# Supplementary material for: The Effects of an Extemporaneous Speech Dual-task on Older Adult Gait Control
Source: Research Square preprint supplement (doi:10.21203/rs.3.rs-7674245/v1), 2025-11-18
Supplement: Supplementary file 113 [file DT9Walk9.xlsx]

## Sheet: Sheet1
Trajectories
		09:LFHD			09:RFHD			09:LBHD			09:RBHD			09:C7			09:T10			09:CLAV			09:STRN			09:RBAK			09:LSHO			09:LUPA			09:LELB			09:LFRM			09:LWRA			09:LWRB			09:LFIN
Frame	Sub Frame	X	Y	Z	X	Y	Z	X	Y	Z	X	Y	Z	X	Y	Z	X	Y	Z	X	Y	Z	X	Y	Z	X	Y	Z	X	Y	Z	X	Y	Z	X	Y	Z	X	Y	Z	X	Y	Z	X	Y	Z	X	Y	Z
		mm	mm	mm	mm	mm	mm	mm	mm	mm	mm	mm	mm	mm	mm	mm	mm	mm	mm	mm	mm	mm	mm	mm	mm	mm	mm	mm	mm	mm	mm	mm	mm	mm	mm	mm	mm	mm	mm	mm	mm	mm	mm	mm	mm	mm	mm	mm	mm
8780	0	92.4441	-1998.91	1640.09	189.302	-1995.83	1643.23	70.8263	-2154.38	1658.71	216.883	-2145.5	1656.46	138.954	-2194.1	1480.98	132.248	-2243.48	1221.82	151.931	-2042.86	1403.24	158.752	-1949.82	1195.54	190.097	-2254.52	1282.73	-37.0898	-2099.11	1435.19	-118.455	-2078.41	1213.33	-141.037	-2057.77	1114.11	-145.821	-1912.65	1006.65	-99.2268	-1842.42	966.674	-154.624	-1876.27	935.436	-141.311	-1798.21	913.352
8781	0	92.1753	-1985.94	1638.05	188.965	-1982.92	1641.31	70.5058	-2141.46	1656.59	216.567	-2132.55	1654.55	139.34	-2182.21	1479.16	133.124	-2230.53	1219.77	151.97	-2029.88	1401.03	158.42	-1936.97	1193.71	190.902	-2241.52	1280.75	-36.9084	-2086.63	1433.21	-118.44	-2062.62	1212.24	-141.602	-2040.2	1113.75	-144.768	-1892.15	1010	-97.2933	-1821.78	971.589	-153.885	-1853.64	940.149	-138.85	-1775.23	919.797
8782	0	91.7223	-1973.19	1636.16	188.667	-1970.03	1639.68	70.2259	-2128.77	1654.55	216.166	-2119.79	1652.66	139.697	-2168.58	1477.14	133.939	-2217.39	1217.75	152.136	-2016.82	1399.32	158.012	-1923.85	1191.66	191.675	-2228.4	1278.86	-36.7262	-2073.99	1431.32	-118.225	-2047.07	1211.14	-141.696	-2022.95	1113.22	-143.777	-1872.31	1013.25	-95.4376	-1801.78	976.154	-152.954	-1832.03	944.617	-136.829	-1753.17	926.085
8783	0	91.4798	-1960.49	1634.3	188.526	-1957.24	1638.01	70.1451	-2116.23	1652.32	215.961	-2106.99	1650.59	139.891	-2156.46	1475.07	134.686	-2204.02	1215.75	152.287	-2003.72	1397.39	158.051	-1910.68	1189.98	192.36	-2215.33	1276.92	-36.5985	-2061.08	1429.47	-117.973	-2031.68	1209.94	-142.043	-2006.05	1112.64	-142.931	-1853.09	1016.08	-93.9123	-1782.42	980.574	-152.258	-1810.96	948.874	-135.031	-1732	931.991
8784	0	91.6623	-1947.83	1632.55	188.519	-1944.48	1636.49	70.1662	-2103.5	1650.28	216.013	-2094.27	1648.92	140.268	-2143.43	1473.15	135.423	-2190.49	1213.66	152.521	-1990.5	1395.62	158.142	-1897.48	1188.18	192.953	-2202.24	1275.03	-36.1269	-2048.22	1427.79	-117.538	-2016.47	1208.88	-141.936	-1989.51	1112.05	-142.09	-1834.54	1018.89	-92.4543	-1763.61	984.619	-151.687	-1790.72	952.63	-133.543	-1711.72	937.57
8785	0	91.8801	-1935.07	1631.27	188.667	-1931.84	1635.05	70.5027	-2090.71	1648.52	216.294	-2081.53	1647.27	140.717	-2130.32	1471.41	135.966	-2176.81	1211.77	152.875	-1977.24	1393.94	158.179	-1884.19	1186.37	193.403	-2188.9	1273.19	-35.7077	-2035	1426.38	-116.975	-2001.57	1207.85	-141.754	-1973.4	1111.63	-141.26	-1816.75	1021.38	-91.3284	-1745.56	988.171	-151.15	-1771.61	956.385	-132.515	-1692.26	942.812
8786	0	92.3465	-1922.4	1629.99	189.117	-1919.2	1633.9	70.9934	-2078.1	1646.99	216.82	-2068.92	1645.95	141.207	-2116.98	1469.83	136.261	-2163.05	1210.08	153.401	-1963.94	1392.49	158.717	-1870.71	1185.11	193.662	-2175.5	1271.55	-35.0907	-2021.56	1425.15	-116.456	-1986.75	1206.97	-141.34	-1957.8	1111.22	-140.491	-1799.48	1023.66	-90.642	-1728.19	991.192	-150.715	-1753.17	959.66	-131.766	-1673.65	947.742
8787	0	93.1635	-1909.66	1628.92	189.853	-1906.69	1632.82	71.5501	-2065.54	1645.49	217.614	-2056.35	1644.58	141.684	-2103.95	1468.23	136.387	-2149.22	1208.45	153.963	-1950.62	1391.27	159.32	-1856.95	1183.88	193.847	-2162.05	1269.83	-34.5989	-2007.97	1423.89	-115.913	-1972.28	1206.13	-141.124	-1942.44	1110.54	-140.088	-1783.04	1025.43	-90.4006	-1711.52	993.809	-150.256	-1735.73	962.196	-131.297	-1656	951.825
8788	0	94.1128	-1896.98	1627.91	190.882	-1894.05	1631.66	72.3221	-2052.79	1644.19	218.196	-2043.89	1642.91	142.309	-2090.87	1466.74	136.316	-2135.29	1206.77	154.777	-1937.26	1390.25	160.261	-1842.99	1182.87	193.915	-2148.52	1268.09	-33.7999	-1994.4	1422.74	-115.317	-1958.02	1205.07	-140.474	-1927.8	1109.95	-139.656	-1767.42	1026.59	-90.0052	-1695.3	995.943	-149.95	-1719.28	964.162	-131.182	-1639.31	955.198
8789	0	95.2036	-1884.36	1627.02	192.202	-1881.46	1630.88	73.2214	-2040.11	1643.18	219.377	-2031.48	1641.98	142.677	-2077.94	1465.36	136.163	-2121.22	1205.28	155.472	-1924.09	1389.22	161.296	-1829.06	1182.24	193.884	-2134.82	1266.42	-33.0011	-1980.63	1421.95	-114.588	-1943.96	1204.46	-139.795	-1913.43	1109.26	-139.234	-1752.13	1027.48	-89.4674	-1679.67	997.868	-149.686	-1703.52	965.555	-131.517	-1623.42	958.116
8790	0	96.3241	-1871.75	1626.4	193.305	-1868.98	1630.04	74.2801	-2027.53	1642.49	220.225	-2018.85	1640.97	143.387	-2065.21	1464.37	136.107	-2106.96	1203.89	156.596	-1910.82	1388.78	162.396	-1814.81	1182.11	193.949	-2120.9	1264.86	-32.1522	-1967.14	1421.35	-113.854	-1929.93	1204.09	-139.141	-1899.33	1108.82	-139.091	-1737.55	1028.01	-89.5414	-1664.67	998.974	-149.473	-1688.7	966.37	-132.222	-1608.35	960.278
8791	0	97.635	-1859.14	1625.91	194.413	-1856.47	1629.49	75.524	-2014.9	1642.05	221.656	-2006.45	1640.58	144.389	-2052.05	1463.46	136.204	-2092.46	1202.69	157.542	-1897.37	1388.8	163.752	-1800.49	1182.34	194.196	-2106.81	1263.36	-31.0736	-1953.72	1420.92	-113.183	-1916.15	1203.83	-138.156	-1885.4	1108.48	-138.877	-1723.53	1028.2	-89.6827	-1650.35	999.656	-149.429	-1674.55	966.735	-133.134	-1594.04	961.735
8792	0	99.0793	-1846.69	1625.83	195.806	-1844.04	1629.12	77.2867	-2002.46	1642.1	223.023	-1993.68	1640.46	145.473	-2039.1	1462.75	136.419	-2077.9	1201.5	159.034	-1883.94	1388.95	165.174	-1786.05	1183.04	194.611	-2092.64	1261.96	-29.7562	-1940.43	1421	-112.281	-1902.51	1204	-137.177	-1871.99	1108.44	-138.706	-1710.07	1027.97	-90.1886	-1636.54	999.608	-149.437	-1661.08	966.478	-134.191	-1580.56	962.535
8793	0	100.434	-1834.22	1626.15	197.301	-1831.44	1629.35	78.8441	-1990.12	1642.28	224.626	-1981.05	1640.63	146.602	-2025.98	1462.35	136.63	-2063.23	1200.86	159.998	-1870.71	1389.09	166.62	-1771.41	1184.14	195.138	-2078.31	1260.96	-28.7893	-1927.16	1421.17	-111.329	-1889.2	1204.04	-136.224	-1858.73	1108.43	-138.695	-1697.26	1027.48	-90.4438	-1623.3	999.057	-149.64	-1648.58	965.958	-135.36	-1567.94	962.626
8794	0	101.975	-1822.08	1626.64	198.698	-1819.05	1629.85	80.7287	-1977.98	1642.81	226.399	-1968.5	1640.82	147.791	-2013.02	1462.25	137.009	-2048.7	1200.49	161.18	-1857.1	1390.15	167.766	-1756.51	1185.47	195.804	-2063.89	1260.29	-27.5657	-1914.11	1421.79	-110.259	-1876.07	1204.37	-135.028	-1845.79	1108.74	-138.565	-1684.91	1026.6	-90.9762	-1610.88	997.892	-149.788	-1636.71	964.896	-136.797	-1556.04	961.774
8795	0	103.755	-1809.81	1627.73	200.477	-1806.62	1630.53	82.9037	-1965.77	1643.56	228.785	-1956.07	1641.02	149.13	-1999.8	1462.25	137.527	-2034.32	1200.47	162.385	-1843.66	1391.08	168.793	-1741.61	1187.08	196.504	-2049.46	1259.7	-26.5978	-1900.85	1422.69	-109.037	-1863.24	1205.16	-133.623	-1833.43	1109.05	-138.505	-1673.27	1025.64	-91.2509	-1599.02	996.531	-149.752	-1625.76	963.497	-138.099	-1545.05	960.471
8796	0	105.662	-1797.43	1629.04	202.758	-1793.87	1631.65	85.1636	-1953.56	1644.72	230.79	-1943.35	1641.77	150.469	-1986.35	1462.8	138.097	-2020.26	1200.69	163.407	-1830.06	1392.14	169.383	-1726.8	1188.57	197.188	-2034.95	1259.72	-25.7531	-1887.68	1424.04	-108.046	-1850.56	1205.82	-132.699	-1821.21	1109.9	-138.237	-1662.08	1024.55	-91.6711	-1587.82	994.547	-150.09	-1615.44	961.948	-139.366	-1534.82	958.52
8797	0	107.822	-1784.96	1630.89	204.498	-1781.59	1632.69	87.507	-1941.03	1646.11	233.064	-1930.71	1642.3	151.663	-1972.92	1463.65	138.521	-2006.4	1201.54	164.19	-1816.85	1393.36	169.484	-1712.43	1190.09	197.721	-2020.65	1260.17	-24.8686	-1874.45	1425.77	-106.933	-1837.94	1206.81	-131.255	-1809.44	1110.83	-138.029	-1651.44	1023.33	-91.9795	-1577.3	992.319	-150.297	-1605.73	960.142	-140.618	-1525.36	955.894
8798	0	109.949	-1772.3	1632.83	206.546	-1769.1	1633.83	89.7799	-1928.69	1647.56	235.283	-1918.1	1642.56	152.729	-1959.42	1464.59	138.813	-1993.04	1202.64	164.602	-1803.36	1394.74	169.102	-1698.47	1191.42	198.013	-2006.84	1261.18	-24.1789	-1861.19	1427.64	-105.773	-1825.59	1207.99	-130.394	-1797.85	1112.04	-137.765	-1641.48	1022	-92.4323	-1567.72	988.82	-150.239	-1596.96	957.901	-141.725	-1516.85	952.581
8799	0	112.125	-1759.65	1634.71	208.976	-1756.25	1634.89	92.0321	-1915.99	1649.11	237.496	-1905.7	1642.55	153.613	-1946.21	1465.59	138.862	-1980.13	1203.98	164.874	-1790.15	1395.74	168.644	-1684.89	1192.52	198.165	-1993.57	1262.16	-23.5091	-1847.98	1429.74	-104.992	-1813.42	1209.4	-129.419	-1786.71	1113.32	-137.412	-1632.07	1020.26	-92.5348	-1558.73	985.663	-150.243	-1588.96	955.36	-142.684	-1509.11	948.831
8800	0	114.179	-1746.79	1636.66	210.865	-1743.79	1635.68	93.9907	-1903.33	1650.69	239.198	-1892.91	1642.77	154.258	-1933.1	1466.73	138.625	-1967.26	1205.44	165.069	-1777.19	1396.55	168.259	-1671.51	1193.9	198.228	-1980.5	1263.05	-23.0806	-1834.89	1431.93	-104.102	-1801.38	1210.88	-128.783	-1775.94	1114.83	-137.177	-1623.18	1018.53	-92.7846	-1550.41	982.049	-150.305	-1581.6	952.493	-143.656	-1502.01	944.464
8801	0	115.894	-1733.9	1638.37	212.467	-1731.22	1636.45	95.7687	-1890.53	1652.51	241.136	-1880.13	1643.35	154.818	-1920.04	1467.97	138.413	-1954.45	1206.81	165.196	-1763.91	1398.46	167.667	-1658.32	1195.4	198.336	-1967.42	1264.25	-22.6465	-1821.91	1433.9	-103.557	-1789.39	1212.51	-127.924	-1765.27	1116.01	-137.015	-1614.73	1016.49	-92.96	-1542.7	978.02	-150.317	-1574.78	949.41	-144.229	-1495.53	939.715
8802	0	117.364	-1720.91	1639.97	214.063	-1717.9	1637.58	97.2727	-1877.37	1654.47	242.35	-1867.04	1644.2	155.468	-1907.46	1469.46	138.303	-1941.99	1208.16	164.976	-1751.62	1399.12	166.975	-1645.55	1196.77	198.496	-1954.61	1265.53	-22.2331	-1809.45	1435.9	-103.171	-1777.66	1214.23	-127.097	-1754.55	1117.49	-136.774	-1606.62	1014.41	-92.8094	-1535.49	973.774	-150.345	-1568.54	946.259	-144.618	-1489.64	934.419
8803	0	118.451	-1707.72	1641.33	215.003	-1705.23	1638.21	98.5581	-1864.3	1656.48	243.569	-1853.88	1645.6	156.009	-1894.91	1471.06	138.276	-1929.45	1209.78	164.877	-1738.8	1400.74	166.334	-1633.06	1197.94	198.712	-1942.02	1266.91	-22.034	-1797.32	1437.8	-102.747	-1766.12	1215.96	-126.727	-1744.47	1118.91	-136.535	-1599.04	1012.16	-92.5929	-1528.98	969.335	-150.394	-1562.8	942.992	-144.792	-1484.46	928.597
8804	0	119.125	-1694.69	1642.34	215.562	-1691.99	1639.02	99.2683	-1851.19	1658.53	244.316	-1840.69	1647.11	156.342	-1882.6	1472.97	138.52	-1917.25	1211.55	164.932	-1726.28	1402.35	165.34	-1621.06	1199.37	199.085	-1929.69	1268.46	-21.8888	-1785.56	1439.56	-102.66	-1754.91	1217.54	-126.479	-1734.6	1120.2	-136.433	-1591.96	1009.63	-92.6411	-1523.2	964.566	-150.637	-1557.76	939.673	-144.706	-1479.8	922.628
8805	0	119.351	-1681.62	1643.08	215.795	-1678.77	1639.88	99.7426	-1838.05	1660.37	244.711	-1827.4	1648.78	156.667	-1870.44	1474.9	139.121	-1905.06	1213.1	164.453	-1714.24	1403.59	164.653	-1609.09	1200.92	199.631	-1917.44	1269.98	-21.854	-1774.22	1441	-102.415	-1744	1218.89	-125.625	-1725.06	1121.14	-136.36	-1585.37	1007.03	-92.5421	-1517.93	959.635	-150.753	-1553	936.002	-144.563	-1475.82	916.056
8806	0	119.32	-1668.51	1644.05	215.724	-1665.62	1640.67	100.024	-1824.85	1662.37	245.066	-1814.03	1650.78	157.102	-1858.18	1476.8	139.894	-1892.96	1214.81	164.662	-1702.4	1405.09	163.757	-1597.22	1202.45	200.402	-1905.44	1271.67	-21.823	-1763.04	1442.71	-102.397	-1733.51	1220.13	-125.138	-1715.82	1121.87	-136.488	-1579.36	1004.29	-92.5928	-1513.16	954.798	-150.865	-1548.86	932.265	-144.085	-1472.39	909.329
8807	0	119.086	-1655.47	1645.02	215.591	-1652.3	1641.76	100.182	-1811.54	1664.63	245.153	-1800.61	1652.96	157.417	-1846.16	1478.86	140.9	-1881.31	1216.57	164.449	-1689.95	1407.4	163.11	-1585.18	1204.47	201.111	-1893.53	1273.49	-22.0064	-1751.74	1444.38	-102.439	-1723.3	1221.44	-124.794	-1706.98	1122.86	-136.297	-1573.68	1001.58	-92.5085	-1509.13	950.054	-150.987	-1545.23	928.817	-143.39	-1469.69	902.432
8808	0	118.918	-1642.39	1646.4	215.431	-1639.1	1643.16	100.175	-1798.38	1666.99	245.146	-1787.22	1655.5	157.708	-1833.82	1481.15	141.996	-1869.51	1218.67	164.326	-1678.06	1409.26	162.165	-1573.31	1206.13	201.764	-1881.69	1275.76	-22.3438	-1740.5	1445.8	-102.394	-1713.36	1222.48	-124.122	-1698.57	1123.43	-136.302	-1568.61	999.021	-92.618	-1505.75	944.822	-151.393	-1541.99	925.492	-142.845	-1467.47	895.727
8809	0	118.881	-1629.28	1647.82	214.985	-1626.33	1644.5	100.043	-1785.23	1669.19	245.087	-1774.01	1657.9	157.955	-1821.68	1483.43	143.316	-1857.7	1220.84	163.986	-1666.15	1411.11	161.291	-1561.25	1208.39	202.51	-1870.01	1277.97	-22.5026	-1729.26	1447.21	-102.194	-1703.91	1223.38	-123.493	-1690.5	1124.08	-136.263	-1563.93	996.306	-92.6271	-1503.15	939.642	-151.423	-1539.39	921.962	-142.115	-1466.09	888.937
8810	0	118.31	-1616.45	1648.99	214.742	-1613.21	1646.15	99.7761	-1772.29	1671.42	244.779	-1761.06	1660.31	158.126	-1809.29	1485.58	144.554	-1845.82	1223.03	164.052	-1654.1	1413.15	160.654	-1549.47	1210.39	203.279	-1858.39	1280.35	-22.8885	-1717.86	1448.64	-102.131	-1694.97	1224.26	-122.928	-1682.61	1124.51	-136.321	-1559.93	993.632	-92.5511	-1500.78	935.08	-151.644	-1537.43	918.571	-141.382	-1465.4	882.282
8811	0	118.024	-1603.71	1650.53	214.486	-1600.32	1647.87	99.4074	-1759.41	1673.51	244.497	-1748.15	1662.72	158.211	-1797.07	1487.87	145.738	-1833.91	1225.23	163.957	-1641.95	1415.53	159.941	-1537.83	1212.38	204.088	-1846.59	1282.71	-23.0996	-1706.28	1450.01	-102.046	-1686.26	1224.88	-121.716	-1675.29	1124.67	-136.333	-1556.27	991.143	-92.3013	-1498.94	930.688	-151.739	-1535.85	915.372	-140.754	-1465.4	875.784
8812	0	117.75	-1591.11	1651.88	214.035	-1587.86	1649.41	99.113	-1746.54	1675.39	244.223	-1735.64	1664.89	158.296	-1784.74	1489.8	146.891	-1822.09	1227.25	163.966	-1629.89	1417.28	159.672	-1526.43	1214.17	205.012	-1834.68	1284.89	-23.2074	-1694.64	1451.27	-101.854	-1677.97	1225.61	-121.348	-1668.18	1125.19	-136.193	-1553.2	988.602	-92.1403	-1497.5	926.291	-151.797	-1534.94	912.202	-140.168	-1465.89	869.636
8813	0	117.464	-1578.51	1653.34	213.872	-1575.17	1651.16	98.9019	-1733.99	1677.16	243.967	-1722.91	1666.82	158.476	-1772.53	1491.64	147.804	-1809.94	1229.13	164.117	-1617.62	1419.19	159.293	-1514.98	1215.95	206.047	-1822.41	1287.12	-23.2265	-1682.74	1452.74	-101.381	-1669.73	1226.12	-120.272	-1661.46	1125.61	-135.832	-1550.3	986.175	-92.1583	-1496.61	922.036	-151.371	-1534.57	909.035	-139.656	-1466.97	863.805
8814	0	117.447	-1566	1654.89	213.766	-1562.67	1652.72	98.8502	-1721.45	1678.63	244.047	-1710.37	1668.72	158.609	-1760.09	1493.36	148.594	-1797.71	1230.78	164.15	-1605.39	1420.8	159.333	-1503.62	1217.6	207.035	-1810.28	1289.03	-23.1485	-1670.9	1453.91	-100.714	-1661.47	1226.85	-119.352	-1654.84	1126.01	-135.076	-1547.83	983.867	-91.7735	-1495.97	917.914	-151.179	-1534.32	906.101	-139.038	-1468.57	858.242
8815	0	117.213	-1553.64	1656.18	213.372	-1550.46	1654.16	98.5786	-1709.04	1679.95	243.839	-1697.91	1670.31	158.737	-1747.71	1494.94	149.204	-1785.62	1232.33	164.255	-1593.11	1422.1	159.521	-1491.97	1219.11	207.936	-1797.85	1290.75	-23.1027	-1658.71	1454.88	-100.168	-1653.5	1227.18	-118.328	-1648.33	1126.25	-134.58	-1545.73	981.387	-91.3827	-1495.75	913.721	-150.854	-1534.55	903.169	-138.579	-1470.43	852.807
8816	0	116.932	-1541.5	1657.31	213.349	-1538.09	1655.47	98.46	-1697.05	1680.63	243.584	-1685.72	1671.47	158.83	-1735.22	1496.18	149.725	-1773.3	1233.55	164.588	-1580.66	1423.35	159.815	-1480.23	1220.25	208.796	-1785.41	1292.15	-23.0749	-1646.67	1455.61	-99.4636	-1645.4	1227.1	-117.266	-1642.08	1126.38	-133.904	-1543.78	978.778	-90.98	-1495.78	909.349	-150.353	-1535.05	899.987	-138.261	-1472.76	847.621
8817	0	116.854	-1529.27	1658.13	213.153	-1525.76	1656.51	98.3959	-1684.67	1681.49	243.412	-1673.51	1672.31	158.912	-1722.86	1496.89	150.097	-1761.05	1234.41	164.868	-1568.23	1424.29	160.303	-1468.18	1221.2	209.612	-1772.99	1293.31	-23.0009	-1634.22	1456.01	-98.5972	-1637.09	1227.11	-115.931	-1636.08	1126.22	-132.776	-1542.53	975.954	-90.3401	-1496.13	905.455	-149.519	-1535.97	897.245	-137.822	-1475.42	842.579
8818	0	116.559	-1517.16	1658.95	212.841	-1513.63	1657.37	98.3987	-1672.77	1681.84	243.559	-1661.08	1673.13	159.103	-1710.19	1497.75	150.433	-1748.75	1235.18	165.131	-1556.05	1424.7	161.007	-1456.05	1221.73	210.285	-1760.39	1294.13	-22.7751	-1621.75	1456.39	-97.5027	-1628.66	1227.12	-114.659	-1630.03	1126.14	-132.08	-1541.14	973.443	-89.8104	-1496.81	901.323	-148.527	-1537.25	894.316	-137.404	-1478.26	837.821
8819	0	116.399	-1504.94	1659.53	212.89	-1501.38	1658.29	98.4894	-1660.5	1682.14	243.495	-1648.78	1673.55	159.216	-1697.8	1498.15	150.714	-1736.12	1235.84	165.359	-1543.55	1425.14	161.782	-1443.74	1222.07	210.889	-1747.81	1294.72	-22.7	-1609.12	1456.55	-96.6409	-1620.21	1226.74	-113.116	-1623.94	1126.03	-131.001	-1539.85	970.839	-89.283	-1497.43	897.242	-147.579	-1538.55	891.493	-136.972	-1481.29	833.365
8820	0	116.395	-1492.7	1659.85	212.82	-1488.8	1658.85	98.6961	-1648.39	1682.12	243.628	-1636.47	1673.78	159.392	-1684.84	1498.37	150.886	-1723.83	1236.05	165.874	-1531.03	1425.09	162.703	-1431.61	1221.94	211.348	-1735.28	1295.1	-22.652	-1596.33	1456.38	-95.5644	-1611.49	1226.33	-111.494	-1617.85	1125.66	-129.991	-1538.77	968.231	-88.4927	-1498.5	893.451	-146.661	-1540.13	888.858	-136.645	-1484.47	828.985
8821	0	116.317	-1480.43	1659.95	212.742	-1476.46	1659.06	98.6726	-1636.16	1681.71	243.771	-1623.88	1673.73	159.503	-1672.26	1498.13	150.837	-1711.24	1235.86	166.297	-1518.29	1425.09	163.651	-1419.67	1221.23	211.715	-1722.77	1295.06	-22.4376	-1583.53	1455.89	-94.3281	-1602.64	1225.73	-109.7	-1611.7	1125.06	-128.742	-1537.83	965.562	-87.8459	-1498.96	890.347	-145.204	-1542.03	886.184	-136.23	-1487.76	824.851
8822	0	116.204	-1468.04	1659.68	212.518	-1464.07	1658.81	98.704	-1623.93	1680.98	243.761	-1611.44	1673.13	159.532	-1659.5	1497.76	150.647	-1698.97	1235.57	166.587	-1505.77	1424.48	164.612	-1407.97	1220.01	211.852	-1710.31	1294.87	-22.2227	-1570.52	1455.26	-93.1472	-1593.64	1224.87	-107.616	-1605.68	1124.51	-127.722	-1537.04	963.044	-87.2094	-1500.38	885.899	-144.332	-1543.73	883.759	-135.84	-1491.5	820.964
8823	0	116.091	-1455.5	1659.02	212.329	-1451.61	1658.26	98.7684	-1611.32	1680.04	243.548	-1599.15	1672.4	159.552	-1646.75	1497.07	150.406	-1686.36	1235.22	166.908	-1493.21	1423.6	165.401	-1396.26	1218.38	211.916	-1697.86	1294.44	-22.1356	-1557.4	1454.3	-91.8372	-1584.61	1223.79	-105.683	-1599.17	1123.85	-126.541	-1536.16	960.481	-86.6162	-1501.25	882.239	-143.048	-1545.62	881.478	-135.461	-1495.08	817.01
8824	0	116.329	-1442.74	1658.14	212.8	-1438.68	1657.76	99.0093	-1598.61	1679.16	243.921	-1586.05	1671.74	159.752	-1633.82	1496.18	149.96	-1674.23	1234.47	167.226	-1480.63	1422.56	166.216	-1384.31	1216.49	211.883	-1685.52	1293.81	-22.0208	-1544.31	1453.21	-90.4694	-1575.26	1222.6	-103.363	-1592.79	1123.24	-125.275	-1535.13	958.233	-86.0584	-1501.48	879.365	-141.545	-1547.44	879.324	-135.001	-1498.86	813.445
8825	0	116.604	-1429.77	1657.21	212.998	-1425.77	1656.63	99.0356	-1585.64	1678.15	244.145	-1573.15	1670.92	159.752	-1620.89	1495.31	149.201	-1661.96	1233.66	167.643	-1468.04	1421.05	167.104	-1371.2	1214.51	211.615	-1673.15	1292.87	-21.9525	-1531.08	1452.12	-89.2291	-1565.99	1221.53	-101.08	-1585.99	1122.62	-123.838	-1533.98	956.159	-85.616	-1501.54	876.089	-140.133	-1549.19	877.559	-134.634	-1502.47	810.284
8826	0	116.815	-1416.66	1655.63	213.148	-1412.73	1655.18	99.0231	-1572.42	1676.94	244.26	-1560.05	1669.82	159.653	-1607.94	1494.29	148.232	-1649.81	1232.8	167.819	-1455.44	1419.3	167.771	-1358.08	1212.43	211.207	-1660.76	1292.01	-21.9172	-1517.87	1450.89	-88.407	-1556.49	1220.48	-98.8565	-1578.8	1121.91	-122.589	-1532.56	954.293	-85.3903	-1502.17	873.248	-138.462	-1550.79	876.139	-134.135	-1506.06	807.399
8827	0	116.795	-1403.37	1653.82	213.379	-1399.48	1653.49	99.0491	-1559.21	1675.36	243.981	-1546.99	1668.05	159.504	-1594.96	1493.04	147.167	-1637.69	1231.71	168.122	-1442.63	1417.79	168.764	-1344.69	1210.91	210.672	-1648.55	1290.73	-22.0026	-1504.43	1449.34	-87.425	-1547.06	1219.29	-96.6936	-1571.33	1121.23	-121.366	-1531.11	952.57	-84.4308	-1503.38	870.096	-136.676	-1551.96	874.94	-133.539	-1509.58	804.525
8828	0	116.935	-1389.93	1651.85	213.555	-1386.11	1651.42	99.1651	-1545.72	1673.84	244.198	-1533.55	1666.52	159.309	-1582	1491.5	145.859	-1625.46	1230.27	168.397	-1429.78	1415.95	169.528	-1331.34	1209.14	210.08	-1636.08	1289.19	-22.2338	-1491.12	1447.95	-86.83	-1537.49	1218.15	-94.398	-1563.54	1120.72	-120.074	-1529.04	951.113	-84.4768	-1502.47	868.315	-135.2	-1553.01	874.099	-132.946	-1513.07	802.067
8829	0	117.013	-1376.47	1649.48	213.706	-1372.54	1648.9	99.0987	-1531.96	1672.37	244.247	-1519.95	1665.03	158.95	-1569.02	1490.07	144.653	-1613.12	1228.9	168.575	-1416.85	1414.04	170.178	-1318.83	1206.71	209.41	-1623.67	1287.68	-22.1765	-1477.69	1446.41	-86.2804	-1527.63	1217.2	-92.335	-1555.4	1120.04	-118.835	-1526.61	949.874	-83.7763	-1502.09	865.966	-133.782	-1553.32	873.736	-132.16	-1516.07	800.069
8830	0	117.033	-1362.76	1647.04	213.571	-1358.98	1646.4	99.0414	-1518.15	1670.89	244.224	-1506.31	1663.08	158.516	-1555.79	1488.49	143.464	-1600.42	1227.2	168.363	-1403.87	1411.77	170.708	-1306.25	1204.47	208.673	-1610.99	1286.06	-22.4654	-1464.23	1444.83	-85.781	-1517.76	1216.26	-90.4468	-1546.89	1119.28	-117.903	-1523.45	948.925	-83.4411	-1501.13	864.115	-132.558	-1552.95	873.684	-131.386	-1518.55	798.258
8831	0	116.853	-1349.03	1644.38	213.387	-1345.26	1643.53	99.1012	-1504.14	1669.16	244.346	-1492.41	1661.5	158.047	-1542.8	1486.6	142.555	-1587.68	1225.42	168.485	-1390.92	1409.81	171.08	-1293.84	1202.21	207.996	-1598.38	1284.2	-22.6873	-1450.83	1443.2	-85.2526	-1507.68	1215.07	-88.7635	-1537.95	1118.45	-117.017	-1519.79	948.272	-82.958	-1499.93	862.459	-131.14	-1551.76	873.794	-130.259	-1520.39	796.588
8832	0	116.76	-1335.24	1641.71	213.193	-1331.52	1640.62	98.9282	-1490.29	1667.35	244.033	-1478.36	1659.4	157.573	-1529.67	1484.71	141.715	-1574.71	1223.58	168.367	-1377.88	1407.52	171.503	-1281.27	1199.96	207.25	-1585.5	1282.21	-23.0974	-1437.39	1441.21	-84.8624	-1497.35	1213.83	-87.3666	-1528.78	1117.69	-116.678	-1515.54	947.602	-82.4444	-1497.73	861.099	-130.341	-1549.75	874.024	-129.287	-1521.75	795.164
8833	0	116.451	-1321.48	1638.84	212.819	-1317.74	1637.76	98.4491	-1476.28	1665.69	243.683	-1464.58	1657.52	156.754	-1516.5	1482.77	140.837	-1561.41	1221.7	167.969	-1364.83	1405.52	171.813	-1268.44	1198.17	206.45	-1572.67	1280.25	-23.7561	-1424	1439.26	-84.5709	-1486.69	1212.42	-86.3989	-1519.27	1116.83	-116.319	-1510.56	946.954	-82.3785	-1494.66	860.018	-130.24	-1546.88	874.592	-128.252	-1522.35	793.701
8834	0	115.888	-1307.66	1636.16	212.38	-1304.09	1635.11	98.0445	-1462.4	1663.97	242.051	-1451.79	1654.77	155.956	-1503.52	1480.68	140.154	-1548.29	1219.54	167.337	-1351.64	1403.29	171.859	-1255.41	1196.23	205.767	-1559.7	1278.24	-24.2393	-1410.79	1437.04	-84.299	-1475.78	1210.81	-85.4581	-1509.52	1115.8	-116.524	-1504.76	946.085	-82.232	-1491.92	858.526	-130.249	-1542.69	874.916	-127.293	-1522.05	792.534
8835	0	115.428	-1293.73	1633.61	211.946	-1290.28	1632.53	97.4954	-1448.48	1662.33	242.264	-1437.33	1653.47	155.238	-1490.26	1478.83	139.641	-1534.91	1217.65	167.238	-1338.46	1401.72	172.035	-1242.31	1194.82	205.125	-1546.71	1276.28	-24.9291	-1397.4	1435	-84.264	-1464.53	1209.25	-85.0011	-1499.3	1114.72	-116.787	-1498.18	945.481	-83.3025	-1486.26	857.889	-130.682	-1537.77	875.193	-126.222	-1520.8	791.417
8836	0	114.572	-1280.03	1631.43	211.247	-1276.58	1630.24	96.5871	-1434.46	1660.85	241.269	-1423.65	1651.78	154.36	-1476.84	1477.16	139.153	-1521.27	1215.86	166.254	-1325.19	1399.75	171.848	-1229.41	1192.99	204.47	-1533.62	1274.62	-25.639	-1384.2	1432.97	-84.4993	-1452.67	1207.52	-84.7641	-1488.72	1113.48	-117.759	-1490.84	945.012	-84.0247	-1480.41	856.713	-131.693	-1531.72	875.54	-125.639	-1518.49	790.463
8837	0	113.628	-1266.27	1629.24	209.97	-1263.14	1627.92	95.3701	-1420.55	1659.33	239.93	-1409.93	1650.51	153.577	-1463.58	1475.54	138.838	-1507.62	1214.27	165.508	-1311.85	1398.02	171.601	-1216.49	1191.41	203.991	-1520.41	1273.15	-26.4069	-1370.78	1430.81	-84.7809	-1440.86	1205.93	-84.8859	-1477.79	1112.36	-118.837	-1482.73	944.33	-85.2765	-1473.77	855.834	-133.038	-1524.74	875.83	-125.365	-1515.19	789.784
8838	0	112.252	-1252.67	1627.12	208.9	-1249.48	1626.42	93.9337	-1406.87	1657.51	238.542	-1396.41	1649.33	152.927	-1450.26	1474	138.738	-1494.04	1212.71	164.682	-1298.42	1396.45	171.048	-1203.48	1189.67	203.762	-1507.16	1271.67	-27.2177	-1357.73	1428.78	-85.3101	-1428.77	1204.07	-85.234	-1466.51	1110.85	-120.276	-1473.76	943.584	-86.903	-1466.55	854.995	-134.695	-1517.01	875.697	-125.6	-1510.63	789.532
8839	0	110.813	-1239.05	1625.14	207.83	-1235.81	1625.07	92.2067	-1393.25	1655.76	236.94	-1382.92	1648.19	152.106	-1436.82	1472.61	138.652	-1480.45	1211.27	163.979	-1285	1395.21	170.229	-1190.1	1188.39	203.652	-1493.7	1270.27	-27.9008	-1344.65	1426.78	-85.7363	-1416.48	1202.47	-85.9066	-1454.73	1109.64	-121.857	-1464.12	942.779	-88.6346	-1458.26	854.07	-136.663	-1508.12	875.738	-126.014	-1504.9	789.017
8840	0	109.307	-1225.42	1623.45	206.16	-1222.41	1623.77	90.4396	-1379.64	1654.48	234.903	-1369.65	1646.99	151.344	-1423.54	1471.38	138.651	-1466.62	1209.94	163.037	-1271.51	1393.98	169.07	-1176.42	1187.22	203.681	-1480.1	1269.26	-28.8242	-1331.71	1425.19	-86.3924	-1403.97	1200.96	-86.6736	-1442.77	1108.39	-123.524	-1453.83	942.076	-90.5856	-1449.02	853.181	-138.816	-1498.4	875.562	-126.819	-1497.74	788.788
8841	0	107.532	-1212	1622.22	204.525	-1209.04	1623.01	88.6454	-1366.09	1653.45	232.899	-1356.52	1646.69	150.598	-1410.23	1470.4	138.862	-1452.88	1208.74	162.068	-1257.99	1393.27	167.825	-1162.32	1186.66	203.772	-1466.45	1268.28	-29.9219	-1318.82	1423.82	-87.0231	-1391.37	1199.72	-87.5567	-1430.41	1107.4	-125.192	-1442.83	941.471	-92.6334	-1438.46	852.485	-140.937	-1487.9	875.568	-128.247	-1489.12	788.653
8842	0	105.708	-1198.72	1621.23	202.652	-1195.91	1622.38	86.5794	-1352.75	1652.63	231.365	-1342.74	1647.08	149.545	-1396.91	1469.5	139.069	-1439.04	1207.65	161.005	-1244.37	1392.78	166.305	-1148.18	1186.41	203.768	-1452.58	1267.46	-30.9631	-1305.88	1422.77	-87.9338	-1378.38	1198.69	-88.4217	-1417.82	1106.7	-126.822	-1431.01	941.316	-94.7563	-1427.59	851.892	-142.993	-1476.71	875.717	-130.277	-1479.15	788.718
8843	0	103.729	-1185.48	1620.77	200.984	-1182.56	1622.58	84.4582	-1339.39	1652.1	229.423	-1329.47	1647.4	148.34	-1383.49	1468.97	139.043	-1424.97	1206.75	159.967	-1230.7	1392.98	164.682	-1133.81	1186.38	203.407	-1438.68	1266.84	-32.1486	-1292.72	1422.11	-88.8817	-1365.32	1198.16	-89.67	-1404.73	1106.1	-128.712	-1418.84	941.145	-96.2677	-1416.72	851.455	-145.083	-1464.58	875.885	-132.599	-1467.77	788.93
8844	0	101.884	-1172.25	1620.92	198.952	-1169.69	1623.06	82.1	-1326.17	1651.95	226.895	-1316.8	1647.51	146.799	-1370.14	1468.71	138.633	-1410.64	1206.31	158.637	-1217.09	1393.34	163.048	-1119.44	1187.05	202.531	-1424.7	1266.53	-33.5381	-1279.39	1421.68	-90.0513	-1352.03	1197.82	-90.9542	-1391.16	1105.81	-130.612	-1405.73	941.128	-98.6302	-1403.4	851.543	-147.058	-1451.64	875.951	-135.514	-1454.96	789.105
8845	0	99.9697	-1159.17	1621.5	197.101	-1156.71	1624.11	79.9007	-1313.13	1651.94	224.39	-1304.25	1647.79	145.274	-1356.75	1468.65	137.933	-1396.38	1206.17	157.269	-1203.41	1394.03	161.921	-1104.88	1188.16	201.389	-1410.71	1266.49	-34.9499	-1265.76	1421.51	-91.2699	-1338.38	1197.64	-92.424	-1377.13	1105.68	-132.408	-1391.96	941.245	-101.094	-1389.8	851.414	-149.058	-1438.05	876.148	-138.501	-1440.56	789.145
8846	0	98.153	-1146.23	1622.6	195.28	-1143.71	1625.46	77.9323	-1300.3	1652.31	222.27	-1291.62	1648.45	143.767	-1343.15	1469.03	136.879	-1381.97	1206.43	156.061	-1189.62	1394.94	160.579	-1090.02	1189.06	199.952	-1396.67	1266.66	-36.3968	-1251.87	1421.71	-92.6756	-1324.24	1197.92	-93.877	-1362.72	1105.99	-134.11	-1377.41	941.479	-103.482	-1374.2	851.629	-150.678	-1423.3	876.462	-141.861	-1424.87	789.499
8847	0	96.2651	-1133.25	1624.39	193.877	-1130.8	1627.75	75.8768	-1287.68	1652.8	220.835	-1278.48	1649.88	142.194	-1329.46	1469.98	135.436	-1367.66	1207.01	154.925	-1175.93	1396.02	159.787	-1075.58	1190.45	198.252	-1382.59	1267.43	-37.664	-1237.7	1422.13	-94.1805	-1309.42	1198.46	-95.5359	-1347.72	1106.22	-135.807	-1361.88	941.947	-104.822	-1358.98	851.747	-152.543	-1407.7	876.572	-145.157	-1407.81	789.881
8848	0	94.1872	-1120.4	1626.37	191.605	-1117.96	1630.03	73.7805	-1274.89	1653.56	218.56	-1265.75	1651.27	140.721	-1315.74	1471.13	133.668	-1353.51	1208.38	153.725	-1162.14	1397.31	159.53	-1061.5	1192.21	196.377	-1368.36	1268.61	-38.763	-1223.41	1422.97	-95.4894	-1294.31	1199.21	-97.2256	-1332.15	1106.87	-137.646	-1345.59	942.373	-107.695	-1341.54	852.076	-154.504	-1391.05	876.969	-148.805	-1389.41	790.422
8849	0	92.4131	-1107.53	1628.34	189.626	-1105.02	1632.47	71.9742	-1262.14	1654.33	216.389	-1253.3	1652.62	139.486	-1301.9	1472.65	131.942	-1339.75	1210	152.969	-1148.47	1399	159.057	-1047.74	1193.46	194.747	-1354.49	1270.09	-39.6676	-1209.21	1423.93	-96.9004	-1278.7	1199.92	-98.8506	-1316.34	1107.31	-139.474	-1328.51	942.883	-109.878	-1323.68	852.57	-156.616	-1373.41	876.973	-152.14	-1369.77	790.706
8850	0	90.6787	-1094.81	1630.17	187.822	-1092.04	1634.68	70.274	-1249.61	1655.05	214.684	-1240.61	1653.84	138.443	-1288.29	1474.08	130.105	-1326.5	1211.47	152.112	-1135	1400.58	158.819	-1034.36	1194.71	193.353	-1340.85	1271.89	-40.454	-1195.04	1425.14	-98.1596	-1262.93	1200.79	-100.463	-1300.15	1108.01	-141.138	-1310.51	943.255	-111.265	-1305.7	853.078	-158.751	-1354.6	877.203	-155.749	-1349.11	791.191
8851	0	88.8567	-1082	1631.59	185.994	-1079.16	1636.63	68.6055	-1237.02	1655.56	213.057	-1227.77	1655.49	137.507	-1274.91	1475.58	128.491	-1313.3	1213.19	151.437	-1121.66	1401.92	158.757	-1021.4	1195.9	192.365	-1327.52	1273.69	-41.0158	-1181.01	1426.5	-99.4299	-1246.85	1201.52	-102.304	-1283.61	1108.62	-143.105	-1291.73	943.796	-113.908	-1285.25	853.702	-160.953	-1335.03	877.092	-159.149	-1327.33	791.432
8852	0	87.4583	-1069.2	1632.7	184.506	-1066.05	1638.24	67.4029	-1224.27	1656.32	211.674	-1214.86	1657.03	136.656	-1261.76	1477.1	127.297	-1300.19	1214.69	150.946	-1108.54	1403.2	158.664	-1008.55	1196.97	191.777	-1314.5	1275.37	-41.4866	-1167.04	1428.03	-100.448	-1230.62	1202.4	-103.967	-1266.65	1109.42	-144.863	-1272.39	944.272	-115.112	-1265.45	854.12	-163.081	-1314.61	877.129	-162.36	-1304.65	791.944
8853	0	86.4735	-1056.22	1634.08	183.348	-1053.16	1639.79	66.4049	-1211.36	1657.5	210.697	-1201.76	1658.6	135.761	-1248.82	1478.48	126.441	-1287.53	1216.06	151.042	-1095.78	1404.57	158.587	-995.918	1198.04	191.482	-1301.79	1277.02	-41.8384	-1153.22	1429.5	-101.598	-1214.12	1203.2	-105.652	-1249.49	1109.78	-146.788	-1252.24	944.693	-117.847	-1243.43	854.676	-165.342	-1293.34	876.84	-165.58	-1281.13	792.315
8854	0	85.6342	-1043.17	1635.24	182.8	-1040.04	1641.34	65.3466	-1198.26	1658.79	210.492	-1188.26	1660.87	134.892	-1236.25	1479.91	125.733	-1274.97	1217.37	150.659	-1083.27	1405.87	158.6	-983.417	1199.29	191.071	-1289.49	1278.57	-42.1763	-1139.7	1430.98	-102.785	-1197.56	1204.1	-107.521	-1232.27	1110.29	-148.404	-1231.68	945.038	-119.626	-1221.63	854.941	-167.589	-1271.3	876.458	-168.565	-1256.83	792.639
8855	0	85.0696	-1030.07	1636.24	182.076	-1027.21	1642.31	64.467	-1184.99	1660.34	209.067	-1175.8	1662.14	133.935	-1223.77	1481.42	125.132	-1262.65	1218.63	150.251	-1070.76	1407.26	158.72	-971.339	1200.5	190.336	-1277.52	1279.95	-42.5883	-1126.29	1432.47	-103.874	-1181.11	1204.76	-109.478	-1214.74	1110.59	-150.147	-1210.67	945.093	-121.674	-1198.82	855.588	-169.722	-1248.73	875.878	-171.39	-1231.83	792.985
8856	0	84.9486	-1016.93	1637.04	181.863	-1014.4	1643.05	63.9825	-1171.76	1662.03	208.503	-1163.01	1663.66	133.101	-1211.37	1482.76	124.62	-1250.43	1220.03	150.039	-1058.44	1408.7	158.867	-959.368	1201.73	189.438	-1265.58	1281.41	-42.9155	-1112.96	1433.83	-105.059	-1164.32	1205.4	-111.283	-1196.92	1110.95	-151.835	-1189.01	945.321	-122.658	-1175.95	855.859	-171.722	-1225.59	875.357	-173.861	-1206.21	793.188
8857	0	85.1015	-1003.65	1637.81	182.336	-1001.38	1643.88	63.6098	-1158.35	1663.79	208.962	-1149.65	1665.61	132.358	-1199.08	1484.21	123.839	-1237.89	1221.44	149.998	-1046.3	1410.05	158.924	-947.37	1202.76	188.292	-1253.41	1282.77	-43.0884	-1099.76	1435.19	-106	-1147.61	1206.16	-113.16	-1178.87	1111.28	-153.352	-1167.09	945.434	-124.877	-1151.45	856.455	-173.225	-1201.85	874.606	-176.257	-1179.99	793.637
8858	0	85.4701	-990.425	1638.9	182.798	-988.385	1644.6	63.4968	-1144.68	1665.9	208.395	-1136.52	1666.86	131.686	-1186.52	1485.73	122.669	-1225.52	1222.95	150.136	-1034.05	1411.75	159.153	-935.266	1204.18	186.881	-1241.24	1284.16	-43.3042	-1086.58	1436.9	-107.169	-1130.9	1207.23	-114.989	-1160.88	1111.64	-154.943	-1144.66	945.975	-126.399	-1126.94	857.321	-175.056	-1177.38	874.248	-178.141	-1153.01	794.453
8859	0	85.9303	-977.282	1640.07	183.338	-975.502	1645.53	63.3629	-1131.32	1668.04	208.737	-1123.73	1669.11	131.176	-1174.38	1487.55	121.317	-1213.24	1224.81	149.903	-1021.96	1413.25	159.686	-923.12	1205.67	185.367	-1229.28	1285.7	-43.5567	-1073.48	1438.54	-108.082	-1113.92	1208.35	-116.798	-1142.73	1112.08	-156.294	-1121.97	946.634	-127.787	-1102.11	858.186	-176.587	-1152.79	874.09	-179.842	-1125.57	795.434
8860	0	86.576	-964.12	1641.22	184.024	-962.613	1646.49	63.6633	-1117.87	1670.12	208.942	-1110.92	1670.74	130.765	-1161.83	1489.4	119.894	-1201.08	1226.73	149.85	-1009.91	1414.78	160.349	-910.796	1207.14	183.508	-1217.94	1287.32	-43.7285	-1060.55	1440.17	-109.085	-1097.23	1209.58	-118.415	-1124.43	1112.81	-157.541	-1098.88	947.688	-128.459	-1077.04	859.609	-177.63	-1127.64	873.942	-181.312	-1097.55	796.835
8861	0	87.2846	-950.927	1642.41	184.619	-949.779	1647.46	63.8063	-1104.57	1672.2	209.079	-1098.14	1672.18	130.311	-1149.36	1491.12	118.544	-1189.24	1228.63	149.929	-997.875	1416.38	161.121	-898.449	1208.94	181.93	-1206.09	1289.16	-43.884	-1047.66	1442.02	-110.008	-1080.63	1211.08	-119.998	-1106.05	1113.53	-158.463	-1075.4	948.942	-129.271	-1050.86	861.737	-178.382	-1102.05	874.278	-182.392	-1069.19	798.541
8862	0	88.0036	-937.82	1643.88	185.406	-936.957	1648.57	64.2444	-1091.36	1674.34	209.071	-1085.4	1673.42	130.001	-1136.95	1493.13	117.267	-1177.23	1230.67	149.894	-985.76	1418	161.555	-886.325	1210.59	180.415	-1194.27	1290.94	-43.8583	-1035	1444.21	-110.847	-1063.97	1212.82	-121.625	-1087.6	1114.81	-159.451	-1051.9	950.722	-130.294	-1023.83	864.672	-179.109	-1075.94	875.202	-183.369	-1040.46	801.252
8863	0	88.7133	-924.844	1645.22	186.216	-924.196	1649.42	64.5043	-1078.12	1676.54	209.597	-1072.76	1675.05	129.789	-1124.26	1495.02	116.249	-1165.16	1232.71	149.783	-973.667	1419.41	161.974	-874.376	1212.05	179.189	-1182.22	1292.68	-43.9814	-1022.09	1446.27	-111.701	-1047.69	1214.86	-123.22	-1069.1	1116.12	-159.945	-1027.85	952.86	-130.798	-997.526	867.846	-179.338	-1049.45	876.621	-183.631	-1011.06	804.237
8864	0	89.5886	-911.935	1646.65	187.047	-911.422	1650.4	65.3575	-1065.01	1678.7	210.663	-1059.71	1676.67	129.651	-1111.82	1496.59	115.37	-1153.2	1234.48	149.706	-961.416	1420.64	162.328	-862.539	1213.45	178.253	-1170.12	1294.39	-43.8771	-1009.19	1448.6	-112.688	-1031.35	1217.13	-124.722	-1050.59	1117.84	-160.409	-1003.85	955.637	-130.514	-970.528	871.717	-179.523	-1022.75	878.379	-183.725	-981.407	807.911
8865	0	90.3048	-899.073	1648.04	187.854	-898.774	1651.23	65.7783	-1051.93	1680.48	211.301	-1046.96	1677.95	129.453	-1099.32	1498.12	114.508	-1141.11	1236.03	149.671	-949.172	1421.76	162.589	-850.894	1214.82	177.191	-1158.13	1295.91	-43.9137	-996.402	1450.64	-113.475	-1015.34	1219.32	-126.196	-1032.14	1119.51	-160.817	-979.581	958.408	-130.26	-943.356	876.18	-179.57	-995.656	880.51	-183.408	-951.448	812.004
8866	0	91.1001	-886.264	1649.12	188.605	-886.17	1652	66.3086	-1039.03	1682.14	211.362	-1034.73	1678.49	129.195	-1086.69	1499.55	113.778	-1129.05	1237.72	149.816	-936.839	1422.96	162.619	-839.349	1215.92	176.296	-1146	1297.32	-43.8813	-983.499	1452.58	-114.487	-999.372	1221.39	-127.689	-1013.82	1121.19	-160.909	-955.211	961.623	-130.119	-917.061	880.145	-179.44	-968.263	883.11	-182.81	-921.346	816.499
8867	0	91.766	-873.444	1650.11	189.296	-873.61	1652.64	66.7588	-1026.27	1683.55	211.593	-1022.37	1678.81	128.921	-1074.31	1500.49	112.936	-1117.7	1238.85	149.714	-924.513	1423.74	162.581	-827.727	1216.88	175.539	-1133.92	1298.43	-43.833	-970.761	1454.21	-115.305	-983.589	1223.33	-129.106	-995.664	1122.78	-160.978	-930.893	964.86	-129.339	-889.644	885.266	-179.064	-940.768	885.718	-181.858	-890.953	821.156
8868	0	92.4649	-860.667	1651.08	189.916	-861.155	1653.07	67.1407	-1013.37	1684.58	212.093	-1009.96	1679.5	128.9	-1061.68	1501.57	112.717	-1105.48	1239.86	149.6	-912.115	1424.33	162.551	-815.958	1217.72	175.013	-1121.59	1299.31	-43.8411	-957.961	1455.6	-116.166	-968.052	1225.04	-130.451	-977.583	1124.15	-161.095	-906.38	968.191	-128.603	-862.149	890.631	-178.594	-913.096	888.566	-180.46	-860.586	826.283
8869	0	93.0259	-847.945	1651.84	190.724	-848.599	1653.58	67.6828	-1000.61	1685.53	212.748	-997.212	1680.01	128.818	-1048.57	1502.19	112.616	-1093.42	1240.9	149.424	-899.73	1424.7	162.446	-804.096	1218.21	174.479	-1109.25	1300.08	-43.688	-945.189	1456.64	-117.032	-952.552	1226.44	-131.875	-959.503	1125.34	-160.982	-881.964	971.44	-127.446	-834.963	896.156	-177.885	-885.412	891.574	-178.776	-830.188	831.658
8870	0	93.709	-835.133	1652.47	191.439	-836.057	1653.92	67.9662	-987.662	1686.21	212.897	-984.689	1680	128.777	-1035.75	1502.78	112.604	-1081.21	1241.49	149.376	-887.267	1424.91	162.293	-792.152	1218.34	174.06	-1096.78	1300.72	-43.5067	-932.332	1457.36	-117.954	-937.018	1227.69	-133.194	-941.521	1126.25	-160.533	-857.614	974.94	-125.969	-807.993	901.547	-177.136	-857.622	894.921	-177.007	-799.669	837.546
8871	0	94.1456	-822.384	1652.72	192.016	-823.44	1654.04	68.1479	-974.865	1686.16	213.14	-972.223	1679.84	128.685	-1022.98	1502.64	112.551	-1069.19	1241.67	149.343	-874.725	1424.71	162.054	-780.192	1218.18	173.729	-1084.34	1300.84	-43.4177	-919.533	1457.67	-118.831	-921.695	1228.36	-134.505	-923.583	1126.84	-160.201	-833.358	978.145	-124.447	-781.37	907.194	-176.058	-830.029	898.258	-174.904	-769.537	843.489
8872	0	95.2026	-809.65	1652.72	192.247	-810.969	1653.68	68.2915	-962.171	1685.89	213.104	-959.993	1679.4	128.573	-1010.18	1502.17	112.512	-1057.06	1241.82	149.344	-862.085	1424.39	161.827	-768.242	1217.85	173.425	-1071.94	1300.65	-43.3553	-906.854	1457.49	-119.688	-906.406	1228.85	-135.785	-905.461	1127.22	-159.88	-809.204	981.352	-122.507	-754.896	913.37	-176.118	-802.83	901.943	-172.701	-739.726	849.576
8873	0	95.1127	-796.797	1652.53	192.64	-798.323	1653.49	68.1663	-949.256	1685.33	212.907	-947.732	1678.56	128.519	-997.495	1501.75	112.455	-1045.08	1241.57	149.36	-849.346	1423.85	161.618	-756.248	1217.21	173.222	-1059.45	1300.31	-43.3362	-894.144	1457.07	-120.517	-891.225	1228.93	-137.194	-887.397	1127.27	-159.434	-785.153	984.827	-121.226	-728.524	919.334	-174.377	-775.385	905.194	-170.473	-710.174	856.11
8874	0	95.7377	-783.846	1652.16	192.982	-785.54	1653.1	68.1272	-936.356	1684.48	212.964	-935.039	1677.68	128.617	-984.855	1500.39	112.586	-1033.11	1240.99	149.464	-836.573	1423.01	161.335	-744.274	1215.87	173.296	-1046.86	1299.85	-43.2244	-881.289	1456.24	-121.378	-875.998	1228.91	-138.563	-869.13	1127.48	-158.776	-761.275	988.153	-119.49	-702.748	925.169	-173.56	-748.319	909.213	-168.052	-680.929	862.706
8875	0	95.5207	-770.791	1651.42	193.341	-772.571	1652.41	68.2242	-923.458	1683.48	213.372	-921.92	1677.18	128.918	-971.582	1500.52	113.049	-1021.01	1240.19	149.516	-823.678	1421.77	161.106	-732.26	1214.52	173.58	-1034.23	1299.17	-43.0698	-868.508	1455.25	-122.032	-860.634	1228.7	-139.728	-850.694	1127.23	-158.187	-737.404	991.604	-117.669	-677.316	931.053	-171.957	-721.291	912.986	-165.548	-652.178	869.536
8876	0	95.7638	-757.723	1650.42	193.411	-759.672	1651.36	68.2146	-910.307	1682.18	213.311	-908.933	1675.88	129.089	-958.553	1499.67	113.611	-1008.91	1239.22	149.521	-810.807	1420.24	160.931	-720.196	1212.62	173.854	-1021.67	1298.32	-42.9609	-855.758	1453.86	-122.569	-845.162	1228.11	-140.935	-832.191	1127.11	-157.353	-713.753	995.195	-115.657	-652.256	936.833	-170.977	-694.675	917.14	-163.059	-623.851	876.484
8877	0	96.1339	-744.73	1649.26	193.276	-746.715	1650.09	68.057	-897.314	1680.44	212.739	-896.262	1674.06	129.249	-945.462	1498.55	114.318	-996.738	1238.18	149.71	-797.897	1418.73	160.635	-707.864	1210.78	174.345	-1009.06	1297.36	-42.7171	-842.86	1452.27	-123.036	-829.605	1227.26	-142.141	-813.598	1126.91	-156.572	-690.419	998.445	-113.844	-627.331	942.694	-169.631	-668.271	921.263	-160.561	-596.01	883.41
8878	0	96.2185	-731.555	1647.76	193.404	-733.526	1648.99	68.0508	-884.317	1678.6	212.717	-883.402	1672.29	129.495	-932.394	1496.84	115.348	-984.591	1236.77	149.76	-784.917	1416.67	160.407	-695.357	1208.5	174.987	-996.496	1296.12	-42.3367	-830.022	1450.26	-123.411	-813.982	1226.13	-143.134	-794.958	1126.34	-155.678	-667.014	1001.9	-111.837	-603.021	948.381	-168.3	-642.263	925.668	-158.054	-568.84	890.32
8879	0	96.3387	-718.436	1646.14	193.499	-720.368	1647.42	67.9015	-871.162	1676.34	212.702	-870.197	1670.27	129.931	-919.254	1495.28	116.607	-972.178	1235.39	150.038	-771.957	1414.63	160.076	-682.587	1205.93	175.848	-983.827	1294.76	-41.8384	-817.205	1448.2	-123.549	-798.146	1225.07	-143.842	-776.277	1126.07	-154.664	-644.113	1005.34	-109.903	-579.268	953.693	-167.065	-616.558	929.819	-155.558	-542.232	897.362
8880	0	95.8803	-705.16	1644.49	193.295	-707.214	1645.7	67.9837	-858.172	1674.29	212.748	-857.078	1668.26	130.467	-906.145	1493.56	118.04	-959.649	1233.76	150.21	-758.929	1412.44	159.922	-669.539	1203.72	176.782	-971.11	1293.36	-41.462	-804.514	1446.19	-123.568	-782.113	1224.18	-144.42	-757.575	1125.72	-153.547	-621.482	1009.04	-107.994	-555.83	959.327	-166.429	-591.447	934.961	-153.371	-516.274	904.418
8881	0	95.7044	-692.029	1642.7	193.425	-693.815	1644.24	68.2801	-844.987	1671.93	213.055	-843.669	1666.26	131.183	-893.35	1492.03	119.652	-946.882	1232.01	150.363	-745.789	1410.12	159.824	-656.512	1201.33	177.965	-958.256	1291.7	-40.851	-791.664	1444.05	-123.559	-765.952	1223.16	-144.821	-738.694	1125.73	-152.425	-599.126	1012.84	-106.251	-532.949	964.62	-165.338	-566.732	939.798	-151.261	-490.936	911.433
8882	0	96.1853	-678.862	1640.94	193.488	-680.424	1642.53	68.5102	-831.868	1669.62	213.647	-830.298	1664.43	131.942	-880.17	1489.94	121.197	-934.167	1230	150.878	-732.626	1407.96	159.653	-643.435	1198.84	179.293	-945.31	1289.95	-40.1994	-778.963	1441.87	-123.192	-749.66	1222.27	-145.05	-719.96	1125.71	-151.39	-577.142	1016.55	-104.276	-510.484	969.895	-164.207	-542.669	944.992	-149.221	-466.348	918.356
8883	0	96.1796	-665.792	1638.96	193.571	-667.14	1640.76	68.6823	-818.968	1666.95	214.241	-816.881	1662.15	132.718	-867.106	1487.76	122.653	-921.236	1227.95	151.273	-719.548	1405.53	159.577	-630.468	1196.24	180.636	-932.357	1287.96	-39.5645	-766.418	1439.7	-122.774	-733.401	1221.38	-145.201	-701.406	1125.62	-150.149	-555.784	1020.16	-102.487	-488.675	974.9	-163.318	-519.374	949.935	-147.488	-442.457	925.229
8884	0	96.2446	-652.76	1637.03	193.752	-653.829	1639.13	69.2533	-806.088	1664.62	214.112	-804.072	1659.75	133.69	-854.12	1485.58	124.025	-908.209	1225.67	151.818	-706.241	1403.36	159.815	-617.407	1193.85	181.982	-919.474	1286.14	-38.6119	-753.776	1437.54	-122.116	-717.065	1220.59	-145.041	-683.267	1125.77	-149.027	-534.946	1023.64	-101.002	-467.495	979.516	-162.281	-496.66	954.586	-145.738	-419.394	931.851
8885	0	96.2187	-639.734	1635.27	193.885	-640.737	1637.25	69.8988	-793.31	1662.15	214.738	-790.819	1657.53	134.821	-840.848	1483.51	125.637	-894.905	1223.47	152.59	-692.973	1401.2	160.023	-604.229	1191.42	183.638	-906.077	1284.02	-37.5923	-741.04	1435.44	-121.225	-700.618	1219.99	-144.75	-665.247	1125.97	-147.968	-514.711	1026.92	-99.5931	-447.067	983.704	-161.273	-474.712	958.943	-144.258	-397.156	938.171
8886	0	96.7357	-626.73	1633.48	194.705	-627.471	1635.64	70.9883	-780.461	1659.92	216.218	-777.391	1655.8	136.144	-827.663	1481.3	127.297	-881.346	1221.47	153.455	-679.552	1398.94	160.42	-590.922	1189.22	185.096	-892.985	1282.09	-36.4967	-728.242	1433.66	-120.198	-684.38	1219.34	-144.624	-647.618	1126.42	-146.734	-494.958	1030.35	-97.9876	-427.084	987.953	-160.235	-453.608	963.169	-142.952	-375.754	944.3
8887	0	97.5598	-613.896	1631.88	195.584	-614.362	1634.21	71.9291	-767.695	1657.78	217.106	-764.07	1653.77	137.371	-814.392	1479.32	128.782	-867.715	1219.41	154.521	-666.172	1397.17	161.058	-577.303	1187.36	186.545	-879.574	1280.18	-35.2928	-715.24	1432.06	-119.105	-668.352	1218.92	-143.628	-630.606	1126.8	-145.779	-476.229	1033.2	-96.7489	-407.832	991.867	-159.357	-433.334	967.135	-141.783	-355.287	949.957
8888	0	98.9064	-601.017	1630.44	196.467	-601.388	1632.74	73.1147	-754.907	1655.88	218.204	-751.402	1651.76	138.662	-801.167	1477.31	130.071	-853.921	1217.41	155.678	-652.65	1395.28	161.734	-563.58	1185.5	187.843	-866.073	1278.23	-34.1286	-702.029	1430.61	-117.953	-652.466	1218.68	-142.961	-614.145	1126.5	-144.775	-458.034	1035.87	-95.6146	-389.318	995.452	-158.622	-413.987	970.918	-140.843	-335.716	955.412
8889	0	99.7686	-588.1	1628.94	197.928	-588.311	1631.54	74.5476	-742.204	1653.82	219.336	-738.639	1649.46	140.231	-787.718	1475.58	131.206	-840.092	1215.48	156.839	-639.061	1393.67	162.631	-549.699	1184	188.901	-852.665	1276.32	-32.6261	-688.493	1429.42	-116.77	-636.752	1218.29	-142.827	-597.874	1126.92	-143.827	-440.575	1038.29	-94.5504	-371.319	999.065	-157.631	-395.433	974.443	-140.046	-316.927	960.396
8890	0	101.638	-575.31	1627.87	199.063	-575.646	1629.85	76.2568	-729.361	1652.25	220.963	-725.748	1648.1	141.672	-774.421	1473.8	132.115	-826.176	1213.75	158.308	-625.341	1392.39	163.809	-535.865	1182.81	190.378	-838.537	1274.54	-31.1697	-674.731	1428.57	-115.562	-621.639	1218.08	-141.225	-582.265	1126.94	-142.902	-423.791	1040.57	-93.6531	-354.096	1002.3	-156.897	-377.704	977.422	-139.617	-299.143	965.073
8891	0	103.228	-562.302	1626.93	200.809	-562.596	1628.84	78.2287	-716.405	1651.1	222.801	-712.744	1646.65	143.338	-760.822	1472.41	132.838	-811.983	1212.21	159.834	-611.668	1391.31	165.222	-521.832	1181.92	191.143	-824.894	1272.84	-29.681	-660.817	1428	-114.428	-606.502	1218.15	-140.516	-567.286	1127.2	-142.092	-407.752	1042.56	-92.8844	-337.596	1005.11	-156.201	-360.952	980.156	-139.206	-282.114	969.349
8892	0	105.201	-549.237	1626.24	203.065	-549.566	1628.06	80.3301	-703.366	1650.13	225.714	-699.462	1645.82	145.012	-747.335	1471.19	133.617	-797.627	1210.74	161.485	-597.834	1390.31	166.716	-507.735	1181.03	192.133	-810.648	1271.3	-27.8406	-646.662	1427.52	-113.158	-591.966	1218	-139.649	-552.492	1127.18	-141.335	-392.316	1044	-92.323	-321.754	1007.24	-155.631	-344.917	982.33	-139.045	-265.826	972.9
8893	0	107.729	-536.231	1625.76	205.419	-536.576	1627.27	82.6279	-690.359	1649.36	228.178	-686.523	1644.89	146.835	-733.77	1469.92	134.478	-783.046	1209.42	163.37	-583.967	1389.76	168.376	-493.447	1180.67	193.166	-796.029	1269.71	-25.8992	-632.416	1427.37	-112	-577.599	1218.17	-138.432	-538.095	1127.23	-140.505	-377.499	1045.13	-91.772	-306.489	1009.06	-154.955	-329.656	983.9	-138.994	-250.519	975.878
8894	0	109.807	-523.247	1625.71	207.318	-523.99	1626.47	84.9746	-677.353	1648.88	230.279	-673.7	1643.87	148.573	-720.34	1468.96	135.156	-768.387	1208.33	165.219	-569.96	1389.35	170.161	-478.95	1180.47	194.114	-781.698	1268.23	-24.0668	-618.408	1427.37	-110.74	-563.574	1218.26	-137.102	-524.286	1127.08	-139.756	-363.23	1045.79	-91.2894	-291.736	1010.46	-154.291	-315.223	984.858	-139.146	-235.964	978.072
8895	0	112.415	-510.189	1625.93	209.661	-510.872	1626.34	87.4883	-664.426	1648.65	232.405	-661.066	1643.11	150.552	-706.636	1468.5	135.887	-753.646	1207.58	167.115	-555.998	1389.25	171.935	-464.171	1180.73	195.083	-767.093	1267.26	-22.1944	-604.259	1427.62	-109.368	-549.928	1218.35	-135.74	-510.633	1127.41	-139.037	-349.642	1045.9	-91.0719	-277.997	1010.62	-153.66	-301.699	984.944	-139.409	-222.247	979.578
8896	0	115.052	-497.118	1626.36	212.357	-497.747	1626.5	90.1674	-651.653	1648.82	234.946	-647.843	1642.66	152.577	-692.871	1468.09	136.822	-738.753	1207.31	169.222	-541.908	1389.44	173.786	-449.294	1181.16	196.564	-752.396	1266.19	-20.2156	-590.141	1428.17	-107.92	-536.595	1218.73	-134.137	-497.313	1127.6	-138.21	-336.597	1045.57	-90.7175	-264.743	1010.44	-152.971	-288.888	984.439	-139.793	-209.504	980.199
8897	0	117.975	-483.921	1627.47	215.604	-484.449	1627.37	93.4512	-638.536	1649.43	238.333	-634.669	1642.51	154.591	-678.955	1468.06	137.785	-724.069	1207.11	171.292	-527.828	1389.87	175.579	-434.106	1181.91	197.544	-737.875	1266.03	-18.1424	-575.854	1429.24	-106.482	-523.363	1219.28	-132.785	-484.406	1128.13	-137.507	-324.29	1044.82	-90.3017	-252.369	1009.61	-152.248	-277.032	983.589	-139.975	-197.643	980.225
8898	0	120.696	-470.714	1628.75	218.407	-471.174	1628.34	96.5471	-625.393	1650.37	242.012	-620.958	1643.61	156.659	-664.921	1468.84	138.655	-709.447	1207.83	173.091	-513.763	1390.65	177.141	-418.889	1183.12	198.606	-723.119	1266.22	-16.1901	-561.392	1430.79	-105.034	-510.317	1220.23	-131.308	-471.751	1128.64	-136.63	-312.544	1044.06	-90.0352	-240.716	1008.28	-151.596	-266	982.267	-140.504	-186.647	979.526
8899	0	123.752	-457.328	1630.61	220.436	-458.307	1628.83	99.4496	-612.266	1651.61	244.3	-608.043	1643.44	158.444	-650.867	1469.61	139.314	-695.255	1208.64	174.954	-499.648	1391.74	178.622	-403.689	1184.71	199.426	-708.612	1266.73	-14.4294	-547.05	1432.55	-103.553	-497.232	1221.42	-129.881	-459.592	1129.66	-135.797	-301.485	1042.97	-89.5332	-229.846	1006.56	-150.923	-255.654	980.595	-140.901	-176.599	978.047
8900	0	126.877	-443.897	1632.6	224.192	-444.58	1630.73	102.37	-598.924	1652.76	247.081	-594.929	1643.85	160.284	-636.815	1470.66	139.872	-681.282	1209.96	176.741	-485.577	1392.98	179.803	-388.774	1186.33	200.039	-694.351	1267.66	-12.761	-532.692	1434.53	-102.103	-484.271	1222.79	-128.226	-447.786	1130.59	-134.833	-290.966	1041.7	-88.9731	-219.819	1004.02	-150.284	-246.226	978.694	-141.148	-167.324	975.805
8901	0	129.822	-430.423	1634.36	226.819	-431.495	1631.66	105.427	-585.244	1654.2	250.223	-581.417	1644.35	161.913	-622.824	1471.94	140.167	-667.663	1211.65	177.909	-471.868	1394.35	180.709	-374.352	1187.83	200.568	-680.701	1268.82	-11.1086	-518.363	1436.74	-100.685	-471.341	1224.4	-126.93	-436.166	1131.79	-133.944	-281.111	1040.21	-88.3177	-210.399	1001.28	-149.661	-237.572	976.664	-141.253	-158.842	972.753
8902	0	132.824	-416.666	1636.19	229.866	-417.869	1632.8	108.105	-571.585	1656.18	253.127	-567.926	1644.96	163.449	-609.006	1473.35	140.354	-654.266	1213.29	179.011	-458.118	1395.61	181.458	-360.306	1189.2	201.022	-667.149	1270.22	-9.58293	-504.207	1439.07	-99.0732	-458.34	1226.05	-125.384	-425.097	1133.12	-132.941	-271.725	1038.64	-87.6355	-201.71	998.099	-149.051	-229.71	973.998	-140.917	-150.975	969.059
8903	0	135.797	-402.844	1637.96	232.546	-404.472	1633.58	110.444	-557.92	1657.97	255.284	-554.616	1645.67	164.579	-595.716	1475.08	140.806	-640.982	1215.15	180.398	-444.558	1396.95	182.212	-346.768	1190.48	201.619	-653.61	1271.65	-8.01276	-490.356	1441.24	-97.5904	-445.679	1227.72	-124.175	-414.036	1134.33	-132.017	-262.849	1036.7	-86.8799	-193.774	994.16	-148.285	-222.087	971.378	-140.48	-143.737	964.351
8904	0	138.336	-388.972	1639.35	234.702	-390.937	1634.08	112.764	-543.854	1660	257.443	-540.724	1646.67	165.694	-582.498	1476.62	141.278	-628.061	1216.85	181.399	-431.276	1398.29	182.619	-333.768	1191.47	202.495	-640.138	1273.04	-6.72492	-477.033	1443.28	-96.0697	-433.129	1229.22	-122.75	-403.441	1135.38	-130.871	-254.395	1034.74	-86.0279	-186.31	989.988	-147.826	-215.318	968.221	-139.774	-137.086	958.91
8905	0	140.045	-375.18	1640.67	236.831	-377.216	1635.04	114.491	-529.919	1662.04	258.922	-526.999	1647.74	166.858	-569.522	1478.44	141.959	-615.289	1218.58	182.108	-418.211	1399.61	182.982	-320.869	1192.73	203.371	-626.989	1274.65	-5.41182	-464.051	1444.98	-94.6278	-420.983	1230.63	-121.329	-393.019	1136.48	-129.966	-246.308	1032.33	-85.0533	-179.463	985.439	-146.912	-208.829	964.893	-138.755	-131.044	952.765
8906	0	141.897	-361.379	1641.85	238.034	-363.702	1635.86	115.792	-516.089	1664.18	260.065	-513.64	1649.21	168.105	-556.632	1480.51	143.049	-602.433	1220.31	182.696	-405.32	1401.3	183.368	-308.133	1194.23	204.228	-614.337	1276.24	-4.49526	-451.544	1446.72	-93.3823	-408.983	1232.02	-120.86	-382.685	1137.81	-129.131	-238.794	1029.73	-84.2719	-173.24	980.716	-146.434	-202.953	961.491	-137.569	-125.559	946.211
8907	0	142.68	-347.808	1643.1	238.893	-350.212	1636.87	116.782	-502.352	1666.08	261.154	-499.95	1651.02	169.462	-543.706	1482.32	144.297	-589.937	1222.25	183.413	-392.607	1403.11	183.609	-295.708	1195.82	205.521	-601.628	1277.98	-3.67046	-439.39	1448.34	-92.1584	-397.564	1233.15	-119.393	-372.899	1138.55	-128.139	-231.637	1027.3	-83.3537	-167.628	975.894	-145.76	-197.546	957.936	-136.319	-120.777	939.16
8908	0	143.695	-334.412	1644.3	239.856	-336.417	1638.34	117.926	-488.535	1668.28	262.248	-486.145	1653.2	170.655	-530.896	1484.12	145.611	-577.831	1224.22	184.031	-380.029	1404.92	183.855	-283.327	1197.77	207.167	-588.944	1279.98	-3.02346	-427.707	1450.06	-91.1746	-386.44	1234.44	-118.26	-363.413	1139.22	-127.365	-225.065	1024.35	-82.3012	-162.583	971.095	-145.236	-192.707	954.576	-134.726	-116.746	931.967
8909	0	144.014	-320.977	1646.01	240.522	-322.768	1640.29	118.796	-475.202	1670.51	263.748	-472.234	1656.22	171.646	-518.092	1486.53	147.247	-565.571	1226.28	184.675	-367.373	1407.01	183.927	-271.066	1199.93	208.69	-576.415	1282.16	-2.49268	-416.004	1451.9	-90.4105	-375.926	1235.67	-117.087	-354.303	1139.78	-126.444	-218.918	1021.65	-81.2297	-158.107	966.201	-144.715	-188.338	950.939	-133.219	-113.501	924.49
8910	0	144.336	-307.785	1647.72	240.57	-309.415	1642.16	119.272	-462.079	1672.67	264.23	-458.977	1658.54	172.533	-505.265	1488.87	148.885	-553.285	1228.42	185.08	-354.814	1409.19	183.722	-258.817	1202.25	209.941	-564.044	1284.43	-2.44152	-404.281	1453.52	-89.705	-365.821	1236.51	-115.419	-345.743	1140.01	-125.576	-213.676	1018.68	-80.2252	-154.259	961.3	-143.89	-184.575	947.286	-131.535	-110.904	917.056
8911	0	144.203	-294.713	1649.71	241.026	-296.058	1644.62	119.735	-449.145	1674.86	265.073	-445.586	1661.07	173.227	-492.621	1491.08	150.666	-541.1	1230.59	185.663	-342.285	1411.49	183.713	-246.512	1204.27	211.318	-551.713	1286.8	-2.27991	-392.536	1455.16	-88.9113	-356.267	1237.15	-114.066	-337.547	1140.25	-124.578	-208.552	1015.85	-79.0605	-151.105	956.333	-143.059	-181.488	943.617	-129.678	-109.137	909.649
8912	0	144.585	-281.809	1652.02	240.992	-282.948	1646.94	120.136	-436.229	1677.17	264.633	-432.568	1663.24	173.893	-479.886	1493.38	152.492	-528.986	1233.17	185.94	-329.792	1413.83	183.613	-234.268	1206.41	212.493	-539.592	1289.43	-2.17756	-380.645	1456.78	-88.1018	-347.125	1237.63	-112.729	-329.697	1140.31	-123.44	-204.277	1012.69	-77.6835	-148.536	951.627	-141.972	-178.923	939.808	-127.747	-108.268	902.371
8913	0	144.339	-269.053	1654.2	241.016	-270.038	1649.56	120.318	-423.445	1679.37	264.965	-419.565	1665.72	174.478	-467.148	1496.01	154.162	-516.953	1235.84	186.424	-317.281	1416.19	183.553	-222.083	1208.46	213.801	-527.27	1292.26	-1.92879	-368.572	1458.23	-87.3955	-338.642	1238.19	-111.33	-322.332	1140.55	-122.31	-200.438	1009.68	-76.418	-146.577	946.652	-141.03	-177.08	935.921	-125.998	-107.996	895.318
8914	0	144.411	-256.309	1656.57	240.903	-257.37	1651.78	120.585	-410.826	1681.41	265.311	-406.768	1668.27	175.284	-454.323	1498.56	155.869	-504.617	1238.25	186.919	-304.638	1418.38	183.588	-209.941	1210.46	215.211	-514.847	1294.96	-1.48699	-356.375	1459.87	-86.448	-330.27	1238.69	-110.094	-315.056	1140.8	-120.838	-197.09	1006.78	-74.932	-145.229	941.801	-139.691	-175.946	932.195	-124.041	-108.55	888.557
8915	0	144.885	-243.747	1658.78	241.187	-244.546	1654.4	120.867	-398.233	1683.47	265.543	-393.872	1670.65	176.099	-441.622	1500.96	157.465	-492.187	1240.55	187.213	-291.985	1420.51	183.411	-198.255	1212.04	216.862	-502.326	1297.51	-1.11869	-344.27	1461.35	-85.3518	-321.913	1239.12	-108.161	-308.511	1140.75	-119.447	-194.34	1003.67	-73.3863	-144.292	937.249	-138.168	-175.24	928.332	-122.183	-109.611	882.046
8916	0	144.723	-231.206	1661.03	241.726	-231.829	1657.07	121.033	-385.837	1685.11	266.094	-381.382	1672.82	176.607	-429.064	1503.06	158.839	-479.79	1242.64	187.866	-279.466	1422.6	183.723	-186.358	1213.86	218.471	-489.809	1299.88	-0.670756	-332.113	1462.83	-84.282	-313.8	1239.62	-106.327	-302.133	1140.89	-117.883	-191.963	1000.78	-71.7413	-143.974	932.715	-136.698	-175.254	924.648	-120.238	-111.077	875.965
8917	0	145.314	-218.845	1663.07	241.415	-219.626	1658.98	121.127	-373.567	1686.48	266.011	-369.183	1674.44	177.274	-416.423	1504.91	159.991	-467.325	1244.5	188.056	-266.806	1424.39	183.98	-174.48	1215.5	220.073	-477.123	1302.02	-0.139779	-320.01	1463.97	-83.2711	-305.767	1239.83	-104.749	-295.986	1140.94	-116.18	-190.012	997.898	-70.0399	-143.776	928.693	-135.096	-175.527	921.127	-118.473	-113.048	870.25
8918	0	145.491	-206.604	1664.96	241.719	-207.218	1661.19	121.42	-361.302	1687.65	266.213	-356.902	1675.93	178.031	-403.774	1506.44	161.29	-454.632	1246.25	188.868	-254.255	1425.94	184.547	-162.535	1217.04	221.81	-464.378	1303.81	0.422642	-307.941	1465.02	-81.8644	-297.67	1239.8	-102.828	-290.094	1140.76	-114.564	-188.345	994.903	-68.6928	-144.43	924.364	-133.235	-176.116	917.784	-116.603	-115.327	864.619
8919	0	145.407	-194.193	1666.7	242.188	-194.686	1663.18	121.981	-349.16	1688.48	266.755	-344.479	1677.22	178.836	-390.993	1507.68	162.511	-441.981	1247.43	189.568	-241.595	1427.43	185.203	-150.451	1218.48	223.698	-451.473	1305.52	0.971949	-295.722	1466	-80.3785	-289.52	1239.86	-100.893	-284.535	1140.37	-112.794	-187.034	991.966	-67.0006	-144.985	920.218	-131.574	-177.245	914.327	-114.992	-118.189	859.504
8920	0	145.68	-181.997	1668.22	242.652	-182.154	1665.03	122.612	-336.996	1689.21	267.529	-331.919	1678.51	179.565	-378.29	1508.9	163.813	-429.397	1248.8	190.137	-229.104	1428.63	186.061	-138.212	1219.74	225.489	-438.77	1306.93	1.45678	-283.466	1466.66	-78.8615	-281.329	1239.77	-98.7691	-278.979	1139.9	-111.008	-185.911	989.074	-65.3298	-145.815	916.236	-129.401	-178.444	910.955	-113.189	-120.951	854.518
8921	0	145.925	-169.666	1669.25	242.824	-169.711	1666.23	123.071	-324.925	1689.58	268.05	-319.551	1679.24	180.313	-365.448	1509.65	164.972	-416.893	1249.59	190.55	-216.426	1429.57	186.904	-125.812	1220.55	227.054	-426.139	1307.99	2.021	-271.143	1467.01	-77.3405	-273.195	1239.36	-96.6474	-273.443	1139.53	-109.063	-184.946	986.117	-63.6117	-146.708	912.096	-127.477	-179.953	907.664	-111.547	-124.021	849.463
8922	0	146.119	-157.427	1670.08	242.782	-157.232	1666.82	123.792	-312.745	1689.63	268.532	-306.984	1679.25	181.095	-352.763	1509.81	166.159	-404.313	1250.27	191.492	-203.946	1430.02	187.801	-113.445	1220.9	228.587	-413.507	1308.83	2.70735	-258.806	1466.82	-75.9592	-265.078	1238.64	-94.4266	-267.93	1138.81	-107.075	-184.236	982.74	-61.9067	-147.679	907.898	-125.373	-181.594	904.364	-109.412	-127.364	844.302
8923	0	146.39	-145.169	1670.7	242.935	-144.523	1667.47	124.416	-300.731	1689.26	269.097	-294.286	1678.97	181.861	-340.19	1509.94	167.165	-391.885	1250.29	192.216	-191.32	1430.19	188.792	-100.844	1220.85	230.1	-400.973	1309.29	3.13582	-246.399	1466.62	-74.2497	-256.832	1237.7	-92.2902	-262.568	1137.91	-105.169	-183.361	979.83	-59.9967	-148.71	903.889	-123.153	-183.553	900.728	-107.766	-130.763	839.527
8924	0	146.495	-132.704	1670.86	243.174	-131.755	1667.78	125.069	-288.605	1688.64	269.927	-281.698	1678.55	181.692	-328.378	1509.74	168.222	-379.522	1250.25	192.901	-178.672	1429.93	189.779	-88.3171	1220.39	231.379	-388.572	1309.36	3.75312	-233.88	1465.98	-72.598	-248.526	1236.52	-89.7662	-256.834	1137.14	-103.283	-182.759	976.74	-58.2805	-149.816	899.728	-120.834	-185.397	897.354	-105.957	-134.217	834.659
8925	0	146.91	-120.284	1670.7	243.335	-118.961	1667.57	126.084	-276.216	1687.85	270.88	-268.7	1677.93	183.8	-314.012	1509	169.178	-367.177	1249.92	193.735	-165.907	1429.28	190.77	-75.8815	1219.34	232.643	-376.038	1309.14	4.35724	-221.266	1465.02	-70.7987	-240.094	1235.32	-87.4108	-251.079	1136.13	-100.953	-181.793	973.646	-56.6879	-150.865	895.714	-118.709	-187.085	894.471	-103.983	-137.727	830.122
8926	0	147.04	-107.857	1669.98	243.417	-105.974	1667	127.185	-263.819	1686.81	272	-255.55	1677.16	184.825	-300.855	1507.85	169.967	-354.888	1249.38	194.465	-153.142	1428.48	192.074	-63.4066	1218.25	233.776	-363.55	1308.68	5.04205	-208.637	1464.07	-68.9376	-231.63	1234.05	-84.8456	-245.187	1134.89	-98.7784	-180.947	970.625	-54.7026	-151.671	892.306	-116.519	-188.913	891.498	-102.22	-141.358	825.768
8927	0	147.15	-95.1601	1669.1	243.842	-92.9115	1666.52	127.848	-251.383	1685.43	272.426	-242.48	1675.53	183.543	-290.226	1507.98	170.362	-342.847	1248.64	195.323	-140.432	1427.5	193.07	-51.2667	1216.7	234.637	-351.132	1307.91	5.55856	-195.848	1462.92	-67.481	-223.172	1232.7	-82.3789	-239.127	1133.9	-96.9896	-180.043	967.815	-53.6022	-152.419	888.734	-114.213	-190.634	889.175	-100.243	-144.857	821.672
8928	0	147.417	-82.6224	1667.98	244.037	-79.7899	1665.48	128.596	-238.797	1683.74	272.942	-229.316	1674.06	185.824	-275.681	1505.75	170.385	-330.648	1247.74	195.953	-127.54	1426.26	194.173	-38.9802	1214.91	235.232	-338.689	1306.93	5.94749	-182.92	1461.53	-65.7793	-214.827	1231.11	-79.8385	-232.7	1132.88	-95.0371	-178.828	965.503	-51.3837	-152.422	886.108	-112.238	-192.052	886.913	-98.4741	-148.501	817.871
8929	0	147.862	-69.7723	1666.62	244.168	-66.6638	1664.03	129.333	-226.168	1682	273.947	-216.253	1672.47	185.049	-264.304	1505.23	170.35	-318.327	1246.61	196.731	-114.544	1424.68	195.305	-26.6169	1212.94	235.765	-326.184	1305.69	6.32991	-169.925	1460.24	-64.3378	-206.19	1230.04	-77.1926	-226.084	1131.84	-92.9318	-177.429	963.294	-49.9303	-152.799	883.259	-109.913	-193.325	885.098	-96.4485	-152.082	814.52
8930	0	148.057	-56.8711	1665.09	244.448	-53.5199	1662.55	130.274	-213.282	1680.28	274.545	-202.709	1670.66	185.721	-251.145	1503.8	170.215	-305.898	1245.28	197.328	-101.546	1423.18	196.515	-14.1194	1211.09	236.328	-313.76	1304.35	6.5941	-156.859	1458.86	-63.0777	-197.391	1228.94	-74.578	-219.303	1130.57	-91.0169	-175.704	961.451	-48.0991	-152.986	880.656	-107.665	-194.277	883.52	-94.3199	-155.465	811.47
8931	0	148.255	-43.8381	1663.16	244.969	-40.1932	1660.81	131.024	-200.207	1678.59	275.316	-189.293	1668.87	186.174	-237.856	1502.25	169.994	-293.174	1243.9	197.868	-88.5618	1421.35	197.359	-1.54912	1208.75	236.55	-301.299	1302.98	7.02697	-143.583	1457.54	-62.0554	-188.336	1227.97	-72.3312	-212.053	1129.9	-89.0701	-173.492	959.956	-46.644	-153.079	878.061	-105.573	-194.522	882.517	-92.318	-158.552	808.956
8932	0	148.677	-30.7359	1660.95	245.223	-26.9243	1658.42	131.721	-187.139	1676.78	275.698	-175.981	1666.68	186.515	-224.816	1500.54	169.696	-280.347	1242.47	198.368	-75.449	1419.39	198.427	11.3749	1206.47	236.676	-288.695	1301.58	7.25268	-130.049	1455.84	-61.1655	-179.1	1226.97	-70.1478	-204.501	1129.27	-87.1398	-170.814	958.4	-44.6717	-152.353	875.977	-103.17	-194.282	881.521	-89.781	-161.266	806.537
8933	0	149.06	-17.6609	1658.63	245.272	-13.6853	1655.76	132.424	-174.096	1674.78	276.635	-162.734	1664.54	186.801	-211.915	1499.06	169.307	-267.478	1240.83	198.785	-62.2573	1417.36	199.303	24.3222	1204.06	236.78	-276.053	1299.83	7.50098	-116.525	1454.14	-60.3146	-169.511	1225.89	-68.1993	-196.699	1128.61	-85.3663	-167.666	956.948	-42.7331	-151.385	873.966	-101.207	-193.431	880.815	-86.9632	-163.459	804.023
8934	0	149.164	-4.5884	1656.22	245.726	-0.443467	1653.46	132.938	-160.952	1672.69	276.703	-149.382	1661.9	186.938	-198.746	1496.87	168.778	-254.4	1239.04	198.873	-49.3215	1415.21	200.212	37.4582	1202.04	236.714	-263.382	1297.89	7.65219	-103.006	1452.4	-59.7148	-159.778	1224.87	-66.607	-188.463	1128.05	-83.7272	-163.795	955.771	-40.8427	-149.823	872.396	-99.2746	-191.741	880.32	-84.3199	-165.229	801.999
8935	0	149.273	8.41981	1653.93	245.868	12.7173	1651.05	133.228	-148.063	1670.45	277.348	-136.266	1659.98	187.072	-185.514	1495	168.282	-241.291	1237.21	199.124	-36.1693	1413.31	200.971	50.5459	1200.15	236.578	-250.533	1296.12	7.76352	-89.3126	1450.66	-59.3557	-149.757	1223.94	-65.2525	-179.773	1127.51	-82.3807	-159.203	954.902	-39.1905	-147.33	871.248	-97.8575	-188.959	880.091	-81.3185	-166.19	800.417
8936	0	149.412	21.4182	1651.5	245.898	25.736	1648.6	133.483	-135.073	1668.36	277.173	-123.118	1657.36	187.1	-172.173	1492.71	167.916	-228.052	1235.29	199.329	-22.7949	1411.53	201.723	63.7383	1198.65	236.597	-237.406	1294.24	7.66441	-75.6827	1448.96	-59.0852	-139.27	1223.1	-64.2152	-170.886	1126.93	-81.2777	-153.861	954.062	-38.5991	-144.055	870.417	-96.5557	-185.263	879.999	-78.5463	-166.481	799.076
8937	0	149.242	34.3833	1649.56	245.952	38.7604	1646.59	133.64	-121.986	1666.41	277.318	-110.094	1655.32	186.805	-159.064	1490.53	167.625	-214.766	1233	199.393	-9.50491	1409.95	202.227	77.0907	1197.34	236.511	-224.198	1291.97	7.46731	-62.023	1447.32	-59.0086	-128.571	1222.22	-63.3662	-161.454	1126.24	-80.585	-147.778	953.444	-35.7645	-140.616	869.801	-95.7795	-180.77	879.924	-75.9285	-165.825	797.947
8938	0	148.768	47.1841	1647.79	245.521	51.5652	1644.67	133.357	-109.252	1664.4	277.182	-97.1484	1653.5	186.243	-146.22	1488.74	167.371	-201.317	1230.99	199.162	3.86002	1408.53	202.571	90.4691	1196.2	236.292	-210.779	1290.07	7.00641	-48.4318	1445.73	-59.0902	-117.268	1221.46	-63.0109	-151.597	1125.58	-80.1996	-141.037	952.869	-34.009	-136.397	869.461	-95.7685	-174.845	880.122	-73.6529	-164.207	797.296
8939	0	148.485	60.0483	1646.31	245.251	64.3814	1643.35	132.721	-96.4704	1662.4	276.708	-84.5031	1651.69	185.565	-133.35	1486.78	167.186	-187.749	1229.09	198.912	17.3854	1407.15	202.704	104.024	1195.16	236.06	-197.224	1288.19	6.61999	-34.7547	1444	-59.1663	-105.531	1220.31	-62.9005	-141.193	1125.02	-79.935	-133.336	952.213	-33.5771	-130.604	869.094	-95.6347	-168.357	880.365	-71.5172	-161.444	796.718
8940	0	147.718	72.6959	1644.92	244.393	77.0623	1641.9	132.017	-83.8069	1660.49	276.051	-71.9014	1649.95	185.001	-120.248	1485.08	167.168	-174.053	1227.21	198.552	31.0815	1405.89	202.697	117.583	1193.98	235.963	-183.471	1286.39	6.07098	-21.2249	1442.4	-59.3319	-93.5264	1218.97	-62.8364	-130.507	1124.26	-79.8858	-124.992	951.297	-32.993	-123.565	868.868	-95.6072	-160.877	880.255	-69.8905	-157.508	796.342
8941	0	146.681	85.4244	1643.63	243.572	89.7839	1641.08	131.231	-71.0654	1658.57	275.288	-59.1087	1648.4	184.332	-107.013	1483.25	167.188	-160.327	1225.49	197.999	44.7793	1404.8	202.305	131.328	1192.91	235.867	-169.615	1284.75	5.42256	-7.58781	1440.73	-59.5344	-80.9498	1217.71	-63.0277	-119.11	1123.53	-80.1143	-115.784	950.659	-33.1671	-115.924	867.926	-95.7863	-152.625	879.978	-68.6687	-152.352	796.044
8942	0	145.423	98.0856	1642.59	242.355	102.532	1640.35	129.818	-58.5712	1656.74	273.676	-46.5556	1646.91	183.759	-93.7566	1482.07	167.266	-146.405	1224.03	197.216	58.4977	1403.77	201.736	145.094	1192.01	235.637	-155.925	1283.54	4.95095	5.91473	1439.36	-59.8809	-68.355	1216.63	-63.5385	-107.475	1122.96	-80.6517	-105.893	949.935	-33.5817	-107.153	867.722	-96.5851	-143.537	879.7	-68.2731	-145.934	795.926
8943	0	144.149	110.864	1641.72	240.805	115.222	1639.73	128.502	-45.9943	1655.14	272.489	-33.7443	1645.97	183.232	-80.3338	1480.97	167.611	-132.282	1222.74	196.48	72.3334	1402.91	200.837	159.076	1191.16	235.745	-141.848	1282.47	4.337	19.3252	1438.12	-60.217	-55.3694	1215.51	-64.053	-95.0759	1122.18	-81.2403	-95.2223	949.425	-34.2972	-97.4244	867.299	-97.6387	-133.505	879.534	-67.6944	-138.24	796.075
8944	0	142.421	123.333	1640.89	239.117	127.976	1639.42	127.096	-33.4504	1653.62	271.173	-21.0995	1645.35	182.773	-66.8674	1479.82	167.932	-117.909	1221.5	195.763	86.2139	1402.58	199.841	173.342	1190.8	235.987	-127.529	1281.21	3.54388	32.5427	1437.28	-60.9287	-42.4044	1214.73	-64.5796	-82.6327	1121.37	-82.0901	-83.9852	948.858	-35.4347	-87.0466	866.519	-98.4579	-122.755	879.479	-68.2823	-129.098	795.952
8945	0	140.673	135.908	1640.37	237.424	140.775	1639.43	125.444	-20.9949	1652.47	269.608	-8.44115	1645.01	182.035	-53.4045	1478.73	168.329	-103.416	1220.45	194.511	100.08	1402.37	198.631	187.95	1190.9	236.005	-113.355	1280.2	2.6502	45.7369	1436.56	-61.4432	-29.1346	1213.94	-65.2303	-69.5835	1120.87	-83.1964	-71.8763	948.669	-36.4327	-76.0297	866.016	-99.8004	-111.231	879.482	-69.6201	-118.441	795.712
8946	0	138.9	148.539	1640.11	235.738	153.514	1639.78	123.658	-8.48115	1651.79	268.007	4.4157	1645	181.021	-40.196	1477.91	168.52	-88.7988	1219.44	193.403	113.986	1402.61	197.221	202.613	1191.3	236.054	-99.1458	1279.46	1.47797	58.8861	1436.21	-62.3526	-15.8565	1213.61	-66.1198	-56.3829	1120.49	-84.4176	-59.2082	948.415	-37.868	-63.2346	865.872	-101.429	-98.7115	879.551	-71.2985	-106.482	795.849
8947	0	137.121	161.109	1640.23	233.901	166.308	1640.22	122.269	4.38551	1651.5	266.26	17.2397	1645.25	180.365	-26.5524	1477.49	168.794	-74.0387	1218.78	192.679	127.923	1403.1	195.792	217.313	1191.83	236.022	-84.7756	1278.87	0.513978	72.1369	1436.14	-63.0788	-2.2197	1213.31	-66.8937	-42.7157	1120.25	-85.7765	-45.8338	948.424	-39.5006	-49.7983	865.469	-102.953	-85.4087	879.516	-73.5847	-92.9421	795.927
8948	0	135.507	173.996	1640.6	232.185	179.117	1640.85	120.698	17.0678	1651.45	265.335	30.2015	1645.97	178.168	-14.6636	1477.29	168.754	-59.3902	1218.23	191.554	141.882	1404.07	194.552	232.253	1192.96	235.735	-70.3333	1278.54	-0.425943	85.4467	1436.41	-63.8732	11.6245	1213.42	-67.6367	-28.6083	1120.22	-87.1947	-31.7181	948.763	-41.6731	-35.75	864.955	-104.581	-71.3222	879.712	-76.4356	-78.0669	795.985
8949	0	133.699	186.553	1641.07	230.473	191.796	1641.68	119.116	29.7097	1651.45	263.505	42.8577	1646.47	178.272	-0.027349	1477.38	168.296	-44.6971	1218.07	190.367	155.695	1405.1	193.462	247.38	1194.43	235.192	-55.8954	1278.48	-1.51789	98.8529	1436.85	-64.8234	25.6297	1213.81	-68.6489	-14.2329	1120.38	-88.8028	-16.9562	948.886	-43.6916	-20.3467	865.05	-106.207	-56.4037	880.04	-79.2788	-61.8886	795.951
8950	0	131.992	199.243	1641.77	228.804	204.625	1642.76	117.43	42.1795	1651.48	261.96	55.559	1647.06	177.271	13.2733	1477.58	167.623	-29.8802	1218.13	189.443	169.668	1406.31	192.575	262.507	1195.94	234.412	-41.5297	1278.52	-2.33306	112.412	1437.37	-65.7788	39.9353	1214.04	-69.7412	0.558979	1120.68	-90.5681	-1.42706	949.278	-45.9228	-4.20194	865.282	-108.218	-40.4914	880.452	-82.6343	-44.5261	795.832
8951	0	130.422	211.924	1642.64	227.181	217.472	1644.15	116.116	54.7911	1651.72	260.583	68.4802	1648.01	175.474	25.3844	1477.76	166.914	-15.2847	1218.46	188.57	183.631	1407.66	192.038	277.391	1197.59	233.739	-27.2085	1278.78	-3.26102	125.844	1437.95	-66.695	54.6316	1214.51	-70.6379	15.9444	1120.9	-92.5574	14.8447	949.653	-48.14	12.9396	865.389	-110.125	-23.7964	880.622	-86.0727	-25.83	796.001
8952	0	128.74	224.458	1643.96	225.631	230.458	1645.9	114.966	67.4037	1652.36	259.743	81.598	1649.47	175.677	39.7679	1478.96	166.149	-1.04015	1219.29	187.767	197.466	1409.39	191.692	291.856	1199.52	233.079	-13.0764	1279.63	-3.70987	139.326	1439.06	-67.3575	69.6927	1215.08	-71.5852	31.7166	1121.27	-94.2883	31.8919	950.12	-50.6153	30.8651	865.524	-112.388	-6.23452	880.836	-89.7239	-6.15583	796.214
8953	0	127.504	237.208	1645.32	224.005	243.506	1647.58	113.887	79.7999	1653.11	258.686	94.7583	1650.89	175.163	52.9294	1480.12	165.378	12.8187	1220.44	186.993	210.938	1411.14	190.988	305.66	1201.13	232.633	0.927902	1280.91	-3.9409	152.847	1440.5	-68.1064	84.9713	1215.83	-72.7183	47.8512	1121.75	-96.2618	49.7131	950.743	-52.8475	49.7679	866.078	-114.671	12.2956	881.263	-93.4579	14.6431	796.569
8954	0	126.06	249.773	1646.36	222.665	256.651	1649.07	113.273	92.5705	1653.84	258.174	108.016	1652.29	175.04	65.9778	1481.69	165.019	26.4422	1221.98	186.579	224.512	1412.88	190.017	318.704	1202.08	232.597	14.7044	1282.43	-4.16906	166.005	1441.89	-68.7745	100.583	1216.69	-73.7316	64.4197	1122.26	-98.2762	68.1834	951.683	-55.4984	69.7091	866.621	-116.717	31.7832	881.565	-97.4835	36.4831	796.868
8955	0	124.945	262.551	1647.3	221.489	269.793	1650.34	113.076	105.178	1654.59	258.022	121.263	1653.57	175.896	79.6719	1482.67	164.885	39.8182	1223.36	186.152	237.8	1414.49	189.705	332.071	1203.5	233.024	28.1444	1283.98	-4.12207	179.094	1443.64	-69.1876	116.303	1217.67	-74.7532	81.1501	1122.71	-100.091	87.4568	952.364	-58.2252	90.1548	866.683	-118.861	52.095	881.972	-101.111	59.281	797.556
8956	0	123.967	275.057	1648.11	220.61	283.038	1651.3	112.914	117.559	1655.65	257.345	134.634	1654.59	176.261	92.7179	1483.97	164.99	52.6995	1225.01	185.856	250.944	1416.02	189.401	345.973	1204.82	233.623	41.3218	1285.77	-4.01181	191.821	1445.17	-69.6548	132.329	1218.44	-75.9768	98.0395	1123.45	-101.875	107.451	953.172	-61.0794	111.993	867.393	-121.169	73.2918	882.286	-104.826	83.0521	798.137
8957	0	123.737	287.791	1649.02	219.927	296.07	1652.17	112.898	130.112	1656.82	257.273	147.962	1655.85	176.68	105.785	1485.11	165.345	65.2892	1226.27	185.588	263.828	1417.44	189.301	358.823	1206.14	234.211	54.2836	1287.14	-3.73865	204.635	1447.07	-69.946	148.469	1219.33	-77.261	114.986	1124.23	-103.521	127.881	953.985	-63.3912	134.09	868.234	-123.522	95.3636	882.739	-108.356	107.676	799.206
8958	0	123.627	300.641	1650.01	219.853	309.112	1653.02	113.461	142.975	1658.36	257.753	161.012	1657.04	176.686	118.206	1486.35	165.717	77.9278	1227.74	185.907	276.747	1419.1	189.123	371.593	1207.6	235	66.6219	1288.78	-3.47633	217.277	1449.02	-70.3743	164.477	1220.64	-78.1834	132.471	1125.09	-105.201	148.852	955.026	-65.5326	156.812	869.251	-125.355	117.895	883.29	-111.731	133.216	800.518
8959	0	123.948	313.345	1651.05	220.241	322.096	1653.86	114.253	155.847	1660.37	258.639	174.19	1658.61	176.655	130.364	1488.08	166.186	90.2356	1228.92	186.07	289.401	1420.76	188.82	383.681	1208.89	235.369	79.2753	1289.94	-3.18796	229.906	1451.1	-70.7761	180.515	1222.16	-79.4265	149.6	1126.04	-106.608	170.237	956.473	-67.5049	180.248	870.387	-127.401	140.975	883.984	-114.984	159.383	802.096
8960	0	124.643	326.276	1652.31	220.969	334.939	1654.69	114.751	168.649	1662.24	259.605	187.204	1660.53	177.121	143.167	1489.62	166.23	102.671	1230.54	186.136	301.87	1422.55	188.737	396.017	1210.38	235.522	91.447	1291.73	-2.77052	242.828	1453.36	-71.0283	196.613	1223.7	-80.8489	166.717	1127.32	-108.078	191.945	958.19	-69.2242	204.129	872.202	-129.22	164.661	884.881	-117.821	186.237	804.258
8961	0	125.579	338.976	1653.58	222.012	347.569	1655.79	115.345	181.385	1664.14	259.903	199.505	1661.51	176.83	154.548	1491.81	166.063	115.044	1231.99	186.653	314.331	1424.44	188.692	408.185	1212.21	235.283	103.676	1292.92	-2.3651	255.509	1455.55	-71.6128	212.544	1225.6	-82.114	184.089	1128.7	-109.591	213.882	960.131	-70.7982	229.198	874.972	-130.591	188.739	886.404	-120.621	213.556	806.884
8962	0	126.672	351.778	1655.12	223.224	360.157	1657	116.349	194.247	1666.08	260.907	212.341	1663.33	178.148	167.848	1492.56	165.702	127.263	1233.67	187.323	326.74	1426.4	188.898	420.458	1213.99	235.089	115.982	1294.39	-1.82952	268.258	1457.92	-72.2655	228.161	1227.77	-83.5206	201.394	1130.19	-110.831	236.064	962.221	-72.4135	253.971	877.558	-131.908	213.115	888.036	-123.215	241.248	810.206
8963	0	128.068	364.424	1656.98	224.746	372.648	1658.54	117.443	207.073	1668.38	262.14	224.602	1665.03	178.007	179.224	1495.19	164.968	139.636	1235.63	187.803	339.027	1428.66	189.289	433.092	1216.09	234.478	127.854	1296.01	-1.29611	281.154	1460.66	-72.9424	243.839	1230.18	-84.7881	218.879	1131.95	-111.977	258.344	964.911	-73.3093	279.543	880.764	-132.774	237.806	889.973	-125.085	269.542	813.854
8964	0	129.657	377.077	1658.94	226.301	384.984	1660.1	118.548	219.778	1670.79	263.132	236.855	1666.48	178.448	191.873	1497.27	164.254	151.708	1237.77	188.337	351.313	1430.81	189.804	445.611	1218.4	233.717	139.987	1298.1	-0.632212	293.87	1463.48	-73.6592	259.634	1232.91	-86.2149	236.346	1134.21	-113.005	281.032	967.929	-75.8001	305.174	884.29	-133.563	262.715	892.242	-126.813	298.057	818.289
8965	0	131.364	389.702	1660.98	227.881	397.168	1661.51	119.67	232.293	1672.99	264.548	249.009	1668.13	178.929	204.094	1499.57	163.526	163.757	1240.09	189.047	363.61	1432.86	190.208	457.945	1220.57	233.08	151.91	1299.91	0.029959	307.085	1466.32	-74.2201	275.225	1235.87	-87.4543	253.878	1136.5	-113.733	303.899	971.507	-76.2979	331.181	888.65	-133.922	288.186	894.948	-127.829	326.88	823.08
8966	0	132.984	402.221	1663.03	229.636	409.347	1663.02	120.86	244.804	1675.35	265.715	261.071	1669.47	179.208	216.669	1501.36	162.578	175.903	1242.09	189.589	375.918	1434.97	190.496	470.393	1222.95	232.293	164.082	1301.98	0.906583	320.031	1469.28	-75.1375	290.747	1238.92	-88.7994	271.391	1139.07	-114.339	326.803	975.358	-76.5949	357.212	893.787	-134.088	313.614	898.298	-128.734	355.843	828.697
8967	0	134.498	414.485	1665.01	231.097	421.368	1664.54	121.875	257.046	1677.33	266.797	272.938	1670.82	179.374	228.593	1503.54	161.769	187.934	1244.3	190.136	388.196	1437.18	191.048	483.036	1225.59	231.398	176.172	1303.73	1.44285	333.096	1472.44	-75.946	306.287	1242.03	-90.2869	288.879	1141.94	-114.885	349.753	979.367	-76.8586	383.333	899.07	-134.191	339.374	902.004	-129.329	384.831	834.715
8968	0	135.916	426.65	1666.95	232.487	433.353	1666	123.009	269.385	1679.33	267.618	284.963	1671.94	179.559	241.203	1504.98	160.892	200.103	1246.35	190.71	400.494	1439.14	191.383	495.436	1227.76	230.688	188.209	1305.66	2.20007	346.23	1475.33	-76.7289	321.796	1245.17	-91.7903	306.429	1144.76	-115.322	372.995	983.833	-76.812	409.942	905.498	-134.084	365.176	905.995	-129.511	413.938	841.156
8969	0	137.106	438.875	1668.59	233.659	445.295	1667.22	124.173	281.56	1681.03	268.818	297.013	1672.94	179.519	252.713	1506.31	160.221	212.423	1248.01	191.146	412.938	1440.67	191.609	507.454	1229.88	229.92	200.558	1307	3.07382	359.272	1478.1	-77.5022	337.519	1248.25	-93.0861	324.069	1147.48	-115.705	396.507	988.392	-77.6617	435.331	911.019	-133.788	391.373	910.254	-129.272	442.861	847.941
8970	0	138.083	450.982	1670.28	234.729	457.382	1668.54	125.239	293.645	1682.64	270.193	308.942	1674.22	180.071	265.879	1507.98	159.733	224.659	1249.68	191.684	425.43	1442.37	191.675	519.128	1231.67	229.536	212.789	1308.57	3.77079	372.342	1480.85	-78.2188	353.406	1251.19	-94.4861	341.654	1150.03	-116.022	419.935	993.302	-77.5336	461.823	917.895	-133.194	417.629	914.416	-128.629	471.966	854.829
8971	0	138.96	463.141	1671.86	235.53	469.503	1669.88	125.862	305.671	1683.8	270.923	320.869	1675.24	180.243	277.999	1509.22	159.101	237.183	1251.09	192.072	437.781	1443.93	191.849	530.838	1233.38	228.832	225.117	1309.89	4.38519	385.32	1483.14	-79.0308	369.147	1253.8	-95.9875	359.35	1152.51	-116.344	443.458	998.228	-77.0564	488.211	925.074	-132.367	444.284	918.925	-127.947	501.081	862.002
8972	0	139.488	475.216	1672.85	236.26	481.593	1670.84	126.531	317.863	1684.49	271.032	333.127	1675.61	180.209	290.213	1510.04	158.718	249.571	1252.24	192.378	450.242	1445.02	191.595	542.317	1234.5	228.222	237.455	1310.89	4.99824	398.408	1485.27	-79.8955	384.954	1256.31	-97.5482	377.015	1154.61	-116.487	467.145	1003.17	-76.5427	514.615	932.379	-132.218	470.927	923.854	-126.599	530.104	869.134
8973	0	139.909	487.474	1673.47	236.727	493.918	1671.33	127.117	330.067	1685.04	271.617	345.247	1675.87	180.194	302.644	1510.6	158.441	261.992	1253.19	192.843	462.774	1445.76	191.679	553.959	1235.11	227.905	249.785	1311.81	5.66701	411.299	1486.42	-80.7179	400.964	1258.13	-98.8993	394.811	1156.15	-116.863	490.857	1007.95	-75.8737	540.818	939.295	-131.586	497.88	928.685	-125.131	558.927	875.884
8974	0	140.137	499.823	1673.82	236.91	506.242	1671.55	127.379	342.44	1685.31	271.729	357.742	1676.1	180.525	315.651	1511.26	158.143	274.411	1253.75	193.128	475.357	1446.15	191.474	565.577	1235.3	227.388	262.317	1312.35	6.11006	424.274	1487.33	-81.4775	416.731	1259.52	-100.235	412.883	1157.64	-116.879	514.441	1012.3	-75.0464	566.717	945.998	-131.076	524.48	933.222	-123.352	587.737	882.906
8975	0	140.416	512.271	1673.84	237.111	518.745	1671.6	127.516	354.83	1685.32	271.924	370.16	1676.02	180.575	328.126	1511.5	158.088	286.882	1254.2	193.363	487.919	1446.29	191.196	577.327	1235.12	227.076	274.585	1312.57	6.68623	437.069	1487.98	-82.0089	432.751	1260.38	-101.898	430.887	1158.78	-116.787	537.977	1016.71	-74.0967	592.412	952.818	-130.394	551.326	938.161	-121.244	616.525	890.164
8976	0	140.677	525.053	1673.69	237.354	531.485	1671.34	127.82	367.682	1685.21	272.85	382.975	1676.23	180.74	340.743	1511.32	158.176	299.125	1254.25	193.695	500.62	1446.05	191.068	589.472	1234.43	226.943	287.194	1312.7	7.17386	449.923	1488.2	-82.7147	448.895	1261.24	-103.011	449.552	1159.79	-116.425	561.685	1021.03	-72.806	617.988	959.576	-129.574	578.064	943.064	-119.212	644.897	897.533
8977	0	140.746	537.896	1673	237.426	544.288	1670.73	128.003	380.548	1684.71	272.599	395.88	1675.53	180.997	353.336	1510.91	158.426	311.546	1254.05	193.953	513.276	1445.39	191.014	601.858	1233.73	227.041	299.539	1312.35	7.53164	462.624	1487.98	-83.3253	464.983	1261.52	-104.418	467.857	1160.31	-116.031	585.178	1025.18	-71.3359	643.139	966.247	-129.368	604.172	948.079	-117.111	672.908	904.864
8978	0	140.862	550.895	1672.16	237.575	557.28	1669.94	127.78	393.606	1684.08	272.276	408.809	1674.93	181.067	366.059	1510.46	158.769	323.619	1253.63	193.89	525.976	1444.41	190.769	614.358	1232.54	226.988	312.148	1311.99	7.86463	475.288	1487.33	-84.1254	480.994	1261.6	-105.669	486.446	1160.58	-115.603	608.493	1029.25	-69.8639	667.797	972.657	-128.374	630.67	952.92	-114.808	700.647	912.261
8979	0	140.705	563.972	1670.98	237.641	570.335	1668.93	127.893	406.765	1683.23	272.175	421.778	1674.2	181.131	378.753	1509.63	159.148	335.907	1252.62	194.186	538.728	1443.5	190.665	627.107	1231.49	227.225	324.588	1311.28	8.01442	487.871	1486.32	-84.5967	497.213	1261.37	-106.842	505.045	1160.84	-115.019	631.739	1033.4	-68.2856	692.193	978.915	-127.32	656.877	957.93	-112.456	728.036	919.809
8980	0	140.953	577.26	1669.67	237.704	583.61	1667.68	127.901	420.031	1682.25	272.272	435.12	1673.44	181.551	391.518	1508.64	159.915	348.355	1251.8	194.207	551.578	1442.17	190.394	639.773	1229.93	227.7	337.179	1310.27	8.22724	500.495	1485.21	-85.1902	513.228	1260.98	-107.844	523.828	1160.6	-114.278	654.572	1037.33	-66.4722	716.111	985.237	-126.266	682.401	963.008	-110.212	754.844	927.524
8981	0	140.989	590.682	1668.21	237.769	596.984	1666.23	128.175	433.385	1681.15	272.731	448.484	1672.63	182.089	404.827	1506.61	160.843	360.633	1250.68	194.518	564.485	1440.84	190.318	652.789	1228.56	228.359	349.999	1309.36	8.38268	512.985	1483.84	-85.3991	529.34	1260.47	-108.592	542.495	1160.38	-113.304	677.24	1041.25	-64.6741	739.536	991.249	-125.247	707.723	968.37	-107.696	781.001	935.188
8982	0	141.027	603.958	1666.43	237.807	610.374	1664.57	128.221	446.814	1679.95	272.779	462.01	1671.4	182.132	417.293	1506.36	161.818	373.214	1249.59	194.473	577.455	1439.03	190.284	665.943	1226.86	229.133	362.533	1308.46	8.65588	525.603	1482.4	-85.426	545.502	1259.85	-109.273	561.273	1160.25	-112.193	699.369	1044.88	-63.0056	762.302	996.711	-123.952	732.213	973.125	-105.801	806.439	942.614
8983	0	140.901	617.259	1664.34	237.757	623.866	1662.45	128.409	460.027	1678.48	273.037	475.48	1669.92	182.644	430.498	1504.91	162.935	385.9	1248.2	194.59	590.443	1436.84	190.202	679.098	1224.71	229.958	375.293	1307.14	8.95821	538.261	1480.49	-85.4674	561.501	1259.11	-109.815	579.747	1160.05	-111.197	721.132	1048.45	-61.1359	784.737	1002.11	-122.767	756.092	978.041	-103.69	831.269	949.909
8984	0	140.793	630.468	1662.2	237.678	637.333	1660.36	128.668	473.413	1676.81	273.012	489.108	1668.13	183.267	443.48	1503.24	164.031	398.49	1246.52	194.791	603.509	1434.71	190.165	692.42	1222.52	230.783	388.141	1305.69	9.36812	550.747	1478.54	-85.2284	577.383	1258.15	-109.979	598.141	1159.66	-110.089	742.412	1051.71	-59.4789	806.619	1006.94	-121.728	779.513	982.35	-101.883	855.34	956.923
8985	0	140.88	643.693	1660.24	237.672	650.815	1658.33	129.14	486.644	1675.12	273.601	502.507	1666.43	183.887	456.686	1501.37	165.297	411.234	1244.9	194.983	616.609	1432.58	190.033	705.678	1220.39	231.678	400.883	1304.03	9.77904	563.26	1476.65	-84.7514	593.397	1257.1	-110.055	616.107	1159.36	-108.853	763.142	1055.19	-57.7079	828.132	1011.61	-120.415	802.304	986.387	-100.344	878.599	963.711
8986	0	141.112	656.929	1658.1	237.918	664.198	1656.29	129.525	499.937	1673.36	273.794	516.062	1664.71	184.673	469.892	1499.69	166.358	423.902	1243.09	195.226	629.722	1430.17	190.147	719.006	1218.17	232.617	413.815	1302.27	10.3231	575.924	1474.65	-84.1562	609.132	1256.19	-109.796	634.161	1159.29	-107.707	783.425	1058.33	-56.2179	848.933	1015.87	-119.307	824.144	990.714	-98.5433	901.203	970.282
8987	0	141.579	670.199	1656.14	238.231	677.497	1654.21	130.174	513.044	1671.57	274.177	529.578	1662.68	185.296	482.962	1497.43	167.537	437.287	1241.05	195.829	642.884	1428.02	190.736	732.295	1216.32	233.674	427.022	1300.66	11.0381	588.646	1472.9	-83.4559	625.003	1255.39	-109.527	651.596	1159.04	-106.371	803.155	1061.4	-54.7583	869.177	1020.06	-118.171	845.72	995.018	-96.9278	922.899	976.482
8988	0	141.926	683.247	1654.42	238.504	690.734	1652.44	130.908	526.129	1669.82	275.771	542.676	1661.55	186.143	495.999	1495.4	168.588	450.408	1239.05	196.491	656.199	1426.31	190.987	745.383	1214.54	234.58	440.073	1298.69	11.6538	601.273	1471.31	-82.6906	640.318	1254.54	-109.019	668.755	1158.68	-105.463	822.249	1064.36	-53.4658	888.765	1024.37	-117.113	866.366	999.023	-95.6748	943.775	982.412
8989	0	142.205	696.18	1652.7	239.098	703.858	1650.89	131.383	539.111	1668.04	275.943	555.91	1659.82	186.703	508.714	1493.22	169.239	463.304	1237.22	197.145	669.407	1424.7	191.384	758.432	1212.98	235.403	453.34	1296.74	12.3107	614.075	1469.65	-81.953	655.58	1253.69	-108.506	685.358	1158.33	-104.675	840.723	1067.02	-52.5111	907.79	1028.21	-116.318	886.12	1002.83	-94.8076	963.877	987.999
8990	0	142.912	709.249	1651.26	239.743	716.875	1649.36	132.02	552.023	1666.36	276.303	568.831	1657.94	187.296	521.371	1490.89	169.888	476.988	1235.22	197.817	682.543	1423.16	191.729	771.537	1211.61	235.896	466.631	1294.91	12.8422	627.046	1468.34	-81.2685	670.514	1252.98	-107.825	701.692	1157.92	-103.892	858.6	1069.41	-51.7311	926.16	1031.8	-115.649	905.028	1006.21	-94.0539	983.243	993.112
8991	0	143.9	722.374	1649.82	240.792	729.954	1647.93	133.028	565.042	1664.83	277.36	581.807	1656.32	188.394	535.6	1490.72	170.517	490.3	1233.43	198.391	695.814	1421.65	192.589	784.956	1210.33	236.656	479.694	1293.32	13.6379	640.265	1466.98	-80.4261	685.238	1252.42	-106.969	717.509	1157.53	-103.014	875.911	1071.48	-50.7035	944.105	1034.91	-114.993	923.277	1009.25	-93.5571	1001.69	997.581
8992	0	144.931	735.308	1648.59	241.684	742.875	1646.59	134.074	578.15	1663.56	278.174	594.717	1655.01	188.847	548.196	1487.82	170.975	504.058	1231.78	199.606	709.153	1420.43	193.388	798.505	1208.98	237.023	493.41	1291.38	14.5709	653.715	1465.84	-79.6482	699.772	1251.65	-106.122	733.227	1157.1	-102.386	892.559	1073.18	-50.1955	961.233	1037.54	-114.214	940.81	1011.62	-93.2861	1019.4	1001.51
8993	0	146.058	748.274	1647.58	242.973	755.729	1645.36	134.92	591.223	1662.36	279.099	607.56	1653.63	190.207	562.246	1487.76	171.316	517.738	1230.4	200.283	722.462	1419.06	194.147	811.95	1207.94	237.291	506.842	1289.89	15.5482	667.291	1464.66	-78.316	714.281	1250.46	-105.352	748.317	1156.84	-101.697	908.7	1074.43	-49.761	977.929	1039.65	-113.534	957.686	1013.32	-93.2175	1036.41	1004.67
8994	0	147.414	761.432	1646.47	244.142	768.623	1644.24	135.968	604.069	1661.26	279.94	620.386	1652.26	191.079	575.633	1486.35	171.646	531.78	1228.87	201.346	735.927	1417.92	195.488	825.878	1206.89	237.522	520.525	1288.31	16.6226	681.069	1463.53	-77.5771	728.555	1249.89	-104.421	763.264	1156.43	-101.131	924.369	1075.19	-49.278	994.101	1041.21	-113.059	973.762	1014.46	-93.1936	1052.57	1007.24
8995	0	148.668	774.356	1645.64	245.584	781.466	1643.25	137.112	617.028	1660.15	281.162	633.078	1651.06	191.806	589.018	1484.91	172.06	545.712	1227.49	202.702	749.234	1416.93	196.677	839.853	1206.11	237.939	534.266	1286.92	17.7987	694.823	1462.67	-76.5244	742.554	1249.27	-103.482	777.668	1155.91	-100.516	939.422	1075.62	-49.0258	1009.52	1042.16	-112.632	989.14	1015.37	-93.3785	1068.08	1009.05
8996	0	150.055	787.302	1645.13	246.916	794.286	1642.72	138.171	629.952	1659.32	282.256	645.808	1650.3	192.788	602.134	1483.82	172.449	560.329	1226.15	204.099	762.612	1416.37	198.289	854.211	1206.15	238.324	548.18	1285.47	19.1051	708.514	1461.97	-75.6689	756.515	1248.64	-102.629	791.944	1155.56	-100.157	953.897	1075.9	-48.9236	1024.39	1042.56	-112.175	1003.65	1015.56	-93.7205	1082.88	1010.05
8997	0	151.478	800.257	1644.94	248.267	807.043	1642.57	139.394	642.92	1658.75	283.231	658.785	1649.48	194.069	615.34	1482.9	172.956	574.784	1224.96	205.684	776.283	1416.38	200.036	868.773	1206.24	238.797	562.214	1284.23	20.2362	722.116	1461.61	-74.8541	770.456	1248.68	-101.266	805.967	1155.23	-99.8759	967.852	1075.69	-48.8986	1038.59	1042.55	-112.282	1017.49	1015.62	-94.2672	1096.79	1010.51
8998	0	152.82	813.075	1645.13	249.879	819.919	1642.81	140.981	655.766	1658.53	285.048	671.488	1649.68	195.348	628.847	1482.26	173.796	589.542	1224.11	207.07	789.747	1416.37	201.668	883.341	1206.8	239.764	576.636	1282.91	21.6495	735.805	1461.68	-74.1739	784.235	1249.07	-99.9908	819.624	1155.18	-99.3809	981.392	1075.29	-48.9236	1052.22	1041.91	-111.941	1030.76	1015.04	-94.7168	1110.16	1010.2
8999	0	154.541	825.989	1645.6	251.558	832.821	1643.3	142.612	668.646	1658.52	286.78	684.353	1649.84	196.614	642.322	1481.71	174.566	604.289	1223.38	208.834	803.582	1416.87	203.335	898.159	1207.78	240.608	590.923	1282.03	22.9018	749.385	1461.98	-72.7141	797.948	1249.1	-98.8761	833.14	1155.3	-99.2319	994.235	1074.45	-48.9324	1065.12	1040.68	-112.114	1043.24	1014.05	-95.405	1122.56	1009.15
9000	0	156.039	838.899	1646.26	253.146	845.73	1643.85	144.173	681.46	1658.61	288.239	697.155	1649.73	197.789	655.866	1481.65	175.096	618.682	1223	210.091	817.226	1417.33	204.869	913.212	1208.68	241.299	605.454	1281.35	24.1434	763.188	1462.37	-71.7229	811.602	1249.45	-97.9699	846.295	1155.35	-98.9208	1006.64	1073.15	-49.1742	1077.46	1038.49	-112.11	1054.97	1012.28	-96.2001	1134.24	1006.99
9001	0	157.829	851.873	1647.12	254.466	858.648	1644.58	145.97	694.328	1659.01	289.928	710.215	1650.03	198.442	668.756	1481.72	175.64	633.206	1222.94	211.605	831.149	1417.94	206.136	928.168	1209.7	242.106	619.924	1280.92	25.3531	777.057	1463	-70.5734	825.336	1249.84	-96.8853	859.19	1155.67	-98.7893	1018.49	1071.54	-49.3088	1088.99	1035.94	-112.473	1065.94	1010.21	-96.9517	1145.21	1004.03
9002	0	159.669	865.076	1648.44	256.702	871.908	1645.7	148.062	707.417	1659.97	291.648	723.242	1650.4	199.687	682.805	1481.98	176.29	647.25	1223.34	212.737	844.823	1418.64	207.302	943.117	1210.71	242.878	634.482	1280.84	26.6651	791.088	1463.8	-69.373	839.06	1250.55	-95.6332	871.9	1156.28	-98.5955	1029.77	1069.5	-49.5305	1099.88	1032.83	-112.687	1076.05	1007.5	-97.7805	1155.28	1000.26
9003	0	161.497	878.33	1649.85	258.548	885.252	1646.77	149.937	720.645	1660.94	293.446	736.615	1650.89	201.451	697.037	1482.83	176.564	661.155	1224.29	213.734	858.628	1419.5	208	957.777	1211.82	243.423	648.454	1281.35	27.7274	805.028	1465	-67.9374	852.53	1251.1	-94.6063	884.121	1156.61	-98.2799	1040.45	1067.27	-50.003	1109.79	1028.98	-112.751	1085.64	1004.38	-98.3132	1164.7	995.674
9004	0	163.569	891.85	1651.4	259.882	898.538	1647.41	151.615	734.067	1662.13	295.357	750.034	1651.24	202.532	710.965	1484.05	176.864	674.486	1225.68	214.568	872.138	1420.47	208.432	972.122	1212.85	243.709	662.313	1282.27	28.7612	819.165	1466.27	-66.6131	866.034	1251.92	-93.5464	896.242	1157.46	-97.9371	1050.72	1064.71	-50.2416	1119.38	1024.5	-112.963	1094.38	1001.02	-98.9452	1173.26	990.445
9005	0	165.427	905.584	1652.59	262.003	912.164	1647.97	153.323	747.83	1663.61	296.981	763.541	1651.59	203.418	725.045	1485.15	177.169	687.761	1227.22	215.155	885.776	1421.17	209.002	986.488	1213.93	243.882	675.564	1283.46	29.6529	833.134	1467.58	-65.517	879.222	1252.88	-92.4407	907.968	1158.25	-97.6835	1060.32	1061.95	-50.2826	1128.15	1020.02	-113.03	1102.45	997.073	-99.3883	1181.08	984.577
9006	0	166.948	919.354	1653.76	263.499	925.733	1648.54	154.795	761.624	1665.18	298.124	777.078	1652.05	204.202	738.674	1486.3	177.472	700.707	1228.77	215.753	898.963	1422.36	209.268	1000.28	1215.21	243.767	688.574	1284.8	30.1959	846.73	1468.81	-64.4267	892.186	1253.69	-91.5338	919.201	1158.8	-97.4584	1069.41	1059.21	-50.4732	1136.22	1015.18	-113.572	1109.85	993.313	-100.044	1187.79	978.289
9007	0	168.183	933.263	1654.87	265.04	939.45	1649.28	155.758	775.47	1666.6	298.903	790.728	1652.76	204.986	752.33	1487.72	177.733	713.185	1230.41	216.032	912.027	1423.65	209.668	1013.81	1216.65	243.953	701.765	1286.01	30.6253	859.809	1470.2	-63.435	904.919	1254.62	-90.6354	930.398	1159.45	-97.4686	1077.9	1056.24	-50.5706	1143.68	1010.04	-113.787	1116.84	989.329	-100.438	1194.04	971.703
9008	0	169.234	947.291	1655.87	266.116	953.331	1649.8	156.441	789.461	1668.63	300.03	804.395	1654.26	205.416	765.345	1488.97	178.312	725.556	1231.98	216.288	924.981	1424.77	209.802	1026.6	1217.82	244.384	714.351	1287.68	31.0849	872.629	1471.52	-62.5408	917.284	1255.75	-89.9068	941.338	1160.2	-97.2621	1086.05	1053.17	-50.7658	1150.62	1004.35	-114.19	1123	985.35	-100.633	1199.57	964.694
9009	0	169.919	961.26	1656.78	266.712	967.079	1650.38	157.231	803.536	1670.33	300.555	818.319	1655.84	206.031	778.007	1490.49	179.174	738.178	1233.4	216.229	937.913	1425.89	209.818	1039.09	1218.85	245.276	727.158	1289.04	31.3218	884.912	1472.66	-61.7642	929.182	1256.63	-88.8137	951.903	1160.51	-97.0009	1093.67	1049.97	-50.6543	1156.78	998.827	-114.712	1128.69	981.934	-100.583	1204.46	957.377
9010	0	169.906	975.095	1657.37	266.811	980.966	1651.13	157.291	817.59	1672.36	300.947	832.199	1657.77	206.215	789.461	1492.16	179.873	750.517	1234.84	216.32	950.545	1427.32	209.722	1051.36	1220.18	246.087	739.714	1290.49	31.3221	896.841	1473.81	-61.0669	940.708	1257.41	-87.9146	961.877	1160.73	-96.9493	1100.58	1046.55	-50.7897	1162.2	993.172	-115.004	1133.81	977.619	-100.39	1208.62	949.803
9011	0	169.597	988.85	1658.07	266.877	994.899	1652.07	157.128	831.327	1674.16	300.575	845.981	1659.72	206.609	802.284	1494.16	180.637	762.841	1236.46	216.131	962.994	1428.71	209.387	1063.51	1221.43	246.924	752.114	1292.33	31.08	908.525	1474.9	-60.4629	951.731	1257.89	-87.2301	971.466	1160.98	-96.735	1106.94	1043.13	-50.8453	1166.94	987.342	-115.227	1138.47	973.33	-100.025	1211.88	942.287
9012	0	169.178	1002.49	1658.79	265.275	1007.91	1652.53	156.622	845.092	1676.03	300.022	859.595	1661.55	206.635	814.506	1495.82	181.679	775.043	1237.99	215.849	975.478	1429.99	208.903	1075.89	1222.99	247.969	764.237	1294.19	30.6676	920.058	1475.89	-60.0033	962.278	1258.16	-86.5556	980.273	1160.96	-96.5001	1112.79	1039.65	-51.1634	1170.63	980.961	-115.112	1142.39	968.663	-99.9911	1214.39	934.597
9013	0	168.852	1015.98	1659.9	264.749	1021.63	1653.77	156.24	858.484	1678.24	299.553	873.333	1663.85	207.15	827.211	1497.76	183.011	787.189	1239.68	215.703	987.922	1431.73	208.348	1088.23	1224.71	249.106	776.478	1295.9	30.2322	931.59	1476.85	-59.7275	971.835	1258.1	-85.4463	988.676	1160.75	-96.3824	1117.84	1036.01	-51.3708	1174.03	975.155	-115.045	1145.63	964.275	-99.7919	1216.15	927.074
9014	0	167.702	1029.31	1661.1	263.548	1034.77	1655.22	155.459	872.029	1680.41	299.131	886.718	1666.58	205.071	836.588	1500.09	184.142	799.075	1241.72	215.234	1000.24	1433.62	207.715	1100.5	1226.57	250.236	788.426	1298.34	29.678	943.119	1478.01	-59.3793	981.044	1258.12	-84.556	996.491	1160.28	-96.1869	1122.38	1032.65	-51.1614	1176.96	970.104	-115.029	1148.01	959.948	-99.6033	1217.3	919.846
9015	0	166.881	1042.43	1663.02	262.648	1047.91	1657.17	154.746	885.109	1682.8	298.416	900.04	1669.32	204.963	849.022	1502.73	185.332	811.072	1244.04	214.77	1012.52	1435.77	207.02	1112.41	1228.54	251.214	800.595	1300.83	29.1268	954.408	1479.31	-59.1272	989.571	1258.23	-83.6888	1003.62	1159.93	-95.8968	1126.17	1029.43	-51.6226	1178.87	964.668	-114.909	1149.84	955.886	-99.5039	1217.64	913.218
9016	0	166.084	1055.37	1664.91	261.533	1060.7	1659.25	154.014	898.316	1685.18	297.79	913.003	1672.17	204.564	861.356	1505.51	186.59	823.19	1246.37	214.437	1024.72	1438.34	206.385	1124.29	1230.72	252.272	812.823	1303.39	28.338	965.93	1480.67	-59.0566	997.613	1258.43	-82.43	1010.25	1159.61	-95.7424	1129.33	1026.24	-51.309	1180.78	960.424	-114.91	1150.94	951.962	-99.5136	1217.3	907.068
9017	0	165.133	1068.11	1666.84	260.781	1073.53	1661.71	153.114	910.996	1687.28	296.666	925.866	1674.89	204.41	873.883	1507.72	187.665	835.195	1248.8	213.894	1037.05	1440.62	205.929	1136.16	1233.28	253.13	825.276	1306.17	27.5821	977.489	1481.97	-58.9271	1005.04	1258.43	-81.4068	1016.18	1158.98	-95.7764	1131.96	1023.21	-51.529	1181.82	955.974	-114.788	1151.3	948.18	-99.537	1216.45	901.128
9018	0	164.352	1080.22	1668.73	260.143	1086.3	1664.19	152.098	923.761	1689.5	295.842	938.474	1677.28	203.741	885.826	1510.06	188.512	847.451	1251.13	213.442	1049.45	1443.1	205.372	1147.88	1235.56	253.904	837.365	1308.98	26.8267	989.242	1483.3	-58.6608	1012.07	1258.57	-80.1882	1022	1158.69	-95.3911	1134.02	1020.27	-51.5751	1182.58	951.856	-114.541	1151.12	944.798	-99.7294	1214.96	895.655
9019	0	163.632	1092.7	1670.64	259.138	1098.68	1666.29	150.988	936.172	1691.24	294.969	950.983	1679.67	203.614	898.554	1512.33	189.339	859.768	1253.24	212.813	1061.81	1445.12	204.9	1159.78	1237.56	254.738	849.903	1311.46	26.257	1000.97	1484.6	-58.3159	1018.92	1258.69	-78.9172	1027.17	1158.34	-94.8616	1135.38	1017.23	-51.3195	1182.92	948.035	-114.051	1150.41	941.403	-99.8337	1213	890.521
9020	0	162.66	1105.11	1672.72	258.293	1111.09	1668.53	150.351	948.506	1692.89	294.055	963.422	1681.93	205.885	913.903	1513.69	190.152	872.093	1255.29	212.329	1074.28	1447.1	204.765	1171.67	1239.81	255.461	862.512	1313.71	25.6589	1012.8	1485.82	-57.8789	1025.66	1258.75	-77.4288	1032.12	1158.06	-94.2509	1136.59	1014.57	-51.2215	1182.89	944.395	-113.212	1149.14	937.954	-99.8704	1210.72	885.685
9021	0	161.768	1117.37	1674.5	257.308	1123.36	1670.62	149.601	960.847	1694.43	293.301	975.772	1683.66	205.73	926.465	1515.44	190.783	884.514	1256.93	211.803	1086.78	1448.91	204.409	1183.32	1241.46	256.225	875.209	1315.74	25.1331	1024.61	1486.86	-57.5161	1032.41	1258.97	-76.1157	1036.97	1157.82	-93.8324	1137.38	1011.92	-51.0606	1182.94	940.747	-112.714	1147.63	934.855	-99.9647	1208.12	880.906
9022	0	161.242	1129.7	1676.11	256.218	1135.71	1672.34	148.547	972.915	1695.65	292.27	988.111	1684.87	203.821	937.389	1517.24	191.15	896.797	1258.56	211.04	1099.43	1450.21	204.05	1194.94	1242.62	256.756	887.912	1317.62	24.5823	1036.58	1487.68	-56.7123	1039.32	1258.82	-74.7218	1041.39	1157.62	-93.2128	1137.98	1009.22	-51.1591	1182.32	936.719	-111.74	1145.79	931.629	-100.045	1205.13	876.386
9023	0	160.281	1141.8	1677.55	255.265	1148.11	1674.02	147.789	984.976	1696.37	291.496	1000.48	1686.08	203.452	950.05	1518.29	191.444	908.835	1259.91	210.484	1112.09	1451.3	203.857	1206.45	1243.55	257.422	900.67	1319.08	23.9964	1048.66	1488.2	-56.0793	1046.32	1258.58	-73.4304	1046.02	1157.4	-92.57	1138.42	1006.51	-51.0156	1181.63	933.072	-110.889	1143.89	928.574	-99.7772	1202.43	871.88
9024	0	159.201	1153.97	1678.79	254.037	1160.41	1675.43	147.158	996.999	1696.85	290.667	1012.92	1687.07	203.104	962.729	1519.1	191.837	921.42	1260.88	209.739	1124.77	1452.09	203.633	1218.1	1244.18	258.06	913.561	1320.39	23.397	1060.83	1488.3	-55.292	1053.47	1258	-71.8917	1050.46	1157.13	-92.0075	1138.71	1003.99	-51.2175	1180.73	929.466	-109.944	1141.42	925.647	-99.7174	1198.92	867.361
9025	0	157.822	1166.14	1679.74	253.085	1172.95	1676.76	146.521	1009.12	1697.14	290.105	1025.4	1687.82	202.8	975.477	1519.83	192.198	933.945	1261.6	209.335	1137.46	1452.86	203.492	1229.79	1244.48	258.475	926.284	1321.2	22.8316	1073.05	1488.46	-54.7193	1060.71	1257.79	-70.5075	1055.23	1156.85	-91.5903	1138.81	1001.36	-50.9305	1180.28	926.763	-109.021	1139.31	922.815	-99.6302	1195.23	863.265
9026	0	156.831	1178.48	1680.31	252.198	1185.55	1677.67	145.951	1021.4	1697.1	289.048	1038.04	1688.35	204.19	990.476	1519.95	192.581	946.465	1262.14	208.855	1150.21	1453.13	203.19	1241.55	1244.1	258.83	939.104	1321.91	22.1675	1085.45	1488.33	-54.0301	1068.1	1257.53	-68.8853	1059.96	1156.48	-91.0214	1139.09	999.059	-51.2439	1179.17	922.924	-107.956	1136.83	920.153	-99.6081	1191.47	859.175
9027	0	155.774	1190.95	1680.64	251.336	1198.32	1678.27	145.273	1033.76	1696.64	288.772	1050.74	1688.42	203.909	1003.62	1520.01	192.785	958.731	1262.4	208.27	1163.08	1452.94	203.223	1253.67	1243.66	259.175	951.902	1322.27	21.4197	1097.8	1487.83	-53.4285	1075.61	1256.86	-67.5185	1064.96	1155.85	-90.4736	1138.83	996.574	-51.0871	1178.49	919.783	-106.871	1134.38	917.617	-99.4025	1187.57	855.133
9028	0	154.723	1203.52	1680.5	250.366	1211.18	1678.41	144.481	1046.38	1696	287.93	1063.61	1688.12	203.856	1017.99	1519.82	193.065	971.523	1262.11	207.732	1175.91	1452.41	202.984	1265.96	1242.55	259.335	964.628	1322.25	20.7927	1110.36	1487.15	-52.859	1083.31	1256.19	-65.9868	1070.3	1155.22	-89.9055	1139.11	994.246	-50.7652	1177.98	916.969	-105.948	1132.06	915.115	-99.4268	1183.56	851.159
9029	0	153.953	1216.39	1680.07	249.317	1224.14	1678.17	143.638	1059.18	1695.16	287.286	1076.7	1687.75	202.84	1029.36	1519.27	192.654	983.725	1261.9	207.269	1188.9	1451.75	202.766	1278.23	1241.28	259.244	977.321	1322.01	20.2194	1123.07	1486.1	-52.2792	1091.28	1255.35	-64.4433	1075.89	1154.73	-89.3665	1139.58	991.97	-51.5045	1176.79	913.52	-104.532	1129.69	912.822	-99.4681	1179.55	847.382
9030	0	152.684	1229.53	1679.04	248.283	1237.44	1677.32	142.945	1072.17	1693.94	286.605	1089.92	1687.05	202.486	1042.64	1518.25	192.115	995.815	1261.26	206.647	1201.89	1450.38	202.502	1290.6	1239.49	259.209	990.043	1321.36	19.6125	1135.91	1484.88	-51.8355	1099.43	1254.13	-63.0468	1081.88	1154.17	-88.8889	1140.27	989.636	-51.4754	1175.73	910.282	-103.758	1127.7	910.6	-99.2523	1175.27	843.622
9031	0	151.98	1242.87	1677.58	247.482	1250.89	1676.05	142.306	1085.55	1692.77	285.717	1103.51	1685.88	202.293	1056.18	1517.28	192.056	1008.38	1260.45	205.974	1214.87	1448.54	202.243	1303.09	1237.34	259.151	1002.77	1320.59	18.9239	1148.72	1483.51	-51.5582	1108.27	1253.27	-61.5778	1088.35	1153.42	-88.1565	1141.27	987.733	-51.728	1175.47	907.216	-102.638	1125.76	908.804	-98.9547	1171.32	840.127
9032	0	151.132	1256.51	1675.99	246.266	1264.47	1674.37	141.435	1099.18	1691.49	284.998	1117.17	1684.75	202.119	1070.59	1516.46	191.496	1020.82	1259.52	205.463	1228.04	1446.81	201.769	1315.88	1234.98	258.829	1015.4	1319.63	18.3649	1161.84	1481.93	-51.494	1116.97	1251.9	-60.0202	1095.32	1152.74	-87.4682	1142.57	985.518	-51.595	1174.6	903.824	-101.728	1124.14	907.208	-98.5931	1167.65	836.785
9033	0	149.871	1270.13	1673.86	245.265	1278.28	1672.4	140.624	1112.93	1690.03	284.259	1130.96	1683.52	201.625	1083.79	1515.21	190.82	1033.23	1258.35	204.827	1241	1444.8	201.248	1328.69	1232.56	258.303	1028.05	1318.51	17.5805	1175	1480.26	-51.2078	1126.38	1250.85	-58.8365	1102.59	1151.93	-87.0843	1144.3	983.832	-51.8186	1174.24	900.768	-100.912	1122.98	905.787	-98.3943	1164.12	833.899
9034	0	148.937	1284.09	1671.54	244.471	1292.21	1670.12	139.611	1126.9	1688.36	283.326	1145.08	1681.86	200.755	1095.95	1513.5	190.026	1045.55	1257.13	204.289	1254.1	1442.66	200.66	1341.71	1230.07	257.668	1040.58	1317.26	16.8187	1188.17	1478.5	-51.1875	1136.31	1249.6	-57.5315	1110.43	1151.12	-86.8019	1146.42	982.096	-52.0336	1174.27	897.907	-100.386	1122.49	904.798	-98.198	1160.87	831.044
9035	0	147.989	1298.03	1669.01	243.325	1306.19	1667.62	138.633	1140.99	1686.57	282.267	1159.09	1680.16	200.379	1110.64	1512.01	189.244	1058.21	1255.66	203.54	1267.1	1440.36	200.086	1354.88	1227.6	256.934	1053.18	1315.81	16.0186	1201.47	1476.67	-51.3663	1146.46	1248.29	-56.4776	1118.69	1150.09	-86.6186	1149.1	980.724	-52.1652	1174.82	895.594	-100.051	1122.42	904.099	-98.2533	1157.89	828.922
9036	0	147.153	1312.14	1666.34	242.392	1320.31	1664.92	137.54	1155.18	1684.85	281.377	1173.24	1678.47	199.362	1122.83	1510.34	188.046	1070.8	1254.03	202.818	1280.19	1438.14	199.388	1368.05	1225.19	256.035	1065.87	1314.2	15.0767	1214.69	1474.8	-51.1116	1157.07	1246.77	-55.3177	1127.45	1149.28	-86.4843	1152.27	979.496	-52.5245	1175.81	893.713	-99.9899	1122.95	903.826	-98.1986	1155.37	826.834
9037	0	145.758	1326.28	1663.45	241.355	1334.33	1662.15	136.307	1169.47	1683.04	280.165	1187.45	1676.63	198.594	1136.15	1508.63	186.936	1083.56	1252.28	201.936	1293.25	1435.67	198.702	1381.33	1222.76	255.088	1078.57	1312.5	14.142	1228.09	1472.79	-51.3016	1168.01	1245.29	-54.419	1136.83	1148.11	-86.6949	1156.18	978.659	-53.4712	1177.16	891.784	-100.051	1124.29	903.909	-98.3689	1153.52	825.255
9038	0	144.9	1340.27	1660.64	239.92	1348.24	1659.28	135.226	1183.59	1681	279.109	1201.42	1674.67	197.682	1149.53	1506.57	185.68	1096.31	1250.34	201.087	1306.47	1433.29	197.815	1394.51	1220.5	253.951	1091.31	1310.51	12.902	1241.16	1470.69	-51.5686	1179.38	1243.67	-53.6681	1146.68	1147.12	-86.9887	1160.56	977.815	-53.9112	1179.22	889.718	-100.356	1126.44	904.104	-98.6173	1152.22	823.887
9039	0	143.298	1354.19	1657.72	238.751	1362.18	1656.54	133.626	1197.61	1678.79	277.655	1215.45	1672.74	196.318	1162.75	1504.43	184.457	1109.22	1248.38	200.057	1319.63	1430.98	197.067	1407.82	1218.44	252.856	1104.27	1308.53	11.8587	1254.57	1468.62	-52.1251	1190.75	1241.56	-53.1922	1156.74	1145.65	-88.0953	1165.37	977.346	-54.8673	1182.28	888.472	-100.961	1129.23	904.259	-99.1177	1151.46	822.729
9040	0	141.749	1368.05	1654.77	237.159	1375.85	1653.84	131.981	1211.48	1676.7	275.951	1229.28	1670.67	194.83	1175.67	1502.38	183.112	1122.31	1246.24	198.869	1332.86	1428.76	196.19	1420.96	1216.39	251.549	1117.23	1306.6	10.4555	1267.64	1466.24	-52.7048	1202.54	1239.53	-53.0963	1167.19	1144.41	-88.8774	1171.21	976.244	-56.2904	1185.9	886.901	-102.115	1132.98	904.603	-99.7792	1151.7	821.831
9041	0	140.414	1381.66	1652.21	235.567	1389.57	1651.36	130.144	1225.16	1674.54	274.39	1242.91	1668.84	193.454	1188.63	1500.34	181.852	1135.46	1244.22	197.488	1346.03	1426.55	195.256	1434.24	1214.42	250.351	1130.34	1304.62	9.08607	1280.76	1463.88	-53.3344	1214.46	1237.36	-53.0372	1178.13	1143.09	-89.8341	1177.9	975.523	-57.8523	1190.03	885.342	-103.415	1137.56	904.964	-100.583	1152.83	821.105
9042	0	138.533	1395.16	1649.84	233.794	1402.9	1649.23	128.28	1238.7	1672.58	272.404	1256.35	1667	192.03	1202.08	1498.1	180.855	1148.87	1242.02	196.022	1359.36	1424.61	194.16	1447.36	1212.55	249.189	1143.58	1302.59	7.62466	1293.96	1461.47	-53.9314	1226.54	1235.4	-53.1125	1189.23	1141.25	-91.0188	1185.29	974.552	-59.6422	1195.46	884.174	-104.942	1143.28	905.428	-101.54	1154.96	820.53
9043	0	136.382	1408.39	1647.89	231.855	1416.18	1647.63	126.227	1251.95	1670.71	270.742	1269.55	1665.59	190.114	1215.16	1496.28	179.763	1162.39	1240	194.383	1372.58	1422.79	192.993	1460.55	1210.93	248.214	1157.27	1300.57	5.827	1307	1459.18	-54.8116	1238.7	1233.37	-53.5715	1200.66	1139.63	-92.8609	1193.35	974.04	-61.6924	1201.83	882.909	-106.853	1149.87	905.916	-102.918	1158.25	820.257
9044	0	134.18	1421.61	1646.19	229.682	1429.28	1646.23	123.808	1265.03	1668.57	267.957	1282.65	1663.87	188.467	1228.36	1494.44	178.581	1175.79	1238.09	192.606	1386.05	1420.96	191.723	1473.79	1209.34	246.843	1170.66	1298.92	4.22714	1320.13	1456.94	-55.9094	1250.88	1231.3	-54.4283	1212.27	1138.06	-94.4585	1202.34	973.31	-64.2819	1209.15	881.734	-108.937	1157.62	906.154	-104.576	1162.79	819.895
9045	0	131.851	1434.51	1644.61	227.215	1442.13	1645	121.264	1277.97	1666.49	265.399	1295.48	1662.36	186.778	1241.58	1492.72	177.842	1189.55	1236.31	190.861	1399.5	1419.44	190.369	1486.97	1207.91	245.711	1184.3	1297.27	2.49336	1333.16	1454.7	-56.8801	1263.27	1229.28	-55.3686	1224.25	1136.29	-96.7299	1211.78	972.379	-67.2243	1217.51	880.449	-111.339	1166.14	905.935	-106.404	1168.73	819.468
9046	0	129.35	1447.26	1643.41	224.833	1454.87	1644.33	118.684	1290.74	1664.48	262.736	1308.2	1661.11	184.762	1254.55	1491.05	176.858	1203.21	1234.54	188.985	1412.89	1418.15	188.89	1500.54	1206.64	244.62	1198.11	1295.79	0.531931	1345.97	1452.73	-58.4833	1275.49	1227.4	-56.8868	1236.44	1134.57	-98.9863	1221.93	971.404	-70.7243	1227.15	879.959	-113.601	1175.74	905.498	-108.664	1176.01	819.246
9047	0	126.977	1460.06	1642.44	222.239	1467.67	1643.84	115.779	1303.36	1662.73	259.949	1320.84	1660.44	179.758	1264.13	1490.37	175.962	1217.05	1232.98	187.212	1426.32	1417.29	186.872	1514.2	1205.53	243.447	1211.88	1294.49	-1.42079	1358.9	1450.99	-59.878	1288.17	1225.63	-58.6517	1248.95	1133.11	-100.859	1233.15	969.898	-69.4857	1236.63	878.052	-116.045	1186.17	905.129	-111.098	1185.07	818.694
9048	0	124.085	1472.73	1641.84	219.613	1480.35	1643.71	113.182	1316.02	1661.61	257.245	1333.42	1659.91	180.985	1280.82	1488.66	174.994	1231.05	1231.49	184.956	1439.75	1416.47	184.772	1528.15	1204.7	242.433	1225.71	1293.29	-3.4541	1371.9	1449.57	-61.7559	1300.9	1224.2	-60.6107	1261.73	1131.77	-103.164	1245.07	969.238	-72.9652	1247.75	877.034	-118.489	1197.57	904.628	-113.477	1195.94	817.996
9049	0	121.759	1485.42	1641.62	216.984	1492.98	1643.85	110.459	1328.59	1660.83	254.486	1345.88	1659.67	175.559	1290.24	1488.67	173.839	1245.27	1230.39	182.934	1453.14	1416.11	183.051	1542.34	1204.39	241.094	1239.64	1292.27	-5.57069	1384.87	1448.32	-63.5336	1314.05	1222.97	-62.3312	1274.85	1130.57	-105.285	1257.7	968.276	-74.5913	1259.89	875.791	-120.723	1210.12	903.815	-116.234	1208.25	817.367
9050	0	118.717	1497.99	1641.77	214.209	1505.43	1644.33	107.526	1341.17	1660.25	251.635	1358.29	1659.62	173.5	1303.56	1487.96	172.655	1259.78	1229.48	180.64	1466.55	1415.98	180.739	1556.83	1204.36	239.409	1253.62	1291.39	-7.76066	1397.97	1447.5	-65.4919	1327.58	1222.08	-64.6899	1288.24	1129.63	-107.562	1271.13	967.143	-74.764	1274.54	875.393	-123.326	1223.65	903.112	-119.037	1222.3	816.499
9051	0	116.244	1510.4	1642.33	211.514	1517.83	1645.28	104.513	1353.42	1659.88	248.77	1370.56	1659.85	173.834	1319.87	1486.96	170.815	1273.83	1229.22	178.631	1479.88	1416.59	178.884	1571.32	1205.21	237.455	1267.57	1291.25	-9.97123	1411.27	1447.03	-67.9488	1341.04	1221.52	-67.158	1301.88	1129.24	-109.893	1285.37	966.854	-76.9461	1289.36	875.15	-125.674	1238.07	902.311	-122.155	1237.79	815.806
9052	0	113.18	1522.76	1643.32	208.711	1530.3	1646.58	101.752	1365.79	1659.89	245.847	1382.8	1660.48	171.813	1333.3	1487.08	169.087	1287.97	1229.27	176.661	1493.24	1417.36	176.737	1585.76	1205.96	235.539	1281.31	1291.22	-12.056	1424.46	1447.1	-69.8292	1355.29	1221.48	-69.4387	1316.09	1128.99	-112.207	1300.44	966.234	-79.5771	1304.88	874.57	-128.083	1253.56	901.63	-125.385	1254.78	815.291
9053	0	110.418	1535.2	1644.77	205.955	1542.78	1648.46	99.0775	1378.1	1660.27	242.976	1395.24	1661.46	170.279	1346.58	1487.69	167.111	1301.91	1229.49	174.745	1506.51	1418.35	175.251	1599.99	1207.22	233.452	1294.86	1291.71	-14.0068	1437.72	1447.42	-72.2218	1369.28	1221.85	-71.7849	1330.48	1128.93	-114.458	1316.4	966.246	-83.294	1320.92	874.12	-130.366	1270.28	900.776	-128.615	1273.25	814.747
9054	0	107.312	1547.53	1646.5	202.961	1555.23	1650.53	96.6234	1390.49	1661.11	240.586	1407.75	1663	168.305	1359.82	1488.85	165.433	1315.69	1230.55	172.959	1519.71	1419.81	173.782	1614.12	1208.72	231.282	1308.13	1292.69	-15.7161	1451	1448.07	-74.3749	1383.81	1222.17	-74.2956	1345.58	1129.19	-116.937	1332.97	966.297	-85.2051	1339.36	874.15	-132.823	1287.8	900.125	-131.988	1292.79	814.459
9055	0	104.653	1559.83	1648.21	200.174	1567.74	1652.63	94.1679	1402.8	1661.96	238.121	1420.4	1664.43	166.821	1372.96	1490.39	163.357	1328.86	1231.97	171.335	1532.8	1421.28	172.481	1627.77	1210.15	229.452	1321.46	1294.31	-17.2665	1464.02	1449.28	-76.2242	1398.65	1223.02	-76.5985	1361.01	1129.56	-119.241	1350.6	966.316	-87.0105	1358.11	874.552	-135.296	1306.17	899.496	-135.501	1313.65	814.29
9056	0	102.009	1572.24	1649.68	197.496	1580.45	1654.57	91.9925	1415.08	1662.73	235.844	1433.09	1666.06	165.355	1385.63	1492.1	161.617	1341.83	1233.76	169.658	1545.64	1422.78	171.419	1641.08	1211.77	227.85	1334.56	1296.07	-18.5307	1477.02	1450.55	-78.1087	1413.64	1224.02	-78.9398	1376.55	1129.99	-121.506	1368.82	966.315	-90.676	1378.2	875.01	-137.915	1325.59	898.93	-138.819	1335.49	814.165
9057	0	99.5668	1584.38	1650.95	195.069	1593.15	1656.42	90.0709	1427.28	1663.43	233.784	1445.79	1667.6	163.76	1398.54	1493.54	160.085	1354.54	1235.46	168.185	1558.4	1424.35	170.177	1654.02	1213.37	226.571	1347.36	1297.99	-19.8146	1489.59	1452.14	-79.9913	1428.7	1224.73	-81.3746	1392.48	1130.55	-124.084	1387.74	966.889	-93.2593	1399.16	875.735	-140.303	1345.68	898.233	-142.222	1358.32	814.263
9058	0	97.3853	1596.75	1652.18	192.96	1605.82	1657.94	88.3936	1439.35	1664.4	232.182	1458.58	1669.06	162.59	1411.69	1494.96	158.779	1366.96	1237.02	166.896	1570.83	1425.83	169.159	1666.71	1215	225.482	1359.82	1299.81	-20.9681	1502.15	1453.88	-81.8207	1443.92	1225.87	-83.8138	1408.59	1131.28	-126.373	1407.26	967.081	-96.9852	1419.87	876.156	-142.863	1366.65	897.684	-145.624	1382.02	814.401
9059	0	95.4322	1608.96	1653.31	191.029	1618.31	1659.17	87.1278	1451.7	1665.81	230.913	1471.35	1670.63	161.398	1424.06	1496.38	157.654	1379.21	1238.52	165.682	1583.2	1427.12	167.849	1678.85	1216.24	224.542	1372.05	1301.38	-21.9009	1514.53	1455.52	-83.4246	1459.18	1226.92	-86.2749	1424.87	1131.96	-128.729	1427.33	967.696	-98.3707	1442.53	876.864	-145.204	1388.23	897.092	-148.633	1406.63	814.838
9060	0	94.1665	1621.32	1654.65	189.702	1630.85	1660.53	86.1445	1464.11	1667.28	229.58	1483.88	1672.06	160.08	1436.14	1497.58	156.601	1391.29	1239.65	164.647	1595.35	1428.56	166.741	1690.66	1217.58	223.535	1384.09	1302.71	-22.9489	1526.83	1457.15	-85.0381	1474.52	1228.04	-88.6245	1441.23	1132.57	-130.841	1448.03	968.142	-100.775	1465.43	877.483	-147.286	1410.75	896.588	-151.769	1431.91	815.205
9061	0	92.9776	1633.66	1656.11	188.68	1643.27	1662.01	85.0919	1476.31	1668.89	228.674	1496.35	1673.49	158.983	1448.26	1498.82	155.275	1403.22	1240.82	163.663	1607.23	1430	165.802	1702.5	1219.08	222.26	1395.99	1303.87	-23.9662	1539.21	1458.83	-86.63	1489.91	1228.96	-91.1155	1457.65	1133.07	-132.784	1469.22	968.266	-103.178	1488.94	878.372	-149.648	1433.88	895.895	-154.47	1458.01	815.612
9062	0	92.4928	1645.85	1657.95	187.832	1655.43	1663.49	84.1353	1488.54	1670.48	227.873	1508.53	1674.85	156.326	1458.5	1500.4	153.813	1415.21	1242.03	163.09	1619.11	1431.59	165.068	1714.14	1220.51	220.647	1407.77	1305.1	-24.9184	1551.55	1460.26	-88.2295	1505.26	1229.86	-93.6475	1474.26	1133.81	-135.173	1490.54	968.672	-106.178	1512.28	879.377	-151.886	1457.25	895.309	-156.887	1484.6	816.447
9063	0	91.7297	1658.08	1659.45	187.291	1667.52	1664.83	83.5834	1500.67	1672.06	227.22	1520.57	1675.85	155.564	1470.96	1501.43	152.199	1427.34	1243.4	162.559	1630.97	1432.89	164.582	1725.89	1221.77	218.941	1419.41	1306.26	-25.8062	1564.04	1461.8	-90.0218	1520.41	1231.16	-96.0504	1490.96	1134.37	-137.163	1512.46	969.549	-108.271	1536.81	880.583	-153.748	1481.83	895.026	-159.103	1511.83	817.535
9064	0	91.5005	1670.21	1661.41	187.087	1679.69	1666.5	83.1624	1512.93	1673.74	226.667	1532.51	1677.15	155.556	1484.17	1502.64	150.427	1439.44	1244.82	161.946	1642.76	1434.32	164.158	1737.82	1223.15	217.179	1430.97	1307.44	-26.5808	1576.71	1463.33	-91.6486	1535.55	1232.62	-98.6136	1507.43	1134.97	-138.986	1534.69	970.44	-110.642	1561.4	882.482	-155.4	1506.83	894.829	-161.093	1539.74	819.052
9065	0	91.3202	1682.35	1663.63	187.003	1691.53	1668.7	82.6921	1524.93	1675.64	226.479	1544.32	1678.82	153.63	1494.92	1504.78	148.597	1451.38	1246.39	161.521	1654.5	1435.9	163.963	1749.69	1224.74	215.163	1442.46	1308.85	-27.1982	1589.42	1464.93	-93.355	1550.7	1234.22	-101.068	1524.25	1135.89	-140.492	1557.36	971.409	-112.24	1586.6	884.729	-156.977	1532.13	895.139	-162.723	1568.03	821.247
9066	0	90.9638	1694.49	1665.99	186.904	1703.49	1670.75	82.4277	1537.02	1677.46	226.144	1556.05	1680.36	152.789	1507.05	1506.69	146.841	1463.17	1248.22	161.085	1666.25	1437.51	163.876	1761.58	1226.26	213.188	1453.94	1310.48	-27.8042	1602.24	1466.66	-94.9669	1565.72	1236.1	-103.439	1541.14	1136.95	-141.884	1580.2	972.905	-113.282	1612.92	887.804	-158.364	1557.93	895.824	-164.205	1596.79	823.962
9067	0	91.6419	1706.41	1668.63	187.203	1715.28	1673.04	82.2637	1549.04	1679.23	225.939	1567.73	1681.84	152.566	1519.8	1508.54	144.786	1474.83	1250.24	161.012	1678.03	1439.2	163.947	1773.45	1227.92	211.07	1465.33	1312.21	-28.4937	1615.03	1468.6	-96.7629	1580.71	1238.09	-106.085	1557.73	1138.19	-143.475	1603.25	974.723	-114.116	1638.95	891.499	-159.611	1583.97	897.006	-165.199	1625.91	827.386
9068	0	91.5961	1718.46	1671.01	187.29	1726.98	1675.08	82.0339	1561.02	1681.28	225.778	1579.36	1683.27	151.606	1531.73	1510.48	142.872	1486.48	1252.18	160.759	1689.68	1440.89	163.838	1785.27	1229.53	209.173	1476.96	1313.98	-28.9451	1627.89	1470.62	-98.1973	1595.77	1240.16	-108.33	1574.69	1139.48	-144.609	1626.48	977.386	-115.068	1664.99	895.76	-160.686	1610.24	898.792	-166.005	1655.24	831.336
9069	0	91.8021	1730.32	1673.41	187.766	1738.72	1677.16	81.9751	1572.97	1683.1	225.765	1590.94	1684.7	150.652	1543.89	1512.41	140.97	1498	1254.18	160.496	1701.45	1442.54	163.844	1797.22	1231.1	207.11	1488.45	1315.79	-29.4381	1640.73	1472.52	-99.9337	1610.52	1242.22	-110.702	1591.65	1141.24	-145.654	1649.84	980.458	-115.514	1691.18	900.711	-161.66	1636.62	901.268	-166.486	1684.72	836.134
9070	0	92.1563	1742.35	1675.5	188.005	1750.29	1678.76	82.002	1584.98	1685.13	225.919	1602.64	1685.94	149.908	1556.11	1514.03	139.097	1509.59	1256.1	160.21	1713.25	1443.81	163.629	1808.93	1232.62	205.227	1499.94	1317.41	-29.8003	1653.67	1474.77	-101.551	1625.43	1244.14	-112.946	1608.7	1142.94	-146.637	1673.3	983.839	-115.901	1717.48	905.641	-162.429	1663.42	904.405	-166.652	1714.63	841.381
9071	0	92.5873	1754.45	1677.49	188.517	1762.11	1680.28	82.0764	1597.05	1686.95	225.959	1614.23	1687.14	149.179	1568.26	1515.79	137.466	1521.28	1257.48	159.808	1725.1	1445	163.54	1820.75	1234.2	203.532	1511.68	1318.73	-30.1423	1666.35	1476.72	-102.896	1640.57	1246.44	-115.365	1625.48	1144.85	-147.208	1697.08	987.534	-116.133	1743.75	911.289	-162.733	1690.27	907.793	-166.495	1744.31	847.38
9072	0	93.4072	1766.46	1679.31	188.93	1773.99	1681.61	82.0575	1609.1	1688.6	225.921	1625.93	1688.19	148.277	1580.08	1517.23	135.889	1533.09	1258.96	159.4	1736.89	1446.07	163.297	1832.38	1235.6	201.708	1523.31	1320.12	-30.5393	1679.1	1478.37	-104.466	1655.73	1248.45	-117.56	1642.79	1146.69	-148.102	1720.52	991.672	-116.198	1769.87	917.577	-163.18	1717.07	911.6	-166.304	1773.85	853.375
9073	0	93.2347	1778.44	1680.6	188.986	1785.75	1682.55	81.7884	1621.01	1690.11	225.838	1637.6	1688.9	147.503	1592.2	1518.26	134.123	1544.94	1260.22	159.06	1748.79	1447	162.945	1843.86	1236.72	199.815	1534.95	1321.2	-30.9733	1691.64	1479.9	-105.932	1670.96	1250.33	-120.009	1659.87	1148.38	-148.725	1744.15	995.704	-116.214	1796.11	924.055	-163.539	1743.96	915.702	-165.707	1803.1	859.89
9074	0	93.8156	1790.75	1681.79	189.489	1797.73	1683.25	81.8642	1633.25	1691.26	225.712	1649.47	1689.32	146.192	1603.69	1518.75	132.554	1556.77	1261.27	158.614	1760.62	1447.72	162.636	1855.23	1237.62	198.162	1546.62	1322.1	-31.5855	1704.09	1481.17	-107.365	1686.35	1251.93	-122.415	1677.12	1149.85	-149.638	1767.59	999.767	-115.79	1822.26	930.904	-163.724	1770.89	919.808	-165.023	1832.62	866.812
9075	0	93.9449	1802.91	1682.63	189.607	1809.65	1683.67	81.7731	1645.41	1692.33	225.717	1661.5	1689.79	145.893	1616.31	1519.55	131.143	1568.68	1261.98	158.213	1772.49	1448.42	162.209	1866.52	1238.27	196.573	1558.31	1322.63	-31.9474	1716.59	1482.19	-109.096	1701.31	1253.22	-124.684	1694.58	1150.94	-150.14	1791.25	1004.03	-115.474	1848.22	937.799	-163.701	1797.74	924.269	-164.152	1861.7	873.891
9076	0	93.9807	1815.1	1683.06	189.859	1821.91	1683.87	81.7561	1657.81	1693.08	225.732	1673.78	1689.9	145.017	1628.21	1519.99	129.914	1580.74	1262.32	157.869	1784.56	1448.77	161.725	1877.84	1238.69	195.033	1570.1	1322.93	-32.6061	1728.83	1482.82	-110.783	1716.46	1254.37	-127.042	1712.15	1151.85	-150.601	1814.78	1008.44	-115.157	1874.27	944.867	-163.976	1824.47	928.629	-163.081	1890.61	881.148
9077	0	94.1675	1827.54	1683.35	189.813	1834.05	1683.57	81.7362	1670.23	1693.59	225.631	1686.02	1689.89	144.28	1640.42	1520.37	128.627	1592.73	1262.57	157.201	1796.57	1448.7	161.215	1889.04	1238.69	193.635	1581.91	1323.1	-33.1076	1741.3	1483.26	-112.407	1731.84	1255	-129.434	1730	1152.63	-151.378	1838.26	1012.76	-114.918	1899.29	951.534	-163.903	1851.31	933.467	-161.821	1919.31	888.557
9078	0	94.2651	1839.92	1683.28	189.724	1846.33	1683.18	81.5428	1682.76	1693.68	225.325	1698.3	1689.47	142.952	1652	1520.23	127.515	1604.71	1262.45	156.968	1808.72	1448.44	160.576	1900.13	1238.27	192.482	1593.87	1322.87	-33.6034	1753.61	1483.4	-113.803	1747.17	1255.76	-131.654	1747.89	1153.14	-151.693	1861.63	1017.03	-114.012	1924.61	958.532	-163.628	1877.91	938.061	-160.571	1947.46	896.036
9079	0	93.9546	1852.52	1682.63	189.726	1859.01	1682.47	81.345	1695.34	1693.52	224.927	1710.78	1689.08	141.909	1663.95	1520.01	126.552	1616.67	1262.3	156.479	1820.79	1447.98	159.937	1911.48	1237.7	191.329	1605.88	1322.54	-34.2667	1766.02	1483	-115.377	1762.45	1255.96	-133.976	1765.99	1153.51	-152.127	1884.87	1021.15	-113.587	1949.34	965.397	-163.226	1904.51	942.91	-159.392	1975.49	903.651
9080	0	93.6475	1865.11	1681.96	189.284	1871.38	1681.51	80.5539	1707.82	1693.12	224.638	1723.26	1688.17	141.996	1677.14	1519.46	125.816	1628.36	1261.94	155.923	1833	1447.05	159.163	1922.97	1236.7	190.574	1617.69	1322.11	-34.7585	1778.6	1482.6	-117.102	1777.55	1255.96	-136.071	1784.38	1153.68	-152.724	1907.91	1025.26	-112.61	1973.93	972.145	-163.428	1930.59	948.167	-157.916	2003	911.075
9081	0	93.1584	1877.9	1680.57	189.076	1884.12	1680.2	80.3359	1720.62	1692.23	224.89	1736.42	1687.38	141.062	1688.92	1518.72	125.541	1640.26	1261.42	155.534	1845.24	1445.93	158.209	1934.32	1235.13	190.067	1629.76	1321.54	-35.102	1790.99	1481.66	-118.133	1793.33	1255.75	-138.248	1802.81	1153.92	-152.721	1930.92	1029.3	-111.611	1998.09	978.466	-163.17	1956.51	953.048	-156.563	2030.03	918.766
9082	0	93.2031	1890.74	1679.47	188.895	1896.84	1678.84	80.1369	1733.59	1691.39	223.987	1748.71	1686.32	141.574	1702.23	1517.42	125.63	1652.09	1260.45	155.165	1857.65	1444.67	157.405	1946.11	1233.47	189.898	1641.97	1320.62	-35.2927	1803.4	1480.68	-119.459	1808.77	1255.48	-140.017	1821.3	1154.05	-152.88	1953.76	1033.39	-110.965	2021.4	984.453	-163.358	1981.9	958.019	-154.901	2056.65	926.266
9083	0	92.8976	1903.59	1677.96	188.431	1909.55	1677.35	79.5901	1746.31	1690.3	223.642	1761.6	1685.16	141.054	1714.44	1516.68	126.104	1664.05	1259.62	154.579	1869.98	1443.1	156.546	1958.17	1231.84	189.453	1654.08	1319.63	-35.4786	1815.76	1479.33	-120.569	1824.53	1255.04	-141.838	1840.12	1154.13	-152.875	1976.36	1037.31	-110.059	2044.72	990.658	-163.2	2006.94	963.359	-153.603	2082.68	933.888
9084	0	92.3599	1916.41	1676.14	188	1922.35	1675.66	78.9497	1759.19	1688.92	222.95	1774.32	1683.85	140.888	1727.31	1515.56	126.271	1675.94	1258.6	154.178	1882.54	1441.35	155.751	1970.5	1229.95	189.275	1666.25	1318.45	-35.7166	1828.2	1477.84	-121.574	1840.48	1254.51	-143.58	1858.69	1154.36	-152.941	1998.53	1041.26	-108.998	2067.49	996.52	-164.284	2031.29	968.693	-152.593	2108.03	941.609
9085	0	92.1036	1929.24	1674.29	187.768	1935.29	1673.81	78.4912	1772.14	1687.34	222.519	1787.19	1682.41	140.116	1739.18	1513.83	126.789	1687.97	1257.33	153.768	1895.02	1439.41	155.11	1983.12	1227.93	189.791	1678.66	1317.44	-35.7238	1840.49	1476.17	-122.574	1856.48	1253.98	-145.116	1877.24	1154.47	-152.829	2020.26	1045.27	-107.91	2089.71	1002.14	-163.95	2055.31	973.783	-151.138	2132.5	948.966
9086	0	91.8031	1942.07	1672.18	187.46	1948.13	1672.02	78.2155	1785.1	1685.57	222.316	1799.96	1680.86	140.373	1752.47	1512	127.5	1700.18	1255.98	153.448	1907.55	1437.54	154.494	1995.87	1226.08	190.108	1690.83	1315.98	-35.6556	1852.78	1474.52	-123.206	1872.39	1253.7	-146.455	1895.54	1154.48	-152.563	2041.77	1049.24	-106.788	2111.36	1007.62	-163.751	2078.66	979.076	-149.718	2156.53	956.352
9087	0	91.4134	1954.93	1670.15	187.179	1960.88	1670.14	77.8706	1797.99	1683.98	221.865	1812.67	1679.37	141.269	1765.32	1510.27	128.321	1712.45	1254.46	153.228	1920.11	1435.57	153.881	2008.82	1224.23	190.798	1703.27	1314.56	-35.45	1865.01	1472.99	-123.548	1888.54	1253.34	-147.705	1913.5	1154.88	-152.233	2062.51	1053.27	-105.556	2132.44	1013.16	-163.484	2101.48	984.169	-148.874	2179.45	963.614
9088	0	91.0926	1967.6	1667.92	186.849	1973.58	1668.08	77.5592	1810.54	1682.02	221.649	1825.53	1677.77	141.708	1778.18	1508.6	129.347	1724.9	1252.76	153.118	1932.7	1433.54	153.404	2021.8	1222.36	191.628	1715.77	1313.17	-35.1584	1877.2	1471.38	-123.754	1904.72	1252.92	-148.502	1931.47	1155.32	-151.953	2082.82	1057.22	-104.485	2152.84	1018.32	-163.233	2123.45	989.256	-147.874	2201.86	970.618
9089	0	91.0889	1980.32	1665.7	186.567	1986.26	1665.99	77.5458	1823.28	1680.07	221.626	1838.36	1675.99	142.033	1790.72	1506.55	130.409	1737.41	1250.82	153.031	1945.24	1431.52	153.136	2034.73	1220.44	192.532	1728.41	1311.25	-34.8445	1889.46	1469.56	-123.722	1920.76	1252.63	-149.241	1948.89	1155.66	-151.46	2102.36	1060.94	-103.325	2172.58	1023.38	-163.111	2144.85	994.317	-146.716	2223.42	977.499
9090	0	90.729	1992.88	1663.41	186.353	1998.96	1663.99	77.5445	1835.98	1678.03	221.938	1851.59	1674.63	142.315	1803.18	1504.47	131.448	1750.22	1248.87	153.403	1957.95	1429.64	152.866	2047.4	1218.54	193.342	1741.1	1309.39	-34.3962	1901.64	1467.87	-123.839	1936.47	1252.31	-149.87	1965.77	1155.79	-151.448	2121.32	1064.51	-102.796	2191.73	1027.84	-163.096	2165.37	999.348	-145.54	2244.21	983.996
9091	0	90.6906	2005.29	1661.29	186.256	2011.7	1661.98	77.6289	1848.4	1676.08	221.538	1863.83	1672.75	142.709	1815.47	1502.63	132.346	1763.12	1246.88	153.633	1970.61	1427.68	152.821	2060.14	1216.69	194.287	1753.86	1307.53	-33.9108	1913.96	1466.35	-123.995	1951.73	1251.85	-150.369	1982.21	1156.33	-150.946	2139.59	1067.9	-102.041	2210.1	1032.21	-162.891	2185.16	1003.88	-144.79	2264.13	990.328
9092	0	90.9542	2017.77	1659.25	186.411	2024.38	1660.1	77.9732	1860.71	1674.22	222.157	1876.6	1671	143.283	1827.93	1500.19	133.384	1776.04	1244.74	154.046	1983.28	1425.95	153.018	2073.02	1214.99	195.142	1766.68	1305.41	-33.2139	1926.19	1464.92	-123.441	1966.99	1251.64	-150.649	1998.12	1156.46	-150.679	2157.24	1071.01	-101.333	2227.94	1036.37	-163.024	2204.15	1008.28	-144.098	2283.19	996.06
9093	0	91.1718	2030.09	1657.48	186.847	2037.04	1658.41	78.7317	1872.96	1672.33	222.352	1889.17	1669.52	144.618	1840.66	1498.65	134.135	1789.02	1242.55	154.52	1995.97	1424.27	153.228	2085.37	1213.21	196.222	1779.68	1303.37	-32.4116	1938.47	1463.51	-122.866	1981.87	1251.01	-150.729	2013.5	1156.59	-150.496	2174.05	1073.84	-100.944	2245.08	1039.94	-162.787	2222.26	1012.1	-143.763	2301.52	1001.43
9094	0	91.8447	2042.37	1655.8	187.438	2049.42	1656.88	79.5143	1885.38	1670.79	223.41	1901.69	1667.72	144.618	1852.25	1496.98	134.85	1802.26	1240.67	154.895	2008.7	1422.56	153.86	2098.65	1211.91	197.084	1792.58	1301.52	-31.5994	1950.94	1462.35	-122.509	1995.99	1250.75	-150.63	2028.58	1156.49	-150.472	2190.47	1076.48	-100.859	2261.59	1043.21	-162.936	2239.57	1015.56	-143.661	2318.88	1006.49
9095	0	92.8302	2054.76	1654.41	188.342	2061.83	1655.37	80.2961	1897.54	1669.02	224.414	1914.05	1666.13	146.237	1865.97	1495.17	135.095	1815.42	1238.89	155.714	2021.51	1421.13	154.498	2111.3	1210.54	197.609	1805.64	1299.54	-30.8255	1963.55	1461.37	-122.119	2009.64	1250.18	-150.496	2043.04	1156.56	-150.309	2206	1078.52	-100.365	2277.75	1046.44	-163.144	2256.01	1018.35	-143.694	2335.53	1010.79
9096	0	93.9439	2067.16	1653.48	189.542	2074.1	1654.31	81.509	1909.88	1667.64	225.421	1926.35	1664.55	147.114	1878.62	1493.49	135.62	1828.73	1237.29	156.537	2034.29	1419.95	155.386	2124.56	1209.54	198.289	1818.77	1297.84	-29.8632	1976.38	1460.35	-121.552	2023.15	1249.56	-150.2	2057.13	1156.2	-150.52	2220.94	1080.14	-100.882	2292.84	1048.61	-163.236	2271.55	1020.84	-144.378	2351.16	1014.4
9097	0	95.5164	2079.34	1652.64	190.751	2086.36	1653.39	82.8054	1921.99	1666.66	226.567	1938.41	1663.32	148.183	1891.39	1492.13	136.107	1842.16	1235.61	157.619	2047.28	1419.03	156.249	2137.77	1208.74	198.899	1832.07	1296.14	-28.9033	1989.2	1459.67	-121.004	2035.99	1249.2	-149.816	2070.71	1155.95	-150.246	2235.02	1081.3	-101.265	2307.61	1050.66	-163.466	2286.09	1022.34	-145.146	2366	1017.58
9098	0	96.745	2091.7	1651.85	192.542	2098.73	1652.56	84.4971	1934.37	1665.68	228.266	1950.78	1662.24	149.395	1904	1490.91	136.605	1855.9	1234.22	158.753	2060.19	1418.23	157.261	2151.06	1208.31	199.223	1845.36	1294.5	-27.7556	2002.15	1458.83	-120.455	2048.59	1248.61	-149.176	2083.95	1155.65	-150.444	2248.83	1082.19	-101.414	2321.64	1052.13	-163.72	2300.09	1023.47	-146.274	2380.1	1019.75
9099	0	98.2434	2104.04	1651.1	194.158	2110.93	1651.59	86.257	1946.69	1664.98	230.109	1963.02	1661.39	150.953	1917.1	1489.8	137.203	1869.72	1232.8	159.99	2073.23	1417.46	158.531	2165.21	1207.76	199.765	1858.81	1292.76	-26.4036	2015.15	1458.66	-119.817	2061.13	1248.47	-148.278	2097.12	1155.51	-150.301	2261.9	1081.82	-101.939	2335.08	1052.51	-163.921	2313.21	1023.34	-147.48	2393.33	1021.03
9100	0	100.28	2116.34	1650.73	196.051	2123.26	1651.2	88.339	1959.08	1664.5	231.975	1975.32	1660.61	152.409	1929.66	1488.78	137.608	1883.69	1231.43	161.36	2086.32	1417.06	159.787	2178.83	1207.52	200.723	1872.56	1291.2	-25.0215	2028.06	1458.37	-119.235	2073.34	1248.05	-147.368	2109.72	1155.25	-150.464	2274.33	1081.22	-103.09	2347.79	1051.66	-164.265	2325.27	1022.34	-148.804	2405.71	1021.29
9101	0	102.399	2128.71	1650.7	198.076	2135.73	1651.13	89.9726	1971.04	1664.29	233.494	1987.53	1660.19	154.026	1942.51	1487.96	138.466	1897.8	1230.49	162.845	2099.5	1416.93	161.124	2192.78	1207.69	201.631	1886.34	1290.07	-23.4993	2040.92	1458.5	-118.725	2085.57	1248.11	-146.444	2122.03	1155.37	-150.717	2286.16	1079.88	-103.658	2359.92	1050.75	-164.693	2336.62	1020.77	-150.717	2416.91	1020.54
9102	0	104.173	2141.09	1650.84	200.188	2148.1	1651.09	91.9291	1983.28	1664.21	235.975	1999.93	1660.11	155.601	1955.25	1487.55	139.159	1911.9	1229.93	164.144	2112.57	1417.03	162.31	2207.22	1208.36	202.447	1900.12	1289.03	-22.0401	2053.94	1459.11	-117.706	2097.72	1248.64	-145.556	2134.1	1155.58	-150.851	2297.49	1078.55	-104.855	2371.1	1048.48	-165.111	2347.12	1018.78	-152.615	2427.32	1018.75
9103	0	106.705	2153.41	1651.45	202.65	2160.65	1651.28	94.448	1995.63	1664.75	238.349	2012.53	1659.91	157.519	1968.31	1487.41	139.828	1925.67	1229.68	165.628	2125.87	1417.42	163.344	2221.5	1208.98	204.255	1914.71	1288.29	-20.5121	2066.94	1460.13	-116.774	2110.12	1249.42	-144.602	2145.63	1155.84	-150.868	2308.16	1076.52	-105.011	2381.82	1046	-165.261	2356.83	1016.33	-154.035	2436.99	1016.19
9104	0	109.302	2165.97	1652.31	204.972	2173.11	1651.81	97.0749	2008.16	1665.51	240.864	2024.98	1660.25	158.832	1980.8	1487.34	141.263	1940.01	1229.63	166.954	2139.08	1418.07	164.187	2235.94	1210.29	205.181	1928.67	1287.73	-19.0189	2080.11	1461.66	-115.503	2122.4	1250.36	-143.166	2157.18	1156.38	-150.68	2318.01	1074.24	-105.912	2391.51	1042.5	-165.674	2365.55	1013.2	-155.445	2445.87	1012.52
9105	0	111.718	2178.62	1653.44	207.606	2185.7	1652.67	99.975	2021.2	1666.6	243.608	2037.69	1660.74	160.147	1993.39	1488.2	141.758	1953.51	1230.29	168.28	2152.31	1419.08	164.642	2250.08	1211.63	205.613	1942.42	1287.7	-17.6029	2093.21	1463.35	-114.182	2134.79	1251.52	-141.997	2168.2	1157.26	-150.682	2327.37	1072.12	-106.26	2400.55	1038.77	-165.7	2373.8	1010.08	-156.645	2453.73	1007.95
9106	0	114.318	2191.45	1655	210.358	2198.35	1653.44	103.288	2034.5	1668.16	246.48	2050.74	1661.35	162.331	2007.24	1489.34	142.09	1966.78	1231.19	169.561	2165.5	1420.3	164.983	2263.96	1212.96	206.631	1956.2	1288.22	-16.4795	2106.37	1465.06	-113.065	2147.11	1252.73	-140.793	2178.9	1158.24	-150.518	2336.12	1069.72	-107.059	2408.77	1034.15	-166.115	2381.12	1006.75	-157.717	2460.89	1002.44
9107	0	117.183	2204.51	1656.49	212.947	2211.08	1654.15	105.453	2047.01	1669.74	249.146	2063.47	1661.59	163.681	2020.36	1490.34	142.533	1979.98	1232.51	170.658	2178.6	1421.35	165.231	2277.82	1214.62	207.171	1969.4	1289.07	-15.0958	2119.71	1467.44	-111.53	2159.39	1253.98	-139.331	2189.48	1159.14	-150.27	2344.39	1067.18	-107.061	2416.49	1029.46	-166.46	2387.64	1003.05	-158.159	2467.28	996.229
9108	0	120.05	2217.59	1657.88	215.609	2223.92	1654.64	108.193	2060.42	1671.27	251.358	2076.26	1661.95	164.973	2033.52	1491.43	142.851	1993	1233.95	171.609	2191.56	1422.57	165.264	2290.95	1216	207.593	1982.34	1290.23	-13.8953	2132.87	1469.35	-110.253	2171.52	1255.36	-138.15	2199.64	1160.2	-150.325	2352.41	1064.62	-107.266	2423.21	1023.91	-166.688	2393.73	999.459	-158.484	2473.03	989.255
9109	0	122.329	2230.78	1659.06	217.946	2236.88	1655.07	110.603	2073.86	1673.09	253.545	2089.24	1662.28	166.017	2046.35	1492.58	142.887	2005.7	1235.34	172.334	2204.28	1423.71	165.316	2304.16	1217.43	207.524	1995	1291.29	-12.8766	2145.74	1471.19	-108.992	2183.5	1256.76	-136.902	2209.79	1161.42	-149.74	2359.3	1061.23	-107.249	2429.29	1018.02	-167.003	2398.99	995.284	-158.666	2477.76	981.49
9110	0	124.302	2244.05	1660.04	220.065	2249.94	1655.17	112.437	2086.94	1674.92	255.685	2102.32	1663.04	167.494	2059.25	1494.11	143.497	2018.39	1236.85	172.886	2216.9	1424.53	165.355	2317.17	1218.78	208.033	2007.73	1292.23	-11.7866	2158.38	1473.24	-107.478	2195.31	1258.12	-135.345	2220.19	1162.6	-149.038	2366.54	1058.25	-107.253	2434.84	1011.6	-167.349	2403.86	990.911	-158.46	2481.93	973.301
9111	0	126.137	2257.17	1660.9	221.656	2263.02	1655.59	114.096	2100.26	1676.77	257.354	2115.71	1664.02	168.581	2071.88	1495.34	144.203	2030.68	1238.18	173.352	2229.36	1425.6	165.264	2329.67	1220.19	208.952	2020.32	1293.37	-10.8535	2170.54	1474.71	-106.309	2207.12	1259.39	-134.289	2230.01	1163.7	-148.792	2372.96	1054.78	-106.982	2439.46	1004.99	-167.275	2408	986.302	-157.993	2485.32	964.66
9112	0	127.092	2270.3	1661.68	222.841	2276.22	1655.99	116.08	2114.01	1678.75	258.522	2128.8	1665.27	169.27	2083.81	1496.65	144.9	2042.73	1239.62	173.567	2241.54	1426.8	165.379	2341.73	1221.5	209.616	2032.63	1294.52	-10.1859	2182.44	1476.29	-105.155	2218.63	1260.73	-133.347	2239.51	1164.5	-148.211	2378.97	1051.09	-106.511	2443.46	998.273	-167.511	2411.71	981.685	-157.425	2487.84	955.966
9113	0	127.996	2283.23	1662.26	223.467	2289.4	1656.5	115.75	2125.98	1680.46	259.325	2142.05	1666.57	167.806	2092.32	1498.21	145.554	2054.68	1240.89	173.756	2253.6	1427.91	165.519	2353.59	1222.66	210.495	2044.72	1295.91	-9.62455	2193.94	1477.6	-104.26	2229.52	1261.83	-132.405	2248.8	1164.97	-147.856	2384.61	1047.5	-105.96	2446.78	991.593	-167.445	2414.97	977.261	-156.587	2489.54	946.757
9114	0	128.248	2296.22	1663.01	223.972	2302.49	1656.99	116.865	2139.2	1682.18	260.23	2155.39	1668.28	167.725	2103.25	1500.26	146.605	2066.51	1242.32	174.38	2265.68	1429.43	165.508	2365.35	1224.05	211.666	2056.77	1297.3	-9.42963	2205.11	1478.94	-103.229	2240.3	1262.58	-131.244	2257.72	1165.21	-147.043	2389.58	1043.67	-105.311	2449.36	984.892	-167.75	2417.49	972.589	-155.453	2490.5	937.77
9115	0	128.719	2309.04	1663.72	223.924	2315.64	1657.85	119.195	2153.58	1684.22	261.122	2168.91	1670.25	168.655	2115.35	1501.93	147.78	2078.43	1243.66	174.422	2277.41	1430.98	165.517	2377.55	1225.76	212.812	2068.68	1298.74	-9.03534	2216.38	1480.12	-102.523	2250.42	1263.2	-129.664	2266.47	1165.44	-146.386	2393.95	1039.91	-104.439	2451.4	978.302	-167.132	2419.79	967.701	-154.553	2490.65	929.183
9116	0	128.345	2321.74	1664.54	223.855	2328.67	1658.79	118.021	2165.22	1686.25	261.334	2181.98	1672.38	169.204	2127.52	1503.86	148.784	2090.12	1245.18	174.804	2289.43	1432.56	165.435	2389.82	1227.56	213.873	2080.34	1300.31	-8.93274	2227.61	1481.29	-101.873	2260.05	1263.43	-128.569	2274.38	1165.5	-145.767	2397.68	1036	-103.877	2452.63	971.984	-167.201	2421.11	963.119	-153.24	2490.04	920.452
9117	0	128.308	2334.45	1665.52	223.794	2341.53	1659.87	119.369	2179.15	1688.19	261.326	2194.98	1674.31	169.628	2139.52	1505.67	150.019	2101.76	1246.93	174.679	2301.18	1434.05	165.216	2401.88	1229.29	214.997	2092.08	1302.24	-9.18721	2238.72	1482.18	-101.116	2269.28	1263.32	-127.316	2281.59	1165.02	-144.906	2400.96	1032.16	-103.084	2453.34	965.42	-166.56	2422.08	958.431	-152.205	2488.79	912.151
9118	0	128.206	2347.06	1666.8	223.68	2354.39	1661.35	119.027	2191.55	1690.44	261.379	2207.92	1676.73	171.085	2152.41	1506.9	151.313	2113.33	1248.83	174.355	2312.63	1435.76	165.174	2413.77	1230.98	216.023	2103.7	1304.35	-9.12863	2250.02	1483.16	-100.495	2277.73	1263.2	-125.462	2288.65	1164.62	-144.23	2403.6	1028.23	-102.221	2453.54	959.585	-165.765	2422.37	953.967	-150.943	2486.96	904.583
9119	0	127.909	2359.82	1668.26	223.343	2366.97	1663.03	118.459	2204.09	1692.81	260.937	2220.42	1679.12	171.119	2164.31	1509.08	152.442	2124.91	1251.16	175.247	2324.81	1438.23	165.014	2425.15	1232.64	217.172	2115.31	1306.88	-9.28673	2261.67	1484.08	-99.5869	2285.81	1263.14	-124.109	2294.85	1163.79	-143.22	2405.63	1024.7	-101.352	2453.29	954.044	-165.782	2421.68	949.763	-150.014	2484.23	897.328
9120	0	128.001	2372.31	1669.96	223.252	2379.54	1664.81	117.966	2216.63	1694.8	260.917	2233.16	1681.57	170.157	2175.42	1512.24	153.345	2136.45	1253.36	174.751	2336.24	1440.1	164.967	2436.53	1234.42	217.998	2126.78	1309.6	-9.41404	2273.04	1484.96	-98.5934	2293.3	1262.99	-122.14	2300.75	1163.4	-142.243	2407.15	1021.35	-100.516	2452.48	949.054	-164.708	2420.95	945.899	-148.899	2481.34	890.961
9121	0	127.602	2384.74	1671.66	223.171	2391.72	1666.73	118.132	2229.56	1696.99	259.94	2244.89	1684.33	171.616	2188.52	1513.76	154.575	2148.14	1255.62	174.892	2348.07	1442.21	165.072	2447.69	1236.33	219.134	2138.53	1312.04	-9.7828	2284.45	1485.98	-97.8613	2300.31	1262.97	-120.252	2306.17	1162.89	-140.992	2408.11	1018.19	-99.5472	2451.35	944.274	-163.406	2419.51	942.097	-147.832	2478.04	885.067
9122	0	127.595	2396.87	1673.24	222.984	2403.65	1668.65	117.356	2241.74	1698.96	259.754	2257.28	1686.46	173.021	2201.54	1516.01	155.351	2159.82	1257.56	175.392	2360.09	1444.42	165.387	2459.05	1238.38	219.973	2150.16	1314.46	-9.93139	2296.01	1487.02	-96.654	2307.13	1262.73	-117.884	2311.05	1162.23	-139.668	2408.57	1015.21	-98.0924	2450.48	940.328	-162.426	2417.47	938.788	-147.363	2474.33	879.87
9123	0	127.347	2409.14	1674.82	222.817	2415.8	1670.51	116.551	2253.87	1700.72	259.488	2269.13	1688.66	170.762	2211.84	1518.33	156.215	2171.74	1259.56	175.082	2371.71	1446.13	165.736	2470.56	1240.19	220.776	2161.91	1317.04	-10.3716	2307.38	1487.83	-95.4398	2313.8	1262.59	-116.203	2315.51	1161.69	-138.595	2408.29	1012.41	-97.4736	2448.29	936.093	-160.949	2415.16	935.518	-146.465	2470.08	874.722
9124	0	127.381	2421.19	1676.38	222.77	2427.94	1672.3	116.007	2265.91	1702.15	258.804	2281.07	1690.54	172.707	2225.48	1519.4	156.663	2183.37	1261.25	175.344	2383.78	1447.78	166.282	2482.29	1242.02	221.454	2173.88	1318.78	-10.5629	2319.1	1488.58	-94.2495	2320.09	1262.26	-113.888	2320.09	1161.16	-137.064	2408.09	1009.47	-96.3983	2446.73	932.42	-159.603	2412.36	932.503	-145.587	2465.8	870.277
9125	0	127.082	2433.27	1677.77	222.635	2439.75	1673.94	115.506	2278	1703.36	258.492	2292.99	1692.19	170.333	2235.75	1521.88	157.633	2195.27	1262.9	175.473	2395.74	1449.11	166.972	2493.92	1243.64	222.459	2185.59	1320.59	-10.2553	2330.83	1489.13	-92.8901	2326.65	1261.88	-111.744	2324	1160.84	-135.367	2407.71	1007.04	-95.1068	2445.1	929.037	-157.861	2409.21	929.728	-144.932	2461.27	866.189
9126	0	127.235	2445.08	1678.93	222.355	2451.59	1675.4	115.026	2289.72	1704.09	257.982	2304.83	1693.22	172.061	2248.96	1522.8	158.235	2207.29	1264.05	175.457	2407.65	1450.06	167.672	2505.34	1244.91	223.145	2197.52	1321.92	-10.3195	2342.51	1489.57	-91.2033	2333.44	1261.38	-109.384	2328.06	1160.36	-133.643	2406.97	1004.48	-93.8607	2442.48	925.756	-155.573	2405.94	926.984	-143.862	2456.71	862.461
9127	0	126.751	2457.45	1679.98	222.138	2463.57	1676.68	113.963	2301.26	1704.96	257.824	2316.65	1694.41	172.561	2261.63	1523.55	158.37	2218.91	1264.98	175.824	2419.74	1450.88	168.526	2516.58	1245.72	223.938	2209.47	1323.28	-10.6215	2354.28	1489.73	-89.6749	2339.99	1261.09	-107.072	2331.94	1160.42	-131.729	2406.12	1002.16	-89.5576	2446.43	924.662	-153.318	2402.64	924.738	-142.853	2451.77	859.22
9128	0	126.535	2468.99	1680.79	221.793	2475.4	1677.74	113.381	2312.82	1705.26	257.665	2328.56	1695.16	171.436	2272.86	1524.83	158.901	2230.83	1265.81	175.838	2431.74	1451.58	169.314	2527.59	1246.28	224.309	2221.55	1324.14	-10.5296	2366.18	1489.92	-88.3607	2346.5	1260.9	-104.624	2336.08	1160.22	-129.917	2405.25	1000.22	-88.1143	2444.2	921.935	-150.183	2399.04	922.157	-141.362	2447.14	856.254
9129	0	125.946	2480.8	1681.56	221.393	2487.22	1678.76	113.289	2324.92	1705.18	257.058	2340.31	1695.78	173.272	2288.9	1524.14	159.336	2242.8	1266.27	176.006	2443.8	1451.98	170.165	2538.84	1246.59	224.748	2233.34	1324.77	-10.722	2378.14	1489.72	-87.1508	2353.01	1260.52	-102.254	2339.92	1160.12	-128.074	2404.21	998.536	-86.7118	2441.77	919.514	-147.174	2395.35	919.953	-139.919	2442.18	853.497
9130	0	125.62	2492.54	1681.86	221.112	2499.15	1679.6	112.642	2336.5	1705.01	256.588	2352.21	1696.09	173.017	2300.97	1524.11	159.242	2254.42	1266.44	176.419	2455.93	1452.36	171.082	2550.14	1246.74	225.106	2245.27	1325.19	-10.8087	2390.39	1489.6	-85.4836	2360.2	1260.25	-99.973	2344.13	1159.88	-126.201	2403.22	996.549	-85.1001	2439.34	917.298	-144.501	2391.86	918.154	-138.444	2437.32	850.856
9131	0	125.217	2504.62	1681.93	220.828	2511.14	1679.81	111.878	2348.28	1704.55	256.246	2364.11	1696.12	170.89	2309.24	1525	159.475	2266.45	1266.52	176.429	2467.98	1451.75	172.014	2561.5	1245.94	225.398	2257.27	1325.22	-10.9858	2402.5	1488.93	-84.6334	2366.47	1259.61	-97.5343	2348.33	1159.86	-124.081	2402.48	995.026	-83.6549	2437.23	915.061	-141.803	2388.35	916.704	-136.639	2432.54	848.507
9132	0	124.911	2516.8	1681.71	220.522	2523.21	1679.89	112.099	2360.42	1703.69	256.169	2376.25	1695.79	170.865	2321.31	1524.99	159.725	2278.22	1266.24	176.714	2480.27	1451	172.923	2572.96	1244.9	225.781	2269.21	1324.95	-10.6657	2415.02	1488.22	-83.0399	2373.74	1259.46	-94.3671	2353.67	1160.26	-122.025	2401.9	993.728	-82.0917	2434.95	912.663	-139.209	2384.84	915.519	-134.698	2427.74	846.202
9133	0	124.576	2528.9	1680.96	220.221	2535.52	1679.47	112.101	2372.82	1702.64	256.386	2388.71	1695.24	171.249	2334.24	1524	159.595	2290.13	1265.63	176.877	2492.58	1450.07	173.69	2584.64	1243.51	225.743	2281.17	1324.46	-10.5687	2427.53	1487.32	-81.7264	2381.19	1258.88	-92.3781	2358	1159.71	-119.915	2401.55	992.373	-83.0236	2428.17	908.742	-135.839	2382.1	914.478	-132.422	2423.1	843.912
9134	0	124.491	2541.36	1680.09	220.081	2547.88	1678.91	111.654	2384.98	1701.6	255.565	2400.73	1694.34	170.113	2345.17	1523.85	159.344	2301.99	1265.01	177.053	2504.83	1448.82	174.453	2596.6	1241.85	225.752	2293	1323.83	-10.9799	2439.85	1485.89	-80.712	2388.74	1258.28	-89.5747	2363.67	1159.9	-117.968	2401.57	991.212	-81.3383	2426.91	906.973	-133.053	2379.44	913.773	-130.251	2418.65	841.887
9135	0	124.509	2553.68	1678.9	219.9	2560.44	1677.82	111.228	2397.43	1700.31	255.318	2413.28	1693.15	170.202	2357.81	1522.56	158.721	2313.74	1264.14	177.154	2517.12	1447.24	175.034	2608.66	1239.8	225.509	2305.08	1323.04	-10.8667	2452.78	1484.69	-79.8272	2396.63	1258.02	-87.6492	2369.3	1159.72	-116.04	2402.06	990.191	-79.6898	2425.93	905.215	-130.494	2376.93	913.274	-127.941	2414.43	840.014
9136	0	124.115	2566.2	1677.44	219.872	2573.15	1676.4	111.112	2409.99	1698.83	254.603	2425.58	1691.75	170.578	2371.42	1521.07	158.348	2325.67	1263.33	177.237	2529.36	1445.55	175.469	2620.75	1237.82	225.453	2317.07	1321.86	-11.1641	2465.44	1483.31	-78.7339	2405.61	1257.73	-85.1146	2375.67	1159.7	-114.175	2403	989.517	-78.092	2425.39	903.828	-127.999	2375.38	913.554	-125.433	2410.55	838.528
9137	0	124.273	2578.98	1675.65	219.986	2585.85	1674.88	110.822	2422.86	1697.62	254.606	2438.45	1690.55	169.978	2383.14	1520.03	157.511	2337.66	1262.05	177.115	2541.72	1443.98	175.815	2633.11	1235.89	224.94	2329.07	1320.77	-11.1073	2478.42	1482.2	-78.4224	2414.35	1256.96	-82.362	2383	1159.64	-112.348	2404.57	989.086	-76.3471	2428.94	903.753	-125.137	2374.37	913.575	-123.103	2406.92	837.223
9138	0	124.261	2591.99	1673.97	220.132	2598.55	1673.11	110.846	2435.93	1696.17	254.562	2451.1	1689.06	172.141	2400.3	1517.94	156.568	2349.72	1260.99	177.053	2554.08	1442.26	176.023	2645.55	1233.93	224.289	2341.04	1319.78	-11.3918	2491.49	1481.08	-78.0997	2423.74	1256.65	-80.5928	2390.36	1159.59	-110.617	2406.84	988.916	-71.7921	2424.36	901.094	-123.305	2374.02	914.135	-120.665	2403.97	836.306
9139	0	124.265	2605.06	1672.09	220.169	2611.35	1670.95	110.357	2449.08	1694.8	254.659	2463.92	1687.51	169.269	2408.44	1517.73	155.795	2361.83	1259.65	176.955	2566.52	1440.43	176.172	2657.8	1231.85	223.595	2353.26	1318.39	-11.6337	2504.55	1479.71	-77.3047	2433.23	1255.68	-78.3246	2398.69	1159.47	-109.522	2409.61	988.906	-70.3626	2425.58	900.497	-121.27	2374.87	915.114	-118.343	2401.54	835.599
9140	0	124.42	2618.13	1670	220.276	2624.23	1668.63	110.475	2462.45	1693.34	253.6	2476.79	1685.53	168.532	2421.11	1515.9	154.883	2374.13	1258.23	176.86	2578.94	1438.6	176.086	2670.05	1229.92	222.921	2365.24	1316.73	-12.2371	2517.51	1478.25	-76.9163	2443.44	1254.96	-76.9095	2407.03	1158.92	-108.306	2413.38	989.024	-71.6196	2427.92	900.491	-119.626	2376.33	915.691	-116.159	2399.84	835.197
9141	0	124.263	2631.44	1667.83	220.228	2637.09	1666.24	109.918	2475.92	1691.73	253.474	2489.86	1684	167.883	2433.79	1514.15	153.823	2386.34	1256.69	176.474	2591.34	1436.78	175.766	2682.3	1228.03	221.807	2377.43	1315.31	-12.9356	2530.44	1476.54	-76.3339	2454.13	1254.1	-75.447	2416.58	1158.6	-107.347	2417.95	989.073	-70.7926	2430.4	899.961	-118.442	2379.03	916.939	-113.234	2398.93	834.085
9142	0	124.37	2644.7	1665.25	220.113	2650.07	1663.68	108.976	2489.19	1690.11	252.961	2502.56	1682.13	169.305	2450.65	1511.26	152.944	2398.8	1255.2	176.006	2603.75	1434.82	175.259	2694.64	1226.19	220.878	2389.44	1313.8	-13.6345	2543.48	1474.88	-76.201	2464.98	1252.55	-74.2461	2426.59	1157.97	-106.709	2423.6	989.203	-68.3983	2433.59	899.552	-117.755	2382.58	917.881	-111.298	2398.89	833.807
9143	0	123.733	2657.99	1662.64	219.848	2663.04	1661.03	108.743	2502.73	1688.44	252.367	2515.93	1680.33	167.248	2459.98	1510.41	152.018	2411.27	1253.16	175.461	2616.27	1432.8	174.871	2707.24	1224.34	219.858	2401.74	1311.96	-14.1855	2556.5	1473.04	-75.9685	2476.4	1251.19	-73.2119	2436.99	1157.17	-106.218	2430.14	989.067	-69.3726	2438.01	899.33	-117.259	2387.45	918.868	-109.511	2400.05	833.825
9144	0	123.497	2671.11	1659.9	219.387	2676.09	1658.34	109.636	2518.14	1686.72	252.04	2528.82	1678.46	166.781	2472.98	1508.63	151.235	2423.99	1251.14	174.708	2628.83	1430.84	174.38	2719.87	1222.58	219.093	2414.09	1310.02	-15.2989	2569	1470.8	-76.1185	2488.34	1249.51	-72.6888	2447.86	1156.18	-106.254	2437.53	988.321	-68.9044	2443.14	898.485	-117.359	2393.4	919.597	-108.109	2402.01	833.478
9145	0	122.698	2684.43	1657.47	218.702	2688.9	1655.84	106.59	2529.41	1685.3	250.431	2541.88	1676.59	165.659	2485.56	1506.75	150.118	2436.76	1249.27	173.806	2641.41	1428.99	173.699	2732.5	1220.92	217.923	2426.63	1308.24	-16.1038	2581.94	1468.64	-76.362	2500.57	1247.59	-72.7988	2458.96	1154.94	-106.581	2445.72	987.523	-69.3887	2449.47	897.808	-117.967	2400.73	919.741	-107.009	2405.26	833.117
9146	0	122.02	2697.45	1655.41	217.74	2701.72	1653.91	107.185	2544.42	1683.34	249.015	2554.49	1675.21	165.013	2498.73	1504.13	149.369	2449.45	1247.37	172.938	2654.12	1427.34	172.886	2745.08	1219.42	216.957	2439.39	1306.21	-17.247	2594.43	1466.37	-76.6893	2512.8	1245.82	-73.0818	2470.62	1153.34	-107.401	2455	986.491	-69.9837	2456.64	896.875	-119.419	2408.66	919.859	-106.358	2409.8	832.869
9147	0	120.654	2710.44	1653.66	216.602	2714.51	1652.26	105.806	2557.48	1681.87	248.008	2567.32	1673.62	163.895	2511.38	1502.37	148.753	2462.28	1245.48	172.006	2666.93	1425.87	172.099	2757.65	1218.07	216.341	2452.34	1304.6	-18.0788	2606.98	1464.46	-77.3172	2525.13	1243.59	-73.3879	2482.72	1151.59	-108.566	2464.95	985.393	-70.1692	2464.53	895.627	-120.907	2418.05	919.612	-105.976	2415.86	832.336
9148	0	118.79	2723.3	1652.34	215.15	2727.2	1651.17	104.188	2570.2	1679.99	245.768	2579.76	1672.54	163.035	2524.11	1500.89	148.298	2475.22	1243.65	170.897	2679.71	1424.5	171.099	2770.37	1216.84	215.475	2465.27	1302.82	-19.231	2619.39	1462.53	-78.1646	2537.5	1241.31	-74.3323	2494.59	1149.6	-109.93	2475.62	983.986	-70.8855	2473.73	894.591	-123.099	2428.43	918.966	-106.519	2423.19	832.428
9149	0	116.948	2735.84	1650.88	213.402	2739.77	1650.37	102.083	2582.83	1678.58	243.633	2592.52	1671.52	161.805	2536.65	1499.8	147.916	2488.06	1242.23	169.69	2692.6	1423.24	170.009	2783.23	1215.73	214.994	2478.64	1301.28	-20.4281	2631.66	1460.8	-79.2317	2549.77	1239.28	-75.4167	2507.11	1147.78	-111.499	2487.09	983.055	-72.7318	2483.98	893.051	-125.395	2439.84	918.099	-107.536	2432.03	831.377
9150	0	115.016	2748.34	1649.81	211.351	2752.41	1649.61	99.9243	2595.46	1677.01	242.319	2605	1670.82	161.012	2549.55	1499	147.861	2501.25	1240.7	168.495	2705.52	1422.15	168.831	2796.52	1214.58	214.383	2491.5	1300.06	-21.5936	2643.8	1459.07	-79.874	2562.3	1237.62	-76.4035	2519.56	1145.64	-113.445	2499.27	981.578	-74.6049	2495.28	891.387	-127.912	2451.68	916.896	-109.187	2442.37	830.735
9151	0	112.857	2760.87	1648.73	209.287	2765.12	1649.02	98.2085	2607.93	1675.22	239.586	2617.68	1669.98	159.76	2563.48	1496.4	147.837	2514.45	1239.22	167.261	2718.47	1421.33	167.465	2809.85	1213.81	214.305	2504.7	1298.95	-22.8933	2655.83	1457.45	-80.7772	2574.72	1235.66	-77.5703	2532.28	1143.84	-115.292	2512.03	979.542	-76.6296	2507.4	889.8	-130.163	2464.58	915.671	-111.928	2453.97	829.036
9152	0	110.621	2773.33	1647.93	207.079	2777.53	1648.92	95.7121	2620.22	1674.23	237.212	2629.99	1669.95	158.957	2575.18	1496.42	147.626	2527.83	1238.15	165.575	2731.36	1420.81	165.909	2823.21	1213.32	213.803	2517.82	1298.1	-24.3204	2667.78	1455.91	-81.9853	2587.23	1233.7	-79.1875	2545.27	1142.19	-117.3	2525.23	977.893	-79.3528	2520.73	888.22	-132.851	2477.93	914.017	-114.898	2467.35	827.87
9153	0	108.424	2785.77	1647.51	204.732	2789.93	1648.8	93.3793	2632.52	1673.66	234.67	2642.29	1669.58	157.568	2587.86	1496.2	147.595	2541.38	1237.3	164.12	2744.28	1420.43	164.348	2836.9	1212.81	213.385	2531.11	1297.44	-25.7314	2679.8	1454.78	-83.4995	2599.88	1232.11	-80.962	2558.44	1140.62	-119.36	2539.16	976.146	-82.3302	2534.83	886.428	-135.181	2492.05	912.526	-118.342	2482.29	826.487
9154	0	106.097	2798.02	1647.14	202.411	2802.35	1649.07	90.9496	2644.95	1673.06	232.91	2654.91	1669.5	156.629	2600.87	1495.77	147.191	2555.04	1236.51	162.433	2757.32	1420.55	162.754	2850.76	1212.73	213.259	2544.56	1296.73	-27.0413	2691.99	1454.01	-84.7442	2613.04	1231.05	-82.5975	2572.01	1139.36	-121.315	2553.77	974.873	-84.4138	2550.01	885.036	-137.317	2506.97	911.01	-122.039	2498.68	824.484
9155	0	103.886	2810.26	1647.49	200.079	2814.63	1649.89	88.4416	2657.03	1672.68	230.315	2666.85	1670.01	155.283	2613.59	1495.13	146.671	2568.84	1235.97	160.93	2770.22	1420.93	161.248	2864.66	1213.39	211.919	2557.89	1296.38	-28.5784	2704.17	1453.52	-85.1773	2626.63	1230.92	-84.3573	2585.9	1138.36	-123.562	2568.66	973.517	-87.3822	2566.15	883.823	-139.042	2522.98	909.336	-125.909	2516.61	823.069
9156	0	101.614	2822.56	1648.24	197.675	2826.75	1651.2	85.9637	2669.06	1672.62	228.017	2678.84	1670.88	153.522	2626.09	1495.65	145.517	2582.28	1235.91	159.278	2783.12	1421.72	159.659	2878.35	1214.45	210.719	2571.33	1296.34	-30.19	2716.45	1453.46	-87.6904	2639.68	1230.41	-86.5347	2599.83	1137.77	-126.293	2584.28	972.592	-90.2812	2583.21	882.87	-141.404	2539.19	908.254	-130.316	2535.76	821.688
9157	0	99.2423	2834.5	1649.6	195.418	2838.71	1652.8	83.7014	2681.01	1672.73	225.599	2690.7	1671.75	152.233	2638.8	1496.08	144.51	2595.73	1236.53	157.872	2796.01	1422.73	158.498	2891.71	1215.53	209.802	2584.6	1296.88	-31.876	2728.74	1453.75	-90.5791	2653.29	1229.9	-88.2808	2614.59	1137.44	-128.001	2600.93	972.568	-92.9872	2601.23	881.987	-143.699	2556.24	906.804	-134.476	2556.29	820.797
9158	0	96.9442	2846.47	1651.36	193.039	2850.6	1654.99	81.5003	2692.83	1672.89	222.738	2702.64	1672.68	151.171	2651.46	1496.66	143.305	2609.15	1236.73	156.605	2808.88	1424.01	157.556	2905.07	1217.03	208.463	2597.88	1297.08	-33.0646	2741.24	1454.38	-91.3953	2667.26	1230.44	-90.5788	2628.99	1136.86	-130.461	2617.71	971.876	-95.2905	2620.06	881.104	-145.647	2574.29	905.489	-138.813	2577.9	819.635
9159	0	94.376	2857.93	1652.7	190.621	2862.64	1657.23	79.4673	2704.62	1673.12	220.752	2714.43	1674.18	149.796	2664.06	1497.34	141.714	2622.27	1237.61	155.361	2821.53	1425.44	156.719	2918.28	1218.59	206.985	2611.07	1298.02	-34.289	2753.78	1455.04	-93.1557	2681.14	1230.97	-92.5816	2644.23	1136.63	-132.829	2635.29	971.52	-95.2904	2639.3	879.664	-147.85	2593.08	903.753	-143.03	2600.41	818.589
9160	0	92.1747	2869.91	1654.63	188.337	2874.83	1659.28	77.4996	2716.07	1673.46	219.247	2726.33	1675.3	148.475	2676.25	1498.49	140.196	2635.23	1238.72	154.101	2834.14	1426.69	155.965	2931.06	1219.95	205.633	2624.05	1299.32	-35.2144	2766.3	1455.88	-95.3509	2695.89	1231.1	-94.7534	2659.5	1136.61	-135.073	2653.65	971.421	-99.7286	2660.22	879.952	-150.099	2612.83	902.461	-147.264	2623.95	818.279
9161	0	90.2788	2881.6	1655.88	186.086	2886.7	1661.09	75.9206	2727.56	1673.58	217.499	2738.57	1676.01	147.822	2689.18	1499.53	139.004	2648	1239.78	152.94	2846.73	1427.68	155.559	2943.77	1220.85	204.753	2636.82	1300.33	-35.9953	2778.72	1456.67	-96.024	2710.66	1231.4	-96.561	2675.48	1136.61	-137.331	2672.77	970.925	-102.992	2681.75	879.838	-152.184	2633.38	901.346	-152.016	2648.32	818.397
9162	0	88.4606	2893.13	1656.95	184.186	2898.72	1662.68	74.8253	2738.99	1673.84	215.957	2750.55	1676.72	147.156	2701.12	1500.63	137.817	2660.61	1240.7	152.021	2859.16	1428.49	154.94	2956.09	1221.62	204.105	2649.58	1301.46	-36.9572	2790.94	1457.41	-97.2982	2725.52	1231.59	-99.1873	2691.04	1136.44	-139.562	2692.49	970.051	-105.076	2703.86	879.38	-154.601	2654.39	899.786	-155.81	2673.19	818.03
9163	0	86.8357	2904.7	1658.26	182.513	2910.67	1664.26	73.6183	2750.22	1674.35	214.774	2762.67	1677.37	146.007	2713.67	1501.45	136.705	2672.91	1241.56	151.228	2871.44	1429.29	154.346	2968.08	1222.4	203.299	2661.79	1302.49	-37.7714	2803.29	1457.82	-99.1854	2740.46	1231.34	-101.645	2707.37	1136.65	-141.763	2712.98	969.838	-108.187	2726.92	879.657	-157.334	2676.09	898.591	-159.512	2698.89	817.865
9164	0	85.3553	2916.33	1659.71	180.997	2922.51	1666.01	72.6441	2761.7	1675	214.053	2774.51	1678.53	145.202	2724.96	1502.97	135.803	2685.07	1242.6	150.508	2883.48	1430.36	153.903	2980	1223.32	202.785	2673.88	1303.55	-38.3904	2815.8	1459.36	-100.601	2755.6	1231.69	-104.078	2723.63	1136.79	-143.957	2733.81	969.512	-112.345	2750.62	880.051	-159.392	2699.11	897.62	-162.955	2725.1	818.329
9165	0	84.3071	2927.98	1661.4	179.549	2934.13	1667.71	72.1056	2773.31	1675.9	213.122	2786.44	1679.65	144.545	2737.58	1503.53	135.074	2697.21	1243.29	150.028	2895.35	1431.49	153.388	2991.69	1224.18	202.195	2685.83	1304.56	-38.9759	2828.04	1460.22	-101.394	2771.34	1232.76	-105.497	2739.56	1136.17	-146.123	2755.05	969.526	-114.671	2775.09	880.529	-161.512	2722.52	896.397	-166.225	2751.75	818.849
9166	0	83.3842	2939.55	1663.11	178.932	2945.94	1669.33	71.4831	2784.88	1676.99	212.576	2798.04	1680.92	143.441	2749.06	1504.64	134.388	2709.37	1244.13	149.645	2907.23	1432.71	152.881	3003.25	1225.2	201.119	2697.52	1305.35	-39.5754	2840.37	1461.4	-102.73	2786.71	1233.41	-107.498	2755.66	1136.1	-148.12	2776.99	970.115	-118.972	2799.97	881.986	-163.36	2746.75	895.445	-169.117	2779	820.002
9167	0	82.7149	2951.23	1664.76	178.262	2957.72	1670.91	70.9666	2796.59	1678.2	212.177	2809.83	1682.23	142.658	2762.65	1505.09	133.212	2721.33	1245.41	149.324	2918.83	1434.03	152.527	3014.72	1226.07	199.677	2708.89	1306.63	-40.109	2852.73	1462.69	-104.248	2801.94	1234.55	-108.991	2773.83	1136.88	-149.853	2799.35	971.039	-118.742	2830.06	884.385	-165.065	2771.85	894.944	-171.805	2806.61	821.323
9168	0	82.3168	2963.05	1666.62	177.925	2969.61	1672.5	70.7959	2808.39	1679.82	212.091	2821.75	1683.87	141.758	2773.31	1507.21	132.125	2733.35	1246.85	149.119	2930.44	1435.32	152.363	3026.3	1227.09	198.325	2720.44	1307.95	-40.8805	2865.18	1464.06	-105.754	2817.21	1235.64	-111.164	2790.34	1137.34	-152.037	2821.57	971.573	-120.709	2856	886.901	-167.094	2796.89	894.685	-173.98	2834.81	823.204
9169	0	82.0763	2975.01	1668.42	177.447	2981.53	1674.29	70.6329	2820.31	1681.4	212.053	2833.58	1685.22	141.155	2784.91	1508.54	130.921	2745.36	1248.38	149.024	2941.93	1436.58	152.408	3037.93	1228.21	196.878	2731.83	1309.28	-41.1816	2877.61	1465.57	-107.457	2832.1	1236.61	-114.1	2805.24	1137.19	-153.767	2844.47	972.974	-122.245	2882.55	889.522	-168.455	2822.79	895.202	-175.742	2863.48	825.716
9170	0	82.0103	2987.09	1669.94	177.36	2993.65	1675.82	70.5484	2832.28	1683.06	211.769	2845.81	1686.48	140.918	2797.2	1510.39	129.575	2757.13	1249.97	148.953	2953.61	1437.77	152.702	3049.98	1229.31	194.975	2742.95	1311.14	-41.1928	2890.18	1466.73	-108.378	2847.43	1238.19	-116.157	2821.04	1137.54	-155.4	2867.43	974.63	-115.276	2899.57	894.914	-169.217	2849.21	896.138	-177.042	2892.45	828.483
9171	0	82.1934	2999.31	1671.59	177.383	3005.93	1677.21	69.2697	2842.87	1685.13	211.859	2857.97	1687.74	140.047	2808.98	1512.31	128.133	2768.84	1251.94	148.888	2965.12	1438.81	153.262	3062.18	1230.41	193.533	2754.3	1312.53	-41.3796	2902.71	1468.04	-109.552	2862.37	1239.55	-118.216	2838.61	1138.84	-156.003	2890.99	976.573	-127.261	2931	895.572	-170.671	2875.3	897.643	-177.823	2921.89	832.159
9172	0	82.3794	3011.45	1673.01	177.84	3018.33	1678.37	70.9525	2856.62	1686.87	212.301	2870.49	1688.9	139.792	2821.03	1514.05	126.881	2780.3	1253.62	148.891	2976.72	1440.03	153.797	3074.21	1231.71	192.137	2765.63	1314.14	-41.3183	2915.46	1469.98	-110.572	2877.36	1241.16	-120.068	2855.32	1140.12	-157	2914.5	979.337	-124.045	2963.23	901.901	-171.704	2902.15	900.179	-178.375	2951.32	836.322
9173	0	82.5408	3023.68	1674.8	178.316	3030.67	1679.57	70.2551	2867.46	1688.71	212.787	2882.65	1690.34	139.379	2833.61	1515.34	125.41	2791.75	1255.42	148.865	2988.35	1441.43	154.298	3086.03	1233.38	190.594	2776.86	1315.75	-41.5356	2927.87	1471.89	-111.758	2892.16	1243.07	-121.881	2872.68	1141.51	-157.885	2937.91	982.593	-124.372	2989.82	907.278	-171.424	2928.96	902.782	-178.544	2980.83	841.542
9174	0	83.2247	3035.87	1676.64	178.67	3042.59	1680.89	70.6131	2879.66	1690.63	213.167	2894.64	1691.81	138.681	2845.12	1517.14	123.997	2803.26	1257.1	148.845	2999.95	1442.85	154.758	3097.68	1235.08	188.968	2788.31	1317.38	-41.7362	2940.41	1474.13	-113.255	2906.88	1245.28	-123.964	2889.12	1142.79	-158.553	2961.48	986.458	-124.615	3016.3	913.667	-171.829	2955.91	906.119	-178.421	3010.4	847.454
9175	0	83.7719	3047.99	1678.23	179.354	3054.86	1681.86	70.3686	2891.7	1692.61	213.506	2906.55	1692.61	138.571	2859.08	1518.08	122.512	2814.73	1258.67	148.724	3011.59	1444.09	155.025	3109.09	1236.67	187.716	2799.9	1318.64	-41.9502	2953.05	1476.4	-114.538	2921.76	1247.56	-125.94	2906.99	1144.71	-159.017	2985.13	990.693	-124.526	3042.22	920.429	-172.506	2982.51	910.118	-178.138	3039.76	854.04
9176	0	84.4687	3060.32	1679.66	180.112	3067.06	1682.6	69.8237	2903.33	1694.35	214.265	2918.87	1693.69	135.925	2868.05	1520.03	121.334	2826.26	1259.79	148.539	3023.23	1445.13	155.108	3120.04	1237.86	186.401	2811.88	1319.88	-41.9236	2965.91	1478.5	-115.738	2936.65	1249.38	-127.665	2924.24	1146.13	-159.234	3008.73	995.003	-124.099	3067.85	927.117	-171.872	3009.6	913.858	-177.412	3069.11	860.836
9177	0	85.1633	3072.83	1680.68	180.783	3079.21	1682.98	70.4869	2915.88	1695.75	214.587	2930.93	1694.17	136.74	2881.03	1520.84	120.169	2837.9	1260.94	148.36	3035.15	1445.84	155.204	3131.16	1238.63	185.142	2823.64	1320.94	-42.1	2978.45	1479.89	-116.5	2951.8	1250.91	-129.418	2941.78	1147.81	-159.404	3032.33	998.998	-124.416	3092.73	933.674	-171.833	3036.44	918.377	-176.138	3098.34	867.494
9178	0	85.8293	3085.27	1681.34	181.358	3091.48	1683.36	70.3753	2928.3	1696.92	214.817	2943.5	1694.54	136.5	2895.59	1521.13	118.973	2849.61	1261.95	148.062	3047.15	1446.37	155.227	3142.3	1239.34	183.853	2835.32	1321.88	-42.3824	2991.12	1480.93	-117.922	2967.06	1252.44	-131.437	2959.24	1149.03	-159.203	3056.14	1003.25	-122.337	3118.7	940.349	-171.995	3063.1	922.825	-174.726	3127.4	874.522
9179	0	86.1808	3097.87	1681.9	182.048	3103.75	1683.21	71.1466	2941.14	1697.56	215.641	2956.56	1694.54	135.363	2905.7	1522.47	118.004	2861.32	1262.78	147.88	3058.99	1446.52	155.427	3153.81	1239.54	182.547	2846.71	1322.6	-42.4947	3004	1481.88	-119.053	2982.52	1253.31	-133.272	2976.94	1150.06	-159.045	3079.7	1007.42	-121.033	3144.39	946.577	-170.929	3090.18	927.506	-173.042	3156.34	881.786
9180	0	86.7526	3110.33	1681.99	182.574	3116.15	1683.52	71.1149	2953.65	1697.96	215.448	2968.69	1694.52	135.06	2918.02	1522.22	117.141	2872.99	1263.33	147.536	3071.15	1446.55	155.301	3165.17	1239.61	181.516	2858.88	1322.98	-42.6431	3016.8	1482.47	-120.084	2997.97	1254.05	-135.164	2994.4	1150.78	-158.905	3103.04	1011.63	-123.418	3165.56	951.6	-170.188	3116.63	931.994	-171.011	3184.8	889.107
9181	0	87.0144	3122.86	1682.22	182.913	3128.46	1683.5	70.8507	2966.1	1698	215.419	2980.45	1694.14	133.817	2929.85	1522.58	116.383	2884.81	1263.47	147.409	3083.29	1446.14	155.28	3176.73	1239.43	180.329	2870.35	1323.19	-43.0072	3029.42	1482.49	-121.169	3013.33	1254.42	-136.72	3011.95	1151.28	-158.634	3126.16	1015.51	-119.367	3192.79	960.049	-169.625	3143.09	936.859	-168.995	3213.06	896.616
9182	0	86.9347	3135.51	1681.99	183.099	3140.79	1683.34	70.4645	2978.57	1697.78	215.361	2992.61	1693.61	133.54	2942.57	1522.6	115.844	2896.75	1263.56	147.136	3095.43	1445.68	155.251	3188.41	1238.88	179.336	2882.2	1323.18	-43.1058	3042.25	1482.41	-122.559	3028.79	1254.67	-138.625	3029.82	1151.54	-158.1	3149.25	1019.6	-120.511	3214.91	965.13	-168.905	3169.53	942.07	-167.204	3240.71	904
9183	0	87.1108	3147.91	1682.07	183.201	3153.16	1683.21	70.3457	2991.14	1697.22	215.447	3004.77	1693.24	133.339	2955.57	1522.3	114.989	2908.51	1263.7	146.952	3107.77	1445.02	154.974	3199.82	1237.83	178.363	2894.32	1322.86	-43.1737	3055.08	1482.01	-123.32	3044.56	1254.71	-139.915	3047.51	1151.36	-157.582	3171.99	1023.52	-118.532	3239.23	971.882	-167.811	3195.14	946.468	-164.656	3267.94	911.784
9184	0	87.1095	3160.69	1681.62	183.196	3165.67	1682.82	69.969	3003.97	1696.43	214.754	3017.33	1692.96	132.886	2967.8	1521.84	114.674	2920.63	1262.9	146.697	3120	1444.14	154.792	3211.31	1236.48	177.68	2906.46	1322.39	-43.3505	3067.68	1481.18	-124.365	3060.38	1254.37	-141.913	3066.01	1151.7	-157.17	3194.63	1027.45	-116.6	3262.87	978.286	-166.837	3220.79	951.318	-162.376	3294.72	919.294
9185	0	87.0465	3173.35	1680.97	183.077	3178.15	1682.29	69.3678	3016.63	1695.49	213.867	3029.88	1691.84	132.206	2980.21	1521.03	113.993	2931.9	1262.49	146.527	3132.35	1442.97	154.572	3222.77	1234.79	177.321	2918.65	1321.68	-43.5422	3080.34	1480.32	-125.439	3076.21	1253.84	-143.844	3084	1151.28	-157.332	3217.22	1030.85	-114.421	3286.3	984.556	-166.079	3245.91	956.063	-160.264	3320.8	926.479
[truncated: 69 more columns]

## Sheet: Sheet2
Devices
		025370 - Force			025370 - Moment			025370 - CoP			027571 - Force			027571 - Moment			027571 - CoP			037720 - Force			037720 - Moment			037720 - CoP
Frame	Sub Frame	Fx	Fy	Fz	Mx	My	Mz	Cx	Cy	Cz	Fx	Fy	Fz	Mx	My	Mz	Cx	Cy	Cz	Fx	Fy	Fz	Mx	My	Mz	Cx	Cy	Cz
		N	N	N	N.mm	N.mm	N.mm	mm	mm	mm	N	N	N	N.mm	N.mm	N.mm	mm	mm	mm	N	N	N	N.mm	N.mm	N.mm	mm	mm	mm
8780	0	0	0	0	0	0	0	200	300	0	0	0	0	0	0	0	200	903	0	0	0	0	0	0	0	603	903	0
8780	1	0	0	0	0	0	0	200	300	0	0	0	0	0	0	0	200	903	0	0	0	0	0	0	0	603	903	0
8780	2	0	0	0	0	0	0	200	300	0	0	0	0	0	0	0	200	903	0	0	0	0	0	0	0	603	903	0
8780	3	0	0	0	0	0	0	200	300	0	0	0	0	0	0	0	200	903	0	0	0	0	0	0	0	603	903	0
8780	4	0	0	0	0	0	0	200	300	0	0	0	0	0	0	0	200	903	0	0	0	0	0	0	0	603	903	0
8780	5	0	0	0	0	0	0	200	300	0	0	0	0	0	0	0	200	903	0	0	0	0	0	0	0	603	903	0
8780	6	0	0	0	0	0	0	200	300	0	0	0	0	0	0	0	200	903	0	0	0	0	0	0	0	603	903	0
8780	7	0	0	0	0	0	0	200	300	0	0	0	0	0	0	0	200	903	0	0	0	0	0	0	0	603	903	0
8780	8	0	0	0	0	0	0	200	300	0	0	0	0	0	0	0	200	903	0	0	0	0	0	0	0	603	903	0
8780	9	0	0	0	0	0	0	200	300	0	0	0	0	0	0	0	200	903	0	0	0	0	0	0	0	603	903	0
8781	0	0	0	0	0	0	0	200	300	0	0	0	0	0	0	0	200	903	0	0	0	0	0	0	0	603	903	0
8781	1	0	0	0	0	0	0	200	300	0	0	0	0	0	0	0	200	903	0	0	0	0	0	0	0	603	903	0
8781	2	0	0	0	0	0	0	200	300	0	0	0	0	0	0	0	200	903	0	0	0	0	0	0	0	603	903	0
8781	3	0	0	0	0	0	0	200	300	0	0	0	0	0	0	0	200	903	0	0	0	0	0	0	0	603	903	0
8781	4	0	0	0	0	0	0	200	300	0	0	0	0	0	0	0	200	903	0	0	0	0	0	0	0	603	903	0
8781	5	0	0	0	0	0	0	200	300	0	0	0	0	0	0	0	200	903	0	0	0	0	0	0	0	603	903	0
8781	6	0	0	0	0	0	0	200	300	0	0	0	0	0	0	0	200	903	0	0	0	0	0	0	0	603	903	0
8781	7	0	0	0	0	0	0	200	300	0	0	0	0	0	0	0	200	903	0	0	0	0	0	0	0	603	903	0
8781	8	0	0	0	0	0	0	200	300	0	0	0	0	0	0	0	200	903	0	0	0	0	0	0	0	603	903	0
8781	9	0	0	0	0	0	0	200	300	0	0	0	0	0	0	0	200	903	0	0	0	0	0	0	0	603	903	0
8782	0	0	0	0	0	0	0	200	300	0	0	0	0	0	0	0	200	903	0	0	0	0	0	0	0	603	903	0
8782	1	0	0	0	0	0	0	200	300	0	0	0	0	0	0	0	200	903	0	0	0	0	0	0	0	603	903	0
8782	2	0	0	0	0	0	0	200	300	0	0	0	0	0	0	0	200	903	0	0	0	0	0	0	0	603	903	0
8782	3	0	0	0	0	0	0	200	300	0	0	0	0	0	0	0	200	903	0	0	0	0	0	0	0	603	903	0
8782	4	0	0	0	0	0	0	200	300	0	0	0	0	0	0	0	200	903	0	0	0	0	0	0	0	603	903	0
8782	5	0	0	0	0	0	0	200	300	0	0	0	0	0	0	0	200	903	0	0	0	0	0	0	0	603	903	0
8782	6	0	0	0	0	0	0	200	300	0	0	0	0	0	0	0	200	903	0	0	0	0	0	0	0	603	903	0
8782	7	0	0	0	0	0	0	200	300	0	0	0	0	0	0	0	200	903	0	0	0	0	0	0	0	603	903	0
8782	8	0	0	0	0	0	0	200	300	0	0	0	0	0	0	0	200	903	0	0	0	0	0	0	0	603	903	0
8782	9	0	0	0	0	0	0	200	300	0	0	0	0	0	0	0	200	903	0	0	0	0	0	0	0	603	903	0
8783	0	0	0	0	0	0	0	200	300	0	0	0	0	0	0	0	200	903	0	0	0	0	0	0	0	603	903	0
8783	1	0	0	0	0	0	0	200	300	0	0	0	0	0	0	0	200	903	0	0	0	0	0	0	0	603	903	0
8783	2	0	0	0	0	0	0	200	300	0	0	0	0	0	0	0	200	903	0	0	0	0	0	0	0	603	903	0
8783	3	0	0	0	0	0	0	200	300	0	0	0	0	0	0	0	200	903	0	0	0	0	0	0	0	603	903	0
8783	4	0	0	0	0	0	0	200	300	0	0	0	0	0	0	0	200	903	0	0	0	0	0	0	0	603	903	0
8783	5	0	0	0	0	0	0	200	300	0	0	0	0	0	0	0	200	903	0	0	0	0	0	0	0	603	903	0
8783	6	0	0	0	0	0	0	200	300	0	0	0	0	0	0	0	200	903	0	0	0	0	0	0	0	603	903	0
8783	7	0	0	0	0	0	0	200	300	0	0	0	0	0	0	0	200	903	0	0	0	0	0	0	0	603	903	0
8783	8	0	0	0	0	0	0	200	300	0	0	0	0	0	0	0	200	903	0	0	0	0	0	0	0	603	903	0
8783	9	0	0	0	0	0	0	200	300	0	0	0	0	0	0	0	200	903	0	0	0	0	0	0	0	603	903	0
8784	0	0	0	0	0	0	0	200	300	0	0	0	0	0	0	0	200	903	0	0	0	0	0	0	0	603	903	0
8784	1	0	0	0	0	0	0	200	300	0	0	0	0	0	0	0	200	903	0	0	0	0	0	0	0	603	903	0
8784	2	0	0	0	0	0	0	200	300	0	0	0	0	0	0	0	200	903	0	0	0	0	0	0	0	603	903	0
8784	3	0	0	0	0	0	0	200	300	0	0	0	0	0	0	0	200	903	0	0	0	0	0	0	0	603	903	0
8784	4	0	0	0	0	0	0	200	300	0	0	0	0	0	0	0	200	903	0	0	0	0	0	0	0	603	903	0
8784	5	0	0	0	0	0	0	200	300	0	0	0	0	0	0	0	200	903	0	0	0	0	0	0	0	603	903	0
8784	6	0	0	0	0	0	0	200	300	0	0	0	0	0	0	0	200	903	0	0	0	0	0	0	0	603	903	0
8784	7	0	0	0	0	0	0	200	300	0	0	0	0	0	0	0	200	903	0	0	0	0	0	0	0	603	903	0
8784	8	0	0	0	0	0	0	200	300	0	0	0	0	0	0	0	200	903	0	0	0	0	0	0	0	603	903	0
8784	9	0	0	0	0	0	0	200	300	0	0	0	0	0	0	0	200	903	0	0	0	0	0	0	0	603	903	0
8785	0	0	0	0	0	0	0	200	300	0	0	0	0	0	0	0	200	903	0	0	0	0	0	0	0	603	903	0
8785	1	0	0	0	0	0	0	200	300	0	0	0	0	0	0	0	200	903	0	0	0	0	0	0	0	603	903	0
8785	2	0	0	0	0	0	0	200	300	0	0	0	0	0	0	0	200	903	0	0	0	0	0	0	0	603	903	0
8785	3	0	0	0	0	0	0	200	300	0	0	0	0	0	0	0	200	903	0	0	0	0	0	0	0	603	903	0
8785	4	0	0	0	0	0	0	200	300	0	0	0	0	0	0	0	200	903	0	0	0	0	0	0	0	603	903	0
8785	5	0	0	0	0	0	0	200	300	0	0	0	0	0	0	0	200	903	0	0	0	0	0	0	0	603	903	0
8785	6	0	0	0	0	0	0	200	300	0	0	0	0	0	0	0	200	903	0	0	0	0	0	0	0	603	903	0
8785	7	0	0	0	0	0	0	200	300	0	0	0	0	0	0	0	200	903	0	0	0	0	0	0	0	603	903	0
8785	8	0	0	0	0	0	0	200	300	0	0	0	0	0	0	0	200	903	0	0	0	0	0	0	0	603	903	0
8785	9	0	0	0	0	0	0	200	300	0	0	0	0	0	0	0	200	903	0	0	0	0	0	0	0	603	903	0
8786	0	0	0	0	0	0	0	200	300	0	0	0	0	0	0	0	200	903	0	0	0	0	0	0	0	603	903	0
8786	1	0	0	0	0	0	0	200	300	0	0	0	0	0	0	0	200	903	0	0	0	0	0	0	0	603	903	0
8786	2	0	0	0	0	0	0	200	300	0	0	0	0	0	0	0	200	903	0	0	0	0	0	0	0	603	903	0
8786	3	0	0	0	0	0	0	200	300	0	0	0	0	0	0	0	200	903	0	0	0	0	0	0	0	603	903	0
8786	4	0	0	0	0	0	0	200	300	0	0	0	0	0	0	0	200	903	0	0	0	0	0	0	0	603	903	0
8786	5	0	0	0	0	0	0	200	300	0	0	0	0	0	0	0	200	903	0	0	0	0	0	0	0	603	903	0
8786	6	0	0	0	0	0	0	200	300	0	0	0	0	0	0	0	200	903	0	0	0	0	0	0	0	603	903	0
8786	7	0	0	0	0	0	0	200	300	0	0	0	0	0	0	0	200	903	0	0	0	0	0	0	0	603	903	0
8786	8	0	0	0	0	0	0	200	300	0	0	0	0	0	0	0	200	903	0	0	0	0	0	0	0	603	903	0
8786	9	0	0	0	0	0	0	200	300	0	0	0	0	0	0	0	200	903	0	0	0	0	0	0	0	603	903	0
8787	0	0	0	0	0	0	0	200	300	0	0	0	0	0	0	0	200	903	0	0	0	0	0	0	0	603	903	0
8787	1	0	0	0	0	0	0	200	300	0	0	0	0	0	0	0	200	903	0	0	0	0	0	0	0	603	903	0
8787	2	0	0	0	0	0	0	200	300	0	0	0	0	0	0	0	200	903	0	0	0	0	0	0	0	603	903	0
8787	3	0	0	0	0	0	0	200	300	0	0	0	0	0	0	0	200	903	0	0	0	0	0	0	0	603	903	0
8787	4	0	0	0	0	0	0	200	300	0	0	0	0	0	0	0	200	903	0	0	0	0	0	0	0	603	903	0
8787	5	0	0	0	0	0	0	200	300	0	0	0	0	0	0	0	200	903	0	0	0	0	0	0	0	603	903	0
8787	6	0	0	0	0	0	0	200	300	0	0	0	0	0	0	0	200	903	0	0	0	0	0	0	0	603	903	0
8787	7	0	0	0	0	0	0	200	300	0	0	0	0	0	0	0	200	903	0	0	0	0	0	0	0	603	903	0
8787	8	0	0	0	0	0	0	200	300	0	0	0	0	0	0	0	200	903	0	0	0	0	0	0	0	603	903	0
8787	9	0	0	0	0	0	0	200	300	0	0	0	0	0	0	0	200	903	0	0	0	0	0	0	0	603	903	0
8788	0	0	0	0	0	0	0	200	300	0	0	0	0	0	0	0	200	903	0	0	0	0	0	0	0	603	903	0
8788	1	0	0	0	0	0	0	200	300	0	0	0	0	0	0	0	200	903	0	0	0	0	0	0	0	603	903	0
8788	2	0	0	0	0	0	0	200	300	0	0	0	0	0	0	0	200	903	0	0	0	0	0	0	0	603	903	0
8788	3	0	0	0	0	0	0	200	300	0	0	0	0	0	0	0	200	903	0	0	0	0	0	0	0	603	903	0
8788	4	0	0	0	0	0	0	200	300	0	0	0	0	0	0	0	200	903	0	0	0	0	0	0	0	603	903	0
8788	5	0	0	0	0	0	0	200	300	0	0	0	0	0	0	0	200	903	0	0	0	0	0	0	0	603	903	0
8788	6	0	0	0	0	0	0	200	300	0	0	0	0	0	0	0	200	903	0	0	0	0	0	0	0	603	903	0
8788	7	0	0	0	0	0	0	200	300	0	0	0	0	0	0	0	200	903	0	0	0	0	0	0	0	603	903	0
8788	8	0	0	0	0	0	0	200	300	0	0	0	0	0	0	0	200	903	0	0	0	0	0	0	0	603	903	0
8788	9	0	0	0	0	0	0	200	300	0	0	0	0	0	0	0	200	903	0	0	0	0	0	0	0	603	903	0
8789	0	0	0	0	0	0	0	200	300	0	0	0	0	0	0	0	200	903	0	0	0	0	0	0	0	603	903	0
8789	1	0	0	0	0	0	0	200	300	0	0	0	0	0	0	0	200	903	0	0	0	0	0	0	0	603	903	0
8789	2	0	0	0	0	0	0	200	300	0	0	0	0	0	0	0	200	903	0	0	0	0	0	0	0	603	903	0
8789	3	0	0	0	0	0	0	200	300	0	0	0	0	0	0	0	200	903	0	0	0	0	0	0	0	603	903	0
8789	4	0	0	0	0	0	0	200	300	0	0	0	0	0	0	0	200	903	0	0	0	0	0	0	0	603	903	0
8789	5	0	0	0	0	0	0	200	300	0	0	0	0	0	0	0	200	903	0	0	0	0	0	0	0	603	903	0
8789	6	0	0	0	0	0	0	200	300	0	0	0	0	0	0	0	200	903	0	0	0	0	0	0	0	603	903	0
8789	7	0	0	0	0	0	0	200	300	0	0	0	0	0	0	0	200	903	0	0	0	0	0	0	0	603	903	0
8789	8	0	0	0	0	0	0	200	300	0	0	0	0	0	0	0	200	903	0	0	0	0	0	0	0	603	903	0
8789	9	0	0	0	0	0	0	200	300	0	0	0	0	0	0	0	200	903	0	0	0	0	0	0	0	603	903	0
8790	0	0	0	0	0	0	0	200	300	0	0	0	0	0	0	0	200	903	0	0	0	0	0	0	0	603	903	0
8790	1	0	0	0	0	0	0	200	300	0	0	0	0	0	0	0	200	903	0	0	0	0	0	0	0	603	903	0
8790	2	0	0	0	0	0	0	200	300	0	0	0	0	0	0	0	200	903	0	0	0	0	0	0	0	603	903	0
8790	3	0	0	0	0	0	0	200	300	0	0	0	0	0	0	0	200	903	0	0	0	0	0	0	0	603	903	0
8790	4	0	0	0	0	0	0	200	300	0	0	0	0	0	0	0	200	903	0	0	0	0	0	0	0	603	903	0
8790	5	0	0	0	0	0	0	200	300	0	0	0	0	0	0	0	200	903	0	0	0	0	0	0	0	603	903	0
8790	6	0	0	0	0	0	0	200	300	0	0	0	0	0	0	0	200	903	0	0	0	0	0	0	0	603	903	0
8790	7	0	0	0	0	0	0	200	300	0	0	0	0	0	0	0	200	903	0	0	0	0	0	0	0	603	903	0
8790	8	0	0	0	0	0	0	200	300	0	0	0	0	0	0	0	200	903	0	0	0	0	0	0	0	603	903	0
8790	9	0	0	0	0	0	0	200	300	0	0	0	0	0	0	0	200	903	0	0	0	0	0	0	0	603	903	0
8791	0	0	0	0	0	0	0	200	300	0	0	0	0	0	0	0	200	903	0	0	0	0	0	0	0	603	903	0
8791	1	0	0	0	0	0	0	200	300	0	0	0	0	0	0	0	200	903	0	0	0	0	0	0	0	603	903	0
8791	2	0	0	0	0	0	0	200	300	0	0	0	0	0	0	0	200	903	0	0	0	0	0	0	0	603	903	0
8791	3	0	0	0	0	0	0	200	300	0	0	0	0	0	0	0	200	903	0	0	0	0	0	0	0	603	903	0
8791	4	0	0	0	0	0	0	200	300	0	0	0	0	0	0	0	200	903	0	0	0	0	0	0	0	603	903	0
8791	5	0	0	0	0	0	0	200	300	0	0	0	0	0	0	0	200	903	0	0	0	0	0	0	0	603	903	0
8791	6	0	0	0	0	0	0	200	300	0	0	0	0	0	0	0	200	903	0	0	0	0	0	0	0	603	903	0
8791	7	0	0	0	0	0	0	200	300	0	0	0	0	0	0	0	200	903	0	0	0	0	0	0	0	603	903	0
8791	8	0	0	0	0	0	0	200	300	0	0	0	0	0	0	0	200	903	0	0	0	0	0	0	0	603	903	0
8791	9	0	0	0	0	0	0	200	300	0	0	0	0	0	0	0	200	903	0	0	0	0	0	0	0	603	903	0
8792	0	0	0	0	0	0	0	200	300	0	0	0	0	0	0	0	200	903	0	0	0	0	0	0	0	603	903	0
8792	1	0	0	0	0	0	0	200	300	0	0	0	0	0	0	0	200	903	0	0	0	0	0	0	0	603	903	0
8792	2	0	0	0	0	0	0	200	300	0	0	0	0	0	0	0	200	903	0	0	0	0	0	0	0	603	903	0
8792	3	0	0	0	0	0	0	200	300	0	0	0	0	0	0	0	200	903	0	0	0	0	0	0	0	603	903	0
8792	4	0	0	0	0	0	0	200	300	0	0	0	0	0	0	0	200	903	0	0	0	0	0	0	0	603	903	0
8792	5	0	0	0	0	0	0	200	300	0	0	0	0	0	0	0	200	903	0	0	0	0	0	0	0	603	903	0
8792	6	0	0	0	0	0	0	200	300	0	0	0	0	0	0	0	200	903	0	0	0	0	0	0	0	603	903	0
8792	7	0	0	0	0	0	0	200	300	0	0	0	0	0	0	0	200	903	0	0	0	0	0	0	0	603	903	0
8792	8	0	0	0	0	0	0	200	300	0	0	0	0	0	0	0	200	903	0	0	0	0	0	0	0	603	903	0
8792	9	0	0	0	0	0	0	200	300	0	0	0	0	0	0	0	200	903	0	0	0	0	0	0	0	603	903	0
8793	0	0	0	0	0	0	0	200	300	0	0	0	0	0	0	0	200	903	0	0	0	0	0	0	0	603	903	0
8793	1	0	0	0	0	0	0	200	300	0	0	0	0	0	0	0	200	903	0	0	0	0	0	0	0	603	903	0
8793	2	0	0	0	0	0	0	200	300	0	0	0	0	0	0	0	200	903	0	0	0	0	0	0	0	603	903	0
8793	3	0	0	0	0	0	0	200	300	0	0	0	0	0	0	0	200	903	0	0	0	0	0	0	0	603	903	0
8793	4	0	0	0	0	0	0	200	300	0	0	0	0	0	0	0	200	903	0	0	0	0	0	0	0	603	903	0
8793	5	0	0	0	0	0	0	200	300	0	0	0	0	0	0	0	200	903	0	0	0	0	0	0	0	603	903	0
8793	6	0	0	0	0	0	0	200	300	0	0	0	0	0	0	0	200	903	0	0	0	0	0	0	0	603	903	0
8793	7	0	0	0	0	0	0	200	300	0	0	0	0	0	0	0	200	903	0	0	0	0	0	0	0	603	903	0
8793	8	0	0	0	0	0	0	200	300	0	0	0	0	0	0	0	200	903	0	0	0	0	0	0	0	603	903	0
8793	9	0	0	0	0	0	0	200	300	0	0	0	0	0	0	0	200	903	0	0	0	0	0	0	0	603	903	0
8794	0	0	0	0	0	0	0	200	300	0	0	0	0	0	0	0	200	903	0	0	0	0	0	0	0	603	903	0
8794	1	0	0	0	0	0	0	200	300	0	0	0	0	0	0	0	200	903	0	0	0	0	0	0	0	603	903	0
8794	2	0	0	0	0	0	0	200	300	0	0	0	0	0	0	0	200	903	0	0	0	0	0	0	0	603	903	0
8794	3	0	0	0	0	0	0	200	300	0	0	0	0	0	0	0	200	903	0	0	0	0	0	0	0	603	903	0
8794	4	0	0	0	0	0	0	200	300	0	0	0	0	0	0	0	200	903	0	0	0	0	0	0	0	603	903	0
8794	5	0	0	0	0	0	0	200	300	0	0	0	0	0	0	0	200	903	0	0	0	0	0	0	0	603	903	0
8794	6	0	0	0	0	0	0	200	300	0	0	0	0	0	0	0	200	903	0	0	0	0	0	0	0	603	903	0
8794	7	0	0	0	0	0	0	200	300	0	0	0	0	0	0	0	200	903	0	0	0	0	0	0	0	603	903	0
8794	8	0	0	0	0	0	0	200	300	0	0	0	0	0	0	0	200	903	0	0	0	0	0	0	0	603	903	0
8794	9	0	0	0	0	0	0	200	300	0	0	0	0	0	0	0	200	903	0	0	0	0	0	0	0	603	903	0
8795	0	0	0	0	0	0	0	200	300	0	0	0	0	0	0	0	200	903	0	0	0	0	0	0	0	603	903	0
8795	1	0	0	0	0	0	0	200	300	0	0	0	0	0	0	0	200	903	0	0	0	0	0	0	0	603	903	0
8795	2	0	0	0	0	0	0	200	300	0	0	0	0	0	0	0	200	903	0	0	0	0	0	0	0	603	903	0
8795	3	0	0	0	0	0	0	200	300	0	0	0	0	0	0	0	200	903	0	0	0	0	0	0	0	603	903	0
8795	4	0	0	0	0	0	0	200	300	0	0	0	0	0	0	0	200	903	0	0	0	0	0	0	0	603	903	0
8795	5	0	0	0	0	0	0	200	300	0	0	0	0	0	0	0	200	903	0	0	0	0	0	0	0	603	903	0
8795	6	0	0	0	0	0	0	200	300	0	0	0	0	0	0	0	200	903	0	0	0	0	0	0	0	603	903	0
8795	7	0	0	0	0	0	0	200	300	0	0	0	0	0	0	0	200	903	0	0	0	0	0	0	0	603	903	0
8795	8	0	0	0	0	0	0	200	300	0	0	0	0	0	0	0	200	903	0	0	0	0	0	0	0	603	903	0
8795	9	0	0	0	0	0	0	200	300	0	0	0	0	0	0	0	200	903	0	0	0	0	0	0	0	603	903	0
8796	0	0	0	0	0	0	0	200	300	0	0	0	0	0	0	0	200	903	0	0	0	0	0	0	0	603	903	0
8796	1	0	0	0	0	0	0	200	300	0	0	0	0	0	0	0	200	903	0	0	0	0	0	0	0	603	903	0
8796	2	0	0	0	0	0	0	200	300	0	0	0	0	0	0	0	200	903	0	0	0	0	0	0	0	603	903	0
8796	3	0	0	0	0	0	0	200	300	0	0	0	0	0	0	0	200	903	0	0	0	0	0	0	0	603	903	0
8796	4	0	0	0	0	0	0	200	300	0	0	0	0	0	0	0	200	903	0	0	0	0	0	0	0	603	903	0
8796	5	0	0	0	0	0	0	200	300	0	0	0	0	0	0	0	200	903	0	0	0	0	0	0	0	603	903	0
8796	6	0	0	0	0	0	0	200	300	0	0	0	0	0	0	0	200	903	0	0	0	0	0	0	0	603	903	0
8796	7	0	0	0	0	0	0	200	300	0	0	0	0	0	0	0	200	903	0	0	0	0	0	0	0	603	903	0
8796	8	0	0	0	0	0	0	200	300	0	0	0	0	0	0	0	200	903	0	0	0	0	0	0	0	603	903	0
8796	9	0	0	0	0	0	0	200	300	0	0	0	0	0	0	0	200	903	0	0	0	0	0	0	0	603	903	0
8797	0	0	0	0	0	0	0	200	300	0	0	0	0	0	0	0	200	903	0	0	0	0	0	0	0	603	903	0
8797	1	0	0	0	0	0	0	200	300	0	0	0	0	0	0	0	200	903	0	0	0	0	0	0	0	603	903	0
8797	2	0	0	0	0	0	0	200	300	0	0	0	0	0	0	0	200	903	0	0	0	0	0	0	0	603	903	0
8797	3	0	0	0	0	0	0	200	300	0	0	0	0	0	0	0	200	903	0	0	0	0	0	0	0	603	903	0
8797	4	0	0	0	0	0	0	200	300	0	0	0	0	0	0	0	200	903	0	0	0	0	0	0	0	603	903	0
8797	5	0	0	0	0	0	0	200	300	0	0	0	0	0	0	0	200	903	0	0	0	0	0	0	0	603	903	0
8797	6	0	0	0	0	0	0	200	300	0	0	0	0	0	0	0	200	903	0	0	0	0	0	0	0	603	903	0
8797	7	0	0	0	0	0	0	200	300	0	0	0	0	0	0	0	200	903	0	0	0	0	0	0	0	603	903	0
8797	8	0	0	0	0	0	0	200	300	0	0	0	0	0	0	0	200	903	0	0	0	0	0	0	0	603	903	0
8797	9	0	0	0	0	0	0	200	300	0	0	0	0	0	0	0	200	903	0	0	0	0	0	0	0	603	903	0
8798	0	0	0	0	0	0	0	200	300	0	0	0	0	0	0	0	200	903	0	0	0	0	0	0	0	603	903	0
8798	1	0	0	0	0	0	0	200	300	0	0	0	0	0	0	0	200	903	0	0	0	0	0	0	0	603	903	0
8798	2	0	0	0	0	0	0	200	300	0	0	0	0	0	0	0	200	903	0	0	0	0	0	0	0	603	903	0
8798	3	0	0	0	0	0	0	200	300	0	0	0	0	0	0	0	200	903	0	0	0	0	0	0	0	603	903	0
8798	4	0	0	0	0	0	0	200	300	0	0	0	0	0	0	0	200	903	0	0	0	0	0	0	0	603	903	0
8798	5	0	0	0	0	0	0	200	300	0	0	0	0	0	0	0	200	903	0	0	0	0	0	0	0	603	903	0
8798	6	0	0	0	0	0	0	200	300	0	0	0	0	0	0	0	200	903	0	0	0	0	0	0	0	603	903	0
8798	7	0	0	0	0	0	0	200	300	0	0	0	0	0	0	0	200	903	0	0	0	0	0	0	0	603	903	0
8798	8	0	0	0	0	0	0	200	300	0	0	0	0	0	0	0	200	903	0	0	0	0	0	0	0	603	903	0
8798	9	0	0	0	0	0	0	200	300	0	0	0	0	0	0	0	200	903	0	0	0	0	0	0	0	603	903	0
8799	0	0	0	0	0	0	0	200	300	0	0	0	0	0	0	0	200	903	0	0	0	0	0	0	0	603	903	0
8799	1	0	0	0	0	0	0	200	300	0	0	0	0	0	0	0	200	903	0	0	0	0	0	0	0	603	903	0
8799	2	0	0	0	0	0	0	200	300	0	0	0	0	0	0	0	200	903	0	0	0	0	0	0	0	603	903	0
8799	3	0	0	0	0	0	0	200	300	0	0	0	0	0	0	0	200	903	0	0	0	0	0	0	0	603	903	0
8799	4	0	0	0	0	0	0	200	300	0	0	0	0	0	0	0	200	903	0	0	0	0	0	0	0	603	903	0
8799	5	0	0	0	0	0	0	200	300	0	0	0	0	0	0	0	200	903	0	0	0	0	0	0	0	603	903	0
8799	6	0	0	0	0	0	0	200	300	0	0	0	0	0	0	0	200	903	0	0	0	0	0	0	0	603	903	0
8799	7	0	0	0	0	0	0	200	300	0	0	0	0	0	0	0	200	903	0	0	0	0	0	0	0	603	903	0
8799	8	0	0	0	0	0	0	200	300	0	0	0	0	0	0	0	200	903	0	0	0	0	0	0	0	603	903	0
8799	9	0	0	0	0	0	0	200	300	0	0	0	0	0	0	0	200	903	0	0	0	0	0	0	0	603	903	0
8800	0	0	0	0	0	0	0	200	300	0	0	0	0	0	0	0	200	903	0	0	0	0	0	0	0	603	903	0
8800	1	0	0	0	0	0	0	200	300	0	0	0	0	0	0	0	200	903	0	0	0	0	0	0	0	603	903	0
8800	2	0	0	0	0	0	0	200	300	0	0	0	0	0	0	0	200	903	0	0	0	0	0	0	0	603	903	0
8800	3	0	0	0	0	0	0	200	300	0	0	0	0	0	0	0	200	903	0	0	0	0	0	0	0	603	903	0
8800	4	0	0	0	0	0	0	200	300	0	0	0	0	0	0	0	200	903	0	0	0	0	0	0	0	603	903	0
8800	5	0	0	0	0	0	0	200	300	0	0	0	0	0	0	0	200	903	0	0	0	0	0	0	0	603	903	0
8800	6	0	0	0	0	0	0	200	300	0	0	0	0	0	0	0	200	903	0	0	0	0	0	0	0	603	903	0
8800	7	0	0	0	0	0	0	200	300	0	0	0	0	0	0	0	200	903	0	0	0	0	0	0	0	603	903	0
8800	8	0	0	0	0	0	0	200	300	0	0	0	0	0	0	0	200	903	0	0	0	0	0	0	0	603	903	0
8800	9	0	0	0	0	0	0	200	300	0	0	0	0	0	0	0	200	903	0	0	0	0	0	0	0	603	903	0
8801	0	0	0	0	0	0	0	200	300	0	0	0	0	0	0	0	200	903	0	0	0	0	0	0	0	603	903	0
8801	1	0	0	0	0	0	0	200	300	0	0	0	0	0	0	0	200	903	0	0	0	0	0	0	0	603	903	0
8801	2	0	0	0	0	0	0	200	300	0	0	0	0	0	0	0	200	903	0	0	0	0	0	0	0	603	903	0
8801	3	0	0	0	0	0	0	200	300	0	0	0	0	0	0	0	200	903	0	0	0	0	0	0	0	603	903	0
8801	4	0	0	0	0	0	0	200	300	0	0	0	0	0	0	0	200	903	0	0	0	0	0	0	0	603	903	0
8801	5	0	0	0	0	0	0	200	300	0	0	0	0	0	0	0	200	903	0	0	0	0	0	0	0	603	903	0
8801	6	0	0	0	0	0	0	200	300	0	0	0	0	0	0	0	200	903	0	0	0	0	0	0	0	603	903	0
8801	7	0	0	0	0	0	0	200	300	0	0	0	0	0	0	0	200	903	0	0	0	0	0	0	0	603	903	0
8801	8	0	0	0	0	0	0	200	300	0	0	0	0	0	0	0	200	903	0	0	0	0	0	0	0	603	903	0
8801	9	0	0	0	0	0	0	200	300	0	0	0	0	0	0	0	200	903	0	0	0	0	0	0	0	603	903	0
8802	0	0	0	0	0	0	0	200	300	0	0	0	0	0	0	0	200	903	0	0	0	0	0	0	0	603	903	0
8802	1	0	0	0	0	0	0	200	300	0	0	0	0	0	0	0	200	903	0	0	0	0	0	0	0	603	903	0
8802	2	0	0	0	0	0	0	200	300	0	0	0	0	0	0	0	200	903	0	0	0	0	0	0	0	603	903	0
8802	3	0	0	0	0	0	0	200	300	0	0	0	0	0	0	0	200	903	0	0	0	0	0	0	0	603	903	0
8802	4	0	0	0	0	0	0	200	300	0	0	0	0	0	0	0	200	903	0	0	0	0	0	0	0	603	903	0
8802	5	0	0	0	0	0	0	200	300	0	0	0	0	0	0	0	200	903	0	0	0	0	0	0	0	603	903	0
8802	6	0	0	0	0	0	0	200	300	0	0	0	0	0	0	0	200	903	0	0	0	0	0	0	0	603	903	0
8802	7	0	0	0	0	0	0	200	300	0	0	0	0	0	0	0	200	903	0	0	0	0	0	0	0	603	903	0
8802	8	0	0	0	0	0	0	200	300	0	0	0	0	0	0	0	200	903	0	0	0	0	0	0	0	603	903	0
8802	9	0	0	0	0	0	0	200	300	0	0	0	0	0	0	0	200	903	0	0	0	0	0	0	0	603	903	0
8803	0	0	0	0	0	0	0	200	300	0	0	0	0	0	0	0	200	903	0	0	0	0	0	0	0	603	903	0
8803	1	0	0	0	0	0	0	200	300	0	0	0	0	0	0	0	200	903	0	0	0	0	0	0	0	603	903	0
8803	2	0	0	0	0	0	0	200	300	0	0	0	0	0	0	0	200	903	0	0	0	0	0	0	0	603	903	0
8803	3	0	0	0	0	0	0	200	300	0	0	0	0	0	0	0	200	903	0	0	0	0	0	0	0	603	903	0
8803	4	0	0	0	0	0	0	200	300	0	0	0	0	0	0	0	200	903	0	0	0	0	0	0	0	603	903	0
8803	5	0	0	0	0	0	0	200	300	0	0	0	0	0	0	0	200	903	0	0	0	0	0	0	0	603	903	0
8803	6	0	0	0	0	0	0	200	300	0	0	0	0	0	0	0	200	903	0	0	0	0	0	0	0	603	903	0
8803	7	0	0	0	0	0	0	200	300	0	0	0	0	0	0	0	200	903	0	0	0	0	0	0	0	603	903	0
8803	8	0	0	0	0	0	0	200	300	0	0	0	0	0	0	0	200	903	0	0	0	0	0	0	0	603	903	0
8803	9	0	0	0	0	0	0	200	300	0	0	0	0	0	0	0	200	903	0	0	0	0	0	0	0	603	903	0
8804	0	0	0	0	0	0	0	200	300	0	0	0	0	0	0	0	200	903	0	0	0	0	0	0	0	603	903	0
8804	1	0	0	0	0	0	0	200	300	0	0	0	0	0	0	0	200	903	0	0	0	0	0	0	0	603	903	0
8804	2	0	0	0	0	0	0	200	300	0	0	0	0	0	0	0	200	903	0	0	0	0	0	0	0	603	903	0
8804	3	0	0	0	0	0	0	200	300	0	0	0	0	0	0	0	200	903	0	0	0	0	0	0	0	603	903	0
8804	4	0	0	0	0	0	0	200	300	0	0	0	0	0	0	0	200	903	0	0	0	0	0	0	0	603	903	0
8804	5	0	0	0	0	0	0	200	300	0	0	0	0	0	0	0	200	903	0	0	0	0	0	0	0	603	903	0
8804	6	0	0	0	0	0	0	200	300	0	0	0	0	0	0	0	200	903	0	0	0	0	0	0	0	603	903	0
8804	7	0	0	0	0	0	0	200	300	0	0	0	0	0	0	0	200	903	0	0	0	0	0	0	0	603	903	0
8804	8	0	0	0	0	0	0	200	300	0	0	0	0	0	0	0	200	903	0	0	0	0	0	0	0	603	903	0
8804	9	0	0	0	0	0	0	200	300	0	0	0	0	0	0	0	200	903	0	0	0	0	0	0	0	603	903	0
8805	0	0	0	0	0	0	0	200	300	0	0	0	0	0	0	0	200	903	0	0	0	0	0	0	0	603	903	0
8805	1	0	0	0	0	0	0	200	300	0	0	0	0	0	0	0	200	903	0	0	0	0	0	0	0	603	903	0
8805	2	0	0	0	0	0	0	200	300	0	0	0	0	0	0	0	200	903	0	0	0	0	0	0	0	603	903	0
8805	3	0	0	0	0	0	0	200	300	0	0	0	0	0	0	0	200	903	0	0	0	0	0	0	0	603	903	0
8805	4	0	0	0	0	0	0	200	300	0	0	0	0	0	0	0	200	903	0	0	0	0	0	0	0	603	903	0
8805	5	0	0	0	0	0	0	200	300	0	0	0	0	0	0	0	200	903	0	0	0	0	0	0	0	603	903	0
8805	6	0	0	0	0	0	0	200	300	0	0	0	0	0	0	0	200	903	0	0	0	0	0	0	0	603	903	0
8805	7	0	0	0	0	0	0	200	300	0	0	0	0	0	0	0	200	903	0	0	0	0	0	0	0	603	903	0
8805	8	0	0	0	0	0	0	200	300	0	0	0	0	0	0	0	200	903	0	0	0	0	0	0	0	603	903	0
8805	9	0	0	0	0	0	0	200	300	0	0	0	0	0	0	0	200	903	0	0	0	0	0	0	0	603	903	0
8806	0	0	0	0	0	0	0	200	300	0	0	0	0	0	0	0	200	903	0	0	0	0	0	0	0	603	903	0
8806	1	0	0	0	0	0	0	200	300	0	0	0	0	0	0	0	200	903	0	0	0	0	0	0	0	603	903	0
8806	2	0	0	0	0	0	0	200	300	0	0	0	0	0	0	0	200	903	0	0	0	0	0	0	0	603	903	0
8806	3	0	0	0	0	0	0	200	300	0	0	0	0	0	0	0	200	903	0	0	0	0	0	0	0	603	903	0
8806	4	0	0	0	0	0	0	200	300	0	0	0	0	0	0	0	200	903	0	0	0	0	0	0	0	603	903	0
8806	5	0	0	0	0	0	0	200	300	0	0	0	0	0	0	0	200	903	0	0	0	0	0	0	0	603	903	0
8806	6	0	0	0	0	0	0	200	300	0	0	0	0	0	0	0	200	903	0	0	0	0	0	0	0	603	903	0
8806	7	0	0	0	0	0	0	200	300	0	0	0	0	0	0	0	200	903	0	0	0	0	0	0	0	603	903	0
8806	8	0	0	0	0	0	0	200	300	0	0	0	0	0	0	0	200	903	0	0	0	0	0	0	0	603	903	0
8806	9	0	0	0	0	0	0	200	300	0	0	0	0	0	0	0	200	903	0	0	0	0	0	0	0	603	903	0
8807	0	0	0	0	0	0	0	200	300	0	0	0	0	0	0	0	200	903	0	0	0	0	0	0	0	603	903	0
8807	1	0	0	0	0	0	0	200	300	0	0	0	0	0	0	0	200	903	0	0	0	0	0	0	0	603	903	0
8807	2	0	0	0	0	0	0	200	300	0	0	0	0	0	0	0	200	903	0	0	0	0	0	0	0	603	903	0
8807	3	0	0	0	0	0	0	200	300	0	0	0	0	0	0	0	200	903	0	0	0	0	0	0	0	603	903	0
8807	4	0	0	0	0	0	0	200	300	0	0	0	0	0	0	0	200	903	0	0	0	0	0	0	0	603	903	0
8807	5	0	0	0	0	0	0	200	300	0	0	0	0	0	0	0	200	903	0	0	0	0	0	0	0	603	903	0
8807	6	0	0	0	0	0	0	200	300	0	0	0	0	0	0	0	200	903	0	0	0	0	0	0	0	603	903	0
8807	7	0	0	0	0	0	0	200	300	0	0	0	0	0	0	0	200	903	0	0	0	0	0	0	0	603	903	0
8807	8	0	0	0	0	0	0	200	300	0	0	0	0	0	0	0	200	903	0	0	0	0	0	0	0	603	903	0
8807	9	0	0	0	0	0	0	200	300	0	0	0	0	0	0	0	200	903	0	0	0	0	0	0	0	603	903	0
8808	0	0	0	0	0	0	0	200	300	0	0	0	0	0	0	0	200	903	0	0	0	0	0	0	0	603	903	0
8808	1	0	0	0	0	0	0	200	300	0	0	0	0	0	0	0	200	903	0	0	0	0	0	0	0	603	903	0
8808	2	0	0	0	0	0	0	200	300	0	0	0	0	0	0	0	200	903	0	0	0	0	0	0	0	603	903	0
8808	3	0	0	0	0	0	0	200	300	0	0	0	0	0	0	0	200	903	0	0	0	0	0	0	0	603	903	0
8808	4	0	0	0	0	0	0	200	300	0	0	0	0	0	0	0	200	903	0	0	0	0	0	0	0	603	903	0
8808	5	0	0	0	0	0	0	200	300	0	0	0	0	0	0	0	200	903	0	0	0	0	0	0	0	603	903	0
8808	6	0	0	0	0	0	0	200	300	0	0	0	0	0	0	0	200	903	0	0	0	0	0	0	0	603	903	0
8808	7	0	0	0	0	0	0	200	300	0	0	0	0	0	0	0	200	903	0	0	0	0	0	0	0	603	903	0
8808	8	0	0	0	0	0	0	200	300	0	0	0	0	0	0	0	200	903	0	0	0	0	0	0	0	603	903	0
8808	9	0	0	0	0	0	0	200	300	0	0	0	0	0	0	0	200	903	0	0	0	0	0	0	0	603	903	0
8809	0	0	0	0	0	0	0	200	300	0	0	0	0	0	0	0	200	903	0	0	0	0	0	0	0	603	903	0
8809	1	0	0	0	0	0	0	200	300	0	0	0	0	0	0	0	200	903	0	0	0	0	0	0	0	603	903	0
8809	2	0	0	0	0	0	0	200	300	0	0	0	0	0	0	0	200	903	0	0	0	0	0	0	0	603	903	0
8809	3	0	0	0	0	0	0	200	300	0	0	0	0	0	0	0	200	903	0	0	0	0	0	0	0	603	903	0
8809	4	0	0	0	0	0	0	200	300	0	0	0	0	0	0	0	200	903	0	0	0	0	0	0	0	603	903	0
8809	5	0	0	0	0	0	0	200	300	0	0	0	0	0	0	0	200	903	0	0	0	0	0	0	0	603	903	0
8809	6	0	0	0	0	0	0	200	300	0	0	0	0	0	0	0	200	903	0	0	0	0	0	0	0	603	903	0
8809	7	0	0	0	0	0	0	200	300	0	0	0	0	0	0	0	200	903	0	0	0	0	0	0	0	603	903	0
8809	8	0	0	0	0	0	0	200	300	0	0	0	0	0	0	0	200	903	0	0	0	0	0	0	0	603	903	0
8809	9	0	0	0	0	0	0	200	300	0	0	0	0	0	0	0	200	903	0	0	0	0	0	0	0	603	903	0
8810	0	0	0	0	0	0	0	200	300	0	0	0	0	0	0	0	200	903	0	0	0	0	0	0	0	603	903	0
8810	1	0	0	0	0	0	0	200	300	0	0	0	0	0	0	0	200	903	0	0	0	0	0	0	0	603	903	0
8810	2	0	0	0	0	0	0	200	300	0	0	0	0	0	0	0	200	903	0	0	0	0	0	0	0	603	903	0
8810	3	0	0	0	0	0	0	200	300	0	0	0	0	0	0	0	200	903	0	0	0	0	0	0	0	603	903	0
8810	4	0	0	0	0	0	0	200	300	0	0	0	0	0	0	0	200	903	0	0	0	0	0	0	0	603	903	0
8810	5	0	0	0	0	0	0	200	300	0	0	0	0	0	0	0	200	903	0	0	0	0	0	0	0	603	903	0
8810	6	0	0	0	0	0	0	200	300	0	0	0	0	0	0	0	200	903	0	0	0	0	0	0	0	603	903	0
8810	7	0	0	0	0	0	0	200	300	0	0	0	0	0	0	0	200	903	0	0	0	0	0	0	0	603	903	0
8810	8	0	0	0	0	0	0	200	300	0	0	0	0	0	0	0	200	903	0	0	0	0	0	0	0	603	903	0
8810	9	0	0	0	0	0	0	200	300	0	0	0	0	0	0	0	200	903	0	0	0	0	0	0	0	603	903	0
8811	0	0	0	0	0	0	0	200	300	0	0	0	0	0	0	0	200	903	0	0	0	0	0	0	0	603	903	0
8811	1	0	0	0	0	0	0	200	300	0	0	0	0	0	0	0	200	903	0	0	0	0	0	0	0	603	903	0
8811	2	0	0	0	0	0	0	200	300	0	0	0	0	0	0	0	200	903	0	0	0	0	0	0	0	603	903	0
8811	3	0	0	0	0	0	0	200	300	0	0	0	0	0	0	0	200	903	0	0	0	0	0	0	0	603	903	0
8811	4	0	0	0	0	0	0	200	300	0	0	0	0	0	0	0	200	903	0	0	0	0	0	0	0	603	903	0
8811	5	0	0	0	0	0	0	200	300	0	0	0	0	0	0	0	200	903	0	0	0	0	0	0	0	603	903	0
8811	6	0	0	0	0	0	0	200	300	0	0	0	0	0	0	0	200	903	0	0	0	0	0	0	0	603	903	0
8811	7	0	0	0	0	0	0	200	300	0	0	0	0	0	0	0	200	903	0	0	0	0	0	0	0	603	903	0
8811	8	0	0	0	0	0	0	200	300	0	0	0	0	0	0	0	200	903	0	0	0	0	0	0	0	603	903	0
8811	9	0	0	0	0	0	0	200	300	0	0	0	0	0	0	0	200	903	0	0	0	0	0	0	0	603	903	0
8812	0	0	0	0	0	0	0	200	300	0	0	0	0	0	0	0	200	903	0	0	0	0	0	0	0	603	903	0
8812	1	0	0	0	0	0	0	200	300	0	0	0	0	0	0	0	200	903	0	0	0	0	0	0	0	603	903	0
8812	2	0	0	0	0	0	0	200	300	0	0	0	0	0	0	0	200	903	0	0	0	0	0	0	0	603	903	0
8812	3	0	0	0	0	0	0	200	300	0	0	0	0	0	0	0	200	903	0	0	0	0	0	0	0	603	903	0
8812	4	0	0	0	0	0	0	200	300	0	0	0	0	0	0	0	200	903	0	0	0	0	0	0	0	603	903	0
8812	5	0	0	0	0	0	0	200	300	0	0	0	0	0	0	0	200	903	0	0	0	0	0	0	0	603	903	0
8812	6	0	0	0	0	0	0	200	300	0	0	0	0	0	0	0	200	903	0	0	0	0	0	0	0	603	903	0
8812	7	0	0	0	0	0	0	200	300	0	0	0	0	0	0	0	200	903	0	0	0	0	0	0	0	603	903	0
8812	8	0	0	0	0	0	0	200	300	0	0	0	0	0	0	0	200	903	0	0	0	0	0	0	0	603	903	0
8812	9	0	0	0	0	0	0	200	300	0	0	0	0	0	0	0	200	903	0	0	0	0	0	0	0	603	903	0
8813	0	0	0	0	0	0	0	200	300	0	0	0	0	0	0	0	200	903	0	0	0	0	0	0	0	603	903	0
8813	1	0	0	0	0	0	0	200	300	0	0	0	0	0	0	0	200	903	0	0	0	0	0	0	0	603	903	0
8813	2	0	0	0	0	0	0	200	300	0	0	0	0	0	0	0	200	903	0	0	0	0	0	0	0	603	903	0
8813	3	0	0	0	0	0	0	200	300	0	0	0	0	0	0	0	200	903	0	0	0	0	0	0	0	603	903	0
8813	4	0	0	0	0	0	0	200	300	0	0	0	0	0	0	0	200	903	0	0	0	0	0	0	0	603	903	0
8813	5	0	0	0	0	0	0	200	300	0	0	0	0	0	0	0	200	903	0	0	0	0	0	0	0	603	903	0
8813	6	0	0	0	0	0	0	200	300	0	0	0	0	0	0	0	200	903	0	0	0	0	0	0	0	603	903	0
8813	7	0	0	0	0	0	0	200	300	0	0	0	0	0	0	0	200	903	0	0	0	0	0	0	0	603	903	0
8813	8	0	0	0	0	0	0	200	300	0	0	0	0	0	0	0	200	903	0	0	0	0	0	0	0	603	903	0
8813	9	0	0	0	0	0	0	200	300	0	0	0	0	0	0	0	200	903	0	0	0	0	0	0	0	603	903	0
8814	0	0	0	0	0	0	0	200	300	0	0	0	0	0	0	0	200	903	0	0	0	0	0	0	0	603	903	0
8814	1	0	0	0	0	0	0	200	300	0	0	0	0	0	0	0	200	903	0	0	0	0	0	0	0	603	903	0
8814	2	0	0	0	0	0	0	200	300	0	0	0	0	0	0	0	200	903	0	0	0	0	0	0	0	603	903	0
8814	3	0	0	0	0	0	0	200	300	0	0	0	0	0	0	0	200	903	0	0	0	0	0	0	0	603	903	0
8814	4	0	0	0	0	0	0	200	300	0	0	0	0	0	0	0	200	903	0	0	0	0	0	0	0	603	903	0
8814	5	0	0	0	0	0	0	200	300	0	0	0	0	0	0	0	200	903	0	0	0	0	0	0	0	603	903	0
8814	6	0	0	0	0	0	0	200	300	0	0	0	0	0	0	0	200	903	0	0	0	0	0	0	0	603	903	0
8814	7	0	0	0	0	0	0	200	300	0	0	0	0	0	0	0	200	903	0	0	0	0	0	0	0	603	903	0
8814	8	0	0	0	0	0	0	200	300	0	0	0	0	0	0	0	200	903	0	0	0	0	0	0	0	603	903	0
8814	9	0	0	0	0	0	0	200	300	0	0	0	0	0	0	0	200	903	0	0	0	0	0	0	0	603	903	0
8815	0	0	0	0	0	0	0	200	300	0	0	0	0	0	0	0	200	903	0	0	0	0	0	0	0	603	903	0
8815	1	0	0	0	0	0	0	200	300	0	0	0	0	0	0	0	200	903	0	0	0	0	0	0	0	603	903	0
8815	2	0	0	0	0	0	0	200	300	0	0	0	0	0	0	0	200	903	0	0	0	0	0	0	0	603	903	0
8815	3	0	0	0	0	0	0	200	300	0	0	0	0	0	0	0	200	903	0	0	0	0	0	0	0	603	903	0
8815	4	0	0	0	0	0	0	200	300	0	0	0	0	0	0	0	200	903	0	0	0	0	0	0	0	603	903	0
8815	5	0	0	0	0	0	0	200	300	0	0	0	0	0	0	0	200	903	0	0	0	0	0	0	0	603	903	0
8815	6	0	0	0	0	0	0	200	300	0	0	0	0	0	0	0	200	903	0	0	0	0	0	0	0	603	903	0
8815	7	0	0	0	0	0	0	200	300	0	0	0	0	0	0	0	200	903	0	0	0	0	0	0	0	603	903	0
8815	8	0	0	0	0	0	0	200	300	0	0	0	0	0	0	0	200	903	0	0	0	0	0	0	0	603	903	0
8815	9	0	0	0	0	0	0	200	300	0	0	0	0	0	0	0	200	903	0	0	0	0	0	0	0	603	903	0
8816	0	0	0	0	0	0	0	200	300	0	0	0	0	0	0	0	200	903	0	0	0	0	0	0	0	603	903	0
8816	1	0	0	0	0	0	0	200	300	0	0	0	0	0	0	0	200	903	0	0	0	0	0	0	0	603	903	0
8816	2	0	0	0	0	0	0	200	300	0	0	0	0	0	0	0	200	903	0	0	0	0	0	0	0	603	903	0
8816	3	0	0	0	0	0	0	200	300	0	0	0	0	0	0	0	200	903	0	0	0	0	0	0	0	603	903	0
8816	4	0	0	0	0	0	0	200	300	0	0	0	0	0	0	0	200	903	0	0	0	0	0	0	0	603	903	0
8816	5	0	0	0	0	0	0	200	300	0	0	0	0	0	0	0	200	903	0	0	0	0	0	0	0	603	903	0
8816	6	0	0	0	0	0	0	200	300	0	0	0	0	0	0	0	200	903	0	0	0	0	0	0	0	603	903	0
8816	7	0	0	0	0	0	0	200	300	0	0	0	0	0	0	0	200	903	0	0	0	0	0	0	0	603	903	0
8816	8	0	0	0	0	0	0	200	300	0	0	0	0	0	0	0	200	903	0	0	0	0	0	0	0	603	903	0
8816	9	0	0	0	0	0	0	200	300	0	0	0	0	0	0	0	200	903	0	0	0	0	0	0	0	603	903	0
8817	0	0	0	0	0	0	0	200	300	0	0	0	0	0	0	0	200	903	0	0	0	0	0	0	0	603	903	0
8817	1	0	0	0	0	0	0	200	300	0	0	0	0	0	0	0	200	903	0	0	0	0	0	0	0	603	903	0
8817	2	0	0	0	0	0	0	200	300	0	0	0	0	0	0	0	200	903	0	0	0	0	0	0	0	603	903	0
8817	3	0	0	0	0	0	0	200	300	0	0	0	0	0	0	0	200	903	0	0	0	0	0	0	0	603	903	0
8817	4	0	0	0	0	0	0	200	300	0	0	0	0	0	0	0	200	903	0	0	0	0	0	0	0	603	903	0
8817	5	0	0	0	0	0	0	200	300	0	0	0	0	0	0	0	200	903	0	0	0	0	0	0	0	603	903	0
8817	6	0	0	0	0	0	0	200	300	0	0	0	0	0	0	0	200	903	0	0	0	0	0	0	0	603	903	0
8817	7	0	0	0	0	0	0	200	300	0	0	0	0	0	0	0	200	903	0	0	0	0	0	0	0	603	903	0
8817	8	0	0	0	0	0	0	200	300	0	0	0	0	0	0	0	200	903	0	0	0	0	0	0	0	603	903	0
8817	9	0	0	0	0	0	0	200	300	0	0	0	0	0	0	0	200	903	0	0	0	0	0	0	0	603	903	0
8818	0	0	0	0	0	0	0	200	300	0	0	0	0	0	0	0	200	903	0	0	0	0	0	0	0	603	903	0
8818	1	0	0	0	0	0	0	200	300	0	0	0	0	0	0	0	200	903	0	0	0	0	0	0	0	603	903	0
8818	2	0	0	0	0	0	0	200	300	0	0	0	0	0	0	0	200	903	0	0	0	0	0	0	0	603	903	0
8818	3	0	0	0	0	0	0	200	300	0	0	0	0	0	0	0	200	903	0	0	0	0	0	0	0	603	903	0
8818	4	0	0	0	0	0	0	200	300	0	0	0	0	0	0	0	200	903	0	0	0	0	0	0	0	603	903	0
8818	5	0	0	0	0	0	0	200	300	0	0	0	0	0	0	0	200	903	0	0	0	0	0	0	0	603	903	0
8818	6	0	0	0	0	0	0	200	300	0	0	0	0	0	0	0	200	903	0	0	0	0	0	0	0	603	903	0
8818	7	0	0	0	0	0	0	200	300	0	0	0	0	0	0	0	200	903	0	0	0	0	0	0	0	603	903	0
8818	8	0	0	0	0	0	0	200	300	0	0	0	0	0	0	0	200	903	0	0	0	0	0	0	0	603	903	0
8818	9	0	0	0	0	0	0	200	300	0	0	0	0	0	0	0	200	903	0	0	0	0	0	0	0	603	903	0
8819	0	0	0	0	0	0	0	200	300	0	0	0	0	0	0	0	200	903	0	0	0	0	0	0	0	603	903	0
8819	1	0	0	0	0	0	0	200	300	0	0	0	0	0	0	0	200	903	0	0	0	0	0	0	0	603	903	0
8819	2	0	0	0	0	0	0	200	300	0	0	0	0	0	0	0	200	903	0	0	0	0	0	0	0	603	903	0
8819	3	0	0	0	0	0	0	200	300	0	0	0	0	0	0	0	200	903	0	0	0	0	0	0	0	603	903	0
8819	4	0	0	0	0	0	0	200	300	0	0	0	0	0	0	0	200	903	0	0	0	0	0	0	0	603	903	0
8819	5	0	0	0	0	0	0	200	300	0	0	0	0	0	0	0	200	903	0	0	0	0	0	0	0	603	903	0
8819	6	0	0	0	0	0	0	200	300	0	0	0	0	0	0	0	200	903	0	0	0	0	0	0	0	603	903	0
8819	7	0	0	0	0	0	0	200	300	0	0	0	0	0	0	0	200	903	0	0	0	0	0	0	0	603	903	0
8819	8	0	0	0	0	0	0	200	300	0	0	0	0	0	0	0	200	903	0	0	0	0	0	0	0	603	903	0
8819	9	0	0	0	0	0	0	200	300	0	0	0	0	0	0	0	200	903	0	0	0	0	0	0	0	603	903	0
8820	0	0	0	0	0	0	0	200	300	0	0	0	0	0	0	0	200	903	0	0	0	0	0	0	0	603	903	0
8820	1	0	0	0	0	0	0	200	300	0	0	0	0	0	0	0	200	903	0	0	0	0	0	0	0	603	903	0
8820	2	0	0	0	0	0	0	200	300	0	0	0	0	0	0	0	200	903	0	0	0	0	0	0	0	603	903	0
8820	3	0	0	0	0	0	0	200	300	0	0	0	0	0	0	0	200	903	0	0	0	0	0	0	0	603	903	0
8820	4	0	0	0	0	0	0	200	300	0	0	0	0	0	0	0	200	903	0	0	0	0	0	0	0	603	903	0
8820	5	0	0	0	0	0	0	200	300	0	0	0	0	0	0	0	200	903	0	0	0	0	0	0	0	603	903	0
8820	6	0	0	0	0	0	0	200	300	0	0	0	0	0	0	0	200	903	0	0	0	0	0	0	0	603	903	0
8820	7	0	0	0	0	0	0	200	300	0	0	0	0	0	0	0	200	903	0	0	0	0	0	0	0	603	903	0
8820	8	0	0	0	0	0	0	200	300	0	0	0	0	0	0	0	200	903	0	0	0	0	0	0	0	603	903	0
8820	9	0	0	0	0	0	0	200	300	0	0	0	0	0	0	0	200	903	0	0	0	0	0	0	0	603	903	0
8821	0	0	0	0	0	0	0	200	300	0	0	0	0	0	0	0	200	903	0	0	0	0	0	0	0	603	903	0
8821	1	0	0	0	0	0	0	200	300	0	0	0	0	0	0	0	200	903	0	0	0	0	0	0	0	603	903	0
8821	2	0	0	0	0	0	0	200	300	0	0	0	0	0	0	0	200	903	0	0	0	0	0	0	0	603	903	0
8821	3	0	0	0	0	0	0	200	300	0	0	0	0	0	0	0	200	903	0	0	0	0	0	0	0	603	903	0
8821	4	0	0	0	0	0	0	200	300	0	0	0	0	0	0	0	200	903	0	0	0	0	0	0	0	603	903	0
8821	5	0	0	0	0	0	0	200	300	0	0	0	0	0	0	0	200	903	0	0	0	0	0	0	0	603	903	0
8821	6	0	0	0	0	0	0	200	300	0	0	0	0	0	0	0	200	903	0	0	0	0	0	0	0	603	903	0
8821	7	0	0	0	0	0	0	200	300	0	0	0	0	0	0	0	200	903	0	0	0	0	0	0	0	603	903	0
8821	8	0	0	0	0	0	0	200	300	0	0	0	0	0	0	0	200	903	0	0	0	0	0	0	0	603	903	0
8821	9	0	0	0	0	0	0	200	300	0	0	0	0	0	0	0	200	903	0	0	0	0	0	0	0	603	903	0
8822	0	0	0	0	0	0	0	200	300	0	0	0	0	0	0	0	200	903	0	0	0	0	0	0	0	603	903	0
8822	1	0	0	0	0	0	0	200	300	0	0	0	0	0	0	0	200	903	0	0	0	0	0	0	0	603	903	0
8822	2	0	0	0	0	0	0	200	300	0	0	0	0	0	0	0	200	903	0	0	0	0	0	0	0	603	903	0
8822	3	0	0	0	0	0	0	200	300	0	0	0	0	0	0	0	200	903	0	0	0	0	0	0	0	603	903	0
8822	4	0	0	0	0	0	0	200	300	0	0	0	0	0	0	0	200	903	0	0	0	0	0	0	0	603	903	0
8822	5	0	0	0	0	0	0	200	300	0	0	0	0	0	0	0	200	903	0	0	0	0	0	0	0	603	903	0
8822	6	0	0	0	0	0	0	200	300	0	0	0	0	0	0	0	200	903	0	0	0	0	0	0	0	603	903	0
8822	7	0	0	0	0	0	0	200	300	0	0	0	0	0	0	0	200	903	0	0	0	0	0	0	0	603	903	0
8822	8	0	0	0	0	0	0	200	300	0	0	0	0	0	0	0	200	903	0	0	0	0	0	0	0	603	903	0
8822	9	0	0	0	0	0	0	200	300	0	0	0	0	0	0	0	200	903	0	0	0	0	0	0	0	603	903	0
8823	0	0	0	0	0	0	0	200	300	0	0	0	0	0	0	0	200	903	0	0	0	0	0	0	0	603	903	0
8823	1	0	0	0	0	0	0	200	300	0	0	0	0	0	0	0	200	903	0	0	0	0	0	0	0	603	903	0
8823	2	0	0	0	0	0	0	200	300	0	0	0	0	0	0	0	200	903	0	0	0	0	0	0	0	603	903	0
8823	3	0	0	0	0	0	0	200	300	0	0	0	0	0	0	0	200	903	0	0	0	0	0	0	0	603	903	0
8823	4	0	0	0	0	0	0	200	300	0	0	0	0	0	0	0	200	903	0	0	0	0	0	0	0	603	903	0
8823	5	0	0	0	0	0	0	200	300	0	0	0	0	0	0	0	200	903	0	0	0	0	0	0	0	603	903	0
8823	6	0	0	0	0	0	0	200	300	0	0	0	0	0	0	0	200	903	0	0	0	0	0	0	0	603	903	0
8823	7	0	0	0	0	0	0	200	300	0	0	0	0	0	0	0	200	903	0	0	0	0	0	0	0	603	903	0
8823	8	0	0	0	0	0	0	200	300	0	0	0	0	0	0	0	200	903	0	0	0	0	0	0	0	603	903	0
8823	9	0	0	0	0	0	0	200	300	0	0	0	0	0	0	0	200	903	0	0	0	0	0	0	0	603	903	0
8824	0	0	0	0	0	0	0	200	300	0	0	0	0	0	0	0	200	903	0	0	0	0	0	0	0	603	903	0
8824	1	0	0	0	0	0	0	200	300	0	0	0	0	0	0	0	200	903	0	0	0	0	0	0	0	603	903	0
8824	2	0	0	0	0	0	0	200	300	0	0	0	0	0	0	0	200	903	0	0	0	0	0	0	0	603	903	0
8824	3	0	0	0	0	0	0	200	300	0	0	0	0	0	0	0	200	903	0	0	0	0	0	0	0	603	903	0
8824	4	0	0	0	0	0	0	200	300	0	0	0	0	0	0	0	200	903	0	0	0	0	0	0	0	603	903	0
8824	5	0	0	0	0	0	0	200	300	0	0	0	0	0	0	0	200	903	0	0	0	0	0	0	0	603	903	0
8824	6	0	0	0	0	0	0	200	300	0	0	0	0	0	0	0	200	903	0	0	0	0	0	0	0	603	903	0
8824	7	0	0	0	0	0	0	200	300	0	0	0	0	0	0	0	200	903	0	0	0	0	0	0	0	603	903	0
8824	8	0	0	0	0	0	0	200	300	0	0	0	0	0	0	0	200	903	0	0	0	0	0	0	0	603	903	0
8824	9	0	0	0	0	0	0	200	300	0	0	0	0	0	0	0	200	903	0	0	0	0	0	0	0	603	903	0
8825	0	0	0	0	0	0	0	200	300	0	0	0	0	0	0	0	200	903	0	0	0	0	0	0	0	603	903	0
8825	1	0	0	0	0	0	0	200	300	0	0	0	0	0	0	0	200	903	0	0	0	0	0	0	0	603	903	0
8825	2	0	0	0	0	0	0	200	300	0	0	0	0	0	0	0	200	903	0	0	0	0	0	0	0	603	903	0
8825	3	0	0	0	0	0	0	200	300	0	0	0	0	0	0	0	200	903	0	0	0	0	0	0	0	603	903	0
8825	4	0	0	0	0	0	0	200	300	0	0	0	0	0	0	0	200	903	0	0	0	0	0	0	0	603	903	0
8825	5	0	0	0	0	0	0	200	300	0	0	0	0	0	0	0	200	903	0	0	0	0	0	0	0	603	903	0
8825	6	0	0	0	0	0	0	200	300	0	0	0	0	0	0	0	200	903	0	0	0	0	0	0	0	603	903	0
8825	7	0	0	0	0	0	0	200	300	0	0	0	0	0	0	0	200	903	0	0	0	0	0	0	0	603	903	0
8825	8	0	0	0	0	0	0	200	300	0	0	0	0	0	0	0	200	903	0	0	0	0	0	0	0	603	903	0
8825	9	0	0	0	0	0	0	200	300	0	0	0	0	0	0	0	200	903	0	0	0	0	0	0	0	603	903	0
8826	0	0	0	0	0	0	0	200	300	0	0	0	0	0	0	0	200	903	0	0	0	0	0	0	0	603	903	0
8826	1	0	0	0	0	0	0	200	300	0	0	0	0	0	0	0	200	903	0	0	0	0	0	0	0	603	903	0
8826	2	0	0	0	0	0	0	200	300	0	0	0	0	0	0	0	200	903	0	0	0	0	0	0	0	603	903	0
8826	3	0	0	0	0	0	0	200	300	0	0	0	0	0	0	0	200	903	0	0	0	0	0	0	0	603	903	0
8826	4	0	0	0	0	0	0	200	300	0	0	0	0	0	0	0	200	903	0	0	0	0	0	0	0	603	903	0
8826	5	0	0	0	0	0	0	200	300	0	0	0	0	0	0	0	200	903	0	0	0	0	0	0	0	603	903	0
8826	6	0	0	0	0	0	0	200	300	0	0	0	0	0	0	0	200	903	0	0	0	0	0	0	0	603	903	0
8826	7	0	0	0	0	0	0	200	300	0	0	0	0	0	0	0	200	903	0	0	0	0	0	0	0	603	903	0
8826	8	0	0	0	0	0	0	200	300	0	0	0	0	0	0	0	200	903	0	0	0	0	0	0	0	603	903	0
8826	9	0	0	0	0	0	0	200	300	0	0	0	0	0	0	0	200	903	0	0	0	0	0	0	0	603	903	0
8827	0	0	0	0	0	0	0	200	300	0	0	0	0	0	0	0	200	903	0	0	0	0	0	0	0	603	903	0
8827	1	0	0	0	0	0	0	200	300	0	0	0	0	0	0	0	200	903	0	0	0	0	0	0	0	603	903	0
8827	2	0	0	0	0	0	0	200	300	0	0	0	0	0	0	0	200	903	0	0	0	0	0	0	0	603	903	0
8827	3	0	0	0	0	0	0	200	300	0	0	0	0	0	0	0	200	903	0	0	0	0	0	0	0	603	903	0
8827	4	0	0	0	0	0	0	200	300	0	0	0	0	0	0	0	200	903	0	0	0	0	0	0	0	603	903	0
8827	5	0	0	0	0	0	0	200	300	0	0	0	0	0	0	0	200	903	0	0	0	0	0	0	0	603	903	0
8827	6	0	0	0	0	0	0	200	300	0	0	0	0	0	0	0	200	903	0	0	0	0	0	0	0	603	903	0
8827	7	0	0	0	0	0	0	200	300	0	0	0	0	0	0	0	200	903	0	0	0	0	0	0	0	603	903	0
8827	8	0	0	0	0	0	0	200	300	0	0	0	0	0	0	0	200	903	0	0	0	0	0	0	0	603	903	0
8827	9	0	0	0	0	0	0	200	300	0	0	0	0	0	0	0	200	903	0	0	0	0	0	0	0	603	903	0
8828	0	0	0	0	0	0	0	200	300	0	0	0	0	0	0	0	200	903	0	0	0	0	0	0	0	603	903	0
8828	1	0	0	0	0	0	0	200	300	0	0	0	0	0	0	0	200	903	0	0	0	0	0	0	0	603	903	0
8828	2	0	0	0	0	0	0	200	300	0	0	0	0	0	0	0	200	903	0	0	0	0	0	0	0	603	903	0
8828	3	0	0	0	0	0	0	200	300	0	0	0	0	0	0	0	200	903	0	0	0	0	0	0	0	603	903	0
8828	4	0	0	0	0	0	0	200	300	0	0	0	0	0	0	0	200	903	0	0	0	0	0	0	0	603	903	0
8828	5	0	0	0	0	0	0	200	300	0	0	0	0	0	0	0	200	903	0	0	0	0	0	0	0	603	903	0
8828	6	0	0	0	0	0	0	200	300	0	0	0	0	0	0	0	200	903	0	0	0	0	0	0	0	603	903	0
8828	7	0	0	0	0	0	0	200	300	0	0	0	0	0	0	0	200	903	0	0	0	0	0	0	0	603	903	0
8828	8	0	0	0	0	0	0	200	300	0	0	0	0	0	0	0	200	903	0	0	0	0	0	0	0	603	903	0
8828	9	0	0	0	0	0	0	200	300	0	0	0	0	0	0	0	200	903	0	0	0	0	0	0	0	603	903	0
8829	0	0	0	0	0	0	0	200	300	0	0	0	0	0	0	0	200	903	0	0	0	0	0	0	0	603	903	0
8829	1	0	0	0	0	0	0	200	300	0	0	0	0	0	0	0	200	903	0	0	0	0	0	0	0	603	903	0
8829	2	0	0	0	0	0	0	200	300	0	0	0	0	0	0	0	200	903	0	0	0	0	0	0	0	603	903	0
8829	3	0	0	0	0	0	0	200	300	0	0	0	0	0	0	0	200	903	0	0	0	0	0	0	0	603	903	0
8829	4	0	0	0	0	0	0	200	300	0	0	0	0	0	0	0	200	903	0	0	0	0	0	0	0	603	903	0
8829	5	0	0	0	0	0	0	200	300	0	0	0	0	0	0	0	200	903	0	0	0	0	0	0	0	603	903	0
8829	6	0	0	0	0	0	0	200	300	0	0	0	0	0	0	0	200	903	0	0	0	0	0	0	0	603	903	0
8829	7	0	0	0	0	0	0	200	300	0	0	0	0	0	0	0	200	903	0	0	0	0	0	0	0	603	903	0
8829	8	0	0	0	0	0	0	200	300	0	0	0	0	0	0	0	200	903	0	0	0	0	0	0	0	603	903	0
8829	9	0	0	0	0	0	0	200	300	0	0	0	0	0	0	0	200	903	0	0	0	0	0	0	0	603	903	0
8830	0	0	0	0	0	0	0	200	300	0	0	0	0	0	0	0	200	903	0	0	0	0	0	0	0	603	903	0
8830	1	0	0	0	0	0	0	200	300	0	0	0	0	0	0	0	200	903	0	0	0	0	0	0	0	603	903	0
8830	2	0	0	0	0	0	0	200	300	0	0	0	0	0	0	0	200	903	0	0	0	0	0	0	0	603	903	0
8830	3	0	0	0	0	0	0	200	300	0	0	0	0	0	0	0	200	903	0	0	0	0	0	0	0	603	903	0
8830	4	0	0	0	0	0	0	200	300	0	0	0	0	0	0	0	200	903	0	0	0	0	0	0	0	603	903	0
8830	5	0	0	0	0	0	0	200	300	0	0	0	0	0	0	0	200	903	0	0	0	0	0	0	0	603	903	0
8830	6	0	0	0	0	0	0	200	300	0	0	0	0	0	0	0	200	903	0	0	0	0	0	0	0	603	903	0
8830	7	0	0	0	0	0	0	200	300	0	0	0	0	0	0	0	200	903	0	0	0	0	0	0	0	603	903	0
8830	8	0	0	0	0	0	0	200	300	0	0	0	0	0	0	0	200	903	0	0	0	0	0	0	0	603	903	0
8830	9	0	0	0	0	0	0	200	300	0	0	0	0	0	0	0	200	903	0	0	0	0	0	0	0	603	903	0
8831	0	0	0	0	0	0	0	200	300	0	0	0	0	0	0	0	200	903	0	0	0	0	0	0	0	603	903	0
8831	1	0	0	0	0	0	0	200	300	0	0	0	0	0	0	0	200	903	0	0	0	0	0	0	0	603	903	0
8831	2	0	0	0	0	0	0	200	300	0	0	0	0	0	0	0	200	903	0	0	0	0	0	0	0	603	903	0
8831	3	0	0	0	0	0	0	200	300	0	0	0	0	0	0	0	200	903	0	0	0	0	0	0	0	603	903	0
8831	4	0	0	0	0	0	0	200	300	0	0	0	0	0	0	0	200	903	0	0	0	0	0	0	0	603	903	0
8831	5	0	0	0	0	0	0	200	300	0	0	0	0	0	0	0	200	903	0	0	0	0	0	0	0	603	903	0
8831	6	0	0	0	0	0	0	200	300	0	0	0	0	0	0	0	200	903	0	0	0	0	0	0	0	603	903	0
8831	7	0	0	0	0	0	0	200	300	0	0	0	0	0	0	0	200	903	0	0	0	0	0	0	0	603	903	0
8831	8	0	0	0	0	0	0	200	300	0	0	0	0	0	0	0	200	903	0	0	0	0	0	0	0	603	903	0
8831	9	0	0	0	0	0	0	200	300	0	0	0	0	0	0	0	200	903	0	0	0	0	0	0	0	603	903	0
8832	0	0	0	0	0	0	0	200	300	0	0	0	0	0	0	0	200	903	0	0	0	0	0	0	0	603	903	0
8832	1	0	0	0	0	0	0	200	300	0	0	0	0	0	0	0	200	903	0	0	0	0	0	0	0	603	903	0
8832	2	0	0	0	0	0	0	200	300	0	0	0	0	0	0	0	200	903	0	0	0	0	0	0	0	603	903	0
8832	3	0	0	0	0	0	0	200	300	0	0	0	0	0	0	0	200	903	0	0	0	0	0	0	0	603	903	0
8832	4	0	0	0	0	0	0	200	300	0	0	0	0	0	0	0	200	903	0	0	0	0	0	0	0	603	903	0
8832	5	0	0	0	0	0	0	200	300	0	0	0	0	0	0	0	200	903	0	0	0	0	0	0	0	603	903	0
8832	6	0	0	0	0	0	0	200	300	0	0	0	0	0	0	0	200	903	0	0	0	0	0	0	0	603	903	0
8832	7	0	0	0	0	0	0	200	300	0	0	0	0	0	0	0	200	903	0	0	0	0	0	0	0	603	903	0
8832	8	0	0	0	0	0	0	200	300	0	0	0	0	0	0	0	200	903	0	0	0	0	0	0	0	603	903	0
8832	9	0	0	0	0	0	0	200	300	0	0	0	0	0	0	0	200	903	0	0	0	0	0	0	0	603	903	0
8833	0	0	0	0	0	0	0	200	300	0	0	0	0	0	0	0	200	903	0	0	0	0	0	0	0	603	903	0
8833	1	0	0	0	0	0	0	200	300	0	0	0	0	0	0	0	200	903	0	0	0	0	0	0	0	603	903	0
8833	2	0	0	0	0	0	0	200	300	0	0	0	0	0	0	0	200	903	0	0	0	0	0	0	0	603	903	0
8833	3	0	0	0	0	0	0	200	300	0	0	0	0	0	0	0	200	903	0	0	0	0	0	0	0	603	903	0
8833	4	0	0	0	0	0	0	200	300	0	0	0	0	0	0	0	200	903	0	0	0	0	0	0	0	603	903	0
8833	5	0	0	0	0	0	0	200	300	0	0	0	0	0	0	0	200	903	0	0	0	0	0	0	0	603	903	0
8833	6	0	0	0	0	0	0	200	300	0	0	0	0	0	0	0	200	903	0	0	0	0	0	0	0	603	903	0
8833	7	0	0	0	0	0	0	200	300	0	0	0	0	0	0	0	200	903	0	0	0	0	0	0	0	603	903	0
8833	8	0	0	0	0	0	0	200	300	0	0	0	0	0	0	0	200	903	0	0	0	0	0	0	0	603	903	0
8833	9	0	0	0	0	0	0	200	300	0	0	0	0	0	0	0	200	903	0	0	0	0	0	0	0	603	903	0
8834	0	0	0	0	0	0	0	200	300	0	0	0	0	0	0	0	200	903	0	0	0	0	0	0	0	603	903	0
8834	1	0	0	0	0	0	0	200	300	0	0	0	0	0	0	0	200	903	0	0	0	0	0	0	0	603	903	0
8834	2	0	0	0	0	0	0	200	300	0	0	0	0	0	0	0	200	903	0	0	0	0	0	0	0	603	903	0
8834	3	0	0	0	0	0	0	200	300	0	0	0	0	0	0	0	200	903	0	0	0	0	0	0	0	603	903	0
8834	4	0	0	0	0	0	0	200	300	0	0	0	0	0	0	0	200	903	0	0	0	0	0	0	0	603	903	0
8834	5	0	0	0	0	0	0	200	300	0	0	0	0	0	0	0	200	903	0	0	0	0	0	0	0	603	903	0
8834	6	0	0	0	0	0	0	200	300	0	0	0	0	0	0	0	200	903	0	0	0	0	0	0	0	603	903	0
8834	7	0	0	0	0	0	0	200	300	0	0	0	0	0	0	0	200	903	0	0	0	0	0	0	0	603	903	0
8834	8	0	0	0	0	0	0	200	300	0	0	0	0	0	0	0	200	903	0	0	0	0	0	0	0	603	903	0
8834	9	0	0	0	0	0	0	200	300	0	0	0	0	0	0	0	200	903	0	0	0	0	0	0	0	603	903	0
8835	0	0	0	0	0	0	0	200	300	0	0	0	0	0	0	0	200	903	0	0	0	0	0	0	0	603	903	0
8835	1	0	0	0	0	0	0	200	300	0	0	0	0	0	0	0	200	903	0	0	0	0	0	0	0	603	903	0
8835	2	0	0	0	0	0	0	200	300	0	0	0	0	0	0	0	200	903	0	0	0	0	0	0	0	603	903	0
8835	3	0	0	0	0	0	0	200	300	0	0	0	0	0	0	0	200	903	0	0	0	0	0	0	0	603	903	0
8835	4	0	0	0	0	0	0	200	300	0	0	0	0	0	0	0	200	903	0	0	0	0	0	0	0	603	903	0
8835	5	0	0	0	0	0	0	200	300	0	0	0	0	0	0	0	200	903	0	0	0	0	0	0	0	603	903	0
8835	6	0	0	0	0	0	0	200	300	0	0	0	0	0	0	0	200	903	0	0	0	0	0	0	0	603	903	0
8835	7	0	0	0	0	0	0	200	300	0	0	0	0	0	0	0	200	903	0	0	0	0	0	0	0	603	903	0
8835	8	0	0	0	0	0	0	200	300	0	0	0	0	0	0	0	200	903	0	0	0	0	0	0	0	603	903	0
8835	9	0	0	0	0	0	0	200	300	0	0	0	0	0	0	0	200	903	0	0	0	0	0	0	0	603	903	0
8836	0	0	0	0	0	0	0	200	300	0	0	0	0	0	0	0	200	903	0	0	0	0	0	0	0	603	903	0
8836	1	0	0	0	0	0	0	200	300	0	0	0	0	0	0	0	200	903	0	0	0	0	0	0	0	603	903	0
8836	2	0	0	0	0	0	0	200	300	0	0	0	0	0	0	0	200	903	0	0	0	0	0	0	0	603	903	0
8836	3	0	0	0	0	0	0	200	300	0	0	0	0	0	0	0	200	903	0	0	0	0	0	0	0	603	903	0
8836	4	0	0	0	0	0	0	200	300	0	0	0	0	0	0	0	200	903	0	0	0	0	0	0	0	603	903	0
8836	5	0	0	0	0	0	0	200	300	0	0	0	0	0	0	0	200	903	0	0	0	0	0	0	0	603	903	0
8836	6	0	0	0	0	0	0	200	300	0	0	0	0	0	0	0	200	903	0	0	0	0	0	0	0	603	903	0
8836	7	0	0	0	0	0	0	200	300	0	0	0	0	0	0	0	200	903	0	0	0	0	0	0	0	603	903	0
8836	8	0	0	0	0	0	0	200	300	0	0	0	0	0	0	0	200	903	0	0	0	0	0	0	0	603	903	0
8836	9	0	0	0	0	0	0	200	300	0	0	0	0	0	0	0	200	903	0	0	0	0	0	0	0	603	903	0
8837	0	0	0	0	0	0	0	200	300	0	0	0	0	0	0	0	200	903	0	0	0	0	0	0	0	603	903	0
8837	1	0	0	0	0	0	0	200	300	0	0	0	0	0	0	0	200	903	0	0	0	0	0	0	0	603	903	0
8837	2	0	0	0	0	0	0	200	300	0	0	0	0	0	0	0	200	903	0	0	0	0	0	0	0	603	903	0
8837	3	0	0	0	0	0	0	200	300	0	0	0	0	0	0	0	200	903	0	0	0	0	0	0	0	603	903	0
8837	4	0	0	0	0	0	0	200	300	0	0	0	0	0	0	0	200	903	0	0	0	0	0	0	0	603	903	0
8837	5	0	0	0	0	0	0	200	300	0	0	0	0	0	0	0	200	903	0	0	0	0	0	0	0	603	903	0
8837	6	0	0	0	0	0	0	200	300	0	0	0	0	0	0	0	200	903	0	0	0	0	0	0	0	603	903	0
8837	7	0	0	0	0	0	0	200	300	0	0	0	0	0	0	0	200	903	0	0	0	0	0	0	0	603	903	0
8837	8	0	0	0	0	0	0	200	300	0	0	0	0	0	0	0	200	903	0	0	0	0	0	0	0	603	903	0
8837	9	0	0	0	0	0	0	200	300	0	0	0	0	0	0	0	200	903	0	0	0	0	0	0	0	603	903	0
8838	0	0	0	0	0	0	0	200	300	0	0	0	0	0	0	0	200	903	0	0	0	0	0	0	0	603	903	0
8838	1	0	0	0	0	0	0	200	300	0	0	0	0	0	0	0	200	903	0	0	0	0	0	0	0	603	903	0
8838	2	0	0	0	0	0	0	200	300	0	0	0	0	0	0	0	200	903	0	0	0	0	0	0	0	603	903	0
8838	3	0	0	0	0	0	0	200	300	0	0	0	0	0	0	0	200	903	0	0	0	0	0	0	0	603	903	0
8838	4	0	0	0	0	0	0	200	300	0	0	0	0	0	0	0	200	903	0	0	0	0	0	0	0	603	903	0
8838	5	0	0	0	0	0	0	200	300	0	0	0	0	0	0	0	200	903	0	0	0	0	0	0	0	603	903	0
8838	6	0	0	0	0	0	0	200	300	0	0	0	0	0	0	0	200	903	0	0	0	0	0	0	0	603	903	0
8838	7	0	0	0	0	0	0	200	300	0	0	0	0	0	0	0	200	903	0	0	0	0	0	0	0	603	903	0
8838	8	0	0	0	0	0	0	200	300	0	0	0	0	0	0	0	200	903	0	0	0	0	0	0	0	603	903	0
8838	9	0	0	0	0	0	0	200	300	0	0	0	0	0	0	0	200	903	0	0	0	0	0	0	0	603	903	0
8839	0	0	0	0	0	0	0	200	300	0	0	0	0	0	0	0	200	903	0	0	0	0	0	0	0	603	903	0
8839	1	0	0	0	0	0	0	200	300	0	0	0	0	0	0	0	200	903	0	0	0	0	0	0	0	603	903	0
8839	2	0	0	0	0	0	0	200	300	0	0	0	0	0	0	0	200	903	0	0	0	0	0	0	0	603	903	0
8839	3	0	0	0	0	0	0	200	300	0	0	0	0	0	0	0	200	903	0	0	0	0	0	0	0	603	903	0
8839	4	0	0	0	0	0	0	200	300	0	0	0	0	0	0	0	200	903	0	0	0	0	0	0	0	603	903	0
8839	5	0	0	0	0	0	0	200	300	0	0	0	0	0	0	0	200	903	0	0	0	0	0	0	0	603	903	0
8839	6	0	0	0	0	0	0	200	300	0	0	0	0	0	0	0	200	903	0	0	0	0	0	0	0	603	903	0
8839	7	0	0	0	0	0	0	200	300	0	0	0	0	0	0	0	200	903	0	0	0	0	0	0	0	603	903	0
8839	8	0	0	0	0	0	0	200	300	0	0	0	0	0	0	0	200	903	0	0	0	0	0	0	0	603	903	0
8839	9	0	0	0	0	0	0	200	300	0	0	0	0	0	0	0	200	903	0	0	0	0	0	0	0	603	903	0
8840	0	0	0	0	0	0	0	200	300	0	0	0	0	0	0	0	200	903	0	0	0	0	0	0	0	603	903	0
8840	1	0	0	0	0	0	0	200	300	0	0	0	0	0	0	0	200	903	0	0	0	0	0	0	0	603	903	0
8840	2	0	0	0	0	0	0	200	300	0	0	0	0	0	0	0	200	903	0	0	0	0	0	0	0	603	903	0
8840	3	0	0	0	0	0	0	200	300	0	0	0	0	0	0	0	200	903	0	0	0	0	0	0	0	603	903	0
8840	4	0	0	0	0	0	0	200	300	0	0	0	0	0	0	0	200	903	0	0	0	0	0	0	0	603	903	0
8840	5	0	0	0	0	0	0	200	300	0	0	0	0	0	0	0	200	903	0	0	0	0	0	0	0	603	903	0
8840	6	0	0	0	0	0	0	200	300	0	0	0	0	0	0	0	200	903	0	0	0	0	0	0	0	603	903	0
8840	7	0	0	0	0	0	0	200	300	0	0	0	0	0	0	0	200	903	0	0	0	0	0	0	0	603	903	0
8840	8	0	0	0	0	0	0	200	300	0	0	0	0	0	0	0	200	903	0	0	0	0	0	0	0	603	903	0
8840	9	0	0	0	0	0	0	200	300	0	0	0	0	0	0	0	200	903	0	0	0	0	0	0	0	603	903	0
8841	0	0	0	0	0	0	0	200	300	0	0	0	0	0	0	0	200	903	0	0	0	0	0	0	0	603	903	0
8841	1	0	0	0	0	0	0	200	300	0	0	0	0	0	0	0	200	903	0	0	0	0	0	0	0	603	903	0
8841	2	0	0	0	0	0	0	200	300	0	0	0	0	0	0	0	200	903	0	0	0	0	0	0	0	603	903	0
8841	3	0	0	0	0	0	0	200	300	0	0	0	0	0	0	0	200	903	0	0	0	0	0	0	0	603	903	0
8841	4	0	0	0	0	0	0	200	300	0	0	0	0	0	0	0	200	903	0	0	0	0	0	0	0	603	903	0
8841	5	0	0	0	0	0	0	200	300	0	0	0	0	0	0	0	200	903	0	0	0	0	0	0	0	603	903	0
8841	6	0	0	0	0	0	0	200	300	0	0	0	0	0	0	0	200	903	0	0	0	0	0	0	0	603	903	0
8841	7	0	0	0	0	0	0	200	300	0	0	0	0	0	0	0	200	903	0	0	0	0	0	0	0	603	903	0
8841	8	0	0	0	0	0	0	200	300	0	0	0	0	0	0	0	200	903	0	0	0	0	0	0	0	603	903	0
8841	9	0	0	0	0	0	0	200	300	0	0	0	0	0	0	0	200	903	0	0	0	0	0	0	0	603	903	0
8842	0	0	0	0	0	0	0	200	300	0	0	0	0	0	0	0	200	903	0	0	0	0	0	0	0	603	903	0
8842	1	0	0	0	0	0	0	200	300	0	0	0	0	0	0	0	200	903	0	0	0	0	0	0	0	603	903	0
8842	2	0	0	0	0	0	0	200	300	0	0	0	0	0	0	0	200	903	0	0	0	0	0	0	0	603	903	0
8842	3	0	0	0	0	0	0	200	300	0	0	0	0	0	0	0	200	903	0	0	0	0	0	0	0	603	903	0
8842	4	0	0	0	0	0	0	200	300	0	0	0	0	0	0	0	200	903	0	0	0	0	0	0	0	603	903	0
8842	5	0	0	0	0	0	0	200	300	0	0	0	0	0	0	0	200	903	0	0	0	0	0	0	0	603	903	0
8842	6	0	0	0	0	0	0	200	300	0	0	0	0	0	0	0	200	903	0	0	0	0	0	0	0	603	903	0
8842	7	0	0	0	0	0	0	200	300	0	0	0	0	0	0	0	200	903	0	0	0	0	0	0	0	603	903	0
8842	8	0	0	0	0	0	0	200	300	0	0	0	0	0	0	0	200	903	0	0	0	0	0	0	0	603	903	0
8842	9	0	0	0	0	0	0	200	300	0	0	0	0	0	0	0	200	903	0	0	0	0	0	0	0	603	903	0
8843	0	0	0	0	0	0	0	200	300	0	0	0	0	0	0	0	200	903	0	0	0	0	0	0	0	603	903	0
8843	1	0	0	0	0	0	0	200	300	0	0	0	0	0	0	0	200	903	0	0	0	0	0	0	0	603	903	0
8843	2	0	0	0	0	0	0	200	300	0	0	0	0	0	0	0	200	903	0	0	0	0	0	0	0	603	903	0
8843	3	0	0	0	0	0	0	200	300	0	0	0	0	0	0	0	200	903	0	0	0	0	0	0	0	603	903	0
8843	4	0	0	0	0	0	0	200	300	0	0	0	0	0	0	0	200	903	0	0	0	0	0	0	0	603	903	0
8843	5	0	0	0	0	0	0	200	300	0	0	0	0	0	0	0	200	903	0	0	0	0	0	0	0	603	903	0
8843	6	0	0	0	0	0	0	200	300	0	0	0	0	0	0	0	200	903	0	0	0	0	0	0	0	603	903	0
8843	7	0	0	0	0	0	0	200	300	0	0	0	0	0	0	0	200	903	0	0	0	0	0	0	0	603	903	0
8843	8	0	0	0	0	0	0	200	300	0	0	0	0	0	0	0	200	903	0	0	0	0	0	0	0	603	903	0
8843	9	0	0	0	0	0	0	200	300	0	0	0	0	0	0	0	200	903	0	0	0	0	0	0	0	603	903	0
8844	0	0	0	0	0	0	0	200	300	0	0	0	0	0	0	0	200	903	0	0	0	0	0	0	0	603	903	0
8844	1	0	0	0	0	0	0	200	300	0	0	0	0	0	0	0	200	903	0	0	0	0	0	0	0	603	903	0
8844	2	0	0	0	0	0	0	200	300	0	0	0	0	0	0	0	200	903	0	0	0	0	0	0	0	603	903	0
8844	3	0	0	0	0	0	0	200	300	0	0	0	0	0	0	0	200	903	0	0	0	0	0	0	0	603	903	0
8844	4	0	0	0	0	0	0	200	300	0	0	0	0	0	0	0	200	903	0	0	0	0	0	0	0	603	903	0
8844	5	0	0	0	0	0	0	200	300	0	0	0	0	0	0	0	200	903	0	0	0	0	0	0	0	603	903	0
8844	6	0	0	0	0	0	0	200	300	0	0	0	0	0	0	0	200	903	0	0	0	0	0	0	0	603	903	0
8844	7	0	0	0	0	0	0	200	300	0	0	0	0	0	0	0	200	903	0	0	0	0	0	0	0	603	903	0
8844	8	0	0	0	0	0	0	200	300	0	0	0	0	0	0	0	200	903	0	0	0	0	0	0	0	603	903	0
8844	9	0	0	0	0	0	0	200	300	0	0	0	0	0	0	0	200	903	0	0	0	0	0	0	0	603	903	0
8845	0	0	0	0	0	0	0	200	300	0	0	0	0	0	0	0	200	903	0	0	0	0	0	0	0	603	903	0
8845	1	0	0	0	0	0	0	200	300	0	0	0	0	0	0	0	200	903	0	0	0	0	0	0	0	603	903	0
8845	2	0	0	0	0	0	0	200	300	0	0	0	0	0	0	0	200	903	0	0	0	0	0	0	0	603	903	0
8845	3	0	0	0	0	0	0	200	300	0	0	0	0	0	0	0	200	903	0	0	0	0	0	0	0	603	903	0
8845	4	0	0	0	0	0	0	200	300	0	0	0	0	0	0	0	200	903	0	0	0	0	0	0	0	603	903	0
8845	5	0	0	0	0	0	0	200	300	0	0	0	0	0	0	0	200	903	0	0	0	0	0	0	0	603	903	0
8845	6	0	0	0	0	0	0	200	300	0	0	0	0	0	0	0	200	903	0	0	0	0	0	0	0	603	903	0
8845	7	0	0	0	0	0	0	200	300	0	0	0	0	0	0	0	200	903	0	0	0	0	0	0	0	603	903	0
8845	8	0	0	0	0	0	0	200	300	0	0	0	0	0	0	0	200	903	0	0	0	0	0	0	0	603	903	0
8845	9	0	0	0	0	0	0	200	300	0	0	0	0	0	0	0	200	903	0	0	0	0	0	0	0	603	903	0
8846	0	0	0	0	0	0	0	200	300	0	0	0	0	0	0	0	200	903	0	0	0	0	0	0	0	603	903	0
8846	1	0	0	0	0	0	0	200	300	0	0	0	0	0	0	0	200	903	0	0	0	0	0	0	0	603	903	0
8846	2	0	0	0	0	0	0	200	300	0	0	0	0	0	0	0	200	903	0	0	0	0	0	0	0	603	903	0
8846	3	0	0	0	0	0	0	200	300	0	0	0	0	0	0	0	200	903	0	0	0	0	0	0	0	603	903	0
8846	4	0	0	0	0	0	0	200	300	0	0	0	0	0	0	0	200	903	0	0	0	0	0	0	0	603	903	0
8846	5	0	0	0	0	0	0	200	300	0	0	0	0	0	0	0	200	903	0	0	0	0	0	0	0	603	903	0
8846	6	0	0	0	0	0	0	200	300	0	0	0	0	0	0	0	200	903	0	0	0	0	0	0	0	603	903	0
8846	7	0	0	0	0	0	0	200	300	0	0	0	0	0	0	0	200	903	0	0	0	0	0	0	0	603	903	0
8846	8	0	0	0	0	0	0	200	300	0	0	0	0	0	0	0	200	903	0	0	0	0	0	0	0	603	903	0
8846	9	0	0	0	0	0	0	200	300	0	0	0	0	0	0	0	200	903	0	0	0	0	0	0	0	603	903	0
8847	0	0	0	0	0	0	0	200	300	0	0	0	0	0	0	0	200	903	0	0	0	0	0	0	0	603	903	0
8847	1	0	0	0	0	0	0	200	300	0	0	0	0	0	0	0	200	903	0	0	0	0	0	0	0	603	903	0
8847	2	0	0	0	0	0	0	200	300	0	0	0	0	0	0	0	200	903	0	0	0	0	0	0	0	603	903	0
8847	3	0	0	0	0	0	0	200	300	0	0	0	0	0	0	0	200	903	0	0	0	0	0	0	0	603	903	0
8847	4	0	0	0	0	0	0	200	300	0	0	0	0	0	0	0	200	903	0	0	0	0	0	0	0	603	903	0
8847	5	0	0	0	0	0	0	200	300	0	0	0	0	0	0	0	200	903	0	0	0	0	0	0	0	603	903	0
8847	6	0	0	0	0	0	0	200	300	0	0	0	0	0	0	0	200	903	0	0	0	0	0	0	0	603	903	0
8847	7	0	0	0	0	0	0	200	300	0	0	0	0	0	0	0	200	903	0	0	0	0	0	0	0	603	903	0
8847	8	0	0	0	0	0	0	200	300	0	0	0	0	0	0	0	200	903	0	0	0	0	0	0	0	603	903	0
8847	9	0	0	0	0	0	0	200	300	0	0	0	0	0	0	0	200	903	0	0	0	0	0	0	0	603	903	0
8848	0	0	0	0	0	0	0	200	300	0	0	0	0	0	0	0	200	903	0	0	0	0	0	0	0	603	903	0
8848	1	0	0	0	0	0	0	200	300	0	0	0	0	0	0	0	200	903	0	0	0	0	0	0	0	603	903	0
8848	2	0	0	0	0	0	0	200	300	0	0	0	0	0	0	0	200	903	0	0	0	0	0	0	0	603	903	0
8848	3	0	0	0	0	0	0	200	300	0	0	0	0	0	0	0	200	903	0	0	0	0	0	0	0	603	903	0
8848	4	0	0	0	0	0	0	200	300	0	0	0	0	0	0	0	200	903	0	0	0	0	0	0	0	603	903	0
8848	5	0	0	0	0	0	0	200	300	0	0	0	0	0	0	0	200	903	0	0	0	0	0	0	0	603	903	0
8848	6	0	0	0	0	0	0	200	300	0	0	0	0	0	0	0	200	903	0	0	0	0	0	0	0	603	903	0
8848	7	0	0	0	0	0	0	200	300	0	0	0	0	0	0	0	200	903	0	0	0	0	0	0	0	603	903	0
8848	8	0	0	0	0	0	0	200	300	0	0	0	0	0	0	0	200	903	0	0	0	0	0	0	0	603	903	0
8848	9	0	0	0	0	0	0	200	300	0	0	0	0	0	0	0	200	903	0	0	0	0	0	0	0	603	903	0
8849	0	0	0	0	0	0	0	200	300	0	0	0	0	0	0	0	200	903	0	0	0	0	0	0	0	603	903	0
8849	1	0	0	0	0	0	0	200	300	0	0	0	0	0	0	0	200	903	0	0	0	0	0	0	0	603	903	0
8849	2	0	0	0	0	0	0	200	300	0	0	0	0	0	0	0	200	903	0	0	0	0	0	0	0	603	903	0
8849	3	0	0	0	0	0	0	200	300	0	0	0	0	0	0	0	200	903	0	0	0	0	0	0	0	603	903	0
8849	4	0	0	0	0	0	0	200	300	0	0	0	0	0	0	0	200	903	0	0	0	0	0	0	0	603	903	0
8849	5	0	0	0	0	0	0	200	300	0	0	0	0	0	0	0	200	903	0	0	0	0	0	0	0	603	903	0
8849	6	0	0	0	0	0	0	200	300	0	0	0	0	0	0	0	200	903	0	0	0	0	0	0	0	603	903	0
8849	7	0	0	0	0	0	0	200	300	0	0	0	0	0	0	0	200	903	0	0	0	0	0	0	0	603	903	0
8849	8	0	0	0	0	0	0	200	300	0	0	0	0	0	0	0	200	903	0	0	0	0	0	0	0	603	903	0
8849	9	0	0	0	0	0	0	200	300	0	0	0	0	0	0	0	200	903	0	0	0	0	0	0	0	603	903	0
8850	0	0	0	0	0	0	0	200	300	0	0	0	0	0	0	0	200	903	0	0	0	0	0	0	0	603	903	0
8850	1	0	0	0	0	0	0	200	300	0	0	0	0	0	0	0	200	903	0	0	0	0	0	0	0	603	903	0
8850	2	0	0	0	0	0	0	200	300	0	0	0	0	0	0	0	200	903	0	0	0	0	0	0	0	603	903	0
8850	3	0	0	0	0	0	0	200	300	0	0	0	0	0	0	0	200	903	0	0	0	0	0	0	0	603	903	0
8850	4	0	0	0	0	0	0	200	300	0	0	0	0	0	0	0	200	903	0	0	0	0	0	0	0	603	903	0
8850	5	0	0	0	0	0	0	200	300	0	0	0	0	0	0	0	200	903	0	0	0	0	0	0	0	603	903	0
8850	6	0	0	0	0	0	0	200	300	0	0	0	0	0	0	0	200	903	0	0	0	0	0	0	0	603	903	0
8850	7	0	0	0	0	0	0	200	300	0	0	0	0	0	0	0	200	903	0	0	0	0	0	0	0	603	903	0
8850	8	0	0	0	0	0	0	200	300	0	0	0	0	0	0	0	200	903	0	0	0	0	0	0	0	603	903	0
8850	9	0	0	0	0	0	0	200	300	0	0	0	0	0	0	0	200	903	0	0	0	0	0	0	0	603	903	0
8851	0	0	0	0	0	0	0	200	300	0	0	0	0	0	0	0	200	903	0	0	0	0	0	0	0	603	903	0
8851	1	0	0	0	0	0	0	200	300	0	0	0	0	0	0	0	200	903	0	0	0	0	0	0	0	603	903	0
8851	2	0	0	0	0	0	0	200	300	0	0	0	0	0	0	0	200	903	0	0	0	0	0	0	0	603	903	0
8851	3	0	0	0	0	0	0	200	300	0	0	0	0	0	0	0	200	903	0	0	0	0	0	0	0	603	903	0
8851	4	0	0	0	0	0	0	200	300	0	0	0	0	0	0	0	200	903	0	0	0	0	0	0	0	603	903	0
8851	5	0	0	0	0	0	0	200	300	0	0	0	0	0	0	0	200	903	0	0	0	0	0	0	0	603	903	0
8851	6	0	0	0	0	0	0	200	300	0	0	0	0	0	0	0	200	903	0	0	0	0	0	0	0	603	903	0
8851	7	0	0	0	0	0	0	200	300	0	0	0	0	0	0	0	200	903	0	0	0	0	0	0	0	603	903	0
8851	8	0	0	0	0	0	0	200	300	0	0	0	0	0	0	0	200	903	0	0	0	0	0	0	0	603	903	0
8851	9	0	0	0	0	0	0	200	300	0	0	0	0	0	0	0	200	903	0	0	0	0	0	0	0	603	903	0
8852	0	0	0	0	0	0	0	200	300	0	0	0	0	0	0	0	200	903	0	0	0	0	0	0	0	603	903	0
8852	1	0	0	0	0	0	0	200	300	0	0	0	0	0	0	0	200	903	0	0	0	0	0	0	0	603	903	0
8852	2	0	0	0	0	0	0	200	300	0	0	0	0	0	0	0	200	903	0	0	0	0	0	0	0	603	903	0
8852	3	0	0	0	0	0	0	200	300	0	0	0	0	0	0	0	200	903	0	0	0	0	0	0	0	603	903	0
8852	4	0	0	0	0	0	0	200	300	0	0	0	0	0	0	0	200	903	0	0	0	0	0	0	0	603	903	0
8852	5	0	0	0	0	0	0	200	300	0	0	0	0	0	0	0	200	903	0	0	0	0	0	0	0	603	903	0
8852	6	0	0	0	0	0	0	200	300	0	0	0	0	0	0	0	200	903	0	0	0	0	0	0	0	603	903	0
8852	7	0	0	0	0	0	0	200	300	0	0	0	0	0	0	0	200	903	0	0	0	0	0	0	0	603	903	0
8852	8	0	0	0	0	0	0	200	300	0	0	0	0	0	0	0	200	903	0	0	0	0	0	0	0	603	903	0
8852	9	0	0	0	0	0	0	200	300	0	0	0	0	0	0	0	200	903	0	0	0	0	0	0	0	603	903	0
8853	0	0	0	0	0	0	0	200	300	0	0	0	0	0	0	0	200	903	0	0	0	0	0	0	0	603	903	0
8853	1	0	0	0	0	0	0	200	300	0	0	0	0	0	0	0	200	903	0	0	0	0	0	0	0	603	903	0
8853	2	0	0	0	0	0	0	200	300	0	0	0	0	0	0	0	200	903	0	0	0	0	0	0	0	603	903	0
8853	3	0	0	0	0	0	0	200	300	0	0	0	0	0	0	0	200	903	0	0	0	0	0	0	0	603	903	0
8853	4	0	0	0	0	0	0	200	300	0	0	0	0	0	0	0	200	903	0	0	0	0	0	0	0	603	903	0
8853	5	0	0	0	0	0	0	200	300	0	0	0	0	0	0	0	200	903	0	0	0	0	0	0	0	603	903	0
8853	6	0	0	0	0	0	0	200	300	0	0	0	0	0	0	0	200	903	0	0	0	0	0	0	0	603	903	0
8853	7	0	0	0	0	0	0	200	300	0	0	0	0	0	0	0	200	903	0	0	0	0	0	0	0	603	903	0
8853	8	0	0	0	0	0	0	200	300	0	0	0	0	0	0	0	200	903	0	0	0	0	0	0	0	603	903	0
8853	9	0	0	0	0	0	0	200	300	0	0	0	0	0	0	0	200	903	0	0	0	0	0	0	0	603	903	0
8854	0	0	0	0	0	0	0	200	300	0	0	0	0	0	0	0	200	903	0	0	0	0	0	0	0	603	903	0
8854	1	0	0	0	0	0	0	200	300	0	0	0	0	0	0	0	200	903	0	0	0	0	0	0	0	603	903	0
8854	2	0	0	0	0	0	0	200	300	0	0	0	0	0	0	0	200	903	0	0	0	0	0	0	0	603	903	0
8854	3	0	0	0	0	0	0	200	300	0	0	0	0	0	0	0	200	903	0	0	0	0	0	0	0	603	903	0
8854	4	0	0	0	0	0	0	200	300	0	0	0	0	0	0	0	200	903	0	0	0	0	0	0	0	603	903	0
8854	5	0	0	0	0	0	0	200	300	0	0	0	0	0	0	0	200	903	0	0	0	0	0	0	0	603	903	0
8854	6	0	0	0	0	0	0	200	300	0	0	0	0	0	0	0	200	903	0	0	0	0	0	0	0	603	903	0
8854	7	0	0	0	0	0	0	200	300	0	0	0	0	0	0	0	200	903	0	0	0	0	0	0	0	603	903	0
8854	8	0	0	0	0	0	0	200	300	0	0	0	0	0	0	0	200	903	0	0	0	0	0	0	0	603	903	0
8854	9	0	0	0	0	0	0	200	300	0	0	0	0	0	0	0	200	903	0	0	0	0	0	0	0	603	903	0
8855	0	0	0	0	0	0	0	200	300	0	0	0	0	0	0	0	200	903	0	0	0	0	0	0	0	603	903	0
8855	1	0	0	0	0	0	0	200	300	0	0	0	0	0	0	0	200	903	0	0	0	0	0	0	0	603	903	0
8855	2	0	0	0	0	0	0	200	300	0	0	0	0	0	0	0	200	903	0	0	0	0	0	0	0	603	903	0
8855	3	0	0	0	0	0	0	200	300	0	0	0	0	0	0	0	200	903	0	0	0	0	0	0	0	603	903	0
8855	4	0	0	0	0	0	0	200	300	0	0	0	0	0	0	0	200	903	0	0	0	0	0	0	0	603	903	0
8855	5	0	0	0	0	0	0	200	300	0	0	0	0	0	0	0	200	903	0	0	0	0	0	0	0	603	903	0
8855	6	0	0	0	0	0	0	200	300	0	0	0	0	0	0	0	200	903	0	0	0	0	0	0	0	603	903	0
8855	7	0	0	0	0	0	0	200	300	0	0	0	0	0	0	0	200	903	0	0	0	0	0	0	0	603	903	0
8855	8	0	0	0	0	0	0	200	300	0	0	0	0	0	0	0	200	903	0	0	0	0	0	0	0	603	903	0
8855	9	0	0	0	0	0	0	200	300	0	0	0	0	0	0	0	200	903	0	0	0	0	0	0	0	603	903	0
8856	0	0	0	0	0	0	0	200	300	0	0	0	0	0	0	0	200	903	0	0	0	0	0	0	0	603	903	0
8856	1	0	0	0	0	0	0	200	300	0	0	0	0	0	0	0	200	903	0	0	0	0	0	0	0	603	903	0
8856	2	0	0	0	0	0	0	200	300	0	0	0	0	0	0	0	200	903	0	0	0	0	0	0	0	603	903	0
8856	3	0	0	0	0	0	0	200	300	0	0	0	0	0	0	0	200	903	0	0	0	0	0	0	0	603	903	0
8856	4	0	0	0	0	0	0	200	300	0	0	0	0	0	0	0	200	903	0	0	0	0	0	0	0	603	903	0
8856	5	0	0	0	0	0	0	200	300	0	0	0	0	0	0	0	200	903	0	0	0	0	0	0	0	603	903	0
8856	6	0	0	0	0	0	0	200	300	0	0	0	0	0	0	0	200	903	0	0	0	0	0	0	0	603	903	0
8856	7	0	0	0	0	0	0	200	300	0	0	0	0	0	0	0	200	903	0	0	0	0	0	0	0	603	903	0
8856	8	0	0	0	0	0	0	200	300	0	0	0	0	0	0	0	200	903	0	0	0	0	0	0	0	603	903	0
8856	9	0	0	0	0	0	0	200	300	0	0	0	0	0	0	0	200	903	0	0	0	0	0	0	0	603	903	0
8857	0	0	0	0	0	0	0	200	300	0	0	0	0	0	0	0	200	903	0	0	0	0	0	0	0	603	903	0
8857	1	0	0	0	0	0	0	200	300	0	0	0	0	0	0	0	200	903	0	0	0	0	0	0	0	603	903	0
8857	2	0	0	0	0	0	0	200	300	0	0	0	0	0	0	0	200	903	0	0	0	0	0	0	0	603	903	0
8857	3	0	0	0	0	0	0	200	300	0	0	0	0	0	0	0	200	903	0	0	0	0	0	0	0	603	903	0
8857	4	0	0	0	0	0	0	200	300	0	0	0	0	0	0	0	200	903	0	0	0	0	0	0	0	603	903	0
8857	5	0	0	0	0	0	0	200	300	0	0	0	0	0	0	0	200	903	0	0	0	0	0	0	0	603	903	0
8857	6	0	0	0	0	0	0	200	300	0	0	0	0	0	0	0	200	903	0	0	0	0	0	0	0	603	903	0
8857	7	0	0	0	0	0	0	200	300	0	0	0	0	0	0	0	200	903	0	0	0	0	0	0	0	603	903	0
8857	8	0	0	0	0	0	0	200	300	0	0	0	0	0	0	0	200	903	0	0	0	0	0	0	0	603	903	0
8857	9	0	0	0	0	0	0	200	300	0	0	0	0	0	0	0	200	903	0	0	0	0	0	0	0	603	903	0
8858	0	0	0	0	0	0	0	200	300	0	0	0	0	0	0	0	200	903	0	0	0	0	0	0	0	603	903	0
8858	1	0	0	0	0	0	0	200	300	0	0	0	0	0	0	0	200	903	0	0	0	0	0	0	0	603	903	0
8858	2	0	0	0	0	0	0	200	300	0	0	0	0	0	0	0	200	903	0	0	0	0	0	0	0	603	903	0
8858	3	0	0	0	0	0	0	200	300	0	0	0	0	0	0	0	200	903	0	0	0	0	0	0	0	603	903	0
8858	4	0	0	0	0	0	0	200	300	0	0	0	0	0	0	0	200	903	0	0	0	0	0	0	0	603	903	0
8858	5	0	0	0	0	0	0	200	300	0	0	0	0	0	0	0	200	903	0	0	0	0	0	0	0	603	903	0
8858	6	0	0	0	0	0	0	200	300	0	0	0	0	0	0	0	200	903	0	0	0	0	0	0	0	603	903	0
8858	7	0	0	0	0	0	0	200	300	0	0	0	0	0	0	0	200	903	0	0	0	0	0	0	0	603	903	0
8858	8	0	0	0	0	0	0	200	300	0	0	0	0	0	0	0	200	903	0	0	0	0	0	0	0	603	903	0
8858	9	0	0	0	0	0	0	200	300	0	0	0	0	0	0	0	200	903	0	0	0	0	0	0	0	603	903	0
8859	0	0	0	0	0	0	0	200	300	0	0	0	0	0	0	0	200	903	0	0	0	0	0	0	0	603	903	0
8859	1	0	0	0	0	0	0	200	300	0	0	0	0	0	0	0	200	903	0	0	0	0	0	0	0	603	903	0
8859	2	0	0	0	0	0	0	200	300	0	0	0	0	0	0	0	200	903	0	0	0	0	0	0	0	603	903	0
8859	3	0	0	0	0	0	0	200	300	0	0	0	0	0	0	0	200	903	0	0	0	0	0	0	0	603	903	0
8859	4	0	0	0	0	0	0	200	300	0	0	0	0	0	0	0	200	903	0	0	0	0	0	0	0	603	903	0
8859	5	0	0	0	0	0	0	200	300	0	0	0	0	0	0	0	200	903	0	0	0	0	0	0	0	603	903	0
8859	6	0	0	0	0	0	0	200	300	0	0	0	0	0	0	0	200	903	0	0	0	0	0	0	0	603	903	0
8859	7	0	0	0	0	0	0	200	300	0	0	0	0	0	0	0	200	903	0	0	0	0	0	0	0	603	903	0
8859	8	0	0	0	0	0	0	200	300	0	0	0	0	0	0	0	200	903	0	0	0	0	0	0	0	603	903	0
8859	9	0	0	0	0	0	0	200	300	0	0	0	0	0	0	0	200	903	0	0	0	0	0	0	0	603	903	0
8860	0	0	0	0	0	0	0	200	300	0	0	0	0	0	0	0	200	903	0	0	0	0	0	0	0	603	903	0
8860	1	0	0	0	0	0	0	200	300	0	0	0	0	0	0	0	200	903	0	0	0	0	0	0	0	603	903	0
8860	2	0	0	0	0	0	0	200	300	0	0	0	0	0	0	0	200	903	0	0	0	0	0	0	0	603	903	0
8860	3	0	0	0	0	0	0	200	300	0	0	0	0	0	0	0	200	903	0	0	0	0	0	0	0	603	903	0
8860	4	0	0	0	0	0	0	200	300	0	0	0	0	0	0	0	200	903	0	0	0	0	0	0	0	603	903	0
8860	5	0	0	0	0	0	0	200	300	0	0	0	0	0	0	0	200	903	0	0	0	0	0	0	0	603	903	0
8860	6	0	0	0	0	0	0	200	300	0	0	0	0	0	0	0	200	903	0	0	0	0	0	0	0	603	903	0
8860	7	0	0	0	0	0	0	200	300	0	0	0	0	0	0	0	200	903	0	0	0	0	0	0	0	603	903	0
8860	8	0	0	0	0	0	0	200	300	0	0	0	0	0	0	0	200	903	0	0	0	0	0	0	0	603	903	0
8860	9	0	0	0	0	0	0	200	300	0	0	0	0	0	0	0	200	903	0	0	0	0	0	0	0	603	903	0
8861	0	0	0	0	0	0	0	200	300	0	0	0	0	0	0	0	200	903	0	0	0	0	0	0	0	603	903	0
8861	1	0	0	0	0	0	0	200	300	0	0	0	0	0	0	0	200	903	0	0	0	0	0	0	0	603	903	0
8861	2	0	0	0	0	0	0	200	300	0	0	0	0	0	0	0	200	903	0	0	0	0	0	0	0	603	903	0
8861	3	0	0	0	0	0	0	200	300	0	0	0	0	0	0	0	200	903	0	0	0	0	0	0	0	603	903	0
8861	4	0	0	0	0	0	0	200	300	0	0	0	0	0	0	0	200	903	0	0	0	0	0	0	0	603	903	0
8861	5	0	0	0	0	0	0	200	300	0	0	0	0	0	0	0	200	903	0	0	0	0	0	0	0	603	903	0
8861	6	0	0	0	0	0	0	200	300	0	0	0	0	0	0	0	200	903	0	0	0	0	0	0	0	603	903	0
8861	7	0	0	0	0	0	0	200	300	0	0	0	0	0	0	0	200	903	0	0	0	0	0	0	0	603	903	0
8861	8	0	0	0	0	0	0	200	300	0	0	0	0	0	0	0	200	903	0	0	0	0	0	0	0	603	903	0
8861	9	0	0	0	0	0	0	200	300	0	0	0	0	0	0	0	200	903	0	0	0	0	0	0	0	603	903	0
8862	0	0	0	0	0	0	0	200	300	0	0	0	0	0	0	0	200	903	0	0	0	0	0	0	0	603	903	0
8862	1	0	0	0	0	0	0	200	300	0	0	0	0	0	0	0	200	903	0	0	0	0	0	0	0	603	903	0
8862	2	0	0	0	0	0	0	200	300	0	0	0	0	0	0	0	200	903	0	0	0	0	0	0	0	603	903	0
8862	3	0	0	0	0	0	0	200	300	0	0	0	0	0	0	0	200	903	0	0	0	0	0	0	0	603	903	0
8862	4	0	0	0	0	0	0	200	300	0	0	0	0	0	0	0	200	903	0	0	0	0	0	0	0	603	903	0
8862	5	0	0	0	0	0	0	200	300	0	0	0	0	0	0	0	200	903	0	0	0	0	0	0	0	603	903	0
8862	6	0	0	0	0	0	0	200	300	0	0	0	0	0	0	0	200	903	0	0	0	0	0	0	0	603	903	0
8862	7	0	0	0	0	0	0	200	300	0	0	0	0	0	0	0	200	903	0	0	0	0	0	0	0	603	903	0
8862	8	0	0	0	0	0	0	200	300	0	0	0	0	0	0	0	200	903	0	0	0	0	0	0	0	603	903	0
8862	9	0	0	0	0	0	0	200	300	0	0	0	0	0	0	0	200	903	0	0	0	0	0	0	0	603	903	0
8863	0	0	0	0	0	0	0	200	300	0	0	0	0	0	0	0	200	903	0	0	0	0	0	0	0	603	903	0
8863	1	0	0	0	0	0	0	200	300	0	0	0	0	0	0	0	200	903	0	0	0	0	0	0	0	603	903	0
8863	2	0	0	0	0	0	0	200	300	0	0	0	0	0	0	0	200	903	0	0	0	0	0	0	0	603	903	0
8863	3	0	0	0	0	0	0	200	300	0	0	0	0	0	0	0	200	903	0	0	0	0	0	0	0	603	903	0
8863	4	0	0	0	0	0	0	200	300	0	0	0	0	0	0	0	200	903	0	0	0	0	0	0	0	603	903	0
8863	5	0	0	0	0	0	0	200	300	0	0	0	0	0	0	0	200	903	0	0	0	0	0	0	0	603	903	0
8863	6	0	0	0	0	0	0	200	300	0	0	0	0	0	0	0	200	903	0	0	0	0	0	0	0	603	903	0
8863	7	0	0	0	0	0	0	200	300	0	0	0	0	0	0	0	200	903	0	0	0	0	0	0	0	603	903	0
8863	8	0	0	0	0	0	0	200	300	0	0	0	0	0	0	0	200	903	0	0	0	0	0	0	0	603	903	0
8863	9	0	0	0	0	0	0	200	300	0	0	0	0	0	0	0	200	903	0	0	0	0	0	0	0	603	903	0
8864	0	0	0	0	0	0	0	200	300	0	0	0	0	0	0	0	200	903	0	0	0	0	0	0	0	603	903	0
8864	1	0	0	0	0	0	0	200	300	0	0	0	0	0	0	0	200	903	0	0	0	0	0	0	0	603	903	0
8864	2	0	0	0	0	0	0	200	300	0	0	0	0	0	0	0	200	903	0	0	0	0	0	0	0	603	903	0
8864	3	0	0	0	0	0	0	200	300	0	0	0	0	0	0	0	200	903	0	0	0	0	0	0	0	603	903	0
8864	4	0	0	0	0	0	0	200	300	0	0	0	0	0	0	0	200	903	0	0	0	0	0	0	0	603	903	0
8864	5	0	0	0	0	0	0	200	300	0	0	0	0	0	0	0	200	903	0	0	0	0	0	0	0	603	903	0
8864	6	0	0	0	0	0	0	200	300	0	0	0	0	0	0	0	200	903	0	0	0	0	0	0	0	603	903	0
8864	7	0	0	0	0	0	0	200	300	0	0	0	0	0	0	0	200	903	0	0	0	0	0	0	0	603	903	0
8864	8	0	0	0	0	0	0	200	300	0	0	0	0	0	0	0	200	903	0	0	0	0	0	0	0	603	903	0
8864	9	0	0	0	0	0	0	200	300	0	0	0	0	0	0	0	200	903	0	0	0	0	0	0	0	603	903	0
8865	0	0	0	0	0	0	0	200	300	0	0	0	0	0	0	0	200	903	0	0	0	0	0	0	0	603	903	0
8865	1	0	0	0	0	0	0	200	300	0	0	0	0	0	0	0	200	903	0	0	0	0	0	0	0	603	903	0
8865	2	0	0	0	0	0	0	200	300	0	0	0	0	0	0	0	200	903	0	0	0	0	0	0	0	603	903	0
8865	3	0	0	0	0	0	0	200	300	0	0	0	0	0	0	0	200	903	0	0	0	0	0	0	0	603	903	0
8865	4	0	0	0	0	0	0	200	300	0	0	0	0	0	0	0	200	903	0	0	0	0	0	0	0	603	903	0
8865	5	0	0	0	0	0	0	200	300	0	0	0	0	0	0	0	200	903	0	0	0	0	0	0	0	603	903	0
8865	6	0	0	0	0	0	0	200	300	0	0	0	0	0	0	0	200	903	0	0	0	0	0	0	0	603	903	0
8865	7	0	0	0	0	0	0	200	300	0	0	0	0	0	0	0	200	903	0	0	0	0	0	0	0	603	903	0
8865	8	0	0	0	0	0	0	200	300	0	0	0	0	0	0	0	200	903	0	0	0	0	0	0	0	603	903	0
8865	9	0	0	0	0	0	0	200	300	0	0	0	0	0	0	0	200	903	0	0	0	0	0	0	0	603	903	0
8866	0	0	0	0	0	0	0	200	300	0	0	0	0	0	0	0	200	903	0	0	0	0	0	0	0	603	903	0
8866	1	0	0	0	0	0	0	200	300	0	0	0	0	0	0	0	200	903	0	0	0	0	0	0	0	603	903	0
8866	2	0	0	0	0	0	0	200	300	0	0	0	0	0	0	0	200	903	0	0	0	0	0	0	0	603	903	0
8866	3	0	0	0	0	0	0	200	300	0	0	0	0	0	0	0	200	903	0	0	0	0	0	0	0	603	903	0
8866	4	0	0	0	0	0	0	200	300	0	0	0	0	0	0	0	200	903	0	0	0	0	0	0	0	603	903	0
8866	5	0	0	0	0	0	0	200	300	0	0	0	0	0	0	0	200	903	0	0	0	0	0	0	0	603	903	0
8866	6	0	0	0	0	0	0	200	300	0	0	0	0	0	0	0	200	903	0	0	0	0	0	0	0	603	903	0
8866	7	0	0	0	0	0	0	200	300	0	0	0	0	0	0	0	200	903	0	0	0	0	0	0	0	603	903	0
8866	8	0	0	0	0	0	0	200	300	0	0	0	0	0	0	0	200	903	0	0	0	0	0	0	0	603	903	0
8866	9	0	0	0	0	0	0	200	300	0	0	0	0	0	0	0	200	903	0	0	0	0	0	0	0	603	903	0
8867	0	0	0	0	0	0	0	200	300	0	0	0	0	0	0	0	200	903	0	0	0	0	0	0	0	603	903	0
8867	1	0	0	0	0	0	0	200	300	0	0	0	0	0	0	0	200	903	0	0	0	0	0	0	0	603	903	0
8867	2	0	0	0	0	0	0	200	300	0	0	0	0	0	0	0	200	903	0	0	0	0	0	0	0	603	903	0
8867	3	0	0	0	0	0	0	200	300	0	0	0	0	0	0	0	200	903	0	0	0	0	0	0	0	603	903	0
8867	4	0	0	0	0	0	0	200	300	0	0	0	0	0	0	0	200	903	0	0	0	0	0	0	0	603	903	0
8867	5	0	0	0	0	0	0	200	300	0	0	0	0	0	0	0	200	903	0	0	0	0	0	0	0	603	903	0
8867	6	0	0	0	0	0	0	200	300	0	0	0	0	0	0	0	200	903	0	0	0	0	0	0	0	603	903	0
8867	7	0	0	0	0	0	0	200	300	0	0	0	0	0	0	0	200	903	0	0	0	0	0	0	0	603	903	0
8867	8	0	0	0	0	0	0	200	300	0	0	0	0	0	0	0	200	903	0	0	0	0	0	0	0	603	903	0
8867	9	0	0	0	0	0	0	200	300	0	0	0	0	0	0	0	200	903	0	0	0	0	0	0	0	603	903	0
8868	0	0	0	0	0	0	0	200	300	0	0	0	0	0	0	0	200	903	0	0	0	0	0	0	0	603	903	0
8868	1	0	0	0	0	0	0	200	300	0	0	0	0	0	0	0	200	903	0	0	0	0	0	0	0	603	903	0
8868	2	0	0	0	0	0	0	200	300	0	0	0	0	0	0	0	200	903	0	0	0	0	0	0	0	603	903	0
8868	3	0	0	0	0	0	0	200	300	0	0	0	0	0	0	0	200	903	0	0	0	0	0	0	0	603	903	0
8868	4	0	0	0	0	0	0	200	300	0	0	0	0	0	0	0	200	903	0	0	0	0	0	0	0	603	903	0
8868	5	0	0	0	0	0	0	200	300	0	0	0	0	0	0	0	200	903	0	0	0	0	0	0	0	603	903	0
8868	6	0	0	0	0	0	0	200	300	0	0	0	0	0	0	0	200	903	0	0	0	0	0	0	0	603	903	0
8868	7	0	0	0	0	0	0	200	300	0	0	0	0	0	0	0	200	903	0	0	0	0	0	0	0	603	903	0
8868	8	0	0	0	0	0	0	200	300	0	0	0	0	0	0	0	200	903	0	0	0	0	0	0	0	603	903	0
8868	9	0	0	0	0	0	0	200	300	0	0	0	0	0	0	0	200	903	0	0	0	0	0	0	0	603	903	0
8869	0	0	0	0	0	0	0	200	300	0	0	0	0	0	0	0	200	903	0	0	0	0	0	0	0	603	903	0
8869	1	0	0	0	0	0	0	200	300	0	0	0	0	0	0	0	200	903	0	0	0	0	0	0	0	603	903	0
8869	2	0	0	0	0	0	0	200	300	0	0	0	0	0	0	0	200	903	0	0	0	0	0	0	0	603	903	0
8869	3	0	0	0	0	0	0	200	300	0	0	0	0	0	0	0	200	903	0	0	0	0	0	0	0	603	903	0
8869	4	0	0	0	0	0	0	200	300	0	0	0	0	0	0	0	200	903	0	0	0	0	0	0	0	603	903	0
8869	5	0	0	0	0	0	0	200	300	0	0	0	0	0	0	0	200	903	0	0	0	0	0	0	0	603	903	0
8869	6	0	0	0	0	0	0	200	300	0	0	0	0	0	0	0	200	903	0	0	0	0	0	0	0	603	903	0
8869	7	0	0	0	0	0	0	200	300	0	0	0	0	0	0	0	200	903	0	0	0	0	0	0	0	603	903	0
8869	8	0	0	0	0	0	0	200	300	0	0	0	0	0	0	0	200	903	0	0	0	0	0	0	0	603	903	0
8869	9	0	0	0	0	0	0	200	300	0	0	0	0	0	0	0	200	903	0	0	0	0	0	0	0	603	903	0
8870	0	0	0	0	0	0	0	200	300	0	0	0	0	0	0	0	200	903	0	0	0	0	0	0	0	603	903	0
8870	1	0	0	0	0	0	0	200	300	0	0	0	0	0	0	0	200	903	0	0	0	0	0	0	0	603	903	0
8870	2	0	0	0	0	0	0	200	300	0	0	0	0	0	0	0	200	903	0	0	0	0	0	0	0	603	903	0
8870	3	0	0	0	0	0	0	200	300	0	0	0	0	0	0	0	200	903	0	0	0	0	0	0	0	603	903	0
8870	4	0	0	0	0	0	0	200	300	0	0	0	0	0	0	0	200	903	0	0	0	0	0	0	0	603	903	0
8870	5	0	0	0	0	0	0	200	300	0	0	0	0	0	0	0	200	903	0	0	0	0	0	0	0	603	903	0
8870	6	0	0	0	0	0	0	200	300	0	0	0	0	0	0	0	200	903	0	0	0	0	0	0	0	603	903	0
8870	7	0	0	0	0	0	0	200	300	0	0	0	0	0	0	0	200	903	0	0	0	0	0	0	0	603	903	0
8870	8	0	0	0	0	0	0	200	300	0	0	0	0	0	0	0	200	903	0	0	0	0	0	0	0	603	903	0
8870	9	0	0	0	0	0	0	200	300	0	0	0	0	0	0	0	200	903	0	0	0	0	0	0	0	603	903	0
8871	0	0	0	0	0	0	0	200	300	0	0	0	0	0	0	0	200	903	0	0	0	0	0	0	0	603	903	0
8871	1	0	0	0	0	0	0	200	300	0	0	0	0	0	0	0	200	903	0	0	0	0	0	0	0	603	903	0
8871	2	0	0	0	0	0	0	200	300	0	0	0	0	0	0	0	200	903	0	0	0	0	0	0	0	603	903	0
8871	3	0	0	0	0	0	0	200	300	0	0	0	0	0	0	0	200	903	0	0	0	0	0	0	0	603	903	0
8871	4	0	0	0	0	0	0	200	300	0	0	0	0	0	0	0	200	903	0	0	0	0	0	0	0	603	903	0
8871	5	0	0	0	0	0	0	200	300	0	0	0	0	0	0	0	200	903	0	0	0	0	0	0	0	603	903	0
8871	6	0	0	0	0	0	0	200	300	0	0	0	0	0	0	0	200	903	0	0	0	0	0	0	0	603	903	0
8871	7	0	0	0	0	0	0	200	300	0	0	0	0	0	0	0	200	903	0	0	0	0	0	0	0	603	903	0
8871	8	0	0	0	0	0	0	200	300	0	0	0	0	0	0	0	200	903	0	0	0	0	0	0	0	603	903	0
8871	9	0	0	0	0	0	0	200	300	0	0	0	0	0	0	0	200	903	0	0	0	0	0	0	0	603	903	0
8872	0	0	0	0	0	0	0	200	300	0	0	0	0	0	0	0	200	903	0	0	0	0	0	0	0	603	903	0
8872	1	0	0	0	0	0	0	200	300	0	0	0	0	0	0	0	200	903	0	0	0	0	0	0	0	603	903	0
8872	2	0	0	0	0	0	0	200	300	0	0	0	0	0	0	0	200	903	0	0	0	0	0	0	0	603	903	0
8872	3	0	0	0	0	0	0	200	300	0	0	0	0	0	0	0	200	903	0	0	0	0	0	0	0	603	903	0
8872	4	0	0	0	0	0	0	200	300	0	0	0	0	0	0	0	200	903	0	0	0	0	0	0	0	603	903	0
8872	5	0	0	0	0	0	0	200	300	0	0	0	0	0	0	0	200	903	0	0	0	0	0	0	0	603	903	0
8872	6	0	0	0	0	0	0	200	300	0	0	0	0	0	0	0	200	903	0	0	0	0	0	0	0	603	903	0
8872	7	0	0	0	0	0	0	200	300	0	0	0	0	0	0	0	200	903	0	0	0	0	0	0	0	603	903	0
8872	8	0	0	0	0	0	0	200	300	0	0	0	0	0	0	0	200	903	0	0	0	0	0	0	0	603	903	0
8872	9	0	0	0	0	0	0	200	300	0	0	0	0	0	0	0	200	903	0	0	0	0	0	0	0	603	903	0
8873	0	0	0	0	0	0	0	200	300	0	0	0	0	0	0	0	200	903	0	0	0	0	0	0	0	603	903	0
8873	1	0	0	0	0	0	0	200	300	0	0	0	0	0	0	0	200	903	0	0	0	0	0	0	0	603	903	0
8873	2	0	0	0	0	0	0	200	300	0	0	0	0	0	0	0	200	903	0	0	0	0	0	0	0	603	903	0
8873	3	0	0	0	0	0	0	200	300	0	0	0	0	0	0	0	200	903	0	0	0	0	0	0	0	603	903	0
8873	4	0	0	0	0	0	0	200	300	0	0	0	0	0	0	0	200	903	0	0	0	0	0	0	0	603	903	0
8873	5	0	0	0	0	0	0	200	300	0	0	0	0	0	0	0	200	903	0	0	0	0	0	0	0	603	903	0
8873	6	0	0	0	0	0	0	200	300	0	0	0	0	0	0	0	200	903	0	0	0	0	0	0	0	603	903	0
8873	7	0	0	0	0	0	0	200	300	0	0	0	0	0	0	0	200	903	0	0	0	0	0	0	0	603	903	0
8873	8	0	0	0	0	0	0	200	300	0	0	0	0	0	0	0	200	903	0	0	0	0	0	0	0	603	903	0
8873	9	0	0	0	0	0	0	200	300	0	0	0	0	0	0	0	200	903	0	0	0	0	0	0	0	603	903	0
8874	0	0	0	0	0	0	0	200	300	0	0	0	0	0	0	0	200	903	0	0	0	0	0	0	0	603	903	0
8874	1	0	0	0	0	0	0	200	300	0	0	0	0	0	0	0	200	903	0	0	0	0	0	0	0	603	903	0
8874	2	0	0	0	0	0	0	200	300	0	0	0	0	0	0	0	200	903	0	0	0	0	0	0	0	603	903	0
8874	3	0	0	0	0	0	0	200	300	0	0	0	0	0	0	0	200	903	0	0	0	0	0	0	0	603	903	0
8874	4	0	0	0	0	0	0	200	300	0	0	0	0	0	0	0	200	903	0	0	0	0	0	0	0	603	903	0
8874	5	0	0	0	0	0	0	200	300	0	0	0	0	0	0	0	200	903	0	0	0	0	0	0	0	603	903	0
8874	6	0	0	0	0	0	0	200	300	0	0	0	0	0	0	0	200	903	0	0	0	0	0	0	0	603	903	0
8874	7	0	0	0	0	0	0	200	300	0	0	0	0	0	0	0	200	903	0	0	0	0	0	0	0	603	903	0
8874	8	0	0	0	0	0	0	200	300	0	0	0	0	0	0	0	200	903	0	0	0	0	0	0	0	603	903	0
8874	9	0	0	0	0	0	0	200	300	0	0	0	0	0	0	0	200	903	0	0	0	0	0	0	0	603	903	0
8875	0	0	0	0	0	0	0	200	300	0	0	0	0	0	0	0	200	903	0	0	0	0	0	0	0	603	903	0
8875	1	0	0	0	0	0	0	200	300	0	0	0	0	0	0	0	200	903	0	0	0	0	0	0	0	603	903	0
8875	2	0	0	0	0	0	0	200	300	0	0	0	0	0	0	0	200	903	0	0	0	0	0	0	0	603	903	0
8875	3	0	0	0	0	0	0	200	300	0	0	0	0	0	0	0	200	903	0	0	0	0	0	0	0	603	903	0
8875	4	0	0	0	0	0	0	200	300	0	0	0	0	0	0	0	200	903	0	0	0	0	0	0	0	603	903	0
8875	5	0	0	0	0	0	0	200	300	0	0	0	0	0	0	0	200	903	0	0	0	0	0	0	0	603	903	0
8875	6	0	0	0	0	0	0	200	300	0	0	0	0	0	0	0	200	903	0	0	0	0	0	0	0	603	903	0
8875	7	0	0	0	0	0	0	200	300	0	0	0	0	0	0	0	200	903	0	0	0	0	0	0	0	603	903	0
8875	8	0	0	0	0	0	0	200	300	0	0	0	0	0	0	0	200	903	0	0	0	0	0	0	0	603	903	0
8875	9	0	0	0	0	0	0	200	300	0	0	0	0	0	0	0	200	903	0	0	0	0	0	0	0	603	903	0
8876	0	0	0	0	0	0	0	200	300	0	0	0	0	0	0	0	200	903	0	0	0	0	0	0	0	603	903	0
8876	1	0	0	0	0	0	0	200	300	0	0	0	0	0	0	0	200	903	0	0	0	0	0	0	0	603	903	0
8876	2	0	0	0	0	0	0	200	300	0	0	0	0	0	0	0	200	903	0	0	0	0	0	0	0	603	903	0
8876	3	0	0	0	0	0	0	200	300	0	0	0	0	0	0	0	200	903	0	0	0	0	0	0	0	603	903	0
8876	4	0	0	0	0	0	0	200	300	0	0	0	0	0	0	0	200	903	0	0	0	0	0	0	0	603	903	0
8876	5	0	0	0	0	0	0	200	300	0	0	0	0	0	0	0	200	903	0	0	0	0	0	0	0	603	903	0
8876	6	0	0	0	0	0	0	200	300	0	0	0	0	0	0	0	200	903	0	0	0	0	0	0	0	603	903	0
8876	7	0	0	0	0	0	0	200	300	0	0	0	0	0	0	0	200	903	0	0	0	0	0	0	0	603	903	0
8876	8	0	0	0	0	0	0	200	300	0	0	0	0	0	0	0	200	903	0	0	0	0	0	0	0	603	903	0
8876	9	0	0	0	0	0	0	200	300	0	0	0	0	0	0	0	200	903	0	0	0	0	0	0	0	603	903	0
8877	0	0	0	0	0	0	0	200	300	0	0	0	0	0	0	0	200	903	0	0	0	0	0	0	0	603	903	0
8877	1	0	0	0	0	0	0	200	300	0	0	0	0	0	0	0	200	903	0	0	0	0	0	0	0	603	903	0
8877	2	0	0	0	0	0	0	200	300	0	0	0	0	0	0	0	200	903	0	0	0	0	0	0	0	603	903	0
8877	3	0	0	0	0	0	0	200	300	0	0	0	0	0	0	0	200	903	0	0	0	0	0	0	0	603	903	0
8877	4	0	0	0	0	0	0	200	300	0	0	0	0	0	0	0	200	903	0	0	0	0	0	0	0	603	903	0
8877	5	0	0	0	0	0	0	200	300	0	0	0	0	0	0	0	200	903	0	0	0	0	0	0	0	603	903	0
8877	6	0	0	0	0	0	0	200	300	0	0	0	0	0	0	0	200	903	0	0	0	0	0	0	0	603	903	0
8877	7	0	0	0	0	0	0	200	300	0	0	0	0	0	0	0	200	903	0	0	0	0	0	0	0	603	903	0
8877	8	0	0	0	0	0	0	200	300	0	0	0	0	0	0	0	200	903	0	0	0	0	0	0	0	603	903	0
8877	9	0	0	0	0	0	0	200	300	0	0	0	0	0	0	0	200	903	0	0	0	0	0	0	0	603	903	0
8878	0	0	0	0	0	0	0	200	300	0	0	0	0	0	0	0	200	903	0	0	0	0	0	0	0	603	903	0
8878	1	0	0	0	0	0	0	200	300	0	0	0	0	0	0	0	200	903	0	0	0	0	0	0	0	603	903	0
8878	2	0	0	0	0	0	0	200	300	0	0	0	0	0	0	0	200	903	0	0	0	0	0	0	0	603	903	0
8878	3	0	0	0	0	0	0	200	300	0	0	0	0	0	0	0	200	903	0	0	0	0	0	0	0	603	903	0
8878	4	0	0	0	0	0	0	200	300	0	0	0	0	0	0	0	200	903	0	0	0	0	0	0	0	603	903	0
8878	5	0	0	0	0	0	0	200	300	0	0	0	0	0	0	0	200	903	0	0	0	0	0	0	0	603	903	0
8878	6	0	0	0	0	0	0	200	300	0	0	0	0	0	0	0	200	903	0	0	0	0	0	0	0	603	903	0
8878	7	0	0	0	0	0	0	200	300	0	0	0	0	0	0	0	200	903	0	0	0	0	0	0	0	603	903	0
8878	8	0	0	0	0	0	0	200	300	0	0	0	0	0	0	0	200	903	0	0	0	0	0	0	0	603	903	0
8878	9	0	0	0	0	0	0	200	300	0	0	0	0	0	0	0	200	903	0	0	0	0	0	0	0	603	903	0
8879	0	0	0	0	0	0	0	200	300	0	0	0	0	0	0	0	200	903	0	0	0	0	0	0	0	603	903	0
8879	1	0	0	0	0	0	0	200	300	0	0	0	0	0	0	0	200	903	0	0	0	0	0	0	0	603	903	0
8879	2	0	0	0	0	0	0	200	300	0	0	0	0	0	0	0	200	903	0	0	0	0	0	0	0	603	903	0
8879	3	0	0	0	0	0	0	200	300	0	0	0	0	0	0	0	200	903	0	0	0	0	0	0	0	603	903	0
8879	4	0	0	0	0	0	0	200	300	0	0	0	0	0	0	0	200	903	0	0	0	0	0	0	0	603	903	0
8879	5	0	0	0	0	0	0	200	300	0	0	0	0	0	0	0	200	903	0	0	0	0	0	0	0	603	903	0
8879	6	0	0	0	0	0	0	200	300	0	0	0	0	0	0	0	200	903	0	0	0	0	0	0	0	603	903	0
8879	7	0	0	0	0	0	0	200	300	0	0	0	0	0	0	0	200	903	0	0	0	0	0	0	0	603	903	0
8879	8	0	0	0	0	0	0	200	300	0	0	0	0	0	0	0	200	903	0	0	0	0	0	0	0	603	903	0
8879	9	0	0	0	0	0	0	200	300	0	0	0	0	0	0	0	200	903	0	0	0	0	0	0	0	603	903	0
8880	0	0	0	0	0	0	0	200	300	0	0	0	0	0	0	0	200	903	0	0	0	0	0	0	0	603	903	0
8880	1	0	0	0	0	0	0	200	300	0	0	0	0	0	0	0	200	903	0	0	0	0	0	0	0	603	903	0
8880	2	0	0	0	0	0	0	200	300	0	0	0	0	0	0	0	200	903	0	0	0	0	0	0	0	603	903	0
8880	3	0	0	0	0	0	0	200	300	0	0	0	0	0	0	0	200	903	0	0	0	0	0	0	0	603	903	0
8880	4	0	0	0	0	0	0	200	300	0	0	0	0	0	0	0	200	903	0	0	0	0	0	0	0	603	903	0
8880	5	0	0	0	0	0	0	200	300	0	0	0	0	0	0	0	200	903	0	0	0	0	0	0	0	603	903	0
8880	6	0	0	0	0	0	0	200	300	0	0	0	0	0	0	0	200	903	0	0	0	0	0	0	0	603	903	0
8880	7	0	0	0	0	0	0	200	300	0	0	0	0	0	0	0	200	903	0	0	0	0	0	0	0	603	903	0
8880	8	0	0	0	0	0	0	200	300	0	0	0	0	0	0	0	200	903	0	0	0	0	0	0	0	603	903	0
8880	9	0	0	0	0	0	0	200	300	0	0	0	0	0	0	0	200	903	0	0	0	0	0	0	0	603	903	0
8881	0	0	0	0	0	0	0	200	300	0	0	0	0	0	0	0	200	903	0	0	0	0	0	0	0	603	903	0
8881	1	0	0	0	0	0	0	200	300	0	0	0	0	0	0	0	200	903	0	0	0	0	0	0	0	603	903	0
8881	2	0	0	0	0	0	0	200	300	0	0	0	0	0	0	0	200	903	0	0	0	0	0	0	0	603	903	0
8881	3	0	0	0	0	0	0	200	300	0	0	0	0	0	0	0	200	903	0	0	0	0	0	0	0	603	903	0
8881	4	0	0	0	0	0	0	200	300	0	0	0	0	0	0	0	200	903	0	0	0	0	0	0	0	603	903	0
8881	5	0	0	0	0	0	0	200	300	0	0	0	0	0	0	0	200	903	0	0	0	0	0	0	0	603	903	0
8881	6	0	0	0	0	0	0	200	300	0	0	0	0	0	0	0	200	903	0	0	0	0	0	0	0	603	903	0
8881	7	0	0	0	0	0	0	200	300	0	0	0	0	0	0	0	200	903	0	0	0	0	0	0	0	603	903	0
8881	8	0	0	0	0	0	0	200	300	0	0	0	0	0	0	0	200	903	0	0	0	0	0	0	0	603	903	0
8881	9	0	0	0	0	0	0	200	300	0	0	0	0	0	0	0	200	903	0	0	0	0	0	0	0	603	903	0
8882	0	0	0	0	0	0	0	200	300	0	0	0	0	0	0	0	200	903	0	0	0	0	0	0	0	603	903	0
8882	1	0	0	0	0	0	0	200	300	0	0	0	0	0	0	0	200	903	0	0	0	0	0	0	0	603	903	0
8882	2	0	0	0	0	0	0	200	300	0	0	0	0	0	0	0	200	903	0	0	0	0	0	0	0	603	903	0
8882	3	0	0	0	0	0	0	200	300	0	0	0	0	0	0	0	200	903	0	0	0	0	0	0	0	603	903	0
8882	4	0	0	0	0	0	0	200	300	0	0	0	0	0	0	0	200	903	0	0	0	0	0	0	0	603	903	0
8882	5	0	0	0	0	0	0	200	300	0	0	0	0	0	0	0	200	903	0	0	0	0	0	0	0	603	903	0
8882	6	0	0	0	0	0	0	200	300	0	0	0	0	0	0	0	200	903	0	0	0	0	0	0	0	603	903	0
8882	7	0	0	0	0	0	0	200	300	0	0	0	0	0	0	0	200	903	0	0	0	0	0	0	0	603	903	0
8882	8	0	0	0	0	0	0	200	300	0	0	0	0	0	0	0	200	903	0	0	0	0	0	0	0	603	903	0
8882	9	0	0	0	0	0	0	200	300	0	0	0	0	0	0	0	200	903	0	0	0	0	0	0	0	603	903	0
8883	0	0	0	0	0	0	0	200	300	0	0	0	0	0	0	0	200	903	0	0	0	0	0	0	0	603	903	0
8883	1	0	0	0	0	0	0	200	300	0	0	0	0	0	0	0	200	903	0	0	0	0	0	0	0	603	903	0
8883	2	0	0	0	0	0	0	200	300	0	0	0	0	0	0	0	200	903	0	0	0	0	0	0	0	603	903	0
8883	3	0	0	0	0	0	0	200	300	0	0	0	0	0	0	0	200	903	0	0	0	0	0	0	0	603	903	0
8883	4	0	0	0	0	0	0	200	300	0	0	0	0	0	0	0	200	903	0	0	0	0	0	0	0	603	903	0
8883	5	0	0	0	0	0	0	200	300	0	0	0	0	0	0	0	200	903	0	0	0	0	0	0	0	603	903	0
8883	6	0	0	0	0	0	0	200	300	0	0	0	0	0	0	0	200	903	0	0	0	0	0	0	0	603	903	0
8883	7	0	0	0	0	0	0	200	300	0	0	0	0	0	0	0	200	903	0	0	0	0	0	0	0	603	903	0
8883	8	0	0	0	0	0	0	200	300	0	0	0	0	0	0	0	200	903	0	0	0	0	0	0	0	603	903	0
8883	9	0	0	0	0	0	0	200	300	0	0	0	0	0	0	0	200	903	0	0	0	0	0	0	0	603	903	0
8884	0	0	0	0	0	0	0	200	300	0	0	0	0	0	0	0	200	903	0	0	0	0	0	0	0	603	903	0
8884	1	0	0	0	0	0	0	200	300	0	0	0	0	0	0	0	200	903	0	0	0	0	0	0	0	603	903	0
8884	2	0	0	0	0	0	0	200	300	0	0	0	0	0	0	0	200	903	0	0	0	0	0	0	0	603	903	0
8884	3	0	0	0	0	0	0	200	300	0	0	0	0	0	0	0	200	903	0	0	0	0	0	0	0	603	903	0
8884	4	0	0	0	0	0	0	200	300	0	0	0	0	0	0	0	200	903	0	0	0	0	0	0	0	603	903	0
8884	5	0	0	0	0	0	0	200	300	0	0	0	0	0	0	0	200	903	0	0	0	0	0	0	0	603	903	0
8884	6	0	0	0	0	0	0	200	300	0	0	0	0	0	0	0	200	903	0	0	0	0	0	0	0	603	903	0
8884	7	0	0	0	0	0	0	200	300	0	0	0	0	0	0	0	200	903	0	0	0	0	0	0	0	603	903	0
8884	8	0	0	0	0	0	0	200	300	0	0	0	0	0	0	0	200	903	0	0	0	0	0	0	0	603	903	0
8884	9	0	0	0	0	0	0	200	300	0	0	0	0	0	0	0	200	903	0	0	0	0	0	0	0	603	903	0
8885	0	0	0	0	0	0	0	200	300	0	0	0	0	0	0	0	200	903	0	0	0	0	0	0	0	603	903	0
8885	1	0	0	0	0	0	0	200	300	0	0	0	0	0	0	0	200	903	0	0	0	0	0	0	0	603	903	0
8885	2	0	0	0	0	0	0	200	300	0	0	0	0	0	0	0	200	903	0	0	0	0	0	0	0	603	903	0
8885	3	0	0	0	0	0	0	200	300	0	0	0	0	0	0	0	200	903	0	0	0	0	0	0	0	603	903	0
8885	4	0	0	0	0	0	0	200	300	0	0	0	0	0	0	0	200	903	0	0	0	0	0	0	0	603	903	0
8885	5	0	0	0	0	0	0	200	300	0	0	0	0	0	0	0	200	903	0	0	0	0	0	0	0	603	903	0
8885	6	0	0	0	0	0	0	200	300	0	0	0	0	0	0	0	200	903	0	0	0	0	0	0	0	603	903	0
8885	7	0	0	0	0	0	0	200	300	0	0	0	0	0	0	0	200	903	0	0	0	0	0	0	0	603	903	0
8885	8	0	0	0	0	0	0	200	300	0	0	0	0	0	0	0	200	903	0	0	0	0	0	0	0	603	903	0
8885	9	0	0	0	0	0	0	200	300	0	0	0	0	0	0	0	200	903	0	0	0	0	0	0	0	603	903	0
8886	0	0	0	0	0	0	0	200	300	0	0	0	0	0	0	0	200	903	0	0	0	0	0	0	0	603	903	0
8886	1	0	0	0	0	0	0	200	300	0	0	0	0	0	0	0	200	903	0	0	0	0	0	0	0	603	903	0
8886	2	0	0	0	0	0	0	200	300	0	0	0	0	0	0	0	200	903	0	0	0	0	0	0	0	603	903	0
8886	3	0	0	0	0	0	0	200	300	0	0	0	0	0	0	0	200	903	0	0	0	0	0	0	0	603	903	0
8886	4	0	0	0	0	0	0	200	300	0	0	0	0	0	0	0	200	903	0	0	0	0	0	0	0	603	903	0
8886	5	0	0	0	0	0	0	200	300	0	0	0	0	0	0	0	200	903	0	0	0	0	0	0	0	603	903	0
8886	6	0	0	0	0	0	0	200	300	0	0	0	0	0	0	0	200	903	0	0	0	0	0	0	0	603	903	0
8886	7	0	0	0	0	0	0	200	300	0	0	0	0	0	0	0	200	903	0	0	0	0	0	0	0	603	903	0
8886	8	0	0	0	0	0	0	200	300	0	0	0	0	0	0	0	200	903	0	0	0	0	0	0	0	603	903	0
8886	9	0	0	0	0	0	0	200	300	0	0	0	0	0	0	0	200	903	0	0	0	0	0	0	0	603	903	0
8887	0	0	0	0	0	0	0	200	300	0	0	0	0	0	0	0	200	903	0	0	0	0	0	0	0	603	903	0
8887	1	0	0	0	0	0	0	200	300	0	0	0	0	0	0	0	200	903	0	0	0	0	0	0	0	603	903	0
8887	2	0	0	0	0	0	0	200	300	0	0	0	0	0	0	0	200	903	0	0	0	0	0	0	0	603	903	0
8887	3	0	0	0	0	0	0	200	300	0	0	0	0	0	0	0	200	903	0	0	0	0	0	0	0	603	903	0
8887	4	0	0	0	0	0	0	200	300	0	0	0	0	0	0	0	200	903	0	0	0	0	0	0	0	603	903	0
8887	5	0	0	0	0	0	0	200	300	0	0	0	0	0	0	0	200	903	0	0	0	0	0	0	0	603	903	0
8887	6	0	0	0	0	0	0	200	300	0	0	0	0	0	0	0	200	903	0	0	0	0	0	0	0	603	903	0
8887	7	0	0	0	0	0	0	200	300	0	0	0	0	0	0	0	200	903	0	0	0	0	0	0	0	603	903	0
8887	8	0	0	0	0	0	0	200	300	0	0	0	0	0	0	0	200	903	0	0	0	0	0	0	0	603	903	0
8887	9	0	0	0	0	0	0	200	300	0	0	0	0	0	0	0	200	903	0	0	0	0	0	0	0	603	903	0
8888	0	0	0	0	0	0	0	200	300	0	0	0	0	0	0	0	200	903	0	0	0	0	0	0	0	603	903	0
8888	1	0	0	0	0	0	0	200	300	0	0	0	0	0	0	0	200	903	0	0	0	0	0	0	0	603	903	0
8888	2	0	0	0	0	0	0	200	300	0	0	0	0	0	0	0	200	903	0	0	0	0	0	0	0	603	903	0
8888	3	0	0	0	0	0	0	200	300	0	0	0	0	0	0	0	200	903	0	0	0	0	0	0	0	603	903	0
8888	4	0	0	0	0	0	0	200	300	0	0	0	0	0	0	0	200	903	0	0	0	0	0	0	0	603	903	0
8888	5	0	0	0	0	0	0	200	300	0	0	0	0	0	0	0	200	903	0	0	0	0	0	0	0	603	903	0
8888	6	0	0	0	0	0	0	200	300	0	0	0	0	0	0	0	200	903	0	0	0	0	0	0	0	603	903	0
8888	7	0	0	0	0	0	0	200	300	0	0	0	0	0	0	0	200	903	0	0	0	0	0	0	0	603	903	0
8888	8	0	0	0	0	0	0	200	300	0	0	0	0	0	0	0	200	903	0	0	0	0	0	0	0	603	903	0
8888	9	0	0	0	0	0	0	200	300	0	0	0	0	0	0	0	200	903	0	0	0	0	0	0	0	603	903	0
8889	0	0	0	0	0	0	0	200	300	0	0	0	0	0	0	0	200	903	0	0	0	0	0	0	0	603	903	0
8889	1	0	0	0	0	0	0	200	300	0	0	0	0	0	0	0	200	903	0	0	0	0	0	0	0	603	903	0
8889	2	0	0	0	0	0	0	200	300	0	0	0	0	0	0	0	200	903	0	0	0	0	0	0	0	603	903	0
8889	3	0	0	0	0	0	0	200	300	0	0	0	0	0	0	0	200	903	0	0	0	0	0	0	0	603	903	0
8889	4	0	0	0	0	0	0	200	300	0	0	0	0	0	0	0	200	903	0	0	0	0	0	0	0	603	903	0
8889	5	0	0	0	0	0	0	200	300	0	0	0	0	0	0	0	200	903	0	0	0	0	0	0	0	603	903	0
8889	6	0	0	0	0	0	0	200	300	0	0	0	0	0	0	0	200	903	0	0	0	0	0	0	0	603	903	0
8889	7	0	0	0	0	0	0	200	300	0	0	0	0	0	0	0	200	903	0	0	0	0	0	0	0	603	903	0
8889	8	0	0	0	0	0	0	200	300	0	0	0	0	0	0	0	200	903	0	0	0	0	0	0	0	603	903	0
8889	9	0	0	0	0	0	0	200	300	0	0	0	0	0	0	0	200	903	0	0	0	0	0	0	0	603	903	0
8890	0	0	0	0	0	0	0	200	300	0	0	0	0	0	0	0	200	903	0	0	0	0	0	0	0	603	903	0
8890	1	0	0	0	0	0	0	200	300	0	0	0	0	0	0	0	200	903	0	0	0	0	0	0	0	603	903	0
8890	2	0	0	0	0	0	0	200	300	0	0	0	0	0	0	0	200	903	0	0	0	0	0	0	0	603	903	0
8890	3	0	0	0	0	0	0	200	300	0	0	0	0	0	0	0	200	903	0	0	0	0	0	0	0	603	903	0
8890	4	0	0	0	0	0	0	200	300	0	0	0	0	0	0	0	200	903	0	0	0	0	0	0	0	603	903	0
8890	5	0	0	0	0	0	0	200	300	0	0	0	0	0	0	0	200	903	0	0	0	0	0	0	0	603	903	0
8890	6	0	0	0	0	0	0	200	300	0	0	0	0	0	0	0	200	903	0	0	0	0	0	0	0	603	903	0
8890	7	0	0	0	0	0	0	200	300	0	0	0	0	0	0	0	200	903	0	0	0	0	0	0	0	603	903	0
8890	8	0	0	0	0	0	0	200	300	0	0	0	0	0	0	0	200	903	0	0	0	0	0	0	0	603	903	0
8890	9	0	0	0	0	0	0	200	300	0	0	0	0	0	0	0	200	903	0	0	0	0	0	0	0	603	903	0
8891	0	0	0	0	0	0	0	200	300	0	0	0	0	0	0	0	200	903	0	0	0	0	0	0	0	603	903	0
8891	1	0	0	0	0	0	0	200	300	0	0	0	0	0	0	0	200	903	0	0	0	0	0	0	0	603	903	0
8891	2	0	0	0	0	0	0	200	300	0	0	0	0	0	0	0	200	903	0	0	0	0	0	0	0	603	903	0
8891	3	0	0	0	0	0	0	200	300	0	0	0	0	0	0	0	200	903	0	0	0	0	0	0	0	603	903	0
8891	4	0	0	0	0	0	0	200	300	0	0	0	0	0	0	0	200	903	0	0	0	0	0	0	0	603	903	0
8891	5	0	0	0	0	0	0	200	300	0	0	0	0	0	0	0	200	903	0	0	0	0	0	0	0	603	903	0
8891	6	0	0	0	0	0	0	200	300	0	0	0	0	0	0	0	200	903	0	0	0	0	0	0	0	603	903	0
8891	7	0	0	0	0	0	0	200	300	0	0	0	0	0	0	0	200	903	0	0	0	0	0	0	0	603	903	0
8891	8	0	0	0	0	0	0	200	300	0	0	0	0	0	0	0	200	903	0	0	0	0	0	0	0	603	903	0
8891	9	0	0	0	0	0	0	200	300	0	0	0	0	0	0	0	200	903	0	0	0	0	0	0	0	603	903	0
8892	0	0	0	0	0	0	0	200	300	0	0	0	0	0	0	0	200	903	0	0	0	0	0	0	0	603	903	0
8892	1	0	0	0	0	0	0	200	300	0	0	0	0	0	0	0	200	903	0	0	0	0	0	0	0	603	903	0
8892	2	0	0	0	0	0	0	200	300	0	0	0	0	0	0	0	200	903	0	0	0	0	0	0	0	603	903	0
8892	3	0	0	0	0	0	0	200	300	0	0	0	0	0	0	0	200	903	0	0	0	0	0	0	0	603	903	0
8892	4	0	0	0	0	0	0	200	300	0	0	0	0	0	0	0	200	903	0	0	0	0	0	0	0	603	903	0
8892	5	0	0	0	0	0	0	200	300	0	0	0	0	0	0	0	200	903	0	0	0	0	0	0	0	603	903	0
8892	6	0	0	0	0	0	0	200	300	0	0	0	0	0	0	0	200	903	0	0	0	0	0	0	0	603	903	0
8892	7	0	0	0	0	0	0	200	300	0	0	0	0	0	0	0	200	903	0	0	0	0	0	0	0	603	903	0
8892	8	0	0	0	0	0	0	200	300	0	0	0	0	0	0	0	200	903	0	0	0	0	0	0	0	603	903	0
8892	9	0	0	0	0	0	0	200	300	0	0	0	0	0	0	0	200	903	0	0	0	0	0	0	0	603	903	0
8893	0	0	0	0	0	0	0	200	300	0	0	0	0	0	0	0	200	903	0	0	0	0	0	0	0	603	903	0
8893	1	0	0	0	0	0	0	200	300	0	0	0	0	0	0	0	200	903	0	0	0	0	0	0	0	603	903	0
8893	2	0	0	0	0	0	0	200	300	0	0	0	0	0	0	0	200	903	0	0	0	0	0	0	0	603	903	0
8893	3	0	0	0	0	0	0	200	300	0	0	0	0	0	0	0	200	903	0	0	0	0	0	0	0	603	903	0
8893	4	0	0	0	0	0	0	200	300	0	0	0	0	0	0	0	200	903	0	0	0	0	0	0	0	603	903	0
8893	5	0	0	0	0	0	0	200	300	0	0	0	0	0	0	0	200	903	0	0	0	0	0	0	0	603	903	0
8893	6	0	0	0	0	0	0	200	300	0	0	0	0	0	0	0	200	903	0	0	0	0	0	0	0	603	903	0
8893	7	0	0	0	0	0	0	200	300	0	0	0	0	0	0	0	200	903	0	0	0	0	0	0	0	603	903	0
8893	8	0	0	0	0	0	0	200	300	0	0	0	0	0	0	0	200	903	0	0	0	0	0	0	0	603	903	0
8893	9	0	0	0	0	0	0	200	300	0	0	0	0	0	0	0	200	903	0	0	0	0	0	0	0	603	903	0
8894	0	0	0	0	0	0	0	200	300	0	0	0	0	0	0	0	200	903	0	0	0	0	0	0	0	603	903	0
8894	1	0	0	0	0	0	0	200	300	0	0	0	0	0	0	0	200	903	0	0	0	0	0	0	0	603	903	0
8894	2	0	0	0	0	0	0	200	300	0	0	0	0	0	0	0	200	903	0	0	0	0	0	0	0	603	903	0
8894	3	0	0	0	0	0	0	200	300	0	0	0	0	0	0	0	200	903	0	0	0	0	0	0	0	603	903	0
8894	4	0	0	0	0	0	0	200	300	0	0	0	0	0	0	0	200	903	0	0	0	0	0	0	0	603	903	0
8894	5	0	0	0	0	0	0	200	300	0	0	0	0	0	0	0	200	903	0	0	0	0	0	0	0	603	903	0
8894	6	0	0	0	0	0	0	200	300	0	0	0	0	0	0	0	200	903	0	0	0	0	0	0	0	603	903	0
8894	7	0	0	0	0	0	0	200	300	0	0	0	0	0	0	0	200	903	0	0	0	0	0	0	0	603	903	0
8894	8	0	0	0	0	0	0	200	300	0	0	0	0	0	0	0	200	903	0	0	0	0	0	0	0	603	903	0
8894	9	0	0	0	0	0	0	200	300	0	0	0	0	0	0	0	200	903	0	0	0	0	0	0	0	603	903	0
8895	0	0	0	0	0	0	0	200	300	0	0	0	0	0	0	0	200	903	0	0	0	0	0	0	0	603	903	0
8895	1	0	0	0	0	0	0	200	300	0	0	0	0	0	0	0	200	903	0	0	0	0	0	0	0	603	903	0
8895	2	0	0	0	0	0	0	200	300	0	0	0	0	0	0	0	200	903	0	0	0	0	0	0	0	603	903	0
8895	3	0	0	0	0	0	0	200	300	0	0	0	0	0	0	0	200	903	0	0	0	0	0	0	0	603	903	0
8895	4	0	0	0	0	0	0	200	300	0	0	0	0	0	0	0	200	903	0	0	0	0	0	0	0	603	903	0
8895	5	0	0	0	0	0	0	200	300	0	0	0	0	0	0	0	200	903	0	0	0	0	0	0	0	603	903	0
8895	6	0	0	0	0	0	0	200	300	0	0	0	0	0	0	0	200	903	0	0	0	0	0	0	0	603	903	0
8895	7	0	0	0	0	0	0	200	300	0	0	0	0	0	0	0	200	903	0	0	0	0	0	0	0	603	903	0
8895	8	0	0	0	0	0	0	200	300	0	0	0	0	0	0	0	200	903	0	0	0	0	0	0	0	603	903	0
8895	9	0	0	0	0	0	0	200	300	0	0	0	0	0	0	0	200	903	0	0	0	0	0	0	0	603	903	0
8896	0	0	0	0	0	0	0	200	300	0	0	0	0	0	0	0	200	903	0	0	0	0	0	0	0	603	903	0
8896	1	0	0	0	0	0	0	200	300	0	0	0	0	0	0	0	200	903	0	0	0	0	0	0	0	603	903	0
8896	2	0	0	0	0	0	0	200	300	0	0	0	0	0	0	0	200	903	0	0	0	0	0	0	0	603	903	0
8896	3	0	0	0	0	0	0	200	300	0	0	0	0	0	0	0	200	903	0	0	0	0	0	0	0	603	903	0
8896	4	0	0	0	0	0	0	200	300	0	0	0	0	0	0	0	200	903	0	0	0	0	0	0	0	603	903	0
8896	5	0	0	0	0	0	0	200	300	0	0	0	0	0	0	0	200	903	0	0	0	0	0	0	0	603	903	0
8896	6	0	0	0	0	0	0	200	300	0	0	0	0	0	0	0	200	903	0	0	0	0	0	0	0	603	903	0
8896	7	0	0	0	0	0	0	200	300	0	0	0	0	0	0	0	200	903	0	0	0	0	0	0	0	603	903	0
8896	8	0	0	0	0	0	0	200	300	0	0	0	0	0	0	0	200	903	0	0	0	0	0	0	0	603	903	0
8896	9	0	0	0	0	0	0	200	300	0	0	0	0	0	0	0	200	903	0	0	0	0	0	0	0	603	903	0
8897	0	0	0	0	0	0	0	200	300	0	0	0	0	0	0	0	200	903	0	0	0	0	0	0	0	603	903	0
8897	1	0	0	0	0	0	0	200	300	0	0	0	0	0	0	0	200	903	0	0	0	0	0	0	0	603	903	0
8897	2	0	0	0	0	0	0	200	300	0	0	0	0	0	0	0	200	903	0	0	0	0	0	0	0	603	903	0
8897	3	0	0	0	0	0	0	200	300	0	0	0	0	0	0	0	200	903	0	0	0	0	0	0	0	603	903	0
8897	4	0	0	0	0	0	0	200	300	0	0	0	0	0	0	0	200	903	0	0	0	0	0	0	0	603	903	0
8897	5	0	0	0	0	0	0	200	300	0	0	0	0	0	0	0	200	903	0	0	0	0	0	0	0	603	903	0
8897	6	0	0	0	0	0	0	200	300	0	0	0	0	0	0	0	200	903	0	0	0	0	0	0	0	603	903	0
8897	7	0	0	0	0	0	0	200	300	0	0	0	0	0	0	0	200	903	0	0	0	0	0	0	0	603	903	0
8897	8	0	0	0	0	0	0	200	300	0	0	0	0	0	0	0	200	903	0	0	0	0	0	0	0	603	903	0
8897	9	0	0	0	0	0	0	200	300	0	0	0	0	0	0	0	200	903	0	0	0	0	0	0	0	603	903	0
8898	0	0	0	0	0	0	0	200	300	0	0	0	0	0	0	0	200	903	0	0	0	0	0	0	0	603	903	0
8898	1	0	0	0	0	0	0	200	300	0	0	0	0	0	0	0	200	903	0	0	0	0	0	0	0	603	903	0
8898	2	0	0	0	0	0	0	200	300	0	0	0	0	0	0	0	200	903	0	0	0	0	0	0	0	603	903	0
8898	3	0	0	0	0	0	0	200	300	0	0	0	0	0	0	0	200	903	0	0	0	0	0	0	0	603	903	0
8898	4	0	0	0	0	0	0	200	300	0	0	0	0	0	0	0	200	903	0	0	0	0	0	0	0	603	903	0
8898	5	0	0	0	0	0	0	200	300	0	0	0	0	0	0	0	200	903	0	0	0	0	0	0	0	603	903	0
8898	6	0	0	0	0	0	0	200	300	0	0	0	0	0	0	0	200	903	0	0	0	0	0	0	0	603	903	0
8898	7	0	0	0	0	0	0	200	300	0	0	0	0	0	0	0	200	903	0	0	0	0	0	0	0	603	903	0
8898	8	0	0	0	0	0	0	200	300	0	0	0	0	0	0	0	200	903	0	0	0	0	0	0	0	603	903	0
8898	9	0	0	0	0	0	0	200	300	0	0	0	0	0	0	0	200	903	0	0	0	0	0	0	0	603	903	0
8899	0	0	0	0	0	0	0	200	300	0	0	0	0	0	0	0	200	903	0	0	0	0	0	0	0	603	903	0
8899	1	0	0	0	0	0	0	200	300	0	0	0	0	0	0	0	200	903	0	0	0	0	0	0	0	603	903	0
8899	2	0	0	0	0	0	0	200	300	0	0	0	0	0	0	0	200	903	0	0	0	0	0	0	0	603	903	0
8899	3	0	0	0	0	0	0	200	300	0	0	0	0	0	0	0	200	903	0	0	0	0	0	0	0	603	903	0
8899	4	0	0	0	0	0	0	200	300	0	0	0	0	0	0	0	200	903	0	0	0	0	0	0	0	603	903	0
8899	5	0	0	0	0	0	0	200	300	0	0	0	0	0	0	0	200	903	0	0	0	0	0	0	0	603	903	0
8899	6	0	0	0	0	0	0	200	300	0	0	0	0	0	0	0	200	903	0	0	0	0	0	0	0	603	903	0
8899	7	0	0	0	0	0	0	200	300	0	0	0	0	0	0	0	200	903	0	0	0	0	0	0	0	603	903	0
8899	8	0	0	0	0	0	0	200	300	0	0	0	0	0	0	0	200	903	0	0	0	0	0	0	0	603	903	0
8899	9	0	0	0	0	0	0	200	300	0	0	0	0	0	0	0	200	903	0	0	0	0	0	0	0	603	903	0
8900	0	0	0	0	0	0	0	200	300	0	0	0	0	0	0	0	200	903	0	0	0	0	0	0	0	603	903	0
8900	1	0	0	0	0	0	0	200	300	0	0	0	0	0	0	0	200	903	0	0	0	0	0	0	0	603	903	0
8900	2	0	0	0	0	0	0	200	300	0	0	0	0	0	0	0	200	903	0	0	0	0	0	0	0	603	903	0
8900	3	0	0	0	0	0	0	200	300	0	0	0	0	0	0	0	200	903	0	0	0	0	0	0	0	603	903	0
8900	4	0	0	0	0	0	0	200	300	0	0	0	0	0	0	0	200	903	0	0	0	0	0	0	0	603	903	0
8900	5	0	0	0	0	0	0	200	300	0	0	0	0	0	0	0	200	903	0	0	0	0	0	0	0	603	903	0
8900	6	0	0	0	0	0	0	200	300	0	0	0	0	0	0	0	200	903	0	0	0	0	0	0	0	603	903	0
8900	7	0	0	0	0	0	0	200	300	0	0	0	0	0	0	0	200	903	0	0	0	0	0	0	0	603	903	0
8900	8	0	0	0	0	0	0	200	300	0	0	0	0	0	0	0	200	903	0	0	0	0	0	0	0	603	903	0
8900	9	0	0	0	0	0	0	200	300	0	0	0	0	0	0	0	200	903	0	0	0	0	0	0	0	603	903	0
8901	0	0	0	0	0	0	0	200	300	0	0	0	0	0	0	0	200	903	0	0	0	0	0	0	0	603	903	0
8901	1	0	0	0	0	0	0	200	300	0	0	0	0	0	0	0	200	903	0	0	0	0	0	0	0	603	903	0
8901	2	0	0	0	0	0	0	200	300	0	0	0	0	0	0	0	200	903	0	0	0	0	0	0	0	603	903	0
8901	3	0	0	0	0	0	0	200	300	0	0	0	0	0	0	0	200	903	0	0	0	0	0	0	0	603	903	0
8901	4	0	0	0	0	0	0	200	300	0	0	0	0	0	0	0	200	903	0	0	0	0	0	0	0	603	903	0
8901	5	0.120193	10.3935	-1.78863	946.379	-67.6952	-2002.76	162.152	-229.109	0	0	0	0	0	0	0	200	903	0	0	0	0	0	0	0	603	903	0
8901	6	0.883132	11.0039	-2.39898	671.721	-250.801	-2048.54	95.4552	19.9972	0	0	0	0	0	0	0	200	903	0	0	0	0	0	0	0	603	903	0
8901	7	0.577956	11.6142	-3.31451	580.168	176.445	-2231.64	253.234	124.961	0	0	0	0	0	0	0	200	903	0	0	0	0	0	0	0	603	903	0
8901	8	-0.184983	12.9875	-1.48345	763.274	-67.6952	-2231.64	154.366	-214.525	0	0	0	0	0	0	0	200	903	0	0	0	0	0	0	0	603	903	0
8901	9	-0.490159	12.5298	-3.31451	122.405	481.621	-2323.2	345.307	263.07	0	0	0	0	0	0	0	200	903	0	0	0	0	0	0	0	603	903	0
8902	0	0.120193	12.6823	-2.39898	397.063	115.41	-2414.75	248.108	134.487	0	0	0	0	0	0	0	200	903	0	0	0	0	0	0	0	603	903	0
8902	1	1.64607	14.2082	-1.48345	30.8518	-128.73	-2414.75	113.222	279.203	0	0	0	0	0	0	0	200	903	0	0	0	0	0	0	0	603	903	0
8902	2	1.18831	15.1237	-2.0938	305.51	-6.66007	-2506.3	196.819	154.089	0	0	0	0	0	0	0	200	903	0	0	0	0	0	0	0	603	903	0
8902	3	1.79866	15.5815	-3.31451	-60.7009	-67.6952	-2597.85	179.576	318.314	0	0	0	0	0	0	0	200	903	0	0	0	0	0	0	0	603	903	0
8902	4	1.79866	16.8022	-4.53521	30.8518	54.3751	-2780.96	211.99	293.197	0	0	0	0	0	0	0	200	903	0	0	0	0	0	0	0	603	903	0
8902	5	0.883132	16.6496	-3.61968	213.957	-6.66007	-2780.96	198.16	240.891	0	0	0	0	0	0	0	200	903	0	0	0	0	0	0	0	603	903	0
8902	6	1.03572	19.854	-3.61968	-60.7009	-189.766	-2918.29	147.574	316.77	0	0	0	0	0	0	0	200	903	0	0	0	0	0	0	0	603	903	0
8902	7	3.01936	19.7014	-3.00933	763.274	-6.66007	-2964.07	197.787	46.3643	0	0	0	0	0	0	0	200	903	0	0	0	0	0	0	0	603	903	0
8902	8	4.24007	20.3117	-4.53521	-610.017	-128.73	-3284.5	171.615	434.507	0	0	0	0	0	0	0	200	903	0	0	0	0	0	0	0	603	903	0
8902	9	2.86677	21.5324	-6.06109	30.8518	-311.836	-3238.72	148.551	294.91	0	0	0	0	0	0	0	200	903	0	0	0	0	0	0	0	603	903	0
8903	0	2.25642	21.5324	-4.84039	30.8518	-311.836	-3376.05	135.576	293.626	0	0	0	0	0	0	0	200	903	0	0	0	0	0	0	0	603	903	0
8903	1	2.86677	21.3799	-3.00933	488.616	-250.801	-3467.61	116.659	137.633	0	0	0	0	0	0	0	200	903	0	0	0	0	0	0	0	603	903	0
8903	2	1.49348	23.5161	-2.39898	580.168	-250.801	-3559.16	95.4552	58.1604	0	0	0	0	0	0	0	200	903	0	0	0	0	0	0	0	603	903	0
8903	3	3.17195	23.8213	-4.23003	854.827	-128.73	-3696.49	169.568	97.915	0	0	0	0	0	0	0	200	903	0	0	0	0	0	0	0	603	903	0
8903	4	2.71419	23.9738	-5.14556	763.274	-372.871	-3925.37	127.535	151.664	0	0	0	0	0	0	0	200	903	0	0	0	0	0	0	0	603	903	0
8903	5	2.40901	25.3471	-4.84039	1404.14	-433.906	-3833.82	110.357	9.91095	0	0	0	0	0	0	0	200	903	0	0	0	0	0	0	0	603	903	0
8903	6	2.10384	25.3471	-5.14556	854.827	-311.836	-4062.7	139.397	133.871	0	0	0	0	0	0	0	200	903	0	0	0	0	0	0	0	603	903	0
8903	7	1.49348	25.3471	-3.92486	397.063	-128.73	-3971.15	167.201	198.834	0	0	0	0	0	0	0	200	903	0	0	0	0	0	0	0	603	903	0
8903	8	2.71419	24.8894	-3.92486	1221.04	-67.6952	-4245.8	182.752	-11.1035	0	0	0	0	0	0	0	200	903	0	0	0	0	0	0	0	603	903	0
8903	9	3.32454	25.8049	-5.14556	1221.04	-250.801	-4383.13	151.259	62.7009	0	0	0	0	0	0	0	200	903	0	0	0	0	0	0	0	603	903	0
8904	0	2.5616	25.3471	-6.06109	1312.59	-189.766	-4383.13	168.691	83.4399	0	0	0	0	0	0	0	200	903	0	0	0	0	0	0	0	603	903	0
8904	1	1.95125	26.1101	-4.53521	1678.8	-433.906	-4383.13	104.325	-70.1705	0	0	0	0	0	0	0	200	903	0	0	0	0	0	0	0	603	903	0
8904	2	1.64607	26.5678	-5.14556	1037.93	-128.73	-4383.13	174.982	98.286	0	0	0	0	0	0	0	200	903	0	0	0	0	0	0	0	603	903	0
8904	3	1.03572	26.5678	-3.31451	763.274	-128.73	-4520.46	161.162	69.7172	0	0	0	0	0	0	0	200	903	0	0	0	0	0	0	0	603	903	0
8904	4	3.01936	26.873	-4.23003	946.379	-250.801	-4520.46	140.71	76.2715	0	0	0	0	0	0	0	200	903	0	0	0	0	0	0	0	603	903	0
8904	5	2.86677	27.0256	-5.75591	1129.48	-555.977	-4520.46	103.408	103.77	0	0	0	0	0	0	0	200	903	0	0	0	0	0	0	0	603	903	0
8904	6	1.95125	25.9575	-6.36626	397.063	-189.766	-4200.03	170.192	237.63	0	0	0	0	0	0	0	200	903	0	0	0	0	0	0	0	603	903	0
8904	7	3.62971	26.873	-5.14556	763.274	-250.801	-4291.58	151.259	151.664	0	0	0	0	0	0	0	200	903	0	0	0	0	0	0	0	603	903	0
8904	8	2.25642	27.4834	-5.45074	1312.59	-494.941	-4657.79	109.197	59.1904	0	0	0	0	0	0	0	200	903	0	0	0	0	0	0	0	603	903	0
8904	9	2.25642	27.0256	-6.36626	671.721	-739.082	-4520.46	83.9065	194.487	0	0	0	0	0	0	0	200	903	0	0	0	0	0	0	0	603	903	0
8905	0	3.7823	27.4834	-7.28179	671.721	-678.047	-4291.58	106.885	207.753	0	0	0	0	0	0	0	200	903	0	0	0	0	0	0	0	603	903	0
8905	1	3.01936	26.7204	-5.75591	671.721	-372.871	-4154.25	135.219	183.299	0	0	0	0	0	0	0	200	903	0	0	0	0	0	0	0	603	903	0
8905	2	2.5616	27.1782	-6.06109	763.274	-372.871	-4291.58	138.481	174.07	0	0	0	0	0	0	0	200	903	0	0	0	0	0	0	0	603	903	0
8905	3	2.71419	26.873	-5.75591	1129.48	-494.941	-4291.58	114.012	103.77	0	0	0	0	0	0	0	200	903	0	0	0	0	0	0	0	603	903	0
8905	4	4.39265	27.1782	-6.06109	671.721	-433.906	-4200.03	128.411	189.175	0	0	0	0	0	0	0	200	903	0	0	0	0	0	0	0	603	903	0
8905	5	4.08748	27.0256	-6.67144	1770.35	-372.871	-4016.92	144.109	34.637	0	0	0	0	0	0	0	200	903	0	0	0	0	0	0	0	603	903	0
8905	6	3.01936	27.1782	-5.14556	1037.93	-311.836	-4016.92	139.397	98.286	0	0	0	0	0	0	0	200	903	0	0	0	0	0	0	0	603	903	0
8905	7	2.71419	26.5678	-7.28179	763.274	-800.117	-4291.58	90.1208	195.18	0	0	0	0	0	0	0	200	903	0	0	0	0	0	0	0	603	903	0
8905	8	3.62971	25.9575	-4.53521	946.379	-678.047	-3696.49	50.4928	91.3262	0	0	0	0	0	0	0	200	903	0	0	0	0	0	0	0	603	903	0
8905	9	4.39265	26.1101	-5.75591	854.827	-494.941	-3833.82	114.012	151.487	0	0	0	0	0	0	0	200	903	0	0	0	0	0	0	0	603	903	0
8906	0	3.7823	25.6523	-5.75591	671.721	-311.836	-3650.71	145.823	183.299	0	0	0	0	0	0	0	200	903	0	0	0	0	0	0	0	603	903	0
8906	1	4.39265	24.279	-6.97662	763.274	-128.73	-3788.04	181.548	190.595	0	0	0	0	0	0	0	200	903	0	0	0	0	0	0	0	603	903	0
8906	2	2.71419	25.1945	-6.36626	763.274	-678.047	-3742.26	93.4938	180.106	0	0	0	0	0	0	0	200	903	0	0	0	0	0	0	0	603	903	0
8906	3	4.54524	25.042	-6.67144	1221.04	-983.223	-3559.16	52.6221	116.975	0	0	0	0	0	0	0	200	903	0	0	0	0	0	0	0	603	903	0
8906	4	3.17195	24.5842	-5.75591	1129.48	-555.977	-3604.93	103.408	103.77	0	0	0	0	0	0	0	200	903	0	0	0	0	0	0	0	603	903	0
8906	5	3.93489	24.7368	-5.45074	1404.14	-494.941	-3238.72	109.197	42.394	0	0	0	0	0	0	0	200	903	0	0	0	0	0	0	0	603	903	0
8906	6	3.62971	23.9738	-7.58697	1312.59	-617.012	-3559.16	118.675	126.994	0	0	0	0	0	0	0	200	903	0	0	0	0	0	0	0	603	903	0
8906	7	3.01936	23.3635	-6.06109	854.827	-617.012	-3696.49	98.2012	158.965	0	0	0	0	0	0	0	200	903	0	0	0	0	0	0	0	603	903	0
8906	8	2.25642	23.3635	-8.19732	1495.7	-983.223	-3513.38	80.0556	117.538	0	0	0	0	0	0	0	200	903	0	0	0	0	0	0	0	603	903	0
8906	9	3.01936	23.3635	-6.36626	1587.25	-983.223	-3421.83	45.5573	50.6782	0	0	0	0	0	0	0	200	903	0	0	0	0	0	0	0	603	903	0
8907	0	3.32454	22.9057	-6.67144	1770.35	-372.871	-2872.51	144.109	34.637	0	0	0	0	0	0	0	200	903	0	0	0	0	0	0	0	603	903	0
8907	1	5.15559	22.6006	-7.28179	1404.14	-678.047	-3421.83	106.885	107.171	0	0	0	0	0	0	0	200	903	0	0	0	0	0	0	0	603	903	0
8907	2	3.93489	22.2954	-6.67144	1312.59	-678.047	-3376.05	98.3658	103.252	0	0	0	0	0	0	0	200	903	0	0	0	0	0	0	0	603	903	0
8907	3	2.40901	21.8376	-6.36626	1312.59	-617.012	-3467.61	103.081	93.821	0	0	0	0	0	0	0	200	903	0	0	0	0	0	0	0	603	903	0
8907	4	3.01936	22.2954	-6.06109	1495.7	-494.941	-3330.28	118.341	53.2299	0	0	0	0	0	0	0	200	903	0	0	0	0	0	0	0	603	903	0
8907	5	2.71419	20.1591	-3.61968	1404.14	-800.117	-3192.95	-21.0462	-87.9187	0	0	0	0	0	0	0	200	903	0	0	0	0	0	0	0	603	903	0
8907	6	3.7823	21.2273	-6.97662	1770.35	-372.871	-3101.39	146.554	46.2446	0	0	0	0	0	0	0	200	903	0	0	0	0	0	0	0	603	903	0
8907	7	4.08748	21.685	-6.36626	671.721	-739.082	-3055.62	83.9065	194.487	0	0	0	0	0	0	0	200	903	0	0	0	0	0	0	0	603	903	0
8907	8	3.93489	20.7695	-5.14556	946.379	-555.977	-3238.72	91.9503	116.079	0	0	0	0	0	0	0	200	903	0	0	0	0	0	0	0	603	903	0
8907	9	2.86677	20.1591	-8.19732	854.827	-433.906	-2826.74	147.067	195.719	0	0	0	0	0	0	0	200	903	0	0	0	0	0	0	0	603	903	0
8908	0	3.17195	19.5488	-6.36626	946.379	-433.906	-2689.41	131.843	151.345	0	0	0	0	0	0	0	200	903	0	0	0	0	0	0	0	603	903	0
8908	1	3.47713	19.091	-6.36626	854.827	-678.047	-2780.96	93.4938	165.726	0	0	0	0	0	0	0	200	903	0	0	0	0	0	0	0	603	903	0
8908	2	5.15559	18.7859	-7.89214	1037.93	-1044.26	-2872.51	67.6838	168.485	0	0	0	0	0	0	0	200	903	0	0	0	0	0	0	0	603	903	0
8908	3	4.08748	19.091	-7.28179	1495.7	-678.047	-2368.97	106.885	94.5979	0	0	0	0	0	0	0	200	903	0	0	0	0	0	0	0	603	903	0
8908	4	3.01936	18.6333	-7.89214	1312.59	-494.941	-2323.2	137.287	133.684	0	0	0	0	0	0	0	200	903	0	0	0	0	0	0	0	603	903	0
8908	5	2.10384	18.4807	-7.28179	854.827	-678.047	-2002.76	106.885	182.608	0	0	0	0	0	0	0	200	903	0	0	0	0	0	0	0	603	903	0
8908	6	3.32454	17.8703	-6.06109	854.827	-739.082	-2414.75	78.0612	158.965	0	0	0	0	0	0	0	200	903	0	0	0	0	0	0	0	603	903	0
8908	7	3.93489	16.6496	-5.75591	1037.93	-678.047	-2323.2	82.2	119.676	0	0	0	0	0	0	0	200	903	0	0	0	0	0	0	0	603	903	0
8908	8	3.01936	16.1919	-7.58697	671.721	-800.117	-2414.75	94.5406	211.464	0	0	0	0	0	0	0	200	903	0	0	0	0	0	0	0	603	903	0
8908	9	2.71419	17.5652	-7.58697	397.063	-617.012	-2185.87	118.675	247.665	0	0	0	0	0	0	0	200	903	0	0	0	0	0	0	0	603	903	0
8909	0	3.32454	16.0393	-6.97662	1404.14	-1166.33	-2414.75	32.8232	98.7358	0	0	0	0	0	0	0	200	903	0	0	0	0	0	0	0	603	903	0
8909	1	2.25642	16.6496	-6.67144	1770.35	-739.082	-1773.88	89.217	34.637	0	0	0	0	0	0	0	200	903	0	0	0	0	0	0	0	603	903	0
8909	2	3.17195	16.0393	-6.06109	1404.14	-861.153	-2140.09	57.9212	68.3349	0	0	0	0	0	0	0	200	903	0	0	0	0	0	0	0	603	903	0
8909	3	4.39265	15.8867	-6.97662	1312.59	-433.906	-1956.99	137.806	111.859	0	0	0	0	0	0	0	200	903	0	0	0	0	0	0	0	603	903	0
8909	4	3.17195	16.0393	-5.45074	1312.59	-617.012	-1911.21	86.8022	59.1904	0	0	0	0	0	0	0	200	903	0	0	0	0	0	0	0	603	903	0
8909	5	2.5616	14.0556	-7.28179	1221.04	-739.082	-1819.66	98.5027	132.316	0	0	0	0	0	0	0	200	903	0	0	0	0	0	0	0	603	903	0
8909	6	2.5616	14.0556	-7.58697	2136.56	-678.047	-1865.43	110.63	18.3902	0	0	0	0	0	0	0	200	903	0	0	0	0	0	0	0	603	903	0
8909	7	4.08748	13.5979	-5.45074	1495.7	-433.906	-1773.88	120.395	25.5976	0	0	0	0	0	0	0	200	903	0	0	0	0	0	0	0	603	903	0
8909	8	5.00301	12.8349	-7.28179	1312.59	-494.941	-1499.22	132.03	119.744	0	0	0	0	0	0	0	200	903	0	0	0	0	0	0	0	603	903	0
8909	9	3.93489	12.6823	-8.19732	1221.04	-800.117	-1682.33	102.393	151.044	0	0	0	0	0	0	0	200	903	0	0	0	0	0	0	0	603	903	0
8910	0	3.01936	11.6142	-7.58697	1495.7	-617.012	-1316.12	118.675	102.86	0	0	0	0	0	0	0	200	903	0	0	0	0	0	0	0	603	903	0
8910	1	2.86677	11.4616	-6.67144	1037.93	-800.117	-1407.67	80.0683	144.422	0	0	0	0	0	0	0	200	903	0	0	0	0	0	0	0	603	903	0
8910	2	3.62971	11.7668	-5.75591	1037.93	-372.871	-1270.34	135.219	119.676	0	0	0	0	0	0	0	200	903	0	0	0	0	0	0	0	603	903	0
8910	3	3.7823	10.6987	-6.06109	580.168	-678.047	-1224.56	88.1312	204.28	0	0	0	0	0	0	0	200	903	0	0	0	0	0	0	0	603	903	0
8910	4	3.47713	10.6987	-7.58697	1037.93	-494.941	-1316.12	134.764	163.195	0	0	0	0	0	0	0	200	903	0	0	0	0	0	0	0	603	903	0
8910	5	2.10384	10.2409	-7.58697	763.274	-922.188	-1224.56	78.4511	199.397	0	0	0	0	0	0	0	200	903	0	0	0	0	0	0	0	603	903	0
8910	6	2.10384	10.5461	-5.45074	763.274	-617.012	-904.13	86.8022	159.969	0	0	0	0	0	0	0	200	903	0	0	0	0	0	0	0	603	903	0
8910	7	1.95125	10.0883	-5.75591	854.827	-555.977	-629.471	103.408	151.487	0	0	0	0	0	0	0	200	903	0	0	0	0	0	0	0	603	903	0
8910	8	2.86677	10.2409	-6.06109	1587.25	-494.941	-812.577	118.341	38.1249	0	0	0	0	0	0	0	200	903	0	0	0	0	0	0	0	603	903	0
8910	9	3.62971	9.78317	-6.67144	1129.48	-555.977	-904.13	116.663	130.699	0	0	0	0	0	0	0	200	903	0	0	0	0	0	0	0	603	903	0
8911	0	3.01936	9.17282	-7.89214	763.274	-678.047	-1041.46	114.086	203.287	0	0	0	0	0	0	0	200	903	0	0	0	0	0	0	0	603	903	0
8911	1	2.10384	8.71506	-6.67144	1129.48	-433.906	-766.8	134.961	130.699	0	0	0	0	0	0	0	200	903	0	0	0	0	0	0	0	603	903	0
8911	2	2.25642	8.40988	-6.06109	854.827	-617.012	-766.8	98.2012	158.965	0	0	0	0	0	0	0	200	903	0	0	0	0	0	0	0	603	903	0
8911	3	0	0	0	0	0	0	200	300	0	0	0	0	0	0	0	200	903	0	0	0	0	0	0	0	603	903	0
8911	4	0	0	0	0	0	0	200	300	0	0	0	0	0	0	0	200	903	0	0	0	0	0	0	0	603	903	0
8911	5	2.5616	7.64694	-6.67144	580.168	-678.047	-812.577	98.3658	213.037	0	0	0	0	0	0	0	200	903	0	0	0	0	0	0	0	603	903	0
8911	6	0	0	0	0	0	0	200	300	0	0	0	0	0	0	0	200	903	0	0	0	0	0	0	0	603	903	0
8911	7	0	0	0	0	0	0	200	300	0	0	0	0	0	0	0	200	903	0	0	0	0	0	0	0	603	903	0
8911	8	0	0	0	0	0	0	200	300	0	0	0	0	0	0	0	200	903	0	0	0	0	0	0	0	603	903	0
8911	9	0	0	0	0	0	0	200	300	0	0	0	0	0	0	0	200	903	0	0	0	0	0	0	0	603	903	0
8912	0	0	0	0	0	0	0	200	300	0	0	0	0	0	0	0	200	903	0	0	0	0	0	0	0	603	903	0
8912	1	0	0	0	0	0	0	200	300	0	0	0	0	0	0	0	200	903	0	0	0	0	0	0	0	603	903	0
8912	2	0	0	0	0	0	0	200	300	0	0	0	0	0	0	0	200	903	0	0	0	0	0	0	0	603	903	0
8912	3	0	0	0	0	0	0	200	300	0	0	0	0	0	0	0	200	903	0	0	0	0	0	0	0	603	903	0
8912	4	0	0	0	0	0	0	200	300	0	0	0	0	0	0	0	200	903	0	0	0	0	0	0	0	603	903	0
8912	5	0	0	0	0	0	0	200	300	0	0	0	0	0	0	0	200	903	0	0	0	0	0	0	0	603	903	0
8912	6	0	0	0	0	0	0	200	300	0	0	0	0	0	0	0	200	903	0	0	0	0	0	0	0	603	903	0
8912	7	0	0	0	0	0	0	200	300	0	0	0	0	0	0	0	200	903	0	0	0	0	0	0	0	603	903	0
8912	8	0	0	0	0	0	0	200	300	0	0	0	0	0	0	0	200	903	0	0	0	0	0	0	0	603	903	0
8912	9	0	0	0	0	0	0	200	300	0	0	0	0	0	0	0	200	903	0	0	0	0	0	0	0	603	903	0
8913	0	0	0	0	0	0	0	200	300	0	0	0	0	0	0	0	200	903	0	0	0	0	0	0	0	603	903	0
8913	1	0	0	0	0	0	0	200	300	0	0	0	0	0	0	0	200	903	0	0	0	0	0	0	0	603	903	0
8913	2	0	0	0	0	0	0	200	300	0	0	0	0	0	0	0	200	903	0	0	0	0	0	0	0	603	903	0
8913	3	0	0	0	0	0	0	200	300	0	0	0	0	0	0	0	200	903	0	0	0	0	0	0	0	603	903	0
8913	4	0	0	0	0	0	0	200	300	0	0	0	0	0	0	0	200	903	0	0	0	0	0	0	0	603	903	0
8913	5	0	0	0	0	0	0	200	300	0	0	0	0	0	0	0	200	903	0	0	0	0	0	0	0	603	903	0
8913	6	0	0	0	0	0	0	200	300	0	0	0	0	0	0	0	200	903	0	0	0	0	0	0	0	603	903	0
8913	7	0	0	0	0	0	0	200	300	0	0	0	0	0	0	0	200	903	0	0	0	0	0	0	0	603	903	0
8913	8	0	0	0	0	0	0	200	300	0	0	0	0	0	0	0	200	903	0	0	0	0	0	0	0	603	903	0
8913	9	0	0	0	0	0	0	200	300	0	0	0	0	0	0	0	200	903	0	0	0	0	0	0	0	603	903	0
8914	0	0	0	0	0	0	0	200	300	0	0	0	0	0	0	0	200	903	0	0	0	0	0	0	0	603	903	0
8914	1	0	0	0	0	0	0	200	300	0	0	0	0	0	0	0	200	903	0	0	0	0	0	0	0	603	903	0
8914	2	0	0	0	0	0	0	200	300	0	0	0	0	0	0	0	200	903	0	0	0	0	0	0	0	603	903	0
8914	3	0	0	0	0	0	0	200	300	0	0	0	0	0	0	0	200	903	0	0	0	0	0	0	0	603	903	0
8914	4	0	0	0	0	0	0	200	300	0	0	0	0	0	0	0	200	903	0	0	0	0	0	0	0	603	903	0
8914	5	0	0	0	0	0	0	200	300	0	0	0	0	0	0	0	200	903	0	0	0	0	0	0	0	603	903	0
8914	6	0	0	0	0	0	0	200	300	0	0	0	0	0	0	0	200	903	0	0	0	0	0	0	0	603	903	0
8914	7	0	0	0	0	0	0	200	300	0	0	0	0	0	0	0	200	903	0	0	0	0	0	0	0	603	903	0
8914	8	0	0	0	0	0	0	200	300	0	0	0	0	0	0	0	200	903	0	0	0	0	0	0	0	603	903	0
8914	9	0	0	0	0	0	0	200	300	0	0	0	0	0	0	0	200	903	0	0	0	0	0	0	0	603	903	0
8915	0	0	0	0	0	0	0	200	300	0	0	0	0	0	0	0	200	903	0	0	0	0	0	0	0	603	903	0
8915	1	0	0	0	0	0	0	200	300	0	0	0	0	0	0	0	200	903	0	0	0	0	0	0	0	603	903	0
8915	2	0	0	0	0	0	0	200	300	0	0	0	0	0	0	0	200	903	0	0	0	0	0	0	0	603	903	0
8915	3	0	0	0	0	0	0	200	300	0	0	0	0	0	0	0	200	903	0	0	0	0	0	0	0	603	903	0
8915	4	0	0	0	0	0	0	200	300	0	0	0	0	0	0	0	200	903	0	0	0	0	0	0	0	603	903	0
8915	5	0	0	0	0	0	0	200	300	0	0	0	0	0	0	0	200	903	0	0	0	0	0	0	0	603	903	0
8915	6	0	0	0	0	0	0	200	300	0	0	0	0	0	0	0	200	903	0	0	0	0	0	0	0	603	903	0
8915	7	0	0	0	0	0	0	200	300	0	0	0	0	0	0	0	200	903	0	0	0	0	0	0	0	603	903	0
8915	8	0	0	0	0	0	0	200	300	0	0	0	0	0	0	0	200	903	0	0	0	0	0	0	0	603	903	0
8915	9	0	0	0	0	0	0	200	300	0	0	0	0	0	0	0	200	903	0	0	0	0	0	0	0	603	903	0
8916	0	0	0	0	0	0	0	200	300	0	0	0	0	0	0	0	200	903	0	0	0	0	0	0	0	603	903	0
8916	1	0	0	0	0	0	0	200	300	0	0	0	0	0	0	0	200	903	0	0	0	0	0	0	0	603	903	0
8916	2	0	0	0	0	0	0	200	300	0	0	0	0	0	0	0	200	903	0	0	0	0	0	0	0	603	903	0
8916	3	0	0	0	0	0	0	200	300	0	0	0	0	0	0	0	200	903	0	0	0	0	0	0	0	603	903	0
8916	4	0	0	0	0	0	0	200	300	0	0	0	0	0	0	0	200	903	0	0	0	0	0	0	0	603	903	0
8916	5	0	0	0	0	0	0	200	300	0	0	0	0	0	0	0	200	903	0	0	0	0	0	0	0	603	903	0
8916	6	0	0	0	0	0	0	200	300	0	0	0	0	0	0	0	200	903	0	0	0	0	0	0	0	603	903	0
8916	7	0	0	0	0	0	0	200	300	0	0	0	0	0	0	0	200	903	0	0	0	0	0	0	0	603	903	0
8916	8	0	0	0	0	0	0	200	300	0	0	0	0	0	0	0	200	903	0	0	0	0	0	0	0	603	903	0
8916	9	0	0	0	0	0	0	200	300	0	0	0	0	0	0	0	200	903	0	0	0	0	0	0	0	603	903	0
8917	0	0	0	0	0	0	0	200	300	0	0	0	0	0	0	0	200	903	0	0	0	0	0	0	0	603	903	0
8917	1	0	0	0	0	0	0	200	300	0	0	0	0	0	0	0	200	903	0	0	0	0	0	0	0	603	903	0
8917	2	0	0	0	0	0	0	200	300	0	0	0	0	0	0	0	200	903	0	0	0	0	0	0	0	603	903	0
8917	3	0	0	0	0	0	0	200	300	0	0	0	0	0	0	0	200	903	0	0	0	0	0	0	0	603	903	0
8917	4	0	0	0	0	0	0	200	300	0	0	0	0	0	0	0	200	903	0	0	0	0	0	0	0	603	903	0
8917	5	0	0	0	0	0	0	200	300	0	0	0	0	0	0	0	200	903	0	0	0	0	0	0	0	603	903	0
8917	6	0	0	0	0	0	0	200	300	0	0	0	0	0	0	0	200	903	0	0	0	0	0	0	0	603	903	0
8917	7	0	0	0	0	0	0	200	300	0	0	0	0	0	0	0	200	903	0	0	0	0	0	0	0	603	903	0
8917	8	0	0	0	0	0	0	200	300	0	0	0	0	0	0	0	200	903	0	0	0	0	0	0	0	603	903	0
8917	9	0	0	0	0	0	0	200	300	0	0	0	0	0	0	0	200	903	0	0	0	0	0	0	0	603	903	0
8918	0	0	0	0	0	0	0	200	300	0	0	0	0	0	0	0	200	903	0	0	0	0	0	0	0	603	903	0
8918	1	0	0	0	0	0	0	200	300	0	0	0	0	0	0	0	200	903	0	0	0	0	0	0	0	603	903	0
8918	2	0	0	0	0	0	0	200	300	0	0	0	0	0	0	0	200	903	0	0	0	0	0	0	0	603	903	0
8918	3	0	0	0	0	0	0	200	300	0	0	0	0	0	0	0	200	903	0	0	0	0	0	0	0	603	903	0
8918	4	0	0	0	0	0	0	200	300	0	0	0	0	0	0	0	200	903	0	0	0	0	0	0	0	603	903	0
8918	5	0	0	0	0	0	0	200	300	0	0	0	0	0	0	0	200	903	0	0	0	0	0	0	0	603	903	0
8918	6	0	0	0	0	0	0	200	300	0	0	0	0	0	0	0	200	903	0	0	0	0	0	0	0	603	903	0
8918	7	0	0	0	0	0	0	200	300	0	0	0	0	0	0	0	200	903	0	0	0	0	0	0	0	603	903	0
8918	8	0	0	0	0	0	0	200	300	0	0	0	0	0	0	0	200	903	0	0	0	0	0	0	0	603	903	0
8918	9	0	0	0	0	0	0	200	300	0	0	0	0	0	0	0	200	903	0	0	0	0	0	0	0	603	903	0
8919	0	0	0	0	0	0	0	200	300	0	0	0	0	0	0	0	200	903	0	0	0	0	0	0	0	603	903	0
8919	1	0	0	0	0	0	0	200	300	0	0	0	0	0	0	0	200	903	0	0	0	0	0	0	0	603	903	0
8919	2	0	0	0	0	0	0	200	300	0	0	0	0	0	0	0	200	903	0	0	0	0	0	0	0	603	903	0
8919	3	0	0	0	0	0	0	200	300	0	0	0	0	0	0	0	200	903	0	0	0	0	0	0	0	603	903	0
8919	4	0	0	0	0	0	0	200	300	0	0	0	0	0	0	0	200	903	0	0	0	0	0	0	0	603	903	0
8919	5	0	0	0	0	0	0	200	300	0	0	0	0	0	0	0	200	903	0	0	0	0	0	0	0	603	903	0
8919	6	0	0	0	0	0	0	200	300	0	0	0	0	0	0	0	200	903	0	0	0	0	0	0	0	603	903	0
8919	7	0	0	0	0	0	0	200	300	0	0	0	0	0	0	0	200	903	0	0	0	0	0	0	0	603	903	0
8919	8	0	0	0	0	0	0	200	300	0	0	0	0	0	0	0	200	903	0	0	0	0	0	0	0	603	903	0
8919	9	0	0	0	0	0	0	200	300	0	0	0	0	0	0	0	200	903	0	0	0	0	0	0	0	603	903	0
8920	0	0	0	0	0	0	0	200	300	0	0	0	0	0	0	0	200	903	0	0	0	0	0	0	0	603	903	0
8920	1	0	0	0	0	0	0	200	300	0	0	0	0	0	0	0	200	903	0	0	0	0	0	0	0	603	903	0
8920	2	0	0	0	0	0	0	200	300	0	0	0	0	0	0	0	200	903	0	0	0	0	0	0	0	603	903	0
8920	3	0	0	0	0	0	0	200	300	0	0	0	0	0	0	0	200	903	0	0	0	0	0	0	0	603	903	0
8920	4	0	0	0	0	0	0	200	300	0	0	0	0	0	0	0	200	903	0	0	0	0	0	0	0	603	903	0
8920	5	0	0	0	0	0	0	200	300	0	0	0	0	0	0	0	200	903	0	0	0	0	0	0	0	603	903	0
8920	6	0	0	0	0	0	0	200	300	0	0	0	0	0	0	0	200	903	0	0	0	0	0	0	0	603	903	0
8920	7	0	0	0	0	0	0	200	300	0	0	0	0	0	0	0	200	903	0	0	0	0	0	0	0	603	903	0
8920	8	0	0	0	0	0	0	200	300	0	0	0	0	0	0	0	200	903	0	0	0	0	0	0	0	603	903	0
8920	9	0	0	0	0	0	0	200	300	0	0	0	0	0	0	0	200	903	0	0	0	0	0	0	0	603	903	0
8921	0	0	0	0	0	0	0	200	300	0	0	0	0	0	0	0	200	903	0	0	0	0	0	0	0	603	903	0
8921	1	0	0	0	0	0	0	200	300	0	0	0	0	0	0	0	200	903	0	0	0	0	0	0	0	603	903	0
8921	2	0	0	0	0	0	0	200	300	0	0	0	0	0	0	0	200	903	0	0	0	0	0	0	0	603	903	0
8921	3	0	0	0	0	0	0	200	300	0	0	0	0	0	0	0	200	903	0	0	0	0	0	0	0	603	903	0
8921	4	0	0	0	0	0	0	200	300	0	0	0	0	0	0	0	200	903	0	0	0	0	0	0	0	603	903	0
8921	5	0	0	0	0	0	0	200	300	0	0	0	0	0	0	0	200	903	0	0	0	0	0	0	0	603	903	0
8921	6	0	0	0	0	0	0	200	300	0	0	0	0	0	0	0	200	903	0	0	0	0	0	0	0	603	903	0
8921	7	0	0	0	0	0	0	200	300	0	0	0	0	0	0	0	200	903	0	0	0	0	0	0	0	603	903	0
8921	8	0	0	0	0	0	0	200	300	0	0	0	0	0	0	0	200	903	0	0	0	0	0	0	0	603	903	0
8921	9	0	0	0	0	0	0	200	300	0	0	0	0	0	0	0	200	903	0	0	0	0	0	0	0	603	903	0
8922	0	0	0	0	0	0	0	200	300	0	0	0	0	0	0	0	200	903	0	0	0	0	0	0	0	603	903	0
8922	1	0	0	0	0	0	0	200	300	0	0	0	0	0	0	0	200	903	0	0	0	0	0	0	0	603	903	0
8922	2	0	0	0	0	0	0	200	300	0	0	0	0	0	0	0	200	903	0	0	0	0	0	0	0	603	903	0
8922	3	0	0	0	0	0	0	200	300	0	0	0	0	0	0	0	200	903	0	0	0	0	0	0	0	603	903	0
8922	4	0	0	0	0	0	0	200	300	0	0	0	0	0	0	0	200	903	0	0	0	0	0	0	0	603	903	0
8922	5	0	0	0	0	0	0	200	300	0	0	0	0	0	0	0	200	903	0	0	0	0	0	0	0	603	903	0
8922	6	0	0	0	0	0	0	200	300	0	0	0	0	0	0	0	200	903	0	0	0	0	0	0	0	603	903	0
8922	7	0	0	0	0	0	0	200	300	0	0	0	0	0	0	0	200	903	0	0	0	0	0	0	0	603	903	0
8922	8	0	0	0	0	0	0	200	300	0	0	0	0	0	0	0	200	903	0	0	0	0	0	0	0	603	903	0
8922	9	0	0	0	0	0	0	200	300	0	0	0	0	0	0	0	200	903	0	0	0	0	0	0	0	603	903	0
8923	0	0	0	0	0	0	0	200	300	0	0	0	0	0	0	0	200	903	0	0	0	0	0	0	0	603	903	0
8923	1	0	0	0	0	0	0	200	300	0	0	0	0	0	0	0	200	903	0	0	0	0	0	0	0	603	903	0
8923	2	0	0	0	0	0	0	200	300	0	0	0	0	0	0	0	200	903	0	0	0	0	0	0	0	603	903	0
8923	3	0	0	0	0	0	0	200	300	0	0	0	0	0	0	0	200	903	0	0	0	0	0	0	0	603	903	0
8923	4	0	0	0	0	0	0	200	300	0	0	0	0	0	0	0	200	903	0	0	0	0	0	0	0	603	903	0
8923	5	0	0	0	0	0	0	200	300	0	0	0	0	0	0	0	200	903	0	0	0	0	0	0	0	603	903	0
8923	6	0	0	0	0	0	0	200	300	0	0	0	0	0	0	0	200	903	0	0	0	0	0	0	0	603	903	0
8923	7	0	0	0	0	0	0	200	300	0	0	0	0	0	0	0	200	903	0	0	0	0	0	0	0	603	903	0
8923	8	0	0	0	0	0	0	200	300	0	0	0	0	0	0	0	200	903	0	0	0	0	0	0	0	603	903	0
8923	9	0	0	0	0	0	0	200	300	0	0	0	0	0	0	0	200	903	0	0	0	0	0	0	0	603	903	0
8924	0	0	0	0	0	0	0	200	300	0	0	0	0	0	0	0	200	903	0	0	0	0	0	0	0	603	903	0
8924	1	0	0	0	0	0	0	200	300	0	0	0	0	0	0	0	200	903	0	0	0	0	0	0	0	603	903	0
8924	2	0	0	0	0	0	0	200	300	0	0	0	0	0	0	0	200	903	0	0	0	0	0	0	0	603	903	0
8924	3	0	0	0	0	0	0	200	300	0	0	0	0	0	0	0	200	903	0	0	0	0	0	0	0	603	903	0
8924	4	0	0	0	0	0	0	200	300	0	0	0	0	0	0	0	200	903	0	0	0	0	0	0	0	603	903	0
8924	5	0	0	0	0	0	0	200	300	0	0	0	0	0	0	0	200	903	0	0	0	0	0	0	0	603	903	0
8924	6	0	0	0	0	0	0	200	300	0	0	0	0	0	0	0	200	903	0	0	0	0	0	0	0	603	903	0
8924	7	0	0	0	0	0	0	200	300	0	0	0	0	0	0	0	200	903	0	0	0	0	0	0	0	603	903	0
8924	8	0	0	0	0	0	0	200	300	0	0	0	0	0	0	0	200	903	0	0	0	0	0	0	0	603	903	0
8924	9	0	0	0	0	0	0	200	300	0	0	0	0	0	0	0	200	903	0	0	0	0	0	0	0	603	903	0
8925	0	0	0	0	0	0	0	200	300	0	0	0	0	0	0	0	200	903	0	0	0	0	0	0	0	603	903	0
8925	1	0	0	0	0	0	0	200	300	0	0	0	0	0	0	0	200	903	0	0	0	0	0	0	0	603	903	0
8925	2	0	0	0	0	0	0	200	300	0	0	0	0	0	0	0	200	903	0	0	0	0	0	0	0	603	903	0
8925	3	0	0	0	0	0	0	200	300	0	0	0	0	0	0	0	200	903	0	0	0	0	0	0	0	603	903	0
8925	4	0	0	0	0	0	0	200	300	0	0	0	0	0	0	0	200	903	0	0	0	0	0	0	0	603	903	0
8925	5	0	0	0	0	0	0	200	300	0	0	0	0	0	0	0	200	903	0	0	0	0	0	0	0	603	903	0
8925	6	0	0	0	0	0	0	200	300	0	0	0	0	0	0	0	200	903	0	0	0	0	0	0	0	603	903	0
8925	7	0	0	0	0	0	0	200	300	0	0	0	0	0	0	0	200	903	0	0	0	0	0	0	0	603	903	0
8925	8	0	0	0	0	0	0	200	300	0	0	0	0	0	0	0	200	903	0	0	0	0	0	0	0	603	903	0
8925	9	0	0	0	0	0	0	200	300	0	0	0	0	0	0	0	200	903	0	0	0	0	0	0	0	603	903	0
8926	0	0	0	0	0	0	0	200	300	0	0	0	0	0	0	0	200	903	0	0	0	0	0	0	0	603	903	0
8926	1	0	0	0	0	0	0	200	300	0	0	0	0	0	0	0	200	903	0	0	0	0	0	0	0	603	903	0
8926	2	0	0	0	0	0	0	200	300	0	0	0	0	0	0	0	200	903	0	0	0	0	0	0	0	603	903	0
8926	3	0	0	0	0	0	0	200	300	0	0	0	0	0	0	0	200	903	0	0	0	0	0	0	0	603	903	0
8926	4	0	0	0	0	0	0	200	300	0	0	0	0	0	0	0	200	903	0	0	0	0	0	0	0	603	903	0
8926	5	0	0	0	0	0	0	200	300	0	0	0	0	0	0	0	200	903	0	0	0	0	0	0	0	603	903	0
8926	6	0	0	0	0	0	0	200	300	0	0	0	0	0	0	0	200	903	0	0	0	0	0	0	0	603	903	0
8926	7	0	0	0	0	0	0	200	300	0	0	0	0	0	0	0	200	903	0	0	0	0	0	0	0	603	903	0
8926	8	0	0	0	0	0	0	200	300	0	0	0	0	0	0	0	200	903	0	0	0	0	0	0	0	603	903	0
8926	9	0	0	0	0	0	0	200	300	0	0	0	0	0	0	0	200	903	0	0	0	0	0	0	0	603	903	0
8927	0	0	0	0	0	0	0	200	300	0	0	0	0	0	0	0	200	903	0	0	0	0	0	0	0	603	903	0
8927	1	0	0	0	0	0	0	200	300	0	0	0	0	0	0	0	200	903	0	0	0	0	0	0	0	603	903	0
8927	2	0	0	0	0	0	0	200	300	0	0	0	0	0	0	0	200	903	0	0	0	0	0	0	0	603	903	0
8927	3	0	0	0	0	0	0	200	300	0	0	0	0	0	0	0	200	903	0	0	0	0	0	0	0	603	903	0
8927	4	0	0	0	0	0	0	200	300	0	0	0	0	0	0	0	200	903	0	0	0	0	0	0	0	603	903	0
8927	5	0	0	0	0	0	0	200	300	0	0	0	0	0	0	0	200	903	0	0	0	0	0	0	0	603	903	0
8927	6	0	0	0	0	0	0	200	300	0	0	0	0	0	0	0	200	903	0	0	0	0	0	0	0	603	903	0
8927	7	0	0	0	0	0	0	200	300	0	0	0	0	0	0	0	200	903	0	0	0	0	0	0	0	603	903	0
8927	8	0	0	0	0	0	0	200	300	0	0	0	0	0	0	0	200	903	0	0	0	0	0	0	0	603	903	0
8927	9	0	0	0	0	0	0	200	300	0	0	0	0	0	0	0	200	903	0	0	0	0	0	0	0	603	903	0
8928	0	0	0	0	0	0	0	200	300	0	0	0	0	0	0	0	200	903	0	0	0	0	0	0	0	603	903	0
8928	1	0	0	0	0	0	0	200	300	0	0	0	0	0	0	0	200	903	0	0	0	0	0	0	0	603	903	0
8928	2	0	0	0	0	0	0	200	300	0	0	0	0	0	0	0	200	903	0	0	0	0	0	0	0	603	903	0
8928	3	0	0	0	0	0	0	200	300	0	0	0	0	0	0	0	200	903	0	0	0	0	0	0	0	603	903	0
8928	4	0	0	0	0	0	0	200	300	0	0	0	0	0	0	0	200	903	0	0	0	0	0	0	0	603	903	0
8928	5	0	0	0	0	0	0	200	300	0	0	0	0	0	0	0	200	903	0	0	0	0	0	0	0	603	903	0
8928	6	0	0	0	0	0	0	200	300	0	0	0	0	0	0	0	200	903	0	0	0	0	0	0	0	603	903	0
8928	7	0	0	0	0	0	0	200	300	0	0	0	0	0	0	0	200	903	0	0	0	0	0	0	0	603	903	0
8928	8	0	0	0	0	0	0	200	300	0	0	0	0	0	0	0	200	903	0	0	0	0	0	0	0	603	903	0
8928	9	0	0	0	0	0	0	200	300	0	0	0	0	0	0	0	200	903	0	0	0	0	0	0	0	603	903	0
8929	0	0	0	0	0	0	0	200	300	0	0	0	0	0	0	0	200	903	0	0	0	0	0	0	0	603	903	0
8929	1	0	0	0	0	0	0	200	300	0	0	0	0	0	0	0	200	903	0	0	0	0	0	0	0	603	903	0
8929	2	0	0	0	0	0	0	200	300	0	0	0	0	0	0	0	200	903	0	0	0	0	0	0	0	603	903	0
8929	3	0	0	0	0	0	0	200	300	0	0	0	0	0	0	0	200	903	0	0	0	0	0	0	0	603	903	0
8929	4	0	0	0	0	0	0	200	300	0	0	0	0	0	0	0	200	903	0	0	0	0	0	0	0	603	903	0
8929	5	0	0	0	0	0	0	200	300	0	0	0	0	0	0	0	200	903	0	0	0	0	0	0	0	603	903	0
8929	6	0	0	0	0	0	0	200	300	0	0	0	0	0	0	0	200	903	0	0	0	0	0	0	0	603	903	0
8929	7	0	0	0	0	0	0	200	300	0	0	0	0	0	0	0	200	903	0	0	0	0	0	0	0	603	903	0
8929	8	0	0	0	0	0	0	200	300	0	0	0	0	0	0	0	200	903	0	0	0	0	0	0	0	603	903	0
8929	9	0	0	0	0	0	0	200	300	0	0	0	0	0	0	0	200	903	0	0	0	0	0	0	0	603	903	0
8930	0	0	0	0	0	0	0	200	300	0	0	0	0	0	0	0	200	903	0	0	0	0	0	0	0	603	903	0
8930	1	0	0	0	0	0	0	200	300	0	0	0	0	0	0	0	200	903	0	0	0	0	0	0	0	603	903	0
8930	2	0	0	0	0	0	0	200	300	0	0	0	0	0	0	0	200	903	0	0	0	0	0	0	0	603	903	0
8930	3	0	0	0	0	0	0	200	300	0	0	0	0	0	0	0	200	903	0	0	0	0	0	0	0	603	903	0
8930	4	0	0	0	0	0	0	200	300	0	0	0	0	0	0	0	200	903	0	0	0	0	0	0	0	603	903	0
8930	5	0	0	0	0	0	0	200	300	0	0	0	0	0	0	0	200	903	0	0	0	0	0	0	0	603	903	0
8930	6	0	0	0	0	0	0	200	300	0	0	0	0	0	0	0	200	903	0	0	0	0	0	0	0	603	903	0
8930	7	0	0	0	0	0	0	200	300	0	0	0	0	0	0	0	200	903	0	0	0	0	0	0	0	603	903	0
8930	8	0	0	0	0	0	0	200	300	0	0	0	0	0	0	0	200	903	0	0	0	0	0	0	0	603	903	0
8930	9	0	0	0	0	0	0	200	300	0	0	0	0	0	0	0	200	903	0	0	0	0	0	0	0	603	903	0
8931	0	0	0	0	0	0	0	200	300	0	0	0	0	0	0	0	200	903	0	0	0	0	0	0	0	603	903	0
8931	1	0	0	0	0	0	0	200	300	0	0	0	0	0	0	0	200	903	0	0	0	0	0	0	0	603	903	0
8931	2	0	0	0	0	0	0	200	300	0	0	0	0	0	0	0	200	903	0	0	0	0	0	0	0	603	903	0
8931	3	0	0	0	0	0	0	200	300	0	0	0	0	0	0	0	200	903	0	0	0	0	0	0	0	603	903	0
8931	4	0	0	0	0	0	0	200	300	0	0	0	0	0	0	0	200	903	0	0	0	0	0	0	0	603	903	0
8931	5	0	0	0	0	0	0	200	300	0	0	0	0	0	0	0	200	903	0	0	0	0	0	0	0	603	903	0
8931	6	0	0	0	0	0	0	200	300	0	0	0	0	0	0	0	200	903	0	0	0	0	0	0	0	603	903	0
8931	7	0	0	0	0	0	0	200	300	0	0	0	0	0	0	0	200	903	0	0	0	0	0	0	0	603	903	0
8931	8	0	0	0	0	0	0	200	300	0	0	0	0	0	0	0	200	903	0	0	0	0	0	0	0	603	903	0
8931	9	0	0	0	0	0	0	200	300	0	0	0	0	0	0	0	200	903	0	0	0	0	0	0	0	603	903	0
8932	0	0	0	0	0	0	0	200	300	0	0	0	0	0	0	0	200	903	0	0	0	0	0	0	0	603	903	0
8932	1	0	0	0	0	0	0	200	300	0	0	0	0	0	0	0	200	903	0	0	0	0	0	0	0	603	903	0
8932	2	0	0	0	0	0	0	200	300	0	0	0	0	0	0	0	200	903	0	0	0	0	0	0	0	603	903	0
8932	3	0	0	0	0	0	0	200	300	0	0	0	0	0	0	0	200	903	0	0	0	0	0	0	0	603	903	0
8932	4	0	0	0	0	0	0	200	300	0	0	0	0	0	0	0	200	903	0	0	0	0	0	0	0	603	903	0
8932	5	0	0	0	0	0	0	200	300	0	0	0	0	0	0	0	200	903	0	0	0	0	0	0	0	603	903	0
8932	6	0	0	0	0	0	0	200	300	0	0	0	0	0	0	0	200	903	0	0	0	0	0	0	0	603	903	0
8932	7	0	0	0	0	0	0	200	300	0	0	0	0	0	0	0	200	903	0	0	0	0	0	0	0	603	903	0
8932	8	0	0	0	0	0	0	200	300	0	0	0	0	0	0	0	200	903	0	0	0	0	0	0	0	603	903	0
8932	9	0	0	0	0	0	0	200	300	0	0	0	0	0	0	0	200	903	0	0	0	0	0	0	0	603	903	0
8933	0	0	0	0	0	0	0	200	300	0	0	0	0	0	0	0	200	903	0	0	0	0	0	0	0	603	903	0
8933	1	0	0	0	0	0	0	200	300	0	0	0	0	0	0	0	200	903	0	0	0	0	0	0	0	603	903	0
8933	2	0	0	0	0	0	0	200	300	0	0	0	0	0	0	0	200	903	0	0	0	0	0	0	0	603	903	0
8933	3	0	0	0	0	0	0	200	300	0	0	0	0	0	0	0	200	903	0	0	0	0	0	0	0	603	903	0
8933	4	0	0	0	0	0	0	200	300	0	0	0	0	0	0	0	200	903	0	0	0	0	0	0	0	603	903	0
8933	5	0	0	0	0	0	0	200	300	0	0	0	0	0	0	0	200	903	0	0	0	0	0	0	0	603	903	0
8933	6	0	0	0	0	0	0	200	300	0	0	0	0	0	0	0	200	903	0	0	0	0	0	0	0	603	903	0
8933	7	0	0	0	0	0	0	200	300	0	0	0	0	0	0	0	200	903	0	0	0	0	0	0	0	603	903	0
8933	8	0	0	0	0	0	0	200	300	0	0	0	0	0	0	0	200	903	0	0	0	0	0	0	0	603	903	0
8933	9	0	0	0	0	0	0	200	300	0	0	0	0	0	0	0	200	903	0	0	0	0	0	0	0	603	903	0
8934	0	0	0	0	0	0	0	200	300	0	0	0	0	0	0	0	200	903	0	0	0	0	0	0	0	603	903	0
8934	1	0	0	0	0	0	0	200	300	0	0	0	0	0	0	0	200	903	0	0	0	0	0	0	0	603	903	0
8934	2	0	0	0	0	0	0	200	300	0	0	0	0	0	0	0	200	903	0	0	0	0	0	0	0	603	903	0
8934	3	0	0	0	0	0	0	200	300	0	0	0	0	0	0	0	200	903	0	0	0	0	0	0	0	603	903	0
8934	4	0	0	0	0	0	0	200	300	0	0	0	0	0	0	0	200	903	0	0	0	0	0	0	0	603	903	0
8934	5	0	0	0	0	0	0	200	300	0	0	0	0	0	0	0	200	903	0	0	0	0	0	0	0	603	903	0
8934	6	0	0	0	0	0	0	200	300	0	0	0	0	0	0	0	200	903	0	0	0	0	0	0	0	603	903	0
8934	7	0	0	0	0	0	0	200	300	0	0	0	0	0	0	0	200	903	0	0	0	0	0	0	0	603	903	0
8934	8	0	0	0	0	0	0	200	300	0	0	0	0	0	0	0	200	903	0	0	0	0	0	0	0	603	903	0
8934	9	0	0	0	0	0	0	200	300	0	0	0	0	0	0	0	200	903	0	0	0	0	0	0	0	603	903	0
8935	0	0	0	0	0	0	0	200	300	0	0	0	0	0	0	0	200	903	0	0	0	0	0	0	0	603	903	0
8935	1	0	0	0	0	0	0	200	300	0	0	0	0	0	0	0	200	903	0	0	0	0	0	0	0	603	903	0
8935	2	0	0	0	0	0	0	200	300	0	0	0	0	0	0	0	200	903	0	0	0	0	0	0	0	603	903	0
8935	3	0	0	0	0	0	0	200	300	0	0	0	0	0	0	0	200	903	0	0	0	0	0	0	0	603	903	0
8935	4	0	0	0	0	0	0	200	300	0	0	0	0	0	0	0	200	903	0	0	0	0	0	0	0	603	903	0
8935	5	0	0	0	0	0	0	200	300	0	0	0	0	0	0	0	200	903	0	0	0	0	0	0	0	603	903	0
8935	6	0	0	0	0	0	0	200	300	0	0	0	0	0	0	0	200	903	0	0	0	0	0	0	0	603	903	0
8935	7	0	0	0	0	0	0	200	300	0	0	0	0	0	0	0	200	903	0	0	0	0	0	0	0	603	903	0
8935	8	0	0	0	0	0	0	200	300	0	0	0	0	0	0	0	200	903	0	0	0	0	0	0	0	603	903	0
8935	9	0	0	0	0	0	0	200	300	0	0	0	0	0	0	0	200	903	0	0	0	0	0	0	0	603	903	0
8936	0	0	0	0	0	0	0	200	300	0	0	0	0	0	0	0	200	903	0	0	0	0	0	0	0	603	903	0
8936	1	0	0	0	0	0	0	200	300	0	0	0	0	0	0	0	200	903	0	0	0	0	0	0	0	603	903	0
8936	2	0	0	0	0	0	0	200	300	0	0	0	0	0	0	0	200	903	0	0	0	0	0	0	0	603	903	0
8936	3	0	0	0	0	0	0	200	300	0	0	0	0	0	0	0	200	903	0	0	0	0	0	0	0	603	903	0
8936	4	0	0	0	0	0	0	200	300	0	0	0	0	0	0	0	200	903	0	0	0	0	0	0	0	603	903	0
8936	5	0	0	0	0	0	0	200	300	0	0	0	0	0	0	0	200	903	0	0	0	0	0	0	0	603	903	0
8936	6	0	0	0	0	0	0	200	300	0	0	0	0	0	0	0	200	903	0	0	0	0	0	0	0	603	903	0
8936	7	0	0	0	0	0	0	200	300	0	0	0	0	0	0	0	200	903	0	0	0	0	0	0	0	603	903	0
8936	8	0	0	0	0	0	0	200	300	0	0	0	0	0	0	0	200	903	0	0	0	0	0	0	0	603	903	0
8936	9	0	0	0	0	0	0	200	300	0	0	0	0	0	0	0	200	903	0	0	0	0	0	0	0	603	903	0
8937	0	0	0	0	0	0	0	200	300	0	0	0	0	0	0	0	200	903	0	0	0	0	0	0	0	603	903	0
8937	1	0	0	0	0	0	0	200	300	0	0	0	0	0	0	0	200	903	0	0	0	0	0	0	0	603	903	0
8937	2	0	0	0	0	0	0	200	300	0	0	0	0	0	0	0	200	903	0	0	0	0	0	0	0	603	903	0
8937	3	0	0	0	0	0	0	200	300	0	0	0	0	0	0	0	200	903	0	0	0	0	0	0	0	603	903	0
8937	4	0	0	0	0	0	0	200	300	0	0	0	0	0	0	0	200	903	0	0	0	0	0	0	0	603	903	0
8937	5	0	0	0	0	0	0	200	300	0	0	0	0	0	0	0	200	903	0	0	0	0	0	0	0	603	903	0
8937	6	0	0	0	0	0	0	200	300	0	0	0	0	0	0	0	200	903	0	0	0	0	0	0	0	603	903	0
8937	7	0	0	0	0	0	0	200	300	0	0	0	0	0	0	0	200	903	0	0	0	0	0	0	0	603	903	0
8937	8	0	0	0	0	0	0	200	300	0	0	0	0	0	0	0	200	903	0	0	0	0	0	0	0	603	903	0
8937	9	0	0	0	0	0	0	200	300	0	0	0	0	0	0	0	200	903	0	0	0	0	0	0	0	603	903	0
8938	0	0	0	0	0	0	0	200	300	0	0	0	0	0	0	0	200	903	0	0	0	0	0	0	0	603	903	0
8938	1	0	0	0	0	0	0	200	300	0	0	0	0	0	0	0	200	903	0	0	0	0	0	0	0	603	903	0
8938	2	0	0	0	0	0	0	200	300	0	0	0	0	0	0	0	200	903	0	0	0	0	0	0	0	603	903	0
8938	3	0	0	0	0	0	0	200	300	0	0	0	0	0	0	0	200	903	0	0	0	0	0	0	0	603	903	0
8938	4	0	0	0	0	0	0	200	300	0	0	0	0	0	0	0	200	903	0	0	0	0	0	0	0	603	903	0
8938	5	0	0	0	0	0	0	200	300	0	0	0	0	0	0	0	200	903	0	0	0	0	0	0	0	603	903	0
8938	6	0	0	0	0	0	0	200	300	0	0	0	0	0	0	0	200	903	0	0	0	0	0	0	0	603	903	0
8938	7	0	0	0	0	0	0	200	300	0	0	0	0	0	0	0	200	903	0	0	0	0	0	0	0	603	903	0
8938	8	0	0	0	0	0	0	200	300	0	0	0	0	0	0	0	200	903	0	0	0	0	0	0	0	603	903	0
8938	9	0	0	0	0	0	0	200	300	0	0	0	0	0	0	0	200	903	0	0	0	0	0	0	0	603	903	0
8939	0	0	0	0	0	0	0	200	300	0	0	0	0	0	0	0	200	903	0	0	0	0	0	0	0	603	903	0
8939	1	0	0	0	0	0	0	200	300	0	0	0	0	0	0	0	200	903	0	0	0	0	0	0	0	603	903	0
8939	2	0	0	0	0	0	0	200	300	0	0	0	0	0	0	0	200	903	0	0	0	0	0	0	0	603	903	0
8939	3	0	0	0	0	0	0	200	300	0	0	0	0	0	0	0	200	903	0	0	0	0	0	0	0	603	903	0
8939	4	0	0	0	0	0	0	200	300	0	0	0	0	0	0	0	200	903	0	0	0	0	0	0	0	603	903	0
8939	5	0	0	0	0	0	0	200	300	0	0	0	0	0	0	0	200	903	0	0	0	0	0	0	0	603	903	0
8939	6	0	0	0	0	0	0	200	300	0	0	0	0	0	0	0	200	903	0	0	0	0	0	0	0	603	903	0
8939	7	0	0	0	0	0	0	200	300	0	0	0	0	0	0	0	200	903	0	0	0	0	0	0	0	603	903	0
8939	8	0	0	0	0	0	0	200	300	0	0	0	0	0	0	0	200	903	0	0	0	0	0	0	0	603	903	0
8939	9	0	0	0	0	0	0	200	300	0	0	0	0	0	0	0	200	903	0	0	0	0	0	0	0	603	903	0
8940	0	0	0	0	0	0	0	200	300	0	0	0	0	0	0	0	200	903	0	0	0	0	0	0	0	603	903	0
8940	1	0	0	0	0	0	0	200	300	0	0	0	0	0	0	0	200	903	0	0	0	0	0	0	0	603	903	0
8940	2	0	0	0	0	0	0	200	300	0	0	0	0	0	0	0	200	903	0	0	0	0	0	0	0	603	903	0
8940	3	0	0	0	0	0	0	200	300	0	0	0	0	0	0	0	200	903	0	0	0	0	0	0	0	603	903	0
8940	4	0	0	0	0	0	0	200	300	0	0	0	0	0	0	0	200	903	0	0	0	0	0	0	0	603	903	0
8940	5	0	0	0	0	0	0	200	300	0	0	0	0	0	0	0	200	903	0	0	0	0	0	0	0	603	903	0
8940	6	0	0	0	0	0	0	200	300	0	0	0	0	0	0	0	200	903	0	0	0	0	0	0	0	603	903	0
8940	7	0	0	0	0	0	0	200	300	0	0	0	0	0	0	0	200	903	0	0	0	0	0	0	0	603	903	0
8940	8	0	0	0	0	0	0	200	300	0	0	0	0	0	0	0	200	903	0	0	0	0	0	0	0	603	903	0
8940	9	0	0	0	0	0	0	200	300	0	0	0	0	0	0	0	200	903	0	0	0	0	0	0	0	603	903	0
8941	0	0	0	0	0	0	0	200	300	0	0	0	0	0	0	0	200	903	0	0	0	0	0	0	0	603	903	0
8941	1	0	0	0	0	0	0	200	300	0	0	0	0	0	0	0	200	903	0	0	0	0	0	0	0	603	903	0
8941	2	0	0	0	0	0	0	200	300	0	0	0	0	0	0	0	200	903	0	0	0	0	0	0	0	603	903	0
8941	3	0	0	0	0	0	0	200	300	0	0	0	0	0	0	0	200	903	0	0	0	0	0	0	0	603	903	0
8941	4	0	0	0	0	0	0	200	300	0	0	0	0	0	0	0	200	903	0	0	0	0	0	0	0	603	903	0
8941	5	0	0	0	0	0	0	200	300	0	0	0	0	0	0	0	200	903	0	0	0	0	0	0	0	603	903	0
8941	6	0	0	0	0	0	0	200	300	0	0	0	0	0	0	0	200	903	0	0	0	0	0	0	0	603	903	0
8941	7	0	0	0	0	0	0	200	300	0	0	0	0	0	0	0	200	903	0	0	0	0	0	0	0	603	903	0
8941	8	0	0	0	0	0	0	200	300	0	0	0	0	0	0	0	200	903	0	0	0	0	0	0	0	603	903	0
8941	9	0	0	0	0	0	0	200	300	0	0	0	0	0	0	0	200	903	0	0	0	0	0	0	0	603	903	0
8942	0	0	0	0	0	0	0	200	300	0	0	0	0	0	0	0	200	903	0	0	0	0	0	0	0	603	903	0
8942	1	0	0	0	0	0	0	200	300	0	0	0	0	0	0	0	200	903	0	0	0	0	0	0	0	603	903	0
8942	2	0	0	0	0	0	0	200	300	0	0	0	0	0	0	0	200	903	0	0	0	0	0	0	0	603	903	0
8942	3	0	0	0	0	0	0	200	300	0	0	0	0	0	0	0	200	903	0	0	0	0	0	0	0	603	903	0
8942	4	0	0	0	0	0	0	200	300	0	0	0	0	0	0	0	200	903	0	0	0	0	0	0	0	603	903	0
8942	5	0	0	0	0	0	0	200	300	0	0	0	0	0	0	0	200	903	0	0	0	0	0	0	0	603	903	0
8942	6	0	0	0	0	0	0	200	300	0	0	0	0	0	0	0	200	903	0	0	0	0	0	0	0	603	903	0
8942	7	0	0	0	0	0	0	200	300	0	0	0	0	0	0	0	200	903	0	0	0	0	0	0	0	603	903	0
8942	8	0	0	0	0	0	0	200	300	0	0	0	0	0	0	0	200	903	0	0	0	0	0	0	0	603	903	0
8942	9	0	0	0	0	0	0	200	300	0	0	0	0	0	0	0	200	903	0	0	0	0	0	0	0	603	903	0
8943	0	0	0	0	0	0	0	200	300	0	0	0	0	0	0	0	200	903	0	0	0	0	0	0	0	603	903	0
8943	1	0	0	0	0	0	0	200	300	0	0	0	0	0	0	0	200	903	0	0	0	0	0	0	0	603	903	0
8943	2	0	0	0	0	0	0	200	300	0	0	0	0	0	0	0	200	903	0	0	0	0	0	0	0	603	903	0
8943	3	0	0	0	0	0	0	200	300	0	0	0	0	0	0	0	200	903	0	0	0	0	0	0	0	603	903	0
8943	4	0	0	0	0	0	0	200	300	0	0	0	0	0	0	0	200	903	0	0	0	0	0	0	0	603	903	0
8943	5	0	0	0	0	0	0	200	300	0	0	0	0	0	0	0	200	903	0	0	0	0	0	0	0	603	903	0
8943	6	5.61336	0.933075	-16.1319	-152.254	-861.153	194.503	146.618	309.438	0	0	0	0	0	0	0	200	903	0	0	0	0	0	0	0	603	903	0
8943	7	8.35994	0.170136	-25.2872	-152.254	-1044.26	-171.707	158.704	306.021	0	0	0	0	0	0	0	200	903	0	0	0	0	0	0	0	603	903	0
8943	8	-2.77898	-6.54373	-25.5923	-60.7009	-617.012	560.714	175.891	302.372	0	0	0	0	0	0	0	200	903	0	0	0	0	0	0	0	603	903	0
8943	9	-7.5092	-15.3938	-20.0992	-426.912	-1105.29	743.82	145.008	321.24	0	0	0	0	0	0	0	200	903	0	0	0	0	0	0	0	603	903	0
8944	0	-0.490159	-12.6472	-21.9302	30.8518	-861.153	469.162	160.732	298.593	0	0	0	0	0	0	0	200	903	0	0	0	0	0	0	0	603	903	0
8944	1	-0.184983	-9.90067	-31.6959	-610.017	-1532.54	652.267	151.649	319.246	0	0	0	0	0	0	0	200	903	0	0	0	0	0	0	0	603	903	0
8944	2	-2.4738	-18.293	-37.4942	30.8518	-1532.54	1155.81	159.126	299.177	0	0	0	0	0	0	0	200	903	0	0	0	0	0	0	0	603	903	0
8944	3	-2.62639	-25.4646	-39.0201	-518.465	-1715.64	1155.81	156.032	313.287	0	0	0	0	0	0	0	200	903	0	0	0	0	0	0	0	603	903	0
8944	4	-1.10051	-20.2766	-39.0201	-335.359	-1959.79	1155.81	149.775	308.595	0	0	0	0	0	0	0	200	903	0	0	0	0	0	0	0	603	903	0
8944	5	-4.15227	-18.9034	-46.6495	-701.57	-2081.86	1384.69	155.372	315.039	0	0	0	0	0	0	0	200	903	0	0	0	0	0	0	0	603	903	0
8944	6	-2.62639	-28.8216	-52.753	-335.359	-2264.96	1293.14	157.065	306.357	0	0	0	0	0	0	0	200	903	0	0	0	0	0	0	0	603	903	0
8944	7	-3.84709	-31.8733	-58.5513	-152.254	-2753.24	1476.24	152.977	302.6	0	0	0	0	0	0	0	200	903	0	0	0	0	0	0	0	603	903	0
8944	8	-2.32121	-25.0069	-64.6548	-335.359	-2631.17	1613.57	159.304	305.187	0	0	0	0	0	0	0	200	903	0	0	0	0	0	0	0	603	903	0
8944	9	2.10384	-25.1595	-71.0635	-243.806	-2936.35	1338.91	158.68	303.431	0	0	0	0	0	0	0	200	903	0	0	0	0	0	0	0	603	903	0
8945	0	1.03572	-33.094	-77.4722	-701.57	-3424.63	1567.79	155.795	309.056	0	0	0	0	0	0	0	200	903	0	0	0	0	0	0	0	603	903	0
8945	1	-0.184983	-32.0259	-84.7964	-60.7009	-3302.56	1705.12	161.053	300.716	0	0	0	0	0	0	0	200	903	0	0	0	0	0	0	0	603	903	0
8945	2	4.69783	-27.6009	-89.6793	-793.123	-3363.59	1384.69	162.493	308.844	0	0	0	0	0	0	0	200	903	0	0	0	0	0	0	0	603	903	0
8945	3	4.85042	-29.2793	-94.8672	-701.57	-3912.91	1110.03	158.754	307.395	0	0	0	0	0	0	0	200	903	0	0	0	0	0	0	0	603	903	0
8945	4	2.25642	-34.4673	-101.886	-426.912	-4157.05	1430.47	159.199	304.19	0	0	0	0	0	0	0	200	903	0	0	0	0	0	0	0	603	903	0
8945	5	5.76594	-32.3311	-112.262	-518.465	-4401.19	1705.12	160.795	304.618	0	0	0	0	0	0	0	200	903	0	0	0	0	0	0	0	603	903	0
8945	6	8.97029	-29.2793	-117.45	-976.228	-4584.3	1155.81	160.968	308.312	0	0	0	0	0	0	0	200	903	0	0	0	0	0	0	0	603	903	0
8945	7	8.05476	-30.0423	-122.028	-152.254	-4462.23	1430.47	163.433	301.248	0	0	0	0	0	0	0	200	903	0	0	0	0	0	0	0	603	903	0
8945	8	6.98665	-33.094	-124.774	-518.465	-4950.51	1338.91	160.324	304.155	0	0	0	0	0	0	0	200	903	0	0	0	0	0	0	0	603	903	0
8945	9	8.20735	-30.6526	-132.709	-701.57	-5133.62	972.702	161.317	305.287	0	0	0	0	0	0	0	200	903	0	0	0	0	0	0	0	603	903	0
8946	0	11.5643	-28.0586	-139.728	-610.017	-5194.65	1110.03	162.823	304.366	0	0	0	0	0	0	0	200	903	0	0	0	0	0	0	0	603	903	0
8946	1	13.0902	-30.1949	-143.39	-518.465	-5316.72	1064.25	162.921	303.616	0	0	0	0	0	0	0	200	903	0	0	0	0	0	0	0	603	903	0
8946	2	15.9893	-31.263	-151.325	-152.254	-5072.58	743.82	166.479	301.006	0	0	0	0	0	0	0	200	903	0	0	0	0	0	0	0	603	903	0
8946	3	17.5152	-25.4646	-154.987	-243.806	-5011.54	194.503	167.665	301.573	0	0	0	0	0	0	0	200	903	0	0	0	0	0	0	0	603	903	0
8946	4	18.5833	-21.4973	-160.785	-243.806	-5438.79	286.056	166.174	301.516	0	0	0	0	0	0	0	200	903	0	0	0	0	0	0	0	603	903	0
8946	5	18.1256	-22.4129	-163.227	-1433.99	-5927.07	-34.3784	163.688	308.785	0	0	0	0	0	0	0	200	903	0	0	0	0	0	0	0	603	903	0
8946	6	19.9566	-20.887	-166.584	-1525.55	-5438.79	-446.366	167.351	309.158	0	0	0	0	0	0	0	200	903	0	0	0	0	0	0	0	603	903	0
8946	7	22.398	-16.0042	-170.246	-1433.99	-5255.69	-125.931	169.129	308.423	0	0	0	0	0	0	0	200	903	0	0	0	0	0	0	0	603	903	0
8946	8	24.992	-14.1731	-177.265	-1800.2	-5621.9	-629.471	168.285	310.155	0	0	0	0	0	0	0	200	903	0	0	0	0	0	0	0	603	903	0
8946	9	24.5343	-15.3938	-178.791	-2166.41	-5743.97	-1133.01	167.873	312.117	0	0	0	0	0	0	0	200	903	0	0	0	0	0	0	0	603	903	0
8947	0	24.0765	-12.1895	-181.842	-1800.2	-5682.93	-1087.24	168.748	309.9	0	0	0	0	0	0	0	200	903	0	0	0	0	0	0	0	603	903	0
8947	1	26.2127	-8.37479	-184.589	-2166.41	-5927.07	-1178.79	167.89	311.736	0	0	0	0	0	0	0	200	903	0	0	0	0	0	0	0	603	903	0
8947	2	29.1119	-5.32303	-187.946	-1983.31	-5438.79	-1316.12	171.062	310.553	0	0	0	0	0	0	0	200	903	0	0	0	0	0	0	0	603	903	0
8947	3	28.8067	-5.01785	-190.082	-2898.84	-5255.69	-1545	172.35	315.25	0	0	0	0	0	0	0	200	903	0	0	0	0	0	0	0	603	903	0
8947	4	29.8748	-1.66092	-195.575	-2990.39	-5743.97	-1316.12	170.63	315.29	0	0	0	0	0	0	0	200	903	0	0	0	0	0	0	0	603	903	0
8947	5	30.18	2.45895	-197.406	-3081.94	-5682.93	-2002.76	171.212	315.612	0	0	0	0	0	0	0	200	903	0	0	0	0	0	0	0	603	903	0
8947	6	30.3326	4.59518	-202.289	-3448.15	-6049.14	-2140.09	170.097	317.046	0	0	0	0	0	0	0	200	903	0	0	0	0	0	0	0	603	903	0
8947	7	30.7904	5.6633	-204.731	-3081.94	-5682.93	-2185.87	172.242	315.054	0	0	0	0	0	0	0	200	903	0	0	0	0	0	0	0	603	903	0
8947	8	34.6051	8.40988	-208.698	-3722.81	-6232.25	-2597.85	170.137	317.838	0	0	0	0	0	0	0	200	903	0	0	0	0	0	0	0	603	903	0
8947	9	35.9783	12.3772	-211.75	-3997.47	-6049.14	-3101.39	171.433	318.878	0	0	0	0	0	0	0	200	903	0	0	0	0	0	0	0	603	903	0
8948	0	35.2154	13.903	-222.431	-4455.23	-6598.46	-3147.17	170.335	320.03	0	0	0	0	0	0	0	200	903	0	0	0	0	0	0	0	603	903	0
8948	1	34.7576	13.5979	-228.534	-4821.44	-6842.6	-3238.72	170.059	321.097	0	0	0	0	0	0	0	200	903	0	0	0	0	0	0	0	603	903	0
8948	2	37.1991	18.4807	-233.417	-4546.78	-6842.6	-3650.71	170.685	319.479	0	0	0	0	0	0	0	200	903	0	0	0	0	0	0	0	603	903	0
8948	3	36.7413	22.6006	-240.131	-4913	-7086.74	-3833.82	170.488	320.46	0	0	0	0	0	0	0	200	903	0	0	0	0	0	0	0	603	903	0
8948	4	38.2672	22.2954	-247.455	-5462.31	-7330.88	-4154.25	170.375	322.074	0	0	0	0	0	0	0	200	903	0	0	0	0	0	0	0	603	903	0
8948	5	39.1827	23.8213	-257.831	-6011.63	-7697.09	-4200.03	170.147	323.316	0	0	0	0	0	0	0	200	903	0	0	0	0	0	0	0	603	903	0
8948	6	39.793	27.3308	-262.409	-6560.94	-8124.34	-4383.13	169.039	325.003	0	0	0	0	0	0	0	200	903	0	0	0	0	0	0	0	603	903	0
8948	7	39.9456	29.9248	-276.142	-7201.81	-8368.48	-4795.12	169.695	326.08	0	0	0	0	0	0	0	200	903	0	0	0	0	0	0	0	603	903	0
8948	8	40.4034	29.467	-283.161	-7293.37	-8551.58	-5161.33	169.8	325.757	0	0	0	0	0	0	0	200	903	0	0	0	0	0	0	0	603	903	0
8948	9	41.0137	30.6877	-293.842	-8392	-9222.97	-5344.44	168.612	328.56	0	0	0	0	0	0	0	200	903	0	0	0	0	0	0	0	603	903	0
8949	0	40.8612	34.5024	-304.828	-8849.76	-9711.25	-5161.33	168.142	329.032	0	0	0	0	0	0	0	200	903	0	0	0	0	0	0	0	603	903	0
8949	1	41.3189	35.4179	-317.646	-10223.1	-10504.7	-5527.54	166.929	332.184	0	0	0	0	0	0	0	200	903	0	0	0	0	0	0	0	603	903	0
8949	2	39.793	35.7231	-328.327	-10497.7	-10443.7	-5481.77	168.191	331.973	0	0	0	0	0	0	0	200	903	0	0	0	0	0	0	0	603	903	0
8949	3	38.5723	36.9438	-335.956	-11413.2	-10809.9	-5619.1	167.824	333.972	0	0	0	0	0	0	0	200	903	0	0	0	0	0	0	0	603	903	0
8949	4	39.9456	39.6904	-349.079	-11962.6	-11542.3	-5390.21	166.935	334.269	0	0	0	0	0	0	0	200	903	0	0	0	0	0	0	0	603	903	0
8949	5	39.9456	40.3008	-359.76	-12878.1	-12091.6	-5664.87	166.39	335.796	0	0	0	0	0	0	0	200	903	0	0	0	0	0	0	0	603	903	0
8949	6	39.6405	39.08	-373.798	-13610.5	-12763	-5435.99	165.856	336.411	0	0	0	0	0	0	0	200	903	0	0	0	0	0	0	0	603	903	0
8949	7	38.1146	40.3008	-382.953	-14709.1	-13434.4	-5481.77	164.919	338.41	0	0	0	0	0	0	0	200	903	0	0	0	0	0	0	0	603	903	0
8949	8	36.2835	44.1154	-394.855	-15533.1	-13678.5	-5252.88	165.358	339.339	0	0	0	0	0	0	0	200	903	0	0	0	0	0	0	0	603	903	0
8949	9	35.6732	45.3362	-404.315	-16265.5	-13922.7	-5252.88	165.565	340.23	0	0	0	0	0	0	0	200	903	0	0	0	0	0	0	0	603	903	0
8950	0	33.8421	45.6413	-412.86	-17272.6	-15082.3	-5161.33	163.469	341.836	0	0	0	0	0	0	0	200	903	0	0	0	0	0	0	0	603	903	0
8950	1	33.6895	47.9301	-423.542	-17638.8	-15204.4	-5207.11	164.102	341.646	0	0	0	0	0	0	0	200	903	0	0	0	0	0	0	0	603	903	0
8950	2	32.4688	50.0664	-434.528	-19012.1	-15326.5	-5252.88	164.728	343.754	0	0	0	0	0	0	0	200	903	0	0	0	0	0	0	0	603	903	0
8950	3	30.6378	51.2871	-442.768	-19836.1	-16364.1	-4749.34	163.041	344.8	0	0	0	0	0	0	0	200	903	0	0	0	0	0	0	0	603	903	0
8950	4	28.6541	51.7448	-450.397	-20477	-16364.1	-4886.67	163.667	345.464	0	0	0	0	0	0	0	200	903	0	0	0	0	0	0	0	603	903	0
8950	5	28.6541	54.9492	-458.637	-21300.9	-16486.2	-4795.12	164.054	346.444	0	0	0	0	0	0	0	200	903	0	0	0	0	0	0	0	603	903	0
8950	6	25.6024	56.7802	-468.097	-22124.9	-17401.7	-4108.48	162.825	347.266	0	0	0	0	0	0	0	200	903	0	0	0	0	0	0	0	603	903	0
8950	7	24.8394	57.8484	-480.609	-23864.4	-18256.2	-4291.58	162.015	349.655	0	0	0	0	0	0	0	200	903	0	0	0	0	0	0	0	603	903	0
8950	8	21.3299	59.832	-494.648	-25329.3	-18866.5	-4016.92	161.859	351.207	0	0	0	0	0	0	0	200	903	0	0	0	0	0	0	0	603	903	0
8950	9	17.0574	65.4778	-507.465	-26153.2	-19476.9	-3650.71	161.619	351.537	0	0	0	0	0	0	0	200	903	0	0	0	0	0	0	0	603	903	0
8951	0	13.2428	68.6821	-515.705	-27343.4	-20270.3	-3192.95	160.694	353.022	0	0	0	0	0	0	0	200	903	0	0	0	0	0	0	0	603	903	0
8951	1	13.0902	69.7502	-524.555	-28899.8	-20697.6	-3101.39	160.543	355.094	0	0	0	0	0	0	0	200	903	0	0	0	0	0	0	0	603	903	0
8951	2	8.66511	72.6494	-532.184	-29998.5	-21246.9	-2780.96	160.076	356.369	0	0	0	0	0	0	0	200	903	0	0	0	0	0	0	0	603	903	0
8951	3	5.91853	78.1425	-542.865	-31188.6	-22040.4	-2918.29	159.4	357.452	0	0	0	0	0	0	0	200	903	0	0	0	0	0	0	0	603	903	0
8951	4	4.85042	82.8728	-550.8	-31921.1	-22223.5	-2918.29	159.652	357.954	0	0	0	0	0	0	0	200	903	0	0	0	0	0	0	0	603	903	0
8951	5	1.3409	87.1452	-557.819	-32928.1	-22894.8	-2826.74	158.956	359.03	0	0	0	0	0	0	0	200	903	0	0	0	0	0	0	0	603	903	0
8951	6	-1.55827	90.0444	-566.364	-33660.6	-22955.9	-3009.84	159.468	359.433	0	0	0	0	0	0	0	200	903	0	0	0	0	0	0	0	603	903	0
8951	7	0.120193	95.6902	-572.162	-34850.7	-23810.4	-3421.83	158.385	360.911	0	0	0	0	0	0	0	200	903	0	0	0	0	0	0	0	603	903	0
8951	8	-1.71086	99.3523	-578.876	-35033.8	-23993.5	-3376.05	158.552	360.52	0	0	0	0	0	0	0	200	903	0	0	0	0	0	0	0	603	903	0
8951	9	-1.86345	101.641	-583.759	-36040.9	-24359.7	-3879.59	158.271	361.739	0	0	0	0	0	0	0	200	903	0	0	0	0	0	0	0	603	903	0
8952	0	-2.16863	104.082	-591.693	-36681.8	-24420.7	-3971.15	158.727	361.995	0	0	0	0	0	0	0	200	903	0	0	0	0	0	0	0	603	903	0
8952	1	-1.86345	106.982	-596.576	-37414.2	-24542.8	-3925.37	158.861	362.715	0	0	0	0	0	0	0	200	903	0	0	0	0	0	0	0	603	903	0
8952	2	-2.16863	106.829	-600.849	-37505.8	-24725.9	-4062.7	158.848	362.421	0	0	0	0	0	0	0	200	903	0	0	0	0	0	0	0	603	903	0
8952	3	-0.490159	106.371	-602.069	-38879.1	-24786.9	-4154.25	158.83	364.576	0	0	0	0	0	0	0	200	903	0	0	0	0	0	0	0	603	903	0
8952	4	-0.490159	107.134	-607.257	-39336.8	-25092.1	-4200.03	158.68	364.778	0	0	0	0	0	0	0	200	903	0	0	0	0	0	0	0	603	903	0
8952	5	0.425369	106.982	-609.394	-40069.3	-24786.9	-4612.02	159.325	365.753	0	0	0	0	0	0	0	200	903	0	0	0	0	0	0	0	603	903	0
8952	6	1.64607	104.998	-613.971	-40343.9	-25275.2	-4795.12	158.833	365.71	0	0	0	0	0	0	0	200	903	0	0	0	0	0	0	0	603	903	0
8952	7	2.40901	105.151	-617.328	-41167.9	-25214.2	-5024	159.156	366.687	0	0	0	0	0	0	0	200	903	0	0	0	0	0	0	0	603	903	0
8952	8	3.32454	104.845	-618.549	-41991.9	-25214.2	-5024	159.237	367.888	0	0	0	0	0	0	0	200	903	0	0	0	0	0	0	0	603	903	0
8952	9	5.30818	104.082	-620.38	-42266.5	-25275.2	-5161.33	159.258	368.13	0	0	0	0	0	0	0	200	903	0	0	0	0	0	0	0	603	903	0
8953	0	3.93489	103.167	-620.99	-43182	-25336.2	-5527.54	159.2	369.537	0	0	0	0	0	0	0	200	903	0	0	0	0	0	0	0	603	903	0
8953	1	5.30818	103.167	-622.516	-43090.5	-25275.2	-5344.44	159.398	369.22	0	0	0	0	0	0	0	200	903	0	0	0	0	0	0	0	603	903	0
8953	2	7.29182	103.167	-625.263	-43731.4	-25641.4	-5802.2	158.991	369.941	0	0	0	0	0	0	0	200	903	0	0	0	0	0	0	0	603	903	0
8953	3	6.52888	103.93	-628.009	-43639.8	-25519.4	-5527.54	159.365	369.489	0	0	0	0	0	0	0	200	903	0	0	0	0	0	0	0	603	903	0
8953	4	5.15559	103.014	-628.009	-43639.8	-25763.5	-5573.32	158.976	369.489	0	0	0	0	0	0	0	200	903	0	0	0	0	0	0	0	603	903	0
8953	5	6.68147	104.235	-627.704	-44189.1	-25275.2	-5435.99	159.734	370.398	0	0	0	0	0	0	0	200	903	0	0	0	0	0	0	0	603	903	0
8953	6	4.69783	105.456	-628.315	-44830	-25580.4	-6031.08	159.287	371.35	0	0	0	0	0	0	0	200	903	0	0	0	0	0	0	0	603	903	0
8953	7	6.22371	105.303	-629.84	-45196.2	-26007.6	-5847.98	158.708	371.758	0	0	0	0	0	0	0	200	903	0	0	0	0	0	0	0	603	903	0
8953	8	5.00301	105.914	-631.366	-45287.8	-25458.3	-5985.31	159.677	371.73	0	0	0	0	0	0	0	200	903	0	0	0	0	0	0	0	603	903	0
8953	9	4.69783	105.456	-630.146	-45562.4	-25641.4	-5802.2	159.309	372.305	0	0	0	0	0	0	0	200	903	0	0	0	0	0	0	0	603	903	0
8954	0	2.25642	107.897	-634.723	-46477.9	-25641.4	-5710.65	159.602	373.226	0	0	0	0	0	0	0	200	903	0	0	0	0	0	0	0	603	903	0
8954	1	1.03572	108.66	-634.418	-46844.2	-25702.5	-5847.98	159.487	373.838	0	0	0	0	0	0	0	200	903	0	0	0	0	0	0	0	603	903	0
8954	2	-0.490159	108.813	-633.197	-46203.3	-26251.8	-5115.56	158.541	372.968	0	0	0	0	0	0	0	200	903	0	0	0	0	0	0	0	603	903	0
8954	3	-0.184983	110.491	-637.775	-47027.3	-26068.7	-5481.77	159.126	373.736	0	0	0	0	0	0	0	200	903	0	0	0	0	0	0	0	603	903	0
8954	4	-2.01604	111.864	-642.353	-47485	-26495.9	-5161.33	158.752	373.924	0	0	0	0	0	0	0	200	903	0	0	0	0	0	0	0	603	903	0
8954	5	-2.4738	112.17	-640.522	-48034.3	-26373.8	-5115.56	158.824	374.993	0	0	0	0	0	0	0	200	903	0	0	0	0	0	0	0	603	903	0
8954	6	-5.98332	114.458	-646.625	-47851.2	-26495.9	-4978.23	159.024	374.002	0	0	0	0	0	0	0	200	903	0	0	0	0	0	0	0	603	903	0
8954	7	-7.66179	115.679	-647.235	-49499.2	-27045.2	-4978.23	158.214	376.478	0	0	0	0	0	0	0	200	903	0	0	0	0	0	0	0	603	903	0
8954	8	-7.5092	114.764	-645.71	-49773.8	-26740.1	-4749.34	158.588	377.084	0	0	0	0	0	0	0	200	903	0	0	0	0	0	0	0	603	903	0
8954	9	-7.96697	115.984	-652.729	-50506.3	-27289.4	-4657.79	158.192	377.377	0	0	0	0	0	0	0	200	903	0	0	0	0	0	0	0	603	903	0
8955	0	-9.18767	117.358	-657.917	-50323.2	-27167.3	-4657.79	158.707	376.489	0	0	0	0	0	0	0	200	903	0	0	0	0	0	0	0	603	903	0
8955	1	-10.2558	118.426	-658.527	-51330.2	-27777.7	-4795.12	157.818	377.947	0	0	0	0	0	0	0	200	903	0	0	0	0	0	0	0	603	903	0
8955	2	-11.1713	119.036	-664.63	-51788	-27533.5	-4703.57	158.573	377.92	0	0	0	0	0	0	0	200	903	0	0	0	0	0	0	0	603	903	0
8955	3	-12.6972	119.189	-664.936	-52337.3	-28082.8	-4840.9	157.766	378.71	0	0	0	0	0	0	0	200	903	0	0	0	0	0	0	0	603	903	0
8955	4	-12.6972	120.104	-665.241	-53069.7	-28143.9	-4978.23	157.694	379.775	0	0	0	0	0	0	0	200	903	0	0	0	0	0	0	0	603	903	0
8955	5	-11.9343	121.02	-671.344	-53344.4	-27899.7	-4749.34	158.442	379.459	0	0	0	0	0	0	0	200	903	0	0	0	0	0	0	0	603	903	0
8955	6	-11.9343	120.715	-675.922	-53802.2	-28388	-4520.46	158.001	379.598	0	0	0	0	0	0	0	200	903	0	0	0	0	0	0	0	603	903	0
8955	7	-13.0024	121.478	-679.584	-54076.8	-28143.9	-4657.79	158.587	379.573	0	0	0	0	0	0	0	200	903	0	0	0	0	0	0	0	603	903	0
8955	8	-14.0705	121.783	-682.941	-54443	-28571.1	-5298.66	158.165	379.719	0	0	0	0	0	0	0	200	903	0	0	0	0	0	0	0	603	903	0
8955	9	-13.4601	122.24	-682.941	-55816.3	-28693.2	-5207.11	157.986	381.729	0	0	0	0	0	0	0	200	903	0	0	0	0	0	0	0	603	903	0
8956	0	-13.3075	122.24	-685.993	-56457.2	-28571.1	-5115.56	158.351	382.3	0	0	0	0	0	0	0	200	903	0	0	0	0	0	0	0	603	903	0
8956	1	-12.2394	123.003	-688.739	-56365.6	-28632.2	-5207.11	158.428	381.839	0	0	0	0	0	0	0	200	903	0	0	0	0	0	0	0	603	903	0
8956	2	-12.5446	122.546	-693.927	-57830.5	-28754.2	-5390.21	158.563	383.338	0	0	0	0	0	0	0	200	903	0	0	0	0	0	0	0	603	903	0
8956	3	-12.8498	123.309	-696.064	-58013.6	-29181.5	-5344.44	158.076	383.345	0	0	0	0	0	0	0	200	903	0	0	0	0	0	0	0	603	903	0
8956	4	-13.4601	122.698	-699.115	-58562.9	-29242.5	-5527.54	158.172	383.767	0	0	0	0	0	0	0	200	903	0	0	0	0	0	0	0	603	903	0
8956	5	-13.155	124.224	-700.946	-58654.5	-29059.4	-5619.1	158.543	383.679	0	0	0	0	0	0	0	200	903	0	0	0	0	0	0	0	603	903	0
8956	6	-13.0024	124.377	-704.914	-58929.1	-29181.5	-4886.67	158.603	383.598	0	0	0	0	0	0	0	200	903	0	0	0	0	0	0	0	603	903	0
8956	7	-11.7817	124.377	-707.66	-59020.7	-29547.7	-5161.33	158.246	383.403	0	0	0	0	0	0	0	200	903	0	0	0	0	0	0	0	603	903	0
8956	8	-12.2394	125.292	-713.153	-60577.1	-29669.8	-5161.33	158.396	384.943	0	0	0	0	0	0	0	200	903	0	0	0	0	0	0	0	603	903	0
8956	9	-11.1713	125.597	-714.069	-60851.7	-29303.5	-5481.77	158.963	385.218	0	0	0	0	0	0	0	200	903	0	0	0	0	0	0	0	603	903	0
8957	0	-13.9179	125.903	-718.036	-61217.9	-29852.9	-5207.11	158.424	385.257	0	0	0	0	0	0	0	200	903	0	0	0	0	0	0	0	603	903	0
8957	1	-14.0705	124.224	-720.172	-61492.6	-29486.6	-5252.88	159.056	385.386	0	0	0	0	0	0	0	200	903	0	0	0	0	0	0	0	603	903	0
8957	2	-14.986	125.75	-721.393	-61858.8	-30219.1	-5298.66	158.11	385.749	0	0	0	0	0	0	0	200	903	0	0	0	0	0	0	0	603	903	0
8957	3	-13.4601	125.597	-725.971	-62133.5	-30280.1	-5115.56	158.29	385.587	0	0	0	0	0	0	0	200	903	0	0	0	0	0	0	0	603	903	0
8957	4	-13.7653	126.208	-730.548	-62225	-30158	-5024	158.719	385.176	0	0	0	0	0	0	0	200	903	0	0	0	0	0	0	0	603	903	0
8957	5	-13.9179	125.75	-729.938	-62408.1	-30402.2	-5069.78	158.35	385.498	0	0	0	0	0	0	0	200	903	0	0	0	0	0	0	0	603	903	0
8957	6	-15.1386	124.987	-736.652	-62774.3	-30341.1	-5252.88	158.812	385.216	0	0	0	0	0	0	0	200	903	0	0	0	0	0	0	0	603	903	0
8957	7	-15.7489	125.292	-738.483	-63506.8	-30585.3	-5252.88	158.584	385.996	0	0	0	0	0	0	0	200	903	0	0	0	0	0	0	0	603	903	0
8957	8	-13.7653	124.987	-741.84	-63049	-30951.5	-5024	158.277	384.99	0	0	0	0	0	0	0	200	903	0	0	0	0	0	0	0	603	903	0
8957	9	-13.9179	123.919	-744.281	-64056.1	-30951.5	-4474.69	158.414	386.064	0	0	0	0	0	0	0	200	903	0	0	0	0	0	0	0	603	903	0
8958	0	-13.9179	124.072	-748.554	-64513.8	-30707.4	-5024	158.978	386.185	0	0	0	0	0	0	0	200	903	0	0	0	0	0	0	0	603	903	0
8958	1	-14.0705	123.156	-750.69	-64788.5	-30646.3	-5161.33	159.176	386.305	0	0	0	0	0	0	0	200	903	0	0	0	0	0	0	0	603	903	0
8958	2	-14.2231	121.63	-753.742	-65520.9	-31012.5	-5252.88	158.855	386.928	0	0	0	0	0	0	0	200	903	0	0	0	0	0	0	0	603	903	0
8958	3	-13.6127	122.24	-754.657	-66528	-30585.3	-5161.33	159.471	388.157	0	0	0	0	0	0	0	200	903	0	0	0	0	0	0	0	603	903	0
8958	4	-12.6972	122.24	-756.794	-66985.8	-31073.6	-5115.56	158.941	388.513	0	0	0	0	0	0	0	200	903	0	0	0	0	0	0	0	603	903	0
8958	5	-11.4765	122.546	-759.845	-66894.2	-31073.6	-5298.66	159.105	388.037	0	0	0	0	0	0	0	200	903	0	0	0	0	0	0	0	603	903	0
8958	6	-11.7817	121.63	-763.507	-65978.7	-30951.5	-5344.44	159.461	386.415	0	0	0	0	0	0	0	200	903	0	0	0	0	0	0	0	603	903	0
8958	7	-11.4765	120.867	-765.033	-67535.1	-31134.6	-5161.33	159.303	388.277	0	0	0	0	0	0	0	200	903	0	0	0	0	0	0	0	603	903	0
8958	8	-11.6291	120.257	-767.475	-67809.7	-31317.7	-5161.33	159.194	388.354	0	0	0	0	0	0	0	200	903	0	0	0	0	0	0	0	603	903	0
8958	9	-11.6291	119.341	-768.39	-68084.4	-31439.8	-4612.02	159.084	388.607	0	0	0	0	0	0	0	200	903	0	0	0	0	0	0	0	603	903	0
8959	0	-11.4765	118.578	-770.832	-67626.6	-31073.6	-5069.78	159.688	387.732	0	0	0	0	0	0	0	200	903	0	0	0	0	0	0	0	603	903	0
8959	1	-10.7135	117.815	-771.747	-67626.6	-30951.5	-5207.11	159.894	387.628	0	0	0	0	0	0	0	200	903	0	0	0	0	0	0	0	603	903	0
8959	2	-10.7135	116.595	-775.104	-67992.8	-31622.9	-4978.23	159.202	387.721	0	0	0	0	0	0	0	200	903	0	0	0	0	0	0	0	603	903	0
8959	3	-9.64543	115.527	-775.409	-68633.7	-31989.1	-4886.67	158.746	388.513	0	0	0	0	0	0	0	200	903	0	0	0	0	0	0	0	603	903	0
8959	4	-10.7135	114.916	-780.292	-68084.4	-31439.8	-5115.56	159.708	387.255	0	0	0	0	0	0	0	200	903	0	0	0	0	0	0	0	603	903	0
8959	5	-10.2558	114.153	-779.987	-68450.6	-31561.8	-5161.33	159.535	387.759	0	0	0	0	0	0	0	200	903	0	0	0	0	0	0	0	603	903	0
8959	6	-10.4084	112.933	-779.682	-68816.8	-31256.7	-4749.34	159.911	388.263	0	0	0	0	0	0	0	200	903	0	0	0	0	0	0	0	603	903	0
8959	7	-9.34026	112.322	-783.954	-69457.7	-31500.8	-4428.91	159.818	388.599	0	0	0	0	0	0	0	200	903	0	0	0	0	0	0	0	603	903	0
8959	8	-9.49284	111.864	-787.921	-69366.1	-31928.1	-4657.79	159.478	388.037	0	0	0	0	0	0	0	200	903	0	0	0	0	0	0	0	603	903	0
8959	9	-9.18767	111.102	-785.48	-70007	-31806	-4978.23	159.508	389.126	0	0	0	0	0	0	0	200	903	0	0	0	0	0	0	0	603	903	0
8960	0	-9.64543	110.491	-791.889	-70281.7	-31439.8	-4703.57	160.298	388.752	0	0	0	0	0	0	0	200	903	0	0	0	0	0	0	0	603	903	0
8960	1	-9.79802	108.813	-791.278	-70831	-31561.8	-4657.79	160.113	389.515	0	0	0	0	0	0	0	200	903	0	0	0	0	0	0	0	603	903	0
8960	2	-9.18767	108.66	-794.33	-71014.1	-31806	-4474.69	159.959	389.401	0	0	0	0	0	0	0	200	903	0	0	0	0	0	0	0	603	903	0
8960	3	-8.57732	107.745	-794.635	-71563.4	-32111.2	-4520.46	159.59	390.058	0	0	0	0	0	0	0	200	903	0	0	0	0	0	0	0	603	903	0
8960	4	-7.81438	107.439	-798.603	-70739.4	-32355.3	-4428.91	159.485	388.579	0	0	0	0	0	0	0	200	903	0	0	0	0	0	0	0	603	903	0
8960	5	-8.11955	106.371	-800.434	-72112.7	-31867	-4520.46	160.188	390.092	0	0	0	0	0	0	0	200	903	0	0	0	0	0	0	0	603	903	0
8960	6	-8.42473	105.151	-800.739	-71929.6	-31744.9	-4291.58	160.355	389.829	0	0	0	0	0	0	0	200	903	0	0	0	0	0	0	0	603	903	0
8960	7	-8.11955	104.082	-800.434	-71929.6	-31622.9	-4154.25	160.493	389.863	0	0	0	0	0	0	0	200	903	0	0	0	0	0	0	0	603	903	0
8960	8	-8.57732	101.946	-801.044	-72478.9	-32172.2	-4474.69	159.837	390.481	0	0	0	0	0	0	0	200	903	0	0	0	0	0	0	0	603	903	0
8960	9	-7.35661	101.488	-802.265	-71471.8	-32111.2	-4108.48	159.974	389.088	0	0	0	0	0	0	0	200	903	0	0	0	0	0	0	0	603	903	0
8961	0	-7.81438	100.878	-804.401	-71838.1	-31989.1	-3971.15	160.232	389.306	0	0	0	0	0	0	0	200	903	0	0	0	0	0	0	0	603	903	0
8961	1	-7.5092	99.9626	-805.927	-72021.1	-31867	-3879.59	160.459	389.364	0	0	0	0	0	0	0	200	903	0	0	0	0	0	0	0	603	903	0
8961	2	-8.27214	98.4367	-805.927	-72112.7	-32050.1	-3788.04	160.232	389.478	0	0	0	0	0	0	0	200	903	0	0	0	0	0	0	0	603	903	0
8961	3	-7.05144	96.4531	-805.011	-71746.5	-32233.2	-4016.92	159.959	389.125	0	0	0	0	0	0	0	200	903	0	0	0	0	0	0	0	603	903	0
8961	4	-9.03508	95.6902	-805.011	-72753.6	-32599.4	-3788.04	159.504	390.376	0	0	0	0	0	0	0	200	903	0	0	0	0	0	0	0	603	903	0
8961	5	-7.35661	95.0798	-805.316	-72570.5	-32233.2	-3604.93	159.974	390.114	0	0	0	0	0	0	0	200	903	0	0	0	0	0	0	0	603	903	0
8961	6	-7.05144	93.7065	-806.537	-72021.1	-32416.3	-3376.05	159.808	389.297	0	0	0	0	0	0	0	200	903	0	0	0	0	0	0	0	603	903	0
8961	7	-7.20403	92.9436	-806.842	-72295.8	-32172.2	-3101.39	160.126	389.603	0	0	0	0	0	0	0	200	903	0	0	0	0	0	0	0	603	903	0
8961	8	-8.88249	92.1806	-805.927	-72112.7	-32355.3	-3513.38	159.853	389.478	0	0	0	0	0	0	0	200	903	0	0	0	0	0	0	0	603	903	0
8961	9	-6.2885	91.1125	-805.011	-72570.5	-32172.2	-3559.16	160.035	390.148	0	0	0	0	0	0	0	200	903	0	0	0	0	0	0	0	603	903	0
8962	0	-9.03508	89.7392	-802.875	-71929.6	-32477.4	-3192.95	159.549	389.59	0	0	0	0	0	0	0	200	903	0	0	0	0	0	0	0	603	903	0
8962	1	-8.42473	88.8237	-800.739	-72295.8	-31989.1	-3421.83	160.051	390.286	0	0	0	0	0	0	0	200	903	0	0	0	0	0	0	0	603	903	0
8962	2	-6.44109	85.9245	-801.96	-72295.8	-31867	-3101.39	160.264	390.149	0	0	0	0	0	0	0	200	903	0	0	0	0	0	0	0	603	903	0
8962	3	-7.5092	86.8401	-800.434	-72570.5	-32111.2	-3009.84	159.883	390.664	0	0	0	0	0	0	0	200	903	0	0	0	0	0	0	0	603	903	0
8962	4	-9.03508	86.2297	-798.908	-72204.3	-32111.2	-2368.97	159.806	390.379	0	0	0	0	0	0	0	200	903	0	0	0	0	0	0	0	603	903	0
8962	5	-9.64543	84.8564	-798.603	-73302.9	-31989.1	-2597.85	159.944	391.789	0	0	0	0	0	0	0	200	903	0	0	0	0	0	0	0	603	903	0
8962	6	-9.34026	84.2461	-794.025	-73119.8	-31622.9	-3009.84	160.174	392.088	0	0	0	0	0	0	0	200	903	0	0	0	0	0	0	0	603	903	0
8962	7	-8.42473	83.0254	-792.194	-72936.7	-31256.7	-2964.07	160.544	392.069	0	0	0	0	0	0	0	200	903	0	0	0	0	0	0	0	603	903	0
8962	8	-8.27214	82.2624	-789.753	-72662	-31439.8	-2140.09	160.19	392.006	0	0	0	0	0	0	0	200	903	0	0	0	0	0	0	0	603	903	0
8962	9	-8.27214	81.3469	-788.837	-72662	-31622.9	-2368.97	159.912	392.113	0	0	0	0	0	0	0	200	903	0	0	0	0	0	0	0	603	903	0
8963	0	-10.2558	80.7365	-786.701	-72021.1	-31561.8	-2506.3	159.881	391.548	0	0	0	0	0	0	0	200	903	0	0	0	0	0	0	0	603	903	0
8963	1	-9.79802	78.9055	-785.175	-72204.3	-31744.9	-1819.66	159.57	391.96	0	0	0	0	0	0	0	200	903	0	0	0	0	0	0	0	603	903	0
8963	2	-9.95061	78.2951	-780.597	-72478.9	-31378.7	-1956.99	159.802	392.851	0	0	0	0	0	0	0	200	903	0	0	0	0	0	0	0	603	903	0
8963	3	-10.561	78.1425	-773.883	-72021.1	-31195.6	-1728.1	159.689	393.065	0	0	0	0	0	0	0	200	903	0	0	0	0	0	0	0	603	903	0
8963	4	-9.34026	75.396	-774.189	-71838.1	-31500.8	-1956.99	159.311	392.791	0	0	0	0	0	0	0	200	903	0	0	0	0	0	0	0	603	903	0
8963	5	-9.64543	76.1589	-772.968	-71929.6	-31195.6	-2002.76	159.642	393.056	0	0	0	0	0	0	0	200	903	0	0	0	0	0	0	0	603	903	0
8963	6	-9.79802	75.2434	-768.085	-70556.3	-31317.7	-2002.76	159.226	391.86	0	0	0	0	0	0	0	200	903	0	0	0	0	0	0	0	603	903	0
8963	7	-11.3239	74.1753	-766.559	-70556.3	-30829.4	-1545	159.782	392.043	0	0	0	0	0	0	0	200	903	0	0	0	0	0	0	0	603	903	0
8963	8	-11.6291	73.1071	-760.456	-70281.7	-30524.2	-1361.89	159.861	392.421	0	0	0	0	0	0	0	200	903	0	0	0	0	0	0	0	603	903	0
8963	9	-11.9343	72.9546	-756.488	-69732.3	-30829.4	-1590.78	159.247	392.179	0	0	0	0	0	0	0	200	903	0	0	0	0	0	0	0	603	903	0
8964	0	-11.4765	70.5132	-753.742	-69823.9	-30646.3	-1499.22	159.341	392.636	0	0	0	0	0	0	0	200	903	0	0	0	0	0	0	0	603	903	0
8964	1	-11.1713	69.5976	-752.521	-69091.5	-30341.1	-1316.12	159.681	391.813	0	0	0	0	0	0	0	200	903	0	0	0	0	0	0	0	603	903	0
8964	2	-10.4084	68.5295	-747.028	-69274.6	-30341.1	-1361.89	159.384	392.734	0	0	0	0	0	0	0	200	903	0	0	0	0	0	0	0	603	903	0
8964	3	-13.0024	68.3769	-743.671	-69183	-30219.1	-1316.12	159.365	393.029	0	0	0	0	0	0	0	200	903	0	0	0	0	0	0	0	603	903	0
8964	4	-12.6972	66.5459	-738.178	-68908.4	-30158	-1041.46	159.145	393.349	0	0	0	0	0	0	0	200	903	0	0	0	0	0	0	0	603	903	0
8964	5	-12.6972	64.7148	-733.6	-68450.6	-30097	-537.919	158.974	393.308	0	0	0	0	0	0	0	200	903	0	0	0	0	0	0	0	603	903	0
8964	6	-12.392	65.4778	-730.243	-68725.2	-29486.6	-949.906	159.621	394.113	0	0	0	0	0	0	0	200	903	0	0	0	0	0	0	0	603	903	0
8964	7	-12.392	63.9519	-727.191	-69366.1	-29425.6	-721.024	159.535	395.389	0	0	0	0	0	0	0	200	903	0	0	0	0	0	0	0	603	903	0
8964	8	-13.6127	62.7312	-723.835	-68542.2	-29913.9	-537.919	158.673	394.693	0	0	0	0	0	0	0	200	903	0	0	0	0	0	0	0	603	903	0
8964	9	-14.6808	62.2734	-719.257	-68359	-29669.8	-675.248	158.749	395.041	0	0	0	0	0	0	0	200	903	0	0	0	0	0	0	0	603	903	0
8965	0	-14.5282	61.3579	-714.374	-68267.5	-29181.5	-446.366	159.151	395.563	0	0	0	0	0	0	0	200	903	0	0	0	0	0	0	0	603	903	0
8965	1	-13.4601	60.7475	-708.881	-68084.4	-28998.4	-217.484	159.093	396.045	0	0	0	0	0	0	0	200	903	0	0	0	0	0	0	0	603	903	0
8965	2	-13.4601	59.2216	-704.608	-67352	-28937.3	-34.3784	158.931	395.588	0	0	0	0	0	0	0	200	903	0	0	0	0	0	0	0	603	903	0
8965	3	-14.3757	59.5268	-702.472	-66070.2	-29242.5	-80.1548	158.372	394.054	0	0	0	0	0	0	0	200	903	0	0	0	0	0	0	0	603	903	0
8965	4	-14.5282	58.4587	-697.589	-65520.9	-28571.1	-171.707	159.043	393.925	0	0	0	0	0	0	0	200	903	0	0	0	0	0	0	0	603	903	0
8965	5	-15.9015	57.6958	-693.012	-67168.9	-28754.2	-80.1548	158.508	396.923	0	0	0	0	0	0	0	200	903	0	0	0	0	0	0	0	603	903	0
8965	6	-15.9015	56.7802	-686.908	-66711.1	-28327	57.1744	158.762	397.118	0	0	0	0	0	0	0	200	903	0	0	0	0	0	0	0	603	903	0
8965	7	-15.5964	56.3225	-682.636	-66253.4	-28265.9	194.503	158.593	397.055	0	0	0	0	0	0	0	200	903	0	0	0	0	0	0	0	603	903	0
8965	8	-14.8334	55.407	-678.974	-65795.6	-28204.9	423.385	158.46	396.904	0	0	0	0	0	0	0	200	903	0	0	0	0	0	0	0	603	903	0
8965	9	-15.1386	52.2026	-676.837	-65429.4	-28327	286.056	158.148	396.669	0	0	0	0	0	0	0	200	903	0	0	0	0	0	0	0	603	903	0
8966	0	-17.1222	54.0337	-672.565	-65704	-28021.8	331.833	158.336	397.692	0	0	0	0	0	0	0	200	903	0	0	0	0	0	0	0	603	903	0
8966	1	-17.4274	53.8811	-667.377	-65612.5	-27350.4	606.491	159.018	398.314	0	0	0	0	0	0	0	200	903	0	0	0	0	0	0	0	603	903	0
8966	2	-17.4274	52.3552	-661.273	-64513.8	-27472.5	698.044	158.455	397.56	0	0	0	0	0	0	0	200	903	0	0	0	0	0	0	0	603	903	0
8966	3	-16.3593	51.8974	-657.306	-64056.1	-27411.5	789.596	158.297	397.452	0	0	0	0	0	0	0	200	903	0	0	0	0	0	0	0	603	903	0
8966	4	-16.8171	51.2871	-654.865	-63781.4	-27167.3	789.596	158.515	397.396	0	0	0	0	0	0	0	200	903	0	0	0	0	0	0	0	603	903	0
8966	5	-16.2067	50.0664	-652.118	-63689.9	-27411.5	926.926	157.966	397.666	0	0	0	0	0	0	0	200	903	0	0	0	0	0	0	0	603	903	0
8966	6	-17.1222	47.7776	-647.846	-63689.9	-27045.2	926.926	158.254	398.31	0	0	0	0	0	0	0	200	903	0	0	0	0	0	0	0	603	903	0
8966	7	-16.9697	48.8457	-646.015	-62408.1	-26618	1064.25	158.797	396.605	0	0	0	0	0	0	0	200	903	0	0	0	0	0	0	0	603	903	0
8966	8	-17.4274	47.9301	-640.216	-62408.1	-26618	1293.14	158.423	397.48	0	0	0	0	0	0	0	200	903	0	0	0	0	0	0	0	603	903	0
8966	9	-17.58	47.3198	-635.639	-63049	-26679	1018.48	158.028	399.19	0	0	0	0	0	0	0	200	903	0	0	0	0	0	0	0	603	903	0
8967	0	-17.2748	46.2517	-632.587	-62774.3	-26984.2	1430.47	157.343	399.234	0	0	0	0	0	0	0	200	903	0	0	0	0	0	0	0	603	903	0
8967	1	-17.4274	45.6413	-630.756	-62865.9	-26373.8	1155.81	158.187	399.668	0	0	0	0	0	0	0	200	903	0	0	0	0	0	0	0	603	903	0
8967	2	-17.8852	45.6413	-628.62	-62865.9	-26129.7	1338.91	158.433	400.006	0	0	0	0	0	0	0	200	903	0	0	0	0	0	0	0	603	903	0
8967	3	-18.6481	45.1836	-624.652	-62591.2	-26434.9	1476.24	157.681	400.202	0	0	0	0	0	0	0	200	903	0	0	0	0	0	0	0	603	903	0
8967	4	-19.2585	43.8103	-620.075	-62591.2	-26129.7	1705.12	157.86	400.941	0	0	0	0	0	0	0	200	903	0	0	0	0	0	0	0	603	903	0
8967	5	-18.9533	43.9629	-616.718	-62133.5	-25885.6	1750.9	158.027	400.749	0	0	0	0	0	0	0	200	903	0	0	0	0	0	0	0	603	903	0
8967	6	-18.9533	43.3525	-613.361	-61675.7	-25946.6	1567.79	157.698	400.554	0	0	0	0	0	0	0	200	903	0	0	0	0	0	0	0	603	903	0
8967	7	-18.9533	42.7422	-612.14	-62225	-25702.5	1567.79	158.012	401.652	0	0	0	0	0	0	0	200	903	0	0	0	0	0	0	0	603	903	0
8967	8	-20.4792	42.7422	-610.004	-61767.3	-25946.6	1705.12	157.465	401.257	0	0	0	0	0	0	0	200	903	0	0	0	0	0	0	0	603	903	0
8967	9	-19.2585	41.674	-604.511	-61858.8	-25824.5	1842.45	157.28	402.329	0	0	0	0	0	0	0	200	903	0	0	0	0	0	0	0	603	903	0
8968	0	-20.4792	39.2326	-602.375	-61584.2	-25214.2	2071.33	158.142	402.236	0	0	0	0	0	0	0	200	903	0	0	0	0	0	0	0	603	903	0
8968	1	-19.7162	40.4533	-598.712	-61401	-25031.1	1934.01	158.192	402.555	0	0	0	0	0	0	0	200	903	0	0	0	0	0	0	0	603	903	0
8968	2	-18.0378	40.1482	-597.797	-61858.8	-24970	2025.56	158.23	403.478	0	0	0	0	0	0	0	200	903	0	0	0	0	0	0	0	603	903	0
8968	3	-19.7162	39.2326	-595.966	-60577.1	-25397.3	2071.33	157.385	401.645	0	0	0	0	0	0	0	200	903	0	0	0	0	0	0	0	603	903	0
8968	4	-20.3266	38.6223	-592.914	-60851.7	-25214.2	2117.11	157.474	402.632	0	0	0	0	0	0	0	200	903	0	0	0	0	0	0	0	603	903	0
8968	5	-18.8007	38.0119	-589.252	-60485.5	-24909	2071.33	157.728	402.648	0	0	0	0	0	0	0	200	903	0	0	0	0	0	0	0	603	903	0
8968	6	-21.0895	37.5542	-586.2	-60760.2	-24909	2208.66	157.508	403.651	0	0	0	0	0	0	0	200	903	0	0	0	0	0	0	0	603	903	0
8968	7	-20.0214	37.249	-584.674	-60302.4	-24909	2300.22	157.397	403.138	0	0	0	0	0	0	0	200	903	0	0	0	0	0	0	0	603	903	0
8968	8	-19.2585	35.7231	-584.98	-60485.5	-24848	2345.99	157.523	403.398	0	0	0	0	0	0	0	200	903	0	0	0	0	0	0	0	603	903	0
8968	9	-20.9369	36.3335	-581.012	-60302.4	-24848	2574.88	157.233	403.789	0	0	0	0	0	0	0	200	903	0	0	0	0	0	0	0	603	903	0
8969	0	-21.8525	33.8921	-579.181	-60302.4	-24603.8	2712.2	157.52	404.117	0	0	0	0	0	0	0	200	903	0	0	0	0	0	0	0	603	903	0
8969	1	-20.9369	34.1972	-574.604	-60027.8	-24481.8	2437.55	157.394	404.468	0	0	0	0	0	0	0	200	903	0	0	0	0	0	0	0	603	903	0
8969	2	-23.0732	33.5869	-573.078	-59112.2	-24725.9	2483.32	156.854	403.149	0	0	0	0	0	0	0	200	903	0	0	0	0	0	0	0	603	903	0
8969	3	-20.7843	33.1291	-570.941	-60119.3	-24664.9	2712.2	156.8	405.299	0	0	0	0	0	0	0	200	903	0	0	0	0	0	0	0	603	903	0
8969	4	-22.0051	31.7558	-570.026	-59936.2	-24237.6	2620.65	157.48	405.146	0	0	0	0	0	0	0	200	903	0	0	0	0	0	0	0	603	903	0
8969	5	-21.5473	32.3662	-568.805	-59661.5	-24298.7	2712.2	157.281	404.889	0	0	0	0	0	0	0	200	903	0	0	0	0	0	0	0	603	903	0
8969	6	-22.9206	31.1455	-566.364	-59753.1	-23932.4	2803.76	157.744	405.503	0	0	0	0	0	0	0	200	903	0	0	0	0	0	0	0	603	903	0
8969	7	-22.0051	31.1455	-563.007	-59753.1	-24115.5	2574.88	157.167	406.132	0	0	0	0	0	0	0	200	903	0	0	0	0	0	0	0	603	903	0
8969	8	-22.1576	30.0774	-557.819	-59753.1	-24237.6	2986.86	156.549	407.119	0	0	0	0	0	0	0	200	903	0	0	0	0	0	0	0	603	903	0
8969	9	-21.5473	29.467	-559.65	-59570	-23993.5	2895.31	157.128	406.442	0	0	0	0	0	0	0	200	903	0	0	0	0	0	0	0	603	903	0
8970	0	-22.1576	29.0092	-559.04	-60210.9	-23810.4	3032.64	157.408	407.704	0	0	0	0	0	0	0	200	903	0	0	0	0	0	0	0	603	903	0
8970	1	-21.5473	28.7041	-554.462	-60485.5	-24237.6	3078.42	156.286	409.089	0	0	0	0	0	0	0	200	903	0	0	0	0	0	0	0	603	903	0
8970	2	-22.4628	28.2463	-556.598	-59936.2	-24115.5	3169.97	156.673	407.683	0	0	0	0	0	0	0	200	903	0	0	0	0	0	0	0	603	903	0
8970	3	-22.9206	27.0256	-552.021	-60668.6	-23993.5	3215.74	156.535	409.903	0	0	0	0	0	0	0	200	903	0	0	0	0	0	0	0	603	903	0
8970	4	-22.1576	26.873	-550.495	-59844.6	-23566.2	3215.74	157.191	408.711	0	0	0	0	0	0	0	200	903	0	0	0	0	0	0	0	603	903	0
8970	5	-21.5473	27.3308	-550.19	-60577.1	-23688.3	3124.19	156.945	410.102	0	0	0	0	0	0	0	200	903	0	0	0	0	0	0	0	603	903	0
8970	6	-21.5473	26.4153	-551.41	-59936.2	-23810.4	3398.85	156.819	408.696	0	0	0	0	0	0	0	200	903	0	0	0	0	0	0	0	603	903	0
8970	7	-21.8525	25.8049	-543.17	-60668.6	-23688.3	3353.07	156.389	411.694	0	0	0	0	0	0	0	200	903	0	0	0	0	0	0	0	603	903	0
8970	8	-23.3783	25.1945	-548.664	-60394	-23871.4	3353.07	156.492	410.075	0	0	0	0	0	0	0	200	903	0	0	0	0	0	0	0	603	903	0
8970	9	-23.5309	25.042	-545.612	-60577.1	-23444.2	3261.52	157.031	411.026	0	0	0	0	0	0	0	200	903	0	0	0	0	0	0	0	603	903	0
8971	0	-23.0732	23.2109	-542.56	-60027.8	-23505.2	3353.07	156.677	410.638	0	0	0	0	0	0	0	200	903	0	0	0	0	0	0	0	603	903	0
8971	1	-22.3102	23.3635	-543.17	-60577.1	-23322.1	3444.63	157.063	411.525	0	0	0	0	0	0	0	200	903	0	0	0	0	0	0	0	603	903	0
8971	2	-22.0051	23.9738	-544.696	-59753.1	-23810.4	3581.96	156.287	409.7	0	0	0	0	0	0	0	200	903	0	0	0	0	0	0	0	603	903	0
8971	3	-22.768	22.9057	-542.56	-59936.2	-23627.3	3398.85	156.452	410.469	0	0	0	0	0	0	0	200	903	0	0	0	0	0	0	0	603	903	0
8971	4	-22.6154	22.7531	-542.255	-59936.2	-23261.1	3261.52	157.103	410.531	0	0	0	0	0	0	0	200	903	0	0	0	0	0	0	0	603	903	0
8971	5	-22.768	22.7531	-538.898	-60119.3	-23322.1	3627.73	156.723	411.56	0	0	0	0	0	0	0	200	903	0	0	0	0	0	0	0	603	903	0
8971	6	-21.6999	22.9057	-539.508	-60302.4	-23566.2	3993.94	156.319	411.773	0	0	0	0	0	0	0	200	903	0	0	0	0	0	0	0	603	903	0
8971	7	-21.3947	21.3799	-537.677	-60851.7	-23383.1	3856.61	156.511	413.175	0	0	0	0	0	0	0	200	903	0	0	0	0	0	0	0	603	903	0
8971	8	-20.7843	20.4643	-538.288	-60210.9	-23566.2	3673.51	156.22	411.856	0	0	0	0	0	0	0	200	903	0	0	0	0	0	0	0	603	903	0
8971	9	-22.6154	20.6169	-537.067	-60760.2	-23077.9	3765.06	157.03	413.133	0	0	0	0	0	0	0	200	903	0	0	0	0	0	0	0	603	903	0
8972	0	-22.1576	20.6169	-537.677	-61126.4	-23077.9	3856.61	157.078	413.686	0	0	0	0	0	0	0	200	903	0	0	0	0	0	0	0	603	903	0
8972	1	-21.8525	19.854	-534.626	-60668.6	-22833.8	4268.6	157.29	413.479	0	0	0	0	0	0	0	200	903	0	0	0	0	0	0	0	603	903	0
8972	2	-20.7843	18.7859	-534.626	-61034.8	-23200	3948.17	156.605	414.164	0	0	0	0	0	0	0	200	903	0	0	0	0	0	0	0	603	903	0
8972	3	-21.0895	18.7859	-532.184	-61034.8	-23200	4268.6	156.406	414.687	0	0	0	0	0	0	0	200	903	0	0	0	0	0	0	0	603	903	0
8972	4	-21.0895	16.9548	-534.32	-61675.7	-22833.8	4085.5	157.266	415.428	0	0	0	0	0	0	0	200	903	0	0	0	0	0	0	0	603	903	0
8972	5	-22.1576	17.8703	-533.71	-61401	-22955.9	3948.17	156.988	415.046	0	0	0	0	0	0	0	200	903	0	0	0	0	0	0	0	603	903	0
8972	6	-21.5473	17.4126	-532.489	-62133.5	-23200	4039.72	156.431	416.685	0	0	0	0	0	0	0	200	903	0	0	0	0	0	0	0	603	903	0
8972	7	-21.0895	16.9548	-532.489	-62225	-23505.2	4222.83	155.858	416.857	0	0	0	0	0	0	0	200	903	0	0	0	0	0	0	0	603	903	0
8972	8	-20.4792	17.26	-530.963	-62499.7	-22894.8	4222.83	156.881	417.71	0	0	0	0	0	0	0	200	903	0	0	0	0	0	0	0	603	903	0
8972	9	-20.4792	17.4126	-532.794	-61675.7	-22894.8	4222.83	157.029	415.759	0	0	0	0	0	0	0	200	903	0	0	0	0	0	0	0	603	903	0
8973	0	-19.8688	16.6496	-531.269	-62591.2	-22772.8	4314.38	157.135	417.815	0	0	0	0	0	0	0	200	903	0	0	0	0	0	0	0	603	903	0
8973	1	-20.7843	16.1919	-532.184	-62774.3	-22833.8	4177.05	157.094	417.956	0	0	0	0	0	0	0	200	903	0	0	0	0	0	0	0	603	903	0
8973	2	-20.6318	15.7341	-527.301	-62865.9	-23139	4177.05	156.118	419.222	0	0	0	0	0	0	0	200	903	0	0	0	0	0	0	0	603	903	0
8973	3	-20.3266	13.5979	-528.827	-63323.6	-23139	4268.6	156.245	419.744	0	0	0	0	0	0	0	200	903	0	0	0	0	0	0	0	603	903	0
8973	4	-19.2585	14.3608	-529.438	-63689.9	-22528.6	4314.38	157.448	420.297	0	0	0	0	0	0	0	200	903	0	0	0	0	0	0	0	603	903	0
8973	5	-17.1222	15.1237	-528.827	-63232.1	-22711.7	4314.38	157.053	419.57	0	0	0	0	0	0	0	200	903	0	0	0	0	0	0	0	603	903	0
8973	6	-18.3429	14.8186	-530.658	-62957.4	-22894.8	4405.93	156.856	418.64	0	0	0	0	0	0	0	200	903	0	0	0	0	0	0	0	603	903	0
8973	7	-19.5636	13.5979	-530.048	-63415.2	-22833.8	4405.93	156.921	419.641	0	0	0	0	0	0	0	200	903	0	0	0	0	0	0	0	603	903	0
8973	8	-17.58	13.2927	-528.217	-63232.1	-22894.8	4543.26	156.656	419.709	0	0	0	0	0	0	0	200	903	0	0	0	0	0	0	0	603	903	0
8973	9	-18.4955	12.2246	-528.217	-63781.4	-22589.7	4268.6	157.234	420.749	0	0	0	0	0	0	0	200	903	0	0	0	0	0	0	0	603	903	0
8974	0	-17.8852	12.3772	-528.522	-63873	-22528.6	4955.25	157.374	420.852	0	0	0	0	0	0	0	200	903	0	0	0	0	0	0	0	603	903	0
8974	1	-16.3593	11.9194	-530.353	-64513.8	-22833.8	4543.26	156.946	421.643	0	0	0	0	0	0	0	200	903	0	0	0	0	0	0	0	603	903	0
8974	2	-17.4274	11.9194	-531.574	-64147.6	-22894.8	4543.26	156.93	420.675	0	0	0	0	0	0	0	200	903	0	0	0	0	0	0	0	603	903	0
8974	3	-18.6481	10.5461	-531.574	-64330.7	-22833.8	4634.81	157.045	421.019	0	0	0	0	0	0	0	200	903	0	0	0	0	0	0	0	603	903	0
8974	4	-17.1222	11.1565	-530.658	-65246.2	-22711.7	4680.59	157.201	422.953	0	0	0	0	0	0	0	200	903	0	0	0	0	0	0	0	603	903	0
8974	5	-16.5119	10.8513	-529.743	-65704	-22894.8	4634.81	156.781	424.03	0	0	0	0	0	0	0	200	903	0	0	0	0	0	0	0	603	903	0
8974	6	-15.5964	10.3935	-530.658	-65795.6	-22833.8	4772.14	156.971	423.989	0	0	0	0	0	0	0	200	903	0	0	0	0	0	0	0	603	903	0
8974	7	-15.7489	10.2409	-533.71	-66344.9	-22833.8	4726.37	157.217	424.309	0	0	0	0	0	0	0	200	903	0	0	0	0	0	0	0	603	903	0
8974	8	-16.6645	10.0883	-532.794	-66985.8	-22711.7	4589.04	157.372	425.725	0	0	0	0	0	0	0	200	903	0	0	0	0	0	0	0	603	903	0
8974	9	-14.5282	10.2409	-530.963	-66161.8	-22528.6	4543.26	157.57	424.607	0	0	0	0	0	0	0	200	903	0	0	0	0	0	0	0	603	903	0
8975	0	-16.5119	9.93576	-531.269	-67260.4	-22833.8	4589.04	157.02	426.603	0	0	0	0	0	0	0	200	903	0	0	0	0	0	0	0	603	903	0
8975	1	-14.6808	9.78317	-531.879	-67535.1	-22528.6	4726.37	157.643	426.975	0	0	0	0	0	0	0	200	903	0	0	0	0	0	0	0	603	903	0
8975	2	-12.8498	9.02023	-532.794	-67352	-22772.8	4726.37	157.258	426.413	0	0	0	0	0	0	0	200	903	0	0	0	0	0	0	0	603	903	0
8975	3	-13.9179	7.18918	-535.236	-67809.7	-22467.6	4863.69	158.023	426.691	0	0	0	0	0	0	0	200	903	0	0	0	0	0	0	0	603	903	0
8975	4	-13.9179	8.56247	-535.236	-68267.5	-22406.6	4726.37	158.137	427.547	0	0	0	0	0	0	0	200	903	0	0	0	0	0	0	0	603	903	0
8975	5	-12.5446	8.56247	-533.71	-67626.6	-22650.7	4772.14	157.56	426.71	0	0	0	0	0	0	0	200	903	0	0	0	0	0	0	0	603	903	0
8975	6	-14.0705	7.95212	-534.626	-68084.4	-23016.9	4955.25	156.948	427.35	0	0	0	0	0	0	0	200	903	0	0	0	0	0	0	0	603	903	0
8975	7	-12.0868	8.10471	-535.236	-68175.9	-23261.1	5001.02	156.541	427.376	0	0	0	0	0	0	0	200	903	0	0	0	0	0	0	0	603	903	0
8975	8	-12.0868	8.10471	-538.288	-68725.2	-22284.5	4909.47	158.601	427.674	0	0	0	0	0	0	0	200	903	0	0	0	0	0	0	0	603	903	0
8975	9	-12.2394	6.42624	-534.626	-68175.9	-22589.7	4772.14	157.747	427.521	0	0	0	0	0	0	0	200	903	0	0	0	0	0	0	0	603	903	0
8976	0	-12.6972	5.96848	-539.203	-69091.5	-22955.9	5001.02	157.426	428.136	0	0	0	0	0	0	0	200	903	0	0	0	0	0	0	0	603	903	0
8976	1	-12.6972	5.35812	-538.288	-69823.9	-23077.9	5046.8	157.127	429.715	0	0	0	0	0	0	0	200	903	0	0	0	0	0	0	0	603	903	0
8976	2	-10.4084	5.81589	-539.508	-70098.5	-22467.6	5367.23	158.355	429.93	0	0	0	0	0	0	0	200	903	0	0	0	0	0	0	0	603	903	0
8976	3	-10.561	4.90036	-539.203	-70464.8	-23077.9	5046.8	157.2	430.683	0	0	0	0	0	0	0	200	903	0	0	0	0	0	0	0	603	903	0
8976	4	-10.8661	2.76413	-541.95	-70464.8	-22955.9	5092.58	157.642	430.021	0	0	0	0	0	0	0	200	903	0	0	0	0	0	0	0	603	903	0
8976	5	-10.2558	4.4426	-541.339	-70922.5	-23139	5001.02	157.256	431.013	0	0	0	0	0	0	0	200	903	0	0	0	0	0	0	0	603	903	0
8976	6	-11.4765	3.98483	-543.476	-71838.1	-23139	5001.02	157.424	432.183	0	0	0	0	0	0	0	200	903	0	0	0	0	0	0	0	603	903	0
8976	7	-11.9343	2.91672	-542.56	-72295.8	-22833.8	5504.56	157.915	433.249	0	0	0	0	0	0	0	200	903	0	0	0	0	0	0	0	603	903	0
8976	8	-10.8661	3.67966	-543.476	-72295.8	-22894.8	5138.35	157.873	433.025	0	0	0	0	0	0	0	200	903	0	0	0	0	0	0	0	603	903	0
8976	9	-10.1032	2.76413	-545.002	-72936.7	-22833.8	5092.58	158.103	433.828	0	0	0	0	0	0	0	200	903	0	0	0	0	0	0	0	603	903	0
8977	0	-9.18767	2.91672	-546.833	-73211.4	-23139	5275.68	157.685	433.883	0	0	0	0	0	0	0	200	903	0	0	0	0	0	0	0	603	903	0
8977	1	-9.79802	1.69601	-544.696	-73760.6	-23200	5321.46	157.407	435.416	0	0	0	0	0	0	0	200	903	0	0	0	0	0	0	0	603	903	0
8977	2	-10.2558	2.00119	-548.358	-74126.9	-23016.9	5001.02	158.026	435.18	0	0	0	0	0	0	0	200	903	0	0	0	0	0	0	0	603	903	0
8977	3	-9.18767	2.30637	-547.748	-73394.4	-22955.9	5138.35	158.09	433.993	0	0	0	0	0	0	0	200	903	0	0	0	0	0	0	0	603	903	0
8977	4	-9.79802	2.30637	-549.274	-74950.8	-23322.1	5275.68	157.54	436.454	0	0	0	0	0	0	0	200	903	0	0	0	0	0	0	0	603	903	0
8977	5	-9.18767	1.69601	-550.19	-75042.4	-23077.9	5550.34	158.055	436.394	0	0	0	0	0	0	0	200	903	0	0	0	0	0	0	0	603	903	0
8977	6	-8.72991	1.08566	-555.378	-75591.7	-22894.8	5504.56	158.776	436.109	0	0	0	0	0	0	0	200	903	0	0	0	0	0	0	0	603	903	0
8977	7	-9.03508	-0.592804	-554.462	-75957.9	-23322.1	5550.34	157.937	436.994	0	0	0	0	0	0	0	200	903	0	0	0	0	0	0	0	603	903	0
8977	8	-9.95061	1.23825	-555.072	-75957.9	-23322.1	5641.89	157.984	436.843	0	0	0	0	0	0	0	200	903	0	0	0	0	0	0	0	603	903	0
8977	9	-10.1032	0.475312	-555.988	-75134	-23505.2	5733.45	157.724	435.136	0	0	0	0	0	0	0	200	903	0	0	0	0	0	0	0	603	903	0
8978	0	-9.95061	0.017548	-554.157	-76507.3	-23688.3	5825	157.253	438.061	0	0	0	0	0	0	0	200	903	0	0	0	0	0	0	0	603	903	0
8978	1	-9.18767	-0.287628	-555.988	-76781.9	-23261.1	5779.22	158.163	438.1	0	0	0	0	0	0	0	200	903	0	0	0	0	0	0	0	603	903	0
8978	2	-9.64543	-0.592804	-556.903	-77239.7	-23322.1	5687.67	158.122	438.695	0	0	0	0	0	0	0	200	903	0	0	0	0	0	0	0	603	903	0
8978	3	-9.03508	-3.03421	-560.26	-77514.3	-23566.2	5733.45	157.937	438.354	0	0	0	0	0	0	0	200	903	0	0	0	0	0	0	0	603	903	0
8978	4	-9.95061	-1.81351	-560.871	-77789	-23871.4	5870.77	157.439	438.693	0	0	0	0	0	0	0	200	903	0	0	0	0	0	0	0	603	903	0
8978	5	-10.2558	-1.81351	-561.481	-78063.6	-23566.2	5825	158.028	439.032	0	0	0	0	0	0	0	200	903	0	0	0	0	0	0	0	603	903	0
8978	6	-10.1032	-2.42386	-561.481	-78704.5	-23566.2	5870.77	158.028	440.173	0	0	0	0	0	0	0	200	903	0	0	0	0	0	0	0	603	903	0
8978	7	-9.64543	-2.27127	-561.786	-79345.4	-23566.2	6145.43	158.051	441.238	0	0	0	0	0	0	0	200	903	0	0	0	0	0	0	0	603	903	0
8978	8	-9.34026	-3.94974	-562.702	-79711.6	-23749.3	5962.33	157.794	441.659	0	0	0	0	0	0	0	200	903	0	0	0	0	0	0	0	603	903	0
8978	9	-9.34026	-3.49197	-565.753	-79711.6	-23749.3	6145.43	158.022	440.895	0	0	0	0	0	0	0	200	903	0	0	0	0	0	0	0	603	903	0
8979	0	-10.8661	-3.79715	-566.059	-81268	-23871.4	6099.66	157.829	443.568	0	0	0	0	0	0	0	200	903	0	0	0	0	0	0	0	603	903	0
8979	1	-10.2558	-4.25491	-568.5	-81908.8	-23993.5	6145.43	157.795	444.079	0	0	0	0	0	0	0	200	903	0	0	0	0	0	0	0	603	903	0
8979	2	-10.7135	-4.4075	-568.5	-82275.1	-23932.4	6328.54	157.902	444.723	0	0	0	0	0	0	0	200	903	0	0	0	0	0	0	0	603	903	0
8979	3	-9.64543	-5.78079	-569.11	-82824.4	-24359.7	6282.76	157.197	445.533	0	0	0	0	0	0	0	200	903	0	0	0	0	0	0	0	603	903	0
8979	4	-9.49284	-5.01785	-571.247	-82458.2	-24359.7	6420.09	157.357	444.348	0	0	0	0	0	0	0	200	903	0	0	0	0	0	0	0	603	903	0
8979	5	-9.95061	-4.4075	-572.773	-83831.5	-24420.7	6465.87	157.364	446.361	0	0	0	0	0	0	0	200	903	0	0	0	0	0	0	0	603	903	0
[truncated: 2,064 more rows]
