# Supplementary material for: The Effects of an Extemporaneous Speech Dual-task on Older Adult Gait Control
Source: Research Square preprint supplement (doi:10.21203/rs.3.rs-7674245/v1), 2025-11-18
Supplement: Supplementary file 115 [file Over10ground1.xlsx]

## Sheet: Sheet1
Trajectories
		10:LFHD			10:RFHD			10:LBHD			10:RBHD			10:C7			10:T10			10:CLAV			10:STRN			10:RBAK			10:LSHO			10:LUPA			10:LELB			10:LFRM			10:LWRA			10:LWRB			10:LFIN
Frame	Sub Frame	X	Y	Z	X	Y	Z	X	Y	Z	X	Y	Z	X	Y	Z	X	Y	Z	X	Y	Z	X	Y	Z	X	Y	Z	X	Y	Z	X	Y	Z	X	Y	Z	X	Y	Z	X	Y	Z	X	Y	Z	X	Y	Z
		mm	mm	mm	mm	mm	mm	mm	mm	mm	mm	mm	mm	mm	mm	mm	mm	mm	mm	mm	mm	mm	mm	mm	mm	mm	mm	mm	mm	mm	mm	mm	mm	mm	mm	mm	mm	mm	mm	mm	mm	mm	mm	mm	mm	mm	mm	mm	mm
775	0	279.767	2094.68	1584.82	174.846	2099.7	1586.67	302.387	2257.63	1566.55	183.599	2266.85	1569.99	217.042	2293.01	1435.57	214.192	2395.07	1154.73	236.302	2138.89	1325.67	237.8	2039.6	1128.44	135.776	2383.85	1251.03	383.709	2218.66	1387.4	491.44	2251.41	1152.41	496.827	2266.92	1054.77	518.924	2194.36	919.292	473.515	2164.8	819.507	531.399	2213.21	805.884	528.026	2154.39	744.831
776	0	281.634	2085.34	1585.22	176.603	2090.52	1587.02	304.185	2248.37	1566.62	185.442	2257.76	1570.24	218.815	2283.74	1436.15	216.281	2386	1155.58	237.562	2129.9	1325.78	238.527	2031.16	1127.93	137.856	2375.62	1251.86	385.387	2208.69	1387.55	493.804	2241.33	1152.96	500.146	2256.24	1055.87	521.2	2183.12	919.963	475.743	2153.4	820.197	534.1	2201.3	806.543	530.313	2141.95	745.985
777	0	283.325	2076.19	1585.52	178.182	2081.41	1587.46	306.028	2239.55	1566.74	187.346	2248.54	1570.37	220.747	2274.61	1436.65	218.684	2377.24	1156.37	238.708	2120.9	1325.85	238.743	2022.4	1127.46	140.1	2367.28	1252.72	386.723	2198.91	1387.7	495.934	2231.35	1153.36	502.508	2245.47	1055.91	523.485	2171.73	920.597	477.897	2141.84	820.895	536.303	2189.77	807.239	532.628	2129.59	747.029
778	0	284.839	2067.04	1585.5	179.91	2072.22	1587.72	307.598	2230.06	1566.52	188.916	2239.46	1570.54	222.679	2265.42	1436.93	220.97	2368.4	1156.87	239.736	2111.98	1325.82	238.95	2013.96	1126.92	142.466	2359.13	1253.26	388.275	2189.08	1387.59	498.028	2221.28	1153.34	505.108	2234.64	1056.1	525.649	2160.26	920.986	479.869	2130.51	821.457	539.301	2177.76	807.56	535.01	2117.53	747.709
779	0	286.613	2057.86	1585.58	181.455	2063.12	1587.83	309.209	2220.95	1566.54	190.621	2230.39	1570.66	224.567	2256.39	1437.39	223.313	2359.81	1157.55	240.594	2103.13	1325.8	238.961	2005.59	1126.31	144.739	2350.91	1253.94	389.529	2179.16	1387.6	499.818	2210.92	1153.47	508.786	2223.74	1057.26	527.712	2148.77	921.426	481.992	2119.26	821.8	541.825	2165.93	808.054	537.097	2105.29	748.379
780	0	288.08	2048.56	1585.6	182.991	2053.94	1588.04	310.714	2211.71	1566.62	192.135	2221.15	1571.07	226.301	2247.32	1437.96	225.619	2351.59	1158.47	241.479	2094.41	1325.77	238.913	1997.41	1125.94	146.954	2342.68	1254.89	390.822	2169.13	1387.87	501.589	2200.42	1153.74	510.631	2212.6	1057.25	529.632	2137.28	922.075	483.904	2107.85	822.271	544.212	2153.97	808.612	539.11	2093.23	749.142
781	0	289.152	2039.4	1585.52	184.405	2044.67	1588.17	312.162	2202.32	1566.86	193.429	2211.93	1571.35	227.989	2238.36	1438.37	227.878	2343.39	1159.28	242.263	2085.6	1325.85	238.907	1989.07	1125.83	149.109	2334.52	1255.54	392.055	2159.39	1388.01	503.187	2189.9	1154.03	512.928	2201.43	1057.69	531.353	2125.73	922.609	485.768	2096.64	822.785	546.269	2142.27	809.351	541.101	2081.29	749.866
782	0	290.58	2030.29	1585.18	185.68	2035.67	1588.15	313.819	2193.49	1566.95	195.017	2202.87	1571.56	229.703	2229.54	1438.64	229.94	2335.06	1159.62	242.924	2076.93	1325.75	238.935	1980.86	1125.65	151.27	2326.36	1255.92	393.218	2149.61	1388.03	504.617	2179.25	1154.03	515.432	2190.32	1058.08	533.128	2114.22	922.882	487.422	2085.27	822.944	548.694	2130.46	809.364	543.054	2069.23	750.283
783	0	291.877	2021.01	1584.81	186.928	2026.48	1587.94	315.027	2183.95	1566.79	196.401	2193.68	1571.85	231.204	2220.72	1438.78	232.087	2326.85	1160.07	243.529	2068.34	1325.47	238.911	1972.41	1125.42	153.335	2318.38	1256.46	394.301	2140.07	1387.93	505.995	2168.4	1153.78	516.75	2179.17	1057.66	534.367	2102.58	923.017	489.005	2073.89	823.047	549.93	2118.73	809.415	544.867	2057.25	750.626
784	0	292.92	2011.81	1584.47	188.01	2017.36	1587.81	316.387	2174.81	1566.86	197.631	2184.65	1572.15	233.002	2211.93	1439.01	233.888	2318.56	1160.23	244.159	2059.72	1325.47	238.882	1964	1125.33	155.17	2310.17	1256.65	395.313	2130.57	1387.91	507.18	2157.41	1153.92	518.231	2167.81	1057.86	535.515	2090.76	923.28	490.542	2062.67	822.95	551.791	2106.73	809.732	546.645	2045.12	751.292
785	0	294.092	2002.53	1584.05	189.059	2008.43	1587.63	317.705	2165.65	1566.91	199.165	2175.64	1572.29	234.239	2203.37	1438.93	235.595	2310.06	1160.38	244.762	2051.09	1325.43	239.008	1955.73	1125.26	157.002	2302.14	1256.77	396.394	2121.25	1387.77	508.325	2146.38	1153.86	519.925	2156.56	1057.91	536.74	2079.11	923.49	492.062	2052.02	823.061	554.37	2094.82	810.426	548.019	2033.5	751.516
786	0	294.946	1993.45	1583.41	190.088	1999.25	1587.12	318.78	2156.44	1566.66	200.293	2166.56	1572.4	235.713	2194.81	1438.81	237.131	2301.66	1160.06	245.258	2042.61	1325.09	239.143	1947.47	1124.88	158.682	2293.96	1256.68	397.264	2111.96	1387.33	509.376	2135.26	1153.38	521.164	2145.31	1057.52	537.87	2067.66	923.308	493.165	2040.24	822.852	555.68	2082.86	810.014	549.312	2021.69	751.4
787	0	295.847	1984.22	1582.66	190.921	1990.27	1586.62	320.049	2147.47	1566.53	201.444	2157.74	1572.56	236.917	2186.22	1438.65	238.732	2293.31	1159.95	245.658	2034.17	1324.69	239.206	1939.38	1124.42	160.18	2285.77	1256.64	398.117	2102.82	1386.99	510.511	2124.1	1152.5	521.931	2134.02	1056.86	538.572	2055.89	923.06	494.173	2028.53	822.519	556.915	2070.91	809.782	550.565	2009.79	751.273
788	0	296.714	1974.94	1582.1	191.566	1981.12	1586.17	321.025	2138.1	1566.5	202.441	2148.54	1572.62	238.106	2177.56	1438.39	240.014	2284.87	1159.93	246.081	2025.52	1324.43	239.183	1931.3	1124.05	161.58	2277.61	1256.57	398.905	2093.73	1386.68	511.377	2112.93	1152.17	523.066	2122.8	1056.6	539.513	2044.36	922.975	495.149	2017.58	822.294	557.309	2059.15	809.44	551.506	1997.91	751.25
789	0	297.37	1965.78	1581.37	192.492	1972.09	1585.5	321.945	2129.08	1566.49	203.375	2139.56	1572.64	239.163	2169.03	1438.08	241.207	2276.67	1159.58	246.566	2016.91	1324.1	239.212	1923.33	1123.46	162.883	2269.28	1256.27	399.683	2084.64	1386.24	512.193	2101.82	1151.65	523.91	2111.51	1056.15	540.029	2032.76	922.728	495.867	2005.55	822.064	559.027	2047.39	809.656	552.365	1986.18	751.1
790	0	298.029	1956.65	1580.41	193.119	1962.94	1584.63	322.784	2119.98	1566.19	204.212	2130.63	1572.55	240.01	2160.36	1437.59	242.345	2268.42	1159.26	247.021	2008.22	1323.47	239.418	1915.37	1122.72	164.021	2261.04	1255.9	400.358	2075.64	1385.61	512.724	2090.69	1150.77	524.615	2100.34	1055.46	540.598	2021.2	922.204	496.445	1993.96	821.479	559.668	2035.16	808.913	553.008	1974.19	750.675
791	0	298.735	1947.45	1579.34	193.764	1953.83	1583.66	323.289	2110.75	1565.67	204.794	2121.35	1572.3	241.01	2151.74	1437.12	243.447	2260.07	1158.82	247.506	1999.62	1322.92	239.802	1907.33	1121.87	165.08	2252.56	1255.41	401.055	2066.57	1385	513.336	2079.66	1149.99	524.275	2088.97	1054	540.893	2009.53	921.663	496.604	1982.31	820.887	559.19	2023.26	807.743	553.25	1962.16	750.036
792	0	299.485	1938.27	1578.45	194.375	1944.67	1582.71	324.071	2101.99	1565.36	205.453	2112.32	1571.84	241.694	2142.86	1436.4	244.406	2251.8	1158.25	248.011	1991.01	1322.26	240.17	1899.08	1121.01	165.952	2244.04	1254.85	401.691	2057.62	1384.32	513.762	2068.63	1149.21	524.893	2077.81	1053.23	541.107	1998.06	921.36	497.076	1970.77	820.432	560.916	2011.17	808.028	553.51	1950.26	749.702
793	0	300.204	1929.1	1577.37	194.754	1935.4	1581.62	324.464	2092.91	1564.86	205.872	2103.22	1571.29	242.294	2134.06	1435.62	245.209	2243.24	1157.55	248.431	1982.2	1321.39	240.634	1890.64	1120.01	166.834	2235.64	1254.15	402.179	2048.72	1383.5	514.138	2057.78	1148.18	525.44	2066.73	1052.6	540.938	1986.19	920.661	496.828	1959.05	819.746	559.965	1999.14	806.818	553.555	1938.13	749.287
794	0	300.362	1919.99	1575.98	195.497	1926.16	1580.29	324.666	2083.78	1564.23	206.017	2093.8	1570.74	242.744	2125.22	1434.84	245.849	2234.7	1156.8	248.842	1973.32	1320.32	240.952	1882.01	1118.83	167.431	2226.98	1253.47	402.62	2039.68	1382.57	514.198	2046.82	1147.04	526.395	2055.88	1051.99	540.694	1974.64	919.876	496.807	1947.44	819.169	560.844	1986.89	806.432	553.259	1925.94	748.653
795	0	300.922	1910.88	1574.61	195.973	1916.71	1578.99	324.922	2074.81	1563.49	206.17	2084.43	1570.06	243.155	2116.32	1433.92	246.333	2225.93	1155.94	249.203	1964.44	1319.23	241.526	1873.29	1117.74	167.997	2218.28	1252.55	403.036	2030.61	1381.59	514.531	2036.13	1146.05	526.516	2044.67	1050.78	540.5	1962.91	919.204	496.519	1935.34	818.757	560.632	1974.68	805.646	552.756	1913.76	748.057
796	0	301.623	1901.67	1573.37	196.212	1907.24	1577.67	325.211	2065.9	1562.74	206.36	2075.23	1569.19	243.512	2107.36	1432.81	246.932	2217.18	1154.96	249.567	1955.47	1318.19	242.006	1864.42	1116.5	168.428	2209.53	1251.53	403.393	2021.62	1380.66	514.588	2025.63	1144.98	526.114	2033.59	1049.35	539.99	1951.32	918.514	495.752	1923.69	818.131	560.099	1962.69	804.883	552.177	1901.44	747.609
797	0	301.863	1892.48	1571.77	196.549	1897.81	1576	325.072	2056.75	1561.64	206.389	2065.81	1568.11	243.71	2098.24	1431.57	247.29	2208.32	1153.9	249.942	1946.46	1316.83	242.539	1855.69	1115.16	168.849	2200.64	1250.31	403.566	2012.73	1379.42	514.689	2015.32	1143.79	525.912	2022.71	1047.87	539.652	1939.79	917.805	495.165	1912.21	817.407	559.818	1950.16	803.958	551.124	1889.07	746.958
798	0	302.076	1883.21	1570.41	196.77	1888.48	1574.41	324.893	2047.52	1560.46	206.054	2056.35	1566.93	243.865	2089.15	1430.38	247.633	2199.61	1152.85	250.064	1937.23	1315.48	243.046	1846.74	1113.78	169.03	2191.59	1249.07	403.743	2003.68	1378.23	514.654	2005.08	1142.56	525.962	2011.87	1046.72	538.824	1928.16	916.861	494.222	1900.73	816.695	558.744	1937.96	802.887	549.894	1876.52	746.275
799	0	302.188	1873.87	1568.86	196.736	1878.9	1572.84	324.871	2038.48	1559.44	205.818	2046.91	1565.62	243.891	2079.98	1429.02	247.813	2190.41	1151.58	250.251	1928.25	1314.08	243.592	1837.74	1112.27	169.102	2182.52	1247.71	403.924	1994.72	1377	514.591	1995.18	1141.24	526.013	2001.09	1045.51	538.06	1916.51	916.117	492.933	1889.13	815.838	557.922	1925.41	802.108	548.384	1863.94	745.753
800	0	301.813	1864.56	1567.07	196.721	1869.33	1571.08	324.703	2029.27	1558.24	205.606	2037.36	1564.31	243.702	2070.73	1427.5	248.013	2181.4	1150.06	250.637	1919	1312.64	244.01	1828.83	1110.82	169.148	2173.4	1246.16	404.062	1985.73	1375.69	514.537	1985.43	1139.84	525.996	1990.51	1044.02	537.18	1905.04	915.061	491.846	1877.57	815.395	557.511	1912.99	801.123	546.881	1851.4	745.22
801	0	301.766	1855.15	1565.53	196.517	1859.82	1569.34	324.182	2019.72	1557	205.291	2027.92	1562.93	243.462	2061.45	1426.11	248.046	2172.24	1148.68	250.595	1909.39	1311.04	244.531	1819.57	1109.2	169.05	2164.05	1244.74	403.954	1976.53	1374.27	514.575	1975.91	1138.57	525.873	1980.14	1042.46	536.508	1893.7	914.129	490.478	1866.06	814.607	556.325	1900.82	800.154	545.123	1838.73	744.552
802	0	301.744	1845.56	1564.05	196.225	1850.26	1567.56	323.664	2010.17	1555.77	204.594	2018.37	1561.5	243.343	2052.1	1424.67	247.794	2162.84	1147.24	250.585	1900.16	1309.54	244.938	1810.26	1107.57	168.805	2154.57	1243.21	403.876	1967.43	1372.91	514.619	1966.45	1137.31	526.494	1969.75	1041.47	535.631	1882.11	913.38	488.991	1854.22	813.992	555.293	1888.18	799.085	543.09	1826.01	744.012
803	0	300.863	1836.09	1562.28	195.836	1840.62	1565.63	323.154	2001.02	1554.72	204.046	2008.73	1560.05	242.982	2042.65	1423.18	247.706	2153.38	1145.73	250.713	1890.71	1308.11	245.07	1800.94	1106.05	168.557	2145.18	1241.64	403.722	1958.16	1371.71	514.503	1957.12	1136.17	526.671	1959.34	1040.42	534.781	1870.61	912.694	487.406	1842.81	813.585	554.363	1876	798.499	541.064	1813.39	743.706
804	0	300.387	1826.65	1560.62	195.266	1830.93	1563.88	322.528	1991.5	1553.47	203.475	1999.13	1558.64	242.542	2033.17	1421.51	247.774	2144.14	1144.11	250.616	1881.18	1306.48	245.711	1791.58	1104.55	168.334	2135.71	1239.85	403.463	1948.9	1370.29	514.372	1947.98	1134.82	525.834	1948.98	1038.49	533.712	1859.56	911.639	485.734	1831.12	813.049	552.245	1864.03	797.136	539.043	1800.91	743.196
805	0	299.96	1816.86	1558.95	194.509	1821.18	1561.83	321.685	1981.84	1552.14	202.64	1989.4	1556.98	242.072	2023.68	1419.8	247.618	2134.8	1142.53	250.429	1871.78	1304.83	245.841	1781.89	1102.81	168.079	2126.01	1238.04	403.101	1939.66	1368.74	514.149	1938.86	1133.36	525.593	1938.85	1036.9	532.781	1848.44	910.721	484.339	1819.71	812.539	551.281	1851.98	796.172	537.008	1788.59	742.864
806	0	298.847	1807.12	1557.22	193.876	1811.31	1559.95	320.684	1972.15	1551.11	201.594	1979.64	1555.5	241.585	2014.17	1418.25	247.178	2125.02	1140.87	250.298	1862.13	1303.32	246.203	1772.22	1101.36	167.601	2116.42	1236.36	402.654	1930.2	1367.47	513.927	1929.6	1132.29	525.569	1928.96	1035.84	531.645	1837.66	909.864	482.604	1808.27	812.279	549.704	1839.98	795.35	534.644	1775.89	742.613
807	0	298.168	1797.44	1555.78	193.019	1801.49	1558.09	319.665	1962.46	1549.94	200.608	1969.89	1554.24	240.964	2004.62	1416.71	246.669	2115.23	1139.01	249.88	1852.22	1301.89	246.471	1762.46	1099.94	167.032	2106.67	1234.49	402.283	1920.63	1366.27	514.141	1920.66	1131.44	525.479	1919.05	1034.79	530.822	1826.68	909.25	481.214	1796.88	812.254	548.132	1828.5	794.801	532.613	1763.93	742.492
808	0	297.394	1787.66	1554.2	191.995	1791.47	1556.32	318.543	1952.67	1548.73	199.416	1959.88	1552.66	240.433	1995.02	1415.03	246.428	2105.38	1137.33	249.554	1842.62	1300.48	246.591	1752.58	1098.45	166.732	2096.76	1232.69	401.499	1910.67	1364.79	513.511	1911.48	1129.95	525.781	1909.37	1033.89	529.982	1815.95	908.422	479.735	1785.6	811.985	545.979	1817.08	793.371	530.796	1751.98	742.266
809	0	296.295	1777.68	1552.6	191.087	1781.61	1554.45	317.345	1942.9	1547.7	198.185	1949.87	1551.3	239.702	1985.22	1413.48	246.115	2095.42	1135.83	249.179	1832.75	1298.93	246.817	1742.54	1097.02	166.246	2086.88	1231.06	400.82	1901.01	1363.56	513.664	1902.09	1129.19	524.838	1899.78	1032.18	529.029	1805.59	907.624	478.298	1774.53	811.763	545.21	1805.83	792.845	528.826	1740.36	742.068
810	0	294.872	1767.62	1551.21	189.978	1771.44	1552.84	316.036	1932.99	1546.84	196.894	1939.87	1550.18	238.916	1975.43	1412.06	245.641	2085.3	1134.29	248.561	1822.63	1297.77	246.695	1732.5	1095.79	165.745	2076.78	1229.23	400.288	1890.96	1362.56	513.324	1892.47	1128.42	524.473	1890.07	1031.3	528.147	1795.59	906.924	477.013	1763.51	811.746	543.557	1795.01	792.082	527.182	1728.96	741.995
811	0	293.641	1757.67	1550.08	188.794	1761.39	1551.37	314.637	1923	1546.05	195.474	1929.59	1548.91	238.135	1965.49	1410.71	245.286	2074.88	1132.63	247.87	1812.66	1296.59	246.65	1722.29	1094.54	165.327	2066.72	1227.6	399.696	1881.03	1361.71	512.722	1883.02	1127.58	524.2	1880.64	1030.61	527.302	1785.45	906.201	475.907	1752.87	811.791	542.277	1784.43	791.46	525.64	1717.76	741.932
812	0	292.437	1747.58	1548.91	187.498	1751.26	1549.85	313.327	1913.01	1545.23	193.98	1919.5	1547.76	237.394	1955.5	1409.43	244.949	2064.38	1131.16	247.405	1802.48	1295.53	246.326	1711.99	1093.46	165.082	2056.58	1226.22	398.85	1870.78	1360.85	512.684	1873.43	1127.13	523.959	1871.3	1029.98	526.76	1775.67	905.662	475.14	1742.28	811.667	540.867	1774.45	790.585	524.443	1707.05	741.861
813	0	291.418	1737.38	1548.15	186.137	1740.82	1548.71	311.799	1902.79	1544.39	192.539	1909.22	1546.73	236.583	1945.41	1408.42	244.799	2053.72	1129.95	246.549	1792	1294.62	246.166	1701.44	1092.55	164.852	2046.34	1224.79	397.975	1860.27	1360.12	512.067	1863.45	1126.54	522.796	1861.64	1028.81	526.406	1766.02	905.061	474.47	1731.94	811.5	539.049	1764.68	789.404	523.543	1696.65	741.442
814	0	289.563	1727.03	1547.5	184.708	1730.48	1547.86	310.287	1892.56	1543.94	191.148	1898.96	1545.85	235.819	1935.11	1407.63	244.671	2043.27	1129.04	245.677	1781.61	1293.94	245.462	1690.86	1091.78	164.679	2036.15	1223.74	397.209	1849.58	1359.67	511.474	1853.42	1126.39	522.171	1852.19	1028.52	525.92	1756.59	904.524	473.849	1721.79	811.469	538.204	1755.35	788.995	523.035	1686.99	741.371
815	0	287.924	1716.74	1547.18	183.076	1720.26	1547.26	308.882	1882.07	1543.71	189.86	1888.84	1545.16	234.993	1924.79	1406.97	244.648	2033.14	1128.36	244.857	1771	1293.55	244.817	1680	1091.28	164.752	2025.89	1222.93	396.228	1838.64	1359.39	510.65	1843.35	1126.11	521.955	1842.95	1028.66	525.54	1747.54	903.959	473.705	1712	811.413	537.55	1746.45	788.368	522.759	1677.63	741.062
816	0	286.62	1706.04	1547.17	181.392	1709.78	1546.82	307.384	1871.58	1543.55	188.254	1878.24	1544.82	234.299	1914.08	1406.67	244.966	2022.86	1128.13	243.947	1760.76	1293.03	243.939	1669.03	1091.04	164.929	2015.69	1222.46	395.397	1827.62	1359.43	509.84	1832.88	1126.12	520.548	1833.19	1028.2	525.216	1738.53	903.532	473.678	1702.52	811.309	536.853	1738.19	787.772	522.949	1668.77	740.766
817	0	284.8	1695.41	1547.37	179.679	1699.26	1546.59	305.784	1860.77	1543.95	186.589	1867.76	1544.74	233.454	1903.35	1406.68	245.501	2012.62	1128.28	242.805	1750.01	1293.11	242.984	1657.67	1091.15	165.119	2005.28	1222.43	394.316	1816.1	1359.88	508.98	1822.51	1126.5	519.843	1823.62	1028.75	525.01	1729.68	903.239	473.749	1693.33	811.305	535.458	1730.26	787.399	523.346	1660.46	740.607
818	0	282.924	1684.69	1547.66	177.909	1688.68	1546.61	304.389	1850.15	1544.52	185.075	1857.05	1544.82	232.784	1892.66	1406.9	246.217	2001.95	1128.49	241.655	1739.12	1293.53	241.738	1646.23	1091.71	165.571	1994.97	1222.54	393.368	1804.45	1360.49	508.001	1812.04	1127.03	518.862	1814.12	1029.42	524.644	1720.93	903.317	473.892	1684.08	811.471	534.57	1722.68	787.08	523.943	1652.75	740.482
819	0	280.993	1673.93	1548.01	176.021	1678.09	1546.72	302.724	1839.21	1545.16	183.746	1846.62	1545.18	232.185	1882.08	1407.3	247.041	1991.01	1128.97	240.506	1728.37	1294.2	240.373	1634.87	1092.48	166.107	1984.3	1222.51	392.319	1792.85	1361.38	507.139	1801.5	1127.83	518.243	1804.52	1030.32	524.658	1712.59	903.512	474.058	1675.29	811.61	534.562	1715.33	787.506	524.622	1645.43	740.37
820	0	279.25	1662.92	1548.75	174.223	1667.47	1547	301.199	1828.21	1546.39	182.171	1835.69	1546.08	231.527	1871.52	1407.93	247.663	1979.83	1129.46	239.182	1717.53	1294.92	238.852	1623.37	1093.56	166.454	1973.97	1223.03	391.187	1781.15	1362.51	505.989	1790.7	1128.87	517.333	1794.91	1031.38	524.437	1704.22	903.962	474.004	1667.54	811.27	534.183	1708.15	787.954	525.308	1638.55	740.288
821	0	277.186	1651.95	1549.5	172.377	1656.72	1547.46	299.665	1817.33	1547.78	180.531	1825.06	1547.11	230.998	1861.06	1408.78	248.37	1968.4	1130.07	237.871	1706.67	1295.99	237.043	1612.15	1094.96	167.077	1963.47	1223.56	390.145	1769.46	1363.94	505.358	1780.17	1130.38	516.532	1785.43	1032.85	524.249	1696.06	904.627	474.262	1659.89	811.479	534.543	1700.96	788.865	525.915	1631.87	740.355
822	0	275.245	1640.99	1550.54	170.49	1645.83	1548.16	298.271	1806.2	1549.72	179.187	1814.36	1548.51	230.454	1850.67	1409.81	249.068	1956.74	1130.88	236.516	1695.91	1297.54	235.27	1600.95	1096.67	167.492	1952.8	1224.03	388.859	1757.92	1365.33	504.394	1769.31	1131.94	515.803	1776	1034.56	523.938	1687.92	905.42	474.191	1652.33	811.779	534.4	1693.88	789.781	526.484	1625.57	740.49
823	0	273.485	1630.02	1551.76	168.772	1635.24	1549.06	296.678	1795.2	1551.58	177.699	1803.59	1550.05	229.931	1840.39	1410.95	249.64	1944.75	1131.53	235.168	1685.28	1299.09	233.494	1589.9	1098.61	167.817	1942.27	1224.84	387.798	1746.54	1366.97	503.456	1758.58	1133.43	515.125	1766.53	1036.41	523.865	1679.9	906.326	474.328	1645.15	812.026	534.708	1687.05	790.878	527.059	1619.53	740.604
824	0	271.756	1619.03	1553.19	167.079	1624.51	1550.02	295.164	1784.15	1553.78	176.306	1792.67	1552.08	229.221	1830.07	1412.33	250.49	1932.84	1132.63	233.789	1674.55	1300.98	231.592	1578.94	1100.73	168.129	1931.6	1225.74	386.715	1735.32	1368.74	502.621	1747.75	1135.4	514.134	1757.01	1038.23	523.602	1671.77	907.495	474.966	1638.64	812.583	535.005	1680.42	792.171	527.51	1613.55	740.859
825	0	270.07	1608.11	1554.86	165.292	1613.72	1551.35	293.699	1773.11	1556.32	174.967	1782.12	1554.34	228.601	1819.78	1413.88	251.434	1921.28	1134.1	232.5	1663.99	1303.24	229.731	1568.03	1103.23	168.221	1921.05	1226.85	385.712	1724.31	1370.91	501.83	1736.98	1137.63	513.696	1747.59	1040.7	523.564	1663.92	909.05	475.083	1631.63	813.497	535.641	1673.55	794.127	527.643	1607.5	741.374
826	0	268.243	1597.22	1556.41	163.646	1603.15	1552.65	292.337	1761.9	1558.95	173.643	1771.36	1556.59	227.987	1809.45	1415.49	251.812	1910	1135.59	231.234	1653.58	1305.49	227.979	1557.21	1105.81	168.344	1910.43	1228.17	384.643	1713.23	1373.01	500.993	1726.27	1139.81	512.748	1738.29	1042.94	523.328	1655.92	910.591	474.986	1625	814.257	535.701	1666.99	795.78	527.828	1602.19	741.72
827	0	266.82	1586.32	1558.19	162.157	1592.61	1554.13	291.093	1750.99	1561.59	172.271	1760.62	1558.98	227.341	1799.33	1417.29	251.703	1899.25	1136.95	229.877	1643.29	1307.78	226.344	1546.51	1108.29	168.188	1899.89	1229.52	383.68	1702.54	1375.15	500.431	1715.6	1142.21	511.993	1728.83	1045.23	523.072	1647.84	912.269	475.095	1618.45	815.217	535.752	1660.25	797.325	528.029	1596.58	742.36
828	0	265.192	1575.68	1559.98	160.623	1582.24	1555.47	289.893	1740.23	1564.35	171.131	1750.02	1561.34	226.82	1789.2	1419.2	251.306	1888.91	1138.37	228.638	1632.95	1310.04	224.848	1535.99	1111.01	168.14	1889.26	1231.15	382.791	1691.62	1377.42	499.849	1705.2	1144.88	511.326	1719.4	1047.83	522.806	1639.88	914.174	475.066	1612.07	816.212	536.338	1653.36	799.633	528.134	1591.02	743.199
829	0	263.604	1564.85	1561.77	159.008	1571.44	1557.3	288.783	1729.3	1567.21	170.045	1739.52	1563.82	226.279	1779.14	1421.05	250.982	1878.74	1140.22	227.344	1622.57	1312.42	223.41	1525.54	1113.64	167.857	1878.93	1232.79	381.949	1681.24	1379.77	499.053	1694.73	1147.34	510.804	1709.93	1050.55	522.447	1631.88	916.071	474.94	1605.41	817.417	536.953	1646.63	802.085	528.213	1585.55	744.123
830	0	262.288	1554.14	1563.53	157.881	1561.19	1558.53	287.592	1718.47	1569.77	169.091	1729.12	1566.18	226.086	1769.21	1422.94	250.395	1868.67	1142.13	226.612	1612.73	1314.77	222.111	1515.09	1116.18	167.753	1868.5	1234.52	381.129	1670.63	1381.94	498.384	1684.46	1149.63	510.155	1700.67	1052.98	522.126	1623.79	917.849	474.887	1598.79	818.622	537.136	1639.74	803.952	528.219	1579.88	744.976
831	0	260.993	1543.52	1565.08	156.702	1550.83	1559.91	286.648	1707.72	1572.38	168.038	1718.55	1568.65	225.665	1759.1	1424.81	249.523	1858.77	1144.07	225.474	1602.58	1316.79	221.07	1505.02	1118.5	167.612	1858.19	1236.29	380.481	1660.33	1384.09	498.079	1674.22	1152.02	509.445	1691.36	1055.42	521.71	1615.56	919.785	474.827	1592.17	819.712	538.326	1633.28	806.364	528.215	1574.05	745.929
832	0	259.862	1532.95	1566.61	155.479	1540.38	1561.06	285.59	1697.13	1574.87	167.135	1708.01	1570.8	225.126	1749.14	1426.61	248.702	1848.97	1145.89	224.811	1592.74	1318.86	220.219	1495.25	1120.71	167.394	1848.09	1238	380.004	1649.96	1386.13	497.257	1664.13	1154.12	509.004	1681.96	1057.82	521.376	1607.5	921.565	474.712	1585.4	820.996	538.849	1625.72	808.442	528.212	1568.12	746.86
833	0	258.892	1522.44	1568.01	154.423	1529.99	1562.28	284.814	1686.54	1577.22	166.319	1697.74	1572.88	224.719	1739.1	1428.36	248.14	1839.04	1147.75	223.927	1582.66	1320.7	219.475	1485.4	1122.68	167.148	1838.03	1239.6	379.379	1639.82	1388.01	496.595	1654.46	1156.01	508.351	1672.74	1059.96	520.774	1599.6	923.16	474.625	1578.42	822.386	538.81	1618.79	810.444	528.095	1562.05	747.849
834	0	258.065	1511.93	1569.32	153.586	1519.85	1563.21	284.115	1676.13	1579.35	165.58	1687.38	1574.76	224.437	1729.08	1430.03	247.825	1829.35	1149.74	223.578	1573.01	1322.37	218.945	1475.83	1124.26	166.866	1828.08	1241.33	378.923	1629.8	1389.62	495.971	1644.88	1157.66	507.901	1663.44	1061.95	520.197	1591.29	924.565	474.405	1571.36	823.352	538.982	1611.36	812.026	527.812	1555.95	748.546
835	0	257.398	1501.72	1570.37	153.058	1509.66	1564.03	283.617	1665.69	1581.49	165.054	1677.12	1576.64	224.139	1719.22	1431.59	247.647	1819.84	1151.58	223.071	1563.23	1323.71	218.687	1466.5	1125.56	166.632	1818.23	1243.1	378.642	1619.81	1391.19	495.425	1635.51	1159.04	507.333	1654.37	1063.52	519.953	1583.15	925.903	474.381	1564.17	824.317	539.48	1603.74	813.488	527.681	1549.39	749.289
836	0	256.818	1491.36	1571.47	152.456	1499.44	1564.93	283.073	1655.28	1583.51	164.497	1666.83	1578.36	223.763	1709.51	1433.22	247.119	1810.3	1153.16	222.921	1553.55	1325.18	218.598	1457.33	1126.72	166.102	1808.38	1244.68	378.421	1610.29	1392.84	494.727	1626.42	1160.45	506.985	1645.45	1065.22	519.602	1574.99	927.228	474.265	1556.86	825.276	539.642	1596.27	815.058	527.637	1542.68	750.151
837	0	256.44	1481.26	1572.31	152.031	1489.45	1565.68	282.661	1644.96	1585.11	164.104	1656.66	1579.84	223.567	1699.87	1434.66	246.568	1800.91	1154.69	222.987	1544.26	1326.53	218.731	1448.31	1127.63	165.695	1798.73	1246.14	378.16	1600.77	1394.18	494.48	1617.6	1161.6	506.487	1636.51	1066.42	519.268	1566.83	928.189	473.955	1549.25	826.084	538.819	1588.76	815.786	527.532	1535.61	750.808
838	0	256.141	1471.1	1573.08	151.812	1479.33	1566.37	282.258	1634.78	1586.57	163.899	1646.55	1581.24	223.206	1690.17	1435.96	246.134	1791.99	1156.32	223.169	1534.82	1327.53	219.027	1439.39	1128.27	165.231	1789.48	1247.83	378.088	1591.5	1395.21	494.082	1608.88	1162.47	505.789	1627.84	1067.18	519.148	1558.65	929.017	473.896	1541.66	826.715	539.387	1581.02	816.847	527.546	1528.41	751.358
839	0	255.888	1460.91	1573.9	151.579	1469.2	1567.06	282.003	1624.64	1587.92	163.62	1636.34	1582.5	222.733	1680.56	1437.26	245.131	1782.87	1157.65	223.212	1525.28	1328.51	219.428	1430.4	1128.8	164.279	1780.06	1249.42	377.99	1582.49	1396.29	493.845	1600.35	1163.44	505.644	1619.16	1068.5	518.7	1550.35	929.789	473.641	1533.89	827.303	539.204	1573.09	817.948	527.498	1521.03	752.079
840	0	255.695	1450.84	1574.56	151.375	1459.15	1567.6	281.785	1614.44	1589.31	163.425	1626.32	1583.8	222.424	1671.12	1438.53	244.323	1773.87	1159.05	223.443	1515.98	1329.47	220.055	1421.51	1129.35	163.447	1770.81	1250.77	377.865	1573.52	1397.25	493.692	1591.91	1164.33	505.26	1610.56	1069.4	518.488	1542.19	930.585	473.437	1525.98	827.935	538.631	1565.38	818.735	527.327	1513.3	752.747
841	0	255.724	1440.97	1575.02	151.483	1449.4	1568.06	281.658	1604.39	1590.28	163.389	1616.35	1584.77	222.1	1661.74	1439.54	243.468	1765.05	1160.23	223.939	1506.78	1330.35	220.873	1412.6	1129.81	162.649	1761.59	1252.2	378.041	1564.89	1398.08	493.611	1583.64	1164.93	504.539	1602.18	1069.72	518.303	1534.11	931.133	473.206	1517.9	828.542	538.446	1557.44	819.413	527.556	1505.13	753.232
842	0	255.772	1430.8	1575.4	151.429	1439.25	1568.44	281.668	1594.21	1591.52	163.264	1606.25	1586.04	221.712	1652.27	1440.74	242.45	1756.06	1161.53	224.294	1497.61	1331.03	221.763	1403.67	1130.2	161.548	1752.43	1253.61	378.164	1556.32	1399.03	493.489	1575.32	1165.9	504.372	1593.8	1070.5	518.063	1525.84	931.789	472.889	1509.6	829.106	537.8	1549.16	819.792	527.424	1497.25	753.99
843	0	255.609	1420.98	1575.61	151.558	1429.39	1568.64	281.509	1584.19	1592.49	163.202	1596.22	1587.08	221.208	1642.92	1441.69	241.509	1747.4	1162.75	224.597	1488.38	1331.64	222.553	1394.56	1130.63	160.565	1743.24	1255.02	378.119	1547.88	1399.88	493.54	1567.3	1166.63	504.139	1585.46	1071.3	517.772	1517.51	932.492	472.52	1500.99	829.808	537.65	1540.85	820.828	526.936	1488.7	754.924
844	0	255.723	1410.9	1575.65	151.451	1419.32	1568.69	281.544	1574.2	1593.61	163.052	1586.1	1588.2	220.934	1633.76	1442.61	240.568	1738.61	1163.79	225.038	1479.37	1332.37	223.455	1385.48	1131.17	159.592	1734.07	1256.03	378.182	1539.51	1400.6	493.58	1559.44	1167.38	503.742	1577.17	1071.89	517.73	1509.3	933.297	472.185	1492.48	830.659	537.522	1532.12	821.5	526.547	1479.99	755.642
845	0	255.766	1400.96	1575.54	151.517	1409.5	1568.56	281.584	1564.24	1594.42	163.044	1575.99	1589.02	220.425	1624.47	1443.28	239.724	1729.92	1164.63	225.444	1470.32	1332.76	224.479	1376.41	1131.69	158.681	1724.96	1257.07	378.373	1531.23	1401.23	493.512	1551.74	1167.85	503.661	1569.08	1072.38	517.422	1500.79	933.851	471.776	1483.88	831.409	536.816	1523.5	821.842	526.148	1471.13	756.41
846	0	255.877	1391.09	1575.22	151.673	1399.61	1568.2	281.423	1554.05	1595.28	162.997	1566.07	1589.97	220.201	1615.45	1443.94	239.055	1721.2	1165.57	225.969	1461.28	1333.02	225.4	1367.36	1132.13	157.921	1715.93	1257.93	378.655	1522.94	1401.91	493.58	1544.13	1168.28	503.732	1560.85	1072.98	517.037	1492.21	934.435	471.37	1475.06	832.049	536.187	1514.87	822.41	525.586	1461.93	757.081
847	0	255.963	1381.35	1574.95	151.864	1389.74	1567.94	281.665	1544.2	1596.14	163.048	1555.94	1590.82	219.913	1606.25	1444.57	238.311	1712.48	1166.16	226.32	1452.42	1333.39	226.331	1358.41	1132.63	157.31	1706.83	1258.7	378.733	1514.62	1402.47	493.654	1536.65	1168.94	503.963	1552.84	1073.66	516.867	1483.7	935.035	470.977	1466.13	832.84	535.643	1506.3	822.87	525.044	1452.78	757.902
848	0	256.245	1371.59	1574.46	151.972	1379.86	1567.59	281.6	1534.43	1596.65	163.051	1546.11	1591.34	219.684	1597.11	1444.93	237.866	1703.74	1166.7	226.88	1443.5	1333.66	227.148	1349.5	1133.06	156.632	1697.79	1259.23	379.024	1506.39	1402.82	493.825	1529.32	1169.34	503.911	1544.69	1073.97	516.797	1475.11	935.603	470.512	1456.98	833.615	535.339	1497.46	823.488	524.28	1443.39	758.573
849	0	256.481	1361.87	1573.89	152.346	1370.15	1566.96	281.668	1524.5	1596.93	162.999	1536.02	1591.68	219.53	1588.03	1445.07	237.471	1695.02	1167.13	227.33	1434.63	1333.63	228.057	1340.94	1133.19	156.239	1688.9	1259.5	379.282	1497.92	1403	493.997	1521.82	1169.6	503.956	1536.64	1074.08	516.634	1466.52	935.858	470.197	1447.91	834.171	534.721	1488.47	823.464	523.78	1433.92	759.086
850	0	256.656	1352.33	1573.18	152.499	1360.3	1566.35	281.671	1514.6	1597.15	162.994	1526.11	1591.98	219.424	1578.92	1445.19	236.95	1686.27	1167.17	227.709	1425.93	1333.54	228.832	1332.39	1133.13	155.805	1679.87	1259.84	379.638	1489.49	1403.12	494.178	1514.39	1169.82	504.278	1528.61	1074.18	516.568	1457.9	936.136	469.878	1438.79	834.624	534.132	1479.34	823.487	523.252	1424.46	759.544
851	0	257.034	1342.6	1572.66	152.845	1350.65	1565.71	282.077	1505.22	1597.37	163.086	1516.32	1591.97	219.397	1569.92	1445.15	236.732	1677.77	1167.34	228.118	1416.99	1333.43	229.35	1323.86	1133.1	155.595	1671.02	1260.01	379.857	1481.12	1403.07	494.533	1506.87	1170.02	504.384	1520.44	1074.16	516.63	1449.24	936.298	469.595	1429.49	835.182	533.373	1470.25	823.367	522.634	1414.84	759.981
852	0	257.312	1333.08	1571.78	153.113	1340.94	1564.95	282.186	1495.46	1597.12	163.324	1506.68	1591.67	219.37	1560.84	1444.87	236.561	1669.11	1167.35	228.444	1408.16	1333.14	229.918	1315.39	1132.76	155.425	1662.09	1259.76	380.088	1472.33	1402.68	494.825	1499.15	1169.87	504.956	1512.23	1074.11	516.692	1440.55	936.149	469.37	1420.13	835.464	532.975	1461.11	823.147	522.16	1405.25	760.33
853	0	257.719	1323.45	1570.87	153.542	1331.25	1563.89	282.175	1485.78	1596.63	163.404	1496.79	1591.29	219.4	1551.84	1444.55	236.642	1660.73	1167.33	228.885	1399.19	1332.49	230.31	1306.94	1131.96	155.4	1653.16	1259.56	380.497	1463.66	1402.31	495.255	1491.23	1169.58	505.065	1504.05	1073.55	516.713	1431.75	935.747	469.188	1410.79	835.286	532.879	1451.92	822.674	521.725	1395.54	759.916
854	0	257.984	1314	1569.78	153.906	1321.67	1562.84	282.583	1476.22	1596.23	163.631	1487.11	1590.82	219.689	1542.51	1444.1	236.753	1652.21	1167.02	229.156	1390.27	1331.78	230.665	1298.41	1131.18	155.372	1644.2	1259.38	380.777	1454.71	1401.63	495.759	1483.15	1169.17	505.194	1495.65	1072.81	516.791	1422.97	935.271	469.126	1401.55	835.026	532.169	1443	821.938	521.419	1385.49	759.937
855	0	258.521	1304.43	1568.65	154.247	1312.1	1561.67	282.801	1466.52	1595.6	163.999	1477.51	1590.12	220.111	1533.37	1443.48	236.872	1643.44	1166.46	229.448	1381.29	1330.99	230.967	1289.85	1130.27	155.778	1635.38	1258.97	381.214	1445.69	1400.95	496.482	1475.09	1168.63	505.743	1487.24	1072.13	517.216	1414.34	934.665	469.21	1392.3	834.825	531.825	1434.05	821.042	521.543	1376.58	759.555
856	0	258.893	1294.95	1567.29	154.639	1302.5	1560.35	283.216	1457.04	1594.75	164.229	1467.82	1589.3	220.258	1524.2	1442.66	237.37	1634.91	1166.03	229.857	1372.28	1329.95	231.089	1281.06	1128.98	156.181	1626.5	1258.45	381.411	1436.43	1399.96	496.839	1466.47	1167.76	506.077	1478.67	1071.15	517.5	1405.59	933.808	469.372	1382.92	834.294	531.267	1425.04	819.798	521.325	1366.51	759.046
857	0	259.459	1285.4	1565.85	155.347	1293	1558.87	283.266	1447.3	1593.67	164.596	1458.18	1588.4	220.894	1514.77	1441.85	237.976	1626.29	1165.44	230.183	1363.2	1328.67	231.387	1272.34	1127.56	156.799	1617.61	1257.89	381.896	1427.06	1398.94	497.327	1457.67	1166.75	506.603	1470	1070.17	517.801	1396.5	932.735	469.714	1373.51	833.396	531.98	1416.09	818.978	521.439	1357.03	758.256
858	0	260.038	1276.01	1564.38	155.832	1283.45	1557.45	283.975	1438.04	1592.49	165.015	1448.59	1587.24	221.47	1505.49	1440.73	238.54	1617.35	1164.59	230.487	1353.99	1327.37	231.415	1263.46	1126.01	157.419	1608.74	1257.04	382.303	1417.67	1397.65	497.775	1448.63	1165.59	507.157	1461.08	1069.08	518.101	1387.7	931.462	469.953	1364.24	832.299	531.846	1407.21	817.63	521.822	1347.8	757.176
859	0	260.662	1266.59	1562.76	156.526	1274.04	1555.91	284.526	1428.58	1591.13	165.671	1439.09	1585.8	221.917	1496.16	1439.41	239.406	1608.82	1163.51	230.683	1344.81	1325.96	231.471	1254.5	1124.4	158.275	1599.79	1255.93	382.859	1408.05	1396.29	498.248	1439.53	1164.2	507.307	1451.96	1067.46	518.626	1378.78	930.087	470.582	1355.13	831.209	531.183	1398.46	815.785	522.283	1338.78	756.025
860	0	261.465	1257.16	1560.97	157.244	1264.43	1554.25	285.345	1419.2	1589.55	166.318	1429.5	1584.28	222.742	1486.86	1437.96	240.431	1600.21	1162.3	231.099	1335.53	1324.36	231.561	1245.56	1122.55	159.249	1590.87	1254.65	383.312	1398.33	1394.6	498.705	1429.95	1162.55	508.198	1442.67	1066.24	519.073	1369.77	928.371	471.127	1345.96	829.68	531.555	1389.66	814.215	522.851	1329.61	754.567
861	0	262.336	1247.71	1559.18	158.089	1254.97	1552.54	285.837	1409.71	1587.54	167.047	1420.03	1582.54	223.573	1477.21	1436.43	241.199	1591.01	1160.93	231.581	1326.26	1322.61	231.582	1236.32	1120.58	160.16	1581.9	1253.33	383.783	1388.48	1392.83	499.26	1420.16	1160.81	508.409	1433.38	1064.41	519.738	1360.81	926.594	471.777	1336.9	827.84	532.503	1380.78	812.633	523.468	1320.69	752.685
862	0	263.127	1238.33	1557.33	158.888	1245.54	1550.72	286.698	1400.25	1585.88	167.794	1410.56	1580.8	224.544	1467.85	1434.83	242.282	1581.8	1159.6	231.858	1316.85	1320.79	231.55	1227.08	1118.7	161.153	1572.83	1251.89	384.364	1378.57	1391.08	499.611	1410.08	1158.95	509.003	1423.91	1062.77	520.271	1351.6	924.727	472.372	1327.65	826.04	533.329	1372.47	810.913	524.263	1311.87	750.846
863	0	263.922	1228.93	1555.23	159.831	1236	1548.88	287.814	1390.97	1583.91	168.8	1401.14	1579.08	225.522	1458.29	1433.06	243.541	1572.65	1158.14	232.375	1307.46	1318.82	231.564	1217.74	1116.64	162.437	1563.73	1250.37	385.123	1368.59	1389.16	500.214	1399.75	1156.95	509.825	1414.24	1060.95	520.825	1342.41	922.617	472.986	1318.67	823.777	533.422	1363.47	808.695	524.999	1303.23	748.571
864	0	264.902	1219.39	1553.28	160.69	1226.67	1546.97	288.799	1381.46	1581.73	169.844	1391.69	1576.96	226.663	1448.79	1431.25	244.765	1563.18	1156.47	232.844	1297.94	1316.82	231.575	1208.34	1114.56	163.776	1554.45	1248.78	385.84	1358.53	1387.1	501.136	1389.92	1154.84	510.276	1404.65	1058.68	521.715	1333.28	920.308	473.842	1309.66	821.485	534.43	1354.29	806.369	525.965	1294.56	746.323
865	0	265.893	1209.99	1551.35	161.738	1217.34	1545.1	289.943	1371.91	1579.79	170.919	1382.27	1575.04	227.759	1439.26	1429.45	245.975	1553.6	1154.64	233.549	1288.36	1314.81	231.748	1198.94	1112.48	164.799	1544.94	1247.16	386.759	1348.54	1385.05	501.507	1378.87	1152.42	510.441	1394.97	1056.47	522.462	1323.88	918.078	474.655	1300.7	819.035	535.557	1345.26	804.354	526.826	1285.83	743.846
866	0	266.949	1200.44	1549.4	162.69	1207.86	1543.31	291.301	1362.51	1577.63	172.176	1372.93	1572.97	229.192	1429.78	1427.55	247.337	1544.05	1152.63	234.136	1278.72	1312.82	231.701	1189.24	1110.56	166.159	1535.59	1245.3	387.755	1338.3	1382.84	502.201	1368.22	1150.07	511.271	1385.11	1054.16	523.217	1314.49	915.643	475.527	1291.87	816.521	536.141	1336.33	802.089	527.704	1277.15	741.273
867	0	267.96	1190.87	1547.49	163.71	1198.39	1541.45	292.624	1352.86	1575.49	173.509	1363.43	1570.92	230.691	1420.17	1425.55	248.473	1534.16	1150.48	234.957	1269.01	1310.82	231.793	1179.45	1108.48	167.561	1526.19	1243.31	388.648	1328.29	1380.44	502.86	1357.66	1147.3	512.131	1375.22	1051.63	524.158	1305.08	913.145	476.479	1282.84	813.808	537.631	1327.14	799.64	528.701	1268.49	738.532
868	0	269.238	1181.19	1545.55	165.053	1188.93	1539.66	293.931	1343.2	1573.05	175.146	1354	1568.85	232.109	1410.46	1423.41	250.037	1524.4	1148.4	235.793	1259.12	1308.93	231.948	1169.64	1106.53	169.042	1516.53	1241.25	389.673	1318.24	1377.94	503.781	1347.18	1144.61	512.949	1365.23	1049.08	525.018	1295.56	910.359	477.352	1273.89	810.856	538.698	1317.94	797.021	529.692	1259.84	735.567
869	0	270.511	1171.5	1543.69	166.329	1179.29	1538.12	295.647	1333.65	1571.08	176.702	1344.44	1566.79	233.568	1400.59	1421.44	251.21	1514.27	1146.26	236.744	1249.2	1307.01	232.005	1159.57	1104.65	170.443	1506.94	1239.37	390.926	1308.15	1375.59	504.694	1336.56	1142.08	513.843	1355.19	1046.63	525.883	1286.01	907.815	478.354	1264.78	808.138	539.791	1308.84	794.798	530.781	1251.2	732.795
870	0	271.93	1161.77	1542.07	167.745	1169.58	1536.69	297.293	1323.99	1568.97	178.347	1334.78	1565.04	235.212	1390.79	1419.6	252.634	1504.28	1144.12	237.73	1239.14	1305.24	232.291	1149.53	1102.93	171.952	1496.96	1237.56	392.165	1297.77	1373.39	505.582	1326.01	1139.66	514.736	1345.27	1044.25	526.821	1276.55	905.267	479.317	1255.79	805.465	541.394	1299.47	792.437	531.894	1242.59	729.973
871	0	273.637	1151.94	1540.55	169.419	1159.77	1535.35	298.974	1314.09	1566.98	180.017	1325.05	1563.39	236.276	1380.68	1417.84	253.717	1493.89	1142.21	238.729	1228.95	1303.59	232.498	1139.27	1101.3	173.383	1487.05	1235.96	393.56	1287.42	1371.29	506.545	1315.39	1137.35	515.755	1335.18	1042.04	527.829	1266.88	902.845	480.249	1246.61	802.666	542.506	1290.27	789.983	532.982	1233.66	727.398
872	0	275.505	1142.16	1539.15	171.204	1150	1534.09	300.877	1304.37	1565.2	181.886	1315.28	1561.66	238.137	1370.39	1416.08	255.023	1483.65	1140.53	239.887	1218.63	1301.93	232.898	1128.91	1099.63	174.747	1476.65	1234.41	395.113	1277	1369.25	507.647	1305.11	1135.2	516.613	1325.1	1039.86	528.72	1257.21	900.422	481.36	1237.43	800.157	543.272	1281.06	787.614	534.235	1224.63	724.903
873	0	277.289	1132.15	1537.83	173.061	1139.98	1533	302.956	1294.49	1563.37	183.846	1305.47	1560.14	239.656	1360.05	1414.43	256.25	1473.12	1138.84	240.958	1208.15	1300.51	233.334	1118.3	1098.3	176.106	1466.28	1232.67	396.521	1266.51	1367.32	508.684	1294.8	1133.24	517.559	1314.92	1037.88	529.695	1247.56	898.221	482.379	1228.32	797.815	544.365	1271.59	785.602	535.289	1215.64	722.51
874	0	279.219	1122.18	1536.57	174.983	1129.89	1532.04	304.837	1284.5	1561.54	185.857	1295.49	1558.62	241.485	1349.68	1412.81	257.287	1462.34	1136.92	242.231	1197.49	1299.15	233.927	1107.63	1097.03	177.454	1455.76	1231.13	397.923	1255.95	1365.42	509.768	1284.59	1131.33	518.674	1305.01	1036.03	530.698	1237.84	896.234	483.423	1218.88	795.67	546.023	1262.11	783.746	536.591	1206.66	720.513
875	0	281.333	1112.06	1535.51	177.148	1119.83	1531.06	307.056	1274.35	1560.04	188.073	1285.49	1557.29	242.999	1339.04	1411.22	258.193	1451.68	1135.1	243.825	1186.84	1297.89	234.717	1096.72	1095.85	178.654	1444.79	1229.58	399.506	1245.35	1363.71	510.817	1274.38	1129.52	519.742	1294.9	1034.26	531.782	1227.98	894.377	484.561	1209.44	793.533	547.173	1252.61	781.93	537.765	1197.61	718.156
876	0	283.371	1101.83	1534.47	179.285	1109.67	1530.31	309.342	1264.32	1558.55	190.281	1275.37	1556.07	244.817	1328.57	1409.84	259.105	1440.66	1133.33	245.311	1175.92	1296.84	235.803	1085.64	1094.81	179.783	1433.65	1228.09	401.118	1234.81	1362.01	511.911	1264.25	1127.77	520.751	1284.86	1032.45	532.825	1218.18	892.485	485.834	1200.04	791.614	548.01	1243.12	780.123	539.124	1188.33	716.219
877	0	285.555	1091.59	1533.65	181.319	1099.37	1529.87	311.658	1254.02	1557.14	192.693	1265.18	1554.92	246.368	1317.86	1408.57	259.756	1429.44	1131.55	246.91	1164.97	1295.91	236.767	1074.27	1094.12	181	1422.7	1226.72	402.775	1224.4	1360.42	513.233	1254.62	1125.95	521.839	1274.95	1030.78	534.275	1208.6	890.869	487.178	1190.46	789.934	549.425	1233.6	778.498	540.189	1178.96	714.271
878	0	287.77	1081.22	1533.1	183.437	1088.96	1529.61	313.877	1243.55	1555.82	195.01	1254.96	1553.93	247.952	1307.04	1407.41	260.298	1418.03	1130.07	248.567	1153.74	1295.2	238.09	1062.76	1093.58	181.862	1411.4	1225.38	404.451	1213.86	1359.02	514.648	1244.84	1124.44	522.699	1264.93	1029.13	535.67	1198.78	889.24	488.467	1180.3	788.506	551.146	1223.99	777.058	541.544	1169.66	712.697
879	0	289.981	1070.63	1532.87	185.65	1078.56	1529.62	316.419	1233.23	1554.88	197.385	1244.53	1553.32	249.579	1296.17	1406.63	260.745	1406.36	1128.99	250.317	1142.4	1294.63	239.532	1051.02	1093.22	182.455	1399.82	1224.49	406.171	1203.3	1357.86	516.043	1234.95	1123.16	523.826	1255.1	1027.87	537.064	1188.96	887.844	490.097	1170.25	786.985	551.861	1214.41	775.486	543.016	1160.13	711.143
880	0	292.179	1059.94	1532.98	187.765	1067.95	1529.96	318.815	1222.49	1554.24	199.788	1234.01	1552.98	251.033	1284.98	1406.12	261.089	1394.69	1128.21	252.208	1130.99	1294.42	241.138	1039.07	1093.26	182.862	1388.08	1223.93	407.926	1192.71	1357	517.411	1225.03	1122.17	524.92	1245.09	1026.87	538.655	1179.21	886.734	491.907	1160.09	785.847	553.639	1204.77	774.56	544.54	1150.56	709.844
881	0	294.446	1049.18	1533.27	190.13	1057.28	1530.52	321.252	1211.88	1553.73	202.244	1223.49	1552.7	252.336	1273.9	1406.19	261.277	1383.11	1127.56	254.121	1119.49	1294.52	242.911	1026.75	1093.51	183.013	1376.38	1223.56	409.691	1182.26	1356.31	518.729	1215.06	1121.24	525.75	1235.08	1025.84	540.275	1169.55	885.719	493.54	1149.85	785.178	554.945	1195.23	773.575	546.263	1141.08	708.938
882	0	296.826	1038.37	1533.75	192.434	1046.44	1531.35	323.679	1201.17	1553.53	204.584	1212.71	1552.71	253.725	1262.64	1406.33	261.314	1371.6	1127.52	256.081	1107.97	1294.88	245.074	1014.52	1094.14	183.184	1364.39	1223.65	411.503	1171.73	1355.97	519.977	1205.13	1120.72	526.462	1225.01	1025.12	541.849	1159.74	885.046	495.286	1139.92	784.401	556.139	1185.83	772.851	548.033	1131.43	708.284
883	0	299.12	1027.48	1534.62	194.86	1035.38	1532.46	325.828	1190.28	1553.66	206.908	1201.77	1553.23	255.002	1251.27	1406.87	261.259	1360.09	1128.08	258.077	1096.35	1295.49	247.273	1002.15	1094.88	182.996	1352.61	1224.37	413.229	1161.28	1356.1	521.137	1195.02	1120.64	527.158	1214.91	1025.03	543.497	1149.71	884.955	497.099	1129.53	784.028	557.362	1175.99	772.743	549.971	1121.38	708.411
884	0	301.472	1016.52	1535.8	197.255	1024.37	1533.78	328.225	1179.44	1554.26	209.155	1190.83	1554.08	256.306	1239.64	1407.32	261.186	1348.58	1128.9	259.986	1084.71	1296.53	249.703	989.927	1096.13	182.828	1340.49	1225.31	414.974	1150.92	1356.59	522.045	1184.93	1120.79	527.759	1204.77	1025.2	545.12	1139.76	885.287	499.088	1120.25	783.893	558.659	1166.38	773.096	552.158	1111.97	708.4
885	0	303.846	1005.52	1537.02	199.56	1013.15	1535.41	330.413	1168.48	1555.13	211.428	1179.71	1555.15	257.385	1228.24	1408.58	261.092	1336.85	1129.94	262.024	1073.14	1297.91	252.174	977.799	1097.56	182.562	1328.42	1226.45	416.501	1140.49	1357.26	522.827	1174.99	1121.21	528.221	1194.58	1025.68	546.415	1130.06	885.856	500.816	1108.96	784.845	559.549	1156.6	773.566	554.152	1102.23	708.938
886	0	306.093	994.427	1538.57	201.835	1002.02	1537.15	332.611	1157.48	1556.45	213.614	1168.65	1556.73	258.573	1216.96	1410.19	260.674	1324.94	1131.27	264.055	1061.62	1299.49	254.957	965.876	1099.35	182.354	1316.35	1228.09	418.215	1130.26	1358.65	523.572	1164.92	1122.15	528.615	1184.33	1026.57	547.792	1120.06	886.984	502.636	1098.21	785.753	560.727	1146.77	774.599	556.122	1092.21	709.933
887	0	308.328	983.465	1540.35	203.94	990.921	1539.15	334.601	1146.44	1558.02	215.702	1157.51	1558.65	259.618	1205.76	1411.68	259.86	1312.75	1132.58	266.193	1050.28	1301.42	257.712	954.08	1101.53	182.246	1304.28	1229.82	419.895	1120.06	1360.32	524.173	1154.9	1123.45	529.149	1174.13	1028.12	549.131	1109.94	888.573	504.38	1087.44	787.049	562.315	1136.71	776.386	558.264	1082.24	711.541
888	0	310.301	972.406	1542.28	205.891	979.851	1541.2	336.623	1135.37	1560.06	217.668	1146.4	1561.03	260.688	1194.68	1413.74	259.559	1300.6	1134.24	268.127	1039.03	1303.72	260.334	942.514	1104.04	182.258	1292.29	1231.68	421.484	1109.98	1362.36	524.717	1144.77	1125.14	529.791	1163.87	1030.14	550.29	1099.74	890.546	506.233	1076.56	789.195	563.18	1126.69	778.407	560.167	1072.01	713.686
889	0	312.129	961.464	1544.08	207.834	968.876	1543.41	338.564	1124.42	1562.35	219.51	1135.36	1563.38	261.69	1183.66	1415.7	259.613	1288.66	1135.96	270.124	1027.94	1305.99	262.88	931.142	1106.67	182.362	1280.4	1233.55	422.974	1099.85	1364.54	525.433	1134.72	1127.18	530.31	1153.63	1032.18	551.441	1089.24	892.702	507.973	1065.56	791.415	564.416	1116.29	780.585	561.963	1061.62	715.86
890	0	313.943	950.699	1546.02	209.571	958.021	1545.39	340.183	1113.36	1564.54	221.235	1124.39	1565.79	262.758	1172.98	1417.66	259.768	1277.07	1137.6	271.929	1017.01	1308.32	265.11	919.981	1109.35	182.685	1268.74	1235.38	424.473	1089.84	1366.72	526.256	1124.73	1129.35	531.023	1143.48	1034.31	552.696	1078.92	895.008	509.337	1054.48	793.6	565.445	1105.83	782.852	563.821	1050.98	718.251
891	0	315.41	939.855	1547.96	211.113	947.194	1547.53	341.865	1102.66	1566.84	222.82	1113.66	1568.28	263.902	1162.49	1419.54	260.098	1265.66	1139.19	273.83	1006.28	1310.69	267.364	909.203	1112.11	183.173	1257.19	1237.18	425.893	1079.96	1368.99	527.102	1114.57	1131.64	531.951	1133.39	1036.72	553.924	1068.5	897.518	510.734	1043.5	796.053	566.491	1095.05	785.333	565.435	1039.98	721.098
892	0	316.869	929.304	1549.89	212.502	936.597	1549.45	343.099	1091.91	1569.05	224.178	1102.92	1570.62	265.039	1151.94	1421.33	260.775	1254.62	1140.8	275.516	995.72	1313.02	269.311	898.536	1114.91	183.828	1245.96	1238.69	427.378	1069.99	1371.27	528.169	1104.51	1133.91	532.848	1123.17	1038.96	555.295	1057.92	900.147	512.044	1032.5	798.513	567.609	1084.35	787.861	566.703	1029.24	723.281
893	0	318.252	918.81	1551.77	213.86	926.072	1551.37	344.421	1081.53	1571.06	225.436	1092.43	1572.7	266.164	1141.83	1423.29	262.002	1244.03	1142.53	277.167	985.252	1315.09	271.086	888.124	1117.47	184.681	1234.93	1240.2	428.804	1060.02	1373.42	529.474	1094.43	1136.23	534.318	1113.13	1041.35	556.537	1047.22	902.376	513.333	1021.14	800.993	568.496	1073.14	790.033	568.284	1018.33	725.626
894	0	319.564	908.522	1553.59	215.244	915.774	1553.05	345.484	1071.12	1573.02	226.583	1082.04	1574.56	267.218	1131.58	1424.82	262.978	1233.18	1143.93	278.678	974.854	1317.04	272.783	877.846	1119.93	185.711	1224.31	1241.75	430.131	1050.03	1375.4	530.873	1084.21	1138.41	535.436	1102.86	1043.2	558.062	1036.51	904.654	514.697	1009.95	803.27	569.589	1061.97	791.996	569.432	1006.83	727.885
895	0	320.796	898.443	1555.28	216.399	905.385	1554.86	346.553	1061.06	1574.81	227.535	1071.74	1576.35	268.297	1121.48	1426.41	264.053	1222.36	1145.17	280.064	964.654	1318.91	274.098	867.555	1122.32	186.919	1213.97	1243.18	431.323	1040.12	1377.17	532.467	1074.21	1140.6	536.884	1092.57	1045.03	559.723	1025.82	906.805	515.962	998.53	805.663	570.864	1050.57	794.06	570.319	994.758	730.184
896	0	321.903	888.268	1556.98	217.586	895.188	1556.39	347.34	1051	1576.41	228.479	1061.52	1577.8	269.404	1111.5	1427.86	265.274	1211.83	1146.51	281.207	954.531	1320.64	275.261	857.612	1124.18	187.945	1203.78	1244.58	432.508	1030.01	1378.84	534.052	1064.15	1142.49	538.12	1082.2	1046.52	561.23	1014.88	908.665	517.323	986.856	808.075	572.057	1038.89	795.959	571.279	982.802	732.257
897	0	323.043	878.355	1558.47	218.728	884.982	1557.76	348.206	1041.08	1577.98	229.266	1051.33	1579.34	270.432	1101.38	1429.26	266.555	1201.25	1148.04	282.36	944.554	1322.04	276.276	847.67	1125.59	189.273	1193.92	1245.99	433.587	1019.72	1380.26	535.721	1054.01	1144.14	540.01	1071.89	1048.14	562.863	1003.79	910.436	518.543	975.117	810.037	573.341	1027.17	797.422	572.233	970.557	734.187
898	0	324.125	868.384	1559.81	219.717	874.778	1559.09	348.91	1031.14	1579.3	229.847	1041.28	1580.6	271.539	1091.44	1430.62	267.772	1191.38	1149.31	283.212	934.537	1323.33	277.05	837.668	1126.83	190.51	1184.21	1247.45	434.527	1009.63	1381.58	537.29	1043.83	1145.71	541.91	1061.57	1049.58	564.422	992.692	912.092	519.796	963.317	811.954	574.525	1015.21	798.8	573.129	958.151	735.94
899	0	325.179	858.506	1561.07	220.717	864.841	1560.28	349.649	1021.33	1580.77	230.558	1031.2	1581.92	272.382	1081.44	1431.83	269.11	1181.54	1150.71	284.055	924.65	1324.56	277.602	827.759	1127.87	191.585	1174.69	1248.75	435.43	999.502	1382.82	539.028	1033.67	1147.17	543.563	1050.89	1050.75	565.951	981.389	913.587	521.217	951.609	814.055	576.182	1003.19	800.367	574.235	945.733	737.715
900	0	326.06	848.616	1562.15	221.653	854.767	1561.33	350.38	1011.57	1581.89	231.429	1021.19	1583.05	273.308	1071.64	1432.92	270.355	1172.12	1152.15	284.799	914.928	1325.63	278.025	817.911	1128.58	192.777	1165.4	1250.01	436.071	989.31	1383.89	540.743	1023.45	1148.51	545.295	1040.19	1051.75	567.548	969.944	915.056	522.221	939.458	815.786	577.399	990.966	801.455	575.326	933.214	739.375
901	0	326.935	838.774	1563.06	222.437	844.639	1562.24	350.954	1001.52	1583.11	231.874	1011.09	1584.29	274.201	1061.73	1434.22	271.508	1162.68	1153.43	285.205	905.229	1326.48	278.242	808.107	1129.13	193.969	1156.16	1251.45	436.695	979.215	1384.78	542.216	1013.09	1149.67	547.242	1029.42	1052.97	568.952	958.297	916.308	523.547	928.072	817.122	578.599	978.615	802.522	576.481	920.425	741.006
902	0	327.625	828.806	1563.92	223.222	834.858	1563.12	351.614	991.596	1584.19	232.483	1001.19	1585.36	274.93	1051.92	1435.38	272.722	1153.64	1154.8	285.6	895.628	1327.32	278.357	798.415	1129.66	195.029	1146.92	1252.78	437.305	969.021	1385.81	543.635	1002.65	1150.82	549.056	1018.32	1054.1	570.162	946.517	917.671	524.652	916.026	818.668	580.154	966.228	803.918	577.488	907.483	742.763
903	0	328.211	818.867	1564.64	223.82	824.926	1563.85	352.376	981.667	1585.42	233.232	991.145	1586.51	275.907	1042.31	1436.58	274.171	1144.41	1156.24	285.947	886.173	1328.14	278.322	789.041	1130.18	196.225	1137.86	1254.02	437.772	958.852	1386.69	544.849	992.063	1151.86	550.614	1007.1	1055.09	571.258	934.605	918.855	525.634	903.894	820.127	581.78	953.916	805.159	578.701	894.669	744.295
904	0	328.9	808.937	1565.23	224.388	814.926	1564.39	352.969	971.507	1586.35	233.904	981.185	1587.46	276.761	1032.72	1437.66	275.241	1135.41	1157.53	286.077	876.767	1328.8	278.253	779.714	1130.65	197.405	1128.83	1255.32	438.285	948.775	1387.6	545.98	981.318	1152.9	552.278	995.744	1056.13	572.378	922.551	919.989	526.836	891.869	821.477	583.004	941.532	806.133	580.088	881.854	745.802
905	0	329.312	798.968	1565.67	224.939	805.134	1564.8	353.684	961.607	1587.29	234.612	971.229	1588.51	277.521	1023.14	1438.94	276.394	1126.33	1158.73	286.044	867.419	1329.31	277.915	770.542	1130.94	198.579	1119.9	1256.49	438.801	938.734	1388.44	547.104	970.533	1153.87	553.906	984.223	1057.23	573.573	910.721	921.151	528.035	879.741	822.662	584.437	929.052	807.151	581.305	868.988	747.34
906	0	329.583	788.987	1566.03	225.226	795.337	1565.2	354.185	951.394	1588.26	235.11	961.31	1589.37	278.427	1013.72	1439.67	277.647	1117.4	1160.05	286.365	858.362	1329.89	277.531	761.496	1131.5	199.871	1111.08	1257.69	439.359	928.718	1389.38	547.869	959.458	1154.68	555.274	972.69	1058.14	574.53	898.487	922.617	528.903	867.983	823.704	586.374	916.494	808.538	582.621	856.234	748.871
907	0	329.982	779.089	1566.29	225.552	785.518	1565.52	354.647	941.406	1588.98	235.78	951.533	1590.1	279.327	1004.48	1440.51	278.661	1108.25	1160.79	286.23	849.232	1330.41	277.247	752.604	1132.08	201.106	1102.35	1258.51	439.581	918.816	1390	548.553	948.385	1155.33	556.484	961.162	1058.96	575.276	886.177	923.682	529.748	856.113	824.831	587.705	904.028	809.835	583.93	843.504	750.372
908	0	330.301	769.162	1566.27	225.889	775.766	1565.51	355.138	931.403	1589.54	236.19	941.489	1590.8	280.066	995.378	1441.17	279.829	1099.58	1161.69	286.34	840.175	1330.8	276.996	743.776	1132.46	202.29	1093.6	1259.31	440.089	909.208	1390.64	549.116	936.952	1155.76	557.33	949.343	1059.29	575.809	873.97	924.541	530.653	844.265	825.629	589.169	891.406	810.687	585.024	830.763	751.497
909	0	330.607	759.355	1566.13	226.28	765.981	1565.33	355.508	921.307	1590.22	236.717	931.648	1591.52	281.126	986.063	1441.51	280.737	1090.7	1162.2	286.707	831.277	1331.19	276.809	734.986	1132.85	203.377	1084.92	1259.86	440.472	899.436	1391.07	549.751	925.51	1156.09	558.653	937.711	1060	576.564	861.881	925.335	531.295	832.156	826.26	590.382	878.846	811.433	586.128	818.101	752.503
910	0	330.872	749.579	1565.98	226.46	756.233	1565.2	356.009	911.502	1591.01	237.033	921.859	1592.21	281.733	977.092	1442.28	281.738	1081.96	1162.98	286.924	822.434	1331.58	276.634	726.483	1133.35	204.385	1076.21	1260.63	440.944	890.005	1391.68	550.272	914.005	1156.61	559.478	925.932	1060.47	577.121	849.662	926.196	532.002	820.285	826.964	591.683	866.402	812.417	587.028	805.475	753.526
911	0	331.002	739.885	1565.7	226.567	746.678	1564.93	356.206	901.568	1591.56	237.261	912.041	1592.91	282.395	968.15	1442.71	282.526	1073.28	1163.39	287.09	813.635	1331.91	276.522	717.931	1133.67	205.155	1067.48	1261.08	441.208	880.661	1392.1	550.8	902.491	1156.94	560.39	914.155	1060.99	577.612	837.512	926.826	532.633	808.4	827.385	592.561	853.978	813.082	587.939	792.87	754.325
912	0	331.26	730.197	1565.33	226.835	737.136	1564.48	356.442	891.745	1592.11	237.61	902.294	1593.35	282.913	959.234	1442.97	283.169	1064.51	1163.73	287.157	804.822	1331.97	276.46	709.47	1133.83	205.807	1058.72	1261.42	441.698	871.415	1392.38	551.161	890.915	1157.06	561.499	902.547	1061.39	578.025	825.4	927.122	532.974	796.087	827.708	593.709	841.233	813.406	588.545	780.186	754.816
913	0	331.269	720.586	1564.94	226.912	727.639	1564	356.863	882.076	1592.67	237.873	892.669	1593.78	283.484	950.354	1443.14	283.704	1055.94	1164.02	287.374	795.816	1332.12	276.49	700.859	1134	206.393	1049.96	1261.66	442.094	862.265	1392.48	551.575	879.467	1157.03	561.872	890.776	1061.24	578.256	813.08	927.477	533.839	785.487	827.388	594.56	828.569	813.697	589.062	767.5	755.215
914	0	331.3	711.077	1564.55	226.908	718.226	1563.63	356.93	872.311	1592.98	238.008	883.073	1593.99	283.927	941.535	1443.18	284.206	1047.27	1164.02	287.812	787.091	1332.22	276.562	692.284	1134.12	206.842	1041.16	1261.71	442.345	853.379	1392.35	551.81	867.985	1156.67	562.389	879.18	1061.03	578.55	800.979	927.549	533.987	773.084	827.705	595.231	816.097	814.158	589.37	754.915	755.585
915	0	331.263	701.486	1564.1	226.867	708.848	1563.05	357.106	862.618	1593.06	238.303	873.609	1593.98	284.301	932.593	1443.05	284.412	1038.59	1163.88	287.866	778.045	1332.02	276.724	683.628	1133.87	207.167	1032.34	1261.65	442.68	844.21	1392.11	552.072	856.627	1156.22	562.714	867.602	1060.62	578.629	788.896	927.706	533.937	760.8	827.67	595.694	803.379	814.264	589.398	742.101	755.746
916	0	331.338	692.033	1563.58	226.902	699.425	1562.38	357.354	853.106	1592.99	238.55	864.094	1593.8	284.749	923.386	1442.92	284.482	1029.9	1163.79	288.224	769.19	1331.72	277.153	675.36	1133.04	207.44	1023.53	1261.6	443.025	835.209	1391.79	552.512	845.433	1155.85	563.242	856.126	1060.21	578.692	776.813	927.647	534.087	748.971	827.442	595.951	790.585	814.019	589.345	729.288	755.822
917	0	331.264	682.525	1562.94	226.995	690.073	1561.7	357.335	843.476	1592.75	238.563	854.648	1593.53	284.82	914.324	1442.81	284.575	1021.14	1163.6	288.485	760.108	1331.35	277.384	666.19	1132.82	207.68	1014.69	1261.35	443.319	826.206	1391.35	552.639	834.373	1155.21	563.211	844.627	1059.41	578.585	764.9	927.379	534.013	737.35	827.094	596.157	777.862	813.804	589.181	716.388	755.853
918	0	331.354	673.191	1562.32	226.895	680.791	1561	357.372	833.966	1592.5	238.67	845.209	1593.14	284.98	905.166	1442.44	284.424	1012.44	1163.4	288.966	751.125	1330.94	277.843	657.248	1132.24	207.531	1005.6	1261.16	443.494	817.129	1390.87	552.626	823.288	1154.53	563.44	833.302	1058.87	578.299	752.755	927.207	533.48	725.146	826.999	596.366	765.238	813.706	588.784	703.565	755.869
919	0	331.424	663.819	1561.61	226.986	671.395	1560.19	357.487	824.561	1592.11	238.793	835.767	1592.67	285.118	895.907	1441.87	284.174	1003.7	1163.26	289.147	741.994	1330.21	278.25	648.238	1131.35	207.302	996.5	1260.98	443.507	808.187	1390.27	552.82	812.483	1154	563.483	821.926	1058.29	577.903	740.753	926.893	532.918	713.095	826.684	596.131	752.353	813.364	588.193	690.668	755.822
920	0	331.567	654.385	1560.74	227.128	661.887	1559.35	357.52	815.21	1591.46	238.597	826.326	1592.12	285.031	886.681	1441.39	283.94	994.942	1163.03	289.352	732.776	1329.3	278.604	639.551	1130.05	207.041	987.42	1260.67	443.739	798.995	1389.5	552.808	801.778	1153.25	563.54	810.749	1057.53	577.328	728.654	926.556	532.308	700.939	826.307	595.867	739.502	812.937	587.386	677.542	755.718
921	0	331.671	645.105	1559.89	227.29	652.383	1558.56	357.523	805.908	1590.7	238.577	816.786	1591.33	284.888	877.307	1440.72	283.691	986.091	1162.45	289.436	723.64	1328.4	279.034	630.812	1128.95	206.788	978.262	1260.08	443.731	789.989	1388.65	552.746	791.379	1152.51	563.428	799.715	1056.61	576.598	716.706	926.136	531.446	688.872	826.15	595.43	726.804	812.58	586.47	664.611	755.74
922	0	331.872	635.773	1558.86	227.405	642.931	1557.54	357.328	796.552	1589.61	238.598	807.322	1590.22	284.651	867.937	1439.8	283.149	976.917	1161.57	289.383	714.32	1327.4	279.282	621.44	1127.94	206.356	968.827	1259.19	443.575	781.137	1387.61	552.683	781.218	1151.49	563.151	788.727	1055.42	575.976	704.912	925.663	530.451	676.697	825.846	595.181	713.895	812.032	585.378	651.555	755.548
923	0	331.967	626.399	1557.72	227.499	633.46	1556.41	357.179	787.19	1588.36	238.452	797.886	1589.12	284.393	858.646	1438.71	282.61	967.593	1160.55	289.476	705.041	1326.08	279.506	612.424	1126.46	205.966	959.451	1258.21	443.404	772.036	1386.32	552.27	771.059	1150.19	563.103	777.902	1054.3	575.14	692.956	925.072	529.492	664.682	825.313	594.098	701.226	811.296	584.055	638.419	755.264
924	0	331.996	617.01	1556.56	227.559	624.01	1555.31	357.029	777.884	1587.18	238.15	788.343	1588.06	284.037	849.157	1437.51	282.125	958.446	1159.51	289.558	695.767	1324.89	279.62	603.151	1125.25	205.402	950.018	1257.22	443.28	763.019	1385.11	552.063	761.336	1149.08	562.707	767.172	1053	574.165	681.136	924.438	528.147	652.571	824.891	593.346	688.477	810.799	582.535	625.295	755.15
925	0	331.86	607.639	1555.29	227.504	614.377	1554.15	356.971	768.603	1586.01	237.916	778.821	1586.78	283.589	839.647	1436.47	281.377	948.939	1158.28	289.406	686.407	1323.62	279.73	593.867	1123.82	204.7	940.384	1256.11	443.22	754.109	1383.95	551.747	751.68	1147.85	562.49	756.522	1051.85	573.197	669.44	923.781	526.884	640.635	824.489	592.292	675.751	810.058	580.909	612.299	754.845
926	0	331.811	598.18	1553.88	227.298	604.823	1552.8	356.637	759.117	1584.42	237.838	769.327	1585.28	283.24	830.127	1435.05	280.776	939.413	1157.1	289.229	677.004	1322.09	279.78	584.483	1122.39	204.185	930.894	1254.76	442.636	744.876	1382.28	551.419	742.317	1146.41	562.076	745.951	1050.31	572.232	657.83	922.924	525.496	628.597	823.975	591.414	663.163	809.212	579.186	599.275	754.572
927	0	331.545	588.712	1552.42	227.037	595.325	1551.39	356.281	749.547	1582.98	237.411	759.857	1583.96	282.673	820.557	1433.54	280.246	929.921	1155.86	289.1	667.531	1320.64	279.884	575.367	1120.43	203.311	921.095	1253.42	442.701	736.003	1381.01	551.156	733.046	1145.14	561.722	735.538	1048.92	571.275	646.323	921.997	524.013	616.578	823.397	590.358	650.404	808.129	577.453	586.337	754.112
928	0	331.157	579.138	1551.04	226.591	585.789	1549.91	355.915	740.041	1581.53	236.802	750.199	1582.55	281.941	811.028	1432.31	279.342	920.094	1154.56	288.823	657.981	1319.12	279.874	565.961	1118.95	202.56	911.48	1251.96	442.319	726.865	1379.66	550.895	723.841	1143.89	561.473	725.216	1047.59	570.193	634.898	921.236	522.707	604.838	822.883	588.599	638.018	807.178	575.559	573.471	753.901
929	0	330.535	569.558	1549.51	225.996	576.249	1548.38	355.395	730.469	1579.91	236.46	740.731	1580.79	281.285	801.465	1430.61	278.586	910.501	1152.78	288.51	648.451	1317.53	279.687	556.221	1117.52	201.592	901.632	1250.3	441.734	717.682	1378.06	550.591	714.717	1142.49	561.17	715.092	1046.15	569.121	623.605	920.293	521.138	592.923	822.492	587.722	625.685	806.369	573.668	560.747	753.491
930	0	329.79	560.01	1547.84	225.265	566.593	1546.8	354.804	720.831	1578.38	235.94	731.206	1579.16	280.584	791.949	1428.99	277.736	900.615	1151.04	288.126	638.834	1315.92	279.678	546.394	1115.94	200.874	891.867	1248.46	441.145	708.487	1376.28	550.004	705.74	1140.75	560.573	704.998	1044.28	568.153	612.484	919.166	520.03	581.487	821.738	585.987	613.73	805.203	571.753	548.184	752.956
931	0	329.066	550.29	1546.28	224.533	557.047	1544.99	353.901	711.122	1576.49	235.191	721.533	1577.28	279.676	782.413	1427.29	276.941	890.837	1149.22	287.692	629.182	1314.27	279.566	536.361	1114.34	199.832	881.968	1246.56	440.509	699.222	1374.58	549.646	696.736	1139.17	559.985	694.949	1042.49	567.138	601.452	918.049	518.189	569.302	821.173	584.248	601.733	803.782	569.948	535.731	752.421
932	0	328.197	540.598	1544.71	223.661	547.522	1543.42	353.231	701.62	1575.01	234.373	712.015	1575.61	278.863	772.797	1425.52	275.973	881.052	1147.27	287.077	619.404	1312.66	279.495	526.797	1112.75	198.939	872.063	1244.7	439.832	689.923	1373.06	549.188	687.739	1137.74	559.45	685.165	1040.9	566.075	590.607	917.026	516.691	557.636	820.769	583.152	589.97	802.852	568.167	523.611	752.057
933	0	327.205	531.014	1543.22	222.783	537.732	1541.76	352.137	691.903	1573.48	233.269	702.396	1573.98	277.816	763.06	1423.82	275.053	871.091	1145.6	286.453	609.646	1311.15	279.244	516.395	1111.49	197.822	862.041	1242.81	438.935	680.463	1371.54	548.519	678.713	1136.26	558.898	675.385	1039.49	565.034	579.942	916.036	515.194	546.26	820.254	581.102	578.639	801.83	566.316	511.59	751.652
934	0	326.339	521.393	1541.63	221.739	527.998	1540.14	351.029	682.347	1571.85	231.892	692.562	1572.38	276.651	753.5	1422.15	274.184	861.136	1143.7	285.795	599.753	1309.63	279.06	506.265	1109.89	196.976	852.1	1240.93	438.117	670.985	1370.03	547.738	669.487	1134.76	558.058	665.605	1037.79	564.093	569.464	914.849	513.806	534.978	819.691	579.478	567.403	800.496	564.59	499.848	751.029
935	0	325.215	511.693	1540.2	220.679	518.288	1538.64	349.706	672.713	1570.42	230.639	682.92	1570.88	275.598	743.661	1420.3	273.131	850.901	1141.8	284.888	589.76	1308.07	278.915	496.371	1108.33	195.758	841.89	1239	437.111	661.327	1368.62	547.081	660.252	1133.48	557.162	655.904	1036.37	562.965	559.117	913.797	512.388	523.952	819.016	578.084	556.29	799.273	563.029	488.414	750.632
936	0	324.009	502.023	1538.99	219.377	508.434	1537.29	348.214	663.008	1569.04	229.081	673.055	1569.32	274.314	733.802	1418.79	272.264	840.656	1140.12	284.037	579.884	1306.8	278.398	485.818	1107.24	194.826	831.802	1237.08	436	651.602	1367.44	546.25	650.994	1132.4	556.31	646.317	1035.19	561.854	548.883	912.923	510.926	513.211	818.77	576.42	545.667	798.439	561.426	477.309	750.248
937	0	322.705	492.355	1537.77	218.218	498.59	1535.95	346.854	653.488	1567.83	227.95	663.237	1567.87	273.112	723.911	1417.04	271.33	830.186	1138.17	283.016	569.726	1305.47	277.996	475.351	1106.13	193.737	821.367	1235.1	434.734	641.721	1366.18	545.201	641.414	1131.26	555.429	636.823	1034.1	560.796	538.949	911.93	509.51	502.404	818.305	574.949	535.231	797.56	559.883	466.413	749.815
938	0	321.369	482.631	1536.6	216.812	488.759	1534.53	345.063	643.686	1566.52	226.028	653.416	1566.36	271.602	713.975	1415.47	270.443	819.282	1136.27	281.98	559.601	1304.17	277.412	464.94	1104.81	192.772	810.919	1232.94	433.56	631.762	1365.1	544.23	631.764	1130.31	554.259	627.24	1032.89	559.819	529.055	911.042	508.269	491.874	817.695	573.34	525.064	796.343	558.559	455.914	749.238
939	0	319.803	472.882	1535.53	215.109	478.909	1533.37	343.412	634.143	1565.34	224.22	643.66	1565.06	270.112	704.026	1413.95	269.826	808.482	1134.45	280.751	549.23	1303.01	276.627	454.232	1103.99	191.881	800.396	1230.84	432.182	621.684	1364.15	543.156	622.024	1129.57	553.153	617.671	1032.04	558.687	519.313	910.239	507.141	481.799	817.308	571.539	515.364	795.564	557.124	445.73	748.751
940	0	317.935	463.247	1534.6	213.524	469.122	1532.13	341.432	624.401	1564.39	222.173	633.914	1563.7	268.471	694.049	1412.26	268.989	797.352	1132.23	279.435	539.027	1302.03	275.765	443.467	1103.13	190.77	789.628	1228.61	430.545	611.604	1363.31	541.865	612.055	1128.99	552.028	608.129	1031.38	557.639	509.735	909.607	506.007	472.225	816.677	570.28	505.672	794.947	555.966	435.949	748.3
941	0	316.096	453.396	1533.81	211.402	459.251	1531.1	339.388	614.837	1563.35	220.301	624.073	1562.34	266.63	684.392	1410.79	268.163	785.971	1130.17	277.987	528.571	1301.13	274.863	432.85	1102.3	189.683	778.912	1226.29	428.885	601.458	1362.5	540.686	601.985	1128.5	550.835	598.655	1030.65	556.595	500.277	908.877	505.331	462.588	816.111	569.248	496.363	794.265	554.972	426.425	747.581
942	0	314.042	443.576	1533.34	209.432	449.403	1530.34	337.079	604.888	1562.51	218.201	614.381	1561.43	264.714	674.472	1409.3	267.359	774.505	1128.35	276.439	518.097	1300.3	273.759	421.533	1101.87	188.63	768.207	1224.19	427.054	591.246	1362.03	539.445	591.909	1128.05	549.593	589.08	1030.18	555.494	490.86	908.238	504.449	453.418	815.334	567.893	487.136	793.411	553.95	417.176	746.902
943	0	311.829	433.663	1533.3	207.318	439.356	1530.04	334.808	595.282	1562.11	215.777	604.363	1560.58	262.997	664.267	1408.29	266.54	763.215	1126.8	274.841	507.496	1299.97	272.815	410.642	1101.57	187.38	757.2	1222.46	425.367	581.018	1361.88	538.048	581.523	1128.05	548.473	579.563	1030.09	554.666	481.681	907.858	503.181	444.054	815.031	567.147	478.234	793.13	553.222	408.305	746.365
944	0	309.576	423.645	1533.53	204.924	429.363	1530.05	332.31	585.4	1562.04	213.232	594.446	1560.03	260.943	654.033	1407.84	265.45	752.21	1125.65	273.145	496.828	1299.97	271.627	399.138	1101.81	186.33	746.254	1221.05	423.432	570.542	1361.84	536.567	571.099	1128.17	547.118	570.036	1030.25	553.748	472.711	907.586	502.514	435.081	814.686	566.513	469.55	792.826	552.532	399.865	745.863
945	0	307.192	413.674	1534.1	202.637	419.137	1530.2	329.568	575.427	1562.02	210.674	584.407	1559.71	258.654	643.593	1407.77	264.599	741.264	1124.99	271.344	485.979	1300.16	270.433	387.518	1102.01	185.278	735.342	1220.01	421.572	559.831	1362.26	535.124	560.902	1128.57	545.863	560.48	1030.59	552.794	463.82	907.426	501.787	426.713	814.432	565.179	461.401	792.627	552.143	391.794	745.515
946	0	304.832	403.55	1535.03	200.168	408.857	1530.76	326.979	565.515	1562.42	207.843	574.303	1559.76	256.671	632.909	1407.72	264.225	730.505	1124.89	269.445	475.095	1300.58	269.438	375.889	1102.68	184.368	724.401	1219.47	419.759	548.928	1362.95	533.653	550.654	1129.3	544.517	551.029	1031.35	551.895	455.17	907.66	501.075	418.292	814.205	564.507	453.489	792.92	551.669	384.138	745.341
947	0	302.164	393.422	1536.36	197.557	398.612	1531.7	324.181	555.637	1563.13	204.985	564.018	1559.98	254.71	622.192	1408.16	263.779	719.292	1125.39	267.439	464.091	1301.36	268.353	364.069	1103.88	183.495	713.529	1219.59	417.891	537.718	1364.21	532.068	540.423	1130.47	543.228	541.654	1032.64	551.184	446.859	908.343	500.336	410.517	814.457	563.861	445.977	793.591	551.375	376.95	745.502
948	0	299.633	383.094	1537.9	195.027	388.18	1532.78	321.33	545.383	1564.2	202.024	553.815	1560.41	253.064	611.339	1408.97	263.519	708.177	1126.06	265.487	453.144	1302.41	267.14	352.444	1105.03	183.008	702.797	1219.97	415.953	526.26	1365.78	530.47	530.136	1132.07	541.899	532.34	1034.41	550.165	438.645	909.203	499.534	403.028	814.763	563.332	438.698	794.585	551.061	370.039	745.943
949	0	296.852	372.794	1539.54	192.319	377.853	1534.04	318.443	535.169	1565.46	199.351	543.472	1561.2	251.359	600.566	1410.17	263.667	697.271	1127.45	263.482	442.216	1303.67	265.795	340.633	1106.51	182.597	691.925	1220.75	414.096	514.628	1367.74	529.119	520.057	1134.18	540.566	522.975	1036.47	549.265	430.61	910.376	498.905	395.78	815.479	562.625	431.841	795.647	550.787	363.654	746.576
950	0	294.08	362.395	1541.51	189.649	367.344	1535.44	315.626	524.813	1567.1	196.54	533.215	1562.27	249.677	589.778	1411.6	263.634	686.064	1128.84	261.49	431.389	1305.26	264.222	328.905	1108.29	182.284	681.301	1221.93	412.263	503.031	1370.25	527.756	509.914	1136.8	539.236	513.647	1039.02	548.246	422.661	912.028	498.28	388.942	816.594	561.642	425.426	797.503	550.552	357.638	747.567
951	0	291.247	351.895	1543.69	186.696	357.056	1537	312.799	514.592	1569.2	193.57	522.847	1563.51	248.098	579.093	1413.2	263.906	675.039	1130.46	259.574	420.707	1307.16	262.829	318.21	1110.63	182.063	670.656	1223.07	410.246	491.494	1372.86	526.393	499.831	1139.76	538.094	504.332	1042.1	547.344	414.942	914.066	497.557	382.323	818.039	561.242	419.049	799.705	550.08	351.887	748.809
952	0	288.327	341.494	1545.71	183.942	346.907	1538.43	310.022	504.096	1571.39	190.89	512.56	1564.9	246.601	568.678	1414.88	264.096	663.541	1132.12	257.728	410.102	1309.15	261.348	307.328	1113.07	181.819	659.99	1224.3	408.377	480.187	1375.57	524.992	489.653	1142.81	537.084	495.118	1045.29	546.432	407.175	916.263	496.913	375.752	819.621	560.472	412.757	801.796	549.551	346.299	750.027
953	0	285.37	331.012	1547.77	181.047	336.629	1539.77	307.448	493.609	1573.77	188.322	502.224	1566.5	245.027	558.337	1416.58	264.343	651.792	1133.62	255.948	399.734	1311.18	259.655	296.869	1115.11	181.579	649.513	1225.67	406.586	469.122	1378.35	523.898	479.413	1146.02	536.119	485.946	1048.52	545.457	399.487	918.42	496.111	368.955	821.371	559.552	406.372	803.839	548.864	340.765	751.186
954	0	282.534	320.687	1549.92	178.213	326.589	1541.25	304.771	483.048	1576.23	185.832	492.182	1568.32	243.674	548.076	1418.27	264.964	640.136	1135.22	254.343	389.483	1313.26	258.312	287.202	1117.27	181.189	638.885	1226.86	404.85	458.292	1381.07	522.778	469.162	1149.21	535.164	476.902	1051.73	544.581	391.702	920.792	495.48	363.268	822.892	559.362	399.875	806.447	548.033	335.381	752.436
955	0	279.765	310.351	1552.05	175.489	316.573	1542.67	302.352	472.684	1578.67	183.519	482.186	1569.84	242.264	538.052	1419.82	265.263	628.707	1136.86	252.77	379.367	1315.34	256.719	277.187	1119.78	180.929	628.575	1228.09	403.194	447.733	1383.64	521.813	459.013	1152.38	534.279	467.905	1054.83	543.821	384.091	923.188	494.732	357.047	824.701	559.246	393.39	808.957	547.214	330.023	753.616
956	0	276.995	300.184	1553.81	172.928	306.754	1544.06	299.929	462.412	1580.72	181.158	472.169	1571.28	240.807	528.029	1421.48	265.105	618.335	1138.36	251.387	369.328	1317.2	255.503	268.017	1121.54	180.324	618.158	1229.21	401.695	437.368	1386.07	520.892	448.827	1155.25	533.472	459.037	1057.66	543.095	376.388	925.429	494.044	350.778	826.434	559.096	386.964	811.147	546.442	324.643	754.748
957	0	274.57	290.118	1555.66	170.582	296.932	1545.35	297.669	452.276	1582.57	179.171	462.418	1572.66	239.614	517.958	1422.79	264.335	608.539	1139.75	250.026	359.408	1318.9	254.177	258.359	1123.3	179.813	608.007	1230.42	400.27	427.044	1388.29	520.121	438.574	1157.98	532.818	450.413	1060.35	542.503	368.646	927.457	493.661	344.239	828.115	558.849	380.073	813.25	545.37	319.13	755.572
958	0	272.241	280.102	1557.51	168.18	287.302	1546.66	295.662	442.279	1584.16	177.2	452.679	1573.69	238.196	507.996	1424.23	263.356	599.298	1140.96	248.727	349.526	1320.42	252.902	248.635	1125.14	179.052	597.874	1231.56	398.971	416.859	1390.27	519.402	428.537	1160.48	532.27	441.859	1062.88	542.077	361.086	929.408	493.328	337.572	829.8	558.552	373.068	815.491	544.91	313.56	756.512
959	0	269.942	270.315	1559.06	165.981	277.619	1547.89	293.915	432.474	1585.63	175.396	443.137	1574.58	237.089	498.124	1425.48	262.327	590.145	1142.53	247.518	339.738	1321.69	251.932	239.042	1126.62	178.405	587.958	1232.72	397.67	406.778	1392.03	518.877	418.616	1162.73	531.833	433.316	1065.3	541.819	353.457	931.139	492.88	330.758	831.228	558.722	366.179	817.178	544.218	307.829	757.251
960	0	267.974	260.386	1560.52	164.085	268.034	1548.88	292.164	422.522	1586.83	173.804	433.514	1575.35	235.869	488.124	1426.83	260.877	580.76	1144.22	246.484	329.931	1322.76	251.255	228.959	1127.86	177.644	578.13	1234.02	396.637	396.71	1393.69	518.34	408.727	1164.58	531.357	424.707	1067.2	541.554	345.658	932.477	492.708	323.918	832.233	558.513	359.434	818.773	543.71	302.001	757.77
961	0	266.21	250.633	1561.99	162.221	258.52	1549.99	290.656	412.859	1587.91	172.357	424.133	1576.16	234.909	478.187	1428.11	259.789	571.379	1145.95	245.518	320.182	1323.72	250.579	219.131	1128.73	176.797	568.394	1235.28	395.704	386.817	1395	517.864	399.002	1166.21	530.881	415.919	1068.79	541.325	338.221	933.644	492.507	317.213	833.104	558.499	352.516	820.046	543.435	295.919	758.299
962	0	264.421	240.986	1563.26	160.565	248.974	1551.01	289.335	403.154	1588.86	170.961	414.608	1576.74	233.868	468.354	1429.22	258.798	561.744	1147.24	244.641	310.429	1324.65	250.124	209.636	1129.32	175.999	558.895	1236.53	394.889	377.053	1396.22	517.354	389.542	1167.45	530.485	407.233	1070.25	541.19	330.401	934.549	492.297	310.047	833.909	558.467	345.703	821.108	543.468	289.664	758.768
963	0	262.816	231.211	1564.46	158.981	239.591	1551.9	287.92	393.276	1589.76	169.762	405.147	1577.27	232.901	458.452	1430.27	258.045	552.02	1148.62	243.883	300.713	1325.41	249.672	199.924	1129.82	175.143	549.411	1237.78	393.992	367.257	1397.12	516.803	380.364	1168.35	529.977	398.406	1071.29	541.055	322.724	935.186	492.371	303.145	834.455	558.442	338.772	821.907	543.34	283.127	759.051
964	0	261.304	221.453	1565.54	157.531	230.064	1552.65	286.912	383.671	1590.68	168.756	395.754	1577.79	232.153	448.644	1431.39	257.394	542.516	1149.74	243.203	291.106	1326.03	249.514	190.564	1129.93	174.056	539.945	1239.09	393.205	357.614	1397.92	516.383	371.572	1169.09	529.447	389.507	1072.14	540.684	314.903	935.608	492.238	296.067	834.584	558.686	331.603	822.462	543.698	276.803	759.42
965	0	259.785	211.765	1566.48	156.163	220.427	1553.42	285.727	373.827	1591.59	167.632	386.176	1578.36	231.196	438.865	1432.43	256.608	533.305	1151.09	242.582	281.566	1326.7	249.385	181.432	1130.01	173.257	530.723	1240.45	392.474	348.067	1398.66	515.584	362.918	1169.62	528.948	380.687	1073.06	540.289	307.026	936.149	492.255	288.92	834.91	558.533	324.577	823.036	543.977	270.077	759.811
966	0	258.484	202.012	1567.37	154.926	210.957	1554.06	284.647	364.064	1592.47	166.625	376.558	1578.85	230.345	429.189	1433.6	255.773	524.247	1152.35	242.138	272.146	1327.31	249.326	172.117	1130.25	172.326	521.541	1241.79	391.851	338.727	1399.48	515.009	354.657	1170.26	528.447	372.005	1073.95	539.96	299.235	936.698	492.288	281.802	835.174	558.528	317.593	823.882	544.415	263.174	760.286
967	0	257.482	192.254	1568.09	153.823	201.43	1554.56	283.751	354.365	1593.14	165.814	367.056	1579.43	229.633	419.574	1434.66	255.035	515.372	1153.66	241.756	262.722	1327.82	249.38	162.924	1130.53	171.203	512.28	1243.15	391.327	329.534	1400.21	514.339	346.49	1170.83	527.955	363.29	1074.74	539.745	291.445	937.166	491.922	274.67	835.337	558.63	310.269	824.609	544.696	256.124	760.723
968	0	256.471	182.476	1568.68	152.842	191.783	1554.98	282.824	344.45	1593.95	164.961	357.372	1580.08	228.803	409.942	1435.58	254.242	506.738	1154.97	241.42	253.379	1328.28	249.403	153.982	1130.62	170.182	503.127	1244.48	390.776	320.457	1400.96	513.582	338.405	1171.5	527.342	354.751	1075.58	538.945	283.273	937.633	491.957	267.2	835.598	558.696	302.592	825.161	545.021	248.645	761.329
969	0	255.463	172.711	1569.24	151.823	182.083	1555.36	282.037	334.617	1594.7	164.074	347.609	1580.54	227.912	400.471	1436.54	253.266	497.954	1156.05	240.995	244.192	1328.79	249.34	145.229	1130.91	169.297	494.107	1245.68	390.185	311.443	1401.74	512.909	330.541	1172.23	526.783	346.406	1076.44	538.344	275.195	938.261	491.718	259.79	836.009	558.61	295.234	826.12	545.182	241.299	761.992
970	0	254.579	162.972	1569.56	151.099	172.411	1555.54	281.243	324.887	1595.26	163.305	337.9	1580.91	227.194	391.174	1437.39	252.472	489.148	1157.14	240.663	235.172	1329.29	249.255	136.4	1131.22	168.447	485.074	1246.72	389.722	302.636	1402.4	512.173	322.754	1172.76	526.077	338.029	1077.18	537.776	267.281	938.817	491.302	252.507	836.089	558.421	287.615	826.775	545.576	233.703	762.836
971	0	253.898	153.202	1569.66	150.54	162.668	1555.51	280.464	315.104	1595.78	162.637	328.248	1581.28	226.55	381.852	1438.09	251.627	480.435	1158.04	240.472	226.078	1329.55	249.513	127.615	1131.52	167.551	476.069	1247.74	389.223	293.777	1402.91	511.635	314.926	1173.31	525.392	329.777	1077.69	537.188	259.18	939.315	491.017	244.754	836.423	558.512	279.746	827.383	545.433	225.996	763.294
972	0	253.251	143.529	1569.73	149.856	152.967	1555.46	279.653	305.23	1596.27	161.804	318.338	1581.75	225.979	372.657	1438.74	250.869	471.902	1159.06	240.219	217.165	1329.86	249.528	118.662	1132.11	166.801	467.147	1248.67	388.886	284.979	1403.62	511.327	307.157	1174.07	524.967	321.622	1078.5	536.666	251.146	939.964	490.889	237.343	836.871	558.096	272.081	828.145	545.46	218.395	763.882
973	0	252.646	133.838	1569.73	149.328	143.295	1555.38	278.955	295.446	1596.95	161.081	308.487	1582.24	225.415	363.552	1439.45	250.14	463.443	1159.91	239.899	208.346	1330.23	249.397	109.771	1132.84	166.226	458.369	1249.51	388.516	276.249	1404.37	510.866	299.327	1174.79	524.477	313.652	1079.31	536.413	243.147	940.74	490.956	229.675	837.521	558.076	264.092	829.005	545.491	210.635	764.672
974	0	252.135	124.119	1569.66	148.866	133.667	1555.15	278.404	285.722	1597.63	160.526	298.735	1582.84	224.949	354.475	1440.12	249.517	454.994	1160.68	239.649	199.516	1330.56	249.043	101.201	1133.33	165.667	449.613	1250.3	388.219	267.435	1404.99	510.606	291.448	1175.49	523.942	305.658	1079.98	535.699	235.245	941.278	490.131	221.459	837.972	557.661	256.195	829.703	545.186	202.495	765.391
975	0	251.728	114.497	1569.46	148.363	123.927	1554.83	277.742	275.961	1598.17	159.929	288.996	1583.34	224.5	345.458	1440.67	249.109	446.498	1161.47	239.41	190.669	1330.71	248.79	92.6748	1133.42	165.325	440.957	1250.99	387.915	258.576	1405.45	510.38	283.493	1176.04	523.467	297.695	1080.49	535.633	227.165	941.743	489.884	213.037	838.501	557.112	248.143	830.078	544.85	194.494	765.875
976	0	251.27	104.887	1569.2	147.879	114.294	1554.5	277.222	266.258	1598.7	159.352	279.188	1583.79	224.244	336.513	1441.07	248.842	438.088	1162.12	239.118	181.86	1330.82	248.403	84.1966	1133.42	165.12	432.375	1251.61	387.657	249.685	1405.91	510.046	275.319	1176.51	522.999	289.638	1080.83	535.373	219.184	942.148	489.893	204.708	839.223	556.422	240.372	830.529	544.446	186.421	766.248
977	0	250.905	95.309	1568.96	147.523	104.844	1554.17	276.57	256.593	1599.11	158.759	269.47	1584.2	223.931	327.568	1441.46	248.737	429.607	1162.61	238.785	173.143	1331.04	247.893	75.8439	1133.53	165.009	423.787	1252.14	387.296	240.669	1406.16	509.764	267.164	1177.04	522.763	281.637	1081.39	535.289	211.16	942.573	489.93	196.092	839.781	556.027	232.496	830.918	544.282	178.157	766.819
978	0	250.603	85.7961	1568.52	147.23	95.3419	1553.75	276.167	246.851	1599.51	158.314	259.971	1584.63	223.727	318.595	1441.74	248.754	421.131	1163.08	238.597	164.281	1331.07	247.471	67.3971	1133.48	165.073	415.264	1252.56	387.067	231.581	1406.42	509.732	258.86	1177.4	522.416	273.326	1081.61	535.216	203.104	942.696	489.254	187.541	840.124	555.544	224.468	830.821	543.502	169.988	766.878
979	0	250.149	76.2511	1568.03	146.884	86.015	1553.23	275.795	237.236	1599.76	157.91	250.445	1584.86	223.612	309.54	1442.05	248.882	412.902	1163.7	238.3	155.426	1331.06	247.002	58.8092	1133.25	165.086	406.768	1253.09	386.887	222.438	1406.59	509.521	250.311	1177.62	522.006	264.942	1081.75	534.88	194.898	942.764	488.954	179	840.212	554.783	216.436	830.976	543.17	161.649	767.131
980	0	249.841	66.8565	1567.57	146.492	76.6368	1552.76	275.507	227.681	1599.87	157.647	241.025	1584.94	223.526	300.52	1442.2	248.988	404.455	1163.98	237.967	146.629	1330.98	246.29	50.3326	1133.1	165.278	398.245	1253.38	386.664	213.292	1406.65	509.292	241.666	1177.8	521.747	256.457	1081.83	534.953	186.665	942.846	489.221	169.922	840.601	554.178	208.303	830.829	542.658	153.396	767.054
981	0	249.452	57.4258	1567.09	146.145	67.4943	1552.24	275.241	218.222	1599.87	157.475	231.641	1584.87	223.488	291.468	1442.16	249.146	395.938	1164.11	237.491	137.71	1330.82	245.502	41.8406	1132.76	165.508	389.678	1253.52	386.466	204.031	1406.49	509.016	232.803	1177.72	521.637	247.966	1081.86	534.725	178.44	942.633	488.872	161.111	840.908	553.423	200.176	830.497	542.132	145.137	766.899
982	0	249.143	48.0313	1566.49	145.905	58.2729	1551.61	275.117	208.742	1599.68	157.353	222.279	1584.68	223.467	282.413	1442.08	249.36	387.388	1164.2	237.136	128.799	1330.4	244.831	33.1774	1132.15	165.676	381.071	1253.64	386.225	194.58	1406.13	508.887	223.769	1177.48	521.5	239.255	1081.67	534.517	169.819	942.231	488.401	152.187	840.722	552.636	191.759	830.133	541.534	136.56	766.492
983	0	248.827	38.7037	1565.79	145.556	48.9403	1551.04	275.009	199.241	1599.35	157.193	213.039	1584.43	223.549	273.257	1441.83	249.607	378.675	1164.11	236.824	119.918	1329.83	244.187	24.6378	1131.56	165.875	372.477	1253.64	386.096	185.151	1405.87	508.811	214.653	1177.18	521.373	230.292	1081.35	534.146	161.201	941.828	488.093	143.575	840.256	551.778	183.447	829.572	540.661	128.145	765.872
984	0	248.584	29.4158	1565.08	145.362	39.8391	1550.31	275.014	189.824	1598.9	157.169	203.817	1584	223.628	264.188	1441.42	249.919	369.946	1163.85	236.467	110.936	1329.39	243.361	16.1123	1130.78	166.335	363.812	1253.41	385.981	175.777	1405.34	508.683	205.376	1176.69	521.287	221.366	1080.92	533.904	152.484	941.365	487.853	134.618	840.145	551.366	174.994	828.942	540.055	119.565	765.316
985	0	248.327	20.1369	1564.16	145.114	30.6941	1549.53	274.935	180.477	1598.15	157.187	194.573	1583.44	223.732	255.067	1440.82	250.442	361.273	1163.44	236.208	101.835	1328.62	242.654	7.50856	1129.9	166.819	355.227	1252.95	385.851	166.149	1404.59	508.765	195.99	1176.08	521.056	212.194	1080.12	533.479	143.47	940.495	487.06	125.79	839.441	550.792	166.371	828.053	539.745	110.883	764.569
986	0	248.218	10.8433	1563.25	145.046	21.5109	1548.62	274.93	171.116	1597.2	157.205	185.286	1582.74	223.934	245.808	1440.04	250.986	352.494	1162.88	235.783	92.921	1327.53	241.995	-1.22332	1128.74	167.353	346.686	1252.49	385.715	156.568	1403.59	508.645	186.308	1175.15	520.96	202.853	1079.31	532.9	134.507	939.557	486.081	117.988	837.625	550.232	157.577	826.992	539.073	102.101	763.473
987	0	248.085	1.51291	1562.2	144.946	12.3108	1547.61	275.005	161.767	1596.29	157.186	176.117	1581.83	224.185	236.521	1439.22	251.492	343.595	1162.23	235.578	84.1137	1326.34	241.237	-9.89733	1127.56	167.826	337.843	1251.88	385.672	147.172	1402.54	508.63	176.634	1174.26	520.944	193.385	1078.5	532.573	125.302	938.441	485.366	109.296	836.481	549.698	148.765	825.896	538.487	93.2419	762.399
988	0	248.059	-7.7136	1561.04	144.83	3.11256	1546.54	275.194	152.488	1595.26	157.359	166.97	1580.78	224.435	227.319	1438.32	252.124	334.634	1161.49	235.201	75.2015	1325.21	240.558	-18.7575	1126.34	168.292	328.985	1251.06	385.652	137.342	1401.57	508.625	166.765	1173.29	521.036	183.849	1077.64	532.164	115.917	937.36	484.683	100.405	835.368	549.278	139.763	824.9	537.962	84.3779	761.258
989	0	248.143	-17.0134	1559.78	144.921	-6.08824	1545.41	275.391	143.16	1593.95	157.619	157.754	1579.6	224.861	218.008	1437.2	252.874	325.58	1160.49	234.981	66.0163	1323.8	239.859	-27.7761	1124.91	168.893	320.013	1250.02	385.751	127.478	1400.24	508.74	156.849	1171.97	521.024	174.118	1076.23	531.828	106.585	935.816	484.702	91.2826	833.841	548.939	130.698	823.276	537.089	75.4682	759.416
990	0	248.231	-26.3674	1558.26	145.057	-15.3314	1543.99	275.611	133.815	1592.42	157.889	148.591	1578.28	225.351	208.676	1435.96	253.709	316.601	1159.24	234.858	56.7594	1322.36	239.235	-36.9135	1123.32	169.687	311.31	1248.97	385.879	117.633	1398.74	508.813	146.761	1170.4	521.066	164.254	1074.62	531.478	96.9517	934.111	484.04	82.5174	832.013	548.734	121.327	821.552	536.463	66.4535	757.634
991	0	248.351	-35.7501	1556.91	145.049	-24.5439	1542.6	275.891	124.466	1590.9	158.246	139.341	1576.72	225.828	199.386	1434.61	254.463	307.484	1158	234.706	47.5048	1320.82	238.658	-46.0905	1121.83	170.522	302.396	1247.78	385.992	107.762	1397.26	508.876	136.688	1168.76	521.094	154.3	1073.02	531.097	87.4073	932.31	483.494	73.4668	830.258	548.675	112.045	819.905	536.322	57.3093	755.937
992	0	248.385	-45.2325	1555.3	145.115	-33.8013	1541.18	276.308	114.949	1589.3	158.568	130.054	1575.14	226.398	189.927	1432.99	255.159	298.298	1156.57	234.605	38.161	1319.37	237.959	-55.4326	1120.1	171.315	293.343	1246.42	386.201	97.7775	1395.56	508.908	126.42	1166.84	521.162	144.257	1071.21	530.809	77.7341	930.322	482.896	64.4153	828.254	548.639	102.707	818.147	535.73	48.1738	753.882
993	0	248.442	-54.7593	1553.58	145.274	-43.1525	1539.43	276.686	105.375	1587.57	158.899	120.578	1573.5	227.077	180.449	1431.49	255.941	288.873	1155.12	234.583	28.7632	1317.46	237.391	-64.8922	1118.29	172.121	284.326	1245	386.458	87.7325	1393.51	508.903	115.95	1164.65	521.277	134.073	1069.21	530.293	67.874	928.024	482.734	55.1738	825.933	548.354	92.9977	815.924	535.299	38.9323	751.506
994	0	248.593	-64.3758	1551.87	145.384	-52.6055	1537.74	277.119	95.7101	1585.89	159.383	111.099	1571.83	227.808	170.94	1430.01	256.757	279.335	1153.62	234.721	19.2515	1315.74	236.815	-74.3661	1116.43	173.055	275.208	1243.67	386.833	77.6207	1391.58	508.991	105.517	1162.39	521.349	123.808	1067.11	530.112	58.039	925.691	482.378	45.7831	823.538	548.335	83.3339	813.668	534.835	29.6813	749.029
995	0	248.754	-74.0039	1550.21	145.647	-62.012	1536.16	277.611	86.0058	1584.15	160	101.603	1570.15	228.527	161.318	1428.35	257.47	269.833	1152.1	234.772	9.7607	1314.04	236.321	-83.8864	1114.58	173.961	266.01	1242.23	387.237	67.5027	1389.73	509.147	95.0193	1160.29	521.412	113.487	1065.03	529.882	48.0698	923.532	482.074	36.3982	821.343	548.464	73.5825	811.699	534.364	20.4003	746.656
996	0	249.182	-83.6725	1548.55	145.927	-71.5677	1534.54	278.204	76.283	1582.34	160.72	92.1453	1568.45	229.333	151.667	1426.71	258.179	260.148	1150.39	234.938	0.188836	1312.27	235.913	-93.4582	1112.93	174.808	256.65	1240.76	387.669	57.3099	1387.72	509.196	84.3673	1158.03	521.385	103.177	1062.79	529.647	38.0952	921.219	481.927	26.6709	819.176	548.364	63.7141	809.46	534.192	11.0077	744.252
997	0	249.585	-93.5042	1546.8	146.472	-81.2525	1532.91	278.944	66.5421	1580.52	161.37	82.5633	1566.73	230.199	141.878	1425.11	258.994	250.44	1148.84	235.167	-9.6116	1310.42	235.378	-103.152	1110.88	175.651	247.139	1239.3	388.099	47.0649	1385.66	509.147	73.6616	1155.65	521.463	92.9033	1060.58	529.582	28.0637	918.899	481.776	17.0975	816.712	548.351	53.7589	807.178	533.97	1.3957	741.799
998	0	250.223	-103.371	1545.24	147.062	-90.9894	1531.48	279.802	56.7759	1578.73	162.165	72.8003	1565.12	231.046	131.96	1423.39	259.727	240.6	1147.12	235.394	-19.5063	1308.61	234.922	-112.986	1109.06	176.498	237.454	1237.67	388.565	36.8065	1383.57	509.212	63.0382	1153.31	521.546	82.6453	1058.43	529.724	18.0282	916.654	481.544	7.29922	814.298	548.295	43.9631	805.059	533.844	-8.23826	739.397
999	0	250.927	-113.183	1543.64	147.751	-100.804	1530.13	280.652	46.9221	1576.89	162.988	62.9053	1563.49	231.769	122.042	1421.69	260.329	230.63	1145.29	235.686	-29.4513	1306.98	234.521	-122.817	1107.54	177.221	227.697	1236.03	389.041	26.5129	1381.57	509.317	52.5104	1151.16	521.668	72.5175	1056.38	529.717	8.04188	914.538	481.359	-2.54029	812.198	548.361	34.1245	803.068	533.853	-18.0326	737.293
1000	0	251.937	-123.036	1542.1	148.701	-110.762	1528.78	281.65	37.0177	1575.08	163.948	52.9711	1561.73	232.604	111.971	1420.03	260.872	220.518	1143.49	236.031	-39.5352	1305.22	234.164	-132.857	1105.67	177.879	217.785	1234.45	389.602	16.2151	1379.56	509.368	41.9571	1148.87	521.635	62.2334	1054.11	529.707	-1.98492	912.26	481.505	-12.4403	810.013	548.371	24.0833	800.767	533.943	-27.8907	735.12
1001	0	253.064	-133.081	1540.66	149.785	-120.84	1527.53	282.714	27.0291	1573.23	165.086	43.0482	1560.35	233.36	101.863	1418.42	261.379	210.217	1141.77	236.395	-49.6361	1303.64	233.92	-143.002	1104.05	178.556	207.678	1232.96	390.184	5.86381	1377.58	509.671	31.6228	1146.84	521.792	52.0231	1051.97	529.751	-12.054	910.128	481.64	-22.6704	807.792	548.219	14.1611	798.574	533.92	-37.7897	732.852
1002	0	254.246	-143.042	1539.2	150.956	-130.896	1526.35	283.975	17.1079	1571.56	166.235	33.1058	1559.04	234.151	91.6588	1416.76	261.73	199.776	1140.06	236.735	-59.8996	1302.08	233.736	-153.352	1102.56	179.075	197.416	1231.34	390.775	-4.46499	1375.71	509.96	21.331	1144.87	521.953	41.9052	1049.98	529.825	-22.135	908.169	481.619	-32.6885	805.752	548.28	4.06417	796.685	534.123	-47.9746	730.845
1003	0	255.556	-153.111	1537.9	152.207	-141.102	1525.31	285.257	7.16481	1569.93	167.535	22.9253	1557.5	234.942	81.4355	1415.2	262.014	189.208	1138.15	237.201	-70.2693	1300.76	233.639	-163.81	1101.26	179.502	186.955	1229.65	391.486	-14.8141	1373.96	510.364	11.1889	1142.97	522.219	31.7811	1048.14	530.035	-32.2858	906.167	481.64	-42.9322	803.936	548.289	-6.07949	794.791	534.312	-58.0576	728.894
1004	0	256.93	-163.288	1536.45	153.488	-151.251	1524.27	286.615	-2.97059	1568.34	168.724	12.7447	1556.3	235.813	71.0676	1413.61	262.03	178.546	1136.2	237.77	-80.7401	1299.36	233.618	-174.434	1099.96	179.923	176.406	1227.96	392.205	-25.1714	1372.06	510.753	1.13207	1140.9	522.416	21.617	1046.06	530.174	-42.4482	904.057	481.444	-53.3297	801.795	548.235	-16.2626	792.642	534.333	-68.3672	726.844
1005	0	258.248	-173.498	1535.1	154.923	-161.61	1523.18	288.079	-13.1592	1566.8	170.154	2.4347	1555.2	236.733	60.7092	1412.02	262.136	167.773	1134.35	238.357	-91.2794	1297.94	233.711	-185.268	1098.67	180.383	165.674	1226.34	393.028	-35.5717	1370.22	511.262	-8.93735	1138.96	522.701	11.3997	1044	530.321	-52.8217	901.863	481.843	-63.7812	799.865	548.118	-26.626	790.471	534.231	-78.842	724.844
1006	0	259.849	-183.774	1534	156.38	-171.833	1522.33	289.638	-23.3408	1565.31	171.697	-7.76495	1554.08	237.715	50.3688	1410.39	262.166	156.752	1132.38	239.052	-102.042	1296.93	233.816	-196.367	1097.79	180.863	154.899	1224.58	393.933	-45.9621	1368.49	511.909	-18.8181	1137.13	523.185	1.26317	1042.07	530.768	-63.0198	900.295	481.77	-74.3137	798.065	548.133	-37.0188	788.613	534.179	-89.3554	722.99
1007	0	261.375	-194.033	1532.88	157.826	-182.197	1521.54	291.325	-33.5566	1563.94	173.327	-17.9894	1553	238.862	40.0147	1408.9	262.403	145.553	1130.35	239.748	-112.753	1295.86	233.98	-207.62	1097.12	181.436	143.872	1222.77	395.069	-56.2845	1366.81	512.608	-28.7501	1135.22	523.753	-8.91795	1040.12	531.102	-73.5847	898.149	481.936	-85.069	796.409	548.138	-47.5324	786.621	534.107	-99.897	721.079
1008	0	262.817	-204.543	1531.84	159.26	-192.576	1520.86	292.909	-44.0333	1562.67	174.958	-28.3364	1552.11	240.141	29.5761	1407.54	262.67	133.976	1128.36	240.662	-123.737	1294.89	234.231	-219.055	1096.35	181.965	132.834	1221.15	396.19	-66.7721	1364.98	513.469	-38.7984	1133.22	524.076	-19.253	1037.89	531.372	-84.1876	896.177	482.432	-95.9945	794.559	547.927	-58.1871	784.393	533.932	-110.694	719.144
1009	0	264.226	-215.079	1531.14	160.745	-202.999	1520.43	294.561	-54.5497	1561.65	176.549	-38.863	1551.37	241.363	19.0318	1406.4	263.099	122.41	1126.61	241.512	-134.621	1294.3	234.536	-230.741	1095.96	182.468	121.614	1219.79	397.36	-77.3437	1363.44	514.162	-48.9407	1131.43	524.549	-29.6519	1035.98	531.708	-94.7888	894.306	482.026	-106.734	792.81	547.762	-68.8743	782.424	533.694	-121.589	717.347
1010	0	265.755	-225.69	1530.75	162.161	-213.456	1520.23	296.417	-65.1434	1560.92	178.359	-49.3333	1550.9	242.678	8.3996	1405.5	263.473	110.776	1125.11	242.526	-145.8	1293.84	234.733	-242.405	1095.81	183.085	110.391	1218.63	398.562	-88.0076	1362.09	514.971	-59.1221	1129.92	525.082	-40.0929	1034.38	532.106	-105.357	892.72	482.019	-117.49	791.266	547.664	-79.5348	780.813	533.709	-132.512	715.945
1011	0	267.387	-236.468	1530.42	163.754	-224.147	1520.27	298.277	-75.8558	1560.3	180.34	-59.8423	1550.65	243.943	-2.36403	1404.87	263.856	99.0782	1123.91	243.536	-156.907	1293.54	235.213	-254.232	1095.68	183.618	99.1983	1217.74	399.794	-98.744	1360.84	515.801	-69.6257	1128.47	525.542	-50.687	1032.85	532.268	-116.161	890.927	482.049	-128.472	789.948	547.605	-90.3061	779.254	533.383	-143.396	714.339
1012	0	269.045	-247.319	1530.48	165.406	-234.985	1520.55	300.243	-86.7602	1559.95	182.298	-70.5928	1550.68	245.177	-13.3573	1404.59	264.167	87.481	1123.33	244.715	-168.191	1293.44	235.633	-266.184	1095.75	184.083	87.9529	1217.38	401.106	-109.627	1360.01	516.461	-80.1829	1127.35	525.862	-61.5187	1031.5	532.47	-127.029	889.726	482.225	-139.557	788.809	547.481	-101.185	777.866	533.446	-154.369	713.135
1013	0	270.837	-258.314	1530.93	167.19	-245.831	1521.33	302.358	-97.701	1560.05	184.236	-81.5015	1551.04	246.288	-24.3877	1404.78	264.267	75.9631	1123.28	245.8	-179.451	1293.78	236.031	-278.1	1096.26	184.259	76.6416	1217.46	402.217	-120.435	1359.45	517.039	-90.8881	1126.66	526.065	-72.3441	1030.63	532.988	-137.676	889.018	482.32	-150.751	788.173	547.417	-112.049	776.933	533.25	-165.463	712.237
1014	0	272.734	-269.4	1531.53	169.009	-256.896	1522.34	304.295	-108.706	1560.44	186.29	-92.5379	1551.8	247.148	-35.6198	1405.25	264.048	64.7183	1123.47	246.864	-190.722	1294.58	236.603	-290.09	1097.05	184.242	65.3085	1218.13	403.419	-131.346	1359.33	517.709	-101.462	1126.24	526.139	-83.237	1030.15	532.937	-148.562	888.436	482.41	-161.951	787.834	547.291	-122.937	776.386	533.616	-176.541	712.026
1015	0	274.696	-280.5	1532.38	170.996	-268.069	1523.67	306.371	-119.895	1561.13	188.315	-103.704	1552.98	248.134	-46.7596	1406.35	263.734	53.6281	1124.33	248.032	-202.108	1295.55	237.192	-302.086	1098.09	184.153	53.8764	1219.29	404.412	-142.234	1359.57	517.596	-112.708	1126.06	525.984	-94.2924	1029.94	533.337	-159.58	888.34	482.534	-173.271	787.744	547.274	-133.93	776.183	533.815	-187.606	711.929
1016	0	276.777	-291.698	1533.46	173.008	-279.296	1525.2	308.493	-131.159	1562.07	190.303	-115.034	1554.63	248.849	-58.001	1407.58	263.696	42.642	1125.86	249.115	-213.349	1296.82	237.941	-313.851	1099.5	183.685	42.402	1220.91	405.247	-153.024	1360.31	517.662	-123.775	1126.47	525.755	-105.433	1030.16	533.426	-170.771	888.815	482.725	-184.792	788.065	547.326	-145.237	776.541	534.011	-199.044	712.251
1017	0	278.899	-302.895	1534.61	175.048	-290.631	1527.02	310.621	-142.383	1563.43	192.326	-126.367	1556.59	249.415	-69.1493	1409.1	263.498	31.5769	1127.77	250.198	-224.47	1298.41	238.673	-325.608	1101.48	183.177	30.977	1222.78	406.023	-163.551	1361.6	517.571	-135.008	1127.24	525.368	-116.604	1031.05	533.532	-181.99	889.777	482.897	-196.456	788.966	547.309	-156.575	777.568	534.318	-210.344	713.198
1018	0	281.032	-314.114	1535.83	177.043	-302.002	1528.93	312.521	-153.584	1564.95	194.181	-137.752	1559	250.041	-80.0852	1410.83	262.917	20.506	1129.51	251.173	-235.413	1300.22	239.536	-336.976	1103.61	182.52	19.4409	1224.76	406.801	-173.87	1363.14	517.329	-146.158	1128.44	525.138	-127.656	1032.28	533.47	-193.315	891.207	483.512	-208.263	790.517	547.288	-168.104	778.935	534.708	-221.912	714.584
1019	0	282.998	-325.143	1537.06	178.993	-313.273	1530.78	314.383	-164.734	1566.57	195.853	-149.12	1561.45	250.533	-90.8923	1412.68	261.945	9.33546	1131.04	252.207	-246.299	1302.15	240.344	-347.978	1105.9	181.938	8.05249	1226.73	407.515	-184.053	1364.87	517.016	-157.428	1129.72	524.741	-138.854	1033.75	533.397	-204.966	892.932	483.348	-220.153	791.865	547.247	-179.89	780.557	534.995	-233.621	716.165
1020	0	284.786	-336.164	1538.31	180.784	-324.508	1532.64	316.031	-175.845	1568.44	197.362	-160.429	1563.98	250.961	-101.432	1414.5	261.016	-2.03337	1132.64	252.96	-256.868	1304.09	241.218	-358.654	1108.27	181.464	-3.1701	1228.65	408.151	-194.04	1366.67	516.626	-168.51	1131.25	524.313	-149.934	1035.29	533.28	-216.548	894.879	483.373	-232.162	793.708	547.325	-191.834	782.481	535.015	-245.563	717.915
1021	0	286.325	-347.064	1539.52	182.214	-335.51	1534.46	317.468	-186.852	1570.33	198.967	-171.627	1566.49	251.545	-111.894	1416.23	260.421	-13.3705	1134.08	253.766	-267.495	1306.28	242.005	-368.784	1110.61	181.133	-14.3113	1230.31	408.769	-203.87	1368.6	516.238	-179.404	1132.84	524.069	-160.794	1037.13	533.146	-228.148	896.972	483.395	-244.337	795.851	547.338	-203.888	784.59	535.269	-257.647	720.087
1022	0	287.726	-357.739	1540.74	183.521	-346.338	1536.19	318.71	-197.717	1572.32	200.216	-182.702	1568.97	252.112	-122.133	1417.88	260.15	-24.4279	1135.56	254.396	-277.807	1308.34	242.8	-378.647	1113.05	180.95	-25.1302	1231.89	409.545	-213.693	1370.44	516.089	-190.178	1134.48	524.003	-171.626	1038.94	533.073	-239.854	899.078	483.608	-256.79	797.973	547.247	-216.19	786.539	535.238	-269.874	722.082
1023	0	288.791	-368.447	1541.9	184.715	-357.039	1537.51	319.697	-208.535	1574.19	200.959	-193.518	1571.25	252.828	-132.187	1419.56	260.119	-35.0024	1137.06	255.024	-288.1	1310.16	243.516	-388.259	1114.99	181.045	-35.8345	1233.48	410.283	-223.444	1372.32	516.052	-200.923	1136.01	524.038	-182.47	1040.53	533.01	-251.594	901.083	483.533	-269.3	800.042	547.157	-228.65	788.525	535.111	-282.606	724.147
1024	0	289.663	-378.879	1543.09	185.488	-367.553	1538.94	320.477	-219.166	1575.95	202.007	-204.157	1573.32	253.366	-142.372	1421.03	260.372	-45.1516	1138.53	255.639	-298.216	1311.98	244.271	-397.575	1116.99	181.276	-46.1734	1234.96	410.926	-233.216	1373.96	516.248	-211.455	1137.6	524.221	-193.285	1042.06	533.084	-263.346	902.952	483.058	-281.583	802.093	546.916	-241.372	790.419	535.041	-295.534	726.3
1025	0	290.363	-389.231	1544.2	186.074	-377.94	1540.18	321.153	-229.528	1577.66	202.364	-214.586	1575.07	254.034	-152.25	1422.46	260.87	-54.9221	1139.85	256.152	-308.104	1313.64	244.909	-406.667	1118.81	181.643	-56.3042	1236.33	411.629	-242.898	1375.5	516.569	-221.863	1139.14	524.558	-204.022	1043.48	533.149	-275.035	904.81	483.015	-294.233	804.325	546.721	-253.762	792.052	534.717	-308.582	728.439
1026	0	290.877	-399.346	1545.25	186.631	-388.09	1541.31	321.636	-239.793	1578.92	202.937	-224.808	1576.43	254.63	-162.209	1423.75	261.414	-64.7433	1141.12	256.619	-317.972	1314.93	245.435	-415.889	1120.21	182.286	-66.1153	1237.62	412.257	-252.796	1376.65	517.108	-232.301	1140.38	525.106	-214.755	1044.51	533.41	-286.777	906.27	483.159	-307.055	806.224	546.405	-266.562	793.424	534.457	-321.956	730.382
1027	0	291.345	-409.456	1546.27	187.031	-398.197	1542.28	321.93	-249.875	1580.01	203.237	-234.915	1577.59	255.244	-172.136	1424.97	262.021	-74.6351	1142.35	257.008	-327.804	1315.97	245.789	-425.383	1121.39	182.853	-75.7616	1238.96	412.718	-262.748	1377.67	517.705	-242.676	1141.35	525.83	-225.579	1045.44	533.627	-298.579	907.522	482.546	-319.601	807.712	546.092	-279.239	794.479	534.048	-335.446	732.176
1028	0	291.63	-419.382	1547.3	187.386	-408.16	1543.29	322.228	-259.744	1581.09	203.552	-244.888	1578.6	255.699	-182.106	1426.06	262.721	-84.4619	1143.64	257.375	-337.653	1317.01	245.937	-435.164	1122.36	183.398	-85.1746	1240.25	413.178	-272.714	1378.71	518.523	-252.912	1142.51	526.606	-236.29	1046.32	533.925	-310.39	908.89	482.645	-332.463	809.703	545.56	-292.192	795.628	533.421	-349.101	734.045
1029	0	291.968	-429.177	1548.11	187.728	-418.05	1544.13	322.487	-269.531	1581.95	203.785	-254.767	1579.45	256.139	-191.945	1427.03	263.392	-94.2459	1144.69	257.669	-347.344	1317.87	246.041	-445.269	1123.1	184.057	-94.4611	1241.47	413.441	-282.764	1379.45	519.355	-263.077	1143.37	527.521	-247.022	1047.04	534.12	-322.083	910.003	482.718	-345.714	811.923	545.204	-304.939	796.6	532.881	-362.76	735.809
1030	0	292.275	-438.968	1548.77	188.011	-428.002	1544.9	322.521	-279.27	1582.58	204.165	-264.611	1580.1	256.491	-201.686	1428.02	263.929	-103.833	1145.9	257.877	-357.021	1318.37	245.974	-455.484	1123.52	184.65	-103.579	1242.7	413.61	-292.804	1380.03	520.305	-273.28	1144.08	528.338	-257.881	1047.48	534.397	-334.079	910.984	481.913	-357.871	813.049	544.823	-317.96	797.214	532.057	-376.454	737.362
1031	0	292.557	-448.742	1549.42	188.316	-437.824	1545.61	322.602	-288.93	1583.2	203.963	-274.425	1580.76	256.689	-211.364	1429.02	264.422	-113.127	1147.15	257.852	-366.517	1318.88	245.798	-465.569	1124.03	185.061	-112.653	1243.83	413.655	-302.854	1380.62	521.112	-283.491	1144.92	529.14	-268.743	1047.94	534.52	-345.881	911.914	481.731	-370.39	814.585	544.364	-330.962	797.959	531.397	-390.263	739.043
1032	0	292.728	-458.366	1550	188.453	-447.575	1546.31	322.712	-298.575	1583.87	204.022	-284.219	1581.5	256.831	-220.915	1429.99	265.09	-122.115	1148.36	257.708	-375.97	1319.29	245.345	-475.451	1124.36	185.581	-121.629	1245.11	413.513	-312.869	1381.17	521.965	-293.727	1145.76	530.009	-279.591	1048.57	534.665	-357.924	912.97	481.103	-382.876	816.048	544.06	-343.702	798.83	530.635	-404.024	740.773
1033	0	292.891	-467.948	1550.42	188.629	-457.23	1546.74	322.786	-308.16	1584.46	204.07	-294.005	1582.08	256.895	-230.535	1430.74	265.755	-130.833	1149.51	257.695	-385.332	1319.49	244.938	-484.708	1124.29	186.068	-130.588	1246.08	413.419	-322.823	1381.69	522.721	-304.039	1146.45	530.895	-290.574	1049.05	534.679	-369.832	913.87	480.804	-395.288	817.436	543.74	-356.636	799.661	529.992	-417.734	742.353
1034	0	293.047	-477.589	1550.67	188.726	-467.076	1547	322.801	-317.804	1584.84	204.043	-303.731	1582.67	256.929	-240.125	1431.52	266.392	-139.465	1150.64	257.571	-394.527	1319.53	244.477	-493.564	1123.86	186.574	-139.362	1247.17	413.266	-332.797	1382.15	523.437	-314.506	1147.02	531.544	-301.815	1049.37	534.742	-381.911	914.765	480.406	-407.782	818.663	543.421	-369.628	800.244	529.294	-431.481	743.916
1035	0	293.074	-487.264	1550.85	188.696	-476.657	1547.32	322.888	-327.486	1585.21	204.106	-313.356	1583.13	256.978	-249.623	1432.19	266.963	-148.195	1151.59	256.9	-403.692	1319.81	243.811	-502.296	1123.75	187.174	-148.216	1248.01	413.045	-342.645	1382.66	523.958	-324.83	1147.63	532.242	-312.966	1049.86	534.634	-393.992	915.699	479.99	-420.161	819.979	543.094	-382.525	800.961	528.518	-444.922	745.409
1036	0	292.995	-496.727	1550.9	188.589	-486.133	1547.47	322.847	-337.141	1585.57	204.086	-322.924	1583.43	257.002	-259.068	1432.69	267.533	-156.766	1152.48	256.51	-412.759	1320.1	243.194	-510.895	1123.67	187.688	-156.908	1248.71	412.813	-352.367	1383.12	524.431	-335.046	1148.37	532.861	-324.237	1050.44	534.357	-406.027	916.696	479.397	-432.32	821.31	542.874	-395.326	801.758	527.87	-458.242	746.954
1037	0	292.778	-506.36	1550.85	188.415	-495.622	1547.39	322.775	-346.828	1585.73	204.023	-332.503	1583.66	257.115	-268.244	1433.22	268.148	-165.371	1153.13	256.095	-421.714	1320.14	242.557	-519.282	1123.47	188.205	-165.594	1249.36	412.562	-362.065	1383.52	524.484	-345.677	1148.73	533.337	-335.647	1050.88	534.074	-418.208	917.575	478.756	-444.474	822.215	542.557	-408.088	802.404	527.271	-471.379	748.259
1038	0	292.414	-515.942	1550.56	188.103	-505.122	1547.14	322.625	-356.585	1585.77	203.882	-342.08	1583.78	257.215	-277.393	1433.62	268.622	-173.877	1153.66	255.778	-430.546	1320.07	241.847	-527.485	1123.09	188.731	-174.215	1249.89	412.364	-371.538	1383.84	524.525	-356.258	1148.92	533.513	-347.135	1051.07	533.596	-430.328	918.321	478.325	-456.53	823.037	542.337	-420.87	803.027	526.571	-484.434	749.245
1039	0	292.026	-525.49	1550.33	187.736	-514.515	1546.93	322.469	-366.232	1585.96	203.702	-351.488	1583.98	257.254	-286.466	1433.92	269.106	-182.381	1154.17	255.413	-439.323	1320.06	241.274	-535.607	1122.95	189.186	-182.773	1250.21	412.098	-380.96	1384.11	524.458	-367.009	1149.22	533.839	-358.545	1051.44	533.151	-442.443	919.115	477.693	-468.586	823.828	542.323	-433.529	803.835	525.842	-497.233	750.332
1040	0	291.49	-535.03	1550	187.151	-523.811	1546.6	322.256	-375.891	1586.19	203.551	-360.991	1584.13	257.39	-295.47	1434.16	269.56	-190.788	1154.61	255.123	-447.957	1320.12	240.805	-543.781	1123.01	189.639	-191.301	1250.59	412.015	-390.145	1384.54	524.33	-377.775	1149.57	534.112	-369.977	1051.92	532.358	-454.489	919.833	477.16	-480.725	824.78	542.199	-446.079	804.735	525.16	-509.886	751.42
1041	0	290.934	-544.479	1549.58	186.806	-532.965	1546.11	321.921	-385.594	1586.37	203.297	-370.324	1584.35	257.443	-304.372	1434.45	269.935	-199.165	1155.04	254.88	-456.547	1319.9	240.471	-551.955	1122.81	189.946	-199.865	1250.9	411.916	-399.329	1384.76	524.011	-388.697	1149.61	534.081	-381.568	1052.03	531.827	-466.528	920.339	476.545	-492.601	825.286	542.09	-458.92	805.234	524.607	-522.548	752.227
1042	0	290.307	-553.804	1549.11	186.139	-542.248	1545.55	321.548	-395.209	1586.49	202.918	-379.726	1584.47	257.379	-313.243	1434.58	270.073	-207.62	1155.19	254.617	-465.075	1319.69	240.053	-560.16	1122.44	190.283	-208.388	1251.17	411.706	-408.336	1384.73	523.569	-399.682	1149.49	533.925	-393.106	1051.97	531.338	-478.568	920.723	475.801	-504.344	825.722	541.833	-471.476	805.862	523.829	-534.985	752.617
1043	0	289.705	-563.089	1548.71	185.523	-551.379	1545.03	321.142	-404.753	1586.78	202.524	-389.038	1584.6	257.419	-321.976	1434.72	270.127	-216.141	1155.34	254.297	-473.696	1319.68	239.739	-568.375	1122.37	190.37	-216.91	1251.3	411.545	-417.307	1384.86	523.113	-410.599	1149.48	533.764	-404.518	1052.1	530.697	-490.427	921.123	475.045	-516.05	826.039	541.719	-483.909	806.307	522.882	-547.169	752.973
1044	0	289.015	-572.359	1548.19	184.911	-560.466	1544.47	320.699	-414.213	1586.95	202.433	-398.376	1584.63	257.279	-330.816	1434.66	270.024	-224.695	1155.37	254.046	-482.344	1319.61	239.5	-576.648	1122.1	190.425	-225.525	1251.37	411.347	-426.098	1384.82	522.623	-421.592	1149.23	533.41	-415.969	1051.97	529.999	-502.264	921.255	474.108	-527.846	826.031	541.35	-496.031	806.609	521.895	-559.568	753.115
1045	0	288.363	-581.606	1547.6	184.392	-569.578	1543.71	320.281	-423.591	1587	201.768	-407.518	1584.56	257.097	-339.641	1434.59	269.99	-233.164	1155.44	253.834	-491.009	1319.39	239.318	-585.029	1121.45	190.271	-234.15	1251.35	411.145	-435.027	1384.61	522.115	-432.573	1148.81	532.889	-427.47	1051.53	528.916	-513.979	921.095	473.534	-539.499	825.997	540.817	-508.383	806.58	521.021	-571.574	753.065
1046	0	287.8	-590.766	1547.18	183.777	-578.574	1543.19	319.76	-432.891	1586.93	201.407	-416.664	1584.49	256.891	-348.436	1434.48	269.697	-241.662	1155.42	253.566	-499.764	1319.11	239.15	-593.353	1121.05	190.069	-242.868	1251.25	410.844	-443.869	1384.36	521.504	-443.426	1148.34	532.25	-438.802	1051.07	528.291	-525.715	921.211	472.86	-550.779	825.622	540.374	-520.487	806.492	520.303	-583.509	753.051
1047	0	287.248	-599.891	1546.79	183.363	-587.455	1542.58	319.328	-442.129	1586.79	200.854	-425.75	1584.22	256.635	-357.362	1434.2	269.426	-250.248	1155.17	253.27	-508.494	1318.79	239.049	-601.712	1120.6	189.805	-251.617	1251.05	410.625	-452.635	1384.01	520.85	-454.207	1147.77	531.619	-450.059	1050.56	527.288	-537.165	921.027	471.761	-562.239	825.362	539.936	-532.333	806.415	519.313	-595.306	753.068
1048	0	286.638	-608.879	1546.24	182.676	-596.559	1542	318.719	-451.319	1586.48	200.396	-434.807	1583.81	256.254	-366.366	1433.81	269.055	-258.82	1154.9	252.998	-517.296	1318.44	238.987	-610.195	1119.84	189.413	-260.416	1250.72	410.293	-461.454	1383.52	520.202	-464.953	1147.07	530.807	-461.172	1049.98	526.262	-548.619	920.745	471.344	-573.706	825.331	539.222	-544.183	806.099	518.381	-607.128	752.838
1049	0	285.994	-618.024	1545.67	182.171	-605.508	1541.28	318.245	-460.405	1586.14	199.878	-443.825	1583.36	255.878	-375.34	1433.45	268.538	-267.513	1154.59	252.762	-526.244	1317.91	238.97	-618.818	1119.03	188.946	-269.341	1250.44	410.001	-470.335	1383.03	519.435	-475.682	1146.44	530.165	-472.123	1049.33	525.177	-560.028	920.6	470.083	-584.612	824.459	538.613	-556.178	805.74	517.405	-618.799	752.682
1050	0	285.411	-627.025	1545.26	181.538	-614.443	1540.75	317.747	-469.532	1585.75	199.7	-452.842	1582.83	255.482	-384.366	1433	268.026	-276.334	1154.29	252.467	-535.174	1317.19	238.962	-627.523	1118.29	188.379	-278.301	1250.11	409.647	-479.197	1382.51	518.583	-486.246	1145.85	529.25	-483.09	1048.85	523.876	-571.253	920.216	469.217	-595.998	824.358	537.744	-567.641	805.695	516.352	-630.465	752.454
1051	0	284.829	-636.026	1544.72	180.839	-623.542	1540.17	317.202	-478.527	1585.12	198.987	-461.765	1582.06	254.976	-393.525	1432.44	267.428	-285.098	1153.79	252.421	-544.192	1316.48	239.019	-636.311	1117.37	187.9	-287.378	1249.61	409.282	-488.141	1381.92	517.883	-496.569	1145.23	528.43	-493.915	1048.31	522.654	-582.408	919.965	467.922	-606.616	823.573	537.018	-579.221	805.544	515.118	-641.871	752.139
1052	0	284.28	-645.107	1543.96	180.372	-632.536	1539.34	316.62	-487.627	1584.29	198.378	-470.733	1581.15	254.439	-402.778	1431.68	266.95	-294.048	1153.21	252.02	-553.318	1315.64	239.094	-645.226	1116.38	187.345	-296.49	1248.96	408.892	-497.002	1381.11	517.087	-506.827	1144.35	527.489	-504.624	1047.44	521.138	-593.474	919.37	466.86	-617.45	823.156	536.268	-590.963	804.879	514.027	-653.447	751.76
1053	0	283.72	-654.182	1543.32	179.908	-641.662	1538.52	316.084	-496.661	1583.37	198.127	-479.752	1580.17	253.806	-411.994	1430.87	266.204	-303.076	1152.45	251.919	-562.504	1314.5	239.121	-654.206	1115.17	186.706	-305.738	1248.27	408.506	-506.004	1380.27	516.286	-516.99	1143.47	526.417	-515.332	1046.42	519.786	-604.349	918.897	465.741	-627.675	822.159	535.3	-602.509	804.351	512.581	-664.776	751.337
1054	0	283.098	-663.253	1542.65	179.232	-650.873	1537.8	315.444	-505.704	1582.4	197.252	-488.878	1579.04	253.261	-421.268	1429.93	265.459	-312.178	1151.55	251.335	-571.651	1313.68	239.079	-663.273	1114.21	185.948	-315.061	1247.39	408.048	-514.91	1379.39	515.516	-526.831	1142.53	525.664	-525.649	1045.63	518.424	-615.287	918.358	464.385	-638.331	821.695	534.26	-613.842	803.921	511.022	-676.123	750.983
1055	0	282.468	-672.499	1541.72	178.6	-660.041	1536.86	314.801	-514.779	1581.26	196.531	-498.031	1577.72	252.5	-430.622	1428.79	264.617	-321.444	1150.46	251.069	-580.956	1312.35	239.066	-672.408	1112.96	185.058	-324.474	1246.19	407.515	-523.845	1378.28	514.825	-536.424	1141.47	524.817	-535.844	1044.51	517.092	-626.025	917.696	462.874	-648.82	820.81	533.073	-625.052	803.239	509.346	-687.399	750.531
1056	0	281.893	-681.744	1540.75	178.011	-669.367	1535.87	314.052	-523.94	1579.85	196.19	-507.188	1576.31	251.68	-440.128	1427.57	263.895	-330.702	1149.35	250.618	-590.252	1311.13	239.039	-681.647	1111.59	184.195	-333.969	1244.98	406.979	-532.95	1377.02	514.191	-545.859	1140.19	524.004	-546.028	1043.23	515.776	-636.635	916.867	461.547	-659.452	820.047	531.856	-636.307	802.31	507.64	-698.551	749.851
1057	0	281.26	-691.063	1539.82	177.324	-678.715	1534.69	313.286	-533.138	1578.57	195.094	-516.412	1575	250.783	-449.655	1426.35	262.95	-339.914	1148.15	250.196	-599.758	1309.73	238.912	-690.989	1110.17	183.264	-343.57	1243.75	406.368	-542.032	1375.81	513.587	-555.094	1139	523.139	-556.086	1041.92	514.493	-647.188	916.15	460.041	-669.738	819.181	530.482	-647.492	801.492	505.836	-709.706	749.379
1058	0	280.499	-700.376	1538.81	176.549	-688.183	1533.68	312.501	-542.382	1577.26	194.559	-525.768	1573.47	249.881	-459.231	1425.05	262.135	-349.416	1147.07	249.737	-609.282	1308.53	238.732	-700.42	1108.85	182.299	-353.253	1242.46	405.755	-551.213	1374.63	513.027	-564.038	1137.94	522.662	-565.894	1040.9	513.251	-657.57	915.268	458.712	-680.146	818.557	529.268	-658.522	800.84	503.905	-720.75	748.805
1059	0	279.739	-709.758	1537.65	175.85	-697.649	1532.38	311.512	-551.722	1575.77	193.365	-535.105	1571.91	248.905	-468.927	1423.62	261.049	-358.749	1145.67	249.264	-618.86	1307	238.598	-709.99	1107.28	181.151	-362.975	1241.01	405.061	-560.417	1373.34	512.588	-572.947	1136.67	522.031	-575.613	1039.65	512.163	-667.874	914.38	457.073	-690.41	817.866	527.916	-669.397	799.951	501.933	-731.582	748.159
1060	0	278.784	-719.287	1536.39	174.982	-707.124	1530.98	310.637	-561.17	1574.39	192.719	-544.56	1570.35	247.913	-478.635	1422.36	260.031	-368.303	1144.39	248.635	-628.518	1305.45	238.397	-719.685	1105.56	180.128	-372.874	1239.61	404.239	-569.84	1371.88	512.173	-581.725	1135.42	521.489	-585.332	1038.28	510.95	-678.031	913.226	455.455	-700.682	816.966	526.223	-680.025	799.035	499.981	-742.436	747.401
1061	0	277.848	-728.885	1535.33	173.893	-716.71	1529.75	309.596	-570.533	1572.94	191.426	-554.069	1568.68	246.872	-488.436	1420.87	259.201	-378.221	1143.18	247.99	-638.315	1303.9	238.141	-729.4	1103.97	178.922	-382.786	1238.23	403.438	-579.341	1370.58	511.676	-590.435	1134.17	520.93	-594.716	1037.03	509.97	-688.002	912.299	453.967	-710.97	816.477	524.977	-690.877	797.993	498.014	-753.151	746.682
1062	0	276.838	-738.398	1534.08	172.915	-726.318	1528.36	308.5	-579.975	1571.38	190.602	-563.593	1566.87	245.783	-498.263	1419.36	257.985	-387.833	1141.48	247.358	-648.18	1302.36	237.87	-739.239	1102.34	177.787	-392.821	1236.57	402.661	-588.837	1369.17	511.319	-599.166	1132.9	520.464	-604.042	1035.68	509.01	-697.826	911.193	452.532	-721.088	815.674	523.54	-701.106	796.878	496.257	-763.703	746.061
1063	0	275.75	-748.031	1532.81	171.828	-735.996	1526.82	307.247	-589.565	1569.71	189.038	-573.165	1564.96	244.639	-508.161	1417.67	256.819	-397.8	1139.75	246.697	-658.132	1300.74	237.655	-749.191	1100.5	176.529	-402.876	1234.74	401.692	-598.474	1367.54	510.982	-607.885	1131.38	519.909	-613.313	1034.03	508.129	-707.693	909.917	451.125	-731.203	814.736	522.079	-711.417	795.513	494.369	-774.109	745.085
1064	0	274.515	-757.757	1531.44	170.725	-745.788	1525.35	305.868	-599.216	1567.95	188.016	-582.802	1563.13	243.452	-518.219	1416.06	255.627	-407.844	1138.08	245.942	-668.208	1299.01	237.435	-759.297	1098.83	175.374	-413.045	1233.1	400.796	-608.291	1365.97	510.397	-616.671	1129.89	519.313	-622.483	1032.39	507.272	-717.375	908.744	449.815	-741.2	813.839	520.538	-721.481	794.024	492.673	-784.371	744.136
1065	0	273.313	-767.508	1530.36	169.392	-755.639	1523.86	304.376	-608.713	1566.48	186.202	-592.515	1561.26	242.175	-528.293	1414.38	254.347	-418.006	1136.38	245.15	-678.401	1297.58	237.165	-769.502	1097.23	173.838	-423.185	1231.29	399.812	-617.985	1364.6	509.819	-625.562	1128.59	518.75	-631.602	1030.98	506.442	-726.856	907.491	448.564	-751.08	812.92	518.834	-731.033	792.815	491.196	-794.411	743.378
1066	0	271.969	-777.23	1529.16	168.191	-765.599	1522.57	302.824	-618.397	1564.92	184.983	-602.371	1559.51	240.824	-538.389	1412.73	252.934	-428.371	1134.54	244.4	-688.602	1296.08	236.859	-779.789	1095.62	172.508	-433.57	1229.51	398.729	-627.849	1363.1	509.232	-634.477	1127.29	518.173	-640.599	1029.66	505.723	-736.255	906.336	447.376	-760.829	812.222	517.737	-740.772	791.491	489.644	-804.336	742.4
1067	0	270.669	-787.111	1527.95	166.751	-775.635	1521.06	301.254	-628.111	1563.49	183.315	-612.322	1557.68	239.401	-548.607	1411.15	251.612	-438.708	1132.94	243.357	-698.882	1294.46	236.697	-790.241	1094.06	171.116	-444.124	1227.76	397.635	-637.766	1361.74	508.53	-643.678	1125.96	517.492	-649.698	1028.18	504.926	-745.549	904.868	446.182	-770.52	811.067	516.36	-750.275	790.084	488.348	-814.154	741.348
1068	0	269.293	-797.015	1526.79	165.329	-785.746	1519.58	299.477	-637.867	1562.07	181.252	-622.207	1556.02	237.96	-558.824	1409.62	250.171	-449.334	1131.17	242.58	-709.369	1293.02	236.442	-800.757	1092.55	169.647	-454.727	1225.94	396.417	-647.739	1360.41	507.8	-652.814	1124.79	516.751	-658.756	1026.95	504.159	-754.765	903.619	445.214	-780.16	810.385	514.925	-759.373	788.879	487.221	-823.792	740.414
1069	0	267.775	-806.84	1525.81	163.817	-795.751	1518.4	297.72	-647.655	1560.79	179.707	-632.157	1554.32	236.424	-569.115	1407.97	248.776	-460.07	1129.37	241.514	-719.798	1291.8	236.101	-811.387	1091.34	168.178	-465.504	1224.14	395.296	-657.735	1359.37	506.994	-662.031	1123.96	516.04	-667.707	1025.98	503.433	-763.8	902.571	444.331	-789.465	809.459	513.999	-768.616	787.766	486.144	-833.03	739.495
1070	0	266.245	-816.87	1524.71	162.275	-805.884	1517.01	295.89	-657.517	1559.51	177.514	-642.218	1552.75	234.877	-579.37	1406.42	247.281	-471.005	1127.56	240.473	-730.467	1290.48	235.746	-822.174	1090.11	166.681	-476.483	1222.09	393.98	-667.806	1358.25	506.079	-671.527	1123.04	515.099	-676.684	1024.96	502.746	-772.786	901.355	443.731	-798.807	808.617	512.995	-777.495	786.594	485.281	-842.134	738.503
1071	0	264.623	-826.934	1523.67	160.693	-816.139	1515.64	293.897	-667.442	1558.07	175.625	-652.336	1551.14	233.219	-589.636	1404.86	245.78	-482.236	1125.46	239.358	-741.16	1289.21	235.326	-833.127	1088.91	165.105	-487.571	1220.06	392.588	-678.049	1357.14	504.94	-681.062	1122.07	514.044	-685.698	1023.82	502.09	-781.714	900.205	442.86	-807.867	807.493	512.068	-786.259	785.314	484.589	-851.046	737.295
1072	0	262.839	-836.989	1522.74	158.924	-826.298	1514.56	291.867	-677.365	1556.93	173.66	-662.434	1549.59	231.466	-600.028	1403.18	244.296	-493.562	1123.51	238.169	-751.978	1288.12	234.824	-844.223	1087.94	163.534	-498.617	1218	391.076	-688.234	1356.24	503.763	-690.668	1121.31	512.99	-694.468	1022.99	501.427	-790.486	899.207	442.362	-816.785	806.585	511.34	-794.476	784.352	484.196	-859.617	736.334
1073	0	261.106	-847.123	1522.25	157.101	-836.7	1513.71	289.798	-687.325	1555.95	171.743	-672.623	1548.32	229.664	-610.395	1401.82	242.813	-504.965	1121.78	236.866	-762.801	1287.26	234.215	-855.422	1087.23	161.966	-509.809	1216.04	389.401	-698.448	1355.55	502.584	-700.286	1120.9	511.958	-703.197	1022.53	500.992	-799.035	898.487	442.095	-825.526	805.754	511.041	-802.785	783.487	483.997	-867.953	735.31
1074	0	259.319	-857.408	1521.89	155.308	-847.156	1513.08	287.641	-697.475	1555.05	169.287	-682.97	1547.11	227.626	-620.912	1400.8	241.215	-516.356	1120.32	235.583	-773.869	1286.55	233.68	-866.856	1086.7	160.347	-521.011	1214.34	387.858	-708.935	1355.07	501.284	-710.002	1120.49	510.668	-712.001	1021.89	500.643	-807.463	897.528	442.098	-834.252	804.911	510.554	-810.618	782.625	484.34	-876.006	734.384
1075	0	257.478	-867.844	1521.77	153.486	-857.818	1512.8	285.317	-707.713	1554.4	167.018	-693.513	1546.26	225.63	-631.71	1400.03	239.542	-527.643	1119.39	234.143	-784.924	1286.13	233.086	-878.525	1086.24	158.845	-532.32	1213.08	386.168	-719.595	1354.83	499.792	-719.786	1120.13	509.339	-720.747	1021.5	500.57	-815.673	896.845	442.123	-842.68	804.012	510.357	-818.293	781.647	485.003	-883.467	733.326
1076	0	255.598	-878.164	1522.12	151.523	-868.483	1512.78	282.903	-717.906	1554.23	164.652	-703.919	1545.78	223.643	-642.729	1399.61	238.018	-538.721	1118.95	232.602	-796.122	1286.02	232.397	-890.326	1086.32	157.434	-543.469	1212.46	384.497	-730.446	1354.97	498.479	-729.497	1120.43	508.063	-729.397	1021.74	500.6	-823.643	896.401	442.463	-850.833	803.587	510.473	-825.395	781.349	486	-890.792	732.725
1077	0	253.71	-888.738	1522.71	149.435	-879.354	1513.11	280.524	-728.25	1554.56	162.189	-714.681	1545.61	221.753	-653.836	1399.67	236.935	-549.59	1119	230.979	-807.385	1286.32	231.601	-902.335	1086.5	156.172	-554.797	1212.16	382.8	-741.679	1355.48	497.022	-739.193	1121.01	506.797	-737.989	1022.4	500.543	-831.376	896.229	442.897	-858.87	803.37	510.751	-832.27	781.272	487.307	-897.736	732.348
1078	0	251.723	-899.424	1523.51	147.724	-890.282	1513.54	278.085	-738.698	1555.04	159.709	-725.571	1545.81	220.136	-665.049	1400.08	236.428	-560.502	1119.64	229.341	-818.769	1286.82	230.657	-914.364	1086.89	155.152	-565.897	1212.4	381.008	-753.229	1356.27	495.433	-749.022	1121.8	505.422	-746.807	1023.32	500.654	-839.017	896.207	443.364	-866.566	802.546	510.399	-838.349	781.064	488.732	-904.266	731.86
1079	0	249.594	-910.078	1524.46	145.752	-901.217	1514.21	275.498	-749.291	1555.89	157.13	-736.351	1546.4	218.417	-676.275	1400.93	236.209	-571.443	1120.73	227.763	-830.143	1287.6	229.632	-926.383	1087.74	154.388	-577.03	1213.12	379.261	-764.989	1357.47	494.113	-758.854	1123.05	504.044	-755.572	1024.64	500.742	-846.53	896.626	443.875	-875.073	803.09	510.569	-844.588	781.476	490.427	-910.361	731.847
1080	0	247.513	-920.806	1525.82	143.673	-912.065	1515.17	272.988	-759.969	1557.16	154.657	-747.29	1547.18	216.901	-687.488	1401.95	236.15	-582.705	1121.92	226.046	-841.362	1288.94	228.468	-938.24	1089.11	153.767	-587.935	1214.14	377.606	-776.743	1359.18	492.771	-768.489	1124.95	502.842	-764.192	1026.61	500.943	-853.644	897.489	444.769	-882.033	803.449	511.038	-850.318	782.535	492.227	-915.96	732.156
1081	0	245.355	-931.639	1527.23	141.443	-922.977	1516.26	270.536	-770.755	1558.79	152.195	-758.158	1548.2	215.44	-698.53	1403.24	235.913	-594.102	1123.55	224.364	-852.229	1290.49	227.11	-949.972	1090.8	153.229	-599.025	1215.15	375.899	-788.443	1361.11	491.296	-778.204	1127.04	501.576	-772.93	1028.72	501.182	-860.767	898.642	445.583	-888.714	804.296	511.603	-855.761	784.012	494.378	-921.249	732.81
1082	0	242.978	-942.5	1528.91	139.227	-933.861	1517.42	268.193	-781.655	1560.77	149.757	-769.024	1549.69	214.081	-709.393	1404.78	235.724	-606.013	1124.84	222.692	-863.352	1292.25	225.631	-961.42	1092.74	152.78	-609.935	1216.5	374.267	-800.095	1363.32	489.992	-788.129	1129.29	500.399	-781.824	1031.11	501.426	-867.991	900.115	446.518	-895.34	805.016	511.891	-861.184	785.351	496.192	-926.258	733.401
1083	0	240.716	-953.443	1530.84	136.947	-944.664	1518.79	265.802	-792.643	1563.01	147.59	-780.004	1551.41	212.85	-720.066	1406.55	235.299	-617.573	1126.33	221.095	-874.288	1294.39	224.066	-972.599	1095.12	152.427	-620.96	1217.79	372.596	-811.343	1365.72	488.667	-797.946	1131.99	499.344	-790.676	1034.02	501.597	-874.976	901.977	447.325	-901.994	806.169	512.421	-866.545	787.269	497.733	-931.09	734.291
1084	0	238.491	-964.313	1532.94	134.792	-955.306	1520.41	263.728	-803.624	1565.79	145.563	-790.69	1553.48	211.43	-730.614	1408.28	235.31	-629.486	1127.87	219.5	-884.975	1296.86	222.497	-983.335	1097.8	151.797	-631.828	1219.4	371.007	-822.387	1368.29	487.556	-807.816	1134.98	498.547	-799.349	1037.11	501.518	-882.062	904.019	448.133	-908.2	807.777	513.153	-871.936	789.635	499.094	-935.675	735.418
1085	0	236.341	-975.097	1534.98	132.853	-965.896	1522.15	261.684	-814.621	1568.41	143.546	-801.505	1555.71	210.399	-741.204	1410.48	235.408	-641.209	1129.81	218.156	-895.702	1299.37	220.932	-993.9	1100.54	151.357	-642.778	1221.07	369.529	-833.158	1370.99	486.629	-817.933	1137.99	497.782	-808.259	1040.3	501.839	-889.333	906.361	449.174	-914.11	809.064	513.936	-877.553	792.009	500.617	-940.308	736.752
1086	0	234.433	-985.903	1537.21	131.051	-976.432	1524.1	259.888	-825.509	1571.23	141.836	-812.234	1558.22	208.922	-751.398	1412.44	234.84	-652.519	1131.52	216.772	-906.197	1301.91	219.43	-1004.21	1103.34	150.53	-653.58	1222.71	368.185	-843.842	1373.79	485.616	-828.107	1141.19	496.882	-817.196	1043.47	502.076	-896.698	908.926	450.134	-919.699	810.657	514.853	-883.533	794.671	501.627	-944.973	738.133
1087	0	232.659	-996.491	1539.53	129.256	-986.823	1526.1	258.227	-836.159	1574.01	140.152	-822.651	1560.87	207.797	-761.616	1414.68	233.754	-663.241	1133.47	215.42	-916.681	1304.58	217.844	-1014.53	1106.25	149.779	-664.492	1224.44	366.747	-854.255	1376.49	484.874	-838.205	1144.4	496.525	-825.734	1047.02	502.028	-904.184	911.513	450.94	-925.732	812.845	515.99	-889.557	797.726	502.336	-949.665	739.626
1088	0	231.021	-1006.89	1541.79	127.649	-997.144	1528.44	256.724	-846.706	1576.65	138.814	-833.142	1563.28	206.367	-772.096	1416.65	232.451	-673.572	1135.34	214.125	-927.006	1307.11	216.516	-1024.64	1109.02	148.739	-675.226	1226.35	365.51	-864.629	1379.27	484.179	-848.278	1147.6	496.127	-834.223	1050.51	502.393	-911.575	914.235	451.525	-932.187	815.069	517.166	-895.648	800.833	503.107	-954.51	741.363
1089	0	229.575	-1017.32	1544.02	126.189	-1007.37	1530.6	255.53	-856.982	1579.19	137.89	-843.312	1565.88	205.219	-782.408	1418.9	231.093	-683.822	1137.67	212.847	-937.274	1309.37	215.269	-1034.76	1111.57	147.828	-686.015	1228.29	364.246	-874.97	1381.76	483.6	-858.391	1150.67	495.658	-842.784	1053.66	502.577	-918.553	916.872	452.199	-939.17	817.33	518.226	-902.024	803.647	503.887	-959.582	742.971
1090	0	228.316	-1027.6	1546.18	124.911	-1017.6	1532.85	254.393	-867.315	1581.39	136.552	-853.565	1568.09	203.992	-792.829	1420.87	229.504	-694.027	1139.85	211.702	-947.548	1311.61	214.264	-1044.96	1113.93	146.726	-696.579	1230.34	363.112	-885.295	1384.11	483.045	-868.417	1153.57	495.413	-851.298	1056.88	502.641	-925.909	919.312	453.272	-945.785	819.196	519.397	-908.495	806.503	504.442	-964.655	744.485
1091	0	227.128	-1037.72	1548.42	123.692	-1027.63	1535.11	253.409	-877.648	1583.35	135.655	-863.644	1570.12	202.918	-803.163	1423.01	227.732	-704.246	1142.18	210.574	-957.632	1313.79	213.314	-1055.09	1116.24	145.575	-707.109	1232.3	362.186	-895.432	1386.45	482.618	-878.138	1156.49	495.093	-859.797	1059.95	503.2	-933.246	921.966	453.799	-950.131	820.874	520.674	-914.978	809.381	505.245	-969.825	746.196
1092	0	226.16	-1047.85	1550.55	122.702	-1037.66	1537.29	252.691	-887.5	1585.28	135.065	-873.593	1572.02	201.845	-813.494	1424.85	226.298	-714.541	1144.32	209.628	-967.789	1315.66	212.71	-1065.19	1118.09	144.484	-717.588	1234.2	361.213	-905.472	1388.39	482.187	-887.664	1158.89	494.943	-868.203	1062.52	503.6	-940.592	924.091	454.738	-956.483	822.739	521.697	-921.367	811.605	506.214	-975.377	747.733
1093	0	225.232	-1057.98	1552.33	121.932	-1047.5	1539.07	251.855	-897.71	1586.57	134.449	-883.613	1573.65	200.853	-823.887	1426.65	225.098	-724.903	1146.17	208.785	-977.899	1317.3	212.273	-1075.3	1119.62	143.292	-727.847	1236.08	360.41	-915.624	1389.98	481.676	-896.901	1160.85	494.602	-876.819	1064.63	503.984	-948.045	925.8	455.681	-962.843	823.95	522.601	-928.002	813.574	507.214	-981.04	748.953
1094	0	224.381	-1067.95	1554.08	121.068	-1057.5	1540.96	251.263	-907.83	1588.03	133.474	-893.37	1575.19	200.124	-834.002	1428.42	224.168	-735.174	1147.93	208.018	-987.9	1318.94	211.944	-1084.98	1120.91	142.233	-738.166	1237.99	359.571	-925.518	1391.53	481.273	-905.74	1162.76	494.391	-885.221	1066.73	504.385	-955.385	927.54	456.536	-969.428	825.311	523.594	-934.444	815.482	508.268	-986.845	750.201
1095	0	223.815	-1077.89	1555.84	120.27	-1067.38	1542.91	250.928	-917.664	1589.6	133.434	-903.274	1576.69	198.995	-844.377	1430	223.124	-745.242	1149.82	207.427	-997.925	1320.33	211.674	-1094.64	1121.99	141.006	-748.262	1239.8	358.908	-935.26	1393.08	480.684	-914.237	1164.4	494.242	-893.535	1068.83	504.81	-962.696	929.074	457.541	-976.059	826.541	524.564	-940.811	817.34	509.606	-992.762	751.542
1096	0	223.277	-1087.85	1557.32	119.921	-1077.28	1544.37	250.529	-927.33	1590.88	132.716	-913.035	1578.01	198.197	-854.316	1431.72	221.899	-754.628	1151.72	206.962	-1007.86	1321.5	211.78	-1104.06	1122.64	139.779	-758.269	1241.55	358.296	-945.044	1394.29	480.156	-922.553	1165.69	493.871	-901.957	1070.4	505.156	-970.048	930.288	458.449	-983.025	827.478	525.327	-947.325	818.781	511.042	-998.989	752.704
1097	0	222.812	-1097.72	1558.68	119.513	-1087.15	1545.8	250.124	-937.292	1591.95	132.342	-922.935	1579.32	197.091	-864.455	1433.22	220.668	-763.623	1153.53	206.641	-1017.83	1322.56	211.909	-1113.61	1123.16	138.54	-768.188	1243.36	357.682	-954.519	1395.4	479.46	-930.657	1166.65	493.334	-910.245	1071.65	505.497	-977.401	931.306	459.396	-990.347	828.353	525.945	-953.851	819.97	512.46	-1005.33	753.657
1098	0	222.613	-1107.57	1560.04	119.076	-1097.11	1547.36	249.914	-947.049	1593.12	132.019	-932.692	1580.48	196.16	-874.531	1434.6	219.399	-772.644	1155.13	206.447	-1027.63	1323.63	212.309	-1122.92	1123.8	137.101	-778.008	1245.09	357.255	-963.864	1396.64	478.91	-938.58	1167.68	492.855	-918.206	1072.96	505.782	-984.608	932.476	460.337	-997.382	829.347	526.616	-960.365	821.259	513.968	-1011.92	754.744
1099	0	222.345	-1117.27	1561.31	118.996	-1106.81	1548.76	249.66	-956.643	1594.15	131.793	-942.483	1581.55	195.341	-884.467	1435.99	218.041	-781.745	1156.89	206.371	-1037.32	1324.68	212.801	-1131.89	1124.32	135.671	-787.799	1246.81	356.86	-972.961	1397.7	478.249	-946.307	1168.65	492.243	-926.066	1074.2	506.043	-991.789	933.487	461.238	-1004.35	830.129	527.316	-966.909	822.63	515.502	-1018.55	755.93
1100	0	222.261	-1127.09	1562.4	118.76	-1116.8	1549.95	249.411	-966.728	1594.8	131.528	-952.332	1582.43	194.459	-894.496	1437.18	216.516	-790.845	1158.31	206.353	-1047	1325.38	213.433	-1140.86	1124.57	134.255	-797.513	1248.33	356.297	-981.993	1398.58	477.634	-954.162	1169.56	491.436	-934.012	1075.13	506.145	-999.217	934.284	462.556	-1011.41	830.235	527.704	-973.591	823.509	516.815	-1025.44	756.972
1101	0	222.211	-1136.81	1563.34	118.732	-1126.6	1551.01	249.303	-976.05	1595.44	131.412	-962.057	1583.23	193.539	-904.426	1438.27	215.065	-799.856	1159.67	206.378	-1056.67	1326.02	214.207	-1149.81	1124.84	132.785	-807.256	1249.76	355.873	-990.87	1399.45	477.029	-961.885	1170.39	490.615	-941.865	1076.04	506.202	-1006.58	935.104	462.657	-1018.52	830.813	527.946	-980.354	824.496	518.038	-1032.49	758.162
1102	0	222.25	-1146.38	1564.36	118.718	-1136.33	1552.17	249.105	-985.563	1595.96	131.15	-971.739	1583.92	192.484	-914.315	1439.22	213.65	-808.982	1160.97	206.51	-1066.12	1326.73	214.946	-1158.65	1125.29	131.388	-816.908	1251.08	355.543	-999.548	1400.41	476.531	-969.434	1171.38	489.876	-949.473	1077.02	506.011	-1013.82	936.063	463.437	-1026.06	831.604	528.216	-987.237	825.631	519.238	-1039.54	759.346
1103	0	222.515	-1155.88	1565.23	118.857	-1146.12	1553.23	249.089	-994.918	1596.4	130.966	-981.406	1584.5	191.639	-924.169	1440.09	212.232	-818.091	1162.03	206.628	-1075.61	1327.27	215.82	-1167.66	1125.71	129.875	-826.598	1252.18	355.249	-1008.23	1401.35	476.089	-977.036	1172.36	489.152	-957.128	1077.9	506.245	-1021.29	937.056	463.745	-1033.4	832.388	528.193	-994.321	826.479	520.12	-1046.87	760.446
1104	0	222.664	-1165.35	1565.87	119.053	-1155.85	1554.01	248.878	-1004.22	1596.53	130.845	-990.992	1585.03	190.888	-933.861	1440.84	210.647	-827.185	1162.94	206.843	-1085.04	1327.68	216.751	-1176.86	1126	128.417	-836.31	1253.08	354.996	-1016.89	1402.12	475.659	-984.631	1173.12	488.426	-964.809	1078.68	506.194	-1028.82	937.794	464.149	-1041.68	833.088	528.204	-1001.69	827.486	520.88	-1054.24	761.366
1105	0	222.886	-1174.68	1566.56	119.239	-1165.59	1554.88	248.796	-1013.48	1596.87	130.616	-1000.56	1585.37	190.075	-943.444	1441.57	209.371	-836.268	1163.92	206.984	-1094.41	1327.98	217.664	-1185.91	1126.35	127.184	-845.95	1253.97	354.685	-1025.44	1402.8	475.313	-992.195	1173.92	487.753	-972.417	1079.46	506.186	-1036.35	938.657	464.287	-1049.34	833.558	528.026	-1009	828.393	521.4	-1061.73	762.24
1106	0	223.231	-1183.95	1567.17	119.48	-1175.06	1555.69	248.672	-1022.78	1596.96	130.575	-1010.04	1585.64	189.231	-953.171	1442.12	208.27	-845.207	1164.79	207.227	-1103.74	1328.33	218.572	-1194.99	1126.81	125.927	-855.488	1254.71	354.55	-1033.94	1403.56	474.953	-999.545	1174.78	487.336	-979.905	1080.34	506.217	-1043.81	939.43	464.281	-1057.28	834.447	527.817	-1016.3	829.223	521.72	-1069.29	763.118
1107	0	223.513	-1193.1	1567.73	119.779	-1184.57	1556.25	248.665	-1031.47	1597.04	130.292	-1019.41	1585.72	188.691	-962.623	1442.47	207.139	-854.207	1165.46	207.48	-1112.96	1328.48	219.521	-1204.28	1127.07	124.896	-864.92	1255.28	354.492	-1042.57	1404.11	474.635	-1006.89	1175.43	486.829	-987.455	1080.88	506.237	-1051.47	940.017	464.31	-1065.49	834.917	527.396	-1024.01	829.732	521.859	-1077.39	763.766
1108	0	223.838	-1202.24	1568.15	120.127	-1194.16	1556.75	248.538	-1040.55	1596.81	130.25	-1028.78	1585.55	188.235	-972.117	1442.69	206.257	-863.248	1165.77	207.806	-1122.3	1328.52	220.339	-1213.47	1127.27	124.051	-874.49	1255.61	354.367	-1051.22	1404.24	474.203	-1014.25	1175.73	486.337	-995.18	1081.06	506.234	-1059.25	940.303	464.331	-1074.15	835.517	527.036	-1032.03	829.973	521.72	-1085.46	764.096
1109	0	224.37	-1211.25	1568.69	120.557	-1203.43	1557.3	248.584	-1049.31	1596.42	130.137	-1037.95	1585.31	187.633	-981.621	1442.83	205.516	-872.16	1165.91	208.106	-1131.45	1328.56	221.186	-1222.41	1127.36	123.108	-883.919	1255.88	354.377	-1059.84	1404.48	473.772	-1021.42	1176.04	485.982	-1002.87	1081.29	506.288	-1067	940.632	464.207	-1082.31	835.91	526.402	-1039.62	830.04	521.235	-1093.12	764.025
1110	0	224.77	-1220.17	1569.22	120.914	-1212.71	1557.9	248.67	-1057.92	1595.94	130.262	-1046.91	1584.81	187.464	-990.963	1442.82	204.71	-881.3	1166.03	208.463	-1140.7	1328.49	221.919	-1231.48	1127.41	122.569	-893.303	1255.97	354.369	-1068.56	1404.58	473.646	-1028.76	1176.36	485.765	-1010.54	1081.45	506.383	-1074.85	940.831	464.094	-1090.86	836.266	525.844	-1047.64	830.128	521.085	-1101.36	764.31
1111	0	225.181	-1228.95	1569.55	121.35	-1221.8	1558.45	248.68	-1066.6	1595.19	130.391	-1055.98	1584.14	187.1	-1000.48	1442.69	204.312	-890.299	1166.01	208.772	-1150.01	1328.29	222.548	-1240.6	1127.19	122.014	-902.677	1255.94	354.427	-1077.47	1404.39	473.686	-1036.3	1176.44	485.536	-1018.46	1081.33	506.476	-1082.98	940.749	463.924	-1099.5	836.411	525.245	-1055.78	829.904	520.622	-1109.84	764.284
1112	0	225.729	-1237.82	1569.91	121.945	-1230.93	1558.83	249.013	-1075.05	1594.41	130.514	-1064.75	1583.43	187.014	-1009.91	1442.45	203.792	-899.416	1165.86	208.966	-1159.36	1327.95	223.042	-1249.83	1126.65	121.639	-912.21	1255.83	354.552	-1086.47	1404.11	473.566	-1044.04	1176.26	485.369	-1026.53	1081.19	506.345	-1090.89	940.377	463.739	-1108.33	836.409	524.726	-1063.91	829.465	519.987	-1118.05	763.755
1113	0	226.355	-1246.53	1570.36	122.372	-1239.83	1559.33	249.344	-1083.54	1593.56	130.74	-1073.56	1582.52	186.86	-1019.45	1442.17	203.507	-908.605	1165.77	209.287	-1168.75	1327.56	223.488	-1258.85	1126.24	121.408	-921.493	1255.67	354.698	-1095.61	1403.8	473.611	-1051.91	1176.28	485.045	-1034.22	1080.75	506.345	-1099.05	940.15	463.579	-1117.02	836.461	524.179	-1072.01	829.147	519.467	-1126.51	763.49
1114	0	226.967	-1255.04	1570.53	122.947	-1248.81	1559.73	249.693	-1091.98	1592.51	131.203	-1082.3	1581.61	187.004	-1028.92	1441.69	203.299	-917.931	1165.42	209.506	-1178.19	1327.04	223.866	-1268.07	1125.66	121.093	-931.019	1255.38	354.904	-1104.77	1403.38	473.816	-1059.98	1175.98	485.035	-1042.38	1080.36	506.339	-1107.3	939.728	463.514	-1125.8	836.344	523.635	-1080.17	828.626	519.002	-1135.06	763.11
1115	0	227.65	-1263.69	1570.67	123.65	-1257.66	1559.98	250.153	-1100.42	1591.15	131.619	-1090.91	1580.54	186.954	-1038.66	1441.14	203.176	-927.303	1165.07	209.793	-1187.75	1326.34	224.16	-1277.42	1124.69	121.185	-940.456	1254.92	355.096	-1114.13	1402.49	473.854	-1068.44	1175.26	484.982	-1050.78	1079.61	506.364	-1115.67	939.065	463.505	-1134.81	835.826	523.041	-1088.58	827.594	518.637	-1143.66	762.332
1116	0	228.48	-1272.39	1570.72	124.495	-1266.48	1560.19	250.75	-1108.81	1589.75	132.321	-1099.63	1579.32	187.375	-1048.18	1440.45	203.106	-936.581	1164.42	209.995	-1197.28	1325.54	224.324	-1286.73	1123.76	121.013	-949.941	1254.47	355.32	-1123.7	1401.61	474.043	-1077.11	1174.58	484.92	-1059.25	1078.77	506.418	-1124.14	938.252	463.541	-1143.71	835.163	522.439	-1096.99	826.515	518.3	-1152.27	761.491
1117	0	229.332	-1280.92	1570.7	125.207	-1275.24	1560.41	251.423	-1117.06	1588.2	132.873	-1108.21	1577.97	187.506	-1057.95	1439.5	203.234	-945.977	1163.65	210.245	-1206.92	1324.73	224.409	-1296.14	1122.73	121.352	-959.409	1253.76	355.646	-1133.3	1400.68	474.447	-1085.96	1173.93	485.015	-1067.76	1078.03	506.438	-1132.55	937.283	463.493	-1152.45	834.51	522.1	-1105.21	825.482	518.151	-1160.84	760.601
1118	0	230.187	-1289.51	1570.44	126.082	-1284.11	1560.41	252.248	-1125.46	1586.37	133.677	-1116.87	1576.29	187.926	-1067.67	1438.48	203.355	-955.369	1162.67	210.514	-1216.57	1323.58	224.427	-1305.61	1121.48	121.518	-968.932	1252.89	355.954	-1143.07	1399.46	474.704	-1095.1	1172.86	485.092	-1076.44	1076.88	506.572	-1141.17	936.036	463.752	-1161.58	833.387	521.735	-1113.62	824.11	518.177	-1169.44	759.303
1119	0	231.153	-1298.16	1570.01	126.951	-1293.03	1560.26	252.873	-1134.28	1584.12	134.449	-1125.64	1574.59	188.373	-1077.46	1437.28	203.82	-964.716	1161.68	210.821	-1226.38	1322.28	224.382	-1315.33	1120.03	122.051	-978.496	1251.94	356.346	-1153.1	1397.92	474.958	-1104.65	1171.3	485.141	-1085.61	1075.33	506.75	-1149.91	934.4	463.925	-1170.54	831.926	521.37	-1122.34	822.477	518.246	-1178.17	757.772
1120	0	232.273	-1306.88	1569.58	127.928	-1301.91	1560.11	253.748	-1142.53	1582.08	135.234	-1134.33	1572.8	189.047	-1087.2	1436.08	204.238	-974.274	1160.59	211.087	-1236.08	1321.05	224.183	-1324.99	1118.58	122.573	-988.119	1250.87	356.769	-1163.09	1396.46	475.312	-1114.35	1169.9	485.341	-1094.72	1073.88	507	-1158.73	932.869	464.228	-1180.44	830.927	521.299	-1130.78	820.925	518.452	-1186.7	756.21
1121	0	233.31	-1315.51	1568.98	128.912	-1310.77	1559.84	254.689	-1151.12	1579.96	136.135	-1143.21	1570.8	189.827	-1096.95	1434.69	204.907	-983.614	1159.38	211.353	-1245.95	1319.62	224.122	-1334.53	1117	123.199	-997.802	1249.73	357.322	-1173.2	1394.95	475.732	-1124.09	1168.26	485.671	-1104.06	1072.49	507.282	-1167.63	931.218	464.487	-1189.39	829.258	521.361	-1139.35	819.248	518.804	-1195.29	754.552
1122	0	234.379	-1324.25	1568.12	130.07	-1319.77	1559.18	255.677	-1159.79	1577.6	136.984	-1151.98	1568.82	190.544	-1106.83	1433.19	205.478	-993.279	1157.89	211.728	-1255.85	1318.16	223.883	-1344.78	1115.51	124.103	-1007.45	1248.27	357.946	-1183.44	1393.16	476.095	-1134.28	1166.42	485.934	-1113.71	1070.68	507.627	-1176.83	929.29	464.929	-1198.4	827.301	521.463	-1148.19	817.324	519.157	-1204	752.603
1123	0	235.497	-1333.11	1567.12	131.119	-1328.71	1558.38	256.662	-1168.55	1575.26	138.075	-1160.98	1566.65	191.428	-1116.67	1431.52	206.305	-1002.96	1156.34	211.934	-1265.75	1316.44	223.629	-1354.86	1113.71	125.032	-1017.04	1246.96	358.57	-1193.81	1391.2	476.52	-1144.6	1164.31	486.32	-1123.46	1068.68	507.966	-1186.19	927.099	465.264	-1207.47	825.148	521.694	-1157.29	815.269	519.479	-1212.8	750.372
1124	0	236.585	-1342.03	1566.05	132.249	-1337.78	1557.64	257.789	-1177.32	1572.9	139.191	-1169.82	1564.52	192.629	-1126.41	1429.95	207.408	-1012.67	1154.7	212.464	-1275.74	1314.81	223.392	-1365.17	1112.1	126.046	-1026.85	1245.39	359.316	-1204.24	1389.25	477.085	-1155	1162.2	486.785	-1133.35	1066.8	508.427	-1195.61	925.01	465.713	-1216.6	822.882	522.338	-1166.3	813.433	519.855	-1221.61	748.122
1125	0	237.766	-1350.92	1565	133.378	-1346.82	1556.69	258.988	-1186.24	1570.68	140.32	-1178.87	1562.27	193.694	-1136.29	1428.24	208.357	-1022.67	1152.93	212.795	-1285.74	1313.23	223.164	-1375.45	1110.47	127.252	-1036.39	1243.82	360.156	-1214.71	1387.19	477.589	-1165.67	1159.97	487.351	-1143.31	1064.73	508.973	-1205.15	922.802	466.11	-1225	820.333	522.935	-1175.61	811.329	520.395	-1230.49	745.838
1126	0	239.101	-1360.11	1563.87	134.635	-1355.96	1555.59	260.09	-1195.59	1568.13	141.505	-1187.98	1560.2	194.865	-1146.15	1426.37	209.463	-1032.79	1151.06	213.53	-1295.95	1311.5	222.937	-1385.96	1108.81	128.386	-1046.25	1242.14	361.022	-1225.23	1385.02	478.007	-1176.64	1157.45	487.776	-1153.57	1062.29	509.527	-1215.03	920.276	466.631	-1234.45	817.743	523.53	-1185.21	808.938	520.935	-1239.53	743.181
1127	0	240.315	-1369.22	1562.7	135.954	-1365.22	1554.66	261.47	-1204.52	1566.06	142.796	-1197.11	1558.15	196.163	-1156.06	1424.6	210.689	-1043.04	1149.04	213.978	-1306.08	1309.86	222.684	-1396.47	1107.18	129.511	-1056.14	1240.42	361.98	-1235.75	1382.88	478.608	-1187.64	1155.06	488.326	-1163.99	1059.94	510.089	-1224.94	917.901	467.198	-1243.98	815.287	524.281	-1194.84	806.694	521.478	-1248.73	740.622
1128	0	241.746	-1378.35	1561.63	137.18	-1374.41	1553.77	262.811	-1213.59	1563.95	144.068	-1206.44	1556.12	197.549	-1165.96	1422.88	211.883	-1053.51	1147.1	214.593	-1316.28	1308.33	222.453	-1407.14	1105.87	130.819	-1066.03	1238.65	362.936	-1246.36	1380.87	479.38	-1198.59	1152.86	489.014	-1174.35	1057.88	510.715	-1234.96	915.682	467.777	-1253.63	812.928	525.162	-1204.53	804.732	522.14	-1258.02	738.23
1129	0	243.275	-1387.59	1560.38	138.646	-1383.67	1552.93	264.292	-1222.75	1561.85	145.509	-1215.68	1554.25	198.841	-1176.02	1421.08	213.149	-1063.81	1145.23	215.259	-1326.6	1306.84	222.29	-1417.93	1104.46	132.181	-1075.94	1237	363.96	-1256.89	1378.81	480.033	-1209.65	1150.64	489.7	-1184.85	1055.78	511.398	-1245.22	913.467	468.399	-1263.43	810.602	525.995	-1214.59	802.668	522.793	-1267.58	735.82
1130	0	244.762	-1396.88	1559.33	140.269	-1393.23	1551.98	265.762	-1232.41	1559.7	146.982	-1225.06	1552.37	200.202	-1186.14	1419.36	214.269	-1074.3	1143.29	216.052	-1337.06	1305.3	222.193	-1428.64	1103.1	133.39	-1086.31	1235.3	365.119	-1267.59	1376.82	480.852	-1220.99	1148.41	490.384	-1195.61	1053.5	512.036	-1255.67	911.22	469.036	-1273.49	808.008	526.84	-1224.87	800.367	523.437	-1277.45	733.382
1131	0	246.541	-1406.24	1558.38	141.918	-1402.57	1551.17	267.233	-1241.34	1557.6	148.622	-1234.55	1550.66	201.706	-1196.21	1417.73	215.306	-1084.8	1141.34	216.924	-1347.52	1304.01	222.21	-1439.52	1101.93	134.69	-1096.62	1233.51	366.281	-1278.22	1374.91	481.641	-1231.93	1146.34	491.204	-1206.39	1051.34	512.89	-1266.26	909.104	469.808	-1284.02	806.042	527.784	-1235.36	798.379	524.219	-1287.25	730.955
1132	0	248.261	-1415.59	1557.39	143.625	-1411.88	1550.52	268.899	-1250.64	1555.65	150.321	-1243.81	1548.93	203.255	-1206.35	1416	216.488	-1095.29	1139.31	217.77	-1358.05	1302.69	222.257	-1450.55	1100.93	136.042	-1107.01	1231.7	367.577	-1288.76	1373.05	482.721	-1242.9	1144.4	492.024	-1217.14	1049.32	513.625	-1276.96	907.087	470.453	-1294.2	803.744	528.683	-1246.06	796.485	524.868	-1297.66	728.971
1133	0	250.101	-1424.99	1556.36	145.458	-1421.41	1549.85	270.72	-1260.08	1553.63	152.114	-1253.3	1547.12	204.811	-1216.58	1414.28	217.478	-1106.13	1137.29	218.815	-1368.68	1301.49	222.515	-1461.6	1099.81	137.415	-1117.64	1229.99	368.981	-1299.53	1371.22	483.727	-1253.97	1142.32	492.851	-1228.05	1047.14	514.458	-1287.93	904.912	471.197	-1305.18	801.629	529.672	-1256.94	794.456	525.652	-1308.35	726.668
1134	0	251.903	-1434.45	1555.4	147.336	-1431.04	1549.1	272.553	-1269.63	1551.65	153.972	-1262.8	1545.49	206.457	-1226.86	1412.62	218.859	-1117.17	1135.2	219.892	-1379.46	1300.34	222.776	-1472.84	1098.89	138.779	-1128.34	1228.13	370.411	-1310.2	1369.32	484.616	-1264.73	1139.94	493.827	-1239.12	1044.97	515.37	-1299.06	902.896	472.121	-1316.31	799.619	530.402	-1268.25	792.394	526.4	-1319.28	724.58
1135	0	253.89	-1444.02	1554.75	149.185	-1440.46	1548.55	274.441	-1279.13	1549.98	155.995	-1272.4	1544.01	208.244	-1237.11	1411.01	220.032	-1128.58	1133	221.144	-1390.22	1299.41	223.273	-1484.47	1098.39	140.056	-1139.29	1226.32	371.832	-1320.83	1367.6	485.913	-1275.58	1138.24	494.954	-1250.12	1043.13	516.341	-1310.29	901.108	472.939	-1327.57	797.82	531.426	-1279.56	790.518	527.15	-1330.51	722.628
1136	0	255.787	-1453.56	1554.06	151.093	-1450.02	1548.11	276.526	-1288.68	1548.42	157.913	-1282.02	1542.54	210.121	-1247.4	1409.47	221.378	-1140.16	1130.83	222.42	-1401.14	1298.54	223.738	-1495.6	1097.64	141.583	-1150.35	1224.44	373.404	-1331.49	1365.91	487.249	-1286.38	1136.54	496.102	-1261.18	1041.32	517.414	-1321.77	899.331	473.841	-1339.28	796.106	532.23	-1291.18	788.677	527.916	-1342.18	720.835
1137	0	257.813	-1463.29	1553.38	153.116	-1459.68	1547.71	278.631	-1298.82	1546.64	160.125	-1291.69	1541.2	211.919	-1257.74	1407.94	222.596	-1152.01	1128.75	223.862	-1412.17	1297.71	224.619	-1506.67	1096.92	143.088	-1161.34	1222.59	375.202	-1342.16	1364.26	488.646	-1297.25	1134.55	497.324	-1272.44	1039.22	518.57	-1333.42	897.509	474.929	-1351.35	794.333	533.186	-1303.03	786.698	528.504	-1354.11	718.737
1138	0	259.88	-1473.04	1553.04	155.079	-1469.45	1547.6	280.787	-1308.42	1545.14	162.226	-1301.35	1540.04	213.818	-1268.16	1406.55	223.889	-1163.84	1126.73	225.378	-1423.32	1297.09	225.493	-1518.7	1096.66	144.341	-1172.7	1220.93	376.884	-1352.91	1362.77	490.05	-1308.29	1132.68	498.513	-1283.8	1037.25	519.775	-1345.16	895.696	475.983	-1363.56	792.787	534.01	-1315.22	784.784	529.373	-1366.45	717.028
1139	0	261.962	-1482.96	1552.93	157.153	-1479.2	1547.74	283.022	-1318.32	1544.05	164.458	-1311.2	1539.17	215.626	-1278.74	1405.44	225.123	-1175.8	1125.03	226.903	-1434.53	1296.82	226.134	-1530.56	1096.77	145.964	-1183.9	1219.49	378.665	-1363.59	1361.57	491.658	-1319.25	1131.3	499.762	-1295.19	1035.71	521.052	-1357.15	894.268	477.072	-1375.98	791.562	534.854	-1327.42	783.134	530.299	-1378.93	715.721
1140	0	264.08	-1492.99	1552.98	159.259	-1489.19	1548.11	285.331	-1328.33	1543.26	166.691	-1321.27	1538.49	217.449	-1289.44	1404.62	226.359	-1187.72	1123.67	228.547	-1445.88	1296.72	227.217	-1542.75	1097.02	147.064	-1195.35	1218.38	380.454	-1374.4	1360.52	493.281	-1330.48	1130.13	500.995	-1306.79	1034.27	522.454	-1369.16	892.897	478.321	-1388.02	790.029	535.958	-1339.7	781.744	531.458	-1391.86	714.555
1141	0	266.299	-1503.22	1553.26	161.488	-1499.34	1548.65	287.618	-1338.57	1542.61	168.985	-1331.45	1538.16	219.268	-1300.27	1404.19	227.372	-1199.46	1122.81	230.192	-1457.35	1296.81	228.204	-1555.25	1097.49	148.157	-1206.72	1217.73	382.183	-1385.31	1359.64	494.728	-1341.99	1128.94	502.053	-1318.74	1032.89	523.628	-1381.3	891.648	479.529	-1401.01	789.141	536.769	-1352.47	780.387	532.486	-1404.97	713.552
1142	0	268.556	-1513.53	1553.97	163.703	-1509.56	1549.52	289.885	-1348.93	1542.32	171.298	-1341.72	1538.26	220.785	-1311.39	1404.15	228.172	-1211.04	1122.42	231.904	-1468.88	1297.34	229.344	-1568.05	1098.5	148.873	-1218.48	1217.52	383.883	-1396.18	1359.24	496.068	-1353.63	1128.18	502.923	-1330.8	1031.88	524.928	-1393.71	890.963	480.812	-1414.3	788.782	537.838	-1365.33	779.411	533.746	-1418.21	712.945
1143	0	270.867	-1523.83	1554.97	165.882	-1519.87	1550.71	292.108	-1359.4	1542.68	173.582	-1352.15	1538.77	222.437	-1322.55	1404.67	229.184	-1222.61	1122.91	233.632	-1480.33	1298.26	230.7	-1580.56	1099.73	149.729	-1230.1	1217.93	385.496	-1407.01	1359.25	497.32	-1365.36	1127.94	504.036	-1342.71	1031.45	526.193	-1406.19	890.766	482.122	-1427.17	788.528	539.066	-1378.15	779.071	535.138	-1431.6	713.023
1144	0	273.085	-1534.32	1556.26	168.139	-1530.51	1552.16	294.38	-1369.89	1543.23	175.854	-1362.66	1539.54	223.894	-1333.85	1405.48	229.867	-1234.53	1123.73	235.314	-1491.93	1299.36	232.277	-1592.66	1100.94	150.114	-1241.85	1218.92	387.069	-1417.98	1359.68	498.314	-1377.37	1127.92	504.787	-1355.21	1031.48	527.397	-1418.98	890.944	483.631	-1440.33	788.597	540.126	-1391.31	779.036	536.61	-1445.15	713.275
1145	0	275.262	-1545.07	1557.69	170.41	-1541.15	1553.85	296.573	-1380.94	1544.12	178.042	-1373.3	1540.79	225.3	-1345.16	1406.67	230.393	-1246.49	1125.05	236.96	-1503.42	1300.83	233.791	-1605.34	1102.86	150.469	-1253.79	1220.31	388.582	-1428.85	1360.53	499.065	-1389.39	1128.11	505.347	-1367.93	1031.68	528.505	-1432.03	891.601	484.797	-1454.53	789.562	541.407	-1404.79	779.692	538.2	-1458.93	714.062
1146	0	277.436	-1555.68	1559.37	172.55	-1551.86	1555.93	298.873	-1391.42	1545.53	180.193	-1384.13	1542.38	226.583	-1356.4	1408.26	230.401	-1258.48	1126.22	238.68	-1514.89	1302.63	235.57	-1617.26	1104.96	150.859	-1265.62	1222.09	390.051	-1439.54	1361.91	499.778	-1401.37	1128.98	506.132	-1380.33	1032.63	529.578	-1445.13	892.831	486.223	-1468.01	790.618	542.592	-1418.29	780.835	539.913	-1472.73	715.462
1147	0	279.461	-1566.5	1561.35	174.502	-1562.58	1558.22	300.876	-1402.15	1547.16	182.216	-1394.92	1544.26	227.903	-1367.64	1409.85	230.177	-1270.69	1127.42	240.229	-1526.15	1304.7	237.309	-1628.16	1106.98	151.191	-1277.29	1223.85	391.4	-1450.18	1363.58	500.175	-1413.2	1130.14	506.849	-1392.85	1034.13	530.523	-1458.39	894.544	487.664	-1482	792.364	543.765	-1431.91	782.537	541.638	-1486.67	717.412
1148	0	281.414	-1577.33	1563.25	176.507	-1573.38	1560.38	302.727	-1413.07	1548.73	184.198	-1405.63	1546.39	229.156	-1378.6	1411.77	230.381	-1283.06	1129.12	241.815	-1537.29	1306.89	239.097	-1639.41	1109.35	151.739	-1289.02	1225.71	392.81	-1460.91	1365.4	500.522	-1425.32	1131.41	507.1	-1405.72	1035.49	531.49	-1471.87	896.506	489.093	-1496.37	794.386	545.059	-1445.79	784.346	543.403	-1500.86	719.498
1149	0	283.099	-1588.25	1565.22	178.231	-1584.14	1562.75	304.583	-1423.92	1550.62	186.064	-1416.42	1548.75	230.432	-1389.41	1413.61	230.646	-1295.19	1130.69	243.366	-1548.26	1309.22	240.756	-1650.32	1111.8	152.293	-1300.69	1227.69	394.18	-1471.5	1367.43	500.912	-1437.33	1132.86	507.706	-1418.21	1037.17	532.378	-1485.26	898.737	490.459	-1510.7	796.781	546.162	-1459.87	786.353	545.149	-1515.18	721.953
1150	0	284.663	-1599.04	1567.23	179.731	-1594.79	1564.88	306.24	-1434.77	1552.85	187.692	-1427.2	1551.11	231.85	-1400.05	1415.71	231.283	-1306.72	1132.68	244.776	-1559.11	1311.64	242.31	-1660.87	1114.52	153.105	-1312.05	1229.56	395.522	-1481.94	1369.76	501.541	-1449.19	1134.84	508.334	-1430.76	1039.34	533.327	-1498.63	901.238	491.692	-1524.96	799.422	547.292	-1473.97	788.972	546.821	-1529.65	724.781
1151	0	286.078	-1609.79	1569.17	181.065	-1605.45	1567.11	307.776	-1445.49	1555.12	189.178	-1437.81	1553.48	233.018	-1410.62	1417.5	231.984	-1317.4	1134.06	246.116	-1569.78	1314.03	243.761	-1671.22	1117.14	153.986	-1323.18	1231.39	396.862	-1492.42	1372	502.26	-1461.11	1136.88	509.149	-1443.06	1041.58	534.394	-1512.08	903.876	492.975	-1539.34	802.058	548.427	-1488.16	791.553	548.329	-1544.36	727.647
1152	0	287.292	-1620.53	1570.96	182.324	-1616.1	1568.89	309.194	-1456.11	1557.15	190.627	-1448.4	1555.62	234.438	-1421.1	1419.38	232.885	-1328.2	1135.94	247.421	-1580.48	1316.04	245.117	-1681.54	1119.6	155.017	-1334.11	1233.11	398.189	-1502.94	1374.07	503.182	-1473.18	1138.78	510.115	-1455.41	1043.34	535.408	-1525.71	906.277	494.16	-1553.97	804.564	549.42	-1502.67	793.837	549.699	-1559.32	730.394
1153	0	288.396	-1631.12	1572.78	183.583	-1626.62	1570.76	310.256	-1466.77	1559.04	191.885	-1458.9	1557.77	235.725	-1431.55	1421.07	234.047	-1338.79	1137.56	248.649	-1590.99	1318.14	246.253	-1691.86	1121.97	156.114	-1344.75	1234.9	399.484	-1513.52	1376.06	504.176	-1485.16	1140.66	511.157	-1467.93	1045.14	536.53	-1539.21	908.676	495.339	-1568.62	807.191	550.333	-1517.2	796.043	550.968	-1574.47	733.074
1154	0	289.532	-1641.47	1574.59	184.603	-1636.92	1572.62	311.386	-1477.09	1560.92	192.971	-1469.26	1559.44	236.959	-1441.92	1422.72	235.307	-1349.43	1139.25	249.78	-1601.35	1320.01	247.269	-1702.04	1124.17	157.562	-1355.1	1236.68	400.76	-1524	1377.92	505.472	-1496.99	1142.67	512.528	-1480.07	1046.94	537.853	-1552.66	911.01	496.453	-1583.21	809.94	551.363	-1531.78	798.28	552.071	-1589.7	735.895
1155	0	290.554	-1651.72	1576.3	185.641	-1647.2	1574.29	312.336	-1487.35	1562.35	193.844	-1479.65	1561	238.251	-1452.36	1424.24	236.577	-1359.95	1140.66	250.817	-1611.75	1321.69	248.171	-1712.2	1126.14	158.809	-1365.27	1238.32	401.888	-1534.61	1379.63	506.815	-1508.86	1144.36	514.01	-1492.52	1048.44	539.178	-1566.13	913.106	497.592	-1597.87	812.49	552.345	-1546.59	800.149	553.14	-1605.2	738.487
1156	0	291.646	-1661.94	1577.75	186.631	-1657.58	1575.88	313.183	-1498.06	1563.62	194.802	-1489.87	1562.32	239.416	-1462.68	1425.77	238.066	-1370.2	1142.4	251.77	-1622.09	1323.14	248.801	-1722.52	1127.59	160.205	-1375.29	1239.96	402.917	-1545.39	1381	508.226	-1520.86	1145.77	515.538	-1504.98	1049.65	540.455	-1579.79	914.93	498.64	-1612.76	814.885	553.223	-1561.5	801.647	553.898	-1620.89	740.789
1157	0	292.53	-1672.01	1579.22	187.594	-1667.74	1577.32	314.051	-1507.73	1564.86	195.556	-1500.05	1563.45	240.537	-1473.01	1427.2	239.428	-1380.32	1144	252.512	-1632.35	1324.42	249.196	-1732.7	1128.81	161.509	-1385.04	1241.54	403.774	-1556.04	1382.31	509.767	-1532.63	1147.29	517.276	-1517.26	1050.81	541.798	-1593.38	916.723	499.596	-1627.42	817.294	554.223	-1576.2	803.294	554.61	-1636.66	743.205
1158	0	293.476	-1682.01	1580.65	188.408	-1677.87	1578.82	314.837	-1517.69	1566.02	196.335	-1510.18	1564.6	241.52	-1483.27	1428.52	240.782	-1390.23	1145.58	253.147	-1642.51	1325.64	249.433	-1742.87	1129.9	162.867	-1394.59	1243.06	404.499	-1566.76	1383.53	511.29	-1544.19	1148.77	519.115	-1529.63	1052.11	543.118	-1607.07	918.514	500.437	-1642.04	819.692	554.959	-1591.17	804.695	555.278	-1652.65	745.757
1159	0	294.369	-1692.09	1581.88	189.402	-1687.97	1580.08	315.514	-1527.75	1566.88	197.046	-1520.22	1565.67	242.456	-1493.48	1429.92	242.148	-1399.85	1147.05	253.711	-1652.69	1326.64	249.546	-1753.04	1130.5	163.937	-1404.1	1244.63	405.092	-1577.52	1384.44	512.876	-1556.05	1149.9	520.786	-1542.14	1052.89	544.324	-1620.9	920.051	501.317	-1656.8	821.884	555.981	-1606.41	806.015	555.794	-1668.56	747.947
1160	0	295.195	-1702.08	1582.86	190.223	-1698.02	1581.18	316.134	-1537.69	1567.68	197.888	-1530.24	1566.66	243.165	-1503.67	1431.12	243.611	-1409.33	1148.61	254.116	-1662.79	1327.49	249.455	-1763.17	1130.84	165.182	-1413.59	1246.08	405.563	-1588.39	1385.3	514.372	-1567.82	1150.85	522.652	-1554.78	1053.64	545.521	-1634.78	921.528	502.064	-1671.45	823.9	556.825	-1621.62	807.133	556.349	-1684.58	750.148
1161	0	295.837	-1712.03	1584.1	190.81	-1707.97	1582.31	316.916	-1547.6	1568.64	198.377	-1540.31	1567.64	243.909	-1513.76	1432.22	244.841	-1418.74	1150.07	254.298	-1672.81	1328.35	249.106	-1773.1	1131.35	166.376	-1422.71	1247.49	405.926	-1599.03	1386.28	515.872	-1579.46	1152.08	524.34	-1567.33	1054.5	546.577	-1648.67	923.15	502.656	-1685.8	825.982	557.767	-1636.63	808.578	556.836	-1700.52	752.504
1162	0	296.459	-1721.92	1584.92	191.405	-1717.8	1583.47	317.414	-1557.63	1569.5	199.032	-1550.2	1568.57	244.605	-1523.8	1433.47	246.095	-1428.08	1151.56	254.375	-1682.66	1329.08	248.648	-1782.95	1131.87	167.665	-1431.99	1248.81	406.27	-1609.64	1387.15	517.245	-1591.04	1153.33	526.267	-1579.92	1055.67	547.474	-1662.64	924.779	503.134	-1700.27	828.129	558.722	-1651.68	810.165	557.243	-1716.5	754.933
1163	0	296.932	-1731.96	1585.65	191.889	-1727.71	1584.3	318.079	-1567.55	1570.1	199.684	-1560.03	1569.45	245.293	-1533.79	1434.58	247.39	-1437.29	1152.87	254.346	-1692.48	1329.66	248.045	-1792.63	1132	168.848	-1441.09	1250.15	406.468	-1620.4	1387.91	518.504	-1602.9	1154.33	527.845	-1592.76	1056.52	548.156	-1676.72	926.284	503.537	-1714.66	830.013	559.56	-1666.89	811.491	557.529	-1732.36	757.186
1164	0	297.234	-1741.98	1586.28	192.316	-1737.54	1585.05	318.657	-1577.61	1570.64	200.245	-1569.9	1570.2	245.963	-1543.71	1435.5	248.755	-1446.48	1154.21	254.236	-1702.18	1330.15	247.302	-1802.09	1132.15	169.961	-1450.22	1251.31	406.666	-1631.07	1388.59	519.577	-1614.67	1155.2	529.333	-1605.6	1057.38	548.778	-1690.82	927.86	503.899	-1729.75	832.18	560.405	-1682.06	812.938	557.795	-1748.17	759.487
1165	0	297.565	-1751.95	1586.92	192.565	-1747.31	1585.65	319.121	-1587.5	1571.28	200.766	-1579.71	1570.72	246.684	-1553.5	1436.41	250.037	-1455.67	1155.25	253.978	-1711.72	1330.61	246.472	-1811.2	1132.43	171.116	-1459.39	1252.27	406.865	-1641.58	1389.3	520.463	-1626.25	1156.25	530.852	-1618.26	1058.48	549.207	-1704.8	929.539	504.014	-1743.13	834.003	561.353	-1697.07	814.652	558.026	-1763.73	761.867
1166	0	297.724	-1761.77	1587.4	192.733	-1757.02	1586.13	319.63	-1597.45	1571.71	201.363	-1589.41	1571.15	247.491	-1563.21	1437.17	251.165	-1464.82	1156.14	253.809	-1721.18	1331	245.777	-1820.37	1132.75	172.358	-1468.36	1253.17	407.088	-1651.98	1389.99	521.185	-1637.91	1157.07	532.161	-1631.05	1059.34	549.613	-1718.82	931.172	504.164	-1756.64	835.718	562.163	-1712.07	816.193	558.263	-1779.12	764.141
1167	0	297.839	-1771.71	1587.74	192.883	-1766.78	1586.42	320.045	-1607.47	1571.88	201.745	-1599.17	1571.52	248.145	-1572.82	1437.88	252.224	-1473.93	1156.87	253.618	-1730.64	1331.27	244.999	-1829.48	1132.88	173.341	-1477.45	1253.99	407.292	-1662.39	1390.37	521.849	-1649.99	1157.6	533.076	-1643.7	1059.81	549.831	-1732.86	932.596	504.297	-1770.69	837.287	562.773	-1727.15	817.447	558.296	-1794.55	766.203
1168	0	297.699	-1781.58	1587.9	192.969	-1776.47	1586.7	320.34	-1617.42	1572.19	201.957	-1608.94	1571.84	248.857	-1582.28	1438.26	253.138	-1483.06	1157.62	253.389	-1740.04	1331.54	244.308	-1838.41	1133.07	174.447	-1486.3	1254.71	407.401	-1672.61	1390.77	522.256	-1661.72	1158.24	534.157	-1656.38	1060.68	549.988	-1746.78	934.047	504.309	-1784.6	838.897	563.481	-1741.98	819.042	558.33	-1809.74	768.135
1169	0	297.935	-1791.39	1588.05	193.047	-1786.15	1586.92	320.476	-1627.01	1572.61	202.235	-1618.7	1572.11	249.454	-1591.77	1438.7	254.016	-1492.05	1158.02	253.18	-1749.3	1331.75	243.694	-1847.09	1133.28	175.503	-1495.31	1255.12	407.581	-1682.55	1391.06	522.609	-1673.42	1158.9	535.255	-1669.15	1061.61	550.109	-1760.59	935.462	504.291	-1798.45	840.419	564.043	-1756.48	820.494	558.319	-1824.65	770.032
1170	0	298.034	-1801.21	1587.97	193.167	-1795.88	1586.88	320.796	-1636.87	1572.62	202.564	-1628.36	1572.25	249.91	-1601.23	1438.89	254.813	-1500.95	1158.62	253.067	-1758.62	1331.8	243.238	-1855.78	1133.32	176.2	-1504.31	1255.65	407.766	-1692.5	1391.24	522.802	-1685.29	1159.13	535.847	-1681.73	1061.84	550.216	-1774.32	936.572	504.334	-1812.38	841.588	564.518	-1771.19	821.563	558.304	-1839.48	771.539
1171	0	298.158	-1811.02	1587.83	193.278	-1805.57	1586.73	320.898	-1646.77	1572.57	202.75	-1637.93	1572.5	250.274	-1610.62	1438.95	255.349	-1509.86	1158.84	252.928	-1767.88	1331.78	242.809	-1864.55	1133.16	176.927	-1513.35	1255.88	407.888	-1702.3	1391.19	523.043	-1697.36	1159.09	536.534	-1694.59	1061.9	550.341	-1788.28	937.473	504.265	-1826.19	842.54	564.954	-1785.99	822.454	558.195	-1854.29	772.697
1172	0	298.113	-1820.71	1587.57	193.252	-1815.21	1586.58	321.013	-1656.42	1572.66	202.808	-1647.65	1572.57	250.686	-1619.98	1439.02	255.756	-1518.71	1158.94	252.813	-1777.14	1331.72	242.383	-1873.26	1133.21	177.216	-1522.42	1256.04	407.951	-1711.92	1391.13	523.172	-1709.09	1159.18	536.91	-1707.06	1062.1	550.321	-1801.55	938.396	504.062	-1839.91	843.408	565.289	-1800.34	823.389	557.94	-1868.69	773.841
1173	0	297.941	-1830.23	1587.18	193.122	-1824.91	1586.37	321.105	-1665.97	1572.64	202.915	-1657.23	1572.4	251.009	-1629.31	1438.93	255.999	-1527.68	1158.89	252.648	-1786.43	1331.6	242.117	-1882.15	1133.04	177.596	-1531.5	1256	408.032	-1721.42	1390.92	523.292	-1720.75	1159.16	537.067	-1719.41	1062.04	550.256	-1814.83	939.034	503.902	-1853.67	844.367	565.184	-1814.26	824.052	557.675	-1883.13	774.897
1174	0	298.032	-1840.03	1586.79	193.148	-1834.46	1585.87	321.053	-1675.59	1572.42	202.97	-1666.78	1572.24	251.079	-1638.69	1438.64	256.089	-1536.65	1158.78	252.567	-1795.74	1331.22	241.924	-1891.26	1132.63	177.784	-1540.54	1255.95	407.914	-1730.87	1390.46	523.345	-1732.55	1158.77	537.121	-1731.94	1061.74	550.027	-1828.12	939.308	503.599	-1867.39	844.748	565.257	-1828.67	824.505	557.291	-1897.44	775.533
1175	0	297.837	-1849.68	1586.16	193.015	-1843.96	1585.33	321.115	-1685.4	1572.03	202.921	-1676.46	1571.92	251.06	-1648.12	1438.29	256.182	-1545.53	1158.53	252.503	-1805.15	1330.75	241.762	-1900.31	1132.1	177.853	-1549.81	1255.67	407.936	-1740.27	1389.94	523.048	-1744.11	1158.11	537.142	-1744.47	1061.26	549.673	-1841.18	939.562	503.139	-1880.89	845.189	564.784	-1842.46	824.556	556.846	-1911.64	776.237
1176	0	297.766	-1859.27	1585.64	192.921	-1853.58	1584.83	321.091	-1694.9	1571.59	202.942	-1685.92	1571.41	251.042	-1657.55	1437.83	256.153	-1554.5	1158.15	252.439	-1814.45	1330.21	241.719	-1909.42	1131.48	177.529	-1559.06	1255.37	407.837	-1749.6	1389.34	523.002	-1755.66	1157.68	536.954	-1756.63	1060.81	549.305	-1854.21	939.793	502.636	-1894.38	845.695	564.639	-1856.38	824.975	556.31	-1925.58	776.833
1177	0	297.628	-1868.84	1585.05	192.703	-1863.05	1584.04	320.85	-1704.56	1570.92	202.78	-1695.35	1570.85	250.924	-1667.05	1437.26	255.843	-1563.7	1157.74	252.417	-1823.87	1329.57	241.755	-1918.56	1130.65	177.423	-1568.42	1254.85	407.725	-1758.98	1388.71	522.936	-1767.4	1157.15	536.56	-1768.82	1060.19	548.778	-1867.13	939.894	501.975	-1907.57	845.816	564.053	-1869.88	824.975	555.612	-1939.55	777.379
1178	0	297.359	-1878.45	1584.09	192.521	-1872.64	1583.21	320.614	-1714.2	1570.05	202.522	-1705.03	1570.16	250.591	-1676.64	1436.6	255.538	-1572.87	1157.26	252.345	-1833.43	1328.58	241.824	-1927.86	1129.54	177.208	-1577.75	1254.38	407.523	-1768.52	1387.87	522.401	-1778.84	1156.2	535.975	-1781.01	1059.31	547.978	-1879.95	939.792	501.273	-1920.91	846.02	563.506	-1883.7	824.828	554.833	-1953.37	777.68
1179	0	297.064	-1887.97	1583.27	192.24	-1882.22	1582.34	320.256	-1723.69	1569.18	202.252	-1714.63	1569.19	250.276	-1686.24	1435.79	255.18	-1582.08	1156.68	252.247	-1843	1327.69	241.865	-1937.15	1128.3	176.663	-1587.34	1253.62	407.246	-1777.87	1387.03	522.025	-1790.18	1155.49	535.389	-1792.87	1058.64	547.207	-1892.64	939.838	500.343	-1933.93	845.928	562.859	-1897.21	824.968	553.848	-1967.04	778.007
1180	0	296.678	-1897.56	1582.4	191.891	-1891.82	1581.46	319.953	-1733.2	1568.13	201.837	-1724.17	1567.95	249.782	-1695.95	1434.86	254.595	-1591.54	1155.92	251.997	-1852.58	1326.64	241.92	-1946.49	1127.11	176.124	-1596.75	1252.87	406.881	-1787.25	1386.09	521.473	-1801.25	1154.78	534.848	-1804.65	1057.99	546.004	-1905.14	939.572	499.319	-1946.92	846.161	562.219	-1910.4	825.119	552.856	-1980.49	778.406
1181	0	296.477	-1907.19	1581.29	191.576	-1901.48	1580.29	319.424	-1742.8	1566.79	201.381	-1733.94	1566.7	249.185	-1705.72	1433.78	254.131	-1600.96	1155.03	251.764	-1862.26	1325.26	242.006	-1955.93	1125.59	175.45	-1606.49	1251.79	406.528	-1796.82	1384.9	520.869	-1812.32	1153.63	534.157	-1816.47	1057.05	544.978	-1917.74	939.362	498.205	-1959.77	845.852	561.116	-1923.63	824.764	551.663	-1994	778.347
1182	0	296.135	-1916.78	1580.22	191.328	-1911.15	1579.09	318.877	-1752.43	1565.22	200.758	-1743.62	1565.29	248.599	-1715.52	1432.62	253.472	-1610.51	1153.89	251.493	-1872.09	1323.83	242.053	-1965.46	1123.83	174.707	-1616.14	1250.79	406.07	-1806.44	1383.63	520.13	-1823.06	1152.37	533.146	-1828	1055.74	543.73	-1930.15	938.821	496.988	-1972.48	845.585	559.867	-1936.66	824.082	550.435	-2007.36	778.406
1183	0	295.501	-1926.3	1579.09	190.799	-1920.9	1578	318.239	-1761.97	1563.7	200.188	-1753.3	1563.62	247.949	-1725.34	1431.41	252.653	-1620.17	1152.67	251.105	-1881.81	1322.52	242.024	-1974.98	1122.25	173.997	-1625.87	1249.61	405.543	-1815.97	1382.35	519.395	-1833.48	1151.14	532.376	-1839.34	1054.63	542.512	-1942.33	938.423	495.608	-1985.05	845.448	558.713	-1949.58	823.72	548.894	-2020.48	778.383
1184	0	295.109	-1935.97	1577.84	190.212	-1930.64	1576.82	317.342	-1771.52	1562.15	199.268	-1763.13	1562.12	247.106	-1735.36	1429.95	251.995	-1629.78	1151.36	250.64	-1891.69	1320.95	242.027	-1984.61	1120.64	173.123	-1635.87	1248.22	404.941	-1825.54	1381.02	518.524	-1843.62	1149.82	531.621	-1850.71	1053.5	541.226	-1954.37	937.927	494.104	-1997.43	845.076	557.379	-1962.37	823.261	547.367	-2033.4	778.308
1185	0	294.328	-1945.54	1576.42	189.618	-1940.41	1575.27	316.548	-1781.23	1560.44	198.468	-1772.97	1560.32	246.123	-1745.38	1428.4	251.144	-1639.75	1150.01	250.155	-1901.68	1319.2	241.95	-1994.53	1118.74	172.288	-1645.74	1246.68	404.247	-1835.29	1379.43	517.856	-1853.85	1148.24	530.758	-1861.93	1051.9	539.867	-1966.37	936.982	492.567	-2009.83	844.577	555.816	-1975.19	822.352	545.744	-2046.54	778.016
1186	0	293.518	-1955.32	1574.99	188.762	-1950.23	1573.76	315.622	-1791.04	1558.68	197.526	-1782.72	1558.55	245.135	-1755.47	1426.91	250.437	-1649.65	1148.51	249.586	-1911.71	1317.53	241.719	-2004.41	1116.88	171.184	-1655.9	1245.19	403.43	-1845.02	1377.77	516.775	-1863.55	1146.53	529.66	-1872.82	1050.21	538.672	-1978.34	936.193	490.893	-2021.94	844.035	554.32	-1987.76	821.466	543.821	-2059.33	777.518
1187	0	292.556	-1965.04	1573.56	187.73	-1960.14	1572.33	314.615	-1800.76	1557.07	196.44	-1792.57	1556.75	244.161	-1765.44	1425.29	249.484	-1659.69	1146.96	248.931	-1921.7	1315.86	241.42	-2014.33	1115.1	170.382	-1666.03	1243.46	402.57	-1854.78	1376.26	515.777	-1873.04	1145.02	528.928	-1883.55	1048.87	537.291	-1989.89	935.353	489.113	-2033.81	843.476	552.901	-2000.16	820.805	541.798	-2071.92	777.204
1188	0	291.49	-1974.86	1572.14	186.759	-1969.9	1570.69	313.563	-1810.57	1555.39	195.415	-1802.44	1554.9	243.052	-1775.51	1423.66	248.447	-1669.68	1145.4	248.204	-1931.79	1314.14	241.069	-2024.29	1113.24	169.18	-1676.21	1241.72	401.678	-1864.56	1374.75	515.007	-1882.6	1143.46	528.07	-1894.26	1047.39	535.772	-2001.34	934.341	487.237	-2045.59	842.719	551.123	-2012.3	819.918	539.559	-2084.38	776.714
1189	0	290.265	-1984.7	1570.52	185.57	-1979.78	1569.02	312.367	-1820.53	1553.62	194.164	-1812.35	1553.15	241.842	-1785.66	1422.02	247.48	-1679.74	1143.93	247.437	-1942.02	1312.35	240.668	-2034.51	1111.34	168.088	-1686.35	1240.07	400.703	-1874.54	1373.07	513.994	-1892.1	1141.63	527.196	-1904.93	1045.69	534.457	-2012.76	933.147	485.397	-2057.27	841.992	549.655	-2024.85	818.992	537.376	-2096.72	776.155
1190	0	288.97	-1994.61	1569.11	184.193	-1989.64	1567.44	311.066	-1830.46	1551.95	192.879	-1822.16	1551.21	240.715	-1795.81	1420.28	246.382	-1690.04	1142.07	246.523	-1952.22	1310.67	240.149	-2044.69	1109.61	166.901	-1696.65	1238.23	399.72	-1884.5	1371.52	513.26	-1901.71	1140.13	526.336	-1915.34	1044.17	532.885	-2023.74	931.923	483.463	-2068.72	841.441	547.819	-2036.59	817.959	535.045	-2108.69	775.68
1191	0	287.545	-2004.4	1567.72	182.811	-1999.54	1565.96	309.56	-1840.35	1550.28	191.449	-1832.21	1549.33	239.384	-1805.92	1418.58	245.344	-1700.32	1140.31	245.481	-1962.58	1309.05	239.575	-2055.01	1107.98	165.816	-1707.04	1236.25	398.592	-1894.54	1369.93	512.584	-1911.33	1138.83	525.487	-1925.52	1042.78	531.622	-2034.64	930.989	481.437	-2079.83	840.737	545.998	-2048.03	817.062	532.68	-2120.35	775.032
1192	0	286.083	-2014.42	1566.39	181.287	-2009.54	1564.47	308.128	-1850.3	1548.48	189.901	-1842.25	1547.32	238.079	-1816.11	1416.78	244.39	-1710.71	1138.52	244.371	-1972.97	1307.37	239.049	-2065.51	1106.38	164.568	-1717.5	1234.37	397.376	-1904.75	1368.32	511.59	-1920.91	1137.19	524.535	-1935.68	1041.03	530.191	-2045.38	929.757	479.464	-2090.85	839.808	543.899	-2059.27	815.695	530.37	-2131.89	774.247
1193	0	284.537	-2024.36	1564.95	179.857	-2019.48	1562.86	306.41	-1860.37	1546.68	188.283	-1852.22	1545.6	236.734	-1826.47	1415.1	243.146	-1721.2	1136.45	243.211	-1983.46	1305.79	238.398	-2076.16	1104.8	163.398	-1727.9	1232.3	396.098	-1915.03	1366.7	510.486	-1930.66	1135.5	523.518	-1945.91	1039.29	528.688	-2055.87	928.393	477.565	-2101.71	839.091	541.695	-2070.26	814.101	528.167	-2143.16	773.293
1194	0	282.879	-2034.25	1563.76	178.11	-2029.55	1561.68	304.764	-1870.29	1545.08	186.669	-1862.2	1543.79	235.201	-1836.84	1413.51	242.132	-1731.74	1134.76	241.914	-1994.03	1304.4	237.727	-2086.8	1103.4	162.178	-1738.52	1230.46	394.936	-1925.62	1365.54	509.372	-1940.34	1134.13	522.422	-1955.65	1037.85	527.185	-2066.06	927.225	475.547	-2112.27	838.449	539.584	-2080.88	812.938	525.793	-2153.9	772.607
1195	0	281.229	-2044.19	1562.73	176.555	-2039.54	1560.57	302.855	-1880.34	1543.59	184.642	-1872.49	1542.13	233.775	-1847.28	1411.77	240.86	-1742.54	1133.03	240.553	-2004.66	1303.13	236.95	-2097.58	1102.14	161.091	-1749.19	1228.67	393.502	-1936.12	1364.32	508.293	-1950.19	1133.11	521.555	-1965.43	1036.74	525.635	-2076.09	926.062	473.569	-2122.43	837.717	537.601	-2091.21	811.953	523.518	-2164.48	771.908
1196	0	279.414	-2054.23	1561.59	174.65	-2049.72	1559.3	300.968	-1890.39	1542.02	182.827	-1882.58	1540.49	232.219	-1857.79	1410.34	239.953	-1753.43	1131.25	239.104	-2015.37	1301.8	236.052	-2108.54	1100.78	159.941	-1759.95	1226.78	391.953	-1946.86	1363.17	507.226	-1960.38	1132.08	520.387	-1975.22	1035.47	524.129	-2086.04	924.887	471.604	-2132.46	836.745	535.436	-2101.35	810.694	521.104	-2174.75	770.872
1197	0	277.462	-2064.29	1560.52	172.829	-2059.79	1558.05	299.035	-1900.5	1540.64	180.86	-1892.66	1538.99	230.531	-1868.26	1408.83	238.835	-1764.58	1129.51	237.51	-2026.28	1300.54	235.035	-2119.58	1099.65	158.86	-1770.88	1224.99	390.487	-1957.84	1362.24	506.036	-1970.65	1131.21	519.217	-1984.94	1034.42	522.342	-2095.79	923.652	469.645	-2142.23	835.825	533.33	-2111.17	809.465	518.84	-2184.72	769.996
1198	0	275.503	-2074.34	1559.65	170.704	-2069.86	1557.07	297.05	-1910.58	1539.47	178.772	-1902.8	1537.65	228.949	-1878.77	1407.33	238.038	-1775.75	1127.76	235.889	-2037.16	1299.53	233.818	-2130.68	1098.89	157.874	-1781.84	1222.99	388.821	-1968.7	1361.39	504.988	-1980.94	1130.8	518.023	-1994.44	1033.63	520.827	-2105.37	922.586	467.797	-2151.71	834.987	531.498	-2120.62	808.497	516.727	-2194.27	769.052
1199	0	273.447	-2084.42	1558.88	168.719	-2079.9	1555.96	294.969	-1920.66	1538.36	176.686	-1912.94	1536.28	227.351	-1889.17	1405.93	237.017	-1787.3	1125.82	234.142	-2048.08	1298.64	232.457	-2141.92	1098.19	156.78	-1792.95	1220.93	387.017	-1979.57	1360.6	503.788	-1991.49	1130.4	516.981	-2004.04	1032.91	519.309	-2114.7	921.456	466.048	-2160.8	834.025	529.568	-2129.58	807.232	514.579	-2203.35	767.896
1200	0	271.27	-2094.56	1558.05	166.499	-2090.12	1555.19	292.796	-1930.91	1537.17	174.514	-1923.13	1535.08	225.653	-1899.49	1404.62	236.169	-1799.2	1123.84	232.32	-2059.08	1297.85	230.965	-2153.36	1097.47	155.923	-1803.91	1218.91	385.133	-1990.68	1359.85	502.541	-2002.42	1129.98	515.595	-2013.73	1032.03	517.804	-2123.91	920.159	464.438	-2169.71	832.698	527.73	-2138.47	805.695	512.811	-2212.31	766.519
1201	0	269.133	-2104.7	1557.72	164.4	-2100.28	1554.67	290.568	-1941.03	1536.3	172.318	-1933.32	1534.17	223.877	-1909.87	1403.4	235.3	-1811.29	1122.2	230.396	-2070.2	1297.33	229.287	-2164.88	1097.31	154.931	-1815.02	1217.05	383.161	-2001.7	1359.35	501.241	-2013.29	1129.82	514.235	-2023.39	1031.43	516.465	-2132.95	919.142	462.949	-2178.17	831.59	526.046	-2146.8	804.249	511.122	-2220.56	765.093
1202	0	266.893	-2114.69	1557.66	162.167	-2110.45	1554.68	288.317	-1951.2	1535.95	169.995	-1943.52	1533.65	222.031	-1920.41	1402.58	234.54	-1823.51	1120.97	228.321	-2081.32	1297.33	227.407	-2176.42	1097.39	154.071	-1826.06	1215.55	381.184	-2012.85	1359.31	500.039	-2024.26	1130.14	512.866	-2032.88	1031.38	515.062	-2141.62	918.118	461.673	-2186.34	830.625	524.644	-2154.54	803.203	509.653	-2228.32	763.645
1203	0	264.81	-2124.95	1558.06	159.998	-2120.77	1554.89	285.886	-1961.32	1535.71	167.573	-1953.93	1533.4	220.096	-1931.15	1402.25	233.815	-1835.6	1120.31	226.152	-2092.46	1297.51	225.441	-2188.32	1097.74	153.101	-1837.21	1214.6	379.179	-2024.32	1359.54	498.736	-2035.59	1130.57	511.245	-2042.41	1031.49	513.824	-2150.12	917.26	460.517	-2194.2	829.465	523.393	-2161.98	802.144	508.631	-2235.72	762.401
1204	0	262.65	-2135.15	1558.49	157.933	-2131	1555.45	283.558	-1971.66	1535.88	165.312	-1964.36	1533.48	218.305	-1941.95	1402.36	233.434	-1847.14	1120.09	223.893	-2103.65	1298.09	223.388	-2200.5	1098.44	152.505	-1848.3	1214.03	377.083	-2036.04	1360.08	496.923	-2046.87	1131.16	509.747	-2052.15	1032	512.547	-2158.51	916.506	459.591	-2201.73	828.234	522.226	-2169.11	801.312	507.651	-2242.48	760.879
1205	0	260.448	-2145.29	1559.64	155.694	-2141.33	1556.5	281.281	-1981.92	1536.63	162.865	-1974.7	1534.04	216.654	-1952.74	1402.98	232.8	-1858.27	1120.51	221.588	-2114.99	1299.14	221.176	-2212.69	1099.71	151.815	-1859.41	1214.13	374.903	-2047.8	1361.26	495.205	-2058.42	1132.35	507.962	-2061.6	1033.08	511.222	-2166.2	915.951	458.732	-2208.81	827.597	521.306	-2175.7	800.997	507.136	-2248.81	759.974
1206	0	258.244	-2155.43	1561.12	153.492	-2151.65	1557.96	278.857	-1992.12	1537.72	160.358	-1985.1	1534.98	214.771	-1963.77	1403.9	232.413	-1869.19	1121.56	219.275	-2126.08	1300.53	218.951	-2224.84	1101.46	151.361	-1870.35	1214.49	372.692	-2059.64	1362.81	493.287	-2069.65	1133.9	506.311	-2070.88	1034.66	510.158	-2173.84	916.073	457.913	-2215.44	826.913	520.608	-2181.69	801.168	506.841	-2254.49	759.132
1207	0	255.98	-2165.63	1562.89	151.288	-2162.02	1559.59	276.365	-2002.46	1538.99	157.904	-1995.57	1536.24	213.105	-1974.61	1405.26	232.879	-1880.64	1122.78	216.923	-2137.31	1302.22	216.636	-2236.95	1103.29	150.98	-1881.38	1215.43	370.622	-2071.68	1364.76	491.229	-2081.04	1135.68	504.44	-2080.22	1036.46	509.098	-2181.32	916.464	457.293	-2221.88	826.598	519.869	-2187.44	801.441	506.543	-2259.5	758.325
1208	0	253.605	-2175.96	1565.03	149.017	-2172.39	1561.6	273.916	-2012.79	1540.7	155.606	-2005.93	1537.85	211.558	-1985.54	1406.95	233.207	-1891.99	1124.4	214.645	-2148.3	1304.18	214.285	-2248.67	1105.56	150.509	-1892.31	1216.91	368.476	-2083.66	1367.11	489.137	-2092.18	1137.75	502.452	-2089.52	1038.69	507.942	-2188.53	917.185	456.621	-2227.89	826.373	519.058	-2192.73	802.079	506.532	-2264.15	757.841
1209	0	251.27	-2186.28	1567.48	146.566	-2182.75	1563.92	271.713	-2023.15	1542.92	153.276	-2016.36	1539.74	209.791	-1996.4	1409	233.604	-1903.43	1126.39	212.382	-2159.22	1306.56	212.049	-2260	1108.26	150.287	-1903.31	1218.49	366.3	-2095.58	1370.04	486.933	-2102.89	1140.26	500.566	-2098.59	1041.5	506.927	-2195.59	918.516	455.938	-2233.5	826.562	518.483	-2197.63	803.399	506.687	-2268.33	757.812
1210	0	248.925	-2196.62	1570.18	144.272	-2192.96	1566.2	269.332	-2033.55	1545.3	151.02	-2026.8	1541.75	208.442	-2007.16	1411.17	233.416	-1915.12	1128.5	210.237	-2169.93	1309.13	209.964	-2271.03	1111.23	149.876	-1914.17	1220.42	364.218	-2107.15	1373.05	485.045	-2113.56	1143.22	498.828	-2107.8	1044.72	505.66	-2202.47	920.124	455.36	-2239.1	827.032	518.144	-2202.58	805.153	506.567	-2272.21	757.864
1211	0	246.532	-2207.01	1572.77	141.982	-2203.25	1568.7	267.229	-2044.03	1547.73	148.948	-2037.09	1544.03	206.848	-2017.74	1413.42	233.282	-1926.76	1130.87	208.245	-2180.53	1311.64	207.89	-2281.79	1114.01	149.536	-1925.07	1222.47	362.329	-2118.57	1376.17	483.097	-2124.13	1146.33	496.938	-2116.96	1047.84	504.431	-2209.45	921.939	454.785	-2245.14	827.992	517.689	-2207.48	806.91	506.497	-2275.93	758.17
1212	0	244.116	-2217.31	1575.46	139.631	-2213.49	1571.1	265.179	-2054.47	1550.38	146.843	-2047.29	1546.33	205.386	-2028.32	1415.83	232.893	-1938.14	1133.1	206.338	-2191.05	1314.26	206.013	-2292.05	1116.86	149.054	-1935.82	1224.48	360.499	-2129.79	1379.25	481.287	-2134.35	1149.59	495.216	-2125.86	1051.15	503.221	-2216.29	924.045	454.192	-2249.35	828.582	517.47	-2212.43	809.124	506.579	-2279.43	758.584
1213	0	241.908	-2227.74	1578.22	137.46	-2223.55	1573.35	263.223	-2064.82	1553.02	144.852	-2057.56	1548.66	203.941	-2038.64	1418.06	232.32	-1949.34	1135.46	204.492	-2201.33	1316.88	204.272	-2302.06	1119.8	148.444	-1946.54	1226.67	358.619	-2140.65	1382.41	479.675	-2144.32	1152.98	493.807	-2134.64	1054.9	502.249	-2223.24	926.535	453.613	-2254.33	829.871	517.526	-2217.52	811.857	505.878	-2282.98	759.354
1214	0	239.705	-2238.02	1580.57	135.181	-2233.76	1575.62	261.276	-2075.09	1555.6	143.065	-2067.68	1550.95	202.448	-2048.92	1420.38	231.573	-1960	1137.64	202.808	-2211.49	1319.27	202.728	-2311.92	1122.47	147.65	-1957.15	1228.69	356.839	-2151.44	1385.37	478.319	-2154.2	1156.34	492.463	-2143.2	1058.37	501.339	-2230.25	928.832	453.102	-2259.35	831.03	517.626	-2222.93	814.576	505.435	-2286.69	759.984
1215	0	237.666	-2248.37	1582.7	133.275	-2243.83	1577.6	259.579	-2085.43	1557.88	141.364	-2077.8	1553.08	201.168	-2059.08	1422.6	230.475	-1970.42	1139.95	201.215	-2221.61	1321.48	201.334	-2321.7	1124.79	146.872	-1967.51	1230.85	355.381	-2162.04	1388.12	477.104	-2163.95	1159.41	491.116	-2151.73	1061.41	500.383	-2237.3	931.096	452.679	-2264.5	832.235	517.878	-2228.79	817.003	504.817	-2290.62	760.516
1216	0	235.694	-2258.51	1584.8	131.319	-2253.84	1579.45	257.871	-2095.68	1560.05	139.66	-2087.9	1555.04	199.836	-2069.19	1424.61	229.52	-1980.68	1141.95	199.724	-2231.61	1323.55	200.133	-2331.28	1127.04	145.865	-1977.89	1232.62	353.965	-2172.4	1390.71	476.112	-2173.36	1162.43	490.091	-2160.03	1064.45	499.634	-2244.31	933.353	452.304	-2269.63	833.616	518.21	-2234.76	819.522	504.175	-2294.76	761.092
1217	0	233.915	-2268.63	1586.76	129.546	-2263.71	1581.16	256.286	-2105.82	1562.02	138.176	-2097.87	1556.73	198.477	-2079.24	1426.47	228.404	-1990.91	1144.01	198.41	-2241.45	1325.42	199.138	-2340.82	1129.07	144.911	-1987.99	1234.61	352.667	-2182.61	1393.06	475.202	-2182.56	1165.05	489.288	-2168.14	1067.15	499.083	-2251.22	935.082	451.841	-2274.91	834.867	518.654	-2240.86	821.836	503.555	-2299.04	761.62
1218	0	232.213	-2278.67	1588.49	127.87	-2273.68	1582.66	254.826	-2115.89	1563.86	136.709	-2107.88	1558.33	197.442	-2089.22	1428.18	227.497	-2000.96	1145.73	197.36	-2251.33	1327.11	198.28	-2350.47	1130.59	143.855	-1998.04	1236.28	351.573	-2192.65	1394.97	474.477	-2191.74	1167.26	488.465	-2176.3	1069.31	498.878	-2258.44	936.791	451.748	-2280.72	836.014	518.951	-2247.11	823.556	503.112	-2303.64	761.998
1219	0	230.748	-2288.73	1590.14	126.373	-2283.58	1584.16	253.551	-2126	1565.31	135.501	-2117.71	1559.73	196.312	-2099.28	1429.79	226.156	-2010.79	1147.47	196.364	-2261.24	1328.62	197.581	-2360.08	1131.95	142.7	-2007.8	1237.78	350.577	-2202.58	1396.65	473.875	-2200.83	1169.03	487.656	-2184.39	1070.99	498.693	-2265.58	938.105	451.754	-2286.48	836.906	519.538	-2253.49	825.205	502.806	-2308.63	762.291
1220	0	229.42	-2298.76	1591.81	124.968	-2293.31	1585.51	252.347	-2135.87	1566.89	134.268	-2127.62	1561	195.249	-2109.2	1431.42	224.925	-2020.29	1149.16	195.56	-2270.98	1329.94	196.962	-2369.59	1132.97	141.625	-2017.55	1239.61	349.605	-2212.19	1398.08	473.411	-2209.65	1170.57	487.085	-2192.47	1072.67	498.758	-2272.66	939.237	451.737	-2292.59	837.963	519.761	-2259.77	826.568	502.592	-2313.86	762.435
1221	0	228.186	-2308.75	1593.35	123.827	-2303.05	1586.75	251.167	-2145.74	1568.39	133.189	-2137.42	1562.34	194.228	-2119.06	1432.87	223.499	-2029.7	1150.65	194.834	-2280.61	1331.2	196.498	-2379.21	1133.86	140.43	-2027.21	1241.13	348.765	-2221.67	1399.35	472.999	-2218.36	1171.94	486.563	-2200.46	1074.12	498.633	-2279.79	940.253	451.886	-2298.73	838.44	520.055	-2266.14	827.901	502.915	-2318.79	762.733
1222	0	227.032	-2318.43	1594.53	122.657	-2312.86	1587.99	250.169	-2155.64	1569.55	132.189	-2147.21	1563.52	193.1	-2128.85	1434.17	222.28	-2038.84	1152.39	194.29	-2290.34	1332.18	196.248	-2388.82	1134.52	138.9	-2036.65	1242.74	348.031	-2231.14	1400.5	472.689	-2226.96	1172.98	486.143	-2208.85	1075.24	498.78	-2287.02	940.946	452.156	-2305.44	839.089	520.351	-2272.7	828.755	503.196	-2324.35	763.119
1223	0	226.072	-2328.2	1595.71	121.738	-2322.61	1589.15	249.178	-2165.42	1570.63	131.214	-2157.09	1564.69	192.051	-2138.62	1435.58	220.839	-2047.88	1154	193.792	-2299.91	1333.23	196.044	-2398.44	1135.12	137.678	-2046.18	1244.41	347.384	-2240.39	1401.44	472.354	-2235.28	1173.97	485.64	-2216.93	1076.27	498.749	-2294.15	941.698	452.59	-2312.13	839.514	520.668	-2279.12	829.664	503.759	-2330.3	763.486
1224	0	225.239	-2338	1597.05	120.918	-2332.23	1590.23	248.245	-2175.13	1571.81	130.346	-2166.74	1565.59	190.939	-2148.4	1436.79	219.42	-2057.03	1155.28	193.259	-2309.38	1334.12	195.817	-2407.92	1135.61	136.109	-2055.54	1245.87	346.646	-2249.43	1402.43	471.878	-2243.32	1174.93	485.181	-2224.86	1077.42	498.682	-2301.23	942.287	452.834	-2319.1	840.195	520.989	-2285.41	830.605	504.501	-2336.65	764.182
1225	0	224.419	-2347.7	1597.92	120.157	-2341.97	1591.1	247.431	-2184.86	1572.72	129.557	-2176.52	1566.41	189.828	-2158.07	1437.94	217.993	-2065.97	1156.53	192.875	-2318.92	1334.96	195.733	-2417.33	1136.01	134.642	-2065.07	1247.16	345.984	-2258.41	1403.19	471.473	-2251.05	1175.58	484.839	-2232.81	1078.4	498.854	-2308.5	943.029	453.174	-2326.17	840.585	521.114	-2292.17	831.398	505.332	-2343.32	764.812
1226	0	223.752	-2357.49	1598.81	119.494	-2351.79	1591.87	246.679	-2194.56	1573.39	128.68	-2186.33	1567.27	188.789	-2167.72	1438.92	216.614	-2074.97	1157.76	192.493	-2328.5	1335.62	195.733	-2426.62	1136.3	133.142	-2074.55	1248.34	345.454	-2267.46	1403.78	470.882	-2258.87	1176.17	484.267	-2240.77	1078.97	498.824	-2315.84	943.488	453.839	-2333.42	840.779	521.108	-2299.13	831.941	506.112	-2350.35	765.383
1227	0	223.141	-2367.13	1599.23	118.918	-2361.67	1592.61	245.925	-2204.37	1573.96	127.988	-2196.15	1567.88	187.87	-2177.33	1439.8	215.244	-2083.84	1158.91	192.057	-2338	1336.13	195.69	-2435.82	1136.59	131.952	-2083.76	1249.64	344.769	-2276.27	1404.37	469.183	-2265.36	1176.39	483.708	-2248.53	1079.64	498.731	-2323.26	944.138	454.044	-2340.69	841.23	521.257	-2306.18	832.617	506.833	-2357.66	766.275
1228	0	222.676	-2376.77	1599.66	118.488	-2371.23	1592.91	245.327	-2213.94	1574.46	127.299	-2205.94	1568.43	186.761	-2186.96	1440.42	214.089	-2092.79	1159.67	191.849	-2347.11	1336.41	195.687	-2444.79	1136.88	130.492	-2093.18	1250.75	344.381	-2285.04	1404.9	468.664	-2272.61	1176.94	483.215	-2256.11	1080.35	498.474	-2330.51	944.645	454.201	-2348.02	841.692	521.326	-2313.19	833.317	507.493	-2365.16	767.198
1229	0	222.27	-2386.62	1600.03	117.98	-2381.22	1593.4	244.588	-2223.67	1574.77	126.493	-2215.77	1568.77	186.16	-2196.54	1441.04	212.764	-2101.59	1160.25	191.502	-2356.39	1336.73	195.618	-2453.75	1137	128.928	-2102.4	1251.42	343.866	-2293.84	1405.28	468.151	-2279.91	1177.45	482.621	-2263.68	1080.86	498.403	-2338.02	945.166	454.278	-2355.59	842.141	521.198	-2320.51	833.761	508.118	-2373.17	768.09
1230	0	221.742	-2396.29	1599.95	117.589	-2390.9	1593.44	243.98	-2233.44	1575.05	125.976	-2225.55	1569.18	185.098	-2205.94	1441.48	211.428	-2110.52	1161.08	191.246	-2365.75	1336.94	195.582	-2462.72	1137.16	127.719	-2111.69	1252.05	343.381	-2302.6	1405.54	467.424	-2287	1177.58	482.035	-2271.3	1081.28	498.092	-2345.63	945.609	454.244	-2363.31	842.519	520.947	-2328.04	834.087	508.526	-2381.26	768.899
1231	0	221.272	-2405.94	1599.87	117.088	-2400.72	1593.31	243.4	-2243.11	1575.43	125.442	-2235.29	1569.43	184.156	-2215.26	1441.8	210.398	-2119.32	1161.75	191.235	-2374.37	1336.72	195.425	-2471.63	1137.12	126.506	-2120.86	1252.53	342.875	-2311.27	1405.83	467.045	-2294.05	1178.17	481.631	-2278.72	1081.85	497.756	-2353.26	946.096	454.181	-2371.01	842.893	520.789	-2335.46	834.751	508.878	-2389.4	769.837
1232	0	220.928	-2415.91	1599.97	116.682	-2410.62	1593.33	242.887	-2252.73	1575.49	124.887	-2245.13	1569.56	183.472	-2224.55	1442.03	209.191	-2128.1	1162.14	190.925	-2383.36	1336.62	195.203	-2480.43	1137.04	125.341	-2129.96	1252.97	342.32	-2319.97	1405.9	466.493	-2301.05	1178.39	481.223	-2286.19	1082.31	497.555	-2360.97	946.392	453.913	-2379	843.242	520.667	-2343.24	835.299	509.076	-2397.68	770.558
1233	0	220.567	-2425.75	1599.53	116.438	-2420.4	1592.93	242.268	-2262.47	1575.47	124.346	-2254.96	1569.54	182.719	-2233.84	1442.14	208.033	-2136.83	1162.29	190.694	-2392.48	1336.28	195.083	-2489.27	1136.7	124.524	-2139.11	1253.15	341.976	-2328.84	1405.76	466.045	-2308.34	1178.27	480.6	-2293.74	1082.11	497.169	-2368.75	946.419	453.727	-2387.17	843.231	520.165	-2351.21	835.271	509.12	-2406.28	771.037
1234	0	220.219	-2435.48	1599.18	115.994	-2430.24	1592.5	241.718	-2272.19	1575.45	123.823	-2264.68	1569.57	182.082	-2243.2	1442.13	207.213	-2145.34	1162.48	190.395	-2401.48	1335.92	194.818	-2497.92	1136.2	123.901	-2148.14	1253.31	341.545	-2337.71	1405.52	465.472	-2315.58	1178.09	480.11	-2301.33	1081.97	496.963	-2376.49	946.309	453.487	-2395.35	843.285	519.722	-2359.18	835.153	509.135	-2414.78	771.319
1235	0	219.796	-2445.19	1598.69	115.674	-2440.15	1592.19	241.263	-2281.88	1575.49	123.425	-2274.42	1569.52	181.432	-2252.54	1442.14	206.583	-2153.73	1162.78	190.098	-2410.55	1335.57	194.58	-2506.54	1135.66	123.235	-2157.36	1253.42	341.325	-2346.72	1405.31	465.11	-2322.93	1177.94	479.535	-2308.84	1081.76	496.752	-2384.29	946.071	453.152	-2403.58	843.28	519.084	-2366.93	834.885	509.017	-2423.29	771.649
1236	0	219.416	-2455.07	1598.16	115.383	-2449.84	1591.4	240.763	-2291.53	1575.32	122.872	-2284.25	1569.29	181.032	-2261.81	1441.96	205.872	-2162.17	1162.8	189.726	-2419.65	1335.05	194.282	-2515.27	1134.96	122.517	-2166.35	1253.58	340.987	-2355.96	1404.97	464.937	-2330.63	1177.89	478.98	-2316.55	1081.51	496.308	-2392.17	945.594	452.817	-2412.02	843.013	518.363	-2374.7	834.489	508.717	-2431.76	771.636
1237	0	219.021	-2464.84	1597.48	114.986	-2459.86	1590.68	240.473	-2301.26	1575.1	122.5	-2294.09	1569.16	180.294	-2271.38	1441.58	205.372	-2170.91	1162.7	189.437	-2428.81	1334.4	194.059	-2524.07	1134.07	122.232	-2175.37	1253.54	340.875	-2365.31	1404.51	464.352	-2338.52	1177.28	478.343	-2324.64	1080.97	496.093	-2400.2	945.025	452.546	-2420.58	842.612	517.522	-2382.58	833.619	508.471	-2440.31	771.389
1238	0	218.768	-2474.75	1597.08	114.72	-2469.46	1589.84	240.041	-2311	1574.9	122.189	-2303.7	1568.89	180.285	-2280.58	1441.41	204.928	-2179.67	1162.7	189.165	-2437.88	1333.8	193.81	-2532.98	1133.41	121.986	-2184.42	1253.47	340.347	-2374.33	1403.94	464.177	-2346.82	1177.04	477.747	-2332.8	1080.53	495.994	-2408.16	944.589	452.391	-2429.12	842.36	516.647	-2390.17	832.706	508.243	-2448.64	771.011
1239	0	218.52	-2484.48	1596.33	114.349	-2479.73	1589.64	239.707	-2320.54	1574.68	121.894	-2313.42	1568.53	180.135	-2290.01	1441.13	204.77	-2188.79	1162.57	188.839	-2447	1333.2	193.599	-2541.79	1132.57	121.701	-2193.42	1253.23	340.192	-2383.5	1403.55	463.912	-2355.35	1176.95	477.217	-2341.12	1080.26	495.74	-2415.97	943.976	452.204	-2437.46	842.021	515.725	-2397.59	831.852	508.087	-2456.67	770.747
1240	0	218.351	-2494.2	1595.4	114.408	-2488.93	1588.3	239.538	-2330.28	1574.27	121.612	-2323.19	1568.15	179.721	-2299.36	1440.6	204.505	-2197.84	1162.23	188.596	-2456.23	1332.44	193.468	-2550.78	1131.72	121.33	-2202.61	1252.76	339.821	-2392.72	1402.82	463.724	-2364.4	1176.45	476.677	-2349.82	1079.75	495.558	-2423.97	943.231	452.127	-2446.17	841.475	514.817	-2405.26	830.96	507.938	-2464.63	770.08
1241	0	218.132	-2503.87	1594.3	113.914	-2499.26	1587.75	239.334	-2340.17	1573.47	121.53	-2332.74	1567.5	179.53	-2308.79	1440.05	204.407	-2207.07	1161.78	188.407	-2465.55	1331.52	193.332	-2559.73	1130.67	121.213	-2211.7	1252.31	339.634	-2402.16	1402.13	463.397	-2373.69	1175.78	476.147	-2358.62	1079.06	495.38	-2432.1	942.365	452.07	-2454.83	840.806	514.015	-2412.84	829.94	507.889	-2472.51	769.181
1242	0	217.974	-2513.7	1593.52	113.97	-2508.58	1586.63	239.108	-2349.72	1572.88	121.398	-2342.45	1566.83	179.229	-2318.31	1439.4	204.324	-2216.35	1161.32	188.214	-2474.82	1330.72	193.204	-2568.69	1129.66	120.926	-2221.03	1251.86	339.231	-2411.52	1401.49	463.164	-2383.19	1175.22	475.726	-2367.47	1078.62	495.211	-2440.22	941.532	452.108	-2463.48	840.174	513.183	-2420.26	829.069	507.865	-2480.16	768.237
1243	0	218.047	-2523.55	1592.69	113.652	-2518.63	1585.99	239.15	-2359.3	1572.14	121.4	-2352.04	1566.03	179.197	-2327.84	1438.59	204.45	-2225.46	1160.66	188.056	-2484.1	1329.81	193.184	-2577.66	1128.74	120.685	-2230.2	1251.12	339.147	-2420.86	1400.75	462.914	-2392.74	1174.53	475.463	-2376.38	1078.13	494.907	-2448.43	940.567	452.136	-2471.87	839.404	512.495	-2427.65	828.153	507.893	-2487.56	767.455
1244	0	217.833	-2533.21	1591.4	113.612	-2528.38	1584.93	239.504	-2369.42	1571.09	121.314	-2361.77	1565.03	179.036	-2337.47	1437.66	204.548	-2234.73	1159.89	187.881	-2493.65	1328.64	193.197	-2586.89	1127.52	120.57	-2239.56	1250.51	339.058	-2430.71	1399.93	462.579	-2402.82	1173.39	475.2	-2385.69	1077.25	494.79	-2456.83	939.421	452.223	-2480.43	838.146	511.899	-2435.26	826.686	507.878	-2495.29	765.762
1245	0	217.882	-2543.04	1590.32	113.688	-2538.08	1583.87	239.286	-2379.13	1569.98	121.375	-2371.54	1564.21	178.973	-2347.17	1436.76	204.682	-2244.05	1159.08	187.868	-2503.13	1327.57	193.249	-2596.19	1126.22	120.609	-2249.14	1249.6	338.901	-2440.21	1398.94	462.256	-2412.98	1172.26	474.754	-2394.93	1076.24	494.595	-2465.3	938.221	452.351	-2488.81	836.951	511.301	-2442.95	825.304	507.815	-2502.63	764.214
1246	0	217.99	-2552.8	1589.33	113.659	-2547.77	1582.89	239.32	-2388.81	1568.94	121.431	-2381.22	1563.17	178.882	-2356.79	1435.74	204.426	-2253.5	1158.03	187.782	-2512.63	1326.56	193.321	-2605.59	1125.15	120.509	-2258.67	1248.65	338.774	-2449.78	1398.02	462.108	-2423.01	1171.23	474.645	-2404.16	1075.44	494.469	-2473.65	937.053	452.433	-2496.95	835.769	511.01	-2450.54	824.166	507.812	-2509.86	762.662
1247	0	218.122	-2562.6	1588.21	113.807	-2557.57	1581.74	239.58	-2398.76	1567.78	121.562	-2391.01	1561.85	178.852	-2366.54	1434.59	204.336	-2262.85	1156.93	187.762	-2522.33	1325.31	193.497	-2615.22	1124.09	120.728	-2268.17	1247.64	338.776	-2459.46	1396.95	461.786	-2432.81	1170.17	474.502	-2413.46	1074.59	494.357	-2482.28	935.815	452.511	-2505.04	834.33	511.06	-2458.43	823.246	507.77	-2517.38	760.984
1248	0	218.245	-2572.39	1586.56	113.956	-2567.52	1580.45	239.341	-2408.28	1566.11	121.623	-2400.9	1560.53	178.983	-2376.36	1433.37	204.459	-2272.55	1155.93	187.856	-2532.11	1323.9	193.649	-2624.98	1122.6	120.867	-2277.92	1246.39	338.829	-2469.44	1395.66	461.96	-2443.06	1168.88	474.42	-2423.03	1073.36	494.329	-2491.05	934.273	452.579	-2513.18	832.542	511.107	-2466.61	821.796	507.729	-2524.88	759.096
1249	0	218.454	-2582.29	1585.2	114.224	-2577.4	1579.09	239.772	-2418.35	1564.8	121.788	-2410.8	1559.21	178.913	-2386.24	1432.03	204.516	-2282.27	1154.76	187.969	-2541.94	1322.56	193.781	-2634.89	1121.26	120.983	-2287.69	1245.18	338.897	-2479.31	1394.33	461.688	-2452.98	1167.41	474.373	-2432.45	1072.13	494.087	-2499.74	932.588	452.63	-2521.09	830.743	511.388	-2474.62	820.426	507.816	-2532.45	757.248
1250	0	218.716	-2592.25	1584.08	114.491	-2587.31	1577.86	239.929	-2428.21	1563.5	121.987	-2420.79	1557.81	179.133	-2396.22	1430.7	204.547	-2292.46	1153.3	188.174	-2551.86	1321.24	193.954	-2644.88	1120.01	121.081	-2297.54	1243.89	339.148	-2489.35	1393.05	461.898	-2462.73	1166.27	474.386	-2441.84	1071	494.218	-2508.54	931.164	452.757	-2528.87	829.059	511.997	-2482.75	819.289	508.09	-2539.08	756.454
1251	0	219.199	-2602.38	1582.82	114.601	-2597.48	1576.71	239.879	-2437.9	1561.87	122.297	-2430.64	1556.3	179.501	-2406.34	1429.5	204.576	-2302.25	1152.02	188.408	-2561.85	1319.8	194.173	-2654.94	1118.67	121.249	-2307.4	1242.56	339.499	-2499.52	1391.72	461.979	-2472.57	1164.76	474.611	-2451.44	1069.76	494.411	-2517.38	929.679	452.937	-2536.71	827.075	512.627	-2490.88	817.757	508.101	-2547.12	753.782
1252	0	219.61	-2612.21	1581.24	115.288	-2607.48	1575.26	240.512	-2448.18	1560.35	122.681	-2440.78	1554.89	179.72	-2416.44	1428.15	204.911	-2312.48	1150.58	188.75	-2572.07	1318.3	194.326	-2665.16	1117.12	121.44	-2317.37	1241.32	339.704	-2509.75	1390.19	462.239	-2482.52	1163.26	474.599	-2460.92	1068.13	494.647	-2526.22	927.875	453.449	-2544.55	825.195	513.415	-2499.25	816.197	508.676	-2554.45	752.221
1253	0	220.098	-2622.23	1579.9	115.792	-2617.57	1573.89	241.032	-2458.17	1558.83	123.181	-2450.86	1553.44	180.05	-2426.67	1426.49	205.192	-2322.76	1149.17	189.093	-2582.27	1316.89	194.394	-2675.41	1115.6	121.723	-2327.7	1239.97	340.054	-2520.02	1388.65	462.51	-2492.14	1161.8	474.808	-2470.35	1066.8	494.992	-2535.05	926.237	453.739	-2552.19	823.136	514.183	-2507.49	814.705	508.914	-2561.55	750.182
1254	0	220.78	-2632.39	1578.66	116.438	-2627.71	1572.61	241.343	-2468	1557.38	123.779	-2461.08	1551.83	180.603	-2436.95	1424.86	205.345	-2333.13	1147.63	189.482	-2592.52	1315.49	194.517	-2685.72	1114.17	121.809	-2337.95	1238.55	340.531	-2530.26	1386.95	462.814	-2501.64	1160.44	475.205	-2479.68	1065.55	495.413	-2543.72	924.54	454.516	-2560.39	821.2	515.056	-2515.51	813.423	509.861	-2569.11	748.522
1255	0	221.586	-2642.7	1577.28	117.257	-2637.91	1571.23	242.191	-2478.31	1555.71	124.526	-2471.32	1550.42	181.124	-2447.33	1423.48	205.778	-2343.49	1146.13	189.943	-2602.97	1313.94	194.692	-2696.19	1112.67	122.294	-2348.39	1237.22	341.117	-2540.85	1385.3	463.179	-2511.38	1158.79	475.366	-2489.14	1063.89	495.996	-2552.6	922.713	455.342	-2568.52	819.112	516.148	-2523.94	811.931	510.032	-2578.68	744.261
1256	0	222.455	-2652.74	1575.54	118.263	-2648.21	1569.86	243.037	-2488.45	1553.85	125.428	-2481.53	1548.85	181.74	-2457.77	1422.06	205.922	-2354.03	1144.38	190.424	-2613.47	1312.36	194.82	-2706.79	1111.06	122.655	-2358.87	1235.45	341.653	-2551.28	1383.59	463.49	-2520.98	1156.81	475.783	-2498.63	1062.23	496.768	-2561.36	920.844	456.178	-2576.66	816.98	517.164	-2532.26	810.278	511.44	-2585.5	743.181
1257	0	223.603	-2662.82	1573.92	119.301	-2658.45	1568.62	244.308	-2499.94	1552.65	126.308	-2491.85	1547.42	182.638	-2468.36	1420.33	206.169	-2364.64	1142.8	190.9	-2623.93	1310.87	194.902	-2717.38	1109.68	123.134	-2369.52	1233.98	342.203	-2561.74	1381.85	463.917	-2530.41	1155.2	476.135	-2507.8	1060.57	497.545	-2570.11	919.155	457.085	-2584.96	815.003	518.223	-2540.68	808.79	512.991	-2592.51	742.325
1258	0	224.856	-2673.08	1572.58	120.575	-2668.76	1567.42	245.193	-2509.59	1550.63	126.929	-2503	1546.33	183.182	-2478.9	1418.78	206.277	-2375.27	1141.21	191.446	-2634.58	1309.46	195.083	-2728.09	1108.33	123.347	-2380.01	1232.46	343.004	-2572.17	1380.03	464.474	-2539.9	1153.46	476.637	-2517.08	1059.03	498.402	-2578.9	917.459	458.151	-2593.46	813.061	519.161	-2549.13	807.247	514.143	-2600.29	740.591
1259	0	226.377	-2683.53	1570.94	122.016	-2679.19	1566.14	246.441	-2520.56	1548.94	128.462	-2512.92	1544.47	183.723	-2489.45	1417.17	206.316	-2386.06	1139.46	192.064	-2645.29	1307.84	195.267	-2739.01	1106.74	123.475	-2390.86	1230.86	343.592	-2582.78	1378.15	465.083	-2549.53	1151.55	477.11	-2526.45	1057.15	499.4	-2587.83	915.478	459.346	-2602.14	811.026	520.168	-2557.52	805.238	514.738	-2611.04	736.692
1260	0	227.722	-2693.96	1569.49	123.508	-2689.69	1564.76	247.761	-2531.05	1547.18	129.332	-2524.01	1543.27	184.642	-2499.97	1415.7	206.43	-2396.9	1137.36	192.699	-2656.04	1306.27	195.415	-2749.97	1105.32	123.769	-2401.81	1229.4	344.441	-2593.3	1376.11	465.628	-2559.1	1149.64	477.485	-2535.77	1055.21	500.386	-2596.86	913.486	460.387	-2611.01	808.757	521.135	-2565.94	803.348	516.168	-2619.17	734.431
1261	0	229.339	-2704.2	1567.89	125.048	-2700.23	1563.72	248.976	-2541.35	1545.37	130.631	-2534.5	1541.85	185.776	-2510.82	1413.96	206.083	-2407.88	1135.42	193.404	-2666.87	1304.9	195.612	-2761.03	1104.02	124.11	-2412.81	1227.74	345.29	-2603.71	1374.22	466.298	-2568.5	1147.87	478.203	-2545.06	1053.53	501.437	-2605.76	911.63	461.56	-2619.99	806.573	522.18	-2574.58	801.857	517.773	-2627.72	732.51
1262	0	231.086	-2714.88	1566.54	126.554	-2710.96	1562.67	250.593	-2551.93	1543.59	132.065	-2545.19	1540.52	186.792	-2521.43	1412.06	206.11	-2419.22	1133.59	194.201	-2677.76	1303.5	195.895	-2772.25	1102.78	124.406	-2423.98	1225.6	346.188	-2614.38	1372.29	467.077	-2578.01	1145.95	478.847	-2554.53	1051.68	502.591	-2614.9	909.687	462.877	-2628.94	804.738	523.133	-2583.31	799.987	519.09	-2636.35	730.474
1263	0	232.86	-2725.14	1564.68	128.53	-2721.43	1561.34	252.366	-2562.68	1541.94	133.532	-2555.94	1539.29	187.566	-2531.98	1410.32	205.706	-2430.4	1131.35	195.017	-2688.8	1302.04	196.261	-2783.68	1101.6	124.986	-2435.28	1223.9	347.215	-2624.98	1370.28	467.853	-2587.86	1143.82	479.369	-2563.84	1049.43	503.737	-2624.23	907.636	463.977	-2638.54	802.53	524.267	-2592.5	798.094	520.498	-2645.18	728.394
1264	0	234.785	-2735.59	1563.18	130.349	-2732.11	1560.28	253.982	-2572.97	1540.22	135.184	-2566.51	1537.93	188.646	-2542.79	1408.69	205.958	-2441.57	1129.25	195.935	-2699.83	1300.84	196.521	-2795.14	1100.67	125.512	-2446.69	1221.99	348.348	-2635.51	1368.23	468.639	-2597.45	1141.88	480.011	-2573.41	1047.58	504.794	-2633.47	905.646	465.442	-2647.74	800.81	524.989	-2601.43	796.011	522.231	-2651.71	728.695
1265	0	236.632	-2746.33	1562.08	132.24	-2742.71	1559.29	255.455	-2583.54	1538.55	136.74	-2577.32	1536.72	189.783	-2553.32	1406.85	206.484	-2453.19	1127.1	196.857	-2710.92	1299.68	196.757	-2806.7	1100.03	126.012	-2458.04	1219.84	349.358	-2646.34	1366.33	469.512	-2607.06	1140.07	480.734	-2583.14	1045.8	506.069	-2642.94	903.862	466.467	-2658.25	798.386	526.007	-2610.52	794.087	523.125	-2663.65	724.397
1266	0	238.433	-2756.83	1560.75	134.189	-2753.46	1558.39	257.007	-2594.31	1537.13	138.535	-2588.09	1535.79	191.127	-2564.42	1405.55	207.052	-2464.98	1124.82	197.851	-2722.29	1298.6	197.092	-2818.26	1099.93	126.812	-2469.69	1218.03	350.686	-2657.2	1364.53	470.516	-2617.18	1138.21	481.323	-2593.2	1043.84	507.065	-2652.54	901.696	467.899	-2667.18	796.703	527.002	-2619.9	792.201	525.026	-2670.15	724.999
1267	0	240.609	-2767.69	1559.64	135.951	-2764.43	1557.83	258.964	-2605.27	1535.91	140.38	-2598.88	1534.94	192.625	-2575.27	1404.26	207.563	-2477.02	1123.09	198.957	-2733.57	1297.72	197.398	-2830.73	1098.77	127.275	-2481.13	1216.5	351.958	-2668.07	1362.73	471.252	-2627.45	1136.21	481.922	-2603.6	1041.82	508.209	-2662.56	899.655	468.999	-2678.29	793.985	527.975	-2629.56	790.262	526.167	-2682.54	720.399
1268	0	242.732	-2778.63	1559.3	138.186	-2775.07	1557.59	260.986	-2616.15	1535.18	142.182	-2609.78	1534.31	193.354	-2586.72	1403.75	208.113	-2488.99	1121.65	200.037	-2744.9	1297.28	197.681	-2842.87	1098.87	127.753	-2492.55	1215.41	353.129	-2678.83	1361.25	472.291	-2638.04	1134.79	482.34	-2614.06	1040.27	509.212	-2672.51	897.909	470.243	-2688.44	792.031	528.85	-2639.04	788.608	527.665	-2692.03	718.55
1269	0	244.7	-2789.11	1558.89	140.311	-2785.94	1557.58	262.704	-2626.85	1534.44	143.94	-2620.8	1534.02	194.848	-2597.36	1403.01	208.375	-2500.81	1120.63	201.188	-2756.31	1297.11	197.931	-2855	1099.15	128.321	-2504.23	1214.72	354.363	-2689.82	1360.14	472.961	-2648.71	1133.47	482.794	-2625.08	1038.99	510.417	-2681.92	897.538	471.433	-2698.79	790.394	529.667	-2648.85	787.226	529.512	-2698.96	720.055
1270	0	246.855	-2800	1558.98	142.465	-2797	1557.97	264.582	-2637.78	1534	145.904	-2631.81	1534.07	196.016	-2609.14	1403.11	208.581	-2512.88	1120.18	202.389	-2767.94	1297.23	198.091	-2867.14	1099.71	128.668	-2515.67	1214.45	355.582	-2700.9	1359.24	473.354	-2659.65	1132.09	483.08	-2635.96	1037.67	511.135	-2692.87	895.687	471.862	-2706.12	790.81	530.401	-2658.9	786.094	530.458	-2708.8	718.733
1271	0	249.157	-2811.05	1559.52	144.685	-2807.98	1558.76	266.568	-2648.75	1533.99	147.85	-2642.82	1534.49	196.869	-2620.49	1403.54	208.19	-2524.57	1120.59	203.416	-2779.93	1297.65	198.486	-2879.56	1100.37	128.566	-2527.14	1215	356.873	-2712.17	1358.71	473.725	-2670.93	1131.14	482.978	-2647.13	1036.73	511.721	-2702.93	895.269	473.214	-2718.35	788.723	531.084	-2669.12	785.28	531.651	-2718.91	717.592
1272	0	251.243	-2821.88	1560.41	146.865	-2819.03	1560.02	268.295	-2659.69	1534.52	149.645	-2654.06	1535.26	198.139	-2631.96	1404.44	208.276	-2536.4	1121.52	204.586	-2791.11	1298.61	198.91	-2891.78	1101.65	128.81	-2538.8	1216.26	357.895	-2723.36	1358.98	473.922	-2682.12	1130.83	482.949	-2658.45	1036.45	512.192	-2713.69	895.046	474.668	-2731.02	787.142	531.682	-2679.54	785.183	532.97	-2729.03	717.499
1273	0	253.529	-2832.9	1561.58	149.128	-2830.13	1561.63	270.488	-2670.88	1535.43	151.757	-2665.19	1536.51	198.748	-2643.4	1405.62	208.124	-2547.93	1123.24	205.689	-2802.64	1299.95	199.41	-2903.75	1103.01	129.007	-2550.19	1217.82	358.865	-2734.47	1359.57	473.697	-2693.48	1130.73	482.747	-2670.11	1036.68	512.446	-2724.76	895.227	474.68	-2738.83	789.601	532.092	-2690.2	785.502	533.582	-2738.96	717.704
1274	0	255.805	-2844.08	1562.93	151.398	-2841.28	1563.47	272.372	-2681.98	1536.42	153.804	-2676.22	1538.22	199.918	-2654.89	1407.28	207.901	-2559.36	1124.97	206.707	-2814.5	1301.6	200.291	-2915.75	1104.77	127.965	-2561.75	1220.02	359.75	-2745.39	1360.46	473.392	-2705.31	1131.02	482.148	-2682.1	1037.11	512.664	-2736.45	895.895	475.557	-2750.83	788.654	532.389	-2701.56	786.137	534.198	-2749.7	718.076
1275	0	257.857	-2855.2	1564.57	153.486	-2852.49	1565.54	274.191	-2693.21	1538.16	155.565	-2687.44	1540.48	200.833	-2666.06	1409.28	206.781	-2571.11	1126.25	207.69	-2825.29	1303.54	200.969	-2927.07	1106.97	127.99	-2573.64	1222.25	360.579	-2756.22	1362.17	472.881	-2716.89	1131.97	481.607	-2693.74	1038.34	512.648	-2748.03	897.307	476.367	-2765.53	788.661	532.676	-2712.89	787.698	534.682	-2767.26	717.602
[truncated: 69 more columns]

## Sheet: Sheet2
Devices
		025370 - Force			025370 - Moment			025370 - CoP			027571 - Force			027571 - Moment			027571 - CoP			037720 - Force			037720 - Moment			037720 - CoP
Frame	Sub Frame	Fx	Fy	Fz	Mx	My	Mz	Cx	Cy	Cz	Fx	Fy	Fz	Mx	My	Mz	Cx	Cy	Cz	Fx	Fy	Fz	Mx	My	Mz	Cx	Cy	Cz
		N	N	N	N.mm	N.mm	N.mm	mm	mm	mm	N	N	N	N.mm	N.mm	N.mm	mm	mm	mm	N	N	N	N.mm	N.mm	N.mm	mm	mm	mm
775	0	0	0	0	0	0	0	200	300	0	0	0	0	0	0	0	200	903	0	0	0	0	0	0	0	603	903	0
775	1	0	0	0	0	0	0	200	300	0	0	0	0	0	0	0	200	903	0	0	0	0	0	0	0	603	903	0
775	2	0	0	0	0	0	0	200	300	0	0	0	0	0	0	0	200	903	0	0	0	0	0	0	0	603	903	0
775	3	0	0	0	0	0	0	200	300	0	0	0	0	0	0	0	200	903	0	0	0	0	0	0	0	603	903	0
775	4	0	0	0	0	0	0	200	300	0	0	0	0	0	0	0	200	903	0	0	0	0	0	0	0	603	903	0
775	5	0	0	0	0	0	0	200	300	0	0	0	0	0	0	0	200	903	0	0	0	0	0	0	0	603	903	0
775	6	0	0	0	0	0	0	200	300	0	0	0	0	0	0	0	200	903	0	0	0	0	0	0	0	603	903	0
775	7	0	0	0	0	0	0	200	300	0	0	0	0	0	0	0	200	903	0	0	0	0	0	0	0	603	903	0
775	8	0	0	0	0	0	0	200	300	0	0	0	0	0	0	0	200	903	0	0	0	0	0	0	0	603	903	0
775	9	0	0	0	0	0	0	200	300	0	0	0	0	0	0	0	200	903	0	0	0	0	0	0	0	603	903	0
776	0	0	0	0	0	0	0	200	300	0	0	0	0	0	0	0	200	903	0	0	0	0	0	0	0	603	903	0
776	1	0	0	0	0	0	0	200	300	0	0	0	0	0	0	0	200	903	0	0	0	0	0	0	0	603	903	0
776	2	0	0	0	0	0	0	200	300	0	0	0	0	0	0	0	200	903	0	0	0	0	0	0	0	603	903	0
776	3	0	0	0	0	0	0	200	300	0	0	0	0	0	0	0	200	903	0	0	0	0	0	0	0	603	903	0
776	4	0	0	0	0	0	0	200	300	0	0	0	0	0	0	0	200	903	0	0	0	0	0	0	0	603	903	0
776	5	0	0	0	0	0	0	200	300	0	0	0	0	0	0	0	200	903	0	0	0	0	0	0	0	603	903	0
776	6	0	0	0	0	0	0	200	300	0	0	0	0	0	0	0	200	903	0	0	0	0	0	0	0	603	903	0
776	7	0	0	0	0	0	0	200	300	0	0	0	0	0	0	0	200	903	0	0	0	0	0	0	0	603	903	0
776	8	0	0	0	0	0	0	200	300	0	0	0	0	0	0	0	200	903	0	0	0	0	0	0	0	603	903	0
776	9	0	0	0	0	0	0	200	300	0	0	0	0	0	0	0	200	903	0	0	0	0	0	0	0	603	903	0
777	0	0	0	0	0	0	0	200	300	0	0	0	0	0	0	0	200	903	0	0	0	0	0	0	0	603	903	0
777	1	0	0	0	0	0	0	200	300	0	0	0	0	0	0	0	200	903	0	0	0	0	0	0	0	603	903	0
777	2	0	0	0	0	0	0	200	300	0	0	0	0	0	0	0	200	903	0	0	0	0	0	0	0	603	903	0
777	3	0	0	0	0	0	0	200	300	0	0	0	0	0	0	0	200	903	0	0	0	0	0	0	0	603	903	0
777	4	0	0	0	0	0	0	200	300	0	0	0	0	0	0	0	200	903	0	0	0	0	0	0	0	603	903	0
777	5	0	0	0	0	0	0	200	300	0	0	0	0	0	0	0	200	903	0	0	0	0	0	0	0	603	903	0
777	6	0	0	0	0	0	0	200	300	0	0	0	0	0	0	0	200	903	0	0	0	0	0	0	0	603	903	0
777	7	0	0	0	0	0	0	200	300	0	0	0	0	0	0	0	200	903	0	0	0	0	0	0	0	603	903	0
777	8	0	0	0	0	0	0	200	300	0	0	0	0	0	0	0	200	903	0	0	0	0	0	0	0	603	903	0
777	9	0	0	0	0	0	0	200	300	0	0	0	0	0	0	0	200	903	0	0	0	0	0	0	0	603	903	0
778	0	0	0	0	0	0	0	200	300	0	0	0	0	0	0	0	200	903	0	0	0	0	0	0	0	603	903	0
778	1	0	0	0	0	0	0	200	300	0	0	0	0	0	0	0	200	903	0	0	0	0	0	0	0	603	903	0
778	2	0	0	0	0	0	0	200	300	0	0	0	0	0	0	0	200	903	0	0	0	0	0	0	0	603	903	0
778	3	0	0	0	0	0	0	200	300	0	0	0	0	0	0	0	200	903	0	0	0	0	0	0	0	603	903	0
778	4	0	0	0	0	0	0	200	300	0	0	0	0	0	0	0	200	903	0	0	0	0	0	0	0	603	903	0
778	5	0	0	0	0	0	0	200	300	0	0	0	0	0	0	0	200	903	0	0	0	0	0	0	0	603	903	0
778	6	0	0	0	0	0	0	200	300	0	0	0	0	0	0	0	200	903	0	0	0	0	0	0	0	603	903	0
778	7	0	0	0	0	0	0	200	300	0	0	0	0	0	0	0	200	903	0	0	0	0	0	0	0	603	903	0
778	8	0	0	0	0	0	0	200	300	0	0	0	0	0	0	0	200	903	0	0	0	0	0	0	0	603	903	0
778	9	0	0	0	0	0	0	200	300	0	0	0	0	0	0	0	200	903	0	0	0	0	0	0	0	603	903	0
779	0	0	0	0	0	0	0	200	300	0	0	0	0	0	0	0	200	903	0	0	0	0	0	0	0	603	903	0
779	1	0	0	0	0	0	0	200	300	0	0	0	0	0	0	0	200	903	0	0	0	0	0	0	0	603	903	0
779	2	0	0	0	0	0	0	200	300	0	0	0	0	0	0	0	200	903	0	0	0	0	0	0	0	603	903	0
779	3	0	0	0	0	0	0	200	300	0	0	0	0	0	0	0	200	903	0	0	0	0	0	0	0	603	903	0
779	4	0	0	0	0	0	0	200	300	0	0	0	0	0	0	0	200	903	0	0	0	0	0	0	0	603	903	0
779	5	0	0	0	0	0	0	200	300	0	0	0	0	0	0	0	200	903	0	0	0	0	0	0	0	603	903	0
779	6	0	0	0	0	0	0	200	300	0	0	0	0	0	0	0	200	903	0	0	0	0	0	0	0	603	903	0
779	7	0	0	0	0	0	0	200	300	0	0	0	0	0	0	0	200	903	0	0	0	0	0	0	0	603	903	0
779	8	0	0	0	0	0	0	200	300	0	0	0	0	0	0	0	200	903	0	0	0	0	0	0	0	603	903	0
779	9	0	0	0	0	0	0	200	300	0	0	0	0	0	0	0	200	903	0	0	0	0	0	0	0	603	903	0
780	0	0	0	0	0	0	0	200	300	0	0	0	0	0	0	0	200	903	0	0	0	0	0	0	0	603	903	0
780	1	0	0	0	0	0	0	200	300	0	0	0	0	0	0	0	200	903	0	0	0	0	0	0	0	603	903	0
780	2	0	0	0	0	0	0	200	300	0	0	0	0	0	0	0	200	903	0	0	0	0	0	0	0	603	903	0
780	3	0	0	0	0	0	0	200	300	0	0	0	0	0	0	0	200	903	0	0	0	0	0	0	0	603	903	0
780	4	0	0	0	0	0	0	200	300	0	0	0	0	0	0	0	200	903	0	0	0	0	0	0	0	603	903	0
780	5	0	0	0	0	0	0	200	300	0	0	0	0	0	0	0	200	903	0	0	0	0	0	0	0	603	903	0
780	6	0	0	0	0	0	0	200	300	0	0	0	0	0	0	0	200	903	0	0	0	0	0	0	0	603	903	0
780	7	0	0	0	0	0	0	200	300	0	0	0	0	0	0	0	200	903	0	0	0	0	0	0	0	603	903	0
780	8	0	0	0	0	0	0	200	300	0	0	0	0	0	0	0	200	903	0	0	0	0	0	0	0	603	903	0
780	9	0	0	0	0	0	0	200	300	0	0	0	0	0	0	0	200	903	0	0	0	0	0	0	0	603	903	0
781	0	0	0	0	0	0	0	200	300	0	0	0	0	0	0	0	200	903	0	0	0	0	0	0	0	603	903	0
781	1	0	0	0	0	0	0	200	300	0	0	0	0	0	0	0	200	903	0	0	0	0	0	0	0	603	903	0
781	2	0	0	0	0	0	0	200	300	0	0	0	0	0	0	0	200	903	0	0	0	0	0	0	0	603	903	0
781	3	0	0	0	0	0	0	200	300	0	0	0	0	0	0	0	200	903	0	0	0	0	0	0	0	603	903	0
781	4	0	0	0	0	0	0	200	300	0	0	0	0	0	0	0	200	903	0	0	0	0	0	0	0	603	903	0
781	5	0	0	0	0	0	0	200	300	0	0	0	0	0	0	0	200	903	0	0	0	0	0	0	0	603	903	0
781	6	0	0	0	0	0	0	200	300	0	0	0	0	0	0	0	200	903	0	0	0	0	0	0	0	603	903	0
781	7	0	0	0	0	0	0	200	300	0	0	0	0	0	0	0	200	903	0	0	0	0	0	0	0	603	903	0
781	8	0	0	0	0	0	0	200	300	0	0	0	0	0	0	0	200	903	0	0	0	0	0	0	0	603	903	0
781	9	0	0	0	0	0	0	200	300	0	0	0	0	0	0	0	200	903	0	0	0	0	0	0	0	603	903	0
782	0	0	0	0	0	0	0	200	300	0	0	0	0	0	0	0	200	903	0	0	0	0	0	0	0	603	903	0
782	1	0	0	0	0	0	0	200	300	0	0	0	0	0	0	0	200	903	0	0	0	0	0	0	0	603	903	0
782	2	0	0	0	0	0	0	200	300	0	0	0	0	0	0	0	200	903	0	0	0	0	0	0	0	603	903	0
782	3	0	0	0	0	0	0	200	300	0	0	0	0	0	0	0	200	903	0	0	0	0	0	0	0	603	903	0
782	4	0	0	0	0	0	0	200	300	0	0	0	0	0	0	0	200	903	0	0	0	0	0	0	0	603	903	0
782	5	0	0	0	0	0	0	200	300	0	0	0	0	0	0	0	200	903	0	0	0	0	0	0	0	603	903	0
782	6	0	0	0	0	0	0	200	300	0	0	0	0	0	0	0	200	903	0	0	0	0	0	0	0	603	903	0
782	7	0	0	0	0	0	0	200	300	0	0	0	0	0	0	0	200	903	0	0	0	0	0	0	0	603	903	0
782	8	0	0	0	0	0	0	200	300	0	0	0	0	0	0	0	200	903	0	0	0	0	0	0	0	603	903	0
782	9	0	0	0	0	0	0	200	300	0	0	0	0	0	0	0	200	903	0	0	0	0	0	0	0	603	903	0
783	0	0	0	0	0	0	0	200	300	0	0	0	0	0	0	0	200	903	0	0	0	0	0	0	0	603	903	0
783	1	0	0	0	0	0	0	200	300	0	0	0	0	0	0	0	200	903	0	0	0	0	0	0	0	603	903	0
783	2	0	0	0	0	0	0	200	300	0	0	0	0	0	0	0	200	903	0	0	0	0	0	0	0	603	903	0
783	3	0	0	0	0	0	0	200	300	0	0	0	0	0	0	0	200	903	0	0	0	0	0	0	0	603	903	0
783	4	0	0	0	0	0	0	200	300	0	0	0	0	0	0	0	200	903	0	0	0	0	0	0	0	603	903	0
783	5	0	0	0	0	0	0	200	300	0	0	0	0	0	0	0	200	903	0	0	0	0	0	0	0	603	903	0
783	6	0	0	0	0	0	0	200	300	0	0	0	0	0	0	0	200	903	0	0	0	0	0	0	0	603	903	0
783	7	0	0	0	0	0	0	200	300	0	0	0	0	0	0	0	200	903	0	0	0	0	0	0	0	603	903	0
783	8	0	0	0	0	0	0	200	300	0	0	0	0	0	0	0	200	903	0	0	0	0	0	0	0	603	903	0
783	9	0	0	0	0	0	0	200	300	0	0	0	0	0	0	0	200	903	0	0	0	0	0	0	0	603	903	0
784	0	0	0	0	0	0	0	200	300	0	0	0	0	0	0	0	200	903	0	0	0	0	0	0	0	603	903	0
784	1	0	0	0	0	0	0	200	300	0	0	0	0	0	0	0	200	903	0	0	0	0	0	0	0	603	903	0
784	2	0	0	0	0	0	0	200	300	0	0	0	0	0	0	0	200	903	0	0	0	0	0	0	0	603	903	0
784	3	0	0	0	0	0	0	200	300	0	0	0	0	0	0	0	200	903	0	0	0	0	0	0	0	603	903	0
784	4	0	0	0	0	0	0	200	300	0	0	0	0	0	0	0	200	903	0	0	0	0	0	0	0	603	903	0
784	5	0	0	0	0	0	0	200	300	0	0	0	0	0	0	0	200	903	0	0	0	0	0	0	0	603	903	0
784	6	0	0	0	0	0	0	200	300	0	0	0	0	0	0	0	200	903	0	0	0	0	0	0	0	603	903	0
784	7	0	0	0	0	0	0	200	300	0	0	0	0	0	0	0	200	903	0	0	0	0	0	0	0	603	903	0
784	8	0	0	0	0	0	0	200	300	0	0	0	0	0	0	0	200	903	0	0	0	0	0	0	0	603	903	0
784	9	0	0	0	0	0	0	200	300	0	0	0	0	0	0	0	200	903	0	0	0	0	0	0	0	603	903	0
785	0	0	0	0	0	0	0	200	300	0	0	0	0	0	0	0	200	903	0	0	0	0	0	0	0	603	903	0
785	1	0	0	0	0	0	0	200	300	0	0	0	0	0	0	0	200	903	0	0	0	0	0	0	0	603	903	0
785	2	0	0	0	0	0	0	200	300	0	0	0	0	0	0	0	200	903	0	0	0	0	0	0	0	603	903	0
785	3	0	0	0	0	0	0	200	300	0	0	0	0	0	0	0	200	903	0	0	0	0	0	0	0	603	903	0
785	4	0	0	0	0	0	0	200	300	0	0	0	0	0	0	0	200	903	0	0	0	0	0	0	0	603	903	0
785	5	0	0	0	0	0	0	200	300	0	0	0	0	0	0	0	200	903	0	0	0	0	0	0	0	603	903	0
785	6	0	0	0	0	0	0	200	300	0	0	0	0	0	0	0	200	903	0	0	0	0	0	0	0	603	903	0
785	7	0	0	0	0	0	0	200	300	0	0	0	0	0	0	0	200	903	0	0	0	0	0	0	0	603	903	0
785	8	0	0	0	0	0	0	200	300	0	0	0	0	0	0	0	200	903	0	0	0	0	0	0	0	603	903	0
785	9	0	0	0	0	0	0	200	300	0	0	0	0	0	0	0	200	903	0	0	0	0	0	0	0	603	903	0
786	0	0	0	0	0	0	0	200	300	0	0	0	0	0	0	0	200	903	0	0	0	0	0	0	0	603	903	0
786	1	0	0	0	0	0	0	200	300	0	0	0	0	0	0	0	200	903	0	0	0	0	0	0	0	603	903	0
786	2	0	0	0	0	0	0	200	300	0	0	0	0	0	0	0	200	903	0	0	0	0	0	0	0	603	903	0
786	3	0	0	0	0	0	0	200	300	0	0	0	0	0	0	0	200	903	0	0	0	0	0	0	0	603	903	0
786	4	0	0	0	0	0	0	200	300	0	0	0	0	0	0	0	200	903	0	0	0	0	0	0	0	603	903	0
786	5	0	0	0	0	0	0	200	300	0	0	0	0	0	0	0	200	903	0	0	0	0	0	0	0	603	903	0
786	6	0	0	0	0	0	0	200	300	0	0	0	0	0	0	0	200	903	0	0	0	0	0	0	0	603	903	0
786	7	0	0	0	0	0	0	200	300	0	0	0	0	0	0	0	200	903	0	0	0	0	0	0	0	603	903	0
786	8	0	0	0	0	0	0	200	300	0	0	0	0	0	0	0	200	903	0	0	0	0	0	0	0	603	903	0
786	9	0	0	0	0	0	0	200	300	0	0	0	0	0	0	0	200	903	0	0	0	0	0	0	0	603	903	0
787	0	0	0	0	0	0	0	200	300	0	0	0	0	0	0	0	200	903	0	0	0	0	0	0	0	603	903	0
787	1	0	0	0	0	0	0	200	300	0	0	0	0	0	0	0	200	903	0	0	0	0	0	0	0	603	903	0
787	2	0	0	0	0	0	0	200	300	0	0	0	0	0	0	0	200	903	0	0	0	0	0	0	0	603	903	0
787	3	0	0	0	0	0	0	200	300	0	0	0	0	0	0	0	200	903	0	0	0	0	0	0	0	603	903	0
787	4	0	0	0	0	0	0	200	300	0	0	0	0	0	0	0	200	903	0	0	0	0	0	0	0	603	903	0
787	5	0	0	0	0	0	0	200	300	0	0	0	0	0	0	0	200	903	0	0	0	0	0	0	0	603	903	0
787	6	0	0	0	0	0	0	200	300	0	0	0	0	0	0	0	200	903	0	0	0	0	0	0	0	603	903	0
787	7	0	0	0	0	0	0	200	300	0	0	0	0	0	0	0	200	903	0	0	0	0	0	0	0	603	903	0
787	8	0	0	0	0	0	0	200	300	0	0	0	0	0	0	0	200	903	0	0	0	0	0	0	0	603	903	0
787	9	0	0	0	0	0	0	200	300	0	0	0	0	0	0	0	200	903	0	0	0	0	0	0	0	603	903	0
788	0	0	0	0	0	0	0	200	300	0	0	0	0	0	0	0	200	903	0	0	0	0	0	0	0	603	903	0
788	1	0	0	0	0	0	0	200	300	0	0	0	0	0	0	0	200	903	0	0	0	0	0	0	0	603	903	0
788	2	0	0	0	0	0	0	200	300	0	0	0	0	0	0	0	200	903	0	0	0	0	0	0	0	603	903	0
788	3	0	0	0	0	0	0	200	300	0	0	0	0	0	0	0	200	903	0	0	0	0	0	0	0	603	903	0
788	4	0	0	0	0	0	0	200	300	0	0	0	0	0	0	0	200	903	0	0	0	0	0	0	0	603	903	0
788	5	0	0	0	0	0	0	200	300	0	0	0	0	0	0	0	200	903	0	0	0	0	0	0	0	603	903	0
788	6	0	0	0	0	0	0	200	300	0	0	0	0	0	0	0	200	903	0	0	0	0	0	0	0	603	903	0
788	7	0	0	0	0	0	0	200	300	0	0	0	0	0	0	0	200	903	0	0	0	0	0	0	0	603	903	0
788	8	0	0	0	0	0	0	200	300	0	0	0	0	0	0	0	200	903	0	0	0	0	0	0	0	603	903	0
788	9	0	0	0	0	0	0	200	300	0	0	0	0	0	0	0	200	903	0	0	0	0	0	0	0	603	903	0
789	0	0	0	0	0	0	0	200	300	0	0	0	0	0	0	0	200	903	0	0	0	0	0	0	0	603	903	0
789	1	0	0	0	0	0	0	200	300	0	0	0	0	0	0	0	200	903	0	0	0	0	0	0	0	603	903	0
789	2	0	0	0	0	0	0	200	300	0	0	0	0	0	0	0	200	903	0	0	0	0	0	0	0	603	903	0
789	3	0	0	0	0	0	0	200	300	0	0	0	0	0	0	0	200	903	0	0	0	0	0	0	0	603	903	0
789	4	0	0	0	0	0	0	200	300	0	0	0	0	0	0	0	200	903	0	0	0	0	0	0	0	603	903	0
789	5	0	0	0	0	0	0	200	300	0	0	0	0	0	0	0	200	903	0	0	0	0	0	0	0	603	903	0
789	6	0	0	0	0	0	0	200	300	0	0	0	0	0	0	0	200	903	0	0	0	0	0	0	0	603	903	0
789	7	0	0	0	0	0	0	200	300	0	0	0	0	0	0	0	200	903	0	0	0	0	0	0	0	603	903	0
789	8	0	0	0	0	0	0	200	300	0	0	0	0	0	0	0	200	903	0	0	0	0	0	0	0	603	903	0
789	9	0	0	0	0	0	0	200	300	0	0	0	0	0	0	0	200	903	0	0	0	0	0	0	0	603	903	0
790	0	0	0	0	0	0	0	200	300	0	0	0	0	0	0	0	200	903	0	0	0	0	0	0	0	603	903	0
790	1	0	0	0	0	0	0	200	300	0	0	0	0	0	0	0	200	903	0	0	0	0	0	0	0	603	903	0
790	2	0	0	0	0	0	0	200	300	0	0	0	0	0	0	0	200	903	0	0	0	0	0	0	0	603	903	0
790	3	0	0	0	0	0	0	200	300	0	0	0	0	0	0	0	200	903	0	0	0	0	0	0	0	603	903	0
790	4	0	0	0	0	0	0	200	300	0	0	0	0	0	0	0	200	903	0	0	0	0	0	0	0	603	903	0
790	5	0	0	0	0	0	0	200	300	0	0	0	0	0	0	0	200	903	0	0	0	0	0	0	0	603	903	0
790	6	0	0	0	0	0	0	200	300	0	0	0	0	0	0	0	200	903	0	0	0	0	0	0	0	603	903	0
790	7	0	0	0	0	0	0	200	300	0	0	0	0	0	0	0	200	903	0	0	0	0	0	0	0	603	903	0
790	8	0	0	0	0	0	0	200	300	0	0	0	0	0	0	0	200	903	0	0	0	0	0	0	0	603	903	0
790	9	0	0	0	0	0	0	200	300	0	0	0	0	0	0	0	200	903	0	0	0	0	0	0	0	603	903	0
791	0	0	0	0	0	0	0	200	300	0	0	0	0	0	0	0	200	903	0	0	0	0	0	0	0	603	903	0
791	1	0	0	0	0	0	0	200	300	0	0	0	0	0	0	0	200	903	0	0	0	0	0	0	0	603	903	0
791	2	0	0	0	0	0	0	200	300	0	0	0	0	0	0	0	200	903	0	0	0	0	0	0	0	603	903	0
791	3	0	0	0	0	0	0	200	300	0	0	0	0	0	0	0	200	903	0	0	0	0	0	0	0	603	903	0
791	4	0	0	0	0	0	0	200	300	0	0	0	0	0	0	0	200	903	0	0	0	0	0	0	0	603	903	0
791	5	0	0	0	0	0	0	200	300	0	0	0	0	0	0	0	200	903	0	0	0	0	0	0	0	603	903	0
791	6	0	0	0	0	0	0	200	300	0	0	0	0	0	0	0	200	903	0	0	0	0	0	0	0	603	903	0
791	7	0	0	0	0	0	0	200	300	0	0	0	0	0	0	0	200	903	0	0	0	0	0	0	0	603	903	0
791	8	0	0	0	0	0	0	200	300	0	0	0	0	0	0	0	200	903	0	0	0	0	0	0	0	603	903	0
791	9	0	0	0	0	0	0	200	300	0	0	0	0	0	0	0	200	903	0	0	0	0	0	0	0	603	903	0
792	0	0	0	0	0	0	0	200	300	0	0	0	0	0	0	0	200	903	0	0	0	0	0	0	0	603	903	0
792	1	0	0	0	0	0	0	200	300	0	0	0	0	0	0	0	200	903	0	0	0	0	0	0	0	603	903	0
792	2	0	0	0	0	0	0	200	300	0	0	0	0	0	0	0	200	903	0	0	0	0	0	0	0	603	903	0
792	3	0	0	0	0	0	0	200	300	0	0	0	0	0	0	0	200	903	0	0	0	0	0	0	0	603	903	0
792	4	0	0	0	0	0	0	200	300	0	0	0	0	0	0	0	200	903	0	0	0	0	0	0	0	603	903	0
792	5	0	0	0	0	0	0	200	300	0	0	0	0	0	0	0	200	903	0	0	0	0	0	0	0	603	903	0
792	6	0	0	0	0	0	0	200	300	0	0	0	0	0	0	0	200	903	0	0	0	0	0	0	0	603	903	0
792	7	0	0	0	0	0	0	200	300	0	0	0	0	0	0	0	200	903	0	0	0	0	0	0	0	603	903	0
792	8	0	0	0	0	0	0	200	300	0	0	0	0	0	0	0	200	903	0	0	0	0	0	0	0	603	903	0
792	9	0	0	0	0	0	0	200	300	0	0	0	0	0	0	0	200	903	0	0	0	0	0	0	0	603	903	0
793	0	0	0	0	0	0	0	200	300	0	0	0	0	0	0	0	200	903	0	0	0	0	0	0	0	603	903	0
793	1	0	0	0	0	0	0	200	300	0	0	0	0	0	0	0	200	903	0	0	0	0	0	0	0	603	903	0
793	2	0	0	0	0	0	0	200	300	0	0	0	0	0	0	0	200	903	0	0	0	0	0	0	0	603	903	0
793	3	0	0	0	0	0	0	200	300	0	0	0	0	0	0	0	200	903	0	0	0	0	0	0	0	603	903	0
793	4	0	0	0	0	0	0	200	300	0	0	0	0	0	0	0	200	903	0	0	0	0	0	0	0	603	903	0
793	5	0	0	0	0	0	0	200	300	0	0	0	0	0	0	0	200	903	0	0	0	0	0	0	0	603	903	0
793	6	0	0	0	0	0	0	200	300	0	0	0	0	0	0	0	200	903	0	0	0	0	0	0	0	603	903	0
793	7	0	0	0	0	0	0	200	300	0	0	0	0	0	0	0	200	903	0	0	0	0	0	0	0	603	903	0
793	8	0	0	0	0	0	0	200	300	0	0	0	0	0	0	0	200	903	0	0	0	0	0	0	0	603	903	0
793	9	0	0	0	0	0	0	200	300	0	0	0	0	0	0	0	200	903	0	0	0	0	0	0	0	603	903	0
794	0	0	0	0	0	0	0	200	300	0	0	0	0	0	0	0	200	903	0	0	0	0	0	0	0	603	903	0
794	1	0	0	0	0	0	0	200	300	0	0	0	0	0	0	0	200	903	0	0	0	0	0	0	0	603	903	0
794	2	0	0	0	0	0	0	200	300	0	0	0	0	0	0	0	200	903	0	0	0	0	0	0	0	603	903	0
794	3	0	0	0	0	0	0	200	300	0	0	0	0	0	0	0	200	903	0	0	0	0	0	0	0	603	903	0
794	4	0	0	0	0	0	0	200	300	0	0	0	0	0	0	0	200	903	0	0	0	0	0	0	0	603	903	0
794	5	0	0	0	0	0	0	200	300	0	0	0	0	0	0	0	200	903	0	0	0	0	0	0	0	603	903	0
794	6	0	0	0	0	0	0	200	300	0	0	0	0	0	0	0	200	903	0	0	0	0	0	0	0	603	903	0
794	7	0	0	0	0	0	0	200	300	0	0	0	0	0	0	0	200	903	0	0	0	0	0	0	0	603	903	0
794	8	0	0	0	0	0	0	200	300	0	0	0	0	0	0	0	200	903	0	0	0	0	0	0	0	603	903	0
794	9	0	0	0	0	0	0	200	300	0	0	0	0	0	0	0	200	903	0	0	0	0	0	0	0	603	903	0
795	0	0	0	0	0	0	0	200	300	0	0	0	0	0	0	0	200	903	0	0	0	0	0	0	0	603	903	0
795	1	0	0	0	0	0	0	200	300	0	0	0	0	0	0	0	200	903	0	0	0	0	0	0	0	603	903	0
795	2	0	0	0	0	0	0	200	300	0	0	0	0	0	0	0	200	903	0	0	0	0	0	0	0	603	903	0
795	3	0	0	0	0	0	0	200	300	0	0	0	0	0	0	0	200	903	0	0	0	0	0	0	0	603	903	0
795	4	0	0	0	0	0	0	200	300	0	0	0	0	0	0	0	200	903	0	0	0	0	0	0	0	603	903	0
795	5	0	0	0	0	0	0	200	300	0	0	0	0	0	0	0	200	903	0	0	0	0	0	0	0	603	903	0
795	6	0	0	0	0	0	0	200	300	0	0	0	0	0	0	0	200	903	0	0	0	0	0	0	0	603	903	0
795	7	0	0	0	0	0	0	200	300	0	0	0	0	0	0	0	200	903	0	0	0	0	0	0	0	603	903	0
795	8	0	0	0	0	0	0	200	300	0	0	0	0	0	0	0	200	903	0	0	0	0	0	0	0	603	903	0
795	9	0	0	0	0	0	0	200	300	0	0	0	0	0	0	0	200	903	0	0	0	0	0	0	0	603	903	0
796	0	0	0	0	0	0	0	200	300	0	0	0	0	0	0	0	200	903	0	0	0	0	0	0	0	603	903	0
796	1	0	0	0	0	0	0	200	300	0	0	0	0	0	0	0	200	903	0	0	0	0	0	0	0	603	903	0
796	2	0	0	0	0	0	0	200	300	0	0	0	0	0	0	0	200	903	0	0	0	0	0	0	0	603	903	0
796	3	0	0	0	0	0	0	200	300	0	0	0	0	0	0	0	200	903	0	0	0	0	0	0	0	603	903	0
796	4	0	0	0	0	0	0	200	300	0	0	0	0	0	0	0	200	903	0	0	0	0	0	0	0	603	903	0
796	5	0	0	0	0	0	0	200	300	0	0	0	0	0	0	0	200	903	0	0	0	0	0	0	0	603	903	0
796	6	0	0	0	0	0	0	200	300	0	0	0	0	0	0	0	200	903	0	0	0	0	0	0	0	603	903	0
796	7	0	0	0	0	0	0	200	300	0	0	0	0	0	0	0	200	903	0	0	0	0	0	0	0	603	903	0
796	8	0	0	0	0	0	0	200	300	0	0	0	0	0	0	0	200	903	0	0	0	0	0	0	0	603	903	0
796	9	0	0	0	0	0	0	200	300	0	0	0	0	0	0	0	200	903	0	0	0	0	0	0	0	603	903	0
797	0	0	0	0	0	0	0	200	300	0	0	0	0	0	0	0	200	903	0	0	0	0	0	0	0	603	903	0
797	1	0	0	0	0	0	0	200	300	0	0	0	0	0	0	0	200	903	0	0	0	0	0	0	0	603	903	0
797	2	0	0	0	0	0	0	200	300	0	0	0	0	0	0	0	200	903	0	0	0	0	0	0	0	603	903	0
797	3	0	0	0	0	0	0	200	300	0	0	0	0	0	0	0	200	903	0	0	0	0	0	0	0	603	903	0
797	4	0	0	0	0	0	0	200	300	0	0	0	0	0	0	0	200	903	0	0	0	0	0	0	0	603	903	0
797	5	0	0	0	0	0	0	200	300	0	0	0	0	0	0	0	200	903	0	0	0	0	0	0	0	603	903	0
797	6	0	0	0	0	0	0	200	300	0	0	0	0	0	0	0	200	903	0	0	0	0	0	0	0	603	903	0
797	7	0	0	0	0	0	0	200	300	0	0	0	0	0	0	0	200	903	0	0	0	0	0	0	0	603	903	0
797	8	0	0	0	0	0	0	200	300	0	0	0	0	0	0	0	200	903	0	0	0	0	0	0	0	603	903	0
797	9	0	0	0	0	0	0	200	300	0	0	0	0	0	0	0	200	903	0	0	0	0	0	0	0	603	903	0
798	0	0	0	0	0	0	0	200	300	0	0	0	0	0	0	0	200	903	0	0	0	0	0	0	0	603	903	0
798	1	0	0	0	0	0	0	200	300	0	0	0	0	0	0	0	200	903	0	0	0	0	0	0	0	603	903	0
798	2	0	0	0	0	0	0	200	300	0	0	0	0	0	0	0	200	903	0	0	0	0	0	0	0	603	903	0
798	3	0	0	0	0	0	0	200	300	0	0	0	0	0	0	0	200	903	0	0	0	0	0	0	0	603	903	0
798	4	0	0	0	0	0	0	200	300	0	0	0	0	0	0	0	200	903	0	0	0	0	0	0	0	603	903	0
798	5	0	0	0	0	0	0	200	300	0	0	0	0	0	0	0	200	903	0	0	0	0	0	0	0	603	903	0
798	6	0	0	0	0	0	0	200	300	0	0	0	0	0	0	0	200	903	0	0	0	0	0	0	0	603	903	0
798	7	0	0	0	0	0	0	200	300	0	0	0	0	0	0	0	200	903	0	0	0	0	0	0	0	603	903	0
798	8	0	0	0	0	0	0	200	300	0	0	0	0	0	0	0	200	903	0	0	0	0	0	0	0	603	903	0
798	9	0	0	0	0	0	0	200	300	0	0	0	0	0	0	0	200	903	0	0	0	0	0	0	0	603	903	0
799	0	0	0	0	0	0	0	200	300	0	0	0	0	0	0	0	200	903	0	0	0	0	0	0	0	603	903	0
799	1	0	0	0	0	0	0	200	300	0	0	0	0	0	0	0	200	903	0	0	0	0	0	0	0	603	903	0
799	2	0	0	0	0	0	0	200	300	0	0	0	0	0	0	0	200	903	0	0	0	0	0	0	0	603	903	0
799	3	0	0	0	0	0	0	200	300	0	0	0	0	0	0	0	200	903	0	0	0	0	0	0	0	603	903	0
799	4	0	0	0	0	0	0	200	300	0	0	0	0	0	0	0	200	903	0	0	0	0	0	0	0	603	903	0
799	5	0	0	0	0	0	0	200	300	0	0	0	0	0	0	0	200	903	0	0	0	0	0	0	0	603	903	0
799	6	0	0	0	0	0	0	200	300	0	0	0	0	0	0	0	200	903	0	0	0	0	0	0	0	603	903	0
799	7	0	0	0	0	0	0	200	300	0	0	0	0	0	0	0	200	903	0	0	0	0	0	0	0	603	903	0
799	8	0	0	0	0	0	0	200	300	0	0	0	0	0	0	0	200	903	0	0	0	0	0	0	0	603	903	0
799	9	0	0	0	0	0	0	200	300	0	0	0	0	0	0	0	200	903	0	0	0	0	0	0	0	603	903	0
800	0	0	0	0	0	0	0	200	300	0	0	0	0	0	0	0	200	903	0	0	0	0	0	0	0	603	903	0
800	1	0	0	0	0	0	0	200	300	0	0	0	0	0	0	0	200	903	0	0	0	0	0	0	0	603	903	0
800	2	0	0	0	0	0	0	200	300	0	0	0	0	0	0	0	200	903	0	0	0	0	0	0	0	603	903	0
800	3	0	0	0	0	0	0	200	300	0	0	0	0	0	0	0	200	903	0	0	0	0	0	0	0	603	903	0
800	4	0	0	0	0	0	0	200	300	0	0	0	0	0	0	0	200	903	0	0	0	0	0	0	0	603	903	0
800	5	0	0	0	0	0	0	200	300	0	0	0	0	0	0	0	200	903	0	0	0	0	0	0	0	603	903	0
800	6	0	0	0	0	0	0	200	300	0	0	0	0	0	0	0	200	903	0	0	0	0	0	0	0	603	903	0
800	7	0	0	0	0	0	0	200	300	0	0	0	0	0	0	0	200	903	0	0	0	0	0	0	0	603	903	0
800	8	0	0	0	0	0	0	200	300	0	0	0	0	0	0	0	200	903	0	0	0	0	0	0	0	603	903	0
800	9	0	0	0	0	0	0	200	300	0	0	0	0	0	0	0	200	903	0	0	0	0	0	0	0	603	903	0
801	0	0	0	0	0	0	0	200	300	0	0	0	0	0	0	0	200	903	0	0	0	0	0	0	0	603	903	0
801	1	0	0	0	0	0	0	200	300	0	0	0	0	0	0	0	200	903	0	0	0	0	0	0	0	603	903	0
801	2	0	0	0	0	0	0	200	300	0	0	0	0	0	0	0	200	903	0	0	0	0	0	0	0	603	903	0
801	3	0	0	0	0	0	0	200	300	0	0	0	0	0	0	0	200	903	0	0	0	0	0	0	0	603	903	0
801	4	0	0	0	0	0	0	200	300	0	0	0	0	0	0	0	200	903	0	0	0	0	0	0	0	603	903	0
801	5	0	0	0	0	0	0	200	300	0	0	0	0	0	0	0	200	903	0	0	0	0	0	0	0	603	903	0
801	6	0	0	0	0	0	0	200	300	0	0	0	0	0	0	0	200	903	0	0	0	0	0	0	0	603	903	0
801	7	0	0	0	0	0	0	200	300	0	0	0	0	0	0	0	200	903	0	0	0	0	0	0	0	603	903	0
801	8	0	0	0	0	0	0	200	300	0	0	0	0	0	0	0	200	903	0	0	0	0	0	0	0	603	903	0
801	9	0	0	0	0	0	0	200	300	0	0	0	0	0	0	0	200	903	0	0	0	0	0	0	0	603	903	0
802	0	0	0	0	0	0	0	200	300	0	0	0	0	0	0	0	200	903	0	0	0	0	0	0	0	603	903	0
802	1	0	0	0	0	0	0	200	300	0	0	0	0	0	0	0	200	903	0	0	0	0	0	0	0	603	903	0
802	2	0	0	0	0	0	0	200	300	0	0	0	0	0	0	0	200	903	0	0	0	0	0	0	0	603	903	0
802	3	0	0	0	0	0	0	200	300	0	0	0	0	0	0	0	200	903	0	0	0	0	0	0	0	603	903	0
802	4	0	0	0	0	0	0	200	300	0	0	0	0	0	0	0	200	903	0	0	0	0	0	0	0	603	903	0
802	5	0	0	0	0	0	0	200	300	0	0	0	0	0	0	0	200	903	0	0	0	0	0	0	0	603	903	0
802	6	0	0	0	0	0	0	200	300	0	0	0	0	0	0	0	200	903	0	0	0	0	0	0	0	603	903	0
802	7	0	0	0	0	0	0	200	300	0	0	0	0	0	0	0	200	903	0	0	0	0	0	0	0	603	903	0
802	8	0	0	0	0	0	0	200	300	0	0	0	0	0	0	0	200	903	0	0	0	0	0	0	0	603	903	0
802	9	0	0	0	0	0	0	200	300	0	0	0	0	0	0	0	200	903	0	0	0	0	0	0	0	603	903	0
803	0	0	0	0	0	0	0	200	300	0	0	0	0	0	0	0	200	903	0	0	0	0	0	0	0	603	903	0
803	1	0	0	0	0	0	0	200	300	0	0	0	0	0	0	0	200	903	0	0	0	0	0	0	0	603	903	0
803	2	0	0	0	0	0	0	200	300	0	0	0	0	0	0	0	200	903	0	0	0	0	0	0	0	603	903	0
803	3	0	0	0	0	0	0	200	300	0	0	0	0	0	0	0	200	903	0	0	0	0	0	0	0	603	903	0
803	4	0	0	0	0	0	0	200	300	0	0	0	0	0	0	0	200	903	0	0	0	0	0	0	0	603	903	0
803	5	0	0	0	0	0	0	200	300	0	0	0	0	0	0	0	200	903	0	0	0	0	0	0	0	603	903	0
803	6	0	0	0	0	0	0	200	300	0	0	0	0	0	0	0	200	903	0	0	0	0	0	0	0	603	903	0
803	7	0	0	0	0	0	0	200	300	0	0	0	0	0	0	0	200	903	0	0	0	0	0	0	0	603	903	0
803	8	0	0	0	0	0	0	200	300	0	0	0	0	0	0	0	200	903	0	0	0	0	0	0	0	603	903	0
803	9	0	0	0	0	0	0	200	300	0	0	0	0	0	0	0	200	903	0	0	0	0	0	0	0	603	903	0
804	0	0	0	0	0	0	0	200	300	0	0	0	0	0	0	0	200	903	0	0	0	0	0	0	0	603	903	0
804	1	0	0	0	0	0	0	200	300	0	0	0	0	0	0	0	200	903	0	0	0	0	0	0	0	603	903	0
804	2	0	0	0	0	0	0	200	300	0	0	0	0	0	0	0	200	903	0	0	0	0	0	0	0	603	903	0
804	3	0	0	0	0	0	0	200	300	0	0	0	0	0	0	0	200	903	0	0	0	0	0	0	0	603	903	0
804	4	0	0	0	0	0	0	200	300	0	0	0	0	0	0	0	200	903	0	0	0	0	0	0	0	603	903	0
804	5	0	0	0	0	0	0	200	300	0	0	0	0	0	0	0	200	903	0	0	0	0	0	0	0	603	903	0
804	6	0	0	0	0	0	0	200	300	0	0	0	0	0	0	0	200	903	0	0	0	0	0	0	0	603	903	0
804	7	0	0	0	0	0	0	200	300	0	0	0	0	0	0	0	200	903	0	0	0	0	0	0	0	603	903	0
804	8	0	0	0	0	0	0	200	300	0	0	0	0	0	0	0	200	903	0	0	0	0	0	0	0	603	903	0
804	9	0	0	0	0	0	0	200	300	0	0	0	0	0	0	0	200	903	0	0	0	0	0	0	0	603	903	0
805	0	0	0	0	0	0	0	200	300	0	0	0	0	0	0	0	200	903	0	0	0	0	0	0	0	603	903	0
805	1	0	0	0	0	0	0	200	300	0	0	0	0	0	0	0	200	903	0	0	0	0	0	0	0	603	903	0
805	2	0	0	0	0	0	0	200	300	0	0	0	0	0	0	0	200	903	0	0	0	0	0	0	0	603	903	0
805	3	0	0	0	0	0	0	200	300	0	0	0	0	0	0	0	200	903	0	0	0	0	0	0	0	603	903	0
805	4	0	0	0	0	0	0	200	300	0	0	0	0	0	0	0	200	903	0	0	0	0	0	0	0	603	903	0
805	5	0	0	0	0	0	0	200	300	0	0	0	0	0	0	0	200	903	0	0	0	0	0	0	0	603	903	0
805	6	0	0	0	0	0	0	200	300	0	0	0	0	0	0	0	200	903	0	0	0	0	0	0	0	603	903	0
805	7	0	0	0	0	0	0	200	300	0	0	0	0	0	0	0	200	903	0	0	0	0	0	0	0	603	903	0
805	8	0	0	0	0	0	0	200	300	0	0	0	0	0	0	0	200	903	0	0	0	0	0	0	0	603	903	0
805	9	0	0	0	0	0	0	200	300	0	0	0	0	0	0	0	200	903	0	0	0	0	0	0	0	603	903	0
806	0	0	0	0	0	0	0	200	300	0	0	0	0	0	0	0	200	903	0	0	0	0	0	0	0	603	903	0
806	1	0	0	0	0	0	0	200	300	0	0	0	0	0	0	0	200	903	0	0	0	0	0	0	0	603	903	0
806	2	0	0	0	0	0	0	200	300	0	0	0	0	0	0	0	200	903	0	0	0	0	0	0	0	603	903	0
806	3	0	0	0	0	0	0	200	300	0	0	0	0	0	0	0	200	903	0	0	0	0	0	0	0	603	903	0
806	4	0	0	0	0	0	0	200	300	0	0	0	0	0	0	0	200	903	0	0	0	0	0	0	0	603	903	0
806	5	0	0	0	0	0	0	200	300	0	0	0	0	0	0	0	200	903	0	0	0	0	0	0	0	603	903	0
806	6	0	0	0	0	0	0	200	300	0	0	0	0	0	0	0	200	903	0	0	0	0	0	0	0	603	903	0
806	7	0	0	0	0	0	0	200	300	0	0	0	0	0	0	0	200	903	0	0	0	0	0	0	0	603	903	0
806	8	0	0	0	0	0	0	200	300	0	0	0	0	0	0	0	200	903	0	0	0	0	0	0	0	603	903	0
806	9	0	0	0	0	0	0	200	300	0	0	0	0	0	0	0	200	903	0	0	0	0	0	0	0	603	903	0
807	0	0	0	0	0	0	0	200	300	0	0	0	0	0	0	0	200	903	0	0	0	0	0	0	0	603	903	0
807	1	0	0	0	0	0	0	200	300	0	0	0	0	0	0	0	200	903	0	0	0	0	0	0	0	603	903	0
807	2	0	0	0	0	0	0	200	300	0	0	0	0	0	0	0	200	903	0	0	0	0	0	0	0	603	903	0
807	3	0	0	0	0	0	0	200	300	0	0	0	0	0	0	0	200	903	0	0	0	0	0	0	0	603	903	0
807	4	0	0	0	0	0	0	200	300	0	0	0	0	0	0	0	200	903	0	0	0	0	0	0	0	603	903	0
807	5	0	0	0	0	0	0	200	300	0	0	0	0	0	0	0	200	903	0	0	0	0	0	0	0	603	903	0
807	6	0	0	0	0	0	0	200	300	0	0	0	0	0	0	0	200	903	0	0	0	0	0	0	0	603	903	0
807	7	0	0	0	0	0	0	200	300	0	0	0	0	0	0	0	200	903	0	0	0	0	0	0	0	603	903	0
807	8	0	0	0	0	0	0	200	300	0	0	0	0	0	0	0	200	903	0	0	0	0	0	0	0	603	903	0
807	9	0	0	0	0	0	0	200	300	0	0	0	0	0	0	0	200	903	0	0	0	0	0	0	0	603	903	0
808	0	0	0	0	0	0	0	200	300	0	0	0	0	0	0	0	200	903	0	0	0	0	0	0	0	603	903	0
808	1	0	0	0	0	0	0	200	300	0	0	0	0	0	0	0	200	903	0	0	0	0	0	0	0	603	903	0
808	2	0	0	0	0	0	0	200	300	0	0	0	0	0	0	0	200	903	0	0	0	0	0	0	0	603	903	0
808	3	0	0	0	0	0	0	200	300	0	0	0	0	0	0	0	200	903	0	0	0	0	0	0	0	603	903	0
808	4	0	0	0	0	0	0	200	300	0	0	0	0	0	0	0	200	903	0	0	0	0	0	0	0	603	903	0
808	5	0	0	0	0	0	0	200	300	0	0	0	0	0	0	0	200	903	0	0	0	0	0	0	0	603	903	0
808	6	0	0	0	0	0	0	200	300	0	0	0	0	0	0	0	200	903	0	0	0	0	0	0	0	603	903	0
808	7	0	0	0	0	0	0	200	300	0	0	0	0	0	0	0	200	903	0	0	0	0	0	0	0	603	903	0
808	8	0	0	0	0	0	0	200	300	0	0	0	0	0	0	0	200	903	0	0	0	0	0	0	0	603	903	0
808	9	0	0	0	0	0	0	200	300	0	0	0	0	0	0	0	200	903	0	0	0	0	0	0	0	603	903	0
809	0	0	0	0	0	0	0	200	300	0	0	0	0	0	0	0	200	903	0	0	0	0	0	0	0	603	903	0
809	1	0	0	0	0	0	0	200	300	0	0	0	0	0	0	0	200	903	0	0	0	0	0	0	0	603	903	0
809	2	0	0	0	0	0	0	200	300	0	0	0	0	0	0	0	200	903	0	0	0	0	0	0	0	603	903	0
809	3	0	0	0	0	0	0	200	300	0	0	0	0	0	0	0	200	903	0	0	0	0	0	0	0	603	903	0
809	4	0	0	0	0	0	0	200	300	0	0	0	0	0	0	0	200	903	0	0	0	0	0	0	0	603	903	0
809	5	0	0	0	0	0	0	200	300	0	0	0	0	0	0	0	200	903	0	0	0	0	0	0	0	603	903	0
809	6	0	0	0	0	0	0	200	300	0	0	0	0	0	0	0	200	903	0	0	0	0	0	0	0	603	903	0
809	7	0	0	0	0	0	0	200	300	0	0	0	0	0	0	0	200	903	0	0	0	0	0	0	0	603	903	0
809	8	0	0	0	0	0	0	200	300	0	0	0	0	0	0	0	200	903	0	0	0	0	0	0	0	603	903	0
809	9	0	0	0	0	0	0	200	300	0	0	0	0	0	0	0	200	903	0	0	0	0	0	0	0	603	903	0
810	0	0	0	0	0	0	0	200	300	0	0	0	0	0	0	0	200	903	0	0	0	0	0	0	0	603	903	0
810	1	0	0	0	0	0	0	200	300	0	0	0	0	0	0	0	200	903	0	0	0	0	0	0	0	603	903	0
810	2	0	0	0	0	0	0	200	300	0	0	0	0	0	0	0	200	903	0	0	0	0	0	0	0	603	903	0
810	3	0	0	0	0	0	0	200	300	0	0	0	0	0	0	0	200	903	0	0	0	0	0	0	0	603	903	0
810	4	0	0	0	0	0	0	200	300	0	0	0	0	0	0	0	200	903	0	0	0	0	0	0	0	603	903	0
810	5	0	0	0	0	0	0	200	300	0	0	0	0	0	0	0	200	903	0	0	0	0	0	0	0	603	903	0
810	6	0	0	0	0	0	0	200	300	0	0	0	0	0	0	0	200	903	0	0	0	0	0	0	0	603	903	0
810	7	0	0	0	0	0	0	200	300	0	0	0	0	0	0	0	200	903	0	0	0	0	0	0	0	603	903	0
810	8	0	0	0	0	0	0	200	300	0	0	0	0	0	0	0	200	903	0	0	0	0	0	0	0	603	903	0
810	9	0	0	0	0	0	0	200	300	0	0	0	0	0	0	0	200	903	0	0	0	0	0	0	0	603	903	0
811	0	0	0	0	0	0	0	200	300	0	0	0	0	0	0	0	200	903	0	0	0	0	0	0	0	603	903	0
811	1	0	0	0	0	0	0	200	300	0	0	0	0	0	0	0	200	903	0	0	0	0	0	0	0	603	903	0
811	2	0	0	0	0	0	0	200	300	0	0	0	0	0	0	0	200	903	0	0	0	0	0	0	0	603	903	0
811	3	0	0	0	0	0	0	200	300	0	0	0	0	0	0	0	200	903	0	0	0	0	0	0	0	603	903	0
811	4	0	0	0	0	0	0	200	300	0	0	0	0	0	0	0	200	903	0	0	0	0	0	0	0	603	903	0
811	5	0	0	0	0	0	0	200	300	0	0	0	0	0	0	0	200	903	0	0	0	0	0	0	0	603	903	0
811	6	0	0	0	0	0	0	200	300	0	0	0	0	0	0	0	200	903	0	0	0	0	0	0	0	603	903	0
811	7	0	0	0	0	0	0	200	300	0	0	0	0	0	0	0	200	903	0	0	0	0	0	0	0	603	903	0
811	8	0	0	0	0	0	0	200	300	0	0	0	0	0	0	0	200	903	0	0	0	0	0	0	0	603	903	0
811	9	0	0	0	0	0	0	200	300	0	0	0	0	0	0	0	200	903	0	0	0	0	0	0	0	603	903	0
812	0	0	0	0	0	0	0	200	300	0	0	0	0	0	0	0	200	903	0	0	0	0	0	0	0	603	903	0
812	1	0	0	0	0	0	0	200	300	0	0	0	0	0	0	0	200	903	0	0	0	0	0	0	0	603	903	0
812	2	0	0	0	0	0	0	200	300	0	0	0	0	0	0	0	200	903	0	0	0	0	0	0	0	603	903	0
812	3	0	0	0	0	0	0	200	300	0	0	0	0	0	0	0	200	903	0	0	0	0	0	0	0	603	903	0
812	4	0	0	0	0	0	0	200	300	0	0	0	0	0	0	0	200	903	0	0	0	0	0	0	0	603	903	0
812	5	0	0	0	0	0	0	200	300	0	0	0	0	0	0	0	200	903	0	0	0	0	0	0	0	603	903	0
812	6	0	0	0	0	0	0	200	300	0	0	0	0	0	0	0	200	903	0	0	0	0	0	0	0	603	903	0
812	7	0	0	0	0	0	0	200	300	0	0	0	0	0	0	0	200	903	0	0	0	0	0	0	0	603	903	0
812	8	0	0	0	0	0	0	200	300	0	0	0	0	0	0	0	200	903	0	0	0	0	0	0	0	603	903	0
812	9	0	0	0	0	0	0	200	300	0	0	0	0	0	0	0	200	903	0	0	0	0	0	0	0	603	903	0
813	0	0	0	0	0	0	0	200	300	0	0	0	0	0	0	0	200	903	0	0	0	0	0	0	0	603	903	0
813	1	0	0	0	0	0	0	200	300	0	0	0	0	0	0	0	200	903	0	0	0	0	0	0	0	603	903	0
813	2	0	0	0	0	0	0	200	300	0	0	0	0	0	0	0	200	903	0	0	0	0	0	0	0	603	903	0
813	3	0	0	0	0	0	0	200	300	0	0	0	0	0	0	0	200	903	0	0	0	0	0	0	0	603	903	0
813	4	0	0	0	0	0	0	200	300	0	0	0	0	0	0	0	200	903	0	0	0	0	0	0	0	603	903	0
813	5	0	0	0	0	0	0	200	300	0	0	0	0	0	0	0	200	903	0	0	0	0	0	0	0	603	903	0
813	6	0	0	0	0	0	0	200	300	0	0	0	0	0	0	0	200	903	0	0	0	0	0	0	0	603	903	0
813	7	0	0	0	0	0	0	200	300	0	0	0	0	0	0	0	200	903	0	0	0	0	0	0	0	603	903	0
813	8	0	0	0	0	0	0	200	300	0	0	0	0	0	0	0	200	903	0	0	0	0	0	0	0	603	903	0
813	9	0	0	0	0	0	0	200	300	0	0	0	0	0	0	0	200	903	0	0	0	0	0	0	0	603	903	0
814	0	0	0	0	0	0	0	200	300	0	0	0	0	0	0	0	200	903	0	0	0	0	0	0	0	603	903	0
814	1	0	0	0	0	0	0	200	300	0	0	0	0	0	0	0	200	903	0	0	0	0	0	0	0	603	903	0
814	2	0	0	0	0	0	0	200	300	0	0	0	0	0	0	0	200	903	0	0	0	0	0	0	0	603	903	0
814	3	0	0	0	0	0	0	200	300	0	0	0	0	0	0	0	200	903	0	0	0	0	0	0	0	603	903	0
814	4	0	0	0	0	0	0	200	300	0	0	0	0	0	0	0	200	903	0	0	0	0	0	0	0	603	903	0
814	5	0	0	0	0	0	0	200	300	0	0	0	0	0	0	0	200	903	0	0	0	0	0	0	0	603	903	0
814	6	0	0	0	0	0	0	200	300	0	0	0	0	0	0	0	200	903	0	0	0	0	0	0	0	603	903	0
814	7	0	0	0	0	0	0	200	300	0	0	0	0	0	0	0	200	903	0	0	0	0	0	0	0	603	903	0
814	8	0	0	0	0	0	0	200	300	0	0	0	0	0	0	0	200	903	0	0	0	0	0	0	0	603	903	0
814	9	0	0	0	0	0	0	200	300	0	0	0	0	0	0	0	200	903	0	0	0	0	0	0	0	603	903	0
815	0	0	0	0	0	0	0	200	300	0	0	0	0	0	0	0	200	903	0	0	0	0	0	0	0	603	903	0
815	1	0	0	0	0	0	0	200	300	0	0	0	0	0	0	0	200	903	0	0	0	0	0	0	0	603	903	0
815	2	0	0	0	0	0	0	200	300	0	0	0	0	0	0	0	200	903	0	0	0	0	0	0	0	603	903	0
815	3	0	0	0	0	0	0	200	300	0	0	0	0	0	0	0	200	903	0	0	0	0	0	0	0	603	903	0
815	4	0	0	0	0	0	0	200	300	0	0	0	0	0	0	0	200	903	0	0	0	0	0	0	0	603	903	0
815	5	0	0	0	0	0	0	200	300	0	0	0	0	0	0	0	200	903	0	0	0	0	0	0	0	603	903	0
815	6	0	0	0	0	0	0	200	300	0	0	0	0	0	0	0	200	903	0	0	0	0	0	0	0	603	903	0
815	7	0	0	0	0	0	0	200	300	0	0	0	0	0	0	0	200	903	0	0	0	0	0	0	0	603	903	0
815	8	0	0	0	0	0	0	200	300	0	0	0	0	0	0	0	200	903	0	0	0	0	0	0	0	603	903	0
815	9	0	0	0	0	0	0	200	300	0	0	0	0	0	0	0	200	903	0	0	0	0	0	0	0	603	903	0
816	0	0	0	0	0	0	0	200	300	0	0	0	0	0	0	0	200	903	0	0	0	0	0	0	0	603	903	0
816	1	0	0	0	0	0	0	200	300	0	0	0	0	0	0	0	200	903	0	0	0	0	0	0	0	603	903	0
816	2	0	0	0	0	0	0	200	300	0	0	0	0	0	0	0	200	903	0	0	0	0	0	0	0	603	903	0
816	3	0	0	0	0	0	0	200	300	0	0	0	0	0	0	0	200	903	0	0	0	0	0	0	0	603	903	0
816	4	0	0	0	0	0	0	200	300	0	0	0	0	0	0	0	200	903	0	0	0	0	0	0	0	603	903	0
816	5	0	0	0	0	0	0	200	300	0	0	0	0	0	0	0	200	903	0	0	0	0	0	0	0	603	903	0
816	6	0	0	0	0	0	0	200	300	0	0	0	0	0	0	0	200	903	0	0	0	0	0	0	0	603	903	0
816	7	0	0	0	0	0	0	200	300	0	0	0	0	0	0	0	200	903	0	0	0	0	0	0	0	603	903	0
816	8	0	0	0	0	0	0	200	300	0	0	0	0	0	0	0	200	903	0	0	0	0	0	0	0	603	903	0
816	9	0	0	0	0	0	0	200	300	0	0	0	0	0	0	0	200	903	0	0	0	0	0	0	0	603	903	0
817	0	0	0	0	0	0	0	200	300	0	0	0	0	0	0	0	200	903	0	0	0	0	0	0	0	603	903	0
817	1	0	0	0	0	0	0	200	300	0	0	0	0	0	0	0	200	903	0	0	0	0	0	0	0	603	903	0
817	2	0	0	0	0	0	0	200	300	0	0	0	0	0	0	0	200	903	0	0	0	0	0	0	0	603	903	0
817	3	0	0	0	0	0	0	200	300	0	0	0	0	0	0	0	200	903	0	0	0	0	0	0	0	603	903	0
817	4	0	0	0	0	0	0	200	300	0	0	0	0	0	0	0	200	903	0	0	0	0	0	0	0	603	903	0
817	5	0	0	0	0	0	0	200	300	0	0	0	0	0	0	0	200	903	0	0	0	0	0	0	0	603	903	0
817	6	0	0	0	0	0	0	200	300	0	0	0	0	0	0	0	200	903	0	0	0	0	0	0	0	603	903	0
817	7	0	0	0	0	0	0	200	300	0	0	0	0	0	0	0	200	903	0	0	0	0	0	0	0	603	903	0
817	8	0	0	0	0	0	0	200	300	0	0	0	0	0	0	0	200	903	0	0	0	0	0	0	0	603	903	0
817	9	0	0	0	0	0	0	200	300	0	0	0	0	0	0	0	200	903	0	0	0	0	0	0	0	603	903	0
818	0	0	0	0	0	0	0	200	300	0	0	0	0	0	0	0	200	903	0	0	0	0	0	0	0	603	903	0
818	1	0	0	0	0	0	0	200	300	0	0	0	0	0	0	0	200	903	0	0	0	0	0	0	0	603	903	0
818	2	0	0	0	0	0	0	200	300	0	0	0	0	0	0	0	200	903	0	0	0	0	0	0	0	603	903	0
818	3	0	0	0	0	0	0	200	300	0	0	0	0	0	0	0	200	903	0	0	0	0	0	0	0	603	903	0
818	4	0	0	0	0	0	0	200	300	0	0	0	0	0	0	0	200	903	0	0	0	0	0	0	0	603	903	0
818	5	0	0	0	0	0	0	200	300	0	0	0	0	0	0	0	200	903	0	0	0	0	0	0	0	603	903	0
818	6	0	0	0	0	0	0	200	300	0	0	0	0	0	0	0	200	903	0	0	0	0	0	0	0	603	903	0
818	7	0	0	0	0	0	0	200	300	0	0	0	0	0	0	0	200	903	0	0	0	0	0	0	0	603	903	0
818	8	0	0	0	0	0	0	200	300	0	0	0	0	0	0	0	200	903	0	0	0	0	0	0	0	603	903	0
818	9	0	0	0	0	0	0	200	300	0	0	0	0	0	0	0	200	903	0	0	0	0	0	0	0	603	903	0
819	0	0	0	0	0	0	0	200	300	0	0	0	0	0	0	0	200	903	0	0	0	0	0	0	0	603	903	0
819	1	0	0	0	0	0	0	200	300	0	0	0	0	0	0	0	200	903	0	0	0	0	0	0	0	603	903	0
819	2	0	0	0	0	0	0	200	300	0	0	0	0	0	0	0	200	903	0	0	0	0	0	0	0	603	903	0
819	3	0	0	0	0	0	0	200	300	0	0	0	0	0	0	0	200	903	0	0	0	0	0	0	0	603	903	0
819	4	0	0	0	0	0	0	200	300	0	0	0	0	0	0	0	200	903	0	0	0	0	0	0	0	603	903	0
819	5	0	0	0	0	0	0	200	300	0	0	0	0	0	0	0	200	903	0	0	0	0	0	0	0	603	903	0
819	6	0	0	0	0	0	0	200	300	0	0	0	0	0	0	0	200	903	0	0	0	0	0	0	0	603	903	0
819	7	0	0	0	0	0	0	200	300	0	0	0	0	0	0	0	200	903	0	0	0	0	0	0	0	603	903	0
819	8	0	0	0	0	0	0	200	300	0	0	0	0	0	0	0	200	903	0	0	0	0	0	0	0	603	903	0
819	9	0	0	0	0	0	0	200	300	0	0	0	0	0	0	0	200	903	0	0	0	0	0	0	0	603	903	0
820	0	0	0	0	0	0	0	200	300	0	0	0	0	0	0	0	200	903	0	0	0	0	0	0	0	603	903	0
820	1	0	0	0	0	0	0	200	300	0	0	0	0	0	0	0	200	903	0	0	0	0	0	0	0	603	903	0
820	2	0	0	0	0	0	0	200	300	0	0	0	0	0	0	0	200	903	0	0	0	0	0	0	0	603	903	0
820	3	0	0	0	0	0	0	200	300	0	0	0	0	0	0	0	200	903	0	0	0	0	0	0	0	603	903	0
820	4	0	0	0	0	0	0	200	300	0	0	0	0	0	0	0	200	903	0	0	0	0	0	0	0	603	903	0
820	5	0	0	0	0	0	0	200	300	0	0	0	0	0	0	0	200	903	0	0	0	0	0	0	0	603	903	0
820	6	0	0	0	0	0	0	200	300	0	0	0	0	0	0	0	200	903	0	0	0	0	0	0	0	603	903	0
820	7	0	0	0	0	0	0	200	300	0	0	0	0	0	0	0	200	903	0	0	0	0	0	0	0	603	903	0
820	8	0	0	0	0	0	0	200	300	0	0	0	0	0	0	0	200	903	0	0	0	0	0	0	0	603	903	0
820	9	0	0	0	0	0	0	200	300	0	0	0	0	0	0	0	200	903	0	0	0	0	0	0	0	603	903	0
821	0	0	0	0	0	0	0	200	300	0	0	0	0	0	0	0	200	903	0	0	0	0	0	0	0	603	903	0
821	1	0	0	0	0	0	0	200	300	0	0	0	0	0	0	0	200	903	0	0	0	0	0	0	0	603	903	0
821	2	0	0	0	0	0	0	200	300	0	0	0	0	0	0	0	200	903	0	0	0	0	0	0	0	603	903	0
821	3	0	0	0	0	0	0	200	300	0	0	0	0	0	0	0	200	903	0	0	0	0	0	0	0	603	903	0
821	4	0	0	0	0	0	0	200	300	0	0	0	0	0	0	0	200	903	0	0	0	0	0	0	0	603	903	0
821	5	0	0	0	0	0	0	200	300	0	0	0	0	0	0	0	200	903	0	0	0	0	0	0	0	603	903	0
821	6	0	0	0	0	0	0	200	300	0	0	0	0	0	0	0	200	903	0	0	0	0	0	0	0	603	903	0
821	7	0	0	0	0	0	0	200	300	0	0	0	0	0	0	0	200	903	0	0	0	0	0	0	0	603	903	0
821	8	0	0	0	0	0	0	200	300	0	0	0	0	0	0	0	200	903	0	0	0	0	0	0	0	603	903	0
821	9	0	0	0	0	0	0	200	300	0	0	0	0	0	0	0	200	903	0	0	0	0	0	0	0	603	903	0
822	0	0	0	0	0	0	0	200	300	0	0	0	0	0	0	0	200	903	0	0	0	0	0	0	0	603	903	0
822	1	0	0	0	0	0	0	200	300	0	0	0	0	0	0	0	200	903	0	0	0	0	0	0	0	603	903	0
822	2	0	0	0	0	0	0	200	300	0	0	0	0	0	0	0	200	903	0	0	0	0	0	0	0	603	903	0
822	3	0	0	0	0	0	0	200	300	0	0	0	0	0	0	0	200	903	0	0	0	0	0	0	0	603	903	0
822	4	0	0	0	0	0	0	200	300	0	0	0	0	0	0	0	200	903	0	0	0	0	0	0	0	603	903	0
822	5	0	0	0	0	0	0	200	300	0	0	0	0	0	0	0	200	903	0	0	0	0	0	0	0	603	903	0
822	6	0	0	0	0	0	0	200	300	0	0	0	0	0	0	0	200	903	0	0	0	0	0	0	0	603	903	0
822	7	0	0	0	0	0	0	200	300	0	0	0	0	0	0	0	200	903	0	0	0	0	0	0	0	603	903	0
822	8	0	0	0	0	0	0	200	300	0	0	0	0	0	0	0	200	903	0	0	0	0	0	0	0	603	903	0
822	9	0	0	0	0	0	0	200	300	0	0	0	0	0	0	0	200	903	0	0	0	0	0	0	0	603	903	0
823	0	0	0	0	0	0	0	200	300	0	0	0	0	0	0	0	200	903	0	0	0	0	0	0	0	603	903	0
823	1	0	0	0	0	0	0	200	300	0	0	0	0	0	0	0	200	903	0	0	0	0	0	0	0	603	903	0
823	2	0	0	0	0	0	0	200	300	0	0	0	0	0	0	0	200	903	0	0	0	0	0	0	0	603	903	0
823	3	0	0	0	0	0	0	200	300	0	0	0	0	0	0	0	200	903	0	0	0	0	0	0	0	603	903	0
823	4	0	0	0	0	0	0	200	300	0	0	0	0	0	0	0	200	903	0	0	0	0	0	0	0	603	903	0
823	5	0	0	0	0	0	0	200	300	0	0	0	0	0	0	0	200	903	0	0	0	0	0	0	0	603	903	0
823	6	0	0	0	0	0	0	200	300	0	0	0	0	0	0	0	200	903	0	0	0	0	0	0	0	603	903	0
823	7	0	0	0	0	0	0	200	300	0	0	0	0	0	0	0	200	903	0	0	0	0	0	0	0	603	903	0
823	8	0	0	0	0	0	0	200	300	0	0	0	0	0	0	0	200	903	0	0	0	0	0	0	0	603	903	0
823	9	0	0	0	0	0	0	200	300	0	0	0	0	0	0	0	200	903	0	0	0	0	0	0	0	603	903	0
824	0	0	0	0	0	0	0	200	300	0	0	0	0	0	0	0	200	903	0	0	0	0	0	0	0	603	903	0
824	1	0	0	0	0	0	0	200	300	0	0	0	0	0	0	0	200	903	0	0	0	0	0	0	0	603	903	0
824	2	0	0	0	0	0	0	200	300	0	0	0	0	0	0	0	200	903	0	0	0	0	0	0	0	603	903	0
824	3	0	0	0	0	0	0	200	300	0	0	0	0	0	0	0	200	903	0	0	0	0	0	0	0	603	903	0
824	4	0	0	0	0	0	0	200	300	0	0	0	0	0	0	0	200	903	0	0	0	0	0	0	0	603	903	0
824	5	0	0	0	0	0	0	200	300	0	0	0	0	0	0	0	200	903	0	0	0	0	0	0	0	603	903	0
824	6	0	0	0	0	0	0	200	300	0	0	0	0	0	0	0	200	903	0	0	0	0	0	0	0	603	903	0
824	7	0	0	0	0	0	0	200	300	0	0	0	0	0	0	0	200	903	0	0	0	0	0	0	0	603	903	0
824	8	0	0	0	0	0	0	200	300	0	0	0	0	0	0	0	200	903	0	0	0	0	0	0	0	603	903	0
824	9	0	0	0	0	0	0	200	300	0	0	0	0	0	0	0	200	903	0	0	0	0	0	0	0	603	903	0
825	0	0	0	0	0	0	0	200	300	0	0	0	0	0	0	0	200	903	0	0	0	0	0	0	0	603	903	0
825	1	0	0	0	0	0	0	200	300	0	0	0	0	0	0	0	200	903	0	0	0	0	0	0	0	603	903	0
825	2	0	0	0	0	0	0	200	300	0	0	0	0	0	0	0	200	903	0	0	0	0	0	0	0	603	903	0
825	3	0	0	0	0	0	0	200	300	0	0	0	0	0	0	0	200	903	0	0	0	0	0	0	0	603	903	0
825	4	0	0	0	0	0	0	200	300	0	0	0	0	0	0	0	200	903	0	0	0	0	0	0	0	603	903	0
825	5	0	0	0	0	0	0	200	300	0	0	0	0	0	0	0	200	903	0	0	0	0	0	0	0	603	903	0
825	6	0	0	0	0	0	0	200	300	0	0	0	0	0	0	0	200	903	0	0	0	0	0	0	0	603	903	0
825	7	0	0	0	0	0	0	200	300	0	0	0	0	0	0	0	200	903	0	0	0	0	0	0	0	603	903	0
825	8	0	0	0	0	0	0	200	300	0	0	0	0	0	0	0	200	903	0	0	0	0	0	0	0	603	903	0
825	9	0	0	0	0	0	0	200	300	0	0	0	0	0	0	0	200	903	0	0	0	0	0	0	0	603	903	0
826	0	0	0	0	0	0	0	200	300	0	0	0	0	0	0	0	200	903	0	0	0	0	0	0	0	603	903	0
826	1	0	0	0	0	0	0	200	300	0	0	0	0	0	0	0	200	903	0	0	0	0	0	0	0	603	903	0
826	2	0	0	0	0	0	0	200	300	0	0	0	0	0	0	0	200	903	0	0	0	0	0	0	0	603	903	0
826	3	0	0	0	0	0	0	200	300	0	0	0	0	0	0	0	200	903	0	0	0	0	0	0	0	603	903	0
826	4	0	0	0	0	0	0	200	300	0	0	0	0	0	0	0	200	903	0	0	0	0	0	0	0	603	903	0
826	5	0	0	0	0	0	0	200	300	0	0	0	0	0	0	0	200	903	0	0	0	0	0	0	0	603	903	0
826	6	0	0	0	0	0	0	200	300	0	0	0	0	0	0	0	200	903	0	0	0	0	0	0	0	603	903	0
826	7	0	0	0	0	0	0	200	300	0	0	0	0	0	0	0	200	903	0	0	0	0	0	0	0	603	903	0
826	8	0	0	0	0	0	0	200	300	0	0	0	0	0	0	0	200	903	0	0	0	0	0	0	0	603	903	0
826	9	0	0	0	0	0	0	200	300	0	0	0	0	0	0	0	200	903	0	0	0	0	0	0	0	603	903	0
827	0	0	0	0	0	0	0	200	300	0	0	0	0	0	0	0	200	903	0	0	0	0	0	0	0	603	903	0
827	1	0	0	0	0	0	0	200	300	0	0	0	0	0	0	0	200	903	0	0	0	0	0	0	0	603	903	0
827	2	0	0	0	0	0	0	200	300	0	0	0	0	0	0	0	200	903	0	0	0	0	0	0	0	603	903	0
827	3	0	0	0	0	0	0	200	300	0	0	0	0	0	0	0	200	903	0	0	0	0	0	0	0	603	903	0
827	4	0	0	0	0	0	0	200	300	0	0	0	0	0	0	0	200	903	0	0	0	0	0	0	0	603	903	0
827	5	0	0	0	0	0	0	200	300	0	0	0	0	0	0	0	200	903	0	0	0	0	0	0	0	603	903	0
827	6	0	0	0	0	0	0	200	300	0	0	0	0	0	0	0	200	903	0	0	0	0	0	0	0	603	903	0
827	7	0	0	0	0	0	0	200	300	0	0	0	0	0	0	0	200	903	0	0	0	0	0	0	0	603	903	0
827	8	0	0	0	0	0	0	200	300	0	0	0	0	0	0	0	200	903	0	0	0	0	0	0	0	603	903	0
827	9	0	0	0	0	0	0	200	300	0	0	0	0	0	0	0	200	903	0	0	0	0	0	0	0	603	903	0
828	0	0	0	0	0	0	0	200	300	0	0	0	0	0	0	0	200	903	0	0	0	0	0	0	0	603	903	0
828	1	0	0	0	0	0	0	200	300	0	0	0	0	0	0	0	200	903	0	0	0	0	0	0	0	603	903	0
828	2	0	0	0	0	0	0	200	300	0	0	0	0	0	0	0	200	903	0	0	0	0	0	0	0	603	903	0
828	3	0	0	0	0	0	0	200	300	0	0	0	0	0	0	0	200	903	0	0	0	0	0	0	0	603	903	0
828	4	0	0	0	0	0	0	200	300	0	0	0	0	0	0	0	200	903	0	0	0	0	0	0	0	603	903	0
828	5	0	0	0	0	0	0	200	300	0	0	0	0	0	0	0	200	903	0	0	0	0	0	0	0	603	903	0
828	6	0	0	0	0	0	0	200	300	0	0	0	0	0	0	0	200	903	0	0	0	0	0	0	0	603	903	0
828	7	0	0	0	0	0	0	200	300	0	0	0	0	0	0	0	200	903	0	0	0	0	0	0	0	603	903	0
828	8	0	0	0	0	0	0	200	300	0	0	0	0	0	0	0	200	903	0	0	0	0	0	0	0	603	903	0
828	9	0	0	0	0	0	0	200	300	0	0	0	0	0	0	0	200	903	0	0	0	0	0	0	0	603	903	0
829	0	0	0	0	0	0	0	200	300	0	0	0	0	0	0	0	200	903	0	0	0	0	0	0	0	603	903	0
829	1	0	0	0	0	0	0	200	300	0	0	0	0	0	0	0	200	903	0	0	0	0	0	0	0	603	903	0
829	2	0	0	0	0	0	0	200	300	0	0	0	0	0	0	0	200	903	0	0	0	0	0	0	0	603	903	0
829	3	0	0	0	0	0	0	200	300	0	0	0	0	0	0	0	200	903	0	0	0	0	0	0	0	603	903	0
829	4	0	0	0	0	0	0	200	300	0	0	0	0	0	0	0	200	903	0	0	0	0	0	0	0	603	903	0
829	5	0	0	0	0	0	0	200	300	0	0	0	0	0	0	0	200	903	0	0	0	0	0	0	0	603	903	0
829	6	0	0	0	0	0	0	200	300	0	0	0	0	0	0	0	200	903	0	0	0	0	0	0	0	603	903	0
829	7	0	0	0	0	0	0	200	300	0	0	0	0	0	0	0	200	903	0	0	0	0	0	0	0	603	903	0
829	8	0	0	0	0	0	0	200	300	0	0	0	0	0	0	0	200	903	0	0	0	0	0	0	0	603	903	0
829	9	0	0	0	0	0	0	200	300	0	0	0	0	0	0	0	200	903	0	0	0	0	0	0	0	603	903	0
830	0	0	0	0	0	0	0	200	300	0	0	0	0	0	0	0	200	903	0	0	0	0	0	0	0	603	903	0
830	1	0	0	0	0	0	0	200	300	0	0	0	0	0	0	0	200	903	0	0	0	0	0	0	0	603	903	0
830	2	0	0	0	0	0	0	200	300	0	0	0	0	0	0	0	200	903	0	0	0	0	0	0	0	603	903	0
830	3	0	0	0	0	0	0	200	300	0	0	0	0	0	0	0	200	903	0	0	0	0	0	0	0	603	903	0
830	4	0	0	0	0	0	0	200	300	0	0	0	0	0	0	0	200	903	0	0	0	0	0	0	0	603	903	0
830	5	0	0	0	0	0	0	200	300	0	0	0	0	0	0	0	200	903	0	0	0	0	0	0	0	603	903	0
830	6	0	0	0	0	0	0	200	300	0	0	0	0	0	0	0	200	903	0	0	0	0	0	0	0	603	903	0
830	7	0	0	0	0	0	0	200	300	0	0	0	0	0	0	0	200	903	0	0	0	0	0	0	0	603	903	0
830	8	0	0	0	0	0	0	200	300	0	0	0	0	0	0	0	200	903	0	0	0	0	0	0	0	603	903	0
830	9	0	0	0	0	0	0	200	300	0	0	0	0	0	0	0	200	903	0	0	0	0	0	0	0	603	903	0
831	0	0	0	0	0	0	0	200	300	0	0	0	0	0	0	0	200	903	0	0	0	0	0	0	0	603	903	0
831	1	0	0	0	0	0	0	200	300	0	0	0	0	0	0	0	200	903	0	0	0	0	0	0	0	603	903	0
831	2	0	0	0	0	0	0	200	300	0	0	0	0	0	0	0	200	903	0	0	0	0	0	0	0	603	903	0
831	3	0	0	0	0	0	0	200	300	0	0	0	0	0	0	0	200	903	0	0	0	0	0	0	0	603	903	0
831	4	0	0	0	0	0	0	200	300	0	0	0	0	0	0	0	200	903	0	0	0	0	0	0	0	603	903	0
831	5	0	0	0	0	0	0	200	300	0	0	0	0	0	0	0	200	903	0	0	0	0	0	0	0	603	903	0
831	6	0	0	0	0	0	0	200	300	0	0	0	0	0	0	0	200	903	0	0	0	0	0	0	0	603	903	0
831	7	0	0	0	0	0	0	200	300	0	0	0	0	0	0	0	200	903	0	0	0	0	0	0	0	603	903	0
831	8	0	0	0	0	0	0	200	300	0	0	0	0	0	0	0	200	903	0	0	0	0	0	0	0	603	903	0
831	9	0	0	0	0	0	0	200	300	0	0	0	0	0	0	0	200	903	0	0	0	0	0	0	0	603	903	0
832	0	0	0	0	0	0	0	200	300	0	0	0	0	0	0	0	200	903	0	0	0	0	0	0	0	603	903	0
832	1	0	0	0	0	0	0	200	300	0	0	0	0	0	0	0	200	903	0	0	0	0	0	0	0	603	903	0
832	2	0	0	0	0	0	0	200	300	0	0	0	0	0	0	0	200	903	0	0	0	0	0	0	0	603	903	0
832	3	0	0	0	0	0	0	200	300	0	0	0	0	0	0	0	200	903	0	0	0	0	0	0	0	603	903	0
832	4	0	0	0	0	0	0	200	300	0	0	0	0	0	0	0	200	903	0	0	0	0	0	0	0	603	903	0
832	5	0	0	0	0	0	0	200	300	0	0	0	0	0	0	0	200	903	0	0	0	0	0	0	0	603	903	0
832	6	0	0	0	0	0	0	200	300	0	0	0	0	0	0	0	200	903	0	0	0	0	0	0	0	603	903	0
832	7	0	0	0	0	0	0	200	300	0	0	0	0	0	0	0	200	903	0	0	0	0	0	0	0	603	903	0
832	8	0	0	0	0	0	0	200	300	0	0	0	0	0	0	0	200	903	0	0	0	0	0	0	0	603	903	0
832	9	0	0	0	0	0	0	200	300	0	0	0	0	0	0	0	200	903	0	0	0	0	0	0	0	603	903	0
833	0	0	0	0	0	0	0	200	300	0	0	0	0	0	0	0	200	903	0	0	0	0	0	0	0	603	903	0
833	1	0	0	0	0	0	0	200	300	0	0	0	0	0	0	0	200	903	0	0	0	0	0	0	0	603	903	0
833	2	0	0	0	0	0	0	200	300	0	0	0	0	0	0	0	200	903	0	0	0	0	0	0	0	603	903	0
833	3	0	0	0	0	0	0	200	300	0	0	0	0	0	0	0	200	903	0	0	0	0	0	0	0	603	903	0
833	4	0	0	0	0	0	0	200	300	0	0	0	0	0	0	0	200	903	0	0	0	0	0	0	0	603	903	0
833	5	0	0	0	0	0	0	200	300	0	0	0	0	0	0	0	200	903	0	0	0	0	0	0	0	603	903	0
833	6	0	0	0	0	0	0	200	300	0	0	0	0	0	0	0	200	903	0	0	0	0	0	0	0	603	903	0
833	7	0	0	0	0	0	0	200	300	0	0	0	0	0	0	0	200	903	0	0	0	0	0	0	0	603	903	0
833	8	0	0	0	0	0	0	200	300	0	0	0	0	0	0	0	200	903	0	0	0	0	0	0	0	603	903	0
833	9	0	0	0	0	0	0	200	300	0	0	0	0	0	0	0	200	903	0	0	0	0	0	0	0	603	903	0
834	0	0	0	0	0	0	0	200	300	0	0	0	0	0	0	0	200	903	0	0	0	0	0	0	0	603	903	0
834	1	0	0	0	0	0	0	200	300	0	0	0	0	0	0	0	200	903	0	0	0	0	0	0	0	603	903	0
834	2	0	0	0	0	0	0	200	300	0	0	0	0	0	0	0	200	903	0	0	0	0	0	0	0	603	903	0
834	3	0	0	0	0	0	0	200	300	0	0	0	0	0	0	0	200	903	0	0	0	0	0	0	0	603	903	0
834	4	0	0	0	0	0	0	200	300	0	0	0	0	0	0	0	200	903	0	0	0	0	0	0	0	603	903	0
834	5	0	0	0	0	0	0	200	300	0	0	0	0	0	0	0	200	903	0	0	0	0	0	0	0	603	903	0
834	6	0	0	0	0	0	0	200	300	0	0	0	0	0	0	0	200	903	0	0	0	0	0	0	0	603	903	0
834	7	0	0	0	0	0	0	200	300	0	0	0	0	0	0	0	200	903	0	0	0	0	0	0	0	603	903	0
834	8	0	0	0	0	0	0	200	300	0	0	0	0	0	0	0	200	903	0	0	0	0	0	0	0	603	903	0
834	9	0	0	0	0	0	0	200	300	0	0	0	0	0	0	0	200	903	0	0	0	0	0	0	0	603	903	0
835	0	0	0	0	0	0	0	200	300	0	0	0	0	0	0	0	200	903	0	0	0	0	0	0	0	603	903	0
835	1	0	0	0	0	0	0	200	300	0	0	0	0	0	0	0	200	903	0	0	0	0	0	0	0	603	903	0
835	2	0	0	0	0	0	0	200	300	0	0	0	0	0	0	0	200	903	0	0	0	0	0	0	0	603	903	0
835	3	0	0	0	0	0	0	200	300	0	0	0	0	0	0	0	200	903	0	0	0	0	0	0	0	603	903	0
835	4	0	0	0	0	0	0	200	300	0	0	0	0	0	0	0	200	903	0	0	0	0	0	0	0	603	903	0
835	5	0	0	0	0	0	0	200	300	0	0	0	0	0	0	0	200	903	0	0	0	0	0	0	0	603	903	0
835	6	0	0	0	0	0	0	200	300	0	0	0	0	0	0	0	200	903	0	0	0	0	0	0	0	603	903	0
835	7	0	0	0	0	0	0	200	300	0	0	0	0	0	0	0	200	903	0	0	0	0	0	0	0	603	903	0
835	8	0	0	0	0	0	0	200	300	0	0	0	0	0	0	0	200	903	0	0	0	0	0	0	0	603	903	0
835	9	0	0	0	0	0	0	200	300	0	0	0	0	0	0	0	200	903	0	0	0	0	0	0	0	603	903	0
836	0	0	0	0	0	0	0	200	300	0	0	0	0	0	0	0	200	903	0	0	0	0	0	0	0	603	903	0
836	1	0	0	0	0	0	0	200	300	0	0	0	0	0	0	0	200	903	0	0	0	0	0	0	0	603	903	0
836	2	0	0	0	0	0	0	200	300	0	0	0	0	0	0	0	200	903	0	0	0	0	0	0	0	603	903	0
836	3	0	0	0	0	0	0	200	300	0	0	0	0	0	0	0	200	903	0	0	0	0	0	0	0	603	903	0
836	4	0	0	0	0	0	0	200	300	0	0	0	0	0	0	0	200	903	0	0	0	0	0	0	0	603	903	0
836	5	0	0	0	0	0	0	200	300	0	0	0	0	0	0	0	200	903	0	0	0	0	0	0	0	603	903	0
836	6	0	0	0	0	0	0	200	300	0	0	0	0	0	0	0	200	903	0	0	0	0	0	0	0	603	903	0
836	7	0	0	0	0	0	0	200	300	0	0	0	0	0	0	0	200	903	0	0	0	0	0	0	0	603	903	0
836	8	0	0	0	0	0	0	200	300	0	0	0	0	0	0	0	200	903	0	0	0	0	0	0	0	603	903	0
836	9	0	0	0	0	0	0	200	300	0	0	0	0	0	0	0	200	903	0	0	0	0	0	0	0	603	903	0
837	0	0	0	0	0	0	0	200	300	0	0	0	0	0	0	0	200	903	0	0	0	0	0	0	0	603	903	0
837	1	0	0	0	0	0	0	200	300	0	0	0	0	0	0	0	200	903	0	0	0	0	0	0	0	603	903	0
837	2	0	0	0	0	0	0	200	300	0	0	0	0	0	0	0	200	903	0	0	0	0	0	0	0	603	903	0
837	3	0	0	0	0	0	0	200	300	0	0	0	0	0	0	0	200	903	0	0	0	0	0	0	0	603	903	0
837	4	0	0	0	0	0	0	200	300	0	0	0	0	0	0	0	200	903	0	0	0	0	0	0	0	603	903	0
837	5	0	0	0	0	0	0	200	300	0	0	0	0	0	0	0	200	903	0	0	0	0	0	0	0	603	903	0
837	6	0	0	0	0	0	0	200	300	0	0	0	0	0	0	0	200	903	0	0	0	0	0	0	0	603	903	0
837	7	0	0	0	0	0	0	200	300	0	0	0	0	0	0	0	200	903	0	0	0	0	0	0	0	603	903	0
837	8	0	0	0	0	0	0	200	300	0	0	0	0	0	0	0	200	903	0	0	0	0	0	0	0	603	903	0
837	9	0	0	0	0	0	0	200	300	0	0	0	0	0	0	0	200	903	0	0	0	0	0	0	0	603	903	0
838	0	0	0	0	0	0	0	200	300	0	0	0	0	0	0	0	200	903	0	0	0	0	0	0	0	603	903	0
838	1	0	0	0	0	0	0	200	300	0	0	0	0	0	0	0	200	903	0	0	0	0	0	0	0	603	903	0
838	2	0	0	0	0	0	0	200	300	0	0	0	0	0	0	0	200	903	0	0	0	0	0	0	0	603	903	0
838	3	0	0	0	0	0	0	200	300	0	0	0	0	0	0	0	200	903	0	0	0	0	0	0	0	603	903	0
838	4	0	0	0	0	0	0	200	300	0	0	0	0	0	0	0	200	903	0	0	0	0	0	0	0	603	903	0
838	5	0	0	0	0	0	0	200	300	0	0	0	0	0	0	0	200	903	0	0	0	0	0	0	0	603	903	0
838	6	0	0	0	0	0	0	200	300	0	0	0	0	0	0	0	200	903	0	0	0	0	0	0	0	603	903	0
838	7	0	0	0	0	0	0	200	300	0	0	0	0	0	0	0	200	903	0	0	0	0	0	0	0	603	903	0
838	8	0	0	0	0	0	0	200	300	0	0	0	0	0	0	0	200	903	0	0	0	0	0	0	0	603	903	0
838	9	0	0	0	0	0	0	200	300	0	0	0	0	0	0	0	200	903	0	0	0	0	0	0	0	603	903	0
839	0	0	0	0	0	0	0	200	300	0	0	0	0	0	0	0	200	903	0	0	0	0	0	0	0	603	903	0
839	1	0	0	0	0	0	0	200	300	0	0	0	0	0	0	0	200	903	0	0	0	0	0	0	0	603	903	0
839	2	0	0	0	0	0	0	200	300	0	0	0	0	0	0	0	200	903	0	0	0	0	0	0	0	603	903	0
839	3	0	0	0	0	0	0	200	300	0	0	0	0	0	0	0	200	903	0	0	0	0	0	0	0	603	903	0
839	4	0	0	0	0	0	0	200	300	0	0	0	0	0	0	0	200	903	0	0	0	0	0	0	0	603	903	0
839	5	0	0	0	0	0	0	200	300	0	0	0	0	0	0	0	200	903	0	0	0	0	0	0	0	603	903	0
839	6	0	0	0	0	0	0	200	300	0	0	0	0	0	0	0	200	903	0	0	0	0	0	0	0	603	903	0
839	7	0	0	0	0	0	0	200	300	0	0	0	0	0	0	0	200	903	0	0	0	0	0	0	0	603	903	0
839	8	0	0	0	0	0	0	200	300	0	0	0	0	0	0	0	200	903	0	0	0	0	0	0	0	603	903	0
839	9	0	0	0	0	0	0	200	300	0	0	0	0	0	0	0	200	903	0	0	0	0	0	0	0	603	903	0
840	0	0	0	0	0	0	0	200	300	0	0	0	0	0	0	0	200	903	0	0	0	0	0	0	0	603	903	0
840	1	0	0	0	0	0	0	200	300	0	0	0	0	0	0	0	200	903	0	0	0	0	0	0	0	603	903	0
840	2	0	0	0	0	0	0	200	300	0	0	0	0	0	0	0	200	903	0	0	0	0	0	0	0	603	903	0
840	3	0	0	0	0	0	0	200	300	0	0	0	0	0	0	0	200	903	0	0	0	0	0	0	0	603	903	0
840	4	0	0	0	0	0	0	200	300	0	0	0	0	0	0	0	200	903	0	0	0	0	0	0	0	603	903	0
840	5	0	0	0	0	0	0	200	300	0	0	0	0	0	0	0	200	903	0	0	0	0	0	0	0	603	903	0
840	6	0	0	0	0	0	0	200	300	0	0	0	0	0	0	0	200	903	0	0	0	0	0	0	0	603	903	0
840	7	0	0	0	0	0	0	200	300	0	0	0	0	0	0	0	200	903	0	0	0	0	0	0	0	603	903	0
840	8	0	0	0	0	0	0	200	300	0	0	0	0	0	0	0	200	903	0	0	0	0	0	0	0	603	903	0
840	9	0	0	0	0	0	0	200	300	0	0	0	0	0	0	0	200	903	0	0	0	0	0	0	0	603	903	0
841	0	0	0	0	0	0	0	200	300	0	0	0	0	0	0	0	200	903	0	0	0	0	0	0	0	603	903	0
841	1	0	0	0	0	0	0	200	300	0	0	0	0	0	0	0	200	903	0	0	0	0	0	0	0	603	903	0
841	2	0	0	0	0	0	0	200	300	0	0	0	0	0	0	0	200	903	0	0	0	0	0	0	0	603	903	0
841	3	0	0	0	0	0	0	200	300	0	0	0	0	0	0	0	200	903	0	0	0	0	0	0	0	603	903	0
841	4	0	0	0	0	0	0	200	300	0	0	0	0	0	0	0	200	903	0	0	0	0	0	0	0	603	903	0
841	5	0	0	0	0	0	0	200	300	0	0	0	0	0	0	0	200	903	0	0	0	0	0	0	0	603	903	0
841	6	0	0	0	0	0	0	200	300	0	0	0	0	0	0	0	200	903	0	0	0	0	0	0	0	603	903	0
841	7	0	0	0	0	0	0	200	300	0	0	0	0	0	0	0	200	903	0	0	0	0	0	0	0	603	903	0
841	8	0	0	0	0	0	0	200	300	0	0	0	0	0	0	0	200	903	0	0	0	0	0	0	0	603	903	0
841	9	0	0	0	0	0	0	200	300	0	0	0	0	0	0	0	200	903	0	0	0	0	0	0	0	603	903	0
842	0	0	0	0	0	0	0	200	300	0	0	0	0	0	0	0	200	903	0	0	0	0	0	0	0	603	903	0
842	1	0	0	0	0	0	0	200	300	0	0	0	0	0	0	0	200	903	0	0	0	0	0	0	0	603	903	0
842	2	0	0	0	0	0	0	200	300	0	0	0	0	0	0	0	200	903	0	0	0	0	0	0	0	603	903	0
842	3	0	0	0	0	0	0	200	300	0	0	0	0	0	0	0	200	903	0	0	0	0	0	0	0	603	903	0
842	4	0	0	0	0	0	0	200	300	0	0	0	0	0	0	0	200	903	0	0	0	0	0	0	0	603	903	0
842	5	0	0	0	0	0	0	200	300	0	0	0	0	0	0	0	200	903	0	0	0	0	0	0	0	603	903	0
842	6	0	0	0	0	0	0	200	300	0	0	0	0	0	0	0	200	903	0	0	0	0	0	0	0	603	903	0
842	7	0	0	0	0	0	0	200	300	0	0	0	0	0	0	0	200	903	0	0	0	0	0	0	0	603	903	0
842	8	0	0	0	0	0	0	200	300	0	0	0	0	0	0	0	200	903	0	0	0	0	0	0	0	603	903	0
842	9	0	0	0	0	0	0	200	300	0	0	0	0	0	0	0	200	903	0	0	0	0	0	0	0	603	903	0
843	0	0	0	0	0	0	0	200	300	0	0	0	0	0	0	0	200	903	0	0	0	0	0	0	0	603	903	0
843	1	0	0	0	0	0	0	200	300	0	0	0	0	0	0	0	200	903	0	0	0	0	0	0	0	603	903	0
843	2	0	0	0	0	0	0	200	300	0	0	0	0	0	0	0	200	903	0	0	0	0	0	0	0	603	903	0
843	3	0	0	0	0	0	0	200	300	0	0	0	0	0	0	0	200	903	0	0	0	0	0	0	0	603	903	0
843	4	0	0	0	0	0	0	200	300	0	0	0	0	0	0	0	200	903	0	0	0	0	0	0	0	603	903	0
843	5	0	0	0	0	0	0	200	300	0	0	0	0	0	0	0	200	903	0	0	0	0	0	0	0	603	903	0
843	6	0	0	0	0	0	0	200	300	0	0	0	0	0	0	0	200	903	0	0	0	0	0	0	0	603	903	0
843	7	0	0	0	0	0	0	200	300	0	0	0	0	0	0	0	200	903	0	0	0	0	0	0	0	603	903	0
843	8	0	0	0	0	0	0	200	300	0	0	0	0	0	0	0	200	903	0	0	0	0	0	0	0	603	903	0
843	9	0	0	0	0	0	0	200	300	0	0	0	0	0	0	0	200	903	0	0	0	0	0	0	0	603	903	0
844	0	0	0	0	0	0	0	200	300	0	0	0	0	0	0	0	200	903	0	0	0	0	0	0	0	603	903	0
844	1	0	0	0	0	0	0	200	300	0	0	0	0	0	0	0	200	903	0	0	0	0	0	0	0	603	903	0
844	2	0	0	0	0	0	0	200	300	0	0	0	0	0	0	0	200	903	0	0	0	0	0	0	0	603	903	0
844	3	0	0	0	0	0	0	200	300	0	0	0	0	0	0	0	200	903	0	0	0	0	0	0	0	603	903	0
844	4	0	0	0	0	0	0	200	300	0	0	0	0	0	0	0	200	903	0	0	0	0	0	0	0	603	903	0
844	5	0	0	0	0	0	0	200	300	0	0	0	0	0	0	0	200	903	0	0	0	0	0	0	0	603	903	0
844	6	0	0	0	0	0	0	200	300	0	0	0	0	0	0	0	200	903	0	0	0	0	0	0	0	603	903	0
844	7	0	0	0	0	0	0	200	300	0	0	0	0	0	0	0	200	903	0	0	0	0	0	0	0	603	903	0
844	8	0	0	0	0	0	0	200	300	0	0	0	0	0	0	0	200	903	0	0	0	0	0	0	0	603	903	0
844	9	0	0	0	0	0	0	200	300	0	0	0	0	0	0	0	200	903	0	0	0	0	0	0	0	603	903	0
845	0	0	0	0	0	0	0	200	300	0	0	0	0	0	0	0	200	903	0	0	0	0	0	0	0	603	903	0
845	1	0	0	0	0	0	0	200	300	0	0	0	0	0	0	0	200	903	0	0	0	0	0	0	0	603	903	0
845	2	0	0	0	0	0	0	200	300	0	0	0	0	0	0	0	200	903	0	0	0	0	0	0	0	603	903	0
845	3	0	0	0	0	0	0	200	300	0	0	0	0	0	0	0	200	903	0	0	0	0	0	0	0	603	903	0
845	4	0	0	0	0	0	0	200	300	0	0	0	0	0	0	0	200	903	0	0	0	0	0	0	0	603	903	0
845	5	0	0	0	0	0	0	200	300	0	0	0	0	0	0	0	200	903	0	0	0	0	0	0	0	603	903	0
845	6	0	0	0	0	0	0	200	300	0	0	0	0	0	0	0	200	903	0	0	0	0	0	0	0	603	903	0
845	7	0	0	0	0	0	0	200	300	0	0	0	0	0	0	0	200	903	0	0	0	0	0	0	0	603	903	0
845	8	0	0	0	0	0	0	200	300	0	0	0	0	0	0	0	200	903	0	0	0	0	0	0	0	603	903	0
845	9	0	0	0	0	0	0	200	300	0	0	0	0	0	0	0	200	903	0	0	0	0	0	0	0	603	903	0
846	0	0	0	0	0	0	0	200	300	0	0	0	0	0	0	0	200	903	0	0	0	0	0	0	0	603	903	0
846	1	0	0	0	0	0	0	200	300	0	0	0	0	0	0	0	200	903	0	0	0	0	0	0	0	603	903	0
846	2	0	0	0	0	0	0	200	300	0	0	0	0	0	0	0	200	903	0	0	0	0	0	0	0	603	903	0
846	3	0	0	0	0	0	0	200	300	0	0	0	0	0	0	0	200	903	0	0	0	0	0	0	0	603	903	0
846	4	0	0	0	0	0	0	200	300	0	0	0	0	0	0	0	200	903	0	0	0	0	0	0	0	603	903	0
846	5	0	0	0	0	0	0	200	300	0	0	0	0	0	0	0	200	903	0	0	0	0	0	0	0	603	903	0
846	6	0	0	0	0	0	0	200	300	0	0	0	0	0	0	0	200	903	0	0	0	0	0	0	0	603	903	0
846	7	0	0	0	0	0	0	200	300	0	0	0	0	0	0	0	200	903	0	0	0	0	0	0	0	603	903	0
846	8	0	0	0	0	0	0	200	300	0	0	0	0	0	0	0	200	903	0	0	0	0	0	0	0	603	903	0
846	9	0	0	0	0	0	0	200	300	0	0	0	0	0	0	0	200	903	0	0	0	0	0	0	0	603	903	0
847	0	0	0	0	0	0	0	200	300	0	0	0	0	0	0	0	200	903	0	0	0	0	0	0	0	603	903	0
847	1	0	0	0	0	0	0	200	300	0	0	0	0	0	0	0	200	903	0	0	0	0	0	0	0	603	903	0
847	2	0	0	0	0	0	0	200	300	0	0	0	0	0	0	0	200	903	0	0	0	0	0	0	0	603	903	0
847	3	0	0	0	0	0	0	200	300	0	0	0	0	0	0	0	200	903	0	0	0	0	0	0	0	603	903	0
847	4	0	0	0	0	0	0	200	300	0	0	0	0	0	0	0	200	903	0	0	0	0	0	0	0	603	903	0
847	5	0	0	0	0	0	0	200	300	0	0	0	0	0	0	0	200	903	0	0	0	0	0	0	0	603	903	0
847	6	0	0	0	0	0	0	200	300	0	0	0	0	0	0	0	200	903	0	0	0	0	0	0	0	603	903	0
847	7	0	0	0	0	0	0	200	300	0	0	0	0	0	0	0	200	903	0	0	0	0	0	0	0	603	903	0
847	8	0	0	0	0	0	0	200	300	0	0	0	0	0	0	0	200	903	0	0	0	0	0	0	0	603	903	0
847	9	0	0	0	0	0	0	200	300	0	0	0	0	0	0	0	200	903	0	0	0	0	0	0	0	603	903	0
848	0	0	0	0	0	0	0	200	300	0	0	0	0	0	0	0	200	903	0	0	0	0	0	0	0	603	903	0
848	1	0	0	0	0	0	0	200	300	0	0	0	0	0	0	0	200	903	0	0	0	0	0	0	0	603	903	0
848	2	0	0	0	0	0	0	200	300	0	0	0	0	0	0	0	200	903	0	0	0	0	0	0	0	603	903	0
848	3	0	0	0	0	0	0	200	300	0	0	0	0	0	0	0	200	903	0	0	0	0	0	0	0	603	903	0
848	4	0	0	0	0	0	0	200	300	0	0	0	0	0	0	0	200	903	0	0	0	0	0	0	0	603	903	0
848	5	0	0	0	0	0	0	200	300	0	0	0	0	0	0	0	200	903	0	0	0	0	0	0	0	603	903	0
848	6	0	0	0	0	0	0	200	300	0	0	0	0	0	0	0	200	903	0	0	0	0	0	0	0	603	903	0
848	7	0	0	0	0	0	0	200	300	0	0	0	0	0	0	0	200	903	0	0	0	0	0	0	0	603	903	0
848	8	0	0	0	0	0	0	200	300	0	0	0	0	0	0	0	200	903	0	0	0	0	0	0	0	603	903	0
848	9	0	0	0	0	0	0	200	300	0	0	0	0	0	0	0	200	903	0	0	0	0	0	0	0	603	903	0
849	0	0	0	0	0	0	0	200	300	0	0	0	0	0	0	0	200	903	0	0	0	0	0	0	0	603	903	0
849	1	0	0	0	0	0	0	200	300	0	0	0	0	0	0	0	200	903	0	0	0	0	0	0	0	603	903	0
849	2	0	0	0	0	0	0	200	300	0	0	0	0	0	0	0	200	903	0	0	0	0	0	0	0	603	903	0
849	3	0	0	0	0	0	0	200	300	0	0	0	0	0	0	0	200	903	0	0	0	0	0	0	0	603	903	0
849	4	0	0	0	0	0	0	200	300	0	0	0	0	0	0	0	200	903	0	0	0	0	0	0	0	603	903	0
849	5	0	0	0	0	0	0	200	300	0	0	0	0	0	0	0	200	903	0	0	0	0	0	0	0	603	903	0
849	6	0	0	0	0	0	0	200	300	0	0	0	0	0	0	0	200	903	0	0	0	0	0	0	0	603	903	0
849	7	0	0	0	0	0	0	200	300	0	0	0	0	0	0	0	200	903	0	0	0	0	0	0	0	603	903	0
849	8	0	0	0	0	0	0	200	300	0	0	0	0	0	0	0	200	903	0	0	0	0	0	0	0	603	903	0
849	9	0	0	0	0	0	0	200	300	0	0	0	0	0	0	0	200	903	0	0	0	0	0	0	0	603	903	0
850	0	0	0	0	0	0	0	200	300	0	0	0	0	0	0	0	200	903	0	0	0	0	0	0	0	603	903	0
850	1	0	0	0	0	0	0	200	300	0	0	0	0	0	0	0	200	903	0	0	0	0	0	0	0	603	903	0
850	2	0	0	0	0	0	0	200	300	0	0	0	0	0	0	0	200	903	0	0	0	0	0	0	0	603	903	0
850	3	0	0	0	0	0	0	200	300	0	0	0	0	0	0	0	200	903	0	0	0	0	0	0	0	603	903	0
850	4	0	0	0	0	0	0	200	300	0	0	0	0	0	0	0	200	903	0	0	0	0	0	0	0	603	903	0
850	5	0	0	0	0	0	0	200	300	0	0	0	0	0	0	0	200	903	0	0	0	0	0	0	0	603	903	0
850	6	0	0	0	0	0	0	200	300	0	0	0	0	0	0	0	200	903	0	0	0	0	0	0	0	603	903	0
850	7	0	0	0	0	0	0	200	300	0	0	0	0	0	0	0	200	903	0	0	0	0	0	0	0	603	903	0
850	8	0	0	0	0	0	0	200	300	0	0	0	0	0	0	0	200	903	0	0	0	0	0	0	0	603	903	0
850	9	0	0	0	0	0	0	200	300	0	0	0	0	0	0	0	200	903	0	0	0	0	0	0	0	603	903	0
851	0	0	0	0	0	0	0	200	300	0	0	0	0	0	0	0	200	903	0	0	0	0	0	0	0	603	903	0
851	1	0	0	0	0	0	0	200	300	0	0	0	0	0	0	0	200	903	0	0	0	0	0	0	0	603	903	0
851	2	0	0	0	0	0	0	200	300	0	0	0	0	0	0	0	200	903	0	0	0	0	0	0	0	603	903	0
851	3	0	0	0	0	0	0	200	300	0	0	0	0	0	0	0	200	903	0	0	0	0	0	0	0	603	903	0
851	4	0	0	0	0	0	0	200	300	0	0	0	0	0	0	0	200	903	0	0	0	0	0	0	0	603	903	0
851	5	0	0	0	0	0	0	200	300	0	0	0	0	0	0	0	200	903	0	0	0	0	0	0	0	603	903	0
851	6	0	0	0	0	0	0	200	300	0	0	0	0	0	0	0	200	903	0	0	0	0	0	0	0	603	903	0
851	7	0	0	0	0	0	0	200	300	0	0	0	0	0	0	0	200	903	0	0	0	0	0	0	0	603	903	0
851	8	0	0	0	0	0	0	200	300	0	0	0	0	0	0	0	200	903	0	0	0	0	0	0	0	603	903	0
851	9	0	0	0	0	0	0	200	300	0	0	0	0	0	0	0	200	903	0	0	0	0	0	0	0	603	903	0
852	0	0	0	0	0	0	0	200	300	0	0	0	0	0	0	0	200	903	0	0	0	0	0	0	0	603	903	0
852	1	0	0	0	0	0	0	200	300	0	0	0	0	0	0	0	200	903	0	0	0	0	0	0	0	603	903	0
852	2	0	0	0	0	0	0	200	300	0	0	0	0	0	0	0	200	903	0	0	0	0	0	0	0	603	903	0
852	3	0	0	0	0	0	0	200	300	0	0	0	0	0	0	0	200	903	0	0	0	0	0	0	0	603	903	0
852	4	0	0	0	0	0	0	200	300	0	0	0	0	0	0	0	200	903	0	0	0	0	0	0	0	603	903	0
852	5	0	0	0	0	0	0	200	300	0	0	0	0	0	0	0	200	903	0	0	0	0	0	0	0	603	903	0
852	6	0	0	0	0	0	0	200	300	0	0	0	0	0	0	0	200	903	0	0	0	0	0	0	0	603	903	0
852	7	0	0	0	0	0	0	200	300	0	0	0	0	0	0	0	200	903	0	0	0	0	0	0	0	603	903	0
852	8	0	0	0	0	0	0	200	300	0	0	0	0	0	0	0	200	903	0	0	0	0	0	0	0	603	903	0
852	9	0	0	0	0	0	0	200	300	0	0	0	0	0	0	0	200	903	0	0	0	0	0	0	0	603	903	0
853	0	0	0	0	0	0	0	200	300	0	0	0	0	0	0	0	200	903	0	0	0	0	0	0	0	603	903	0
853	1	0	0	0	0	0	0	200	300	0	0	0	0	0	0	0	200	903	0	0	0	0	0	0	0	603	903	0
853	2	0	0	0	0	0	0	200	300	0	0	0	0	0	0	0	200	903	0	0	0	0	0	0	0	603	903	0
853	3	0	0	0	0	0	0	200	300	0	0	0	0	0	0	0	200	903	0	0	0	0	0	0	0	603	903	0
853	4	0	0	0	0	0	0	200	300	0	0	0	0	0	0	0	200	903	0	0	0	0	0	0	0	603	903	0
853	5	0	0	0	0	0	0	200	300	0	0	0	0	0	0	0	200	903	0	0	0	0	0	0	0	603	903	0
853	6	0	0	0	0	0	0	200	300	0	0	0	0	0	0	0	200	903	0	0	0	0	0	0	0	603	903	0
853	7	0	0	0	0	0	0	200	300	0	0	0	0	0	0	0	200	903	0	0	0	0	0	0	0	603	903	0
853	8	0	0	0	0	0	0	200	300	0	0	0	0	0	0	0	200	903	0	0	0	0	0	0	0	603	903	0
853	9	0	0	0	0	0	0	200	300	0	0	0	0	0	0	0	200	903	0	0	0	0	0	0	0	603	903	0
854	0	0	0	0	0	0	0	200	300	0	0	0	0	0	0	0	200	903	0	0	0	0	0	0	0	603	903	0
854	1	0	0	0	0	0	0	200	300	0	0	0	0	0	0	0	200	903	0	0	0	0	0	0	0	603	903	0
854	2	0	0	0	0	0	0	200	300	0	0	0	0	0	0	0	200	903	0	0	0	0	0	0	0	603	903	0
854	3	0	0	0	0	0	0	200	300	0	0	0	0	0	0	0	200	903	0	0	0	0	0	0	0	603	903	0
854	4	0	0	0	0	0	0	200	300	0	0	0	0	0	0	0	200	903	0	0	0	0	0	0	0	603	903	0
854	5	0	0	0	0	0	0	200	300	0	0	0	0	0	0	0	200	903	0	0	0	0	0	0	0	603	903	0
854	6	0	0	0	0	0	0	200	300	0	0	0	0	0	0	0	200	903	0	0	0	0	0	0	0	603	903	0
854	7	0	0	0	0	0	0	200	300	0	0	0	0	0	0	0	200	903	0	0	0	0	0	0	0	603	903	0
854	8	0	0	0	0	0	0	200	300	0	0	0	0	0	0	0	200	903	0	0	0	0	0	0	0	603	903	0
854	9	0	0	0	0	0	0	200	300	0	0	0	0	0	0	0	200	903	0	0	0	0	0	0	0	603	903	0
855	0	0	0	0	0	0	0	200	300	0	0	0	0	0	0	0	200	903	0	0	0	0	0	0	0	603	903	0
855	1	0	0	0	0	0	0	200	300	0	0	0	0	0	0	0	200	903	0	0	0	0	0	0	0	603	903	0
855	2	0	0	0	0	0	0	200	300	0	0	0	0	0	0	0	200	903	0	0	0	0	0	0	0	603	903	0
855	3	0	0	0	0	0	0	200	300	0	0	0	0	0	0	0	200	903	0	0	0	0	0	0	0	603	903	0
855	4	0	0	0	0	0	0	200	300	0	0	0	0	0	0	0	200	903	0	0	0	0	0	0	0	603	903	0
855	5	0	0	0	0	0	0	200	300	0	0	0	0	0	0	0	200	903	0	0	0	0	0	0	0	603	903	0
855	6	0	0	0	0	0	0	200	300	0	0	0	0	0	0	0	200	903	0	0	0	0	0	0	0	603	903	0
855	7	0	0	0	0	0	0	200	300	0	0	0	0	0	0	0	200	903	0	0	0	0	0	0	0	603	903	0
855	8	0	0	0	0	0	0	200	300	0	0	0	0	0	0	0	200	903	0	0	0	0	0	0	0	603	903	0
855	9	0	0	0	0	0	0	200	300	0	0	0	0	0	0	0	200	903	0	0	0	0	0	0	0	603	903	0
856	0	0	0	0	0	0	0	200	300	0	0	0	0	0	0	0	200	903	0	0	0	0	0	0	0	603	903	0
856	1	0	0	0	0	0	0	200	300	0	0	0	0	0	0	0	200	903	0	0	0	0	0	0	0	603	903	0
856	2	0	0	0	0	0	0	200	300	0	0	0	0	0	0	0	200	903	0	0	0	0	0	0	0	603	903	0
856	3	0	0	0	0	0	0	200	300	0	0	0	0	0	0	0	200	903	0	0	0	0	0	0	0	603	903	0
856	4	0	0	0	0	0	0	200	300	0	0	0	0	0	0	0	200	903	0	0	0	0	0	0	0	603	903	0
856	5	0	0	0	0	0	0	200	300	0	0	0	0	0	0	0	200	903	0	0	0	0	0	0	0	603	903	0
856	6	0	0	0	0	0	0	200	300	0	0	0	0	0	0	0	200	903	0	0	0	0	0	0	0	603	903	0
856	7	0	0	0	0	0	0	200	300	0	0	0	0	0	0	0	200	903	0	0	0	0	0	0	0	603	903	0
856	8	0	0	0	0	0	0	200	300	0	0	0	0	0	0	0	200	903	0	0	0	0	0	0	0	603	903	0
856	9	0	0	0	0	0	0	200	300	0	0	0	0	0	0	0	200	903	0	0	0	0	0	0	0	603	903	0
857	0	0	0	0	0	0	0	200	300	0	0	0	0	0	0	0	200	903	0	0	0	0	0	0	0	603	903	0
857	1	0	0	0	0	0	0	200	300	0	0	0	0	0	0	0	200	903	0	0	0	0	0	0	0	603	903	0
857	2	0	0	0	0	0	0	200	300	0	0	0	0	0	0	0	200	903	0	0	0	0	0	0	0	603	903	0
857	3	0	0	0	0	0	0	200	300	0	0	0	0	0	0	0	200	903	0	0	0	0	0	0	0	603	903	0
857	4	0	0	0	0	0	0	200	300	0	0	0	0	0	0	0	200	903	0	0	0	0	0	0	0	603	903	0
857	5	0	0	0	0	0	0	200	300	0	0	0	0	0	0	0	200	903	0	0	0	0	0	0	0	603	903	0
857	6	0	0	0	0	0	0	200	300	0	0	0	0	0	0	0	200	903	0	0	0	0	0	0	0	603	903	0
857	7	0	0	0	0	0	0	200	300	0	0	0	0	0	0	0	200	903	0	0	0	0	0	0	0	603	903	0
857	8	0	0	0	0	0	0	200	300	0	0	0	0	0	0	0	200	903	0	0	0	0	0	0	0	603	903	0
857	9	0	0	0	0	0	0	200	300	0	0	0	0	0	0	0	200	903	0	0	0	0	0	0	0	603	903	0
858	0	0	0	0	0	0	0	200	300	0	0	0	0	0	0	0	200	903	0	0	0	0	0	0	0	603	903	0
858	1	0	0	0	0	0	0	200	300	0	0	0	0	0	0	0	200	903	0	0	0	0	0	0	0	603	903	0
858	2	0	0	0	0	0	0	200	300	0	0	0	0	0	0	0	200	903	0	0	0	0	0	0	0	603	903	0
858	3	0	0	0	0	0	0	200	300	0	0	0	0	0	0	0	200	903	0	0	0	0	0	0	0	603	903	0
858	4	0	0	0	0	0	0	200	300	0	0	0	0	0	0	0	200	903	0	0	0	0	0	0	0	603	903	0
858	5	0	0	0	0	0	0	200	300	0	0	0	0	0	0	0	200	903	0	0	0	0	0	0	0	603	903	0
858	6	0	0	0	0	0	0	200	300	0	0	0	0	0	0	0	200	903	0	0	0	0	0	0	0	603	903	0
858	7	0	0	0	0	0	0	200	300	0	0	0	0	0	0	0	200	903	0	0	0	0	0	0	0	603	903	0
858	8	0	0	0	0	0	0	200	300	0	0	0	0	0	0	0	200	903	0	0	0	0	0	0	0	603	903	0
858	9	0	0	0	0	0	0	200	300	0	0	0	0	0	0	0	200	903	0	0	0	0	0	0	0	603	903	0
859	0	0	0	0	0	0	0	200	300	0	0	0	0	0	0	0	200	903	0	0	0	0	0	0	0	603	903	0
859	1	0	0	0	0	0	0	200	300	0	0	0	0	0	0	0	200	903	0	0	0	0	0	0	0	603	903	0
859	2	0	0	0	0	0	0	200	300	0	0	0	0	0	0	0	200	903	0	0	0	0	0	0	0	603	903	0
859	3	0	0	0	0	0	0	200	300	0	0	0	0	0	0	0	200	903	0	0	0	0	0	0	0	603	903	0
859	4	0	0	0	0	0	0	200	300	0	0	0	0	0	0	0	200	903	0	0	0	0	0	0	0	603	903	0
859	5	0	0	0	0	0	0	200	300	0	0	0	0	0	0	0	200	903	0	0	0	0	0	0	0	603	903	0
859	6	0	0	0	0	0	0	200	300	0	0	0	0	0	0	0	200	903	0	0	0	0	0	0	0	603	903	0
859	7	0	0	0	0	0	0	200	300	0	0	0	0	0	0	0	200	903	0	0	0	0	0	0	0	603	903	0
859	8	0	0	0	0	0	0	200	300	0	0	0	0	0	0	0	200	903	0	0	0	0	0	0	0	603	903	0
859	9	0	0	0	0	0	0	200	300	0	0	0	0	0	0	0	200	903	0	0	0	0	0	0	0	603	903	0
860	0	0	0	0	0	0	0	200	300	0	0	0	0	0	0	0	200	903	0	0	0	0	0	0	0	603	903	0
860	1	0	0	0	0	0	0	200	300	0	0	0	0	0	0	0	200	903	0	0	0	0	0	0	0	603	903	0
860	2	0	0	0	0	0	0	200	300	0	0	0	0	0	0	0	200	903	0	0	0	0	0	0	0	603	903	0
860	3	0	0	0	0	0	0	200	300	0	0	0	0	0	0	0	200	903	0	0	0	0	0	0	0	603	903	0
860	4	0	0	0	0	0	0	200	300	0	0	0	0	0	0	0	200	903	0	0	0	0	0	0	0	603	903	0
860	5	0	0	0	0	0	0	200	300	0	0	0	0	0	0	0	200	903	0	0	0	0	0	0	0	603	903	0
860	6	0	0	0	0	0	0	200	300	0	0	0	0	0	0	0	200	903	0	0	0	0	0	0	0	603	903	0
860	7	0	0	0	0	0	0	200	300	0	0	0	0	0	0	0	200	903	0	0	0	0	0	0	0	603	903	0
860	8	0	0	0	0	0	0	200	300	0	0	0	0	0	0	0	200	903	0	0	0	0	0	0	0	603	903	0
860	9	0	0	0	0	0	0	200	300	0	0	0	0	0	0	0	200	903	0	0	0	0	0	0	0	603	903	0
861	0	0	0	0	0	0	0	200	300	0	0	0	0	0	0	0	200	903	0	0	0	0	0	0	0	603	903	0
861	1	0	0	0	0	0	0	200	300	0	0	0	0	0	0	0	200	903	0	0	0	0	0	0	0	603	903	0
861	2	0	0	0	0	0	0	200	300	0	0	0	0	0	0	0	200	903	0	0	0	0	0	0	0	603	903	0
861	3	0	0	0	0	0	0	200	300	0	0	0	0	0	0	0	200	903	0	0	0	0	0	0	0	603	903	0
861	4	0	0	0	0	0	0	200	300	0	0	0	0	0	0	0	200	903	0	0	0	0	0	0	0	603	903	0
861	5	0	0	0	0	0	0	200	300	0	0	0	0	0	0	0	200	903	0	0	0	0	0	0	0	603	903	0
861	6	0	0	0	0	0	0	200	300	0	0	0	0	0	0	0	200	903	0	0	0	0	0	0	0	603	903	0
861	7	0	0	0	0	0	0	200	300	0	0	0	0	0	0	0	200	903	0	0	0	0	0	0	0	603	903	0
861	8	0	0	0	0	0	0	200	300	0	0	0	0	0	0	0	200	903	0	0	0	0	0	0	0	603	903	0
861	9	0	0	0	0	0	0	200	300	0	0	0	0	0	0	0	200	903	0	0	0	0	0	0	0	603	903	0
862	0	0	0	0	0	0	0	200	300	0	0	0	0	0	0	0	200	903	0	0	0	0	0	0	0	603	903	0
862	1	0	0	0	0	0	0	200	300	0	0	0	0	0	0	0	200	903	0	0	0	0	0	0	0	603	903	0
862	2	0	0	0	0	0	0	200	300	0	0	0	0	0	0	0	200	903	0	0	0	0	0	0	0	603	903	0
862	3	0	0	0	0	0	0	200	300	0	0	0	0	0	0	0	200	903	0	0	0	0	0	0	0	603	903	0
862	4	0	0	0	0	0	0	200	300	0	0	0	0	0	0	0	200	903	0	0	0	0	0	0	0	603	903	0
862	5	0	0	0	0	0	0	200	300	0	0	0	0	0	0	0	200	903	0	0	0	0	0	0	0	603	903	0
862	6	0	0	0	0	0	0	200	300	0	0	0	0	0	0	0	200	903	0	0	0	0	0	0	0	603	903	0
862	7	0	0	0	0	0	0	200	300	0	0	0	0	0	0	0	200	903	0	0	0	0	0	0	0	603	903	0
862	8	0	0	0	0	0	0	200	300	0	0	0	0	0	0	0	200	903	0	0	0	0	0	0	0	603	903	0
862	9	0	0	0	0	0	0	200	300	0	0	0	0	0	0	0	200	903	0	0	0	0	0	0	0	603	903	0
863	0	0	0	0	0	0	0	200	300	0	0	0	0	0	0	0	200	903	0	0	0	0	0	0	0	603	903	0
863	1	0	0	0	0	0	0	200	300	0	0	0	0	0	0	0	200	903	0	0	0	0	0	0	0	603	903	0
863	2	0	0	0	0	0	0	200	300	0	0	0	0	0	0	0	200	903	0	0	0	0	0	0	0	603	903	0
863	3	0	0	0	0	0	0	200	300	0	0	0	0	0	0	0	200	903	0	0	0	0	0	0	0	603	903	0
863	4	0	0	0	0	0	0	200	300	0	0	0	0	0	0	0	200	903	0	0	0	0	0	0	0	603	903	0
863	5	0	0	0	0	0	0	200	300	0	0	0	0	0	0	0	200	903	0	0	0	0	0	0	0	603	903	0
863	6	0	0	0	0	0	0	200	300	0	0	0	0	0	0	0	200	903	0	0	0	0	0	0	0	603	903	0
863	7	0	0	0	0	0	0	200	300	0	0	0	0	0	0	0	200	903	0	0	0	0	0	0	0	603	903	0
863	8	0	0	0	0	0	0	200	300	0	0	0	0	0	0	0	200	903	0	0	0	0	0	0	0	603	903	0
863	9	0	0	0	0	0	0	200	300	0	0	0	0	0	0	0	200	903	0	0	0	0	0	0	0	603	903	0
864	0	0	0	0	0	0	0	200	300	0	0	0	0	0	0	0	200	903	0	0	0	0	0	0	0	603	903	0
864	1	0	0	0	0	0	0	200	300	0	0	0	0	0	0	0	200	903	0	0	0	0	0	0	0	603	903	0
864	2	0	0	0	0	0	0	200	300	0	0	0	0	0	0	0	200	903	0	0	0	0	0	0	0	603	903	0
864	3	0	0	0	0	0	0	200	300	0	0	0	0	0	0	0	200	903	0	0	0	0	0	0	0	603	903	0
864	4	0	0	0	0	0	0	200	300	0	0	0	0	0	0	0	200	903	0	0	0	0	0	0	0	603	903	0
864	5	0	0	0	0	0	0	200	300	0	0	0	0	0	0	0	200	903	0	0	0	0	0	0	0	603	903	0
864	6	0	0	0	0	0	0	200	300	0	0	0	0	0	0	0	200	903	0	0	0	0	0	0	0	603	903	0
864	7	0	0	0	0	0	0	200	300	0	0	0	0	0	0	0	200	903	0	0	0	0	0	0	0	603	903	0
864	8	0	0	0	0	0	0	200	300	0	0	0	0	0	0	0	200	903	0	0	0	0	0	0	0	603	903	0
864	9	0	0	0	0	0	0	200	300	0	0	0	0	0	0	0	200	903	0	0	0	0	0	0	0	603	903	0
865	0	0	0	0	0	0	0	200	300	0	0	0	0	0	0	0	200	903	0	0	0	0	0	0	0	603	903	0
865	1	0	0	0	0	0	0	200	300	0	0	0	0	0	0	0	200	903	0	0	0	0	0	0	0	603	903	0
865	2	0	0	0	0	0	0	200	300	0	0	0	0	0	0	0	200	903	0	0	0	0	0	0	0	603	903	0
865	3	0	0	0	0	0	0	200	300	0	0	0	0	0	0	0	200	903	0	0	0	0	0	0	0	603	903	0
865	4	0	0	0	0	0	0	200	300	0	0	0	0	0	0	0	200	903	0	0	0	0	0	0	0	603	903	0
865	5	0	0	0	0	0	0	200	300	0	0	0	0	0	0	0	200	903	0	0	0	0	0	0	0	603	903	0
865	6	0	0	0	0	0	0	200	300	0	0	0	0	0	0	0	200	903	0	0	0	0	0	0	0	603	903	0
865	7	0	0	0	0	0	0	200	300	0	0	0	0	0	0	0	200	903	0	0	0	0	0	0	0	603	903	0
865	8	0	0	0	0	0	0	200	300	0	0	0	0	0	0	0	200	903	0	0	0	0	0	0	0	603	903	0
865	9	0	0	0	0	0	0	200	300	0	0	0	0	0	0	0	200	903	0	0	0	0	0	0	0	603	903	0
866	0	0	0	0	0	0	0	200	300	0	0	0	0	0	0	0	200	903	0	0	0	0	0	0	0	603	903	0
866	1	0	0	0	0	0	0	200	300	0	0	0	0	0	0	0	200	903	0	0	0	0	0	0	0	603	903	0
866	2	0	0	0	0	0	0	200	300	0	0	0	0	0	0	0	200	903	0	0	0	0	0	0	0	603	903	0
866	3	0	0	0	0	0	0	200	300	0	0	0	0	0	0	0	200	903	0	0	0	0	0	0	0	603	903	0
866	4	0	0	0	0	0	0	200	300	0	0	0	0	0	0	0	200	903	0	0	0	0	0	0	0	603	903	0
866	5	0	0	0	0	0	0	200	300	0	0	0	0	0	0	0	200	903	0	0	0	0	0	0	0	603	903	0
866	6	0	0	0	0	0	0	200	300	0	0	0	0	0	0	0	200	903	0	0	0	0	0	0	0	603	903	0
866	7	0	0	0	0	0	0	200	300	0	0	0	0	0	0	0	200	903	0	0	0	0	0	0	0	603	903	0
866	8	0	0	0	0	0	0	200	300	0	0	0	0	0	0	0	200	903	0	0	0	0	0	0	0	603	903	0
866	9	0	0	0	0	0	0	200	300	0	0	0	0	0	0	0	200	903	0	0	0	0	0	0	0	603	903	0
867	0	0	0	0	0	0	0	200	300	0	0	0	0	0	0	0	200	903	0	0	0	0	0	0	0	603	903	0
867	1	0	0	0	0	0	0	200	300	0	0	0	0	0	0	0	200	903	0	0	0	0	0	0	0	603	903	0
867	2	0	0	0	0	0	0	200	300	0	0	0	0	0	0	0	200	903	0	0	0	0	0	0	0	603	903	0
867	3	0	0	0	0	0	0	200	300	0	0	0	0	0	0	0	200	903	0	0	0	0	0	0	0	603	903	0
867	4	0	0	0	0	0	0	200	300	0	0	0	0	0	0	0	200	903	0	0	0	0	0	0	0	603	903	0
867	5	0	0	0	0	0	0	200	300	0	0	0	0	0	0	0	200	903	0	0	0	0	0	0	0	603	903	0
867	6	0	0	0	0	0	0	200	300	0	0	0	0	0	0	0	200	903	0	0	0	0	0	0	0	603	903	0
867	7	0	0	0	0	0	0	200	300	0	0	0	0	0	0	0	200	903	0	0	0	0	0	0	0	603	903	0
867	8	0	0	0	0	0	0	200	300	0	0	0	0	0	0	0	200	903	0	0	0	0	0	0	0	603	903	0
867	9	0	0	0	0	0	0	200	300	0	0	0	0	0	0	0	200	903	0	0	0	0	0	0	0	603	903	0
868	0	0	0	0	0	0	0	200	300	0	0	0	0	0	0	0	200	903	0	0	0	0	0	0	0	603	903	0
868	1	0	0	0	0	0	0	200	300	0	0	0	0	0	0	0	200	903	0	0	0	0	0	0	0	603	903	0
868	2	0	0	0	0	0	0	200	300	0	0	0	0	0	0	0	200	903	0	0	0	0	0	0	0	603	903	0
868	3	0	0	0	0	0	0	200	300	0	0	0	0	0	0	0	200	903	0	0	0	0	0	0	0	603	903	0
868	4	0	0	0	0	0	0	200	300	0	0	0	0	0	0	0	200	903	0	0	0	0	0	0	0	603	903	0
868	5	0	0	0	0	0	0	200	300	0	0	0	0	0	0	0	200	903	0	0	0	0	0	0	0	603	903	0
868	6	0	0	0	0	0	0	200	300	0	0	0	0	0	0	0	200	903	0	0	0	0	0	0	0	603	903	0
868	7	0	0	0	0	0	0	200	300	0	0	0	0	0	0	0	200	903	0	0	0	0	0	0	0	603	903	0
868	8	0	0	0	0	0	0	200	300	0	0	0	0	0	0	0	200	903	0	0	0	0	0	0	0	603	903	0
868	9	0	0	0	0	0	0	200	300	0	0	0	0	0	0	0	200	903	0	0	0	0	0	0	0	603	903	0
869	0	0	0	0	0	0	0	200	300	0	0	0	0	0	0	0	200	903	0	0	0	0	0	0	0	603	903	0
869	1	0	0	0	0	0	0	200	300	0	0	0	0	0	0	0	200	903	0	0	0	0	0	0	0	603	903	0
869	2	0	0	0	0	0	0	200	300	0	0	0	0	0	0	0	200	903	0	0	0	0	0	0	0	603	903	0
869	3	0	0	0	0	0	0	200	300	0	0	0	0	0	0	0	200	903	0	0	0	0	0	0	0	603	903	0
869	4	0	0	0	0	0	0	200	300	0	0	0	0	0	0	0	200	903	0	0	0	0	0	0	0	603	903	0
869	5	0	0	0	0	0	0	200	300	0	0	0	0	0	0	0	200	903	0	0	0	0	0	0	0	603	903	0
869	6	0	0	0	0	0	0	200	300	0	0	0	0	0	0	0	200	903	0	0	0	0	0	0	0	603	903	0
869	7	0	0	0	0	0	0	200	300	0	0	0	0	0	0	0	200	903	0	0	0	0	0	0	0	603	903	0
869	8	0	0	0	0	0	0	200	300	0	0	0	0	0	0	0	200	903	0	0	0	0	0	0	0	603	903	0
869	9	0	0	0	0	0	0	200	300	0	0	0	0	0	0	0	200	903	0	0	0	0	0	0	0	603	903	0
870	0	0	0	0	0	0	0	200	300	0	0	0	0	0	0	0	200	903	0	0	0	0	0	0	0	603	903	0
870	1	0	0	0	0	0	0	200	300	0	0	0	0	0	0	0	200	903	0	0	0	0	0	0	0	603	903	0
870	2	0	0	0	0	0	0	200	300	0	0	0	0	0	0	0	200	903	0	0	0	0	0	0	0	603	903	0
870	3	0	0	0	0	0	0	200	300	0	0	0	0	0	0	0	200	903	0	0	0	0	0	0	0	603	903	0
870	4	0	0	0	0	0	0	200	300	0	0	0	0	0	0	0	200	903	0	0	0	0	0	0	0	603	903	0
870	5	0	0	0	0	0	0	200	300	0	0	0	0	0	0	0	200	903	0	0	0	0	0	0	0	603	903	0
870	6	0	0	0	0	0	0	200	300	0	0	0	0	0	0	0	200	903	0	0	0	0	0	0	0	603	903	0
870	7	0	0	0	0	0	0	200	300	0	0	0	0	0	0	0	200	903	0	0	0	0	0	0	0	603	903	0
870	8	0	0	0	0	0	0	200	300	0	0	0	0	0	0	0	200	903	0	0	0	0	0	0	0	603	903	0
870	9	0	0	0	0	0	0	200	300	0	0	0	0	0	0	0	200	903	0	0	0	0	0	0	0	603	903	0
871	0	0	0	0	0	0	0	200	300	0	0	0	0	0	0	0	200	903	0	0	0	0	0	0	0	603	903	0
871	1	0	0	0	0	0	0	200	300	0	0	0	0	0	0	0	200	903	0	0	0	0	0	0	0	603	903	0
871	2	0	0	0	0	0	0	200	300	0	0	0	0	0	0	0	200	903	0	0	0	0	0	0	0	603	903	0
871	3	0	0	0	0	0	0	200	300	0	0	0	0	0	0	0	200	903	0	0	0	0	0	0	0	603	903	0
871	4	0	0	0	0	0	0	200	300	0	0	0	0	0	0	0	200	903	0	0	0	0	0	0	0	603	903	0
871	5	0	0	0	0	0	0	200	300	0	0	0	0	0	0	0	200	903	0	0	0	0	0	0	0	603	903	0
871	6	0	0	0	0	0	0	200	300	0	0	0	0	0	0	0	200	903	0	0	0	0	0	0	0	603	903	0
871	7	0	0	0	0	0	0	200	300	0	0	0	0	0	0	0	200	903	0	0	0	0	0	0	0	603	903	0
871	8	0	0	0	0	0	0	200	300	0	0	0	0	0	0	0	200	903	0	0	0	0	0	0	0	603	903	0
871	9	0	0	0	0	0	0	200	300	0	0	0	0	0	0	0	200	903	0	0	0	0	0	0	0	603	903	0
872	0	0	0	0	0	0	0	200	300	0	0	0	0	0	0	0	200	903	0	0	0	0	0	0	0	603	903	0
872	1	0	0	0	0	0	0	200	300	0	0	0	0	0	0	0	200	903	0	0	0	0	0	0	0	603	903	0
872	2	0	0	0	0	0	0	200	300	0	0	0	0	0	0	0	200	903	0	0	0	0	0	0	0	603	903	0
872	3	0	0	0	0	0	0	200	300	0	0	0	0	0	0	0	200	903	0	0	0	0	0	0	0	603	903	0
872	4	0	0	0	0	0	0	200	300	0	0	0	0	0	0	0	200	903	0	0	0	0	0	0	0	603	903	0
872	5	0	0	0	0	0	0	200	300	0	0	0	0	0	0	0	200	903	0	0	0	0	0	0	0	603	903	0
872	6	0	0	0	0	0	0	200	300	0	0	0	0	0	0	0	200	903	0	0	0	0	0	0	0	603	903	0
872	7	0	0	0	0	0	0	200	300	0	0	0	0	0	0	0	200	903	0	0	0	0	0	0	0	603	903	0
872	8	0	0	0	0	0	0	200	300	0	0	0	0	0	0	0	200	903	0	0	0	0	0	0	0	603	903	0
872	9	0	0	0	0	0	0	200	300	0	0	0	0	0	0	0	200	903	0	0	0	0	0	0	0	603	903	0
873	0	0	0	0	0	0	0	200	300	0	0	0	0	0	0	0	200	903	0	0	0	0	0	0	0	603	903	0
873	1	0	0	0	0	0	0	200	300	0	0	0	0	0	0	0	200	903	0	0	0	0	0	0	0	603	903	0
873	2	0	0	0	0	0	0	200	300	0	0	0	0	0	0	0	200	903	0	0	0	0	0	0	0	603	903	0
873	3	0	0	0	0	0	0	200	300	0	0	0	0	0	0	0	200	903	0	0	0	0	0	0	0	603	903	0
873	4	0	0	0	0	0	0	200	300	0	0	0	0	0	0	0	200	903	0	0	0	0	0	0	0	603	903	0
873	5	0	0	0	0	0	0	200	300	0	0	0	0	0	0	0	200	903	0	0	0	0	0	0	0	603	903	0
873	6	0	0	0	0	0	0	200	300	0	0	0	0	0	0	0	200	903	0	0	0	0	0	0	0	603	903	0
873	7	0	0	0	0	0	0	200	300	0	0	0	0	0	0	0	200	903	0	0	0	0	0	0	0	603	903	0
873	8	0	0	0	0	0	0	200	300	0	0	0	0	0	0	0	200	903	0	0	0	0	0	0	0	603	903	0
873	9	0	0	0	0	0	0	200	300	0	0	0	0	0	0	0	200	903	0	0	0	0	0	0	0	603	903	0
874	0	0	0	0	0	0	0	200	300	0	0	0	0	0	0	0	200	903	0	0	0	0	0	0	0	603	903	0
874	1	0	0	0	0	0	0	200	300	0	0	0	0	0	0	0	200	903	0	0	0	0	0	0	0	603	903	0
874	2	0	0	0	0	0	0	200	300	0	0	0	0	0	0	0	200	903	0	0	0	0	0	0	0	603	903	0
874	3	0	0	0	0	0	0	200	300	0	0	0	0	0	0	0	200	903	0	0	0	0	0	0	0	603	903	0
874	4	0	0	0	0	0	0	200	300	0	0	0	0	0	0	0	200	903	0	0	0	0	0	0	0	603	903	0
874	5	0	0	0	0	0	0	200	300	0	0	0	0	0	0	0	200	903	0	0	0	0	0	0	0	603	903	0
874	6	0	0	0	0	0	0	200	300	0	0	0	0	0	0	0	200	903	0	0	0	0	0	0	0	603	903	0
874	7	0	0	0	0	0	0	200	300	0	0	0	0	0	0	0	200	903	0	0	0	0	0	0	0	603	903	0
874	8	0	0	0	0	0	0	200	300	0	0	0	0	0	0	0	200	903	0	0	0	0	0	0	0	603	903	0
874	9	0	0	0	0	0	0	200	300	0	0	0	0	0	0	0	200	903	0	0	0	0	0	0	0	603	903	0
875	0	0	0	0	0	0	0	200	300	0	0	0	0	0	0	0	200	903	0	0	0	0	0	0	0	603	903	0
875	1	0	0	0	0	0	0	200	300	0	0	0	0	0	0	0	200	903	0	0	0	0	0	0	0	603	903	0
875	2	0	0	0	0	0	0	200	300	0	0	0	0	0	0	0	200	903	0	0	0	0	0	0	0	603	903	0
875	3	0	0	0	0	0	0	200	300	0	-1.1441	8.4935	-17.1395	-933.289	2079.15	1360.02	321.307	957.452	0	0	0	0	0	0	0	603	903	0
875	4	0	0	0	0	0	0	200	300	0	0	0	0	0	0	0	200	903	0	0	0	0	0	0	0	603	903	0
875	5	0	0	0	0	0	0	200	300	0	0	0	0	0	0	0	200	903	0	0	0	0	0	0	0	603	903	0
875	6	0	0	0	0	0	0	200	300	0	-3.7381	9.86679	-19.8861	-1299.5	2506.4	1451.57	326.037	968.347	0	0	0	0	0	0	0	603	903	0
875	7	0	0	0	0	0	0	200	300	0	-2.36481	9.56162	-23.8534	-1848.82	2933.64	1360.02	322.986	980.507	0	0	0	0	0	0	0	603	903	0
875	8	0	0	0	0	0	0	200	300	0	-1.29669	11.5453	-22.9379	-2031.92	3421.92	1543.12	349.182	991.584	0	0	0	0	0	0	0	603	903	0
875	9	0	0	0	0	0	0	200	300	0	-1.1441	13.5289	-25.6845	-2489.69	3421.92	2046.66	333.229	999.934	0	0	0	0	0	0	0	603	903	0
876	0	0	0	0	0	0	0	200	300	0	-4.04327	14.1393	-30.8725	-2215.03	3971.24	1863.56	328.634	974.748	0	0	0	0	0	0	0	603	903	0
876	1	0	0	0	0	0	0	200	300	0	-2.66998	13.9867	-31.788	-2489.69	4520.56	2000.88	342.21	981.322	0	0	0	0	0	0	0	603	903	0
876	2	0	0	0	0	0	0	200	300	0	1.60248	15.2074	-33.3139	-3039	4459.52	1955.11	333.864	994.223	0	0	0	0	0	0	0	603	903	0
876	3	0	0	0	0	0	0	200	300	0	-1.90704	17.6488	-36.0604	-3130.55	5252.98	1955.11	345.672	989.814	0	0	0	0	0	0	0	603	903	0
876	4	0	0	0	0	0	0	200	300	0	-2.82257	19.1747	-41.8588	-3405.21	5252.98	2687.53	325.493	984.35	0	0	0	0	0	0	0	603	903	0
876	5	0	0	0	0	0	0	200	300	0	0.229187	21.7686	-47.0468	-3039	5802.3	2641.75	323.33	967.595	0	0	0	0	0	0	0	603	903	0
876	6	0	0	0	0	0	0	200	300	0	0.381775	24.3626	-51.9296	-3954.53	6717.82	2916.41	329.364	979.152	0	0	0	0	0	0	0	603	903	0
876	7	0	0	0	0	0	0	200	300	0	-1.29669	27.4144	-58.0331	-4412.29	7389.21	3419.95	327.328	979.031	0	0	0	0	0	0	0	603	903	0
876	8	0	0	0	0	0	0	200	300	0	-1.60187	29.7032	-65.9677	-4595.4	8426.81	3694.61	327.742	972.661	0	0	0	0	0	0	0	603	903	0
876	9	0	0	0	0	0	0	200	300	0	-0.991516	30.7713	-73.5971	-5327.82	8976.13	3740.39	321.963	975.392	0	0	0	0	0	0	0	603	903	0
877	0	0	0	0	0	0	0	200	300	0	-1.60187	31.2291	-80.0058	-5236.27	9830.62	3877.72	322.874	968.449	0	0	0	0	0	0	0	603	903	0
877	1	0	0	0	0	0	0	200	300	0	-2.5174	31.2291	-83.973	-5968.69	10441	4015.04	324.337	974.079	0	0	0	0	0	0	0	603	903	0
877	2	0	0	0	0	0	0	200	300	0	-3.43292	27.8722	-86.4145	-5785.58	11051.3	3465.73	327.887	969.952	0	0	0	0	0	0	0	603	903	0
877	3	0	0	0	0	0	0	200	300	0	-5.72174	26.6515	-94.6542	-6060.24	11051.3	3694.61	316.755	967.025	0	0	0	0	0	0	0	603	903	0
877	4	0	0	0	0	0	0	200	300	0	-5.26398	28.4825	-102.284	-6334.9	12150	3282.62	318.787	964.935	0	0	0	0	0	0	0	603	903	0
877	5	0	0	0	0	0	0	200	300	0	-6.48468	26.3463	-105.946	-6884.22	12943.4	3191.07	322.17	967.979	0	0	0	0	0	0	0	603	903	0
877	6	0	0	0	0	0	0	200	300	0	-8.92609	25.7359	-110.829	-6701.11	13187.6	3374.18	318.991	963.464	0	0	0	0	0	0	0	603	903	0
877	7	0	0	0	0	0	0	200	300	0	-10.7571	25.8885	-116.627	-7158.88	13858.9	3374.18	318.831	964.383	0	0	0	0	0	0	0	603	903	0
877	8	0	0	0	0	0	0	200	300	0	-11.8253	24.2101	-125.172	-7616.64	14591.4	3053.74	316.571	963.85	0	0	0	0	0	0	0	603	903	0
877	9	0	0	0	0	0	0	200	300	0	-11.5201	21.9212	-130.055	-7433.53	15384.8	2733.31	318.295	960.157	0	0	0	0	0	0	0	603	903	0
878	0	0	0	0	0	0	0	200	300	0	-13.1985	19.0221	-134.022	-7525.09	15384.8	2458.65	314.793	959.148	0	0	0	0	0	0	0	603	903	0
878	1	0	0	0	0	0	0	200	300	0	-16.2503	16.2755	-138.6	-7982.85	16300.3	1863.56	317.607	960.597	0	0	0	0	0	0	0	603	903	0
878	2	0	0	0	0	0	0	200	300	0	-14.2667	12.1556	-141.651	-8532.17	16666.6	2046.66	317.659	963.234	0	0	0	0	0	0	0	603	903	0
878	3	0	0	0	0	0	0	200	300	0	-16.8607	10.172	-143.177	-8165.95	16666.6	1405.79	316.405	960.034	0	0	0	0	0	0	0	603	903	0
878	4	0	0	0	0	0	0	200	300	0	-19.3021	6.50986	-152.027	-8165.95	17093.8	581.817	312.439	956.714	0	0	0	0	0	0	0	603	903	0
878	5	0	0	0	0	0	0	200	300	0	-20.065	3.30551	-156.605	-7891.3	17948.3	719.146	314.609	953.39	0	0	0	0	0	0	0	603	903	0
878	6	0	0	0	0	0	0	200	300	0	-22.5064	1.01669	-159.657	-7341.98	18131.4	32.5004	313.565	948.986	0	0	0	0	0	0	0	603	903	0
878	7	0	0	0	0	0	0	200	300	0	-23.5745	-1.88248	-164.539	-8532.17	18558.6	-242.158	312.791	954.855	0	0	0	0	0	0	0	603	903	0
878	8	0	0	0	0	0	0	200	300	0	-25.5582	-4.62906	-170.033	-8257.51	18924.9	-59.0523	311.301	951.564	0	0	0	0	0	0	0	603	903	0
878	9	0	0	0	0	0	0	200	300	0	-24.0323	-7.98599	-173.695	-8440.61	19535.2	-699.922	312.469	951.595	0	0	0	0	0	0	0	603	903	0
879	0	0	0	0	0	0	0	200	300	0	-26.1685	-9.35928	-178.578	-8898.38	19230	-1203.46	307.684	952.829	0	0	0	0	0	0	0	603	903	0
879	1	0	0	0	0	0	0	200	300	0	-30.5936	-11.6481	-183.766	-8440.61	20328.7	-1432.34	310.623	948.932	0	0	0	0	0	0	0	603	903	0
879	2	0	0	0	0	0	0	200	300	0	-32.4246	-15.768	-190.479	-8440.61	20633.8	-1569.67	308.326	947.313	0	0	0	0	0	0	0	603	903	0
879	3	0	0	0	0	0	0	200	300	0	-32.8824	-18.6671	-194.447	-8165.95	20939	-2302.09	307.685	944.996	0	0	0	0	0	0	0	603	903	0
879	4	0	0	0	0	0	0	200	300	0	-31.3565	-19.8878	-195.667	-8989.93	21366.3	-2118.99	309.197	948.945	0	0	0	0	0	0	0	603	903	0
879	5	0	0	0	0	0	0	200	300	0	-35.7816	-22.9396	-204.823	-8898.38	22281.8	-2530.98	308.786	946.444	0	0	0	0	0	0	0	603	903	0
879	6	0	0	0	0	0	0	200	300	0	-37.6126	-26.2965	-208.18	-9264.59	22525.9	-2988.74	308.204	947.503	0	0	0	0	0	0	0	603	903	0
879	7	0	0	0	0	0	0	200	300	0	-38.0704	-26.2965	-216.114	-8532.17	22953.2	-2942.96	306.209	942.48	0	0	0	0	0	0	0	603	903	0
879	8	0	0	0	0	0	0	200	300	0	-38.0704	-29.6535	-219.776	-8257.51	23807.7	-3263.4	308.327	940.572	0	0	0	0	0	0	0	603	903	0
879	9	0	0	0	0	0	0	200	300	0	-38.9859	-31.9423	-225.575	-8806.82	24723.2	-3721.16	309.601	942.042	0	0	0	0	0	0	0	603	903	0
880	0	0	0	0	0	0	0	200	300	0	-41.1221	-33.7733	-232.594	-9173.04	24906.3	-3812.72	307.081	942.438	0	0	0	0	0	0	0	603	903	0
880	1	0	0	0	0	0	0	200	300	0	-41.8851	-36.2148	-238.697	-9813.9	25699.8	-4178.93	307.667	944.115	0	0	0	0	0	0	0	603	903	0
880	2	0	0	0	0	0	0	200	300	0	-42.3428	-38.1984	-243.58	-8715.27	26249.1	-4499.36	307.764	938.78	0	0	0	0	0	0	0	603	903	0
880	3	0	0	0	0	0	0	200	300	0	-42.648	-39.8769	-249.378	-9173.04	26859.4	-4819.79	307.706	939.784	0	0	0	0	0	0	0	603	903	0
880	4	0	0	0	0	0	0	200	300	0	-42.4954	-42.0131	-257.313	-9264.59	27591.8	-5048.68	307.231	939.005	0	0	0	0	0	0	0	603	903	0
880	5	0	0	0	0	0	0	200	300	0	-43.4109	-42.776	-262.196	-9630.8	28141.2	-5460.66	307.329	939.731	0	0	0	0	0	0	0	603	903	0
880	6	0	0	0	0	0	0	200	300	0	-42.9532	-46.133	-267.384	-9447.69	28751.5	-5277.56	307.529	938.334	0	0	0	0	0	0	0	603	903	0
880	7	0	0	0	0	0	0	200	300	0	-42.9532	-46.7433	-269.825	-8349.06	29483.9	-5918.43	309.271	933.943	0	0	0	0	0	0	0	603	903	0
880	8	0	0	0	0	0	0	200	300	0	-42.8006	-48.5744	-278.065	-9264.59	30399.5	-6330.41	309.325	936.318	0	0	0	0	0	0	0	603	903	0
880	9	0	0	0	0	0	0	200	300	0	-43.5635	-49.7951	-284.474	-9356.14	30887.7	-6742.4	308.579	935.889	0	0	0	0	0	0	0	603	903	0
881	0	0	0	0	0	0	0	200	300	0	-41.7325	-53.4572	-289.967	-9539.25	31437.1	-6696.63	308.416	935.898	0	0	0	0	0	0	0	603	903	0
881	1	0	0	0	0	0	0	200	300	0	-41.8851	-54.2201	-296.07	-9264.59	32474.7	-6742.4	309.686	934.292	0	0	0	0	0	0	0	603	903	0
881	2	0	0	0	0	0	0	200	300	0	-43.5635	-54.9831	-301.869	-8989.93	33085	-7429.05	309.601	932.781	0	0	0	0	0	0	0	603	903	0
881	3	0	0	0	0	0	0	200	300	0	-43.8687	-56.3564	-309.193	-9447.69	33451.2	-7108.61	308.189	933.556	0	0	0	0	0	0	0	603	903	0
881	4	0	0	0	0	0	0	200	300	0	-45.242	-58.0348	-312.245	-8989.93	33939.5	-7474.82	308.695	931.791	0	0	0	0	0	0	0	603	903	0
881	5	0	0	0	0	0	0	200	300	0	-44.4791	-59.2555	-317.738	-8440.61	35099.2	-7657.93	310.466	929.565	0	0	0	0	0	0	0	603	903	0
881	6	0	0	0	0	0	0	200	300	0	-43.8687	-59.8659	-324.146	-8715.27	35465.4	-7703.71	309.412	929.887	0	0	0	0	0	0	0	603	903	0
881	7	0	0	0	0	0	0	200	300	0	-42.648	-60.6288	-330.25	-9173.04	36197.8	-7978.36	309.607	930.776	0	0	0	0	0	0	0	603	903	0
881	8	0	0	0	0	0	0	200	300	0	-43.1058	-61.6969	-335.743	-9447.69	36930.2	-7795.26	309.996	931.14	0	0	0	0	0	0	0	603	903	0
881	9	0	0	0	0	0	0	200	300	0	-41.4273	-63.3754	-340.626	-9173.04	37601.6	-8207.25	310.39	929.93	0	0	0	0	0	0	0	603	903	0
882	0	0	0	0	0	0	0	200	300	0	-41.4273	-63.8332	-346.119	-8715.27	37357.5	-8115.69	307.932	928.18	0	0	0	0	0	0	0	603	903	0
882	1	0	0	0	0	0	0	200	300	0	-39.1385	-64.4435	-351.002	-8349.06	39005.4	-8207.25	311.126	926.786	0	0	0	0	0	0	0	603	903	0
882	2	0	0	0	0	0	0	200	300	0	-40.9695	-66.122	-354.359	-8623.72	39737.9	-7657.93	312.14	927.336	0	0	0	0	0	0	0	603	903	0
882	3	0	0	0	0	0	0	200	300	0	-39.7488	-65.9694	-361.378	-8715.27	39554.8	-8344.58	309.455	927.117	0	0	0	0	0	0	0	603	903	0
882	4	0	0	0	0	0	0	200	300	0	-39.2911	-66.7323	-364.124	-8715.27	40470.3	-8344.58	311.144	926.935	0	0	0	0	0	0	0	603	903	0
882	5	0	0	0	0	0	0	200	300	0	-37.6126	-68.2582	-367.176	-8440.61	40836.5	-8527.68	311.218	925.988	0	0	0	0	0	0	0	603	903	0
882	6	0	0	0	0	0	0	200	300	0	-36.5445	-68.5634	-370.533	-8257.51	41629.9	-8848.12	312.352	925.286	0	0	0	0	0	0	0	603	903	0
882	7	0	0	0	0	0	0	200	300	0	-36.3919	-69.3263	-374.806	-8074.4	41691	-8802.34	311.234	924.543	0	0	0	0	0	0	0	603	903	0
882	8	0	0	0	0	0	0	200	300	0	-35.9341	-72.2255	-379.383	-7982.85	42789.6	-8985.45	312.787	924.042	0	0	0	0	0	0	0	603	903	0
882	9	0	0	0	0	0	0	200	300	0	-33.1876	-72.5307	-383.35	-7799.75	43216.9	-8985.45	312.735	923.346	0	0	0	0	0	0	0	603	903	0
883	0	0	0	0	0	0	0	200	300	0	-32.272	-73.7514	-383.35	-7708.19	43155.8	-8985.45	312.575	923.107	0	0	0	0	0	0	0	603	903	0
883	1	0	0	0	0	0	0	200	300	0	-30.8987	-74.5143	-390.98	-7982.85	43888.2	-9122.78	312.252	923.418	0	0	0	0	0	0	0	603	903	0
883	2	0	0	0	0	0	0	200	300	0	-30.5936	-74.9721	-390.37	-7525.09	44132.4	-9397.43	313.053	922.277	0	0	0	0	0	0	0	603	903	0
883	3	0	0	0	0	0	0	200	300	0	-30.1358	-76.498	-394.642	-7158.88	44742.7	-9626.32	313.375	921.14	0	0	0	0	0	0	0	603	903	0
883	4	0	0	0	0	0	0	200	300	0	-27.084	-78.1764	-396.168	-7525.09	45170	-9443.21	314.017	921.995	0	0	0	0	0	0	0	603	903	0
883	5	0	0	0	0	0	0	200	300	0	-26.0159	-78.329	-403.797	-7433.53	46085.5	-9809.42	314.13	921.409	0	0	0	0	0	0	0	603	903	0
883	6	0	0	0	0	0	0	200	300	0	-25.8633	-79.8549	-404.713	-7433.53	46390.7	-9900.97	314.626	921.367	0	0	0	0	0	0	0	603	903	0
883	7	0	0	0	0	0	0	200	300	0	-24.7952	-80.923	-407.765	-6426.45	45719.3	-9488.99	312.122	918.76	0	0	0	0	0	0	0	603	903	0
883	8	0	0	0	0	0	0	200	300	0	-23.1168	-81.3808	-410.816	-6243.35	47367.2	-10175.6	315.3	918.198	0	0	0	0	0	0	0	603	903	0
883	9	0	0	0	0	0	0	200	300	0	-19.3021	-84.4325	-415.089	-6426.45	47733.5	-10175.6	314.996	918.482	0	0	0	0	0	0	0	603	903	0
884	0	0	0	0	0	0	0	200	300	0	-20.8279	-84.5851	-416.615	-6334.9	47977.6	-10129.9	315.161	918.206	0	0	0	0	0	0	0	603	903	0
884	1	0	0	0	0	0	0	200	300	0	-19.1495	-85.0429	-418.446	-6518.01	47977.6	-10633.4	314.657	918.577	0	0	0	0	0	0	0	603	903	0
884	2	0	0	0	0	0	0	200	300	0	-18.9969	-85.8058	-422.108	-5785.58	48282.8	-10953.8	314.385	916.706	0	0	0	0	0	0	0	603	903	0
884	3	0	0	0	0	0	0	200	300	0	-17.471	-87.7895	-424.854	-5785.58	48954.2	-10953.8	315.226	916.618	0	0	0	0	0	0	0	603	903	0
884	4	0	0	0	0	0	0	200	300	0	-16.2503	-87.942	-426.685	-5144.72	49076.2	-11320	315.017	915.057	0	0	0	0	0	0	0	603	903	0
884	5	0	0	0	0	0	0	200	300	0	-16.4029	-88.8576	-427.296	-5602.48	49930.7	-10999.6	316.853	916.111	0	0	0	0	0	0	0	603	903	0
884	6	0	0	0	0	0	0	200	300	0	-15.4874	-89.6205	-431.263	-5785.58	50358	-11274.3	316.769	916.416	0	0	0	0	0	0	0	603	903	0
884	7	0	0	0	0	0	0	200	300	0	-13.5037	-91.6042	-434.01	-5144.72	50602.1	-11457.4	316.592	914.854	0	0	0	0	0	0	0	603	903	0
884	8	0	0	0	0	0	0	200	300	0	-10.9097	-92.6723	-434.925	-5144.72	50968.3	-11503.1	317.189	914.829	0	0	0	0	0	0	0	603	903	0
884	9	0	0	0	0	0	0	200	300	0	-11.6727	-92.3671	-436.756	-4595.4	51578.7	-11686.3	318.095	913.522	0	0	0	0	0	0	0	603	903	0
885	0	0	0	0	0	0	0	200	300	0	-8.92609	-92.9774	-440.418	-4686.95	51578.7	-11732	317.113	913.642	0	0	0	0	0	0	0	603	903	0
885	1	0	0	0	0	0	0	200	300	0	-8.31573	-94.8085	-442.555	-4412.29	51761.8	-11960.9	316.961	912.97	0	0	0	0	0	0	0	603	903	0
885	2	0	0	0	0	0	0	200	300	0	-8.62091	-95.5714	-443.47	-4778.5	52860.4	-11960.9	319.197	913.775	0	0	0	0	0	0	0	603	903	0
885	3	0	0	0	0	0	0	200	300	0	-5.87433	-95.4189	-444.386	-4412.29	52738.3	-11732	318.677	912.929	0	0	0	0	0	0	0	603	903	0
885	4	0	0	0	0	0	0	200	300	0	-6.02692	-95.2663	-447.437	-4229.19	52921.4	-12235.6	318.277	912.452	0	0	0	0	0	0	0	603	903	0
885	5	0	0	0	0	0	0	200	300	0	-5.11139	-96.6396	-447.132	-3679.87	53714.9	-12235.6	320.132	911.23	0	0	0	0	0	0	0	603	903	0
885	6	0	0	0	0	0	0	200	300	0	-2.82257	-96.487	-449.879	-3222.11	54203.2	-12281.3	320.484	910.162	0	0	0	0	0	0	0	603	903	0
885	7	0	0	0	0	0	0	200	300	0	-1.1441	-98.1654	-452.931	-3862.98	54264.2	-12235.6	319.807	911.529	0	0	0	0	0	0	0	603	903	0
885	8	0	0	0	0	0	0	200	300	0	-0.68634	-97.7077	-458.729	-3130.55	54569.4	-12052.5	318.958	909.824	0	0	0	0	0	0	0	603	903	0
885	9	0	0	0	0	0	0	200	300	0	0.534363	-99.2336	-460.255	-3405.21	55301.8	-12647.6	320.155	910.399	0	0	0	0	0	0	0	603	903	0
886	0	0	0	0	0	0	0	200	300	0	2.97577	-99.081	-461.781	-3130.55	55362.9	-12556	319.89	909.779	0	0	0	0	0	0	0	603	903	0
886	1	0	0	0	0	0	0	200	300	0	5.56976	-99.3861	-463.917	-2672.79	54813.5	-12739.1	318.154	908.761	0	0	0	0	0	0	0	603	903	0
886	2	0	0	0	0	0	0	200	300	0	5.112	-99.6913	-468.189	-3313.66	56583.6	-12739.1	320.856	910.078	0	0	0	0	0	0	0	603	903	0
886	3	0	0	0	0	0	0	200	300	0	6.48529	-101.37	-470.631	-2947.45	56949.8	-12372.9	321.007	909.263	0	0	0	0	0	0	0	603	903	0
886	4	0	0	0	0	0	0	200	300	0	6.94305	-101.37	-472.767	-2215.03	57377	-12464.5	321.364	907.685	0	0	0	0	0	0	0	603	903	0
886	5	0	0	0	0	0	0	200	300	0	10.7578	-100.759	-476.734	-2306.58	58170.5	-12647.6	322.019	907.838	0	0	0	0	0	0	0	603	903	0
886	6	0	0	0	0	0	0	200	300	0	12.2836	-101.217	-481.922	-2398.13	59086	-12647.6	322.605	907.976	0	0	0	0	0	0	0	603	903	0
886	7	0	0	0	0	0	0	200	300	0	13.8095	-102.438	-485.89	-1482.61	59513.2	-12647.6	322.483	906.051	0	0	0	0	0	0	0	603	903	0
886	8	0	0	0	0	0	0	200	300	0	15.6406	-103.201	-487.415	-1757.26	59879.5	-12418.7	322.851	906.605	0	0	0	0	0	0	0	603	903	0
886	9	0	0	0	0	0	0	200	300	0	20.5234	-104.116	-491.688	-1665.71	60367.7	-12647.6	322.777	906.388	0	0	0	0	0	0	0	603	903	0
887	0	0	0	0	0	0	0	200	300	0	22.3544	-104.422	-496.266	-1024.84	60428.8	-12739.1	321.767	905.065	0	0	0	0	0	0	0	603	903	0
887	1	0	0	0	0	0	0	200	300	0	23.4225	-106.558	-500.233	-1207.95	61527.4	-12693.3	322.998	905.415	0	0	0	0	0	0	0	603	903	0
887	2	0	0	0	0	0	0	200	300	0	24.1855	-107.931	-502.064	-383.972	61954.7	-12876.4	323.4	903.765	0	0	0	0	0	0	0	603	903	0
887	3	0	0	0	0	0	0	200	300	0	25.2536	-108.541	-504.2	-109.314	62992.2	-12968	324.935	903.217	0	0	0	0	0	0	0	603	903	0
887	4	0	0	0	0	0	0	200	300	0	28.3054	-109.915	-509.083	256.897	63419.5	-12876.4	324.576	902.495	0	0	0	0	0	0	0	603	903	0
887	5	0	0	0	0	0	0	200	300	0	29.0683	-111.746	-511.829	348.45	63541.6	-13380	324.146	902.319	0	0	0	0	0	0	0	603	903	0
887	6	0	0	0	0	0	0	200	300	0	30.5942	-113.272	-513.355	165.344	63846.7	-13151.1	324.371	902.678	0	0	0	0	0	0	0	603	903	0
887	7	0	0	0	0	0	0	200	300	0	32.1201	-113.272	-516.407	440.003	63907.8	-13471.5	323.755	902.148	0	0	0	0	0	0	0	603	903	0
887	8	0	0	0	0	0	0	200	300	0	32.1201	-113.882	-518.543	531.555	64701.2	-13471.5	324.775	901.975	0	0	0	0	0	0	0	603	903	0
887	9	0	0	0	0	0	0	200	300	0	32.4252	-114.492	-521.595	897.766	65067.5	-13837.7	324.747	901.279	0	0	0	0	0	0	0	603	903	0
888	0	0	0	0	0	0	0	200	300	0	32.883	-115.255	-522.816	1538.64	65921.9	-13792	326.09	900.057	0	0	0	0	0	0	0	603	903	0
888	1	0	0	0	0	0	0	200	300	0	32.883	-114.798	-525.562	1721.74	65860.9	-13837.7	325.315	899.724	0	0	0	0	0	0	0	603	903	0
888	2	0	0	0	0	0	0	200	300	0	32.883	-113.729	-528.309	989.319	65677.8	-13746.2	324.317	901.127	0	0	0	0	0	0	0	603	903	0
888	3	0	0	0	0	0	0	200	300	0	33.4933	-114.187	-531.666	1813.29	67081.6	-13196.9	326.172	899.589	0	0	0	0	0	0	0	603	903	0
888	4	0	0	0	0	0	0	200	300	0	36.0873	-113.424	-531.056	1721.74	67325.7	-13471.5	326.777	899.758	0	0	0	0	0	0	0	603	903	0
888	5	0	0	0	0	0	0	200	300	0	34.7141	-111.593	-534.718	1263.98	67325.7	-13563.1	325.909	900.636	0	0	0	0	0	0	0	603	903	0
888	6	0	0	0	0	0	0	200	300	0	34.5615	-110.525	-537.464	1813.29	67630.9	-13654.6	325.833	899.626	0	0	0	0	0	0	0	603	903	0
888	7	0	0	0	0	0	0	200	300	0	34.4089	-111.135	-538.99	2454.16	68241.3	-13654.6	326.61	898.447	0	0	0	0	0	0	0	603	903	0
888	8	0	0	0	0	0	0	200	300	0	35.477	-110.678	-540.211	2271.06	67875.1	-13517.3	325.646	898.796	0	0	0	0	0	0	0	603	903	0
888	9	0	0	0	0	0	0	200	300	0	35.1718	-108.999	-541.126	2728.82	68485.4	-13425.8	326.561	897.957	0	0	0	0	0	0	0	603	903	0
889	0	0	0	0	0	0	0	200	300	0	35.0192	-108.236	-543.263	3003.48	69217.8	-13425.8	327.411	897.471	0	0	0	0	0	0	0	603	903	0
889	1	0	0	0	0	0	0	200	300	0	34.7141	-108.541	-546.925	3095.03	69523	-13288.4	327.116	897.341	0	0	0	0	0	0	0	603	903	0
889	2	0	0	0	0	0	0	200	300	0	36.2399	-109.915	-549.976	2637.27	69339.9	-13242.6	326.078	898.205	0	0	0	0	0	0	0	603	903	0
889	3	0	0	0	0	0	0	200	300	0	37.1555	-109.61	-551.197	2637.27	69950.3	-13334.2	326.906	898.215	0	0	0	0	0	0	0	603	903	0
889	4	0	0	0	0	0	0	200	300	0	36.6977	-108.694	-552.418	2728.82	70438.5	-13242.6	327.51	898.06	0	0	0	0	0	0	0	603	903	0
889	5	0	0	0	0	0	0	200	300	0	37.308	-109.152	-556.385	3003.48	69950.3	-13196.9	325.723	897.602	0	0	0	0	0	0	0	603	903	0
889	6	0	0	0	0	0	0	200	300	0	37.4606	-109.457	-558.521	3186.59	70560.6	-13242.6	326.335	897.295	0	0	0	0	0	0	0	603	903	0
889	7	0	0	0	0	0	0	200	300	0	39.2917	-109.457	-560.352	3369.69	70865.8	-13105.3	326.466	896.987	0	0	0	0	0	0	0	603	903	0
889	8	0	0	0	0	0	0	200	300	0	39.2917	-108.236	-563.404	3278.14	71232	-13151.1	326.431	897.182	0	0	0	0	0	0	0	603	903	0
889	9	0	0	0	0	0	0	200	300	0	39.902	-108.847	-565.235	3461.24	71598.2	-13242.6	326.67	896.877	0	0	0	0	0	0	0	603	903	0
890	0	0	0	0	0	0	0	200	300	0	40.8176	-108.999	-568.897	3644.35	72269.6	-13105.3	327.035	896.594	0	0	0	0	0	0	0	603	903	0
890	1	0	0	0	0	0	0	200	300	0	40.9702	-109.304	-571.034	3919.01	72818.9	-12876.4	327.521	896.137	0	0	0	0	0	0	0	603	903	0
890	2	0	0	0	0	0	0	200	300	0	41.8857	-108.236	-573.475	4468.32	72330.6	-12510.2	326.127	895.208	0	0	0	0	0	0	0	603	903	0
890	3	0	0	0	0	0	0	200	300	0	42.3434	-107.931	-575.306	4376.77	73551.3	-12693.3	327.847	895.392	0	0	0	0	0	0	0	603	903	0
890	4	0	0	0	0	0	0	200	300	0	44.3271	-109.152	-578.968	4285.22	73978.6	-12830.7	327.777	895.599	0	0	0	0	0	0	0	603	903	0
890	5	0	0	0	0	0	0	200	300	0	43.5641	-108.389	-580.189	4376.77	73917.5	-13196.9	327.403	895.456	0	0	0	0	0	0	0	603	903	0
890	6	0	0	0	0	0	0	200	300	0	43.1064	-107.931	-582.935	3919.01	74344.8	-13105.3	327.535	896.277	0	0	0	0	0	0	0	603	903	0
890	7	0	0	0	0	0	0	200	300	0	44.3271	-108.084	-587.513	5292.3	74405.8	-12784.9	326.645	893.992	0	0	0	0	0	0	0	603	903	0
890	8	0	0	0	0	0	0	200	300	0	44.3271	-107.778	-589.344	5200.75	75016.2	-12922.2	327.288	894.175	0	0	0	0	0	0	0	603	903	0
890	9	0	0	0	0	0	0	200	300	0	43.7167	-107.931	-591.786	4926.09	75443.4	-12922.2	327.484	894.676	0	0	0	0	0	0	0	603	903	0
891	0	0	0	0	0	0	0	200	300	0	44.9374	-106.863	-592.396	5017.64	76481	-12784.9	329.105	894.53	0	0	0	0	0	0	0	603	903	0
891	1	0	0	0	0	0	0	200	300	0	44.0219	-105.49	-594.227	5200.75	76053.8	-12556	327.988	894.248	0	0	0	0	0	0	0	603	903	0
891	2	0	0	0	0	0	0	200	300	0	44.3271	-107.473	-597.584	5383.85	76603.1	-12876.4	328.188	893.991	0	0	0	0	0	0	0	603	903	0
891	3	0	0	0	0	0	0	200	300	0	44.4797	-106.1	-602.772	5292.3	77274.5	-12830.7	328.199	894.22	0	0	0	0	0	0	0	603	903	0
891	4	0	0	0	0	0	0	200	300	0	43.5641	-106.71	-604.603	5566.96	77152.4	-12556	327.608	893.792	0	0	0	0	0	0	0	603	903	0
891	5	0	0	0	0	0	0	200	300	0	43.1064	-105.795	-606.434	6024.72	77396.6	-12693.3	327.626	893.065	0	0	0	0	0	0	0	603	903	0
891	6	0	0	0	0	0	0	200	300	0	43.8693	-105.947	-610.706	5841.62	78067.9	-12968	327.832	893.435	0	0	0	0	0	0	0	603	903	0
891	7	0	0	0	0	0	0	200	300	0	43.1064	-106.863	-613.148	6299.38	78556.2	-12784.9	328.12	892.726	0	0	0	0	0	0	0	603	903	0
891	8	0	0	0	0	0	0	200	300	0	42.8012	-106.253	-614.979	6390.93	78556.2	-12556	327.738	892.608	0	0	0	0	0	0	0	603	903	0
891	9	0	0	0	0	0	0	200	300	0	42.3434	-105.49	-617.115	6665.59	78861.4	-12556	327.79	892.199	0	0	0	0	0	0	0	603	903	0
892	0	0	0	0	0	0	0	200	300	0	42.3434	-105.184	-620.472	6940.25	79288.6	-12235.6	327.788	891.815	0	0	0	0	0	0	0	603	903	0
892	1	0	0	0	0	0	0	200	300	0	44.1745	-105.337	-623.219	6848.7	79471.8	-12693.3	327.518	892.011	0	0	0	0	0	0	0	603	903	0
892	2	0	0	0	0	0	0	200	300	0	42.6486	-104.879	-624.134	6757.14	79960	-12647.6	328.114	892.174	0	0	0	0	0	0	0	603	903	0
892	3	0	0	0	0	0	0	200	300	0	44.9374	-104.422	-626.576	6848.7	80509.3	-12464.5	328.491	892.07	0	0	0	0	0	0	0	603	903	0
892	4	0	0	0	0	0	0	200	300	0	42.496	-104.116	-629.627	7581.12	80692.5	-12693.3	328.159	890.959	0	0	0	0	0	0	0	603	903	0
892	5	0	0	0	0	0	0	200	300	0	42.1909	-104.727	-632.679	7398.01	80021	-12418.7	326.48	891.307	0	0	0	0	0	0	0	603	903	0
892	6	0	0	0	0	0	0	200	300	0	42.0383	-104.879	-633.595	8038.88	81302.8	-12372.9	328.32	890.312	0	0	0	0	0	0	0	603	903	0
892	7	0	0	0	0	0	0	200	300	0	41.1227	-104.422	-636.036	7947.33	81791.1	-12464.5	328.595	890.505	0	0	0	0	0	0	0	603	903	0
892	8	0	0	0	0	0	0	200	300	0	41.1227	-103.506	-640.003	8679.75	81485.9	-12372.9	327.321	889.438	0	0	0	0	0	0	0	603	903	0
892	9	0	0	0	0	0	0	200	300	0	41.2753	-104.574	-641.529	8679.75	82767.6	-12052.5	329.016	889.47	0	0	0	0	0	0	0	603	903	0
893	0	0	0	0	0	0	0	200	300	0	42.496	-104.879	-644.276	8496.64	82767.6	-12098.2	328.466	889.812	0	0	0	0	0	0	0	603	903	0
893	1	0	0	0	0	0	0	200	300	0	40.9702	-104.269	-646.412	8588.2	82706.6	-12327.1	327.947	889.714	0	0	0	0	0	0	0	603	903	0
893	2	0	0	0	0	0	0	200	300	0	41.7331	-104.269	-650.99	8496.64	83072.8	-12281.3	327.61	889.948	0	0	0	0	0	0	0	603	903	0
893	3	0	0	0	0	0	0	200	300	0	40.5124	-104.727	-653.736	9412.17	83866.3	-12327.1	328.288	888.602	0	0	0	0	0	0	0	603	903	0
893	4	0	0	0	0	0	0	200	300	0	40.5124	-105.49	-655.262	9229.06	84293.5	-12372.9	328.641	888.915	0	0	0	0	0	0	0	603	903	0
893	5	0	0	0	0	0	0	200	300	0	40.0546	-103.811	-658.314	9595.28	84171.4	-12464.5	327.859	888.424	0	0	0	0	0	0	0	603	903	0
893	6	0	0	0	0	0	0	200	300	0	38.8339	-103.964	-662.281	9686.83	85025.9	-12372.9	328.383	888.374	0	0	0	0	0	0	0	603	903	0
893	7	0	0	0	0	0	0	200	300	0	38.5287	-104.574	-665.333	9686.83	85087	-11869.4	327.886	888.441	0	0	0	0	0	0	0	603	903	0
893	8	0	0	0	0	0	0	200	300	0	41.2753	-104.116	-665.943	10693.9	85331.1	-12144	328.136	886.942	0	0	0	0	0	0	0	603	903	0
893	9	0	0	0	0	0	0	200	300	0	38.6813	-103.811	-668.69	10785.5	85880.4	-12372.9	328.431	886.871	0	0	0	0	0	0	0	603	903	0
894	0	0	0	0	0	0	0	200	300	0	38.2236	-103.353	-672.352	10693.9	86307.7	-12098.2	328.367	887.095	0	0	0	0	0	0	0	603	903	0
894	1	0	0	0	0	0	0	200	300	0	37.1555	-104.422	-675.709	10693.9	86246.6	-12098.2	327.639	887.174	0	0	0	0	0	0	0	603	903	0
894	2	0	0	0	0	0	0	200	300	0	37.1555	-104.879	-676.319	10785.5	86429.8	-12098.2	327.794	887.053	0	0	0	0	0	0	0	603	903	0
894	3	0	0	0	0	0	0	200	300	0	36.6977	-103.201	-678.761	11792.5	87223.2	-11869.4	328.504	885.626	0	0	0	0	0	0	0	603	903	0
894	4	0	0	0	0	0	0	200	300	0	37.1555	-102.896	-682.728	11609.4	87589.4	-12098.2	328.293	885.996	0	0	0	0	0	0	0	603	903	0
894	5	0	0	0	0	0	0	200	300	0	36.3925	-103.048	-685.169	12158.8	87833.5	-12144	328.193	885.254	0	0	0	0	0	0	0	603	903	0
894	6	0	0	0	0	0	0	200	300	0	36.3925	-103.659	-688.221	12341.9	87284.2	-11823.6	326.826	885.067	0	0	0	0	0	0	0	603	903	0
894	7	0	0	0	0	0	0	200	300	0	38.3762	-102.285	-690.052	12341.9	88443.9	-12327.1	328.17	885.115	0	0	0	0	0	0	0	603	903	0
894	8	0	0	0	0	0	0	200	300	0	35.7822	-102.285	-691.883	12433.4	88566	-12052.5	328.007	885.03	0	0	0	0	0	0	0	603	903	0
894	9	0	0	0	0	0	0	200	300	0	35.9348	-100.759	-694.935	12799.6	88627	-12281.3	327.533	884.582	0	0	0	0	0	0	0	603	903	0
895	0	0	0	0	0	0	0	200	300	0	35.477	-103.353	-694.325	12982.7	89298.4	-11823.6	328.612	884.302	0	0	0	0	0	0	0	603	903	0
895	1	0	0	0	0	0	0	200	300	0	35.1718	-100.302	-698.902	12982.7	89664.6	-12281.3	328.293	884.424	0	0	0	0	0	0	0	603	903	0
895	2	0	0	0	0	0	0	200	300	0	34.8666	-101.675	-699.818	13257.4	89176.3	-12052.5	327.428	884.056	0	0	0	0	0	0	0	603	903	0
895	3	0	0	0	0	0	0	200	300	0	34.5615	-100.454	-703.48	13532	90274.9	-11915.1	328.326	883.764	0	0	0	0	0	0	0	603	903	0
895	4	0	0	0	0	0	0	200	300	0	35.1718	-101.522	-704.09	14356	90519.1	-12006.7	328.562	882.611	0	0	0	0	0	0	0	603	903	0
895	5	0	0	0	0	0	0	200	300	0	35.0192	-101.217	-706.226	14172.9	90519.1	-11960.9	328.173	882.932	0	0	0	0	0	0	0	603	903	0
895	6	0	0	0	0	0	0	200	300	0	34.1037	-100.759	-709.278	14081.4	90946.4	-11823.6	328.224	883.147	0	0	0	0	0	0	0	603	903	0
895	7	0	0	0	0	0	0	200	300	0	35.6296	-101.828	-710.499	14081.4	90274.9	-11823.6	327.059	883.181	0	0	0	0	0	0	0	603	903	0
895	8	0	0	0	0	0	0	200	300	0	34.5615	-101.37	-712.94	14356	91129.4	-11365.8	327.822	882.864	0	0	0	0	0	0	0	603	903	0
895	9	0	0	0	0	0	0	200	300	0	35.0192	-100.607	-712.94	14996.9	91495.6	-11228.5	328.336	881.965	0	0	0	0	0	0	0	603	903	0
896	0	0	0	0	0	0	0	200	300	0	35.0192	-100.302	-717.213	14905.3	92106	-11594.7	328.422	882.218	0	0	0	0	0	0	0	603	903	0
896	1	0	0	0	0	0	0	200	300	0	33.4933	-100.912	-718.128	15363.1	92411.2	-11686.3	328.683	881.607	0	0	0	0	0	0	0	603	903	0
896	2	0	0	0	0	0	0	200	300	0	33.1882	-100.759	-718.433	15180	92411.2	-11777.8	328.629	881.871	0	0	0	0	0	0	0	603	903	0
896	3	0	0	0	0	0	0	200	300	0	33.7985	-99.6913	-720.875	15637.8	92289.1	-11640.5	328.024	881.307	0	0	0	0	0	0	0	603	903	0
896	4	0	0	0	0	0	0	200	300	0	34.1037	-99.2336	-722.401	15180	92899.5	-11732	328.598	881.987	0	0	0	0	0	0	0	603	903	0
896	5	0	0	0	0	0	0	200	300	0	34.8666	-99.8439	-723.621	15271.5	92533.3	-11640.5	327.875	881.896	0	0	0	0	0	0	0	603	903	0
896	6	0	0	0	0	0	0	200	300	0	33.3408	-99.081	-723.927	15729.3	92716.4	-11823.6	328.074	881.272	0	0	0	0	0	0	0	603	903	0
896	7	0	0	0	0	0	0	200	300	0	33.3408	-98.6232	-725.758	15637.8	93326.7	-11503.1	328.592	881.453	0	0	0	0	0	0	0	603	903	0
896	8	0	0	0	0	0	0	200	300	0	33.6459	-97.7077	-726.673	16644.8	93570.8	-11777.8	328.766	880.095	0	0	0	0	0	0	0	603	903	0
896	9	0	0	0	0	0	0	200	300	0	35.6296	-98.9284	-728.504	16461.7	93265.7	-11548.9	328.024	880.403	0	0	0	0	0	0	0	603	903	0
897	0	0	0	0	0	0	0	200	300	0	33.0356	-98.1654	-728.199	16553.3	93387.8	-11594.7	328.245	880.268	0	0	0	0	0	0	0	603	903	0
897	1	0	0	0	0	0	0	200	300	0	31.9675	-97.4025	-727.894	16736.4	94120.2	-11503.1	329.305	880.007	0	0	0	0	0	0	0	603	903	0
897	2	0	0	0	0	0	0	200	300	0	32.1201	-96.6396	-731.861	16644.8	93692.9	-11594.7	328.02	880.257	0	0	0	0	0	0	0	603	903	0
897	3	0	0	0	0	0	0	200	300	0	33.0356	-97.2499	-730.641	17194.2	93387.8	-11365.8	327.816	879.467	0	0	0	0	0	0	0	603	903	0
897	4	0	0	0	0	0	0	200	300	0	33.3408	-97.0973	-731.251	16827.9	94120.2	-10953.8	328.711	879.987	0	0	0	0	0	0	0	603	903	0
897	5	0	0	0	0	0	0	200	300	0	31.8149	-95.8766	-732.777	17377.3	94303.3	-11320	328.693	879.286	0	0	0	0	0	0	0	603	903	0
897	6	0	0	0	0	0	0	200	300	0	32.1201	-95.5714	-733.692	17011	94181.2	-11228.5	328.366	879.815	0	0	0	0	0	0	0	603	903	0
897	7	0	0	0	0	0	0	200	300	0	33.9511	-96.1818	-731.556	17743.5	93998.1	-11228.5	328.491	878.746	0	0	0	0	0	0	0	603	903	0
897	8	0	0	0	0	0	0	200	300	0	32.4252	-94.8085	-736.439	17926.6	94608.5	-11136.9	328.468	878.658	0	0	0	0	0	0	0	603	903	0
897	9	0	0	0	0	0	0	200	300	0	31.6623	-94.9611	-734.913	17560.4	94547.4	-11182.7	328.651	879.106	0	0	0	0	0	0	0	603	903	0
898	0	0	0	0	0	0	0	200	300	0	30.289	-94.9611	-735.218	17651.9	94608.5	-11365.8	328.681	878.991	0	0	0	0	0	0	0	603	903	0
898	1	0	0	0	0	0	0	200	300	0	31.8149	-94.0456	-737.049	18201.2	94364.3	-10999.6	328.03	878.305	0	0	0	0	0	0	0	603	903	0
898	2	0	0	0	0	0	0	200	300	0	31.2045	-94.0456	-737.354	18018.1	93998.1	-11228.5	327.48	878.564	0	0	0	0	0	0	0	603	903	0
898	3	0	0	0	0	0	0	200	300	0	31.3571	-94.0456	-736.134	18384.3	93998.1	-10862.3	327.692	878.026	0	0	0	0	0	0	0	603	903	0
898	4	0	0	0	0	0	0	200	300	0	32.4252	-92.2145	-737.354	17835	94608.5	-11182.7	328.308	878.812	0	0	0	0	0	0	0	603	903	0
898	5	0	0	0	0	0	0	200	300	0	30.7468	-92.2145	-735.828	18384.3	94974.7	-10999.6	329.072	878.015	0	0	0	0	0	0	0	603	903	0
898	6	0	0	0	0	0	0	200	300	0	30.4416	-92.6723	-737.354	18475.9	94974.7	-10770.7	328.805	877.943	0	0	0	0	0	0	0	603	903	0
898	7	0	0	0	0	0	0	200	300	0	31.3571	-92.2145	-737.049	17926.6	94669.5	-10770.7	328.444	878.678	0	0	0	0	0	0	0	603	903	0
898	8	0	0	0	0	0	0	200	300	0	31.5097	-91.6042	-737.049	18842.1	94730.5	-10587.6	328.527	877.436	0	0	0	0	0	0	0	603	903	0
898	9	0	0	0	0	0	0	200	300	0	32.2726	-89.6205	-738.27	18933.7	95157.8	-10496.1	328.893	877.354	0	0	0	0	0	0	0	603	903	0
899	0	0	0	0	0	0	0	200	300	0	31.9675	-90.9938	-738.575	18933.7	95279.8	-10221.4	329.005	877.365	0	0	0	0	0	0	0	603	903	0
899	1	0	0	0	0	0	0	200	300	0	30.5942	-88.5524	-734.913	19116.8	94547.4	-10541.8	328.651	876.988	0	0	0	0	0	0	0	603	903	0
899	2	0	0	0	0	0	0	200	300	0	31.0519	-89.7731	-735.523	19116.8	95463	-10404.5	329.789	877.009	0	0	0	0	0	0	0	603	903	0
899	3	0	0	0	0	0	0	200	300	0	31.5097	-87.7895	-736.439	19299.9	95279.8	-10267.2	329.379	876.793	0	0	0	0	0	0	0	603	903	0
899	4	0	0	0	0	0	0	200	300	0	30.5942	-86.5688	-737.965	19116.8	95096.8	-10084.1	328.864	877.095	0	0	0	0	0	0	0	603	903	0
899	5	0	0	0	0	0	0	200	300	0	30.7468	-87.4843	-737.66	18659	95035.7	-10404.5	328.834	877.705	0	0	0	0	0	0	0	603	903	0
899	6	0	0	0	0	0	0	200	300	0	31.8149	-86.5688	-737.049	20306.9	95401.9	-10313	329.438	875.448	0	0	0	0	0	0	0	603	903	0
899	7	0	0	0	0	0	0	200	300	0	33.7985	-85.6532	-735.828	19849.2	95524	-10084.1	329.818	876.025	0	0	0	0	0	0	0	603	903	0
899	8	0	0	0	0	0	0	200	300	0	33.0356	-84.7377	-737.049	19574.5	94303.3	-9626.32	327.947	876.442	0	0	0	0	0	0	0	603	903	0
899	9	0	0	0	0	0	0	200	300	0	33.0356	-84.8903	-737.965	19757.6	95401.9	-9855.2	329.277	876.227	0	0	0	0	0	0	0	603	903	0
900	0	0	0	0	0	0	0	200	300	0	31.8149	-83.6696	-735.523	19940.7	94974.7	-9672.09	329.125	875.889	0	0	0	0	0	0	0	603	903	0
900	1	0	0	0	0	0	0	200	300	0	32.5778	-83.517	-734.913	20123.8	94974.7	-9855.2	329.233	875.617	0	0	0	0	0	0	0	603	903	0
900	2	0	0	0	0	0	0	200	300	0	33.1882	-83.0592	-733.997	20123.8	94974.7	-9580.54	329.394	875.583	0	0	0	0	0	0	0	603	903	0
900	3	0	0	0	0	0	0	200	300	0	32.1201	-81.0756	-735.828	20032.3	95218.8	-9580.54	329.404	875.776	0	0	0	0	0	0	0	603	903	0
900	4	0	0	0	0	0	0	200	300	0	32.1201	-83.3644	-735.218	20398.5	95340.9	-9397.43	329.677	875.255	0	0	0	0	0	0	0	603	903	0
900	5	0	0	0	0	0	0	200	300	0	33.1882	-81.8385	-733.692	20947.8	95157.8	-9443.21	329.697	874.449	0	0	0	0	0	0	0	603	903	0
900	6	0	0	0	0	0	0	200	300	0	35.1718	-81.0756	-732.472	20764.7	95096.8	-9168.55	329.83	874.651	0	0	0	0	0	0	0	603	903	0
900	7	0	0	0	0	0	0	200	300	0	33.6459	-80.1601	-733.387	20398.5	95524	-9351.66	330.25	875.186	0	0	0	0	0	0	0	603	903	0
900	8	0	0	0	0	0	0	200	300	0	33.0356	-80.0075	-731.861	20764.7	94913.6	-9214.33	329.688	874.628	0	0	0	0	0	0	0	603	903	0
900	9	0	0	0	0	0	0	200	300	0	33.6459	-79.3971	-730.335	20856.3	94852.6	-9031.22	329.875	874.443	0	0	0	0	0	0	0	603	903	0
901	0	0	0	0	0	0	0	200	300	0	34.2563	-78.329	-730.641	21222.5	95157.8	-9168.55	330.239	873.954	0	0	0	0	0	0	0	603	903	0
901	1	0	0	0	0	0	0	200	300	0	34.2563	-78.1764	-731.861	20581.6	95218.8	-9122.78	330.105	874.878	0	0	0	0	0	0	0	603	903	0
901	2	0	0	0	0	0	0	200	300	0	33.4933	-78.0238	-731.251	21130.9	94669.5	-9214.33	329.462	874.103	0	0	0	0	0	0	0	603	903	0
901	3	0	0	0	0	0	0	200	300	0	32.883	-76.498	-725.758	20856.3	94608.5	-9122.78	330.358	874.263	0	0	0	0	0	0	0	603	903	0
901	4	0	0	0	0	0	0	200	300	0	34.4089	-77.2609	-726.673	21680.2	94913.6	-8985.45	330.614	873.165	0	0	0	0	0	0	0	603	903	0
901	5	0	0	0	0	0	0	200	300	0	35.0192	-75.5824	-727.589	21680.2	94852.6	-8985.45	330.366	873.203	0	0	0	0	0	0	0	603	903	0
901	6	0	0	0	0	0	0	200	300	0	35.477	-74.9721	-723.927	21588.7	94364.3	-8619.24	330.351	873.178	0	0	0	0	0	0	0	603	903	0
901	7	0	0	0	0	0	0	200	300	0	34.4089	-74.9721	-726.673	21954.9	94791.5	-8665.01	330.446	872.787	0	0	0	0	0	0	0	603	903	0
901	8	0	0	0	0	0	0	200	300	0	34.7141	-75.735	-725.453	21863.3	94852.6	-8390.35	330.75	872.862	0	0	0	0	0	0	0	603	903	0
901	9	0	0	0	0	0	0	200	300	0	35.3244	-74.3617	-724.232	22229.6	94059.1	-8802.34	329.874	872.306	0	0	0	0	0	0	0	603	903	0
902	0	0	0	0	0	0	0	200	300	0	35.477	-73.4462	-723.316	22321.1	94486.4	-8665.01	330.629	872.141	0	0	0	0	0	0	0	603	903	0
902	1	0	0	0	0	0	0	200	300	0	34.5615	-74.5143	-722.706	22321.1	94425.3	-8436.13	330.655	872.115	0	0	0	0	0	0	0	603	903	0
902	2	0	0	0	0	0	0	200	300	0	34.8666	-74.0565	-722.096	22321.1	94425.3	-8390.35	330.766	872.089	0	0	0	0	0	0	0	603	903	0
902	3	0	0	0	0	0	0	200	300	0	34.1037	-73.4462	-721.485	22504.2	94059.1	-7978.36	330.369	871.809	0	0	0	0	0	0	0	603	903	0
902	4	0	0	0	0	0	0	200	300	0	35.477	-71.31	-721.18	23236.6	94181.2	-8069.92	330.593	870.78	0	0	0	0	0	0	0	603	903	0
902	5	0	0	0	0	0	0	200	300	0	35.1718	-72.0729	-719.654	22687.3	94364.3	-8115.69	331.125	871.475	0	0	0	0	0	0	0	603	903	0
902	6	0	0	0	0	0	0	200	300	0	34.4089	-71.7677	-717.823	22412.7	93692.9	-7978.36	330.524	871.777	0	0	0	0	0	0	0	603	903	0
902	7	0	0	0	0	0	0	200	300	0	34.1037	-70.6996	-716.602	23145.1	94181.2	-7978.36	331.427	870.702	0	0	0	0	0	0	0	603	903	0
902	8	0	0	0	0	0	0	200	300	0	35.477	-69.6315	-717.518	22870.4	93815	-7703.71	330.749	871.126	0	0	0	0	0	0	0	603	903	0
902	9	0	0	0	0	0	0	200	300	0	36.3925	-70.6996	-715.992	23511.3	93631.9	-7429.05	330.772	870.163	0	0	0	0	0	0	0	603	903	0
903	0	0	0	0	0	0	0	200	300	0	35.0192	-69.4789	-714.161	23419.7	93692.9	-7749.48	331.193	870.207	0	0	0	0	0	0	0	603	903	0
903	1	0	0	0	0	0	0	200	300	0	32.883	-68.1056	-714.161	23694.4	93692.9	-7657.93	331.193	869.822	0	0	0	0	0	0	0	603	903	0
903	2	0	0	0	0	0	0	200	300	0	33.7985	-68.1056	-713.551	23969.1	94181.2	-7520.6	331.99	869.409	0	0	0	0	0	0	0	603	903	0
903	3	0	0	0	0	0	0	200	300	0	35.0192	-68.5634	-714.161	23602.8	92716.4	-7383.27	329.826	869.95	0	0	0	0	0	0	0	603	903	0
903	4	0	0	0	0	0	0	200	300	0	34.4089	-67.0375	-711.72	24335.3	93937.1	-7429.05	331.986	868.808	0	0	0	0	0	0	0	603	903	0
903	5	0	0	0	0	0	0	200	300	0	33.9511	-66.122	-711.109	24060.6	93509.8	-7337.49	331.499	869.165	0	0	0	0	0	0	0	603	903	0
903	6	0	0	0	0	0	0	200	300	0	36.0873	-65.6642	-710.804	24335.3	93326.7	-7520.6	331.297	868.764	0	0	0	0	0	0	0	603	903	0
903	7	0	0	0	0	0	0	200	300	0	33.0356	-65.8168	-709.278	24426.8	93082.6	-7337.49	331.236	868.561	0	0	0	0	0	0	0	603	903	0
903	8	0	0	0	0	0	0	200	300	0	34.5615	-64.7487	-709.278	24609.9	93631.9	-7520.6	332.01	868.303	0	0	0	0	0	0	0	603	903	0
903	9	0	0	0	0	0	0	200	300	0	34.2563	-64.9013	-708.057	24609.9	93021.6	-6925.51	331.376	868.243	0	0	0	0	0	0	0	603	903	0
904	0	0	0	0	0	0	0	200	300	0	34.1037	-63.9857	-708.973	24609.9	92289.1	-7108.61	330.173	868.288	0	0	0	0	0	0	0	603	903	0
904	1	0	0	0	0	0	0	200	300	0	33.4933	-63.6806	-707.447	25159.2	93082.6	-7108.61	331.575	867.437	0	0	0	0	0	0	0	603	903	0
904	2	0	0	0	0	0	0	200	300	0	34.2563	-63.3754	-707.142	25067.7	92655.3	-6879.73	331.028	867.551	0	0	0	0	0	0	0	603	903	0
904	3	0	0	0	0	0	0	200	300	0	33.7985	-62.4599	-704.701	26074.8	92716.4	-6833.95	331.568	865.999	0	0	0	0	0	0	0	603	903	0
904	4	0	0	0	0	0	0	200	300	0	33.6459	-62.1547	-706.226	25525.5	92899.5	-6605.07	331.543	866.857	0	0	0	0	0	0	0	603	903	0
904	5	0	0	0	0	0	0	200	300	0	33.4933	-61.8495	-705.616	24976.1	93143.6	-6788.18	332.003	867.604	0	0	0	0	0	0	0	603	903	0
904	6	0	0	0	0	0	0	200	300	0	34.1037	-62.4599	-703.48	25159.2	92960.5	-6605.07	332.144	867.236	0	0	0	0	0	0	0	603	903	0
904	7	0	0	0	0	0	0	200	300	0	34.1037	-61.2392	-704.09	25983.2	92533.3	-6605.07	331.422	866.097	0	0	0	0	0	0	0	603	903	0
904	8	0	0	0	0	0	0	200	300	0	33.3408	-60.7814	-702.87	25983.2	92472.2	-6467.74	331.564	866.033	0	0	0	0	0	0	0	603	903	0
904	9	0	0	0	0	0	0	200	300	0	35.477	-60.6288	-703.48	25983.2	92472.2	-6147.31	331.45	866.065	0	0	0	0	0	0	0	603	903	0
905	0	0	0	0	0	0	0	200	300	0	32.1201	-60.1711	-701.954	26624.1	92655.3	-6421.97	331.996	865.072	0	0	0	0	0	0	0	603	903	0
905	1	0	0	0	0	0	0	200	300	0	33.4933	-59.5607	-700.428	26166.3	92411.2	-6284.64	331.935	865.642	0	0	0	0	0	0	0	603	903	0
905	2	0	0	0	0	0	0	200	300	0	33.1882	-59.4081	-702.87	26624.1	92594.3	-6284.64	331.738	865.121	0	0	0	0	0	0	0	603	903	0
905	3	0	0	0	0	0	0	200	300	0	32.2726	-58.7978	-701.344	26441	92533.3	-6193.09	331.937	865.3	0	0	0	0	0	0	0	603	903	0
905	4	0	0	0	0	0	0	200	300	0	32.1201	-57.5771	-700.123	26807.2	92045	-6009.98	331.47	864.711	0	0	0	0	0	0	0	603	903	0
905	5	0	0	0	0	0	0	200	300	0	32.7304	-57.8822	-694.935	27356.5	91861.9	-6284.64	332.188	863.635	0	0	0	0	0	0	0	603	903	0
905	6	0	0	0	0	0	0	200	300	0	32.7304	-56.8141	-695.85	27539.6	91739.8	-6101.53	331.838	863.423	0	0	0	0	0	0	0	603	903	0
905	7	0	0	0	0	0	0	200	300	0	31.2045	-58.0348	-695.545	27173.4	91922.9	-6193.09	332.159	863.932	0	0	0	0	0	0	0	603	903	0
905	8	0	0	0	0	0	0	200	300	0	33.1882	-56.9667	-697.376	26898.7	91983.9	-5826.87	331.9	864.429	0	0	0	0	0	0	0	603	903	0
905	9	0	0	0	0	0	0	200	300	0	31.5097	-57.5771	-696.461	27631.2	92228.1	-5643.77	332.424	863.326	0	0	0	0	0	0	0	603	903	0
906	0	0	0	0	0	0	0	200	300	0	31.5097	-56.2038	-695.85	27539.6	92289.1	-5964.2	332.628	863.423	0	0	0	0	0	0	0	603	903	0
906	1	0	0	0	0	0	0	200	300	0	31.2045	-55.746	-697.376	27631.2	91861.9	-5735.32	331.725	863.378	0	0	0	0	0	0	0	603	903	0
906	2	0	0	0	0	0	0	200	300	0	30.7468	-56.9667	-694.935	27997.4	91800.9	-5781.1	332.1	862.712	0	0	0	0	0	0	0	603	903	0
906	3	0	0	0	0	0	0	200	300	0	31.3571	-55.5934	-693.714	27997.4	92106	-5689.55	332.772	862.641	0	0	0	0	0	0	0	603	903	0
906	4	0	0	0	0	0	0	200	300	0	31.6623	-54.2201	-694.935	28546.7	92045	-5735.32	332.451	861.922	0	0	0	0	0	0	0	603	903	0
906	5	0	0	0	0	0	0	200	300	0	31.6623	-54.3727	-695.545	28272	91617.7	-5186.01	331.721	862.353	0	0	0	0	0	0	0	603	903	0
906	6	0	0	0	0	0	0	200	300	0	31.9675	-54.5253	-694.019	28729.8	91739.8	-5506.44	332.186	861.604	0	0	0	0	0	0	0	603	903	0
906	7	0	0	0	0	0	0	200	300	0	30.7468	-54.5253	-691.883	28638.2	92228.1	-5460.66	333.3	861.608	0	0	0	0	0	0	0	603	903	0
906	8	0	0	0	0	0	0	200	300	0	31.2045	-53.3046	-692.188	29187.6	91373.6	-5323.33	332.007	860.833	0	0	0	0	0	0	0	603	903	0
906	9	0	0	0	0	0	0	200	300	0	31.3571	-53.3046	-692.494	28638.2	91495.6	-5369.11	332.125	861.645	0	0	0	0	0	0	0	603	903	0
907	0	0	0	0	0	0	0	200	300	0	31.9675	-53.3046	-691.883	29462.2	91495.6	-5048.68	332.241	860.417	0	0	0	0	0	0	0	603	903	0
907	1	0	0	0	0	0	0	200	300	0	31.0519	-52.0839	-691.883	29279.1	91617.7	-5048.68	332.418	860.682	0	0	0	0	0	0	0	603	903	0
907	2	0	0	0	0	0	0	200	300	0	32.4252	-52.6942	-688.831	29370.7	91312.6	-5231.78	332.562	860.362	0	0	0	0	0	0	0	603	903	0
907	3	0	0	0	0	0	0	200	300	0	30.289	-51.6261	-690.052	30011.5	91190.5	-5277.56	332.15	859.508	0	0	0	0	0	0	0	603	903	0
907	4	0	0	0	0	0	0	200	300	0	31.0519	-52.3891	-688.221	30194.6	91251.5	-4911.35	332.59	859.127	0	0	0	0	0	0	0	603	903	0
907	5	0	0	0	0	0	0	200	300	0	31.0519	-51.1684	-688.831	29736.9	91007.4	-4865.57	332.118	859.83	0	0	0	0	0	0	0	603	903	0
907	6	0	0	0	0	0	0	200	300	0	29.8312	-51.0158	-688.221	29920	90824.3	-5186.01	331.97	859.526	0	0	0	0	0	0	0	603	903	0
907	7	0	0	0	0	0	0	200	300	0	29.9838	-50.8632	-689.137	30011.5	91251.5	-4865.57	332.414	859.451	0	0	0	0	0	0	0	603	903	0
907	8	0	0	0	0	0	0	200	300	0	31.3571	-50.4054	-686.695	30835.5	91251.5	-4865.57	332.885	858.096	0	0	0	0	0	0	0	603	903	0
907	9	0	0	0	0	0	0	200	300	0	30.7468	-50.2528	-686.39	30194.6	91068.4	-4774.02	332.677	859.01	0	0	0	0	0	0	0	603	903	0
908	0	0	0	0	0	0	0	200	300	0	30.1364	-49.0321	-686.085	30560.9	90763.2	-4865.57	332.292	858.456	0	0	0	0	0	0	0	603	903	0
908	1	0	0	0	0	0	0	200	300	0	30.289	-49.4899	-686.39	31201.7	91007.4	-4545.14	332.588	857.542	0	0	0	0	0	0	0	603	903	0
908	2	0	0	0	0	0	0	200	300	0	31.6623	-49.0321	-684.864	31110.2	90213.9	-4453.58	331.725	857.575	0	0	0	0	0	0	0	603	903	0
908	3	0	0	0	0	0	0	200	300	0	30.7468	-48.727	-683.643	31842.6	90763.2	-4453.58	332.764	856.422	0	0	0	0	0	0	0	603	903	0
908	4	0	0	0	0	0	0	200	300	0	29.6786	-48.4218	-683.643	30835.5	90885.3	-4590.91	332.943	857.895	0	0	0	0	0	0	0	603	903	0
908	5	0	0	0	0	0	0	200	300	0	29.2209	-47.5063	-684.254	31201.7	90885.3	-4453.58	332.824	857.4	0	0	0	0	0	0	0	603	903	0
908	6	0	0	0	0	0	0	200	300	0	30.7468	-48.8795	-682.728	31751	90580.1	-4407.81	332.674	856.494	0	0	0	0	0	0	0	603	903	0
908	7	0	0	0	0	0	0	200	300	0	31.2045	-47.0485	-680.286	32025.7	90458.1	-4453.58	332.971	855.923	0	0	0	0	0	0	0	603	903	0
908	8	0	0	0	0	0	0	200	300	0	30.1364	-47.5063	-681.812	31384.8	90763.2	-4407.81	333.121	856.969	0	0	0	0	0	0	0	603	903	0
908	9	0	0	0	0	0	0	200	300	0	32.5778	-46.4381	-681.202	31659.5	89786.7	-4133.15	331.806	856.524	0	0	0	0	0	0	0	603	903	0
909	0	0	0	0	0	0	0	200	300	0	32.4252	-46.7433	-681.202	32117.2	90274.9	-4316.25	332.523	855.852	0	0	0	0	0	0	0	603	903	0
909	1	0	0	0	0	0	0	200	300	0	33.1882	-47.0485	-681.812	32208.8	90580.1	-3995.82	332.852	855.76	0	0	0	0	0	0	0	603	903	0
909	2	0	0	0	0	0	0	200	300	0	30.289	-45.8278	-678.15	32208.8	90519.1	-3950.04	333.479	855.505	0	0	0	0	0	0	0	603	903	0
909	3	0	0	0	0	0	0	200	300	0	31.5097	-46.133	-677.54	32391.9	90030.8	-3812.72	332.879	855.192	0	0	0	0	0	0	0	603	903	0
909	4	0	0	0	0	0	0	200	300	0	30.1364	-45.6752	-679.066	32941.2	89847.7	-3812.72	332.311	854.49	0	0	0	0	0	0	0	603	903	0
909	5	0	0	0	0	0	0	200	300	0	31.2045	-45.37	-678.15	33124.3	89969.8	-3812.72	332.669	854.155	0	0	0	0	0	0	0	603	903	0
909	6	0	0	0	0	0	0	200	300	0	31.2045	-43.9967	-676.624	32666.6	90458.1	-3583.83	333.69	854.721	0	0	0	0	0	0	0	603	903	0
909	7	0	0	0	0	0	0	200	300	0	30.1364	-44.6071	-676.319	32666.6	89725.7	-3538.06	332.668	854.699	0	0	0	0	0	0	0	603	903	0
909	8	0	0	0	0	0	0	200	300	0	30.7468	-44.3019	-677.54	33032.8	90519.1	-3583.83	333.6	854.246	0	0	0	0	0	0	0	603	903	0
909	9	0	0	0	0	0	0	200	300	0	31.6623	-43.6916	-677.235	33215.9	90152.9	-3629.61	333.119	853.954	0	0	0	0	0	0	0	603	903	0
910	0	0	0	0	0	0	0	200	300	0	31.5097	-43.9967	-674.488	32758.1	89786.7	-3583.83	333.118	854.433	0	0	0	0	0	0	0	603	903	0
910	1	0	0	0	0	0	0	200	300	0	30.7468	-42.776	-675.709	33490.5	89542.5	-3583.83	332.516	853.437	0	0	0	0	0	0	0	603	903	0
910	2	0	0	0	0	0	0	200	300	0	29.9838	-42.4709	-675.404	33856.8	89847.7	-3309.18	333.028	852.872	0	0	0	0	0	0	0	603	903	0
910	3	0	0	0	0	0	0	200	300	0	31.6623	-42.6234	-675.404	33948.3	90580.1	-3263.4	334.113	852.736	0	0	0	0	0	0	0	603	903	0
910	4	0	0	0	0	0	0	200	300	0	31.0519	-42.1657	-673.878	34223	89786.7	-3309.18	333.239	852.215	0	0	0	0	0	0	0	603	903	0
910	5	0	0	0	0	0	0	200	300	0	30.7468	-41.0976	-672.962	33948.3	89969.8	-3126.07	333.692	852.554	0	0	0	0	0	0	0	603	903	0
910	6	0	0	0	0	0	0	200	300	0	30.5942	-41.2502	-674.183	33948.3	89603.6	-3126.07	332.907	852.645	0	0	0	0	0	0	0	603	903	0
910	7	0	0	0	0	0	0	200	300	0	31.0519	-40.6398	-674.488	34772.3	89359.4	-3126.07	332.485	851.446	0	0	0	0	0	0	0	603	903	0
910	8	0	0	0	0	0	0	200	300	0	30.7468	-40.182	-673.267	34314.5	89237.4	-3171.85	332.544	852.033	0	0	0	0	0	0	0	603	903	0
910	9	0	0	0	0	0	0	200	300	0	29.8312	-40.0294	-670.521	34589.2	89115.3	-3080.29	332.905	851.414	0	0	0	0	0	0	0	603	903	0
911	0	0	0	0	0	0	0	200	300	0	31.9675	-38.5036	-670.216	34406.1	89298.4	-2668.31	333.238	851.664	0	0	0	0	0	0	0	603	903	0
911	1	0	0	0	0	0	0	200	300	0	29.9838	-38.8087	-671.742	34772.3	89176.3	-2714.08	332.754	851.236	0	0	0	0	0	0	0	603	903	0
911	2	0	0	0	0	0	0	200	300	0	31.6623	-40.182	-672.352	34955.4	89603.6	-2210.54	333.269	851.01	0	0	0	0	0	0	0	603	903	0
911	3	0	0	0	0	0	0	200	300	0	31.0519	-38.8087	-670.521	35321.6	89725.7	-2302.09	333.815	850.322	0	0	0	0	0	0	0	603	903	0
911	4	0	0	0	0	0	0	200	300	0	32.1201	-38.1984	-670.216	35138.5	89481.5	-2256.32	333.512	850.571	0	0	0	0	0	0	0	603	903	0
911	5	0	0	0	0	0	0	200	300	0	29.9838	-37.588	-671.436	35321.6	89115.3	-2485.2	332.723	850.394	0	0	0	0	0	0	0	603	903	0
911	6	0	0	0	0	0	0	200	300	0	30.1364	-37.4355	-671.436	35230.1	89115.3	-2530.98	332.723	850.53	0	0	0	0	0	0	0	603	903	0
911	7	0	0	0	0	0	0	200	300	0	30.8994	-37.2829	-669.911	35046.9	88932.2	-2210.54	332.752	850.684	0	0	0	0	0	0	0	603	903	0
911	8	0	0	0	0	0	0	200	300	0	29.5261	-36.5199	-669.3	35779.4	88871.2	-2347.87	332.782	849.542	0	0	0	0	0	0	0	603	903	0
911	9	0	0	0	0	0	0	200	300	0	29.2209	-36.2148	-671.131	35779.4	89603.6	-1844.33	333.511	849.688	0	0	0	0	0	0	0	603	903	0
912	0	0	0	0	0	0	0	200	300	0	30.1364	-36.0622	-671.131	36328.7	89237.4	-2118.99	332.966	848.87	0	0	0	0	0	0	0	603	903	0
912	1	0	0	0	0	0	0	200	300	0	28.9157	-36.5199	-669.3	35870.9	89115.3	-1981.66	333.147	849.405	0	0	0	0	0	0	0	603	903	0
912	2	0	0	0	0	0	0	200	300	0	29.2209	-35.757	-668.69	36145.6	88871.2	-2027.44	332.903	848.946	0	0	0	0	0	0	0	603	903	0
912	3	0	0	0	0	0	0	200	300	0	28.4579	-34.994	-670.216	36145.6	89298.4	-1935.88	333.238	849.069	0	0	0	0	0	0	0	603	903	0
912	4	0	0	0	0	0	0	200	300	0	30.289	-34.3837	-666.248	36511.8	89359.4	-1661.23	334.123	848.198	0	0	0	0	0	0	0	603	903	0
912	5	0	0	0	0	0	0	200	300	0	29.3735	-33.6208	-669.605	37061.1	88138.7	-1707	331.628	847.652	0	0	0	0	0	0	0	603	903	0
912	6	0	0	0	0	0	0	200	300	0	28.3054	-34.3837	-667.774	36603.3	88993.2	-1752.78	333.268	848.186	0	0	0	0	0	0	0	603	903	0
912	7	0	0	0	0	0	0	200	300	0	29.9838	-33.4682	-668.079	36694.9	89054.2	-1890.11	333.299	848.074	0	0	0	0	0	0	0	603	903	0
912	8	0	0	0	0	0	0	200	300	0	29.2209	-33.6208	-668.69	36694.9	88688	-1707	332.63	848.124	0	0	0	0	0	0	0	603	903	0
912	9	0	0	0	0	0	0	200	300	0	29.3735	-33.163	-668.69	37244.2	88749.1	-1340.79	332.721	847.303	0	0	0	0	0	0	0	603	903	0
913	0	0	0	0	0	0	0	200	300	0	28.0002	-32.5526	-667.164	37152.6	89115.3	-1478.12	333.573	847.313	0	0	0	0	0	0	0	603	903	0
913	1	0	0	0	0	0	0	200	300	0	26.7795	-31.9423	-668.079	36969.5	89054.2	-1157.69	333.299	847.663	0	0	0	0	0	0	0	603	903	0
913	2	0	0	0	0	0	0	200	300	0	26.7795	-31.3319	-668.69	37610.4	88505	-1157.69	332.356	846.755	0	0	0	0	0	0	0	603	903	0
913	3	0	0	0	0	0	0	200	300	0	27.695	-31.1794	-668.995	37518.9	88932.2	-974.58	332.934	846.918	0	0	0	0	0	0	0	603	903	0
913	4	0	0	0	0	0	0	200	300	0	27.695	-30.1112	-667.469	37335.8	88871.2	-1020.36	333.147	847.064	0	0	0	0	0	0	0	603	903	0
913	5	0	0	0	0	0	0	200	300	0	26.1691	-29.9586	-666.248	37244.2	89420.5	-699.922	334.215	847.099	0	0	0	0	0	0	0	603	903	0
913	6	0	0	0	0	0	0	200	300	0	27.0847	-28.2802	-667.164	37976.6	88382.9	-837.251	332.476	846.078	0	0	0	0	0	0	0	603	903	0
913	7	0	0	0	0	0	0	200	300	0	26.6269	-28.1276	-664.723	38342.8	88932.2	-745.698	333.788	845.318	0	0	0	0	0	0	0	603	903	0
913	8	0	0	0	0	0	0	200	300	0	26.6269	-29.0431	-666.859	38068.2	88810.1	-516.816	333.177	845.914	0	0	0	0	0	0	0	603	903	0
913	9	0	0	0	0	0	0	200	300	0	25.2536	-28.4328	-667.164	38434.4	88505	-745.698	332.659	845.391	0	0	0	0	0	0	0	603	903	0
914	0	0	0	0	0	0	0	200	300	0	25.864	-27.975	-667.164	38342.8	88443.9	-425.263	332.567	845.529	0	0	0	0	0	0	0	603	903	0
914	1	0	0	0	0	0	0	200	300	0	26.0165	-27.2121	-668.385	38800.6	88688	-242.158	332.69	844.949	0	0	0	0	0	0	0	603	903	0
914	2	0	0	0	0	0	0	200	300	0	26.3217	-27.0595	-667.774	38342.8	88688	-562.593	332.811	845.581	0	0	0	0	0	0	0	603	903	0
914	3	0	0	0	0	0	0	200	300	0	25.101	-25.9914	-666.859	38617.5	87772.5	-333.711	331.621	845.091	0	0	0	0	0	0	0	603	903	0
914	4	0	0	0	0	0	0	200	300	0	24.6432	-25.381	-665.943	39258.4	88810.1	-379.487	333.36	844.049	0	0	0	0	0	0	0	603	903	0
914	5	0	0	0	0	0	0	200	300	0	25.864	-25.2284	-667.469	38983.7	88749.1	32.5004	332.964	844.595	0	0	0	0	0	0	0	603	903	0
914	6	0	0	0	0	0	0	200	300	0	24.9484	-24.6181	-667.774	38892.2	88505	307.159	332.537	844.759	0	0	0	0	0	0	0	603	903	0
914	7	0	0	0	0	0	0	200	300	0	23.4225	-24.3129	-667.164	39441.5	88505	261.382	332.659	843.882	0	0	0	0	0	0	0	603	903	0
914	8	0	0	0	0	0	0	200	300	0	26.3217	-24.1603	-665.943	39349.9	87589.4	261.382	331.527	843.911	0	0	0	0	0	0	0	603	903	0
914	9	0	0	0	0	0	0	200	300	0	22.8122	-23.0922	-666.859	39441.5	88443.9	215.606	332.628	843.855	0	0	0	0	0	0	0	603	903	0
915	0	0	0	0	0	0	0	200	300	0	25.2536	-22.6344	-666.859	39349.9	88505	627.593	332.719	843.992	0	0	0	0	0	0	0	603	903	0
915	1	0	0	0	0	0	0	200	300	0	23.8803	-21.4137	-665.943	39533	88810.1	444.488	333.36	843.636	0	0	0	0	0	0	0	603	903	0
915	2	0	0	0	0	0	0	200	300	0	24.0329	-21.1086	-664.112	39441.5	88688	581.817	333.544	843.61	0	0	0	0	0	0	0	603	903	0
915	3	0	0	0	0	0	0	200	300	0	23.27	-21.2611	-665.943	40265.4	88260.8	536.04	332.535	842.536	0	0	0	0	0	0	0	603	903	0
915	4	0	0	0	0	0	0	200	300	0	23.5751	-19.4301	-665.638	39807.7	88321.8	810.699	332.688	843.196	0	0	0	0	0	0	0	603	903	0
915	5	0	0	0	0	0	0	200	300	0	23.4225	-20.193	-666.248	40723.2	88749.1	764.922	333.207	841.877	0	0	0	0	0	0	0	603	903	0
915	6	0	0	0	0	0	0	200	300	0	22.507	-20.4982	-665.638	40357	88566	856.475	333.054	842.371	0	0	0	0	0	0	0	603	903	0
915	7	0	0	0	0	0	0	200	300	0	24.1855	-19.8878	-666.554	40540.1	88443.9	948.028	332.688	842.18	0	0	0	0	0	0	0	603	903	0
915	8	0	0	0	0	0	0	200	300	0	22.3544	-18.8197	-667.164	40814.8	88993.2	993.804	333.39	841.824	0	0	0	0	0	0	0	603	903	0
915	9	0	0	0	0	0	0	200	300	0	23.8803	-18.9723	-667.164	40997.9	88566	1360.02	332.75	841.549	0	0	0	0	0	0	0	603	903	0
916	0	0	0	0	0	0	0	200	300	0	23.1174	-17.1413	-665.028	41547.2	87833.5	1131.13	332.075	840.526	0	0	0	0	0	0	0	603	903	0
916	1	0	0	0	0	0	0	200	300	0	22.6596	-17.1413	-666.554	41089.4	88871.2	1360.02	333.329	841.355	0	0	0	0	0	0	0	603	903	0
916	2	0	0	0	0	0	0	200	300	0	24.3381	-16.5309	-668.995	41089.4	88749.1	1085.36	332.66	841.58	0	0	0	0	0	0	0	603	903	0
916	3	0	0	0	0	0	0	200	300	0	22.0493	-16.9887	-667.164	41821.9	88566	1360.02	332.75	840.314	0	0	0	0	0	0	0	603	903	0
916	4	0	0	0	0	0	0	200	300	0	22.507	-16.3783	-666.859	42005	88566	1634.67	332.811	840.011	0	0	0	0	0	0	0	603	903	0
916	5	0	0	0	0	0	0	200	300	0	22.2018	-15.6154	-666.554	41547.2	88810.1	1405.79	333.238	840.669	0	0	0	0	0	0	0	603	903	0
916	6	0	0	0	0	0	0	200	300	0	21.7441	-15.005	-668.69	41821.9	89054.2	1772	333.177	840.457	0	0	0	0	0	0	0	603	903	0
916	7	0	0	0	0	0	0	200	300	0	21.5915	-14.8524	-668.69	42371.2	88627	1726.23	332.538	839.636	0	0	0	0	0	0	0	603	903	0
916	8	0	0	0	0	0	0	200	300	0	22.2018	-14.3947	-667.774	42737.4	89115.3	1863.56	333.451	839	0	0	0	0	0	0	0	603	903	0
916	9	0	0	0	0	0	0	200	300	0	22.8122	-13.7843	-667.164	43012	89115.3	1909.33	333.573	838.53	0	0	0	0	0	0	0	603	903	0
917	0	0	0	0	0	0	0	200	300	0	22.3544	-13.9369	-666.859	42371.2	88749.1	1863.56	333.085	839.462	0	0	0	0	0	0	0	603	903	0
917	1	0	0	0	0	0	0	200	300	0	24.4907	-13.174	-667.774	42554.3	88871.2	2000.88	333.086	839.275	0	0	0	0	0	0	0	603	903	0
917	2	0	0	0	0	0	0	200	300	0	21.2863	-12.7162	-666.554	43012	88932.2	2000.88	333.421	838.471	0	0	0	0	0	0	0	603	903	0
917	3	0	0	0	0	0	0	200	300	0	22.507	-12.2585	-664.417	43103.6	89115.3	2092.44	334.126	838.126	0	0	0	0	0	0	0	603	903	0
917	4	0	0	0	0	0	0	200	300	0	22.0493	-11.8007	-665.333	43561.3	88077.7	2183.99	332.381	837.527	0	0	0	0	0	0	0	603	903	0
917	5	0	0	0	0	0	0	200	300	0	21.2863	-11.9533	-667.774	43012	89359.4	2321.32	333.817	838.589	0	0	0	0	0	0	0	603	903	0
917	6	0	0	0	0	0	0	200	300	0	21.4389	-11.6481	-668.69	43836	89359.4	2458.65	333.634	837.445	0	0	0	0	0	0	0	603	903	0
917	7	0	0	0	0	0	0	200	300	0	22.0493	-11.1903	-667.164	43286.7	88932.2	2367.1	333.299	838.118	0	0	0	0	0	0	0	603	903	0
917	8	0	0	0	0	0	0	200	300	0	22.507	-10.1222	-666.859	44202.2	88505	2733.31	332.719	836.716	0	0	0	0	0	0	0	603	903	0
917	9	0	0	0	0	0	0	200	300	0	21.4389	-9.51187	-668.69	43927.6	89176.3	2595.98	333.36	837.308	0	0	0	0	0	0	0	603	903	0
918	0	0	0	0	0	0	0	200	300	0	23.1174	-10.1222	-668.385	44110.7	89176.3	2595.98	333.421	837.004	0	0	0	0	0	0	0	603	903	0
918	1	0	0	0	0	0	0	200	300	0	21.1337	-9.66446	-667.164	44476.9	88932.2	2504.42	333.299	836.334	0	0	0	0	0	0	0	603	903	0
918	2	0	0	0	0	0	0	200	300	0	21.8967	-9.66446	-666.859	44751.5	88993.2	2733.31	333.451	835.892	0	0	0	0	0	0	0	603	903	0
918	3	0	0	0	0	0	0	200	300	0	22.3544	-9.35928	-669.3	44660	89054.2	2733.31	333.056	836.274	0	0	0	0	0	0	0	603	903	0
918	4	0	0	0	0	0	0	200	300	0	21.1337	-8.59634	-665.943	44751.5	89054.2	3282.62	333.727	835.8	0	0	0	0	0	0	0	603	903	0
918	5	0	0	0	0	0	0	200	300	0	21.2863	-7.8334	-668.385	45026.2	88871.2	2962.19	332.964	835.634	0	0	0	0	0	0	0	603	903	0
918	6	0	0	0	0	0	0	200	300	0	22.507	-7.98599	-664.417	45575.5	89237.4	3053.74	334.309	834.405	0	0	0	0	0	0	0	603	903	0
918	7	0	0	0	0	0	0	200	300	0	22.9648	-8.13858	-664.723	45575.5	89603.6	3236.85	334.798	834.437	0	0	0	0	0	0	0	603	903	0
918	8	0	0	0	0	0	0	200	300	0	21.5915	-8.44376	-665.333	45392.4	88932.2	2962.19	333.666	834.775	0	0	0	0	0	0	0	603	903	0
918	9	0	0	0	0	0	0	200	300	0	22.6596	-7.52823	-668.385	45300.9	89115.3	3191.07	333.329	835.223	0	0	0	0	0	0	0	603	903	0
919	0	0	0	0	0	0	0	200	300	0	22.2018	-6.46011	-667.164	46216.4	89298.4	3099.52	333.848	833.727	0	0	0	0	0	0	0	603	903	0
919	1	0	0	0	0	0	0	200	300	0	23.8803	-6.15494	-667.469	46307.9	89298.4	3236.85	333.787	833.622	0	0	0	0	0	0	0	603	903	0
919	2	0	0	0	0	0	0	200	300	0	22.2018	-6.00235	-669.3	45941.7	89115.3	3191.07	333.147	834.359	0	0	0	0	0	0	0	603	903	0
919	3	0	0	0	0	0	0	200	300	0	21.2863	-5.54459	-668.995	46674.1	89420.5	3419.95	333.664	833.233	0	0	0	0	0	0	0	603	903	0
919	4	0	0	0	0	0	0	200	300	0	22.2018	-6.30753	-667.774	46674.1	89908.7	3465.73	334.639	833.105	0	0	0	0	0	0	0	603	903	0
919	5	0	0	0	0	0	0	200	300	0	22.8122	-5.392	-668.995	46857.2	89237.4	3603.06	333.39	832.959	0	0	0	0	0	0	0	603	903	0
919	6	0	0	0	0	0	0	200	300	0	23.27	-4.93423	-668.69	46674.1	89359.4	3648.83	333.634	833.201	0	0	0	0	0	0	0	603	903	0
919	7	0	0	0	0	0	0	200	300	0	22.507	-4.17129	-670.521	46948.8	89298.4	3786.16	333.178	832.982	0	0	0	0	0	0	0	603	903	0
919	8	0	0	0	0	0	0	200	300	0	22.6596	-4.47647	-667.164	47589.7	89542.5	3603.06	334.214	831.669	0	0	0	0	0	0	0	603	903	0
919	9	0	0	0	0	0	0	200	300	0	23.5751	-4.01871	-668.385	47589.7	89298.4	3831.94	333.603	831.799	0	0	0	0	0	0	0	603	903	0
920	0	0	0	0	0	0	0	200	300	0	23.4225	-3.56094	-665.333	47589.7	89603.6	3740.39	334.675	831.472	0	0	0	0	0	0	0	603	903	0
920	1	0	0	0	0	0	0	200	300	0	22.507	-5.392	-667.774	47772.8	89786.7	4243.93	334.457	831.46	0	0	0	0	0	0	0	603	903	0
920	2	0	0	0	0	0	0	200	300	0	22.9648	-4.32388	-670.521	47681.2	89542.5	4015.04	333.542	831.889	0	0	0	0	0	0	0	603	903	0
920	3	0	0	0	0	0	0	200	300	0	23.5751	-3.25577	-670.826	48413.6	89664.6	4106.6	333.663	830.83	0	0	0	0	0	0	0	603	903	0
920	4	0	0	0	0	0	0	200	300	0	23.8803	-2.18765	-669.911	49054.5	89908.7	4289.7	334.21	829.775	0	0	0	0	0	0	0	603	903	0
920	5	0	0	0	0	0	0	200	300	0	22.507	-2.34024	-670.521	48963	89542.5	4518.58	333.542	829.978	0	0	0	0	0	0	0	603	903	0
920	6	0	0	0	0	0	0	200	300	0	23.4225	-2.18765	-672.352	48688.3	89725.7	4427.03	333.45	830.585	0	0	0	0	0	0	0	603	903	0
920	7	0	0	0	0	0	0	200	300	0	24.3381	-1.72989	-670.216	49146.1	89603.6	4289.7	333.694	829.671	0	0	0	0	0	0	0	603	903	0
920	8	0	0	0	0	0	0	200	300	0	26.0165	-1.42471	-670.216	49237.6	89786.7	4381.26	333.967	829.535	0	0	0	0	0	0	0	603	903	0
920	9	0	0	0	0	0	0	200	300	0	24.7958	-0.966949	-671.742	49695.4	89664.6	4427.03	333.481	829.02	0	0	0	0	0	0	0	603	903	0
921	0	0	0	0	0	0	0	200	300	0	23.5751	-1.27212	-671.742	49420.7	89908.7	4381.26	333.844	829.429	0	0	0	0	0	0	0	603	903	0
921	1	0	0	0	0	0	0	200	300	0	24.4907	-1.11954	-671.742	50061.6	90152.9	4518.58	334.208	828.475	0	0	0	0	0	0	0	603	903	0
921	2	0	0	0	0	0	0	200	300	0	24.3381	0.101166	-671.131	50244.7	90397	4518.58	334.693	828.134	0	0	0	0	0	0	0	603	903	0
921	3	0	0	0	0	0	0	200	300	0	25.5588	-0.0514216	-672.657	50061.6	89908.7	4930.57	333.662	828.576	0	0	0	0	0	0	0	603	903	0
921	4	0	0	0	0	0	0	200	300	0	24.4907	0.406342	-671.742	50061.6	89786.7	4564.36	333.663	828.475	0	0	0	0	0	0	0	603	903	0
921	5	0	0	0	0	0	0	200	300	0	23.7277	0.406342	-671.131	49970	90213.9	4839.02	334.421	828.544	0	0	0	0	0	0	0	603	903	0
921	6	0	0	0	0	0	0	200	300	0	25.7114	1.47446	-668.69	50977.1	90152.9	4655.91	334.82	826.766	0	0	0	0	0	0	0	603	903	0
921	7	0	0	0	0	0	0	200	300	0	27.0847	1.62705	-671.742	51618	89237.4	4930.57	332.845	826.158	0	0	0	0	0	0	0	603	903	0
921	8	0	0	0	0	0	0	200	300	0	25.2536	1.16928	-670.521	51068.7	90336	5022.12	334.725	826.837	0	0	0	0	0	0	0	603	903	0
921	9	0	0	0	0	0	0	200	300	0	24.6432	0.864106	-674.183	51343.3	90336	5113.68	333.993	826.844	0	0	0	0	0	0	0	603	903	0
922	0	0	0	0	0	0	0	200	300	0	24.9484	2.38998	-669.911	51709.5	90397	5434.11	334.939	825.811	0	0	0	0	0	0	0	603	903	0
922	1	0	0	0	0	0	0	200	300	0	26.1691	3.00034	-672.047	52350.4	90152.9	5342.56	334.147	825.103	0	0	0	0	0	0	0	603	903	0
922	2	0	0	0	0	0	0	200	300	0	27.3898	2.54257	-671.436	52075.8	90580.1	5571.44	334.905	825.441	0	0	0	0	0	0	0	603	903	0
922	3	0	0	0	0	0	0	200	300	0	26.6269	1.47446	-672.352	52350.4	90519.1	5434.11	334.631	825.138	0	0	0	0	0	0	0	603	903	0
922	4	0	0	0	0	0	0	200	300	0	25.101	2.08481	-670.216	52167.3	90519.1	5342.56	335.06	825.163	0	0	0	0	0	0	0	603	903	0
922	5	0	0	0	0	0	0	200	300	0	26.0165	2.54257	-674.488	52808.2	90397	5525.67	334.023	824.706	0	0	0	0	0	0	0	603	903	0
922	6	0	0	0	0	0	0	200	300	0	26.4743	4.6788	-674.793	53449	90580.1	5571.44	334.234	823.792	0	0	0	0	0	0	0	603	903	0
922	7	0	0	0	0	0	0	200	300	0	28.0002	2.69516	-676.319	53449	90458.1	5800.32	333.751	823.971	0	0	0	0	0	0	0	603	903	0
922	8	0	0	0	0	0	0	200	300	0	25.864	3.15292	-673.878	53540.6	90519.1	5525.67	334.326	823.549	0	0	0	0	0	0	0	603	903	0
922	9	0	0	0	0	0	0	200	300	0	25.4062	4.22104	-673.573	53723.7	90946.4	5662.99	335.021	823.241	0	0	0	0	0	0	0	603	903	0
923	0	0	0	0	0	0	0	200	300	0	25.4062	5.89951	-674.488	54089.9	90519.1	5662.99	334.204	822.806	0	0	0	0	0	0	0	603	903	0
923	1	0	0	0	0	0	0	200	300	0	26.4743	4.06845	-676.319	54364.6	90702.2	5662.99	334.112	822.617	0	0	0	0	0	0	0	603	903	0
923	2	0	0	0	0	0	0	200	300	0	27.0847	5.28915	-676.624	54913.9	90702.2	5708.77	334.051	821.841	0	0	0	0	0	0	0	603	903	0
923	3	0	0	0	0	0	0	200	300	0	25.4062	6.50986	-676.624	54730.8	90885.3	5891.88	334.322	822.112	0	0	0	0	0	0	0	603	903	0
923	4	0	0	0	0	0	0	200	300	0	27.695	6.81503	-679.371	54456.1	90763.2	5800.32	333.599	822.843	0	0	0	0	0	0	0	603	903	0
923	5	0	0	0	0	0	0	200	300	0	25.2536	7.12021	-678.761	55463.2	90885.3	5800.32	333.899	821.288	0	0	0	0	0	0	0	603	903	0
923	6	0	0	0	0	0	0	200	300	0	27.2372	6.66245	-677.845	55280.1	91190.5	6074.98	334.53	821.447	0	0	0	0	0	0	0	603	903	0
923	7	0	0	0	0	0	0	200	300	0	27.0847	7.42538	-680.592	55280.1	90580.1	6166.53	333.09	821.776	0	0	0	0	0	0	0	603	903	0
923	8	0	0	0	0	0	0	200	300	0	25.864	7.73056	-680.286	55829.4	91129.4	6120.76	333.957	820.932	0	0	0	0	0	0	0	603	903	0
923	9	0	0	0	0	0	0	200	300	0	26.3217	7.73056	-678.761	55921	91190.5	6349.64	334.349	820.613	0	0	0	0	0	0	0	603	903	0
924	0	0	0	0	0	0	0	200	300	0	26.9321	6.96762	-680.592	56836.5	91434.6	6349.64	334.346	819.49	0	0	0	0	0	0	0	603	903	0
924	1	0	0	0	0	0	0	200	300	0	28.3054	8.95126	-679.981	56653.4	91312.6	6349.64	334.287	819.684	0	0	0	0	0	0	0	603	903	0
924	2	0	0	0	0	0	0	200	300	0	27.5424	7.88315	-682.423	56470.3	91678.8	6532.75	334.343	820.25	0	0	0	0	0	0	0	603	903	0
924	3	0	0	0	0	0	0	200	300	0	26.7795	9.10385	-683.033	56653.4	91739.8	6715.85	334.312	820.056	0	0	0	0	0	0	0	603	903	0
924	4	0	0	0	0	0	0	200	300	0	26.3217	9.40903	-683.338	57660.5	91068.4	6898.96	333.27	818.62	0	0	0	0	0	0	0	603	903	0
924	5	0	0	0	0	0	0	200	300	0	26.7795	9.40903	-683.033	57843.6	91434.6	6624.3	333.866	818.314	0	0	0	0	0	0	0	603	903	0
924	6	0	0	0	0	0	0	200	300	0	27.695	10.3246	-684.254	57477.4	91495.6	6761.63	333.716	819	0	0	0	0	0	0	0	603	903	0
924	7	0	0	0	0	0	0	200	300	0	26.1691	11.2401	-684.559	58392.9	91007.4	6853.18	332.943	817.7	0	0	0	0	0	0	0	603	903	0
924	8	0	0	0	0	0	0	200	300	0	26.3217	10.4771	-685.169	57752	91556.7	7082.06	333.626	818.711	0	0	0	0	0	0	0	603	903	0
924	9	0	0	0	0	0	0	200	300	0	27.2372	11.3927	-686.085	59400	92045	7127.84	334.16	816.422	0	0	0	0	0	0	0	603	903	0
925	0	0	0	0	0	0	0	200	300	0	29.0683	12.1556	-685.474	59216.9	91861.9	6990.51	334.012	816.612	0	0	0	0	0	0	0	603	903	0
925	1	0	0	0	0	0	0	200	300	0	26.9321	12.766	-687.916	58850.7	91434.6	7082.06	332.915	817.451	0	0	0	0	0	0	0	603	903	0
925	2	0	0	0	0	0	0	200	300	0	26.0165	12.3082	-687.306	59308.4	91861.9	7036.29	333.655	816.709	0	0	0	0	0	0	0	603	903	0
925	3	0	0	0	0	0	0	200	300	0	26.7795	12.9185	-687.916	59400	91861.9	7356.72	333.536	816.652	0	0	0	0	0	0	0	603	903	0
925	4	0	0	0	0	0	0	200	300	0	26.3217	13.2237	-688.831	59583.1	91861.9	7219.39	333.359	816.501	0	0	0	0	0	0	0	603	903	0
925	5	0	0	0	0	0	0	200	300	0	26.9321	13.5289	-690.968	60498.6	91556.7	7494.05	332.505	815.444	0	0	0	0	0	0	0	603	903	0
925	6	0	0	0	0	0	0	200	300	0	25.2536	13.8341	-690.662	60498.6	92411.2	7265.17	333.801	815.405	0	0	0	0	0	0	0	603	903	0
925	7	0	0	0	0	0	0	200	300	0	28.3054	13.9867	-690.052	60498.6	92472.2	7585.6	334.008	815.328	0	0	0	0	0	0	0	603	903	0
925	8	0	0	0	0	0	0	200	300	0	26.6269	14.9022	-691.883	61139.5	92228.1	7448.27	333.3	814.633	0	0	0	0	0	0	0	603	903	0
925	9	0	0	0	0	0	0	200	300	0	26.3217	15.5125	-692.494	61231	92411.2	7768.71	333.447	814.579	0	0	0	0	0	0	0	603	903	0
926	0	0	0	0	0	0	0	200	300	0	27.0847	15.36	-694.019	61047.9	92777.4	8089.14	333.681	815.037	0	0	0	0	0	0	0	603	903	0
926	1	0	0	0	0	0	0	200	300	0	25.5588	15.8177	-693.409	61505.7	92350.1	7814.48	333.183	814.3	0	0	0	0	0	0	0	603	903	0
926	2	0	0	0	0	0	0	200	300	0	26.0165	16.4281	-695.24	61597.2	91983.9	7722.93	332.305	814.401	0	0	0	0	0	0	0	603	903	0
926	3	0	0	0	0	0	0	200	300	0	26.6269	16.7332	-696.461	63336.7	93082.6	7951.81	333.651	812.059	0	0	0	0	0	0	0	603	903	0
926	4	0	0	0	0	0	0	200	300	0	27.5424	16.2755	-697.071	62879	93082.6	8089.14	333.534	812.796	0	0	0	0	0	0	0	603	903	0
926	5	0	0	0	0	0	0	200	300	0	25.7114	16.7332	-697.682	62970.5	92899.5	8134.92	333.155	812.743	0	0	0	0	0	0	0	603	903	0
926	6	0	0	0	0	0	0	200	300	0	25.4062	17.8014	-696.461	63153.6	93082.6	7997.59	333.651	812.322	0	0	0	0	0	0	0	603	903	0
926	7	0	0	0	0	0	0	200	300	0	25.7114	18.7169	-699.818	63703	93021.6	8318.02	332.923	811.972	0	0	0	0	0	0	0	603	903	0
926	8	0	0	0	0	0	0	200	300	0	25.5588	19.0221	-697.376	64160.7	93326.7	8089.14	333.825	810.997	0	0	0	0	0	0	0	603	903	0
926	9	0	0	0	0	0	0	200	300	0	26.3217	18.8695	-699.818	63794.5	93265.7	8180.69	333.271	811.841	0	0	0	0	0	0	0	603	903	0
927	0	0	0	0	0	0	0	200	300	0	24.3381	20.3954	-701.344	63886.1	93448.8	8226.47	333.242	811.909	0	0	0	0	0	0	0	603	903	0
927	1	0	0	0	0	0	0	200	300	0	24.7958	19.6324	-702.259	64710	93204.6	8546.9	332.721	810.855	0	0	0	0	0	0	0	603	903	0
927	2	0	0	0	0	0	0	200	300	0	25.864	21.4635	-703.48	65350.9	93448.8	8272.25	332.838	810.103	0	0	0	0	0	0	0	603	903	0
927	3	0	0	0	0	0	0	200	300	0	25.864	19.9376	-705.616	65259.4	93876	8592.68	333.041	810.514	0	0	0	0	0	0	0	603	903	0
927	4	0	0	0	0	0	0	200	300	0	24.7958	21.0057	-706.226	65350.9	93998.1	8684.23	333.099	810.465	0	0	0	0	0	0	0	603	903	0
927	5	0	0	0	0	0	0	200	300	0	23.8803	20.7005	-705.006	66358	94181.2	8546.9	333.589	808.876	0	0	0	0	0	0	0	603	903	0
927	6	0	0	0	0	0	0	200	300	0	24.9484	22.379	-707.447	66449.5	94181.2	8821.56	333.128	809.071	0	0	0	0	0	0	0	603	903	0
927	7	0	0	0	0	0	0	200	300	0	25.5588	22.9893	-708.668	66541.1	94303.3	8775.79	333.071	809.104	0	0	0	0	0	0	0	603	903	0
927	8	0	0	0	0	0	0	200	300	0	24.6432	23.2945	-708.668	66266.4	94486.4	8913.12	333.33	809.492	0	0	0	0	0	0	0	603	903	0
927	9	0	0	0	0	0	0	200	300	0	24.7958	23.7523	-709.278	67456.6	93998.1	9233.55	332.526	807.894	0	0	0	0	0	0	0	603	903	0
928	0	0	0	0	0	0	0	200	300	0	24.9484	24.973	-711.109	66998.9	94303.3	9187.77	332.614	808.783	0	0	0	0	0	0	0	603	903	0
928	1	0	0	0	0	0	0	200	300	0	25.2536	24.5152	-711.109	68555.2	94669.5	9096.22	333.129	806.594	0	0	0	0	0	0	0	603	903	0
928	2	0	0	0	0	0	0	200	300	0	23.7277	25.5833	-712.025	68280.6	95279.8	9096.22	333.815	807.104	0	0	0	0	0	0	0	603	903	0
928	3	0	0	0	0	0	0	200	300	0	27.0847	25.5833	-712.94	68555.2	94547.4	9508.21	332.616	806.842	0	0	0	0	0	0	0	603	903	0
928	4	0	0	0	0	0	0	200	300	0	24.4907	26.3463	-715.687	69196.1	95401.9	9599.76	333.301	806.315	0	0	0	0	0	0	0	603	903	0
928	5	0	0	0	0	0	0	200	300	0	24.9484	26.0411	-715.687	69196.1	95157.8	9233.55	332.96	806.315	0	0	0	0	0	0	0	603	903	0
928	6	0	0	0	0	0	0	200	300	0	24.7958	26.6515	-716.602	69196.1	94852.6	9279.33	332.364	806.439	0	0	0	0	0	0	0	603	903	0
928	7	0	0	0	0	0	0	200	300	0	23.4225	26.9566	-715.992	69196.1	95463	9782.87	333.33	806.356	0	0	0	0	0	0	0	603	903	0
928	8	0	0	0	0	0	0	200	300	0	24.0329	28.0247	-719.349	70386.3	95707.1	9553.98	333.047	805.153	0	0	0	0	0	0	0	603	903	0
928	9	0	0	0	0	0	0	200	300	0	24.6432	28.1773	-720.265	69837	95829.2	9508.21	333.047	806.04	0	0	0	0	0	0	0	603	903	0
929	0	0	0	0	0	0	0	200	300	0	25.2536	28.9403	-720.57	71027.2	94852.6	9828.64	331.636	804.429	0	0	0	0	0	0	0	603	903	0
929	1	0	0	0	0	0	0	200	300	0	23.5751	29.7032	-720.265	71210.3	95951.2	9737.09	333.217	804.133	0	0	0	0	0	0	0	603	903	0
929	2	0	0	0	0	0	0	200	300	0	26.1691	30.4662	-722.096	70935.6	96378.5	9828.64	333.471	804.764	0	0	0	0	0	0	0	603	903	0
929	3	0	0	0	0	0	0	200	300	0	24.0329	30.4662	-724.232	71576.5	95829.2	9874.42	332.318	804.169	0	0	0	0	0	0	0	603	903	0
929	4	0	0	0	0	0	0	200	300	0	24.6432	29.5506	-725.453	71668.1	96012.2	10011.7	332.348	804.209	0	0	0	0	0	0	0	603	903	0
929	5	0	0	0	0	0	0	200	300	0	25.101	31.6869	-724.232	71851.1	96134.3	10011.7	332.74	803.79	0	0	0	0	0	0	0	603	903	0
929	6	0	0	0	0	0	0	200	300	0	24.0329	31.6869	-725.758	72217.3	96561.6	10149.1	333.049	803.494	0	0	0	0	0	0	0	603	903	0
929	7	0	0	0	0	0	0	200	300	0	24.1855	32.9076	-728.199	72949.8	96073.3	10378	331.933	802.822	0	0	0	0	0	0	0	603	903	0
929	8	0	0	0	0	0	0	200	300	0	24.7958	33.5179	-728.199	73590.7	96927.8	10378	333.106	801.942	0	0	0	0	0	0	0	603	903	0
929	9	0	0	0	0	0	0	200	300	0	24.9484	33.3653	-728.199	73316	96988.8	10515.3	333.19	802.319	0	0	0	0	0	0	0	603	903	0
930	0	0	0	0	0	0	0	200	300	0	24.1855	34.8912	-729.725	73316	96622.6	10515.3	332.41	802.529	0	0	0	0	0	0	0	603	903	0
930	1	0	0	0	0	0	0	200	300	0	24.0329	35.8067	-730.946	73682.2	96866.7	10469.5	332.523	802.196	0	0	0	0	0	0	0	603	903	0
930	2	0	0	0	0	0	0	200	300	0	25.2536	36.1119	-731.251	74506.2	96622.6	10515.3	332.133	801.111	0	0	0	0	0	0	0	603	903	0
930	3	0	0	0	0	0	0	200	300	0	26.6269	36.2645	-730.335	74597.7	97233	10606.8	333.135	800.858	0	0	0	0	0	0	0	603	903	0
930	4	0	0	0	0	0	0	200	300	0	24.3381	37.4852	-731.556	74140	96988.8	10789.9	332.579	801.654	0	0	0	0	0	0	0	603	903	0
930	5	0	0	0	0	0	0	200	300	0	24.9484	37.943	-734.913	74506.2	97782.3	10927.3	333.053	801.619	0	0	0	0	0	0	0	603	903	0
930	6	0	0	0	0	0	0	200	300	0	23.8803	37.7904	-732.166	75330.2	97660.2	11156.2	333.385	800.113	0	0	0	0	0	0	0	603	903	0
930	7	0	0	0	0	0	0	200	300	0	24.9484	36.1119	-735.523	75787.9	97477.1	10881.5	332.528	799.961	0	0	0	0	0	0	0	603	903	0
930	8	0	0	0	0	0	0	200	300	0	25.101	39.6214	-734.303	75330.2	97538.2	11156.2	332.831	800.413	0	0	0	0	0	0	0	603	903	0
930	9	0	0	0	0	0	0	200	300	0	24.7958	38.4007	-737.354	75696.4	97904.4	11110.4	332.778	800.341	0	0	0	0	0	0	0	603	903	0
931	0	0	0	0	0	0	0	200	300	0	24.1855	40.0792	-737.049	76337.2	98392.6	11339.3	333.495	799.429	0	0	0	0	0	0	0	603	903	0
931	1	0	0	0	0	0	0	200	300	0	26.0165	39.0111	-739.491	76428.8	97660.2	11293.5	332.064	799.647	0	0	0	0	0	0	0	603	903	0
931	2	0	0	0	0	0	0	200	300	0	25.7114	41.2999	-737.965	77802.1	98026.4	11293.5	332.833	797.572	0	0	0	0	0	0	0	603	903	0
931	3	0	0	0	0	0	0	200	300	0	24.6432	40.2318	-738.88	77161.2	98453.7	11339.3	333.247	798.57	0	0	0	0	0	0	0	603	903	0
931	4	0	0	0	0	0	0	200	300	0	26.1691	44.0465	-739.491	78076.7	98148.5	11430.8	332.725	797.418	0	0	0	0	0	0	0	603	903	0
931	5	0	0	0	0	0	0	200	300	0	24.3381	42.368	-741.322	78168.3	98636.8	11568.1	333.055	797.556	0	0	0	0	0	0	0	603	903	0
931	6	0	0	0	0	0	0	200	300	0	25.5588	44.6568	-742.848	77985.2	98392.6	11751.2	332.453	798.019	0	0	0	0	0	0	0	603	903	0
931	7	0	0	0	0	0	0	200	300	0	26.1691	43.131	-742.237	78168.3	98514.7	11842.8	332.727	797.686	0	0	0	0	0	0	0	603	903	0
931	8	0	0	0	0	0	0	200	300	0	25.5588	46.0301	-743.763	78351.4	98148.5	12025.9	331.962	797.655	0	0	0	0	0	0	0	603	903	0
931	9	0	0	0	0	0	0	200	300	0	25.2536	46.0301	-743.763	79083.8	99186.1	11888.6	333.357	796.671	0	0	0	0	0	0	0	603	903	0
932	0	0	0	0	0	0	0	200	300	0	26.4743	46.1827	-743.763	79541.6	98758.9	11888.6	332.783	796.055	0	0	0	0	0	0	0	603	903	0
932	1	0	0	0	0	0	0	200	300	0	27.5424	48.0138	-744.373	79541.6	98697.8	11980.1	332.592	796.143	0	0	0	0	0	0	0	603	903	0
932	2	0	0	0	0	0	0	200	300	0	26.0165	48.1664	-745.899	79633.1	98941.9	12346.3	332.648	796.239	0	0	0	0	0	0	0	603	903	0
932	3	0	0	0	0	0	0	200	300	0	25.7114	48.6241	-745.899	79724.7	99064	12346.3	332.812	796.116	0	0	0	0	0	0	0	603	903	0
932	4	0	0	0	0	0	0	200	300	0	25.101	49.2345	-745.899	80548.7	98880.9	12529.4	332.566	795.011	0	0	0	0	0	0	0	603	903	0
932	5	0	0	0	0	0	0	200	300	0	26.1691	50.7603	-747.425	80090.9	99125.1	12254.8	332.622	795.844	0	0	0	0	0	0	0	603	903	0
932	6	0	0	0	0	0	0	200	300	0	26.3217	51.3707	-746.815	80457.1	99430.2	12575.2	333.139	795.266	0	0	0	0	0	0	0	603	903	0
932	7	0	0	0	0	0	0	200	300	0	25.864	51.0655	-747.73	81098	99491.3	12529.4	333.058	794.541	0	0	0	0	0	0	0	603	903	0
932	8	0	0	0	0	0	0	200	300	0	25.7114	51.981	-748.036	81372.6	98697.8	12529.4	331.943	794.218	0	0	0	0	0	0	0	603	903	0
932	9	0	0	0	0	0	0	200	300	0	26.3217	53.0492	-748.951	81372.6	99674.4	12849.9	333.085	794.351	0	0	0	0	0	0	0	603	903	0
933	0	0	0	0	0	0	0	200	300	0	28.7631	54.1173	-750.477	82196.6	99430.2	12758.3	332.489	793.474	0	0	0	0	0	0	0	603	903	0
933	1	0	0	0	0	0	0	200	300	0	26.4743	53.3543	-750.782	82288.2	99369.2	12621	332.354	793.397	0	0	0	0	0	0	0	603	903	0
933	2	0	0	0	0	0	0	200	300	0	28.4579	54.2699	-751.392	82105	99613.4	12895.7	332.572	793.73	0	0	0	0	0	0	0	603	903	0
933	3	0	0	0	0	0	0	200	300	0	26.3217	55.9483	-750.477	83020.6	99552.3	13033	332.652	792.376	0	0	0	0	0	0	0	603	903	0
933	4	0	0	0	0	0	0	200	300	0	27.3898	55.7957	-751.698	83295.2	99735.4	13353.4	332.68	792.191	0	0	0	0	0	0	0	603	903	0
933	5	0	0	0	0	0	0	200	300	0	27.695	56.2535	-752.918	83112.1	99735.4	13124.5	332.465	792.613	0	0	0	0	0	0	0	603	903	0
933	6	0	0	0	0	0	0	200	300	0	26.4743	57.169	-752.918	82471.2	100041	13261.9	332.87	793.465	0	0	0	0	0	0	0	603	903	0
933	7	0	0	0	0	0	0	200	300	0	26.7795	58.6949	-752.003	82837.5	99918.5	13307.6	332.87	792.844	0	0	0	0	0	0	0	603	903	0
933	8	0	0	0	0	0	0	200	300	0	27.695	58.8475	-753.834	84668.5	99674.4	13536.5	332.223	790.683	0	0	0	0	0	0	0	603	903	0
933	9	0	0	0	0	0	0	200	300	0	27.8476	59.4579	-755.36	84027.6	100224	13628.1	332.683	791.758	0	0	0	0	0	0	0	603	903	0
934	0	0	0	0	0	0	0	200	300	0	26.1691	60.2208	-754.444	84485.4	100590	13628.1	333.33	791.016	0	0	0	0	0	0	0	603	903	0
934	1	0	0	0	0	0	0	200	300	0	25.864	60.526	-755.055	84393.9	100041	13719.6	332.495	791.228	0	0	0	0	0	0	0	603	903	0
934	2	0	0	0	0	0	0	200	300	0	27.8476	61.5941	-755.665	85400.9	100285	13948.5	332.711	789.986	0	0	0	0	0	0	0	603	903	0
934	3	0	0	0	0	0	0	200	300	0	28.0002	61.7467	-757.191	85309.4	100468	13948.5	332.685	790.334	0	0	0	0	0	0	0	603	903	0
934	4	0	0	0	0	0	0	200	300	0	27.695	62.5096	-755.36	85034.7	100285	13902.7	332.764	790.425	0	0	0	0	0	0	0	603	903	0
934	5	0	0	0	0	0	0	200	300	0	26.7795	62.0518	-755.665	85217.9	100346	13994.3	332.791	790.228	0	0	0	0	0	0	0	603	903	0
934	6	0	0	0	0	0	0	200	300	0	26.9321	63.12	-756.886	85309.4	100773	13582.3	333.142	790.289	0	0	0	0	0	0	0	603	903	0
934	7	0	0	0	0	0	0	200	300	0	27.0847	62.9674	-754.749	86041.8	100834	13902.7	333.599	789	0	0	0	0	0	0	0	603	903	0
934	8	0	0	0	0	0	0	200	300	0	27.3898	65.2562	-755.055	86499.6	99552.3	14040.1	331.848	788.439	0	0	0	0	0	0	0	603	903	0
934	9	0	0	0	0	0	0	200	300	0	26.0165	66.0191	-760.243	86591.1	100956	13994.3	332.795	789.101	0	0	0	0	0	0	0	603	903	0
935	0	0	0	0	0	0	0	200	300	0	28.4579	65.2562	-759.022	86682.7	101200	14085.8	333.33	788.797	0	0	0	0	0	0	0	603	903	0
935	1	0	0	0	0	0	0	200	300	0	27.2372	66.0191	-759.632	87140.5	100590	14314.7	332.419	788.286	0	0	0	0	0	0	0	603	903	0
935	2	0	0	0	0	0	0	200	300	0	26.9321	67.8502	-759.327	87323.5	100895	14131.6	332.874	787.999	0	0	0	0	0	0	0	603	903	0
935	3	0	0	0	0	0	0	200	300	0	28.0002	68.308	-761.158	87415.1	99857.5	14452.1	331.192	788.155	0	0	0	0	0	0	0	603	903	0
935	4	0	0	0	0	0	0	200	300	0	26.4743	68.308	-761.463	86865.8	101322	14360.5	333.063	788.923	0	0	0	0	0	0	0	603	903	0
935	5	0	0	0	0	0	0	200	300	0	26.4743	68.0028	-761.463	87689.8	100895	14452.1	332.502	787.841	0	0	0	0	0	0	0	603	903	0
935	6	0	0	0	0	0	0	200	300	0	26.7795	70.139	-761.768	88605.3	101444	14360.5	333.17	786.685	0	0	0	0	0	0	0	603	903	0
935	7	0	0	0	0	0	0	200	300	0	28.9157	69.9864	-762.379	88330.6	101139	14818.3	332.663	787.138	0	0	0	0	0	0	0	603	903	0
935	8	0	0	0	0	0	0	200	300	0	26.6269	70.5968	-764.515	88147.5	100285	14772.5	331.174	787.701	0	0	0	0	0	0	0	603	903	0
935	9	0	0	0	0	0	0	200	300	0	27.8476	70.7494	-762.684	88330.6	101505	14864	333.09	787.185	0	0	0	0	0	0	0	603	903	0
936	0	0	0	0	0	0	0	200	300	0	27.3898	72.1227	-762.684	88971.5	101566	14772.5	333.17	786.344	0	0	0	0	0	0	0	603	903	0
936	1	0	0	0	0	0	0	200	300	0	27.5424	72.733	-762.684	89612.4	100956	14909.8	332.37	785.504	0	0	0	0	0	0	0	603	903	0
936	2	0	0	0	0	0	0	200	300	0	27.695	72.2752	-763.599	89063	101261	14909.8	332.61	786.364	0	0	0	0	0	0	0	603	903	0
936	3	0	0	0	0	0	0	200	300	0	26.4743	72.8856	-763.294	88971.5	101383	15001.4	332.823	786.437	0	0	0	0	0	0	0	603	903	0
936	4	0	0	0	0	0	0	200	300	0	26.6269	73.8011	-764.515	89612.4	102055	14955.6	333.49	785.785	0	0	0	0	0	0	0	603	903	0
936	5	0	0	0	0	0	0	200	300	0	27.8476	74.7166	-765.125	89887	101078	15092.9	332.107	785.52	0	0	0	0	0	0	0	603	903	0
936	6	0	0	0	0	0	0	200	300	0	27.695	74.2589	-765.431	90711	101566	14864	332.692	784.49	0	0	0	0	0	0	0	603	903	0
936	7	0	0	0	0	0	0	200	300	0	26.7795	74.4115	-763.294	90253.2	101444	15001.4	332.903	784.758	0	0	0	0	0	0	0	603	903	0
936	8	0	0	0	0	0	0	200	300	0	28.4579	75.9373	-763.905	90436.4	101505	15092.9	332.877	784.613	0	0	0	0	0	0	0	603	903	0
936	9	0	0	0	0	0	0	200	300	0	27.0847	76.3951	-765.431	91168.8	101200	15276	332.214	783.892	0	0	0	0	0	0	0	603	903	0
937	0	0	0	0	0	0	0	200	300	0	26.9321	76.2425	-765.736	91443.4	101689	15321.8	332.799	783.581	0	0	0	0	0	0	0	603	903	0
937	1	0	0	0	0	0	0	200	300	0	28.0002	77.0055	-763.905	91077.2	101322	15092.9	332.637	783.774	0	0	0	0	0	0	0	603	903	0
937	2	0	0	0	0	0	0	200	300	0	26.4743	78.3788	-764.515	91351.9	101078	15367.6	332.212	783.51	0	0	0	0	0	0	0	603	903	0
937	3	0	0	0	0	0	0	200	300	0	26.0165	78.3788	-765.736	91901.2	101505	15413.4	332.559	782.983	0	0	0	0	0	0	0	603	903	0
937	4	0	0	0	0	0	0	200	300	0	27.2372	78.6839	-766.041	91351.9	101566	15138.7	332.586	783.748	0	0	0	0	0	0	0	603	903	0
937	5	0	0	0	0	0	0	200	300	0	26.7795	78.8365	-765.431	92725.2	100773	15321.8	331.655	781.859	0	0	0	0	0	0	0	603	903	0
937	6	0	0	0	0	0	0	200	300	0	25.864	80.515	-766.346	92450.5	101505	15642.2	332.454	782.362	0	0	0	0	0	0	0	603	903	0
937	7	0	0	0	0	0	0	200	300	0	26.0165	81.1253	-766.041	92358.9	101444	15550.7	332.427	782.433	0	0	0	0	0	0	0	603	903	0
937	8	0	0	0	0	0	0	200	300	0	24.7958	80.515	-765.431	92725.2	101261	15871.1	332.293	781.859	0	0	0	0	0	0	0	603	903	0
937	9	0	0	0	0	0	0	200	300	0	27.695	81.5831	-765.736	92999.8	100956	15688	331.842	781.548	0	0	0	0	0	0	0	603	903	0
938	0	0	0	0	0	0	0	200	300	0	26.1691	83.5667	-764.21	92267.4	100224	16008.5	331.147	782.264	0	0	0	0	0	0	0	603	903	0
938	1	0	0	0	0	0	0	200	300	0	26.4743	83.2616	-765.125	92542.1	100651	16054.2	331.548	782.05	0	0	0	0	0	0	0	603	903	0
938	2	0	0	0	0	0	0	200	300	0	25.5588	83.4142	-765.125	93549.2	100956	15733.8	331.947	780.734	0	0	0	0	0	0	0	603	903	0
938	3	0	0	0	0	0	0	200	300	0	26.3217	83.8719	-764.515	93549.2	101383	16145.8	332.611	780.636	0	0	0	0	0	0	0	603	903	0
938	4	0	0	0	0	0	0	200	300	0	27.2372	84.94	-765.125	94006.9	101139	16054.2	332.186	780.135	0	0	0	0	0	0	0	603	903	0
938	5	4.18122	-3.04916	-10.3363	-1203.46	424.194	-756.225	241.039	416.43	0	26.3217	85.3978	-764.515	93457.6	100590	16237.3	331.574	780.756	0	0	0	0	0	0	0	603	903	0
938	6	6.31745	-3.8121	-14.6088	-1203.46	546.265	-847.778	237.393	382.379	0	25.2536	85.5504	-763.905	93549.2	101017	16512	332.238	780.538	0	0	0	0	0	0	0	603	903	0
938	7	6.47004	-3.20175	-13.3881	-1111.91	790.405	-664.672	259.038	383.052	0	25.7114	86.6185	-763.294	93823.8	101017	16420.4	332.344	780.081	0	0	0	0	0	0	0	603	903	0
938	8	5.85969	-0.455165	-10.0311	-1295.01	607.3	-710.449	260.542	429.099	0	26.4743	88.1444	-763.599	93823.8	100529	16328.9	331.651	780.13	0	0	0	0	0	0	0	603	903	0
938	9	6.16486	1.68107	-10.0311	-1020.35	668.335	-298.461	266.626	401.719	0	25.864	89.0599	-762.074	93732.3	100529	16191.6	331.915	780.004	0	0	0	0	0	0	0	603	903	0
939	0	4.48639	3.51212	-14.6088	-1478.12	729.37	-618.896	249.927	401.18	0	24.9484	89.2125	-762.379	93640.7	100712	16374.7	332.102	780.173	0	0	0	0	0	0	0	603	903	0
939	1	5.24933	4.27506	-16.1346	-745.695	485.23	-435.79	230.074	346.217	0	25.4062	89.5177	-760.853	93732.3	100834	16328.9	332.528	779.806	0	0	0	0	0	0	0	603	903	0
939	2	5.09675	4.42765	-20.1019	-1111.91	1034.55	-344.238	251.465	355.313	0	25.101	90.128	-758.717	94190	100041	16740.9	331.855	778.856	0	0	0	0	0	0	0	603	903	0
939	3	5.7071	6.41129	-18.576	-1295.01	1034.55	-435.79	255.692	369.714	0	25.4062	91.9591	-761.463	94556.2	100468	16786.7	331.94	778.823	0	0	0	0	0	0	0	603	903	0
939	4	3.1131	6.56388	-21.6278	-1752.77	851.441	-298.461	239.368	381.043	0	25.7114	91.9591	-757.496	94098.5	100346	16695.1	332.47	778.777	0	0	0	0	0	0	0	603	903	0
939	5	2.35016	8.54752	-23.764	-1935.88	973.511	-390.014	240.966	381.463	0	24.9484	91.0435	-760.243	93823.8	99979.6	16695.1	331.51	779.587	0	0	0	0	0	0	0	603	903	0
939	6	1.8924	9.92081	-24.6796	-2759.85	973.511	-252.685	239.446	411.828	0	24.6432	93.485	-756.275	94373.1	99796.4	17015.5	331.958	778.213	0	0	0	0	0	0	0	603	903	0
939	7	2.80793	10.5312	-31.0882	-1935.88	485.23	113.526	215.608	362.271	0	25.864	93.0272	-759.937	94464.7	99979.6	17152.9	331.563	778.694	0	0	0	0	0	0	0	603	903	0
939	8	4.63898	13.1252	-33.5297	-1752.77	1461.79	296.631	243.597	352.275	0	27.2372	94.8582	-758.106	94922.4	100041	17015.5	331.961	777.79	0	0	0	0	0	0	0	603	903	0
939	9	2.80793	12.5148	-37.4969	-1569.67	1583.86	-115.356	242.24	341.861	0	25.4062	95.4686	-757.191	94556.2	99552.3	17244.4	331.476	778.122	0	0	0	0	0	0	0	603	903	0
940	0	0.671698	14.651	-40.5487	-2393.64	1644.9	113.526	240.566	359.031	0	24.1855	96.2315	-754.139	94830.9	99552.3	17427.5	332.008	777.253	0	0	0	0	0	0	0	603	903	0
940	1	1.43464	16.4821	-43.6005	-3309.17	1766.97	250.855	240.526	375.898	0	23.5751	97.4522	-755.055	94922.4	99857.5	17015.5	332.252	777.284	0	0	0	0	0	0	0	603	903	0
940	2	4.48639	18.1606	-50.3143	-3126.07	1828	21.9732	236.332	362.131	0	25.2536	98.0626	-755.36	95471.8	99003	17473.3	331.067	776.608	0	0	0	0	0	0	0	603	903	0
940	3	6.31745	18.7709	-56.1127	-3583.83	2316.28	205.079	241.279	363.868	0	27.0847	98.3678	-753.834	95380.2	99064	17473.3	331.414	776.473	0	0	0	0	0	0	0	603	903	0
940	4	7.23298	18.008	-57.9437	-3217.62	2499.39	-69.5796	243.135	355.53	0	25.2536	98.5204	-751.087	94922.4	99125.1	17748	331.975	776.62	0	0	0	0	0	0	0	603	903	0
940	5	8.45368	20.1442	-63.4369	-2851.41	2804.57	296.631	244.21	344.949	0	23.5751	100.199	-751.087	94922.4	99125.1	17564.8	331.975	776.62	0	0	0	0	0	0	0	603	903	0
940	6	8.91144	19.839	-67.4042	-2668.3	2987.67	21.9732	244.325	339.587	0	24.0329	100.657	-751.087	94190	98575.7	17748	331.244	777.595	0	0	0	0	0	0	0	603	903	0
940	7	8.45368	19.839	-73.2025	-3583.83	3475.95	113.526	247.484	348.958	0	24.6432	101.572	-749.561	95563.3	98514.7	17427.5	331.43	775.508	0	0	0	0	0	0	0	603	903	0
940	8	10.8951	18.4657	-78.3905	-4224.7	3659.06	-23.8032	246.677	353.893	0	26.9321	102.335	-747.73	95105.6	98392.6	17839.5	331.588	775.808	0	0	0	0	0	0	0	603	903	0
940	9	15.015	19.0761	-82.9681	-3950.04	4025.27	-161.132	248.516	347.609	0	24.7958	102.64	-747.425	95014	97843.3	17793.7	330.907	775.878	0	0	0	0	0	0	0	603	903	0
941	0	15.015	19.0761	-90.9027	-4499.36	4574.58	250.855	250.324	349.496	0	23.4225	103.403	-747.12	95014	98026.4	17793.7	331.206	775.826	0	0	0	0	0	0	0	603	903	0
941	1	14.5572	17.8554	-96.0907	-3217.62	4452.51	-206.909	246.337	333.485	0	23.1174	103.556	-745.899	95197.1	98148.5	17748	331.584	775.373	0	0	0	0	0	0	0	603	903	0
941	2	16.3883	16.7873	-102.805	-4133.15	5123.9	-252.685	249.841	340.204	0	24.1855	104.319	-743.458	95014	97965.4	17976.8	331.77	775.2	0	0	0	0	0	0	0	603	903	0
941	3	16.9986	15.1088	-105.856	-3675.38	5245.97	-161.132	249.558	334.72	0	24.4907	104.624	-741.627	95471.8	97477.1	18159.9	331.437	774.267	0	0	0	0	0	0	0	603	903	0
941	4	20.3555	12.5148	-111.655	-4041.59	5612.18	-435.79	250.264	336.197	0	23.1174	105.082	-737.354	94922.4	96988.8	18114.2	331.536	774.266	0	0	0	0	0	0	0	603	903	0
941	5	21.7288	10.3786	-117.758	-4224.7	6100.47	-69.5796	251.805	335.876	0	25.7114	105.387	-742.237	94464.7	96561.6	18205.7	330.095	775.73	0	0	0	0	0	0	0	603	903	0
941	6	22.6444	8.8527	-125.082	-3675.38	6832.89	-481.567	254.627	329.384	0	23.5751	108.286	-734.303	95197.1	96134.3	18709.3	330.919	773.357	0	0	0	0	0	0	0	603	903	0
941	7	23.4073	3.96988	-129.355	-4590.91	6954.96	-390.014	253.767	335.491	0	23.4225	107.523	-735.218	95014	96439.5	18388.8	331.171	773.768	0	0	0	0	0	0	0	603	903	0
941	8	23.4073	3.96988	-137.289	-4041.59	6893.92	-618.896	250.215	329.438	0	23.8803	108.591	-733.082	94830.9	96744.7	18663.5	331.97	773.641	0	0	0	0	0	0	0	603	903	0
941	9	24.9332	0.155186	-141.867	-4224.7	7565.31	-664.672	253.327	329.779	0	22.8122	108.744	-731.556	94464.7	96744.7	18755	332.245	773.872	0	0	0	0	0	0	0	603	903	0
942	0	26.4591	-2.43881	-145.834	-4224.7	7931.52	-298.461	254.387	328.969	0	24.3381	110.117	-729.42	94647.8	95890.2	18571.9	331.461	773.242	0	0	0	0	0	0	0	603	903	0
942	1	29.3582	-5.33798	-153.159	-4316.25	8053.59	-710.449	252.583	328.182	0	23.8803	111.185	-732.166	95105.6	95646	18846.6	330.634	773.104	0	0	0	0	0	0	0	603	903	0
942	2	29.053	-8.23715	-162.924	-4774.02	8602.91	-1030.88	252.803	329.302	0	23.8803	110.88	-726.063	94556.2	95646	18709.3	331.732	772.769	0	0	0	0	0	0	0	603	903	0
942	3	28.9005	-9.00009	-168.723	-4499.36	8908.08	-939.331	252.797	326.667	0	23.5751	111.796	-726.368	94281.6	95096.8	18846.6	330.921	773.201	0	0	0	0	0	0	0	603	903	0
942	4	29.5108	-11.5941	-176.962	-3492.28	9091.19	-847.778	251.374	319.735	0	22.0493	112.864	-723.927	94190	94852.6	18755	331.025	772.89	0	0	0	0	0	0	0	603	903	0
942	5	31.3419	-14.0355	-181.54	-3766.94	9579.47	-1076.66	252.768	320.75	0	22.507	113.474	-724.537	94098.5	95096.8	18800.8	331.252	773.126	0	0	0	0	0	0	0	603	903	0
942	6	31.7996	-17.2398	-186.423	-4133.15	10067.8	-1168.21	254.005	322.171	0	23.1174	112.558	-722.401	94556.2	94791.5	18755	331.217	772.108	0	0	0	0	0	0	0	603	903	0
942	7	33.1729	-19.5287	-193.442	-4041.59	10189.8	-1259.77	252.676	320.893	0	22.8122	113.474	-719.654	93823.8	94120.2	19167	330.785	772.627	0	0	0	0	0	0	0	603	903	0
942	8	34.241	-22.8856	-199.24	-4682.46	10556	-1625.98	252.981	323.502	0	21.5915	115.305	-716.908	94464.7	93692.9	18892.4	330.69	771.233	0	0	0	0	0	0	0	603	903	0
942	9	34.5462	-23.8011	-208.701	-4316.25	10922.2	-1397.09	252.335	320.682	0	23.27	115.458	-715.687	93823.8	93876	19350.1	331.169	771.904	0	0	0	0	0	0	0	603	903	0
943	0	34.3936	-27.6158	-214.194	-4224.7	11105.3	-1534.42	251.847	319.724	0	21.8967	115	-714.466	93823.8	93143.6	18800.8	330.368	771.68	0	0	0	0	0	0	0	603	903	0
943	1	37.7506	-27.6158	-221.213	-3858.49	11715.7	-1122.44	252.961	317.442	0	22.507	115.915	-710.804	93457.6	92960.5	18938.1	330.782	771.519	0	0	0	0	0	0	0	603	903	0
943	2	37.9031	-30.0572	-226.706	-3400.72	11776.7	-1671.75	251.947	315.001	0	22.8122	116.068	-709.278	93457.6	92594.3	19075.5	330.547	771.236	0	0	0	0	0	0	0	603	903	0
943	3	39.8868	-32.1934	-231.589	-3583.83	12509.2	-1625.98	254.015	315.475	0	21.4389	116.526	-707.447	93549.2	92533.3	19029.7	330.799	770.765	0	0	0	0	0	0	0	603	903	0
943	4	39.2764	-34.4823	-239.828	-3858.49	12448.1	-1580.2	251.904	316.089	0	22.8122	116.831	-705.006	92816.7	91739.8	19304.4	330.126	771.346	0	0	0	0	0	0	0	603	903	0
943	5	39.5816	-35.5504	-247.153	-2851.41	12997.4	-1763.31	252.589	311.537	0	20.676	117.594	-701.038	93457.6	90946.4	19350.1	329.731	769.687	0	0	0	0	0	0	0	603	903	0
943	6	40.4971	-37.6866	-252.646	-3675.38	13119.5	-1763.31	251.928	314.548	0	22.9648	116.221	-699.513	92816.7	91678.8	19304.4	331.061	770.312	0	0	0	0	0	0	0	603	903	0
943	7	41.2601	-38.7547	-259.055	-3309.17	13424.7	-1992.19	251.822	312.774	0	21.8967	118.204	-699.513	92358.9	90885.3	19441.7	329.927	770.967	0	0	0	0	0	0	0	603	903	0
943	8	41.7178	-42.1117	-264.243	-3034.51	14096.1	-1442.87	253.345	311.484	0	20.8286	118.815	-694.63	91718.1	90152.9	18983.9	329.786	770.961	0	0	0	0	0	0	0	603	903	0
943	9	41.4127	-42.5694	-269.125	-2851.41	14401.2	-2037.96	253.511	310.595	0	21.2863	120.188	-692.188	92175.9	90336	19670.6	330.508	769.834	0	0	0	0	0	0	0	603	903	0
944	0	42.3282	-44.8582	-279.501	-3217.62	14157.1	-1900.63	250.651	311.512	0	20.9811	119.883	-690.357	91809.7	89969.8	19304.4	330.324	770.011	0	0	0	0	0	0	0	603	903	0
944	1	42.786	-46.8419	-286.52	-2942.96	14645.4	-1854.86	251.115	310.271	0	20.9811	119.883	-687.916	91809.7	88749.1	19487.5	329.012	769.539	0	0	0	0	0	0	0	603	903	0
944	2	42.023	-48.5204	-292.624	-2393.64	15194.7	-1992.19	251.926	308.18	0	19.7604	120.34	-684.254	91168.8	89420.5	19167	330.683	769.762	0	0	0	0	0	0	0	603	903	0
944	3	41.5653	-50.1988	-299.948	-2302.09	15011.6	-2129.52	250.047	307.675	0	18.9975	120.798	-681.812	90711	89054.2	19350.1	330.614	769.956	0	0	0	0	0	0	0	603	903	0
944	4	42.786	-52.9454	-303.915	-1935.88	15377.8	-2358.4	250.599	306.37	0	20.5234	120.646	-680.592	91168.8	88077.7	19258.6	329.413	769.045	0	0	0	0	0	0	0	603	903	0
944	5	41.1075	-54.929	-310.629	-2210.54	15255.7	-1946.41	249.112	307.116	0	21.5915	120.951	-676.624	90711	88016.7	19167	330.082	768.936	0	0	0	0	0	0	0	603	903	0
944	6	40.6497	-57.0653	-317.648	-2027.43	15744	-2221.07	249.564	306.383	0	19.7604	121.409	-671.742	90436.4	86796	18983.9	329.21	768.37	0	0	0	0	0	0	0	603	903	0
944	7	40.4971	-57.6756	-324.057	-2118.99	16171.3	-2175.29	249.903	306.539	0	18.2346	122.629	-668.995	90070.1	86857	19075.5	329.832	768.365	0	0	0	0	0	0	0	603	903	0
944	8	40.192	-59.3541	-331.686	-1661.22	16232.3	-2724.61	248.939	305.008	0	18.8449	122.934	-666.554	89795.5	86429.8	19121.2	329.667	768.284	0	0	0	0	0	0	0	603	903	0
944	9	39.2764	-60.88	-335.654	-745.695	16659.5	-2175.29	249.633	302.222	0	18.9975	122.477	-662.891	89887	86673.9	19258.6	330.751	767.402	0	0	0	0	0	0	0	603	903	0
945	0	38.8187	-63.6266	-346.64	-928.8	16781.6	-2861.94	248.412	302.679	0	18.6923	122.019	-659.84	88788.4	85819.4	18892.4	330.061	768.439	0	0	0	0	0	0	0	603	903	0
945	1	38.5135	-65.305	-350.912	-745.695	17453	-2953.49	249.736	302.125	0	16.5561	122.782	-655.262	88880	85087	19212.8	329.852	767.36	0	0	0	0	0	0	0	603	903	0
945	2	37.4454	-67.7464	-358.542	-654.142	17453	-2770.39	248.678	301.824	0	16.7087	124.155	-651.905	88696.8	84842.8	19029.7	330.146	766.942	0	0	0	0	0	0	0	603	903	0
945	3	36.3773	-68.5094	-366.171	-928.8	17514	-2861.94	247.83	302.537	0	17.7768	121.103	-651.905	88513.8	84232.5	19029.7	329.21	767.223	0	0	0	0	0	0	0	603	903	0
945	4	37.2928	-69.8827	-374.106	-104.826	17880.2	-3136.6	247.795	300.28	0	17.319	124.155	-643.665	87689.8	83927.3	19029.7	330.39	766.765	0	0	0	0	0	0	0	603	903	0
945	5	35.3092	-70.6456	-380.82	-196.378	18185.4	-3273.93	247.753	300.516	0	16.2509	124.155	-642.445	86865.8	83011.8	19212.8	329.212	767.789	0	0	0	0	0	0	0	603	903	0
945	6	34.5462	-72.3241	-386.923	352.938	17880.2	-3045.04	246.211	299.088	0	16.0983	123.85	-639.698	86957.3	83133.9	18938.1	329.958	767.065	0	0	0	0	0	0	0	603	903	0
945	7	33.3255	-74.3077	-394.247	993.807	18368.5	-3182.37	246.591	297.479	0	16.7087	123.392	-632.984	86957.3	83072.8	19029.7	331.24	765.623	0	0	0	0	0	0	0	603	903	0
945	8	31.7996	-74.6129	-397.604	993.807	18795.8	-3411.26	247.273	297.501	0	16.2509	124.46	-631.153	86499.6	81608	18755	329.3	765.95	0	0	0	0	0	0	0	603	903	0
945	9	32.7152	-76.2913	-403.708	627.596	18673.7	-3319.7	246.256	298.445	0	16.0983	123.545	-627.491	85675.6	81424.9	18709.3	329.763	766.463	0	0	0	0	0	0	0	603	903	0
946	0	30.5789	-78.1224	-408.286	1451.57	18978.9	-3090.82	246.484	296.445	0	14.8776	123.392	-623.829	85492.5	80265.2	18755	328.665	765.955	0	0	0	0	0	0	0	603	903	0
946	1	28.4427	-78.8853	-415.61	1360.02	19162	-3594.36	246.106	296.728	0	13.9621	123.697	-619.862	85400.9	80326.2	18617.7	329.587	765.226	0	0	0	0	0	0	0	603	903	0
946	2	27.9849	-79.9535	-415.915	2458.65	18917.8	-3869.02	245.485	294.089	0	14.5724	124.155	-616.505	85217.9	79654.8	18709.3	329.204	764.773	0	0	0	0	0	0	0	603	903	0
946	3	26.4591	-81.3267	-425.986	2092.44	19223	-3731.69	245.126	295.088	0	14.5724	123.697	-612.232	85126.3	79410.7	18343.1	329.707	763.958	0	0	0	0	0	0	0	603	903	0
946	4	26.4591	-83.1578	-428.732	2733.31	18917.8	-3777.47	244.125	293.625	0	13.3517	123.392	-609.181	83661.4	79044.5	18434.6	329.755	765.666	0	0	0	0	0	0	0	603	903	0
946	5	24.1702	-84.0733	-431.784	3007.97	19162	-3823.24	244.379	293.034	0	16.2509	123.392	-603.382	83386.8	77884.8	18343.1	329.08	764.801	0	0	0	0	0	0	0	603	903	0
946	6	23.5599	-85.294	-436.057	2824.86	19162	-3914.8	243.944	293.522	0	13.1992	123.85	-598.805	83020.6	77457.6	18159.9	329.354	764.356	0	0	0	0	0	0	0	603	903	0
946	7	23.1021	-85.7518	-439.413	3465.73	19711.3	-3731.69	244.858	292.113	0	13.8095	124.003	-595.753	83112.1	76725.1	18343.1	328.787	763.492	0	0	0	0	0	0	0	603	903	0
946	8	21.7288	-88.8036	-445.517	3374.18	19284.1	-3594.36	243.285	292.426	0	12.7414	122.934	-589.954	82105	76114.8	18159.9	329.018	763.828	0	0	0	0	0	0	0	603	903	0
946	9	21.4237	-88.651	-444.296	4106.6	19223	-3594.36	243.266	290.757	0	12.131	122.477	-584.461	81464.2	75626.5	18343.1	329.395	763.617	0	0	0	0	0	0	0	603	903	0
947	0	19.7452	-91.245	-451.01	4106.6	18978.9	-3869.02	242.081	290.895	0	11.5207	122.171	-580.799	81189.5	75626.5	18251.5	330.211	763.211	0	0	0	0	0	0	0	603	903	0
947	1	18.9822	-92.9234	-452.536	4472.81	19162	-4143.68	242.344	290.116	0	13.0466	122.782	-574.085	81738.8	74894.1	18388.8	330.458	760.619	0	0	0	0	0	0	0	603	903	0
947	2	18.3719	-92.9234	-454.367	4198.15	19284.1	-4143.68	242.442	290.76	0	12.131	123.392	-570.728	80731.8	73246.2	18114.2	328.338	761.546	0	0	0	0	0	0	0	603	903	0
947	3	18.2193	-94.1441	-457.724	4106.6	19528.2	-3960.57	242.664	291.028	0	10.9103	122.782	-566.761	79541.6	73734.4	18159.9	330.098	762.656	0	0	0	0	0	0	0	603	903	0
947	4	18.3719	-95.67	-462.912	4655.92	19772.3	-3594.36	242.713	289.942	0	10.1474	123.24	-561.878	79175.4	72818.9	17885.3	329.599	762.088	0	0	0	0	0	0	0	603	903	0
947	5	16.846	-95.8226	-464.743	5388.34	18917.8	-3731.69	240.706	288.406	0	11.3681	122.171	-557.301	78992.3	71781.3	17702.2	328.802	761.259	0	0	0	0	0	0	0	603	903	0
947	6	15.3201	-97.3485	-465.659	6395.42	19650.3	-3777.47	242.199	286.266	0	12.5888	122.324	-552.113	78076.7	71293	17793.7	329.128	761.586	0	0	0	0	0	0	0	603	903	0
947	7	14.5572	-98.8744	-467.49	5937.65	19711.3	-3869.02	242.164	287.299	0	10.6052	121.866	-547.84	77069.6	71048.9	17702.2	329.689	762.321	0	0	0	0	0	0	0	603	903	0
947	8	12.7261	-99.3321	-467.795	5846.1	19406.1	-4006.35	241.484	287.503	0	10.6052	122.019	-544.483	76520.3	70560.6	17885.3	329.592	762.462	0	0	0	0	0	0	0	603	903	0
947	9	15.3201	-99.4847	-469.931	6212.31	19406.1	-4052.12	241.296	286.78	0	9.23187	121.561	-537.464	76886.6	68973.7	17519.1	328.332	759.946	0	0	0	0	0	0	0	603	903	0
948	0	13.1839	-100.858	-469.626	6486.97	19467.2	-4052.12	241.453	286.187	0	10.3	121.103	-531.666	75421.7	69095.8	17473.3	329.961	761.141	0	0	0	0	0	0	0	603	903	0
948	1	12.1158	-101.011	-473.593	6853.18	19223	-3960.57	240.59	285.529	0	10.1474	121.866	-527.088	74964	68424.4	17336	329.816	760.777	0	0	0	0	0	0	0	603	903	0
948	2	11.3528	-101.163	-473.288	6853.18	19223	-3731.69	240.616	285.52	0	8.01117	121.409	-522.205	73773.7	67203.7	17107.1	328.692	761.727	0	0	0	0	0	0	0	603	903	0
948	3	9.67438	-102.079	-475.729	7310.95	18795.8	-3823.24	239.509	284.632	0	8.77411	120.188	-517.017	73773.7	66349.2	17152.9	328.331	760.309	0	0	0	0	0	0	0	603	903	0
948	4	10.2847	-103.452	-475.424	7402.5	19101	-3914.8	240.177	284.43	0	9.38446	120.34	-510.304	72766.7	66288.2	17015.5	329.899	760.405	0	0	0	0	0	0	0	603	903	0
948	5	7.84333	-103.605	-478.476	7219.39	19039.9	-3823.24	239.793	284.912	0	8.46893	120.646	-505.116	72675.1	65677.8	17015.5	330.025	759.122	0	0	0	0	0	0	0	603	903	0
948	6	7.84333	-104.062	-479.086	7402.5	19223	-3777.47	240.124	284.549	0	7.85858	120.493	-500.233	71851.1	64762.3	17107.1	329.464	759.365	0	0	0	0	0	0	0	603	903	0
948	7	7.84333	-104.825	-482.443	7677.16	18795.8	-3960.57	238.96	284.087	0	8.01117	118.204	-494.74	70844.1	64029.9	17244.4	329.421	759.805	0	0	0	0	0	0	0	603	903	0
948	8	6.62263	-105.13	-483.359	8592.68	18856.8	-3823.24	239.012	282.223	0	7.40082	118.815	-488.026	70661	62992.2	16924	329.076	758.211	0	0	0	0	0	0	0	603	903	0
948	9	5.09675	-105.436	-485.495	8134.92	19101	-3869.02	239.343	283.244	0	7.70599	118.509	-482.533	69653.9	62259.8	16878.2	329.027	758.649	0	0	0	0	0	0	0	603	903	0
949	0	4.18122	-106.504	-486.411	8867.34	19101	-3685.91	239.269	281.77	0	7.55341	118.967	-477.955	68829.9	61283.3	16649.3	328.22	758.991	0	0	0	0	0	0	0	603	903	0
949	1	3.26569	-106.351	-487.326	8501.13	18612.7	-3777.47	238.193	282.556	0	6.18011	116.983	-470.936	67914.4	61100.2	16557.8	329.742	758.789	0	0	0	0	0	0	0	603	903	0
949	2	2.19758	-106.504	-488.242	9142	18673.7	-3731.69	238.247	281.276	0	6.02753	117.136	-464.527	68005.9	60123.6	16283.1	329.43	756.602	0	0	0	0	0	0	0	603	903	0
949	3	1.28205	-107.419	-488.547	9142	19039.9	-3823.24	238.973	281.287	0	6.48529	117.136	-459.339	67273.5	59269.1	16191.6	329.031	756.543	0	0	0	0	0	0	0	603	903	0
949	4	-0.396417	-108.335	-491.293	9691.32	18551.6	-4006.35	237.761	280.274	0	8.16376	116.678	-455.372	66174.9	58353.6	16374.7	328.145	757.68	0	0	0	0	0	0	0	603	903	0
949	5	-1.00677	-108.487	-490.378	9691.32	18551.6	-3777.47	237.831	280.237	0	5.87494	115.458	-448.963	65350.9	57621.2	16145.8	328.343	757.44	0	0	0	0	0	0	0	603	903	0
949	6	-2.99041	-110.166	-495.261	10057.5	18124.4	-3823.24	236.596	279.692	0	3.8913	114.389	-440.724	64435.4	56888.7	15962.7	329.08	756.796	0	0	0	0	0	0	0	603	903	0
949	7	-3.90594	-110.776	-494.955	10332.2	18490.6	-4052.12	237.358	279.125	0	4.50165	115	-434.925	64069.2	55851.1	15825.3	328.416	755.689	0	0	0	0	0	0	0	603	903	0
949	8	-5.12664	-110.929	-496.481	10149.1	18490.6	-3869.02	237.243	279.558	0	4.65424	113.627	-427.296	62879	55546	15688	329.994	755.844	0	0	0	0	0	0	0	603	903	0
949	9	-5.43182	-111.234	-498.007	11797	18490.6	-3823.24	237.129	276.312	0	4.19647	112.864	-422.718	61688.8	54569.4	15733.8	329.092	757.066	0	0	0	0	0	0	0	603	903	0
950	0	-6.19476	-111.997	-502.28	10698.4	18551.6	-3777.47	236.935	278.7	0	2.82318	111.796	-415.089	61047.9	53348.7	15367.6	328.524	755.928	0	0	0	0	0	0	0	603	903	0
950	1	-8.02581	-112.455	-503.806	11339.3	17575.1	-4006.35	234.885	277.493	0	2.51801	111.49	-409.901	60681.7	52616.3	15367.6	328.363	754.96	0	0	0	0	0	0	0	603	903	0
950	2	-10.0095	-112.912	-504.721	11430.8	18307.5	-4097.9	236.273	277.352	0	2.82318	110.575	-403.187	60498.6	52250.1	15230.3	329.593	752.949	0	0	0	0	0	0	0	603	903	0
950	3	-9.24652	-113.981	-506.857	11797	17880.2	-4006.35	235.277	276.725	0	4.19647	108.133	-396.778	58850.7	51456.6	15047.1	329.686	754.679	0	0	0	0	0	0	0	603	903	0
950	4	-11.8405	-114.286	-507.468	12346.3	17880.2	-4326.78	235.234	275.671	0	2.82318	107.37	-389.454	58209.8	49808.7	14726.7	327.894	753.535	0	0	0	0	0	0	0	603	903	0
950	5	-11.9931	-114.743	-509.299	11430.8	18063.4	-4189.45	235.467	277.556	0	1.14471	107.523	-382.435	56836.5	49747.6	14635.2	330.081	754.383	0	0	0	0	0	0	0	603	903	0
950	6	-11.8405	-115.049	-514.487	11705.5	18063.4	-4235.23	235.109	277.248	0	0.839539	106.455	-376.026	56836.5	48404.8	14314.7	328.727	751.85	0	0	0	0	0	0	0	603	903	0
950	7	-13.3664	-116.117	-516.013	12254.8	17880.2	-4006.35	234.651	276.251	0	1.14471	104.319	-369.007	56104.1	47733.5	14360.5	329.356	750.959	0	0	0	0	0	0	0	603	903	0
950	8	-16.2656	-115.659	-519.37	13261.9	17941.3	-4326.78	234.544	274.465	0	2.67059	103.098	-360.462	54639.2	46634.8	13857	329.375	751.419	0	0	0	0	0	0	0	603	903	0
950	9	-17.3337	-116.269	-521.201	13719.6	18063.4	-4372.56	234.657	273.677	0	0.0765991	100.657	-354.054	53632.2	46390.7	13673.9	331.027	751.52	0	0	0	0	0	0	0	603	903	0
951	0	-19.3173	-116.88	-522.421	13536.5	17025.8	-4235.23	232.59	274.089	0	-0.68634	100.504	-344.593	52442	45292.1	13673.9	331.436	750.815	0	0	0	0	0	0	0	603	903	0
951	1	-19.9277	-116.727	-524.557	13628.1	18002.3	-4555.66	234.319	274.02	0	-1.75446	99.7411	-341.236	51984.2	44071.4	13353.4	329.152	750.659	0	0	0	0	0	0	0	603	903	0
951	2	-20.3854	-118.253	-526.999	13994.3	18063.4	-4326.78	234.276	273.445	0	-0.838928	99.2833	-334.522	50153.1	43644.1	12895.7	330.467	753.075	0	0	0	0	0	0	0	603	903	0
951	3	-22.0639	-119.321	-532.492	13994.3	17758.2	-4509.89	233.349	273.719	0	-1.60187	97.7574	-327.503	50061.6	42667.5	12758.3	330.281	750.142	0	0	0	0	0	0	0	603	903	0
951	4	-22.3691	-118.711	-537.68	14909.8	18002.3	-4464.11	233.481	272.27	0	-2.82257	95.1634	-320.179	48963	41691	12483.7	330.211	750.076	0	0	0	0	0	0	0	603	903	0
951	5	-24.8105	-119.626	-538.596	16008.5	17941.3	-4692.99	233.311	270.277	0	-1.29669	94.2479	-313.465	47406.6	40348.2	12300.6	328.717	751.766	0	0	0	0	0	0	0	603	903	0
951	6	-24.3527	-121.152	-539.816	15276	17758.2	-4784.55	232.897	271.701	0	-3.89069	93.0272	-305.836	47223.4	39921	11934.4	330.531	748.592	0	0	0	0	0	0	0	603	903	0
951	7	-26.6415	-122.068	-542.868	15642.2	17819.2	-4647.22	232.824	271.186	0	-3.7381	91.5013	-300.343	46216.4	38944.4	11797	329.667	749.121	0	0	0	0	0	0	0	603	903	0
951	8	-25.8786	-121.763	-544.699	15367.6	18002.3	-4738.77	233.05	271.787	0	-4.80621	89.0599	-292.713	45209.3	37723.7	11522.4	328.876	748.551	0	0	0	0	0	0	0	603	903	0
951	9	-25.2682	-124.509	-547.446	15825.4	17392	-4738.77	231.769	271.092	0	-5.56915	86.6185	-284.474	43836	37418.5	11476.6	331.536	748.905	0	0	0	0	0	0	0	603	903	0
952	0	-26.7941	-123.594	-550.497	16557.8	17819.2	-4784.55	232.369	269.922	0	-5.72174	85.3978	-278.065	43378.2	36014.7	10789.9	329.519	747	0	0	0	0	0	0	0	603	903	0
952	1	-27.4045	-124.357	-554.465	16740.9	17819.2	-4464.11	232.138	269.807	0	-5.72174	83.8719	-272.572	42371.2	35221.3	10469.5	329.218	747.55	0	0	0	0	0	0	0	603	903	0
952	2	-28.1674	-123.899	-552.634	16649.3	17758.2	-4555.66	232.134	269.873	0	-5.72174	82.0409	-264.942	41638.7	34061.6	10423.7	328.562	745.838	0	0	0	0	0	0	0	603	903	0
952	3	-27.2519	-124.814	-555.991	16466.2	18002.3	-4052.12	232.379	270.384	0	-5.41656	80.0572	-256.092	40357	33390.2	10240.6	330.384	745.412	0	0	0	0	0	0	0	603	903	0
952	4	-27.4045	-125.272	-559.042	16924	18002.3	-4326.78	232.202	269.727	0	-6.33209	78.0736	-250.294	39533	32413.6	9737.09	329.502	745.054	0	0	0	0	0	0	0	603	903	0
952	5	-26.7941	-123.899	-560.263	16924	17880.2	-4281.01	231.914	269.793	0	-7.5528	75.9373	-244.801	38526	31070.8	9508.21	326.923	745.623	0	0	0	0	0	0	0	603	903	0
952	6	-26.9467	-123.746	-563.62	17198.6	17941.3	-4326.78	231.832	269.485	0	-5.11139	71.2071	-238.087	37793.5	30948.8	9233.55	329.99	744.262	0	0	0	0	0	0	0	603	903	0
952	7	-26.3364	-122.983	-563.315	17931.1	17880.2	-4281.01	231.741	268.169	0	-6.33209	71.6649	-229.542	36694.9	30033.2	8730.01	330.84	743.139	0	0	0	0	0	0	0	603	903	0
952	8	-27.8622	-123.441	-567.892	17748	17941.3	-4143.68	231.593	268.748	0	-7.09503	69.8338	-224.049	36054	28995.7	8638.46	329.417	742.08	0	0	0	0	0	0	0	603	903	0
952	9	-26.4889	-122.373	-567.282	18388.8	18002.3	-4097.9	231.734	267.584	0	-8.31573	67.545	-218.556	34589.2	28141.2	8363.8	328.76	744.737	0	0	0	0	0	0	0	603	903	0
953	0	-27.4045	-122.373	-569.418	17290.2	18246.5	-4006.35	232.044	269.635	0	-8.16315	64.951	-210.011	34039.9	27042.5	7906.04	328.767	740.914	0	0	0	0	0	0	0	603	903	0
953	1	-26.7941	-121.305	-571.249	17931.1	17819.2	-4006.35	231.193	268.611	0	-6.33209	63.12	-204.517	32941.2	26493.2	7906.04	329.54	741.932	0	0	0	0	0	0	0	603	903	0
953	2	-25.4208	-120.389	-575.827	18205.7	18246.5	-3777.47	231.687	268.383	0	-6.48468	62.0518	-198.109	32208.8	25638.7	7539.83	329.417	740.419	0	0	0	0	0	0	0	603	903	0
953	3	-26.7941	-120.542	-577.353	18755	18429.6	-3685.91	231.921	267.515	0	-6.78986	59.0001	-191.395	30469.3	25150.4	7082.06	331.406	743.804	0	0	0	0	0	0	0	603	903	0
953	4	-27.7097	-119.931	-579.184	18938.1	18124.4	-3548.58	231.293	267.302	0	-7.85797	57.0164	-184.681	30194.6	24173.9	7082.06	330.895	739.504	0	0	0	0	0	0	0	603	903	0
953	5	-27.2519	-120.847	-581.931	19121.2	18124.4	-3685.91	231.145	267.142	0	-7.5528	55.4906	-178.272	28546.7	23258.3	6761.63	330.465	742.87	0	0	0	0	0	0	0	603	903	0
953	6	-27.8622	-119.779	-581.625	19029.7	18612.7	-3777.47	232.001	267.282	0	-6.02692	54.4225	-172.474	28455.1	22770.1	6395.42	332.02	738.018	0	0	0	0	0	0	0	603	903	0
953	7	-27.0993	-119.321	-584.067	18755	18734.7	-3685.91	232.076	267.889	0	-4.04327	51.8285	-165.76	27356.5	22220.8	6532.75	334.054	737.963	0	0	0	0	0	0	0	603	903	0
953	8	-27.4045	-118.863	-587.119	19670.6	17941.3	-3914.8	230.558	266.496	0	-5.41656	49.6922	-158.436	26074.8	20572.8	6303.86	329.849	738.424	0	0	0	0	0	0	0	603	903	0
953	9	-27.7097	-119.016	-590.781	19762.1	18490.6	-3548.58	231.299	266.549	0	-6.48468	49.2345	-153.248	25525.5	19901.4	5891.88	329.864	736.437	0	0	0	0	0	0	0	603	903	0
954	0	-27.8622	-119.016	-594.443	20494.5	18795.8	-3502.81	231.619	265.523	0	-6.33209	46.4879	-147.45	24152.2	18741.7	5800.32	327.106	739.201	0	0	0	0	0	0	0	603	903	0
954	1	-28.9304	-118.711	-595.663	20311.4	18673.7	-3594.36	231.349	265.901	0	-5.56915	44.0465	-141.956	23969.1	18497.6	5479.89	330.305	734.152	0	0	0	0	0	0	0	603	903	0
954	2	-28.0148	-119.321	-595.663	19579	18673.7	-3502.81	231.349	267.131	0	-4.04327	42.0628	-135.853	22687.3	18009.3	5388.34	332.565	736.001	0	0	0	0	0	0	0	603	903	0
954	3	-29.5407	-118.558	-599.326	20494.5	18673.7	-3640.14	231.158	265.804	0	-4.50104	40.8421	-130.665	21680.2	17399	5205.23	333.157	737.078	0	0	0	0	0	0	0	603	903	0
954	4	-27.5571	-118.863	-602.377	20219.9	18734.7	-3731.69	231.101	266.433	0	-4.9588	39.4688	-124.256	21130.9	16727.6	5113.68	334.622	732.941	0	0	0	0	0	0	0	603	903	0
954	5	-28.32	-119.016	-604.514	21043.9	18795.8	-3914.8	231.092	265.189	0	-4.80621	35.6541	-122.12	21039.4	15812.1	4930.57	329.48	730.716	0	0	0	0	0	0	0	603	903	0
954	6	-28.6252	-119.169	-609.396	20952.3	19223	-3548.58	231.544	265.618	0	-3.28033	36.8748	-112.965	20123.8	15567.9	4610.14	337.812	724.857	0	0	0	0	0	0	0	603	903	0
954	7	-30.4562	-119.016	-610.617	21227	18917.8	-3640.14	230.982	265.237	0	-3.12775	34.586	-110.218	18567.4	14835.5	4610.14	334.601	734.539	0	0	0	0	0	0	0	603	903	0
954	8	-30.4562	-118.406	-614.89	20952.3	18612.7	-3869.02	230.27	265.925	0	-2.5174	31.8394	-106.861	18018.1	14103.1	4243.93	331.976	734.388	0	0	0	0	0	0	0	603	903	0
954	9	-29.9985	-118.406	-616.415	21043.9	19345.1	-3731.69	231.383	265.861	0	-0.533752	30.4662	-100.758	16919.5	13431.7	4243.93	333.307	735.077	0	0	0	0	0	0	0	603	903	0
955	0	-30.3036	-117.49	-617.636	21501.6	19650.3	-3411.26	231.815	265.187	0	-1.60187	29.8558	-96.7904	16827.9	12760.3	4106.6	331.834	729.14	0	0	0	0	0	0	0	603	903	0
955	1	-28.32	-117.643	-620.993	21684.7	19284.1	-3365.48	231.054	265.081	0	-1.44928	26.9566	-92.2128	15820.9	12699.3	3648.83	337.717	731.431	0	0	0	0	0	0	0	603	903	0
955	2	-28.0148	-118.558	-624.045	22142.5	19345.1	-3228.15	231	264.518	0	-0.228577	25.2782	-88.2455	14996.9	11661.7	3557.28	332.15	733.055	0	0	0	0	0	0	0	603	903	0
955	3	-28.1674	-117.185	-628.012	22050.9	19711.3	-3548.58	231.387	264.888	0	-1.60187	24.2101	-83.6679	14539.1	11295.5	3603.06	335.004	729.228	0	0	0	0	0	0	0	603	903	0
955	4	-29.5407	-117.185	-630.453	23241.1	19223	-3502.81	230.491	263.136	0	-0.0759888	22.9893	-80.0058	13532	10807.2	3328.4	335.08	733.862	0	0	0	0	0	0	0	603	903	0
955	5	-29.5407	-116.88	-628.928	22050.9	19467.2	-3090.82	230.953	264.939	0	0.381775	21.0057	-76.3437	13623.6	10013.7	3191.07	331.166	724.549	0	0	0	0	0	0	0	603	903	0
955	6	-28.32	-115.964	-633.2	21959.4	19833.4	-3594.36	231.322	265.32	0	2.36542	19.6324	-72.9867	12708.1	9769.58	3191.07	333.854	728.885	0	0	0	0	0	0	0	603	903	0
955	7	-28.0148	-114.438	-635.031	22508.7	20016.5	-3457.03	231.52	264.555	0	0.381775	19.3272	-69.3246	11884.1	9281.3	2824.86	333.882	731.573	0	0	0	0	0	0	0	603	903	0
955	8	-26.6415	-114.438	-638.998	22783.4	19650.3	-3228.15	230.752	264.345	0	0.534363	17.9539	-64.747	11609.4	8976.13	3099.52	338.634	723.695	0	0	0	0	0	0	0	603	903	0
955	9	-26.1838	-114.438	-642.355	23424.2	20077.5	-3457.03	231.256	263.534	0	0.686951	15.5125	-62.6107	10693.9	8060.6	3007.97	328.741	732.2	0	0	0	0	0	0	0	603	903	0
956	0	-25.8786	-114.438	-643.271	23149.6	20382.7	-3319.7	231.686	264.013	0	0.992126	15.0548	-60.1693	10236.1	7938.53	2595.98	331.936	732.878	0	0	0	0	0	0	0	603	903	0
956	1	-27.2519	-113.523	-646.933	22874.9	20077.5	-3182.37	231.035	264.641	0	1.44989	13.8341	-55.8969	10053	7633.35	2687.53	336.561	723.15	0	0	0	0	0	0	0	603	903	0
956	2	-25.5734	-112.149	-647.543	23241.1	20199.6	-2953.49	231.194	264.109	0	1.2973	12.6134	-52.8451	10236.1	7328.18	2550.2	338.673	709.299	0	0	0	0	0	0	0	603	903	0
956	3	-26.6415	-112.302	-652.121	22874.9	20199.6	-3228.15	230.975	264.922	0	0.992126	11.3927	-51.6244	9045.96	6839.89	1955.11	332.493	727.774	0	0	0	0	0	0	0	603	903	0
956	4	-25.726	-111.539	-652.121	23882	20504.8	-3182.37	231.443	263.378	0	1.75507	10.9349	-48.2675	8771.3	6717.82	1955.11	339.179	721.277	0	0	0	0	0	0	0	603	903	0
956	5	-23.895	-111.387	-656.393	24065.1	20382.7	-3182.37	231.053	263.337	0	4.50165	8.34091	-44.3002	7855.78	6473.68	1955.11	346.132	725.669	0	0	0	0	0	0	0	603	903	0
956	6	-24.2001	-110.318	-659.75	24431.3	20809.9	-3182.37	231.542	262.969	0	2.21283	7.57797	-43.0795	7855.78	5680.23	1680.45	331.855	720.645	0	0	0	0	0	0	0	603	903	0
956	7	-22.5217	-110.013	-656.699	24339.8	21176.1	-3136.6	232.246	262.936	0	1.44989	7.57797	-41.8588	7398.01	5558.16	1314.24	332.784	726.263	0	0	0	0	0	0	0	603	903	0
956	8	-24.2001	-109.403	-664.328	24065.1	20626.8	-2999.27	231.049	263.775	0	1.44989	5.74692	-39.7226	7031.8	5191.94	1543.12	330.705	725.977	0	0	0	0	0	0	0	603	903	0
956	9	-23.7424	-108.945	-664.938	24156.6	20932	-2953.49	231.48	263.671	0	2.82318	4.06845	-37.5863	7306.46	5252.98	1405.79	339.758	708.609	0	0	0	0	0	0	0	603	903	0
957	0	-24.3527	-108.182	-667.99	24431.3	20993	-3136.6	231.427	263.426	0	2.51801	3.61069	-34.8397	6848.7	5008.84	1176.91	343.768	706.423	0	0	0	0	0	0	0	603	903	0
957	1	-22.5217	-108.182	-669.821	25163.7	20993	-3090.82	231.341	262.432	0	1.14471	4.06845	-35.7553	5933.17	5008.84	1405.79	340.087	737.062	0	0	0	0	0	0	0	603	903	0
957	2	-20.538	-108.03	-673.178	25255.3	21054.1	-2907.72	231.276	262.484	0	1.75507	1.32187	-33.619	6299.38	4703.66	1085.36	339.911	715.625	0	0	0	0	0	0	0	603	903	0
957	3	-22.6742	-108.03	-677.451	25163.7	21115.1	-2907.72	231.168	262.855	0	3.43353	0.711518	-31.1776	5566.96	3971.24	1039.58	327.375	724.444	0	0	0	0	0	0	0	603	903	0
957	4	-22.0639	-107.267	-679.587	24706	21298.2	-2907.72	231.34	263.646	0	2.36542	0.55893	-28.4311	5383.85	3910.21	948.028	337.533	713.635	0	0	0	0	0	0	0	603	903	0
957	5	-21.4535	-106.656	-678.976	25987.7	21298.2	-3182.37	231.368	261.725	0	1.75507	0.406342	-26.2948	4834.53	3971.24	1131.13	351.027	719.141	0	0	0	0	0	0	0	603	903	0
957	6	-22.0639	-106.199	-682.028	25438.4	21847.5	-2770.39	232.033	262.702	0	1.2973	-1.27212	-26.6	4834.53	3788.14	673.37	342.411	721.251	0	0	0	0	0	0	0	603	903	0
957	7	-21.7587	-106.046	-684.775	25987.7	21847.5	-2633.06	231.905	262.049	0	1.75507	-0.661773	-23.2431	5017.64	3360.89	719.146	344.598	687.123	0	0	0	0	0	0	0	603	903	0
957	8	-20.8432	-105.283	-689.047	26353.9	21481.3	-2678.83	231.175	261.753	0	2.36542	-1.11954	-25.0741	4742.98	3482.96	627.593	338.907	713.842	0	0	0	0	0	0	0	603	903	0
957	9	-20.8432	-105.436	-690.878	25896.2	22030.6	-2907.72	231.888	262.517	0	1.90765	-2.95059	-21.7172	4010.56	3482.96	719.146	360.378	718.328	0	0	0	0	0	0	0	603	903	0
958	0	-21.301	-104.52	-692.709	25896.2	22030.6	-2358.4	231.804	262.616	0	3.28094	-2.95059	-20.4965	3919.01	3116.75	719.146	352.063	711.796	0	0	0	0	0	0	0	603	903	0
958	1	-21.1484	-105.283	-689.658	25987.7	21847.5	-3182.37	231.679	262.318	0	0	0	0	0	0	0	200	903	0	0	0	0	0	0	0	603	903	0
958	2	-20.538	-103.452	-695.456	26720.1	21969.6	-2907.72	231.59	261.579	0	1.90765	-2.64542	-19.8861	3369.69	2933.64	352.935	347.522	733.551	0	0	0	0	0	0	0	603	903	0
958	3	-19.1647	-103.147	-697.592	26811.7	22335.8	-2770.39	232.018	261.565	0	2.97577	-2.95059	-19.2758	3461.24	2079.15	398.711	307.863	723.436	0	0	0	0	0	0	0	603	903	0
958	4	-19.1647	-103.757	-699.728	27452.6	22518.9	-2816.16	232.182	260.767	0	0	0	0	0	0	0	200	903	0	0	0	0	0	0	0	603	903	0
958	5	-18.8596	-103.299	-702.78	27544.1	22335.8	-2770.39	231.782	260.807	0	0	0	0	0	0	0	200	903	0	0	0	0	0	0	0	603	903	0
958	6	-20.3854	-102.842	-701.254	28001.9	22518.9	-2724.61	232.112	260.069	0	0	0	0	0	0	0	200	903	0	0	0	0	0	0	0	603	903	0
958	7	-19.6225	-102.384	-706.747	27452.6	22518.9	-2678.83	231.863	261.156	0	0	0	0	0	0	0	200	903	0	0	0	0	0	0	0	603	903	0
958	8	-18.5544	-101.621	-707.053	27452.6	22396.9	-2587.28	231.676	261.173	0	0	0	0	0	0	0	200	903	0	0	0	0	0	0	0	603	903	0
958	9	-19.4699	-100.858	-705.222	27544.1	22824.1	-2861.94	232.364	260.943	0	0	0	0	0	0	0	200	903	0	0	0	0	0	0	0	603	903	0
959	0	-16.7233	-100.248	-711.02	28459.6	22824.1	-2587.28	232.101	259.974	0	0	0	0	0	0	0	200	903	0	0	0	0	0	0	0	603	903	0
959	1	-15.5026	-100.248	-715.292	28551.2	22641	-2404.17	231.653	260.085	0	0	0	0	0	0	0	200	903	0	0	0	0	0	0	0	603	903	0
959	2	-16.7233	-99.6373	-714.682	28551.2	22946.2	-2358.4	232.107	260.051	0	0	0	0	0	0	0	200	903	0	0	0	0	0	0	0	603	903	0
959	3	-16.5707	-99.1795	-716.818	28185	23007.2	-2221.07	232.096	260.68	0	0	0	0	0	0	0	200	903	0	0	0	0	0	0	0	603	903	0
959	4	-17.944	-97.8062	-717.429	28001.9	22702	-1946.41	231.644	260.969	0	0	0	0	0	0	0	200	903	0	0	0	0	0	0	0	603	903	0
959	5	-17.4863	-99.1795	-718.344	28642.7	22946.2	-2358.4	231.943	260.127	0	0	0	0	0	0	0	200	903	0	0	0	0	0	0	0	603	903	0
959	6	-17.4863	-97.1959	-716.208	29192.1	23129.3	-2541.5	232.294	259.241	0	0	0	0	0	0	0	200	903	0	0	0	0	0	0	0	603	903	0
959	7	-15.8078	-97.1959	-721.396	29008.9	23373.4	-2495.73	232.4	259.788	0	0	0	0	0	0	0	200	903	0	0	0	0	0	0	0	603	903	0
959	8	-15.0449	-97.3485	-725.058	29558.3	23129.3	-2312.62	231.9	259.233	0	0	0	0	0	0	0	200	903	0	0	0	0	0	0	0	603	903	0
959	9	-15.1974	-96.1278	-725.363	29466.7	23373.4	-2449.95	232.223	259.377	0	0	0	0	0	0	0	200	903	0	0	0	0	0	0	0	603	903	0
960	0	-16.4181	-95.8226	-727.499	30199.1	23251.3	-2358.4	231.961	258.489	0	0	0	0	0	0	0	200	903	0	0	0	0	0	0	0	603	903	0
960	1	-14.7397	-95.0597	-728.11	29741.4	23068.2	-2449.95	231.682	259.153	0	0	0	0	0	0	0	200	903	0	0	0	0	0	0	0	603	903	0
960	2	-15.9604	-94.7545	-728.72	30199.1	23495.5	-2129.52	232.242	258.559	0	0	0	0	0	0	0	200	903	0	0	0	0	0	0	0	603	903	0
960	3	-14.8923	-95.9752	-730.551	30565.3	23617.6	-2266.85	232.328	258.161	0	0	0	0	0	0	0	200	903	0	0	0	0	0	0	0	603	903	0
960	4	-13.0612	-94.6019	-731.467	30382.2	23495.5	-2312.62	232.121	258.464	0	0	0	0	0	0	0	200	903	0	0	0	0	0	0	0	603	903	0
960	5	-14.7397	-93.839	-733.603	30931.6	23373.4	-2358.4	231.861	257.836	0	0	0	0	0	0	0	200	903	0	0	0	0	0	0	0	603	903	0
960	6	-15.35	-93.3812	-733.603	30290.7	23556.5	-1992.19	232.111	258.71	0	0	0	0	0	0	0	200	903	0	0	0	0	0	0	0	603	903	0
960	7	-16.113	-92.7708	-735.129	30290.7	23373.4	-1900.63	231.795	258.795	0	0	0	0	0	0	0	200	903	0	0	0	0	0	0	0	603	903	0
960	8	-15.6552	-92.6182	-734.824	30382.2	23495.5	-1900.63	231.974	258.654	0	0	0	0	0	0	0	200	903	0	0	0	0	0	0	0	603	903	0
960	9	-15.8078	-92.6182	-735.739	31114.7	23678.6	-2129.52	232.183	257.71	0	0	0	0	0	0	0	200	903	0	0	0	0	0	0	0	603	903	0
961	0	-14.8923	-92.6182	-735.739	31664	23739.6	-2221.07	232.266	256.963	0	0	0	0	0	0	0	200	903	0	0	0	0	0	0	0	603	903	0
961	1	-15.0449	-91.8553	-738.486	31297.8	23190.3	-2358.4	231.403	257.619	0	0	0	0	0	0	0	200	903	0	0	0	0	0	0	0	603	903	0
961	2	-15.35	-92.1605	-735.434	31297.8	23861.7	-2266.85	232.446	257.443	0	0	0	0	0	0	0	200	903	0	0	0	0	0	0	0	603	903	0
961	3	-16.113	-90.9398	-739.706	31206.2	23983.8	-2175.29	232.423	257.813	0	0	0	0	0	0	0	200	903	0	0	0	0	0	0	0	603	903	0
961	4	-16.2656	-91.7027	-738.486	31389.3	23373.4	-2266.85	231.65	257.495	0	0	0	0	0	0	0	200	903	0	0	0	0	0	0	0	603	903	0
961	5	-16.8759	-90.3294	-734.824	31755.5	23373.4	-2266.85	231.808	256.785	0	0	0	0	0	0	0	200	903	0	0	0	0	0	0	0	603	903	0
961	6	-15.8078	-90.482	-738.486	32304.8	23922.7	-2266.85	232.394	256.255	0	0	0	0	0	0	0	200	903	0	0	0	0	0	0	0	603	903	0
961	7	-14.8923	-90.1768	-740.317	32579.5	23739.6	-2266.85	232.067	255.993	0	0	0	0	0	0	0	200	903	0	0	0	0	0	0	0	603	903	0
961	8	-14.7397	-90.3294	-740.622	31847.1	23800.7	-2129.52	232.136	257	0	0	0	0	0	0	0	200	903	0	0	0	0	0	0	0	603	903	0
961	9	-16.8759	-89.2613	-741.232	32121.7	23861.7	-2266.85	232.192	256.664	0	0	0	0	0	0	0	200	903	0	0	0	0	0	0	0	603	903	0
962	0	-16.7233	-88.9561	-741.843	32121.7	23861.7	-2266.85	232.165	256.7	0	0	0	0	0	0	0	200	903	0	0	0	0	0	0	0	603	903	0
962	1	-17.3337	-88.8036	-739.706	32762.6	23617.6	-2221.07	231.928	255.709	0	0	0	0	0	0	0	200	903	0	0	0	0	0	0	0	603	903	0
962	2	-16.4181	-89.1087	-737.57	33311.9	23800.7	-2129.52	232.269	254.836	0	0	0	0	0	0	0	200	903	0	0	0	0	0	0	0	603	903	0
962	3	-15.8078	-88.9561	-739.096	32945.7	23739.6	-1992.19	232.12	255.424	0	0	0	0	0	0	0	200	903	0	0	0	0	0	0	0	603	903	0
962	4	-15.6552	-88.3458	-741.232	33586.6	23678.6	-2221.07	231.945	254.688	0	0	0	0	0	0	0	200	903	0	0	0	0	0	0	0	603	903	0
962	5	-15.6552	-88.1932	-735.129	32579.5	23861.7	-2083.74	232.459	255.682	0	0	0	0	0	0	0	200	903	0	0	0	0	0	0	0	603	903	0
962	6	-17.0285	-87.4303	-740.927	32762.6	23861.7	-2221.07	232.205	255.782	0	0	0	0	0	0	0	200	903	0	0	0	0	0	0	0	603	903	0
962	7	-16.5707	-87.1251	-738.181	33128.8	23739.6	-2266.85	232.16	255.121	0	0	0	0	0	0	0	200	903	0	0	0	0	0	0	0	603	903	0
962	8	-17.0285	-86.5147	-736.96	33586.6	23800.7	-2358.4	232.296	254.425	0	0	0	0	0	0	0	200	903	0	0	0	0	0	0	0	603	903	0
962	9	-16.113	-86.9725	-738.181	33678.1	23922.7	-2129.52	232.408	254.377	0	0	0	0	0	0	0	200	903	0	0	0	0	0	0	0	603	903	0
963	0	-16.2656	-86.9725	-739.096	33311.9	23556.5	-2129.52	231.872	254.929	0	0	0	0	0	0	0	200	903	0	0	0	0	0	0	0	603	903	0
963	1	-16.7233	-86.2096	-739.706	34227.5	23434.4	-2449.95	231.681	253.728	0	0	0	0	0	0	0	200	903	0	0	0	0	0	0	0	603	903	0
963	2	-17.1811	-86.057	-739.096	33495	23922.7	-2175.29	232.368	254.681	0	0	0	0	0	0	0	200	903	0	0	0	0	0	0	0	603	903	0
963	3	-16.5707	-84.6837	-735.739	34044.4	23739.6	-2221.07	232.266	253.728	0	0	0	0	0	0	0	200	903	0	0	0	0	0	0	0	603	903	0
963	4	-17.3337	-85.1414	-736.96	33586.6	23739.6	-2404.17	232.213	254.425	0	0	0	0	0	0	0	200	903	0	0	0	0	0	0	0	603	903	0
963	5	-16.7233	-84.6837	-739.096	34227.5	23739.6	-2312.62	232.12	253.69	0	0	0	0	0	0	0	200	903	0	0	0	0	0	0	0	603	903	0
963	6	-16.7233	-83.463	-736.96	34227.5	23983.8	-2129.52	232.544	253.556	0	0	0	0	0	0	0	200	903	0	0	0	0	0	0	0	603	903	0
963	7	-16.8759	-83.9207	-739.096	34593.7	23007.2	-2129.52	231.129	253.195	0	0	0	0	0	0	0	200	903	0	0	0	0	0	0	0	603	903	0
963	8	-18.707	-83.463	-734.824	35234.5	23678.6	-2083.74	232.224	252.05	0	0	0	0	0	0	0	200	903	0	0	0	0	0	0	0	603	903	0
963	9	-17.6388	-82.7	-738.486	34044.4	23678.6	-2358.4	232.064	253.9	0	0	0	0	0	0	0	200	903	0	0	0	0	0	0	0	603	903	0
964	0	-18.4018	-82.0897	-736.349	34227.5	23617.6	-1992.19	232.074	253.517	0	0	0	0	0	0	0	200	903	0	0	0	0	0	0	0	603	903	0
964	1	-17.4863	-82.7	-734.824	34319	23678.6	-2312.62	232.224	253.296	0	0	0	0	0	0	0	200	903	0	0	0	0	0	0	0	603	903	0
964	2	-17.0285	-81.6319	-736.044	34959.9	23739.6	-2358.4	232.253	252.503	0	0	0	0	0	0	0	200	903	0	0	0	0	0	0	0	603	903	0
964	3	-17.3337	-81.0216	-736.655	35600.7	23678.6	-2221.07	232.143	251.672	0	0	0	0	0	0	0	200	903	0	0	0	0	0	0	0	603	903	0
964	4	-17.944	-81.3267	-734.213	35051.4	23617.6	-2266.85	232.167	252.26	0	0	0	0	0	0	0	200	903	0	0	0	0	0	0	0	603	903	0
964	5	-18.5544	-80.869	-737.265	35051.4	23800.7	-2266.85	232.282	252.458	0	0	0	0	0	0	0	200	903	0	0	0	0	0	0	0	603	903	0
964	6	-18.0966	-80.7164	-734.518	34593.7	24044.8	-2221.07	232.735	252.903	0	0	0	0	0	0	0	200	903	0	0	0	0	0	0	0	603	903	0
964	7	-18.707	-79.4957	-733.908	34868.3	23556.5	-2358.4	232.097	252.49	0	0	0	0	0	0	0	200	903	0	0	0	0	0	0	0	603	903	0
964	8	-17.3337	-78.8853	-733.603	34227.5	23800.7	-2175.29	232.444	253.343	0	0	0	0	0	0	0	200	903	0	0	0	0	0	0	0	603	903	0
964	9	-16.4181	-78.5802	-735.129	35692.3	23617.6	-2312.62	232.127	251.448	0	0	0	0	0	0	0	200	903	0	0	0	0	0	0	0	603	903	0
965	0	-17.3337	-78.5802	-734.518	35692.3	23678.6	-2541.5	232.237	251.407	0	0	0	0	0	0	0	200	903	0	0	0	0	0	0	0	603	903	0
965	1	-18.5544	-79.3431	-735.129	35509.2	23800.7	-1946.41	232.376	251.697	0	0	0	0	0	0	0	200	903	0	0	0	0	0	0	0	603	903	0
965	2	-18.4018	-78.1224	-729.025	35692.3	24044.8	-2312.62	232.982	251.041	0	0	0	0	0	0	0	200	903	0	0	0	0	0	0	0	603	903	0
965	3	-18.707	-77.2069	-732.382	35051.4	23434.4	-2358.4	231.998	252.141	0	0	0	0	0	0	0	200	903	0	0	0	0	0	0	0	603	903	0
965	4	-18.2492	-77.3595	-732.077	35417.6	23495.5	-2221.07	232.094	251.62	0	0	0	0	0	0	0	200	903	0	0	0	0	0	0	0	603	903	0
965	5	-16.8759	-76.4439	-731.772	36150.1	23800.7	-2175.29	232.525	250.599	0	0	0	0	0	0	0	200	903	0	0	0	0	0	0	0	603	903	0
965	6	-17.944	-76.4439	-733.298	36424.7	23007.2	-2449.95	231.375	250.328	0	0	0	0	0	0	0	200	903	0	0	0	0	0	0	0	603	903	0
965	7	-16.8759	-75.9862	-729.636	36516.3	23434.4	-2449.95	232.118	249.953	0	0	0	0	0	0	0	200	903	0	0	0	0	0	0	0	603	903	0
965	8	-18.2492	-75.5284	-732.077	35692.3	23617.6	-2221.07	232.261	251.245	0	0	0	0	0	0	0	200	903	0	0	0	0	0	0	0	603	903	0
965	9	-15.9604	-73.2396	-731.161	36150.1	23861.7	-2312.62	232.635	250.558	0	0	0	0	0	0	0	200	903	0	0	0	0	0	0	0	603	903	0
966	0	-18.8596	-74.0025	-732.077	35967	23556.5	-2129.52	232.178	250.87	0	0	0	0	0	0	0	200	903	0	0	0	0	0	0	0	603	903	0
966	1	-18.707	-73.5448	-729.025	37065.6	23617.6	-2175.29	232.396	249.157	0	0	0	0	0	0	0	200	903	0	0	0	0	0	0	0	603	903	0
966	2	-17.6388	-72.9344	-729.941	36699.4	23861.7	-2129.52	232.69	249.723	0	0	0	0	0	0	0	200	903	0	0	0	0	0	0	0	603	903	0
966	3	-18.0966	-73.087	-730.856	36974	23434.4	-2358.4	232.064	249.41	0	0	0	0	0	0	0	200	903	0	0	0	0	0	0	0	603	903	0
966	4	-17.944	-73.5448	-727.194	36790.9	23617.6	-2404.17	232.478	249.407	0	0	0	0	0	0	0	200	903	0	0	0	0	0	0	0	603	903	0
966	5	-18.707	-72.7818	-729.33	36333.2	23434.4	-2266.85	232.131	250.183	0	0	0	0	0	0	0	200	903	0	0	0	0	0	0	0	603	903	0
966	6	-17.3337	-71.1034	-728.415	37706.5	23861.7	-1946.41	232.758	248.235	0	0	0	0	0	0	0	200	903	0	0	0	0	0	0	0	603	903	0
966	7	-19.0121	-70.0352	-728.72	36974	23129.3	-2129.52	231.74	249.262	0	0	0	0	0	0	0	200	903	0	0	0	0	0	0	0	603	903	0
966	8	-18.2492	-69.4249	-728.415	37889.6	23800.7	-2404.17	232.675	247.984	0	0	0	0	0	0	0	200	903	0	0	0	0	0	0	0	603	903	0
966	9	-16.2656	-70.0352	-731.161	37614.9	23800.7	-2221.07	232.552	248.555	0	0	0	0	0	0	0	200	903	0	0	0	0	0	0	0	603	903	0
967	0	-17.3337	-69.4249	-729.941	37706.5	23312.4	-2358.4	231.937	248.343	0	0	0	0	0	0	0	200	903	0	0	0	0	0	0	0	603	903	0
967	1	-18.5544	-70.1878	-729.33	37614.9	22885.1	-2495.73	231.378	248.425	0	0	0	0	0	0	0	200	903	0	0	0	0	0	0	0	603	903	0
967	2	-18.8596	-68.8145	-729.636	37523.4	23495.5	-2358.4	232.202	248.572	0	0	0	0	0	0	0	200	903	0	0	0	0	0	0	0	603	903	0
967	3	-18.5544	-67.2887	-726.279	37981.1	23373.4	-2358.4	232.182	247.704	0	0	0	0	0	0	0	200	903	0	0	0	0	0	0	0	603	903	0
967	4	-17.3337	-66.8309	-728.415	37431.8	23312.4	-2175.29	232.004	248.612	0	0	0	0	0	0	0	200	903	0	0	0	0	0	0	0	603	903	0
967	5	-17.0285	-65.6102	-727.499	38255.8	23251.3	-2449.95	231.961	247.415	0	0	0	0	0	0	0	200	903	0	0	0	0	0	0	0	603	903	0
967	6	-16.5707	-65.6102	-729.33	38347.3	23190.3	-2312.62	231.797	247.421	0	0	0	0	0	0	0	200	903	0	0	0	0	0	0	0	603	903	0
967	7	-18.4018	-66.3731	-729.33	38347.3	23373.4	-2266.85	232.048	247.421	0	0	0	0	0	0	0	200	903	0	0	0	0	0	0	0	603	903	0
967	8	-17.944	-65.305	-729.33	38805.1	23922.7	-2129.52	232.801	246.794	0	0	0	0	0	0	0	200	903	0	0	0	0	0	0	0	603	903	0
967	9	-18.707	-64.6947	-727.805	38072.7	23373.4	-2358.4	232.115	247.688	0	0	0	0	0	0	0	200	903	0	0	0	0	0	0	0	603	903	0
968	0	-18.2492	-63.9317	-727.194	38255.8	23434.4	-2404.17	232.226	247.393	0	0	0	0	0	0	0	200	903	0	0	0	0	0	0	0	603	903	0
968	1	-17.0285	-63.7791	-726.889	38164.2	23678.6	-1900.63	232.575	247.497	0	0	0	0	0	0	0	200	903	0	0	0	0	0	0	0	603	903	0
968	2	-17.4863	-63.1688	-728.415	38805.1	23617.6	-2404.17	232.423	246.727	0	0	0	0	0	0	0	200	903	0	0	0	0	0	0	0	603	903	0
968	3	-17.3337	-62.1007	-728.11	38805.1	23495.5	-2541.5	232.269	246.704	0	0	0	0	0	0	0	200	903	0	0	0	0	0	0	0	603	903	0
968	4	-17.944	-62.2533	-727.805	39537.5	23068.2	-2312.62	231.696	245.676	0	0	0	0	0	0	0	200	903	0	0	0	0	0	0	0	603	903	0
968	5	-16.2656	-61.6429	-725.668	39812.2	23678.6	-2404.17	232.63	245.137	0	0	0	0	0	0	0	200	903	0	0	0	0	0	0	0	603	903	0
968	6	-17.6388	-60.88	-727.194	38896.6	23251.3	-2358.4	231.974	246.511	0	0	0	0	0	0	0	200	903	0	0	0	0	0	0	0	603	903	0
968	7	-17.1811	-59.6593	-726.279	38896.6	23617.6	-2449.95	232.519	246.444	0	0	0	0	0	0	0	200	903	0	0	0	0	0	0	0	603	903	0
968	8	-16.2656	-59.8119	-725.974	38896.6	23434.4	-2083.74	232.28	246.421	0	0	0	0	0	0	0	200	903	0	0	0	0	0	0	0	603	903	0
968	9	-16.8759	-58.8963	-727.805	39629.1	23434.4	-2221.07	232.199	245.55	0	0	0	0	0	0	0	200	903	0	0	0	0	0	0	0	603	903	0
969	0	-17.0285	-59.0489	-727.194	39537.5	22824.1	-1946.41	231.387	245.63	0	0	0	0	0	0	0	200	903	0	0	0	0	0	0	0	603	903	0
969	1	-17.4863	-59.5067	-728.72	39720.6	23556.5	-2404.17	232.326	245.493	0	0	0	0	0	0	0	200	903	0	0	0	0	0	0	0	603	903	0
969	2	-16.2656	-57.523	-725.668	39446	23373.4	-1992.19	232.21	245.642	0	0	0	0	0	0	0	200	903	0	0	0	0	0	0	0	603	903	0
969	3	-17.6388	-56.4549	-724.753	39354.4	23129.3	-2129.52	231.913	245.7	0	0	0	0	0	0	0	200	903	0	0	0	0	0	0	0	603	903	0
969	4	-16.4181	-56.3023	-725.974	39537.5	23312.4	-2266.85	232.112	245.539	0	0	0	0	0	0	0	200	903	0	0	0	0	0	0	0	603	903	0
969	5	-16.113	-54.7765	-728.72	40361.5	23495.5	-2175.29	232.242	244.613	0	0	0	0	0	0	0	200	903	0	0	0	0	0	0	0	603	903	0
969	6	-16.4181	-54.4713	-727.499	41002.4	23434.4	-2129.52	232.212	243.639	0	0	0	0	0	0	0	200	903	0	0	0	0	0	0	0	603	903	0
969	7	-16.5707	-53.2506	-727.805	40453	23190.3	-2129.52	231.863	244.418	0	0	0	0	0	0	0	200	903	0	0	0	0	0	0	0	603	903	0
969	8	-15.8078	-53.4032	-726.279	40086.8	22885.1	-2404.17	231.51	244.805	0	0	0	0	0	0	0	200	903	0	0	0	0	0	0	0	603	903	0
969	9	-16.7233	-52.6402	-725.974	40086.8	23312.4	-2175.29	232.112	244.782	0	0	0	0	0	0	0	200	903	0	0	0	0	0	0	0	603	903	0
970	0	-15.35	-52.0299	-725.668	40361.5	22885.1	-2129.52	231.537	244.38	0	0	0	0	0	0	0	200	903	0	0	0	0	0	0	0	603	903	0
970	1	-15.5026	-50.9618	-725.363	40819.3	23373.4	-2129.52	232.223	243.726	0	0	0	0	0	0	0	200	903	0	0	0	0	0	0	0	603	903	0
970	2	-15.0449	-51.2669	-728.415	40636.1	23312.4	-1992.19	232.004	244.213	0	0	0	0	0	0	0	200	903	0	0	0	0	0	0	0	603	903	0
970	3	-14.8923	-50.6566	-725.668	41368.6	23434.4	-2266.85	232.294	242.992	0	0	0	0	0	0	0	200	903	0	0	0	0	0	0	0	603	903	0
970	4	-15.35	-50.6566	-727.499	40727.7	23251.3	-1717.53	231.961	244.017	0	0	0	0	0	0	0	200	903	0	0	0	0	0	0	0	603	903	0
970	5	-14.7397	-49.2833	-727.194	41093.9	23312.4	-1854.86	232.058	243.49	0	0	0	0	0	0	0	200	903	0	0	0	0	0	0	0	603	903	0
970	6	-15.8078	-48.3678	-726.279	41093.9	23373.4	-2266.85	232.182	243.419	0	0	0	0	0	0	0	200	903	0	0	0	0	0	0	0	603	903	0
970	7	-15.0449	-47.6048	-725.974	41368.6	23251.3	-2175.29	232.028	243.016	0	0	0	0	0	0	0	200	903	0	0	0	0	0	0	0	603	903	0
970	8	-14.4345	-46.3841	-725.668	41826.3	23434.4	-2083.74	232.294	242.362	0	0	0	0	0	0	0	200	903	0	0	0	0	0	0	0	603	903	0
970	9	-14.5871	-47.2996	-728.415	41734.8	23068.2	-2037.96	231.669	242.705	0	0	0	0	0	0	0	200	903	0	0	0	0	0	0	0	603	903	0
971	0	-15.1974	-46.5367	-728.72	42284.1	23129.3	-2083.74	231.74	241.975	0	0	0	0	0	0	0	200	903	0	0	0	0	0	0	0	603	903	0
971	1	-15.5026	-45.4686	-728.415	41551.7	23312.4	-1992.19	232.004	242.956	0	0	0	0	0	0	0	200	903	0	0	0	0	0	0	0	603	903	0
971	2	-14.8923	-44.2479	-725.363	42009.4	23007.2	-2083.74	231.718	242.085	0	0	0	0	0	0	0	200	903	0	0	0	0	0	0	0	603	903	0
971	3	-14.5871	-45.316	-726.279	42101	23251.3	-2083.74	232.014	242.032	0	0	0	0	0	0	0	200	903	0	0	0	0	0	0	0	603	903	0
971	4	-13.9767	-44.8582	-726.279	42925	22457.9	-2266.85	230.922	240.897	0	0	0	0	0	0	0	200	903	0	0	0	0	0	0	0	603	903	0
971	5	-12.9086	-44.0953	-729.636	42192.5	22946.2	-2083.74	231.449	242.173	0	0	0	0	0	0	0	200	903	0	0	0	0	0	0	0	603	903	0
971	6	-13.9767	-44.8582	-728.72	42925	22885.1	-2037.96	231.405	241.095	0	0	0	0	0	0	0	200	903	0	0	0	0	0	0	0	603	903	0
971	7	-13.8242	-43.1798	-727.194	42558.8	23434.4	-2266.85	232.226	241.475	0	0	0	0	0	0	0	200	903	0	0	0	0	0	0	0	603	903	0
971	8	-14.5871	-41.9591	-728.415	43016.5	23556.5	-1992.19	232.339	240.945	0	0	0	0	0	0	0	200	903	0	0	0	0	0	0	0	603	903	0
971	9	-14.8923	-40.891	-726.889	43016.5	23129.3	-2083.74	231.82	240.821	0	0	0	0	0	0	0	200	903	0	0	0	0	0	0	0	603	903	0
972	0	-13.9767	-41.1961	-725.363	43657.4	23251.3	-1900.63	232.055	239.813	0	0	0	0	0	0	0	200	903	0	0	0	0	0	0	0	603	903	0
972	1	-13.3664	-40.5858	-726.279	43840.5	23251.3	-1992.19	232.014	239.637	0	0	0	0	0	0	0	200	903	0	0	0	0	0	0	0	603	903	0
972	2	-12.9086	-40.891	-727.194	43932	22824.1	-1900.63	231.387	239.587	0	0	0	0	0	0	0	200	903	0	0	0	0	0	0	0	603	903	0
972	3	-13.3664	-41.8065	-728.415	43932	23007.2	-2037.96	231.585	239.688	0	0	0	0	0	0	0	200	903	0	0	0	0	0	0	0	603	903	0
972	4	-13.2138	-39.9754	-727.499	43565.8	23007.2	-2266.85	231.625	240.116	0	0	0	0	0	0	0	200	903	0	0	0	0	0	0	0	603	903	0
972	5	-13.519	-39.9754	-728.11	43932	22885.1	-2083.74	231.431	239.663	0	0	0	0	0	0	0	200	903	0	0	0	0	0	0	0	603	903	0
972	6	-13.0612	-38.6021	-725.668	44023.6	23007.2	-1534.42	231.705	239.334	0	0	0	0	0	0	0	200	903	0	0	0	0	0	0	0	603	903	0
972	7	-13.519	-39.3651	-727.194	44206.7	23129.3	-1900.63	231.806	239.209	0	0	0	0	0	0	0	200	903	0	0	0	0	0	0	0	603	903	0
972	8	-12.6034	-37.8392	-725.363	45030.7	22885.1	-2175.29	231.55	237.92	0	0	0	0	0	0	0	200	903	0	0	0	0	0	0	0	603	903	0
972	9	-10.925	-38.1444	-728.11	44847.6	23251.3	-1854.86	231.934	238.405	0	0	0	0	0	0	0	200	903	0	0	0	0	0	0	0	603	903	0
973	0	-12.2983	-38.1444	-726.889	45305.3	22946.2	-1946.41	231.568	237.672	0	0	0	0	0	0	0	200	903	0	0	0	0	0	0	0	603	903	0
973	1	-13.0612	-38.9073	-726.889	44847.6	22763.1	-1717.53	231.316	238.302	0	0	0	0	0	0	0	200	903	0	0	0	0	0	0	0	603	903	0
973	2	-13.2138	-37.534	-726.279	44939.1	22641	-1992.19	231.174	238.124	0	0	0	0	0	0	0	200	903	0	0	0	0	0	0	0	603	903	0
973	3	-13.2138	-36.3133	-725.058	45030.7	22824.1	-2175.29	231.479	237.894	0	0	0	0	0	0	0	200	903	0	0	0	0	0	0	0	603	903	0
973	4	-13.0612	-36.4659	-723.227	45213.8	22702	-2083.74	231.39	237.483	0	0	0	0	0	0	0	200	903	0	0	0	0	0	0	0	603	903	0
973	5	-12.2983	-35.703	-725.058	45213.8	23129.3	-2266.85	231.9	237.641	0	0	0	0	0	0	0	200	903	0	0	0	0	0	0	0	603	903	0
973	6	-12.1457	-36.3133	-726.279	45946.2	22518.9	-1900.63	231.006	236.738	0	0	0	0	0	0	0	200	903	0	0	0	0	0	0	0	603	903	0
973	7	-12.756	-35.8556	-725.668	45580	22457.9	-2221.07	230.948	237.189	0	0	0	0	0	0	0	200	903	0	0	0	0	0	0	0	603	903	0
973	8	-12.756	-35.3978	-725.363	45946.2	22518.9	-2266.85	231.045	236.658	0	0	0	0	0	0	0	200	903	0	0	0	0	0	0	0	603	903	0
973	9	-13.519	-35.5504	-725.668	45946.2	22580	-2266.85	231.116	236.684	0	0	0	0	0	0	0	200	903	0	0	0	0	0	0	0	603	903	0
974	0	-12.4509	-35.0926	-722.922	45946.2	22641	-1992.19	231.319	236.444	0	0	0	0	0	0	0	200	903	0	0	0	0	0	0	0	603	903	0
974	1	-12.9086	-34.94	-723.837	46220.9	22580	-1992.19	231.195	236.145	0	0	0	0	0	0	0	200	903	0	0	0	0	0	0	0	603	903	0
974	2	-12.2983	-35.2452	-723.532	46404	22580	-1946.41	231.208	235.865	0	0	0	0	0	0	0	200	903	0	0	0	0	0	0	0	603	903	0
974	3	-12.4509	-34.3297	-722.617	46953.3	22580	-1900.63	231.248	235.023	0	0	0	0	0	0	0	200	903	0	0	0	0	0	0	0	603	903	0
974	4	-12.1457	-34.0245	-723.837	47685.7	22518.9	-1625.98	231.11	234.121	0	0	0	0	0	0	0	200	903	0	0	0	0	0	0	0	603	903	0
[truncated: 3,015 more rows]
