# Supplementary material for: The Effects of an Extemporaneous Speech Dual-task on Older Adult Gait Control
Source: Research Square preprint supplement (doi:10.21203/rs.3.rs-7674245/v1), 2025-11-18
Supplement: Supplementary file 117 [file Over10ground10.xlsx]

## Sheet: Sheet1
Trajectories
		10:LFHD			10:RFHD			10:LBHD			10:RBHD			10:C7			10:T10			10:CLAV			10:STRN			10:RBAK			10:LSHO			10:LUPA			10:LELB			10:LFRM			10:LWRA			10:LWRB			10:LFIN
Frame	Sub Frame	X	Y	Z	X	Y	Z	X	Y	Z	X	Y	Z	X	Y	Z	X	Y	Z	X	Y	Z	X	Y	Z	X	Y	Z	X	Y	Z	X	Y	Z	X	Y	Z	X	Y	Z	X	Y	Z	X	Y	Z	X	Y	Z
		mm	mm	mm	mm	mm	mm	mm	mm	mm	mm	mm	mm	mm	mm	mm	mm	mm	mm	mm	mm	mm	mm	mm	mm	mm	mm	mm	mm	mm	mm	mm	mm	mm	mm	mm	mm	mm	mm	mm	mm	mm	mm	mm	mm	mm	mm	mm	mm
569	0	198.799	-2327.81	1573.6	302.684	-2336.96	1569.75	170.303	-2488.58	1547.96	287.676	-2502.49	1544.89	234.442	-2517.54	1413.98	205.716	-2611.28	1135.87	234.711	-2356.83	1312.35	235.408	-2257.58	1110.9	290.009	-2612.92	1224.89	82.5153	-2413.17	1378.91	-38.319	-2420.54	1147.12	-50.1944	-2427.49	1048.6	-58.7824	-2337.85	921.047	-9.2761	-2300.71	827.64	-68.3968	-2342.86	805.243	-60.75	-2275.05	755.199
570	0	200.243	-2316.56	1576.22	304.163	-2325.73	1571.98	171.671	-2477.5	1551.24	289.129	-2491.34	1547.82	235.478	-2506.6	1416.19	206.287	-2600.11	1138.07	236.04	-2345.89	1315.29	236.619	-2246.72	1114.17	290.351	-2601.38	1226.8	83.6176	-2402.02	1382.16	-37.4996	-2409.28	1150.57	-49.4012	-2417.85	1052.02	-57.9121	-2329.31	923.782	-8.6671	-2293.52	829.353	-68.4314	-2335.2	808.317	-59.7569	-2268.55	756.552
571	0	201.743	-2305.42	1578.75	305.581	-2314.6	1574.36	173.1	-2466.34	1554.45	290.451	-2480.19	1550.74	236.343	-2495.71	1418.71	207.3	-2589.11	1140.52	237.041	-2334.94	1318.05	237.505	-2235.82	1117.26	290.901	-2589.81	1228.91	84.7053	-2391.06	1385.25	-36.8033	-2398.11	1153.89	-48.4073	-2408.16	1055.19	-57.3179	-2320.54	926.255	-8.01075	-2286.34	831.183	-68.6428	-2327.19	810.951	-58.8467	-2261.94	758.013
572	0	202.862	-2294.5	1581.09	306.935	-2303.5	1576.39	174.225	-2455.34	1557.17	291.589	-2469.14	1553.23	237.37	-2484.78	1420.89	208.503	-2578.2	1142.98	238.048	-2324.2	1320.58	238.33	-2225.02	1120.01	291.577	-2578.46	1230.97	85.5748	-2380.07	1387.84	-36.2096	-2387.09	1157.1	-47.7616	-2398.7	1058.28	-56.728	-2311.92	928.726	-7.41715	-2279.22	832.903	-68.8279	-2319.25	813.689	-57.8185	-2255.25	759.238
573	0	204.296	-2283.47	1583.48	308.164	-2292.77	1578.46	175.278	-2444.38	1559.56	292.683	-2458.42	1555.45	238.264	-2473.97	1423	209.679	-2567.17	1145.33	239.062	-2313.33	1322.99	238.986	-2214.22	1122.82	292.399	-2567.29	1232.91	86.2576	-2369.41	1390.51	-35.7206	-2376.24	1160	-47.1449	-2389.34	1061.05	-56.3231	-2303.32	931.066	-6.74984	-2272.06	834.777	-69.3152	-2311.26	816.312	-56.8387	-2248.5	760.289
574	0	205.289	-2272.57	1585.68	309.165	-2281.87	1580.43	176.205	-2433.33	1561.9	293.491	-2447.37	1557.36	239.023	-2463.11	1425.18	210.796	-2556.19	1147.71	239.498	-2302.6	1325.19	239.435	-2203.63	1125.04	293.289	-2556.12	1235.05	86.7844	-2358.8	1392.77	-35.1684	-2365.47	1162.53	-46.6371	-2379.84	1063.8	-55.9802	-2294.64	933.227	-6.42362	-2264.71	836.144	-69.6597	-2303.08	818.45	-56.1665	-2241.72	761.355
575	0	206.359	-2261.62	1587.63	310.09	-2271.05	1582.2	176.859	-2422.42	1564.06	294.187	-2436.53	1559.17	239.733	-2452.19	1427.24	211.897	-2545.22	1149.88	239.921	-2291.88	1326.96	239.474	-2192.93	1126.91	294.207	-2545.17	1237.2	87.4117	-2348.18	1394.72	-34.6925	-2354.96	1164.68	-46.3351	-2370.37	1066.02	-55.668	-2286.07	934.898	-6.23529	-2257.33	837.484	-70.0863	-2295.08	820.436	-55.5613	-2234.89	762.206
576	0	207.137	-2250.74	1589.46	311.117	-2260.43	1583.85	177.487	-2411.58	1565.89	294.754	-2425.84	1560.76	240.383	-2441.39	1429.12	212.956	-2534.36	1151.71	240.535	-2281.04	1328.71	239.66	-2182.49	1128.57	295.272	-2534.31	1239.21	87.753	-2337.85	1396.62	-34.3899	-2344.95	1166.51	-45.9867	-2360.95	1067.81	-55.4588	-2277.39	936.343	-6.2081	-2250.03	838.331	-70.3105	-2287.24	822.104	-55.1888	-2228.02	762.812
577	0	207.971	-2239.94	1591.23	311.915	-2249.78	1585.41	178.038	-2400.77	1567.71	295.266	-2415.2	1562.26	240.935	-2430.64	1430.86	213.97	-2523.64	1153.38	240.459	-2270.49	1330.36	239.334	-2172.06	1129.84	296.329	-2523.75	1241.18	87.926	-2327.69	1398.18	-34.0277	-2335.25	1167.82	-45.6583	-2351.57	1069.55	-55.3348	-2269.01	937.514	-6.45179	-2242.45	839.163	-70.7662	-2279.44	823.346	-55.3104	-2220.96	763.332
578	0	208.682	-2229.15	1593.01	312.425	-2239.14	1586.95	178.34	-2389.91	1569.36	295.592	-2404.59	1563.88	241.435	-2419.95	1432.68	215.006	-2513.06	1155.15	240.365	-2259.78	1331.74	238.767	-2161.4	1130.9	297.417	-2513.09	1243.22	88.0501	-2317.48	1399.65	-33.8914	-2326.06	1169	-45.4161	-2342.17	1070.97	-55.4121	-2260.5	938.448	-6.89463	-2234.62	839.802	-71.2525	-2271.72	824.464	-55.6748	-2213.89	763.762
579	0	209.133	-2218.46	1594.53	312.949	-2228.5	1588.37	178.64	-2379.19	1571.03	295.952	-2393.9	1565.28	242.026	-2409.25	1434.33	216.218	-2502.81	1156.85	240.117	-2249.26	1332.84	238.345	-2151.07	1131.74	298.67	-2502.55	1245.16	87.9979	-2307.57	1400.93	-33.556	-2317.14	1169.86	-45.2203	-2333.08	1072.02	-55.4138	-2252.19	939.182	-7.20549	-2226.68	840.355	-71.519	-2264.33	825.313	-56.3602	-2206.94	764.429
580	0	209.429	-2207.82	1596.02	313.506	-2217.9	1589.66	178.997	-2368.53	1572.61	296.196	-2383.25	1566.62	242.586	-2398.65	1435.81	217.586	-2492.97	1158.47	239.864	-2238.66	1334.3	237.779	-2140.75	1132.55	299.926	-2492.1	1246.95	88.0904	-2297.64	1402.05	-33.2353	-2308.58	1170.61	-44.7582	-2324.11	1073.17	-55.6455	-2244.04	939.991	-7.94527	-2219.09	840.95	-72.1079	-2256.98	826.047	-57.428	-2199.69	764.891
581	0	209.748	-2197.09	1597.38	313.498	-2207.23	1590.91	179.249	-2357.89	1573.96	296.433	-2372.56	1567.99	243.106	-2388.07	1437.34	218.972	-2483.29	1160.16	239.877	-2228.24	1335.47	237.055	-2130.57	1133.19	301.243	-2481.51	1248.73	88.1014	-2287.92	1403.1	-32.8052	-2300.25	1171.56	-44.2887	-2315.22	1074.16	-56.0081	-2235.8	940.713	-8.73825	-2211.23	841.179	-72.6061	-2249.71	826.916	-58.6327	-2192.35	765.509
582	0	209.869	-2186.41	1598.45	313.568	-2196.43	1592.1	179.43	-2347.35	1575.34	296.631	-2361.75	1569.2	243.683	-2377.44	1438.73	220.346	-2473.66	1161.67	239.588	-2217.97	1336.32	236.269	-2120.36	1133.85	302.547	-2470.99	1250.44	88.0177	-2278.21	1403.92	-32.5046	-2292.14	1172.15	-43.799	-2306.66	1074.95	-56.3688	-2227.84	941.323	-9.55878	-2203.28	841.55	-73.1211	-2242.42	827.539	-60.0229	-2184.95	766.057
583	0	209.748	-2175.84	1599.38	313.695	-2185.66	1592.98	179.637	-2336.81	1576.41	296.846	-2351.1	1570.34	244.252	-2366.93	1439.92	221.642	-2464.01	1162.93	239.147	-2207.65	1337.15	235.555	-2110.12	1134.31	303.796	-2460.52	1251.88	88.0876	-2268.66	1404.64	-32.1668	-2284.07	1172.88	-43.3236	-2298.25	1075.77	-56.7114	-2219.99	941.882	-10.4313	-2195.33	841.941	-73.5933	-2235.24	828.182	-61.4694	-2177.52	766.671
584	0	209.758	-2165.28	1600.07	313.721	-2175.01	1593.71	179.891	-2326.3	1577.35	297.061	-2340.53	1571.27	244.748	-2356.57	1440.89	222.904	-2454.45	1164	238.825	-2197.62	1337.66	234.864	-2100.11	1134.75	305.072	-2450.09	1253.11	88.0836	-2259.33	1405.34	-31.8502	-2276.25	1173.44	-42.7941	-2290.06	1076.51	-56.9552	-2212.42	942.341	-11.1186	-2187.36	842.32	-74.0499	-2227.85	828.716	-62.9483	-2169.98	767.267
585	0	209.7	-2154.69	1600.63	313.551	-2164.21	1594.39	180.005	-2315.89	1578.19	297.262	-2329.74	1572.07	245.204	-2346.22	1441.78	224.099	-2444.67	1165.01	238.316	-2187.36	1338.18	234.138	-2089.91	1135.27	306.272	-2439.65	1254.27	87.9836	-2249.85	1405.99	-31.6487	-2268.5	1174.07	-42.3812	-2281.94	1077.17	-57.2783	-2204.67	942.919	-12.0182	-2179.53	842.486	-74.6255	-2220.45	829.268	-64.4669	-2162.24	768.022
586	0	209.668	-2144.03	1601.12	313.512	-2153.4	1594.99	180.077	-2305.32	1578.8	297.463	-2318.99	1572.84	245.626	-2335.93	1442.59	225.217	-2434.77	1165.84	238.052	-2177.23	1338.61	233.546	-2079.69	1135.83	307.284	-2429.27	1255.22	87.8095	-2240.51	1406.63	-31.4518	-2260.66	1174.48	-42.0516	-2273.92	1077.78	-57.7407	-2196.88	943.287	-12.9	-2171.65	842.808	-75.2955	-2212.84	829.945	-65.9189	-2154.48	768.746
587	0	209.466	-2133.41	1601.51	313.303	-2142.6	1595.18	180.347	-2294.88	1579.55	297.619	-2308.21	1573.38	246.042	-2325.74	1443.13	226.247	-2424.72	1166.34	237.571	-2167.11	1339.04	232.993	-2069.57	1136.28	308.259	-2419.02	1255.93	87.7193	-2231.16	1406.95	-31.4734	-2252.88	1175	-41.7828	-2266.02	1078.21	-58.1927	-2189.11	943.784	-13.7925	-2163.49	843.234	-75.8367	-2205.39	830.482	-67.3728	-2146.69	769.485
588	0	209.366	-2122.79	1601.63	313.284	-2131.88	1595.32	180.394	-2284.38	1579.99	297.794	-2297.62	1573.94	246.391	-2315.52	1443.47	227.04	-2414.67	1166.69	237.283	-2157.12	1339.42	232.478	-2059.62	1136.81	309.084	-2408.66	1256.45	87.4613	-2221.86	1407.33	-31.3508	-2245.26	1175.33	-41.5984	-2258.17	1078.69	-58.8509	-2181.36	944.254	-14.6469	-2155.26	843.628	-76.3974	-2197.84	831.054	-68.7516	-2138.82	770.199
589	0	209.235	-2112.11	1601.51	313.27	-2121.07	1595.39	180.493	-2273.85	1580.54	297.863	-2286.75	1574.28	246.628	-2305.32	1443.74	227.571	-2404.53	1166.86	236.852	-2147.12	1339.51	232.071	-2049.72	1137.16	309.707	-2398.34	1256.77	87.2346	-2212.38	1407.46	-31.3296	-2237.64	1175.55	-41.5582	-2250.19	1078.82	-59.5403	-2173.63	944.432	-15.6012	-2146.83	843.796	-77.1487	-2190.33	831.348	-69.9924	-2130.93	770.546
590	0	209.31	-2101.61	1601.36	313.282	-2110.23	1595.1	180.653	-2263.27	1580.78	298.046	-2276.08	1574.52	246.825	-2295.11	1443.82	228.037	-2394.12	1166.93	236.467	-2137.12	1339.33	231.654	-2039.91	1136.96	310.294	-2388.16	1257.01	87.0244	-2202.84	1407.39	-31.4251	-2229.71	1175.55	-41.4718	-2242.19	1078.71	-60.1349	-2165.73	944.345	-16.0972	-2138.29	843.923	-77.3082	-2182.38	831.209	-71.0387	-2123.05	770.567
591	0	209.084	-2090.92	1600.9	313.019	-2099.41	1594.62	180.751	-2252.78	1580.85	298.204	-2265.55	1574.62	246.975	-2284.97	1443.63	228.393	-2383.92	1166.77	236.51	-2126.98	1339.06	231.366	-2030.25	1136.74	310.681	-2378.11	1256.89	86.8717	-2193.16	1407.16	-31.3279	-2221.91	1175.46	-41.5159	-2234.21	1078.68	-60.7537	-2157.74	944.18	-16.9764	-2130.31	843.58	-77.5431	-2174.43	831.057	-71.9648	-2115	770.549
592	0	209.011	-2080.31	1600.37	312.828	-2088.82	1593.88	180.802	-2242.35	1580.81	298.196	-2254.77	1574.45	247.014	-2274.78	1443.3	228.571	-2373.99	1166.72	236.284	-2116.91	1338.79	231.148	-2020.54	1136.39	310.931	-2367.98	1256.63	86.8078	-2183.44	1406.75	-31.3893	-2213.96	1175.22	-41.8074	-2226.05	1078.57	-61.4348	-2149.91	943.797	-17.7546	-2121.98	843.281	-77.8671	-2166.58	830.895	-72.7804	-2107	770.366
593	0	208.837	-2069.64	1599.75	312.696	-2077.96	1593.15	180.78	-2231.75	1580.56	298.264	-2244.23	1574.29	247.06	-2264.48	1442.97	228.832	-2364.12	1166.34	236.185	-2106.68	1338.21	231.017	-2010.77	1135.77	311.05	-2357.86	1256.46	86.6699	-2173.39	1406.16	-31.5473	-2205.7	1174.97	-41.984	-2217.77	1078.16	-62.004	-2141.86	943.247	-18.2568	-2113.26	842.877	-78.1865	-2158.52	830.381	-73.5168	-2099.01	770.041
594	0	208.602	-2059.05	1598.82	312.568	-2067.27	1592.41	180.742	-2221.16	1580.08	298.154	-2233.46	1573.7	247.03	-2254.15	1442.47	228.971	-2354.42	1165.86	236.021	-2096.53	1337.36	231.157	-2001.06	1134.78	311.065	-2347.72	1256	86.5372	-2163.25	1405.44	-31.7555	-2197.35	1174.51	-42.1691	-2209.18	1077.64	-62.4981	-2133.62	942.486	-18.5948	-2105.61	841.885	-78.9459	-2150.01	830.071	-74.0861	-2090.88	769.335
595	0	208.45	-2048.42	1597.94	312.275	-2056.67	1591.45	180.736	-2210.71	1579.24	298.129	-2222.77	1572.92	246.891	-2243.72	1441.7	228.949	-2344.63	1165.25	235.887	-2086.26	1336.45	231.298	-1991.19	1133.86	310.849	-2337.72	1255.41	86.3625	-2152.92	1404.58	-31.9862	-2188.59	1173.81	-42.3679	-2200.57	1077.05	-63.0469	-2125.48	941.696	-18.9241	-2097.6	841.042	-78.9232	-2142.39	828.976	-74.8949	-2082.41	769.022
596	0	208.221	-2037.77	1596.95	312.088	-2045.83	1590.53	180.517	-2200.13	1578.45	297.998	-2212.16	1572.24	246.722	-2233.15	1440.9	228.77	-2334.62	1164.69	235.951	-2075.77	1335.62	231.462	-1981	1132.78	310.597	-2327.62	1254.8	86.2051	-2142.34	1403.64	-32.1828	-2179.59	1173.08	-42.6064	-2191.56	1076.24	-63.5669	-2117.02	940.849	-19.388	-2089.11	840.416	-78.6394	-2134.46	827.804	-75.0832	-2074.67	767.676
597	0	207.749	-2026.99	1595.77	311.834	-2035.06	1589.57	180.333	-2189.4	1577.34	297.828	-2201.41	1571.29	246.414	-2222.53	1440.08	228.415	-2324.56	1164.03	236.04	-2065.33	1334.39	231.726	-1970.86	1131.27	310.264	-2317.4	1254.18	86.1206	-2131.56	1402.48	-32.4341	-2170.29	1172.32	-43.0501	-2182.58	1075.44	-63.8942	-2108.53	939.609	-19.8878	-2080.56	839.277	-78.8569	-2126.33	826.626	-75.4065	-2066.6	766.381
598	0	207.547	-2016.35	1594.46	311.475	-2024.47	1588.08	180.018	-2178.83	1576.15	297.517	-2190.6	1569.88	246.124	-2211.89	1438.89	228.04	-2314.45	1163.02	235.884	-2054.87	1332.93	232.069	-1960.64	1129.62	309.849	-2307.17	1253.25	85.9705	-2120.76	1401.06	-32.6954	-2160.56	1171.22	-43.2406	-2173.42	1074.52	-64.1205	-2099.92	938.217	-20.0133	-2072.26	837.808	-78.738	-2118.35	825.251	-75.6577	-2058.64	764.921
599	0	207.226	-2005.61	1592.98	311.273	-2013.71	1586.64	179.709	-2167.97	1574.65	297.178	-2179.98	1568.53	245.739	-2201.14	1437.64	227.635	-2304.19	1161.94	235.925	-2044.17	1331.51	232.363	-1950.3	1127.9	309.359	-2296.9	1252.23	85.82	-2109.82	1399.65	-33.0816	-2150.58	1170.05	-43.5533	-2164.02	1073.36	-64.4071	-2091.31	936.723	-20.5986	-2063.66	836.351	-78.6545	-2110.36	823.668	-75.6563	-2050.81	763.176
600	0	206.8	-1994.73	1591.56	310.826	-2002.91	1585.37	179.201	-2157.16	1573.18	296.802	-2169.36	1567.28	245.297	-2190.29	1436.39	226.988	-2293.67	1160.83	235.84	-2033.49	1329.95	232.485	-1939.97	1125.96	308.747	-2286.53	1251.09	85.6138	-2098.6	1398.09	-33.5227	-2140.2	1168.81	-44.0303	-2154.51	1072.09	-64.5787	-2082.44	935.047	-20.8193	-2055.23	834.766	-78.8575	-2101.94	822.082	-75.9844	-2042.88	761.311
601	0	206.423	-1983.83	1589.85	310.529	-1992.12	1583.87	178.709	-2146.31	1571.67	296.272	-2158.52	1565.66	244.777	-2179.41	1434.91	226.289	-2283.15	1159.53	235.867	-2022.69	1328.08	232.871	-1929.53	1124.02	308.066	-2276.03	1249.84	85.2618	-2087.31	1396.39	-33.9805	-2129.6	1167.2	-44.3864	-2144.89	1070.64	-64.7765	-2073.58	933.206	-20.9201	-2046.65	832.866	-78.5967	-2093.91	820.273	-75.943	-2034.9	759.257
602	0	205.959	-1972.92	1587.92	310.209	-1981.31	1581.98	178.216	-2135.36	1569.74	295.717	-2147.77	1563.93	244.185	-2168.47	1433.19	225.495	-2272.62	1158	235.72	-2011.92	1326.43	233.081	-1918.9	1121.91	307.298	-2265.57	1248.31	85.0099	-2076.08	1394.54	-34.5101	-2118.61	1165.56	-44.5352	-2135.04	1068.78	-64.8917	-2064.63	931.116	-21.0259	-2038.35	830.562	-78.5323	-2085.62	818.169	-75.993	-2026.99	757.033
603	0	205.447	-1961.96	1586.16	309.634	-1970.49	1580.21	177.529	-2124.4	1567.8	295.076	-2136.93	1562.18	243.544	-2157.53	1431.46	224.634	-2261.96	1156.3	235.451	-2001.15	1324.35	233.374	-1908.05	1119.96	306.464	-2254.98	1246.61	84.5595	-2064.65	1392.68	-34.8973	-2107.5	1163.71	-44.8966	-2124.94	1067.21	-65.0381	-2055.35	928.957	-21.0367	-2029.67	828.498	-78.4346	-2077.24	815.983	-75.9195	-2018.97	754.62
604	0	204.89	-1950.84	1584.18	309.114	-1959.53	1578.4	176.798	-2113.21	1565.98	294.358	-2125.97	1560.51	242.804	-2146.46	1429.68	223.755	-2251.15	1154.75	235.381	-1990.05	1322.6	233.44	-1897.17	1117.82	305.618	-2244.29	1245.03	84.1708	-2053.21	1390.79	-35.3763	-2096.19	1161.67	-45.3482	-2114.7	1065.29	-65.0564	-2045.97	926.633	-20.9543	-2021.13	826.07	-78.4259	-2068.59	814.034	-75.8053	-2010.79	751.984
605	0	204.107	-1939.75	1582.21	308.548	-1948.5	1576.56	175.949	-2102.19	1564.02	293.757	-2115.24	1558.82	242.036	-2135.46	1427.9	222.923	-2240.28	1152.94	234.937	-1979.14	1320.38	233.707	-1886.11	1115.91	304.709	-2233.58	1243.33	83.6431	-2041.7	1388.56	-35.8065	-2084.54	1159.45	-45.8636	-2104.45	1063.45	-64.9997	-2036.57	924.226	-20.6472	-2012.51	823.364	-78.3604	-2059.82	811.796	-75.4279	-2002.44	749.312
606	0	203.394	-1928.6	1580.08	307.768	-1937.56	1574.52	175.145	-2091.13	1561.87	292.92	-2104.22	1556.76	241.094	-2124.5	1425.8	222.135	-2229.36	1150.89	234.631	-1967.91	1318.42	233.639	-1875.11	1113.73	303.747	-2222.91	1241.35	82.9666	-2030.3	1386.43	-36.2318	-2073	1157.27	-45.9904	-2093.89	1061.1	-65.2622	-2026.62	921.953	-20.3953	-2004.03	820.659	-78.6457	-2050.75	809.241	-75.1342	-1994.33	746.42
607	0	202.489	-1917.41	1577.89	306.731	-1926.25	1572.34	174.105	-2079.91	1559.82	291.902	-2093.04	1554.8	240.131	-2113.44	1423.82	221.359	-2218.29	1148.95	234.183	-1956.72	1316.32	233.702	-1863.76	1111.78	302.826	-2212.01	1239.38	82.4489	-2018.77	1384.09	-36.7859	-2061.08	1154.91	-46.3261	-2083.28	1058.85	-65.5035	-2016.76	919.449	-20.1263	-1995.06	817.89	-78.6585	-2041.76	806.784	-74.6819	-1985.72	743.487
608	0	201.491	-1906.15	1575.91	305.691	-1914.97	1570.39	173.027	-2068.59	1557.94	290.734	-2081.39	1552.57	239.092	-2102.25	1421.92	220.507	-2206.98	1146.87	233.356	-1945.81	1313.95	233.601	-1852.42	1109.67	301.879	-2200.99	1237.49	81.6757	-2007.35	1381.89	-37.2598	-2049.23	1152.5	-46.8115	-2072.71	1056.78	-65.2094	-2006.91	916.706	-19.5473	-1986.16	814.756	-78.6287	-2032.31	804.498	-74.1523	-1977.14	740.451
609	0	200.379	-1894.87	1573.76	304.653	-1903.77	1568.49	171.894	-2057.36	1555.86	289.603	-2070.42	1550.95	238.048	-2091.12	1419.88	219.779	-2195.49	1144.73	232.707	-1934.36	1312.26	233.554	-1840.78	1107.96	301.061	-2189.97	1235.59	80.9255	-1995.96	1379.57	-37.8679	-2037.26	1150.19	-47.1	-2061.91	1054.31	-65.3541	-1996.85	913.998	-19.569	-1977.07	812.046	-78.7491	-2022.66	801.918	-73.4242	-1968.25	737.365
610	0	199.254	-1883.5	1571.93	303.469	-1892.53	1566.73	170.659	-2046.08	1553.89	288.302	-2059.18	1549.14	236.956	-2079.99	1417.89	219.065	-2183.92	1142.49	231.852	-1923.18	1310.53	233.393	-1829.35	1106.27	300.211	-2178.79	1233.56	79.847	-1984.58	1377.54	-38.3627	-2025.49	1147.9	-47.4319	-2051	1051.92	-65.3333	-1986.7	911.525	-19.1466	-1967.8	809.397	-78.8874	-2012.91	799.281	-72.7735	-1959.23	734.397
611	0	197.806	-1872.13	1570.07	302.256	-1881.15	1565.09	169.215	-2034.57	1552.14	286.798	-2047.72	1547.39	235.769	-2068.69	1415.96	218.394	-2172.31	1140.44	231.099	-1911.67	1308.84	233.154	-1817.52	1104.87	299.337	-2167.44	1231.63	78.8139	-1973.28	1375.34	-39.1059	-2013.71	1145.56	-47.7969	-2039.86	1049.49	-65.2983	-1976.15	908.928	-18.6939	-1958.26	806.643	-79.2378	-2002.86	797.06	-72.3287	-1949.88	731.522
612	0	196.469	-1860.63	1568.26	300.778	-1869.78	1563.44	167.684	-2023.19	1550.26	285.324	-2036.32	1545.81	234.586	-2057.38	1414.19	217.861	-2160.57	1138.36	230.105	-1900.42	1306.97	232.907	-1805.75	1103.37	298.643	-2155.89	1229.79	77.7092	-1961.87	1373.15	-39.826	-2002.2	1143.21	-48.0709	-2028.74	1047.05	-65.2688	-1965.66	906.127	-18.5074	-1948.28	804.356	-79.4158	-1992.38	794.545	-71.8425	-1940.27	728.547
613	0	194.945	-1849.24	1566.52	299.287	-1858.38	1561.91	165.98	-2011.65	1548.5	283.656	-2024.96	1544.27	233.28	-2046.22	1412.29	217.46	-2148.75	1136.12	229.061	-1888.54	1305.65	232.389	-1793.95	1101.9	297.943	-2144.2	1227.86	76.544	-1950.61	1371.06	-40.4231	-1990.65	1140.87	-48.4003	-2017.63	1044.55	-65.3938	-1954.77	903.765	-18.0853	-1938.18	801.481	-79.3365	-1981.93	791.938	-71.1902	-1930.46	725.517
614	0	193.312	-1837.67	1564.68	297.786	-1847	1560.32	164.366	-2000.16	1546.79	281.965	-2013.61	1542.81	231.995	-2034.88	1410.35	217.06	-2136.85	1133.9	228.059	-1877.14	1303.89	232.093	-1781.9	1100.66	297.325	-2132.41	1225.94	75.3634	-1939.33	1368.91	-41.0803	-1979.45	1138.41	-48.6337	-2006.11	1042.01	-65.2025	-1943.84	901.096	-17.9527	-1927.99	798.873	-79.5416	-1971.28	789.426	-70.6526	-1920.3	722.665
615	0	191.606	-1826.06	1562.99	295.883	-1835.51	1558.87	162.599	-1988.59	1545.09	280.156	-2002.09	1541.48	230.823	-2023.42	1408.59	216.747	-2124.61	1131.6	226.894	-1865.33	1302.63	231.438	-1769.73	1099.41	296.689	-2120.43	1223.98	74.1062	-1928.02	1366.78	-41.7141	-1968.34	1135.93	-48.8396	-1994.77	1039.55	-65.0507	-1932.61	898.391	-18.0166	-1917.45	795.976	-79.4318	-1960.12	786.974	-70.1951	-1909.8	719.689
616	0	189.734	-1814.6	1561.3	294.184	-1823.95	1557.64	160.604	-1976.91	1543.55	278.326	-1990.55	1540.34	229.597	-2011.97	1406.9	216.482	-2112.21	1129.41	225.794	-1853.75	1300.99	230.825	-1757.35	1098.23	296.139	-2108.25	1222.12	72.7435	-1916.76	1364.68	-42.3316	-1957.32	1133.47	-49.0549	-1983.39	1037.01	-65.033	-1921.25	895.771	-17.8921	-1906.16	793.6	-79.6569	-1948.97	784.515	-69.7556	-1899.07	716.851
617	0	187.854	-1802.9	1559.95	292.368	-1812.52	1556.49	158.649	-1965.4	1542.13	276.337	-1979.07	1539.18	228.181	-2000.72	1405.31	216.348	-2099.86	1127.13	224.639	-1841.88	1299.84	230.08	-1744.93	1097.49	295.571	-2096.25	1220.18	71.3952	-1905.65	1362.66	-42.9353	-1946.38	1130.96	-49.4204	-1971.9	1034.49	-64.9239	-1909.65	893.276	-17.608	-1894.88	790.846	-79.6459	-1937.57	781.898	-69.3817	-1887.93	714.335
618	0	185.861	-1791.28	1558.89	290.282	-1800.77	1555.84	156.613	-1953.73	1541.02	274.376	-1967.36	1538.36	226.69	-1989.42	1404.04	216.294	-2087.27	1125.27	223.254	-1829.78	1299.18	229.357	-1732.3	1097.05	295.147	-2084.09	1218.65	69.9494	-1894.25	1361	-43.5227	-1935.64	1128.79	-49.4527	-1960.54	1032.2	-64.8968	-1898.22	891.06	-17.9531	-1882.72	788.773	-79.7121	-1925.92	779.698	-69.1203	-1876.46	711.945
619	0	183.721	-1779.6	1558.23	288.272	-1789.09	1555.59	154.59	-1941.95	1540.19	272.322	-1955.77	1538.1	225.472	-1977.69	1403.18	216.255	-2074.68	1123.96	221.931	-1817.87	1298.64	228.505	-1719.42	1096.83	294.856	-2071.74	1217.64	68.4626	-1883	1359.59	-44.0102	-1924.65	1126.69	-49.494	-1948.93	1029.95	-65.1763	-1886.33	888.863	-17.0693	-1871.57	786.359	-79.4752	-1914.14	777.661	-69.0867	-1864.7	709.902
620	0	181.658	-1767.77	1557.92	286.236	-1777.29	1555.55	152.533	-1930.13	1539.69	270.365	-1943.93	1537.91	224.255	-1966.02	1402.68	216.201	-2062.18	1122.92	220.611	-1805.8	1298.56	227.544	-1706.41	1097.23	294.742	-2059.54	1216.95	67.0907	-1871.78	1358.46	-44.5127	-1913.59	1125.02	-49.3	-1937.1	1027.98	-65.3459	-1874.57	887.378	-17.3602	-1859.45	784.951	-79.5097	-1902.15	775.854	-68.9049	-1852.74	708.295
621	0	179.418	-1755.96	1557.95	284.056	-1765.46	1555.85	150.412	-1918.34	1539.55	268.376	-1932.09	1538.2	223.174	-1954.28	1402.53	216.249	-2050.05	1122.34	219.279	-1793.8	1298.9	226.821	-1693.21	1097.8	294.934	-2047.09	1216.79	65.624	-1860.58	1357.86	-44.8109	-1902.42	1123.74	-49.0707	-1925.53	1026.66	-65.3383	-1862.71	885.967	-17.4593	-1847.21	783.852	-79.3401	-1890.03	774.5	-68.8898	-1840.39	706.934
622	0	177.291	-1744.05	1558.16	281.817	-1753.45	1556.6	148.283	-1906.38	1539.92	266.186	-1920.15	1538.97	222.031	-1942.47	1402.81	216.663	-2037.85	1122.4	217.98	-1781.67	1299.54	225.76	-1680.17	1098.86	295.227	-2034.61	1217.14	64.4579	-1849.45	1357.4	-45.0329	-1891.2	1122.9	-48.6213	-1913.54	1025.49	-65.7128	-1850.63	885.118	-17.4722	-1834.43	782.523	-79.0794	-1877.78	773.518	-69.1198	-1827.93	706.11
623	0	175.09	-1732.04	1558.58	279.669	-1741.4	1557.59	146.214	-1894.44	1540.69	264.194	-1908.08	1540.32	221.074	-1930.73	1403.57	217.518	-2025.87	1122.92	216.602	-1769.69	1300.37	224.589	-1667.24	1100.18	295.694	-2022.07	1218.04	63.2602	-1838.41	1357.33	-45.0938	-1879.74	1122.29	-48.247	-1901.22	1025.44	-65.5849	-1838.44	884.512	-17.8932	-1821.3	782.479	-79.0709	-1865.11	772.984	-69.4609	-1814.93	705.719
624	0	172.991	-1720.02	1559.42	277.496	-1729.4	1558.89	144.227	-1882.52	1541.79	262.142	-1896.15	1541.94	220.451	-1918.81	1404.72	217.842	-2013.7	1124.12	215.329	-1757.69	1301.83	223.437	-1654.68	1101.81	296.245	-2009.59	1219.39	62.1324	-1827.43	1357.9	-44.746	-1868.19	1121.99	-47.9946	-1889.35	1025.19	-65.8791	-1826	884.837	-17.8338	-1808.05	782.429	-78.5897	-1852.57	773.04	-69.7461	-1801.95	705.89
625	0	170.928	-1707.99	1560.66	275.476	-1717.27	1560.53	142.26	-1870.41	1543.46	260.126	-1884.08	1544.09	219.708	-1907.06	1406.22	218.081	-2001.1	1125.66	214.12	-1745.92	1303.71	222.376	-1642.54	1104.03	296.847	-1996.96	1221.07	60.9957	-1816.56	1359.08	-44.343	-1856.68	1122.61	-47.1216	-1877.22	1025.4	-65.8396	-1813.67	885.497	-17.8104	-1794.33	783.344	-78.1414	-1839.7	773.642	-70.2301	-1788.62	706.883
626	0	169.123	-1695.92	1562.11	273.642	-1705.15	1562.55	140.48	-1858.3	1545.42	258.299	-1872.01	1546.7	218.99	-1895.46	1408.06	219.027	-1988.53	1127.1	212.889	-1734.04	1305.82	221.048	-1630.69	1106.45	297.368	-1984.3	1223.03	60.0179	-1805.71	1360.72	-43.8901	-1845.05	1123.3	-46.5149	-1865.28	1026.42	-65.6806	-1800.91	886.774	-18.21	-1780.41	784.561	-77.6412	-1826.53	774.932	-70.8349	-1774.94	708.388
627	0	167.557	-1683.76	1563.68	272.077	-1693.2	1564.58	138.682	-1846.28	1547.7	256.617	-1860.08	1549.53	218.279	-1884.14	1410.03	220.476	-1975.42	1128.34	211.822	-1722.6	1308.24	220.026	-1619.02	1109.13	297.791	-1971.89	1225.05	59.0708	-1794.99	1362.56	-43.4004	-1833.2	1124.47	-46.015	-1852.92	1027.81	-65.7038	-1788.01	888.519	-18.5954	-1765.99	786.434	-77.3557	-1813.1	776.608	-71.5103	-1760.93	710.399
628	0	166.157	-1671.83	1565.44	270.69	-1681.32	1566.72	137.146	-1834.36	1550.05	254.992	-1848.23	1552.39	217.614	-1872.85	1411.88	221.419	-1962.14	1129.79	210.806	-1711.22	1310.75	218.876	-1607.39	1112.31	298.077	-1959.48	1226.85	58.0897	-1784.34	1364.72	-42.8977	-1821.62	1126.05	-45.1612	-1840.89	1029.5	-65.3944	-1774.97	890.615	-18.4084	-1751.83	788.629	-76.7126	-1799.5	778.686	-72.2616	-1746.8	712.965
629	0	165.027	-1659.97	1567.22	269.599	-1669.6	1568.79	135.862	-1822.46	1552.77	253.636	-1836.5	1555.37	216.931	-1861.75	1413.88	221.663	-1949.01	1131.48	209.85	-1699.96	1313.37	217.744	-1596.11	1115.19	298.17	-1947.23	1228.76	57.1093	-1773.65	1366.91	-42.4279	-1810.02	1127.84	-44.6908	-1828.65	1031.39	-65.2692	-1761.72	893.178	-18.521	-1737.32	791.035	-76.3055	-1785.53	780.94	-72.7149	-1732.14	715.821
630	0	164.222	-1648.14	1569.11	268.602	-1657.85	1570.91	134.744	-1810.63	1555.39	252.471	-1824.85	1558.33	216.238	-1850.69	1415.93	221.61	-1936.89	1133.34	208.893	-1688.81	1315.91	216.685	-1584.82	1118.32	298.087	-1935.28	1230.68	56.2768	-1762.87	1369.24	-42.3322	-1798.28	1129.76	-44.3963	-1816.36	1033.26	-65.3177	-1748.21	895.672	-18.8551	-1722.22	794.133	-75.9853	-1771.15	783.366	-73.0476	-1717.26	718.789
631	0	163.422	-1636.8	1570.93	267.919	-1646.34	1572.87	133.856	-1799.06	1558.09	251.624	-1813.45	1561.17	215.559	-1839.89	1417.94	221.536	-1925.48	1134.97	208.014	-1677.74	1318.26	215.942	-1573.91	1121.07	297.86	-1923.52	1232.39	55.7107	-1752.49	1371.5	-42.3116	-1786.64	1131.79	-44.3194	-1804.2	1035.31	-65.1474	-1734.71	898.095	-19.2295	-1707.17	797.248	-75.5995	-1756.69	785.765	-73.3982	-1701.99	721.672
632	0	162.781	-1625.26	1572.94	267.209	-1634.92	1574.69	133.246	-1787.82	1560.61	250.941	-1801.96	1563.6	215.017	-1828.8	1419.77	221.311	-1914.34	1136.7	207.275	-1666.63	1320.54	215.069	-1563.24	1123.78	297.477	-1911.99	1234.12	54.9874	-1741.72	1373.59	-42.618	-1774.98	1133.83	-44.5028	-1791.92	1037.24	-65.2402	-1721.14	900.627	-18.8531	-1692.62	799.703	-75.152	-1742.08	788.119	-73.3012	-1686.35	724.753
633	0	162.173	-1614.13	1574.64	266.728	-1623.68	1576.57	132.815	-1776.55	1562.9	250.532	-1790.7	1566.09	214.298	-1818	1421.73	220.764	-1903.15	1138.51	206.586	-1655.78	1322.63	214.277	-1552.69	1126.2	296.868	-1900.68	1236	54.2994	-1730.89	1375.64	-43.2882	-1763.11	1135.82	-45.3074	-1779.58	1039.15	-65.478	-1707.3	903.07	-18.8747	-1677.48	802.878	-75.0333	-1727.02	790.195	-73.3916	-1670.46	727.437
634	0	161.576	-1603.02	1576.32	266.095	-1612.33	1578.34	132.481	-1765.47	1565.01	250.214	-1779.48	1568.2	213.732	-1806.95	1423.56	220.099	-1892.13	1140.32	206.136	-1644.94	1324.46	213.716	-1541.97	1128.04	296.267	-1889.65	1237.85	53.6771	-1719.89	1377.54	-43.9968	-1751.32	1137.67	-46.0232	-1767.26	1040.9	-65.7594	-1693.43	905.395	-18.6411	-1662.25	805.798	-74.9439	-1711.59	792.406	-72.8863	-1654.17	730.428
635	0	161.15	-1592.1	1577.91	265.641	-1601.14	1579.9	132.326	-1754.68	1566.83	250.086	-1768.24	1569.96	213.349	-1795.69	1425.1	219.443	-1881.22	1142.05	205.633	-1634.04	1326.13	213.269	-1531.31	1129.73	295.657	-1878.89	1239.55	53.3212	-1708.99	1379.21	-44.9418	-1739.37	1139.57	-47.485	-1754.83	1042.73	-66.0554	-1679.41	907.561	-18.3764	-1647.14	808.65	-74.7677	-1696.06	794.427	-72.4214	-1637.7	733.456
636	0	160.588	-1581.2	1579.39	265.171	-1590.01	1581.38	132.395	-1743.89	1568.45	250.195	-1757.16	1571.69	212.875	-1784.75	1426.86	218.636	-1870.56	1143.79	205.248	-1623.11	1327.66	212.915	-1520.48	1131.2	294.942	-1868.33	1241.25	52.9957	-1697.82	1380.73	-45.9605	-1727.69	1141.44	-48.7821	-1742.6	1044.25	-66.6885	-1665.33	909.895	-18.339	-1631.77	811.88	-74.5792	-1680.56	796.388	-71.9159	-1621.04	736.552
637	0	160.288	-1570.3	1580.76	264.804	-1578.88	1582.77	132.382	-1733.16	1570.05	250.201	-1746.09	1573.18	212.531	-1773.65	1428.39	217.816	-1860.05	1145.55	204.944	-1612.29	1328.97	212.669	-1509.49	1132.37	294.306	-1857.8	1242.96	52.7131	-1686.59	1382.35	-47.1744	-1715.7	1143.27	-50.4342	-1730.14	1045.76	-67.0783	-1651.16	912.18	-18.2608	-1616.41	814.978	-74.4555	-1664.76	798.323	-71.4606	-1604.15	739.691
638	0	159.885	-1559.53	1582	264.535	-1567.74	1584.08	132.436	-1722.45	1571.34	250.301	-1734.97	1574.51	212.262	-1762.71	1429.8	216.941	-1849.78	1147.18	204.851	-1601.34	1330.19	212.682	-1498.75	1133.14	293.657	-1847.55	1244.55	52.6216	-1675.3	1383.8	-48.3628	-1703.91	1144.97	-52.2058	-1717.7	1047.23	-67.5122	-1637	914.42	-18.1413	-1601.16	818.179	-74.4697	-1648.84	800.286	-70.7974	-1587.09	742.922
639	0	159.588	-1548.73	1583.14	264.227	-1556.72	1585.18	132.619	-1711.8	1572.37	250.418	-1724.03	1575.62	212.02	-1751.76	1431.05	216.1	-1839.73	1148.65	204.727	-1590.44	1330.99	212.668	-1487.9	1133.74	292.888	-1837.45	1245.98	52.5553	-1664.05	1384.89	-49.8243	-1691.94	1146.61	-53.5047	-1705.22	1048.68	-68.0048	-1622.78	916.611	-17.7927	-1585.96	821.222	-73.8836	-1633.33	802.078	-69.9408	-1570.13	746.139
640	0	159.45	-1537.87	1584.1	264.073	-1545.71	1586.24	132.675	-1701.05	1573.48	250.58	-1713.01	1576.73	211.795	-1740.85	1432.33	215.178	-1829.5	1150.19	204.938	-1579.69	1331.98	212.876	-1477.13	1134.1	292.138	-1827.27	1247.33	52.591	-1652.61	1386	-51.0487	-1680	1148.17	-54.9872	-1692.57	1049.92	-68.4757	-1608.54	918.788	-17.6591	-1570.88	824.234	-74.6058	-1617.36	804.098	-69.5193	-1552.97	749.345
641	0	159.171	-1527.01	1584.88	263.739	-1534.48	1587.2	132.833	-1690.13	1574.38	250.718	-1701.93	1577.74	211.589	-1730.03	1433.58	214.145	-1819.27	1151.66	205.165	-1569.01	1332.57	213.358	-1466.63	1134.5	291.312	-1817.23	1248.8	52.6439	-1641.16	1387.19	-52.3034	-1668	1149.83	-57.0444	-1679.84	1051.3	-69.0382	-1594.34	920.895	-17.3073	-1555.84	827.319	-74.9411	-1601.41	806.518	-68.9723	-1536.12	752.737
642	0	159.297	-1516.01	1585.35	264.016	-1523.62	1587.76	132.944	-1679.34	1575.19	250.834	-1691	1578.52	211.353	-1719.26	1434.62	213.039	-1809.27	1152.95	205.299	-1558.41	1333.07	213.911	-1456.1	1134.57	290.507	-1807.34	1249.77	52.89	-1629.81	1388	-53.5106	-1655.99	1151.04	-58.4864	-1667.08	1052.51	-69.4734	-1579.97	922.804	-17.0882	-1540.83	830.051	-74.6505	-1585.76	808.073	-68.2822	-1519.28	755.862
643	0	159.46	-1505.09	1585.81	264.018	-1512.66	1588.15	133.168	-1668.37	1575.72	251.003	-1680.11	1579.18	211.207	-1708.45	1435.41	211.925	-1799.39	1153.97	205.845	-1547.94	1333.27	214.483	-1445.86	1134.51	289.563	-1797.43	1250.74	53.0179	-1618.49	1388.83	-54.5735	-1643.8	1152.28	-60.0768	-1654.35	1053.48	-69.7093	-1565.63	924.653	-16.9452	-1525.94	832.441	-74.913	-1569.87	809.864	-67.918	-1502.69	758.672
644	0	159.665	-1494.03	1586	264.405	-1501.72	1588.33	133.198	-1657.41	1576.33	251.125	-1669.1	1579.72	210.932	-1697.8	1436.21	210.773	-1789.43	1155.07	206.25	-1537.74	1333.26	215.317	-1435.79	1134.42	288.546	-1787.48	1251.53	53.2931	-1607.12	1389.47	-55.5155	-1631.61	1153.5	-61.6866	-1641.43	1054.56	-69.9467	-1551.16	926.513	-16.8148	-1511.02	835.005	-74.9499	-1554.27	811.504	-67.4083	-1486.16	761.671
645	0	160.088	-1482.99	1586.09	264.758	-1490.77	1588.42	133.471	-1646.24	1576.72	251.379	-1658.15	1580.16	210.655	-1687.28	1436.81	209.666	-1779.56	1155.94	206.734	-1527.76	1332.93	216.08	-1425.99	1134.19	287.603	-1777.64	1252.26	53.5161	-1595.78	1390.08	-56.2752	-1619.28	1154.41	-63.1678	-1628.27	1055.64	-70.194	-1536.62	928.335	-16.6945	-1496.02	837.459	-75.0263	-1538.69	813.119	-66.9226	-1469.97	764.222
646	0	160.374	-1472.01	1585.93	265.107	-1479.83	1588.16	133.589	-1635.3	1576.84	251.595	-1647.31	1580.23	210.478	-1676.72	1437.06	208.599	-1769.66	1156.34	207.099	-1517.42	1332.78	216.892	-1416.32	1133.81	286.633	-1767.84	1252.57	53.757	-1584.61	1390.48	-57.1035	-1607	1155.21	-64.8732	-1615.14	1056.38	-70.6479	-1522.11	930.041	-16.7144	-1481.05	839.691	-75.5761	-1522.86	814.856	-66.546	-1453.82	766.617
647	0	160.758	-1460.97	1585.65	265.561	-1468.94	1587.88	134.049	-1624.27	1576.95	251.901	-1636.4	1580.29	210.233	-1666.3	1437.2	207.527	-1759.91	1156.69	207.642	-1507.25	1332.64	217.55	-1406.58	1133.56	285.681	-1758.18	1252.67	53.9687	-1573.45	1390.83	-57.5926	-1594.64	1155.86	-65.9588	-1601.98	1057.1	-70.9674	-1507.72	931.566	-16.8788	-1465.76	841.951	-75.8121	-1507.3	816.462	-66.3319	-1437.83	768.737
648	0	161.192	-1450.05	1585.29	265.999	-1458.03	1587.5	134.292	-1613.3	1577.08	252.28	-1625.43	1580.32	210.021	-1655.89	1437.26	206.651	-1750.16	1156.99	208.013	-1497.1	1332.37	218.202	-1396.96	1133.18	284.821	-1748.38	1252.94	54.1959	-1562.43	1390.96	-58.2311	-1582.07	1156.33	-66.9813	-1589.03	1057.29	-71.3924	-1493.41	932.968	-16.9156	-1450.96	843.759	-75.9607	-1491.94	817.8	-66.0301	-1422.19	770.619
649	0	161.491	-1439.11	1584.64	266.254	-1447.03	1586.96	134.703	-1602.39	1576.87	252.698	-1614.47	1580.21	209.917	-1645.62	1437.09	205.817	-1740.5	1157.02	208.322	-1486.88	1331.99	218.648	-1387.45	1132.66	284.19	-1738.81	1252.91	54.3959	-1551.52	1390.93	-58.5139	-1569.62	1156.44	-68.0251	-1576.04	1057.71	-71.7949	-1479.11	934.04	-16.9996	-1436.19	845.295	-76.4066	-1476.45	818.986	-65.8279	-1406.47	772.241
650	0	161.846	-1428.23	1583.92	266.678	-1436.16	1586.14	135.108	-1591.67	1576.55	253.029	-1603.62	1579.9	209.806	-1635.29	1436.73	205.101	-1730.84	1156.81	208.699	-1476.77	1331.45	219.298	-1377.87	1131.93	283.482	-1729.15	1252.63	54.4887	-1540.77	1390.87	-58.7657	-1557.03	1156.52	-68.4914	-1562.89	1057.55	-72.0471	-1464.99	934.84	-17.1645	-1421.27	846.598	-76.4864	-1461.19	820.006	-65.6921	-1390.93	773.542
651	0	162.07	-1417.41	1583.16	266.872	-1425.18	1585.33	135.509	-1580.89	1576.19	253.523	-1592.68	1579.48	209.691	-1624.91	1436.22	204.497	-1721.39	1156.55	209.146	-1466.62	1330.8	219.778	-1368.34	1131.08	282.955	-1719.37	1252.2	54.7762	-1530.02	1390.48	-58.9818	-1544.44	1156.18	-69.2255	-1549.69	1057.36	-72.2393	-1450.93	935.491	-17.2271	-1406.45	847.61	-76.5855	-1445.97	820.563	-65.5831	-1375.48	774.65
652	0	162.236	-1406.63	1582.29	267.16	-1414.24	1584.48	136.044	-1569.99	1575.77	254.029	-1581.81	1579.2	209.698	-1614.32	1435.72	203.972	-1711.82	1156.36	209.482	-1456.49	1329.84	220.263	-1358.8	1130.02	282.522	-1709.61	1251.86	55.061	-1519.32	1389.78	-59.0709	-1531.85	1155.76	-69.5621	-1536.68	1057.1	-72.5299	-1436.85	935.77	-17.4132	-1391.67	848.149	-76.785	-1431.06	820.835	-65.5296	-1360.25	775.521
653	0	162.615	-1395.87	1581.16	267.486	-1403.33	1583.38	136.369	-1559.39	1575.19	254.476	-1570.88	1578.52	209.748	-1603.9	1435.03	203.647	-1702.16	1155.85	209.82	-1446.29	1328.89	220.484	-1349.23	1128.95	282.201	-1699.64	1251.33	55.5334	-1508.55	1388.8	-59.0387	-1519.2	1155.09	-69.6951	-1523.6	1056.32	-72.6297	-1422.9	935.67	-17.4236	-1377.02	848.541	-76.6395	-1416.29	820.906	-65.645	-1345.16	776.127
654	0	162.781	-1385.18	1579.99	267.679	-1392.53	1582.22	137.001	-1548.76	1574.38	254.925	-1560.11	1577.73	209.907	-1593.46	1434.27	203.446	-1692.47	1155.23	210.331	-1436.02	1328.01	220.932	-1339.39	1127.71	282.117	-1689.86	1250.8	55.6012	-1497.99	1388.2	-58.8124	-1506.69	1154.27	-69.71	-1510.29	1055.51	-72.7602	-1408.79	935.642	-17.4479	-1362.58	848.949	-76.2407	-1401.74	820.704	-65.7236	-1330.23	776.653
655	0	163.284	-1374.36	1578.95	268.183	-1381.7	1581.22	137.442	-1538.06	1573.59	255.504	-1549.29	1576.92	210.076	-1582.9	1433.55	203.344	-1682.4	1154.79	210.519	-1425.72	1327.03	221.279	-1329.55	1126.42	282.058	-1679.85	1250.27	56.0843	-1487.31	1387.28	-58.7273	-1494.01	1153.41	-69.495	-1497.18	1054.56	-72.6035	-1395.03	935.495	-17.4767	-1348.15	848.983	-76.5305	-1387.29	820.621	-65.7369	-1315.45	776.915
656	0	163.574	-1363.58	1577.86	268.541	-1370.75	1580.13	137.868	-1527.34	1572.58	255.971	-1538.42	1575.92	210.301	-1572.32	1432.77	203.255	-1672.18	1154.27	210.95	-1415.23	1325.78	221.504	-1319.48	1124.98	282.119	-1669.74	1249.7	56.4001	-1476.68	1386.27	-58.4869	-1481.57	1152.36	-69.0872	-1484.04	1053.57	-72.4006	-1381.49	934.992	-17.4381	-1333.97	848.809	-76.3006	-1373.03	819.996	-65.8537	-1300.99	776.825
657	0	163.926	-1352.82	1576.62	268.973	-1359.96	1578.75	138.559	-1516.56	1571.43	256.456	-1527.57	1574.67	210.656	-1561.62	1431.8	203.407	-1662.1	1153.45	211.419	-1404.8	1324.53	221.854	-1309.35	1123.25	282.297	-1659.53	1248.86	56.7322	-1466	1384.93	-58.0734	-1469.02	1151.23	-68.9196	-1470.73	1052.63	-72.1043	-1367.87	934.39	-17.3124	-1319.85	848.463	-76.1037	-1358.96	819.635	-65.9054	-1286.57	776.7
658	0	164.46	-1342.03	1575.31	269.476	-1349.22	1577.4	138.945	-1505.85	1570.24	257.026	-1516.82	1573.44	211.034	-1550.9	1430.79	203.591	-1652.16	1152.68	211.669	-1394.28	1323.12	222.039	-1299.16	1121.63	282.536	-1649.2	1247.99	57.2593	-1455.21	1383.67	-57.4019	-1456.58	1149.89	-67.58	-1457.88	1050.85	-71.8368	-1354.21	933.834	-17.1892	-1305.93	847.763	-75.9788	-1345	818.729	-65.9941	-1272.4	776.211
659	0	165.011	-1331.07	1574.02	270.052	-1338.29	1576.1	139.466	-1494.93	1569	257.563	-1506	1572.16	211.461	-1540.05	1429.76	203.856	-1641.88	1151.94	212.072	-1383.62	1321.59	222.249	-1288.85	1119.79	282.837	-1638.74	1247.14	57.6067	-1444.46	1382.33	-56.7443	-1444.19	1148.49	-67.2175	-1444.6	1049.68	-71.2812	-1340.69	932.893	-17.106	-1292.13	846.912	-75.9348	-1330.99	818.018	-65.8825	-1258.28	775.643
660	0	165.613	-1320.22	1572.64	270.694	-1327.39	1574.68	140.062	-1483.97	1567.59	258.096	-1495.01	1570.71	211.983	-1529.26	1428.67	204.255	-1631.4	1151.01	212.532	-1373.08	1320.06	222.568	-1278.65	1118.02	283.322	-1628.12	1246.16	58.3198	-1433.74	1380.6	-55.9591	-1431.85	1147.05	-66.5032	-1431.41	1048.3	-70.5493	-1327.05	932.035	-16.6618	-1278.46	845.896	-75.6549	-1317.32	817.224	-65.8663	-1244.51	774.896
661	0	166.217	-1309.29	1571.13	271.202	-1316.52	1573.09	140.616	-1473.07	1566.18	258.713	-1484.14	1569.17	212.575	-1518.47	1427.42	204.762	-1621.08	1149.8	212.952	-1362.26	1318.46	222.711	-1268.08	1116.11	283.85	-1617.58	1244.92	58.8463	-1422.93	1379.3	-55.0996	-1419.76	1145.52	-65.7489	-1418.3	1047.03	-69.7295	-1313.56	931.116	-16.1923	-1265.02	844.723	-75.295	-1303.74	815.932	-65.6049	-1230.9	773.931
662	0	166.806	-1298.31	1569.63	271.918	-1305.6	1571.63	141.255	-1462.13	1564.61	259.253	-1473.18	1567.59	213.216	-1507.57	1426.05	205.337	-1610.54	1148.54	213.469	-1351.48	1316.99	223.06	-1257.46	1114.56	284.433	-1606.8	1243.6	59.21	-1412.3	1377.84	-54.138	-1407.84	1143.96	-65.0512	-1405.19	1045.75	-68.9286	-1300.18	930.086	-15.5837	-1251.75	843.615	-75.284	-1290.12	815.196	-65.2606	-1217.4	773.086
663	0	167.548	-1287.25	1568.17	272.638	-1294.48	1570.12	141.972	-1451.01	1563.08	259.968	-1462.08	1566.09	213.903	-1496.57	1424.81	205.964	-1599.78	1147.38	213.987	-1340.62	1315.38	223.249	-1246.75	1112.72	285.103	-1595.81	1242.3	59.9052	-1401.48	1376.21	-53.3957	-1396	1142.35	-64.1457	-1392.2	1044.32	-68.0489	-1286.92	929.098	-14.9775	-1238.59	842.236	-74.7632	-1276.79	814.091	-64.8222	-1204.14	772.01
664	0	168.242	-1276.16	1566.52	273.308	-1283.31	1568.43	142.691	-1439.93	1561.46	260.722	-1451.01	1564.49	214.766	-1485.65	1423.34	206.717	-1589.03	1145.98	214.422	-1329.7	1313.71	223.374	-1235.98	1111.13	285.896	-1584.8	1240.89	60.5496	-1390.62	1374.82	-52.364	-1384.26	1140.74	-63.3186	-1379.26	1043.06	-67.075	-1273.72	928.027	-14.3062	-1225.64	840.874	-74.4964	-1263.33	813.197	-64.3086	-1190.84	770.887
665	0	169.116	-1265.15	1564.9	274.261	-1272.35	1566.84	143.445	-1428.89	1559.85	261.53	-1439.94	1562.81	215.621	-1474.74	1421.78	207.457	-1578.17	1144.39	215.113	-1318.76	1312.23	223.72	-1225.15	1109.48	286.806	-1573.8	1239.27	61.1524	-1379.88	1373.42	-51.5195	-1372.78	1139.21	-62.345	-1366.49	1041.58	-66.117	-1260.82	926.909	-13.3368	-1212.89	839.531	-73.9337	-1250.55	811.899	-63.5968	-1177.87	769.753
666	0	169.864	-1254.05	1563.25	275.114	-1261.25	1565.12	144.305	-1417.82	1558.35	262.467	-1428.93	1561.34	216.339	-1463.83	1420.22	208.275	-1567.11	1142.84	215.797	-1307.7	1310.67	224.123	-1214.09	1107.89	287.686	-1562.64	1237.64	61.9267	-1369.17	1371.88	-50.5933	-1361.36	1137.72	-61.3655	-1353.95	1040.27	-65.0319	-1247.97	925.721	-12.3717	-1200.48	838.094	-73.4566	-1237.51	810.916	-62.5045	-1165.15	768.493
667	0	170.898	-1242.94	1561.54	276.024	-1250.1	1563.4	145.335	-1406.62	1556.88	263.44	-1417.84	1559.85	217.442	-1452.84	1418.66	209.157	-1556.02	1141.28	216.566	-1296.72	1309	224.328	-1203.2	1106.18	288.683	-1551.44	1236.03	62.7556	-1358.33	1370.47	-49.6307	-1349.9	1136.29	-60.3676	-1341.43	1038.75	-63.9826	-1235.3	924.496	-11.3877	-1188.05	836.612	-72.919	-1224.54	809.779	-61.6006	-1152.47	767.115
668	0	172.04	-1231.85	1559.82	277.216	-1239.06	1561.63	146.45	-1395.44	1555.44	264.418	-1406.69	1558.24	218.557	-1441.89	1416.98	210.076	-1544.89	1139.49	217.39	-1285.69	1307.39	224.605	-1192.08	1104.64	289.71	-1540.29	1234.06	63.7429	-1347.46	1369.02	-48.4701	-1338.51	1134.67	-59.38	-1329.22	1037.37	-62.8206	-1222.89	923.358	-10.3512	-1176.06	835.03	-71.6959	-1212.15	808.745	-60.4503	-1139.99	765.934
669	0	173.287	-1220.76	1558.25	278.395	-1228.04	1559.81	147.551	-1384.41	1554.08	265.576	-1395.79	1556.74	219.577	-1430.96	1415.2	211.039	-1533.71	1137.53	218.206	-1274.58	1305.93	225.112	-1180.79	1103.3	290.742	-1529.01	1232.05	64.774	-1336.65	1367.58	-47.4164	-1327.16	1133.31	-58.2576	-1317.41	1036.14	-61.5094	-1210.92	922.084	-9.24267	-1164	833.905	-70.4541	-1199.97	807.174	-59.3192	-1127.78	764.751
670	0	174.756	-1209.67	1556.77	279.787	-1216.99	1558.21	148.659	-1373.23	1552.86	266.913	-1384.75	1555.38	220.72	-1419.94	1413.56	212.044	-1522.17	1135.7	219.113	-1263.51	1304.51	225.49	-1169.38	1101.89	291.768	-1517.58	1230.12	65.6457	-1325.74	1366.34	-46.4237	-1315.81	1132.12	-57.3071	-1305.71	1034.75	-60.5908	-1198.94	920.995	-7.97881	-1152.32	832.664	-69.8288	-1187.51	806.287	-58.1213	-1115.64	763.744
671	0	176.121	-1198.6	1555.22	281.208	-1205.86	1556.71	150.08	-1362.24	1551.57	268.257	-1373.61	1554	221.924	-1409.08	1411.89	213.064	-1510.61	1133.83	220.073	-1252.2	1303.28	225.969	-1157.79	1100.81	292.864	-1506.07	1228.15	66.7097	-1314.78	1365.27	-45.5263	-1304.48	1130.91	-56.2457	-1294.14	1033.66	-59.4564	-1187.22	920.086	-6.86586	-1140.68	831.66	-69.2816	-1175.41	805.571	-56.5365	-1103.97	762.611
672	0	177.697	-1187.64	1553.93	282.785	-1194.98	1555.1	151.627	-1351.38	1550.33	269.806	-1362.78	1552.64	223.338	-1398.16	1410.12	214.171	-1498.8	1131.75	221.197	-1241.03	1302.12	226.552	-1146.19	1099.78	293.992	-1494.5	1225.96	67.8694	-1303.8	1364.18	-44.5245	-1293.1	1130.04	-55.1711	-1282.96	1032.61	-58.4512	-1175.68	919.286	-5.61233	-1129.43	830.753	-68.4487	-1163.75	804.741	-55.331	-1092.34	761.787
673	0	179.353	-1176.73	1552.64	284.337	-1184.08	1553.65	153.228	-1340.48	1549.26	271.392	-1351.9	1551.35	224.698	-1387.26	1408.42	215.073	-1486.93	1129.61	222.252	-1229.76	1300.81	227.094	-1134.4	1098.79	295.062	-1482.83	1223.79	69.1124	-1292.8	1363.09	-43.6821	-1281.74	1129.23	-54.2423	-1272.12	1031.65	-57.4309	-1164.54	918.36	-4.49786	-1118.37	829.968	-67.5032	-1152.46	804.001	-54.16	-1080.91	761.265
674	0	180.981	-1165.78	1551.43	285.93	-1173.13	1552.33	154.862	-1329.55	1548.27	273.057	-1340.94	1550.14	226.191	-1376.37	1406.73	216.037	-1474.72	1127.47	223.403	-1218.42	1299.73	227.83	-1122.52	1097.95	296.181	-1470.97	1221.47	70.6505	-1281.73	1361.98	-42.7377	-1270.25	1128.51	-53.2986	-1261.47	1030.69	-56.51	-1153.73	917.586	-3.45517	-1107.42	829.15	-66.2565	-1141.49	803.094	-52.8065	-1069.81	760.395
675	0	182.548	-1155.08	1550.16	287.618	-1162.26	1551	156.634	-1318.79	1547.21	274.854	-1330.08	1548.9	227.908	-1365.57	1404.95	216.969	-1462.47	1125.22	224.815	-1207.07	1298.68	228.616	-1110.48	1097.11	297.355	-1459.11	1218.91	72.2071	-1270.7	1361.07	-41.8167	-1258.86	1128.02	-52.1768	-1250.96	1029.99	-55.4728	-1143.13	916.627	-2.46316	-1096.87	828.328	-65.401	-1130.8	802.179	-51.7949	-1059.03	759.658
676	0	184.232	-1144.38	1549.07	289.333	-1151.47	1549.81	158.564	-1308.21	1546.08	276.788	-1319.31	1547.74	229.717	-1354.89	1403.27	217.991	-1450.12	1122.87	226.112	-1195.6	1297.82	229.318	-1098.4	1096.69	298.651	-1447.17	1216.34	73.8524	-1259.8	1360.36	-40.7934	-1247.45	1127.66	-51.2062	-1240.38	1029.5	-54.643	-1133.02	915.748	-1.73966	-1086.47	827.682	-64.2188	-1120.79	801.248	-50.8019	-1048.62	758.925
677	0	185.875	-1133.63	1548.65	291.028	-1140.51	1549.3	160.486	-1297.52	1545.29	278.763	-1308.45	1546.89	231.713	-1344.09	1401.9	218.96	-1437.28	1120.92	227.609	-1184.07	1297.25	230.179	-1086.08	1096.5	300.069	-1435.15	1214.17	75.5936	-1248.85	1359.84	-39.8182	-1236.11	1127.55	-50.1693	-1229.95	1029.02	-53.9649	-1122.98	915.125	-1.21993	-1076.43	826.972	-63.2944	-1110.98	800.372	-50.252	-1038.8	758.237
678	0	187.537	-1122.94	1548.66	292.707	-1129.52	1549.32	162.524	-1286.74	1544.81	280.859	-1297.5	1546.41	233.669	-1333.04	1401.08	219.986	-1424.16	1119.59	229.119	-1172.4	1296.98	231.065	-1073.64	1096.5	301.485	-1423.09	1212.45	77.3924	-1237.88	1359.7	-38.7024	-1224.93	1127.65	-49.0476	-1219.74	1028.74	-53.2541	-1112.93	914.552	-0.809857	-1066.62	826.43	-62.7404	-1101.73	799.588	-49.889	-1029.18	757.593
679	0	189.325	-1112.29	1549.04	294.533	-1118.59	1549.64	164.665	-1276.24	1544.44	282.953	-1286.57	1545.93	235.823	-1321.76	1400.58	220.835	-1411.3	1118.69	230.73	-1160.73	1297.2	231.885	-1061.18	1096.91	302.835	-1411.06	1211.14	79.1252	-1226.76	1359.79	-37.4365	-1214	1127.97	-47.8841	-1209.56	1028.94	-52.6057	-1103.61	914.008	-0.595333	-1057.17	826.04	-61.9459	-1092.95	799.015	-49.6303	-1020.24	756.972
680	0	191.067	-1101.54	1549.88	296.266	-1107.64	1550.37	166.835	-1265.54	1544.6	285.106	-1275.52	1545.88	237.997	-1310.15	1400.61	221.485	-1398.26	1118.46	232.35	-1148.96	1297.79	232.681	-1048.42	1097.69	304.141	-1399	1210.47	80.8374	-1215.21	1360.44	-36.1526	-1203.25	1128.63	-46.4178	-1199.51	1029.26	-52.0132	-1094.55	913.816	-0.451097	-1048.19	825.807	-61.2734	-1084.73	798.649	-49.6314	-1011.85	756.577
681	0	192.784	-1090.7	1551.1	297.974	-1096.47	1551.55	168.967	-1254.67	1545.06	287.447	-1264.46	1546.36	239.757	-1298.34	1401.2	222.089	-1385.52	1118.97	233.99	-1137.14	1298.6	233.408	-1035.35	1098.91	305.246	-1386.99	1210.59	82.5963	-1203.47	1361.52	-34.8014	-1192.65	1129.63	-45.2789	-1189.74	1030.43	-51.599	-1085.73	914.112	-0.44923	-1039.62	825.832	-60.8456	-1076.95	798.61	-49.9542	-1004.16	756.405
682	0	194.679	-1079.83	1552.65	300.001	-1085.39	1553.09	171.367	-1243.95	1545.83	289.771	-1253.31	1546.99	241.488	-1286.54	1402.12	222.972	-1373.56	1119.84	235.585	-1125.37	1299.74	234.34	-1022.36	1100.39	306.126	-1374.97	1211.15	84.2256	-1191.41	1363.11	-33.2048	-1182.44	1130.89	-43.9074	-1180.13	1032.02	-50.9912	-1077.39	914.551	-0.491988	-1031.41	826.119	-60.0261	-1069.78	798.908	-50.5343	-996.949	756.417
683	0	196.603	-1068.98	1554.39	301.802	-1074.24	1554.51	173.755	-1233.12	1546.96	292.133	-1242.15	1547.81	243.299	-1274.76	1403.21	223.972	-1362.48	1120.78	237.246	-1113.58	1301.14	235.331	-1009.63	1102.09	306.847	-1363.2	1211.91	86.0606	-1179.35	1365.08	-31.5258	-1172.42	1132.61	-42.4518	-1170.59	1033.92	-50.3695	-1069.35	915.395	-0.379208	-1023.69	826.466	-59.5646	-1063.12	799.613	-51.0567	-990.43	756.684
684	0	198.499	-1058.02	1556.46	303.728	-1062.99	1556.29	175.941	-1222.15	1548.48	294.472	-1230.89	1549.06	244.925	-1263.18	1404.71	224.185	-1351.59	1122.34	238.845	-1101.95	1302.92	236.216	-997.305	1104.09	307.413	-1351.31	1212.99	87.7291	-1167.33	1367.51	-30.1236	-1162.72	1134.83	-41.3143	-1161.49	1036.43	-49.797	-1061.56	916.714	-0.272412	-1016.36	827.111	-58.9761	-1056.88	800.905	-51.6805	-984.533	757.259
685	0	200.351	-1047.01	1558.62	305.567	-1051.73	1558.19	178.294	-1211.24	1550.47	296.792	-1219.52	1550.64	246.44	-1251.7	1406.42	224.397	-1339.88	1124.17	240.328	-1090.45	1304.8	237.061	-985.405	1106.47	308.006	-1339.4	1214.47	89.4375	-1155.37	1370.18	-28.7645	-1152.93	1137.53	-39.9039	-1152.32	1039.01	-49.2053	-1054.02	918.234	-0.286129	-1009.22	828.199	-58.7286	-1050.79	802.389	-52.1972	-978.975	757.983
686	0	202.224	-1036.08	1560.93	307.465	-1040.43	1560.19	180.534	-1200.35	1552.74	299.037	-1208.34	1552.46	247.962	-1240.49	1408.2	225.05	-1327.63	1125.85	241.681	-1079.09	1307.09	237.853	-973.883	1108.96	308.595	-1327.64	1215.83	91.1823	-1143.78	1373.07	-27.2893	-1143.3	1140.41	-38.9661	-1143.45	1042.16	-48.5038	-1046.52	920.042	-0.007619	-1003.07	829.13	-58.4114	-1044.95	804.156	-52.6048	-973.791	758.834
687	0	204.02	-1025.1	1563.23	309.111	-1029.17	1561.94	182.634	-1189.33	1555.27	301.202	-1197.13	1554.42	249.52	-1229.42	1409.98	225.677	-1315.46	1127.54	243.089	-1068	1309.19	238.803	-962.723	1111.54	309.16	-1315.89	1217.08	92.7245	-1132.53	1375.82	-26.1905	-1133.55	1143.43	-37.7267	-1134.63	1045.19	-47.9005	-1039.3	922.036	0.194513	-996.91	830.26	-58.0676	-1039.02	806.291	-52.7172	-968.589	759.655
688	0	205.686	-1014.08	1565.5	310.905	-1017.95	1563.88	184.646	-1178.41	1557.91	303.259	-1185.84	1556.71	251.088	-1218.35	1411.66	226.201	-1303.69	1129.32	244.25	-1056.87	1311.57	239.548	-951.758	1113.97	309.905	-1304.11	1218.57	94.1392	-1121.42	1378.53	-24.9503	-1123.81	1146.48	-36.7772	-1126.06	1048.33	-47.4267	-1032.11	924.18	0.585056	-990.793	831.358	-58.2974	-1033.24	808.563	-52.658	-963.632	760.581
689	0	207.366	-1003.07	1567.7	312.504	-1006.79	1565.76	186.543	-1167.49	1560.61	305.129	-1174.69	1559.02	252.456	-1207.38	1413.59	226.72	-1292.3	1131	245.336	-1046.01	1313.82	240.456	-941.04	1116.63	310.811	-1292.54	1220.26	95.5384	-1110.59	1381.31	-24.1698	-1114.05	1149.49	-35.9579	-1117.86	1051.33	-46.8747	-1024.99	926.189	0.799976	-984.824	832.605	-58.1996	-1027.17	810.696	-52.392	-958.715	761.409
690	0	208.959	-992.16	1569.81	314.059	-995.719	1567.57	188.263	-1156.63	1563.2	306.889	-1163.66	1561.2	253.875	-1196.5	1415.32	227.629	-1281.18	1132.6	246.3	-1035.18	1316.09	241.128	-930.522	1118.92	311.796	-1280.97	1221.64	96.7203	-1099.95	1383.78	-23.2037	-1104.5	1152.34	-35.252	-1109.8	1054.01	-46.5877	-1017.94	928.272	1.11623	-978.98	833.923	-58.5613	-1021.11	812.906	-51.9226	-953.778	762.047
691	0	210.385	-981.216	1571.87	315.572	-984.825	1569.24	189.788	-1145.79	1565.41	308.393	-1152.7	1563.11	255.267	-1185.72	1416.95	228.649	-1270.11	1134.21	247.086	-1024.44	1318.09	241.692	-920.059	1121.2	312.796	-1269.59	1222.97	97.8287	-1089.4	1386.07	-22.7576	-1094.99	1155.12	-34.5194	-1101.84	1056.6	-46.3072	-1010.93	930.139	1.39569	-973.179	835.187	-58.898	-1015.02	814.886	-51.4443	-949.032	762.747
692	0	211.838	-970.39	1573.68	316.904	-973.918	1570.94	191.181	-1134.9	1567.4	309.707	-1141.84	1564.85	256.348	-1174.73	1418.74	229.821	-1258.8	1136.13	248.023	-1013.72	1320.03	242.159	-909.59	1123.18	313.948	-1258.32	1224.65	98.7824	-1078.86	1388.16	-22.2816	-1085.61	1157.46	-34.113	-1093.93	1058.86	-46.179	-1004.05	931.758	1.66966	-967.734	836.182	-59.1319	-1008.89	816.728	-50.8455	-944.025	763.205
693	0	213.076	-959.475	1575.59	318.223	-963.121	1572.46	192.371	-1123.99	1569.04	310.895	-1131.07	1566.19	257.68	-1163.86	1420.43	231.199	-1247.39	1137.93	248.73	-1002.88	1321.7	242.635	-898.987	1124.7	315.159	-1247.29	1226.37	99.5259	-1068.46	1390.04	-22.101	-1076.19	1159.62	-33.6994	-1086.2	1060.97	-46.0658	-997.23	933.052	1.9365	-962.121	836.955	-59.586	-1002.82	818.266	-50.3054	-938.788	763.59
694	0	214.358	-948.662	1577.19	319.438	-952.533	1573.81	193.332	-1113.2	1570.6	311.869	-1120.42	1567.45	258.706	-1152.94	1421.98	232.798	-1235.97	1139.55	249.314	-992.278	1323.12	242.675	-888.441	1126.13	316.448	-1236.4	1228.01	100.18	-1058.15	1391.52	-21.7124	-1066.9	1161.52	-33.477	-1078.42	1062.81	-46.0083	-990.42	934.224	2.09123	-956.368	837.671	-59.9984	-996.675	819.719	-49.6723	-933.712	763.797
695	0	215.464	-937.924	1578.86	320.493	-941.95	1575.23	194.116	-1102.36	1571.89	312.684	-1109.76	1568.54	259.626	-1142.01	1423.57	234.418	-1225.14	1141.42	249.657	-981.637	1324.38	242.583	-877.852	1127.2	317.759	-1225.6	1229.73	100.805	-1047.78	1392.89	-21.5905	-1057.64	1163.08	-33.1622	-1070.43	1064.3	-46.1582	-983.502	935.209	2.21616	-950.741	838.078	-59.9863	-990.704	820.548	-49.2882	-928.609	764.002
696	0	216.43	-927.124	1580.38	321.509	-931.311	1576.64	194.865	-1091.52	1573.25	313.37	-1099.12	1569.63	260.5	-1131.1	1425.2	235.948	-1214.89	1143.33	250.072	-970.897	1325.61	242.5	-867.219	1127.95	318.909	-1214.81	1231.63	101.146	-1037.53	1394.26	-21.4586	-1048.61	1164.46	-32.9959	-1062.49	1065.7	-46.1239	-976.734	935.808	2.21088	-944.902	838.431	-60.1109	-984.698	821.477	-49.1163	-923.337	764.064
697	0	217.334	-916.403	1581.86	322.448	-920.713	1577.93	195.482	-1080.74	1574.54	313.929	-1088.52	1570.57	261.215	-1120.29	1426.83	237.416	-1204.89	1145.1	250.437	-960.184	1326.49	242.167	-856.8	1128.66	320.203	-1204.11	1233.45	101.619	-1027.33	1395.33	-21.2363	-1039.91	1165.46	-32.8496	-1054.5	1066.95	-46.0988	-970.002	936.223	2.2991	-939.036	838.692	-60.012	-978.998	821.984	-48.9735	-918.061	764.008
698	0	218.117	-905.638	1583.21	323.208	-910.17	1579.16	195.973	-1069.98	1575.61	314.39	-1077.92	1571.57	262.085	-1109.32	1428.14	238.796	-1195.1	1146.79	250.401	-949.698	1327.43	241.649	-846.384	1129.16	321.551	-1193.68	1235.18	102.029	-1017.19	1396.28	-20.9965	-1031.66	1166.37	-32.5395	-1046.33	1068.1	-45.9485	-963.298	936.655	2.26118	-933.11	838.816	-60.1254	-973.258	822.321	-49.0696	-912.898	764.019
699	0	218.733	-894.908	1584.66	323.91	-899.576	1580.42	196.189	-1059.13	1576.93	314.758	-1067.35	1572.67	262.828	-1098.52	1429.79	240.091	-1185.45	1148.56	250.491	-939.168	1328.3	241.183	-835.968	1129.81	322.887	-1183.15	1237.2	102.191	-1007.16	1397.33	-20.7468	-1023.69	1167.21	-32.1906	-1038.27	1069.19	-45.8318	-956.687	937.103	2.2182	-927.191	839.072	-59.9092	-967.759	822.856	-49.3583	-907.746	764.23
700	0	219.352	-884.036	1585.9	324.525	-888.931	1581.62	196.472	-1048.26	1578.02	315.069	-1056.71	1573.64	263.573	-1087.61	1431.24	241.374	-1175.55	1150.3	250.565	-928.707	1329.36	240.46	-825.841	1130.37	324.299	-1172.64	1239.09	102.457	-997.199	1398.35	-20.2343	-1016.02	1168	-31.8155	-1030.29	1070.16	-45.6097	-950.097	937.449	2.15228	-921.206	839.225	-60.158	-962.016	823.365	-49.5813	-902.326	764.307
701	0	219.849	-873.3	1587.03	324.978	-878.288	1582.75	196.907	-1037.57	1579	315.329	-1046.04	1574.61	264.254	-1076.86	1432.6	242.665	-1165.96	1151.84	250.396	-918.315	1330.28	239.77	-815.808	1130.75	325.62	-1162.24	1240.73	102.739	-987.313	1399.21	-19.6136	-1008.57	1168.87	-31.471	-1022.53	1071.29	-45.3328	-943.47	937.851	2.16039	-915.23	839.339	-59.7511	-956.598	823.764	-49.9731	-897.014	764.504
702	0	220.108	-862.553	1587.95	325.244	-867.703	1583.61	197.156	-1026.74	1579.88	315.502	-1035.29	1575.49	264.898	-1066.16	1433.87	243.864	-1156.24	1153.26	250.34	-908.018	1331.03	239.05	-806.091	1131.16	326.943	-1151.84	1242.26	102.943	-977.611	1400.18	-19.0519	-1001.17	1169.65	-30.9642	-1014.79	1072.23	-45.1345	-936.769	938.318	2.21611	-909.359	839.482	-59.9319	-950.922	824.446	-50.4549	-891.563	764.932
703	0	220.33	-851.757	1588.8	325.487	-856.937	1584.48	197.082	-1015.96	1580.78	315.652	-1024.68	1576.51	265.521	-1055.46	1435.11	244.985	-1146.4	1154.76	250.038	-897.844	1331.79	238.363	-796.232	1131.55	328.178	-1141.4	1243.87	103.158	-967.884	1401.02	-18.4011	-993.785	1170.49	-30.337	-1007.16	1073.31	-44.6842	-930.172	938.805	2.17462	-903.391	839.603	-59.6346	-945.301	824.974	-50.8428	-886.129	765.246
704	0	220.489	-841.025	1589.36	325.743	-846.135	1585.11	197.354	-1004.98	1581.6	315.758	-1013.84	1577.31	266.12	-1044.85	1436.21	246.043	-1136.7	1156.17	249.9	-887.727	1332.37	237.609	-786.433	1131.97	329.403	-1131.05	1245.4	103.174	-958.248	1401.81	-17.754	-986.364	1171.25	-29.8702	-999.819	1074.29	-44.2328	-923.469	939.249	2.27224	-897.419	839.781	-59.6586	-939.439	825.687	-51.0422	-880.541	765.691
705	0	220.693	-830.149	1589.83	325.826	-835.384	1585.57	197.496	-994.257	1582.22	315.907	-1003.1	1578.01	266.742	-1034.35	1437.08	247.051	-1126.82	1157.27	249.734	-877.549	1332.97	236.987	-776.553	1132.49	330.467	-1120.81	1246.42	103.403	-948.694	1402.6	-17.2718	-978.858	1172.18	-29.3288	-992.417	1075.51	-43.8509	-916.709	939.791	2.36214	-891.296	840.042	-59.2402	-933.622	826.379	-51.2465	-874.898	765.985
706	0	220.81	-819.348	1590.21	325.88	-824.627	1585.96	197.472	-983.674	1583	315.915	-992.388	1578.74	267.173	-1023.94	1437.97	248.042	-1116.96	1158.35	249.649	-867.524	1333.45	236.329	-766.619	1133.17	331.422	-1110.52	1247.49	103.49	-939.228	1403.31	-16.6697	-971.411	1172.99	-28.8715	-985.115	1076.43	-43.5005	-910.09	940.318	2.5146	-885.12	840.381	-59.0898	-927.732	826.931	-51.3103	-869.249	766.382
707	0	220.776	-808.582	1590.51	325.912	-813.849	1586.27	197.552	-972.901	1583.7	315.974	-981.613	1579.46	267.579	-1013.57	1438.7	248.926	-1107.21	1159.32	249.308	-857.536	1333.83	235.792	-756.834	1133.68	332.291	-1100.39	1248.51	103.575	-929.569	1404.07	-16.4129	-963.71	1173.85	-28.364	-977.701	1077.27	-43.1489	-903.293	940.757	2.6469	-878.929	840.665	-58.6903	-921.705	827.63	-51.3318	-863.49	766.679
708	0	220.761	-797.854	1590.55	325.915	-803.14	1586.35	197.58	-962.001	1584.03	316.046	-970.847	1580.01	268.087	-1003.18	1439.18	249.788	-1097.46	1159.98	249.382	-847.468	1334.05	235.413	-747.176	1134.06	333.003	-1090.2	1249.18	103.595	-919.938	1404.58	-16.2974	-955.86	1174.53	-27.9407	-970.125	1077.87	-43.0187	-896.435	941.095	3.23992	-872.708	840.443	-58.2887	-915.622	827.971	-51.0596	-857.762	766.674
709	0	220.638	-787.15	1590.53	325.844	-792.431	1586.35	197.445	-951.471	1584.43	316.032	-960.225	1580.38	268.364	-992.93	1439.54	250.472	-1088.63	1160.57	249.018	-837.516	1334.16	235.064	-737.669	1134.2	333.558	-1080.19	1249.65	103.639	-910.262	1404.83	-16.1621	-947.865	1175.21	-27.629	-962.627	1078.54	-42.8649	-889.828	941.29	3.57686	-866.335	840.458	-58.0517	-909.367	828.21	-50.778	-851.933	766.631
710	0	220.557	-776.401	1590.36	325.712	-781.729	1586.32	197.585	-940.823	1584.61	315.992	-949.519	1580.8	268.63	-982.694	1439.82	251.116	-1079.02	1160.97	248.923	-827.505	1334.24	234.875	-728.071	1134.18	334.126	-1070.42	1250.24	103.602	-900.517	1405.09	-16.2396	-939.784	1175.75	-27.3638	-954.924	1078.85	-42.5854	-882.804	941.215	3.89319	-859.855	840.532	-57.4001	-903.133	828.263	-50.3473	-846.03	766.532
711	0	220.409	-765.753	1589.99	325.521	-771.081	1586.12	197.388	-930.113	1584.77	315.857	-938.797	1581.02	268.881	-972.297	1439.96	251.637	-1069.33	1161.35	248.903	-817.404	1333.92	234.486	-718.588	1133.64	334.466	-1060.44	1250.54	103.506	-890.478	1405.2	-16.1347	-931.407	1175.89	-26.9324	-947.034	1079	-42.4276	-875.731	940.861	4.20937	-853.129	840.14	-57.0966	-896.489	828.21	-49.7571	-839.959	765.788
712	0	220.251	-755.159	1589.47	325.41	-760.387	1585.76	197.146	-919.454	1584.66	315.788	-928.165	1581.01	269.012	-961.88	1439.86	251.982	-1060.05	1161.52	248.738	-807.377	1333.6	234.531	-709.128	1132.98	334.662	-1050.49	1250.66	103.523	-880.401	1404.9	-15.9793	-922.876	1175.92	-26.6242	-939.053	1079.15	-42.2308	-868.476	940.402	4.49262	-845.886	839.827	-56.3784	-889.788	827.738	-49.1652	-833.744	765.011
713	0	219.951	-744.578	1588.95	325.092	-750.047	1585.12	196.992	-908.963	1584.29	315.532	-917.565	1580.77	268.92	-951.485	1439.69	252.088	-1050.5	1161.39	248.595	-797.231	1333.11	234.478	-699.662	1132.26	334.734	-1040.57	1250.62	103.418	-870.316	1404.51	-16.0546	-914.248	1175.74	-26.4027	-930.91	1078.97	-42.0848	-861.181	939.703	4.93277	-838.98	839.193	-55.9016	-883.086	827.095	-48.4168	-827.433	764.158
714	0	219.605	-733.998	1588.34	324.77	-739.433	1584.57	196.827	-898.386	1583.79	315.292	-906.943	1580.43	268.866	-940.958	1439.34	252.13	-1041	1161.3	248.755	-786.999	1332.44	234.464	-690.194	1131.23	334.701	-1030.58	1250.65	103.22	-859.85	1403.99	-15.9054	-905.173	1175.31	-26.1558	-922.52	1078.59	-42.0295	-853.673	939.003	5.55976	-831.897	838.078	-55.2201	-876.103	826.495	-47.6606	-820.888	762.975
715	0	219.399	-723.294	1587.43	324.492	-728.615	1583.99	196.602	-887.652	1582.94	315.017	-896.337	1579.73	268.864	-930.382	1438.85	252.176	-1031.4	1161	248.618	-776.755	1331.65	234.67	-680.456	1129.99	334.539	-1020.62	1250.41	103.202	-849.255	1403.17	-15.9427	-896.061	1174.8	-26.0611	-913.889	1078.03	-41.7822	-845.881	938.053	5.84358	-824.604	837.264	-54.8427	-868.863	825.603	-46.81	-814.226	761.649
716	0	219.083	-712.675	1586.43	324.167	-718.244	1583.04	196.141	-877.133	1581.88	314.689	-885.674	1578.83	268.55	-919.785	1438.14	252.045	-1021.57	1160.55	248.58	-766.534	1330.46	234.964	-670.596	1128.71	334.239	-1010.55	1249.9	103.048	-838.61	1402.21	-15.8185	-886.676	1174.04	-25.9896	-905.047	1077.34	-41.4856	-837.938	936.924	6.44971	-817.023	836.162	-54.0463	-861.786	824.48	-46.1185	-807.364	760.229
717	0	218.616	-702.094	1585.38	323.81	-707.621	1582.04	195.965	-866.552	1580.52	314.325	-875.136	1577.81	268.216	-909.154	1437.26	251.868	-1011.84	1159.92	248.685	-756.095	1329.41	235.261	-660.703	1127.21	333.888	-1000.57	1249.32	102.839	-827.8	1401.1	-16.0146	-877.027	1173.24	-26.0447	-896.027	1076.65	-41.3802	-829.776	935.788	6.77739	-809.457	835.012	-53.6497	-854.272	823.368	-45.4384	-800.259	758.762
718	0	218.178	-691.428	1584.2	323.44	-696.928	1581.09	195.425	-855.816	1579.26	313.921	-864.398	1576.62	267.87	-898.253	1436.31	251.51	-1001.7	1159.36	248.646	-745.497	1328.03	235.633	-650.601	1125.62	333.42	-990.369	1248.74	102.56	-816.712	1399.86	-16.1699	-867.253	1172.15	-26.0629	-886.836	1075.6	-40.9688	-821.305	934.332	7.12037	-801.576	833.617	-53.0597	-846.566	821.992	-44.7789	-793.003	757.177
719	0	217.686	-680.668	1582.88	322.975	-686.185	1579.94	194.821	-844.944	1577.74	313.446	-853.664	1575.18	267.408	-887.376	1435.13	251.087	-991.677	1158.51	248.767	-734.844	1326.41	236.044	-640.511	1123.76	332.903	-980.286	1247.99	102.339	-805.57	1398.41	-16.4839	-857.074	1171.04	-26.1216	-877.254	1074.46	-40.6643	-812.766	932.761	7.54372	-793.578	832.207	-52.6531	-838.723	820.476	-44.0347	-785.591	755.198
720	0	217.196	-669.883	1581.25	322.404	-675.467	1578.45	194.31	-834.373	1575.89	312.893	-842.951	1573.56	266.917	-876.439	1433.86	250.508	-981.574	1157.52	248.714	-724.29	1324.79	236.578	-630.319	1121.78	332.239	-970.088	1246.97	102.172	-794.31	1396.74	-16.803	-846.692	1169.52	-26.17	-867.626	1073.11	-40.4432	-803.938	930.987	7.63715	-785.683	830.383	-52.4967	-830.802	818.786	-43.4624	-778.02	753.226
721	0	216.55	-659.079	1579.63	321.689	-664.709	1576.98	193.705	-823.548	1574.02	312.32	-832.091	1571.95	266.263	-865.423	1432.54	249.783	-971.275	1156.48	248.568	-713.52	1322.89	236.947	-620.047	1119.52	331.486	-959.812	1246.03	101.718	-782.771	1394.99	-17.194	-835.914	1167.98	-26.3505	-857.723	1071.7	-40.1694	-794.904	929.013	8.17091	-777.461	828.316	-52.2622	-822.755	817.117	-43.1609	-770.317	751.17
722	0	215.866	-648.237	1577.9	321.155	-653.763	1575.56	193.145	-812.659	1572.15	311.661	-821.182	1570.24	265.542	-854.292	1431.06	248.836	-961.02	1155.32	248.478	-702.713	1320.95	237.499	-609.615	1117.31	330.61	-949.415	1244.9	101.493	-771.297	1393.17	-17.5392	-824.879	1166.12	-26.5778	-847.605	1070.25	-39.9186	-785.796	926.884	8.15876	-769.31	826.158	-52.077	-814.526	815.132	-42.8193	-762.47	748.903
723	0	215.139	-637.379	1575.97	320.46	-642.897	1573.78	192.329	-801.635	1569.86	310.92	-810.308	1568.23	264.803	-843.182	1429.39	247.745	-950.647	1153.98	248.398	-691.868	1318.9	238.065	-599.085	1114.97	329.709	-939.017	1243.58	101.003	-759.529	1391.04	-17.836	-813.616	1164.25	-26.5596	-837.226	1068.38	-39.6946	-776.725	924.654	8.43908	-760.857	823.882	-51.9267	-806.322	813.104	-42.6671	-754.683	746.626
724	0	214.353	-626.425	1574.18	319.77	-631.984	1572.11	191.517	-790.782	1567.74	310.055	-799.423	1566.15	263.95	-832	1427.63	246.475	-940.32	1152.55	248.31	-680.816	1316.8	238.527	-588.488	1112.57	328.585	-928.53	1242.06	100.543	-747.741	1388.96	-18.2298	-802.218	1162.28	-26.8366	-827.038	1066.4	-39.6879	-767.443	922.359	8.19091	-752.782	821.539	-51.9655	-798.006	811.003	-42.8232	-746.598	744.25
725	0	213.6	-615.4	1572.12	318.888	-621.07	1570.33	190.561	-779.705	1565.39	309.124	-788.388	1564.19	263.056	-820.646	1425.98	245.166	-929.778	1151.17	248.063	-669.704	1314.66	238.974	-577.656	1110.26	327.427	-917.824	1240.66	100.09	-735.858	1386.64	-18.6744	-790.644	1160.06	-27.129	-816.371	1064.56	-39.8399	-757.993	919.996	8.1333	-744.02	818.93	-52.0807	-789.361	808.87	-42.9615	-738.418	741.759
726	0	212.696	-604.188	1570.23	318.055	-610.076	1568.64	189.551	-768.553	1563.2	308.118	-777.405	1562.13	262.082	-809.258	1424.21	243.989	-919.015	1149.69	247.714	-658.54	1312.38	239.4	-566.801	1107.84	326.304	-907.12	1239.29	99.4721	-723.905	1384.43	-18.982	-778.909	1157.82	-27.331	-805.608	1062.56	-40.0619	-748.474	917.486	7.75665	-735.228	816.382	-52.2354	-780.633	806.707	-43.2955	-730.238	739.089
727	0	211.862	-592.983	1568.29	317.136	-599.063	1566.76	188.501	-757.375	1560.85	307.001	-766.394	1560.02	261.085	-797.981	1422.36	242.973	-908.093	1147.98	247.49	-647.283	1310.26	239.769	-555.776	1105.45	325.181	-896.365	1237.66	98.7066	-711.907	1382.21	-19.2417	-767.283	1155.38	-27.6251	-794.872	1060.31	-40.3011	-738.741	914.89	7.81045	-726.18	813.609	-52.4966	-771.854	804.422	-43.2176	-722.059	736.277
728	0	210.764	-581.761	1566.33	316.166	-588.014	1565.04	187.209	-746.107	1558.35	305.724	-755.273	1557.86	259.968	-786.599	1420.46	241.939	-897.02	1146.18	247.04	-635.85	1308.07	240.129	-544.58	1103.09	323.982	-885.459	1235.92	98.0801	-700.008	1379.71	-19.7066	-755.573	1152.91	-27.9069	-783.883	1058	-40.6815	-728.773	912.255	7.67624	-717.247	810.764	-52.8525	-762.656	801.969	-43.6086	-713.628	733.454
729	0	209.71	-570.553	1564.41	315.073	-576.856	1563.34	185.804	-734.747	1556.23	304.306	-744.184	1555.87	258.799	-775.039	1418.63	240.839	-885.689	1144.45	246.432	-624.392	1305.87	240.508	-533.209	1100.85	322.856	-874.315	1234.4	97.241	-687.955	1377.3	-20.1586	-743.713	1150.39	-28.4132	-772.492	1055.86	-40.9868	-718.664	909.664	7.26065	-707.747	808.114	-53.5856	-753.127	799.69	-43.9208	-704.787	730.716
730	0	208.399	-559.293	1562.42	313.84	-565.703	1561.7	184.375	-723.331	1553.75	302.869	-732.999	1553.78	257.606	-763.524	1416.79	239.859	-874.337	1142.57	245.908	-612.876	1303.86	240.793	-521.718	1098.71	321.8	-863.135	1232.83	96.4382	-675.936	1374.95	-20.5714	-731.813	1147.96	-29.0905	-761.232	1053.5	-41.5016	-708.229	907.088	6.95341	-698.183	805.462	-54.1349	-743.41	797.298	-44.3451	-695.873	727.882
731	0	207.04	-547.975	1560.71	312.416	-554.583	1560.07	182.861	-712.018	1551.56	301.342	-721.726	1551.73	256.384	-751.969	1414.82	239.018	-862.94	1140.62	245.342	-601.287	1301.81	241.035	-510.119	1096.75	320.712	-851.863	1231.03	95.4453	-664.035	1372.71	-21.122	-719.938	1145.63	-29.534	-749.873	1051.1	-42.0332	-697.63	904.606	6.41931	-688.778	802.747	-54.8689	-733.428	795.053	-44.6972	-686.613	725.147
732	0	205.762	-536.562	1558.97	310.8	-543.389	1558.64	181.078	-700.592	1549.32	299.68	-710.494	1549.96	255.076	-740.294	1412.99	238.205	-851.354	1138.74	244.497	-589.625	1300.03	241.107	-498.387	1094.94	319.693	-840.388	1229.34	94.3978	-652.067	1370.4	-21.9488	-708.021	1143.4	-30.1515	-738.326	1048.93	-42.6162	-686.858	902.235	5.88118	-678.588	800.179	-55.4062	-723.25	792.871	-45.2494	-677.056	722.646
733	0	203.897	-525.159	1557.33	309.176	-532.024	1557.42	179.343	-689.208	1547.2	297.874	-699.087	1548.12	253.764	-728.608	1411.24	237.438	-839.6	1136.88	243.783	-577.775	1298.27	241.17	-486.586	1093.25	318.735	-828.659	1227.73	93.3192	-640.06	1368.23	-22.7345	-696.092	1141.14	-30.9777	-726.795	1046.82	-43.2715	-675.73	899.883	5.27861	-668.255	797.75	-56.4984	-712.493	790.763	-45.7847	-667.074	720.095
734	0	202.08	-513.876	1555.5	307.292	-520.621	1555.96	177.531	-677.773	1545.01	296.093	-687.745	1546.35	252.497	-716.861	1409.36	236.717	-827.817	1134.82	242.931	-565.945	1296.48	241.187	-474.624	1091.54	317.94	-816.851	1226	92.3241	-628.216	1365.86	-23.5573	-684.269	1138.88	-31.5922	-715.154	1044.57	-43.9342	-664.505	897.6	4.68062	-657.705	795.371	-57.4119	-701.413	788.55	-46.4076	-656.68	717.677
735	0	200.184	-502.5	1554.03	305.292	-509.259	1554.65	175.612	-666.424	1542.88	294.092	-676.355	1544.66	251.175	-705.08	1407.48	235.738	-815.639	1132.69	241.965	-554.021	1294.88	241.044	-462.472	1089.98	317.067	-804.86	1224.09	90.9832	-616.346	1363.79	-24.4082	-672.468	1136.66	-32.2451	-703.481	1042.36	-44.6375	-653.055	895.321	4.06145	-647.234	792.902	-58.461	-690.248	786.347	-47.0693	-645.934	715.229
736	0	198.028	-491.106	1552.31	303.185	-497.924	1553.41	173.454	-654.967	1540.77	291.975	-664.92	1543.01	249.771	-693.293	1405.68	234.907	-803.154	1130.6	240.866	-542.013	1293.15	240.76	-450.173	1088.55	316.351	-792.642	1222.31	89.8398	-604.489	1361.46	-25.3334	-660.684	1134.38	-33.082	-691.781	1040.19	-45.4582	-641.369	893.028	3.09419	-635.929	790.694	-59.572	-678.8	784.162	-47.9476	-634.805	712.748
737	0	195.964	-479.618	1550.76	301.081	-486.452	1552.33	171.62	-643.398	1538.77	289.955	-653.508	1541.54	248.365	-681.542	1403.94	234.376	-790.352	1128.35	239.776	-529.877	1291.7	240.355	-437.677	1087.27	315.715	-780.294	1220.57	88.5748	-592.72	1359.31	-26.2645	-649	1132.07	-33.78	-679.906	1037.99	-46.2958	-629.727	890.718	2.03992	-624.182	788.42	-60.6967	-667.144	782.082	-48.9955	-623.403	710.382
738	0	193.627	-468.285	1549.36	298.905	-475.006	1551.43	169.263	-631.953	1536.8	287.645	-642.038	1540.01	246.898	-669.902	1402.29	233.947	-777.634	1126.18	238.5	-517.689	1290.34	239.877	-424.994	1086.27	314.993	-768.026	1218.69	87.1929	-581.012	1357.13	-27.2282	-637.291	1129.74	-34.3817	-667.988	1035.68	-47.3318	-617.826	888.496	0.804161	-612.329	786.032	-61.82	-655.37	779.715	-50.2172	-611.704	708.07
739	0	191.434	-456.688	1548.66	296.568	-463.568	1550.88	167.037	-620.414	1535.16	285.367	-630.552	1538.78	245.363	-658.188	1401.06	233.74	-764.475	1124.21	237.16	-505.37	1289.47	239.269	-412.047	1085.55	314.316	-755.751	1217.15	85.6143	-569.283	1355.37	-28.1919	-625.533	1127.57	-35.0384	-655.949	1033.23	-48.4519	-605.832	886.324	-0.427015	-600.258	783.731	-63.0065	-643.473	777.545	-51.6273	-599.776	705.904
740	0	189.262	-445.239	1548.1	294.272	-452.061	1550.77	164.677	-608.713	1533.84	283.015	-619.013	1538.05	243.788	-646.217	1400.09	233.458	-751.136	1122.78	235.845	-492.923	1288.85	238.745	-398.814	1085.31	313.733	-743.305	1216.22	84.0662	-557.445	1353.7	-29.0938	-613.692	1125.57	-35.6535	-643.755	1031.04	-49.6468	-593.688	884.227	-1.89956	-587.767	781.727	-64.2808	-631.456	775.591	-53.2743	-587.595	703.843
741	0	187.05	-433.627	1547.75	292.104	-440.464	1551.01	162.314	-596.994	1533.06	280.595	-607.396	1537.61	242.164	-634.075	1399.58	233.117	-738.44	1121.79	234.618	-480.468	1288.59	237.953	-385.459	1085.27	313.151	-730.859	1215.61	82.6389	-545.673	1352.26	-29.8826	-601.721	1123.68	-36.059	-631.31	1029.22	-50.9024	-581.432	882.356	-3.53479	-574.975	779.861	-65.2097	-619.285	773.645	-55.0994	-575.098	702.186
742	0	184.757	-421.68	1547.92	289.865	-428.894	1551.46	159.906	-585.199	1532.47	278.156	-595.762	1537.51	240.673	-621.933	1399.42	232.769	-725.843	1121.21	233.283	-468.029	1288.65	237.302	-371.918	1085.68	312.818	-718.399	1215.45	81.3325	-533.971	1351.14	-30.4254	-589.62	1122.08	-36.3113	-618.687	1027.49	-52.0922	-568.961	880.883	-5.08101	-562.122	778	-66.3404	-606.917	772.045	-56.9574	-562.351	700.777
743	0	182.428	-409.985	1548.45	287.538	-417.324	1552.32	157.506	-573.301	1532.53	275.708	-584.096	1537.98	239.308	-609.804	1399.89	232.713	-713.289	1121.35	231.897	-455.579	1289.28	236.38	-358.351	1086.68	312.602	-705.818	1215.95	79.8202	-522.17	1350.69	-30.9148	-577.326	1120.96	-36.4645	-605.899	1026.31	-53.3154	-556.301	879.941	-6.74695	-548.917	776.806	-67.7551	-594.263	771.169	-59.0715	-549.396	699.925
744	0	180.279	-398.18	1549.33	285.257	-405.576	1553.63	154.988	-561.34	1533.05	273.261	-572.389	1538.91	237.867	-597.508	1400.77	233.127	-700.731	1122.06	230.46	-443.124	1290.23	235.444	-344.863	1088.01	312.546	-693.264	1217.14	78.4478	-510.361	1350.61	-31.1715	-564.822	1120.27	-36.5868	-592.844	1025.68	-54.48	-543.377	879.471	-8.46691	-535.183	776.322	-69.0308	-581.212	770.726	-61.1507	-536.135	699.536
745	0	178.118	-386.415	1550.5	283.067	-393.85	1555.29	152.729	-549.466	1533.88	270.915	-560.649	1540.17	236.583	-585.259	1401.91	233.121	-687.736	1123.35	229.13	-430.801	1291.58	234.476	-331.702	1089.71	312.558	-680.665	1218.63	77.1244	-498.634	1351.15	-31.2007	-552.132	1120	-36.4048	-579.736	1025.54	-55.4885	-530.257	879.731	-10.1078	-521.213	776.128	-69.9308	-568.144	771.021	-63.3814	-522.525	700.005
746	0	175.908	-374.49	1552.25	280.88	-382.142	1557.24	150.49	-537.613	1535.28	268.637	-548.877	1541.88	235.377	-573.275	1403.66	232.973	-674.775	1125.21	227.769	-418.579	1293.57	233.463	-318.901	1091.9	312.656	-668.022	1220.54	75.7914	-487.061	1352.31	-31.2816	-539.375	1120.41	-36.1987	-566.512	1026.12	-56.4931	-516.743	880.67	-11.8913	-506.682	776.609	-71.3008	-554.484	771.76	-66.096	-508.453	701.297
747	0	173.814	-362.846	1554.02	278.691	-370.388	1559.49	148.319	-525.742	1537.01	266.449	-537.145	1544.15	234.293	-561.401	1405.65	233.055	-661.907	1127.21	226.672	-406.626	1295.82	232.445	-306.388	1094.42	312.723	-655.425	1222.8	74.525	-475.675	1354.18	-31.2791	-526.534	1121.36	-35.9084	-553.348	1027.23	-57.4146	-502.994	882.209	-13.4218	-492.395	777.931	-72.4902	-540.384	773.248	-68.4356	-494.144	702.935
748	0	171.969	-351.142	1555.83	276.771	-358.63	1561.99	146.276	-513.845	1539.15	264.342	-525.356	1546.69	233.223	-549.667	1407.62	233.265	-649.073	1129.24	225.285	-394.754	1298.13	231.417	-294.227	1097.16	312.694	-642.825	1225.11	73.4292	-464.371	1356.12	-31.0898	-513.581	1122.68	-35.6972	-540.075	1028.75	-58.1867	-489.066	884.166	-15.1431	-477.124	779.868	-73.6128	-525.915	775.263	-70.5718	-479.476	705.118
749	0	170.129	-339.275	1557.9	274.916	-346.872	1564.22	144.401	-502.096	1541.34	262.442	-513.711	1549.45	232.226	-538.242	1409.84	233.417	-636.414	1130.93	224.142	-383.139	1300.77	230.422	-282.388	1100.15	312.599	-630.443	1227.23	72.3967	-453.171	1358.36	-31.0413	-500.692	1124.29	-35.4699	-527.025	1030.51	-59.0488	-474.926	886.531	-16.25	-462.06	781.849	-74.5689	-511.266	777.507	-72.3848	-464.43	707.513
750	0	168.567	-327.608	1559.87	273.395	-335.292	1566.71	142.789	-490.358	1543.82	260.696	-502.162	1552.39	231.167	-526.937	1411.93	233.453	-624.093	1132.8	222.939	-371.715	1303.37	229.545	-270.937	1103.21	312.362	-618.305	1229.32	71.2273	-442.092	1360.82	-31.1582	-487.941	1126.27	-35.499	-513.928	1032.6	-59.725	-460.661	889.185	-17.591	-446.65	784.165	-75.5564	-496.09	779.873	-74.1129	-449.003	710.099
751	0	167.204	-316.047	1561.87	271.902	-323.752	1569.02	141.207	-478.823	1546.41	259.19	-490.655	1555.36	230.308	-515.901	1414.07	233.356	-612.169	1134.79	221.881	-360.425	1306	228.684	-259.825	1106.24	311.951	-606.368	1231.54	70.2357	-430.94	1363.18	-31.4734	-475.186	1128.26	-35.8023	-500.933	1034.78	-60.6032	-446.238	891.82	-18.4622	-431.006	786.893	-76.345	-480.686	782.281	-75.6378	-433.052	712.868
752	0	166.097	-304.642	1563.7	270.791	-312.44	1571.22	139.913	-467.341	1548.74	257.853	-479.284	1557.95	229.17	-504.68	1415.99	232.925	-600.627	1136.71	220.936	-349.287	1308.29	227.925	-248.916	1108.88	311.432	-594.669	1233.55	69.2701	-419.81	1365.4	-32.0365	-462.577	1130.36	-36.374	-487.825	1036.8	-61.6836	-431.828	894.491	-20.2382	-414.522	789.564	-77.1209	-465.198	784.568	-76.8421	-416.72	715.609
753	0	165.024	-293.333	1565.51	269.655	-301.195	1573.11	138.835	-456.066	1550.76	256.686	-468.067	1560.25	228.247	-493.82	1417.97	232.424	-589.348	1138.33	220.174	-338.157	1310.56	227.234	-238.444	1111.44	310.677	-583.358	1235.34	68.3413	-408.817	1367.42	-32.7148	-449.972	1132.29	-37.2022	-474.76	1038.38	-62.745	-417.249	896.791	-20.8559	-399.002	791.794	-77.7772	-449.499	786.462	-78.2617	-400.013	718.069
754	0	164.142	-282.146	1567.36	268.761	-290.033	1575.02	137.944	-444.872	1552.73	255.655	-456.964	1562.37	227.216	-482.674	1419.65	231.92	-578.157	1140.1	219.444	-327.159	1312.75	226.64	-228.064	1113.75	309.978	-572.299	1237.3	67.5031	-397.799	1369.37	-33.6247	-437.359	1134.2	-38.2445	-461.648	1039.98	-63.851	-402.685	898.905	-21.9459	-382.389	794.102	-78.3427	-433.47	788.236	-78.8003	-383.323	720.393
755	0	163.242	-271.091	1568.92	267.981	-278.951	1576.84	136.954	-433.734	1554.4	254.89	-445.885	1564.12	226.208	-471.485	1421.43	231.277	-567.145	1141.71	218.833	-316.128	1314.44	226.164	-217.846	1115.63	309.064	-561.386	1239.15	66.5479	-386.661	1371.09	-34.723	-424.806	1135.88	-39.5673	-448.384	1041.43	-64.9715	-387.82	900.63	-22.9374	-366.068	796.747	-79.1987	-417.265	789.902	-79.4909	-366.138	722.625
756	0	162.655	-260.137	1570.39	267.185	-267.974	1578.27	136.398	-422.806	1555.82	254.155	-434.956	1565.48	225.377	-460.47	1422.99	230.625	-556.345	1143.32	218.204	-305.242	1315.95	225.857	-207.16	1117.24	308.192	-550.697	1240.8	65.8907	-375.441	1372.42	-35.9388	-412.273	1137.44	-41.0046	-435.158	1042.6	-66.0679	-372.952	902.442	-23.9031	-349.82	798.935	-79.9066	-400.802	791.206	-79.9021	-348.587	724.742
757	0	161.909	-249.155	1571.99	266.552	-257.028	1579.73	135.78	-412.012	1557.12	253.592	-424.023	1566.71	224.607	-449.518	1424.44	229.723	-545.598	1145.05	217.657	-294.353	1317.37	225.66	-196.239	1118.58	307.349	-540.214	1242.5	65.2284	-364.303	1373.82	-37.1603	-399.772	1138.87	-42.4409	-422.124	1043.67	-67.3224	-358.095	904.298	-25.1767	-333.409	801.559	-80.7848	-384.206	792.355	-80.3021	-330.898	726.981
758	0	161.199	-238.352	1573.32	265.892	-246.069	1581.29	135.25	-401.025	1558.26	253.063	-413.093	1568.07	223.844	-438.447	1426.13	228.662	-535.031	1146.85	217.239	-283.54	1318.66	225.508	-184.966	1119.84	306.41	-529.794	1244.25	64.6698	-353.026	1375.06	-38.5432	-387.365	1140.2	-44.2402	-408.863	1044.74	-68.5222	-343.044	906.043	-25.495	-316.907	804.231	-81.6119	-367.515	793.632	-80.7007	-312.939	729.247
759	0	160.493	-227.469	1574.68	265.261	-235.133	1582.66	134.71	-390.238	1559.49	252.638	-402.171	1569.32	223.241	-427.457	1427.53	227.795	-524.674	1148.65	216.853	-272.714	1319.76	225.51	-173.615	1120.87	305.578	-519.56	1246.05	64.1412	-341.712	1376.21	-39.9465	-374.948	1141.38	-45.9899	-395.615	1045.61	-69.6468	-328.009	907.555	-26.3029	-300.332	806.715	-82.4952	-350.684	794.825	-81.0493	-294.975	731.524
760	0	159.832	-216.599	1575.89	264.597	-224.148	1583.88	134.303	-379.496	1560.46	252.18	-391.235	1570.33	222.829	-416.503	1428.87	226.764	-514.539	1150.21	216.603	-261.928	1320.67	225.811	-162.417	1121.75	304.629	-509.358	1247.6	63.9012	-330.518	1377.04	-41.2425	-362.624	1142.46	-47.5761	-382.395	1046.29	-70.6434	-312.883	909.099	-26.8518	-283.961	808.791	-83.0103	-333.963	795.849	-81.3995	-276.932	733.734
761	0	159.279	-205.797	1577	263.983	-213.192	1584.98	133.911	-368.668	1561.53	251.668	-380.346	1571.33	222.19	-405.536	1430.17	225.782	-504.389	1151.92	216.383	-251.122	1321.62	226.111	-151.517	1122.4	303.802	-499.307	1249.25	63.6878	-319.266	1377.91	-42.5055	-350.289	1143.61	-49.2831	-369.037	1047.02	-71.4442	-297.665	910.589	-27.2543	-267.692	810.926	-83.7096	-317.172	796.961	-81.6907	-258.803	736.134
762	0	158.636	-194.883	1577.94	263.401	-202.227	1586.05	133.533	-357.764	1562.57	251.349	-369.371	1572.55	221.739	-394.603	1431.69	224.703	-494.222	1153.58	216.258	-240.48	1322.4	226.321	-141.049	1122.69	302.758	-489.141	1250.82	63.5005	-307.939	1378.79	-43.6713	-337.982	1144.57	-51.0415	-355.502	1047.88	-72.2903	-282.427	912.188	-27.6792	-251.411	813.095	-84.3604	-300.217	798.272	-81.9905	-240.567	738.68
763	0	158.22	-183.991	1578.64	262.967	-191.245	1586.89	133.143	-346.762	1563.48	250.911	-358.454	1573.57	221.248	-383.612	1432.91	223.606	-484.143	1155.28	216.214	-229.939	1323.02	226.74	-130.983	1122.8	301.936	-479.109	1252.44	63.5537	-296.684	1379.39	-44.6809	-325.586	1145.63	-52.6165	-342.046	1048.76	-72.9104	-266.964	913.767	-27.8911	-235.164	815.182	-84.9037	-283.27	799.618	-82.2233	-222.457	741.188
764	0	157.806	-173.085	1579.12	262.582	-180.342	1587.4	132.891	-335.961	1564.13	250.567	-347.535	1574.27	220.758	-372.796	1433.84	222.662	-474.196	1156.52	216.269	-219.432	1323.54	227.275	-121.085	1122.85	300.924	-469.106	1253.57	63.4388	-285.514	1380.24	-45.6063	-313.331	1146.56	-54.1683	-328.578	1049.58	-73.2937	-251.507	915.391	-28.0709	-219.149	817.394	-85.2468	-266.469	801.03	-82.353	-204.445	743.7
765	0	157.694	-162.12	1579.52	262.323	-169.442	1587.83	132.442	-325.008	1564.81	250.224	-336.723	1575.01	220.315	-362.064	1434.75	221.648	-464.298	1157.74	216.43	-208.962	1324.02	227.751	-111.284	1122.87	300.041	-459.122	1254.75	63.364	-274.36	1380.99	-46.6549	-300.871	1147.78	-55.6633	-315.024	1050.56	-73.6694	-235.971	917.11	-27.9702	-203.232	819.492	-85.7967	-249.557	802.743	-82.538	-186.625	746.31
766	0	157.5	-151.096	1579.86	262.238	-158.525	1588.26	132.105	-313.951	1565.45	249.922	-325.822	1575.64	219.646	-351.438	1435.64	220.799	-454.44	1158.78	216.518	-198.611	1324.39	228.178	-101.549	1122.94	299.103	-449.192	1255.81	63.3193	-263.33	1381.61	-47.3959	-288.532	1148.7	-57.0763	-301.444	1051.4	-74.0574	-220.55	919.014	-28.0404	-187.064	821.78	-86.4834	-232.511	804.418	-82.4968	-168.688	749.014
767	0	157.548	-140.115	1580.08	262.24	-147.705	1588.4	131.945	-302.953	1565.87	249.725	-314.986	1576.06	219.329	-341.049	1436.26	220.066	-444.631	1159.71	216.594	-188.378	1324.66	228.639	-91.9373	1123.05	298.315	-439.21	1256.59	63.2273	-252.396	1382.18	-48.0855	-276.264	1149.46	-58.3665	-287.87	1052.11	-74.2068	-205.118	920.754	-27.9942	-171.154	823.921	-87.0667	-215.527	806.041	-82.294	-151.042	751.561
768	0	157.598	-129.113	1580.1	262.274	-136.893	1588.38	131.651	-291.924	1566.11	249.355	-304.196	1576.32	218.847	-330.7	1436.68	219.342	-434.957	1160.16	216.68	-178.24	1324.86	228.971	-82.5429	1123.03	297.548	-429.417	1257.13	62.9935	-241.716	1382.77	-48.5562	-264.096	1149.93	-59.6248	-274.423	1052.66	-74.423	-189.79	922.383	-27.8209	-155.23	825.979	-87.6299	-198.598	807.463	-82.0632	-133.627	753.929
769	0	157.663	-118.113	1579.94	262.43	-126.041	1588.29	131.458	-280.906	1566.41	249.118	-293.331	1576.6	218.396	-320.404	1437.01	218.747	-425.223	1160.63	216.721	-168	1324.98	229.137	-73.2719	1123.03	296.912	-419.514	1257.66	62.8412	-231.08	1382.97	-49.0348	-251.716	1150.35	-60.6759	-260.893	1053.04	-74.6478	-174.411	923.923	-27.7733	-139.134	827.925	-88.1524	-181.657	808.921	-81.7838	-116.182	756.018
770	0	157.782	-107.181	1579.62	262.528	-115.258	1587.98	131.224	-269.909	1566.74	248.926	-282.523	1576.93	217.98	-310.113	1437.24	218.356	-415.471	1161	216.375	-157.948	1325.07	229.357	-63.9985	1122.89	296.372	-409.52	1258.03	62.6577	-220.552	1383.06	-49.5123	-239.332	1150.59	-61.7295	-247.403	1053.42	-74.7248	-159.028	925.2	-27.5721	-123.299	829.474	-88.5661	-164.892	810.245	-81.5658	-98.9436	758.04
771	0	157.819	-96.2342	1579.23	262.622	-104.42	1587.49	131.143	-259.052	1566.88	248.813	-271.759	1577.06	217.664	-299.884	1437.19	218.042	-405.839	1161.1	216.526	-147.767	1324.95	229.427	-54.8661	1122.65	295.93	-399.664	1258.09	62.484	-210.258	1382.98	-49.8191	-227.046	1150.6	-62.5439	-233.922	1053.37	-74.8428	-143.872	926.235	-27.244	-108.029	830.866	-88.8454	-148.247	811.235	-81.1854	-81.8322	759.75
772	0	157.94	-85.3489	1578.7	262.656	-93.6596	1586.84	130.921	-248.129	1566.96	248.552	-260.999	1577.2	217.36	-289.677	1437.15	217.754	-396.158	1161.14	216.403	-137.65	1324.8	229.274	-45.9966	1122.06	295.619	-389.804	1258.09	62.3301	-199.973	1382.83	-50.2283	-214.834	1150.52	-63.3017	-220.418	1053.26	-75.0254	-128.86	927.174	-27.2677	-91.7222	832.24	-89.2117	-131.782	812.133	-80.7194	-64.9281	761.289
773	0	158.012	-74.5108	1577.94	262.665	-82.9083	1586.15	130.784	-237.26	1567.04	248.441	-250.28	1577.17	217.261	-279.476	1437.04	217.632	-386.535	1161.15	216.266	-127.48	1324.37	229.202	-36.4712	1121.71	295.427	-379.707	1258.17	62.1943	-189.712	1382.56	-50.6003	-202.518	1150.31	-63.9009	-206.864	1053.11	-75.1142	-113.947	928.07	-26.9732	-76.119	833.338	-89.7933	-115.58	813.222	-80.3541	-48.1181	762.693
774	0	158.041	-63.6656	1577.16	262.709	-72.2057	1585.35	130.653	-226.423	1566.94	248.384	-239.555	1577.02	217.066	-269.041	1436.81	217.692	-376.801	1161.11	216.195	-117.204	1323.84	228.969	-26.5827	1121.23	295.498	-369.614	1258.16	62.2087	-179.536	1382.06	-50.8198	-190.228	1150.02	-64.3166	-193.402	1052.78	-75.1455	-99.0947	928.625	-26.6685	-60.5154	834.289	-89.0731	-99.2222	813.744	-79.7906	-31.4583	763.901
775	0	158.092	-52.9587	1576.41	262.796	-61.5287	1584.54	130.572	-215.77	1566.54	248.248	-228.949	1576.6	217.012	-258.689	1436.3	217.748	-367.173	1160.76	216.023	-106.912	1323.41	228.68	-16.9076	1120.3	295.565	-359.582	1257.88	62.1315	-169.37	1381.52	-51.1313	-178.049	1149.64	-64.6081	-179.922	1052.2	-75.17	-84.5092	929.089	-26.52	-44.9538	835.269	-89.2247	-83.1831	814.263	-79.326	-14.9592	765.088
776	0	158.133	-42.2638	1575.7	262.846	-50.8725	1583.66	130.459	-205.04	1566.07	248.089	-218.302	1576.09	217.031	-248.322	1435.86	218	-357.445	1160.5	215.815	-96.5311	1322.89	228.23	-6.85748	1119.65	295.815	-349.319	1257.59	61.9331	-159.166	1380.98	-51.2934	-165.831	1149.07	-64.8301	-166.635	1051.64	-75.2535	-69.9133	929.498	-26.2337	-29.5202	836.265	-89.1171	-67.2714	814.751	-78.7871	1.29459	766.333
777	0	158.223	-31.5419	1574.78	262.899	-40.1962	1582.77	130.393	-194.385	1565.44	248.028	-207.614	1575.34	217.008	-237.763	1435.24	218.344	-347.534	1160.17	215.531	-86.0912	1322.12	227.778	3.21801	1118.75	296.026	-338.939	1257.23	61.8191	-149.097	1380.19	-51.3536	-153.487	1148.36	-64.8749	-153.305	1050.9	-75.0438	-55.3979	929.949	-25.9113	-14.1213	837.222	-88.5946	-51.5971	815.043	-78.3054	17.4849	767.388
778	0	158.142	-20.8634	1573.65	262.911	-29.5875	1581.57	130.401	-183.766	1564.58	248.007	-196.987	1574.32	217.109	-227.135	1434.41	218.777	-337.546	1159.66	215.276	-75.5714	1321.04	227.346	13.3863	1117.33	296.436	-328.518	1256.68	61.8066	-138.894	1379.26	-51.382	-141.273	1147.54	-64.953	-140.142	1050.09	-74.7477	-40.9113	930.023	-25.3473	1.11607	837.574	-88.4483	-35.8406	815.247	-77.604	33.5942	768.048
779	0	158.247	-10.3249	1572.5	262.975	-18.9609	1580.38	130.509	-173.139	1563.4	248.036	-186.354	1573.19	217.247	-216.483	1433.36	219.336	-327.489	1158.85	214.823	-65.0791	1319.99	226.83	23.8038	1116.11	296.955	-318.027	1255.85	61.854	-128.565	1378.03	-51.1363	-129.049	1146.47	-64.8735	-127.076	1049.09	-74.265	-26.554	930.036	-24.9532	15.8325	837.789	-88.0126	-20.3122	815.258	-77.0274	49.4103	768.814
780	0	158.206	0.205815	1571.39	263.046	-8.29091	1579.17	130.575	-162.532	1562.32	248.252	-175.719	1572.02	217.414	-205.789	1432.51	219.862	-317.21	1158.16	214.574	-54.4764	1318.72	226.258	34.102	1114.68	297.433	-307.467	1255.16	61.6657	-118.273	1377.12	-51.0639	-116.971	1145.52	-64.6559	-113.932	1048.12	-73.8009	-12.2661	930.124	-24.2918	31.1058	838.394	-87.5645	-4.89804	815.377	-76.4028	65.0946	769.554
781	0	158.298	10.8304	1570.12	263.088	2.30423	1577.92	130.764	-151.905	1560.92	248.391	-165.077	1570.59	217.644	-195.015	1431.27	220.428	-306.701	1157.15	214.354	-43.7147	1317.48	225.717	44.4179	1113.16	297.971	-296.676	1254.19	61.7302	-107.995	1375.75	-50.7727	-104.886	1144.14	-64.2591	-100.733	1046.89	-73.2005	1.91159	929.956	-23.5007	45.9868	838.744	-87.0014	10.2955	815.149	-75.6993	80.823	770.123
782	0	158.426	21.4637	1568.72	263.262	13.0118	1576.37	131.089	-141.299	1559.32	248.682	-154.356	1568.81	217.975	-184.354	1429.94	221.016	-296.228	1155.93	214.203	-32.9516	1315.85	225.244	54.8274	1111.44	298.623	-285.804	1252.93	61.67	-97.6718	1374.54	-50.4919	-93.1016	1142.88	-63.8871	-87.7632	1045.57	-72.5003	16.0114	929.554	-22.9833	60.1327	838.434	-86.1972	25.222	814.9	-74.8063	96.2604	770.55
783	0	158.546	32.0307	1567.14	263.415	23.6804	1574.77	131.401	-130.77	1557.63	249.092	-143.727	1567.09	218.24	-173.41	1428.42	221.574	-285.696	1154.6	214.063	-22.0959	1314.32	224.696	65.3584	1109.64	299.214	-275.083	1251.59	61.7851	-87.3285	1373.15	-50.1607	-81.4297	1141.32	-63.649	-74.9948	1044.2	-71.8866	29.8497	929.196	-22.2182	75.1338	838.542	-85.9139	40.0675	814.646	-74.0874	111.604	770.741
784	0	158.855	42.579	1565.62	263.679	34.3785	1573.13	131.804	-120.298	1555.88	249.51	-133.069	1565.24	218.677	-162.604	1426.94	222.239	-274.999	1153.11	213.939	-11.151	1312.61	224.125	76.0423	1107.82	299.841	-264.046	1250.13	61.9612	-76.8333	1371.39	-49.7977	-69.9001	1139.65	-63.4372	-62.316	1042.82	-71.1876	43.563	928.607	-21.3611	89.4171	838.505	-85.001	54.7479	814.033	-73.2653	126.678	770.953
785	0	159.256	53.0997	1564.03	264.054	45.0637	1571.33	132.352	-109.711	1554.05	250.067	-122.415	1563.26	219.235	-151.71	1425.1	222.87	-264.174	1151.58	213.966	-0.198824	1310.86	223.657	86.7915	1105.92	300.589	-252.985	1248.54	62.1446	-66.2718	1369.83	-49.5191	-58.6456	1138	-62.9809	-49.701	1041.2	-70.5096	57.1098	927.789	-20.5251	103.556	838.094	-84.4424	69.3074	813.572	-72.3211	141.591	771.077
786	0	159.891	63.7194	1562.24	264.705	55.725	1569.52	133.118	-99.1262	1552.19	250.833	-111.798	1561.25	219.793	-140.946	1423.4	223.591	-253.215	1149.87	213.993	10.7398	1309.03	223.194	97.5922	1103.97	301.353	-241.994	1246.7	62.5209	-55.8207	1368.15	-49.1086	-47.5423	1136.17	-62.9245	-37.606	1039.61	-69.7681	70.4437	927.091	-19.6359	117.422	837.651	-83.5411	83.5832	812.817	-71.1877	156.208	770.94
787	0	160.549	74.2849	1560.8	265.439	66.364	1567.7	133.894	-88.5102	1550.4	251.526	-101.103	1559.14	220.361	-130.071	1421.53	224.283	-242.118	1148.1	214.116	21.7815	1307.39	222.816	108.77	1102.12	302.125	-230.798	1244.88	62.9636	-45.3296	1366.47	-48.6907	-36.5835	1134.54	-62.3727	-25.2802	1038.03	-69.0786	83.4764	926.255	-18.6319	131.128	837.384	-82.431	97.5316	812.076	-70.1837	170.485	770.943
788	0	161.355	84.8848	1559.2	266.329	76.9905	1566.07	134.587	-77.8985	1548.68	252.441	-90.4703	1557.3	221.027	-119.224	1419.88	224.855	-230.938	1146.26	214.264	32.8883	1305.78	222.412	120.077	1100.63	302.815	-219.645	1242.99	63.278	-34.7698	1364.94	-48.3909	-25.7565	1132.86	-62.054	-13.2572	1036.47	-68.4441	96.3396	925.564	-17.7601	144.549	836.932	-81.4801	111.28	811.312	-69.1415	184.558	770.99
789	0	162.401	95.5356	1557.8	267.334	87.5493	1564.28	135.629	-67.2279	1547.06	253.432	-79.934	1555.22	221.805	-108.455	1417.87	225.476	-219.783	1144.21	214.578	43.9579	1304.15	221.984	131.343	1099	303.592	-208.491	1240.9	63.8772	-24.1476	1363.41	-48.0055	-14.9967	1131.47	-61.2558	-1.24231	1034.91	-67.5204	109.08	924.585	-16.56	157.642	836.545	-80.8261	124.67	810.726	-68.0083	198.186	770.73
790	0	163.426	106.065	1556.33	268.512	98.0324	1562.54	136.764	-56.5791	1545.45	254.604	-69.1887	1553.31	222.658	-97.6987	1416.02	226.149	-208.589	1142.09	214.984	55.1228	1302.65	221.652	142.951	1097.63	304.274	-197.21	1238.68	64.4749	-13.4006	1361.8	-47.4591	-4.2204	1129.98	-60.7674	10.3735	1033.51	-66.795	121.35	923.873	-15.7222	169.869	835.92	-79.7145	137.689	809.962	-66.8252	211.578	770.772
791	0	164.783	116.74	1554.98	269.854	108.668	1561.08	137.91	-46.0509	1543.96	255.854	-58.6683	1551.63	223.58	-86.958	1414.3	226.763	-197.275	1140.1	215.456	66.2534	1301.19	221.432	154.586	1096.37	304.955	-185.996	1236.52	64.9376	-2.65363	1360.82	-46.9586	6.54547	1128.67	-60.2812	21.8473	1032.27	-66.097	133.218	922.996	-14.5216	182.807	835.851	-78.4426	150.317	809.231	-65.5134	224.441	770.596
792	0	166.233	127.261	1553.66	271.195	119.213	1559.41	139.243	-35.3204	1542.52	257.233	-48.0832	1549.93	224.614	-76.1358	1412.46	227.317	-185.806	1137.98	216.104	77.5049	1299.71	221.31	166.039	1094.79	305.698	-174.723	1234.25	65.8143	8.26153	1359.55	-46.5192	17.4875	1127.59	-60.2006	32.7283	1031.17	-65.0606	145.111	922.233	-13.3267	194.901	835.418	-77.0734	162.798	808.538	-64.1286	237.128	770.281
793	0	167.826	137.837	1552.37	272.683	129.688	1557.79	140.729	-24.8557	1541.17	258.677	-37.5278	1548.17	225.678	-65.4081	1410.61	227.844	-174.224	1135.63	216.933	88.71	1298.39	221.39	177.841	1093.75	306.346	-163.312	1231.82	66.7259	19.2375	1358.45	-45.854	28.5624	1126.55	-59.6234	43.6773	1030.01	-64.3378	156.55	921.466	-12.2388	206.784	835.086	-76.0028	174.735	808.001	-62.899	249.277	770.173
794	0	169.318	148.217	1551.17	274.397	140.143	1556.44	142.284	-14.3864	1539.92	260.146	-27.1939	1546.67	226.847	-54.6213	1408.72	228.248	-162.424	1133.38	217.74	99.9631	1297.31	221.305	189.636	1092.92	306.815	-151.836	1229.34	67.702	30.3524	1357.56	-45.418	39.585	1125.8	-59.1894	54.3649	1029.14	-63.6935	167.626	920.917	-11.2461	218.201	834.86	-75.2086	186.083	807.346	-61.6976	260.844	770.057
795	0	171.086	158.719	1550.12	276.059	150.583	1555.11	144.021	-3.89651	1538.78	261.925	-16.7409	1545.25	228.097	-43.9608	1407.08	228.645	-150.335	1131.03	218.812	111.302	1296.34	221.727	201.705	1092.34	307.351	-140.405	1226.75	68.8489	41.5302	1356.75	-44.9702	50.7424	1125.34	-58.7882	64.7576	1028.46	-63.0807	178.257	920.404	-10.2194	229.218	834.722	-73.7934	197.288	806.76	-60.3521	272.223	769.851
796	0	172.771	169.1	1549.31	277.939	161.027	1554.03	145.756	6.39883	1537.72	263.682	-6.36512	1543.81	229.484	-33.3215	1405.25	228.947	-137.96	1128.49	219.9	122.63	1295.54	222.166	213.692	1091.87	307.895	-128.791	1224.16	70.0668	52.7024	1356.15	-44.5285	62.1164	1125.18	-58.1787	75.1608	1027.8	-62.4733	188.75	919.768	-9.26853	239.848	834.505	-72.966	207.838	806.428	-59.1163	283.089	769.454
797	0	174.711	179.517	1548.87	279.859	171.338	1553.24	147.766	16.8099	1536.69	265.673	4.03664	1542.51	231.023	-22.8758	1403.47	229.231	-125.303	1126.08	221.208	134.071	1294.97	222.673	225.853	1091.72	308.462	-117.135	1221.37	71.4109	63.8096	1355.8	-44.2115	73.3778	1125.29	-57.77	85.3147	1027.38	-61.8202	198.997	919.328	-8.60331	249.787	834.211	-71.6762	218.164	805.634	-58.1116	293.273	769.284
798	0	176.524	189.701	1548.84	281.845	181.682	1552.85	149.739	27.0569	1536.01	267.745	14.4044	1541.49	232.488	-12.3191	1402.24	229.282	-112.427	1123.85	222.561	145.582	1294.82	223.437	238.041	1091.87	309.015	-105.564	1218.88	72.9437	74.8987	1355.51	-43.5554	84.7499	1125.36	-56.9222	95.7232	1027.18	-61.2425	208.836	918.794	-7.77629	259.994	834.078	-70.5604	227.939	804.991	-57.3522	303.028	768.9
799	0	178.594	200.053	1549.04	283.749	192.101	1552.97	151.881	37.4383	1535.7	269.849	24.8882	1540.81	234.122	-1.45535	1401.28	229.169	-99.2877	1122.4	223.969	157.223	1294.92	224.151	250.738	1092.32	309.367	-93.8119	1216.88	74.3532	86.155	1355.56	-43.1359	96.0464	1125.86	-56.3613	105.892	1027.29	-60.7818	218.527	918.341	-7.11158	269.456	833.652	-69.6748	237.148	804.201	-56.4706	312.366	768.212
800	0	180.545	210.271	1549.57	285.783	202.599	1553.17	154.049	47.7341	1535.69	272.135	35.3787	1540.42	235.639	9.57718	1400.8	228.644	-86.329	1121.44	225.573	168.93	1295.16	224.87	263.356	1092.84	309.652	-82.1697	1215.45	75.8507	97.8009	1355.96	-42.3117	107.409	1126.34	-55.9491	115.786	1027.68	-60.1248	227.929	917.944	-6.59545	278.535	833.045	-68.953	245.843	803.657	-55.748	321.113	767.583
801	0	182.755	220.69	1550.6	287.94	213.019	1553.85	156.505	58.0856	1535.89	274.53	45.901	1540.34	237.181	20.7512	1400.84	228.041	-73.62	1121.05	227.178	180.656	1295.84	225.706	276.252	1093.76	309.717	-70.5565	1214.57	77.2141	109.735	1356.8	-41.3179	118.547	1127.3	-55.0119	125.756	1028.43	-59.496	236.938	917.68	-6.16926	287.011	832.438	-68.3535	253.995	803.441	-55.4068	329.171	766.753
802	0	184.692	231.027	1552.31	289.972	223.643	1555.04	158.719	68.3356	1536.65	276.851	56.4477	1540.63	238.456	32.227	1401.48	227.359	-61.9866	1121.55	228.755	192.404	1297.03	226.705	289.382	1095.41	309.451	-59.0696	1214.5	78.5767	121.977	1358.4	-40.3871	129.436	1128.64	-54.1885	135.71	1029.75	-58.9811	245.682	917.771	-5.72923	294.7	832.064	-68.0811	261.426	803.503	-55.2329	336.663	766.294
803	0	186.841	241.473	1554.23	292.08	234.193	1556.66	161.234	78.9696	1537.91	279.257	67.082	1541.33	239.42	43.7483	1402.58	226.607	-50.8128	1122.45	230.34	204.228	1298.55	227.756	302.439	1097.27	309.004	-47.6309	1215.09	80.02	134.644	1360.33	-39.3028	140.469	1130.4	-53.2313	145.55	1031.54	-58.2545	254.029	918.24	-5.3853	302.477	832.281	-67.1813	268.266	803.626	-55.3307	343.164	766.078
804	0	188.635	251.813	1556.4	294.203	244.839	1558.45	163.622	89.4191	1539.41	281.728	77.8164	1542.35	240.586	55.2971	1403.9	225.602	-39.8025	1123.71	231.911	215.951	1300.42	228.91	315.19	1099.34	308.329	-36.2229	1216	81.6255	147.567	1362.92	-38.296	151.273	1132.76	-52.1047	155.249	1033.78	-57.5509	262.087	919.097	-4.97996	309.434	832.393	-66.7563	274.605	804.222	-55.3626	349.248	765.787
805	0	190.849	262.404	1559.05	296.447	255.56	1560.56	165.944	99.9933	1541.28	283.93	88.5061	1543.61	241.237	66.4833	1405.66	224.371	-28.2504	1125.45	233.406	227.474	1302.64	230.099	327.634	1102.05	307.535	-24.8761	1217.18	82.9735	160.249	1365.78	-37.1748	162.123	1135.4	-51.1351	164.816	1036.51	-56.8763	269.734	920.233	-4.66753	316.032	832.701	-65.9123	280.474	805.134	-55.5384	354.628	765.726
806	0	193.069	272.981	1561.96	298.566	266.191	1562.8	168.052	110.388	1543.64	286.173	99.2674	1545.45	242.081	77.7261	1407.69	223.391	-16.1079	1127.5	234.784	238.918	1305.18	231.212	339.59	1104.82	306.651	-13.5364	1218.76	84.2596	172.783	1368.92	-36.1053	172.896	1138.51	-49.9485	174.463	1039.6	-56.2102	277.243	921.71	-4.22589	322.152	833.213	-65.8974	285.964	806.44	-55.6309	359.393	765.746
807	0	195.073	283.587	1564.64	300.535	276.954	1565.13	170.134	121.352	1546.36	288.141	110.002	1547.43	242.823	88.8825	1409.71	222.74	-3.81142	1129.56	236.138	250.177	1307.83	232.432	351.006	1107.75	305.958	-2.18447	1220.38	85.7273	184.948	1372.21	-35.2191	183.551	1141.85	-49.1912	183.741	1042.99	-55.386	284.613	923.35	-3.8393	327.942	833.818	-65.2855	291.163	807.973	-55.4557	363.89	765.956
808	0	197.016	294.202	1567.49	302.457	287.599	1567.44	171.936	131.812	1549.2	289.903	120.745	1549.66	243.642	99.8153	1411.88	222.103	8.25407	1131.66	237.319	261.269	1310.55	233.59	362.24	1110.95	305.244	9.18098	1222.08	86.8615	196.955	1375.68	-34.1868	194.342	1145.24	-48.3231	193.064	1046.49	-54.8943	291.868	925.366	-3.33182	333.432	834.553	-65.4167	296.398	809.83	-55.3871	368.013	766.176
809	0	198.789	304.95	1570.3	304.184	298.162	1569.68	173.561	142.548	1552.14	291.523	131.351	1552.12	244.325	110.545	1414.09	221.464	19.843	1133.8	238.438	272.185	1313.27	234.694	373.428	1114.02	304.645	20.5239	1223.75	87.9915	208.436	1378.94	-33.3036	205.124	1148.78	-47.4967	202.24	1049.97	-54.1656	299.116	927.225	-3.00711	338.781	835.372	-65.1634	301.651	811.776	-55.0384	372.008	766.343
810	0	200.493	315.732	1572.98	305.907	308.773	1571.88	174.895	153.33	1555.12	292.886	141.966	1554.6	244.958	121.371	1416.31	220.914	31.0101	1135.93	239.338	283.025	1315.98	235.478	383.753	1116.95	304.256	31.7593	1225.54	89.0364	219.844	1382.04	-32.7982	215.801	1152.34	-46.8996	211.205	1053.46	-53.6105	306.216	929.21	-2.65219	344.054	836.288	-65.4999	306.984	813.969	-54.5322	375.84	766.34
811	0	201.92	326.397	1575.41	307.363	319.214	1573.98	176.048	163.997	1557.9	294.001	152.516	1556.9	245.597	132.048	1418.38	220.703	41.7915	1138.05	240.269	293.767	1318.55	236.438	394.492	1119.85	304.031	42.9308	1227.33	89.7637	231.002	1385.01	-32.4226	226.38	1155.63	-46.3641	219.859	1056.72	-53.417	313.273	931.335	-2.37201	349.198	837.243	-65.8819	312.498	816.128	-53.916	379.74	766.349
812	0	203.287	337.011	1577.62	308.651	329.591	1575.9	177.137	174.712	1560.42	295.034	162.953	1559.06	246.087	142.768	1420.31	220.781	52.6464	1140.16	240.989	304.465	1321	236.997	404.923	1122.47	303.957	53.865	1228.93	90.3941	242.026	1387.91	-32.1009	236.811	1158.65	-45.9122	228.209	1059.61	-53.1696	320.345	933.171	-2.22423	354.346	838.247	-66.3975	318.528	818.195	-53.255	383.758	766.346
813	0	204.558	347.658	1580.08	309.91	339.934	1577.83	177.89	185.316	1562.78	295.709	173.389	1560.91	246.474	153.197	1422.33	221.067	63.4835	1142.2	241.521	315.051	1323.29	237.446	415.447	1125.14	303.954	64.7956	1230.72	90.8824	252.852	1390.33	-32.0798	247.093	1161.66	-45.665	236.563	1062.48	-53.3264	327.333	934.965	-2.30335	359.864	839.245	-66.9845	324.483	820.042	-52.6728	387.775	766.316
814	0	205.873	358.283	1582.2	310.985	350.269	1579.6	178.364	196.159	1564.94	296.232	183.703	1562.75	246.845	163.756	1424.37	221.246	74.5366	1144.17	241.924	325.624	1325.41	237.823	426.001	1127.17	304.065	75.4219	1232.59	91.2067	263.508	1392.59	-32.1483	257.331	1164.15	-45.4018	245.056	1064.8	-53.3916	334.433	936.524	-2.43106	365.326	840.173	-67.5518	330.421	821.893	-52.2187	391.905	766.209
815	0	206.725	368.811	1584.01	311.896	360.434	1581.15	178.901	206.689	1566.73	296.615	193.972	1564.08	247.151	174.299	1426.05	221.257	85.8297	1145.63	242.181	336.195	1327.14	237.967	436.486	1128.87	304.291	86.0638	1234.38	91.429	274.098	1394.55	-32.2895	267.306	1166.31	-45.3372	253.446	1066.81	-53.5832	341.378	937.66	-2.2243	370.565	840.511	-68.1149	336.413	823.148	-51.9952	396.27	765.894
816	0	207.5	379.223	1585.84	312.647	370.609	1582.66	179.072	217.473	1568.28	296.785	204.218	1565.46	247.265	184.878	1427.69	221.395	96.9599	1147.11	242.256	346.796	1328.74	237.794	446.836	1130.34	304.611	96.4746	1236.08	91.4768	284.671	1396.13	-32.629	277.123	1168.15	-45.4797	261.834	1068.6	-53.8503	348.541	938.578	-2.37605	376.093	840.903	-68.9193	342.413	824.273	-51.7713	400.678	765.552
817	0	208.23	389.772	1587.55	313.251	380.783	1584.21	179.092	227.949	1569.84	296.796	214.398	1566.78	247.202	195.299	1429.27	221.791	107.763	1148.95	242.132	357.316	1330.17	237.614	457.238	1131.58	304.898	106.884	1237.9	91.3346	295.006	1397.52	-33.0274	286.541	1169.53	-45.7314	270.476	1070.09	-54.1881	355.633	939.148	-2.62703	381.84	841.079	-69.3829	348.222	825.144	-51.8814	405.218	765.217
818	0	208.669	400.185	1589.04	313.67	390.958	1585.64	179.043	238.453	1571.3	296.805	224.633	1567.96	247.315	205.882	1430.88	222.426	117.638	1150.72	241.94	367.8	1331.45	237.472	467.633	1132.59	305.266	117.17	1239.74	91.186	305.167	1398.79	-33.3771	295.62	1170.66	-45.8673	279.225	1071.41	-54.4581	362.883	939.555	-2.9642	387.634	841.167	-70.2311	354.254	825.825	-51.6497	410.022	764.832
819	0	208.811	410.494	1590.62	313.894	401.111	1587	178.96	248.872	1572.51	296.743	234.823	1569.15	247.444	216.286	1432.35	223.212	127.044	1152.41	241.679	378.185	1332.66	237.01	477.912	1133.4	305.825	127.414	1241.49	90.9679	315.109	1399.84	-33.8147	304.289	1171.56	-46.2133	287.921	1072.53	-54.8385	370.013	939.968	-3.78254	393.839	841.356	-70.8009	360.332	826.231	-52.398	415.022	764.514
820	0	209	420.888	1591.9	313.94	411.239	1588.27	178.952	259.326	1573.63	296.601	245.119	1570.39	247.529	226.72	1433.86	223.811	136.424	1154.14	241.376	388.579	1333.81	236.362	487.945	1134.06	306.52	137.38	1243.29	90.7326	324.999	1401	-33.9945	312.724	1172.34	-46.3913	296.485	1073.44	-55.155	377.259	940.341	-4.46937	399.987	841.372	-71.2754	366.357	826.645	-53.1201	420.431	764.402
821	0	208.934	431.277	1593.03	313.816	421.554	1589.48	178.782	269.775	1574.74	296.275	255.309	1571.39	247.598	237.146	1435.25	224.511	145.929	1155.7	240.936	398.941	1334.84	235.638	497.903	1134.82	307.165	147.557	1245.11	90.4383	334.797	1401.92	-33.8855	320.953	1172.85	-46.6366	304.86	1074.44	-55.4578	384.329	940.6	-5.08365	406.339	841.391	-71.8734	372.367	827.041	-53.8479	426.1	764.433
822	0	208.596	441.543	1594	313.632	431.901	1590.46	178.451	280.034	1575.81	296.113	265.674	1572.47	247.705	247.565	1436.49	225.16	155.575	1157.25	240.451	409.124	1335.72	234.904	507.748	1135.25	307.986	157.667	1246.8	90.2069	344.471	1402.62	-33.8194	329.03	1173.29	-46.8391	313.28	1075.36	-55.6307	391.612	940.798	-5.73888	412.684	841.331	-72.3805	378.322	827.448	-54.6836	431.753	764.245
823	0	208.274	451.842	1594.77	313.243	442.249	1591.26	178.139	290.302	1576.65	295.876	276.07	1573.36	247.902	257.901	1437.63	225.914	165.151	1158.42	239.903	419.196	1336.41	234.131	517.506	1135.69	308.754	167.783	1248.21	89.8869	353.976	1403.44	-33.7572	336.756	1173.73	-46.7052	321.653	1076.01	-55.8861	398.607	941.103	-5.72513	418.534	840.738	-73.3577	384.549	827.889	-56.0428	437.721	764.314
824	0	207.884	462.188	1595.44	312.755	452.615	1592	177.695	300.429	1577.42	295.537	286.453	1574.17	247.958	268.089	1438.54	226.661	174.661	1159.65	239.316	429.216	1337.08	233.364	527.245	1136.13	309.427	177.826	1249.54	89.6612	363.312	1404.04	-33.6916	344.352	1174.4	-46.7089	329.613	1076.76	-56.0408	405.986	941.412	-6.44432	424.895	840.676	-73.9026	390.952	828.289	-57.3036	443.985	764.751
825	0	207.393	472.587	1595.95	312.329	463.097	1592.7	177.468	310.912	1577.95	295.191	296.865	1574.91	248.085	278.141	1439.49	227.357	184.168	1160.74	238.714	439.141	1337.68	232.527	536.906	1136.54	310.234	187.891	1250.84	89.2662	372.575	1404.69	-33.6793	352	1175.01	-46.9252	337.505	1077.71	-56.3379	413.039	941.891	-7.14337	431.505	840.906	-74.592	397.391	828.922	-58.2488	450.3	765.218
826	0	206.788	482.857	1596.2	311.761	473.48	1593.06	177.209	321.151	1578.39	294.923	307.257	1575.49	248.354	288.146	1440.25	228.017	193.584	1161.55	238.164	448.965	1338.19	231.823	546.503	1137.05	310.865	197.869	1251.76	88.9009	381.82	1405.24	-33.83	359.324	1175.63	-46.6064	345.321	1078.33	-56.586	420.3	942.209	-8.21797	438.313	841.265	-75.1606	403.692	829.378	-59.7982	456.999	765.634
827	0	206.051	493.095	1596.34	311.177	483.925	1593.3	176.864	331.383	1578.71	294.583	317.63	1576.07	248.34	298.024	1440.82	228.607	203.059	1162.16	237.554	458.733	1338.55	231.107	556.027	1137.57	311.473	207.792	1252.53	88.5317	390.926	1405.64	-33.8629	366.91	1176.03	-46.4719	352.995	1078.81	-57.1292	427.462	942.514	-8.86896	445.126	841.192	-76.0264	410.432	829.773	-60.9381	463.743	765.995
828	0	205.577	503.445	1596.28	310.598	494.379	1593.46	176.356	341.473	1579.14	294.217	327.979	1576.64	248.23	307.872	1441.31	228.944	212.486	1162.46	236.97	468.475	1338.89	230.389	565.525	1137.92	311.838	217.672	1253.14	88.0313	400.122	1406.02	-34.0029	374.402	1176.38	-46.4814	360.459	1079.35	-57.5443	434.618	942.639	-9.91049	452.198	841.297	-76.7478	417.259	830.025	-62.3711	470.585	766.338
829	0	205.063	513.846	1596.03	310.048	504.792	1593.36	176	351.617	1579.46	293.897	338.346	1577.03	248.169	317.699	1441.62	229.352	221.866	1162.76	236.449	478.192	1339	229.774	574.999	1138.07	312.17	227.466	1253.6	87.5372	409.381	1406.31	-34.2586	381.953	1176.68	-46.3255	368.104	1079.65	-58.2665	441.82	942.861	-10.7106	459.495	841.194	-77.5056	423.889	830.359	-63.5711	477.396	766.564
830	0	204.498	524.1	1595.83	309.602	515.216	1593.15	175.712	361.809	1579.57	293.605	348.667	1577.32	248.024	327.499	1441.71	229.581	231.373	1162.94	235.875	487.919	1339.04	229.136	584.328	1138.07	312.307	237.097	1253.76	87.1851	418.625	1406.38	-34.2922	389.596	1176.77	-46.1167	375.559	1079.7	-58.8619	448.997	942.864	-11.2216	466.6	840.922	-77.6527	430.612	830.429	-64.7924	484.55	766.599
831	0	203.948	534.315	1595.5	309.126	525.557	1592.84	175.435	372.032	1579.67	293.219	358.938	1577.5	247.786	337.296	1441.76	229.514	240.832	1163.08	235.399	497.647	1339.03	228.605	593.741	1138	312.348	246.834	1253.97	86.655	428.016	1406.33	-34.6428	397.294	1176.81	-46.1345	383.1	1079.78	-59.7047	456.271	942.687	-12.3079	474.27	840.811	-78.4096	437.408	830.463	-65.9631	491.503	766.623
832	0	203.477	544.593	1595.1	308.619	535.801	1592.47	175.057	382.246	1579.71	292.843	369.242	1577.52	247.68	346.998	1441.86	229.468	250.139	1163.25	234.948	507.36	1338.91	228.17	603.15	1138	312.245	256.464	1254.04	86.1454	437.456	1406.18	-34.8477	404.934	1176.62	-46.0068	390.797	1079.68	-60.4394	463.63	942.377	-13.418	482.022	840.62	-78.823	444.436	830.167	-67.297	498.839	766.529
833	0	203.114	554.865	1594.52	308.152	546.104	1591.89	174.65	392.344	1579.6	292.504	379.506	1577.33	247.297	356.935	1441.66	229.267	259.508	1163.06	234.41	517.23	1338.71	227.774	612.707	1137.63	311.983	266.039	1254.03	85.6251	447.064	1405.85	-35.1035	413.03	1176.33	-45.9822	398.838	1079.51	-61.4806	471.045	942.07	-14.5759	490.308	840.401	-79.3451	451.536	829.902	-68.2854	506.072	765.984
834	0	202.521	564.96	1593.86	307.646	556.405	1591.17	174.234	402.405	1579.29	292.194	389.764	1576.99	246.806	366.87	1441.31	228.892	269.02	1163.14	233.949	526.961	1338.26	227.336	622.271	1137.01	311.744	275.451	1254.06	85.142	456.826	1405.46	-35.3577	421.152	1176.11	-46.044	406.869	1079.06	-62.2322	478.628	941.431	-15.8824	498.307	839.874	-79.6148	458.705	829.294	-69.5729	513.349	765.503
835	0	201.764	575.098	1593.26	307.114	566.715	1590.52	173.892	412.544	1578.88	291.818	399.958	1576.59	246.286	376.886	1440.96	228.552	278.398	1163.2	233.476	536.914	1337.81	226.927	631.919	1136.59	311.289	285.088	1253.97	84.6788	466.767	1404.91	-35.7716	429.563	1175.74	-46.3107	415.131	1078.73	-63.1256	486.409	940.825	-16.8093	506.868	839.611	-79.974	465.91	828.635	-70.4541	520.803	764.728
836	0	201.312	585.384	1592.47	306.552	576.895	1589.65	173.487	422.731	1578.27	291.428	410.223	1575.94	245.728	387.026	1440.44	228.273	287.624	1163.18	233.122	546.867	1337.13	226.471	641.491	1135.64	310.758	294.755	1253.72	84.1705	476.912	1404.2	-36.2013	438.359	1175.23	-46.6227	423.738	1078.36	-64.0333	494.49	940.028	-17.882	514.898	838.566	-80.2429	473.461	828.065	-71.4168	528.334	763.956
837	0	200.977	595.587	1591.41	306.056	587.258	1588.65	173.06	432.882	1577.53	290.956	420.558	1575.06	245.114	397.178	1439.7	227.808	297.172	1162.74	232.753	556.921	1336.21	226.238	651.318	1134.65	310.226	304.455	1253.21	83.6639	487.02	1403.59	-36.733	447.394	1174.71	-47.0231	432.525	1077.7	-64.6469	502.595	939.21	-18.4931	523.344	837.687	-80.5563	480.973	827.044	-72.0995	535.675	762.86
838	0	200.273	605.729	1590.47	305.419	597.468	1587.58	172.521	443.035	1576.6	290.437	430.757	1574.16	244.569	407.369	1438.85	227.132	306.471	1162.18	232.33	566.994	1335.29	225.959	661.26	1133.54	309.397	313.938	1252.6	83.0726	497.26	1402.63	-37.5131	456.671	1174.16	-47.3448	441.525	1077.01	-65.3433	510.752	938.233	-19.4985	532.076	837.021	-81.2522	488.774	826.15	-72.8938	543.537	761.917
839	0	199.336	616.066	1589.26	304.676	607.786	1586.51	171.719	453.312	1575.54	289.765	441.107	1573.24	243.832	417.563	1438.07	226.417	316.382	1161.49	231.652	577.089	1334.21	225.603	671.075	1132.43	308.63	323.763	1252.04	82.5461	507.778	1401.63	-38.2196	466.419	1173.34	-48.0744	450.753	1076.35	-66.135	519.435	937.259	-19.611	539.95	835.56	-81.584	496.871	825.018	-73.6756	551.179	760.642
840	0	198.915	626.429	1587.92	303.975	618.148	1585.28	171.133	463.609	1574.38	289.036	451.357	1572.07	243.035	427.84	1436.97	225.558	326.202	1160.57	231.341	587.252	1333.04	225.146	680.94	1130.88	307.866	333.63	1251.13	81.9771	518.202	1400.49	-38.9635	476.64	1172.6	-48.7495	460.232	1075.53	-66.8203	528.16	936.118	-20.3711	548.655	834.507	-81.8419	505.012	823.921	-74.3834	559.322	759.287
841	0	198.129	636.657	1586.35	303.246	628.46	1583.68	170.427	474.053	1572.81	288.279	461.746	1570.62	242.322	438.135	1435.6	224.797	336.187	1159.5	230.899	597.53	1331.57	224.937	690.94	1129.46	306.962	343.514	1250.02	81.2825	528.701	1399.15	-39.8533	486.803	1171.5	-49.5266	469.782	1074.45	-67.51	537.085	934.877	-21.2468	557.413	833.091	-82.5129	513.355	822.554	-74.964	567.439	757.581
842	0	197.18	647.254	1584.85	302.46	638.814	1582.33	169.505	484.47	1571.45	287.5	472.097	1569.45	241.459	448.448	1434.39	223.827	346.171	1158.33	230.271	607.666	1330.1	224.68	701.095	1127.91	305.837	353.487	1248.83	80.6787	539.404	1397.83	-40.6329	497.41	1170.28	-50.5518	479.509	1073.41	-68.3453	546.28	933.532	-22.021	566.189	831.703	-83.3524	521.947	821.116	-75.4755	575.803	756.125
843	0	196.563	657.741	1583.14	301.599	649.219	1580.81	168.434	494.965	1569.87	286.543	482.544	1568.08	240.456	458.782	1432.99	222.795	356.067	1157.17	229.742	618.086	1328.73	224.308	711.14	1126.3	304.781	363.491	1247.59	79.8898	550.091	1396.35	-41.521	508.212	1169.04	-51.5569	489.495	1072.1	-69.2393	555.699	931.953	-22.8399	575.165	830.285	-84.2607	530.805	819.797	-76.2417	584.372	754.429
844	0	195.653	668.251	1581.4	300.853	659.822	1579.15	167.562	505.515	1568.24	285.471	493.023	1566.59	239.474	469.214	1431.48	221.755	366.158	1155.67	229.139	628.49	1327.03	224.078	721.465	1124.66	303.552	373.49	1246.06	79.0581	560.81	1394.48	-42.4243	519.063	1167.29	-52.4837	499.515	1070.66	-69.9495	565.17	930.116	-23.6373	584.143	828.527	-85.1376	539.732	818.187	-76.9388	592.926	752.452
845	0	194.846	678.949	1579.45	299.83	670.084	1577.22	166.548	516.143	1566.35	284.44	503.278	1564.65	238.335	479.513	1429.69	220.711	376.357	1154.07	228.389	638.926	1325.2	223.819	731.924	1122.77	302.455	383.541	1244.48	78.3082	571.661	1392.76	-43.4078	529.897	1165.41	-53.5022	509.581	1069	-70.7783	574.728	928.252	-24.4302	593.159	826.421	-86.0798	548.884	816.218	-77.6718	601.793	750.358
846	0	193.67	689.488	1577.52	298.767	680.624	1575.41	165.344	526.69	1564.62	283.337	513.781	1563.12	237.134	489.958	1428.08	219.434	386.776	1152.44	227.628	649.438	1323.46	223.43	742.322	1120.87	301.001	393.735	1242.87	77.2701	582.425	1390.83	-44.3662	541.08	1163.44	-54.5595	519.855	1067.26	-71.691	584.451	926.207	-25.3133	602.361	824.302	-87.0366	558.22	814.356	-78.4956	610.864	748.242
847	0	192.566	700.203	1575.68	297.661	691.275	1573.66	164.027	537.331	1562.89	282.027	524.331	1561.4	235.786	500.421	1426.42	218.055	397.302	1150.71	226.944	660.059	1321.63	223.293	753.14	1119.18	300.013	404.047	1241.45	76.3362	593.496	1388.79	-45.4245	552.116	1161.58	-55.7235	530.206	1065.51	-72.5599	594.305	924.066	-26.2996	611.527	822.1	-87.9038	567.656	812.447	-79.428	620.015	746.104
848	0	191.311	710.885	1573.75	296.39	701.819	1571.91	162.697	548.063	1560.91	280.737	534.934	1559.65	234.482	511.04	1424.56	216.787	407.947	1148.76	225.921	670.629	1319.8	223.077	763.909	1117.52	298.619	414.342	1239.68	75.2345	604.296	1386.78	-46.3604	563.354	1159.41	-56.7361	540.633	1063.39	-73.5175	604.223	921.96	-27.1457	620.908	819.802	-89.2246	577.338	810.266	-80.3565	629.368	743.791
849	0	189.644	721.443	1571.97	294.863	712.484	1570.17	161.327	558.772	1558.96	279.353	545.626	1557.88	233.129	521.565	1422.64	215.581	418.731	1146.78	225.171	681.42	1318.08	222.753	774.826	1115.74	297.204	424.731	1237.84	74.1313	615.292	1384.65	-47.3154	574.352	1157.31	-57.6637	551.243	1061.21	-74.5222	614.246	919.703	-28.0929	630.633	817.481	-90.1761	587.107	808.094	-81.4196	638.855	741.55
850	0	188.137	732.14	1570.27	293.272	723.162	1568.62	159.688	569.328	1557.21	277.797	556.326	1556.21	231.675	532.284	1420.91	214.171	429.828	1144.9	224.11	692.202	1316.33	222.481	785.984	1114.04	295.898	435.463	1236.21	72.8775	626.316	1382.66	-48.1484	585.438	1155.1	-58.8492	561.779	1059.28	-75.6393	624.506	917.591	-29.2387	640.51	815.353	-91.4787	597.187	806.097	-82.6621	648.607	739.372
851	0	186.434	742.886	1568.56	291.406	733.887	1567.06	158.151	579.982	1555.26	276.189	567.119	1554.58	230.137	543.143	1419.19	212.922	440.844	1143.1	223.068	703.071	1314.63	222.083	797.007	1112.52	294.704	446.004	1234.69	71.5424	637.253	1380.67	-49.1762	596.438	1152.94	-59.8208	572.555	1057.16	-76.5825	634.808	915.435	-30.2371	650.675	813.271	-92.67	607.381	803.993	-83.8343	658.522	737.109
852	0	184.395	753.466	1566.92	289.639	744.666	1565.75	156.355	590.698	1553.38	274.392	577.869	1552.9	228.726	553.919	1417.38	211.883	451.817	1141.1	222.015	714.047	1312.99	221.752	808.277	1110.93	293.416	457.048	1232.82	70.3481	648.389	1378.5	-50.1917	607.36	1150.74	-60.6429	583.375	1054.91	-77.5698	645.24	913.143	-31.3192	661.006	810.891	-93.6014	617.522	801.826	-85.2244	668.548	734.961
853	0	182.477	764.284	1565.39	287.592	755.525	1564.3	154.566	601.555	1551.57	272.56	588.702	1551.32	227.174	564.886	1415.76	210.788	463.12	1139.16	220.8	725.084	1311.4	221.231	819.398	1109.3	292.163	468.177	1231.2	68.8358	659.279	1376.43	-51.0908	618.375	1148.42	-61.7338	593.945	1052.91	-78.4999	655.965	910.99	-32.2526	671.25	808.396	-94.6823	628.07	799.709	-86.4342	679.083	732.887
854	0	180.439	775.173	1563.81	285.457	766.306	1563.06	152.351	612.325	1549.87	270.536	599.514	1549.94	225.484	575.942	1414.09	209.821	474.408	1137.49	219.584	736.348	1309.75	220.645	830.648	1107.78	291.059	479.306	1229.63	67.4881	670.476	1374.37	-52.2079	629.188	1146.32	-62.6698	604.834	1050.75	-79.4609	666.701	908.877	-33.2898	682.08	806.301	-95.9259	639.02	797.681	-87.4069	689.911	730.703
855	0	178.131	785.936	1562.23	283.283	777.241	1561.77	150.32	623.1	1547.97	268.337	610.433	1548.29	223.937	587.04	1412.4	208.869	485.875	1135.54	218.136	747.538	1308.26	220.145	842.197	1106.41	289.859	490.894	1227.89	65.8133	681.579	1372.45	-53.2423	640.107	1144	-63.6622	615.663	1048.62	-80.4177	677.629	906.584	-34.162	693.084	804.076	-97.0934	649.861	795.67	-88.4362	700.433	728.442
856	0	175.845	796.759	1560.79	280.979	787.976	1560.5	148.024	634.037	1546.2	266.104	621.245	1546.85	222.205	598.082	1410.68	208.086	497.496	1133.33	216.68	758.973	1306.79	219.183	853.777	1105.01	288.809	502.271	1226.2	64.1842	692.598	1370.44	-54.522	650.781	1141.95	-64.5616	626.473	1046.36	-81.3181	688.64	904.567	-35.1589	703.983	801.865	-97.6958	661.03	793.485	-89.2777	711.755	726.368
857	0	173.533	807.73	1559.35	278.575	798.9	1559.52	145.615	645.016	1544.48	263.626	632.154	1545.53	220.438	609.17	1409.1	207.329	509.314	1131.32	214.987	770.342	1305.55	218.1	865.497	1104.17	287.591	513.996	1224.45	62.5017	703.63	1368.37	-55.7119	661.47	1139.79	-65.4042	637.402	1044.08	-82.319	699.801	902.412	-36.1293	715.476	799.826	-98.7111	672.263	791.432	-90.3717	722.967	724.346
858	0	171.094	818.701	1558.11	276.191	809.779	1558.54	143.097	655.924	1542.81	261.116	643.074	1544.23	218.555	620.273	1407.43	206.543	521.193	1129.29	213.475	781.898	1304.39	217.101	877.636	1103.23	286.489	525.677	1222.68	60.5356	714.511	1366.56	-56.9649	672.281	1137.76	-66.4134	648.329	1041.98	-83.4227	711.111	900.347	-36.9971	727.077	797.992	-99.7465	684.032	789.333	-91.1798	734.726	722.321
859	0	168.559	829.69	1556.86	273.768	820.626	1557.72	140.535	667.019	1541.26	258.561	654.011	1543.03	216.712	631.292	1405.8	205.861	533.153	1127.13	211.628	793.456	1303.28	215.937	889.865	1102.5	285.372	537.665	1220.74	58.6809	725.585	1364.73	-58.3683	682.955	1135.62	-67.1623	659.501	1039.57	-84.4734	722.572	898.229	-37.9082	738.649	795.802	-100.601	695.557	787.146	-92.0235	746.555	720.29
860	0	166.191	840.815	1556	271.299	831.674	1557.21	137.965	678.238	1539.95	255.974	664.819	1542.14	214.762	642.35	1404.38	205.055	545.242	1125.13	209.925	805.16	1302.57	214.706	902.259	1102.19	284.189	549.469	1219.09	56.7518	736.624	1363.05	-59.5799	693.866	1133.44	-68.0137	670.712	1037.33	-85.5215	734.085	896.111	-38.7447	750.621	793.773	-101.288	707.234	784.949	-92.9195	758.465	718.314
861	0	163.646	851.884	1555.37	268.749	842.644	1556.9	135.3	689.42	1538.83	253.248	675.84	1541.51	212.681	653.527	1403.31	203.911	557.504	1123.62	208.014	816.866	1302.14	213.363	914.753	1102.04	283.084	561.324	1217.87	54.6783	747.651	1361.57	-60.9983	704.868	1131.66	-68.9214	682.212	1035.25	-86.6291	745.74	894.091	-39.6803	762.9	791.963	-101.716	719.026	782.812	-93.8022	770.628	716.445
862	0	161.005	863.135	1555.11	266.18	853.605	1556.98	132.435	700.705	1538.21	250.332	687.085	1541.15	210.709	664.93	1402.7	202.789	569.751	1122.59	206.025	828.697	1301.99	211.954	927.435	1102.07	282.01	573.233	1217.09	52.7713	758.927	1360.17	-62.1551	716.346	1129.77	-69.6414	694.047	1033.25	-87.7105	757.477	892.224	-40.81	775.401	790.411	-102.271	730.893	780.866	-94.616	782.917	714.705
863	0	158.598	874.421	1555.11	263.579	864.786	1557.26	129.71	711.961	1537.82	247.691	698.234	1541.11	208.743	676.348	1402.37	201.999	581.886	1121.88	204.18	840.535	1302.09	210.702	940.096	1102.58	281.011	585.083	1216.69	50.6944	770.056	1359.38	-63.6471	727.718	1128.39	-70.0525	706.114	1031.53	-88.7813	769.366	890.7	-41.8928	787.728	788.857	-103.152	742.776	779.169	-95.5132	795.174	713.117
864	0	155.874	885.637	1555.63	260.986	875.984	1558.03	127.057	723.415	1537.91	244.951	709.433	1541.55	206.766	687.901	1402.65	201.553	593.762	1121.94	202.055	852.343	1302.63	209.355	952.689	1103.37	280.521	597.088	1217.17	48.7787	781.438	1358.83	-64.5938	739.588	1127.4	-70.556	718.129	1030.47	-89.8637	781.435	889.672	-43.0084	800.406	787.792	-103.815	754.795	777.868	-96.6291	807.478	712.061
865	0	153.313	897.025	1556.6	258.33	887.076	1559.25	124.22	734.925	1538.58	242.211	720.717	1542.53	204.937	699.591	1403.5	201.322	605.711	1122.63	200.225	864.263	1303.68	208.019	965.286	1104.51	279.773	608.993	1218.28	46.8908	792.656	1358.93	-65.285	751.68	1126.74	-70.8306	730.438	1029.79	-90.8338	793.6	889.15	-44.2634	813.26	787.38	-104.524	767.037	777.232	-97.9372	819.831	711.516
866	0	150.799	908.424	1557.85	255.631	898.364	1560.73	121.893	745.907	1539.48	239.65	731.868	1543.91	203.111	711.223	1404.72	200.992	617.923	1123.99	198.193	875.976	1305.05	206.526	977.487	1105.99	279.256	621.041	1219.89	44.9907	803.903	1359.47	-65.6777	764.142	1126.38	-70.9031	743.068	1029.63	-91.5977	805.953	889.023	-45.5854	826.272	787.317	-105.08	779.284	777.142	-99.1723	832.238	711.493
867	0	148.126	919.681	1559.48	253.153	909.761	1562.65	119.172	757.458	1540.93	236.896	743.286	1545.57	201.419	722.713	1406.32	200.491	630.199	1125.67	196.47	887.701	1306.89	204.957	989.317	1107.99	278.84	633.03	1221.87	43.2299	815.116	1360.5	-66.1147	776.572	1126.49	-70.9491	755.74	1029.87	-92.3749	818.485	889.555	-46.6667	839.37	787.615	-105.457	791.447	777.573	-100.533	844.761	711.832
868	0	145.737	931.14	1561.3	250.534	920.938	1564.95	116.751	768.765	1542.68	234.306	754.517	1547.85	199.802	734.124	1408.39	200.112	642.866	1127.47	194.528	899.2	1309.04	203.509	1001.02	1110.22	278.315	645.056	1224.14	41.4701	826.04	1361.95	-66.4328	789.023	1127.33	-70.7971	768.462	1030.78	-93.016	831.222	890.724	-47.8956	852.607	788.59	-106.348	804.16	778.518	-101.943	857.368	712.915
869	0	143.218	942.429	1563.2	248.062	932.248	1567.29	114.297	780.154	1544.7	231.898	765.735	1550.49	198.213	745.529	1410.58	200.307	655.605	1129.31	192.838	910.57	1311.38	201.961	1012.34	1112.92	277.894	657.048	1226.63	39.9069	836.938	1363.8	-66.5935	801.63	1128.47	-70.7078	781.193	1032.27	-93.5008	843.995	892.341	-48.9987	866.022	790.197	-106.99	816.928	780.279	-103.444	870.058	714.516
870	0	140.95	953.74	1565.18	245.831	943.547	1569.79	111.939	791.422	1546.85	229.581	777.015	1553.22	196.717	756.618	1412.73	200.469	667.761	1131.21	191.126	921.595	1313.96	200.663	1023.41	1115.85	277.296	668.959	1228.82	38.3978	847.746	1365.92	-66.4704	814.277	1129.69	-70.6787	793.887	1034.07	-94.0696	857.107	894.445	-50.032	879.491	792.049	-107.573	829.948	782.283	-104.848	883.062	716.565
871	0	138.963	964.988	1567.09	243.649	954.551	1572.1	109.883	802.668	1549.19	227.278	788.085	1556.01	195.262	767.519	1414.91	199.792	679.033	1133.2	189.654	932.544	1316.5	199.172	1034.22	1118.77	276.542	680.573	1231.05	36.8451	858.254	1368.19	-66.938	826.605	1131.52	-70.7366	806.411	1036.11	-94.4035	870.091	896.646	-50.8731	892.98	794.047	-108.188	843.33	784.451	-106.034	896.296	718.801
872	0	137.044	976.066	1569.01	241.89	965.632	1574.51	107.745	813.771	1551.51	225.23	799.035	1558.84	193.749	778.093	1417.05	199.007	690.13	1135.09	188.201	943.367	1319.11	198.065	1044.88	1121.77	275.605	692.044	1233.13	35.3368	868.823	1370.35	-67.2319	838.91	1133.38	-71.0352	818.729	1038.03	-94.8739	883.27	898.992	-51.5631	906.809	796.274	-108.802	856.796	786.838	-107.086	909.856	721.133
873	0	135.487	987.164	1570.83	240.157	976.601	1576.5	105.893	824.781	1554.07	223.35	809.888	1561.62	192.261	788.604	1419.07	198.363	701.328	1136.89	186.847	953.971	1321.47	196.72	1055.16	1124.32	274.643	703.22	1235	33.9792	879.411	1372.62	-67.8626	851.151	1135.27	-71.6683	831.187	1040.13	-95.4003	896.532	901.332	-52.2304	920.811	798.593	-109.416	870.539	789.246	-107.945	923.898	723.449
874	0	133.955	998.048	1572.55	238.688	987.238	1578.37	104.348	835.746	1556.26	221.692	820.659	1564.06	190.795	798.962	1420.79	197.452	712.194	1138.5	185.632	964.626	1323.68	195.604	1065.47	1127.03	273.48	714.182	1236.6	32.5473	889.702	1374.62	-68.7255	863.333	1137.23	-72.5305	843.509	1041.98	-96.0178	909.648	903.501	-52.9213	934.561	800.736	-109.84	884.198	791.292	-108.613	937.958	725.761
875	0	132.803	1008.8	1574.33	237.476	997.952	1580.2	102.889	846.492	1558.47	220.235	831.255	1566.27	189.365	809.25	1422.54	196.241	723.071	1139.99	184.407	975.08	1325.95	194.587	1075.61	1129.4	272.225	724.865	1238.19	31.1982	900.106	1376.53	-69.4793	875.404	1138.82	-73.4593	855.783	1043.58	-96.895	922.846	905.64	-53.6118	948.288	802.851	-110.362	897.945	793.156	-109.356	952.138	727.97
876	0	131.566	1019.35	1576.14	236.163	1008.29	1581.93	101.499	857.09	1560.38	218.931	841.709	1568.3	187.947	819.542	1424.19	194.98	733.742	1141.53	183.374	985.428	1327.96	193.457	1085.63	1131.59	270.781	735.217	1239.82	29.9355	910.653	1378.38	-70.8367	887.387	1140.71	-74.8213	868.183	1045.19	-97.7347	935.962	907.506	-54.3508	962.317	805.235	-110.991	911.977	794.941	-109.955	966.851	730.17
877	0	130.662	1029.92	1577.78	235.307	1018.88	1583.64	100.417	867.615	1561.96	217.836	852.101	1569.94	186.537	829.823	1425.63	193.652	744.055	1143.01	182.243	995.895	1329.53	192.692	1095.87	1133.5	269.336	745.393	1241.22	28.5854	921.09	1379.94	-72.7676	899.057	1142.55	-76.3778	880.345	1046.64	-98.9203	949.218	909.327	-55.0971	976.42	807.486	-111.598	925.996	796.31	-110.38	981.306	732.127
878	0	129.561	1040.16	1579.23	234.268	1029.07	1585	99.5516	877.941	1563.4	216.814	862.519	1571.11	185.28	840.192	1426.89	192.181	754.11	1144.24	181.42	1005.99	1330.94	191.996	1106.09	1135.05	267.899	755.408	1242.56	27.5071	931.773	1381.23	-74.0489	910.864	1143.8	-77.9934	892.572	1047.64	-99.991	962.275	910.759	-56.0137	990.194	809.438	-112.515	940.117	797.537	-110.632	996.086	733.907
879	0	128.697	1050.5	1580.68	233.359	1039.42	1586.39	98.6972	888.232	1564.65	215.949	872.829	1572.3	184.006	850.598	1428.26	190.691	764.112	1145.65	180.686	1016.39	1332.23	191.452	1116.57	1136.26	266.297	765.168	1244.08	26.3959	942.373	1382.42	-75.8011	922.486	1145.16	-79.6963	904.892	1048.83	-101.304	975.523	912.331	-57.1566	1004.06	811.377	-113.279	954.2	798.694	-110.957	1010.88	735.733
880	0	127.708	1060.63	1581.95	232.391	1049.79	1587.61	97.8939	898.399	1565.77	215.155	883.13	1573.39	182.78	861.049	1429.57	189.067	773.867	1147.17	179.649	1026.78	1333.25	190.916	1127.03	1137.18	264.736	774.815	1245.57	25.5182	953.257	1383.35	-77.6089	934.077	1146.39	-81.4742	916.943	1049.92	-102.549	988.673	913.669	-58.3254	1018.04	813.361	-114.256	968.475	799.902	-111.452	1025.82	737.467
881	0	126.867	1070.83	1582.94	231.436	1060.04	1588.54	97.1185	908.472	1566.59	214.565	893.392	1574.17	181.757	871.466	1430.63	187.479	783.592	1148.48	179.378	1037.09	1334.04	190.736	1137.51	1137.59	263.265	784.442	1246.73	24.6947	963.99	1384.21	-79.1894	945.689	1147.42	-83.5282	928.976	1050.64	-103.808	1001.89	914.846	-59.1188	1032.21	815.42	-115.011	982.519	800.649	-111.774	1040.82	739.034
882	0	125.89	1080.99	1583.83	230.649	1070.4	1589.4	96.6029	918.631	1567.27	213.934	903.697	1574.89	180.799	881.823	1431.6	185.925	793.315	1149.74	178.614	1047.31	1334.48	190.519	1147.72	1137.85	261.904	794.035	1248.04	24.0838	974.886	1384.86	-80.8596	956.981	1148.41	-85.1657	941.104	1051.2	-105.075	1015.05	916.035	-60.3371	1046.39	817.235	-116.113	996.805	801.639	-112.39	1055.84	740.748
883	0	124.925	1091.12	1584.64	229.639	1080.69	1590.32	95.8812	928.795	1567.93	213.244	914.022	1575.62	179.85	892.326	1432.66	184.3	802.996	1151.16	178.419	1057.42	1335.03	190.597	1158.08	1138.01	260.515	803.612	1249.25	23.432	985.777	1385.62	-82.3805	968.482	1149.38	-87.0157	953.185	1052.07	-106.458	1028.14	917.331	-61.0577	1060.21	818.843	-117.055	1010.86	802.552	-113.202	1070.78	742.524
884	0	124.137	1101.32	1585.25	228.9	1091.05	1591.07	95.1783	938.929	1568.55	212.65	924.363	1576.23	178.904	902.606	1433.68	182.706	812.541	1152.45	178.153	1067.31	1335.27	190.79	1168.08	1138.17	259.071	813.095	1250.48	22.8785	996.614	1386.39	-84.0272	979.795	1150.34	-88.9791	965.327	1052.97	-107.768	1041.5	918.55	-61.9441	1073.8	820.56	-118.333	1025.06	803.641	-113.985	1085.73	744.24
885	0	123.314	1111.6	1585.77	228.06	1101.28	1591.53	94.6667	949.072	1568.89	212.114	934.63	1576.66	178.055	912.862	1434.42	181.203	822.015	1153.49	177.892	1077.28	1335.49	191.075	1177.94	1138.19	257.589	822.469	1251.38	22.5273	1007.51	1386.97	-85.4027	991.103	1151.16	-90.7123	977.394	1053.55	-108.91	1054.58	919.754	-63.1052	1087.19	822.145	-119.544	1039.17	804.596	-115.03	1100.52	746.037
886	0	122.637	1121.76	1586.09	227.537	1111.62	1591.88	93.9311	959.34	1569.23	211.407	944.859	1576.99	177.152	923.012	1435.09	179.637	831.505	1154.33	177.832	1087.11	1335.71	191.411	1187.47	1138.01	256.084	831.804	1252.28	22.0863	1018.27	1387.45	-86.5942	1002.41	1151.85	-92.3207	989.614	1054.15	-109.989	1067.85	920.939	-63.922	1100.84	823.612	-120.66	1053.16	805.639	-116.061	1115.2	747.861
887	0	122.181	1132.15	1586.25	226.913	1121.83	1592.1	93.321	969.696	1569.53	210.762	955.136	1577.36	176.269	933.038	1435.79	178.021	840.971	1155.27	177.613	1096.96	1335.86	191.79	1196.7	1137.61	254.643	841.183	1252.99	21.6751	1028.79	1387.62	-87.7541	1013.78	1152.58	-94.2549	1001.75	1054.93	-110.908	1081.11	922.078	-64.73	1114.31	824.983	-122.093	1067.34	806.784	-117.076	1129.88	749.61
888	0	121.669	1142.48	1586.27	226.445	1132.14	1592.1	92.7798	980.146	1569.82	210.161	965.461	1577.58	175.417	943.129	1436.23	176.595	850.339	1155.97	177.63	1106.79	1335.77	192.144	1205.71	1137.31	253.335	850.486	1253.58	21.2705	1039.43	1388.04	-88.691	1025.15	1153.01	-95.6595	1013.89	1055.55	-111.847	1094.35	923.279	-65.5241	1127.64	826.139	-123.477	1081.49	807.893	-118.1	1144.56	751.248
889	0	121.446	1152.88	1586.21	226.143	1142.41	1591.98	92.17	990.497	1569.89	209.569	975.653	1577.67	174.599	952.98	1436.54	175.268	859.449	1156.48	177.314	1116.35	1335.66	192.506	1214.64	1136.97	251.996	859.712	1254	20.8707	1049.85	1388.22	-89.3993	1036.56	1153.31	-97.3263	1025.81	1055.94	-112.733	1107.62	924.294	-66.3353	1140.9	827.295	-124.714	1095.59	808.938	-119.101	1159	752.747
890	0	121.129	1163.28	1586.11	225.831	1152.41	1591.88	91.6199	1000.94	1570.04	208.886	985.849	1577.8	173.847	962.727	1436.87	174.106	868.724	1156.91	177.08	1125.99	1335.5	192.517	1223.34	1136.54	250.772	868.924	1254.48	20.3555	1060.05	1388.13	-90.1419	1047.97	1153.47	-98.7569	1037.99	1056.47	-113.48	1120.8	925.173	-67.0546	1154.29	828.241	-126.272	1109.63	809.743	-120.181	1173.4	754.314
891	0	120.858	1173.63	1585.8	225.664	1162.77	1591.72	91.0415	1011.31	1570.16	208.318	996.019	1577.95	172.914	972.511	1437.03	173.048	878.031	1157.27	176.76	1135.41	1335.37	192.516	1231.97	1136.12	249.741	878.167	1254.8	19.9099	1070.36	1388.28	-90.7856	1059.48	1153.64	-100.063	1050.18	1056.55	-114.221	1133.93	925.95	-67.7144	1167.55	829.011	-127.425	1123.68	810.819	-121.038	1187.74	755.578
892	0	120.694	1184.01	1585.33	225.412	1172.93	1591.26	90.5666	1021.66	1570.08	207.915	1006.24	1577.92	172.339	982.378	1437	172.128	886.901	1157.47	176.692	1145.15	1335.06	192.586	1240.71	1135.53	248.872	887.426	1255	19.2437	1080.45	1388.33	-91.3947	1070.87	1153.56	-101.241	1062.22	1056.67	-115.043	1146.92	926.625	-68.3469	1180.66	829.634	-128.601	1137.58	811.447	-121.824	1201.88	756.579
893	0	120.489	1194.34	1584.92	225.125	1183.05	1590.73	90.1993	1032	1569.83	207.392	1016.43	1577.73	171.705	992.133	1436.94	171.494	896.115	1157.55	176.344	1154.51	1334.64	192.377	1249.54	1134.9	248.084	896.64	1255.17	19.2748	1090.19	1387.87	-91.9663	1082.24	1153.5	-102.384	1074.16	1056.45	-115.819	1159.75	927.119	-68.9011	1193.74	830.22	-129.695	1151.47	811.965	-122.57	1216.06	757.572
894	0	120.337	1204.45	1584.34	224.982	1193.36	1590.25	89.6942	1042.28	1569.65	206.995	1026.59	1577.65	171.215	1001.98	1436.94	170.964	905.25	1157.73	176.057	1164.15	1334.3	192.13	1258.41	1134.52	247.443	905.92	1255.36	18.8481	1099.93	1387.57	-92.561	1093.5	1153.31	-103.424	1086.17	1056.36	-116.557	1172.61	927.582	-69.3827	1206.93	830.83	-130.746	1165.19	812.538	-123.282	1229.97	758.552
895	0	120.066	1214.8	1583.68	224.703	1203.41	1589.76	89.3617	1052.55	1569.44	206.681	1036.76	1577.47	170.777	1011.82	1436.75	170.339	914.117	1157.94	175.948	1173.81	1333.79	191.81	1267.52	1133.52	246.92	915.301	1255.39	18.5628	1109.85	1387	-93.0324	1104.85	1153.02	-103.915	1097.78	1056.04	-117.106	1185.41	927.878	-69.9626	1219.9	831.145	-132.012	1178.91	813.061	-123.808	1243.95	759.24
896	0	119.919	1225.1	1582.96	224.512	1213.6	1588.82	89.058	1062.79	1569.03	206.27	1046.99	1576.94	170.523	1021.76	1436.38	169.979	922.75	1158.02	175.433	1183.35	1332.95	191.444	1276.84	1132.7	246.691	924.728	1255.35	18.3139	1119.51	1386.47	-93.4806	1115.98	1152.6	-104.637	1109.67	1055.58	-117.632	1198.08	927.886	-70.3378	1232.95	831.214	-132.543	1192.5	813.149	-124.327	1257.67	759.683
897	0	119.617	1235.31	1582.15	224.247	1223.84	1587.98	88.8156	1073	1568.42	205.896	1057.19	1576.44	170.187	1031.68	1436.05	169.728	931.814	1157.87	175.198	1193.12	1332.27	190.871	1286.22	1131.61	246.405	934.19	1255.28	18.0597	1129.32	1385.81	-93.9147	1127.15	1152.14	-105.171	1121.5	1054.99	-118.174	1210.65	928.185	-70.7085	1246.01	831.506	-133.222	1205.77	813.277	-124.837	1271.3	760.227
898	0	119.249	1245.43	1581.49	224.094	1233.92	1587.39	88.4863	1083.15	1567.92	205.668	1067.38	1575.97	170.003	1041.61	1435.71	169.46	940.972	1157.74	174.542	1202.54	1331.46	190.253	1295.59	1130.77	246.234	943.722	1255.25	17.6728	1138.99	1385.44	-94.3084	1138.31	1151.69	-105.697	1133.28	1054.58	-118.592	1223.21	928.274	-71.2854	1258.94	831.855	-133.68	1219.07	813.342	-125.268	1284.77	760.642
899	0	119.372	1255.6	1580.33	223.887	1244.16	1586.24	88.3408	1093.32	1567.35	205.431	1077.51	1575.26	169.887	1051.65	1435.06	169.414	950.281	1157.53	174.292	1212.34	1330.4	189.707	1305.1	1129.44	246.224	953.413	1254.8	17.4606	1148.79	1384.68	-94.6691	1149.29	1151.11	-106.134	1145.03	1053.87	-118.644	1235.92	928.185	-71.4467	1271.95	831.901	-134.066	1232.33	813.405	-125.405	1298.34	760.93
900	0	119.289	1265.85	1579.36	223.852	1254.44	1585.3	88.2297	1103.55	1566.45	205.301	1087.83	1574.31	169.79	1061.63	1434.31	169.431	959.685	1156.94	173.938	1222.09	1329.42	189.143	1314.52	1128.21	246.199	963.038	1254.2	17.2577	1158.4	1383.83	-94.9874	1160.23	1150.38	-106.399	1156.67	1053.06	-118.898	1248.25	928.109	-71.6472	1284.89	831.946	-134.344	1245.49	813.089	-125.676	1311.69	761.073
901	0	119.034	1276.04	1578.28	223.624	1264.54	1584.15	88.0949	1113.74	1565.58	205.082	1097.95	1573.5	169.747	1071.72	1433.56	169.38	969.092	1156.43	173.602	1231.97	1328.31	188.508	1324.03	1126.96	246.213	972.841	1253.63	17.0079	1168.19	1382.93	-94.9017	1170.9	1149.36	-106.625	1168.34	1052.25	-119.045	1260.64	927.96	-71.7763	1297.63	831.97	-134.552	1258.59	812.876	-125.722	1324.9	761.26
902	0	118.988	1286.25	1577.23	223.574	1274.75	1583.09	87.9554	1123.91	1564.76	205.044	1108.19	1572.54	169.707	1081.82	1432.82	169.461	978.635	1155.92	173.132	1241.86	1327.15	187.849	1333.66	1125.57	246.383	982.693	1253.08	16.8185	1177.83	1381.72	-95.0327	1181.52	1148.45	-106.902	1179.86	1051.54	-118.944	1273.18	927.797	-71.7659	1310.56	831.907	-134.733	1271.64	812.734	-125.73	1338.18	761.286
903	0	118.988	1296.57	1575.98	223.558	1285.1	1581.73	88.0236	1134.15	1563.6	205.082	1118.5	1571.4	169.792	1091.97	1431.76	169.643	988.303	1155.06	172.971	1251.79	1325.9	187.197	1343.36	1124.23	246.446	992.556	1252.12	16.6243	1187.57	1380.66	-95.0733	1191.99	1147.38	-107.072	1191.38	1050.64	-118.949	1285.47	927.464	-71.6195	1323.27	831.719	-134.776	1284.71	812.395	-125.435	1351.43	761.182
904	0	119.012	1306.94	1574.77	223.636	1295.46	1580.38	88.122	1144.42	1562.42	205.164	1128.88	1570.05	169.937	1102.16	1430.66	169.926	997.998	1154.15	172.658	1261.89	1324.55	186.631	1353.01	1122.8	246.741	1002.66	1251.15	16.5412	1197.34	1379.58	-95.007	1202.38	1146.19	-107.156	1202.84	1049.37	-118.857	1297.79	927.097	-71.3223	1335.89	831.403	-134.891	1297.82	811.902	-125.098	1364.67	761.076
905	0	119.048	1317.21	1573.3	223.598	1305.73	1579.04	88.1574	1154.79	1561.13	205.155	1139.16	1568.78	170.025	1112.37	1429.49	170.146	1007.73	1153.26	172.357	1271.88	1323.17	186.064	1362.94	1121.23	246.986	1012.77	1250.12	16.4177	1207.14	1378.49	-95.105	1212.51	1145.17	-107.226	1214.24	1048.43	-118.745	1310.29	926.701	-70.9163	1348.65	831.12	-134.218	1310.44	811.253	-124.687	1377.74	760.923
906	0	119.128	1327.6	1572.04	223.677	1316.15	1577.61	88.3034	1165.17	1559.96	205.34	1149.61	1567.5	170.275	1122.68	1428.36	170.392	1017.65	1152.22	172.142	1282.11	1321.71	185.378	1372.86	1119.62	247.312	1022.95	1249.16	16.397	1217.23	1377.23	-95.0876	1222.6	1143.88	-107.331	1225.74	1047.44	-118.164	1322.22	925.89	-70.6225	1361.1	830.716	-134.275	1323.53	810.865	-124.115	1390.84	760.67
907	0	119.214	1338.07	1570.5	223.877	1326.64	1575.95	88.4595	1175.54	1558.41	205.635	1159.91	1565.98	170.433	1133.16	1426.94	170.847	1027.7	1150.97	172.03	1292.38	1320.26	184.902	1382.88	1118.03	247.677	1033.28	1247.81	16.3371	1227.06	1375.85	-95.038	1232.61	1142.46	-107.38	1237.04	1045.98	-117.918	1334.29	925.261	-69.8772	1373.6	830.167	-133.864	1336.2	810.101	-123.406	1404	760.284
908	0	119.559	1348.37	1568.83	224.081	1337.17	1574.46	88.7449	1186.05	1556.95	205.808	1170.41	1564.48	170.69	1143.56	1425.57	171.181	1037.87	1149.63	171.885	1302.66	1318.8	184.475	1392.94	1116.54	248.078	1043.61	1246.55	16.4172	1237.06	1374.48	-95.1562	1242.5	1141.29	-107.338	1248.33	1044.65	-117.576	1346.47	924.463	-69.4896	1386.04	829.82	-133.466	1348.99	809.251	-122.699	1417.01	759.95
909	0	119.778	1359.06	1567.46	224.395	1347.76	1572.83	88.9919	1196.54	1555.46	206.041	1181.09	1562.86	171.033	1154	1424.16	171.643	1048.15	1148.39	171.799	1313.09	1317.23	184.014	1403.09	1114.9	248.554	1054.23	1245.17	16.4596	1247.17	1373.25	-95.1287	1252.47	1139.97	-107.315	1259.51	1043.47	-117.23	1358.39	923.708	-68.6594	1398.37	829.344	-133.385	1361.58	808.828	-121.883	1429.98	759.644
910	0	120.132	1369.63	1565.86	224.811	1358.29	1571.28	89.3445	1207.08	1554	206.449	1191.61	1561.26	171.447	1164.64	1422.65	171.987	1058.43	1147.01	171.854	1323.51	1315.62	183.687	1413.44	1113.05	249.063	1064.82	1243.67	16.6981	1257.32	1371.76	-95.124	1262.56	1138.72	-107.304	1270.61	1042.22	-116.951	1370.16	922.916	-67.9468	1410.91	828.829	-132.92	1374.42	807.933	-121.114	1442.93	759.109
911	0	120.675	1380.22	1564.26	225.274	1368.87	1569.57	89.8025	1217.68	1552.43	206.853	1202.16	1559.72	171.912	1175.17	1421.12	172.528	1068.84	1145.48	172.157	1334.3	1314.16	183.253	1423.75	1111.27	249.623	1075.43	1242.14	17.1858	1267.68	1370.21	-95.0584	1272.68	1137.5	-107.258	1281.57	1040.71	-116.576	1381.96	922.094	-67.421	1422.82	828.398	-131.92	1386.85	806.928	-119.932	1455.48	758.812
912	0	121.313	1390.79	1562.61	225.855	1379.46	1567.86	90.3121	1228.32	1550.94	207.368	1212.8	1558.09	172.517	1185.81	1419.61	173.025	1079.32	1143.92	172.261	1344.98	1312.53	182.978	1434.26	1109.68	250.023	1086.22	1240.49	17.3816	1278.03	1369.03	-95.0194	1282.93	1136.25	-107.178	1292.41	1039.55	-116.129	1393.66	921.34	-66.7063	1435	827.897	-131.23	1399.26	806.243	-118.958	1468.12	758.514
913	0	121.951	1401.57	1561.15	226.575	1390.08	1566.29	90.8403	1239.03	1549.51	207.934	1223.31	1556.5	173.075	1196.53	1418.01	173.451	1089.9	1142.41	172.48	1355.59	1310.87	182.719	1444.82	1107.99	250.585	1097.13	1238.83	17.8047	1288.49	1367.46	-94.9273	1293.35	1135.11	-107.098	1303.2	1038.4	-115.877	1405.14	920.478	-66.0271	1446.94	827.51	-130.593	1411.44	805.4	-118.098	1480.56	758.034
914	0	122.965	1412.33	1559.48	227.336	1400.69	1564.4	91.4999	1249.74	1548.02	208.576	1234.02	1554.77	173.824	1207.07	1416.35	173.968	1100.66	1140.82	172.867	1366.47	1309.35	182.562	1455.57	1106.21	251.292	1108.11	1236.89	18.3059	1299.09	1366.25	-94.8459	1303.99	1133.85	-106.973	1313.97	1036.99	-115.542	1416.46	919.579	-65.3051	1458.89	826.879	-130.336	1423.49	804.645	-117.165	1492.89	757.619
915	0	123.825	1423.02	1558.12	228.38	1411.3	1562.86	92.3292	1260.51	1546.53	209.445	1244.68	1553.05	174.595	1217.94	1414.68	174.472	1111.45	1139.02	173.218	1377.32	1307.77	182.288	1466.5	1104.49	251.877	1119.06	1235.05	18.999	1309.75	1364.88	-94.7167	1314.7	1132.67	-106.787	1324.59	1035.67	-115.202	1427.62	918.768	-64.675	1470.68	826.478	-129.112	1435.19	803.638	-116.334	1504.96	757.121
916	0	124.865	1433.72	1556.85	229.446	1421.94	1561.28	93.2409	1271.3	1545.11	210.287	1255.22	1551.56	175.39	1228.61	1413.18	174.895	1122.37	1137.4	173.544	1388.19	1306.43	182.081	1477.26	1103.12	252.382	1130.17	1233.3	19.5715	1320.52	1363.66	-94.5154	1325.61	1131.73	-106.617	1335.28	1034.6	-114.926	1438.73	917.982	-64.1703	1482.25	826.111	-128.885	1446.87	802.986	-115.554	1516.8	756.897
917	0	126.208	1444.57	1555.48	230.683	1432.49	1559.83	94.2117	1282.08	1543.82	211.282	1265.87	1549.94	176.214	1239.52	1411.5	175.258	1133.46	1135.72	174.206	1399.23	1305.11	181.986	1488.49	1101.79	252.843	1141.33	1231.35	20.2607	1331.4	1362.39	-94.236	1336.84	1130.89	-106.471	1346	1033.57	-114.518	1449.77	917.153	-63.7747	1492.5	825.187	-127.835	1458.12	802.039	-114.879	1528.52	756.331
918	0	127.246	1455.09	1554.13	231.951	1443.21	1558.23	95.3842	1292.89	1542.33	212.429	1276.59	1548.31	177.154	1250.41	1409.74	175.681	1144.69	1133.83	174.756	1410.33	1303.55	182.043	1499.74	1100.34	253.51	1152.69	1229.17	21.0733	1342.4	1361.38	-93.9319	1347.97	1130.08	-106.182	1356.6	1032.52	-114.153	1460.78	916.116	-63.1476	1504.31	824.831	-127.585	1469.44	801.279	-114.18	1540.05	755.755
919	0	128.558	1465.75	1552.91	233.344	1453.82	1556.77	96.6002	1303.64	1540.99	213.65	1287.26	1546.67	178.054	1261.38	1408.03	176.004	1156.06	1131.97	175.508	1421.37	1302.42	181.961	1511.01	1099.09	254.075	1163.92	1227	21.9158	1353.27	1360.24	-93.5299	1359.21	1129.37	-105.905	1367.34	1031.5	-113.753	1471.54	915.275	-62.7661	1515.39	824.187	-126.501	1480.38	799.947	-113.681	1551.22	755.213
920	0	130.056	1476.74	1551.57	234.731	1464.53	1555.3	97.8892	1314.4	1539.72	214.979	1298.1	1545.17	179.251	1272.01	1406.45	176.266	1167.58	1130.11	176.092	1432.47	1301.16	182.07	1522.49	1098.13	254.567	1175.29	1224.96	22.8868	1364.38	1359.35	-93.0636	1370.62	1128.63	-105.613	1378.11	1030.65	-113.406	1482.26	914.589	-62.3774	1526.13	823.604	-126.465	1491.15	799.366	-113.253	1562.08	754.565
921	0	131.398	1487.33	1550.35	236.204	1475.34	1553.81	99.3061	1325.18	1538.62	216.43	1308.82	1543.78	180.528	1282.78	1404.79	176.59	1179.32	1128.1	176.991	1443.7	1300.03	182.232	1534.19	1096.96	255.24	1186.73	1222.52	24.0723	1375.3	1358.41	-92.4638	1382.06	1128	-105.207	1388.95	1030.02	-112.983	1493.05	913.525	-62.0166	1536.81	822.564	-125.675	1501.63	798.341	-112.827	1572.84	753.803
922	0	132.984	1498.15	1549.26	237.773	1486.24	1552.54	100.869	1335.91	1537.52	217.989	1319.53	1542.53	181.897	1293.49	1403.23	176.994	1191.33	1125.96	177.972	1454.99	1298.88	182.513	1546.13	1096.14	256.117	1198.25	1220.19	25.3284	1386.2	1357.6	-91.7709	1393.52	1127.5	-104.686	1399.75	1029.34	-112.446	1503.62	912.635	-61.7704	1547.32	821.69	-125.292	1511.96	797.354	-112.582	1583.26	752.772
923	0	134.515	1509.01	1548.73	239.342	1497.08	1551.91	102.482	1346.72	1536.87	219.561	1330.4	1541.55	183.331	1304.26	1402.05	177.385	1203.55	1124.21	179.167	1466.46	1298.49	182.742	1557.97	1095.67	256.933	1209.73	1218.27	26.5288	1397.12	1357.15	-91.1089	1405.05	1127.05	-104.113	1410.57	1029.01	-112.157	1513.97	911.995	-61.6574	1557.48	820.939	-125.123	1522	796.849	-112.383	1593.28	752.042
924	0	135.979	1519.82	1548.78	240.937	1507.99	1551.77	104.114	1357.78	1536.47	221.284	1341.3	1541.09	184.744	1315.28	1401.39	177.546	1215.87	1123.11	180.203	1477.82	1298.21	183.039	1569.95	1095.61	257.591	1221.36	1216.94	27.7754	1408.27	1357.08	-90.3663	1416.52	1127.11	-103.593	1421.32	1029.07	-111.844	1524.23	911.573	-61.5562	1567.36	820.299	-125.084	1531.71	796.211	-112.621	1602.9	751.472
925	0	137.796	1530.9	1548.83	242.55	1518.98	1551.75	105.85	1368.73	1536.37	223.126	1352.4	1540.79	186.214	1326.57	1401.05	177.622	1228.04	1122.41	181.216	1489.19	1298.28	183.193	1582.06	1095.57	258.068	1232.76	1215.87	29.0662	1419.63	1357.39	-89.3541	1428	1127.43	-102.819	1431.92	1029.38	-111.393	1534.1	911.283	-61.3349	1577.01	819.859	-124.888	1541.07	796.002	-112.684	1612.1	750.967
926	0	139.374	1541.77	1549.32	244.269	1530.1	1552.1	107.645	1379.68	1536.55	224.969	1363.4	1540.86	187.583	1337.95	1401.13	177.385	1240.17	1122.19	182.472	1500.77	1298.71	183.586	1594.59	1096.17	258.444	1244.17	1215.37	30.3858	1431.25	1358.09	-88.3198	1439.28	1128.19	-102.012	1442.43	1029.98	-110.876	1543.8	911.502	-61.3167	1586.09	819.605	-125.214	1549.98	796.275	-112.906	1620.9	750.821
927	0	141.096	1552.66	1550.16	245.876	1541.37	1552.8	109.463	1390.66	1537.26	226.828	1374.58	1541.44	188.715	1349.33	1401.71	177.163	1252.07	1122.75	183.808	1512.36	1299.5	183.805	1606.82	1097.02	258.472	1255.6	1215.57	31.6537	1443.07	1359.23	-87.3434	1450.5	1129.4	-101.167	1452.85	1031.28	-110.302	1553.27	911.964	-61.0705	1594.98	819.655	-124.893	1558.25	796.75	-113.287	1628.96	750.956
928	0	142.79	1563.83	1551.44	247.538	1552.59	1553.72	111.477	1401.74	1538.45	228.856	1385.79	1542.22	189.826	1360.63	1402.61	176.682	1263.6	1123.79	184.913	1523.82	1300.62	184.332	1619.29	1098.5	258.403	1266.92	1216.11	32.9684	1455.15	1361.17	-86.3669	1461.62	1131.09	-100.334	1463.11	1033.17	-109.942	1562.16	912.867	-60.9642	1603.19	819.977	-124.624	1566.23	797.694	-113.679	1636.59	751.332
929	0	144.576	1574.87	1552.94	249.227	1563.83	1554.9	113.411	1412.73	1539.81	230.844	1397.01	1543.37	190.805	1371.88	1403.86	176.349	1274.99	1125.07	186.125	1535.13	1302.17	185.058	1631.53	1100.49	258.08	1278.17	1217.1	34.2214	1467.25	1363.33	-85.3389	1472.64	1133.3	-99.5443	1473.11	1035.27	-109.294	1571.06	914.155	-60.7464	1611.08	820.702	-124.249	1573.82	798.931	-114.12	1643.84	752.146
930	0	146.163	1586.01	1554.65	250.884	1575.17	1556.35	115.301	1423.64	1541.64	232.873	1408.26	1544.81	191.748	1383	1405.42	175.701	1286.33	1126.53	187.213	1546.51	1303.91	185.612	1643.3	1102.63	257.587	1289.26	1218.2	35.4626	1479.08	1365.83	-84.3779	1483.58	1135.74	-98.503	1483.14	1037.77	-108.884	1579.41	915.693	-60.5447	1618.63	821.645	-123.72	1580.93	800.37	-114.372	1650.57	753.066
931	0	147.695	1596.97	1556.48	252.378	1586.42	1557.74	117.101	1434.62	1543.85	234.693	1419.49	1546.61	192.48	1393.87	1407.15	175.035	1297.82	1128.34	188.345	1557.54	1306	186.172	1654.74	1104.86	257.052	1300.52	1219.57	36.5476	1490.92	1368.65	-83.515	1494.4	1138.58	-97.812	1492.92	1040.78	-108.272	1587.98	917.328	-60.3119	1626.39	822.81	-123.596	1588.1	802.246	-114.558	1657.12	754.141
932	0	149.192	1608.07	1558.35	253.803	1597.66	1559.24	118.814	1445.49	1546.5	236.612	1430.66	1548.65	193.29	1404.7	1409.01	174.405	1309.42	1130.13	189.314	1568.57	1308.06	186.94	1666.01	1107.5	256.585	1311.66	1220.99	37.6857	1502.44	1371.5	-82.6527	1505.16	1141.53	-97.1458	1502.6	1043.94	-107.828	1596.14	919.429	-59.9152	1633.2	823.815	-123.46	1594.91	804.471	-114.516	1663.4	755.278
933	0	150.529	1619.01	1560.5	255.193	1608.88	1560.91	120.492	1456.28	1549.13	238.228	1441.75	1550.91	193.835	1415.05	1410.79	173.906	1320.73	1131.83	190.332	1579.21	1310.55	187.551	1676.91	1110.29	256.243	1322.74	1222.32	38.7386	1513.53	1374.43	-81.9226	1515.77	1144.68	-96.4278	1512.14	1047.1	-107.347	1604.34	921.599	-59.738	1640.29	825.409	-123.449	1601.87	806.68	-114.408	1669.43	756.457
934	0	151.715	1629.88	1562.59	256.293	1619.81	1562.62	121.775	1466.97	1551.99	239.638	1452.56	1553.45	194.507	1425.56	1412.72	173.634	1332.09	1133.54	190.953	1589.72	1312.91	188.227	1687.53	1113.23	255.73	1333.63	1223.84	39.5947	1524.39	1377.43	-81.3579	1526.19	1148.04	-95.8941	1521.42	1050.26	-106.989	1612.43	924.086	-59.7303	1646.63	827.257	-123.889	1608.86	809.204	-114.281	1675.33	757.765
935	0	152.653	1640.46	1564.7	257.341	1630.66	1564.59	122.927	1477.6	1554.9	240.794	1463.4	1555.98	195.106	1435.92	1414.59	173.327	1343.57	1135.4	191.72	1600.22	1315.53	188.949	1697.99	1116.25	255.666	1344.71	1225.37	40.3191	1535.05	1380.39	-80.9952	1536.51	1151.26	-95.4325	1530.56	1053.38	-106.934	1620.36	926.522	-59.7593	1653.35	829.069	-123.878	1615.82	811.451	-113.979	1681.22	758.883
936	0	153.574	1651.1	1566.67	258.208	1641.31	1566.23	123.884	1488.2	1557.46	241.904	1474.18	1558.22	195.743	1446.21	1416.44	172.698	1354.96	1136.96	192.167	1610.49	1317.65	189.36	1708.15	1118.59	255.558	1355.63	1226.73	40.8688	1545.56	1382.98	-80.7079	1546.65	1154.11	-94.9118	1539.54	1056.29	-106.851	1628.27	928.667	-59.6818	1660.76	830.862	-124.221	1622.8	813.811	-113.68	1687.14	759.808
937	0	154.343	1661.62	1568.66	259.128	1651.78	1568.16	124.701	1498.65	1559.86	242.441	1484.6	1560.36	196.183	1456.57	1418.18	172.197	1366.23	1138.33	192.564	1620.81	1319.91	189.808	1718.38	1121.16	255.527	1366.46	1228.12	41.389	1556.02	1385.35	-80.5974	1556.57	1156.96	-94.6914	1548.16	1058.81	-107.044	1636.18	930.852	-60.0769	1667.34	832.425	-124.706	1629.93	815.814	-113.598	1692.99	760.659
938	0	155.008	1671.99	1570.7	259.791	1662.03	1569.95	125.155	1509.05	1561.82	243.021	1494.8	1562.33	196.592	1466.87	1419.94	172.21	1377.05	1140.08	192.731	1630.97	1321.74	190.001	1728.75	1123.34	255.547	1377.05	1229.72	41.6723	1566.3	1387.45	-80.5795	1566.42	1159.25	-94.6338	1556.69	1061.18	-107.297	1644.13	932.752	-60.4244	1674.02	833.851	-125.29	1636.88	817.767	-113.297	1699.01	761.44
939	0	155.747	1682.39	1572.42	260.487	1672.1	1571.6	125.514	1519.44	1563.57	243.327	1504.93	1563.91	196.814	1477.29	1421.56	172.582	1387.23	1141.88	192.996	1641.2	1323.38	190.144	1739.05	1125	255.648	1387.66	1231.3	41.9104	1576.62	1389.36	-80.6467	1576	1161.36	-94.51	1565.21	1063.32	-107.601	1651.76	934.187	-60.6617	1681.17	835.024	-125.886	1643.9	819.42	-113.416	1705.01	761.863
940	0	156.377	1692.54	1574.03	261.079	1682.15	1573.12	125.701	1529.79	1564.96	243.44	1515.04	1565.03	197.158	1487.81	1423.03	172.977	1397.04	1143.73	193.099	1651.54	1324.73	190.172	1749.47	1126.31	255.879	1398.06	1232.81	41.9586	1586.91	1390.83	-80.7905	1585.4	1162.99	-94.6328	1573.66	1064.86	-108.032	1659.39	935.283	-61.0611	1688.17	835.855	-126.404	1650.8	820.657	-113.706	1711.13	762.121
941	0	156.956	1702.87	1575.7	261.454	1692.04	1574.45	125.66	1540.14	1566.13	243.513	1524.95	1566.07	197.159	1498.29	1424.57	173.167	1406.93	1145.43	193.095	1661.77	1325.92	189.917	1759.65	1127.3	256.127	1408.27	1234.6	41.9444	1597.1	1392.15	-81.0652	1594.55	1164.4	-94.8272	1582.05	1066.29	-108.591	1666.91	936.185	-61.6693	1695.33	836.604	-126.842	1657.69	821.578	-114.224	1717.26	762.403
942	0	157.182	1712.98	1577.37	261.842	1702.05	1575.99	125.699	1550.41	1567.36	243.318	1534.96	1567.14	197.141	1508.66	1426.27	173.365	1416.58	1147.25	192.85	1672.11	1327.12	189.533	1769.7	1128.26	256.354	1418.39	1236.5	41.6866	1607.19	1393.34	-81.464	1603.59	1165.42	-95.0504	1590.56	1067.45	-109.234	1674.35	936.944	-62.5958	1702.54	837.306	-127.372	1664.54	822.34	-114.97	1723.54	762.745
943	0	157.484	1723.16	1578.85	262.238	1711.99	1577.46	125.533	1560.56	1568.56	243.289	1545.02	1568.11	197.168	1519.08	1427.79	173.945	1426.07	1149.12	192.505	1682.11	1328.04	188.988	1779.92	1128.93	256.685	1428.37	1238.38	41.3847	1617.15	1394.44	-81.8583	1612.39	1166.29	-95.2616	1599.18	1068.34	-109.859	1681.86	937.372	-63.2318	1709.45	837.572	-127.962	1671.2	822.862	-115.922	1729.88	763.01
944	0	157.635	1733.45	1580.28	262.36	1722.07	1578.57	125.572	1570.85	1569.79	243.258	1555.15	1569	197.076	1529.49	1429.18	174.56	1435.53	1150.81	192.036	1692.24	1328.94	188.417	1789.74	1129.32	257.305	1438.24	1240.22	41.0099	1626.87	1395.37	-82.2874	1621	1166.88	-95.4315	1607.58	1069.05	-110.51	1689.16	937.621	-64.1406	1716.66	837.625	-128.418	1677.8	823.162	-116.865	1736.38	763.022
945	0	157.612	1743.45	1581.63	262.17	1732.18	1579.6	125.528	1581.05	1571.01	243.05	1565.24	1570.14	196.984	1539.74	1430.69	175.153	1444.82	1152.59	191.611	1702.25	1329.86	187.623	1799.32	1129.68	257.772	1448.19	1242.15	40.8114	1636.79	1396.19	-82.5346	1629.33	1167.32	-95.4198	1616.16	1069.64	-110.953	1696.66	937.846	-64.8459	1723.62	837.644	-128.975	1684.39	823.479	-117.91	1743.04	763.32
946	0	157.315	1753.75	1582.67	262.084	1742.4	1580.62	125.228	1591.13	1572.37	242.905	1575.49	1571.33	196.915	1549.98	1432.18	175.756	1454.03	1154.32	190.96	1712.16	1330.81	186.58	1809.18	1130.03	258.366	1457.95	1244.16	40.3903	1646.34	1396.99	-82.7854	1637.41	1167.68	-95.6936	1624.48	1070.43	-111.286	1703.98	938.084	-65.3061	1730.66	837.586	-129.52	1691.04	823.974	-119.022	1749.7	763.698
947	0	157.082	1763.86	1583.5	261.797	1753.07	1581.51	125.069	1601.3	1573.56	242.802	1585.68	1572.46	196.737	1560.09	1433.45	176.589	1463.4	1155.89	190.25	1722.06	1331.61	185.603	1818.5	1130.12	258.891	1467.79	1245.79	39.8585	1655.81	1397.75	-82.7958	1645.26	1168	-95.8027	1632.76	1071.08	-111.515	1711.48	938.31	-66.3404	1737.9	837.56	-130.014	1697.73	824.295	-120.147	1756.41	763.874
948	0	156.655	1774.17	1584.29	261.319	1763.33	1582.2	124.838	1611.33	1574.66	242.405	1596	1573.45	196.778	1570.18	1434.72	177.207	1472.44	1157.25	189.597	1731.76	1332.39	184.556	1827.85	1130.56	259.541	1477.57	1247.43	39.478	1665.07	1398.44	-82.7544	1653.02	1168.56	-95.7516	1641.05	1071.69	-111.658	1718.92	938.484	-66.9427	1745.42	837.769	-130.872	1704.57	824.716	-121.249	1763.15	764.359
949	0	156.146	1784.3	1584.86	260.813	1773.68	1582.79	124.433	1621.44	1575.71	242.173	1606.35	1574.47	196.693	1580.1	1435.83	177.831	1481.67	1158.6	188.851	1741.47	1333.07	183.493	1837.12	1131.03	260.398	1487.47	1249.04	38.9623	1674.14	1399.32	-82.7354	1660.75	1169.14	-95.7955	1649.08	1072.61	-111.717	1726.5	938.797	-67.1867	1751.12	837.706	-131.511	1711.31	825.322	-122.304	1769.94	765.033
950	0	155.627	1794.6	1585.42	260.277	1784.11	1583.41	124.119	1631.69	1576.63	241.928	1616.65	1575.51	196.548	1589.95	1436.78	178.43	1490.91	1159.77	188.039	1751.02	1333.7	182.439	1846.34	1131.5	260.747	1497.13	1250.23	38.4335	1683.2	1400.13	-82.8542	1668.31	1169.86	-95.775	1656.95	1073.43	-111.92	1733.99	939.407	-67.9418	1757.7	837.86	-132.246	1718.08	826.038	-123.147	1776.78	765.566
951	0	155.044	1804.85	1585.9	259.816	1794.4	1583.85	123.729	1641.93	1577.35	241.467	1626.98	1576.35	196.565	1599.58	1437.63	178.995	1500.12	1160.76	187.355	1760.46	1334.35	181.429	1855.61	1132.31	261.228	1506.85	1251.29	37.8067	1692.02	1400.89	-83.084	1675.85	1170.63	-95.6599	1664.74	1074.07	-112.185	1741.35	940.158	-68.4006	1764.85	838.558	-132.553	1724.87	826.532	-124.244	1783.47	766.141
952	0	154.532	1815.05	1586.17	259.268	1804.73	1584.12	123.389	1652.09	1578.04	241.129	1637.26	1577.13	196.325	1609.21	1438.31	179.504	1509.34	1161.56	186.491	1769.92	1334.9	180.427	1864.93	1133.17	261.533	1516.41	1252.12	37.2488	1700.88	1401.55	-83.2591	1683.46	1171.23	-95.6633	1672.31	1074.62	-112.539	1748.73	940.786	-69.3223	1771.59	838.599	-133.126	1731.79	827.079	-125.14	1790.27	766.486
953	0	153.944	1825.3	1586.13	258.716	1815.11	1584.25	122.875	1662.33	1578.75	240.695	1647.67	1577.79	196.18	1618.7	1438.81	179.816	1518.48	1162.24	185.638	1779.35	1335.21	179.487	1874.35	1133.8	261.773	1525.98	1252.79	36.5425	1709.58	1402.13	-83.5432	1691.21	1171.61	-95.5623	1680.02	1075.2	-113.046	1755.98	941.128	-69.874	1778.79	839.042	-134.068	1738.82	827.759	-126.016	1797.03	766.805
954	0	153.271	1835.67	1585.93	257.995	1825.42	1583.98	122.458	1672.58	1579.35	240.234	1657.95	1578.3	195.955	1628.3	1439.3	180.046	1527.65	1162.77	184.934	1788.78	1335.4	178.636	1884.11	1134.4	261.952	1535.57	1253.26	35.9702	1718.46	1402.43	-83.8608	1698.94	1171.91	-95.8233	1687.45	1075.5	-113.674	1763.32	941.175	-70.6719	1786.2	838.811	-134.27	1745.9	827.945	-126.791	1803.91	766.739
955	0	152.767	1845.82	1585.57	257.431	1835.85	1583.55	122.007	1682.63	1579.75	239.842	1668.15	1578.73	195.712	1637.8	1439.55	180.172	1536.82	1163.04	184.189	1798.11	1335.48	177.752	1893.1	1134.34	262.061	1545.07	1253.52	35.3683	1727.34	1402.43	-84.255	1706.77	1171.87	-95.932	1694.86	1075.55	-114.222	1770.52	941.091	-71.2959	1793.49	838.564	-134.889	1752.84	827.843	-127.544	1810.77	766.45
956	0	151.991	1856.03	1585.28	256.715	1846.19	1583.18	121.486	1692.69	1580.14	239.345	1678.5	1579.07	195.357	1647.35	1439.74	180.204	1546.04	1163.25	183.507	1807.65	1335.47	176.924	1902.66	1134.56	262.013	1554.5	1253.87	34.7067	1736.33	1402.4	-84.8106	1714.57	1171.75	-96.1296	1702.49	1075.41	-114.915	1777.84	940.854	-71.7518	1801.43	838.421	-135.175	1759.52	827.648	-128.041	1817.72	766.232
957	0	151.34	1866.06	1584.96	256.077	1856.47	1582.93	121.112	1702.77	1580.37	239.022	1688.65	1579.44	194.967	1656.97	1439.8	180.056	1555.21	1163.45	182.728	1817.08	1335.36	176.204	1911.47	1134.38	261.892	1563.91	1254.06	33.983	1745.47	1402.31	-85.4922	1722.47	1171.7	-96.4045	1710.22	1075.3	-115.899	1785.04	940.397	-72.6662	1808.69	838.027	-135.628	1766.67	827.341	-129.016	1824.7	765.654
958	0	150.503	1876.13	1584.28	255.244	1866.65	1582.21	120.696	1712.75	1580.37	238.603	1698.91	1579.3	194.538	1666.64	1439.58	179.891	1564.42	1163.46	182.206	1826.56	1335.1	175.728	1920.73	1133.92	261.67	1573.42	1253.97	33.2859	1754.67	1402.04	-86.1853	1730.29	1171.4	-96.7888	1718.09	1074.98	-116.719	1792.3	939.946	-73.3675	1816.45	837.695	-136.131	1773.85	826.848	-129.644	1831.6	764.887
959	0	149.772	1886.05	1583.89	254.49	1876.87	1581.74	120.422	1722.99	1580.11	238.006	1709.04	1579.1	194.015	1676.38	1439.35	179.719	1573.83	1163.3	181.264	1836.12	1334.84	175.018	1929.97	1133.62	261.302	1582.89	1253.97	32.6657	1764.01	1401.52	-86.8952	1738.3	1170.99	-96.6567	1725.77	1074.31	-117.683	1799.64	939.215	-74.1912	1823.92	836.969	-136.21	1780.89	825.979	-130.395	1838.61	764.212
960	0	148.601	1895.98	1583.24	253.586	1887.01	1581.15	119.814	1732.79	1579.79	237.588	1719.25	1578.9	193.371	1686.14	1439.12	179.265	1583.18	1163.16	180.782	1845.74	1334.35	174.428	1939.37	1133.04	260.841	1592.32	1253.86	31.9655	1773.61	1400.87	-87.5504	1746.29	1170.54	-97.1109	1733.8	1073.84	-118.601	1807.04	938.408	-74.9493	1831.47	836.19	-136.398	1788.1	825.08	-131.109	1845.78	763.264
961	0	147.852	1905.94	1582.46	252.69	1897.06	1580.37	119.159	1742.66	1579.35	236.98	1729.25	1578.4	192.78	1696.05	1438.6	178.778	1592.5	1163	180.051	1855.26	1333.65	173.898	1948.57	1132.13	260.296	1601.91	1253.64	31.2635	1783.35	1400.26	-88.0683	1754.87	1169.88	-97.5998	1742.13	1073.12	-119.309	1814.68	937.625	-75.6271	1839.25	835.41	-137.052	1795.36	824.234	-131.763	1852.95	762.201
962	0	146.998	1916.04	1581.51	251.775	1907.06	1579.36	118.486	1752.66	1578.58	236.198	1739.37	1577.55	192.066	1705.99	1437.9	178.351	1601.89	1162.54	179.396	1865.1	1332.72	173.5	1957.74	1130.75	259.777	1611.37	1253.27	30.571	1793.14	1399.28	-88.4471	1763.47	1169.03	-97.9788	1750.51	1072.22	-119.923	1822.72	936.325	-76.2906	1847.11	834.262	-137.14	1802.71	822.949	-132.22	1860.3	760.985
963	0	146.121	1925.92	1580.55	250.887	1917.17	1578.36	117.663	1762.77	1577.56	235.426	1749.5	1576.64	191.158	1715.93	1437.13	177.674	1611.23	1161.84	179.231	1875.06	1331.57	173.185	1967.23	1129.47	259.005	1620.96	1252.65	29.9214	1803.27	1398.11	-88.9495	1772.2	1167.91	-98.5663	1759.13	1071.3	-120.473	1830.81	934.976	-76.9246	1855.1	832.866	-137.852	1810.23	821.719	-132.917	1867.66	759.536
964	0	145.167	1936.09	1579.3	249.983	1927.24	1577.35	116.543	1772.72	1576.42	234.349	1759.61	1575.63	190.265	1726	1436.3	176.895	1620.84	1161.14	178.33	1884.83	1330.48	172.846	1976.89	1128.13	258.146	1630.57	1252.19	29.1386	1813.38	1396.93	-89.7226	1781.19	1166.87	-99.155	1767.97	1070.24	-121.164	1838.92	933.716	-77.6575	1862.96	831.296	-138.214	1817.83	820.433	-133.583	1875.06	757.921
965	0	144.173	1946.14	1578.09	249.233	1937.33	1576.31	115.383	1782.94	1575.13	233.294	1769.61	1574.47	189.421	1736.14	1435.24	176.112	1630.47	1160.36	177.582	1894.76	1329	172.588	1986.54	1126.4	257.308	1640.27	1251.35	28.3135	1823.72	1395.57	-90.5826	1790.44	1165.83	-99.7779	1776.96	1069.15	-121.77	1847.51	932.159	-78.4311	1870.85	829.792	-138.935	1825.69	819.029	-134.339	1882.62	756.212
966	0	143.312	1956.37	1576.67	248.151	1947.35	1574.95	114.372	1793.05	1573.62	232.155	1779.59	1573.02	188.388	1746.29	1433.99	175.122	1640.26	1159.16	177.074	1904.77	1327.52	172.42	1996.1	1124.66	256.364	1650.19	1250.33	27.6255	1834.08	1394.08	-91.6183	1800.15	1164.7	-100.414	1786.02	1067.79	-122.342	1855.92	930.61	-79.2489	1878.63	828.055	-139.56	1833.44	817.329	-135.115	1890.21	754.367
967	0	142.164	1966.45	1575.15	247.073	1957.25	1573.64	113.053	1803.32	1571.94	230.919	1789.77	1571.56	187.349	1756.44	1432.68	174.014	1649.98	1157.93	176.444	1914.85	1326.19	172.074	2005.94	1123.08	255.167	1659.99	1249.07	26.7046	1844.44	1392.63	-91.9152	1809.78	1163.18	-101.042	1795.48	1066.28	-123.007	1864.73	929.061	-79.9591	1886.88	826.21	-140.368	1841.28	815.653	-135.95	1897.71	752.494
968	0	140.982	1976.68	1573.59	246.002	1967.43	1572.36	111.72	1813.49	1570.36	229.479	1799.84	1570.12	186.129	1766.67	1431.3	172.763	1659.89	1156.67	175.679	1924.91	1324.68	171.755	2015.97	1121.44	253.943	1669.87	1247.86	25.5963	1854.9	1391.03	-93.0587	1819.66	1161.55	-101.678	1805.1	1064.93	-123.815	1873.47	927.266	-80.9718	1894.93	824.313	-141.446	1849.3	814.037	-136.728	1905.14	750.388
969	0	139.674	1986.99	1571.83	244.946	1977.88	1570.88	110.482	1823.88	1568.57	228.202	1810.06	1568.52	184.965	1776.9	1429.66	171.515	1669.81	1155.22	174.892	1935.2	1322.92	171.4	2025.97	1119.7	252.714	1679.92	1246.39	24.6531	1865.53	1389.33	-93.8491	1830.16	1159.78	-102.356	1814.55	1063.11	-124.662	1882.34	925.228	-82.1559	1902.8	822.123	-142.398	1857.49	812.133	-137.702	1912.89	748.181
970	0	138.414	1997.19	1570.01	243.459	1988.01	1568.97	109.142	1834.15	1566.63	226.747	1820.35	1566.79	183.579	1787.16	1427.99	170.149	1679.91	1153.52	174.039	1945.42	1321.05	171.006	2036.31	1117.81	251.271	1689.89	1244.7	23.5825	1876.19	1387.37	-94.842	1840.55	1157.64	-103.07	1824.22	1061.15	-125.55	1891.24	922.966	-83.0861	1911.36	819.711	-143.33	1865.74	809.929	-138.772	1920.57	745.696
971	0	136.879	2007.61	1568.17	242.032	1998.43	1567.27	107.647	1844.48	1564.71	225.353	1830.65	1565.09	182.192	1797.29	1426.34	168.809	1690.01	1151.87	172.953	1955.8	1319.24	170.511	2046.53	1115.87	249.722	1699.82	1243.12	22.4031	1886.83	1385.39	-95.8289	1851.4	1155.49	-103.832	1834.12	1059.2	-126.428	1900.47	920.474	-84.1893	1919.98	817.215	-144.462	1873.84	807.881	-140.081	1928.42	743.062
972	0	135.509	2017.93	1566.32	240.694	2008.9	1565.69	106.115	1854.79	1562.96	223.873	1841.01	1563.4	180.518	1807.67	1424.59	167.447	1700.4	1150.2	171.925	1966.14	1317.38	169.911	2057.04	1113.98	248.215	1710.02	1241.44	21.1733	1897.54	1383.42	-96.5785	1862.51	1153.16	-104.807	1844.23	1057.3	-127.63	1909.4	918.121	-85.3982	1928.25	814.614	-145.809	1882.41	805.833	-141.308	1936.41	740.391
973	0	133.847	2028.42	1564.4	239.094	2019.29	1563.89	104.495	1865.14	1561.04	222.388	1851.48	1561.63	179.013	1818.01	1422.81	166.054	1710.82	1148.34	170.719	1976.66	1315.61	169.21	2067.44	1112.17	246.816	1720.2	1239.66	19.8259	1908.2	1381.33	-97.4793	1873.63	1150.74	-105.671	1854.27	1055.06	-128.585	1918.85	915.739	-86.6135	1937.23	811.914	-146.891	1891.13	803.631	-142.569	1944.54	737.784
974	0	132.102	2038.78	1562.62	237.116	2029.6	1562.03	102.844	1875.5	1559.19	220.64	1861.83	1559.83	177.467	1828.59	1420.99	164.601	1721.25	1146.42	169.451	1987.12	1313.97	168.294	2078.29	1110.66	245.179	1730.49	1238.01	18.3742	1918.81	1379.3	-98.1827	1884.86	1148.17	-106.524	1864.56	1052.85	-129.82	1928.09	913.426	-87.8122	1946.03	809.306	-148.244	1899.93	801.362	-143.833	1953.21	735.372
975	0	130.158	2049.11	1561.02	235.309	2040.11	1560.46	101.047	1885.92	1557.52	218.847	1872.39	1558.33	175.598	1839.14	1419.32	163.256	1732.03	1144.58	168.05	1997.68	1312.44	167.42	2089.03	1109.13	243.721	1740.92	1236.36	16.7728	1929.54	1377.44	-99.1838	1896.18	1146.02	-107.654	1874.88	1050.79	-131.137	1937.64	911.224	-88.8839	1955.48	807.125	-149.576	1909.19	799.205	-145.331	1961.67	732.836
976	0	128.221	2059.73	1559.34	233.49	2050.65	1558.96	99.1582	1896.48	1555.87	216.904	1882.87	1556.55	173.96	1849.56	1417.56	161.889	1742.84	1142.8	166.529	2008.31	1310.86	166.483	2099.98	1107.61	242.325	1751.54	1234.59	15.1068	1940.09	1375.53	-100.25	1907.36	1143.85	-108.958	1885.27	1048.63	-132.43	1947.57	908.886	-90.3021	1964.38	804.685	-150.955	1918.66	797.264	-146.69	1970.57	730.525
977	0	126.322	2070.19	1557.78	231.468	2061.08	1557.42	97.092	1906.95	1554.19	215.049	1893.5	1554.92	172.232	1860.19	1415.88	160.536	1753.72	1140.84	164.994	2018.98	1309.35	165.29	2110.97	1106.31	240.847	1762.22	1233.02	13.4267	1950.7	1373.67	-101.541	1918.36	1141.81	-109.932	1895.88	1046.42	-133.517	1957.62	906.733	-91.5009	1974.03	802.285	-152.423	1928.51	795.234	-148.06	1979.63	728.3
978	0	124.036	2080.77	1556.4	229.304	2071.61	1556.09	95.0199	1917.52	1552.57	212.87	1903.92	1553.49	170.285	1870.77	1414.3	159.388	1764.57	1139.09	163.236	2029.69	1308.01	164.058	2121.94	1105.16	239.346	1772.91	1231.43	11.5935	1961.17	1371.83	-102.7	1929.48	1139.76	-111.068	1906.36	1044.37	-134.79	1967.9	904.753	-92.7675	1983.81	800.025	-153.983	1938.66	793.276	-149.285	1989.28	725.979
979	0	121.884	2091.38	1554.88	227.042	2082.31	1554.7	92.7542	1928.18	1551.01	210.666	1914.62	1552.05	168.422	1881.33	1412.73	158.021	1775.55	1137.28	161.412	2040.51	1306.51	162.849	2132.98	1103.89	238.012	1783.88	1229.91	9.70076	1971.78	1370.01	-104.17	1940.25	1137.7	-112.516	1916.97	1042.58	-136.024	1978.39	902.796	-93.7599	1994.13	798.065	-155.617	1949.1	791.522	-150.578	1999.18	723.734
980	0	119.584	2102.04	1553.14	224.602	2092.97	1553.13	90.5395	1938.73	1549.33	208.364	1925.35	1550.49	166.533	1891.97	1411.07	156.873	1786.87	1135.37	159.597	2051.46	1304.96	161.629	2144.5	1102.68	236.609	1795.03	1228.25	7.78142	1982.41	1368.14	-105.853	1950.77	1135.62	-113.801	1927.6	1040.59	-137.294	1989.12	900.701	-95.0462	2004.18	795.842	-157.023	1959.91	789.63	-151.843	2009.4	721.606
981	0	116.801	2112.55	1551.8	222.063	2103.63	1551.84	88.1308	1949.34	1547.64	205.978	1935.88	1549.09	164.462	1902.65	1409.4	155.812	1798.24	1133.32	157.678	2062.38	1303.77	160.052	2156.01	1101.7	235.264	1806.13	1226.5	5.89676	1992.96	1366.29	-107.228	1961.32	1133.58	-115.077	1938.27	1038.44	-138.656	1999.85	898.689	-96.2679	2014.76	793.705	-158.545	1970.87	787.749	-152.532	2020.1	719.529
982	0	114.293	2123.15	1550.37	219.334	2114.34	1550.84	85.5953	1959.96	1546.2	203.571	1946.64	1548.01	162.482	1913.19	1407.98	154.694	1810.04	1131.4	155.655	2073.46	1302.71	158.298	2167.54	1100.92	233.876	1817.47	1224.9	3.78032	2003.55	1364.66	-108.954	1971.65	1131.78	-116.659	1948.78	1036.57	-140.094	2010.81	896.873	-97.5235	2025.98	791.873	-160.024	1982.07	786.017	-153.848	2031.25	717.553
983	0	111.457	2133.81	1549.35	216.568	2125.17	1550.07	83.1133	1970.5	1544.86	200.955	1957.42	1546.89	160.441	1923.9	1406.63	153.575	1821.84	1129.61	153.561	2084.67	1301.87	156.588	2179.22	1100.34	232.51	1828.77	1223.45	1.58257	2014.04	1363.1	-110.848	1981.65	1130.03	-118.249	1959.44	1034.62	-141.524	2021.87	895.128	-98.6819	2037.21	790.319	-161.442	1993.67	784.238	-155.028	2042.49	715.773
984	0	108.694	2144.54	1548.6	213.875	2136.07	1549.52	80.5744	1981.21	1543.65	198.318	1968.28	1545.91	158.343	1934.83	1405.41	152.566	1833.44	1127.99	151.345	2095.94	1301.09	155.115	2191.28	1099.96	231.113	1840.21	1221.94	-0.648915	2024.68	1361.59	-112.953	1991.66	1128.34	-119.61	1970.06	1032.68	-142.971	2033.05	893.568	-99.9753	2048.51	788.737	-162.58	2005.23	782.319	-156.198	2054.18	714.201
985	0	105.615	2155.31	1548	211.09	2147.12	1549.36	77.9137	1992	1542.6	195.822	1979.19	1545.35	156.203	1945.83	1404.56	151.755	1844.95	1126.74	149.165	2107.36	1300.74	153.266	2203.32	1099.83	229.884	1851.75	1220.9	-2.89578	2035.31	1360.17	-115.09	2001.72	1126.89	-121.018	1980.93	1030.89	-144.413	2044.38	891.854	-101.293	2060.12	787.202	-163.838	2016.57	780.501	-157.31	2066.2	712.84
986	0	102.597	2166.1	1547.68	208.12	2158.12	1549.39	75.0636	2002.69	1541.96	193.123	1990.19	1545.11	154.136	1956.93	1404.05	150.752	1856.31	1125.95	146.944	2118.78	1300.6	151.563	2215.8	1100.1	228.657	1863.48	1220.4	-5.13408	2046.08	1359.11	-116.999	2011.86	1125.64	-122.547	1991.73	1029.58	-145.973	2055.67	890.547	-102.71	2072.09	786.127	-165.244	2028.23	779.164	-158.721	2078.15	711.676
987	0	99.8341	2176.97	1547.58	205.116	2169.1	1549.6	72.2954	2013.51	1541.61	190.195	2001.09	1544.91	152.131	1968.15	1403.88	149.337	1867.77	1125.52	144.728	2130.25	1300.63	149.754	2228.15	1100.39	227.566	1875.21	1220.18	-7.34505	2056.78	1358.35	-118.749	2022.14	1124.62	-123.951	2002.71	1028.44	-147.684	2066.84	889.591	-104.253	2084.17	785.389	-166.151	2039.98	778.075	-159.902	2090.54	710.849
988	0	96.8848	2188.03	1547.94	202.236	2180.17	1550.15	69.6575	2024.45	1541.44	187.489	2012.12	1545.04	150.256	1979.44	1403.98	148.167	1879.24	1125.4	142.552	2141.77	1300.9	148.097	2240.67	1101.14	226.657	1887.02	1220.37	-9.39693	2067.5	1357.95	-120.323	2032.55	1123.98	-125.016	2013.59	1027.46	-149.248	2078.06	888.937	-105.564	2096.88	784.967	-166.978	2051.4	777.109	-161.474	2102.82	710.369
989	0	93.8893	2199.01	1548.56	199.237	2191.22	1551.1	66.8963	2035.45	1541.72	184.767	2023.28	1545.74	148.27	1990.81	1404.45	147.762	1890.72	1125.85	140.372	2153.33	1301.75	146.152	2252.77	1102.26	225.869	1898.89	1221.05	-11.5268	2078.24	1357.86	-121.754	2043.16	1123.86	-125.815	2024.64	1027.08	-150.887	2089.55	888.624	-107.383	2108.76	784.91	-168.015	2063.04	776.639	-162.977	2115.39	710.467
990	0	90.8697	2210.09	1549.6	196.339	2202.35	1552.54	64.0499	2046.55	1542.49	181.835	2034.38	1546.81	146.302	2002.23	1405.46	147.052	1902.53	1126.83	138.146	2164.87	1302.99	144.247	2264.91	1103.68	225.057	1910.82	1222.24	-13.6291	2088.91	1358.37	-123.11	2054.03	1124.05	-126.929	2035.68	1027.11	-152.186	2100.82	889.295	-109.166	2121.72	785.784	-169.013	2074.87	776.862	-164.834	2127.76	711.191
991	0	87.9347	2221.17	1550.93	193.477	2213.53	1554.17	61.315	2057.7	1543.54	179.272	2045.65	1548.22	144.491	2013.72	1406.65	146.16	1914.81	1128.18	135.872	2176.29	1304.41	142.153	2276.61	1105.32	224.414	1922.88	1223.79	-15.6916	2099.67	1359.32	-124.134	2064.85	1124.46	-127.682	2046.73	1027.58	-153.915	2111.97	889.939	-111.034	2134.32	786.794	-169.787	2086.51	777.334	-166.693	2140.31	712.175
992	0	85.1198	2232.27	1552.45	190.637	2224.84	1555.93	58.6717	2068.87	1544.85	176.674	2056.87	1549.95	142.693	2025.12	1408.12	145.112	1927.36	1129.56	133.747	2187.73	1306.12	140.077	2288.17	1107.19	223.608	1934.91	1225.48	-17.6285	2110.52	1360.51	-125.138	2075.73	1125.3	-128.305	2057.69	1028.32	-155.257	2123.47	891.226	-112.868	2147.17	788.209	-170.506	2098.32	778.052	-168.576	2152.74	713.699
993	0	82.4712	2243.33	1554.18	187.931	2236	1558.08	56.066	2080.04	1546.5	174.027	2068.04	1552.1	140.83	2036.42	1409.97	144.582	1940.16	1131.16	131.583	2199.01	1308.13	138.063	2299.63	1109.37	222.662	1946.75	1227.49	-19.7187	2121.26	1362	-125.405	2086.4	1126.07	-128.949	2069.07	1029.56	-156.675	2135.04	892.751	-114.654	2160.31	789.936	-171.448	2110	779.477	-170.619	2165.16	715.555
994	0	80.1682	2254.41	1555.97	185.536	2247.2	1560.21	53.6116	2091.09	1548.48	171.632	2079.22	1554.42	138.937	2047.54	1411.98	144.16	1952.51	1132.86	129.465	2210.25	1310.11	136.195	2310.86	1111.63	221.929	1958.96	1229.59	-21.738	2132.05	1363.76	-126.828	2097.56	1127.76	-129.783	2080.15	1031.29	-158.111	2146.48	894.533	-116.351	2173.5	792.154	-172.072	2122.09	781.242	-172.433	2177.9	717.5
995	0	77.893	2265.62	1557.72	183.226	2258.31	1562.2	51.2794	2102.15	1550.64	169.44	2090.36	1556.87	136.952	2058.54	1413.92	143.422	1963.91	1134.58	127.36	2221.36	1312.19	134.127	2321.86	1114	220.838	1970.62	1231.53	-23.6142	2142.8	1365.64	-127.595	2108.68	1129.37	-130.451	2091.52	1033.07	-159.21	2158.42	896.35	-118.194	2186.23	794.043	-172.539	2134	783.073	-174.485	2190.31	719.743
996	0	75.7136	2276.74	1559.63	181.054	2269.16	1564.22	49.0133	2113.15	1552.81	167.089	2101.28	1559.3	135.198	2069.43	1415.69	142.367	1975.08	1136.24	125.454	2232.32	1314.51	132.22	2332.68	1116.56	219.529	1982.12	1233.46	-25.4724	2153.45	1367.7	-128.507	2119.69	1131.07	-131.222	2102.96	1034.84	-160.68	2170	898.618	-119.778	2199.39	796.377	-173.259	2146.03	785.045	-176.231	2203.07	722.148
997	0	73.7909	2287.62	1561.74	179.15	2279.85	1566.49	46.7807	2124.24	1555.03	164.754	2112.06	1561.66	133.275	2080.21	1417.64	141.184	1986.23	1138.04	123.479	2243.14	1316.92	130.244	2343.38	1119.15	218.013	1993.46	1235.41	-27.5472	2164.11	1369.97	-129.805	2130.88	1133.08	-132.272	2114.32	1036.9	-161.915	2182.07	900.89	-121.504	2212.49	798.874	-173.923	2158.47	787.111	-178.035	2215.79	724.723
998	0	72.0741	2298.41	1563.74	177.416	2290.66	1568.51	44.8664	2135.27	1557.39	162.892	2122.91	1563.94	131.387	2091.03	1419.56	140.261	1997.88	1139.68	121.516	2253.82	1318.96	128.486	2353.9	1121.68	216.411	2004.5	1237.25	-29.4541	2174.8	1372.04	-130.493	2142.16	1134.7	-133.449	2126.03	1038.88	-163.506	2193.84	903.124	-122.969	2225.71	801.561	-174.97	2170.83	789.122	-179.748	2228.48	727.177
999	0	70.3655	2309.35	1565.62	175.749	2301.47	1570.34	43.1663	2146.27	1559.3	161.085	2133.68	1565.9	129.555	2101.69	1421.2	138.819	2008.95	1141.26	119.694	2264.39	1320.82	126.795	2364.22	1124.03	215.02	2015.43	1238.96	-31.2479	2185.42	1373.9	-132.71	2153.66	1136.82	-134.889	2137.59	1040.52	-164.734	2206.19	905.133	-124.501	2238.1	803.761	-175.807	2183.41	790.941	-181.282	2241.41	729.568
1000	0	69.0212	2320.04	1567.32	174.189	2311.98	1572.12	41.3714	2157	1560.98	159.248	2144.32	1567.69	127.874	2112.3	1422.88	137.213	2019.88	1142.88	117.945	2274.98	1322.6	125.184	2374.68	1126.18	213.245	2026.12	1240.69	-33.0761	2195.94	1375.57	-133.764	2165.25	1138.25	-136.453	2149.37	1042.16	-166.244	2218.44	907.096	-126.01	2251.09	805.705	-176.999	2196.31	792.673	-182.527	2254.56	731.651
1001	0	67.4093	2330.67	1568.99	172.803	2322.62	1573.84	39.6628	2167.67	1562.59	157.631	2154.94	1569.25	126.333	2123.06	1424.53	135.719	2030.44	1144.58	116.311	2285.4	1324.13	123.833	2384.95	1127.98	211.614	2036.73	1242.34	-34.6394	2206.76	1377.25	-136.304	2177.1	1140.36	-138.249	2161.2	1043.83	-167.911	2230.75	908.815	-127.382	2263.97	807.743	-178.412	2209.42	794.373	-183.671	2267.87	733.58
1002	0	65.9375	2341.32	1570.49	171.32	2333.18	1575.32	38.2298	2178.24	1563.88	156.195	2165.55	1570.51	124.691	2133.78	1425.96	134.149	2040.87	1146.06	114.858	2295.95	1325.35	122.611	2395.33	1129.36	210.197	2047.09	1243.98	-36.0671	2217.46	1378.62	-138.148	2188.93	1141.86	-140.028	2173.2	1045.11	-169.405	2243.43	910.271	-128.59	2277.11	809.613	-179.993	2222.51	795.843	-184.738	2281.24	735.101
1003	0	64.4717	2351.69	1571.77	169.757	2343.81	1576.65	37.027	2188.8	1564.92	154.782	2176.02	1571.65	123.26	2144.43	1427.28	132.597	2051.11	1147.48	113.387	2306.55	1326.47	121.469	2405.77	1130.5	208.589	2057.35	1245.46	-37.4446	2228.18	1379.69	-139.516	2200.7	1143.08	-142.054	2185.17	1046.21	-170.858	2256.11	911.648	-130.087	2289.84	811.087	-181.603	2235.65	797.076	-185.727	2294.76	736.45
1004	0	63.0632	2362.3	1572.91	168.312	2354.31	1577.84	35.6503	2199.28	1565.89	153.416	2186.67	1572.66	121.863	2155.19	1428.5	130.931	2061.2	1148.91	112.17	2316.92	1327.38	120.505	2415.94	1131.23	207.134	2067.41	1246.86	-38.7871	2238.98	1380.64	-142.165	2212.75	1144.41	-144.135	2197.31	1047.38	-172.572	2268.84	913.055	-131.54	2302.58	812.573	-183.622	2248.99	798.27	-186.781	2308.41	737.919
1005	0	61.7379	2372.83	1573.93	166.986	2364.78	1578.99	34.4621	2209.73	1566.67	152.345	2197.1	1573.63	120.696	2165.93	1429.68	129.381	2071.33	1150.49	111.14	2327.49	1328.21	119.752	2426.44	1131.64	205.687	2077.33	1248.34	-39.8435	2249.93	1381.51	-144.094	2224.64	1145.52	-146.45	2209.26	1048.45	-174.381	2281.6	914.111	-132.859	2315.5	814.043	-185.521	2262.4	799.549	-187.959	2321.97	739.214
1006	0	60.353	2383.3	1574.82	165.656	2375.41	1579.99	33.2611	2220.27	1567.34	151.127	2207.79	1574.43	119.52	2176.59	1430.67	127.692	2081.15	1151.76	110.372	2337.96	1328.89	119.142	2436.47	1131.86	204.395	2087.24	1249.66	-40.7795	2260.8	1382.39	-145.948	2236.49	1146.56	-148.338	2221.62	1049.25	-175.997	2294.36	915.328	-134.281	2327.92	815.192	-187.712	2275.46	800.507	-189.236	2335.61	740.467
1007	0	59.1072	2393.68	1575.63	164.494	2386.03	1580.9	32.3004	2230.77	1567.88	150.106	2218.3	1575.12	118.409	2187.13	1431.69	126.096	2091.13	1153.06	109.722	2348.31	1329.35	118.796	2446.83	1132.04	202.816	2096.95	1250.96	-41.7443	2271.79	1383.19	-147.698	2248.14	1147.49	-150.55	2233.67	1050	-177.581	2307.19	916.554	-135.572	2340.76	816.411	-189.71	2288.91	801.535	-190.597	2349.21	741.839
1008	0	58.0501	2404.05	1576.27	163.495	2396.57	1581.77	31.1231	2241.2	1568.54	148.946	2228.86	1575.85	117.211	2197.81	1432.68	124.208	2100.94	1154.4	108.999	2358.79	1329.76	118.592	2456.89	1131.95	201.248	2106.7	1252.11	-42.3877	2282.91	1383.76	-149.389	2260.06	1148.21	-152.696	2246.1	1050.78	-179.17	2320.14	917.431	-137.035	2353.34	817.363	-191.775	2302.42	802.632	-192.086	2362.85	742.917
1009	0	57.0714	2414.81	1576.78	162.645	2407.02	1582.42	30.0853	2251.7	1569.06	148.04	2239.34	1576.41	116.099	2208.36	1433.59	122.414	2110.73	1155.79	108.632	2369.08	1329.97	118.522	2467	1131.76	199.645	2116.29	1253.24	-43.3129	2293.93	1384.22	-151.173	2271.55	1149.08	-154.863	2258.44	1051.53	-180.559	2333.13	918.597	-138.415	2365.77	818.395	-193.907	2315.66	803.614	-193.717	2376.29	744.331
1010	0	56.5002	2425.3	1577.08	161.748	2417.55	1582.91	29.3819	2262.41	1569.31	147.078	2249.92	1576.81	114.996	2219.01	1434.37	120.642	2120.52	1156.8	108.413	2379.4	1330.17	118.695	2477	1131.43	197.809	2125.9	1254.16	-44.0054	2305.11	1384.51	-152.515	2283.38	1149.69	-157.033	2270.62	1052.28	-182.024	2346.12	919.298	-139.633	2378.74	819.305	-195.898	2328.92	804.573	-195.435	2389.83	745.444
1011	0	55.8028	2435.79	1577.47	161.134	2427.89	1583.15	28.6094	2273.19	1569.6	146.222	2260.32	1577.14	113.88	2229.61	1435.01	118.803	2130.08	1157.8	108.115	2389.4	1330.23	118.961	2486.84	1131.23	196.146	2135.43	1255.01	-44.6653	2316.23	1385	-153.732	2295.06	1150.06	-158.787	2283.18	1052.93	-183.356	2359.15	920.296	-141.102	2390.97	819.888	-198.02	2342.22	805.512	-196.794	2403.19	746.727
1012	0	55.3167	2446.6	1577.68	160.71	2438.5	1583.38	27.8188	2283.66	1569.8	145.557	2270.79	1577.45	112.823	2240.03	1435.56	116.96	2139.81	1158.62	107.873	2399.57	1330.01	119.384	2496.76	1130.89	194.486	2144.94	1255.88	-45.1302	2327.63	1385.32	-155.151	2306.73	1150.78	-160.793	2295.48	1053.68	-184.622	2372.19	921.078	-142.38	2403.64	820.651	-200.091	2355.61	806.547	-198.499	2416.85	747.75
1013	0	55.1315	2457.09	1577.48	160.38	2448.96	1583.25	27.059	2294.32	1569.9	144.845	2281.36	1577.4	111.75	2250.54	1435.76	115	2149.46	1159.26	107.921	2409.55	1329.85	119.893	2506.36	1130.41	192.65	2154.5	1256.29	-45.7141	2338.69	1385.36	-155.942	2318.71	1151.03	-162.666	2307.76	1054.2	-185.834	2385.14	921.867	-143.681	2416.19	821.244	-202.209	2369.02	807.437	-199.942	2430.07	748.799
1014	0	54.7651	2467.55	1577.33	160.08	2459.19	1583.05	26.7286	2304.98	1569.76	144.426	2291.66	1577.31	110.666	2260.77	1435.95	113.302	2159.05	1159.66	107.81	2419.61	1329.51	120.429	2515.85	1130.11	190.977	2163.85	1256.67	-46.1301	2349.89	1385.46	-156.985	2330.41	1151.36	-164.324	2320.07	1054.69	-187.066	2398.06	922.566	-145.082	2428.49	821.517	-203.973	2382.28	808.04	-201.454	2443.81	749.562
1015	0	54.5065	2478.2	1577.13	159.5	2469.17	1582.79	26.1091	2315.55	1569.48	143.689	2302.04	1577.13	109.589	2270.86	1436.03	111.535	2168.57	1159.85	107.58	2429.5	1329.25	120.757	2525.2	1129.74	189.104	2173.27	1256.92	-46.5193	2360.79	1385.1	-158.079	2342.14	1151.49	-165.972	2332.47	1054.91	-188.251	2410.87	923.129	-146.653	2440.49	821.823	-205.876	2395.65	808.718	-202.917	2457.26	750.548
1016	0	54.1608	2488.6	1576.65	159.512	2480.02	1582.48	25.6673	2326.1	1569.34	143.296	2312.55	1576.87	108.576	2281.21	1435.9	109.969	2178.02	1159.92	107.646	2439.35	1328.76	121.209	2534.54	1129.28	187.645	2182.68	1256.91	-46.7252	2371.96	1384.97	-159.056	2354.07	1151.59	-167.429	2344.75	1055.05	-189.397	2423.75	923.466	-147.313	2453.64	822.59	-207.753	2409.18	809.208	-204.16	2470.79	751.119
1017	0	54.298	2499.27	1576.11	159.397	2490.37	1581.8	25.4157	2336.79	1568.94	142.909	2323.03	1576.4	107.953	2291.3	1435.61	108.6	2187.55	1159.86	107.621	2449.24	1328.16	121.77	2543.88	1128.45	186.296	2192.16	1256.8	-47.2394	2382.54	1384.64	-159.917	2366.03	1151.48	-168.856	2356.82	1054.93	-190.413	2436.53	923.789	-148.265	2466.23	822.779	-209.488	2422.59	809.334	-205.242	2484.34	751.507
1018	0	54.1824	2509.58	1575.29	159.297	2500.82	1581.16	25.0892	2347.19	1568.44	142.64	2333.39	1575.95	107.249	2301.48	1435.15	107.249	2196.98	1159.6	107.66	2459.03	1327.47	122.157	2553	1127.63	184.914	2201.52	1256.48	-47.4128	2393.31	1384.08	-160.47	2377.96	1151.28	-170.228	2368.94	1054.69	-191.502	2449.31	923.719	-149.175	2478.88	822.777	-210.962	2436.11	809.595	-206.27	2497.73	751.897
1019	0	53.9788	2520.15	1574.76	159.301	2511.06	1580.49	24.6269	2357.8	1568.02	142.148	2343.67	1575.56	106.648	2311.44	1434.8	106.069	2206.45	1159.34	107.67	2468.96	1326.86	122.389	2562.16	1126.78	183.83	2210.95	1256.25	-47.656	2403.86	1383.42	-161.277	2389.6	1150.57	-171.397	2381.26	1054.19	-192.361	2462.08	923.661	-149.881	2491.22	822.622	-212.429	2449.58	809.775	-207.101	2510.97	752.197
1020	0	53.9916	2530.53	1573.77	159.322	2521.47	1579.66	24.4219	2368.39	1567.33	141.962	2354.1	1574.94	106.046	2321.75	1434.12	104.898	2215.81	1158.99	107.625	2478.86	1325.94	122.732	2571.54	1125.71	182.606	2220.54	1255.92	-47.9252	2414.57	1382.8	-161.722	2401.77	1150.02	-172.53	2393.59	1053.83	-193.163	2474.84	923.549	-150.652	2504.25	822.318	-213.463	2463.08	809.636	-208.072	2524.48	751.988
1021	0	54.2743	2541.01	1572.88	159.441	2531.8	1578.62	24.2807	2378.81	1566.53	141.858	2364.44	1573.96	105.72	2331.93	1433.47	103.964	2225.35	1158.42	107.883	2488.86	1324.93	122.989	2581.09	1124.32	181.973	2230.1	1255.24	-48.0138	2425.16	1381.81	-162.121	2413.77	1149.38	-173.213	2406.04	1053.14	-193.864	2487.58	923.196	-151.301	2516.98	821.969	-214.687	2476.29	809.167	-208.671	2537.97	751.858
1022	0	54.4013	2551.56	1571.77	159.585	2541.9	1577.52	24.1534	2389.4	1565.54	141.547	2374.71	1573.06	105.306	2342.38	1432.68	103.129	2234.92	1157.86	107.709	2498.89	1323.82	123.174	2590.67	1122.95	181.059	2239.69	1254.69	-48.1406	2435.65	1380.86	-162.662	2425.5	1148.63	-174.044	2418.05	1052.3	-194.467	2500.37	922.714	-151.868	2529.71	821.509	-215.624	2489.4	808.846	-209.224	2551.39	751.777
1023	0	54.8482	2561.91	1570.64	159.898	2552.35	1576.58	23.9663	2400.03	1564.66	141.358	2385.05	1572.11	104.996	2352.59	1431.99	102.364	2244.54	1157.42	107.806	2508.96	1322.75	123.276	2600.22	1121.57	180.406	2249.51	1254.19	-47.9444	2446.41	1379.66	-163.108	2437.38	1147.68	-174.74	2430.25	1051.48	-194.633	2513.1	922.341	-152.428	2542.69	820.95	-216.502	2502.67	808.422	-209.739	2564.66	751.479
1024	0	55.1415	2572.42	1569.69	160.316	2562.63	1575.32	23.8767	2410.44	1563.63	141.34	2395.34	1570.93	104.844	2363.05	1430.94	101.688	2254.36	1156.71	107.887	2519.28	1321.48	123.433	2609.96	1119.91	180.171	2259.43	1253.48	-48.07	2457	1378.63	-163.356	2449.17	1146.63	-175.105	2442.59	1050.59	-195.077	2525.71	921.755	-152.499	2555.63	820.139	-216.893	2515.93	807.805	-210.118	2577.95	751.021
1025	0	55.5816	2582.8	1568.42	160.574	2572.8	1573.99	24.2076	2421.08	1562.19	141.474	2405.56	1569.56	104.897	2373.33	1429.87	101.329	2264.25	1155.91	107.972	2529.38	1320.05	123.537	2619.72	1118.17	179.613	2269.34	1252.39	-47.9733	2467.61	1377.38	-163.432	2461.2	1145.65	-175.523	2454.66	1049.43	-195.121	2538.55	921.107	-152.164	2567.91	819.046	-217.211	2529.18	807.073	-210.247	2591.32	750.422
1026	0	56.0193	2593.21	1567.31	161.226	2583.18	1572.92	24.3003	2431.52	1560.98	141.628	2415.77	1568.14	104.621	2383.84	1428.86	100.861	2274.14	1154.95	108.019	2539.62	1318.6	123.521	2629.42	1116.4	179.183	2279.24	1251.5	-47.8461	2478.2	1376.15	-163.422	2473.04	1144.57	-175.835	2466.94	1048.5	-194.992	2551.32	920.251	-152.25	2580.49	818.295	-217.445	2542.51	806.47	-210.225	2604.71	749.844
1027	0	56.6498	2603.57	1566.14	161.731	2593.68	1571.64	24.6154	2441.97	1559.7	141.869	2426.14	1566.7	104.762	2394.31	1427.73	100.367	2284.05	1154.11	108.185	2549.89	1317.09	123.486	2639.34	1114.61	178.85	2289.5	1250.53	-47.745	2488.81	1374.97	-163.34	2484.87	1143.44	-175.905	2479.27	1047.49	-194.684	2564.14	919.338	-152.07	2593.11	817.406	-217.792	2555.4	805.822	-210.154	2617.92	749.219
1028	0	57.1071	2614.02	1564.94	162.168	2603.27	1570.21	25.0606	2452.58	1558.21	142.214	2436.44	1565.13	104.973	2404.8	1426.49	100.014	2294.03	1152.98	108.32	2560.31	1315.68	123.443	2649.43	1112.85	179.055	2299.72	1249.33	-47.5091	2499.44	1373.68	-163.252	2496.48	1142.23	-175.826	2491.44	1046.37	-194.307	2576.95	918.555	-151.935	2606.11	816.851	-217.602	2568.53	804.922	-209.962	2631.19	748.682
1029	0	57.7946	2624.2	1563.81	163.054	2614.21	1569.1	25.4694	2462.83	1556.75	142.779	2446.82	1563.51	105.353	2415.36	1425.23	100.07	2304.15	1151.9	108.611	2570.55	1314.2	123.291	2659.5	1111.16	179.004	2310.02	1247.98	-47.2732	2509.94	1372.38	-162.931	2508.1	1141.01	-175.569	2503.69	1045.16	-193.824	2589.52	917.842	-151.51	2618.89	816.034	-217.319	2581.74	803.961	-209.422	2644.5	748.021
1030	0	58.5059	2634.71	1562.65	163.419	2623.54	1567.46	26.1287	2473.39	1555.32	143.273	2457.1	1561.86	105.626	2425.99	1423.87	99.9943	2314.51	1150.6	108.878	2581.14	1312.67	123.085	2669.91	1109.59	179.056	2320.28	1246.68	-46.7752	2520.63	1371.28	-162.757	2519.52	1139.81	-175.332	2515.8	1043.95	-193.24	2602.02	917.015	-150.861	2631.61	815.236	-216.894	2594.93	802.991	-208.794	2657.73	747.292
1031	0	59.2814	2644.96	1561.26	164.501	2634.63	1566.13	26.698	2483.69	1553.97	144.036	2467.51	1560.2	106.085	2436.7	1422.49	100.304	2325.17	1149.3	109.111	2591.52	1310.92	122.979	2680.14	1107.77	179.401	2331.07	1245.17	-46.3936	2531.16	1369.93	-162.176	2531.01	1138.52	-174.966	2527.98	1042.74	-192.535	2614.62	916	-149.966	2644.18	814.216	-216.368	2607.85	802.152	-207.899	2670.87	746.561
1032	0	60.2831	2655.64	1560.07	165.284	2644.82	1564.46	27.6021	2494.26	1552.34	145.137	2477.79	1558.32	106.58	2447.19	1421.01	100.586	2335.75	1147.85	109.391	2602.1	1309.28	122.617	2690.69	1106.05	179.749	2341.58	1243.53	-45.9623	2541.72	1368.65	-161.675	2542.24	1137.26	-174.373	2540.01	1041.42	-191.596	2627.16	914.93	-148.678	2656.49	812.969	-215.613	2620.79	801.17	-206.701	2684.01	745.777
1033	0	61.3529	2665.52	1558.66	166.206	2654.64	1562.86	28.5706	2504.62	1550.93	145.756	2488.11	1556.67	107.222	2457.73	1419.56	100.679	2346.23	1146.25	109.776	2612.62	1307.89	122.441	2701.09	1104.46	180.257	2352.24	1241.95	-45.4669	2552.09	1367.38	-161.233	2553.32	1136.07	-173.818	2551.96	1040.04	-190.636	2639.67	914.007	-147.828	2669.02	812.082	-214.639	2633.84	800.213	-205.47	2697.18	745.076
1034	0	62.5332	2676.12	1557.39	167.405	2664.88	1561.33	29.4705	2515.19	1549.72	146.785	2498.44	1555.1	107.904	2468.18	1418.01	101.065	2356.65	1144.84	110.163	2623.45	1306.65	122.3	2711.94	1102.98	180.8	2362.89	1240.21	-44.9092	2562.52	1366.38	-160.633	2564.46	1134.88	-173.271	2563.81	1038.97	-189.084	2652.08	913.15	-146.339	2681.44	811.24	-213.53	2646.95	799.375	-203.656	2710.19	744.219
1035	0	63.6778	2686.47	1556.23	168.684	2675.34	1559.64	30.3894	2525.57	1548.42	147.95	2508.9	1553.38	108.703	2478.73	1416.39	101.571	2367.58	1143.07	110.745	2633.6	1304.91	122.05	2722.5	1101.37	181.479	2373.74	1238.3	-44.3008	2572.86	1365.06	-160.067	2575.6	1133.56	-172.555	2575.49	1037.74	-188.243	2664.41	912.093	-145.082	2693.68	810.224	-212.621	2659.45	798.346	-201.914	2722.98	743.357
1036	0	65.6633	2696.88	1554.71	170.122	2685.58	1557.89	31.8259	2536.2	1547.27	149.13	2519.29	1551.72	109.644	2489.09	1414.85	102.201	2378.57	1141.2	111.012	2644.38	1303.48	121.968	2733.54	1100.04	182.118	2384.61	1236.34	-43.5893	2583.16	1363.82	-159.488	2586.56	1132.42	-171.706	2587.1	1036.36	-186.772	2676.69	911.021	-143.62	2706.07	809.249	-211.34	2672.22	797.189	-200.147	2735.96	742.549
1037	0	66.9671	2707.32	1553.58	171.697	2696.02	1556.32	33.0305	2546.62	1546.21	150.301	2529.63	1550.34	110.456	2499.5	1413.36	102.707	2389.54	1139.45	111.55	2654.96	1302.22	121.645	2744.54	1098.95	182.741	2395.47	1234.58	-42.9096	2593.46	1362.8	-158.853	2597.76	1131.6	-170.908	2598.69	1035.17	-185.739	2688.75	910.196	-142.37	2718.4	808.632	-209.894	2684.81	796.406	-198.678	2748.77	741.87
1038	0	68.7516	2717.87	1552.47	173.442	2706.26	1554.84	34.5465	2557.13	1545.36	151.701	2539.86	1548.95	111.358	2509.8	1411.85	103.257	2400.59	1137.58	112.129	2665.83	1301.18	121.423	2755.47	1097.86	183.335	2406.41	1232.5	-42.1608	2603.72	1361.57	-157.957	2608.93	1130.37	-169.999	2610.02	1034.14	-184.495	2700.62	909.394	-140.847	2730.42	808.078	-208.363	2697.23	795.591	-196.866	2761.25	741.372
1039	0	70.4051	2728.2	1551.46	175.187	2716.63	1553.29	35.9273	2567.42	1544.42	153.3	2550.23	1547.43	112.258	2520.26	1410.14	103.597	2411.36	1135.64	112.765	2676.48	1300.12	121.425	2766.95	1096.89	183.984	2417.34	1230.3	-41.3884	2614.09	1360.76	-157.359	2619.78	1129.47	-168.859	2621.27	1033.12	-183.24	2712.29	908.638	-139.248	2742.7	807.513	-206.697	2709.4	794.611	-195.158	2773.66	740.777
1040	0	72.2146	2738.57	1550.59	176.98	2726.66	1551.76	37.8216	2578.08	1543.65	154.935	2560.51	1546.16	113.359	2530.51	1408.63	104.537	2423.05	1133.61	113.318	2687.17	1299.14	121.334	2778.07	1096.31	184.813	2428.59	1228.23	-40.6663	2624.51	1360.11	-156.522	2630.86	1128.92	-167.978	2632.35	1032.17	-181.607	2723.79	908.198	-137.56	2754.52	807.175	-205.041	2721.19	793.84	-193.463	2785.96	740.622
1041	0	74.0599	2748.76	1549.6	178.817	2736.92	1550.52	39.3889	2588.33	1542.96	156.553	2570.75	1544.95	114.371	2540.83	1407.08	104.827	2434.36	1131.36	114.014	2697.96	1298.37	121.359	2789.45	1095.79	185.406	2439.79	1226.04	-39.8068	2635.06	1359.59	-155.701	2642.11	1128.2	-166.987	2643.28	1031.29	-180.849	2735	907.552	-136.347	2766.14	806.861	-203.459	2732.83	793.192	-192.215	2798.44	740.374
1042	0	76.2302	2758.99	1548.73	180.862	2747.28	1549.21	41.209	2598.62	1542.42	158.264	2580.9	1543.73	115.556	2551.05	1405.34	105.339	2445.74	1129.31	114.842	2708.32	1297.1	121.493	2801.06	1095.11	186.062	2451.15	1223.55	-38.8262	2645.52	1358.68	-154.767	2653.42	1127.78	-166.041	2654.13	1030.7	-179.383	2746.15	907.055	-134.739	2778.14	806.569	-201.974	2744.07	792.544	-190.626	2810.24	740.116
1043	0	77.8883	2769.41	1547.87	182.682	2757.49	1547.59	42.9215	2608.66	1541.73	160.182	2591.07	1542.51	116.836	2561.27	1403.69	105.888	2457.62	1126.96	115.763	2719.57	1296.53	121.788	2812.89	1094.75	186.826	2462.56	1220.93	-37.7036	2655.97	1358.1	-153.666	2664.52	1127.07	-164.908	2664.96	1029.92	-178.486	2757.4	906.358	-133.66	2789.4	806.21	-200.377	2755.17	791.846	-189.083	2821.91	739.63
1044	0	79.9782	2779.55	1547.23	184.665	2767.38	1546.49	44.8703	2618.92	1541.1	162.101	2601.31	1541.39	118.249	2571.46	1402.2	106.672	2470.01	1124.59	116.764	2730.4	1295.88	122.132	2824.77	1094.65	187.736	2474.19	1218.4	-36.4439	2666.31	1357.46	-152.76	2675.53	1126.77	-163.943	2675.55	1029.53	-177.416	2768.15	905.84	-132.236	2800.83	805.954	-198.793	2766.18	791.094	-187.968	2833.15	739.298
1045	0	81.9452	2789.86	1547.17	186.583	2777.84	1545.94	46.685	2628.91	1540.97	163.985	2611.57	1540.62	119.873	2581.59	1401.06	107.202	2482.45	1122.47	117.897	2741.4	1295.62	122.561	2836.6	1094.63	188.731	2485.77	1216.13	-35.2118	2676.61	1357.12	-151.64	2686.64	1126.31	-162.65	2686.46	1029.1	-176.359	2778.74	905.275	-131.714	2811.95	806.344	-197.6	2776.65	790.658	-186.872	2844.13	738.917
1046	0	83.6435	2800.09	1547.49	188.544	2788.03	1545.84	48.7619	2639.19	1540.86	166.058	2621.68	1540	121.532	2592.15	1400.1	108.135	2495.61	1120.99	118.928	2752.62	1295.63	122.914	2848.49	1095.22	189.85	2497.47	1214.23	-33.8907	2686.94	1357.21	-150.57	2697.75	1126.49	-161.192	2697.16	1029.01	-175.383	2789.16	905.276	-130.464	2823.27	806.195	-196.053	2786.99	790.289	-185.806	2854.72	738.977
1047	0	85.7555	2810.14	1548.03	190.613	2798.29	1545.99	50.8121	2649.37	1541	168.145	2632.04	1539.71	123.249	2602.73	1399.55	108.776	2508.28	1119.87	119.967	2763.78	1296.1	123.109	2860.61	1095.94	190.875	2509.22	1212.69	-32.6601	2697.52	1357.48	-149.648	2708.28	1126.86	-160.251	2707.59	1029.13	-170.961	2799.44	903.629	-130.219	2833.81	806.772	-194.812	2796.9	790.06	-185.004	2864.91	739.198
1048	0	87.3056	2820.94	1549.12	192.615	2808.43	1546.53	53.1324	2659.56	1541.36	170.223	2642.35	1539.71	124.821	2613.73	1399.44	109.209	2520.37	1119.51	121.085	2774.9	1296.64	123.32	2873.2	1097.06	191.8	2520.99	1211.77	-31.4758	2708.3	1358.09	-148.737	2718.83	1127.39	-159.008	2718.18	1029.59	-175	2807.15	905.884	-129.39	2843.63	807.558	-193.059	2806.71	790.308	-184.411	2874.9	739.536
1049	0	89.411	2831.21	1550.26	194.749	2819.14	1547.49	55.3289	2670.04	1542.19	172.298	2652.71	1540	126.278	2624.69	1399.66	109.244	2532.41	1119.47	122.338	2786.24	1297.59	123.622	2885.74	1098.29	192.45	2532.72	1211.27	-30.143	2719.37	1359.23	-147.568	2729.4	1128.24	-157.969	2728.41	1030.53	-174.118	2816.71	906.822	-128.388	2853.84	808.357	-192.212	2816.13	790.901	-183.661	2884.27	740.133
1050	0	91.6107	2841.61	1551.81	196.998	2827.69	1548.32	57.5342	2680.44	1543.17	174.59	2663.27	1540.45	127.676	2635.71	1400.18	109.801	2543.67	1119.75	123.711	2797.71	1298.78	124.029	2898.33	1099.73	193.102	2544.37	1211.24	-28.8359	2730.55	1360.73	-146.5	2739.61	1129.49	-156.808	2738.61	1031.87	-172.991	2826.22	907.711	-127.493	2863.09	809.205	-190.623	2825.22	791.767	-182.887	2893.26	741.027
1051	0	93.9476	2852.11	1553.33	199.203	2838.15	1549.23	59.5911	2690.78	1544.6	176.622	2673.72	1541.24	129.009	2646.74	1401.06	110.408	2554.65	1120.47	124.917	2808.94	1300.14	124.51	2910.59	1101.42	193.492	2555.94	1211.64	-27.336	2742.19	1362.31	-146.716	2747.73	1131.25	-155.632	2748.57	1033.59	-172.035	2835.67	908.808	-126.487	2872.23	810.315	-189.541	2833.84	793.017	-182.161	2902.04	742.127
1052	0	96.3809	2862.66	1555.22	201.501	2848.58	1550.27	62.2165	2701.36	1546.43	178.845	2684.21	1542.23	130.153	2657.81	1402.25	110.463	2565.96	1121.58	126.166	2820.2	1301.65	124.918	2922.78	1103.39	193.623	2567.39	1212.42	-26.1302	2753.68	1364.56	-144.485	2759.92	1132.99	-154.922	2758.34	1035.75	-170.842	2844.92	910.4	-125.533	2881.15	811.456	-188.669	2842.38	794.713	-181.383	2910.44	743.467
1053	0	98.7918	2873.26	1557.06	203.973	2859.4	1551.43	64.1274	2712.44	1548.43	180.913	2694.76	1543.54	131.507	2668.83	1403.57	110.751	2577.67	1122.86	127.048	2831.01	1303.01	125.442	2934.64	1105.46	193.818	2578.9	1213.31	-24.7935	2765.33	1366.86	-144.677	2767.63	1135.53	-153.831	2768.19	1038.38	-169.971	2853.83	912.113	-124.617	2889.64	812.908	-187.348	2850.5	796.808	-180.248	2918.51	745.127
1054	0	103.141	2887.84	1559.94	205.971	2869.51	1552.76	66.4708	2722.69	1550.61	182.821	2705.45	1544.86	132.617	2679.64	1404.89	111.336	2589.77	1124.17	128.164	2842.24	1305.08	125.957	2946.12	1107.81	194.081	2590.46	1214.13	-23.5168	2776.77	1369.58	-143.913	2777.36	1138.15	-153.043	2777.7	1040.85	-169.307	2862.67	913.988	-123.624	2897.8	814.784	-186.557	2858.67	798.858	-179.545	2926.14	746.742
1055	0	103.19	2894.64	1561.42	208.359	2880.07	1554.14	68.104	2733.63	1553.2	184.732	2715.85	1546.47	133.834	2690.39	1406.5	111.461	2601.76	1125.66	129.059	2853	1307.21	126.274	2957.17	1110.38	194.115	2601.94	1215.18	-22.2607	2787.71	1372.07	-143.231	2787.21	1141.14	-152.131	2787.12	1043.62	-167.603	2875.22	916.364	-122.727	2905.51	816.91	-186.755	2864.75	801.767	-178.535	2933.95	748.453
1056	0	107.519	2909.37	1564.71	210.914	2893.66	1556.77	69.9798	2744.32	1555.74	186.569	2726.33	1548.41	135.028	2700.95	1408.19	111.724	2613.59	1127.12	129.809	2863.88	1309.39	126.674	2968.1	1112.92	194.421	2613.29	1216.44	-21.4116	2798.78	1375.04	-142.659	2796.97	1144.18	-151.64	2796.12	1046.55	-167.952	2879.61	918.699	-121.754	2913.63	819.189	-186.443	2876.01	803.944	-177.456	2941.19	750.327
1057	0	107.239	2916.02	1566.1	212.223	2900.97	1557.55	71.8189	2755	1558.26	188.168	2737.35	1550.09	136.293	2711.72	1409.64	112.002	2624.81	1128.49	130.656	2874.51	1311.49	127.083	2978.33	1115.31	195.163	2624.69	1217.52	-19.7813	2809.14	1377.51	-142.35	2806.56	1147.18	-150.573	2805.52	1049.13	-167.564	2888.06	920.753	-120.834	2921.6	821.57	-185.52	2880.25	806.735	-176.48	2947.95	752.138
1058	0	111.238	2930.63	1568.76	214.192	2911.97	1559.01	73.6238	2765.9	1560.74	190.001	2747.76	1551.78	137.383	2722.35	1411.26	112.624	2635.74	1130	131.37	2884.95	1313.33	127.415	2988.85	1117.42	195.685	2635.89	1218.67	-18.8977	2819.83	1379.91	-141.826	2816.41	1149.95	-149.933	2814.3	1051.74	-167.164	2896.34	923.011	-120.341	2929.07	823.272	-185.321	2891.47	808.046	-175.441	2955.26	753.545
1059	0	110.795	2937.41	1569.83	216.165	2925.36	1561	74.9881	2776.53	1562.93	191.356	2758.32	1553.75	138.506	2732.95	1412.99	113.482	2646.55	1131.68	131.886	2895.52	1315.17	127.66	2999.48	1119.49	196.364	2646.98	1220.24	-18.2246	2830.57	1382.21	-141.361	2826.28	1152.32	-149.878	2822.94	1054.11	-165.224	2908.91	925.413	-119.696	2936.93	825.323	-184.577	2899.87	810.185	-174.646	2962.33	754.814
1060	0	114.501	2952.09	1572.07	217.848	2936.36	1562.38	76.3745	2787.25	1565.24	192.56	2769.37	1555.33	139.329	2743.69	1414.64	114.646	2656.96	1133.78	132.464	2906.01	1316.87	127.771	3009.55	1121.09	197.174	2657.99	1221.78	-17.5095	2840.9	1384.22	-140.883	2835.9	1154.64	-149.569	2831.67	1056.52	-165.144	2917.07	927.084	-119.115	2944.44	826.848	-184.219	2907.24	812.407	-173.49	2969.06	755.85
1061	0	116.192	2963.19	1573.82	219.632	2947.67	1563.71	77.5083	2798.31	1567.1	194.092	2779.4	1556.68	140.458	2754.37	1416.19	115.847	2667.17	1135.7	132.954	2916.44	1318.31	127.798	3019.83	1122.6	198.295	2668.83	1223.27	-16.8542	2851.17	1386.09	-140.619	2845.46	1156.57	-148.996	2840.22	1058.39	-164.98	2924.94	928.641	-119.13	2952.48	828.383	-184.134	2914.76	813.763	-173.091	2976.43	756.89
1062	0	117.731	2974.34	1575.5	219.486	2953.83	1563.5	78.8126	2808.62	1568.87	195.039	2790.39	1558.04	141.351	2765	1417.81	117.363	2677.13	1137.64	133.247	2926.84	1319.69	127.795	3030.52	1123.87	199.304	2679.46	1224.93	-16.28	2861.23	1387.7	-139.978	2855.01	1158.62	-148.698	2848.81	1060.04	-164.842	2932.96	930.042	-119.014	2960.11	829.676	-183.869	2921.95	815.097	-172.41	2983.14	757.555
1063	0	118.563	2984.8	1576.69	221.962	2969.12	1565.81	79.0672	2820.47	1570.53	195.902	2801.08	1559.35	142.035	2775.78	1419.41	118.446	2687.3	1139.62	133.489	2937.3	1320.91	127.289	3040.11	1124.82	200.407	2690.08	1226.65	-15.8358	2871.41	1389.33	-138.911	2868.96	1160.24	-148.257	2857.28	1061.69	-164.906	2940.91	931.288	-119.046	2967.77	830.853	-183.686	2929.48	816.383	-172.242	2990.07	758.261
1064	0	117.048	2991	1577.21	225.146	2972.4	1565.71	79.8643	2831.27	1572.1	196.511	2813.49	1560.54	142.956	2786.3	1420.96	119.625	2697.27	1141.34	133.635	2947.57	1322.05	126.832	3050.43	1125.68	201.718	2700.45	1228.62	-15.5163	2881.47	1390.71	-139.846	2873.32	1161.49	-149.278	2867.1	1063.58	-164.93	2948.58	932.341	-119.209	2975.38	831.938	-183.55	2936.45	817.564	-172.395	2996.98	758.978
1065	0	120.382	3006.7	1579.42	226.087	2982.96	1566.65	80.4708	2841.84	1573.44	196.984	2823.86	1561.49	143.606	2797.14	1422.48	120.742	2706.99	1143.13	133.695	2957.9	1323.16	126.137	3060.15	1126.28	202.803	2710.89	1230.31	-15.1713	2891.23	1391.76	-138.437	2887.17	1162.65	-148.875	2875.65	1064.79	-164.983	2956.43	933.188	-119.288	2982.84	832.877	-183.346	2943.71	818.374	-172.651	3003.85	759.699
[truncated: 69 more columns]

## Sheet: Sheet2
Devices
		025370 - Force			025370 - Moment			025370 - CoP			027571 - Force			027571 - Moment			027571 - CoP			037720 - Force			037720 - Moment			037720 - CoP
Frame	Sub Frame	Fx	Fy	Fz	Mx	My	Mz	Cx	Cy	Cz	Fx	Fy	Fz	Mx	My	Mz	Cx	Cy	Cz	Fx	Fy	Fz	Mx	My	Mz	Cx	Cy	Cz
		N	N	N	N.mm	N.mm	N.mm	mm	mm	mm	N	N	N	N.mm	N.mm	N.mm	mm	mm	mm	N	N	N	N.mm	N.mm	N.mm	mm	mm	mm
569	0	0	0	0	0	0	0	200	300	0	0	0	0	0	0	0	200	903	0	0	0	0	0	0	0	603	903	0
569	1	0	0	0	0	0	0	200	300	0	0	0	0	0	0	0	200	903	0	0	0	0	0	0	0	603	903	0
569	2	0	0	0	0	0	0	200	300	0	0	0	0	0	0	0	200	903	0	0	0	0	0	0	0	603	903	0
569	3	0	0	0	0	0	0	200	300	0	0	0	0	0	0	0	200	903	0	0	0	0	0	0	0	603	903	0
569	4	0	0	0	0	0	0	200	300	0	0	0	0	0	0	0	200	903	0	0	0	0	0	0	0	603	903	0
569	5	0	0	0	0	0	0	200	300	0	0	0	0	0	0	0	200	903	0	0	0	0	0	0	0	603	903	0
569	6	0	0	0	0	0	0	200	300	0	0	0	0	0	0	0	200	903	0	0	0	0	0	0	0	603	903	0
569	7	0	0	0	0	0	0	200	300	0	0	0	0	0	0	0	200	903	0	0	0	0	0	0	0	603	903	0
569	8	0	0	0	0	0	0	200	300	0	0	0	0	0	0	0	200	903	0	0	0	0	0	0	0	603	903	0
569	9	0	0	0	0	0	0	200	300	0	0	0	0	0	0	0	200	903	0	0	0	0	0	0	0	603	903	0
570	0	0	0	0	0	0	0	200	300	0	0	0	0	0	0	0	200	903	0	0	0	0	0	0	0	603	903	0
570	1	0	0	0	0	0	0	200	300	0	0	0	0	0	0	0	200	903	0	0	0	0	0	0	0	603	903	0
570	2	0	0	0	0	0	0	200	300	0	0	0	0	0	0	0	200	903	0	0	0	0	0	0	0	603	903	0
570	3	0	0	0	0	0	0	200	300	0	0	0	0	0	0	0	200	903	0	0	0	0	0	0	0	603	903	0
570	4	0	0	0	0	0	0	200	300	0	0	0	0	0	0	0	200	903	0	0	0	0	0	0	0	603	903	0
570	5	0	0	0	0	0	0	200	300	0	0	0	0	0	0	0	200	903	0	0	0	0	0	0	0	603	903	0
570	6	0	0	0	0	0	0	200	300	0	0	0	0	0	0	0	200	903	0	0	0	0	0	0	0	603	903	0
570	7	0	0	0	0	0	0	200	300	0	0	0	0	0	0	0	200	903	0	0	0	0	0	0	0	603	903	0
570	8	0	0	0	0	0	0	200	300	0	0	0	0	0	0	0	200	903	0	0	0	0	0	0	0	603	903	0
570	9	0	0	0	0	0	0	200	300	0	0	0	0	0	0	0	200	903	0	0	0	0	0	0	0	603	903	0
571	0	0	0	0	0	0	0	200	300	0	0	0	0	0	0	0	200	903	0	0	0	0	0	0	0	603	903	0
571	1	0	0	0	0	0	0	200	300	0	0	0	0	0	0	0	200	903	0	0	0	0	0	0	0	603	903	0
571	2	0	0	0	0	0	0	200	300	0	0	0	0	0	0	0	200	903	0	0	0	0	0	0	0	603	903	0
571	3	0	0	0	0	0	0	200	300	0	0	0	0	0	0	0	200	903	0	0	0	0	0	0	0	603	903	0
571	4	0	0	0	0	0	0	200	300	0	0	0	0	0	0	0	200	903	0	0	0	0	0	0	0	603	903	0
571	5	0	0	0	0	0	0	200	300	0	0	0	0	0	0	0	200	903	0	0	0	0	0	0	0	603	903	0
571	6	0	0	0	0	0	0	200	300	0	0	0	0	0	0	0	200	903	0	0	0	0	0	0	0	603	903	0
571	7	0	0	0	0	0	0	200	300	0	0	0	0	0	0	0	200	903	0	0	0	0	0	0	0	603	903	0
571	8	0	0	0	0	0	0	200	300	0	0	0	0	0	0	0	200	903	0	0	0	0	0	0	0	603	903	0
571	9	0	0	0	0	0	0	200	300	0	0	0	0	0	0	0	200	903	0	0	0	0	0	0	0	603	903	0
572	0	0	0	0	0	0	0	200	300	0	0	0	0	0	0	0	200	903	0	0	0	0	0	0	0	603	903	0
572	1	0	0	0	0	0	0	200	300	0	0	0	0	0	0	0	200	903	0	0	0	0	0	0	0	603	903	0
572	2	0	0	0	0	0	0	200	300	0	0	0	0	0	0	0	200	903	0	0	0	0	0	0	0	603	903	0
572	3	0	0	0	0	0	0	200	300	0	0	0	0	0	0	0	200	903	0	0	0	0	0	0	0	603	903	0
572	4	0	0	0	0	0	0	200	300	0	0	0	0	0	0	0	200	903	0	0	0	0	0	0	0	603	903	0
572	5	0	0	0	0	0	0	200	300	0	0	0	0	0	0	0	200	903	0	0	0	0	0	0	0	603	903	0
572	6	0	0	0	0	0	0	200	300	0	0	0	0	0	0	0	200	903	0	0	0	0	0	0	0	603	903	0
572	7	0	0	0	0	0	0	200	300	0	0	0	0	0	0	0	200	903	0	0	0	0	0	0	0	603	903	0
572	8	0	0	0	0	0	0	200	300	0	0	0	0	0	0	0	200	903	0	0	0	0	0	0	0	603	903	0
572	9	0	0	0	0	0	0	200	300	0	0	0	0	0	0	0	200	903	0	0	0	0	0	0	0	603	903	0
573	0	0	0	0	0	0	0	200	300	0	0	0	0	0	0	0	200	903	0	0	0	0	0	0	0	603	903	0
573	1	0	0	0	0	0	0	200	300	0	0	0	0	0	0	0	200	903	0	0	0	0	0	0	0	603	903	0
573	2	0	0	0	0	0	0	200	300	0	0	0	0	0	0	0	200	903	0	0	0	0	0	0	0	603	903	0
573	3	0	0	0	0	0	0	200	300	0	0	0	0	0	0	0	200	903	0	0	0	0	0	0	0	603	903	0
573	4	0	0	0	0	0	0	200	300	0	0	0	0	0	0	0	200	903	0	0	0	0	0	0	0	603	903	0
573	5	0	0	0	0	0	0	200	300	0	0	0	0	0	0	0	200	903	0	0	0	0	0	0	0	603	903	0
573	6	0	0	0	0	0	0	200	300	0	0	0	0	0	0	0	200	903	0	0	0	0	0	0	0	603	903	0
573	7	0	0	0	0	0	0	200	300	0	0	0	0	0	0	0	200	903	0	0	0	0	0	0	0	603	903	0
573	8	0	0	0	0	0	0	200	300	0	0	0	0	0	0	0	200	903	0	0	0	0	0	0	0	603	903	0
573	9	0	0	0	0	0	0	200	300	0	0	0	0	0	0	0	200	903	0	0	0	0	0	0	0	603	903	0
574	0	0	0	0	0	0	0	200	300	0	0	0	0	0	0	0	200	903	0	0	0	0	0	0	0	603	903	0
574	1	0	0	0	0	0	0	200	300	0	0	0	0	0	0	0	200	903	0	0	0	0	0	0	0	603	903	0
574	2	0	0	0	0	0	0	200	300	0	0	0	0	0	0	0	200	903	0	0	0	0	0	0	0	603	903	0
574	3	0	0	0	0	0	0	200	300	0	0	0	0	0	0	0	200	903	0	0	0	0	0	0	0	603	903	0
574	4	0	0	0	0	0	0	200	300	0	0	0	0	0	0	0	200	903	0	0	0	0	0	0	0	603	903	0
574	5	0	0	0	0	0	0	200	300	0	0	0	0	0	0	0	200	903	0	0	0	0	0	0	0	603	903	0
574	6	0	0	0	0	0	0	200	300	0	0	0	0	0	0	0	200	903	0	0	0	0	0	0	0	603	903	0
574	7	0	0	0	0	0	0	200	300	0	0	0	0	0	0	0	200	903	0	0	0	0	0	0	0	603	903	0
574	8	0	0	0	0	0	0	200	300	0	0	0	0	0	0	0	200	903	0	0	0	0	0	0	0	603	903	0
574	9	0	0	0	0	0	0	200	300	0	0	0	0	0	0	0	200	903	0	0	0	0	0	0	0	603	903	0
575	0	0	0	0	0	0	0	200	300	0	0	0	0	0	0	0	200	903	0	0	0	0	0	0	0	603	903	0
575	1	0	0	0	0	0	0	200	300	0	0	0	0	0	0	0	200	903	0	0	0	0	0	0	0	603	903	0
575	2	0	0	0	0	0	0	200	300	0	0	0	0	0	0	0	200	903	0	0	0	0	0	0	0	603	903	0
575	3	0	0	0	0	0	0	200	300	0	0	0	0	0	0	0	200	903	0	0	0	0	0	0	0	603	903	0
575	4	0	0	0	0	0	0	200	300	0	0	0	0	0	0	0	200	903	0	0	0	0	0	0	0	603	903	0
575	5	0	0	0	0	0	0	200	300	0	0	0	0	0	0	0	200	903	0	0	0	0	0	0	0	603	903	0
575	6	0	0	0	0	0	0	200	300	0	0	0	0	0	0	0	200	903	0	0	0	0	0	0	0	603	903	0
575	7	0	0	0	0	0	0	200	300	0	0	0	0	0	0	0	200	903	0	0	0	0	0	0	0	603	903	0
575	8	0	0	0	0	0	0	200	300	0	0	0	0	0	0	0	200	903	0	0	0	0	0	0	0	603	903	0
575	9	0	0	0	0	0	0	200	300	0	0	0	0	0	0	0	200	903	0	0	0	0	0	0	0	603	903	0
576	0	0	0	0	0	0	0	200	300	0	0	0	0	0	0	0	200	903	0	0	0	0	0	0	0	603	903	0
576	1	0	0	0	0	0	0	200	300	0	0	0	0	0	0	0	200	903	0	0	0	0	0	0	0	603	903	0
576	2	0	0	0	0	0	0	200	300	0	0	0	0	0	0	0	200	903	0	0	0	0	0	0	0	603	903	0
576	3	0	0	0	0	0	0	200	300	0	0	0	0	0	0	0	200	903	0	0	0	0	0	0	0	603	903	0
576	4	0	0	0	0	0	0	200	300	0	0	0	0	0	0	0	200	903	0	0	0	0	0	0	0	603	903	0
576	5	0	0	0	0	0	0	200	300	0	0	0	0	0	0	0	200	903	0	0	0	0	0	0	0	603	903	0
576	6	0	0	0	0	0	0	200	300	0	0	0	0	0	0	0	200	903	0	0	0	0	0	0	0	603	903	0
576	7	0	0	0	0	0	0	200	300	0	0	0	0	0	0	0	200	903	0	0	0	0	0	0	0	603	903	0
576	8	0	0	0	0	0	0	200	300	0	0	0	0	0	0	0	200	903	0	0	0	0	0	0	0	603	903	0
576	9	0	0	0	0	0	0	200	300	0	0	0	0	0	0	0	200	903	0	0	0	0	0	0	0	603	903	0
577	0	0	0	0	0	0	0	200	300	0	0	0	0	0	0	0	200	903	0	0	0	0	0	0	0	603	903	0
577	1	0	0	0	0	0	0	200	300	0	0	0	0	0	0	0	200	903	0	0	0	0	0	0	0	603	903	0
577	2	0	0	0	0	0	0	200	300	0	0	0	0	0	0	0	200	903	0	0	0	0	0	0	0	603	903	0
577	3	0	0	0	0	0	0	200	300	0	0	0	0	0	0	0	200	903	0	0	0	0	0	0	0	603	903	0
577	4	0	0	0	0	0	0	200	300	0	0	0	0	0	0	0	200	903	0	0	0	0	0	0	0	603	903	0
577	5	0	0	0	0	0	0	200	300	0	0	0	0	0	0	0	200	903	0	0	0	0	0	0	0	603	903	0
577	6	0	0	0	0	0	0	200	300	0	0	0	0	0	0	0	200	903	0	0	0	0	0	0	0	603	903	0
577	7	0	0	0	0	0	0	200	300	0	0	0	0	0	0	0	200	903	0	0	0	0	0	0	0	603	903	0
577	8	0	0	0	0	0	0	200	300	0	0	0	0	0	0	0	200	903	0	0	0	0	0	0	0	603	903	0
577	9	0	0	0	0	0	0	200	300	0	0	0	0	0	0	0	200	903	0	0	0	0	0	0	0	603	903	0
578	0	0	0	0	0	0	0	200	300	0	0	0	0	0	0	0	200	903	0	0	0	0	0	0	0	603	903	0
578	1	0	0	0	0	0	0	200	300	0	0	0	0	0	0	0	200	903	0	0	0	0	0	0	0	603	903	0
578	2	0	0	0	0	0	0	200	300	0	0	0	0	0	0	0	200	903	0	0	0	0	0	0	0	603	903	0
578	3	0	0	0	0	0	0	200	300	0	0	0	0	0	0	0	200	903	0	0	0	0	0	0	0	603	903	0
578	4	0	0	0	0	0	0	200	300	0	0	0	0	0	0	0	200	903	0	0	0	0	0	0	0	603	903	0
578	5	0	0	0	0	0	0	200	300	0	0	0	0	0	0	0	200	903	0	0	0	0	0	0	0	603	903	0
578	6	0	0	0	0	0	0	200	300	0	0	0	0	0	0	0	200	903	0	0	0	0	0	0	0	603	903	0
578	7	0	0	0	0	0	0	200	300	0	0	0	0	0	0	0	200	903	0	0	0	0	0	0	0	603	903	0
578	8	0	0	0	0	0	0	200	300	0	0	0	0	0	0	0	200	903	0	0	0	0	0	0	0	603	903	0
578	9	0	0	0	0	0	0	200	300	0	0	0	0	0	0	0	200	903	0	0	0	0	0	0	0	603	903	0
579	0	0	0	0	0	0	0	200	300	0	0	0	0	0	0	0	200	903	0	0	0	0	0	0	0	603	903	0
579	1	0	0	0	0	0	0	200	300	0	0	0	0	0	0	0	200	903	0	0	0	0	0	0	0	603	903	0
579	2	0	0	0	0	0	0	200	300	0	0	0	0	0	0	0	200	903	0	0	0	0	0	0	0	603	903	0
579	3	0	0	0	0	0	0	200	300	0	0	0	0	0	0	0	200	903	0	0	0	0	0	0	0	603	903	0
579	4	0	0	0	0	0	0	200	300	0	0	0	0	0	0	0	200	903	0	0	0	0	0	0	0	603	903	0
579	5	0	0	0	0	0	0	200	300	0	0	0	0	0	0	0	200	903	0	0	0	0	0	0	0	603	903	0
579	6	0	0	0	0	0	0	200	300	0	0	0	0	0	0	0	200	903	0	0	0	0	0	0	0	603	903	0
579	7	0	0	0	0	0	0	200	300	0	0	0	0	0	0	0	200	903	0	0	0	0	0	0	0	603	903	0
579	8	0	0	0	0	0	0	200	300	0	0	0	0	0	0	0	200	903	0	0	0	0	0	0	0	603	903	0
579	9	0	0	0	0	0	0	200	300	0	0	0	0	0	0	0	200	903	0	0	0	0	0	0	0	603	903	0
580	0	0	0	0	0	0	0	200	300	0	0	0	0	0	0	0	200	903	0	0	0	0	0	0	0	603	903	0
580	1	0	0	0	0	0	0	200	300	0	0	0	0	0	0	0	200	903	0	0	0	0	0	0	0	603	903	0
580	2	0	0	0	0	0	0	200	300	0	0	0	0	0	0	0	200	903	0	0	0	0	0	0	0	603	903	0
580	3	0	0	0	0	0	0	200	300	0	0	0	0	0	0	0	200	903	0	0	0	0	0	0	0	603	903	0
580	4	0	0	0	0	0	0	200	300	0	0	0	0	0	0	0	200	903	0	0	0	0	0	0	0	603	903	0
580	5	0	0	0	0	0	0	200	300	0	0	0	0	0	0	0	200	903	0	0	0	0	0	0	0	603	903	0
580	6	0	0	0	0	0	0	200	300	0	0	0	0	0	0	0	200	903	0	0	0	0	0	0	0	603	903	0
580	7	0	0	0	0	0	0	200	300	0	0	0	0	0	0	0	200	903	0	0	0	0	0	0	0	603	903	0
580	8	0	0	0	0	0	0	200	300	0	0	0	0	0	0	0	200	903	0	0	0	0	0	0	0	603	903	0
580	9	0	0	0	0	0	0	200	300	0	0	0	0	0	0	0	200	903	0	0	0	0	0	0	0	603	903	0
581	0	0	0	0	0	0	0	200	300	0	0	0	0	0	0	0	200	903	0	0	0	0	0	0	0	603	903	0
581	1	0	0	0	0	0	0	200	300	0	0	0	0	0	0	0	200	903	0	0	0	0	0	0	0	603	903	0
581	2	0	0	0	0	0	0	200	300	0	0	0	0	0	0	0	200	903	0	0	0	0	0	0	0	603	903	0
581	3	0	0	0	0	0	0	200	300	0	0	0	0	0	0	0	200	903	0	0	0	0	0	0	0	603	903	0
581	4	0	0	0	0	0	0	200	300	0	0	0	0	0	0	0	200	903	0	0	0	0	0	0	0	603	903	0
581	5	0	0	0	0	0	0	200	300	0	0	0	0	0	0	0	200	903	0	0	0	0	0	0	0	603	903	0
581	6	0	0	0	0	0	0	200	300	0	0	0	0	0	0	0	200	903	0	0	0	0	0	0	0	603	903	0
581	7	0	0	0	0	0	0	200	300	0	0	0	0	0	0	0	200	903	0	0	0	0	0	0	0	603	903	0
581	8	0	0	0	0	0	0	200	300	0	0	0	0	0	0	0	200	903	0	0	0	0	0	0	0	603	903	0
581	9	0	0	0	0	0	0	200	300	0	0	0	0	0	0	0	200	903	0	0	0	0	0	0	0	603	903	0
582	0	0	0	0	0	0	0	200	300	0	0	0	0	0	0	0	200	903	0	0	0	0	0	0	0	603	903	0
582	1	0	0	0	0	0	0	200	300	0	0	0	0	0	0	0	200	903	0	0	0	0	0	0	0	603	903	0
582	2	0	0	0	0	0	0	200	300	0	0	0	0	0	0	0	200	903	0	0	0	0	0	0	0	603	903	0
582	3	0	0	0	0	0	0	200	300	0	0	0	0	0	0	0	200	903	0	0	0	0	0	0	0	603	903	0
582	4	0	0	0	0	0	0	200	300	0	0	0	0	0	0	0	200	903	0	0	0	0	0	0	0	603	903	0
582	5	0	0	0	0	0	0	200	300	0	0	0	0	0	0	0	200	903	0	0	0	0	0	0	0	603	903	0
582	6	0	0	0	0	0	0	200	300	0	0	0	0	0	0	0	200	903	0	0	0	0	0	0	0	603	903	0
582	7	0	0	0	0	0	0	200	300	0	0	0	0	0	0	0	200	903	0	0	0	0	0	0	0	603	903	0
582	8	0	0	0	0	0	0	200	300	0	0	0	0	0	0	0	200	903	0	0	0	0	0	0	0	603	903	0
582	9	0	0	0	0	0	0	200	300	0	0	0	0	0	0	0	200	903	0	0	0	0	0	0	0	603	903	0
583	0	0	0	0	0	0	0	200	300	0	0	0	0	0	0	0	200	903	0	0	0	0	0	0	0	603	903	0
583	1	0	0	0	0	0	0	200	300	0	0	0	0	0	0	0	200	903	0	0	0	0	0	0	0	603	903	0
583	2	0	0	0	0	0	0	200	300	0	0	0	0	0	0	0	200	903	0	0	0	0	0	0	0	603	903	0
583	3	0	0	0	0	0	0	200	300	0	0	0	0	0	0	0	200	903	0	0	0	0	0	0	0	603	903	0
583	4	0	0	0	0	0	0	200	300	0	0	0	0	0	0	0	200	903	0	0	0	0	0	0	0	603	903	0
583	5	0	0	0	0	0	0	200	300	0	0	0	0	0	0	0	200	903	0	0	0	0	0	0	0	603	903	0
583	6	0	0	0	0	0	0	200	300	0	0	0	0	0	0	0	200	903	0	0	0	0	0	0	0	603	903	0
583	7	0	0	0	0	0	0	200	300	0	0	0	0	0	0	0	200	903	0	0	0	0	0	0	0	603	903	0
583	8	0	0	0	0	0	0	200	300	0	0	0	0	0	0	0	200	903	0	0	0	0	0	0	0	603	903	0
583	9	0	0	0	0	0	0	200	300	0	0	0	0	0	0	0	200	903	0	0	0	0	0	0	0	603	903	0
584	0	0	0	0	0	0	0	200	300	0	0	0	0	0	0	0	200	903	0	0	0	0	0	0	0	603	903	0
584	1	0	0	0	0	0	0	200	300	0	0	0	0	0	0	0	200	903	0	0	0	0	0	0	0	603	903	0
584	2	0	0	0	0	0	0	200	300	0	0	0	0	0	0	0	200	903	0	0	0	0	0	0	0	603	903	0
584	3	0	0	0	0	0	0	200	300	0	0	0	0	0	0	0	200	903	0	0	0	0	0	0	0	603	903	0
584	4	0	0	0	0	0	0	200	300	0	0	0	0	0	0	0	200	903	0	0	0	0	0	0	0	603	903	0
584	5	0	0	0	0	0	0	200	300	0	0	0	0	0	0	0	200	903	0	0	0	0	0	0	0	603	903	0
584	6	0	0	0	0	0	0	200	300	0	0	0	0	0	0	0	200	903	0	0	0	0	0	0	0	603	903	0
584	7	0	0	0	0	0	0	200	300	0	0	0	0	0	0	0	200	903	0	0	0	0	0	0	0	603	903	0
584	8	0	0	0	0	0	0	200	300	0	0	0	0	0	0	0	200	903	0	0	0	0	0	0	0	603	903	0
584	9	0	0	0	0	0	0	200	300	0	0	0	0	0	0	0	200	903	0	0	0	0	0	0	0	603	903	0
585	0	0	0	0	0	0	0	200	300	0	0	0	0	0	0	0	200	903	0	0	0	0	0	0	0	603	903	0
585	1	0	0	0	0	0	0	200	300	0	0	0	0	0	0	0	200	903	0	0	0	0	0	0	0	603	903	0
585	2	0	0	0	0	0	0	200	300	0	0	0	0	0	0	0	200	903	0	0	0	0	0	0	0	603	903	0
585	3	0	0	0	0	0	0	200	300	0	0	0	0	0	0	0	200	903	0	0	0	0	0	0	0	603	903	0
585	4	0	0	0	0	0	0	200	300	0	0	0	0	0	0	0	200	903	0	0	0	0	0	0	0	603	903	0
585	5	0	0	0	0	0	0	200	300	0	0	0	0	0	0	0	200	903	0	0	0	0	0	0	0	603	903	0
585	6	0	0	0	0	0	0	200	300	0	0	0	0	0	0	0	200	903	0	0	0	0	0	0	0	603	903	0
585	7	0	0	0	0	0	0	200	300	0	0	0	0	0	0	0	200	903	0	0	0	0	0	0	0	603	903	0
585	8	0	0	0	0	0	0	200	300	0	0	0	0	0	0	0	200	903	0	0	0	0	0	0	0	603	903	0
585	9	0	0	0	0	0	0	200	300	0	0	0	0	0	0	0	200	903	0	0	0	0	0	0	0	603	903	0
586	0	0	0	0	0	0	0	200	300	0	0	0	0	0	0	0	200	903	0	0	0	0	0	0	0	603	903	0
586	1	0	0	0	0	0	0	200	300	0	0	0	0	0	0	0	200	903	0	0	0	0	0	0	0	603	903	0
586	2	0	0	0	0	0	0	200	300	0	0	0	0	0	0	0	200	903	0	0	0	0	0	0	0	603	903	0
586	3	0	0	0	0	0	0	200	300	0	0	0	0	0	0	0	200	903	0	0	0	0	0	0	0	603	903	0
586	4	0	0	0	0	0	0	200	300	0	0	0	0	0	0	0	200	903	0	0	0	0	0	0	0	603	903	0
586	5	0	0	0	0	0	0	200	300	0	0	0	0	0	0	0	200	903	0	0	0	0	0	0	0	603	903	0
586	6	0	0	0	0	0	0	200	300	0	0	0	0	0	0	0	200	903	0	0	0	0	0	0	0	603	903	0
586	7	0	0	0	0	0	0	200	300	0	0	0	0	0	0	0	200	903	0	0	0	0	0	0	0	603	903	0
586	8	0	0	0	0	0	0	200	300	0	0	0	0	0	0	0	200	903	0	0	0	0	0	0	0	603	903	0
586	9	0	0	0	0	0	0	200	300	0	0	0	0	0	0	0	200	903	0	0	0	0	0	0	0	603	903	0
587	0	0	0	0	0	0	0	200	300	0	0	0	0	0	0	0	200	903	0	0	0	0	0	0	0	603	903	0
587	1	0	0	0	0	0	0	200	300	0	0	0	0	0	0	0	200	903	0	0	0	0	0	0	0	603	903	0
587	2	0	0	0	0	0	0	200	300	0	0	0	0	0	0	0	200	903	0	0	0	0	0	0	0	603	903	0
587	3	0	0	0	0	0	0	200	300	0	0	0	0	0	0	0	200	903	0	0	0	0	0	0	0	603	903	0
587	4	0	0	0	0	0	0	200	300	0	0	0	0	0	0	0	200	903	0	0	0	0	0	0	0	603	903	0
587	5	0	0	0	0	0	0	200	300	0	0	0	0	0	0	0	200	903	0	0	0	0	0	0	0	603	903	0
587	6	0	0	0	0	0	0	200	300	0	0	0	0	0	0	0	200	903	0	0	0	0	0	0	0	603	903	0
587	7	0	0	0	0	0	0	200	300	0	0	0	0	0	0	0	200	903	0	0	0	0	0	0	0	603	903	0
587	8	0	0	0	0	0	0	200	300	0	0	0	0	0	0	0	200	903	0	0	0	0	0	0	0	603	903	0
587	9	0	0	0	0	0	0	200	300	0	0	0	0	0	0	0	200	903	0	0	0	0	0	0	0	603	903	0
588	0	0	0	0	0	0	0	200	300	0	0	0	0	0	0	0	200	903	0	0	0	0	0	0	0	603	903	0
588	1	0	0	0	0	0	0	200	300	0	0	0	0	0	0	0	200	903	0	0	0	0	0	0	0	603	903	0
588	2	0	0	0	0	0	0	200	300	0	0	0	0	0	0	0	200	903	0	0	0	0	0	0	0	603	903	0
588	3	0	0	0	0	0	0	200	300	0	0	0	0	0	0	0	200	903	0	0	0	0	0	0	0	603	903	0
588	4	0	0	0	0	0	0	200	300	0	0	0	0	0	0	0	200	903	0	0	0	0	0	0	0	603	903	0
588	5	0	0	0	0	0	0	200	300	0	0	0	0	0	0	0	200	903	0	0	0	0	0	0	0	603	903	0
588	6	0	0	0	0	0	0	200	300	0	0	0	0	0	0	0	200	903	0	0	0	0	0	0	0	603	903	0
588	7	0	0	0	0	0	0	200	300	0	0	0	0	0	0	0	200	903	0	0	0	0	0	0	0	603	903	0
588	8	0	0	0	0	0	0	200	300	0	0	0	0	0	0	0	200	903	0	0	0	0	0	0	0	603	903	0
588	9	0	0	0	0	0	0	200	300	0	0	0	0	0	0	0	200	903	0	0	0	0	0	0	0	603	903	0
589	0	0	0	0	0	0	0	200	300	0	0	0	0	0	0	0	200	903	0	0	0	0	0	0	0	603	903	0
589	1	0	0	0	0	0	0	200	300	0	0	0	0	0	0	0	200	903	0	0	0	0	0	0	0	603	903	0
589	2	0	0	0	0	0	0	200	300	0	0	0	0	0	0	0	200	903	0	0	0	0	0	0	0	603	903	0
589	3	0	0	0	0	0	0	200	300	0	0	0	0	0	0	0	200	903	0	0	0	0	0	0	0	603	903	0
589	4	0	0	0	0	0	0	200	300	0	0	0	0	0	0	0	200	903	0	0	0	0	0	0	0	603	903	0
589	5	0	0	0	0	0	0	200	300	0	0	0	0	0	0	0	200	903	0	0	0	0	0	0	0	603	903	0
589	6	0	0	0	0	0	0	200	300	0	0	0	0	0	0	0	200	903	0	0	0	0	0	0	0	603	903	0
589	7	0	0	0	0	0	0	200	300	0	0	0	0	0	0	0	200	903	0	0	0	0	0	0	0	603	903	0
589	8	0	0	0	0	0	0	200	300	0	0	0	0	0	0	0	200	903	0	0	0	0	0	0	0	603	903	0
589	9	0	0	0	0	0	0	200	300	0	0	0	0	0	0	0	200	903	0	0	0	0	0	0	0	603	903	0
590	0	0	0	0	0	0	0	200	300	0	0	0	0	0	0	0	200	903	0	0	0	0	0	0	0	603	903	0
590	1	0	0	0	0	0	0	200	300	0	0	0	0	0	0	0	200	903	0	0	0	0	0	0	0	603	903	0
590	2	0	0	0	0	0	0	200	300	0	0	0	0	0	0	0	200	903	0	0	0	0	0	0	0	603	903	0
590	3	0	0	0	0	0	0	200	300	0	0	0	0	0	0	0	200	903	0	0	0	0	0	0	0	603	903	0
590	4	0	0	0	0	0	0	200	300	0	0	0	0	0	0	0	200	903	0	0	0	0	0	0	0	603	903	0
590	5	0	0	0	0	0	0	200	300	0	0	0	0	0	0	0	200	903	0	0	0	0	0	0	0	603	903	0
590	6	0	0	0	0	0	0	200	300	0	0	0	0	0	0	0	200	903	0	0	0	0	0	0	0	603	903	0
590	7	0	0	0	0	0	0	200	300	0	0	0	0	0	0	0	200	903	0	0	0	0	0	0	0	603	903	0
590	8	0	0	0	0	0	0	200	300	0	0	0	0	0	0	0	200	903	0	0	0	0	0	0	0	603	903	0
590	9	0	0	0	0	0	0	200	300	0	0	0	0	0	0	0	200	903	0	0	0	0	0	0	0	603	903	0
591	0	0	0	0	0	0	0	200	300	0	0	0	0	0	0	0	200	903	0	0	0	0	0	0	0	603	903	0
591	1	0	0	0	0	0	0	200	300	0	0	0	0	0	0	0	200	903	0	0	0	0	0	0	0	603	903	0
591	2	0	0	0	0	0	0	200	300	0	0	0	0	0	0	0	200	903	0	0	0	0	0	0	0	603	903	0
591	3	0	0	0	0	0	0	200	300	0	0	0	0	0	0	0	200	903	0	0	0	0	0	0	0	603	903	0
591	4	0	0	0	0	0	0	200	300	0	0	0	0	0	0	0	200	903	0	0	0	0	0	0	0	603	903	0
591	5	0	0	0	0	0	0	200	300	0	0	0	0	0	0	0	200	903	0	0	0	0	0	0	0	603	903	0
591	6	0	0	0	0	0	0	200	300	0	0	0	0	0	0	0	200	903	0	0	0	0	0	0	0	603	903	0
591	7	0	0	0	0	0	0	200	300	0	0	0	0	0	0	0	200	903	0	0	0	0	0	0	0	603	903	0
591	8	0	0	0	0	0	0	200	300	0	0	0	0	0	0	0	200	903	0	0	0	0	0	0	0	603	903	0
591	9	0	0	0	0	0	0	200	300	0	0	0	0	0	0	0	200	903	0	0	0	0	0	0	0	603	903	0
592	0	0	0	0	0	0	0	200	300	0	0	0	0	0	0	0	200	903	0	0	0	0	0	0	0	603	903	0
592	1	0	0	0	0	0	0	200	300	0	0	0	0	0	0	0	200	903	0	0	0	0	0	0	0	603	903	0
592	2	0	0	0	0	0	0	200	300	0	0	0	0	0	0	0	200	903	0	0	0	0	0	0	0	603	903	0
592	3	0	0	0	0	0	0	200	300	0	0	0	0	0	0	0	200	903	0	0	0	0	0	0	0	603	903	0
592	4	0	0	0	0	0	0	200	300	0	0	0	0	0	0	0	200	903	0	0	0	0	0	0	0	603	903	0
592	5	0	0	0	0	0	0	200	300	0	0	0	0	0	0	0	200	903	0	0	0	0	0	0	0	603	903	0
592	6	0	0	0	0	0	0	200	300	0	0	0	0	0	0	0	200	903	0	0	0	0	0	0	0	603	903	0
592	7	0	0	0	0	0	0	200	300	0	0	0	0	0	0	0	200	903	0	0	0	0	0	0	0	603	903	0
592	8	0	0	0	0	0	0	200	300	0	0	0	0	0	0	0	200	903	0	0	0	0	0	0	0	603	903	0
592	9	0	0	0	0	0	0	200	300	0	0	0	0	0	0	0	200	903	0	0	0	0	0	0	0	603	903	0
593	0	0	0	0	0	0	0	200	300	0	0	0	0	0	0	0	200	903	0	0	0	0	0	0	0	603	903	0
593	1	0	0	0	0	0	0	200	300	0	0	0	0	0	0	0	200	903	0	0	0	0	0	0	0	603	903	0
593	2	0	0	0	0	0	0	200	300	0	0	0	0	0	0	0	200	903	0	0	0	0	0	0	0	603	903	0
593	3	0	0	0	0	0	0	200	300	0	0	0	0	0	0	0	200	903	0	0	0	0	0	0	0	603	903	0
593	4	0	0	0	0	0	0	200	300	0	0	0	0	0	0	0	200	903	0	0	0	0	0	0	0	603	903	0
593	5	0	0	0	0	0	0	200	300	0	0	0	0	0	0	0	200	903	0	0	0	0	0	0	0	603	903	0
593	6	0	0	0	0	0	0	200	300	0	0	0	0	0	0	0	200	903	0	0	0	0	0	0	0	603	903	0
593	7	0	0	0	0	0	0	200	300	0	0	0	0	0	0	0	200	903	0	0	0	0	0	0	0	603	903	0
593	8	0	0	0	0	0	0	200	300	0	0	0	0	0	0	0	200	903	0	0	0	0	0	0	0	603	903	0
593	9	0	0	0	0	0	0	200	300	0	0	0	0	0	0	0	200	903	0	0	0	0	0	0	0	603	903	0
594	0	0	0	0	0	0	0	200	300	0	0	0	0	0	0	0	200	903	0	0	0	0	0	0	0	603	903	0
594	1	0	0	0	0	0	0	200	300	0	0	0	0	0	0	0	200	903	0	0	0	0	0	0	0	603	903	0
594	2	0	0	0	0	0	0	200	300	0	0	0	0	0	0	0	200	903	0	0	0	0	0	0	0	603	903	0
594	3	0	0	0	0	0	0	200	300	0	0	0	0	0	0	0	200	903	0	0	0	0	0	0	0	603	903	0
594	4	0	0	0	0	0	0	200	300	0	0	0	0	0	0	0	200	903	0	0	0	0	0	0	0	603	903	0
594	5	0	0	0	0	0	0	200	300	0	0	0	0	0	0	0	200	903	0	0	0	0	0	0	0	603	903	0
594	6	0	0	0	0	0	0	200	300	0	0	0	0	0	0	0	200	903	0	0	0	0	0	0	0	603	903	0
594	7	0	0	0	0	0	0	200	300	0	0	0	0	0	0	0	200	903	0	0	0	0	0	0	0	603	903	0
594	8	0	0	0	0	0	0	200	300	0	0	0	0	0	0	0	200	903	0	0	0	0	0	0	0	603	903	0
594	9	0	0	0	0	0	0	200	300	0	0	0	0	0	0	0	200	903	0	0	0	0	0	0	0	603	903	0
595	0	0	0	0	0	0	0	200	300	0	0	0	0	0	0	0	200	903	0	0	0	0	0	0	0	603	903	0
595	1	0	0	0	0	0	0	200	300	0	0	0	0	0	0	0	200	903	0	0	0	0	0	0	0	603	903	0
595	2	0	0	0	0	0	0	200	300	0	0	0	0	0	0	0	200	903	0	0	0	0	0	0	0	603	903	0
595	3	0	0	0	0	0	0	200	300	0	0	0	0	0	0	0	200	903	0	0	0	0	0	0	0	603	903	0
595	4	0	0	0	0	0	0	200	300	0	0	0	0	0	0	0	200	903	0	0	0	0	0	0	0	603	903	0
595	5	0	0	0	0	0	0	200	300	0	0	0	0	0	0	0	200	903	0	0	0	0	0	0	0	603	903	0
595	6	0	0	0	0	0	0	200	300	0	0	0	0	0	0	0	200	903	0	0	0	0	0	0	0	603	903	0
595	7	0	0	0	0	0	0	200	300	0	0	0	0	0	0	0	200	903	0	0	0	0	0	0	0	603	903	0
595	8	0	0	0	0	0	0	200	300	0	0	0	0	0	0	0	200	903	0	0	0	0	0	0	0	603	903	0
595	9	0	0	0	0	0	0	200	300	0	0	0	0	0	0	0	200	903	0	0	0	0	0	0	0	603	903	0
596	0	0	0	0	0	0	0	200	300	0	0	0	0	0	0	0	200	903	0	0	0	0	0	0	0	603	903	0
596	1	0	0	0	0	0	0	200	300	0	0	0	0	0	0	0	200	903	0	0	0	0	0	0	0	603	903	0
596	2	0	0	0	0	0	0	200	300	0	0	0	0	0	0	0	200	903	0	0	0	0	0	0	0	603	903	0
596	3	0	0	0	0	0	0	200	300	0	0	0	0	0	0	0	200	903	0	0	0	0	0	0	0	603	903	0
596	4	0	0	0	0	0	0	200	300	0	0	0	0	0	0	0	200	903	0	0	0	0	0	0	0	603	903	0
596	5	0	0	0	0	0	0	200	300	0	0	0	0	0	0	0	200	903	0	0	0	0	0	0	0	603	903	0
596	6	0	0	0	0	0	0	200	300	0	0	0	0	0	0	0	200	903	0	0	0	0	0	0	0	603	903	0
596	7	0	0	0	0	0	0	200	300	0	0	0	0	0	0	0	200	903	0	0	0	0	0	0	0	603	903	0
596	8	0	0	0	0	0	0	200	300	0	0	0	0	0	0	0	200	903	0	0	0	0	0	0	0	603	903	0
596	9	0	0	0	0	0	0	200	300	0	0	0	0	0	0	0	200	903	0	0	0	0	0	0	0	603	903	0
597	0	0	0	0	0	0	0	200	300	0	0	0	0	0	0	0	200	903	0	0	0	0	0	0	0	603	903	0
597	1	0	0	0	0	0	0	200	300	0	0	0	0	0	0	0	200	903	0	0	0	0	0	0	0	603	903	0
597	2	0	0	0	0	0	0	200	300	0	0	0	0	0	0	0	200	903	0	0	0	0	0	0	0	603	903	0
597	3	0	0	0	0	0	0	200	300	0	0	0	0	0	0	0	200	903	0	0	0	0	0	0	0	603	903	0
597	4	0	0	0	0	0	0	200	300	0	0	0	0	0	0	0	200	903	0	0	0	0	0	0	0	603	903	0
597	5	0	0	0	0	0	0	200	300	0	0	0	0	0	0	0	200	903	0	0	0	0	0	0	0	603	903	0
597	6	0	0	0	0	0	0	200	300	0	0	0	0	0	0	0	200	903	0	0	0	0	0	0	0	603	903	0
597	7	0	0	0	0	0	0	200	300	0	0	0	0	0	0	0	200	903	0	0	0	0	0	0	0	603	903	0
597	8	0	0	0	0	0	0	200	300	0	0	0	0	0	0	0	200	903	0	0	0	0	0	0	0	603	903	0
597	9	0	0	0	0	0	0	200	300	0	0	0	0	0	0	0	200	903	0	0	0	0	0	0	0	603	903	0
598	0	0	0	0	0	0	0	200	300	0	0	0	0	0	0	0	200	903	0	0	0	0	0	0	0	603	903	0
598	1	0	0	0	0	0	0	200	300	0	0	0	0	0	0	0	200	903	0	0	0	0	0	0	0	603	903	0
598	2	0	0	0	0	0	0	200	300	0	0	0	0	0	0	0	200	903	0	0	0	0	0	0	0	603	903	0
598	3	0	0	0	0	0	0	200	300	0	0	0	0	0	0	0	200	903	0	0	0	0	0	0	0	603	903	0
598	4	0	0	0	0	0	0	200	300	0	0	0	0	0	0	0	200	903	0	0	0	0	0	0	0	603	903	0
598	5	0	0	0	0	0	0	200	300	0	0	0	0	0	0	0	200	903	0	0	0	0	0	0	0	603	903	0
598	6	0	0	0	0	0	0	200	300	0	0	0	0	0	0	0	200	903	0	0	0	0	0	0	0	603	903	0
598	7	0	0	0	0	0	0	200	300	0	0	0	0	0	0	0	200	903	0	0	0	0	0	0	0	603	903	0
598	8	0	0	0	0	0	0	200	300	0	0	0	0	0	0	0	200	903	0	0	0	0	0	0	0	603	903	0
598	9	0	0	0	0	0	0	200	300	0	0	0	0	0	0	0	200	903	0	0	0	0	0	0	0	603	903	0
599	0	0	0	0	0	0	0	200	300	0	0	0	0	0	0	0	200	903	0	0	0	0	0	0	0	603	903	0
599	1	0	0	0	0	0	0	200	300	0	0	0	0	0	0	0	200	903	0	0	0	0	0	0	0	603	903	0
599	2	0	0	0	0	0	0	200	300	0	0	0	0	0	0	0	200	903	0	0	0	0	0	0	0	603	903	0
599	3	0	0	0	0	0	0	200	300	0	0	0	0	0	0	0	200	903	0	0	0	0	0	0	0	603	903	0
599	4	0	0	0	0	0	0	200	300	0	0	0	0	0	0	0	200	903	0	0	0	0	0	0	0	603	903	0
599	5	0	0	0	0	0	0	200	300	0	0	0	0	0	0	0	200	903	0	0	0	0	0	0	0	603	903	0
599	6	0	0	0	0	0	0	200	300	0	0	0	0	0	0	0	200	903	0	0	0	0	0	0	0	603	903	0
599	7	0	0	0	0	0	0	200	300	0	0	0	0	0	0	0	200	903	0	0	0	0	0	0	0	603	903	0
599	8	0	0	0	0	0	0	200	300	0	0	0	0	0	0	0	200	903	0	0	0	0	0	0	0	603	903	0
599	9	0	0	0	0	0	0	200	300	0	0	0	0	0	0	0	200	903	0	0	0	0	0	0	0	603	903	0
600	0	0	0	0	0	0	0	200	300	0	0	0	0	0	0	0	200	903	0	0	0	0	0	0	0	603	903	0
600	1	0	0	0	0	0	0	200	300	0	0	0	0	0	0	0	200	903	0	0	0	0	0	0	0	603	903	0
600	2	0	0	0	0	0	0	200	300	0	0	0	0	0	0	0	200	903	0	0	0	0	0	0	0	603	903	0
600	3	0	0	0	0	0	0	200	300	0	0	0	0	0	0	0	200	903	0	0	0	0	0	0	0	603	903	0
600	4	0	0	0	0	0	0	200	300	0	0	0	0	0	0	0	200	903	0	0	0	0	0	0	0	603	903	0
600	5	0	0	0	0	0	0	200	300	0	0	0	0	0	0	0	200	903	0	0	0	0	0	0	0	603	903	0
600	6	0	0	0	0	0	0	200	300	0	0	0	0	0	0	0	200	903	0	0	0	0	0	0	0	603	903	0
600	7	0	0	0	0	0	0	200	300	0	0	0	0	0	0	0	200	903	0	0	0	0	0	0	0	603	903	0
600	8	0	0	0	0	0	0	200	300	0	0	0	0	0	0	0	200	903	0	0	0	0	0	0	0	603	903	0
600	9	0	0	0	0	0	0	200	300	0	0	0	0	0	0	0	200	903	0	0	0	0	0	0	0	603	903	0
601	0	0	0	0	0	0	0	200	300	0	0	0	0	0	0	0	200	903	0	0	0	0	0	0	0	603	903	0
601	1	0	0	0	0	0	0	200	300	0	0	0	0	0	0	0	200	903	0	0	0	0	0	0	0	603	903	0
601	2	0	0	0	0	0	0	200	300	0	0	0	0	0	0	0	200	903	0	0	0	0	0	0	0	603	903	0
601	3	0	0	0	0	0	0	200	300	0	0	0	0	0	0	0	200	903	0	0	0	0	0	0	0	603	903	0
601	4	0	0	0	0	0	0	200	300	0	0	0	0	0	0	0	200	903	0	0	0	0	0	0	0	603	903	0
601	5	0	0	0	0	0	0	200	300	0	0	0	0	0	0	0	200	903	0	0	0	0	0	0	0	603	903	0
601	6	0	0	0	0	0	0	200	300	0	0	0	0	0	0	0	200	903	0	0	0	0	0	0	0	603	903	0
601	7	0	0	0	0	0	0	200	300	0	0	0	0	0	0	0	200	903	0	0	0	0	0	0	0	603	903	0
601	8	0	0	0	0	0	0	200	300	0	0	0	0	0	0	0	200	903	0	0	0	0	0	0	0	603	903	0
601	9	0	0	0	0	0	0	200	300	0	0	0	0	0	0	0	200	903	0	0	0	0	0	0	0	603	903	0
602	0	0	0	0	0	0	0	200	300	0	0	0	0	0	0	0	200	903	0	0	0	0	0	0	0	603	903	0
602	1	0	0	0	0	0	0	200	300	0	0	0	0	0	0	0	200	903	0	0	0	0	0	0	0	603	903	0
602	2	0	0	0	0	0	0	200	300	0	0	0	0	0	0	0	200	903	0	0	0	0	0	0	0	603	903	0
602	3	0	0	0	0	0	0	200	300	0	0	0	0	0	0	0	200	903	0	0	0	0	0	0	0	603	903	0
602	4	0	0	0	0	0	0	200	300	0	0	0	0	0	0	0	200	903	0	0	0	0	0	0	0	603	903	0
602	5	0	0	0	0	0	0	200	300	0	0	0	0	0	0	0	200	903	0	0	0	0	0	0	0	603	903	0
602	6	0	0	0	0	0	0	200	300	0	0	0	0	0	0	0	200	903	0	0	0	0	0	0	0	603	903	0
602	7	0	0	0	0	0	0	200	300	0	0	0	0	0	0	0	200	903	0	0	0	0	0	0	0	603	903	0
602	8	0	0	0	0	0	0	200	300	0	0	0	0	0	0	0	200	903	0	0	0	0	0	0	0	603	903	0
602	9	0	0	0	0	0	0	200	300	0	0	0	0	0	0	0	200	903	0	0	0	0	0	0	0	603	903	0
603	0	0	0	0	0	0	0	200	300	0	0	0	0	0	0	0	200	903	0	0	0	0	0	0	0	603	903	0
603	1	0	0	0	0	0	0	200	300	0	0	0	0	0	0	0	200	903	0	0	0	0	0	0	0	603	903	0
603	2	0	0	0	0	0	0	200	300	0	0	0	0	0	0	0	200	903	0	0	0	0	0	0	0	603	903	0
603	3	0	0	0	0	0	0	200	300	0	0	0	0	0	0	0	200	903	0	0	0	0	0	0	0	603	903	0
603	4	0	0	0	0	0	0	200	300	0	0	0	0	0	0	0	200	903	0	0	0	0	0	0	0	603	903	0
603	5	0	0	0	0	0	0	200	300	0	0	0	0	0	0	0	200	903	0	0	0	0	0	0	0	603	903	0
603	6	0	0	0	0	0	0	200	300	0	0	0	0	0	0	0	200	903	0	0	0	0	0	0	0	603	903	0
603	7	0	0	0	0	0	0	200	300	0	0	0	0	0	0	0	200	903	0	0	0	0	0	0	0	603	903	0
603	8	0	0	0	0	0	0	200	300	0	0	0	0	0	0	0	200	903	0	0	0	0	0	0	0	603	903	0
603	9	0	0	0	0	0	0	200	300	0	0	0	0	0	0	0	200	903	0	0	0	0	0	0	0	603	903	0
604	0	0	0	0	0	0	0	200	300	0	0	0	0	0	0	0	200	903	0	0	0	0	0	0	0	603	903	0
604	1	0	0	0	0	0	0	200	300	0	0	0	0	0	0	0	200	903	0	0	0	0	0	0	0	603	903	0
604	2	0	0	0	0	0	0	200	300	0	0	0	0	0	0	0	200	903	0	0	0	0	0	0	0	603	903	0
604	3	0	0	0	0	0	0	200	300	0	0	0	0	0	0	0	200	903	0	0	0	0	0	0	0	603	903	0
604	4	0	0	0	0	0	0	200	300	0	0	0	0	0	0	0	200	903	0	0	0	0	0	0	0	603	903	0
604	5	0	0	0	0	0	0	200	300	0	0	0	0	0	0	0	200	903	0	0	0	0	0	0	0	603	903	0
604	6	0	0	0	0	0	0	200	300	0	0	0	0	0	0	0	200	903	0	0	0	0	0	0	0	603	903	0
604	7	0	0	0	0	0	0	200	300	0	0	0	0	0	0	0	200	903	0	0	0	0	0	0	0	603	903	0
604	8	0	0	0	0	0	0	200	300	0	0	0	0	0	0	0	200	903	0	0	0	0	0	0	0	603	903	0
604	9	0	0	0	0	0	0	200	300	0	0	0	0	0	0	0	200	903	0	0	0	0	0	0	0	603	903	0
605	0	0	0	0	0	0	0	200	300	0	0	0	0	0	0	0	200	903	0	0	0	0	0	0	0	603	903	0
605	1	0	0	0	0	0	0	200	300	0	0	0	0	0	0	0	200	903	0	0	0	0	0	0	0	603	903	0
605	2	0	0	0	0	0	0	200	300	0	0	0	0	0	0	0	200	903	0	0	0	0	0	0	0	603	903	0
605	3	0	0	0	0	0	0	200	300	0	0	0	0	0	0	0	200	903	0	0	0	0	0	0	0	603	903	0
605	4	0	0	0	0	0	0	200	300	0	0	0	0	0	0	0	200	903	0	0	0	0	0	0	0	603	903	0
605	5	0	0	0	0	0	0	200	300	0	0	0	0	0	0	0	200	903	0	0	0	0	0	0	0	603	903	0
605	6	0	0	0	0	0	0	200	300	0	0	0	0	0	0	0	200	903	0	0	0	0	0	0	0	603	903	0
605	7	0	0	0	0	0	0	200	300	0	0	0	0	0	0	0	200	903	0	0	0	0	0	0	0	603	903	0
605	8	0	0	0	0	0	0	200	300	0	0	0	0	0	0	0	200	903	0	0	0	0	0	0	0	603	903	0
605	9	0	0	0	0	0	0	200	300	0	0	0	0	0	0	0	200	903	0	0	0	0	0	0	0	603	903	0
606	0	0	0	0	0	0	0	200	300	0	0	0	0	0	0	0	200	903	0	0	0	0	0	0	0	603	903	0
606	1	0	0	0	0	0	0	200	300	0	0	0	0	0	0	0	200	903	0	0	0	0	0	0	0	603	903	0
606	2	0	0	0	0	0	0	200	300	0	0	0	0	0	0	0	200	903	0	0	0	0	0	0	0	603	903	0
606	3	0	0	0	0	0	0	200	300	0	0	0	0	0	0	0	200	903	0	0	0	0	0	0	0	603	903	0
606	4	0	0	0	0	0	0	200	300	0	0	0	0	0	0	0	200	903	0	0	0	0	0	0	0	603	903	0
606	5	0	0	0	0	0	0	200	300	0	0	0	0	0	0	0	200	903	0	0	0	0	0	0	0	603	903	0
606	6	0	0	0	0	0	0	200	300	0	0	0	0	0	0	0	200	903	0	0	0	0	0	0	0	603	903	0
606	7	0	0	0	0	0	0	200	300	0	0	0	0	0	0	0	200	903	0	0	0	0	0	0	0	603	903	0
606	8	0	0	0	0	0	0	200	300	0	0	0	0	0	0	0	200	903	0	0	0	0	0	0	0	603	903	0
606	9	0	0	0	0	0	0	200	300	0	0	0	0	0	0	0	200	903	0	0	0	0	0	0	0	603	903	0
607	0	0	0	0	0	0	0	200	300	0	0	0	0	0	0	0	200	903	0	0	0	0	0	0	0	603	903	0
607	1	0	0	0	0	0	0	200	300	0	0	0	0	0	0	0	200	903	0	0	0	0	0	0	0	603	903	0
607	2	0	0	0	0	0	0	200	300	0	0	0	0	0	0	0	200	903	0	0	0	0	0	0	0	603	903	0
607	3	0	0	0	0	0	0	200	300	0	0	0	0	0	0	0	200	903	0	0	0	0	0	0	0	603	903	0
607	4	0	0	0	0	0	0	200	300	0	0	0	0	0	0	0	200	903	0	0	0	0	0	0	0	603	903	0
607	5	0	0	0	0	0	0	200	300	0	0	0	0	0	0	0	200	903	0	0	0	0	0	0	0	603	903	0
607	6	0	0	0	0	0	0	200	300	0	0	0	0	0	0	0	200	903	0	0	0	0	0	0	0	603	903	0
607	7	0	0	0	0	0	0	200	300	0	0	0	0	0	0	0	200	903	0	0	0	0	0	0	0	603	903	0
607	8	0	0	0	0	0	0	200	300	0	0	0	0	0	0	0	200	903	0	0	0	0	0	0	0	603	903	0
607	9	0	0	0	0	0	0	200	300	0	0	0	0	0	0	0	200	903	0	0	0	0	0	0	0	603	903	0
608	0	0	0	0	0	0	0	200	300	0	0	0	0	0	0	0	200	903	0	0	0	0	0	0	0	603	903	0
608	1	0	0	0	0	0	0	200	300	0	0	0	0	0	0	0	200	903	0	0	0	0	0	0	0	603	903	0
608	2	0	0	0	0	0	0	200	300	0	0	0	0	0	0	0	200	903	0	0	0	0	0	0	0	603	903	0
608	3	0	0	0	0	0	0	200	300	0	0	0	0	0	0	0	200	903	0	0	0	0	0	0	0	603	903	0
608	4	0	0	0	0	0	0	200	300	0	0	0	0	0	0	0	200	903	0	0	0	0	0	0	0	603	903	0
608	5	0	0	0	0	0	0	200	300	0	0	0	0	0	0	0	200	903	0	0	0	0	0	0	0	603	903	0
608	6	0	0	0	0	0	0	200	300	0	0	0	0	0	0	0	200	903	0	0	0	0	0	0	0	603	903	0
608	7	0	0	0	0	0	0	200	300	0	0	0	0	0	0	0	200	903	0	0	0	0	0	0	0	603	903	0
608	8	0	0	0	0	0	0	200	300	0	0	0	0	0	0	0	200	903	0	0	0	0	0	0	0	603	903	0
608	9	0	0	0	0	0	0	200	300	0	0	0	0	0	0	0	200	903	0	0	0	0	0	0	0	603	903	0
609	0	0	0	0	0	0	0	200	300	0	0	0	0	0	0	0	200	903	0	0	0	0	0	0	0	603	903	0
609	1	0	0	0	0	0	0	200	300	0	0	0	0	0	0	0	200	903	0	0	0	0	0	0	0	603	903	0
609	2	0	0	0	0	0	0	200	300	0	0	0	0	0	0	0	200	903	0	0	0	0	0	0	0	603	903	0
609	3	0	0	0	0	0	0	200	300	0	0	0	0	0	0	0	200	903	0	0	0	0	0	0	0	603	903	0
609	4	0	0	0	0	0	0	200	300	0	0	0	0	0	0	0	200	903	0	0	0	0	0	0	0	603	903	0
609	5	0	0	0	0	0	0	200	300	0	0	0	0	0	0	0	200	903	0	0	0	0	0	0	0	603	903	0
609	6	0	0	0	0	0	0	200	300	0	0	0	0	0	0	0	200	903	0	0	0	0	0	0	0	603	903	0
609	7	0	0	0	0	0	0	200	300	0	0	0	0	0	0	0	200	903	0	0	0	0	0	0	0	603	903	0
609	8	0	0	0	0	0	0	200	300	0	0	0	0	0	0	0	200	903	0	0	0	0	0	0	0	603	903	0
609	9	0	0	0	0	0	0	200	300	0	0	0	0	0	0	0	200	903	0	0	0	0	0	0	0	603	903	0
610	0	0	0	0	0	0	0	200	300	0	0	0	0	0	0	0	200	903	0	0	0	0	0	0	0	603	903	0
610	1	0	0	0	0	0	0	200	300	0	0	0	0	0	0	0	200	903	0	0	0	0	0	0	0	603	903	0
610	2	0	0	0	0	0	0	200	300	0	0	0	0	0	0	0	200	903	0	0	0	0	0	0	0	603	903	0
610	3	0	0	0	0	0	0	200	300	0	0	0	0	0	0	0	200	903	0	0	0	0	0	0	0	603	903	0
610	4	0	0	0	0	0	0	200	300	0	0	0	0	0	0	0	200	903	0	0	0	0	0	0	0	603	903	0
610	5	0	0	0	0	0	0	200	300	0	0	0	0	0	0	0	200	903	0	0	0	0	0	0	0	603	903	0
610	6	0	0	0	0	0	0	200	300	0	0	0	0	0	0	0	200	903	0	0	0	0	0	0	0	603	903	0
610	7	0	0	0	0	0	0	200	300	0	0	0	0	0	0	0	200	903	0	0	0	0	0	0	0	603	903	0
610	8	0	0	0	0	0	0	200	300	0	0	0	0	0	0	0	200	903	0	0	0	0	0	0	0	603	903	0
610	9	0	0	0	0	0	0	200	300	0	0	0	0	0	0	0	200	903	0	0	0	0	0	0	0	603	903	0
611	0	0	0	0	0	0	0	200	300	0	0	0	0	0	0	0	200	903	0	0	0	0	0	0	0	603	903	0
611	1	0	0	0	0	0	0	200	300	0	0	0	0	0	0	0	200	903	0	0	0	0	0	0	0	603	903	0
611	2	0	0	0	0	0	0	200	300	0	0	0	0	0	0	0	200	903	0	0	0	0	0	0	0	603	903	0
611	3	0	0	0	0	0	0	200	300	0	0	0	0	0	0	0	200	903	0	0	0	0	0	0	0	603	903	0
611	4	0	0	0	0	0	0	200	300	0	0	0	0	0	0	0	200	903	0	0	0	0	0	0	0	603	903	0
611	5	0	0	0	0	0	0	200	300	0	0	0	0	0	0	0	200	903	0	0	0	0	0	0	0	603	903	0
611	6	0	0	0	0	0	0	200	300	0	0	0	0	0	0	0	200	903	0	0	0	0	0	0	0	603	903	0
611	7	0	0	0	0	0	0	200	300	0	0	0	0	0	0	0	200	903	0	0	0	0	0	0	0	603	903	0
611	8	0	0	0	0	0	0	200	300	0	0	0	0	0	0	0	200	903	0	0	0	0	0	0	0	603	903	0
611	9	0	0	0	0	0	0	200	300	0	0	0	0	0	0	0	200	903	0	0	0	0	0	0	0	603	903	0
612	0	0	0	0	0	0	0	200	300	0	0	0	0	0	0	0	200	903	0	0	0	0	0	0	0	603	903	0
612	1	0	0	0	0	0	0	200	300	0	0	0	0	0	0	0	200	903	0	0	0	0	0	0	0	603	903	0
612	2	0	0	0	0	0	0	200	300	0	0	0	0	0	0	0	200	903	0	0	0	0	0	0	0	603	903	0
612	3	0	0	0	0	0	0	200	300	0	0	0	0	0	0	0	200	903	0	0	0	0	0	0	0	603	903	0
612	4	0	0	0	0	0	0	200	300	0	0	0	0	0	0	0	200	903	0	0	0	0	0	0	0	603	903	0
612	5	0	0	0	0	0	0	200	300	0	0	0	0	0	0	0	200	903	0	0	0	0	0	0	0	603	903	0
612	6	0	0	0	0	0	0	200	300	0	0	0	0	0	0	0	200	903	0	0	0	0	0	0	0	603	903	0
612	7	0	0	0	0	0	0	200	300	0	0	0	0	0	0	0	200	903	0	0	0	0	0	0	0	603	903	0
612	8	0	0	0	0	0	0	200	300	0	0	0	0	0	0	0	200	903	0	0	0	0	0	0	0	603	903	0
612	9	0	0	0	0	0	0	200	300	0	0	0	0	0	0	0	200	903	0	0	0	0	0	0	0	603	903	0
613	0	0	0	0	0	0	0	200	300	0	0	0	0	0	0	0	200	903	0	0	0	0	0	0	0	603	903	0
613	1	0	0	0	0	0	0	200	300	0	0	0	0	0	0	0	200	903	0	0	0	0	0	0	0	603	903	0
613	2	0	0	0	0	0	0	200	300	0	0	0	0	0	0	0	200	903	0	0	0	0	0	0	0	603	903	0
613	3	0	0	0	0	0	0	200	300	0	0	0	0	0	0	0	200	903	0	0	0	0	0	0	0	603	903	0
613	4	0	0	0	0	0	0	200	300	0	0	0	0	0	0	0	200	903	0	0	0	0	0	0	0	603	903	0
613	5	0	0	0	0	0	0	200	300	0	0	0	0	0	0	0	200	903	0	0	0	0	0	0	0	603	903	0
613	6	0	0	0	0	0	0	200	300	0	0	0	0	0	0	0	200	903	0	0	0	0	0	0	0	603	903	0
613	7	0	0	0	0	0	0	200	300	0	0	0	0	0	0	0	200	903	0	0	0	0	0	0	0	603	903	0
613	8	0	0	0	0	0	0	200	300	0	0	0	0	0	0	0	200	903	0	0	0	0	0	0	0	603	903	0
613	9	0	0	0	0	0	0	200	300	0	0	0	0	0	0	0	200	903	0	0	0	0	0	0	0	603	903	0
614	0	0	0	0	0	0	0	200	300	0	0	0	0	0	0	0	200	903	0	0	0	0	0	0	0	603	903	0
614	1	0	0	0	0	0	0	200	300	0	0	0	0	0	0	0	200	903	0	0	0	0	0	0	0	603	903	0
614	2	0	0	0	0	0	0	200	300	0	0	0	0	0	0	0	200	903	0	0	0	0	0	0	0	603	903	0
614	3	0	0	0	0	0	0	200	300	0	0	0	0	0	0	0	200	903	0	0	0	0	0	0	0	603	903	0
614	4	0	0	0	0	0	0	200	300	0	0	0	0	0	0	0	200	903	0	0	0	0	0	0	0	603	903	0
614	5	0	0	0	0	0	0	200	300	0	0	0	0	0	0	0	200	903	0	0	0	0	0	0	0	603	903	0
614	6	0	0	0	0	0	0	200	300	0	0	0	0	0	0	0	200	903	0	0	0	0	0	0	0	603	903	0
614	7	0	0	0	0	0	0	200	300	0	0	0	0	0	0	0	200	903	0	0	0	0	0	0	0	603	903	0
614	8	0	0	0	0	0	0	200	300	0	0	0	0	0	0	0	200	903	0	0	0	0	0	0	0	603	903	0
614	9	0	0	0	0	0	0	200	300	0	0	0	0	0	0	0	200	903	0	0	0	0	0	0	0	603	903	0
615	0	0	0	0	0	0	0	200	300	0	0	0	0	0	0	0	200	903	0	0	0	0	0	0	0	603	903	0
615	1	0	0	0	0	0	0	200	300	0	0	0	0	0	0	0	200	903	0	0	0	0	0	0	0	603	903	0
615	2	0	0	0	0	0	0	200	300	0	0	0	0	0	0	0	200	903	0	0	0	0	0	0	0	603	903	0
615	3	0	0	0	0	0	0	200	300	0	0	0	0	0	0	0	200	903	0	0	0	0	0	0	0	603	903	0
615	4	0	0	0	0	0	0	200	300	0	0	0	0	0	0	0	200	903	0	0	0	0	0	0	0	603	903	0
615	5	0	0	0	0	0	0	200	300	0	0	0	0	0	0	0	200	903	0	0	0	0	0	0	0	603	903	0
615	6	0	0	0	0	0	0	200	300	0	0	0	0	0	0	0	200	903	0	0	0	0	0	0	0	603	903	0
615	7	0	0	0	0	0	0	200	300	0	0	0	0	0	0	0	200	903	0	0	0	0	0	0	0	603	903	0
615	8	0	0	0	0	0	0	200	300	0	0	0	0	0	0	0	200	903	0	0	0	0	0	0	0	603	903	0
615	9	0	0	0	0	0	0	200	300	0	0	0	0	0	0	0	200	903	0	0	0	0	0	0	0	603	903	0
616	0	0	0	0	0	0	0	200	300	0	0	0	0	0	0	0	200	903	0	0	0	0	0	0	0	603	903	0
616	1	0	0	0	0	0	0	200	300	0	0	0	0	0	0	0	200	903	0	0	0	0	0	0	0	603	903	0
616	2	0	0	0	0	0	0	200	300	0	0	0	0	0	0	0	200	903	0	0	0	0	0	0	0	603	903	0
616	3	0	0	0	0	0	0	200	300	0	0	0	0	0	0	0	200	903	0	0	0	0	0	0	0	603	903	0
616	4	0	0	0	0	0	0	200	300	0	0	0	0	0	0	0	200	903	0	0	0	0	0	0	0	603	903	0
616	5	0	0	0	0	0	0	200	300	0	0	0	0	0	0	0	200	903	0	0	0	0	0	0	0	603	903	0
616	6	0	0	0	0	0	0	200	300	0	0	0	0	0	0	0	200	903	0	0	0	0	0	0	0	603	903	0
616	7	0	0	0	0	0	0	200	300	0	0	0	0	0	0	0	200	903	0	0	0	0	0	0	0	603	903	0
616	8	0	0	0	0	0	0	200	300	0	0	0	0	0	0	0	200	903	0	0	0	0	0	0	0	603	903	0
616	9	0	0	0	0	0	0	200	300	0	0	0	0	0	0	0	200	903	0	0	0	0	0	0	0	603	903	0
617	0	0	0	0	0	0	0	200	300	0	0	0	0	0	0	0	200	903	0	0	0	0	0	0	0	603	903	0
617	1	0	0	0	0	0	0	200	300	0	0	0	0	0	0	0	200	903	0	0	0	0	0	0	0	603	903	0
617	2	0	0	0	0	0	0	200	300	0	0	0	0	0	0	0	200	903	0	0	0	0	0	0	0	603	903	0
617	3	0	0	0	0	0	0	200	300	0	0	0	0	0	0	0	200	903	0	0	0	0	0	0	0	603	903	0
617	4	0	0	0	0	0	0	200	300	0	0	0	0	0	0	0	200	903	0	0	0	0	0	0	0	603	903	0
617	5	0	0	0	0	0	0	200	300	0	0	0	0	0	0	0	200	903	0	0	0	0	0	0	0	603	903	0
617	6	0	0	0	0	0	0	200	300	0	0	0	0	0	0	0	200	903	0	0	0	0	0	0	0	603	903	0
617	7	0	0	0	0	0	0	200	300	0	0	0	0	0	0	0	200	903	0	0	0	0	0	0	0	603	903	0
617	8	0	0	0	0	0	0	200	300	0	0	0	0	0	0	0	200	903	0	0	0	0	0	0	0	603	903	0
617	9	0	0	0	0	0	0	200	300	0	0	0	0	0	0	0	200	903	0	0	0	0	0	0	0	603	903	0
618	0	0	0	0	0	0	0	200	300	0	0	0	0	0	0	0	200	903	0	0	0	0	0	0	0	603	903	0
618	1	0	0	0	0	0	0	200	300	0	0	0	0	0	0	0	200	903	0	0	0	0	0	0	0	603	903	0
618	2	0	0	0	0	0	0	200	300	0	0	0	0	0	0	0	200	903	0	0	0	0	0	0	0	603	903	0
618	3	0	0	0	0	0	0	200	300	0	0	0	0	0	0	0	200	903	0	0	0	0	0	0	0	603	903	0
618	4	0	0	0	0	0	0	200	300	0	0	0	0	0	0	0	200	903	0	0	0	0	0	0	0	603	903	0
618	5	0	0	0	0	0	0	200	300	0	0	0	0	0	0	0	200	903	0	0	0	0	0	0	0	603	903	0
618	6	0	0	0	0	0	0	200	300	0	0	0	0	0	0	0	200	903	0	0	0	0	0	0	0	603	903	0
618	7	0	0	0	0	0	0	200	300	0	0	0	0	0	0	0	200	903	0	0	0	0	0	0	0	603	903	0
618	8	0	0	0	0	0	0	200	300	0	0	0	0	0	0	0	200	903	0	0	0	0	0	0	0	603	903	0
618	9	0	0	0	0	0	0	200	300	0	0	0	0	0	0	0	200	903	0	0	0	0	0	0	0	603	903	0
619	0	0	0	0	0	0	0	200	300	0	0	0	0	0	0	0	200	903	0	0	0	0	0	0	0	603	903	0
619	1	0	0	0	0	0	0	200	300	0	0	0	0	0	0	0	200	903	0	0	0	0	0	0	0	603	903	0
619	2	0	0	0	0	0	0	200	300	0	0	0	0	0	0	0	200	903	0	0	0	0	0	0	0	603	903	0
619	3	0	0	0	0	0	0	200	300	0	0	0	0	0	0	0	200	903	0	0	0	0	0	0	0	603	903	0
619	4	0	0	0	0	0	0	200	300	0	0	0	0	0	0	0	200	903	0	0	0	0	0	0	0	603	903	0
619	5	0	0	0	0	0	0	200	300	0	0	0	0	0	0	0	200	903	0	0	0	0	0	0	0	603	903	0
619	6	0	0	0	0	0	0	200	300	0	0	0	0	0	0	0	200	903	0	0	0	0	0	0	0	603	903	0
619	7	0	0	0	0	0	0	200	300	0	0	0	0	0	0	0	200	903	0	0	0	0	0	0	0	603	903	0
619	8	0	0	0	0	0	0	200	300	0	0	0	0	0	0	0	200	903	0	0	0	0	0	0	0	603	903	0
619	9	0	0	0	0	0	0	200	300	0	0	0	0	0	0	0	200	903	0	0	0	0	0	0	0	603	903	0
620	0	0	0	0	0	0	0	200	300	0	0	0	0	0	0	0	200	903	0	0	0	0	0	0	0	603	903	0
620	1	0	0	0	0	0	0	200	300	0	0	0	0	0	0	0	200	903	0	0	0	0	0	0	0	603	903	0
620	2	0	0	0	0	0	0	200	300	0	0	0	0	0	0	0	200	903	0	0	0	0	0	0	0	603	903	0
620	3	0	0	0	0	0	0	200	300	0	0	0	0	0	0	0	200	903	0	0	0	0	0	0	0	603	903	0
620	4	0	0	0	0	0	0	200	300	0	0	0	0	0	0	0	200	903	0	0	0	0	0	0	0	603	903	0
620	5	0	0	0	0	0	0	200	300	0	0	0	0	0	0	0	200	903	0	0	0	0	0	0	0	603	903	0
620	6	0	0	0	0	0	0	200	300	0	0	0	0	0	0	0	200	903	0	0	0	0	0	0	0	603	903	0
620	7	0	0	0	0	0	0	200	300	0	0	0	0	0	0	0	200	903	0	0	0	0	0	0	0	603	903	0
620	8	0	0	0	0	0	0	200	300	0	0	0	0	0	0	0	200	903	0	0	0	0	0	0	0	603	903	0
620	9	0	0	0	0	0	0	200	300	0	0	0	0	0	0	0	200	903	0	0	0	0	0	0	0	603	903	0
621	0	0	0	0	0	0	0	200	300	0	0	0	0	0	0	0	200	903	0	0	0	0	0	0	0	603	903	0
621	1	0	0	0	0	0	0	200	300	0	0	0	0	0	0	0	200	903	0	0	0	0	0	0	0	603	903	0
621	2	0	0	0	0	0	0	200	300	0	0	0	0	0	0	0	200	903	0	0	0	0	0	0	0	603	903	0
621	3	0	0	0	0	0	0	200	300	0	0	0	0	0	0	0	200	903	0	0	0	0	0	0	0	603	903	0
621	4	0	0	0	0	0	0	200	300	0	0	0	0	0	0	0	200	903	0	0	0	0	0	0	0	603	903	0
621	5	0	0	0	0	0	0	200	300	0	0	0	0	0	0	0	200	903	0	0	0	0	0	0	0	603	903	0
621	6	0	0	0	0	0	0	200	300	0	0	0	0	0	0	0	200	903	0	0	0	0	0	0	0	603	903	0
621	7	0	0	0	0	0	0	200	300	0	0	0	0	0	0	0	200	903	0	0	0	0	0	0	0	603	903	0
621	8	0	0	0	0	0	0	200	300	0	0	0	0	0	0	0	200	903	0	0	0	0	0	0	0	603	903	0
621	9	0	0	0	0	0	0	200	300	0	0	0	0	0	0	0	200	903	0	0	0	0	0	0	0	603	903	0
622	0	0	0	0	0	0	0	200	300	0	0	0	0	0	0	0	200	903	0	0	0	0	0	0	0	603	903	0
622	1	0	0	0	0	0	0	200	300	0	0	0	0	0	0	0	200	903	0	0	0	0	0	0	0	603	903	0
622	2	0	0	0	0	0	0	200	300	0	0	0	0	0	0	0	200	903	0	0	0	0	0	0	0	603	903	0
622	3	0	0	0	0	0	0	200	300	0	0	0	0	0	0	0	200	903	0	0	0	0	0	0	0	603	903	0
622	4	0	0	0	0	0	0	200	300	0	0	0	0	0	0	0	200	903	0	0	0	0	0	0	0	603	903	0
622	5	0	0	0	0	0	0	200	300	0	0	0	0	0	0	0	200	903	0	0	0	0	0	0	0	603	903	0
622	6	0	0	0	0	0	0	200	300	0	0	0	0	0	0	0	200	903	0	0	0	0	0	0	0	603	903	0
622	7	0	0	0	0	0	0	200	300	0	0	0	0	0	0	0	200	903	0	0	0	0	0	0	0	603	903	0
622	8	0	0	0	0	0	0	200	300	0	0	0	0	0	0	0	200	903	0	0	0	0	0	0	0	603	903	0
622	9	0	0	0	0	0	0	200	300	0	0	0	0	0	0	0	200	903	0	0	0	0	0	0	0	603	903	0
623	0	0	0	0	0	0	0	200	300	0	0	0	0	0	0	0	200	903	0	0	0	0	0	0	0	603	903	0
623	1	0	0	0	0	0	0	200	300	0	0	0	0	0	0	0	200	903	0	0	0	0	0	0	0	603	903	0
623	2	0	0	0	0	0	0	200	300	0	0	0	0	0	0	0	200	903	0	0	0	0	0	0	0	603	903	0
623	3	0	0	0	0	0	0	200	300	0	0	0	0	0	0	0	200	903	0	0	0	0	0	0	0	603	903	0
623	4	0	0	0	0	0	0	200	300	0	0	0	0	0	0	0	200	903	0	0	0	0	0	0	0	603	903	0
623	5	0	0	0	0	0	0	200	300	0	0	0	0	0	0	0	200	903	0	0	0	0	0	0	0	603	903	0
623	6	0	0	0	0	0	0	200	300	0	0	0	0	0	0	0	200	903	0	0	0	0	0	0	0	603	903	0
623	7	0	0	0	0	0	0	200	300	0	0	0	0	0	0	0	200	903	0	0	0	0	0	0	0	603	903	0
623	8	0	0	0	0	0	0	200	300	0	0	0	0	0	0	0	200	903	0	0	0	0	0	0	0	603	903	0
623	9	0	0	0	0	0	0	200	300	0	0	0	0	0	0	0	200	903	0	0	0	0	0	0	0	603	903	0
624	0	0	0	0	0	0	0	200	300	0	0	0	0	0	0	0	200	903	0	0	0	0	0	0	0	603	903	0
624	1	0	0	0	0	0	0	200	300	0	0	0	0	0	0	0	200	903	0	0	0	0	0	0	0	603	903	0
624	2	0	0	0	0	0	0	200	300	0	0	0	0	0	0	0	200	903	0	0	0	0	0	0	0	603	903	0
624	3	0	0	0	0	0	0	200	300	0	0	0	0	0	0	0	200	903	0	0	0	0	0	0	0	603	903	0
624	4	0	0	0	0	0	0	200	300	0	0	0	0	0	0	0	200	903	0	0	0	0	0	0	0	603	903	0
624	5	0	0	0	0	0	0	200	300	0	0	0	0	0	0	0	200	903	0	0	0	0	0	0	0	603	903	0
624	6	0	0	0	0	0	0	200	300	0	0	0	0	0	0	0	200	903	0	0	0	0	0	0	0	603	903	0
624	7	0	0	0	0	0	0	200	300	0	0	0	0	0	0	0	200	903	0	0	0	0	0	0	0	603	903	0
624	8	0	0	0	0	0	0	200	300	0	0	0	0	0	0	0	200	903	0	0	0	0	0	0	0	603	903	0
624	9	0	0	0	0	0	0	200	300	0	0	0	0	0	0	0	200	903	0	0	0	0	0	0	0	603	903	0
625	0	0	0	0	0	0	0	200	300	0	0	0	0	0	0	0	200	903	0	0	0	0	0	0	0	603	903	0
625	1	0	0	0	0	0	0	200	300	0	0	0	0	0	0	0	200	903	0	0	0	0	0	0	0	603	903	0
625	2	0	0	0	0	0	0	200	300	0	0	0	0	0	0	0	200	903	0	0	0	0	0	0	0	603	903	0
625	3	0	0	0	0	0	0	200	300	0	0	0	0	0	0	0	200	903	0	0	0	0	0	0	0	603	903	0
625	4	0	0	0	0	0	0	200	300	0	0	0	0	0	0	0	200	903	0	0	0	0	0	0	0	603	903	0
625	5	0	0	0	0	0	0	200	300	0	0	0	0	0	0	0	200	903	0	0	0	0	0	0	0	603	903	0
625	6	0	0	0	0	0	0	200	300	0	0	0	0	0	0	0	200	903	0	0	0	0	0	0	0	603	903	0
625	7	0	0	0	0	0	0	200	300	0	0	0	0	0	0	0	200	903	0	0	0	0	0	0	0	603	903	0
625	8	0	0	0	0	0	0	200	300	0	0	0	0	0	0	0	200	903	0	0	0	0	0	0	0	603	903	0
625	9	0	0	0	0	0	0	200	300	0	0	0	0	0	0	0	200	903	0	0	0	0	0	0	0	603	903	0
626	0	0	0	0	0	0	0	200	300	0	0	0	0	0	0	0	200	903	0	0	0	0	0	0	0	603	903	0
626	1	0	0	0	0	0	0	200	300	0	0	0	0	0	0	0	200	903	0	0	0	0	0	0	0	603	903	0
626	2	0	0	0	0	0	0	200	300	0	0	0	0	0	0	0	200	903	0	0	0	0	0	0	0	603	903	0
626	3	0	0	0	0	0	0	200	300	0	0	0	0	0	0	0	200	903	0	0	0	0	0	0	0	603	903	0
626	4	0	0	0	0	0	0	200	300	0	0	0	0	0	0	0	200	903	0	0	0	0	0	0	0	603	903	0
626	5	0	0	0	0	0	0	200	300	0	0	0	0	0	0	0	200	903	0	0	0	0	0	0	0	603	903	0
626	6	0	0	0	0	0	0	200	300	0	0	0	0	0	0	0	200	903	0	0	0	0	0	0	0	603	903	0
626	7	0	0	0	0	0	0	200	300	0	0	0	0	0	0	0	200	903	0	0	0	0	0	0	0	603	903	0
626	8	0	0	0	0	0	0	200	300	0	0	0	0	0	0	0	200	903	0	0	0	0	0	0	0	603	903	0
626	9	0	0	0	0	0	0	200	300	0	0	0	0	0	0	0	200	903	0	0	0	0	0	0	0	603	903	0
627	0	0	0	0	0	0	0	200	300	0	0	0	0	0	0	0	200	903	0	0	0	0	0	0	0	603	903	0
627	1	0	0	0	0	0	0	200	300	0	0	0	0	0	0	0	200	903	0	0	0	0	0	0	0	603	903	0
627	2	0	0	0	0	0	0	200	300	0	0	0	0	0	0	0	200	903	0	0	0	0	0	0	0	603	903	0
627	3	0	0	0	0	0	0	200	300	0	0	0	0	0	0	0	200	903	0	0	0	0	0	0	0	603	903	0
627	4	0	0	0	0	0	0	200	300	0	0	0	0	0	0	0	200	903	0	0	0	0	0	0	0	603	903	0
627	5	0	0	0	0	0	0	200	300	0	0	0	0	0	0	0	200	903	0	0	0	0	0	0	0	603	903	0
627	6	0	0	0	0	0	0	200	300	0	0	0	0	0	0	0	200	903	0	0	0	0	0	0	0	603	903	0
627	7	0	0	0	0	0	0	200	300	0	0	0	0	0	0	0	200	903	0	0	0	0	0	0	0	603	903	0
627	8	0	0	0	0	0	0	200	300	0	0	0	0	0	0	0	200	903	0	0	0	0	0	0	0	603	903	0
627	9	0	0	0	0	0	0	200	300	0	0	0	0	0	0	0	200	903	0	0	0	0	0	0	0	603	903	0
628	0	0	0	0	0	0	0	200	300	0	0	0	0	0	0	0	200	903	0	0	0	0	0	0	0	603	903	0
628	1	0	0	0	0	0	0	200	300	0	0	0	0	0	0	0	200	903	0	0	0	0	0	0	0	603	903	0
628	2	0	0	0	0	0	0	200	300	0	0	0	0	0	0	0	200	903	0	0	0	0	0	0	0	603	903	0
628	3	0	0	0	0	0	0	200	300	0	0	0	0	0	0	0	200	903	0	0	0	0	0	0	0	603	903	0
628	4	0	0	0	0	0	0	200	300	0	0	0	0	0	0	0	200	903	0	0	0	0	0	0	0	603	903	0
628	5	0	0	0	0	0	0	200	300	0	0	0	0	0	0	0	200	903	0	0	0	0	0	0	0	603	903	0
628	6	0	0	0	0	0	0	200	300	0	0	0	0	0	0	0	200	903	0	0	0	0	0	0	0	603	903	0
628	7	0	0	0	0	0	0	200	300	0	0	0	0	0	0	0	200	903	0	0	0	0	0	0	0	603	903	0
628	8	0	0	0	0	0	0	200	300	0	0	0	0	0	0	0	200	903	0	0	0	0	0	0	0	603	903	0
628	9	0	0	0	0	0	0	200	300	0	0	0	0	0	0	0	200	903	0	0	0	0	0	0	0	603	903	0
629	0	0	0	0	0	0	0	200	300	0	0	0	0	0	0	0	200	903	0	0	0	0	0	0	0	603	903	0
629	1	0	0	0	0	0	0	200	300	0	0	0	0	0	0	0	200	903	0	0	0	0	0	0	0	603	903	0
629	2	0	0	0	0	0	0	200	300	0	0	0	0	0	0	0	200	903	0	0	0	0	0	0	0	603	903	0
629	3	0	0	0	0	0	0	200	300	0	0	0	0	0	0	0	200	903	0	0	0	0	0	0	0	603	903	0
629	4	0	0	0	0	0	0	200	300	0	0	0	0	0	0	0	200	903	0	0	0	0	0	0	0	603	903	0
629	5	0	0	0	0	0	0	200	300	0	0	0	0	0	0	0	200	903	0	0	0	0	0	0	0	603	903	0
629	6	0	0	0	0	0	0	200	300	0	0	0	0	0	0	0	200	903	0	0	0	0	0	0	0	603	903	0
629	7	0	0	0	0	0	0	200	300	0	0	0	0	0	0	0	200	903	0	0	0	0	0	0	0	603	903	0
629	8	0	0	0	0	0	0	200	300	0	0	0	0	0	0	0	200	903	0	0	0	0	0	0	0	603	903	0
629	9	0	0	0	0	0	0	200	300	0	0	0	0	0	0	0	200	903	0	0	0	0	0	0	0	603	903	0
630	0	0	0	0	0	0	0	200	300	0	0	0	0	0	0	0	200	903	0	0	0	0	0	0	0	603	903	0
630	1	0	0	0	0	0	0	200	300	0	0	0	0	0	0	0	200	903	0	0	0	0	0	0	0	603	903	0
630	2	0	0	0	0	0	0	200	300	0	0	0	0	0	0	0	200	903	0	0	0	0	0	0	0	603	903	0
630	3	0	0	0	0	0	0	200	300	0	0	0	0	0	0	0	200	903	0	0	0	0	0	0	0	603	903	0
630	4	0	0	0	0	0	0	200	300	0	0	0	0	0	0	0	200	903	0	0	0	0	0	0	0	603	903	0
630	5	0	0	0	0	0	0	200	300	0	0	0	0	0	0	0	200	903	0	0	0	0	0	0	0	603	903	0
630	6	0	0	0	0	0	0	200	300	0	0	0	0	0	0	0	200	903	0	0	0	0	0	0	0	603	903	0
630	7	0	0	0	0	0	0	200	300	0	0	0	0	0	0	0	200	903	0	0	0	0	0	0	0	603	903	0
630	8	0	0	0	0	0	0	200	300	0	0	0	0	0	0	0	200	903	0	0	0	0	0	0	0	603	903	0
630	9	0	0	0	0	0	0	200	300	0	0	0	0	0	0	0	200	903	0	0	0	0	0	0	0	603	903	0
631	0	0	0	0	0	0	0	200	300	0	0	0	0	0	0	0	200	903	0	0	0	0	0	0	0	603	903	0
631	1	0	0	0	0	0	0	200	300	0	0	0	0	0	0	0	200	903	0	0	0	0	0	0	0	603	903	0
631	2	0	0	0	0	0	0	200	300	0	0	0	0	0	0	0	200	903	0	0	0	0	0	0	0	603	903	0
631	3	0	0	0	0	0	0	200	300	0	0	0	0	0	0	0	200	903	0	0	0	0	0	0	0	603	903	0
631	4	0	0	0	0	0	0	200	300	0	0	0	0	0	0	0	200	903	0	0	0	0	0	0	0	603	903	0
631	5	0	0	0	0	0	0	200	300	0	0	0	0	0	0	0	200	903	0	0	0	0	0	0	0	603	903	0
631	6	0	0	0	0	0	0	200	300	0	0	0	0	0	0	0	200	903	0	0	0	0	0	0	0	603	903	0
631	7	0	0	0	0	0	0	200	300	0	0	0	0	0	0	0	200	903	0	0	0	0	0	0	0	603	903	0
631	8	0	0	0	0	0	0	200	300	0	0	0	0	0	0	0	200	903	0	0	0	0	0	0	0	603	903	0
631	9	0	0	0	0	0	0	200	300	0	0	0	0	0	0	0	200	903	0	0	0	0	0	0	0	603	903	0
632	0	0	0	0	0	0	0	200	300	0	0	0	0	0	0	0	200	903	0	0	0	0	0	0	0	603	903	0
632	1	0	0	0	0	0	0	200	300	0	0	0	0	0	0	0	200	903	0	0	0	0	0	0	0	603	903	0
632	2	0	0	0	0	0	0	200	300	0	0	0	0	0	0	0	200	903	0	0	0	0	0	0	0	603	903	0
632	3	0	0	0	0	0	0	200	300	0	0	0	0	0	0	0	200	903	0	0	0	0	0	0	0	603	903	0
632	4	0	0	0	0	0	0	200	300	0	0	0	0	0	0	0	200	903	0	0	0	0	0	0	0	603	903	0
632	5	0	0	0	0	0	0	200	300	0	0	0	0	0	0	0	200	903	0	0	0	0	0	0	0	603	903	0
632	6	0	0	0	0	0	0	200	300	0	0	0	0	0	0	0	200	903	0	0	0	0	0	0	0	603	903	0
632	7	0	0	0	0	0	0	200	300	0	0	0	0	0	0	0	200	903	0	0	0	0	0	0	0	603	903	0
632	8	0	0	0	0	0	0	200	300	0	0	0	0	0	0	0	200	903	0	0	0	0	0	0	0	603	903	0
632	9	0	0	0	0	0	0	200	300	0	0	0	0	0	0	0	200	903	0	0	0	0	0	0	0	603	903	0
633	0	0	0	0	0	0	0	200	300	0	0	0	0	0	0	0	200	903	0	0	0	0	0	0	0	603	903	0
633	1	0	0	0	0	0	0	200	300	0	0	0	0	0	0	0	200	903	0	0	0	0	0	0	0	603	903	0
633	2	0	0	0	0	0	0	200	300	0	0	0	0	0	0	0	200	903	0	0	0	0	0	0	0	603	903	0
633	3	0	0	0	0	0	0	200	300	0	0	0	0	0	0	0	200	903	0	0	0	0	0	0	0	603	903	0
633	4	0	0	0	0	0	0	200	300	0	0	0	0	0	0	0	200	903	0	0	0	0	0	0	0	603	903	0
633	5	0	0	0	0	0	0	200	300	0	0	0	0	0	0	0	200	903	0	0	0	0	0	0	0	603	903	0
633	6	0	0	0	0	0	0	200	300	0	0	0	0	0	0	0	200	903	0	0	0	0	0	0	0	603	903	0
633	7	0	0	0	0	0	0	200	300	0	0	0	0	0	0	0	200	903	0	0	0	0	0	0	0	603	903	0
633	8	0	0	0	0	0	0	200	300	0	0	0	0	0	0	0	200	903	0	0	0	0	0	0	0	603	903	0
633	9	0	0	0	0	0	0	200	300	0	0	0	0	0	0	0	200	903	0	0	0	0	0	0	0	603	903	0
634	0	0	0	0	0	0	0	200	300	0	0	0	0	0	0	0	200	903	0	0	0	0	0	0	0	603	903	0
634	1	0	0	0	0	0	0	200	300	0	0	0	0	0	0	0	200	903	0	0	0	0	0	0	0	603	903	0
634	2	0	0	0	0	0	0	200	300	0	0	0	0	0	0	0	200	903	0	0	0	0	0	0	0	603	903	0
634	3	0	0	0	0	0	0	200	300	0	0	0	0	0	0	0	200	903	0	0	0	0	0	0	0	603	903	0
634	4	0	0	0	0	0	0	200	300	0	0	0	0	0	0	0	200	903	0	0	0	0	0	0	0	603	903	0
634	5	0	0	0	0	0	0	200	300	0	0	0	0	0	0	0	200	903	0	0	0	0	0	0	0	603	903	0
634	6	0	0	0	0	0	0	200	300	0	0	0	0	0	0	0	200	903	0	0	0	0	0	0	0	603	903	0
634	7	0	0	0	0	0	0	200	300	0	0	0	0	0	0	0	200	903	0	0	0	0	0	0	0	603	903	0
634	8	0	0	0	0	0	0	200	300	0	0	0	0	0	0	0	200	903	0	0	0	0	0	0	0	603	903	0
634	9	0	0	0	0	0	0	200	300	0	0	0	0	0	0	0	200	903	0	0	0	0	0	0	0	603	903	0
635	0	0	0	0	0	0	0	200	300	0	0	0	0	0	0	0	200	903	0	0	0	0	0	0	0	603	903	0
635	1	0	0	0	0	0	0	200	300	0	0	0	0	0	0	0	200	903	0	0	0	0	0	0	0	603	903	0
635	2	0	0	0	0	0	0	200	300	0	0	0	0	0	0	0	200	903	0	0	0	0	0	0	0	603	903	0
635	3	0	0	0	0	0	0	200	300	0	0	0	0	0	0	0	200	903	0	0	0	0	0	0	0	603	903	0
635	4	0	0	0	0	0	0	200	300	0	0	0	0	0	0	0	200	903	0	0	0	0	0	0	0	603	903	0
635	5	0	0	0	0	0	0	200	300	0	0	0	0	0	0	0	200	903	0	0	0	0	0	0	0	603	903	0
635	6	0	0	0	0	0	0	200	300	0	0	0	0	0	0	0	200	903	0	0	0	0	0	0	0	603	903	0
635	7	0	0	0	0	0	0	200	300	0	0	0	0	0	0	0	200	903	0	0	0	0	0	0	0	603	903	0
635	8	0	0	0	0	0	0	200	300	0	0	0	0	0	0	0	200	903	0	0	0	0	0	0	0	603	903	0
635	9	0	0	0	0	0	0	200	300	0	0	0	0	0	0	0	200	903	0	0	0	0	0	0	0	603	903	0
636	0	0	0	0	0	0	0	200	300	0	0	0	0	0	0	0	200	903	0	0	0	0	0	0	0	603	903	0
636	1	0	0	0	0	0	0	200	300	0	0	0	0	0	0	0	200	903	0	0	0	0	0	0	0	603	903	0
636	2	0	0	0	0	0	0	200	300	0	0	0	0	0	0	0	200	903	0	0	0	0	0	0	0	603	903	0
636	3	0	0	0	0	0	0	200	300	0	0	0	0	0	0	0	200	903	0	0	0	0	0	0	0	603	903	0
636	4	0	0	0	0	0	0	200	300	0	0	0	0	0	0	0	200	903	0	0	0	0	0	0	0	603	903	0
636	5	0	0	0	0	0	0	200	300	0	0	0	0	0	0	0	200	903	0	0	0	0	0	0	0	603	903	0
636	6	0	0	0	0	0	0	200	300	0	0	0	0	0	0	0	200	903	0	0	0	0	0	0	0	603	903	0
636	7	0	0	0	0	0	0	200	300	0	0	0	0	0	0	0	200	903	0	0	0	0	0	0	0	603	903	0
636	8	0	0	0	0	0	0	200	300	0	0	0	0	0	0	0	200	903	0	0	0	0	0	0	0	603	903	0
636	9	0	0	0	0	0	0	200	300	0	0	0	0	0	0	0	200	903	0	0	0	0	0	0	0	603	903	0
637	0	0	0	0	0	0	0	200	300	0	0	0	0	0	0	0	200	903	0	0	0	0	0	0	0	603	903	0
637	1	0	0	0	0	0	0	200	300	0	0	0	0	0	0	0	200	903	0	0	0	0	0	0	0	603	903	0
637	2	0	0	0	0	0	0	200	300	0	0	0	0	0	0	0	200	903	0	0	0	0	0	0	0	603	903	0
637	3	0	0	0	0	0	0	200	300	0	0	0	0	0	0	0	200	903	0	0	0	0	0	0	0	603	903	0
637	4	0	0	0	0	0	0	200	300	0	0	0	0	0	0	0	200	903	0	0	0	0	0	0	0	603	903	0
637	5	0	0	0	0	0	0	200	300	0	0	0	0	0	0	0	200	903	0	0	0	0	0	0	0	603	903	0
637	6	0	0	0	0	0	0	200	300	0	0	0	0	0	0	0	200	903	0	0	0	0	0	0	0	603	903	0
637	7	0	0	0	0	0	0	200	300	0	0	0	0	0	0	0	200	903	0	0	0	0	0	0	0	603	903	0
637	8	0	0	0	0	0	0	200	300	0	0	0	0	0	0	0	200	903	0	0	0	0	0	0	0	603	903	0
637	9	0	0	0	0	0	0	200	300	0	0	0	0	0	0	0	200	903	0	0	0	0	0	0	0	603	903	0
638	0	0	0	0	0	0	0	200	300	0	0	0	0	0	0	0	200	903	0	0	0	0	0	0	0	603	903	0
638	1	0	0	0	0	0	0	200	300	0	0	0	0	0	0	0	200	903	0	0	0	0	0	0	0	603	903	0
638	2	0	0	0	0	0	0	200	300	0	0	0	0	0	0	0	200	903	0	0	0	0	0	0	0	603	903	0
638	3	0	0	0	0	0	0	200	300	0	0	0	0	0	0	0	200	903	0	0	0	0	0	0	0	603	903	0
638	4	0	0	0	0	0	0	200	300	0	0	0	0	0	0	0	200	903	0	0	0	0	0	0	0	603	903	0
638	5	0	0	0	0	0	0	200	300	0	0	0	0	0	0	0	200	903	0	0	0	0	0	0	0	603	903	0
638	6	0	0	0	0	0	0	200	300	0	0	0	0	0	0	0	200	903	0	0	0	0	0	0	0	603	903	0
638	7	0	0	0	0	0	0	200	300	0	0	0	0	0	0	0	200	903	0	0	0	0	0	0	0	603	903	0
638	8	0	0	0	0	0	0	200	300	0	0	0	0	0	0	0	200	903	0	0	0	0	0	0	0	603	903	0
638	9	0	0	0	0	0	0	200	300	0	0	0	0	0	0	0	200	903	0	0	0	0	0	0	0	603	903	0
639	0	0	0	0	0	0	0	200	300	0	0	0	0	0	0	0	200	903	0	0	0	0	0	0	0	603	903	0
639	1	0	0	0	0	0	0	200	300	0	0	0	0	0	0	0	200	903	0	0	0	0	0	0	0	603	903	0
639	2	0	0	0	0	0	0	200	300	0	0	0	0	0	0	0	200	903	0	0	0	0	0	0	0	603	903	0
639	3	0	0	0	0	0	0	200	300	0	0	0	0	0	0	0	200	903	0	0	0	0	0	0	0	603	903	0
639	4	0	0	0	0	0	0	200	300	0	0	0	0	0	0	0	200	903	0	0	0	0	0	0	0	603	903	0
639	5	0	0	0	0	0	0	200	300	0	0	0	0	0	0	0	200	903	0	0	0	0	0	0	0	603	903	0
639	6	0	0	0	0	0	0	200	300	0	0	0	0	0	0	0	200	903	0	0	0	0	0	0	0	603	903	0
639	7	0	0	0	0	0	0	200	300	0	0	0	0	0	0	0	200	903	0	0	0	0	0	0	0	603	903	0
639	8	0	0	0	0	0	0	200	300	0	0	0	0	0	0	0	200	903	0	0	0	0	0	0	0	603	903	0
639	9	0	0	0	0	0	0	200	300	0	0	0	0	0	0	0	200	903	0	0	0	0	0	0	0	603	903	0
640	0	0	0	0	0	0	0	200	300	0	0	0	0	0	0	0	200	903	0	0	0	0	0	0	0	603	903	0
640	1	0	0	0	0	0	0	200	300	0	0	0	0	0	0	0	200	903	0	0	0	0	0	0	0	603	903	0
640	2	0	0	0	0	0	0	200	300	0	0	0	0	0	0	0	200	903	0	0	0	0	0	0	0	603	903	0
640	3	0	0	0	0	0	0	200	300	0	0	0	0	0	0	0	200	903	0	0	0	0	0	0	0	603	903	0
640	4	0	0	0	0	0	0	200	300	0	0	0	0	0	0	0	200	903	0	0	0	0	0	0	0	603	903	0
640	5	0	0	0	0	0	0	200	300	0	0	0	0	0	0	0	200	903	0	0	0	0	0	0	0	603	903	0
640	6	0	0	0	0	0	0	200	300	0	0	0	0	0	0	0	200	903	0	0	0	0	0	0	0	603	903	0
640	7	0	0	0	0	0	0	200	300	0	0	0	0	0	0	0	200	903	0	0	0	0	0	0	0	603	903	0
640	8	0	0	0	0	0	0	200	300	0	0	0	0	0	0	0	200	903	0	0	0	0	0	0	0	603	903	0
640	9	0	0	0	0	0	0	200	300	0	0	0	0	0	0	0	200	903	0	0	0	0	0	0	0	603	903	0
641	0	0	0	0	0	0	0	200	300	0	0	0	0	0	0	0	200	903	0	0	0	0	0	0	0	603	903	0
641	1	0	0	0	0	0	0	200	300	0	0	0	0	0	0	0	200	903	0	0	0	0	0	0	0	603	903	0
641	2	0	0	0	0	0	0	200	300	0	0	0	0	0	0	0	200	903	0	0	0	0	0	0	0	603	903	0
641	3	0	0	0	0	0	0	200	300	0	0	0	0	0	0	0	200	903	0	0	0	0	0	0	0	603	903	0
641	4	0	0	0	0	0	0	200	300	0	0	0	0	0	0	0	200	903	0	0	0	0	0	0	0	603	903	0
641	5	0	0	0	0	0	0	200	300	0	0	0	0	0	0	0	200	903	0	0	0	0	0	0	0	603	903	0
641	6	0	0	0	0	0	0	200	300	0	0	0	0	0	0	0	200	903	0	0	0	0	0	0	0	603	903	0
641	7	0	0	0	0	0	0	200	300	0	0	0	0	0	0	0	200	903	0	0	0	0	0	0	0	603	903	0
641	8	0	0	0	0	0	0	200	300	0	0	0	0	0	0	0	200	903	0	0	0	0	0	0	0	603	903	0
641	9	0	0	0	0	0	0	200	300	0	0	0	0	0	0	0	200	903	0	0	0	0	0	0	0	603	903	0
642	0	0	0	0	0	0	0	200	300	0	0	0	0	0	0	0	200	903	0	0	0	0	0	0	0	603	903	0
642	1	0	0	0	0	0	0	200	300	0	0	0	0	0	0	0	200	903	0	0	0	0	0	0	0	603	903	0
642	2	0	0	0	0	0	0	200	300	0	0	0	0	0	0	0	200	903	0	0	0	0	0	0	0	603	903	0
642	3	0	0	0	0	0	0	200	300	0	0	0	0	0	0	0	200	903	0	0	0	0	0	0	0	603	903	0
642	4	0	0	0	0	0	0	200	300	0	0	0	0	0	0	0	200	903	0	0	0	0	0	0	0	603	903	0
642	5	0	0	0	0	0	0	200	300	0	0	0	0	0	0	0	200	903	0	0	0	0	0	0	0	603	903	0
642	6	0	0	0	0	0	0	200	300	0	0	0	0	0	0	0	200	903	0	0	0	0	0	0	0	603	903	0
642	7	0	0	0	0	0	0	200	300	0	0	0	0	0	0	0	200	903	0	0	0	0	0	0	0	603	903	0
642	8	0	0	0	0	0	0	200	300	0	0	0	0	0	0	0	200	903	0	0	0	0	0	0	0	603	903	0
642	9	0	0	0	0	0	0	200	300	0	0	0	0	0	0	0	200	903	0	0	0	0	0	0	0	603	903	0
643	0	0	0	0	0	0	0	200	300	0	0	0	0	0	0	0	200	903	0	0	0	0	0	0	0	603	903	0
643	1	0	0	0	0	0	0	200	300	0	0	0	0	0	0	0	200	903	0	0	0	0	0	0	0	603	903	0
643	2	0	0	0	0	0	0	200	300	0	0	0	0	0	0	0	200	903	0	0	0	0	0	0	0	603	903	0
643	3	0	0	0	0	0	0	200	300	0	0	0	0	0	0	0	200	903	0	0	0	0	0	0	0	603	903	0
643	4	0	0	0	0	0	0	200	300	0	0	0	0	0	0	0	200	903	0	0	0	0	0	0	0	603	903	0
643	5	0	0	0	0	0	0	200	300	0	0	0	0	0	0	0	200	903	0	0	0	0	0	0	0	603	903	0
643	6	0	0	0	0	0	0	200	300	0	0	0	0	0	0	0	200	903	0	0	0	0	0	0	0	603	903	0
643	7	0	0	0	0	0	0	200	300	0	0	0	0	0	0	0	200	903	0	0	0	0	0	0	0	603	903	0
643	8	0	0	0	0	0	0	200	300	0	0	0	0	0	0	0	200	903	0	0	0	0	0	0	0	603	903	0
643	9	0	0	0	0	0	0	200	300	0	0	0	0	0	0	0	200	903	0	0	0	0	0	0	0	603	903	0
644	0	0	0	0	0	0	0	200	300	0	0	0	0	0	0	0	200	903	0	0	0	0	0	0	0	603	903	0
644	1	0	0	0	0	0	0	200	300	0	0	0	0	0	0	0	200	903	0	0	0	0	0	0	0	603	903	0
644	2	0	0	0	0	0	0	200	300	0	0	0	0	0	0	0	200	903	0	0	0	0	0	0	0	603	903	0
644	3	0	0	0	0	0	0	200	300	0	0	0	0	0	0	0	200	903	0	0	0	0	0	0	0	603	903	0
644	4	0	0	0	0	0	0	200	300	0	0	0	0	0	0	0	200	903	0	0	0	0	0	0	0	603	903	0
644	5	0	0	0	0	0	0	200	300	0	0	0	0	0	0	0	200	903	0	0	0	0	0	0	0	603	903	0
644	6	0	0	0	0	0	0	200	300	0	0	0	0	0	0	0	200	903	0	0	0	0	0	0	0	603	903	0
644	7	0	0	0	0	0	0	200	300	0	0	0	0	0	0	0	200	903	0	0	0	0	0	0	0	603	903	0
644	8	0	0	0	0	0	0	200	300	0	0	0	0	0	0	0	200	903	0	0	0	0	0	0	0	603	903	0
644	9	0	0	0	0	0	0	200	300	0	0	0	0	0	0	0	200	903	0	0	0	0	0	0	0	603	903	0
645	0	0	0	0	0	0	0	200	300	0	0	0	0	0	0	0	200	903	0	0	0	0	0	0	0	603	903	0
645	1	0	0	0	0	0	0	200	300	0	0	0	0	0	0	0	200	903	0	0	0	0	0	0	0	603	903	0
645	2	0	0	0	0	0	0	200	300	0	0	0	0	0	0	0	200	903	0	0	0	0	0	0	0	603	903	0
645	3	0	0	0	0	0	0	200	300	0	0	0	0	0	0	0	200	903	0	0	0	0	0	0	0	603	903	0
645	4	0	0	0	0	0	0	200	300	0	0	0	0	0	0	0	200	903	0	0	0	0	0	0	0	603	903	0
645	5	0	0	0	0	0	0	200	300	0	0	0	0	0	0	0	200	903	0	0	0	0	0	0	0	603	903	0
645	6	0	0	0	0	0	0	200	300	0	0	0	0	0	0	0	200	903	0	0	0	0	0	0	0	603	903	0
645	7	0	0	0	0	0	0	200	300	0	0	0	0	0	0	0	200	903	0	0	0	0	0	0	0	603	903	0
645	8	0	0	0	0	0	0	200	300	0	0	0	0	0	0	0	200	903	0	0	0	0	0	0	0	603	903	0
645	9	0	0	0	0	0	0	200	300	0	0	0	0	0	0	0	200	903	0	0	0	0	0	0	0	603	903	0
646	0	0	0	0	0	0	0	200	300	0	0	0	0	0	0	0	200	903	0	0	0	0	0	0	0	603	903	0
646	1	0	0	0	0	0	0	200	300	0	0	0	0	0	0	0	200	903	0	0	0	0	0	0	0	603	903	0
646	2	0	0	0	0	0	0	200	300	0	0	0	0	0	0	0	200	903	0	0	0	0	0	0	0	603	903	0
646	3	0	0	0	0	0	0	200	300	0	0	0	0	0	0	0	200	903	0	0	0	0	0	0	0	603	903	0
646	4	0	0	0	0	0	0	200	300	0	0	0	0	0	0	0	200	903	0	0	0	0	0	0	0	603	903	0
646	5	0	0	0	0	0	0	200	300	0	0	0	0	0	0	0	200	903	0	0	0	0	0	0	0	603	903	0
646	6	0	0	0	0	0	0	200	300	0	0	0	0	0	0	0	200	903	0	0	0	0	0	0	0	603	903	0
646	7	0	0	0	0	0	0	200	300	0	0	0	0	0	0	0	200	903	0	0	0	0	0	0	0	603	903	0
646	8	0	0	0	0	0	0	200	300	0	0	0	0	0	0	0	200	903	0	0	0	0	0	0	0	603	903	0
646	9	0	0	0	0	0	0	200	300	0	0	0	0	0	0	0	200	903	0	0	0	0	0	0	0	603	903	0
647	0	0	0	0	0	0	0	200	300	0	0	0	0	0	0	0	200	903	0	0	0	0	0	0	0	603	903	0
647	1	0	0	0	0	0	0	200	300	0	0	0	0	0	0	0	200	903	0	0	0	0	0	0	0	603	903	0
647	2	0	0	0	0	0	0	200	300	0	0	0	0	0	0	0	200	903	0	0	0	0	0	0	0	603	903	0
647	3	0	0	0	0	0	0	200	300	0	0	0	0	0	0	0	200	903	0	0	0	0	0	0	0	603	903	0
647	4	0	0	0	0	0	0	200	300	0	0	0	0	0	0	0	200	903	0	0	0	0	0	0	0	603	903	0
647	5	0	0	0	0	0	0	200	300	0	0	0	0	0	0	0	200	903	0	0	0	0	0	0	0	603	903	0
647	6	0	0	0	0	0	0	200	300	0	0	0	0	0	0	0	200	903	0	0	0	0	0	0	0	603	903	0
647	7	0	0	0	0	0	0	200	300	0	0	0	0	0	0	0	200	903	0	0	0	0	0	0	0	603	903	0
647	8	0	0	0	0	0	0	200	300	0	0	0	0	0	0	0	200	903	0	0	0	0	0	0	0	603	903	0
647	9	0	0	0	0	0	0	200	300	0	0	0	0	0	0	0	200	903	0	0	0	0	0	0	0	603	903	0
648	0	0	0	0	0	0	0	200	300	0	0	0	0	0	0	0	200	903	0	0	0	0	0	0	0	603	903	0
648	1	0	0	0	0	0	0	200	300	0	0	0	0	0	0	0	200	903	0	0	0	0	0	0	0	603	903	0
648	2	0	0	0	0	0	0	200	300	0	0	0	0	0	0	0	200	903	0	0	0	0	0	0	0	603	903	0
648	3	0	0	0	0	0	0	200	300	0	0	0	0	0	0	0	200	903	0	0	0	0	0	0	0	603	903	0
648	4	0	0	0	0	0	0	200	300	0	0	0	0	0	0	0	200	903	0	0	0	0	0	0	0	603	903	0
648	5	0	0	0	0	0	0	200	300	0	0	0	0	0	0	0	200	903	0	0	0	0	0	0	0	603	903	0
648	6	0	0	0	0	0	0	200	300	0	0	0	0	0	0	0	200	903	0	0	0	0	0	0	0	603	903	0
648	7	0	0	0	0	0	0	200	300	0	0	0	0	0	0	0	200	903	0	0	0	0	0	0	0	603	903	0
648	8	0	0	0	0	0	0	200	300	0	0	0	0	0	0	0	200	903	0	0	0	0	0	0	0	603	903	0
648	9	0	0	0	0	0	0	200	300	0	0	0	0	0	0	0	200	903	0	0	0	0	0	0	0	603	903	0
649	0	0	0	0	0	0	0	200	300	0	0	0	0	0	0	0	200	903	0	0	0	0	0	0	0	603	903	0
649	1	0	0	0	0	0	0	200	300	0	0	0	0	0	0	0	200	903	0	0	0	0	0	0	0	603	903	0
649	2	0	0	0	0	0	0	200	300	0	0	0	0	0	0	0	200	903	0	0	0	0	0	0	0	603	903	0
649	3	0	0	0	0	0	0	200	300	0	0	0	0	0	0	0	200	903	0	0	0	0	0	0	0	603	903	0
649	4	0	0	0	0	0	0	200	300	0	0	0	0	0	0	0	200	903	0	0	0	0	0	0	0	603	903	0
649	5	0	0	0	0	0	0	200	300	0	0	0	0	0	0	0	200	903	0	0	0	0	0	0	0	603	903	0
649	6	0	0	0	0	0	0	200	300	0	0	0	0	0	0	0	200	903	0	0	0	0	0	0	0	603	903	0
649	7	0	0	0	0	0	0	200	300	0	0	0	0	0	0	0	200	903	0	0	0	0	0	0	0	603	903	0
649	8	0	0	0	0	0	0	200	300	0	0	0	0	0	0	0	200	903	0	0	0	0	0	0	0	603	903	0
649	9	0	0	0	0	0	0	200	300	0	0	0	0	0	0	0	200	903	0	0	0	0	0	0	0	603	903	0
650	0	0	0	0	0	0	0	200	300	0	0	0	0	0	0	0	200	903	0	0	0	0	0	0	0	603	903	0
650	1	0	0	0	0	0	0	200	300	0	0	0	0	0	0	0	200	903	0	0	0	0	0	0	0	603	903	0
650	2	0	0	0	0	0	0	200	300	0	0	0	0	0	0	0	200	903	0	0	0	0	0	0	0	603	903	0
650	3	0	0	0	0	0	0	200	300	0	0	0	0	0	0	0	200	903	0	0	0	0	0	0	0	603	903	0
650	4	0	0	0	0	0	0	200	300	0	0	0	0	0	0	0	200	903	0	0	0	0	0	0	0	603	903	0
650	5	0	0	0	0	0	0	200	300	0	0	0	0	0	0	0	200	903	0	0	0	0	0	0	0	603	903	0
650	6	0	0	0	0	0	0	200	300	0	0	0	0	0	0	0	200	903	0	0	0	0	0	0	0	603	903	0
650	7	0	0	0	0	0	0	200	300	0	0	0	0	0	0	0	200	903	0	0	0	0	0	0	0	603	903	0
650	8	0	0	0	0	0	0	200	300	0	0	0	0	0	0	0	200	903	0	0	0	0	0	0	0	603	903	0
650	9	0	0	0	0	0	0	200	300	0	0	0	0	0	0	0	200	903	0	0	0	0	0	0	0	603	903	0
651	0	0	0	0	0	0	0	200	300	0	0	0	0	0	0	0	200	903	0	0	0	0	0	0	0	603	903	0
651	1	0	0	0	0	0	0	200	300	0	0	0	0	0	0	0	200	903	0	0	0	0	0	0	0	603	903	0
651	2	0	0	0	0	0	0	200	300	0	0	0	0	0	0	0	200	903	0	0	0	0	0	0	0	603	903	0
651	3	0	0	0	0	0	0	200	300	0	0	0	0	0	0	0	200	903	0	0	0	0	0	0	0	603	903	0
651	4	0	0	0	0	0	0	200	300	0	0	0	0	0	0	0	200	903	0	0	0	0	0	0	0	603	903	0
651	5	0	0	0	0	0	0	200	300	0	0	0	0	0	0	0	200	903	0	0	0	0	0	0	0	603	903	0
651	6	0	0	0	0	0	0	200	300	0	0	0	0	0	0	0	200	903	0	0	0	0	0	0	0	603	903	0
651	7	0	0	0	0	0	0	200	300	0	0	0	0	0	0	0	200	903	0	0	0	0	0	0	0	603	903	0
651	8	0	0	0	0	0	0	200	300	0	0	0	0	0	0	0	200	903	0	0	0	0	0	0	0	603	903	0
651	9	0	0	0	0	0	0	200	300	0	0	0	0	0	0	0	200	903	0	0	0	0	0	0	0	603	903	0
652	0	0	0	0	0	0	0	200	300	0	0	0	0	0	0	0	200	903	0	0	0	0	0	0	0	603	903	0
652	1	0	0	0	0	0	0	200	300	0	0	0	0	0	0	0	200	903	0	0	0	0	0	0	0	603	903	0
652	2	0	0	0	0	0	0	200	300	0	0	0	0	0	0	0	200	903	0	0	0	0	0	0	0	603	903	0
652	3	0	0	0	0	0	0	200	300	0	0	0	0	0	0	0	200	903	0	0	0	0	0	0	0	603	903	0
652	4	0	0	0	0	0	0	200	300	0	0	0	0	0	0	0	200	903	0	0	0	0	0	0	0	603	903	0
652	5	0	0	0	0	0	0	200	300	0	0	0	0	0	0	0	200	903	0	0	0	0	0	0	0	603	903	0
652	6	0	0	0	0	0	0	200	300	0	0	0	0	0	0	0	200	903	0	0	0	0	0	0	0	603	903	0
652	7	0	0	0	0	0	0	200	300	0	0	0	0	0	0	0	200	903	0	0	0	0	0	0	0	603	903	0
652	8	0	0	0	0	0	0	200	300	0	0	0	0	0	0	0	200	903	0	0	0	0	0	0	0	603	903	0
652	9	0	0	0	0	0	0	200	300	0	0	0	0	0	0	0	200	903	0	0	0	0	0	0	0	603	903	0
653	0	0	0	0	0	0	0	200	300	0	0	0	0	0	0	0	200	903	0	0	0	0	0	0	0	603	903	0
653	1	0	0	0	0	0	0	200	300	0	0	0	0	0	0	0	200	903	0	0	0	0	0	0	0	603	903	0
653	2	0	0	0	0	0	0	200	300	0	0	0	0	0	0	0	200	903	0	0	0	0	0	0	0	603	903	0
653	3	0	0	0	0	0	0	200	300	0	0	0	0	0	0	0	200	903	0	0	0	0	0	0	0	603	903	0
653	4	0	0	0	0	0	0	200	300	0	0	0	0	0	0	0	200	903	0	0	0	0	0	0	0	603	903	0
653	5	0	0	0	0	0	0	200	300	0	0	0	0	0	0	0	200	903	0	0	0	0	0	0	0	603	903	0
653	6	0	0	0	0	0	0	200	300	0	0	0	0	0	0	0	200	903	0	0	0	0	0	0	0	603	903	0
653	7	0	0	0	0	0	0	200	300	0	0	0	0	0	0	0	200	903	0	0	0	0	0	0	0	603	903	0
653	8	0	0	0	0	0	0	200	300	0	0	0	0	0	0	0	200	903	0	0	0	0	0	0	0	603	903	0
653	9	0	0	0	0	0	0	200	300	0	0	0	0	0	0	0	200	903	0	0	0	0	0	0	0	603	903	0
654	0	0	0	0	0	0	0	200	300	0	0	0	0	0	0	0	200	903	0	0	0	0	0	0	0	603	903	0
654	1	0	0	0	0	0	0	200	300	0	0	0	0	0	0	0	200	903	0	0	0	0	0	0	0	603	903	0
654	2	0	0	0	0	0	0	200	300	0	0	0	0	0	0	0	200	903	0	0	0	0	0	0	0	603	903	0
654	3	0	0	0	0	0	0	200	300	0	0	0	0	0	0	0	200	903	0	0	0	0	0	0	0	603	903	0
654	4	0	0	0	0	0	0	200	300	0	0	0	0	0	0	0	200	903	0	0	0	0	0	0	0	603	903	0
654	5	0	0	0	0	0	0	200	300	0	0	0	0	0	0	0	200	903	0	0	0	0	0	0	0	603	903	0
654	6	0	0	0	0	0	0	200	300	0	0	0	0	0	0	0	200	903	0	0	0	0	0	0	0	603	903	0
654	7	0	0	0	0	0	0	200	300	0	0	0	0	0	0	0	200	903	0	0	0	0	0	0	0	603	903	0
654	8	0	0	0	0	0	0	200	300	0	0	0	0	0	0	0	200	903	0	0	0	0	0	0	0	603	903	0
654	9	0	0	0	0	0	0	200	300	0	0	0	0	0	0	0	200	903	0	0	0	0	0	0	0	603	903	0
655	0	0	0	0	0	0	0	200	300	0	0	0	0	0	0	0	200	903	0	0	0	0	0	0	0	603	903	0
655	1	0	0	0	0	0	0	200	300	0	0	0	0	0	0	0	200	903	0	0	0	0	0	0	0	603	903	0
655	2	0	0	0	0	0	0	200	300	0	0	0	0	0	0	0	200	903	0	0	0	0	0	0	0	603	903	0
655	3	0	0	0	0	0	0	200	300	0	0	0	0	0	0	0	200	903	0	0	0	0	0	0	0	603	903	0
655	4	0	0	0	0	0	0	200	300	0	0	0	0	0	0	0	200	903	0	0	0	0	0	0	0	603	903	0
655	5	0	0	0	0	0	0	200	300	0	0	0	0	0	0	0	200	903	0	0	0	0	0	0	0	603	903	0
655	6	0	0	0	0	0	0	200	300	0	0	0	0	0	0	0	200	903	0	0	0	0	0	0	0	603	903	0
655	7	0	0	0	0	0	0	200	300	0	0	0	0	0	0	0	200	903	0	0	0	0	0	0	0	603	903	0
655	8	0	0	0	0	0	0	200	300	0	0	0	0	0	0	0	200	903	0	0	0	0	0	0	0	603	903	0
655	9	0	0	0	0	0	0	200	300	0	0	0	0	0	0	0	200	903	0	0	0	0	0	0	0	603	903	0
656	0	0	0	0	0	0	0	200	300	0	0	0	0	0	0	0	200	903	0	0	0	0	0	0	0	603	903	0
656	1	0	0	0	0	0	0	200	300	0	0	0	0	0	0	0	200	903	0	0	0	0	0	0	0	603	903	0
656	2	0	0	0	0	0	0	200	300	0	0	0	0	0	0	0	200	903	0	0	0	0	0	0	0	603	903	0
656	3	0	0	0	0	0	0	200	300	0	0	0	0	0	0	0	200	903	0	0	0	0	0	0	0	603	903	0
656	4	0	0	0	0	0	0	200	300	0	0	0	0	0	0	0	200	903	0	0	0	0	0	0	0	603	903	0
656	5	0	0	0	0	0	0	200	300	0	0	0	0	0	0	0	200	903	0	0	0	0	0	0	0	603	903	0
656	6	0	0	0	0	0	0	200	300	0	0	0	0	0	0	0	200	903	0	0	0	0	0	0	0	603	903	0
656	7	0	0	0	0	0	0	200	300	0	0	0	0	0	0	0	200	903	0	0	0	0	0	0	0	603	903	0
656	8	0	0	0	0	0	0	200	300	0	0	0	0	0	0	0	200	903	0	0	0	0	0	0	0	603	903	0
656	9	0	0	0	0	0	0	200	300	0	0	0	0	0	0	0	200	903	0	0	0	0	0	0	0	603	903	0
657	0	0	0	0	0	0	0	200	300	0	0	0	0	0	0	0	200	903	0	0	0	0	0	0	0	603	903	0
657	1	0	0	0	0	0	0	200	300	0	0	0	0	0	0	0	200	903	0	0	0	0	0	0	0	603	903	0
657	2	0	0	0	0	0	0	200	300	0	0	0	0	0	0	0	200	903	0	0	0	0	0	0	0	603	903	0
657	3	0	0	0	0	0	0	200	300	0	0	0	0	0	0	0	200	903	0	0	0	0	0	0	0	603	903	0
657	4	0	0	0	0	0	0	200	300	0	0	0	0	0	0	0	200	903	0	0	0	0	0	0	0	603	903	0
657	5	0	0	0	0	0	0	200	300	0	0	0	0	0	0	0	200	903	0	0	0	0	0	0	0	603	903	0
657	6	0	0	0	0	0	0	200	300	0	0	0	0	0	0	0	200	903	0	0	0	0	0	0	0	603	903	0
657	7	0	0	0	0	0	0	200	300	0	0	0	0	0	0	0	200	903	0	0	0	0	0	0	0	603	903	0
657	8	0	0	0	0	0	0	200	300	0	0	0	0	0	0	0	200	903	0	0	0	0	0	0	0	603	903	0
657	9	0	0	0	0	0	0	200	300	0	0	0	0	0	0	0	200	903	0	0	0	0	0	0	0	603	903	0
658	0	0	0	0	0	0	0	200	300	0	0	0	0	0	0	0	200	903	0	0	0	0	0	0	0	603	903	0
658	1	0	0	0	0	0	0	200	300	0	0	0	0	0	0	0	200	903	0	0	0	0	0	0	0	603	903	0
658	2	0	0	0	0	0	0	200	300	0	0	0	0	0	0	0	200	903	0	0	0	0	0	0	0	603	903	0
658	3	0	0	0	0	0	0	200	300	0	0	0	0	0	0	0	200	903	0	0	0	0	0	0	0	603	903	0
658	4	0	0	0	0	0	0	200	300	0	0	0	0	0	0	0	200	903	0	0	0	0	0	0	0	603	903	0
658	5	0	0	0	0	0	0	200	300	0	0	0	0	0	0	0	200	903	0	0	0	0	0	0	0	603	903	0
658	6	0	0	0	0	0	0	200	300	0	0	0	0	0	0	0	200	903	0	0	0	0	0	0	0	603	903	0
658	7	0	0	0	0	0	0	200	300	0	0	0	0	0	0	0	200	903	0	0	0	0	0	0	0	603	903	0
658	8	0	0	0	0	0	0	200	300	0	0	0	0	0	0	0	200	903	0	0	0	0	0	0	0	603	903	0
658	9	0	0	0	0	0	0	200	300	0	0	0	0	0	0	0	200	903	0	0	0	0	0	0	0	603	903	0
659	0	0	0	0	0	0	0	200	300	0	0	0	0	0	0	0	200	903	0	0	0	0	0	0	0	603	903	0
659	1	0	0	0	0	0	0	200	300	0	0	0	0	0	0	0	200	903	0	0	0	0	0	0	0	603	903	0
659	2	0	0	0	0	0	0	200	300	0	0	0	0	0	0	0	200	903	0	0	0	0	0	0	0	603	903	0
659	3	0	0	0	0	0	0	200	300	0	0	0	0	0	0	0	200	903	0	0	0	0	0	0	0	603	903	0
659	4	0	0	0	0	0	0	200	300	0	0	0	0	0	0	0	200	903	0	0	0	0	0	0	0	603	903	0
659	5	0	0	0	0	0	0	200	300	0	0	0	0	0	0	0	200	903	0	0	0	0	0	0	0	603	903	0
659	6	0	0	0	0	0	0	200	300	0	0	0	0	0	0	0	200	903	0	0	0	0	0	0	0	603	903	0
659	7	0	0	0	0	0	0	200	300	0	0	0	0	0	0	0	200	903	0	0	0	0	0	0	0	603	903	0
659	8	0	0	0	0	0	0	200	300	0	0	0	0	0	0	0	200	903	0	0	0	0	0	0	0	603	903	0
659	9	0	0	0	0	0	0	200	300	0	0	0	0	0	0	0	200	903	0	0	0	0	0	0	0	603	903	0
660	0	0	0	0	0	0	0	200	300	0	0	0	0	0	0	0	200	903	0	0	0	0	0	0	0	603	903	0
660	1	0	0	0	0	0	0	200	300	0	0	0	0	0	0	0	200	903	0	0	0	0	0	0	0	603	903	0
660	2	0	0	0	0	0	0	200	300	0	0	0	0	0	0	0	200	903	0	0	0	0	0	0	0	603	903	0
660	3	0	0	0	0	0	0	200	300	0	0	0	0	0	0	0	200	903	0	0	0	0	0	0	0	603	903	0
660	4	0	0	0	0	0	0	200	300	0	0	0	0	0	0	0	200	903	0	0	0	0	0	0	0	603	903	0
660	5	0	0	0	0	0	0	200	300	0	0	0	0	0	0	0	200	903	0	0	0	0	0	0	0	603	903	0
660	6	0	0	0	0	0	0	200	300	0	0	0	0	0	0	0	200	903	0	0	0	0	0	0	0	603	903	0
660	7	0	0	0	0	0	0	200	300	0	0	0	0	0	0	0	200	903	0	0	0	0	0	0	0	603	903	0
660	8	0	0	0	0	0	0	200	300	0	0	0	0	0	0	0	200	903	0	0	0	0	0	0	0	603	903	0
660	9	0	0	0	0	0	0	200	300	0	0	0	0	0	0	0	200	903	0	0	0	0	0	0	0	603	903	0
661	0	0	0	0	0	0	0	200	300	0	0	0	0	0	0	0	200	903	0	0	0	0	0	0	0	603	903	0
661	1	0	0	0	0	0	0	200	300	0	0	0	0	0	0	0	200	903	0	0	0	0	0	0	0	603	903	0
661	2	0	0	0	0	0	0	200	300	0	0	0	0	0	0	0	200	903	0	0	0	0	0	0	0	603	903	0
661	3	0	0	0	0	0	0	200	300	0	0	0	0	0	0	0	200	903	0	0	0	0	0	0	0	603	903	0
661	4	0	0	0	0	0	0	200	300	0	0	0	0	0	0	0	200	903	0	0	0	0	0	0	0	603	903	0
661	5	0	0	0	0	0	0	200	300	0	0	0	0	0	0	0	200	903	0	0	0	0	0	0	0	603	903	0
661	6	0	0	0	0	0	0	200	300	0	0	0	0	0	0	0	200	903	0	0	0	0	0	0	0	603	903	0
661	7	0	0	0	0	0	0	200	300	0	0	0	0	0	0	0	200	903	0	0	0	0	0	0	0	603	903	0
661	8	0	0	0	0	0	0	200	300	0	0	0	0	0	0	0	200	903	0	0	0	0	0	0	0	603	903	0
661	9	0	0	0	0	0	0	200	300	0	0	0	0	0	0	0	200	903	0	0	0	0	0	0	0	603	903	0
662	0	0	0	0	0	0	0	200	300	0	0	0	0	0	0	0	200	903	0	0	0	0	0	0	0	603	903	0
662	1	0	0	0	0	0	0	200	300	0	0	0	0	0	0	0	200	903	0	0	0	0	0	0	0	603	903	0
662	2	0	0	0	0	0	0	200	300	0	0	0	0	0	0	0	200	903	0	0	0	0	0	0	0	603	903	0
662	3	0	0	0	0	0	0	200	300	0	0	0	0	0	0	0	200	903	0	0	0	0	0	0	0	603	903	0
662	4	0	0	0	0	0	0	200	300	0	0	0	0	0	0	0	200	903	0	0	0	0	0	0	0	603	903	0
662	5	0	0	0	0	0	0	200	300	0	0	0	0	0	0	0	200	903	0	0	0	0	0	0	0	603	903	0
662	6	0	0	0	0	0	0	200	300	0	0	0	0	0	0	0	200	903	0	0	0	0	0	0	0	603	903	0
662	7	0	0	0	0	0	0	200	300	0	0	0	0	0	0	0	200	903	0	0	0	0	0	0	0	603	903	0
662	8	0	0	0	0	0	0	200	300	0	0	0	0	0	0	0	200	903	0	0	0	0	0	0	0	603	903	0
662	9	0	0	0	0	0	0	200	300	0	0	0	0	0	0	0	200	903	0	0	0	0	0	0	0	603	903	0
663	0	0	0	0	0	0	0	200	300	0	0	0	0	0	0	0	200	903	0	0	0	0	0	0	0	603	903	0
663	1	0	0	0	0	0	0	200	300	0	0	0	0	0	0	0	200	903	0	0	0	0	0	0	0	603	903	0
663	2	0	0	0	0	0	0	200	300	0	0	0	0	0	0	0	200	903	0	0	0	0	0	0	0	603	903	0
663	3	0	0	0	0	0	0	200	300	0	0	0	0	0	0	0	200	903	0	0	0	0	0	0	0	603	903	0
663	4	0	0	0	0	0	0	200	300	0	0	0	0	0	0	0	200	903	0	0	0	0	0	0	0	603	903	0
663	5	0	0	0	0	0	0	200	300	0	0	0	0	0	0	0	200	903	0	0	0	0	0	0	0	603	903	0
663	6	0	0	0	0	0	0	200	300	0	0	0	0	0	0	0	200	903	0	0	0	0	0	0	0	603	903	0
663	7	0	0	0	0	0	0	200	300	0	0	0	0	0	0	0	200	903	0	0	0	0	0	0	0	603	903	0
663	8	0	0	0	0	0	0	200	300	0	0	0	0	0	0	0	200	903	0	0	0	0	0	0	0	603	903	0
663	9	0	0	0	0	0	0	200	300	0	0	0	0	0	0	0	200	903	0	0	0	0	0	0	0	603	903	0
664	0	0	0	0	0	0	0	200	300	0	0	0	0	0	0	0	200	903	0	0	0	0	0	0	0	603	903	0
664	1	0	0	0	0	0	0	200	300	0	0	0	0	0	0	0	200	903	0	0	0	0	0	0	0	603	903	0
664	2	0	0	0	0	0	0	200	300	0	0	0	0	0	0	0	200	903	0	0	0	0	0	0	0	603	903	0
664	3	0	0	0	0	0	0	200	300	0	0	0	0	0	0	0	200	903	0	0	0	0	0	0	0	603	903	0
664	4	0	0	0	0	0	0	200	300	0	0	0	0	0	0	0	200	903	0	0	0	0	0	0	0	603	903	0
664	5	0	0	0	0	0	0	200	300	0	0	0	0	0	0	0	200	903	0	0	0	0	0	0	0	603	903	0
664	6	0	0	0	0	0	0	200	300	0	0	0	0	0	0	0	200	903	0	0	0	0	0	0	0	603	903	0
664	7	0	0	0	0	0	0	200	300	0	0	0	0	0	0	0	200	903	0	0	0	0	0	0	0	603	903	0
664	8	0	0	0	0	0	0	200	300	0	0	0	0	0	0	0	200	903	0	0	0	0	0	0	0	603	903	0
664	9	0	0	0	0	0	0	200	300	0	0	0	0	0	0	0	200	903	0	0	0	0	0	0	0	603	903	0
665	0	0	0	0	0	0	0	200	300	0	0	0	0	0	0	0	200	903	0	0	0	0	0	0	0	603	903	0
665	1	0	0	0	0	0	0	200	300	0	0	0	0	0	0	0	200	903	0	0	0	0	0	0	0	603	903	0
665	2	0	0	0	0	0	0	200	300	0	0	0	0	0	0	0	200	903	0	0	0	0	0	0	0	603	903	0
665	3	0	0	0	0	0	0	200	300	0	0	0	0	0	0	0	200	903	0	0	0	0	0	0	0	603	903	0
665	4	0	0	0	0	0	0	200	300	0	0	0	0	0	0	0	200	903	0	0	0	0	0	0	0	603	903	0
665	5	0	0	0	0	0	0	200	300	0	0	0	0	0	0	0	200	903	0	0	0	0	0	0	0	603	903	0
665	6	0	0	0	0	0	0	200	300	0	0	0	0	0	0	0	200	903	0	0	0	0	0	0	0	603	903	0
665	7	0	0	0	0	0	0	200	300	0	0	0	0	0	0	0	200	903	0	0	0	0	0	0	0	603	903	0
665	8	0	0	0	0	0	0	200	300	0	0	0	0	0	0	0	200	903	0	0	0	0	0	0	0	603	903	0
665	9	0	0	0	0	0	0	200	300	0	0	0	0	0	0	0	200	903	0	0	0	0	0	0	0	603	903	0
666	0	0	0	0	0	0	0	200	300	0	0	0	0	0	0	0	200	903	0	0	0	0	0	0	0	603	903	0
666	1	0	0	0	0	0	0	200	300	0	0	0	0	0	0	0	200	903	0	0	0	0	0	0	0	603	903	0
666	2	0	0	0	0	0	0	200	300	0	0	0	0	0	0	0	200	903	0	0	0	0	0	0	0	603	903	0
666	3	0	0	0	0	0	0	200	300	0	0	0	0	0	0	0	200	903	0	0	0	0	0	0	0	603	903	0
666	4	0	0	0	0	0	0	200	300	0	0	0	0	0	0	0	200	903	0	0	0	0	0	0	0	603	903	0
666	5	0	0	0	0	0	0	200	300	0	0	0	0	0	0	0	200	903	0	0	0	0	0	0	0	603	903	0
666	6	0	0	0	0	0	0	200	300	0	0	0	0	0	0	0	200	903	0	0	0	0	0	0	0	603	903	0
666	7	0	0	0	0	0	0	200	300	0	0	0	0	0	0	0	200	903	0	0	0	0	0	0	0	603	903	0
666	8	0	0	0	0	0	0	200	300	0	0	0	0	0	0	0	200	903	0	0	0	0	0	0	0	603	903	0
666	9	0	0	0	0	0	0	200	300	0	0	0	0	0	0	0	200	903	0	0	0	0	0	0	0	603	903	0
667	0	0	0	0	0	0	0	200	300	0	0	0	0	0	0	0	200	903	0	0	0	0	0	0	0	603	903	0
667	1	0	0	0	0	0	0	200	300	0	0	0	0	0	0	0	200	903	0	0	0	0	0	0	0	603	903	0
667	2	0	0	0	0	0	0	200	300	0	0	0	0	0	0	0	200	903	0	0	0	0	0	0	0	603	903	0
667	3	0	0	0	0	0	0	200	300	0	0	0	0	0	0	0	200	903	0	0	0	0	0	0	0	603	903	0
667	4	0	0	0	0	0	0	200	300	0	0	0	0	0	0	0	200	903	0	0	0	0	0	0	0	603	903	0
667	5	0	0	0	0	0	0	200	300	0	0	0	0	0	0	0	200	903	0	0	0	0	0	0	0	603	903	0
667	6	0	0	0	0	0	0	200	300	0	0	0	0	0	0	0	200	903	0	0	0	0	0	0	0	603	903	0
667	7	0	0	0	0	0	0	200	300	0	0	0	0	0	0	0	200	903	0	0	0	0	0	0	0	603	903	0
667	8	0	0	0	0	0	0	200	300	0	0	0	0	0	0	0	200	903	0	0	0	0	0	0	0	603	903	0
667	9	0	0	0	0	0	0	200	300	0	0	0	0	0	0	0	200	903	0	0	0	0	0	0	0	603	903	0
668	0	0	0	0	0	0	0	200	300	0	0	0	0	0	0	0	200	903	0	0	0	0	0	0	0	603	903	0
668	1	0	0	0	0	0	0	200	300	0	0	0	0	0	0	0	200	903	0	0	0	0	0	0	0	603	903	0
668	2	0	0	0	0	0	0	200	300	0	0	0	0	0	0	0	200	903	0	0	0	0	0	0	0	603	903	0
668	3	0	0	0	0	0	0	200	300	0	0	0	0	0	0	0	200	903	0	0	0	0	0	0	0	603	903	0
668	4	0	0	0	0	0	0	200	300	0	0	0	0	0	0	0	200	903	0	0	0	0	0	0	0	603	903	0
668	5	0	0	0	0	0	0	200	300	0	0	0	0	0	0	0	200	903	0	0	0	0	0	0	0	603	903	0
668	6	0	0	0	0	0	0	200	300	0	0	0	0	0	0	0	200	903	0	0	0	0	0	0	0	603	903	0
668	7	0	0	0	0	0	0	200	300	0	0	0	0	0	0	0	200	903	0	0	0	0	0	0	0	603	903	0
668	8	0	0	0	0	0	0	200	300	0	0	0	0	0	0	0	200	903	0	0	0	0	0	0	0	603	903	0
668	9	0	0	0	0	0	0	200	300	0	0	0	0	0	0	0	200	903	0	0	0	0	0	0	0	603	903	0
669	0	0	0	0	0	0	0	200	300	0	0	0	0	0	0	0	200	903	0	0	0	0	0	0	0	603	903	0
669	1	0	0	0	0	0	0	200	300	0	0	0	0	0	0	0	200	903	0	0	0	0	0	0	0	603	903	0
669	2	0	0	0	0	0	0	200	300	0	0	0	0	0	0	0	200	903	0	0	0	0	0	0	0	603	903	0
669	3	0	0	0	0	0	0	200	300	0	0	0	0	0	0	0	200	903	0	0	0	0	0	0	0	603	903	0
669	4	0	0	0	0	0	0	200	300	0	0	0	0	0	0	0	200	903	0	0	0	0	0	0	0	603	903	0
669	5	0	0	0	0	0	0	200	300	0	0	0	0	0	0	0	200	903	0	0	0	0	0	0	0	603	903	0
669	6	0	0	0	0	0	0	200	300	0	0	0	0	0	0	0	200	903	0	0	0	0	0	0	0	603	903	0
669	7	0	0	0	0	0	0	200	300	0	0	0	0	0	0	0	200	903	0	0	0	0	0	0	0	603	903	0
669	8	0	0	0	0	0	0	200	300	0	0	0	0	0	0	0	200	903	0	0	0	0	0	0	0	603	903	0
669	9	0	0	0	0	0	0	200	300	0	0	0	0	0	0	0	200	903	0	0	0	0	0	0	0	603	903	0
670	0	0	0	0	0	0	0	200	300	0	0	0	0	0	0	0	200	903	0	0	0	0	0	0	0	603	903	0
670	1	0	0	0	0	0	0	200	300	0	0	0	0	0	0	0	200	903	0	0	0	0	0	0	0	603	903	0
670	2	0	0	0	0	0	0	200	300	0	0	0	0	0	0	0	200	903	0	0	0	0	0	0	0	603	903	0
670	3	0	0	0	0	0	0	200	300	0	0	0	0	0	0	0	200	903	0	0	0	0	0	0	0	603	903	0
670	4	0	0	0	0	0	0	200	300	0	0	0	0	0	0	0	200	903	0	0	0	0	0	0	0	603	903	0
670	5	0	0	0	0	0	0	200	300	0	0	0	0	0	0	0	200	903	0	0	0	0	0	0	0	603	903	0
670	6	0	0	0	0	0	0	200	300	0	0	0	0	0	0	0	200	903	0	0	0	0	0	0	0	603	903	0
670	7	0	0	0	0	0	0	200	300	0	0	0	0	0	0	0	200	903	0	0	0	0	0	0	0	603	903	0
670	8	0	0	0	0	0	0	200	300	0	0	0	0	0	0	0	200	903	0	0	0	0	0	0	0	603	903	0
670	9	0	0	0	0	0	0	200	300	0	0	0	0	0	0	0	200	903	0	0	0	0	0	0	0	603	903	0
671	0	0	0	0	0	0	0	200	300	0	0	0	0	0	0	0	200	903	0	0	0	0	0	0	0	603	903	0
671	1	0	0	0	0	0	0	200	300	0	0	0	0	0	0	0	200	903	0	0	0	0	0	0	0	603	903	0
671	2	0	0	0	0	0	0	200	300	0	0	0	0	0	0	0	200	903	0	0	0	0	0	0	0	603	903	0
671	3	0	0	0	0	0	0	200	300	0	0	0	0	0	0	0	200	903	0	0	0	0	0	0	0	603	903	0
671	4	0	0	0	0	0	0	200	300	0	0	0	0	0	0	0	200	903	0	0	0	0	0	0	0	603	903	0
671	5	0	0	0	0	0	0	200	300	0	0	0	0	0	0	0	200	903	0	0	0	0	0	0	0	603	903	0
671	6	0	0	0	0	0	0	200	300	0	0	0	0	0	0	0	200	903	0	0	0	0	0	0	0	603	903	0
671	7	0	0	0	0	0	0	200	300	0	0	0	0	0	0	0	200	903	0	0	0	0	0	0	0	603	903	0
671	8	0	0	0	0	0	0	200	300	0	0	0	0	0	0	0	200	903	0	0	0	0	0	0	0	603	903	0
671	9	0	0	0	0	0	0	200	300	0	0	0	0	0	0	0	200	903	0	0	0	0	0	0	0	603	903	0
672	0	0	0	0	0	0	0	200	300	0	0	0	0	0	0	0	200	903	0	0	0	0	0	0	0	603	903	0
672	1	0	0	0	0	0	0	200	300	0	0	0	0	0	0	0	200	903	0	0	0	0	0	0	0	603	903	0
672	2	0	0	0	0	0	0	200	300	0	0	0	0	0	0	0	200	903	0	0	0	0	0	0	0	603	903	0
672	3	0	0	0	0	0	0	200	300	0	0	0	0	0	0	0	200	903	0	0	0	0	0	0	0	603	903	0
672	4	0	0	0	0	0	0	200	300	0	0	0	0	0	0	0	200	903	0	0	0	0	0	0	0	603	903	0
672	5	0	0	0	0	0	0	200	300	0	0	0	0	0	0	0	200	903	0	0	0	0	0	0	0	603	903	0
672	6	0	0	0	0	0	0	200	300	0	0	0	0	0	0	0	200	903	0	0	0	0	0	0	0	603	903	0
672	7	0	0	0	0	0	0	200	300	0	0	0	0	0	0	0	200	903	0	0	0	0	0	0	0	603	903	0
672	8	0	0	0	0	0	0	200	300	0	0	0	0	0	0	0	200	903	0	0	0	0	0	0	0	603	903	0
672	9	0	0	0	0	0	0	200	300	0	0	0	0	0	0	0	200	903	0	0	0	0	0	0	0	603	903	0
673	0	0	0	0	0	0	0	200	300	0	0	0	0	0	0	0	200	903	0	0	0	0	0	0	0	603	903	0
673	1	0	0	0	0	0	0	200	300	0	0	0	0	0	0	0	200	903	0	0	0	0	0	0	0	603	903	0
673	2	0	0	0	0	0	0	200	300	0	0	0	0	0	0	0	200	903	0	0	0	0	0	0	0	603	903	0
673	3	0	0	0	0	0	0	200	300	0	0	0	0	0	0	0	200	903	0	0	0	0	0	0	0	603	903	0
673	4	0	0	0	0	0	0	200	300	0	0	0	0	0	0	0	200	903	0	0	0	0	0	0	0	603	903	0
673	5	0	0	0	0	0	0	200	300	0	0	0	0	0	0	0	200	903	0	0	0	0	0	0	0	603	903	0
673	6	0	0	0	0	0	0	200	300	0	0	0	0	0	0	0	200	903	0	0	0	0	0	0	0	603	903	0
673	7	0	0	0	0	0	0	200	300	0	0	0	0	0	0	0	200	903	0	0	0	0	0	0	0	603	903	0
673	8	0	0	0	0	0	0	200	300	0	0	0	0	0	0	0	200	903	0	0	0	0	0	0	0	603	903	0
673	9	0	0	0	0	0	0	200	300	0	0	0	0	0	0	0	200	903	0	0	0	0	0	0	0	603	903	0
674	0	0	0	0	0	0	0	200	300	0	0	0	0	0	0	0	200	903	0	0	0	0	0	0	0	603	903	0
674	1	0	0	0	0	0	0	200	300	0	0	0	0	0	0	0	200	903	0	0	0	0	0	0	0	603	903	0
674	2	0	0	0	0	0	0	200	300	0	0	0	0	0	0	0	200	903	0	0	0	0	0	0	0	603	903	0
674	3	0	0	0	0	0	0	200	300	0	0	0	0	0	0	0	200	903	0	0	0	0	0	0	0	603	903	0
674	4	0	0	0	0	0	0	200	300	0	0	0	0	0	0	0	200	903	0	0	0	0	0	0	0	603	903	0
674	5	0	0	0	0	0	0	200	300	0	0	0	0	0	0	0	200	903	0	0	0	0	0	0	0	603	903	0
674	6	0	0	0	0	0	0	200	300	0	0	0	0	0	0	0	200	903	0	0	0	0	0	0	0	603	903	0
674	7	0	0	0	0	0	0	200	300	0	0	0	0	0	0	0	200	903	0	0	0	0	0	0	0	603	903	0
674	8	0	0	0	0	0	0	200	300	0	0	0	0	0	0	0	200	903	0	0	0	0	0	0	0	603	903	0
674	9	0	0	0	0	0	0	200	300	0	0	0	0	0	0	0	200	903	0	0	0	0	0	0	0	603	903	0
675	0	0	0	0	0	0	0	200	300	0	0	0	0	0	0	0	200	903	0	0	0	0	0	0	0	603	903	0
675	1	0	0	0	0	0	0	200	300	0	0	0	0	0	0	0	200	903	0	0	0	0	0	0	0	603	903	0
675	2	0	0	0	0	0	0	200	300	0	0	0	0	0	0	0	200	903	0	0	0	0	0	0	0	603	903	0
675	3	0	0	0	0	0	0	200	300	0	0	0	0	0	0	0	200	903	0	0	0	0	0	0	0	603	903	0
675	4	0	0	0	0	0	0	200	300	0	0	0	0	0	0	0	200	903	0	0	0	0	0	0	0	603	903	0
675	5	0	0	0	0	0	0	200	300	0	0	0	0	0	0	0	200	903	0	0	0	0	0	0	0	603	903	0
675	6	0	0	0	0	0	0	200	300	0	0	0	0	0	0	0	200	903	0	0	0	0	0	0	0	603	903	0
675	7	0	0	0	0	0	0	200	300	0	0	0	0	0	0	0	200	903	0	0	0	0	0	0	0	603	903	0
675	8	0	0	0	0	0	0	200	300	0	0	0	0	0	0	0	200	903	0	0	0	0	0	0	0	603	903	0
675	9	0	0	0	0	0	0	200	300	0	0	0	0	0	0	0	200	903	0	0	0	0	0	0	0	603	903	0
676	0	0	0	0	0	0	0	200	300	0	0	0	0	0	0	0	200	903	0	0	0	0	0	0	0	603	903	0
676	1	0	0	0	0	0	0	200	300	0	0	0	0	0	0	0	200	903	0	0	0	0	0	0	0	603	903	0
676	2	0	0	0	0	0	0	200	300	0	0	0	0	0	0	0	200	903	0	0	0	0	0	0	0	603	903	0
676	3	0	0	0	0	0	0	200	300	0	0	0	0	0	0	0	200	903	0	0	0	0	0	0	0	603	903	0
676	4	0	0	0	0	0	0	200	300	0	0	0	0	0	0	0	200	903	0	0	0	0	0	0	0	603	903	0
676	5	0	0	0	0	0	0	200	300	0	0	0	0	0	0	0	200	903	0	0	0	0	0	0	0	603	903	0
676	6	0	0	0	0	0	0	200	300	0	0	0	0	0	0	0	200	903	0	0	0	0	0	0	0	603	903	0
676	7	0	0	0	0	0	0	200	300	0	0	0	0	0	0	0	200	903	0	0	0	0	0	0	0	603	903	0
676	8	0	0	0	0	0	0	200	300	0	0	0	0	0	0	0	200	903	0	0	0	0	0	0	0	603	903	0
676	9	0	0	0	0	0	0	200	300	0	0	0	0	0	0	0	200	903	0	0	0	0	0	0	0	603	903	0
677	0	0	0	0	0	0	0	200	300	0	0	0	0	0	0	0	200	903	0	0	0	0	0	0	0	603	903	0
677	1	0	0	0	0	0	0	200	300	0	0	0	0	0	0	0	200	903	0	0	0	0	0	0	0	603	903	0
677	2	0	0	0	0	0	0	200	300	0	0	0	0	0	0	0	200	903	0	0	0	0	0	0	0	603	903	0
677	3	0	0	0	0	0	0	200	300	0	0	0	0	0	0	0	200	903	0	0	0	0	0	0	0	603	903	0
677	4	0	0	0	0	0	0	200	300	0	0	0	0	0	0	0	200	903	0	0	0	0	0	0	0	603	903	0
677	5	0	0	0	0	0	0	200	300	0	0	0	0	0	0	0	200	903	0	0	0	0	0	0	0	603	903	0
677	6	0	0	0	0	0	0	200	300	0	0	0	0	0	0	0	200	903	0	0	0	0	0	0	0	603	903	0
677	7	0	0	0	0	0	0	200	300	0	0	0	0	0	0	0	200	903	0	0	0	0	0	0	0	603	903	0
677	8	0	0	0	0	0	0	200	300	0	0	0	0	0	0	0	200	903	0	0	0	0	0	0	0	603	903	0
677	9	0	0	0	0	0	0	200	300	0	0	0	0	0	0	0	200	903	0	0	0	0	0	0	0	603	903	0
678	0	0	0	0	0	0	0	200	300	0	0	0	0	0	0	0	200	903	0	0	0	0	0	0	0	603	903	0
678	1	0	0	0	0	0	0	200	300	0	0	0	0	0	0	0	200	903	0	0	0	0	0	0	0	603	903	0
678	2	0	0	0	0	0	0	200	300	0	0	0	0	0	0	0	200	903	0	0	0	0	0	0	0	603	903	0
678	3	0	0	0	0	0	0	200	300	0	0	0	0	0	0	0	200	903	0	0	0	0	0	0	0	603	903	0
678	4	0	0	0	0	0	0	200	300	0	0	0	0	0	0	0	200	903	0	0	0	0	0	0	0	603	903	0
678	5	0	0	0	0	0	0	200	300	0	0	0	0	0	0	0	200	903	0	0	0	0	0	0	0	603	903	0
678	6	0	0	0	0	0	0	200	300	0	0	0	0	0	0	0	200	903	0	0	0	0	0	0	0	603	903	0
678	7	0	0	0	0	0	0	200	300	0	0	0	0	0	0	0	200	903	0	0	0	0	0	0	0	603	903	0
678	8	0	0	0	0	0	0	200	300	0	0	0	0	0	0	0	200	903	0	0	0	0	0	0	0	603	903	0
678	9	0	0	0	0	0	0	200	300	0	0	0	0	0	0	0	200	903	0	0	0	0	0	0	0	603	903	0
679	0	0	0	0	0	0	0	200	300	0	0	0	0	0	0	0	200	903	0	0	0	0	0	0	0	603	903	0
679	1	0	0	0	0	0	0	200	300	0	0	0	0	0	0	0	200	903	0	0	0	0	0	0	0	603	903	0
679	2	0	0	0	0	0	0	200	300	0	0	0	0	0	0	0	200	903	0	0	0	0	0	0	0	603	903	0
679	3	0	0	0	0	0	0	200	300	0	0	0	0	0	0	0	200	903	0	0	0	0	0	0	0	603	903	0
679	4	0	0	0	0	0	0	200	300	0	0	0	0	0	0	0	200	903	0	0	0	0	0	0	0	603	903	0
679	5	0	0	0	0	0	0	200	300	0	0	0	0	0	0	0	200	903	0	0	0	0	0	0	0	603	903	0
679	6	0	0	0	0	0	0	200	300	0	0	0	0	0	0	0	200	903	0	0	0	0	0	0	0	603	903	0
679	7	0	0	0	0	0	0	200	300	0	0	0	0	0	0	0	200	903	0	0	0	0	0	0	0	603	903	0
679	8	0	0	0	0	0	0	200	300	0	0	0	0	0	0	0	200	903	0	0	0	0	0	0	0	603	903	0
679	9	0	0	0	0	0	0	200	300	0	0	0	0	0	0	0	200	903	0	0	0	0	0	0	0	603	903	0
680	0	0	0	0	0	0	0	200	300	0	0	0	0	0	0	0	200	903	0	0	0	0	0	0	0	603	903	0
680	1	0	0	0	0	0	0	200	300	0	0	0	0	0	0	0	200	903	0	0	0	0	0	0	0	603	903	0
680	2	0	0	0	0	0	0	200	300	0	0	0	0	0	0	0	200	903	0	0	0	0	0	0	0	603	903	0
680	3	0	0	0	0	0	0	200	300	0	0	0	0	0	0	0	200	903	0	0	0	0	0	0	0	603	903	0
680	4	0	0	0	0	0	0	200	300	0	0	0	0	0	0	0	200	903	0	0	0	0	0	0	0	603	903	0
680	5	0	0	0	0	0	0	200	300	0	0	0	0	0	0	0	200	903	0	0	0	0	0	0	0	603	903	0
680	6	0	0	0	0	0	0	200	300	0	0	0	0	0	0	0	200	903	0	0	0	0	0	0	0	603	903	0
680	7	0	0	0	0	0	0	200	300	0	0	0	0	0	0	0	200	903	0	0	0	0	0	0	0	603	903	0
680	8	0	0	0	0	0	0	200	300	0	0	0	0	0	0	0	200	903	0	0	0	0	0	0	0	603	903	0
680	9	0	0	0	0	0	0	200	300	0	0	0	0	0	0	0	200	903	0	0	0	0	0	0	0	603	903	0
681	0	0	0	0	0	0	0	200	300	0	0	0	0	0	0	0	200	903	0	0	0	0	0	0	0	603	903	0
681	1	0	0	0	0	0	0	200	300	0	0	0	0	0	0	0	200	903	0	0	0	0	0	0	0	603	903	0
681	2	0	0	0	0	0	0	200	300	0	0	0	0	0	0	0	200	903	0	0	0	0	0	0	0	603	903	0
681	3	0	0	0	0	0	0	200	300	0	0	0	0	0	0	0	200	903	0	0	0	0	0	0	0	603	903	0
681	4	0	0	0	0	0	0	200	300	0	0	0	0	0	0	0	200	903	0	0	0	0	0	0	0	603	903	0
681	5	0	0	0	0	0	0	200	300	0	0	0	0	0	0	0	200	903	0	0	0	0	0	0	0	603	903	0
681	6	0	0	0	0	0	0	200	300	0	0	0	0	0	0	0	200	903	0	0	0	0	0	0	0	603	903	0
681	7	0	0	0	0	0	0	200	300	0	0	0	0	0	0	0	200	903	0	0	0	0	0	0	0	603	903	0
681	8	0	0	0	0	0	0	200	300	0	0	0	0	0	0	0	200	903	0	0	0	0	0	0	0	603	903	0
681	9	0	0	0	0	0	0	200	300	0	0	0	0	0	0	0	200	903	0	0	0	0	0	0	0	603	903	0
682	0	0	0	0	0	0	0	200	300	0	0	0	0	0	0	0	200	903	0	0	0	0	0	0	0	603	903	0
682	1	0	0	0	0	0	0	200	300	0	0	0	0	0	0	0	200	903	0	0	0	0	0	0	0	603	903	0
682	2	0	0	0	0	0	0	200	300	0	0	0	0	0	0	0	200	903	0	0	0	0	0	0	0	603	903	0
682	3	0	0	0	0	0	0	200	300	0	0	0	0	0	0	0	200	903	0	0	0	0	0	0	0	603	903	0
682	4	0	0	0	0	0	0	200	300	0	0	0	0	0	0	0	200	903	0	0	0	0	0	0	0	603	903	0
682	5	0	0	0	0	0	0	200	300	0	0	0	0	0	0	0	200	903	0	0	0	0	0	0	0	603	903	0
682	6	0	0	0	0	0	0	200	300	0	0	0	0	0	0	0	200	903	0	0	0	0	0	0	0	603	903	0
682	7	0	0	0	0	0	0	200	300	0	0	0	0	0	0	0	200	903	0	0	0	0	0	0	0	603	903	0
682	8	0	0	0	0	0	0	200	300	0	0	0	0	0	0	0	200	903	0	0	0	0	0	0	0	603	903	0
682	9	0	0	0	0	0	0	200	300	0	0	0	0	0	0	0	200	903	0	0	0	0	0	0	0	603	903	0
683	0	0	0	0	0	0	0	200	300	0	0	0	0	0	0	0	200	903	0	0	0	0	0	0	0	603	903	0
683	1	0	0	0	0	0	0	200	300	0	0	0	0	0	0	0	200	903	0	0	0	0	0	0	0	603	903	0
683	2	0	0	0	0	0	0	200	300	0	0	0	0	0	0	0	200	903	0	0	0	0	0	0	0	603	903	0
683	3	0	0	0	0	0	0	200	300	0	0	0	0	0	0	0	200	903	0	0	0	0	0	0	0	603	903	0
683	4	0	0	0	0	0	0	200	300	0	0	0	0	0	0	0	200	903	0	0	0	0	0	0	0	603	903	0
683	5	0	0	0	0	0	0	200	300	0	0	0	0	0	0	0	200	903	0	0	0	0	0	0	0	603	903	0
683	6	0	0	0	0	0	0	200	300	0	0	0	0	0	0	0	200	903	0	0	0	0	0	0	0	603	903	0
683	7	0	0	0	0	0	0	200	300	0	0	0	0	0	0	0	200	903	0	0	0	0	0	0	0	603	903	0
683	8	0	0	0	0	0	0	200	300	0	0	0	0	0	0	0	200	903	0	0	0	0	0	0	0	603	903	0
683	9	0	0	0	0	0	0	200	300	0	0	0	0	0	0	0	200	903	0	0	0	0	0	0	0	603	903	0
684	0	0	0	0	0	0	0	200	300	0	0	0	0	0	0	0	200	903	0	0	0	0	0	0	0	603	903	0
684	1	0	0	0	0	0	0	200	300	0	0	0	0	0	0	0	200	903	0	0	0	0	0	0	0	603	903	0
684	2	0	0	0	0	0	0	200	300	0	0	0	0	0	0	0	200	903	0	0	0	0	0	0	0	603	903	0
684	3	0	0	0	0	0	0	200	300	0	0	0	0	0	0	0	200	903	0	0	0	0	0	0	0	603	903	0
684	4	0	0	0	0	0	0	200	300	0	0	0	0	0	0	0	200	903	0	0	0	0	0	0	0	603	903	0
684	5	0	0	0	0	0	0	200	300	0	0	0	0	0	0	0	200	903	0	0	0	0	0	0	0	603	903	0
684	6	0	0	0	0	0	0	200	300	0	0	0	0	0	0	0	200	903	0	0	0	0	0	0	0	603	903	0
684	7	0	0	0	0	0	0	200	300	0	0	0	0	0	0	0	200	903	0	0	0	0	0	0	0	603	903	0
684	8	0	0	0	0	0	0	200	300	0	0	0	0	0	0	0	200	903	0	0	0	0	0	0	0	603	903	0
684	9	0	0	0	0	0	0	200	300	0	0	0	0	0	0	0	200	903	0	0	0	0	0	0	0	603	903	0
685	0	0	0	0	0	0	0	200	300	0	0	0	0	0	0	0	200	903	0	0	0	0	0	0	0	603	903	0
685	1	0	0	0	0	0	0	200	300	0	0	0	0	0	0	0	200	903	0	0	0	0	0	0	0	603	903	0
685	2	0	0	0	0	0	0	200	300	0	0	0	0	0	0	0	200	903	0	0	0	0	0	0	0	603	903	0
685	3	0	0	0	0	0	0	200	300	0	0	0	0	0	0	0	200	903	0	0	0	0	0	0	0	603	903	0
685	4	0	0	0	0	0	0	200	300	0	0	0	0	0	0	0	200	903	0	0	0	0	0	0	0	603	903	0
685	5	0	0	0	0	0	0	200	300	0	0	0	0	0	0	0	200	903	0	0	0	0	0	0	0	603	903	0
685	6	0	0	0	0	0	0	200	300	0	0	0	0	0	0	0	200	903	0	0	0	0	0	0	0	603	903	0
685	7	0	0	0	0	0	0	200	300	0	0	0	0	0	0	0	200	903	0	0	0	0	0	0	0	603	903	0
685	8	0	0	0	0	0	0	200	300	0	0	0	0	0	0	0	200	903	0	0	0	0	0	0	0	603	903	0
685	9	0	0	0	0	0	0	200	300	0	0	0	0	0	0	0	200	903	0	0	0	0	0	0	0	603	903	0
686	0	0	0	0	0	0	0	200	300	0	0	0	0	0	0	0	200	903	0	0	0	0	0	0	0	603	903	0
686	1	0	0	0	0	0	0	200	300	0	0	0	0	0	0	0	200	903	0	0	0	0	0	0	0	603	903	0
686	2	0	0	0	0	0	0	200	300	0	0	0	0	0	0	0	200	903	0	0	0	0	0	0	0	603	903	0
686	3	0	0	0	0	0	0	200	300	0	0	0	0	0	0	0	200	903	0	0	0	0	0	0	0	603	903	0
686	4	0	0	0	0	0	0	200	300	0	0	0	0	0	0	0	200	903	0	0	0	0	0	0	0	603	903	0
686	5	0	0	0	0	0	0	200	300	0	0	0	0	0	0	0	200	903	0	0	0	0	0	0	0	603	903	0
686	6	0	0	0	0	0	0	200	300	0	0	0	0	0	0	0	200	903	0	0	0	0	0	0	0	603	903	0
686	7	0	0	0	0	0	0	200	300	0	0	0	0	0	0	0	200	903	0	0	0	0	0	0	0	603	903	0
686	8	0	0	0	0	0	0	200	300	0	0	0	0	0	0	0	200	903	0	0	0	0	0	0	0	603	903	0
686	9	0	0	0	0	0	0	200	300	0	0	0	0	0	0	0	200	903	0	0	0	0	0	0	0	603	903	0
687	0	0	0	0	0	0	0	200	300	0	0	0	0	0	0	0	200	903	0	0	0	0	0	0	0	603	903	0
687	1	0	0	0	0	0	0	200	300	0	0	0	0	0	0	0	200	903	0	0	0	0	0	0	0	603	903	0
687	2	0	0	0	0	0	0	200	300	0	0	0	0	0	0	0	200	903	0	0	0	0	0	0	0	603	903	0
687	3	0	0	0	0	0	0	200	300	0	0	0	0	0	0	0	200	903	0	0	0	0	0	0	0	603	903	0
687	4	0	0	0	0	0	0	200	300	0	0	0	0	0	0	0	200	903	0	0	0	0	0	0	0	603	903	0
687	5	0	0	0	0	0	0	200	300	0	0	0	0	0	0	0	200	903	0	0	0	0	0	0	0	603	903	0
687	6	0	0	0	0	0	0	200	300	0	0	0	0	0	0	0	200	903	0	0	0	0	0	0	0	603	903	0
687	7	0	0	0	0	0	0	200	300	0	0	0	0	0	0	0	200	903	0	0	0	0	0	0	0	603	903	0
687	8	0	0	0	0	0	0	200	300	0	0	0	0	0	0	0	200	903	0	0	0	0	0	0	0	603	903	0
687	9	0	0	0	0	0	0	200	300	0	0	0	0	0	0	0	200	903	0	0	0	0	0	0	0	603	903	0
688	0	0	0	0	0	0	0	200	300	0	0	0	0	0	0	0	200	903	0	0	0	0	0	0	0	603	903	0
688	1	0	0	0	0	0	0	200	300	0	0	0	0	0	0	0	200	903	0	0	0	0	0	0	0	603	903	0
688	2	0	0	0	0	0	0	200	300	0	0	0	0	0	0	0	200	903	0	0	0	0	0	0	0	603	903	0
688	3	0	0	0	0	0	0	200	300	0	0	0	0	0	0	0	200	903	0	0	0	0	0	0	0	603	903	0
688	4	0	0	0	0	0	0	200	300	0	0	0	0	0	0	0	200	903	0	0	0	0	0	0	0	603	903	0
688	5	0	0	0	0	0	0	200	300	0	0	0	0	0	0	0	200	903	0	0	0	0	0	0	0	603	903	0
688	6	0	0	0	0	0	0	200	300	0	0	0	0	0	0	0	200	903	0	0	0	0	0	0	0	603	903	0
688	7	0	0	0	0	0	0	200	300	0	0	0	0	0	0	0	200	903	0	0	0	0	0	0	0	603	903	0
688	8	0	0	0	0	0	0	200	300	0	0	0	0	0	0	0	200	903	0	0	0	0	0	0	0	603	903	0
688	9	0	0	0	0	0	0	200	300	0	0	0	0	0	0	0	200	903	0	0	0	0	0	0	0	603	903	0
689	0	0	0	0	0	0	0	200	300	0	0	0	0	0	0	0	200	903	0	0	0	0	0	0	0	603	903	0
689	1	0	0	0	0	0	0	200	300	0	0	0	0	0	0	0	200	903	0	0	0	0	0	0	0	603	903	0
689	2	0	0	0	0	0	0	200	300	0	0	0	0	0	0	0	200	903	0	0	0	0	0	0	0	603	903	0
689	3	0	0	0	0	0	0	200	300	0	0	0	0	0	0	0	200	903	0	0	0	0	0	0	0	603	903	0
689	4	0	0	0	0	0	0	200	300	0	0	0	0	0	0	0	200	903	0	0	0	0	0	0	0	603	903	0
689	5	0	0	0	0	0	0	200	300	0	0	0	0	0	0	0	200	903	0	0	0	0	0	0	0	603	903	0
689	6	0	0	0	0	0	0	200	300	0	0	0	0	0	0	0	200	903	0	0	0	0	0	0	0	603	903	0
689	7	0	0	0	0	0	0	200	300	0	0	0	0	0	0	0	200	903	0	0	0	0	0	0	0	603	903	0
689	8	0	0	0	0	0	0	200	300	0	0	0	0	0	0	0	200	903	0	0	0	0	0	0	0	603	903	0
689	9	0	0	0	0	0	0	200	300	0	0	0	0	0	0	0	200	903	0	0	0	0	0	0	0	603	903	0
690	0	0	0	0	0	0	0	200	300	0	0	0	0	0	0	0	200	903	0	0	0	0	0	0	0	603	903	0
690	1	0	0	0	0	0	0	200	300	0	0	0	0	0	0	0	200	903	0	0	0	0	0	0	0	603	903	0
690	2	0	0	0	0	0	0	200	300	0	0	0	0	0	0	0	200	903	0	0	0	0	0	0	0	603	903	0
690	3	0	0	0	0	0	0	200	300	0	0	0	0	0	0	0	200	903	0	0	0	0	0	0	0	603	903	0
690	4	0	0	0	0	0	0	200	300	0	0	0	0	0	0	0	200	903	0	0	0	0	0	0	0	603	903	0
690	5	0	0	0	0	0	0	200	300	0	0	0	0	0	0	0	200	903	0	0	0	0	0	0	0	603	903	0
690	6	0	0	0	0	0	0	200	300	0	0	0	0	0	0	0	200	903	0	0	0	0	0	0	0	603	903	0
690	7	0	0	0	0	0	0	200	300	0	0	0	0	0	0	0	200	903	0	0	0	0	0	0	0	603	903	0
690	8	0	0	0	0	0	0	200	300	0	0	0	0	0	0	0	200	903	0	0	0	0	0	0	0	603	903	0
690	9	0	0	0	0	0	0	200	300	0	0	0	0	0	0	0	200	903	0	0	0	0	0	0	0	603	903	0
691	0	0	0	0	0	0	0	200	300	0	0	0	0	0	0	0	200	903	0	0	0	0	0	0	0	603	903	0
691	1	0	0	0	0	0	0	200	300	0	0	0	0	0	0	0	200	903	0	0	0	0	0	0	0	603	903	0
691	2	0	0	0	0	0	0	200	300	0	0	0	0	0	0	0	200	903	0	0	0	0	0	0	0	603	903	0
691	3	0	0	0	0	0	0	200	300	0	0	0	0	0	0	0	200	903	0	0	0	0	0	0	0	603	903	0
691	4	0	0	0	0	0	0	200	300	0	0	0	0	0	0	0	200	903	0	0	0	0	0	0	0	603	903	0
691	5	0	0	0	0	0	0	200	300	0	0	0	0	0	0	0	200	903	0	0	0	0	0	0	0	603	903	0
691	6	0	0	0	0	0	0	200	300	0	0	0	0	0	0	0	200	903	0	0	0	0	0	0	0	603	903	0
691	7	0	0	0	0	0	0	200	300	0	0	0	0	0	0	0	200	903	0	0	0	0	0	0	0	603	903	0
691	8	0	0	0	0	0	0	200	300	0	0	0	0	0	0	0	200	903	0	0	0	0	0	0	0	603	903	0
691	9	0	0	0	0	0	0	200	300	0	0	0	0	0	0	0	200	903	0	0	0	0	0	0	0	603	903	0
692	0	0	0	0	0	0	0	200	300	0	0	0	0	0	0	0	200	903	0	0	0	0	0	0	0	603	903	0
692	1	0	0	0	0	0	0	200	300	0	0	0	0	0	0	0	200	903	0	0	0	0	0	0	0	603	903	0
692	2	0	0	0	0	0	0	200	300	0	0	0	0	0	0	0	200	903	0	0	0	0	0	0	0	603	903	0
692	3	0	0	0	0	0	0	200	300	0	0	0	0	0	0	0	200	903	0	0	0	0	0	0	0	603	903	0
692	4	0	0	0	0	0	0	200	300	0	0	0	0	0	0	0	200	903	0	0	0	0	0	0	0	603	903	0
692	5	0	0	0	0	0	0	200	300	0	0	0	0	0	0	0	200	903	0	0	0	0	0	0	0	603	903	0
692	6	0	0	0	0	0	0	200	300	0	0	0	0	0	0	0	200	903	0	0	0	0	0	0	0	603	903	0
692	7	0	0	0	0	0	0	200	300	0	0	0	0	0	0	0	200	903	0	0	0	0	0	0	0	603	903	0
692	8	0	0	0	0	0	0	200	300	0	0	0	0	0	0	0	200	903	0	0	0	0	0	0	0	603	903	0
692	9	0	0	0	0	0	0	200	300	0	0	0	0	0	0	0	200	903	0	0	0	0	0	0	0	603	903	0
693	0	0	0	0	0	0	0	200	300	0	0	0	0	0	0	0	200	903	0	0	0	0	0	0	0	603	903	0
693	1	0	0	0	0	0	0	200	300	0	0	0	0	0	0	0	200	903	0	0	0	0	0	0	0	603	903	0
693	2	0	0	0	0	0	0	200	300	0	0	0	0	0	0	0	200	903	0	0	0	0	0	0	0	603	903	0
693	3	0	0	0	0	0	0	200	300	0	0	0	0	0	0	0	200	903	0	0	0	0	0	0	0	603	903	0
693	4	0	0	0	0	0	0	200	300	0	0	0	0	0	0	0	200	903	0	0	0	0	0	0	0	603	903	0
693	5	0	0	0	0	0	0	200	300	0	0	0	0	0	0	0	200	903	0	0	0	0	0	0	0	603	903	0
693	6	0	0	0	0	0	0	200	300	0	0	0	0	0	0	0	200	903	0	0	0	0	0	0	0	603	903	0
693	7	0	0	0	0	0	0	200	300	0	0	0	0	0	0	0	200	903	0	0	0	0	0	0	0	603	903	0
693	8	0	0	0	0	0	0	200	300	0	0	0	0	0	0	0	200	903	0	0	0	0	0	0	0	603	903	0
693	9	0	0	0	0	0	0	200	300	0	0	0	0	0	0	0	200	903	0	0	0	0	0	0	0	603	903	0
694	0	0	0	0	0	0	0	200	300	0	0	0	0	0	0	0	200	903	0	0	0	0	0	0	0	603	903	0
694	1	0	0	0	0	0	0	200	300	0	0	0	0	0	0	0	200	903	0	0	0	0	0	0	0	603	903	0
694	2	0	0	0	0	0	0	200	300	0	0	0	0	0	0	0	200	903	0	0	0	0	0	0	0	603	903	0
694	3	0	0	0	0	0	0	200	300	0	0	0	0	0	0	0	200	903	0	0	0	0	0	0	0	603	903	0
694	4	0	0	0	0	0	0	200	300	0	0	0	0	0	0	0	200	903	0	0	0	0	0	0	0	603	903	0
694	5	0	0	0	0	0	0	200	300	0	0	0	0	0	0	0	200	903	0	0	0	0	0	0	0	603	903	0
694	6	0	0	0	0	0	0	200	300	0	0	0	0	0	0	0	200	903	0	0	0	0	0	0	0	603	903	0
694	7	0	0	0	0	0	0	200	300	0	0	0	0	0	0	0	200	903	0	0	0	0	0	0	0	603	903	0
694	8	0	0	0	0	0	0	200	300	0	0	0	0	0	0	0	200	903	0	0	0	0	0	0	0	603	903	0
694	9	0	0	0	0	0	0	200	300	0	0	0	0	0	0	0	200	903	0	0	0	0	0	0	0	603	903	0
695	0	0	0	0	0	0	0	200	300	0	0	0	0	0	0	0	200	903	0	0	0	0	0	0	0	603	903	0
695	1	0	0	0	0	0	0	200	300	0	0	0	0	0	0	0	200	903	0	0	0	0	0	0	0	603	903	0
695	2	0	0	0	0	0	0	200	300	0	0	0	0	0	0	0	200	903	0	0	0	0	0	0	0	603	903	0
695	3	0	0	0	0	0	0	200	300	0	0	0	0	0	0	0	200	903	0	0	0	0	0	0	0	603	903	0
695	4	0	0	0	0	0	0	200	300	0	0	0	0	0	0	0	200	903	0	0	0	0	0	0	0	603	903	0
695	5	0	0	0	0	0	0	200	300	0	0	0	0	0	0	0	200	903	0	0	0	0	0	0	0	603	903	0
695	6	0	0	0	0	0	0	200	300	0	0	0	0	0	0	0	200	903	0	0	0	0	0	0	0	603	903	0
695	7	0	0	0	0	0	0	200	300	0	0	0	0	0	0	0	200	903	0	0	0	0	0	0	0	603	903	0
695	8	0	0	0	0	0	0	200	300	0	0	0	0	0	0	0	200	903	0	0	0	0	0	0	0	603	903	0
695	9	0	0	0	0	0	0	200	300	0	0	0	0	0	0	0	200	903	0	0	0	0	0	0	0	603	903	0
696	0	0	0	0	0	0	0	200	300	0	0	0	0	0	0	0	200	903	0	0	0	0	0	0	0	603	903	0
696	1	0	0	0	0	0	0	200	300	0	0	0	0	0	0	0	200	903	0	0	0	0	0	0	0	603	903	0
696	2	0	0	0	0	0	0	200	300	0	0	0	0	0	0	0	200	903	0	0	0	0	0	0	0	603	903	0
696	3	0	0	0	0	0	0	200	300	0	0	0	0	0	0	0	200	903	0	0	0	0	0	0	0	603	903	0
696	4	0	0	0	0	0	0	200	300	0	0	0	0	0	0	0	200	903	0	0	0	0	0	0	0	603	903	0
696	5	0	0	0	0	0	0	200	300	0	0	0	0	0	0	0	200	903	0	0	0	0	0	0	0	603	903	0
696	6	0	0	0	0	0	0	200	300	0	0	0	0	0	0	0	200	903	0	0	0	0	0	0	0	603	903	0
696	7	0	0	0	0	0	0	200	300	0	0	0	0	0	0	0	200	903	0	0	0	0	0	0	0	603	903	0
696	8	0	0	0	0	0	0	200	300	0	0	0	0	0	0	0	200	903	0	0	0	0	0	0	0	603	903	0
696	9	0	0	0	0	0	0	200	300	0	0	0	0	0	0	0	200	903	0	0	0	0	0	0	0	603	903	0
697	0	0	0	0	0	0	0	200	300	0	0	0	0	0	0	0	200	903	0	0	0	0	0	0	0	603	903	0
697	1	0	0	0	0	0	0	200	300	0	0	0	0	0	0	0	200	903	0	0	0	0	0	0	0	603	903	0
697	2	0	0	0	0	0	0	200	300	0	0	0	0	0	0	0	200	903	0	0	0	0	0	0	0	603	903	0
697	3	0	0	0	0	0	0	200	300	0	0	0	0	0	0	0	200	903	0	0	0	0	0	0	0	603	903	0
697	4	0	0	0	0	0	0	200	300	0	0	0	0	0	0	0	200	903	0	0	0	0	0	0	0	603	903	0
697	5	0	0	0	0	0	0	200	300	0	0	0	0	0	0	0	200	903	0	0	0	0	0	0	0	603	903	0
697	6	0	0	0	0	0	0	200	300	0	0	0	0	0	0	0	200	903	0	0	0	0	0	0	0	603	903	0
697	7	0	0	0	0	0	0	200	300	0	0	0	0	0	0	0	200	903	0	0	0	0	0	0	0	603	903	0
697	8	0	0	0	0	0	0	200	300	0	0	0	0	0	0	0	200	903	0	0	0	0	0	0	0	603	903	0
697	9	0	0	0	0	0	0	200	300	0	0	0	0	0	0	0	200	903	0	0	0	0	0	0	0	603	903	0
698	0	0	0	0	0	0	0	200	300	0	0	0	0	0	0	0	200	903	0	0	0	0	0	0	0	603	903	0
698	1	0	0	0	0	0	0	200	300	0	0	0	0	0	0	0	200	903	0	0	0	0	0	0	0	603	903	0
698	2	0	0	0	0	0	0	200	300	0	0	0	0	0	0	0	200	903	0	0	0	0	0	0	0	603	903	0
698	3	0	0	0	0	0	0	200	300	0	0	0	0	0	0	0	200	903	0	0	0	0	0	0	0	603	903	0
698	4	0	0	0	0	0	0	200	300	0	0	0	0	0	0	0	200	903	0	0	0	0	0	0	0	603	903	0
698	5	0	0	0	0	0	0	200	300	0	0	0	0	0	0	0	200	903	0	0	0	0	0	0	0	603	903	0
698	6	0	0	0	0	0	0	200	300	0	0	0	0	0	0	0	200	903	0	0	0	0	0	0	0	603	903	0
698	7	0	0	0	0	0	0	200	300	0	0	0	0	0	0	0	200	903	0	0	0	0	0	0	0	603	903	0
698	8	0	0	0	0	0	0	200	300	0	0	0	0	0	0	0	200	903	0	0	0	0	0	0	0	603	903	0
698	9	0	0	0	0	0	0	200	300	0	0	0	0	0	0	0	200	903	0	0	0	0	0	0	0	603	903	0
699	0	0	0	0	0	0	0	200	300	0	0	0	0	0	0	0	200	903	0	0	0	0	0	0	0	603	903	0
699	1	0	0	0	0	0	0	200	300	0	0	0	0	0	0	0	200	903	0	0	0	0	0	0	0	603	903	0
699	2	0	0	0	0	0	0	200	300	0	0	0	0	0	0	0	200	903	0	0	0	0	0	0	0	603	903	0
699	3	0	0	0	0	0	0	200	300	0	0	0	0	0	0	0	200	903	0	0	0	0	0	0	0	603	903	0
699	4	0	0	0	0	0	0	200	300	0	0	0	0	0	0	0	200	903	0	0	0	0	0	0	0	603	903	0
699	5	0	0	0	0	0	0	200	300	0	0	0	0	0	0	0	200	903	0	0	0	0	0	0	0	603	903	0
699	6	0	0	0	0	0	0	200	300	0	0	0	0	0	0	0	200	903	0	0	0	0	0	0	0	603	903	0
699	7	0	0	0	0	0	0	200	300	0	0	0	0	0	0	0	200	903	0	0	0	0	0	0	0	603	903	0
699	8	0	0	0	0	0	0	200	300	0	0	0	0	0	0	0	200	903	0	0	0	0	0	0	0	603	903	0
699	9	0	0	0	0	0	0	200	300	0	0	0	0	0	0	0	200	903	0	0	0	0	0	0	0	603	903	0
700	0	0	0	0	0	0	0	200	300	0	0	0	0	0	0	0	200	903	0	0	0	0	0	0	0	603	903	0
700	1	0	0	0	0	0	0	200	300	0	0	0	0	0	0	0	200	903	0	0	0	0	0	0	0	603	903	0
700	2	0	0	0	0	0	0	200	300	0	0	0	0	0	0	0	200	903	0	0	0	0	0	0	0	603	903	0
700	3	0	0	0	0	0	0	200	300	0	0	0	0	0	0	0	200	903	0	0	0	0	0	0	0	603	903	0
700	4	0	0	0	0	0	0	200	300	0	0	0	0	0	0	0	200	903	0	0	0	0	0	0	0	603	903	0
700	5	0	0	0	0	0	0	200	300	0	0	0	0	0	0	0	200	903	0	0	0	0	0	0	0	603	903	0
700	6	0	0	0	0	0	0	200	300	0	0	0	0	0	0	0	200	903	0	0	0	0	0	0	0	603	903	0
700	7	0	0	0	0	0	0	200	300	0	0	0	0	0	0	0	200	903	0	0	0	0	0	0	0	603	903	0
700	8	0	0	0	0	0	0	200	300	0	0	0	0	0	0	0	200	903	0	0	0	0	0	0	0	603	903	0
700	9	0	0	0	0	0	0	200	300	0	0	0	0	0	0	0	200	903	0	0	0	0	0	0	0	603	903	0
701	0	0	0	0	0	0	0	200	300	0	0	0	0	0	0	0	200	903	0	0	0	0	0	0	0	603	903	0
701	1	0	0	0	0	0	0	200	300	0	0	0	0	0	0	0	200	903	0	0	0	0	0	0	0	603	903	0
701	2	0	0	0	0	0	0	200	300	0	0	0	0	0	0	0	200	903	0	0	0	0	0	0	0	603	903	0
701	3	0	0	0	0	0	0	200	300	0	0	0	0	0	0	0	200	903	0	0	0	0	0	0	0	603	903	0
701	4	0	0	0	0	0	0	200	300	0	0	0	0	0	0	0	200	903	0	0	0	0	0	0	0	603	903	0
701	5	0	0	0	0	0	0	200	300	0	0	0	0	0	0	0	200	903	0	0	0	0	0	0	0	603	903	0
701	6	0	0	0	0	0	0	200	300	0	0	0	0	0	0	0	200	903	0	0	0	0	0	0	0	603	903	0
701	7	0	0	0	0	0	0	200	300	0	0	0	0	0	0	0	200	903	0	0	0	0	0	0	0	603	903	0
701	8	0	0	0	0	0	0	200	300	0	0	0	0	0	0	0	200	903	0	0	0	0	0	0	0	603	903	0
701	9	0	0	0	0	0	0	200	300	0	0	0	0	0	0	0	200	903	0	0	0	0	0	0	0	603	903	0
702	0	0	0	0	0	0	0	200	300	0	0	0	0	0	0	0	200	903	0	0	0	0	0	0	0	603	903	0
702	1	0	0	0	0	0	0	200	300	0	0	0	0	0	0	0	200	903	0	0	0	0	0	0	0	603	903	0
702	2	0	0	0	0	0	0	200	300	0	0	0	0	0	0	0	200	903	0	0	0	0	0	0	0	603	903	0
702	3	0	0	0	0	0	0	200	300	0	0	0	0	0	0	0	200	903	0	0	0	0	0	0	0	603	903	0
702	4	0	0	0	0	0	0	200	300	0	0	0	0	0	0	0	200	903	0	0	0	0	0	0	0	603	903	0
702	5	0	0	0	0	0	0	200	300	0	0	0	0	0	0	0	200	903	0	0	0	0	0	0	0	603	903	0
702	6	0	0	0	0	0	0	200	300	0	0	0	0	0	0	0	200	903	0	0	0	0	0	0	0	603	903	0
702	7	0	0	0	0	0	0	200	300	0	0	0	0	0	0	0	200	903	0	0	0	0	0	0	0	603	903	0
702	8	0	0	0	0	0	0	200	300	0	0	0	0	0	0	0	200	903	0	0	0	0	0	0	0	603	903	0
702	9	0	0	0	0	0	0	200	300	0	0	0	0	0	0	0	200	903	0	0	0	0	0	0	0	603	903	0
703	0	0	0	0	0	0	0	200	300	0	0	0	0	0	0	0	200	903	0	0	0	0	0	0	0	603	903	0
703	1	0	0	0	0	0	0	200	300	0	0	0	0	0	0	0	200	903	0	0	0	0	0	0	0	603	903	0
703	2	0	0	0	0	0	0	200	300	0	0	0	0	0	0	0	200	903	0	0	0	0	0	0	0	603	903	0
703	3	0	0	0	0	0	0	200	300	0	0	0	0	0	0	0	200	903	0	0	0	0	0	0	0	603	903	0
703	4	0	0	0	0	0	0	200	300	0	0	0	0	0	0	0	200	903	0	0	0	0	0	0	0	603	903	0
703	5	0	0	0	0	0	0	200	300	0	0	0	0	0	0	0	200	903	0	0	0	0	0	0	0	603	903	0
703	6	0	0	0	0	0	0	200	300	0	0	0	0	0	0	0	200	903	0	0	0	0	0	0	0	603	903	0
703	7	0	0	0	0	0	0	200	300	0	0	0	0	0	0	0	200	903	0	0	0	0	0	0	0	603	903	0
703	8	0	0	0	0	0	0	200	300	0	0	0	0	0	0	0	200	903	0	0	0	0	0	0	0	603	903	0
703	9	0	0	0	0	0	0	200	300	0	0	0	0	0	0	0	200	903	0	0	0	0	0	0	0	603	903	0
704	0	0	0	0	0	0	0	200	300	0	0	0	0	0	0	0	200	903	0	0	0	0	0	0	0	603	903	0
704	1	0	0	0	0	0	0	200	300	0	0	0	0	0	0	0	200	903	0	0	0	0	0	0	0	603	903	0
704	2	0	0	0	0	0	0	200	300	0	0	0	0	0	0	0	200	903	0	0	0	0	0	0	0	603	903	0
704	3	0	0	0	0	0	0	200	300	0	0	0	0	0	0	0	200	903	0	0	0	0	0	0	0	603	903	0
704	4	0	0	0	0	0	0	200	300	0	0	0	0	0	0	0	200	903	0	0	0	0	0	0	0	603	903	0
704	5	0	0	0	0	0	0	200	300	0	0	0	0	0	0	0	200	903	0	0	0	0	0	0	0	603	903	0
704	6	0	0	0	0	0	0	200	300	0	0	0	0	0	0	0	200	903	0	0	0	0	0	0	0	603	903	0
704	7	0	0	0	0	0	0	200	300	0	0	0	0	0	0	0	200	903	0	0	0	0	0	0	0	603	903	0
704	8	0	0	0	0	0	0	200	300	0	0	0	0	0	0	0	200	903	0	0	0	0	0	0	0	603	903	0
704	9	0	0	0	0	0	0	200	300	0	0	0	0	0	0	0	200	903	0	0	0	0	0	0	0	603	903	0
705	0	0	0	0	0	0	0	200	300	0	0	0	0	0	0	0	200	903	0	0	0	0	0	0	0	603	903	0
705	1	0	0	0	0	0	0	200	300	0	0	0	0	0	0	0	200	903	0	0	0	0	0	0	0	603	903	0
705	2	0	0	0	0	0	0	200	300	0	0	0	0	0	0	0	200	903	0	0	0	0	0	0	0	603	903	0
705	3	0	0	0	0	0	0	200	300	0	0	0	0	0	0	0	200	903	0	0	0	0	0	0	0	603	903	0
705	4	0	0	0	0	0	0	200	300	0	0	0	0	0	0	0	200	903	0	0	0	0	0	0	0	603	903	0
705	5	0	0	0	0	0	0	200	300	0	0	0	0	0	0	0	200	903	0	0	0	0	0	0	0	603	903	0
705	6	0	0	0	0	0	0	200	300	0	0	0	0	0	0	0	200	903	0	0	0	0	0	0	0	603	903	0
705	7	0	0	0	0	0	0	200	300	0	0	0	0	0	0	0	200	903	0	0	0	0	0	0	0	603	903	0
705	8	0	0	0	0	0	0	200	300	0	0	0	0	0	0	0	200	903	0	0	0	0	0	0	0	603	903	0
705	9	0	0	0	0	0	0	200	300	0	0	0	0	0	0	0	200	903	0	0	0	0	0	0	0	603	903	0
706	0	0	0	0	0	0	0	200	300	0	0	0	0	0	0	0	200	903	0	0	0	0	0	0	0	603	903	0
706	1	0	0	0	0	0	0	200	300	0	0	0	0	0	0	0	200	903	0	0	0	0	0	0	0	603	903	0
706	2	0	0	0	0	0	0	200	300	0	0	0	0	0	0	0	200	903	0	0	0	0	0	0	0	603	903	0
706	3	0	0	0	0	0	0	200	300	0	0	0	0	0	0	0	200	903	0	0	0	0	0	0	0	603	903	0
706	4	0	0	0	0	0	0	200	300	0	0	0	0	0	0	0	200	903	0	0	0	0	0	0	0	603	903	0
706	5	0	0	0	0	0	0	200	300	0	0	0	0	0	0	0	200	903	0	0	0	0	0	0	0	603	903	0
706	6	0	0	0	0	0	0	200	300	0	0	0	0	0	0	0	200	903	0	0	0	0	0	0	0	603	903	0
706	7	0	0	0	0	0	0	200	300	0	0	0	0	0	0	0	200	903	0	0	0	0	0	0	0	603	903	0
706	8	0	0	0	0	0	0	200	300	0	0	0	0	0	0	0	200	903	0	0	0	0	0	0	0	603	903	0
706	9	0	0	0	0	0	0	200	300	0	0	0	0	0	0	0	200	903	0	0	0	0	0	0	0	603	903	0
707	0	0	0	0	0	0	0	200	300	0	0	0	0	0	0	0	200	903	0	0	0	0	0	0	0	603	903	0
707	1	0	0	0	0	0	0	200	300	0	0	0	0	0	0	0	200	903	0	0	0	0	0	0	0	603	903	0
707	2	0	0	0	0	0	0	200	300	0	0	0	0	0	0	0	200	903	0	0	0	0	0	0	0	603	903	0
707	3	0	0	0	0	0	0	200	300	0	0	0	0	0	0	0	200	903	0	0	0	0	0	0	0	603	903	0
707	4	0	0	0	0	0	0	200	300	0	0	0	0	0	0	0	200	903	0	0	0	0	0	0	0	603	903	0
707	5	0	0	0	0	0	0	200	300	0	0	0	0	0	0	0	200	903	0	0	0	0	0	0	0	603	903	0
707	6	0	0	0	0	0	0	200	300	0	0	0	0	0	0	0	200	903	0	0	0	0	0	0	0	603	903	0
707	7	0	0	0	0	0	0	200	300	0	0	0	0	0	0	0	200	903	0	0	0	0	0	0	0	603	903	0
707	8	0	0	0	0	0	0	200	300	0	0	0	0	0	0	0	200	903	0	0	0	0	0	0	0	603	903	0
707	9	0	0	0	0	0	0	200	300	0	0	0	0	0	0	0	200	903	0	0	0	0	0	0	0	603	903	0
708	0	0	0	0	0	0	0	200	300	0	0	0	0	0	0	0	200	903	0	0	0	0	0	0	0	603	903	0
708	1	0	0	0	0	0	0	200	300	0	0	0	0	0	0	0	200	903	0	0	0	0	0	0	0	603	903	0
708	2	0	0	0	0	0	0	200	300	0	0	0	0	0	0	0	200	903	0	0	0	0	0	0	0	603	903	0
708	3	0	0	0	0	0	0	200	300	0	0	0	0	0	0	0	200	903	0	0	0	0	0	0	0	603	903	0
708	4	0	0	0	0	0	0	200	300	0	0	0	0	0	0	0	200	903	0	0	0	0	0	0	0	603	903	0
708	5	0	0	0	0	0	0	200	300	0	0	0	0	0	0	0	200	903	0	0	0	0	0	0	0	603	903	0
708	6	0	0	0	0	0	0	200	300	0	0	0	0	0	0	0	200	903	0	0	0	0	0	0	0	603	903	0
708	7	0	0	0	0	0	0	200	300	0	0	0	0	0	0	0	200	903	0	0	0	0	0	0	0	603	903	0
708	8	0	0	0	0	0	0	200	300	0	0	0	0	0	0	0	200	903	0	0	0	0	0	0	0	603	903	0
708	9	0	0	0	0	0	0	200	300	0	0	0	0	0	0	0	200	903	0	0	0	0	0	0	0	603	903	0
709	0	0	0	0	0	0	0	200	300	0	0	0	0	0	0	0	200	903	0	0	0	0	0	0	0	603	903	0
709	1	0	0	0	0	0	0	200	300	0	0	0	0	0	0	0	200	903	0	0	0	0	0	0	0	603	903	0
709	2	0	0	0	0	0	0	200	300	0	0	0	0	0	0	0	200	903	0	0	0	0	0	0	0	603	903	0
709	3	0	0	0	0	0	0	200	300	0	0	0	0	0	0	0	200	903	0	0	0	0	0	0	0	603	903	0
709	4	0	0	0	0	0	0	200	300	0	0	0	0	0	0	0	200	903	0	0	0	0	0	0	0	603	903	0
709	5	0	0	0	0	0	0	200	300	0	0	0	0	0	0	0	200	903	0	0	0	0	0	0	0	603	903	0
709	6	0	0	0	0	0	0	200	300	0	0	0	0	0	0	0	200	903	0	0	0	0	0	0	0	603	903	0
709	7	0	0	0	0	0	0	200	300	0	0	0	0	0	0	0	200	903	0	0	0	0	0	0	0	603	903	0
709	8	0	0	0	0	0	0	200	300	0	0	0	0	0	0	0	200	903	0	0	0	0	0	0	0	603	903	0
709	9	0	0	0	0	0	0	200	300	0	0	0	0	0	0	0	200	903	0	0	0	0	0	0	0	603	903	0
710	0	0	0	0	0	0	0	200	300	0	0	0	0	0	0	0	200	903	0	0	0	0	0	0	0	603	903	0
710	1	0	0	0	0	0	0	200	300	0	0	0	0	0	0	0	200	903	0	0	0	0	0	0	0	603	903	0
710	2	0	0	0	0	0	0	200	300	0	0	0	0	0	0	0	200	903	0	0	0	0	0	0	0	603	903	0
710	3	0	0	0	0	0	0	200	300	0	0	0	0	0	0	0	200	903	0	0	0	0	0	0	0	603	903	0
710	4	0	0	0	0	0	0	200	300	0	0	0	0	0	0	0	200	903	0	0	0	0	0	0	0	603	903	0
710	5	0	0	0	0	0	0	200	300	0	0	0	0	0	0	0	200	903	0	0	0	0	0	0	0	603	903	0
710	6	0	0	0	0	0	0	200	300	0	0	0	0	0	0	0	200	903	0	0	0	0	0	0	0	603	903	0
710	7	0	0	0	0	0	0	200	300	0	0	0	0	0	0	0	200	903	0	0	0	0	0	0	0	603	903	0
710	8	0	0	0	0	0	0	200	300	0	0	0	0	0	0	0	200	903	0	0	0	0	0	0	0	603	903	0
710	9	0	0	0	0	0	0	200	300	0	0	0	0	0	0	0	200	903	0	0	0	0	0	0	0	603	903	0
711	0	0	0	0	0	0	0	200	300	0	0	0	0	0	0	0	200	903	0	0	0	0	0	0	0	603	903	0
711	1	0	0	0	0	0	0	200	300	0	0	0	0	0	0	0	200	903	0	0	0	0	0	0	0	603	903	0
711	2	0	0	0	0	0	0	200	300	0	0	0	0	0	0	0	200	903	0	0	0	0	0	0	0	603	903	0
711	3	0	0	0	0	0	0	200	300	0	0	0	0	0	0	0	200	903	0	0	0	0	0	0	0	603	903	0
711	4	0	0	0	0	0	0	200	300	0	0	0	0	0	0	0	200	903	0	0	0	0	0	0	0	603	903	0
711	5	0	0	0	0	0	0	200	300	0	0	0	0	0	0	0	200	903	0	0	0	0	0	0	0	603	903	0
711	6	0	0	0	0	0	0	200	300	0	0	0	0	0	0	0	200	903	0	0	0	0	0	0	0	603	903	0
711	7	0	0	0	0	0	0	200	300	0	0	0	0	0	0	0	200	903	0	0	0	0	0	0	0	603	903	0
711	8	0	0	0	0	0	0	200	300	0	0	0	0	0	0	0	200	903	0	0	0	0	0	0	0	603	903	0
711	9	0	0	0	0	0	0	200	300	0	0	0	0	0	0	0	200	903	0	0	0	0	0	0	0	603	903	0
712	0	0	0	0	0	0	0	200	300	0	0	0	0	0	0	0	200	903	0	0	0	0	0	0	0	603	903	0
712	1	0	0	0	0	0	0	200	300	0	0	0	0	0	0	0	200	903	0	0	0	0	0	0	0	603	903	0
712	2	0	0	0	0	0	0	200	300	0	0	0	0	0	0	0	200	903	0	0	0	0	0	0	0	603	903	0
712	3	0	0	0	0	0	0	200	300	0	0	0	0	0	0	0	200	903	0	0	0	0	0	0	0	603	903	0
712	4	0	0	0	0	0	0	200	300	0	0	0	0	0	0	0	200	903	0	0	0	0	0	0	0	603	903	0
712	5	0	0	0	0	0	0	200	300	0	0	0	0	0	0	0	200	903	0	0	0	0	0	0	0	603	903	0
712	6	0	0	0	0	0	0	200	300	0	0	0	0	0	0	0	200	903	0	0	0	0	0	0	0	603	903	0
712	7	0	0	0	0	0	0	200	300	0	0	0	0	0	0	0	200	903	0	0	0	0	0	0	0	603	903	0
712	8	0	0	0	0	0	0	200	300	0	0	0	0	0	0	0	200	903	0	0	0	0	0	0	0	603	903	0
712	9	0	0	0	0	0	0	200	300	0	0	0	0	0	0	0	200	903	0	0	0	0	0	0	0	603	903	0
713	0	0	0	0	0	0	0	200	300	0	0	0	0	0	0	0	200	903	0	0	0	0	0	0	0	603	903	0
713	1	0	0	0	0	0	0	200	300	0	0	0	0	0	0	0	200	903	0	0	0	0	0	0	0	603	903	0
713	2	0	0	0	0	0	0	200	300	0	0	0	0	0	0	0	200	903	0	0	0	0	0	0	0	603	903	0
713	3	0	0	0	0	0	0	200	300	0	0	0	0	0	0	0	200	903	0	0	0	0	0	0	0	603	903	0
713	4	0	0	0	0	0	0	200	300	0	0	0	0	0	0	0	200	903	0	0	0	0	0	0	0	603	903	0
713	5	0	0	0	0	0	0	200	300	0	0	0	0	0	0	0	200	903	0	0	0	0	0	0	0	603	903	0
713	6	0	0	0	0	0	0	200	300	0	0	0	0	0	0	0	200	903	0	0	0	0	0	0	0	603	903	0
713	7	0	0	0	0	0	0	200	300	0	0	0	0	0	0	0	200	903	0	0	0	0	0	0	0	603	903	0
713	8	0	0	0	0	0	0	200	300	0	0	0	0	0	0	0	200	903	0	0	0	0	0	0	0	603	903	0
713	9	0	0	0	0	0	0	200	300	0	0	0	0	0	0	0	200	903	0	0	0	0	0	0	0	603	903	0
714	0	0	0	0	0	0	0	200	300	0	0	0	0	0	0	0	200	903	0	0	0	0	0	0	0	603	903	0
714	1	0	0	0	0	0	0	200	300	0	0	0	0	0	0	0	200	903	0	0	0	0	0	0	0	603	903	0
714	2	0	0	0	0	0	0	200	300	0	0	0	0	0	0	0	200	903	0	0	0	0	0	0	0	603	903	0
714	3	0	0	0	0	0	0	200	300	0	0	0	0	0	0	0	200	903	0	0	0	0	0	0	0	603	903	0
714	4	0	0	0	0	0	0	200	300	0	0	0	0	0	0	0	200	903	0	0	0	0	0	0	0	603	903	0
714	5	0	0	0	0	0	0	200	300	0	0	0	0	0	0	0	200	903	0	0	0	0	0	0	0	603	903	0
714	6	0	0	0	0	0	0	200	300	0	0	0	0	0	0	0	200	903	0	0	0	0	0	0	0	603	903	0
714	7	0	0	0	0	0	0	200	300	0	0	0	0	0	0	0	200	903	0	0	0	0	0	0	0	603	903	0
714	8	0	0	0	0	0	0	200	300	0	0	0	0	0	0	0	200	903	0	0	0	0	0	0	0	603	903	0
714	9	0	0	0	0	0	0	200	300	0	0	0	0	0	0	0	200	903	0	0	0	0	0	0	0	603	903	0
715	0	0	0	0	0	0	0	200	300	0	0	0	0	0	0	0	200	903	0	0	0	0	0	0	0	603	903	0
715	1	0	0	0	0	0	0	200	300	0	0	0	0	0	0	0	200	903	0	0	0	0	0	0	0	603	903	0
715	2	0	0	0	0	0	0	200	300	0	0	0	0	0	0	0	200	903	0	0	0	0	0	0	0	603	903	0
715	3	0	0	0	0	0	0	200	300	0	0	0	0	0	0	0	200	903	0	0	0	0	0	0	0	603	903	0
715	4	0	0	0	0	0	0	200	300	0	0	0	0	0	0	0	200	903	0	0	0	0	0	0	0	603	903	0
715	5	0	0	0	0	0	0	200	300	0	0	0	0	0	0	0	200	903	0	0	0	0	0	0	0	603	903	0
715	6	0	0	0	0	0	0	200	300	0	0	0	0	0	0	0	200	903	0	0	0	0	0	0	0	603	903	0
715	7	0	0	0	0	0	0	200	300	0	0	0	0	0	0	0	200	903	0	0	0	0	0	0	0	603	903	0
715	8	0	0	0	0	0	0	200	300	0	0	0	0	0	0	0	200	903	0	0	0	0	0	0	0	603	903	0
715	9	0	0	0	0	0	0	200	300	0	0	0	0	0	0	0	200	903	0	0	0	0	0	0	0	603	903	0
716	0	0	0	0	0	0	0	200	300	0	0	0	0	0	0	0	200	903	0	0	0	0	0	0	0	603	903	0
716	1	0	0	0	0	0	0	200	300	0	0	0	0	0	0	0	200	903	0	0	0	0	0	0	0	603	903	0
716	2	0	0	0	0	0	0	200	300	0	0	0	0	0	0	0	200	903	0	0	0	0	0	0	0	603	903	0
716	3	0	0	0	0	0	0	200	300	0	0	0	0	0	0	0	200	903	0	0	0	0	0	0	0	603	903	0
716	4	0	0	0	0	0	0	200	300	0	0	0	0	0	0	0	200	903	0	0	0	0	0	0	0	603	903	0
716	5	0	0	0	0	0	0	200	300	0	0	0	0	0	0	0	200	903	0	0	0	0	0	0	0	603	903	0
716	6	0	0	0	0	0	0	200	300	0	0	0	0	0	0	0	200	903	0	0	0	0	0	0	0	603	903	0
716	7	0	0	0	0	0	0	200	300	0	0	0	0	0	0	0	200	903	0	0	0	0	0	0	0	603	903	0
716	8	0	0	0	0	0	0	200	300	0	0	0	0	0	0	0	200	903	0	0	0	0	0	0	0	603	903	0
716	9	0	0	0	0	0	0	200	300	0	0	0	0	0	0	0	200	903	0	0	0	0	0	0	0	603	903	0
717	0	0	0	0	0	0	0	200	300	0	0	0	0	0	0	0	200	903	0	0	0	0	0	0	0	603	903	0
717	1	0	0	0	0	0	0	200	300	0	0	0	0	0	0	0	200	903	0	0	0	0	0	0	0	603	903	0
717	2	0	0	0	0	0	0	200	300	0	0	0	0	0	0	0	200	903	0	0	0	0	0	0	0	603	903	0
717	3	0	0	0	0	0	0	200	300	0	0	0	0	0	0	0	200	903	0	0	0	0	0	0	0	603	903	0
717	4	0	0	0	0	0	0	200	300	0	0	0	0	0	0	0	200	903	0	0	0	0	0	0	0	603	903	0
717	5	0	0	0	0	0	0	200	300	0	0	0	0	0	0	0	200	903	0	0	0	0	0	0	0	603	903	0
717	6	0	0	0	0	0	0	200	300	0	0	0	0	0	0	0	200	903	0	0	0	0	0	0	0	603	903	0
717	7	0	0	0	0	0	0	200	300	0	0	0	0	0	0	0	200	903	0	0	0	0	0	0	0	603	903	0
717	8	0	0	0	0	0	0	200	300	0	0	0	0	0	0	0	200	903	0	0	0	0	0	0	0	603	903	0
717	9	0	0	0	0	0	0	200	300	0	0	0	0	0	0	0	200	903	0	0	0	0	0	0	0	603	903	0
718	0	0	0	0	0	0	0	200	300	0	0	0	0	0	0	0	200	903	0	0	0	0	0	0	0	603	903	0
718	1	0	0	0	0	0	0	200	300	0	0	0	0	0	0	0	200	903	0	0	0	0	0	0	0	603	903	0
718	2	0	0	0	0	0	0	200	300	0	0	0	0	0	0	0	200	903	0	0	0	0	0	0	0	603	903	0
718	3	0	0	0	0	0	0	200	300	0	0	0	0	0	0	0	200	903	0	0	0	0	0	0	0	603	903	0
718	4	0	0	0	0	0	0	200	300	0	0	0	0	0	0	0	200	903	0	0	0	0	0	0	0	603	903	0
718	5	0	0	0	0	0	0	200	300	0	0	0	0	0	0	0	200	903	0	0	0	0	0	0	0	603	903	0
718	6	0	0	0	0	0	0	200	300	0	0	0	0	0	0	0	200	903	0	0	0	0	0	0	0	603	903	0
718	7	0	0	0	0	0	0	200	300	0	0	0	0	0	0	0	200	903	0	0	0	0	0	0	0	603	903	0
718	8	0	0	0	0	0	0	200	300	0	0	0	0	0	0	0	200	903	0	0	0	0	0	0	0	603	903	0
718	9	0	0	0	0	0	0	200	300	0	0	0	0	0	0	0	200	903	0	0	0	0	0	0	0	603	903	0
719	0	0	0	0	0	0	0	200	300	0	0	0	0	0	0	0	200	903	0	0	0	0	0	0	0	603	903	0
719	1	0	0	0	0	0	0	200	300	0	0	0	0	0	0	0	200	903	0	0	0	0	0	0	0	603	903	0
719	2	0	0	0	0	0	0	200	300	0	0	0	0	0	0	0	200	903	0	0	0	0	0	0	0	603	903	0
719	3	0	0	0	0	0	0	200	300	0	0	0	0	0	0	0	200	903	0	0	0	0	0	0	0	603	903	0
719	4	0	0	0	0	0	0	200	300	0	0	0	0	0	0	0	200	903	0	0	0	0	0	0	0	603	903	0
719	5	0	0	0	0	0	0	200	300	0	0	0	0	0	0	0	200	903	0	0	0	0	0	0	0	603	903	0
719	6	0	0	0	0	0	0	200	300	0	0	0	0	0	0	0	200	903	0	0	0	0	0	0	0	603	903	0
719	7	0	0	0	0	0	0	200	300	0	0	0	0	0	0	0	200	903	0	0	0	0	0	0	0	603	903	0
719	8	0	0	0	0	0	0	200	300	0	0	0	0	0	0	0	200	903	0	0	0	0	0	0	0	603	903	0
719	9	0	0	0	0	0	0	200	300	0	0	0	0	0	0	0	200	903	0	0	0	0	0	0	0	603	903	0
720	0	0	0	0	0	0	0	200	300	0	0	0	0	0	0	0	200	903	0	0	0	0	0	0	0	603	903	0
720	1	0	0	0	0	0	0	200	300	0	0	0	0	0	0	0	200	903	0	0	0	0	0	0	0	603	903	0
720	2	0	0	0	0	0	0	200	300	0	0	0	0	0	0	0	200	903	0	0	0	0	0	0	0	603	903	0
720	3	0	0	0	0	0	0	200	300	0	0	0	0	0	0	0	200	903	0	0	0	0	0	0	0	603	903	0
720	4	0	0	0	0	0	0	200	300	0	0	0	0	0	0	0	200	903	0	0	0	0	0	0	0	603	903	0
720	5	0	0	0	0	0	0	200	300	0	0	0	0	0	0	0	200	903	0	0	0	0	0	0	0	603	903	0
720	6	0	0	0	0	0	0	200	300	0	0	0	0	0	0	0	200	903	0	0	0	0	0	0	0	603	903	0
720	7	0	0	0	0	0	0	200	300	0	0	0	0	0	0	0	200	903	0	0	0	0	0	0	0	603	903	0
720	8	0	0	0	0	0	0	200	300	0	0	0	0	0	0	0	200	903	0	0	0	0	0	0	0	603	903	0
720	9	0	0	0	0	0	0	200	300	0	0	0	0	0	0	0	200	903	0	0	0	0	0	0	0	603	903	0
721	0	0	0	0	0	0	0	200	300	0	0	0	0	0	0	0	200	903	0	0	0	0	0	0	0	603	903	0
721	1	0	0	0	0	0	0	200	300	0	0	0	0	0	0	0	200	903	0	0	0	0	0	0	0	603	903	0
721	2	0	0	0	0	0	0	200	300	0	0	0	0	0	0	0	200	903	0	0	0	0	0	0	0	603	903	0
721	3	0	0	0	0	0	0	200	300	0	0	0	0	0	0	0	200	903	0	0	0	0	0	0	0	603	903	0
721	4	0	0	0	0	0	0	200	300	0	0	0	0	0	0	0	200	903	0	0	0	0	0	0	0	603	903	0
721	5	0	0	0	0	0	0	200	300	0	0	0	0	0	0	0	200	903	0	0	0	0	0	0	0	603	903	0
721	6	0	0	0	0	0	0	200	300	0	0	0	0	0	0	0	200	903	0	0	0	0	0	0	0	603	903	0
721	7	0	0	0	0	0	0	200	300	0	0	0	0	0	0	0	200	903	0	0	0	0	0	0	0	603	903	0
721	8	0	0	0	0	0	0	200	300	0	0	0	0	0	0	0	200	903	0	0	0	0	0	0	0	603	903	0
721	9	0	0	0	0	0	0	200	300	0	0	0	0	0	0	0	200	903	0	0	0	0	0	0	0	603	903	0
722	0	0	0	0	0	0	0	200	300	0	0	0	0	0	0	0	200	903	0	0	0	0	0	0	0	603	903	0
722	1	0	0	0	0	0	0	200	300	0	0	0	0	0	0	0	200	903	0	0	0	0	0	0	0	603	903	0
722	2	0	0	0	0	0	0	200	300	0	0	0	0	0	0	0	200	903	0	0	0	0	0	0	0	603	903	0
722	3	0	0	0	0	0	0	200	300	0	0	0	0	0	0	0	200	903	0	0	0	0	0	0	0	603	903	0
722	4	0	0	0	0	0	0	200	300	0	0	0	0	0	0	0	200	903	0	0	0	0	0	0	0	603	903	0
722	5	0	0	0	0	0	0	200	300	0	0	0	0	0	0	0	200	903	0	0	0	0	0	0	0	603	903	0
722	6	0	0	0	0	0	0	200	300	0	0	0	0	0	0	0	200	903	0	0	0	0	0	0	0	603	903	0
722	7	0	0	0	0	0	0	200	300	0	0	0	0	0	0	0	200	903	0	0	0	0	0	0	0	603	903	0
722	8	0	0	0	0	0	0	200	300	0	0	0	0	0	0	0	200	903	0	0	0	0	0	0	0	603	903	0
722	9	0	0	0	0	0	0	200	300	0	0	0	0	0	0	0	200	903	0	0	0	0	0	0	0	603	903	0
723	0	0	0	0	0	0	0	200	300	0	0	0	0	0	0	0	200	903	0	0	0	0	0	0	0	603	903	0
723	1	0	0	0	0	0	0	200	300	0	0	0	0	0	0	0	200	903	0	0	0	0	0	0	0	603	903	0
723	2	0	0	0	0	0	0	200	300	0	0	0	0	0	0	0	200	903	0	0	0	0	0	0	0	603	903	0
723	3	0	0	0	0	0	0	200	300	0	0	0	0	0	0	0	200	903	0	0	0	0	0	0	0	603	903	0
723	4	0	0	0	0	0	0	200	300	0	0	0	0	0	0	0	200	903	0	0	0	0	0	0	0	603	903	0
723	5	0	0	0	0	0	0	200	300	0	0	0	0	0	0	0	200	903	0	0	0	0	0	0	0	603	903	0
723	6	0	0	0	0	0	0	200	300	0	0	0	0	0	0	0	200	903	0	0	0	0	0	0	0	603	903	0
723	7	0	0	0	0	0	0	200	300	0	0	0	0	0	0	0	200	903	0	0	0	0	0	0	0	603	903	0
723	8	0	0	0	0	0	0	200	300	0	0	0	0	0	0	0	200	903	0	0	0	0	0	0	0	603	903	0
723	9	0	0	0	0	0	0	200	300	0	0	0	0	0	0	0	200	903	0	0	0	0	0	0	0	603	903	0
724	0	0	0	0	0	0	0	200	300	0	0	0	0	0	0	0	200	903	0	0	0	0	0	0	0	603	903	0
724	1	0	0	0	0	0	0	200	300	0	0	0	0	0	0	0	200	903	0	0	0	0	0	0	0	603	903	0
724	2	0	0	0	0	0	0	200	300	0	0	0	0	0	0	0	200	903	0	0	0	0	0	0	0	603	903	0
724	3	0	0	0	0	0	0	200	300	0	0	0	0	0	0	0	200	903	0	0	0	0	0	0	0	603	903	0
724	4	0	0	0	0	0	0	200	300	0	0	0	0	0	0	0	200	903	0	0	0	0	0	0	0	603	903	0
724	5	0	0	0	0	0	0	200	300	0	0	0	0	0	0	0	200	903	0	0	0	0	0	0	0	603	903	0
724	6	0	0	0	0	0	0	200	300	0	0	0	0	0	0	0	200	903	0	0	0	0	0	0	0	603	903	0
724	7	0	0	0	0	0	0	200	300	0	0	0	0	0	0	0	200	903	0	0	0	0	0	0	0	603	903	0
724	8	0	0	0	0	0	0	200	300	0	0	0	0	0	0	0	200	903	0	0	0	0	0	0	0	603	903	0
724	9	0	0	0	0	0	0	200	300	0	0	0	0	0	0	0	200	903	0	0	0	0	0	0	0	603	903	0
725	0	0	0	0	0	0	0	200	300	0	0	0	0	0	0	0	200	903	0	0	0	0	0	0	0	603	903	0
725	1	0	0	0	0	0	0	200	300	0	0	0	0	0	0	0	200	903	0	0	0	0	0	0	0	603	903	0
725	2	0	0	0	0	0	0	200	300	0	0	0	0	0	0	0	200	903	0	0	0	0	0	0	0	603	903	0
725	3	0	0	0	0	0	0	200	300	0	0	0	0	0	0	0	200	903	0	0	0	0	0	0	0	603	903	0
725	4	0	0	0	0	0	0	200	300	0	0	0	0	0	0	0	200	903	0	0	0	0	0	0	0	603	903	0
725	5	0	0	0	0	0	0	200	300	0	0	0	0	0	0	0	200	903	0	0	0	0	0	0	0	603	903	0
725	6	0	0	0	0	0	0	200	300	0	0	0	0	0	0	0	200	903	0	0	0	0	0	0	0	603	903	0
725	7	0	0	0	0	0	0	200	300	0	0	0	0	0	0	0	200	903	0	0	0	0	0	0	0	603	903	0
725	8	0	0	0	0	0	0	200	300	0	0	0	0	0	0	0	200	903	0	0	0	0	0	0	0	603	903	0
725	9	0	0	0	0	0	0	200	300	0	0	0	0	0	0	0	200	903	0	0	0	0	0	0	0	603	903	0
726	0	0	0	0	0	0	0	200	300	0	0	0	0	0	0	0	200	903	0	0	0	0	0	0	0	603	903	0
726	1	0	0	0	0	0	0	200	300	0	0	0	0	0	0	0	200	903	0	0	0	0	0	0	0	603	903	0
726	2	0	0	0	0	0	0	200	300	0	0	0	0	0	0	0	200	903	0	0	0	0	0	0	0	603	903	0
726	3	0	0	0	0	0	0	200	300	0	0	0	0	0	0	0	200	903	0	0	0	0	0	0	0	603	903	0
726	4	0	0	0	0	0	0	200	300	0	0	0	0	0	0	0	200	903	0	0	0	0	0	0	0	603	903	0
726	5	0	0	0	0	0	0	200	300	0	0	0	0	0	0	0	200	903	0	0	0	0	0	0	0	603	903	0
726	6	0	0	0	0	0	0	200	300	0	0	0	0	0	0	0	200	903	0	0	0	0	0	0	0	603	903	0
726	7	0	0	0	0	0	0	200	300	0	0	0	0	0	0	0	200	903	0	0	0	0	0	0	0	603	903	0
726	8	0	0	0	0	0	0	200	300	0	0	0	0	0	0	0	200	903	0	0	0	0	0	0	0	603	903	0
726	9	0	0	0	0	0	0	200	300	0	0	0	0	0	0	0	200	903	0	0	0	0	0	0	0	603	903	0
727	0	0	0	0	0	0	0	200	300	0	0	0	0	0	0	0	200	903	0	0	0	0	0	0	0	603	903	0
727	1	0	0	0	0	0	0	200	300	0	0	0	0	0	0	0	200	903	0	0	0	0	0	0	0	603	903	0
727	2	0	0	0	0	0	0	200	300	0	0	0	0	0	0	0	200	903	0	0	0	0	0	0	0	603	903	0
727	3	0	0	0	0	0	0	200	300	0	0	0	0	0	0	0	200	903	0	0	0	0	0	0	0	603	903	0
727	4	0	0	0	0	0	0	200	300	0	0	0	0	0	0	0	200	903	0	0	0	0	0	0	0	603	903	0
727	5	0	0	0	0	0	0	200	300	0	0	0	0	0	0	0	200	903	0	0	0	0	0	0	0	603	903	0
727	6	0	0	0	0	0	0	200	300	0	0	0	0	0	0	0	200	903	0	0	0	0	0	0	0	603	903	0
727	7	0	0	0	0	0	0	200	300	0	0	0	0	0	0	0	200	903	0	0	0	0	0	0	0	603	903	0
727	8	0	0	0	0	0	0	200	300	0	0	0	0	0	0	0	200	903	0	0	0	0	0	0	0	603	903	0
727	9	0	0	0	0	0	0	200	300	0	0	0	0	0	0	0	200	903	0	0	0	0	0	0	0	603	903	0
728	0	0	0	0	0	0	0	200	300	0	0	0	0	0	0	0	200	903	0	0	0	0	0	0	0	603	903	0
728	1	0	0	0	0	0	0	200	300	0	0	0	0	0	0	0	200	903	0	0	0	0	0	0	0	603	903	0
728	2	0	0	0	0	0	0	200	300	0	0	0	0	0	0	0	200	903	0	0	0	0	0	0	0	603	903	0
728	3	0	0	0	0	0	0	200	300	0	0	0	0	0	0	0	200	903	0	0	0	0	0	0	0	603	903	0
728	4	0	0	0	0	0	0	200	300	0	0	0	0	0	0	0	200	903	0	0	0	0	0	0	0	603	903	0
728	5	0	0	0	0	0	0	200	300	0	0	0	0	0	0	0	200	903	0	0	0	0	0	0	0	603	903	0
728	6	0	0	0	0	0	0	200	300	0	0	0	0	0	0	0	200	903	0	0	0	0	0	0	0	603	903	0
728	7	0	0	0	0	0	0	200	300	0	0	0	0	0	0	0	200	903	0	0	0	0	0	0	0	603	903	0
728	8	0	0	0	0	0	0	200	300	0	0	0	0	0	0	0	200	903	0	0	0	0	0	0	0	603	903	0
728	9	0	0	0	0	0	0	200	300	0	0	0	0	0	0	0	200	903	0	0	0	0	0	0	0	603	903	0
729	0	0	0	0	0	0	0	200	300	0	0	0	0	0	0	0	200	903	0	0	0	0	0	0	0	603	903	0
729	1	0	0	0	0	0	0	200	300	0	0	0	0	0	0	0	200	903	0	0	0	0	0	0	0	603	903	0
729	2	0	0	0	0	0	0	200	300	0	0	0	0	0	0	0	200	903	0	0	0	0	0	0	0	603	903	0
729	3	0	0	0	0	0	0	200	300	0	0	0	0	0	0	0	200	903	0	0	0	0	0	0	0	603	903	0
729	4	0	0	0	0	0	0	200	300	0	0	0	0	0	0	0	200	903	0	0	0	0	0	0	0	603	903	0
729	5	0	0	0	0	0	0	200	300	0	0	0	0	0	0	0	200	903	0	0	0	0	0	0	0	603	903	0
729	6	0	0	0	0	0	0	200	300	0	0	0	0	0	0	0	200	903	0	0	0	0	0	0	0	603	903	0
729	7	0	0	0	0	0	0	200	300	0	0	0	0	0	0	0	200	903	0	0	0	0	0	0	0	603	903	0
729	8	0	0	0	0	0	0	200	300	0	0	0	0	0	0	0	200	903	0	0	0	0	0	0	0	603	903	0
729	9	0	0	0	0	0	0	200	300	0	0	0	0	0	0	0	200	903	0	0	0	0	0	0	0	603	903	0
730	0	0	0	0	0	0	0	200	300	0	0	0	0	0	0	0	200	903	0	0	0	0	0	0	0	603	903	0
730	1	0	0	0	0	0	0	200	300	0	0	0	0	0	0	0	200	903	0	0	0	0	0	0	0	603	903	0
730	2	0	0	0	0	0	0	200	300	0	0	0	0	0	0	0	200	903	0	0	0	0	0	0	0	603	903	0
730	3	0	0	0	0	0	0	200	300	0	0	0	0	0	0	0	200	903	0	0	0	0	0	0	0	603	903	0
730	4	0	0	0	0	0	0	200	300	0	0	0	0	0	0	0	200	903	0	0	0	0	0	0	0	603	903	0
730	5	0	0	0	0	0	0	200	300	0	0	0	0	0	0	0	200	903	0	0	0	0	0	0	0	603	903	0
730	6	0	0	0	0	0	0	200	300	0	0	0	0	0	0	0	200	903	0	0	0	0	0	0	0	603	903	0
730	7	0	0	0	0	0	0	200	300	0	0	0	0	0	0	0	200	903	0	0	0	0	0	0	0	603	903	0
730	8	0	0	0	0	0	0	200	300	0	0	0	0	0	0	0	200	903	0	0	0	0	0	0	0	603	903	0
730	9	0	0	0	0	0	0	200	300	0	0	0	0	0	0	0	200	903	0	0	0	0	0	0	0	603	903	0
731	0	0	0	0	0	0	0	200	300	0	0	0	0	0	0	0	200	903	0	0	0	0	0	0	0	603	903	0
731	1	0	0	0	0	0	0	200	300	0	0	0	0	0	0	0	200	903	0	0	0	0	0	0	0	603	903	0
731	2	0	0	0	0	0	0	200	300	0	0	0	0	0	0	0	200	903	0	0	0	0	0	0	0	603	903	0
731	3	0	0	0	0	0	0	200	300	0	0	0	0	0	0	0	200	903	0	0	0	0	0	0	0	603	903	0
731	4	0	0	0	0	0	0	200	300	0	0	0	0	0	0	0	200	903	0	0	0	0	0	0	0	603	903	0
731	5	0	0	0	0	0	0	200	300	0	0	0	0	0	0	0	200	903	0	0	0	0	0	0	0	603	903	0
731	6	0	0	0	0	0	0	200	300	0	0	0	0	0	0	0	200	903	0	0	0	0	0	0	0	603	903	0
731	7	0	0	0	0	0	0	200	300	0	0	0	0	0	0	0	200	903	0	0	0	0	0	0	0	603	903	0
731	8	0	0	0	0	0	0	200	300	0	0	0	0	0	0	0	200	903	0	0	0	0	0	0	0	603	903	0
731	9	0	0	0	0	0	0	200	300	0	0	0	0	0	0	0	200	903	0	0	0	0	0	0	0	603	903	0
732	0	0	0	0	0	0	0	200	300	0	0	0	0	0	0	0	200	903	0	0	0	0	0	0	0	603	903	0
732	1	0	0	0	0	0	0	200	300	0	0	0	0	0	0	0	200	903	0	0	0	0	0	0	0	603	903	0
732	2	0	0	0	0	0	0	200	300	0	0	0	0	0	0	0	200	903	0	0	0	0	0	0	0	603	903	0
732	3	0	0	0	0	0	0	200	300	0	0	0	0	0	0	0	200	903	0	0	0	0	0	0	0	603	903	0
732	4	0	0	0	0	0	0	200	300	0	0	0	0	0	0	0	200	903	0	0	0	0	0	0	0	603	903	0
732	5	0	0	0	0	0	0	200	300	0	0	0	0	0	0	0	200	903	0	0	0	0	0	0	0	603	903	0
732	6	0	0	0	0	0	0	200	300	0	0	0	0	0	0	0	200	903	0	0	0	0	0	0	0	603	903	0
732	7	0	0	0	0	0	0	200	300	0	0	0	0	0	0	0	200	903	0	0	0	0	0	0	0	603	903	0
732	8	0	0	0	0	0	0	200	300	0	0	0	0	0	0	0	200	903	0	0	0	0	0	0	0	603	903	0
732	9	0	0	0	0	0	0	200	300	0	0	0	0	0	0	0	200	903	0	0	0	0	0	0	0	603	903	0
733	0	0	0	0	0	0	0	200	300	0	0	0	0	0	0	0	200	903	0	0	0	0	0	0	0	603	903	0
733	1	0	0	0	0	0	0	200	300	0	0	0	0	0	0	0	200	903	0	0	0	0	0	0	0	603	903	0
733	2	0	0	0	0	0	0	200	300	0	0	0	0	0	0	0	200	903	0	0	0	0	0	0	0	603	903	0
733	3	0	0	0	0	0	0	200	300	0	0	0	0	0	0	0	200	903	0	0	0	0	0	0	0	603	903	0
733	4	0	0	0	0	0	0	200	300	0	0	0	0	0	0	0	200	903	0	0	0	0	0	0	0	603	903	0
733	5	0	0	0	0	0	0	200	300	0	0	0	0	0	0	0	200	903	0	0	0	0	0	0	0	603	903	0
733	6	0	0	0	0	0	0	200	300	0	0	0	0	0	0	0	200	903	0	0	0	0	0	0	0	603	903	0
733	7	0	0	0	0	0	0	200	300	0	0	0	0	0	0	0	200	903	0	0	0	0	0	0	0	603	903	0
733	8	0	0	0	0	0	0	200	300	0	0	0	0	0	0	0	200	903	0	0	0	0	0	0	0	603	903	0
733	9	0	0	0	0	0	0	200	300	0	0	0	0	0	0	0	200	903	0	0	0	0	0	0	0	603	903	0
734	0	0	0	0	0	0	0	200	300	0	0	0	0	0	0	0	200	903	0	0	0	0	0	0	0	603	903	0
734	1	0	0	0	0	0	0	200	300	0	0	0	0	0	0	0	200	903	0	0	0	0	0	0	0	603	903	0
734	2	0	0	0	0	0	0	200	300	0	0	0	0	0	0	0	200	903	0	0	0	0	0	0	0	603	903	0
734	3	0	0	0	0	0	0	200	300	0	0	0	0	0	0	0	200	903	0	0	0	0	0	0	0	603	903	0
734	4	0	0	0	0	0	0	200	300	0	0	0	0	0	0	0	200	903	0	0	0	0	0	0	0	603	903	0
734	5	0	0	0	0	0	0	200	300	0	0	0	0	0	0	0	200	903	0	0	0	0	0	0	0	603	903	0
734	6	0	0	0	0	0	0	200	300	0	0	0	0	0	0	0	200	903	0	0	0	0	0	0	0	603	903	0
734	7	0	0	0	0	0	0	200	300	0	0	0	0	0	0	0	200	903	0	0	0	0	0	0	0	603	903	0
734	8	0	0	0	0	0	0	200	300	0	0	0	0	0	0	0	200	903	0	0	0	0	0	0	0	603	903	0
734	9	0	0	0	0	0	0	200	300	0	0	0	0	0	0	0	200	903	0	0	0	0	0	0	0	603	903	0
735	0	0	0	0	0	0	0	200	300	0	0	0	0	0	0	0	200	903	0	0	0	0	0	0	0	603	903	0
735	1	0	0	0	0	0	0	200	300	0	0	0	0	0	0	0	200	903	0	0	0	0	0	0	0	603	903	0
735	2	0	0	0	0	0	0	200	300	0	0	0	0	0	0	0	200	903	0	0	0	0	0	0	0	603	903	0
735	3	0	0	0	0	0	0	200	300	0	0	0	0	0	0	0	200	903	0	0	0	0	0	0	0	603	903	0
735	4	0	0	0	0	0	0	200	300	0	0	0	0	0	0	0	200	903	0	0	0	0	0	0	0	603	903	0
735	5	0	0	0	0	0	0	200	300	0	0	0	0	0	0	0	200	903	0	0	0	0	0	0	0	603	903	0
735	6	0	0	0	0	0	0	200	300	0	0	0	0	0	0	0	200	903	0	0	0	0	0	0	0	603	903	0
735	7	0	0	0	0	0	0	200	300	0	0	0	0	0	0	0	200	903	0	0	0	0	0	0	0	603	903	0
735	8	0	0	0	0	0	0	200	300	0	0	0	0	0	0	0	200	903	0	0	0	0	0	0	0	603	903	0
735	9	0	0	0	0	0	0	200	300	0	0	0	0	0	0	0	200	903	0	0	0	0	0	0	0	603	903	0
736	0	0	0	0	0	0	0	200	300	0	0	0	0	0	0	0	200	903	0	0	0	0	0	0	0	603	903	0
736	1	0	0	0	0	0	0	200	300	0	0	0	0	0	0	0	200	903	0	0	0	0	0	0	0	603	903	0
736	2	0	0	0	0	0	0	200	300	0	0	0	0	0	0	0	200	903	0	0	0	0	0	0	0	603	903	0
736	3	0	0	0	0	0	0	200	300	0	0	0	0	0	0	0	200	903	0	0	0	0	0	0	0	603	903	0
736	4	0	0	0	0	0	0	200	300	0	0	0	0	0	0	0	200	903	0	0	0	0	0	0	0	603	903	0
736	5	0	0	0	0	0	0	200	300	0	0	0	0	0	0	0	200	903	0	0	0	0	0	0	0	603	903	0
736	6	0	0	0	0	0	0	200	300	0	0	0	0	0	0	0	200	903	0	0	0	0	0	0	0	603	903	0
736	7	0	0	0	0	0	0	200	300	0	0	0	0	0	0	0	200	903	0	0	0	0	0	0	0	603	903	0
736	8	0	0	0	0	0	0	200	300	0	0	0	0	0	0	0	200	903	0	0	0	0	0	0	0	603	903	0
736	9	0	0	0	0	0	0	200	300	0	0	0	0	0	0	0	200	903	0	0	0	0	0	0	0	603	903	0
737	0	0	0	0	0	0	0	200	300	0	0	0	0	0	0	0	200	903	0	0	0	0	0	0	0	603	903	0
737	1	0	0	0	0	0	0	200	300	0	0	0	0	0	0	0	200	903	0	0	0	0	0	0	0	603	903	0
737	2	0	0	0	0	0	0	200	300	0	0	0	0	0	0	0	200	903	0	0	0	0	0	0	0	603	903	0
737	3	0	0	0	0	0	0	200	300	0	0	0	0	0	0	0	200	903	0	0	0	0	0	0	0	603	903	0
737	4	0	0	0	0	0	0	200	300	0	0	0	0	0	0	0	200	903	0	0	0	0	0	0	0	603	903	0
737	5	0	0	0	0	0	0	200	300	0	0	0	0	0	0	0	200	903	0	0	0	0	0	0	0	603	903	0
737	6	0	0	0	0	0	0	200	300	0	0	0	0	0	0	0	200	903	0	0	0	0	0	0	0	603	903	0
737	7	0	0	0	0	0	0	200	300	0	0	0	0	0	0	0	200	903	0	0	0	0	0	0	0	603	903	0
737	8	0	0	0	0	0	0	200	300	0	0	0	0	0	0	0	200	903	0	0	0	0	0	0	0	603	903	0
737	9	0	0	0	0	0	0	200	300	0	0	0	0	0	0	0	200	903	0	0	0	0	0	0	0	603	903	0
738	0	0	0	0	0	0	0	200	300	0	0	0	0	0	0	0	200	903	0	0	0	0	0	0	0	603	903	0
738	1	0	0	0	0	0	0	200	300	0	0	0	0	0	0	0	200	903	0	0	0	0	0	0	0	603	903	0
738	2	0	0	0	0	0	0	200	300	0	0	0	0	0	0	0	200	903	0	0	0	0	0	0	0	603	903	0
738	3	0	0	0	0	0	0	200	300	0	0	0	0	0	0	0	200	903	0	0	0	0	0	0	0	603	903	0
738	4	0	0	0	0	0	0	200	300	0	0	0	0	0	0	0	200	903	0	0	0	0	0	0	0	603	903	0
738	5	0	0	0	0	0	0	200	300	0	0	0	0	0	0	0	200	903	0	0	0	0	0	0	0	603	903	0
738	6	0	0	0	0	0	0	200	300	0	0	0	0	0	0	0	200	903	0	0	0	0	0	0	0	603	903	0
738	7	0	0	0	0	0	0	200	300	0	0	0	0	0	0	0	200	903	0	0	0	0	0	0	0	603	903	0
738	8	0	0	0	0	0	0	200	300	0	0	0	0	0	0	0	200	903	0	0	0	0	0	0	0	603	903	0
738	9	0	0	0	0	0	0	200	300	0	0	0	0	0	0	0	200	903	0	0	0	0	0	0	0	603	903	0
739	0	0	0	0	0	0	0	200	300	0	0	0	0	0	0	0	200	903	0	0	0	0	0	0	0	603	903	0
739	1	0	0	0	0	0	0	200	300	0	0	0	0	0	0	0	200	903	0	0	0	0	0	0	0	603	903	0
739	2	0	0	0	0	0	0	200	300	0	0	0	0	0	0	0	200	903	0	0	0	0	0	0	0	603	903	0
739	3	0	0	0	0	0	0	200	300	0	0	0	0	0	0	0	200	903	0	0	0	0	0	0	0	603	903	0
739	4	0	0	0	0	0	0	200	300	0	0	0	0	0	0	0	200	903	0	0	0	0	0	0	0	603	903	0
739	5	0	0	0	0	0	0	200	300	0	0	0	0	0	0	0	200	903	0	0	0	0	0	0	0	603	903	0
739	6	0	0	0	0	0	0	200	300	0	0	0	0	0	0	0	200	903	0	0	0	0	0	0	0	603	903	0
739	7	0	0	0	0	0	0	200	300	0	0	0	0	0	0	0	200	903	0	0	0	0	0	0	0	603	903	0
739	8	0	0	0	0	0	0	200	300	0	0	0	0	0	0	0	200	903	0	0	0	0	0	0	0	603	903	0
739	9	0	0	0	0	0	0	200	300	0	0	0	0	0	0	0	200	903	0	0	0	0	0	0	0	603	903	0
740	0	0	0	0	0	0	0	200	300	0	0	0	0	0	0	0	200	903	0	0	0	0	0	0	0	603	903	0
740	1	0	0	0	0	0	0	200	300	0	0	0	0	0	0	0	200	903	0	0	0	0	0	0	0	603	903	0
740	2	0	0	0	0	0	0	200	300	0	0	0	0	0	0	0	200	903	0	0	0	0	0	0	0	603	903	0
740	3	0	0	0	0	0	0	200	300	0	0	0	0	0	0	0	200	903	0	0	0	0	0	0	0	603	903	0
740	4	0	0	0	0	0	0	200	300	0	0	0	0	0	0	0	200	903	0	0	0	0	0	0	0	603	903	0
740	5	0	0	0	0	0	0	200	300	0	0	0	0	0	0	0	200	903	0	0	0	0	0	0	0	603	903	0
740	6	0	0	0	0	0	0	200	300	0	0	0	0	0	0	0	200	903	0	0	0	0	0	0	0	603	903	0
740	7	0	0	0	0	0	0	200	300	0	0	0	0	0	0	0	200	903	0	0	0	0	0	0	0	603	903	0
740	8	0	0	0	0	0	0	200	300	0	0	0	0	0	0	0	200	903	0	0	0	0	0	0	0	603	903	0
740	9	0	0	0	0	0	0	200	300	0	0	0	0	0	0	0	200	903	0	0	0	0	0	0	0	603	903	0
741	0	0	0	0	0	0	0	200	300	0	0	0	0	0	0	0	200	903	0	0	0	0	0	0	0	603	903	0
741	1	0	0	0	0	0	0	200	300	0	0	0	0	0	0	0	200	903	0	0	0	0	0	0	0	603	903	0
741	2	0	0	0	0	0	0	200	300	0	0	0	0	0	0	0	200	903	0	0	0	0	0	0	0	603	903	0
741	3	0	0	0	0	0	0	200	300	0	0	0	0	0	0	0	200	903	0	0	0	0	0	0	0	603	903	0
741	4	0	0	0	0	0	0	200	300	0	0	0	0	0	0	0	200	903	0	0	0	0	0	0	0	603	903	0
741	5	0	0	0	0	0	0	200	300	0	0	0	0	0	0	0	200	903	0	0	0	0	0	0	0	603	903	0
741	6	0	0	0	0	0	0	200	300	0	0	0	0	0	0	0	200	903	0	0	0	0	0	0	0	603	903	0
741	7	0	0	0	0	0	0	200	300	0	0	0	0	0	0	0	200	903	0	0	0	0	0	0	0	603	903	0
741	8	0	0	0	0	0	0	200	300	0	0	0	0	0	0	0	200	903	0	0	0	0	0	0	0	603	903	0
741	9	0	0	0	0	0	0	200	300	0	0	0	0	0	0	0	200	903	0	0	0	0	0	0	0	603	903	0
742	0	0	0	0	0	0	0	200	300	0	0	0	0	0	0	0	200	903	0	0	0	0	0	0	0	603	903	0
742	1	0	0	0	0	0	0	200	300	0	0	0	0	0	0	0	200	903	0	0	0	0	0	0	0	603	903	0
742	2	0	0	0	0	0	0	200	300	0	0	0	0	0	0	0	200	903	0	0	0	0	0	0	0	603	903	0
742	3	0	0	0	0	0	0	200	300	0	0	0	0	0	0	0	200	903	0	0	0	0	0	0	0	603	903	0
742	4	0	0	0	0	0	0	200	300	0	0	0	0	0	0	0	200	903	0	0	0	0	0	0	0	603	903	0
742	5	0	0	0	0	0	0	200	300	0	0	0	0	0	0	0	200	903	0	0	0	0	0	0	0	603	903	0
742	6	0	0	0	0	0	0	200	300	0	0	0	0	0	0	0	200	903	0	0	0	0	0	0	0	603	903	0
742	7	0	0	0	0	0	0	200	300	0	0	0	0	0	0	0	200	903	0	0	0	0	0	0	0	603	903	0
742	8	0	0	0	0	0	0	200	300	0	0	0	0	0	0	0	200	903	0	0	0	0	0	0	0	603	903	0
742	9	0	0	0	0	0	0	200	300	0	0	0	0	0	0	0	200	903	0	0	0	0	0	0	0	603	903	0
743	0	0	0	0	0	0	0	200	300	0	0	0	0	0	0	0	200	903	0	0	0	0	0	0	0	603	903	0
743	1	0	0	0	0	0	0	200	300	0	0	0	0	0	0	0	200	903	0	0	0	0	0	0	0	603	903	0
743	2	0	0	0	0	0	0	200	300	0	0	0	0	0	0	0	200	903	0	0	0	0	0	0	0	603	903	0
743	3	0	0	0	0	0	0	200	300	0	0	0	0	0	0	0	200	903	0	0	0	0	0	0	0	603	903	0
743	4	0	0	0	0	0	0	200	300	0	0	0	0	0	0	0	200	903	0	0	0	0	0	0	0	603	903	0
743	5	0	0	0	0	0	0	200	300	0	0	0	0	0	0	0	200	903	0	0	0	0	0	0	0	603	903	0
743	6	0	0	0	0	0	0	200	300	0	0	0	0	0	0	0	200	903	0	0	0	0	0	0	0	603	903	0
743	7	0	0	0	0	0	0	200	300	0	0	0	0	0	0	0	200	903	0	0	0	0	0	0	0	603	903	0
743	8	0	0	0	0	0	0	200	300	0	0	0	0	0	0	0	200	903	0	0	0	0	0	0	0	603	903	0
743	9	0	0	0	0	0	0	200	300	0	0	0	0	0	0	0	200	903	0	0	0	0	0	0	0	603	903	0
744	0	0	0	0	0	0	0	200	300	0	0	0	0	0	0	0	200	903	0	0	0	0	0	0	0	603	903	0
744	1	0	0	0	0	0	0	200	300	0	0	0	0	0	0	0	200	903	0	0	0	0	0	0	0	603	903	0
744	2	0	0	0	0	0	0	200	300	0	0	0	0	0	0	0	200	903	0	0	0	0	0	0	0	603	903	0
744	3	0	0	0	0	0	0	200	300	0	0	0	0	0	0	0	200	903	0	0	0	0	0	0	0	603	903	0
744	4	0	0	0	0	0	0	200	300	0	0	0	0	0	0	0	200	903	0	0	0	0	0	0	0	603	903	0
744	5	0	0	0	0	0	0	200	300	0	0	0	0	0	0	0	200	903	0	0	0	0	0	0	0	603	903	0
744	6	0	0	0	0	0	0	200	300	0	0	0	0	0	0	0	200	903	0	0	0	0	0	0	0	603	903	0
744	7	0	0	0	0	0	0	200	300	0	0	0	0	0	0	0	200	903	0	0	0	0	0	0	0	603	903	0
744	8	0	0	0	0	0	0	200	300	0	0	0	0	0	0	0	200	903	0	0	0	0	0	0	0	603	903	0
744	9	0	0	0	0	0	0	200	300	0	0	0	0	0	0	0	200	903	0	0	0	0	0	0	0	603	903	0
745	0	0	0	0	0	0	0	200	300	0	0	0	0	0	0	0	200	903	0	0	0	0	0	0	0	603	903	0
745	1	0	0	0	0	0	0	200	300	0	0	0	0	0	0	0	200	903	0	0	0	0	0	0	0	603	903	0
745	2	0	0	0	0	0	0	200	300	0	0	0	0	0	0	0	200	903	0	0	0	0	0	0	0	603	903	0
745	3	0	0	0	0	0	0	200	300	0	0	0	0	0	0	0	200	903	0	0	0	0	0	0	0	603	903	0
745	4	0	0	0	0	0	0	200	300	0	0	0	0	0	0	0	200	903	0	0	0	0	0	0	0	603	903	0
745	5	0	0	0	0	0	0	200	300	0	0	0	0	0	0	0	200	903	0	0	0	0	0	0	0	603	903	0
745	6	0	0	0	0	0	0	200	300	0	0	0	0	0	0	0	200	903	0	0	0	0	0	0	0	603	903	0
745	7	0	0	0	0	0	0	200	300	0	0	0	0	0	0	0	200	903	0	0	0	0	0	0	0	603	903	0
745	8	0	0	0	0	0	0	200	300	0	0	0	0	0	0	0	200	903	0	0	0	0	0	0	0	603	903	0
745	9	0	0	0	0	0	0	200	300	0	0	0	0	0	0	0	200	903	0	0	0	0	0	0	0	603	903	0
746	0	0	0	0	0	0	0	200	300	0	0	0	0	0	0	0	200	903	0	0	0	0	0	0	0	603	903	0
746	1	0	0	0	0	0	0	200	300	0	0	0	0	0	0	0	200	903	0	0	0	0	0	0	0	603	903	0
746	2	0	0	0	0	0	0	200	300	0	0	0	0	0	0	0	200	903	0	0	0	0	0	0	0	603	903	0
746	3	0	0	0	0	0	0	200	300	0	0	0	0	0	0	0	200	903	0	0	0	0	0	0	0	603	903	0
746	4	0	0	0	0	0	0	200	300	0	0	0	0	0	0	0	200	903	0	0	0	0	0	0	0	603	903	0
746	5	0	0	0	0	0	0	200	300	0	0	0	0	0	0	0	200	903	0	0	0	0	0	0	0	603	903	0
746	6	0	0	0	0	0	0	200	300	0	0	0	0	0	0	0	200	903	0	0	0	0	0	0	0	603	903	0
746	7	0	0	0	0	0	0	200	300	0	0	0	0	0	0	0	200	903	0	0	0	0	0	0	0	603	903	0
746	8	0	0	0	0	0	0	200	300	0	0	0	0	0	0	0	200	903	0	0	0	0	0	0	0	603	903	0
746	9	0	0	0	0	0	0	200	300	0	0	0	0	0	0	0	200	903	0	0	0	0	0	0	0	603	903	0
747	0	0	0	0	0	0	0	200	300	0	0	0	0	0	0	0	200	903	0	0	0	0	0	0	0	603	903	0
747	1	0	0	0	0	0	0	200	300	0	0	0	0	0	0	0	200	903	0	0	0	0	0	0	0	603	903	0
747	2	0	0	0	0	0	0	200	300	0	0	0	0	0	0	0	200	903	0	0	0	0	0	0	0	603	903	0
747	3	0	0	0	0	0	0	200	300	0	0	0	0	0	0	0	200	903	0	0	0	0	0	0	0	603	903	0
747	4	0	0	0	0	0	0	200	300	0	0	0	0	0	0	0	200	903	0	0	0	0	0	0	0	603	903	0
747	5	0	0	0	0	0	0	200	300	0	0	0	0	0	0	0	200	903	0	0	0	0	0	0	0	603	903	0
747	6	0	0	0	0	0	0	200	300	0	0	0	0	0	0	0	200	903	0	0	0	0	0	0	0	603	903	0
747	7	0	0	0	0	0	0	200	300	0	0	0	0	0	0	0	200	903	0	0	0	0	0	0	0	603	903	0
747	8	0	0	0	0	0	0	200	300	0	0	0	0	0	0	0	200	903	0	0	0	0	0	0	0	603	903	0
747	9	0	0	0	0	0	0	200	300	0	0	0	0	0	0	0	200	903	0	0	0	0	0	0	0	603	903	0
748	0	0	0	0	0	0	0	200	300	0	0	0	0	0	0	0	200	903	0	0	0	0	0	0	0	603	903	0
748	1	0	0	0	0	0	0	200	300	0	0	0	0	0	0	0	200	903	0	0	0	0	0	0	0	603	903	0
748	2	0	0	0	0	0	0	200	300	0	0	0	0	0	0	0	200	903	0	0	0	0	0	0	0	603	903	0
748	3	0	0	0	0	0	0	200	300	0	0	0	0	0	0	0	200	903	0	0	0	0	0	0	0	603	903	0
748	4	0	0	0	0	0	0	200	300	0	0	0	0	0	0	0	200	903	0	0	0	0	0	0	0	603	903	0
748	5	0	0	0	0	0	0	200	300	0	0	0	0	0	0	0	200	903	0	0	0	0	0	0	0	603	903	0
748	6	0	0	0	0	0	0	200	300	0	0	0	0	0	0	0	200	903	0	0	0	0	0	0	0	603	903	0
748	7	0	0	0	0	0	0	200	300	0	0	0	0	0	0	0	200	903	0	0	0	0	0	0	0	603	903	0
748	8	0	0	0	0	0	0	200	300	0	0	0	0	0	0	0	200	903	0	0	0	0	0	0	0	603	903	0
748	9	0	0	0	0	0	0	200	300	0	0	0	0	0	0	0	200	903	0	0	0	0	0	0	0	603	903	0
749	0	0	0	0	0	0	0	200	300	0	0	0	0	0	0	0	200	903	0	0	0	0	0	0	0	603	903	0
749	1	0	0	0	0	0	0	200	300	0	0	0	0	0	0	0	200	903	0	0	0	0	0	0	0	603	903	0
749	2	0	0	0	0	0	0	200	300	0	0	0	0	0	0	0	200	903	0	0	0	0	0	0	0	603	903	0
749	3	0	0	0	0	0	0	200	300	0	0	0	0	0	0	0	200	903	0	0	0	0	0	0	0	603	903	0
749	4	0	0	0	0	0	0	200	300	0	0	0	0	0	0	0	200	903	0	0	0	0	0	0	0	603	903	0
749	5	0	0	0	0	0	0	200	300	0	0	0	0	0	0	0	200	903	0	0	0	0	0	0	0	603	903	0
749	6	0	0	0	0	0	0	200	300	0	0	0	0	0	0	0	200	903	0	0	0	0	0	0	0	603	903	0
749	7	0	0	0	0	0	0	200	300	0	0	0	0	0	0	0	200	903	0	0	0	0	0	0	0	603	903	0
749	8	0	0	0	0	0	0	200	300	0	0	0	0	0	0	0	200	903	0	0	0	0	0	0	0	603	903	0
749	9	0	0	0	0	0	0	200	300	0	0	0	0	0	0	0	200	903	0	0	0	0	0	0	0	603	903	0
750	0	0	0	0	0	0	0	200	300	0	0	0	0	0	0	0	200	903	0	0	0	0	0	0	0	603	903	0
750	1	0	0	0	0	0	0	200	300	0	0	0	0	0	0	0	200	903	0	0	0	0	0	0	0	603	903	0
750	2	0	0	0	0	0	0	200	300	0	0	0	0	0	0	0	200	903	0	0	0	0	0	0	0	603	903	0
750	3	0	0	0	0	0	0	200	300	0	0	0	0	0	0	0	200	903	0	0	0	0	0	0	0	603	903	0
750	4	0	0	0	0	0	0	200	300	0	0	0	0	0	0	0	200	903	0	0	0	0	0	0	0	603	903	0
750	5	0	0	0	0	0	0	200	300	0	0	0	0	0	0	0	200	903	0	0	0	0	0	0	0	603	903	0
750	6	0	0	0	0	0	0	200	300	0	0	0	0	0	0	0	200	903	0	0	0	0	0	0	0	603	903	0
750	7	0	0	0	0	0	0	200	300	0	0	0	0	0	0	0	200	903	0	0	0	0	0	0	0	603	903	0
750	8	0	0	0	0	0	0	200	300	0	0	0	0	0	0	0	200	903	0	0	0	0	0	0	0	603	903	0
750	9	0	0	0	0	0	0	200	300	0	0	0	0	0	0	0	200	903	0	0	0	0	0	0	0	603	903	0
751	0	0	0	0	0	0	0	200	300	0	0	0	0	0	0	0	200	903	0	0	0	0	0	0	0	603	903	0
751	1	0	0	0	0	0	0	200	300	0	0	0	0	0	0	0	200	903	0	0	0	0	0	0	0	603	903	0
751	2	0	0	0	0	0	0	200	300	0	0	0	0	0	0	0	200	903	0	0	0	0	0	0	0	603	903	0
751	3	0	0	0	0	0	0	200	300	0	0	0	0	0	0	0	200	903	0	0	0	0	0	0	0	603	903	0
751	4	0	0	0	0	0	0	200	300	0	0	0	0	0	0	0	200	903	0	0	0	0	0	0	0	603	903	0
751	5	0	0	0	0	0	0	200	300	0	0	0	0	0	0	0	200	903	0	0	0	0	0	0	0	603	903	0
751	6	0	0	0	0	0	0	200	300	0	0	0	0	0	0	0	200	903	0	0	0	0	0	0	0	603	903	0
751	7	0	0	0	0	0	0	200	300	0	0	0	0	0	0	0	200	903	0	0	0	0	0	0	0	603	903	0
751	8	0	0	0	0	0	0	200	300	0	0	0	0	0	0	0	200	903	0	0	0	0	0	0	0	603	903	0
751	9	0	0	0	0	0	0	200	300	0	0	0	0	0	0	0	200	903	0	0	0	0	0	0	0	603	903	0
752	0	0	0	0	0	0	0	200	300	0	0	0	0	0	0	0	200	903	0	0	0	0	0	0	0	603	903	0
752	1	0	0	0	0	0	0	200	300	0	0	0	0	0	0	0	200	903	0	0	0	0	0	0	0	603	903	0
752	2	0	0	0	0	0	0	200	300	0	0	0	0	0	0	0	200	903	0	0	0	0	0	0	0	603	903	0
752	3	0	0	0	0	0	0	200	300	0	0	0	0	0	0	0	200	903	0	0	0	0	0	0	0	603	903	0
752	4	0	0	0	0	0	0	200	300	0	0	0	0	0	0	0	200	903	0	0	0	0	0	0	0	603	903	0
752	5	0	0	0	0	0	0	200	300	0	0	0	0	0	0	0	200	903	0	0	0	0	0	0	0	603	903	0
752	6	0	0	0	0	0	0	200	300	0	0	0	0	0	0	0	200	903	0	0	0	0	0	0	0	603	903	0
752	7	0	0	0	0	0	0	200	300	0	0	0	0	0	0	0	200	903	0	0	0	0	0	0	0	603	903	0
752	8	0	0	0	0	0	0	200	300	0	0	0	0	0	0	0	200	903	0	0	0	0	0	0	0	603	903	0
752	9	0	0	0	0	0	0	200	300	0	0	0	0	0	0	0	200	903	0	0	0	0	0	0	0	603	903	0
753	0	0	0	0	0	0	0	200	300	0	0	0	0	0	0	0	200	903	0	0	0	0	0	0	0	603	903	0
753	1	0	0	0	0	0	0	200	300	0	0	0	0	0	0	0	200	903	0	0	0	0	0	0	0	603	903	0
753	2	0	0	0	0	0	0	200	300	0	0	0	0	0	0	0	200	903	0	0	0	0	0	0	0	603	903	0
753	3	0	0	0	0	0	0	200	300	0	0	0	0	0	0	0	200	903	0	0	0	0	0	0	0	603	903	0
753	4	0	0	0	0	0	0	200	300	0	0	0	0	0	0	0	200	903	0	0	0	0	0	0	0	603	903	0
753	5	0	0	0	0	0	0	200	300	0	0	0	0	0	0	0	200	903	0	0	0	0	0	0	0	603	903	0
753	6	0	0	0	0	0	0	200	300	0	0	0	0	0	0	0	200	903	0	0	0	0	0	0	0	603	903	0
753	7	0	0	0	0	0	0	200	300	0	0	0	0	0	0	0	200	903	0	0	0	0	0	0	0	603	903	0
753	8	0	0	0	0	0	0	200	300	0	0	0	0	0	0	0	200	903	0	0	0	0	0	0	0	603	903	0
753	9	0	0	0	0	0	0	200	300	0	0	0	0	0	0	0	200	903	0	0	0	0	0	0	0	603	903	0
754	0	0	0	0	0	0	0	200	300	0	0	0	0	0	0	0	200	903	0	0	0	0	0	0	0	603	903	0
754	1	0	0	0	0	0	0	200	300	0	0	0	0	0	0	0	200	903	0	0	0	0	0	0	0	603	903	0
754	2	0	0	0	0	0	0	200	300	0	0	0	0	0	0	0	200	903	0	0	0	0	0	0	0	603	903	0
754	3	0	0	0	0	0	0	200	300	0	0	0	0	0	0	0	200	903	0	0	0	0	0	0	0	603	903	0
754	4	0	0	0	0	0	0	200	300	0	0	0	0	0	0	0	200	903	0	0	0	0	0	0	0	603	903	0
754	5	0	0	0	0	0	0	200	300	0	0	0	0	0	0	0	200	903	0	0	0	0	0	0	0	603	903	0
754	6	0	0	0	0	0	0	200	300	0	0	0	0	0	0	0	200	903	0	0	0	0	0	0	0	603	903	0
754	7	0	0	0	0	0	0	200	300	0	0	0	0	0	0	0	200	903	0	0	0	0	0	0	0	603	903	0
754	8	0	0	0	0	0	0	200	300	0	0	0	0	0	0	0	200	903	0	0	0	0	0	0	0	603	903	0
754	9	0	0	0	0	0	0	200	300	0	0	0	0	0	0	0	200	903	0	0	0	0	0	0	0	603	903	0
755	0	0	0	0	0	0	0	200	300	0	0	0	0	0	0	0	200	903	0	0	0	0	0	0	0	603	903	0
755	1	0	0	0	0	0	0	200	300	0	0	0	0	0	0	0	200	903	0	0	0	0	0	0	0	603	903	0
755	2	0	0	0	0	0	0	200	300	0	0	0	0	0	0	0	200	903	0	0	0	0	0	0	0	603	903	0
755	3	0	0	0	0	0	0	200	300	0	0	0	0	0	0	0	200	903	0	0	0	0	0	0	0	603	903	0
755	4	0	0	0	0	0	0	200	300	0	0	0	0	0	0	0	200	903	0	0	0	0	0	0	0	603	903	0
755	5	0	0	0	0	0	0	200	300	0	0	0	0	0	0	0	200	903	0	0	0	0	0	0	0	603	903	0
755	6	0	0	0	0	0	0	200	300	0	0	0	0	0	0	0	200	903	0	0	0	0	0	0	0	603	903	0
755	7	0	0	0	0	0	0	200	300	0	0	0	0	0	0	0	200	903	0	0	0	0	0	0	0	603	903	0
755	8	0	0	0	0	0	0	200	300	0	0	0	0	0	0	0	200	903	0	0	0	0	0	0	0	603	903	0
755	9	0	0	0	0	0	0	200	300	0	0	0	0	0	0	0	200	903	0	0	0	0	0	0	0	603	903	0
756	0	0	0	0	0	0	0	200	300	0	0	0	0	0	0	0	200	903	0	0	0	0	0	0	0	603	903	0
756	1	0	0	0	0	0	0	200	300	0	0	0	0	0	0	0	200	903	0	0	0	0	0	0	0	603	903	0
756	2	0	0	0	0	0	0	200	300	0	0	0	0	0	0	0	200	903	0	0	0	0	0	0	0	603	903	0
756	3	0	0	0	0	0	0	200	300	0	0	0	0	0	0	0	200	903	0	0	0	0	0	0	0	603	903	0
756	4	0	0	0	0	0	0	200	300	0	0	0	0	0	0	0	200	903	0	0	0	0	0	0	0	603	903	0
756	5	0	0	0	0	0	0	200	300	0	0	0	0	0	0	0	200	903	0	0	0	0	0	0	0	603	903	0
756	6	0	0	0	0	0	0	200	300	0	0	0	0	0	0	0	200	903	0	0	0	0	0	0	0	603	903	0
756	7	0	0	0	0	0	0	200	300	0	0	0	0	0	0	0	200	903	0	0	0	0	0	0	0	603	903	0
756	8	0	0	0	0	0	0	200	300	0	0	0	0	0	0	0	200	903	0	0	0	0	0	0	0	603	903	0
756	9	0	0	0	0	0	0	200	300	0	0	0	0	0	0	0	200	903	0	0	0	0	0	0	0	603	903	0
757	0	0	0	0	0	0	0	200	300	0	0	0	0	0	0	0	200	903	0	0	0	0	0	0	0	603	903	0
757	1	0	0	0	0	0	0	200	300	0	0	0	0	0	0	0	200	903	0	0	0	0	0	0	0	603	903	0
757	2	0	0	0	0	0	0	200	300	0	0	0	0	0	0	0	200	903	0	0	0	0	0	0	0	603	903	0
757	3	0	0	0	0	0	0	200	300	0	0	0	0	0	0	0	200	903	0	0	0	0	0	0	0	603	903	0
757	4	0	0	0	0	0	0	200	300	0	0	0	0	0	0	0	200	903	0	0	0	0	0	0	0	603	903	0
757	5	0	0	0	0	0	0	200	300	0	0	0	0	0	0	0	200	903	0	0	0	0	0	0	0	603	903	0
757	6	0	0	0	0	0	0	200	300	0	0	0	0	0	0	0	200	903	0	0	0	0	0	0	0	603	903	0
757	7	0	0	0	0	0	0	200	300	0	0	0	0	0	0	0	200	903	0	0	0	0	0	0	0	603	903	0
757	8	0	0	0	0	0	0	200	300	0	0	0	0	0	0	0	200	903	0	0	0	0	0	0	0	603	903	0
757	9	0	0	0	0	0	0	200	300	0	0	0	0	0	0	0	200	903	0	0	0	0	0	0	0	603	903	0
758	0	0	0	0	0	0	0	200	300	0	0	0	0	0	0	0	200	903	0	0	0	0	0	0	0	603	903	0
758	1	0	0	0	0	0	0	200	300	0	0	0	0	0	0	0	200	903	0	0	0	0	0	0	0	603	903	0
758	2	0	0	0	0	0	0	200	300	0	0	0	0	0	0	0	200	903	0	0	0	0	0	0	0	603	903	0
758	3	0	0	0	0	0	0	200	300	0	0	0	0	0	0	0	200	903	0	0	0	0	0	0	0	603	903	0
758	4	0	0	0	0	0	0	200	300	0	0	0	0	0	0	0	200	903	0	0	0	0	0	0	0	603	903	0
758	5	0	0	0	0	0	0	200	300	0	0	0	0	0	0	0	200	903	0	0	0	0	0	0	0	603	903	0
758	6	0	0	0	0	0	0	200	300	0	0	0	0	0	0	0	200	903	0	0	0	0	0	0	0	603	903	0
758	7	0	0	0	0	0	0	200	300	0	0	0	0	0	0	0	200	903	0	0	0	0	0	0	0	603	903	0
758	8	0	0	0	0	0	0	200	300	0	0	0	0	0	0	0	200	903	0	0	0	0	0	0	0	603	903	0
758	9	0	0	0	0	0	0	200	300	0	0	0	0	0	0	0	200	903	0	0	0	0	0	0	0	603	903	0
759	0	0	0	0	0	0	0	200	300	0	0	0	0	0	0	0	200	903	0	0	0	0	0	0	0	603	903	0
759	1	0	0	0	0	0	0	200	300	0	0	0	0	0	0	0	200	903	0	0	0	0	0	0	0	603	903	0
759	2	0	0	0	0	0	0	200	300	0	0	0	0	0	0	0	200	903	0	0	0	0	0	0	0	603	903	0
759	3	0	0	0	0	0	0	200	300	0	0	0	0	0	0	0	200	903	0	0	0	0	0	0	0	603	903	0
759	4	0	0	0	0	0	0	200	300	0	0	0	0	0	0	0	200	903	0	0	0	0	0	0	0	603	903	0
759	5	0	0	0	0	0	0	200	300	0	0	0	0	0	0	0	200	903	0	0	0	0	0	0	0	603	903	0
759	6	0	0	0	0	0	0	200	300	0	0	0	0	0	0	0	200	903	0	0	0	0	0	0	0	603	903	0
759	7	0	0	0	0	0	0	200	300	0	0	0	0	0	0	0	200	903	0	0	0	0	0	0	0	603	903	0
759	8	0	0	0	0	0	0	200	300	0	0	0	0	0	0	0	200	903	0	0	0	0	0	0	0	603	903	0
759	9	0	0	0	0	0	0	200	300	0	0	0	0	0	0	0	200	903	0	0	0	0	0	0	0	603	903	0
760	0	0	0	0	0	0	0	200	300	0	0	0	0	0	0	0	200	903	0	0	0	0	0	0	0	603	903	0
760	1	0	0	0	0	0	0	200	300	0	0	0	0	0	0	0	200	903	0	0	0	0	0	0	0	603	903	0
760	2	0	0	0	0	0	0	200	300	0	0	0	0	0	0	0	200	903	0	0	0	0	0	0	0	603	903	0
760	3	0	0	0	0	0	0	200	300	0	0	0	0	0	0	0	200	903	0	0	0	0	0	0	0	603	903	0
760	4	0	0	0	0	0	0	200	300	0	0	0	0	0	0	0	200	903	0	0	0	0	0	0	0	603	903	0
760	5	0	0	0	0	0	0	200	300	0	0	0	0	0	0	0	200	903	0	0	0	0	0	0	0	603	903	0
760	6	0	0	0	0	0	0	200	300	0	0	0	0	0	0	0	200	903	0	0	0	0	0	0	0	603	903	0
760	7	0	0	0	0	0	0	200	300	0	0	0	0	0	0	0	200	903	0	0	0	0	0	0	0	603	903	0
760	8	0	0	0	0	0	0	200	300	0	0	0	0	0	0	0	200	903	0	0	0	0	0	0	0	603	903	0
760	9	0	0	0	0	0	0	200	300	0	0	0	0	0	0	0	200	903	0	0	0	0	0	0	0	603	903	0
761	0	0	0	0	0	0	0	200	300	0	0	0	0	0	0	0	200	903	0	0	0	0	0	0	0	603	903	0
761	1	0	0	0	0	0	0	200	300	0	0	0	0	0	0	0	200	903	0	0	0	0	0	0	0	603	903	0
761	2	0	0	0	0	0	0	200	300	0	0	0	0	0	0	0	200	903	0	0	0	0	0	0	0	603	903	0
761	3	0	0	0	0	0	0	200	300	0	0	0	0	0	0	0	200	903	0	0	0	0	0	0	0	603	903	0
761	4	0	0	0	0	0	0	200	300	0	0	0	0	0	0	0	200	903	0	0	0	0	0	0	0	603	903	0
761	5	0	0	0	0	0	0	200	300	0	0	0	0	0	0	0	200	903	0	0	0	0	0	0	0	603	903	0
761	6	0	0	0	0	0	0	200	300	0	0	0	0	0	0	0	200	903	0	0	0	0	0	0	0	603	903	0
761	7	0	0	0	0	0	0	200	300	0	0	0	0	0	0	0	200	903	0	0	0	0	0	0	0	603	903	0
761	8	0	0	0	0	0	0	200	300	0	0	0	0	0	0	0	200	903	0	0	0	0	0	0	0	603	903	0
761	9	0	0	0	0	0	0	200	300	0	0	0	0	0	0	0	200	903	0	0	0	0	0	0	0	603	903	0
762	0	0	0	0	0	0	0	200	300	0	0	0	0	0	0	0	200	903	0	0	0	0	0	0	0	603	903	0
762	1	0	0	0	0	0	0	200	300	0	0	0	0	0	0	0	200	903	0	0	0	0	0	0	0	603	903	0
762	2	0	0	0	0	0	0	200	300	0	0	0	0	0	0	0	200	903	0	0	0	0	0	0	0	603	903	0
762	3	0	0	0	0	0	0	200	300	0	0	0	0	0	0	0	200	903	0	0	0	0	0	0	0	603	903	0
762	4	0	0	0	0	0	0	200	300	0	0	0	0	0	0	0	200	903	0	0	0	0	0	0	0	603	903	0
762	5	0	0	0	0	0	0	200	300	0	0	0	0	0	0	0	200	903	0	0	0	0	0	0	0	603	903	0
762	6	0	0	0	0	0	0	200	300	0	0	0	0	0	0	0	200	903	0	0	0	0	0	0	0	603	903	0
762	7	0	0	0	0	0	0	200	300	0	0	0	0	0	0	0	200	903	0	0	0	0	0	0	0	603	903	0
762	8	0	0	0	0	0	0	200	300	0	0	0	0	0	0	0	200	903	0	0	0	0	0	0	0	603	903	0
762	9	0	0	0	0	0	0	200	300	0	0	0	0	0	0	0	200	903	0	0	0	0	0	0	0	603	903	0
763	0	0	0	0	0	0	0	200	300	0	0	0	0	0	0	0	200	903	0	0	0	0	0	0	0	603	903	0
763	1	0	0	0	0	0	0	200	300	0	0	0	0	0	0	0	200	903	0	0	0	0	0	0	0	603	903	0
763	2	0	0	0	0	0	0	200	300	0	0	0	0	0	0	0	200	903	0	0	0	0	0	0	0	603	903	0
763	3	0	0	0	0	0	0	200	300	0	0	0	0	0	0	0	200	903	0	0	0	0	0	0	0	603	903	0
763	4	0	0	0	0	0	0	200	300	0	0	0	0	0	0	0	200	903	0	0	0	0	0	0	0	603	903	0
763	5	0	0	0	0	0	0	200	300	0	0	0	0	0	0	0	200	903	0	0	0	0	0	0	0	603	903	0
763	6	0	0	0	0	0	0	200	300	0	0	0	0	0	0	0	200	903	0	0	0	0	0	0	0	603	903	0
763	7	0	0	0	0	0	0	200	300	0	0	0	0	0	0	0	200	903	0	0	0	0	0	0	0	603	903	0
763	8	0	0	0	0	0	0	200	300	0	0	0	0	0	0	0	200	903	0	0	0	0	0	0	0	603	903	0
763	9	0	0	0	0	0	0	200	300	0	0	0	0	0	0	0	200	903	0	0	0	0	0	0	0	603	903	0
764	0	0	0	0	0	0	0	200	300	0	0	0	0	0	0	0	200	903	0	0	0	0	0	0	0	603	903	0
764	1	0	0	0	0	0	0	200	300	0	0	0	0	0	0	0	200	903	0	0	0	0	0	0	0	603	903	0
764	2	0	0	0	0	0	0	200	300	0	0	0	0	0	0	0	200	903	0	0	0	0	0	0	0	603	903	0
764	3	0	0	0	0	0	0	200	300	0	0	0	0	0	0	0	200	903	0	0	0	0	0	0	0	603	903	0
764	4	0	0	0	0	0	0	200	300	0	0	0	0	0	0	0	200	903	0	0	0	0	0	0	0	603	903	0
764	5	0	0	0	0	0	0	200	300	0	0	0	0	0	0	0	200	903	0	0	0	0	0	0	0	603	903	0
764	6	0	0	0	0	0	0	200	300	0	0	0	0	0	0	0	200	903	0	0	0	0	0	0	0	603	903	0
764	7	0	0	0	0	0	0	200	300	0	0	0	0	0	0	0	200	903	0	0	0	0	0	0	0	603	903	0
764	8	0	0	0	0	0	0	200	300	0	0	0	0	0	0	0	200	903	0	0	0	0	0	0	0	603	903	0
764	9	0	0	0	0	0	0	200	300	0	0	0	0	0	0	0	200	903	0	0	0	0	0	0	0	603	903	0
765	0	0	0	0	0	0	0	200	300	0	0	0	0	0	0	0	200	903	0	0	0	0	0	0	0	603	903	0
765	1	0	0	0	0	0	0	200	300	0	0	0	0	0	0	0	200	903	0	0	0	0	0	0	0	603	903	0
765	2	0	0	0	0	0	0	200	300	0	0	0	0	0	0	0	200	903	0	0	0	0	0	0	0	603	903	0
765	3	0	0	0	0	0	0	200	300	0	0	0	0	0	0	0	200	903	0	0	0	0	0	0	0	603	903	0
765	4	0	0	0	0	0	0	200	300	0	0	0	0	0	0	0	200	903	0	0	0	0	0	0	0	603	903	0
765	5	0	0	0	0	0	0	200	300	0	0	0	0	0	0	0	200	903	0	0	0	0	0	0	0	603	903	0
765	6	0	0	0	0	0	0	200	300	0	0	0	0	0	0	0	200	903	0	0	0	0	0	0	0	603	903	0
765	7	0	0	0	0	0	0	200	300	0	0	0	0	0	0	0	200	903	0	0	0	0	0	0	0	603	903	0
765	8	0	0	0	0	0	0	200	300	0	0	0	0	0	0	0	200	903	0	0	0	0	0	0	0	603	903	0
765	9	0	0	0	0	0	0	200	300	0	0	0	0	0	0	0	200	903	0	0	0	0	0	0	0	603	903	0
766	0	0	0	0	0	0	0	200	300	0	0	0	0	0	0	0	200	903	0	0	0	0	0	0	0	603	903	0
766	1	0	0	0	0	0	0	200	300	0	0	0	0	0	0	0	200	903	0	0	0	0	0	0	0	603	903	0
766	2	0	0	0	0	0	0	200	300	0	0	0	0	0	0	0	200	903	0	0	0	0	0	0	0	603	903	0
766	3	0	0	0	0	0	0	200	300	0	0	0	0	0	0	0	200	903	0	0	0	0	0	0	0	603	903	0
766	4	0	0	0	0	0	0	200	300	0	0	0	0	0	0	0	200	903	0	0	0	0	0	0	0	603	903	0
766	5	0	0	0	0	0	0	200	300	0	0	0	0	0	0	0	200	903	0	0	0	0	0	0	0	603	903	0
766	6	0	0	0	0	0	0	200	300	0	0	0	0	0	0	0	200	903	0	0	0	0	0	0	0	603	903	0
766	7	0	0	0	0	0	0	200	300	0	0	0	0	0	0	0	200	903	0	0	0	0	0	0	0	603	903	0
766	8	0	0	0	0	0	0	200	300	0	0	0	0	0	0	0	200	903	0	0	0	0	0	0	0	603	903	0
766	9	0	0	0	0	0	0	200	300	0	0	0	0	0	0	0	200	903	0	0	0	0	0	0	0	603	903	0
767	0	0	0	0	0	0	0	200	300	0	0	0	0	0	0	0	200	903	0	0	0	0	0	0	0	603	903	0
767	1	0	0	0	0	0	0	200	300	0	0	0	0	0	0	0	200	903	0	0	0	0	0	0	0	603	903	0
767	2	0	0	0	0	0	0	200	300	0	0	0	0	0	0	0	200	903	0	0	0	0	0	0	0	603	903	0
767	3	0	0	0	0	0	0	200	300	0	0	0	0	0	0	0	200	903	0	0	0	0	0	0	0	603	903	0
767	4	0	0	0	0	0	0	200	300	0	0	0	0	0	0	0	200	903	0	0	0	0	0	0	0	603	903	0
767	5	0	0	0	0	0	0	200	300	0	0	0	0	0	0	0	200	903	0	0	0	0	0	0	0	603	903	0
767	6	0	0	0	0	0	0	200	300	0	0	0	0	0	0	0	200	903	0	0	0	0	0	0	0	603	903	0
767	7	0	0	0	0	0	0	200	300	0	0	0	0	0	0	0	200	903	0	0	0	0	0	0	0	603	903	0
767	8	0	0	0	0	0	0	200	300	0	0	0	0	0	0	0	200	903	0	0	0	0	0	0	0	603	903	0
767	9	0	0	0	0	0	0	200	300	0	0	0	0	0	0	0	200	903	0	0	0	0	0	0	0	603	903	0
768	0	0	0	0	0	0	0	200	300	0	0	0	0	0	0	0	200	903	0	0	0	0	0	0	0	603	903	0
768	1	0	0	0	0	0	0	200	300	0	0	0	0	0	0	0	200	903	0	0	0	0	0	0	0	603	903	0
768	2	0	0	0	0	0	0	200	300	0	0	0	0	0	0	0	200	903	0	0	0	0	0	0	0	603	903	0
768	3	0	0	0	0	0	0	200	300	0	0	0	0	0	0	0	200	903	0	0	0	0	0	0	0	603	903	0
768	4	0	0	0	0	0	0	200	300	0	0	0	0	0	0	0	200	903	0	0	0	0	0	0	0	603	903	0
768	5	0	0	0	0	0	0	200	300	0	0	0	0	0	0	0	200	903	0	0	0	0	0	0	0	603	903	0
[truncated: 2,974 more rows]
