# Supplementary material for: The Effects of an Extemporaneous Speech Dual-task on Older Adult Gait Control
Source: Research Square preprint supplement (doi:10.21203/rs.3.rs-7674245/v1), 2025-11-18
Supplement: Supplementary file 119 [file Over10ground3.xlsx]

## Sheet: Sheet1
Trajectories
		10:LFHD			10:RFHD			10:LBHD			10:RBHD			10:C7			10:T10			10:CLAV			10:STRN			10:RBAK			10:LSHO			10:LUPA			10:LELB			10:LFRM			10:LWRA			10:LWRB			10:LFIN
Frame	Sub Frame	X	Y	Z	X	Y	Z	X	Y	Z	X	Y	Z	X	Y	Z	X	Y	Z	X	Y	Z	X	Y	Z	X	Y	Z	X	Y	Z	X	Y	Z	X	Y	Z	X	Y	Z	X	Y	Z	X	Y	Z	X	Y	Z
		mm	mm	mm	mm	mm	mm	mm	mm	mm	mm	mm	mm	mm	mm	mm	mm	mm	mm	mm	mm	mm	mm	mm	mm	mm	mm	mm	mm	mm	mm	mm	mm	mm	mm	mm	mm	mm	mm	mm	mm	mm	mm	mm	mm	mm	mm	mm	mm
465	0	235.218	2143.23	1552.95	130.938	2151.37	1545.84	259.517	2301.24	1598.5	140.348	2312.42	1592.85	203.105	2385.39	1442.22	231.865	2494.24	1168.07	209.913	2234.98	1327.17	214.494	2144.27	1125.64	147.894	2490.1	1257.23	361.543	2291.99	1404.09	483.554	2329.68	1175.83	495.337	2348.24	1080.08	507.199	2281.72	939.103	459.372	2264.69	837.868	523.38	2305.45	826.901	512.747	2249.63	763.519
466	0	235.528	2132.92	1551.93	131.177	2140.96	1544.89	259.557	2290.85	1598.03	140.556	2301.78	1592.36	203.187	2375.45	1441.75	231.743	2484.66	1167.54	209.914	2225.14	1326.62	214.36	2134.67	1124.83	148.046	2480.41	1256.84	361.725	2282.03	1403.46	483.705	2321.51	1175.58	495.615	2340.52	1079.92	507.697	2274.79	938.547	459.793	2257.83	837.229	523.641	2298.96	826.492	513.164	2243.58	762.781
467	0	235.575	2122.5	1551.12	131.233	2130.64	1544	259.696	2280.63	1597.51	140.363	2291.25	1591.96	203.338	2365.38	1441.17	231.729	2475.19	1167.14	209.892	2215.14	1326.02	214.116	2125.02	1124.07	148.074	2470.62	1256.48	361.708	2272.15	1402.77	483.791	2313.07	1175.43	495.98	2332.49	1079.97	508.122	2267.6	937.943	460.154	2250.85	836.483	523.436	2292.69	826.289	513.451	2237.4	761.995
468	0	235.944	2112.32	1550.01	131.508	2120.14	1542.97	259.879	2270.35	1596.76	140.467	2280.82	1591.18	203.473	2355.4	1440.43	231.938	2465.42	1166.49	209.893	2205.17	1325.17	213.877	2115.32	1123.28	148.285	2460.82	1255.92	361.914	2261.98	1401.81	484.018	2304.43	1174.69	496.219	2324.35	1079.51	508.519	2260.37	936.972	460.634	2243.83	835.604	523.711	2286.01	825.473	513.719	2231.03	760.667
469	0	236.308	2102.07	1548.78	131.912	2109.9	1541.82	260.199	2259.97	1595.72	140.876	2270.53	1590.23	203.758	2345.19	1439.5	232.232	2455.78	1165.76	210.045	2195.31	1324.08	213.705	2105.53	1122.11	148.592	2451.06	1255.19	362.124	2251.78	1400.68	484.364	2295.48	1173.84	496.277	2316.12	1078.48	508.967	2252.97	935.837	461.179	2236.65	834.566	524.186	2279.13	824.152	514.272	2224.69	759.326
470	0	236.743	2091.64	1547.62	132.155	2099.59	1540.65	260.505	2249.5	1594.55	141.289	2260.24	1589.16	203.94	2335.07	1438.58	232.575	2445.78	1165.02	210.134	2185.23	1322.96	213.376	2095.62	1120.8	149.007	2441.1	1254.35	362.348	2241.49	1399.45	484.601	2286.3	1172.96	496.371	2307.53	1077.49	509.371	2245.23	934.639	461.589	2229.5	833.111	524.318	2272.27	823.001	514.839	2218.27	758.031
471	0	237.006	2081.43	1546.36	132.502	2089.26	1539.41	260.948	2239.03	1593.39	141.742	2249.95	1587.93	204.411	2324.77	1437.48	233.017	2435.96	1164.1	210.178	2174.89	1321.77	213.158	2085.78	1119.5	149.365	2431.23	1253.5	362.679	2230.96	1398.31	484.882	2276.82	1171.92	496.713	2298.67	1076.61	509.544	2237.23	933.233	461.821	2222.33	831.544	524.64	2265.2	821.838	514.977	2211.56	756.352
472	0	237.364	2070.92	1544.92	132.696	2079.06	1538.13	261.565	2228.67	1592.01	142.31	2239.63	1586.56	205.028	2314.37	1436.23	233.505	2425.87	1163.08	210.231	2164.62	1320.31	212.868	2075.8	1117.95	149.819	2421.12	1252.5	362.995	2220.3	1396.78	485.075	2267.15	1170.46	496.868	2289.69	1075.29	509.708	2229.09	931.562	462.102	2214.88	829.956	524.866	2257.95	820.389	515.4	2204.75	754.504
473	0	237.785	2060.54	1543.28	133.249	2068.55	1536.74	262.08	2218.12	1590.33	142.858	2229.23	1585.14	205.452	2303.97	1434.92	233.992	2415.94	1161.83	210.428	2154.25	1318.61	212.606	2065.52	1116.01	150.371	2411.08	1251.37	363.248	2209.71	1395.01	485.248	2257.21	1168.84	496.786	2280.51	1073.65	509.638	2220.75	929.626	462.148	2207.15	827.68	525.199	2250.42	818.777	515.582	2197.85	752.39
474	0	238.361	2050.09	1541.82	133.683	2058.07	1535.23	262.719	2207.81	1588.63	143.557	2218.78	1583.6	206.042	2293.52	1433.45	234.552	2405.73	1160.46	210.555	2143.91	1317	212.552	2055.35	1114.4	151	2400.85	1250.08	363.742	2198.86	1393.28	485.402	2247.16	1167.1	497.122	2270.97	1072.36	509.833	2212.22	927.746	462.448	2199.77	825.817	525.557	2242.69	817.213	515.997	2190.58	750.444
475	0	239.082	2039.59	1540.2	134.373	2047.68	1533.63	263.556	2197.46	1586.76	144.173	2208.38	1581.89	206.855	2282.94	1431.76	235.112	2395.71	1158.76	210.912	2133.38	1315.44	212.5	2045.09	1112.57	151.683	2390.75	1248.58	364.219	2188.09	1391.42	485.647	2236.85	1165.14	497.252	2261.48	1070.6	510.019	2203.57	925.958	463.043	2192.03	823.86	525.914	2234.81	815.422	516.391	2183.26	748.442
476	0	239.837	2029.03	1538.42	135.087	2037.19	1532.11	264.327	2186.91	1584.76	145.109	2197.85	1580.05	207.572	2272.4	1430.09	235.924	2385.57	1157.03	211.306	2122.9	1313.62	212.554	2034.67	1110.69	152.47	2380.4	1247.02	364.749	2177.01	1389.38	485.862	2226.25	1163.11	497.413	2251.68	1068.86	510.066	2194.78	923.775	463.285	2183.66	821.699	525.704	2226.96	813.505	516.599	2175.75	746.091
477	0	240.55	2018.55	1536.61	136.122	2026.62	1530.36	265.295	2176.46	1582.93	146.072	2187.34	1578.39	208.508	2261.77	1428.4	236.563	2375.08	1155.37	211.552	2112.22	1311.76	212.298	2023.75	1108.74	153.199	2369.9	1245.44	365.307	2166	1387.41	486.204	2215.55	1161.2	497.609	2241.78	1067.06	510.335	2185.8	921.682	463.192	2174.49	819.33	526.259	2218.52	811.505	517.017	2168.05	743.909
478	0	241.574	2007.76	1534.86	136.894	2015.97	1528.72	266.368	2165.74	1581.2	147.165	2176.8	1576.72	209.412	2250.97	1426.74	236.939	2364.07	1153.68	212.022	2101.52	1310.07	212.412	2013.21	1106.85	153.987	2359.41	1243.87	366.037	2155	1385.66	486.522	2204.62	1159.31	497.962	2231.73	1065.4	510.633	2176.55	919.544	464.191	2166.07	817.371	526.808	2210.01	809.786	517.065	2160.02	741.44
479	0	242.64	1997.14	1532.95	138.062	2005.4	1526.89	267.512	2155.1	1579.42	148.116	2166.08	1575.03	210.602	2240.24	1425	237.631	2353.12	1151.95	212.507	2090.7	1308.24	212.566	2002.37	1105.05	154.811	2348.86	1242.18	366.795	2143.9	1383.62	487.033	2193.6	1157.27	498.351	2221.42	1063.38	510.922	2167.28	917.248	464.484	2156.86	815.198	527.128	2201.35	807.659	517.332	2151.89	738.994
480	0	243.664	1986.42	1530.93	139.125	1994.56	1525.19	268.77	2144.27	1577.57	149.507	2155.22	1573.34	211.52	2229.6	1423.24	238.362	2342.17	1150.19	213.239	2079.92	1306.46	212.921	1991.57	1103.12	155.582	2338.19	1240.42	367.605	2132.93	1381.52	487.583	2182.44	1155.06	498.524	2211.08	1061.07	511.44	2157.65	914.795	464.717	2147.64	812.538	527.239	2192.46	805.264	517.729	2143.49	736.383
481	0	244.952	1975.5	1529.16	140.257	1983.87	1523.64	270.026	2133.42	1575.68	150.731	2144.41	1571.77	212.837	2218.84	1421.48	238.995	2331.18	1148.2	214.014	2068.87	1304.86	213.082	1980.51	1101.58	156.422	2327.41	1238.75	368.571	2121.88	1379.52	488.146	2171.19	1152.92	498.873	2200.49	1058.97	512.018	2147.83	912.611	465.465	2138.2	810.401	527.901	2183.07	803.201	517.835	2134.4	733.886
482	0	246.054	1964.56	1527.35	141.596	1972.98	1521.92	271.537	2122.33	1573.88	152.129	2133.58	1570.16	213.888	2207.98	1419.59	239.734	2320.13	1146.08	214.761	2057.96	1303.23	213.438	1969.33	1100.07	157.398	2316.52	1236.95	369.641	2110.91	1377.51	488.856	2159.99	1150.65	499.354	2189.71	1056.8	512.449	2137.75	910.258	466.074	2128.2	808.113	528.209	2173.45	800.908	518.326	2125.46	731.416
483	0	247.282	1953.56	1525.41	142.746	1962.13	1520.27	273.208	2111.42	1572.01	153.839	2122.7	1568.59	215.258	2197.21	1417.65	240.405	2308.72	1143.85	215.799	2046.82	1301.61	213.526	1957.78	1098.49	158.405	2305.49	1235	370.693	2099.85	1375.3	489.517	2148.67	1148.28	500.102	2178.74	1054.66	512.973	2127.31	907.842	466.699	2117.63	805.548	528.663	2163.49	798.64	518.276	2115.84	728.548
484	0	248.681	1942.4	1523.66	144.11	1951.33	1518.72	274.828	2100.22	1570.08	155.571	2111.67	1566.99	216.574	2186.27	1415.79	241.609	2297.72	1141.81	216.547	2035.55	1299.99	213.814	1946.33	1097.19	159.351	2294.45	1232.98	371.918	2088.85	1373.14	490.137	2137.38	1145.84	500.504	2167.78	1052.33	513.097	2116.52	905.264	466.073	2108.13	802.435	528.812	2153.19	796.244	518.65	2105.88	725.977
485	0	250.075	1931.19	1522.02	145.73	1940.27	1517.36	276.56	2089.18	1568.28	157.394	2100.73	1565.45	217.859	2175.23	1413.91	242.147	2286.05	1139.66	217.682	2024.37	1298.49	214.225	1934.72	1095.84	160.208	2283.14	1231.01	373.086	2077.8	1371	490.879	2126.2	1143.5	500.647	2156.65	1049.91	513.559	2105.55	902.912	466.609	2097.67	800.022	529.227	2142.51	794.215	518.851	2095.8	723.388
486	0	251.752	1920.13	1520.51	147.469	1929.13	1516.14	278.531	2078.1	1566.71	159.32	2089.69	1564.03	219.078	2164.08	1412.19	242.998	2274.69	1137.55	218.823	2012.92	1297.07	214.625	1922.97	1094.7	161.012	2271.63	1229.19	374.494	2066.7	1369.09	491.728	2115.05	1141.31	501.59	2145.39	1047.96	514.211	2094.37	900.749	467.211	2086.51	797.957	530.457	2131.41	792.14	519.303	2084.86	721.065
487	0	253.626	1908.99	1518.91	149.233	1917.95	1514.9	280.377	2066.86	1564.96	161.323	2078.6	1562.65	220.501	2152.81	1410.45	243.39	2262.52	1135.42	220.151	2001.39	1295.72	215.182	1911.12	1093.72	161.743	2259.93	1227.45	375.951	2055.47	1367.25	492.582	2103.9	1139.12	502.052	2134.07	1045.52	514.867	2083.13	898.595	468.142	2075.18	795.933	530.529	2119.99	789.511	519.665	2073.92	718.647
488	0	255.363	1897.77	1517.31	151.104	1906.73	1513.69	282.315	2055.63	1563.3	163.172	2067.36	1561.34	221.819	2141.49	1408.75	244.207	2250.74	1133.36	221.28	1989.75	1294.29	215.724	1898.92	1092.46	162.617	2248.26	1225.75	377.318	2044.23	1365.27	493.449	2092.66	1136.84	502.287	2122.68	1042.91	515.254	2071.4	896.143	468.528	2063.61	793.436	530.88	2108.3	787.042	520.532	2062.44	716.409
489	0	257.408	1886.48	1516.08	152.907	1895.27	1512.77	284.516	2044.65	1561.82	165.067	2056.03	1560.17	223.247	2130.25	1407.23	244.548	2238.39	1131.51	222.457	1977.97	1293.12	216.388	1886.83	1091.52	163.249	2236.34	1223.97	378.544	2033.07	1363.48	494.277	2081.53	1134.77	503.134	2111.19	1041.03	515.677	2059.6	893.953	469.127	2051.86	791.266	531.455	2096.51	784.953	521.104	2050.57	714.165
490	0	259.536	1875.02	1515.19	155.105	1883.73	1512.12	286.551	2033.42	1560.34	167.084	2044.63	1559.13	224.561	2118.78	1405.85	244.74	2226.53	1129.68	223.787	1966.09	1292.09	217.137	1874.43	1090.74	163.694	2224.36	1222.39	379.951	2021.86	1361.74	494.904	2070.16	1132.49	503.69	2099.5	1038.97	516.38	2047.66	891.937	469.838	2039.89	789.097	532.723	2085.01	783.453	521.822	2038.48	712.117
491	0	261.875	1863.6	1514.46	157.339	1872.01	1511.61	288.611	2022.15	1559	169.208	2033.14	1558.16	225.934	2107.21	1404.76	244.256	2214.18	1128.24	225.21	1954.19	1291.27	218.051	1861.89	1090.18	164.175	2212.68	1221.23	381.225	2010.57	1359.96	495.631	2058.89	1130.32	503.475	2087.56	1036.52	517.206	2035.66	889.979	470.796	2027.44	787.086	532.664	2072.69	780.928	522.871	2026.21	710.212
492	0	264.169	1851.95	1513.97	159.734	1860.26	1511.58	290.758	2010.72	1558.03	171.458	2021.57	1557.62	226.949	2095.51	1404.08	244.292	2202.41	1127.39	226.541	1942.13	1290.88	219.067	1849.15	1089.94	164.476	2200.59	1220.37	382.576	1999.36	1358.67	496.243	2047.39	1128.51	503.36	2075.43	1034.37	518.16	2023.59	888.365	471.637	2014.79	785.329	533.006	2060.23	778.864	524.051	2013.41	708.826
493	0	266.512	1840.29	1513.79	161.955	1848.42	1511.75	292.893	1999.12	1557.53	173.548	2009.69	1557.48	227.995	2083.69	1403.85	244.4	2190.66	1126.76	227.836	1929.99	1290.97	220.134	1836.03	1090.19	164.368	2188.31	1220	383.859	1988.23	1357.81	496.863	2035.67	1127.16	503.545	2063.29	1032.79	518.791	2011.19	886.894	472.833	2001.8	784.195	534.333	2047.79	777.612	525.401	2000.47	707.628
494	0	268.69	1828.58	1513.76	164.194	1836.43	1512.31	294.956	1987.31	1557.46	175.482	1997.68	1557.91	228.841	2071.78	1404.04	244.025	2178.7	1126.77	229.211	1917.84	1291.32	221.459	1822.88	1090.8	164.117	2176.07	1220.29	385.187	1977.01	1357.52	497.432	2023.82	1126.31	504.052	2051.24	1031.91	519.517	1998.73	886.051	474.191	1988.46	783.455	535.33	2035.17	776.878	526.806	1987.43	706.814
495	0	270.761	1816.76	1514.3	166.336	1824.45	1513.06	297.045	1975.53	1557.94	177.589	1985.81	1558.91	229.639	2059.83	1404.73	243.638	2167.17	1127.52	230.289	1905.23	1292.15	222.984	1809.85	1091.72	163.482	2163.56	1221.09	386.286	1965.84	1357.74	497.613	2011.69	1125.85	504.909	2039.03	1031.86	520.328	1986.05	885.802	475.152	1975.12	782.852	535.384	2022.19	776.371	528.255	1974.1	706.655
496	0	272.793	1804.88	1515.09	168.401	1812.38	1514.27	299.046	1963.79	1558.72	179.415	1973.8	1560.08	230.474	2047.94	1405.72	242.755	2155.34	1128.27	231.57	1892.95	1293.37	224.396	1796.79	1093.23	162.996	2151.16	1222.4	387.379	1954.78	1358.26	497.812	1999.61	1125.73	504.073	2026.43	1031.29	521.085	1973.07	886.044	476.115	1961.5	782.971	536.206	2008.76	776.526	529.761	1960.54	707.143
497	0	274.826	1793.16	1516.32	170.464	1800.57	1516.04	301.039	1952.08	1559.81	181.312	1961.81	1561.54	231.356	2036.17	1406.96	242.564	2143.43	1129.56	233.015	1880.92	1294.94	226.089	1784.12	1095.26	162.694	2138.76	1223.77	388.62	1943.74	1359.46	498.014	1987.63	1126.19	504.011	2014.07	1031.6	521.776	1960.09	886.854	477.153	1947.77	783.713	536.137	1995.22	776.648	531.091	1946.64	708.031
498	0	276.806	1781.26	1517.9	172.325	1788.68	1517.94	302.734	1940.27	1561.1	183.219	1950.11	1563.45	232.079	2024.37	1408.52	242.23	2130.68	1131.09	234.228	1868.95	1296.9	227.781	1771.78	1097.44	162.307	2126.35	1225.33	389.737	1932.8	1360.88	498.18	1975.65	1127.12	503.905	2001.62	1032.53	522.484	1946.89	888.366	478.478	1933.41	785.42	537.44	1981.42	778.313	532.466	1932.52	709.669
499	0	278.502	1769.67	1519.76	174.038	1776.89	1520.11	304.389	1928.79	1562.9	184.972	1938.36	1565.65	232.754	2012.68	1410.32	241.972	2118.8	1132.63	235.513	1857.15	1299.11	229.365	1759.56	1099.97	162.244	2114.02	1227.15	390.766	1921.82	1362.75	498.141	1963.41	1128.41	504.273	1989.03	1034.35	523.205	1933.63	890.427	479.277	1919.03	787.195	537.802	1967.4	780.204	533.728	1918.04	711.941
500	0	280.116	1758.12	1521.9	175.534	1765.32	1522.5	305.872	1917.35	1565.04	186.298	1926.69	1568.14	233.682	2001.19	1412.34	241.41	2106.14	1134.12	236.817	1845.38	1301.6	230.914	1747.74	1102.59	162.219	2101.47	1228.84	391.47	1910.48	1364.79	498.121	1951.3	1130.15	505.156	1976.64	1036.85	523.575	1920.2	892.763	479.747	1904.26	789.427	538.039	1953.35	782.464	534.634	1903.27	714.39
501	0	281.434	1746.98	1524.05	176.997	1753.72	1525	307.183	1906.24	1567.35	187.723	1915.3	1570.73	234.338	1989.74	1414.16	241.66	2094.34	1135.82	238.082	1833.72	1304.05	232.309	1736.1	1105.48	162.409	2089.26	1230.66	392.325	1899.55	1367.03	498.477	1939.25	1132.15	504.695	1964.18	1038.39	523.971	1906.6	895.044	480.298	1889.58	791.864	538.467	1938.87	784.648	535.57	1888.3	717.06
502	0	282.867	1735.99	1526.46	178.511	1742.44	1527.65	308.197	1895.2	1569.65	188.898	1904.07	1573.31	235.176	1978.32	1416.27	241.865	2082.33	1137.77	239.098	1822.28	1306.56	233.709	1724.74	1108.23	162.768	2077.33	1232.66	393.388	1888.51	1369.58	499.092	1927.37	1134.6	505.286	1951.62	1040.73	525.038	1893.09	898.088	481.518	1873.81	795.325	538.136	1924.35	786.771	536.314	1873.01	720.12
503	0	284.33	1725.01	1529.25	179.797	1731.32	1530.37	309.118	1884.32	1572.03	189.792	1893.11	1575.92	235.87	1966.97	1418.51	242.239	2070.55	1139.88	240.256	1810.9	1309.1	235.071	1713.58	1110.95	163.068	2065.28	1234.78	394.341	1877.48	1372.25	499.848	1915.38	1137.31	506.169	1939.19	1043.28	525.634	1879.29	900.941	482.175	1858.85	798.414	539.143	1909.63	789.634	536.815	1857.47	723.102
504	0	285.719	1714.33	1532.2	180.958	1720.41	1533.21	310.155	1873.78	1574.39	190.669	1882.22	1578.11	236.672	1955.71	1420.59	242.746	2058.86	1141.87	241.209	1799.51	1311.59	236.128	1702.73	1113.57	163.703	2053.66	1236.83	395.336	1866.35	1374.83	500.711	1903.34	1139.95	506.371	1926.83	1045.47	526.429	1865.57	903.793	482.832	1844.17	801.735	539.568	1894.63	792.277	537.131	1841.57	726.144
505	0	286.703	1703.79	1534.85	182.262	1709.55	1536.02	310.859	1863.51	1576.27	191.371	1871.72	1580.07	237.425	1944.54	1422.55	243.517	2047.55	1143.74	242.141	1788.24	1313.83	237.173	1692.02	1116.04	164.424	2042.27	1238.73	396.095	1855.37	1376.97	501.721	1891.3	1142.32	507.867	1914.46	1047.72	527.209	1851.77	906.356	483.32	1829.18	804.754	539.138	1879.79	794.111	537.395	1825.69	729.037
506	0	287.919	1693.32	1537.57	183.266	1698.85	1538.8	311.428	1853.28	1577.81	192.142	1861.3	1581.7	238.163	1933.3	1424.47	244.418	2036.28	1145.55	243.053	1777.1	1315.89	237.969	1681.4	1118.03	165.098	2030.8	1240.51	396.876	1844.19	1379.03	502.79	1879.37	1144.46	509.049	1902.04	1049.57	527.981	1837.97	908.657	483.903	1814.19	807.659	539.188	1864.73	795.88	537.669	1809.46	731.873
507	0	288.705	1683.04	1540.28	184.349	1688.15	1541.63	312.008	1843.35	1579.42	192.711	1850.97	1583.31	238.723	1922.07	1426.2	244.931	2024.68	1147.29	243.795	1766	1317.75	238.68	1670.89	1119.91	165.77	2019.96	1242.48	397.474	1833.02	1380.8	504.013	1867.54	1146.58	510.197	1889.58	1051.35	528.716	1823.86	911.029	483.907	1798.86	810.357	540.288	1849.47	798.331	537.617	1793.39	734.298
508	0	289.88	1672.61	1542.92	185.262	1677.49	1544.32	312.573	1833.3	1580.87	193.294	1840.7	1584.6	239.395	1910.87	1427.92	245.795	2013.86	1149.1	244.568	1754.95	1319.51	239.228	1659.99	1121.56	166.476	2009.03	1244.36	397.973	1821.68	1382.44	505.217	1855.53	1148.51	511.931	1877.25	1053.23	529.782	1810.12	913.382	484.651	1784.12	813.27	540.668	1834.12	800.242	537.644	1777.18	737.365
509	0	290.864	1662.33	1545.36	186.287	1666.96	1546.82	312.859	1823.43	1581.64	193.887	1830.62	1585.85	239.903	1899.77	1429.49	246.334	2002.7	1150.82	245.219	1744.11	1320.67	239.649	1649.08	1122.78	167.224	1998.32	1246.15	398.587	1810.42	1384	506.509	1843.54	1150.26	513.365	1864.94	1054.6	530.879	1796.21	915.424	485.229	1768.8	816.025	540.865	1818.8	801.701	537.897	1760.92	739.92
510	0	291.826	1652.05	1547.59	187.216	1656.36	1549.17	313.577	1813.51	1582.86	194.363	1820.25	1587.05	240.318	1888.61	1431.09	247.073	1991.53	1152.6	245.529	1733.07	1322.02	239.875	1638.05	1123.83	167.97	1987.74	1247.99	398.849	1799.04	1385.27	507.917	1831.73	1151.96	514.831	1852.52	1055.88	531.802	1782.26	917.289	485.701	1753.6	818.614	541.418	1803.67	803.204	538.082	1744.59	742.339
511	0	292.536	1641.9	1549.71	187.88	1645.94	1551.44	314.224	1803.84	1583.93	194.699	1810.1	1588.12	240.653	1877.35	1432.69	247.763	1980.66	1154.6	245.798	1722.03	1323.19	239.876	1627.14	1124.69	168.594	1977.2	1249.89	399.156	1787.65	1386.66	508.982	1819.59	1153.54	515.812	1839.76	1057.06	532.661	1768.27	919.206	486.08	1738.61	821.044	542.045	1788.1	805.019	538.309	1728.13	744.947
512	0	293.31	1631.53	1551.82	188.652	1635.42	1553.61	314.539	1793.52	1584.82	195.133	1799.8	1589.15	240.963	1866.2	1434.3	248.661	1970.35	1156.61	245.887	1711.32	1324.13	239.673	1616.35	1125.38	169.145	1966.76	1251.8	399.3	1776.24	1387.94	510.013	1807.61	1154.99	517.413	1827.23	1058.42	533.407	1754.23	920.862	486.498	1723.52	823.326	542.389	1772.71	806.479	538.484	1711.92	747.361
513	0	293.69	1621.59	1553.29	189.272	1625.05	1555.47	314.964	1783.58	1585.31	195.556	1789.64	1589.94	241.475	1855.24	1435.78	249.723	1960.34	1158.5	245.897	1700.38	1324.99	239.521	1605.97	1125.76	169.861	1956.41	1253.54	399.354	1764.81	1388.94	510.823	1795.5	1156.14	518.653	1814.33	1059.29	534.253	1740.13	922.44	486.987	1708.53	825.464	542.272	1757.51	807.591	538.829	1695.74	749.54
514	0	294.321	1611.27	1555.02	189.924	1614.63	1557.32	315.437	1773.48	1585.88	195.978	1779.42	1590.53	241.803	1844.17	1437.09	250.632	1950.41	1160.2	245.799	1689.7	1325.76	239.163	1595.63	1126.12	170.663	1946.24	1255.05	399.467	1753.25	1389.81	511.821	1783.65	1157.22	520.011	1801.73	1060.37	534.707	1725.89	923.909	487.396	1693.67	827.57	543.441	1742.12	809.31	539.166	1679.57	751.803
515	0	294.9	1600.83	1556.63	190.233	1604.25	1558.96	315.972	1763.49	1586.34	196.582	1769.41	1591.19	242.013	1833.07	1438.27	251.461	1940.16	1161.62	245.661	1678.94	1326.62	238.514	1585.51	1126.44	171.524	1935.94	1256.43	399.636	1741.92	1390.73	512.534	1771.82	1158.17	520.727	1788.73	1060.9	535.517	1711.58	925.604	487.612	1678.9	829.566	543.683	1726.72	810.619	539.533	1663.59	754.152
516	0	295.183	1590.62	1557.87	190.663	1594.05	1560.33	316.227	1752.95	1586.72	196.995	1759.26	1591.75	242.469	1822.02	1439.33	252.236	1929.9	1162.88	245.313	1668.45	1327.2	237.806	1575.4	1126.64	172.442	1925.71	1257.93	399.631	1730.43	1391.46	512.95	1759.69	1159.04	521.752	1775.89	1061.71	536.038	1697.53	927.213	487.811	1664.27	831.251	544.258	1711.41	812	539.965	1647.68	756.376
517	0	295.202	1580.32	1558.68	190.842	1583.75	1561.58	316.663	1742.73	1586.95	197.504	1749.27	1592.16	242.931	1811.29	1440.31	253.14	1919.74	1164.1	245.11	1657.97	1327.64	237.148	1565.6	1126.73	173.305	1915.5	1259.12	399.637	1719.14	1392.1	513.175	1747.56	1159.58	522.578	1763.05	1062.43	536.231	1683.22	928.514	488.002	1649.48	832.889	545.544	1696.15	813.631	540.281	1631.87	758.324
518	0	295.58	1569.94	1559.73	191.133	1573.63	1562.53	317.019	1732.39	1587.25	197.903	1739.11	1592.54	243.511	1800.52	1441.12	254.192	1909.79	1165.4	244.646	1647.54	1328.04	236.327	1555.8	1126.86	174.256	1905.37	1260.17	399.571	1707.91	1392.65	513.44	1735.54	1160.16	523.416	1750.18	1063.14	536.418	1669.06	929.8	488.275	1634.83	834.472	545.731	1681.11	814.893	540.458	1616.26	760.138
519	0	295.854	1559.57	1560.46	191.357	1563.39	1563.41	317.498	1722.2	1587.49	198.315	1729.01	1592.76	244.193	1790.19	1441.69	254.977	1899.8	1166.11	244.546	1637.28	1328.37	235.667	1546.27	1126.93	175.156	1895.26	1261.03	399.719	1696.69	1393.16	513.454	1723.3	1160.57	523.843	1737.34	1063.4	536.64	1655.06	930.898	488.56	1620.37	835.892	546.166	1666.05	815.905	540.609	1600.77	761.775
520	0	296.125	1549.32	1560.93	191.712	1553.24	1564.06	317.823	1712.16	1587.26	198.582	1718.92	1592.88	244.733	1779.61	1442.21	255.745	1889.65	1166.84	244.412	1627.05	1328.52	234.951	1536.95	1126.8	176.024	1885.11	1261.67	399.808	1685.67	1393.41	513.675	1711.11	1160.9	524.48	1724.51	1063.8	536.798	1641.05	931.815	488.854	1605.87	837.108	546.687	1651.13	816.529	541.078	1585.62	763.062
521	0	296.391	1539.02	1561.37	191.914	1543.04	1564.48	318.12	1701.75	1587.06	198.963	1708.86	1593.02	245.15	1769.2	1442.53	256.343	1879.75	1167.25	244.227	1616.77	1328.62	234.238	1527.8	1126.6	176.682	1875.07	1262.19	399.911	1674.76	1393.65	513.86	1698.93	1161.18	524.931	1711.77	1063.89	537.047	1627.33	932.643	489.042	1591.51	838.04	546.789	1636.39	817.276	541.6	1570.41	764.574
522	0	296.479	1528.79	1561.55	192.035	1532.75	1564.92	318.581	1691.62	1586.94	199.253	1698.64	1593.02	245.576	1758.8	1442.67	257.079	1869.81	1167.7	243.971	1606.4	1328.59	233.517	1518.36	1126.45	177.345	1864.99	1262.5	399.952	1663.85	1393.62	513.882	1686.62	1161.2	525.136	1698.89	1063.92	537.069	1613.51	933.218	489.118	1576.85	838.897	547.091	1621.96	817.991	541.799	1555.36	765.593
523	0	296.733	1518.44	1561.49	192.172	1522.47	1565.05	318.904	1681.38	1586.55	199.69	1688.67	1592.73	245.864	1748.46	1442.64	257.368	1859.94	1167.59	243.753	1596.32	1328.41	232.926	1508.92	1126.27	177.826	1854.98	1262.59	399.807	1653.21	1393.38	513.686	1674.29	1160.8	525.345	1686.28	1063.58	537.159	1599.95	933.421	489.115	1562.55	839.385	547.407	1607.4	818.347	541.937	1540.64	766.328
524	0	297.08	1508.29	1561.29	192.521	1512.41	1564.96	319.021	1671.23	1585.77	200.04	1678.54	1592.27	246.079	1738.17	1442.33	257.487	1849.83	1167.26	243.741	1586.17	1328.05	232.394	1499.38	1125.79	178.127	1844.92	1262.45	399.918	1642.74	1392.95	513.686	1662.11	1160.17	525.227	1673.72	1062.88	537.36	1586.52	933.53	489.044	1548.28	839.547	547.187	1593.27	818.029	541.936	1525.91	766.738
525	0	297.175	1498.26	1560.92	192.779	1502.29	1564.69	319.402	1661.11	1584.93	200.239	1668.47	1591.68	246.332	1727.87	1441.97	257.519	1839.87	1167.15	243.664	1575.91	1327.53	232.11	1489.57	1125.27	178.168	1834.84	1262.14	399.904	1632.38	1392.33	513.608	1649.84	1159.37	524.979	1661.1	1061.92	537.395	1573.26	933.326	489.227	1534.33	839.702	547.164	1578.89	817.978	541.965	1511.25	767.104
526	0	297.532	1488.01	1560.55	192.957	1492.07	1564.46	319.617	1650.98	1584.19	200.415	1658.25	1591.02	246.334	1717.42	1441.48	257.374	1829.91	1166.84	243.76	1565.82	1327.08	231.842	1479.84	1124.58	178.125	1824.66	1261.77	399.859	1621.94	1391.55	513.436	1637.7	1158.55	524.667	1648.65	1060.9	537.228	1559.96	933.036	489.103	1519.84	840.003	547.498	1564.54	817.802	542.031	1496.71	767.407
527	0	297.741	1477.85	1559.97	193.197	1481.83	1564.04	319.839	1640.73	1583.21	200.594	1648.14	1590.15	246.33	1707.06	1440.86	257.188	1819.95	1166.32	243.44	1555.24	1326.3	231.669	1469.8	1123.64	177.962	1814.41	1261.33	399.885	1611.53	1390.71	513.193	1625.51	1157.49	524.439	1636.31	1059.83	537.052	1546.81	932.465	489.022	1506.08	839.839	546.617	1550.63	817.147	541.836	1482.33	767.33
528	0	297.848	1467.68	1559.02	193.266	1471.64	1563.35	319.867	1630.54	1581.85	200.748	1638.01	1589.03	246.272	1696.56	1439.99	256.785	1809.97	1165.62	243.356	1544.85	1325.23	231.488	1459.75	1122.41	177.552	1804.17	1260.7	399.765	1601.28	1389.53	512.775	1613.38	1156.07	523.714	1623.76	1058.24	536.789	1533.64	931.761	488.564	1492.34	839.102	546.236	1536.83	816.15	541.514	1468.06	766.872
529	0	297.847	1457.48	1558.12	193.464	1461.45	1562.62	319.991	1620.38	1580.5	200.913	1627.88	1587.86	246.057	1686.01	1439.06	256.12	1799.9	1164.85	243.249	1534.43	1324.1	231.452	1449.5	1120.97	177.082	1793.63	1259.95	399.454	1590.83	1388.24	512.301	1601.41	1154.6	523.451	1611.57	1056.96	536.204	1520.5	930.827	488.169	1478.87	838.405	546.167	1522.76	815.496	541.145	1453.97	766.504
530	0	297.921	1447.2	1557.21	193.498	1451.1	1561.85	320.002	1610.35	1579.05	200.857	1617.66	1586.64	245.813	1675.5	1438.04	255.395	1789.67	1163.96	243.088	1523.89	1322.86	231.446	1439.27	1119.62	176.419	1783.29	1259.04	399.144	1580.46	1386.85	511.901	1589.62	1153.23	522.672	1599.28	1055.3	535.514	1507.33	929.874	487.691	1465.28	837.757	545.711	1509.28	814.758	540.742	1439.94	765.944
531	0	298.082	1436.91	1556.15	193.589	1440.66	1560.94	320.044	1600.08	1577.55	200.52	1607.29	1585.26	245.396	1664.77	1436.78	254.599	1779.45	1162.93	243.178	1513.41	1321.55	231.577	1428.93	1117.96	175.652	1772.69	1257.99	399.114	1570.31	1385.44	511.447	1577.8	1151.64	521.945	1586.82	1053.53	534.906	1494.38	928.922	487.081	1451.74	836.791	544.87	1495.47	813.496	540.159	1426.08	765.237
532	0	298.262	1426.59	1554.9	193.701	1430.22	1559.86	319.726	1589.82	1575.62	200.671	1596.9	1583.58	244.863	1654.07	1435.46	253.681	1769.1	1161.61	242.859	1502.66	1319.89	231.627	1418.3	1116.24	174.832	1762	1256.77	398.817	1559.99	1383.81	510.954	1566.33	1149.86	521.368	1574.64	1051.8	534.327	1481.39	927.7	486.56	1438.47	835.796	544.191	1482.11	812.129	539.55	1412.4	764.343
533	0	298.182	1416.24	1553.52	193.613	1419.71	1558.67	319.758	1579.43	1574.01	200.21	1586.47	1582.03	244.261	1643.24	1433.94	252.76	1758.97	1160.32	242.673	1491.91	1318.36	231.694	1407.71	1114.51	174.006	1751.28	1255.6	398.521	1549.69	1382.14	510.183	1554.75	1148.07	520.529	1562.12	1050.06	533.375	1468.49	926.386	485.611	1425.11	834.639	543.252	1468.65	810.625	538.681	1398.7	763.21
534	0	297.925	1405.87	1552	193.482	1409.16	1557.38	319.439	1569.35	1572.28	199.899	1576	1580.27	243.59	1632.37	1432.4	251.748	1748.39	1158.89	242.326	1481.02	1316.68	231.678	1397	1112.69	172.971	1740.29	1254.19	398.144	1539.39	1380.42	509.415	1543.49	1146.26	519.838	1549.97	1048.41	532.281	1455.44	925.061	484.624	1412.05	833.444	542.659	1455.31	809.62	537.795	1385.24	762.286
535	0	297.759	1395.46	1550.49	193.357	1398.59	1555.94	318.971	1558.85	1570.15	199.41	1565.36	1578.41	242.789	1621.41	1430.74	250.725	1737.65	1157.47	241.854	1470.14	1314.82	231.752	1386.19	1110.83	171.733	1729.33	1252.56	397.588	1528.99	1378.58	508.685	1532.57	1144.28	518.813	1537.67	1046.47	531.39	1442.67	923.708	483.76	1399.13	832.066	542.357	1442.04	808.287	536.924	1371.87	761.07
536	0	297.375	1384.84	1548.76	193.04	1387.94	1554.33	318.46	1548.45	1568.03	198.968	1554.81	1576.33	241.972	1610.55	1428.86	249.468	1726.79	1155.58	241.569	1459.2	1312.92	231.653	1375.34	1108.78	170.566	1718.33	1250.79	397.118	1518.6	1376.61	507.759	1521.82	1142.16	518.142	1525.62	1044.52	530.256	1429.95	922.2	482.587	1386.3	830.516	540.8	1428.89	806.596	535.601	1358.57	759.769
537	0	297.091	1374.27	1547.14	192.614	1377.23	1552.69	317.892	1537.87	1565.82	198.354	1544.13	1574.19	241.185	1599.51	1426.92	248.176	1715.82	1153.5	241.139	1448.15	1310.99	231.468	1364.29	1106.94	169.522	1707.18	1248.95	396.566	1508.23	1374.63	506.896	1511.2	1139.99	517.34	1513.64	1042.46	529.124	1417.35	920.658	481.554	1373.59	829.296	540.306	1415.65	805.147	534.351	1345.43	758.327
538	0	296.442	1363.69	1545.38	192.014	1366.5	1551.1	317.121	1527.3	1563.59	197.59	1533.43	1572.06	240.195	1588.5	1424.87	247.032	1704.77	1151.73	240.739	1437.17	1309.19	231.488	1353.19	1105.09	168.149	1695.9	1246.9	395.956	1497.64	1372.74	506.119	1500.71	1137.96	516.534	1501.72	1040.42	528.1	1404.86	919.186	480.265	1361.05	827.843	538.949	1402.73	803.556	533.078	1332.38	757.185
539	0	295.673	1353.01	1543.54	191.272	1355.72	1549.19	316.315	1516.51	1561.57	196.66	1522.58	1569.94	239.205	1577.46	1422.96	245.634	1693.66	1149.65	240.085	1425.92	1307.19	231.161	1341.85	1103.16	166.849	1684.53	1245.01	395.295	1487.13	1370.83	505.298	1490.29	1135.96	515.761	1489.88	1038.48	527.035	1392.37	917.713	478.865	1348.52	826.268	538.093	1389.92	802.127	531.511	1319.45	755.713
540	0	294.765	1342.22	1541.86	190.399	1344.85	1547.44	315.264	1505.89	1559.58	195.611	1511.83	1567.81	238.045	1566.32	1420.95	244.331	1682.63	1147.77	239.851	1414.92	1305.4	230.761	1330.43	1101.31	165.328	1673.16	1242.94	394.285	1476.29	1368.96	504.388	1479.91	1134.06	514.941	1478.12	1036.71	525.72	1380.02	916.055	477.394	1336.18	824.82	537.141	1376.84	800.703	529.841	1306.53	754.374
541	0	293.865	1331.37	1540.08	189.4	1333.88	1545.61	314.247	1495.01	1557.67	194.524	1500.92	1565.78	236.817	1555.25	1418.93	243.075	1671.46	1145.66	238.669	1403.44	1303.39	230.309	1318.77	1099.63	163.989	1661.53	1240.75	393.456	1465.57	1367.09	503.412	1469.47	1132.1	514.06	1466.46	1034.8	524.544	1367.95	914.427	476.063	1324.18	823.365	535.484	1364.43	799.029	528.204	1293.93	752.948
542	0	292.73	1320.53	1538.36	188.428	1322.96	1543.89	312.919	1484.3	1555.58	193.251	1490.04	1563.67	235.47	1544.1	1416.88	241.423	1659.82	1143.31	238.298	1392.23	1301.71	229.99	1307.13	1097.83	162.514	1650	1238.49	392.297	1454.67	1365.16	502.665	1459.1	1130.32	513.157	1455.22	1032.87	523.482	1356.09	912.876	474.661	1312.17	822.086	534.639	1352.26	797.547	526.763	1281.5	751.691
543	0	291.8	1309.63	1536.88	187.248	1311.85	1542.21	311.534	1473.35	1553.83	191.795	1479.04	1561.9	234.031	1532.91	1414.82	240.137	1648.17	1141.22	237.44	1380.75	1299.92	229.589	1295.26	1096.17	161.113	1638.33	1236.14	391.39	1443.82	1363.54	501.923	1448.68	1128.81	512.41	1443.97	1031.26	522.566	1344.3	911.568	473.274	1300.32	820.747	533.09	1339.85	795.973	525.1	1269.23	750.493
544	0	290.365	1298.72	1535.37	185.975	1300.82	1540.57	309.723	1462.45	1552.11	190.112	1467.95	1560.11	232.676	1521.77	1412.9	238.819	1636.26	1138.82	236.036	1369.08	1298.28	228.99	1283.26	1094.73	159.718	1626.38	1233.8	390.081	1432.67	1361.93	501.018	1437.86	1127.43	511.289	1432.73	1029.67	521.461	1332.8	910.285	471.998	1288.67	819.685	532.034	1327.97	794.921	523.544	1257.11	749.461
545	0	288.965	1287.94	1533.82	184.598	1289.63	1539.05	308.109	1451.61	1550.49	188.392	1456.85	1558.33	231.097	1510.54	1410.9	237.459	1623.95	1136.58	234.922	1357.51	1296.72	228.45	1271.19	1093.39	158.499	1614.56	1231.41	388.777	1421.5	1360.37	500.207	1427.1	1126.08	510.43	1421.95	1028.26	520.288	1321.46	908.954	470.681	1277.16	818.583	531.062	1316.26	793.541	522.006	1245.35	748.292
546	0	287.494	1277	1532.32	182.992	1278.59	1537.38	306.222	1440.72	1548.84	186.93	1445.77	1556.43	229.364	1499.23	1408.89	236.207	1611.84	1133.87	233.915	1345.95	1295.26	227.546	1258.97	1091.97	157.037	1602.4	1228.67	387.206	1410.26	1358.86	499.212	1415.93	1124.84	509.314	1411.09	1026.85	519.403	1310.45	907.674	469.492	1265.73	817.693	529.42	1305.17	792.169	520.721	1233.95	747.282
547	0	285.627	1266.11	1530.94	181.234	1267.41	1535.85	304.107	1430.01	1547.29	184.634	1434.8	1554.69	227.457	1487.88	1406.73	234.856	1599.23	1131.48	232.417	1334.2	1293.89	226.685	1246.59	1090.89	155.675	1590.37	1226.06	385.588	1398.88	1357.65	498.223	1404.64	1124.06	508.255	1400.46	1025.77	518.382	1299.53	906.682	468.504	1254.65	816.757	528.228	1294.06	791.299	519.502	1222.77	746.391
548	0	283.873	1255.24	1529.73	179.371	1256.44	1534.41	302.184	1419.21	1545.95	182.424	1423.77	1553.03	225.422	1476.84	1404.76	233.393	1586.38	1128.68	230.995	1322.4	1292.57	225.957	1234.23	1089.94	154.026	1578.03	1223.22	383.625	1387.43	1356.49	497.155	1393.16	1123.49	507.042	1389.69	1024.92	517.623	1288.83	905.933	467.651	1243.77	816.036	526.932	1283.43	790.261	518.534	1211.91	745.631
549	0	281.926	1244.28	1528.71	177.31	1245.51	1533.21	299.724	1408.36	1544.37	180.083	1412.75	1551.44	223.282	1465.54	1402.79	232.415	1573.44	1126.2	229.303	1310.42	1291.47	225.062	1221.61	1089.17	152.505	1565.7	1220.37	381.625	1376.13	1355.58	496.085	1381.51	1123.06	506.018	1378.98	1024.25	516.638	1278.57	904.928	466.683	1232.76	815.296	526.025	1273.09	789.325	517.623	1201.48	744.717
550	0	279.803	1233.4	1528.12	175.237	1234.36	1532.57	297.523	1397.69	1543.34	177.723	1401.84	1550.15	220.732	1454.53	1401.21	230.947	1560.12	1123.65	227.464	1298.5	1290.63	224.044	1208.77	1088.6	150.862	1553.37	1217.78	379.544	1364.86	1354.89	494.783	1369.64	1122.75	505.028	1368.26	1023.81	515.818	1268.21	904.077	465.989	1222.14	814.578	525.085	1262.88	788.396	516.944	1191.28	743.854
551	0	277.426	1222.4	1528.18	172.875	1223.18	1532.47	294.854	1386.69	1542.65	175.015	1390.76	1549.22	218.268	1443.25	1399.9	229.665	1546.67	1121.9	225.544	1286.33	1290.1	223.162	1195.68	1088.43	148.979	1540.89	1215.5	377.396	1353.49	1354.61	493.304	1357.67	1122.54	503.967	1357.68	1023.8	514.986	1257.99	903.47	465.129	1212.18	813.766	524.047	1252.94	787.726	516.431	1181.48	743.14
552	0	274.963	1211.44	1528.77	170.508	1211.89	1532.83	291.958	1375.57	1542.29	172.18	1379.65	1548.64	215.776	1431.43	1399.15	228.6	1533.93	1120.83	223.469	1274.07	1290.06	222.171	1182.38	1088.54	147.091	1528.41	1213.89	375.078	1341.79	1354.59	491.555	1345.87	1122.59	502.509	1346.93	1023.85	513.914	1247.86	903.134	464.52	1202.52	813.2	523.952	1243.71	787.932	515.966	1172.06	742.692
553	0	272.583	1200.42	1529.83	167.933	1200.8	1533.66	289.243	1365.07	1542.27	169.635	1368.63	1548.31	213.21	1419.43	1399.06	227.393	1520.84	1120.32	221.549	1261.77	1290.45	221.327	1168.89	1089.05	145.392	1515.86	1213	373.111	1329.87	1355.1	489.858	1334.31	1122.96	501.019	1336.4	1024.35	512.957	1238.16	903.012	463.93	1193.03	812.943	522.774	1234.71	787.722	515.727	1163.2	742.399
554	0	270.015	1189.43	1531.33	165.425	1189.6	1534.93	286.177	1354.13	1542.64	166.476	1357.45	1548.36	210.713	1406.93	1399.25	226.295	1507.79	1120.49	219.593	1249.26	1291.11	220.458	1155.31	1089.75	143.854	1503.42	1212.79	371.016	1317.39	1356.06	488.011	1323.01	1123.86	499.697	1326.21	1025.45	512.143	1228.9	903.404	463.557	1184.2	812.984	521.888	1226.44	787.862	515.655	1155	742.446
555	0	267.224	1178.41	1533.43	162.578	1178.36	1536.55	283.085	1343.08	1543.44	163.221	1346.4	1548.72	208.494	1394.4	1400.11	225.087	1495.97	1121.69	217.5	1236.87	1292.16	219.241	1141.72	1090.9	142.589	1491.04	1213.3	368.827	1304.47	1357.72	486.009	1311.8	1125.48	498.018	1315.88	1027.26	511.002	1219.78	904.314	462.827	1175.58	813.444	520.829	1218.53	788.798	515.594	1147.17	742.997
556	0	264.296	1167.21	1535.76	159.679	1167.17	1538.49	279.915	1332.18	1544.62	159.966	1335.15	1549.45	206.416	1382.05	1401.47	224.198	1484.58	1123	215.222	1224.35	1293.54	218.044	1128.38	1092.54	141.665	1478.74	1214.54	366.556	1291.4	1359.95	484.214	1301.04	1127.8	496.335	1305.6	1029.74	509.985	1211.29	905.675	462.236	1167.71	814.33	520.276	1211.38	790.542	515.626	1140.47	743.807
557	0	261.543	1156.15	1538.43	156.828	1155.8	1540.57	276.773	1321.09	1546.29	156.833	1323.97	1550.45	204.343	1369.63	1403.27	224.08	1473.09	1124.98	213.229	1212.01	1295.24	216.753	1115.46	1094.38	141.013	1466.48	1215.91	364.191	1278.33	1362.54	482.295	1290.05	1130.61	494.768	1295.62	1032.72	508.641	1202.82	907.453	461.575	1160.09	815.494	519.155	1204.56	792.226	515.636	1134.11	744.974
558	0	258.39	1144.93	1541.26	153.871	1144.67	1542.96	273.408	1310.08	1548.13	153.565	1312.76	1551.73	202.583	1357.5	1405.13	224.289	1460.89	1127.23	211.128	1199.98	1297.32	215.188	1102.91	1096.61	140.34	1454.22	1217.55	361.895	1265.38	1365.56	480.42	1279.04	1133.84	492.992	1285.65	1036.06	507.466	1194.72	909.675	461.102	1153.03	816.92	518.576	1198.14	794.504	515.508	1128.31	746.431
559	0	255.682	1133.81	1544.59	150.866	1133.54	1545.55	270.456	1299.09	1550.65	150.736	1301.66	1553.28	200.531	1345.48	1407.34	223.923	1447.88	1129.31	209.219	1188.02	1299.8	213.69	1090.85	1099.25	139.797	1442.09	1219.37	359.726	1252.67	1368.78	478.684	1268.07	1137.54	491.295	1275.82	1039.82	506.196	1186.82	912.159	460.397	1146.23	818.748	517.462	1192.12	797.038	515.412	1122.94	748.081
560	0	252.643	1122.89	1548.04	148.023	1122.51	1548.36	267.485	1287.93	1553.3	147.724	1290.59	1555.13	198.775	1333.78	1409.74	223.73	1434.98	1131.53	207.35	1176.3	1302.44	212.291	1079.35	1102.05	139.171	1430.01	1221.28	357.604	1240.46	1372.28	477.187	1257.09	1141.6	489.797	1266.22	1043.82	505.24	1179.06	915.088	459.928	1139.82	820.775	517.034	1186.17	799.943	515.043	1117.68	749.872
561	0	249.697	1111.98	1551.63	145.244	1111.77	1551.16	264.605	1277.07	1555.82	144.868	1279.76	1557.06	196.709	1322.32	1412.15	223.434	1421.95	1133.97	205.64	1164.71	1305.14	210.776	1068.05	1104.93	138.325	1417.92	1223.49	355.677	1228.38	1375.83	475.746	1246.02	1145.61	488.548	1256.85	1048.17	504.277	1171.37	918.114	459.336	1133.55	822.84	516.598	1179.94	802.928	514.494	1112.68	751.547
562	0	246.819	1101.22	1555.17	142.474	1101.35	1554.21	262.107	1266.5	1558.35	142.09	1269.27	1558.9	194.998	1310.84	1414.55	223.146	1409.69	1136.28	203.964	1153.32	1307.84	209.374	1057.05	1107.73	137.453	1406.11	1225.5	353.751	1216.77	1379.12	474.334	1235.08	1149.53	487.306	1247.71	1052.27	503.426	1163.92	921.103	458.938	1127.59	825.022	515.885	1174.06	805.965	513.843	1107.91	753.204
563	0	244.087	1090.72	1558.81	139.756	1091.03	1557.36	259.686	1255.97	1560.64	139.728	1258.92	1560.29	193.378	1299.7	1416.83	222.244	1398	1138.48	202.388	1141.93	1310.59	208.007	1046.1	1110.61	136.457	1394.23	1227.44	351.953	1205.19	1382.25	472.913	1224.29	1153.18	486.012	1238.78	1056.06	502.506	1156.48	924.05	458.34	1121.67	827.298	516.163	1168.37	809.435	513.024	1103.08	754.861
564	0	241.947	1080.4	1562.54	137.277	1080.84	1560.57	257.43	1245.73	1562.33	137.638	1248.95	1561.71	191.676	1288.24	1418.94	221.057	1386.84	1140.88	200.984	1130.72	1313.1	206.897	1035.2	1113.26	135.184	1382.6	1229.34	350.248	1193.97	1385.2	471.942	1213.83	1156.76	485.064	1230.14	1059.74	502.093	1149.45	926.803	457.894	1115.61	829.274	514.999	1162.56	811.854	512.521	1098.43	756.375
565	0	239.703	1070.32	1566.02	135.099	1071.1	1563.61	255.271	1235.47	1563.72	135.776	1239.01	1562.6	190.02	1277.01	1421.03	219.448	1375.71	1143.15	199.613	1119.5	1315.39	206.058	1024.26	1115.64	134.096	1371.19	1231.36	348.826	1182.68	1387.92	471.019	1203.47	1159.98	484.032	1221.6	1062.95	501.641	1142.32	929.36	457.631	1109.76	831.266	515.33	1156.67	814.622	511.944	1093.87	757.752
566	0	237.667	1060.49	1569.44	132.86	1061.34	1566.77	253.683	1225.64	1565	134.032	1229.33	1563.58	188.37	1265.76	1423.07	217.715	1365.21	1145.58	198.451	1108.43	1317.71	205.387	1013.21	1118.06	132.882	1359.95	1233.44	347.546	1171.66	1390.54	470.398	1193.32	1163.17	483.33	1213.11	1066.06	501.381	1135.35	931.677	457.446	1104.08	833.113	515.59	1150.82	817.215	511.373	1089.2	759.004
567	0	235.765	1050.71	1572.73	130.83	1051.71	1569.76	252.207	1215.68	1566.38	132.412	1219.67	1564.55	187.04	1254.6	1425.18	216.035	1354.31	1147.91	197.162	1097.41	1319.75	204.768	1002.22	1120.09	131.61	1348.75	1235.44	346.196	1160.63	1392.77	469.742	1183.23	1165.97	482.607	1204.46	1068.86	501.257	1128.38	933.774	457.276	1098.29	834.736	515.401	1145.19	819.472	510.983	1084.58	760.114
568	0	233.768	1040.9	1575.63	129.111	1042.37	1572.44	250.674	1205.71	1567.48	131.217	1210.05	1565.36	185.668	1243.54	1427.21	214.808	1343.37	1150.13	196.203	1086.38	1321.59	204.345	991.243	1121.69	130.242	1337.73	1237.55	345.171	1149.85	1394.88	469.108	1173.34	1168.3	482.244	1195.8	1071.53	501.136	1121.35	935.415	457.172	1092.52	835.946	515.641	1139.42	821.46	510.619	1079.96	761.004
569	0	232.008	1031.17	1578.62	127.214	1032.71	1575.25	249.279	1195.89	1568.55	129.941	1200.5	1566.26	184.265	1232.46	1429.23	213.718	1332.27	1152.36	195.176	1075.53	1323.29	204.063	980.335	1123.08	128.84	1326.81	1239.84	344.105	1139.12	1396.81	468.568	1163.81	1170.43	481.762	1187.03	1073.88	501.015	1114.35	937.003	456.914	1086.52	837.168	515.773	1133.6	823.445	510.166	1075.09	761.906
570	0	230.526	1021.47	1581.5	125.631	1023.15	1577.86	248.184	1186.15	1569.98	128.74	1190.83	1567.32	182.925	1221.31	1431.27	212.52	1321.25	1154.61	194.35	1064.72	1325.07	203.913	969.555	1124.46	127.433	1316.08	1242.13	343.132	1128.63	1398.65	468.099	1154.86	1172.47	481.481	1178.29	1076.23	500.918	1107.15	938.5	456.937	1080.75	838.322	516.104	1127.79	825.315	510.353	1070.15	762.953
571	0	229.211	1011.66	1584.18	124.388	1013.69	1580.31	247.075	1176.26	1571.18	127.565	1181.12	1568.36	182.073	1210.5	1433.39	210.958	1310.96	1156.84	193.703	1054.05	1326.72	203.865	958.869	1125.81	125.881	1305.44	1244.24	342.373	1118.22	1400.46	467.638	1146.38	1174.26	481.021	1169.51	1078.3	501	1100.01	940.077	457.174	1074.96	839.464	516.196	1122.11	827.078	510.862	1065.2	764.121
572	0	228.045	1001.88	1586.59	123.049	1003.95	1582.58	245.891	1166.23	1572.45	126.533	1171.35	1569.57	180.582	1199.75	1435.13	209.268	1301.01	1158.68	193.115	1043.47	1328.34	203.946	948.352	1126.89	124.335	1294.88	1246.19	341.494	1108.06	1402.06	467.043	1138.19	1175.98	480.689	1160.91	1080.39	500.879	1092.94	941.737	457.155	1069.04	840.468	516.449	1116.16	828.79	511.24	1060.04	765.294
573	0	226.875	992.063	1588.72	122.026	994.115	1584.69	244.79	1156.25	1573.69	125.636	1161.51	1570.69	179.503	1189.05	1436.89	207.953	1291.07	1160.66	192.563	1032.99	1329.88	204.002	937.955	1128.13	122.849	1284.42	1248.12	340.694	1097.97	1403.57	466.326	1130.18	1177.66	480.312	1152.48	1082.39	500.417	1085.96	943.105	457.161	1062.97	841.525	516.81	1110.17	830.56	511.639	1054.72	766.487
574	0	225.58	982.326	1590.41	121.097	984.34	1586.61	243.765	1146.45	1574.69	124.749	1151.61	1571.77	178.31	1178.53	1438.43	206.507	1280.77	1162.2	191.991	1022.64	1331.33	204.128	927.74	1129.23	121.288	1274.02	1249.93	339.691	1087.96	1405.01	465.436	1122.19	1179.3	479.617	1144.03	1084.25	499.914	1078.69	944.527	457.413	1056.55	842.949	517.094	1104.03	832.322	512.088	1049.33	767.758
575	0	224.855	972.427	1592.15	120.327	974.264	1588.34	243.108	1136.56	1576.1	124.009	1141.44	1572.8	177.058	1168.12	1440.11	205.279	1271.16	1163.88	191.57	1012.4	1332.62	204.184	917.602	1130.4	119.748	1263.57	1251.56	339.004	1078.19	1406.66	464.773	1114.25	1181.26	479.025	1135.8	1086.29	499.543	1071.51	946.103	457.47	1051.89	843.676	517.374	1097.67	834.194	512.506	1043.5	769.237
576	0	224.491	962.475	1593.74	119.581	964.211	1589.94	241.928	1126.43	1576.89	122.891	1131.41	1574.1	176.004	1157.71	1441.5	204.316	1261.22	1165.65	191.135	1002.23	1333.76	204.409	907.619	1131.39	118.478	1253.26	1253.19	338.254	1068.49	1408.11	464.146	1106.24	1183.24	478.402	1127.72	1088.37	499.094	1064.21	947.719	457.185	1044.84	845.132	517.76	1091.41	836.139	513.048	1037.69	770.821
577	0	223.987	952.418	1594.99	118.996	954.084	1591.28	241.384	1116.63	1578.04	122.177	1121.23	1575.14	174.947	1147.56	1442.86	202.96	1251.26	1166.98	190.733	992.252	1334.98	204.537	897.668	1132.61	117.139	1243	1254.49	337.658	1058.77	1409.73	463.786	1098.31	1185.34	477.933	1119.72	1090.56	498.636	1056.82	949.524	457.207	1038.87	846.556	518.131	1084.77	838.191	513.516	1031.71	772.586
578	0	223.35	942.413	1596.02	118.45	943.997	1592.32	240.732	1106.56	1579.01	121.314	1111.09	1576.26	173.795	1137.47	1443.96	202.05	1241.36	1168.38	190.336	982.331	1336.03	204.581	887.843	1133.79	116.09	1232.86	1255.72	336.903	1049.21	1411.09	463.279	1090.16	1187.19	477.407	1111.8	1092.54	498.383	1049.56	951.253	457.324	1033.43	847.626	518.444	1078.28	840.19	513.882	1025.46	774.157
579	0	222.719	932.296	1596.72	117.754	933.693	1593.18	239.846	1096.39	1579.81	120.66	1100.88	1577.11	172.951	1127.4	1444.92	201.245	1231.58	1169.19	189.89	972.42	1336.85	204.437	877.907	1134.76	115.198	1222.89	1256.52	336.333	1039.62	1412.23	462.839	1082.03	1188.82	477.04	1103.97	1094.34	498.028	1042.16	952.6	457.075	1026.5	848.723	518.708	1071.48	841.825	514.185	1019.11	775.51
580	0	221.975	922.127	1597.3	117.31	923.561	1593.75	239.169	1086.32	1580.55	119.889	1090.7	1577.99	172.057	1117.56	1445.71	200.299	1221.73	1170.24	189.474	962.594	1337.59	204.441	868.231	1135.86	114.348	1212.95	1257.41	335.656	1030.02	1413.41	462.437	1073.69	1190.38	476.435	1096.07	1095.9	497.877	1034.88	953.897	457.361	1020.41	849.678	519.105	1065.26	843.537	514.361	1012.62	776.77
581	0	221.098	912.046	1597.57	116.671	913.426	1594.21	238.537	1076.16	1581.26	119.178	1080.5	1578.6	171.03	1107.78	1446.15	199.442	1211.89	1170.69	188.984	952.735	1338.13	204.099	858.374	1136.63	113.59	1203.11	1257.99	335.137	1020.46	1414.12	462.056	1065.42	1191.64	476.122	1088.15	1097.23	497.879	1027.63	954.933	457.38	1013.74	850.434	519.294	1058.39	844.805	514.702	1006.16	777.788
582	0	220.863	901.804	1597.9	116.019	903.175	1594.52	237.725	1065.84	1581.64	118.687	1070.38	1579.14	170.543	1097.8	1446.46	198.824	1202.41	1170.89	188.696	942.933	1338.55	203.683	848.573	1137.19	113.006	1193.36	1258.21	334.748	1010.89	1414.75	461.683	1056.96	1192.54	475.599	1080.06	1098.11	498.025	1020.36	955.651	457.82	1007.27	851.052	519.309	1051.53	845.634	515.013	999.439	778.397
583	0	220.319	891.628	1598.03	115.551	893.043	1594.52	237.353	1055.8	1582.06	118.115	1060.29	1579.48	169.84	1088.2	1446.76	198.253	1192.71	1171.22	188.395	933.19	1338.76	203.288	838.797	1137.52	112.609	1183.65	1258.35	334.353	1001.12	1415.1	461.476	1048.59	1193.34	475.383	1071.9	1098.89	498.341	1013.03	956.249	458.34	999.72	851.68	519.144	1044.7	846.25	515.343	992.7	778.874
584	0	219.333	881.464	1597.86	114.868	882.903	1594.51	236.834	1045.76	1582.26	117.587	1050.12	1579.66	169.507	1078.19	1446.78	198.284	1183.23	1171.43	187.894	923.364	1338.85	202.876	829.407	1137.59	112.269	1173.81	1258.53	333.868	991.324	1415.31	461.198	1039.9	1194.01	474.938	1063.41	1099.55	498.593	1005.35	956.664	458.834	991.647	852.211	519.119	1037.65	846.852	515.639	985.892	779.235
585	0	218.778	871.321	1597.65	114.179	872.789	1594.25	236.155	1035.5	1582.37	117.006	1040.04	1579.78	168.935	1068.67	1446.75	198.038	1173.18	1171.42	187.359	913.514	1338.73	202.297	819.753	1137.48	112.118	1164.26	1258.56	333.462	981.377	1415.36	460.855	1030.94	1194.34	474.858	1054.88	1100.15	498.81	997.594	956.868	459.302	983.241	852.691	519.247	1030.34	847.231	515.666	979.127	779.275
586	0	218.536	861.149	1597.4	113.723	862.668	1593.8	235.707	1025.43	1582.23	116.464	1029.9	1579.65	168.751	1058.49	1446.52	197.953	1163.79	1171.29	186.808	903.583	1338.37	201.533	810.121	1137.13	111.907	1154.45	1258.37	333.04	971.164	1415.07	460.813	1022.04	1194.52	474.506	1046.1	1100.34	498.982	989.617	956.815	458.84	976.681	851.592	519.118	1022.92	847.359	515.879	972.065	779.077
587	0	218.091	851.122	1596.82	113.264	852.554	1593.21	235.356	1015.37	1581.79	115.996	1019.74	1579.22	168.41	1048.33	1446.07	197.831	1153.88	1170.91	186.309	893.705	1337.8	200.768	800.263	1136.56	111.997	1144.83	1258.02	332.709	960.933	1414.58	460.503	1012.48	1194.38	474.419	1037.2	1100.37	499.246	981.505	956.574	459.26	968.97	851.183	519.128	1015.34	847.209	516.278	964.908	778.653
588	0	217.518	841.08	1596.04	112.878	842.528	1592.68	234.968	1005.14	1581.32	115.666	1009.71	1578.65	168.221	1038.48	1445.6	198.089	1144.2	1170.53	185.79	883.734	1337.23	200.113	790.493	1135.79	112.008	1135.06	1257.54	332.418	950.62	1413.99	460.466	1002.95	1194.19	474.195	1028.02	1100.18	499.519	973.222	956.32	459.646	960.483	850.956	519.078	1007.63	846.891	516.496	957.255	778.239
589	0	217.126	830.923	1595.29	112.477	832.335	1591.94	234.734	995.093	1580.5	115.401	999.618	1577.84	168.003	1028.25	1444.87	198.075	1134.28	1169.93	185.28	873.719	1336.39	199.114	780.635	1134.8	112.187	1125.39	1256.98	332.203	940.15	1413.22	460.345	993.12	1193.69	474.07	1018.67	1099.84	499.651	964.672	955.76	460.036	952.164	850.367	519.283	999.924	846.477	516.844	949.598	777.58
590	0	217.025	820.734	1594.34	112.31	822.373	1590.9	234.332	984.82	1579.24	115.084	989.557	1576.74	168.133	1018.32	1443.89	198.481	1124.55	1169.13	184.677	863.671	1335.29	198.298	770.73	1133.46	112.364	1115.57	1256.16	331.775	929.555	1412.01	460.222	983.008	1192.84	474.031	1009.17	1099.17	499.692	955.924	954.756	460.401	943.959	849.235	519.221	991.903	845.603	517.168	941.789	776.477
591	0	216.737	810.6	1593.18	111.863	812.289	1589.74	234.394	974.839	1577.9	115.139	979.607	1575.46	167.836	1008.04	1442.74	198.604	1114.65	1168.17	184.08	853.459	1333.91	197.344	760.719	1131.88	112.695	1105.81	1255.18	331.422	918.905	1410.72	460.074	972.66	1191.77	473.847	999.332	1098.31	499.632	947.022	953.589	460.622	935.298	847.985	519.305	983.579	844.665	517.534	933.916	775.24
592	0	216.211	800.424	1591.87	111.565	802.378	1588.55	234.257	964.434	1576.55	115.135	969.538	1574.09	168.344	997.657	1441.5	199.047	1104.67	1167.01	183.596	843.301	1332.59	196.454	750.769	1130.35	113.016	1095.95	1254.15	331.064	908.038	1409.21	460.02	962.202	1190.62	473.821	989.436	1097.27	499.674	937.872	952.336	460.997	927.001	846.641	519.502	975.224	843.65	518.011	925.84	774.01
593	0	216.267	790.158	1590.58	111.343	792.271	1587.31	234.422	954.311	1575.03	115.265	959.464	1572.6	168.247	987.463	1440.2	199.417	1094.27	1165.73	183.238	833.072	1331.05	195.587	740.719	1128.49	113.469	1085.92	1252.92	330.962	897.247	1407.72	460.061	951.577	1189.2	473.673	979.292	1095.9	499.645	928.496	950.811	461.345	918.231	845.072	519.674	966.604	842.268	518.392	917.478	772.465
594	0	215.991	779.841	1589.02	111.277	782.275	1585.74	234.465	943.809	1573.14	115.447	949.298	1570.96	168.826	977.165	1438.66	200.061	1084.05	1164.46	182.852	822.718	1329.29	194.82	730.464	1126.64	114.076	1075.85	1251.54	330.844	886.259	1405.92	460.181	940.69	1187.52	473.703	969.088	1094.39	499.742	919.045	949.13	461.588	909.165	843.245	519.976	957.718	840.671	518.885	909.003	770.793
595	0	215.867	769.585	1587.46	111.032	772.256	1584.28	234.966	933.564	1571.57	115.701	939.215	1569.33	168.911	966.51	1437.09	200.67	1073.67	1163.04	182.45	812.33	1327.53	193.988	720.176	1124.75	114.516	1065.65	1250.08	330.933	875.236	1404.22	460.022	929.589	1185.71	473.912	958.744	1092.91	499.695	909.243	947.312	461.735	900.404	841.264	520.241	948.582	839.166	519.21	900.308	768.969
596	0	215.492	759.21	1585.52	110.914	762.108	1582.65	235.1	922.999	1569.56	116.03	929.17	1567.45	169.422	956.04	1435.35	201.439	1063.27	1161.43	182.162	801.88	1325.66	193.093	709.755	1122.76	115.167	1055.51	1248.38	330.871	864.148	1402.22	460.104	918.486	1183.71	474.203	948.228	1091.27	499.826	899.426	945.315	461.742	891.191	839.099	520.73	939.263	837.529	519.553	891.367	767.042
597	0	215.646	748.819	1583.84	110.847	752.092	1580.85	235.701	912.677	1567.55	116.418	919.057	1565.46	170.009	945.491	1433.5	202.085	1052.85	1159.56	181.929	791.276	1323.63	192.382	699.186	1120.75	115.823	1045.13	1246.63	330.998	852.98	1400.07	460.098	907.304	1181.4	474.165	937.392	1089.12	499.729	889.265	943.001	461.744	881.894	836.565	521.097	929.568	835.652	519.724	882.127	764.714
598	0	215.918	738.308	1582.1	110.975	741.8	1579.17	236.014	901.996	1565.25	116.955	908.744	1563.32	170.552	934.919	1431.48	202.701	1042.22	1157.46	181.873	780.631	1321.6	191.791	688.514	1118.67	116.621	1034.9	1244.7	331.199	841.805	1397.71	460.165	896.002	1178.98	474.427	926.588	1086.87	499.913	878.969	940.578	461.88	872.463	834.124	521.352	919.587	833.395	519.802	872.643	762.252
599	0	216.276	727.843	1580.28	111.324	731.611	1577.33	236.663	891.656	1563.01	117.56	898.401	1561.07	171.151	924.289	1429.5	203.165	1031.41	1155.4	181.969	769.939	1319.52	191.208	677.815	1116.53	117.165	1024.32	1242.7	331.605	830.652	1395.53	460.251	884.508	1176.55	474.439	915.375	1084.41	499.977	868.487	938.155	461.85	862.571	831.734	521.493	909.333	831.005	519.815	862.934	759.782
600	0	216.675	717.354	1578.39	111.72	721.167	1575.63	237.195	880.89	1560.55	118.246	888.037	1558.8	171.892	913.555	1427.44	203.859	1020.65	1153.3	182.015	759.065	1317.57	190.912	667.181	1114.52	117.87	1013.78	1240.66	331.941	819.414	1393.17	460.576	873.123	1174.05	474.724	904.265	1081.97	499.964	857.742	935.59	461.698	852.622	829.287	521.91	898.686	828.729	519.786	852.965	757.163
601	0	217.304	706.793	1576.43	112.333	710.662	1573.91	237.99	870.326	1558.25	118.937	877.424	1556.57	172.58	902.711	1425.34	204.204	1009.51	1151.04	182.232	748.06	1315.46	190.637	656.182	1112.46	118.543	1003	1238.71	332.438	808.248	1390.83	460.84	861.518	1171.48	474.81	892.911	1079.37	499.933	846.59	932.957	461.613	842.148	826.64	522.308	887.602	826.373	519.589	842.471	754.428
602	0	218.067	696.093	1574.63	113.081	700.142	1572.01	238.768	859.622	1556.01	119.731	866.883	1554.6	173.219	891.809	1423.44	204.736	998.423	1148.98	182.511	737.114	1313.43	190.289	645.011	1110.36	119.107	992.167	1236.8	332.859	796.889	1388.5	461.167	849.947	1169.07	475.067	881.457	1077.03	500.01	835.278	930.545	461.284	831.509	824.021	522.703	876.539	823.994	519.346	831.591	751.865
603	0	218.861	685.361	1572.81	113.868	689.334	1570.45	239.698	848.79	1553.93	120.608	855.995	1552.47	173.997	880.856	1421.45	205.167	987.259	1146.93	182.814	725.974	1311.42	190.067	633.83	1108.53	119.688	981.198	1234.79	333.31	785.596	1386.36	461.34	838.044	1166.67	475.425	869.915	1074.81	499.771	823.642	928.026	460.976	820.467	821.345	523.011	864.779	821.769	518.749	820.412	749.249
604	0	219.903	674.631	1570.81	115.03	678.501	1568.76	240.843	838.067	1551.73	121.622	845.297	1550.66	174.625	869.669	1419.47	205.411	975.785	1144.65	183.279	714.773	1309.54	189.973	622.508	1106.58	120.146	969.978	1232.85	333.989	774.338	1384.01	461.753	826.402	1164.1	475.717	858.223	1072.19	499.725	811.841	925.372	460.858	809.011	818.757	523.174	852.978	819.199	518.645	808.829	746.482
605	0	221.272	663.759	1569.02	116.337	667.713	1567.02	241.898	827.011	1549.54	122.808	834.332	1548.8	175.589	858.679	1417.59	205.853	964.383	1142.48	183.841	703.538	1307.56	190.025	610.978	1104.68	120.668	958.752	1230.93	334.78	763.166	1381.67	462.19	814.662	1161.58	475.88	846.307	1069.48	499.776	799.909	922.81	460.711	797.421	816.048	523.278	840.875	816.397	518.448	796.821	743.75
606	0	222.431	652.74	1567.31	117.437	656.752	1565.57	243.249	816.079	1547.59	124.097	823.347	1547.02	176.256	847.341	1415.53	206.118	952.808	1140.38	184.453	692.148	1305.83	189.824	599.241	1102.96	121.052	947.305	1228.9	335.523	752.101	1379.5	462.564	802.843	1159.09	476.062	834.415	1066.91	499.84	787.708	920.272	460.646	785.367	813.538	523.206	828.37	813.805	517.966	784.604	741.024
607	0	223.811	641.705	1565.58	118.767	645.733	1564.08	244.541	804.966	1545.55	125.495	812.378	1545.24	177.061	836.252	1413.53	206.17	940.901	1137.92	184.967	680.619	1304.08	189.807	587.411	1101.53	121.216	935.591	1226.81	336.341	740.91	1377.36	462.798	791.036	1156.39	476.145	822.391	1064.16	499.592	775.356	917.465	460.329	772.865	811	523.164	815.876	811.125	518.115	771.87	738.486
608	0	225.255	630.676	1563.78	120.313	634.739	1562.52	246.008	793.839	1543.62	126.807	801.354	1543.43	177.964	824.84	1411.48	206.083	928.933	1135.39	185.791	669.14	1302.43	189.805	575.515	1099.98	121.535	923.735	1224.67	337.038	729.556	1374.86	463.034	779.344	1153.42	476.092	810.411	1061.1	499.532	762.883	914.6	460.187	760.162	808.245	522.856	803.148	808.056	517.57	758.894	735.758
609	0	226.984	619.473	1561.97	121.751	623.57	1561.07	247.532	782.749	1541.45	128.526	790.218	1541.67	179.103	813.5	1409.43	205.721	916.813	1132.65	186.56	657.457	1300.76	190.132	563.309	1098.54	121.687	911.753	1222.27	338.073	718.339	1372.47	463.384	767.657	1150.48	476.089	798.357	1058	499.421	750.31	911.684	460.077	747.183	805.369	522.727	790.396	805.145	517.488	745.564	732.91
610	0	228.577	608.324	1560.36	123.407	612.372	1559.75	248.971	771.413	1539.5	130.163	778.964	1540.2	180.16	802.054	1407.33	205.281	904.638	1130.15	187.472	645.661	1299.27	190.491	550.945	1097.41	121.938	899.609	1220.12	339.163	707.199	1370.36	463.633	755.906	1147.81	476.165	786.223	1055.3	499.476	737.671	909.12	459.96	733.806	802.931	522.182	777.205	802.123	517.472	731.998	730.487
611	0	230.316	597.111	1558.94	125.258	601.137	1558.6	250.862	760.244	1537.86	131.819	767.741	1538.73	181.304	790.676	1405.49	205.099	892.137	1127.76	188.478	633.742	1297.99	190.914	538.514	1096.57	122.181	887.331	1217.97	340.481	695.925	1368.33	464.175	744.202	1145.3	476.16	773.984	1052.44	499.525	724.892	906.599	459.887	720.089	800.578	521.952	764.06	799.359	517.45	718.298	727.981
612	0	232.27	585.733	1557.61	127.023	589.922	1557.56	252.627	748.857	1536.12	133.581	756.436	1537.43	182.323	779.252	1403.74	205.302	879.442	1125.32	189.517	621.758	1296.75	191.518	525.747	1095.65	122.519	875.054	1216.01	341.72	684.635	1366.21	464.676	732.436	1142.66	476.39	761.672	1049.75	499.621	711.971	904.059	459.823	706.379	798.066	521.545	750.624	796.577	517.204	704.307	725.517
613	0	233.933	574.41	1556.57	128.871	578.446	1556.91	254.442	737.354	1534.66	135.44	744.933	1536.38	183.734	767.602	1402.41	205.649	866.769	1123.55	190.57	609.611	1295.73	191.769	512.854	1094.97	122.947	862.813	1214.45	343.097	673.098	1364.46	465.125	720.459	1140.25	476.562	749.144	1047.34	499.618	698.827	901.556	459.557	692.443	795.485	520.825	737.114	793.833	517.094	689.925	723.204
614	0	235.787	562.88	1556.11	130.77	567.115	1556.83	256.472	725.888	1533.53	137.273	733.559	1535.72	185.228	755.789	1401.67	205.946	853.909	1122.17	191.691	597.426	1295.24	192.221	499.66	1094.88	123.325	850.606	1213.31	344.319	661.387	1362.75	465.459	708.446	1138.03	476.578	736.611	1044.99	499.531	685.614	899.263	459.367	678.369	793.437	520.413	723.57	791.479	516.675	675.687	720.977
615	0	237.934	551.408	1556.13	132.765	555.629	1557.18	258.392	714.099	1532.73	139.377	721.91	1535.27	186.28	743.855	1401.46	206.163	841.294	1121.32	192.766	585.082	1295.2	192.539	486.532	1095.12	123.618	838.463	1212.77	345.695	649.648	1361.5	465.851	696.309	1135.99	476.331	723.695	1042.65	499.418	672.341	897.071	459.162	664.173	791.567	519.809	709.85	789.113	516.45	661.392	719.107
616	0	240.05	539.686	1556.61	134.805	544.017	1557.98	260.572	702.498	1532.39	141.481	710.301	1535.33	187.522	731.669	1401.79	206.088	829.066	1121.14	193.944	572.715	1295.5	192.932	473.056	1095.52	123.661	826.256	1213.11	346.955	637.794	1360.67	466.05	683.733	1134.24	475.726	710.464	1040.53	499.311	658.957	895.318	459.031	649.978	789.857	519.227	696.044	787.047	516.24	646.845	717.621
617	0	241.713	528.038	1557.39	136.906	532.423	1559.25	262.555	690.469	1532.58	143.541	698.559	1535.88	188.599	719.451	1402.58	205.839	816.919	1121.99	195.001	560.361	1296.3	193.213	459.638	1096.51	123.614	813.939	1214.11	348.065	625.816	1360.3	466.018	671.089	1133	475.181	697.249	1039.03	499.043	645.175	894.192	458.688	635.61	788.917	518.618	681.998	785.583	515.787	632.183	716.534
618	0	243.766	516.216	1558.7	138.945	520.689	1561.1	264.723	678.748	1533.2	145.846	686.828	1536.92	189.636	707.072	1404.03	205.111	805.059	1123.13	196.051	547.94	1297.67	193.498	446.4	1097.87	123.239	801.594	1215.97	349.096	613.92	1360.68	465.772	658.132	1132.31	474.237	683.755	1038.12	498.493	631.289	893.707	458.017	620.875	788.591	517.849	667.665	785.025	515.495	617.686	716.325
619	0	245.694	504.417	1560.41	140.926	508.904	1563.16	266.684	666.624	1534.28	147.714	674.936	1538.5	190.223	694.784	1405.8	204.86	792.862	1125.53	196.933	535.706	1299.44	193.954	433.537	1099.68	122.757	789.113	1218.28	349.775	602.095	1361.63	465.239	644.816	1132.33	473.363	670.083	1038.21	497.814	617.135	894.082	457.477	606.033	788.914	517.036	653.067	785.225	514.995	602.802	716.736
620	0	247.751	492.483	1562.17	143.052	497.097	1565.56	268.763	654.761	1535.66	149.993	663.062	1540.59	190.882	682.52	1407.82	204.637	780.448	1128.06	197.755	523.581	1301.35	194.524	421.032	1101.91	122.182	776.57	1220.89	350.494	590.394	1363.04	464.459	631.515	1132.89	472.797	656.759	1039.12	496.874	602.756	895.022	456.746	591.019	789.806	516.338	638.385	786.106	514.34	587.781	717.75
621	0	249.671	480.748	1564.17	144.924	485.168	1568.15	270.53	642.712	1537.54	151.453	651.209	1543.1	191.503	670.714	1410.1	203.748	767.899	1130.39	198.611	511.728	1303.8	194.891	409.075	1104.5	121.592	764.045	1223.69	351.244	578.933	1365.22	463.801	618.281	1134.18	471.876	643.262	1040.57	496.04	588.385	897.11	456.074	575.901	791.523	515.397	623.456	787.655	513.733	572.703	719.396
622	0	251.441	468.853	1566.16	146.854	473.438	1570.76	272.191	630.969	1539.59	153.093	639.414	1545.92	192.296	658.956	1412.52	202.702	754.908	1132.24	199.286	500.119	1306.31	195.273	397.648	1107.26	121.274	751.696	1226.32	351.923	567.596	1367.59	463.113	604.926	1135.95	470.995	629.733	1042.46	495.25	573.793	899.413	455.44	560.614	793.893	514.293	608.07	789.711	513.073	557.457	721.615
623	0	253.015	457.11	1568.04	148.383	461.633	1573.32	273.558	619.094	1541.59	154.648	627.614	1548.81	192.923	647.559	1414.7	202.07	742.016	1134.22	200.013	488.761	1308.86	195.631	386.91	1109.92	121.237	739.682	1228.7	352.665	556.357	1370.04	462.448	591.733	1137.74	470.343	616.37	1044.37	494.452	559.253	901.734	454.604	544.958	796.298	513.192	592.758	791.725	511.972	541.582	723.954
624	0	254.231	445.502	1569.81	149.791	449.979	1575.57	274.91	607.704	1543.8	156.059	616.1	1551.53	193.557	636.348	1416.79	202.121	729.845	1136.33	200.468	477.5	1311.17	195.988	377.116	1112.09	121.58	727.971	1230.85	353.216	545.147	1372.27	461.886	578.59	1139.51	470.005	603.206	1046.19	493.596	544.826	903.975	453.762	529.278	798.631	512.077	577.672	793.623	510.914	525.818	726.126
625	0	255.342	433.963	1571.64	150.764	438.551	1577.85	275.845	596.233	1546.21	157.053	604.669	1554.24	194.177	625.091	1418.65	202.464	718.605	1138.13	200.844	466.356	1313.54	196.068	366.855	1114.72	121.964	716.424	1232.84	353.82	533.927	1374.55	461.705	565.515	1141.42	469.845	589.98	1048.05	492.857	530.344	906.083	452.726	513.514	801.055	510.636	562.219	795.376	509.797	510.022	728.252
626	0	256.175	422.656	1573.42	151.7	427.284	1579.87	276.709	585.036	1548.33	157.747	593.424	1556.73	195.365	614.258	1420.65	203.063	707.819	1139.82	201.212	455.434	1315.7	196.194	357.135	1117.02	122.591	705.242	1234.65	354.45	522.823	1376.57	461.727	552.536	1143.24	470.037	576.82	1049.63	492.398	516.113	907.814	451.947	497.704	803.52	509.408	546.759	797.011	508.53	493.786	730.293
627	0	256.869	411.612	1575.14	152.44	416.186	1581.71	277.34	573.871	1550.11	158.493	582.378	1558.7	196.09	603.333	1422.36	203.503	696.838	1141.35	201.691	444.505	1317.62	196.409	347.39	1119.07	123.571	694.338	1236.33	355.243	511.663	1378.36	462.148	539.685	1144.93	470.3	563.376	1050.89	492.282	501.812	909.586	451.121	481.907	805.792	508.23	531.056	798.273	507.074	477.378	732.215
628	0	257.481	400.734	1576.95	153.049	405.227	1583.47	278.119	562.999	1551.94	159.399	571.428	1560.49	197.141	592.426	1423.8	204.555	686.111	1143	202.069	433.74	1319.53	196.351	337.232	1121	124.486	683.628	1237.97	356.033	500.553	1380.15	462.933	526.92	1146.56	471.042	550.271	1052.17	492.181	487.098	911.512	450.285	465.907	808.18	507.216	515.173	799.376	505.62	460.794	734.014
629	0	258.033	389.914	1578.59	153.537	394.556	1585.25	278.491	552.057	1553.39	159.9	560.594	1561.93	198.305	581.832	1425.59	205.478	675.354	1144.67	202.348	423.035	1321.09	196.177	326.761	1122.7	125.499	673.149	1239.6	356.642	489.429	1381.53	463.818	514.223	1148.09	471.957	537.089	1053.35	492.178	472.567	913.129	449.948	449.705	810.912	506.63	499.553	800.541	503.936	443.918	735.944
630	0	258.471	379.264	1580.27	153.86	383.875	1586.75	279.011	541.435	1555.01	160.216	549.938	1563.34	198.724	570.839	1427.02	206.366	664.616	1146.25	202.586	412.316	1322.48	195.936	315.848	1123.94	126.627	662.875	1241.32	357.112	478.151	1382.82	464.697	501.499	1149.3	472.976	523.922	1054.43	492.186	457.817	914.569	448.822	434.35	812.737	505.505	482.974	801.584	502.388	426.867	737.753
631	0	258.852	368.703	1581.63	154.299	373.276	1588.25	279.351	530.915	1556.09	160.455	539.249	1564.56	199.756	560.266	1428.55	207.529	654.141	1147.88	202.83	401.585	1323.66	195.697	304.752	1124.97	127.624	652.722	1242.93	357.514	466.865	1383.88	465.576	488.748	1150.33	474	510.853	1055.09	492.077	443.087	915.824	448.155	418.808	814.617	504.964	466.82	802.508	500.939	409.665	739.459
632	0	259.475	358.278	1583.12	154.956	362.9	1589.74	279.569	520.373	1557.25	160.964	528.719	1565.72	200.28	549.46	1429.96	208.572	643.674	1149.61	203.034	390.95	1324.92	195.263	293.44	1126.18	128.515	642.58	1244.53	357.851	455.767	1384.99	466.661	476.349	1151.35	475.024	497.794	1055.78	492.13	428.481	917.125	447.43	403.306	816.7	504.505	450.738	803.344	499.586	392.539	741.314
633	0	260.127	347.891	1584.52	155.534	352.352	1591.21	280.001	510.15	1558.33	160.979	518.116	1566.82	200.718	538.681	1431.36	209.471	633.392	1151.16	203.229	380.404	1325.97	194.93	282.072	1127.29	129.331	632.542	1246.12	358.11	444.638	1385.95	467.728	463.982	1152.44	475.993	484.693	1056.32	492.089	413.766	918.44	446.623	387.897	818.771	504.315	434.573	804.338	498.395	375.154	743.225
634	0	260.782	337.577	1585.75	156.246	341.711	1592.59	280.117	499.753	1559.11	161.348	507.533	1567.86	201.173	527.918	1432.69	210.397	623.501	1152.77	203.396	369.872	1326.9	194.832	271.076	1127.99	130.252	622.623	1247.69	358.201	433.448	1386.77	468.761	451.669	1153.45	477.108	471.432	1056.87	492.143	399.039	919.761	446.051	372.556	820.686	504.016	418.302	805.129	497.384	358.139	745.276
635	0	261.373	327.215	1586.79	156.933	331.159	1593.72	280.443	489.36	1560.2	161.729	496.981	1568.99	201.553	517.072	1434.14	211.349	613.611	1154.45	203.417	359.444	1327.65	194.275	260.675	1128.27	131.124	612.68	1249.35	358.219	422.261	1387.66	469.581	439.515	1154.46	478.247	458.224	1057.56	491.925	384.234	921.025	445.181	357.342	822.429	503.687	402.099	806.312	496.52	341.048	747.438
636	0	261.906	316.863	1587.78	157.446	320.651	1594.83	280.763	479.05	1561.02	162.048	486.332	1569.98	201.955	506.502	1435.31	212.054	603.837	1155.93	203.266	349.097	1328.42	193.614	250.91	1128.44	131.847	602.664	1250.75	358.106	411.175	1388.6	470.242	427.403	1155.44	479.196	444.859	1058.5	491.675	369.434	922.597	444.185	342.369	824.328	503.648	385.879	807.746	495.509	324.044	749.736
637	0	262.38	306.409	1588.46	157.925	310.113	1595.59	281.089	468.695	1561.59	162.462	475.942	1570.6	202.278	495.865	1436.32	212.754	593.906	1157.03	203.247	338.861	1329.05	193.182	241.253	1128.46	132.596	592.773	1252.04	358.1	400.196	1389.39	470.865	415.303	1156.31	480.321	431.489	1059.26	491.244	354.316	924.019	443.33	327.282	826.08	503.583	369.674	809.193	494.856	307.227	752.019
638	0	262.92	295.963	1589.01	158.393	299.608	1596.23	281.326	458.111	1562.06	162.738	465.415	1571.18	202.611	485.381	1437.06	213.36	584.157	1158.21	203.179	328.734	1329.41	192.808	231.781	1128.52	133.355	582.946	1253.05	358.237	389.357	1390.1	471.54	403.403	1157.11	481.231	418.109	1059.99	490.908	339.463	925.458	442.588	312.323	827.702	503.634	353.469	810.542	494.08	290.466	754.255
639	0	263.3	285.439	1589.4	158.708	289.099	1596.73	281.74	447.674	1562.4	162.704	454.828	1571.69	203.136	475.167	1437.88	213.979	574.416	1159.05	203.087	318.638	1329.82	192.469	222.217	1128.66	134.031	573.151	1254.04	358.366	378.704	1390.82	471.901	391.505	1157.89	482.166	404.835	1060.72	490.434	324.53	927.005	442.001	297.141	829.597	503.443	337.233	811.955	493.316	273.862	756.446
640	0	263.493	274.899	1589.65	158.926	278.613	1597.04	282.088	437.183	1562.76	163.174	444.443	1572.03	203.536	464.987	1438.46	214.451	564.747	1159.73	203.064	308.713	1330.1	192.278	213.53	1128.66	134.803	563.438	1254.7	358.609	368.151	1391.4	472.119	379.686	1158.48	483.027	391.744	1061.46	490.008	309.769	928.514	441.034	282.588	831.125	503.836	321.166	813.559	492.552	257.393	758.598
641	0	263.631	264.322	1589.65	159.073	268.214	1597.09	282.385	426.498	1562.94	163.83	434.025	1572.21	203.956	454.832	1438.75	215.076	555.316	1160.25	203.059	298.768	1330.24	191.949	204.837	1128.35	135.398	553.704	1255.17	358.806	357.886	1391.59	472.205	367.852	1158.72	483.765	378.889	1061.77	489.764	295.434	929.69	440.076	267.821	832.491	503.928	305.156	814.861	491.614	240.976	760.443
642	0	263.633	253.683	1589.47	159.105	257.712	1596.97	282.721	415.889	1563.03	164.089	423.505	1572.34	204.286	444.684	1438.88	215.551	545.801	1160.48	203.139	288.848	1330.2	191.933	195.956	1127.95	135.981	543.919	1255.47	358.995	347.595	1391.64	472.218	356.083	1158.77	484.36	366.135	1061.88	489.625	280.979	930.838	440.117	253.348	833.709	503.873	289.188	815.915	490.865	224.765	762.076
643	0	263.634	243.088	1589.31	159.154	247.271	1596.75	283.172	405.366	1563.26	164.468	413.144	1572.48	204.729	434.668	1439.02	216.015	536.316	1160.87	203.247	279.009	1330.13	191.932	187.463	1127.8	136.307	534.096	1255.78	359.057	337.203	1391.71	472.357	344.488	1158.87	484.995	353.641	1062.04	489.541	266.859	931.862	439.302	238.652	834.94	503.983	273.247	816.901	489.934	208.675	763.654
644	0	263.731	232.569	1589.04	159.228	236.784	1596.45	283.468	394.814	1563.22	164.69	402.884	1572.58	205.11	424.636	1439.06	216.17	526.655	1161.07	203.485	269.168	1330.03	192.058	178.377	1127.51	136.489	524.34	1255.94	359.459	327.269	1391.56	472.582	332.887	1158.81	485.455	341.134	1061.85	489.599	252.984	932.657	438.605	223.769	836.163	503.695	258.008	817.845	489.228	192.806	765.085
645	0	263.957	222.02	1588.48	159.393	226.437	1595.98	283.743	384.235	1563.03	165.143	392.564	1572.5	205.515	414.566	1438.83	216.135	517.038	1160.93	203.711	259.298	1329.63	192.159	168.892	1126.99	136.751	514.576	1255.88	359.682	317.236	1391.14	472.741	321.385	1158.42	485.632	328.747	1061.16	489.689	239.252	933.132	438.511	208.933	837.213	503.303	242.767	818.178	488.602	177.178	766.297
646	0	264.085	211.49	1587.85	159.502	216.099	1595.4	284.059	373.805	1562.79	165.603	382.091	1572.31	205.518	404.535	1438.55	216.061	507.438	1160.84	203.92	249.431	1329	192.224	159.187	1126.18	136.86	504.785	1255.89	359.838	307.257	1390.65	472.919	309.988	1157.99	485.911	316.595	1060.58	489.456	225.601	933.33	437.829	194.154	837.998	503.108	227.675	818.439	487.942	161.55	767.335
647	0	264.236	201.069	1587.17	159.642	205.67	1594.79	284.411	363.503	1562.58	165.861	371.705	1572.03	205.613	394.359	1438.29	215.806	497.99	1160.71	204.032	239.421	1328.4	192.309	149.627	1125.55	136.626	494.829	1255.83	360.004	297.334	1390.07	473.009	298.704	1157.4	486.125	304.451	1060	489.332	212.105	933.562	437.445	179.436	838.908	502.311	213.047	818.795	487.375	146.159	768.362
648	0	264.495	190.699	1586.4	159.894	195.252	1594.02	284.628	353.162	1562.01	166.189	361.431	1571.55	205.735	384.144	1437.8	215.467	488.578	1160.43	204.19	229.407	1327.72	192.539	140.046	1124.48	136.309	484.774	1255.62	360.058	287.379	1389.2	473.104	287.468	1156.51	485.883	292.438	1058.96	489.245	198.897	933.534	437.237	164.867	839.392	501.736	198.544	818.817	486.886	131.028	769.1
649	0	264.852	180.411	1585.45	160.3	184.763	1593.04	284.804	342.817	1561.19	166.466	351.082	1570.88	205.851	373.887	1437.1	215.04	479.248	1159.93	204.477	219.418	1326.78	192.794	130.318	1123.24	136.023	474.758	1255.16	360.204	277.554	1388.07	473.166	276.309	1155.38	485.624	280.521	1057.6	489.155	185.674	933.199	436.704	150.489	839.688	500.899	184.152	818.354	486.251	115.989	769.674
650	0	265.228	170.051	1584.33	160.66	174.347	1592.07	284.971	332.476	1560.25	166.304	340.637	1570	205.676	363.474	1436.2	214.642	469.692	1159.4	204.683	209.232	1325.67	193.217	120.454	1122.09	135.575	464.634	1254.66	360.4	267.702	1386.99	473.091	265.203	1154.18	485.429	268.724	1056.23	488.829	172.642	932.811	436.018	136.105	839.914	500.384	169.735	817.876	485.698	101.12	770.061
651	0	265.614	159.761	1583.25	160.976	163.979	1591.15	285.122	322.223	1559.16	166.393	330.182	1569.06	205.756	352.95	1435.37	214.001	459.96	1158.71	205.031	199.02	1324.65	193.541	110.429	1120.69	134.928	454.307	1254.09	360.551	257.903	1385.8	472.981	254.133	1152.97	485.11	256.836	1054.91	488.547	159.687	932.537	435.667	121.889	840.291	499.381	155.847	817.516	485.079	86.5993	770.507
652	0	265.979	149.346	1582.06	161.284	153.459	1589.91	285.376	312.044	1558	166.826	319.71	1567.91	205.74	342.584	1434.52	213.305	450.195	1158.06	205.345	188.699	1323.32	193.964	100.301	1119.24	134.448	444.041	1253.41	360.683	247.968	1384.32	472.714	243.155	1151.46	484.849	245.061	1053.52	487.941	146.664	931.938	435.132	107.971	840.239	498.675	141.919	817.024	484.456	72.0905	770.692
653	0	266.262	138.919	1580.54	161.64	142.851	1588.44	285.485	301.604	1556.68	167.005	309.299	1566.58	205.767	332.042	1433.38	212.597	440.263	1157.22	205.584	178.344	1321.8	194.357	90.1105	1117.39	133.79	433.669	1252.55	360.822	238.065	1382.86	472.35	232.282	1149.73	484.301	233.324	1051.84	487.318	133.765	931.197	434.433	94.1246	839.853	497.798	128.135	816.312	483.667	57.7525	770.649
654	0	266.433	128.5	1579.06	161.892	132.339	1587.14	285.597	291.303	1555.37	167.031	298.638	1565.06	205.295	321.485	1432.15	211.939	430.233	1156.19	205.701	168.093	1320.33	194.926	79.9471	1115.8	133.012	423.093	1251.51	360.909	228.11	1381.18	472.061	221.555	1148.04	483.915	221.593	1050.33	486.638	121.026	930.432	433.833	80.4265	839.654	496.866	114.458	815.608	482.935	43.5971	770.63
655	0	266.782	118.045	1577.59	162.055	121.66	1585.64	285.424	280.724	1553.6	166.633	287.904	1563.63	205.341	310.678	1430.59	211.014	419.843	1154.92	205.919	157.595	1318.77	195.38	69.8063	1114.02	132.403	412.618	1250.29	361.014	218.193	1379.61	471.716	211.062	1146.2	483.557	210.02	1048.65	485.847	108.301	929.604	433.198	67.4087	839.029	496.059	100.943	814.75	482.088	29.7302	770.361
656	0	266.987	107.489	1575.9	162.3	110.922	1583.93	285.376	270.265	1551.78	166.918	277.331	1561.81	205.005	300.234	1429.08	210.327	409.406	1153.36	206.142	147.069	1317.08	195.86	59.5098	1112.25	131.59	401.834	1248.83	361.064	208.188	1377.81	471.435	200.815	1144.22	483.043	198.429	1046.72	485.142	95.9018	928.52	432.22	53.9145	838.602	495.293	87.5475	813.528	481.235	16.1234	769.923
657	0	267.117	96.8874	1574.18	162.421	100.173	1582.25	285.24	259.848	1549.89	166.836	266.654	1560.05	204.642	289.654	1427.48	209.562	398.84	1151.74	206.288	136.487	1315.22	196.276	49.0782	1110.37	131.011	391.241	1247.3	361.096	198.146	1376.06	470.965	190.643	1142.12	482.515	186.934	1044.76	484.359	83.4815	927.282	431.224	41.0358	837.637	494.174	74.532	812.342	480.232	2.61315	769.297
658	0	266.936	86.2907	1572.36	162.278	89.4435	1580.43	284.941	249.22	1548.14	166.143	255.77	1558.13	203.995	278.818	1425.59	208.906	388.135	1150.16	206.369	125.838	1313.44	196.639	38.4475	1108.45	130.287	380.344	1245.59	360.991	188.029	1374.12	470.539	180.6	1140.07	481.876	175.435	1042.83	483.491	71.3178	926.057	430.274	28.2533	836.895	493.369	61.446	811.153	479.176	-10.5009	768.621
659	0	266.817	75.6822	1570.7	162.153	78.607	1578.67	284.545	238.573	1546.4	166.046	244.991	1556.27	203.94	268.228	1424.01	208.164	377.489	1148.33	206.428	115.158	1311.66	197.001	27.8185	1106.69	129.641	369.581	1243.86	360.847	177.86	1372.37	470.154	170.697	1138.16	481.451	164.228	1041.05	482.634	59.2878	924.815	429.17	15.8263	835.819	492.379	48.8459	809.947	478.089	-23.4597	767.897
660	0	266.626	64.9602	1568.82	161.903	67.6884	1576.71	284.069	227.934	1544.52	165.314	234.158	1554.33	203.379	257.509	1422.23	207.28	366.548	1146.55	206.408	104.365	1309.67	197.352	17.098	1104.64	128.782	358.589	1242.14	360.568	167.53	1370.48	469.789	160.783	1136.29	480.93	153.073	1039.15	481.98	47.4305	923.411	428.308	3.48633	834.817	491.486	36.4605	808.68	476.942	-36.0638	767.019
661	0	266.317	54.2265	1567.07	161.562	56.8059	1574.79	283.572	217.389	1542.79	164.803	223.161	1552.51	202.705	246.772	1420.46	206.544	355.746	1144.86	206.505	93.5253	1307.88	197.759	6.05397	1102.72	128.036	347.605	1240.28	360.341	157.202	1368.72	469.371	150.935	1134.47	480.437	142.131	1037.25	480.955	35.8555	921.998	427.278	-8.42692	833.759	490.081	24.3785	807.277	475.814	-48.4375	765.987
662	0	265.783	43.5722	1565.29	161.033	45.9749	1572.95	282.793	206.536	1541	164.157	212.357	1550.49	202.153	236	1418.69	205.724	344.787	1142.95	206.327	82.7722	1306.03	198.131	-4.93713	1101.1	127.202	336.504	1238.36	359.991	146.76	1367.03	469.028	141.016	1132.76	479.988	131.404	1035.46	480.362	24.5601	920.661	426.333	-20.0986	832.73	489.194	12.6146	805.976	474.701	-60.4395	765.089
663	0	265.184	32.8677	1563.65	160.434	35.0722	1571.04	282.086	195.91	1539.35	163.332	201.5	1548.63	201.462	225.11	1416.71	204.979	333.801	1141.01	206.059	71.7631	1304.32	198.436	-16.1311	1099.24	126.471	325.37	1236.38	359.578	136.198	1365.43	468.662	130.978	1131.09	479.524	120.811	1033.64	479.829	13.464	919.188	425.488	-31.6465	831.701	488.207	1.07643	804.547	473.505	-72.0646	763.915
664	0	264.312	21.9441	1561.9	159.573	24.135	1569.16	281.218	185.106	1537.69	162.06	190.55	1546.71	200.775	214.252	1414.92	204.395	323.027	1139.17	205.674	60.8007	1302.44	198.751	-27.4617	1097.58	125.679	314.112	1234.34	358.946	125.566	1363.67	468.198	120.699	1129.32	478.921	110.235	1031.76	479.283	2.55307	917.662	424.557	-42.9614	830.473	487.281	-10.3704	802.946	472.435	-83.5502	762.657
665	0	263.45	11.0856	1560.52	158.626	13.2385	1567.39	280.202	174.285	1536.23	161.481	179.717	1545.01	199.965	203.338	1413.09	203.38	311.452	1137.05	205.325	49.6451	1300.8	198.936	-38.8933	1095.96	124.827	302.824	1232.29	358.37	114.915	1362.22	467.768	110.32	1127.81	478.48	99.8606	1030.22	478.674	-8.20459	916.192	423.687	-53.9062	829.42	486.137	-21.036	801.67	471.293	-94.648	761.509
666	0	262.365	0.198868	1558.91	157.538	2.32442	1565.77	279.207	163.565	1534.85	159.96	168.678	1543.26	198.992	192.401	1411.29	202.668	300.041	1134.91	204.854	38.5758	1299.29	199.071	-50.4831	1094.62	123.999	291.327	1230.03	357.655	104.127	1360.68	467.41	99.7624	1126.35	478.104	89.6849	1028.76	478.18	-18.585	914.78	422.86	-64.5352	828.117	485.184	-31.6193	800.223	470.23	-105.279	760.139
667	0	261.248	-10.5831	1557.49	156.405	-8.64172	1564.03	277.947	152.677	1533.29	159.268	157.854	1541.52	198.042	181.442	1409.39	201.939	288.398	1132.67	204.394	27.3089	1297.81	199.226	-62.1358	1093.31	123.274	279.866	1227.71	357.039	93.321	1359.36	467.188	89.0794	1125.07	477.539	79.5179	1027.13	477.725	-28.7535	913.186	422.235	-74.9072	826.972	484.159	-42.0206	798.547	469.465	-115.627	758.707
668	0	260.032	-21.4201	1556.14	155.191	-19.5884	1562.53	276.702	141.91	1531.98	157.81	146.867	1540.07	196.889	170.493	1407.63	201.224	276.49	1130.44	203.86	16.0555	1296.45	199.258	-73.9708	1092.15	122.408	268.039	1225.36	356.203	82.339	1358.03	466.883	78.2514	1124.11	477.387	69.518	1025.96	477.318	-38.824	911.872	421.615	-84.9612	825.679	483.271	-52.0486	797.027	468.631	-125.627	757.363
669	0	258.683	-32.2885	1554.98	153.766	-30.4395	1561.05	275.395	131.213	1530.94	156.162	136.053	1538.6	195.722	159.517	1405.91	200.741	264.44	1128.38	203.06	4.7538	1295.22	199.131	-85.8963	1091.17	121.696	256.321	1223.02	355.219	71.3206	1357.07	466.501	67.321	1123.4	477.107	59.4376	1025.09	476.849	-48.7384	910.576	420.995	-94.7747	824.455	482.822	-61.6828	795.871	467.94	-135.269	755.981
670	0	257.282	-43.1327	1553.85	152.339	-41.3733	1559.73	273.892	120.285	1529.88	154.538	125.047	1537.24	194.369	148.634	1404.15	200.138	252.003	1125.97	202.165	-6.67735	1294.09	199.004	-97.6327	1090.55	120.803	244.412	1220.56	354.088	60.3624	1356.12	465.91	56.1638	1122.72	476.693	49.3334	1024.38	476.6	-58.3431	909.528	420.554	-104.294	823.166	482.353	-71.0172	794.678	467.352	-144.603	754.565
671	0	255.891	-53.9845	1553.06	150.917	-52.3229	1558.74	272.308	109.49	1528.83	153.349	114.19	1536.08	192.977	137.683	1402.62	199.673	239.518	1123.81	201.361	-18.2392	1293.1	198.669	-110.047	1089.77	119.933	232.464	1218.18	352.925	49.3529	1355.28	465.52	45.1477	1122.29	476.166	39.2644	1023.64	476.217	-67.9377	908.216	420.29	-113.547	821.694	482.14	-80.1561	793.231	466.938	-153.471	752.944
672	0	254.423	-64.8105	1552.74	149.451	-63.294	1558.2	270.579	98.6457	1528.02	151.476	103.025	1534.86	191.49	126.549	1401.46	199.26	226.961	1122.15	200.317	-29.8554	1292.44	198.47	-122.482	1089.57	119.092	220.47	1216.02	351.751	38.3454	1354.83	464.873	33.977	1121.88	475.379	29.2253	1023.01	475.894	-77.2469	907.15	420.193	-122.431	820.409	481.799	-88.7212	792.029	466.791	-161.952	751.348
673	0	252.902	-75.583	1552.98	147.931	-74.3198	1558.2	268.763	87.8393	1527.62	149.755	92.0986	1534.22	189.885	115.082	1400.75	198.901	213.706	1120.86	199.241	-41.6664	1292.36	198.244	-135.1	1089.75	118.136	208.296	1214.42	350.509	27.0452	1354.75	464.196	22.9828	1122.05	474.81	19.3337	1023.01	475.565	-86.2972	906.243	420.227	-130.858	819.161	481.833	-96.8778	791.136	466.99	-170.011	749.992
674	0	251.375	-86.3583	1553.48	146.352	-85.3713	1558.57	266.702	76.755	1527.41	147.471	80.8915	1534.02	188.323	103.383	1400.47	198.542	200.86	1120.29	198.272	-53.5396	1292.63	198.037	-147.628	1089.92	117.41	196.218	1213.57	349.308	15.4744	1355.12	463.263	11.9269	1122.48	473.937	9.28298	1023.29	475.368	-94.9709	905.811	420.278	-138.84	818.173	481.928	-104.579	790.52	467.347	-177.408	748.817
675	0	249.958	-97.2347	1554.37	144.684	-96.4303	1559.23	264.788	65.7907	1527.6	145.486	69.7072	1533.91	186.957	91.5312	1400.57	198.279	188.115	1120.23	197.008	-65.4675	1293.12	197.628	-160.65	1090.36	116.874	184.125	1213.19	348.07	3.49819	1355.91	462.319	0.989991	1123.14	473.143	-0.400026	1024.02	474.99	-103.459	905.406	420.45	-146.653	817.249	482.005	-111.766	790.11	467.923	-184.308	747.709
676	0	248.139	-108.169	1555.61	142.948	-107.548	1560.27	262.81	54.8789	1528.19	143.526	58.4697	1534.06	185.493	79.5755	1401.21	197.796	176.027	1120.84	195.762	-77.6324	1293.94	197.169	-173.689	1091.42	116.306	172.006	1213.34	346.755	-8.76439	1357.16	461.236	-9.70298	1124.29	472.393	-9.98537	1025.31	474.713	-111.662	905.403	420.579	-153.843	816.508	482.118	-118.38	790.159	468.64	-190.515	747.013
677	0	246.319	-119.164	1557.28	141.271	-118.758	1561.62	260.814	43.8699	1528.97	141.399	47.0522	1534.54	184.167	67.6061	1402.14	197.505	164.715	1121.8	194.62	-89.7077	1295.23	196.932	-186.799	1092.95	116.196	160.104	1214.08	345.585	-21.2199	1358.95	460.162	-20.2754	1125.91	471.525	-19.4459	1027.11	474.502	-119.327	905.808	420.803	-160.546	816.05	482.553	-124.249	790.848	469.651	-196.214	746.596
678	0	244.938	-130.195	1559.24	139.523	-130.08	1563.28	258.776	32.7296	1530.08	139.386	35.6213	1535.27	183.081	55.6845	1403.36	197.937	153.595	1123.18	193.478	-101.627	1296.76	196.658	-199.607	1094.67	116.219	148.268	1215.1	344.294	-33.7779	1361.06	459.304	-30.665	1127.93	470.609	-28.7494	1029.23	474.345	-126.737	906.521	421.242	-166.888	816.046	482.7	-129.758	791.379	470.777	-201.235	746.363
679	0	243.132	-141.357	1561.39	137.9	-141.43	1565.08	256.812	21.5227	1531.64	137.76	24.2679	1536.48	182.004	43.8717	1405.05	198.852	142.185	1125.16	192.497	-113.651	1298.54	196.189	-211.956	1096.7	116.307	136.455	1216.55	343.111	-46.3922	1363.75	458.226	-41.0818	1130.55	469.69	-38.0467	1031.85	474.213	-133.796	907.829	421.976	-173.472	816.683	482.952	-135.074	792.431	471.881	-205.728	746.472
680	0	241.35	-152.559	1563.91	136.053	-152.729	1567.05	254.93	10.1873	1533.74	135.75	12.7827	1538.1	180.987	32.1086	1406.92	199.928	129.989	1127.07	191.407	-125.064	1300.41	195.481	-224.064	1098.99	116.248	124.543	1218.22	341.885	-58.7419	1366.67	457.36	-51.4392	1133.58	468.897	-47.1068	1035.17	474	-140.813	909.452	422.331	-178.302	817.137	483.366	-140.013	794.121	472.943	-209.839	746.868
681	0	239.546	-163.782	1566.34	134.342	-164.082	1569.08	253.312	-0.962423	1536.2	133.983	1.35744	1539.83	180.149	20.7539	1408.98	200.302	117.298	1129.01	190.447	-136.663	1302.82	194.798	-235.589	1101.45	116.488	112.842	1220.01	340.681	-70.8688	1369.68	456.5	-61.7776	1136.78	468.128	-56.0406	1038.53	474.087	-147.494	911.181	422.883	-183.609	817.874	484.012	-144.648	796.058	473.937	-213.633	747.329
682	0	237.91	-175.105	1568.89	132.595	-175.434	1571.04	251.639	-12.2981	1538.82	132.241	-9.87638	1541.92	179.292	9.4696	1411.06	200.568	104.727	1130.98	189.606	-147.999	1305.07	194.234	-246.965	1104.03	116.438	101.149	1221.68	339.667	-82.4714	1372.4	455.462	-72.0763	1139.9	467.335	-64.8232	1041.96	474.142	-154.042	913.088	423.356	-188.773	818.672	484.571	-149.318	797.949	474.876	-217.114	747.851
683	0	236.28	-186.37	1571.42	131.116	-186.641	1573.15	250.293	-23.5468	1541.61	130.923	-21.2047	1544.25	178.482	-1.71428	1413.14	200.879	92.4842	1133.02	188.788	-159.116	1307.44	193.613	-257.931	1106.52	116.402	89.7811	1223.59	338.751	-94.0954	1375.5	454.721	-82.3709	1143.13	466.613	-73.5128	1045.32	474.204	-160.601	915.206	424.098	-193.573	819.856	485.167	-153.826	800.046	475.649	-220.44	748.359
684	0	234.963	-197.603	1573.97	129.653	-197.769	1575.18	248.953	-34.7231	1544.44	129.586	-32.2634	1546.57	177.794	-12.7591	1415.25	200.824	80.736	1134.92	188.172	-170.096	1309.93	193.108	-268.524	1109.27	116.234	77.9884	1225.27	337.945	-105.353	1378.31	454.235	-92.4666	1146.43	466.049	-81.9207	1048.75	474.441	-166.854	917.416	424.864	-198.399	821.236	486.13	-158.257	802.384	476.598	-223.315	749.116
685	0	233.815	-208.714	1576.24	128.397	-208.831	1577.25	247.93	-45.8644	1547.09	128.434	-43.379	1548.8	177.179	-23.7304	1417.17	200.647	69.7777	1136.69	187.682	-181.1	1312.23	192.63	-279.027	1111.66	116.131	66.6327	1226.98	337.303	-116.551	1381.23	453.829	-102.395	1149.44	465.565	-90.1042	1051.8	474.786	-173.133	919.45	425.629	-203.023	822.68	487.123	-162.524	804.697	477.464	-226.494	749.663
686	0	232.461	-219.896	1578.3	127.214	-219.815	1578.95	247.01	-56.9875	1549.36	127.796	-54.2187	1550.77	176.545	-34.7942	1419.08	200.131	59.2054	1138.57	187.269	-191.994	1314.38	192.215	-289.51	1113.67	115.884	55.5986	1228.82	336.656	-127.598	1383.53	453.507	-112.191	1152.21	465.195	-98.2198	1054.69	475.262	-179.451	921.388	426.42	-207.841	823.586	488.061	-167.119	806.678	478.198	-229.598	750
687	0	231.491	-230.85	1580.42	126.227	-230.64	1580.81	246.41	-68.0094	1551.55	127.236	-65.1415	1552.62	175.994	-45.7395	1420.93	199.348	48.7038	1140.79	186.763	-202.74	1316.36	191.917	-299.93	1115.81	115.568	44.2875	1230.61	336.246	-138.479	1385.9	453.348	-121.801	1154.9	464.995	-106.307	1057.65	475.693	-185.598	923.126	427.216	-212.614	824.648	489.082	-171.721	808.831	479.029	-232.774	750.564
688	0	230.532	-241.869	1582.35	125.242	-241.36	1582.48	245.854	-79.0162	1553.47	126.449	-75.9132	1554.31	175.55	-56.6302	1422.88	198.574	38.2723	1143	186.433	-213.51	1318.08	191.761	-310.397	1117.61	115.164	33.4377	1232.53	335.912	-149.128	1388.21	453.383	-131.346	1157.39	464.869	-114.229	1060.34	476.293	-191.796	924.8	428.141	-217.513	825.653	490.107	-176.356	810.81	479.919	-236.042	751.059
689	0	229.937	-252.757	1584.13	124.519	-252.036	1584	245.546	-90.043	1554.96	126.2	-86.5486	1555.47	175.172	-67.5728	1424.56	197.744	27.6277	1144.97	186.296	-224.271	1319.65	191.855	-320.966	1118.99	114.771	22.5697	1234.39	335.737	-160.004	1389.69	453.532	-140.761	1159.42	464.796	-122.305	1062.36	477.002	-198.062	926.053	429.163	-222.422	826.401	491.155	-181.084	812.247	480.68	-239.342	751.176
690	0	229.012	-263.541	1585.6	123.928	-262.561	1585.43	245.319	-100.998	1556.29	126.042	-97.1249	1556.76	174.928	-78.3953	1426.25	197.016	16.8275	1146.94	186.236	-234.882	1321	192.12	-331.477	1120.19	114.244	11.8975	1236.18	335.659	-170.49	1391.38	453.764	-150.035	1161.17	464.868	-130.348	1064.19	477.701	-204.26	927.088	430.112	-227.358	826.86	492.143	-185.844	813.507	481.83	-242.959	751.464
691	0	228.458	-274.377	1587.21	123.366	-273.218	1586.82	245.25	-111.886	1557.69	126.261	-107.782	1557.87	174.621	-89.2245	1427.83	196.616	6.19078	1148.78	186.181	-245.492	1322.35	192.374	-341.878	1121.29	113.84	1.36248	1238.1	335.642	-181.091	1392.58	454.044	-159.115	1162.73	465.151	-138.495	1065.97	478.415	-210.605	928.102	431.107	-232.341	827.47	493.237	-190.707	814.714	482.893	-246.745	751.785
692	0	228.182	-285.229	1588.64	122.907	-283.729	1588.12	245.255	-122.732	1558.9	126.247	-118.398	1558.86	174.49	-99.9275	1429.37	195.978	-4.28896	1150.45	186.316	-256.114	1323.51	192.802	-352.216	1122	113.207	-8.96658	1239.89	335.644	-191.44	1393.65	454.283	-167.865	1163.85	465.377	-146.666	1067.41	479.074	-217	928.706	432.03	-237.363	827.732	494.507	-195.466	815.862	484.048	-250.749	751.988
693	0	227.627	-295.92	1589.79	122.583	-294.282	1589.29	245.258	-133.582	1560.08	126.243	-128.953	1560.02	174.335	-110.654	1430.75	195.138	-14.1648	1152.21	186.424	-266.589	1324.49	193.389	-362.454	1122.55	112.545	-19.3726	1241.64	335.749	-201.577	1394.44	454.564	-176.238	1164.76	465.806	-154.768	1068.71	479.667	-223.464	929.182	433.179	-242.698	827.802	495.387	-200.767	816.616	485.212	-255.018	752.021
694	0	227.557	-306.713	1590.99	122.425	-304.835	1590.32	245.422	-144.382	1561.23	126.384	-139.565	1561.16	174.205	-121.29	1432.24	194.335	-23.8061	1153.72	186.706	-277.124	1325.35	194.015	-372.596	1123.09	111.905	-29.68	1243.41	335.832	-211.632	1395.25	454.73	-184.379	1165.43	466.021	-162.886	1069.77	480.205	-229.985	929.547	433.97	-248.113	827.907	496.492	-206.043	817.475	486.237	-259.517	752.191
695	0	227.516	-317.331	1592.07	122.388	-315.432	1591.29	245.585	-155.09	1562.38	126.561	-150.106	1562.06	174.04	-131.827	1433.51	193.747	-33.2617	1155.3	187.06	-287.539	1326.37	194.809	-382.753	1123.73	111.095	-39.8299	1245.02	336.097	-221.439	1396.2	454.895	-192.22	1166.26	466.125	-170.975	1070.82	480.826	-236.7	930.218	434.864	-253.784	828.078	497.588	-211.411	818.388	487.73	-264.248	752.63
696	0	227.604	-327.985	1592.84	122.477	-325.987	1592.2	245.794	-165.718	1563.33	126.782	-160.667	1563.1	173.853	-142.283	1434.71	193.058	-42.8621	1156.65	187.431	-297.675	1327.17	195.626	-392.704	1124.3	110.368	-50.0219	1246.62	336.291	-231.139	1396.93	454.934	-200.095	1167	466.335	-178.986	1071.84	481.392	-243.592	930.819	435.744	-259.351	828.272	498.505	-217.128	819.154	489.032	-269.277	753.077
697	0	227.805	-338.63	1593.53	122.685	-336.568	1592.91	245.987	-176.293	1564.13	127.076	-171.193	1564.07	173.774	-152.665	1435.83	192.376	-52.4638	1157.93	187.885	-307.929	1327.84	196.54	-402.513	1124.7	109.539	-60.0196	1248.11	336.563	-240.613	1397.82	454.976	-207.822	1167.83	466.397	-186.925	1072.74	481.878	-250.566	931.366	436.48	-265.114	828.417	499.425	-222.966	819.994	490.147	-274.806	753.506
698	0	228.012	-349.209	1594.11	122.949	-347.184	1593.51	246.349	-186.655	1565.04	127.091	-181.762	1564.86	173.681	-162.894	1436.85	191.594	-62.0248	1159.15	188.34	-318.018	1328.51	197.446	-412.326	1125.11	108.796	-70.1285	1249.46	336.742	-250.103	1398.56	455.014	-215.437	1168.71	466.659	-194.681	1073.94	482.019	-257.02	932.032	437.122	-270.948	828.723	500.349	-228.901	821.046	491.367	-280.323	754.12
699	0	228.282	-359.816	1594.62	123.164	-357.736	1594.06	246.443	-197.291	1565.77	127.279	-192.296	1565.6	173.333	-173.184	1437.64	190.99	-71.6767	1160.19	188.631	-327.853	1329.09	198.237	-422.011	1125.7	108.14	-80.2456	1250.6	336.894	-259.449	1399.23	455.043	-223.049	1169.67	466.87	-202.282	1075.11	482.221	-263.954	932.725	437.645	-277.056	829.19	501.204	-235.017	822.112	492.27	-285.874	754.689
700	0	228.659	-370.26	1594.92	123.638	-368.31	1594.4	246.714	-207.779	1566.22	127.517	-202.767	1566.24	173.243	-183.223	1438.36	190.545	-81.3445	1161.07	189.174	-337.644	1329.46	199.186	-431.8	1126.15	107.321	-89.9383	1251.53	337.16	-268.811	1399.82	455.299	-230.801	1170.43	466.819	-210.086	1075.92	482.57	-270.974	933.292	438.235	-283.286	829.593	501.911	-241.277	822.917	493.117	-291.977	755.296
701	0	229.093	-380.779	1595.1	123.926	-378.824	1594.69	246.96	-218.278	1566.63	127.871	-213.247	1566.87	173.108	-193.204	1439.05	189.965	-91.0427	1161.97	189.71	-347.451	1329.85	200.063	-441.661	1126.68	106.796	-99.8254	1252.39	337.469	-278.067	1400.38	455.531	-238.457	1171.29	466.907	-217.795	1076.7	482.575	-278.059	933.875	438.684	-289.662	829.959	502.341	-247.839	823.62	493.878	-298.241	755.883
702	0	229.305	-391.185	1595.31	124.192	-389.281	1594.92	247.261	-228.688	1567.14	128.365	-223.646	1567.34	173.042	-203.166	1439.6	189.511	-100.617	1162.67	190.119	-357.086	1330.12	200.724	-451.308	1127.35	106.36	-109.542	1253.2	337.626	-287.336	1400.97	455.819	-246.349	1172.2	467.166	-225.358	1077.72	483.07	-285.18	934.6	438.839	-296.216	830.589	502.843	-254.524	824.554	494.891	-305.19	756.949
703	0	229.562	-401.59	1595.37	124.426	-399.619	1595.02	247.567	-238.99	1567.62	128.642	-234.004	1567.7	172.996	-213.112	1439.99	189.002	-110.023	1163.18	190.561	-366.604	1330.26	201.283	-460.715	1127.59	106.061	-119.348	1253.75	338.012	-296.599	1401.48	456.036	-254.304	1172.91	467.285	-233.083	1078.49	483.366	-292.374	935.061	439.567	-302.921	830.837	503.292	-261.229	825.222	495.395	-311.226	757.287
704	0	229.821	-411.928	1595.3	124.676	-409.984	1594.94	247.777	-249.266	1567.91	128.621	-244.205	1568.01	173.113	-222.961	1440.26	188.706	-119.302	1163.67	191.016	-376.283	1330.22	201.906	-469.942	1127.5	105.93	-129.074	1254.13	338.335	-305.95	1401.62	456.248	-262.387	1173.29	467.455	-240.839	1078.98	483.778	-299.663	935.333	439.913	-310.101	831.069	503.611	-268.095	825.551	495.485	-317.992	757.398
705	0	230.026	-422.214	1595.18	124.91	-420.216	1594.76	248.077	-259.444	1568.12	128.806	-254.32	1568.26	173.165	-232.75	1440.45	188.405	-128.755	1163.98	191.512	-385.927	1330.1	202.464	-479.23	1127.26	105.98	-138.833	1254.4	338.601	-315.381	1401.62	456.569	-270.537	1173.64	467.636	-248.553	1079.41	484.211	-307.089	935.457	440.274	-317.583	831.231	503.705	-275.037	825.87	495.908	-325.241	757.719
706	0	230.335	-432.391	1595.1	125.171	-430.335	1594.59	248.344	-269.598	1568.22	129.089	-264.597	1568.26	173.448	-242.59	1440.51	188.249	-137.956	1164.09	191.957	-395.508	1330.01	202.911	-488.414	1127	106.003	-148.294	1254.59	339	-324.943	1401.65	456.833	-278.549	1173.94	467.768	-256.455	1079.61	484.748	-314.489	935.608	440.56	-325.126	831.371	503.612	-282.264	825.96	496.194	-332.289	757.564
707	0	230.691	-442.436	1594.84	125.503	-440.4	1594.41	248.618	-279.651	1568.11	129.371	-274.47	1568.31	173.775	-252.496	1440.4	188.378	-147.153	1163.94	192.409	-405.162	1329.85	203.295	-497.692	1126.69	106.315	-157.891	1254.67	339.459	-334.52	1401.44	457.164	-286.913	1173.95	467.89	-264.488	1079.49	485.21	-322.09	935.487	440.872	-332.875	831.374	503.651	-289.655	825.806	496.267	-339.507	757.314
708	0	231.029	-452.579	1594.43	125.887	-450.454	1594.02	248.909	-289.61	1567.84	130.028	-284.436	1568.08	174.111	-262.396	1440.19	188.761	-156.431	1163.86	192.829	-415.003	1329.49	203.653	-507.11	1126.16	106.746	-167.574	1254.54	339.847	-344.247	1401.07	457.383	-295.342	1173.79	467.964	-272.729	1079.28	485.664	-329.89	935.123	441.182	-341.07	831.163	503.384	-297.564	825.491	496.315	-346.903	756.809
709	0	231.295	-462.491	1593.98	126.196	-460.496	1593.54	249.227	-299.549	1567.6	130.118	-294.424	1567.81	174.459	-272.262	1439.89	188.875	-165.9	1163.48	193.11	-424.783	1329.02	203.841	-516.621	1125.57	107.182	-177.246	1254.33	340.179	-354.176	1400.6	457.746	-304.025	1173.63	468.246	-281.055	1079.22	486.03	-337.883	934.782	441.293	-349.253	830.885	503.285	-305.297	825.209	496.26	-354.733	756.377
710	0	231.676	-472.383	1593.43	126.531	-470.389	1593.11	249.592	-309.457	1567.19	130.713	-304.523	1567.35	174.865	-282.244	1439.47	189.329	-175.043	1163.44	193.3	-434.484	1328.53	203.924	-526.151	1124.91	107.685	-186.861	1254	340.568	-364.181	1400.18	458.164	-312.867	1173.54	468.533	-289.65	1079.12	486.344	-346.098	934.406	441.321	-357.786	830.545	502.929	-313.131	824.732	496.135	-362.788	755.986
711	0	232.251	-482.31	1592.8	127.048	-480.253	1592.51	250.008	-319.376	1566.45	130.758	-314.332	1566.77	175.436	-292.212	1438.88	189.982	-184.585	1162.97	193.578	-444.379	1327.84	203.974	-535.839	1124.13	108.352	-196.322	1253.56	340.977	-374.283	1399.47	458.736	-321.983	1173.03	468.821	-298.517	1078.6	486.616	-354.66	933.727	441.421	-366.407	829.859	502.72	-321.295	823.98	496.067	-371	755.254
712	0	232.736	-492.127	1591.98	127.536	-490.174	1591.81	250.514	-329.301	1565.48	131.623	-324.249	1566	175.981	-302.134	1438.18	190.667	-194.285	1162.32	193.855	-454.333	1326.91	203.912	-545.626	1123.04	109.155	-206.043	1252.96	341.43	-384.522	1398.53	459.218	-331.488	1172.36	469.017	-307.671	1077.81	486.798	-363.366	932.808	441.431	-375.264	829.008	502.342	-329.961	823.039	495.839	-379.509	754.232
713	0	233.278	-502.136	1591.12	127.996	-500.071	1591.01	251.083	-339.284	1564.38	132.152	-334.087	1565	176.696	-312.239	1437.14	191.391	-204.103	1161.49	194.044	-464.158	1326.01	203.927	-555.511	1122.1	109.982	-215.762	1252.12	341.903	-394.837	1397.55	459.641	-340.997	1171.66	469.631	-316.85	1077.08	487.026	-372.38	931.89	441.45	-384.243	828.251	502.13	-338.501	822.042	495.508	-388.14	753.173
714	0	233.775	-512.073	1590.07	128.534	-509.901	1590.05	251.747	-349.331	1563.16	132.509	-344.026	1563.73	177.373	-322.345	1436.11	192.34	-213.769	1160.5	194.381	-474.176	1324.95	203.792	-565.423	1120.89	110.818	-225.471	1251.24	342.437	-405.298	1396.4	460.438	-350.863	1170.74	469.831	-326.559	1076.09	487.116	-381.572	930.752	441.379	-393.38	827.335	501.904	-347.532	820.879	495.047	-396.979	751.957
715	0	234.287	-522.231	1588.89	129.084	-519.855	1588.85	252.453	-359.467	1561.64	133.29	-353.995	1562.34	178.264	-332.504	1435.01	193.472	-223.741	1159.33	194.593	-484.195	1323.59	203.655	-575.324	1119.52	111.94	-235.158	1250.17	343.007	-415.83	1394.99	461.021	-361.05	1169.53	470.258	-336.421	1074.82	487.113	-391.211	929.299	441.272	-402.743	825.958	501.682	-356.758	819.4	494.938	-406.236	750.538
716	0	234.834	-532.35	1587.38	129.577	-529.775	1587.49	253.241	-369.64	1560.02	134.2	-363.93	1560.91	179.2	-342.58	1433.43	194.568	-233.821	1157.93	194.807	-494.337	1322.12	203.426	-585.426	1117.96	113.149	-245.091	1248.8	343.529	-426.518	1393.45	461.599	-371.49	1168.05	470.731	-346.521	1073.47	487.017	-401.026	927.701	441.111	-412.522	824.563	501.628	-366.21	817.867	494.649	-415.567	748.902
717	0	235.432	-542.599	1585.85	130.26	-539.725	1586.08	254.192	-379.922	1558.37	135.092	-374.022	1559.27	180.141	-352.737	1431.95	195.883	-243.833	1156.37	195.209	-504.464	1320.57	203.25	-595.594	1116.3	114.319	-254.838	1247.44	344.146	-437.33	1391.77	462.078	-382.396	1166.43	471.317	-356.762	1071.88	487.096	-411.012	925.912	441.022	-421.985	822.946	501.546	-375.89	816.097	494.309	-425.208	747.134
718	0	236.188	-552.842	1584.11	130.974	-549.804	1584.5	255.186	-390.247	1556.44	136.433	-384.072	1557.51	181.285	-363.014	1430.31	197.447	-254.042	1154.82	195.583	-514.67	1318.76	203.141	-605.804	1114.68	115.7	-264.716	1245.85	344.933	-448.182	1389.9	462.826	-393.228	1164.54	471.89	-367.251	1070.02	487.225	-421.196	923.971	440.909	-431.837	821.205	501.579	-385.968	814.301	493.991	-434.952	745.198
719	0	237.042	-563.229	1582.33	131.756	-559.985	1582.73	256.268	-400.683	1554.47	137.309	-394.169	1555.78	182.52	-373.275	1428.63	198.973	-264	1153.3	196.063	-525.037	1316.93	202.911	-616.163	1112.8	117.065	-274.645	1244.22	345.778	-459.3	1388.1	463.418	-404.593	1162.54	472.465	-377.972	1068.12	487.368	-431.643	921.976	440.826	-441.933	819.209	501.583	-396.17	812.252	493.794	-445.009	743.144
720	0	237.776	-573.646	1580.31	132.646	-570.127	1580.97	257.549	-411.152	1552.63	138.653	-404.446	1554.03	183.633	-383.67	1426.9	200.549	-274.145	1151.74	196.411	-535.365	1314.84	202.646	-626.565	1110.7	118.592	-284.664	1242.64	346.53	-470.496	1386.1	464.171	-416.082	1160.49	473.134	-388.787	1066.23	487.488	-442.213	919.835	440.635	-452.214	817.008	501.73	-406.476	810.228	493.586	-455.286	741.036
721	0	238.808	-584.092	1578.36	133.579	-580.403	1579.16	258.779	-421.692	1550.47	139.687	-414.666	1551.98	184.988	-394.176	1425.07	201.906	-284.464	1149.95	196.913	-545.888	1312.92	202.406	-637.078	1108.67	120.037	-294.703	1240.96	347.308	-481.723	1383.98	464.772	-427.619	1158.25	473.919	-399.781	1064.15	487.751	-452.957	917.537	440.56	-462.608	814.767	501.979	-416.974	808.013	493.291	-465.539	738.651
722	0	239.983	-594.706	1576.26	134.863	-590.697	1577.28	260.084	-432.227	1548.27	141.116	-425.125	1550.02	186.312	-404.681	1423.08	203.33	-295.024	1147.97	197.457	-556.44	1310.82	202.242	-647.727	1106.64	121.554	-304.857	1239.14	348.222	-493.008	1381.63	465.443	-439.269	1155.7	474.555	-411.01	1061.61	487.978	-463.806	914.863	440.513	-473.261	812.343	502.165	-427.746	805.684	492.919	-476.169	735.893
723	0	241.307	-605.211	1574.13	136.105	-601.258	1575.46	261.469	-442.918	1545.89	142.683	-435.677	1548.04	187.622	-415.321	1421.1	204.78	-305.622	1145.85	198.143	-567.09	1308.71	202.138	-658.496	1104.51	123.016	-315.072	1237.2	349.188	-504.335	1379.28	466.124	-451.151	1153.09	475.225	-422.361	1059.01	488.253	-474.906	912.207	440.613	-484.136	809.938	502.238	-438.677	802.935	493.052	-487.033	733.39
724	0	242.706	-615.957	1572.26	137.495	-611.744	1573.65	262.938	-453.623	1543.68	144.005	-446.156	1546.12	189.016	-426.017	1419.12	206.246	-316.415	1143.88	198.892	-577.88	1306.8	202.06	-669.327	1102.47	124.568	-325.534	1235.31	350.217	-515.596	1377.06	466.877	-463.115	1150.53	475.913	-433.848	1056.56	488.629	-486.088	909.726	440.892	-495.172	807.686	502.47	-449.915	800.376	492.979	-498.05	730.95
725	0	244.147	-626.699	1570.25	138.906	-622.414	1572.1	264.555	-464.389	1541.6	145.848	-456.872	1544.29	190.408	-436.805	1417.25	207.58	-327.39	1141.94	199.654	-588.701	1304.78	201.965	-680.254	1100.5	125.957	-336.013	1233.58	351.22	-526.907	1374.79	467.61	-475.16	1147.96	476.652	-445.451	1054	489.14	-497.504	907.227	440.956	-506.643	805.254	502.884	-461.374	797.985	493.135	-509.307	728.452
726	0	245.679	-637.592	1568.24	140.505	-633.206	1570.32	266.167	-475.268	1539.34	147.279	-467.661	1542.4	191.72	-447.671	1415.36	208.84	-338.406	1139.92	200.473	-599.652	1302.69	202.001	-691.389	1098.52	127.465	-346.829	1231.73	352.335	-538.29	1372.51	468.407	-487.258	1145.38	477.492	-457.182	1051.46	489.555	-509.32	904.634	441.255	-518.081	802.55	503.284	-473.125	795.309	493.173	-520.937	725.661
727	0	247.269	-648.566	1566.25	142.161	-644.032	1568.56	268.008	-486.274	1537.45	149.337	-478.5	1540.77	193.2	-458.685	1413.59	210.039	-349.458	1138.01	201.438	-610.734	1300.86	202.048	-702.557	1096.77	128.817	-357.683	1229.98	353.395	-549.649	1370.29	469.244	-499.339	1143.01	478.174	-469.078	1049.12	489.934	-521.264	902.176	441.639	-529.487	800.005	503.641	-485.072	792.931	493.243	-532.804	723.245
728	0	249.054	-659.564	1564.56	143.882	-654.889	1567.03	269.731	-497.314	1535.45	150.792	-489.366	1539.08	194.781	-469.719	1411.67	211.1	-360.623	1136.1	202.469	-621.777	1299.11	202.282	-713.768	1095.06	130.175	-368.758	1228.03	354.697	-560.931	1368.31	470.02	-511.305	1140.78	478.96	-480.98	1046.85	490.446	-533.266	899.987	441.826	-542.079	797.835	504.195	-497.211	790.783	493.567	-544.834	720.984
729	0	250.801	-670.631	1562.61	145.789	-665.782	1565.46	271.643	-508.393	1533.42	153.03	-500.33	1537.37	196.306	-480.708	1409.82	212.037	-372.055	1134.02	203.622	-633	1297.37	202.63	-725.117	1093.52	131.512	-379.898	1226.27	356.032	-572.24	1366.18	471.002	-523.281	1138.3	479.765	-492.987	1044.35	490.915	-545.502	897.519	442.53	-554.559	795.837	504.964	-509.805	788.458	493.923	-557.332	718.743
730	0	252.793	-681.717	1560.87	147.687	-676.898	1563.93	273.67	-519.639	1531.46	154.704	-511.391	1535.7	197.997	-491.809	1408	212.877	-383.645	1131.8	204.836	-644.301	1295.7	203.053	-736.666	1092.06	132.848	-391.258	1224.29	357.431	-583.545	1364.04	471.993	-535.169	1135.9	480.533	-505.061	1041.79	491.478	-557.841	895.168	443.028	-567.091	793.53	505.17	-522.069	785.667	493.991	-569.823	715.913
731	0	254.648	-692.907	1559.06	149.627	-687.904	1562.37	275.685	-530.88	1529.57	156.763	-522.519	1534.15	199.681	-502.872	1406.07	213.959	-395.433	1129.54	206.01	-655.676	1294.11	203.554	-748.327	1090.73	134.277	-402.773	1222.28	358.978	-594.943	1362.05	473.034	-546.946	1133.58	481.395	-517.103	1039.43	492.191	-570.291	892.949	443.574	-579.579	791.339	505.785	-534.711	783.325	494.555	-582.604	713.777
732	0	256.704	-704.168	1557.54	151.589	-699.11	1561.16	277.782	-542.073	1527.83	159.187	-533.677	1532.79	201.34	-514.055	1404.26	215.297	-407.583	1127.29	207.284	-667.205	1292.74	204.112	-760.182	1089.66	135.521	-414.397	1220.26	360.464	-606.349	1360.1	474.154	-558.585	1131.39	482.309	-529.201	1037.25	493.033	-582.799	890.818	444.307	-592.551	789.35	506.543	-547.48	781.231	495.52	-595.784	711.849
733	0	258.805	-715.475	1555.94	153.798	-710.257	1559.92	279.932	-553.371	1526.25	161.039	-544.921	1531.51	203.084	-525.319	1402.6	216.738	-419.881	1124.84	208.675	-678.847	1291.34	204.757	-772.323	1088.56	136.863	-426.157	1218.25	361.99	-617.783	1358.07	475.295	-570.194	1129.16	483.204	-541.38	1034.84	493.829	-595.524	888.551	444.898	-605.871	787.134	507.274	-560.411	778.953	496.251	-609.191	709.663
734	0	261.071	-726.791	1554.67	155.988	-721.582	1558.96	282.211	-564.746	1524.66	163.364	-556.146	1530.29	204.897	-536.614	1401.07	218.117	-432.265	1122.79	210.166	-690.734	1290.19	205.52	-784.655	1087.8	138.322	-438.021	1216.56	363.608	-629.339	1356.14	476.461	-582.08	1126.87	484.065	-553.714	1032.45	494.763	-608.345	886.304	446.288	-618.709	784.914	507.988	-573.528	776.566	497.126	-622.602	707.551
735	0	263.45	-738.133	1553.9	158.409	-732.735	1558.46	284.442	-576.161	1523.39	165.67	-567.495	1529.44	206.631	-548.228	1400.02	219.328	-444.699	1121.32	211.486	-702.699	1289.58	206.206	-797.238	1087.28	139.632	-449.915	1215.17	365.361	-640.891	1354.74	477.784	-593.89	1125.06	484.956	-566.081	1030.34	495.971	-621.132	884.474	447.167	-632.25	783.185	508.954	-586.68	774.458	498.479	-636.152	705.8
736	0	265.889	-749.465	1553.42	160.688	-744.087	1558.39	286.814	-587.721	1522.48	168.066	-578.902	1528.84	208.229	-560.088	1399.33	220.615	-457.106	1120.22	212.937	-714.718	1289.14	207.036	-809.973	1087.13	140.679	-461.856	1214.38	367.02	-652.595	1353.47	479.024	-605.781	1123.48	485.737	-578.582	1028.5	497.212	-634.187	882.955	448.517	-645.821	781.721	509.986	-600.024	772.77	499.703	-649.836	704.346
737	0	268.342	-760.963	1553.19	163.321	-755.452	1558.48	289.262	-599.337	1521.69	170.79	-590.455	1528.55	209.902	-572.041	1399.08	221.692	-469.303	1119.72	214.458	-726.859	1288.92	207.938	-823.036	1087.1	141.753	-473.921	1214	368.698	-664.424	1352.37	480.131	-618.066	1121.93	486.524	-591.268	1026.81	498.516	-647.302	881.447	449.912	-659.52	780	511.107	-613.476	771.188	501.115	-663.707	702.93
738	0	270.783	-772.464	1553.36	165.701	-767.129	1559.1	291.657	-610.979	1521.36	173.247	-602.052	1528.7	211.539	-584.158	1399.29	222.496	-481.28	1119.91	216.109	-739.014	1289.09	208.888	-836.231	1087.48	142.403	-486.03	1214.27	370.147	-676.295	1351.68	480.998	-630.4	1120.83	487.053	-604.221	1025.6	499.783	-660.689	880.444	451.289	-673.463	778.798	512.183	-626.948	769.975	502.768	-677.544	701.866
739	0	273.268	-784.108	1554.09	168.26	-778.669	1560.23	294.131	-622.708	1521.47	175.454	-613.785	1529.02	213.032	-596.308	1400.02	222.751	-493.07	1120.58	217.441	-751.385	1289.87	209.99	-849.371	1088.31	142.837	-498.28	1215.18	371.683	-688.082	1351.58	481.739	-642.827	1120.26	487.531	-617.133	1024.89	500.928	-673.705	879.753	452.971	-687.488	778.356	513.409	-640.525	769.516	504.673	-691.498	701.504
740	0	275.867	-795.743	1555.22	170.807	-790.38	1561.72	296.627	-634.477	1521.92	177.942	-625.487	1529.85	214.632	-608.507	1401.17	222.915	-505.124	1121.75	218.989	-763.588	1291.07	211.227	-862.389	1089.59	143.049	-510.414	1216.81	373.147	-699.845	1351.99	482.288	-655.467	1120.02	487.9	-630.218	1024.67	502.228	-687.056	879.862	454.711	-701.264	778.207	514.762	-654.225	769.473	506.74	-705.439	701.748
741	0	278.388	-807.449	1556.62	173.436	-802.077	1563.65	298.943	-646.447	1522.63	180.384	-637.255	1531.31	215.978	-620.631	1402.88	223.176	-517.521	1123.91	220.593	-775.889	1292.7	212.549	-875.281	1091.2	143.13	-522.779	1218.85	374.58	-711.614	1352.82	482.722	-668.4	1120.17	488.063	-643.445	1024.81	503.333	-700.604	880.481	456.31	-715.792	778.795	516.044	-668.016	769.807	508.756	-719.593	702.378
742	0	280.804	-819.126	1558.39	175.923	-813.817	1565.96	301.282	-658.356	1524.1	182.746	-649.071	1533.23	217.25	-632.737	1404.77	223.114	-530.146	1126.23	222.044	-787.934	1294.73	213.845	-887.652	1093.28	143.013	-535.121	1221.26	375.834	-723.087	1354.34	482.93	-681.153	1121.07	488.266	-656.608	1025.91	504.466	-714.247	881.903	458.095	-729.859	779.912	517.362	-681.878	771.225	510.951	-733.871	703.921
743	0	283.215	-830.931	1560.37	178.285	-825.647	1568.52	303.431	-670.143	1525.9	184.885	-660.936	1535.69	218.536	-644.521	1407.13	222.443	-542.593	1128.05	223.442	-799.878	1297.25	215.115	-899.634	1095.86	143.098	-547.587	1223.93	377.083	-734.483	1356.45	483.134	-694.013	1122.64	488.544	-669.658	1027.76	505.48	-728.014	884.049	459.617	-745.039	782.112	518.731	-696.094	773.401	512.862	-748.229	706.077
744	0	285.444	-842.649	1562.39	180.661	-837.506	1571.13	305.468	-681.943	1528.05	186.986	-672.782	1538.44	219.704	-656.246	1409.38	221.704	-555.335	1129.99	224.754	-811.586	1299.81	216.46	-911.305	1098.5	143.288	-559.839	1226.51	378.312	-745.743	1358.71	483.134	-706.817	1124.31	488.939	-682.763	1029.9	506.429	-741.845	886.533	461.155	-759.416	784.198	519.752	-710.706	775.707	515.088	-762.921	708.743
745	0	287.458	-854.429	1564.33	182.785	-849.386	1573.74	307.138	-693.574	1530.31	188.825	-684.478	1541.51	220.803	-667.672	1411.75	221.468	-568.148	1132.21	226.03	-823.135	1302.51	217.704	-922.635	1101.37	143.608	-571.945	1229.19	379.444	-756.939	1361.26	483.333	-719.666	1126.38	489.19	-695.73	1032.04	507.293	-755.743	889.129	462.621	-774.587	786.828	520.978	-725.144	778.257	516.952	-777.788	711.532
746	0	289.311	-866.009	1566.52	184.603	-861.057	1576.42	308.823	-705.108	1532.88	190.508	-696.068	1544.74	221.959	-678.858	1414.12	221.885	-580.237	1134.42	227.117	-834.351	1305.29	218.83	-933.675	1104.36	144.034	-583.815	1231.47	380.631	-767.897	1363.89	483.672	-732.285	1128.76	489.75	-708.541	1034.56	508.241	-769.636	892.178	464.082	-788.964	789.623	522.041	-739.824	781.147	518.812	-792.85	714.796
747	0	290.941	-877.474	1568.71	186.194	-872.521	1578.96	310.275	-716.442	1535.62	192.036	-707.436	1547.81	223.001	-689.613	1416.54	222.528	-591.633	1136.75	228.244	-845.441	1308.12	219.89	-944.41	1107.46	144.647	-595.465	1233.82	382.052	-778.705	1366.78	484.397	-744.937	1131.19	490.557	-721.278	1037.08	509.347	-783.456	895.246	465.375	-803.615	792.632	523.102	-754.422	783.982	520.435	-808.076	718.095
748	0	292.2	-888.805	1570.82	187.56	-883.847	1581.37	311.542	-727.711	1538.13	193.315	-718.68	1550.75	224.053	-700.425	1418.65	223.259	-602.859	1138.78	229.264	-856.496	1310.71	220.813	-955.008	1110.33	145.483	-606.813	1236.06	383.069	-789.58	1369.16	485.208	-757.396	1133.74	491.752	-734.064	1039.5	510.399	-797.307	898.06	466.48	-818.692	795.61	523.893	-769.179	786.548	521.716	-823.48	721.183
749	0	293.151	-900.025	1572.85	188.614	-895.084	1583.55	312.585	-738.887	1540.48	194.833	-729.857	1553.31	225.219	-711.326	1420.87	224.115	-614.071	1140.7	230.109	-867.445	1313.23	221.487	-965.259	1112.99	146.468	-618.002	1238.01	384.025	-800.446	1371.55	486.204	-769.981	1136.02	492.942	-746.879	1041.76	511.442	-811.264	900.805	467.267	-833.678	798.494	524.672	-784.226	789.016	522.738	-839.147	724.222
750	0	294.108	-911.033	1575.01	189.478	-905.992	1585.79	313.541	-749.833	1542.87	195.526	-740.81	1555.67	226.251	-722.166	1422.77	225.124	-625.098	1142.72	230.924	-878.286	1315.57	222.091	-975.449	1115.56	147.494	-628.862	1240.02	385.02	-811.292	1373.77	487.408	-782.297	1138.47	494.415	-759.5	1044.01	512.491	-825.113	903.419	468.034	-848.907	801.634	525.606	-799.137	791.537	523.493	-854.873	727.201
751	0	294.94	-921.911	1576.95	190.342	-916.767	1587.82	314.392	-760.697	1544.77	196.324	-751.592	1557.61	227.312	-732.904	1424.65	226.178	-635.995	1144.59	231.768	-888.974	1317.74	222.739	-985.465	1117.88	148.536	-639.506	1241.96	386.066	-822.161	1375.81	488.705	-794.544	1140.63	496.066	-772.051	1045.95	513.72	-839.005	905.923	468.983	-863.797	804.734	526.353	-814.536	793.752	524.046	-871.01	730.245
752	0	295.665	-932.572	1578.8	191.063	-927.508	1589.7	315.077	-771.432	1546.42	196.975	-762.312	1559.4	228.25	-743.624	1426.48	227.344	-646.794	1146.36	232.508	-899.717	1319.64	223.133	-995.974	1119.84	149.664	-650.001	1243.8	386.88	-833.132	1377.52	490.036	-806.643	1142.58	497.766	-784.491	1047.63	514.866	-852.987	908.281	469.589	-878.892	807.612	527.272	-829.868	795.742	524.243	-887.087	732.982
753	0	296.132	-943.099	1580.49	191.672	-938.159	1591.43	315.537	-782.037	1547.81	197.505	-773.033	1560.99	228.995	-754.468	1428.17	228.471	-657.383	1148.41	233.137	-910.443	1321.39	223.346	-1006.55	1121.63	150.734	-660.163	1245.85	387.554	-844.15	1379.17	491.553	-818.649	1144.59	499.573	-796.738	1049.29	516.117	-866.883	910.648	470.099	-893.857	810.608	527.922	-845.473	797.626	524.337	-903.512	735.9
754	0	296.863	-953.667	1582.01	192.336	-948.689	1593.11	315.986	-792.502	1549.34	197.934	-783.653	1562.28	229.725	-765.243	1429.79	229.725	-667.587	1150.24	233.569	-920.993	1322.95	223.416	-1017.31	1123.01	151.742	-670.409	1247.63	388.05	-855.219	1380.61	492.984	-830.324	1146.47	501.455	-808.704	1050.89	517.147	-880.672	912.927	470.7	-908.668	813.533	528.744	-860.844	799.649	524.29	-919.899	738.812
755	0	297.353	-963.983	1583.46	192.868	-959.282	1594.57	316.331	-802.921	1550.51	198.168	-794.193	1563.61	230.375	-775.916	1431.37	230.817	-677.698	1151.96	233.855	-931.631	1324.14	223.269	-1028.07	1124.05	152.846	-680.41	1249.28	388.408	-866.378	1381.85	494.494	-841.897	1148.09	503.414	-820.777	1052.31	518.22	-894.535	914.959	470.797	-923.604	816.277	529.172	-876.521	801.642	524.1	-936.403	741.619
756	0	297.972	-974.397	1584.62	193.42	-969.848	1595.85	316.514	-813.302	1551.42	198.444	-804.89	1564.72	230.917	-786.592	1432.74	231.907	-687.7	1153.69	234.117	-942.232	1325.16	222.905	-1038.9	1124.84	153.845	-690.294	1251.09	388.632	-877.754	1382.86	495.928	-853.364	1149.49	505.132	-832.965	1053.35	519.101	-908.479	916.814	471.235	-938.893	818.992	529.685	-891.907	803.113	523.792	-953.014	744.256
757	0	298.428	-984.796	1585.86	193.991	-980.281	1597.14	316.662	-823.637	1552.33	198.67	-815.336	1565.65	231.463	-797.425	1434.05	233.116	-697.672	1155.16	234.105	-952.665	1326.05	222.382	-1049.4	1125.61	154.892	-700.184	1252.51	388.838	-888.87	1383.89	497.406	-864.517	1151.06	506.998	-845.131	1054.52	519.964	-922.587	918.551	471.052	-952.909	821.554	529.899	-907.51	804.63	523.497	-969.463	746.971
758	0	298.924	-995.041	1586.8	194.397	-990.839	1598.28	316.847	-833.994	1553.08	198.853	-825.805	1566.56	231.926	-808.036	1435.24	234.22	-707.57	1156.78	234.05	-963.122	1326.89	221.797	-1059.59	1126.02	156.018	-709.889	1254.02	388.957	-900.045	1384.82	498.858	-875.638	1152.43	508.629	-857.552	1055.53	520.628	-936.405	920.377	471.015	-967.431	824.041	530.407	-922.741	806.341	523.346	-985.773	749.716
759	0	299.292	-1005.49	1587.56	194.723	-1001.28	1599.17	316.961	-844.374	1553.79	198.928	-836.366	1567.37	232.46	-818.583	1436.35	235.406	-717.366	1158.05	233.883	-973.482	1327.5	221.063	-1069.49	1126.18	157.017	-719.609	1255.2	389.015	-911.344	1385.73	500.086	-886.671	1153.77	510.281	-870.118	1056.5	521.176	-950.323	922.152	470.994	-982.081	826.325	530.498	-938.062	807.691	523.051	-1001.95	752.254
760	0	299.284	-1015.91	1588.16	194.852	-1011.75	1599.74	317.046	-854.823	1554.46	198.975	-846.914	1568.04	232.945	-829.108	1437.33	236.524	-727.178	1159.38	233.577	-983.696	1328	220.166	-1079.19	1126.19	158.159	-729.214	1256.51	388.806	-922.605	1386.4	501.121	-897.86	1155.08	511.621	-882.768	1057.52	521.503	-964.373	923.785	470.728	-996.538	828.419	530.649	-953.303	809.101	522.624	-1017.9	754.676
761	0	299.312	-1026.39	1588.6	194.83	-1022.26	1600.24	317.007	-865.23	1554.97	198.973	-857.302	1568.49	233.258	-839.415	1438.14	237.705	-736.827	1160.28	233.09	-993.768	1328.38	219.001	-1088.77	1126.28	159.116	-738.781	1257.42	388.703	-933.492	1387.1	502.014	-909.082	1156.16	513.034	-895.543	1058.68	521.643	-978.538	925.392	470.511	-1011	830.475	530.766	-968.36	810.669	522.138	-1033.8	756.999
762	0	299.349	-1036.86	1588.85	194.743	-1032.76	1600.53	317.078	-875.725	1555.18	199.104	-867.724	1568.71	233.86	-849.658	1438.63	238.782	-746.566	1161.12	232.61	-1003.69	1328.67	217.874	-1098.3	1126.24	160.248	-748.271	1258.14	388.301	-944.844	1387.3	502.74	-920.4	1157.01	514.263	-908.526	1059.64	521.583	-992.72	926.805	470.234	-1025.37	832.186	530.787	-983.434	811.922	521.684	-1049.41	758.965
763	0	299.251	-1047.4	1588.84	194.694	-1043.14	1600.59	317.033	-886.22	1555.23	199.056	-878.077	1569.01	234.11	-859.743	1439.06	239.989	-756.237	1161.87	232.182	-1013.55	1328.72	216.785	-1107.65	1126.05	161.323	-757.643	1258.75	388.058	-955.762	1387.64	503.2	-931.964	1157.64	515.15	-921.359	1059.68	521.429	-1006.86	928.049	469.991	-1039.92	833.743	530.569	-998.66	812.988	521.075	-1064.84	760.577
764	0	299.05	-1057.89	1588.85	194.492	-1053.51	1600.55	317.004	-896.771	1555.33	199.049	-888.529	1569.18	234.502	-869.787	1439.46	240.865	-765.898	1162.29	231.744	-1023.35	1328.81	215.662	-1116.86	1125.86	162.175	-767.097	1259.28	387.769	-966.353	1387.88	503.664	-943.86	1158.12	515.913	-934.33	1060.08	521.241	-1021	929.231	469.588	-1054.27	835.165	530.61	-1013.8	813.992	520.48	-1080.2	762.117
765	0	298.748	-1068.37	1588.66	194.097	-1063.86	1600.41	316.867	-907.195	1555.46	198.947	-898.765	1569.23	234.94	-879.635	1439.69	241.823	-775.326	1162.67	231.176	-1032.96	1328.73	214.608	-1125.98	1125.6	163.131	-776.366	1259.65	387.453	-976.984	1388.07	503.834	-955.849	1158.39	516.494	-947.163	1060.46	520.937	-1034.95	930.237	468.993	-1068.74	836.53	530.399	-1028.59	814.972	519.644	-1095.26	763.499
766	0	298.29	-1078.88	1588.15	193.881	-1074.14	1600.11	316.786	-917.625	1555.32	198.87	-909.005	1569.17	235.014	-889.53	1439.68	242.481	-784.831	1162.9	230.692	-1042.73	1328.52	213.62	-1135.13	1125.19	163.75	-785.634	1259.71	387.138	-987.514	1387.92	503.704	-968.035	1158.15	516.832	-959.957	1060.4	520.51	-1048.81	930.808	468.358	-1082.86	837.357	530.093	-1043.47	815.709	518.811	-1110.3	764.6
767	0	297.94	-1089.31	1587.56	193.388	-1084.55	1599.56	316.655	-927.999	1555.02	198.691	-919.371	1568.99	235.339	-899.333	1439.53	243.195	-794.148	1162.91	230.105	-1052.36	1328.09	212.728	-1144.52	1124.64	164.542	-794.953	1259.69	386.853	-997.97	1387.44	503.376	-980.455	1157.63	516.736	-972.849	1059.96	520.062	-1062.4	930.968	467.54	-1097.1	837.868	529.387	-1058.11	815.786	517.778	-1125.27	765.176
768	0	297.418	-1099.62	1587.05	193.101	-1094.72	1599.07	316.405	-938.359	1554.75	198.614	-929.415	1568.82	235.294	-909.138	1439.21	243.622	-803.553	1162.66	229.573	-1062	1327.81	211.843	-1153.8	1124.23	164.909	-804.219	1259.51	386.539	-1008.18	1387.01	502.927	-992.877	1157.21	516.632	-985.246	1059.43	519.552	-1075.87	931.214	466.691	-1111.06	838.555	528.793	-1072.59	816.092	516.723	-1139.82	765.783
769	0	297.045	-1109.96	1586.43	192.688	-1104.82	1598.6	316.238	-948.614	1554.49	198.418	-939.607	1568.6	235.225	-918.791	1438.88	243.923	-812.905	1162.48	229.028	-1071.64	1327.35	211.062	-1163.12	1123.7	165.266	-813.571	1259.26	386.184	-1018.39	1386.57	502.357	-1005.34	1156.55	516.152	-997.768	1058.88	518.941	-1089.13	931.297	465.799	-1124.7	838.853	528.048	-1086.79	816.144	515.586	-1154.42	766.482
770	0	296.625	-1120.15	1585.68	192.271	-1115.04	1597.97	316.074	-958.839	1554.01	198.083	-949.671	1568.27	235.118	-928.66	1438.41	244.061	-822.325	1162.19	228.473	-1081.23	1326.78	210.351	-1172.54	1123.04	165.407	-822.956	1259.02	385.863	-1028.58	1386.02	501.671	-1017.83	1155.74	515.637	-1010.11	1058.03	518.187	-1102.29	931.074	464.779	-1138.6	839.063	527.144	-1100.9	815.967	514.6	-1168.76	766.755
771	0	296.042	-1130.33	1584.76	191.814	-1125.03	1597.22	315.785	-969.123	1553.49	197.913	-959.574	1567.87	234.819	-938.346	1437.98	244.18	-831.698	1161.9	227.779	-1091.06	1326.07	209.537	-1182.08	1122.31	165.448	-832.262	1258.81	385.319	-1038.74	1385.3	500.695	-1030.35	1154.79	514.712	-1022.42	1057.06	517.198	-1115.25	930.791	463.565	-1152.29	839.012	525.861	-1114.73	815.69	513.39	-1182.91	766.984
772	0	295.448	-1140.47	1584.07	191.139	-1135.02	1596.58	315.201	-979.066	1552.8	197.475	-969.593	1567.35	234.502	-948.29	1437.49	243.908	-841.236	1161.56	227.014	-1100.8	1325.46	208.887	-1191.27	1121.42	165.206	-841.923	1258.31	384.714	-1048.82	1384.76	499.72	-1042.62	1154.05	513.784	-1034.5	1056.39	516.129	-1128.03	930.406	462.328	-1165.5	838.897	524.67	-1128.18	815.495	512.186	-1196.83	767.164
773	0	294.904	-1150.58	1583.28	190.572	-1145.02	1595.79	314.741	-989.041	1551.97	197.016	-979.677	1566.57	233.952	-958.1	1436.86	243.664	-850.562	1161.13	226.374	-1110.63	1324.75	208.237	-1200.81	1120.49	164.861	-851.417	1257.85	384.141	-1058.91	1383.92	498.557	-1054.8	1153.01	512.562	-1046.5	1055.24	514.793	-1140.67	929.854	460.895	-1178.92	838.627	523.179	-1141.43	814.965	510.833	-1210.64	767.19
774	0	294.142	-1160.61	1582.23	189.928	-1154.93	1594.9	314.123	-999.279	1551.04	196.485	-989.438	1565.82	233.392	-968.156	1436.14	243.274	-860.209	1160.58	225.702	-1120.54	1323.78	207.508	-1210.49	1119.3	164.476	-861.016	1257.34	383.54	-1069.03	1383.01	497.294	-1066.94	1151.81	511.193	-1058.59	1053.87	513.444	-1153.28	929.137	459.584	-1192.02	838.179	521.425	-1154.65	814.027	509.356	-1224.05	766.738
775	0	293.406	-1170.63	1581.42	189.167	-1165.01	1593.97	313.461	-1009.32	1550.1	195.832	-999.452	1564.88	232.804	-978.081	1435.41	242.743	-869.791	1159.92	225.063	-1130.5	1322.92	206.868	-1220.22	1118.28	163.916	-870.953	1256.57	382.785	-1079.08	1382.12	495.993	-1078.75	1150.68	509.621	-1070.51	1052.51	511.721	-1165.68	928.294	457.976	-1204.95	837.599	519.731	-1167.72	813.162	507.795	-1237.36	766.404
776	0	292.597	-1180.67	1580.46	188.294	-1174.87	1593	312.687	-1019.28	1549.14	195.033	-1009.4	1563.84	231.938	-988.185	1434.43	242.105	-879.428	1159.19	224.258	-1140.42	1321.98	206.253	-1229.81	1117.14	163.205	-880.746	1255.86	381.958	-1089.12	1381.21	494.62	-1090.33	1149.43	508.056	-1082.27	1051.32	510.098	-1178.04	927.631	456.253	-1217.82	837.075	518.006	-1180.49	812.505	506.018	-1250.35	765.986
777	0	291.675	-1190.68	1579.4	187.404	-1184.91	1591.87	311.777	-1029.26	1548	194.161	-1019.53	1562.63	231.028	-998.285	1433.49	241.238	-889.258	1158.29	223.494	-1150.51	1320.89	205.627	-1239.72	1115.78	162.596	-890.707	1254.82	381.152	-1099.2	1380.08	493.216	-1101.74	1147.98	506.391	-1094.06	1049.88	508.139	-1190.54	926.709	454.504	-1230.59	836.356	516.06	-1193.21	811.44	504.175	-1263.32	765.163
778	0	290.537	-1200.74	1578.16	186.369	-1195.09	1590.68	310.607	-1039.36	1546.82	193.062	-1029.51	1561.39	230.185	-1008.54	1432.25	240.401	-899.075	1157.21	222.666	-1160.62	1319.63	205.108	-1249.57	1114.4	161.544	-900.819	1254.04	380.261	-1109.17	1378.85	491.699	-1112.89	1146.38	504.527	-1105.96	1048.22	505.834	-1202.91	925.495	452.354	-1243.05	835.292	514.061	-1205.82	810.245	502.05	-1276.08	764.165
779	0	289.514	-1210.7	1577	185.231	-1205.13	1589.35	309.447	-1049.36	1545.58	191.832	-1039.61	1560.07	229.207	-1018.57	1431.23	239.407	-909.083	1156.11	221.867	-1170.79	1318.39	204.442	-1259.63	1113.14	160.334	-911.003	1252.73	379.256	-1119.06	1377.71	490.205	-1123.79	1144.85	502.731	-1117.76	1046.8	503.905	-1215.07	924.443	450.463	-1255.42	834.26	512.113	-1218.44	809.172	499.804	-1288.69	763.251
780	0	288.462	-1220.69	1575.75	184.151	-1215.19	1587.98	308.201	-1059.23	1544.31	190.462	-1049.67	1558.67	227.829	-1028.74	1429.84	238.327	-919.086	1154.85	221.033	-1180.92	1317.09	204.145	-1269.27	1111.61	159.238	-921.344	1251.33	378.283	-1128.91	1376.52	488.813	-1134.53	1143.3	500.85	-1129.43	1045.32	501.69	-1227.14	923.325	448.104	-1267.43	833.108	510.087	-1230.87	808.104	497.527	-1301.08	762.327
781	0	287.248	-1230.7	1574.37	182.885	-1225.31	1586.61	306.815	-1069.28	1542.99	189.126	-1059.76	1557.27	226.514	-1038.83	1428.41	237.055	-929.245	1153.53	220.185	-1191.1	1315.71	203.64	-1279.79	1110.35	157.895	-931.579	1249.84	377.296	-1138.68	1375.28	487.348	-1145.07	1141.66	498.89	-1141.12	1043.6	499.466	-1239.24	922.15	445.766	-1279.44	831.86	507.818	-1243.27	806.772	495.051	-1313.36	761.156
782	0	285.867	-1240.65	1573	181.437	-1235.5	1584.98	305.18	-1079.22	1541.49	187.558	-1069.84	1555.65	225.048	-1048.98	1426.93	235.654	-939.696	1151.88	219.204	-1201.4	1314.25	203.117	-1290.15	1108.93	156.35	-942.03	1248.13	376.132	-1148.36	1373.92	485.689	-1155.24	1139.73	496.951	-1152.73	1041.9	497.101	-1251.26	920.817	443.195	-1291.25	830.507	505.679	-1255.51	805.43	492.405	-1325.63	759.926
783	0	284.334	-1250.5	1571.6	180.028	-1245.51	1583.43	303.534	-1089.04	1540.21	185.772	-1079.99	1554.04	223.47	-1059.02	1425.27	234.135	-949.98	1150.15	218.091	-1211.72	1312.83	202.71	-1300.45	1107.38	154.73	-952.546	1246.21	374.936	-1158.07	1372.63	484.13	-1165.3	1138.19	495.044	-1164.08	1040.43	494.461	-1262.95	919.469	440.307	-1302.48	829.271	503.495	-1267.56	804.419	489.593	-1337.65	758.718
784	0	282.734	-1260.36	1570.26	178.413	-1255.58	1581.94	301.751	-1098.83	1538.88	183.87	-1089.98	1552.4	221.813	-1069.01	1423.59	232.574	-960.33	1148.38	216.98	-1222	1311.4	202.23	-1311.18	1106.07	152.928	-963.125	1244.31	373.59	-1167.64	1371.22	482.615	-1175.27	1136.61	493.242	-1175.31	1039.01	492.116	-1274.61	918.239	437.781	-1313.94	828.021	501.114	-1279.57	803.284	486.553	-1349.4	757.591
785	0	281.092	-1270.19	1568.67	176.659	-1265.69	1580.15	299.758	-1108.66	1537.13	181.958	-1100.08	1550.69	219.825	-1079.13	1421.7	230.817	-970.826	1146.33	215.846	-1232.32	1309.75	201.882	-1321.75	1104.62	150.909	-973.648	1242.08	372.08	-1177.3	1369.74	480.991	-1185.16	1134.94	491.254	-1186.41	1037.16	489.72	-1286.18	916.877	434.97	-1325.23	826.758	498.682	-1291.56	801.794	483.502	-1361.24	756.303
786	0	279.31	-1279.94	1567.24	174.908	-1275.6	1578.57	297.727	-1118.47	1535.74	179.892	-1109.94	1549.01	217.662	-1089	1420.01	228.964	-981.205	1144.38	214.556	-1242.7	1308.33	201.4	-1332.37	1103.36	148.898	-984.307	1240.01	370.6	-1186.88	1368.43	479.457	-1194.95	1133.63	489.481	-1197.28	1035.64	487.326	-1297.33	915.82	432.157	-1335.45	825.329	496.262	-1303.36	800.688	480.274	-1372.75	755.253
787	0	277.463	-1289.71	1565.94	173.024	-1285.46	1577.03	295.502	-1128.14	1534.23	177.728	-1119.86	1547.34	215.623	-1099	1418.09	226.914	-991.872	1142.34	213.13	-1253.03	1306.94	201.073	-1342.52	1101.83	146.682	-994.992	1237.72	369.01	-1196.52	1367.26	478.017	-1204.63	1132.53	487.832	-1207.75	1034.48	485.075	-1308.39	914.993	429.415	-1346.15	824.379	494.051	-1314.86	799.844	477.193	-1384.15	754.366
788	0	275.438	-1299.38	1564.48	170.917	-1295.39	1575.42	293.247	-1137.8	1532.79	175.462	-1129.74	1545.62	213.422	-1109.05	1416.31	224.907	-1002.24	1140.27	211.619	-1263.39	1305.42	200.437	-1353.8	1100.73	144.501	-1005.66	1235.53	367.183	-1206.18	1365.93	476.46	-1214.44	1131.42	486.24	-1217.95	1033.2	482.855	-1319.13	913.93	426.818	-1356.74	823.455	491.873	-1326.15	799.099	473.72	-1395.25	753.454
789	0	273.218	-1309.18	1563.03	168.754	-1305.37	1573.79	290.862	-1147.52	1531.28	172.973	-1139.79	1543.89	211.114	-1118.9	1414.47	222.726	-1013.01	1137.99	210.013	-1273.86	1303.86	199.777	-1364.87	1099.43	142.183	-1016.4	1233.17	365.241	-1215.97	1364.65	474.91	-1224.25	1130.32	484.473	-1228.12	1031.92	480.735	-1329.78	912.871	424.249	-1367.33	822.766	489.64	-1337.3	798.083	470.737	-1406.3	752.611
790	0	270.998	-1318.77	1561.87	166.484	-1315.16	1572.42	288.466	-1157.09	1529.83	170.49	-1149.57	1542.23	208.715	-1128.89	1412.61	220.578	-1023.79	1135.87	208.27	-1284.25	1302.62	198.948	-1376.14	1098.39	139.771	-1027.14	1230.94	363.197	-1225.71	1363.6	473.338	-1234.07	1129.43	482.807	-1237.95	1030.86	478.806	-1340.01	912.049	422.192	-1377.57	822.009	487.475	-1347.96	797.272	467.887	-1416.92	751.976
791	0	268.757	-1328.4	1560.77	164.187	-1324.85	1571.11	285.96	-1166.74	1528.51	167.909	-1159.39	1540.73	206.106	-1138.86	1410.75	218.275	-1034.84	1133.49	206.491	-1294.68	1301.49	198.177	-1387.29	1097.55	137.465	-1038.05	1228.41	361.074	-1235.35	1362.62	471.92	-1243.88	1128.71	481.242	-1247.7	1029.91	477.045	-1349.93	911.26	420.142	-1387.5	821.29	485.435	-1358.29	796.435	465.338	-1427.36	751.251
792	0	266.442	-1338.19	1559.58	161.834	-1334.67	1569.8	283.202	-1176.36	1527.04	165.228	-1169.2	1539.31	203.498	-1148.68	1408.93	216.047	-1046	1131.24	204.554	-1305.1	1300.27	197.159	-1398.81	1096.82	134.976	-1049.12	1225.81	358.815	-1245.08	1361.57	470.457	-1253.84	1127.97	479.624	-1257.38	1028.86	475.421	-1359.81	910.371	418.228	-1397.76	820.955	483.323	-1368.27	795.359	463.25	-1437.51	750.551
793	0	263.874	-1347.74	1558.51	159.225	-1344.45	1568.64	280.626	-1186.09	1525.89	162.629	-1178.99	1538.02	200.62	-1158.6	1407.13	213.607	-1057.42	1128.68	202.487	-1315.6	1299.33	196.032	-1409.98	1096.13	132.531	-1060.14	1223.23	356.374	-1254.67	1360.69	468.752	-1263.75	1127.46	477.871	-1266.93	1028.06	473.999	-1369.45	909.732	416.646	-1407.47	820.344	481.526	-1377.9	794.506	461.391	-1447.22	749.924
794	0	261.21	-1357.35	1557.75	156.502	-1354.22	1567.88	277.843	-1195.78	1524.95	159.792	-1188.76	1536.88	197.683	-1168.37	1405.56	211.192	-1069.04	1126.47	200.251	-1326.09	1298.65	194.742	-1421.44	1095.91	129.959	-1071.24	1220.7	353.94	-1264.27	1360.12	467.052	-1273.67	1127.13	476.179	-1276.32	1027.72	472.519	-1378.74	909.039	415.188	-1417.05	819.919	479.914	-1387.09	793.929	459.858	-1456.62	749.291
795	0	258.641	-1367.08	1557.3	153.742	-1364.03	1567.32	274.935	-1205.49	1524.18	156.954	-1198.55	1536.02	194.619	-1178.31	1404.36	208.732	-1080.61	1124.5	197.852	-1336.64	1298.16	193.329	-1432.9	1095.88	127.164	-1082.27	1218.49	351.407	-1273.9	1359.66	465.159	-1283.46	1126.89	474.456	-1285.59	1027.43	471.2	-1387.86	908.489	414.04	-1426.43	819.517	478.493	-1395.92	793.288	458.736	-1465.84	748.831
796	0	255.908	-1376.85	1557.2	151.083	-1373.92	1567.17	272.074	-1215.3	1523.71	154.062	-1208.58	1535.4	191.566	-1188.55	1403.48	206.348	-1092.07	1123.27	195.47	-1347.37	1298.04	191.874	-1444.5	1096.02	124.703	-1093.4	1216.85	348.851	-1283.79	1359.46	463.135	-1293.16	1126.78	472.466	-1294.92	1027.16	469.685	-1396.8	907.914	413.142	-1435.63	819.094	477.099	-1404.5	792.644	457.872	-1474.54	748.268
797	0	253.191	-1386.69	1557.6	148.348	-1383.88	1567.56	269.111	-1225.26	1523.68	151.059	-1218.53	1535.42	188.749	-1199.02	1403.26	204.191	-1103.02	1122.67	192.975	-1358.11	1298.44	190.182	-1456.45	1096.82	122.286	-1104.66	1215.86	346.358	-1294.01	1359.92	460.988	-1302.65	1127.1	470.57	-1304.14	1027.51	468.743	-1405.45	907.978	412.756	-1444.2	818.907	476.046	-1412.61	792.488	457.826	-1482.76	748.276
798	0	250.302	-1396.58	1558.51	145.48	-1393.85	1568.16	266.003	-1235.15	1524.13	147.945	-1228.55	1535.58	185.934	-1209.48	1403.52	201.996	-1113.54	1122.56	190.314	-1368.91	1299.24	188.468	-1468.33	1097.92	119.971	-1115.66	1215.4	343.739	-1304.39	1360.79	458.804	-1311.99	1127.95	468.691	-1313.15	1028.61	467.621	-1413.83	908.351	411.89	-1452.66	819.28	475.086	-1420.09	792.817	457.638	-1490.49	748.451
799	0	247.414	-1406.43	1559.59	142.686	-1403.98	1569.06	262.889	-1245.14	1524.85	144.859	-1238.87	1536.09	183.26	-1220.17	1404.03	200.372	-1124.4	1122.85	187.702	-1379.81	1300.19	186.603	-1480.39	1099.33	118.096	-1126.58	1215.58	341.17	-1315.26	1362.16	456.586	-1321.19	1129.12	466.747	-1322.11	1030.07	466.366	-1421.91	908.931	411.559	-1460.53	819.546	474.249	-1427.32	793.543	457.818	-1497.72	748.784
800	0	244.645	-1416.55	1561.01	139.75	-1414.12	1570.36	259.767	-1255.2	1526.01	141.658	-1249.05	1537.03	180.677	-1230.68	1405.11	198.8	-1135.54	1123.71	185.076	-1390.68	1301.54	184.653	-1492.45	1101.13	116.302	-1137.5	1216.2	338.507	-1326.31	1363.86	454.249	-1330.21	1130.77	464.774	-1330.96	1031.91	465.449	-1429.79	910.008	410.999	-1468.17	819.996	473.476	-1434.02	794.603	458.094	-1504.44	749.49
801	0	241.766	-1426.51	1562.96	136.882	-1424.44	1572.07	256.589	-1265.18	1527.52	138.424	-1259.42	1538.24	178.078	-1241.29	1406.55	197.472	-1146.84	1125.11	182.464	-1401.45	1303.38	182.475	-1504.29	1103.44	114.765	-1148.34	1217.27	335.839	-1337.47	1366.17	451.99	-1339.18	1133.02	462.873	-1339.63	1034.38	464.367	-1437.47	911.504	410.587	-1475.22	820.862	472.861	-1440.3	796.097	458.521	-1510.68	750.5
802	0	238.945	-1436.59	1565.25	134.068	-1434.66	1573.99	253.52	-1275.18	1529.63	135.331	-1269.74	1539.83	175.657	-1251.78	1408.21	196.147	-1158.38	1126.72	179.952	-1412.15	1305.4	180.314	-1515.65	1105.99	113.309	-1159.2	1218.64	333.303	-1348.58	1368.86	449.902	-1348.24	1135.77	460.954	-1348.27	1037.23	463.38	-1444.87	913.439	410.236	-1481.9	822.112	472.393	-1446.32	798.031	459.099	-1516.41	751.816
803	0	236.362	-1446.58	1567.64	131.371	-1445.01	1576.09	250.454	-1285.17	1531.81	132.231	-1280.09	1541.76	173.353	-1262.2	1410.06	194.842	-1169.83	1128.51	177.557	-1422.72	1307.75	178.192	-1526.25	1108.52	112.008	-1170.14	1220.16	330.752	-1359.61	1371.62	447.97	-1357.59	1138.78	459.028	-1356.95	1040.21	462.345	-1452.05	915.539	409.924	-1488.5	823.462	472.011	-1452.31	800.078	459.578	-1521.86	753.215
804	0	233.545	-1456.71	1570.27	128.66	-1455.35	1578.41	247.523	-1295.24	1534.26	129.331	-1290.5	1544.13	171.213	-1272.5	1412.23	193.772	-1181.32	1130.71	175.195	-1433.2	1310.32	175.946	-1536.75	1111.25	110.629	-1180.99	1221.86	328.265	-1370.52	1374.61	445.864	-1366.94	1142.07	457.268	-1365.46	1043.43	461.547	-1459.12	917.843	409.629	-1494.56	824.922	471.684	-1458.05	802.394	459.953	-1527.02	754.582
805	0	230.968	-1466.72	1573.04	126.072	-1465.52	1580.95	244.851	-1305.2	1537.34	126.448	-1300.66	1546.49	169.12	-1282.7	1414.52	192.971	-1192.78	1132.59	172.834	-1443.46	1313.01	173.636	-1546.98	1114.19	109.21	-1191.79	1223.72	325.763	-1381.2	1377.68	443.989	-1376.38	1145.64	455.551	-1373.87	1047.17	460.605	-1466.26	920.385	409.276	-1500.45	826.628	471.652	-1463.62	805.288	460.11	-1531.83	756.202
806	0	228.577	-1476.73	1575.68	123.592	-1475.74	1583.41	242.113	-1315.15	1539.99	123.786	-1311.02	1548.95	166.948	-1292.88	1416.68	192.329	-1204.44	1134.74	170.571	-1453.69	1315.72	171.399	-1556.83	1117.05	108.006	-1202.61	1225.58	323.277	-1391.87	1380.66	442.197	-1386.09	1149.14	453.971	-1382.19	1050.75	459.727	-1473.44	922.898	409.024	-1506.29	828.355	471.686	-1469.23	808.128	460.363	-1536.57	757.785
807	0	226.238	-1486.73	1578.23	121.295	-1485.81	1585.8	239.662	-1325.16	1542.64	121.385	-1320.96	1551.43	164.906	-1303.06	1418.91	191.815	-1215.79	1136.92	168.508	-1463.87	1318.28	169.337	-1566.69	1119.68	106.551	-1213.28	1227.45	321.147	-1402.21	1383.51	440.517	-1395.93	1152.4	452.41	-1390.5	1054.03	458.985	-1480.08	925.299	408.982	-1512.2	829.973	471.687	-1474.95	810.56	460.473	-1541.2	759.116
808	0	223.998	-1496.7	1580.67	119.103	-1495.88	1588.21	237.409	-1335.2	1545.01	119.254	-1331.04	1553.82	162.858	-1313.22	1421.08	191.081	-1226.68	1139.37	166.511	-1473.9	1320.81	167.359	-1576.28	1122.26	105.169	-1223.79	1229.42	319.13	-1412.47	1386.43	439.068	-1405.77	1155.63	450.914	-1398.59	1057.3	458.414	-1486.86	927.943	408.92	-1517.8	831.933	471.969	-1480.61	813.269	460.455	-1545.82	760.354
809	0	221.83	-1506.58	1583.21	116.864	-1505.65	1590.48	235.46	-1345.05	1547.38	117.162	-1340.74	1556.09	160.736	-1323.4	1423.27	190.144	-1236.6	1141.76	164.587	-1483.82	1323.25	165.589	-1585.89	1124.78	103.774	-1234.3	1231.37	317.203	-1422.67	1389.29	437.616	-1415.55	1158.88	449.542	-1406.55	1060.69	457.92	-1493.55	930.575	408.912	-1523.43	833.774	472.213	-1486.22	816.018	460.402	-1550.37	761.689
810	0	219.826	-1516.54	1585.34	114.788	-1515.52	1592.47	233.616	-1355.07	1549.52	115.318	-1350.7	1557.94	159.156	-1333.44	1425.23	188.74	-1246.19	1143.6	162.838	-1493.75	1325.37	164.069	-1595.53	1127	102.242	-1244.5	1233.44	315.484	-1432.81	1391.8	436.265	-1425.3	1161.73	448.481	-1414.54	1063.69	457.591	-1500.22	932.821	409.079	-1529.63	835.382	472.502	-1491.87	818.396	460.406	-1554.95	762.711
811	0	217.763	-1526.5	1587.38	112.74	-1525.28	1594.2	231.963	-1364.84	1551.35	113.544	-1360.46	1559.64	157.36	-1343.52	1427.28	187.096	-1255.36	1145.67	161.168	-1503.64	1327.26	162.749	-1605.31	1128.75	100.987	-1254.65	1235.24	313.786	-1442.94	1393.92	435	-1435.14	1164.14	447.148	-1422.19	1066.08	457.255	-1506.97	934.59	409.273	-1536.18	836.792	472.659	-1497.5	820.332	460.452	-1559.53	763.439
812	0	215.782	-1536.48	1589.22	110.727	-1535.04	1595.99	230.502	-1374.74	1553.26	112.119	-1370.31	1561.14	156.276	-1353.45	1429.14	185.401	-1264.4	1147.72	159.648	-1513.5	1328.98	161.614	-1615.05	1130.41	99.6507	-1264.45	1237.31	312.27	-1453.03	1395.85	433.807	-1444.74	1166.27	446.078	-1430.1	1068.42	456.718	-1513.51	936.06	409.192	-1541.34	837.547	472.763	-1502.97	822.061	460.6	-1564.17	764.24
813	0	213.987	-1546.34	1591.19	108.935	-1544.65	1597.67	229.082	-1385.08	1555.01	110.892	-1379.8	1562.6	155.011	-1363.31	1430.86	183.595	-1273.44	1149.79	158.42	-1523.26	1330.62	160.823	-1624.73	1132.04	98.4912	-1274.29	1239.05	311.155	-1462.73	1397.63	432.873	-1454.08	1168.23	445.134	-1438.07	1070.46	456.743	-1520.23	937.584	409.416	-1547.07	838.556	472.916	-1508.32	823.574	460.996	-1568.94	764.978
814	0	212.335	-1556.29	1592.94	107.217	-1554.38	1599.07	227.839	-1394.84	1556.65	109.51	-1389.67	1564.07	153.659	-1373.24	1432.62	181.733	-1282.73	1151.77	157.457	-1533.09	1332.11	160.224	-1634.38	1133.25	97.1122	-1283.88	1241.06	310.11	-1472.42	1399.12	431.949	-1463.31	1169.72	444.435	-1446.29	1071.99	456.523	-1526.97	938.537	409.552	-1552.95	839.168	472.976	-1514.05	824.688	461.333	-1573.83	765.43
815	0	210.77	-1566.17	1594.61	105.692	-1564.17	1600.44	226.659	-1404.8	1558.4	108.361	-1399.25	1565.61	152.622	-1383.02	1434.34	180.173	-1292.05	1153.73	156.568	-1542.87	1333.47	159.732	-1644.06	1134.25	95.6768	-1293.46	1242.91	309.132	-1482.04	1400.6	431.08	-1472.34	1171.04	443.557	-1454.61	1073.46	456.303	-1533.77	939.368	409.658	-1558.89	839.621	472.938	-1519.73	825.62	461.728	-1578.94	765.903
816	0	209.335	-1576.06	1596.15	104.236	-1573.87	1601.9	225.484	-1414.53	1560.16	107.205	-1408.98	1567.14	151.664	-1392.93	1436.01	178.832	-1301.54	1155.55	155.842	-1552.56	1334.76	159.384	-1653.45	1135.23	94.4611	-1302.89	1244.83	308.274	-1491.4	1402	430.368	-1480.93	1172.27	443.004	-1462.83	1075.09	456.049	-1540.64	940.28	409.68	-1564.77	840.09	472.988	-1525.38	826.697	462.082	-1584.06	766.369
817	0	207.987	-1585.93	1597.61	102.958	-1583.69	1603.15	224.39	-1424.38	1561.93	105.928	-1418.8	1568.55	150.432	-1402.73	1437.59	177.28	-1311.04	1157.14	155.194	-1562.17	1336.07	159.154	-1663	1136.16	92.7962	-1312.29	1246.67	307.498	-1500.74	1403.3	429.602	-1489.01	1173.35	442.374	-1470.9	1076.6	455.604	-1547.49	940.971	409.648	-1570.72	840.473	473.219	-1531.27	827.896	462.345	-1589.42	766.917
818	0	206.894	-1595.83	1598.81	101.936	-1593.55	1604.22	223.336	-1434.15	1563.37	105.035	-1428.52	1569.9	149.46	-1412.41	1439.08	175.858	-1320.39	1158.81	154.729	-1571.87	1337.11	159.099	-1672.46	1136.89	91.1807	-1321.81	1248.4	306.73	-1509.98	1404.42	428.936	-1496.94	1174.29	441.632	-1479.22	1077.72	455.206	-1554.39	941.655	409.644	-1576.85	840.799	473.327	-1537.43	828.812	462.573	-1595.05	767.313
819	0	206.095	-1605.65	1599.82	100.952	-1603.46	1605.22	222.475	-1443.93	1564.73	104.068	-1438.46	1571.2	148.177	-1422.07	1440.52	174.555	-1329.51	1160.34	154.293	-1581.41	1338.16	159.088	-1681.76	1137.73	89.8276	-1331.22	1250.02	306.103	-1519.06	1405.47	428.234	-1504.68	1175.3	440.919	-1487.22	1078.79	454.845	-1561.51	942.397	409.561	-1582.93	841.119	473.229	-1543.39	829.564	462.866	-1600.84	767.776
820	0	205.233	-1615.36	1600.75	100.196	-1613.3	1606.09	221.492	-1453.96	1565.82	103.089	-1448.21	1572.32	147.07	-1431.65	1441.58	173.106	-1338.67	1161.64	153.883	-1590.82	1339.21	159.07	-1691.12	1138.51	88.277	-1340.49	1251.47	305.476	-1527.88	1406.53	427.577	-1512.14	1176.51	440.263	-1495.11	1080.02	454.392	-1568.54	943.331	409.427	-1588.99	841.721	473.343	-1549.67	830.635	462.992	-1606.71	768.476
821	0	204.49	-1625.17	1601.56	99.6656	-1623.21	1606.73	220.814	-1463.42	1566.87	102.431	-1457.97	1573.26	146.234	-1441.18	1442.58	171.792	-1347.77	1162.86	153.558	-1600.18	1340.02	159.088	-1700.33	1139.3	86.8658	-1350.07	1252.62	304.875	-1536.76	1407.44	427.017	-1519.46	1177.67	439.566	-1502.8	1081.19	453.949	-1575.78	944.276	409.4	-1595.32	842.325	473.596	-1556.37	831.717	463.158	-1612.92	769.153
822	0	203.8	-1635.1	1602.04	98.8133	-1633.09	1607.31	219.886	-1473.52	1567.53	101.508	-1467.91	1573.99	145.355	-1450.72	1443.53	170.598	-1356.93	1163.88	153.155	-1609.54	1340.62	159.046	-1709.8	1139.95	85.7528	-1359.33	1253.72	304.329	-1545.64	1408.21	426.325	-1526.56	1178.49	438.923	-1510.45	1082.17	453.563	-1582.99	944.981	409.359	-1601.84	842.801	473.747	-1563.1	832.559	463.205	-1619.18	769.71
823	0	203.047	-1644.94	1602.51	98.217	-1642.81	1607.72	219.309	-1483.05	1568.3	100.959	-1477.62	1574.62	144.374	-1460.15	1444.33	169.324	-1366.07	1164.77	152.793	-1618.85	1341.11	158.913	-1719.07	1140.68	84.4865	-1368.69	1254.66	303.792	-1554.39	1408.91	425.918	-1533.75	1179.48	438.195	-1517.84	1083.18	453.183	-1590.14	945.727	409.313	-1608.42	843.315	473.877	-1569.7	833.41	463.32	-1625.68	770.303
824	0	202.499	-1654.74	1602.91	97.5286	-1652.73	1608.06	218.737	-1492.84	1568.89	100.338	-1487.49	1575.14	143.554	-1469.5	1444.79	168.144	-1374.97	1165.53	152.517	-1628.05	1341.59	158.886	-1728.34	1141.39	83.4997	-1377.92	1255.4	303.397	-1563.18	1409.55	425.064	-1540.52	1180.42	437.473	-1525.12	1084.1	453.094	-1597.35	946.583	409.475	-1615.11	843.919	474.104	-1576.49	834.457	463.748	-1632.42	770.844
825	0	201.892	-1664.7	1602.98	96.9216	-1662.59	1608.19	218.284	-1502.62	1569.33	99.8288	-1497.25	1575.56	142.932	-1478.81	1445.24	167.14	-1383.88	1166.03	152.316	-1637.21	1341.85	158.809	-1737.36	1141.77	82.5238	-1387.04	1255.95	303.085	-1571.99	1409.99	424.82	-1547.93	1181.12	437.003	-1532.6	1084.77	453.083	-1604.5	947.13	409.691	-1622.16	844.23	474.347	-1583.18	835.165	464.07	-1638.39	770.538
826	0	201.236	-1674.56	1602.92	96.327	-1672.41	1608.01	217.747	-1512.51	1569.6	99.3513	-1506.93	1576.04	142.134	-1488.23	1445.66	166.195	-1392.64	1166.49	152.144	-1646.44	1341.91	158.649	-1746.26	1141.94	81.9245	-1396.27	1256.51	302.786	-1580.91	1410.34	424.287	-1555.3	1181.44	436.478	-1540.17	1085.25	453.154	-1611.6	947.433	409.978	-1629.3	844.429	474.359	-1590.02	835.504	464.47	-1645.17	770.805
827	0	200.793	-1684.31	1602.77	95.7334	-1682.07	1607.81	217.338	-1522.4	1569.94	98.9552	-1516.6	1576.17	141.758	-1497.45	1445.8	165.502	-1401.35	1166.84	151.942	-1655.63	1341.88	158.403	-1754.81	1141.85	81.0045	-1405.31	1256.83	302.523	-1589.81	1410.5	424.093	-1562.62	1181.93	436.064	-1547.54	1085.66	453.358	-1618.57	947.638	410.316	-1636.59	844.535	474.146	-1596.61	835.756	464.919	-1652	771.117
828	0	200.296	-1694.1	1602.53	95.3966	-1691.83	1607.54	216.834	-1531.73	1570.02	98.5821	-1526.32	1576.09	141.31	-1506.83	1445.8	164.762	-1410	1166.94	151.702	-1664.88	1341.68	158.185	-1763.59	1141.63	80.6763	-1414.38	1256.92	302.234	-1598.96	1410.44	423.771	-1570.1	1182.07	435.543	-1555.05	1085.83	453.714	-1625.78	947.608	410.651	-1644.08	844.482	474.079	-1603.34	835.769	465.472	-1658.9	771.151
829	0	199.902	-1703.87	1602.01	95.0572	-1701.65	1606.99	216.687	-1541.54	1569.79	98.2972	-1535.97	1575.9	140.902	-1516.31	1445.58	164.266	-1418.5	1166.94	151.477	-1674.19	1341.26	157.842	-1772.41	1141.07	80.2251	-1423.51	1256.95	301.99	-1608.17	1410.02	423.354	-1577.79	1181.65	435.118	-1562.81	1085.56	453.938	-1632.91	947.124	411.076	-1651.7	844.135	473.97	-1610.16	835.361	466.024	-1665.55	770.689
830	0	199.763	-1713.51	1601.41	94.8508	-1711.25	1606.53	216.375	-1551.45	1569.28	98.2035	-1545.57	1575.6	140.796	-1525.79	1445.31	163.756	-1427.13	1166.73	151.249	-1683.56	1340.79	157.466	-1781.31	1140.34	79.9099	-1432.59	1256.79	301.812	-1617.54	1409.41	423.003	-1585.65	1181.18	434.86	-1570.64	1085.15	454.289	-1640.1	946.502	411.461	-1659.38	843.622	473.656	-1616.92	834.726	466.596	-1672.51	770.215
831	0	199.691	-1723.13	1601.03	94.6952	-1720.86	1606.03	216.164	-1560.73	1568.86	97.8029	-1555.29	1575.14	140.505	-1535.36	1445	163.409	-1435.94	1166.56	150.96	-1692.87	1340.24	157.088	-1790.28	1139.57	79.9502	-1441.68	1256.65	301.608	-1626.96	1408.83	422.703	-1593.66	1180.77	434.53	-1578.47	1084.72	454.578	-1647.38	945.941	411.863	-1667.02	843.136	473.614	-1623.77	834.177	467.111	-1679.47	769.757
832	0	199.709	-1732.8	1600.28	94.822	-1730.44	1605.27	216.019	-1570.56	1568.26	97.7368	-1564.83	1574.64	140.465	-1544.92	1444.52	163.391	-1444.83	1166.4	150.722	-1702.23	1339.54	156.65	-1799.3	1138.63	79.7416	-1450.88	1256.34	301.384	-1636.68	1408	422.578	-1602.09	1180.24	434.404	-1586.43	1084.21	454.979	-1654.87	945.284	412.355	-1674.75	842.518	473.444	-1630.87	833.473	467.698	-1686.56	769.122
833	0	199.688	-1742.4	1599.23	94.8827	-1740.2	1604.47	216.087	-1579.88	1567.38	97.7615	-1574.5	1573.87	140.521	-1554.49	1443.94	163.588	-1453.94	1166.15	150.451	-1711.79	1338.59	156.218	-1808.54	1137.36	79.8033	-1460.03	1256.18	301.336	-1646.4	1407.09	422.426	-1610.85	1179.45	434.321	-1594.73	1083.54	455.117	-1662.49	944.296	412.695	-1682.67	841.471	473.351	-1637.98	832.571	468.162	-1693.73	768.024
834	0	199.674	-1752.09	1598.41	94.8242	-1749.86	1603.48	216.004	-1589.51	1566.47	97.7931	-1584.24	1572.87	140.535	-1564.28	1443.22	163.718	-1463.22	1165.65	150.089	-1721.3	1337.57	155.607	-1817.65	1135.93	79.9843	-1469.25	1255.69	301.173	-1656.29	1406.09	422.516	-1619.79	1178.8	434.345	-1603.05	1083	455.308	-1670.15	943.352	412.904	-1690.47	840.457	473.107	-1644.99	831.703	468.646	-1701.02	767.237
835	0	199.796	-1761.81	1597.41	94.963	-1759.49	1602.61	216.291	-1599.31	1565.29	97.9367	-1593.97	1571.73	140.756	-1574.1	1442.38	164.075	-1472.48	1165.05	149.906	-1730.89	1336.44	155.145	-1826.88	1134.53	80.2147	-1478.43	1255.14	301.137	-1666.36	1404.92	422.676	-1628.96	1177.96	434.497	-1611.48	1082.24	455.385	-1677.92	942.106	413.17	-1698.22	839.281	472.883	-1652.23	830.582	468.928	-1708.22	766.103
836	0	200.024	-1771.76	1596.29	95.1183	-1769.15	1601.57	216.506	-1609.45	1563.86	98.3113	-1603.58	1570.54	140.955	-1584.09	1441.3	164.478	-1481.81	1164.35	149.728	-1740.56	1335.08	154.695	-1836.1	1132.84	80.5665	-1487.92	1254.37	301.221	-1676.54	1403.58	422.702	-1638.4	1176.55	434.537	-1620.14	1080.97	455.61	-1685.92	940.733	413.378	-1706.01	837.983	472.678	-1659.55	829.07	469.234	-1715.65	764.659
837	0	200.201	-1781.67	1594.95	95.3806	-1778.93	1600.33	216.921	-1619.13	1562.33	98.6319	-1613.37	1569.22	141.343	-1593.88	1440.27	164.921	-1491.3	1163.4	149.623	-1750.33	1333.67	154.231	-1845.56	1131.07	81.0052	-1497.25	1253.54	301.316	-1686.74	1402.16	422.911	-1648.11	1175.04	434.72	-1629.06	1079.56	455.563	-1693.94	939.059	413.472	-1713.76	836.397	472.562	-1667.16	827.44	469.2	-1722.96	762.884
838	0	200.348	-1791.61	1593.55	95.4772	-1788.78	1599.04	217.356	-1629.25	1560.84	99.1773	-1623.19	1567.81	141.715	-1603.97	1439.08	165.51	-1500.88	1162.42	149.523	-1760.09	1332.18	153.776	-1854.92	1129.43	81.5676	-1506.63	1252.58	301.442	-1697.08	1400.63	423.227	-1657.84	1173.73	434.927	-1637.9	1078.34	455.658	-1702.11	937.498	413.448	-1721.49	834.883	472.499	-1674.67	825.964	469.28	-1730.36	761.352
839	0	200.595	-1801.71	1592.09	95.7499	-1798.62	1597.68	217.886	-1639.39	1559.16	99.6739	-1633.19	1566.12	142.302	-1613.98	1437.89	166.195	-1510.54	1161.23	149.569	-1769.93	1330.59	153.406	-1864.37	1127.58	82.3744	-1516.19	1251.51	301.717	-1707.43	1398.98	423.59	-1667.74	1172.29	435.197	-1646.95	1076.96	455.65	-1710.48	935.718	413.414	-1729.3	833.033	472.414	-1682.42	824.356	469.18	-1737.89	759.498
840	0	200.78	-1811.96	1590.47	96.0601	-1808.61	1596.12	218.521	-1649.61	1557.56	100.299	-1643.18	1564.6	142.975	-1623.93	1436.47	166.885	-1520.15	1160.07	149.623	-1779.71	1328.84	153.121	-1874.1	1125.69	82.9663	-1525.69	1250.43	301.961	-1718.01	1397.28	423.883	-1677.88	1170.57	435.488	-1656.33	1075.36	455.623	-1719.21	933.757	413.234	-1737.14	831.014	472.51	-1690.43	822.533	468.898	-1745.57	757.418
841	0	201.203	-1822.36	1588.92	96.3359	-1818.71	1594.51	219.22	-1660.03	1555.86	101.137	-1653.25	1563.02	143.69	-1634.05	1435.06	167.78	-1529.91	1158.9	149.918	-1790.1	1327.2	152.933	-1883.64	1123.74	83.7083	-1535.35	1249.34	302.476	-1728.46	1395.56	424.222	-1688.12	1168.81	435.9	-1665.92	1073.76	455.532	-1727.92	931.715	413.04	-1745.02	828.879	472.451	-1698.56	820.628	468.645	-1753.33	755.225
842	0	201.681	-1832.69	1587.27	96.7838	-1828.78	1592.95	219.952	-1670.43	1554.21	101.873	-1663.42	1561.35	144.555	-1644.18	1433.73	168.625	-1539.69	1157.68	150.189	-1800.08	1325.57	152.798	-1893.27	1122.01	84.5512	-1545.11	1248.14	303.104	-1739.12	1393.82	424.632	-1698.53	1167.05	436.255	-1675.6	1072.13	455.457	-1736.85	929.681	412.818	-1752.95	826.744	472.584	-1706.87	818.842	468.272	-1761.05	753.042
843	0	202.219	-1843.15	1585.56	97.3536	-1839.07	1591.35	220.821	-1680.96	1552.53	102.728	-1673.67	1559.74	145.378	-1654.43	1432.32	169.293	-1549.51	1156.2	150.671	-1810.22	1323.79	152.766	-1903.08	1120.1	85.528	-1554.95	1246.91	303.708	-1749.66	1392.06	425.042	-1709.04	1165.04	436.59	-1685.51	1070.29	455.377	-1746.01	927.618	412.552	-1761.01	824.479	472.65	-1715.4	816.817	467.642	-1768.84	750.379
844	0	202.879	-1853.64	1583.71	98.0307	-1849.42	1589.59	221.761	-1691.37	1550.77	103.75	-1684.02	1558.17	146.455	-1664.73	1430.82	170.035	-1559.55	1154.8	151.201	-1820.38	1322	152.798	-1912.96	1118.14	86.4874	-1564.73	1245.64	304.433	-1760.35	1390.14	425.395	-1719.7	1162.88	436.94	-1695.64	1068.3	455.382	-1755.43	925.349	412.239	-1769.34	822.081	472.921	-1724.25	814.749	467.065	-1776.92	747.785
845	0	203.623	-1864.2	1582	98.7428	-1859.81	1587.97	222.7	-1702.31	1549.08	104.624	-1694.38	1556.39	147.515	-1675.02	1429.12	170.77	-1569.57	1153.33	151.788	-1830.64	1320.29	152.916	-1922.97	1116.39	87.3735	-1574.65	1244.22	305.133	-1770.61	1388.15	425.809	-1730.36	1160.78	437.294	-1705.75	1066.35	455.141	-1764.8	923.004	411.917	-1777.78	819.742	473.01	-1733.16	812.626	466.538	-1785.16	745.259
846	0	204.476	-1874.86	1580.28	99.667	-1870.21	1586.24	223.892	-1712.67	1547.46	105.789	-1704.83	1554.78	148.511	-1685.35	1427.54	171.368	-1579.78	1151.67	152.589	-1840.87	1318.4	153.159	-1933.23	1114.63	88.2987	-1584.66	1242.86	305.992	-1781.54	1386.26	426.269	-1741.05	1158.69	437.603	-1715.86	1064.3	454.801	-1774.27	920.557	411.589	-1786.35	817.316	473.144	-1742.27	810.543	465.943	-1793.54	742.673
847	0	205.582	-1885.55	1578.47	100.756	-1880.73	1584.48	225.021	-1723.3	1545.7	107.119	-1715.26	1553.24	149.656	-1695.8	1425.99	172.211	-1590.16	1150.17	153.333	-1851.43	1316.91	153.478	-1943.62	1112.84	89.0399	-1594.88	1241.36	306.936	-1792.19	1384.47	426.775	-1751.99	1156.39	437.838	-1726.21	1062	454.962	-1784.11	918.214	411.406	-1795.22	814.871	473.563	-1751.9	808.327	465.509	-1802.32	740.038
848	0	206.742	-1896.32	1576.85	101.831	-1891.24	1582.94	226.342	-1734.01	1544.05	108.421	-1725.77	1551.74	150.776	-1706.27	1424.38	172.81	-1600.66	1148.54	154.224	-1861.88	1315.19	153.877	-1954.13	1111.2	89.9045	-1605.21	1239.98	307.925	-1802.64	1382.37	427.271	-1762.97	1154.13	438.117	-1736.78	1059.71	454.96	-1794.09	915.958	411.191	-1804.27	812.525	473.482	-1761.43	805.956	465.086	-1811.32	737.438
849	0	207.998	-1906.98	1575.24	103.061	-1901.75	1581.4	227.812	-1744.66	1542.52	109.895	-1736.36	1550.35	151.977	-1716.84	1422.82	173.47	-1611.13	1147.07	155.143	-1872.33	1313.66	154.273	-1964.79	1109.77	90.7557	-1615.63	1238.6	308.996	-1813.13	1380.58	427.837	-1773.77	1152.16	438.537	-1747.22	1057.76	455.033	-1804.14	913.742	411.075	-1813.56	810.274	474.06	-1771.65	804.056	464.946	-1820.68	735.092
850	0	209.316	-1917.68	1573.46	104.455	-1912.41	1579.75	229.407	-1755.34	1541.14	111.424	-1746.94	1548.97	153.211	-1727.32	1421.34	174.181	-1621.84	1145.37	156.155	-1882.92	1312.08	154.78	-1975.5	1108.27	91.5227	-1626.21	1237.25	310.144	-1823.65	1378.78	428.411	-1784.51	1150.22	439.026	-1757.76	1055.86	455.085	-1814.46	911.551	410.911	-1823.3	807.936	474.177	-1781.67	801.9	464.626	-1830.14	732.573
851	0	210.803	-1928.44	1571.68	106.003	-1923.03	1578.14	231.051	-1766.14	1539.59	113.058	-1757.64	1547.62	154.487	-1737.91	1419.85	174.607	-1632.52	1143.66	157.26	-1893.7	1310.48	155.29	-1986.38	1106.74	92.2788	-1636.92	1235.78	311.369	-1834.28	1376.9	428.979	-1795.21	1147.98	439.359	-1768.42	1053.64	455.256	-1824.95	909.233	411.027	-1832.98	805.29	474.539	-1792.05	799.89	464.333	-1839.91	730.001
852	0	212.369	-1939.21	1570.02	107.635	-1933.68	1576.73	232.83	-1776.92	1537.93	114.803	-1768.2	1546.29	155.857	-1748.49	1418.12	175.333	-1643.39	1141.93	158.385	-1904.48	1309.01	155.904	-1997.36	1105.42	93.1641	-1647.69	1234.11	312.654	-1844.9	1374.82	429.679	-1805.75	1145.77	439.671	-1778.91	1051.36	455.425	-1835.43	906.943	411.045	-1843.34	803.094	474.875	-1802.77	797.688	464.223	-1850.09	727.545
853	0	213.982	-1949.81	1568.46	109.396	-1944.25	1575.44	234.629	-1787.63	1536.35	116.748	-1778.8	1544.82	157.391	-1759.07	1416.45	175.841	-1654.41	1139.81	159.596	-1915.23	1307.64	156.564	-2008.37	1104.26	94.074	-1658.62	1232.42	314.128	-1855.49	1372.96	430.41	-1816.2	1143.59	440.146	-1789.46	1049.1	455.578	-1845.91	904.654	411.068	-1854.24	801.253	474.675	-1813.06	795.322	464.196	-1860.44	725.266
854	0	216.036	-1960.59	1567	111.209	-1954.85	1574.12	236.583	-1798.34	1534.64	118.637	-1789.41	1543.48	158.964	-1769.84	1414.85	176.256	-1665.49	1137.75	160.937	-1926.13	1306.27	157.297	-2019.57	1103.1	94.9728	-1669.78	1230.72	315.648	-1866.12	1371.14	431.204	-1826.59	1141.23	440.722	-1800.15	1046.76	456.235	-1856.77	902.539	411.382	-1864.84	798.896	475.09	-1824.3	793.132	464.249	-1871.14	723.007
855	0	218.109	-1971.37	1565.56	113.336	-1965.54	1572.68	238.604	-1809.09	1532.93	120.746	-1800.14	1542.21	160.524	-1780.74	1413.27	176.924	-1676.97	1135.77	162.357	-1937.22	1304.89	158.121	-2030.96	1101.96	96.013	-1681	1228.96	317.325	-1876.8	1369.18	432.114	-1836.97	1138.88	441.186	-1810.81	1044.28	456.697	-1867.72	900.198	411.497	-1876.27	796.681	475.324	-1835.42	790.758	464.416	-1882.32	720.65
856	0	220.168	-1982.04	1564.14	115.523	-1976.13	1571.63	240.702	-1819.74	1531.49	122.881	-1810.8	1541.03	162.332	-1791.38	1411.63	177.368	-1688.5	1133.68	163.803	-1948.27	1303.72	158.877	-2042.51	1101.13	97.2547	-1692.17	1227.24	318.945	-1887.62	1367.3	433.124	-1847.26	1136.78	441.969	-1821.75	1042.18	457.223	-1878.75	898.027	411.831	-1887.74	794.69	475.374	-1846.51	788.527	464.621	-1893.72	718.51
857	0	222.181	-1992.57	1562.82	117.695	-1986.7	1570.71	242.887	-1830.53	1530.06	125.153	-1821.46	1539.65	164.198	-1802.09	1410.1	177.998	-1700.32	1131.77	165.286	-1959.46	1302.66	159.602	-2054.18	1100.37	98.3411	-1703.62	1225.49	320.68	-1898.46	1365.44	434.273	-1857.59	1134.81	442.566	-1832.43	1040	457.804	-1889.96	895.828	412.189	-1899.63	792.786	475.185	-1857.54	786.294	464.832	-1905.45	716.388
858	0	224.574	-2003.43	1561.82	120.038	-1997.36	1570.05	245.326	-1841.67	1528.66	127.559	-1832.13	1538.57	166.092	-1813.17	1408.76	178.643	-1711.99	1129.89	166.941	-1970.79	1301.7	160.484	-2066.16	1099.74	99.4706	-1715.18	1224	322.514	-1909.41	1363.54	435.511	-1868.17	1132.66	443.29	-1843.55	1037.65	458.51	-1901.33	893.617	412.637	-1911.64	790.733	475.437	-1869.18	783.932	465.127	-1917.42	714.287
859	0	227.044	-2014.34	1561.33	122.509	-2008.08	1569.62	247.613	-1852.56	1527.43	130.029	-1842.89	1537.76	167.975	-1824.21	1407.77	179.724	-1723.94	1128.52	168.635	-1982.29	1301	161.274	-2078.21	1099.28	100.816	-1726.59	1222.9	324.447	-1920.58	1362.05	436.703	-1879.02	1130.62	443.907	-1854.88	1035.33	459.311	-1912.93	891.548	413.152	-1923.75	788.9	475.583	-1881.11	781.628	465.528	-1929.66	712.395
860	0	229.371	-2025	1561.08	124.849	-2018.77	1569.77	250.255	-1863.38	1526.61	132.637	-1853.67	1537.26	170.009	-1835.54	1407.17	180.885	-1735.64	1127.61	170.319	-1993.83	1300.69	162.062	-2090.48	1099.3	102.103	-1738.08	1222.16	326.316	-1931.72	1360.76	437.761	-1889.88	1128.87	444.71	-1866.39	1033.51	460.068	-1924.57	889.819	413.689	-1936.14	787.417	475.935	-1892.98	779.717	466.011	-1942.1	710.885
861	0	231.854	-2035.82	1561.05	127.522	-2029.51	1569.95	252.796	-1874.37	1526.12	135.115	-1864.55	1537.01	171.887	-1847.09	1406.95	181.934	-1747.34	1127.14	172.054	-2005.41	1300.73	162.881	-2102.8	1099.44	102.969	-1749.79	1221.91	328.201	-1943.02	1359.8	438.936	-1901.25	1127.6	445.318	-1877.93	1031.92	460.874	-1936.45	888.339	414.31	-1948.55	785.95	476.135	-1905.07	778.148	466.601	-1954.71	709.572
862	0	234.316	-2046.83	1561.36	129.971	-2040.42	1570.67	255.395	-1885.5	1526.02	137.741	-1875.6	1537.1	173.824	-1858.6	1407.27	182.524	-1758.92	1127.24	173.851	-2017.19	1300.96	163.764	-2115.27	1099.74	103.96	-1761.41	1222.39	329.941	-1954.36	1359.03	439.791	-1912.73	1126.31	445.823	-1889.83	1030.59	461.721	-1948.61	887.177	415.012	-1961.48	785.03	476.447	-1917.48	776.797	467.249	-1967.62	708.596
863	0	236.908	-2058.01	1562.27	132.512	-2051.48	1571.75	257.922	-1896.74	1526.34	140.404	-1886.66	1537.61	175.474	-1870.35	1408.07	182.922	-1770.27	1127.99	175.641	-2028.89	1301.61	164.772	-2127.52	1100.5	104.472	-1773.04	1223.56	331.705	-1965.75	1358.9	440.674	-1924.57	1125.59	446.093	-1901.61	1029.6	462.469	-1960.9	886.563	415.773	-1974.55	784.626	476.849	-1930.02	776.067	468.024	-1980.63	708.145
864	0	239.42	-2069.1	1563.44	135.041	-2062.41	1572.97	260.463	-1907.98	1527.03	142.943	-1897.67	1538.54	177.051	-1882.05	1409.36	183.249	-1781.4	1129.5	177.386	-2040.57	1302.69	165.921	-2139.72	1101.67	104.968	-1784.81	1225.15	333.285	-1977.04	1359.25	441.219	-1936.4	1125.35	446.5	-1913.78	1029.47	463.149	-1973.35	886.569	416.466	-1987.62	784.543	477.29	-1942.68	775.89	468.834	-1993.84	708.251
865	0	241.891	-2080.21	1564.81	137.617	-2073.6	1574.74	262.997	-1919.17	1528.19	145.51	-1908.96	1539.92	178.666	-1893.7	1410.95	184.023	-1792.75	1131.62	179.236	-2052.06	1304.22	167.255	-2151.53	1103.14	105.186	-1796.61	1227.4	335.006	-1988.32	1360.19	441.794	-1948.64	1125.53	446.965	-1926.21	1029.72	463.875	-1986.04	887.143	417.355	-2000.86	785.039	477.759	-1955.75	776.21	469.815	-2007.11	708.898
866	0	244.36	-2091.47	1566.46	140.026	-2084.83	1576.65	265.514	-1930.6	1529.64	147.946	-1920.19	1541.81	180.279	-1905.12	1412.83	184.088	-1804.28	1133.48	181.053	-2063.56	1306.06	168.688	-2163.28	1105.05	105.416	-1808.41	1229.71	336.563	-1999.2	1361.44	442.059	-1960.91	1126.04	446.984	-1938.53	1030.31	464.416	-1998.91	888.21	418.261	-2014.39	786.102	478.331	-1969.14	777.156	470.825	-2020.74	710.033
867	0	246.518	-2102.76	1568.27	142.372	-2096	1578.8	267.823	-1941.89	1531.43	150.318	-1931.26	1543.87	181.56	-1916.36	1414.87	183.558	-1816.38	1135.42	182.69	-2074.82	1308.22	170.148	-2174.65	1107.47	105.699	-1820.26	1232.26	338.142	-2009.87	1363.22	442.397	-1973.25	1127.24	447.5	-1950.77	1031.85	464.966	-2011.96	889.885	418.912	-2028.36	787.82	478.96	-1982.47	778.749	471.846	-2034.43	711.743
868	0	248.605	-2114.12	1570.29	144.446	-2107.17	1580.89	269.924	-1953.12	1533.56	152.508	-1942.52	1546.19	182.976	-1927.34	1417.14	183.133	-1828.82	1137.1	184.31	-2085.79	1310.59	171.669	-2185.63	1109.97	105.984	-1831.94	1234.58	339.615	-2020.33	1365.33	442.925	-1985.64	1128.99	447.542	-1963.14	1033.48	465.331	-2025.1	891.904	419.66	-2042.22	789.872	479.541	-1996.25	780.893	473.059	-2048.5	714.05
869	0	250.491	-2125.34	1572.1	146.492	-2118.28	1583.14	272.01	-1964.42	1535.83	154.689	-1953.54	1548.85	184.396	-1937.97	1419.13	182.993	-1841.2	1138.95	185.978	-2096.65	1313.02	173.351	-2196.26	1112.64	106.506	-1843.46	1236.66	341.087	-2030.65	1367.38	443.271	-1997.9	1130.64	447.887	-1975.53	1035.26	465.966	-2038.39	894.181	420.503	-2056.48	792.14	479.932	-2009.95	782.805	473.887	-2062.65	716.276
870	0	252.128	-2136.41	1573.76	148.147	-2129.39	1585.06	273.858	-1975.52	1538.08	156.66	-1964.41	1551.57	185.836	-1948.45	1421.21	183.381	-1852.86	1140.76	187.495	-2107.34	1315.41	174.969	-2206.49	1115.24	107.093	-1854.88	1238.66	342.578	-2040.74	1369.5	443.644	-2009.98	1132.29	448.409	-1987.8	1037.11	466.553	-2051.68	896.551	421.266	-2070.72	794.558	480.49	-2024.16	785.062	474.683	-2077.08	718.712
871	0	253.662	-2147.53	1575.76	149.72	-2140.17	1587.28	275.681	-1986.6	1540.59	158.482	-1975.3	1554.31	187.245	-1958.74	1423.08	184.017	-1863.58	1142.42	188.989	-2117.9	1317.83	176.632	-2216.48	1118.04	107.717	-1866.13	1240.49	344.162	-2050.64	1371.87	444.289	-2021.88	1134.34	449.145	-1999.91	1039.2	467.447	-2065.19	899.354	422.06	-2085.03	797.318	481.183	-2038.36	787.45	475.525	-2091.89	721.586
872	0	255.052	-2158.42	1577.72	151.088	-2150.88	1589.22	277.305	-1997.58	1543.11	160.03	-1985.96	1556.93	188.569	-1968.95	1424.8	184.856	-1874.08	1144.06	190.464	-2128.25	1320.17	178.256	-2226.22	1120.61	108.766	-1877.03	1242.21	345.809	-2060.55	1374.11	445.252	-2033.63	1136.4	450.315	-2012.11	1041.29	468.311	-2078.5	901.82	422.9	-2099.52	799.998	481.649	-2052.55	789.653	476.346	-2106.72	724.243
873	0	256.217	-2169.14	1579.35	152.431	-2161.42	1590.98	278.802	-2008.11	1545.06	161.49	-1996.41	1558.99	189.835	-1979.11	1426.46	185.629	-1884.51	1145.47	191.887	-2138.76	1322.18	179.925	-2235.92	1123.01	109.698	-1887.73	1243.71	347.228	-2070.56	1375.9	446.299	-2045.31	1138.16	451.57	-2024.28	1042.98	469.251	-2091.92	904.003	423.705	-2114.19	802.55	482.54	-2067.35	791.802	477.15	-2122.18	726.82
874	0	257.325	-2179.79	1581.09	153.422	-2171.78	1592.56	280.019	-2018.56	1547.06	162.943	-2006.81	1560.99	191.17	-1989.3	1427.94	186.713	-1894.94	1146.85	193.227	-2149.05	1324.09	181.355	-2245.71	1125.15	110.831	-1898.23	1245.05	348.714	-2080.47	1377.65	447.625	-2056.91	1140	452.924	-2036.31	1044.53	470.293	-2105.37	906.128	424.536	-2128.84	804.949	482.967	-2081.82	793.445	477.756	-2137.55	729.259
875	0	258.321	-2189.92	1582.61	154.49	-2181.99	1594.12	281.231	-2028.83	1548.73	164.08	-2016.99	1562.44	192.452	-1999.46	1429.32	187.792	-1905.33	1148.22	194.587	-2159.09	1325.8	182.835	-2255.51	1127.3	111.893	-1908.55	1246.44	350.214	-2090.36	1379.32	449.138	-2068.26	1141.63	454.622	-2048.35	1045.99	471.51	-2118.75	908.145	425.417	-2143.45	807.627	483.758	-2096.54	795.229	478.417	-2153.1	731.803
876	0	259.415	-2199.97	1584.04	155.578	-2192.11	1595.47	282.293	-2039.05	1550.15	165.115	-2027.21	1563.78	193.739	-2009.68	1430.59	189.069	-1915.64	1149.46	195.85	-2169.36	1327.27	184.262	-2265.55	1128.99	113.214	-1918.68	1247.65	351.402	-2100.2	1380.61	450.832	-2079.59	1143.14	456.282	-2060.27	1047.13	472.898	-2132.14	909.968	426.499	-2158	810.068	484.791	-2111.31	796.718	478.91	-2168.71	734.017
877	0	260.518	-2209.96	1585.37	156.706	-2202.24	1596.73	283.098	-2049.08	1551.32	166.057	-2037.31	1564.96	194.816	-2019.95	1431.93	190.589	-1926.01	1150.72	197.095	-2179.65	1328.48	185.587	-2275.89	1130.25	114.575	-1928.71	1249.01	352.738	-2110.48	1381.8	452.64	-2090.88	1144.35	458.129	-2072.28	1048.04	474.387	-2145.59	911.706	427.709	-2172.68	812.372	485.786	-2126.1	797.94	479.538	-2184.55	736.379
878	0	261.576	-2219.84	1586.49	157.674	-2212.29	1597.77	283.947	-2058.9	1552.55	166.935	-2047.32	1565.94	196.021	-2030.1	1433	191.973	-1935.83	1152.03	198.255	-2189.79	1329.53	186.77	-2286.33	1131.27	115.928	-1938.57	1250.36	353.932	-2120.71	1382.88	454.464	-2101.84	1145.62	459.941	-2084.02	1049.04	475.863	-2158.87	913.385	429.057	-2187.28	814.779	487.047	-2140.88	799.382	480.35	-2200.27	738.582
879	0	262.612	-2229.66	1587.58	158.716	-2222.24	1598.81	284.91	-2068.77	1553.57	167.725	-2057.41	1566.69	197.18	-2040.3	1434.03	193.291	-1945.45	1153.34	199.36	-2199.92	1330.38	187.88	-2296.82	1132.03	117.213	-1948.31	1251.43	354.929	-2131.01	1383.76	456.447	-2112.64	1147.01	461.584	-2095.48	1049.91	477.537	-2172.13	915.069	430.543	-2201.86	817.134	488.46	-2155.26	800.762	481.464	-2215.93	740.957
880	0	263.68	-2239.55	1588.57	159.774	-2232.18	1599.61	285.811	-2078.57	1554.41	168.574	-2067.42	1567.34	198.288	-2050.58	1434.94	194.863	-1955.08	1154.49	200.478	-2210.07	1331.06	188.885	-2307.32	1132.47	118.545	-1957.97	1252.71	355.953	-2141.44	1384.4	458.176	-2123.44	1147.91	463.301	-2107.1	1050.47	479.328	-2185.31	916.475	432.259	-2216.48	819.217	489.542	-2169.87	801.696	482.802	-2231.54	743.026
881	0	264.64	-2249.24	1589.32	160.923	-2242.16	1600.38	286.653	-2088.35	1555.07	169.52	-2077.38	1567.95	199.336	-2060.79	1435.99	196.257	-1964.61	1155.72	201.407	-2220.32	1331.56	189.769	-2317.55	1132.62	119.953	-1967.45	1253.64	356.877	-2152.02	1385.03	459.851	-2134.2	1148.52	464.907	-2118.66	1050.76	481.163	-2198.28	917.699	434.125	-2230.96	821.159	491.081	-2184.36	802.653	484.572	-2247.05	745.085
882	0	265.96	-2259.6	1590.6	161.889	-2251.98	1601.16	287.624	-2098.27	1555.69	170.469	-2087.28	1568.66	200.411	-2071.09	1436.85	197.71	-1974	1156.87	202.623	-2229.77	1331.84	190.379	-2327.46	1132.57	121.3	-1977.06	1254.83	357.859	-2162.5	1385.73	461.577	-2144.91	1149.35	466.451	-2130.16	1051.25	483.092	-2211.13	919.107	436.096	-2245.28	823.143	492.499	-2198.52	803.646	486.505	-2262.23	747.224
883	0	266.876	-2269.14	1591.07	162.853	-2261.85	1601.73	288.719	-2108.17	1556.28	171.475	-2097.22	1569.13	201.474	-2081.25	1437.61	199.277	-1983.24	1158.08	203.506	-2239.6	1332.19	191.039	-2336.98	1132.49	122.792	-1986.51	1256.06	358.568	-2172.86	1386.27	463.108	-2155.42	1150.13	468.015	-2141.72	1051.88	485.14	-2223.93	920.443	438.271	-2259.55	825.031	494.358	-2212.62	805.035	488.929	-2277.27	749.603
884	0	267.737	-2279	1591.45	163.805	-2271.7	1602.15	289.652	-2118.16	1556.6	172.455	-2107.15	1569.45	202.56	-2091.57	1438.55	200.637	-1992.71	1159.12	204.367	-2249.43	1332.28	191.512	-2346.29	1132.06	124.255	-1996.1	1256.87	359.336	-2183.43	1386.73	464.43	-2166.01	1150.64	469.452	-2153.37	1052.31	487.015	-2236.77	921.593	440.538	-2273.8	826.61	496.005	-2226.54	806.025	491.383	-2292.18	751.654
885	0	268.559	-2288.99	1591.81	164.675	-2281.52	1602.45	290.519	-2128.16	1556.88	173.528	-2116.97	1569.65	203.555	-2101.6	1439.24	202.093	-2001.79	1160.16	205.111	-2259.15	1332.29	191.913	-2355.39	1131.55	125.351	-2005.51	1257.78	360.078	-2193.78	1387.06	465.777	-2176.7	1151.2	470.824	-2164.98	1052.7	488.949	-2249.56	922.762	442.777	-2287.85	828.136	497.979	-2240.35	807.279	494.215	-2306.82	753.629
886	0	269.354	-2298.97	1592.24	165.424	-2291.44	1602.75	291.52	-2138.17	1557.18	174.391	-2126.9	1569.78	204.714	-2111.52	1439.83	203.409	-2010.97	1161	205.813	-2268.73	1332.45	192.341	-2364.18	1131.13	126.773	-2014.85	1258.8	360.897	-2204.01	1387.42	466.62	-2186.97	1151.48	472.075	-2176.38	1053.15	490.824	-2262.17	923.946	445.119	-2301.69	829.688	499.853	-2253.82	808.327	497.034	-2321	755.592
887	0	270.223	-2309.1	1592.6	166.3	-2301.2	1602.88	292.608	-2148.27	1557.28	175.488	-2136.81	1569.86	205.941	-2121.41	1440.32	204.691	-2020.14	1161.7	206.591	-2278.1	1332.39	192.836	-2372.79	1130.61	128.116	-2024.26	1259.37	361.696	-2214.11	1387.69	467.544	-2197.56	1151.7	473.443	-2187.96	1053.45	492.705	-2274.74	925.021	447.46	-2315.39	831.089	502.049	-2267.3	809.47	499.997	-2335.21	757.463
888	0	271.002	-2319.13	1592.62	167.124	-2311.15	1602.93	293.589	-2158.49	1557.22	176.501	-2146.73	1569.87	206.902	-2131.35	1440.71	205.863	-2029.3	1162.37	207.454	-2287.77	1332.37	193.465	-2381.2	1130	129.283	-2033.73	1259.88	362.723	-2224.08	1387.81	468.384	-2208.47	1151.66	474.658	-2199.55	1053.5	494.581	-2287.32	926.042	449.779	-2329.01	832.303	504.026	-2280.83	810.298	502.91	-2349.15	759.255
889	0	271.785	-2329.14	1592.62	167.905	-2321.01	1602.87	294.594	-2168.49	1557.32	177.646	-2156.72	1570.01	208.151	-2141.05	1441.01	206.955	-2038.27	1162.96	208.271	-2297.16	1332.39	194.131	-2389.65	1129.46	130.259	-2043.02	1260.65	363.579	-2234.01	1387.91	468.948	-2218.99	1151.49	475.894	-2210.9	1053.71	496.429	-2299.66	927.038	452.035	-2342.96	833.752	506.3	-2294.16	811.451	505.798	-2362.89	760.96
890	0	272.5	-2339.24	1592.6	168.749	-2330.85	1602.87	295.583	-2178.51	1557.51	178.61	-2166.58	1570.01	209.245	-2150.75	1441.25	207.809	-2047.16	1163.53	209.181	-2306.43	1332.24	194.972	-2398.13	1129.14	131.131	-2052.26	1261.27	364.436	-2243.7	1387.97	469.799	-2229.68	1151.76	477.294	-2222.13	1054.03	498.156	-2311.87	927.984	454.203	-2355.58	834.805	508.47	-2307.22	812.708	508.658	-2376.45	762.716
[truncated: 69 more columns]

## Sheet: Sheet2
Devices
		025370 - Force			025370 - Moment			025370 - CoP			027571 - Force			027571 - Moment			027571 - CoP			037720 - Force			037720 - Moment			037720 - CoP
Frame	Sub Frame	Fx	Fy	Fz	Mx	My	Mz	Cx	Cy	Cz	Fx	Fy	Fz	Mx	My	Mz	Cx	Cy	Cz	Fx	Fy	Fz	Mx	My	Mz	Cx	Cy	Cz
		N	N	N	N.mm	N.mm	N.mm	mm	mm	mm	N	N	N	N.mm	N.mm	N.mm	mm	mm	mm	N	N	N	N.mm	N.mm	N.mm	mm	mm	mm
465	0	0	0	0	0	0	0	200	300	0	0	0	0	0	0	0	200	903	0	0	0	0	0	0	0	603	903	0
465	1	0	0	0	0	0	0	200	300	0	0	0	0	0	0	0	200	903	0	0	0	0	0	0	0	603	903	0
465	2	0	0	0	0	0	0	200	300	0	0	0	0	0	0	0	200	903	0	0	0	0	0	0	0	603	903	0
465	3	0	0	0	0	0	0	200	300	0	0	0	0	0	0	0	200	903	0	0	0	0	0	0	0	603	903	0
465	4	0	0	0	0	0	0	200	300	0	0	0	0	0	0	0	200	903	0	0	0	0	0	0	0	603	903	0
465	5	0	0	0	0	0	0	200	300	0	0	0	0	0	0	0	200	903	0	0	0	0	0	0	0	603	903	0
465	6	0	0	0	0	0	0	200	300	0	0	0	0	0	0	0	200	903	0	0	0	0	0	0	0	603	903	0
465	7	0	0	0	0	0	0	200	300	0	0	0	0	0	0	0	200	903	0	0	0	0	0	0	0	603	903	0
465	8	0	0	0	0	0	0	200	300	0	0	0	0	0	0	0	200	903	0	0	0	0	0	0	0	603	903	0
465	9	0	0	0	0	0	0	200	300	0	0	0	0	0	0	0	200	903	0	0	0	0	0	0	0	603	903	0
466	0	0	0	0	0	0	0	200	300	0	0	0	0	0	0	0	200	903	0	0	0	0	0	0	0	603	903	0
466	1	0	0	0	0	0	0	200	300	0	0	0	0	0	0	0	200	903	0	0	0	0	0	0	0	603	903	0
466	2	0	0	0	0	0	0	200	300	0	0	0	0	0	0	0	200	903	0	0	0	0	0	0	0	603	903	0
466	3	0	0	0	0	0	0	200	300	0	0	0	0	0	0	0	200	903	0	0	0	0	0	0	0	603	903	0
466	4	0	0	0	0	0	0	200	300	0	0	0	0	0	0	0	200	903	0	0	0	0	0	0	0	603	903	0
466	5	0	0	0	0	0	0	200	300	0	0	0	0	0	0	0	200	903	0	0	0	0	0	0	0	603	903	0
466	6	0	0	0	0	0	0	200	300	0	0	0	0	0	0	0	200	903	0	0	0	0	0	0	0	603	903	0
466	7	0	0	0	0	0	0	200	300	0	0	0	0	0	0	0	200	903	0	0	0	0	0	0	0	603	903	0
466	8	0	0	0	0	0	0	200	300	0	0	0	0	0	0	0	200	903	0	0	0	0	0	0	0	603	903	0
466	9	0	0	0	0	0	0	200	300	0	0	0	0	0	0	0	200	903	0	0	0	0	0	0	0	603	903	0
467	0	0	0	0	0	0	0	200	300	0	0	0	0	0	0	0	200	903	0	0	0	0	0	0	0	603	903	0
467	1	0	0	0	0	0	0	200	300	0	0	0	0	0	0	0	200	903	0	0	0	0	0	0	0	603	903	0
467	2	0	0	0	0	0	0	200	300	0	0	0	0	0	0	0	200	903	0	0	0	0	0	0	0	603	903	0
467	3	0	0	0	0	0	0	200	300	0	0	0	0	0	0	0	200	903	0	0	0	0	0	0	0	603	903	0
467	4	0	0	0	0	0	0	200	300	0	0	0	0	0	0	0	200	903	0	0	0	0	0	0	0	603	903	0
467	5	0	0	0	0	0	0	200	300	0	0	0	0	0	0	0	200	903	0	0	0	0	0	0	0	603	903	0
467	6	0	0	0	0	0	0	200	300	0	0	0	0	0	0	0	200	903	0	0	0	0	0	0	0	603	903	0
467	7	0	0	0	0	0	0	200	300	0	0	0	0	0	0	0	200	903	0	0	0	0	0	0	0	603	903	0
467	8	0	0	0	0	0	0	200	300	0	0	0	0	0	0	0	200	903	0	0	0	0	0	0	0	603	903	0
467	9	0	0	0	0	0	0	200	300	0	0	0	0	0	0	0	200	903	0	0	0	0	0	0	0	603	903	0
468	0	0	0	0	0	0	0	200	300	0	0	0	0	0	0	0	200	903	0	0	0	0	0	0	0	603	903	0
468	1	0	0	0	0	0	0	200	300	0	0	0	0	0	0	0	200	903	0	0	0	0	0	0	0	603	903	0
468	2	0	0	0	0	0	0	200	300	0	0	0	0	0	0	0	200	903	0	0	0	0	0	0	0	603	903	0
468	3	0	0	0	0	0	0	200	300	0	0	0	0	0	0	0	200	903	0	0	0	0	0	0	0	603	903	0
468	4	0	0	0	0	0	0	200	300	0	0	0	0	0	0	0	200	903	0	0	0	0	0	0	0	603	903	0
468	5	0	0	0	0	0	0	200	300	0	0	0	0	0	0	0	200	903	0	0	0	0	0	0	0	603	903	0
468	6	0	0	0	0	0	0	200	300	0	0	0	0	0	0	0	200	903	0	0	0	0	0	0	0	603	903	0
468	7	0	0	0	0	0	0	200	300	0	0	0	0	0	0	0	200	903	0	0	0	0	0	0	0	603	903	0
468	8	0	0	0	0	0	0	200	300	0	0	0	0	0	0	0	200	903	0	0	0	0	0	0	0	603	903	0
468	9	0	0	0	0	0	0	200	300	0	0	0	0	0	0	0	200	903	0	0	0	0	0	0	0	603	903	0
469	0	0	0	0	0	0	0	200	300	0	0	0	0	0	0	0	200	903	0	0	0	0	0	0	0	603	903	0
469	1	0	0	0	0	0	0	200	300	0	0	0	0	0	0	0	200	903	0	0	0	0	0	0	0	603	903	0
469	2	0	0	0	0	0	0	200	300	0	0	0	0	0	0	0	200	903	0	0	0	0	0	0	0	603	903	0
469	3	0	0	0	0	0	0	200	300	0	0	0	0	0	0	0	200	903	0	0	0	0	0	0	0	603	903	0
469	4	0	0	0	0	0	0	200	300	0	0	0	0	0	0	0	200	903	0	0	0	0	0	0	0	603	903	0
469	5	0	0	0	0	0	0	200	300	0	0	0	0	0	0	0	200	903	0	0	0	0	0	0	0	603	903	0
469	6	0	0	0	0	0	0	200	300	0	0	0	0	0	0	0	200	903	0	0	0	0	0	0	0	603	903	0
469	7	0	0	0	0	0	0	200	300	0	0	0	0	0	0	0	200	903	0	0	0	0	0	0	0	603	903	0
469	8	0	0	0	0	0	0	200	300	0	0	0	0	0	0	0	200	903	0	0	0	0	0	0	0	603	903	0
469	9	0	0	0	0	0	0	200	300	0	0	0	0	0	0	0	200	903	0	0	0	0	0	0	0	603	903	0
470	0	0	0	0	0	0	0	200	300	0	0	0	0	0	0	0	200	903	0	0	0	0	0	0	0	603	903	0
470	1	0	0	0	0	0	0	200	300	0	0	0	0	0	0	0	200	903	0	0	0	0	0	0	0	603	903	0
470	2	0	0	0	0	0	0	200	300	0	0	0	0	0	0	0	200	903	0	0	0	0	0	0	0	603	903	0
470	3	0	0	0	0	0	0	200	300	0	0	0	0	0	0	0	200	903	0	0	0	0	0	0	0	603	903	0
470	4	0	0	0	0	0	0	200	300	0	0	0	0	0	0	0	200	903	0	0	0	0	0	0	0	603	903	0
470	5	0	0	0	0	0	0	200	300	0	0	0	0	0	0	0	200	903	0	0	0	0	0	0	0	603	903	0
470	6	0	0	0	0	0	0	200	300	0	0	0	0	0	0	0	200	903	0	0	0	0	0	0	0	603	903	0
470	7	0	0	0	0	0	0	200	300	0	0	0	0	0	0	0	200	903	0	0	0	0	0	0	0	603	903	0
470	8	0	0	0	0	0	0	200	300	0	0	0	0	0	0	0	200	903	0	0	0	0	0	0	0	603	903	0
470	9	0	0	0	0	0	0	200	300	0	0	0	0	0	0	0	200	903	0	0	0	0	0	0	0	603	903	0
471	0	0	0	0	0	0	0	200	300	0	0	0	0	0	0	0	200	903	0	0	0	0	0	0	0	603	903	0
471	1	0	0	0	0	0	0	200	300	0	0	0	0	0	0	0	200	903	0	0	0	0	0	0	0	603	903	0
471	2	0	0	0	0	0	0	200	300	0	0	0	0	0	0	0	200	903	0	0	0	0	0	0	0	603	903	0
471	3	0	0	0	0	0	0	200	300	0	0	0	0	0	0	0	200	903	0	0	0	0	0	0	0	603	903	0
471	4	0	0	0	0	0	0	200	300	0	0	0	0	0	0	0	200	903	0	0	0	0	0	0	0	603	903	0
471	5	0	0	0	0	0	0	200	300	0	0	0	0	0	0	0	200	903	0	0	0	0	0	0	0	603	903	0
471	6	0	0	0	0	0	0	200	300	0	0	0	0	0	0	0	200	903	0	0	0	0	0	0	0	603	903	0
471	7	0	0	0	0	0	0	200	300	0	0	0	0	0	0	0	200	903	0	0	0	0	0	0	0	603	903	0
471	8	0	0	0	0	0	0	200	300	0	0	0	0	0	0	0	200	903	0	0	0	0	0	0	0	603	903	0
471	9	0	0	0	0	0	0	200	300	0	0	0	0	0	0	0	200	903	0	0	0	0	0	0	0	603	903	0
472	0	0	0	0	0	0	0	200	300	0	0	0	0	0	0	0	200	903	0	0	0	0	0	0	0	603	903	0
472	1	0	0	0	0	0	0	200	300	0	0	0	0	0	0	0	200	903	0	0	0	0	0	0	0	603	903	0
472	2	0	0	0	0	0	0	200	300	0	0	0	0	0	0	0	200	903	0	0	0	0	0	0	0	603	903	0
472	3	0	0	0	0	0	0	200	300	0	0	0	0	0	0	0	200	903	0	0	0	0	0	0	0	603	903	0
472	4	0	0	0	0	0	0	200	300	0	0	0	0	0	0	0	200	903	0	0	0	0	0	0	0	603	903	0
472	5	0	0	0	0	0	0	200	300	0	0	0	0	0	0	0	200	903	0	0	0	0	0	0	0	603	903	0
472	6	0	0	0	0	0	0	200	300	0	0	0	0	0	0	0	200	903	0	0	0	0	0	0	0	603	903	0
472	7	0	0	0	0	0	0	200	300	0	0	0	0	0	0	0	200	903	0	0	0	0	0	0	0	603	903	0
472	8	0	0	0	0	0	0	200	300	0	0	0	0	0	0	0	200	903	0	0	0	0	0	0	0	603	903	0
472	9	0	0	0	0	0	0	200	300	0	0	0	0	0	0	0	200	903	0	0	0	0	0	0	0	603	903	0
473	0	0	0	0	0	0	0	200	300	0	0	0	0	0	0	0	200	903	0	0	0	0	0	0	0	603	903	0
473	1	0	0	0	0	0	0	200	300	0	0	0	0	0	0	0	200	903	0	0	0	0	0	0	0	603	903	0
473	2	0	0	0	0	0	0	200	300	0	0	0	0	0	0	0	200	903	0	0	0	0	0	0	0	603	903	0
473	3	0	0	0	0	0	0	200	300	0	0	0	0	0	0	0	200	903	0	0	0	0	0	0	0	603	903	0
473	4	0	0	0	0	0	0	200	300	0	0	0	0	0	0	0	200	903	0	0	0	0	0	0	0	603	903	0
473	5	0	0	0	0	0	0	200	300	0	0	0	0	0	0	0	200	903	0	0	0	0	0	0	0	603	903	0
473	6	0	0	0	0	0	0	200	300	0	0	0	0	0	0	0	200	903	0	0	0	0	0	0	0	603	903	0
473	7	0	0	0	0	0	0	200	300	0	0	0	0	0	0	0	200	903	0	0	0	0	0	0	0	603	903	0
473	8	0	0	0	0	0	0	200	300	0	0	0	0	0	0	0	200	903	0	0	0	0	0	0	0	603	903	0
473	9	0	0	0	0	0	0	200	300	0	0	0	0	0	0	0	200	903	0	0	0	0	0	0	0	603	903	0
474	0	0	0	0	0	0	0	200	300	0	0	0	0	0	0	0	200	903	0	0	0	0	0	0	0	603	903	0
474	1	0	0	0	0	0	0	200	300	0	0	0	0	0	0	0	200	903	0	0	0	0	0	0	0	603	903	0
474	2	0	0	0	0	0	0	200	300	0	0	0	0	0	0	0	200	903	0	0	0	0	0	0	0	603	903	0
474	3	0	0	0	0	0	0	200	300	0	0	0	0	0	0	0	200	903	0	0	0	0	0	0	0	603	903	0
474	4	0	0	0	0	0	0	200	300	0	0	0	0	0	0	0	200	903	0	0	0	0	0	0	0	603	903	0
474	5	0	0	0	0	0	0	200	300	0	0	0	0	0	0	0	200	903	0	0	0	0	0	0	0	603	903	0
474	6	0	0	0	0	0	0	200	300	0	0	0	0	0	0	0	200	903	0	0	0	0	0	0	0	603	903	0
474	7	0	0	0	0	0	0	200	300	0	0	0	0	0	0	0	200	903	0	0	0	0	0	0	0	603	903	0
474	8	0	0	0	0	0	0	200	300	0	0	0	0	0	0	0	200	903	0	0	0	0	0	0	0	603	903	0
474	9	0	0	0	0	0	0	200	300	0	0	0	0	0	0	0	200	903	0	0	0	0	0	0	0	603	903	0
475	0	0	0	0	0	0	0	200	300	0	0	0	0	0	0	0	200	903	0	0	0	0	0	0	0	603	903	0
475	1	0	0	0	0	0	0	200	300	0	0	0	0	0	0	0	200	903	0	0	0	0	0	0	0	603	903	0
475	2	0	0	0	0	0	0	200	300	0	0	0	0	0	0	0	200	903	0	0	0	0	0	0	0	603	903	0
475	3	0	0	0	0	0	0	200	300	0	0	0	0	0	0	0	200	903	0	0	0	0	0	0	0	603	903	0
475	4	0	0	0	0	0	0	200	300	0	0	0	0	0	0	0	200	903	0	0	0	0	0	0	0	603	903	0
475	5	0	0	0	0	0	0	200	300	0	0	0	0	0	0	0	200	903	0	0	0	0	0	0	0	603	903	0
475	6	0	0	0	0	0	0	200	300	0	0	0	0	0	0	0	200	903	0	0	0	0	0	0	0	603	903	0
475	7	0	0	0	0	0	0	200	300	0	0	0	0	0	0	0	200	903	0	0	0	0	0	0	0	603	903	0
475	8	0	0	0	0	0	0	200	300	0	0	0	0	0	0	0	200	903	0	0	0	0	0	0	0	603	903	0
475	9	0	0	0	0	0	0	200	300	0	0	0	0	0	0	0	200	903	0	0	0	0	0	0	0	603	903	0
476	0	0	0	0	0	0	0	200	300	0	0	0	0	0	0	0	200	903	0	0	0	0	0	0	0	603	903	0
476	1	0	0	0	0	0	0	200	300	0	0	0	0	0	0	0	200	903	0	0	0	0	0	0	0	603	903	0
476	2	0	0	0	0	0	0	200	300	0	0	0	0	0	0	0	200	903	0	0	0	0	0	0	0	603	903	0
476	3	0	0	0	0	0	0	200	300	0	0	0	0	0	0	0	200	903	0	0	0	0	0	0	0	603	903	0
476	4	0	0	0	0	0	0	200	300	0	0	0	0	0	0	0	200	903	0	0	0	0	0	0	0	603	903	0
476	5	0	0	0	0	0	0	200	300	0	0	0	0	0	0	0	200	903	0	0	0	0	0	0	0	603	903	0
476	6	0	0	0	0	0	0	200	300	0	0	0	0	0	0	0	200	903	0	0	0	0	0	0	0	603	903	0
476	7	0	0	0	0	0	0	200	300	0	0	0	0	0	0	0	200	903	0	0	0	0	0	0	0	603	903	0
476	8	0	0	0	0	0	0	200	300	0	0	0	0	0	0	0	200	903	0	0	0	0	0	0	0	603	903	0
476	9	0	0	0	0	0	0	200	300	0	0	0	0	0	0	0	200	903	0	0	0	0	0	0	0	603	903	0
477	0	0	0	0	0	0	0	200	300	0	0	0	0	0	0	0	200	903	0	0	0	0	0	0	0	603	903	0
477	1	0	0	0	0	0	0	200	300	0	0	0	0	0	0	0	200	903	0	0	0	0	0	0	0	603	903	0
477	2	0	0	0	0	0	0	200	300	0	0	0	0	0	0	0	200	903	0	0	0	0	0	0	0	603	903	0
477	3	0	0	0	0	0	0	200	300	0	0	0	0	0	0	0	200	903	0	0	0	0	0	0	0	603	903	0
477	4	0	0	0	0	0	0	200	300	0	0	0	0	0	0	0	200	903	0	0	0	0	0	0	0	603	903	0
477	5	0	0	0	0	0	0	200	300	0	0	0	0	0	0	0	200	903	0	0	0	0	0	0	0	603	903	0
477	6	0	0	0	0	0	0	200	300	0	0	0	0	0	0	0	200	903	0	0	0	0	0	0	0	603	903	0
477	7	0	0	0	0	0	0	200	300	0	0	0	0	0	0	0	200	903	0	0	0	0	0	0	0	603	903	0
477	8	0	0	0	0	0	0	200	300	0	0	0	0	0	0	0	200	903	0	0	0	0	0	0	0	603	903	0
477	9	0	0	0	0	0	0	200	300	0	0	0	0	0	0	0	200	903	0	0	0	0	0	0	0	603	903	0
478	0	0	0	0	0	0	0	200	300	0	0	0	0	0	0	0	200	903	0	0	0	0	0	0	0	603	903	0
478	1	0	0	0	0	0	0	200	300	0	0	0	0	0	0	0	200	903	0	0	0	0	0	0	0	603	903	0
478	2	0	0	0	0	0	0	200	300	0	0	0	0	0	0	0	200	903	0	0	0	0	0	0	0	603	903	0
478	3	0	0	0	0	0	0	200	300	0	0	0	0	0	0	0	200	903	0	0	0	0	0	0	0	603	903	0
478	4	0	0	0	0	0	0	200	300	0	0	0	0	0	0	0	200	903	0	0	0	0	0	0	0	603	903	0
478	5	0	0	0	0	0	0	200	300	0	0	0	0	0	0	0	200	903	0	0	0	0	0	0	0	603	903	0
478	6	0	0	0	0	0	0	200	300	0	0	0	0	0	0	0	200	903	0	0	0	0	0	0	0	603	903	0
478	7	0	0	0	0	0	0	200	300	0	0	0	0	0	0	0	200	903	0	0	0	0	0	0	0	603	903	0
478	8	0	0	0	0	0	0	200	300	0	0	0	0	0	0	0	200	903	0	0	0	0	0	0	0	603	903	0
478	9	0	0	0	0	0	0	200	300	0	0	0	0	0	0	0	200	903	0	0	0	0	0	0	0	603	903	0
479	0	0	0	0	0	0	0	200	300	0	0	0	0	0	0	0	200	903	0	0	0	0	0	0	0	603	903	0
479	1	0	0	0	0	0	0	200	300	0	0	0	0	0	0	0	200	903	0	0	0	0	0	0	0	603	903	0
479	2	0	0	0	0	0	0	200	300	0	0	0	0	0	0	0	200	903	0	0	0	0	0	0	0	603	903	0
479	3	0	0	0	0	0	0	200	300	0	0	0	0	0	0	0	200	903	0	0	0	0	0	0	0	603	903	0
479	4	0	0	0	0	0	0	200	300	0	0	0	0	0	0	0	200	903	0	0	0	0	0	0	0	603	903	0
479	5	0	0	0	0	0	0	200	300	0	0	0	0	0	0	0	200	903	0	0	0	0	0	0	0	603	903	0
479	6	0	0	0	0	0	0	200	300	0	0	0	0	0	0	0	200	903	0	0	0	0	0	0	0	603	903	0
479	7	0	0	0	0	0	0	200	300	0	0	0	0	0	0	0	200	903	0	0	0	0	0	0	0	603	903	0
479	8	0	0	0	0	0	0	200	300	0	0	0	0	0	0	0	200	903	0	0	0	0	0	0	0	603	903	0
479	9	0	0	0	0	0	0	200	300	0	0	0	0	0	0	0	200	903	0	0	0	0	0	0	0	603	903	0
480	0	0	0	0	0	0	0	200	300	0	0	0	0	0	0	0	200	903	0	0	0	0	0	0	0	603	903	0
480	1	0	0	0	0	0	0	200	300	0	0	0	0	0	0	0	200	903	0	0	0	0	0	0	0	603	903	0
480	2	0	0	0	0	0	0	200	300	0	0	0	0	0	0	0	200	903	0	0	0	0	0	0	0	603	903	0
480	3	0	0	0	0	0	0	200	300	0	0	0	0	0	0	0	200	903	0	0	0	0	0	0	0	603	903	0
480	4	0	0	0	0	0	0	200	300	0	0	0	0	0	0	0	200	903	0	0	0	0	0	0	0	603	903	0
480	5	0	0	0	0	0	0	200	300	0	0	0	0	0	0	0	200	903	0	0	0	0	0	0	0	603	903	0
480	6	0	0	0	0	0	0	200	300	0	0	0	0	0	0	0	200	903	0	0	0	0	0	0	0	603	903	0
480	7	0	0	0	0	0	0	200	300	0	0	0	0	0	0	0	200	903	0	0	0	0	0	0	0	603	903	0
480	8	0	0	0	0	0	0	200	300	0	0	0	0	0	0	0	200	903	0	0	0	0	0	0	0	603	903	0
480	9	0	0	0	0	0	0	200	300	0	0	0	0	0	0	0	200	903	0	0	0	0	0	0	0	603	903	0
481	0	0	0	0	0	0	0	200	300	0	0	0	0	0	0	0	200	903	0	0	0	0	0	0	0	603	903	0
481	1	0	0	0	0	0	0	200	300	0	0	0	0	0	0	0	200	903	0	0	0	0	0	0	0	603	903	0
481	2	0	0	0	0	0	0	200	300	0	0	0	0	0	0	0	200	903	0	0	0	0	0	0	0	603	903	0
481	3	0	0	0	0	0	0	200	300	0	0	0	0	0	0	0	200	903	0	0	0	0	0	0	0	603	903	0
481	4	0	0	0	0	0	0	200	300	0	0	0	0	0	0	0	200	903	0	0	0	0	0	0	0	603	903	0
481	5	0	0	0	0	0	0	200	300	0	0	0	0	0	0	0	200	903	0	0	0	0	0	0	0	603	903	0
481	6	0	0	0	0	0	0	200	300	0	0	0	0	0	0	0	200	903	0	0	0	0	0	0	0	603	903	0
481	7	0	0	0	0	0	0	200	300	0	0	0	0	0	0	0	200	903	0	0	0	0	0	0	0	603	903	0
481	8	0	0	0	0	0	0	200	300	0	0	0	0	0	0	0	200	903	0	0	0	0	0	0	0	603	903	0
481	9	0	0	0	0	0	0	200	300	0	0	0	0	0	0	0	200	903	0	0	0	0	0	0	0	603	903	0
482	0	0	0	0	0	0	0	200	300	0	0	0	0	0	0	0	200	903	0	0	0	0	0	0	0	603	903	0
482	1	0	0	0	0	0	0	200	300	0	0	0	0	0	0	0	200	903	0	0	0	0	0	0	0	603	903	0
482	2	0	0	0	0	0	0	200	300	0	0	0	0	0	0	0	200	903	0	0	0	0	0	0	0	603	903	0
482	3	0	0	0	0	0	0	200	300	0	0	0	0	0	0	0	200	903	0	0	0	0	0	0	0	603	903	0
482	4	0	0	0	0	0	0	200	300	0	0	0	0	0	0	0	200	903	0	0	0	0	0	0	0	603	903	0
482	5	0	0	0	0	0	0	200	300	0	0	0	0	0	0	0	200	903	0	0	0	0	0	0	0	603	903	0
482	6	0	0	0	0	0	0	200	300	0	0	0	0	0	0	0	200	903	0	0	0	0	0	0	0	603	903	0
482	7	0	0	0	0	0	0	200	300	0	0	0	0	0	0	0	200	903	0	0	0	0	0	0	0	603	903	0
482	8	0	0	0	0	0	0	200	300	0	0	0	0	0	0	0	200	903	0	0	0	0	0	0	0	603	903	0
482	9	0	0	0	0	0	0	200	300	0	0	0	0	0	0	0	200	903	0	0	0	0	0	0	0	603	903	0
483	0	0	0	0	0	0	0	200	300	0	0	0	0	0	0	0	200	903	0	0	0	0	0	0	0	603	903	0
483	1	0	0	0	0	0	0	200	300	0	0	0	0	0	0	0	200	903	0	0	0	0	0	0	0	603	903	0
483	2	0	0	0	0	0	0	200	300	0	0	0	0	0	0	0	200	903	0	0	0	0	0	0	0	603	903	0
483	3	0	0	0	0	0	0	200	300	0	0	0	0	0	0	0	200	903	0	0	0	0	0	0	0	603	903	0
483	4	0	0	0	0	0	0	200	300	0	0	0	0	0	0	0	200	903	0	0	0	0	0	0	0	603	903	0
483	5	0	0	0	0	0	0	200	300	0	0	0	0	0	0	0	200	903	0	0	0	0	0	0	0	603	903	0
483	6	0	0	0	0	0	0	200	300	0	0	0	0	0	0	0	200	903	0	0	0	0	0	0	0	603	903	0
483	7	0	0	0	0	0	0	200	300	0	0	0	0	0	0	0	200	903	0	0	0	0	0	0	0	603	903	0
483	8	0	0	0	0	0	0	200	300	0	0	0	0	0	0	0	200	903	0	0	0	0	0	0	0	603	903	0
483	9	0	0	0	0	0	0	200	300	0	0	0	0	0	0	0	200	903	0	0	0	0	0	0	0	603	903	0
484	0	0	0	0	0	0	0	200	300	0	0	0	0	0	0	0	200	903	0	0	0	0	0	0	0	603	903	0
484	1	0	0	0	0	0	0	200	300	0	0	0	0	0	0	0	200	903	0	0	0	0	0	0	0	603	903	0
484	2	0	0	0	0	0	0	200	300	0	0	0	0	0	0	0	200	903	0	0	0	0	0	0	0	603	903	0
484	3	0	0	0	0	0	0	200	300	0	0	0	0	0	0	0	200	903	0	0	0	0	0	0	0	603	903	0
484	4	0	0	0	0	0	0	200	300	0	0	0	0	0	0	0	200	903	0	0	0	0	0	0	0	603	903	0
484	5	0	0	0	0	0	0	200	300	0	0	0	0	0	0	0	200	903	0	0	0	0	0	0	0	603	903	0
484	6	0	0	0	0	0	0	200	300	0	0	0	0	0	0	0	200	903	0	0	0	0	0	0	0	603	903	0
484	7	0	0	0	0	0	0	200	300	0	0	0	0	0	0	0	200	903	0	0	0	0	0	0	0	603	903	0
484	8	0	0	0	0	0	0	200	300	0	0	0	0	0	0	0	200	903	0	0	0	0	0	0	0	603	903	0
484	9	0	0	0	0	0	0	200	300	0	0	0	0	0	0	0	200	903	0	0	0	0	0	0	0	603	903	0
485	0	0	0	0	0	0	0	200	300	0	0	0	0	0	0	0	200	903	0	0	0	0	0	0	0	603	903	0
485	1	0	0	0	0	0	0	200	300	0	0	0	0	0	0	0	200	903	0	0	0	0	0	0	0	603	903	0
485	2	0	0	0	0	0	0	200	300	0	0	0	0	0	0	0	200	903	0	0	0	0	0	0	0	603	903	0
485	3	0	0	0	0	0	0	200	300	0	0	0	0	0	0	0	200	903	0	0	0	0	0	0	0	603	903	0
485	4	0	0	0	0	0	0	200	300	0	0	0	0	0	0	0	200	903	0	0	0	0	0	0	0	603	903	0
485	5	0	0	0	0	0	0	200	300	0	0	0	0	0	0	0	200	903	0	0	0	0	0	0	0	603	903	0
485	6	0	0	0	0	0	0	200	300	0	0	0	0	0	0	0	200	903	0	0	0	0	0	0	0	603	903	0
485	7	0	0	0	0	0	0	200	300	0	0	0	0	0	0	0	200	903	0	0	0	0	0	0	0	603	903	0
485	8	0	0	0	0	0	0	200	300	0	0	0	0	0	0	0	200	903	0	0	0	0	0	0	0	603	903	0
485	9	0	0	0	0	0	0	200	300	0	0	0	0	0	0	0	200	903	0	0	0	0	0	0	0	603	903	0
486	0	0	0	0	0	0	0	200	300	0	0	0	0	0	0	0	200	903	0	0	0	0	0	0	0	603	903	0
486	1	0	0	0	0	0	0	200	300	0	0	0	0	0	0	0	200	903	0	0	0	0	0	0	0	603	903	0
486	2	0	0	0	0	0	0	200	300	0	0	0	0	0	0	0	200	903	0	0	0	0	0	0	0	603	903	0
486	3	0	0	0	0	0	0	200	300	0	0	0	0	0	0	0	200	903	0	0	0	0	0	0	0	603	903	0
486	4	0	0	0	0	0	0	200	300	0	0	0	0	0	0	0	200	903	0	0	0	0	0	0	0	603	903	0
486	5	0	0	0	0	0	0	200	300	0	0	0	0	0	0	0	200	903	0	0	0	0	0	0	0	603	903	0
486	6	0	0	0	0	0	0	200	300	0	0	0	0	0	0	0	200	903	0	0	0	0	0	0	0	603	903	0
486	7	0	0	0	0	0	0	200	300	0	0	0	0	0	0	0	200	903	0	0	0	0	0	0	0	603	903	0
486	8	0	0	0	0	0	0	200	300	0	0	0	0	0	0	0	200	903	0	0	0	0	0	0	0	603	903	0
486	9	0	0	0	0	0	0	200	300	0	0	0	0	0	0	0	200	903	0	0	0	0	0	0	0	603	903	0
487	0	0	0	0	0	0	0	200	300	0	0	0	0	0	0	0	200	903	0	0	0	0	0	0	0	603	903	0
487	1	0	0	0	0	0	0	200	300	0	0	0	0	0	0	0	200	903	0	0	0	0	0	0	0	603	903	0
487	2	0	0	0	0	0	0	200	300	0	0	0	0	0	0	0	200	903	0	0	0	0	0	0	0	603	903	0
487	3	0	0	0	0	0	0	200	300	0	0	0	0	0	0	0	200	903	0	0	0	0	0	0	0	603	903	0
487	4	0	0	0	0	0	0	200	300	0	0	0	0	0	0	0	200	903	0	0	0	0	0	0	0	603	903	0
487	5	0	0	0	0	0	0	200	300	0	0	0	0	0	0	0	200	903	0	0	0	0	0	0	0	603	903	0
487	6	0	0	0	0	0	0	200	300	0	0	0	0	0	0	0	200	903	0	0	0	0	0	0	0	603	903	0
487	7	0	0	0	0	0	0	200	300	0	0	0	0	0	0	0	200	903	0	0	0	0	0	0	0	603	903	0
487	8	0	0	0	0	0	0	200	300	0	0	0	0	0	0	0	200	903	0	0	0	0	0	0	0	603	903	0
487	9	0	0	0	0	0	0	200	300	0	0	0	0	0	0	0	200	903	0	0	0	0	0	0	0	603	903	0
488	0	0	0	0	0	0	0	200	300	0	0	0	0	0	0	0	200	903	0	0	0	0	0	0	0	603	903	0
488	1	0	0	0	0	0	0	200	300	0	0	0	0	0	0	0	200	903	0	0	0	0	0	0	0	603	903	0
488	2	0	0	0	0	0	0	200	300	0	0	0	0	0	0	0	200	903	0	0	0	0	0	0	0	603	903	0
488	3	0	0	0	0	0	0	200	300	0	0	0	0	0	0	0	200	903	0	0	0	0	0	0	0	603	903	0
488	4	0	0	0	0	0	0	200	300	0	0	0	0	0	0	0	200	903	0	0	0	0	0	0	0	603	903	0
488	5	0	0	0	0	0	0	200	300	0	0	0	0	0	0	0	200	903	0	0	0	0	0	0	0	603	903	0
488	6	0	0	0	0	0	0	200	300	0	0	0	0	0	0	0	200	903	0	0	0	0	0	0	0	603	903	0
488	7	0	0	0	0	0	0	200	300	0	0	0	0	0	0	0	200	903	0	0	0	0	0	0	0	603	903	0
488	8	0	0	0	0	0	0	200	300	0	0	0	0	0	0	0	200	903	0	0	0	0	0	0	0	603	903	0
488	9	0	0	0	0	0	0	200	300	0	0	0	0	0	0	0	200	903	0	0	0	0	0	0	0	603	903	0
489	0	0	0	0	0	0	0	200	300	0	0	0	0	0	0	0	200	903	0	0	0	0	0	0	0	603	903	0
489	1	0	0	0	0	0	0	200	300	0	0	0	0	0	0	0	200	903	0	0	0	0	0	0	0	603	903	0
489	2	0	0	0	0	0	0	200	300	0	0	0	0	0	0	0	200	903	0	0	0	0	0	0	0	603	903	0
489	3	0	0	0	0	0	0	200	300	0	0	0	0	0	0	0	200	903	0	0	0	0	0	0	0	603	903	0
489	4	0	0	0	0	0	0	200	300	0	0	0	0	0	0	0	200	903	0	0	0	0	0	0	0	603	903	0
489	5	0	0	0	0	0	0	200	300	0	0	0	0	0	0	0	200	903	0	0	0	0	0	0	0	603	903	0
489	6	0	0	0	0	0	0	200	300	0	0	0	0	0	0	0	200	903	0	0	0	0	0	0	0	603	903	0
489	7	0	0	0	0	0	0	200	300	0	0	0	0	0	0	0	200	903	0	0	0	0	0	0	0	603	903	0
489	8	0	0	0	0	0	0	200	300	0	0	0	0	0	0	0	200	903	0	0	0	0	0	0	0	603	903	0
489	9	0	0	0	0	0	0	200	300	0	0	0	0	0	0	0	200	903	0	0	0	0	0	0	0	603	903	0
490	0	0	0	0	0	0	0	200	300	0	0	0	0	0	0	0	200	903	0	0	0	0	0	0	0	603	903	0
490	1	0	0	0	0	0	0	200	300	0	0	0	0	0	0	0	200	903	0	0	0	0	0	0	0	603	903	0
490	2	0	0	0	0	0	0	200	300	0	0	0	0	0	0	0	200	903	0	0	0	0	0	0	0	603	903	0
490	3	0	0	0	0	0	0	200	300	0	0	0	0	0	0	0	200	903	0	0	0	0	0	0	0	603	903	0
490	4	0	0	0	0	0	0	200	300	0	0	0	0	0	0	0	200	903	0	0	0	0	0	0	0	603	903	0
490	5	0	0	0	0	0	0	200	300	0	0	0	0	0	0	0	200	903	0	0	0	0	0	0	0	603	903	0
490	6	0	0	0	0	0	0	200	300	0	0	0	0	0	0	0	200	903	0	0	0	0	0	0	0	603	903	0
490	7	0	0	0	0	0	0	200	300	0	0	0	0	0	0	0	200	903	0	0	0	0	0	0	0	603	903	0
490	8	0	0	0	0	0	0	200	300	0	0	0	0	0	0	0	200	903	0	0	0	0	0	0	0	603	903	0
490	9	0	0	0	0	0	0	200	300	0	0	0	0	0	0	0	200	903	0	0	0	0	0	0	0	603	903	0
491	0	0	0	0	0	0	0	200	300	0	0	0	0	0	0	0	200	903	0	0	0	0	0	0	0	603	903	0
491	1	0	0	0	0	0	0	200	300	0	0	0	0	0	0	0	200	903	0	0	0	0	0	0	0	603	903	0
491	2	0	0	0	0	0	0	200	300	0	0	0	0	0	0	0	200	903	0	0	0	0	0	0	0	603	903	0
491	3	0	0	0	0	0	0	200	300	0	0	0	0	0	0	0	200	903	0	0	0	0	0	0	0	603	903	0
491	4	0	0	0	0	0	0	200	300	0	0	0	0	0	0	0	200	903	0	0	0	0	0	0	0	603	903	0
491	5	0	0	0	0	0	0	200	300	0	0	0	0	0	0	0	200	903	0	0	0	0	0	0	0	603	903	0
491	6	0	0	0	0	0	0	200	300	0	0	0	0	0	0	0	200	903	0	0	0	0	0	0	0	603	903	0
491	7	0	0	0	0	0	0	200	300	0	0	0	0	0	0	0	200	903	0	0	0	0	0	0	0	603	903	0
491	8	0	0	0	0	0	0	200	300	0	0	0	0	0	0	0	200	903	0	0	0	0	0	0	0	603	903	0
491	9	0	0	0	0	0	0	200	300	0	0	0	0	0	0	0	200	903	0	0	0	0	0	0	0	603	903	0
492	0	0	0	0	0	0	0	200	300	0	0	0	0	0	0	0	200	903	0	0	0	0	0	0	0	603	903	0
492	1	0	0	0	0	0	0	200	300	0	0	0	0	0	0	0	200	903	0	0	0	0	0	0	0	603	903	0
492	2	0	0	0	0	0	0	200	300	0	0	0	0	0	0	0	200	903	0	0	0	0	0	0	0	603	903	0
492	3	0	0	0	0	0	0	200	300	0	0	0	0	0	0	0	200	903	0	0	0	0	0	0	0	603	903	0
492	4	0	0	0	0	0	0	200	300	0	0	0	0	0	0	0	200	903	0	0	0	0	0	0	0	603	903	0
492	5	0	0	0	0	0	0	200	300	0	0	0	0	0	0	0	200	903	0	0	0	0	0	0	0	603	903	0
492	6	0	0	0	0	0	0	200	300	0	0	0	0	0	0	0	200	903	0	0	0	0	0	0	0	603	903	0
492	7	0	0	0	0	0	0	200	300	0	0	0	0	0	0	0	200	903	0	0	0	0	0	0	0	603	903	0
492	8	0	0	0	0	0	0	200	300	0	0	0	0	0	0	0	200	903	0	0	0	0	0	0	0	603	903	0
492	9	0	0	0	0	0	0	200	300	0	0	0	0	0	0	0	200	903	0	0	0	0	0	0	0	603	903	0
493	0	0	0	0	0	0	0	200	300	0	0	0	0	0	0	0	200	903	0	0	0	0	0	0	0	603	903	0
493	1	0	0	0	0	0	0	200	300	0	0	0	0	0	0	0	200	903	0	0	0	0	0	0	0	603	903	0
493	2	0	0	0	0	0	0	200	300	0	0	0	0	0	0	0	200	903	0	0	0	0	0	0	0	603	903	0
493	3	0	0	0	0	0	0	200	300	0	0	0	0	0	0	0	200	903	0	0	0	0	0	0	0	603	903	0
493	4	0	0	0	0	0	0	200	300	0	0	0	0	0	0	0	200	903	0	0	0	0	0	0	0	603	903	0
493	5	0	0	0	0	0	0	200	300	0	0	0	0	0	0	0	200	903	0	0	0	0	0	0	0	603	903	0
493	6	0	0	0	0	0	0	200	300	0	0	0	0	0	0	0	200	903	0	0	0	0	0	0	0	603	903	0
493	7	0	0	0	0	0	0	200	300	0	0	0	0	0	0	0	200	903	0	0	0	0	0	0	0	603	903	0
493	8	0	0	0	0	0	0	200	300	0	0	0	0	0	0	0	200	903	0	0	0	0	0	0	0	603	903	0
493	9	0	0	0	0	0	0	200	300	0	0	0	0	0	0	0	200	903	0	0	0	0	0	0	0	603	903	0
494	0	0	0	0	0	0	0	200	300	0	0	0	0	0	0	0	200	903	0	0	0	0	0	0	0	603	903	0
494	1	0	0	0	0	0	0	200	300	0	0	0	0	0	0	0	200	903	0	0	0	0	0	0	0	603	903	0
494	2	0	0	0	0	0	0	200	300	0	0	0	0	0	0	0	200	903	0	0	0	0	0	0	0	603	903	0
494	3	0	0	0	0	0	0	200	300	0	0	0	0	0	0	0	200	903	0	0	0	0	0	0	0	603	903	0
494	4	0	0	0	0	0	0	200	300	0	0	0	0	0	0	0	200	903	0	0	0	0	0	0	0	603	903	0
494	5	0	0	0	0	0	0	200	300	0	0	0	0	0	0	0	200	903	0	0	0	0	0	0	0	603	903	0
494	6	0	0	0	0	0	0	200	300	0	0	0	0	0	0	0	200	903	0	0	0	0	0	0	0	603	903	0
494	7	0	0	0	0	0	0	200	300	0	0	0	0	0	0	0	200	903	0	0	0	0	0	0	0	603	903	0
494	8	0	0	0	0	0	0	200	300	0	0	0	0	0	0	0	200	903	0	0	0	0	0	0	0	603	903	0
494	9	0	0	0	0	0	0	200	300	0	0	0	0	0	0	0	200	903	0	0	0	0	0	0	0	603	903	0
495	0	0	0	0	0	0	0	200	300	0	0	0	0	0	0	0	200	903	0	0	0	0	0	0	0	603	903	0
495	1	0	0	0	0	0	0	200	300	0	0	0	0	0	0	0	200	903	0	0	0	0	0	0	0	603	903	0
495	2	0	0	0	0	0	0	200	300	0	0	0	0	0	0	0	200	903	0	0	0	0	0	0	0	603	903	0
495	3	0	0	0	0	0	0	200	300	0	0	0	0	0	0	0	200	903	0	0	0	0	0	0	0	603	903	0
495	4	0	0	0	0	0	0	200	300	0	0	0	0	0	0	0	200	903	0	0	0	0	0	0	0	603	903	0
495	5	0	0	0	0	0	0	200	300	0	0	0	0	0	0	0	200	903	0	0	0	0	0	0	0	603	903	0
495	6	0	0	0	0	0	0	200	300	0	0	0	0	0	0	0	200	903	0	0	0	0	0	0	0	603	903	0
495	7	0	0	0	0	0	0	200	300	0	0	0	0	0	0	0	200	903	0	0	0	0	0	0	0	603	903	0
495	8	0	0	0	0	0	0	200	300	0	0	0	0	0	0	0	200	903	0	0	0	0	0	0	0	603	903	0
495	9	0	0	0	0	0	0	200	300	0	0	0	0	0	0	0	200	903	0	0	0	0	0	0	0	603	903	0
496	0	0	0	0	0	0	0	200	300	0	0	0	0	0	0	0	200	903	0	0	0	0	0	0	0	603	903	0
496	1	0	0	0	0	0	0	200	300	0	0	0	0	0	0	0	200	903	0	0	0	0	0	0	0	603	903	0
496	2	0	0	0	0	0	0	200	300	0	0	0	0	0	0	0	200	903	0	0	0	0	0	0	0	603	903	0
496	3	0	0	0	0	0	0	200	300	0	0	0	0	0	0	0	200	903	0	0	0	0	0	0	0	603	903	0
496	4	0	0	0	0	0	0	200	300	0	0	0	0	0	0	0	200	903	0	0	0	0	0	0	0	603	903	0
496	5	0	0	0	0	0	0	200	300	0	0	0	0	0	0	0	200	903	0	0	0	0	0	0	0	603	903	0
496	6	0	0	0	0	0	0	200	300	0	0	0	0	0	0	0	200	903	0	0	0	0	0	0	0	603	903	0
496	7	0	0	0	0	0	0	200	300	0	0	0	0	0	0	0	200	903	0	0	0	0	0	0	0	603	903	0
496	8	0	0	0	0	0	0	200	300	0	0	0	0	0	0	0	200	903	0	0	0	0	0	0	0	603	903	0
496	9	0	0	0	0	0	0	200	300	0	0	0	0	0	0	0	200	903	0	0	0	0	0	0	0	603	903	0
497	0	0	0	0	0	0	0	200	300	0	0	0	0	0	0	0	200	903	0	0	0	0	0	0	0	603	903	0
497	1	0	0	0	0	0	0	200	300	0	0	0	0	0	0	0	200	903	0	0	0	0	0	0	0	603	903	0
497	2	0	0	0	0	0	0	200	300	0	0	0	0	0	0	0	200	903	0	0	0	0	0	0	0	603	903	0
497	3	0	0	0	0	0	0	200	300	0	0	0	0	0	0	0	200	903	0	0	0	0	0	0	0	603	903	0
497	4	0	0	0	0	0	0	200	300	0	0	0	0	0	0	0	200	903	0	0	0	0	0	0	0	603	903	0
497	5	0	0	0	0	0	0	200	300	0	0	0	0	0	0	0	200	903	0	0	0	0	0	0	0	603	903	0
497	6	0	0	0	0	0	0	200	300	0	0	0	0	0	0	0	200	903	0	0	0	0	0	0	0	603	903	0
497	7	0	0	0	0	0	0	200	300	0	0	0	0	0	0	0	200	903	0	0	0	0	0	0	0	603	903	0
497	8	0	0	0	0	0	0	200	300	0	0	0	0	0	0	0	200	903	0	0	0	0	0	0	0	603	903	0
497	9	0	0	0	0	0	0	200	300	0	0	0	0	0	0	0	200	903	0	0	0	0	0	0	0	603	903	0
498	0	0	0	0	0	0	0	200	300	0	0	0	0	0	0	0	200	903	0	0	0	0	0	0	0	603	903	0
498	1	0	0	0	0	0	0	200	300	0	0	0	0	0	0	0	200	903	0	0	0	0	0	0	0	603	903	0
498	2	0	0	0	0	0	0	200	300	0	0	0	0	0	0	0	200	903	0	0	0	0	0	0	0	603	903	0
498	3	0	0	0	0	0	0	200	300	0	0	0	0	0	0	0	200	903	0	0	0	0	0	0	0	603	903	0
498	4	0	0	0	0	0	0	200	300	0	0	0	0	0	0	0	200	903	0	0	0	0	0	0	0	603	903	0
498	5	0	0	0	0	0	0	200	300	0	0	0	0	0	0	0	200	903	0	0	0	0	0	0	0	603	903	0
498	6	0	0	0	0	0	0	200	300	0	0	0	0	0	0	0	200	903	0	0	0	0	0	0	0	603	903	0
498	7	0	0	0	0	0	0	200	300	0	0	0	0	0	0	0	200	903	0	0	0	0	0	0	0	603	903	0
498	8	0	0	0	0	0	0	200	300	0	0	0	0	0	0	0	200	903	0	0	0	0	0	0	0	603	903	0
498	9	0	0	0	0	0	0	200	300	0	0	0	0	0	0	0	200	903	0	0	0	0	0	0	0	603	903	0
499	0	0	0	0	0	0	0	200	300	0	0	0	0	0	0	0	200	903	0	0	0	0	0	0	0	603	903	0
499	1	0	0	0	0	0	0	200	300	0	0	0	0	0	0	0	200	903	0	0	0	0	0	0	0	603	903	0
499	2	0	0	0	0	0	0	200	300	0	0	0	0	0	0	0	200	903	0	0	0	0	0	0	0	603	903	0
499	3	0	0	0	0	0	0	200	300	0	0	0	0	0	0	0	200	903	0	0	0	0	0	0	0	603	903	0
499	4	0	0	0	0	0	0	200	300	0	0	0	0	0	0	0	200	903	0	0	0	0	0	0	0	603	903	0
499	5	0	0	0	0	0	0	200	300	0	0	0	0	0	0	0	200	903	0	0	0	0	0	0	0	603	903	0
499	6	0	0	0	0	0	0	200	300	0	0	0	0	0	0	0	200	903	0	0	0	0	0	0	0	603	903	0
499	7	0	0	0	0	0	0	200	300	0	0	0	0	0	0	0	200	903	0	0	0	0	0	0	0	603	903	0
499	8	0	0	0	0	0	0	200	300	0	0	0	0	0	0	0	200	903	0	0	0	0	0	0	0	603	903	0
499	9	0	0	0	0	0	0	200	300	0	0	0	0	0	0	0	200	903	0	0	0	0	0	0	0	603	903	0
500	0	0	0	0	0	0	0	200	300	0	0	0	0	0	0	0	200	903	0	0	0	0	0	0	0	603	903	0
500	1	0	0	0	0	0	0	200	300	0	0	0	0	0	0	0	200	903	0	0	0	0	0	0	0	603	903	0
500	2	0	0	0	0	0	0	200	300	0	0	0	0	0	0	0	200	903	0	0	0	0	0	0	0	603	903	0
500	3	0	0	0	0	0	0	200	300	0	0	0	0	0	0	0	200	903	0	0	0	0	0	0	0	603	903	0
500	4	0	0	0	0	0	0	200	300	0	0	0	0	0	0	0	200	903	0	0	0	0	0	0	0	603	903	0
500	5	0	0	0	0	0	0	200	300	0	0	0	0	0	0	0	200	903	0	0	0	0	0	0	0	603	903	0
500	6	0	0	0	0	0	0	200	300	0	0	0	0	0	0	0	200	903	0	0	0	0	0	0	0	603	903	0
500	7	0	0	0	0	0	0	200	300	0	0	0	0	0	0	0	200	903	0	0	0	0	0	0	0	603	903	0
500	8	0	0	0	0	0	0	200	300	0	0	0	0	0	0	0	200	903	0	0	0	0	0	0	0	603	903	0
500	9	0	0	0	0	0	0	200	300	0	0	0	0	0	0	0	200	903	0	0	0	0	0	0	0	603	903	0
501	0	0	0	0	0	0	0	200	300	0	0	0	0	0	0	0	200	903	0	0	0	0	0	0	0	603	903	0
501	1	0	0	0	0	0	0	200	300	0	0	0	0	0	0	0	200	903	0	0	0	0	0	0	0	603	903	0
501	2	0	0	0	0	0	0	200	300	0	0	0	0	0	0	0	200	903	0	0	0	0	0	0	0	603	903	0
501	3	0	0	0	0	0	0	200	300	0	0	0	0	0	0	0	200	903	0	0	0	0	0	0	0	603	903	0
501	4	0	0	0	0	0	0	200	300	0	0	0	0	0	0	0	200	903	0	0	0	0	0	0	0	603	903	0
501	5	0	0	0	0	0	0	200	300	0	0	0	0	0	0	0	200	903	0	0	0	0	0	0	0	603	903	0
501	6	0	0	0	0	0	0	200	300	0	0	0	0	0	0	0	200	903	0	0	0	0	0	0	0	603	903	0
501	7	0	0	0	0	0	0	200	300	0	0	0	0	0	0	0	200	903	0	0	0	0	0	0	0	603	903	0
501	8	0	0	0	0	0	0	200	300	0	0	0	0	0	0	0	200	903	0	0	0	0	0	0	0	603	903	0
501	9	0	0	0	0	0	0	200	300	0	0	0	0	0	0	0	200	903	0	0	0	0	0	0	0	603	903	0
502	0	0	0	0	0	0	0	200	300	0	0	0	0	0	0	0	200	903	0	0	0	0	0	0	0	603	903	0
502	1	0	0	0	0	0	0	200	300	0	0	0	0	0	0	0	200	903	0	0	0	0	0	0	0	603	903	0
502	2	0	0	0	0	0	0	200	300	0	0	0	0	0	0	0	200	903	0	0	0	0	0	0	0	603	903	0
502	3	0	0	0	0	0	0	200	300	0	0	0	0	0	0	0	200	903	0	0	0	0	0	0	0	603	903	0
502	4	0	0	0	0	0	0	200	300	0	0	0	0	0	0	0	200	903	0	0	0	0	0	0	0	603	903	0
502	5	0	0	0	0	0	0	200	300	0	0	0	0	0	0	0	200	903	0	0	0	0	0	0	0	603	903	0
502	6	0	0	0	0	0	0	200	300	0	0	0	0	0	0	0	200	903	0	0	0	0	0	0	0	603	903	0
502	7	0	0	0	0	0	0	200	300	0	0	0	0	0	0	0	200	903	0	0	0	0	0	0	0	603	903	0
502	8	0	0	0	0	0	0	200	300	0	0	0	0	0	0	0	200	903	0	0	0	0	0	0	0	603	903	0
502	9	0	0	0	0	0	0	200	300	0	0	0	0	0	0	0	200	903	0	0	0	0	0	0	0	603	903	0
503	0	0	0	0	0	0	0	200	300	0	0	0	0	0	0	0	200	903	0	0	0	0	0	0	0	603	903	0
503	1	0	0	0	0	0	0	200	300	0	0	0	0	0	0	0	200	903	0	0	0	0	0	0	0	603	903	0
503	2	0	0	0	0	0	0	200	300	0	0	0	0	0	0	0	200	903	0	0	0	0	0	0	0	603	903	0
503	3	0	0	0	0	0	0	200	300	0	0	0	0	0	0	0	200	903	0	0	0	0	0	0	0	603	903	0
503	4	0	0	0	0	0	0	200	300	0	0	0	0	0	0	0	200	903	0	0	0	0	0	0	0	603	903	0
503	5	0	0	0	0	0	0	200	300	0	0	0	0	0	0	0	200	903	0	0	0	0	0	0	0	603	903	0
503	6	0	0	0	0	0	0	200	300	0	0	0	0	0	0	0	200	903	0	0	0	0	0	0	0	603	903	0
503	7	0	0	0	0	0	0	200	300	0	0	0	0	0	0	0	200	903	0	0	0	0	0	0	0	603	903	0
503	8	0	0	0	0	0	0	200	300	0	0	0	0	0	0	0	200	903	0	0	0	0	0	0	0	603	903	0
503	9	0	0	0	0	0	0	200	300	0	0	0	0	0	0	0	200	903	0	0	0	0	0	0	0	603	903	0
504	0	0	0	0	0	0	0	200	300	0	0	0	0	0	0	0	200	903	0	0	0	0	0	0	0	603	903	0
504	1	0	0	0	0	0	0	200	300	0	0	0	0	0	0	0	200	903	0	0	0	0	0	0	0	603	903	0
504	2	0	0	0	0	0	0	200	300	0	0	0	0	0	0	0	200	903	0	0	0	0	0	0	0	603	903	0
504	3	0	0	0	0	0	0	200	300	0	0	0	0	0	0	0	200	903	0	0	0	0	0	0	0	603	903	0
504	4	0	0	0	0	0	0	200	300	0	0	0	0	0	0	0	200	903	0	0	0	0	0	0	0	603	903	0
504	5	0	0	0	0	0	0	200	300	0	0	0	0	0	0	0	200	903	0	0	0	0	0	0	0	603	903	0
504	6	0	0	0	0	0	0	200	300	0	0	0	0	0	0	0	200	903	0	0	0	0	0	0	0	603	903	0
504	7	0	0	0	0	0	0	200	300	0	0	0	0	0	0	0	200	903	0	0	0	0	0	0	0	603	903	0
504	8	0	0	0	0	0	0	200	300	0	0	0	0	0	0	0	200	903	0	0	0	0	0	0	0	603	903	0
504	9	0	0	0	0	0	0	200	300	0	0	0	0	0	0	0	200	903	0	0	0	0	0	0	0	603	903	0
505	0	0	0	0	0	0	0	200	300	0	0	0	0	0	0	0	200	903	0	0	0	0	0	0	0	603	903	0
505	1	0	0	0	0	0	0	200	300	0	0	0	0	0	0	0	200	903	0	0	0	0	0	0	0	603	903	0
505	2	0	0	0	0	0	0	200	300	0	0	0	0	0	0	0	200	903	0	0	0	0	0	0	0	603	903	0
505	3	0	0	0	0	0	0	200	300	0	0	0	0	0	0	0	200	903	0	0	0	0	0	0	0	603	903	0
505	4	0	0	0	0	0	0	200	300	0	0	0	0	0	0	0	200	903	0	0	0	0	0	0	0	603	903	0
505	5	0	0	0	0	0	0	200	300	0	0	0	0	0	0	0	200	903	0	0	0	0	0	0	0	603	903	0
505	6	0	0	0	0	0	0	200	300	0	0	0	0	0	0	0	200	903	0	0	0	0	0	0	0	603	903	0
505	7	0	0	0	0	0	0	200	300	0	0	0	0	0	0	0	200	903	0	0	0	0	0	0	0	603	903	0
505	8	0	0	0	0	0	0	200	300	0	0	0	0	0	0	0	200	903	0	0	0	0	0	0	0	603	903	0
505	9	0	0	0	0	0	0	200	300	0	0	0	0	0	0	0	200	903	0	0	0	0	0	0	0	603	903	0
506	0	0	0	0	0	0	0	200	300	0	0	0	0	0	0	0	200	903	0	0	0	0	0	0	0	603	903	0
506	1	0	0	0	0	0	0	200	300	0	0	0	0	0	0	0	200	903	0	0	0	0	0	0	0	603	903	0
506	2	0	0	0	0	0	0	200	300	0	0	0	0	0	0	0	200	903	0	0	0	0	0	0	0	603	903	0
506	3	0	0	0	0	0	0	200	300	0	0	0	0	0	0	0	200	903	0	0	0	0	0	0	0	603	903	0
506	4	0	0	0	0	0	0	200	300	0	0	0	0	0	0	0	200	903	0	0	0	0	0	0	0	603	903	0
506	5	0	0	0	0	0	0	200	300	0	0	0	0	0	0	0	200	903	0	0	0	0	0	0	0	603	903	0
506	6	0	0	0	0	0	0	200	300	0	0	0	0	0	0	0	200	903	0	0	0	0	0	0	0	603	903	0
506	7	0	0	0	0	0	0	200	300	0	0	0	0	0	0	0	200	903	0	0	0	0	0	0	0	603	903	0
506	8	0	0	0	0	0	0	200	300	0	0	0	0	0	0	0	200	903	0	0	0	0	0	0	0	603	903	0
506	9	0	0	0	0	0	0	200	300	0	0	0	0	0	0	0	200	903	0	0	0	0	0	0	0	603	903	0
507	0	0	0	0	0	0	0	200	300	0	0	0	0	0	0	0	200	903	0	0	0	0	0	0	0	603	903	0
507	1	0	0	0	0	0	0	200	300	0	0	0	0	0	0	0	200	903	0	0	0	0	0	0	0	603	903	0
507	2	0	0	0	0	0	0	200	300	0	0	0	0	0	0	0	200	903	0	0	0	0	0	0	0	603	903	0
507	3	0	0	0	0	0	0	200	300	0	0	0	0	0	0	0	200	903	0	0	0	0	0	0	0	603	903	0
507	4	0	0	0	0	0	0	200	300	0	0	0	0	0	0	0	200	903	0	0	0	0	0	0	0	603	903	0
507	5	0	0	0	0	0	0	200	300	0	0	0	0	0	0	0	200	903	0	0	0	0	0	0	0	603	903	0
507	6	0	0	0	0	0	0	200	300	0	0	0	0	0	0	0	200	903	0	0	0	0	0	0	0	603	903	0
507	7	0	0	0	0	0	0	200	300	0	0	0	0	0	0	0	200	903	0	0	0	0	0	0	0	603	903	0
507	8	0	0	0	0	0	0	200	300	0	0	0	0	0	0	0	200	903	0	0	0	0	0	0	0	603	903	0
507	9	0	0	0	0	0	0	200	300	0	0	0	0	0	0	0	200	903	0	0	0	0	0	0	0	603	903	0
508	0	0	0	0	0	0	0	200	300	0	0	0	0	0	0	0	200	903	0	0	0	0	0	0	0	603	903	0
508	1	0	0	0	0	0	0	200	300	0	0	0	0	0	0	0	200	903	0	0	0	0	0	0	0	603	903	0
508	2	0	0	0	0	0	0	200	300	0	0	0	0	0	0	0	200	903	0	0	0	0	0	0	0	603	903	0
508	3	0	0	0	0	0	0	200	300	0	0	0	0	0	0	0	200	903	0	0	0	0	0	0	0	603	903	0
508	4	0	0	0	0	0	0	200	300	0	0	0	0	0	0	0	200	903	0	0	0	0	0	0	0	603	903	0
508	5	0	0	0	0	0	0	200	300	0	0	0	0	0	0	0	200	903	0	0	0	0	0	0	0	603	903	0
508	6	0	0	0	0	0	0	200	300	0	0	0	0	0	0	0	200	903	0	0	0	0	0	0	0	603	903	0
508	7	0	0	0	0	0	0	200	300	0	0	0	0	0	0	0	200	903	0	0	0	0	0	0	0	603	903	0
508	8	0	0	0	0	0	0	200	300	0	0	0	0	0	0	0	200	903	0	0	0	0	0	0	0	603	903	0
508	9	0	0	0	0	0	0	200	300	0	0	0	0	0	0	0	200	903	0	0	0	0	0	0	0	603	903	0
509	0	0	0	0	0	0	0	200	300	0	0	0	0	0	0	0	200	903	0	0	0	0	0	0	0	603	903	0
509	1	0	0	0	0	0	0	200	300	0	0	0	0	0	0	0	200	903	0	0	0	0	0	0	0	603	903	0
509	2	0	0	0	0	0	0	200	300	0	0	0	0	0	0	0	200	903	0	0	0	0	0	0	0	603	903	0
509	3	0	0	0	0	0	0	200	300	0	0	0	0	0	0	0	200	903	0	0	0	0	0	0	0	603	903	0
509	4	0	0	0	0	0	0	200	300	0	0	0	0	0	0	0	200	903	0	0	0	0	0	0	0	603	903	0
509	5	0	0	0	0	0	0	200	300	0	0	0	0	0	0	0	200	903	0	0	0	0	0	0	0	603	903	0
509	6	0	0	0	0	0	0	200	300	0	0	0	0	0	0	0	200	903	0	0	0	0	0	0	0	603	903	0
509	7	0	0	0	0	0	0	200	300	0	0	0	0	0	0	0	200	903	0	0	0	0	0	0	0	603	903	0
509	8	0	0	0	0	0	0	200	300	0	0	0	0	0	0	0	200	903	0	0	0	0	0	0	0	603	903	0
509	9	0	0	0	0	0	0	200	300	0	0	0	0	0	0	0	200	903	0	0	0	0	0	0	0	603	903	0
510	0	0	0	0	0	0	0	200	300	0	0	0	0	0	0	0	200	903	0	0	0	0	0	0	0	603	903	0
510	1	0	0	0	0	0	0	200	300	0	0	0	0	0	0	0	200	903	0	0	0	0	0	0	0	603	903	0
510	2	0	0	0	0	0	0	200	300	0	0	0	0	0	0	0	200	903	0	0	0	0	0	0	0	603	903	0
510	3	0	0	0	0	0	0	200	300	0	0	0	0	0	0	0	200	903	0	0	0	0	0	0	0	603	903	0
510	4	0	0	0	0	0	0	200	300	0	0	0	0	0	0	0	200	903	0	0	0	0	0	0	0	603	903	0
510	5	0	0	0	0	0	0	200	300	0	0	0	0	0	0	0	200	903	0	0	0	0	0	0	0	603	903	0
510	6	0	0	0	0	0	0	200	300	0	0	0	0	0	0	0	200	903	0	0	0	0	0	0	0	603	903	0
510	7	0	0	0	0	0	0	200	300	0	0	0	0	0	0	0	200	903	0	0	0	0	0	0	0	603	903	0
510	8	0	0	0	0	0	0	200	300	0	0	0	0	0	0	0	200	903	0	0	0	0	0	0	0	603	903	0
510	9	0	0	0	0	0	0	200	300	0	0	0	0	0	0	0	200	903	0	0	0	0	0	0	0	603	903	0
511	0	0	0	0	0	0	0	200	300	0	0	0	0	0	0	0	200	903	0	0	0	0	0	0	0	603	903	0
511	1	0	0	0	0	0	0	200	300	0	0	0	0	0	0	0	200	903	0	0	0	0	0	0	0	603	903	0
511	2	0	0	0	0	0	0	200	300	0	0	0	0	0	0	0	200	903	0	0	0	0	0	0	0	603	903	0
511	3	0	0	0	0	0	0	200	300	0	0	0	0	0	0	0	200	903	0	0	0	0	0	0	0	603	903	0
511	4	0	0	0	0	0	0	200	300	0	0	0	0	0	0	0	200	903	0	0	0	0	0	0	0	603	903	0
511	5	0	0	0	0	0	0	200	300	0	0	0	0	0	0	0	200	903	0	0	0	0	0	0	0	603	903	0
511	6	0	0	0	0	0	0	200	300	0	0	0	0	0	0	0	200	903	0	0	0	0	0	0	0	603	903	0
511	7	0	0	0	0	0	0	200	300	0	0	0	0	0	0	0	200	903	0	0	0	0	0	0	0	603	903	0
511	8	0	0	0	0	0	0	200	300	0	0	0	0	0	0	0	200	903	0	0	0	0	0	0	0	603	903	0
511	9	0	0	0	0	0	0	200	300	0	0	0	0	0	0	0	200	903	0	0	0	0	0	0	0	603	903	0
512	0	0	0	0	0	0	0	200	300	0	0	0	0	0	0	0	200	903	0	0	0	0	0	0	0	603	903	0
512	1	0	0	0	0	0	0	200	300	0	0	0	0	0	0	0	200	903	0	0	0	0	0	0	0	603	903	0
512	2	0	0	0	0	0	0	200	300	0	0	0	0	0	0	0	200	903	0	0	0	0	0	0	0	603	903	0
512	3	0	0	0	0	0	0	200	300	0	0	0	0	0	0	0	200	903	0	0	0	0	0	0	0	603	903	0
512	4	0	0	0	0	0	0	200	300	0	0	0	0	0	0	0	200	903	0	0	0	0	0	0	0	603	903	0
512	5	0	0	0	0	0	0	200	300	0	0	0	0	0	0	0	200	903	0	0	0	0	0	0	0	603	903	0
512	6	0	0	0	0	0	0	200	300	0	0	0	0	0	0	0	200	903	0	0	0	0	0	0	0	603	903	0
512	7	0	0	0	0	0	0	200	300	0	0	0	0	0	0	0	200	903	0	0	0	0	0	0	0	603	903	0
512	8	0	0	0	0	0	0	200	300	0	0	0	0	0	0	0	200	903	0	0	0	0	0	0	0	603	903	0
512	9	0	0	0	0	0	0	200	300	0	0	0	0	0	0	0	200	903	0	0	0	0	0	0	0	603	903	0
513	0	0	0	0	0	0	0	200	300	0	0	0	0	0	0	0	200	903	0	0	0	0	0	0	0	603	903	0
513	1	0	0	0	0	0	0	200	300	0	0	0	0	0	0	0	200	903	0	0	0	0	0	0	0	603	903	0
513	2	0	0	0	0	0	0	200	300	0	0	0	0	0	0	0	200	903	0	0	0	0	0	0	0	603	903	0
513	3	0	0	0	0	0	0	200	300	0	0	0	0	0	0	0	200	903	0	0	0	0	0	0	0	603	903	0
513	4	0	0	0	0	0	0	200	300	0	0	0	0	0	0	0	200	903	0	0	0	0	0	0	0	603	903	0
513	5	0	0	0	0	0	0	200	300	0	0	0	0	0	0	0	200	903	0	0	0	0	0	0	0	603	903	0
513	6	0	0	0	0	0	0	200	300	0	0	0	0	0	0	0	200	903	0	0	0	0	0	0	0	603	903	0
513	7	0	0	0	0	0	0	200	300	0	0	0	0	0	0	0	200	903	0	0	0	0	0	0	0	603	903	0
513	8	0	0	0	0	0	0	200	300	0	0	0	0	0	0	0	200	903	0	0	0	0	0	0	0	603	903	0
513	9	0	0	0	0	0	0	200	300	0	0	0	0	0	0	0	200	903	0	0	0	0	0	0	0	603	903	0
514	0	0	0	0	0	0	0	200	300	0	0	0	0	0	0	0	200	903	0	0	0	0	0	0	0	603	903	0
514	1	0	0	0	0	0	0	200	300	0	0	0	0	0	0	0	200	903	0	0	0	0	0	0	0	603	903	0
514	2	0	0	0	0	0	0	200	300	0	0	0	0	0	0	0	200	903	0	0	0	0	0	0	0	603	903	0
514	3	0	0	0	0	0	0	200	300	0	0	0	0	0	0	0	200	903	0	0	0	0	0	0	0	603	903	0
514	4	0	0	0	0	0	0	200	300	0	0	0	0	0	0	0	200	903	0	0	0	0	0	0	0	603	903	0
514	5	0	0	0	0	0	0	200	300	0	0	0	0	0	0	0	200	903	0	0	0	0	0	0	0	603	903	0
514	6	0	0	0	0	0	0	200	300	0	0	0	0	0	0	0	200	903	0	0	0	0	0	0	0	603	903	0
514	7	0	0	0	0	0	0	200	300	0	0	0	0	0	0	0	200	903	0	0	0	0	0	0	0	603	903	0
514	8	0	0	0	0	0	0	200	300	0	0	0	0	0	0	0	200	903	0	0	0	0	0	0	0	603	903	0
514	9	0	0	0	0	0	0	200	300	0	0	0	0	0	0	0	200	903	0	0	0	0	0	0	0	603	903	0
515	0	0	0	0	0	0	0	200	300	0	0	0	0	0	0	0	200	903	0	0	0	0	0	0	0	603	903	0
515	1	0	0	0	0	0	0	200	300	0	0	0	0	0	0	0	200	903	0	0	0	0	0	0	0	603	903	0
515	2	0	0	0	0	0	0	200	300	0	0	0	0	0	0	0	200	903	0	0	0	0	0	0	0	603	903	0
515	3	0	0	0	0	0	0	200	300	0	0	0	0	0	0	0	200	903	0	0	0	0	0	0	0	603	903	0
515	4	0	0	0	0	0	0	200	300	0	0	0	0	0	0	0	200	903	0	0	0	0	0	0	0	603	903	0
515	5	0	0	0	0	0	0	200	300	0	0	0	0	0	0	0	200	903	0	0	0	0	0	0	0	603	903	0
515	6	0	0	0	0	0	0	200	300	0	0	0	0	0	0	0	200	903	0	0	0	0	0	0	0	603	903	0
515	7	0	0	0	0	0	0	200	300	0	0	0	0	0	0	0	200	903	0	0	0	0	0	0	0	603	903	0
515	8	0	0	0	0	0	0	200	300	0	0	0	0	0	0	0	200	903	0	0	0	0	0	0	0	603	903	0
515	9	0	0	0	0	0	0	200	300	0	0	0	0	0	0	0	200	903	0	0	0	0	0	0	0	603	903	0
516	0	0	0	0	0	0	0	200	300	0	0	0	0	0	0	0	200	903	0	0	0	0	0	0	0	603	903	0
516	1	0	0	0	0	0	0	200	300	0	0	0	0	0	0	0	200	903	0	0	0	0	0	0	0	603	903	0
516	2	0	0	0	0	0	0	200	300	0	0	0	0	0	0	0	200	903	0	0	0	0	0	0	0	603	903	0
516	3	0	0	0	0	0	0	200	300	0	0	0	0	0	0	0	200	903	0	0	0	0	0	0	0	603	903	0
516	4	0	0	0	0	0	0	200	300	0	0	0	0	0	0	0	200	903	0	0	0	0	0	0	0	603	903	0
516	5	0	0	0	0	0	0	200	300	0	0	0	0	0	0	0	200	903	0	0	0	0	0	0	0	603	903	0
516	6	0	0	0	0	0	0	200	300	0	0	0	0	0	0	0	200	903	0	0	0	0	0	0	0	603	903	0
516	7	0	0	0	0	0	0	200	300	0	0	0	0	0	0	0	200	903	0	0	0	0	0	0	0	603	903	0
516	8	0	0	0	0	0	0	200	300	0	0	0	0	0	0	0	200	903	0	0	0	0	0	0	0	603	903	0
516	9	0	0	0	0	0	0	200	300	0	0	0	0	0	0	0	200	903	0	0	0	0	0	0	0	603	903	0
517	0	0	0	0	0	0	0	200	300	0	0	0	0	0	0	0	200	903	0	0	0	0	0	0	0	603	903	0
517	1	0	0	0	0	0	0	200	300	0	0	0	0	0	0	0	200	903	0	0	0	0	0	0	0	603	903	0
517	2	0	0	0	0	0	0	200	300	0	0	0	0	0	0	0	200	903	0	0	0	0	0	0	0	603	903	0
517	3	0	0	0	0	0	0	200	300	0	0	0	0	0	0	0	200	903	0	0	0	0	0	0	0	603	903	0
517	4	0	0	0	0	0	0	200	300	0	0	0	0	0	0	0	200	903	0	0	0	0	0	0	0	603	903	0
517	5	0	0	0	0	0	0	200	300	0	0	0	0	0	0	0	200	903	0	0	0	0	0	0	0	603	903	0
517	6	0	0	0	0	0	0	200	300	0	0	0	0	0	0	0	200	903	0	0	0	0	0	0	0	603	903	0
517	7	0	0	0	0	0	0	200	300	0	0	0	0	0	0	0	200	903	0	0	0	0	0	0	0	603	903	0
517	8	0	0	0	0	0	0	200	300	0	0	0	0	0	0	0	200	903	0	0	0	0	0	0	0	603	903	0
517	9	0	0	0	0	0	0	200	300	0	0	0	0	0	0	0	200	903	0	0	0	0	0	0	0	603	903	0
518	0	0	0	0	0	0	0	200	300	0	0	0	0	0	0	0	200	903	0	0	0	0	0	0	0	603	903	0
518	1	0	0	0	0	0	0	200	300	0	0	0	0	0	0	0	200	903	0	0	0	0	0	0	0	603	903	0
518	2	0	0	0	0	0	0	200	300	0	0	0	0	0	0	0	200	903	0	0	0	0	0	0	0	603	903	0
518	3	0	0	0	0	0	0	200	300	0	0	0	0	0	0	0	200	903	0	0	0	0	0	0	0	603	903	0
518	4	0	0	0	0	0	0	200	300	0	0	0	0	0	0	0	200	903	0	0	0	0	0	0	0	603	903	0
518	5	0	0	0	0	0	0	200	300	0	0	0	0	0	0	0	200	903	0	0	0	0	0	0	0	603	903	0
518	6	0	0	0	0	0	0	200	300	0	0	0	0	0	0	0	200	903	0	0	0	0	0	0	0	603	903	0
518	7	0	0	0	0	0	0	200	300	0	0	0	0	0	0	0	200	903	0	0	0	0	0	0	0	603	903	0
518	8	0	0	0	0	0	0	200	300	0	0	0	0	0	0	0	200	903	0	0	0	0	0	0	0	603	903	0
518	9	0	0	0	0	0	0	200	300	0	0	0	0	0	0	0	200	903	0	0	0	0	0	0	0	603	903	0
519	0	0	0	0	0	0	0	200	300	0	0	0	0	0	0	0	200	903	0	0	0	0	0	0	0	603	903	0
519	1	0	0	0	0	0	0	200	300	0	0	0	0	0	0	0	200	903	0	0	0	0	0	0	0	603	903	0
519	2	0	0	0	0	0	0	200	300	0	0	0	0	0	0	0	200	903	0	0	0	0	0	0	0	603	903	0
519	3	0	0	0	0	0	0	200	300	0	0	0	0	0	0	0	200	903	0	0	0	0	0	0	0	603	903	0
519	4	0	0	0	0	0	0	200	300	0	0	0	0	0	0	0	200	903	0	0	0	0	0	0	0	603	903	0
519	5	0	0	0	0	0	0	200	300	0	0	0	0	0	0	0	200	903	0	0	0	0	0	0	0	603	903	0
519	6	0	0	0	0	0	0	200	300	0	0	0	0	0	0	0	200	903	0	0	0	0	0	0	0	603	903	0
519	7	0	0	0	0	0	0	200	300	0	0	0	0	0	0	0	200	903	0	0	0	0	0	0	0	603	903	0
519	8	0	0	0	0	0	0	200	300	0	0	0	0	0	0	0	200	903	0	0	0	0	0	0	0	603	903	0
519	9	0	0	0	0	0	0	200	300	0	0	0	0	0	0	0	200	903	0	0	0	0	0	0	0	603	903	0
520	0	0	0	0	0	0	0	200	300	0	0	0	0	0	0	0	200	903	0	0	0	0	0	0	0	603	903	0
520	1	0	0	0	0	0	0	200	300	0	0	0	0	0	0	0	200	903	0	0	0	0	0	0	0	603	903	0
520	2	0	0	0	0	0	0	200	300	0	0	0	0	0	0	0	200	903	0	0	0	0	0	0	0	603	903	0
520	3	0	0	0	0	0	0	200	300	0	0	0	0	0	0	0	200	903	0	0	0	0	0	0	0	603	903	0
520	4	0	0	0	0	0	0	200	300	0	0	0	0	0	0	0	200	903	0	0	0	0	0	0	0	603	903	0
520	5	0	0	0	0	0	0	200	300	0	0	0	0	0	0	0	200	903	0	0	0	0	0	0	0	603	903	0
520	6	0	0	0	0	0	0	200	300	0	0	0	0	0	0	0	200	903	0	0	0	0	0	0	0	603	903	0
520	7	0	0	0	0	0	0	200	300	0	0	0	0	0	0	0	200	903	0	0	0	0	0	0	0	603	903	0
520	8	0	0	0	0	0	0	200	300	0	0	0	0	0	0	0	200	903	0	0	0	0	0	0	0	603	903	0
520	9	0	0	0	0	0	0	200	300	0	0	0	0	0	0	0	200	903	0	0	0	0	0	0	0	603	903	0
521	0	0	0	0	0	0	0	200	300	0	0	0	0	0	0	0	200	903	0	0	0	0	0	0	0	603	903	0
521	1	0	0	0	0	0	0	200	300	0	0	0	0	0	0	0	200	903	0	0	0	0	0	0	0	603	903	0
521	2	0	0	0	0	0	0	200	300	0	0	0	0	0	0	0	200	903	0	0	0	0	0	0	0	603	903	0
521	3	0	0	0	0	0	0	200	300	0	0	0	0	0	0	0	200	903	0	0	0	0	0	0	0	603	903	0
521	4	0	0	0	0	0	0	200	300	0	0	0	0	0	0	0	200	903	0	0	0	0	0	0	0	603	903	0
521	5	0	0	0	0	0	0	200	300	0	0	0	0	0	0	0	200	903	0	0	0	0	0	0	0	603	903	0
521	6	0	0	0	0	0	0	200	300	0	0	0	0	0	0	0	200	903	0	0	0	0	0	0	0	603	903	0
521	7	0	0	0	0	0	0	200	300	0	0	0	0	0	0	0	200	903	0	0	0	0	0	0	0	603	903	0
521	8	0	0	0	0	0	0	200	300	0	0	0	0	0	0	0	200	903	0	0	0	0	0	0	0	603	903	0
521	9	0	0	0	0	0	0	200	300	0	0	0	0	0	0	0	200	903	0	0	0	0	0	0	0	603	903	0
522	0	0	0	0	0	0	0	200	300	0	0	0	0	0	0	0	200	903	0	0	0	0	0	0	0	603	903	0
522	1	0	0	0	0	0	0	200	300	0	0	0	0	0	0	0	200	903	0	0	0	0	0	0	0	603	903	0
522	2	0	0	0	0	0	0	200	300	0	0	0	0	0	0	0	200	903	0	0	0	0	0	0	0	603	903	0
522	3	0	0	0	0	0	0	200	300	0	0	0	0	0	0	0	200	903	0	0	0	0	0	0	0	603	903	0
522	4	0	0	0	0	0	0	200	300	0	0	0	0	0	0	0	200	903	0	0	0	0	0	0	0	603	903	0
522	5	0	0	0	0	0	0	200	300	0	0	0	0	0	0	0	200	903	0	0	0	0	0	0	0	603	903	0
522	6	0	0	0	0	0	0	200	300	0	0	0	0	0	0	0	200	903	0	0	0	0	0	0	0	603	903	0
522	7	0	0	0	0	0	0	200	300	0	0	0	0	0	0	0	200	903	0	0	0	0	0	0	0	603	903	0
522	8	0	0	0	0	0	0	200	300	0	0	0	0	0	0	0	200	903	0	0	0	0	0	0	0	603	903	0
522	9	0	0	0	0	0	0	200	300	0	0	0	0	0	0	0	200	903	0	0	0	0	0	0	0	603	903	0
523	0	0	0	0	0	0	0	200	300	0	0	0	0	0	0	0	200	903	0	0	0	0	0	0	0	603	903	0
523	1	0	0	0	0	0	0	200	300	0	0	0	0	0	0	0	200	903	0	0	0	0	0	0	0	603	903	0
523	2	0	0	0	0	0	0	200	300	0	0	0	0	0	0	0	200	903	0	0	0	0	0	0	0	603	903	0
523	3	0	0	0	0	0	0	200	300	0	0	0	0	0	0	0	200	903	0	0	0	0	0	0	0	603	903	0
523	4	0	0	0	0	0	0	200	300	0	0	0	0	0	0	0	200	903	0	0	0	0	0	0	0	603	903	0
523	5	0	0	0	0	0	0	200	300	0	0	0	0	0	0	0	200	903	0	0	0	0	0	0	0	603	903	0
523	6	0	0	0	0	0	0	200	300	0	0	0	0	0	0	0	200	903	0	0	0	0	0	0	0	603	903	0
523	7	0	0	0	0	0	0	200	300	0	0	0	0	0	0	0	200	903	0	0	0	0	0	0	0	603	903	0
523	8	0	0	0	0	0	0	200	300	0	0	0	0	0	0	0	200	903	0	0	0	0	0	0	0	603	903	0
523	9	0	0	0	0	0	0	200	300	0	0	0	0	0	0	0	200	903	0	0	0	0	0	0	0	603	903	0
524	0	0	0	0	0	0	0	200	300	0	0	0	0	0	0	0	200	903	0	0	0	0	0	0	0	603	903	0
524	1	0	0	0	0	0	0	200	300	0	0	0	0	0	0	0	200	903	0	0	0	0	0	0	0	603	903	0
524	2	0	0	0	0	0	0	200	300	0	0	0	0	0	0	0	200	903	0	0	0	0	0	0	0	603	903	0
524	3	0	0	0	0	0	0	200	300	0	0	0	0	0	0	0	200	903	0	0	0	0	0	0	0	603	903	0
524	4	0	0	0	0	0	0	200	300	0	0	0	0	0	0	0	200	903	0	0	0	0	0	0	0	603	903	0
524	5	0	0	0	0	0	0	200	300	0	0	0	0	0	0	0	200	903	0	0	0	0	0	0	0	603	903	0
524	6	0	0	0	0	0	0	200	300	0	0	0	0	0	0	0	200	903	0	0	0	0	0	0	0	603	903	0
524	7	0	0	0	0	0	0	200	300	0	0	0	0	0	0	0	200	903	0	0	0	0	0	0	0	603	903	0
524	8	0	0	0	0	0	0	200	300	0	0	0	0	0	0	0	200	903	0	0	0	0	0	0	0	603	903	0
524	9	0	0	0	0	0	0	200	300	0	0	0	0	0	0	0	200	903	0	0	0	0	0	0	0	603	903	0
525	0	0	0	0	0	0	0	200	300	0	0	0	0	0	0	0	200	903	0	0	0	0	0	0	0	603	903	0
525	1	0	0	0	0	0	0	200	300	0	0	0	0	0	0	0	200	903	0	0	0	0	0	0	0	603	903	0
525	2	0	0	0	0	0	0	200	300	0	0	0	0	0	0	0	200	903	0	0	0	0	0	0	0	603	903	0
525	3	0	0	0	0	0	0	200	300	0	0	0	0	0	0	0	200	903	0	0	0	0	0	0	0	603	903	0
525	4	0	0	0	0	0	0	200	300	0	0	0	0	0	0	0	200	903	0	0	0	0	0	0	0	603	903	0
525	5	0	0	0	0	0	0	200	300	0	0	0	0	0	0	0	200	903	0	0	0	0	0	0	0	603	903	0
525	6	0	0	0	0	0	0	200	300	0	0	0	0	0	0	0	200	903	0	0	0	0	0	0	0	603	903	0
525	7	0	0	0	0	0	0	200	300	0	0	0	0	0	0	0	200	903	0	0	0	0	0	0	0	603	903	0
525	8	0	0	0	0	0	0	200	300	0	0	0	0	0	0	0	200	903	0	0	0	0	0	0	0	603	903	0
525	9	0	0	0	0	0	0	200	300	0	0	0	0	0	0	0	200	903	0	0	0	0	0	0	0	603	903	0
526	0	0	0	0	0	0	0	200	300	0	0	0	0	0	0	0	200	903	0	0	0	0	0	0	0	603	903	0
526	1	0	0	0	0	0	0	200	300	0	0	0	0	0	0	0	200	903	0	0	0	0	0	0	0	603	903	0
526	2	0	0	0	0	0	0	200	300	0	0	0	0	0	0	0	200	903	0	0	0	0	0	0	0	603	903	0
526	3	0	0	0	0	0	0	200	300	0	0	0	0	0	0	0	200	903	0	0	0	0	0	0	0	603	903	0
526	4	0	0	0	0	0	0	200	300	0	0	0	0	0	0	0	200	903	0	0	0	0	0	0	0	603	903	0
526	5	0	0	0	0	0	0	200	300	0	0	0	0	0	0	0	200	903	0	0	0	0	0	0	0	603	903	0
526	6	0	0	0	0	0	0	200	300	0	0	0	0	0	0	0	200	903	0	0	0	0	0	0	0	603	903	0
526	7	0	0	0	0	0	0	200	300	0	0	0	0	0	0	0	200	903	0	0	0	0	0	0	0	603	903	0
526	8	0	0	0	0	0	0	200	300	0	0	0	0	0	0	0	200	903	0	0	0	0	0	0	0	603	903	0
526	9	0	0	0	0	0	0	200	300	0	0	0	0	0	0	0	200	903	0	0	0	0	0	0	0	603	903	0
527	0	0	0	0	0	0	0	200	300	0	0	0	0	0	0	0	200	903	0	0	0	0	0	0	0	603	903	0
527	1	0	0	0	0	0	0	200	300	0	0	0	0	0	0	0	200	903	0	0	0	0	0	0	0	603	903	0
527	2	0	0	0	0	0	0	200	300	0	0	0	0	0	0	0	200	903	0	0	0	0	0	0	0	603	903	0
527	3	0	0	0	0	0	0	200	300	0	0	0	0	0	0	0	200	903	0	0	0	0	0	0	0	603	903	0
527	4	0	0	0	0	0	0	200	300	0	0	0	0	0	0	0	200	903	0	0	0	0	0	0	0	603	903	0
527	5	0	0	0	0	0	0	200	300	0	0	0	0	0	0	0	200	903	0	0	0	0	0	0	0	603	903	0
527	6	0	0	0	0	0	0	200	300	0	0	0	0	0	0	0	200	903	0	0	0	0	0	0	0	603	903	0
527	7	0	0	0	0	0	0	200	300	0	0	0	0	0	0	0	200	903	0	0	0	0	0	0	0	603	903	0
527	8	0	0	0	0	0	0	200	300	0	0	0	0	0	0	0	200	903	0	0	0	0	0	0	0	603	903	0
527	9	0	0	0	0	0	0	200	300	0	0	0	0	0	0	0	200	903	0	0	0	0	0	0	0	603	903	0
528	0	0	0	0	0	0	0	200	300	0	0	0	0	0	0	0	200	903	0	0	0	0	0	0	0	603	903	0
528	1	0	0	0	0	0	0	200	300	0	0	0	0	0	0	0	200	903	0	0	0	0	0	0	0	603	903	0
528	2	0	0	0	0	0	0	200	300	0	0	0	0	0	0	0	200	903	0	0	0	0	0	0	0	603	903	0
528	3	0	0	0	0	0	0	200	300	0	0	0	0	0	0	0	200	903	0	0	0	0	0	0	0	603	903	0
528	4	0	0	0	0	0	0	200	300	0	0	0	0	0	0	0	200	903	0	0	0	0	0	0	0	603	903	0
528	5	0	0	0	0	0	0	200	300	0	0	0	0	0	0	0	200	903	0	0	0	0	0	0	0	603	903	0
528	6	0	0	0	0	0	0	200	300	0	0	0	0	0	0	0	200	903	0	0	0	0	0	0	0	603	903	0
528	7	0	0	0	0	0	0	200	300	0	0	0	0	0	0	0	200	903	0	0	0	0	0	0	0	603	903	0
528	8	0	0	0	0	0	0	200	300	0	0	0	0	0	0	0	200	903	0	0	0	0	0	0	0	603	903	0
528	9	0	0	0	0	0	0	200	300	0	0	0	0	0	0	0	200	903	0	0	0	0	0	0	0	603	903	0
529	0	0	0	0	0	0	0	200	300	0	0	0	0	0	0	0	200	903	0	0	0	0	0	0	0	603	903	0
529	1	0	0	0	0	0	0	200	300	0	0	0	0	0	0	0	200	903	0	0	0	0	0	0	0	603	903	0
529	2	0	0	0	0	0	0	200	300	0	0	0	0	0	0	0	200	903	0	0	0	0	0	0	0	603	903	0
529	3	0	0	0	0	0	0	200	300	0	0	0	0	0	0	0	200	903	0	0	0	0	0	0	0	603	903	0
529	4	0	0	0	0	0	0	200	300	0	0	0	0	0	0	0	200	903	0	0	0	0	0	0	0	603	903	0
529	5	0	0	0	0	0	0	200	300	0	0	0	0	0	0	0	200	903	0	0	0	0	0	0	0	603	903	0
529	6	0	0	0	0	0	0	200	300	0	0	0	0	0	0	0	200	903	0	0	0	0	0	0	0	603	903	0
529	7	0	0	0	0	0	0	200	300	0	0	0	0	0	0	0	200	903	0	0	0	0	0	0	0	603	903	0
529	8	0	0	0	0	0	0	200	300	0	0	0	0	0	0	0	200	903	0	0	0	0	0	0	0	603	903	0
529	9	0	0	0	0	0	0	200	300	0	0	0	0	0	0	0	200	903	0	0	0	0	0	0	0	603	903	0
530	0	0	0	0	0	0	0	200	300	0	0	0	0	0	0	0	200	903	0	0	0	0	0	0	0	603	903	0
530	1	0	0	0	0	0	0	200	300	0	0	0	0	0	0	0	200	903	0	0	0	0	0	0	0	603	903	0
530	2	0	0	0	0	0	0	200	300	0	0	0	0	0	0	0	200	903	0	0	0	0	0	0	0	603	903	0
530	3	0	0	0	0	0	0	200	300	0	0	0	0	0	0	0	200	903	0	0	0	0	0	0	0	603	903	0
530	4	0	0	0	0	0	0	200	300	0	0	0	0	0	0	0	200	903	0	0	0	0	0	0	0	603	903	0
530	5	0	0	0	0	0	0	200	300	0	0	0	0	0	0	0	200	903	0	0	0	0	0	0	0	603	903	0
530	6	0	0	0	0	0	0	200	300	0	0	0	0	0	0	0	200	903	0	0	0	0	0	0	0	603	903	0
530	7	0	0	0	0	0	0	200	300	0	0	0	0	0	0	0	200	903	0	0	0	0	0	0	0	603	903	0
530	8	0	0	0	0	0	0	200	300	0	0	0	0	0	0	0	200	903	0	0	0	0	0	0	0	603	903	0
530	9	0	0	0	0	0	0	200	300	0	0	0	0	0	0	0	200	903	0	0	0	0	0	0	0	603	903	0
531	0	0	0	0	0	0	0	200	300	0	0	0	0	0	0	0	200	903	0	0	0	0	0	0	0	603	903	0
531	1	0	0	0	0	0	0	200	300	0	0	0	0	0	0	0	200	903	0	0	0	0	0	0	0	603	903	0
531	2	0	0	0	0	0	0	200	300	0	0	0	0	0	0	0	200	903	0	0	0	0	0	0	0	603	903	0
531	3	0	0	0	0	0	0	200	300	0	0	0	0	0	0	0	200	903	0	0	0	0	0	0	0	603	903	0
531	4	0	0	0	0	0	0	200	300	0	0	0	0	0	0	0	200	903	0	0	0	0	0	0	0	603	903	0
531	5	0	0	0	0	0	0	200	300	0	0	0	0	0	0	0	200	903	0	0	0	0	0	0	0	603	903	0
531	6	0	0	0	0	0	0	200	300	0	0	0	0	0	0	0	200	903	0	0	0	0	0	0	0	603	903	0
531	7	0	0	0	0	0	0	200	300	0	0	0	0	0	0	0	200	903	0	0	0	0	0	0	0	603	903	0
531	8	0	0	0	0	0	0	200	300	0	0	0	0	0	0	0	200	903	0	0	0	0	0	0	0	603	903	0
531	9	0	0	0	0	0	0	200	300	0	0	0	0	0	0	0	200	903	0	0	0	0	0	0	0	603	903	0
532	0	0	0	0	0	0	0	200	300	0	0	0	0	0	0	0	200	903	0	0	0	0	0	0	0	603	903	0
532	1	0	0	0	0	0	0	200	300	0	0	0	0	0	0	0	200	903	0	0	0	0	0	0	0	603	903	0
532	2	0	0	0	0	0	0	200	300	0	0	0	0	0	0	0	200	903	0	0	0	0	0	0	0	603	903	0
532	3	0	0	0	0	0	0	200	300	0	0	0	0	0	0	0	200	903	0	0	0	0	0	0	0	603	903	0
532	4	0	0	0	0	0	0	200	300	0	0	0	0	0	0	0	200	903	0	0	0	0	0	0	0	603	903	0
532	5	0	0	0	0	0	0	200	300	0	0	0	0	0	0	0	200	903	0	0	0	0	0	0	0	603	903	0
532	6	0	0	0	0	0	0	200	300	0	0	0	0	0	0	0	200	903	0	0	0	0	0	0	0	603	903	0
532	7	0	0	0	0	0	0	200	300	0	0	0	0	0	0	0	200	903	0	0	0	0	0	0	0	603	903	0
532	8	0	0	0	0	0	0	200	300	0	0	0	0	0	0	0	200	903	0	0	0	0	0	0	0	603	903	0
532	9	0	0	0	0	0	0	200	300	0	0	0	0	0	0	0	200	903	0	0	0	0	0	0	0	603	903	0
533	0	0	0	0	0	0	0	200	300	0	0	0	0	0	0	0	200	903	0	0	0	0	0	0	0	603	903	0
533	1	0	0	0	0	0	0	200	300	0	0	0	0	0	0	0	200	903	0	0	0	0	0	0	0	603	903	0
533	2	0	0	0	0	0	0	200	300	0	0	0	0	0	0	0	200	903	0	0	0	0	0	0	0	603	903	0
533	3	0	0	0	0	0	0	200	300	0	0	0	0	0	0	0	200	903	0	0	0	0	0	0	0	603	903	0
533	4	0	0	0	0	0	0	200	300	0	0	0	0	0	0	0	200	903	0	0	0	0	0	0	0	603	903	0
533	5	0	0	0	0	0	0	200	300	0	0	0	0	0	0	0	200	903	0	0	0	0	0	0	0	603	903	0
533	6	0	0	0	0	0	0	200	300	0	0	0	0	0	0	0	200	903	0	0	0	0	0	0	0	603	903	0
533	7	0	0	0	0	0	0	200	300	0	0	0	0	0	0	0	200	903	0	0	0	0	0	0	0	603	903	0
533	8	0	0	0	0	0	0	200	300	0	0	0	0	0	0	0	200	903	0	0	0	0	0	0	0	603	903	0
533	9	0	0	0	0	0	0	200	300	0	0	0	0	0	0	0	200	903	0	0	0	0	0	0	0	603	903	0
534	0	0	0	0	0	0	0	200	300	0	0	0	0	0	0	0	200	903	0	0	0	0	0	0	0	603	903	0
534	1	0	0	0	0	0	0	200	300	0	0	0	0	0	0	0	200	903	0	0	0	0	0	0	0	603	903	0
534	2	0	0	0	0	0	0	200	300	0	0	0	0	0	0	0	200	903	0	0	0	0	0	0	0	603	903	0
534	3	0	0	0	0	0	0	200	300	0	0	0	0	0	0	0	200	903	0	0	0	0	0	0	0	603	903	0
534	4	0	0	0	0	0	0	200	300	0	0	0	0	0	0	0	200	903	0	0	0	0	0	0	0	603	903	0
534	5	0	0	0	0	0	0	200	300	0	0	0	0	0	0	0	200	903	0	0	0	0	0	0	0	603	903	0
534	6	0	0	0	0	0	0	200	300	0	0	0	0	0	0	0	200	903	0	0	0	0	0	0	0	603	903	0
534	7	0	0	0	0	0	0	200	300	0	0	0	0	0	0	0	200	903	0	0	0	0	0	0	0	603	903	0
534	8	0	0	0	0	0	0	200	300	0	0	0	0	0	0	0	200	903	0	0	0	0	0	0	0	603	903	0
534	9	0	0	0	0	0	0	200	300	0	0	0	0	0	0	0	200	903	0	0	0	0	0	0	0	603	903	0
535	0	0	0	0	0	0	0	200	300	0	0	0	0	0	0	0	200	903	0	0	0	0	0	0	0	603	903	0
535	1	0	0	0	0	0	0	200	300	0	0	0	0	0	0	0	200	903	0	0	0	0	0	0	0	603	903	0
535	2	0	0	0	0	0	0	200	300	0	0	0	0	0	0	0	200	903	0	0	0	0	0	0	0	603	903	0
535	3	0	0	0	0	0	0	200	300	0	0	0	0	0	0	0	200	903	0	0	0	0	0	0	0	603	903	0
535	4	0	0	0	0	0	0	200	300	0	0	0	0	0	0	0	200	903	0	0	0	0	0	0	0	603	903	0
535	5	0	0	0	0	0	0	200	300	0	0	0	0	0	0	0	200	903	0	0	0	0	0	0	0	603	903	0
535	6	0	0	0	0	0	0	200	300	0	0	0	0	0	0	0	200	903	0	0	0	0	0	0	0	603	903	0
535	7	0	0	0	0	0	0	200	300	0	0	0	0	0	0	0	200	903	0	0	0	0	0	0	0	603	903	0
535	8	0	0	0	0	0	0	200	300	0	0	0	0	0	0	0	200	903	0	0	0	0	0	0	0	603	903	0
535	9	0	0	0	0	0	0	200	300	0	0	0	0	0	0	0	200	903	0	0	0	0	0	0	0	603	903	0
536	0	0	0	0	0	0	0	200	300	0	0	0	0	0	0	0	200	903	0	0	0	0	0	0	0	603	903	0
536	1	0	0	0	0	0	0	200	300	0	0	0	0	0	0	0	200	903	0	0	0	0	0	0	0	603	903	0
536	2	0	0	0	0	0	0	200	300	0	0	0	0	0	0	0	200	903	0	0	0	0	0	0	0	603	903	0
536	3	0	0	0	0	0	0	200	300	0	0	0	0	0	0	0	200	903	0	0	0	0	0	0	0	603	903	0
536	4	0	0	0	0	0	0	200	300	0	0	0	0	0	0	0	200	903	0	0	0	0	0	0	0	603	903	0
536	5	0	0	0	0	0	0	200	300	0	0	0	0	0	0	0	200	903	0	0	0	0	0	0	0	603	903	0
536	6	0	0	0	0	0	0	200	300	0	0	0	0	0	0	0	200	903	0	0	0	0	0	0	0	603	903	0
536	7	0	0	0	0	0	0	200	300	0	0	0	0	0	0	0	200	903	0	0	0	0	0	0	0	603	903	0
536	8	0	0	0	0	0	0	200	300	0	0	0	0	0	0	0	200	903	0	0	0	0	0	0	0	603	903	0
536	9	0	0	0	0	0	0	200	300	0	0	0	0	0	0	0	200	903	0	0	0	0	0	0	0	603	903	0
537	0	0	0	0	0	0	0	200	300	0	0	0	0	0	0	0	200	903	0	0	0	0	0	0	0	603	903	0
537	1	0	0	0	0	0	0	200	300	0	0	0	0	0	0	0	200	903	0	0	0	0	0	0	0	603	903	0
537	2	0	0	0	0	0	0	200	300	0	0	0	0	0	0	0	200	903	0	0	0	0	0	0	0	603	903	0
537	3	0	0	0	0	0	0	200	300	0	0	0	0	0	0	0	200	903	0	0	0	0	0	0	0	603	903	0
537	4	0	0	0	0	0	0	200	300	0	0	0	0	0	0	0	200	903	0	0	0	0	0	0	0	603	903	0
537	5	0	0	0	0	0	0	200	300	0	0	0	0	0	0	0	200	903	0	0	0	0	0	0	0	603	903	0
537	6	0	0	0	0	0	0	200	300	0	0	0	0	0	0	0	200	903	0	0	0	0	0	0	0	603	903	0
537	7	0	0	0	0	0	0	200	300	0	0	0	0	0	0	0	200	903	0	0	0	0	0	0	0	603	903	0
537	8	0	0	0	0	0	0	200	300	0	0	0	0	0	0	0	200	903	0	0	0	0	0	0	0	603	903	0
537	9	0	0	0	0	0	0	200	300	0	0	0	0	0	0	0	200	903	0	0	0	0	0	0	0	603	903	0
538	0	0	0	0	0	0	0	200	300	0	0	0	0	0	0	0	200	903	0	0	0	0	0	0	0	603	903	0
538	1	0	0	0	0	0	0	200	300	0	0	0	0	0	0	0	200	903	0	0	0	0	0	0	0	603	903	0
538	2	0	0	0	0	0	0	200	300	0	0	0	0	0	0	0	200	903	0	0	0	0	0	0	0	603	903	0
538	3	0	0	0	0	0	0	200	300	0	0	0	0	0	0	0	200	903	0	0	0	0	0	0	0	603	903	0
538	4	0	0	0	0	0	0	200	300	0	0	0	0	0	0	0	200	903	0	0	0	0	0	0	0	603	903	0
538	5	0	0	0	0	0	0	200	300	0	0	0	0	0	0	0	200	903	0	0	0	0	0	0	0	603	903	0
538	6	0	0	0	0	0	0	200	300	0	0	0	0	0	0	0	200	903	0	0	0	0	0	0	0	603	903	0
538	7	0	0	0	0	0	0	200	300	0	0	0	0	0	0	0	200	903	0	0	0	0	0	0	0	603	903	0
538	8	0	0	0	0	0	0	200	300	0	0	0	0	0	0	0	200	903	0	0	0	0	0	0	0	603	903	0
538	9	0	0	0	0	0	0	200	300	0	0	0	0	0	0	0	200	903	0	0	0	0	0	0	0	603	903	0
539	0	0	0	0	0	0	0	200	300	0	0	0	0	0	0	0	200	903	0	0	0	0	0	0	0	603	903	0
539	1	0	0	0	0	0	0	200	300	0	0	0	0	0	0	0	200	903	0	0	0	0	0	0	0	603	903	0
539	2	0	0	0	0	0	0	200	300	0	0	0	0	0	0	0	200	903	0	0	0	0	0	0	0	603	903	0
539	3	0	0	0	0	0	0	200	300	0	0	0	0	0	0	0	200	903	0	0	0	0	0	0	0	603	903	0
539	4	0	0	0	0	0	0	200	300	0	0	0	0	0	0	0	200	903	0	0	0	0	0	0	0	603	903	0
539	5	0	0	0	0	0	0	200	300	0	0	0	0	0	0	0	200	903	0	0	0	0	0	0	0	603	903	0
539	6	0	0	0	0	0	0	200	300	0	0	0	0	0	0	0	200	903	0	0	0	0	0	0	0	603	903	0
539	7	0	0	0	0	0	0	200	300	0	0	0	0	0	0	0	200	903	0	0	0	0	0	0	0	603	903	0
539	8	0	0	0	0	0	0	200	300	0	0	0	0	0	0	0	200	903	0	0	0	0	0	0	0	603	903	0
539	9	0	0	0	0	0	0	200	300	0	0	0	0	0	0	0	200	903	0	0	0	0	0	0	0	603	903	0
540	0	0	0	0	0	0	0	200	300	0	0	0	0	0	0	0	200	903	0	0	0	0	0	0	0	603	903	0
540	1	0	0	0	0	0	0	200	300	0	0	0	0	0	0	0	200	903	0	0	0	0	0	0	0	603	903	0
540	2	0	0	0	0	0	0	200	300	0	0	0	0	0	0	0	200	903	0	0	0	0	0	0	0	603	903	0
540	3	0	0	0	0	0	0	200	300	0	0	0	0	0	0	0	200	903	0	0	0	0	0	0	0	603	903	0
540	4	0	0	0	0	0	0	200	300	0	0	0	0	0	0	0	200	903	0	0	0	0	0	0	0	603	903	0
540	5	0	0	0	0	0	0	200	300	0	0	0	0	0	0	0	200	903	0	0	0	0	0	0	0	603	903	0
540	6	0	0	0	0	0	0	200	300	0	0	0	0	0	0	0	200	903	0	0	0	0	0	0	0	603	903	0
540	7	0	0	0	0	0	0	200	300	0	0	0	0	0	0	0	200	903	0	0	0	0	0	0	0	603	903	0
540	8	0	0	0	0	0	0	200	300	0	0	0	0	0	0	0	200	903	0	0	0	0	0	0	0	603	903	0
540	9	0	0	0	0	0	0	200	300	0	0	0	0	0	0	0	200	903	0	0	0	0	0	0	0	603	903	0
541	0	0	0	0	0	0	0	200	300	0	0	0	0	0	0	0	200	903	0	0	0	0	0	0	0	603	903	0
541	1	0	0	0	0	0	0	200	300	0	0	0	0	0	0	0	200	903	0	0	0	0	0	0	0	603	903	0
541	2	0	0	0	0	0	0	200	300	0	0	0	0	0	0	0	200	903	0	0	0	0	0	0	0	603	903	0
541	3	0	0	0	0	0	0	200	300	0	0	0	0	0	0	0	200	903	0	0	0	0	0	0	0	603	903	0
541	4	0	0	0	0	0	0	200	300	0	0	0	0	0	0	0	200	903	0	0	0	0	0	0	0	603	903	0
541	5	0	0	0	0	0	0	200	300	0	0	0	0	0	0	0	200	903	0	0	0	0	0	0	0	603	903	0
541	6	0	0	0	0	0	0	200	300	0	0	0	0	0	0	0	200	903	0	0	0	0	0	0	0	603	903	0
541	7	0	0	0	0	0	0	200	300	0	0	0	0	0	0	0	200	903	0	0	0	0	0	0	0	603	903	0
541	8	0	0	0	0	0	0	200	300	0	0	0	0	0	0	0	200	903	0	0	0	0	0	0	0	603	903	0
541	9	0	0	0	0	0	0	200	300	0	0	0	0	0	0	0	200	903	0	0	0	0	0	0	0	603	903	0
542	0	0	0	0	0	0	0	200	300	0	0	0	0	0	0	0	200	903	0	0	0	0	0	0	0	603	903	0
542	1	0	0	0	0	0	0	200	300	0	0	0	0	0	0	0	200	903	0	0	0	0	0	0	0	603	903	0
542	2	0	0	0	0	0	0	200	300	0	0	0	0	0	0	0	200	903	0	0	0	0	0	0	0	603	903	0
542	3	0	0	0	0	0	0	200	300	0	0	0	0	0	0	0	200	903	0	0	0	0	0	0	0	603	903	0
542	4	0	0	0	0	0	0	200	300	0	0	0	0	0	0	0	200	903	0	0	0	0	0	0	0	603	903	0
542	5	0	0	0	0	0	0	200	300	0	0	0	0	0	0	0	200	903	0	0	0	0	0	0	0	603	903	0
542	6	0	0	0	0	0	0	200	300	0	0	0	0	0	0	0	200	903	0	0	0	0	0	0	0	603	903	0
542	7	0	0	0	0	0	0	200	300	0	0	0	0	0	0	0	200	903	0	0	0	0	0	0	0	603	903	0
542	8	0	0	0	0	0	0	200	300	0	0	0	0	0	0	0	200	903	0	0	0	0	0	0	0	603	903	0
542	9	0	0	0	0	0	0	200	300	0	0	0	0	0	0	0	200	903	0	0	0	0	0	0	0	603	903	0
543	0	0	0	0	0	0	0	200	300	0	0	0	0	0	0	0	200	903	0	0	0	0	0	0	0	603	903	0
543	1	0	0	0	0	0	0	200	300	0	0	0	0	0	0	0	200	903	0	0	0	0	0	0	0	603	903	0
543	2	0	0	0	0	0	0	200	300	0	0	0	0	0	0	0	200	903	0	0	0	0	0	0	0	603	903	0
543	3	0	0	0	0	0	0	200	300	0	0	0	0	0	0	0	200	903	0	0	0	0	0	0	0	603	903	0
543	4	0	0	0	0	0	0	200	300	0	0	0	0	0	0	0	200	903	0	0	0	0	0	0	0	603	903	0
543	5	0	0	0	0	0	0	200	300	0	0	0	0	0	0	0	200	903	0	0	0	0	0	0	0	603	903	0
543	6	0	0	0	0	0	0	200	300	0	0	0	0	0	0	0	200	903	0	0	0	0	0	0	0	603	903	0
543	7	0	0	0	0	0	0	200	300	0	0	0	0	0	0	0	200	903	0	0	0	0	0	0	0	603	903	0
543	8	0	0	0	0	0	0	200	300	0	0	0	0	0	0	0	200	903	0	0	0	0	0	0	0	603	903	0
543	9	0	0	0	0	0	0	200	300	0	0	0	0	0	0	0	200	903	0	0	0	0	0	0	0	603	903	0
544	0	0	0	0	0	0	0	200	300	0	0	0	0	0	0	0	200	903	0	0	0	0	0	0	0	603	903	0
544	1	0	0	0	0	0	0	200	300	0	0	0	0	0	0	0	200	903	0	0	0	0	0	0	0	603	903	0
544	2	0	0	0	0	0	0	200	300	0	0	0	0	0	0	0	200	903	0	0	0	0	0	0	0	603	903	0
544	3	0	0	0	0	0	0	200	300	0	0	0	0	0	0	0	200	903	0	0	0	0	0	0	0	603	903	0
544	4	0	0	0	0	0	0	200	300	0	0	0	0	0	0	0	200	903	0	0	0	0	0	0	0	603	903	0
544	5	0	0	0	0	0	0	200	300	0	0	0	0	0	0	0	200	903	0	0	0	0	0	0	0	603	903	0
544	6	0	0	0	0	0	0	200	300	0	0	0	0	0	0	0	200	903	0	0	0	0	0	0	0	603	903	0
544	7	0	0	0	0	0	0	200	300	0	0	0	0	0	0	0	200	903	0	0	0	0	0	0	0	603	903	0
544	8	0	0	0	0	0	0	200	300	0	0	0	0	0	0	0	200	903	0	0	0	0	0	0	0	603	903	0
544	9	0	0	0	0	0	0	200	300	0	0	0	0	0	0	0	200	903	0	0	0	0	0	0	0	603	903	0
545	0	0	0	0	0	0	0	200	300	0	0	0	0	0	0	0	200	903	0	0	0	0	0	0	0	603	903	0
545	1	0	0	0	0	0	0	200	300	0	0	0	0	0	0	0	200	903	0	0	0	0	0	0	0	603	903	0
545	2	0	0	0	0	0	0	200	300	0	0	0	0	0	0	0	200	903	0	0	0	0	0	0	0	603	903	0
545	3	0	0	0	0	0	0	200	300	0	0	0	0	0	0	0	200	903	0	0	0	0	0	0	0	603	903	0
545	4	0	0	0	0	0	0	200	300	0	0	0	0	0	0	0	200	903	0	0	0	0	0	0	0	603	903	0
545	5	0	0	0	0	0	0	200	300	0	0	0	0	0	0	0	200	903	0	0	0	0	0	0	0	603	903	0
545	6	0	0	0	0	0	0	200	300	0	0	0	0	0	0	0	200	903	0	0	0	0	0	0	0	603	903	0
545	7	0	0	0	0	0	0	200	300	0	0	0	0	0	0	0	200	903	0	0	0	0	0	0	0	603	903	0
545	8	0	0	0	0	0	0	200	300	0	0	0	0	0	0	0	200	903	0	0	0	0	0	0	0	603	903	0
545	9	0	0	0	0	0	0	200	300	0	0	0	0	0	0	0	200	903	0	0	0	0	0	0	0	603	903	0
546	0	0	0	0	0	0	0	200	300	0	0	0	0	0	0	0	200	903	0	0	0	0	0	0	0	603	903	0
546	1	0	0	0	0	0	0	200	300	0	0	0	0	0	0	0	200	903	0	0	0	0	0	0	0	603	903	0
546	2	0	0	0	0	0	0	200	300	0	0	0	0	0	0	0	200	903	0	0	0	0	0	0	0	603	903	0
546	3	0	0	0	0	0	0	200	300	0	0	0	0	0	0	0	200	903	0	0	0	0	0	0	0	603	903	0
546	4	0	0	0	0	0	0	200	300	0	0	0	0	0	0	0	200	903	0	0	0	0	0	0	0	603	903	0
546	5	0	0	0	0	0	0	200	300	0	0	0	0	0	0	0	200	903	0	0	0	0	0	0	0	603	903	0
546	6	0	0	0	0	0	0	200	300	0	0	0	0	0	0	0	200	903	0	0	0	0	0	0	0	603	903	0
546	7	0	0	0	0	0	0	200	300	0	0	0	0	0	0	0	200	903	0	0	0	0	0	0	0	603	903	0
546	8	0	0	0	0	0	0	200	300	0	0	0	0	0	0	0	200	903	0	0	0	0	0	0	0	603	903	0
546	9	0	0	0	0	0	0	200	300	0	0	0	0	0	0	0	200	903	0	0	0	0	0	0	0	603	903	0
547	0	0	0	0	0	0	0	200	300	0	0	0	0	0	0	0	200	903	0	0	0	0	0	0	0	603	903	0
547	1	0	0	0	0	0	0	200	300	0	0	0	0	0	0	0	200	903	0	0	0	0	0	0	0	603	903	0
547	2	0	0	0	0	0	0	200	300	0	0	0	0	0	0	0	200	903	0	0	0	0	0	0	0	603	903	0
547	3	0	0	0	0	0	0	200	300	0	0	0	0	0	0	0	200	903	0	0	0	0	0	0	0	603	903	0
547	4	0	0	0	0	0	0	200	300	0	0	0	0	0	0	0	200	903	0	0	0	0	0	0	0	603	903	0
547	5	0	0	0	0	0	0	200	300	0	0	0	0	0	0	0	200	903	0	0	0	0	0	0	0	603	903	0
547	6	0	0	0	0	0	0	200	300	0	0	0	0	0	0	0	200	903	0	0	0	0	0	0	0	603	903	0
547	7	0	0	0	0	0	0	200	300	0	3.73871	-5.392	-20.4965	-3679.87	431.201	-516.816	221.038	1082.54	0	0	0	0	0	0	0	603	903	0
547	8	0	0	0	0	0	0	200	300	0	2.82318	-6.91788	-19.8861	-4686.95	-606.397	-791.474	169.507	1138.69	0	0	0	0	0	0	0	603	903	0
547	9	0	0	0	0	0	0	200	300	0	4.04388	-8.74893	-22.0224	-5053.16	64.9899	-379.487	202.951	1132.46	0	0	0	0	0	0	0	603	903	0
548	0	0	0	0	0	0	0	200	300	0	5.72235	-7.68082	-25.0741	-5510.93	-57.0804	-745.698	197.724	1122.79	0	0	0	0	0	0	0	603	903	0
548	1	0	0	0	0	0	0	200	300	0	3.58612	-5.69717	-31.788	-7158.88	-301.221	-516.816	190.524	1128.21	0	0	0	0	0	0	0	603	903	0
548	2	0	0	0	0	0	0	200	300	0	0.839539	-4.62906	-36.976	-8257.51	-362.256	-104.829	190.203	1126.32	0	0	0	0	0	0	0	603	903	0
548	3	0	0	0	0	0	0	200	300	0	0.534363	-2.798	-42.164	-9630.8	248.095	-654.145	205.884	1131.41	0	0	0	0	0	0	0	603	903	0
548	4	0	0	0	0	0	0	200	300	0	6.02753	1.16928	-51.0141	-10821	187.06	-928.804	203.667	1115.12	0	0	0	0	0	0	0	603	903	0
548	5	0	0	0	0	0	0	200	300	0	6.02753	3.00034	-57.7279	-12468.9	-57.0804	-745.698	199.011	1118.99	0	0	0	0	0	0	0	603	903	0
548	6	0	0	0	0	0	0	200	300	0	3.8913	2.38998	-64.1366	-14116.9	370.166	-883.027	205.772	1123.11	0	0	0	0	0	0	0	603	903	0
548	7	0	0	0	0	0	0	200	300	0	5.56976	4.6788	-71.4608	-15215.5	126.025	-1203.46	201.764	1115.92	0	0	0	0	0	0	0	603	903	0
548	8	0	0	0	0	0	0	200	300	0	8.31635	6.05209	-79.3954	-17229.7	64.9899	-1249.24	200.819	1120.01	0	0	0	0	0	0	0	603	903	0
548	9	0	0	0	0	0	0	200	300	0	8.46893	6.50986	-89.7714	-18877.6	64.9899	-1661.23	200.724	1113.29	0	0	0	0	0	0	0	603	903	0
549	0	0	0	0	0	0	0	200	300	0	8.31635	8.34091	-99.2318	-21166.4	309.131	-1661.23	203.115	1116.3	0	0	0	0	0	0	0	603	903	0
549	1	0	0	0	0	0	0	200	300	0	13.1992	10.3246	-111.439	-23455.3	370.166	-1935.88	203.322	1113.48	0	0	0	0	0	0	0	603	903	0
549	2	0	0	0	0	0	0	200	300	0	14.2673	12.003	-119.984	-25469.4	248.095	-2347.87	202.068	1115.27	0	0	0	0	0	0	0	603	903	0
549	3	0	0	0	0	0	0	200	300	0	15.7932	12.766	-133.412	-27208.9	309.131	-2668.31	202.317	1106.95	0	0	0	0	0	0	0	603	903	0
549	4	0	0	0	0	0	0	200	300	0	14.8776	12.9185	-144.703	-29864	309.131	-2805.64	202.136	1109.38	0	0	0	0	0	0	0	603	903	0
549	5	0	0	0	0	0	0	200	300	0	16.7087	12.766	-156.605	-32152.8	797.412	-3492.28	205.092	1108.31	0	0	0	0	0	0	0	603	903	0
549	6	0	0	0	0	0	0	200	300	0	20.676	12.766	-167.896	-33892.3	309.131	-3538.06	201.841	1104.86	0	0	0	0	0	0	0	603	903	0
549	7	0	0	0	0	0	0	200	300	0	21.1337	10.4771	-180.714	-37371.3	797.412	-3263.4	204.413	1109.8	0	0	0	0	0	0	0	603	903	0
549	8	0	0	0	0	0	0	200	300	0	21.5915	6.50986	-193.226	-39293.9	553.271	-3812.72	202.863	1106.36	0	0	0	0	0	0	0	603	903	0
549	9	0	0	0	0	0	0	200	300	0	22.9648	3.91586	-203.602	-40484.1	614.307	-3904.27	203.017	1101.84	0	0	0	0	0	0	0	603	903	0
550	0	0	0	0	0	0	0	200	300	0	23.8803	0.101166	-213.978	-42406.7	980.517	-3995.82	204.582	1101.18	0	0	0	0	0	0	0	603	903	0
550	1	0	0	0	0	0	0	200	300	0	22.3544	-2.34024	-221.607	-43505.3	1102.59	-4087.37	204.975	1099.32	0	0	0	0	0	0	0	603	903	0
550	2	0	0	0	0	0	0	200	300	0	24.3381	-6.76529	-231.983	-45336.4	797.412	-4316.25	203.437	1098.43	0	0	0	0	0	0	0	603	903	0
550	3	0	0	0	0	0	0	200	300	0	26.3217	-10.1222	-244.801	-47533.6	919.482	-3904.27	203.756	1097.17	0	0	0	0	0	0	0	603	903	0
550	4	0	0	0	0	0	0	200	300	0	27.0847	-14.6999	-254.566	-49364.7	1102.59	-4362.03	204.331	1096.92	0	0	0	0	0	0	0	603	903	0
550	5	0	0	0	0	0	0	200	300	0	28.9157	-18.6671	-263.722	-51012.6	980.517	-4545.14	203.718	1096.43	0	0	0	0	0	0	0	603	903	0
550	6	0	0	0	0	0	0	200	300	0	30.5942	-24.1603	-271.656	-52202.8	1041.55	-4682.47	203.834	1095.17	0	0	0	0	0	0	0	603	903	0
550	7	0	0	0	0	0	0	200	300	0	30.4416	-28.5854	-280.811	-53484.6	1285.69	-4911.35	204.579	1093.46	0	0	0	0	0	0	0	603	903	0
550	8	0	0	0	0	0	0	200	300	0	29.8312	-32.4001	-290.577	-54857.8	1346.73	-4819.79	204.635	1091.79	0	0	0	0	0	0	0	603	903	0
550	9	0	0	0	0	0	0	200	300	0	30.4416	-37.7406	-299.732	-56231.2	1163.62	-4957.12	203.882	1090.6	0	0	0	0	0	0	0	603	903	0
551	0	0	0	0	0	0	0	200	300	0	32.4252	-41.7079	-308.582	-56414.3	1346.73	-5323.33	204.364	1085.82	0	0	0	0	0	0	0	603	903	0
551	1	0	0	0	0	0	0	200	300	0	32.883	-44.9123	-315.601	-58977.7	1590.87	-5506.44	205.041	1089.87	0	0	0	0	0	0	0	603	903	0
551	2	0	0	0	0	0	0	200	300	0	32.5778	-48.5744	-325.672	-60442.6	1102.59	-5323.33	203.386	1088.59	0	0	0	0	0	0	0	603	903	0
551	3	0	0	0	0	0	0	200	300	0	34.4089	-54.2201	-332.081	-60991.9	1285.69	-5643.77	203.872	1086.67	0	0	0	0	0	0	0	603	903	0
551	4	0	0	0	0	0	0	200	300	0	37.7658	-58.4926	-340.626	-62456.7	1468.8	-5689.55	204.312	1086.36	0	0	0	0	0	0	0	603	903	0
551	5	0	0	0	0	0	0	200	300	0	34.5615	-61.2392	-349.781	-63921.6	1285.69	-5643.77	203.676	1085.75	0	0	0	0	0	0	0	603	903	0
551	6	0	0	0	0	0	0	200	300	0	33.4933	-65.2065	-358.631	-65020.2	1346.73	-5735.32	203.755	1084.3	0	0	0	0	0	0	0	603	903	0
551	7	0	0	0	0	0	0	200	300	0	34.4089	-69.7841	-366.261	-64745.5	1285.69	-5643.77	203.51	1079.77	0	0	0	0	0	0	0	603	903	0
551	8	0	0	0	0	0	0	200	300	0	34.4089	-72.8358	-373.89	-67217.5	1529.83	-5689.55	204.092	1082.78	0	0	0	0	0	0	0	603	903	0
551	9	0	0	0	0	0	0	200	300	0	33.9511	-74.6669	-383.35	-68224.5	980.517	-5918.43	202.558	1080.97	0	0	0	0	0	0	0	603	903	0
552	0	0	0	0	0	0	0	200	300	0	33.0356	-78.1764	-392.811	-69231.6	1224.66	-5460.66	203.118	1079.25	0	0	0	0	0	0	0	603	903	0
552	1	0	0	0	0	0	0	200	300	0	36.2399	-81.8385	-401.661	-70421.8	919.482	-5323.33	202.289	1078.33	0	0	0	0	0	0	0	603	903	0
552	2	0	0	0	0	0	0	200	300	0	33.3408	-84.7377	-409.29	-71062.7	1346.73	-5781.1	203.29	1076.62	0	0	0	0	0	0	0	603	903	0
552	3	0	0	0	0	0	0	200	300	0	32.7304	-86.7213	-419.056	-73534.6	858.447	-5460.66	202.049	1078.48	0	0	0	0	0	0	0	603	903	0
552	4	0	0	0	0	0	0	200	300	0	31.8149	-88.8576	-430.042	-73443.1	858.447	-5552.22	201.996	1073.78	0	0	0	0	0	0	0	603	903	0
552	5	0	0	0	0	0	0	200	300	0	31.3571	-92.8249	-439.198	-76281.2	736.377	-5277.56	201.677	1076.68	0	0	0	0	0	0	0	603	903	0
552	6	0	0	0	0	0	0	200	300	0	30.289	-94.1982	-448.658	-77471.4	675.342	-4957.12	201.505	1075.67	0	0	0	0	0	0	0	603	903	0
552	7	0	0	0	0	0	0	200	300	0	28.6105	-95.2663	-457.813	-77837.6	675.342	-4957.12	201.475	1073.02	0	0	0	0	0	0	0	603	903	0
552	8	0	0	0	0	0	0	200	300	0	28.4579	-97.5551	-467.274	-79577.1	797.412	-4636.69	201.707	1073.3	0	0	0	0	0	0	0	603	903	0
552	9	0	0	0	0	0	0	200	300	0	28.3054	-100.149	-476.429	-80858.9	736.377	-4865.57	201.546	1072.72	0	0	0	0	0	0	0	603	903	0
553	0	0	0	0	0	0	0	200	300	0	29.3735	-102.133	-484.669	-81957.5	492.236	-4407.81	201.016	1072.1	0	0	0	0	0	0	0	603	903	0
553	1	0	0	0	0	0	0	200	300	0	26.3217	-103.201	-493.214	-82506.8	370.166	-4362.03	200.751	1070.28	0	0	0	0	0	0	0	603	903	0
553	2	0	0	0	0	0	0	200	300	0	25.5588	-105.337	-501.148	-84429.4	248.095	-4316.25	200.495	1071.47	0	0	0	0	0	0	0	603	903	0
553	3	0	0	0	0	0	0	200	300	0	24.0329	-107.626	-509.083	-84612.5	-240.186	-4087.37	199.528	1069.21	0	0	0	0	0	0	0	603	903	0
553	4	0	0	0	0	0	0	200	300	0	22.6596	-109.457	-515.797	-85436.5	309.131	-4133.15	200.599	1068.64	0	0	0	0	0	0	0	603	903	0
553	5	0	0	0	0	0	0	200	300	0	22.8122	-110.525	-522.816	-86260.5	126.025	-3950.04	200.241	1067.99	0	0	0	0	0	0	0	603	903	0
553	6	0	0	0	0	0	0	200	300	0	20.9811	-112.356	-529.224	-87725.3	-362.256	-3583.83	199.316	1068.76	0	0	0	0	0	0	0	603	903	0
553	7	0	0	0	0	0	0	200	300	0	22.6596	-113.882	-535.023	-88274.6	-362.256	-3354.95	199.323	1067.99	0	0	0	0	0	0	0	603	903	0
553	8	0	0	0	0	0	0	200	300	0	21.1337	-114.492	-539.295	-88091.5	-240.186	-3309.18	199.555	1066.35	0	0	0	0	0	0	0	603	903	0
553	9	0	0	0	0	0	0	200	300	0	20.2182	-115.56	-545.094	-89464.8	-118.116	-3126.07	199.783	1067.13	0	0	0	0	0	0	0	603	903	0
554	0	0	0	0	0	0	0	200	300	0	18.8449	-116.781	-549.976	-89831	-789.502	-2851.41	198.564	1066.34	0	0	0	0	0	0	0	603	903	0
554	1	0	0	0	0	0	0	200	300	0	18.6923	-119.375	-554.249	-89739.4	-606.397	-3080.29	198.906	1064.91	0	0	0	0	0	0	0	603	903	0
554	2	0	0	0	0	0	0	200	300	0	18.5397	-119.986	-556.995	-90197.2	-789.502	-2759.86	198.583	1064.94	0	0	0	0	0	0	0	603	903	0
554	3	0	0	0	0	0	0	200	300	0	16.2509	-120.291	-560.047	-90197.2	-972.608	-2622.53	198.263	1064.05	0	0	0	0	0	0	0	603	903	0
554	4	0	0	0	0	0	0	200	300	0	15.9457	-121.817	-566.456	-90929.6	-1277.78	-2714.08	197.744	1063.52	0	0	0	0	0	0	0	603	903	0
554	5	0	0	0	0	0	0	200	300	0	17.319	-123.648	-569.203	-90014.1	-1216.75	-2393.65	197.862	1061.14	0	0	0	0	0	0	0	603	903	0
554	6	0	0	0	0	0	0	200	300	0	16.7087	-124.716	-571.034	-91387.4	-1155.71	-2210.54	197.976	1063.04	0	0	0	0	0	0	0	603	903	0
554	7	0	0	0	0	0	0	200	300	0	15.0302	-125.173	-573.17	-91112.8	-1216.75	-2347.87	197.877	1061.96	0	0	0	0	0	0	0	603	903	0
554	8	0	0	0	0	0	0	200	300	0	15.7932	-126.547	-575.306	-90197.2	-1216.75	-1707	197.885	1059.78	0	0	0	0	0	0	0	603	903	0
554	9	0	0	0	0	0	0	200	300	0	15.7932	-128.378	-577.137	-91936.7	-1888.14	-1707	196.728	1062.3	0	0	0	0	0	0	0	603	903	0
555	0	0	0	0	0	0	0	200	300	0	16.7087	-129.141	-578.358	-91295.8	-1277.78	-1935.88	197.791	1060.85	0	0	0	0	0	0	0	603	903	0
555	1	0	0	0	0	0	0	200	300	0	14.2673	-130.056	-580.189	-90929.6	-1277.78	-1478.12	197.798	1059.72	0	0	0	0	0	0	0	603	903	0
555	2	0	0	0	0	0	0	200	300	0	13.9621	-130.972	-581.715	-91112.8	-1094.68	-1157.69	198.118	1059.63	0	0	0	0	0	0	0	603	903	0
555	3	0	0	0	0	0	0	200	300	0	12.7414	-133.261	-581.715	-91021.2	-1521.92	-1157.69	197.384	1059.47	0	0	0	0	0	0	0	603	903	0
555	4	0	0	0	0	0	0	200	300	0	12.5888	-134.024	-582.935	-90380.3	-1582.96	-745.698	197.285	1058.04	0	0	0	0	0	0	0	603	903	0
555	5	0	0	0	0	0	0	200	300	0	12.7414	-134.481	-583.241	-90655	-1766.06	-791.474	196.972	1058.43	0	0	0	0	0	0	0	603	903	0
555	6	0	0	0	0	0	0	200	300	0	11.6733	-134.787	-585.072	-90380.3	-2498.49	-837.251	195.73	1057.48	0	0	0	0	0	0	0	603	903	0
555	7	0	0	0	0	0	0	200	300	0	10.9103	-136.465	-584.766	-89739.4	-1643.99	-654.145	197.189	1056.46	0	0	0	0	0	0	0	603	903	0
555	8	0	0	0	0	0	0	200	300	0	13.6569	-137.533	-583.851	-89647.9	-1949.17	-425.263	196.662	1056.55	0	0	0	0	0	0	0	603	903	0
555	9	0	0	0	0	0	0	200	300	0	9.23187	-137.075	-583.241	-89556.4	-2315.38	-287.934	196.03	1056.55	0	0	0	0	0	0	0	603	903	0
556	0	0	0	0	0	0	0	200	300	0	8.16376	-138.296	-585.377	-88915.5	-2376.42	-104.829	195.94	1054.89	0	0	0	0	0	0	0	603	903	0
556	1	0	0	0	0	0	0	200	300	0	8.9267	-139.364	-585.377	-88640.8	-2193.31	-196.381	196.253	1054.43	0	0	0	0	0	0	0	603	903	0
556	2	0	0	0	0	0	0	200	300	0	7.85858	-139.975	-584.156	-88640.8	-2681.59	444.488	195.409	1054.74	0	0	0	0	0	0	0	603	903	0
556	3	0	0	0	0	0	0	200	300	0	7.70599	-139.669	-584.766	-88732.4	-2559.52	352.935	195.623	1054.74	0	0	0	0	0	0	0	603	903	0
556	4	0	0	0	0	0	0	200	300	0	6.02753	-140.127	-583.546	-87816.9	-2681.59	764.922	195.405	1053.49	0	0	0	0	0	0	0	603	903	0
556	5	0	0	0	0	0	0	200	300	0	5.112	-141.348	-583.851	-88183.1	-3108.84	948.028	194.675	1054.04	0	0	0	0	0	0	0	603	903	0
556	6	0	0	0	0	0	0	200	300	0	2.67059	-141.195	-582.325	-87084.4	-2925.73	993.804	194.976	1052.55	0	0	0	0	0	0	0	603	903	0
556	7	0	0	0	0	0	0	200	300	0	1.2973	-141.043	-582.325	-87359.1	-2803.66	1268.46	195.185	1053.02	0	0	0	0	0	0	0	603	903	0
556	8	0	0	0	0	0	0	200	300	0	1.14471	-141.653	-583.546	-86809.8	-3169.87	1634.67	194.568	1051.76	0	0	0	0	0	0	0	603	903	0
556	9	0	0	0	0	0	0	200	300	0	-0.0759888	-143.179	-582.935	-87084.4	-3230.91	1588.9	194.458	1052.39	0	0	0	0	0	0	0	603	903	0
557	0	0	0	0	0	0	0	200	300	0	-2.05963	-143.637	-584.766	-86443.5	-3169.87	2046.66	194.579	1050.83	0	0	0	0	0	0	0	603	903	0
557	1	0	0	0	0	0	0	200	300	0	-3.12775	-143.331	-584.156	-86352	-3108.84	2092.44	194.678	1050.82	0	0	0	0	0	0	0	603	903	0
557	2	0	0	0	0	0	0	200	300	0	-4.04327	-143.942	-585.987	-86626.7	-3780.23	2733.31	193.549	1050.83	0	0	0	0	0	0	0	603	903	0
557	3	0	0	0	0	0	0	200	300	0	-5.56915	-146.078	-588.734	-86535.1	-3902.3	2550.2	193.372	1049.99	0	0	0	0	0	0	0	603	903	0
557	4	0	0	0	0	0	0	200	300	0	-7.40021	-146.994	-588.429	-86077.3	-4085.4	2733.31	193.057	1049.28	0	0	0	0	0	0	0	603	903	0
557	5	0	0	0	0	0	0	200	300	0	-9.84161	-147.146	-591.48	-86535.1	-4390.58	3007.97	192.577	1049.3	0	0	0	0	0	0	0	603	903	0
557	6	0	0	0	0	0	0	200	300	0	-12.7408	-148.825	-593.311	-86443.5	-4573.68	3557.28	192.291	1048.7	0	0	0	0	0	0	0	603	903	0
557	7	0	0	0	0	0	0	200	300	0	-15.0296	-147.604	-597.279	-86077.3	-4512.65	3374.18	192.445	1047.12	0	0	0	0	0	0	0	603	903	0
557	8	0	0	0	0	0	0	200	300	0	-15.4874	-150.961	-596.668	-85985.8	-4512.65	3969.27	192.437	1047.11	0	0	0	0	0	0	0	603	903	0
557	9	0	0	0	0	0	0	200	300	0	-18.0814	-152.334	-600.636	-86443.5	-5123	4243.93	191.471	1046.92	0	0	0	0	0	0	0	603	903	0
558	0	0	0	0	0	0	0	200	300	0	-18.9969	-153.707	-597.889	-85985.8	-5061.96	4381.26	191.534	1046.82	0	0	0	0	0	0	0	603	903	0
558	1	0	0	0	0	0	0	200	300	0	-18.9969	-155.386	-604.603	-85161.8	-4756.79	4655.91	192.132	1043.86	0	0	0	0	0	0	0	603	903	0
558	2	0	0	0	0	0	0	200	300	0	-20.3702	-156.912	-608.875	-86535.1	-5489.21	4793.24	190.985	1045.12	0	0	0	0	0	0	0	603	903	0
558	3	0	0	0	0	0	0	200	300	0	-22.2012	-158.895	-611.012	-86809.8	-5550.24	5159.45	190.916	1045.08	0	0	0	0	0	0	0	603	903	0
558	4	0	0	0	0	0	0	200	300	0	-21.4383	-160.116	-614.674	-86077.3	-5733.35	5342.56	190.673	1043.04	0	0	0	0	0	0	0	603	903	0
558	5	0	0	0	0	0	0	200	300	0	-21.4383	-160.421	-614.979	-85985.8	-5611.28	5388.34	190.876	1042.82	0	0	0	0	0	0	0	603	903	0
558	6	0	0	0	0	0	0	200	300	0	-23.5745	-160.421	-617.725	-86809.8	-5916.46	5251.01	190.422	1043.53	0	0	0	0	0	0	0	603	903	0
558	7	0	0	0	0	0	0	200	300	0	-25.253	-160.574	-620.472	-86809.8	-6038.53	5754.55	190.268	1042.91	0	0	0	0	0	0	0	603	903	0
558	8	0	0	0	0	0	0	200	300	0	-22.9642	-161.947	-622.608	-86352	-5489.21	5891.88	191.184	1041.69	0	0	0	0	0	0	0	603	903	0
558	9	0	0	0	0	0	0	200	300	0	-23.1168	-161.795	-624.745	-86809.8	-6221.63	5708.77	190.041	1041.95	0	0	0	0	0	0	0	603	903	0
559	0	0	0	0	0	0	0	200	300	0	-24.0323	-160.574	-625.66	-86901.3	-6038.53	5662.99	190.349	1041.9	0	0	0	0	0	0	0	603	903	0
559	1	0	0	0	0	0	0	200	300	0	-23.7271	-160.116	-628.407	-86352	-6465.77	5754.55	189.711	1040.41	0	0	0	0	0	0	0	603	903	0
559	2	0	0	0	0	0	0	200	300	0	-24.0323	-160.879	-628.712	-86352	-6282.67	5754.55	190.007	1040.35	0	0	0	0	0	0	0	603	903	0
559	3	0	0	0	0	0	0	200	300	0	-24.6426	-161.032	-631.458	-87267.5	-6465.77	5937.65	189.761	1041.2	0	0	0	0	0	0	0	603	903	0
559	4	0	0	0	0	0	0	200	300	0	-23.7271	-158.132	-633.289	-86809.8	-6343.7	5983.43	189.983	1040.08	0	0	0	0	0	0	0	603	903	0
559	5	0	0	0	0	0	0	200	300	0	-24.3375	-157.37	-631.458	-86809.8	-6526.81	6258.09	189.664	1040.47	0	0	0	0	0	0	0	603	903	0
559	6	0	0	0	0	0	0	200	300	0	-22.3538	-157.675	-634.205	-87084.4	-6709.91	6074.98	189.42	1040.31	0	0	0	0	0	0	0	603	903	0
559	7	0	0	0	0	0	0	200	300	0	-24.1849	-157.522	-637.867	-86992.9	-6648.88	6303.86	189.576	1039.38	0	0	0	0	0	0	0	603	903	0
559	8	0	0	0	0	0	0	200	300	0	-23.4219	-156.454	-642.14	-87176	-6770.95	6212.31	189.456	1038.76	0	0	0	0	0	0	0	603	903	0
559	9	0	0	0	0	0	0	200	300	0	-23.1168	-157.37	-641.834	-87725.3	-6770.95	6303.86	189.451	1039.68	0	0	0	0	0	0	0	603	903	0
560	0	0	0	0	0	0	0	200	300	0	-23.7271	-156.454	-643.055	-87908.4	-7015.09	6395.42	189.091	1039.7	0	0	0	0	0	0	0	603	903	0
560	1	0	0	0	0	0	0	200	300	0	-23.7271	-154.776	-643.971	-86992.9	-6648.88	6258.09	189.675	1038.09	0	0	0	0	0	0	0	603	903	0
560	2	0	0	0	0	0	0	200	300	0	-24.0323	-154.47	-647.328	-87816.9	-7015.09	6441.19	189.163	1038.66	0	0	0	0	0	0	0	603	903	0
560	3	0	0	0	0	0	0	200	300	0	-26.4737	-155.386	-649.769	-87542.2	-7381.3	6349.64	188.64	1037.73	0	0	0	0	0	0	0	603	903	0
560	4	0	0	0	0	0	0	200	300	0	-26.0159	-155.691	-649.464	-87633.7	-7198.19	6349.64	188.917	1037.93	0	0	0	0	0	0	0	603	903	0
560	5	0	0	0	0	0	0	200	300	0	-24.1849	-153.86	-652.516	-87633.7	-7015.09	6624.3	189.249	1037.3	0	0	0	0	0	0	0	603	903	0
560	6	0	0	0	0	0	0	200	300	0	-27.5418	-153.555	-654.957	-87267.5	-7442.33	6578.52	188.637	1036.24	0	0	0	0	0	0	0	603	903	0
560	7	0	0	0	0	0	0	200	300	0	-27.5418	-154.013	-657.703	-87908.4	-7747.51	6715.85	188.22	1036.66	0	0	0	0	0	0	0	603	903	0
560	8	0	0	0	0	0	0	200	300	0	-26.7789	-153.555	-658.009	-88183.1	-7381.3	6624.3	188.782	1037.02	0	0	0	0	0	0	0	603	903	0
560	9	0	0	0	0	0	0	200	300	0	-27.847	-152.182	-660.755	-88915.5	-7686.47	7082.06	188.367	1037.57	0	0	0	0	0	0	0	603	903	0
561	0	0	0	0	0	0	0	200	300	0	-29.0677	-152.029	-664.417	-88915.5	-7625.44	6807.4	188.523	1036.82	0	0	0	0	0	0	0	603	903	0
561	1	0	0	0	0	0	0	200	300	0	-28.7625	-152.792	-665.943	-88091.5	-7625.44	6990.51	188.549	1035.28	0	0	0	0	0	0	0	603	903	0
561	2	0	0	0	0	0	0	200	300	0	-28.9151	-151.724	-667.774	-89190.1	-7747.51	7036.29	188.398	1036.56	0	0	0	0	0	0	0	603	903	0
561	3	0	0	0	0	0	0	200	300	0	-30.8987	-150.503	-669.3	-89922.6	-8479.93	7265.17	187.33	1037.35	0	0	0	0	0	0	0	603	903	0
561	4	0	0	0	0	0	0	200	300	0	-30.5936	-149.588	-673.267	-89647.9	-7747.51	7036.29	188.493	1036.15	0	0	0	0	0	0	0	603	903	0
561	5	0	0	0	0	0	0	200	300	0	-28.9151	-149.893	-673.267	-89464.8	-7869.58	7082.06	188.311	1035.88	0	0	0	0	0	0	0	603	903	0
561	6	0	0	0	0	0	0	200	300	0	-30.5936	-148.977	-674.793	-90746.5	-8174.76	7402.5	187.886	1037.48	0	0	0	0	0	0	0	603	903	0
561	7	0	0	0	0	0	0	200	300	0	-30.2884	-146.994	-677.845	-89281.7	-8296.83	7173.61	187.76	1034.71	0	0	0	0	0	0	0	603	903	0
561	8	0	0	0	0	0	0	200	300	0	-29.3729	-146.231	-680.592	-90380.3	-7930.62	7219.39	188.347	1035.8	0	0	0	0	0	0	0	603	903	0
561	9	0	0	0	0	0	0	200	300	0	-29.678	-145.925	-682.728	-90380.3	-7991.65	6990.51	188.295	1035.38	0	0	0	0	0	0	0	603	903	0
562	0	0	0	0	0	0	0	200	300	0	-31.0513	-145.01	-683.643	-91295.8	-8602	7127.84	187.417	1036.54	0	0	0	0	0	0	0	603	903	0
562	1	0	0	0	0	0	0	200	300	0	-30.1358	-143.484	-687	-91021.2	-8235.79	7310.94	188.012	1035.49	0	0	0	0	0	0	0	603	903	0
562	2	0	0	0	0	0	0	200	300	0	-29.0677	-141.806	-689.747	-91204.3	-8052.69	7448.27	188.325	1035.23	0	0	0	0	0	0	0	603	903	0
562	3	0	0	0	0	0	0	200	300	0	-29.3729	-142.111	-690.357	-91753.6	-8724.07	7356.72	187.363	1035.91	0	0	0	0	0	0	0	603	903	0
562	4	0	0	0	0	0	0	200	300	0	-29.3729	-141.195	-691.273	-91387.4	-8785.11	7173.61	187.291	1035.2	0	0	0	0	0	0	0	603	903	0
562	5	0	0	0	0	0	0	200	300	0	-27.9996	-139.669	-693.104	-92211.4	-8846.14	6990.51	187.237	1036.04	0	0	0	0	0	0	0	603	903	0
562	6	0	0	0	0	0	0	200	300	0	-28.1522	-138.143	-696.461	-92577.6	-8663.04	7173.61	187.561	1035.93	0	0	0	0	0	0	0	603	903	0
562	7	0	0	0	0	0	0	200	300	0	-26.0159	-138.601	-696.461	-92669.1	-8663.04	7082.06	187.561	1036.06	0	0	0	0	0	0	0	603	903	0
562	8	0	0	0	0	0	0	200	300	0	-27.2366	-137.228	-699.207	-92394.5	-8663.04	6990.51	187.61	1035.14	0	0	0	0	0	0	0	603	903	0
562	9	0	0	0	0	0	0	200	300	0	-27.2366	-136.16	-700.733	-92852.3	-8479.93	7082.06	187.898	1035.51	0	0	0	0	0	0	0	603	903	0
563	0	0	0	0	0	0	0	200	300	0	-28.4573	-134.787	-704.395	-93218.5	-8785.11	6944.73	187.528	1035.34	0	0	0	0	0	0	0	603	903	0
563	1	0	0	0	0	0	0	200	300	0	-28.7625	-134.634	-704.701	-92852.3	-8785.11	6761.63	187.534	1034.76	0	0	0	0	0	0	0	603	903	0
563	2	0	0	0	0	0	0	200	300	0	-25.7108	-134.176	-705.616	-93218.5	-8174.76	6944.73	188.415	1035.11	0	0	0	0	0	0	0	603	903	0
563	3	0	0	0	0	0	0	200	300	0	-27.3892	-132.345	-707.142	-93767.8	-8968.21	6624.3	187.318	1035.6	0	0	0	0	0	0	0	603	903	0
563	4	0	0	0	0	0	0	200	300	0	-27.6944	-130.972	-708.973	-93767.8	-8907.18	6761.63	187.437	1035.26	0	0	0	0	0	0	0	603	903	0
563	5	0	0	0	0	0	0	200	300	0	-26.3211	-130.972	-711.109	-93218.5	-9151.32	6898.96	187.131	1034.09	0	0	0	0	0	0	0	603	903	0
563	6	0	0	0	0	0	0	200	300	0	-26.6263	-130.667	-711.414	-94317.1	-8846.14	6761.63	187.565	1035.58	0	0	0	0	0	0	0	603	903	0
563	7	0	0	0	0	0	0	200	300	0	-27.3892	-128.836	-713.245	-94500.2	-9639.6	6761.63	186.485	1035.49	0	0	0	0	0	0	0	603	903	0
563	8	0	0	0	0	0	0	200	300	0	-26.6263	-128.378	-716.602	-93950.9	-8663.04	6670.07	187.911	1034.11	0	0	0	0	0	0	0	603	903	0
563	9	0	0	0	0	0	0	200	300	0	-25.8633	-128.073	-715.992	-94683.3	-8907.18	6944.73	187.56	1035.24	0	0	0	0	0	0	0	603	903	0
564	0	0	0	0	0	0	0	200	300	0	-24.6426	-126.852	-718.128	-94408.7	-9151.32	6807.4	187.257	1034.46	0	0	0	0	0	0	0	603	903	0
564	1	0	0	0	0	0	0	200	300	0	-26.3211	-125.173	-719.349	-94683.3	-9578.56	6807.4	186.684	1034.62	0	0	0	0	0	0	0	603	903	0
564	2	0	0	0	0	0	0	200	300	0	-25.7108	-123.953	-720.875	-94683.3	-9456.49	6807.4	186.882	1034.34	0	0	0	0	0	0	0	603	903	0
564	3	0	0	0	0	0	0	200	300	0	-27.084	-124.563	-722.706	-95049.5	-9456.49	6578.52	186.915	1034.52	0	0	0	0	0	0	0	603	903	0
564	4	0	0	0	0	0	0	200	300	0	-26.1685	-123.648	-722.096	-94866.4	-9456.49	6624.3	186.904	1034.38	0	0	0	0	0	0	0	603	903	0
564	5	0	0	0	0	0	0	200	300	0	-23.8797	-121.817	-725.147	-94957.9	-9151.32	6624.3	187.38	1033.95	0	0	0	0	0	0	0	603	903	0
564	6	0	0	0	0	0	0	200	300	0	-26.3211	-122.274	-726.673	-95232.6	-9456.49	6853.18	186.987	1034.05	0	0	0	0	0	0	0	603	903	0
564	7	0	0	0	0	0	0	200	300	0	-26.3211	-121.511	-727.284	-94774.9	-9761.67	6715.85	186.578	1033.31	0	0	0	0	0	0	0	603	903	0
564	8	0	0	0	0	0	0	200	300	0	-25.7108	-120.748	-727.589	-95141.1	-9639.6	6715.85	186.751	1033.76	0	0	0	0	0	0	0	603	903	0
564	9	0	0	0	0	0	0	200	300	0	-24.6426	-118.917	-728.504	-95598.8	-9639.6	6578.52	186.768	1034.23	0	0	0	0	0	0	0	603	903	0
565	0	0	0	0	0	0	0	200	300	0	-24.3375	-118.307	-730.03	-95324.2	-10005.8	6578.52	186.294	1033.58	0	0	0	0	0	0	0	603	903	0
565	1	0	0	0	0	0	0	200	300	0	-23.7271	-118.612	-729.725	-95598.8	-10066.8	6670.07	186.205	1034.01	0	0	0	0	0	0	0	603	903	0
565	2	0	0	0	0	0	0	200	300	0	-24.3375	-116.171	-728.504	-95049.5	-9639.6	6532.75	186.768	1033.47	0	0	0	0	0	0	0	603	903	0
565	3	0	0	0	0	0	0	200	300	0	-25.4056	-116.476	-731.861	-95690.4	-9639.6	6670.07	186.829	1033.75	0	0	0	0	0	0	0	603	903	0
565	4	0	0	0	0	0	0	200	300	0	-25.8633	-115.713	-733.082	-95049.5	-9578.56	6486.97	186.934	1032.66	0	0	0	0	0	0	0	603	903	0
565	5	0	0	0	0	0	0	200	300	0	-24.7952	-114.95	-733.692	-95141.1	-9578.56	6578.52	186.945	1032.67	0	0	0	0	0	0	0	603	903	0
565	6	0	0	0	0	0	0	200	300	0	-24.0323	-115.408	-735.828	-95598.8	-9883.74	6395.42	186.568	1032.92	0	0	0	0	0	0	0	603	903	0
565	7	0	0	0	0	0	0	200	300	0	-23.1168	-113.882	-734.913	-95598.8	-9822.71	6486.97	186.634	1033.08	0	0	0	0	0	0	0	603	903	0
565	8	0	0	0	0	0	0	200	300	0	-23.8797	-112.356	-736.439	-95232.6	-10616.2	6670.07	185.584	1032.32	0	0	0	0	0	0	0	603	903	0
565	9	0	0	0	0	0	0	200	300	0	-22.9642	-111.441	-738.27	-95141.1	-9944.78	6486.97	186.53	1031.87	0	0	0	0	0	0	0	603	903	0
566	0	0	0	0	0	0	0	200	300	0	-25.4056	-112.204	-737.965	-95781.9	-10311	6624.3	186.028	1032.79	0	0	0	0	0	0	0	603	903	0
566	1	0	0	0	0	0	0	200	300	0	-24.9478	-110.83	-738.88	-95141.1	-10250	6486.97	186.128	1031.76	0	0	0	0	0	0	0	603	903	0
566	2	0	0	0	0	0	0	200	300	0	-24.0323	-109.762	-739.796	-94591.7	-10066.8	6532.75	186.392	1030.86	0	0	0	0	0	0	0	603	903	0
566	3	0	0	0	0	0	0	200	300	0	-23.5745	-109.304	-743.153	-95965	-10372	6578.52	186.043	1032.13	0	0	0	0	0	0	0	603	903	0
566	4	0	0	0	0	0	0	200	300	0	-24.6426	-109.61	-741.627	-95324.2	-10311	6670.07	186.097	1031.53	0	0	0	0	0	0	0	603	903	0
566	5	0	0	0	0	0	0	200	300	0	-22.9642	-108.541	-741.932	-95324.2	-10127.9	6715.85	186.349	1031.48	0	0	0	0	0	0	0	603	903	0
566	6	0	0	0	0	0	0	200	300	0	-23.4219	-107.473	-742.237	-94774.9	-10127.9	6944.73	186.355	1030.69	0	0	0	0	0	0	0	603	903	0
566	7	0	0	0	0	0	0	200	300	0	-24.7952	-107.168	-743.763	-94866.4	-10433.1	6578.52	185.973	1030.55	0	0	0	0	0	0	0	603	903	0
566	8	0	0	0	0	0	0	200	300	0	-24.7952	-107.016	-743.458	-94774.9	-10738.2	6441.19	185.556	1030.48	0	0	0	0	0	0	0	603	903	0
566	9	0	0	0	0	0	0	200	300	0	-23.5745	-106.1	-743.763	-94957.9	-10188.9	6715.85	186.301	1030.67	0	0	0	0	0	0	0	603	903	0
567	0	0	0	0	0	0	0	200	300	0	-24.3375	-105.337	-743.153	-94957.9	-10860.3	6486.97	185.386	1030.78	0	0	0	0	0	0	0	603	903	0
567	1	0	0	0	0	0	0	200	300	0	-24.4901	-104.574	-746.51	-95049.5	-10677.2	6486.97	185.697	1030.33	0	0	0	0	0	0	0	603	903	0
567	2	0	0	0	0	0	0	200	300	0	-23.2693	-104.727	-746.204	-94500.2	-10433.1	6395.42	186.018	1029.64	0	0	0	0	0	0	0	603	903	0
567	3	0	0	0	0	0	0	200	300	0	-23.5745	-104.116	-745.289	-94957.9	-10250	6624.3	186.247	1030.41	0	0	0	0	0	0	0	603	903	0
567	4	0	0	0	0	0	0	200	300	0	-23.5745	-103.201	-744.679	-94866.4	-10738.2	6761.63	185.58	1030.39	0	0	0	0	0	0	0	603	903	0
567	5	0	0	0	0	0	0	200	300	0	-23.1168	-102.285	-744.984	-94225.5	-10860.3	6761.63	185.422	1029.48	0	0	0	0	0	0	0	603	903	0
567	6	0	0	0	0	0	0	200	300	0	-22.8116	-102.285	-744.373	-94134	-10616.2	6578.52	185.738	1029.46	0	0	0	0	0	0	0	603	903	0
567	7	0	0	0	0	0	0	200	300	0	-23.7271	-100.912	-744.373	-93859.3	-11043.4	6395.42	185.164	1029.09	0	0	0	0	0	0	0	603	903	0
567	8	0	0	0	0	0	0	200	300	0	-23.8797	-100.302	-742.542	-93859.3	-10738.2	6578.52	185.539	1029.4	0	0	0	0	0	0	0	603	903	0
567	9	0	0	0	0	0	0	200	300	0	-22.3538	-99.3861	-743.458	-93493.1	-11226.5	6441.19	184.9	1028.75	0	0	0	0	0	0	0	603	903	0
568	0	0	0	0	0	0	0	200	300	0	-22.5064	-99.081	-743.458	-94042.4	-10921.3	6349.64	185.31	1029.49	0	0	0	0	0	0	0	603	903	0
568	1	0	0	0	0	0	0	200	300	0	-23.1168	-99.3861	-742.237	-93767.8	-10860.3	6532.75	185.368	1029.33	0	0	0	0	0	0	0	603	903	0
568	2	0	0	0	0	0	0	200	300	0	-22.3538	-97.7077	-741.322	-92943.8	-10799.3	6441.19	185.432	1028.38	0	0	0	0	0	0	0	603	903	0
568	3	0	0	0	0	0	0	200	300	0	-21.8961	-97.0973	-741.932	-93401.5	-10738.2	6441.19	185.527	1028.89	0	0	0	0	0	0	0	603	903	0
568	4	0	0	0	0	0	0	200	300	0	-19.7598	-97.2499	-741.627	-93218.5	-11470.7	6578.52	184.533	1028.69	0	0	0	0	0	0	0	603	903	0
568	5	0	0	0	0	0	0	200	300	0	-21.7435	-96.487	-739.491	-92669.1	-11104.4	6349.64	184.984	1028.31	0	0	0	0	0	0	0	603	903	0
568	6	0	0	0	0	0	0	200	300	0	-21.5909	-95.2663	-738.88	-93035.3	-10799.3	6441.19	185.384	1028.91	0	0	0	0	0	0	0	603	903	0
568	7	0	0	0	0	0	0	200	300	0	-22.659	-94.1982	-738.27	-92669.1	-11470.7	6441.19	184.463	1028.52	0	0	0	0	0	0	0	603	903	0
568	8	0	0	0	0	0	0	200	300	0	-22.9642	-94.5033	-737.965	-92211.4	-11043.4	6441.19	185.035	1027.95	0	0	0	0	0	0	0	603	903	0
568	9	0	0	0	0	0	0	200	300	0	-22.0486	-94.1982	-737.354	-91753.6	-11226.5	6486.97	184.775	1027.44	0	0	0	0	0	0	0	603	903	0
569	0	0	0	0	0	0	0	200	300	0	-22.5064	-93.13	-736.134	-91845.2	-11043.4	6670.07	184.998	1027.77	0	0	0	0	0	0	0	603	903	0
569	1	0	0	0	0	0	0	200	300	0	-22.3538	-92.0619	-735.828	-92211.4	-11348.6	6349.64	184.577	1028.32	0	0	0	0	0	0	0	603	903	0
569	2	0	0	0	0	0	0	200	300	0	-21.4383	-92.3671	-735.523	-91204.3	-10799.3	6212.31	185.318	1027	0	0	0	0	0	0	0	603	903	0
569	3	0	0	0	0	0	0	200	300	0	-21.1331	-91.6042	-733.692	-91479	-11165.5	6441.19	184.782	1027.68	0	0	0	0	0	0	0	603	903	0
569	4	0	0	0	0	0	0	200	300	0	-21.8961	-90.536	-732.777	-90929.6	-11470.7	6166.53	184.346	1027.09	0	0	0	0	0	0	0	603	903	0
569	5	0	0	0	0	0	0	200	300	0	-21.5909	-90.2309	-733.082	-90746.5	-11409.6	6395.42	184.436	1026.79	0	0	0	0	0	0	0	603	903	0
569	6	0	0	0	0	0	0	200	300	0	-22.2012	-90.0783	-732.472	-90929.6	-11348.6	6212.31	184.506	1027.14	0	0	0	0	0	0	0	603	903	0
569	7	0	0	0	0	0	0	200	300	0	-22.8116	-89.9257	-730.641	-90746.5	-11470.7	6395.42	184.301	1027.2	0	0	0	0	0	0	0	603	903	0
569	8	0	0	0	0	0	0	200	300	0	-22.8116	-87.7895	-729.42	-90014.1	-11775.8	6486.97	183.856	1026.41	0	0	0	0	0	0	0	603	903	0
569	9	0	0	0	0	0	0	200	300	0	-22.0486	-87.1791	-728.199	-88823.9	-11409.6	6486.97	184.332	1024.98	0	0	0	0	0	0	0	603	903	0
570	0	0	0	0	0	0	0	200	300	0	-21.8961	-87.3317	-728.199	-90288.8	-11348.6	6441.19	184.416	1026.99	0	0	0	0	0	0	0	603	903	0
570	1	0	0	0	0	0	0	200	300	0	-23.1168	-86.7213	-724.842	-88640.8	-11775.8	6441.19	183.754	1025.29	0	0	0	0	0	0	0	603	903	0
570	2	0	0	0	0	0	0	200	300	0	-23.1168	-85.5006	-724.232	-88823.9	-11104.4	6578.52	184.667	1025.65	0	0	0	0	0	0	0	603	903	0
570	3	0	0	0	0	0	0	200	300	0	-22.3538	-84.7377	-723.927	-87816.9	-11470.7	6303.86	184.155	1024.31	0	0	0	0	0	0	0	603	903	0
570	4	0	0	0	0	0	0	200	300	0	-22.3538	-85.1955	-723.621	-88274.6	-11653.8	6624.3	183.895	1024.99	0	0	0	0	0	0	0	603	903	0
570	5	0	0	0	0	0	0	200	300	0	-23.1168	-84.4325	-722.706	-88549.3	-11836.9	6258.09	183.621	1025.52	0	0	0	0	0	0	0	603	903	0
570	6	0	0	0	0	0	0	200	300	0	-21.4383	-83.3644	-720.265	-88183.1	-11470.7	6486.97	184.074	1025.43	0	0	0	0	0	0	0	603	903	0
570	7	0	0	0	0	0	0	200	300	0	-23.2693	-82.7541	-719.654	-87816.9	-11714.8	6395.42	183.722	1025.03	0	0	0	0	0	0	0	603	903	0
570	8	0	0	0	0	0	0	200	300	0	-23.1168	-83.2118	-719.044	-87084.4	-11714.8	6532.75	183.708	1024.11	0	0	0	0	0	0	0	603	903	0
570	9	0	0	0	0	0	0	200	300	0	-22.3538	-82.4489	-716.908	-87816.9	-11531.7	6486.97	183.915	1025.49	0	0	0	0	0	0	0	603	903	0
571	0	0	0	0	0	0	0	200	300	0	-22.9642	-81.0756	-715.382	-87359.1	-12081	6441.19	183.113	1025.12	0	0	0	0	0	0	0	603	903	0
571	1	0	0	0	0	0	0	200	300	0	-23.4219	-80.4652	-715.992	-86901.3	-11775.8	6349.64	183.553	1024.37	0	0	0	0	0	0	0	603	903	0
571	2	0	0	0	0	0	0	200	300	0	-22.9642	-79.8549	-714.771	-87176	-11836.9	6761.63	183.44	1024.96	0	0	0	0	0	0	0	603	903	0
571	3	0	0	0	0	0	0	200	300	0	-22.0486	-80.0075	-711.109	-86535.1	-11714.8	6349.64	183.526	1024.69	0	0	0	0	0	0	0	603	903	0
571	4	0	0	0	0	0	0	200	300	0	-22.8116	-79.2445	-710.804	-86626.7	-12142	6486.97	182.918	1024.87	0	0	0	0	0	0	0	603	903	0
571	5	0	0	0	0	0	0	200	300	0	-23.7271	-78.9394	-709.583	-85711.1	-12020	6670.07	183.061	1023.79	0	0	0	0	0	0	0	603	903	0
571	6	0	0	0	0	0	0	200	300	0	-22.3538	-78.9394	-709.583	-85894.2	-11775.8	6578.52	183.405	1024.05	0	0	0	0	0	0	0	603	903	0
571	7	0	0	0	0	0	0	200	300	0	-21.8961	-78.0238	-708.057	-84795.6	-11958.9	6395.42	183.11	1022.76	0	0	0	0	0	0	0	603	903	0
571	8	0	0	0	0	0	0	200	300	0	-23.4219	-77.7187	-706.837	-85344.9	-12447.2	6532.75	182.39	1023.74	0	0	0	0	0	0	0	603	903	0
571	9	0	0	0	0	0	0	200	300	0	-20.9805	-76.3454	-706.226	-85253.4	-11958.9	6303.86	183.066	1023.72	0	0	0	0	0	0	0	603	903	0
572	0	0	0	0	0	0	0	200	300	0	-23.1168	-76.1928	-704.701	-84612.5	-12020	6349.64	182.943	1023.07	0	0	0	0	0	0	0	603	903	0
572	1	0	0	0	0	0	0	200	300	0	-20.9805	-76.498	-703.785	-84612.5	-12386.2	6395.42	182.401	1023.22	0	0	0	0	0	0	0	603	903	0
572	2	0	0	0	0	0	0	200	300	0	-22.2012	-74.8195	-702.259	-84704	-12325.1	6303.86	182.449	1023.62	0	0	0	0	0	0	0	603	903	0
572	3	0	0	0	0	0	0	200	300	0	-22.9642	-74.2091	-703.48	-84704	-12203.1	5983.43	182.653	1023.41	0	0	0	0	0	0	0	603	903	0
572	4	0	0	0	0	0	0	200	300	0	-23.4219	-74.2091	-702.564	-83605.4	-12020	6258.09	182.891	1022	0	0	0	0	0	0	0	603	903	0
572	5	0	0	0	0	0	0	200	300	0	-21.7435	-74.2091	-700.123	-83788.5	-12142	6349.64	182.657	1022.68	0	0	0	0	0	0	0	603	903	0
572	6	0	0	0	0	0	0	200	300	0	-22.2012	-73.2936	-699.513	-83605.4	-12325.1	6303.86	182.38	1022.52	0	0	0	0	0	0	0	603	903	0
572	7	0	0	0	0	0	0	200	300	0	-23.2693	-72.0729	-699.513	-83605.4	-12020	6212.31	182.817	1022.52	0	0	0	0	0	0	0	603	903	0
572	8	0	0	0	0	0	0	200	300	0	-21.2857	-71.31	-699.207	-83513.9	-12752.4	6303.86	181.762	1022.44	0	0	0	0	0	0	0	603	903	0
572	9	0	0	0	0	0	0	200	300	0	-21.2857	-71.0048	-695.545	-82873	-12630.3	6349.64	181.841	1022.15	0	0	0	0	0	0	0	603	903	0
573	0	0	0	0	0	0	0	200	300	0	-22.3538	-70.0893	-695.24	-82689.9	-12386.2	6212.31	182.184	1021.94	0	0	0	0	0	0	0	603	903	0
573	1	0	0	0	0	0	0	200	300	0	-22.0486	-69.3263	-696.461	-82781.4	-12447.2	5983.43	182.128	1021.86	0	0	0	0	0	0	0	603	903	0
573	2	0	0	0	0	0	0	200	300	0	-22.659	-69.7841	-695.24	-82689.9	-12630.3	6258.09	181.833	1021.94	0	0	0	0	0	0	0	603	903	0
573	3	0	0	0	0	0	0	200	300	0	-22.3538	-68.4108	-693.409	-82140.6	-12691.4	6258.09	181.697	1021.46	0	0	0	0	0	0	0	603	903	0
573	4	0	0	0	0	0	0	200	300	0	-21.5909	-67.8004	-692.494	-81774.4	-12325.1	5983.43	182.202	1021.09	0	0	0	0	0	0	0	603	903	0
573	5	0	0	0	0	0	0	200	300	0	-21.8961	-67.0375	-693.409	-81865.9	-12203.1	6120.76	182.401	1021.06	0	0	0	0	0	0	0	603	903	0
573	6	0	0	0	0	0	0	200	300	0	-22.8116	-67.0375	-690.357	-81957.5	-12569.3	6074.98	181.793	1021.72	0	0	0	0	0	0	0	603	903	0
573	7	0	0	0	0	0	0	200	300	0	-21.8961	-66.5797	-690.357	-81591.3	-12569.3	5800.32	181.793	1021.19	0	0	0	0	0	0	0	603	903	0
573	8	0	0	0	0	0	0	200	300	0	-21.2857	-64.9013	-689.442	-80950.4	-12508.3	6029.21	181.857	1020.41	0	0	0	0	0	0	0	603	903	0
573	9	0	0	0	0	0	0	200	300	0	-22.2012	-64.9013	-689.442	-81499.7	-12630.3	5937.65	181.68	1021.21	0	0	0	0	0	0	0	603	903	0
574	0	0	0	0	0	0	0	200	300	0	-22.659	-65.0539	-687.306	-80858.9	-12935.5	6120.76	181.179	1020.65	0	0	0	0	0	0	0	603	903	0
574	1	0	0	0	0	0	0	200	300	0	-22.3538	-64.4435	-687.306	-80492.6	-12508.3	5846.1	181.801	1020.11	0	0	0	0	0	0	0	603	903	0
574	2	0	0	0	0	0	0	200	300	0	-20.9805	-63.528	-685.78	-80218	-12996.5	5891.88	181.049	1019.97	0	0	0	0	0	0	0	603	903	0
574	3	0	0	0	0	0	0	200	300	0	-22.3538	-61.3918	-685.474	-80584.2	-12630.3	6120.76	181.574	1020.56	0	0	0	0	0	0	0	603	903	0
574	4	0	0	0	0	0	0	200	300	0	-19.7598	-62.765	-683.643	-80309.5	-12813.4	6029.21	181.257	1020.47	0	0	0	0	0	0	0	603	903	0
574	5	0	0	0	0	0	0	200	300	0	-21.1331	-60.934	-686.39	-79485.5	-12691.4	5662.99	181.51	1018.8	0	0	0	0	0	0	0	603	903	0
574	6	0	0	0	0	0	0	200	300	0	-19.3021	-62.1547	-683.338	-79668.7	-12935.5	6029.21	181.07	1019.59	0	0	0	0	0	0	0	603	903	0
574	7	0	0	0	0	0	0	200	300	0	-20.8279	-59.1029	-682.728	-79668.7	-13179.6	5479.89	180.696	1019.69	0	0	0	0	0	0	0	603	903	0
574	8	0	0	0	0	0	0	200	300	0	-19.4547	-60.6288	-682.118	-79668.7	-12874.5	5662.99	181.126	1019.8	0	0	0	0	0	0	0	603	903	0
574	9	0	0	0	0	0	0	200	300	0	-22.0486	-59.4081	-685.169	-79485.5	-12996.5	5617.22	181.032	1019.01	0	0	0	0	0	0	0	603	903	0
575	0	0	0	0	0	0	0	200	300	0	-20.6754	-58.1874	-680.592	-79210.9	-12813.4	5708.77	181.173	1019.39	0	0	0	0	0	0	0	603	903	0
575	1	0	0	0	0	0	0	200	300	0	-21.4383	-56.8141	-683.033	-79394	-12813.4	5754.55	181.24	1019.24	0	0	0	0	0	0	0	603	903	0
575	2	0	0	0	0	0	0	200	300	0	-22.3538	-57.5771	-679.981	-78753.1	-12874.5	5434.11	181.066	1018.82	0	0	0	0	0	0	0	603	903	0
575	3	0	0	0	0	0	0	200	300	0	-21.8961	-56.2038	-677.54	-78753.1	-13179.6	5434.11	180.548	1019.23	0	0	0	0	0	0	0	603	903	0
575	4	0	0	0	0	0	0	200	300	0	-20.6754	-55.5934	-679.676	-78386.9	-13423.8	5434.11	180.25	1018.33	0	0	0	0	0	0	0	603	903	0
575	5	0	0	0	0	0	0	200	300	0	-20.8279	-54.0675	-677.845	-79210.9	-12935.5	5479.89	180.917	1019.86	0	0	0	0	0	0	0	603	903	0
575	6	0	0	0	0	0	0	200	300	0	-21.7435	-54.3727	-678.15	-77563	-13423.8	5525.67	180.205	1017.37	0	0	0	0	0	0	0	603	903	0
575	7	0	0	0	0	0	0	200	300	0	-21.8961	-53.7624	-679.676	-76830.5	-13423.8	5342.56	180.25	1016.04	0	0	0	0	0	0	0	603	903	0
575	8	0	0	0	0	0	0	200	300	0	-21.4383	-53.7624	-677.54	-77746	-13057.6	5479.89	180.728	1017.75	0	0	0	0	0	0	0	603	903	0
575	9	0	0	0	0	0	0	200	300	0	-21.2857	-52.2365	-677.845	-77563	-12874.5	5525.67	181.007	1017.43	0	0	0	0	0	0	0	603	903	0
576	0	0	0	0	0	0	0	200	300	0	-20.8279	-51.4735	-677.54	-77471.4	-13240.7	5388.34	180.458	1017.34	0	0	0	0	0	0	0	603	903	0
576	1	0	0	0	0	0	0	200	300	0	-19.7598	-51.7787	-678.455	-77196.7	-13118.6	5205.23	180.664	1016.78	0	0	0	0	0	0	0	603	903	0
576	2	0	0	0	0	0	0	200	300	0	-21.2857	-50.558	-675.709	-77196.7	-13057.6	5251.01	180.676	1017.25	0	0	0	0	0	0	0	603	903	0
576	3	0	0	0	0	0	0	200	300	0	-20.8279	-49.0321	-675.709	-77105.2	-13667.9	4930.57	179.772	1017.11	0	0	0	0	0	0	0	603	903	0
576	4	0	0	0	0	0	0	200	300	0	-21.1331	-48.8795	-674.488	-76922.1	-13423.8	4930.57	180.098	1017.05	0	0	0	0	0	0	0	603	903	0
576	5	0	0	0	0	0	0	200	300	0	-22.0486	-48.1166	-674.793	-77288.3	-12996.5	5022.12	180.74	1017.54	0	0	0	0	0	0	0	603	903	0
576	6	0	0	0	0	0	0	200	300	0	-21.7435	-49.0321	-673.267	-76647.4	-13423.8	4747.47	180.062	1016.84	0	0	0	0	0	0	0	603	903	0
576	7	0	0	0	0	0	0	200	300	0	-20.5228	-46.8959	-673.267	-76647.4	-13423.8	5022.12	180.062	1016.84	0	0	0	0	0	0	0	603	903	0
576	8	0	0	0	0	0	0	200	300	0	-20.6754	-47.2011	-670.826	-76647.4	-13484.8	4839.02	179.898	1017.26	0	0	0	0	0	0	0	603	903	0
576	9	0	0	0	0	0	0	200	300	0	-22.659	-46.2856	-674.183	-75731.9	-13362.7	4747.47	180.179	1015.33	0	0	0	0	0	0	0	603	903	0
577	0	0	0	0	0	0	0	200	300	0	-21.5909	-45.0648	-671.436	-76555.8	-13606.9	4839.02	179.735	1017.02	0	0	0	0	0	0	0	603	903	0
577	1	0	0	0	0	0	0	200	300	0	-20.5228	-43.3864	-672.047	-75182.6	-13240.7	4793.24	180.298	1014.87	0	0	0	0	0	0	0	603	903	0
577	2	0	0	0	0	0	0	200	300	0	-19.6072	-44.3019	-669.3	-75915	-13484.8	5159.45	179.852	1016.42	0	0	0	0	0	0	0	603	903	0
577	3	0	0	0	0	0	0	200	300	0	-21.4383	-42.6234	-671.131	-75548.8	-13729	4610.14	179.544	1015.57	0	0	0	0	0	0	0	603	903	0
577	4	0	0	0	0	0	0	200	300	0	-21.2857	-42.1657	-671.131	-75640.3	-13667.9	4564.36	179.635	1015.71	0	0	0	0	0	0	0	603	903	0
577	5	0	0	0	0	0	0	200	300	0	-20.6754	-41.7079	-671.131	-75457.2	-12935.5	4564.36	180.726	1015.43	0	0	0	0	0	0	0	603	903	0
577	6	0	0	0	0	0	0	200	300	0	-20.065	-41.4027	-670.826	-75091	-13667.9	4198.15	179.625	1014.94	0	0	0	0	0	0	0	603	903	0
577	7	0	0	0	0	0	0	200	300	0	-21.1331	-40.6398	-670.216	-75182.6	-13790	4243.93	179.425	1015.18	0	0	0	0	0	0	0	603	903	0
577	8	0	0	0	0	0	0	200	300	0	-21.5909	-38.6562	-665.638	-75457.2	-13240.7	4243.93	180.108	1016.36	0	0	0	0	0	0	0	603	903	0
577	9	0	0	0	0	0	0	200	300	0	-19.1495	-38.1984	-666.248	-74541.7	-13484.8	4610.14	179.76	1014.88	0	0	0	0	0	0	0	603	903	0
578	0	0	0	0	0	0	0	200	300	0	-19.6072	-37.8932	-665.333	-74083.9	-13973.1	4289.7	178.998	1014.35	0	0	0	0	0	0	0	603	903	0
578	1	0	0	0	0	0	0	200	300	0	-20.8279	-38.1984	-666.859	-74907.9	-13606.9	4243.93	179.596	1015.33	0	0	0	0	0	0	0	603	903	0
578	2	0	0	0	0	0	0	200	300	0	-20.6754	-37.8932	-665.943	-74358.6	-13729	4015.04	179.384	1014.66	0	0	0	0	0	0	0	603	903	0
578	3	0	0	0	0	0	0	200	300	0	-19.1495	-37.588	-665.333	-73809.3	-13729	4015.04	179.365	1013.94	0	0	0	0	0	0	0	603	903	0
578	4	0	0	0	0	0	0	200	300	0	-19.1495	-36.0622	-667.164	-73900.8	-13912.1	4198.15	179.147	1013.77	0	0	0	0	0	0	0	603	903	0
578	5	0	0	0	0	0	0	200	300	0	-19.9124	-36.3673	-665.638	-73351.5	-13240.7	4243.93	180.108	1013.2	0	0	0	0	0	0	0	603	903	0
578	6	0	0	0	0	0	0	200	300	0	-20.3702	-35.2992	-664.112	-73809.3	-13606.9	4198.15	179.511	1014.14	0	0	0	0	0	0	0	603	903	0
578	7	0	0	0	0	0	0	200	300	0	-18.9969	-35.1466	-662.891	-71978.2	-13545.8	4152.37	179.566	1011.58	0	0	0	0	0	0	0	603	903	0
578	8	0	0	0	0	0	0	200	300	0	-18.5391	-34.2311	-663.807	-72985.3	-13484.8	4015.04	179.686	1012.95	0	0	0	0	0	0	0	603	903	0
578	9	0	0	0	0	0	0	200	300	0	-19.9124	-33.4682	-663.197	-72436	-13362.7	3786.16	179.851	1012.22	0	0	0	0	0	0	0	603	903	0
579	0	0	0	0	0	0	0	200	300	0	-19.4547	-32.8578	-661.06	-72802.2	-13484.8	3786.16	179.601	1013.13	0	0	0	0	0	0	0	603	903	0
579	1	0	0	0	0	0	0	200	300	0	-17.9288	-32.4001	-661.06	-72619.1	-13912.1	3877.72	178.955	1012.85	0	0	0	0	0	0	0	603	903	0
579	2	0	0	0	0	0	0	200	300	0	-18.3865	-31.3319	-661.06	-72344.4	-13545.8	3557.28	179.509	1012.44	0	0	0	0	0	0	0	603	903	0
579	3	0	0	0	0	0	0	200	300	0	-18.9969	-31.3319	-661.06	-72436	-13362.7	3419.95	179.786	1012.58	0	0	0	0	0	0	0	603	903	0
579	4	0	0	0	0	0	0	200	300	0	-18.8443	-30.569	-659.535	-71612	-13667.9	3465.73	179.276	1011.58	0	0	0	0	0	0	0	603	903	0
579	5	0	0	0	0	0	0	200	300	0	-15.1822	-30.569	-658.924	-71428.9	-13667.9	3648.83	179.257	1011.4	0	0	0	0	0	0	0	603	903	0
579	6	0	0	0	0	0	0	200	300	0	-18.3865	-29.3483	-659.535	-71886.7	-13484.8	3511.51	179.554	1012	0	0	0	0	0	0	0	603	903	0
579	7	0	0	0	0	0	0	200	300	0	-18.3865	-28.8905	-658.924	-72161.3	-13301.7	3191.07	179.813	1012.51	0	0	0	0	0	0	0	603	903	0
579	8	0	0	0	0	0	0	200	300	0	-16.7081	-28.2802	-657.093	-71245.8	-14095.2	3465.73	178.549	1011.43	0	0	0	0	0	0	0	603	903	0
579	9	0	0	0	0	0	0	200	300	0	-17.6236	-27.6698	-654.957	-71154.2	-13423.8	3236.85	179.504	1011.64	0	0	0	0	0	0	0	603	903	0
580	0	0	0	0	0	0	0	200	300	0	-17.9288	-27.6698	-655.872	-70513.4	-13790	3419.95	178.975	1010.51	0	0	0	0	0	0	0	603	903	0
580	1	0	0	0	0	0	0	200	300	0	-18.3865	-27.2121	-655.262	-71062.7	-13729	3282.62	179.048	1011.45	0	0	0	0	0	0	0	603	903	0
580	2	0	0	0	0	0	0	200	300	0	-17.1658	-26.4491	-654.347	-70604.9	-13667.9	3419.95	179.112	1010.9	0	0	0	0	0	0	0	603	903	0
580	3	0	0	0	0	0	0	200	300	0	-16.5555	-25.9914	-652.516	-69597.8	-13545.8	3191.07	179.241	1009.66	0	0	0	0	0	0	0	603	903	0
580	4	0	0	0	0	0	0	200	300	0	-17.471	-25.381	-653.431	-70513.4	-13240.7	3236.85	179.737	1010.91	0	0	0	0	0	0	0	603	903	0
580	5	0	0	0	0	0	0	200	300	0	-17.471	-25.381	-653.431	-70147.2	-13484.8	3007.97	179.363	1010.35	0	0	0	0	0	0	0	603	903	0
580	6	0	0	0	0	0	0	200	300	0	-18.2339	-24.1603	-650.684	-69872.5	-13423.8	3145.29	179.37	1010.38	0	0	0	0	0	0	0	603	903	0
580	7	0	0	0	0	0	0	200	300	0	-15.9451	-24.3129	-650.074	-68499.2	-13545.8	3191.07	179.163	1008.37	0	0	0	0	0	0	0	603	903	0
580	8	0	0	0	0	0	0	200	300	0	-16.7081	-23.2448	-650.684	-69506.3	-13729	2779.08	178.901	1009.82	0	0	0	0	0	0	0	603	903	0
580	9	0	0	0	0	0	0	200	300	0	-17.7762	-22.9396	-650.074	-69414.7	-13729	3053.74	178.881	1009.78	0	0	0	0	0	0	0	603	903	0
581	0	0	0	0	0	0	0	200	300	0	-18.2339	-22.4818	-649.159	-68590.8	-13484.8	2962.19	179.227	1008.66	0	0	0	0	0	0	0	603	903	0
581	1	0	0	0	0	0	0	200	300	0	-16.8607	-22.787	-647.938	-68957	-13301.7	2962.19	179.471	1009.43	0	0	0	0	0	0	0	603	903	0
581	2	0	0	0	0	0	0	200	300	0	-14.2667	-22.0241	-648.243	-68499.2	-13912.1	3053.74	178.539	1008.67	0	0	0	0	0	0	0	603	903	0
581	3	0	0	0	0	0	0	200	300	0	-17.3184	-22.0241	-647.938	-69048.5	-13545.8	2687.53	179.094	1009.57	0	0	0	0	0	0	0	603	903	0
581	4	0	0	0	0	0	0	200	300	0	-17.471	-21.4137	-645.496	-68407.7	-13790	2962.19	178.637	1008.98	0	0	0	0	0	0	0	603	903	0
581	5	0	0	0	0	0	0	200	300	0	-16.8607	-20.8034	-643.665	-67766.8	-13545.8	2824.86	178.955	1008.28	0	0	0	0	0	0	0	603	903	0
581	6	0	0	0	0	0	0	200	300	0	-16.7081	-20.8034	-645.191	-68224.5	-13729	2916.41	178.721	1008.74	0	0	0	0	0	0	0	603	903	0
581	7	0	0	0	0	0	0	200	300	0	-18.0814	-20.4982	-644.276	-67949.9	-13484.8	2824.86	179.07	1008.47	0	0	0	0	0	0	0	603	903	0
581	8	0	0	0	0	0	0	200	300	0	-18.0814	-20.8034	-643.36	-67125.9	-13423.8	2916.41	179.135	1007.34	0	0	0	0	0	0	0	603	903	0
581	9	0	0	0	0	0	0	200	300	0	-16.8607	-19.4301	-642.445	-67034.4	-13912.1	2870.64	178.345	1007.34	0	0	0	0	0	0	0	603	903	0
582	0	0	0	0	0	0	0	200	300	0	-17.471	-19.4301	-643.36	-67400.6	-13667.9	2916.41	178.755	1007.76	0	0	0	0	0	0	0	603	903	0
582	1	0	0	0	0	0	0	200	300	0	-17.9288	-18.8197	-641.834	-67217.5	-13484.8	2687.53	178.99	1007.73	0	0	0	0	0	0	0	603	903	0
582	2	0	0	0	0	0	0	200	300	0	-18.0814	-18.8197	-639.698	-66759.7	-13484.8	2687.53	178.92	1007.36	0	0	0	0	0	0	0	603	903	0
582	3	0	0	0	0	0	0	200	300	0	-16.0977	-18.5146	-639.393	-66118.8	-13973.1	2550.2	178.146	1006.41	0	0	0	0	0	0	0	603	903	0
582	4	0	0	0	0	0	0	200	300	0	-16.5555	-17.7516	-640.308	-66210.4	-13851	2504.42	178.368	1006.4	0	0	0	0	0	0	0	603	903	0
582	5	0	0	0	0	0	0	200	300	0	-17.6236	-18.2094	-638.783	-65752.6	-13423.8	2504.42	178.985	1005.93	0	0	0	0	0	0	0	603	903	0
582	6	0	0	0	0	0	0	200	300	0	-17.9288	-17.9042	-636.646	-65752.6	-13790	2550.2	178.34	1006.28	0	0	0	0	0	0	0	603	903	0
582	7	0	0	0	0	0	0	200	300	0	-17.0132	-17.9042	-638.172	-65111.8	-13484.8	2595.98	178.87	1005.03	0	0	0	0	0	0	0	603	903	0
582	8	0	0	0	0	0	0	200	300	0	-16.0977	-15.768	-636.646	-65386.4	-13484.8	2458.65	178.819	1005.7	0	0	0	0	0	0	0	603	903	0
582	9	0	0	0	0	0	0	200	300	0	-17.471	-16.2257	-637.867	-65020.2	-13179.6	2412.87	179.338	1004.93	0	0	0	0	0	0	0	603	903	0
583	0	0	0	0	0	0	0	200	300	0	-17.1658	-15.768	-635.426	-64654	-13973.1	2916.41	178.01	1004.75	0	0	0	0	0	0	0	603	903	0
583	1	0	0	0	0	0	0	200	300	0	-16.4029	-14.8524	-634.51	-64013.1	-13484.8	2367.1	178.748	1003.89	0	0	0	0	0	0	0	603	903	0
583	2	0	0	0	0	0	0	200	300	0	-16.0977	-15.768	-630.848	-65020.2	-13545.8	2275.54	178.528	1006.07	0	0	0	0	0	0	0	603	903	0
583	3	0	0	0	0	0	0	200	300	0	-17.0132	-14.8524	-632.374	-65111.8	-13667.9	2595.98	178.386	1005.96	0	0	0	0	0	0	0	603	903	0
583	4	0	0	0	0	0	0	200	300	0	-16.8607	-14.3947	-634.51	-64104.7	-13912.1	2550.2	178.074	1004.03	0	0	0	0	0	0	0	603	903	0
583	5	0	0	0	0	0	0	200	300	0	-15.4874	-13.7843	-635.12	-62914.5	-13729	2229.77	178.384	1002.06	0	0	0	0	0	0	0	603	903	0
583	6	0	0	0	0	0	0	200	300	0	-15.7925	-13.3266	-633.9	-64104.7	-13851	2138.21	178.15	1004.13	0	0	0	0	0	0	0	603	903	0
583	7	0	0	0	0	0	0	200	300	0	-16.0977	-13.0214	-632.679	-64196.2	-13606.9	2183.99	178.493	1004.47	0	0	0	0	0	0	0	603	903	0
583	8	0	0	0	0	0	0	200	300	0	-17.1658	-13.0214	-632.069	-63280.7	-13240.7	2000.88	179.052	1003.12	0	0	0	0	0	0	0	603	903	0
583	9	0	0	0	0	0	0	200	300	0	-15.9451	-12.2585	-632.374	-62548.3	-13362.7	2367.1	178.869	1001.91	0	0	0	0	0	0	0	603	903	0
584	0	0	0	0	0	0	0	200	300	0	-15.4874	-11.8007	-632.984	-63463.8	-13912.1	2000.88	178.021	1003.26	0	0	0	0	0	0	0	603	903	0
584	1	0	0	0	0	0	0	200	300	0	-16.2503	-11.6481	-631.458	-63463.8	-13729	2321.32	178.258	1003.5	0	0	0	0	0	0	0	603	903	0
584	2	0	0	0	0	0	0	200	300	0	-15.3348	-11.1903	-629.627	-62731.4	-13606.9	2092.44	178.389	1002.63	0	0	0	0	0	0	0	603	903	0
584	3	0	0	0	0	0	0	200	300	0	-17.3184	-11.0377	-631.458	-62365.2	-13667.9	2138.21	178.355	1001.76	0	0	0	0	0	0	0	603	903	0
584	4	0	0	0	0	0	0	200	300	0	-15.3348	-11.0377	-630.238	-62365.2	-13729	2046.66	178.216	1001.96	0	0	0	0	0	0	0	603	903	0
584	5	0	0	0	0	0	0	200	300	0	-14.7244	-11.9533	-629.627	-62639.8	-13118.6	1909.33	179.165	1002.49	0	0	0	0	0	0	0	603	903	0
584	6	0	0	0	0	0	0	200	300	0	-15.3348	-10.1222	-629.017	-62456.7	-13484.8	2046.66	178.562	1002.29	0	0	0	0	0	0	0	603	903	0
584	7	0	0	0	0	0	0	200	300	0	-16.2503	-9.66446	-629.017	-61449.6	-13606.9	2000.88	178.368	1000.69	0	0	0	0	0	0	0	603	903	0
584	8	0	0	0	0	0	0	200	300	0	-15.3348	-9.35928	-630.238	-61541.2	-13423.8	1817.78	178.7	1000.65	0	0	0	0	0	0	0	603	903	0
584	9	0	0	0	0	0	0	200	300	0	-14.877	-9.05411	-629.322	-61724.3	-13301.7	1634.67	178.863	1001.08	0	0	0	0	0	0	0	603	903	0
585	0	0	0	0	0	0	0	200	300	0	-16.4029	-9.20669	-628.407	-61632.8	-13545.8	1634.67	178.444	1001.08	0	0	0	0	0	0	0	603	903	0
585	1	0	0	0	0	0	0	200	300	0	-15.1822	-8.59634	-629.017	-61358.1	-13912.1	1817.78	177.883	1000.55	0	0	0	0	0	0	0	603	903	0
585	2	0	0	0	0	0	0	200	300	0	-14.7244	-7.98599	-629.932	-61083.4	-13179.6	1863.56	179.078	999.968	0	0	0	0	0	0	0	603	903	0
585	3	0	0	0	0	0	0	200	300	0	-14.4193	-7.37564	-630.543	-61175	-13362.7	1772	178.808	1000.02	0	0	0	0	0	0	0	603	903	0
585	4	0	0	0	0	0	0	200	300	0	-15.7925	-7.22305	-628.101	-60076.4	-13790	1451.57	178.045	998.648	0	0	0	0	0	0	0	603	903	0
585	5	0	0	0	0	0	0	200	300	0	-15.0296	-6.46011	-626.576	-60625.7	-13179.6	1634.67	178.966	999.757	0	0	0	0	0	0	0	603	903	0
585	6	0	0	0	0	0	0	200	300	0	-13.6563	-6.15494	-627.796	-60351	-13118.6	1497.34	179.104	999.132	0	0	0	0	0	0	0	603	903	0
585	7	0	0	0	0	0	0	200	300	0	-12.5882	-6.00235	-627.491	-60259.5	-13545.8	1405.79	178.413	999.032	0	0	0	0	0	0	0	603	903	0
585	8	0	0	0	0	0	0	200	300	0	-13.5037	-6.15494	-626.576	-60442.6	-13851	1497.34	177.894	999.465	0	0	0	0	0	0	0	603	903	0
585	9	0	0	0	0	0	0	200	300	0	-13.046	-5.392	-626.27	-60351	-13118.6	1405.79	179.053	999.366	0	0	0	0	0	0	0	603	903	0
586	0	0	0	0	0	0	0	200	300	0	-14.4193	-4.62906	-628.101	-59801.7	-13423.8	1222.69	178.628	998.21	0	0	0	0	0	0	0	603	903	0
586	1	0	0	0	0	0	0	200	300	0	-14.1141	-4.47647	-628.101	-59252.4	-13240.7	1131.13	178.92	997.336	0	0	0	0	0	0	0	603	903	0
586	2	0	0	0	0	0	0	200	300	0	-12.7408	-4.01871	-625.965	-59893.3	-12996.5	1268.46	179.238	998.681	0	0	0	0	0	0	0	603	903	0
586	3	0	0	0	0	0	0	200	300	0	-13.8089	-3.40836	-626.576	-59618.6	-13301.7	1039.58	178.771	998.15	0	0	0	0	0	0	0	603	903	0
586	4	0	0	0	0	0	0	200	300	0	-13.5037	-2.798	-627.186	-59252.4	-13545.8	1222.69	178.402	997.473	0	0	0	0	0	0	0	603	903	0
586	5	0	0	0	0	0	0	200	300	0	-12.8934	-2.03506	-626.881	-58794.6	-13790	902.251	178.002	996.789	0	0	0	0	0	0	0	603	903	0
586	6	0	0	0	0	0	0	200	300	0	-11.6727	-2.64542	-625.66	-59160.8	-13667.9	1039.58	178.154	997.557	0	0	0	0	0	0	0	603	903	0
586	7	0	0	0	0	0	0	200	300	0	-11.8253	-2.18765	-626.576	-59343.9	-13484.8	948.028	178.479	997.712	0	0	0	0	0	0	0	603	903	0
586	8	0	0	0	0	0	0	200	300	0	-14.1141	-1.42471	-627.796	-58520	-13362.7	948.028	178.715	996.215	0	0	0	0	0	0	0	603	903	0
586	9	0	0	0	0	0	0	200	300	0	-10.1468	-0.966949	-622.913	-58153.7	-13118.6	1085.36	178.94	996.358	0	0	0	0	0	0	0	603	903	0
587	0	0	0	0	0	0	0	200	300	0	-13.046	-0.661773	-627.491	-57970.6	-13240.7	1039.58	178.899	995.385	0	0	0	0	0	0	0	603	903	0
587	1	0	0	0	0	0	0	200	300	0	-11.5201	-0.814361	-626.27	-58336.9	-13484.8	627.593	178.468	996.15	0	0	0	0	0	0	0	603	903	0
587	2	0	0	0	0	0	0	200	300	0	-11.5201	0.101166	-626.881	-57787.5	-13423.8	490.264	178.586	995.183	0	0	0	0	0	0	0	603	903	0
587	3	0	0	0	0	0	0	200	300	0	-11.6727	0.864106	-627.186	-58062.2	-13362.7	444.488	178.694	995.576	0	0	0	0	0	0	0	603	903	0
587	4	0	0	0	0	0	0	200	300	0	-12.1304	1.47446	-630.238	-58062.2	-13240.7	764.922	178.991	995.128	0	0	0	0	0	0	0	603	903	0
587	5	0	0	0	0	0	0	200	300	0	-12.283	2.2374	-625.965	-57879.1	-13423.8	352.935	178.555	995.464	0	0	0	0	0	0	0	603	903	0
587	6	0	0	0	0	0	0	200	300	0	-11.5201	1.93222	-624.745	-57512.9	-13118.6	307.159	179.002	995.058	0	0	0	0	0	0	0	603	903	0
587	7	0	0	0	0	0	0	200	300	0	-11.3675	1.93222	-624.439	-56963.6	-13179.6	856.475	178.894	994.224	0	0	0	0	0	0	0	603	903	0
587	8	0	0	0	0	0	0	200	300	0	-11.9778	2.38998	-629.322	-56963.6	-13240.7	307.159	178.96	993.516	0	0	0	0	0	0	0	603	903	0
587	9	0	0	0	0	0	0	200	300	0	-11.3675	3.4581	-629.017	-57329.8	-13484.8	215.606	178.562	994.142	0	0	0	0	0	0	0	603	903	0
588	0	0	0	0	0	0	0	200	300	0	-10.1468	3.00034	-628.712	-56780.5	-13057.6	307.159	179.231	993.312	0	0	0	0	0	0	0	603	903	0
588	1	0	0	0	0	0	0	200	300	0	-10.1468	4.83139	-630.848	-56963.6	-13606.9	398.711	178.431	993.297	0	0	0	0	0	0	0	603	903	0
588	2	0	0	0	0	0	0	200	300	0	-11.6727	4.98398	-629.322	-56139.6	-13362.7	78.2768	178.766	992.206	0	0	0	0	0	0	0	603	903	0
588	3	0	0	0	0	0	0	200	300	0	-11.0623	4.83139	-627.796	-56597.4	-13179.6	307.159	179.007	993.153	0	0	0	0	0	0	0	603	903	0
588	4	0	0	0	0	0	0	200	300	0	-9.9942	5.28915	-630.238	-56780.5	-13057.6	-104.829	179.282	993.094	0	0	0	0	0	0	0	603	903	0
588	5	0	0	0	0	0	0	200	300	0	-9.84161	6.05209	-627.491	-56688.9	-13240.7	78.2768	178.899	993.342	0	0	0	0	0	0	0	603	903	0
588	6	0	0	0	0	0	0	200	300	0	-10.7571	6.35727	-627.796	-56414.3	-13484.8	169.83	178.52	992.861	0	0	0	0	0	0	0	603	903	0
588	7	0	0	0	0	0	0	200	300	0	-10.7571	6.96762	-629.932	-56139.6	-13240.7	78.2768	178.981	992.12	0	0	0	0	0	0	0	603	903	0
588	8	0	0	0	0	0	0	200	300	0	-10.1468	8.03574	-633.289	-56139.6	-13423.8	-104.829	178.803	991.648	0	0	0	0	0	0	0	603	903	0
588	9	0	0	0	0	0	0	200	300	0	-9.53644	7.73056	-629.627	-55773.4	-13545.8	-104.829	178.486	991.582	0	0	0	0	0	0	0	603	903	0
589	0	0	0	0	0	0	0	200	300	0	-10.2994	7.57797	-632.069	-56231.2	-12874.5	-150.605	179.631	991.964	0	0	0	0	0	0	0	603	903	0
589	1	0	0	0	0	0	0	200	300	0	-9.68903	9.10385	-632.984	-55041	-12996.5	-287.934	179.468	989.955	0	0	0	0	0	0	0	603	903	0
589	2	0	0	0	0	0	0	200	300	0	-9.38385	9.40903	-633.595	-55956.5	-13729	-242.158	178.332	991.316	0	0	0	0	0	0	0	603	903	0
589	3	0	0	0	0	0	0	200	300	0	-9.07867	9.25644	-634.51	-55864.9	-13973.1	-150.605	177.978	991.044	0	0	0	0	0	0	0	603	903	0
589	4	0	0	0	0	0	0	200	300	0	-11.5201	9.86679	-634.205	-55407.2	-12996.5	-425.263	179.507	990.365	0	0	0	0	0	0	0	603	903	0
589	5	0	0	0	0	0	0	200	300	0	-10.1468	10.4771	-635.426	-55498.7	-13423.8	-379.487	178.874	990.341	0	0	0	0	0	0	0	603	903	0
589	6	0	0	0	0	0	0	200	300	0	-9.53644	11.0875	-636.646	-54491.6	-13362.7	-562.593	179.011	988.592	0	0	0	0	0	0	0	603	903	0
589	7	0	0	0	0	0	0	200	300	0	-8.7735	10.3246	-636.952	-55041	-13362.7	-196.381	179.021	989.413	0	0	0	0	0	0	0	603	903	0
589	8	0	0	0	0	0	0	200	300	0	-9.68903	11.0875	-636.646	-54308.5	-13545.8	-516.816	178.723	988.304	0	0	0	0	0	0	0	603	903	0
589	9	0	0	0	0	0	0	200	300	0	-9.84161	11.6978	-637.257	-55132.5	-13484.8	-562.593	178.839	989.515	0	0	0	0	0	0	0	603	903	0
590	0	0	0	0	0	0	0	200	300	0	-8.31573	12.3082	-639.088	-54583.2	-13423.8	-699.922	178.995	988.408	0	0	0	0	0	0	0	603	903	0
590	1	0	0	0	0	0	0	200	300	0	-6.33209	11.8504	-638.783	-54217	-13362.7	-699.922	179.081	987.876	0	0	0	0	0	0	0	603	903	0
590	2	0	0	0	0	0	0	200	300	0	-9.68903	12.3082	-639.088	-55315.6	-13179.6	-745.698	179.377	989.554	0	0	0	0	0	0	0	603	903	0
590	3	0	0	0	0	0	0	200	300	0	-7.24762	13.3763	-639.088	-54400.1	-13240.7	-608.369	179.282	988.122	0	0	0	0	0	0	0	603	903	0
590	4	0	0	0	0	0	0	200	300	0	-9.38385	13.3763	-642.14	-53942.3	-13301.7	-333.711	179.285	987.004	0	0	0	0	0	0	0	603	903	0
590	5	0	0	0	0	0	0	200	300	0	-6.63727	13.6815	-642.75	-53484.6	-13423.8	-745.698	179.115	986.212	0	0	0	0	0	0	0	603	903	0
590	6	0	0	0	0	0	0	200	300	0	-9.9942	13.6815	-640.919	-54033.9	-13301.7	-699.922	179.246	987.307	0	0	0	0	0	0	0	603	903	0
590	7	0	0	0	0	0	0	200	300	0	-9.53644	14.4444	-642.445	-53393	-13301.7	-654.145	179.295	986.109	0	0	0	0	0	0	0	603	903	0
590	8	0	0	0	0	0	0	200	300	0	-8.7735	15.36	-643.055	-53484.6	-13729	-791.474	178.65	986.173	0	0	0	0	0	0	0	603	903	0
590	9	0	0	0	0	0	0	200	300	0	-8.16315	15.2074	-644.886	-53759.2	-13667.9	-791.474	178.806	986.362	0	0	0	0	0	0	0	603	903	0
591	0	0	0	0	0	0	0	200	300	0	-10.2994	15.36	-643.36	-53209.9	-13423.8	-928.804	179.135	985.706	0	0	0	0	0	0	0	603	903	0
591	1	0	0	0	0	0	0	200	300	0	-9.53644	15.6651	-645.496	-53301.5	-13179.6	-928.804	179.582	985.574	0	0	0	0	0	0	0	603	903	0
591	2	0	0	0	0	0	0	200	300	0	-8.92609	16.8858	-645.802	-52019.7	-13423.8	-654.145	179.214	983.551	0	0	0	0	0	0	0	603	903	0
591	3	0	0	0	0	0	0	200	300	0	-8.92609	15.0548	-647.022	-52660.6	-13118.6	-791.474	179.725	984.389	0	0	0	0	0	0	0	603	903	0
591	4	0	0	0	0	0	0	200	300	0	-9.38385	17.3436	-644.276	-52752.1	-13240.7	-745.698	179.449	984.878	0	0	0	0	0	0	0	603	903	0
591	5	0	0	0	0	0	0	200	300	0	-9.84161	17.4962	-648.243	-51928.2	-13484.8	-974.58	179.198	983.106	0	0	0	0	0	0	0	603	903	0
591	6	0	0	0	0	0	0	200	300	0	-8.16315	17.6488	-648.548	-51928.2	-13973.1	-928.804	178.455	983.068	0	0	0	0	0	0	0	603	903	0
591	7	0	0	0	0	0	0	200	300	0	-8.62091	17.8014	-647.328	-52477.5	-13423.8	-791.474	179.263	984.068	0	0	0	0	0	0	0	603	903	0
591	8	0	0	0	0	0	0	200	300	0	-9.53644	18.5643	-649.159	-52111.3	-13362.7	-1066.13	179.415	983.275	0	0	0	0	0	0	0	603	903	0
591	9	0	0	0	0	0	0	200	300	0	-9.84161	19.0221	-650.379	-52569	-13667.9	-1432.34	178.985	983.828	0	0	0	0	0	0	0	603	903	0
592	0	0	0	0	0	0	0	200	300	0	-8.46832	18.2591	-651.6	-51928.2	-13545.8	-928.804	179.211	982.693	0	0	0	0	0	0	0	603	903	0
592	1	0	0	0	0	0	0	200	300	0	-6.33209	18.7169	-651.6	-51653.5	-13484.8	-1066.13	179.305	982.272	0	0	0	0	0	0	0	603	903	0
592	2	0	0	0	0	0	0	200	300	0	-8.01056	19.9376	-652.21	-51928.2	-13545.8	-1111.91	179.231	982.619	0	0	0	0	0	0	0	603	903	0
592	3	0	0	0	0	0	0	200	300	0	-7.40021	21.0057	-654.041	-51745.1	-13973.1	-1066.13	178.636	982.116	0	0	0	0	0	0	0	603	903	0
592	4	0	0	0	0	0	0	200	300	0	-9.38385	20.3954	-652.821	-51287.3	-13362.7	-1249.24	179.531	981.563	0	0	0	0	0	0	0	603	903	0
592	5	0	0	0	0	0	0	200	300	0	-7.85797	20.5479	-653.126	-51470.4	-13851	-1111.91	178.793	981.806	0	0	0	0	0	0	0	603	903	0
592	6	0	0	0	0	0	0	200	300	0	-9.84161	21.7686	-653.431	-51195.7	-13790	-1066.13	178.896	981.349	0	0	0	0	0	0	0	603	903	0
592	7	0	0	0	0	0	0	200	300	0	-9.53644	21.7686	-654.957	-51470.4	-13484.8	-1295.01	179.411	981.586	0	0	0	0	0	0	0	603	903	0
592	8	0	0	0	0	0	0	200	300	0	-9.23126	21.6161	-656.178	-50646.4	-14217.2	-1111.91	178.333	980.184	0	0	0	0	0	0	0	603	903	0
592	9	0	0	0	0	0	0	200	300	0	-9.07867	22.2264	-656.178	-50280.2	-13790	-1295.01	178.984	979.626	0	0	0	0	0	0	0	603	903	0
593	0	0	0	0	0	0	0	200	300	0	-8.31573	23.2945	-657.703	-50646.4	-13484.8	-1432.34	179.497	980.005	0	0	0	0	0	0	0	603	903	0
593	1	0	0	0	0	0	0	200	300	0	-10.452	23.1419	-658.619	-50554.9	-13301.7	-1340.79	179.804	979.759	0	0	0	0	0	0	0	603	903	0
593	2	0	0	0	0	0	0	200	300	0	-9.68903	22.6842	-658.924	-50188.7	-14034.1	-1249.24	178.701	979.168	0	0	0	0	0	0	0	603	903	0
593	3	0	0	0	0	0	0	200	300	0	-9.23126	23.5997	-659.229	-49822.5	-14095.2	-1157.69	178.619	978.577	0	0	0	0	0	0	0	603	903	0
593	4	0	0	0	0	0	0	200	300	0	-8.92609	24.3626	-658.009	-50097.1	-13484.8	-1569.67	179.507	979.134	0	0	0	0	0	0	0	603	903	0
593	5	0	0	0	0	0	0	200	300	0	-10.6046	25.5833	-660.755	-50188.7	-14217.2	-1661.23	178.483	978.957	0	0	0	0	0	0	0	603	903	0
593	6	0	0	0	0	0	0	200	300	0	-10.6046	24.5152	-661.671	-49364.7	-13851	-1478.12	179.067	977.606	0	0	0	0	0	0	0	603	903	0
593	7	0	0	0	0	0	0	200	300	0	-9.07867	25.1256	-661.976	-49364.7	-13667.9	-1340.79	179.353	977.572	0	0	0	0	0	0	0	603	903	0
593	8	0	0	0	0	0	0	200	300	0	-9.38385	25.7359	-662.281	-49364.7	-13423.8	-1386.57	179.731	977.537	0	0	0	0	0	0	0	603	903	0
593	9	0	0	0	0	0	0	200	300	0	-10.452	26.1937	-665.028	-49364.7	-13851	-1203.46	179.172	977.23	0	0	0	0	0	0	0	603	903	0
594	0	0	0	0	0	0	0	200	300	0	-10.452	26.4989	-664.723	-48266.1	-13912.1	-1432.34	179.071	975.611	0	0	0	0	0	0	0	603	903	0
594	1	0	0	0	0	0	0	200	300	0	-9.38385	26.3463	-664.112	-48540.7	-13606.9	-1340.79	179.511	976.091	0	0	0	0	0	0	0	603	903	0
594	2	0	0	0	0	0	0	200	300	0	-9.53644	27.2618	-665.943	-48906.9	-14095.2	-1340.79	178.834	976.44	0	0	0	0	0	0	0	603	903	0
594	3	0	0	0	0	0	0	200	300	0	-10.7571	27.8722	-667.774	-49364.7	-14034.1	-1478.12	178.984	976.924	0	0	0	0	0	0	0	603	903	0
594	4	0	0	0	0	0	0	200	300	0	-9.9942	27.4144	-669.3	-48906.9	-13667.9	-1615.45	179.579	976.072	0	0	0	0	0	0	0	603	903	0
594	5	0	0	0	0	0	0	200	300	0	-10.1468	28.4825	-668.079	-48082.9	-13851	-1981.66	179.267	974.972	0	0	0	0	0	0	0	603	903	0
594	6	0	0	0	0	0	0	200	300	0	-7.70538	28.7877	-670.216	-47899.8	-14095.2	-1569.67	178.969	974.469	0	0	0	0	0	0	0	603	903	0
594	7	0	0	0	0	0	0	200	300	0	-11.0623	29.398	-672.047	-47991.4	-14095.2	-1432.34	179.027	974.411	0	0	0	0	0	0	0	603	903	0
594	8	0	0	0	0	0	0	200	300	0	-9.53644	29.2455	-673.267	-48174.5	-14095.2	-1432.34	179.065	974.553	0	0	0	0	0	0	0	603	903	0
594	9	0	0	0	0	0	0	200	300	0	-11.0623	30.0084	-673.878	-47350.5	-14278.3	-1615.45	178.812	973.266	0	0	0	0	0	0	0	603	903	0
595	0	0	0	0	0	0	0	200	300	0	-9.23126	30.9239	-672.962	-47350.5	-14156.2	-1523.9	178.964	973.361	0	0	0	0	0	0	0	603	903	0
595	1	0	0	0	0	0	0	200	300	0	-9.84161	32.1446	-676.014	-47808.3	-14339.3	-1615.45	178.788	973.721	0	0	0	0	0	0	0	603	903	0
595	2	0	0	0	0	0	0	200	300	0	-11.2149	31.2291	-677.235	-47625.2	-14034.1	-1661.23	179.277	973.323	0	0	0	0	0	0	0	603	903	0
595	3	0	0	0	0	0	0	200	300	0	-11.3675	31.8394	-678.15	-47167.4	-14461.4	-1615.45	178.675	972.553	0	0	0	0	0	0	0	603	903	0
595	4	0	0	0	0	0	0	200	300	0	-10.6046	32.2972	-678.15	-46709.7	-14339.3	-1844.33	178.855	971.878	0	0	0	0	0	0	0	603	903	0
595	5	0	0	0	0	0	0	200	300	0	-10.1468	32.755	-680.897	-47533.6	-14095.2	-1478.12	179.299	972.81	0	0	0	0	0	0	0	603	903	0
595	6	0	0	0	0	0	0	200	300	0	-11.0623	33.2127	-678.761	-46709.7	-14278.3	-1752.78	178.964	971.816	0	0	0	0	0	0	0	603	903	0
595	7	0	0	0	0	0	0	200	300	0	-11.8253	32.2972	-679.676	-46251.9	-14461.4	-1661.23	178.723	971.05	0	0	0	0	0	0	0	603	903	0
595	8	0	0	0	0	0	0	200	300	0	-9.9942	34.2809	-682.728	-45427.9	-14461.4	-1844.33	178.818	969.539	0	0	0	0	0	0	0	603	903	0
595	9	0	0	0	0	0	0	200	300	0	-10.1468	35.0438	-683.643	-46343.5	-13912.1	-1661.23	179.65	970.789	0	0	0	0	0	0	0	603	903	0
596	0	0	0	0	0	0	0	200	300	0	-11.2149	35.8067	-686.085	-46709.7	-14583.5	-1661.23	178.744	971.082	0	0	0	0	0	0	0	603	903	0
596	1	0	0	0	0	0	0	200	300	0	-10.2994	35.6541	-688.221	-46251.9	-14400.3	-1478.12	179.076	970.205	0	0	0	0	0	0	0	603	903	0
596	2	0	0	0	0	0	0	200	300	0	-11.6727	35.9593	-687.611	-46068.8	-14400.3	-1707	179.057	969.998	0	0	0	0	0	0	0	603	903	0
596	3	0	0	0	0	0	0	200	300	0	-8.31573	37.7904	-687.916	-45519.5	-14522.4	-1661.23	178.889	969.17	0	0	0	0	0	0	0	603	903	0
596	4	0	0	0	0	0	0	200	300	0	-10.2994	37.4852	-690.662	-46068.8	-14705.5	-1752.78	178.708	969.702	0	0	0	0	0	0	0	603	903	0
596	5	0	0	0	0	0	0	200	300	0	-8.46832	37.3326	-692.494	-45611	-14888.6	-1844.33	178.5	968.865	0	0	0	0	0	0	0	603	903	0
596	6	0	0	0	0	0	0	200	300	0	-10.6046	38.2481	-691.883	-45244.8	-13790	-1798.55	180.069	968.394	0	0	0	0	0	0	0	603	903	0
596	7	0	0	0	0	0	0	200	300	0	-9.68903	39.3163	-693.409	-45061.7	-14705.5	-1707	178.792	967.986	0	0	0	0	0	0	0	603	903	0
596	8	0	0	0	0	0	0	200	300	0	-11.3675	40.0792	-694.935	-45244.8	-14766.6	-1890.11	178.751	968.107	0	0	0	0	0	0	0	603	903	0
596	9	0	0	0	0	0	0	200	300	0	-10.452	39.4688	-695.545	-45336.4	-14522.4	-1798.55	179.121	968.181	0	0	0	0	0	0	0	603	903	0
597	0	0	0	0	0	0	0	200	300	0	-11.6727	40.6895	-696.766	-44695.5	-14644.5	-1752.78	178.982	967.147	0	0	0	0	0	0	0	603	903	0
597	1	0	0	0	0	0	0	200	300	0	-11.5201	40.3844	-697.376	-44603.9	-14766.6	-1844.33	178.826	966.96	0	0	0	0	0	0	0	603	903	0
597	2	0	0	0	0	0	0	200	300	0	-10.6046	41.6051	-700.123	-44787	-15193.8	-1432.34	178.298	966.97	0	0	0	0	0	0	0	603	903	0
597	3	0	0	0	0	0	0	200	300	0	-12.283	41.7577	-702.259	-44512.4	-14522.4	-1707	179.32	966.385	0	0	0	0	0	0	0	603	903	0
597	4	0	0	0	0	0	0	200	300	0	-11.9778	42.6732	-702.564	-44237.7	-14949.7	-1569.67	178.721	965.966	0	0	0	0	0	0	0	603	903	0
597	5	0	0	0	0	0	0	200	300	0	-11.0623	43.8939	-702.87	-43596.9	-14949.7	-1981.66	178.731	965.027	0	0	0	0	0	0	0	603	903	0
597	6	0	0	0	0	0	0	200	300	0	-11.0623	44.8094	-704.701	-44512.4	-14583.5	-1935.88	179.305	966.165	0	0	0	0	0	0	0	603	903	0
597	7	0	0	0	0	0	0	200	300	0	-11.9778	44.3517	-707.142	-44054.6	-14766.6	-1798.55	179.118	965.3	0	0	0	0	0	0	0	603	903	0
597	8	0	0	0	0	0	0	200	300	0	-12.1304	44.5042	-705.006	-43596.9	-15071.7	-1935.88	178.622	964.839	0	0	0	0	0	0	0	603	903	0
597	9	0	0	0	0	0	0	200	300	0	-10.7571	46.0301	-704.395	-43688.4	-15132.8	-1844.33	178.517	965.023	0	0	0	0	0	0	0	603	903	0
598	0	0	0	0	0	0	0	200	300	0	-11.2149	47.2508	-709.583	-43780	-15193.8	-1935.88	178.588	964.698	0	0	0	0	0	0	0	603	903	0
598	1	0	0	0	0	0	0	200	300	0	-12.4356	46.4879	-708.057	-43596.9	-14705.5	-1798.55	179.231	964.573	0	0	0	0	0	0	0	603	903	0
598	2	0	0	0	0	0	0	200	300	0	-12.7408	45.8775	-709.889	-42498.2	-14888.6	-1844.33	179.027	962.866	0	0	0	0	0	0	0	603	903	0
598	3	0	0	0	0	0	0	200	300	0	-11.8253	47.8612	-711.109	-42772.9	-14583.5	-1523.9	179.492	963.15	0	0	0	0	0	0	0	603	903	0
598	4	0	0	0	0	0	0	200	300	0	-11.6727	47.4034	-711.72	-43047.6	-15010.7	-1707	178.909	963.484	0	0	0	0	0	0	0	603	903	0
598	5	0	0	0	0	0	0	200	300	0	-12.4356	50.15	-713.856	-43139.1	-15254.8	-1798.55	178.63	963.431	0	0	0	0	0	0	0	603	903	0
598	6	0	0	0	0	0	0	200	300	0	-11.9778	47.8612	-716.908	-42223.6	-15743.1	-1935.88	178.04	961.897	0	0	0	0	0	0	0	603	903	0
598	7	0	0	0	0	0	0	200	300	0	-11.2149	49.8448	-715.992	-42315.1	-14888.6	-2027.44	179.206	962.1	0	0	0	0	0	0	0	603	903	0
598	8	0	0	0	0	0	0	200	300	0	-12.5882	50.15	-718.739	-42589.8	-15010.7	-2210.54	179.115	962.256	0	0	0	0	0	0	0	603	903	0
598	9	0	0	0	0	0	0	200	300	0	-11.6727	51.5233	-718.433	-42498.2	-15193.8	-1981.66	178.852	962.154	0	0	0	0	0	0	0	603	903	0
599	0	0	0	0	0	0	0	200	300	0	-11.9778	50.6078	-719.959	-41857.4	-15499	-1249.24	178.472	961.139	0	0	0	0	0	0	0	603	903	0
599	1	0	0	0	0	0	0	200	300	0	-11.5201	52.2862	-720.57	-41491.1	-15132.8	-1661.23	178.999	960.581	0	0	0	0	0	0	0	603	903	0
599	2	0	0	0	0	0	0	200	300	0	-11.3675	52.2862	-722.401	-41857.4	-15193.8	-1615.45	178.968	960.942	0	0	0	0	0	0	0	603	903	0
599	3	0	0	0	0	0	0	200	300	0	-11.6727	54.1173	-723.011	-41674.3	-15376.9	-1935.88	178.732	960.64	0	0	0	0	0	0	0	603	903	0
599	4	0	0	0	0	0	0	200	300	0	-13.046	52.5914	-723.927	-41124.9	-15254.8	-1844.33	178.928	959.808	0	0	0	0	0	0	0	603	903	0
599	5	0	0	0	0	0	0	200	300	0	-12.5882	54.8802	-724.232	-41216.5	-15071.7	-1798.55	179.189	959.911	0	0	0	0	0	0	0	603	903	0
599	6	0	0	0	0	0	0	200	300	0	-13.5037	55.0328	-726.063	-41124.9	-15560	-1981.66	178.569	959.641	0	0	0	0	0	0	0	603	903	0
599	7	0	0	0	0	0	0	200	300	0	-13.1985	56.5587	-724.537	-41491.1	-15437.9	-1707	178.693	960.266	0	0	0	0	0	0	0	603	903	0
599	8	0	0	0	0	0	0	200	300	0	-13.9615	55.9483	-726.063	-40575.6	-15376.9	-1752.78	178.822	958.884	0	0	0	0	0	0	0	603	903	0
599	9	0	0	0	0	0	0	200	300	0	-13.5037	57.7794	-727.284	-40301	-15560	-2027.44	178.605	958.413	0	0	0	0	0	0	0	603	903	0
600	0	0	0	0	0	0	0	200	300	0	-12.8934	58.0846	-729.725	-40392.5	-15682.1	-1661.23	178.51	958.353	0	0	0	0	0	0	0	603	903	0
600	1	0	0	0	0	0	0	200	300	0	-14.7244	59.1527	-729.115	-40209.4	-15132.8	-1798.55	179.245	958.148	0	0	0	0	0	0	0	603	903	0
600	2	0	0	0	0	0	0	200	300	0	-14.1141	57.7794	-734.608	-39843.2	-15560	-1203.46	178.819	957.237	0	0	0	0	0	0	0	603	903	0
600	3	0	0	0	0	0	0	200	300	0	-13.6563	59.1527	-730.641	-39202.3	-15987.3	-1981.66	178.119	956.655	0	0	0	0	0	0	0	603	903	0
600	4	0	0	0	0	0	0	200	300	0	-13.5037	59.4579	-733.082	-39751.7	-15254.8	-1661.23	179.191	957.225	0	0	0	0	0	0	0	603	903	0
600	5	0	0	0	0	0	0	200	300	0	-14.877	60.9837	-733.692	-38836.1	-15804.2	-2027.44	178.459	955.932	0	0	0	0	0	0	0	603	903	0
600	6	0	0	0	0	0	0	200	300	0	-15.0296	61.1363	-735.828	-38561.5	-15682.1	-1798.55	178.688	955.406	0	0	0	0	0	0	0	603	903	0
600	7	0	0	0	0	0	0	200	300	0	-13.6563	62.6622	-737.354	-39110.8	-15865.2	-1707	178.484	956.042	0	0	0	0	0	0	0	603	903	0
600	8	0	0	0	0	0	0	200	300	0	-13.9615	62.9674	-737.66	-39019.2	-15499	-1844.33	178.989	955.896	0	0	0	0	0	0	0	603	903	0
600	9	0	0	0	0	0	0	200	300	0	-15.0296	63.4251	-739.796	-39019.2	-15560	-1569.67	178.967	955.743	0	0	0	0	0	0	0	603	903	0
601	0	0	0	0	0	0	0	200	300	0	-16.0977	64.0355	-738.88	-37737.5	-16353.5	-1752.78	177.867	954.074	0	0	0	0	0	0	0	603	903	0
601	1	0	0	0	0	0	0	200	300	0	-14.2667	64.6458	-738.88	-37645.9	-15621	-1478.12	178.859	953.95	0	0	0	0	0	0	0	603	903	0
601	2	0	0	0	0	0	0	200	300	0	-14.2667	65.5614	-741.627	-38195.2	-15682.1	-1569.67	178.854	954.502	0	0	0	0	0	0	0	603	903	0
601	3	0	0	0	0	0	0	200	300	0	-15.3348	65.2562	-741.627	-38012.1	-15987.3	-1752.78	178.443	954.255	0	0	0	0	0	0	0	603	903	0
601	4	0	0	0	0	0	0	200	300	0	-15.64	66.1717	-741.627	-37462.8	-16231.4	-1569.67	178.114	953.514	0	0	0	0	0	0	0	603	903	0
601	5	0	0	0	0	0	0	200	300	0	-15.0296	67.0872	-743.153	-37005.1	-15865.2	-1752.78	178.652	952.795	0	0	0	0	0	0	0	603	903	0
601	6	0	0	0	0	0	0	200	300	0	-15.1822	67.3924	-744.984	-37188.2	-15865.2	-1798.55	178.704	952.918	0	0	0	0	0	0	0	603	903	0
601	7	0	0	0	0	0	0	200	300	0	-16.7081	68.1554	-744.373	-36364.2	-16414.5	-1615.45	177.949	951.852	0	0	0	0	0	0	0	603	903	0
601	8	0	0	0	0	0	0	200	300	0	-16.4029	67.2398	-744.068	-36272.7	-15804.2	-1569.67	178.76	951.749	0	0	0	0	0	0	0	603	903	0
601	9	0	0	0	0	0	0	200	300	0	-15.0296	66.3243	-744.068	-36364.2	-15987.3	-1615.45	178.514	951.872	0	0	0	0	0	0	0	603	903	0
602	0	0	0	0	0	0	0	200	300	0	-15.7925	69.9864	-746.204	-36181.1	-16109.3	-1798.55	178.412	951.487	0	0	0	0	0	0	0	603	903	0
602	1	0	0	0	0	0	0	200	300	0	-16.0977	67.3924	-746.51	-35723.3	-16353.5	-1386.57	178.093	950.854	0	0	0	0	0	0	0	603	903	0
602	2	0	0	0	0	0	0	200	300	0	-16.5555	70.139	-744.068	-35906.4	-16048.3	-1569.67	178.432	951.257	0	0	0	0	0	0	0	603	903	0
602	3	0	0	0	0	0	0	200	300	0	-16.7081	69.9864	-745.289	-35357.1	-16109.3	-1478.12	178.385	950.441	0	0	0	0	0	0	0	603	903	0
602	4	0	0	0	0	0	0	200	300	0	-14.7244	71.5123	-746.815	-35174	-15987.3	-1523.9	178.593	950.099	0	0	0	0	0	0	0	603	903	0
602	5	0	0	0	0	0	0	200	300	0	-15.3348	71.5123	-748.036	-35174	-15743.1	-1569.67	178.954	950.022	0	0	0	0	0	0	0	603	903	0
602	6	0	0	0	0	0	0	200	300	0	-14.5718	73.3434	-748.951	-35082.5	-16109.3	-1386.57	178.491	949.842	0	0	0	0	0	0	0	603	903	0
602	7	0	0	0	0	0	0	200	300	0	-16.8607	73.3434	-750.172	-34624.7	-16414.5	-1295.01	178.119	949.156	0	0	0	0	0	0	0	603	903	0
602	8	0	0	0	0	0	0	200	300	0	-15.1822	73.4959	-751.698	-34441.6	-16475.5	-1249.24	178.082	948.818	0	0	0	0	0	0	0	603	903	0
602	9	0	0	0	0	0	0	200	300	0	-16.4029	74.7166	-750.782	-34166.9	-16353.5	-1432.34	178.218	948.508	0	0	0	0	0	0	0	603	903	0
603	0	0	0	0	0	0	0	200	300	0	-17.471	75.6322	-750.477	-34350	-16170.4	-1478.12	178.453	948.771	0	0	0	0	0	0	0	603	903	0
603	1	0	0	0	0	0	0	200	300	0	-17.1658	76.0899	-752.308	-33617.6	-16536.6	-1478.12	178.019	947.686	0	0	0	0	0	0	0	603	903	0
603	2	0	0	0	0	0	0	200	300	0	-16.4029	75.6322	-752.918	-33526.1	-16353.5	-1340.79	178.28	947.528	0	0	0	0	0	0	0	603	903	0
603	3	0	0	0	0	0	0	200	300	0	-16.0977	76.0899	-752.003	-33800.7	-16475.5	-1203.46	178.091	947.948	0	0	0	0	0	0	0	603	903	0
603	4	0	0	0	0	0	0	200	300	0	-17.3184	78.3788	-752.308	-33343	-16597.6	-1432.34	177.938	947.321	0	0	0	0	0	0	0	603	903	0
603	5	0	0	0	0	0	0	200	300	0	-17.7762	78.3788	-754.139	-33068.3	-16597.6	-1432.34	177.991	946.849	0	0	0	0	0	0	0	603	903	0
603	6	0	0	0	0	0	0	200	300	0	-17.1658	78.0736	-753.834	-32244.3	-16109.3	-1111.91	178.63	945.774	0	0	0	0	0	0	0	603	903	0
603	7	0	0	0	0	0	0	200	300	0	-16.5555	77.921	-753.834	-32885.2	-16048.3	-1203.46	178.711	946.624	0	0	0	0	0	0	0	603	903	0
603	8	0	0	0	0	0	0	200	300	0	-17.6236	80.2098	-753.834	-32519	-16292.4	-1249.24	178.387	946.138	0	0	0	0	0	0	0	603	903	0
603	9	0	0	0	0	0	0	200	300	0	-17.7762	80.6676	-755.665	-31878.1	-16048.3	-1386.57	178.763	945.186	0	0	0	0	0	0	0	603	903	0
604	0	0	0	0	0	0	0	200	300	0	-16.2503	80.9727	-755.36	-31511.9	-16597.6	-1203.46	178.027	944.718	0	0	0	0	0	0	0	603	903	0
604	1	0	0	0	0	0	0	200	300	0	-16.7081	81.4305	-754.444	-31511.9	-16658.7	-1432.34	177.919	944.768	0	0	0	0	0	0	0	603	903	0
604	2	0	0	0	0	0	0	200	300	0	-17.471	82.6512	-755.36	-31786.6	-16841.8	-1020.36	177.704	945.081	0	0	0	0	0	0	0	603	903	0
604	3	0	0	0	0	0	0	200	300	0	-18.0814	83.5667	-755.97	-31511.9	-16353.5	-1340.79	178.368	944.684	0	0	0	0	0	0	0	603	903	0
604	4	0	0	0	0	0	0	200	300	0	-16.5555	83.109	-756.58	-30871	-16292.4	-1111.91	178.466	943.803	0	0	0	0	0	0	0	603	903	0
604	5	0	0	0	0	0	0	200	300	0	-16.5555	83.7193	-757.191	-30687.9	-17024.9	-1249.24	177.516	943.529	0	0	0	0	0	0	0	603	903	0
604	6	0	0	0	0	0	0	200	300	0	-18.3865	84.7874	-756.58	-30779.5	-16719.7	-1249.24	177.901	943.682	0	0	0	0	0	0	0	603	903	0
604	7	0	0	0	0	0	0	200	300	0	-16.0977	85.5504	-758.411	-30596.4	-16109.3	-1020.36	178.759	943.343	0	0	0	0	0	0	0	603	903	0
604	8	0	0	0	0	0	0	200	300	0	-17.6236	86.3133	-758.411	-29497.7	-16719.7	-928.804	177.954	941.894	0	0	0	0	0	0	0	603	903	0
604	9	0	0	0	0	0	0	200	300	0	-17.6236	87.0763	-755.97	-29589.3	-16475.5	-1157.69	178.206	942.141	0	0	0	0	0	0	0	603	903	0
605	0	0	0	0	0	0	0	200	300	0	-16.8607	88.297	-757.496	-29680.9	-16536.6	-1157.69	178.169	942.183	0	0	0	0	0	0	0	603	903	0
605	1	0	0	0	0	0	0	200	300	0	-17.471	88.9073	-756.886	-30138.6	-16353.5	-1157.69	178.394	942.819	0	0	0	0	0	0	0	603	903	0
605	2	0	0	0	0	0	0	200	300	0	-16.8607	87.534	-759.022	-29223.1	-16658.7	-1111.91	178.052	941.501	0	0	0	0	0	0	0	603	903	0
605	3	0	0	0	0	0	0	200	300	0	-16.2503	89.8228	-755.665	-28307.6	-16292.4	-1432.34	178.44	940.461	0	0	0	0	0	0	0	603	903	0
605	4	0	0	0	0	0	0	200	300	0	-15.9451	88.297	-758.106	-29040	-16231.4	-1157.69	178.59	941.306	0	0	0	0	0	0	0	603	903	0
605	5	0	0	0	0	0	0	200	300	0	-17.9288	90.4332	-754.749	-28032.9	-16597.6	-1340.79	178.009	940.142	0	0	0	0	0	0	0	603	903	0
605	6	0	0	0	0	0	0	200	300	0	-17.0132	88.7547	-757.191	-28673.8	-16597.6	-1111.91	178.08	940.869	0	0	0	0	0	0	0	603	903	0
605	7	0	0	0	0	0	0	200	300	0	-15.4874	90.891	-757.191	-27025.8	-16475.5	-1020.36	178.241	938.692	0	0	0	0	0	0	0	603	903	0
605	8	0	0	0	0	0	0	200	300	0	-15.7925	91.0435	-757.191	-27941.4	-16109.3	-1066.13	178.725	939.901	0	0	0	0	0	0	0	603	903	0
605	9	0	0	0	0	0	0	200	300	0	-16.5555	90.4332	-755.36	-27575.1	-16780.7	-1020.36	177.784	939.506	0	0	0	0	0	0	0	603	903	0
606	0	0	0	0	0	0	0	200	300	0	-13.9615	90.4332	-761.158	-27575.1	-16841.8	-1203.46	177.874	939.228	0	0	0	0	0	0	0	603	903	0
606	1	0	0	0	0	0	0	200	300	0	-16.4029	92.8746	-755.36	-27117.4	-16170.4	-928.804	178.592	938.9	0	0	0	0	0	0	0	603	903	0
606	2	0	0	0	0	0	0	200	300	0	-15.9451	92.5694	-758.106	-26476.5	-16658.7	-1203.46	178.026	937.925	0	0	0	0	0	0	0	603	903	0
606	3	0	0	0	0	0	0	200	300	0	-16.2503	94.5531	-757.801	-27025.8	-16597.6	-928.804	178.098	938.663	0	0	0	0	0	0	0	603	903	0
606	4	0	0	0	0	0	0	200	300	0	-13.6563	92.4168	-756.275	-26659.6	-16292.4	-974.58	178.457	938.251	0	0	0	0	0	0	0	603	903	0
606	5	0	0	0	0	0	0	200	300	0	-16.0977	95.1634	-755.665	-25927.2	-15987.3	-883.027	178.843	937.31	0	0	0	0	0	0	0	603	903	0
606	6	0	0	0	0	0	0	200	300	0	-14.5718	96.2315	-759.632	-25652.5	-16597.6	-974.58	178.15	936.77	0	0	0	0	0	0	0	603	903	0
606	7	0	0	0	0	0	0	200	300	0	-14.877	95.1634	-757.801	-25652.5	-16475.5	-1066.13	178.259	936.851	0	0	0	0	0	0	0	603	903	0
606	8	0	0	0	0	0	0	200	300	0	-15.1822	95.1634	-757.496	-25835.6	-16231.4	-1203.46	178.572	937.107	0	0	0	0	0	0	0	603	903	0
606	9	0	0	0	0	0	0	200	300	0	-14.5718	97.6048	-758.411	-24920.1	-16353.5	-1249.24	178.437	935.858	0	0	0	0	0	0	0	603	903	0
607	0	0	0	0	0	0	0	200	300	0	-14.2667	97.91	-758.717	-25377.9	-16353.5	-1203.46	178.446	936.448	0	0	0	0	0	0	0	603	903	0
607	1	0	0	0	0	0	0	200	300	0	-13.8089	97.2997	-757.801	-25011.7	-16536.6	-1020.36	178.178	936.006	0	0	0	0	0	0	0	603	903	0
607	2	0	0	0	0	0	0	200	300	0	-15.4874	96.9945	-757.191	-24096.1	-16170.4	-1203.46	178.644	934.823	0	0	0	0	0	0	0	603	903	0
607	3	0	0	0	0	0	0	200	300	0	-14.877	98.8255	-757.801	-24553.9	-16353.5	-974.58	178.42	935.402	0	0	0	0	0	0	0	603	903	0
607	4	0	0	0	0	0	0	200	300	0	-13.6563	98.9781	-758.106	-23180.6	-16231.4	-1111.91	178.59	933.577	0	0	0	0	0	0	0	603	903	0
607	5	0	0	0	0	0	0	200	300	0	-13.9615	98.2152	-757.191	-24096.1	-16109.3	-974.58	178.725	934.823	0	0	0	0	0	0	0	603	903	0
607	6	0	0	0	0	0	0	200	300	0	-14.1141	99.1307	-755.97	-22631.3	-16292.4	-974.58	178.448	932.937	0	0	0	0	0	0	0	603	903	0
607	7	0	0	0	0	0	0	200	300	0	-13.5037	100.809	-755.36	-23821.5	-16353.5	-974.58	178.35	934.537	0	0	0	0	0	0	0	603	903	0
607	8	0	0	0	0	0	0	200	300	0	-12.4356	100.962	-755.665	-22997.5	-16231.4	-974.58	178.52	933.434	0	0	0	0	0	0	0	603	903	0
607	9	0	0	0	0	0	0	200	300	0	-12.5882	100.657	-755.36	-22356.6	-16109.3	-1111.91	178.673	932.597	0	0	0	0	0	0	0	603	903	0
608	0	0	0	0	0	0	0	200	300	0	-10.7571	101.877	-753.529	-22906	-16292.4	-1066.13	178.378	933.398	0	0	0	0	0	0	0	603	903	0
608	1	0	0	0	0	0	0	200	300	0	-11.3675	101.877	-751.698	-22722.8	-16231.4	-1203.46	178.407	933.229	0	0	0	0	0	0	0	603	903	0
608	2	0	0	0	0	0	0	200	300	0	-13.046	101.877	-751.698	-21990.4	-15865.2	-928.804	178.894	932.254	0	0	0	0	0	0	0	603	903	0
608	3	0	0	0	0	0	0	200	300	0	-11.6727	102.64	-752.918	-21624.2	-15804.2	-1111.91	179.009	931.721	0	0	0	0	0	0	0	603	903	0
608	4	0	0	0	0	0	0	200	300	0	-12.283	104.471	-750.172	-21898.9	-15926.2	-1340.79	178.77	932.192	0	0	0	0	0	0	0	603	903	0
608	5	0	0	0	0	0	0	200	300	0	-12.5882	104.776	-752.308	-21898.9	-16048.3	-1203.46	178.668	932.109	0	0	0	0	0	0	0	603	903	0
608	6	0	0	0	0	0	0	200	300	0	-12.4356	104.929	-750.172	-21166.4	-15621	-1203.46	179.177	931.216	0	0	0	0	0	0	0	603	903	0
608	7	0	0	0	0	0	0	200	300	0	-11.2149	105.387	-749.867	-21166.4	-16048.3	-974.58	178.598	931.227	0	0	0	0	0	0	0	603	903	0
608	8	-4.97405	-3.04916	-10.0311	-2393.64	302.124	754.395	230.119	538.622	0	-10.9097	106.913	-748.951	-21074.9	-15987.3	-1249.24	178.654	931.139	0	0	0	0	0	0	0	603	903	0
608	9	-11.6879	-2.13363	-18.576	-3309.17	1156.62	2173.46	262.264	478.142	0	-12.4356	107.37	-748.646	-21441.1	-15499	-1203.46	179.297	931.64	0	0	0	0	0	0	0	603	903	0
609	0	-13.8242	1.98624	-17.9657	-2576.75	790.405	1853.03	243.995	443.426	0	-11.8253	107.523	-749.256	-19976.3	-15682.1	-1203.46	179.07	929.661	0	0	0	0	0	0	0	603	903	0
609	1	-10.925	2.74918	-16.745	-2851.41	363.159	1257.94	221.688	470.284	0	-11.2149	108.439	-746.815	-19793.2	-15926.2	-1066.13	178.674	929.503	0	0	0	0	0	0	0	603	903	0
609	2	-8.1784	4.42765	-11.557	-2302.09	851.441	1029.05	273.673	499.195	0	-10.2994	109.507	-747.12	-20342.5	-15621	-1020.36	179.092	930.228	0	0	0	0	0	0	0	603	903	0
609	3	-4.82147	4.12247	-11.557	-2668.3	1095.58	1441.04	294.798	530.882	0	-11.6727	109.964	-746.204	-19976.3	-15315.9	-1295.01	179.475	929.771	0	0	0	0	0	0	0	603	903	0
609	4	-5.88958	3.35953	-20.4071	-3400.72	851.441	1212.16	241.723	466.644	0	-11.6727	110.422	-745.594	-19701.6	-15865.2	-654.145	178.721	929.424	0	0	0	0	0	0	0	603	903	0
609	5	-8.1784	8.08976	-24.0692	-2851.41	912.476	1166.38	237.911	418.467	0	-10.2994	110.422	-744.373	-18603	-15743.1	-1203.46	178.851	927.992	0	0	0	0	0	0	0	603	903	0
609	6	-9.55169	10.9889	-22.8485	-4590.91	912.476	1486.82	239.936	500.928	0	-9.84161	111.338	-744.373	-19518.5	-15499	-1249.24	179.179	929.221	0	0	0	0	0	0	0	603	903	0
609	7	-7.87322	10.5312	-25.5951	-4682.46	912.476	800.172	235.65	482.944	0	-11.0623	114.542	-742.848	-18969.2	-16109.3	-1295.01	178.314	928.536	0	0	0	0	0	0	0	603	903	0
609	8	-2.38006	11.9045	-28.952	-4957.12	1095.58	891.724	237.841	471.219	0	-10.9097	113.321	-740.406	-18877.6	-15743.1	-1249.24	178.737	928.496	0	0	0	0	0	0	0	603	903	0
609	9	-0.549005	13.2777	-33.8348	-5231.78	1766.97	1303.71	252.223	454.627	0	-9.07867	114.237	-740.406	-18694.5	-15437.9	-1066.13	179.149	928.249	0	0	0	0	0	0	0	603	903	0
610	0	1.28205	16.4821	-35.3607	-5964.2	1705.93	800.172	248.244	468.668	0	-7.40021	114.847	-741.932	-18145.2	-15437.9	-1203.46	179.192	927.457	0	0	0	0	0	0	0	603	903	0
610	1	-1.9223	16.3295	-43.6005	-6971.28	1522.83	342.408	234.927	459.89	0	-9.38385	114.237	-740.406	-18603	-15743.1	-1020.36	178.737	928.125	0	0	0	0	0	0	0	603	903	0
610	2	-5.58441	17.245	-48.1781	-8161.47	1705.93	754.395	235.409	469.402	0	-7.70538	115.458	-737.66	-17779	-15376.9	-1249.24	179.154	927.102	0	0	0	0	0	0	0	603	903	0
610	3	-2.38006	17.3976	-56.4178	-8893.89	1889.04	433.961	233.483	457.643	0	-9.9942	116.373	-735.828	-17962.1	-15499	-1203.46	178.937	927.411	0	0	0	0	0	0	0	603	903	0
610	4	2.50275	16.9399	-58.2489	-9077	2255.25	342.408	238.717	455.831	0	-9.07867	117.594	-736.439	-17779	-15437.9	-1295.01	179.037	927.142	0	0	0	0	0	0	0	603	903	0
610	5	1.73981	16.4821	-62.2162	-8985.44	2377.32	113.526	238.211	444.423	0	-8.92609	116.678	-734.608	-18053.7	-15376.9	-1157.69	179.068	927.576	0	0	0	0	0	0	0	603	903	0
610	6	1.43464	14.0407	-68.6249	-10267.2	2499.39	250.855	236.421	449.613	0	-8.62091	117.441	-732.166	-17687.4	-15193.8	-1066.13	179.248	927.158	0	0	0	0	0	0	0	603	903	0
610	7	-0.0912417	15.7192	-77.7801	-11732	2560.43	-69.5796	232.919	450.836	0	-9.53644	119.12	-731.251	-16863.5	-15010.7	-1295.01	179.473	926.061	0	0	0	0	0	0	0	603	903	0
610	8	-2.38006	15.8717	-83.5785	-12556	2865.6	21.9732	234.286	450.23	0	-8.31573	119.73	-730.946	-16863.5	-15071.7	-1020.36	179.381	926.071	0	0	0	0	0	0	0	603	903	0
610	9	-1.9223	15.5666	-86.3251	-12556	2926.64	433.961	233.903	445.45	0	-8.01056	118.815	-729.115	-16405.7	-15376.9	-1295.01	178.91	925.501	0	0	0	0	0	0	0	603	903	0
611	0	1.12946	12.057	-89.0716	-12739.1	3170.78	388.184	235.598	443.021	0	-9.38385	119.577	-726.063	-16405.7	-14888.6	-1295.01	179.494	925.596	0	0	0	0	0	0	0	603	903	0
611	1	-0.701593	10.9889	-94.5648	-13746.2	3414.92	67.7495	236.112	445.363	0	-8.31573	121.103	-724.842	-16039.5	-15193.8	-974.58	179.038	925.128	0	0	0	0	0	0	0	603	903	0
611	2	-2.22747	11.1415	-104.33	-15851.9	3414.92	159.302	232.732	451.939	0	-7.5528	121.866	-723.316	-15398.6	-14949.7	-1432.34	179.332	924.289	0	0	0	0	0	0	0	603	903	0
611	3	-6.04217	12.057	-113.791	-17133.6	2926.64	433.961	225.719	450.571	0	-6.48468	120.646	-722.401	-15856.4	-14827.6	-1066.13	179.475	924.95	0	0	0	0	0	0	0	603	903	0
611	4	-8.78875	10.9889	-118.369	-17225.2	3170.78	845.948	226.787	445.522	0	-7.85797	122.171	-720.265	-14757.8	-14888.6	-1340.79	179.329	923.489	0	0	0	0	0	0	0	603	903	0
611	5	-11.5353	8.54752	-129.355	-18781.6	3231.81	983.277	224.984	445.194	0	-7.5528	123.087	-717.823	-15398.6	-15010.7	-1111.91	179.089	924.452	0	0	0	0	0	0	0	603	903	0
611	6	-11.3827	7.17423	-137.595	-19788.7	3353.88	1349.49	224.375	443.819	0	-6.33209	124.46	-717.213	-14849.3	-15254.8	-1386.57	178.73	923.704	0	0	0	0	0	0	0	603	903	0
611	7	-16.4181	3.66471	-145.834	-21619.7	3231.81	1853.03	222.161	448.249	0	-5.87433	123.85	-714.466	-14666.2	-14827.6	-1523.9	179.247	923.528	0	0	0	0	0	0	0	603	903	0
611	8	-19.1647	0.918126	-153.159	-22443.7	3048.71	1624.15	219.906	446.539	0	-6.94244	124.613	-711.72	-15215.5	-14644.5	-1432.34	179.424	924.379	0	0	0	0	0	0	0	603	903	0
611	9	-19.7751	-1.82846	-164.755	-23176.1	3048.71	1944.58	218.504	440.67	0	-7.40021	125.986	-710.194	-14757.8	-14766.6	-1523.9	179.208	923.78	0	0	0	0	0	0	0	603	903	0
612	0	-23.2846	-4.72763	-177.267	-24274.8	2682.5	2219.24	215.132	436.939	0	-6.1795	126.291	-708.973	-14300	-14278.3	-1157.69	179.861	923.17	0	0	0	0	0	0	0	603	903	0
612	1	-25.8786	-7.77938	-185.507	-25648	3170.78	2310.79	217.092	438.259	0	-4.34845	126.902	-707.142	-13842.2	-14583.5	-1340.79	179.377	922.575	0	0	0	0	0	0	0	603	903	0
612	2	-29.6933	-10.9837	-194.968	-26563.6	2926.64	2677	215.011	436.246	0	-6.78986	126.597	-703.785	-14116.9	-14461.4	-1249.24	179.452	923.059	0	0	0	0	0	0	0	603	903	0
612	3	-34.7287	-13.5777	-205.344	-28394.6	2865.6	3134.77	213.955	438.279	0	-6.02692	128.885	-701.038	-13750.7	-14461.4	-1386.57	179.372	922.615	0	0	0	0	0	0	0	603	903	0
612	4	-38.2382	-16.1717	-216.94	-29035.5	2377.32	3409.43	210.958	433.841	0	-6.78986	128.885	-699.513	-13567.6	-14339.3	-1432.34	179.501	922.396	0	0	0	0	0	0	0	603	903	0
612	5	-38.696	-21.5123	-225.485	-30134.1	2316.28	3088.99	210.272	433.641	0	-5.11139	128.58	-697.682	-13659.1	-14461.4	-1340.79	179.272	922.578	0	0	0	0	0	0	0	603	903	0
612	6	-39.1537	-25.0218	-237.082	-31415.9	2926.64	3317.87	212.344	432.511	0	-5.26398	128.885	-693.714	-13292.9	-14461.4	-1661.23	179.154	922.162	0	0	0	0	0	0	0	603	903	0
612	7	-41.9003	-28.6839	-247.458	-32514.5	2987.67	4050.29	212.073	431.394	0	-5.87433	130.411	-691.273	-12835.1	-13667.9	-1523.9	180.228	921.567	0	0	0	0	0	0	0	603	903	0
612	8	-46.3254	-33.2616	-258.749	-33063.8	2926.64	3729.86	211.311	427.783	0	-5.87433	130.869	-689.747	-12926.7	-14095.2	-1157.69	179.565	921.741	0	0	0	0	0	0	0	603	903	0
612	9	-48.7668	-37.9918	-267.294	-34162.4	2682.5	4416.5	210.036	427.808	0	-5.11139	130.106	-688.221	-12285.8	-14034.1	-1569.67	179.608	920.852	0	0	0	0	0	0	0	603	903	0
613	0	-54.7177	-41.5013	-277.67	-35627.3	2560.43	4324.95	209.221	428.308	0	-2.82257	130.564	-684.864	-12285.8	-13851	-1432.34	179.776	920.939	0	0	0	0	0	0	0	603	903	0
613	1	-53.9548	-44.4005	-287.131	-37092.1	2560.43	4324.95	208.917	429.182	0	-6.48468	131.174	-680.897	-12011.2	-13423.8	-1478.12	180.285	920.64	0	0	0	0	0	0	0	603	903	0
613	2	-56.2436	-47.2996	-298.422	-38190.8	2743.53	4508.06	209.193	427.976	0	-4.04327	131.937	-677.845	-12194.3	-13851	-1295.01	179.566	920.99	0	0	0	0	0	0	0	603	903	0
613	3	-57.3117	-50.3514	-310.324	-38282.3	2804.57	4645.39	209.038	423.362	0	-5.26398	129.953	-677.845	-11553.4	-14095.2	-1523.9	179.206	920.044	0	0	0	0	0	0	0	603	903	0
613	4	-60.9738	-54.929	-321.31	-39197.8	2560.43	5057.38	207.969	421.994	0	-4.19586	131.632	-671.742	-11370.3	-13545.8	-1157.69	179.835	919.927	0	0	0	0	0	0	0	603	903	0
613	5	-64.4833	-58.1334	-333.517	-41212	2926.64	4828.49	208.775	423.568	0	-3.89069	132.242	-668.079	-11461.9	-13790	-1340.79	179.359	920.156	0	0	0	0	0	0	0	603	903	0
613	6	-66.6196	-62.1007	-343.893	-42676.8	2865.6	5423.59	208.333	424.099	0	-4.65363	134.989	-664.723	-11187.2	-13545.8	-1432.34	179.622	919.83	0	0	0	0	0	0	0	603	903	0
613	7	-67.0773	-64.6947	-352.438	-43683.9	2743.53	5377.81	207.784	423.948	0	-4.04327	132.242	-663.807	-10729.4	-13301.7	-1386.57	179.962	919.164	0	0	0	0	0	0	0	603	903	0
613	8	-65.2463	-68.3568	-367.697	-43683.9	3231.81	5240.48	208.789	418.804	0	-3.12775	134.684	-658.619	-9997.01	-13057.6	-1478.12	180.174	918.179	0	0	0	0	0	0	0	603	903	0
613	9	-66.0092	-70.9508	-379.904	-44782.6	3170.78	5240.48	208.346	417.879	0	-2.66998	133.921	-656.788	-9997.01	-13423.8	-1340.79	179.561	918.221	0	0	0	0	0	0	0	603	903	0
614	0	-69.2136	-74.3077	-391.501	-45972.7	3353.88	5286.26	208.567	417.427	0	-3.58551	134.379	-653.126	-10271.7	-13484.8	-1569.67	179.353	918.727	0	0	0	0	0	0	0	603	903	0
614	1	-70.7394	-77.2069	-404.929	-48078.5	3353.88	5240.48	208.283	418.733	0	-1.60187	134.684	-647.938	-9905.46	-12996.5	-974.58	179.942	918.288	0	0	0	0	0	0	0	603	903	0
614	2	-71.1972	-78.4276	-415.305	-48444.7	3231.81	5148.93	207.782	416.649	0	-2.5174	135.447	-645.802	-9813.9	-13057.6	-1569.67	179.781	918.196	0	0	0	0	0	0	0	603	903	0
614	3	-69.8239	-81.4793	-424.46	-49085.5	3842.16	5194.7	209.052	415.642	0	-2.21222	134.989	-640.919	-9447.69	-13240.7	-1478.12	179.341	917.741	0	0	0	0	0	0	0	603	903	0
614	4	-69.2136	-84.5311	-436.667	-49634.9	3781.13	5057.38	208.659	413.668	0	-0.991516	135.141	-638.477	-9722.35	-12935.5	-1249.24	179.74	918.227	0	0	0	0	0	0	0	603	903	0
614	5	-68.7558	-86.3621	-447.348	-50733.5	3842.16	4782.72	208.589	413.409	0	-2.66998	135.752	-633.595	-9356.14	-12691.4	-1432.34	179.969	917.767	0	0	0	0	0	0	0	603	903	0
614	6	-69.3661	-88.4984	-461.386	-52564.5	4391.48	5148.93	209.518	413.927	0	-1.75446	136.21	-629.932	-9081.48	-12996.5	-1432.34	179.368	917.417	0	0	0	0	0	0	0	603	903	0
614	7	-67.8403	-91.7027	-471.457	-53663.2	4635.62	4874.27	209.833	413.824	0	-0.68634	136.21	-626.881	-8257.51	-12996.5	-1295.01	179.268	916.172	0	0	0	0	0	0	0	603	903	0
614	8	-68.6032	-93.839	-482.443	-53571.6	4940.8	4965.82	210.241	411.042	0	-0.381165	135.752	-621.693	-8806.82	-12447.2	-1432.34	179.979	917.166	0	0	0	0	0	0	0	603	903	0
614	9	-68.1454	-96.1278	-492.819	-54304.1	5123.9	4965.82	210.397	410.191	0	-1.1441	135.599	-617.115	-8806.82	-12813.4	-1478.12	179.237	917.271	0	0	0	0	0	0	0	603	903	0
615	0	-66.6196	-98.8744	-502.28	-56135.1	5062.87	4874.27	210.08	411.761	0	-1.29669	136.515	-612.232	-8074.4	-12325.1	-1478.12	179.869	916.189	0	0	0	0	0	0	0	603	903	0
615	1	-66.1618	-99.9425	-511.74	-56043.5	5245.97	4508.06	210.251	409.516	0	0.0765991	136.057	-610.096	-7982.85	-11958.9	-1111.91	180.398	916.085	0	0	0	0	0	0	0	603	903	0
615	2	-65.3989	-103.147	-522.116	-57416.8	5734.25	4599.61	210.983	409.97	0	0.839539	135.752	-606.129	-7891.3	-11958.9	-1569.67	180.27	916.019	0	0	0	0	0	0	0	603	903	0
615	3	-64.0256	-104.825	-533.102	-57142.2	5917.36	4782.72	211.1	407.188	0	1.14471	134.989	-600.025	-7891.3	-12447.2	-1386.57	179.256	916.152	0	0	0	0	0	0	0	603	903	0
615	4	-63.4152	-107.877	-541.647	-57783.1	6283.57	4324.95	211.601	406.68	0	0.534363	135.294	-596.058	-7158.88	-12325.1	-1340.79	179.322	915.01	0	0	0	0	0	0	0	603	903	0
615	5	-63.5678	-110.776	-548.056	-59522.5	6832.89	4508.06	212.468	408.607	0	2.06024	135.752	-589.344	-7067.32	-11897.9	-1523.9	179.812	914.992	0	0	0	0	0	0	0	603	903	0
615	6	-62.6523	-112.76	-556.601	-59247.9	6283.57	4279.18	211.289	406.446	0	2.21283	134.226	-587.513	-7158.88	-11653.8	-1432.34	180.164	915.185	0	0	0	0	0	0	0	603	903	0
615	7	-61.4316	-112.912	-563.925	-60438.1	6954.96	3867.19	212.333	407.174	0	0.992126	135.141	-582.63	-6792.67	-11958.9	-1249.24	179.474	914.659	0	0	0	0	0	0	0	603	903	0
615	8	-60.9738	-118.1	-574.301	-60071.9	7077.03	3912.97	212.323	404.6	0	2.06024	134.073	-577.137	-6518.01	-11348.6	-1386.57	180.336	914.294	0	0	0	0	0	0	0	603	903	0
615	9	-59.7531	-120.237	-581.625	-60529.6	7199.1	3821.41	212.378	404.07	0	3.12836	134.836	-572.559	-6151.8	-11714.8	-1157.69	179.54	913.744	0	0	0	0	0	0	0	603	903	0
616	0	-61.279	-122.831	-584.067	-61902.9	7443.24	3684.08	212.744	405.986	0	3.58612	132.547	-567.982	-5877.14	-11470.7	-1386.57	179.805	913.347	0	0	0	0	0	0	0	603	903	0
616	1	-59.6005	-123.594	-595.969	-61902.9	7809.45	3592.53	213.104	403.869	0	3.73871	134.684	-557.606	-6060.24	-11531.7	-1386.57	179.319	913.868	0	0	0	0	0	0	0	603	903	0
616	2	-59.4479	-124.967	-600.546	-62086	7687.38	3272.1	212.801	403.383	0	3.58612	132.547	-555.775	-5602.48	-11531.7	-1249.24	179.251	913.081	0	0	0	0	0	0	0	603	903	0
616	3	-58.8376	-127.408	-604.514	-61628.3	7931.52	3226.32	213.12	401.947	0	5.41718	132.547	-550.587	-5968.69	-11043.4	-1432.34	179.942	913.841	0	0	0	0	0	0	0	603	903	0
616	4	-56.8539	-129.087	-612.448	-62818.4	8053.59	2860.11	213.15	402.569	0	4.65424	133.005	-546.009	-5236.27	-11287.5	-1615.45	179.327	912.59	0	0	0	0	0	0	0	603	903	0
616	5	-56.2436	-130.307	-621.298	-61902.9	8480.83	2951.66	213.65	399.635	0	3.8913	132.853	-539.295	-4961.61	-10860.3	-1386.57	179.862	912.2	0	0	0	0	0	0	0	603	903	0
616	6	-56.091	-131.376	-627.707	-62818.4	8847.05	2585.45	214.094	400.076	0	4.65424	132.547	-535.023	-5053.16	-10982.4	-1432.34	179.473	912.445	0	0	0	0	0	0	0	603	903	0
616	7	-56.8539	-133.97	-632.285	-62543.8	8908.08	2814.33	214.089	398.917	0	5.87494	131.022	-528.919	-4412.29	-10799.3	-1661.23	179.582	911.342	0	0	0	0	0	0	0	603	903	0
616	8	-57.6169	-135.343	-633.81	-62635.3	9030.15	2814.33	214.247	398.823	0	8.46893	131.022	-524.036	-4686.95	-10677.2	-1386.57	179.625	911.944	0	0	0	0	0	0	0	603	903	0
616	9	-55.6332	-136.106	-638.693	-63734	8847.05	2265.02	213.852	399.788	0	6.63788	131.174	-516.712	-4320.74	-10188.9	-1386.57	180.281	911.362	0	0	0	0	0	0	0	603	903	0
617	0	-55.3281	-137.479	-641.44	-63459.3	9213.26	1898.8	214.363	398.933	0	8.46893	129.953	-513.355	-4046.08	-10311	-1340.79	179.915	910.882	0	0	0	0	0	0	0	603	903	0
617	1	-54.4125	-139.31	-644.797	-62635.3	9457.4	1898.8	214.667	397.14	0	8.46893	129.191	-506.336	-3405.21	-10188.9	-1340.79	179.877	909.725	0	0	0	0	0	0	0	603	903	0
617	2	-54.1074	-140.989	-649.68	-63001.6	8847.05	1898.8	213.618	396.973	0	8.9267	129.038	-499.622	-3771.42	-9822.71	-1707	180.34	910.549	0	0	0	0	0	0	0	603	903	0
617	3	-53.497	-141.599	-652.426	-63550.9	9762.57	1624.15	214.964	397.407	0	8.16376	129.343	-494.434	-3862.98	-10005.8	-1615.45	179.763	910.813	0	0	0	0	0	0	0	603	903	0
617	4	-54.2599	-142.514	-656.699	-62177.6	9884.64	1257.94	215.052	394.682	0	9.68964	127.817	-487.415	-3405.21	-9944.78	-1432.34	179.597	909.986	0	0	0	0	0	0	0	603	903	0
617	5	-53.6496	-143.888	-657.614	-62177.6	9823.61	1349.49	214.938	394.55	0	9.84222	126.444	-482.533	-3222.11	-9517.53	-1523.9	180.276	909.677	0	0	0	0	0	0	0	603	903	0
617	6	-51.9711	-144.498	-657.614	-62452.2	10372.9	1120.61	215.774	394.968	0	10.3	125.681	-475.514	-2764.34	-9273.39	-1523.9	180.498	908.813	0	0	0	0	0	0	0	603	903	0
617	7	-50.1401	-144.498	-657.919	-62269.1	10556	800.172	216.045	394.646	0	10.6052	124.613	-470.631	-2672.79	-9090.28	-1020.36	180.685	908.679	0	0	0	0	0	0	0	603	903	0
617	8	-49.3771	-145.871	-658.53	-63001.6	10434	754.395	215.844	395.67	0	10.6052	124.308	-463.001	-2123.47	-9822.71	-1386.57	178.785	907.586	0	0	0	0	0	0	0	603	903	0
617	9	-47.8512	-146.634	-662.802	-63184.7	10189.8	617.066	215.374	395.33	0	12.131	122.629	-455.677	-2031.92	-8785.11	-1386.57	180.721	907.459	0	0	0	0	0	0	0	603	903	0
618	0	-46.7831	-144.346	-662.192	-62086	10800.2	617.066	216.31	393.758	0	13.8095	121.561	-448.963	-1940.37	-8785.11	-1340.79	180.432	907.322	0	0	0	0	0	0	0	603	903	0
618	1	-45.5624	-144.651	-663.412	-61902.9	10556	296.631	215.912	393.31	0	12.131	121.561	-440.113	-2123.47	-8785.11	-1340.79	180.039	907.825	0	0	0	0	0	0	0	603	903	0
618	2	-41.4426	-144.956	-662.192	-61628.3	10678.1	342.408	216.125	393.067	0	13.1992	120.188	-435.841	-1665.71	-8846.14	-1340.79	179.703	906.822	0	0	0	0	0	0	0	603	903	0
618	3	-40.9848	-143.888	-661.887	-60895.9	11349.5	-69.5796	217.147	392.003	0	13.9621	119.883	-427.296	-1207.95	-8296.83	-1249.24	180.583	905.827	0	0	0	0	0	0	0	603	903	0
618	4	-37.4753	-142.362	-661.887	-61353.6	11105.3	-23.8032	216.778	392.695	0	15.488	118.204	-420.582	-1299.5	-7930.62	-1478.12	181.144	906.09	0	0	0	0	0	0	0	603	903	0
618	5	-35.1865	-141.599	-660.971	-60804.3	11715.7	-23.8032	217.725	391.992	0	13.9621	115.458	-413.258	-1116.39	-8418.9	-1432.34	179.628	905.702	0	0	0	0	0	0	0	603	903	0
618	6	-32.5925	-142.82	-663.412	-60438.1	11776.7	-344.238	217.752	391.102	0	13.9621	116.221	-406.239	-933.289	-8052.69	-1478.12	180.177	905.297	0	0	0	0	0	0	0	603	903	0
618	7	-29.8459	-140.989	-662.802	-60804.3	11898.8	-847.778	217.952	391.738	0	15.0302	114.695	-398.914	-383.972	-7930.62	-1478.12	180.12	903.963	0	0	0	0	0	0	0	603	903	0
618	8	-27.7097	-140.073	-660.666	-60621.2	11959.8	-802.001	218.103	391.758	0	16.7087	113.016	-389.454	-750.183	-7137.16	-1523.9	181.674	904.926	0	0	0	0	0	0	0	603	903	0
618	9	-25.5734	-139.463	-660.361	-59797.2	12142.9	-985.107	218.388	390.552	0	17.1664	111.643	-382.435	-750.183	-7869.58	-1249.24	179.422	904.962	0	0	0	0	0	0	0	603	903	0
619	0	-23.4372	-139.463	-657.004	-58332.4	12509.2	-1305.54	219.04	388.785	0	17.0139	110.727	-374.195	-200.867	-7320.26	-1569.67	180.437	903.537	0	0	0	0	0	0	0	603	903	0
619	1	-20.0803	-139.31	-656.699	-58423.9	12570.2	-1625.98	219.141	388.966	0	17.7768	109.812	-367.481	-17.7613	-7015.09	-1615.45	180.91	903.048	0	0	0	0	0	0	0	603	903	0
619	2	-16.8759	-138.852	-655.173	-59431	13119.5	-1397.09	220.025	390.71	0	18.082	108.744	-359.852	256.897	-7137.16	-1707	180.166	902.286	0	0	0	0	0	0	0	603	903	0
619	3	-15.1974	-138.852	-657.004	-58881.7	13119.5	-1854.86	219.969	389.622	0	19.1501	106.608	-352.833	256.897	-7015.09	-1432.34	180.118	902.272	0	0	0	0	0	0	0	603	903	0
619	4	-12.9086	-139.158	-654.257	-57508.4	13424.7	-2358.4	220.519	387.899	0	18.8449	103.708	-346.119	440.003	-6709.91	-1432.34	180.614	901.729	0	0	0	0	0	0	0	603	903	0
619	5	-11.2302	-139.005	-652.426	-57600	13668.8	-2312.62	220.951	388.286	0	19.3027	102.182	-336.659	806.214	-6343.7	-1157.69	181.157	900.605	0	0	0	0	0	0	0	603	903	0
619	6	-10.925	-139.158	-651.511	-58057.7	13485.7	-2678.83	220.699	389.112	0	20.8286	100.351	-330.25	623.108	-6526.81	-1295.01	180.237	901.113	0	0	0	0	0	0	0	603	903	0
619	7	-8.63616	-138.395	-647.849	-57416.8	13546.8	-2770.39	220.91	388.627	0	21.1337	98.3678	-322.926	1263.98	-6343.7	-1295.01	180.356	899.086	0	0	0	0	0	0	0	603	903	0
619	8	-6.80511	-138.852	-645.102	-57508.4	13790.9	-2907.72	221.378	389.146	0	21.1337	95.7738	-314.381	714.661	-5916.46	-1386.57	181.181	900.727	0	0	0	0	0	0	0	603	903	0
619	9	-4.51629	-139.005	-645.407	-56135.1	13729.9	-3182.37	221.273	386.976	0	20.8286	93.485	-306.751	1080.87	-5794.38	-1203.46	181.111	899.476	0	0	0	0	0	0	0	603	903	0
620	0	-2.38006	-137.479	-645.712	-56409.8	14584.4	-3045.04	222.586	387.361	0	21.5915	92.5694	-299.122	1355.53	-5855.42	-1523.9	180.425	898.468	0	0	0	0	0	0	0	603	903	0
620	1	-1.15936	-137.174	-644.797	-56318.2	14401.2	-3411.26	222.335	387.343	0	23.27	89.8228	-292.713	1263.98	-5977.49	-1203.46	179.579	898.682	0	0	0	0	0	0	0	603	903	0
620	2	-0.549005	-136.716	-642.966	-56318.2	14584.4	-3548.58	222.683	387.591	0	21.5915	87.2289	-285.389	1630.19	-5245.07	-1111.91	181.621	897.288	0	0	0	0	0	0	0	603	903	0
620	3	0.213934	-137.174	-641.745	-55219.6	14462.3	-3960.57	222.536	386.046	0	22.8122	84.6349	-277.76	2637.27	-5061.96	-1340.79	181.776	893.505	0	0	0	0	0	0	0	603	903	0
620	4	2.50275	-136.716	-639.304	-55402.7	15011.6	-4143.68	223.481	386.661	0	22.8122	83.7193	-270.435	3003.48	-5306.1	-1340.79	180.379	891.894	0	0	0	0	0	0	0	603	903	0
620	5	4.02863	-137.021	-638.388	-54578.7	14767.5	-3869.02	223.132	385.495	0	23.1174	80.3624	-263.416	1904.85	-4634.72	-1249.24	182.405	895.769	0	0	0	0	0	0	0	603	903	0
620	6	5.55451	-135.495	-637.473	-54304.1	14889.5	-4326.78	223.357	385.187	0	22.0493	78.0736	-257.313	2362.61	-4451.61	-1432.34	182.7	893.818	0	0	0	0	0	0	0	603	903	0
620	7	7.38556	-134.885	-638.693	-55311.1	15133.7	-4464.11	223.695	386.6	0	22.507	75.4796	-249.378	2271.06	-4634.72	-1203.46	181.415	893.893	0	0	0	0	0	0	0	603	903	0
620	8	8.1485	-134.275	-638.388	-54212.5	15133.7	-4555.66	223.706	384.921	0	23.5751	73.6485	-241.139	2545.72	-4634.72	-791.474	180.78	892.443	0	0	0	0	0	0	0	603	903	0
620	9	9.82697	-135.648	-637.473	-53754.7	15377.8	-4647.22	224.123	384.325	0	23.1174	71.3597	-235.645	2362.61	-3963.33	-1020.36	183.181	892.974	0	0	0	0	0	0	0	603	903	0
621	0	10.4373	-133.817	-635.336	-54304.1	15560.9	-4281.01	224.492	385.473	0	21.8967	68.0028	-227.406	1996.4	-4512.65	-1066.13	180.156	894.221	0	0	0	0	0	0	0	603	903	0
621	1	12.421	-132.749	-631.979	-54212.5	15622	-4647.22	224.719	385.782	0	21.4389	68.308	-220.692	2728.82	-4329.54	-974.58	180.382	890.635	0	0	0	0	0	0	0	603	903	0
621	2	14.252	-133.207	-634.116	-53388.5	15805.1	-4738.77	224.925	384.194	0	22.507	65.714	-213.673	2728.82	-3963.33	-837.251	181.451	890.229	0	0	0	0	0	0	0	603	903	0
621	3	16.5408	-132.291	-634.726	-53205.4	15866.1	-5059.2	224.997	383.824	0	22.507	62.5096	-205.738	2637.27	-3780.23	-974.58	181.626	890.181	0	0	0	0	0	0	0	603	903	0
621	4	16.846	-131.528	-636.557	-53754.7	16110.2	-5150.76	225.308	384.446	0	20.9811	60.9837	-198.719	3003.48	-3841.26	-974.58	180.67	887.886	0	0	0	0	0	0	0	603	903	0
621	5	17.7615	-131.07	-636.862	-52289.9	16232.3	-5150.76	225.488	382.106	0	20.5234	59.9156	-191.7	2820.37	-3841.26	-928.804	179.962	888.288	0	0	0	0	0	0	0	603	903	0
621	6	18.3719	-129.85	-636.252	-53754.7	16354.4	-4876.1	225.704	384.487	0	22.3544	57.932	-185.597	3095.03	-3475.05	-699.922	181.276	886.324	0	0	0	0	0	0	0	603	903	0
621	7	20.3555	-129.697	-634.421	-53022.3	16598.5	-5379.64	226.163	383.576	0	21.2863	54.7276	-180.103	2454.16	-3291.94	-837.251	181.722	889.374	0	0	0	0	0	0	0	603	903	0
621	8	22.1866	-128.782	-635.336	-52564.5	16659.5	-5333.86	226.222	382.735	0	21.2863	53.0492	-173.39	2820.37	-3230.91	-837.251	181.366	886.734	0	0	0	0	0	0	0	603	903	0
621	9	22.9495	-128.019	-635.031	-53388.5	17453	-5516.97	227.484	384.072	0	18.2346	52.2862	-166.37	2911.93	-2986.77	-791.474	182.048	885.497	0	0	0	0	0	0	0	603	903	0
622	0	23.7125	-126.493	-637.167	-52564.5	17025.8	-5700.07	226.721	382.497	0	21.1337	50.3026	-160.267	3003.48	-2986.77	-883.027	181.364	884.26	0	0	0	0	0	0	0	603	903	0
622	1	24.7806	-126.645	-637.167	-52198.3	17086.8	-5700.07	226.817	381.923	0	17.0139	47.556	-154.163	2637.27	-3291.94	-883.027	178.646	885.893	0	0	0	0	0	0	0	603	903	0
622	2	25.3909	-126.035	-637.778	-52381.4	17025.8	-5288.09	226.695	382.131	0	16.0983	45.2672	-148.975	2637.27	-2742.63	-608.369	181.59	885.297	0	0	0	0	0	0	0	603	903	0
622	3	26.6116	-125.272	-636.557	-52656.1	17453	-5883.18	227.418	382.72	0	17.0139	44.1991	-142.872	3644.35	-2803.66	-562.593	180.376	877.492	0	0	0	0	0	0	0	603	903	0
622	4	26.6116	-124.967	-637.167	-52839.2	17208.9	-5700.07	227.008	382.928	0	15.7932	41.7577	-137.074	2820.37	-2559.52	-699.922	181.327	882.424	0	0	0	0	0	0	0	603	903	0
622	5	28.2901	-124.814	-638.998	-51740.6	17208.9	-5928.96	226.931	380.971	0	15.1828	40.0792	-133.412	3461.24	-2681.59	-562.593	179.9	877.056	0	0	0	0	0	0	0	603	903	0
622	6	28.1375	-123.594	-636.862	-50916.6	17514	-6157.84	227.501	379.949	0	14.2673	38.0956	-127.003	2728.82	-1949.17	-791.474	184.653	881.514	0	0	0	0	0	0	0	603	903	0
622	7	28.7479	-122.831	-639.914	-52198.3	17575.1	-6386.72	227.465	381.571	0	15.488	35.0438	-122.12	3003.48	-2254.35	-516.816	181.54	878.406	0	0	0	0	0	0	0	603	903	0
622	8	29.5108	-122.068	-637.473	-51465.9	17941.3	-5837.4	228.144	380.734	0	14.1147	33.9757	-115.406	2637.27	-2620.56	-745.698	177.293	880.148	0	0	0	0	0	0	0	603	903	0
622	9	29.3582	-122.068	-641.44	-52381.4	17819.2	-6157.84	227.78	381.662	0	12.5888	31.6869	-112.66	2454.16	-2071.24	-562.593	181.615	881.216	0	0	0	0	0	0	0	603	903	0
623	0	31.4945	-121.305	-641.135	-51282.8	17941.3	-6249.39	227.984	379.988	0	12.131	32.1446	-105.03	2637.27	-1827.1	-791.474	182.604	877.89	0	0	0	0	0	0	0	603	903	0
623	1	29.9686	-121.763	-641.745	-51465.9	18246.5	-5883.18	228.433	380.197	0	12.4362	28.7877	-102.284	2820.37	-2132.28	-516.816	179.153	875.426	0	0	0	0	0	0	0	603	903	0
623	2	30.7315	-120.542	-641.745	-51557.5	18124.4	-6112.06	228.242	380.34	0	12.2836	27.1092	-99.2318	2271.06	-2193.31	-516.816	177.897	880.114	0	0	0	0	0	0	0	603	903	0
623	3	31.3419	-119.474	-640.524	-51923.7	18307.5	-6157.84	228.582	381.064	0	9.38446	25.8885	-95.8749	2362.61	-1643.99	-287.934	182.853	878.357	0	0	0	0	0	0	0	603	903	0
623	4	31.3419	-118.406	-644.492	-51191.3	18612.7	-6112.06	228.88	379.429	0	9.38446	24.5152	-90.9921	2454.16	-1827.1	-150.605	179.92	876.029	0	0	0	0	0	0	0	603	903	0
623	5	31.1893	-118.1	-646.323	-51099.7	18612.7	-6157.84	228.798	379.062	0	9.84222	23.1419	-88.8559	3186.59	-2498.49	-59.0523	171.882	867.138	0	0	0	0	0	0	0	603	903	0
623	6	31.7996	-118.253	-646.628	-52106.8	18368.5	-6157.84	228.407	380.582	0	9.38446	21.6161	-84.5834	2087.95	-1949.17	-150.605	176.956	878.315	0	0	0	0	0	0	0	603	903	0
623	7	31.647	-116.117	-646.323	-51649	18917.8	-6203.61	229.27	379.912	0	8.01117	19.9376	-80.0058	2545.72	-1582.96	-425.263	180.214	871.181	0	0	0	0	0	0	0	603	903	0
623	8	31.3419	-116.117	-647.543	-51099.7	18734.7	-5837.4	228.932	378.913	0	7.55341	19.4798	-76.0385	2545.72	-1460.89	-242.158	180.788	869.521	0	0	0	0	0	0	0	603	903	0
623	9	31.647	-115.506	-647.238	-50550.4	18673.7	-6157.84	228.851	378.102	0	8.31635	18.2591	-74.8178	2179.5	-1949.17	-150.605	173.948	873.869	0	0	0	0	0	0	0	603	903	0
624	0	32.8677	-114.896	-648.459	-51465.9	19162	-6066.29	229.55	379.367	0	7.24823	16.7332	-71.1557	2271.06	-1827.1	-333.711	174.322	871.083	0	0	0	0	0	0	0	603	903	0
624	1	31.647	-114.286	-652.731	-51099.7	18612.7	-5974.73	228.515	378.286	0	6.18011	15.2074	-66.578	1904.85	-1460.89	-59.0523	178.058	874.389	0	0	0	0	0	0	0	603	903	0
624	2	31.7996	-112.912	-648.459	-51008.2	19039.9	-5974.73	229.362	378.661	0	7.70599	14.2918	-64.1366	2271.06	-1582.96	-59.0523	175.319	867.59	0	0	0	0	0	0	0	603	903	0
624	3	30.7315	-113.065	-654.868	-50916.6	19223	-5654.3	229.354	377.751	0	6.02753	12.6134	-62.6107	2087.95	-1216.75	-287.934	180.566	869.652	0	0	0	0	0	0	0	603	903	0
624	4	30.2737	-112.149	-650.9	-50458.8	19039.9	-5883.18	229.252	377.522	0	5.41718	11.0875	-60.7797	1904.85	-1277.78	-150.605	178.977	871.66	0	0	0	0	0	0	0	603	903	0
624	5	30.8841	-111.387	-653.952	-51465.9	19162	-5883.18	229.302	378.7	0	5.41718	10.6297	-57.1176	1630.19	-1033.64	-104.829	181.903	874.459	0	0	0	0	0	0	0	603	903	0
624	6	29.5108	-110.624	-656.393	-51374.4	19406.1	-6112.06	229.565	378.268	0	4.80682	9.86679	-53.1503	1721.74	-1521.92	169.83	171.366	870.606	0	0	0	0	0	0	0	603	903	0
624	7	30.4263	-109.556	-657.309	-50733.5	19223	-5883.18	229.245	377.184	0	3.73871	9.40903	-52.8451	1904.85	-1216.75	-104.829	176.975	866.954	0	0	0	0	0	0	0	603	903	0
624	8	31.1893	-108.945	-661.887	-50550.4	19223	-5516.97	229.043	376.373	0	4.50165	7.73056	-49.4882	1538.64	-1094.68	169.83	177.88	871.909	0	0	0	0	0	0	0	603	903	0
624	9	29.2056	-108.335	-662.802	-50916.6	19650.3	-5700.07	229.647	376.82	0	4.19647	7.2728	-46.1312	1447.08	-1033.64	-13.276	177.593	871.631	0	0	0	0	0	0	0	603	903	0
625	0	28.1375	-107.724	-664.633	-50550.4	19406.1	-5196.53	229.198	376.058	0	2.82318	5.74692	-43.995	1355.53	-1460.89	-104.829	166.794	872.189	0	0	0	0	0	0	0	603	903	0
625	1	27.222	-107.267	-664.938	-50916.6	19772.3	-5471.19	229.736	376.573	0	2.36542	4.98398	-44.3002	1630.19	-911.573	-59.0523	179.423	866.201	0	0	0	0	0	0	0	603	903	0
625	2	27.222	-105.893	-665.854	-50550.4	19894.4	-5425.42	229.878	375.918	0	2.97577	4.37363	-40.6381	1355.53	-667.432	78.2768	183.576	869.644	0	0	0	0	0	0	0	603	903	0
625	3	26.3065	-105.893	-663.718	-50275.7	19039.9	-5654.3	228.687	375.749	0	2.82318	3.61069	-36.0604	1355.53	-911.573	215.606	174.721	865.41	0	0	0	0	0	0	0	603	903	0
625	4	26.4591	-104.978	-668.6	-51557.5	20016.5	-5516.97	229.938	377.113	0	1.75507	3.30551	-34.8397	1630.19	-850.538	-104.829	175.587	856.209	0	0	0	0	0	0	0	603	903	0
625	5	27.3746	-104.673	-671.347	-50916.6	19650.3	-5196.53	229.27	375.842	0	3.73871	2.69516	-36.3656	1172.42	-362.256	-13.276	190.038	870.76	0	0	0	0	0	0	0	603	903	0
625	6	25.5435	-103.452	-673.483	-50550.4	19711.3	-5104.98	229.268	375.058	0	2.82318	1.62705	-32.3983	1263.98	-606.397	78.2768	181.283	863.986	0	0	0	0	0	0	0	603	903	0
625	7	24.4754	-102.994	-676.535	-50733.5	20077.5	-5059.2	229.677	374.99	0	1.60248	1.77963	-30.2621	989.319	-789.502	78.2768	173.911	870.308	0	0	0	0	0	0	0	603	903	0
625	8	23.8651	-102.231	-676.84	-50733.5	20016.5	-5333.86	229.573	374.956	0	2.97577	1.16928	-29.0414	531.555	-1033.64	261.382	164.408	884.697	0	0	0	0	0	0	0	603	903	0
625	9	24.1702	-101.774	-678.061	-50550.4	19894.4	-5059.2	229.34	374.551	0	0.839539	0.101166	-28.7362	1172.42	-423.291	78.2768	185.27	862.201	0	0	0	0	0	0	0	603	903	0
626	0	22.9495	-101.316	-676.84	-50916.6	19772.3	-4876.1	229.213	375.227	0	0.992126	-0.204009	-26.2948	989.319	-423.291	352.935	183.902	865.376	0	0	0	0	0	0	0	603	903	0
626	1	22.9495	-101.011	-681.723	-50916.6	20199.6	-5150.76	229.63	374.688	0	1.75507	-0.356597	-23.8534	1538.64	-301.221	169.83	187.372	838.496	0	0	0	0	0	0	0	603	903	0
626	2	22.6444	-101.163	-685.69	-50825.1	19894.4	-5242.31	229.014	374.122	0	1.75507	-1.11954	-21.7172	623.108	-301.221	352.935	186.13	874.308	0	0	0	0	0	0	0	603	903	0
626	3	21.7288	-99.6373	-688.132	-51191.3	19955.4	-4921.87	228.999	374.392	0	0.686951	-1.27212	-23.5482	989.319	-301.221	352.935	187.208	860.988	0	0	0	0	0	0	0	603	903	0
626	4	20.6607	-99.0269	-690.878	-51465.9	20382.7	-4692.99	229.503	374.493	0	0.686951	-1.72989	-18.9706	714.661	-301.221	32.5004	184.122	865.328	0	0	0	0	0	0	0	603	903	0
626	5	19.7452	-98.4166	-693.015	-50641.9	20016.5	-4738.77	228.883	373.075	0	0	0	0	0	0	0	200	903	0	0	0	0	0	0	0	603	903	0
626	6	20.2029	-98.264	-694.235	-50733.5	20260.6	-4647.22	229.184	373.078	0	0	0	0	0	0	0	200	903	0	0	0	0	0	0	0	603	903	0
626	7	18.5245	-97.1959	-694.846	-51649	20504.8	-4601.44	229.51	374.332	0	0	0	0	0	0	0	200	903	0	0	0	0	0	0	0	603	903	0
626	8	19.1348	-95.9752	-699.118	-51740.6	20871	-4738.77	229.853	374.008	0	0	0	0	0	0	0	200	903	0	0	0	0	0	0	0	603	903	0
626	9	19.8978	-95.3648	-702.78	-51099.7	20687.9	-4692.99	229.437	372.711	0	0	0	0	0	0	0	200	903	0	0	0	0	0	0	0	603	903	0
627	0	18.5245	-94.7545	-703.696	-50550.4	20932	-4372.56	229.746	371.836	0	0	0	0	0	0	0	200	903	0	0	0	0	0	0	0	603	903	0
627	1	17.1512	-94.4493	-706.442	-51649	20871	-4464.11	229.544	373.111	0	0	0	0	0	0	0	200	903	0	0	0	0	0	0	0	603	903	0
627	2	15.9305	-93.9915	-708.884	-51740.6	19894.4	-4509.89	228.064	372.989	0	0	0	0	0	0	0	200	903	0	0	0	0	0	0	0	603	903	0
627	3	15.7779	-93.2286	-709.189	-51282.8	20809.9	-4281.01	229.343	372.312	0	0	0	0	0	0	0	200	903	0	0	0	0	0	0	0	603	903	0
627	4	15.015	-93.5338	-708.273	-50733.5	20626.8	-4326.78	229.123	371.63	0	0	0	0	0	0	0	200	903	0	0	0	0	0	0	0	603	903	0
627	5	14.8624	-93.2286	-713.461	-50550.4	20809.9	-3960.57	229.168	370.852	0	0	0	0	0	0	0	200	903	0	0	0	0	0	0	0	603	903	0
627	6	14.7098	-92.0079	-717.429	-51465.9	20932	-4097.9	229.176	371.737	0	0	0	0	0	0	0	200	903	0	0	0	0	0	0	0	603	903	0
627	7	14.252	-91.245	-720.786	-51008.2	21115.1	-4006.35	229.295	370.767	0	0	0	0	0	0	0	200	903	0	0	0	0	0	0	0	603	903	0
627	8	13.6417	-90.9398	-721.091	-50733.5	20382.7	-4235.23	228.266	370.357	0	0	0	0	0	0	0	200	903	0	0	0	0	0	0	0	603	903	0
627	9	13.0313	-91.3975	-722.311	-50825.1	21115.1	-4281.01	229.233	370.365	0	0	0	0	0	0	0	200	903	0	0	0	0	0	0	0	603	903	0
628	0	11.8106	-90.9398	-722.922	-51740.6	21237.2	-4006.35	229.377	371.571	0	0	0	0	0	0	0	200	903	0	0	0	0	0	0	0	603	903	0
628	1	11.8106	-89.2613	-723.837	-51557.5	20199.6	-4143.68	227.906	371.228	0	0	0	0	0	0	0	200	903	0	0	0	0	0	0	0	603	903	0
628	2	11.3528	-89.5665	-725.668	-50458.8	21359.3	-4189.45	229.434	369.534	0	0	0	0	0	0	0	200	903	0	0	0	0	0	0	0	603	903	0
628	3	11.3528	-89.7191	-729.025	-50825.1	21359.3	-3502.81	229.298	369.716	0	0	0	0	0	0	0	200	903	0	0	0	0	0	0	0	603	903	0
628	4	9.5218	-89.1087	-728.72	-51282.8	20443.7	-4052.12	228.054	370.374	0	0	0	0	0	0	0	200	903	0	0	0	0	0	0	0	603	903	0
628	5	10.2847	-87.5828	-732.077	-50550.4	21420.3	-3685.91	229.26	369.051	0	0	0	0	0	0	0	200	903	0	0	0	0	0	0	0	603	903	0
628	6	9.36921	-87.7354	-731.161	-51374.4	21298.2	-3640.14	229.129	370.264	0	0	0	0	0	0	0	200	903	0	0	0	0	0	0	0	603	903	0
628	7	8.91144	-88.1932	-732.382	-50458.8	21420.3	-3731.69	229.247	368.897	0	0	0	0	0	0	0	200	903	0	0	0	0	0	0	0	603	903	0
628	8	9.36921	-88.3458	-733.603	-50458.8	21481.3	-3869.02	229.282	368.782	0	0	0	0	0	0	0	200	903	0	0	0	0	0	0	0	603	903	0
628	9	8.60627	-86.5147	-733.908	-50825.1	21420.3	-3731.69	229.187	369.253	0	0	0	0	0	0	0	200	903	0	0	0	0	0	0	0	603	903	0
629	0	8.30109	-87.7354	-736.96	-51191.3	21298.2	-3273.93	228.9	369.463	0	0	0	0	0	0	0	200	903	0	0	0	0	0	0	0	603	903	0
629	1	8.1485	-85.7518	-737.57	-50001.1	21664.4	-3731.69	229.373	367.792	0	0	0	0	0	0	0	200	903	0	0	0	0	0	0	0	603	903	0
629	2	6.62263	-85.4466	-738.181	-50367.3	21359.3	-3777.47	228.935	368.232	0	0	0	0	0	0	0	200	903	0	0	0	0	0	0	0	603	903	0
629	3	7.84333	-84.6837	-736.96	-50458.8	21359.3	-3502.81	228.983	368.469	0	0	0	0	0	0	0	200	903	0	0	0	0	0	0	0	603	903	0
629	4	5.7071	-83.463	-738.486	-50458.8	21481.3	-4052.12	229.088	368.327	0	0	0	0	0	0	0	200	903	0	0	0	0	0	0	0	603	903	0
629	5	6.31745	-83.1578	-739.401	-49543.3	21725.5	-3411.26	229.383	367.005	0	0	0	0	0	0	0	200	903	0	0	0	0	0	0	0	603	903	0
629	6	5.85969	-82.7	-739.401	-49634.9	21420.3	-3594.36	228.97	367.128	0	0	0	0	0	0	0	200	903	0	0	0	0	0	0	0	603	903	0
629	7	5.7071	-83.463	-741.232	-50001.1	21786.5	-3228.15	229.392	367.457	0	0	0	0	0	0	0	200	903	0	0	0	0	0	0	0	603	903	0
629	8	5.09675	-82.2423	-735.739	-48536.2	21603.4	-3548.58	229.363	365.969	0	0	0	0	0	0	0	200	903	0	0	0	0	0	0	0	603	903	0
629	9	4.79157	-82.0897	-741.232	-49909.5	21481.3	-3685.91	228.981	367.333	0	0	0	0	0	0	0	200	903	0	0	0	0	0	0	0	603	903	0
630	0	5.55451	-81.3267	-739.706	-48810.9	21298.2	-3548.58	228.793	365.987	0	0	0	0	0	0	0	200	903	0	0	0	0	0	0	0	603	903	0
630	1	3.87604	-81.3267	-738.486	-48627.8	21786.5	-3365.48	229.502	365.848	0	0	0	0	0	0	0	200	903	0	0	0	0	0	0	0	603	903	0
630	2	4.63898	-81.1742	-739.706	-49543.3	21237.2	-3457.03	228.71	366.977	0	0	0	0	0	0	0	200	903	0	0	0	0	0	0	0	603	903	0
630	3	4.94416	-79.4957	-739.401	-49451.7	21725.5	-3411.26	229.383	366.881	0	0	0	0	0	0	0	200	903	0	0	0	0	0	0	0	603	903	0
630	4	4.94416	-78.8853	-740.927	-48353.1	21725.5	-3273.93	229.322	365.26	0	0	0	0	0	0	0	200	903	0	0	0	0	0	0	0	603	903	0
630	5	4.02863	-79.3431	-736.96	-47712.3	21481.3	-3502.81	229.149	364.742	0	0	0	0	0	0	0	200	903	0	0	0	0	0	0	0	603	903	0
630	6	3.87604	-78.8853	-739.401	-48719.3	21969.6	-3594.36	229.713	365.89	0	0	0	0	0	0	0	200	903	0	0	0	0	0	0	0	603	903	0
630	7	3.1131	-77.9698	-737.57	-48261.6	21786.5	-3228.15	229.538	365.433	0	0	0	0	0	0	0	200	903	0	0	0	0	0	0	0	603	903	0
630	8	3.72346	-77.6646	-734.518	-47437.6	21481.3	-3731.69	229.245	364.583	0	0	0	0	0	0	0	200	903	0	0	0	0	0	0	0	603	903	0
630	9	4.33381	-77.9698	-736.655	-47620.7	21786.5	-3640.14	229.575	364.645	0	0	0	0	0	0	0	200	903	0	0	0	0	0	0	0	603	903	0
631	0	4.02863	-76.9017	-736.96	-47254.5	21786.5	-3548.58	229.563	364.121	0	0	0	0	0	0	0	200	903	0	0	0	0	0	0	0	603	903	0
631	1	4.79157	-77.6646	-736.655	-47712.3	21054.1	-3228.15	228.581	364.769	0	0	0	0	0	0	0	200	903	0	0	0	0	0	0	0	603	903	0
631	2	4.18122	-77.0543	-736.655	-47071.4	21481.3	-3640.14	229.161	363.899	0	0	0	0	0	0	0	200	903	0	0	0	0	0	0	0	603	903	0
631	3	5.40192	-76.1388	-734.518	-46247.4	21847.5	-3411.26	229.744	362.963	0	0	0	0	0	0	0	200	903	0	0	0	0	0	0	0	603	903	0
631	4	3.87604	-76.2913	-733.298	-46247.4	21664.4	-3548.58	229.544	363.068	0	0	0	0	0	0	0	200	903	0	0	0	0	0	0	0	603	903	0
631	5	4.63898	-75.8336	-731.772	-46522.1	21847.5	-3731.69	229.856	363.575	0	0	0	0	0	0	0	200	903	0	0	0	0	0	0	0	603	903	0
631	6	4.63898	-75.0706	-727.499	-46430.5	21725.5	-3411.26	229.863	363.822	0	0	0	0	0	0	0	200	903	0	0	0	0	0	0	0	603	903	0
631	7	4.48639	-74.1551	-733.298	-45331.9	21420.3	-3090.82	229.211	361.819	0	0	0	0	0	0	0	200	903	0	0	0	0	0	0	0	603	903	0
631	8	4.48639	-74.4603	-730.551	-44691	21847.5	-3457.03	229.906	361.174	0	0	0	0	0	0	0	200	903	0	0	0	0	0	0	0	603	903	0
631	9	4.02863	-74.0025	-730.551	-45240.3	21725.5	-3731.69	229.738	361.926	0	0	0	0	0	0	0	200	903	0	0	0	0	0	0	0	603	903	0
632	0	4.79157	-72.4766	-726.584	-45423.4	21786.5	-3640.14	229.985	362.516	0	0	0	0	0	0	0	200	903	0	0	0	0	0	0	0	603	903	0
632	1	4.48639	-73.5448	-725.974	-45515	21786.5	-3548.58	230.01	362.695	0	0	0	0	0	0	0	200	903	0	0	0	0	0	0	0	603	903	0
632	2	6.01227	-72.3241	-724.448	-44233.3	22274.8	-3365.48	230.747	361.058	0	0	0	0	0	0	0	200	903	0	0	0	0	0	0	0	603	903	0
632	3	7.38556	-72.3241	-724.753	-44141.7	21969.6	-3365.48	230.313	360.906	0	0	0	0	0	0	0	200	903	0	0	0	0	0	0	0	603	903	0
632	4	6.31745	-72.0189	-724.753	-44050.1	21908.6	-3502.81	230.229	360.78	0	0	0	0	0	0	0	200	903	0	0	0	0	0	0	0	603	903	0
632	5	5.7071	-71.2559	-723.227	-44233.3	22396.9	-3548.58	230.968	361.161	0	0	0	0	0	0	0	200	903	0	0	0	0	0	0	0	603	903	0
632	6	5.09675	-69.8827	-722.006	-43500.8	22091.7	-3594.36	230.598	360.25	0	0	0	0	0	0	0	200	903	0	0	0	0	0	0	0	603	903	0
632	7	5.7071	-70.3404	-719.565	-43226.2	21908.6	-3365.48	230.447	360.073	0	0	0	0	0	0	0	200	903	0	0	0	0	0	0	0	603	903	0
632	8	7.69074	-70.7982	-718.649	-43134.6	22091.7	-3685.91	230.741	360.022	0	0	0	0	0	0	0	200	903	0	0	0	0	0	0	0	603	903	0
632	9	7.08039	-69.4249	-717.734	-42768.4	21908.6	-3823.24	230.525	359.588	0	0	0	0	0	0	0	200	903	0	0	0	0	0	0	0	603	903	0
633	0	7.84333	-69.7301	-718.039	-43592.4	22091.7	-3502.81	230.767	360.71	0	0	0	0	0	0	0	200	903	0	0	0	0	0	0	0	603	903	0
633	1	7.69074	-67.7464	-714.682	-41761.3	22274.8	-3594.36	231.167	358.433	0	0	0	0	0	0	0	200	903	0	0	0	0	0	0	0	603	903	0
633	2	7.23298	-68.2042	-715.292	-41944.4	22213.7	-3685.91	231.055	358.64	0	0	0	0	0	0	0	200	903	0	0	0	0	0	0	0	603	903	0
633	3	9.06403	-68.0516	-714.682	-42585.3	22213.7	-3777.47	231.082	359.586	0	0	0	0	0	0	0	200	903	0	0	0	0	0	0	0	603	903	0
633	4	7.69074	-66.6783	-711.02	-42127.5	22580	-3411.26	231.757	359.249	0	0	0	0	0	0	0	200	903	0	0	0	0	0	0	0	603	903	0
633	5	8.75886	-66.9835	-711.325	-41303.6	22213.7	-3640.14	231.229	358.066	0	0	0	0	0	0	0	200	903	0	0	0	0	0	0	0	603	903	0
633	6	8.75886	-66.6783	-709.189	-41303.6	22152.7	-3823.24	231.237	358.241	0	0	0	0	0	0	0	200	903	0	0	0	0	0	0	0	603	903	0
633	7	9.36921	-66.2205	-708.884	-42036	22457.9	-3365.48	231.681	359.299	0	0	0	0	0	0	0	200	903	0	0	0	0	0	0	0	603	903	0
633	8	9.06403	-64.9998	-704.916	-39930.3	22152.7	-3823.24	231.426	356.645	0	0	0	0	0	0	0	200	903	0	0	0	0	0	0	0	603	903	0
633	9	9.36921	-64.2369	-706.137	-41303.6	22396.9	-3869.02	231.717	358.492	0	0	0	0	0	0	0	200	903	0	0	0	0	0	0	0	603	903	0
634	0	11.8106	-64.9998	-705.222	-40845.8	22518.9	-3640.14	231.932	357.919	0	0	0	0	0	0	0	200	903	0	0	0	0	0	0	0	603	903	0
634	1	9.67438	-65.1524	-702.78	-40296.5	22396.9	-3640.14	231.869	357.339	0	0	0	0	0	0	0	200	903	0	0	0	0	0	0	0	603	903	0
634	2	11.0477	-63.1688	-701.865	-40662.7	22274.8	-3685.91	231.737	357.935	0	0	0	0	0	0	0	200	903	0	0	0	0	0	0	0	603	903	0
634	3	12.2684	-63.474	-703.391	-40388	22580	-3869.02	232.102	357.419	0	0	0	0	0	0	0	200	903	0	0	0	0	0	0	0	603	903	0
634	4	11.3528	-62.1007	-700.339	-39838.7	22518.9	-3731.69	232.154	356.885	0	0	0	0	0	0	0	200	903	0	0	0	0	0	0	0	603	903	0
634	5	10.1321	-62.4058	-698.813	-39289.4	22885.1	-3914.8	232.749	356.223	0	0	0	0	0	0	0	200	903	0	0	0	0	0	0	0	603	903	0
634	6	10.2847	-61.4903	-693.32	-39655.6	22702	-3960.57	232.744	357.197	0	0	0	0	0	0	0	200	903	0	0	0	0	0	0	0	603	903	0
634	7	11.2003	-60.4222	-695.151	-39747.2	22335.8	-3777.47	232.131	357.178	0	0	0	0	0	0	0	200	903	0	0	0	0	0	0	0	603	903	0
634	8	11.2003	-59.9644	-695.151	-38648.5	22274.8	-3960.57	232.043	355.597	0	0	0	0	0	0	0	200	903	0	0	0	0	0	0	0	603	903	0
634	9	12.5736	-60.2696	-697.897	-37824.6	22702	-3960.57	232.529	354.198	0	0	0	0	0	0	0	200	903	0	0	0	0	0	0	0	603	903	0
635	0	12.5736	-59.0489	-694.846	-38282.3	22396.9	-3777.47	232.233	355.095	0	0	0	0	0	0	0	200	903	0	0	0	0	0	0	0	603	903	0
635	1	11.5054	-57.8282	-691.794	-38648.5	22824.1	-3777.47	232.993	355.867	0	0	0	0	0	0	0	200	903	0	0	0	0	0	0	0	603	903	0
635	2	12.2684	-59.0489	-691.183	-38465.4	22702	-3869.02	232.845	355.652	0	0	0	0	0	0	0	200	903	0	0	0	0	0	0	0	603	903	0
635	3	11.9632	-57.2179	-689.352	-37641.5	22335.8	-3685.91	232.401	354.604	0	0	0	0	0	0	0	200	903	0	0	0	0	0	0	0	603	903	0
635	4	13.0313	-57.523	-688.437	-37733	22580	-3731.69	232.799	354.81	0	0	0	0	0	0	0	200	903	0	0	0	0	0	0	0	603	903	0
635	5	12.1158	-57.0653	-688.132	-38007.7	22641	-3777.47	232.902	355.233	0	0	0	0	0	0	0	200	903	0	0	0	0	0	0	0	603	903	0
635	6	13.3365	-55.5394	-686.911	-37916.1	22457.9	-4006.35	232.694	355.198	0	0	0	0	0	0	0	200	903	0	0	0	0	0	0	0	603	903	0
635	7	12.421	-55.3868	-686.911	-37000.6	22580	-3502.81	232.872	353.865	0	0	0	0	0	0	0	200	903	0	0	0	0	0	0	0	603	903	0
635	8	13.0313	-55.0816	-683.554	-35627.3	22702	-3914.8	233.212	352.121	0	0	0	0	0	0	0	200	903	0	0	0	0	0	0	0	603	903	0
635	9	12.421	-55.5394	-683.554	-37000.6	22396.9	-3777.47	232.765	354.13	0	0	0	0	0	0	0	200	903	0	0	0	0	0	0	0	603	903	0
636	0	13.3365	-54.3187	-682.028	-37000.6	22763.1	-3457.03	233.376	354.251	0	0	0	0	0	0	0	200	903	0	0	0	0	0	0	0	603	903	0
636	1	13.9468	-55.0816	-681.723	-36909	22946.2	-3457.03	233.659	354.141	0	0	0	0	0	0	0	200	903	0	0	0	0	0	0	0	603	903	0
636	2	13.6417	-53.7083	-682.333	-35718.8	22274.8	-3640.14	232.645	352.348	0	0	0	0	0	0	0	200	903	0	0	0	0	0	0	0	603	903	0
636	3	13.4891	-52.6402	-680.807	-35901.9	22763.1	-3685.91	233.435	352.734	0	0	0	0	0	0	0	200	903	0	0	0	0	0	0	0	603	903	0
636	4	12.8787	-52.1825	-679.282	-36268.2	22763.1	-4006.35	233.511	353.392	0	0	0	0	0	0	0	200	903	0	0	0	0	0	0	0	603	903	0
636	5	12.8787	-50.9618	-676.535	-36542.8	22457.9	-3685.91	233.195	354.015	0	0	0	0	0	0	0	200	903	0	0	0	0	0	0	0	603	903	0
636	6	12.8787	-51.4195	-676.84	-35810.4	22580	-3502.81	233.361	352.908	0	0	0	0	0	0	0	200	903	0	0	0	0	0	0	0	603	903	0
636	7	13.1839	-51.4195	-675.009	-35352.6	22885.1	-3685.91	233.903	352.374	0	0	0	0	0	0	0	200	903	0	0	0	0	0	0	0	603	903	0
636	8	13.1839	-50.9618	-676.535	-36268.2	22702	-3640.14	233.556	353.609	0	0	0	0	0	0	0	200	903	0	0	0	0	0	0	0	603	903	0
636	9	13.6417	-49.2833	-673.788	-34437.1	22641	-3640.14	233.603	351.11	0	0	0	0	0	0	0	200	903	0	0	0	0	0	0	0	603	903	0
637	0	13.4891	-48.2152	-675.314	-35352.6	22702	-3640.14	233.617	352.35	0	0	0	0	0	0	0	200	903	0	0	0	0	0	0	0	603	903	0
637	1	13.3365	-48.6729	-672.873	-35078	22274.8	-3228.15	233.104	352.132	0	0	0	0	0	0	0	200	903	0	0	0	0	0	0	0	603	903	0
637	2	12.8787	-50.1988	-671.652	-34254	22702	-3319.7	233.8	351	0	0	0	0	0	0	0	200	903	0	0	0	0	0	0	0	603	903	0
637	3	13.1839	-48.5204	-671.347	-34986.4	22641	-3319.7	233.725	352.114	0	0	0	0	0	0	0	200	903	0	0	0	0	0	0	0	603	903	0
637	4	13.6417	-46.9945	-671.957	-34894.9	22518.9	-3594.36	233.512	351.93	0	0	0	0	0	0	0	200	903	0	0	0	0	0	0	0	603	903	0
637	5	13.4891	-46.3841	-671.957	-34070.9	22518.9	-3457.03	233.512	350.704	0	0	0	0	0	0	0	200	903	0	0	0	0	0	0	0	603	903	0
637	6	12.5736	-46.6893	-672.263	-33887.8	22641	-2999.27	233.679	350.409	0	0	0	0	0	0	0	200	903	0	0	0	0	0	0	0	603	903	0
637	7	13.6417	-46.2315	-671.347	-34528.7	22702	-3548.58	233.816	351.432	0	0	0	0	0	0	0	200	903	0	0	0	0	0	0	0	603	903	0
637	8	12.5736	-45.7738	-668.906	-32606	22580	-3411.26	233.757	348.745	0	0	0	0	0	0	0	200	903	0	0	0	0	0	0	0	603	903	0
637	9	13.0313	-45.7738	-667.99	-34162.4	22885.1	-2907.72	234.26	351.142	0	0	0	0	0	0	0	200	903	0	0	0	0	0	0	0	603	903	0
638	0	13.1839	-45.0108	-669.211	-33613.1	22580	-3319.7	233.741	350.228	0	0	0	0	0	0	0	200	903	0	0	0	0	0	0	0	603	903	0
638	1	12.5736	-43.7901	-668.906	-32789.1	22702	-3319.7	233.939	349.019	0	0	0	0	0	0	0	200	903	0	0	0	0	0	0	0	603	903	0
638	2	12.8787	-43.9427	-666.159	-33979.3	22641	-3273.93	233.987	351.008	0	0	0	0	0	0	0	200	903	0	0	0	0	0	0	0	603	903	0
638	3	12.1158	-43.1798	-667.99	-33796.2	22763.1	-3273.93	234.077	350.594	0	0	0	0	0	0	0	200	903	0	0	0	0	0	0	0	603	903	0
638	4	11.8106	-41.9591	-666.159	-33155.4	22702	-2770.39	234.079	349.771	0	0	0	0	0	0	0	200	903	0	0	0	0	0	0	0	603	903	0
638	5	11.5054	-42.4168	-665.549	-32606	22702	-2999.27	234.11	348.991	0	0	0	0	0	0	0	200	903	0	0	0	0	0	0	0	603	903	0
638	6	12.1158	-41.6539	-664.633	-33155.4	22457.9	-3136.6	233.79	349.885	0	0	0	0	0	0	0	200	903	0	0	0	0	0	0	0	603	903	0
638	7	11.5054	-41.0435	-664.938	-33063.8	22885.1	-3090.82	234.417	349.725	0	0	0	0	0	0	0	200	903	0	0	0	0	0	0	0	603	903	0
638	8	11.658	-39.9754	-666.464	-32972.3	23190.3	-3228.15	234.796	349.473	0	0	0	0	0	0	0	200	903	0	0	0	0	0	0	0	603	903	0
638	9	11.3528	-40.7384	-665.549	-32239.8	22641	-2907.72	234.019	348.441	0	0	0	0	0	0	0	200	903	0	0	0	0	0	0	0	603	903	0
639	0	11.0477	-41.6539	-666.464	-31873.6	22396.9	-2999.27	233.605	347.825	0	0	0	0	0	0	0	200	903	0	0	0	0	0	0	0	603	903	0
639	1	10.5899	-39.6703	-664.023	-32880.7	22824.1	-3090.82	234.372	349.517	0	0	0	0	0	0	0	200	903	0	0	0	0	0	0	0	603	903	0
639	2	9.67438	-39.3651	-661.276	-32514.5	22763.1	-3045.04	234.423	349.169	0	0	0	0	0	0	0	200	903	0	0	0	0	0	0	0	603	903	0
639	3	11.0477	-38.297	-662.497	-31507.4	22580	-2907.72	234.083	347.559	0	0	0	0	0	0	0	200	903	0	0	0	0	0	0	0	603	903	0
639	4	11.0477	-38.6021	-664.938	-31782.1	22518.9	-2861.94	233.866	347.797	0	0	0	0	0	0	0	200	903	0	0	0	0	0	0	0	603	903	0
639	5	11.2003	-37.534	-664.328	-31690.5	22641	-2816.16	234.081	347.703	0	0	0	0	0	0	0	200	903	0	0	0	0	0	0	0	603	903	0
639	6	10.7425	-37.8392	-664.938	-31965.2	22641	-2587.28	234.05	348.072	0	0	0	0	0	0	0	200	903	0	0	0	0	0	0	0	603	903	0
639	7	10.1321	-36.3133	-665.854	-31599	22702	-2724.61	234.095	347.456	0	0	0	0	0	0	0	200	903	0	0	0	0	0	0	0	603	903	0
639	8	9.82697	-35.3978	-662.192	-31324.3	22580	-2907.72	234.099	347.304	0	0	0	0	0	0	0	200	903	0	0	0	0	0	0	0	603	903	0
639	9	9.82697	-36.6185	-662.497	-30866.6	22396.9	-2083.74	233.807	346.591	0	0	0	0	0	0	0	200	903	0	0	0	0	0	0	0	603	903	0
640	0	10.2847	-35.8556	-661.581	-30958.1	22824.1	-2678.83	234.499	346.794	0	0	0	0	0	0	0	200	903	0	0	0	0	0	0	0	603	903	0
640	1	10.1321	-34.94	-664.023	-31232.8	22824.1	-2587.28	234.372	347.036	0	0	0	0	0	0	0	200	903	0	0	0	0	0	0	0	603	903	0
640	2	9.67438	-35.0926	-664.023	-31324.3	22580	-2495.73	234.005	347.174	0	0	0	0	0	0	0	200	903	0	0	0	0	0	0	0	603	903	0
640	3	9.06403	-34.0245	-663.718	-30500.3	22885.1	-2404.17	234.48	345.954	0	0	0	0	0	0	0	200	903	0	0	0	0	0	0	0	603	903	0
640	4	10.2847	-34.0245	-662.192	-30042.6	22763.1	-2678.83	234.375	345.368	0	0	0	0	0	0	0	200	903	0	0	0	0	0	0	0	603	903	0
640	5	9.21662	-33.5667	-661.581	-31141.2	22396.9	-2449.95	233.854	347.071	0	0	0	0	0	0	0	200	903	0	0	0	0	0	0	0	603	903	0
640	6	9.36921	-32.4986	-662.802	-30591.9	22885.1	-1763.31	234.528	346.155	0	0	0	0	0	0	0	200	903	0	0	0	0	0	0	0	603	903	0
640	7	8.91144	-32.1934	-662.802	-30134.1	23129.3	-2358.4	234.896	345.465	0	0	0	0	0	0	0	200	903	0	0	0	0	0	0	0	603	903	0
640	8	9.21662	-32.9564	-665.244	-30042.6	22518.9	-2175.29	233.851	345.16	0	0	0	0	0	0	0	200	903	0	0	0	0	0	0	0	603	903	0
640	9	8.60627	-31.7357	-661.276	-30317.2	22885.1	-2037.96	234.608	345.847	0	0	0	0	0	0	0	200	903	0	0	0	0	0	0	0	603	903	0
641	0	7.99592	-30.515	-664.938	-30408.8	22885.1	-2175.29	234.417	345.732	0	0	0	0	0	0	0	200	903	0	0	0	0	0	0	0	603	903	0
641	1	9.36921	-29.4469	-664.328	-29676.4	22518.9	-2358.4	233.897	344.671	0	0	0	0	0	0	0	200	903	0	0	0	0	0	0	0	603	903	0
641	2	8.1485	-30.2098	-662.192	-29127	22457.9	-2221.07	233.914	343.986	0	0	0	0	0	0	0	200	903	0	0	0	0	0	0	0	603	903	0
641	3	8.60627	-29.752	-663.107	-30042.6	22641	-1717.53	234.144	345.306	0	0	0	0	0	0	0	200	903	0	0	0	0	0	0	0	603	903	0
641	4	9.82697	-28.5313	-666.159	-29401.7	22824.1	-2083.74	234.262	344.136	0	0	0	0	0	0	0	200	903	0	0	0	0	0	0	0	603	903	0
641	5	8.30109	-27.4632	-664.938	-29493.3	22702	-1946.41	234.142	344.355	0	0	0	0	0	0	0	200	903	0	0	0	0	0	0	0	603	903	0
641	6	7.23298	-28.2262	-664.938	-28486.2	22946.2	-1900.63	234.509	342.84	0	0	0	0	0	0	0	200	903	0	0	0	0	0	0	0	603	903	0
641	7	8.1485	-27.921	-664.633	-29493.3	22824.1	-1809.08	234.341	344.375	0	0	0	0	0	0	0	200	903	0	0	0	0	0	0	0	603	903	0
641	8	6.47004	-27.158	-662.497	-29584.8	22702	-1946.41	234.267	344.657	0	0	0	0	0	0	0	200	903	0	0	0	0	0	0	0	603	903	0
641	9	7.69074	-27.4632	-663.412	-29767.9	23007.2	-1717.53	234.68	344.871	0	0	0	0	0	0	0	200	903	0	0	0	0	0	0	0	603	903	0
642	0	7.84333	-25.9373	-663.718	-28943.9	22152.7	-1580.2	233.377	343.609	0	0	0	0	0	0	0	200	903	0	0	0	0	0	0	0	603	903	0
642	1	8.30109	-25.4796	-665.549	-28852.4	22702	-1900.63	234.11	343.351	0	0	0	0	0	0	0	200	903	0	0	0	0	0	0	0	603	903	0
642	2	7.84333	-25.1744	-663.412	-29401.7	23068.2	-1809.08	234.772	344.319	0	0	0	0	0	0	0	200	903	0	0	0	0	0	0	0	603	903	0
642	3	6.62263	-22.8856	-666.159	-28669.3	22763.1	-1534.42	234.171	343.037	0	0	0	0	0	0	0	200	903	0	0	0	0	0	0	0	603	903	0
642	4	8.91144	-23.0382	-664.023	-28394.6	22885.1	-1580.2	234.464	342.762	0	0	0	0	0	0	0	200	903	0	0	0	0	0	0	0	603	903	0
642	5	6.47004	-23.6485	-664.938	-28211.5	22885.1	-1305.54	234.417	342.427	0	0	0	0	0	0	0	200	903	0	0	0	0	0	0	0	603	903	0
642	6	7.38556	-23.0382	-665.549	-28669.3	23007.2	-1534.42	234.569	343.076	0	0	0	0	0	0	0	200	903	0	0	0	0	0	0	0	603	903	0
642	7	6.62263	-22.1226	-665.549	-28760.8	22396.9	-1534.42	233.652	343.214	0	0	0	0	0	0	0	200	903	0	0	0	0	0	0	0	603	903	0
642	8	6.9278	-23.3433	-666.464	-28303.1	22885.1	-1717.53	234.338	342.468	0	0	0	0	0	0	0	200	903	0	0	0	0	0	0	0	603	903	0
642	9	7.08039	-21.2071	-664.633	-28211.5	23068.2	-1488.65	234.708	342.447	0	0	0	0	0	0	0	200	903	0	0	0	0	0	0	0	603	903	0
643	0	5.7071	-21.2071	-668.295	-28028.4	22518.9	-1213.99	233.696	341.94	0	0	0	0	0	0	0	200	903	0	0	0	0	0	0	0	603	903	0
643	1	7.23298	-20.4442	-667.075	-28303.1	23007.2	-1351.32	234.49	342.429	0	0	0	0	0	0	0	200	903	0	0	0	0	0	0	0	603	903	0
643	2	5.85969	-18.9183	-666.464	-27662.2	22946.2	-1351.32	234.43	341.506	0	0	0	0	0	0	0	200	903	0	0	0	0	0	0	0	603	903	0
643	3	6.31745	-20.139	-665.854	-28303.1	22824.1	-1259.77	234.278	342.506	0	0	0	0	0	0	0	200	903	0	0	0	0	0	0	0	603	903	0
643	4	6.47004	-18.6131	-666.464	-27387.5	22702	-1259.77	234.063	341.094	0	0	0	0	0	0	0	200	903	0	0	0	0	0	0	0	603	903	0
643	5	6.47004	-18.6131	-667.38	-27296	23068.2	-1488.65	234.565	340.9	0	0	0	0	0	0	0	200	903	0	0	0	0	0	0	0	603	903	0
643	6	7.23298	-18.1554	-665.854	-27936.9	22885.1	-1168.21	234.37	341.956	0	0	0	0	0	0	0	200	903	0	0	0	0	0	0	0	603	903	0
643	7	6.01227	-16.3243	-668.906	-27662.2	22946.2	-1305.54	234.304	341.354	0	0	0	0	0	0	0	200	903	0	0	0	0	0	0	0	603	903	0
643	8	5.85969	-16.3243	-667.075	-27112.9	23129.3	-1168.21	234.673	340.644	0	0	0	0	0	0	0	200	903	0	0	0	0	0	0	0	603	903	0
643	9	5.24933	-16.9347	-667.075	-26746.7	22641	-1168.21	233.941	340.096	0	0	0	0	0	0	0	200	903	0	0	0	0	0	0	0	603	903	0
644	0	6.62263	-16.4769	-666.159	-27570.7	22824.1	-1168.21	234.262	341.388	0	0	0	0	0	0	0	200	903	0	0	0	0	0	0	0	603	903	0
644	1	7.53815	-15.714	-668.295	-27204.4	22641	-939.331	233.879	340.707	0	0	0	0	0	0	0	200	903	0	0	0	0	0	0	0	603	903	0
644	2	6.31745	-14.6458	-669.821	-26563.6	23007.2	-710.449	234.348	339.658	0	0	0	0	0	0	0	200	903	0	0	0	0	0	0	0	603	903	0
644	3	5.40192	-15.5614	-670.126	-26014.3	22824.1	-756.225	234.059	338.82	0	0	0	0	0	0	0	200	903	0	0	0	0	0	0	0	603	903	0
644	4	4.48639	-14.6458	-668.295	-26380.5	23068.2	-847.778	234.518	339.474	0	0	0	0	0	0	0	200	903	0	0	0	0	0	0	0	603	903	0
644	5	4.63898	-13.7303	-667.685	-26838.2	22885.1	-893.554	234.275	340.196	0	0	0	0	0	0	0	200	903	0	0	0	0	0	0	0	603	903	0
644	6	4.94416	-13.12	-666.464	-26838.2	22580	-985.107	233.88	340.27	0	0	0	0	0	0	0	200	903	0	0	0	0	0	0	0	603	903	0
644	7	5.85969	-13.12	-667.075	-26014.3	22946.2	-893.554	234.398	338.998	0	0	0	0	0	0	0	200	903	0	0	0	0	0	0	0	603	903	0
644	8	5.09675	-13.2725	-669.211	-26380.5	23007.2	-756.225	234.38	339.42	0	0	0	0	0	0	0	200	903	0	0	0	0	0	0	0	603	903	0
644	9	5.55451	-12.5096	-667.38	-26380.5	22335.8	-664.672	233.468	339.528	0	0	0	0	0	0	0	200	903	0	0	0	0	0	0	0	603	903	0
645	0	4.63898	-11.7467	-670.737	-25831.2	23190.3	-344.238	234.574	338.512	0	0	0	0	0	0	0	200	903	0	0	0	0	0	0	0	603	903	0
645	1	6.31745	-12.9674	-667.685	-25922.7	23190.3	-802.001	234.732	338.825	0	0	0	0	0	0	0	200	903	0	0	0	0	0	0	0	603	903	0
645	2	4.02863	-11.1363	-667.685	-24915.6	22946.2	-618.896	234.367	337.316	0	0	0	0	0	0	0	200	903	0	0	0	0	0	0	0	603	903	0
645	3	3.87604	-11.5941	-667.685	-25556.5	22885.1	-710.449	234.275	338.276	0	0	0	0	0	0	0	200	903	0	0	0	0	0	0	0	603	903	0
645	4	6.47004	-11.1363	-669.516	-25739.6	23068.2	-618.896	234.455	338.445	0	0	0	0	0	0	0	200	903	0	0	0	0	0	0	0	603	903	0
645	5	4.79157	-10.6786	-669.516	-25281.8	22824.1	-481.567	234.09	337.761	0	0	0	0	0	0	0	200	903	0	0	0	0	0	0	0	603	903	0
645	6	3.87604	-11.5941	-669.516	-25556.5	22824.1	-847.778	234.09	338.172	0	0	0	0	0	0	0	200	903	0	0	0	0	0	0	0	603	903	0
645	7	3.41828	-9.45785	-669.821	-24915.6	22885.1	-252.685	234.166	337.197	0	0	0	0	0	0	0	200	903	0	0	0	0	0	0	0	603	903	0
645	8	3.26569	-9.45785	-667.075	-24366.3	22824.1	-573.12	234.215	336.527	0	0	0	0	0	0	0	200	903	0	0	0	0	0	0	0	603	903	0
645	9	4.02863	-9.61044	-667.38	-25190.3	22946.2	-527.343	234.382	337.745	0	0	0	0	0	0	0	200	903	0	0	0	0	0	0	0	603	903	0
646	0	4.18122	-8.8475	-668.295	-24457.9	22946.2	-481.567	234.335	336.597	0	0	0	0	0	0	0	200	903	0	0	0	0	0	0	0	603	903	0
646	1	5.09675	-9.15267	-671.652	-24824.1	23190.3	-298.461	234.527	336.96	0	0	0	0	0	0	0	200	903	0	0	0	0	0	0	0	603	903	0
646	2	4.18122	-8.38974	-669.821	-24091.6	22457.9	-23.8032	233.528	335.967	0	0	0	0	0	0	0	200	903	0	0	0	0	0	0	0	603	903	0
646	3	3.41828	-8.38974	-669.516	-24274.8	22946.2	-618.896	234.273	336.257	0	0	0	0	0	0	0	200	903	0	0	0	0	0	0	0	603	903	0
646	4	3.41828	-7.93197	-670.737	-24274.8	23312.4	-206.909	234.756	336.191	0	0	0	0	0	0	0	200	903	0	0	0	0	0	0	0	603	903	0
646	5	3.1131	-6.71127	-668.906	-23633.9	23190.3	-390.014	234.669	335.332	0	0	0	0	0	0	0	200	903	0	0	0	0	0	0	0	603	903	0
646	6	3.72346	-6.71127	-665.549	-24457.9	23251.3	-390.014	234.936	336.748	0	0	0	0	0	0	0	200	903	0	0	0	0	0	0	0	603	903	0
646	7	4.48639	-6.25351	-668.6	-23542.3	23251.3	-161.132	234.776	335.211	0	0	0	0	0	0	0	200	903	0	0	0	0	0	0	0	603	903	0
646	8	5.24933	-6.55868	-670.737	-23267.7	23190.3	-115.356	234.574	334.69	0	0	0	0	0	0	0	200	903	0	0	0	0	0	0	0	603	903	0
646	9	4.18122	-6.40609	-671.042	-23817	23129.3	67.7495	234.468	335.493	0	0	0	0	0	0	0	200	903	0	0	0	0	0	0	0	603	903	0
647	0	3.26569	-5.49057	-670.126	-23267.7	23190.3	-161.132	234.606	334.721	0	0	0	0	0	0	0	200	903	0	0	0	0	0	0	0	603	903	0
647	1	4.48639	-5.79574	-669.211	-22901.5	23190.3	-115.356	234.653	334.222	0	0	0	0	0	0	0	200	903	0	0	0	0	0	0	0	603	903	0
647	2	3.57087	-6.25351	-668.6	-21985.9	23190.3	-252.685	234.685	332.884	0	0	0	0	0	0	0	200	903	0	0	0	0	0	0	0	603	903	0
647	3	4.18122	-5.18539	-669.211	-22626.8	23190.3	-161.132	234.653	333.811	0	0	0	0	0	0	0	200	903	0	0	0	0	0	0	0	603	903	0
647	4	4.48639	-5.0328	-669.211	-22626.8	22885.1	-23.8032	234.197	333.811	0	0	0	0	0	0	0	200	903	0	0	0	0	0	0	0	603	903	0
647	5	4.63898	-3.35434	-669.516	-22626.8	23190.3	-115.356	234.637	333.796	0	0	0	0	0	0	0	200	903	0	0	0	0	0	0	0	603	903	0
647	6	4.94416	-3.20175	-667.685	-21802.8	22885.1	159.302	234.275	332.654	0	0	0	0	0	0	0	200	903	0	0	0	0	0	0	0	603	903	0
647	7	4.02863	-3.8121	-670.432	-21619.7	23190.3	21.9732	234.59	332.247	0	0	0	0	0	0	0	200	903	0	0	0	0	0	0	0	603	903	0
647	8	5.85969	-4.11727	-667.99	-22169	23373.4	250.855	234.991	333.188	0	0	0	0	0	0	0	200	903	0	0	0	0	0	0	0	603	903	0
647	9	3.57087	-2.28622	-669.211	-21162	22763.1	-23.8032	234.015	331.622	0	0	0	0	0	0	0	200	903	0	0	0	0	0	0	0	603	903	0
648	0	5.09675	-2.13363	-669.821	-21436.6	23312.4	21.9732	234.804	332.004	0	0	0	0	0	0	0	200	903	0	0	0	0	0	0	0	603	903	0
648	1	4.33381	-2.43881	-667.38	-21253.5	23129.3	250.855	234.657	331.846	0	0	0	0	0	0	0	200	903	0	0	0	0	0	0	0	603	903	0
648	2	5.40192	-2.5914	-670.126	-20795.8	23556.5	-69.5796	235.152	331.033	0	0	0	0	0	0	0	200	903	0	0	0	0	0	0	0	603	903	0
648	3	4.79157	-1.67587	-671.042	-21528.2	23190.3	113.526	234.559	332.082	0	0	0	0	0	0	0	200	903	0	0	0	0	0	0	0	603	903	0
648	4	5.55451	-0.14999	-671.347	-20978.9	23251.3	159.302	234.634	331.249	0	0	0	0	0	0	0	200	903	0	0	0	0	0	0	0	603	903	0
648	5	5.55451	0.307774	-670.432	-20521.1	23922.7	250.855	235.683	330.609	0	0	0	0	0	0	0	200	903	0	0	0	0	0	0	0	603	903	0
648	6	6.31745	-0.455165	-670.737	-19971.8	23251.3	525.513	234.665	329.776	0	0	0	0	0	0	0	200	903	0	0	0	0	0	0	0	603	903	0
648	7	6.47004	-0.14999	-670.126	-20795.8	23556.5	388.184	235.152	331.033	0	0	0	0	0	0	0	200	903	0	0	0	0	0	0	0	603	903	0
648	8	6.16486	0.155186	-671.957	-19605.6	23373.4	159.302	234.784	329.177	0	0	0	0	0	0	0	200	903	0	0	0	0	0	0	0	603	903	0
648	9	6.01227	1.2233	-670.737	-20154.9	23617.6	159.302	235.211	330.049	0	0	0	0	0	0	0	200	903	0	0	0	0	0	0	0	603	903	0
649	0	6.01227	-0.455165	-671.042	-19880.2	23373.4	296.631	234.832	329.626	0	0	0	0	0	0	0	200	903	0	0	0	0	0	0	0	603	903	0
649	1	5.24933	0.155186	-668.906	-19330.9	23373.4	525.513	234.943	328.899	0	0	0	0	0	0	0	200	903	0	0	0	0	0	0	0	603	903	0
649	2	6.9278	1.2233	-669.516	-19971.8	23495.5	296.631	235.093	329.83	0	0	0	0	0	0	0	200	903	0	0	0	0	0	0	0	603	903	0
649	3	7.23298	1.83365	-669.821	-19239.4	23495.5	296.631	235.077	328.723	0	0	0	0	0	0	0	200	903	0	0	0	0	0	0	0	603	903	0
649	4	7.53815	2.90177	-670.126	-18598.5	23922.7	479.737	235.699	327.754	0	0	0	0	0	0	0	200	903	0	0	0	0	0	0	0	603	903	0
649	5	7.23298	2.29142	-671.042	-18781.6	23434.4	479.737	234.923	327.989	0	0	0	0	0	0	0	200	903	0	0	0	0	0	0	0	603	903	0
649	6	6.9278	2.74918	-672.263	-18873.1	23739.6	571.29	235.313	328.074	0	0	0	0	0	0	0	200	903	0	0	0	0	0	0	0	603	903	0
649	7	6.62263	2.74918	-670.737	-18140.7	23800.7	479.737	235.484	327.046	0	0	0	0	0	0	0	200	903	0	0	0	0	0	0	0	603	903	0
649	8	6.9278	3.66471	-671.347	-18232.3	23495.5	433.961	234.998	327.158	0	0	0	0	0	0	0	200	903	0	0	0	0	0	0	0	603	903	0
649	9	7.99592	3.8173	-671.347	-18140.7	23678.6	342.408	235.27	327.021	0	0	0	0	0	0	0	200	903	0	0	0	0	0	0	0	603	903	0
650	0	7.84333	2.59659	-672.568	-17683	23861.7	205.079	235.479	326.292	0	0	0	0	0	0	0	200	903	0	0	0	0	0	0	0	603	903	0
650	1	9.36921	3.66471	-669.516	-17866.1	23678.6	388.184	235.367	326.685	0	0	0	0	0	0	0	200	903	0	0	0	0	0	0	0	603	903	0
650	2	7.38556	5.19059	-672.568	-18232.3	23373.4	296.631	234.753	327.108	0	0	0	0	0	0	0	200	903	0	0	0	0	0	0	0	603	903	0
650	3	7.84333	5.19059	-671.347	-17042.1	24105.8	433.961	235.907	325.385	0	0	0	0	0	0	0	200	903	0	0	0	0	0	0	0	603	903	0
650	4	7.84333	5.038	-668.6	-17225.2	23739.6	571.29	235.506	325.763	0	0	0	0	0	0	0	200	903	0	0	0	0	0	0	0	603	903	0
650	5	9.06403	5.64835	-671.652	-17042.1	23861.7	662.842	235.527	325.373	0	0	0	0	0	0	0	200	903	0	0	0	0	0	0	0	603	903	0
650	6	9.82697	6.2587	-672.568	-17316.7	24227.9	708.619	236.023	325.747	0	0	0	0	0	0	0	200	903	0	0	0	0	0	0	0	603	903	0
650	7	8.91144	6.2587	-673.483	-17042.1	23922.7	525.513	235.521	325.304	0	0	0	0	0	0	0	200	903	0	0	0	0	0	0	0	603	903	0
650	8	8.45368	6.41129	-672.873	-16584.3	24044.8	571.29	235.735	324.647	0	0	0	0	0	0	0	200	903	0	0	0	0	0	0	0	603	903	0
650	9	10.8951	6.56388	-672.263	-16035	23983.8	571.29	235.676	323.852	0	0	0	0	0	0	0	200	903	0	0	0	0	0	0	0	603	903	0
651	0	8.60627	7.17423	-671.652	-16126.6	23861.7	296.631	235.527	324.01	0	0	0	0	0	0	0	200	903	0	0	0	0	0	0	0	603	903	0
651	1	9.21662	7.93717	-672.568	-15760.3	23861.7	708.619	235.479	323.433	0	0	0	0	0	0	0	200	903	0	0	0	0	0	0	0	603	903	0
651	2	9.67438	7.78458	-676.84	-13929.3	24227.9	525.513	235.796	320.58	0	0	0	0	0	0	0	200	903	0	0	0	0	0	0	0	603	903	0
651	3	10.5899	8.08976	-675.62	-15119.5	24166.9	708.619	235.77	322.379	0	0	0	0	0	0	0	200	903	0	0	0	0	0	0	0	603	903	0
651	4	9.06403	7.63199	-676.23	-14844.8	23983.8	800.172	235.467	321.952	0	0	0	0	0	0	0	200	903	0	0	0	0	0	0	0	603	903	0
651	5	9.06403	8.08976	-675.925	-15485.7	24105.8	662.842	235.663	322.91	0	0	0	0	0	0	0	200	903	0	0	0	0	0	0	0	603	903	0
651	6	9.36921	9.00528	-674.399	-15119.5	23556.5	662.842	234.93	322.419	0	0	0	0	0	0	0	200	903	0	0	0	0	0	0	0	603	903	0
651	7	9.97956	9.46305	-673.178	-14387.1	23983.8	662.842	235.628	321.372	0	0	0	0	0	0	0	200	903	0	0	0	0	0	0	0	603	903	0
651	8	10.7425	8.8527	-674.399	-13929.3	24472	617.066	236.287	320.654	0	0	0	0	0	0	0	200	903	0	0	0	0	0	0	0	603	903	0
651	9	9.97956	8.24234	-676.23	-14020.8	24288.9	571.29	235.918	320.734	0	0	0	0	0	0	0	200	903	0	0	0	0	0	0	0	603	903	0
652	0	11.2003	10.226	-673.788	-14295.5	24105.8	891.724	235.777	321.217	0	0	0	0	0	0	0	200	903	0	0	0	0	0	0	0	603	903	0
652	1	9.97956	11.1415	-677.451	-14020.8	24227.9	1120.61	235.763	320.696	0	0	0	0	0	0	0	200	903	0	0	0	0	0	0	0	603	903	0
652	2	11.8106	10.9889	-675.925	-13105.3	24472	1166.38	236.205	319.389	0	0	0	0	0	0	0	200	903	0	0	0	0	0	0	0	603	903	0
652	3	9.82697	10.9889	-676.84	-13288.4	24227.9	937.501	235.796	319.633	0	0	0	0	0	0	0	200	903	0	0	0	0	0	0	0	603	903	0
652	4	11.2003	11.1415	-676.23	-12556	24411	891.724	236.099	318.568	0	0	0	0	0	0	0	200	903	0	0	0	0	0	0	0	603	903	0
652	5	11.658	12.057	-676.23	-13105.3	24227.9	983.277	235.828	319.38	0	0	0	0	0	0	0	200	903	0	0	0	0	0	0	0	603	903	0
652	6	11.5054	10.226	-680.502	-12922.2	24044.8	1029.05	235.334	318.989	0	0	0	0	0	0	0	200	903	0	0	0	0	0	0	0	603	903	0
652	7	11.2003	12.6674	-675.62	-12830.7	24533.1	1029.05	236.312	318.991	0	0	0	0	0	0	0	200	903	0	0	0	0	0	0	0	603	903	0
652	8	10.4373	12.6674	-680.502	-11915.1	24288.9	1029.05	235.693	317.509	0	0	0	0	0	0	0	200	903	0	0	0	0	0	0	0	603	903	0
652	9	12.421	13.4303	-679.587	-12464.4	24411	800.172	235.92	318.341	0	0	0	0	0	0	0	200	903	0	0	0	0	0	0	0	603	903	0
653	0	11.0477	13.5829	-679.587	-12464.4	24838.3	1166.38	236.549	318.341	0	0	0	0	0	0	0	200	903	0	0	0	0	0	0	0	603	903	0
653	1	12.421	14.4984	-680.807	-11732	24716.2	1166.38	236.304	317.233	0	0	0	0	0	0	0	200	903	0	0	0	0	0	0	0	603	903	0
653	2	13.6417	14.1933	-684.775	-11365.8	23678.6	1212.16	234.579	316.598	0	0	0	0	0	0	0	200	903	0	0	0	0	0	0	0	603	903	0
653	3	11.5054	14.3459	-682.639	-11091.2	24472	983.277	235.849	316.247	0	0	0	0	0	0	0	200	903	0	0	0	0	0	0	0	603	903	0
653	4	11.3528	14.4984	-683.249	-11640.5	24594.1	1349.49	235.996	317.037	0	0	0	0	0	0	0	200	903	0	0	0	0	0	0	0	603	903	0
653	5	11.0477	15.7192	-684.164	-11182.7	24166.9	1120.61	235.323	316.345	0	0	0	0	0	0	0	200	903	0	0	0	0	0	0	0	603	903	0
653	6	11.8106	15.8717	-682.333	-10358.7	24472	1441.04	235.865	315.181	0	0	0	0	0	0	0	200	903	0	0	0	0	0	0	0	603	903	0
653	7	11.2003	15.1088	-680.197	-10175.6	24533.1	1120.61	236.068	314.96	0	0	0	0	0	0	0	200	903	0	0	0	0	0	0	0	603	903	0
653	8	12.1158	16.3295	-684.47	-10358.7	24350	1257.94	235.575	315.134	0	0	0	0	0	0	0	200	903	0	0	0	0	0	0	0	603	903	0
653	9	13.0313	15.8717	-686.301	-10267.2	24838.3	1441.04	236.192	314.96	0	0	0	0	0	0	0	200	903	0	0	0	0	0	0	0	603	903	0
654	0	12.1158	15.2614	-686.606	-9534.76	24777.2	1212.16	236.087	313.887	0	0	0	0	0	0	0	200	903	0	0	0	0	0	0	0	603	903	0
654	1	11.5054	17.245	-687.521	-9351.65	24533.1	1486.82	235.683	313.602	0	0	0	0	0	0	0	200	903	0	0	0	0	0	0	0	603	903	0
654	2	11.5054	17.245	-688.132	-8985.44	24227.9	1761.48	235.208	313.058	0	0	0	0	0	0	0	200	903	0	0	0	0	0	0	0	603	903	0
654	3	11.2003	18.008	-686.911	-9443.21	24777.2	1257.94	236.071	313.747	0	0	0	0	0	0	0	200	903	0	0	0	0	0	0	0	603	903	0
654	4	11.658	18.1606	-688.132	-9534.76	24227.9	1578.37	235.208	313.856	0	0	0	0	0	0	0	200	903	0	0	0	0	0	0	0	603	903	0
654	5	11.658	19.2287	-688.437	-8527.68	24227.9	1578.37	235.193	312.387	0	0	0	0	0	0	0	200	903	0	0	0	0	0	0	0	603	903	0
654	6	12.1158	18.7709	-691.794	-7703.7	24166.9	1532.59	234.934	311.136	0	0	0	0	0	0	0	200	903	0	0	0	0	0	0	0	603	903	0
654	7	11.9632	18.9235	-692.404	-7886.81	24288.9	1532.59	235.079	311.391	0	0	0	0	0	0	0	200	903	0	0	0	0	0	0	0	603	903	0
654	8	11.2003	20.2968	-693.32	-8527.68	24594.1	1990.36	235.473	312.3	0	0	0	0	0	0	0	200	903	0	0	0	0	0	0	0	603	903	0
654	9	12.7261	21.2123	-692.709	-8161.47	24777.2	1715.7	235.769	311.782	0	0	0	0	0	0	0	200	903	0	0	0	0	0	0	0	603	903	0
655	0	11.0477	21.2123	-693.625	-7703.7	24594.1	1715.7	235.457	311.106	0	0	0	0	0	0	0	200	903	0	0	0	0	0	0	0	603	903	0
655	1	11.3528	21.0597	-694.235	-7612.15	24411	1807.25	235.162	310.965	0	0	0	0	0	0	0	200	903	0	0	0	0	0	0	0	603	903	0
655	2	12.2684	21.6701	-700.339	-7337.49	24838.3	1807.25	235.466	310.477	0	0	0	0	0	0	0	200	903	0	0	0	0	0	0	0	603	903	0
655	3	11.5054	22.5856	-697.592	-6696.62	24594.1	1807.25	235.256	309.6	0	0	0	0	0	0	0	200	903	0	0	0	0	0	0	0	603	903	0
655	4	10.5899	21.5175	-699.423	-7337.49	24533.1	1532.59	235.076	310.491	0	0	0	0	0	0	0	200	903	0	0	0	0	0	0	0	603	903	0
655	5	11.3528	23.3485	-700.034	-6513.52	24899.3	1715.7	235.569	309.305	0	0	0	0	0	0	0	200	903	0	0	0	0	0	0	0	603	903	0
655	6	10.5899	23.196	-700.034	-6788.18	24594.1	1990.36	235.133	309.697	0	0	0	0	0	0	0	200	903	0	0	0	0	0	0	0	603	903	0
655	7	10.2847	23.5011	-700.644	-6605.07	24838.3	1898.8	235.451	309.427	0	0	0	0	0	0	0	200	903	0	0	0	0	0	0	0	603	903	0
655	8	11.0477	24.5692	-703.085	-6055.75	24777.2	2127.69	235.241	308.613	0	0	0	0	0	0	0	200	903	0	0	0	0	0	0	0	603	903	0
655	9	11.5054	25.027	-704.001	-6147.31	24777.2	2127.69	235.195	308.732	0	0	0	0	0	0	0	200	903	0	0	0	0	0	0	0	603	903	0
656	0	11.0477	25.027	-705.527	-5323.33	25021.4	2356.57	235.465	307.545	0	0	0	0	0	0	0	200	903	0	0	0	0	0	0	0	603	903	0
656	1	9.82697	23.3485	-707.053	-5231.78	24960.3	1990.36	235.302	307.399	0	0	0	0	0	0	0	200	903	0	0	0	0	0	0	0	603	903	0
656	2	11.8106	25.6374	-706.137	-5964.2	24716.2	2310.79	235.002	308.446	0	0	0	0	0	0	0	200	903	0	0	0	0	0	0	0	603	903	0
656	3	10.4373	26.8581	-706.442	-5323.33	24716.2	2219.24	234.987	307.535	0	0	0	0	0	0	0	200	903	0	0	0	0	0	0	0	603	903	0
656	4	10.2847	27.7736	-707.968	-4682.46	24533.1	1898.8	234.653	306.614	0	0	0	0	0	0	0	200	903	0	0	0	0	0	0	0	603	903	0
656	5	10.8951	27.1632	-709.494	-4407.81	24899.3	2448.12	235.094	306.213	0	0	0	0	0	0	0	200	903	0	0	0	0	0	0	0	603	903	0
656	6	10.2847	28.2314	-711.02	-4316.25	25143.4	2081.91	235.363	306.07	0	0	0	0	0	0	0	200	903	0	0	0	0	0	0	0	603	903	0
656	7	11.0477	28.3839	-712.241	-4041.59	24960.3	2310.79	235.045	305.674	0	0	0	0	0	0	0	200	903	0	0	0	0	0	0	0	603	903	0
656	8	9.36921	28.8417	-714.682	-4316.25	24960.3	2265.02	234.925	306.039	0	0	0	0	0	0	0	200	903	0	0	0	0	0	0	0	603	903	0
656	9	9.67438	28.3839	-712.851	-3766.94	25326.5	2310.79	235.529	305.284	0	0	0	0	0	0	0	200	903	0	0	0	0	0	0	0	603	903	0
657	0	9.5218	30.0624	-714.682	-3858.49	25082.4	2265.02	235.096	305.399	0	0	0	0	0	0	0	200	903	0	0	0	0	0	0	0	603	903	0
657	1	10.2847	30.3676	-714.682	-3766.94	25143.4	2173.46	235.181	305.271	0	0	0	0	0	0	0	200	903	0	0	0	0	0	0	0	603	903	0
657	2	10.2847	31.2831	-717.123	-3583.83	25143.4	2677	235.062	304.997	0	0	0	0	0	0	0	200	903	0	0	0	0	0	0	0	603	903	0
657	3	10.7425	32.3512	-714.682	-3034.51	25570.7	2310.79	235.779	304.246	0	0	0	0	0	0	0	200	903	0	0	0	0	0	0	0	603	903	0
657	4	10.2847	32.3512	-721.091	-2759.85	25326.5	2585.45	235.123	303.827	0	0	0	0	0	0	0	200	903	0	0	0	0	0	0	0	603	903	0
657	5	9.36921	32.809	-718.649	-2210.54	25082.4	2677	234.902	303.076	0	0	0	0	0	0	0	200	903	0	0	0	0	0	0	0	603	903	0
657	6	9.67438	33.7245	-717.429	-2668.3	25570.7	2493.9	235.642	303.719	0	0	0	0	0	0	0	200	903	0	0	0	0	0	0	0	603	903	0
657	7	10.4373	34.1823	-721.091	-2393.64	25509.6	2402.34	235.376	303.32	0	0	0	0	0	0	0	200	903	0	0	0	0	0	0	0	603	903	0
657	8	11.658	35.5556	-721.701	-2118.99	25387.6	2585.45	235.177	302.936	0	0	0	0	0	0	0	200	903	0	0	0	0	0	0	0	603	903	0
657	9	10.4373	34.9452	-723.837	-1478.12	25753.8	2905.89	235.58	302.042	0	0	0	0	0	0	0	200	903	0	0	0	0	0	0	0	603	903	0
658	0	9.5218	35.0978	-724.753	-1569.67	25387.6	2448.12	235.029	302.166	0	0	0	0	0	0	0	200	903	0	0	0	0	0	0	0	603	903	0
658	1	8.91144	36.6237	-723.837	-1844.33	25753.8	2493.9	235.58	302.548	0	0	0	0	0	0	0	200	903	0	0	0	0	0	0	0	603	903	0
658	2	8.91144	38.4547	-725.974	-1203.46	25631.7	2631.23	235.307	301.658	0	0	0	0	0	0	0	200	903	0	0	0	0	0	0	0	603	903	0
658	3	10.1321	38.9125	-725.974	-837.248	25570.7	2905.89	235.223	301.153	0	0	0	0	0	0	0	200	903	0	0	0	0	0	0	0	603	903	0
658	4	10.5899	38.7599	-727.805	-196.378	25936.9	2768.56	235.637	300.27	0	0	0	0	0	0	0	200	903	0	0	0	0	0	0	0	603	903	0
658	5	9.97956	37.997	-729.941	-196.378	25997.9	2814.33	235.616	300.269	0	0	0	0	0	0	0	200	903	0	0	0	0	0	0	0	603	903	0
658	6	10.1321	38.7599	-732.382	-745.695	25509.6	2722.78	234.831	301.018	0	0	0	0	0	0	0	200	903	0	0	0	0	0	0	0	603	903	0
658	7	9.5218	41.6591	-732.687	-379.484	25631.7	2677	234.983	300.518	0	0	0	0	0	0	0	200	903	0	0	0	0	0	0	0	603	903	0
658	8	9.36921	41.8117	-730.246	-104.826	25875.9	2722.78	235.434	300.144	0	0	0	0	0	0	0	200	903	0	0	0	0	0	0	0	603	903	0
658	9	11.2003	42.2694	-733.603	169.833	25631.7	2631.23	234.94	299.768	0	0	0	0	0	0	0	200	903	0	0	0	0	0	0	0	603	903	0
659	0	10.7425	42.2694	-733.603	352.938	25875.9	2677	235.272	299.519	0	0	0	0	0	0	0	200	903	0	0	0	0	0	0	0	603	903	0
659	1	11.0477	43.4901	-737.265	169.833	26059	3180.54	235.345	299.77	0	0	0	0	0	0	0	200	903	0	0	0	0	0	0	0	603	903	0
659	2	11.3528	44.4057	-736.96	536.044	25875.9	2677	235.112	299.273	0	0	0	0	0	0	0	200	903	0	0	0	0	0	0	0	603	903	0
659	3	10.4373	44.4057	-739.096	993.807	26120	2905.89	235.34	298.655	0	0	0	0	0	0	0	200	903	0	0	0	0	0	0	0	603	903	0
659	4	11.3528	44.8634	-738.486	1634.68	26242.1	2905.89	235.535	297.786	0	0	0	0	0	0	0	200	903	0	0	0	0	0	0	0	603	903	0
659	5	9.97956	45.016	-739.096	902.255	26059	3272.1	235.258	298.779	0	0	0	0	0	0	0	200	903	0	0	0	0	0	0	0	603	903	0
659	6	10.8951	46.5419	-739.096	1543.12	26242.1	2905.89	235.506	297.912	0	0	0	0	0	0	0	200	903	0	0	0	0	0	0	0	603	903	0
659	7	12.2684	47.4574	-739.706	1726.23	26242.1	2951.66	235.476	297.666	0	0	0	0	0	0	0	200	903	0	0	0	0	0	0	0	603	903	0
659	8	10.8951	47.61	-742.453	2458.65	25875.9	2997.44	234.852	296.689	0	0	0	0	0	0	0	200	903	0	0	0	0	0	0	0	603	903	0
659	9	9.97956	48.2204	-742.758	2183.99	26364.1	2905.89	235.495	297.06	0	0	0	0	0	0	0	200	903	0	0	0	0	0	0	0	603	903	0
660	0	11.658	49.2885	-743.063	2458.65	26425.2	3180.54	235.562	296.691	0	0	0	0	0	0	0	200	903	0	0	0	0	0	0	0	603	903	0
660	1	10.1321	50.204	-743.369	2733.31	26364.1	2951.66	235.466	296.323	0	0	0	0	0	0	0	200	903	0	0	0	0	0	0	0	603	903	0
660	2	11.8106	49.2885	-744.589	3374.18	26547.2	3180.54	235.654	295.468	0	0	0	0	0	0	0	200	903	0	0	0	0	0	0	0	603	903	0
660	3	12.2684	48.8307	-748.251	3831.94	26669.3	2951.66	235.642	294.879	0	0	0	0	0	0	0	200	903	0	0	0	0	0	0	0	603	903	0
660	4	11.5054	51.7299	-747.031	3282.63	26242.1	3043.21	235.129	295.606	0	0	0	0	0	0	0	200	903	0	0	0	0	0	0	0	603	903	0
660	5	9.82697	52.0351	-748.251	3282.63	26120	3180.54	234.908	295.613	0	0	0	0	0	0	0	200	903	0	0	0	0	0	0	0	603	903	0
660	6	11.5054	52.3402	-746.115	4106.6	26486.2	2997.44	235.499	294.496	0	0	0	0	0	0	0	200	903	0	0	0	0	0	0	0	603	903	0
660	7	10.7425	52.6454	-748.251	4198.15	26303.1	3180.54	235.153	294.389	0	0	0	0	0	0	0	200	903	0	0	0	0	0	0	0	603	903	0
660	8	11.3528	53.1032	-749.777	4198.15	26913.5	3134.77	235.895	294.401	0	0	0	0	0	0	0	200	903	0	0	0	0	0	0	0	603	903	0
660	9	12.8787	54.1713	-752.829	4015.05	26608.3	3272.1	235.344	294.667	0	0	0	0	0	0	0	200	903	0	0	0	0	0	0	0	603	903	0
661	0	11.2003	54.4765	-751.913	4655.92	26303.1	3134.77	234.982	293.808	0	0	0	0	0	0	0	200	903	0	0	0	0	0	0	0	603	903	0
661	1	10.7425	54.9342	-752.524	5846.1	26852.4	3226.32	235.683	292.231	0	0	0	0	0	0	0	200	903	0	0	0	0	0	0	0	603	903	0
661	2	9.97956	54.3239	-753.745	5663	26852.4	3180.54	235.625	292.487	0	0	0	0	0	0	0	200	903	0	0	0	0	0	0	0	603	903	0
661	3	10.5899	55.392	-751.608	5113.68	26608.3	3180.54	235.402	293.196	0	0	0	0	0	0	0	200	903	0	0	0	0	0	0	0	603	903	0
661	4	11.2003	56.0024	-751.303	5663	25997.9	3226.32	234.604	292.462	0	0	0	0	0	0	0	200	903	0	0	0	0	0	0	0	603	903	0
661	5	11.5054	57.0705	-754.66	6486.97	26547.2	3088.99	235.178	291.404	0	0	0	0	0	0	0	200	903	0	0	0	0	0	0	0	603	903	0
661	6	11.658	57.3756	-756.491	6670.08	26791.4	3272.1	235.415	291.183	0	0	0	0	0	0	0	200	903	0	0	0	0	0	0	0	603	903	0
661	7	10.8951	58.1386	-756.796	6761.63	26730.3	3363.65	235.32	291.065	0	0	0	0	0	0	0	200	903	0	0	0	0	0	0	0	603	903	0
661	8	11.0477	59.2067	-757.407	6944.73	26364.1	3134.77	234.808	290.831	0	0	0	0	0	0	0	200	903	0	0	0	0	0	0	0	603	903	0
661	9	11.0477	59.3593	-757.101	7768.71	27035.5	3180.54	235.709	289.739	0	0	0	0	0	0	0	200	903	0	0	0	0	0	0	0	603	903	0
662	0	10.8951	59.5119	-756.491	7585.6	26547.2	3226.32	235.093	289.973	0	0	0	0	0	0	0	200	903	0	0	0	0	0	0	0	603	903	0
662	1	11.9632	59.9696	-757.101	7402.5	26608.3	3546.75	235.145	290.223	0	0	0	0	0	0	0	200	903	0	0	0	0	0	0	0	603	903	0
662	2	13.1839	61.1903	-757.407	8775.79	26669.3	3363.65	235.211	288.413	0	0	0	0	0	0	0	200	903	0	0	0	0	0	0	0	603	903	0
662	3	12.1158	61.4955	-759.238	7860.26	26791.4	3226.32	235.287	289.647	0	0	0	0	0	0	0	200	903	0	0	0	0	0	0	0	603	903	0
662	4	10.5899	61.4955	-759.543	8958.9	27035.5	3088.99	235.594	288.205	0	0	0	0	0	0	0	200	903	0	0	0	0	0	0	0	603	903	0
662	5	11.2003	61.8007	-760.153	8958.9	26913.5	3043.21	235.405	288.214	0	0	0	0	0	0	0	200	903	0	0	0	0	0	0	0	603	903	0
662	6	11.3528	63.0214	-759.848	8592.68	26608.3	3500.98	235.018	288.692	0	0	0	0	0	0	0	200	903	0	0	0	0	0	0	0	603	903	0
662	7	12.8787	63.9369	-760.458	8958.9	27279.7	3363.65	235.873	288.219	0	0	0	0	0	0	0	200	903	0	0	0	0	0	0	0	603	903	0
662	8	11.8106	64.6999	-761.069	9416.66	27279.7	3500.98	235.844	287.627	0	0	0	0	0	0	0	200	903	0	0	0	0	0	0	0	603	903	0
662	9	12.1158	64.8525	-761.069	10240.6	26852.4	3363.65	235.283	286.544	0	0	0	0	0	0	0	200	903	0	0	0	0	0	0	0	603	903	0
663	0	11.9632	65.005	-760.458	9691.32	27340.7	3500.98	235.953	287.256	0	0	0	0	0	0	0	200	903	0	0	0	0	0	0	0	603	903	0
663	1	11.0477	65.768	-763.51	9782.87	26974.5	3317.87	235.33	287.187	0	0	0	0	0	0	0	200	903	0	0	0	0	0	0	0	603	903	0
663	2	12.1158	66.5309	-761.679	10332.2	26913.5	3684.08	235.334	286.435	0	0	0	0	0	0	0	200	903	0	0	0	0	0	0	0	603	903	0
663	3	11.2003	66.3783	-762.289	11247.7	26913.5	3500.98	235.306	285.245	0	0	0	0	0	0	0	200	903	0	0	0	0	0	0	0	603	903	0
663	4	12.421	66.2257	-762.595	11156.2	26913.5	3317.87	235.292	285.371	0	0	0	0	0	0	0	200	903	0	0	0	0	0	0	0	603	903	0
663	5	13.4891	67.7516	-764.12	10881.5	26913.5	3363.65	235.221	285.759	0	0	0	0	0	0	0	200	903	0	0	0	0	0	0	0	603	903	0
663	6	12.1158	67.7516	-764.426	11430.8	27401.7	3317.87	235.846	285.047	0	0	0	0	0	0	0	200	903	0	0	0	0	0	0	0	603	903	0
663	7	12.1158	69.8879	-765.341	12163.2	27157.6	3546.75	235.484	284.107	0	0	0	0	0	0	0	200	903	0	0	0	0	0	0	0	603	903	0
663	8	13.1839	69.8879	-766.257	11888.6	27096.6	3409.43	235.362	284.485	0	0	0	0	0	0	0	200	903	0	0	0	0	0	0	0	603	903	0
663	9	11.5054	70.193	-761.984	11797	27279.7	3684.08	235.801	284.518	0	0	0	0	0	0	0	200	903	0	0	0	0	0	0	0	603	903	0
664	0	11.8106	71.8715	-763.815	11980.1	26791.4	3546.75	235.076	284.315	0	0	0	0	0	0	0	200	903	0	0	0	0	0	0	0	603	903	0
664	1	12.1158	72.4818	-762.595	12621	27096.6	3317.87	235.532	283.45	0	0	0	0	0	0	0	200	903	0	0	0	0	0	0	0	603	903	0
664	2	12.1158	72.787	-766.867	12804.1	27096.6	3638.31	235.334	283.303	0	0	0	0	0	0	0	200	903	0	0	0	0	0	0	0	603	903	0
664	3	11.3528	73.2448	-766.257	12804.1	27035.5	3592.53	235.283	283.29	0	0	0	0	0	0	0	200	903	0	0	0	0	0	0	0	603	903	0
664	4	11.5054	74.0077	-767.477	12895.7	26730.3	3638.31	234.829	283.197	0	0	0	0	0	0	0	200	903	0	0	0	0	0	0	0	603	903	0
664	5	10.4373	74.9233	-764.731	13719.6	27157.6	3684.08	235.513	282.06	0	0	0	0	0	0	0	200	903	0	0	0	0	0	0	0	603	903	0
[truncated: 2,264 more rows]
