# Supplementary material for: The Effects of an Extemporaneous Speech Dual-task on Older Adult Gait Control
Source: Research Square preprint supplement (doi:10.21203/rs.3.rs-7674245/v1), 2025-11-18
Supplement: Supplementary file 121 [file Over10ground4.xlsx]

## Sheet: Sheet1
Trajectories
		10:LFHD			10:RFHD			10:LBHD			10:RBHD			10:C7			10:T10			10:CLAV			10:STRN			10:RBAK			10:LSHO			10:LUPA			10:LELB			10:LFRM			10:LWRA			10:LWRB			10:LFIN
Frame	Sub Frame	X	Y	Z	X	Y	Z	X	Y	Z	X	Y	Z	X	Y	Z	X	Y	Z	X	Y	Z	X	Y	Z	X	Y	Z	X	Y	Z	X	Y	Z	X	Y	Z	X	Y	Z	X	Y	Z	X	Y	Z	X	Y	Z
		mm	mm	mm	mm	mm	mm	mm	mm	mm	mm	mm	mm	mm	mm	mm	mm	mm	mm	mm	mm	mm	mm	mm	mm	mm	mm	mm	mm	mm	mm	mm	mm	mm	mm	mm	mm	mm	mm	mm	mm	mm	mm	mm	mm	mm	mm	mm	mm
623	0	144.591	-2196.81	1593.6	249.191	-2203.03	1599.14	124.1	-2356.15	1554.74	241.551	-2366.64	1562.04	209.434	-2377.31	1430.77	216.528	-2463.89	1147.56	200.413	-2219.14	1329.55	208.635	-2113.21	1133.15	292.971	-2461.38	1245.83	48.2425	-2292.39	1382.22	-53.853	-2311.64	1144.02	-57.7021	-2327.71	1048.34	-80.4348	-2259.62	911.153	-39.1753	-2230.83	810.269	-91.642	-2283.46	796.944	-93.0192	-2226.08	734.515
624	0	143.818	-2186.63	1594.48	248.373	-2192.91	1600.3	123.487	-2346.1	1555.5	240.996	-2356.4	1562.85	208.651	-2366.82	1431.98	215.046	-2454.17	1148.99	200.097	-2208.97	1330.35	208.91	-2102.49	1133.84	291.645	-2451.74	1247.22	47.8793	-2281.5	1383.15	-55.388	-2299.61	1145.23	-59.5682	-2314.98	1049.21	-81.9651	-2245.44	912.719	-40.6304	-2214.8	812.817	-93.3171	-2267.7	798.236	-94.2319	-2209.41	736.7
625	0	143.17	-2176.51	1595.5	247.63	-2182.83	1601.39	122.934	-2335.94	1556.11	240.519	-2346.32	1563.73	207.857	-2356.42	1433.13	213.566	-2444.6	1150.42	199.706	-2198.94	1331.03	209.201	-2092.01	1134.47	290.33	-2442.22	1248.51	47.3185	-2270.4	1383.92	-56.8976	-2287.8	1146.39	-61.61	-2302.21	1050.11	-83.4096	-2231.19	914.366	-41.6906	-2199.99	814.642	-94.5228	-2252.05	799.563	-95.492	-2192.72	739.231
626	0	142.499	-2166.45	1596.33	246.938	-2172.6	1602.3	122.399	-2325.82	1556.64	239.884	-2335.97	1564.4	207.118	-2346.05	1434.25	212.036	-2434.97	1151.79	199.474	-2188.82	1331.62	209.42	-2081.94	1134.73	288.897	-2432.76	1249.76	47.0218	-2259.34	1384.62	-58.3803	-2275.89	1147.49	-63.5278	-2289.45	1051.08	-84.8907	-2216.68	915.905	-42.6218	-2184.2	817.104	-96.2158	-2236.13	801.047	-96.5497	-2176	741.552
627	0	141.905	-2156.18	1596.89	246.484	-2162.4	1603.02	121.811	-2315.55	1557.04	239.389	-2325.67	1565	206.398	-2335.71	1435.15	210.49	-2425.4	1152.96	199.589	-2178.85	1331.97	210.033	-2072.2	1134.79	287.536	-2423.29	1250.86	46.8865	-2248.39	1385.36	-59.5864	-2264.34	1148.5	-65.4316	-2276.69	1051.89	-85.9036	-2202.28	917.441	-43.7607	-2169.32	818.905	-97.3972	-2220.51	802.505	-97.5154	-2159.29	743.883
628	0	141.525	-2145.92	1597.28	246.108	-2152.22	1603.59	121.438	-2305.31	1557.37	238.816	-2315.51	1565.31	205.619	-2325.6	1435.85	208.961	-2415.96	1153.85	199.562	-2168.94	1332.23	210.592	-2062.63	1134.85	286.124	-2414.1	1251.71	46.502	-2237.56	1386.06	-60.8325	-2252.67	1149.37	-67.327	-2263.96	1052.82	-86.8503	-2187.86	918.954	-44.0239	-2155.38	820.096	-99.2893	-2204.96	804.017	-98.2886	-2142.71	746.005
629	0	141.117	-2135.7	1597.61	245.888	-2142.11	1604.03	120.972	-2295.05	1557.6	238.365	-2305.36	1565.59	204.907	-2315.45	1436.4	207.471	-2406.47	1154.66	199.765	-2159.12	1332.44	211.198	-2053.24	1134.76	284.745	-2404.72	1252.44	46.3012	-2226.71	1386.8	-61.9424	-2241.07	1150.36	-69.0563	-2251.07	1053.79	-87.6264	-2173.26	920.477	-44.1942	-2140.93	821.799	-100.75	-2189.39	805.532	-99.0722	-2126.23	748.417
630	0	140.692	-2125.41	1597.8	245.611	-2131.91	1604.31	120.532	-2284.8	1557.85	237.961	-2295.1	1565.9	204.203	-2305.47	1436.96	206.018	-2397.14	1155.44	199.475	-2149.38	1332.56	211.761	-2044.09	1134.65	283.329	-2395.45	1253.08	46.1784	-2215.73	1387.05	-62.9049	-2229.24	1151.25	-70.7399	-2238.14	1054.53	-88.4855	-2158.65	922.134	-44.6783	-2126.33	823.606	-101.844	-2173.56	807.093	-99.6242	-2109.82	750.713
631	0	140.803	-2115.01	1597.73	245.336	-2121.64	1604.4	120.182	-2274.45	1557.99	237.68	-2284.86	1566.06	203.535	-2295.45	1437.36	204.619	-2387.78	1156.08	199.55	-2139.65	1332.59	212.46	-2035.06	1134.3	282.028	-2386.23	1253.58	46.1259	-2205	1387.27	-63.5998	-2217.44	1151.76	-72.3361	-2225.22	1055.31	-88.9394	-2144.17	923.336	-45.0747	-2111.51	825.27	-102.962	-2157.7	808.452	-100.01	-2093.54	752.647
632	0	140.74	-2104.69	1597.64	245.371	-2111.48	1604.16	119.955	-2264.18	1557.98	237.515	-2274.9	1566.22	202.858	-2285.57	1437.39	203.277	-2378.47	1156.26	199.554	-2130.11	1332.3	212.99	-2026.19	1133.78	280.762	-2377.06	1253.76	45.8138	-2194.45	1387.58	-64.2494	-2205.63	1152.33	-73.7993	-2212.36	1055.69	-89.5508	-2129.82	924.692	-45.1465	-2096.89	826.622	-103.91	-2142.13	809.607	-100.12	-2077.46	754.497
633	0	140.56	-2094.28	1597.41	245.434	-2101.27	1603.9	119.71	-2253.84	1558.08	237.105	-2264.63	1566.18	202.219	-2275.72	1437.44	202.011	-2369.35	1156.55	199.724	-2120.37	1332.12	213.513	-2017.23	1133.49	279.496	-2367.97	1253.87	45.5591	-2183.94	1387.72	-65.1186	-2193.84	1152.56	-75.1202	-2199.46	1056.18	-89.8611	-2115.62	925.685	-45.3741	-2082.49	827.831	-104.691	-2126.41	810.631	-100.075	-2061.49	756.119
634	0	140.532	-2083.93	1596.78	245.341	-2090.93	1603.5	119.517	-2243.49	1557.98	236.937	-2254.36	1566.06	201.64	-2265.84	1437.41	200.978	-2360.18	1156.71	199.868	-2110.68	1331.69	213.928	-2007.99	1132.92	278.411	-2358.82	1253.98	45.5794	-2173.45	1387.37	-65.6525	-2181.94	1152.66	-76.2059	-2186.63	1055.97	-90.1711	-2101.41	926.526	-45.3946	-2068	828.936	-105.507	-2111.04	811.361	-99.9736	-2045.47	757.44
635	0	140.69	-2073.54	1596.21	245.255	-2080.82	1602.84	119.377	-2233.27	1557.76	236.807	-2244.25	1565.87	201.151	-2256.02	1437.17	199.97	-2350.98	1156.61	199.927	-2101.09	1331.23	214.198	-1998.78	1132.24	277.445	-2349.65	1253.95	45.5232	-2163.06	1387.05	-66.1259	-2169.91	1152.54	-77.235	-2173.82	1056.01	-90.5265	-2087.3	927.174	-45.2129	-2053.4	829.805	-106.096	-2095.53	812.047	-99.6209	-2029.76	758.621
636	0	140.755	-2063.19	1595.59	245.514	-2070.5	1602.1	119.267	-2223.09	1557.46	236.749	-2234.22	1565.62	200.733	-2246.18	1436.81	199.137	-2342.02	1156.44	199.846	-2091.52	1330.59	214.562	-1989.54	1131.52	276.638	-2340.43	1253.74	45.24	-2152.74	1386.7	-66.5396	-2158.04	1152.46	-78.0004	-2160.95	1055.92	-90.7386	-2073.28	927.75	-44.8745	-2039.27	830.685	-106.451	-2080.31	812.606	-99.1676	-2014.15	759.705
637	0	140.624	-2052.86	1594.82	245.422	-2060.27	1601.4	119.143	-2212.77	1557.1	236.558	-2223.96	1565.21	200.353	-2236.25	1436.45	198.441	-2332.92	1156.38	200.036	-2081.8	1329.79	214.754	-1980.54	1130.45	275.934	-2331.19	1253.57	45.1968	-2142.43	1386.1	-67.0191	-2145.96	1152.19	-78.694	-2148.12	1055.58	-90.7756	-2059.36	928.032	-44.8858	-2025.01	831.104	-106.372	-2065.17	812.97	-98.7439	-1998.64	760.593
638	0	140.811	-2042.53	1593.97	245.491	-2049.95	1600.56	119.049	-2202.47	1556.5	236.531	-2213.71	1564.63	200.032	-2226.29	1436.04	197.867	-2323.8	1156.16	200.148	-2072.06	1328.99	214.897	-1971.2	1129.36	275.356	-2321.95	1253.36	45.158	-2132.29	1385.44	-67.1953	-2134.03	1151.47	-79.3235	-2135.32	1055.04	-90.7607	-2045.53	928.157	-44.4121	-2010.83	831.564	-106.564	-2050.31	813.075	-98.1107	-1983.37	761.163
639	0	140.952	-2032.22	1592.97	245.698	-2039.71	1599.56	118.996	-2192.25	1555.81	236.562	-2203.72	1563.87	199.806	-2216.3	1435.36	197.459	-2314.78	1155.77	200.237	-2062.31	1328.08	215.008	-1961.99	1128.08	275.01	-2312.57	1252.95	45.247	-2122.1	1384.53	-67.5451	-2122.04	1150.67	-79.5422	-2122.58	1054.23	-90.4163	-2031.82	928.091	-43.7675	-1996.62	831.855	-106.462	-2035.6	812.951	-97.418	-1968.41	761.658
640	0	141.043	-2021.93	1591.94	245.901	-2029.62	1598.49	119.022	-2182.01	1554.84	236.488	-2193.6	1563.03	199.678	-2206.29	1434.63	197.154	-2305.57	1155.28	200.043	-2052.56	1326.98	215.305	-1952.64	1126.63	274.715	-2303.09	1252.47	45.116	-2111.93	1383.64	-67.5136	-2110.14	1149.87	-79.6617	-2110	1053.44	-90.1183	-2018.12	928.049	-43.4302	-1982.62	831.824	-106.102	-2021	812.846	-96.6746	-1953.43	761.948
641	0	141.252	-2011.61	1590.78	245.902	-2019.37	1597.34	119.003	-2171.68	1553.86	236.611	-2183.5	1562.08	199.548	-2196.15	1433.81	196.956	-2296.28	1154.7	200.35	-2042.68	1325.64	215.368	-1943.25	1125.07	274.508	-2293.47	1251.93	45.1852	-2101.71	1382.42	-67.5286	-2098.15	1148.88	-79.6081	-2097.35	1052.31	-89.5773	-2004.6	927.633	-42.5571	-1968.56	831.781	-105.518	-2006.43	812.367	-95.8732	-1938.63	762.117
642	0	141.356	-2001.29	1589.5	246.169	-2009.07	1595.99	119.096	-2161.35	1552.63	236.503	-2173.09	1560.75	199.509	-2185.97	1432.83	196.921	-2286.84	1154.03	200.364	-2032.64	1324.35	215.634	-1933.79	1123.26	274.442	-2283.86	1251.17	45.2437	-2091.53	1381.17	-67.3137	-2086.26	1147.58	-79.3946	-2084.73	1051.13	-88.934	-1991.14	927.202	-41.6469	-1954.7	831.569	-104.955	-1992.02	811.921	-94.8589	-1924.04	761.938
643	0	141.535	-1991.04	1588.2	246.198	-1998.92	1594.57	119.213	-2151.12	1551.35	236.65	-2162.88	1559.4	199.571	-2175.76	1431.7	196.925	-2277.27	1153.1	200.536	-2022.65	1323.09	215.651	-1924.14	1121.72	274.465	-2274.11	1250.24	45.4222	-2081.36	1379.76	-66.9992	-2074.42	1146.38	-79.157	-2072.43	1050.06	-88.0334	-1977.75	926.588	-40.7761	-1940.88	831.267	-104.209	-1977.96	811.314	-93.8496	-1909.63	761.831
644	0	141.65	-1980.62	1586.88	246.407	-1988.53	1593.4	119.34	-2140.81	1550.06	236.77	-2152.58	1558.09	199.623	-2165.5	1430.61	196.905	-2267.57	1152.26	200.666	-2012.49	1321.57	215.628	-1914.5	1120.02	274.521	-2264.31	1249.34	45.4283	-2071.21	1378.41	-66.5908	-2062.67	1145.01	-78.6482	-2059.94	1048.66	-87.1867	-1964.35	926.023	-39.9851	-1927.38	830.709	-103.392	-1963.78	810.748	-92.686	-1895.31	761.723
645	0	141.678	-1970.38	1585.56	246.63	-1977.96	1592.04	119.434	-2130.48	1548.6	236.922	-2142.27	1556.75	199.738	-2155.11	1429.4	197.059	-2257.82	1151.34	200.776	-2002.22	1320.21	215.751	-1904.7	1118.33	274.65	-2254.28	1248.33	45.4981	-2060.98	1376.91	-66.1473	-2051.05	1143.43	-78.0158	-2047.6	1047.15	-86.1673	-1951.29	925.134	-38.8979	-1913.87	830.302	-102.429	-1949.95	809.92	-91.4067	-1881.11	761.32
646	0	141.86	-1959.96	1583.87	246.621	-1967.63	1590.37	119.708	-2120.16	1546.97	237.188	-2131.77	1555.05	199.955	-2144.7	1428.03	197.317	-2247.87	1150.1	200.77	-1992.01	1318.63	215.669	-1894.8	1116.48	274.942	-2244.22	1247.12	45.6901	-2050.69	1375.28	-65.578	-2039.72	1141.84	-77.3196	-2035.45	1045.59	-85.0089	-1938.22	924.363	-37.4534	-1900.43	829.472	-101.467	-1936.13	809.108	-89.9941	-1867.2	760.701
647	0	142.065	-1949.56	1582.27	246.9	-1957.16	1588.78	120.116	-2109.76	1545.3	237.582	-2121.34	1553.5	200.266	-2134.23	1426.48	197.55	-2237.85	1148.79	201.065	-1981.6	1316.75	215.732	-1884.84	1114.71	275.315	-2234	1245.77	45.8691	-2040.41	1373.76	-64.8379	-2028.4	1140.21	-76.5388	-2023.13	1044.01	-83.7714	-1925.13	923.299	-35.963	-1887.06	828.925	-100.248	-1922.37	808.17	-88.3917	-1853.24	760.179
648	0	142.145	-1939.12	1580.61	246.978	-1946.47	1587.19	120.42	-2099.3	1543.61	237.956	-2110.73	1551.84	200.629	-2123.69	1425.07	197.908	-2227.6	1147.57	201.375	-1971.17	1315.18	215.699	-1874.76	1112.82	275.71	-2223.64	1244.5	46.0572	-2030.04	1372.22	-64.1857	-2017.07	1138.49	-75.7208	-2011.04	1042.49	-82.539	-1912.35	922.23	-34.5953	-1874.07	827.863	-98.9961	-1908.68	807.246	-86.6894	-1839.4	759.497
649	0	142.571	-1928.61	1579.02	247.321	-1935.86	1585.49	120.828	-2088.8	1541.92	238.452	-2100.21	1550.23	201.04	-2113.06	1423.59	198.362	-2217.35	1146.26	201.397	-1960.67	1313.4	215.745	-1864.63	1110.98	276.217	-2213.17	1243.19	46.4087	-2019.71	1370.54	-63.4899	-2006.13	1136.74	-74.7536	-1998.95	1040.59	-81.162	-1899.5	921.119	-32.977	-1861.03	826.762	-97.5528	-1895.18	805.977	-84.9597	-1825.79	758.691
650	0	142.869	-1917.97	1577.24	247.69	-1925.25	1583.74	121.328	-2078.32	1540.17	238.893	-2089.47	1548.3	201.533	-2102.38	1421.95	198.937	-2207.02	1144.81	201.785	-1949.94	1311.73	215.657	-1854.4	1108.96	276.862	-2202.66	1241.64	46.7883	-2009.26	1368.86	-62.7297	-1995.16	1134.94	-73.8029	-1987.11	1038.98	-79.6481	-1886.86	919.776	-31.0954	-1848	826.062	-96.035	-1881.9	804.735	-82.9576	-1812.36	757.772
651	0	143.313	-1907.33	1575.67	248.217	-1914.55	1582.1	121.911	-2067.66	1538.35	239.538	-2078.93	1546.57	202.069	-2091.63	1420.24	199.551	-2196.59	1143.29	202.056	-1939.27	1310.1	215.642	-1843.98	1107.19	277.504	-2192.04	1240.05	47.1636	-1998.76	1367.35	-61.9236	-1984.34	1133.1	-72.7733	-1975.28	1037.1	-78.2321	-1874.36	918.618	-29.3747	-1835.48	824.637	-94.5685	-1868.63	803.59	-80.9514	-1798.99	756.853
652	0	143.913	-1896.62	1573.89	248.776	-1903.65	1580.31	122.453	-2056.88	1536.61	240.062	-2067.91	1544.68	202.668	-2080.77	1418.73	200.227	-2186.03	1141.91	202.438	-1928.37	1308.25	215.567	-1833.51	1105.07	278.248	-2181.22	1238.57	47.5415	-1988.23	1365.81	-61.1813	-1973.42	1131.27	-71.7338	-1963.4	1035.37	-76.6767	-1861.94	917.258	-27.6266	-1822.77	823.69	-92.9071	-1855.62	802.26	-78.8011	-1785.93	755.935
653	0	144.625	-1885.78	1572.09	249.476	-1892.77	1578.51	123.166	-2045.98	1534.97	240.779	-2057.12	1542.98	203.416	-2069.92	1417.12	200.984	-2175.5	1140.4	202.842	-1917.54	1306.57	215.63	-1822.98	1103.21	279.134	-2170.34	1237.04	48.0766	-1977.55	1364.06	-60.4064	-1962.6	1129.55	-70.6056	-1951.79	1033.63	-75.1641	-1849.56	915.967	-25.7521	-1810.48	822.375	-91.0726	-1842.75	801.068	-76.6516	-1772.9	754.813
654	0	145.575	-1874.83	1570.46	250.381	-1881.94	1576.67	123.965	-2035.12	1533.32	241.578	-2046.23	1541.1	204.265	-2059.07	1415.4	201.801	-2164.99	1138.75	203.329	-1906.51	1304.81	215.558	-1812.39	1101.15	279.986	-2159.47	1235.26	48.7706	-1966.95	1362.56	-59.5623	-1951.7	1127.85	-69.4865	-1940.36	1031.9	-73.6673	-1837.61	914.596	-23.6426	-1798.12	821.509	-89.2141	-1830.16	799.655	-74.4146	-1760.2	753.857
655	0	146.44	-1863.88	1568.91	251.384	-1871.01	1574.85	124.746	-2024.11	1531.79	242.394	-2035.37	1539.52	205.043	-2048.16	1413.84	202.626	-2154.26	1137.16	203.808	-1895.43	1303.01	215.524	-1801.62	1099.36	280.856	-2148.43	1233.65	49.5405	-1956.16	1361.05	-58.8453	-1940.73	1126.35	-68.4368	-1928.92	1030.3	-72.2062	-1825.77	913.258	-21.7533	-1785.93	820.366	-87.3149	-1817.72	798.264	-72.2347	-1747.71	752.788
656	0	147.518	-1852.83	1567.34	252.365	-1859.89	1573.3	125.716	-2013.1	1530.36	243.449	-2024.3	1538	205.952	-2037.12	1412.35	203.49	-2143.31	1135.7	204.405	-1884.24	1301.5	215.581	-1790.94	1097.27	281.746	-2137.34	1232.06	50.1899	-1945.28	1359.52	-57.981	-1929.58	1124.89	-67.3126	-1917.52	1028.7	-70.7282	-1814.03	912.002	-20.048	-1773.89	819.536	-85.371	-1805.7	796.969	-70.1228	-1735.45	751.793
657	0	148.549	-1841.84	1565.76	253.385	-1848.73	1571.72	126.981	-2002.1	1528.91	244.671	-2013.18	1536.31	206.936	-2026.11	1410.8	204.47	-2132.29	1134.09	205.134	-1873.08	1299.87	215.609	-1780.08	1095.59	282.692	-2125.99	1230.45	50.9732	-1934.32	1358.26	-57.1908	-1918.48	1123.57	-66.0956	-1906.37	1027.29	-69.1523	-1802.43	910.659	-18.2841	-1762.33	818.222	-83.345	-1794.01	795.512	-68.0566	-1723.56	750.654
658	0	149.726	-1830.87	1564.46	254.604	-1837.65	1570.1	128.199	-1991.25	1527.51	246.052	-2002.13	1534.75	207.961	-2015.04	1409.19	205.303	-2121.14	1132.37	205.947	-1861.8	1298.42	215.667	-1768.96	1093.92	283.577	-2114.73	1228.61	51.87	-1923.18	1357.14	-56.3697	-1907.27	1122.4	-65.0396	-1895.35	1025.89	-67.5992	-1791.23	909.468	-16.4484	-1750.9	817.416	-81.4124	-1782.56	794.187	-65.9568	-1711.98	749.658
659	0	150.946	-1819.8	1563.07	255.794	-1826.52	1568.69	129.581	-1980.21	1526.22	247.397	-1990.83	1533.32	209.01	-2003.84	1407.76	206.081	-2109.78	1130.77	206.548	-1850.38	1297.19	215.886	-1757.55	1092.5	284.407	-2103.26	1226.94	52.9692	-1911.95	1355.97	-55.4687	-1895.72	1121.27	-63.9817	-1884.37	1024.61	-66.2826	-1780.19	908.26	-14.8559	-1739.64	816.601	-79.5212	-1771.38	793.045	-63.948	-1700.66	748.615
660	0	152.199	-1808.86	1561.81	257.139	-1815.33	1567.3	131.127	-1969.2	1524.93	248.872	-1979.57	1531.84	210.204	-1992.73	1406.3	206.824	-2098.25	1129.09	207.44	-1838.96	1295.74	216.031	-1746.03	1091.16	285.239	-2091.76	1225.14	54.057	-1900.66	1355.08	-54.5218	-1884.24	1120.46	-62.8561	-1873.53	1023.49	-64.9923	-1769.33	907.162	-13.0007	-1728.44	815.85	-77.7711	-1760.57	791.753	-62.1005	-1689.63	747.538
661	0	153.534	-1797.88	1560.56	258.673	-1804.18	1566.01	132.619	-1958.36	1523.69	250.502	-1968.48	1530.45	211.444	-1981.7	1404.7	207.525	-2086.51	1127.2	208.456	-1827.52	1294.58	216.541	-1734.3	1090.05	286.036	-2080.16	1223.23	55.1212	-1889.3	1354.27	-53.646	-1872.75	1119.89	-61.797	-1862.87	1022.51	-63.6984	-1758.68	906.032	-11.796	-1717.75	814.806	-76.149	-1749.98	790.535	-60.3107	-1679.02	746.451
662	0	155.135	-1786.87	1559.39	260.145	-1793.15	1564.78	134.263	-1947.45	1522.6	252.166	-1957.44	1529.14	212.799	-1970.78	1403.19	208.263	-2074.63	1125.21	209.495	-1816.29	1293.48	217.249	-1722.42	1089.29	286.877	-2068.56	1221.08	56.4992	-1878	1353.49	-52.6656	-1861.26	1119.23	-60.8168	-1852.14	1021.7	-62.5986	-1748.36	904.885	-10.4691	-1707.34	813.913	-74.1533	-1739.85	789.256	-58.855	-1668.72	745.544
663	0	156.754	-1775.92	1558.6	261.69	-1781.93	1563.88	136.089	-1936.44	1521.68	253.942	-1946.33	1528.14	214.299	-1959.87	1401.97	209.087	-2062.3	1123.43	210.459	-1804.43	1292.76	217.897	-1710.3	1088.82	287.81	-2056.88	1219.1	57.8942	-1867.03	1352.94	-51.8001	-1849.59	1118.78	-59.6797	-1841.5	1020.86	-61.5757	-1738.09	903.943	-9.23438	-1697.05	813.25	-73.2553	-1729.93	788.413	-57.5018	-1658.69	744.325
664	0	158.348	-1765.03	1558.28	263.24	-1770.83	1563.33	137.827	-1925.53	1521.22	255.892	-1935.29	1527.46	215.977	-1948.78	1401.09	210.015	-2049.61	1122.11	211.73	-1792.87	1292.14	218.694	-1698.09	1088.59	288.816	-2045.14	1217.44	59.5081	-1855.82	1352.55	-50.5676	-1837.9	1118.6	-58.6683	-1831.01	1020.52	-60.6243	-1728.02	903	-8.43212	-1687.33	812.503	-72.0275	-1720.15	787.26	-56.3533	-1649.15	743.247
665	0	159.968	-1754.16	1558.43	265.138	-1759.8	1563.21	139.739	-1914.64	1521.01	257.655	-1924.1	1526.98	217.727	-1937.49	1400.43	210.989	-2037.3	1121.14	213.11	-1781.22	1292.06	219.671	-1685.62	1088.76	289.892	-2033.31	1216.17	60.9005	-1844.75	1352.5	-49.3517	-1826.4	1118.57	-57.4774	-1820.6	1020.28	-59.6094	-1718.21	902.433	-7.51229	-1677.87	811.51	-71.1913	-1711.02	786.607	-55.394	-1639.95	742.32
666	0	161.741	-1743.22	1558.94	266.856	-1748.78	1563.58	141.69	-1903.65	1521.14	259.684	-1912.98	1527.09	219.403	-1926.04	1400.41	211.938	-2025.18	1120.68	214.61	-1769.55	1292.37	220.614	-1672.9	1089.4	290.885	-2021.46	1215.44	62.1904	-1833.37	1353.01	-48.0001	-1815.03	1118.91	-56.4915	-1810.4	1020.59	-58.8211	-1708.91	902.133	-6.8589	-1668.79	811.01	-70.2235	-1702.19	786.275	-54.7972	-1631.42	741.576
667	0	163.518	-1732.35	1559.83	268.62	-1737.69	1564.26	143.579	-1892.65	1521.74	261.661	-1901.88	1527.41	221.014	-1914.47	1400.81	212.629	-2013.51	1120.84	216.124	-1757.76	1293.17	221.58	-1660.12	1090.41	291.729	-2009.67	1215.39	63.7203	-1821.71	1353.67	-46.6511	-1803.93	1119.64	-55.1297	-1800.46	1021.05	-57.9667	-1699.69	902.104	-6.29667	-1660.04	810.94	-69.5378	-1694.03	786.087	-54.5585	-1623.38	741.151
668	0	165.373	-1721.47	1561.07	270.413	-1726.68	1565.5	145.61	-1881.75	1522.61	263.727	-1890.63	1528	222.61	-1902.86	1401.63	213.023	-2002.21	1121.68	217.595	-1746.05	1294.04	222.531	-1647.34	1091.65	292.46	-1997.97	1215.85	65.0945	-1809.81	1355.13	-45.1788	-1793.17	1120.73	-53.8161	-1790.86	1022.31	-57.1789	-1691.09	902.41	-5.79372	-1651.72	811.052	-68.8776	-1686.37	786.461	-54.4807	-1615.94	741.051
669	0	167.233	-1710.59	1562.85	272.409	-1715.7	1567	147.735	-1870.79	1523.69	265.803	-1879.5	1528.76	224.032	-1891.29	1402.8	212.982	-1991.03	1122.98	219.132	-1734.55	1295.48	223.499	-1634.82	1093.47	292.992	-1986.37	1216.68	66.5677	-1797.65	1356.93	-43.9307	-1782.81	1122.4	-52.6833	-1781.3	1024.11	-56.5324	-1682.83	903.221	-5.59433	-1643.94	811.438	-68.3331	-1679.28	787.155	-54.7507	-1608.93	741.399
670	0	169.288	-1699.65	1564.89	274.349	-1704.67	1568.83	149.72	-1859.74	1525.24	267.827	-1868.46	1530.2	225.347	-1879.78	1404.48	212.641	-1979.66	1124.79	220.664	-1723.22	1296.87	224.487	-1622.47	1095.53	293.287	-1974.83	1218.07	68.1354	-1785.52	1359.44	-42.6776	-1772.57	1124.54	-51.3348	-1772.03	1026.29	-56.0566	-1674.85	904.41	-5.33369	-1636.54	812.126	-68.0173	-1672.51	788.465	-55.1168	-1602.61	741.941
671	0	171.298	-1688.67	1567.41	276.407	-1693.62	1571.06	151.675	-1848.65	1527.17	269.918	-1857.24	1531.78	226.645	-1868.31	1406.47	212.283	-1968.25	1126.9	222.152	-1711.76	1299.07	225.521	-1610.37	1097.89	293.557	-1963.21	1219.76	69.5978	-1773.24	1362.24	-41.4953	-1762.57	1127.04	-50.1175	-1762.73	1028.86	-55.4618	-1667.08	905.847	-5.26994	-1629.55	813.013	-67.5846	-1666.37	789.869	-55.6062	-1596.68	742.71
672	0	173.368	-1677.82	1569.96	278.498	-1682.73	1573.2	153.657	-1837.66	1529.46	271.904	-1846.31	1533.62	227.883	-1857.12	1408.52	212.174	-1956.34	1128.81	223.641	-1700.4	1301.63	226.779	-1598.78	1100.61	293.712	-1951.75	1221.46	71.0902	-1761.31	1365.18	-40.2404	-1753	1129.76	-48.9295	-1753.8	1031.89	-54.9387	-1659.54	907.69	-5.08783	-1622.96	814.13	-67.5005	-1660.49	791.745	-56.1796	-1591.37	743.8
673	0	175.577	-1666.77	1572.71	280.576	-1671.77	1575.42	155.559	-1826.61	1532.19	273.661	-1835.24	1535.73	229.099	-1846.03	1410.66	212.209	-1943.97	1130.76	224.963	-1689.4	1304.11	227.673	-1587.48	1103.28	293.858	-1940.33	1223.24	72.5212	-1749.64	1368.53	-38.9958	-1743.38	1132.99	-47.8746	-1744.72	1034.99	-54.4785	-1652.19	909.819	-5.02891	-1616.66	815.363	-67.4459	-1654.52	793.936	-56.56	-1586.08	744.904
674	0	177.594	-1655.7	1575.53	282.645	-1660.8	1577.82	157.19	-1815.58	1535.22	275.447	-1824.28	1538.2	230.266	-1835.09	1413.01	212.113	-1931.66	1132.93	226.131	-1678.38	1306.74	228.672	-1576.54	1106.31	294.062	-1928.94	1225.25	73.8791	-1738.21	1371.72	-38.0476	-1733.65	1136.33	-46.8759	-1736.01	1038.28	-54.1327	-1644.94	912.061	-4.94497	-1610.43	816.85	-67.2911	-1648.78	796.243	-56.8809	-1581.18	746.185
675	0	179.621	-1644.78	1578.07	284.614	-1649.92	1579.97	158.935	-1804.64	1538.22	277.21	-1813.51	1540.78	231.452	-1824.3	1415.29	211.935	-1919.3	1135.09	227.319	-1667.64	1309.38	229.652	-1566.02	1109.13	294.395	-1917.58	1227.28	75.3013	-1727.12	1374.79	-36.9883	-1724.16	1139.5	-46.1161	-1727.32	1041.73	-53.8371	-1637.47	914.605	-4.90386	-1604.25	818.654	-67.5608	-1642.86	798.882	-57.0808	-1576.27	747.395
676	0	181.486	-1633.93	1580.57	286.488	-1639.14	1582.01	160.579	-1793.93	1541.18	278.799	-1802.75	1543.22	232.637	-1813.57	1417.32	211.981	-1907.41	1136.97	228.333	-1656.92	1311.88	230.665	-1555.69	1111.9	294.871	-1906.39	1228.97	76.5491	-1716.25	1377.95	-36.0665	-1714.72	1142.95	-45.5394	-1718.85	1045.14	-53.5887	-1630.47	917.038	-4.80054	-1598.33	820.466	-67.8019	-1636.9	801.597	-56.9785	-1571.36	748.644
677	0	183.107	-1623.11	1583.08	288.195	-1628.35	1583.99	161.989	-1783.19	1544.11	280.307	-1792.1	1545.74	233.777	-1802.91	1419.41	212.394	-1896.12	1139.04	229.391	-1646.45	1314.17	231.442	-1545.7	1114.4	295.366	-1895.3	1230.82	77.6945	-1705.56	1380.71	-35.4222	-1705.28	1146.12	-45.0475	-1710.73	1048.31	-53.4507	-1623.41	919.442	-4.9855	-1592.53	822.138	-67.8526	-1630.83	803.993	-56.8762	-1566.54	749.902
678	0	184.837	-1612.42	1585.11	289.82	-1617.69	1585.92	163.346	-1772.44	1546.69	281.584	-1781.34	1547.88	234.773	-1792.36	1421.43	212.837	-1885.27	1141.45	230.071	-1635.99	1316.37	232.311	-1535.65	1116.83	295.89	-1884.35	1232.57	78.5883	-1694.95	1383.29	-34.9456	-1696.07	1148.98	-44.7721	-1702.57	1051.21	-53.4227	-1616.21	921.687	-5.07037	-1586.58	823.73	-68.6393	-1624.62	806.51	-56.7253	-1561.44	750.909
679	0	186.219	-1601.85	1587.16	291.304	-1607.07	1587.49	164.505	-1761.88	1548.84	282.913	-1770.74	1549.53	235.782	-1781.88	1423.22	213.706	-1875.1	1143.37	230.862	-1625.49	1318.33	232.866	-1525.65	1118.8	296.596	-1873.54	1234.2	79.467	-1684.54	1385.71	-34.6285	-1686.75	1151.86	-44.5954	-1694.5	1053.91	-53.5503	-1609.13	923.62	-5.26205	-1580.34	825.328	-69.2467	-1618.28	808.609	-56.3738	-1556.27	751.793
680	0	187.644	-1591.3	1589.14	292.767	-1596.7	1588.96	165.764	-1751.34	1550.73	283.971	-1760.32	1551.02	236.687	-1771.46	1424.89	214.857	-1865.46	1144.86	231.598	-1615.13	1320.26	233.355	-1515.5	1120.83	297.364	-1863.03	1235.78	80.1645	-1674.3	1387.76	-34.3616	-1677.5	1154.28	-44.4534	-1686.65	1056.37	-53.898	-1602.15	925.421	-5.46606	-1574.15	827.082	-69.8278	-1611.85	810.536	-56.3445	-1551.16	752.715
681	0	188.913	-1580.79	1591.12	293.955	-1586.36	1590.6	166.539	-1740.8	1552.43	284.888	-1749.89	1552.39	237.446	-1760.9	1426.69	216.034	-1855.07	1146.91	232.117	-1604.63	1321.92	233.521	-1505.29	1122.61	298.048	-1852.52	1237.61	80.7538	-1664	1389.73	-34.449	-1668.26	1156.61	-44.4741	-1678.77	1058.42	-54.3512	-1595.07	927.066	-5.98626	-1568.09	828.482	-70.6305	-1605.55	812.439	-56.4529	-1545.74	753.51
682	0	189.846	-1570.41	1592.67	295.024	-1576.01	1591.96	167.411	-1730.23	1553.98	285.776	-1739.61	1553.57	238.166	-1750.4	1428.37	217.136	-1844.81	1148.81	232.426	-1594.25	1323.25	233.735	-1494.89	1123.87	298.872	-1842.14	1239.44	81.1798	-1653.85	1391.47	-34.6414	-1658.88	1158.45	-44.5334	-1670.71	1060.09	-54.7636	-1588.02	928.321	-6.61447	-1562.39	829.165	-71.1741	-1599.27	813.694	-56.492	-1540.34	754.031
683	0	190.963	-1560.09	1594.2	296.034	-1565.83	1593.14	168.071	-1719.92	1555.38	286.453	-1729.34	1554.7	238.807	-1739.9	1429.86	218.017	-1834.68	1150.53	232.84	-1583.98	1324.51	233.665	-1484.74	1124.76	299.73	-1832.04	1241.18	81.5497	-1643.8	1392.69	-34.8291	-1649.76	1159.83	-44.7284	-1662.54	1061.67	-55.2801	-1581.02	929.242	-7.03631	-1555.86	830.013	-71.7118	-1593.02	814.868	-56.9889	-1534.72	754.481
684	0	191.804	-1549.88	1595.8	296.898	-1555.66	1594.43	168.798	-1709.59	1556.72	287.05	-1719.03	1555.69	239.352	-1729.45	1431.37	218.803	-1824.63	1152.27	232.823	-1573.52	1325.63	233.441	-1474.63	1125.45	300.582	-1821.84	1242.98	81.8448	-1633.8	1393.81	-35.1269	-1640.8	1161.06	-44.8983	-1654.55	1063.2	-55.8087	-1574.01	930.051	-7.65977	-1549.5	830.555	-72.4189	-1586.81	815.805	-57.6899	-1529.11	754.922
685	0	192.534	-1539.63	1597.21	297.619	-1545.46	1595.71	169.18	-1699.24	1558.02	287.568	-1708.82	1556.79	239.881	-1718.96	1432.88	219.831	-1814.87	1154.09	232.903	-1563.31	1326.88	233.147	-1464.48	1126.09	301.479	-1811.78	1244.87	82.0368	-1623.81	1394.89	-35.3269	-1631.93	1161.87	-45.1408	-1646.31	1064.05	-56.2557	-1566.83	930.665	-8.32506	-1543.07	830.956	-73.0461	-1580.54	816.531	-58.524	-1523.18	755.294
686	0	193.075	-1529.36	1598.48	298.204	-1535.31	1596.83	169.665	-1688.9	1559.26	287.914	-1698.63	1557.79	240.491	-1708.52	1434.4	220.902	-1805.64	1155.87	232.972	-1553	1327.8	232.592	-1454.57	1126.49	302.522	-1801.76	1246.77	82.2141	-1613.92	1395.81	-35.4032	-1623.31	1162.76	-45.3732	-1638.09	1065.26	-56.6465	-1559.86	931.091	-8.85396	-1536.63	831.117	-73.6687	-1574.6	817.187	-59.51	-1517.14	755.657
687	0	193.628	-1519.1	1599.67	298.801	-1525.28	1597.81	170.066	-1678.72	1560.19	288.147	-1688.51	1558.62	241.133	-1698.09	1435.6	221.955	-1796.35	1157.35	232.897	-1542.74	1328.72	232.029	-1444.67	1126.91	303.617	-1791.74	1248.37	82.4404	-1604.2	1396.67	-35.3858	-1615.15	1163.43	-45.4188	-1629.95	1066.24	-56.9826	-1552.82	931.657	-9.50387	-1530.12	831.485	-73.9818	-1568.28	817.705	-60.5374	-1511.08	756.153
688	0	193.985	-1508.92	1600.66	299.163	-1515.01	1598.8	170.237	-1668.46	1561.17	288.487	-1678.21	1559.44	241.697	-1687.62	1436.83	222.933	-1787.05	1158.95	232.88	-1532.6	1329.64	231.499	-1434.93	1127.36	304.694	-1781.76	1250	82.5006	-1594.56	1397.48	-35.3099	-1607.27	1164.36	-45.5239	-1621.82	1067.39	-57.2498	-1545.76	932.306	-10.1244	-1523.66	831.865	-74.759	-1561.82	818.719	-61.634	-1504.85	756.838
689	0	194.269	-1498.71	1601.6	299.295	-1504.77	1599.76	170.482	-1658.07	1561.99	288.724	-1667.94	1560.36	242.255	-1677.24	1438.01	223.827	-1777.72	1160.47	232.72	-1522.38	1330.48	230.677	-1425.42	1127.77	305.872	-1771.86	1251.69	82.6466	-1584.96	1398.46	-35.0932	-1599.49	1165.15	-45.5071	-1613.71	1068.55	-57.5998	-1538.7	933.002	-10.9607	-1517.42	832.284	-76.1966	-1555.24	819.746	-62.8382	-1498.54	757.607
690	0	194.275	-1488.52	1602.27	299.534	-1494.51	1600.48	170.557	-1647.85	1562.59	288.783	-1657.69	1560.92	242.804	-1667.02	1438.94	224.931	-1768.49	1161.66	232.657	-1512.49	1331.13	229.919	-1416.02	1128	306.993	-1761.86	1253.14	82.8046	-1575.45	1399.05	-34.6976	-1592.14	1166.03	-45.3977	-1605.76	1069.46	-57.7603	-1531.61	933.62	-11.567	-1510.94	832.739	-76.3014	-1549.07	820.616	-64.123	-1492.16	758.378
691	0	194.418	-1478.28	1602.67	299.613	-1484.27	1600.93	170.759	-1637.68	1562.91	288.895	-1647.5	1561.33	243.342	-1656.91	1439.67	225.975	-1759.14	1162.77	232.629	-1502.48	1331.56	229.365	-1406.74	1128.26	307.986	-1752.09	1254.18	82.8239	-1566.11	1399.87	-34.4127	-1584.82	1166.83	-45.2221	-1598.08	1070.56	-57.8901	-1524.56	934.26	-12.1867	-1504.49	833.089	-76.7976	-1542.91	821.261	-65.3099	-1485.73	759.164
692	0	194.506	-1467.91	1603.17	299.555	-1473.89	1601.31	170.857	-1627.42	1563.48	289.016	-1637.16	1561.88	243.824	-1646.85	1440.51	227.001	-1749.76	1163.94	232.404	-1492.61	1331.96	228.797	-1397.41	1128.52	308.875	-1742.14	1255.29	82.9393	-1556.8	1400.53	-34.0303	-1577.5	1167.81	-45.0219	-1590.37	1071.56	-58.1187	-1517.51	935.033	-12.8603	-1498.01	833.438	-77.505	-1536.6	822.083	-66.7103	-1479.54	760.099
693	0	194.358	-1457.57	1603.31	299.58	-1463.44	1601.51	170.85	-1617.09	1563.93	289.17	-1626.78	1562.51	244.336	-1636.76	1441.29	228.104	-1740.68	1164.98	232.25	-1482.88	1332.22	228.131	-1388.18	1128.6	309.865	-1732.24	1256.49	83.1542	-1547.48	1401.09	-33.7442	-1570.12	1168.36	-44.903	-1582.77	1072.58	-58.2223	-1510.48	935.467	-13.4949	-1491.49	833.532	-78.2014	-1530.15	822.918	-67.8407	-1473.21	760.484
694	0	194.5	-1447.19	1603.24	299.614	-1453.08	1601.48	171.102	-1606.86	1564.14	289.29	-1616.49	1562.83	244.75	-1626.96	1441.71	229.128	-1731.56	1165.6	232.097	-1473.15	1332.18	227.617	-1379.04	1128.66	310.582	-1722.48	1257.13	83.1651	-1538.27	1401.49	-33.5034	-1562.77	1169	-44.7295	-1575.4	1073.22	-58.485	-1503.5	935.857	-14.1928	-1484.88	833.756	-78.6392	-1523.84	823.265	-68.9383	-1466.79	760.961
695	0	194.361	-1436.95	1603.12	299.619	-1442.72	1601.31	171.061	-1596.67	1564.58	289.256	-1606.14	1563.14	245.114	-1617.18	1442.05	229.961	-1722.69	1166.2	231.863	-1463.52	1332.35	227.23	-1369.89	1128.72	311.248	-1712.85	1257.69	83.1152	-1529.12	1401.78	-33.3966	-1555.3	1169.4	-44.6717	-1567.9	1073.89	-58.8361	-1496.56	936.214	-14.7797	-1478.31	833.958	-78.6638	-1517.78	823.604	-70.1132	-1460.67	761.374
696	0	194.549	-1426.56	1602.91	299.667	-1432.18	1601.12	171.219	-1586.31	1564.87	289.403	-1595.77	1563.4	245.334	-1607.41	1442.3	230.622	-1713.57	1166.71	231.713	-1453.87	1332.41	226.805	-1360.63	1128.7	311.82	-1703.21	1258.08	83.1899	-1520.03	1402.01	-33.4366	-1547.71	1169.74	-44.4899	-1560.42	1074.11	-59.2753	-1489.79	936.254	-15.3871	-1471.59	833.825	-79.2414	-1511.49	823.958	-71.1664	-1454.45	761.488
697	0	194.532	-1416.22	1602.44	299.703	-1421.71	1600.69	171.169	-1575.98	1565.17	289.474	-1585.55	1563.62	245.594	-1597.65	1442.51	231.094	-1704.44	1167.12	231.55	-1444.29	1332.21	226.302	-1351.45	1128.58	312.414	-1693.63	1258.53	83.1403	-1510.76	1402.14	-33.5714	-1539.95	1170.01	-44.33	-1552.98	1074.4	-59.8765	-1482.88	936.171	-15.9253	-1464.78	833.63	-79.6558	-1505.18	824.026	-71.9728	-1448.4	761.197
698	0	194.654	-1405.76	1602.1	299.77	-1411.34	1600.07	171.293	-1565.89	1565.33	289.508	-1575.32	1563.75	245.744	-1588.01	1442.4	231.577	-1695.42	1167.16	231.257	-1434.71	1332.1	225.973	-1342.32	1128.48	312.749	-1684.09	1258.56	82.9955	-1501.69	1402.01	-33.7274	-1532.09	1170.17	-44.1615	-1545.45	1074.51	-60.7596	-1475.9	936.282	-16.7207	-1458.04	833.399	-79.7329	-1499.06	823.669	-72.77	-1442.37	760.898
699	0	194.499	-1395.42	1601.44	299.852	-1400.97	1599.37	171.446	-1555.65	1565.43	289.519	-1564.99	1563.75	245.851	-1578.16	1442.25	231.909	-1686.16	1167.27	231.155	-1425.06	1331.8	225.921	-1332.93	1128.28	312.983	-1674.58	1258.5	82.8269	-1492.36	1401.75	-33.889	-1524.1	1170.11	-43.978	-1537.84	1074.36	-61.5998	-1469.01	936.371	-17.3048	-1451.06	833.052	-79.9633	-1492.84	823.292	-73.695	-1436.41	760.572
700	0	194.532	-1385.06	1600.66	299.761	-1390.48	1598.65	171.361	-1545.48	1565.46	289.633	-1554.66	1563.65	245.867	-1568.38	1442.13	232.071	-1677.1	1167.38	231	-1415.41	1331.24	225.555	-1323.52	1127.73	313.197	-1665.01	1258.67	82.686	-1482.79	1401.41	-33.9687	-1516	1169.94	-43.8884	-1530.24	1074.19	-61.8518	-1462.34	935.573	-17.9354	-1444	832.544	-80.0735	-1486.54	823.08	-74.2914	-1430.3	759.894
701	0	194.493	-1374.74	1599.69	299.722	-1380.08	1597.71	171.462	-1535.25	1565.22	289.619	-1544.44	1563.42	245.805	-1558.6	1441.73	232.138	-1667.78	1167.21	230.792	-1405.81	1330.59	225.325	-1314.12	1126.99	313.239	-1655.35	1258.51	82.5688	-1473.28	1400.78	-34.0803	-1507.66	1169.47	-43.822	-1522.53	1073.83	-62.3926	-1455.44	934.84	-18.6808	-1436.99	831.586	-80.2755	-1480.11	822.616	-74.4506	-1424.31	758.902
702	0	194.582	-1364.43	1598.72	299.71	-1369.73	1596.58	171.421	-1525.1	1564.86	289.651	-1534.24	1562.84	245.754	-1548.71	1441.15	232.153	-1658.67	1166.81	230.623	-1395.96	1329.88	225.305	-1304.79	1126.24	313.188	-1645.88	1258.02	82.2535	-1463.62	1400.31	-34.0202	-1499.12	1168.93	-43.7523	-1514.73	1073.46	-62.8111	-1448.49	934.029	-18.7956	-1430.28	830.726	-79.9718	-1473.88	821.669	-74.8219	-1418.34	758.009
703	0	194.386	-1354.17	1597.7	299.496	-1359.36	1595.52	171.453	-1514.93	1564.37	289.713	-1523.97	1562.42	245.628	-1538.82	1440.51	231.993	-1649.05	1166.44	230.482	-1386.22	1329.2	224.899	-1295.34	1125.25	313.102	-1636.23	1257.56	82.1513	-1453.8	1399.59	-34.0582	-1490.4	1168.21	-43.8716	-1506.6	1072.96	-63.1996	-1441.37	933.271	-19.354	-1423.3	829.857	-80.0878	-1467.46	820.965	-75.3032	-1412.13	756.91
704	0	194.073	-1343.89	1596.48	299.337	-1348.96	1594.36	171.37	-1504.77	1563.67	289.696	-1513.55	1561.76	245.439	-1528.82	1439.84	231.831	-1639.62	1165.88	230.477	-1376.3	1328.15	224.822	-1285.76	1124.12	312.943	-1626.62	1257.04	81.9859	-1443.86	1398.65	-34.2252	-1481.56	1167.63	-44.14	-1498.27	1072.45	-63.4109	-1434.02	932.11	-19.6298	-1416.24	828.674	-80.0188	-1460.84	820.163	-75.4897	-1405.91	755.576
705	0	193.863	-1333.65	1595.12	299.007	-1338.56	1593.03	171.387	-1494.71	1562.66	289.554	-1503.23	1560.72	245.236	-1518.78	1438.83	231.632	-1630.05	1165.13	230.249	-1366.37	1327.04	224.761	-1276.15	1122.99	312.709	-1616.95	1256.24	81.7377	-1433.82	1397.63	-34.4503	-1472.85	1166.87	-44.4419	-1489.99	1071.84	-63.651	-1426.55	931.08	-19.6937	-1408.98	827.685	-80.107	-1454.01	819.216	-75.6372	-1399.63	754.25
706	0	193.416	-1323.34	1593.78	298.785	-1328.19	1591.61	171.239	-1484.56	1561.57	289.48	-1493.02	1559.61	244.889	-1508.77	1437.66	231.285	-1620.31	1164.13	230.175	-1356.37	1326.04	224.624	-1266.42	1121.82	312.342	-1607.27	1255.25	81.4884	-1423.74	1396.63	-34.7489	-1463.77	1166.01	-45.2621	-1480.9	1071.75	-63.8233	-1418.98	930.009	-19.8861	-1402.03	826.56	-79.9517	-1447.09	818.068	-75.6267	-1393.08	752.95
707	0	193.059	-1313.13	1592.34	298.331	-1317.79	1590.29	170.946	-1474.3	1560.34	289.182	-1482.73	1558.46	244.533	-1498.7	1436.57	230.858	-1610.58	1163.14	229.908	-1346.24	1324.82	224.408	-1256.58	1120.47	311.885	-1597.44	1254.25	81.0593	-1413.5	1395.42	-35.1185	-1454.65	1164.92	-45.3772	-1472.56	1070.37	-63.8519	-1411.1	928.651	-19.8473	-1394.79	825.264	-80.1095	-1439.95	817.001	-75.4654	-1386.34	751.551
708	0	192.497	-1302.84	1590.67	297.96	-1307.35	1588.66	170.598	-1463.98	1559.06	288.897	-1472.31	1557.13	244.064	-1488.65	1435.34	230.368	-1600.71	1162.07	229.623	-1336.12	1323.33	224.39	-1246.6	1119.12	311.432	-1587.55	1253.15	80.8025	-1403.16	1393.98	-35.7068	-1445.41	1163.99	-45.9745	-1463.79	1069.41	-63.9963	-1402.92	927.28	-19.8403	-1387.66	823.734	-80.3101	-1432.47	815.738	-75.1957	-1379.48	749.85
709	0	192.071	-1292.56	1588.89	297.389	-1297.05	1586.9	170.188	-1453.82	1557.6	288.472	-1461.97	1555.71	243.501	-1478.66	1433.85	229.826	-1590.73	1160.59	229.424	-1325.93	1321.92	224.131	-1236.54	1117.56	310.826	-1577.69	1251.76	80.3855	-1392.92	1392.63	-36.1964	-1436.07	1162.69	-46.6386	-1454.97	1068.28	-63.9667	-1394.7	925.593	-19.5969	-1380.48	822.03	-80.257	-1425.15	814.159	-74.6661	-1372.43	748.034
710	0	191.411	-1282.15	1587.15	296.874	-1286.65	1585.04	169.803	-1443.53	1556	287.97	-1451.58	1554.27	242.895	-1468.47	1432.38	229.256	-1580.8	1159.14	229.036	-1315.72	1320.26	224.136	-1226.31	1115.96	310.283	-1567.82	1250.41	79.9491	-1382.45	1390.98	-36.7779	-1426.46	1161.26	-46.8899	-1446.02	1066.86	-64.0619	-1386.52	923.97	-19.4685	-1373.08	820.361	-80.4063	-1417.64	812.362	-74.5272	-1365.28	746.052
711	0	190.798	-1271.81	1585.32	295.997	-1276.16	1583.27	168.92	-1433.26	1554.6	287.349	-1441.26	1552.92	242.078	-1458.24	1430.82	228.537	-1570.72	1157.7	228.623	-1305.49	1318.69	223.834	-1215.94	1114.39	309.599	-1557.82	1249.06	79.2182	-1371.97	1389.27	-37.4905	-1416.75	1159.69	-47.24	-1436.92	1065.28	-64.159	-1378.2	922.009	-19.5349	-1365.5	818.508	-80.696	-1409.86	810.82	-74.1214	-1358.07	744.076
712	0	189.995	-1261.27	1583.27	295.224	-1265.75	1581.45	168.227	-1422.87	1553.09	286.522	-1430.89	1551.39	241.244	-1448.18	1429.25	227.811	-1560.45	1156.02	228.07	-1295.04	1317.1	223.736	-1205.5	1112.83	308.748	-1547.79	1247.46	78.6608	-1361.41	1387.45	-38.19	-1406.94	1158.08	-48.097	-1427.88	1063.69	-64.0953	-1369.84	919.931	-19.735	-1357.67	816.762	-80.8159	-1401.96	809.081	-73.9183	-1350.81	741.861
713	0	189.124	-1250.93	1581.37	294.257	-1255.34	1579.56	167.428	-1412.64	1551.39	285.656	-1420.62	1549.79	240.288	-1438.23	1427.43	227.054	-1550.1	1154.13	227.498	-1284.78	1315.4	223.552	-1194.89	1111.34	307.984	-1537.84	1245.64	77.6955	-1350.96	1385.72	-38.9502	-1396.81	1156.3	-48.4839	-1418.78	1061.9	-64.3937	-1361.27	917.908	-19.435	-1349.89	814.416	-80.8821	-1393.95	807.073	-73.4863	-1343.31	739.652
714	0	188.039	-1240.36	1579.44	293.267	-1244.86	1577.81	166.245	-1402.23	1549.77	284.602	-1410.22	1548.45	239.214	-1427.94	1425.72	226.263	-1539.67	1152.34	226.829	-1274.18	1313.95	223.314	-1184.24	1109.88	307.12	-1527.68	1244.08	76.9625	-1340.32	1383.69	-39.6606	-1386.66	1154.43	-48.949	-1409.19	1060.31	-64.8072	-1352.67	915.907	-19.7061	-1341.73	812.378	-81.3324	-1385.61	805.041	-73.3475	-1335.54	737.496
715	0	186.613	-1229.96	1577.54	291.978	-1234.39	1576.14	165.114	-1391.8	1548.33	283.529	-1399.74	1547.18	238.153	-1417.69	1424.08	225.513	-1529.15	1150.59	226.091	-1263.75	1312.35	223.253	-1173.3	1108.56	306.327	-1517.37	1242.59	75.9361	-1329.84	1381.97	-40.3782	-1376.28	1152.46	-49.8166	-1399.88	1058.25	-65.3272	-1343.76	913.947	-19.9785	-1333.17	810.465	-81.7399	-1377.2	803.157	-73.3558	-1327.69	735.013
716	0	185.379	-1219.56	1575.71	290.479	-1223.9	1574.41	163.826	-1381.5	1546.77	282.185	-1389.34	1545.74	236.947	-1407.53	1422.29	224.766	-1518.64	1148.58	225.353	-1253.16	1310.9	223.096	-1162.36	1107.24	305.436	-1507.08	1240.77	75.1287	-1319.44	1379.97	-40.9617	-1365.97	1150.58	-50.228	-1390.27	1056.27	-65.4622	-1334.9	911.465	-20.6114	-1324.44	808.453	-81.7374	-1368.8	801.217	-73.4258	-1319.63	732.741
717	0	183.713	-1209.07	1573.87	288.967	-1213.48	1572.84	162.362	-1371.11	1545.05	280.723	-1378.92	1544.45	235.714	-1397.23	1420.46	223.968	-1507.95	1146.56	224.504	-1242.68	1309.57	222.676	-1151.41	1106.2	304.499	-1496.65	1238.89	73.9887	-1308.93	1378.06	-41.9409	-1355.64	1148.72	-50.5193	-1380.36	1054.28	-66.296	-1325.65	909.675	-20.425	-1316.57	805.695	-82.2931	-1359.79	799.066	-73.6621	-1311.21	730.57
718	0	181.921	-1198.66	1572.05	287.145	-1202.97	1571.35	160.872	-1360.69	1543.48	279.184	-1368.48	1543.25	234.386	-1386.92	1418.84	223.095	-1497.1	1144.59	223.532	-1231.89	1308.26	222.493	-1140.33	1105	303.588	-1486.1	1237.25	72.7353	-1298.49	1376.27	-42.4822	-1345.01	1146.38	-51.5227	-1370.42	1052.38	-66.7626	-1316.26	907.369	-20.7497	-1307.36	803.569	-82.7102	-1350.66	797.03	-73.7608	-1302.51	728.018
719	0	180.145	-1188.27	1570.24	285.355	-1192.36	1569.87	159.145	-1350.3	1542	277.499	-1357.91	1541.94	233.042	-1376.65	1417.13	222.358	-1486	1142.68	222.438	-1221.22	1306.95	222.205	-1129.16	1103.88	302.669	-1475.36	1235.53	71.6399	-1287.97	1374.13	-43.5625	-1334.49	1144.64	-52.1851	-1360.43	1050.24	-67.2013	-1306.43	905.026	-21.1279	-1297.78	801.33	-83.3741	-1341.08	795.08	-74.0319	-1293.66	725.593
720	0	178.06	-1177.9	1568.56	283.312	-1181.94	1568.41	157.282	-1340.01	1540.27	275.707	-1347.53	1540.75	231.656	-1366.27	1415.33	221.692	-1474.88	1140.48	221.505	-1210.47	1305.69	221.767	-1117.96	1102.99	301.745	-1464.53	1233.61	70.2484	-1277.65	1372.15	-44.2369	-1323.77	1142.73	-52.6296	-1350.28	1048.02	-68.0241	-1296.45	903.024	-21.3534	-1288.02	798.889	-83.4748	-1331.36	792.793	-74.1561	-1284.2	723.218
721	0	176.209	-1167.37	1567.07	281.253	-1171.6	1567.09	155.423	-1329.63	1538.75	273.853	-1337.18	1539.61	230.106	-1356.02	1413.6	221.016	-1463.6	1138.22	220.193	-1199.58	1304.74	221.391	-1106.62	1102.27	300.864	-1453.48	1231.71	68.7801	-1267.22	1370.49	-45.198	-1313.65	1140.27	-53.305	-1339.86	1046.04	-68.2726	-1286.23	900.73	-21.792	-1278.13	796.701	-84.0463	-1321.38	790.558	-74.493	-1274.54	720.854
722	0	174.059	-1156.91	1565.61	279.05	-1161.07	1566.02	153.358	-1319.19	1537.32	271.78	-1326.71	1538.55	228.491	-1345.59	1411.95	220.348	-1451.95	1136.17	218.956	-1188.64	1303.54	220.842	-1095.02	1101.68	299.989	-1442.3	1229.9	67.36	-1256.8	1368.42	-46.0186	-1303.26	1138.31	-53.7966	-1329.2	1043.83	-68.9507	-1275.65	898.481	-22.2414	-1267.67	794.731	-84.7873	-1310.79	788.596	-74.9064	-1264.52	718.509
723	0	171.864	-1146.5	1564.04	276.874	-1150.55	1564.86	151.225	-1308.73	1535.83	269.639	-1316.31	1537.46	226.822	-1335.18	1410.24	219.732	-1440.33	1133.75	217.613	-1177.7	1302.69	220.206	-1083.34	1101.29	299.051	-1431.01	1227.9	65.7386	-1246.46	1366.73	-47.0321	-1292.93	1136.03	-54.6055	-1318.47	1041.53	-69.4827	-1264.88	896.282	-22.827	-1257.02	792.518	-85.3984	-1300.02	786.507	-75.3527	-1253.94	716.144
724	0	169.232	-1136.08	1562.66	274.585	-1140.25	1563.86	148.966	-1298.39	1534.4	267.402	-1305.99	1536.47	225.147	-1324.79	1408.47	219.04	-1428.47	1131.32	216.27	-1166.56	1301.97	219.612	-1071.51	1100.98	298.059	-1419.62	1225.73	64.0862	-1236.03	1364.89	-47.9228	-1282.6	1134	-55.155	-1307.55	1039.4	-70.1256	-1253.79	894.202	-23.2641	-1246.16	790.369	-86.1733	-1288.96	784.346	-75.8561	-1243.23	714.068
725	0	167.173	-1125.57	1561.64	272.224	-1129.88	1563.19	146.636	-1287.95	1533.23	265.102	-1295.57	1535.76	223.35	-1314.42	1406.97	218.33	-1416.54	1129.13	214.709	-1155.32	1301.46	218.895	-1059.45	1100.91	297.089	-1408.07	1223.96	62.2559	-1225.57	1363.2	-48.9976	-1272.06	1132.06	-55.8116	-1296.43	1037.14	-70.9194	-1242.59	892.233	-23.8966	-1234.93	788.374	-86.3521	-1277.85	782.262	-76.5349	-1231.99	711.934
726	0	164.788	-1115.06	1560.82	269.825	-1119.37	1562.83	144.324	-1277.38	1532.25	262.76	-1285.01	1535.24	221.496	-1303.79	1405.79	217.61	-1404.5	1127.29	213.098	-1143.99	1301.06	218.243	-1047.18	1101.06	296.189	-1396.59	1222.53	60.4053	-1215.01	1361.72	-50.1382	-1261.46	1130	-56.8703	-1285.15	1035.08	-71.5746	-1231.07	890.065	-24.8295	-1223.07	786.332	-87.3814	-1266.1	780.421	-77.1364	-1220.48	709.843
727	0	162.324	-1104.57	1560.44	267.388	-1108.83	1562.6	141.982	-1266.93	1531.44	260.397	-1274.54	1534.83	219.746	-1293.02	1404.83	217.082	-1392.48	1125.76	211.577	-1132.5	1300.96	217.502	-1034.89	1101.3	295.291	-1385.08	1221.37	58.6897	-1204.27	1360.4	-51.0453	-1250.61	1128.13	-57.2161	-1273.55	1033.12	-72.5427	-1219.32	888.316	-25.6608	-1211.29	784.492	-88.1675	-1254.39	778.421	-77.742	-1208.72	707.925
728	0	159.705	-1094.17	1560.35	264.784	-1098.32	1562.82	139.664	-1256.41	1530.95	257.996	-1263.99	1534.77	217.934	-1282.06	1404.42	216.685	-1380.39	1124.8	210.013	-1120.98	1301.22	216.595	-1022.51	1101.86	294.641	-1373.48	1220.79	56.8833	-1193.45	1359.21	-51.827	-1239.57	1126.54	-57.646	-1261.88	1031.44	-73.3986	-1207.6	886.723	-26.4048	-1199.23	782.912	-88.8978	-1242.52	776.758	-79.0153	-1196.59	706.605
729	0	157.056	-1083.57	1560.7	262.058	-1087.71	1563.59	137.119	-1245.9	1531	255.528	-1253.29	1535.19	216.204	-1270.99	1404.61	216.397	-1368.4	1124.69	208.309	-1109.35	1301.84	215.718	-1010.16	1102.65	293.88	-1361.83	1220.91	55.072	-1182.51	1358.63	-52.5984	-1228.31	1125.32	-58.4719	-1250.24	1030.26	-73.9989	-1195.65	885.512	-27.4163	-1186.55	781.692	-89.4914	-1230.46	775.688	-80.0736	-1184.13	705.43
730	0	154.297	-1073.02	1561.52	259.409	-1077.06	1564.93	134.674	-1235.26	1531.38	253.067	-1242.6	1535.96	214.648	-1259.75	1405.15	216.208	-1356.62	1125.31	206.525	-1097.7	1302.8	214.711	-997.81	1103.83	293.539	-1350.02	1221.89	53.4855	-1171.5	1358.47	-53.1375	-1216.77	1124.33	-58.4628	-1238.12	1029.36	-75.0662	-1183.44	885.012	-28.5864	-1173.64	781.255	-90.1307	-1218.01	775.014	-81.2666	-1171.36	704.885
731	0	151.59	-1062.43	1562.75	256.661	-1066.49	1566.47	132.238	-1224.68	1531.98	250.625	-1231.9	1536.96	213.083	-1248.49	1406.21	216.003	-1344.95	1126.26	204.905	-1086.07	1304.11	213.639	-985.453	1105.23	293.15	-1338.33	1223.08	51.8346	-1160.56	1358.76	-53.7474	-1204.91	1124.02	-58.3949	-1225.97	1028.89	-75.9703	-1171.1	884.945	-29.5467	-1160.69	780.91	-90.8499	-1205.41	774.717	-82.5973	-1158.4	704.943
732	0	148.897	-1051.81	1564.35	254.041	-1055.83	1568.51	129.837	-1213.99	1532.94	248.17	-1221.2	1538.44	211.518	-1237.07	1407.87	215.948	-1332.85	1127.55	203.268	-1074.51	1305.88	212.392	-973.546	1107.21	292.943	-1326.52	1225.02	50.2767	-1149.42	1359.58	-54.1318	-1192.92	1124.32	-58.3243	-1213.64	1029.17	-76.6211	-1158.49	885.433	-30.5984	-1147.27	781.392	-91.4123	-1192.77	775.201	-84.1546	-1145.26	705.725
733	0	145.988	-1041.31	1566.18	251.222	-1045.09	1570.92	127.474	-1203.22	1534.14	245.839	-1210.41	1540.41	210.099	-1225.76	1409.81	216.348	-1320.36	1129.39	201.755	-1063.01	1308.01	211.084	-961.785	1109.52	292.653	-1314.54	1227.44	48.779	-1138.45	1361.08	-54.1313	-1180.8	1124.91	-58.1993	-1201.38	1029.83	-77.5278	-1145.65	886.786	-31.6723	-1133.36	782.557	-92.109	-1179.41	776.282	-85.6213	-1131.65	707.052
734	0	143.382	-1030.8	1568.09	248.607	-1034.43	1573.55	125.208	-1192.51	1535.65	243.526	-1199.59	1542.47	208.864	-1214.37	1411.89	216.525	-1308.32	1131.62	200.291	-1051.77	1310.14	209.922	-950.235	1111.87	292.409	-1302.64	1229.87	47.4366	-1127.48	1362.64	-54.2362	-1168.56	1125.91	-58.1228	-1188.92	1031.02	-78.044	-1132.59	888.215	-32.6888	-1119.2	784.199	-92.193	-1166.05	777.667	-86.7986	-1117.63	708.666
735	0	141.2	-1020.16	1570.07	246.222	-1023.9	1576.1	122.946	-1181.95	1537.23	241.257	-1188.99	1544.8	207.605	-1203.3	1413.99	216.286	-1297.09	1133.41	198.778	-1040.65	1312.39	208.682	-939.192	1114.41	292.065	-1290.82	1232.19	46.2229	-1116.68	1364.56	-54.3699	-1156.31	1127.25	-58.1334	-1176.5	1032.61	-78.5746	-1119.4	890.299	-33.3941	-1105.03	785.986	-92.8254	-1152.23	779.459	-87.9405	-1103.36	710.739
736	0	139.089	-1009.49	1572.09	243.943	-1013.29	1578.69	120.888	-1171.29	1539.07	239.096	-1178.41	1547.26	206.266	-1192.35	1416.18	216.068	-1286.12	1135.56	197.414	-1029.71	1314.85	207.614	-928.515	1117.21	291.567	-1279.19	1234.49	44.819	-1106.03	1366.88	-54.5566	-1144.16	1128.82	-57.9172	-1164.27	1034.47	-79.0949	-1106.07	892.535	-34.2524	-1090.36	788.067	-93.2762	-1137.97	781.567	-88.8225	-1088.74	713.092
737	0	137.206	-998.861	1574.04	242.084	-1002.72	1581.11	119.066	-1160.6	1541.08	237.158	-1167.85	1549.82	204.966	-1181.66	1418.38	215.727	-1274.74	1137.65	196.199	-1018.89	1317.08	206.462	-918.07	1119.64	290.959	-1267.72	1236.75	43.7228	-1095.51	1368.8	-54.6657	-1131.97	1130.59	-58.1295	-1151.77	1036.36	-79.4984	-1092.56	894.758	-34.9788	-1075.48	790.536	-93.6337	-1123.43	783.805	-89.7044	-1073.78	715.505
738	0	135.353	-988.363	1575.97	240.396	-992.315	1583.46	117.298	-1149.98	1543.02	235.359	-1157.38	1552.15	203.708	-1171.11	1420.32	215.231	-1263.6	1139.45	194.902	-1008.23	1319.54	205.489	-907.917	1122.29	290.229	-1256.47	1238.65	42.5372	-1084.89	1370.98	-55.0869	-1119.77	1132.54	-58.655	-1139.39	1038.21	-79.9789	-1078.79	897.072	-35.6739	-1060.87	792.854	-93.6433	-1108.86	785.76	-90.3732	-1058.43	718.068
739	0	134.148	-977.863	1577.8	238.857	-981.997	1585.41	115.656	-1139.51	1545.03	233.724	-1147.06	1554.37	202.421	-1160.74	1422.1	214.587	-1252.78	1141.17	193.797	-997.676	1321.65	204.616	-897.821	1124.89	289.447	-1245.53	1240.45	41.2729	-1074.62	1373.19	-55.8857	-1107.84	1134.54	-59.1495	-1127.35	1039.86	-80.5886	-1065.11	899.514	-35.7765	-1045.41	795.649	-93.6525	-1094.02	787.676	-90.9864	-1042.85	720.443
740	0	132.732	-967.36	1579.62	237.694	-971.625	1587.41	114.214	-1129.01	1546.86	232.258	-1136.76	1556.4	201.14	-1150.45	1423.76	213.693	-1242.16	1142.85	192.638	-987.221	1323.8	203.535	-887.82	1127.3	288.552	-1234.91	1242.34	40.0397	-1064.21	1375.12	-56.6226	-1095.96	1136.15	-60.164	-1114.91	1041.51	-81.1959	-1051.34	901.704	-36.2155	-1030	798.328	-93.7467	-1078.87	789.581	-91.0769	-1026.64	723.118
741	0	131.508	-957.078	1581.25	236.37	-961.297	1589.17	112.992	-1118.61	1548.52	231.043	-1126.41	1558.19	199.884	-1140.05	1425.32	212.842	-1231.61	1144.46	191.589	-976.721	1325.72	202.846	-877.761	1129.45	287.512	-1224.49	1243.95	38.9404	-1053.74	1376.72	-57.8825	-1083.95	1137.85	-61.4376	-1102.39	1043.05	-82.0152	-1037.3	903.766	-36.7577	-1014.3	801.132	-93.7862	-1063.29	791.191	-91.1118	-1010.35	725.531
742	0	130.575	-946.793	1582.67	235.365	-951.112	1590.63	111.919	-1108.47	1549.93	229.984	-1116.19	1559.64	198.71	-1129.86	1426.69	211.922	-1221.41	1145.86	190.77	-966.269	1327.42	202.129	-867.682	1131.22	286.524	-1214.26	1245.43	37.9017	-1043.46	1378.25	-59.2395	-1072.17	1139.58	-62.7654	-1090.28	1044.01	-82.67	-1023.33	905.439	-36.8165	-999.122	803.459	-93.954	-1047.77	792.545	-90.5142	-993.701	727.746
743	0	129.353	-936.739	1584.08	234.26	-940.879	1592.03	111.119	-1098.32	1551.06	229.116	-1105.97	1560.95	197.627	-1119.58	1427.98	210.864	-1211.43	1147.32	189.779	-955.957	1328.85	201.673	-857.528	1132.64	285.477	-1204.29	1246.99	36.8749	-1032.93	1379.54	-60.4625	-1060.44	1140.69	-64.2537	-1077.82	1045.02	-83.3767	-1009.34	907.008	-36.666	-983.498	805.81	-93.9298	-1031.99	793.606	-90.2372	-976.85	729.95
744	0	128.364	-926.69	1585.31	233.11	-930.621	1593.44	110.364	-1088.3	1552.18	228.474	-1095.75	1562.13	196.617	-1109.24	1429.3	209.725	-1201.41	1148.91	189.047	-945.611	1330.02	201.102	-847.378	1133.62	284.341	-1194.49	1248.62	35.9444	-1022.41	1380.76	-62.0243	-1048.84	1141.77	-65.9328	-1065.63	1045.71	-84.07	-995.11	908.386	-36.7777	-968.026	808.113	-94.1952	-1015.96	794.902	-89.664	-959.728	732.038
745	0	127.243	-916.746	1586.35	232.105	-920.397	1594.62	109.761	-1078.38	1553.13	227.85	-1085.51	1563.13	195.755	-1098.85	1430.53	208.696	-1191.65	1150.35	188.506	-935.273	1331.07	200.984	-837.078	1134.3	283.338	-1184.84	1250.23	35.4326	-1011.69	1381.35	-63.5356	-1037.05	1142.64	-67.7264	-1053.11	1046.57	-84.5723	-980.787	909.661	-36.6019	-952.531	810.169	-94.0845	-999.874	795.905	-88.8375	-942.632	734.025
746	0	126.116	-906.932	1587.27	231.002	-910.344	1595.6	109.218	-1068.46	1553.75	227.284	-1075.32	1563.91	194.931	-1088.58	1431.57	207.599	-1181.87	1151.63	187.968	-925.004	1331.92	200.811	-826.87	1134.79	282.353	-1175.23	1251.37	34.787	-1001.17	1382.19	-65.1039	-1025.53	1143.61	-69.171	-1040.88	1046.85	-85.1263	-966.456	910.961	-36.3514	-937.09	812.339	-93.8795	-984.052	796.87	-88.1615	-925.233	736.161
747	0	125.207	-897.053	1588.21	230.073	-900.123	1596.75	108.677	-1058.67	1554.46	226.752	-1065.12	1564.78	194.247	-1078.18	1432.71	206.449	-1172.45	1153.11	187.682	-914.703	1332.75	200.767	-816.694	1135.17	281.378	-1165.6	1252.91	34.3766	-990.331	1382.86	-66.4443	-1014.15	1144.35	-71.0673	-1028.39	1047.51	-85.683	-952.28	912.276	-36.3693	-921.764	814.646	-93.7899	-968.145	797.861	-87.5828	-908.12	738.519
748	0	124.06	-887.223	1589.03	228.983	-889.953	1597.82	108.375	-1048.87	1555.1	226.385	-1054.88	1565.69	193.546	-1067.65	1433.8	205.07	-1163.18	1154.67	187.288	-904.527	1333.34	201.022	-806.503	1135.43	280.27	-1156.08	1254.23	33.8556	-979.507	1383.57	-67.8662	-1002.59	1145.32	-72.4584	-1015.88	1048.23	-86.1223	-937.925	913.552	-36.1829	-906.328	816.801	-93.9128	-952.269	798.846	-87.1401	-891.021	740.925
749	0	123.3	-877.37	1589.65	228.124	-879.815	1598.64	107.986	-1039.05	1555.44	225.971	-1044.7	1566.21	192.918	-1057.33	1434.77	203.797	-1153.95	1155.93	187.277	-894.381	1333.84	201.326	-796.462	1135.59	279.247	-1146.66	1255.46	33.5836	-968.77	1384.23	-69.0832	-991.185	1146.07	-73.9354	-1002.94	1048.75	-86.4424	-923.604	914.937	-36.0762	-891.278	818.893	-93.2394	-936.804	799.728	-86.639	-874.105	743.23
750	0	122.336	-867.438	1590.2	227.105	-869.801	1599.26	107.526	-1029.16	1555.54	225.522	-1034.61	1566.62	192.252	-1047.04	1435.56	202.487	-1144.66	1156.99	187.137	-884.349	1334.23	201.615	-786.599	1135.71	278.037	-1137.19	1256.4	33.3647	-957.893	1384.77	-70.3068	-979.755	1147.06	-75.3356	-990.388	1049.39	-86.7562	-909.374	916.292	-35.9146	-876.231	820.957	-93.1942	-921.322	800.596	-86.1882	-857.434	745.579
751	0	121.583	-857.517	1590.61	226.533	-859.657	1599.84	107.149	-1019.31	1555.87	225.029	-1024.48	1567.06	191.547	-1036.82	1436.4	201.095	-1135.26	1158.14	187.177	-874.436	1334.47	202.123	-776.973	1135.71	276.817	-1127.87	1257.51	33.0533	-946.956	1385.39	-71.2558	-968.204	1147.74	-76.8231	-977.542	1049.97	-86.9185	-895.164	917.629	-35.8894	-861.272	822.965	-93.6023	-905.641	801.857	-86.038	-840.977	747.993
752	0	120.993	-847.53	1590.67	225.703	-849.565	1600.24	106.651	-1009.13	1556.02	224.598	-1014.36	1567.37	190.838	-1026.62	1437.1	199.742	-1125.88	1159.14	187.192	-864.48	1334.58	202.629	-767.531	1135.44	275.581	-1118.53	1258.42	32.8015	-936.156	1385.86	-71.8154	-956.607	1148.17	-77.5276	-964.544	1050.6	-87.0366	-880.827	918.946	-35.813	-846.497	824.685	-93.4572	-890.244	803.135	-85.7771	-824.665	750.02
753	0	120.475	-837.39	1590.67	225.38	-839.457	1600.35	106.093	-999.069	1555.86	224.06	-1004.31	1567.42	190.138	-1016.66	1437.42	198.492	-1116.78	1159.73	187.294	-854.775	1334.48	203.094	-758.42	1135.2	274.329	-1109.29	1258.96	32.5448	-925.39	1386.11	-72.2021	-945.035	1148.61	-78.8068	-951.831	1050.84	-87.1045	-866.656	920.058	-35.4185	-831.594	826.312	-93.7809	-875.08	804.143	-85.514	-808.687	752.025
754	0	120.113	-827.376	1590.55	224.841	-829.391	1600.35	105.816	-988.934	1555.68	223.628	-994.23	1567.43	189.417	-1006.79	1437.74	197.351	-1107.67	1160.26	187.374	-844.973	1334.39	203.675	-749.294	1134.83	273.275	-1100.12	1259.46	32.3338	-914.817	1386.38	-72.753	-933.335	1148.69	-79.3683	-938.981	1051.16	-86.9673	-852.554	921.101	-35.3559	-817.129	827.801	-93.9951	-860.103	805.318	-85.261	-792.87	753.808
755	0	119.686	-817.024	1590.28	224.493	-819.21	1600.31	105.416	-978.752	1555.65	223.194	-983.967	1567.58	188.858	-996.789	1438.11	196.299	-1098.6	1160.87	187.493	-835.296	1334.3	204.026	-740.332	1134.55	272.283	-1090.89	1260.1	32.2303	-904.257	1386.57	-73.174	-921.436	1148.95	-80.2144	-926.171	1051.44	-87.0892	-838.395	922.107	-35.0858	-802.583	829.036	-94.1077	-844.711	806.298	-84.9337	-777.186	755.383
756	0	119.483	-806.776	1589.87	224.222	-808.967	1600.1	104.915	-968.362	1555.41	222.821	-973.914	1567.55	188.237	-986.792	1438.26	195.382	-1089.29	1161.24	187.473	-825.637	1334.06	204.421	-731.326	1134.19	271.366	-1081.59	1260.38	32.0863	-893.707	1386.52	-73.4251	-909.288	1148.9	-81.2608	-913.319	1051.38	-87.0191	-824.49	922.88	-34.7376	-788.21	830.101	-93.745	-829.769	806.896	-84.6448	-761.78	756.725
757	0	119.259	-796.506	1589.34	223.934	-798.871	1599.65	104.633	-958.277	1555.07	222.384	-963.79	1567.38	187.836	-977.092	1438.05	194.583	-1080.27	1161.38	187.792	-815.968	1333.82	204.945	-722.175	1133.96	270.586	-1072.45	1260.43	31.8883	-883.568	1386.46	-73.6678	-897.191	1148.66	-81.6362	-900.699	1051.06	-86.936	-810.543	923.385	-34.5649	-774.148	830.972	-94.4661	-814.681	807.676	-84.0938	-746.438	757.937
758	0	118.991	-786.245	1588.71	223.778	-788.627	1599.21	104.263	-947.938	1554.67	221.95	-953.638	1567.29	187.388	-967.309	1437.87	193.831	-1070.99	1161.51	187.842	-806.335	1333.48	205.185	-713.097	1133.51	269.93	-1063.26	1260.52	31.8615	-873.425	1385.99	-73.9199	-885.028	1148.29	-82.0562	-887.849	1050.9	-86.84	-796.883	923.719	-34.1036	-760.036	831.559	-94.4365	-800.013	807.914	-83.7072	-731.601	758.863
759	0	118.986	-775.811	1587.87	223.68	-778.329	1598.57	103.907	-937.553	1554.37	221.632	-943.453	1567.1	187.061	-957.468	1437.63	193.288	-1061.87	1161.66	187.908	-796.668	1333.07	205.4	-703.823	1132.84	269.434	-1053.91	1260.64	31.9725	-863.208	1385.62	-74.1373	-872.746	1147.83	-82.5443	-874.855	1050.49	-86.7919	-783.034	923.909	-33.5653	-746.088	831.829	-93.9568	-785.496	808.183	-83.1594	-716.759	759.359
760	0	118.88	-765.405	1586.9	223.552	-768.112	1597.75	103.56	-927.293	1553.79	221.439	-933.314	1566.84	186.855	-947.619	1437.23	192.877	-1052.67	1161.68	188.075	-786.998	1332.42	205.81	-694.561	1132	269.092	-1044.6	1260.49	31.9065	-853.178	1384.97	-74.0192	-860.556	1147.09	-82.4475	-862.118	1049.53	-86.656	-769.397	923.827	-33.2149	-732.338	831.832	-94.4742	-770.909	808.204	-82.4579	-702.211	759.64
761	0	118.837	-755.121	1585.89	223.458	-757.957	1596.78	103.621	-917.182	1553.13	221.109	-923.218	1566.31	186.744	-937.861	1436.59	192.442	-1043.5	1161.64	188.101	-777.238	1331.71	206.042	-685.166	1131.2	268.849	-1035.17	1260.17	31.9164	-843.253	1384.37	-74.108	-848.207	1146.24	-82.5781	-849.16	1048.96	-86.2215	-755.949	923.571	-32.5491	-718.686	831.628	-94.0963	-756.767	807.924	-81.9672	-687.844	759.713
762	0	118.873	-744.816	1584.76	223.538	-747.697	1595.88	103.262	-906.709	1552.56	220.884	-913.104	1565.83	186.608	-927.92	1436.07	192.151	-1034.22	1161.57	188.231	-767.515	1330.88	206.343	-675.793	1130.15	268.6	-1025.74	1259.87	32.0247	-833.106	1383.48	-74.1	-835.802	1145.49	-82.6454	-836.241	1048.08	-85.8133	-742.501	923.153	-32.1289	-705.253	831.393	-93.7878	-742.624	807.674	-81.3404	-673.657	759.675
763	0	119.049	-734.409	1583.57	223.753	-737.415	1594.86	103.151	-896.526	1551.81	220.777	-902.893	1565.18	186.584	-917.976	1435.32	192.021	-1024.76	1161.2	188.551	-757.569	1330.04	206.59	-666.191	1129.02	268.548	-1016.12	1259.42	32.1778	-823.134	1382.44	-74.0111	-823.424	1144.45	-82.48	-823.397	1047.24	-85.4337	-729.097	922.862	-31.588	-691.808	831.023	-93.8893	-728.567	807.263	-80.6406	-659.735	759.363
764	0	119.351	-724.089	1582.31	223.887	-727.208	1593.61	103.2	-886.244	1550.75	220.723	-892.828	1564.13	186.772	-907.937	1434.45	192.116	-1015.39	1160.51	188.62	-747.756	1328.99	206.776	-656.75	1127.89	268.585	-1006.57	1258.66	32.1755	-813.199	1381.43	-73.813	-810.972	1143.48	-81.491	-810.774	1045.76	-84.7164	-715.819	922.228	-30.9339	-678.269	830.467	-93.5185	-714.805	806.778	-79.9329	-645.903	759.052
765	0	119.463	-713.682	1581.07	224.138	-716.994	1592.32	103.294	-875.815	1549.64	220.751	-882.587	1563.06	186.837	-897.766	1433.47	192.314	-1006.02	1159.72	188.722	-737.812	1327.8	207.024	-647.19	1126.48	268.754	-996.831	1257.9	32.4461	-803.179	1380.26	-73.4002	-798.544	1142.39	-81.1607	-797.998	1044.61	-84.0557	-702.707	921.676	-30.3519	-665.19	829.791	-92.4017	-701.329	805.712	-79.2328	-632.3	758.461
766	0	119.822	-703.444	1579.53	224.465	-706.666	1591	103.335	-865.49	1548.48	220.945	-872.326	1562.03	187.103	-887.816	1432.46	192.412	-996.262	1159.02	188.993	-727.756	1326.61	207.277	-637.407	1125.19	269.001	-987.12	1257.1	32.7863	-793.059	1379.03	-72.9353	-786.144	1141.11	-80.7115	-785.208	1043.67	-83.2355	-689.486	920.951	-29.5273	-652.025	828.821	-92.2498	-687.706	805.001	-78.4886	-618.749	757.798
767	0	120.104	-693.007	1578.09	224.729	-696.318	1589.53	103.469	-855.069	1547.09	221.177	-862.037	1560.7	187.412	-877.751	1431.11	192.729	-986.669	1158.05	189.225	-717.692	1325.17	207.507	-627.661	1123.57	269.329	-977.049	1256.06	33.0878	-783.037	1377.59	-72.3177	-773.921	1139.81	-80.2239	-772.493	1042.34	-82.2554	-676.307	920.144	-28.7475	-639.256	827.94	-92.2379	-674.216	804.486	-77.6692	-605.382	756.951
768	0	120.504	-682.638	1576.44	225.13	-685.931	1587.85	103.933	-844.783	1545.53	221.533	-851.654	1559.16	187.787	-867.516	1429.76	193.132	-976.852	1156.91	189.66	-707.58	1323.61	207.726	-617.722	1121.99	269.844	-967.186	1254.92	33.3823	-772.957	1376.18	-71.6538	-761.942	1138.31	-79.5229	-759.858	1041.13	-81.3248	-663.349	919.388	-27.9572	-626.591	826.702	-91.7945	-660.802	803.527	-76.5206	-592.266	755.947
769	0	120.943	-672.188	1574.69	225.579	-675.382	1586.26	104.412	-834.387	1544.14	221.944	-841.251	1557.77	188.125	-857.036	1428.31	193.49	-966.948	1155.71	189.869	-697.416	1322.09	207.796	-607.702	1120.22	270.305	-957.049	1253.58	33.7096	-762.974	1374.73	-70.9176	-750.164	1136.89	-78.8163	-747.273	1039.68	-80.1137	-650.356	918.435	-26.854	-613.891	825.65	-91.3141	-647.469	802.673	-75.6698	-579.135	754.931
770	0	121.367	-661.743	1572.91	226.069	-664.817	1584.46	104.886	-823.836	1542.6	222.499	-830.711	1556.25	188.767	-846.791	1426.97	194.01	-956.938	1154.46	190.28	-687.239	1320.34	207.976	-597.536	1118.6	270.952	-946.755	1252.26	34.238	-752.832	1373.09	-70.1362	-738.593	1135.38	-78.1341	-734.816	1038.45	-78.8482	-637.613	917.32	-25.9351	-601.477	824.361	-90.8494	-634.209	801.759	-74.7749	-565.966	754.275
771	0	122.071	-651.25	1571.01	226.76	-654.267	1582.71	105.651	-813.435	1540.92	223.249	-820.182	1554.76	189.533	-836.562	1425.41	194.652	-946.695	1152.95	190.774	-676.964	1318.76	208.102	-587.364	1116.71	271.73	-936.481	1250.56	34.8594	-742.625	1371.64	-69.3872	-727.145	1133.92	-77.2776	-722.493	1036.94	-77.5511	-624.836	916.273	-24.6845	-589.143	823.182	-90.2795	-620.983	801.016	-73.6443	-553.049	753.23
772	0	122.785	-640.674	1569.32	227.509	-643.731	1580.69	106.366	-802.873	1539.42	224.027	-809.675	1553.07	190.326	-826.217	1423.65	195.355	-936.528	1151.32	191.222	-666.615	1317.07	208.266	-577.055	1115.14	272.568	-926.057	1248.72	35.4032	-732.599	1370.2	-68.5567	-716.079	1132.42	-76.4644	-710.363	1035.59	-76.4658	-612.319	915.464	-23.4351	-576.945	821.921	-89.9511	-607.797	800.384	-72.4465	-540.257	752.35
773	0	123.735	-630.112	1567.46	228.482	-633.189	1578.9	107.268	-792.432	1537.9	224.917	-799.155	1551.47	191.206	-816.024	1421.87	196.021	-926.134	1149.62	191.836	-656.188	1315.44	208.358	-566.66	1113.33	273.408	-915.494	1246.93	36.2178	-722.496	1368.55	-67.7923	-705.242	1131.01	-75.6322	-698.379	1034.08	-75.3228	-599.832	914.41	-22.2434	-564.945	820.795	-89.1556	-595.034	799.428	-71.1056	-527.547	751.479
774	0	124.848	-619.453	1565.69	229.587	-622.543	1577.03	108.2	-781.72	1536.34	225.945	-788.57	1549.77	192.112	-805.441	1420.22	196.877	-915.679	1147.79	192.416	-645.719	1313.58	208.352	-556.126	1111.67	274.357	-904.959	1245.02	36.9453	-712.362	1367.06	-67.0515	-694.387	1129.44	-74.9114	-686.57	1032.72	-74.0376	-587.557	913.357	-20.9056	-552.934	819.553	-88.6062	-582.117	798.543	-69.6851	-514.901	750.52
775	0	126.124	-608.87	1563.93	230.824	-612.035	1574.99	109.461	-771.281	1534.66	227.13	-778.085	1547.91	193.252	-795.11	1418.27	197.762	-905.125	1145.7	193.176	-635.261	1311.88	208.463	-545.516	1109.87	275.396	-894.348	1242.86	37.88	-702.264	1365.34	-66.2268	-683.825	1127.87	-74.0926	-675.084	1031.23	-72.9099	-575.684	912.252	-19.5273	-541.125	818.411	-87.7325	-569.47	797.685	-68.1175	-502.419	749.594
776	0	127.508	-598.294	1562.18	232.288	-601.424	1573.12	110.717	-760.676	1533.03	228.388	-767.524	1546.08	194.431	-784.841	1416.18	198.739	-894.57	1143.59	193.86	-624.71	1310	208.495	-534.809	1108.09	276.434	-883.711	1240.56	38.7159	-692.002	1363.98	-65.4682	-673.219	1126.39	-73.2636	-663.979	1029.91	-71.7548	-563.781	911.217	-18.3476	-529.604	817.352	-86.7733	-557.171	796.622	-66.6654	-490.162	748.722
777	0	129.107	-587.681	1560.53	233.799	-590.908	1571.24	112.117	-750.059	1531.56	229.896	-756.894	1544.34	195.663	-774.292	1414.4	199.599	-883.67	1141.62	194.626	-614.077	1308.29	208.426	-523.953	1106.36	277.496	-872.884	1238.4	39.7143	-681.624	1362.53	-64.6809	-662.845	1125	-72.5234	-652.927	1028.51	-70.6744	-552.259	910.14	-17.1042	-518.088	816.262	-85.8432	-545.005	795.706	-65.1328	-478.044	748.028
778	0	130.762	-577.19	1558.98	235.486	-580.267	1569.36	113.745	-739.477	1530.15	231.537	-746.34	1542.57	197.03	-763.688	1412.54	200.562	-872.82	1139.5	195.515	-603.454	1306.43	208.553	-513.016	1104.49	278.572	-862.031	1236.24	40.9929	-671.168	1360.89	-63.8904	-652.406	1123.77	-71.5485	-642.214	1027.2	-69.6983	-540.953	909.089	-15.8404	-506.636	815.284	-84.7963	-533.237	794.644	-63.8103	-466.206	747.148
779	0	132.476	-566.544	1557.45	237.191	-569.964	1567.38	115.413	-728.878	1528.69	233.274	-735.756	1540.7	198.455	-753.224	1410.63	201.475	-861.751	1137.22	196.52	-592.724	1304.73	208.653	-501.969	1102.88	279.648	-851.185	1233.88	42.2024	-660.625	1359.58	-63.2762	-641.982	1122.62	-70.8832	-631.563	1026.02	-68.7124	-529.936	908.034	-14.8289	-495.535	814.379	-83.6407	-521.974	793.707	-62.5456	-454.645	746.477
780	0	134.369	-555.951	1556.04	239.044	-559.403	1565.62	117.385	-718.44	1527.21	235.092	-725.163	1539.04	199.963	-742.554	1408.81	202.335	-850.599	1135.03	197.616	-581.992	1303.23	208.812	-490.826	1101.31	280.629	-840.185	1231.55	43.3094	-649.964	1358.68	-62.6282	-631.618	1121.72	-70.0986	-621.211	1024.88	-68.1192	-519.241	907.234	-14.0543	-484.455	813.97	-82.744	-510.982	792.739	-61.5543	-443.456	745.969
781	0	136.394	-545.372	1554.67	241.159	-548.73	1564.16	119.205	-707.795	1525.94	237.026	-714.597	1537.37	201.502	-731.965	1406.99	203.168	-839.209	1132.86	198.752	-571.193	1301.78	209.101	-479.538	1100.03	281.659	-829.061	1229.29	44.7951	-639.283	1357.47	-61.9516	-621.118	1121.03	-69.3338	-610.87	1023.95	-67.4832	-508.843	906.33	-13.1182	-473.82	813.28	-81.6266	-500.473	791.866	-60.7887	-432.535	745.301
782	0	138.399	-534.712	1553.38	243.271	-538.14	1562.47	121.228	-697.205	1524.69	239.112	-703.966	1535.76	203.19	-721.38	1405.11	204.04	-827.623	1130.42	200.117	-560.317	1300.42	209.551	-468.068	1098.72	282.656	-817.85	1226.72	46.1713	-628.51	1356.61	-61.2343	-610.662	1120.38	-68.592	-600.735	1022.96	-66.8585	-498.754	905.397	-12.5967	-463.18	812.593	-80.8022	-490.267	791.032	-60.0843	-421.957	744.753
783	0	140.57	-524.162	1552.01	245.398	-527.562	1560.66	123.395	-686.634	1523.5	241.265	-693.357	1534.24	205.019	-710.852	1403.26	204.86	-815.888	1127.88	201.376	-549.468	1299.16	210.014	-456.53	1097.67	283.748	-806.596	1224.06	47.691	-617.939	1355.77	-60.6025	-599.972	1120.04	-67.7901	-590.71	1022.3	-66.4868	-488.712	904.632	-12.1981	-452.623	812.196	-79.4153	-480.616	789.725	-59.6042	-411.756	744.196
784	0	142.787	-513.442	1550.9	247.726	-516.811	1559.34	125.484	-675.991	1522.52	243.472	-682.711	1533	206.889	-700.364	1401.58	205.821	-803.913	1125.52	202.816	-538.539	1297.98	210.696	-444.736	1096.96	284.922	-795.276	1221.6	49.419	-607.222	1355.08	-59.7227	-589.344	1119.72	-67.044	-580.699	1021.85	-66.087	-478.985	903.886	-11.9011	-442.255	811.759	-79.2347	-470.988	789.036	-59.3694	-401.872	743.507
785	0	145.006	-502.773	1550.17	250	-505.984	1558.33	127.677	-665.294	1521.92	245.758	-671.909	1531.87	208.847	-689.777	1400.05	206.67	-791.793	1123.28	204.334	-527.422	1297.15	211.403	-432.886	1096.22	286.045	-783.876	1219.12	51.1428	-596.457	1354.57	-58.7569	-578.632	1119.42	-66.2235	-570.675	1021.46	-65.7934	-469.418	903.081	-11.9627	-432.025	811.222	-78.2458	-461.954	787.927	-59.4385	-392.462	742.818
786	0	147.252	-491.992	1549.78	252.217	-495.264	1557.6	130.13	-654.63	1521.3	248.072	-661.039	1530.93	210.848	-679.175	1398.72	207.458	-779.624	1121.24	206.108	-516.179	1296.74	212.122	-421.001	1095.92	287.143	-772.428	1216.79	53.0125	-585.73	1354.21	-57.6718	-568.055	1119.32	-65.2649	-560.892	1021.26	-65.7192	-460.166	902.411	-12.1847	-422.787	810.787	-77.7115	-453.414	787.084	-59.7419	-383.519	741.981
787	0	149.56	-481.233	1549.77	254.534	-484.288	1557.31	132.375	-643.692	1521.03	250.425	-650.139	1530.35	212.945	-668.307	1398.03	208.059	-767.534	1119.88	207.608	-504.873	1296.53	212.822	-408.882	1096.08	288.12	-760.834	1215.03	54.649	-574.678	1354.38	-56.5091	-557.513	1119.55	-64.3344	-551.209	1021.56	-65.5216	-451.087	902.039	-12.6249	-413.641	810.436	-77.8738	-445.123	786.667	-60.4541	-375.127	741.476
788	0	151.825	-470.275	1550.18	256.952	-473.315	1557.46	134.635	-632.72	1521.28	252.847	-639.078	1530.23	214.78	-657.144	1397.67	208.455	-755.459	1119.34	209.232	-493.512	1296.82	213.525	-396.543	1096.57	288.909	-749.275	1213.89	56.3901	-563.435	1355.07	-55.3169	-547.091	1120.22	-63.5875	-541.607	1022.18	-65.6188	-442.361	902.1	-12.9935	-404.633	810.246	-77.8409	-437.295	786.474	-61.3835	-367.215	741.156
789	0	154.106	-459.423	1551.01	259.131	-462.364	1558.02	137.107	-621.762	1521.68	255.244	-628.002	1530.38	216.711	-645.964	1398.08	208.8	-743.794	1119.36	211.007	-481.984	1297.27	214.255	-384.184	1097.39	289.677	-737.736	1213.44	58.1197	-551.71	1356.09	-54.1426	-536.93	1121.26	-62.6989	-532.185	1023.31	-65.6241	-433.929	902.443	-13.8276	-396.325	810.578	-77.9508	-430.038	786.804	-62.5768	-359.893	741.016
790	0	156.399	-448.327	1552.36	261.509	-451.337	1558.95	139.334	-610.757	1522.58	257.584	-616.929	1530.78	218.141	-634.434	1398.42	208.853	-732.312	1119.89	212.683	-470.493	1298.11	215.163	-371.837	1098.54	290.063	-726.297	1213.55	59.8352	-539.689	1357.66	-52.9996	-526.789	1122.76	-61.9182	-522.986	1024.83	-65.7189	-425.977	903.24	-14.384	-388.243	811.077	-77.581	-423.443	787.296	-63.8726	-353.264	741.284
791	0	158.712	-437.304	1554.01	263.843	-440.316	1560.22	141.518	-599.698	1523.87	259.805	-605.806	1531.63	219.528	-622.957	1399.52	208.532	-720.865	1121.01	214.332	-459.077	1299.39	216.202	-359.701	1099.94	290.203	-714.976	1214.17	61.4286	-527.476	1359.67	-52.0181	-516.707	1124.68	-61.1352	-513.87	1026.71	-65.7779	-418.174	904.093	-15.1437	-380.594	811.81	-77.8927	-417.025	788.278	-65.1951	-347.121	741.695
792	0	160.972	-426.122	1555.85	266.208	-429.216	1561.71	143.602	-588.484	1525.63	262.033	-594.643	1532.91	220.777	-611.466	1401.14	207.958	-709.213	1122.62	215.904	-447.583	1300.89	217.312	-347.636	1101.64	290.044	-703.599	1215.3	63.0475	-515.033	1361.86	-50.8582	-506.807	1126.8	-60.4335	-504.923	1029.07	-66.0367	-410.731	905.362	-15.8873	-373.53	812.633	-78.5592	-411.013	789.742	-66.829	-341.555	742.405
793	0	163.406	-414.973	1558	268.634	-418.146	1563.25	145.741	-577.303	1527.74	264.087	-583.583	1534.32	221.905	-600.063	1402.81	207.385	-697.192	1124.2	217.512	-436.315	1302.44	218.634	-335.687	1103.49	289.805	-692.3	1216.6	64.4561	-502.738	1364.41	-49.8973	-496.88	1129.32	-59.7219	-496.035	1031.63	-66.2663	-403.408	906.755	-16.5309	-366.957	813.404	-78.9755	-405.165	791.326	-68.3004	-336.233	743.132
794	0	165.701	-403.772	1560.29	270.878	-407.204	1564.8	147.714	-566.091	1530.04	266.054	-572.592	1536.09	222.959	-588.905	1404.55	206.917	-684.811	1125.79	218.819	-425.19	1304.51	219.906	-323.961	1105.64	289.536	-681.091	1218.04	66.0049	-490.562	1366.94	-48.9816	-486.974	1132.13	-59.0786	-487.29	1034.58	-66.3362	-396.291	908.407	-17.2668	-360.693	814.386	-79.1479	-399.791	793.032	-69.6509	-331.316	743.987
795	0	167.981	-392.671	1562.69	273.049	-396.187	1566.76	149.397	-554.963	1533.02	267.863	-561.531	1538.3	223.841	-577.795	1406.67	206.179	-672.274	1127.65	220.068	-414.136	1306.59	221.188	-312.517	1108.17	289.09	-669.738	1219.62	67.4452	-478.659	1369.68	-48.2405	-477.014	1135.19	-58.4917	-478.597	1037.71	-66.5448	-389.259	910.435	-17.9529	-354.754	815.421	-79.8825	-394.416	795.149	-70.8632	-326.646	744.956
796	0	169.979	-381.489	1565.38	275.111	-385.147	1568.88	151.027	-543.77	1536.02	269.527	-550.58	1540.7	224.772	-566.787	1408.91	205.332	-659.838	1129.67	221.404	-403.134	1308.96	222.587	-301.46	1110.64	288.959	-658.481	1221.48	68.6774	-466.931	1372.63	-47.4452	-467.175	1138.33	-58.1401	-470.096	1040.96	-66.7733	-382.301	912.521	-18.5978	-349.035	816.644	-81.0112	-388.846	797.568	-71.8258	-322.131	746.052
797	0	171.644	-370.427	1567.92	276.937	-374.246	1570.95	152.471	-532.798	1538.93	271.036	-539.605	1543.02	225.622	-555.872	1410.91	204.784	-648.176	1131.66	222.454	-392.238	1311.32	223.831	-290.642	1113.29	288.727	-647.304	1223.1	69.7124	-455.575	1375.48	-46.7395	-457.384	1141.57	-57.7564	-461.776	1044.27	-67.0381	-375.553	914.711	-19.3133	-343.551	818.143	-81.7872	-383.631	799.965	-72.7405	-317.914	747.094
798	0	173.255	-359.495	1570.46	278.561	-363.392	1573.26	153.861	-521.803	1541.68	272.338	-528.824	1545.42	226.368	-544.986	1412.96	204.627	-637.204	1133.66	223.599	-381.417	1313.82	225.022	-279.988	1116.12	288.663	-636.113	1224.9	70.7099	-444.427	1378.32	-46.2352	-447.577	1144.85	-57.5633	-453.538	1047.51	-67.4802	-368.895	917.205	-19.9413	-338.265	819.949	-83.2003	-378.286	802.551	-73.5147	-313.767	748.335
799	0	174.617	-348.776	1572.99	279.882	-352.575	1575.51	155.015	-510.851	1544.45	273.544	-517.932	1547.87	227.178	-534.077	1415.17	204.816	-626.663	1135.9	224.315	-370.76	1316.19	226.02	-269.476	1118.7	288.798	-625.022	1226.93	71.5837	-433.396	1381.07	-45.9053	-437.874	1148.07	-57.4288	-445.467	1050.72	-67.9158	-362.245	919.579	-20.6486	-333.025	821.699	-83.4354	-372.769	804.944	-74.2113	-309.562	749.565
800	0	175.765	-337.722	1575.35	281.137	-341.745	1577.61	156.038	-499.936	1546.81	274.636	-507.059	1550.07	227.936	-523.203	1417.39	205.396	-616.447	1138.29	225.249	-360.054	1318.31	226.79	-259.1	1121.03	289.153	-614.005	1228.98	72.4183	-422.47	1383.55	-45.7955	-428.267	1151.25	-57.3363	-437.452	1053.83	-68.335	-355.589	921.736	-21.1302	-328.112	823.099	-84.2973	-367.318	807.322	-74.7526	-305.381	750.484
801	0	176.799	-327.146	1577.22	282.07	-331.003	1579.41	156.951	-489.209	1548.82	275.467	-496.303	1551.89	228.613	-512.374	1419.37	206.184	-606.33	1140.63	225.778	-349.521	1320.16	227.219	-249.054	1122.82	289.487	-603.072	1230.86	73.0343	-411.622	1385.84	-45.6268	-418.586	1153.95	-57.3121	-429.477	1056.5	-68.8336	-348.967	923.835	-21.8535	-322.908	824.367	-85.4904	-361.847	809.469	-75.2718	-301.241	751.31
802	0	177.646	-316.08	1579.5	282.918	-320.265	1581.32	157.545	-478.421	1550.77	276.067	-485.602	1553.64	229.108	-501.573	1421.37	206.866	-596.034	1142.92	226.403	-338.927	1321.93	227.427	-238.831	1124.49	289.74	-592.416	1232.98	73.4987	-400.968	1387.89	-45.6407	-409.002	1156.36	-56.9867	-421.267	1058.9	-69.4528	-342.334	925.514	-22.7189	-317.662	825.571	-86.8324	-356.383	811.451	-76.0119	-296.985	752.068
803	0	178.234	-305.418	1581.2	283.562	-309.569	1582.94	157.946	-467.585	1552.67	276.519	-474.964	1555.38	229.477	-490.8	1423.46	207.351	-585.356	1145.15	226.677	-328.492	1323.42	227.445	-228.695	1125.93	290.234	-581.815	1235.22	73.7906	-390.291	1389.7	-45.7198	-399.53	1158.42	-57.1292	-413.093	1061.13	-70.0524	-335.694	926.882	-23.709	-312.409	826.502	-88.0548	-350.992	813.213	-76.7951	-292.72	752.633
804	0	178.909	-294.664	1582.83	284.1	-298.958	1584.5	158.233	-456.821	1554.34	276.845	-464.303	1556.85	229.858	-480.109	1425.34	207.785	-574.993	1147.21	226.526	-318.094	1324.8	227.201	-218.76	1126.87	290.788	-571.361	1237.32	74.1135	-379.979	1391.23	-45.7878	-390.233	1160.13	-57.5696	-405.046	1063.27	-70.6626	-329.006	927.904	-24.7056	-307.147	827.051	-88.7103	-345.851	814.509	-77.6873	-288.413	752.966
805	0	179.106	-283.959	1584.37	284.461	-288.425	1585.9	158.446	-446.098	1555.91	276.923	-453.8	1558.24	230.069	-469.464	1427.1	208.384	-565.008	1149.2	226.646	-307.71	1325.96	226.726	-208.952	1127.6	291.411	-561.133	1239.32	74.1879	-369.781	1392.57	-45.8651	-381.22	1161.64	-57.5713	-396.714	1064.89	-71.2296	-322.291	928.831	-25.6525	-301.618	827.513	-89.8139	-340.551	815.528	-78.7177	-284.135	753.2
806	0	179.326	-273.407	1585.83	284.715	-277.89	1587.44	158.387	-435.328	1557.5	276.944	-443.211	1559.84	230.274	-458.867	1429.04	209.204	-555.459	1151.38	226.24	-297.462	1327.32	225.906	-199.23	1128.31	292.016	-550.845	1241.56	73.9779	-359.576	1394	-45.8814	-372.454	1162.82	-57.7007	-388.327	1066.49	-71.8998	-315.665	929.696	-26.6921	-295.932	828.105	-90.6098	-335.403	816.629	-80.0518	-279.758	753.558
807	0	179.389	-262.614	1587.57	284.861	-267.38	1588.99	158.311	-424.716	1559.14	276.792	-432.66	1561.42	230.465	-448.229	1430.76	210.192	-546.065	1153.52	225.913	-287.272	1328.6	225.066	-189.514	1129.04	292.795	-540.691	1243.84	73.8636	-349.77	1395.16	-45.9022	-364.112	1163.78	-57.3475	-379.911	1067.71	-72.3166	-309.086	930.299	-27.825	-290.349	828.534	-91.5676	-330.27	817.581	-81.4258	-275.181	753.927
808	0	179.47	-252.204	1588.83	284.73	-256.866	1590.3	157.998	-413.996	1560.64	276.595	-422.143	1562.84	230.663	-437.794	1432.45	211.122	-536.441	1155.39	225.536	-277.138	1329.79	224.048	-179.99	1129.61	293.712	-530.624	1245.89	73.5967	-340.147	1396.31	-45.7991	-356.131	1164.49	-57.2666	-371.869	1068.75	-72.903	-302.587	931.034	-29.0768	-284.612	829.011	-92.5836	-325.044	818.501	-82.9557	-270.63	754.325
809	0	179.359	-241.558	1590.16	284.507	-246.385	1591.55	157.697	-403.6	1561.96	276.168	-411.75	1564.26	230.828	-427.313	1434.02	211.955	-527.163	1157.28	224.955	-267.122	1330.88	222.934	-170.473	1130.13	294.529	-520.481	1247.84	73.2195	-330.587	1397.43	-45.6205	-348.226	1165.31	-57.4682	-364.188	1070.1	-73.4577	-296.156	931.781	-30.4203	-278.897	829.468	-93.9032	-319.658	819.526	-84.628	-265.816	754.849
810	0	179.057	-231.007	1591.16	284.208	-235.882	1592.76	157.379	-392.974	1563.32	275.885	-401.229	1565.73	231.037	-416.984	1435.54	212.756	-517.684	1159.01	224.208	-257.229	1331.78	221.742	-160.644	1130.77	295.432	-510.308	1249.69	72.9322	-321.16	1398.47	-45.3487	-340.531	1166.11	-57.2834	-356.444	1071.22	-73.983	-289.708	932.484	-31.3851	-273.435	829.464	-94.6648	-314.304	820.622	-86.3054	-261.024	755.392
811	0	178.425	-220.58	1591.98	283.776	-225.311	1593.77	157.005	-382.612	1564.45	275.524	-390.765	1566.99	231.309	-406.756	1436.94	213.771	-508.281	1160.56	223.492	-247.392	1332.5	220.447	-151.197	1131.14	296.395	-500.266	1251.44	72.6613	-311.944	1399.28	-45.0781	-332.935	1167.06	-57.1048	-348.828	1072.43	-74.4611	-283.25	933.268	-32.4418	-267.709	829.765	-95.7312	-308.873	821.688	-87.9276	-256.007	756.011
812	0	177.831	-210.163	1592.65	283.165	-214.847	1594.46	156.581	-372.243	1565.4	275.199	-380.274	1568.11	231.469	-396.667	1438.01	214.652	-498.917	1161.91	222.789	-237.638	1333.07	219.224	-141.71	1131.51	297.22	-490.3	1252.81	72.24	-302.869	1400.1	-44.8962	-325.431	1167.95	-56.852	-341.464	1073.4	-74.8592	-276.809	933.852	-33.4809	-261.833	830.101	-96.628	-303.643	822.408	-89.4525	-250.857	756.635
813	0	177.2	-199.852	1593.14	282.523	-204.406	1595.02	156.285	-361.918	1566.28	274.671	-369.906	1569.17	231.58	-386.779	1439.03	215.476	-489.576	1163.03	221.951	-228.03	1333.58	217.951	-132.157	1132	298.021	-480.383	1254.07	71.8485	-293.965	1400.84	-44.9237	-318.042	1168.8	-56.645	-334.334	1074.39	-75.4042	-270.424	934.481	-34.4544	-255.847	830.332	-97.3713	-298.147	823.246	-91.1314	-245.729	757.214
814	0	176.844	-189.411	1593.66	281.902	-193.944	1595.59	155.657	-351.663	1567.13	274.14	-359.497	1570.12	231.663	-376.911	1440.04	216.174	-480.214	1164.18	221.083	-218.409	1334.07	216.693	-122.793	1132.55	298.604	-470.352	1255.2	71.305	-285.005	1401.49	-45.1986	-310.753	1169.54	-56.7454	-327.225	1075.32	-76.0253	-264.01	935.091	-35.3242	-249.819	830.615	-97.9161	-292.48	824.258	-92.6201	-240.257	757.795
815	0	176.021	-179.137	1593.92	281.282	-183.558	1595.93	155.167	-341.516	1567.9	273.704	-349.24	1570.87	231.568	-367.082	1440.63	216.844	-470.81	1164.89	220.289	-208.859	1334.46	215.511	-113.309	1133.04	299.096	-460.549	1256.06	70.6548	-276.308	1402.29	-45.5999	-303.51	1170.07	-56.705	-320.239	1075.92	-76.6905	-257.731	935.617	-36.4088	-243.622	830.789	-98.4823	-286.874	824.98	-93.921	-234.768	758.221
816	0	175.507	-168.925	1594.23	280.675	-173.204	1596.13	154.771	-331.382	1568.48	273.277	-338.997	1571.48	231.38	-357.5	1441.06	217.473	-461.509	1165.51	219.347	-199.428	1334.96	214.229	-103.936	1133.76	299.541	-450.806	1256.58	69.9454	-267.61	1402.71	-46.0148	-296.324	1170.63	-56.7569	-313.443	1076.37	-77.5917	-251.39	936.151	-37.7038	-237.486	831.002	-99.395	-280.963	825.39	-95.14	-229.172	758.642
817	0	174.501	-158.757	1594.41	279.932	-162.936	1596.36	154.262	-321.286	1569.16	272.746	-328.746	1572.14	231.178	-347.917	1441.5	217.806	-452.119	1166.05	218.302	-190.001	1335.39	213.087	-94.743	1134.33	299.772	-441.144	1257.16	69.1191	-258.775	1403.09	-46.6816	-289.231	1171.15	-56.9282	-306.505	1076.81	-78.6084	-245.017	936.517	-38.766	-231.112	831.31	-99.9336	-274.979	825.707	-96.3491	-223.403	758.899
818	0	173.752	-148.639	1594.51	279.181	-152.654	1596.41	153.74	-311.315	1569.63	272.187	-318.559	1572.51	230.902	-338.433	1441.96	217.975	-442.694	1166.37	217.395	-180.493	1335.56	212.005	-85.8107	1134.48	299.93	-431.46	1257.62	68.2508	-249.975	1403.33	-47.2865	-282.184	1171.35	-57.1672	-299.56	1077.02	-79.5792	-238.494	936.481	-39.5972	-224.347	831.362	-100.499	-268.872	825.949	-97.2544	-217.367	758.956
819	0	173.131	-138.718	1594.4	278.354	-142.494	1596.2	153.089	-301.422	1569.89	271.608	-308.5	1572.68	230.371	-328.734	1441.91	218.108	-433.278	1166.42	216.509	-171.062	1335.45	210.944	-76.5807	1134.58	299.819	-421.723	1257.77	67.4264	-241.1	1403.17	-47.82	-275.12	1171.36	-57.4151	-292.515	1076.91	-80.5108	-232.009	936.137	-40.2099	-217.39	831.208	-100.692	-262.857	825.744	-98.063	-211.241	758.567
820	0	171.859	-128.828	1594.11	277.421	-132.425	1595.95	152.444	-291.671	1569.97	270.964	-298.528	1572.9	229.773	-319.203	1441.87	218.071	-423.914	1166.39	215.439	-161.63	1335.32	209.934	-67.3079	1134.45	299.54	-412.137	1257.71	66.5239	-232.162	1402.78	-48.3699	-267.938	1171.11	-57.8419	-285.409	1076.68	-81.6252	-225.377	935.97	-41.048	-210.383	830.869	-101.341	-256.474	825.373	-98.9997	-204.989	758.016
821	0	170.973	-119.049	1593.81	276.417	-122.414	1595.65	151.761	-281.917	1570	270.345	-288.547	1572.99	229.169	-309.589	1441.78	217.848	-414.435	1166.41	214.531	-152.093	1335.01	208.953	-57.9431	1134.1	299.264	-402.463	1257.72	65.6458	-223.035	1402.37	-49.0022	-260.67	1170.85	-58.2834	-278.132	1076.44	-82.4686	-218.704	935.423	-41.9915	-202.992	830.535	-101.561	-249.981	824.976	-99.614	-198.722	757.084
822	0	169.995	-109.315	1593.25	275.375	-112.499	1595.17	150.962	-272.258	1569.86	269.563	-278.596	1572.7	228.452	-299.754	1441.37	217.509	-404.905	1166.08	213.602	-142.55	1334.45	208.019	-48.5597	1133.51	298.849	-392.817	1257.63	64.6747	-213.735	1401.73	-49.783	-253.25	1170.41	-58.8312	-270.656	1076.05	-83.4578	-211.781	934.701	-42.9804	-195.583	830.079	-102.094	-243.155	824.352	-100.301	-191.971	756.318
823	0	168.785	-99.577	1592.76	274.218	-102.706	1594.57	150.064	-262.604	1569.39	268.597	-268.879	1572.13	227.332	-290.188	1441.02	217.027	-395.348	1165.55	212.644	-132.981	1333.96	207.113	-39.1895	1132.82	298.339	-383.148	1257.17	63.7043	-204.429	1400.96	-50.5324	-245.539	1169.88	-59.4016	-263.05	1075.41	-84.4622	-204.642	934.069	-43.9954	-188.183	829.308	-102.431	-236.39	823.457	-101.094	-185.097	755.562
824	0	167.627	-90.0254	1592.37	273.094	-93.0617	1594.14	149.095	-253.013	1568.82	267.666	-259.187	1571.63	226.332	-280.552	1440.42	216.467	-385.684	1165.01	211.631	-123.395	1333.35	206.268	-29.6708	1132.09	297.604	-373.425	1256.71	62.6964	-194.977	1400.17	-51.4742	-237.685	1169.37	-60.1689	-255.286	1074.71	-85.35	-197.296	933.276	-44.9625	-180.375	828.812	-102.989	-229.379	822.54	-101.637	-178.234	754.919
825	0	166.347	-80.4497	1591.77	271.913	-83.3574	1593.68	147.937	-243.343	1568.14	266.499	-249.515	1570.95	225.589	-270.652	1439.7	215.762	-375.913	1164.36	210.634	-113.72	1332.57	205.406	-20.1918	1131.23	296.795	-363.689	1256.24	61.5605	-185.439	1399.18	-52.5008	-229.583	1168.66	-60.9557	-247.27	1073.99	-86.3295	-189.722	932.465	-45.4768	-173.131	827.71	-103.491	-222.084	821.708	-102.215	-171.06	753.809
826	0	165.085	-70.8924	1590.92	270.621	-73.7676	1592.91	146.587	-233.775	1567.05	265.286	-239.871	1569.98	224.421	-260.776	1438.68	214.977	-366.237	1163.38	209.658	-104	1331.66	204.596	-10.629	1130.06	295.923	-353.968	1255.37	60.4085	-175.693	1398.05	-53.4681	-221.131	1167.63	-61.6982	-239.113	1072.89	-87.3092	-182.116	931.219	-46.3161	-165.413	826.852	-104.06	-214.611	820.477	-102.991	-163.817	752.606
827	0	163.796	-61.2229	1590.1	269.303	-64.2387	1591.9	145.414	-224.136	1565.78	263.852	-230.354	1568.66	223.278	-250.93	1437.57	214.127	-356.554	1162.16	208.505	-94.2617	1330.43	203.939	-0.872779	1128.8	294.925	-344.225	1254.37	59.3286	-165.911	1396.58	-54.626	-212.516	1166.53	-62.5	-230.843	1071.62	-88.0709	-174.089	929.929	-47.2095	-157.501	825.274	-104.763	-207.222	819.084	-103.583	-156.424	751.116
828	0	162.315	-51.6619	1588.94	267.875	-54.6682	1590.93	143.904	-214.483	1564.48	262.472	-220.698	1567.47	221.996	-241.064	1436.42	213.154	-346.828	1160.95	207.441	-84.4298	1329.16	203.208	8.9744	1127.38	293.788	-334.378	1253.31	58.1448	-156.018	1395.16	-55.6594	-203.492	1165.19	-63.3633	-222.292	1070.35	-88.99	-165.937	928.271	-48.2243	-149.567	823.805	-105.223	-199.534	817.564	-104.474	-148.76	749.445
829	0	160.802	-42.0076	1587.57	266.367	-45.0565	1589.78	142.33	-204.836	1563	260.93	-211.045	1566.23	220.462	-231.112	1435.07	212.074	-337.086	1159.63	206.324	-74.5836	1327.64	202.538	19.06	1125.86	292.496	-324.586	1252.04	56.806	-145.867	1393.52	-56.6574	-194.239	1163.6	-64.3146	-213.514	1068.98	-89.8617	-157.538	926.729	-49.3322	-141.101	822.294	-105.999	-191.645	816.113	-105.416	-141.107	747.692
830	0	159.238	-32.4281	1586.15	264.751	-35.4865	1588.34	140.822	-195.162	1561.17	259.25	-201.526	1564.49	219.005	-221.302	1433.49	210.754	-327.38	1157.97	205.198	-64.7413	1326.03	201.838	29.3694	1124.35	290.967	-314.707	1250.38	55.4877	-135.733	1391.75	-57.7975	-184.8	1161.93	-65.252	-204.629	1067.3	-90.8339	-149.109	925.008	-50.5745	-132.742	820.269	-106.883	-183.651	814.297	-106.337	-133.113	745.887
831	0	157.487	-22.759	1584.52	263.028	-25.9193	1586.86	138.969	-185.496	1559.33	257.541	-191.916	1562.81	217.276	-211.529	1431.78	209.147	-317.572	1156.16	204.001	-54.8483	1324.4	201.156	39.6026	1122.72	289.294	-304.907	1248.64	54.0518	-125.624	1389.87	-58.9899	-174.984	1160.06	-66.1189	-195.512	1065.45	-92.2405	-140.192	923.112	-51.6431	-124.352	818.147	-107.768	-175.422	812.392	-107.54	-125.13	743.949
832	0	155.707	-13.0629	1582.98	261.242	-16.224	1585.55	137.105	-175.765	1557.53	255.701	-182.263	1561.09	215.434	-201.744	1430.02	207.388	-307.588	1154.4	202.727	-44.9525	1322.75	200.377	49.9855	1121.43	287.554	-295.208	1246.99	52.4782	-115.274	1388.05	-60.2863	-165.002	1158.13	-67.2661	-186.182	1063.66	-93.4663	-131.577	921.055	-53.0838	-115.442	816.418	-109.15	-166.938	810.564	-108.833	-116.821	742.054
833	0	153.733	-3.47357	1581.2	259.345	-6.55952	1584.02	135.347	-165.97	1555.47	253.794	-172.592	1559.36	213.629	-191.933	1428.32	205.67	-297.401	1152.5	201.291	-34.9926	1321.06	199.563	60.4348	1119.73	285.701	-285.336	1245.12	50.845	-105.083	1386.15	-61.4828	-154.771	1156	-68.3201	-176.626	1061.7	-94.5998	-122.475	918.9	-54.0023	-106.901	814.312	-110.099	-158.235	808.653	-110.364	-108.302	739.877
834	0	151.774	6.257	1579.57	257.398	3.05379	1582.4	133.256	-156.258	1553.46	251.81	-162.936	1557.41	211.636	-182.062	1426.27	204.015	-287.182	1150.29	199.806	-24.9869	1319.3	198.654	70.9446	1118.33	283.859	-275.541	1243.15	49.1075	-94.7229	1384.19	-62.9195	-144.353	1153.92	-69.3905	-166.857	1059.46	-96.0722	-113.318	916.795	-55.262	-98.0741	811.935	-111.418	-149.379	806.413	-111.747	-99.7895	737.581
835	0	149.633	15.9987	1577.87	255.307	12.7252	1580.72	131.207	-146.48	1551.33	249.658	-153.247	1555.39	209.687	-172.257	1424.5	202.238	-276.788	1148.19	198.28	-14.9923	1317.56	197.729	81.4864	1116.86	281.845	-265.535	1241.09	47.4072	-84.5573	1381.97	-64.2079	-133.715	1151.55	-70.6027	-156.905	1057.23	-97.5896	-103.987	914.634	-56.6651	-88.8245	809.523	-112.822	-140.219	804.157	-113.261	-90.7961	735.616
836	0	147.531	25.7282	1576.02	253.255	22.4549	1579.17	129.006	-136.583	1549.43	247.517	-143.529	1553.51	207.505	-162.308	1422.44	200.331	-266.316	1146.07	196.569	-4.83852	1315.75	196.637	92.0237	1115.21	279.892	-255.567	1239.27	45.5004	-74.0645	1379.8	-65.7726	-122.831	1149.17	-71.9241	-146.778	1055.08	-98.906	-94.1072	912.129	-58.1929	-79.0799	807.222	-114.237	-130.636	802.102	-114.255	-81.9635	732.547
837	0	145.624	35.4922	1574.48	251.088	32.0782	1577.53	126.645	-126.801	1547.3	245.222	-133.79	1551.5	205.384	-152.428	1420.61	198.418	-255.811	1143.97	194.757	5.28448	1313.88	195.482	102.767	1113.69	277.839	-245.34	1237.17	43.4912	-63.7835	1377.71	-67.1245	-111.962	1146.58	-73.3379	-136.518	1052.68	-100.365	-84.0355	909.814	-59.7486	-69.187	804.738	-115.6	-120.857	799.906	-115.841	-72.5964	730.13
838	0	143.625	45.2947	1572.91	248.919	41.6931	1575.96	124.477	-116.934	1545.18	242.821	-124.189	1549.36	203.146	-142.416	1418.5	196.633	-245.34	1141.57	192.903	15.4222	1312.26	194.215	113.415	1112.36	275.937	-235.254	1235.11	41.4144	-53.6183	1375.58	-68.7589	-100.94	1144.13	-74.7279	-126.079	1050.22	-101.932	-73.8482	907.388	-61.1875	-59.2703	802.096	-117.152	-110.817	797.464	-117.237	-62.7852	727.604
839	0	141.386	55.0309	1571.41	246.618	51.3366	1574.48	121.929	-107.067	1543.22	240.373	-114.449	1547.49	200.827	-132.363	1416.72	194.839	-234.639	1139.48	190.885	25.6581	1310.66	192.708	124.216	1110.99	273.898	-224.837	1233.13	39.2553	-43.4897	1373.46	-70.4534	-89.9185	1141.72	-76.3216	-115.369	1047.81	-103.597	-63.2695	905.089	-62.7355	-48.8135	799.622	-118.962	-100.14	795.189	-118.75	-52.4797	725.188
840	0	138.889	64.879	1569.9	244.256	61.0369	1573.07	119.411	-97.1638	1541.27	237.759	-104.761	1545.5	198.421	-122.4	1414.88	193.068	-223.812	1137.29	188.739	35.935	1309	191.166	135.144	1109.82	271.89	-214.396	1231.29	36.9833	-33.2637	1371.36	-72.23	-78.9242	1139.33	-78.0359	-104.538	1045.53	-105.229	-52.3933	902.703	-64.3553	-37.8859	797.426	-120.675	-89.1414	793.017	-120.25	-41.8088	722.682
841	0	136.592	74.606	1568.49	241.742	70.6513	1571.63	116.782	-87.2208	1539.4	235.183	-94.9827	1543.62	195.936	-112.373	1412.96	191.348	-212.827	1135.01	186.585	46.3191	1307.51	189.425	146.086	1108.54	269.924	-203.787	1229.13	34.587	-23.1697	1369.37	-73.9743	-68.1879	1136.86	-79.7314	-93.6002	1043.05	-106.891	-41.2373	900.464	-65.8817	-26.9826	794.959	-122.488	-77.8518	790.711	-121.82	-30.775	720.328
842	0	133.927	84.3482	1567.21	239.185	80.2668	1570.47	114.016	-77.4825	1537.48	232.375	-85.2932	1541.85	193.301	-102.477	1411.02	189.59	-201.755	1132.5	184.277	56.7031	1306.21	187.599	157.178	1107.72	267.795	-193.07	1227.05	32.0633	-13.1068	1367.47	-75.9259	-57.5255	1134.57	-81.4755	-82.6209	1040.64	-108.591	-29.8921	898.305	-67.4174	-15.7258	792.675	-124.577	-66.2166	788.39	-123.296	-19.3399	718.143
843	0	131.143	94.0776	1566.21	236.433	89.9884	1569.51	111.241	-67.5301	1535.8	229.573	-75.6135	1540.36	190.658	-92.4769	1409.46	187.714	-190.568	1130.3	181.736	67.1965	1305.09	185.491	168.39	1107.05	265.515	-182.384	1225	29.428	-2.98127	1365.66	-77.9466	-46.9068	1132.24	-83.4896	-71.5478	1038.4	-110.324	-18.3045	896.071	-69.0787	-4.02433	790.705	-126.457	-54.3226	786.306	-125.096	-7.40968	716.048
844	0	128.422	103.812	1565.41	233.657	99.6655	1568.96	108.343	-57.7258	1534.36	226.719	-65.8521	1538.94	187.991	-82.3246	1407.96	185.648	-179.297	1128.37	179.208	77.7852	1304.17	183.576	179.761	1106.41	263.311	-171.639	1223.37	26.699	7.26391	1363.96	-80.1244	-36.4429	1130.18	-85.3552	-60.3419	1036.25	-112.147	-6.54396	894.138	-70.8556	8.03729	788.938	-128.352	-42.2597	784.297	-126.729	4.80476	714.049
845	0	125.45	113.573	1565.04	230.788	109.355	1568.58	105.602	-47.7866	1533.06	223.962	-55.9309	1537.89	185.227	-72.0242	1406.93	183.369	-168.117	1126.74	176.755	88.4723	1303.44	181.457	191.164	1106.05	261.094	-160.857	1222.04	24.063	17.4859	1362.53	-82.3855	-26.0359	1128.37	-87.1992	-49.1538	1034.19	-114.007	5.27443	892.375	-72.5162	20.0039	787.087	-130.045	-30.1	782.304	-128.327	17.3237	712.368
846	0	122.58	123.337	1564.88	227.853	119.108	1568.6	102.649	-37.9431	1532.19	220.962	-46.0935	1537.06	182.555	-61.5356	1406.31	181.15	-156.866	1125.69	174.131	99.2294	1303.16	179.284	202.652	1106.01	258.898	-150.238	1221.12	21.3058	27.9236	1361.43	-84.5063	-15.4745	1126.91	-89.0146	-37.8857	1032.43	-115.903	17.031	890.664	-74.4474	32.3896	785.661	-131.873	-17.8524	780.617	-130.197	29.9745	710.936
847	0	119.35	133.136	1565.29	224.796	128.922	1569.06	99.747	-27.7997	1531.68	218.023	-36.0992	1536.71	179.933	-50.7856	1406.29	178.991	-145.634	1125.49	171.39	110.082	1303.26	177.075	214.241	1106.13	256.881	-139.345	1221.08	18.6255	38.3927	1360.75	-86.6201	-4.68144	1125.7	-90.7534	-26.4772	1031.22	-117.98	28.9768	889.553	-76.6946	45.129	784.774	-133.597	-5.40299	779.436	-132.448	42.8547	710.026
848	0	116.515	142.961	1565.94	221.842	138.823	1569.93	96.6415	-17.8748	1531.53	214.96	-26.0758	1536.57	177.315	-39.9553	1406.64	177.221	-134.697	1125.66	168.787	120.987	1303.52	174.74	225.823	1106.65	254.956	-128.362	1221.43	16.01	48.9034	1360.34	-88.9438	6.00959	1125.17	-92.3521	-15.091	1030.33	-120.195	40.8327	889.152	-78.9175	58.1796	784.435	-135.373	6.95873	778.712	-134.616	55.8953	709.637
849	0	113.382	152.842	1567.02	218.81	148.632	1571	93.8236	-7.74771	1531.63	212.052	-16.0188	1536.72	175.024	-29.0503	1407.22	175.82	-124.138	1126.17	166.145	131.871	1304.25	172.413	237.374	1107.45	253.24	-117.445	1222.24	13.4927	59.3982	1360.51	-90.9488	16.9408	1124.96	-93.8136	-3.71048	1029.87	-122.255	52.7468	889.003	-81.0967	71.2007	784.392	-136.77	19.2011	778.372	-136.865	69.1017	709.801
850	0	110.585	162.861	1568.52	215.864	158.607	1572.6	90.8041	2.36321	1532.24	209.152	-5.91497	1537.45	172.576	-18.2559	1408.29	173.916	-113.421	1127.69	163.385	142.739	1305.31	169.839	248.712	1108.72	251.533	-106.314	1223.73	11.0069	69.7592	1361.26	-92.8056	28.0438	1125.23	-95.2896	7.79512	1030.06	-124.519	64.7163	889.782	-83.4957	84.4394	785.116	-138.322	31.8021	778.589	-139.482	82.4342	710.781
851	0	107.612	172.866	1570.18	213.008	168.573	1574.37	87.9509	12.6574	1533.12	206.274	4.30105	1538.48	170.12	-7.27875	1409.74	171.927	-102.512	1129.29	160.683	153.497	1306.77	167.258	259.783	1110.21	249.969	-95.2128	1225.47	8.50553	80.1579	1362.47	-94.5822	39.1869	1126.04	-96.7684	19.3773	1030.84	-126.688	76.8005	890.805	-86.0328	97.9646	786.41	-140.054	44.571	779.5	-142.167	95.6913	711.929
852	0	104.859	182.882	1571.94	210.264	178.624	1576.42	85.208	22.8805	1534.22	203.574	14.4417	1539.8	167.901	3.21734	1411.48	170.683	-91.471	1130.75	158.102	164.114	1308.47	164.497	270.485	1112.15	248.425	-84.2866	1227.23	6.18724	90.335	1363.99	-96.2125	50.339	1127.24	-98.1791	30.8909	1031.99	-128.709	88.946	892.516	-88.417	111.57	788.21	-141.586	57.2842	780.836	-144.765	109.188	713.97
853	0	102.317	193.095	1574.15	207.608	188.643	1578.56	82.4583	33.1359	1535.66	200.756	24.6334	1541.31	165.556	13.5789	1413.05	169.601	-80.1171	1132.14	155.48	174.453	1310.41	161.76	280.785	1114.19	246.665	-73.2305	1229.02	3.75091	100.477	1365.97	-97.4457	61.674	1128.59	-99.6637	42.3256	1033.55	-130.747	101.154	894.483	-90.8516	125.142	790.368	-143.231	70.1573	782.489	-147.023	122.552	716.255
854	0	99.7479	203.252	1576.24	205.093	198.684	1580.85	79.891	43.5143	1537.34	198.004	34.7563	1543.19	163.203	23.8317	1414.96	168.192	-68.7219	1133.86	152.916	184.77	1312.54	159.011	290.843	1116.34	244.843	-62.4863	1230.88	1.30627	110.433	1368.06	-99.3583	72.7146	1130.43	-101.309	53.8595	1035.43	-132.804	113.529	896.883	-93.2213	138.873	792.94	-144.823	83.4404	784.588	-149.85	136.377	718.783
855	0	97.5131	213.391	1578.26	202.853	208.733	1582.97	77.2602	53.6729	1539.5	195.499	44.8433	1545.23	160.912	33.7429	1417.04	166.569	-57.6347	1135.47	150.464	194.92	1314.59	156.336	300.635	1118.54	243.072	-51.7026	1232.83	-0.959188	120.463	1370.3	-101.061	83.9188	1132.3	-103.115	65.3293	1037.47	-134.984	126.183	899.422	-95.5679	152.933	795.682	-146.558	96.6515	786.905	-152.247	150.268	721.438
856	0	95.4775	223.644	1580.36	200.724	218.679	1584.92	74.9874	63.9644	1541.57	193.194	54.7669	1547.29	158.639	43.4538	1418.8	164.923	-47.2096	1137.11	148.064	204.858	1316.68	153.569	310.188	1120.82	241.159	-41.2803	1234.41	-3.32644	130.115	1372.4	-102.853	95.1216	1134.37	-104.992	76.6995	1039.49	-136.954	138.659	901.713	-97.8672	166.61	798.16	-148.105	110.024	788.953	-154.556	164.486	724.185
857	0	93.5188	233.781	1582.32	198.814	228.638	1586.88	72.7723	74.1241	1543.75	190.912	64.7237	1549.46	156.374	53.2759	1420.65	163.057	-37.2644	1138.72	145.753	214.761	1318.73	151.018	319.287	1122.65	239.196	-30.9342	1236.08	-5.55665	139.96	1374.61	-104.858	106.25	1136.41	-107.154	88.1501	1041.45	-139.117	151.116	903.953	-100.141	180.362	800.574	-149.831	123.606	791.024	-156.722	178.586	726.763
858	0	91.6767	243.735	1584.32	196.939	238.592	1588.83	70.5141	84.167	1545.88	188.72	74.6798	1551.45	154.19	63.1188	1422.35	161.168	-27.5214	1140.41	143.456	224.532	1320.69	148.572	328.43	1124.72	237.06	-20.7806	1237.73	-7.75319	149.466	1376.64	-107.122	117.483	1138.59	-109.557	99.6943	1043.43	-141.387	163.733	906.388	-102.556	195.029	803.712	-151.821	137.346	793.307	-158.788	193.157	729.404
859	0	89.7208	253.617	1586.2	194.976	248.342	1590.56	68.6043	94.2012	1547.74	186.704	84.5601	1553.22	151.956	72.7196	1423.93	159.164	-17.7299	1141.95	141.181	234.229	1322.51	146.392	337.631	1126.7	234.97	-10.7813	1239.33	-10.0519	159.225	1378.52	-109.57	128.765	1140.58	-112.239	111.114	1045.27	-143.784	176.348	908.712	-104.781	208.884	806.635	-153.757	151.353	795.279	-160.748	207.712	732.079
860	0	87.9136	263.448	1587.98	193.237	258.116	1592.23	66.7708	103.944	1549.3	184.891	94.3281	1554.69	149.907	82.4358	1425.26	157.101	-7.97494	1143.16	139.053	243.912	1324.25	143.994	346.306	1128.55	232.927	-1.16929	1240.74	-12.0478	168.753	1380.14	-111.858	139.982	1142.4	-114.933	122.395	1046.81	-146.126	189.046	910.865	-107.102	222.697	809.485	-156.116	165.159	797.017	-162.748	222.307	734.645
861	0	86.1098	273.053	1589.59	191.352	267.901	1593.9	64.9557	113.605	1550.67	183.172	104.108	1555.96	147.855	92.2304	1426.81	155.048	1.74331	1144.74	136.924	253.624	1325.8	141.959	355.643	1130.39	230.797	8.46875	1242.2	-14.172	178.268	1381.73	-114.548	150.975	1144.1	-117.828	133.719	1048.26	-148.656	201.898	913.104	-109.103	236.274	812.065	-158.265	179.522	798.632	-164.688	237.329	737.167
862	0	84.0801	282.56	1591.07	189.476	277.689	1595.35	63.3845	123.233	1551.79	181.531	113.937	1557.06	146.161	102.14	1428.24	152.921	11.2783	1146.39	134.917	263.248	1327.03	140.067	365.09	1131.65	228.843	17.9641	1243.92	-16.0246	188.091	1383.09	-117.363	161.991	1145.83	-120.764	145.056	1049.6	-151.157	214.782	914.905	-111.523	250.108	814.547	-160.878	193.591	800.311	-166.424	252.369	739.407
863	0	82.1583	292.068	1592.32	187.498	287.282	1596.51	61.9435	132.758	1552.61	180.143	123.709	1557.94	144.619	112.124	1429.44	150.908	20.5498	1147.81	133.226	272.967	1327.98	138.4	374.538	1132.47	227.12	27.2507	1245.24	-17.6506	197.951	1384.06	-120.098	172.922	1147.13	-123.549	156.347	1050.54	-153.587	227.518	916.574	-113.862	263.819	817.031	-163.174	207.885	801.711	-168.221	267.411	741.634
864	0	80.3224	301.545	1593.39	185.591	296.904	1597.67	60.3734	142.082	1553.34	178.627	133.368	1558.79	142.843	121.82	1430.49	148.884	29.6116	1149.3	131.59	282.619	1328.77	136.838	384.12	1132.89	225.253	36.3908	1246.63	-19.3904	207.704	1384.82	-122.62	183.797	1148.14	-126.463	167.675	1051.39	-156.086	240.324	918.051	-115.898	276.626	818.754	-165.731	221.8	802.934	-170.37	282.367	743.744
865	0	78.394	310.809	1594.23	183.728	306.544	1598.8	58.8645	151.499	1553.98	177.11	143.039	1559.53	141.173	131.645	1431.72	146.872	38.7147	1150.76	130.091	292.294	1329.4	135.663	393.828	1133.11	223.458	45.5008	1248.14	-20.9493	217.66	1385.57	-125.118	194.353	1149	-129.322	179.097	1052.24	-158.284	253.228	919.361	-117.8	290.143	820.459	-168.226	235.868	804.143	-172.381	297.133	745.609
866	0	76.5659	320.136	1595.08	181.871	316.144	1599.84	57.4552	160.976	1554.51	175.688	152.772	1560.25	139.814	141.635	1432.99	144.961	47.9029	1152.38	128.718	301.867	1329.95	134.65	403.549	1133.34	221.677	54.5355	1249.59	-22.3136	227.668	1386.22	-127.602	204.847	1149.94	-132.039	190.54	1053.08	-160.496	265.954	920.422	-120.092	303.88	822.133	-170.888	249.57	805.474	-174.567	311.931	747.447
867	0	74.8969	329.599	1595.89	180.192	325.658	1600.67	56.0657	170.351	1554.97	174.274	162.375	1560.77	138.113	151.261	1433.91	143.015	57.0617	1153.74	127.566	311.219	1330.33	134.024	412.929	1133.36	219.838	63.3828	1250.89	-23.5631	237.63	1386.83	-129.815	215.17	1150.79	-134.578	202.065	1053.66	-162.778	278.527	921.748	-122.184	316.772	823.572	-173.059	263.005	806.36	-177.122	326.342	749.537
868	0	73.1975	339.02	1596.73	178.496	335.151	1601.65	54.5958	179.724	1555.39	172.832	171.935	1561.35	136.632	161.06	1435.05	141.177	66.2958	1154.98	126.398	320.563	1330.86	133.363	422.274	1133.34	218.045	72.1696	1252.23	-24.8578	247.737	1387.48	-131.774	225.513	1151.51	-137.008	213.535	1054.32	-164.868	291.187	922.915	-124.165	329.536	825.089	-175.559	276.543	807.504	-179.847	340.424	751.585
869	0	71.5103	348.418	1597.58	176.908	344.635	1602.6	53.1481	189.287	1555.84	171.398	181.469	1562	135.081	170.627	1436.18	139.21	75.2626	1156.42	125.376	329.786	1331.41	132.818	431.536	1133.47	216.071	80.8625	1253.54	-26.1262	257.896	1388.12	-133.685	235.833	1152.33	-139.352	225.138	1055.18	-167.037	303.669	924.364	-126.579	342.375	826.633	-178.077	289.899	808.828	-182.363	354.326	753.715
870	0	69.9862	357.881	1598.16	175.455	354.108	1603.31	51.7246	198.833	1556.27	169.876	190.966	1562.51	133.56	180.151	1437.07	137.087	83.9539	1157.74	124.451	338.969	1331.79	132.567	440.583	1133.53	214.219	89.3803	1254.76	-27.2526	267.946	1388.63	-135.425	246.125	1153.15	-141.627	236.629	1055.86	-169.019	316.133	925.637	-128.649	355.14	828.077	-180.359	303.141	809.92	-184.908	367.947	755.68
871	0	68.5477	367.32	1598.52	174.005	363.551	1603.83	50.2302	208.314	1556.55	168.403	200.478	1562.91	131.584	189.15	1437.83	135.103	92.3133	1158.59	123.618	347.991	1332.03	132.36	449.404	1133.6	212.293	98.1082	1255.71	-28.322	277.809	1389.03	-136.867	256.54	1153.52	-143.661	248.025	1056.32	-170.873	328.515	926.742	-130.333	367.837	829.519	-182.723	316.09	810.966	-187.274	381.413	757.251
872	0	67.2321	376.819	1598.8	172.559	372.927	1604.3	48.7321	217.787	1556.81	166.917	209.832	1563.43	130.183	198.529	1438.43	133.147	100.676	1159.52	122.749	356.914	1332.28	132.138	457.9	1133.5	210.287	106.684	1256.65	-29.4064	287.623	1389.46	-138.2	267.003	1153.81	-145.769	259.405	1056.97	-172.433	340.797	927.776	-132.285	380.229	830.516	-184.842	329.07	812.129	-189.621	394.672	758.968
873	0	65.932	386.363	1598.88	171.151	382.309	1604.61	47.3033	227.319	1557.06	165.522	219.261	1563.91	128.774	207.807	1439.09	131.326	109.308	1160.53	121.877	365.759	1332.3	131.822	466.084	1133.15	208.475	115.254	1257.49	-30.3724	297.473	1389.77	-139.392	277.7	1153.91	-147.761	270.807	1057.66	-174.097	353.026	928.607	-133.945	392.909	831.501	-187.138	341.871	813.271	-191.663	407.91	760.197
874	0	64.6829	395.849	1598.77	169.812	391.683	1604.82	45.9799	236.815	1557.09	164.102	228.596	1564.2	127.359	216.973	1439.51	129.662	117.856	1161.1	121.225	374.601	1332.29	131.423	474.179	1132.81	206.747	123.801	1258.04	-31.2227	307.247	1389.89	-140.526	288.344	1154.21	-149.515	282.082	1058.04	-175.48	365.368	929.448	-135.387	405.065	832.063	-189.15	354.685	814.12	-193.492	420.998	761.525
875	0	63.3471	405.237	1598.8	168.466	400.946	1604.93	44.6622	246.203	1556.97	162.708	237.896	1564.48	125.914	225.886	1439.78	128.155	126.366	1161.44	120.506	383.376	1332.33	131.101	482.446	1132.88	205.078	132.291	1258.42	-32.3268	316.503	1389.79	-141.644	299.008	1154.41	-151.303	293.298	1058.15	-176.934	377.308	930.183	-136.768	417.131	832.694	-191.22	367.46	814.869	-195.39	433.886	762.535
876	0	62.0321	414.574	1598.65	167.241	410.232	1605.17	43.1698	255.533	1556.92	161.262	247.103	1564.74	124.596	234.798	1440.05	126.626	134.924	1161.76	119.812	392.078	1332.34	130.728	490.88	1132.93	203.466	140.804	1258.83	-33.4334	325.816	1390.05	-142.843	309.827	1154.5	-152.829	304.54	1058.33	-178.449	389.296	930.715	-138.158	429.288	833.328	-193.196	380.12	815.607	-196.871	446.562	763.44
877	0	60.8111	423.918	1598.49	166.037	419.4	1605.18	41.7787	264.882	1556.78	159.91	256.28	1564.83	123.336	243.681	1440.17	125.305	143.383	1161.91	119.069	400.785	1332.26	130.411	499.215	1132.81	202.103	149.329	1259.07	-34.411	334.935	1389.89	-143.996	320.691	1154.41	-154.236	315.837	1058.22	-179.625	401.264	931.151	-139.272	441.273	833.771	-194.848	392.854	816.173	-198.026	459.337	764.125
878	0	59.6347	433.192	1598.14	164.901	428.583	1605.05	40.5543	274.173	1556.57	158.682	265.422	1564.77	122.23	252.628	1440.08	124.175	151.779	1161.77	118.452	409.477	1332.13	129.848	507.411	1132.5	200.911	157.878	1259.04	-35.4114	343.953	1389.68	-144.998	331.49	1154.43	-155.49	327.039	1057.91	-180.929	413.071	931.584	-140.281	453.268	834.067	-196.37	405.208	816.472	-199.258	471.872	764.653
879	0	58.4809	442.389	1597.8	163.831	437.709	1604.93	39.4102	283.535	1556.2	157.404	274.43	1564.66	121.046	261.595	1439.9	123.076	160.234	1161.67	117.691	418.178	1331.84	129.317	515.785	1132.26	199.764	166.449	1258.93	-36.1742	353.086	1389.34	-146.125	342.47	1154.08	-156.745	338.103	1057.57	-181.952	424.83	931.697	-141.241	465.255	834.405	-197.284	417.549	816.235	-200.022	484.358	764.995
880	0	57.5119	451.637	1597.32	162.748	446.822	1604.6	38.2848	292.753	1555.79	156.317	283.539	1564.47	120.213	270.738	1439.61	122.074	168.845	1161.61	117.001	427.024	1331.44	128.799	524.213	1131.83	198.759	175.184	1258.9	-37.0398	361.889	1388.99	-147.311	353.272	1153.67	-158.017	349.18	1057.17	-182.921	436.483	931.706	-141.982	477.154	834.423	-198.374	429.891	816.447	-200.608	496.908	765.061
881	0	56.6114	460.865	1596.64	161.764	455.887	1603.99	37.2293	301.936	1555.13	155.135	292.63	1563.93	119.146	279.6	1439.15	121.197	177.448	1161.36	116.436	435.891	1330.66	128.407	532.72	1130.81	197.768	183.855	1258.61	-37.7771	371.099	1388.08	-148.244	364.036	1153.02	-159.003	360.301	1056.6	-183.451	448.169	931.326	-142.429	489.067	834.219	-199.33	442.313	816.278	-201.024	509.182	764.842
882	0	55.6628	470.054	1595.82	160.861	465.016	1603.35	36.2324	311.029	1554.39	154.088	301.75	1563.25	118.257	288.591	1438.55	120.406	186.157	1160.86	115.763	444.784	1329.87	127.901	541.392	1129.95	196.968	192.598	1258.14	-38.5936	380.14	1387.29	-149.112	374.943	1152.14	-159.911	371.297	1055.65	-184.091	459.803	931.034	-142.974	500.839	834.002	-200.187	454.583	815.986	-201.354	521.543	764.68
883	0	54.6713	479.244	1595.1	159.927	474.146	1602.7	35.2956	320.184	1553.6	153.154	310.912	1562.64	117.488	297.641	1438.16	119.651	194.925	1160.42	114.982	453.771	1329.12	127.271	550.23	1128.88	196.199	201.443	1257.67	-39.311	389.165	1386.59	-149.847	385.842	1151.28	-160.845	382.155	1054.9	-184.513	471.462	930.757	-143.22	512.73	833.826	-200.863	466.721	815.57	-201.39	533.895	764.502
884	0	53.8622	488.44	1594.2	159.057	483.306	1601.86	34.5359	329.376	1552.59	152.384	320.162	1561.85	116.747	306.854	1437.44	119.018	203.756	1159.92	114.298	462.818	1328.11	126.661	559.002	1127.71	195.613	210.373	1257.22	-40.0075	398.458	1385.41	-150.65	396.479	1150.34	-161.575	393.18	1054.07	-184.784	483.05	930.378	-143.253	524.392	833.429	-200.873	478.836	815.017	-201.178	546.083	764.002
885	0	53.0358	497.62	1593.09	158.265	492.572	1600.89	33.9586	338.516	1551.56	151.848	329.377	1560.73	116.184	316.147	1436.5	118.635	212.563	1159.17	113.566	471.891	1326.91	125.948	567.723	1126.13	195.203	219.407	1256.51	-40.5304	407.51	1384.18	-151.183	407.044	1149.3	-162.054	404.088	1052.91	-184.788	494.574	929.751	-143.167	535.963	832.852	-201.162	490.917	814.404	-200.801	558.281	763.439
886	0	52.2653	506.758	1592.02	157.447	501.854	1599.73	33.4023	347.617	1550.24	151.223	338.721	1559.48	115.574	325.444	1435.57	118.294	221.412	1158.31	112.888	480.968	1325.72	125.169	576.51	1124.83	194.781	228.444	1255.57	-41.1697	416.678	1383.05	-151.624	417.504	1148.35	-162.749	414.714	1051.85	-184.691	506.015	929.108	-142.77	547.652	832.458	-201.081	502.841	813.553	-200.47	570.408	763.04
887	0	51.4825	515.968	1590.84	156.671	511.232	1598.72	32.8985	356.928	1549	150.626	348.091	1558.34	115.043	334.811	1434.48	117.893	230.375	1157.57	112.201	490.162	1324.5	124.365	585.321	1123.45	194.383	237.582	1254.83	-41.6917	425.799	1381.82	-152.078	427.747	1147.12	-163.256	425.517	1050.63	-184.568	517.436	928.378	-142.312	559.141	831.911	-201.3	514.937	813.08	-199.87	582.517	762.609
888	0	50.7152	525.227	1589.65	155.999	520.723	1597.62	32.3492	366.202	1547.65	150.282	357.602	1557.07	114.726	344.39	1433.39	117.704	239.46	1156.63	111.622	499.419	1323.19	123.457	594.161	1121.61	194.139	246.982	1253.82	-42.2059	435.077	1380.6	-152.557	437.749	1146	-163.626	436.286	1049.38	-184.309	528.857	927.602	-141.812	570.569	831.287	-200.671	526.892	812.054	-199.148	594.675	762.008
889	0	50.1031	534.509	1588.16	155.346	530.196	1596.08	32.1202	375.506	1546.07	149.976	367.036	1555.44	114.553	354.076	1431.95	117.559	248.596	1155.39	111.152	508.75	1321.52	122.561	603.214	1119.94	194.072	256.265	1252.77	-42.6533	444.115	1379.3	-152.74	447.642	1144.43	-164.027	446.821	1048.04	-183.619	540.199	926.188	-141.084	581.869	830.292	-200.517	538.884	811.016	-198.143	606.784	761.104
890	0	49.4249	543.856	1586.69	154.832	539.761	1594.62	31.777	384.661	1544.53	149.801	376.605	1553.85	114.313	363.646	1430.46	117.536	257.798	1154.05	110.622	518.128	1319.94	121.858	612.332	1118.16	194.016	265.639	1251.46	-42.9822	453.369	1377.63	-152.889	457.432	1142.88	-164.084	457.389	1046.26	-183.28	551.389	925.271	-140.044	593.136	829.365	-199.981	550.65	809.862	-196.95	618.851	760.302
891	0	49.189	553.355	1585.22	154.502	549.394	1593.15	31.7522	394.159	1542.91	149.702	386.244	1552.37	114.102	373.298	1429.24	117.476	267.086	1152.9	110.107	527.56	1318.39	120.923	621.522	1116.25	194.068	275.176	1250.22	-43.3323	462.649	1376.24	-152.999	467.056	1141.33	-164.433	467.808	1044.85	-182.735	562.48	924.042	-139.039	604.396	828.406	-199.405	562.281	808.653	-195.659	630.838	759.425
892	0	48.9708	562.902	1583.59	154.219	558.997	1591.54	31.7289	403.728	1541.1	149.552	395.914	1550.48	114.093	382.954	1427.73	117.533	276.393	1151.6	109.697	537.036	1316.58	120.102	630.738	1114.24	194.083	284.768	1248.82	-43.6214	471.932	1374.54	-153.167	476.376	1139.66	-164.511	478.068	1043.25	-182.02	573.558	922.629	-137.947	615.355	827.153	-199.412	574.014	807.625	-194.177	642.823	758.434
893	0	48.8667	572.468	1581.99	154.011	568.603	1589.79	31.7034	413.277	1539.4	149.449	405.613	1548.76	113.971	392.502	1426.19	117.526	285.85	1150.16	109.273	546.534	1314.86	119.519	640.226	1112.35	194.174	294.335	1247.27	-43.8712	481.211	1372.81	-153.23	485.616	1137.88	-164.455	488.335	1041.44	-181.2	584.558	921.251	-136.75	626.314	825.98	-198.904	585.388	806.38	-192.524	654.627	757.323
894	0	48.5904	581.998	1580.46	154.019	578.291	1588.22	31.6476	422.89	1537.66	149.549	415.286	1546.94	113.929	402.176	1424.56	117.605	295.306	1148.67	109.097	556.207	1313.14	118.809	649.773	1110.62	194.34	304.082	1245.76	-44.0254	490.7	1371.35	-153.406	494.93	1136.24	-164.536	498.331	1039.65	-180.565	595.325	919.888	-135.468	637.193	824.877	-196.909	597.02	804.592	-190.941	666.233	756.27
895	0	48.7007	591.769	1578.8	154.098	588.101	1586.55	31.7912	432.521	1536.17	149.71	425.13	1545.23	114.02	412.035	1423.12	117.582	304.899	1147.3	108.865	565.919	1311.43	118.157	659.386	1108.7	194.408	314.045	1244.08	-43.97	500.315	1369.48	-153.426	504.189	1134.56	-164.466	508.496	1038.07	-179.754	606.115	918.454	-134.051	647.953	823.653	-195.824	608.433	803.153	-189.194	677.753	755.157
896	0	48.9763	601.465	1577.34	154.267	597.897	1584.98	32.1646	442.323	1534.46	150.117	434.93	1543.62	114.183	421.808	1421.5	117.766	314.601	1145.68	108.797	575.678	1309.74	117.48	669.088	1106.85	194.67	323.791	1242.57	-43.9975	509.925	1368.2	-153.375	513.446	1133.19	-164.217	518.664	1036.45	-179.043	616.671	917.189	-132.812	658.544	822.621	-194.839	619.545	801.958	-187.576	689.044	754.181
897	0	49.0974	611.052	1575.92	154.463	607.683	1583.35	32.6478	451.921	1532.94	150.515	444.655	1541.86	114.412	431.591	1419.87	117.809	324.344	1144.02	108.625	585.386	1308.21	117.169	679.034	1105.52	194.749	333.675	1240.88	-44.0308	519.438	1366.75	-153.351	522.799	1131.88	-164.275	528.43	1034.82	-178.267	627.01	915.833	-131.503	668.991	821.655	-193.735	630.36	800.389	-185.869	700.01	753.122
898	0	49.4043	620.905	1574.5	154.847	617.6	1581.93	32.982	461.603	1531.49	150.911	454.666	1540.33	114.652	441.552	1418.36	117.934	334.225	1142.58	108.743	595.307	1306.62	116.89	689.001	1103.87	194.867	343.466	1239.37	-43.9361	529.239	1365.57	-153.486	532.207	1130.46	-163.966	538.345	1033.37	-177.448	637.253	914.576	-130.258	679.431	820.622	-192.407	640.923	798.947	-184.245	710.722	751.993
899	0	49.7265	630.708	1573.21	155.084	627.504	1580.52	33.6477	471.509	1530.13	151.596	464.621	1538.9	115.012	451.481	1416.98	117.91	344.375	1141.06	108.864	605.246	1305.14	116.464	698.968	1102.22	194.897	353.708	1237.63	-43.6066	539.307	1364.07	-153.414	541.741	1129.2	-163.592	548.148	1032.1	-176.79	647.384	913.241	-129.143	689.622	819.648	-191.108	651.417	797.699	-182.655	721.418	750.885
900	0	50.171	640.359	1571.88	155.634	637.473	1579.05	34.2714	481.252	1528.72	152.257	474.54	1537.32	115.392	461.512	1415.37	117.982	354.613	1139.31	108.999	615.215	1303.65	116.461	709.092	1100.85	195.028	363.782	1235.99	-43.4458	549.334	1362.89	-153.173	551.522	1127.85	-163.382	557.757	1030.72	-175.922	657.337	911.896	-127.971	699.686	818.495	-190.094	661.532	796.298	-180.966	731.628	749.561
901	0	50.8267	650.286	1570.72	156.144	647.404	1577.83	35.0603	490.924	1527.32	152.999	484.5	1535.83	115.773	471.568	1413.88	118.034	365.02	1137.62	109.446	625.347	1302.4	116.355	719.366	1099.44	195.023	373.957	1234.26	-42.9738	559.654	1361.51	-152.954	561.424	1126.86	-162.983	567.468	1029.55	-175.17	667.123	910.715	-126.954	709.533	817.676	-188.641	671.329	795.004	-179.693	741.556	748.469
902	0	51.258	660.033	1569.65	156.79	657.414	1576.64	35.8774	500.815	1526.25	153.901	494.626	1534.65	116.158	481.736	1412.63	117.844	375.711	1136.2	109.584	635.385	1301.2	116.384	729.663	1098.27	195.113	384.408	1232.68	-42.6124	570.009	1360.83	-152.827	571.563	1126.09	-162.56	577.231	1028.47	-174.576	676.774	909.586	-125.98	719.215	816.77	-188.175	681.1	793.855	-178.312	751.256	747.366
903	0	52.1703	669.944	1568.56	157.558	667.368	1575.59	36.6637	510.672	1524.97	154.778	504.619	1533.27	116.772	491.843	1411.18	117.703	386.139	1134.62	110.235	645.751	1300.03	116.624	740.101	1097.19	195.082	394.813	1230.83	-41.993	580.471	1359.93	-152.483	581.969	1125.4	-162.138	586.745	1027.6	-173.865	686.195	908.38	-125.15	728.672	815.779	-186.888	690.421	792.552	-177.24	760.687	746.158
904	0	52.9494	679.676	1567.68	158.491	677.277	1574.41	37.7315	520.688	1523.74	155.788	514.594	1531.89	117.484	501.777	1409.66	117.679	397.49	1132.51	110.592	655.938	1299.02	116.971	750.831	1096.28	195.101	405.268	1228.83	-41.3816	590.763	1359.14	-152.237	592.298	1124.74	-161.534	596.512	1026.58	-173.221	695.741	907.204	-124.408	738.038	814.764	-186.297	699.52	791.487	-176.088	769.756	744.833
905	0	53.9208	689.703	1566.99	159.387	687.185	1573.51	38.6862	530.402	1522.79	156.757	524.458	1530.71	118.143	511.839	1408.4	117.476	408.631	1130.72	111.312	666.38	1298.13	117.184	761.556	1095.63	195.093	415.765	1226.96	-40.5676	601.287	1358.52	-151.777	602.873	1124.25	-161.008	606.134	1025.99	-172.755	704.965	906.203	-123.92	747.087	813.916	-185.408	708.244	790.262	-175.542	778.51	743.643
906	0	54.9209	699.482	1566.37	160.475	697.138	1572.94	39.7099	540.543	1521.95	157.744	534.556	1529.72	118.908	521.929	1407.38	117.351	419.965	1129.35	111.931	676.856	1297.53	117.743	772.526	1095.21	195.217	426.363	1225.28	-39.8467	611.73	1358.04	-151.237	613.516	1123.77	-160.363	615.711	1025.39	-172.32	714.116	905.226	-123.639	755.808	812.818	-184.971	717.028	789.353	-175.027	787.046	742.38
907	0	56.0242	709.447	1566.2	161.562	707.053	1572.57	40.7752	550.452	1521.33	158.887	544.56	1528.94	119.867	532.324	1406.49	117.386	431.272	1128.14	112.862	687.527	1297	118.325	783.544	1094.66	195.429	437.065	1223.79	-39.0121	622.272	1357.66	-150.487	624.261	1123.44	-159.633	625.594	1024.95	-171.746	722.954	904.181	-123.353	764.479	811.682	-184.508	725.32	788.268	-174.675	795.051	741.003
908	0	57.1059	719.263	1566.32	162.69	717.012	1572.48	42.1689	560.444	1520.93	160.164	554.561	1528.38	120.85	542.79	1405.93	117.51	442.477	1127.11	113.815	698.224	1296.82	118.898	794.552	1094.55	195.544	447.838	1222.62	-37.9093	633.023	1357.46	-149.533	635.109	1123.31	-158.936	635.015	1024.89	-171.284	731.712	903.383	-123.131	772.858	810.63	-184.075	733.235	787.607	-174.618	802.906	739.775
909	0	58.3111	729.118	1566.77	163.747	726.898	1572.89	43.2913	570.384	1521.01	161.441	564.675	1528.39	121.781	553.335	1405.87	117.312	453.251	1126.79	114.651	708.905	1297.18	119.532	805.848	1094.87	195.532	458.561	1222.06	-37.0889	643.924	1357.89	-148.687	645.766	1123.47	-158.099	644.539	1025.12	-170.926	740.229	902.932	-123.113	780.865	809.919	-184.05	740.813	787.202	-174.814	810.225	738.943
910	0	59.3281	739.022	1567.54	164.941	736.996	1573.63	44.5647	580.484	1521.24	162.723	574.826	1528.57	122.499	563.846	1406.26	116.855	463.838	1126.97	115.705	719.781	1297.8	120.174	817.385	1095.49	195.448	469.294	1221.91	-36.2891	655.129	1358.66	-147.863	656.366	1123.94	-157.33	654.177	1025.95	-170.487	748.526	902.724	-123.165	788.552	809.26	-183.908	748.077	787.136	-175.216	817.12	738.33
911	0	60.4528	748.792	1568.6	165.973	746.913	1574.58	45.9893	590.352	1521.71	164.247	584.97	1528.83	123.229	574.542	1406.82	116.278	474.348	1127.34	116.9	730.714	1298.71	120.881	828.988	1096.43	195.292	479.895	1222.15	-35.3323	666.47	1359.76	-146.787	666.935	1124.88	-156.393	663.359	1026.81	-170.173	756.527	902.81	-123.14	796.194	809.057	-183.212	754.822	787.15	-175.758	823.587	738.015
912	0	61.6013	758.698	1570.04	167.189	757.027	1576.04	47.4966	600.437	1522.4	165.808	595.205	1529.55	123.893	585.151	1407.79	115.534	485.012	1128.34	117.909	741.489	1300.03	121.648	840.549	1097.87	195.077	490.428	1222.8	-34.2993	678.102	1361.42	-145.873	677.067	1126.21	-155.47	672.643	1028.21	-169.928	764.359	903.508	-123.156	803.336	809.124	-183.479	761.021	787.923	-176.548	829.559	738.135
913	0	62.5502	768.643	1571.84	168.249	767.077	1577.7	48.777	610.544	1523.57	166.887	605.559	1530.54	124.445	595.796	1409.14	114.633	495.953	1129.82	118.887	752.207	1301.55	122.478	852.035	1099.75	194.706	501	1223.94	-33.3591	689.805	1363.34	-144.927	687.336	1128.15	-154.601	682.01	1030.21	-169.735	772.008	904.527	-123.401	809.965	809.52	-183.138	767.377	788.929	-177.248	835.26	738.57
914	0	63.8597	778.714	1573.76	169.481	777.265	1579.64	50.1672	620.647	1524.92	168.349	615.946	1531.8	125.043	606.342	1410.81	113.774	506.968	1131.42	120.134	763.003	1303.4	123.378	863.235	1101.79	194.218	511.555	1225.21	-32.3186	701.368	1365.76	-144.208	697.347	1130.4	-153.771	691.127	1032.56	-169.37	779.363	905.744	-123.291	816.597	809.973	-183.441	773.498	790.359	-177.868	840.669	739.17
915	0	64.9457	788.645	1575.93	170.594	787.48	1581.43	51.5109	630.787	1526.66	169.77	626.201	1533.4	125.562	616.755	1412.43	112.823	518.244	1132.95	121.059	773.505	1305.46	124.251	874.222	1103.89	193.618	522.052	1226.53	-31.2859	712.586	1368.17	-143.233	707.364	1132.7	-153.035	700.313	1035.16	-169.185	786.829	907.327	-123.465	822.905	810.797	-183.331	779.431	792.151	-178.467	845.781	739.919
916	0	66.1235	798.959	1578.17	171.722	797.664	1583.52	52.5257	641.042	1528.79	170.943	636.398	1535.25	126.054	626.981	1414.33	111.549	529.722	1134.5	121.947	783.934	1307.75	125.387	884.991	1106.5	193.07	532.499	1228.03	-30.3726	723.607	1370.64	-142.511	717.153	1135.29	-152.256	709.398	1037.95	-168.927	794.298	909.098	-123.418	829.033	811.805	-183.514	785.319	794.106	-178.857	850.776	740.81
917	0	67.2807	809.168	1580.47	172.883	808.01	1585.56	53.5771	651.265	1531.36	171.948	646.742	1537.43	126.59	637.1	1416.21	110.717	541.287	1136.38	122.853	794.146	1309.93	126.184	895.216	1108.94	192.501	542.933	1229.64	-29.4673	734.481	1373.4	-141.674	727.144	1138.15	-151.56	718.335	1041.1	-168.466	801.647	911.086	-123.573	834.984	813.038	-183.801	791.263	796.48	-178.929	855.642	741.762
918	0	68.4205	819.282	1582.67	173.915	818.155	1587.52	54.5761	661.37	1534	172.962	656.911	1539.72	127.109	647.109	1418.07	110.001	552.83	1137.93	123.596	804.167	1312.34	127.156	905.256	1111.63	192.243	553.313	1231.17	-28.708	745.003	1376.27	-141.139	736.898	1141.22	-151.006	727.218	1044.16	-168.335	809.115	913.403	-123.613	841.035	814.498	-184.009	797.306	798.984	-179.053	860.577	742.905
919	0	69.4327	829.533	1584.89	174.891	828.287	1589.42	55.5367	671.451	1536.46	173.894	666.898	1542.01	127.679	656.902	1419.91	109.464	564.112	1139.68	124.254	814.233	1314.67	127.889	914.945	1114.27	192.023	563.644	1232.67	-28.1145	755.225	1378.99	-140.726	746.54	1144.3	-150.319	735.747	1046.98	-168.299	816.433	915.869	-123.768	847.043	816.267	-184.702	803.377	801.195	-179.08	865.542	744.119
920	0	70.0916	839.561	1586.98	175.714	838.361	1591.34	56.2504	681.406	1538.99	174.676	676.847	1544.41	128.073	666.645	1421.73	109.136	574.763	1141.22	124.755	824.128	1317.11	128.632	924.587	1116.93	191.764	573.86	1234.11	-27.4844	765.303	1381.64	-140.329	756.083	1147.26	-150.109	744.154	1050.06	-168.37	823.645	918.253	-124.233	853.082	818.298	-185.607	809.862	804.134	-179.079	870.72	745.434
921	0	71.0078	849.731	1588.8	176.427	848.364	1593.03	56.7142	691.39	1541.23	175.324	686.78	1546.41	128.508	676.383	1423.35	109.181	584.731	1142.81	125.288	833.855	1319.04	129.224	933.869	1119.33	191.742	584.261	1235.39	-27.0535	775.2	1383.98	-140.206	765.452	1149.9	-149.809	752.382	1052.68	-168.656	831.038	920.541	-124.485	859.446	820.016	-186.264	816.387	806.537	-179.107	875.997	746.584
922	0	71.6094	859.597	1590.33	177.162	858.276	1594.5	57.3403	701.329	1543.01	175.76	696.693	1548.06	128.978	685.921	1424.69	109.465	594.194	1144.03	125.827	843.68	1320.81	129.755	943.156	1121.41	191.637	594.179	1236.64	-26.607	784.85	1385.97	-140.177	774.71	1152.28	-149.699	760.502	1055.22	-168.826	838.298	922.359	-124.97	865.729	821.435	-186.511	822.808	808.248	-179.29	881.339	747.519
923	0	72.1677	869.473	1591.85	177.702	868.042	1595.85	57.7774	711.005	1544.46	176.109	706.392	1549.53	129.329	695.498	1426.1	109.795	603.423	1145.54	126.111	853.216	1322.43	130.098	952.624	1123.16	192.073	604.099	1237.87	-26.2679	794.6	1387.62	-140.32	783.965	1154.46	-149.589	768.533	1057.08	-169.357	845.563	924.094	-125.561	872.3	822.975	-187.383	829.486	810.284	-179.543	887.02	748.441
924	0	72.6172	879.181	1593.19	178.193	877.712	1597.24	58.1076	720.78	1545.86	176.812	715.956	1550.88	129.6	705.182	1427.59	110.259	612.711	1147	126.426	862.93	1323.73	130.232	961.938	1124.64	192.135	613.533	1239.4	-26.0917	804.074	1389.18	-140.406	793.001	1156.13	-149.849	776.684	1059.1	-169.908	852.998	925.477	-126.341	878.944	824.089	-188.038	836.068	811.909	-179.897	892.833	749.115
925	0	73.1446	888.904	1594.23	178.619	887.305	1598.27	58.3569	730.562	1547.03	176.865	725.643	1551.8	129.786	714.956	1428.81	110.982	621.671	1148.64	126.633	872.646	1324.78	130.358	971.455	1125.64	192.543	623.045	1240.66	-25.9964	813.635	1390.41	-140.574	801.965	1157.59	-149.926	784.769	1060.59	-170.438	860.245	926.45	-126.983	885.844	824.84	-189.061	842.708	813.168	-180.617	898.723	749.588
926	0	73.2684	898.324	1595.33	178.897	896.718	1599.18	58.5258	740.117	1547.8	177.026	735.237	1552.57	130.058	724.432	1429.85	111.591	630.788	1149.93	126.674	882.188	1325.67	130.303	981.029	1126.41	192.849	632.607	1241.87	-25.8449	823.213	1391.3	-140.864	810.724	1158.58	-150.262	792.993	1061.84	-171.23	867.61	927.31	-127.91	892.649	825.38	-189.762	849.441	814.122	-181.425	904.9	750.048
927	0	73.6516	907.834	1596.32	179.088	906.124	1600.1	58.5942	749.691	1548.54	176.988	744.613	1553.28	130.165	734.031	1430.98	111.986	639.863	1151.23	126.795	891.874	1326.58	130.023	990.383	1126.89	193.087	641.995	1243.19	-25.9163	832.601	1391.97	-141.06	819.086	1159.23	-150.578	801.174	1062.66	-171.828	874.914	927.822	-128.68	899.721	825.862	-190.489	855.988	814.74	-182.538	911.254	750.574
928	0	73.7671	917.278	1597.27	179.295	915.48	1601.06	58.5894	759.166	1549.23	176.769	753.964	1553.97	130.24	743.676	1432.11	112.329	648.909	1152.48	126.726	901.386	1327.37	129.611	999.67	1127.11	193.44	651.276	1244.48	-26.0914	841.755	1392.59	-141.345	827.199	1159.76	-151.06	809.396	1063.53	-172.531	882.17	928.219	-129.652	906.804	826.218	-191.141	862.759	815.223	-183.597	917.816	751.009
929	0	73.7982	926.686	1598.17	179.41	924.752	1601.9	58.5823	768.608	1549.9	176.695	763.395	1554.49	130.389	753.281	1433.03	112.604	658.14	1153.69	126.513	910.843	1328.04	129.253	1008.99	1127.33	193.873	660.469	1245.75	-26.1802	851.08	1393.13	-141.588	834.943	1160.12	-151.318	817.578	1064.09	-173.185	889.636	928.657	-130.356	913.877	826.379	-191.602	869.529	815.736	-184.817	924.674	751.432
930	0	73.9353	936.065	1598.87	179.537	934.047	1602.59	58.6087	778.048	1550.52	177.103	772.708	1555.13	130.674	762.755	1433.88	113.068	667.213	1154.79	126.362	920.364	1328.73	128.773	1018.25	1127.51	194.466	669.599	1246.97	-26.1498	860.223	1393.63	-141.714	842.525	1160.41	-151.608	825.693	1064.45	-173.619	897.041	928.875	-131.163	920.924	826.569	-192.241	876.374	816.072	-186.188	931.578	751.971
931	0	73.8518	945.395	1599.54	179.58	943.459	1603.23	58.6311	787.41	1551.12	176.939	782.079	1555.77	130.779	772.317	1434.84	113.612	676.195	1155.82	126.177	929.729	1329.2	128.013	1027.37	1127.51	195.046	678.682	1248.23	-26.2683	869.096	1393.98	-141.844	850.034	1160.64	-151.846	833.723	1064.82	-174.127	904.645	929.128	-131.999	928.064	826.786	-193.056	883.454	816.547	-187.391	938.668	752.425
932	0	73.7012	954.76	1599.92	179.43	952.786	1603.65	58.5551	796.797	1551.69	176.827	791.531	1556.3	130.977	781.628	1435.64	113.968	685.101	1157.11	125.763	938.952	1329.49	127.307	1036.32	1127.37	195.682	687.859	1249.33	-26.4668	877.959	1394.34	-141.801	857.43	1160.91	-152.066	841.8	1065.28	-174.526	912.305	929.36	-132.748	935.136	826.685	-193.748	890.604	816.969	-188.528	946.169	753.11
933	0	73.74	964.195	1600.25	179.304	962.285	1603.99	58.4763	806.089	1552.1	176.531	800.907	1556.66	131.204	790.883	1436.2	114.712	693.505	1157.94	125.424	948.132	1329.74	126.568	1045.12	1127.43	196.183	696.776	1250.25	-26.5087	886.655	1394.64	-141.682	864.913	1161.26	-152.024	849.534	1065.67	-174.717	919.73	929.569	-133.15	942.508	826.778	-194.443	897.908	817.216	-189.551	953.631	753.559
934	0	73.5137	973.54	1600.51	179.207	971.725	1604.23	58.5564	815.387	1552.39	176.566	810.257	1557.08	131.346	800.006	1436.76	115.327	701.98	1158.62	125.119	957.194	1330.01	125.853	1053.89	1127.54	196.719	705.71	1251.11	-26.5721	895.244	1394.93	-141.724	872.304	1161.77	-152.103	857.286	1066.19	-174.898	927.29	929.954	-133.737	949.717	826.998	-194.513	904.995	817.575	-190.52	961.131	754.377
935	0	73.4047	982.885	1600.6	179.039	981.226	1604.37	58.5384	824.823	1552.83	176.847	819.718	1557.51	131.608	809.083	1437.34	115.936	710.353	1159.47	124.855	966.199	1330.19	125.074	1062.73	1127.54	197.213	714.68	1251.93	-26.6631	903.714	1395.33	-141.896	879.623	1162.22	-152.181	864.964	1066.77	-175.188	934.726	930.531	-134.098	957.316	827.311	-195.285	912.503	818.328	-191.357	968.75	754.974
936	0	73.4129	992.478	1600.6	179.026	990.83	1604.39	58.564	834.184	1553.27	176.969	829.339	1557.84	131.785	818.2	1437.84	116.503	718.784	1160.26	124.458	975.074	1330.33	124.285	1071.59	1127.64	197.706	723.577	1252.57	-26.7671	912.225	1395.76	-141.984	887.025	1162.68	-152.171	872.52	1067.3	-175.283	942.374	930.879	-134.438	965.014	827.611	-195.758	919.969	818.929	-192.108	976.424	755.628
937	0	73.28	1001.8	1600.62	178.912	1000.34	1604.26	58.6682	843.366	1553.55	176.931	838.643	1558.11	131.966	827.148	1438.13	117.207	726.873	1160.52	124.133	983.814	1330.55	123.55	1080.37	1128.03	198.015	732.316	1253.07	-26.9131	920.601	1396.13	-142.185	894.63	1163.07	-152.38	879.995	1067.78	-175.599	950.053	931.311	-134.773	972.683	827.925	-195.951	927.269	819.204	-192.843	984.069	756.269
938	0	73.221	1011.24	1600.7	178.805	1009.85	1604.16	58.6486	852.749	1553.94	176.731	847.971	1558.43	131.938	835.898	1438.42	117.56	735.164	1160.94	123.736	992.441	1330.8	122.902	1088.84	1128.49	198.229	741.11	1253.6	-27.2877	928.836	1396.52	-142.363	902.202	1163.53	-152.421	887.537	1068.22	-175.919	957.547	931.777	-135.379	980.445	828.533	-196.143	934.724	819.557	-193.548	991.665	756.9
939	0	73.1363	1020.7	1600.64	178.841	1019.45	1603.99	58.7032	862.074	1554.44	176.873	857.349	1558.76	131.898	844.869	1438.73	117.785	743.494	1161.4	123.09	1001.02	1330.77	122.278	1097.2	1128.61	198.365	749.904	1253.93	-27.5963	937.18	1396.91	-142.62	909.885	1163.86	-152.565	895.235	1068.65	-176.44	964.97	932.2	-135.776	988.331	829.011	-196.237	942.354	819.98	-194.037	999.344	757.305
940	0	73.1554	1030.09	1600.4	178.757	1028.85	1603.69	58.7004	871.258	1554.87	177.087	866.734	1559.02	131.955	853.583	1438.78	117.989	751.883	1161.76	122.631	1009.7	1330.68	121.623	1105.57	1128.51	198.476	758.743	1254.1	-27.9347	945.537	1397.15	-143.086	917.787	1164.32	-152.693	903.059	1068.74	-176.993	972.578	932.532	-136.14	996.337	829.311	-196.199	949.851	820.13	-194.402	1007.08	757.533
941	0	73.1625	1039.57	1600.08	178.746	1038.37	1603.21	58.6356	880.513	1555.19	176.717	876.079	1559.16	131.92	862.392	1438.82	118.15	760.212	1161.88	122.25	1018.48	1330.71	120.996	1114.01	1128.38	198.789	767.147	1254.16	-28.229	953.909	1397.15	-143.34	925.663	1164.46	-152.91	910.709	1068.73	-177.414	980.178	932.509	-136.533	1004.28	829.347	-196.178	957.494	820.104	-194.598	1014.83	757.622
942	0	72.903	1048.8	1599.8	178.636	1047.78	1602.8	58.6699	889.704	1555.51	176.825	885.235	1559.44	131.828	871.294	1438.92	118.1	768.605	1162.12	121.918	1027.29	1330.71	120.45	1122.55	1128.39	198.816	775.828	1254.42	-28.5542	962.386	1397.19	-143.741	933.706	1164.69	-153.046	918.617	1068.72	-177.88	987.953	932.538	-136.843	1012.42	829.544	-196.371	965.414	819.998	-194.891	1022.69	757.623
943	0	72.9438	1058.29	1599.42	178.527	1057.11	1602.25	58.5765	898.869	1555.83	176.886	894.558	1559.64	131.682	880.144	1438.86	117.925	777.049	1162.33	121.531	1036.02	1330.31	119.861	1131.11	1128.18	198.655	784.475	1254.54	-28.9066	970.957	1397.16	-144.055	941.792	1164.64	-153.423	926.553	1068.84	-178.328	995.809	932.531	-137.102	1020.62	829.677	-196.51	973.424	819.894	-194.813	1030.59	757.355
944	0	72.8449	1067.54	1598.83	178.442	1066.56	1601.51	58.3207	908.026	1555.95	176.647	903.842	1559.47	131.404	889.068	1438.63	117.707	785.459	1162.24	121.108	1044.86	1329.88	119.363	1139.78	1127.68	198.546	793.066	1254.41	-29.2618	979.616	1396.94	-144.455	950.002	1164.45	-153.451	934.629	1068.58	-178.663	1003.75	932.145	-137.337	1029.08	829.499	-196.546	981.388	819.732	-194.684	1038.63	756.993
945	0	72.6195	1076.81	1598.27	178.205	1075.86	1600.89	58.263	917.159	1555.88	176.586	912.922	1559.39	131.202	897.982	1438.37	117.517	793.893	1162.07	120.673	1053.58	1329.55	118.911	1148.41	1127.4	198.297	801.742	1254.26	-29.5644	988.382	1396.6	-144.738	958.235	1164.16	-153.873	942.797	1068.3	-179.052	1011.9	931.869	-137.523	1037.29	829.221	-196.475	989.465	819.268	-194.751	1046.74	756.623
946	0	72.4413	1086.18	1597.66	177.982	1085.14	1600.23	57.9874	926.321	1555.78	176.162	922.061	1559.27	130.791	906.97	1438.07	117.242	802.488	1161.99	120.563	1062.34	1329.2	118.501	1157.13	1126.86	197.972	810.42	1254.19	-29.7958	997.297	1396.19	-145.074	966.665	1163.94	-154.151	951.047	1068.16	-179.339	1020.1	931.503	-137.867	1045.73	829.068	-196.57	997.604	818.942	-194.735	1054.86	756.223
947	0	72.1146	1095.34	1596.97	177.807	1094.42	1599.41	57.7452	935.436	1555.39	176.137	931.114	1558.92	130.551	915.982	1437.64	116.953	811.131	1161.78	120.087	1071.32	1328.52	118.221	1165.87	1126.2	197.695	819.115	1254.04	-30.2298	1006.24	1395.84	-145.52	975.106	1163.68	-154.515	959.542	1067.82	-179.705	1028.44	931.072	-138.16	1054.22	828.762	-196.875	1005.93	818.485	-194.761	1063.12	755.596
948	0	71.8078	1104.66	1596.22	177.468	1103.61	1598.63	57.5104	944.573	1554.88	175.862	940.364	1558.26	130.218	925.026	1437.02	116.584	819.542	1161.31	120.064	1080.18	1327.91	117.957	1174.54	1125.49	197.34	827.892	1253.41	-30.5886	1015.18	1395.33	-145.977	983.728	1163.32	-154.857	967.996	1067.22	-180.049	1036.87	930.725	-138.399	1062.57	828.184	-197.093	1014.25	817.795	-194.888	1071.36	754.939
949	0	71.4165	1113.94	1595.28	177.187	1112.97	1597.62	57.0635	953.918	1554.26	175.141	949.744	1557.58	129.754	934.128	1436.31	116.116	828.171	1160.79	119.653	1089.16	1327.24	117.651	1183.27	1124.66	196.785	836.689	1252.95	-30.9566	1024.39	1394.62	-146.526	992.4	1162.82	-155.229	976.797	1066.7	-180.323	1045.4	929.961	-138.923	1071.03	827.567	-197.166	1022.36	816.968	-195.116	1079.58	754.153
950	0	71.0914	1123.18	1594.26	176.797	1122.21	1596.69	56.5517	963.106	1553.48	174.883	958.744	1556.94	129.19	943.226	1435.51	115.47	836.858	1160.21	119.215	1098.12	1326.3	117.469	1192.11	1123.76	196.245	845.509	1252.44	-31.3761	1033.54	1393.81	-147.054	1001.35	1162.14	-155.696	985.541	1065.91	-180.678	1054.16	929.195	-139.47	1079.57	826.896	-197.809	1030.91	816.333	-195.55	1087.89	753.375
951	0	70.8207	1132.74	1593.07	176.459	1131.57	1595.53	56.077	972.435	1552.61	174.468	967.971	1556.04	128.578	952.243	1434.62	114.913	846.058	1159.27	119.133	1107.37	1325.41	117.272	1201.07	1122.7	195.627	854.339	1251.56	-31.857	1042.86	1392.78	-147.415	1010.52	1161.26	-156.021	994.74	1065.12	-180.896	1062.9	928.141	-140.042	1088.13	825.958	-197.941	1039.23	815.155	-195.953	1096.26	752.335
952	0	70.3942	1142.07	1591.71	176.093	1140.89	1594.03	55.6354	981.868	1551.64	173.871	977.413	1554.9	128.057	961.468	1433.46	114.178	854.545	1158.4	118.641	1116.37	1323.99	117.227	1210.06	1121.48	194.91	863.245	1250.58	-32.1994	1052.31	1391.55	-147.978	1019.77	1160.11	-156.456	1003.58	1063.97	-181.364	1071.69	926.853	-140.669	1096.69	824.73	-198.186	1047.57	813.963	-196.443	1104.62	750.923
953	0	70.0873	1151.65	1590.29	175.607	1150.2	1592.57	55.0647	991.3	1550.45	173.109	986.556	1553.77	127.385	970.643	1432.42	113.541	863.787	1157.31	118.049	1125.56	1322.75	117.204	1219.17	1120.31	194.128	872.213	1249.52	-32.7213	1061.8	1390.38	-148.376	1029.07	1158.84	-157.068	1012.81	1062.89	-181.755	1080.41	925.571	-140.576	1104.7	822.917	-198.88	1056.18	812.711	-196.979	1113.07	749.443
954	0	69.6503	1161.13	1588.84	175.305	1159.68	1591.23	54.3719	1000.77	1549.42	172.634	996.002	1552.75	126.583	979.916	1431.17	112.67	872.767	1156.27	117.973	1134.88	1321.5	117.138	1228.39	1118.92	193.297	881.327	1248.46	-33.3681	1071.34	1389.08	-148.896	1038.73	1157.47	-157.572	1022.04	1061.73	-182.338	1089.49	924.228	-141.176	1113.38	821.5	-199.495	1064.77	811.319	-197.607	1121.55	748.029
955	0	69.1494	1170.72	1587.3	174.664	1169.06	1589.46	53.6945	1010.39	1548.12	171.865	1005.4	1551.31	125.755	989.24	1429.84	111.934	882.219	1154.86	117.484	1144.04	1320.04	117.116	1237.62	1117.74	192.357	890.357	1247.23	-33.8	1081.18	1387.59	-149.574	1048.28	1155.99	-158.108	1031.33	1060.23	-182.795	1098.52	922.469	-141.746	1122.1	819.764	-200.141	1073.42	809.886	-198.356	1130.02	746.396
956	0	68.4471	1180.26	1585.79	174.133	1178.62	1588.08	52.8842	1019.81	1546.81	170.84	1015	1549.93	124.868	998.612	1428.43	110.983	891.424	1153.49	117.044	1153.57	1318.9	117.059	1247.05	1116.3	191.349	899.503	1245.88	-34.6389	1090.68	1386.05	-150.03	1058.06	1154.22	-158.795	1040.75	1058.51	-183.594	1107.5	920.728	-142.431	1130.73	817.898	-200.737	1082.15	808.194	-199.134	1138.52	744.694
957	0	67.7957	1190.01	1584.16	173.366	1188.24	1586.37	52.0221	1029.45	1545.37	170.138	1024.26	1548.58	123.939	1008.11	1427.03	110.031	900.806	1152.21	116.578	1163.11	1317.28	117.047	1256.49	1114.84	190.427	908.721	1244.65	-35.2944	1100.56	1384.42	-150.693	1068.06	1152.51	-159.265	1050.3	1056.97	-184.3	1116.51	918.989	-143.317	1139.51	816.18	-201.815	1091.12	806.678	-199.998	1147.11	742.881
958	0	66.9858	1199.69	1582.47	172.629	1197.71	1584.77	51.01	1039.18	1544.02	169.632	1033.59	1547.37	123.036	1017.6	1425.57	109.03	910.256	1150.74	116.019	1172.63	1315.82	117.092	1266.15	1113.51	189.437	918.108	1243.22	-36.0551	1110.42	1382.85	-151.347	1078.1	1150.84	-160.006	1059.82	1055.4	-185.021	1125.86	917.255	-144.042	1148.56	814.367	-202.621	1100	804.982	-200.739	1155.83	740.903
959	0	66.1677	1209.45	1580.78	171.788	1207.38	1583.19	50.156	1048.81	1542.54	168.345	1043.21	1545.84	122.013	1027.19	1424.04	108.19	919.776	1149.24	115.644	1182.44	1314.47	116.981	1275.85	1111.97	188.462	927.439	1241.84	-36.6962	1120.41	1381.05	-151.826	1088.16	1148.95	-160.503	1069.35	1053.63	-185.736	1134.9	915.407	-144.793	1157.53	812.37	-203.364	1109.02	803.199	-201.637	1164.49	739.049
960	0	65.1599	1219.19	1579.21	170.641	1216.86	1581.43	48.9667	1058.65	1540.96	167.222	1052.84	1544.58	120.976	1036.81	1422.58	107.274	929.465	1147.74	114.824	1192.01	1312.91	116.934	1285.73	1110.54	187.498	936.984	1240.5	-37.5182	1130.29	1379.39	-152.485	1098.33	1147.23	-161.196	1079.04	1051.83	-186.56	1144.23	913.762	-145.586	1166.64	810.429	-204.389	1118.1	801.582	-202.575	1173.37	737.276
961	0	64.1405	1229.1	1577.48	169.765	1226.75	1580.17	47.6708	1068.38	1539.6	165.984	1062.56	1543.19	119.849	1046.53	1421.18	106.074	938.878	1146.28	114.264	1202.1	1311.52	116.876	1295.8	1109.22	186.343	946.585	1239.14	-38.4294	1140.3	1377.48	-153.159	1108.57	1145.43	-162.086	1088.74	1050.32	-187.285	1153.69	911.838	-146.526	1175.94	808.615	-205.028	1127.26	799.901	-203.492	1182.3	735.353
962	0	63.0215	1238.91	1575.84	168.572	1236.36	1578.51	46.2528	1078.32	1538	164.597	1072.34	1541.69	118.715	1056.17	1419.53	105.232	948.706	1144.7	113.571	1211.89	1309.97	116.773	1305.81	1107.72	185.418	956.42	1237.58	-39.3723	1150.46	1375.88	-153.771	1118.66	1143.56	-162.641	1098.49	1048.5	-188.17	1163.14	910.127	-147.303	1185.51	806.825	-206.182	1136.76	798.296	-204.302	1191.51	733.393
963	0	61.8587	1248.82	1574.34	167.293	1245.89	1576.98	44.8669	1088.24	1536.49	163.286	1081.81	1540.32	117.571	1066.07	1418.07	104.307	958.506	1143.1	112.844	1222.05	1308.55	116.697	1315.99	1106.34	184.358	966.251	1236.11	-40.1735	1160.67	1374.18	-154.484	1128.74	1141.79	-163.335	1108.15	1046.66	-188.818	1172.76	908.376	-148.032	1194.94	804.856	-206.731	1146.2	796.371	-205.052	1200.79	731.588
964	0	60.4868	1258.72	1572.97	166.07	1255.75	1575.84	43.4034	1098.23	1535.1	161.753	1091.56	1539.25	116.264	1076.02	1416.75	103.379	968.663	1141.6	111.995	1232.09	1307.49	116.431	1326.21	1105.37	183.206	976.28	1234.91	-41.2837	1170.76	1372.62	-155.289	1138.88	1140.1	-164.203	1118.01	1045.15	-189.623	1182.47	906.771	-148.807	1204.39	803.042	-207.538	1155.83	794.8	-205.993	1210.27	729.955
965	0	59.2044	1268.8	1571.67	164.646	1265.45	1574.55	41.7726	1108.23	1533.69	159.829	1101.49	1537.92	114.889	1086.01	1415.33	102.295	978.853	1140.15	111.035	1242.36	1306.29	116.135	1336.57	1104.12	182.177	986.409	1233.58	-42.4484	1180.98	1371	-156.133	1148.84	1138.47	-164.988	1127.75	1043.66	-190.408	1192.31	904.993	-149.539	1214.29	801.438	-208.195	1165.61	793.22	-206.711	1219.97	728.204
966	0	58.0194	1278.64	1569.93	163.429	1275.34	1573.31	40.1557	1118.25	1532.25	158.263	1111.22	1536.53	113.487	1096.09	1413.68	101.387	989.259	1138.39	110.225	1252.75	1305.02	115.938	1346.91	1103.07	181.165	996.823	1231.94	-43.6146	1191.22	1369.34	-156.997	1158.74	1136.71	-165.782	1137.6	1041.83	-191.211	1202.14	903.3	-150.25	1224.18	799.751	-208.908	1175.49	791.354	-207.303	1229.88	726.303
967	0	56.4257	1288.8	1568.89	161.719	1285.03	1572.05	38.5012	1128.4	1530.69	156.468	1121.06	1535.2	111.965	1106.41	1412.17	100.358	999.904	1136.6	109.074	1263.01	1304.14	115.419	1357.53	1102.2	179.998	1007.25	1230.42	-44.9478	1201.42	1367.75	-158.058	1168.66	1135.08	-166.809	1147.53	1040.07	-191.945	1212.19	901.542	-150.897	1234.18	798.003	-209.758	1185.65	789.652	-208.013	1240.02	724.761
968	0	54.8207	1298.78	1567.73	160.261	1294.91	1571.14	36.5229	1138.47	1529.39	154.588	1130.92	1534.01	110.66	1116.29	1410.84	99.3448	1010.71	1134.87	107.918	1273.58	1303.05	114.802	1368.19	1101.45	178.893	1017.78	1229	-46.4024	1211.71	1366.16	-159.312	1178.52	1133.56	-167.778	1157.5	1038.33	-192.9	1222.18	899.879	-151.631	1244.41	796.512	-210.193	1195.72	787.875	-208.666	1250.29	723.194
969	0	53.1578	1308.88	1566.45	158.456	1304.81	1569.96	34.6539	1148.66	1527.93	152.918	1140.92	1532.86	109.158	1126.41	1409.44	98.5082	1021.77	1133.1	106.675	1284.2	1302.2	114.21	1379.09	1100.78	177.744	1028.55	1227.35	-47.8914	1222.04	1364.64	-160.549	1188.48	1131.88	-168.735	1167.6	1036.62	-193.626	1232.54	898.023	-152.37	1254.86	794.909	-210.649	1206	786.146	-209.37	1260.71	721.487
970	0	51.323	1318.97	1565.39	156.734	1314.74	1569	32.8022	1158.81	1526.55	150.992	1150.98	1531.47	107.511	1136.72	1407.9	97.5968	1032.92	1131.12	105.319	1294.88	1301.2	113.566	1390.26	1100.13	176.618	1039.29	1225.63	-49.4111	1232.41	1363.11	-161.838	1198.52	1130.2	-169.617	1178.02	1034.71	-194.482	1242.83	896.259	-153.02	1265.29	793.081	-211.111	1216.41	784.092	-209.683	1271.03	719.539
971	0	49.5445	1329.08	1564.41	154.852	1324.82	1568.2	30.8276	1169.11	1525.32	149.057	1160.94	1530.49	105.766	1147.01	1406.7	96.5516	1044.12	1129.41	103.949	1305.76	1300.55	112.85	1401.63	1099.79	175.442	1050.12	1224.27	-50.9212	1242.98	1361.6	-163.269	1208.62	1128.66	-170.69	1188.36	1032.99	-195.532	1253.23	894.555	-153.603	1276.34	791.521	-211.542	1226.84	782.044	-210.136	1281.66	717.78
972	0	47.5244	1339.28	1563.97	152.894	1334.83	1567.97	28.6832	1179.39	1524.23	147.139	1171.15	1529.77	103.926	1157.46	1405.8	95.3827	1055.37	1128.15	102.491	1316.71	1300.09	112.111	1413.13	1099.63	174.19	1060.99	1223.17	-52.7703	1253.3	1360.17	-164.599	1218.9	1127.08	-171.636	1198.82	1031.48	-196.379	1263.88	892.809	-154.557	1286.86	790.132	-212.223	1237.34	780.506	-210.743	1292.33	716.247
973	0	45.749	1349.49	1563.37	150.937	1345.04	1567.74	26.6158	1189.8	1523.5	144.731	1181.34	1529	102.101	1168.05	1405.13	94.4962	1066.74	1127.1	100.866	1327.76	1299.91	111.282	1424.81	1099.61	173.221	1071.94	1222.4	-54.4727	1264	1359.22	-165.876	1229.36	1125.69	-172.489	1209.47	1029.99	-197.296	1274.46	891.319	-155.37	1297.6	788.87	-212.925	1248.04	779.053	-211.413	1303.13	714.815
974	0	43.5992	1359.82	1563.41	148.901	1355.02	1567.69	24.4994	1200.21	1522.97	142.518	1191.63	1528.64	100.419	1178.71	1404.8	93.7729	1077.96	1126.39	99.2322	1338.77	1299.86	110.49	1436.62	1099.99	172.369	1082.81	1221.97	-56.0716	1274.74	1358.37	-167.234	1239.84	1124.83	-173.079	1220.33	1028.73	-198.315	1285	890.219	-156.25	1308.51	787.713	-213.51	1258.66	777.768	-212.142	1313.89	713.684
975	0	41.5851	1370.19	1563.87	146.94	1365.38	1568.21	22.2043	1210.74	1523.04	140.467	1201.84	1528.88	98.7925	1189.57	1405.06	93.4093	1089.11	1126.51	97.7992	1349.98	1300.41	109.588	1448.46	1100.55	171.64	1093.8	1222.4	-57.6903	1285.49	1358.08	-168.187	1250.65	1124.09	-173.766	1231.28	1027.94	-199.237	1295.81	889.594	-157.224	1319.85	787.085	-214.13	1269.39	776.946	-212.973	1324.67	712.904
976	0	39.6176	1380.73	1564.55	144.89	1375.48	1569.11	19.8711	1221.3	1523.52	138.219	1212.15	1529.48	97.0591	1200.5	1405.74	93.2272	1100.16	1127.15	96.2832	1361.16	1301.14	108.577	1460.23	1101.3	171	1104.84	1223.37	-59.2879	1296.27	1358	-169.095	1261.5	1123.89	-174.156	1242.33	1027.57	-200.022	1306.74	889.121	-158.138	1331.23	786.802	-214.787	1280.18	776.455	-213.857	1335.5	712.526
977	0	37.7828	1391.11	1565.56	142.928	1385.87	1570.27	17.6813	1231.9	1524.22	135.717	1222.52	1530.32	95.5132	1211.42	1406.74	92.915	1111.27	1128.35	94.6945	1372.15	1302.21	107.565	1471.81	1102.45	170.722	1115.95	1224.65	-60.7682	1306.97	1358.42	-169.632	1272.52	1123.72	-174.339	1253.37	1027.51	-200.766	1317.67	889.202	-159.061	1342.31	786.747	-215.551	1291	776.66	-214.912	1346.28	712.493
978	0	35.6475	1401.67	1567.06	140.889	1396.04	1572.04	15.4469	1242.51	1525.21	133.352	1232.88	1531.56	94.0118	1222.17	1408.18	92.6412	1122.6	1129.9	93.0154	1383.17	1303.85	106.368	1483.09	1104.09	170.342	1126.94	1226.48	-62.2479	1317.44	1359.1	-170.047	1283.61	1124.13	-174.473	1264.56	1027.96	-201.475	1328.62	889.684	-159.984	1353.58	787.197	-215.934	1301.9	777.083	-215.955	1357.17	713.13
979	0	33.6626	1411.99	1568.73	138.947	1406.52	1574.05	13.2934	1253.09	1526.63	131.38	1243.24	1533.34	92.6291	1232.98	1409.95	92.6024	1133.94	1131.66	91.5882	1394.01	1305.58	105.173	1494.21	1106	170.241	1138.12	1228.68	-63.5606	1327.89	1360.42	-170.127	1294.93	1124.87	-174.527	1275.83	1028.79	-202.026	1339.74	890.72	-160.9	1365.17	788.198	-216.514	1312.97	778.232	-216.831	1368.09	713.969
980	0	31.6653	1422.59	1570.63	136.864	1416.8	1576.09	11.3395	1263.7	1528.3	129.28	1253.68	1535.38	91.3881	1243.52	1411.93	93.3213	1145.46	1133.32	90.1933	1404.67	1307.68	103.999	1504.93	1108.25	170.123	1149.27	1230.84	-64.9001	1338.13	1362.32	-170.411	1306.06	1126.11	-174.538	1287.13	1030.32	-202.553	1351.01	892.253	-161.699	1376.72	789.579	-217.025	1324.2	779.827	-217.8	1379.19	715.298
981	0	29.7224	1433.01	1572.42	135.053	1427.33	1578.51	9.56338	1274.09	1530.23	127.517	1264.11	1537.7	90.396	1253.94	1413.96	93.7832	1156.84	1135.07	88.8937	1415.14	1310.15	102.779	1515.39	1110.76	169.961	1160.36	1233.06	-66.0941	1348.15	1364.29	-170.522	1317.21	1127.53	-174.434	1298.32	1031.81	-202.954	1362.35	894.138	-162.442	1388.37	791.214	-217.44	1335.52	781.588	-218.903	1390.35	717.16
982	0	28.0105	1443.28	1574.41	133.047	1437.57	1580.79	7.86925	1284.45	1532.26	125.79	1274.4	1540.31	89.4938	1264.12	1416.21	93.5618	1167.61	1137.04	87.5459	1425.49	1312.69	101.547	1525.58	1113.62	169.689	1171.23	1235.24	-67.2636	1357.95	1366.27	-170.654	1328.2	1129.26	-174.451	1309.32	1033.78	-203.29	1373.7	896.362	-162.986	1400.23	793.314	-217.818	1347.12	783.7	-219.881	1401.8	719.402
983	0	26.3176	1453.69	1576.5	131.538	1447.94	1583.27	6.15236	1294.69	1534.68	124.181	1284.61	1543.1	88.0831	1274	1418.29	93.3527	1178	1139.1	86.4123	1435.53	1315.25	100.418	1535.55	1116.48	169.22	1182	1237.44	-68.5062	1367.74	1368.67	-170.836	1339.21	1131.22	-174.607	1320.4	1035.84	-203.697	1385.13	898.745	-163.595	1412.23	795.707	-218.318	1358.81	786.143	-220.683	1413.58	721.684
984	0	24.9709	1463.87	1578.13	130.044	1458.12	1585.27	5.12873	1304.57	1536.92	122.695	1294.77	1545.59	86.9819	1283.95	1420.16	92.9825	1188.43	1140.83	85.3667	1445.62	1317.51	99.377	1545.43	1119.13	168.736	1192.53	1239.21	-69.6731	1377.47	1370.92	-171.095	1350.08	1133.16	-174.944	1331.33	1038.02	-204.022	1396.69	901.039	-164.086	1424.27	798.012	-218.624	1370.69	788.42	-221.318	1425.6	724.037
985	0	23.8364	1474	1579.96	128.736	1468.17	1587.1	3.94087	1314.53	1539.12	121.506	1304.65	1548.06	86.0558	1293.62	1421.91	92.5034	1198.69	1142.38	84.2721	1455.44	1319.94	98.3738	1555.06	1121.93	168.117	1202.8	1240.81	-70.7574	1387.08	1372.94	-171.652	1360.81	1135.04	-175.492	1342.19	1039.9	-204.359	1408.22	903.16	-164.426	1436.42	800.188	-218.763	1382.77	790.461	-221.704	1437.78	726.376
986	0	22.763	1483.96	1581.81	127.762	1478.02	1589.06	2.77111	1324.39	1541.35	120.317	1314.43	1550.5	85.0205	1303.22	1423.72	91.8308	1208.9	1144.03	83.3506	1465.24	1322.11	97.3765	1564.65	1124.51	167.289	1212.8	1242.59	-71.7825	1396.56	1375.02	-172.318	1371.49	1136.93	-176.194	1353.11	1041.79	-204.741	1419.87	905.167	-164.571	1448.75	802.5	-218.908	1395.09	792.491	-221.826	1450.42	728.576
987	0	21.8118	1493.79	1583.36	126.666	1487.79	1590.65	1.7912	1334.25	1543.53	119.335	1324.19	1552.59	84.0902	1312.78	1425.32	91.0926	1218.89	1145.59	82.2822	1474.94	1324.03	96.5556	1574.36	1127.02	166.529	1222.64	1244.26	-72.7654	1406.14	1376.9	-173.27	1382.16	1138.9	-177.21	1363.9	1043.56	-205.37	1431.48	907.328	-164.874	1461.11	804.87	-219.138	1407.46	794.341	-221.892	1463.36	730.765
988	0	21.0699	1503.46	1584.8	125.968	1497.43	1592.1	0.916899	1343.77	1545.16	118.486	1333.78	1554.14	83.3264	1322.31	1426.72	90.2922	1228.56	1146.94	81.6432	1484.53	1325.8	95.9417	1583.47	1128.83	165.703	1232.33	1245.54	-73.7465	1415.63	1378.53	-174.266	1392.67	1140.61	-178.151	1374.75	1045.13	-205.946	1443.05	909.141	-165.078	1473.44	807.023	-219.259	1420.01	795.957	-221.761	1476.49	732.735
989	0	20.2945	1513.03	1586.2	125.223	1506.91	1593.49	0.226494	1353.32	1546.49	117.769	1343.28	1555.57	82.1213	1331.77	1427.91	89.3191	1237.98	1148.15	80.9235	1494.01	1327.39	95.3606	1593.2	1130.83	164.726	1241.62	1246.86	-74.6178	1425.13	1379.93	-175.607	1403	1142.27	-179.411	1385.47	1046.29	-206.614	1454.76	910.799	-165.157	1485.96	809.068	-219.482	1432.76	797.188	-221.57	1489.69	734.762
990	0	19.5025	1522.47	1587.5	124.582	1516.55	1594.83	-0.49089	1362.75	1547.73	117.082	1352.82	1556.9	81.2887	1341.27	1429.21	88.311	1247.34	1149.54	80.2812	1503.58	1328.77	94.792	1602.64	1132.19	163.674	1250.74	1248.28	-75.3871	1434.72	1381.26	-177.039	1413.36	1143.83	-180.817	1396.17	1047.61	-207.284	1466.57	912.188	-165.285	1498.25	811.256	-219.922	1445.49	798.523	-221.184	1503.2	736.472
991	0	18.8375	1531.8	1588.42	123.736	1525.88	1595.82	-1.00697	1372.04	1548.78	116.526	1362.22	1557.95	80.6334	1350.73	1430.39	87.2919	1256.49	1150.82	79.5847	1512.98	1329.71	94.285	1611.84	1132.99	162.687	1259.85	1249.55	-76.0655	1444.37	1382.36	-178.37	1423.69	1144.98	-182.404	1407.02	1048.69	-207.839	1478.56	913.565	-165.411	1510.88	813.233	-220.161	1458.49	799.628	-220.662	1516.9	738.101
992	0	18.0759	1541.05	1589.21	123.061	1535.31	1596.61	-1.43373	1381.27	1549.61	116.189	1371.54	1558.79	79.9891	1360.12	1431.3	86.4218	1265.48	1152.02	79.1858	1522.44	1330.51	94.1142	1621.63	1133.71	161.913	1268.71	1250.68	-76.4666	1454.01	1383.12	-179.293	1434.08	1145.86	-183.607	1417.78	1049.32	-208.289	1490.49	914.676	-165.495	1523.11	814.678	-220.512	1471.4	800.49	-220.284	1530.65	739.763
993	0	17.3815	1550.3	1589.87	122.232	1544.59	1597.45	-1.74516	1390.43	1550.26	115.72	1380.92	1559.62	79.4412	1369.48	1432.21	85.432	1274.3	1153.1	78.8533	1531.64	1331.16	93.9265	1630.8	1134.08	161.071	1277.47	1251.71	-76.8379	1463.7	1383.82	-180.566	1444.21	1146.79	-185.125	1428.55	1049.93	-208.917	1502.33	915.904	-165.627	1535.53	816.545	-220.726	1484.45	801.279	-219.856	1544.41	741.287
994	0	16.6929	1559.41	1590.44	121.523	1554.11	1598.14	-2.33567	1399.47	1550.91	115.45	1390.16	1560.44	78.9407	1378.91	1433.16	84.3475	1283.13	1154.36	78.6456	1540.84	1331.65	94.047	1640.15	1134.4	160.221	1286.34	1252.79	-77.0803	1473.33	1384.45	-181.886	1454.4	1147.66	-186.322	1439.09	1050.6	-209.519	1514.21	916.931	-165.708	1548.23	818.109	-221.157	1497.51	802.151	-219.537	1558.23	742.9
995	0	16.0619	1568.69	1590.9	120.908	1563.26	1598.81	-2.51226	1408.62	1551.31	114.973	1399.51	1560.97	78.433	1388.19	1433.9	83.3298	1291.82	1155.43	78.5499	1550.03	1332.06	94.3183	1649.22	1134.4	159.385	1295	1253.66	-77.3146	1483	1384.97	-183.07	1464.27	1148.43	-187.831	1449.95	1051.17	-209.696	1526.47	917.671	-165.415	1560.36	819.353	-221.543	1510.45	802.98	-219.287	1571.96	744.376
996	0	15.5291	1577.7	1591.31	120.395	1572.53	1599.3	-2.93418	1417.61	1551.49	114.724	1408.64	1561.34	78.0841	1397.46	1434.49	82.3181	1300.42	1156.22	78.5167	1559.07	1332.32	94.604	1658.11	1134.33	158.608	1303.6	1254.44	-77.3749	1492.65	1385.36	-184.075	1474.39	1149.13	-189.117	1460.8	1051.5	-210.123	1538.41	918.626	-165.068	1572.6	820.663	-221.696	1523.6	803.712	-219.096	1585.6	745.863
997	0	15.04	1586.85	1591.64	119.896	1581.58	1599.73	-3.07633	1426.82	1551.65	114.31	1417.89	1561.7	77.7382	1406.78	1435.11	81.3463	1309.02	1157.05	78.5921	1568.04	1332.41	95.0098	1666.85	1134.19	157.833	1312.25	1255.23	-77.4893	1502.24	1385.77	-184.973	1484.42	1149.79	-190.489	1471.76	1052	-210.29	1550.44	919.518	-164.844	1584.56	821.949	-222.161	1536.55	804.471	-218.8	1599.24	747.492
998	0	14.8019	1596.03	1591.74	119.609	1590.85	1600.02	-3.47993	1435.84	1551.84	114.219	1427.02	1562.08	77.3895	1415.89	1435.67	80.3984	1317.48	1158.02	78.6841	1576.92	1332.37	95.6089	1675.54	1133.88	157.094	1320.79	1255.94	-77.4627	1511.9	1385.91	-185.959	1494.36	1150.36	-191.681	1482.81	1052.72	-210.382	1562.7	920.546	-164.404	1596.63	822.977	-222.053	1549.37	805.309	-218.414	1612.79	748.915
999	0	14.622	1605.2	1591.76	119.353	1599.9	1600.15	-3.6078	1445.12	1551.79	113.8	1436.19	1562.1	77.139	1425.04	1436.09	79.5184	1325.86	1158.65	79.0226	1585.85	1332.33	96.1147	1683.94	1133.58	156.4	1329.25	1256.47	-77.3644	1521.43	1386.3	-186.135	1504.16	1150.56	-192.642	1493.98	1053.04	-210.554	1574.67	921.478	-164.05	1608.77	824.081	-222.315	1562.23	806.096	-217.86	1626.26	750.327
1000	0	14.4783	1614.44	1591.77	119.315	1609.04	1600.29	-3.87326	1454.26	1551.67	113.727	1445.23	1562.15	76.7414	1434	1436.44	78.7736	1334.21	1159.12	79.1443	1594.57	1332.42	96.5926	1692.23	1133.36	155.564	1337.52	1256.95	-77.4055	1530.91	1386.58	-186.528	1514.27	1150.94	-193.725	1504.89	1053.32	-210.377	1586.93	922.191	-163.616	1620.46	825.242	-222.424	1575.04	806.777	-217.45	1639.41	751.777
1001	0	14.2501	1623.43	1591.66	119.408	1618.19	1600.4	-4.12076	1463.57	1551.67	113.261	1454.32	1562.2	76.3402	1443	1436.7	77.9137	1342.45	1159.62	79.3683	1603.35	1332.43	96.9663	1700.34	1133.12	154.851	1345.94	1257.41	-77.4738	1540.08	1386.81	-186.798	1524.43	1151.08	-194.769	1515.86	1053.63	-210.206	1598.51	922.886	-162.992	1631.87	826.123	-222.691	1587.87	807.522	-217.119	1652.46	753.025
1002	0	14.3656	1632.94	1591.41	119.36	1627.18	1600.11	-4.20345	1472.73	1551.71	113.429	1463.46	1562.28	76.2568	1451.88	1436.88	77.2652	1350.65	1160.13	79.5093	1611.98	1332.16	97.3413	1708.55	1132.8	154.372	1354.27	1257.69	-77.3934	1549.43	1386.92	-186.988	1534.7	1151.19	-195.587	1526.89	1053.96	-209.84	1610.78	923.548	-162.443	1643.8	826.87	-223.156	1600.53	808.283	-216.477	1665.25	753.948
1003	0	14.6504	1642.29	1591.21	119.574	1636.48	1599.62	-4.26675	1481.95	1551.61	113.157	1472.56	1562.1	75.9953	1460.61	1436.83	76.986	1358.92	1160.35	79.7566	1620.7	1331.84	97.5855	1716.41	1132.16	153.961	1362.6	1257.83	-77.3371	1558.58	1386.81	-187.028	1545	1151.26	-196.075	1537.89	1053.9	-209.626	1622.53	923.95	-161.933	1655.79	827.211	-222.89	1613.12	808.655	-215.658	1678.18	754.637
1004	0	15.0636	1651.28	1590.68	119.658	1645.54	1599.25	-4.17322	1491.22	1551.43	113.124	1481.65	1562.09	75.9336	1469.5	1436.88	76.6151	1367.04	1160.56	79.9632	1629.26	1331.68	97.6721	1724.49	1131.78	153.658	1370.82	1258.07	-77.2358	1567.55	1386.63	-187.034	1555.43	1151.08	-196.548	1548.86	1053.79	-209.347	1634.23	924.202	-161.342	1667.16	827.55	-222.897	1625.62	809.005	-214.934	1690.81	755.348
1005	0	15.2215	1660.6	1590.03	119.822	1654.72	1598.91	-4.20733	1500.42	1551.4	113.205	1490.67	1562.1	76.0369	1478.03	1436.92	76.3232	1374.99	1160.86	80.1628	1637.89	1331.4	97.8316	1732.42	1131.26	153.389	1378.97	1258.31	-77.055	1576.52	1386.3	-186.91	1566.03	1150.82	-196.881	1559.86	1053.79	-208.901	1645.91	924.505	-160.619	1679.01	828.033	-222.461	1637.84	809.318	-214.173	1703.15	755.92
1006	0	15.5527	1669.93	1589.52	120.093	1664.08	1598.41	-4.15791	1509.5	1551.19	113.175	1499.85	1561.96	76.0711	1486.73	1436.71	76.1789	1383.11	1160.96	80.3595	1646.43	1330.86	98.0491	1740.76	1130.71	153.308	1387.28	1258.3	-77.1448	1585.3	1386.23	-186.803	1576.51	1150.65	-196.969	1570.83	1053.53	-208.585	1657.25	924.581	-159.938	1690.24	827.823	-222.201	1649.96	809.454	-213.298	1715.45	756.058
1007	0	15.8197	1679.09	1588.97	120.142	1673.16	1597.69	-3.91014	1518.72	1550.79	113.473	1508.93	1561.61	76.1793	1495.45	1436.5	76.1848	1391.2	1160.92	80.5789	1655.1	1330.52	98.0729	1748.95	1130.12	153.385	1395.72	1258.17	-76.9021	1594.1	1385.92	-186.782	1586.95	1149.83	-196.902	1581.73	1052.99	-207.825	1668.96	924.302	-159.138	1701.96	828.018	-221.643	1662	809.252	-212.292	1727.59	756.107
1008	0	15.8985	1688.3	1588.3	120.32	1682.24	1597.3	-3.82467	1527.75	1550.57	113.632	1518.04	1561.42	76.3174	1504.29	1436.26	76.2262	1399.33	1161.02	80.8354	1663.78	1330.23	98.2173	1757.35	1129.54	153.363	1404.13	1258.2	-76.6579	1602.83	1385.21	-186.463	1597.39	1149.57	-196.559	1592.73	1052.5	-207.354	1680.2	924.497	-158.157	1713.74	828.258	-221.17	1673.93	809.161	-211.545	1739.51	756.395
1009	0	16.0054	1697.19	1587.8	120.782	1691.48	1596.9	-3.45668	1536.85	1550.22	113.761	1527.03	1561.21	76.7134	1513.09	1436.02	76.2998	1407.5	1161.12	80.9453	1672.47	1329.72	98.2822	1765.81	1129.05	153.662	1412.56	1258.27	-76.237	1611.42	1385.2	-186.055	1608.03	1149.22	-196.227	1603.68	1052.05	-206.699	1691.51	924.293	-157.483	1724.32	827.957	-220.447	1685.84	809.134	-210.41	1751.43	756.396
1010	0	16.4099	1706.32	1587.25	120.979	1700.46	1596.19	-3.13609	1545.92	1549.64	114.429	1536.09	1560.77	77.0864	1522.05	1435.67	76.599	1415.75	1160.97	81.1427	1681.12	1329.11	98.4601	1774.29	1128.3	153.905	1421.09	1257.96	-75.9479	1620.17	1384.81	-185.658	1618.48	1148.84	-195.847	1614.28	1051.52	-205.606	1702.82	924.258	-155.878	1735.64	827.691	-219.673	1697.48	808.79	-209.328	1763.06	756.455
1011	0	16.6498	1715.33	1586.52	121.402	1709.7	1595.57	-2.78508	1554.91	1549.04	114.605	1545.19	1560.09	77.3586	1530.95	1435.14	76.7866	1424.11	1160.65	81.4791	1689.97	1328.54	98.6054	1782.81	1127.61	154.165	1429.68	1257.66	-75.6076	1628.92	1384.17	-185.106	1628.94	1148.17	-195.122	1624.99	1050.81	-204.702	1713.84	924.019	-155.221	1746.85	827.702	-218.641	1709.11	808.452	-208.079	1774.71	756.215
1012	0	17.0463	1724.32	1585.85	121.821	1718.91	1595.04	-2.25411	1564	1548.35	114.991	1554.29	1559.51	77.9074	1540.06	1434.71	77.024	1432.57	1160.46	81.6692	1698.78	1327.73	98.7041	1791.43	1126.71	154.506	1438.37	1257.37	-75.2407	1637.7	1383.62	-184.415	1639.26	1147.34	-194.531	1635.73	1050.11	-203.453	1725.17	923.57	-153.951	1757.89	827.321	-217.671	1720.64	808.189	-206.78	1786.26	755.994
1013	0	17.5764	1733.45	1585.19	122.272	1728.13	1594.22	-1.74023	1573.07	1547.65	115.456	1563.58	1558.69	78.3618	1549.04	1434.18	77.4018	1441.15	1160.21	82.1474	1707.71	1326.93	98.9614	1800.07	1125.69	155.04	1447.19	1256.97	-74.7613	1646.51	1382.83	-183.736	1649.51	1146.57	-193.691	1646.47	1049.39	-202.269	1736.08	923.323	-152.524	1769.39	827.11	-216.93	1732.23	808.023	-205.432	1797.75	755.715
1014	0	18.1656	1742.6	1584.19	122.679	1737.32	1593.35	-1.00846	1582.11	1546.85	116.001	1572.65	1557.71	78.9628	1558.18	1433.46	77.8133	1449.76	1159.68	82.4807	1716.64	1325.87	99.0981	1808.82	1124.7	155.511	1455.92	1256.36	-74.2762	1655.38	1382.1	-182.872	1659.5	1145.76	-192.784	1656.96	1048.62	-200.806	1747.19	922.693	-151.217	1780.08	826.438	-215.281	1743.45	807.323	-203.708	1809.26	755.227
1015	0	18.7186	1751.69	1583.55	123.232	1746.49	1592.5	-0.209825	1591.26	1545.91	117.237	1581.65	1556.95	79.7571	1567.47	1432.76	78.2477	1458.48	1159.15	82.9901	1725.64	1325.04	99.3846	1817.55	1123.6	156.128	1464.84	1255.75	-73.729	1664.31	1381.44	-182.014	1669.39	1144.91	-191.773	1667.33	1047.73	-199.422	1758.18	922.415	-149.239	1790.84	825.894	-214.382	1754.99	807.011	-202.162	1820.47	755.125
1016	0	19.3091	1760.8	1582.5	123.939	1755.86	1591.46	0.690341	1600.5	1545.03	118.153	1591.13	1556.09	80.4196	1576.64	1432.01	78.7477	1467.19	1158.79	83.3861	1734.65	1323.81	99.5927	1826.41	1122.4	156.747	1473.83	1255.23	-73.1392	1673.49	1380.56	-181.24	1679.03	1144.05	-190.928	1677.66	1046.92	-197.997	1768.92	921.828	-147.583	1801.72	825.504	-212.759	1766.17	806.476	-200.301	1831.92	754.611
1017	0	19.9661	1770.02	1581.46	124.75	1765.36	1590.46	1.55436	1609.71	1544.05	118.907	1600.61	1554.88	81.2607	1585.93	1431.09	79.3758	1476.39	1158.13	84.1235	1743.78	1322.78	100.04	1835.38	1121.16	157.492	1482.87	1254.37	-72.4271	1682.46	1379.8	-180.36	1688.52	1143	-189.9	1687.85	1045.98	-196.306	1779.73	921.151	-145.889	1812.55	824.771	-211.691	1777.57	806.03	-198.425	1843.09	754.113
1018	0	20.7441	1779.41	1580.36	125.444	1774.78	1589.17	2.55722	1618.83	1542.89	119.664	1610.11	1553.56	82.215	1595.21	1430.12	80.1731	1485.35	1157.4	84.5924	1752.87	1321.42	100.459	1844.59	1119.92	158.266	1491.97	1253.43	-71.6763	1691.43	1378.63	-179.408	1697.74	1142.02	-188.812	1698.04	1044.77	-194.824	1790.27	920.441	-143.984	1823.44	824.244	-210.043	1788.33	805.226	-196.328	1854.32	753.578
1019	0	21.4245	1788.63	1579.28	126.228	1784.32	1588.15	3.54744	1628.02	1541.82	120.879	1619.47	1552.59	83.1741	1604.54	1429.14	80.8997	1494.15	1156.54	85.393	1762.05	1320.41	100.694	1853.34	1118.53	159.088	1501.12	1252.48	-70.7896	1700.59	1377.56	-178.57	1706.86	1140.78	-187.7	1707.91	1043.66	-193.301	1800.74	919.745	-142.344	1833.73	823.697	-208.702	1799.39	804.608	-194.01	1865.48	753.221
1020	0	22.3289	1798.02	1578.21	127.092	1793.91	1586.87	4.76077	1637.43	1540.71	122.005	1629.2	1551.3	84.2963	1613.86	1428.01	81.8225	1503.14	1155.63	86.1084	1771.4	1319	101.122	1862.02	1117.02	160.108	1510.46	1251.42	-69.8433	1710.03	1376.72	-177.613	1715.84	1139.87	-186.643	1717.85	1042.51	-191.602	1811.32	918.93	-140.181	1844.26	823.159	-206.42	1810.44	803.534	-191.984	1876.49	752.615
1021	0	23.3628	1807.54	1576.84	128.218	1803.52	1585.58	6.05811	1646.8	1539.6	123.663	1638.75	1550.1	85.4296	1623.39	1426.8	82.8073	1512.35	1154.45	86.9898	1780.78	1317.69	101.73	1870.99	1115.28	161.188	1519.94	1250.22	-68.9207	1719.15	1375.66	-176.694	1724.87	1138.55	-185.443	1727.62	1041.25	-190.03	1821.52	918.006	-137.974	1854.79	822.186	-204.977	1821.49	802.901	-189.66	1887.53	751.733
1022	0	24.4997	1817.04	1575.82	129.241	1813.01	1584.18	7.40508	1656.32	1538.32	124.814	1648.3	1548.85	86.4409	1632.92	1425.64	83.7471	1521.59	1153.36	87.8546	1790.14	1316.29	102.143	1880.11	1113.76	162.237	1529.34	1249.07	-67.8955	1728.34	1374.16	-175.679	1733.8	1137.3	-184.313	1737.21	1039.76	-188.528	1831.6	916.962	-136.129	1865.24	821.637	-203.192	1832.05	801.893	-187.379	1898.34	751.309
1023	0	25.6633	1826.5	1574.54	130.65	1822.69	1583	8.71905	1665.92	1537.15	125.84	1658.07	1547.36	87.569	1642.6	1424.49	84.6337	1530.82	1152.29	88.7177	1799.54	1314.95	102.714	1889.19	1112.18	163.264	1538.73	1247.87	-66.8881	1737.77	1373.12	-174.773	1742.68	1135.98	-183.331	1746.8	1038.52	-186.935	1841.76	916.045	-134.249	1875.48	820.852	-200.699	1842.64	800.645	-184.855	1909.05	750.437
1024	0	27.1915	1836.08	1573.41	131.942	1832.4	1581.5	10.1215	1675.51	1535.91	127.296	1667.71	1545.91	88.7935	1652.22	1423.19	85.6556	1540.23	1151.15	89.8698	1809.1	1313.59	103.308	1898.25	1110.42	164.477	1548.31	1246.62	-65.7864	1747.27	1371.67	-173.85	1751.55	1134.63	-182.159	1756.34	1037.17	-185.359	1851.83	914.689	-131.959	1885.87	820.064	-199.025	1853.01	799.534	-182.365	1919.7	749.721
1025	0	28.7354	1845.79	1571.97	133.723	1842.13	1580.12	11.6867	1685.08	1534.48	128.873	1677.5	1544.27	90.1809	1661.97	1421.79	86.8374	1549.66	1149.79	91.0261	1818.84	1311.91	104.074	1907.76	1108.68	165.627	1558.01	1245.08	-64.513	1756.94	1370.6	-172.694	1760.59	1133.35	-181.029	1765.67	1035.73	-183.503	1861.61	913.622	-129.675	1896.04	819.129	-196.514	1863.47	798.37	-180.157	1930.14	748.681
1026	0	30.286	1855.49	1570.99	135.166	1851.78	1578.64	13.3399	1694.77	1533.17	130.515	1687.19	1542.77	91.6021	1671.79	1420.55	87.9316	1559.29	1148.56	92.1456	1828.55	1310.56	104.861	1917.48	1107.09	166.955	1567.74	1243.72	-63.1632	1766.53	1369.12	-171.545	1769.78	1132.04	-179.879	1774.96	1034.34	-181.674	1871.4	912.368	-127.695	1906.03	818.418	-194.263	1873.69	797.117	-177.459	1940.59	747.862
1027	0	31.9131	1865.05	1569.77	137.005	1861.51	1577.5	15.0334	1704.41	1531.94	132.258	1696.98	1541.37	93.1341	1681.56	1419.28	89.1668	1569.01	1147.41	93.3456	1838.38	1309.22	105.57	1927.27	1105.73	168.151	1577.46	1242.51	-61.772	1776.41	1368.22	-170.438	1778.96	1130.97	-178.731	1784.27	1033.34	-180.322	1880.99	911.461	-125.728	1915.85	817.823	-192.071	1883.67	796.077	-175.36	1950.66	747.226
1028	0	33.6886	1874.67	1568.73	138.678	1871.36	1576.1	16.9882	1714.07	1530.66	134.257	1706.74	1539.78	94.6463	1691.41	1417.93	90.4346	1578.8	1146.16	94.5895	1848.14	1307.78	106.39	1937.16	1104.29	169.611	1587.39	1241.02	-60.3117	1786.13	1366.9	-169.272	1788.22	1129.88	-177.491	1793.54	1032.05	-178.727	1890.59	910.333	-123.538	1925.58	816.761	-189.945	1893.33	794.893	-172.843	1960.88	746.268
1029	0	35.4721	1884.34	1567.62	140.434	1881.13	1574.91	19.0305	1723.83	1529.19	136.212	1716.59	1538.16	96.3526	1701.34	1416.53	91.6725	1588.72	1144.65	96.1458	1858.05	1306.6	107.284	1947.26	1103.05	171.003	1597.4	1239.36	-58.8491	1795.82	1365.93	-168.029	1797.71	1128.92	-176.205	1802.76	1030.8	-177.039	1899.96	909.279	-121.442	1935.25	816.256	-187.31	1902.85	793.439	-170.367	1970.65	745.566
1030	0	37.3612	1894	1566.58	142.291	1890.88	1573.73	21.1486	1733.51	1528.03	138.506	1726.42	1536.9	98.0968	1711.19	1415.27	92.9653	1598.71	1143.24	97.5324	1867.89	1305.29	108.259	1957.24	1101.91	172.407	1607.52	1237.89	-57.3044	1805.78	1365.04	-166.782	1807.29	1128.12	-174.894	1812.06	1029.8	-175.408	1909.35	908.224	-119.356	1944.78	815.718	-185.175	1912.38	792.398	-168.04	1980.31	744.667
1031	0	39.2572	1903.62	1565.69	144.248	1900.65	1572.6	23.3707	1743.18	1526.9	140.872	1736.17	1535.73	99.9199	1721.1	1414	94.2401	1608.83	1141.71	99.1528	1878.22	1304.34	109.049	1967.45	1100.82	173.942	1617.61	1236.32	-55.727	1815.43	1364.23	-165.399	1816.88	1127.4	-173.537	1821.43	1028.93	-173.816	1918.59	907.373	-117.843	1954.26	815.175	-183.099	1921.85	791.37	-165.761	1989.78	743.938
1032	0	41.1785	1913.34	1564.43	146.262	1910.59	1571.25	25.7324	1752.88	1525.8	143.057	1746.7	1534.25	101.928	1731.01	1412.56	95.7708	1619.17	1140.09	100.684	1888.23	1302.99	110.096	1977.7	1099.63	175.515	1627.97	1234.5	-53.8816	1825.3	1363.25	-163.987	1826.54	1126.59	-172.128	1830.77	1028.19	-171.966	1927.95	906.333	-115.336	1963.28	814.1	-181.011	1931.12	790.355	-163.435	1999.04	742.932
1033	0	43.503	1922.97	1563.4	148.48	1920.68	1569.88	28.0399	1762.45	1524.75	145.463	1756.6	1532.93	103.972	1740.79	1411.11	97.2241	1629.66	1138.16	102.494	1898.25	1301.97	111.264	1987.93	1098.62	177.183	1638.26	1232.52	-51.9345	1835.16	1362.36	-162.405	1836.23	1126.03	-170.602	1840.22	1027.34	-169.868	1937.17	905.44	-113.475	1972.29	813.179	-179.067	1940.48	789.612	-161.193	2008.11	741.869
1034	0	45.8107	1932.78	1562.33	150.86	1930.49	1568.77	30.4905	1772.1	1523.8	148.111	1766.33	1531.83	106.103	1750.46	1409.69	98.8633	1640.39	1136.42	104.177	1908.14	1300.76	112.426	1998.46	1097.73	178.801	1648.66	1230.5	-49.9169	1844.89	1361.7	-160.863	1846.13	1125.39	-169.206	1849.52	1026.81	-168.409	1946.35	904.588	-111.59	1981.1	812.489	-177.322	1949.58	788.802	-159.061	2017.07	741.131
1035	0	48.2435	1942.49	1561.37	153.253	1940.34	1567.6	33.0087	1781.8	1523.03	150.385	1776.22	1530.82	108.45	1760.09	1408.24	100.577	1651.25	1134.42	105.983	1918.22	1299.93	113.685	2009.19	1097.02	180.839	1659.21	1228.49	-47.9191	1854.38	1360.86	-159.184	1856.1	1124.98	-167.802	1858.78	1026.46	-166.55	1955.6	904.035	-109.819	1989.85	811.695	-175.807	1958.54	788.279	-157.107	2025.94	740.159
1036	0	50.7251	1952.17	1560.7	155.87	1950.09	1566.64	35.7967	1791.51	1522.21	153.336	1785.94	1529.69	111.106	1769.69	1406.82	102.422	1662.3	1132.29	107.994	1928.4	1299.22	114.991	2019.85	1096.6	182.94	1669.88	1226.28	-45.5173	1864.14	1360.39	-157.379	1866.13	1124.81	-166.208	1867.92	1025.98	-164.874	1964.63	903.425	-108.156	1998.76	811.161	-174.065	1967.56	787.5	-155.07	2034.57	739.448
1037	0	53.2084	1961.7	1560.4	158.38	1959.99	1566.12	38.5532	1801.04	1521.6	155.857	1795.91	1528.9	113.803	1779.37	1405.74	104.573	1673.47	1130.56	110.102	1938.63	1298.75	116.107	2030.73	1096.42	185.213	1680.43	1224.37	-43.1125	1873.77	1360.19	-155.683	1876.14	1124.9	-164.544	1877.01	1025.78	-163.069	1973.58	903.095	-106.706	2007.29	810.734	-172.658	1976.36	787.212	-153.57	2042.89	738.896
1038	0	55.7479	1971.3	1560.37	160.982	1969.84	1565.98	41.3228	1810.62	1521.24	159.055	1805.7	1528.46	116.646	1789.31	1405.02	106.46	1684.68	1129.33	112.155	1948.86	1298.63	117.414	2041.61	1096.57	187.419	1691.12	1222.84	-40.7032	1883.55	1360.23	-154.05	1885.98	1125.33	-162.899	1886.15	1025.99	-161.758	1982.47	903.053	-105.352	2015.52	810.535	-171.652	1984.78	787.229	-152.301	2051.22	738.524
1039	0	58.3102	1980.8	1560.71	163.676	1979.53	1566.24	44.2865	1820.21	1521.08	161.883	1815.78	1528.03	119.595	1799.51	1404.55	108.435	1695.52	1128.72	114.51	1959.28	1298.71	118.833	2052.88	1096.85	189.724	1702.02	1221.64	-38.2413	1893.41	1360.64	-152.131	1896.02	1125.96	-161.235	1895.31	1026.51	-160.477	1990.98	903.131	-103.922	2023.56	810.224	-170.575	1992.81	787.371	-151.228	2059.12	738.4
1040	0	60.8548	1990.2	1561.34	166.148	1989.25	1566.79	47.3906	1829.81	1521.09	165.206	1825.57	1528.06	122.482	1809.86	1404.5	110.255	1706.16	1128.38	116.873	1969.79	1299.26	119.957	2064.13	1097.58	191.899	1712.7	1221.02	-35.684	1903.64	1361.31	-150.221	1905.81	1126.9	-159.446	1904.34	1027.28	-159.135	1999.16	903.504	-103.27	2031.58	810.454	-169.487	2000.48	787.586	-150.576	2066.63	738.54
1041	0	63.3304	1999.6	1562.43	168.635	1998.94	1567.73	50.5296	1839.32	1521.55	168.308	1835.4	1528.37	125.022	1820.2	1405.03	112.062	1716.52	1128.71	119.235	1980.31	1300.1	121.302	2075.54	1098.44	193.919	1723.35	1221.01	-33.0892	1914.05	1362.48	-148.209	1915.56	1128.11	-157.706	1913.38	1028.67	-158.062	2007.54	904.103	-102.41	2039.17	810.91	-168.824	2007.69	788.292	-150.425	2073.83	739.08
1042	0	66.0424	2009.11	1563.89	171.46	2008.87	1569.11	53.6882	1848.77	1522.34	171.552	1845.35	1529.02	127.905	1830.61	1405.96	113.647	1727.16	1129.61	121.774	1990.88	1301.06	122.613	2087.02	1099.42	195.88	1734.08	1221.41	-30.3901	1924.76	1363.99	-146.297	1925.1	1129.88	-155.888	1922.52	1030.48	-157.274	2014.98	905.382	-101.71	2046.46	811.306	-168.135	2014.44	789.34	-150.253	2080.62	739.67
1043	0	68.7445	2018.57	1565.28	174.128	2018.75	1570.59	56.9173	1858.3	1523.32	174.966	1855.56	1529.84	130.681	1841.16	1407.05	115.029	1737.63	1130.89	124.4	2001.47	1302.24	124.234	2098.12	1100.56	197.871	1744.59	1222.25	-27.5748	1935.56	1365.78	-144.223	1934.56	1131.93	-154.06	1931.5	1032.81	-156.019	2022.91	906.601	-101.13	2053.73	811.995	-167.233	2021.07	790.8	-150.346	2087.08	740.479
1044	0	71.4624	2028.02	1567.4	176.809	2028.49	1572.35	60.1731	1867.93	1524.58	178.163	1865.37	1530.92	133.347	1851.51	1408.54	116.135	1748.29	1132.38	126.798	2011.84	1303.73	125.806	2109.09	1102.16	199.522	1755.2	1223.33	-24.8507	1946.23	1367.85	-141.925	1943.9	1134.41	-152.235	1940.27	1035.36	-155.162	2030.31	908.107	-100.924	2060.51	813.165	-166.937	2027.18	792.485	-150.67	2093.05	741.695
1045	0	74.2158	2037.58	1569.68	179.493	2038.14	1574.46	63.2609	1877.68	1526.28	181.264	1875.23	1532.53	135.944	1861.64	1410.41	117.059	1759.08	1134.05	129.324	2022.05	1305.77	127.542	2119.64	1104.3	200.999	1765.68	1224.72	-22.0548	1956.98	1370.48	-139.761	1953.14	1137.23	-150.326	1949.13	1038.5	-154.134	2037.65	910.3	-100.931	2067.23	814.638	-166.686	2033.13	794.801	-150.9	2098.63	743.301
1046	0	77.0854	2047.13	1572.04	182.401	2047.95	1576.81	66.283	1887.27	1528.41	184.431	1885.21	1534.3	138.667	1871.69	1412.37	118.233	1769.95	1135.9	131.833	2032.15	1307.84	129.299	2130.16	1106.57	202.552	1776.15	1226.22	-19.1833	1967.46	1373.45	-137.601	1962.37	1140.43	-148.549	1957.75	1041.97	-153.287	2045.11	912.64	-100.806	2073.52	816.401	-166.796	2038.88	797.454	-151.582	2104.07	745.025
1047	0	79.9547	2056.61	1574.49	185.283	2057.81	1579	69.3008	1896.75	1530.67	187.397	1894.99	1536.2	141.478	1881.59	1414.2	119.536	1781.03	1137.58	134.282	2041.99	1310.09	131.111	2140.1	1109.08	204.309	1786.44	1227.63	-16.2643	1977.81	1376.62	-135.441	1971.46	1143.76	-146.759	1966.23	1045.41	-152.642	2052.05	915.627	-100.501	2080.39	818.509	-166.499	2044.72	800.258	-152.153	2109.06	746.753
1048	0	82.6839	2066.17	1577.22	188.209	2067.58	1581.35	72.1799	1906.4	1533.09	189.824	1904.72	1538.3	144.13	1891.29	1416.38	120.861	1792	1139.55	136.514	2051.73	1312.75	132.71	2149.79	1111.93	205.894	1796.72	1229.21	-13.8158	1987.38	1379.59	-133.407	1980.46	1147.4	-144.873	1974.74	1048.9	-152.073	2059.07	918.75	-100.903	2087.11	820.964	-167.049	2050.87	803.488	-152.803	2114.17	749.022
1049	0	85.4498	2075.71	1579.81	191.052	2077.2	1583.75	75.0294	1916.01	1535.82	193.099	1914.34	1540.95	146.669	1900.86	1418.47	121.936	1802.65	1141.5	138.599	2061.26	1315.17	134.291	2159.41	1114.62	207.682	1806.9	1231.01	-11.2113	1997.22	1382.73	-131.535	1989.43	1151.12	-143.483	1982.84	1052.81	-151.545	2066.19	921.885	-100.899	2092.37	823.289	-167.275	2056.96	806.887	-153.513	2119.12	751.339
1050	0	88.1481	2085.34	1582.12	193.818	2086.77	1585.88	77.9946	1925.43	1538.43	195.951	1923.88	1543.28	149.23	1910.38	1420.45	123.328	1813.1	1143.49	140.79	2070.72	1317.45	136.044	2168.99	1117.24	209.498	1816.94	1232.43	-8.78875	2006.77	1385.77	-129.819	1998.38	1154.62	-142.01	1990.7	1056.53	-150.842	2073.42	925.005	-100.889	2098.49	825.926	-167.25	2063.01	810.089	-153.877	2124.37	753.427
1051	0	90.6984	2094.8	1584.24	196.271	2096.3	1587.76	80.522	1934.85	1540.79	198.334	1933.41	1545.39	151.652	1919.69	1422.3	124.902	1822.79	1145.18	143.009	2080.06	1319.85	137.711	2178.26	1119.76	211.4	1826.91	1233.94	-6.43116	2016.02	1388.41	-128.16	2007.24	1157.89	-140.488	1998.61	1059.87	-150.487	2080.33	928.174	-101.188	2104.79	828.355	-167.683	2069.11	813.279	-154.442	2129.36	755.702
1052	0	93.2332	2104.13	1586.4	198.823	2105.75	1589.66	82.8837	1944.09	1543.1	201.117	1942.85	1547.46	153.802	1928.81	1424.14	126.519	1832.13	1146.88	144.935	2089.24	1321.71	139.218	2187.49	1121.99	213.078	1836.61	1235.41	-4.27591	2025.3	1390.96	-126.634	2016.19	1161	-139.623	2006.03	1063.24	-150.155	2087.26	931.042	-101.576	2110.91	830.425	-168.784	2075.48	816.666	-154.722	2134.7	757.734
1053	0	95.7496	2113.34	1588.19	201.173	2115.1	1591.24	85.2651	1953.35	1545.18	203.458	1952.13	1549.24	156.036	1938.03	1425.88	128.5	1841.17	1148.74	146.992	2098.41	1323.6	140.753	2196.71	1124.12	214.774	1846.14	1236.99	-2.21261	2034.43	1393.38	-125.219	2025.13	1163.87	-138.593	2013.65	1066.3	-149.809	2094.17	933.549	-101.897	2117.39	832.663	-168.867	2081.7	819.508	-155.346	2140.18	759.514
1054	0	98.014	2122.43	1589.92	203.563	2124.23	1592.84	87.7146	1962.47	1547.1	206.001	1961.29	1550.77	158.241	1947.1	1427.48	130.452	1849.95	1150.56	148.802	2107.53	1325.15	142.062	2205.91	1125.91	216.539	1855.51	1238.41	-0.256569	2043.48	1395.43	-124.043	2033.85	1166.65	-137.632	2021.18	1069.04	-149.904	2100.99	935.978	-102.097	2123.71	834.654	-169.68	2088.26	822.038	-155.461	2145.85	761.265
1055	0	100.105	2131.36	1591.65	205.569	2133.29	1594.19	89.9697	1971.41	1548.59	208.398	1970.55	1552.22	160.121	1956.2	1429.04	132.368	1858.7	1152.18	150.526	2116.52	1326.77	143.201	2214.96	1127.69	218.256	1864.61	1239.89	1.56109	2052.38	1397.22	-123.046	2042.37	1168.9	-136.776	2028.59	1071.36	-149.783	2107.96	937.974	-102.338	2130.27	836.454	-169.507	2094.54	824.255	-155.972	2151.63	763.096
1056	0	102.104	2140.17	1593.38	207.635	2142.32	1595.87	91.9738	1980.27	1550.13	210.383	1979.59	1553.51	161.867	1965.19	1430.53	134.172	1867.42	1153.94	152.095	2125.49	1328.27	144.194	2223.9	1129.26	219.953	1873.67	1241.4	2.99384	2061.06	1398.95	-122.279	2050.7	1171.2	-135.974	2036.54	1073.5	-149.875	2114.85	939.81	-102.811	2136.56	837.965	-170.004	2100.94	826.195	-156.742	2157.46	764.683
1057	0	103.849	2148.89	1594.97	209.469	2151.32	1597.37	93.9365	1988.93	1551.55	212.535	1988.53	1554.77	163.583	1974.12	1432.07	135.696	1876.13	1155.51	153.428	2134.39	1329.5	145.158	2232.91	1130.37	221.577	1882.55	1242.87	4.47767	2069.79	1400.63	-121.326	2059.09	1172.76	-135.571	2043.96	1075.43	-149.913	2121.67	941.487	-103.318	2143.05	839.56	-170.904	2107.25	828.141	-157.522	2163.5	766.204
1058	0	105.624	2157.51	1596.63	211.215	2160.17	1598.73	96.0438	1997.66	1552.74	214.567	1997.43	1555.93	165.318	1983.06	1433.39	137.324	1884.91	1156.93	154.759	2143.25	1330.83	146.105	2241.79	1131.41	223.24	1891.32	1244.24	6.0369	2078.42	1401.8	-120.537	2066.79	1174.33	-134.9	2051.71	1076.9	-149.815	2128.54	942.926	-103.539	2149.58	840.84	-171.08	2113.51	829.602	-158.513	2169.68	767.659
1059	0	107.186	2166.09	1598.01	212.935	2168.96	1600.16	97.9925	2006.27	1554.04	216.499	2006.13	1557.1	167.039	1991.81	1434.78	138.701	1893.66	1158.2	155.86	2151.89	1332.1	146.745	2250.52	1132.31	224.874	1899.92	1245.71	7.40483	2086.85	1403	-119.5	2074.59	1175.59	-134.22	2059.41	1078.4	-149.723	2135.48	944.147	-103.629	2156.22	841.586	-170.706	2119.8	830.71	-159.233	2176.15	769.034
1060	0	108.718	2174.76	1599.47	214.404	2177.69	1601.36	99.7534	2015.1	1555.31	218.461	2015.04	1558.25	168.727	2000.78	1436.16	140.287	1902.4	1159.8	157.04	2160.53	1333.14	147.409	2259.12	1133	226.637	1908.64	1247.11	8.85455	2095.29	1404.19	-118.656	2081.89	1176.7	-133.855	2066.98	1079.85	-149.369	2142.4	945.302	-103.968	2162.96	842.75	-171.382	2126.48	832.304	-159.704	2182.79	770.275
1061	0	110.336	2183.24	1600.51	215.972	2186.44	1602.39	101.591	2023.61	1556.56	220.602	2024	1559.33	170.439	2009.6	1437.3	141.779	1910.91	1161.15	158.204	2169.09	1333.85	148.251	2267.75	1133.49	228.619	1917.41	1248.48	10.2521	2103.49	1405.17	-117.619	2089.27	1177.73	-133.018	2074.7	1081.21	-149.217	2149.35	946.339	-103.702	2169.66	843.534	-170.984	2133.16	833.451	-159.993	2189.62	771.387
1062	0	111.786	2191.81	1601.47	217.368	2195.19	1603.34	103.328	2032.02	1557.46	222.304	2032.89	1560.21	172.202	2018.26	1438.38	143.582	1919.19	1162.44	159.247	2177.51	1334.67	148.816	2276.08	1134.05	230.385	1925.96	1249.7	11.5897	2111.65	1405.99	-116.552	2096.37	1178.89	-132.461	2081.92	1082.46	-148.416	2156.63	947.308	-103.717	2176.39	844.368	-170.798	2139.91	834.66	-160.322	2196.45	772.775
1063	0	113.18	2200.18	1602.48	218.761	2203.94	1604.37	104.939	2040.48	1558.49	223.772	2041.62	1561.13	173.631	2026.85	1439.52	145.195	1927.32	1163.58	160.226	2185.84	1335.5	149.386	2284.45	1134.79	232.054	1934.43	1251	12.9067	2119.64	1406.91	-115.62	2103.18	1180.24	-131.687	2089.19	1083.66	-148.005	2163.79	948.528	-103.383	2183.36	845.474	-170.737	2146.82	835.97	-160.549	2203.4	774.161
1064	0	114.512	2208.71	1603.42	220.068	2212.71	1605.27	106.587	2049.05	1559.45	225.381	2050.22	1562.03	175.091	2035.26	1440.46	146.832	1935.41	1164.72	161.208	2194.08	1336.28	149.935	2292.72	1135.52	233.857	1943.24	1252.08	14.2304	2127.66	1407.96	-114.701	2110.13	1181.44	-130.853	2096.41	1085.14	-147.489	2170.74	949.911	-103.348	2190.27	846.684	-170.911	2153.95	837.457	-160.326	2210.62	775.617
1065	0	115.818	2217.13	1604.24	221.166	2221.41	1605.82	108.277	2057.47	1560.18	227.215	2058.94	1562.77	176.902	2043.71	1441.21	148.49	1943.42	1165.58	162.392	2202.27	1336.95	150.611	2301.03	1136.17	235.61	1951.61	1252.85	15.4714	2135.46	1409.02	-113.687	2116.98	1182.67	-130.015	2103.29	1086.39	-146.951	2177.72	951.406	-103.003	2197.29	848	-170.252	2160.78	838.802	-160.325	2217.98	777.156
1066	0	117.019	2225.77	1604.97	222.528	2230.03	1606.42	109.976	2065.73	1560.87	228.816	2067.69	1563.43	178.477	2051.96	1441.81	150.124	1951.42	1166.26	163.421	2210.36	1337.62	151.278	2309.34	1137.05	237.161	1959.86	1253.58	16.5537	2143.16	1409.89	-113.033	2123.57	1183.97	-129.123	2109.93	1087.59	-146.278	2184.81	952.695	-102.636	2204.33	849.423	-169.848	2167.73	840.028	-159.849	2225.1	778.641
1067	0	118.117	2234.08	1605.54	223.733	2238.79	1607.04	111.455	2074.08	1561.74	230.262	2076.32	1564.31	179.81	2060.19	1442.65	151.487	1959.16	1167.09	164.343	2218.38	1338.31	151.806	2317.46	1138	238.389	1967.96	1254.42	17.753	2150.94	1410.74	-112.193	2130.21	1185.34	-128.372	2116.71	1088.72	-145.704	2191.9	953.976	-102.148	2211.63	850.708	-169.213	2174.92	841.329	-159.97	2232.3	780.23
1068	0	119.402	2242.41	1605.97	224.996	2247.28	1607.58	113.014	2082.72	1562.44	231.857	2084.78	1565.03	180.981	2068.28	1443.28	152.988	1966.87	1167.9	165.295	2226.33	1338.81	152.584	2325.55	1138.71	239.421	1975.98	1255.04	18.6822	2158.76	1411.6	-111.29	2136.91	1186.53	-127.56	2123.45	1089.92	-145.247	2198.73	955.092	-101.565	2218.97	851.897	-168.593	2182.02	842.508	-159.547	2239.66	781.48
1069	0	120.62	2250.86	1606.21	226.195	2255.94	1607.62	114.427	2090.84	1562.89	233.392	2093.35	1565.37	182.371	2076.43	1443.56	154.151	1975.16	1168.24	166.369	2234.46	1339.09	153.365	2333.29	1139.06	240.615	1984.1	1255.33	19.8767	2166.67	1412.16	-110.625	2143.53	1187.28	-126.61	2130.1	1090.73	-144.507	2205.63	956.076	-101.455	2226.3	852.982	-168.355	2189.02	843.625	-158.778	2247.03	782.254
1070	0	121.907	2259.26	1606.38	227.334	2264.51	1607.76	115.997	2099.13	1563.38	234.808	2101.95	1565.63	183.404	2084.53	1443.87	154.947	1983.06	1168.62	167.372	2242.41	1339.24	154.309	2341.1	1139.29	241.46	1992.02	1255.72	20.7727	2174.53	1412.55	-109.598	2150.41	1187.98	-125.816	2137.07	1091.52	-143.941	2212.52	956.703	-100.4	2233.72	853.718	-167.34	2195.97	844.163	-158.39	2253.95	783.283
1071	0	123.137	2267.64	1606.57	228.613	2273.07	1607.85	117.446	2107.56	1563.93	236.235	2110.33	1566.06	184.601	2092.72	1444.31	155.67	1990.6	1169.22	168.218	2250.5	1339.42	155.143	2348.8	1139.43	242.435	1999.85	1256.24	22.0001	2182.79	1413.03	-108.778	2157.28	1188.61	-124.549	2143.49	1092.15	-143.554	2219.54	957.158	-100.413	2241.66	854.78	-165.916	2202.95	844.546	-157.756	2261.31	784.056
1072	0	124.505	2275.98	1606.68	230.034	2281.52	1607.84	118.827	2115.8	1564.39	237.677	2118.66	1566.3	185.662	2101.06	1444.47	156.429	1998.47	1169.64	169.214	2258.54	1339.42	156.056	2356.44	1139.37	243.188	2007.8	1256.55	22.8998	2190.86	1413.29	-108.251	2163.94	1189.19	-123.542	2150.36	1092.67	-142.758	2226.52	957.559	-99.7823	2249.13	855.35	-164.686	2210.05	844.983	-156.897	2268.73	784.558
1073	0	125.824	2284.39	1606.78	231.246	2289.87	1607.73	120.121	2124.06	1564.58	238.889	2127.07	1566.24	186.436	2108.96	1444.69	156.941	2006.28	1169.84	170.27	2266.63	1339.43	157.08	2364.36	1139.2	243.71	2015.58	1256.69	23.8946	2199.17	1413.44	-107.509	2170.92	1189.57	-122.327	2157.6	1092.78	-142.436	2233.34	957.795	-98.5023	2256.69	855.593	-163.62	2216.9	844.938	-156.105	2275.87	784.858
1074	0	127.065	2292.83	1606.81	232.613	2298.35	1607.55	121.422	2132.71	1564.69	239.984	2135.34	1566.14	187.462	2117.5	1444.69	157.287	2014.07	1170.08	171.25	2274.78	1339.46	157.955	2372.02	1138.94	244.227	2023.46	1256.85	24.723	2207.43	1413.44	-106.634	2178.37	1189.83	-121.607	2164.69	1092.88	-141.894	2240.38	958.005	-98.6172	2264.26	855.975	-162.745	2224.09	844.836	-155.265	2283.12	784.918
1075	0	128.394	2301.06	1606.77	233.895	2306.68	1607.4	122.448	2140.94	1564.76	241.152	2143.83	1566.03	187.965	2125.64	1444.79	157.639	2021.9	1170.32	172.213	2282.86	1339.21	159.074	2379.76	1138.59	244.599	2031.21	1257.14	25.6648	2216.11	1413.66	-105.956	2185.67	1190.06	-120.548	2172.18	1092.87	-141.135	2247.75	957.866	-98.0253	2271.77	856.178	-161.202	2231.14	844.597	-154.183	2290.52	784.862
1076	0	129.554	2309.74	1606.8	235.199	2314.99	1607.01	123.443	2149.3	1564.68	242.257	2152.01	1565.7	189.056	2134.23	1444.79	158.038	2029.76	1170.45	173.075	2290.96	1338.88	160.077	2387.34	1137.93	244.932	2039.11	1257.06	26.3593	2224.59	1413.38	-105.064	2193.55	1190.05	-119.614	2179.91	1092.7	-140.422	2254.99	957.544	-96.8063	2279.56	856.099	-159.934	2238.12	844.368	-153.331	2297.64	784.66
1077	0	130.826	2317.99	1606.38	236.444	2323.41	1606.56	124.553	2158.07	1564.33	243.086	2160.53	1565.11	189.334	2142.46	1444.45	158.345	2037.66	1170.45	174.051	2299.24	1338.41	161.201	2395.1	1137.16	245.316	2046.97	1257.07	27.2594	2233.27	1412.96	-104.525	2201.35	1189.68	-118.696	2187.6	1092.37	-139.532	2262.4	957.208	-96.1085	2287	855.699	-158.553	2245.3	843.548	-152.525	2304.8	784.139
1078	0	131.879	2326.66	1606.12	237.579	2331.8	1606.03	125.353	2166.45	1563.94	244.036	2168.97	1564.53	189.973	2150.98	1444.26	158.496	2045.64	1170.49	174.981	2307.36	1337.87	162.369	2402.9	1136.28	245.57	2054.86	1257.07	28.0164	2242.23	1412.61	-103.617	2209.91	1189.29	-117.816	2195.69	1092.08	-138.592	2270.18	956.547	-95.2862	2294.66	855.194	-157.467	2252.65	842.948	-151.411	2312.23	783.273
1079	0	132.934	2335.12	1605.57	238.564	2340.26	1605.26	126.143	2175.16	1563.47	244.897	2177.14	1563.85	190.591	2159.54	1443.92	158.619	2053.66	1170.38	175.883	2315.73	1336.96	163.556	2410.76	1134.98	245.828	2062.82	1256.97	28.7671	2251.21	1412.03	-102.95	2218.39	1188.85	-116.985	2203.95	1091.64	-137.676	2277.95	955.713	-94.2826	2302.33	854.287	-156.43	2259.71	842.328	-150.382	2319.34	782.433
1080	0	133.849	2343.89	1604.75	239.652	2348.81	1604.43	126.82	2183.55	1562.74	245.653	2185.74	1563	190.92	2168.14	1443.3	158.63	2061.73	1170.02	176.836	2324.08	1336.13	164.771	2418.64	1133.86	245.786	2070.58	1256.55	29.5098	2260.13	1411.14	-102.288	2227.18	1187.92	-116.301	2212.19	1090.87	-136.602	2285.78	954.747	-93.4175	2309.82	853.35	-155.102	2267.18	841.237	-149.314	2326.56	781.091
1081	0	134.74	2352.17	1603.86	240.464	2357.36	1603.67	127.62	2192.48	1561.75	246.258	2194.16	1562.13	191.127	2176.55	1442.69	158.526	2069.86	1169.6	177.359	2332.39	1335.09	165.867	2426.61	1132.63	245.783	2078.59	1256.21	30.2992	2269.33	1410.53	-101.396	2236.42	1187.31	-115.507	2220.71	1090.19	-135.539	2293.86	953.687	-92.2963	2317.47	852.086	-154.247	2274.38	840.173	-148.164	2333.8	779.957
1082	0	135.404	2361.08	1603.03	241.083	2365.94	1602.76	128.165	2201.2	1561.07	247.061	2202.69	1561.35	191.379	2185.18	1442.09	158.515	2078.12	1169.22	178.426	2340.29	1333.96	167.048	2434.64	1131.4	245.879	2086.61	1255.86	30.7058	2278.02	1409.38	-100.904	2245.67	1186.18	-114.69	2229.68	1089.41	-134.738	2301.89	952.525	-91.4166	2324.91	850.914	-153.518	2282.08	839.136	-147.239	2340.92	778.576
1083	0	136.002	2369.8	1601.99	241.824	2374.66	1601.76	128.623	2209.76	1560.04	247.621	2211.52	1560.34	191.909	2193.96	1441.36	158.601	2086.41	1168.82	179.22	2348.75	1332.65	168.344	2442.75	1129.99	245.973	2094.75	1255.27	31.5816	2287.41	1408.78	-100.296	2255.05	1185.35	-114.057	2238.72	1088.55	-133.456	2310.21	951.416	-90.46	2332.27	849.624	-152.766	2289.81	838.002	-146.325	2348.14	777.063
1084	0	136.792	2378.53	1600.72	242.415	2383.53	1600.5	129.272	2218.7	1558.94	248.022	2220.24	1559.2	192.138	2202.51	1440.43	158.403	2094.7	1167.95	180.064	2357.17	1331.59	169.464	2450.95	1128.63	245.93	2102.81	1254.52	32.117	2296.68	1407.52	-99.4868	2264.63	1184.17	-113.259	2247.62	1087.29	-132.709	2318.5	949.853	-89.5759	2339.65	847.934	-152.216	2297.26	836.723	-145.199	2355.39	775.433
1085	0	137.079	2387.62	1599.69	242.843	2392.34	1599.42	129.605	2227.72	1557.67	248.409	2229.04	1558.29	192.253	2211.28	1439.52	158.29	2102.93	1167.18	180.69	2365.67	1330.34	170.686	2459.32	1127.43	245.751	2110.93	1253.88	32.5607	2305.98	1406.42	-98.5608	2274.56	1182.63	-112.653	2256.88	1086.11	-131.916	2326.8	948.312	-88.6126	2346.99	846.189	-151.456	2305.17	835.26	-144.618	2362.58	773.791
1086	0	137.495	2396.52	1598.26	243.293	2401.29	1598.29	129.857	2236.6	1556.67	248.672	2237.87	1557.25	192.323	2220.09	1438.52	157.8	2111.32	1166.43	181.5	2374.26	1329.11	171.764	2467.64	1126	245.437	2118.99	1253.1	33.1152	2315.42	1405.35	-97.7814	2284.29	1181.19	-111.997	2266.19	1084.82	-130.925	2335.13	946.723	-87.8732	2354.52	844.334	-150.722	2312.46	833.717	-143.606	2369.62	771.778
1087	0	138.076	2405.58	1596.9	243.85	2410.23	1596.8	130.199	2245.78	1555.37	249.196	2246.76	1555.99	192.408	2228.74	1437.3	157.803	2119.94	1165.46	182.254	2382.93	1327.61	172.965	2476.1	1124.21	245.324	2127.43	1252.04	33.6167	2324.71	1403.82	-97.1248	2294.05	1179.55	-111.43	2275.6	1083.37	-130.098	2343.86	944.835	-87.0936	2362.06	842.247	-150.439	2320.65	832.207	-142.794	2376.9	769.553
1088	0	138.749	2414.79	1595.28	244.358	2419.25	1595.26	130.527	2254.88	1553.98	249.253	2255.82	1554.55	192.542	2237.58	1436.16	157.329	2128.08	1164.42	182.705	2391.68	1325.93	174.188	2484.65	1122.6	245.005	2135.59	1251.04	33.8239	2333.82	1402.06	-96.3585	2304.01	1177.72	-110.712	2284.87	1081.72	-129.413	2352.36	942.88	-86.2725	2369.66	839.859	-149.789	2328.26	830.313	-142.077	2384.11	767.15
1089	0	139.007	2424.01	1593.64	244.673	2428.38	1593.72	130.54	2263.84	1552.79	249.403	2264.82	1553.34	192.458	2246.53	1434.94	157.264	2136.81	1163.39	183.314	2400.35	1324.56	175.177	2493.08	1121	244.82	2144.11	1250.19	34.2302	2343.51	1400.76	-95.4165	2314.14	1175.86	-109.976	2294.31	1080.2	-128.802	2360.92	940.929	-85.6196	2377.3	837.499	-149.6	2336.48	828.699	-141.262	2391.3	764.796
1090	0	139.344	2433.4	1592.27	245.077	2437.47	1592.32	130.607	2273.37	1551.47	249.427	2273.86	1552.1	192.211	2255.34	1433.7	157.028	2145.58	1162.28	183.994	2409.26	1323.12	176.22	2501.72	1119.4	244.568	2152.5	1249.21	34.5108	2352.92	1399.18	-94.7545	2323.96	1173.88	-109.527	2303.79	1078.52	-127.881	2369.54	938.994	-85.0123	2385.23	835.379	-149.219	2344.41	827.077	-141.063	2398.68	762.499
1091	0	139.859	2442.54	1590.7	245.461	2446.59	1590.76	130.629	2282.66	1550.03	249.494	2282.92	1550.64	191.999	2264.5	1432.17	156.727	2154.32	1160.87	184.456	2418.08	1321.38	177.449	2510.44	1117.8	244.296	2161.24	1247.89	34.5218	2362.33	1397.35	-94.235	2333.73	1171.91	-108.934	2313.23	1076.62	-127.171	2378.3	936.921	-84.4654	2392.94	833.112	-148.984	2352.71	825.064	-140.517	2406.15	760.206
1092	0	140.036	2451.82	1588.98	245.614	2455.74	1589.14	130.689	2291.91	1548.45	249.417	2291.96	1549.22	191.693	2273.59	1430.77	156.397	2163.09	1159.38	184.839	2427.09	1319.91	178.502	2519.17	1116.2	243.857	2169.83	1246.47	34.6785	2372.01	1395.58	-93.8514	2343.24	1169.84	-108.465	2322.55	1074.57	-126.537	2387.13	934.819	-83.452	2400.77	830.578	-149.077	2360.97	823.103	-140.285	2413.68	757.934
1093	0	139.848	2461.39	1587.46	245.769	2464.98	1587.7	130.529	2301.35	1546.93	249.234	2301.21	1547.84	191.488	2282.85	1429.31	156.55	2172.64	1158	185.255	2436.26	1318.4	179.5	2528.06	1114.46	243.625	2178.64	1245.45	34.5863	2381.57	1393.76	-93.2125	2352.86	1167.82	-107.879	2331.99	1072.72	-125.767	2395.93	932.804	-83.4803	2408.8	828.387	-148.504	2369.27	821.147	-139.452	2421.56	755.567
1094	0	139.875	2470.81	1585.86	245.836	2474.19	1586.12	130.295	2310.82	1545.41	249.129	2310.51	1546.27	191.276	2292.13	1427.81	156.276	2181.38	1156.7	185.678	2445.5	1316.73	180.591	2537.03	1112.6	243.406	2187.81	1244.05	34.6608	2391.24	1391.9	-92.9315	2362.34	1165.7	-107.465	2341.41	1070.75	-125.448	2404.74	930.551	-82.3531	2417.19	825.923	-148.062	2377.88	819.116	-139.017	2429.47	753.171
1095	0	139.819	2480.18	1584.15	245.66	2483.5	1584.49	130.074	2320.34	1543.58	248.796	2319.81	1544.67	190.944	2301.58	1426.21	156.238	2190.52	1155.01	185.98	2454.68	1314.97	181.647	2546.18	1110.85	243.126	2196.77	1242.62	34.8024	2401.08	1389.93	-92.5148	2371.99	1163.65	-106.975	2350.83	1068.63	-124.938	2413.72	928.316	-81.808	2425.29	823.464	-148.299	2386.48	817.08	-138.418	2437.75	750.792
1096	0	139.547	2489.74	1582.43	245.323	2493	1582.89	129.442	2329.75	1541.86	248.338	2329.18	1543.11	190.648	2311	1424.66	156.089	2199.74	1153.4	186.169	2464.04	1313.11	182.648	2555.48	1109.08	242.768	2205.84	1241.25	34.7134	2410.76	1387.76	-92.2356	2381.34	1161.48	-106.596	2360.11	1066.47	-124.291	2422.74	925.98	-81.5805	2433.86	821.248	-147.531	2394.99	814.907	-137.833	2446.12	748.348
1097	0	139.192	2499.3	1580.5	245.027	2502.31	1581.26	129.064	2339.5	1540.07	248.035	2338.53	1541.54	190.287	2320.61	1422.99	156.246	2209.19	1152	186.342	2473.52	1311.3	183.594	2564.93	1107.25	242.641	2215.14	1239.91	34.7055	2420.64	1385.76	-92.083	2390.73	1159.33	-106.327	2369.59	1064.5	-123.827	2431.93	923.654	-80.6331	2442.82	818.786	-147.703	2404.23	812.883	-137.231	2454.75	745.87
1098	0	138.688	2508.94	1578.61	244.524	2511.99	1579.64	128.282	2349.04	1538.17	247.295	2348.18	1539.85	189.906	2330.21	1421.29	156.378	2218.64	1150.21	186.578	2483.04	1309.48	184.553	2574.46	1105.25	242.715	2224.54	1238.4	34.5423	2430.38	1383.59	-91.9941	2400.24	1157.12	-106.106	2378.91	1062.29	-123.203	2441.09	921.269	-80.3026	2451.28	816.314	-146.648	2413.2	810.498	-136.576	2463.62	743.404
1099	0	138.145	2518.63	1576.76	243.95	2521.48	1578.06	127.53	2358.8	1536.32	246.548	2357.72	1538.29	189.494	2339.78	1419.69	156.559	2228.25	1148.43	186.617	2492.52	1307.78	185.418	2583.97	1103.51	242.541	2233.9	1236.9	34.4447	2440.14	1381.45	-91.8723	2409.68	1154.95	-105.598	2388.3	1060	-122.827	2450.43	918.937	-79.7499	2460.2	813.939	-146.088	2422.51	808.247	-136.031	2472.62	741.005
1100	0	137.426	2528.4	1575	243.161	2531.13	1576.56	126.754	2368.79	1534.55	245.62	2367.38	1536.84	188.914	2349.38	1418.12	156.797	2238.1	1146.69	186.611	2502.19	1306.32	186.215	2593.68	1102.09	242.359	2243.27	1235.57	34.1959	2449.94	1379.4	-91.9088	2419.15	1152.87	-105.361	2397.76	1057.72	-122.539	2459.63	916.71	-79.3615	2469.25	811.668	-145.759	2431.58	805.853	-135.481	2481.74	738.745
1101	0	136.816	2538.16	1573.29	242.447	2540.82	1575.07	125.633	2378.46	1532.9	244.7	2377.09	1535.53	188.391	2359.01	1416.45	156.89	2248.03	1144.82	186.604	2511.9	1304.72	187.132	2603.67	1100.68	242.094	2253.13	1234	33.7332	2459.78	1377.57	-91.9723	2428.76	1150.71	-105.182	2407.23	1055.58	-122.04	2469.06	914.439	-78.9088	2478.71	809.562	-145.623	2440.96	803.66	-135.099	2490.95	736.464
1102	0	135.639	2548.12	1571.57	241.559	2550.62	1573.56	124.734	2388.5	1531.13	243.585	2386.79	1534.06	187.819	2368.74	1414.61	157.362	2258.13	1142.69	186.438	2521.67	1302.96	188.009	2613.62	1099.05	242.203	2262.97	1232.19	33.2416	2469.49	1375.41	-92.0022	2438.34	1148.37	-104.895	2416.65	1053.11	-122.102	2478.44	912.105	-78.6656	2488.2	807.187	-144.829	2450.29	801.052	-134.716	2500.33	734.2
1103	0	134.665	2558.07	1569.75	240.475	2560.34	1572.15	123.515	2398.49	1529.42	242.293	2396.48	1532.73	187.154	2378.36	1412.79	157.616	2268.34	1140.49	186.189	2531.67	1301.49	188.671	2623.9	1098.02	242.12	2272.83	1230.52	32.6566	2479.32	1373.16	-91.9661	2448	1145.88	-104.644	2426.23	1050.68	-121.896	2487.98	909.76	-78.3428	2498.02	804.811	-144.352	2459.73	798.564	-134.24	2509.93	731.871
1104	0	133.536	2567.98	1567.99	239.265	2570.21	1570.84	122.231	2408.45	1527.95	241.029	2406.24	1531.67	186.12	2388.04	1411.28	157.904	2278.69	1138.41	186.033	2541.53	1300.11	189.506	2634.3	1097.03	241.79	2282.72	1228.78	32.0571	2489.05	1371.07	-91.9911	2457.7	1143.48	-104.4	2435.77	1048.34	-121.406	2497.57	907.446	-78.0437	2508.07	802.648	-143.853	2469.32	796.151	-133.821	2519.71	729.447
1105	0	132.531	2577.97	1566.27	238.147	2580.02	1569.4	120.954	2418.44	1526.35	239.697	2416.1	1530.49	185.394	2397.91	1409.7	158.104	2289.36	1136.2	185.771	2551.8	1298.64	190.365	2645.04	1095.76	241.621	2292.88	1227.03	31.5956	2499.07	1368.67	-92.0408	2467.44	1141	-104.185	2445.48	1045.93	-121.425	2507.24	904.861	-77.4848	2518.45	800.336	-143.119	2478.98	793.675	-133.424	2529.63	726.951
1106	0	131.134	2588.08	1564.74	236.81	2589.98	1568.26	119.412	2428.31	1524.81	238.386	2425.94	1529.35	184.626	2407.66	1408.06	158.135	2300.06	1134.09	185.415	2561.9	1297.27	191.371	2655.65	1094.85	241.602	2303.15	1225.39	30.8502	2509.11	1366.81	-91.9312	2477.19	1138.55	-103.802	2455.42	1043.32	-121.313	2517.05	902.29	-77.539	2529.16	798.119	-142.349	2488.73	791.127	-132.999	2539.8	724.407
1107	0	129.815	2598.07	1563.34	235.465	2599.67	1567.49	118.123	2438.52	1523.39	236.787	2435.81	1528.54	183.599	2417.57	1407.03	158.237	2310.8	1132.32	184.949	2572.18	1296.28	192.182	2666.66	1094.34	241.385	2313.32	1224.06	30.1728	2519.19	1364.77	-92.0495	2486.9	1136.09	-103.22	2465.38	1040.98	-121.027	2527	899.803	-77.2257	2539.23	795.778	-141.933	2498.58	788.786	-132.718	2549.89	722.117
[truncated: 69 more columns]

## Sheet: Sheet2
Devices
		025370 - Force			025370 - Moment			025370 - CoP			027571 - Force			027571 - Moment			027571 - CoP			037720 - Force			037720 - Moment			037720 - CoP
Frame	Sub Frame	Fx	Fy	Fz	Mx	My	Mz	Cx	Cy	Cz	Fx	Fy	Fz	Mx	My	Mz	Cx	Cy	Cz	Fx	Fy	Fz	Mx	My	Mz	Cx	Cy	Cz
		N	N	N	N.mm	N.mm	N.mm	mm	mm	mm	N	N	N	N.mm	N.mm	N.mm	mm	mm	mm	N	N	N	N.mm	N.mm	N.mm	mm	mm	mm
623	0	0	0	0	0	0	0	200	300	0	0	0	0	0	0	0	200	903	0	0	0	0	0	0	0	603	903	0
623	1	0	0	0	0	0	0	200	300	0	0	0	0	0	0	0	200	903	0	0	0	0	0	0	0	603	903	0
623	2	0	0	0	0	0	0	200	300	0	0	0	0	0	0	0	200	903	0	0	0	0	0	0	0	603	903	0
623	3	0	0	0	0	0	0	200	300	0	0	0	0	0	0	0	200	903	0	0	0	0	0	0	0	603	903	0
623	4	0	0	0	0	0	0	200	300	0	0	0	0	0	0	0	200	903	0	0	0	0	0	0	0	603	903	0
623	5	0	0	0	0	0	0	200	300	0	0	0	0	0	0	0	200	903	0	0	0	0	0	0	0	603	903	0
623	6	0	0	0	0	0	0	200	300	0	0	0	0	0	0	0	200	903	0	0	0	0	0	0	0	603	903	0
623	7	0	0	0	0	0	0	200	300	0	0	0	0	0	0	0	200	903	0	0	0	0	0	0	0	603	903	0
623	8	0	0	0	0	0	0	200	300	0	0	0	0	0	0	0	200	903	0	0	0	0	0	0	0	603	903	0
623	9	0	0	0	0	0	0	200	300	0	0	0	0	0	0	0	200	903	0	0	0	0	0	0	0	603	903	0
624	0	0	0	0	0	0	0	200	300	0	0	0	0	0	0	0	200	903	0	0	0	0	0	0	0	603	903	0
624	1	0	0	0	0	0	0	200	300	0	0	0	0	0	0	0	200	903	0	0	0	0	0	0	0	603	903	0
624	2	0	0	0	0	0	0	200	300	0	0	0	0	0	0	0	200	903	0	0	0	0	0	0	0	603	903	0
624	3	0	0	0	0	0	0	200	300	0	0	0	0	0	0	0	200	903	0	0	0	0	0	0	0	603	903	0
624	4	0	0	0	0	0	0	200	300	0	0	0	0	0	0	0	200	903	0	0	0	0	0	0	0	603	903	0
624	5	0	0	0	0	0	0	200	300	0	0	0	0	0	0	0	200	903	0	0	0	0	0	0	0	603	903	0
624	6	0	0	0	0	0	0	200	300	0	0	0	0	0	0	0	200	903	0	0	0	0	0	0	0	603	903	0
624	7	0	0	0	0	0	0	200	300	0	0	0	0	0	0	0	200	903	0	0	0	0	0	0	0	603	903	0
624	8	0	0	0	0	0	0	200	300	0	0	0	0	0	0	0	200	903	0	0	0	0	0	0	0	603	903	0
624	9	0	0	0	0	0	0	200	300	0	0	0	0	0	0	0	200	903	0	0	0	0	0	0	0	603	903	0
625	0	0	0	0	0	0	0	200	300	0	0	0	0	0	0	0	200	903	0	0	0	0	0	0	0	603	903	0
625	1	0	0	0	0	0	0	200	300	0	0	0	0	0	0	0	200	903	0	0	0	0	0	0	0	603	903	0
625	2	0	0	0	0	0	0	200	300	0	0	0	0	0	0	0	200	903	0	0	0	0	0	0	0	603	903	0
625	3	0	0	0	0	0	0	200	300	0	0	0	0	0	0	0	200	903	0	0	0	0	0	0	0	603	903	0
625	4	0	0	0	0	0	0	200	300	0	0	0	0	0	0	0	200	903	0	0	0	0	0	0	0	603	903	0
625	5	0	0	0	0	0	0	200	300	0	0	0	0	0	0	0	200	903	0	0	0	0	0	0	0	603	903	0
625	6	0	0	0	0	0	0	200	300	0	0	0	0	0	0	0	200	903	0	0	0	0	0	0	0	603	903	0
625	7	0	0	0	0	0	0	200	300	0	0	0	0	0	0	0	200	903	0	0	0	0	0	0	0	603	903	0
625	8	0	0	0	0	0	0	200	300	0	0	0	0	0	0	0	200	903	0	0	0	0	0	0	0	603	903	0
625	9	0	0	0	0	0	0	200	300	0	0	0	0	0	0	0	200	903	0	0	0	0	0	0	0	603	903	0
626	0	0	0	0	0	0	0	200	300	0	0	0	0	0	0	0	200	903	0	0	0	0	0	0	0	603	903	0
626	1	0	0	0	0	0	0	200	300	0	0	0	0	0	0	0	200	903	0	0	0	0	0	0	0	603	903	0
626	2	0	0	0	0	0	0	200	300	0	0	0	0	0	0	0	200	903	0	0	0	0	0	0	0	603	903	0
626	3	0	0	0	0	0	0	200	300	0	0	0	0	0	0	0	200	903	0	0	0	0	0	0	0	603	903	0
626	4	0	0	0	0	0	0	200	300	0	0	0	0	0	0	0	200	903	0	0	0	0	0	0	0	603	903	0
626	5	0	0	0	0	0	0	200	300	0	0	0	0	0	0	0	200	903	0	0	0	0	0	0	0	603	903	0
626	6	0	0	0	0	0	0	200	300	0	0	0	0	0	0	0	200	903	0	0	0	0	0	0	0	603	903	0
626	7	0	0	0	0	0	0	200	300	0	0	0	0	0	0	0	200	903	0	0	0	0	0	0	0	603	903	0
626	8	0	0	0	0	0	0	200	300	0	0	0	0	0	0	0	200	903	0	0	0	0	0	0	0	603	903	0
626	9	0	0	0	0	0	0	200	300	0	0	0	0	0	0	0	200	903	0	0	0	0	0	0	0	603	903	0
627	0	0	0	0	0	0	0	200	300	0	0	0	0	0	0	0	200	903	0	0	0	0	0	0	0	603	903	0
627	1	0	0	0	0	0	0	200	300	0	0	0	0	0	0	0	200	903	0	0	0	0	0	0	0	603	903	0
627	2	0	0	0	0	0	0	200	300	0	0	0	0	0	0	0	200	903	0	0	0	0	0	0	0	603	903	0
627	3	0	0	0	0	0	0	200	300	0	0	0	0	0	0	0	200	903	0	0	0	0	0	0	0	603	903	0
627	4	0	0	0	0	0	0	200	300	0	0	0	0	0	0	0	200	903	0	0	0	0	0	0	0	603	903	0
627	5	0	0	0	0	0	0	200	300	0	0	0	0	0	0	0	200	903	0	0	0	0	0	0	0	603	903	0
627	6	0	0	0	0	0	0	200	300	0	0	0	0	0	0	0	200	903	0	0	0	0	0	0	0	603	903	0
627	7	0	0	0	0	0	0	200	300	0	0	0	0	0	0	0	200	903	0	0	0	0	0	0	0	603	903	0
627	8	0	0	0	0	0	0	200	300	0	0	0	0	0	0	0	200	903	0	0	0	0	0	0	0	603	903	0
627	9	0	0	0	0	0	0	200	300	0	0	0	0	0	0	0	200	903	0	0	0	0	0	0	0	603	903	0
628	0	0	0	0	0	0	0	200	300	0	0	0	0	0	0	0	200	903	0	0	0	0	0	0	0	603	903	0
628	1	0	0	0	0	0	0	200	300	0	0	0	0	0	0	0	200	903	0	0	0	0	0	0	0	603	903	0
628	2	0	0	0	0	0	0	200	300	0	0	0	0	0	0	0	200	903	0	0	0	0	0	0	0	603	903	0
628	3	0	0	0	0	0	0	200	300	0	0	0	0	0	0	0	200	903	0	0	0	0	0	0	0	603	903	0
628	4	0	0	0	0	0	0	200	300	0	0	0	0	0	0	0	200	903	0	0	0	0	0	0	0	603	903	0
628	5	0	0	0	0	0	0	200	300	0	0	0	0	0	0	0	200	903	0	0	0	0	0	0	0	603	903	0
628	6	0	0	0	0	0	0	200	300	0	0	0	0	0	0	0	200	903	0	0	0	0	0	0	0	603	903	0
628	7	0	0	0	0	0	0	200	300	0	0	0	0	0	0	0	200	903	0	0	0	0	0	0	0	603	903	0
628	8	0	0	0	0	0	0	200	300	0	0	0	0	0	0	0	200	903	0	0	0	0	0	0	0	603	903	0
628	9	0	0	0	0	0	0	200	300	0	0	0	0	0	0	0	200	903	0	0	0	0	0	0	0	603	903	0
629	0	0	0	0	0	0	0	200	300	0	0	0	0	0	0	0	200	903	0	0	0	0	0	0	0	603	903	0
629	1	0	0	0	0	0	0	200	300	0	0	0	0	0	0	0	200	903	0	0	0	0	0	0	0	603	903	0
629	2	0	0	0	0	0	0	200	300	0	0	0	0	0	0	0	200	903	0	0	0	0	0	0	0	603	903	0
629	3	0	0	0	0	0	0	200	300	0	0	0	0	0	0	0	200	903	0	0	0	0	0	0	0	603	903	0
629	4	0	0	0	0	0	0	200	300	0	0	0	0	0	0	0	200	903	0	0	0	0	0	0	0	603	903	0
629	5	0	0	0	0	0	0	200	300	0	0	0	0	0	0	0	200	903	0	0	0	0	0	0	0	603	903	0
629	6	0	0	0	0	0	0	200	300	0	0	0	0	0	0	0	200	903	0	0	0	0	0	0	0	603	903	0
629	7	0	0	0	0	0	0	200	300	0	0	0	0	0	0	0	200	903	0	0	0	0	0	0	0	603	903	0
629	8	0	0	0	0	0	0	200	300	0	0	0	0	0	0	0	200	903	0	0	0	0	0	0	0	603	903	0
629	9	0	0	0	0	0	0	200	300	0	0	0	0	0	0	0	200	903	0	0	0	0	0	0	0	603	903	0
630	0	0	0	0	0	0	0	200	300	0	0	0	0	0	0	0	200	903	0	0	0	0	0	0	0	603	903	0
630	1	0	0	0	0	0	0	200	300	0	0	0	0	0	0	0	200	903	0	0	0	0	0	0	0	603	903	0
630	2	0	0	0	0	0	0	200	300	0	0	0	0	0	0	0	200	903	0	0	0	0	0	0	0	603	903	0
630	3	0	0	0	0	0	0	200	300	0	0	0	0	0	0	0	200	903	0	0	0	0	0	0	0	603	903	0
630	4	0	0	0	0	0	0	200	300	0	0	0	0	0	0	0	200	903	0	0	0	0	0	0	0	603	903	0
630	5	0	0	0	0	0	0	200	300	0	0	0	0	0	0	0	200	903	0	0	0	0	0	0	0	603	903	0
630	6	0	0	0	0	0	0	200	300	0	0	0	0	0	0	0	200	903	0	0	0	0	0	0	0	603	903	0
630	7	0	0	0	0	0	0	200	300	0	0	0	0	0	0	0	200	903	0	0	0	0	0	0	0	603	903	0
630	8	0	0	0	0	0	0	200	300	0	0	0	0	0	0	0	200	903	0	0	0	0	0	0	0	603	903	0
630	9	0	0	0	0	0	0	200	300	0	0	0	0	0	0	0	200	903	0	0	0	0	0	0	0	603	903	0
631	0	0	0	0	0	0	0	200	300	0	0	0	0	0	0	0	200	903	0	0	0	0	0	0	0	603	903	0
631	1	0	0	0	0	0	0	200	300	0	0	0	0	0	0	0	200	903	0	0	0	0	0	0	0	603	903	0
631	2	0	0	0	0	0	0	200	300	0	0	0	0	0	0	0	200	903	0	0	0	0	0	0	0	603	903	0
631	3	0	0	0	0	0	0	200	300	0	0	0	0	0	0	0	200	903	0	0	0	0	0	0	0	603	903	0
631	4	0	0	0	0	0	0	200	300	0	0	0	0	0	0	0	200	903	0	0	0	0	0	0	0	603	903	0
631	5	0	0	0	0	0	0	200	300	0	0	0	0	0	0	0	200	903	0	0	0	0	0	0	0	603	903	0
631	6	0	0	0	0	0	0	200	300	0	0	0	0	0	0	0	200	903	0	0	0	0	0	0	0	603	903	0
631	7	0	0	0	0	0	0	200	300	0	0	0	0	0	0	0	200	903	0	0	0	0	0	0	0	603	903	0
631	8	0	0	0	0	0	0	200	300	0	0	0	0	0	0	0	200	903	0	0	0	0	0	0	0	603	903	0
631	9	0	0	0	0	0	0	200	300	0	0	0	0	0	0	0	200	903	0	0	0	0	0	0	0	603	903	0
632	0	0	0	0	0	0	0	200	300	0	0	0	0	0	0	0	200	903	0	0	0	0	0	0	0	603	903	0
632	1	0	0	0	0	0	0	200	300	0	0	0	0	0	0	0	200	903	0	0	0	0	0	0	0	603	903	0
632	2	0	0	0	0	0	0	200	300	0	0	0	0	0	0	0	200	903	0	0	0	0	0	0	0	603	903	0
632	3	0	0	0	0	0	0	200	300	0	0	0	0	0	0	0	200	903	0	0	0	0	0	0	0	603	903	0
632	4	0	0	0	0	0	0	200	300	0	0	0	0	0	0	0	200	903	0	0	0	0	0	0	0	603	903	0
632	5	0	0	0	0	0	0	200	300	0	0	0	0	0	0	0	200	903	0	0	0	0	0	0	0	603	903	0
632	6	0	0	0	0	0	0	200	300	0	0	0	0	0	0	0	200	903	0	0	0	0	0	0	0	603	903	0
632	7	0	0	0	0	0	0	200	300	0	0	0	0	0	0	0	200	903	0	0	0	0	0	0	0	603	903	0
632	8	0	0	0	0	0	0	200	300	0	0	0	0	0	0	0	200	903	0	0	0	0	0	0	0	603	903	0
632	9	0	0	0	0	0	0	200	300	0	0	0	0	0	0	0	200	903	0	0	0	0	0	0	0	603	903	0
633	0	0	0	0	0	0	0	200	300	0	0	0	0	0	0	0	200	903	0	0	0	0	0	0	0	603	903	0
633	1	0	0	0	0	0	0	200	300	0	0	0	0	0	0	0	200	903	0	0	0	0	0	0	0	603	903	0
633	2	0	0	0	0	0	0	200	300	0	0	0	0	0	0	0	200	903	0	0	0	0	0	0	0	603	903	0
633	3	0	0	0	0	0	0	200	300	0	0	0	0	0	0	0	200	903	0	0	0	0	0	0	0	603	903	0
633	4	0	0	0	0	0	0	200	300	0	0	0	0	0	0	0	200	903	0	0	0	0	0	0	0	603	903	0
633	5	0	0	0	0	0	0	200	300	0	0	0	0	0	0	0	200	903	0	0	0	0	0	0	0	603	903	0
633	6	0	0	0	0	0	0	200	300	0	0	0	0	0	0	0	200	903	0	0	0	0	0	0	0	603	903	0
633	7	0	0	0	0	0	0	200	300	0	0	0	0	0	0	0	200	903	0	0	0	0	0	0	0	603	903	0
633	8	0	0	0	0	0	0	200	300	0	0	0	0	0	0	0	200	903	0	0	0	0	0	0	0	603	903	0
633	9	0	0	0	0	0	0	200	300	0	0	0	0	0	0	0	200	903	0	0	0	0	0	0	0	603	903	0
634	0	0	0	0	0	0	0	200	300	0	0	0	0	0	0	0	200	903	0	0	0	0	0	0	0	603	903	0
634	1	0	0	0	0	0	0	200	300	0	0	0	0	0	0	0	200	903	0	0	0	0	0	0	0	603	903	0
634	2	0	0	0	0	0	0	200	300	0	0	0	0	0	0	0	200	903	0	0	0	0	0	0	0	603	903	0
634	3	0	0	0	0	0	0	200	300	0	0	0	0	0	0	0	200	903	0	0	0	0	0	0	0	603	903	0
634	4	0	0	0	0	0	0	200	300	0	0	0	0	0	0	0	200	903	0	0	0	0	0	0	0	603	903	0
634	5	0	0	0	0	0	0	200	300	0	0	0	0	0	0	0	200	903	0	0	0	0	0	0	0	603	903	0
634	6	0	0	0	0	0	0	200	300	0	0	0	0	0	0	0	200	903	0	0	0	0	0	0	0	603	903	0
634	7	0	0	0	0	0	0	200	300	0	0	0	0	0	0	0	200	903	0	0	0	0	0	0	0	603	903	0
634	8	0	0	0	0	0	0	200	300	0	0	0	0	0	0	0	200	903	0	0	0	0	0	0	0	603	903	0
634	9	0	0	0	0	0	0	200	300	0	0	0	0	0	0	0	200	903	0	0	0	0	0	0	0	603	903	0
635	0	0	0	0	0	0	0	200	300	0	0	0	0	0	0	0	200	903	0	0	0	0	0	0	0	603	903	0
635	1	0	0	0	0	0	0	200	300	0	0	0	0	0	0	0	200	903	0	0	0	0	0	0	0	603	903	0
635	2	0	0	0	0	0	0	200	300	0	0	0	0	0	0	0	200	903	0	0	0	0	0	0	0	603	903	0
635	3	0	0	0	0	0	0	200	300	0	0	0	0	0	0	0	200	903	0	0	0	0	0	0	0	603	903	0
635	4	0	0	0	0	0	0	200	300	0	0	0	0	0	0	0	200	903	0	0	0	0	0	0	0	603	903	0
635	5	0	0	0	0	0	0	200	300	0	0	0	0	0	0	0	200	903	0	0	0	0	0	0	0	603	903	0
635	6	0	0	0	0	0	0	200	300	0	0	0	0	0	0	0	200	903	0	0	0	0	0	0	0	603	903	0
635	7	0	0	0	0	0	0	200	300	0	0	0	0	0	0	0	200	903	0	0	0	0	0	0	0	603	903	0
635	8	0	0	0	0	0	0	200	300	0	0	0	0	0	0	0	200	903	0	0	0	0	0	0	0	603	903	0
635	9	0	0	0	0	0	0	200	300	0	0	0	0	0	0	0	200	903	0	0	0	0	0	0	0	603	903	0
636	0	0	0	0	0	0	0	200	300	0	0	0	0	0	0	0	200	903	0	0	0	0	0	0	0	603	903	0
636	1	0	0	0	0	0	0	200	300	0	0	0	0	0	0	0	200	903	0	0	0	0	0	0	0	603	903	0
636	2	0	0	0	0	0	0	200	300	0	0	0	0	0	0	0	200	903	0	0	0	0	0	0	0	603	903	0
636	3	0	0	0	0	0	0	200	300	0	0	0	0	0	0	0	200	903	0	0	0	0	0	0	0	603	903	0
636	4	0	0	0	0	0	0	200	300	0	0	0	0	0	0	0	200	903	0	0	0	0	0	0	0	603	903	0
636	5	0	0	0	0	0	0	200	300	0	0	0	0	0	0	0	200	903	0	0	0	0	0	0	0	603	903	0
636	6	0	0	0	0	0	0	200	300	0	0	0	0	0	0	0	200	903	0	0	0	0	0	0	0	603	903	0
636	7	0	0	0	0	0	0	200	300	0	0	0	0	0	0	0	200	903	0	0	0	0	0	0	0	603	903	0
636	8	0	0	0	0	0	0	200	300	0	0	0	0	0	0	0	200	903	0	0	0	0	0	0	0	603	903	0
636	9	0	0	0	0	0	0	200	300	0	0	0	0	0	0	0	200	903	0	0	0	0	0	0	0	603	903	0
637	0	0	0	0	0	0	0	200	300	0	0	0	0	0	0	0	200	903	0	0	0	0	0	0	0	603	903	0
637	1	0	0	0	0	0	0	200	300	0	0	0	0	0	0	0	200	903	0	0	0	0	0	0	0	603	903	0
637	2	0	0	0	0	0	0	200	300	0	0	0	0	0	0	0	200	903	0	0	0	0	0	0	0	603	903	0
637	3	0	0	0	0	0	0	200	300	0	0	0	0	0	0	0	200	903	0	0	0	0	0	0	0	603	903	0
637	4	0	0	0	0	0	0	200	300	0	0	0	0	0	0	0	200	903	0	0	0	0	0	0	0	603	903	0
637	5	0	0	0	0	0	0	200	300	0	0	0	0	0	0	0	200	903	0	0	0	0	0	0	0	603	903	0
637	6	0	0	0	0	0	0	200	300	0	0	0	0	0	0	0	200	903	0	0	0	0	0	0	0	603	903	0
637	7	0	0	0	0	0	0	200	300	0	0	0	0	0	0	0	200	903	0	0	0	0	0	0	0	603	903	0
637	8	0	0	0	0	0	0	200	300	0	0	0	0	0	0	0	200	903	0	0	0	0	0	0	0	603	903	0
637	9	0	0	0	0	0	0	200	300	0	0	0	0	0	0	0	200	903	0	0	0	0	0	0	0	603	903	0
638	0	0	0	0	0	0	0	200	300	0	0	0	0	0	0	0	200	903	0	0	0	0	0	0	0	603	903	0
638	1	0	0	0	0	0	0	200	300	0	0	0	0	0	0	0	200	903	0	0	0	0	0	0	0	603	903	0
638	2	0	0	0	0	0	0	200	300	0	0	0	0	0	0	0	200	903	0	0	0	0	0	0	0	603	903	0
638	3	0	0	0	0	0	0	200	300	0	0	0	0	0	0	0	200	903	0	0	0	0	0	0	0	603	903	0
638	4	0	0	0	0	0	0	200	300	0	0	0	0	0	0	0	200	903	0	0	0	0	0	0	0	603	903	0
638	5	0	0	0	0	0	0	200	300	0	0	0	0	0	0	0	200	903	0	0	0	0	0	0	0	603	903	0
638	6	0	0	0	0	0	0	200	300	0	0	0	0	0	0	0	200	903	0	0	0	0	0	0	0	603	903	0
638	7	0	0	0	0	0	0	200	300	0	0	0	0	0	0	0	200	903	0	0	0	0	0	0	0	603	903	0
638	8	0	0	0	0	0	0	200	300	0	0	0	0	0	0	0	200	903	0	0	0	0	0	0	0	603	903	0
638	9	0	0	0	0	0	0	200	300	0	0	0	0	0	0	0	200	903	0	0	0	0	0	0	0	603	903	0
639	0	0	0	0	0	0	0	200	300	0	0	0	0	0	0	0	200	903	0	0	0	0	0	0	0	603	903	0
639	1	0	0	0	0	0	0	200	300	0	0	0	0	0	0	0	200	903	0	0	0	0	0	0	0	603	903	0
639	2	0	0	0	0	0	0	200	300	0	0	0	0	0	0	0	200	903	0	0	0	0	0	0	0	603	903	0
639	3	0	0	0	0	0	0	200	300	0	0	0	0	0	0	0	200	903	0	0	0	0	0	0	0	603	903	0
639	4	0	0	0	0	0	0	200	300	0	0	0	0	0	0	0	200	903	0	0	0	0	0	0	0	603	903	0
639	5	0	0	0	0	0	0	200	300	0	0	0	0	0	0	0	200	903	0	0	0	0	0	0	0	603	903	0
639	6	0	0	0	0	0	0	200	300	0	0	0	0	0	0	0	200	903	0	0	0	0	0	0	0	603	903	0
639	7	0	0	0	0	0	0	200	300	0	0	0	0	0	0	0	200	903	0	0	0	0	0	0	0	603	903	0
639	8	0	0	0	0	0	0	200	300	0	0	0	0	0	0	0	200	903	0	0	0	0	0	0	0	603	903	0
639	9	0	0	0	0	0	0	200	300	0	0	0	0	0	0	0	200	903	0	0	0	0	0	0	0	603	903	0
640	0	0	0	0	0	0	0	200	300	0	0	0	0	0	0	0	200	903	0	0	0	0	0	0	0	603	903	0
640	1	0	0	0	0	0	0	200	300	0	0	0	0	0	0	0	200	903	0	0	0	0	0	0	0	603	903	0
640	2	0	0	0	0	0	0	200	300	0	0	0	0	0	0	0	200	903	0	0	0	0	0	0	0	603	903	0
640	3	0	0	0	0	0	0	200	300	0	0	0	0	0	0	0	200	903	0	0	0	0	0	0	0	603	903	0
640	4	0	0	0	0	0	0	200	300	0	0	0	0	0	0	0	200	903	0	0	0	0	0	0	0	603	903	0
640	5	0	0	0	0	0	0	200	300	0	0	0	0	0	0	0	200	903	0	0	0	0	0	0	0	603	903	0
640	6	0	0	0	0	0	0	200	300	0	0	0	0	0	0	0	200	903	0	0	0	0	0	0	0	603	903	0
640	7	0	0	0	0	0	0	200	300	0	0	0	0	0	0	0	200	903	0	0	0	0	0	0	0	603	903	0
640	8	0	0	0	0	0	0	200	300	0	0	0	0	0	0	0	200	903	0	0	0	0	0	0	0	603	903	0
640	9	0	0	0	0	0	0	200	300	0	0	0	0	0	0	0	200	903	0	0	0	0	0	0	0	603	903	0
641	0	0	0	0	0	0	0	200	300	0	0	0	0	0	0	0	200	903	0	0	0	0	0	0	0	603	903	0
641	1	0	0	0	0	0	0	200	300	0	0	0	0	0	0	0	200	903	0	0	0	0	0	0	0	603	903	0
641	2	0	0	0	0	0	0	200	300	0	0	0	0	0	0	0	200	903	0	0	0	0	0	0	0	603	903	0
641	3	0	0	0	0	0	0	200	300	0	0	0	0	0	0	0	200	903	0	0	0	0	0	0	0	603	903	0
641	4	0	0	0	0	0	0	200	300	0	0	0	0	0	0	0	200	903	0	0	0	0	0	0	0	603	903	0
641	5	0	0	0	0	0	0	200	300	0	0	0	0	0	0	0	200	903	0	0	0	0	0	0	0	603	903	0
641	6	0	0	0	0	0	0	200	300	0	0	0	0	0	0	0	200	903	0	0	0	0	0	0	0	603	903	0
641	7	0	0	0	0	0	0	200	300	0	0	0	0	0	0	0	200	903	0	0	0	0	0	0	0	603	903	0
641	8	0	0	0	0	0	0	200	300	0	0	0	0	0	0	0	200	903	0	0	0	0	0	0	0	603	903	0
641	9	0	0	0	0	0	0	200	300	0	0	0	0	0	0	0	200	903	0	0	0	0	0	0	0	603	903	0
642	0	0	0	0	0	0	0	200	300	0	0	0	0	0	0	0	200	903	0	0	0	0	0	0	0	603	903	0
642	1	0	0	0	0	0	0	200	300	0	0	0	0	0	0	0	200	903	0	0	0	0	0	0	0	603	903	0
642	2	0	0	0	0	0	0	200	300	0	0	0	0	0	0	0	200	903	0	0	0	0	0	0	0	603	903	0
642	3	0	0	0	0	0	0	200	300	0	0	0	0	0	0	0	200	903	0	0	0	0	0	0	0	603	903	0
642	4	0	0	0	0	0	0	200	300	0	0	0	0	0	0	0	200	903	0	0	0	0	0	0	0	603	903	0
642	5	0	0	0	0	0	0	200	300	0	0	0	0	0	0	0	200	903	0	0	0	0	0	0	0	603	903	0
642	6	0	0	0	0	0	0	200	300	0	0	0	0	0	0	0	200	903	0	0	0	0	0	0	0	603	903	0
642	7	0	0	0	0	0	0	200	300	0	0	0	0	0	0	0	200	903	0	0	0	0	0	0	0	603	903	0
642	8	0	0	0	0	0	0	200	300	0	0	0	0	0	0	0	200	903	0	0	0	0	0	0	0	603	903	0
642	9	0	0	0	0	0	0	200	300	0	0	0	0	0	0	0	200	903	0	0	0	0	0	0	0	603	903	0
643	0	0	0	0	0	0	0	200	300	0	0	0	0	0	0	0	200	903	0	0	0	0	0	0	0	603	903	0
643	1	0	0	0	0	0	0	200	300	0	0	0	0	0	0	0	200	903	0	0	0	0	0	0	0	603	903	0
643	2	0	0	0	0	0	0	200	300	0	0	0	0	0	0	0	200	903	0	0	0	0	0	0	0	603	903	0
643	3	0	0	0	0	0	0	200	300	0	0	0	0	0	0	0	200	903	0	0	0	0	0	0	0	603	903	0
643	4	0	0	0	0	0	0	200	300	0	0	0	0	0	0	0	200	903	0	0	0	0	0	0	0	603	903	0
643	5	0	0	0	0	0	0	200	300	0	0	0	0	0	0	0	200	903	0	0	0	0	0	0	0	603	903	0
643	6	0	0	0	0	0	0	200	300	0	0	0	0	0	0	0	200	903	0	0	0	0	0	0	0	603	903	0
643	7	0	0	0	0	0	0	200	300	0	0	0	0	0	0	0	200	903	0	0	0	0	0	0	0	603	903	0
643	8	0	0	0	0	0	0	200	300	0	0	0	0	0	0	0	200	903	0	0	0	0	0	0	0	603	903	0
643	9	0	0	0	0	0	0	200	300	0	0	0	0	0	0	0	200	903	0	0	0	0	0	0	0	603	903	0
644	0	0	0	0	0	0	0	200	300	0	0	0	0	0	0	0	200	903	0	0	0	0	0	0	0	603	903	0
644	1	0	0	0	0	0	0	200	300	0	0	0	0	0	0	0	200	903	0	0	0	0	0	0	0	603	903	0
644	2	0	0	0	0	0	0	200	300	0	0	0	0	0	0	0	200	903	0	0	0	0	0	0	0	603	903	0
644	3	0	0	0	0	0	0	200	300	0	0	0	0	0	0	0	200	903	0	0	0	0	0	0	0	603	903	0
644	4	0	0	0	0	0	0	200	300	0	0	0	0	0	0	0	200	903	0	0	0	0	0	0	0	603	903	0
644	5	0	0	0	0	0	0	200	300	0	0	0	0	0	0	0	200	903	0	0	0	0	0	0	0	603	903	0
644	6	0	0	0	0	0	0	200	300	0	0	0	0	0	0	0	200	903	0	0	0	0	0	0	0	603	903	0
644	7	0	0	0	0	0	0	200	300	0	0	0	0	0	0	0	200	903	0	0	0	0	0	0	0	603	903	0
644	8	0	0	0	0	0	0	200	300	0	0	0	0	0	0	0	200	903	0	0	0	0	0	0	0	603	903	0
644	9	0	0	0	0	0	0	200	300	0	0	0	0	0	0	0	200	903	0	0	0	0	0	0	0	603	903	0
645	0	0	0	0	0	0	0	200	300	0	0	0	0	0	0	0	200	903	0	0	0	0	0	0	0	603	903	0
645	1	0	0	0	0	0	0	200	300	0	0	0	0	0	0	0	200	903	0	0	0	0	0	0	0	603	903	0
645	2	0	0	0	0	0	0	200	300	0	0	0	0	0	0	0	200	903	0	0	0	0	0	0	0	603	903	0
645	3	0	0	0	0	0	0	200	300	0	0	0	0	0	0	0	200	903	0	0	0	0	0	0	0	603	903	0
645	4	0	0	0	0	0	0	200	300	0	0	0	0	0	0	0	200	903	0	0	0	0	0	0	0	603	903	0
645	5	0	0	0	0	0	0	200	300	0	0	0	0	0	0	0	200	903	0	0	0	0	0	0	0	603	903	0
645	6	0	0	0	0	0	0	200	300	0	0	0	0	0	0	0	200	903	0	0	0	0	0	0	0	603	903	0
645	7	0	0	0	0	0	0	200	300	0	0	0	0	0	0	0	200	903	0	0	0	0	0	0	0	603	903	0
645	8	0	0	0	0	0	0	200	300	0	0	0	0	0	0	0	200	903	0	0	0	0	0	0	0	603	903	0
645	9	0	0	0	0	0	0	200	300	0	0	0	0	0	0	0	200	903	0	0	0	0	0	0	0	603	903	0
646	0	0	0	0	0	0	0	200	300	0	0	0	0	0	0	0	200	903	0	0	0	0	0	0	0	603	903	0
646	1	0	0	0	0	0	0	200	300	0	0	0	0	0	0	0	200	903	0	0	0	0	0	0	0	603	903	0
646	2	0	0	0	0	0	0	200	300	0	0	0	0	0	0	0	200	903	0	0	0	0	0	0	0	603	903	0
646	3	0	0	0	0	0	0	200	300	0	0	0	0	0	0	0	200	903	0	0	0	0	0	0	0	603	903	0
646	4	0	0	0	0	0	0	200	300	0	0	0	0	0	0	0	200	903	0	0	0	0	0	0	0	603	903	0
646	5	0	0	0	0	0	0	200	300	0	0	0	0	0	0	0	200	903	0	0	0	0	0	0	0	603	903	0
646	6	0	0	0	0	0	0	200	300	0	0	0	0	0	0	0	200	903	0	0	0	0	0	0	0	603	903	0
646	7	0	0	0	0	0	0	200	300	0	0	0	0	0	0	0	200	903	0	0	0	0	0	0	0	603	903	0
646	8	0	0	0	0	0	0	200	300	0	0	0	0	0	0	0	200	903	0	0	0	0	0	0	0	603	903	0
646	9	0	0	0	0	0	0	200	300	0	0	0	0	0	0	0	200	903	0	0	0	0	0	0	0	603	903	0
647	0	0	0	0	0	0	0	200	300	0	0	0	0	0	0	0	200	903	0	0	0	0	0	0	0	603	903	0
647	1	0	0	0	0	0	0	200	300	0	0	0	0	0	0	0	200	903	0	0	0	0	0	0	0	603	903	0
647	2	0	0	0	0	0	0	200	300	0	0	0	0	0	0	0	200	903	0	0	0	0	0	0	0	603	903	0
647	3	0	0	0	0	0	0	200	300	0	0	0	0	0	0	0	200	903	0	0	0	0	0	0	0	603	903	0
647	4	0	0	0	0	0	0	200	300	0	0	0	0	0	0	0	200	903	0	0	0	0	0	0	0	603	903	0
647	5	0	0	0	0	0	0	200	300	0	0	0	0	0	0	0	200	903	0	0	0	0	0	0	0	603	903	0
647	6	0	0	0	0	0	0	200	300	0	0	0	0	0	0	0	200	903	0	0	0	0	0	0	0	603	903	0
647	7	0	0	0	0	0	0	200	300	0	0	0	0	0	0	0	200	903	0	0	0	0	0	0	0	603	903	0
647	8	0	0	0	0	0	0	200	300	0	0	0	0	0	0	0	200	903	0	0	0	0	0	0	0	603	903	0
647	9	0	0	0	0	0	0	200	300	0	0	0	0	0	0	0	200	903	0	0	0	0	0	0	0	603	903	0
648	0	0	0	0	0	0	0	200	300	0	0	0	0	0	0	0	200	903	0	0	0	0	0	0	0	603	903	0
648	1	0	0	0	0	0	0	200	300	0	0	0	0	0	0	0	200	903	0	0	0	0	0	0	0	603	903	0
648	2	0	0	0	0	0	0	200	300	0	0	0	0	0	0	0	200	903	0	0	0	0	0	0	0	603	903	0
648	3	0	0	0	0	0	0	200	300	0	0	0	0	0	0	0	200	903	0	0	0	0	0	0	0	603	903	0
648	4	0	0	0	0	0	0	200	300	0	0	0	0	0	0	0	200	903	0	0	0	0	0	0	0	603	903	0
648	5	0	0	0	0	0	0	200	300	0	0	0	0	0	0	0	200	903	0	0	0	0	0	0	0	603	903	0
648	6	0	0	0	0	0	0	200	300	0	0	0	0	0	0	0	200	903	0	0	0	0	0	0	0	603	903	0
648	7	0	0	0	0	0	0	200	300	0	0	0	0	0	0	0	200	903	0	0	0	0	0	0	0	603	903	0
648	8	0	0	0	0	0	0	200	300	0	0	0	0	0	0	0	200	903	0	0	0	0	0	0	0	603	903	0
648	9	0	0	0	0	0	0	200	300	0	0	0	0	0	0	0	200	903	0	0	0	0	0	0	0	603	903	0
649	0	0	0	0	0	0	0	200	300	0	0	0	0	0	0	0	200	903	0	0	0	0	0	0	0	603	903	0
649	1	0	0	0	0	0	0	200	300	0	0	0	0	0	0	0	200	903	0	0	0	0	0	0	0	603	903	0
649	2	0	0	0	0	0	0	200	300	0	0	0	0	0	0	0	200	903	0	0	0	0	0	0	0	603	903	0
649	3	0	0	0	0	0	0	200	300	0	0	0	0	0	0	0	200	903	0	0	0	0	0	0	0	603	903	0
649	4	0	0	0	0	0	0	200	300	0	0	0	0	0	0	0	200	903	0	0	0	0	0	0	0	603	903	0
649	5	0	0	0	0	0	0	200	300	0	0	0	0	0	0	0	200	903	0	0	0	0	0	0	0	603	903	0
649	6	0	0	0	0	0	0	200	300	0	0	0	0	0	0	0	200	903	0	0	0	0	0	0	0	603	903	0
649	7	0	0	0	0	0	0	200	300	0	0	0	0	0	0	0	200	903	0	0	0	0	0	0	0	603	903	0
649	8	0	0	0	0	0	0	200	300	0	0	0	0	0	0	0	200	903	0	0	0	0	0	0	0	603	903	0
649	9	0	0	0	0	0	0	200	300	0	0	0	0	0	0	0	200	903	0	0	0	0	0	0	0	603	903	0
650	0	0	0	0	0	0	0	200	300	0	0	0	0	0	0	0	200	903	0	0	0	0	0	0	0	603	903	0
650	1	0	0	0	0	0	0	200	300	0	0	0	0	0	0	0	200	903	0	0	0	0	0	0	0	603	903	0
650	2	0	0	0	0	0	0	200	300	0	0	0	0	0	0	0	200	903	0	0	0	0	0	0	0	603	903	0
650	3	0	0	0	0	0	0	200	300	0	0	0	0	0	0	0	200	903	0	0	0	0	0	0	0	603	903	0
650	4	0	0	0	0	0	0	200	300	0	0	0	0	0	0	0	200	903	0	0	0	0	0	0	0	603	903	0
650	5	0	0	0	0	0	0	200	300	0	0	0	0	0	0	0	200	903	0	0	0	0	0	0	0	603	903	0
650	6	0	0	0	0	0	0	200	300	0	0	0	0	0	0	0	200	903	0	0	0	0	0	0	0	603	903	0
650	7	0	0	0	0	0	0	200	300	0	0	0	0	0	0	0	200	903	0	0	0	0	0	0	0	603	903	0
650	8	0	0	0	0	0	0	200	300	0	0	0	0	0	0	0	200	903	0	0	0	0	0	0	0	603	903	0
650	9	0	0	0	0	0	0	200	300	0	0	0	0	0	0	0	200	903	0	0	0	0	0	0	0	603	903	0
651	0	0	0	0	0	0	0	200	300	0	0	0	0	0	0	0	200	903	0	0	0	0	0	0	0	603	903	0
651	1	0	0	0	0	0	0	200	300	0	0	0	0	0	0	0	200	903	0	0	0	0	0	0	0	603	903	0
651	2	0	0	0	0	0	0	200	300	0	0	0	0	0	0	0	200	903	0	0	0	0	0	0	0	603	903	0
651	3	0	0	0	0	0	0	200	300	0	0	0	0	0	0	0	200	903	0	0	0	0	0	0	0	603	903	0
651	4	0	0	0	0	0	0	200	300	0	0	0	0	0	0	0	200	903	0	0	0	0	0	0	0	603	903	0
651	5	0	0	0	0	0	0	200	300	0	0	0	0	0	0	0	200	903	0	0	0	0	0	0	0	603	903	0
651	6	0	0	0	0	0	0	200	300	0	0	0	0	0	0	0	200	903	0	0	0	0	0	0	0	603	903	0
651	7	0	0	0	0	0	0	200	300	0	0	0	0	0	0	0	200	903	0	0	0	0	0	0	0	603	903	0
651	8	0	0	0	0	0	0	200	300	0	0	0	0	0	0	0	200	903	0	0	0	0	0	0	0	603	903	0
651	9	0	0	0	0	0	0	200	300	0	0	0	0	0	0	0	200	903	0	0	0	0	0	0	0	603	903	0
652	0	0	0	0	0	0	0	200	300	0	0	0	0	0	0	0	200	903	0	0	0	0	0	0	0	603	903	0
652	1	0	0	0	0	0	0	200	300	0	0	0	0	0	0	0	200	903	0	0	0	0	0	0	0	603	903	0
652	2	0	0	0	0	0	0	200	300	0	0	0	0	0	0	0	200	903	0	0	0	0	0	0	0	603	903	0
652	3	0	0	0	0	0	0	200	300	0	0	0	0	0	0	0	200	903	0	0	0	0	0	0	0	603	903	0
652	4	0	0	0	0	0	0	200	300	0	0	0	0	0	0	0	200	903	0	0	0	0	0	0	0	603	903	0
652	5	0	0	0	0	0	0	200	300	0	0	0	0	0	0	0	200	903	0	0	0	0	0	0	0	603	903	0
652	6	0	0	0	0	0	0	200	300	0	0	0	0	0	0	0	200	903	0	0	0	0	0	0	0	603	903	0
652	7	0	0	0	0	0	0	200	300	0	0	0	0	0	0	0	200	903	0	0	0	0	0	0	0	603	903	0
652	8	0	0	0	0	0	0	200	300	0	0	0	0	0	0	0	200	903	0	0	0	0	0	0	0	603	903	0
652	9	0	0	0	0	0	0	200	300	0	0	0	0	0	0	0	200	903	0	0	0	0	0	0	0	603	903	0
653	0	0	0	0	0	0	0	200	300	0	0	0	0	0	0	0	200	903	0	0	0	0	0	0	0	603	903	0
653	1	0	0	0	0	0	0	200	300	0	0	0	0	0	0	0	200	903	0	0	0	0	0	0	0	603	903	0
653	2	0	0	0	0	0	0	200	300	0	0	0	0	0	0	0	200	903	0	0	0	0	0	0	0	603	903	0
653	3	0	0	0	0	0	0	200	300	0	0	0	0	0	0	0	200	903	0	0	0	0	0	0	0	603	903	0
653	4	0	0	0	0	0	0	200	300	0	0	0	0	0	0	0	200	903	0	0	0	0	0	0	0	603	903	0
653	5	0	0	0	0	0	0	200	300	0	0	0	0	0	0	0	200	903	0	0	0	0	0	0	0	603	903	0
653	6	0	0	0	0	0	0	200	300	0	0	0	0	0	0	0	200	903	0	0	0	0	0	0	0	603	903	0
653	7	0	0	0	0	0	0	200	300	0	0	0	0	0	0	0	200	903	0	0	0	0	0	0	0	603	903	0
653	8	0	0	0	0	0	0	200	300	0	0	0	0	0	0	0	200	903	0	0	0	0	0	0	0	603	903	0
653	9	0	0	0	0	0	0	200	300	0	0	0	0	0	0	0	200	903	0	0	0	0	0	0	0	603	903	0
654	0	0	0	0	0	0	0	200	300	0	0	0	0	0	0	0	200	903	0	0	0	0	0	0	0	603	903	0
654	1	0	0	0	0	0	0	200	300	0	0	0	0	0	0	0	200	903	0	0	0	0	0	0	0	603	903	0
654	2	0	0	0	0	0	0	200	300	0	0	0	0	0	0	0	200	903	0	0	0	0	0	0	0	603	903	0
654	3	0	0	0	0	0	0	200	300	0	0	0	0	0	0	0	200	903	0	0	0	0	0	0	0	603	903	0
654	4	0	0	0	0	0	0	200	300	0	0	0	0	0	0	0	200	903	0	0	0	0	0	0	0	603	903	0
654	5	0	0	0	0	0	0	200	300	0	0	0	0	0	0	0	200	903	0	0	0	0	0	0	0	603	903	0
654	6	0	0	0	0	0	0	200	300	0	0	0	0	0	0	0	200	903	0	0	0	0	0	0	0	603	903	0
654	7	0	0	0	0	0	0	200	300	0	0	0	0	0	0	0	200	903	0	0	0	0	0	0	0	603	903	0
654	8	0	0	0	0	0	0	200	300	0	0	0	0	0	0	0	200	903	0	0	0	0	0	0	0	603	903	0
654	9	0	0	0	0	0	0	200	300	0	0	0	0	0	0	0	200	903	0	0	0	0	0	0	0	603	903	0
655	0	0	0	0	0	0	0	200	300	0	0	0	0	0	0	0	200	903	0	0	0	0	0	0	0	603	903	0
655	1	0	0	0	0	0	0	200	300	0	0	0	0	0	0	0	200	903	0	0	0	0	0	0	0	603	903	0
655	2	0	0	0	0	0	0	200	300	0	0	0	0	0	0	0	200	903	0	0	0	0	0	0	0	603	903	0
655	3	0	0	0	0	0	0	200	300	0	0	0	0	0	0	0	200	903	0	0	0	0	0	0	0	603	903	0
655	4	0	0	0	0	0	0	200	300	0	0	0	0	0	0	0	200	903	0	0	0	0	0	0	0	603	903	0
655	5	0	0	0	0	0	0	200	300	0	0	0	0	0	0	0	200	903	0	0	0	0	0	0	0	603	903	0
655	6	0	0	0	0	0	0	200	300	0	0	0	0	0	0	0	200	903	0	0	0	0	0	0	0	603	903	0
655	7	0	0	0	0	0	0	200	300	0	0	0	0	0	0	0	200	903	0	0	0	0	0	0	0	603	903	0
655	8	0	0	0	0	0	0	200	300	0	0	0	0	0	0	0	200	903	0	0	0	0	0	0	0	603	903	0
655	9	0	0	0	0	0	0	200	300	0	0	0	0	0	0	0	200	903	0	0	0	0	0	0	0	603	903	0
656	0	0	0	0	0	0	0	200	300	0	0	0	0	0	0	0	200	903	0	0	0	0	0	0	0	603	903	0
656	1	0	0	0	0	0	0	200	300	0	0	0	0	0	0	0	200	903	0	0	0	0	0	0	0	603	903	0
656	2	0	0	0	0	0	0	200	300	0	0	0	0	0	0	0	200	903	0	0	0	0	0	0	0	603	903	0
656	3	0	0	0	0	0	0	200	300	0	0	0	0	0	0	0	200	903	0	0	0	0	0	0	0	603	903	0
656	4	0	0	0	0	0	0	200	300	0	0	0	0	0	0	0	200	903	0	0	0	0	0	0	0	603	903	0
656	5	0	0	0	0	0	0	200	300	0	0	0	0	0	0	0	200	903	0	0	0	0	0	0	0	603	903	0
656	6	0	0	0	0	0	0	200	300	0	0	0	0	0	0	0	200	903	0	0	0	0	0	0	0	603	903	0
656	7	0	0	0	0	0	0	200	300	0	0	0	0	0	0	0	200	903	0	0	0	0	0	0	0	603	903	0
656	8	0	0	0	0	0	0	200	300	0	0	0	0	0	0	0	200	903	0	0	0	0	0	0	0	603	903	0
656	9	0	0	0	0	0	0	200	300	0	0	0	0	0	0	0	200	903	0	0	0	0	0	0	0	603	903	0
657	0	0	0	0	0	0	0	200	300	0	0	0	0	0	0	0	200	903	0	0	0	0	0	0	0	603	903	0
657	1	0	0	0	0	0	0	200	300	0	0	0	0	0	0	0	200	903	0	0	0	0	0	0	0	603	903	0
657	2	0	0	0	0	0	0	200	300	0	0	0	0	0	0	0	200	903	0	0	0	0	0	0	0	603	903	0
657	3	0	0	0	0	0	0	200	300	0	0	0	0	0	0	0	200	903	0	0	0	0	0	0	0	603	903	0
657	4	0	0	0	0	0	0	200	300	0	0	0	0	0	0	0	200	903	0	0	0	0	0	0	0	603	903	0
657	5	0	0	0	0	0	0	200	300	0	0	0	0	0	0	0	200	903	0	0	0	0	0	0	0	603	903	0
657	6	0	0	0	0	0	0	200	300	0	0	0	0	0	0	0	200	903	0	0	0	0	0	0	0	603	903	0
657	7	0	0	0	0	0	0	200	300	0	0	0	0	0	0	0	200	903	0	0	0	0	0	0	0	603	903	0
657	8	0	0	0	0	0	0	200	300	0	0	0	0	0	0	0	200	903	0	0	0	0	0	0	0	603	903	0
657	9	0	0	0	0	0	0	200	300	0	0	0	0	0	0	0	200	903	0	0	0	0	0	0	0	603	903	0
658	0	0	0	0	0	0	0	200	300	0	0	0	0	0	0	0	200	903	0	0	0	0	0	0	0	603	903	0
658	1	0	0	0	0	0	0	200	300	0	0	0	0	0	0	0	200	903	0	0	0	0	0	0	0	603	903	0
658	2	0	0	0	0	0	0	200	300	0	0	0	0	0	0	0	200	903	0	0	0	0	0	0	0	603	903	0
658	3	0	0	0	0	0	0	200	300	0	0	0	0	0	0	0	200	903	0	0	0	0	0	0	0	603	903	0
658	4	0	0	0	0	0	0	200	300	0	0	0	0	0	0	0	200	903	0	0	0	0	0	0	0	603	903	0
658	5	0	0	0	0	0	0	200	300	0	0	0	0	0	0	0	200	903	0	0	0	0	0	0	0	603	903	0
658	6	0	0	0	0	0	0	200	300	0	0	0	0	0	0	0	200	903	0	0	0	0	0	0	0	603	903	0
658	7	0	0	0	0	0	0	200	300	0	0	0	0	0	0	0	200	903	0	0	0	0	0	0	0	603	903	0
658	8	0	0	0	0	0	0	200	300	0	0	0	0	0	0	0	200	903	0	0	0	0	0	0	0	603	903	0
658	9	0	0	0	0	0	0	200	300	0	0	0	0	0	0	0	200	903	0	0	0	0	0	0	0	603	903	0
659	0	0	0	0	0	0	0	200	300	0	0	0	0	0	0	0	200	903	0	0	0	0	0	0	0	603	903	0
659	1	0	0	0	0	0	0	200	300	0	0	0	0	0	0	0	200	903	0	0	0	0	0	0	0	603	903	0
659	2	0	0	0	0	0	0	200	300	0	0	0	0	0	0	0	200	903	0	0	0	0	0	0	0	603	903	0
659	3	0	0	0	0	0	0	200	300	0	0	0	0	0	0	0	200	903	0	0	0	0	0	0	0	603	903	0
659	4	0	0	0	0	0	0	200	300	0	0	0	0	0	0	0	200	903	0	0	0	0	0	0	0	603	903	0
659	5	0	0	0	0	0	0	200	300	0	0	0	0	0	0	0	200	903	0	0	0	0	0	0	0	603	903	0
659	6	0	0	0	0	0	0	200	300	0	0	0	0	0	0	0	200	903	0	0	0	0	0	0	0	603	903	0
659	7	0	0	0	0	0	0	200	300	0	0	0	0	0	0	0	200	903	0	0	0	0	0	0	0	603	903	0
659	8	0	0	0	0	0	0	200	300	0	0	0	0	0	0	0	200	903	0	0	0	0	0	0	0	603	903	0
659	9	0	0	0	0	0	0	200	300	0	0	0	0	0	0	0	200	903	0	0	0	0	0	0	0	603	903	0
660	0	0	0	0	0	0	0	200	300	0	0	0	0	0	0	0	200	903	0	0	0	0	0	0	0	603	903	0
660	1	0	0	0	0	0	0	200	300	0	0	0	0	0	0	0	200	903	0	0	0	0	0	0	0	603	903	0
660	2	0	0	0	0	0	0	200	300	0	0	0	0	0	0	0	200	903	0	0	0	0	0	0	0	603	903	0
660	3	0	0	0	0	0	0	200	300	0	0	0	0	0	0	0	200	903	0	0	0	0	0	0	0	603	903	0
660	4	0	0	0	0	0	0	200	300	0	0	0	0	0	0	0	200	903	0	0	0	0	0	0	0	603	903	0
660	5	0	0	0	0	0	0	200	300	0	0	0	0	0	0	0	200	903	0	0	0	0	0	0	0	603	903	0
660	6	0	0	0	0	0	0	200	300	0	0	0	0	0	0	0	200	903	0	0	0	0	0	0	0	603	903	0
660	7	0	0	0	0	0	0	200	300	0	0	0	0	0	0	0	200	903	0	0	0	0	0	0	0	603	903	0
660	8	0	0	0	0	0	0	200	300	0	0	0	0	0	0	0	200	903	0	0	0	0	0	0	0	603	903	0
660	9	0	0	0	0	0	0	200	300	0	0	0	0	0	0	0	200	903	0	0	0	0	0	0	0	603	903	0
661	0	0	0	0	0	0	0	200	300	0	0	0	0	0	0	0	200	903	0	0	0	0	0	0	0	603	903	0
661	1	0	0	0	0	0	0	200	300	0	0	0	0	0	0	0	200	903	0	0	0	0	0	0	0	603	903	0
661	2	0	0	0	0	0	0	200	300	0	0	0	0	0	0	0	200	903	0	0	0	0	0	0	0	603	903	0
661	3	0	0	0	0	0	0	200	300	0	0	0	0	0	0	0	200	903	0	0	0	0	0	0	0	603	903	0
661	4	0	0	0	0	0	0	200	300	0	0	0	0	0	0	0	200	903	0	0	0	0	0	0	0	603	903	0
661	5	0	0	0	0	0	0	200	300	0	0	0	0	0	0	0	200	903	0	0	0	0	0	0	0	603	903	0
661	6	0	0	0	0	0	0	200	300	0	0	0	0	0	0	0	200	903	0	0	0	0	0	0	0	603	903	0
661	7	0	0	0	0	0	0	200	300	0	0	0	0	0	0	0	200	903	0	0	0	0	0	0	0	603	903	0
661	8	0	0	0	0	0	0	200	300	0	0	0	0	0	0	0	200	903	0	0	0	0	0	0	0	603	903	0
661	9	0	0	0	0	0	0	200	300	0	0	0	0	0	0	0	200	903	0	0	0	0	0	0	0	603	903	0
662	0	0	0	0	0	0	0	200	300	0	0	0	0	0	0	0	200	903	0	0	0	0	0	0	0	603	903	0
662	1	0	0	0	0	0	0	200	300	0	0	0	0	0	0	0	200	903	0	0	0	0	0	0	0	603	903	0
662	2	0	0	0	0	0	0	200	300	0	0	0	0	0	0	0	200	903	0	0	0	0	0	0	0	603	903	0
662	3	0	0	0	0	0	0	200	300	0	0	0	0	0	0	0	200	903	0	0	0	0	0	0	0	603	903	0
662	4	0	0	0	0	0	0	200	300	0	0	0	0	0	0	0	200	903	0	0	0	0	0	0	0	603	903	0
662	5	0	0	0	0	0	0	200	300	0	0	0	0	0	0	0	200	903	0	0	0	0	0	0	0	603	903	0
662	6	0	0	0	0	0	0	200	300	0	0	0	0	0	0	0	200	903	0	0	0	0	0	0	0	603	903	0
662	7	0	0	0	0	0	0	200	300	0	0	0	0	0	0	0	200	903	0	0	0	0	0	0	0	603	903	0
662	8	0	0	0	0	0	0	200	300	0	0	0	0	0	0	0	200	903	0	0	0	0	0	0	0	603	903	0
662	9	0	0	0	0	0	0	200	300	0	0	0	0	0	0	0	200	903	0	0	0	0	0	0	0	603	903	0
663	0	0	0	0	0	0	0	200	300	0	0	0	0	0	0	0	200	903	0	0	0	0	0	0	0	603	903	0
663	1	0	0	0	0	0	0	200	300	0	0	0	0	0	0	0	200	903	0	0	0	0	0	0	0	603	903	0
663	2	0	0	0	0	0	0	200	300	0	0	0	0	0	0	0	200	903	0	0	0	0	0	0	0	603	903	0
663	3	0	0	0	0	0	0	200	300	0	0	0	0	0	0	0	200	903	0	0	0	0	0	0	0	603	903	0
663	4	0	0	0	0	0	0	200	300	0	0	0	0	0	0	0	200	903	0	0	0	0	0	0	0	603	903	0
663	5	0	0	0	0	0	0	200	300	0	0	0	0	0	0	0	200	903	0	0	0	0	0	0	0	603	903	0
663	6	0	0	0	0	0	0	200	300	0	0	0	0	0	0	0	200	903	0	0	0	0	0	0	0	603	903	0
663	7	0	0	0	0	0	0	200	300	0	0	0	0	0	0	0	200	903	0	0	0	0	0	0	0	603	903	0
663	8	0	0	0	0	0	0	200	300	0	0	0	0	0	0	0	200	903	0	0	0	0	0	0	0	603	903	0
663	9	0	0	0	0	0	0	200	300	0	0	0	0	0	0	0	200	903	0	0	0	0	0	0	0	603	903	0
664	0	0	0	0	0	0	0	200	300	0	0	0	0	0	0	0	200	903	0	0	0	0	0	0	0	603	903	0
664	1	0	0	0	0	0	0	200	300	0	0	0	0	0	0	0	200	903	0	0	0	0	0	0	0	603	903	0
664	2	0	0	0	0	0	0	200	300	0	0	0	0	0	0	0	200	903	0	0	0	0	0	0	0	603	903	0
664	3	0	0	0	0	0	0	200	300	0	0	0	0	0	0	0	200	903	0	0	0	0	0	0	0	603	903	0
664	4	0	0	0	0	0	0	200	300	0	0	0	0	0	0	0	200	903	0	0	0	0	0	0	0	603	903	0
664	5	0	0	0	0	0	0	200	300	0	0	0	0	0	0	0	200	903	0	0	0	0	0	0	0	603	903	0
664	6	0	0	0	0	0	0	200	300	0	0	0	0	0	0	0	200	903	0	0	0	0	0	0	0	603	903	0
664	7	0	0	0	0	0	0	200	300	0	0	0	0	0	0	0	200	903	0	0	0	0	0	0	0	603	903	0
664	8	0	0	0	0	0	0	200	300	0	0	0	0	0	0	0	200	903	0	0	0	0	0	0	0	603	903	0
664	9	0	0	0	0	0	0	200	300	0	0	0	0	0	0	0	200	903	0	0	0	0	0	0	0	603	903	0
665	0	0	0	0	0	0	0	200	300	0	0	0	0	0	0	0	200	903	0	0	0	0	0	0	0	603	903	0
665	1	0	0	0	0	0	0	200	300	0	0	0	0	0	0	0	200	903	0	0	0	0	0	0	0	603	903	0
665	2	0	0	0	0	0	0	200	300	0	0	0	0	0	0	0	200	903	0	0	0	0	0	0	0	603	903	0
665	3	0	0	0	0	0	0	200	300	0	0	0	0	0	0	0	200	903	0	0	0	0	0	0	0	603	903	0
665	4	0	0	0	0	0	0	200	300	0	0	0	0	0	0	0	200	903	0	0	0	0	0	0	0	603	903	0
665	5	0	0	0	0	0	0	200	300	0	0	0	0	0	0	0	200	903	0	0	0	0	0	0	0	603	903	0
665	6	0	0	0	0	0	0	200	300	0	0	0	0	0	0	0	200	903	0	0	0	0	0	0	0	603	903	0
665	7	0	0	0	0	0	0	200	300	0	0	0	0	0	0	0	200	903	0	0	0	0	0	0	0	603	903	0
665	8	0	0	0	0	0	0	200	300	0	0	0	0	0	0	0	200	903	0	0	0	0	0	0	0	603	903	0
665	9	0	0	0	0	0	0	200	300	0	0	0	0	0	0	0	200	903	0	0	0	0	0	0	0	603	903	0
666	0	0	0	0	0	0	0	200	300	0	0	0	0	0	0	0	200	903	0	0	0	0	0	0	0	603	903	0
666	1	0	0	0	0	0	0	200	300	0	0	0	0	0	0	0	200	903	0	0	0	0	0	0	0	603	903	0
666	2	0	0	0	0	0	0	200	300	0	0	0	0	0	0	0	200	903	0	0	0	0	0	0	0	603	903	0
666	3	0	0	0	0	0	0	200	300	0	0	0	0	0	0	0	200	903	0	0	0	0	0	0	0	603	903	0
666	4	0	0	0	0	0	0	200	300	0	0	0	0	0	0	0	200	903	0	0	0	0	0	0	0	603	903	0
666	5	0	0	0	0	0	0	200	300	0	0	0	0	0	0	0	200	903	0	0	0	0	0	0	0	603	903	0
666	6	0	0	0	0	0	0	200	300	0	0	0	0	0	0	0	200	903	0	0	0	0	0	0	0	603	903	0
666	7	0	0	0	0	0	0	200	300	0	0	0	0	0	0	0	200	903	0	0	0	0	0	0	0	603	903	0
666	8	0	0	0	0	0	0	200	300	0	0	0	0	0	0	0	200	903	0	0	0	0	0	0	0	603	903	0
666	9	0	0	0	0	0	0	200	300	0	0	0	0	0	0	0	200	903	0	0	0	0	0	0	0	603	903	0
667	0	0	0	0	0	0	0	200	300	0	0	0	0	0	0	0	200	903	0	0	0	0	0	0	0	603	903	0
667	1	0	0	0	0	0	0	200	300	0	0	0	0	0	0	0	200	903	0	0	0	0	0	0	0	603	903	0
667	2	0	0	0	0	0	0	200	300	0	0	0	0	0	0	0	200	903	0	0	0	0	0	0	0	603	903	0
667	3	0	0	0	0	0	0	200	300	0	0	0	0	0	0	0	200	903	0	0	0	0	0	0	0	603	903	0
667	4	0	0	0	0	0	0	200	300	0	0	0	0	0	0	0	200	903	0	0	0	0	0	0	0	603	903	0
667	5	0	0	0	0	0	0	200	300	0	0	0	0	0	0	0	200	903	0	0	0	0	0	0	0	603	903	0
667	6	0	0	0	0	0	0	200	300	0	0	0	0	0	0	0	200	903	0	0	0	0	0	0	0	603	903	0
667	7	0	0	0	0	0	0	200	300	0	0	0	0	0	0	0	200	903	0	0	0	0	0	0	0	603	903	0
667	8	0	0	0	0	0	0	200	300	0	0	0	0	0	0	0	200	903	0	0	0	0	0	0	0	603	903	0
667	9	0	0	0	0	0	0	200	300	0	0	0	0	0	0	0	200	903	0	0	0	0	0	0	0	603	903	0
668	0	0	0	0	0	0	0	200	300	0	0	0	0	0	0	0	200	903	0	0	0	0	0	0	0	603	903	0
668	1	0	0	0	0	0	0	200	300	0	0	0	0	0	0	0	200	903	0	0	0	0	0	0	0	603	903	0
668	2	0	0	0	0	0	0	200	300	0	0	0	0	0	0	0	200	903	0	0	0	0	0	0	0	603	903	0
668	3	0	0	0	0	0	0	200	300	0	0	0	0	0	0	0	200	903	0	0	0	0	0	0	0	603	903	0
668	4	0	0	0	0	0	0	200	300	0	0	0	0	0	0	0	200	903	0	0	0	0	0	0	0	603	903	0
668	5	0	0	0	0	0	0	200	300	0	0	0	0	0	0	0	200	903	0	0	0	0	0	0	0	603	903	0
668	6	0	0	0	0	0	0	200	300	0	0	0	0	0	0	0	200	903	0	0	0	0	0	0	0	603	903	0
668	7	0	0	0	0	0	0	200	300	0	0	0	0	0	0	0	200	903	0	0	0	0	0	0	0	603	903	0
668	8	0	0	0	0	0	0	200	300	0	0	0	0	0	0	0	200	903	0	0	0	0	0	0	0	603	903	0
668	9	0	0	0	0	0	0	200	300	0	0	0	0	0	0	0	200	903	0	0	0	0	0	0	0	603	903	0
669	0	0	0	0	0	0	0	200	300	0	0	0	0	0	0	0	200	903	0	0	0	0	0	0	0	603	903	0
669	1	0	0	0	0	0	0	200	300	0	0	0	0	0	0	0	200	903	0	0	0	0	0	0	0	603	903	0
669	2	0	0	0	0	0	0	200	300	0	0	0	0	0	0	0	200	903	0	0	0	0	0	0	0	603	903	0
669	3	0	0	0	0	0	0	200	300	0	0	0	0	0	0	0	200	903	0	0	0	0	0	0	0	603	903	0
669	4	0	0	0	0	0	0	200	300	0	0	0	0	0	0	0	200	903	0	0	0	0	0	0	0	603	903	0
669	5	0	0	0	0	0	0	200	300	0	0	0	0	0	0	0	200	903	0	0	0	0	0	0	0	603	903	0
669	6	0	0	0	0	0	0	200	300	0	0	0	0	0	0	0	200	903	0	0	0	0	0	0	0	603	903	0
669	7	0	0	0	0	0	0	200	300	0	0	0	0	0	0	0	200	903	0	0	0	0	0	0	0	603	903	0
669	8	0	0	0	0	0	0	200	300	0	0	0	0	0	0	0	200	903	0	0	0	0	0	0	0	603	903	0
669	9	0	0	0	0	0	0	200	300	0	0	0	0	0	0	0	200	903	0	0	0	0	0	0	0	603	903	0
670	0	0	0	0	0	0	0	200	300	0	0	0	0	0	0	0	200	903	0	0	0	0	0	0	0	603	903	0
670	1	0	0	0	0	0	0	200	300	0	0	0	0	0	0	0	200	903	0	0	0	0	0	0	0	603	903	0
670	2	0	0	0	0	0	0	200	300	0	0	0	0	0	0	0	200	903	0	0	0	0	0	0	0	603	903	0
670	3	0	0	0	0	0	0	200	300	0	0	0	0	0	0	0	200	903	0	0	0	0	0	0	0	603	903	0
670	4	0	0	0	0	0	0	200	300	0	0	0	0	0	0	0	200	903	0	0	0	0	0	0	0	603	903	0
670	5	0	0	0	0	0	0	200	300	0	0	0	0	0	0	0	200	903	0	0	0	0	0	0	0	603	903	0
670	6	0	0	0	0	0	0	200	300	0	0	0	0	0	0	0	200	903	0	0	0	0	0	0	0	603	903	0
670	7	0	0	0	0	0	0	200	300	0	0	0	0	0	0	0	200	903	0	0	0	0	0	0	0	603	903	0
670	8	0	0	0	0	0	0	200	300	0	0	0	0	0	0	0	200	903	0	0	0	0	0	0	0	603	903	0
670	9	0	0	0	0	0	0	200	300	0	0	0	0	0	0	0	200	903	0	0	0	0	0	0	0	603	903	0
671	0	0	0	0	0	0	0	200	300	0	0	0	0	0	0	0	200	903	0	0	0	0	0	0	0	603	903	0
671	1	0	0	0	0	0	0	200	300	0	0	0	0	0	0	0	200	903	0	0	0	0	0	0	0	603	903	0
671	2	0	0	0	0	0	0	200	300	0	0	0	0	0	0	0	200	903	0	0	0	0	0	0	0	603	903	0
671	3	0	0	0	0	0	0	200	300	0	0	0	0	0	0	0	200	903	0	0	0	0	0	0	0	603	903	0
671	4	0	0	0	0	0	0	200	300	0	0	0	0	0	0	0	200	903	0	0	0	0	0	0	0	603	903	0
671	5	0	0	0	0	0	0	200	300	0	0	0	0	0	0	0	200	903	0	0	0	0	0	0	0	603	903	0
671	6	0	0	0	0	0	0	200	300	0	0	0	0	0	0	0	200	903	0	0	0	0	0	0	0	603	903	0
671	7	0	0	0	0	0	0	200	300	0	0	0	0	0	0	0	200	903	0	0	0	0	0	0	0	603	903	0
671	8	0	0	0	0	0	0	200	300	0	0	0	0	0	0	0	200	903	0	0	0	0	0	0	0	603	903	0
671	9	0	0	0	0	0	0	200	300	0	0	0	0	0	0	0	200	903	0	0	0	0	0	0	0	603	903	0
672	0	0	0	0	0	0	0	200	300	0	0	0	0	0	0	0	200	903	0	0	0	0	0	0	0	603	903	0
672	1	0	0	0	0	0	0	200	300	0	0	0	0	0	0	0	200	903	0	0	0	0	0	0	0	603	903	0
672	2	0	0	0	0	0	0	200	300	0	0	0	0	0	0	0	200	903	0	0	0	0	0	0	0	603	903	0
672	3	0	0	0	0	0	0	200	300	0	0	0	0	0	0	0	200	903	0	0	0	0	0	0	0	603	903	0
672	4	0	0	0	0	0	0	200	300	0	0	0	0	0	0	0	200	903	0	0	0	0	0	0	0	603	903	0
672	5	0	0	0	0	0	0	200	300	0	0	0	0	0	0	0	200	903	0	0	0	0	0	0	0	603	903	0
672	6	0	0	0	0	0	0	200	300	0	0	0	0	0	0	0	200	903	0	0	0	0	0	0	0	603	903	0
672	7	0	0	0	0	0	0	200	300	0	0	0	0	0	0	0	200	903	0	0	0	0	0	0	0	603	903	0
672	8	0	0	0	0	0	0	200	300	0	0	0	0	0	0	0	200	903	0	0	0	0	0	0	0	603	903	0
672	9	0	0	0	0	0	0	200	300	0	0	0	0	0	0	0	200	903	0	0	0	0	0	0	0	603	903	0
673	0	0	0	0	0	0	0	200	300	0	0	0	0	0	0	0	200	903	0	0	0	0	0	0	0	603	903	0
673	1	0	0	0	0	0	0	200	300	0	0	0	0	0	0	0	200	903	0	0	0	0	0	0	0	603	903	0
673	2	0	0	0	0	0	0	200	300	0	0	0	0	0	0	0	200	903	0	0	0	0	0	0	0	603	903	0
673	3	0	0	0	0	0	0	200	300	0	0	0	0	0	0	0	200	903	0	0	0	0	0	0	0	603	903	0
673	4	0	0	0	0	0	0	200	300	0	0	0	0	0	0	0	200	903	0	0	0	0	0	0	0	603	903	0
673	5	0	0	0	0	0	0	200	300	0	0	0	0	0	0	0	200	903	0	0	0	0	0	0	0	603	903	0
673	6	0	0	0	0	0	0	200	300	0	0	0	0	0	0	0	200	903	0	0	0	0	0	0	0	603	903	0
673	7	0	0	0	0	0	0	200	300	0	0	0	0	0	0	0	200	903	0	0	0	0	0	0	0	603	903	0
673	8	0	0	0	0	0	0	200	300	0	0	0	0	0	0	0	200	903	0	0	0	0	0	0	0	603	903	0
673	9	0	0	0	0	0	0	200	300	0	0	0	0	0	0	0	200	903	0	0	0	0	0	0	0	603	903	0
674	0	0	0	0	0	0	0	200	300	0	0	0	0	0	0	0	200	903	0	0	0	0	0	0	0	603	903	0
674	1	0	0	0	0	0	0	200	300	0	0	0	0	0	0	0	200	903	0	0	0	0	0	0	0	603	903	0
674	2	0	0	0	0	0	0	200	300	0	0	0	0	0	0	0	200	903	0	0	0	0	0	0	0	603	903	0
674	3	0	0	0	0	0	0	200	300	0	0	0	0	0	0	0	200	903	0	0	0	0	0	0	0	603	903	0
674	4	0	0	0	0	0	0	200	300	0	0	0	0	0	0	0	200	903	0	0	0	0	0	0	0	603	903	0
674	5	0	0	0	0	0	0	200	300	0	0	0	0	0	0	0	200	903	0	0	0	0	0	0	0	603	903	0
674	6	0	0	0	0	0	0	200	300	0	0	0	0	0	0	0	200	903	0	0	0	0	0	0	0	603	903	0
674	7	0	0	0	0	0	0	200	300	0	0	0	0	0	0	0	200	903	0	0	0	0	0	0	0	603	903	0
674	8	0	0	0	0	0	0	200	300	0	0	0	0	0	0	0	200	903	0	0	0	0	0	0	0	603	903	0
674	9	0	0	0	0	0	0	200	300	0	0	0	0	0	0	0	200	903	0	0	0	0	0	0	0	603	903	0
675	0	0	0	0	0	0	0	200	300	0	0	0	0	0	0	0	200	903	0	0	0	0	0	0	0	603	903	0
675	1	0	0	0	0	0	0	200	300	0	0	0	0	0	0	0	200	903	0	0	0	0	0	0	0	603	903	0
675	2	0	0	0	0	0	0	200	300	0	0	0	0	0	0	0	200	903	0	0	0	0	0	0	0	603	903	0
675	3	0	0	0	0	0	0	200	300	0	0	0	0	0	0	0	200	903	0	0	0	0	0	0	0	603	903	0
675	4	0	0	0	0	0	0	200	300	0	0	0	0	0	0	0	200	903	0	0	0	0	0	0	0	603	903	0
675	5	0	0	0	0	0	0	200	300	0	0	0	0	0	0	0	200	903	0	0	0	0	0	0	0	603	903	0
675	6	0	0	0	0	0	0	200	300	0	0	0	0	0	0	0	200	903	0	0	0	0	0	0	0	603	903	0
675	7	0	0	0	0	0	0	200	300	0	0	0	0	0	0	0	200	903	0	0	0	0	0	0	0	603	903	0
675	8	0	0	0	0	0	0	200	300	0	0	0	0	0	0	0	200	903	0	0	0	0	0	0	0	603	903	0
675	9	0	0	0	0	0	0	200	300	0	0	0	0	0	0	0	200	903	0	0	0	0	0	0	0	603	903	0
676	0	0	0	0	0	0	0	200	300	0	0	0	0	0	0	0	200	903	0	0	0	0	0	0	0	603	903	0
676	1	0	0	0	0	0	0	200	300	0	0	0	0	0	0	0	200	903	0	0	0	0	0	0	0	603	903	0
676	2	0	0	0	0	0	0	200	300	0	0	0	0	0	0	0	200	903	0	0	0	0	0	0	0	603	903	0
676	3	0	0	0	0	0	0	200	300	0	0	0	0	0	0	0	200	903	0	0	0	0	0	0	0	603	903	0
676	4	0	0	0	0	0	0	200	300	0	0	0	0	0	0	0	200	903	0	0	0	0	0	0	0	603	903	0
676	5	0	0	0	0	0	0	200	300	0	0	0	0	0	0	0	200	903	0	0	0	0	0	0	0	603	903	0
676	6	0	0	0	0	0	0	200	300	0	0	0	0	0	0	0	200	903	0	0	0	0	0	0	0	603	903	0
676	7	0	0	0	0	0	0	200	300	0	0	0	0	0	0	0	200	903	0	0	0	0	0	0	0	603	903	0
676	8	0	0	0	0	0	0	200	300	0	0	0	0	0	0	0	200	903	0	0	0	0	0	0	0	603	903	0
676	9	0	0	0	0	0	0	200	300	0	0	0	0	0	0	0	200	903	0	0	0	0	0	0	0	603	903	0
677	0	0	0	0	0	0	0	200	300	0	0	0	0	0	0	0	200	903	0	0	0	0	0	0	0	603	903	0
677	1	0	0	0	0	0	0	200	300	0	0	0	0	0	0	0	200	903	0	0	0	0	0	0	0	603	903	0
677	2	0	0	0	0	0	0	200	300	0	0	0	0	0	0	0	200	903	0	0	0	0	0	0	0	603	903	0
677	3	0	0	0	0	0	0	200	300	0	0	0	0	0	0	0	200	903	0	0	0	0	0	0	0	603	903	0
677	4	0	0	0	0	0	0	200	300	0	0	0	0	0	0	0	200	903	0	0	0	0	0	0	0	603	903	0
677	5	0	0	0	0	0	0	200	300	0	0	0	0	0	0	0	200	903	0	0	0	0	0	0	0	603	903	0
677	6	0	0	0	0	0	0	200	300	0	0	0	0	0	0	0	200	903	0	0	0	0	0	0	0	603	903	0
677	7	0	0	0	0	0	0	200	300	0	0	0	0	0	0	0	200	903	0	0	0	0	0	0	0	603	903	0
677	8	0	0	0	0	0	0	200	300	0	0	0	0	0	0	0	200	903	0	0	0	0	0	0	0	603	903	0
677	9	0	0	0	0	0	0	200	300	0	0	0	0	0	0	0	200	903	0	0	0	0	0	0	0	603	903	0
678	0	0	0	0	0	0	0	200	300	0	0	0	0	0	0	0	200	903	0	0	0	0	0	0	0	603	903	0
678	1	0	0	0	0	0	0	200	300	0	0	0	0	0	0	0	200	903	0	0	0	0	0	0	0	603	903	0
678	2	0	0	0	0	0	0	200	300	0	0	0	0	0	0	0	200	903	0	0	0	0	0	0	0	603	903	0
678	3	0	0	0	0	0	0	200	300	0	0	0	0	0	0	0	200	903	0	0	0	0	0	0	0	603	903	0
678	4	0	0	0	0	0	0	200	300	0	0	0	0	0	0	0	200	903	0	0	0	0	0	0	0	603	903	0
678	5	0	0	0	0	0	0	200	300	0	0	0	0	0	0	0	200	903	0	0	0	0	0	0	0	603	903	0
678	6	0	0	0	0	0	0	200	300	0	0	0	0	0	0	0	200	903	0	0	0	0	0	0	0	603	903	0
678	7	0	0	0	0	0	0	200	300	0	0	0	0	0	0	0	200	903	0	0	0	0	0	0	0	603	903	0
678	8	0	0	0	0	0	0	200	300	0	0	0	0	0	0	0	200	903	0	0	0	0	0	0	0	603	903	0
678	9	0	0	0	0	0	0	200	300	0	0	0	0	0	0	0	200	903	0	0	0	0	0	0	0	603	903	0
679	0	0	0	0	0	0	0	200	300	0	0	0	0	0	0	0	200	903	0	0	0	0	0	0	0	603	903	0
679	1	0	0	0	0	0	0	200	300	0	0	0	0	0	0	0	200	903	0	0	0	0	0	0	0	603	903	0
679	2	0	0	0	0	0	0	200	300	0	0	0	0	0	0	0	200	903	0	0	0	0	0	0	0	603	903	0
679	3	0	0	0	0	0	0	200	300	0	0	0	0	0	0	0	200	903	0	0	0	0	0	0	0	603	903	0
679	4	0	0	0	0	0	0	200	300	0	0	0	0	0	0	0	200	903	0	0	0	0	0	0	0	603	903	0
679	5	0	0	0	0	0	0	200	300	0	0	0	0	0	0	0	200	903	0	0	0	0	0	0	0	603	903	0
679	6	0	0	0	0	0	0	200	300	0	0	0	0	0	0	0	200	903	0	0	0	0	0	0	0	603	903	0
679	7	0	0	0	0	0	0	200	300	0	0	0	0	0	0	0	200	903	0	0	0	0	0	0	0	603	903	0
679	8	0	0	0	0	0	0	200	300	0	0	0	0	0	0	0	200	903	0	0	0	0	0	0	0	603	903	0
679	9	0	0	0	0	0	0	200	300	0	0	0	0	0	0	0	200	903	0	0	0	0	0	0	0	603	903	0
680	0	0	0	0	0	0	0	200	300	0	0	0	0	0	0	0	200	903	0	0	0	0	0	0	0	603	903	0
680	1	0	0	0	0	0	0	200	300	0	0	0	0	0	0	0	200	903	0	0	0	0	0	0	0	603	903	0
680	2	0	0	0	0	0	0	200	300	0	0	0	0	0	0	0	200	903	0	0	0	0	0	0	0	603	903	0
680	3	0	0	0	0	0	0	200	300	0	0	0	0	0	0	0	200	903	0	0	0	0	0	0	0	603	903	0
680	4	0	0	0	0	0	0	200	300	0	0	0	0	0	0	0	200	903	0	0	0	0	0	0	0	603	903	0
680	5	0	0	0	0	0	0	200	300	0	0	0	0	0	0	0	200	903	0	0	0	0	0	0	0	603	903	0
680	6	0	0	0	0	0	0	200	300	0	0	0	0	0	0	0	200	903	0	0	0	0	0	0	0	603	903	0
680	7	0	0	0	0	0	0	200	300	0	0	0	0	0	0	0	200	903	0	0	0	0	0	0	0	603	903	0
680	8	0	0	0	0	0	0	200	300	0	0	0	0	0	0	0	200	903	0	0	0	0	0	0	0	603	903	0
680	9	0	0	0	0	0	0	200	300	0	0	0	0	0	0	0	200	903	0	0	0	0	0	0	0	603	903	0
681	0	0	0	0	0	0	0	200	300	0	0	0	0	0	0	0	200	903	0	0	0	0	0	0	0	603	903	0
681	1	0	0	0	0	0	0	200	300	0	0	0	0	0	0	0	200	903	0	0	0	0	0	0	0	603	903	0
681	2	0	0	0	0	0	0	200	300	0	0	0	0	0	0	0	200	903	0	0	0	0	0	0	0	603	903	0
681	3	0	0	0	0	0	0	200	300	0	0	0	0	0	0	0	200	903	0	0	0	0	0	0	0	603	903	0
681	4	0	0	0	0	0	0	200	300	0	0	0	0	0	0	0	200	903	0	0	0	0	0	0	0	603	903	0
681	5	0	0	0	0	0	0	200	300	0	0	0	0	0	0	0	200	903	0	0	0	0	0	0	0	603	903	0
681	6	0	0	0	0	0	0	200	300	0	0	0	0	0	0	0	200	903	0	0	0	0	0	0	0	603	903	0
681	7	0	0	0	0	0	0	200	300	0	0	0	0	0	0	0	200	903	0	0	0	0	0	0	0	603	903	0
681	8	0	0	0	0	0	0	200	300	0	0	0	0	0	0	0	200	903	0	0	0	0	0	0	0	603	903	0
681	9	0	0	0	0	0	0	200	300	0	0	0	0	0	0	0	200	903	0	0	0	0	0	0	0	603	903	0
682	0	0	0	0	0	0	0	200	300	0	0	0	0	0	0	0	200	903	0	0	0	0	0	0	0	603	903	0
682	1	0	0	0	0	0	0	200	300	0	0	0	0	0	0	0	200	903	0	0	0	0	0	0	0	603	903	0
682	2	0	0	0	0	0	0	200	300	0	0	0	0	0	0	0	200	903	0	0	0	0	0	0	0	603	903	0
682	3	0	0	0	0	0	0	200	300	0	0	0	0	0	0	0	200	903	0	0	0	0	0	0	0	603	903	0
682	4	0	0	0	0	0	0	200	300	0	0	0	0	0	0	0	200	903	0	0	0	0	0	0	0	603	903	0
682	5	0	0	0	0	0	0	200	300	0	0	0	0	0	0	0	200	903	0	0	0	0	0	0	0	603	903	0
682	6	0	0	0	0	0	0	200	300	0	0	0	0	0	0	0	200	903	0	0	0	0	0	0	0	603	903	0
682	7	0	0	0	0	0	0	200	300	0	0	0	0	0	0	0	200	903	0	0	0	0	0	0	0	603	903	0
682	8	0	0	0	0	0	0	200	300	0	0	0	0	0	0	0	200	903	0	0	0	0	0	0	0	603	903	0
682	9	0	0	0	0	0	0	200	300	0	0	0	0	0	0	0	200	903	0	0	0	0	0	0	0	603	903	0
683	0	0	0	0	0	0	0	200	300	0	0	0	0	0	0	0	200	903	0	0	0	0	0	0	0	603	903	0
683	1	0	0	0	0	0	0	200	300	0	0	0	0	0	0	0	200	903	0	0	0	0	0	0	0	603	903	0
683	2	0	0	0	0	0	0	200	300	0	0	0	0	0	0	0	200	903	0	0	0	0	0	0	0	603	903	0
683	3	0	0	0	0	0	0	200	300	0	0	0	0	0	0	0	200	903	0	0	0	0	0	0	0	603	903	0
683	4	0	0	0	0	0	0	200	300	0	0	0	0	0	0	0	200	903	0	0	0	0	0	0	0	603	903	0
683	5	0	0	0	0	0	0	200	300	0	0	0	0	0	0	0	200	903	0	0	0	0	0	0	0	603	903	0
683	6	0	0	0	0	0	0	200	300	0	0	0	0	0	0	0	200	903	0	0	0	0	0	0	0	603	903	0
683	7	0	0	0	0	0	0	200	300	0	0	0	0	0	0	0	200	903	0	0	0	0	0	0	0	603	903	0
683	8	0	0	0	0	0	0	200	300	0	0	0	0	0	0	0	200	903	0	0	0	0	0	0	0	603	903	0
683	9	0	0	0	0	0	0	200	300	0	0	0	0	0	0	0	200	903	0	0	0	0	0	0	0	603	903	0
684	0	0	0	0	0	0	0	200	300	0	0	0	0	0	0	0	200	903	0	0	0	0	0	0	0	603	903	0
684	1	0	0	0	0	0	0	200	300	0	0	0	0	0	0	0	200	903	0	0	0	0	0	0	0	603	903	0
684	2	0	0	0	0	0	0	200	300	0	0	0	0	0	0	0	200	903	0	0	0	0	0	0	0	603	903	0
684	3	0	0	0	0	0	0	200	300	0	0	0	0	0	0	0	200	903	0	0	0	0	0	0	0	603	903	0
684	4	0	0	0	0	0	0	200	300	0	0	0	0	0	0	0	200	903	0	0	0	0	0	0	0	603	903	0
684	5	0	0	0	0	0	0	200	300	0	0	0	0	0	0	0	200	903	0	0	0	0	0	0	0	603	903	0
684	6	0	0	0	0	0	0	200	300	0	0	0	0	0	0	0	200	903	0	0	0	0	0	0	0	603	903	0
684	7	0	0	0	0	0	0	200	300	0	0	0	0	0	0	0	200	903	0	0	0	0	0	0	0	603	903	0
684	8	0	0	0	0	0	0	200	300	0	0	0	0	0	0	0	200	903	0	0	0	0	0	0	0	603	903	0
684	9	0	0	0	0	0	0	200	300	0	0	0	0	0	0	0	200	903	0	0	0	0	0	0	0	603	903	0
685	0	0	0	0	0	0	0	200	300	0	0	0	0	0	0	0	200	903	0	0	0	0	0	0	0	603	903	0
685	1	0	0	0	0	0	0	200	300	0	0	0	0	0	0	0	200	903	0	0	0	0	0	0	0	603	903	0
685	2	0	0	0	0	0	0	200	300	0	0	0	0	0	0	0	200	903	0	0	0	0	0	0	0	603	903	0
685	3	0	0	0	0	0	0	200	300	0	0	0	0	0	0	0	200	903	0	0	0	0	0	0	0	603	903	0
685	4	0	0	0	0	0	0	200	300	0	0	0	0	0	0	0	200	903	0	0	0	0	0	0	0	603	903	0
685	5	0	0	0	0	0	0	200	300	0	0	0	0	0	0	0	200	903	0	0	0	0	0	0	0	603	903	0
685	6	0	0	0	0	0	0	200	300	0	0	0	0	0	0	0	200	903	0	0	0	0	0	0	0	603	903	0
685	7	0	0	0	0	0	0	200	300	0	0	0	0	0	0	0	200	903	0	0	0	0	0	0	0	603	903	0
685	8	0	0	0	0	0	0	200	300	0	0	0	0	0	0	0	200	903	0	0	0	0	0	0	0	603	903	0
685	9	0	0	0	0	0	0	200	300	0	0	0	0	0	0	0	200	903	0	0	0	0	0	0	0	603	903	0
686	0	0	0	0	0	0	0	200	300	0	0	0	0	0	0	0	200	903	0	0	0	0	0	0	0	603	903	0
686	1	0	0	0	0	0	0	200	300	0	0	0	0	0	0	0	200	903	0	0	0	0	0	0	0	603	903	0
686	2	0	0	0	0	0	0	200	300	0	0	0	0	0	0	0	200	903	0	0	0	0	0	0	0	603	903	0
686	3	0	0	0	0	0	0	200	300	0	0	0	0	0	0	0	200	903	0	0	0	0	0	0	0	603	903	0
686	4	0	0	0	0	0	0	200	300	0	0	0	0	0	0	0	200	903	0	0	0	0	0	0	0	603	903	0
686	5	0	0	0	0	0	0	200	300	0	0	0	0	0	0	0	200	903	0	0	0	0	0	0	0	603	903	0
686	6	0	0	0	0	0	0	200	300	0	0	0	0	0	0	0	200	903	0	0	0	0	0	0	0	603	903	0
686	7	0	0	0	0	0	0	200	300	0	0	0	0	0	0	0	200	903	0	0	0	0	0	0	0	603	903	0
686	8	0	0	0	0	0	0	200	300	0	0	0	0	0	0	0	200	903	0	0	0	0	0	0	0	603	903	0
686	9	0	0	0	0	0	0	200	300	0	0	0	0	0	0	0	200	903	0	0	0	0	0	0	0	603	903	0
687	0	0	0	0	0	0	0	200	300	0	0	0	0	0	0	0	200	903	0	0	0	0	0	0	0	603	903	0
687	1	0	0	0	0	0	0	200	300	0	0	0	0	0	0	0	200	903	0	0	0	0	0	0	0	603	903	0
687	2	0	0	0	0	0	0	200	300	0	0	0	0	0	0	0	200	903	0	0	0	0	0	0	0	603	903	0
687	3	0	0	0	0	0	0	200	300	0	0	0	0	0	0	0	200	903	0	0	0	0	0	0	0	603	903	0
687	4	0	0	0	0	0	0	200	300	0	0	0	0	0	0	0	200	903	0	0	0	0	0	0	0	603	903	0
687	5	0	0	0	0	0	0	200	300	0	0	0	0	0	0	0	200	903	0	0	0	0	0	0	0	603	903	0
687	6	0	0	0	0	0	0	200	300	0	0	0	0	0	0	0	200	903	0	0	0	0	0	0	0	603	903	0
687	7	0	0	0	0	0	0	200	300	0	0	0	0	0	0	0	200	903	0	0	0	0	0	0	0	603	903	0
687	8	0	0	0	0	0	0	200	300	0	0	0	0	0	0	0	200	903	0	0	0	0	0	0	0	603	903	0
687	9	0	0	0	0	0	0	200	300	0	0	0	0	0	0	0	200	903	0	0	0	0	0	0	0	603	903	0
688	0	0	0	0	0	0	0	200	300	0	0	0	0	0	0	0	200	903	0	0	0	0	0	0	0	603	903	0
688	1	0	0	0	0	0	0	200	300	0	0	0	0	0	0	0	200	903	0	0	0	0	0	0	0	603	903	0
688	2	0	0	0	0	0	0	200	300	0	0	0	0	0	0	0	200	903	0	0	0	0	0	0	0	603	903	0
688	3	0	0	0	0	0	0	200	300	0	0	0	0	0	0	0	200	903	0	0	0	0	0	0	0	603	903	0
688	4	0	0	0	0	0	0	200	300	0	0	0	0	0	0	0	200	903	0	0	0	0	0	0	0	603	903	0
688	5	0	0	0	0	0	0	200	300	0	0	0	0	0	0	0	200	903	0	0	0	0	0	0	0	603	903	0
688	6	0	0	0	0	0	0	200	300	0	0	0	0	0	0	0	200	903	0	0	0	0	0	0	0	603	903	0
688	7	0	0	0	0	0	0	200	300	0	0	0	0	0	0	0	200	903	0	0	0	0	0	0	0	603	903	0
688	8	0	0	0	0	0	0	200	300	0	0	0	0	0	0	0	200	903	0	0	0	0	0	0	0	603	903	0
688	9	0	0	0	0	0	0	200	300	0	0	0	0	0	0	0	200	903	0	0	0	0	0	0	0	603	903	0
689	0	0	0	0	0	0	0	200	300	0	0	0	0	0	0	0	200	903	0	0	0	0	0	0	0	603	903	0
689	1	0	0	0	0	0	0	200	300	0	0	0	0	0	0	0	200	903	0	0	0	0	0	0	0	603	903	0
689	2	0	0	0	0	0	0	200	300	0	0	0	0	0	0	0	200	903	0	0	0	0	0	0	0	603	903	0
689	3	0	0	0	0	0	0	200	300	0	0	0	0	0	0	0	200	903	0	0	0	0	0	0	0	603	903	0
689	4	0	0	0	0	0	0	200	300	0	0	0	0	0	0	0	200	903	0	0	0	0	0	0	0	603	903	0
689	5	0	0	0	0	0	0	200	300	0	0	0	0	0	0	0	200	903	0	0	0	0	0	0	0	603	903	0
689	6	0	0	0	0	0	0	200	300	0	0	0	0	0	0	0	200	903	0	0	0	0	0	0	0	603	903	0
689	7	0	0	0	0	0	0	200	300	0	0	0	0	0	0	0	200	903	0	0	0	0	0	0	0	603	903	0
689	8	0	0	0	0	0	0	200	300	0	0	0	0	0	0	0	200	903	0	0	0	0	0	0	0	603	903	0
689	9	0	0	0	0	0	0	200	300	0	0	0	0	0	0	0	200	903	0	0	0	0	0	0	0	603	903	0
690	0	0	0	0	0	0	0	200	300	0	0	0	0	0	0	0	200	903	0	0	0	0	0	0	0	603	903	0
690	1	0	0	0	0	0	0	200	300	0	0	0	0	0	0	0	200	903	0	0	0	0	0	0	0	603	903	0
690	2	0	0	0	0	0	0	200	300	0	0	0	0	0	0	0	200	903	0	0	0	0	0	0	0	603	903	0
690	3	0	0	0	0	0	0	200	300	0	0	0	0	0	0	0	200	903	0	0	0	0	0	0	0	603	903	0
690	4	0	0	0	0	0	0	200	300	0	0	0	0	0	0	0	200	903	0	0	0	0	0	0	0	603	903	0
690	5	0	0	0	0	0	0	200	300	0	0	0	0	0	0	0	200	903	0	0	0	0	0	0	0	603	903	0
690	6	0	0	0	0	0	0	200	300	0	0	0	0	0	0	0	200	903	0	0	0	0	0	0	0	603	903	0
690	7	0	0	0	0	0	0	200	300	0	0	0	0	0	0	0	200	903	0	0	0	0	0	0	0	603	903	0
690	8	0	0	0	0	0	0	200	300	0	0	0	0	0	0	0	200	903	0	0	0	0	0	0	0	603	903	0
690	9	0	0	0	0	0	0	200	300	0	0	0	0	0	0	0	200	903	0	0	0	0	0	0	0	603	903	0
691	0	0	0	0	0	0	0	200	300	0	0	0	0	0	0	0	200	903	0	0	0	0	0	0	0	603	903	0
691	1	0	0	0	0	0	0	200	300	0	0	0	0	0	0	0	200	903	0	0	0	0	0	0	0	603	903	0
691	2	0	0	0	0	0	0	200	300	0	0	0	0	0	0	0	200	903	0	0	0	0	0	0	0	603	903	0
691	3	0	0	0	0	0	0	200	300	0	0	0	0	0	0	0	200	903	0	0	0	0	0	0	0	603	903	0
691	4	0	0	0	0	0	0	200	300	0	0	0	0	0	0	0	200	903	0	0	0	0	0	0	0	603	903	0
691	5	0	0	0	0	0	0	200	300	0	0	0	0	0	0	0	200	903	0	0	0	0	0	0	0	603	903	0
691	6	0	0	0	0	0	0	200	300	0	0	0	0	0	0	0	200	903	0	0	0	0	0	0	0	603	903	0
691	7	0	0	0	0	0	0	200	300	0	0	0	0	0	0	0	200	903	0	0	0	0	0	0	0	603	903	0
691	8	0	0	0	0	0	0	200	300	0	0	0	0	0	0	0	200	903	0	0	0	0	0	0	0	603	903	0
691	9	0	0	0	0	0	0	200	300	0	0	0	0	0	0	0	200	903	0	0	0	0	0	0	0	603	903	0
692	0	0	0	0	0	0	0	200	300	0	0	0	0	0	0	0	200	903	0	0	0	0	0	0	0	603	903	0
692	1	0	0	0	0	0	0	200	300	0	0	0	0	0	0	0	200	903	0	0	0	0	0	0	0	603	903	0
692	2	0	0	0	0	0	0	200	300	0	0	0	0	0	0	0	200	903	0	0	0	0	0	0	0	603	903	0
692	3	0	0	0	0	0	0	200	300	0	0	0	0	0	0	0	200	903	0	0	0	0	0	0	0	603	903	0
692	4	0	0	0	0	0	0	200	300	0	0	0	0	0	0	0	200	903	0	0	0	0	0	0	0	603	903	0
692	5	0	0	0	0	0	0	200	300	0	0	0	0	0	0	0	200	903	0	0	0	0	0	0	0	603	903	0
692	6	0	0	0	0	0	0	200	300	0	0	0	0	0	0	0	200	903	0	0	0	0	0	0	0	603	903	0
692	7	0	0	0	0	0	0	200	300	0	0	0	0	0	0	0	200	903	0	0	0	0	0	0	0	603	903	0
692	8	0	0	0	0	0	0	200	300	0	0	0	0	0	0	0	200	903	0	0	0	0	0	0	0	603	903	0
692	9	0	0	0	0	0	0	200	300	0	0	0	0	0	0	0	200	903	0	0	0	0	0	0	0	603	903	0
693	0	0	0	0	0	0	0	200	300	0	0	0	0	0	0	0	200	903	0	0	0	0	0	0	0	603	903	0
693	1	0	0	0	0	0	0	200	300	0	0	0	0	0	0	0	200	903	0	0	0	0	0	0	0	603	903	0
693	2	0	0	0	0	0	0	200	300	0	0	0	0	0	0	0	200	903	0	0	0	0	0	0	0	603	903	0
693	3	0	0	0	0	0	0	200	300	0	0	0	0	0	0	0	200	903	0	0	0	0	0	0	0	603	903	0
693	4	0	0	0	0	0	0	200	300	0	0	0	0	0	0	0	200	903	0	0	0	0	0	0	0	603	903	0
693	5	0	0	0	0	0	0	200	300	0	0	0	0	0	0	0	200	903	0	0	0	0	0	0	0	603	903	0
693	6	0	0	0	0	0	0	200	300	0	0	0	0	0	0	0	200	903	0	0	0	0	0	0	0	603	903	0
693	7	0	0	0	0	0	0	200	300	0	0	0	0	0	0	0	200	903	0	0	0	0	0	0	0	603	903	0
693	8	0	0	0	0	0	0	200	300	0	0	0	0	0	0	0	200	903	0	0	0	0	0	0	0	603	903	0
693	9	0	0	0	0	0	0	200	300	0	0	0	0	0	0	0	200	903	0	0	0	0	0	0	0	603	903	0
694	0	0	0	0	0	0	0	200	300	0	0	0	0	0	0	0	200	903	0	0	0	0	0	0	0	603	903	0
694	1	0	0	0	0	0	0	200	300	0	0	0	0	0	0	0	200	903	0	0	0	0	0	0	0	603	903	0
694	2	0	0	0	0	0	0	200	300	0	0	0	0	0	0	0	200	903	0	0	0	0	0	0	0	603	903	0
694	3	0	0	0	0	0	0	200	300	0	0	0	0	0	0	0	200	903	0	0	0	0	0	0	0	603	903	0
694	4	0	0	0	0	0	0	200	300	0	0	0	0	0	0	0	200	903	0	0	0	0	0	0	0	603	903	0
694	5	0	0	0	0	0	0	200	300	0	0	0	0	0	0	0	200	903	0	0	0	0	0	0	0	603	903	0
694	6	0	0	0	0	0	0	200	300	0	0	0	0	0	0	0	200	903	0	0	0	0	0	0	0	603	903	0
694	7	0	0	0	0	0	0	200	300	0	0	0	0	0	0	0	200	903	0	0	0	0	0	0	0	603	903	0
694	8	0	0	0	0	0	0	200	300	0	0	0	0	0	0	0	200	903	0	0	0	0	0	0	0	603	903	0
694	9	0	0	0	0	0	0	200	300	0	0	0	0	0	0	0	200	903	0	0	0	0	0	0	0	603	903	0
695	0	0	0	0	0	0	0	200	300	0	0	0	0	0	0	0	200	903	0	0	0	0	0	0	0	603	903	0
695	1	0	0	0	0	0	0	200	300	0	0	0	0	0	0	0	200	903	0	0	0	0	0	0	0	603	903	0
695	2	0	0	0	0	0	0	200	300	0	0	0	0	0	0	0	200	903	0	0	0	0	0	0	0	603	903	0
695	3	0	0	0	0	0	0	200	300	0	0	0	0	0	0	0	200	903	0	0	0	0	0	0	0	603	903	0
695	4	0	0	0	0	0	0	200	300	0	0	0	0	0	0	0	200	903	0	0	0	0	0	0	0	603	903	0
695	5	0	0	0	0	0	0	200	300	0	0	0	0	0	0	0	200	903	0	0	0	0	0	0	0	603	903	0
695	6	0	0	0	0	0	0	200	300	0	0	0	0	0	0	0	200	903	0	0	0	0	0	0	0	603	903	0
695	7	0	0	0	0	0	0	200	300	0	0	0	0	0	0	0	200	903	0	0	0	0	0	0	0	603	903	0
695	8	0	0	0	0	0	0	200	300	0	0	0	0	0	0	0	200	903	0	0	0	0	0	0	0	603	903	0
695	9	0	0	0	0	0	0	200	300	0	0	0	0	0	0	0	200	903	0	0	0	0	0	0	0	603	903	0
696	0	0	0	0	0	0	0	200	300	0	0	0	0	0	0	0	200	903	0	0	0	0	0	0	0	603	903	0
696	1	0	0	0	0	0	0	200	300	0	0	0	0	0	0	0	200	903	0	0	0	0	0	0	0	603	903	0
696	2	0	0	0	0	0	0	200	300	0	0	0	0	0	0	0	200	903	0	0	0	0	0	0	0	603	903	0
696	3	0	0	0	0	0	0	200	300	0	0	0	0	0	0	0	200	903	0	0	0	0	0	0	0	603	903	0
696	4	0	0	0	0	0	0	200	300	0	0	0	0	0	0	0	200	903	0	0	0	0	0	0	0	603	903	0
696	5	0	0	0	0	0	0	200	300	0	0	0	0	0	0	0	200	903	0	0	0	0	0	0	0	603	903	0
696	6	0	0	0	0	0	0	200	300	0	0	0	0	0	0	0	200	903	0	0	0	0	0	0	0	603	903	0
696	7	0	0	0	0	0	0	200	300	0	0	0	0	0	0	0	200	903	0	0	0	0	0	0	0	603	903	0
696	8	0	0	0	0	0	0	200	300	0	0	0	0	0	0	0	200	903	0	0	0	0	0	0	0	603	903	0
696	9	0	0	0	0	0	0	200	300	0	0	0	0	0	0	0	200	903	0	0	0	0	0	0	0	603	903	0
697	0	0	0	0	0	0	0	200	300	0	0	0	0	0	0	0	200	903	0	0	0	0	0	0	0	603	903	0
697	1	0	0	0	0	0	0	200	300	0	0	0	0	0	0	0	200	903	0	0	0	0	0	0	0	603	903	0
697	2	0	0	0	0	0	0	200	300	0	0	0	0	0	0	0	200	903	0	0	0	0	0	0	0	603	903	0
697	3	0	0	0	0	0	0	200	300	0	0	0	0	0	0	0	200	903	0	0	0	0	0	0	0	603	903	0
697	4	0	0	0	0	0	0	200	300	0	0	0	0	0	0	0	200	903	0	0	0	0	0	0	0	603	903	0
697	5	0	0	0	0	0	0	200	300	0	0	0	0	0	0	0	200	903	0	0	0	0	0	0	0	603	903	0
697	6	0	0	0	0	0	0	200	300	0	0	0	0	0	0	0	200	903	0	0	0	0	0	0	0	603	903	0
697	7	0	0	0	0	0	0	200	300	0	0	0	0	0	0	0	200	903	0	0	0	0	0	0	0	603	903	0
697	8	0	0	0	0	0	0	200	300	0	0	0	0	0	0	0	200	903	0	0	0	0	0	0	0	603	903	0
697	9	0	0	0	0	0	0	200	300	0	0	0	0	0	0	0	200	903	0	0	0	0	0	0	0	603	903	0
698	0	0	0	0	0	0	0	200	300	0	0	0	0	0	0	0	200	903	0	0	0	0	0	0	0	603	903	0
698	1	0	0	0	0	0	0	200	300	0	0	0	0	0	0	0	200	903	0	0	0	0	0	0	0	603	903	0
698	2	0	0	0	0	0	0	200	300	0	0	0	0	0	0	0	200	903	0	0	0	0	0	0	0	603	903	0
698	3	0	0	0	0	0	0	200	300	0	0	0	0	0	0	0	200	903	0	0	0	0	0	0	0	603	903	0
698	4	0	0	0	0	0	0	200	300	0	0	0	0	0	0	0	200	903	0	0	0	0	0	0	0	603	903	0
698	5	0	0	0	0	0	0	200	300	0	0	0	0	0	0	0	200	903	0	0	0	0	0	0	0	603	903	0
698	6	0	0	0	0	0	0	200	300	0	0	0	0	0	0	0	200	903	0	0	0	0	0	0	0	603	903	0
698	7	0	0	0	0	0	0	200	300	0	0	0	0	0	0	0	200	903	0	0	0	0	0	0	0	603	903	0
698	8	0	0	0	0	0	0	200	300	0	0	0	0	0	0	0	200	903	0	0	0	0	0	0	0	603	903	0
698	9	0	0	0	0	0	0	200	300	0	0	0	0	0	0	0	200	903	0	0	0	0	0	0	0	603	903	0
699	0	0	0	0	0	0	0	200	300	0	0	0	0	0	0	0	200	903	0	0	0	0	0	0	0	603	903	0
699	1	0	0	0	0	0	0	200	300	0	0	0	0	0	0	0	200	903	0	0	0	0	0	0	0	603	903	0
699	2	0	0	0	0	0	0	200	300	0	0	0	0	0	0	0	200	903	0	0	0	0	0	0	0	603	903	0
699	3	0	0	0	0	0	0	200	300	0	0	0	0	0	0	0	200	903	0	0	0	0	0	0	0	603	903	0
699	4	0	0	0	0	0	0	200	300	0	0	0	0	0	0	0	200	903	0	0	0	0	0	0	0	603	903	0
699	5	0	0	0	0	0	0	200	300	0	0	0	0	0	0	0	200	903	0	0	0	0	0	0	0	603	903	0
699	6	0	0	0	0	0	0	200	300	0	0	0	0	0	0	0	200	903	0	0	0	0	0	0	0	603	903	0
699	7	0	0	0	0	0	0	200	300	0	0	0	0	0	0	0	200	903	0	0	0	0	0	0	0	603	903	0
699	8	0	0	0	0	0	0	200	300	0	0	0	0	0	0	0	200	903	0	0	0	0	0	0	0	603	903	0
699	9	0	0	0	0	0	0	200	300	0	0	0	0	0	0	0	200	903	0	0	0	0	0	0	0	603	903	0
700	0	0	0	0	0	0	0	200	300	0	0	0	0	0	0	0	200	903	0	0	0	0	0	0	0	603	903	0
700	1	0	0	0	0	0	0	200	300	0	0	0	0	0	0	0	200	903	0	0	0	0	0	0	0	603	903	0
700	2	0	0	0	0	0	0	200	300	0	0	0	0	0	0	0	200	903	0	0	0	0	0	0	0	603	903	0
700	3	0	0	0	0	0	0	200	300	0	0	0	0	0	0	0	200	903	0	0	0	0	0	0	0	603	903	0
700	4	0	0	0	0	0	0	200	300	0	0	0	0	0	0	0	200	903	0	0	0	0	0	0	0	603	903	0
700	5	0	0	0	0	0	0	200	300	0	0	0	0	0	0	0	200	903	0	0	0	0	0	0	0	603	903	0
700	6	0	0	0	0	0	0	200	300	0	0	0	0	0	0	0	200	903	0	0	0	0	0	0	0	603	903	0
700	7	0	0	0	0	0	0	200	300	0	0	0	0	0	0	0	200	903	0	0	0	0	0	0	0	603	903	0
700	8	0	0	0	0	0	0	200	300	0	0	0	0	0	0	0	200	903	0	0	0	0	0	0	0	603	903	0
700	9	0	0	0	0	0	0	200	300	0	0	0	0	0	0	0	200	903	0	0	0	0	0	0	0	603	903	0
701	0	0	0	0	0	0	0	200	300	0	0	0	0	0	0	0	200	903	0	0	0	0	0	0	0	603	903	0
701	1	0	0	0	0	0	0	200	300	0	0	0	0	0	0	0	200	903	0	0	0	0	0	0	0	603	903	0
701	2	0	0	0	0	0	0	200	300	0	0	0	0	0	0	0	200	903	0	0	0	0	0	0	0	603	903	0
701	3	0	0	0	0	0	0	200	300	0	0	0	0	0	0	0	200	903	0	0	0	0	0	0	0	603	903	0
701	4	0	0	0	0	0	0	200	300	0	0	0	0	0	0	0	200	903	0	0	0	0	0	0	0	603	903	0
701	5	0	0	0	0	0	0	200	300	0	0	0	0	0	0	0	200	903	0	0	0	0	0	0	0	603	903	0
701	6	0	0	0	0	0	0	200	300	0	0	0	0	0	0	0	200	903	0	0	0	0	0	0	0	603	903	0
701	7	0	0	0	0	0	0	200	300	0	0	0	0	0	0	0	200	903	0	0	0	0	0	0	0	603	903	0
701	8	0	0	0	0	0	0	200	300	0	0	0	0	0	0	0	200	903	0	0	0	0	0	0	0	603	903	0
701	9	0	0	0	0	0	0	200	300	0	0	0	0	0	0	0	200	903	0	0	0	0	0	0	0	603	903	0
702	0	0	0	0	0	0	0	200	300	0	0	0	0	0	0	0	200	903	0	0	0	0	0	0	0	603	903	0
702	1	0	0	0	0	0	0	200	300	0	0	0	0	0	0	0	200	903	0	0	0	0	0	0	0	603	903	0
702	2	0	0	0	0	0	0	200	300	0	0	0	0	0	0	0	200	903	0	0	0	0	0	0	0	603	903	0
702	3	0	0	0	0	0	0	200	300	0	0	0	0	0	0	0	200	903	0	0	0	0	0	0	0	603	903	0
702	4	0	0	0	0	0	0	200	300	0	0	0	0	0	0	0	200	903	0	0	0	0	0	0	0	603	903	0
702	5	0	0	0	0	0	0	200	300	0	0	0	0	0	0	0	200	903	0	0	0	0	0	0	0	603	903	0
702	6	0	0	0	0	0	0	200	300	0	0	0	0	0	0	0	200	903	0	0	0	0	0	0	0	603	903	0
702	7	0	0	0	0	0	0	200	300	0	0	0	0	0	0	0	200	903	0	0	0	0	0	0	0	603	903	0
702	8	0	0	0	0	0	0	200	300	0	0	0	0	0	0	0	200	903	0	0	0	0	0	0	0	603	903	0
702	9	0	0	0	0	0	0	200	300	0	0	0	0	0	0	0	200	903	0	0	0	0	0	0	0	603	903	0
703	0	0	0	0	0	0	0	200	300	0	0	0	0	0	0	0	200	903	0	0	0	0	0	0	0	603	903	0
703	1	0	0	0	0	0	0	200	300	0	0	0	0	0	0	0	200	903	0	0	0	0	0	0	0	603	903	0
703	2	0	0	0	0	0	0	200	300	0	0	0	0	0	0	0	200	903	0	0	0	0	0	0	0	603	903	0
703	3	0	0	0	0	0	0	200	300	0	0	0	0	0	0	0	200	903	0	0	0	0	0	0	0	603	903	0
703	4	0	0	0	0	0	0	200	300	0	0	0	0	0	0	0	200	903	0	0	0	0	0	0	0	603	903	0
703	5	0	0	0	0	0	0	200	300	0	0	0	0	0	0	0	200	903	0	0	0	0	0	0	0	603	903	0
703	6	0	0	0	0	0	0	200	300	0	0	0	0	0	0	0	200	903	0	0	0	0	0	0	0	603	903	0
703	7	0	0	0	0	0	0	200	300	0	0	0	0	0	0	0	200	903	0	0	0	0	0	0	0	603	903	0
703	8	0	0	0	0	0	0	200	300	0	0	0	0	0	0	0	200	903	0	0	0	0	0	0	0	603	903	0
703	9	0	0	0	0	0	0	200	300	0	0	0	0	0	0	0	200	903	0	0	0	0	0	0	0	603	903	0
704	0	0	0	0	0	0	0	200	300	0	0	0	0	0	0	0	200	903	0	0	0	0	0	0	0	603	903	0
704	1	0	0	0	0	0	0	200	300	0	0	0	0	0	0	0	200	903	0	0	0	0	0	0	0	603	903	0
704	2	0	0	0	0	0	0	200	300	0	0	0	0	0	0	0	200	903	0	0	0	0	0	0	0	603	903	0
704	3	0	0	0	0	0	0	200	300	0	0	0	0	0	0	0	200	903	0	0	0	0	0	0	0	603	903	0
704	4	0	0	0	0	0	0	200	300	0	0	0	0	0	0	0	200	903	0	0	0	0	0	0	0	603	903	0
704	5	0	0	0	0	0	0	200	300	0	0	0	0	0	0	0	200	903	0	0	0	0	0	0	0	603	903	0
704	6	0	0	0	0	0	0	200	300	0	0	0	0	0	0	0	200	903	0	0	0	0	0	0	0	603	903	0
704	7	0	0	0	0	0	0	200	300	0	0	0	0	0	0	0	200	903	0	0	0	0	0	0	0	603	903	0
704	8	0	0	0	0	0	0	200	300	0	0	0	0	0	0	0	200	903	0	0	0	0	0	0	0	603	903	0
704	9	0	0	0	0	0	0	200	300	0	0	0	0	0	0	0	200	903	0	0	0	0	0	0	0	603	903	0
705	0	0	0	0	0	0	0	200	300	0	0	0	0	0	0	0	200	903	0	0	0	0	0	0	0	603	903	0
705	1	0	0	0	0	0	0	200	300	0	0	0	0	0	0	0	200	903	0	0	0	0	0	0	0	603	903	0
705	2	0	0	0	0	0	0	200	300	0	0	0	0	0	0	0	200	903	0	0	0	0	0	0	0	603	903	0
705	3	0	0	0	0	0	0	200	300	0	0	0	0	0	0	0	200	903	0	0	0	0	0	0	0	603	903	0
705	4	0	0	0	0	0	0	200	300	0	0	0	0	0	0	0	200	903	0	0	0	0	0	0	0	603	903	0
705	5	0	0	0	0	0	0	200	300	0	0	0	0	0	0	0	200	903	0	0	0	0	0	0	0	603	903	0
705	6	0	0	0	0	0	0	200	300	0	0	0	0	0	0	0	200	903	0	0	0	0	0	0	0	603	903	0
705	7	0	0	0	0	0	0	200	300	0	0	0	0	0	0	0	200	903	0	0	0	0	0	0	0	603	903	0
705	8	0	0	0	0	0	0	200	300	0	0	0	0	0	0	0	200	903	0	0	0	0	0	0	0	603	903	0
705	9	0	0	0	0	0	0	200	300	0	0	0	0	0	0	0	200	903	0	0	0	0	0	0	0	603	903	0
706	0	0	0	0	0	0	0	200	300	0	0	0	0	0	0	0	200	903	0	0	0	0	0	0	0	603	903	0
706	1	0	0	0	0	0	0	200	300	0	0	0	0	0	0	0	200	903	0	0	0	0	0	0	0	603	903	0
706	2	0	0	0	0	0	0	200	300	0	0	0	0	0	0	0	200	903	0	0	0	0	0	0	0	603	903	0
706	3	0	0	0	0	0	0	200	300	0	0	0	0	0	0	0	200	903	0	0	0	0	0	0	0	603	903	0
706	4	0	0	0	0	0	0	200	300	0	0	0	0	0	0	0	200	903	0	0	0	0	0	0	0	603	903	0
706	5	0	0	0	0	0	0	200	300	0	0	0	0	0	0	0	200	903	0	0	0	0	0	0	0	603	903	0
706	6	0	0	0	0	0	0	200	300	0	0	0	0	0	0	0	200	903	0	0	0	0	0	0	0	603	903	0
706	7	0	0	0	0	0	0	200	300	0	0	0	0	0	0	0	200	903	0	0	0	0	0	0	0	603	903	0
706	8	0	0	0	0	0	0	200	300	0	0	0	0	0	0	0	200	903	0	0	0	0	0	0	0	603	903	0
706	9	0	0	0	0	0	0	200	300	0	0	0	0	0	0	0	200	903	0	0	0	0	0	0	0	603	903	0
707	0	0	0	0	0	0	0	200	300	0	0	0	0	0	0	0	200	903	0	0	0	0	0	0	0	603	903	0
707	1	0	0	0	0	0	0	200	300	0	0	0	0	0	0	0	200	903	0	0	0	0	0	0	0	603	903	0
707	2	0	0	0	0	0	0	200	300	0	0	0	0	0	0	0	200	903	0	0	0	0	0	0	0	603	903	0
707	3	0	0	0	0	0	0	200	300	0	0	0	0	0	0	0	200	903	0	0	0	0	0	0	0	603	903	0
707	4	0	0	0	0	0	0	200	300	0	0	0	0	0	0	0	200	903	0	0	0	0	0	0	0	603	903	0
707	5	0	0	0	0	0	0	200	300	0	0	0	0	0	0	0	200	903	0	0	0	0	0	0	0	603	903	0
707	6	0	0	0	0	0	0	200	300	0	0	0	0	0	0	0	200	903	0	0	0	0	0	0	0	603	903	0
707	7	0	0	0	0	0	0	200	300	0	0	0	0	0	0	0	200	903	0	0	0	0	0	0	0	603	903	0
707	8	0	0	0	0	0	0	200	300	0	0	0	0	0	0	0	200	903	0	0	0	0	0	0	0	603	903	0
707	9	0	0	0	0	0	0	200	300	0	0	0	0	0	0	0	200	903	0	0	0	0	0	0	0	603	903	0
708	0	0	0	0	0	0	0	200	300	0	0	0	0	0	0	0	200	903	0	0	0	0	0	0	0	603	903	0
708	1	0	0	0	0	0	0	200	300	0	0	0	0	0	0	0	200	903	0	0	0	0	0	0	0	603	903	0
708	2	0	0	0	0	0	0	200	300	0	0	0	0	0	0	0	200	903	0	0	0	0	0	0	0	603	903	0
708	3	0	0	0	0	0	0	200	300	0	0	0	0	0	0	0	200	903	0	0	0	0	0	0	0	603	903	0
708	4	0	0	0	0	0	0	200	300	0	0	0	0	0	0	0	200	903	0	0	0	0	0	0	0	603	903	0
708	5	0	0	0	0	0	0	200	300	0	0	0	0	0	0	0	200	903	0	0	0	0	0	0	0	603	903	0
708	6	0	0	0	0	0	0	200	300	0	0	0	0	0	0	0	200	903	0	0	0	0	0	0	0	603	903	0
708	7	0	0	0	0	0	0	200	300	0	0	0	0	0	0	0	200	903	0	0	0	0	0	0	0	603	903	0
708	8	0	0	0	0	0	0	200	300	0	0	0	0	0	0	0	200	903	0	0	0	0	0	0	0	603	903	0
708	9	0	0	0	0	0	0	200	300	0	0	0	0	0	0	0	200	903	0	0	0	0	0	0	0	603	903	0
709	0	0	0	0	0	0	0	200	300	0	0	0	0	0	0	0	200	903	0	0	0	0	0	0	0	603	903	0
709	1	0	0	0	0	0	0	200	300	0	0	0	0	0	0	0	200	903	0	0	0	0	0	0	0	603	903	0
709	2	0	0	0	0	0	0	200	300	0	0	0	0	0	0	0	200	903	0	0	0	0	0	0	0	603	903	0
709	3	0	0	0	0	0	0	200	300	0	0	0	0	0	0	0	200	903	0	0	0	0	0	0	0	603	903	0
709	4	0	0	0	0	0	0	200	300	0	0	0	0	0	0	0	200	903	0	0	0	0	0	0	0	603	903	0
709	5	0	0	0	0	0	0	200	300	0	0	0	0	0	0	0	200	903	0	0	0	0	0	0	0	603	903	0
709	6	0	0	0	0	0	0	200	300	0	0	0	0	0	0	0	200	903	0	0	0	0	0	0	0	603	903	0
709	7	0	0	0	0	0	0	200	300	0	0	0	0	0	0	0	200	903	0	0	0	0	0	0	0	603	903	0
709	8	0	0	0	0	0	0	200	300	0	0	0	0	0	0	0	200	903	0	0	0	0	0	0	0	603	903	0
709	9	0	0	0	0	0	0	200	300	0	0	0	0	0	0	0	200	903	0	0	0	0	0	0	0	603	903	0
710	0	0	0	0	0	0	0	200	300	0	0	0	0	0	0	0	200	903	0	0	0	0	0	0	0	603	903	0
710	1	0	0	0	0	0	0	200	300	0	0	0	0	0	0	0	200	903	0	0	0	0	0	0	0	603	903	0
710	2	0	0	0	0	0	0	200	300	0	0	0	0	0	0	0	200	903	0	0	0	0	0	0	0	603	903	0
710	3	0	0	0	0	0	0	200	300	0	0	0	0	0	0	0	200	903	0	0	0	0	0	0	0	603	903	0
710	4	0	0	0	0	0	0	200	300	0	0	0	0	0	0	0	200	903	0	0	0	0	0	0	0	603	903	0
710	5	0	0	0	0	0	0	200	300	0	0	0	0	0	0	0	200	903	0	0	0	0	0	0	0	603	903	0
710	6	0	0	0	0	0	0	200	300	0	0	0	0	0	0	0	200	903	0	0	0	0	0	0	0	603	903	0
710	7	0	0	0	0	0	0	200	300	0	0	0	0	0	0	0	200	903	0	0	0	0	0	0	0	603	903	0
710	8	0	0	0	0	0	0	200	300	0	0	0	0	0	0	0	200	903	0	0	0	0	0	0	0	603	903	0
710	9	0	0	0	0	0	0	200	300	0	0	0	0	0	0	0	200	903	0	0	0	0	0	0	0	603	903	0
711	0	0	0	0	0	0	0	200	300	0	0	0	0	0	0	0	200	903	0	0	0	0	0	0	0	603	903	0
711	1	0	0	0	0	0	0	200	300	0	0	0	0	0	0	0	200	903	0	0	0	0	0	0	0	603	903	0
711	2	0	0	0	0	0	0	200	300	0	0	0	0	0	0	0	200	903	0	0	0	0	0	0	0	603	903	0
711	3	0	0	0	0	0	0	200	300	0	0	0	0	0	0	0	200	903	0	0	0	0	0	0	0	603	903	0
711	4	0	0	0	0	0	0	200	300	0	0	0	0	0	0	0	200	903	0	0	0	0	0	0	0	603	903	0
711	5	0	0	0	0	0	0	200	300	0	0	0	0	0	0	0	200	903	0	0	0	0	0	0	0	603	903	0
711	6	0	0	0	0	0	0	200	300	0	0	0	0	0	0	0	200	903	0	0	0	0	0	0	0	603	903	0
711	7	0	0	0	0	0	0	200	300	0	0	0	0	0	0	0	200	903	0	0	0	0	0	0	0	603	903	0
711	8	0	0	0	0	0	0	200	300	0	0	0	0	0	0	0	200	903	0	0	0	0	0	0	0	603	903	0
711	9	0	0	0	0	0	0	200	300	0	0	0	0	0	0	0	200	903	0	0	0	0	0	0	0	603	903	0
712	0	0	0	0	0	0	0	200	300	0	0	0	0	0	0	0	200	903	0	0	0	0	0	0	0	603	903	0
712	1	0	0	0	0	0	0	200	300	0	0	0	0	0	0	0	200	903	0	0	0	0	0	0	0	603	903	0
712	2	0	0	0	0	0	0	200	300	0	0	0	0	0	0	0	200	903	0	0	0	0	0	0	0	603	903	0
712	3	0	0	0	0	0	0	200	300	0	0	0	0	0	0	0	200	903	0	0	0	0	0	0	0	603	903	0
712	4	0	0	0	0	0	0	200	300	0	0	0	0	0	0	0	200	903	0	0	0	0	0	0	0	603	903	0
712	5	0	0	0	0	0	0	200	300	0	0	0	0	0	0	0	200	903	0	0	0	0	0	0	0	603	903	0
712	6	0	0	0	0	0	0	200	300	0	0	0	0	0	0	0	200	903	0	0	0	0	0	0	0	603	903	0
712	7	0	0	0	0	0	0	200	300	0	0	0	0	0	0	0	200	903	0	0	0	0	0	0	0	603	903	0
712	8	0	0	0	0	0	0	200	300	0	0	0	0	0	0	0	200	903	0	0	0	0	0	0	0	603	903	0
712	9	0	0	0	0	0	0	200	300	0	0	0	0	0	0	0	200	903	0	0	0	0	0	0	0	603	903	0
713	0	0	0	0	0	0	0	200	300	0	0	0	0	0	0	0	200	903	0	0	0	0	0	0	0	603	903	0
713	1	0	0	0	0	0	0	200	300	0	0	0	0	0	0	0	200	903	0	0	0	0	0	0	0	603	903	0
713	2	0	0	0	0	0	0	200	300	0	0	0	0	0	0	0	200	903	0	0	0	0	0	0	0	603	903	0
713	3	0	0	0	0	0	0	200	300	0	0	0	0	0	0	0	200	903	0	0	0	0	0	0	0	603	903	0
713	4	0	0	0	0	0	0	200	300	0	0	0	0	0	0	0	200	903	0	0	0	0	0	0	0	603	903	0
713	5	0	0	0	0	0	0	200	300	0	0	0	0	0	0	0	200	903	0	0	0	0	0	0	0	603	903	0
713	6	0	0	0	0	0	0	200	300	0	0	0	0	0	0	0	200	903	0	0	0	0	0	0	0	603	903	0
713	7	0	0	0	0	0	0	200	300	0	0	0	0	0	0	0	200	903	0	0	0	0	0	0	0	603	903	0
713	8	0	0	0	0	0	0	200	300	0	0	0	0	0	0	0	200	903	0	0	0	0	0	0	0	603	903	0
713	9	0	0	0	0	0	0	200	300	0	0	0	0	0	0	0	200	903	0	0	0	0	0	0	0	603	903	0
714	0	0	0	0	0	0	0	200	300	0	0	0	0	0	0	0	200	903	0	0	0	0	0	0	0	603	903	0
714	1	0	0	0	0	0	0	200	300	0	0	0	0	0	0	0	200	903	0	0	0	0	0	0	0	603	903	0
714	2	0	0	0	0	0	0	200	300	0	0	0	0	0	0	0	200	903	0	0	0	0	0	0	0	603	903	0
714	3	0	0	0	0	0	0	200	300	0	0	0	0	0	0	0	200	903	0	0	0	0	0	0	0	603	903	0
714	4	0	0	0	0	0	0	200	300	0	0	0	0	0	0	0	200	903	0	0	0	0	0	0	0	603	903	0
714	5	0	0	0	0	0	0	200	300	0	0	0	0	0	0	0	200	903	0	0	0	0	0	0	0	603	903	0
714	6	0	0	0	0	0	0	200	300	0	0	0	0	0	0	0	200	903	0	0	0	0	0	0	0	603	903	0
714	7	0	0	0	0	0	0	200	300	0	0	0	0	0	0	0	200	903	0	0	0	0	0	0	0	603	903	0
714	8	0	0	0	0	0	0	200	300	0	0	0	0	0	0	0	200	903	0	0	0	0	0	0	0	603	903	0
714	9	0	0	0	0	0	0	200	300	0	0	0	0	0	0	0	200	903	0	0	0	0	0	0	0	603	903	0
715	0	0	0	0	0	0	0	200	300	0	0	0	0	0	0	0	200	903	0	0	0	0	0	0	0	603	903	0
715	1	0	0	0	0	0	0	200	300	0	0	0	0	0	0	0	200	903	0	0	0	0	0	0	0	603	903	0
715	2	0	0	0	0	0	0	200	300	0	0	0	0	0	0	0	200	903	0	0	0	0	0	0	0	603	903	0
715	3	0	0	0	0	0	0	200	300	0	0	0	0	0	0	0	200	903	0	0	0	0	0	0	0	603	903	0
715	4	0	0	0	0	0	0	200	300	0	0	0	0	0	0	0	200	903	0	0	0	0	0	0	0	603	903	0
715	5	0	0	0	0	0	0	200	300	0	0	0	0	0	0	0	200	903	0	0	0	0	0	0	0	603	903	0
715	6	0	0	0	0	0	0	200	300	0	0	0	0	0	0	0	200	903	0	0	0	0	0	0	0	603	903	0
715	7	0	0	0	0	0	0	200	300	0	0	0	0	0	0	0	200	903	0	0	0	0	0	0	0	603	903	0
715	8	0	0	0	0	0	0	200	300	0	0	0	0	0	0	0	200	903	0	0	0	0	0	0	0	603	903	0
715	9	0	0	0	0	0	0	200	300	0	0	0	0	0	0	0	200	903	0	0	0	0	0	0	0	603	903	0
716	0	0	0	0	0	0	0	200	300	0	0	0	0	0	0	0	200	903	0	0	0	0	0	0	0	603	903	0
716	1	0	0	0	0	0	0	200	300	0	0	0	0	0	0	0	200	903	0	0	0	0	0	0	0	603	903	0
716	2	0	0	0	0	0	0	200	300	0	0	0	0	0	0	0	200	903	0	0	0	0	0	0	0	603	903	0
716	3	0	0	0	0	0	0	200	300	0	0	0	0	0	0	0	200	903	0	0	0	0	0	0	0	603	903	0
716	4	0	0	0	0	0	0	200	300	0	0	0	0	0	0	0	200	903	0	0	0	0	0	0	0	603	903	0
716	5	0	0	0	0	0	0	200	300	0	0	0	0	0	0	0	200	903	0	0	0	0	0	0	0	603	903	0
716	6	0	0	0	0	0	0	200	300	0	0	0	0	0	0	0	200	903	0	0	0	0	0	0	0	603	903	0
716	7	0	0	0	0	0	0	200	300	0	0	0	0	0	0	0	200	903	0	0	0	0	0	0	0	603	903	0
716	8	0	0	0	0	0	0	200	300	0	0	0	0	0	0	0	200	903	0	0	0	0	0	0	0	603	903	0
716	9	0	0	0	0	0	0	200	300	0	0	0	0	0	0	0	200	903	0	0	0	0	0	0	0	603	903	0
717	0	0	0	0	0	0	0	200	300	0	0	0	0	0	0	0	200	903	0	0	0	0	0	0	0	603	903	0
717	1	0	0	0	0	0	0	200	300	0	0	0	0	0	0	0	200	903	0	0	0	0	0	0	0	603	903	0
717	2	0	0	0	0	0	0	200	300	0	0	0	0	0	0	0	200	903	0	0	0	0	0	0	0	603	903	0
717	3	0	0	0	0	0	0	200	300	0	0	0	0	0	0	0	200	903	0	0	0	0	0	0	0	603	903	0
717	4	0	0	0	0	0	0	200	300	0	0	0	0	0	0	0	200	903	0	0	0	0	0	0	0	603	903	0
717	5	0	0	0	0	0	0	200	300	0	0	0	0	0	0	0	200	903	0	0	0	0	0	0	0	603	903	0
717	6	0	0	0	0	0	0	200	300	0	0	0	0	0	0	0	200	903	0	0	0	0	0	0	0	603	903	0
717	7	0	0	0	0	0	0	200	300	0	0	0	0	0	0	0	200	903	0	0	0	0	0	0	0	603	903	0
717	8	0	0	0	0	0	0	200	300	0	0	0	0	0	0	0	200	903	0	0	0	0	0	0	0	603	903	0
717	9	0	0	0	0	0	0	200	300	0	0	0	0	0	0	0	200	903	0	0	0	0	0	0	0	603	903	0
718	0	0	0	0	0	0	0	200	300	0	0	0	0	0	0	0	200	903	0	0	0	0	0	0	0	603	903	0
718	1	0	0	0	0	0	0	200	300	0	0	0	0	0	0	0	200	903	0	0	0	0	0	0	0	603	903	0
718	2	0	0	0	0	0	0	200	300	0	0	0	0	0	0	0	200	903	0	0	0	0	0	0	0	603	903	0
718	3	0	0	0	0	0	0	200	300	0	0	0	0	0	0	0	200	903	0	0	0	0	0	0	0	603	903	0
718	4	0	0	0	0	0	0	200	300	0	0	0	0	0	0	0	200	903	0	0	0	0	0	0	0	603	903	0
718	5	0	0	0	0	0	0	200	300	0	0	0	0	0	0	0	200	903	0	0	0	0	0	0	0	603	903	0
718	6	0	0	0	0	0	0	200	300	0	0	0	0	0	0	0	200	903	0	0	0	0	0	0	0	603	903	0
718	7	0	0	0	0	0	0	200	300	0	0	0	0	0	0	0	200	903	0	0	0	0	0	0	0	603	903	0
718	8	0	0	0	0	0	0	200	300	0	0	0	0	0	0	0	200	903	0	0	0	0	0	0	0	603	903	0
718	9	0	0	0	0	0	0	200	300	0	0	0	0	0	0	0	200	903	0	0	0	0	0	0	0	603	903	0
719	0	0	0	0	0	0	0	200	300	0	0	0	0	0	0	0	200	903	0	0	0	0	0	0	0	603	903	0
719	1	0	0	0	0	0	0	200	300	0	0	0	0	0	0	0	200	903	0	0	0	0	0	0	0	603	903	0
719	2	0	0	0	0	0	0	200	300	0	0	0	0	0	0	0	200	903	0	0	0	0	0	0	0	603	903	0
719	3	0	0	0	0	0	0	200	300	0	0	0	0	0	0	0	200	903	0	0	0	0	0	0	0	603	903	0
719	4	0	0	0	0	0	0	200	300	0	0	0	0	0	0	0	200	903	0	0	0	0	0	0	0	603	903	0
719	5	0	0	0	0	0	0	200	300	0	0	0	0	0	0	0	200	903	0	0	0	0	0	0	0	603	903	0
719	6	0	0	0	0	0	0	200	300	0	0	0	0	0	0	0	200	903	0	0	0	0	0	0	0	603	903	0
719	7	0	0	0	0	0	0	200	300	0	0	0	0	0	0	0	200	903	0	0	0	0	0	0	0	603	903	0
719	8	0	0	0	0	0	0	200	300	0	0	0	0	0	0	0	200	903	0	0	0	0	0	0	0	603	903	0
719	9	0	0	0	0	0	0	200	300	0	0	0	0	0	0	0	200	903	0	0	0	0	0	0	0	603	903	0
720	0	0	0	0	0	0	0	200	300	0	0	0	0	0	0	0	200	903	0	0	0	0	0	0	0	603	903	0
720	1	0	0	0	0	0	0	200	300	0	0	0	0	0	0	0	200	903	0	0	0	0	0	0	0	603	903	0
720	2	0	0	0	0	0	0	200	300	0	0	0	0	0	0	0	200	903	0	0	0	0	0	0	0	603	903	0
720	3	0	0	0	0	0	0	200	300	0	0	0	0	0	0	0	200	903	0	0	0	0	0	0	0	603	903	0
720	4	0	0	0	0	0	0	200	300	0	0	0	0	0	0	0	200	903	0	0	0	0	0	0	0	603	903	0
720	5	0	0	0	0	0	0	200	300	0	0	0	0	0	0	0	200	903	0	0	0	0	0	0	0	603	903	0
720	6	0	0	0	0	0	0	200	300	0	0	0	0	0	0	0	200	903	0	0	0	0	0	0	0	603	903	0
720	7	0	0	0	0	0	0	200	300	0	0	0	0	0	0	0	200	903	0	0	0	0	0	0	0	603	903	0
720	8	0	0	0	0	0	0	200	300	0	0	0	0	0	0	0	200	903	0	0	0	0	0	0	0	603	903	0
720	9	0	0	0	0	0	0	200	300	0	0	0	0	0	0	0	200	903	0	0	0	0	0	0	0	603	903	0
721	0	0	0	0	0	0	0	200	300	0	0	0	0	0	0	0	200	903	0	0	0	0	0	0	0	603	903	0
721	1	0	0	0	0	0	0	200	300	0	0	0	0	0	0	0	200	903	0	0	0	0	0	0	0	603	903	0
721	2	0	0	0	0	0	0	200	300	0	0	0	0	0	0	0	200	903	0	0	0	0	0	0	0	603	903	0
721	3	0	0	0	0	0	0	200	300	0	0	0	0	0	0	0	200	903	0	0	0	0	0	0	0	603	903	0
721	4	0	0	0	0	0	0	200	300	0	0	0	0	0	0	0	200	903	0	0	0	0	0	0	0	603	903	0
721	5	0	0	0	0	0	0	200	300	0	0	0	0	0	0	0	200	903	0	0	0	0	0	0	0	603	903	0
721	6	0	0	0	0	0	0	200	300	0	0	0	0	0	0	0	200	903	0	0	0	0	0	0	0	603	903	0
721	7	0	0	0	0	0	0	200	300	0	0	0	0	0	0	0	200	903	0	0	0	0	0	0	0	603	903	0
721	8	0	0	0	0	0	0	200	300	0	0	0	0	0	0	0	200	903	0	0	0	0	0	0	0	603	903	0
721	9	0	0	0	0	0	0	200	300	0	0	0	0	0	0	0	200	903	0	0	0	0	0	0	0	603	903	0
722	0	0	0	0	0	0	0	200	300	0	0	0	0	0	0	0	200	903	0	0	0	0	0	0	0	603	903	0
722	1	0	0	0	0	0	0	200	300	0	0	0	0	0	0	0	200	903	0	0	0	0	0	0	0	603	903	0
722	2	0	0	0	0	0	0	200	300	0	0	0	0	0	0	0	200	903	0	0	0	0	0	0	0	603	903	0
722	3	0	0	0	0	0	0	200	300	0	0	0	0	0	0	0	200	903	0	0	0	0	0	0	0	603	903	0
722	4	0	0	0	0	0	0	200	300	0	0	0	0	0	0	0	200	903	0	0	0	0	0	0	0	603	903	0
722	5	0	0	0	0	0	0	200	300	0	0	0	0	0	0	0	200	903	0	0	0	0	0	0	0	603	903	0
722	6	0	0	0	0	0	0	200	300	0	0	0	0	0	0	0	200	903	0	0	0	0	0	0	0	603	903	0
722	7	0	0	0	0	0	0	200	300	0	0	0	0	0	0	0	200	903	0	0	0	0	0	0	0	603	903	0
722	8	0	0	0	0	0	0	200	300	0	0	0	0	0	0	0	200	903	0	0	0	0	0	0	0	603	903	0
722	9	0	0	0	0	0	0	200	300	0	0	0	0	0	0	0	200	903	0	0	0	0	0	0	0	603	903	0
723	0	0	0	0	0	0	0	200	300	0	0	0	0	0	0	0	200	903	0	0	0	0	0	0	0	603	903	0
723	1	0	0	0	0	0	0	200	300	0	0	0	0	0	0	0	200	903	0	0	0	0	0	0	0	603	903	0
723	2	0	0	0	0	0	0	200	300	0	0	0	0	0	0	0	200	903	0	0	0	0	0	0	0	603	903	0
723	3	0	0	0	0	0	0	200	300	0	0	0	0	0	0	0	200	903	0	0	0	0	0	0	0	603	903	0
723	4	0	0	0	0	0	0	200	300	0	0	0	0	0	0	0	200	903	0	0	0	0	0	0	0	603	903	0
723	5	0	0	0	0	0	0	200	300	0	0	0	0	0	0	0	200	903	0	0	0	0	0	0	0	603	903	0
723	6	0	0	0	0	0	0	200	300	0	0	0	0	0	0	0	200	903	0	0	0	0	0	0	0	603	903	0
723	7	0	0	0	0	0	0	200	300	0	0	0	0	0	0	0	200	903	0	0	0	0	0	0	0	603	903	0
723	8	0	0	0	0	0	0	200	300	0	0	0	0	0	0	0	200	903	0	0	0	0	0	0	0	603	903	0
723	9	0	0	0	0	0	0	200	300	0	0	0	0	0	0	0	200	903	0	0	0	0	0	0	0	603	903	0
724	0	0	0	0	0	0	0	200	300	0	0	0	0	0	0	0	200	903	0	0	0	0	0	0	0	603	903	0
724	1	0	0	0	0	0	0	200	300	0	0	0	0	0	0	0	200	903	0	0	0	0	0	0	0	603	903	0
724	2	0	0	0	0	0	0	200	300	0	0	0	0	0	0	0	200	903	0	0	0	0	0	0	0	603	903	0
724	3	0	0	0	0	0	0	200	300	0	0	0	0	0	0	0	200	903	0	0	0	0	0	0	0	603	903	0
724	4	0	0	0	0	0	0	200	300	0	0	0	0	0	0	0	200	903	0	0	0	0	0	0	0	603	903	0
724	5	0	0	0	0	0	0	200	300	0	0	0	0	0	0	0	200	903	0	0	0	0	0	0	0	603	903	0
724	6	0	0	0	0	0	0	200	300	0	0	0	0	0	0	0	200	903	0	0	0	0	0	0	0	603	903	0
724	7	0	0	0	0	0	0	200	300	0	0	0	0	0	0	0	200	903	0	0	0	0	0	0	0	603	903	0
724	8	0	0	0	0	0	0	200	300	0	0	0	0	0	0	0	200	903	0	0	0	0	0	0	0	603	903	0
724	9	0	0	0	0	0	0	200	300	0	0	0	0	0	0	0	200	903	0	0	0	0	0	0	0	603	903	0
725	0	0	0	0	0	0	0	200	300	0	0	0	0	0	0	0	200	903	0	0	0	0	0	0	0	603	903	0
725	1	0	0	0	0	0	0	200	300	0	0	0	0	0	0	0	200	903	0	0	0	0	0	0	0	603	903	0
725	2	0	0	0	0	0	0	200	300	0	0	0	0	0	0	0	200	903	0	0	0	0	0	0	0	603	903	0
725	3	0	0	0	0	0	0	200	300	0	0	0	0	0	0	0	200	903	0	0	0	0	0	0	0	603	903	0
725	4	0	0	0	0	0	0	200	300	0	0	0	0	0	0	0	200	903	0	0	0	0	0	0	0	603	903	0
725	5	0	0	0	0	0	0	200	300	0	0	0	0	0	0	0	200	903	0	0	0	0	0	0	0	603	903	0
725	6	0	0	0	0	0	0	200	300	0	0	0	0	0	0	0	200	903	0	0	0	0	0	0	0	603	903	0
725	7	0	0	0	0	0	0	200	300	0	0	0	0	0	0	0	200	903	0	0	0	0	0	0	0	603	903	0
725	8	0	0	0	0	0	0	200	300	0	0	0	0	0	0	0	200	903	0	0	0	0	0	0	0	603	903	0
725	9	0	0	0	0	0	0	200	300	0	0	0	0	0	0	0	200	903	0	0	0	0	0	0	0	603	903	0
726	0	0	0	0	0	0	0	200	300	0	0	0	0	0	0	0	200	903	0	0	0	0	0	0	0	603	903	0
726	1	0	0	0	0	0	0	200	300	0	0	0	0	0	0	0	200	903	0	0	0	0	0	0	0	603	903	0
726	2	0	0	0	0	0	0	200	300	0	0	0	0	0	0	0	200	903	0	0	0	0	0	0	0	603	903	0
726	3	0	0	0	0	0	0	200	300	0	0	0	0	0	0	0	200	903	0	0	0	0	0	0	0	603	903	0
726	4	0	0	0	0	0	0	200	300	0	0	0	0	0	0	0	200	903	0	0	0	0	0	0	0	603	903	0
726	5	0	0	0	0	0	0	200	300	0	0	0	0	0	0	0	200	903	0	0	0	0	0	0	0	603	903	0
726	6	0	0	0	0	0	0	200	300	0	0	0	0	0	0	0	200	903	0	0	0	0	0	0	0	603	903	0
726	7	0	0	0	0	0	0	200	300	0	0	0	0	0	0	0	200	903	0	0	0	0	0	0	0	603	903	0
726	8	0	0	0	0	0	0	200	300	0	0	0	0	0	0	0	200	903	0	0	0	0	0	0	0	603	903	0
726	9	0	0	0	0	0	0	200	300	0	0	0	0	0	0	0	200	903	0	0	0	0	0	0	0	603	903	0
727	0	0	0	0	0	0	0	200	300	0	0	0	0	0	0	0	200	903	0	0	0	0	0	0	0	603	903	0
727	1	0	0	0	0	0	0	200	300	0	0	0	0	0	0	0	200	903	0	0	0	0	0	0	0	603	903	0
727	2	0	0	0	0	0	0	200	300	0	0	0	0	0	0	0	200	903	0	0	0	0	0	0	0	603	903	0
727	3	0	0	0	0	0	0	200	300	0	0	0	0	0	0	0	200	903	0	0	0	0	0	0	0	603	903	0
727	4	0	0	0	0	0	0	200	300	0	0	0	0	0	0	0	200	903	0	0	0	0	0	0	0	603	903	0
727	5	0	0	0	0	0	0	200	300	0	0	0	0	0	0	0	200	903	0	0	0	0	0	0	0	603	903	0
727	6	0	0	0	0	0	0	200	300	0	0	0	0	0	0	0	200	903	0	0	0	0	0	0	0	603	903	0
727	7	0	0	0	0	0	0	200	300	0	0	0	0	0	0	0	200	903	0	0	0	0	0	0	0	603	903	0
727	8	0	0	0	0	0	0	200	300	0	0	0	0	0	0	0	200	903	0	0	0	0	0	0	0	603	903	0
727	9	0	0	0	0	0	0	200	300	0	0	0	0	0	0	0	200	903	0	0	0	0	0	0	0	603	903	0
728	0	0	0	0	0	0	0	200	300	0	0	0	0	0	0	0	200	903	0	0	0	0	0	0	0	603	903	0
728	1	0	0	0	0	0	0	200	300	0	0	0	0	0	0	0	200	903	0	0	0	0	0	0	0	603	903	0
728	2	0	0	0	0	0	0	200	300	0	0	0	0	0	0	0	200	903	0	0	0	0	0	0	0	603	903	0
728	3	0	0	0	0	0	0	200	300	0	0	0	0	0	0	0	200	903	0	0	0	0	0	0	0	603	903	0
728	4	0	0	0	0	0	0	200	300	0	0	0	0	0	0	0	200	903	0	0	0	0	0	0	0	603	903	0
728	5	0	0	0	0	0	0	200	300	0	0	0	0	0	0	0	200	903	0	0	0	0	0	0	0	603	903	0
728	6	0	0	0	0	0	0	200	300	0	0	0	0	0	0	0	200	903	0	0	0	0	0	0	0	603	903	0
728	7	0	0	0	0	0	0	200	300	0	0	0	0	0	0	0	200	903	0	0	0	0	0	0	0	603	903	0
728	8	0	0	0	0	0	0	200	300	0	0	0	0	0	0	0	200	903	0	0	0	0	0	0	0	603	903	0
728	9	0	0	0	0	0	0	200	300	0	0	0	0	0	0	0	200	903	0	0	0	0	0	0	0	603	903	0
729	0	0	0	0	0	0	0	200	300	0	0	0	0	0	0	0	200	903	0	0	0	0	0	0	0	603	903	0
729	1	0	0	0	0	0	0	200	300	0	0	0	0	0	0	0	200	903	0	0	0	0	0	0	0	603	903	0
729	2	0	0	0	0	0	0	200	300	0	0	0	0	0	0	0	200	903	0	0	0	0	0	0	0	603	903	0
729	3	0	0	0	0	0	0	200	300	0	0	0	0	0	0	0	200	903	0	0	0	0	0	0	0	603	903	0
729	4	0	0	0	0	0	0	200	300	0	0	0	0	0	0	0	200	903	0	0	0	0	0	0	0	603	903	0
729	5	0	0	0	0	0	0	200	300	0	0	0	0	0	0	0	200	903	0	0	0	0	0	0	0	603	903	0
729	6	0	0	0	0	0	0	200	300	0	0	0	0	0	0	0	200	903	0	0	0	0	0	0	0	603	903	0
729	7	0	0	0	0	0	0	200	300	0	0	0	0	0	0	0	200	903	0	0	0	0	0	0	0	603	903	0
729	8	0	0	0	0	0	0	200	300	0	0	0	0	0	0	0	200	903	0	0	0	0	0	0	0	603	903	0
729	9	0	0	0	0	0	0	200	300	0	0	0	0	0	0	0	200	903	0	0	0	0	0	0	0	603	903	0
730	0	0	0	0	0	0	0	200	300	0	0	0	0	0	0	0	200	903	0	0	0	0	0	0	0	603	903	0
730	1	0	0	0	0	0	0	200	300	0	0	0	0	0	0	0	200	903	0	0	0	0	0	0	0	603	903	0
730	2	0	0	0	0	0	0	200	300	0	0	0	0	0	0	0	200	903	0	0	0	0	0	0	0	603	903	0
730	3	0	0	0	0	0	0	200	300	0	0	0	0	0	0	0	200	903	0	0	0	0	0	0	0	603	903	0
730	4	0	0	0	0	0	0	200	300	0	0	0	0	0	0	0	200	903	0	0	0	0	0	0	0	603	903	0
730	5	0	0	0	0	0	0	200	300	0	0	0	0	0	0	0	200	903	0	0	0	0	0	0	0	603	903	0
730	6	0	0	0	0	0	0	200	300	0	0	0	0	0	0	0	200	903	0	0	0	0	0	0	0	603	903	0
730	7	0	0	0	0	0	0	200	300	0	0	0	0	0	0	0	200	903	0	0	0	0	0	0	0	603	903	0
730	8	0	0	0	0	0	0	200	300	0	0	0	0	0	0	0	200	903	0	0	0	0	0	0	0	603	903	0
730	9	0	0	0	0	0	0	200	300	0	0	0	0	0	0	0	200	903	0	0	0	0	0	0	0	603	903	0
731	0	0	0	0	0	0	0	200	300	0	0	0	0	0	0	0	200	903	0	0	0	0	0	0	0	603	903	0
731	1	0	0	0	0	0	0	200	300	0	0	0	0	0	0	0	200	903	0	0	0	0	0	0	0	603	903	0
731	2	0	0	0	0	0	0	200	300	0	0	0	0	0	0	0	200	903	0	0	0	0	0	0	0	603	903	0
731	3	0	0	0	0	0	0	200	300	0	0	0	0	0	0	0	200	903	0	0	0	0	0	0	0	603	903	0
731	4	0	0	0	0	0	0	200	300	0	0	0	0	0	0	0	200	903	0	0	0	0	0	0	0	603	903	0
731	5	0	0	0	0	0	0	200	300	0	0	0	0	0	0	0	200	903	0	0	0	0	0	0	0	603	903	0
731	6	0	0	0	0	0	0	200	300	0	0	0	0	0	0	0	200	903	0	0	0	0	0	0	0	603	903	0
731	7	0	0	0	0	0	0	200	300	0	0	0	0	0	0	0	200	903	0	0	0	0	0	0	0	603	903	0
731	8	0	0	0	0	0	0	200	300	0	0	0	0	0	0	0	200	903	0	0	0	0	0	0	0	603	903	0
731	9	0	0	0	0	0	0	200	300	0	0	0	0	0	0	0	200	903	0	0	0	0	0	0	0	603	903	0
732	0	0	0	0	0	0	0	200	300	0	0	0	0	0	0	0	200	903	0	0	0	0	0	0	0	603	903	0
732	1	0	0	0	0	0	0	200	300	0	0	0	0	0	0	0	200	903	0	0	0	0	0	0	0	603	903	0
732	2	0	0	0	0	0	0	200	300	0	0	0	0	0	0	0	200	903	0	0	0	0	0	0	0	603	903	0
732	3	0	0	0	0	0	0	200	300	0	0	0	0	0	0	0	200	903	0	0	0	0	0	0	0	603	903	0
732	4	0	0	0	0	0	0	200	300	0	0	0	0	0	0	0	200	903	0	0	0	0	0	0	0	603	903	0
732	5	0	0	0	0	0	0	200	300	0	0	0	0	0	0	0	200	903	0	0	0	0	0	0	0	603	903	0
732	6	0	0	0	0	0	0	200	300	0	0	0	0	0	0	0	200	903	0	0	0	0	0	0	0	603	903	0
732	7	0	0	0	0	0	0	200	300	0	0	0	0	0	0	0	200	903	0	0	0	0	0	0	0	603	903	0
732	8	0	0	0	0	0	0	200	300	0	0	0	0	0	0	0	200	903	0	0	0	0	0	0	0	603	903	0
732	9	0	0	0	0	0	0	200	300	0	0	0	0	0	0	0	200	903	0	0	0	0	0	0	0	603	903	0
733	0	0	0	0	0	0	0	200	300	0	0	0	0	0	0	0	200	903	0	0	0	0	0	0	0	603	903	0
733	1	0	0	0	0	0	0	200	300	0	0	0	0	0	0	0	200	903	0	0	0	0	0	0	0	603	903	0
733	2	0	0	0	0	0	0	200	300	0	0	0	0	0	0	0	200	903	0	0	0	0	0	0	0	603	903	0
733	3	0	0	0	0	0	0	200	300	0	0	0	0	0	0	0	200	903	0	0	0	0	0	0	0	603	903	0
733	4	0	0	0	0	0	0	200	300	0	0	0	0	0	0	0	200	903	0	0	0	0	0	0	0	603	903	0
733	5	0	0	0	0	0	0	200	300	0	0	0	0	0	0	0	200	903	0	0	0	0	0	0	0	603	903	0
733	6	0	0	0	0	0	0	200	300	0	0	0	0	0	0	0	200	903	0	0	0	0	0	0	0	603	903	0
733	7	0	0	0	0	0	0	200	300	0	0	0	0	0	0	0	200	903	0	0	0	0	0	0	0	603	903	0
733	8	0	0	0	0	0	0	200	300	0	0	0	0	0	0	0	200	903	0	0	0	0	0	0	0	603	903	0
733	9	0	0	0	0	0	0	200	300	0	0	0	0	0	0	0	200	903	0	0	0	0	0	0	0	603	903	0
734	0	0	0	0	0	0	0	200	300	0	0	0	0	0	0	0	200	903	0	0	0	0	0	0	0	603	903	0
734	1	0	0	0	0	0	0	200	300	0	0	0	0	0	0	0	200	903	0	0	0	0	0	0	0	603	903	0
734	2	0	0	0	0	0	0	200	300	0	0	0	0	0	0	0	200	903	0	0	0	0	0	0	0	603	903	0
734	3	0	0	0	0	0	0	200	300	0	0	0	0	0	0	0	200	903	0	0	0	0	0	0	0	603	903	0
734	4	0	0	0	0	0	0	200	300	0	0	0	0	0	0	0	200	903	0	0	0	0	0	0	0	603	903	0
734	5	0	0	0	0	0	0	200	300	0	0	0	0	0	0	0	200	903	0	0	0	0	0	0	0	603	903	0
734	6	0	0	0	0	0	0	200	300	0	0	0	0	0	0	0	200	903	0	0	0	0	0	0	0	603	903	0
734	7	0	0	0	0	0	0	200	300	0	0	0	0	0	0	0	200	903	0	0	0	0	0	0	0	603	903	0
734	8	0	0	0	0	0	0	200	300	0	0	0	0	0	0	0	200	903	0	0	0	0	0	0	0	603	903	0
734	9	0	0	0	0	0	0	200	300	0	0	0	0	0	0	0	200	903	0	0	0	0	0	0	0	603	903	0
735	0	0	0	0	0	0	0	200	300	0	0	0	0	0	0	0	200	903	0	0	0	0	0	0	0	603	903	0
735	1	0	0	0	0	0	0	200	300	0	0	0	0	0	0	0	200	903	0	0	0	0	0	0	0	603	903	0
735	2	0	0	0	0	0	0	200	300	0	0	0	0	0	0	0	200	903	0	0	0	0	0	0	0	603	903	0
735	3	0	0	0	0	0	0	200	300	0	0	0	0	0	0	0	200	903	0	0	0	0	0	0	0	603	903	0
735	4	0	0	0	0	0	0	200	300	0	0	0	0	0	0	0	200	903	0	0	0	0	0	0	0	603	903	0
735	5	0	0	0	0	0	0	200	300	0	0	0	0	0	0	0	200	903	0	0	0	0	0	0	0	603	903	0
735	6	0	0	0	0	0	0	200	300	0	0	0	0	0	0	0	200	903	0	0	0	0	0	0	0	603	903	0
735	7	0	0	0	0	0	0	200	300	0	0	0	0	0	0	0	200	903	0	0	0	0	0	0	0	603	903	0
735	8	0	0	0	0	0	0	200	300	0	0	0	0	0	0	0	200	903	0	0	0	0	0	0	0	603	903	0
735	9	0	0	0	0	0	0	200	300	0	0	0	0	0	0	0	200	903	0	0	0	0	0	0	0	603	903	0
736	0	0	0	0	0	0	0	200	300	0	0	0	0	0	0	0	200	903	0	0	0	0	0	0	0	603	903	0
736	1	0	0	0	0	0	0	200	300	0	0	0	0	0	0	0	200	903	0	0	0	0	0	0	0	603	903	0
736	2	0	0	0	0	0	0	200	300	0	0	0	0	0	0	0	200	903	0	0	0	0	0	0	0	603	903	0
736	3	0	0	0	0	0	0	200	300	0	0	0	0	0	0	0	200	903	0	0	0	0	0	0	0	603	903	0
736	4	0	0	0	0	0	0	200	300	0	0	0	0	0	0	0	200	903	0	0	0	0	0	0	0	603	903	0
736	5	0	0	0	0	0	0	200	300	0	0	0	0	0	0	0	200	903	0	0	0	0	0	0	0	603	903	0
736	6	0	0	0	0	0	0	200	300	0	0	0	0	0	0	0	200	903	0	0	0	0	0	0	0	603	903	0
736	7	0	0	0	0	0	0	200	300	0	0	0	0	0	0	0	200	903	0	0	0	0	0	0	0	603	903	0
736	8	0	0	0	0	0	0	200	300	0	0	0	0	0	0	0	200	903	0	0	0	0	0	0	0	603	903	0
736	9	0	0	0	0	0	0	200	300	0	0	0	0	0	0	0	200	903	0	0	0	0	0	0	0	603	903	0
737	0	0	0	0	0	0	0	200	300	0	0	0	0	0	0	0	200	903	0	0	0	0	0	0	0	603	903	0
737	1	0	0	0	0	0	0	200	300	0	0	0	0	0	0	0	200	903	0	0	0	0	0	0	0	603	903	0
737	2	0	0	0	0	0	0	200	300	0	0	0	0	0	0	0	200	903	0	0	0	0	0	0	0	603	903	0
737	3	0	0	0	0	0	0	200	300	0	0	0	0	0	0	0	200	903	0	0	0	0	0	0	0	603	903	0
737	4	0	0	0	0	0	0	200	300	0	0	0	0	0	0	0	200	903	0	0	0	0	0	0	0	603	903	0
737	5	0	0	0	0	0	0	200	300	0	0	0	0	0	0	0	200	903	0	0	0	0	0	0	0	603	903	0
737	6	0	0	0	0	0	0	200	300	0	0	0	0	0	0	0	200	903	0	0	0	0	0	0	0	603	903	0
737	7	0	0	0	0	0	0	200	300	0	0	0	0	0	0	0	200	903	0	0	0	0	0	0	0	603	903	0
737	8	0	0	0	0	0	0	200	300	0	0	0	0	0	0	0	200	903	0	0	0	0	0	0	0	603	903	0
737	9	0	0	0	0	0	0	200	300	0	0	0	0	0	0	0	200	903	0	0	0	0	0	0	0	603	903	0
738	0	0	0	0	0	0	0	200	300	0	0	0	0	0	0	0	200	903	0	0	0	0	0	0	0	603	903	0
738	1	0	0	0	0	0	0	200	300	0	0	0	0	0	0	0	200	903	0	0	0	0	0	0	0	603	903	0
738	2	0	0	0	0	0	0	200	300	0	0	0	0	0	0	0	200	903	0	0	0	0	0	0	0	603	903	0
738	3	0	0	0	0	0	0	200	300	0	0	0	0	0	0	0	200	903	0	0	0	0	0	0	0	603	903	0
738	4	0	0	0	0	0	0	200	300	0	0	0	0	0	0	0	200	903	0	0	0	0	0	0	0	603	903	0
738	5	0	0	0	0	0	0	200	300	0	0	0	0	0	0	0	200	903	0	0	0	0	0	0	0	603	903	0
738	6	0	0	0	0	0	0	200	300	0	0	0	0	0	0	0	200	903	0	0	0	0	0	0	0	603	903	0
738	7	0	0	0	0	0	0	200	300	0	0	0	0	0	0	0	200	903	0	0	0	0	0	0	0	603	903	0
738	8	0	0	0	0	0	0	200	300	0	0	0	0	0	0	0	200	903	0	0	0	0	0	0	0	603	903	0
738	9	0	0	0	0	0	0	200	300	0	0	0	0	0	0	0	200	903	0	0	0	0	0	0	0	603	903	0
739	0	0	0	0	0	0	0	200	300	0	0	0	0	0	0	0	200	903	0	0	0	0	0	0	0	603	903	0
739	1	0	0	0	0	0	0	200	300	0	0	0	0	0	0	0	200	903	0	0	0	0	0	0	0	603	903	0
739	2	0	0	0	0	0	0	200	300	0	0	0	0	0	0	0	200	903	0	0	0	0	0	0	0	603	903	0
739	3	0	0	0	0	0	0	200	300	0	0	0	0	0	0	0	200	903	0	0	0	0	0	0	0	603	903	0
739	4	0	0	0	0	0	0	200	300	0	0	0	0	0	0	0	200	903	0	0	0	0	0	0	0	603	903	0
739	5	0	0	0	0	0	0	200	300	0	0	0	0	0	0	0	200	903	0	0	0	0	0	0	0	603	903	0
739	6	0	0	0	0	0	0	200	300	0	0	0	0	0	0	0	200	903	0	0	0	0	0	0	0	603	903	0
739	7	0	0	0	0	0	0	200	300	0	0	0	0	0	0	0	200	903	0	0	0	0	0	0	0	603	903	0
739	8	0	0	0	0	0	0	200	300	0	0	0	0	0	0	0	200	903	0	0	0	0	0	0	0	603	903	0
739	9	0	0	0	0	0	0	200	300	0	0	0	0	0	0	0	200	903	0	0	0	0	0	0	0	603	903	0
740	0	0	0	0	0	0	0	200	300	0	0	0	0	0	0	0	200	903	0	0	0	0	0	0	0	603	903	0
740	1	0	0	0	0	0	0	200	300	0	0	0	0	0	0	0	200	903	0	0	0	0	0	0	0	603	903	0
740	2	0	0	0	0	0	0	200	300	0	0	0	0	0	0	0	200	903	0	0	0	0	0	0	0	603	903	0
740	3	0	0	0	0	0	0	200	300	0	0	0	0	0	0	0	200	903	0	0	0	0	0	0	0	603	903	0
740	4	0	0	0	0	0	0	200	300	0	0	0	0	0	0	0	200	903	0	0	0	0	0	0	0	603	903	0
740	5	0	0	0	0	0	0	200	300	0	0	0	0	0	0	0	200	903	0	0	0	0	0	0	0	603	903	0
740	6	0	0	0	0	0	0	200	300	0	0	0	0	0	0	0	200	903	0	0	0	0	0	0	0	603	903	0
740	7	0	0	0	0	0	0	200	300	0	0	0	0	0	0	0	200	903	0	0	0	0	0	0	0	603	903	0
740	8	0	0	0	0	0	0	200	300	0	0	0	0	0	0	0	200	903	0	0	0	0	0	0	0	603	903	0
740	9	0	0	0	0	0	0	200	300	0	0	0	0	0	0	0	200	903	0	0	0	0	0	0	0	603	903	0
741	0	0	0	0	0	0	0	200	300	0	0	0	0	0	0	0	200	903	0	0	0	0	0	0	0	603	903	0
741	1	0	0	0	0	0	0	200	300	0	0	0	0	0	0	0	200	903	0	0	0	0	0	0	0	603	903	0
741	2	0	0	0	0	0	0	200	300	0	0	0	0	0	0	0	200	903	0	0	0	0	0	0	0	603	903	0
741	3	0	0	0	0	0	0	200	300	0	0	0	0	0	0	0	200	903	0	0	0	0	0	0	0	603	903	0
741	4	0	0	0	0	0	0	200	300	0	0	0	0	0	0	0	200	903	0	0	0	0	0	0	0	603	903	0
741	5	0	0	0	0	0	0	200	300	0	0	0	0	0	0	0	200	903	0	0	0	0	0	0	0	603	903	0
741	6	0	0	0	0	0	0	200	300	0	0	0	0	0	0	0	200	903	0	0	0	0	0	0	0	603	903	0
741	7	0	0	0	0	0	0	200	300	0	0	0	0	0	0	0	200	903	0	0	0	0	0	0	0	603	903	0
741	8	0	0	0	0	0	0	200	300	0	0	0	0	0	0	0	200	903	0	0	0	0	0	0	0	603	903	0
741	9	0	0	0	0	0	0	200	300	0	0	0	0	0	0	0	200	903	0	0	0	0	0	0	0	603	903	0
742	0	0	0	0	0	0	0	200	300	0	0	0	0	0	0	0	200	903	0	0	0	0	0	0	0	603	903	0
742	1	0	0	0	0	0	0	200	300	0	0	0	0	0	0	0	200	903	0	0	0	0	0	0	0	603	903	0
742	2	0	0	0	0	0	0	200	300	0	0	0	0	0	0	0	200	903	0	0	0	0	0	0	0	603	903	0
742	3	0	0	0	0	0	0	200	300	0	0	0	0	0	0	0	200	903	0	0	0	0	0	0	0	603	903	0
742	4	0	0	0	0	0	0	200	300	0	0	0	0	0	0	0	200	903	0	0	0	0	0	0	0	603	903	0
742	5	0	0	0	0	0	0	200	300	0	0	0	0	0	0	0	200	903	0	0	0	0	0	0	0	603	903	0
742	6	0	0	0	0	0	0	200	300	0	0	0	0	0	0	0	200	903	0	0	0	0	0	0	0	603	903	0
742	7	0	0	0	0	0	0	200	300	0	0	0	0	0	0	0	200	903	0	0	0	0	0	0	0	603	903	0
742	8	0	0	0	0	0	0	200	300	0	0	0	0	0	0	0	200	903	0	0	0	0	0	0	0	603	903	0
742	9	0	0	0	0	0	0	200	300	0	0	0	0	0	0	0	200	903	0	0	0	0	0	0	0	603	903	0
743	0	0	0	0	0	0	0	200	300	0	0	0	0	0	0	0	200	903	0	0	0	0	0	0	0	603	903	0
743	1	0	0	0	0	0	0	200	300	0	0	0	0	0	0	0	200	903	0	0	0	0	0	0	0	603	903	0
743	2	0	0	0	0	0	0	200	300	0	0	0	0	0	0	0	200	903	0	0	0	0	0	0	0	603	903	0
743	3	0	0	0	0	0	0	200	300	0	0	0	0	0	0	0	200	903	0	0	0	0	0	0	0	603	903	0
743	4	0	0	0	0	0	0	200	300	0	0	0	0	0	0	0	200	903	0	0	0	0	0	0	0	603	903	0
743	5	0	0	0	0	0	0	200	300	0	0	0	0	0	0	0	200	903	0	0	0	0	0	0	0	603	903	0
743	6	0	0	0	0	0	0	200	300	0	0	0	0	0	0	0	200	903	0	0	0	0	0	0	0	603	903	0
743	7	0	0	0	0	0	0	200	300	0	0	0	0	0	0	0	200	903	0	0	0	0	0	0	0	603	903	0
743	8	0	0	0	0	0	0	200	300	0	0	0	0	0	0	0	200	903	0	0	0	0	0	0	0	603	903	0
743	9	0	0	0	0	0	0	200	300	0	0	0	0	0	0	0	200	903	0	0	0	0	0	0	0	603	903	0
744	0	0	0	0	0	0	0	200	300	0	0	0	0	0	0	0	200	903	0	0	0	0	0	0	0	603	903	0
744	1	0	0	0	0	0	0	200	300	0	0	0	0	0	0	0	200	903	0	0	0	0	0	0	0	603	903	0
744	2	0	0	0	0	0	0	200	300	0	0	0	0	0	0	0	200	903	0	0	0	0	0	0	0	603	903	0
744	3	0	0	0	0	0	0	200	300	0	0	0	0	0	0	0	200	903	0	0	0	0	0	0	0	603	903	0
744	4	0	0	0	0	0	0	200	300	0	0	0	0	0	0	0	200	903	0	0	0	0	0	0	0	603	903	0
744	5	0	0	0	0	0	0	200	300	0	0	0	0	0	0	0	200	903	0	0	0	0	0	0	0	603	903	0
744	6	0	0	0	0	0	0	200	300	0	0	0	0	0	0	0	200	903	0	0	0	0	0	0	0	603	903	0
744	7	0	0	0	0	0	0	200	300	0	0	0	0	0	0	0	200	903	0	0	0	0	0	0	0	603	903	0
744	8	0	0	0	0	0	0	200	300	0	0	0	0	0	0	0	200	903	0	0	0	0	0	0	0	603	903	0
744	9	0	0	0	0	0	0	200	300	0	0	0	0	0	0	0	200	903	0	0	0	0	0	0	0	603	903	0
745	0	0	0	0	0	0	0	200	300	0	0	0	0	0	0	0	200	903	0	0	0	0	0	0	0	603	903	0
745	1	0	0	0	0	0	0	200	300	0	0	0	0	0	0	0	200	903	0	0	0	0	0	0	0	603	903	0
745	2	0	0	0	0	0	0	200	300	0	0	0	0	0	0	0	200	903	0	0	0	0	0	0	0	603	903	0
745	3	0	0	0	0	0	0	200	300	0	0	0	0	0	0	0	200	903	0	0	0	0	0	0	0	603	903	0
745	4	0	0	0	0	0	0	200	300	0	0	0	0	0	0	0	200	903	0	0	0	0	0	0	0	603	903	0
745	5	0	0	0	0	0	0	200	300	0	0	0	0	0	0	0	200	903	0	0	0	0	0	0	0	603	903	0
745	6	0	0	0	0	0	0	200	300	0	0	0	0	0	0	0	200	903	0	0	0	0	0	0	0	603	903	0
745	7	0	0	0	0	0	0	200	300	0	0	0	0	0	0	0	200	903	0	0	0	0	0	0	0	603	903	0
745	8	0	0	0	0	0	0	200	300	0	0	0	0	0	0	0	200	903	0	0	0	0	0	0	0	603	903	0
745	9	0	0	0	0	0	0	200	300	0	0	0	0	0	0	0	200	903	0	0	0	0	0	0	0	603	903	0
746	0	0	0	0	0	0	0	200	300	0	0	0	0	0	0	0	200	903	0	0	0	0	0	0	0	603	903	0
746	1	0	0	0	0	0	0	200	300	0	0	0	0	0	0	0	200	903	0	0	0	0	0	0	0	603	903	0
746	2	0	0	0	0	0	0	200	300	0	0	0	0	0	0	0	200	903	0	0	0	0	0	0	0	603	903	0
746	3	0	0	0	0	0	0	200	300	0	0	0	0	0	0	0	200	903	0	0	0	0	0	0	0	603	903	0
746	4	0	0	0	0	0	0	200	300	0	0	0	0	0	0	0	200	903	0	0	0	0	0	0	0	603	903	0
746	5	0	0	0	0	0	0	200	300	0	0	0	0	0	0	0	200	903	0	0	0	0	0	0	0	603	903	0
746	6	0	0	0	0	0	0	200	300	0	0	0	0	0	0	0	200	903	0	0	0	0	0	0	0	603	903	0
746	7	0	0	0	0	0	0	200	300	0	0	0	0	0	0	0	200	903	0	0	0	0	0	0	0	603	903	0
746	8	0	0	0	0	0	0	200	300	0	0	0	0	0	0	0	200	903	0	0	0	0	0	0	0	603	903	0
746	9	0	0	0	0	0	0	200	300	0	0	0	0	0	0	0	200	903	0	0	0	0	0	0	0	603	903	0
747	0	0	0	0	0	0	0	200	300	0	0	0	0	0	0	0	200	903	0	0	0	0	0	0	0	603	903	0
747	1	0	0	0	0	0	0	200	300	0	0	0	0	0	0	0	200	903	0	0	0	0	0	0	0	603	903	0
747	2	0	0	0	0	0	0	200	300	0	0	0	0	0	0	0	200	903	0	0	0	0	0	0	0	603	903	0
747	3	0	0	0	0	0	0	200	300	0	0	0	0	0	0	0	200	903	0	0	0	0	0	0	0	603	903	0
747	4	0	0	0	0	0	0	200	300	0	0	0	0	0	0	0	200	903	0	0	0	0	0	0	0	603	903	0
747	5	0	0	0	0	0	0	200	300	0	0	0	0	0	0	0	200	903	0	0	0	0	0	0	0	603	903	0
747	6	0	0	0	0	0	0	200	300	0	0	0	0	0	0	0	200	903	0	0	0	0	0	0	0	603	903	0
747	7	0	0	0	0	0	0	200	300	0	0	0	0	0	0	0	200	903	0	0	0	0	0	0	0	603	903	0
747	8	0	0	0	0	0	0	200	300	0	0	0	0	0	0	0	200	903	0	0	0	0	0	0	0	603	903	0
747	9	0	0	0	0	0	0	200	300	0	0	0	0	0	0	0	200	903	0	0	0	0	0	0	0	603	903	0
748	0	0	0	0	0	0	0	200	300	0	0	0	0	0	0	0	200	903	0	0	0	0	0	0	0	603	903	0
748	1	0	0	0	0	0	0	200	300	0	0	0	0	0	0	0	200	903	0	0	0	0	0	0	0	603	903	0
748	2	0	0	0	0	0	0	200	300	0	0	0	0	0	0	0	200	903	0	0	0	0	0	0	0	603	903	0
748	3	0	0	0	0	0	0	200	300	0	0	0	0	0	0	0	200	903	0	0	0	0	0	0	0	603	903	0
748	4	0	0	0	0	0	0	200	300	0	0	0	0	0	0	0	200	903	0	0	0	0	0	0	0	603	903	0
748	5	0	0	0	0	0	0	200	300	0	0	0	0	0	0	0	200	903	0	0	0	0	0	0	0	603	903	0
748	6	0	0	0	0	0	0	200	300	0	0	0	0	0	0	0	200	903	0	0	0	0	0	0	0	603	903	0
748	7	0	0	0	0	0	0	200	300	0	0	0	0	0	0	0	200	903	0	0	0	0	0	0	0	603	903	0
748	8	0	0	0	0	0	0	200	300	0	0	0	0	0	0	0	200	903	0	0	0	0	0	0	0	603	903	0
748	9	0	0	0	0	0	0	200	300	0	0	0	0	0	0	0	200	903	0	0	0	0	0	0	0	603	903	0
749	0	0	0	0	0	0	0	200	300	0	0	0	0	0	0	0	200	903	0	0	0	0	0	0	0	603	903	0
749	1	0	0	0	0	0	0	200	300	0	0	0	0	0	0	0	200	903	0	0	0	0	0	0	0	603	903	0
749	2	0	0	0	0	0	0	200	300	0	0	0	0	0	0	0	200	903	0	0	0	0	0	0	0	603	903	0
749	3	0	0	0	0	0	0	200	300	0	0	0	0	0	0	0	200	903	0	0	0	0	0	0	0	603	903	0
749	4	0	0	0	0	0	0	200	300	0	0	0	0	0	0	0	200	903	0	0	0	0	0	0	0	603	903	0
749	5	0	0	0	0	0	0	200	300	0	0	0	0	0	0	0	200	903	0	0	0	0	0	0	0	603	903	0
749	6	0	0	0	0	0	0	200	300	0	0	0	0	0	0	0	200	903	0	0	0	0	0	0	0	603	903	0
749	7	0	0	0	0	0	0	200	300	0	0	0	0	0	0	0	200	903	0	0	0	0	0	0	0	603	903	0
749	8	0	0	0	0	0	0	200	300	0	0	0	0	0	0	0	200	903	0	0	0	0	0	0	0	603	903	0
749	9	0	0	0	0	0	0	200	300	0	0	0	0	0	0	0	200	903	0	0	0	0	0	0	0	603	903	0
750	0	0	0	0	0	0	0	200	300	0	0	0	0	0	0	0	200	903	0	0	0	0	0	0	0	603	903	0
750	1	0	0	0	0	0	0	200	300	0	0	0	0	0	0	0	200	903	0	0	0	0	0	0	0	603	903	0
750	2	0	0	0	0	0	0	200	300	0	0	0	0	0	0	0	200	903	0	0	0	0	0	0	0	603	903	0
750	3	0	0	0	0	0	0	200	300	0	0	0	0	0	0	0	200	903	0	0	0	0	0	0	0	603	903	0
750	4	0	0	0	0	0	0	200	300	0	0	0	0	0	0	0	200	903	0	0	0	0	0	0	0	603	903	0
750	5	0	0	0	0	0	0	200	300	0	0	0	0	0	0	0	200	903	0	0	0	0	0	0	0	603	903	0
750	6	0	0	0	0	0	0	200	300	0	0	0	0	0	0	0	200	903	0	0	0	0	0	0	0	603	903	0
750	7	0	0	0	0	0	0	200	300	0	0	0	0	0	0	0	200	903	0	0	0	0	0	0	0	603	903	0
750	8	0	0	0	0	0	0	200	300	0	0	0	0	0	0	0	200	903	0	0	0	0	0	0	0	603	903	0
750	9	0	0	0	0	0	0	200	300	0	0	0	0	0	0	0	200	903	0	0	0	0	0	0	0	603	903	0
751	0	0	0	0	0	0	0	200	300	0	0	0	0	0	0	0	200	903	0	0	0	0	0	0	0	603	903	0
751	1	0	0	0	0	0	0	200	300	0	0	0	0	0	0	0	200	903	0	0	0	0	0	0	0	603	903	0
751	2	0	0	0	0	0	0	200	300	0	0	0	0	0	0	0	200	903	0	0	0	0	0	0	0	603	903	0
751	3	0	0	0	0	0	0	200	300	0	0	0	0	0	0	0	200	903	0	0	0	0	0	0	0	603	903	0
751	4	0	0	0	0	0	0	200	300	0	0	0	0	0	0	0	200	903	0	0	0	0	0	0	0	603	903	0
751	5	0	0	0	0	0	0	200	300	0	0	0	0	0	0	0	200	903	0	0	0	0	0	0	0	603	903	0
751	6	0	0	0	0	0	0	200	300	0	0	0	0	0	0	0	200	903	0	0	0	0	0	0	0	603	903	0
751	7	0	0	0	0	0	0	200	300	0	0	0	0	0	0	0	200	903	0	0	0	0	0	0	0	603	903	0
751	8	0	0	0	0	0	0	200	300	0	0	0	0	0	0	0	200	903	0	0	0	0	0	0	0	603	903	0
751	9	0	0	0	0	0	0	200	300	0	0	0	0	0	0	0	200	903	0	0	0	0	0	0	0	603	903	0
752	0	0	0	0	0	0	0	200	300	0	0	0	0	0	0	0	200	903	0	0	0	0	0	0	0	603	903	0
752	1	0	0	0	0	0	0	200	300	0	0	0	0	0	0	0	200	903	0	0	0	0	0	0	0	603	903	0
752	2	0	0	0	0	0	0	200	300	0	0	0	0	0	0	0	200	903	0	0	0	0	0	0	0	603	903	0
752	3	0	0	0	0	0	0	200	300	0	0	0	0	0	0	0	200	903	0	0	0	0	0	0	0	603	903	0
752	4	0	0	0	0	0	0	200	300	0	0	0	0	0	0	0	200	903	0	0	0	0	0	0	0	603	903	0
752	5	0	0	0	0	0	0	200	300	0	0	0	0	0	0	0	200	903	0	0	0	0	0	0	0	603	903	0
752	6	0	0	0	0	0	0	200	300	0	0	0	0	0	0	0	200	903	0	0	0	0	0	0	0	603	903	0
752	7	0	0	0	0	0	0	200	300	0	0	0	0	0	0	0	200	903	0	0	0	0	0	0	0	603	903	0
752	8	0	0	0	0	0	0	200	300	0	0	0	0	0	0	0	200	903	0	0	0	0	0	0	0	603	903	0
752	9	0	0	0	0	0	0	200	300	0	0	0	0	0	0	0	200	903	0	0	0	0	0	0	0	603	903	0
753	0	0	0	0	0	0	0	200	300	0	0	0	0	0	0	0	200	903	0	0	0	0	0	0	0	603	903	0
753	1	0	0	0	0	0	0	200	300	0	0	0	0	0	0	0	200	903	0	0	0	0	0	0	0	603	903	0
753	2	0	0	0	0	0	0	200	300	0	0	0	0	0	0	0	200	903	0	0	0	0	0	0	0	603	903	0
753	3	0	0	0	0	0	0	200	300	0	0	0	0	0	0	0	200	903	0	0	0	0	0	0	0	603	903	0
753	4	0	0	0	0	0	0	200	300	0	0	0	0	0	0	0	200	903	0	0	0	0	0	0	0	603	903	0
753	5	0	0	0	0	0	0	200	300	0	0	0	0	0	0	0	200	903	0	0	0	0	0	0	0	603	903	0
753	6	0	0	0	0	0	0	200	300	0	0	0	0	0	0	0	200	903	0	0	0	0	0	0	0	603	903	0
753	7	0	0	0	0	0	0	200	300	0	0	0	0	0	0	0	200	903	0	0	0	0	0	0	0	603	903	0
753	8	0	0	0	0	0	0	200	300	0	0	0	0	0	0	0	200	903	0	0	0	0	0	0	0	603	903	0
753	9	0	0	0	0	0	0	200	300	0	0	0	0	0	0	0	200	903	0	0	0	0	0	0	0	603	903	0
754	0	0	0	0	0	0	0	200	300	0	0	0	0	0	0	0	200	903	0	0	0	0	0	0	0	603	903	0
754	1	0	0	0	0	0	0	200	300	0	0	0	0	0	0	0	200	903	0	0	0	0	0	0	0	603	903	0
754	2	0	0	0	0	0	0	200	300	0	0	0	0	0	0	0	200	903	0	0	0	0	0	0	0	603	903	0
754	3	0	0	0	0	0	0	200	300	0	0	0	0	0	0	0	200	903	0	0	0	0	0	0	0	603	903	0
754	4	0	0	0	0	0	0	200	300	0	0	0	0	0	0	0	200	903	0	0	0	0	0	0	0	603	903	0
754	5	0	0	0	0	0	0	200	300	0	0	0	0	0	0	0	200	903	0	0	0	0	0	0	0	603	903	0
754	6	0	0	0	0	0	0	200	300	0	0	0	0	0	0	0	200	903	0	0	0	0	0	0	0	603	903	0
754	7	0	0	0	0	0	0	200	300	0	0	0	0	0	0	0	200	903	0	0	0	0	0	0	0	603	903	0
754	8	0	0	0	0	0	0	200	300	0	0	0	0	0	0	0	200	903	0	0	0	0	0	0	0	603	903	0
754	9	0	0	0	0	0	0	200	300	0	0	0	0	0	0	0	200	903	0	0	0	0	0	0	0	603	903	0
755	0	0	0	0	0	0	0	200	300	0	0	0	0	0	0	0	200	903	0	0	0	0	0	0	0	603	903	0
755	1	0	0	0	0	0	0	200	300	0	0	0	0	0	0	0	200	903	0	0	0	0	0	0	0	603	903	0
755	2	0	0	0	0	0	0	200	300	0	0	0	0	0	0	0	200	903	0	0	0	0	0	0	0	603	903	0
755	3	0	0	0	0	0	0	200	300	0	0	0	0	0	0	0	200	903	0	0	0	0	0	0	0	603	903	0
755	4	0	0	0	0	0	0	200	300	0	0	0	0	0	0	0	200	903	0	0	0	0	0	0	0	603	903	0
755	5	0	0	0	0	0	0	200	300	0	0	0	0	0	0	0	200	903	0	0	0	0	0	0	0	603	903	0
755	6	0	0	0	0	0	0	200	300	0	0	0	0	0	0	0	200	903	0	0	0	0	0	0	0	603	903	0
755	7	0	0	0	0	0	0	200	300	0	0	0	0	0	0	0	200	903	0	0	0	0	0	0	0	603	903	0
755	8	0	0	0	0	0	0	200	300	0	0	0	0	0	0	0	200	903	0	0	0	0	0	0	0	603	903	0
755	9	0	0	0	0	0	0	200	300	0	0	0	0	0	0	0	200	903	0	0	0	0	0	0	0	603	903	0
756	0	0	0	0	0	0	0	200	300	0	0	0	0	0	0	0	200	903	0	0	0	0	0	0	0	603	903	0
756	1	0	0	0	0	0	0	200	300	0	0	0	0	0	0	0	200	903	0	0	0	0	0	0	0	603	903	0
756	2	0	0	0	0	0	0	200	300	0	0	0	0	0	0	0	200	903	0	0	0	0	0	0	0	603	903	0
756	3	0	0	0	0	0	0	200	300	0	0	0	0	0	0	0	200	903	0	0	0	0	0	0	0	603	903	0
756	4	0	0	0	0	0	0	200	300	0	0	0	0	0	0	0	200	903	0	0	0	0	0	0	0	603	903	0
756	5	0	0	0	0	0	0	200	300	0	0	0	0	0	0	0	200	903	0	0	0	0	0	0	0	603	903	0
756	6	0	0	0	0	0	0	200	300	0	0	0	0	0	0	0	200	903	0	0	0	0	0	0	0	603	903	0
756	7	0	0	0	0	0	0	200	300	0	0	0	0	0	0	0	200	903	0	0	0	0	0	0	0	603	903	0
756	8	0	0	0	0	0	0	200	300	0	0	0	0	0	0	0	200	903	0	0	0	0	0	0	0	603	903	0
756	9	0	0	0	0	0	0	200	300	0	0	0	0	0	0	0	200	903	0	0	0	0	0	0	0	603	903	0
757	0	0	0	0	0	0	0	200	300	0	0	0	0	0	0	0	200	903	0	0	0	0	0	0	0	603	903	0
757	1	0	0	0	0	0	0	200	300	0	0	0	0	0	0	0	200	903	0	0	0	0	0	0	0	603	903	0
757	2	0	0	0	0	0	0	200	300	0	0	0	0	0	0	0	200	903	0	0	0	0	0	0	0	603	903	0
757	3	0	0	0	0	0	0	200	300	0	0	0	0	0	0	0	200	903	0	0	0	0	0	0	0	603	903	0
757	4	0	0	0	0	0	0	200	300	0	0	0	0	0	0	0	200	903	0	0	0	0	0	0	0	603	903	0
757	5	0	0	0	0	0	0	200	300	0	0	0	0	0	0	0	200	903	0	0	0	0	0	0	0	603	903	0
757	6	0	0	0	0	0	0	200	300	0	0	0	0	0	0	0	200	903	0	0	0	0	0	0	0	603	903	0
757	7	0	0	0	0	0	0	200	300	0	0	0	0	0	0	0	200	903	0	0	0	0	0	0	0	603	903	0
757	8	0	0	0	0	0	0	200	300	0	0	0	0	0	0	0	200	903	0	0	0	0	0	0	0	603	903	0
757	9	0	0	0	0	0	0	200	300	0	0	0	0	0	0	0	200	903	0	0	0	0	0	0	0	603	903	0
758	0	0	0	0	0	0	0	200	300	0	0	0	0	0	0	0	200	903	0	0	0	0	0	0	0	603	903	0
758	1	0	0	0	0	0	0	200	300	0	0	0	0	0	0	0	200	903	0	0	0	0	0	0	0	603	903	0
758	2	0	0	0	0	0	0	200	300	0	0	0	0	0	0	0	200	903	0	0	0	0	0	0	0	603	903	0
758	3	0	0	0	0	0	0	200	300	0	0	0	0	0	0	0	200	903	0	0	0	0	0	0	0	603	903	0
758	4	0	0	0	0	0	0	200	300	0	0	0	0	0	0	0	200	903	0	0	0	0	0	0	0	603	903	0
758	5	0	0	0	0	0	0	200	300	0	0	0	0	0	0	0	200	903	0	0	0	0	0	0	0	603	903	0
758	6	0	0	0	0	0	0	200	300	0	0	0	0	0	0	0	200	903	0	0	0	0	0	0	0	603	903	0
758	7	0	0	0	0	0	0	200	300	0	0	0	0	0	0	0	200	903	0	0	0	0	0	0	0	603	903	0
758	8	0	0	0	0	0	0	200	300	0	0	0	0	0	0	0	200	903	0	0	0	0	0	0	0	603	903	0
758	9	0	0	0	0	0	0	200	300	0	0	0	0	0	0	0	200	903	0	0	0	0	0	0	0	603	903	0
759	0	0	0	0	0	0	0	200	300	0	0	0	0	0	0	0	200	903	0	0	0	0	0	0	0	603	903	0
759	1	0	0	0	0	0	0	200	300	0	0	0	0	0	0	0	200	903	0	0	0	0	0	0	0	603	903	0
759	2	0	0	0	0	0	0	200	300	0	0	0	0	0	0	0	200	903	0	0	0	0	0	0	0	603	903	0
759	3	0	0	0	0	0	0	200	300	0	0	0	0	0	0	0	200	903	0	0	0	0	0	0	0	603	903	0
759	4	0	0	0	0	0	0	200	300	0	0	0	0	0	0	0	200	903	0	0	0	0	0	0	0	603	903	0
759	5	0	0	0	0	0	0	200	300	0	0	0	0	0	0	0	200	903	0	0	0	0	0	0	0	603	903	0
759	6	0	0	0	0	0	0	200	300	0	0	0	0	0	0	0	200	903	0	0	0	0	0	0	0	603	903	0
759	7	0	0	0	0	0	0	200	300	0	0	0	0	0	0	0	200	903	0	0	0	0	0	0	0	603	903	0
759	8	0	0	0	0	0	0	200	300	0	0	0	0	0	0	0	200	903	0	0	0	0	0	0	0	603	903	0
759	9	0	0	0	0	0	0	200	300	0	0	0	0	0	0	0	200	903	0	0	0	0	0	0	0	603	903	0
760	0	0	0	0	0	0	0	200	300	0	0	0	0	0	0	0	200	903	0	0	0	0	0	0	0	603	903	0
760	1	0	0	0	0	0	0	200	300	0	0	0	0	0	0	0	200	903	0	0	0	0	0	0	0	603	903	0
760	2	0	0	0	0	0	0	200	300	0	0	0	0	0	0	0	200	903	0	0	0	0	0	0	0	603	903	0
760	3	0	0	0	0	0	0	200	300	0	0	0	0	0	0	0	200	903	0	0	0	0	0	0	0	603	903	0
760	4	0	0	0	0	0	0	200	300	0	0	0	0	0	0	0	200	903	0	0	0	0	0	0	0	603	903	0
760	5	0	0	0	0	0	0	200	300	0	0	0	0	0	0	0	200	903	0	0	0	0	0	0	0	603	903	0
760	6	0	0	0	0	0	0	200	300	0	0	0	0	0	0	0	200	903	0	0	0	0	0	0	0	603	903	0
760	7	0	0	0	0	0	0	200	300	0	0	0	0	0	0	0	200	903	0	0	0	0	0	0	0	603	903	0
760	8	0	0	0	0	0	0	200	300	0	0	0	0	0	0	0	200	903	0	0	0	0	0	0	0	603	903	0
760	9	0	0	0	0	0	0	200	300	0	0	0	0	0	0	0	200	903	0	0	0	0	0	0	0	603	903	0
761	0	0	0	0	0	0	0	200	300	0	0	0	0	0	0	0	200	903	0	0	0	0	0	0	0	603	903	0
761	1	0	0	0	0	0	0	200	300	0	0	0	0	0	0	0	200	903	0	0	0	0	0	0	0	603	903	0
761	2	0	0	0	0	0	0	200	300	0	0	0	0	0	0	0	200	903	0	0	0	0	0	0	0	603	903	0
761	3	0	0	0	0	0	0	200	300	0	0	0	0	0	0	0	200	903	0	0	0	0	0	0	0	603	903	0
761	4	0	0	0	0	0	0	200	300	0	0	0	0	0	0	0	200	903	0	0	0	0	0	0	0	603	903	0
761	5	0	0	0	0	0	0	200	300	0	0	0	0	0	0	0	200	903	0	0	0	0	0	0	0	603	903	0
761	6	0	0	0	0	0	0	200	300	0	0	0	0	0	0	0	200	903	0	0	0	0	0	0	0	603	903	0
761	7	0	0	0	0	0	0	200	300	0	0	0	0	0	0	0	200	903	0	0	0	0	0	0	0	603	903	0
761	8	0	0	0	0	0	0	200	300	0	0	0	0	0	0	0	200	903	0	0	0	0	0	0	0	603	903	0
761	9	0	0	0	0	0	0	200	300	0	0	0	0	0	0	0	200	903	0	0	0	0	0	0	0	603	903	0
762	0	0	0	0	0	0	0	200	300	0	0	0	0	0	0	0	200	903	0	0	0	0	0	0	0	603	903	0
762	1	0	0	0	0	0	0	200	300	0	0	0	0	0	0	0	200	903	0	0	0	0	0	0	0	603	903	0
762	2	0	0	0	0	0	0	200	300	0	0	0	0	0	0	0	200	903	0	0	0	0	0	0	0	603	903	0
762	3	0	0	0	0	0	0	200	300	0	0	0	0	0	0	0	200	903	0	0	0	0	0	0	0	603	903	0
762	4	0	0	0	0	0	0	200	300	0	0	0	0	0	0	0	200	903	0	0	0	0	0	0	0	603	903	0
762	5	0	0	0	0	0	0	200	300	0	0	0	0	0	0	0	200	903	0	0	0	0	0	0	0	603	903	0
762	6	0	0	0	0	0	0	200	300	0	0	0	0	0	0	0	200	903	0	0	0	0	0	0	0	603	903	0
762	7	0	0	0	0	0	0	200	300	0	0	0	0	0	0	0	200	903	0	0	0	0	0	0	0	603	903	0
762	8	0	0	0	0	0	0	200	300	0	0	0	0	0	0	0	200	903	0	0	0	0	0	0	0	603	903	0
762	9	0	0	0	0	0	0	200	300	0	0	0	0	0	0	0	200	903	0	0	0	0	0	0	0	603	903	0
763	0	0	0	0	0	0	0	200	300	0	0	0	0	0	0	0	200	903	0	0	0	0	0	0	0	603	903	0
763	1	0	0	0	0	0	0	200	300	0	0	0	0	0	0	0	200	903	0	0	0	0	0	0	0	603	903	0
763	2	0	0	0	0	0	0	200	300	0	0	0	0	0	0	0	200	903	0	0	0	0	0	0	0	603	903	0
763	3	0	0	0	0	0	0	200	300	0	0	0	0	0	0	0	200	903	0	0	0	0	0	0	0	603	903	0
763	4	0	0	0	0	0	0	200	300	0	0	0	0	0	0	0	200	903	0	0	0	0	0	0	0	603	903	0
763	5	0	0	0	0	0	0	200	300	0	0	0	0	0	0	0	200	903	0	0	0	0	0	0	0	603	903	0
763	6	0	0	0	0	0	0	200	300	0	0	0	0	0	0	0	200	903	0	0	0	0	0	0	0	603	903	0
763	7	0	0	0	0	0	0	200	300	0	0	0	0	0	0	0	200	903	0	0	0	0	0	0	0	603	903	0
763	8	0	0	0	0	0	0	200	300	0	0	0	0	0	0	0	200	903	0	0	0	0	0	0	0	603	903	0
763	9	0	0	0	0	0	0	200	300	0	0	0	0	0	0	0	200	903	0	0	0	0	0	0	0	603	903	0
764	0	0	0	0	0	0	0	200	300	0	0	0	0	0	0	0	200	903	0	0	0	0	0	0	0	603	903	0
764	1	0	0	0	0	0	0	200	300	0	0	0	0	0	0	0	200	903	0	0	0	0	0	0	0	603	903	0
764	2	0	0	0	0	0	0	200	300	0	0	0	0	0	0	0	200	903	0	0	0	0	0	0	0	603	903	0
764	3	0	0	0	0	0	0	200	300	0	0	0	0	0	0	0	200	903	0	0	0	0	0	0	0	603	903	0
764	4	0	0	0	0	0	0	200	300	0	0	0	0	0	0	0	200	903	0	0	0	0	0	0	0	603	903	0
764	5	0	0	0	0	0	0	200	300	0	0	0	0	0	0	0	200	903	0	0	0	0	0	0	0	603	903	0
764	6	0	0	0	0	0	0	200	300	0	0	0	0	0	0	0	200	903	0	0	0	0	0	0	0	603	903	0
764	7	0	0	0	0	0	0	200	300	0	0	0	0	0	0	0	200	903	0	0	0	0	0	0	0	603	903	0
764	8	0	0	0	0	0	0	200	300	0	0	0	0	0	0	0	200	903	0	0	0	0	0	0	0	603	903	0
764	9	0	0	0	0	0	0	200	300	0	0	0	0	0	0	0	200	903	0	0	0	0	0	0	0	603	903	0
765	0	0	0	0	0	0	0	200	300	0	0	0	0	0	0	0	200	903	0	0	0	0	0	0	0	603	903	0
765	1	0	0	0	0	0	0	200	300	0	0	0	0	0	0	0	200	903	0	0	0	0	0	0	0	603	903	0
765	2	0	0	0	0	0	0	200	300	0	0	0	0	0	0	0	200	903	0	0	0	0	0	0	0	603	903	0
765	3	0	0	0	0	0	0	200	300	0	0	0	0	0	0	0	200	903	0	0	0	0	0	0	0	603	903	0
765	4	0	0	0	0	0	0	200	300	0	0	0	0	0	0	0	200	903	0	0	0	0	0	0	0	603	903	0
765	5	0	0	0	0	0	0	200	300	0	0	0	0	0	0	0	200	903	0	0	0	0	0	0	0	603	903	0
765	6	0	0	0	0	0	0	200	300	0	0	0	0	0	0	0	200	903	0	0	0	0	0	0	0	603	903	0
765	7	0	0	0	0	0	0	200	300	0	0	0	0	0	0	0	200	903	0	0	0	0	0	0	0	603	903	0
765	8	0	0	0	0	0	0	200	300	0	0	0	0	0	0	0	200	903	0	0	0	0	0	0	0	603	903	0
765	9	0	0	0	0	0	0	200	300	0	0	0	0	0	0	0	200	903	0	0	0	0	0	0	0	603	903	0
766	0	0	0	0	0	0	0	200	300	0	0	0	0	0	0	0	200	903	0	0	0	0	0	0	0	603	903	0
766	1	0	0	0	0	0	0	200	300	0	0	0	0	0	0	0	200	903	0	0	0	0	0	0	0	603	903	0
766	2	0	0	0	0	0	0	200	300	0	0	0	0	0	0	0	200	903	0	0	0	0	0	0	0	603	903	0
766	3	0	0	0	0	0	0	200	300	0	0	0	0	0	0	0	200	903	0	0	0	0	0	0	0	603	903	0
766	4	0	0	0	0	0	0	200	300	0	0	0	0	0	0	0	200	903	0	0	0	0	0	0	0	603	903	0
766	5	0	0	0	0	0	0	200	300	0	0	0	0	0	0	0	200	903	0	0	0	0	0	0	0	603	903	0
766	6	0	0	0	0	0	0	200	300	0	0	0	0	0	0	0	200	903	0	0	0	0	0	0	0	603	903	0
766	7	0	0	0	0	0	0	200	300	0	0	0	0	0	0	0	200	903	0	0	0	0	0	0	0	603	903	0
766	8	0	0	0	0	0	0	200	300	0	0	0	0	0	0	0	200	903	0	0	0	0	0	0	0	603	903	0
766	9	0	0	0	0	0	0	200	300	0	0	0	0	0	0	0	200	903	0	0	0	0	0	0	0	603	903	0
767	0	0	0	0	0	0	0	200	300	0	0	0	0	0	0	0	200	903	0	0	0	0	0	0	0	603	903	0
767	1	0	0	0	0	0	0	200	300	0	0	0	0	0	0	0	200	903	0	0	0	0	0	0	0	603	903	0
767	2	0	0	0	0	0	0	200	300	0	0	0	0	0	0	0	200	903	0	0	0	0	0	0	0	603	903	0
767	3	0	0	0	0	0	0	200	300	0	0	0	0	0	0	0	200	903	0	0	0	0	0	0	0	603	903	0
767	4	0	0	0	0	0	0	200	300	0	0	0	0	0	0	0	200	903	0	0	0	0	0	0	0	603	903	0
767	5	0	0	0	0	0	0	200	300	0	0	0	0	0	0	0	200	903	0	0	0	0	0	0	0	603	903	0
767	6	0	0	0	0	0	0	200	300	0	0	0	0	0	0	0	200	903	0	0	0	0	0	0	0	603	903	0
767	7	0	0	0	0	0	0	200	300	0	0	0	0	0	0	0	200	903	0	0	0	0	0	0	0	603	903	0
767	8	0	0	0	0	0	0	200	300	0	0	0	0	0	0	0	200	903	0	0	0	0	0	0	0	603	903	0
767	9	0	0	0	0	0	0	200	300	0	0	0	0	0	0	0	200	903	0	0	0	0	0	0	0	603	903	0
768	0	0	0	0	0	0	0	200	300	0	0	0	0	0	0	0	200	903	0	0	0	0	0	0	0	603	903	0
768	1	0	0	0	0	0	0	200	300	0	0	0	0	0	0	0	200	903	0	0	0	0	0	0	0	603	903	0
768	2	0	0	0	0	0	0	200	300	0	0	0	0	0	0	0	200	903	0	0	0	0	0	0	0	603	903	0
768	3	0	0	0	0	0	0	200	300	0	0	0	0	0	0	0	200	903	0	0	0	0	0	0	0	603	903	0
768	4	0	0	0	0	0	0	200	300	0	0	0	0	0	0	0	200	903	0	0	0	0	0	0	0	603	903	0
768	5	0	0	0	0	0	0	200	300	0	0	0	0	0	0	0	200	903	0	0	0	0	0	0	0	603	903	0
768	6	0	0	0	0	0	0	200	300	0	0	0	0	0	0	0	200	903	0	0	0	0	0	0	0	603	903	0
768	7	0	0	0	0	0	0	200	300	0	0	0	0	0	0	0	200	903	0	0	0	0	0	0	0	603	903	0
768	8	0	0	0	0	0	0	200	300	0	0	0	0	0	0	0	200	903	0	0	0	0	0	0	0	603	903	0
768	9	0	0	0	0	0	0	200	300	0	0	0	0	0	0	0	200	903	0	0	0	0	0	0	0	603	903	0
769	0	0	0	0	0	0	0	200	300	0	0	0	0	0	0	0	200	903	0	0	0	0	0	0	0	603	903	0
769	1	0	0	0	0	0	0	200	300	0	0	0	0	0	0	0	200	903	0	0	0	0	0	0	0	603	903	0
769	2	0	0	0	0	0	0	200	300	0	0	0	0	0	0	0	200	903	0	0	0	0	0	0	0	603	903	0
769	3	0	0	0	0	0	0	200	300	0	0	0	0	0	0	0	200	903	0	0	0	0	0	0	0	603	903	0
769	4	0	0	0	0	0	0	200	300	0	0	0	0	0	0	0	200	903	0	0	0	0	0	0	0	603	903	0
769	5	0	0	0	0	0	0	200	300	0	0	0	0	0	0	0	200	903	0	0	0	0	0	0	0	603	903	0
769	6	0	0	0	0	0	0	200	300	0	0	0	0	0	0	0	200	903	0	0	0	0	0	0	0	603	903	0
769	7	0	0	0	0	0	0	200	300	0	0	0	0	0	0	0	200	903	0	0	0	0	0	0	0	603	903	0
769	8	0	0	0	0	0	0	200	300	0	0	0	0	0	0	0	200	903	0	0	0	0	0	0	0	603	903	0
769	9	0	0	0	0	0	0	200	300	0	0	0	0	0	0	0	200	903	0	0	0	0	0	0	0	603	903	0
770	0	0	0	0	0	0	0	200	300	0	0	0	0	0	0	0	200	903	0	0	0	0	0	0	0	603	903	0
770	1	0	0	0	0	0	0	200	300	0	0	0	0	0	0	0	200	903	0	0	0	0	0	0	0	603	903	0
770	2	0	0	0	0	0	0	200	300	0	0	0	0	0	0	0	200	903	0	0	0	0	0	0	0	603	903	0
770	3	0	0	0	0	0	0	200	300	0	0	0	0	0	0	0	200	903	0	0	0	0	0	0	0	603	903	0
770	4	0	0	0	0	0	0	200	300	0	0	0	0	0	0	0	200	903	0	0	0	0	0	0	0	603	903	0
770	5	0	0	0	0	0	0	200	300	0	0	0	0	0	0	0	200	903	0	0	0	0	0	0	0	603	903	0
770	6	0	0	0	0	0	0	200	300	0	0	0	0	0	0	0	200	903	0	0	0	0	0	0	0	603	903	0
770	7	0	0	0	0	0	0	200	300	0	0	0	0	0	0	0	200	903	0	0	0	0	0	0	0	603	903	0
770	8	0	0	0	0	0	0	200	300	0	0	0	0	0	0	0	200	903	0	0	0	0	0	0	0	603	903	0
770	9	0	0	0	0	0	0	200	300	0	0	0	0	0	0	0	200	903	0	0	0	0	0	0	0	603	903	0
771	0	0	0	0	0	0	0	200	300	0	0	0	0	0	0	0	200	903	0	0	0	0	0	0	0	603	903	0
771	1	0	0	0	0	0	0	200	300	0	0	0	0	0	0	0	200	903	0	0	0	0	0	0	0	603	903	0
771	2	0	0	0	0	0	0	200	300	0	0	0	0	0	0	0	200	903	0	0	0	0	0	0	0	603	903	0
771	3	0	0	0	0	0	0	200	300	0	0	0	0	0	0	0	200	903	0	0	0	0	0	0	0	603	903	0
771	4	0	0	0	0	0	0	200	300	0	0	0	0	0	0	0	200	903	0	0	0	0	0	0	0	603	903	0
771	5	0	0	0	0	0	0	200	300	0	0	0	0	0	0	0	200	903	0	0	0	0	0	0	0	603	903	0
771	6	0	0	0	0	0	0	200	300	0	0	0	0	0	0	0	200	903	0	0	0	0	0	0	0	603	903	0
771	7	0	0	0	0	0	0	200	300	0	0	0	0	0	0	0	200	903	0	0	0	0	0	0	0	603	903	0
771	8	0	0	0	0	0	0	200	300	0	0	0	0	0	0	0	200	903	0	0	0	0	0	0	0	603	903	0
771	9	0	0	0	0	0	0	200	300	0	0	0	0	0	0	0	200	903	0	0	0	0	0	0	0	603	903	0
772	0	0	0	0	0	0	0	200	300	0	0	0	0	0	0	0	200	903	0	0	0	0	0	0	0	603	903	0
772	1	0	0	0	0	0	0	200	300	0	0	0	0	0	0	0	200	903	0	0	0	0	0	0	0	603	903	0
772	2	0	0	0	0	0	0	200	300	0	0	0	0	0	0	0	200	903	0	0	0	0	0	0	0	603	903	0
772	3	0	0	0	0	0	0	200	300	0	0	0	0	0	0	0	200	903	0	0	0	0	0	0	0	603	903	0
772	4	0	0	0	0	0	0	200	300	0	0	0	0	0	0	0	200	903	0	0	0	0	0	0	0	603	903	0
772	5	0	0	0	0	0	0	200	300	0	0	0	0	0	0	0	200	903	0	0	0	0	0	0	0	603	903	0
772	6	0	0	0	0	0	0	200	300	0	0	0	0	0	0	0	200	903	0	0	0	0	0	0	0	603	903	0
772	7	0	0	0	0	0	0	200	300	0	0	0	0	0	0	0	200	903	0	0	0	0	0	0	0	603	903	0
772	8	0	0	0	0	0	0	200	300	0	0	0	0	0	0	0	200	903	0	0	0	0	0	0	0	603	903	0
772	9	0	0	0	0	0	0	200	300	0	0	0	0	0	0	0	200	903	0	0	0	0	0	0	0	603	903	0
773	0	0	0	0	0	0	0	200	300	0	0	0	0	0	0	0	200	903	0	0	0	0	0	0	0	603	903	0
773	1	0	0	0	0	0	0	200	300	0	0	0	0	0	0	0	200	903	0	0	0	0	0	0	0	603	903	0
773	2	0	0	0	0	0	0	200	300	0	0	0	0	0	0	0	200	903	0	0	0	0	0	0	0	603	903	0
773	3	0	0	0	0	0	0	200	300	0	0	0	0	0	0	0	200	903	0	0	0	0	0	0	0	603	903	0
773	4	0	0	0	0	0	0	200	300	0	0	0	0	0	0	0	200	903	0	0	0	0	0	0	0	603	903	0
773	5	0	0	0	0	0	0	200	300	0	0	0	0	0	0	0	200	903	0	0	0	0	0	0	0	603	903	0
773	6	0	0	0	0	0	0	200	300	0	0	0	0	0	0	0	200	903	0	0	0	0	0	0	0	603	903	0
773	7	0	0	0	0	0	0	200	300	0	0	0	0	0	0	0	200	903	0	0	0	0	0	0	0	603	903	0
773	8	0	0	0	0	0	0	200	300	0	0	0	0	0	0	0	200	903	0	0	0	0	0	0	0	603	903	0
773	9	0	0	0	0	0	0	200	300	0	0	0	0	0	0	0	200	903	0	0	0	0	0	0	0	603	903	0
774	0	0	0	0	0	0	0	200	300	0	0	0	0	0	0	0	200	903	0	0	0	0	0	0	0	603	903	0
774	1	0	0	0	0	0	0	200	300	0	0	0	0	0	0	0	200	903	0	0	0	0	0	0	0	603	903	0
774	2	0	0	0	0	0	0	200	300	0	0	0	0	0	0	0	200	903	0	0	0	0	0	0	0	603	903	0
774	3	0	0	0	0	0	0	200	300	0	0	0	0	0	0	0	200	903	0	0	0	0	0	0	0	603	903	0
774	4	0	0	0	0	0	0	200	300	0	0	0	0	0	0	0	200	903	0	0	0	0	0	0	0	603	903	0
774	5	0	0	0	0	0	0	200	300	0	0	0	0	0	0	0	200	903	0	0	0	0	0	0	0	603	903	0
774	6	0	0	0	0	0	0	200	300	0	0	0	0	0	0	0	200	903	0	0	0	0	0	0	0	603	903	0
774	7	0	0	0	0	0	0	200	300	0	0	0	0	0	0	0	200	903	0	0	0	0	0	0	0	603	903	0
774	8	0	0	0	0	0	0	200	300	0	0	0	0	0	0	0	200	903	0	0	0	0	0	0	0	603	903	0
774	9	0	0	0	0	0	0	200	300	0	0	0	0	0	0	0	200	903	0	0	0	0	0	0	0	603	903	0
775	0	0	0	0	0	0	0	200	300	0	0	0	0	0	0	0	200	903	0	0	0	0	0	0	0	603	903	0
775	1	0	0	0	0	0	0	200	300	0	0	0	0	0	0	0	200	903	0	0	0	0	0	0	0	603	903	0
775	2	0	0	0	0	0	0	200	300	0	0	0	0	0	0	0	200	903	0	0	0	0	0	0	0	603	903	0
775	3	0	0	0	0	0	0	200	300	0	0	0	0	0	0	0	200	903	0	0	0	0	0	0	0	603	903	0
775	4	0	0	0	0	0	0	200	300	0	0	0	0	0	0	0	200	903	0	0	0	0	0	0	0	603	903	0
775	5	0	0	0	0	0	0	200	300	0	0	0	0	0	0	0	200	903	0	0	0	0	0	0	0	603	903	0
775	6	0	0	0	0	0	0	200	300	0	0	0	0	0	0	0	200	903	0	0	0	0	0	0	0	603	903	0
775	7	0	0	0	0	0	0	200	300	0	0	0	0	0	0	0	200	903	0	0	0	0	0	0	0	603	903	0
775	8	0	0	0	0	0	0	200	300	0	0	0	0	0	0	0	200	903	0	0	0	0	0	0	0	603	903	0
775	9	0	0	0	0	0	0	200	300	0	0	0	0	0	0	0	200	903	0	0	0	0	0	0	0	603	903	0
776	0	0	0	0	0	0	0	200	300	0	0	0	0	0	0	0	200	903	0	0	0	0	0	0	0	603	903	0
776	1	0	0	0	0	0	0	200	300	0	0	0	0	0	0	0	200	903	0	0	0	0	0	0	0	603	903	0
776	2	0	0	0	0	0	0	200	300	0	0	0	0	0	0	0	200	903	0	0	0	0	0	0	0	603	903	0
776	3	0	0	0	0	0	0	200	300	0	0	0	0	0	0	0	200	903	0	0	0	0	0	0	0	603	903	0
776	4	0	0	0	0	0	0	200	300	0	0	0	0	0	0	0	200	903	0	0	0	0	0	0	0	603	903	0
776	5	0	0	0	0	0	0	200	300	0	0	0	0	0	0	0	200	903	0	0	0	0	0	0	0	603	903	0
776	6	0	0	0	0	0	0	200	300	0	0	0	0	0	0	0	200	903	0	0	0	0	0	0	0	603	903	0
776	7	0	0	0	0	0	0	200	300	0	0	0	0	0	0	0	200	903	0	0	0	0	0	0	0	603	903	0
776	8	0	0	0	0	0	0	200	300	0	0	0	0	0	0	0	200	903	0	0	0	0	0	0	0	603	903	0
776	9	0	0	0	0	0	0	200	300	0	0	0	0	0	0	0	200	903	0	0	0	0	0	0	0	603	903	0
777	0	0	0	0	0	0	0	200	300	0	0	0	0	0	0	0	200	903	0	0	0	0	0	0	0	603	903	0
777	1	0	0	0	0	0	0	200	300	0	0	0	0	0	0	0	200	903	0	0	0	0	0	0	0	603	903	0
777	2	0	0	0	0	0	0	200	300	0	0	0	0	0	0	0	200	903	0	0	0	0	0	0	0	603	903	0
777	3	0	0	0	0	0	0	200	300	0	0	0	0	0	0	0	200	903	0	0	0	0	0	0	0	603	903	0
777	4	0	0	0	0	0	0	200	300	0	0	0	0	0	0	0	200	903	0	0	0	0	0	0	0	603	903	0
777	5	0	0	0	0	0	0	200	300	0	0	0	0	0	0	0	200	903	0	0	0	0	0	0	0	603	903	0
777	6	0	0	0	0	0	0	200	300	0	0	0	0	0	0	0	200	903	0	0	0	0	0	0	0	603	903	0
777	7	0	0	0	0	0	0	200	300	0	0	0	0	0	0	0	200	903	0	0	0	0	0	0	0	603	903	0
777	8	0	0	0	0	0	0	200	300	0	0	0	0	0	0	0	200	903	0	0	0	0	0	0	0	603	903	0
777	9	0	0	0	0	0	0	200	300	0	0	0	0	0	0	0	200	903	0	0	0	0	0	0	0	603	903	0
778	0	0	0	0	0	0	0	200	300	0	0	0	0	0	0	0	200	903	0	0	0	0	0	0	0	603	903	0
778	1	0	0	0	0	0	0	200	300	0	0	0	0	0	0	0	200	903	0	0	0	0	0	0	0	603	903	0
778	2	0	0	0	0	0	0	200	300	0	0	0	0	0	0	0	200	903	0	0	0	0	0	0	0	603	903	0
778	3	0	0	0	0	0	0	200	300	0	0	0	0	0	0	0	200	903	0	0	0	0	0	0	0	603	903	0
778	4	0	0	0	0	0	0	200	300	0	0	0	0	0	0	0	200	903	0	0	0	0	0	0	0	603	903	0
778	5	0	0	0	0	0	0	200	300	0	0	0	0	0	0	0	200	903	0	0	0	0	0	0	0	603	903	0
778	6	0	0	0	0	0	0	200	300	0	0	0	0	0	0	0	200	903	0	0	0	0	0	0	0	603	903	0
778	7	0	0	0	0	0	0	200	300	0	0	0	0	0	0	0	200	903	0	0	0	0	0	0	0	603	903	0
778	8	0	0	0	0	0	0	200	300	0	0	0	0	0	0	0	200	903	0	0	0	0	0	0	0	603	903	0
778	9	0	0	0	0	0	0	200	300	0	0	0	0	0	0	0	200	903	0	0	0	0	0	0	0	603	903	0
779	0	0	0	0	0	0	0	200	300	0	0	0	0	0	0	0	200	903	0	0	0	0	0	0	0	603	903	0
779	1	0	0	0	0	0	0	200	300	0	0	0	0	0	0	0	200	903	0	0	0	0	0	0	0	603	903	0
779	2	0	0	0	0	0	0	200	300	0	0	0	0	0	0	0	200	903	0	0	0	0	0	0	0	603	903	0
779	3	0	0	0	0	0	0	200	300	0	0	0	0	0	0	0	200	903	0	0	0	0	0	0	0	603	903	0
779	4	0	0	0	0	0	0	200	300	0	0	0	0	0	0	0	200	903	0	0	0	0	0	0	0	603	903	0
779	5	0	0	0	0	0	0	200	300	0	0	0	0	0	0	0	200	903	0	0	0	0	0	0	0	603	903	0
779	6	0	0	0	0	0	0	200	300	0	0	0	0	0	0	0	200	903	0	0	0	0	0	0	0	603	903	0
779	7	0	0	0	0	0	0	200	300	0	0	0	0	0	0	0	200	903	0	0	0	0	0	0	0	603	903	0
779	8	0	0	0	0	0	0	200	300	0	0	0	0	0	0	0	200	903	0	0	0	0	0	0	0	603	903	0
779	9	0	0	0	0	0	0	200	300	0	0	0	0	0	0	0	200	903	0	0	0	0	0	0	0	603	903	0
780	0	0	0	0	0	0	0	200	300	0	0	0	0	0	0	0	200	903	0	0	0	0	0	0	0	603	903	0
780	1	0	0	0	0	0	0	200	300	0	0	0	0	0	0	0	200	903	0	0	0	0	0	0	0	603	903	0
780	2	0	0	0	0	0	0	200	300	0	0	0	0	0	0	0	200	903	0	0	0	0	0	0	0	603	903	0
780	3	0	0	0	0	0	0	200	300	0	0	0	0	0	0	0	200	903	0	0	0	0	0	0	0	603	903	0
780	4	0	0	0	0	0	0	200	300	0	0	0	0	0	0	0	200	903	0	0	0	0	0	0	0	603	903	0
780	5	0	0	0	0	0	0	200	300	0	0	0	0	0	0	0	200	903	0	0	0	0	0	0	0	603	903	0
780	6	0	0	0	0	0	0	200	300	0	0	0	0	0	0	0	200	903	0	0	0	0	0	0	0	603	903	0
780	7	0	0	0	0	0	0	200	300	0	0	0	0	0	0	0	200	903	0	0	0	0	0	0	0	603	903	0
780	8	0	0	0	0	0	0	200	300	0	0	0	0	0	0	0	200	903	0	0	0	0	0	0	0	603	903	0
780	9	0	0	0	0	0	0	200	300	0	0	0	0	0	0	0	200	903	0	0	0	0	0	0	0	603	903	0
781	0	0	0	0	0	0	0	200	300	0	0	0	0	0	0	0	200	903	0	0	0	0	0	0	0	603	903	0
781	1	0	0	0	0	0	0	200	300	0	0	0	0	0	0	0	200	903	0	0	0	0	0	0	0	603	903	0
781	2	0	0	0	0	0	0	200	300	0	0	0	0	0	0	0	200	903	0	0	0	0	0	0	0	603	903	0
781	3	0	0	0	0	0	0	200	300	0	0	0	0	0	0	0	200	903	0	0	0	0	0	0	0	603	903	0
781	4	0	0	0	0	0	0	200	300	0	0	0	0	0	0	0	200	903	0	0	0	0	0	0	0	603	903	0
781	5	0	0	0	0	0	0	200	300	0	0	0	0	0	0	0	200	903	0	0	0	0	0	0	0	603	903	0
781	6	0	0	0	0	0	0	200	300	0	0	0	0	0	0	0	200	903	0	0	0	0	0	0	0	603	903	0
781	7	0	0	0	0	0	0	200	300	0	0	0	0	0	0	0	200	903	0	0	0	0	0	0	0	603	903	0
781	8	0	0	0	0	0	0	200	300	0	0	0	0	0	0	0	200	903	0	0	0	0	0	0	0	603	903	0
781	9	0	0	0	0	0	0	200	300	0	0	0	0	0	0	0	200	903	0	0	0	0	0	0	0	603	903	0
782	0	0	0	0	0	0	0	200	300	0	0	0	0	0	0	0	200	903	0	0	0	0	0	0	0	603	903	0
782	1	0	0	0	0	0	0	200	300	0	0	0	0	0	0	0	200	903	0	0	0	0	0	0	0	603	903	0
782	2	0	0	0	0	0	0	200	300	0	0	0	0	0	0	0	200	903	0	0	0	0	0	0	0	603	903	0
782	3	0	0	0	0	0	0	200	300	0	0	0	0	0	0	0	200	903	0	0	0	0	0	0	0	603	903	0
782	4	0	0	0	0	0	0	200	300	0	0	0	0	0	0	0	200	903	0	0	0	0	0	0	0	603	903	0
782	5	0	0	0	0	0	0	200	300	0	0	0	0	0	0	0	200	903	0	0	0	0	0	0	0	603	903	0
782	6	0	0	0	0	0	0	200	300	0	0	0	0	0	0	0	200	903	0	0	0	0	0	0	0	603	903	0
782	7	0	0	0	0	0	0	200	300	0	0	0	0	0	0	0	200	903	0	0	0	0	0	0	0	603	903	0
782	8	0	0	0	0	0	0	200	300	0	0	0	0	0	0	0	200	903	0	0	0	0	0	0	0	603	903	0
782	9	0	0	0	0	0	0	200	300	0	0	0	0	0	0	0	200	903	0	0	0	0	0	0	0	603	903	0
783	0	0	0	0	0	0	0	200	300	0	0	0	0	0	0	0	200	903	0	0	0	0	0	0	0	603	903	0
783	1	0	0	0	0	0	0	200	300	0	0	0	0	0	0	0	200	903	0	0	0	0	0	0	0	603	903	0
783	2	0	0	0	0	0	0	200	300	0	0	0	0	0	0	0	200	903	0	0	0	0	0	0	0	603	903	0
783	3	0	0	0	0	0	0	200	300	0	0	0	0	0	0	0	200	903	0	0	0	0	0	0	0	603	903	0
783	4	0	0	0	0	0	0	200	300	0	0	0	0	0	0	0	200	903	0	0	0	0	0	0	0	603	903	0
783	5	0	0	0	0	0	0	200	300	0	0	0	0	0	0	0	200	903	0	0	0	0	0	0	0	603	903	0
783	6	0	0	0	0	0	0	200	300	0	0	0	0	0	0	0	200	903	0	0	0	0	0	0	0	603	903	0
783	7	0	0	0	0	0	0	200	300	0	0	0	0	0	0	0	200	903	0	0	0	0	0	0	0	603	903	0
783	8	0	0	0	0	0	0	200	300	0	0	0	0	0	0	0	200	903	0	0	0	0	0	0	0	603	903	0
783	9	0	0	0	0	0	0	200	300	0	0	0	0	0	0	0	200	903	0	0	0	0	0	0	0	603	903	0
784	0	0	0	0	0	0	0	200	300	0	0	0	0	0	0	0	200	903	0	0	0	0	0	0	0	603	903	0
784	1	0	0	0	0	0	0	200	300	0	0	0	0	0	0	0	200	903	0	0	0	0	0	0	0	603	903	0
784	2	0	0	0	0	0	0	200	300	0	0	0	0	0	0	0	200	903	0	0	0	0	0	0	0	603	903	0
784	3	0	0	0	0	0	0	200	300	0	0	0	0	0	0	0	200	903	0	0	0	0	0	0	0	603	903	0
784	4	0	0	0	0	0	0	200	300	0	0	0	0	0	0	0	200	903	0	0	0	0	0	0	0	603	903	0
784	5	0	0	0	0	0	0	200	300	0	0	0	0	0	0	0	200	903	0	0	0	0	0	0	0	603	903	0
784	6	0	0	0	0	0	0	200	300	0	0	0	0	0	0	0	200	903	0	0	0	0	0	0	0	603	903	0
784	7	0	0	0	0	0	0	200	300	0	0	0	0	0	0	0	200	903	0	0	0	0	0	0	0	603	903	0
784	8	0	0	0	0	0	0	200	300	0	0	0	0	0	0	0	200	903	0	0	0	0	0	0	0	603	903	0
784	9	0	0	0	0	0	0	200	300	0	0	0	0	0	0	0	200	903	0	0	0	0	0	0	0	603	903	0
785	0	0	0	0	0	0	0	200	300	0	0	0	0	0	0	0	200	903	0	0	0	0	0	0	0	603	903	0
785	1	0	0	0	0	0	0	200	300	0	0	0	0	0	0	0	200	903	0	0	0	0	0	0	0	603	903	0
785	2	0	0	0	0	0	0	200	300	0	0	0	0	0	0	0	200	903	0	0	0	0	0	0	0	603	903	0
785	3	0	0	0	0	0	0	200	300	0	0	0	0	0	0	0	200	903	0	0	0	0	0	0	0	603	903	0
785	4	0	0	0	0	0	0	200	300	0	0	0	0	0	0	0	200	903	0	0	0	0	0	0	0	603	903	0
785	5	0	0	0	0	0	0	200	300	0	0	0	0	0	0	0	200	903	0	0	0	0	0	0	0	603	903	0
785	6	0	0	0	0	0	0	200	300	0	0	0	0	0	0	0	200	903	0	0	0	0	0	0	0	603	903	0
785	7	0	0	0	0	0	0	200	300	0	0	0	0	0	0	0	200	903	0	0	0	0	0	0	0	603	903	0
785	8	0	0	0	0	0	0	200	300	0	0	0	0	0	0	0	200	903	0	0	0	0	0	0	0	603	903	0
785	9	0	0	0	0	0	0	200	300	0	0	0	0	0	0	0	200	903	0	0	0	0	0	0	0	603	903	0
786	0	0	0	0	0	0	0	200	300	0	0	0	0	0	0	0	200	903	0	0	0	0	0	0	0	603	903	0
786	1	0	0	0	0	0	0	200	300	0	0	0	0	0	0	0	200	903	0	0	0	0	0	0	0	603	903	0
786	2	0	0	0	0	0	0	200	300	0	0	0	0	0	0	0	200	903	0	0	0	0	0	0	0	603	903	0
786	3	0	0	0	0	0	0	200	300	0	0	0	0	0	0	0	200	903	0	0	0	0	0	0	0	603	903	0
786	4	0	0	0	0	0	0	200	300	0	0	0	0	0	0	0	200	903	0	0	0	0	0	0	0	603	903	0
786	5	0	0	0	0	0	0	200	300	0	0	0	0	0	0	0	200	903	0	0	0	0	0	0	0	603	903	0
786	6	0	0	0	0	0	0	200	300	0	0	0	0	0	0	0	200	903	0	0	0	0	0	0	0	603	903	0
786	7	0	0	0	0	0	0	200	300	0	0	0	0	0	0	0	200	903	0	0	0	0	0	0	0	603	903	0
786	8	0	0	0	0	0	0	200	300	0	0	0	0	0	0	0	200	903	0	0	0	0	0	0	0	603	903	0
786	9	0	0	0	0	0	0	200	300	0	0	0	0	0	0	0	200	903	0	0	0	0	0	0	0	603	903	0
787	0	0	0	0	0	0	0	200	300	0	0	0	0	0	0	0	200	903	0	0	0	0	0	0	0	603	903	0
787	1	0	0	0	0	0	0	200	300	0	0	0	0	0	0	0	200	903	0	0	0	0	0	0	0	603	903	0
787	2	0	0	0	0	0	0	200	300	0	0	0	0	0	0	0	200	903	0	0	0	0	0	0	0	603	903	0
787	3	0	0	0	0	0	0	200	300	0	0	0	0	0	0	0	200	903	0	0	0	0	0	0	0	603	903	0
787	4	0	0	0	0	0	0	200	300	0	0	0	0	0	0	0	200	903	0	0	0	0	0	0	0	603	903	0
787	5	0	0	0	0	0	0	200	300	0	0	0	0	0	0	0	200	903	0	0	0	0	0	0	0	603	903	0
787	6	0	0	0	0	0	0	200	300	0	0	0	0	0	0	0	200	903	0	0	0	0	0	0	0	603	903	0
787	7	0	0	0	0	0	0	200	300	0	0	0	0	0	0	0	200	903	0	0	0	0	0	0	0	603	903	0
787	8	0	0	0	0	0	0	200	300	0	0	0	0	0	0	0	200	903	0	0	0	0	0	0	0	603	903	0
787	9	0	0	0	0	0	0	200	300	0	0	0	0	0	0	0	200	903	0	0	0	0	0	0	0	603	903	0
788	0	0	0	0	0	0	0	200	300	0	0	0	0	0	0	0	200	903	0	0	0	0	0	0	0	603	903	0
788	1	0	0	0	0	0	0	200	300	0	0	0	0	0	0	0	200	903	0	0	0	0	0	0	0	603	903	0
788	2	0	0	0	0	0	0	200	300	0	0	0	0	0	0	0	200	903	0	0	0	0	0	0	0	603	903	0
788	3	0	0	0	0	0	0	200	300	0	0	0	0	0	0	0	200	903	0	0	0	0	0	0	0	603	903	0
788	4	0	0	0	0	0	0	200	300	0	0	0	0	0	0	0	200	903	0	0	0	0	0	0	0	603	903	0
788	5	0	0	0	0	0	0	200	300	0	0	0	0	0	0	0	200	903	0	0	0	0	0	0	0	603	903	0
788	6	0	0	0	0	0	0	200	300	0	0	0	0	0	0	0	200	903	0	0	0	0	0	0	0	603	903	0
788	7	0	0	0	0	0	0	200	300	0	0	0	0	0	0	0	200	903	0	0	0	0	0	0	0	603	903	0
788	8	0	0	0	0	0	0	200	300	0	0	0	0	0	0	0	200	903	0	0	0	0	0	0	0	603	903	0
788	9	0	0	0	0	0	0	200	300	0	0	0	0	0	0	0	200	903	0	0	0	0	0	0	0	603	903	0
789	0	0	0	0	0	0	0	200	300	0	0	0	0	0	0	0	200	903	0	0	0	0	0	0	0	603	903	0
789	1	0	0	0	0	0	0	200	300	0	0	0	0	0	0	0	200	903	0	0	0	0	0	0	0	603	903	0
789	2	0	0	0	0	0	0	200	300	0	0	0	0	0	0	0	200	903	0	0	0	0	0	0	0	603	903	0
789	3	0	0	0	0	0	0	200	300	0	0	0	0	0	0	0	200	903	0	0	0	0	0	0	0	603	903	0
789	4	0	0	0	0	0	0	200	300	0	0	0	0	0	0	0	200	903	0	0	0	0	0	0	0	603	903	0
789	5	0	0	0	0	0	0	200	300	0	0	0	0	0	0	0	200	903	0	0	0	0	0	0	0	603	903	0
789	6	0	0	0	0	0	0	200	300	0	0	0	0	0	0	0	200	903	0	0	0	0	0	0	0	603	903	0
789	7	0	0	0	0	0	0	200	300	0	0	0	0	0	0	0	200	903	0	0	0	0	0	0	0	603	903	0
789	8	0	0	0	0	0	0	200	300	0	0	0	0	0	0	0	200	903	0	0	0	0	0	0	0	603	903	0
789	9	0	0	0	0	0	0	200	300	0	0	0	0	0	0	0	200	903	0	0	0	0	0	0	0	603	903	0
790	0	0	0	0	0	0	0	200	300	0	0	0	0	0	0	0	200	903	0	0	0	0	0	0	0	603	903	0
790	1	0	0	0	0	0	0	200	300	0	0	0	0	0	0	0	200	903	0	0	0	0	0	0	0	603	903	0
790	2	0	0	0	0	0	0	200	300	0	0	0	0	0	0	0	200	903	0	0	0	0	0	0	0	603	903	0
790	3	0	0	0	0	0	0	200	300	0	0	0	0	0	0	0	200	903	0	0	0	0	0	0	0	603	903	0
790	4	0	0	0	0	0	0	200	300	0	0	0	0	0	0	0	200	903	0	0	0	0	0	0	0	603	903	0
790	5	0	0	0	0	0	0	200	300	0	0	0	0	0	0	0	200	903	0	0	0	0	0	0	0	603	903	0
790	6	0	0	0	0	0	0	200	300	0	0	0	0	0	0	0	200	903	0	0	0	0	0	0	0	603	903	0
790	7	0	0	0	0	0	0	200	300	0	0	0	0	0	0	0	200	903	0	0	0	0	0	0	0	603	903	0
790	8	0	0	0	0	0	0	200	300	0	0	0	0	0	0	0	200	903	0	0	0	0	0	0	0	603	903	0
790	9	0	0	0	0	0	0	200	300	0	0	0	0	0	0	0	200	903	0	0	0	0	0	0	0	603	903	0
791	0	0	0	0	0	0	0	200	300	0	0	0	0	0	0	0	200	903	0	0	0	0	0	0	0	603	903	0
791	1	0	0	0	0	0	0	200	300	0	0	0	0	0	0	0	200	903	0	0	0	0	0	0	0	603	903	0
791	2	0	0	0	0	0	0	200	300	0	0	0	0	0	0	0	200	903	0	0	0	0	0	0	0	603	903	0
791	3	0	0	0	0	0	0	200	300	0	0	0	0	0	0	0	200	903	0	0	0	0	0	0	0	603	903	0
791	4	0	0	0	0	0	0	200	300	0	0	0	0	0	0	0	200	903	0	0	0	0	0	0	0	603	903	0
791	5	0	0	0	0	0	0	200	300	0	0	0	0	0	0	0	200	903	0	0	0	0	0	0	0	603	903	0
791	6	0	0	0	0	0	0	200	300	0	0	0	0	0	0	0	200	903	0	0	0	0	0	0	0	603	903	0
791	7	0	0	0	0	0	0	200	300	0	0	0	0	0	0	0	200	903	0	0	0	0	0	0	0	603	903	0
791	8	0	0	0	0	0	0	200	300	0	0	0	0	0	0	0	200	903	0	0	0	0	0	0	0	603	903	0
791	9	0	0	0	0	0	0	200	300	0	0	0	0	0	0	0	200	903	0	0	0	0	0	0	0	603	903	0
792	0	0	0	0	0	0	0	200	300	0	0	0	0	0	0	0	200	903	0	0	0	0	0	0	0	603	903	0
792	1	0	0	0	0	0	0	200	300	0	0	0	0	0	0	0	200	903	0	0	0	0	0	0	0	603	903	0
792	2	0	0	0	0	0	0	200	300	0	0	0	0	0	0	0	200	903	0	0	0	0	0	0	0	603	903	0
792	3	0	0	0	0	0	0	200	300	0	0	0	0	0	0	0	200	903	0	0	0	0	0	0	0	603	903	0
792	4	0	0	0	0	0	0	200	300	0	0	0	0	0	0	0	200	903	0	0	0	0	0	0	0	603	903	0
792	5	0	0	0	0	0	0	200	300	0	0	0	0	0	0	0	200	903	0	0	0	0	0	0	0	603	903	0
792	6	0	0	0	0	0	0	200	300	0	0	0	0	0	0	0	200	903	0	0	0	0	0	0	0	603	903	0
792	7	0	0	0	0	0	0	200	300	0	0	0	0	0	0	0	200	903	0	0	0	0	0	0	0	603	903	0
792	8	0	0	0	0	0	0	200	300	0	0	0	0	0	0	0	200	903	0	0	0	0	0	0	0	603	903	0
792	9	0	0	0	0	0	0	200	300	0	0	0	0	0	0	0	200	903	0	0	0	0	0	0	0	603	903	0
793	0	0	0	0	0	0	0	200	300	0	0	0	0	0	0	0	200	903	0	0	0	0	0	0	0	603	903	0
793	1	0	0	0	0	0	0	200	300	0	0	0	0	0	0	0	200	903	0	0	0	0	0	0	0	603	903	0
793	2	0	0	0	0	0	0	200	300	0	0	0	0	0	0	0	200	903	0	0	0	0	0	0	0	603	903	0
793	3	0	0	0	0	0	0	200	300	0	0	0	0	0	0	0	200	903	0	0	0	0	0	0	0	603	903	0
793	4	0	0	0	0	0	0	200	300	0	0	0	0	0	0	0	200	903	0	0	0	0	0	0	0	603	903	0
793	5	0	0	0	0	0	0	200	300	0	0	0	0	0	0	0	200	903	0	0	0	0	0	0	0	603	903	0
793	6	0	0	0	0	0	0	200	300	0	0	0	0	0	0	0	200	903	0	0	0	0	0	0	0	603	903	0
793	7	0	0	0	0	0	0	200	300	0	0	0	0	0	0	0	200	903	0	0	0	0	0	0	0	603	903	0
793	8	0	0	0	0	0	0	200	300	0	0	0	0	0	0	0	200	903	0	0	0	0	0	0	0	603	903	0
793	9	0	0	0	0	0	0	200	300	0	0	0	0	0	0	0	200	903	0	0	0	0	0	0	0	603	903	0
794	0	0	0	0	0	0	0	200	300	0	0	0	0	0	0	0	200	903	0	0	0	0	0	0	0	603	903	0
794	1	0	0	0	0	0	0	200	300	0	0	0	0	0	0	0	200	903	0	0	0	0	0	0	0	603	903	0
794	2	0	0	0	0	0	0	200	300	0	0	0	0	0	0	0	200	903	0	0	0	0	0	0	0	603	903	0
794	3	0	0	0	0	0	0	200	300	0	0	0	0	0	0	0	200	903	0	0	0	0	0	0	0	603	903	0
794	4	0	0	0	0	0	0	200	300	0	0	0	0	0	0	0	200	903	0	0	0	0	0	0	0	603	903	0
794	5	0	0	0	0	0	0	200	300	0	0	0	0	0	0	0	200	903	0	0	0	0	0	0	0	603	903	0
794	6	0	0	0	0	0	0	200	300	0	0	0	0	0	0	0	200	903	0	0	0	0	0	0	0	603	903	0
794	7	0	0	0	0	0	0	200	300	0	0	0	0	0	0	0	200	903	0	0	0	0	0	0	0	603	903	0
794	8	0	0	0	0	0	0	200	300	0	0	0	0	0	0	0	200	903	0	0	0	0	0	0	0	603	903	0
794	9	0	0	0	0	0	0	200	300	0	0	0	0	0	0	0	200	903	0	0	0	0	0	0	0	603	903	0
795	0	0	0	0	0	0	0	200	300	0	0	0	0	0	0	0	200	903	0	0	0	0	0	0	0	603	903	0
795	1	0	0	0	0	0	0	200	300	0	0	0	0	0	0	0	200	903	0	0	0	0	0	0	0	603	903	0
795	2	0	0	0	0	0	0	200	300	0	0	0	0	0	0	0	200	903	0	0	0	0	0	0	0	603	903	0
795	3	0	0	0	0	0	0	200	300	0	0	0	0	0	0	0	200	903	0	0	0	0	0	0	0	603	903	0
795	4	0	0	0	0	0	0	200	300	0	0	0	0	0	0	0	200	903	0	0	0	0	0	0	0	603	903	0
795	5	0	0	0	0	0	0	200	300	0	0	0	0	0	0	0	200	903	0	0	0	0	0	0	0	603	903	0
795	6	0	0	0	0	0	0	200	300	0	0	0	0	0	0	0	200	903	0	0	0	0	0	0	0	603	903	0
795	7	0	0	0	0	0	0	200	300	0	0	0	0	0	0	0	200	903	0	0	0	0	0	0	0	603	903	0
795	8	0	0	0	0	0	0	200	300	0	0	0	0	0	0	0	200	903	0	0	0	0	0	0	0	603	903	0
795	9	0	0	0	0	0	0	200	300	0	0	0	0	0	0	0	200	903	0	0	0	0	0	0	0	603	903	0
796	0	0	0	0	0	0	0	200	300	0	0	0	0	0	0	0	200	903	0	0	0	0	0	0	0	603	903	0
796	1	0	0	0	0	0	0	200	300	0	0	0	0	0	0	0	200	903	0	0	0	0	0	0	0	603	903	0
796	2	0	0	0	0	0	0	200	300	0	0	0	0	0	0	0	200	903	0	0	0	0	0	0	0	603	903	0
796	3	0	0	0	0	0	0	200	300	0	0	0	0	0	0	0	200	903	0	0	0	0	0	0	0	603	903	0
796	4	0	0	0	0	0	0	200	300	0	0	0	0	0	0	0	200	903	0	0	0	0	0	0	0	603	903	0
796	5	0	0	0	0	0	0	200	300	0	0	0	0	0	0	0	200	903	0	0	0	0	0	0	0	603	903	0
796	6	0	0	0	0	0	0	200	300	0	0	0	0	0	0	0	200	903	0	0	0	0	0	0	0	603	903	0
796	7	0	0	0	0	0	0	200	300	0	0	0	0	0	0	0	200	903	0	0	0	0	0	0	0	603	903	0
796	8	0	0	0	0	0	0	200	300	0	0	0	0	0	0	0	200	903	0	0	0	0	0	0	0	603	903	0
796	9	0	0	0	0	0	0	200	300	0	0	0	0	0	0	0	200	903	0	0	0	0	0	0	0	603	903	0
797	0	0	0	0	0	0	0	200	300	0	0	0	0	0	0	0	200	903	0	0	0	0	0	0	0	603	903	0
797	1	0	0	0	0	0	0	200	300	0	0	0	0	0	0	0	200	903	0	0	0	0	0	0	0	603	903	0
797	2	0	0	0	0	0	0	200	300	0	0	0	0	0	0	0	200	903	0	0	0	0	0	0	0	603	903	0
797	3	0	0	0	0	0	0	200	300	0	0	0	0	0	0	0	200	903	0	0	0	0	0	0	0	603	903	0
797	4	0	0	0	0	0	0	200	300	0	0	0	0	0	0	0	200	903	0	0	0	0	0	0	0	603	903	0
797	5	0	0	0	0	0	0	200	300	0	0	0	0	0	0	0	200	903	0	0	0	0	0	0	0	603	903	0
797	6	0	0	0	0	0	0	200	300	0	0	0	0	0	0	0	200	903	0	0	0	0	0	0	0	603	903	0
797	7	0	0	0	0	0	0	200	300	0	0	0	0	0	0	0	200	903	0	0	0	0	0	0	0	603	903	0
797	8	0	0	0	0	0	0	200	300	0	0	0	0	0	0	0	200	903	0	0	0	0	0	0	0	603	903	0
797	9	0	0	0	0	0	0	200	300	0	0	0	0	0	0	0	200	903	0	0	0	0	0	0	0	603	903	0
798	0	0	0	0	0	0	0	200	300	0	0	0	0	0	0	0	200	903	0	0	0	0	0	0	0	603	903	0
798	1	0	0	0	0	0	0	200	300	0	0	0	0	0	0	0	200	903	0	0	0	0	0	0	0	603	903	0
798	2	0	0	0	0	0	0	200	300	0	0	0	0	0	0	0	200	903	0	0	0	0	0	0	0	603	903	0
798	3	0	0	0	0	0	0	200	300	0	0	0	0	0	0	0	200	903	0	0	0	0	0	0	0	603	903	0
798	4	0	0	0	0	0	0	200	300	0	0	0	0	0	0	0	200	903	0	0	0	0	0	0	0	603	903	0
798	5	0	0	0	0	0	0	200	300	0	0	0	0	0	0	0	200	903	0	0	0	0	0	0	0	603	903	0
798	6	0	0	0	0	0	0	200	300	0	0	0	0	0	0	0	200	903	0	0	0	0	0	0	0	603	903	0
798	7	0	0	0	0	0	0	200	300	0	0	0	0	0	0	0	200	903	0	0	0	0	0	0	0	603	903	0
798	8	0	0	0	0	0	0	200	300	0	0	0	0	0	0	0	200	903	0	0	0	0	0	0	0	603	903	0
798	9	0	0	0	0	0	0	200	300	0	0	0	0	0	0	0	200	903	0	0	0	0	0	0	0	603	903	0
799	0	0	0	0	0	0	0	200	300	0	0	0	0	0	0	0	200	903	0	0	0	0	0	0	0	603	903	0
799	1	0	0	0	0	0	0	200	300	0	0	0	0	0	0	0	200	903	0	0	0	0	0	0	0	603	903	0
799	2	0	0	0	0	0	0	200	300	0	0	0	0	0	0	0	200	903	0	0	0	0	0	0	0	603	903	0
799	3	0	0	0	0	0	0	200	300	0	0	0	0	0	0	0	200	903	0	0	0	0	0	0	0	603	903	0
799	4	0	0	0	0	0	0	200	300	0	0	0	0	0	0	0	200	903	0	0	0	0	0	0	0	603	903	0
799	5	0	0	0	0	0	0	200	300	0	0	0	0	0	0	0	200	903	0	0	0	0	0	0	0	603	903	0
799	6	0	0	0	0	0	0	200	300	0	0	0	0	0	0	0	200	903	0	0	0	0	0	0	0	603	903	0
799	7	0	0	0	0	0	0	200	300	0	0	0	0	0	0	0	200	903	0	0	0	0	0	0	0	603	903	0
799	8	0	0	0	0	0	0	200	300	0	0	0	0	0	0	0	200	903	0	0	0	0	0	0	0	603	903	0
799	9	0	0	0	0	0	0	200	300	0	0	0	0	0	0	0	200	903	0	0	0	0	0	0	0	603	903	0
800	0	0	0	0	0	0	0	200	300	0	0	0	0	0	0	0	200	903	0	0	0	0	0	0	0	603	903	0
800	1	0	0	0	0	0	0	200	300	0	0	0	0	0	0	0	200	903	0	0	0	0	0	0	0	603	903	0
800	2	0	0	0	0	0	0	200	300	0	0	0	0	0	0	0	200	903	0	0	0	0	0	0	0	603	903	0
800	3	0	0	0	0	0	0	200	300	0	0	0	0	0	0	0	200	903	0	0	0	0	0	0	0	603	903	0
800	4	0	0	0	0	0	0	200	300	0	0	0	0	0	0	0	200	903	0	0	0	0	0	0	0	603	903	0
800	5	0	0	0	0	0	0	200	300	0	0	0	0	0	0	0	200	903	0	0	0	0	0	0	0	603	903	0
800	6	0	0	0	0	0	0	200	300	0	0	0	0	0	0	0	200	903	0	0	0	0	0	0	0	603	903	0
800	7	0	0	0	0	0	0	200	300	0	0	0	0	0	0	0	200	903	0	0	0	0	0	0	0	603	903	0
800	8	0	0	0	0	0	0	200	300	0	0	0	0	0	0	0	200	903	0	0	0	0	0	0	0	603	903	0
800	9	0	0	0	0	0	0	200	300	0	0	0	0	0	0	0	200	903	0	0	0	0	0	0	0	603	903	0
801	0	0	0	0	0	0	0	200	300	0	0	0	0	0	0	0	200	903	0	0	0	0	0	0	0	603	903	0
801	1	0	0	0	0	0	0	200	300	0	0	0	0	0	0	0	200	903	0	0	0	0	0	0	0	603	903	0
801	2	0	0	0	0	0	0	200	300	0	0	0	0	0	0	0	200	903	0	0	0	0	0	0	0	603	903	0
801	3	0	0	0	0	0	0	200	300	0	0	0	0	0	0	0	200	903	0	0	0	0	0	0	0	603	903	0
801	4	0	0	0	0	0	0	200	300	0	0	0	0	0	0	0	200	903	0	0	0	0	0	0	0	603	903	0
801	5	0	0	0	0	0	0	200	300	0	0	0	0	0	0	0	200	903	0	0	0	0	0	0	0	603	903	0
801	6	0	0	0	0	0	0	200	300	0	0	0	0	0	0	0	200	903	0	0	0	0	0	0	0	603	903	0
801	7	0	0	0	0	0	0	200	300	0	0	0	0	0	0	0	200	903	0	0	0	0	0	0	0	603	903	0
801	8	0	0	0	0	0	0	200	300	0	0	0	0	0	0	0	200	903	0	0	0	0	0	0	0	603	903	0
801	9	0	0	0	0	0	0	200	300	0	0	0	0	0	0	0	200	903	0	0	0	0	0	0	0	603	903	0
802	0	0	0	0	0	0	0	200	300	0	0	0	0	0	0	0	200	903	0	0	0	0	0	0	0	603	903	0
802	1	0	0	0	0	0	0	200	300	0	0	0	0	0	0	0	200	903	0	0	0	0	0	0	0	603	903	0
802	2	0	0	0	0	0	0	200	300	0	0	0	0	0	0	0	200	903	0	0	0	0	0	0	0	603	903	0
802	3	0	0	0	0	0	0	200	300	0	0	0	0	0	0	0	200	903	0	0	0	0	0	0	0	603	903	0
802	4	0	0	0	0	0	0	200	300	0	0	0	0	0	0	0	200	903	0	0	0	0	0	0	0	603	903	0
802	5	0	0	0	0	0	0	200	300	0	0	0	0	0	0	0	200	903	0	0	0	0	0	0	0	603	903	0
802	6	0	0	0	0	0	0	200	300	0	0	0	0	0	0	0	200	903	0	0	0	0	0	0	0	603	903	0
802	7	0	0	0	0	0	0	200	300	0	0	0	0	0	0	0	200	903	0	0	0	0	0	0	0	603	903	0
802	8	0	0	0	0	0	0	200	300	0	0	0	0	0	0	0	200	903	0	0	0	0	0	0	0	603	903	0
802	9	0	0	0	0	0	0	200	300	0	0	0	0	0	0	0	200	903	0	0	0	0	0	0	0	603	903	0
803	0	0	0	0	0	0	0	200	300	0	0	0	0	0	0	0	200	903	0	0	0	0	0	0	0	603	903	0
803	1	0	0	0	0	0	0	200	300	0	0	0	0	0	0	0	200	903	0	0	0	0	0	0	0	603	903	0
803	2	0	0	0	0	0	0	200	300	0	0	0	0	0	0	0	200	903	0	0	0	0	0	0	0	603	903	0
803	3	0	0	0	0	0	0	200	300	0	0	0	0	0	0	0	200	903	0	0	0	0	0	0	0	603	903	0
803	4	0	0	0	0	0	0	200	300	0	0	0	0	0	0	0	200	903	0	0	0	0	0	0	0	603	903	0
803	5	0	0	0	0	0	0	200	300	0	0	0	0	0	0	0	200	903	0	0	0	0	0	0	0	603	903	0
803	6	0	0	0	0	0	0	200	300	0	0	0	0	0	0	0	200	903	0	0	0	0	0	0	0	603	903	0
803	7	0	0	0	0	0	0	200	300	0	0	0	0	0	0	0	200	903	0	0	0	0	0	0	0	603	903	0
803	8	0	0	0	0	0	0	200	300	0	0	0	0	0	0	0	200	903	0	0	0	0	0	0	0	603	903	0
803	9	0	0	0	0	0	0	200	300	0	0	0	0	0	0	0	200	903	0	0	0	0	0	0	0	603	903	0
804	0	0	0	0	0	0	0	200	300	0	0	0	0	0	0	0	200	903	0	0	0	0	0	0	0	603	903	0
804	1	0	0	0	0	0	0	200	300	0	0	0	0	0	0	0	200	903	0	0	0	0	0	0	0	603	903	0
804	2	0	0	0	0	0	0	200	300	0	0	0	0	0	0	0	200	903	0	0	0	0	0	0	0	603	903	0
804	3	0	0	0	0	0	0	200	300	0	0	0	0	0	0	0	200	903	0	0	0	0	0	0	0	603	903	0
804	4	0	0	0	0	0	0	200	300	0	0	0	0	0	0	0	200	903	0	0	0	0	0	0	0	603	903	0
804	5	0	0	0	0	0	0	200	300	0	0	0	0	0	0	0	200	903	0	0	0	0	0	0	0	603	903	0
804	6	0	0	0	0	0	0	200	300	0	0	0	0	0	0	0	200	903	0	0	0	0	0	0	0	603	903	0
804	7	0	0	0	0	0	0	200	300	0	0	0	0	0	0	0	200	903	0	0	0	0	0	0	0	603	903	0
804	8	0	0	0	0	0	0	200	300	0	0	0	0	0	0	0	200	903	0	0	0	0	0	0	0	603	903	0
804	9	0	0	0	0	0	0	200	300	0	0	0	0	0	0	0	200	903	0	0	0	0	0	0	0	603	903	0
805	0	0	0	0	0	0	0	200	300	0	0	0	0	0	0	0	200	903	0	0	0	0	0	0	0	603	903	0
805	1	0	0	0	0	0	0	200	300	0	0	0	0	0	0	0	200	903	0	0	0	0	0	0	0	603	903	0
805	2	0	0	0	0	0	0	200	300	0	0	0	0	0	0	0	200	903	0	0	0	0	0	0	0	603	903	0
805	3	0	0	0	0	0	0	200	300	0	0	0	0	0	0	0	200	903	0	0	0	0	0	0	0	603	903	0
805	4	0	0	0	0	0	0	200	300	0	0	0	0	0	0	0	200	903	0	0	0	0	0	0	0	603	903	0
805	5	0	0	0	0	0	0	200	300	0	0	0	0	0	0	0	200	903	0	0	0	0	0	0	0	603	903	0
805	6	0	0	0	0	0	0	200	300	0	0	0	0	0	0	0	200	903	0	0	0	0	0	0	0	603	903	0
805	7	0	0	0	0	0	0	200	300	0	0	0	0	0	0	0	200	903	0	0	0	0	0	0	0	603	903	0
805	8	0	0	0	0	0	0	200	300	0	0	0	0	0	0	0	200	903	0	0	0	0	0	0	0	603	903	0
805	9	0	0	0	0	0	0	200	300	0	0	0	0	0	0	0	200	903	0	0	0	0	0	0	0	603	903	0
806	0	0	0	0	0	0	0	200	300	0	0	0	0	0	0	0	200	903	0	0	0	0	0	0	0	603	903	0
806	1	0	0	0	0	0	0	200	300	0	0	0	0	0	0	0	200	903	0	0	0	0	0	0	0	603	903	0
806	2	0	0	0	0	0	0	200	300	0	0	0	0	0	0	0	200	903	0	0	0	0	0	0	0	603	903	0
806	3	0	0	0	0	0	0	200	300	0	0	0	0	0	0	0	200	903	0	0	0	0	0	0	0	603	903	0
806	4	0	0	0	0	0	0	200	300	0	0	0	0	0	0	0	200	903	0	0	0	0	0	0	0	603	903	0
806	5	0	0	0	0	0	0	200	300	0	0	0	0	0	0	0	200	903	0	0	0	0	0	0	0	603	903	0
806	6	0	0	0	0	0	0	200	300	0	0	0	0	0	0	0	200	903	0	0	0	0	0	0	0	603	903	0
806	7	0	0	0	0	0	0	200	300	0	0	0	0	0	0	0	200	903	0	0	0	0	0	0	0	603	903	0
806	8	0	0	0	0	0	0	200	300	0	0	0	0	0	0	0	200	903	0	0	0	0	0	0	0	603	903	0
806	9	0	0	0	0	0	0	200	300	0	0	0	0	0	0	0	200	903	0	0	0	0	0	0	0	603	903	0
807	0	0	0	0	0	0	0	200	300	0	0	0	0	0	0	0	200	903	0	0	0	0	0	0	0	603	903	0
807	1	0	0	0	0	0	0	200	300	0	0	0	0	0	0	0	200	903	0	0	0	0	0	0	0	603	903	0
807	2	0	0	0	0	0	0	200	300	0	0	0	0	0	0	0	200	903	0	0	0	0	0	0	0	603	903	0
807	3	0	0	0	0	0	0	200	300	0	0	0	0	0	0	0	200	903	0	0	0	0	0	0	0	603	903	0
807	4	0	0	0	0	0	0	200	300	0	0	0	0	0	0	0	200	903	0	0	0	0	0	0	0	603	903	0
807	5	0	0	0	0	0	0	200	300	0	0	0	0	0	0	0	200	903	0	0	0	0	0	0	0	603	903	0
807	6	0	0	0	0	0	0	200	300	0	0	0	0	0	0	0	200	903	0	0	0	0	0	0	0	603	903	0
807	7	0	0	0	0	0	0	200	300	0	0	0	0	0	0	0	200	903	0	0	0	0	0	0	0	603	903	0
807	8	0	0	0	0	0	0	200	300	0	0	0	0	0	0	0	200	903	0	0	0	0	0	0	0	603	903	0
807	9	0	0	0	0	0	0	200	300	0	0	0	0	0	0	0	200	903	0	0	0	0	0	0	0	603	903	0
808	0	0	0	0	0	0	0	200	300	0	0	0	0	0	0	0	200	903	0	0	0	0	0	0	0	603	903	0
808	1	0	0	0	0	0	0	200	300	0	0	0	0	0	0	0	200	903	0	0	0	0	0	0	0	603	903	0
808	2	0	0	0	0	0	0	200	300	0	0	0	0	0	0	0	200	903	0	0	0	0	0	0	0	603	903	0
808	3	0	0	0	0	0	0	200	300	0	0	0	0	0	0	0	200	903	0	0	0	0	0	0	0	603	903	0
808	4	0	0	0	0	0	0	200	300	0	0	0	0	0	0	0	200	903	0	0	0	0	0	0	0	603	903	0
808	5	0	0	0	0	0	0	200	300	0	0	0	0	0	0	0	200	903	0	0	0	0	0	0	0	603	903	0
808	6	0	0	0	0	0	0	200	300	0	0	0	0	0	0	0	200	903	0	0	0	0	0	0	0	603	903	0
808	7	0	0	0	0	0	0	200	300	0	0	0	0	0	0	0	200	903	0	0	0	0	0	0	0	603	903	0
808	8	0	0	0	0	0	0	200	300	0	0	0	0	0	0	0	200	903	0	0	0	0	0	0	0	603	903	0
808	9	0	0	0	0	0	0	200	300	0	0	0	0	0	0	0	200	903	0	0	0	0	0	0	0	603	903	0
809	0	0	0	0	0	0	0	200	300	0	0	0	0	0	0	0	200	903	0	0	0	0	0	0	0	603	903	0
809	1	0	0	0	0	0	0	200	300	0	0	0	0	0	0	0	200	903	0	0	0	0	0	0	0	603	903	0
809	2	0	0	0	0	0	0	200	300	0	0	0	0	0	0	0	200	903	0	0	0	0	0	0	0	603	903	0
809	3	0	0	0	0	0	0	200	300	0	0	0	0	0	0	0	200	903	0	0	0	0	0	0	0	603	903	0
809	4	0	0	0	0	0	0	200	300	0	0	0	0	0	0	0	200	903	0	0	0	0	0	0	0	603	903	0
809	5	0	0	0	0	0	0	200	300	0	0	0	0	0	0	0	200	903	0	0	0	0	0	0	0	603	903	0
809	6	0	0	0	0	0	0	200	300	0	0	0	0	0	0	0	200	903	0	0	0	0	0	0	0	603	903	0
809	7	0	0	0	0	0	0	200	300	0	0	0	0	0	0	0	200	903	0	0	0	0	0	0	0	603	903	0
809	8	0	0	0	0	0	0	200	300	0	0	0	0	0	0	0	200	903	0	0	0	0	0	0	0	603	903	0
809	9	0	0	0	0	0	0	200	300	0	0	0	0	0	0	0	200	903	0	0	0	0	0	0	0	603	903	0
810	0	0	0	0	0	0	0	200	300	0	0	0	0	0	0	0	200	903	0	0	0	0	0	0	0	603	903	0
810	1	0	0	0	0	0	0	200	300	0	0	0	0	0	0	0	200	903	0	0	0	0	0	0	0	603	903	0
810	2	0	0	0	0	0	0	200	300	0	0	0	0	0	0	0	200	903	0	0	0	0	0	0	0	603	903	0
810	3	0	0	0	0	0	0	200	300	0	0	0	0	0	0	0	200	903	0	0	0	0	0	0	0	603	903	0
810	4	0	0	0	0	0	0	200	300	0	0	0	0	0	0	0	200	903	0	0	0	0	0	0	0	603	903	0
810	5	0	0	0	0	0	0	200	300	0	0	0	0	0	0	0	200	903	0	0	0	0	0	0	0	603	903	0
810	6	0	0	0	0	0	0	200	300	0	0	0	0	0	0	0	200	903	0	0	0	0	0	0	0	603	903	0
810	7	0	0	0	0	0	0	200	300	0	0	0	0	0	0	0	200	903	0	0	0	0	0	0	0	603	903	0
810	8	0	0	0	0	0	0	200	300	0	0	0	0	0	0	0	200	903	0	0	0	0	0	0	0	603	903	0
810	9	0	0	0	0	0	0	200	300	0	0	0	0	0	0	0	200	903	0	0	0	0	0	0	0	603	903	0
811	0	0	0	0	0	0	0	200	300	0	0	0	0	0	0	0	200	903	0	0	0	0	0	0	0	603	903	0
811	1	0	0	0	0	0	0	200	300	0	0	0	0	0	0	0	200	903	0	0	0	0	0	0	0	603	903	0
811	2	0	0	0	0	0	0	200	300	0	0	0	0	0	0	0	200	903	0	0	0	0	0	0	0	603	903	0
811	3	0	0	0	0	0	0	200	300	0	0	0	0	0	0	0	200	903	0	0	0	0	0	0	0	603	903	0
811	4	0	0	0	0	0	0	200	300	0	0	0	0	0	0	0	200	903	0	0	0	0	0	0	0	603	903	0
811	5	0	0	0	0	0	0	200	300	0	0	0	0	0	0	0	200	903	0	0	0	0	0	0	0	603	903	0
811	6	0	0	0	0	0	0	200	300	0	0	0	0	0	0	0	200	903	0	0	0	0	0	0	0	603	903	0
811	7	0	0	0	0	0	0	200	300	0	0	0	0	0	0	0	200	903	0	0	0	0	0	0	0	603	903	0
811	8	0	0	0	0	0	0	200	300	0	0	0	0	0	0	0	200	903	0	0	0	0	0	0	0	603	903	0
811	9	0	0	0	0	0	0	200	300	0	0	0	0	0	0	0	200	903	0	0	0	0	0	0	0	603	903	0
812	0	0	0	0	0	0	0	200	300	0	0	0	0	0	0	0	200	903	0	0	0	0	0	0	0	603	903	0
812	1	0	0	0	0	0	0	200	300	0	0	0	0	0	0	0	200	903	0	0	0	0	0	0	0	603	903	0
812	2	0	0	0	0	0	0	200	300	0	0	0	0	0	0	0	200	903	0	0	0	0	0	0	0	603	903	0
812	3	0	0	0	0	0	0	200	300	0	0	0	0	0	0	0	200	903	0	0	0	0	0	0	0	603	903	0
812	4	0	0	0	0	0	0	200	300	0	0	0	0	0	0	0	200	903	0	0	0	0	0	0	0	603	903	0
812	5	0	0	0	0	0	0	200	300	0	0	0	0	0	0	0	200	903	0	0	0	0	0	0	0	603	903	0
812	6	0	0	0	0	0	0	200	300	0	0	0	0	0	0	0	200	903	0	0	0	0	0	0	0	603	903	0
812	7	0	0	0	0	0	0	200	300	0	0	0	0	0	0	0	200	903	0	0	0	0	0	0	0	603	903	0
812	8	0	0	0	0	0	0	200	300	0	0	0	0	0	0	0	200	903	0	0	0	0	0	0	0	603	903	0
812	9	0	0	0	0	0	0	200	300	0	0	0	0	0	0	0	200	903	0	0	0	0	0	0	0	603	903	0
813	0	0	0	0	0	0	0	200	300	0	0	0	0	0	0	0	200	903	0	0	0	0	0	0	0	603	903	0
813	1	0	0	0	0	0	0	200	300	0	0	0	0	0	0	0	200	903	0	0	0	0	0	0	0	603	903	0
813	2	0	0	0	0	0	0	200	300	0	0	0	0	0	0	0	200	903	0	0	0	0	0	0	0	603	903	0
813	3	0	0	0	0	0	0	200	300	0	0	0	0	0	0	0	200	903	0	0	0	0	0	0	0	603	903	0
813	4	0	0	0	0	0	0	200	300	0	0	0	0	0	0	0	200	903	0	0	0	0	0	0	0	603	903	0
813	5	0	0	0	0	0	0	200	300	0	0	0	0	0	0	0	200	903	0	0	0	0	0	0	0	603	903	0
813	6	0	0	0	0	0	0	200	300	0	0	0	0	0	0	0	200	903	0	0	0	0	0	0	0	603	903	0
813	7	0	0	0	0	0	0	200	300	0	0	0	0	0	0	0	200	903	0	0	0	0	0	0	0	603	903	0
813	8	0	0	0	0	0	0	200	300	0	0	0	0	0	0	0	200	903	0	0	0	0	0	0	0	603	903	0
813	9	0	0	0	0	0	0	200	300	0	0	0	0	0	0	0	200	903	0	0	0	0	0	0	0	603	903	0
814	0	0	0	0	0	0	0	200	300	0	0	0	0	0	0	0	200	903	0	0	0	0	0	0	0	603	903	0
814	1	0	0	0	0	0	0	200	300	0	0	0	0	0	0	0	200	903	0	0	0	0	0	0	0	603	903	0
814	2	0	0	0	0	0	0	200	300	0	0	0	0	0	0	0	200	903	0	0	0	0	0	0	0	603	903	0
814	3	0	0	0	0	0	0	200	300	0	0	0	0	0	0	0	200	903	0	0	0	0	0	0	0	603	903	0
814	4	0	0	0	0	0	0	200	300	0	0	0	0	0	0	0	200	903	0	0	0	0	0	0	0	603	903	0
814	5	0	0	0	0	0	0	200	300	0	0	0	0	0	0	0	200	903	0	0	0	0	0	0	0	603	903	0
814	6	0	0	0	0	0	0	200	300	0	0	0	0	0	0	0	200	903	0	0	0	0	0	0	0	603	903	0
814	7	0	0	0	0	0	0	200	300	0	0	0	0	0	0	0	200	903	0	0	0	0	0	0	0	603	903	0
814	8	0	0	0	0	0	0	200	300	0	0	0	0	0	0	0	200	903	0	0	0	0	0	0	0	603	903	0
814	9	0	0	0	0	0	0	200	300	0	0	0	0	0	0	0	200	903	0	0	0	0	0	0	0	603	903	0
815	0	0	0	0	0	0	0	200	300	0	0	0	0	0	0	0	200	903	0	0	0	0	0	0	0	603	903	0
815	1	0	0	0	0	0	0	200	300	0	0	0	0	0	0	0	200	903	0	0	0	0	0	0	0	603	903	0
815	2	0	0	0	0	0	0	200	300	0	0	0	0	0	0	0	200	903	0	0	0	0	0	0	0	603	903	0
815	3	0	0	0	0	0	0	200	300	0	0	0	0	0	0	0	200	903	0	0	0	0	0	0	0	603	903	0
815	4	0	0	0	0	0	0	200	300	0	0	0	0	0	0	0	200	903	0	0	0	0	0	0	0	603	903	0
815	5	0	0	0	0	0	0	200	300	0	0	0	0	0	0	0	200	903	0	0	0	0	0	0	0	603	903	0
815	6	0	0	0	0	0	0	200	300	0	0	0	0	0	0	0	200	903	0	0	0	0	0	0	0	603	903	0
815	7	0	0	0	0	0	0	200	300	0	0	0	0	0	0	0	200	903	0	0	0	0	0	0	0	603	903	0
815	8	0	0	0	0	0	0	200	300	0	0	0	0	0	0	0	200	903	0	0	0	0	0	0	0	603	903	0
815	9	0	0	0	0	0	0	200	300	0	0	0	0	0	0	0	200	903	0	0	0	0	0	0	0	603	903	0
816	0	0	0	0	0	0	0	200	300	0	0	0	0	0	0	0	200	903	0	0	0	0	0	0	0	603	903	0
816	1	0	0	0	0	0	0	200	300	0	0	0	0	0	0	0	200	903	0	0	0	0	0	0	0	603	903	0
816	2	0	0	0	0	0	0	200	300	0	0	0	0	0	0	0	200	903	0	0	0	0	0	0	0	603	903	0
816	3	0	0	0	0	0	0	200	300	0	0	0	0	0	0	0	200	903	0	0	0	0	0	0	0	603	903	0
816	4	0	0	0	0	0	0	200	300	0	0	0	0	0	0	0	200	903	0	0	0	0	0	0	0	603	903	0
816	5	0	0	0	0	0	0	200	300	0	0	0	0	0	0	0	200	903	0	0	0	0	0	0	0	603	903	0
816	6	0	0	0	0	0	0	200	300	0	0	0	0	0	0	0	200	903	0	0	0	0	0	0	0	603	903	0
816	7	0	0	0	0	0	0	200	300	0	0	0	0	0	0	0	200	903	0	0	0	0	0	0	0	603	903	0
816	8	0	0	0	0	0	0	200	300	0	0	0	0	0	0	0	200	903	0	0	0	0	0	0	0	603	903	0
816	9	0	0	0	0	0	0	200	300	0	0	0	0	0	0	0	200	903	0	0	0	0	0	0	0	603	903	0
817	0	0	0	0	0	0	0	200	300	0	0	0	0	0	0	0	200	903	0	0	0	0	0	0	0	603	903	0
817	1	0	0	0	0	0	0	200	300	0	0	0	0	0	0	0	200	903	0	0	0	0	0	0	0	603	903	0
817	2	0	0	0	0	0	0	200	300	0	0	0	0	0	0	0	200	903	0	0	0	0	0	0	0	603	903	0
817	3	0	0	0	0	0	0	200	300	0	0	0	0	0	0	0	200	903	0	0	0	0	0	0	0	603	903	0
817	4	0	0	0	0	0	0	200	300	0	0	0	0	0	0	0	200	903	0	0	0	0	0	0	0	603	903	0
817	5	0	0	0	0	0	0	200	300	0	0	0	0	0	0	0	200	903	0	0	0	0	0	0	0	603	903	0
817	6	0	0	0	0	0	0	200	300	0	0	0	0	0	0	0	200	903	0	0	0	0	0	0	0	603	903	0
817	7	0	0	0	0	0	0	200	300	0	0	0	0	0	0	0	200	903	0	0	0	0	0	0	0	603	903	0
817	8	0	0	0	0	0	0	200	300	0	0	0	0	0	0	0	200	903	0	0	0	0	0	0	0	603	903	0
817	9	0	0	0	0	0	0	200	300	0	0	0	0	0	0	0	200	903	0	0	0	0	0	0	0	603	903	0
818	0	0	0	0	0	0	0	200	300	0	0	0	0	0	0	0	200	903	0	0	0	0	0	0	0	603	903	0
818	1	0	0	0	0	0	0	200	300	0	0	0	0	0	0	0	200	903	0	0	0	0	0	0	0	603	903	0
818	2	0	0	0	0	0	0	200	300	0	0	0	0	0	0	0	200	903	0	0	0	0	0	0	0	603	903	0
818	3	0	0	0	0	0	0	200	300	0	0	0	0	0	0	0	200	903	0	0	0	0	0	0	0	603	903	0
818	4	0	0	0	0	0	0	200	300	0	0	0	0	0	0	0	200	903	0	0	0	0	0	0	0	603	903	0
818	5	0	0	0	0	0	0	200	300	0	0	0	0	0	0	0	200	903	0	0	0	0	0	0	0	603	903	0
818	6	0	0	0	0	0	0	200	300	0	0	0	0	0	0	0	200	903	0	0	0	0	0	0	0	603	903	0
818	7	0	0	0	0	0	0	200	300	0	0	0	0	0	0	0	200	903	0	0	0	0	0	0	0	603	903	0
818	8	0	0	0	0	0	0	200	300	0	0	0	0	0	0	0	200	903	0	0	0	0	0	0	0	603	903	0
818	9	0	0	0	0	0	0	200	300	0	0	0	0	0	0	0	200	903	0	0	0	0	0	0	0	603	903	0
819	0	0	0	0	0	0	0	200	300	0	0	0	0	0	0	0	200	903	0	0	0	0	0	0	0	603	903	0
819	1	0	0	0	0	0	0	200	300	0	0	0	0	0	0	0	200	903	0	0	0	0	0	0	0	603	903	0
819	2	0	0	0	0	0	0	200	300	0	0	0	0	0	0	0	200	903	0	0	0	0	0	0	0	603	903	0
819	3	0	0	0	0	0	0	200	300	0	0	0	0	0	0	0	200	903	0	0	0	0	0	0	0	603	903	0
819	4	0	0	0	0	0	0	200	300	0	0	0	0	0	0	0	200	903	0	0	0	0	0	0	0	603	903	0
819	5	0	0	0	0	0	0	200	300	0	0	0	0	0	0	0	200	903	0	0	0	0	0	0	0	603	903	0
819	6	0	0	0	0	0	0	200	300	0	0	0	0	0	0	0	200	903	0	0	0	0	0	0	0	603	903	0
819	7	0	0	0	0	0	0	200	300	0	0	0	0	0	0	0	200	903	0	0	0	0	0	0	0	603	903	0
819	8	0	0	0	0	0	0	200	300	0	0	0	0	0	0	0	200	903	0	0	0	0	0	0	0	603	903	0
819	9	0	0	0	0	0	0	200	300	0	0	0	0	0	0	0	200	903	0	0	0	0	0	0	0	603	903	0
820	0	0	0	0	0	0	0	200	300	0	0	0	0	0	0	0	200	903	0	0	0	0	0	0	0	603	903	0
820	1	0	0	0	0	0	0	200	300	0	0	0	0	0	0	0	200	903	0	0	0	0	0	0	0	603	903	0
820	2	0	0	0	0	0	0	200	300	0	0	0	0	0	0	0	200	903	0	0	0	0	0	0	0	603	903	0
820	3	0	0	0	0	0	0	200	300	0	0	0	0	0	0	0	200	903	0	0	0	0	0	0	0	603	903	0
820	4	0	0	0	0	0	0	200	300	0	0	0	0	0	0	0	200	903	0	0	0	0	0	0	0	603	903	0
820	5	0	0	0	0	0	0	200	300	0	0	0	0	0	0	0	200	903	0	0	0	0	0	0	0	603	903	0
820	6	0	0	0	0	0	0	200	300	0	0	0	0	0	0	0	200	903	0	0	0	0	0	0	0	603	903	0
820	7	0	0	0	0	0	0	200	300	0	0	0	0	0	0	0	200	903	0	0	0	0	0	0	0	603	903	0
820	8	0	0	0	0	0	0	200	300	0	0	0	0	0	0	0	200	903	0	0	0	0	0	0	0	603	903	0
820	9	0	0	0	0	0	0	200	300	0	0	0	0	0	0	0	200	903	0	0	0	0	0	0	0	603	903	0
821	0	0	0	0	0	0	0	200	300	0	0	0	0	0	0	0	200	903	0	0	0	0	0	0	0	603	903	0
821	1	0	0	0	0	0	0	200	300	0	0	0	0	0	0	0	200	903	0	0	0	0	0	0	0	603	903	0
821	2	0	0	0	0	0	0	200	300	0	0	0	0	0	0	0	200	903	0	0	0	0	0	0	0	603	903	0
821	3	0	0	0	0	0	0	200	300	0	0	0	0	0	0	0	200	903	0	0	0	0	0	0	0	603	903	0
821	4	0	0	0	0	0	0	200	300	0	0	0	0	0	0	0	200	903	0	0	0	0	0	0	0	603	903	0
821	5	0	0	0	0	0	0	200	300	0	0	0	0	0	0	0	200	903	0	0	0	0	0	0	0	603	903	0
821	6	0	0	0	0	0	0	200	300	0	0	0	0	0	0	0	200	903	0	0	0	0	0	0	0	603	903	0
821	7	0	0	0	0	0	0	200	300	0	0	0	0	0	0	0	200	903	0	0	0	0	0	0	0	603	903	0
821	8	0	0	0	0	0	0	200	300	0	0	0	0	0	0	0	200	903	0	0	0	0	0	0	0	603	903	0
821	9	0	0	0	0	0	0	200	300	0	0	0	0	0	0	0	200	903	0	0	0	0	0	0	0	603	903	0
822	0	0	0	0	0	0	0	200	300	0	0	0	0	0	0	0	200	903	0	0	0	0	0	0	0	603	903	0
822	1	0	0	0	0	0	0	200	300	0	0	0	0	0	0	0	200	903	0	0	0	0	0	0	0	603	903	0
822	2	0	0	0	0	0	0	200	300	0	0	0	0	0	0	0	200	903	0	0	0	0	0	0	0	603	903	0
822	3	0	0	0	0	0	0	200	300	0	0	0	0	0	0	0	200	903	0	0	0	0	0	0	0	603	903	0
822	4	0	0	0	0	0	0	200	300	0	0	0	0	0	0	0	200	903	0	0	0	0	0	0	0	603	903	0
822	5	0	0	0	0	0	0	200	300	0	0	0	0	0	0	0	200	903	0	0	0	0	0	0	0	603	903	0
[truncated: 2,854 more rows]
