# Supplementary material for: The Effects of an Extemporaneous Speech Dual-task on Older Adult Gait Control
Source: Research Square preprint supplement (doi:10.21203/rs.3.rs-7674245/v1), 2025-11-18
Supplement: Supplementary file 123 [file Over10ground5.xlsx]

## Sheet: Sheet1
Trajectories
		10:LFHD			10:RFHD			10:LBHD			10:RBHD			10:C7			10:T10			10:CLAV			10:STRN			10:RBAK			10:LSHO			10:LUPA			10:LELB			10:LFRM			10:LWRA			10:LWRB			10:LFIN
Frame	Sub Frame	X	Y	Z	X	Y	Z	X	Y	Z	X	Y	Z	X	Y	Z	X	Y	Z	X	Y	Z	X	Y	Z	X	Y	Z	X	Y	Z	X	Y	Z	X	Y	Z	X	Y	Z	X	Y	Z	X	Y	Z	X	Y	Z
		mm	mm	mm	mm	mm	mm	mm	mm	mm	mm	mm	mm	mm	mm	mm	mm	mm	mm	mm	mm	mm	mm	mm	mm	mm	mm	mm	mm	mm	mm	mm	mm	mm	mm	mm	mm	mm	mm	mm	mm	mm	mm	mm	mm	mm	mm	mm	mm
566	0	202.011	2153.91	1593.19	97.0806	2161.03	1589.63	228.958	2315.49	1569.34	110.363	2327.04	1566.59	167.056	2345.2	1435.32	193.057	2440.41	1157.62	161.302	2187.84	1329.9	155.002	2091.7	1127.09	111.339	2442.43	1248.09	316.749	2238.29	1396.23	430.225	2237.61	1160.31	438.966	2250.42	1063.36	441.77	2169.72	929.794	391.437	2147.97	831.251	458.556	2182.1	815.84	439.838	2124.46	755.396
567	0	201.998	2143.13	1594.44	96.9419	2150.24	1590.84	228.583	2304.79	1570.45	109.91	2316.35	1567.69	166.347	2334.39	1436.91	191.569	2430.76	1159.58	161.44	2177.35	1331.09	156.152	2081.91	1127.72	109.86	2432.08	1250.07	316.655	2228.77	1397.44	430.299	2229.71	1161.45	438.273	2242.32	1064.4	442.585	2162.57	930.77	392.564	2140.76	831.917	459.274	2175.72	816.523	441.761	2118.4	756.122
568	0	201.929	2132.27	1595.62	96.7143	2139.23	1592.09	228.212	2294.03	1571.63	109.552	2305.41	1569.02	165.496	2323.81	1438.46	189.998	2421.1	1161.36	161.985	2166.79	1332.29	157.273	2072.21	1128.23	108.038	2421.72	1252.05	316.556	2219.26	1398.54	429.439	2222.57	1162.25	438.274	2234.42	1065.72	443.364	2155.52	931.755	393.948	2133.77	832.552	460.209	2169.1	817.546	443.6	2112.1	757.003
569	0	201.917	2121.61	1596.78	96.7301	2128.44	1593.06	228.073	2283.53	1572.85	109.455	2294.57	1570	164.638	2313.44	1439.94	188.321	2411.52	1162.9	162.067	2156.26	1333.59	158.438	2062.45	1128.8	106.434	2411.29	1253.85	316.521	2210	1399.73	429.427	2215.17	1163.67	438.631	2226.72	1067.35	443.905	2148.29	932.705	395.31	2126.64	833.48	461.792	2163.02	818.969	445.393	2105.63	758.001
570	0	202.04	2110.83	1597.55	96.9353	2117.77	1593.94	227.904	2272.76	1573.73	109.166	2283.68	1571.04	163.821	2303.04	1441.05	186.812	2402.09	1164.33	162.448	2146.08	1334.39	159.569	2052.71	1129.45	104.839	2401.03	1255.36	316.517	2200.79	1400.66	429.503	2207.96	1164.69	439.143	2219.28	1068.84	444.905	2141.38	933.563	396.637	2119.46	834.254	462.9	2156.72	819.937	447.459	2099.35	759.046
571	0	202.12	2100.14	1598.01	96.8909	2106.71	1594.47	227.679	2262.08	1574.46	109.07	2273.07	1571.87	163.063	2292.68	1442.08	185.254	2392.67	1165.5	163.021	2136.43	1334.38	160.759	2042.78	1129.75	103.31	2390.64	1256.53	316.509	2191.61	1401.41	429.846	2200.76	1165.73	439.401	2211.91	1069.8	445.933	2134.57	934.308	397.837	2113.7	834.223	464.048	2150.19	820.629	449.475	2092.91	759.918
572	0	202.203	2089.51	1598.47	97.1544	2095.84	1594.99	227.673	2251.42	1575.15	109.029	2262.2	1572.69	162.391	2282.37	1442.98	183.885	2383.05	1166.7	163.568	2126.4	1334.81	161.833	2032.85	1130.23	101.849	2380.36	1257.85	316.578	2182.56	1402.22	430.358	2193.67	1166.82	439.806	2204.69	1070.77	447.093	2127.59	935.259	399.281	2106.83	834.779	464.663	2144.01	821.451	451.298	2086.37	760.683
573	0	202.415	2078.73	1598.88	97.1466	2085.14	1595.42	227.808	2241.03	1575.91	108.925	2251.39	1573.43	161.72	2272.11	1443.68	182.64	2373.45	1167.73	163.928	2116.44	1335.39	163.07	2022.76	1130.85	100.439	2370.16	1258.79	316.715	2173.6	1403.08	431.015	2186.64	1167.94	440.081	2197.57	1071.82	448.416	2120.89	936.203	400.45	2099.85	835.293	466.214	2137.73	822.363	453.399	2079.96	761.647
574	0	202.537	2068.16	1598.96	97.3934	2074.38	1595.55	227.777	2230.22	1576.48	109.235	2240.79	1574.01	161.125	2261.87	1444.23	181.627	2363.99	1168.45	164.424	2106.56	1335.6	164.158	2012.78	1131.23	99.3128	2359.84	1259.45	316.911	2164.55	1403.6	431.658	2179.45	1168.68	441.012	2190.57	1072.64	449.945	2114.29	936.763	402.497	2093.22	835.85	468.379	2131.24	823.194	455.547	2073.59	762.274
575	0	202.648	2057.51	1598.88	97.3636	2063.67	1595.45	227.768	2219.67	1576.69	108.982	2230.18	1574.27	160.674	2251.81	1444.6	180.483	2354.51	1168.89	164.841	2096.57	1335.47	165.091	2002.77	1131.34	98.2075	2349.84	1259.88	317.04	2155.48	1403.8	432.105	2172.36	1169.21	441.335	2183.53	1073.11	451.204	2107.5	937.092	404.585	2086.48	836.196	469.441	2124.93	823.544	457.361	2066.95	762.511
576	0	202.756	2046.98	1598.69	97.4245	2053.1	1595.28	227.82	2209.14	1576.92	109.006	2219.51	1574.5	160.257	2241.71	1444.74	179.642	2344.85	1169.24	165.134	2086.66	1335.38	165.824	1992.56	1131.5	97.4065	2339.69	1260.22	317.233	2146.39	1403.92	432.764	2165.18	1169.67	441.684	2176.43	1073.5	452.642	2100.88	937.334	406.136	2079.52	836.283	470.753	2118.43	823.789	459.562	2060.71	762.897
577	0	203.032	2036.59	1598.42	97.7633	2042.58	1595.11	228.012	2199.02	1576.75	109.29	2209.2	1574.31	159.951	2231.68	1444.5	178.957	2335.23	1169.23	165.749	2076.63	1335.42	166.741	1983.01	1131.51	96.818	2329.67	1260.17	317.654	2137.23	1403.78	433.51	2157.95	1170.11	442.683	2169.3	1073.9	454.214	2094.07	937.369	408	2072.47	836.416	471.638	2112.3	823.67	461.721	2054.38	763.049
578	0	203.328	2026.17	1598.04	97.9772	2032.1	1594.66	228.135	2188.83	1576.39	109.462	2198.79	1573.96	159.755	2221.54	1444.33	178.204	2325.72	1169.05	166.265	2066.8	1334.91	167.731	1973.37	1131.07	96.2165	2319.66	1260	317.919	2127.97	1403.52	434.069	2150.65	1170.1	443.45	2162.05	1074.05	455.799	2087.34	937.175	409.999	2065.59	836.236	473.185	2105.72	823.508	463.856	2047.89	762.884
579	0	203.74	2015.81	1597.45	98.4519	2021.55	1593.99	228.259	2178.45	1575.87	109.558	2188.33	1573.48	159.661	2211.37	1444.04	177.711	2316.13	1168.93	166.623	2056.98	1334.31	168.611	1963.92	1130.45	95.8623	2309.51	1259.81	318.238	2118.58	1403.04	434.733	2143.16	1170.04	443.945	2154.76	1073.81	457.662	2080.62	936.943	411.784	2058.55	835.851	474.898	2099.34	823.399	465.876	2041.61	762.49
580	0	203.79	2005.64	1596.71	98.6918	2011.19	1593.48	228.539	2168.27	1575.43	109.609	2177.92	1572.88	159.738	2201.11	1443.58	177.484	2306.36	1168.7	167.184	2046.83	1333.83	169.462	1954.31	1129.75	95.6169	2299.55	1259.58	318.68	2108.81	1402.61	435.409	2135.58	1169.89	444.909	2147.3	1073.7	459.442	2073.79	936.674	413.669	2051.7	835.413	476.674	2092.92	823.323	468.056	2035.28	762.069
581	0	204.364	1995.34	1596.08	99.1142	2000.68	1592.72	228.823	2158.09	1574.72	109.773	2167.4	1572.07	159.802	2190.85	1443	177.433	2296.72	1168.52	167.46	2036.67	1333.07	170.077	1944.65	1128.72	95.4668	2289.44	1259.29	319.059	2099.15	1401.89	435.992	2127.77	1169.44	445.83	2139.66	1073.37	460.835	2066.7	936	415.416	2044.42	834.676	477.647	2086.78	822.613	469.951	2028.73	761.276
582	0	204.986	1985.14	1595.01	99.656	1990.32	1591.72	229.123	2147.94	1573.68	110.096	2157.06	1571.08	159.969	2180.57	1442.35	177.352	2286.91	1168.1	167.884	2026.66	1331.88	170.838	1934.97	1127.3	95.407	2279.41	1258.78	319.413	2089.06	1400.86	436.669	2119.65	1168.83	445.929	2131.51	1072.3	462.258	2059.45	935.117	417.315	2037.39	833.606	479.289	2079.9	821.805	471.574	2022.3	759.978
583	0	205.696	1974.83	1594.21	100.324	1979.95	1590.68	229.471	2137.72	1572.54	110.382	2146.67	1570.01	160.195	2170.14	1441.55	177.425	2277.11	1167.42	168.563	2016.75	1330.58	171.56	1925.17	1125.94	95.566	2269.34	1258.16	319.809	2078.96	1399.79	437.45	2111.23	1168.09	447.302	2123.5	1072.05	463.544	2052.03	934.133	419.033	2030.1	832.656	480.509	2073.11	820.893	473.496	2015.52	759.016
584	0	206.292	1964.59	1593.08	100.83	1969.59	1589.62	229.757	2127.22	1571.21	110.973	2136.54	1568.62	160.652	2159.85	1440.45	177.709	2267.35	1166.47	169.123	2006.61	1329.57	172.1	1915.39	1124.45	95.9176	2259.27	1257.19	320.329	2068.94	1398.59	438.381	2102.58	1167.3	448.152	2115.31	1071.25	465.048	2044.74	933.023	420.539	2022.92	831.381	482.204	2066.19	819.984	475.701	2008.92	757.915
585	0	207.222	1954.38	1591.61	101.516	1959.24	1588.25	230.553	2117.39	1569.52	111.663	2126.19	1566.97	161.266	2149.49	1439.07	178.269	2257.36	1165.15	169.808	1996.39	1328.08	172.832	1905.44	1122.67	96.4669	2249.17	1256.01	321.044	2058.87	1397.1	439.074	2093.79	1165.89	448.784	2107	1069.78	466.6	2037.22	931.548	422.175	2015.8	829.729	482.692	2059.33	817.953	477.3	2002.82	755.866
586	0	207.76	1944.01	1590.1	102.395	1949	1586.75	231.177	2107.14	1567.93	112.262	2115.86	1565.45	161.844	2139.15	1437.74	178.777	2247.58	1163.95	170.298	1986.19	1326.41	173.44	1895.39	1120.87	97.0044	2238.92	1254.85	321.543	2048.45	1395.39	440.084	2084.47	1164.73	449.148	2098.31	1068.3	467.857	2029.27	930.149	423.633	2008.38	827.938	485.349	2052.2	817.266	478.72	1995.9	754.198
587	0	208.441	1933.84	1588.65	103.112	1938.6	1585.2	231.903	2096.82	1566.37	113.028	2105.42	1563.84	162.509	2128.76	1436.31	179.418	2237.58	1162.7	171.077	1976.12	1324.38	174.056	1885.28	1118.98	97.6111	2228.8	1253.6	322.155	2037.89	1393.79	440.776	2074.87	1163.37	450.387	2089.38	1067.41	468.763	2021.24	928.469	425.148	2000.92	826.221	486.242	2044.97	815.773	480.282	1988.88	752.71
588	0	209.302	1923.46	1586.96	103.854	1928.45	1583.6	232.579	2086.17	1564.57	113.88	2095.3	1561.91	163.378	2118.35	1434.57	180.25	2227.87	1161.13	171.627	1965.79	1322.94	174.698	1875.12	1117.22	98.3821	2218.61	1252.04	322.813	2027.5	1392.03	441.225	2064.69	1161.55	451.22	2080.42	1065.81	470.009	2013.13	926.609	426.343	1993.36	824.137	487.658	2037.52	814.279	481.926	1981.68	750.717
589	0	210.279	1913.17	1585.14	104.924	1918.05	1581.81	233.781	2076.24	1562.57	114.831	2084.81	1559.94	164.32	2108.05	1432.89	181.258	2218.28	1159.49	172.688	1955.48	1320.84	175.403	1864.7	1115.26	99.3464	2208.43	1250.34	323.791	2017	1390.11	442.073	2054.67	1159.61	452.208	2071.48	1064.09	471.36	2004.8	924.732	427.724	1985.64	822.102	489.337	2029.73	812.371	483.466	1974.52	748.383
590	0	211.335	1902.84	1583.36	106.011	1907.7	1580.02	234.756	2065.82	1560.6	115.85	2074.44	1558.08	165.37	2097.55	1431.2	181.848	2208.01	1157.8	173.765	1945.21	1318.73	176.118	1854.25	1113.35	100.286	2198.18	1248.7	324.576	2006.57	1388.3	442.983	2044.22	1157.87	452.823	2062.09	1062.13	472.35	1996.21	922.628	429.281	1977.73	819.914	489.92	2021.83	810.193	485.032	1967.12	746.431
591	0	212.497	1892.44	1581.76	107.213	1897.43	1578.3	235.967	2055.45	1558.85	116.777	2064.13	1556.24	166.363	2087.16	1429.58	182.658	2197.73	1156.25	174.657	1934.84	1317.03	176.747	1843.74	1111.61	101.149	2187.85	1247.11	325.685	1995.75	1386.63	443.832	2033.63	1156.2	453.845	2052.63	1060.74	473.774	1987.76	920.933	430.465	1969.79	817.787	492.52	2013.66	809.265	486.131	1959.64	744.178
592	0	213.633	1881.99	1579.94	108.403	1887.07	1576.52	237.324	2045.11	1556.9	118.29	2053.61	1554.24	167.535	2076.74	1427.7	183.933	2187.71	1154.37	175.577	1924.37	1315.12	177.505	1833.11	1109.7	102.267	2177.52	1245.2	326.639	1985.21	1384.62	444.776	2022.87	1154.12	454.481	2043.2	1058.61	474.635	1978.91	918.68	431.803	1962.06	815.509	493.302	2005.6	807.166	487.384	1951.92	741.839
593	0	214.993	1871.66	1577.87	109.797	1876.63	1574.7	238.585	2034.79	1554.79	119.603	2043.37	1552.34	168.836	2066.31	1425.74	185.033	2176.94	1152.25	176.786	1913.91	1313.19	178.307	1822.43	1107.94	103.562	2167.02	1243.29	327.625	1974.7	1382.42	445.447	2011.97	1151.68	455.296	2033.68	1056.43	475.912	1970.1	916.486	432.938	1953.25	813.008	494.449	1997.2	804.909	488.835	1944.08	739.387
594	0	216.463	1861.18	1576.14	111.351	1866.24	1573.01	239.958	2024.46	1552.89	120.953	2032.93	1550.46	170.084	2055.87	1423.92	186.243	2166.04	1150.34	178.009	1903.33	1311.36	179.064	1811.58	1106.15	104.65	2156.55	1241.49	328.858	1964.01	1380.47	446.204	2000.93	1149.48	456.386	2023.78	1054.75	477.217	1960.89	914.447	433.981	1944.45	810.85	496.276	1988.37	803.233	489.802	1935.74	737.023
595	0	217.895	1850.88	1574.54	112.869	1855.79	1571.42	241.504	2014.09	1551.27	122.447	2022.45	1548.78	171.347	2045.44	1422.1	187.355	2155.11	1148.42	179.373	1892.9	1309.76	180.013	1800.85	1104.68	105.78	2145.91	1239.57	330.23	1953.61	1378.68	447.329	1989.82	1147.74	457.316	2013.96	1053.02	478.153	1951.63	912.5	435.203	1935.56	808.645	497.003	1979.28	801.344	491.138	1927.31	734.998
596	0	219.682	1840.48	1572.92	114.53	1845.34	1569.84	243.224	2003.64	1549.45	124.151	2012.15	1547.14	172.912	2034.88	1420.14	188.534	2144.16	1146.15	180.696	1881.95	1308.21	181.089	1789.9	1103.35	107.023	2135.09	1237.45	331.7	1943.28	1376.66	448.498	1979.03	1145.56	458.142	2003.87	1050.9	479.428	1941.96	910.392	436.347	1926.33	806.657	498.456	1969.75	799.214	492.273	1918.53	732.579
597	0	221.452	1830	1571.23	116.203	1835	1568.22	244.967	1993.18	1547.74	125.967	2001.63	1545.62	174.425	2024.45	1418.41	189.456	2132.63	1143.94	182.151	1871.19	1306.6	182.237	1778.87	1101.87	108.199	2124.28	1235.52	333.161	1932.9	1374.83	449.546	1968.3	1143.36	459.259	1993.84	1048.91	480.394	1932.31	908.099	437.286	1916.71	804.083	499.818	1960.44	797.154	493.241	1909.29	730.225
598	0	223.089	1819.54	1569.62	117.915	1824.53	1566.78	246.754	1982.64	1546.27	127.754	1991.1	1544.11	175.985	2013.94	1416.72	190.609	2121.67	1141.94	183.735	1860.53	1305.18	183.545	1767.83	1100.67	109.327	2113.31	1233.72	334.734	1922.55	1373.08	450.521	1957.67	1141.31	461.102	1983.61	1047.57	481.471	1922.17	906.155	438.584	1907.22	802.205	500.873	1950.54	795.238	494.313	1899.94	727.961
599	0	224.942	1809.02	1568.42	119.848	1814.16	1565.54	248.795	1972.23	1544.94	129.619	1980.62	1542.74	177.646	2003.38	1415.02	191.712	2110.08	1139.94	185.446	1849.7	1303.94	185.003	1756.51	1099.68	110.559	2102.14	1231.88	336.569	1912.34	1371.43	451.597	1947.27	1139.26	461.536	1973.06	1045.19	482.432	1912.08	904.15	439.298	1896.99	799.824	502.14	1940.49	793.445	495.295	1890.23	725.887
600	0	227.129	1798.58	1567.23	121.752	1803.68	1564.32	250.813	1961.74	1543.45	131.551	1970.17	1541.44	179.441	1992.9	1413.48	193.026	2099.11	1137.93	187.162	1838.61	1302.85	186.595	1744.95	1098.81	111.771	2091.02	1230.04	338.386	1901.93	1369.59	453.194	1937.06	1137.32	462.508	1962.66	1042.97	483.303	1901.53	901.884	440.335	1886.82	797.841	502.687	1930.58	791.21	496.3	1880.2	723.571
601	0	228.999	1787.89	1566.08	123.74	1793.08	1563.32	252.847	1951.18	1542.13	133.698	1959.59	1540.31	181.245	1982.34	1412.15	193.832	2087.11	1135.97	189.018	1827.62	1301.79	188.353	1733.29	1098.07	113.073	2079.83	1228.4	340.362	1891.17	1368.01	454.573	1926.94	1135.36	463.55	1952.04	1040.89	484.438	1890.86	899.969	441.46	1876.17	795.762	503.749	1919.59	789.022	497.15	1869.73	721.526
602	0	231.142	1777.32	1565.46	125.885	1782.65	1562.73	255.175	1940.58	1541.21	135.93	1949.02	1539.44	183.319	1971.62	1411.11	195.046	2075.71	1134.42	190.952	1816.48	1301.22	190.146	1721.43	1097.8	114.401	2068.63	1227.15	342.347	1880.55	1366.71	456.236	1916.87	1133.68	464.675	1941.21	1039.06	485.601	1880.21	898.141	442.441	1865.48	794.076	504.154	1909.03	787.148	497.896	1859.02	719.634
603	0	233.422	1766.79	1565.1	128.261	1772.18	1562.45	257.317	1929.78	1540.47	138.285	1938.51	1538.78	185.338	1960.72	1410.31	195.898	2064.01	1133.21	193.021	1805.21	1300.88	191.889	1709.28	1097.67	115.757	2057.34	1226.18	344.454	1870.04	1365.44	457.45	1906.77	1131.86	465.937	1930.45	1037.37	486.634	1869.25	896.487	443.324	1854.35	792.484	505.795	1898.15	785.713	498.926	1847.94	718.066
604	0	235.785	1756.12	1564.94	130.655	1761.42	1562.52	259.697	1919.06	1540.01	140.677	1927.81	1538.39	187.305	1949.7	1409.93	196.494	2051.98	1132.35	195.074	1793.81	1300.68	193.822	1697.1	1097.86	117.107	2046.03	1225.48	346.53	1859.49	1364.41	458.764	1896.57	1130.31	466.738	1919.48	1035.67	487.643	1858.11	894.92	444.261	1842.91	791.048	506.327	1886.83	784.013	499.663	1836.74	716.496
605	0	237.843	1745.16	1565.13	133.062	1750.57	1562.9	261.919	1908.17	1539.95	142.942	1916.96	1538.32	189.221	1938.51	1409.97	197.146	2040.7	1131.99	197.237	1782.67	1300.71	195.671	1684.84	1098.35	118.151	2034.53	1225.51	348.634	1848.69	1363.92	460.3	1886.14	1129.69	467.771	1908.49	1034.75	488.65	1846.96	893.943	445.253	1831.06	790.305	506.673	1875.53	783.013	500.268	1825.19	715.647
606	0	240.576	1734.31	1565.9	135.575	1739.69	1563.84	264.342	1897.4	1540.14	145.443	1906.05	1538.83	190.945	1927.27	1410.42	198.158	2029.57	1132.49	199.394	1771.06	1301.62	197.547	1672.6	1099.37	118.998	2022.9	1225.94	350.718	1838	1363.96	461.867	1875.74	1129.51	468.758	1897.42	1034.43	489.69	1835.65	893.579	446.318	1819.12	790.273	507.99	1863.77	782.869	501.135	1813.31	715.417
607	0	243.295	1723.47	1566.76	138.128	1728.73	1564.9	266.964	1886.51	1540.69	148.033	1895.07	1539.46	192.806	1916.03	1411.09	199.076	2018.48	1132.72	201.65	1759.73	1302.58	199.474	1660.42	1100.6	120.066	2011.25	1226.81	352.759	1827.35	1364.27	463.05	1865.21	1129.36	469.514	1886.38	1034.08	490.892	1824.24	893.547	447.276	1807.25	790.407	508.685	1852.3	782.505	502.064	1801.15	715.399
608	0	245.863	1712.53	1567.9	140.691	1717.71	1566.17	269.252	1875.43	1541.48	150.429	1884.08	1540.56	194.564	1904.72	1412.19	199.872	2007.32	1133.82	203.627	1748.25	1303.77	201.503	1648.49	1102.18	120.789	1999.41	1227.92	354.73	1816.78	1365.08	464.351	1854.47	1129.92	470.165	1875.18	1034.27	491.984	1812.8	893.998	448.336	1794.84	791.029	508.593	1840.49	782.638	503.105	1789.19	715.952
609	0	248.168	1701.63	1569.31	143.27	1706.78	1567.81	271.747	1864.45	1542.65	152.88	1873.09	1542.1	196.317	1893.61	1413.54	200.371	1996.02	1135.11	205.718	1737	1305.27	203.456	1636.73	1104.01	121.512	1987.41	1229.35	356.631	1806.04	1366.24	465.241	1843.6	1130.72	469.804	1864.1	1034.77	493.092	1801.19	895.174	449.281	1782.16	792.148	509.783	1828.35	783.775	503.911	1776.67	717.063
610	0	250.689	1690.58	1571	145.646	1695.89	1569.77	274.304	1853.57	1544.32	155.221	1862.14	1543.94	198.02	1882.59	1415.07	201.115	1984.4	1136.4	207.752	1725.88	1307.21	205.416	1625.2	1106.25	122.398	1975.62	1230.89	358.514	1795.54	1367.82	466.304	1832.69	1131.97	471.749	1852.93	1036.79	494.114	1789.4	896.557	450.298	1769.45	793.578	510.25	1816.13	785.009	504.822	1764.07	718.539
611	0	253.011	1679.59	1572.74	147.926	1684.96	1571.72	276.583	1842.41	1545.87	157.65	1851.18	1545.72	199.786	1871.74	1416.61	201.887	1972.53	1137.46	209.838	1714.72	1309.13	207.444	1613.74	1108.54	123.341	1963.9	1232.38	360.473	1785.14	1369.46	467.335	1821.72	1133.24	471.793	1841.66	1037.52	495.245	1777.52	898.268	451.507	1756.33	795.412	510.567	1803.93	786.365	506.043	1751.37	720.292
612	0	254.879	1668.66	1574.43	150.076	1674.1	1573.72	278.804	1831.34	1547.65	160.011	1840.35	1547.88	201.615	1861.06	1418.3	202.505	1960.68	1138.84	211.964	1703.74	1311.35	209.552	1602.56	1111.02	124.448	1952.4	1233.96	362.466	1774.69	1371.37	468.171	1810.61	1134.63	472.68	1830.36	1039.13	496.32	1765.58	900.081	452.926	1743.36	797.652	511.274	1791.21	787.95	507.212	1738.3	722.347
613	0	256.985	1657.67	1576.56	151.934	1663.34	1575.85	280.929	1820.21	1549.79	162.151	1829.61	1550.13	203.201	1850.46	1420.04	203.061	1948.51	1140.33	213.849	1692.92	1313.68	211.61	1591.66	1113.59	125.578	1940.89	1235.63	364.341	1764.28	1373.45	469.581	1799.66	1136.69	473.759	1819.03	1041.09	497.567	1753.57	902.299	454.122	1729.8	800.177	512.112	1778.51	790.012	508.374	1725.17	724.754
614	0	258.771	1646.89	1578.6	153.659	1652.83	1577.9	283.145	1809.33	1552.16	164.217	1819.12	1552.47	205.014	1840.03	1421.76	204.199	1937	1141.74	215.71	1682.21	1316.02	213.607	1581.09	1116.19	126.791	1929.58	1237.25	366.194	1753.94	1375.44	470.265	1788.68	1137.99	474.626	1807.61	1042.67	498.655	1741.33	904.304	455.397	1716.45	802.488	512.837	1765.92	791.905	509.38	1711.77	726.852
615	0	260.405	1636.09	1580.55	155.306	1642.34	1579.85	285.156	1798.56	1554.28	166.447	1808.54	1554.65	206.775	1829.55	1423.44	205.555	1925.97	1143.11	217.612	1671.55	1318.14	215.395	1570.32	1118.62	128.181	1918.56	1238.8	368.07	1743.53	1377.34	471.511	1777.48	1139.5	476.064	1796.21	1044.46	499.784	1729.09	906.086	456.637	1703.11	804.779	513.28	1752.94	793.416	510.506	1697.84	729.147
616	0	261.734	1625.38	1582.38	156.904	1632.01	1581.7	286.88	1787.87	1556.21	168.392	1798.3	1556.7	208.565	1819.11	1425.08	206.722	1915.27	1144.6	219.344	1660.82	1320.32	217.031	1559.73	1120.99	129.533	1907.59	1240.35	369.726	1733.19	1379.06	472.966	1765.95	1141.27	477.602	1784.51	1046.25	501.207	1716.72	908.124	457.751	1689.66	806.786	513.949	1739.9	795.146	511.931	1684.22	731.252
617	0	263.253	1614.94	1584.3	158.222	1621.74	1583.71	288.641	1777.35	1558.06	170.03	1787.98	1558.63	210.093	1808.71	1426.64	208.046	1904.63	1145.87	220.912	1650.34	1322.25	218.526	1549.34	1123.3	131.334	1897.4	1241.97	371.486	1722.87	1380.87	474.476	1754.46	1142.9	478.918	1772.81	1047.62	502.697	1704.24	910.169	459.087	1676.04	809.194	514.978	1726.57	797.06	512.79	1670.46	733.504
618	0	264.674	1604.53	1585.93	159.644	1611.48	1585.56	290.437	1767.1	1559.61	171.717	1777.65	1560.13	211.758	1798.25	1427.94	209.634	1894.22	1147.15	222.488	1639.78	1324.15	219.958	1539.11	1125.31	132.818	1886.93	1243.42	373.173	1712.55	1382.29	476.053	1743.02	1144.41	480.727	1761.21	1048.95	504.26	1691.67	911.962	460.462	1662.47	811.527	516.259	1713.14	798.714	513.925	1656.38	735.597
619	0	266.238	1594.29	1587.58	161.181	1601.24	1587.18	291.758	1756.28	1560.89	173.337	1767.55	1561.56	213.368	1787.82	1429.42	211.487	1884.13	1148.78	223.889	1629.28	1325.78	221.166	1528.89	1127.1	134.248	1876.64	1244.95	374.638	1702.04	1383.65	477.953	1731.48	1145.96	482.723	1749.44	1050.48	505.606	1678.93	913.578	461.655	1648.81	813.458	517.25	1699.57	800.001	515.206	1642.15	737.721
620	0	267.534	1584.14	1589.1	162.541	1591.3	1588.77	293.181	1746.1	1562.03	174.781	1757.34	1562.96	214.659	1777.33	1430.82	213.289	1874.05	1150.41	225.479	1618.92	1327.29	222.217	1518.66	1128.54	135.607	1866.2	1246.56	375.82	1691.44	1384.98	479.639	1719.98	1147.42	484.471	1737.55	1051.7	507.175	1666.14	915.335	462.991	1635.18	815.529	518.439	1685.79	801.529	516.173	1627.63	739.759
621	0	268.6	1573.96	1590.38	163.923	1581.04	1590.36	294.591	1735.88	1563.11	176.156	1747.16	1563.96	216.067	1766.76	1432	214.928	1863.77	1151.91	226.449	1608.36	1328.51	222.852	1508.26	1129.82	136.941	1855.74	1247.62	376.976	1680.8	1385.97	481.286	1708.49	1148.57	486.168	1725.83	1052.51	508.711	1653.24	916.835	464.21	1621.42	817.6	519.911	1671.77	802.825	517.284	1613.18	741.7
622	0	270.281	1563.95	1591.55	165.209	1570.89	1591.68	295.741	1725.87	1563.8	177.246	1736.86	1564.99	217.089	1756.3	1433.26	216.542	1853.35	1153.4	227.493	1597.94	1329.49	223.509	1498.08	1130.79	138.305	1845.86	1249.25	378.067	1670.01	1386.92	483.272	1697.05	1149.87	488.326	1713.95	1053.6	510.294	1640.35	918.259	465.595	1607.83	819.555	520.748	1658.23	803.923	518.572	1598.66	743.579
623	0	271.62	1553.85	1592.64	166.543	1560.81	1592.83	296.819	1715.52	1564.56	178.338	1726.67	1566.06	218.135	1745.74	1434.45	217.943	1843.09	1154.8	228.177	1587.48	1330.47	223.938	1487.8	1131.43	139.456	1835.88	1250.69	378.87	1659.23	1387.9	485.03	1685.59	1151.18	490.34	1702.03	1054.61	511.756	1627.23	919.694	466.76	1594.22	821.197	522.573	1643.83	805.379	519.688	1583.78	745.599
624	0	272.815	1543.73	1593.61	167.742	1550.55	1594.16	297.88	1705.48	1565.17	179.389	1716.47	1566.87	219.085	1735.29	1435.55	219.314	1832.38	1155.88	228.927	1577.12	1331.24	223.928	1477.29	1132.04	140.634	1825.9	1251.89	379.805	1648.24	1388.81	486.739	1673.91	1152.63	492.519	1690.1	1055.77	513.207	1614.14	921.178	467.955	1580.62	822.95	524.024	1629.6	806.716	520.876	1568.99	747.612
625	0	273.961	1533.61	1594.45	168.85	1540.57	1595.14	298.885	1695.08	1565.6	180.471	1706.38	1567.43	220.042	1724.8	1436.4	220.819	1821.62	1156.91	229.362	1566.74	1331.9	223.891	1467.19	1132.37	142.109	1816.02	1253.06	380.462	1637.26	1389.36	488.084	1662.63	1153.38	494.037	1678.13	1056.17	514.572	1600.99	922.411	469.518	1567.71	824.616	526.003	1615.41	808.052	522.203	1554.22	749.537
626	0	274.715	1523.38	1595.11	169.65	1530.29	1596.02	300.075	1685.17	1566.05	181.528	1696.17	1568.01	221.282	1714.34	1437.31	222.134	1810.88	1157.95	229.848	1556.77	1332.02	223.618	1457.22	1132.32	143.646	1806.43	1254.02	381.05	1626.39	1389.82	489.447	1651.31	1154.12	496.527	1666.3	1057.34	516.082	1587.86	923.678	470.511	1553.76	826.135	527.484	1601.36	809.107	523.463	1539.55	751.271
627	0	275.414	1513.03	1595.63	170.382	1520.18	1596.57	300.651	1674.75	1566.19	182.269	1685.95	1568.39	222.241	1703.91	1438.12	223.689	1800.77	1158.97	229.969	1546.51	1332.5	223.248	1447.31	1132.24	145.071	1796.75	1255.02	381.552	1615.24	1390.27	490.756	1639.95	1154.97	498.612	1654.09	1058.35	517.407	1574.7	925.02	471.322	1540.13	827.54	528.787	1587.2	810.411	524.595	1524.47	753.183
628	0	275.929	1502.86	1596.19	170.946	1510.01	1597.27	301.463	1664.28	1566.58	183.135	1675.76	1568.91	223.113	1693.43	1438.74	225.47	1791.4	1159.83	230.166	1536.44	1332.73	222.679	1437.43	1132.22	146.667	1787.15	1255.88	382.043	1603.92	1390.76	491.942	1628.69	1155.75	500.349	1641.99	1059.15	518.508	1561.33	926.296	472.235	1526.56	828.984	530.452	1572.95	811.69	526.034	1509.9	755.249
629	0	276.668	1492.56	1596.36	171.57	1499.9	1597.61	302.196	1653.89	1566.67	183.927	1665.65	1569.04	224.138	1683.12	1439.25	227.241	1781.99	1160.72	230.266	1526.38	1332.89	222.282	1427.79	1132.12	148.278	1777.53	1256.62	382.52	1592.84	1390.96	492.96	1617.22	1156.15	501.725	1629.55	1059.45	519.721	1547.93	927.331	473.569	1513.25	830.356	531.896	1558.89	812.845	527.254	1495.43	756.867
630	0	277.113	1482.23	1596.4	172.127	1489.8	1597.73	302.965	1643.55	1566.6	184.714	1655.57	1569.06	225.393	1672.68	1439.69	228.763	1772.55	1161.29	230.334	1516.3	1332.7	221.724	1417.97	1131.71	149.839	1767.88	1257.11	382.947	1581.69	1391.21	493.912	1605.89	1156.59	503.303	1617.28	1059.85	520.833	1534.36	928.358	474.592	1499.55	831.533	533.095	1544.8	813.579	528.321	1480.95	758.219
631	0	277.628	1471.91	1596.45	172.507	1479.59	1597.69	303.625	1633.21	1566.58	185.203	1645.2	1569.11	226.382	1662.42	1440.09	230.364	1763.06	1162.06	230.259	1506.33	1332.53	221.132	1408.57	1131.3	151.434	1758.44	1257.79	383.338	1570.5	1391.47	494.84	1594.31	1157.13	504.687	1604.9	1060.43	521.837	1521.03	929.519	475.622	1485.98	832.67	535.161	1530.47	814.927	529.468	1466.39	759.674
632	0	277.949	1461.47	1596.24	172.845	1469.33	1597.59	304.037	1622.66	1566.41	185.676	1634.94	1569.05	227.091	1652.22	1440.23	231.722	1753.37	1162.36	230.172	1496.36	1332.29	220.609	1399.21	1130.71	152.753	1748.93	1258.03	383.37	1559.33	1391.43	495.606	1582.71	1157.38	506.304	1592.57	1060.97	522.805	1507.71	930.418	476.601	1472.26	833.657	535.735	1516.62	815.578	530.544	1452.06	760.894
633	0	278.268	1451.13	1595.66	173.168	1459.08	1597.21	304.482	1612.25	1565.89	186.252	1624.62	1568.74	227.792	1641.91	1440.07	233.239	1743.83	1162.58	230.153	1486.43	1331.64	220.171	1389.93	1129.93	154.126	1739.38	1258.05	383.636	1548.51	1391.23	496.407	1570.92	1157.35	507.727	1580.08	1060.97	523.838	1494.48	930.832	477.677	1458.66	834.354	537.337	1502.65	816.315	531.593	1437.95	761.686
634	0	278.561	1440.78	1595.01	173.622	1448.86	1596.7	304.896	1601.87	1565.28	186.585	1614.32	1568.33	228.385	1631.8	1439.82	234.275	1734.31	1162.36	230.061	1476.55	1331.02	219.709	1380.7	1128.95	155.411	1729.89	1258.02	383.791	1537.62	1390.84	497.009	1558.92	1157.27	508.467	1567.56	1060.52	524.759	1481.14	931.243	478.702	1444.96	834.816	538.059	1488.73	816.299	532.468	1423.7	762.256
635	0	278.951	1430.28	1594.35	173.77	1438.43	1596.16	305.249	1591.46	1564.63	187.018	1604.03	1567.82	228.938	1621.68	1439.43	235.371	1724.77	1162.21	229.97	1466.6	1330.42	219.405	1371.56	1127.99	156.425	1720.47	1257.79	383.816	1526.89	1390.43	497.782	1546.84	1157.16	509.552	1554.98	1060.3	525.524	1467.84	931.549	479.55	1431.23	835.335	539.53	1474.74	816.873	533.457	1409.63	762.895
636	0	278.962	1419.87	1593.57	173.926	1428.03	1595.48	305.537	1581.17	1563.84	187.294	1593.69	1567.23	229.331	1611.6	1438.87	236.363	1715.32	1161.92	229.812	1456.79	1329.66	219.001	1362.53	1127	157.235	1710.96	1257.33	383.95	1516.34	1389.87	498.493	1534.69	1156.86	510.443	1542.22	1059.97	526.399	1454.66	931.642	480.239	1417.48	835.586	540.552	1460.86	816.931	534.406	1395.35	763.423
637	0	279.208	1409.37	1592.52	174.1	1417.74	1594.49	305.765	1570.6	1562.98	187.564	1583.4	1566.5	229.6	1601.44	1438.32	237.171	1706.05	1161.49	229.666	1446.88	1328.57	218.734	1353.45	1125.55	158.013	1701.44	1256.91	383.959	1505.71	1388.96	499.093	1522.4	1156.15	511.486	1529.53	1059.43	527.009	1441.41	931.36	480.936	1403.86	835.422	541.266	1447.09	816.712	535.184	1381.44	763.511
638	0	278.664	1398.89	1591.37	173.976	1407.4	1593.52	306.022	1560.12	1562.22	187.771	1573.03	1565.64	229.949	1591.26	1437.61	237.887	1696.57	1160.9	229.541	1437.05	1327.57	218.424	1344.23	1124.11	158.682	1691.8	1256.33	383.942	1495.34	1388.14	499.562	1509.94	1155.31	512.177	1516.78	1058.62	527.607	1428.19	931.026	481.667	1390.14	835.328	541.692	1433.39	816.172	535.824	1367.62	763.32
639	0	278.694	1388.39	1590.28	173.911	1397.05	1592.43	306.054	1549.57	1561.42	187.764	1562.67	1564.75	229.886	1581.17	1436.83	238.487	1687.38	1160.36	229.516	1427.08	1326.56	218.23	1334.99	1122.73	159.215	1682.07	1255.76	383.765	1484.79	1387.18	500.041	1497.59	1154.59	512.7	1503.98	1057.89	528.002	1414.92	930.644	482.159	1376.05	835.243	541.907	1419.67	815.696	536.366	1353.76	763.185
640	0	278.262	1377.85	1589.19	173.721	1386.68	1591.12	305.996	1539.01	1560.39	187.789	1552.28	1563.72	230.121	1570.89	1435.95	238.94	1677.81	1159.73	229.419	1417.1	1325.31	218.292	1325.59	1121.2	159.579	1672.4	1255.07	383.944	1474.55	1386.18	500.2	1485.01	1153.49	512.941	1491.05	1056.8	528.267	1401.52	930.151	482.551	1362.4	834.825	542.671	1406	815.333	536.73	1339.85	762.717
641	0	278.176	1367.39	1587.9	173.534	1376.35	1589.67	305.859	1528.34	1559.21	187.586	1541.8	1562.65	230.067	1560.6	1435.06	239.128	1667.93	1159.11	229.398	1407.07	1323.88	218.297	1315.93	1119.45	159.792	1662.58	1254.4	383.926	1464.04	1385.07	500.5	1472.44	1152.47	513.279	1478.34	1055.64	528.485	1388.33	929.497	482.866	1348.8	834.182	542.815	1392.15	814.471	537.106	1326.02	762.242
642	0	277.932	1356.87	1586.57	173.158	1365.88	1588.37	305.691	1517.95	1558.02	187.451	1531.28	1561.42	229.968	1550.09	1434.06	239.454	1658.25	1158.45	229.218	1396.94	1322.52	218.32	1306.15	1117.77	159.803	1652.53	1253.54	383.773	1453.67	1383.91	500.45	1459.94	1151.34	513.26	1465.46	1054.46	528.468	1374.92	928.871	482.927	1335.13	833.655	542.742	1378.36	813.789	537.194	1312.26	761.708
643	0	277.38	1346.39	1585.09	172.713	1355.41	1586.99	305.609	1507.59	1556.75	187.172	1520.9	1559.88	229.842	1539.7	1432.83	239.418	1648.57	1157.31	229.091	1386.6	1321.06	218.426	1296.32	1116.08	159.827	1642.58	1252.41	383.589	1443.27	1382.6	500.235	1447.56	1150.04	513.09	1452.58	1053.23	528.176	1361.59	928.188	482.754	1321.2	833.204	542.483	1364.9	813.134	537.016	1298.35	761.136
644	0	277.035	1335.95	1583.65	172.494	1345	1585.32	305.056	1497.06	1555.22	186.866	1510.43	1558.31	229.637	1529.24	1431.49	239.146	1638.4	1156.18	228.993	1376.42	1319.47	218.513	1286.26	1114.24	159.642	1632.47	1251.2	383.377	1432.91	1381.11	500.049	1435.23	1148.65	513.392	1439.78	1052.25	527.78	1348.22	927.355	482.45	1307.89	832.33	542.177	1351.08	812.187	536.633	1284.4	760.441
645	0	276.803	1325.41	1582.17	172.25	1334.42	1583.79	304.467	1486.52	1553.47	186.296	1499.86	1556.76	229.197	1518.66	1430.18	239.007	1628.56	1155.06	228.867	1366.02	1317.83	218.943	1276.27	1112.43	159.343	1622.26	1249.95	382.928	1422.45	1379.64	499.857	1423.08	1147.5	512.805	1426.79	1050.83	527.195	1334.71	926.538	481.995	1294.6	831.422	542.148	1337.18	811.503	536.208	1270.47	759.792
646	0	276.476	1314.91	1580.74	171.883	1323.72	1582.21	303.96	1476.18	1552.06	185.645	1489.19	1554.97	228.695	1508.12	1428.77	238.736	1618.51	1153.86	228.681	1355.61	1316.26	219.094	1266.06	1110.7	158.961	1611.82	1248.59	382.868	1412.21	1378.45	499.353	1410.87	1146.32	512.592	1414.06	1049.68	526.518	1321.32	925.928	481.274	1281.18	830.694	541.895	1322.88	810.855	535.52	1256.33	759.283
647	0	275.993	1304.49	1579.05	171.389	1313.05	1580.65	303.224	1465.64	1550.28	185.024	1478.54	1553.3	228.194	1497.48	1427.16	238.402	1608.47	1152.57	228.297	1345.13	1314.64	219.361	1255.79	1108.94	158.496	1601.33	1247.11	382.29	1401.8	1376.89	499.03	1399.04	1144.9	512.07	1401.23	1048.18	525.628	1307.9	924.942	480.173	1267.75	829.876	541.804	1309.11	810.074	534.698	1242.42	758.706
648	0	275.692	1293.81	1577.4	170.885	1302.32	1578.89	302.461	1455.13	1548.65	184.169	1467.79	1551.6	227.558	1486.84	1425.71	237.952	1597.98	1151.29	228.343	1334.65	1312.92	219.663	1245.42	1107.08	157.892	1590.71	1245.64	381.907	1391.37	1375.5	498.444	1387.24	1143.43	511.615	1388.43	1046.87	524.424	1294.38	924.012	479.575	1254.62	829.026	540.552	1295.27	808.955	533.513	1228.35	757.873
649	0	274.87	1283.29	1575.77	170.15	1291.49	1577	301.658	1444.5	1547.16	183.24	1456.93	1549.97	226.74	1476.12	1424.18	237.207	1587.23	1149.89	227.765	1323.87	1311.09	220.002	1235.07	1105.22	157.011	1579.9	1244.1	381.287	1381.05	1374.14	497.931	1375.55	1142.13	510.972	1375.7	1045.75	523.385	1281.07	923.269	478.102	1241.16	828.067	539.908	1281.11	808.215	532.161	1214.33	757.325
650	0	274.215	1272.66	1574.18	169.402	1280.71	1575.3	300.725	1434.03	1545.67	182.143	1446.2	1548.24	225.875	1465.52	1422.61	236.359	1576.77	1148.21	227.527	1313.42	1309.54	220.045	1224.52	1103.47	156.119	1569.06	1242.41	380.739	1370.71	1372.81	497.083	1363.99	1140.71	510.503	1363.33	1044.67	521.911	1267.71	922.391	476.574	1227.77	827.416	538.41	1267.31	807.56	530.673	1200.3	756.791
651	0	273.406	1261.91	1572.45	168.425	1269.96	1573.35	299.668	1423.42	1543.98	181.282	1435.5	1546.27	224.997	1454.88	1420.83	235.633	1566.11	1146.49	227.093	1302.61	1307.84	220.482	1214.02	1101.75	155.225	1558.23	1240.49	380.088	1360.32	1371.31	496.558	1352.68	1139.34	509.644	1350.86	1043.1	520.732	1254.58	921.581	475.227	1214.58	826.697	537.879	1253.47	806.696	528.993	1186.41	756.21
652	0	272.426	1251.35	1570.71	167.456	1259.21	1571.52	298.505	1412.7	1542.28	180.018	1424.78	1544.42	224.05	1444.19	1418.91	234.757	1555.31	1144.72	226.683	1291.73	1306.05	220.767	1203.23	1100.02	154.142	1547.24	1238.5	379.404	1350.17	1369.83	495.941	1341.26	1137.99	508.639	1338.7	1041.54	519.424	1241.53	920.673	473.746	1201.32	826.092	536.007	1239.71	805.651	527.355	1172.44	755.644
653	0	271.217	1240.56	1569.22	166.206	1248.51	1569.58	297.102	1402.05	1540.71	178.796	1414.06	1542.62	222.92	1433.52	1417.22	233.746	1544.39	1142.72	226.187	1280.94	1304.41	220.97	1192.36	1098.35	153.011	1536.11	1236.53	378.671	1339.79	1368.47	495.187	1330.03	1136.92	507.859	1326.63	1040.34	518.14	1228.68	920.027	472.062	1188.11	825.611	535.241	1226.08	805.112	525.411	1158.6	755.267
654	0	269.84	1229.97	1567.62	164.84	1237.75	1567.93	295.839	1391.48	1539.4	177.385	1403.32	1540.89	221.777	1422.79	1415.39	232.705	1533.46	1140.85	225.307	1269.9	1302.87	221.179	1181.24	1096.85	151.845	1524.95	1234.5	377.591	1329.3	1367.1	494.379	1318.93	1135.68	506.932	1314.76	1039.28	516.645	1215.93	919.276	470.413	1175.11	825.249	533.146	1212.75	804.333	523.456	1144.95	755.042
655	0	268.579	1219.36	1566.11	163.483	1227.01	1565.99	294.245	1380.86	1537.82	175.927	1392.64	1539.01	220.513	1412.06	1413.52	231.728	1522.27	1138.85	224.718	1258.85	1301.23	221.298	1170.07	1095.29	150.748	1513.72	1232.26	376.707	1318.88	1365.73	493.515	1307.67	1134.39	505.956	1303.18	1037.81	515.28	1203.49	918.417	468.853	1162.12	824.893	531.63	1199.73	803.451	521.665	1131.54	754.652
656	0	267.22	1208.86	1564.59	162.217	1216.28	1564.33	292.568	1370.37	1536.32	174.152	1381.95	1537.41	218.858	1401.33	1411.71	230.493	1511.01	1136.73	223.972	1247.9	1299.73	221.497	1158.69	1093.76	149.432	1502.34	1230.15	375.586	1308.3	1364.43	492.885	1296.6	1133.46	505.035	1291.56	1036.7	514.114	1191.32	917.752	467.42	1149.35	824.505	529.734	1186.83	802.564	519.778	1118.22	754.361
657	0	265.748	1198.39	1563.29	160.708	1205.54	1562.79	290.822	1359.94	1535.08	172.396	1371.15	1535.65	217.344	1390.43	1409.99	229.441	1499.35	1134.83	223.169	1236.74	1298.43	221.541	1147.24	1092.62	148.197	1490.78	1227.93	374.418	1297.57	1363.46	492.091	1285.37	1132.65	504.117	1280.34	1035.83	512.875	1179.39	917.212	465.964	1136.88	824.419	528.463	1174.15	802.017	518.061	1105.22	754.436
658	0	264.348	1187.96	1562.21	159.207	1194.84	1561.43	288.901	1349.61	1533.68	170.492	1360.5	1534.11	215.761	1379.64	1408.21	228.213	1487.5	1132.67	222.502	1225.62	1297.27	221.435	1135.46	1091.57	146.887	1479.18	1225.71	373.159	1287	1362.53	491.257	1274.26	1131.93	503.136	1269.09	1035.03	511.762	1167.72	916.617	464.585	1124.48	824.482	526.715	1162.37	801.458	516.559	1092.62	754.35
659	0	262.79	1177.53	1561.08	157.601	1184.21	1560.16	287.003	1339.27	1532.42	168.38	1349.8	1532.59	213.917	1368.78	1406.47	227.218	1475.61	1130.58	221.315	1214.25	1296.02	221.424	1123.6	1090.62	145.56	1467.45	1223.31	371.668	1276.15	1361.6	490.267	1262.85	1131.27	501.644	1258.12	1033.82	510.797	1156.25	916.155	463.491	1112.37	824.447	524.916	1150.4	800.571	515.093	1080.21	754.306
660	0	260.982	1167.25	1560.11	155.889	1173.53	1558.94	284.804	1328.84	1531.27	166.271	1339.13	1531.14	212.141	1357.98	1404.95	226.165	1463.36	1128.49	220.172	1202.96	1294.98	221.14	1111.59	1089.77	144.18	1455.54	1221.03	370.138	1265.43	1360.87	488.954	1251.41	1131.06	500.791	1247.1	1033.5	509.665	1145	915.664	462.487	1100.41	824.409	523.695	1138.8	800.057	513.842	1068.22	754.314
661	0	259.21	1156.94	1559.49	154.034	1162.94	1558.08	282.642	1318.6	1530.13	163.988	1328.47	1529.76	210.147	1347.16	1403.3	224.938	1450.86	1126.22	218.823	1191.42	1294.27	220.563	1099.42	1089.37	142.79	1443.71	1218.6	368.493	1254.6	1360.24	487.713	1240.15	1130.71	499.565	1236.2	1033.12	508.705	1134.05	915.276	461.677	1088.86	824.519	522.221	1127.8	799.602	512.822	1056.73	754.165
662	0	257.334	1146.64	1559.18	152.092	1152.33	1557.72	280.318	1308.29	1529.04	161.87	1317.79	1528.46	208.221	1336.19	1402.1	223.937	1438.27	1124.46	217.429	1179.85	1293.7	220.156	1087.21	1089.1	141.414	1431.73	1216.5	366.655	1243.71	1359.69	486.267	1228.94	1130.21	498.315	1225.53	1032.59	507.777	1123.25	914.864	461.053	1077.42	824.627	521.17	1117.19	799.051	512.069	1045.73	753.914
663	0	255.433	1136.26	1559.44	150.184	1141.74	1557.75	278.091	1297.77	1528.42	159.382	1307	1527.67	205.938	1324.62	1401.43	222.905	1425.53	1123.51	215.967	1168.11	1293.52	219.657	1074.85	1089.1	139.96	1419.68	1215.07	365.203	1232.68	1359.71	485.069	1217.91	1130.3	496.891	1214.69	1032.46	507.2	1113.08	914.644	460.645	1066.44	824.635	519.513	1107.01	798.613	511.684	1035.27	753.919
664	0	253.238	1125.83	1560.04	148.005	1131.06	1558.13	275.702	1287.19	1528.3	156.945	1296.22	1527.22	203.875	1313.05	1401.17	222.031	1412.79	1122.99	214.36	1156.18	1293.79	219.048	1062.24	1089.4	138.836	1407.7	1214.25	363.498	1221.16	1360.14	483.619	1206.99	1130.72	495.674	1204.1	1032.89	506.409	1102.72	914.815	460.072	1055.6	824.956	518.218	1097.15	798.558	511.376	1025.2	754.116
665	0	250.569	1115.25	1561.01	145.704	1120.38	1558.77	273.31	1276.62	1528.35	154.544	1285.33	1526.92	201.99	1301.23	1401.2	221.225	1400.26	1122.87	212.68	1144.31	1294.37	218.199	1049.37	1090.11	137.836	1395.66	1213.83	361.894	1209.53	1360.89	482.146	1196.4	1131.29	494.579	1193.77	1033.76	505.557	1092.95	914.963	459.563	1045.19	825.466	517.284	1088	798.828	511.292	1015.83	754.372
666	0	248.337	1104.56	1562.01	143.239	1109.58	1559.69	270.771	1265.84	1528.62	152.05	1274.31	1526.88	200.492	1289.41	1401.61	220.878	1388.97	1123.47	210.918	1132.36	1295.21	217.359	1036.33	1091.16	137.144	1383.86	1213.95	360.142	1197.42	1361.85	480.294	1185.83	1131.8	492.996	1183.48	1034.52	504.815	1083.4	915.403	459.087	1035.82	825.617	516.406	1079.11	798.972	511.344	1006.97	754.789
667	0	245.842	1093.82	1563.67	140.862	1098.63	1560.76	268.1	1254.86	1529.29	149.479	1263.31	1527.23	199.015	1277.59	1402.74	220.694	1377.65	1124.43	209.148	1120.32	1296.32	216.274	1023.26	1092.38	136.591	1372.11	1214.59	358.279	1185.08	1363.59	479.094	1175.57	1133.45	491.779	1173.21	1036.18	503.873	1074.01	916.235	458.627	1026.95	826.059	515.325	1070.73	799.817	511.195	998.609	755.342
668	0	243.366	1082.94	1565.53	138.283	1087.74	1562.2	265.567	1243.81	1530.7	146.918	1252.21	1528.01	197.215	1266.07	1404.17	221.048	1366.51	1126.17	207.469	1108.51	1297.9	214.944	1010.51	1094.14	136.352	1360.44	1215.92	356.601	1172.48	1365.89	477.743	1165.14	1135.65	490.77	1163.11	1038.71	503.052	1065.01	917.681	458.102	1018.31	826.978	514.782	1062.83	801.465	511.257	990.881	756.482
669	0	240.994	1072.16	1567.68	136.066	1076.72	1563.87	263.297	1232.93	1532.25	144.433	1241.08	1528.98	195.986	1254.31	1405.62	221.285	1354.7	1127.92	205.775	1096.79	1299.75	213.645	998.146	1096.27	136.212	1348.84	1216.97	354.856	1159.94	1368.28	476.554	1154.85	1137.91	489.504	1153.22	1040.94	502.335	1056.17	919.209	457.593	1010.28	828.002	513.583	1055.33	802.739	511.294	983.576	757.442
670	0	238.641	1061.19	1569.69	133.78	1065.65	1565.5	260.853	1221.94	1534	142.202	1229.88	1530.28	194.613	1242.91	1407.19	221.202	1342.45	1129.6	204.102	1085.08	1301.65	212.122	985.956	1098.58	136.275	1337.13	1218.34	352.958	1147.32	1370.83	475.204	1144.38	1140.39	488.244	1143.32	1043.35	501.397	1047.56	920.76	456.962	1002.45	829.062	513.435	1048.39	804.363	511.098	976.43	758.37
671	0	236.493	1050.18	1572.13	131.526	1054.42	1567.46	258.453	1210.93	1536.29	139.788	1218.7	1532.03	193.405	1231.78	1409.21	221.132	1329.89	1131.51	202.604	1073.75	1303.96	210.58	974.237	1101.11	136.21	1325.5	1219.97	351.163	1135.19	1373.64	473.995	1133.68	1143.46	487.061	1133.46	1046.31	500.579	1039.08	922.69	456.333	994.96	830.243	512.732	1041.01	806.375	510.535	970.164	759.299
672	0	234.334	1039.18	1574.74	129.473	1043.25	1569.58	256.283	1200	1539.1	137.56	1207.54	1534.12	192.153	1220.67	1411.26	221.341	1317.38	1133.33	201.067	1062.47	1306.49	209.01	963.008	1103.92	135.999	1313.91	1221.55	349.589	1123.31	1376.67	472.816	1122.89	1146.68	486.06	1123.77	1049.59	499.753	1030.65	924.947	455.728	987.797	831.72	512.725	1033.87	809.113	509.933	963.736	760.644
673	0	232.591	1028.28	1577.25	127.665	1032.09	1571.72	254.291	1189.22	1541.79	135.668	1196.37	1536.31	191.001	1209.74	1413.13	221.595	1305.27	1134.91	199.704	1051.38	1308.95	207.411	951.808	1106.65	135.773	1302.49	1223.08	348.074	1111.81	1379.45	471.665	1112.02	1149.7	485.168	1114.33	1052.69	499.139	1022.39	927.222	455.191	980.755	833.093	512.492	1026.56	811.455	509.398	957.518	761.675
674	0	231.013	1017.47	1579.65	126.142	1021.06	1573.77	252.291	1178.44	1544.28	133.787	1185.52	1538.55	190.16	1198.64	1415.17	221.593	1293.66	1136.87	198.465	1040.43	1311.43	206.092	941.076	1109.27	135.54	1291.1	1224.87	346.835	1100.45	1382.31	470.651	1101.16	1152.68	484.2	1104.93	1055.49	498.685	1014.29	929.422	454.733	973.862	834.57	512.304	1019.46	813.431	508.87	951.384	762.736
675	0	229.569	1006.67	1582.13	124.766	1010.15	1575.87	250.621	1167.89	1546.94	132.043	1174.41	1540.86	188.836	1187.85	1417.38	221.092	1282.58	1139.13	197.267	1029.51	1313.91	204.736	930.474	1111.86	135.119	1279.84	1226.86	345.602	1089.27	1385.07	470.062	1090.33	1155.98	483.392	1095.66	1058.59	498.148	1006.09	931.775	454.419	967.228	836.201	512.554	1012.27	815.883	508.115	945.397	763.826
676	0	228.157	995.993	1584.56	123.309	999.479	1578.03	249.264	1157.26	1549.57	130.543	1163.61	1543.11	188.029	1176.81	1419.33	220.272	1271.57	1141.5	196.066	1018.75	1316.34	203.623	920.063	1114.48	134.628	1268.68	1228.69	344.613	1078.22	1387.82	469.301	1079.58	1159.02	483.218	1086.61	1061.88	497.842	998.141	934.016	453.978	960.497	837.752	512.861	1005.23	818.432	507.497	939.372	764.887
677	0	226.943	985.34	1586.75	122.105	988.591	1579.93	248.299	1146.66	1551.99	129.254	1152.77	1545	187.225	1165.97	1421.41	219.29	1260.47	1143.63	195.098	1008.02	1318.45	202.668	909.645	1116.58	134.051	1257.68	1230.64	343.535	1067.1	1390.13	468.581	1068.77	1161.61	482.454	1077.55	1064.37	497.457	990.072	935.861	453.722	953.741	838.924	513.305	998.221	820.561	507.091	933.442	765.636
678	0	225.757	974.834	1588.79	120.902	978.079	1581.77	247.047	1135.91	1553.72	128.275	1142.28	1546.75	186.405	1155.12	1423.48	218.344	1249.11	1145.53	194.171	997.475	1320.32	201.835	899.013	1118.52	133.363	1246.86	1232.7	342.702	1056.34	1392.25	467.848	1058.1	1163.81	481.819	1068.56	1066.57	497.441	982.306	937.486	453.508	946.954	840.007	514.032	991.042	822.277	506.639	927.468	766.248
679	0	224.536	964.362	1590.71	119.907	967.537	1583.51	246.039	1125.17	1555.42	127.502	1131.69	1548.24	185.401	1144.49	1425.34	217.637	1238.37	1147.46	193.441	986.902	1322.21	201.243	888.566	1120.36	132.658	1236.24	1234.7	341.932	1045.6	1394.1	467.26	1047.68	1165.89	481.675	1059.63	1068.85	497.268	974.405	938.912	453.554	940.341	840.971	514.306	984.156	823.862	506.552	921.617	766.767
680	0	223.742	953.675	1592.56	118.957	957.146	1585.2	245.351	1114.45	1557.02	126.94	1121.33	1549.54	184.723	1133.73	1427.02	216.793	1227.78	1149.47	192.813	976.338	1323.93	200.872	878.036	1121.98	131.876	1225.68	1236.58	341.409	1035.01	1395.78	466.839	1037.56	1167.77	480.956	1050.57	1070.64	497.293	966.727	940.152	453.658	933.662	841.81	514.642	977.381	825.489	506.636	915.654	767.336
681	0	222.833	943.067	1594.39	118.198	946.809	1586.85	245.092	1103.92	1558.53	126.588	1110.79	1550.95	184.229	1123.08	1428.82	215.882	1217.92	1151.48	192.34	965.789	1325.37	200.688	867.638	1123.16	131.041	1215.24	1238.48	340.983	1024.58	1397.31	466.481	1027.48	1169.28	480.63	1041.57	1072.27	497.437	958.974	941.168	453.899	926.971	842.217	515.123	970.633	826.561	506.936	909.605	767.724
682	0	222.204	932.41	1595.92	117.434	936.512	1588.21	245.002	1093.33	1560.23	126.192	1100.48	1552.47	183.781	1112.41	1430.47	214.965	1208.35	1153.29	192.003	955.407	1326.67	200.556	857.318	1124.24	130.091	1204.95	1240.52	340.717	1014.37	1398.71	465.896	1017.78	1170.38	480.384	1032.61	1073.63	497.289	951.154	941.882	454.068	920.206	842.463	515.311	963.758	827.452	507.283	903.457	767.95
683	0	221.495	921.897	1597.36	116.685	926.146	1589.83	244.672	1082.63	1561.63	125.906	1090.14	1553.88	183.258	1101.91	1432.16	213.89	1198.42	1155.24	191.731	945.069	1328.07	200.551	847.21	1125.27	129.138	1194.9	1242.57	340.323	1004.17	1399.95	465.433	1008.47	1171.3	480.024	1023.72	1075.02	497.131	943.476	942.594	454.191	913.282	842.802	515.755	957.099	828.491	507.837	897.359	768.309
684	0	220.91	911.248	1598.77	116.113	915.756	1591.18	244.539	1071.87	1563.17	125.882	1079.76	1555.25	182.775	1091.5	1433.73	212.897	1188.72	1157.15	191.466	934.722	1329.33	200.751	837.075	1126.17	128.004	1184.74	1244.44	339.983	994.243	1401.04	465.064	999.521	1172.15	479.456	1014.89	1075.99	497.055	935.803	943.129	454.603	906.76	843.011	516.647	950.212	829.377	508.784	891.329	768.71
685	0	220.709	900.57	1600.01	115.882	905.389	1592.43	244.33	1061.15	1564.41	125.82	1069.34	1556.83	181.88	1081.1	1435.41	211.768	1179.21	1158.79	191.546	924.549	1330.48	201.069	827.175	1126.88	126.801	1174.69	1246.27	339.739	984.468	1402.17	464.736	990.985	1172.92	479.174	1006.16	1077.12	497.007	928.139	943.857	454.936	899.98	843.163	516.851	943.413	830.152	509.551	884.853	769.224
686	0	220.451	889.908	1601.11	115.584	894.876	1593.61	244.239	1050.5	1565.62	125.57	1058.88	1558.24	181.207	1070.75	1436.97	210.618	1169.48	1160.54	191.478	914.361	1331.59	201.309	817.321	1127.64	125.61	1164.52	1248.09	339.58	974.863	1403.34	464.364	982.778	1173.87	478.634	997.607	1078.24	496.775	920.518	944.509	455.129	893.28	843.355	517.016	936.618	831.013	510.257	878.245	769.929
687	0	220.238	879.541	1601.92	115.422	884.603	1594.66	244.173	1040.03	1566.7	125.637	1048.4	1559.4	180.753	1060.58	1437.94	209.561	1160.11	1161.78	191.474	904.456	1332.69	201.712	807.657	1128.49	124.442	1154.47	1249.42	339.427	965.384	1404.35	463.843	974.915	1174.68	478.25	989.218	1079.29	496.706	913.044	945.241	455.109	886.278	843.834	517.473	929.971	831.925	510.965	871.674	770.624
688	0	220.226	868.963	1602.59	115.453	873.953	1595.67	243.858	1029.55	1567.44	125.615	1037.97	1560.58	180.348	1050.54	1439.14	208.472	1150.79	1163.12	191.426	894.407	1333.58	202.074	797.846	1129.22	123.477	1144.56	1250.89	339.097	955.926	1405.19	463.365	967.29	1175.44	477.926	981.167	1080.36	496.381	905.495	945.823	455.743	881.271	843.466	517.827	923.025	832.722	511.648	864.995	771.257
689	0	220.211	858.446	1603.26	115.357	863.356	1596.33	243.934	1019.21	1568.48	125.487	1027.58	1561.64	179.298	1040.68	1440.34	207.307	1141.04	1164.14	191.476	884.601	1334.3	202.523	788.111	1129.94	122.38	1134.65	1252.04	338.981	946.644	1406.14	463.09	959.761	1176.51	477.379	973.175	1081.31	496.253	897.961	946.656	455.764	874.147	843.953	518.177	916	833.771	512.224	858.162	772.069
690	0	220.205	847.982	1603.77	115.401	852.945	1596.91	243.988	1009.02	1569.29	125.29	1017.17	1562.65	178.744	1031.01	1441.25	206.393	1131.68	1165.3	191.384	874.807	1334.96	202.871	778.445	1130.82	121.326	1124.7	1253.19	338.899	937.369	1407.02	462.528	952.518	1177.49	477.224	965.475	1082.58	496.048	890.513	947.473	455.931	867.426	844.442	518.998	908.901	834.921	512.562	851.263	772.891
691	0	220.186	837.663	1604.03	115.325	842.542	1597.35	243.854	998.656	1569.97	125.261	1006.83	1563.27	178.48	1021.02	1441.91	205.39	1122.16	1165.91	191.556	865.191	1335.64	203.155	768.775	1131.7	120.529	1114.98	1253.94	338.766	928.227	1407.66	462.499	944.987	1178.31	477.07	957.819	1083.46	496.153	883.203	948.034	456.054	860.506	844.88	519.42	902.019	835.672	513.056	844.498	773.535
692	0	220.315	827.268	1604.29	115.258	832.162	1597.68	243.991	988.505	1570.71	125.167	996.62	1564.07	178.065	1011.4	1442.47	204.74	1113.01	1166.66	191.763	855.521	1336.03	203.563	759.069	1132.39	119.884	1105.26	1254.57	338.889	919.144	1408.28	462.573	937.371	1178.94	476.725	950.194	1083.89	496.44	875.92	948.426	456.557	854.017	844.999	519.615	894.954	836.041	513.543	837.564	773.895
693	0	220.174	816.962	1604.46	115.341	821.937	1597.73	243.727	977.993	1571.33	124.96	986.308	1564.68	177.72	1001.64	1443	203.951	1103.39	1167.36	191.802	845.937	1336.32	203.861	749.408	1132.98	119.107	1095.52	1255.34	338.972	909.975	1408.88	462.871	929.805	1179.8	476.503	942.528	1084.46	496.704	868.67	948.84	456.608	846.53	845.379	519.547	888.086	836.529	513.862	830.631	774.226
694	0	219.993	806.736	1604.56	115.244	811.768	1597.7	243.621	967.926	1571.89	124.872	976.202	1565.17	177.465	992.009	1443.3	203.42	1093.97	1167.73	191.831	836.361	1336.53	203.946	739.839	1133.55	118.62	1086.04	1255.64	339.024	900.861	1409.23	462.955	922.193	1180.28	476.685	934.988	1085.14	497.106	861.453	949.131	456.96	839.184	845.562	519.977	881.059	837.047	514.292	823.823	774.277
695	0	220.075	796.608	1604.44	115.165	801.606	1597.54	243.503	957.928	1572.13	124.774	966.195	1565.45	177.238	982.311	1443.42	202.867	1084.45	1167.7	192.051	826.774	1336.6	204.053	730.17	1133.94	118.152	1076.37	1255.79	339.075	891.706	1409.13	463.146	914.386	1180.31	476.247	927.303	1084.9	497.581	854.193	948.917	457.515	831.763	845.495	520.356	873.997	836.904	514.749	817	773.948
696	0	220.004	786.664	1604.11	115.173	791.561	1597.22	243.282	947.887	1572.16	124.664	956.343	1565.57	177.23	972.795	1443.41	202.541	1075.13	1167.84	192.313	817.189	1336.48	204.457	720.31	1134.19	117.931	1066.95	1255.89	339.258	882.479	1408.95	463.441	906.553	1180.27	476.239	919.564	1084.73	498.381	846.764	948.87	458.177	824.406	845.205	520.513	866.897	836.502	515.253	809.976	773.557
697	0	219.983	776.813	1603.83	115.168	781.599	1596.96	243.301	938.06	1572.35	124.637	946.292	1565.61	177.068	963.045	1443.31	202.156	1065.63	1167.81	192.337	807.652	1336.34	204.368	710.704	1134.01	117.613	1057.39	1255.88	339.42	873.141	1408.8	463.654	898.642	1180.23	476.384	911.603	1084.72	498.912	839.277	948.639	458.631	816.405	844.949	520.672	859.708	836.185	515.596	802.901	773.171
698	0	220.195	766.975	1603.49	115.329	771.749	1596.63	243.439	928.428	1572.35	124.674	936.48	1565.43	177.176	953.529	1442.96	201.862	1056.1	1167.5	192.306	798.018	1336.2	204.153	701.211	1133.85	117.545	1047.98	1255.71	339.465	863.716	1408.33	463.721	890.5	1179.82	476.278	903.604	1084.37	499.474	831.827	948.097	459.143	809.086	844.441	520.566	852.49	835.817	515.999	795.8	772.524
699	0	220.025	757.235	1602.82	115.533	761.791	1596.15	243.375	918.604	1571.91	124.626	926.646	1565.17	177.206	943.757	1442.49	201.895	1046.8	1167.08	192.403	788.379	1335.78	204.148	691.513	1133.44	117.477	1038.46	1255.41	339.644	854.235	1407.67	463.862	882.094	1179.17	476.037	895.393	1083.5	500.097	824.202	947.352	459.769	801.145	843.693	520.664	845.128	834.956	516.564	788.595	771.598
700	0	220.48	747.5	1602.14	115.795	751.911	1595.54	243.435	908.969	1571.34	124.856	916.836	1564.76	177.237	934.084	1442.03	201.751	1037.3	1166.68	192.375	778.774	1335.12	203.887	681.775	1132.84	117.405	1028.9	1255.11	339.81	844.571	1406.94	463.999	873.467	1178.46	476.512	887.079	1083.09	500.422	816.173	946.433	460.113	792.897	842.937	520.615	837.493	833.972	516.887	781.068	770.568
701	0	220.784	737.677	1601.54	116.103	742.194	1594.88	243.752	899.299	1570.86	124.839	906.917	1564.27	177.544	924.583	1441.53	201.606	1027.75	1166.23	192.286	769.041	1334.45	203.21	672.289	1131.86	117.455	1019.42	1254.64	339.969	834.989	1406.14	464.204	864.639	1177.88	476.987	878.535	1082.68	500.901	808.039	945.64	460.449	785.127	841.746	521.244	829.59	833.392	517.049	773.361	769.591
702	0	221.249	728.028	1600.62	116.437	732.42	1594.18	243.787	889.422	1569.81	125.121	897.256	1563.52	177.684	914.752	1440.67	201.761	1018.25	1165.39	192.242	759.313	1333.66	202.835	662.672	1131.05	117.566	1009.79	1253.97	340.068	825.074	1405.08	464.34	855.642	1176.94	477.032	869.781	1081.7	501.137	799.743	944.433	460.999	777.051	840.801	521.573	821.676	832.334	517.516	765.655	768.45
703	0	221.748	718.323	1599.45	116.86	722.603	1593.15	244.174	879.84	1568.58	125.409	887.482	1562.5	177.904	904.775	1439.6	201.915	1008.47	1164.44	192.297	749.531	1332.6	202.402	652.897	1129.9	117.898	1000.25	1253.05	340.277	815.119	1403.81	464.614	846.355	1175.69	477.094	860.812	1080.37	501.421	791.254	943.092	461.26	768.532	839.39	521.637	813.715	830.874	517.901	757.671	766.878
704	0	222.234	708.509	1598.31	117.323	712.835	1592.14	244.692	870.098	1567.34	125.787	877.655	1561.34	178.392	895.121	1438.39	202.131	998.745	1163.31	192.256	739.698	1331.35	201.89	643.256	1128.54	118.238	990.626	1252.02	340.53	805.188	1402.5	464.812	836.923	1174.48	477.081	851.619	1079.11	501.538	782.496	941.763	461.698	760.267	837.997	521.811	805.349	829.502	518.225	749.576	765.559
705	0	222.635	698.718	1596.95	117.802	703.007	1591.03	244.973	860.141	1565.8	126.315	867.785	1559.91	178.632	885.015	1437.06	202.576	989.174	1162	192.147	729.753	1330.1	201.168	633.364	1127.32	118.644	980.869	1250.83	340.551	794.846	1400.96	465.06	827.154	1173.08	477.479	842.348	1078.06	501.533	773.629	940.253	462.057	751.606	836.563	522.464	796.81	828.293	518.583	741.37	763.894
706	0	223.018	688.897	1595.36	118.233	693.182	1589.65	245.529	850.25	1564.06	126.946	858.039	1558.39	179.23	875.13	1435.58	202.88	979.171	1160.35	192.233	719.798	1328.68	200.508	623.486	1125.77	119.265	971.113	1249.4	340.751	784.527	1399.18	465.271	817.285	1171.42	477.829	832.934	1076.6	501.814	764.578	938.543	462.311	743.086	834.755	522.925	788.346	826.657	518.95	733.136	761.998
707	0	223.531	678.929	1593.66	118.649	683.271	1588.01	246.189	840.367	1562.41	127.474	848.104	1556.75	179.889	865.33	1434.01	203.414	969.188	1158.79	192.19	709.684	1326.96	200.029	613.317	1124.2	119.922	961.315	1247.88	341.052	774.159	1397.38	465.378	807.082	1169.58	477.93	823.28	1074.85	501.923	755.329	936.593	462.732	735.067	832.462	523.008	779.778	824.713	519.347	724.575	759.902
708	0	224.033	668.945	1592.13	119.146	673.428	1586.55	246.688	830.171	1560.63	127.993	838.118	1555.14	180.294	855.082	1432.42	204.1	959.214	1157.22	192.312	699.59	1325.37	199.415	603.244	1122.46	120.44	951.3	1246.39	341.413	763.724	1395.65	465.774	796.749	1167.96	478.13	813.603	1073.11	502.231	746.166	934.71	462.922	726.264	830.387	523.155	770.979	822.778	519.84	716.024	758.03
709	0	224.478	658.81	1590.58	119.581	663.546	1584.88	247.34	820.035	1558.96	128.613	828.184	1553.54	180.893	844.902	1430.81	204.698	948.916	1155.69	192.393	689.374	1323.68	198.958	592.923	1121	121.123	941.349	1244.77	341.744	753.203	1393.92	465.97	786.218	1166.17	478.476	803.72	1071.33	502.435	736.773	932.664	463.314	717.396	828.327	523.788	762.182	821.109	520.197	707.366	755.943
710	0	224.976	648.682	1588.66	120.005	653.536	1583.1	248.155	809.983	1557	129.236	818.194	1551.61	181.72	834.867	1429.06	205.367	938.728	1153.79	192.605	679.112	1321.86	198.467	582.605	1119.15	121.993	931.279	1242.98	342.135	742.561	1391.76	466.191	775.534	1163.95	478.737	793.707	1069.22	502.716	727.458	930.261	463.822	708.229	825.963	524.482	753.125	818.931	520.772	698.666	753.585
711	0	225.567	638.566	1586.72	120.615	643.381	1581.34	248.75	799.761	1554.86	129.872	808.057	1549.79	182.212	824.376	1427	206.026	928.295	1151.76	192.781	668.677	1319.89	198.175	572.061	1117.27	122.55	920.952	1241.15	342.587	731.871	1389.58	466.33	764.726	1161.5	478.623	783.603	1066.76	503.046	717.856	927.839	464.014	698.937	823.188	524.424	743.955	816.379	521.156	689.737	751.032
712	0	226.238	628.295	1585.03	121.261	633.236	1579.63	249.427	789.386	1553.15	130.677	797.855	1547.95	183.091	814.182	1425.26	206.479	917.75	1149.79	192.977	658.235	1318.15	197.783	561.557	1115.56	123.298	910.745	1239.32	342.977	721.112	1387.35	466.498	753.811	1159.25	479.092	773.456	1064.9	503.343	708.236	925.613	464.27	689.691	820.853	524.764	734.746	814.404	521.479	680.65	748.668
713	0	227.169	618.05	1583.15	122.055	623.062	1578.06	250.172	779.23	1551.04	131.47	787.607	1546.06	184.005	803.861	1423.37	207.194	907.374	1147.9	193.323	647.639	1316.38	197.603	551.033	1113.68	123.892	900.26	1237.51	343.494	710.358	1385.27	466.55	742.662	1156.79	479.349	763.197	1062.89	503.733	698.505	923.268	464.696	680.165	818.669	525.454	725.577	812.247	521.944	671.517	746.384
714	0	227.988	607.811	1581.2	123.034	612.694	1576.33	251.128	768.971	1549.01	132.163	777.307	1544.32	184.457	793.013	1421.33	207.572	896.591	1145.91	193.725	636.978	1314.56	197.622	540.268	1111.85	124.424	889.701	1235.68	344.087	699.517	1382.98	466.748	731.592	1154.31	479.354	752.771	1060.44	504.013	688.578	920.803	465.059	670.366	816.09	525.712	715.866	809.801	522.249	662.065	743.74
715	0	228.993	597.429	1579.41	124.024	602.215	1574.65	251.768	758.462	1546.92	133.044	766.86	1542.57	185.445	782.48	1419.61	208.171	886.129	1143.92	194.241	626.227	1312.75	197.602	529.398	1109.88	124.986	878.947	1233.98	344.689	688.657	1380.94	466.922	720.439	1152.06	479.328	742.294	1058.02	504.215	678.522	918.399	465.31	660.508	813.56	525.69	705.979	807.345	522.563	652.548	741.326
716	0	230.099	587.035	1577.78	124.948	591.739	1573.29	252.823	747.984	1545.25	134.051	756.151	1540.79	186.159	771.692	1417.9	208.388	875.286	1142.1	194.657	615.376	1311.19	197.454	518.183	1108.54	125.535	868.139	1232.24	345.277	677.802	1379	467.218	709.371	1150.07	479.747	731.836	1056.15	504.511	668.304	916.285	465.447	650.503	811.491	526.064	696.096	805.555	522.688	642.798	739.116
717	0	231.176	576.454	1576.12	126.148	581.15	1571.76	253.92	737.586	1543.44	134.998	745.592	1539.28	186.96	760.848	1416.04	208.967	864.62	1140.37	195.194	604.406	1309.55	197.613	507.077	1106.87	126.061	857.203	1230.59	346.049	666.755	1377.15	467.465	698.333	1147.96	479.895	721.256	1053.93	504.657	657.883	914.112	465.57	640.377	809.205	526.174	685.731	803.391	522.907	632.792	736.79
718	0	232.57	565.908	1574.47	127.509	570.498	1570.08	254.898	726.785	1541.47	136.152	734.911	1537.61	187.903	750.041	1414.38	209.36	853.479	1138.58	195.829	593.403	1307.81	197.791	495.888	1105.26	126.643	846.169	1228.91	346.785	655.745	1375.15	467.77	687.418	1145.91	480.094	710.515	1051.76	504.749	647.25	911.779	465.575	629.817	806.726	526.275	675.164	801.183	522.912	622.273	734.437
719	0	233.819	555.154	1572.75	128.746	559.775	1568.65	256.163	715.983	1539.68	137.421	724.155	1535.94	188.978	739.148	1412.66	210.017	842.502	1136.55	196.553	582.247	1306.3	197.985	484.533	1103.7	127.129	834.944	1227.15	347.775	644.787	1373.26	468.202	676.636	1143.82	480.157	699.614	1049.52	505.001	636.499	909.658	465.7	619.201	804.604	526.405	664.555	798.973	523.064	611.58	732.184
720	0	235.209	544.342	1571.34	129.914	549.005	1567.43	257.646	705.313	1538.12	138.709	713.392	1534.39	190.107	728.334	1410.88	210.363	830.912	1134.47	197.348	571.014	1304.94	198.363	472.954	1102.6	127.878	823.707	1225.26	348.691	633.749	1371.32	469.306	665.885	1141.81	480.752	688.769	1047.62	505.263	625.606	907.656	465.675	608.332	802.599	526.52	653.547	796.827	523.062	600.886	730.119
721	0	236.183	533.523	1569.85	131.369	538.191	1566.06	259.085	694.316	1536.39	140.359	702.536	1532.83	191.044	717.075	1409.03	210.991	819.225	1132.49	198.316	559.691	1303.63	198.804	461.206	1101.42	128.449	812.181	1223.46	349.845	622.824	1369.56	470.066	655.203	1139.76	480.934	677.779	1045.36	505.444	614.494	905.468	465.745	597.14	800.549	526.488	642.472	794.598	522.752	590.033	727.798
722	0	237.564	522.451	1568.33	132.923	527.291	1564.61	260.575	683.25	1534.82	141.925	691.67	1531.51	192.501	706.201	1407.37	211.432	807.246	1130.24	199.359	548.258	1302.35	199.348	449.491	1100.34	129.101	800.603	1221.65	351.08	611.648	1367.6	470.721	644.327	1137.59	481.349	666.551	1043.2	505.582	603.081	903.233	465.954	585.651	798.53	526.541	631.123	792.443	522.578	578.691	725.499
723	0	239.114	511.442	1567.01	134.375	516.513	1563.55	262.369	672.202	1533.51	143.563	680.751	1530.4	193.719	695.227	1405.86	211.782	794.89	1127.98	200.399	536.69	1301.17	199.896	437.359	1099.61	129.924	788.93	1219.87	352.326	600.549	1365.85	471.522	633.535	1135.64	481.906	655.383	1041.26	505.831	591.716	901.264	466.11	573.717	796.658	526.599	619.587	790.413	522.443	567.136	723.473
724	0	240.717	500.355	1565.83	136	505.567	1562.69	264.238	661.176	1532.25	145.432	669.848	1529.31	195.404	684.08	1404.22	212.242	782.325	1125.81	201.552	525.124	1300.31	200.385	425.139	1099.15	130.628	777.096	1218.02	353.756	589.408	1364.17	472.475	622.711	1133.7	482.608	644.12	1039.22	506.217	580.158	899.096	466.523	561.52	795.085	526.59	608.087	788.298	522.405	555.361	721.558
725	0	242.743	489.269	1564.92	137.838	494.487	1562.09	266.165	649.866	1531	147.409	658.833	1528.39	196.849	672.889	1402.89	212.834	769.708	1123.9	202.915	513.342	1299.62	200.986	412.824	1098.71	131.607	765.29	1216.39	355.289	578.057	1362.52	473.441	611.695	1131.73	482.751	632.54	1036.88	506.758	568.498	897.182	466.962	549.311	793.375	526.576	596.336	785.97	522.46	543.372	719.592
726	0	244.641	478.032	1564.38	139.783	483.516	1561.79	268.181	638.574	1529.98	149.503	647.624	1527.84	198.533	661.563	1402.02	213.578	757.187	1122.36	204.24	501.417	1299.13	201.445	400.177	1098.68	132.513	753.487	1215.28	356.884	566.627	1361.29	474.613	600.547	1130.25	483.26	620.877	1035.05	507.249	556.785	895.407	466.59	538.299	790.914	526.511	584.321	784.135	522.522	531.318	717.777
727	0	246.695	466.887	1564.15	141.891	472.443	1561.94	270.478	627.306	1529.28	151.494	636.54	1527.55	199.906	650.003	1401.53	214.556	744.863	1121.32	205.451	489.535	1299	201.747	387.485	1098.96	133.227	741.433	1214.48	358.322	555.041	1360.26	475.465	589.181	1128.88	483.744	609.114	1033.56	507.744	544.943	893.817	467.019	525.375	789.812	526.5	572.416	782.468	522.744	519.356	716.23
728	0	249.002	455.659	1564.17	144.155	461.38	1562.51	272.751	615.968	1528.66	153.962	625.205	1527.45	201.657	638.499	1401.32	215.361	732.49	1120.68	206.699	477.464	1299.21	202.085	374.746	1099.34	134.059	729.574	1214.17	359.695	543.281	1359.32	476.046	577.553	1127.45	484.296	597.19	1032.22	508.24	532.923	892.438	467.029	513.358	788.311	526.537	560.143	781.012	522.889	506.939	714.824
729	0	251.382	444.409	1564.57	146.63	450.051	1563.41	275.008	604.457	1528.32	156.241	614.001	1527.68	202.974	626.636	1401.55	215.489	719.98	1120.58	207.923	465.345	1299.69	202.296	361.936	1100.13	134.729	717.647	1214.42	360.99	531.604	1358.81	476.644	565.791	1126.5	484.34	585.037	1031.02	508.763	520.783	891.417	467.389	500.555	787.438	526.621	547.784	779.966	522.94	494.236	714.233
730	0	253.877	433.013	1565.35	149.073	438.814	1564.83	277.263	592.957	1528.31	158.539	602.408	1528.32	204.12	614.96	1402.18	215.267	707.474	1121.14	209.079	453.234	1300.54	202.413	348.99	1101.21	134.85	705.574	1215.4	362.154	519.719	1358.79	477.123	553.685	1126.18	484.21	572.606	1030.38	509.133	508.34	891.022	467.705	487.659	787.012	526.447	535.166	779.381	523.253	481.518	713.528
731	0	256.583	421.753	1566.53	151.682	427.413	1566.58	279.72	581.664	1528.75	160.829	591.039	1529.55	205.32	602.863	1403.33	215.419	694.905	1122.5	210.148	441.193	1301.87	202.712	336.446	1102.64	134.91	693.364	1216.75	363.263	507.956	1359.22	477.424	541.53	1126.14	484.468	560.16	1030.41	509.382	495.775	891.144	467.896	474.501	787.187	526.414	522.352	779.346	523.549	468.399	713.841
732	0	259.171	410.352	1567.77	154.238	416.085	1568.68	282.17	570.102	1529.49	163.4	579.644	1531.12	206.443	590.834	1404.55	215.493	682.346	1124.03	211.302	429.233	1303.5	203.115	324.325	1104.02	134.711	681.125	1218.6	364.227	496.41	1359.91	477.65	529.072	1126.27	484.266	547.523	1030.46	509.51	482.884	891.473	468.101	461.252	787.579	526.48	509.249	779.673	523.833	455.614	714.024
733	0	261.751	398.989	1569.23	156.938	404.649	1570.95	284.311	558.425	1530.45	165.701	568.132	1533.06	207.13	579.119	1406.2	214.653	669.584	1125.16	212.222	417.313	1305.35	203.467	311.933	1106.33	134.449	668.769	1220.65	365.166	484.925	1361.12	477.494	516.48	1126.88	483.841	534.682	1031.06	509.528	469.852	892.403	468.354	447.681	788.571	526.418	495.881	780.498	524.028	442.152	715.005
734	0	264.141	387.524	1570.99	159.277	393.376	1573.45	286.605	547.054	1531.93	167.727	556.691	1535.29	208.02	567.355	1408.34	213.592	656.765	1127.14	212.991	405.614	1307.5	203.864	300.362	1108.46	134.085	656.611	1222.97	365.898	473.584	1362.7	477.151	503.757	1127.91	483.453	521.83	1032.25	509.347	456.455	893.969	468.249	433.987	789.893	526.45	482.283	782.064	524.173	428.481	716.497
735	0	266.325	376.161	1572.67	161.584	381.905	1576.07	288.608	535.624	1533.5	170.045	545.318	1537.86	209.087	555.957	1410.16	213.135	644.641	1129.02	213.798	394.041	1309.91	204.331	288.841	1110.89	134.003	644.442	1225.12	366.797	462.353	1364.49	476.778	491.094	1128.99	483.388	508.985	1033.98	509.015	442.984	895.629	468.1	420.146	791.622	526.313	468.444	783.819	524.328	414.635	718.246
736	0	268.489	364.789	1574.44	163.656	370.534	1578.59	290.375	524.141	1535.09	171.734	533.983	1540.45	209.652	544.487	1412.1	212.76	633.091	1130.69	214.632	382.635	1312.17	204.926	278.124	1113.28	133.97	632.503	1227.19	367.628	451.228	1366.33	476.577	478.426	1130.33	482.665	496.153	1035.18	508.757	429.339	897.476	468.552	405.119	793.985	526.08	454.395	785.582	524.39	400.571	720.106
737	0	270.165	353.498	1576.26	165.509	359.23	1580.94	292.131	512.806	1537.11	173.444	522.684	1543.05	210.825	533.467	1414.17	212.585	621.876	1132.67	215.263	371.321	1314.52	205.347	267.289	1115.61	134.143	620.808	1229.32	368.486	440.164	1368.31	476.265	465.748	1131.63	482.571	483.314	1036.87	508.502	415.933	899.486	468.404	390.981	796.031	525.617	440.173	787.352	524.295	385.991	722.252
738	0	271.653	342.155	1578.21	166.885	348.172	1583.35	293.627	501.574	1539.14	175.164	511.679	1545.68	211.63	522.243	1416.22	212.718	610.492	1134.54	215.768	360.213	1316.86	205.849	256.958	1118.22	134.358	609.271	1231.38	369.358	429.127	1370.46	476.045	453.142	1133.43	482.231	470.589	1038.56	508.173	402.093	901.718	467.733	376.857	798.281	525.219	425.929	789.486	523.969	371.314	724.633
739	0	272.696	331.037	1579.95	168.059	337.056	1585.52	294.797	490.311	1541.06	176.352	500.523	1547.95	212.625	511.163	1418	212.744	599.13	1136.31	216.328	349.162	1319.07	206.307	246.757	1120.21	134.808	598.033	1233.32	370.001	417.972	1372.16	475.94	440.592	1134.98	482.517	457.879	1040.3	507.898	388.548	903.658	467.137	362.423	800.339	524.68	411.416	791.462	523.538	356.285	726.85
740	0	273.762	319.897	1581.68	169.182	326.029	1587.53	295.937	479.314	1542.8	177.501	489.6	1550	213.485	500.157	1419.78	213.29	588.225	1138.15	216.826	338.149	1320.98	206.763	236.414	1122.23	135.402	587.069	1235.24	370.909	406.879	1373.94	476.091	428.135	1136.43	482.48	445.042	1041.61	507.484	374.672	905.412	466.532	347.584	802.48	523.653	396.659	792.969	522.974	340.946	729.047
741	0	274.629	308.921	1583.39	170.052	315.128	1589.41	296.706	468.224	1544.42	178.247	478.802	1551.94	214.236	489.099	1421.65	213.771	577.396	1140.15	217.411	327.082	1322.73	207.049	226.08	1124.17	136.026	576.292	1237.28	371.477	395.699	1375.65	476.408	415.708	1137.98	482.742	432.222	1042.98	507.07	360.746	907.227	465.604	332.862	804.578	523.063	381.93	794.621	522.079	325.296	731.286
742	0	275.464	298.025	1585.05	170.748	304.317	1591.39	297.385	457.339	1545.96	178.915	467.779	1553.76	215.111	478.219	1423.38	214.51	566.83	1142.09	217.763	316.298	1324.64	207.23	215.673	1125.84	136.768	565.657	1239.26	371.972	384.523	1377.15	476.839	403.405	1139.52	483.463	419.422	1044.41	506.839	346.806	909.001	464.769	317.962	806.991	521.838	366.42	796.183	520.895	309.392	733.529
743	0	276.104	287.347	1586.53	171.426	293.413	1593	297.978	446.692	1547.22	179.552	456.964	1555.13	215.365	467.092	1425.07	215.452	556.53	1143.97	218.058	305.484	1326.06	207.238	205.079	1127.05	137.701	555.335	1241.15	372.519	373.322	1378.63	477.284	391.063	1140.8	484.005	406.731	1045.43	506.383	332.811	910.478	463.792	302.846	809.325	521.044	351.14	797.588	519.427	293.076	735.613
744	0	276.654	276.587	1587.76	172.122	282.526	1594.63	298.3	435.818	1548.47	179.643	445.971	1556.7	216.18	456.122	1426.76	216.263	546.252	1145.97	218.262	294.649	1327.31	207.079	194.323	1128.07	138.399	545.094	1243.25	372.871	361.935	1380.08	477.838	378.896	1142.07	484.447	393.887	1046.29	505.977	318.561	912.108	462.517	287.906	811.481	519.888	335.53	798.736	517.718	276.854	737.727
745	0	277.216	265.813	1589.16	172.641	271.756	1596.07	298.485	425.172	1549.67	179.789	435.166	1558.12	216.63	445.156	1428.35	217.138	536.123	1148.04	218.284	283.902	1328.53	206.866	183.697	1128.96	139.174	534.934	1245.13	372.966	350.498	1381.35	478.635	366.778	1143.62	485.394	381.185	1047.57	505.496	304.331	913.76	461.254	272.949	813.852	518.951	319.937	800.282	515.878	260.321	740.013
746	0	277.777	255.177	1590.36	173.058	260.918	1597.5	298.734	414.524	1550.59	180.079	424.328	1559.25	216.872	434.264	1429.89	218.133	526.107	1149.85	218.225	273.202	1329.61	206.37	173.164	1129.55	139.889	524.948	1246.9	372.885	339.093	1382.45	479.223	354.725	1144.8	486.406	368.575	1048.67	504.908	290.091	915.356	459.77	257.875	816.247	517.82	304.248	801.683	513.839	243.668	742.276
747	0	278.222	244.483	1591.33	173.519	250.057	1598.76	298.631	403.678	1551.34	180.262	413.38	1560.3	217.358	423.404	1431.14	219.08	516.168	1151.43	218.204	262.535	1330.39	205.964	162.793	1129.92	140.908	515.09	1248.49	372.858	327.635	1383.37	479.953	342.737	1145.99	487.287	355.719	1049.49	504.262	275.657	916.776	458.182	243.086	818.389	516.665	288.482	802.804	511.687	226.897	744.458
748	0	278.488	233.723	1592.33	173.938	239.193	1599.86	298.747	393.039	1552.15	180.386	402.569	1561.25	217.611	412.464	1432.52	220.17	506.43	1153.15	218.085	251.926	1331.15	205.35	152.61	1130.18	141.866	505.302	1250.12	372.81	316.165	1384.33	480.796	330.777	1147.21	487.991	342.876	1050.14	503.517	261.305	918.35	456.497	227.994	820.68	515.355	272.585	803.94	509.448	210.206	746.799
749	0	278.691	223	1593.31	174.137	228.252	1600.94	298.712	382.236	1552.95	180.107	391.62	1562.34	218.075	401.595	1433.78	221.194	496.705	1154.94	217.796	241.479	1331.94	204.626	142.618	1130.5	142.934	495.598	1251.78	372.835	304.757	1385.44	481.408	318.881	1148.53	488.893	329.968	1051.34	502.698	246.937	920.115	454.774	212.763	823.215	513.892	256.906	805.583	507.186	193.715	749.388
750	0	278.815	212.082	1593.97	174.216	217.437	1601.71	298.77	371.41	1553.69	180.204	380.823	1563.15	218.393	390.969	1434.95	222.34	487.055	1156.38	217.456	231.124	1332.45	203.701	132.964	1130.38	143.936	485.921	1253.26	372.676	293.268	1386.31	482.183	307.02	1149.65	489.881	316.921	1052.33	501.81	232.352	921.654	452.735	198.139	825.196	512.426	241.03	806.658	504.726	177.209	751.721
751	0	278.723	201.113	1594.38	174.23	206.543	1602.17	298.757	360.507	1554.26	180.098	369.734	1563.7	218.798	380.189	1435.91	223.39	477.491	1157.68	217.064	220.791	1332.7	202.727	123.555	1130.02	144.983	476.292	1254.48	372.486	281.858	1386.89	482.686	295.072	1150.46	490.63	303.9	1052.99	500.713	217.955	922.956	450.764	183.267	827.225	510.829	225.38	807.892	502.228	160.799	753.802
752	0	278.63	190.101	1594.75	174.03	195.602	1602.54	298.639	349.378	1554.73	180.329	358.868	1564.2	219.203	369.542	1436.78	224.46	468.021	1159.12	216.667	210.662	1332.93	201.824	114.237	1129.89	145.887	466.696	1255.83	372.371	270.584	1387.6	483.164	282.933	1151.5	491.427	290.799	1053.86	499.538	203.31	924.532	448.998	168.312	829.534	509.069	209.681	809.399	499.684	144.618	755.961
753	0	278.353	179.069	1594.93	173.805	184.614	1602.7	298.634	338.408	1555.26	180.049	347.824	1564.62	219.694	359.26	1437.67	225.358	458.573	1160.13	216.297	200.58	1333.15	201.141	105.15	1129.95	146.941	457.228	1256.79	372.22	259.369	1388.22	483.667	270.905	1152.51	492.381	277.698	1054.82	498.61	188.841	926.238	447.179	153.393	831.862	507.348	194.329	810.946	497.174	128.502	758.129
754	0	278.106	167.962	1594.78	173.63	173.515	1602.54	298.569	327.351	1555.6	179.889	336.89	1564.94	220.063	348.965	1438.14	226.388	449.321	1161.03	215.883	190.524	1333.12	200.196	95.7696	1129.5	147.825	447.765	1257.63	372.095	248.262	1388.53	484.013	258.821	1152.93	493.022	264.702	1055.1	497.463	174.628	927.384	445.658	138.613	833.788	505.497	178.703	812.068	494.528	112.572	759.902
755	0	277.958	156.798	1594.5	173.375	162.48	1602.25	298.407	316.333	1555.78	179.902	326.062	1565.28	220.407	338.636	1438.36	227.225	439.903	1161.64	215.398	180.691	1332.9	199.191	86.6258	1129.01	148.702	438.364	1258.3	372.074	237.293	1388.63	484.323	246.492	1153.29	493.681	251.558	1055.32	496.259	160.203	928.375	443.836	123.482	835.634	503.552	163.219	812.891	491.813	96.6743	761.41
756	0	277.584	145.683	1594.16	172.919	151.447	1601.89	298.3	305.399	1555.99	179.897	315.042	1565.46	220.643	328.35	1438.52	227.846	430.569	1162.11	214.978	170.73	1332.66	198.325	77.2671	1128.82	149.487	428.889	1258.69	371.781	226.385	1388.64	484.34	234.195	1153.48	494.087	238.648	1055.55	495.189	145.733	929.352	441.601	108.243	837.554	501.732	147.888	813.96	489.042	80.9139	762.964
757	0	277.198	134.658	1593.65	172.641	140.429	1601.42	298.028	294.41	1556.11	179.843	304.271	1565.52	220.97	318.191	1438.57	228.578	421.308	1162.42	214.544	160.824	1332.5	197.447	68.2589	1128.53	150.14	419.612	1259.01	371.72	215.858	1388.51	484.368	221.843	1153.52	494.651	225.822	1055.69	494.076	131.703	930.091	439.719	93.2157	839.29	499.819	132.643	815.071	486.442	65.336	764.285
758	0	276.869	123.605	1593.05	172.346	129.347	1600.79	297.98	283.552	1556.14	179.535	293.365	1565.52	221.432	307.936	1438.59	229.091	411.852	1162.55	214.147	150.849	1332.02	196.594	58.8132	1127.76	150.735	410.121	1259.25	371.503	205.23	1388.06	484.272	209.408	1153.15	494.549	212.982	1055.1	493.041	117.651	930.511	437.884	78.2194	840.67	497.736	117.407	815.403	483.696	49.6391	765.397
759	0	276.556	112.54	1592.33	172.01	118.453	1600.11	297.816	272.561	1556.06	179.362	282.533	1565.54	221.549	297.706	1438.49	229.451	402.455	1162.78	213.556	140.89	1331.34	195.727	49.253	1127.05	151.201	400.585	1259.43	371.215	194.628	1387.6	484.099	196.923	1152.77	494.444	200.022	1054.52	491.866	103.704	930.756	436.031	63.3632	841.983	495.328	102.084	815.116	481.107	34.1608	766.34
760	0	276.193	101.618	1591.71	171.524	107.683	1599.41	297.533	261.673	1555.9	179.485	271.884	1565.37	221.375	287.458	1438.23	229.734	392.905	1162.94	213.002	130.994	1330.8	194.795	39.8397	1126.4	151.329	390.896	1259.52	370.933	184.125	1387.25	483.686	184.415	1152.28	494.033	187.23	1054.01	490.548	89.9729	930.952	434.151	48.5987	843.337	493.007	87.2814	815.465	478.451	18.8802	767.352
761	0	275.708	90.7294	1590.74	171.04	96.8654	1598.62	297.479	251.084	1555.66	179.073	261.115	1565.08	221.342	277.015	1437.85	229.98	383.363	1162.84	212.546	120.971	1330.14	194.008	30.4075	1125.53	151.491	381.213	1259.43	370.488	173.541	1386.59	483.259	171.974	1151.43	493.73	174.604	1053.24	489.296	76.2542	930.948	432.266	33.8232	844.287	490.764	72.708	815.465	475.973	3.6176	768.128
762	0	275.24	79.9725	1589.86	170.601	86.0542	1597.62	297.032	240.087	1554.99	178.819	250.366	1564.62	221.111	266.766	1437.46	230.018	373.851	1162.72	212.095	110.847	1329.23	193.319	20.7932	1124.37	151.463	371.402	1259.27	370.064	163.155	1385.66	482.606	159.517	1150.5	493.007	161.795	1052.19	487.876	62.7009	930.741	430.334	19.3202	844.792	488.182	58.0325	815.199	473.526	-11.5265	768.648
763	0	274.629	69.0814	1588.86	170.092	75.3044	1596.65	296.553	229.32	1554.29	178.511	239.839	1563.88	221.032	256.232	1436.95	229.961	364.196	1162.48	211.514	100.716	1328.23	192.558	11.113	1123.12	151.267	361.488	1259.01	369.496	152.657	1384.77	481.897	147.162	1149.72	492.175	148.978	1051.23	486.334	49.0451	930.467	428.213	4.86987	845.354	485.713	43.5609	814.995	471.052	-26.4221	769.192
764	0	274.101	58.3691	1587.83	169.492	64.684	1595.73	296.195	218.919	1553.54	177.933	229.107	1562.97	220.428	245.926	1436.12	229.805	354.47	1161.96	211.053	90.595	1327.4	191.977	1.45833	1121.96	151.056	351.588	1258.48	369.064	142.236	1383.87	481.001	134.832	1148.77	491.238	136.4	1050.26	484.65	35.6384	930.21	426.212	-9.44553	845.955	483.312	29.4397	814.666	468.715	-41.0827	769.672
765	0	273.565	47.697	1586.71	168.844	53.9702	1594.57	295.654	208.317	1552.56	177.185	218.453	1561.97	219.981	235.48	1435.31	229.465	344.635	1161.25	210.616	80.3771	1326.15	191.465	-8.1973	1120.53	150.896	341.612	1257.68	368.438	131.786	1382.64	480.01	122.565	1147.49	490.094	123.671	1048.98	482.8	22.17	929.631	424.126	-23.4922	846.003	480.95	15.2275	814.152	466.362	-55.704	769.763
766	0	272.864	36.9511	1585.51	168.151	43.2222	1593.23	294.925	197.608	1551.49	176.8	207.872	1560.98	219.507	225.015	1434.54	228.998	334.61	1160.67	210.174	70.0718	1324.95	190.987	-18.0409	1118.84	150.316	331.278	1256.94	367.953	121.387	1381.54	478.889	110.368	1146.25	488.801	111.004	1047.58	480.754	8.82893	929.147	421.996	-37.4475	846.046	478.108	1.20096	813.317	463.995	-70.1494	769.854
767	0	272.02	26.3154	1584.24	167.395	32.4753	1591.99	294.11	186.97	1550.53	175.658	197.069	1559.91	218.869	214.505	1433.65	228.424	324.495	1159.91	209.465	59.7225	1323.55	190.496	-27.9298	1117.35	149.592	321.048	1256.2	367.327	110.922	1380.42	477.711	98.2669	1145.08	487.351	98.2611	1046.38	478.622	-4.58325	928.452	419.602	-51.1714	845.742	475.75	-12.6288	812.862	461.408	-84.3852	769.858
768	0	271.11	15.674	1582.95	166.459	21.7427	1590.53	293.184	176.288	1549.47	175.016	186.401	1558.63	218.084	203.95	1432.48	227.757	314.385	1158.87	208.947	49.3882	1322.24	190.168	-37.9128	1115.65	148.935	310.748	1255.15	366.561	100.589	1379.14	476.37	86.4207	1143.69	486.088	85.6692	1045.23	476.396	-17.739	927.844	417.22	-64.651	845.636	473.437	-26.4099	812.316	458.91	-98.4537	769.689
769	0	270.174	4.96599	1581.33	165.465	11.0108	1588.88	292.191	165.579	1548.17	174.016	175.82	1557.18	217.312	193.445	1431.12	227.052	304.233	1157.68	208.367	38.9695	1320.65	190.023	-48.1998	1114.03	148.068	300.236	1253.87	365.915	90.2632	1377.83	475.075	74.765	1142.09	484.521	72.9799	1043.69	474.093	-31.0099	926.899	414.705	-77.919	844.893	470.97	-39.9559	811.386	456.375	-112.302	769.314
770	0	269.262	-5.7199	1579.86	164.484	0.326802	1587.1	291.251	155.086	1546.78	172.894	165.043	1555.73	216.405	182.976	1429.77	226.099	293.88	1156.34	207.711	28.5245	1319.05	189.708	-58.5887	1112.26	147.086	289.742	1252.5	365.134	79.9698	1376.39	473.873	63.2366	1140.59	482.8	60.3471	1042.06	471.771	-44.153	926.034	412.112	-91.1599	844.258	468.426	-53.7363	810.433	453.497	-126.155	768.805
771	0	268.025	-16.347	1578.31	163.293	-10.2769	1585.41	290.048	144.368	1545.4	171.796	154.471	1554.03	215.294	172.447	1428.26	225.232	283.497	1154.87	206.998	18.0691	1317.41	189.506	-68.9833	1110.69	146.052	279.18	1250.83	364.426	69.8078	1375.16	472.605	52.0446	1139.2	481.397	47.8853	1040.79	469.317	-57.1122	925.291	409.391	-103.897	843.624	466.101	-67.1536	809.604	450.706	-139.577	768.47
772	0	266.845	-26.9214	1576.71	162.026	-20.8969	1583.63	288.77	133.898	1543.82	170.411	143.839	1552.41	214.125	162.121	1426.46	224.27	273.007	1153.15	206.314	7.52891	1315.8	189.401	-79.656	1109.15	144.825	268.449	1249.04	363.468	59.6038	1373.58	471.325	40.996	1137.51	479.925	35.5242	1039.37	466.901	-70.085	924.236	406.661	-116.609	842.665	463.796	-80.4524	808.755	447.796	-152.972	767.763
773	0	265.375	-37.4888	1574.77	160.707	-31.5721	1581.71	287.439	123.534	1542.03	168.912	133.272	1550.38	212.911	151.664	1424.66	223.1	262.258	1151.14	205.561	-3.10819	1313.9	189.188	-90.4735	1107.24	143.71	257.796	1246.94	362.505	49.3792	1371.93	469.947	29.9534	1135.64	478.258	23.1679	1037.61	464.511	-82.843	923.008	403.913	-129.15	841.598	461.498	-93.7753	807.488	444.736	-166.162	766.817
774	0	263.885	-48.0216	1573.19	159.173	-42.1584	1579.8	285.937	112.958	1540.44	167.644	122.855	1548.66	211.599	140.886	1422.61	221.898	251.642	1149.26	204.672	-13.7485	1312.11	188.955	-101.244	1105.59	141.989	246.853	1244.91	361.401	39.1844	1370.39	468.654	19.0996	1133.99	476.615	10.9287	1036.14	462.116	-95.5048	921.99	401.129	-141.388	840.616	459.115	-106.783	806.49	441.62	-179.122	766.042
775	0	262.255	-58.4525	1571.54	157.538	-52.6246	1578.01	284.319	102.565	1538.86	165.91	112.179	1546.68	210.082	130.501	1420.93	220.51	240.801	1147.16	203.749	-24.36	1310.46	188.749	-112.212	1104.06	140.797	236.133	1242.65	360.28	28.9546	1368.99	467.401	8.38454	1132.59	475.257	-1.04466	1034.89	459.765	-107.96	921.005	398.337	-153.339	839.639	457.062	-119.628	805.828	438.581	-191.874	765.367
776	0	260.615	-68.8273	1569.92	155.789	-63.1599	1576.08	282.593	92.1921	1537.25	164.291	101.797	1544.81	208.503	120.026	1418.86	219.223	229.974	1145.1	202.65	-35.0467	1308.67	188.642	-123.212	1102.33	139.267	225.207	1240.38	359.015	18.7975	1367.42	466.142	-2.20691	1130.98	473.766	-12.8526	1033.29	457.566	-120.105	919.891	395.649	-165.161	838.54	455.01	-132.372	804.818	435.568	-204.368	764.415
777	0	258.822	-79.2229	1568.27	154.007	-73.606	1574.19	280.663	81.8078	1535.59	162.256	91.2396	1542.98	206.768	109.549	1417.01	217.805	219.015	1142.96	201.663	-45.7627	1306.84	188.406	-134.341	1100.69	137.878	214.369	1238.08	357.683	8.43356	1365.95	464.835	-12.9776	1129.42	472.127	-24.4301	1031.56	455.413	-132.153	918.875	393.182	-176.876	837.577	452.902	-144.998	803.601	432.438	-216.735	763.559
778	0	256.819	-89.5858	1566.78	152.002	-84.1037	1572.4	278.695	71.4341	1534.09	160.221	80.8147	1541.1	205.065	99.0077	1415.07	216.394	207.972	1140.86	200.413	-56.5689	1305.21	188.027	-145.605	1099.08	136.249	203.33	1235.84	356.222	-1.89481	1364.49	463.616	-23.7694	1128.09	470.701	-35.5923	1030.22	453.291	-143.975	917.826	390.7	-188.284	836.719	451.013	-157.303	802.844	429.472	-228.828	762.841
779	0	254.815	-99.8689	1565.34	149.865	-94.481	1570.7	276.451	61.1503	1532.66	158.103	70.3725	1539.23	203.271	88.4446	1413.23	214.919	196.786	1138.58	199.165	-67.3507	1303.6	187.492	-156.856	1097.71	134.724	192.321	1233.44	354.736	-12.2874	1363.12	462.225	-34.4253	1126.95	469.253	-46.3993	1028.97	451.468	-155.384	917.065	388.394	-199.458	835.859	449.223	-169.276	802.214	426.742	-240.656	762.096
780	0	252.689	-110.19	1563.88	147.761	-104.938	1568.89	274.301	50.9046	1531.16	155.55	59.932	1537.35	201.348	77.9466	1411.23	213.459	185.448	1136.22	197.815	-78.2653	1302.13	187.023	-168.369	1096.24	133.104	181.161	1231.04	353.05	-22.6831	1361.76	461.128	-45.3388	1125.8	467.975	-57.2175	1027.69	449.746	-166.582	915.97	386.396	-210.499	835.089	447.623	-180.889	801.253	424.217	-252.295	761.401
781	0	250.517	-120.501	1562.54	145.555	-115.372	1567.26	271.951	40.6276	1529.76	153.48	49.5034	1535.67	199.366	67.4707	1409.35	211.986	173.919	1133.93	196.338	-89.0705	1300.53	186.235	-179.951	1094.81	131.556	169.934	1228.5	351.357	-33.3332	1360.45	460.051	-56.4123	1124.81	466.486	-67.8888	1026.43	448.253	-177.463	915.04	384.696	-221.233	834.042	445.868	-192.359	800.214	422.271	-263.48	760.628
782	0	248.257	-130.741	1561.26	143.234	-125.703	1565.64	269.526	30.4373	1528.46	150.931	39.1173	1534.01	197.276	57.0214	1407.35	210.599	162.365	1131.4	194.731	-99.9753	1299.29	185.379	-191.651	1093.88	129.893	158.505	1225.84	349.479	-43.817	1359.38	458.914	-67.3485	1124.26	465.16	-78.3516	1025.52	446.861	-188.086	914.143	383.037	-231.736	833.272	444.682	-203.093	799.403	420.457	-274.393	759.842
783	0	245.93	-140.975	1559.98	140.903	-136.126	1564.17	267.103	20.2258	1527.19	148.575	28.8251	1532.44	195.114	46.7389	1405.38	209.009	150.477	1128.7	192.957	-110.836	1298.07	184.258	-203.425	1093.02	128.213	147.151	1223.03	347.432	-54.263	1358.31	457.726	-78.3376	1123.67	463.979	-88.8204	1024.68	445.832	-198.461	913.165	381.893	-242.1	832.334	443.571	-213.458	798.403	419.246	-284.802	758.969
784	0	243.617	-151.268	1558.89	138.507	-146.548	1562.8	264.499	10.0108	1526	145.675	18.2965	1530.99	192.798	36.3351	1403.42	207.463	138.357	1126.15	191.192	-121.832	1296.87	183.084	-215.325	1092.36	126.312	135.598	1220.19	345.365	-64.7446	1357.31	456.403	-89.3867	1123.11	462.211	-99.1895	1023.59	444.883	-208.712	912.185	381.104	-252.408	831.176	442.575	-223.643	797.157	418.407	-295.058	757.869
785	0	241.245	-161.478	1558.14	136.14	-156.987	1561.85	261.94	-0.208753	1525.09	143.274	7.92727	1529.81	190.464	25.8731	1401.94	205.787	125.9	1123.87	189.224	-132.897	1296.09	181.689	-227.272	1091.89	124.415	124.042	1217.68	343.214	-75.125	1356.71	454.931	-100.326	1122.71	460.938	-109.639	1022.99	444.006	-218.875	911.328	380.648	-262.488	830.208	441.844	-233.358	796.193	417.948	-304.954	756.835
786	0	238.915	-171.748	1557.84	133.784	-167.458	1561.42	259.172	-10.3589	1524.43	140.638	-2.57527	1529.04	187.757	15.3863	1400.58	204.063	113.192	1121.92	187.144	-144.05	1295.76	180.277	-239.153	1091.99	122.543	112.402	1215.37	340.989	-85.5368	1356.18	453.342	-111.176	1122.56	459.796	-119.88	1022.81	443.392	-228.7	910.494	380.336	-272.241	829.221	441.565	-242.646	795.383	417.974	-314.356	755.78
787	0	236.688	-181.957	1557.67	131.496	-177.963	1561.2	256.568	-20.5568	1523.95	137.458	-13.1872	1528.45	185.284	4.54915	1399.86	202.438	100.466	1120.59	185.056	-155.235	1295.49	178.971	-251.363	1092.29	120.657	100.655	1213.64	338.92	-96.2019	1356.08	451.757	-121.887	1122.5	458.5	-130.048	1022.79	442.919	-238.354	909.843	380.359	-281.8	828.204	441.42	-251.637	794.557	418.474	-323.397	754.694
788	0	234.386	-192.168	1557.84	129.174	-188.542	1561.36	253.646	-30.9081	1523.75	134.77	-23.741	1528.25	182.798	-6.50071	1399.56	201.053	88.0707	1120.02	182.792	-166.546	1295.64	177.613	-263.825	1092.84	118.917	88.8982	1212.54	336.712	-107.108	1356.4	449.926	-132.483	1122.69	457.03	-140.324	1022.96	442.481	-247.893	909.331	380.531	-291.015	827.244	441.424	-260.514	793.833	419.214	-332.112	753.723
789	0	232.031	-202.389	1558.67	126.766	-199.111	1562.04	250.888	-41.0862	1524.06	131.855	-34.5477	1528.44	180.2	-17.5341	1399.73	200.021	76.0086	1120.02	180.465	-177.881	1296.14	176.33	-276.227	1093.68	117.277	77.3441	1212.09	334.483	-118.317	1357.26	448.131	-142.831	1123.47	455.747	-150.415	1023.91	442.32	-256.968	909.499	381.069	-299.893	826.525	441.829	-268.766	793.81	420.296	-340.314	753.193
790	0	229.631	-212.651	1559.79	124.399	-209.735	1563.03	247.868	-51.4515	1524.55	129.115	-45.2554	1528.68	177.988	-28.8275	1400.22	199.067	64.5374	1120.41	178.211	-189.316	1297.08	174.891	-288.717	1094.87	115.821	65.7956	1212.18	332.267	-129.808	1358.49	446.339	-152.809	1124.44	454.532	-160.185	1025.3	442.348	-265.908	909.981	381.505	-308.31	826.151	442.727	-276.81	794.139	421.703	-348.047	752.846
791	0	227.276	-222.982	1561.15	122.063	-220.417	1564.27	245.117	-61.8047	1525.35	126.067	-55.918	1529.23	175.909	-40.1584	1400.99	198.025	53.522	1121.11	176.022	-200.736	1298.17	173.355	-301.187	1096.22	114.766	54.3408	1212.68	330.007	-141.494	1359.97	444.561	-162.912	1125.7	453.178	-170.179	1026.79	441.989	-274.631	910.424	382.117	-316.336	825.706	443.524	-284.242	794.702	423.365	-355.458	752.641
792	0	224.818	-233.382	1562.94	119.716	-231.148	1565.79	242.219	-72.3392	1526.45	123.402	-66.8483	1530.3	173.738	-51.3967	1402.15	197.171	42.5214	1122.26	173.936	-211.879	1299.53	171.85	-313.098	1097.82	113.72	42.9231	1213.59	327.886	-153.363	1361.99	443.031	-172.755	1127.6	451.733	-179.874	1028.71	442.109	-283.089	911.363	382.964	-324.032	825.564	444.466	-291.487	795.419	425.199	-362.392	752.679
793	0	221.962	-244.161	1564.94	117.269	-241.843	1567.65	239.541	-82.8718	1528.24	120.889	-77.6993	1531.45	171.974	-62.4713	1403.78	196.463	31.1829	1123.94	171.962	-222.941	1301.62	170.313	-325.005	1100.14	112.837	31.5335	1214.9	325.789	-165.191	1364.6	441.618	-182.432	1130.3	450.598	-189.383	1031.42	442.044	-291.358	912.772	383.668	-331.248	825.812	445.385	-298.303	796.813	427.153	-368.76	753.233
794	0	219.624	-254.665	1567.2	114.852	-252.496	1569.47	237.02	-93.3757	1530.24	118.342	-88.377	1532.95	170.311	-73.4602	1405.48	195.713	19.1997	1125.58	170.011	-233.969	1303.69	168.57	-336.578	1102.42	112.023	20.2038	1216.24	323.76	-176.82	1367.3	440.142	-192.478	1133.05	449.415	-198.795	1034.32	441.883	-299.327	914.517	384.544	-338.237	826.253	446.881	-304.934	798.536	429.127	-374.918	753.845
795	0	217.251	-265.289	1569.53	112.479	-263.285	1571.37	234.735	-104.073	1532.67	115.522	-99.2512	1534.82	168.69	-84.1405	1407.48	195.257	6.88359	1127.21	168.326	-244.859	1305.88	167.003	-347.83	1104.75	111.355	8.93098	1217.8	321.784	-188.155	1369.94	438.634	-202.816	1135.85	448.331	-208.236	1037.2	442.244	-307.388	916.286	385.608	-345.037	826.664	448.356	-311.598	800.334	431.156	-380.798	754.458
796	0	214.984	-275.948	1572.11	110.209	-273.952	1573.42	232.475	-114.689	1535.33	113.401	-109.936	1537.01	167.04	-94.7855	1409.54	195.053	-5.4957	1129.24	166.681	-255.651	1308.21	165.375	-358.581	1107.22	110.426	-2.29211	1219.44	319.847	-199.243	1372.9	437.205	-213.173	1138.98	447.17	-217.43	1040.34	442.331	-315.191	918.442	386.204	-351.495	827.197	449.981	-318.052	802.699	432.984	-386.629	755.377
797	0	212.908	-286.55	1574.62	108.077	-284.666	1575.59	230.43	-125.291	1538.23	111.46	-120.647	1539.35	165.451	-105.3	1411.56	194.678	-17.5942	1131.12	165.227	-266.274	1310.71	163.812	-368.906	1109.98	109.569	-13.4334	1221.19	318.083	-210.019	1375.62	435.84	-223.478	1142.15	446.3	-226.371	1043.68	442.479	-322.815	920.578	387.18	-357.927	828.236	451.616	-324.438	805.179	434.742	-392.179	756.434
798	0	211.046	-297.145	1576.97	106.266	-295.234	1577.7	228.635	-135.788	1540.85	109.518	-131.173	1541.64	163.962	-115.84	1413.53	193.836	-28.884	1132.93	163.842	-276.89	1313.04	162.461	-379.145	1112.55	108.518	-24.5009	1222.83	316.67	-220.65	1378.39	434.666	-233.425	1145.08	445.329	-234.986	1046.66	442.856	-330.499	922.847	388.311	-364.236	829.492	453.712	-331.536	807.485	436.192	-397.748	757.336
799	0	209.41	-307.674	1579.38	104.592	-305.804	1579.66	226.886	-146.373	1543.26	107.96	-141.809	1543.89	162.687	-126.309	1415.65	192.594	-39.4185	1134.78	162.716	-287.376	1315.26	161.079	-389.344	1114.84	107.482	-35.5829	1224.6	315.212	-231.106	1380.77	433.508	-243.745	1147.84	444.419	-243.703	1049.29	443.173	-338.026	924.936	389.476	-370.644	830.44	455.267	-338.274	809.699	437.894	-403.406	758.31
800	0	207.863	-318.12	1581.56	103.075	-316.252	1581.71	225.42	-156.71	1545.59	106.54	-152.156	1545.97	161.313	-136.804	1417.43	191.328	-49.4357	1136.63	161.535	-297.734	1317.47	159.943	-399.485	1117.33	106.237	-46.4158	1226.27	314.011	-241.399	1383.11	432.425	-253.921	1150.44	443.564	-252.001	1051.94	443.654	-345.414	926.914	390.587	-377.271	831.605	457.039	-344.977	811.899	439.334	-408.979	759.291
801	0	206.531	-328.433	1583.55	101.65	-326.569	1583.64	224.234	-167.053	1547.6	104.99	-162.579	1547.74	159.993	-147.163	1419.2	189.691	-59.2937	1138.6	160.473	-307.989	1319.65	158.862	-409.526	1119.64	104.974	-57.0901	1228.07	312.891	-251.474	1385.3	431.583	-263.808	1152.89	443.019	-260.084	1054.55	444.322	-352.789	928.994	391.898	-383.167	832.699	459.069	-351.56	814.18	440.729	-414.59	760.112
802	0	205.254	-338.782	1585.46	100.437	-336.837	1585.44	223.014	-177.378	1549.34	104.066	-172.921	1549.51	158.766	-157.568	1421.21	187.823	-69.3255	1140.66	159.498	-318.251	1321.46	158.11	-419.712	1121.38	103.648	-67.6425	1230	311.775	-261.631	1387.15	430.817	-273.777	1154.96	442.417	-268.379	1056.76	444.912	-360.076	930.486	393.117	-389.516	833.503	460.682	-358.152	815.936	442.324	-420.311	760.791
803	0	204.137	-349.045	1587.27	99.3903	-347.093	1587.05	221.968	-187.819	1550.88	102.745	-183.15	1550.88	157.592	-167.981	1423.02	185.866	-79.4408	1142.84	158.705	-328.629	1322.92	157.728	-429.917	1122.87	102.146	-78.1473	1231.99	310.984	-271.653	1388.9	430.031	-283.651	1156.81	441.813	-276.588	1058.64	445.525	-367.389	931.825	394.485	-396.182	834.264	462.243	-364.637	817.416	443.994	-426.123	761.363
804	0	203.106	-359.268	1589.15	98.3571	-357.164	1588.77	221.173	-198.103	1552.43	102.206	-193.356	1552.35	156.48	-178.422	1424.83	184.416	-89.8259	1144.85	158.037	-338.908	1324.52	157.388	-439.98	1124.36	100.667	-88.4744	1233.97	310.201	-281.551	1390.66	429.593	-293.096	1158.65	441.595	-284.676	1060.66	446.334	-374.581	933.136	395.899	-402.671	835.033	463.701	-370.882	819.017	445.925	-431.762	762.117
805	0	202.289	-369.393	1590.83	97.3922	-367.208	1590.49	220.584	-208.307	1553.92	101.226	-203.43	1553.61	155.546	-188.748	1426.57	183.014	-100.113	1146.73	157.502	-349.166	1325.97	157.373	-449.927	1125.52	99.2147	-98.6056	1236.03	309.531	-291.311	1392.05	429.04	-302.237	1160.14	441.238	-292.847	1062.27	446.997	-381.53	934.06	397.279	-409.217	835.489	465.3	-376.999	820.003	447.966	-437.405	762.555
806	0	201.452	-379.585	1592.39	96.5872	-377.32	1591.88	219.966	-218.562	1555.12	100.796	-213.642	1554.74	154.567	-199.139	1428.2	181.358	-109.871	1148.56	157.077	-359.298	1327.15	157.503	-459.799	1126.33	97.6332	-108.961	1237.81	309.033	-300.984	1393.18	428.642	-311.166	1161.09	440.783	-301.058	1063.36	447.494	-388.652	934.625	398.656	-415.945	835.735	466.275	-382.825	820.703	450.066	-443.233	762.968
807	0	200.679	-389.7	1594.01	95.7713	-387.417	1593.38	219.366	-228.761	1556.39	100.161	-223.871	1555.98	153.454	-209.463	1429.84	179.628	-119.202	1150.42	156.718	-369.401	1328.32	157.786	-469.642	1126.96	96.0258	-118.969	1239.84	308.493	-310.532	1394.3	428.09	-319.657	1162	440.419	-309.263	1064.57	448.315	-395.637	935.342	400.034	-422.372	835.814	467.454	-388.852	821.376	452.098	-449.14	763.45
808	0	200.005	-399.792	1595.48	95.1533	-397.433	1594.87	218.731	-238.882	1557.66	99.7737	-233.86	1557.2	152.492	-219.764	1431.25	178.019	-128.434	1152.03	156.419	-379.465	1329.53	158.173	-479.205	1127.69	94.3823	-129.05	1241.62	308.036	-320.006	1395.42	427.652	-327.723	1162.84	440.141	-317.228	1065.81	448.935	-402.391	935.982	401.38	-428.886	836.17	468.52	-394.472	822.14	454.147	-455.068	764.139
809	0	199.484	-409.955	1596.71	94.5969	-407.508	1596.08	218.284	-249.036	1558.76	99.4253	-243.943	1558.08	151.595	-230.12	1432.69	176.522	-137.694	1153.71	156.311	-389.53	1330.63	158.725	-488.72	1128.22	92.6766	-139.102	1243.45	307.64	-329.294	1396.39	427.238	-335.48	1163.49	439.797	-325.045	1066.93	449.618	-409.236	936.605	402.742	-435.382	836.424	469.364	-400.111	822.831	456.521	-460.555	764.684
810	0	199.097	-420.106	1597.94	94.1381	-417.736	1597.16	217.768	-259.234	1559.73	98.8134	-254.16	1559.12	150.653	-240.25	1434.04	174.996	-146.958	1155.2	156.225	-399.437	1331.58	159.339	-498.268	1128.67	91.0094	-149.124	1245.02	307.363	-338.558	1397.34	426.821	-342.772	1164.29	439.377	-332.823	1067.84	450.022	-415.903	937.302	404.01	-441.883	836.727	470.323	-406.078	823.392	458.315	-466.511	765.269
811	0	198.689	-430.163	1599.1	93.7797	-427.931	1598.27	217.232	-269.401	1560.85	97.8023	-264.467	1560.33	149.707	-250.463	1435.43	173.425	-156.233	1156.87	156.123	-409.319	1332.5	159.991	-507.587	1129.13	89.4688	-159.161	1246.74	307.066	-347.716	1398.38	426.387	-349.767	1165.28	439.167	-340.33	1069.15	450.692	-422.655	938.103	405.077	-448.301	837.21	471.432	-412.167	824.336	459.931	-472.45	766.121
812	0	198.625	-440.04	1600.16	93.3785	-438.106	1599.18	216.784	-279.448	1561.87	97.8606	-274.601	1561.22	148.741	-260.431	1436.53	171.902	-165.569	1158.17	156.096	-419.168	1333.4	160.637	-516.818	1129.68	87.8625	-169.025	1248.11	306.756	-356.762	1399.35	426.013	-356.483	1166.36	439.017	-347.486	1070.54	451.175	-429.166	938.994	406.064	-454.64	837.868	472.213	-417.851	825.572	461.554	-478.337	767.036
813	0	198.355	-450.292	1600.82	93.0801	-448.459	1599.75	216.261	-289.582	1562.64	97.4053	-284.892	1561.9	147.925	-270.396	1437.44	170.481	-174.86	1159.31	156.177	-428.999	1334.02	161.246	-526.172	1130.01	86.4353	-179.049	1249.36	306.455	-365.863	1399.99	425.721	-362.942	1167.2	438.764	-354.487	1071.44	451.646	-435.89	939.692	407.421	-461.129	838.355	472.869	-423.817	826.32	462.743	-484.198	767.589
814	0	197.767	-460.641	1601.22	92.8301	-458.809	1600.18	215.67	-299.726	1563.26	96.2988	-295.248	1562.53	147.143	-280.346	1438.29	169.166	-184.136	1160.38	156.234	-438.628	1334.49	162.022	-535.608	1130.33	85.0903	-188.877	1250.44	306.211	-374.883	1400.66	425.537	-369.317	1168.01	438.548	-361.353	1072.28	451.975	-442.334	940.28	408.409	-467.412	838.703	473.313	-429.825	826.856	463.912	-490.241	768.26
815	0	197.446	-470.762	1601.79	92.4963	-469.105	1600.59	215.144	-309.797	1563.98	95.7571	-305.516	1563.06	146.42	-290.262	1438.97	167.797	-193.409	1161.31	156.374	-448.175	1335	162.76	-544.914	1130.87	83.8787	-198.692	1251.28	306.184	-383.739	1401.46	425.404	-375.565	1169.02	438.425	-367.958	1073.32	452.52	-448.695	941.083	409.149	-473.765	839.413	473.863	-435.617	827.768	464.958	-495.904	768.941
816	0	197.207	-480.91	1602.12	92.2113	-479.438	1600.79	214.67	-319.842	1564.53	95.2173	-315.83	1563.47	145.755	-300.124	1439.42	166.649	-202.696	1161.93	156.6	-457.826	1335.4	163.446	-554.244	1131.29	82.8217	-208.532	1251.84	306.094	-392.536	1402.07	425.566	-381.774	1169.82	438.505	-374.438	1074.06	453.11	-454.82	941.588	409.457	-479.885	839.9	474.259	-441.435	828.342	465.773	-501.771	769.433
817	0	196.949	-491.052	1602.24	91.987	-489.758	1600.7	214.149	-330.011	1564.98	95.0829	-326.057	1563.7	145.193	-309.855	1439.81	165.559	-211.852	1162.42	156.941	-467.415	1335.55	164.09	-563.675	1131.52	81.8162	-218.15	1252.44	306.072	-401.226	1402.54	425.636	-388.222	1170.3	438.381	-380.94	1074.43	453.654	-461.031	941.841	410.232	-486.535	840.25	474.462	-447.118	828.519	466.413	-507.648	769.625
818	0	196.619	-501.198	1602.35	91.6623	-500.068	1600.54	213.635	-340.066	1565.42	94.544	-336.275	1563.91	144.649	-319.641	1440.15	164.646	-221.082	1162.99	157.132	-476.959	1335.46	164.749	-573.058	1131.55	80.9899	-227.748	1253.03	305.958	-410.25	1402.78	425.934	-394.706	1170.74	438.516	-387.27	1074.9	454.165	-467.24	942.066	410.663	-492.807	840.42	474.461	-453.113	828.659	466.706	-513.437	769.662
819	0	196.339	-511.385	1602.23	91.3654	-510.279	1600.29	213.115	-350.06	1565.78	93.8278	-346.505	1563.88	144.171	-329.381	1440.27	163.966	-230.254	1163.31	157.425	-486.269	1335.27	165.301	-582.388	1131.61	80.3877	-237.562	1253.23	305.926	-419.23	1403.03	426.214	-401.206	1171.28	438.486	-393.752	1075.27	454.737	-473.224	942.146	411.02	-499.161	840.66	474.541	-458.764	828.847	467.059	-519.501	769.634
820	0	196.122	-521.435	1601.93	91.1707	-520.591	1599.99	212.694	-360.02	1565.91	93.7414	-356.687	1563.83	143.869	-339.169	1440.31	163.261	-239.439	1163.45	157.734	-496.143	1335.19	165.887	-591.703	1131.32	79.7364	-247.034	1253.43	306.077	-428.391	1402.93	426.589	-407.9	1171.49	438.685	-400.114	1075.35	455.338	-479.409	941.915	411.314	-505.608	840.502	474.46	-464.54	828.589	467.237	-525.273	769.298
821	0	195.998	-531.418	1601.85	91.0123	-530.838	1599.56	212.358	-370.029	1565.83	93.2381	-366.903	1563.67	143.705	-349.019	1440.23	162.835	-248.729	1163.65	158.063	-505.747	1334.7	166.512	-601.091	1130.78	79.2762	-256.625	1253.58	306.229	-437.68	1402.76	426.97	-414.953	1171.52	438.653	-406.849	1075.09	455.786	-485.484	941.387	411.64	-511.934	840.094	474.106	-470.492	827.965	467.398	-530.98	768.657
822	0	195.884	-541.469	1601.58	90.9237	-540.985	1598.98	212.047	-380.066	1565.67	92.6801	-377.086	1563.31	143.588	-358.982	1440.05	162.446	-258.006	1163.62	158.279	-515.293	1334.19	167.018	-610.443	1130.24	78.9469	-266.342	1253.49	306.325	-447.115	1402.37	427.257	-422.076	1171.56	438.763	-413.612	1074.91	456.21	-491.755	940.858	411.747	-518.423	839.685	473.824	-476.248	827.401	467.267	-536.689	768.127
823	0	195.82	-551.475	1601.02	90.8248	-551.121	1598.43	211.843	-390.001	1565.43	92.4157	-387.167	1562.75	143.562	-368.852	1439.65	162.333	-267.178	1163.46	158.53	-524.906	1333.69	167.411	-619.797	1129.55	78.7722	-275.992	1253.32	306.523	-456.478	1401.93	427.56	-429.495	1171.37	438.935	-420.434	1074.66	456.56	-497.888	940.214	411.922	-524.813	839.378	473.501	-481.995	826.745	467.153	-542.358	767.106
824	0	196.054	-561.574	1600.33	90.8082	-561.352	1597.64	211.677	-400.022	1564.92	92.2752	-397.251	1562.07	143.616	-378.852	1439.14	162.163	-276.344	1163.07	158.732	-534.663	1332.9	167.805	-629.219	1128.52	78.8792	-285.619	1253.02	306.722	-466.147	1401.26	427.816	-437.254	1170.89	439.132	-427.414	1074.12	456.866	-504.342	939.193	411.82	-531.368	838.426	473.093	-487.956	825.688	466.99	-548.132	766.005
825	0	196.142	-571.63	1599.54	90.9412	-571.619	1596.61	211.656	-410.103	1564.22	92.3513	-407.475	1561.31	143.687	-388.927	1438.55	162.233	-285.904	1162.7	159.013	-544.453	1331.89	168.165	-638.758	1127.42	78.8399	-295.301	1252.61	306.898	-475.9	1400.33	428.251	-445.227	1170.21	439.256	-434.731	1073.34	456.911	-510.923	938.035	411.77	-537.859	837.392	472.379	-494.059	824.44	466.635	-553.993	764.688
826	0	196.474	-581.708	1598.87	91.0417	-581.789	1595.58	211.608	-420.175	1563.5	92.9594	-417.474	1560.43	143.784	-398.928	1437.88	162.114	-295.224	1162.06	159.328	-554.27	1331.05	168.424	-648.248	1126.23	78.9351	-304.981	1252.09	307.17	-485.768	1399.5	428.351	-453.477	1169.54	439.524	-442.134	1072.77	457.027	-517.62	936.939	411.822	-544.425	836.435	471.922	-500.051	823.297	466.248	-559.881	763.34
827	0	196.455	-592.013	1597.54	91.2992	-591.993	1594.54	211.908	-430.304	1562.57	93.0433	-427.732	1559.28	144.241	-409.032	1436.84	162.309	-304.701	1161.29	159.598	-564.059	1329.87	168.652	-657.747	1124.95	79.2973	-314.676	1251.37	307.525	-495.648	1398.29	428.616	-461.972	1168.54	439.9	-449.816	1071.87	456.902	-524.435	935.42	411.311	-550.814	835.073	471.434	-506.149	821.937	465.78	-565.828	761.632
828	0	197.074	-602.103	1596.47	91.6594	-602.299	1593.08	212.155	-440.577	1561.32	93.4532	-437.954	1558.07	144.751	-419.124	1435.74	162.629	-314.614	1160.22	159.929	-574.033	1328.49	168.85	-667.411	1123.28	79.7476	-324.435	1250.43	307.903	-505.817	1396.87	428.896	-470.622	1167.32	440.123	-457.673	1070.6	456.883	-531.592	933.816	411.06	-557.474	833.554	470.862	-512.592	820.18	465.189	-571.836	759.714
829	0	197.345	-612.454	1595.1	91.9443	-612.6	1591.64	212.502	-450.88	1560.04	93.5219	-448.26	1556.8	145.194	-429.225	1434.69	163.17	-323.939	1159.49	160.263	-584.033	1326.99	168.92	-677.035	1121.63	80.2468	-334.153	1249.58	308.331	-516.053	1395.55	429.281	-479.594	1166.09	440.405	-465.85	1069.4	456.615	-538.864	932.014	410.457	-564.042	831.803	470.184	-519.192	818.504	464.316	-578.081	757.715
830	0	197.755	-622.84	1593.59	92.3556	-622.935	1590.16	212.981	-461.24	1558.75	93.9723	-458.494	1555.47	145.863	-439.43	1433.4	163.757	-333.696	1158.38	160.6	-594.011	1325.53	168.972	-686.769	1120.05	80.9402	-344.087	1248.54	308.899	-526.321	1394.13	429.706	-488.676	1164.86	440.819	-474.04	1068.24	456.231	-546.568	930.164	409.74	-570.66	829.879	469.666	-525.866	816.874	463.436	-584.386	755.667
831	0	198.266	-633.272	1591.98	92.8917	-633.34	1588.48	213.659	-471.638	1557.31	94.9838	-468.921	1553.88	146.702	-449.552	1432.02	164.619	-343.448	1157.11	161.025	-604.077	1323.87	169.066	-696.622	1118.21	81.7116	-353.864	1247.24	309.414	-536.681	1392.43	430.15	-497.992	1163.24	441.147	-482.424	1066.66	455.892	-554.3	927.956	409.209	-577.588	827.936	469.23	-532.701	815.014	462.43	-590.73	753.35
832	0	199.077	-643.828	1590.09	93.5368	-643.833	1586.56	214.438	-482.209	1555.62	95.395	-479.306	1552.29	147.596	-459.899	1430.46	165.462	-353.421	1155.68	161.553	-614.281	1322.03	169.122	-706.569	1116.21	82.6782	-363.85	1245.9	310.058	-547.296	1390.54	430.693	-507.749	1161.22	441.449	-491.23	1064.75	455.435	-562.178	925.54	408.691	-585.01	825.75	468.666	-539.785	812.553	461.266	-597.255	750.673
833	0	199.483	-654.518	1588.37	94.2682	-654.3	1584.85	215.241	-492.763	1553.93	96.238	-489.729	1550.71	148.482	-470.186	1428.84	166.256	-363.486	1154.12	162.103	-624.463	1320.3	169.23	-716.579	1114.4	83.6212	-373.734	1244.38	310.96	-557.897	1388.68	431.14	-517.503	1159.43	441.667	-500.051	1062.85	455.057	-569.67	923.36	408.195	-592.542	823.555	468.18	-547.018	810.364	460.385	-603.938	748.146
834	0	200.222	-665.041	1586.54	95.0153	-664.636	1582.98	216.277	-503.358	1552.41	97.2873	-500.203	1548.95	149.696	-480.492	1427.17	167.253	-373.589	1152.48	162.721	-634.746	1318.41	169.384	-726.682	1112.51	84.8125	-383.792	1242.92	312.03	-568.601	1386.88	431.807	-527.531	1157.42	442.06	-508.96	1061.06	454.722	-577.762	920.966	406.887	-598.552	820.674	467.764	-554.26	808.141	459.311	-610.543	745.397
835	0	201.053	-675.802	1584.53	95.7974	-675.245	1581.06	217.392	-514.053	1550.6	98.7167	-510.695	1547.22	150.97	-491.013	1425.53	168.272	-383.811	1150.77	163.408	-645.108	1316.46	169.484	-737.001	1110.37	85.9394	-393.901	1241.3	312.832	-579.423	1384.62	432.312	-537.782	1155.15	442.243	-518.242	1058.82	454.399	-586.039	918.195	405.957	-605.909	817.813	467.297	-561.728	805.505	458.196	-617.54	742.351
836	0	202.073	-686.567	1582.54	96.8694	-685.85	1579.08	218.61	-524.853	1548.75	99.6539	-521.149	1545.51	152.234	-501.492	1423.65	169.328	-394.23	1149.08	164.202	-655.686	1314.45	169.588	-747.444	1108.29	87.2451	-404.088	1239.78	313.815	-590.376	1382.39	432.903	-548.367	1152.71	442.442	-527.731	1056.4	454.068	-594.508	915.369	405.359	-613.445	815.023	466.878	-569.405	802.842	456.967	-624.394	739.009
837	0	203.157	-697.422	1580.68	97.9372	-696.434	1577.05	219.981	-535.575	1547.07	101.11	-531.814	1543.71	153.708	-511.977	1421.91	170.405	-404.736	1147.3	164.994	-666.21	1312.53	169.798	-757.972	1106.47	88.3333	-414.314	1238.05	314.922	-601.299	1380.36	433.476	-558.966	1150.51	442.684	-537.308	1054.22	453.81	-603.005	912.727	404.565	-621.086	812.305	466.277	-577.369	800.254	456.242	-631.821	736.204
838	0	204.446	-708.21	1578.77	99.2333	-707.074	1575.32	221.53	-546.382	1545.28	102.883	-542.485	1541.89	154.995	-522.723	1420.03	171.428	-415.367	1145.36	165.949	-676.828	1310.77	169.942	-768.59	1104.64	89.7344	-424.76	1236.41	316.148	-612.232	1378.25	434.192	-569.669	1148.2	443.03	-547.129	1052.02	453.682	-611.705	910.02	403.975	-628.945	809.729	466.128	-585.296	797.802	454.9	-638.804	732.829
839	0	205.888	-719.026	1576.68	100.664	-717.828	1573.31	223.123	-557.297	1543.27	104.167	-553.174	1540.28	156.617	-533.356	1418.23	172.448	-426.131	1143.41	166.946	-687.576	1308.75	170.246	-779.489	1102.63	90.8459	-435.271	1234.64	317.333	-623.32	1375.85	434.905	-580.647	1145.76	443.197	-557.214	1049.52	453.596	-620.851	907.149	403.326	-637.312	806.784	465.641	-593.461	794.911	454.278	-646.429	729.5
840	0	207.464	-730.011	1574.79	102.268	-728.542	1571.54	224.847	-568.264	1541.54	105.718	-563.886	1538.75	157.985	-544.131	1416.46	173.558	-436.922	1141.68	168.016	-698.466	1306.82	170.476	-790.463	1100.73	92.059	-445.924	1233.08	318.511	-634.518	1373.76	435.633	-591.803	1143.44	443.486	-567.516	1047.16	453.218	-630.11	904.274	402.699	-645.767	803.881	465.665	-602.432	792.504	453.477	-654.292	726.322
841	0	209.155	-740.972	1572.93	103.912	-739.362	1569.97	226.613	-579.195	1539.73	107.627	-574.725	1537.04	159.457	-554.919	1414.76	174.664	-447.87	1139.83	169.043	-709.333	1305.16	170.74	-801.454	1099.13	93.3667	-456.702	1231.41	319.802	-645.566	1371.6	436.378	-602.917	1141.02	443.861	-577.805	1044.92	453.332	-639.669	901.692	402.546	-654.812	801.419	465.759	-611.493	790.079	452.595	-662.421	723.394
842	0	211.015	-751.949	1570.99	105.741	-750.37	1568.35	228.473	-590.13	1537.76	109.537	-585.601	1535.44	161.016	-565.801	1412.92	175.688	-458.942	1137.8	170.183	-720.284	1303.33	171.049	-812.64	1097.45	94.6164	-467.656	1229.57	321.148	-656.647	1369.34	437.209	-613.971	1138.59	444.19	-588.385	1042.48	453.393	-649.444	898.859	402.215	-662.453	798.184	465.594	-620.413	787.376	451.979	-670.718	720.102
843	0	213.016	-763.094	1569.2	107.716	-761.384	1566.65	230.492	-601.226	1535.88	111.474	-596.629	1533.97	162.519	-576.917	1411.17	176.604	-470.18	1135.79	171.371	-731.367	1301.66	171.502	-823.891	1095.79	95.7694	-478.708	1227.88	322.543	-667.836	1367.11	437.976	-625.202	1135.95	444.438	-599.283	1039.76	453.404	-659.673	896.123	402.231	-672.388	795.48	465.716	-630.151	784.622	451.546	-679.575	716.931
844	0	215.052	-774.116	1567.43	109.876	-772.388	1565.24	232.493	-612.319	1534.05	113.442	-607.614	1532.51	164.158	-587.975	1409.45	177.613	-481.616	1133.88	172.594	-742.527	1300	172.038	-835.345	1094.29	96.8719	-489.878	1226.13	323.944	-678.951	1364.96	438.717	-636.427	1133.52	444.778	-610.378	1037.34	453.605	-670.19	893.513	402.541	-681.359	792.529	465.865	-640.13	782.043	451.125	-688.675	713.945
845	0	217.244	-785.182	1565.75	111.914	-783.453	1563.93	234.63	-623.416	1532.25	115.928	-618.713	1530.96	165.801	-598.999	1407.69	178.565	-493.059	1131.82	173.886	-753.717	1298.56	172.611	-846.88	1093.02	98.095	-501.203	1224.4	325.48	-689.97	1363	439.513	-647.361	1131.19	445.346	-621.541	1035.06	453.908	-680.822	890.966	402.349	-691.275	790.096	466.331	-650.508	779.773	451.053	-698.042	711.091
846	0	219.43	-796.35	1563.98	114.199	-794.545	1562.5	236.875	-634.598	1530.56	117.829	-629.789	1529.57	167.336	-610.142	1405.93	179.314	-504.801	1129.53	175.262	-765.127	1297.06	173.284	-858.651	1091.81	99.3146	-512.729	1222.53	327.027	-701.117	1360.95	440.344	-658.543	1128.74	445.874	-632.967	1032.6	454.304	-691.938	888.408	402.746	-701.211	787.338	466.912	-661.094	777.352	451.061	-708.045	708.238
847	0	221.692	-807.557	1562.35	116.428	-805.78	1561.2	239.063	-645.888	1528.89	120.308	-640.961	1528.43	169.062	-621.24	1404.24	179.919	-516.691	1127.43	176.716	-776.683	1295.65	174.087	-870.665	1090.67	100.356	-524.434	1220.73	328.542	-712.303	1358.87	441.296	-669.852	1126.23	446.423	-644.736	1030.16	454.744	-703.339	885.883	403.076	-711.845	784.593	467.468	-672.334	774.912	451.082	-718.486	705.357
848	0	223.994	-818.859	1561.08	118.665	-816.906	1560.08	241.415	-657.094	1527.51	122.326	-652.224	1527.31	170.711	-632.465	1402.87	180.433	-528.62	1125.55	178.191	-788.214	1294.45	174.981	-882.853	1089.96	101.44	-536.093	1219.09	330.263	-723.407	1357.13	442.292	-681.048	1124.07	447.06	-656.37	1027.98	455.194	-714.921	883.65	403.574	-723.147	782.418	468.238	-683.775	772.739	451.54	-729.266	702.872
849	0	226.325	-830.178	1560.01	120.889	-828.14	1559.42	243.711	-668.468	1526.29	124.714	-663.502	1526.39	172.49	-643.798	1401.65	181.246	-540.691	1123.91	179.762	-799.937	1293.63	175.945	-895.206	1089.31	102.537	-547.878	1217.57	331.992	-734.61	1355.42	443.317	-692.37	1121.91	447.832	-668.138	1025.88	455.867	-726.772	881.485	404.658	-734.341	779.951	469.227	-695.504	770.694	452.144	-740.513	700.59
850	0	228.763	-841.496	1559.18	123.407	-839.539	1558.97	246.117	-679.951	1525.16	127.1	-674.864	1525.77	174.392	-655.265	1400.69	182.335	-552.881	1122.47	181.488	-811.803	1292.9	177.051	-907.868	1088.98	103.589	-559.686	1216.49	333.866	-745.934	1353.87	444.316	-703.943	1119.75	448.394	-680.278	1023.58	456.564	-738.864	879.275	405.317	-746.416	777.881	470.359	-707.61	768.551	453.126	-752.504	698.391
851	0	231.221	-852.97	1558.77	125.875	-850.976	1558.93	248.511	-691.46	1524.5	129.593	-686.28	1525.57	175.955	-666.983	1400.26	183.41	-565.054	1121.65	183.095	-823.737	1292.58	178.145	-920.646	1088.97	104.486	-571.615	1215.88	335.609	-757.21	1352.66	445.388	-715.801	1117.94	448.982	-692.545	1021.8	457.668	-751.163	877.614	406.689	-758.823	776.059	471.568	-719.839	766.828	454.225	-764.636	696.59
852	0	233.715	-864.564	1558.81	128.414	-862.445	1559.36	250.985	-703.004	1524.39	132.028	-697.824	1525.74	177.593	-678.664	1400.32	184.292	-577.028	1121.36	184.745	-835.623	1292.77	179.295	-933.506	1089.51	105.321	-583.577	1215.74	337.308	-768.592	1352.01	446.4	-727.801	1116.68	449.709	-704.867	1020.7	458.697	-763.619	876.476	407.945	-771.669	775.059	472.78	-732.283	765.797	455.625	-777.182	695.551
853	0	236.356	-876.03	1559.06	130.946	-873.995	1560	253.539	-714.597	1524.53	134.544	-709.387	1526.22	179.277	-690.391	1400.71	184.825	-588.761	1121.44	186.437	-847.657	1293.29	180.59	-946.392	1090.18	105.925	-595.61	1216.27	339.026	-780	1351.62	447.132	-739.825	1115.82	450.33	-717.464	1019.76	459.701	-776.235	875.53	409.437	-784.384	773.94	474.134	-744.961	764.933	457.349	-790.041	694.78
854	0	238.994	-887.559	1559.65	133.624	-885.686	1561.13	256.039	-726.374	1524.94	137.059	-721.033	1527.3	180.845	-702.215	1401.61	185.141	-600.593	1122.26	188.059	-859.668	1294.09	181.985	-959.177	1091.27	106.496	-607.683	1217.28	340.602	-791.51	1351.72	447.92	-752.221	1115.33	450.825	-730.306	1019.24	461.134	-789.193	875.346	410.905	-797.988	773.528	475.434	-758.091	764.558	459.258	-803.439	694.499
855	0	241.629	-899.17	1560.78	136.336	-897.297	1562.77	258.543	-738.027	1525.75	139.619	-732.664	1528.74	182.199	-714.091	1402.86	186.164	-612.579	1123.95	189.533	-871.506	1295.57	183.373	-971.648	1092.79	106.865	-619.792	1218.96	342.016	-802.921	1352.55	448.615	-764.84	1115.56	451.35	-743.264	1019.5	462.384	-802.255	875.855	412.855	-811.561	773.697	476.943	-771.395	765.173	461.444	-817.097	695.12
856	0	244.303	-910.707	1562.28	138.954	-908.868	1564.93	261.095	-749.648	1527.19	142.111	-744.326	1530.62	183.471	-725.892	1404.64	186.696	-624.451	1125.81	191.263	-883.407	1297.49	184.748	-983.757	1094.82	107.113	-631.938	1220.86	343.429	-814.294	1354	449.183	-777.314	1116.48	451.93	-756.121	1020.6	463.864	-815.509	877.21	414.182	-825.086	774.878	478.505	-784.916	766.36	463.782	-831.089	696.63
857	0	246.773	-922.42	1563.9	141.453	-920.467	1567.19	263.514	-761.37	1528.73	144.551	-755.952	1532.94	184.543	-737.623	1406.5	186.642	-636.372	1127.61	192.566	-895.062	1299.56	186.202	-995.695	1097.02	107.425	-644.149	1223.14	344.685	-825.553	1355.74	449.592	-790.028	1117.79	452.49	-769.14	1022.09	465.205	-829.1	879.04	416.179	-839.358	776.373	480.196	-798.883	768.194	466.246	-845.544	698.479
858	0	249.122	-934.127	1565.76	143.884	-932.033	1569.64	265.849	-773.062	1530.65	146.857	-767.49	1535.61	185.772	-749.113	1408.7	186.427	-648.609	1129.59	194.026	-906.657	1301.91	187.528	-1007.41	1099.55	107.834	-656.361	1225.5	345.755	-836.801	1357.88	450.111	-803.023	1119.52	453.015	-782.333	1024	466.534	-842.951	881.371	418.035	-854.228	778.393	481.647	-813.337	770.445	468.576	-860.48	700.894
859	0	251.195	-945.608	1567.78	145.944	-943.516	1572.29	267.831	-784.559	1532.84	148.936	-778.872	1538.46	186.816	-760.318	1410.9	186.395	-661.233	1131.53	195.271	-917.905	1304.53	188.851	-1018.84	1102.39	108.224	-668.433	1227.68	346.915	-847.772	1360.49	450.355	-815.313	1122	453.777	-795.208	1026.45	467.955	-856.888	884.33	419.985	-869.059	781.252	483.333	-827.942	773.375	470.957	-875.651	704.125
860	0	253.016	-956.984	1570.04	147.809	-954.722	1574.89	269.814	-795.951	1535.34	150.88	-790.117	1541.43	187.943	-771.368	1413.09	186.675	-673.76	1133.4	196.513	-929.019	1307.29	190.129	-1029.86	1105.45	108.755	-680.293	1229.85	348.059	-858.618	1363.26	451.295	-828.21	1124.46	454.691	-808.072	1029.18	469.486	-870.876	887.622	421.906	-884.258	784.514	485.043	-842.691	776.469	473.382	-891.241	707.708
861	0	254.503	-968.308	1572.22	149.369	-966.009	1577.49	271.431	-807.211	1537.93	152.596	-801.151	1544.49	188.915	-782.267	1415.42	187.209	-685.871	1135.48	197.8	-940.028	1309.91	191.487	-1040.77	1108.39	109.502	-692.057	1232.06	349.186	-869.522	1365.93	452.064	-840.935	1127.1	455.92	-821.1	1031.94	471.109	-885.258	890.984	423.843	-900.042	787.881	486.704	-858.099	779.589	475.692	-907.342	711.286
862	0	255.762	-979.484	1574.53	150.575	-977.004	1579.89	272.732	-818.394	1540.52	153.979	-812.065	1547.4	190.091	-793.087	1417.64	187.981	-697.506	1137.48	198.931	-950.949	1312.48	192.603	-1051.47	1111.2	110.363	-703.482	1234.08	350.302	-880.288	1368.65	453.094	-853.688	1129.82	457.284	-834.067	1034.7	472.626	-899.574	894.349	425.739	-915.632	791.266	488.219	-873.673	782.752	477.809	-923.74	715.008
863	0	256.659	-990.39	1576.92	151.495	-987.66	1582.33	273.938	-829.253	1543.22	155.159	-822.798	1549.95	191.349	-803.774	1419.7	188.977	-708.604	1139.48	199.938	-961.693	1315.07	193.748	-1061.59	1114.09	111.325	-714.71	1236.02	351.395	-890.933	1371.44	454.419	-866.195	1132.79	459.004	-846.843	1037.63	474.257	-913.981	897.938	427.43	-931.335	795.013	490.086	-889.262	786.222	479.786	-940.311	718.991
864	0	257.456	-1001.11	1579.17	152.202	-998.377	1584.61	274.93	-839.898	1545.69	156.176	-833.375	1552.25	192.432	-814.459	1421.67	190.293	-719.355	1141.35	200.965	-972.367	1317.46	194.818	-1071.55	1116.67	112.562	-725.586	1237.95	352.447	-901.579	1373.9	455.836	-878.606	1135.54	460.939	-859.635	1040.33	475.989	-928.486	901.228	429.157	-947.423	798.66	491.521	-905.175	789.214	481.644	-957.313	722.841
865	0	258.093	-1011.71	1581.36	152.998	-1008.92	1586.7	275.587	-850.573	1547.7	156.905	-843.989	1554.38	193.487	-825.069	1423.61	191.457	-730.057	1143.14	202.058	-982.997	1319.63	195.864	-1081.65	1119.01	113.844	-736.327	1239.7	353.464	-912.384	1376.14	457.337	-891.166	1138	462.916	-872.471	1042.6	477.636	-943.063	904.355	430.865	-963.425	802.172	493.119	-921.211	791.973	483.684	-974.817	726.761
866	0	258.667	-1022.19	1583.54	153.508	-1019.3	1588.66	276.118	-861.027	1549.8	157.345	-854.475	1556.28	194.503	-835.665	1425.51	192.716	-740.741	1145.07	202.932	-993.539	1321.62	196.799	-1091.6	1121.09	115.106	-746.875	1241.6	354.475	-923.17	1378.32	459.027	-903.693	1140.53	465.013	-885.215	1044.92	479.378	-957.586	907.439	432.497	-980.726	806.292	494.572	-937.442	794.762	485.051	-992.058	730.661
867	0	259.166	-1032.36	1585.52	153.948	-1029.64	1590.65	276.59	-871.34	1551.68	157.874	-864.741	1558	195.409	-846.388	1427.22	194.227	-751.162	1146.89	203.788	-1004.04	1323.54	197.607	-1102	1123.06	116.498	-757.155	1243.31	355.37	-933.966	1380.4	460.855	-915.684	1143.02	467.413	-897.732	1047.25	481.249	-971.931	910.538	433.84	-996.412	809.969	496.04	-953.483	797.528	486.484	-1009.54	734.64
868	0	259.679	-1042.58	1587.37	154.421	-1039.85	1592.36	276.921	-881.472	1553.3	158.183	-875.195	1559.49	196.354	-856.991	1428.89	195.622	-761.621	1148.53	204.604	-1014.62	1325.09	198.326	-1112.73	1124.58	117.735	-767.353	1244.93	356.108	-944.871	1382.07	462.716	-927.515	1145.11	469.608	-910.211	1049.06	483.005	-986.35	913.278	435.337	-1012.53	813.529	497.497	-969.839	800.02	487.824	-1027.22	738.396
869	0	260.085	-1052.74	1589	154.853	-1050.3	1593.89	277.063	-891.67	1554.72	158.314	-885.571	1560.85	197.092	-867.577	1430.4	197.1	-771.903	1150.31	205.198	-1025.15	1326.42	198.782	-1123.45	1125.71	119.042	-777.397	1246.58	356.744	-955.98	1383.63	464.519	-939.336	1147	471.874	-922.731	1050.63	484.926	-1001.22	915.848	436.551	-1028.73	816.991	498.782	-986.128	802.277	488.992	-1045	742.157
870	0	260.513	-1062.83	1590.61	155.345	-1060.48	1595.42	277.252	-901.735	1556.03	158.449	-895.82	1562.06	197.707	-878.324	1431.93	198.454	-782.055	1151.93	205.649	-1035.59	1327.67	199.083	-1134.02	1126.7	120.355	-787.363	1248.13	357.232	-967.061	1385.02	466.372	-950.947	1149.03	474.112	-935.085	1052.3	486.537	-1015.11	918.537	437.665	-1043.97	820.265	500.076	-1002.23	804.717	490.054	-1062.71	745.954
871	0	261.012	-1072.81	1592.03	155.789	-1070.72	1596.91	277.439	-911.694	1557.2	158.658	-906.095	1563.02	198.379	-888.966	1433.2	200.006	-792.041	1153.51	206.025	-1046.06	1328.75	199.265	-1144.46	1127.43	121.603	-797.169	1249.63	357.653	-978.073	1386.32	468.193	-962.355	1150.85	476.361	-947.323	1053.76	488.229	-1029.35	920.961	438.875	-1059.82	823.636	501.138	-1018.32	807.094	491.171	-1080.25	749.817
872	0	261.52	-1082.86	1593.16	156.279	-1081.03	1598.01	277.453	-921.833	1557.97	158.796	-916.433	1563.88	199.141	-899.472	1434.52	201.428	-802.018	1155.04	206.33	-1056.61	1329.49	199.36	-1155	1127.75	122.834	-807.021	1251	358.059	-989.323	1387.32	469.871	-973.859	1152.33	478.451	-959.935	1054.93	489.908	-1043.65	923.31	440.137	-1075.65	826.796	502.135	-1034.51	808.966	492.184	-1097.85	753.332
873	0	261.904	-1092.92	1594.24	156.719	-1091.29	1599.06	277.602	-931.968	1558.6	158.833	-926.798	1564.64	199.651	-910.182	1435.74	202.968	-811.899	1156.54	206.505	-1066.99	1330.22	199.158	-1165.07	1128.01	124.341	-816.733	1252.45	358.371	-1000.63	1388.34	471.559	-985.172	1153.87	480.456	-972.471	1056.13	491.46	-1057.93	925.562	441.216	-1091.19	829.736	503.019	-1050.59	811.025	493.148	-1115.11	756.97
874	0	262.228	-1103.05	1595.25	156.899	-1101.53	1600.05	277.703	-942.056	1559.27	159.017	-937.054	1565.22	200.373	-920.874	1436.64	204.467	-821.772	1157.92	206.593	-1077.18	1330.89	198.815	-1175.04	1128.25	125.516	-826.441	1253.65	358.569	-1011.75	1389.19	473.036	-996.289	1155.54	482.418	-985.018	1057.49	492.876	-1072.15	927.822	442.263	-1106.95	832.933	503.996	-1066.35	813.241	494.064	-1132.26	760.474
875	0	262.405	-1113.26	1595.9	157.163	-1111.67	1600.67	277.797	-952.334	1559.74	159.096	-947.379	1565.59	201.071	-931.398	1437.51	206.007	-831.547	1159.09	206.554	-1087.35	1331.2	198.449	-1184.84	1128.17	126.933	-836.068	1254.72	358.777	-1022.97	1389.9	474.402	-1007.52	1156.74	484.366	-997.586	1058.7	494.254	-1086.53	929.854	443.306	-1122.44	835.664	504.821	-1082.14	815.283	495.032	-1149.08	763.776
876	0	262.538	-1123.57	1596.3	157.244	-1122.1	1601.09	277.995	-962.645	1559.94	159.301	-957.709	1565.8	201.702	-941.851	1438.26	207.482	-841.312	1160.12	206.523	-1097.57	1331.37	197.98	-1194.74	1127.91	128.343	-845.713	1255.68	359.012	-1034.27	1390.42	475.659	-1018.85	1157.83	486.014	-1010.48	1059.57	495.427	-1100.87	931.792	444.231	-1138.16	838.233	505.47	-1097.91	816.89	495.901	-1165.84	766.772
877	0	262.466	-1133.9	1596.63	157.255	-1132.31	1601.28	278.155	-973.108	1560.19	159.571	-967.955	1566.02	202.522	-952.163	1438.85	208.919	-850.882	1161.03	206.454	-1107.62	1331.48	197.439	-1204.23	1127.76	129.63	-855.293	1256.38	359.135	-1045.34	1390.86	476.705	-1030.15	1158.82	487.745	-1023.34	1060.48	496.498	-1115.32	933.734	445.169	-1153.56	840.781	505.952	-1113.54	818.653	496.622	-1182.1	769.478
878	0	262.477	-1144.4	1596.83	157.115	-1142.4	1601.36	278.38	-983.506	1560.44	159.66	-978.147	1566.05	203.02	-962.496	1439.18	210.247	-860.461	1161.59	206.376	-1117.53	1331.55	196.845	-1213.74	1127.59	131.007	-864.854	1257.01	359.384	-1056.3	1391.33	477.672	-1041.44	1159.73	489.374	-1036.17	1061.47	497.337	-1129.53	935.516	445.997	-1169.11	843.316	506.575	-1128.92	820.397	497.379	-1198.24	772.05
879	0	262.145	-1154.8	1596.78	156.918	-1152.82	1601.25	278.588	-994.009	1560.44	159.972	-988.505	1566.01	203.74	-972.623	1439.38	211.613	-870.082	1162.15	206.414	-1127.44	1331.38	196.315	-1223.18	1127.04	132.195	-874.361	1257.47	359.516	-1067.29	1391.4	478.454	-1053.05	1160.21	490.857	-1049.07	1061.96	498.065	-1143.94	937.018	446.686	-1184.45	845.321	506.899	-1144.37	821.768	497.922	-1214.2	774.245
880	0	262.094	-1165.5	1596.44	156.847	-1163.21	1600.84	278.774	-1004.69	1560.39	160.091	-998.865	1565.82	204.439	-982.785	1439.5	212.9	-879.558	1162.55	206.341	-1137.4	1331.02	195.794	-1232.5	1126.5	133.473	-883.851	1257.75	359.563	-1078.17	1391.2	479.106	-1064.9	1160.41	491.944	-1062.16	1062.17	498.705	-1158.23	938.178	447.179	-1199.76	847.092	507.067	-1159.75	822.774	498.22	-1229.93	776.058
881	0	261.822	-1175.96	1596.09	156.517	-1173.55	1600.39	278.859	-1015.15	1560.27	160.241	-1009.11	1565.57	204.941	-992.724	1439.4	213.921	-889.128	1162.58	206.262	-1147.24	1330.58	195.213	-1241.76	1125.86	134.514	-893.241	1257.83	359.762	-1088.81	1391.03	479.664	-1076.78	1160.44	493.055	-1074.96	1062.26	499.214	-1172.38	939.256	447.628	-1214.77	848.695	507.308	-1174.83	823.762	498.45	-1245.48	777.634
882	0	261.673	-1186.62	1595.58	156.373	-1183.83	1599.78	279.074	-1025.69	1560.03	160.452	-1019.39	1565.15	205.559	-1002.92	1439.15	214.832	-898.632	1162.48	206.159	-1157.08	1330.11	194.693	-1250.94	1125.17	135.425	-902.786	1257.77	359.798	-1099.34	1390.59	480.068	-1088.72	1160.21	493.954	-1087.84	1062.2	499.57	-1186.37	939.905	447.909	-1229.73	849.978	507.334	-1189.73	824.449	498.556	-1260.93	778.875
883	0	261.508	-1197.19	1594.85	156.255	-1194.43	1599.02	279.079	-1036.33	1559.57	160.58	-1029.93	1564.85	206.039	-1013.01	1438.79	215.791	-907.98	1162.39	206.179	-1167.02	1329.38	194.471	-1259.71	1123.97	136.33	-912.226	1257.64	359.968	-1109.93	1390.03	480.459	-1101.1	1159.59	494.509	-1100.94	1061.57	499.855	-1200.44	940.247	448.067	-1244.52	850.806	507.314	-1204.8	824.749	498.549	-1276.13	779.779
884	0	261.438	-1207.82	1594.06	156.163	-1204.97	1598.19	279.198	-1046.88	1559.13	160.665	-1040.26	1564.38	206.402	-1023.2	1438.34	216.514	-917.503	1162.27	206.071	-1176.87	1328.56	194.133	-1269.1	1123	137.019	-921.709	1257.57	359.904	-1120.38	1389.24	480.596	-1113.4	1158.9	494.883	-1113.9	1061.01	500.051	-1214.28	940.465	448.068	-1259.19	851.5	507.104	-1219.57	824.833	498.383	-1291.18	780.457
885	0	261.282	-1218.41	1593.28	156.06	-1215.35	1597.29	279.262	-1057.27	1558.66	160.703	-1050.68	1563.85	206.613	-1033.21	1437.89	217.124	-926.969	1162	205.906	-1186.71	1327.77	193.64	-1278.5	1122.11	137.56	-931.283	1257.18	359.989	-1130.72	1388.55	480.747	-1125.81	1158.25	495.189	-1126.71	1060.46	500.039	-1227.86	940.553	448.021	-1273.71	852.205	506.697	-1233.97	824.95	498.012	-1305.98	781.005
886	0	261.22	-1228.96	1592.17	155.911	-1225.92	1596.2	279.26	-1067.88	1558.08	160.654	-1061.15	1563.13	206.936	-1043.36	1437.27	217.629	-936.506	1161.66	205.758	-1196.61	1326.86	193.563	-1287.46	1120.71	137.978	-940.917	1256.84	360.025	-1141.03	1387.71	480.676	-1138.3	1157.27	495.25	-1139.62	1059.67	499.833	-1241.56	940.24	447.778	-1288.17	852.476	506.138	-1248.23	824.76	497.668	-1320.44	781.294
887	0	261.156	-1239.61	1590.94	155.92	-1236.39	1595.04	279.326	-1078.34	1557.22	160.782	-1071.66	1562.29	207.004	-1053.61	1436.62	218.012	-946.075	1161.2	205.662	-1206.62	1325.65	193.171	-1297.74	1119.55	138.303	-950.566	1256.35	359.903	-1151.4	1386.64	480.373	-1150.87	1156.12	494.97	-1152.63	1058.51	499.472	-1255.14	939.945	447.435	-1302.49	852.393	505.316	-1262.39	824.23	497.153	-1334.91	781.057
888	0	260.997	-1250.1	1589.72	155.739	-1247	1593.78	279.223	-1088.93	1556.3	160.547	-1082.18	1561.42	207.125	-1063.71	1435.86	218.244	-955.718	1160.66	205.474	-1216.66	1324.49	193.013	-1307.22	1118.13	138.511	-960.406	1255.73	359.898	-1161.83	1385.61	480.036	-1163.52	1154.99	494.393	-1165.46	1057.43	498.828	-1268.48	939.362	446.919	-1316.67	852.379	504.174	-1276.2	823.604	496.51	-1349	780.971
889	0	260.796	-1260.7	1588.57	155.562	-1257.54	1592.71	279.077	-1099.38	1555.26	160.451	-1092.62	1560.4	206.993	-1074.02	1434.83	218.385	-965.399	1159.9	205.337	-1226.66	1323.33	192.826	-1316.92	1116.84	138.483	-970.155	1255	359.735	-1172.09	1384.48	479.556	-1175.9	1153.74	493.893	-1178.21	1056.32	498.154	-1281.68	938.816	446.203	-1330.63	852.197	503.114	-1289.8	823.05	495.79	-1362.83	780.566
890	0	260.7	-1271.27	1587.16	155.414	-1268.13	1591.25	278.913	-1109.98	1553.98	160.377	-1103.13	1559.12	206.951	-1084.31	1433.7	218.385	-975.249	1158.95	205.207	-1236.81	1321.99	192.718	-1326.99	1115.31	138.621	-980.138	1253.97	359.665	-1182.42	1383.13	478.988	-1188.3	1152.28	492.973	-1190.89	1054.72	497.131	-1294.85	937.858	445.343	-1344.42	851.664	501.654	-1303.37	821.953	494.823	-1376.52	779.974
891	0	260.366	-1281.95	1585.69	155.159	-1278.89	1589.85	278.648	-1120.62	1552.66	160.152	-1113.79	1557.9	206.767	-1094.71	1432.47	218.492	-985.195	1157.89	205.015	-1247	1320.56	192.578	-1336.95	1113.72	138.582	-990.087	1252.98	359.421	-1192.84	1381.69	478.246	-1200.72	1150.71	491.954	-1203.61	1053.08	495.964	-1307.96	936.785	444.292	-1358.06	851.094	500.072	-1316.82	820.754	493.646	-1390.15	779.093
892	0	260.028	-1292.6	1584.32	154.74	-1289.31	1588.41	278.344	-1131.28	1551.39	159.893	-1124.24	1556.51	206.38	-1105.13	1431.41	218.271	-995.261	1156.93	204.788	-1257.28	1319.14	192.395	-1346.88	1112.2	138.257	-1000.33	1251.87	359.118	-1203.06	1380.43	477.318	-1212.82	1149.34	490.847	-1216.19	1051.79	494.554	-1320.89	935.995	442.876	-1371.36	850.424	498.598	-1330.12	819.969	492.22	-1403.48	778.473
893	0	259.463	-1303.14	1582.87	154.221	-1299.92	1586.95	278.085	-1141.8	1550.12	159.462	-1134.73	1555.1	206.232	-1115.61	1430.08	218.2	-1005.37	1155.86	204.423	-1267.55	1317.67	192.341	-1356.99	1110.66	138.205	-1010.49	1250.69	358.879	-1213.6	1379.21	476.488	-1224.81	1147.91	489.724	-1228.6	1050.55	493.113	-1333.75	935.085	441.27	-1384.46	849.585	496.884	-1343.18	819.068	490.509	-1416.83	777.724
894	0	258.925	-1313.86	1581.17	153.755	-1310.58	1585.25	277.487	-1152.58	1548.56	158.969	-1145.46	1553.57	205.638	-1126.08	1428.66	217.949	-1015.58	1154.76	204.178	-1277.98	1315.97	192.316	-1367.44	1108.93	137.884	-1020.9	1249.32	358.444	-1224.01	1377.66	475.405	-1236.61	1146.25	488.342	-1241.08	1048.79	491.205	-1346.57	933.838	439.388	-1397.61	848.469	495.158	-1356.41	817.834	488.495	-1430.06	776.659
895	0	258.379	-1324.64	1579.61	153.114	-1321.26	1583.57	276.959	-1163.3	1546.81	158.514	-1156.11	1551.92	205.057	-1136.63	1427.26	217.532	-1026.01	1153.31	203.904	-1288.49	1314.24	192.265	-1377.89	1107.27	137.317	-1031.33	1247.86	357.972	-1234.43	1376.17	474.38	-1248.29	1144.51	486.973	-1253.56	1047.01	489.381	-1359.36	932.562	437.289	-1410.4	847.377	493.128	-1369.53	816.458	486.347	-1443.3	775.53
896	0	257.535	-1335.28	1578.05	152.29	-1331.93	1581.88	276.306	-1173.93	1545.29	157.769	-1166.7	1550.2	204.488	-1147.22	1425.65	217.123	-1036.34	1151.78	203.444	-1298.96	1312.75	192.275	-1387.94	1105.51	136.822	-1041.89	1246.26	357.496	-1244.86	1374.8	473.352	-1259.7	1142.97	485.49	-1265.61	1045.48	487.263	-1371.88	931.359	434.995	-1422.89	846.376	491.095	-1382.42	815.448	483.911	-1456.16	774.532
897	0	256.673	-1345.96	1576.32	151.462	-1342.6	1580.11	275.519	-1184.54	1543.76	156.96	-1177.39	1548.48	203.737	-1157.7	1423.97	216.624	-1046.95	1150.15	202.984	-1309.47	1311.05	192.292	-1398.44	1103.87	136.261	-1052.44	1244.61	356.849	-1255.28	1373.3	472.226	-1270.77	1141.17	484.185	-1277.7	1043.85	485.084	-1384.34	929.951	432.556	-1435.31	845.181	489.067	-1395.24	814.228	481.166	-1468.91	773.415
898	0	255.766	-1356.65	1574.59	150.479	-1353.31	1578.26	274.591	-1195.35	1542.03	156.081	-1187.93	1546.77	202.868	-1168.3	1422.39	216.005	-1057.66	1148.42	202.512	-1320.13	1309.24	192.339	-1408.85	1101.91	135.407	-1063.17	1242.69	356.176	-1265.71	1371.66	471.033	-1281.93	1139.11	482.535	-1289.71	1041.9	482.711	-1396.77	928.439	429.856	-1447.54	843.751	486.552	-1408.02	812.651	478.22	-1481.61	772.094
899	0	254.648	-1367.31	1572.95	149.316	-1363.97	1576.38	273.504	-1206	1540.48	155.083	-1198.64	1544.93	202.102	-1178.87	1420.57	215.31	-1068.37	1146.62	201.847	-1330.8	1307.54	192.368	-1419.27	1100.09	134.537	-1074.03	1240.69	355.439	-1276.2	1370.2	469.889	-1292.93	1137.39	480.996	-1301.53	1040.08	480.509	-1408.98	927.048	427.024	-1459.63	842.486	484.052	-1420.59	811.256	475.125	-1494.19	770.764
900	0	253.44	-1377.88	1571.4	148.11	-1374.46	1574.64	272.477	-1216.47	1538.98	153.92	-1209.26	1543.11	201.092	-1189.31	1418.72	214.577	-1079.16	1144.63	201.24	-1341.49	1305.96	192.272	-1430.11	1098.56	133.686	-1084.81	1238.63	354.714	-1286.56	1368.88	468.705	-1303.75	1135.68	479.692	-1313.06	1038.49	478.163	-1420.93	925.75	424.162	-1471.38	841.457	481.68	-1432.92	810.039	471.913	-1506.56	769.665
901	0	252.067	-1388.55	1569.67	146.829	-1385.11	1572.74	271.231	-1227.09	1537.44	152.647	-1219.76	1541.37	199.969	-1199.91	1416.91	213.635	-1090.06	1142.63	200.53	-1352.21	1304.28	192.204	-1441.06	1096.97	132.84	-1095.62	1236.49	353.795	-1296.91	1367.31	467.569	-1314.55	1134	478.095	-1324.49	1036.62	475.822	-1432.88	924.381	421.254	-1482.95	840.199	479.069	-1445.2	808.667	468.454	-1518.75	768.401
902	0	250.636	-1399.17	1568.12	145.419	-1395.81	1570.9	269.868	-1237.78	1535.9	151.318	-1230.2	1539.8	198.91	-1210.47	1415.01	212.664	-1101.17	1140.45	199.77	-1363.02	1302.61	192.119	-1452.23	1095.38	131.665	-1106.67	1234.36	352.829	-1307.42	1365.75	466.454	-1325.55	1132.3	476.445	-1335.8	1034.79	473.464	-1444.64	922.937	418.308	-1494.5	838.908	476.518	-1457.51	807.235	465.01	-1530.8	767.176
903	0	249.2	-1409.64	1566.53	143.896	-1406.29	1569.12	268.401	-1248.22	1534.52	149.937	-1240.83	1538.03	197.79	-1220.93	1413.17	211.698	-1112.23	1138.35	198.785	-1373.8	1301.02	191.902	-1463.38	1093.91	130.632	-1117.86	1231.99	351.808	-1317.87	1364.37	465.241	-1336.43	1130.86	474.94	-1346.87	1033.26	471.143	-1456.09	921.568	415.391	-1505.71	837.753	474.096	-1469.33	806.01	461.463	-1542.63	765.899
904	0	247.513	-1420.15	1565.11	142.246	-1416.64	1567.49	266.958	-1258.64	1533.27	148.344	-1251.25	1536.36	196.407	-1231.46	1411.25	210.661	-1123.47	1136.01	197.866	-1384.7	1299.57	191.699	-1474.71	1092.71	129.499	-1128.93	1229.69	350.755	-1328.27	1363.01	464.139	-1347.32	1129.47	473.441	-1357.69	1031.79	468.749	-1467.4	920.223	412.715	-1516.76	836.67	471.656	-1480.83	804.762	458.107	-1554.19	764.686
905	0	245.865	-1430.61	1563.7	140.51	-1427.18	1565.8	265.376	-1269.11	1531.77	146.752	-1261.65	1534.69	195.114	-1242.12	1409.34	209.831	-1134.81	1133.77	196.894	-1395.68	1298.11	191.473	-1486.25	1091.45	128.426	-1140.21	1227.25	349.654	-1338.84	1361.54	463.065	-1358.31	1128.11	471.877	-1368.57	1030.04	466.729	-1478.54	918.771	410.176	-1527.88	835.504	469.133	-1492.26	803.154	454.867	-1565.43	763.202
906	0	243.944	-1441.07	1562.41	138.721	-1437.63	1564.21	263.669	-1279.73	1530.32	145.076	-1272.15	1533.11	193.797	-1252.73	1407.4	208.56	-1146.43	1131.52	195.845	-1406.71	1296.72	191.091	-1497.9	1090.3	127.415	-1151.55	1224.76	348.474	-1349.45	1360.25	461.941	-1369.48	1126.83	470.259	-1379.37	1028.44	464.646	-1489.5	917.421	407.8	-1538.51	834.333	466.675	-1503.48	801.605	451.729	-1576.57	761.858
907	0	242.094	-1451.45	1561.22	136.765	-1447.87	1562.79	261.918	-1290.16	1529.11	143.344	-1282.38	1531.43	192.562	-1263.28	1405.51	207.592	-1158.27	1129	194.632	-1417.7	1295.53	190.584	-1509.7	1089.5	126.437	-1162.89	1222.22	347.31	-1360.15	1359.11	460.831	-1380.49	1125.77	468.755	-1389.96	1027.1	462.817	-1500.17	916.1	405.546	-1549.23	833.328	464.606	-1514.24	800.344	448.947	-1587.17	760.471
908	0	240.104	-1461.82	1560.19	134.774	-1458.15	1561.51	260.217	-1300.52	1527.83	141.642	-1292.71	1529.79	190.959	-1273.81	1403.66	206.528	-1170.5	1126.49	193.438	-1428.83	1294.46	189.952	-1521.68	1088.77	125.339	-1174.46	1219.68	346.056	-1370.85	1357.98	459.67	-1391.45	1124.7	467.388	-1400.56	1025.84	461.135	-1510.64	914.674	403.53	-1559.58	832.104	462.376	-1524.68	798.919	446.402	-1597.63	758.893
909	0	238.167	-1472.23	1559.14	133.106	-1468.61	1560.15	258.385	-1311.03	1526.52	139.824	-1303.23	1528.33	189.431	-1284.48	1401.93	205.406	-1183.05	1123.97	192.137	-1440.1	1293.32	189.195	-1533.86	1088.11	124.161	-1186.08	1217.09	344.615	-1381.69	1356.77	458.579	-1402.8	1123.54	465.934	-1411.34	1024.44	459.5	-1521.24	913.187	401.733	-1569.97	830.688	460.281	-1535.07	797.213	444.071	-1607.89	757.127
910	0	236.042	-1482.69	1558.58	130.909	-1478.99	1559.33	256.506	-1321.47	1525.47	137.9	-1313.56	1526.9	187.842	-1295.26	1400.68	204.462	-1195.69	1122.18	190.777	-1451.46	1292.48	188.234	-1546.23	1087.64	123.121	-1197.59	1214.95	343.121	-1392.52	1355.9	457.04	-1413.66	1122.53	464.482	-1422.15	1023.31	457.94	-1531.56	911.728	399.963	-1580.25	829.357	458.381	-1545.09	795.741	442.08	-1617.86	755.612
911	0	234.128	-1493.03	1558.42	128.839	-1489.25	1559	254.622	-1331.98	1524.74	135.964	-1324.15	1525.9	186.282	-1306.31	1399.64	203.688	-1208.24	1120.77	189.253	-1462.87	1292.14	187.16	-1558.55	1087.67	122.205	-1209.21	1213.23	341.665	-1403.59	1355.42	455.742	-1424.58	1121.88	463.18	-1432.69	1022.64	456.559	-1541.72	910.465	398.424	-1590.12	828.192	456.715	-1554.61	794.505	440.297	-1627.32	754.115
912	0	232.17	-1503.54	1558.46	126.954	-1499.86	1558.91	252.453	-1342.63	1524.01	133.928	-1334.84	1525.15	184.693	-1317.47	1398.97	202.807	-1220.29	1119.62	187.76	-1474.38	1291.97	186.059	-1571.13	1087.77	121.358	-1220.86	1211.99	340.196	-1415.05	1355.11	454.223	-1435.44	1121.36	461.822	-1443.35	1022.09	455.264	-1551.75	909.37	397.11	-1599.83	827.091	455.254	-1564.05	793.287	438.873	-1636.64	752.667
913	0	230.278	-1514.08	1558.81	124.969	-1510.53	1559.05	250.378	-1353.29	1523.75	131.889	-1345.39	1524.86	183.3	-1328.72	1398.72	202.432	-1231.82	1119.18	186.103	-1485.96	1292.18	184.759	-1583.99	1088.34	120.735	-1232.42	1211.3	338.692	-1426.63	1355.44	452.825	-1446.24	1121.29	460.397	-1454.04	1022.01	454.095	-1561.63	908.662	395.745	-1609.19	825.947	453.849	-1573.19	792.277	437.63	-1645.58	751.625
914	0	228.179	-1524.69	1559.64	122.838	-1521.12	1559.67	248.355	-1364	1524.26	129.772	-1356.1	1524.95	181.913	-1340.04	1398.92	202.352	-1242.94	1119.26	184.438	-1497.58	1292.79	183.295	-1596.9	1089.28	120.223	-1243.97	1211.03	337.043	-1438.41	1356.25	451.471	-1456.92	1121.96	459.206	-1464.56	1022.7	452.686	-1571.3	908.289	394.48	-1618.12	825.169	452.804	-1581.93	792.133	436.787	-1654.11	750.953
915	0	226.032	-1535.31	1560.83	120.673	-1531.74	1560.6	246.22	-1374.64	1525.12	127.756	-1367.1	1525.37	180.49	-1351.24	1399.55	202.537	-1254.29	1119.89	182.64	-1509.05	1293.74	181.74	-1609.75	1090.72	119.772	-1255.46	1211.24	335.391	-1450.47	1357.46	450.167	-1467.51	1123.05	458.049	-1474.92	1023.98	451.753	-1580.58	908.438	393.685	-1626.63	824.88	452.164	-1590.29	792.415	436.101	-1662.19	750.504
916	0	223.869	-1546.07	1562.14	118.73	-1542.6	1561.54	244.051	-1385.44	1526.13	125.548	-1377.98	1526.13	179.093	-1362.46	1400.56	202.788	-1266.31	1120.63	181.077	-1520.57	1294.94	180.166	-1622.47	1092.43	119.662	-1266.92	1211.78	333.724	-1462.71	1359.06	448.936	-1478.25	1124.42	456.771	-1485.24	1025.36	450.785	-1589.81	908.973	392.658	-1635.12	824.639	451.548	-1598.52	792.772	435.667	-1670.08	750.236
917	0	221.681	-1556.9	1563.95	116.469	-1553.53	1562.93	241.938	-1396.29	1527.7	123.416	-1388.68	1527.23	178.193	-1373.5	1401.79	203.178	-1278.6	1121.67	179.457	-1531.94	1296.54	178.566	-1634.8	1094.57	119.592	-1278.31	1212.57	332.131	-1474.76	1361.07	447.681	-1488.92	1126.4	455.505	-1495.47	1027.14	449.899	-1598.94	909.882	392.114	-1642.78	824.628	451.247	-1606.67	793.708	435.251	-1677.57	750.432
918	0	219.429	-1567.67	1566.1	114.152	-1564.31	1564.6	239.969	-1407.15	1529.89	121.378	-1399.49	1528.77	176.902	-1384.45	1403.15	203.364	-1291.09	1122.89	177.978	-1543	1298.55	176.869	-1646.62	1097.09	119.449	-1289.69	1213.56	330.494	-1486.53	1363.63	446.514	-1499.59	1128.9	454.328	-1505.39	1029.61	448.935	-1607.78	911.366	391.625	-1649.88	825.033	451.238	-1614.3	795.128	434.998	-1684.66	750.993
919	0	217.24	-1578.46	1568.41	112.014	-1575.11	1566.33	238.083	-1417.93	1532.35	119.49	-1410.43	1530.63	175.548	-1395.24	1404.87	203.496	-1303.67	1124.26	176.514	-1554.02	1300.83	175.299	-1658	1099.76	119.108	-1301.17	1214.77	328.883	-1497.99	1366.12	445.343	-1510.56	1131.63	453.256	-1515.24	1032.36	448.413	-1616.43	913.076	391.146	-1657.32	825.803	451.492	-1622.03	796.912	434.933	-1691.52	751.594
920	0	215.074	-1589.38	1570.68	109.949	-1585.92	1568.04	236.217	-1428.53	1535.01	117.61	-1421.2	1532.73	174.648	-1405.94	1406.62	203.493	-1316.11	1125.88	175.176	-1565.01	1303.1	173.883	-1669.11	1102.4	118.782	-1312.6	1216.17	327.412	-1509.32	1368.71	444.018	-1521.53	1134.46	452.165	-1525.11	1035.04	447.682	-1625.13	914.894	390.779	-1664.75	826.678	451.671	-1629.73	798.695	434.827	-1698.36	752.416
921	0	213.001	-1600.24	1573.2	107.905	-1596.62	1570.03	234.385	-1439.22	1537.97	115.766	-1431.88	1535.02	173.362	-1416.59	1408.53	203.04	-1328.08	1127.55	173.891	-1575.68	1305.58	172.496	-1679.84	1105.2	118.287	-1323.89	1217.58	325.862	-1520.36	1371.64	442.84	-1532.54	1137.43	451.241	-1534.87	1038.08	447.144	-1633.65	916.951	390.637	-1671.95	827.783	452.237	-1637.33	800.949	434.959	-1705.15	753.584
922	0	211.129	-1610.93	1575.67	105.981	-1607.19	1572.07	232.68	-1450.07	1541.01	113.99	-1442.45	1537.59	172.074	-1427.12	1410.55	202.225	-1339.36	1129.29	172.709	-1586.32	1308.13	171.297	-1690.25	1108.31	117.701	-1335.2	1219.17	324.605	-1530.95	1374.57	441.771	-1543.52	1140.66	450.431	-1544.27	1041.37	446.68	-1642.06	919.436	390.499	-1678.89	829.225	452.994	-1644.82	803.556	434.97	-1711.62	754.924
923	0	209.302	-1621.5	1578.03	104.382	-1617.89	1573.9	231.049	-1460.64	1543.81	112.402	-1453.05	1539.86	170.854	-1437.69	1412.48	201.273	-1350.36	1131.03	171.754	-1596.73	1310.57	170.331	-1700.57	1110.98	117.007	-1346.49	1220.9	323.362	-1541.55	1377.28	440.735	-1554.45	1143.69	449.576	-1553.52	1044.32	446.425	-1650.36	921.692	390.575	-1685.85	830.467	453.84	-1652.46	805.95	435.302	-1718.23	756.075
924	0	207.64	-1632.07	1580.25	102.769	-1628.39	1575.81	229.568	-1470.95	1546.29	111.04	-1463.46	1542.06	169.775	-1448.11	1414.34	200.08	-1361.04	1132.98	170.73	-1607.3	1312.85	169.589	-1710.99	1113.58	115.962	-1357.69	1222.53	322.281	-1551.98	1379.94	439.71	-1565.26	1146.47	448.828	-1562.84	1047.02	446.136	-1658.78	923.892	390.619	-1692.97	831.783	454.584	-1660.12	808.062	435.684	-1725.02	757.223
925	0	205.968	-1642.5	1582.59	101.124	-1638.75	1577.6	228.093	-1481.35	1548.9	109.728	-1473.81	1544.14	168.745	-1458.43	1416.32	198.775	-1371.82	1134.87	169.796	-1617.53	1315.13	168.974	-1721.19	1116.18	114.965	-1368.57	1224.29	321.354	-1562.06	1382.44	438.802	-1575.81	1149.14	448.202	-1571.78	1049.88	446.018	-1666.91	925.994	391.151	-1700.01	833.082	455.683	-1667.67	810.51	436.23	-1731.65	758.557
926	0	204.478	-1652.79	1584.77	99.6191	-1648.93	1579.38	226.969	-1491.98	1551.29	108.385	-1484.09	1545.74	167.575	-1468.81	1418.15	197.322	-1382.51	1136.75	169.064	-1627.9	1317.15	168.61	-1731.46	1118.48	113.9	-1379.23	1226.05	320.604	-1572.27	1384.76	438.019	-1586.2	1151.72	447.768	-1580.59	1052.56	446.08	-1675.05	928.093	391.632	-1707.1	834.492	456.812	-1675.16	812.732	436.869	-1738.2	759.678
927	0	203.143	-1663.13	1586.69	98.3429	-1659.21	1580.97	225.911	-1502.3	1553.23	107.36	-1494.42	1547.21	166.86	-1479.18	1420.09	196.11	-1393.1	1138.67	168.406	-1638.21	1319.04	168.47	-1741.86	1120.34	112.824	-1389.74	1227.84	319.864	-1582.22	1386.66	437.248	-1596.39	1153.7	447.232	-1589.47	1054.53	446.273	-1683.14	929.566	392.144	-1714.39	835.473	457.705	-1682.59	814.215	437.708	-1745.01	760.49
928	0	201.977	-1673.38	1588.66	97.239	-1669.42	1582.51	225.021	-1512.48	1555.07	106.544	-1504.58	1548.7	165.969	-1489.52	1421.77	194.577	-1403.58	1140.5	167.909	-1648.57	1320.81	168.56	-1752.14	1122	111.712	-1400.27	1229.68	319.388	-1592.02	1388.45	436.719	-1606.29	1155.57	446.875	-1598.39	1056.37	446.506	-1691.14	931.064	392.948	-1721.68	836.314	458.653	-1690.09	815.719	438.771	-1751.9	761.297
929	0	200.93	-1683.54	1590.7	96.1686	-1679.46	1584.02	224.121	-1522.66	1556.96	105.578	-1514.7	1550.17	165.13	-1499.71	1423.54	193.131	-1413.63	1142.5	167.568	-1658.72	1322.53	168.829	-1762.3	1123.62	110.324	-1410.73	1231.53	319.039	-1601.79	1390.29	436.195	-1615.64	1157.26	446.586	-1607.08	1058.26	446.905	-1699.02	932.37	393.696	-1728.99	837.184	459.56	-1697.13	817.137	440.021	-1758.81	762.374
930	0	199.968	-1693.6	1592.59	95.3263	-1689.5	1585.61	223.422	-1532.62	1558.71	104.988	-1524.74	1551.52	164.396	-1509.99	1425.33	191.668	-1423.42	1144.25	167.517	-1668.84	1324.04	169.287	-1772.38	1124.97	108.936	-1420.99	1233.48	318.699	-1611.18	1391.79	435.843	-1624.67	1158.75	446.448	-1615.64	1059.91	447.412	-1706.87	933.395	394.645	-1736.21	837.826	460.598	-1704.17	818.366	441.513	-1765.68	763.192
931	0	199.177	-1703.77	1594.25	94.5881	-1699.62	1587.15	222.71	-1542.94	1560.32	104.282	-1535.02	1553	163.583	-1520.37	1427.05	190.356	-1432.93	1146.22	167.418	-1679.01	1325.33	169.886	-1782.47	1126	107.717	-1431.21	1235.4	318.449	-1620.98	1393.23	435.55	-1633.41	1159.71	446.192	-1624.35	1061.12	447.757	-1714.83	934.151	395.893	-1743.65	838.265	461.529	-1711.25	819.205	443.03	-1772.69	763.881
932	0	198.651	-1713.87	1595.98	93.9701	-1709.81	1588.7	222.264	-1553.26	1561.86	103.674	-1545.22	1554.35	162.844	-1530.71	1428.77	188.897	-1442.62	1147.98	167.38	-1689.21	1326.96	170.575	-1792.48	1127.06	106.316	-1441.32	1237.34	318.206	-1630.29	1394.54	435.403	-1641.58	1160.71	445.888	-1632.71	1062.48	448.242	-1722.71	935.035	396.765	-1750.99	838.871	462.67	-1718.3	820.31	444.75	-1779.62	764.758
933	0	198.233	-1723.87	1597.66	93.6241	-1719.87	1590.26	221.645	-1563.19	1563.53	103.338	-1555.26	1555.66	161.967	-1540.92	1430.48	187.481	-1452.16	1149.83	167.53	-1699.15	1328.44	171.353	-1802.36	1128.21	104.705	-1451.45	1239.28	318.018	-1639.45	1396.12	435.34	-1649.26	1161.93	445.982	-1640.83	1064.05	448.969	-1730.22	936.072	397.899	-1758.07	839.567	463.846	-1724.96	821.556	446.48	-1786.47	765.828
934	0	198.086	-1733.93	1599.17	93.4628	-1730.07	1591.67	221.372	-1572.92	1564.93	102.878	-1565.46	1557.01	161.167	-1551.16	1431.89	186.088	-1461.64	1151.51	167.734	-1709.16	1329.72	172.254	-1812.29	1129.18	103.137	-1461.68	1241.11	317.899	-1648.54	1397.33	435.439	-1656.63	1163.04	445.92	-1648.9	1065.37	449.677	-1737.23	937.011	399.107	-1765.29	840.388	464.85	-1731.7	822.437	448.276	-1793.35	766.828
935	0	197.979	-1744.05	1600.42	93.4364	-1740.32	1592.96	221.025	-1583.18	1566.1	102.627	-1575.63	1558.42	160.469	-1561.33	1433.46	184.548	-1471.26	1152.97	168.046	-1719.23	1330.85	173.223	-1822.15	1130.02	101.689	-1471.71	1242.77	317.799	-1657.66	1398.32	435.424	-1663.67	1164.02	445.729	-1656.69	1066.32	450.414	-1744.47	938.001	400.655	-1772.47	840.892	465.784	-1738.53	823.184	450.089	-1800.39	767.709
936	0	197.99	-1754.1	1601.58	93.404	-1750.53	1594.09	220.869	-1593.46	1567.23	102.34	-1585.86	1559.6	159.753	-1571.45	1434.84	183.119	-1480.63	1154.55	168.296	-1729.04	1331.93	174.115	-1831.82	1130.98	100.246	-1481.83	1244.36	317.742	-1666.66	1399.58	435.619	-1670.46	1165.42	445.736	-1664.04	1067.76	451.281	-1751.6	939.276	401.703	-1779.54	841.918	467.102	-1745.26	824.563	451.875	-1807.17	768.859
937	0	197.969	-1764.24	1602.59	93.3814	-1760.78	1595.14	220.662	-1603.17	1568.5	102.229	-1596.08	1560.73	158.862	-1581.39	1435.98	181.78	-1490.02	1155.95	168.482	-1738.83	1332.98	175.011	-1841.52	1131.99	98.6819	-1491.93	1245.85	317.654	-1675.57	1400.77	435.794	-1676.89	1166.76	446.05	-1671.22	1069.34	452.212	-1758.55	940.293	402.997	-1786.56	842.883	468.484	-1751.87	826.043	453.671	-1813.87	770.149
938	0	198.125	-1774.46	1603.37	93.4283	-1771.12	1596.03	220.568	-1613.18	1569.47	102.106	-1606.39	1561.83	158.275	-1591.34	1437.09	180.484	-1499.55	1157.05	168.837	-1748.71	1333.79	175.94	-1851.28	1132.94	97.3669	-1501.91	1247.17	317.673	-1684.51	1401.79	435.872	-1683.27	1167.89	446.143	-1678.24	1070.59	453.26	-1765.46	941.333	404.646	-1793.85	843.78	469.613	-1758.53	827.23	455.445	-1820.55	771.294
939	0	198.156	-1784.68	1604.04	93.5128	-1781.4	1596.72	220.36	-1623.41	1570.29	102.067	-1616.55	1562.88	157.729	-1601.32	1438.09	179.329	-1508.97	1158.12	169.143	-1758.48	1334.52	176.894	-1861.12	1133.87	96.3394	-1511.9	1248.28	317.74	-1693.44	1402.7	435.962	-1689.69	1168.93	446.333	-1685.15	1071.58	454.255	-1772.22	942.39	406.058	-1801.33	844.728	470.199	-1764.83	827.788	457.065	-1827.28	772.241
940	0	198.191	-1794.84	1604.65	93.534	-1791.56	1597.35	220.502	-1633.89	1571.16	102.033	-1626.67	1563.74	157.137	-1611.11	1438.91	178.24	-1518.41	1159.04	169.418	-1768.12	1335.29	177.679	-1870.68	1134.94	95.1434	-1521.87	1249.16	317.793	-1702.19	1403.5	435.996	-1695.81	1169.95	446.647	-1691.66	1072.73	455.483	-1778.83	943.531	407.443	-1808.73	845.784	471.296	-1771.05	828.867	458.849	-1833.83	773.209
941	0	198.188	-1805.03	1605.06	93.5564	-1801.71	1597.76	220.499	-1643.62	1571.91	102.062	-1636.8	1564.4	156.717	-1620.87	1439.57	177.249	-1527.77	1159.77	169.774	-1777.78	1335.87	178.452	-1880.12	1135.77	94.2961	-1531.67	1249.98	317.892	-1711.07	1404.22	436.416	-1702.2	1170.95	447.084	-1698.18	1073.64	456.686	-1785.3	944.223	408.984	-1816.08	846.775	472.509	-1777.27	829.817	460.626	-1840.31	774.071
942	0	198.275	-1815.36	1605.15	93.6339	-1811.96	1597.86	220.492	-1653.92	1572.41	102.233	-1646.9	1564.91	156.36	-1630.63	1440.06	176.26	-1537.38	1160.33	170.127	-1787.55	1336.1	179.08	-1889.66	1136.12	93.5183	-1541.57	1250.57	318.017	-1720.16	1404.62	436.715	-1708.84	1171.45	447.539	-1705.02	1074.19	458.05	-1791.85	944.637	410.152	-1821.98	846.714	473.385	-1783.48	830.042	462.486	-1846.74	774.46
943	0	198.255	-1825.66	1605.14	93.6526	-1822.21	1597.81	220.675	-1664.12	1572.77	102.28	-1657.05	1565.21	156.111	-1640.35	1440.31	175.555	-1546.76	1160.68	170.459	-1797.23	1336.26	179.664	-1899.02	1136.28	92.8503	-1551.28	1250.97	318.106	-1729.14	1404.8	437.13	-1715.56	1171.92	447.904	-1711.73	1074.63	459.239	-1798.3	944.828	411.56	-1828.85	846.943	474.231	-1789.7	830.278	463.937	-1853.09	774.778
944	0	198.307	-1835.82	1605.15	93.7814	-1832.28	1597.71	220.742	-1674.23	1573.05	102.335	-1667.22	1565.4	155.715	-1650.16	1440.46	174.765	-1556.27	1160.91	170.756	-1806.97	1336.24	180.147	-1908.16	1136.29	92.2165	-1560.99	1251.28	318.294	-1738.33	1404.93	437.651	-1722.27	1172.53	448.63	-1718.5	1075.26	460.39	-1804.33	944.766	412.962	-1835.54	847.164	474.982	-1795.27	830.322	465.636	-1859.27	774.999
945	0	198.517	-1845.95	1604.81	93.893	-1842.42	1597.5	220.902	-1684.31	1572.97	102.642	-1677.24	1565.35	155.68	-1659.99	1440.41	174.216	-1565.56	1160.97	171.031	-1816.74	1336.16	180.655	-1917.55	1136.03	92.0061	-1570.75	1251.34	318.515	-1747.58	1404.75	438.072	-1729.3	1172.64	448.854	-1725.06	1075.16	461.7	-1810.57	944.469	414.408	-1842.29	847.09	475.914	-1801.38	830.17	467.195	-1865.42	774.869
946	0	198.867	-1856.16	1604.38	94.2587	-1852.64	1597.1	221.141	-1694.45	1572.6	102.8	-1687.45	1565.27	155.613	-1669.97	1440.31	173.863	-1574.92	1160.96	171.323	-1826.62	1335.75	181.095	-1926.87	1135.34	91.5385	-1580.46	1251.39	318.68	-1757.12	1404.4	438.547	-1736.86	1172.6	449.209	-1732.14	1074.84	463.007	-1817.04	944.042	415.848	-1849.04	846.648	476.641	-1807.32	829.42	468.741	-1871.39	774.193
947	0	199.118	-1866.22	1603.87	94.5066	-1862.71	1596.67	221.342	-1704.58	1572.27	102.955	-1697.57	1564.94	155.5	-1680.02	1440.11	173.505	-1584.24	1160.93	171.498	-1836.45	1335.22	181.286	-1936.15	1134.66	91.4081	-1590.12	1251.3	318.829	-1766.69	1403.99	439.037	-1744.42	1172.7	449.787	-1739.13	1074.83	464.268	-1823.35	943.559	417.254	-1855.77	846.181	477.315	-1813	828.781	470.283	-1877.28	773.727
948	0	199.493	-1876.27	1603.18	94.7691	-1872.84	1596.1	221.534	-1714.51	1571.67	103.267	-1707.69	1564.36	155.607	-1690.06	1439.61	173.376	-1593.51	1160.67	171.591	-1846.24	1334.53	181.419	-1945.55	1133.75	91.4447	-1599.85	1251.11	318.982	-1776.5	1403.34	439.453	-1752.1	1172.46	450.384	-1746.32	1074.73	465.319	-1829.72	942.799	418.46	-1862.14	845.291	477.96	-1818.38	828.058	471.621	-1882.95	772.709
949	0	199.906	-1886.41	1602.22	95.1923	-1883.07	1595.22	221.9	-1724.58	1570.58	103.615	-1717.85	1563.49	155.826	-1700.22	1439.09	173.529	-1602.82	1160.3	171.807	-1856.34	1333.54	181.59	-1955	1132.49	91.4728	-1609.63	1250.74	319.196	-1786.58	1402.31	439.797	-1760.25	1171.66	450.659	-1753.65	1073.99	466.311	-1836.19	941.609	419.779	-1868.7	844.116	478.772	-1824.31	826.9	473.076	-1888.6	771.372
950	0	200.327	-1896.57	1601.14	95.5853	-1893.24	1594.4	222.253	-1734.87	1569.34	103.897	-1728.05	1562.48	156.014	-1710.42	1438.22	173.663	-1612.17	1159.71	171.898	-1866.31	1332.39	181.582	-1964.74	1130.98	91.798	-1619.28	1250.21	319.422	-1796.8	1401.13	440.159	-1768.85	1170.69	451.271	-1761.59	1073.07	467.343	-1842.82	940.183	420.992	-1875.22	842.633	479.172	-1829.9	825.239	474.527	-1894.27	769.762
951	0	200.809	-1906.82	1600.18	96.0679	-1903.32	1593.38	222.624	-1745.05	1568.1	104.346	-1738.19	1561.19	156.446	-1720.75	1437.27	173.995	-1621.7	1158.98	171.94	-1876.28	1331.28	181.444	-1974.3	1129.49	92.2877	-1629.02	1249.48	319.679	-1807.18	1399.9	440.577	-1777.5	1169.76	451.642	-1769.07	1072.1	467.958	-1849.35	938.689	422.028	-1881.57	841.182	479.898	-1835.56	823.938	475.628	-1899.6	767.996
952	0	201.241	-1917.02	1598.78	96.5205	-1913.52	1592.17	223.105	-1755.21	1566.62	104.944	-1748.38	1559.87	156.915	-1731.04	1436.11	174.551	-1631.3	1158.18	172.1	-1886.38	1329.75	181.28	-1983.89	1127.78	92.8606	-1638.87	1248.63	319.994	-1817.66	1398.53	441.013	-1786.48	1168.53	452.202	-1777	1071.1	468.856	-1856.29	937.055	423.026	-1887.83	839.288	480.621	-1841.46	822.444	476.709	-1904.99	765.91
953	0	201.717	-1927.47	1597.3	96.9812	-1923.75	1590.62	223.718	-1765.64	1565.03	105.476	-1758.66	1558.41	157.478	-1741.44	1434.99	175.24	-1640.99	1157.27	172.252	-1896.5	1328.11	181.12	-1993.76	1125.81	93.4792	-1648.66	1247.77	320.35	-1828.42	1396.93	441.36	-1795.87	1167.07	452.707	-1785.29	1069.74	469.471	-1863.36	935.116	423.859	-1894.25	837.089	481.425	-1847.38	820.675	477.677	-1910.58	763.63
954	0	202.203	-1937.85	1595.68	97.4061	-1934.1	1589.09	224.491	-1776.31	1563.28	106.081	-1769.05	1556.8	158.157	-1751.83	1433.76	176.159	-1650.89	1156.16	172.479	-1906.81	1326.41	180.89	-2003.58	1123.7	94.1112	-1658.48	1246.83	320.804	-1839.39	1395.28	441.736	-1805.36	1165.52	453.135	-1793.65	1068.29	470.012	-1870.57	933.062	424.597	-1900.57	834.738	482.2	-1853.64	818.857	478.292	-1915.79	760.793
955	0	202.682	-1948.41	1594.07	97.9117	-1944.36	1587.59	225.102	-1786.67	1561.76	106.78	-1779.41	1555.13	158.935	-1762.3	1432.27	177.16	-1660.74	1154.87	172.739	-1917.19	1324.78	180.682	-2013.4	1121.75	95.053	-1668.36	1245.62	321.32	-1849.98	1393.55	442.223	-1814.95	1164.07	453.616	-1802.01	1067.11	470.558	-1877.78	931.017	425.158	-1906.68	832.35	482.797	-1859.74	817.078	478.941	-1921.35	758.402
956	0	203.28	-1959	1592.19	98.519	-1954.77	1585.83	225.979	-1797.3	1559.94	107.726	-1789.83	1553.47	159.883	-1772.73	1430.71	178.263	-1670.66	1153.72	173.077	-1927.52	1322.92	180.539	-2023.44	1119.59	96.2632	-1678.29	1244.41	321.861	-1861.1	1391.71	442.447	-1824.79	1162.06	454.082	-1810.7	1065.41	470.881	-1885.19	928.682	425.723	-1913	829.671	483.636	-1866.18	815.145	479.402	-1927.27	755.875
957	0	204.003	-1969.68	1590.29	99.2331	-1965.32	1583.99	227.034	-1808.15	1557.92	108.658	-1800.3	1551.64	160.911	-1783.24	1429.12	179.351	-1680.67	1152.17	173.517	-1938.03	1320.95	180.415	-2033.7	1117.38	97.4084	-1688.34	1243.02	322.515	-1872.33	1389.69	442.906	-1835.25	1159.89	454.415	-1819.7	1063.36	471.414	-1892.89	926.237	426.207	-1919.42	826.805	484.236	-1872.71	812.75	479.926	-1933.28	752.979
958	0	204.8	-1980.35	1588.46	100.036	-1975.77	1582.33	228.182	-1818.9	1556.12	109.774	-1810.79	1549.91	161.907	-1793.84	1427.39	180.387	-1690.72	1150.52	173.878	-1948.45	1319.09	180.295	-2043.89	1115.38	98.7013	-1698.4	1241.47	323.216	-1883.53	1387.79	443.449	-1845.65	1157.99	454.766	-1828.7	1061.58	471.798	-1900.51	923.837	426.45	-1925.71	823.998	485.03	-1879.39	810.627	480.276	-1939.09	750.219
959	0	205.695	-1991.11	1586.5	100.836	-1986.34	1580.35	229.085	-1829.48	1554.17	110.891	-1821.37	1548.13	162.91	-1804.57	1425.7	181.457	-1701.01	1148.89	174.307	-1958.98	1317.13	180.177	-2054.19	1113.32	99.8136	-1708.49	1239.85	323.909	-1894.69	1385.79	444.033	-1856.22	1156.14	455.272	-1837.91	1059.93	472.085	-1908.33	921.363	426.66	-1932.17	821.207	485.636	-1886.08	808.602	480.556	-1944.31	746.869
960	0	206.734	-2002.03	1584.45	101.931	-1997.02	1578.63	230.241	-1840.37	1552.09	112.088	-1832.05	1546.25	164.1	-1815.26	1423.83	182.665	-1711.42	1147.16	174.953	-1969.65	1315.09	180.209	-2064.71	1111.23	101.088	-1718.74	1238.16	324.695	-1905.93	1383.72	444.479	-1867.06	1153.86	455.537	-1847.35	1057.73	472.418	-1916.37	918.728	426.941	-1938.93	818.201	486.183	-1892.94	806.117	480.791	-1950.4	743.812
961	0	207.792	-2012.94	1582.42	102.95	-2007.73	1576.88	231.583	-1851.41	1549.93	113.359	-1842.76	1544.47	165.285	-1825.85	1422	183.721	-1721.92	1145.44	175.595	-1980.44	1313.15	180.217	-2075.35	1109.2	102.211	-1729.04	1236.63	325.523	-1917.19	1381.57	445.15	-1878.39	1151.58	455.648	-1857.05	1055.4	472.437	-1924.59	916.015	427.117	-1945.78	815.108	486.808	-1900.36	803.704	480.871	-1956.71	740.558
962	0	209.046	-2023.83	1580.56	104.14	-2018.41	1575	232.962	-1862.33	1548.07	114.735	-1853.61	1542.78	166.435	-1836.59	1420.3	184.703	-1732.55	1143.79	176.245	-1991.04	1311.39	180.271	-2086.04	1107.46	103.284	-1739.42	1234.98	326.419	-1928.27	1379.63	445.748	-1889.42	1149.67	455.941	-1866.71	1053.6	473.01	-1933.08	913.696	427.293	-1952.65	812.379	487.469	-1907.66	801.606	480.704	-1962.83	737.535
963	0	210.228	-2034.71	1578.69	105.437	-2029.22	1573.43	234.535	-1873.23	1546.33	116.279	-1864.41	1541.26	167.81	-1847.56	1418.78	185.909	-1743.35	1142.21	177.043	-2001.83	1309.65	180.354	-2096.87	1105.72	104.488	-1749.97	1233.53	327.402	-1939.39	1377.74	446.52	-1900.67	1147.9	456.216	-1876.45	1051.81	473.339	-1941.67	911.343	427.509	-1959.96	809.613	488.228	-1915.47	799.677	480.754	-1969.35	734.535
964	0	211.591	-2045.8	1576.78	106.921	-2040.05	1571.9	236.228	-1884.44	1544.48	118.026	-1875.18	1539.65	168.95	-1858.36	1417.15	186.979	-1754.29	1140.57	177.907	-2012.8	1307.85	180.522	-2107.9	1103.89	105.637	-1760.67	1232.18	328.502	-1950.67	1375.72	447.228	-1912.2	1145.73	456.357	-1886.59	1049.59	473.531	-1950.57	908.762	427.759	-1967.66	806.727	488.87	-1923.58	797.48	480.819	-1976.37	731.385
965	0	213.012	-2056.92	1575.12	108.342	-2050.82	1570.35	237.964	-1895.55	1542.68	119.75	-1886.01	1538.2	170.319	-1869.23	1415.53	187.958	-1765.28	1138.95	178.755	-2023.81	1306.28	180.694	-2118.95	1102.27	106.719	-1771.38	1230.54	329.601	-1962	1373.79	447.884	-1923.46	1143.66	456.647	-1896.99	1047.62	473.992	-1959.75	906.441	428.071	-1975.67	804.022	489.728	-1932.21	795.382	481.087	-1983.83	728.594
966	0	214.472	-2068.02	1573.55	109.778	-2061.69	1568.86	239.68	-1906.66	1541.08	121.522	-1896.92	1536.8	171.756	-1880.23	1413.99	188.857	-1776.36	1137.24	179.723	-2034.79	1304.81	180.938	-2130.01	1100.94	107.84	-1782.28	1229.03	330.748	-1973.06	1371.99	448.563	-1934.27	1141.84	456.915	-1907.07	1045.86	474.348	-1969.13	904.302	428.375	-1983.86	801.61	490.472	-1940.71	793.574	481.278	-1991.2	725.788
967	0	216.06	-2079.14	1571.8	111.468	-2072.61	1567.52	241.65	-1917.92	1539.39	123.443	-1907.88	1535.36	173.236	-1891.28	1412.38	189.748	-1787.67	1135.39	180.781	-2045.94	1303.37	181.371	-2141.3	1099.59	108.749	-1793.46	1227.61	332.142	-1984.41	1370.09	449.179	-1945.1	1139.68	457.271	-1917.76	1043.72	474.724	-1978.74	901.876	428.735	-1992.58	799.013	491.314	-1949.8	791.417	481.36	-1999.03	722.97
968	0	217.831	-2090.42	1570.19	113.124	-2083.63	1566.19	243.614	-1929.21	1537.56	125.463	-1918.9	1534	174.621	-1902.32	1410.7	190.724	-1799.13	1133.44	181.942	-2057.33	1301.86	181.856	-2152.71	1098.14	109.977	-1804.71	1225.88	333.589	-1995.54	1367.84	449.795	-1955.97	1137.2	457.42	-1928.43	1041.13	475.083	-1988.64	899.373	429.27	-2001.56	796.347	491.82	-1959.21	789.1	481.597	-2007.42	720.137
969	0	219.647	-2101.53	1568.72	115.008	-2094.53	1564.94	245.659	-1940.45	1536.06	127.534	-1929.85	1532.68	176.15	-1913.28	1409.2	191.407	-1810.63	1131.49	183.137	-2068.67	1300.69	182.381	-2164.23	1097.03	111.04	-1816.06	1224.36	334.855	-2006.71	1366.22	450.614	-1966.59	1135.15	457.817	-1939.13	1039.12	475.513	-1998.74	897.181	429.62	-2011.14	794.235	492.258	-1968.61	786.971	481.949	-2016.14	717.586
970	0	221.604	-2112.64	1567.45	116.955	-2105.46	1563.96	247.714	-1951.49	1534.76	129.697	-1940.87	1531.71	177.857	-1924.27	1407.79	191.964	-1822.22	1129.73	184.358	-2079.98	1299.64	183.068	-2175.88	1096.3	112.029	-1827.51	1222.8	336.597	-2017.82	1364.58	451.463	-1976.84	1133.45	458.409	-1949.85	1037.43	475.975	-2009.06	895.185	429.992	-2020.74	791.876	493.018	-1978.49	785.305	482.291	-2025.13	715.178
971	0	223.635	-2123.84	1566.06	119.05	-2116.47	1563.01	249.904	-1962.78	1533.45	131.89	-1951.8	1530.78	179.596	-1935.34	1406.45	192.461	-1834.09	1127.99	185.762	-2091.62	1298.59	183.789	-2187.86	1095.49	113.047	-1839.18	1221.31	338.167	-2029.08	1362.85	452.385	-1987.45	1131.47	458.895	-1960.76	1035.35	476.503	-2019.83	893.078	430.554	-2030.95	789.604	493.771	-1989.02	783.386	482.61	-2034.95	712.852
972	0	225.76	-2135.08	1565.16	121.186	-2127.53	1562.43	252.131	-1974.02	1532.19	134.121	-1962.91	1530.11	181.306	-1946.56	1405.4	192.965	-1846.19	1126.45	187.172	-2103.27	1297.76	184.511	-2199.99	1094.95	114.451	-1850.88	1220	339.823	-2040.35	1361.16	453.232	-1998	1129.34	459.462	-1971.95	1033.23	477.057	-2030.7	890.926	431.011	-2041.67	787.585	494.371	-1999.84	781.379	483.021	-2045.26	710.702
973	0	227.992	-2146.24	1564.68	123.366	-2138.55	1562.3	254.415	-1985.14	1531.39	136.354	-1974.08	1529.66	183.077	-1957.92	1404.48	193.948	-1858.42	1125.04	188.632	-2114.92	1297.43	185.202	-2212.34	1094.89	115.546	-1862.57	1218.97	341.51	-2051.43	1359.88	454.354	-2008.54	1127.85	460.1	-1982.99	1031.6	477.713	-2041.68	889.182	431.514	-2052.61	786.001	494.964	-2010.68	779.797	483.484	-2055.68	708.8
974	0	230.234	-2157.31	1564.29	125.603	-2149.58	1562.44	256.646	-1996.39	1530.82	138.618	-1985.14	1529.33	184.827	-1969.35	1403.91	195.228	-1870.75	1123.85	190.101	-2126.65	1297.32	185.987	-2224.77	1095.17	116.509	-1874.54	1218.22	343.196	-2062.75	1358.84	455.34	-2019.15	1126.49	460.574	-1994.11	1030.06	478.634	-2053.02	887.77	432.141	-2063.73	784.513	495.387	-2021.67	778.233	484.035	-2066.77	707.24
975	0	232.558	-2168.59	1564.3	127.901	-2160.76	1562.58	259.035	-2007.8	1530.34	141.062	-1996.32	1529.29	186.643	-1980.78	1403.55	196.486	-1882.75	1123.19	191.612	-2138.56	1297.39	186.755	-2237.5	1095.54	117.564	-1886.29	1217.77	344.937	-2074.28	1357.9	456.436	-2030.33	1125.17	461.252	-2006.01	1028.59	479.41	-2064.66	886.374	432.775	-2075.69	783.112	495.962	-2033.39	776.733	484.638	-2078.59	705.859
976	0	234.797	-2179.81	1564.59	130.169	-2171.9	1563.26	261.466	-2019.14	1530.25	143.324	-2007.56	1529.61	188.198	-1992.36	1403.82	197.487	-1894.56	1123.18	193.174	-2150.54	1297.84	187.445	-2250.23	1096.13	118.492	-1898.29	1217.8	346.518	-2085.74	1357.31	457.412	-2041.63	1124.31	461.762	-2017.83	1027.56	480.16	-2076.39	885.304	433.692	-2087.88	782.119	496.542	-2045.05	775.756	485.267	-2090.67	704.898
977	0	237.218	-2191.03	1565.41	132.478	-2182.93	1564.35	263.835	-2030.42	1530.55	145.815	-2018.71	1530.07	189.74	-2004.16	1404.37	197.893	-1906.26	1123.43	194.719	-2162.39	1298.69	188.233	-2262.85	1097.35	119.025	-1910.25	1218.49	348.164	-2097.13	1357.34	458.315	-2052.91	1124.03	462.164	-2029.42	1026.99	481.055	-2088.35	884.949	434.61	-2100.72	781.98	497.13	-2057.37	775.333	486.048	-2103.08	704.602
978	0	239.59	-2202.31	1566.54	134.983	-2194.03	1565.71	266.293	-2041.8	1531.11	148.384	-2030.01	1530.97	191.342	-2015.78	1405.27	198.519	-1918.06	1124.39	196.281	-2174.38	1299.83	189.137	-2275.56	1098.68	119.466	-1922.24	1219.74	349.633	-2108.55	1357.52	459.184	-2064.69	1123.81	462.563	-2041.55	1026.71	481.864	-2100.56	884.751	435.578	-2113.75	781.895	497.553	-2069.91	774.999	486.876	-2115.92	704.496
979	0	242.02	-2213.67	1567.78	137.402	-2205.33	1567.33	268.68	-2053.36	1531.72	150.797	-2041.29	1532.25	192.73	-2027.58	1406.52	199.262	-1930.08	1126.09	197.901	-2186.22	1301.19	190.159	-2288.07	1100.2	119.875	-1934.23	1221.29	351.176	-2120.15	1358.22	459.677	-2076.87	1123.73	462.767	-2053.95	1026.62	482.711	-2113.27	885.12	436.567	-2127.25	781.989	497.857	-2082.84	774.965	487.806	-2129.36	704.831
980	0	244.381	-2224.95	1569.18	139.844	-2216.54	1569.32	271.123	-2064.71	1532.97	153.114	-2052.63	1534.02	193.817	-2039.1	1408.29	199.631	-1942.19	1127.89	199.422	-2197.98	1303.02	191.28	-2300.15	1102.15	120.017	-1946.25	1223.32	352.339	-2131.33	1359.39	460.186	-2089.08	1124.43	462.982	-2066.32	1027.27	483.546	-2126.17	886.173	437.54	-2141.3	783.465	498.398	-2096.24	775.895	488.902	-2143.09	705.864
981	0	246.893	-2236.25	1570.84	142.253	-2227.76	1571.47	273.33	-2075.99	1534.54	155.455	-2063.91	1536	194.923	-2050.66	1409.97	199.177	-1954.6	1129.35	200.83	-2209.46	1305.14	192.522	-2311.98	1104.46	120.206	-1958.34	1225.24	353.658	-2142.31	1361.03	460.577	-2101.34	1125.6	463.302	-2078.78	1028.62	484.264	-2139.24	887.792	438.365	-2155.21	784.849	499.164	-2109.77	777.339	490.044	-2157.23	707.638
982	0	249.195	-2247.62	1572.36	144.647	-2239.09	1573.63	275.417	-2087.32	1535.98	157.638	-2075.17	1538.32	196.075	-2061.91	1411.77	198.47	-1967.09	1130.75	202.22	-2220.86	1307.2	193.786	-2323.66	1106.68	120.411	-1970.08	1227.52	354.888	-2153.41	1362.83	460.79	-2113.81	1126.79	463.628	-2091.23	1029.94	484.917	-2152.74	889.567	439.191	-2169.61	786.596	499.578	-2123.86	778.958	491.21	-2171.87	709.462
983	0	251.124	-2258.91	1573.76	146.704	-2250.38	1575.69	277.583	-2098.77	1537.71	159.616	-2086.4	1540.65	197.166	-2072.9	1413.66	198.404	-1979.5	1132.41	203.506	-2232.05	1309.26	195.068	-2334.99	1109.09	120.621	-1981.89	1229.2	356.042	-2164.04	1364.61	460.763	-2126.23	1127.91	463.575	-2104.14	1031.23	485.515	-2166.48	891.499	439.955	-2184.3	788.479	500.105	-2138.49	780.748	492.223	-2187.04	711.658
984	0	253.053	-2270.23	1575.47	148.646	-2261.52	1577.8	279.262	-2109.82	1539.61	161.592	-2097.53	1543.33	198.124	-2083.72	1415.39	198.45	-1991.12	1133.98	204.689	-2242.95	1311.48	196.343	-2345.92	1111.65	120.92	-1993.55	1231.18	357.049	-2174.5	1366.63	461.065	-2138.58	1129.57	464.152	-2116.51	1033.2	486.164	-2180.28	893.801	440.765	-2199.44	790.945	500.568	-2153.18	782.757	493.358	-2202.59	714.217
985	0	254.644	-2281.27	1576.93	150.288	-2272.46	1579.72	281.004	-2120.88	1541.65	163.252	-2108.47	1545.74	199.241	-2094.31	1417.12	198.864	-2002.09	1135.51	205.824	-2253.81	1313.74	197.671	-2356.51	1114.15	121.292	-2004.8	1232.77	358.112	-2184.94	1368.67	461.375	-2150.8	1131.3	464.616	-2128.95	1034.98	486.866	-2194.29	896.228	441.749	-2214.97	793.532	501.237	-2168.27	785.091	494.442	-2218.31	716.77
986	0	256.243	-2292.6	1578.62	151.752	-2283.42	1581.49	282.509	-2132.04	1543.5	164.836	-2119.3	1548.01	200.539	-2105.02	1418.82	199.248	-2012.85	1136.92	206.923	-2264.58	1315.69	198.968	-2366.83	1116.33	121.671	-2015.95	1234.42	359.292	-2195.38	1370.51	461.866	-2163.35	1132.77	465.198	-2141.7	1036.39	487.649	-2208.5	898.367	442.644	-2230.78	796.041	501.571	-2183.69	786.839	495.544	-2234.92	719.526
987	0	257.374	-2303.44	1580.1	152.96	-2294.13	1583.17	283.793	-2142.95	1545.27	166.138	-2129.98	1550.15	201.604	-2115.53	1420.29	199.805	-2023.61	1138.37	208.272	-2274.59	1317.37	200.106	-2376.82	1118.35	122.354	-2026.85	1235.98	360.339	-2205.6	1372.23	462.432	-2175.59	1134.19	466.095	-2154.4	1037.79	488.46	-2222.76	900.552	443.498	-2246.72	798.652	502.153	-2199.56	788.724	496.529	-2251.57	722.11
988	0	258.258	-2314.06	1581.5	153.928	-2304.76	1584.75	284.803	-2153.54	1547.04	167.314	-2140.55	1551.82	202.542	-2125.95	1421.74	200.526	-2034.37	1139.74	209.238	-2285.1	1319.11	201.21	-2386.58	1120.25	123.1	-2037.44	1237.15	361.455	-2215.82	1373.95	463.259	-2187.66	1135.8	467.217	-2166.88	1039.33	489.368	-2237.04	902.676	444.228	-2262.79	801.291	502.788	-2215.33	790.725	497.244	-2268.61	724.841
989	0	259.19	-2324.78	1582.9	154.805	-2315.26	1586	285.723	-2164.02	1548.45	168.137	-2151.16	1553.31	203.412	-2136.46	1423.11	201.344	-2044.97	1141.18	210.182	-2295.54	1320.64	202.267	-2396.33	1121.87	124.002	-2047.78	1238.95	362.354	-2226.13	1375.33	464.267	-2199.73	1137.22	468.447	-2179.42	1040.51	490.305	-2251.54	904.647	444.923	-2278.99	803.826	503.136	-2231.37	792.247	497.844	-2285.99	727.599
990	0	260	-2335.2	1584.08	155.768	-2325.73	1587.36	286.556	-2174.48	1549.61	168.894	-2161.55	1554.65	204.073	-2146.99	1424.42	202.289	-2055.39	1142.62	211.011	-2305.91	1321.92	203.123	-2406.29	1123.2	124.825	-2058.01	1240.17	363.318	-2236.63	1376.54	465.263	-2211.84	1138.15	469.891	-2192.31	1041.34	491.255	-2266.13	906.356	445.584	-2295.28	806.308	503.652	-2247.93	793.836	498.432	-2303.7	730.102
991	0	260.846	-2345.36	1585.12	156.539	-2336.01	1588.53	287.058	-2184.79	1550.8	169.528	-2171.89	1555.83	205.174	-2157.31	1425.72	203.288	-2065.46	1144.03	211.778	-2316.13	1323.09	203.878	-2416.44	1124.38	125.673	-2068.07	1241.7	364.015	-2246.94	1377.62	466.473	-2223.71	1139.26	471.43	-2205.01	1042.28	492.199	-2280.73	908.208	446.182	-2311.51	808.915	503.917	-2264.23	795.193	498.93	-2321.63	732.969
992	0	261.6	-2355.49	1586.33	157.293	-2346.26	1589.65	287.49	-2194.74	1551.94	169.998	-2182.19	1556.85	205.829	-2167.66	1426.85	204.404	-2075.31	1145.37	212.471	-2326.37	1324.2	204.464	-2426.95	1125.39	126.698	-2077.83	1243.19	364.639	-2257.38	1378.73	467.944	-2235.4	1140.63	472.967	-2217.75	1043.19	493.073	-2295.32	910.112	446.685	-2327.66	811.695	504.424	-2280.74	796.942	499.339	-2339.64	736.054
993	0	262.323	-2365.58	1587.24	158.048	-2356.59	1590.65	287.933	-2204.85	1552.82	170.487	-2192.47	1557.75	206.528	-2177.91	1428.09	205.58	-2085.12	1146.85	212.985	-2336.62	1325.04	204.867	-2437.71	1126	127.686	-2087.53	1244.34	365.118	-2267.95	1379.52	469.271	-2247.12	1141.63	474.568	-2230.42	1043.88	493.922	-2310.02	911.774	447.129	-2344.02	814.188	504.763	-2297.32	798.158	499.621	-2357.76	738.855
994	0	262.99	-2375.48	1588.04	158.8	-2366.77	1591.58	288.322	-2214.96	1553.56	170.725	-2202.74	1558.74	207.121	-2188.21	1429.28	206.634	-2094.79	1147.91	213.424	-2346.8	1325.8	205.096	-2448.33	1126.47	128.808	-2097.12	1245.7	365.605	-2278.52	1380.32	470.654	-2258.8	1142.5	476.159	-2243.12	1044.38	494.747	-2324.82	913.487	447.501	-2360.25	816.878	505.365	-2313.9	799.76	500.002	-2376.08	741.887
995	0	263.808	-2385.69	1589.37	159.542	-2376.88	1592.61	288.561	-2224.75	1554.42	171.063	-2212.9	1559.62	207.739	-2198.47	1430.29	207.939	-2104.32	1149.38	213.693	-2356.82	1326.57	205.188	-2458.65	1127.11	129.643	-2106.58	1246.97	365.942	-2288.99	1381.23	471.984	-2270.21	1143.71	477.913	-2255.68	1045.27	495.499	-2339.46	915.364	447.764	-2376.18	819.715	505.307	-2330.36	801.164	500.168	-2394.01	745.278
996	0	264.527	-2395.63	1590.2	160.13	-2386.97	1593.46	288.808	-2234.47	1555.23	171.374	-2222.97	1560.45	208.26	-2208.66	1431.26	209.185	-2113.76	1150.69	213.939	-2366.7	1327.17	205.164	-2468.61	1127.47	130.868	-2115.89	1248.12	366.242	-2299.59	1382.13	473.404	-2281.53	1145.02	479.621	-2268.38	1046.23	496.154	-2354.08	917.262	447.941	-2392.04	822.519	505.676	-2346.83	803.072	500.112	-2411.86	748.759
997	0	265.004	-2405.51	1590.64	160.763	-2397.05	1593.99	289.468	-2244.77	1555.95	171.744	-2233.09	1561.06	209.022	-2218.68	1432.21	210.527	-2123.16	1151.85	214.166	-2376.5	1327.57	205.011	-2478.35	1127.49	132.077	-2125.19	1249.4	366.48	-2310.29	1382.76	474.627	-2293.13	1145.92	481.363	-2281.47	1046.93	496.851	-2368.95	919.046	448.106	-2407.9	825.147	505.777	-2363.3	804.36	500.197	-2429.88	751.966
998	0	265.482	-2415.44	1591.11	161.208	-2407.16	1594.61	289.591	-2254.55	1556.48	172.016	-2243.06	1561.68	209.815	-2228.68	1433.02	211.87	-2132.39	1153.01	214.318	-2386.14	1327.88	204.682	-2487.86	1127.71	133.173	-2134.54	1250.33	366.833	-2320.82	1383.53	476.038	-2304.75	1147.02	483.033	-2294.47	1047.85	497.41	-2383.67	920.986	448.201	-2423.58	827.906	506.203	-2379.87	806.472	500.122	-2447.32	755.28
999	0	265.905	-2425.43	1591.61	161.599	-2417.01	1594.98	289.896	-2264.38	1557.1	172.33	-2253.04	1562.04	210.385	-2238.52	1433.83	213.054	-2141.7	1153.87	214.349	-2395.71	1328.3	204.242	-2497.29	1128	134.454	-2143.67	1251.08	367.142	-2331.11	1384.25	477.371	-2316.17	1148.46	484.615	-2307.16	1049.07	497.887	-2398.36	923.065	448.313	-2439.13	830.755	506.163	-2395.86	808.199	500.068	-2464.58	758.815
1000	0	266.159	-2435.4	1591.89	161.885	-2426.92	1595.03	290.189	-2274.24	1557.34	172.732	-2263.11	1562.35	211.101	-2248.31	1434.3	214.315	-2150.75	1154.63	214.434	-2405.28	1328.42	203.836	-2506.59	1128.09	135.654	-2152.75	1251.85	367.42	-2341.57	1384.85	478.377	-2327.51	1149.5	486.262	-2320.05	1050.11	498.384	-2413.09	925.15	448.497	-2454.68	833.459	506.87	-2412.01	810.443	500.114	-2481.73	762.133
1001	0	266.343	-2445.34	1591.72	162.145	-2436.82	1595.05	290.486	-2284.39	1557.37	172.984	-2272.87	1562.43	211.734	-2257.88	1434.47	215.625	-2159.94	1155.08	214.533	-2414.67	1328.35	203.474	-2515.66	1128.08	136.741	-2161.9	1252.36	367.624	-2351.85	1385.07	479.136	-2339.03	1149.93	487.655	-2333.05	1050.57	498.835	-2427.83	926.986	448.716	-2470.21	836.029	506.992	-2428.3	811.995	500.03	-2498.98	764.936
1002	0	266.576	-2455.44	1591.87	162.34	-2446.55	1594.72	290.8	-2294.34	1557.37	173.46	-2282.61	1562.41	212.523	-2267.4	1434.6	216.623	-2169.14	1155.35	214.619	-2424	1328.44	203.032	-2524.6	1127.94	137.806	-2170.89	1252.51	368.009	-2361.92	1385.26	479.954	-2350.5	1150.46	489.116	-2345.88	1051.2	499.261	-2442.33	928.737	448.853	-2485.62	838.518	507.72	-2444.6	814.04	499.901	-2515.58	767.89
1003	0	266.595	-2465.26	1591.42	162.496	-2456.3	1594.47	291.204	-2304.2	1557.39	173.903	-2292.44	1562.27	213.45	-2276.92	1434.54	217.925	-2178.47	1155.46	214.728	-2433.34	1328.33	202.751	-2533.44	1127.92	138.774	-2179.88	1252.56	368.191	-2371.86	1385.37	480.782	-2361.94	1151.11	490.525	-2358.4	1051.84	499.85	-2456.87	930.517	449.02	-2501.41	841.124	508.087	-2460.41	815.832	499.529	-2531.58	770.03
1004	0	266.769	-2475.34	1591.13	162.629	-2466.19	1594.12	291.66	-2314.26	1557.21	174.309	-2302.2	1562.17	214.03	-2286.22	1434.36	218.779	-2187.46	1155.55	214.843	-2442.56	1328.01	202.469	-2542.41	1127.67	139.784	-2188.91	1252.51	368.45	-2381.62	1385.17	481.591	-2373.7	1151.2	492.053	-2371.44	1052.27	500.363	-2471.29	932.002	449.199	-2516.07	843.007	508.458	-2476.52	817.448	499.48	-2548.31	772.57
1005	0	266.872	-2485.27	1590.41	162.886	-2475.84	1593.41	292.123	-2324.13	1556.95	174.771	-2311.82	1561.96	214.58	-2295.49	1434.09	219.478	-2196.53	1155.23	214.922	-2451.89	1327.66	202.297	-2551.3	1127.22	140.617	-2197.79	1252.23	368.712	-2391.43	1384.79	482.344	-2385.77	1151.21	492.929	-2383.94	1052.02	500.818	-2485.65	933.168	449.306	-2531.2	844.871	508.696	-2492.42	818.59	498.908	-2564.11	774.473
1006	0	267.019	-2495.27	1589.94	162.966	-2485.58	1592.89	292.473	-2334.04	1556.73	175.267	-2321.51	1561.68	215.136	-2304.73	1433.64	220.148	-2205.58	1154.89	214.927	-2461.14	1327.19	202.1	-2560.38	1126.92	141.228	-2206.88	1251.88	369.069	-2401.15	1384.45	482.59	-2397.1	1150.91	494.205	-2396.72	1052.21	501.305	-2499.7	934.292	449.33	-2546.08	846.57	509.222	-2508.14	820.174	498.639	-2579.21	776.68
1007	0	267.061	-2504.93	1588.94	163.344	-2494.94	1592.05	292.838	-2343.65	1556.37	175.78	-2331.06	1561.33	215.712	-2314.07	1433.31	220.646	-2214.56	1154.43	214.96	-2470.41	1326.72	201.956	-2569.45	1126.41	141.867	-2215.91	1251.44	369.159	-2410.64	1383.85	483.176	-2408.82	1150.66	495.25	-2409.35	1052.06	501.671	-2513.73	935.054	449.353	-2560.83	848.073	509.304	-2523.26	821.062	498.772	-2595.26	778.711
1008	0	267.308	-2514.91	1588.02	163.219	-2505.32	1591.71	293.201	-2353.57	1555.69	176.121	-2340.7	1560.98	216.093	-2323.33	1432.65	220.962	-2223.68	1153.98	215.019	-2479.77	1325.92	201.877	-2578.75	1125.69	142.427	-2225.15	1250.98	369.4	-2420.23	1383.04	483.615	-2420.79	1149.94	495.68	-2421.93	1051.25	501.966	-2527.64	935.496	449.433	-2575.51	849.012	509.393	-2538.56	821.57	497.974	-2610.43	779.652
1009	0	267.398	-2524.51	1586.93	163.296	-2514.8	1590.75	293.622	-2363.23	1555.02	176.602	-2350.17	1560.59	216.519	-2332.7	1432.11	221.302	-2232.88	1153.32	215.025	-2489.14	1325.21	201.768	-2587.99	1124.92	142.841	-2234.37	1250.42	369.639	-2429.89	1382.27	483.909	-2432.56	1149.21	496.344	-2434.68	1050.61	502.268	-2541.45	935.877	449.409	-2589.93	849.87	509.577	-2553.62	822.213	498.143	-2626.21	781.167
1010	0	267.512	-2534.14	1586.11	163.34	-2524.3	1589.94	293.886	-2372.93	1554.43	176.895	-2359.59	1559.89	216.673	-2342	1431.29	221.684	-2241.94	1152.68	215	-2498.48	1324.47	201.649	-2597.21	1124.09	143.071	-2243.59	1249.66	369.734	-2439.14	1381.39	484.208	-2444.24	1148.65	497.077	-2447.42	1050.39	502.651	-2555.26	936.387	449.339	-2603.92	850.484	509.605	-2568.02	822.758	498.033	-2641.03	782.569
1011	0	267.642	-2543.82	1585.32	163.397	-2533.83	1589.03	293.829	-2381.95	1553.4	177.169	-2369.03	1559.03	216.625	-2351.53	1430.36	221.841	-2251.28	1151.77	215.058	-2507.98	1323.54	201.665	-2606.5	1123.16	143.053	-2252.99	1248.91	369.746	-2448.75	1380.24	484.411	-2456.06	1147.91	497.091	-2459.69	1049.37	502.396	-2568.45	936.061	449.204	-2617.8	851.157	509.664	-2582.36	822.926	497.7	-2655.26	783.085
1012	0	267.591	-2553.34	1584.08	163.524	-2543.19	1587.99	294.192	-2391.92	1552.37	177.403	-2378.49	1558.06	216.609	-2361.18	1429.24	221.95	-2260.61	1150.8	215.07	-2517.55	1322.55	201.638	-2615.95	1121.91	143.214	-2262.47	1248	369.763	-2458.42	1379.08	484.629	-2468.27	1146.99	497.019	-2472.25	1048.24	502.409	-2581.82	936.064	449.128	-2631.5	851.176	509.509	-2596.49	822.648	497.954	-2670.38	783.953
[truncated: 69 more columns]

## Sheet: Sheet2
Devices
		025370 - Force			025370 - Moment			025370 - CoP			027571 - Force			027571 - Moment			027571 - CoP			037720 - Force			037720 - Moment			037720 - CoP
Frame	Sub Frame	Fx	Fy	Fz	Mx	My	Mz	Cx	Cy	Cz	Fx	Fy	Fz	Mx	My	Mz	Cx	Cy	Cz	Fx	Fy	Fz	Mx	My	Mz	Cx	Cy	Cz
		N	N	N	N.mm	N.mm	N.mm	mm	mm	mm	N	N	N	N.mm	N.mm	N.mm	mm	mm	mm	N	N	N	N.mm	N.mm	N.mm	mm	mm	mm
566	0	0	0	0	0	0	0	200	300	0	0	0	0	0	0	0	200	903	0	0	0	0	0	0	0	603	903	0
566	1	0	0	0	0	0	0	200	300	0	0	0	0	0	0	0	200	903	0	0	0	0	0	0	0	603	903	0
566	2	0	0	0	0	0	0	200	300	0	0	0	0	0	0	0	200	903	0	0	0	0	0	0	0	603	903	0
566	3	0	0	0	0	0	0	200	300	0	0	0	0	0	0	0	200	903	0	0	0	0	0	0	0	603	903	0
566	4	0	0	0	0	0	0	200	300	0	0	0	0	0	0	0	200	903	0	0	0	0	0	0	0	603	903	0
566	5	0	0	0	0	0	0	200	300	0	0	0	0	0	0	0	200	903	0	0	0	0	0	0	0	603	903	0
566	6	0	0	0	0	0	0	200	300	0	0	0	0	0	0	0	200	903	0	0	0	0	0	0	0	603	903	0
566	7	0	0	0	0	0	0	200	300	0	0	0	0	0	0	0	200	903	0	0	0	0	0	0	0	603	903	0
566	8	0	0	0	0	0	0	200	300	0	0	0	0	0	0	0	200	903	0	0	0	0	0	0	0	603	903	0
566	9	0	0	0	0	0	0	200	300	0	0	0	0	0	0	0	200	903	0	0	0	0	0	0	0	603	903	0
567	0	0	0	0	0	0	0	200	300	0	0	0	0	0	0	0	200	903	0	0	0	0	0	0	0	603	903	0
567	1	0	0	0	0	0	0	200	300	0	0	0	0	0	0	0	200	903	0	0	0	0	0	0	0	603	903	0
567	2	0	0	0	0	0	0	200	300	0	0	0	0	0	0	0	200	903	0	0	0	0	0	0	0	603	903	0
567	3	0	0	0	0	0	0	200	300	0	0	0	0	0	0	0	200	903	0	0	0	0	0	0	0	603	903	0
567	4	0	0	0	0	0	0	200	300	0	0	0	0	0	0	0	200	903	0	0	0	0	0	0	0	603	903	0
567	5	0	0	0	0	0	0	200	300	0	0	0	0	0	0	0	200	903	0	0	0	0	0	0	0	603	903	0
567	6	0	0	0	0	0	0	200	300	0	0	0	0	0	0	0	200	903	0	0	0	0	0	0	0	603	903	0
567	7	0	0	0	0	0	0	200	300	0	0	0	0	0	0	0	200	903	0	0	0	0	0	0	0	603	903	0
567	8	0	0	0	0	0	0	200	300	0	0	0	0	0	0	0	200	903	0	0	0	0	0	0	0	603	903	0
567	9	0	0	0	0	0	0	200	300	0	0	0	0	0	0	0	200	903	0	0	0	0	0	0	0	603	903	0
568	0	0	0	0	0	0	0	200	300	0	0	0	0	0	0	0	200	903	0	0	0	0	0	0	0	603	903	0
568	1	0	0	0	0	0	0	200	300	0	0	0	0	0	0	0	200	903	0	0	0	0	0	0	0	603	903	0
568	2	0	0	0	0	0	0	200	300	0	0	0	0	0	0	0	200	903	0	0	0	0	0	0	0	603	903	0
568	3	0	0	0	0	0	0	200	300	0	0	0	0	0	0	0	200	903	0	0	0	0	0	0	0	603	903	0
568	4	0	0	0	0	0	0	200	300	0	0	0	0	0	0	0	200	903	0	0	0	0	0	0	0	603	903	0
568	5	0	0	0	0	0	0	200	300	0	0	0	0	0	0	0	200	903	0	0	0	0	0	0	0	603	903	0
568	6	0	0	0	0	0	0	200	300	0	0	0	0	0	0	0	200	903	0	0	0	0	0	0	0	603	903	0
568	7	0	0	0	0	0	0	200	300	0	0	0	0	0	0	0	200	903	0	0	0	0	0	0	0	603	903	0
568	8	0	0	0	0	0	0	200	300	0	0	0	0	0	0	0	200	903	0	0	0	0	0	0	0	603	903	0
568	9	0	0	0	0	0	0	200	300	0	0	0	0	0	0	0	200	903	0	0	0	0	0	0	0	603	903	0
569	0	0	0	0	0	0	0	200	300	0	0	0	0	0	0	0	200	903	0	0	0	0	0	0	0	603	903	0
569	1	0	0	0	0	0	0	200	300	0	0	0	0	0	0	0	200	903	0	0	0	0	0	0	0	603	903	0
569	2	0	0	0	0	0	0	200	300	0	0	0	0	0	0	0	200	903	0	0	0	0	0	0	0	603	903	0
569	3	0	0	0	0	0	0	200	300	0	0	0	0	0	0	0	200	903	0	0	0	0	0	0	0	603	903	0
569	4	0	0	0	0	0	0	200	300	0	0	0	0	0	0	0	200	903	0	0	0	0	0	0	0	603	903	0
569	5	0	0	0	0	0	0	200	300	0	0	0	0	0	0	0	200	903	0	0	0	0	0	0	0	603	903	0
569	6	0	0	0	0	0	0	200	300	0	0	0	0	0	0	0	200	903	0	0	0	0	0	0	0	603	903	0
569	7	0	0	0	0	0	0	200	300	0	0	0	0	0	0	0	200	903	0	0	0	0	0	0	0	603	903	0
569	8	0	0	0	0	0	0	200	300	0	0	0	0	0	0	0	200	903	0	0	0	0	0	0	0	603	903	0
569	9	0	0	0	0	0	0	200	300	0	0	0	0	0	0	0	200	903	0	0	0	0	0	0	0	603	903	0
570	0	0	0	0	0	0	0	200	300	0	0	0	0	0	0	0	200	903	0	0	0	0	0	0	0	603	903	0
570	1	0	0	0	0	0	0	200	300	0	0	0	0	0	0	0	200	903	0	0	0	0	0	0	0	603	903	0
570	2	0	0	0	0	0	0	200	300	0	0	0	0	0	0	0	200	903	0	0	0	0	0	0	0	603	903	0
570	3	0	0	0	0	0	0	200	300	0	0	0	0	0	0	0	200	903	0	0	0	0	0	0	0	603	903	0
570	4	0	0	0	0	0	0	200	300	0	0	0	0	0	0	0	200	903	0	0	0	0	0	0	0	603	903	0
570	5	0	0	0	0	0	0	200	300	0	0	0	0	0	0	0	200	903	0	0	0	0	0	0	0	603	903	0
570	6	0	0	0	0	0	0	200	300	0	0	0	0	0	0	0	200	903	0	0	0	0	0	0	0	603	903	0
570	7	0	0	0	0	0	0	200	300	0	0	0	0	0	0	0	200	903	0	0	0	0	0	0	0	603	903	0
570	8	0	0	0	0	0	0	200	300	0	0	0	0	0	0	0	200	903	0	0	0	0	0	0	0	603	903	0
570	9	0	0	0	0	0	0	200	300	0	0	0	0	0	0	0	200	903	0	0	0	0	0	0	0	603	903	0
571	0	0	0	0	0	0	0	200	300	0	0	0	0	0	0	0	200	903	0	0	0	0	0	0	0	603	903	0
571	1	0	0	0	0	0	0	200	300	0	0	0	0	0	0	0	200	903	0	0	0	0	0	0	0	603	903	0
571	2	0	0	0	0	0	0	200	300	0	0	0	0	0	0	0	200	903	0	0	0	0	0	0	0	603	903	0
571	3	0	0	0	0	0	0	200	300	0	0	0	0	0	0	0	200	903	0	0	0	0	0	0	0	603	903	0
571	4	0	0	0	0	0	0	200	300	0	0	0	0	0	0	0	200	903	0	0	0	0	0	0	0	603	903	0
571	5	0	0	0	0	0	0	200	300	0	0	0	0	0	0	0	200	903	0	0	0	0	0	0	0	603	903	0
571	6	0	0	0	0	0	0	200	300	0	0	0	0	0	0	0	200	903	0	0	0	0	0	0	0	603	903	0
571	7	0	0	0	0	0	0	200	300	0	0	0	0	0	0	0	200	903	0	0	0	0	0	0	0	603	903	0
571	8	0	0	0	0	0	0	200	300	0	0	0	0	0	0	0	200	903	0	0	0	0	0	0	0	603	903	0
571	9	0	0	0	0	0	0	200	300	0	0	0	0	0	0	0	200	903	0	0	0	0	0	0	0	603	903	0
572	0	0	0	0	0	0	0	200	300	0	0	0	0	0	0	0	200	903	0	0	0	0	0	0	0	603	903	0
572	1	0	0	0	0	0	0	200	300	0	0	0	0	0	0	0	200	903	0	0	0	0	0	0	0	603	903	0
572	2	0	0	0	0	0	0	200	300	0	0	0	0	0	0	0	200	903	0	0	0	0	0	0	0	603	903	0
572	3	0	0	0	0	0	0	200	300	0	0	0	0	0	0	0	200	903	0	0	0	0	0	0	0	603	903	0
572	4	0	0	0	0	0	0	200	300	0	0	0	0	0	0	0	200	903	0	0	0	0	0	0	0	603	903	0
572	5	0	0	0	0	0	0	200	300	0	0	0	0	0	0	0	200	903	0	0	0	0	0	0	0	603	903	0
572	6	0	0	0	0	0	0	200	300	0	0	0	0	0	0	0	200	903	0	0	0	0	0	0	0	603	903	0
572	7	0	0	0	0	0	0	200	300	0	0	0	0	0	0	0	200	903	0	0	0	0	0	0	0	603	903	0
572	8	0	0	0	0	0	0	200	300	0	0	0	0	0	0	0	200	903	0	0	0	0	0	0	0	603	903	0
572	9	0	0	0	0	0	0	200	300	0	0	0	0	0	0	0	200	903	0	0	0	0	0	0	0	603	903	0
573	0	0	0	0	0	0	0	200	300	0	0	0	0	0	0	0	200	903	0	0	0	0	0	0	0	603	903	0
573	1	0	0	0	0	0	0	200	300	0	0	0	0	0	0	0	200	903	0	0	0	0	0	0	0	603	903	0
573	2	0	0	0	0	0	0	200	300	0	0	0	0	0	0	0	200	903	0	0	0	0	0	0	0	603	903	0
573	3	0	0	0	0	0	0	200	300	0	0	0	0	0	0	0	200	903	0	0	0	0	0	0	0	603	903	0
573	4	0	0	0	0	0	0	200	300	0	0	0	0	0	0	0	200	903	0	0	0	0	0	0	0	603	903	0
573	5	0	0	0	0	0	0	200	300	0	0	0	0	0	0	0	200	903	0	0	0	0	0	0	0	603	903	0
573	6	0	0	0	0	0	0	200	300	0	0	0	0	0	0	0	200	903	0	0	0	0	0	0	0	603	903	0
573	7	0	0	0	0	0	0	200	300	0	0	0	0	0	0	0	200	903	0	0	0	0	0	0	0	603	903	0
573	8	0	0	0	0	0	0	200	300	0	0	0	0	0	0	0	200	903	0	0	0	0	0	0	0	603	903	0
573	9	0	0	0	0	0	0	200	300	0	0	0	0	0	0	0	200	903	0	0	0	0	0	0	0	603	903	0
574	0	0	0	0	0	0	0	200	300	0	0	0	0	0	0	0	200	903	0	0	0	0	0	0	0	603	903	0
574	1	0	0	0	0	0	0	200	300	0	0	0	0	0	0	0	200	903	0	0	0	0	0	0	0	603	903	0
574	2	0	0	0	0	0	0	200	300	0	0	0	0	0	0	0	200	903	0	0	0	0	0	0	0	603	903	0
574	3	0	0	0	0	0	0	200	300	0	0	0	0	0	0	0	200	903	0	0	0	0	0	0	0	603	903	0
574	4	0	0	0	0	0	0	200	300	0	0	0	0	0	0	0	200	903	0	0	0	0	0	0	0	603	903	0
574	5	0	0	0	0	0	0	200	300	0	0	0	0	0	0	0	200	903	0	0	0	0	0	0	0	603	903	0
574	6	0	0	0	0	0	0	200	300	0	0	0	0	0	0	0	200	903	0	0	0	0	0	0	0	603	903	0
574	7	0	0	0	0	0	0	200	300	0	0	0	0	0	0	0	200	903	0	0	0	0	0	0	0	603	903	0
574	8	0	0	0	0	0	0	200	300	0	0	0	0	0	0	0	200	903	0	0	0	0	0	0	0	603	903	0
574	9	0	0	0	0	0	0	200	300	0	0	0	0	0	0	0	200	903	0	0	0	0	0	0	0	603	903	0
575	0	0	0	0	0	0	0	200	300	0	0	0	0	0	0	0	200	903	0	0	0	0	0	0	0	603	903	0
575	1	0	0	0	0	0	0	200	300	0	0	0	0	0	0	0	200	903	0	0	0	0	0	0	0	603	903	0
575	2	0	0	0	0	0	0	200	300	0	0	0	0	0	0	0	200	903	0	0	0	0	0	0	0	603	903	0
575	3	0	0	0	0	0	0	200	300	0	0	0	0	0	0	0	200	903	0	0	0	0	0	0	0	603	903	0
575	4	0	0	0	0	0	0	200	300	0	0	0	0	0	0	0	200	903	0	0	0	0	0	0	0	603	903	0
575	5	0	0	0	0	0	0	200	300	0	0	0	0	0	0	0	200	903	0	0	0	0	0	0	0	603	903	0
575	6	0	0	0	0	0	0	200	300	0	0	0	0	0	0	0	200	903	0	0	0	0	0	0	0	603	903	0
575	7	0	0	0	0	0	0	200	300	0	0	0	0	0	0	0	200	903	0	0	0	0	0	0	0	603	903	0
575	8	0	0	0	0	0	0	200	300	0	0	0	0	0	0	0	200	903	0	0	0	0	0	0	0	603	903	0
575	9	0	0	0	0	0	0	200	300	0	0	0	0	0	0	0	200	903	0	0	0	0	0	0	0	603	903	0
576	0	0	0	0	0	0	0	200	300	0	0	0	0	0	0	0	200	903	0	0	0	0	0	0	0	603	903	0
576	1	0	0	0	0	0	0	200	300	0	0	0	0	0	0	0	200	903	0	0	0	0	0	0	0	603	903	0
576	2	0	0	0	0	0	0	200	300	0	0	0	0	0	0	0	200	903	0	0	0	0	0	0	0	603	903	0
576	3	0	0	0	0	0	0	200	300	0	0	0	0	0	0	0	200	903	0	0	0	0	0	0	0	603	903	0
576	4	0	0	0	0	0	0	200	300	0	0	0	0	0	0	0	200	903	0	0	0	0	0	0	0	603	903	0
576	5	0	0	0	0	0	0	200	300	0	0	0	0	0	0	0	200	903	0	0	0	0	0	0	0	603	903	0
576	6	0	0	0	0	0	0	200	300	0	0	0	0	0	0	0	200	903	0	0	0	0	0	0	0	603	903	0
576	7	0	0	0	0	0	0	200	300	0	0	0	0	0	0	0	200	903	0	0	0	0	0	0	0	603	903	0
576	8	0	0	0	0	0	0	200	300	0	0	0	0	0	0	0	200	903	0	0	0	0	0	0	0	603	903	0
576	9	0	0	0	0	0	0	200	300	0	0	0	0	0	0	0	200	903	0	0	0	0	0	0	0	603	903	0
577	0	0	0	0	0	0	0	200	300	0	0	0	0	0	0	0	200	903	0	0	0	0	0	0	0	603	903	0
577	1	0	0	0	0	0	0	200	300	0	0	0	0	0	0	0	200	903	0	0	0	0	0	0	0	603	903	0
577	2	0	0	0	0	0	0	200	300	0	0	0	0	0	0	0	200	903	0	0	0	0	0	0	0	603	903	0
577	3	0	0	0	0	0	0	200	300	0	0	0	0	0	0	0	200	903	0	0	0	0	0	0	0	603	903	0
577	4	0	0	0	0	0	0	200	300	0	0	0	0	0	0	0	200	903	0	0	0	0	0	0	0	603	903	0
577	5	0	0	0	0	0	0	200	300	0	0	0	0	0	0	0	200	903	0	0	0	0	0	0	0	603	903	0
577	6	0	0	0	0	0	0	200	300	0	0	0	0	0	0	0	200	903	0	0	0	0	0	0	0	603	903	0
577	7	0	0	0	0	0	0	200	300	0	0	0	0	0	0	0	200	903	0	0	0	0	0	0	0	603	903	0
577	8	0	0	0	0	0	0	200	300	0	0	0	0	0	0	0	200	903	0	0	0	0	0	0	0	603	903	0
577	9	0	0	0	0	0	0	200	300	0	0	0	0	0	0	0	200	903	0	0	0	0	0	0	0	603	903	0
578	0	0	0	0	0	0	0	200	300	0	0	0	0	0	0	0	200	903	0	0	0	0	0	0	0	603	903	0
578	1	0	0	0	0	0	0	200	300	0	0	0	0	0	0	0	200	903	0	0	0	0	0	0	0	603	903	0
578	2	0	0	0	0	0	0	200	300	0	0	0	0	0	0	0	200	903	0	0	0	0	0	0	0	603	903	0
578	3	0	0	0	0	0	0	200	300	0	0	0	0	0	0	0	200	903	0	0	0	0	0	0	0	603	903	0
578	4	0	0	0	0	0	0	200	300	0	0	0	0	0	0	0	200	903	0	0	0	0	0	0	0	603	903	0
578	5	0	0	0	0	0	0	200	300	0	0	0	0	0	0	0	200	903	0	0	0	0	0	0	0	603	903	0
578	6	0	0	0	0	0	0	200	300	0	0	0	0	0	0	0	200	903	0	0	0	0	0	0	0	603	903	0
578	7	0	0	0	0	0	0	200	300	0	0	0	0	0	0	0	200	903	0	0	0	0	0	0	0	603	903	0
578	8	0	0	0	0	0	0	200	300	0	0	0	0	0	0	0	200	903	0	0	0	0	0	0	0	603	903	0
578	9	0	0	0	0	0	0	200	300	0	0	0	0	0	0	0	200	903	0	0	0	0	0	0	0	603	903	0
579	0	0	0	0	0	0	0	200	300	0	0	0	0	0	0	0	200	903	0	0	0	0	0	0	0	603	903	0
579	1	0	0	0	0	0	0	200	300	0	0	0	0	0	0	0	200	903	0	0	0	0	0	0	0	603	903	0
579	2	0	0	0	0	0	0	200	300	0	0	0	0	0	0	0	200	903	0	0	0	0	0	0	0	603	903	0
579	3	0	0	0	0	0	0	200	300	0	0	0	0	0	0	0	200	903	0	0	0	0	0	0	0	603	903	0
579	4	0	0	0	0	0	0	200	300	0	0	0	0	0	0	0	200	903	0	0	0	0	0	0	0	603	903	0
579	5	0	0	0	0	0	0	200	300	0	0	0	0	0	0	0	200	903	0	0	0	0	0	0	0	603	903	0
579	6	0	0	0	0	0	0	200	300	0	0	0	0	0	0	0	200	903	0	0	0	0	0	0	0	603	903	0
579	7	0	0	0	0	0	0	200	300	0	0	0	0	0	0	0	200	903	0	0	0	0	0	0	0	603	903	0
579	8	0	0	0	0	0	0	200	300	0	0	0	0	0	0	0	200	903	0	0	0	0	0	0	0	603	903	0
579	9	0	0	0	0	0	0	200	300	0	0	0	0	0	0	0	200	903	0	0	0	0	0	0	0	603	903	0
580	0	0	0	0	0	0	0	200	300	0	0	0	0	0	0	0	200	903	0	0	0	0	0	0	0	603	903	0
580	1	0	0	0	0	0	0	200	300	0	0	0	0	0	0	0	200	903	0	0	0	0	0	0	0	603	903	0
580	2	0	0	0	0	0	0	200	300	0	0	0	0	0	0	0	200	903	0	0	0	0	0	0	0	603	903	0
580	3	0	0	0	0	0	0	200	300	0	0	0	0	0	0	0	200	903	0	0	0	0	0	0	0	603	903	0
580	4	0	0	0	0	0	0	200	300	0	0	0	0	0	0	0	200	903	0	0	0	0	0	0	0	603	903	0
580	5	0	0	0	0	0	0	200	300	0	0	0	0	0	0	0	200	903	0	0	0	0	0	0	0	603	903	0
580	6	0	0	0	0	0	0	200	300	0	0	0	0	0	0	0	200	903	0	0	0	0	0	0	0	603	903	0
580	7	0	0	0	0	0	0	200	300	0	0	0	0	0	0	0	200	903	0	0	0	0	0	0	0	603	903	0
580	8	0	0	0	0	0	0	200	300	0	0	0	0	0	0	0	200	903	0	0	0	0	0	0	0	603	903	0
580	9	0	0	0	0	0	0	200	300	0	0	0	0	0	0	0	200	903	0	0	0	0	0	0	0	603	903	0
581	0	0	0	0	0	0	0	200	300	0	0	0	0	0	0	0	200	903	0	0	0	0	0	0	0	603	903	0
581	1	0	0	0	0	0	0	200	300	0	0	0	0	0	0	0	200	903	0	0	0	0	0	0	0	603	903	0
581	2	0	0	0	0	0	0	200	300	0	0	0	0	0	0	0	200	903	0	0	0	0	0	0	0	603	903	0
581	3	0	0	0	0	0	0	200	300	0	0	0	0	0	0	0	200	903	0	0	0	0	0	0	0	603	903	0
581	4	0	0	0	0	0	0	200	300	0	0	0	0	0	0	0	200	903	0	0	0	0	0	0	0	603	903	0
581	5	0	0	0	0	0	0	200	300	0	0	0	0	0	0	0	200	903	0	0	0	0	0	0	0	603	903	0
581	6	0	0	0	0	0	0	200	300	0	0	0	0	0	0	0	200	903	0	0	0	0	0	0	0	603	903	0
581	7	0	0	0	0	0	0	200	300	0	0	0	0	0	0	0	200	903	0	0	0	0	0	0	0	603	903	0
581	8	0	0	0	0	0	0	200	300	0	0	0	0	0	0	0	200	903	0	0	0	0	0	0	0	603	903	0
581	9	0	0	0	0	0	0	200	300	0	0	0	0	0	0	0	200	903	0	0	0	0	0	0	0	603	903	0
582	0	0	0	0	0	0	0	200	300	0	0	0	0	0	0	0	200	903	0	0	0	0	0	0	0	603	903	0
582	1	0	0	0	0	0	0	200	300	0	0	0	0	0	0	0	200	903	0	0	0	0	0	0	0	603	903	0
582	2	0	0	0	0	0	0	200	300	0	0	0	0	0	0	0	200	903	0	0	0	0	0	0	0	603	903	0
582	3	0	0	0	0	0	0	200	300	0	0	0	0	0	0	0	200	903	0	0	0	0	0	0	0	603	903	0
582	4	0	0	0	0	0	0	200	300	0	0	0	0	0	0	0	200	903	0	0	0	0	0	0	0	603	903	0
582	5	0	0	0	0	0	0	200	300	0	0	0	0	0	0	0	200	903	0	0	0	0	0	0	0	603	903	0
582	6	0	0	0	0	0	0	200	300	0	0	0	0	0	0	0	200	903	0	0	0	0	0	0	0	603	903	0
582	7	0	0	0	0	0	0	200	300	0	0	0	0	0	0	0	200	903	0	0	0	0	0	0	0	603	903	0
582	8	0	0	0	0	0	0	200	300	0	0	0	0	0	0	0	200	903	0	0	0	0	0	0	0	603	903	0
582	9	0	0	0	0	0	0	200	300	0	0	0	0	0	0	0	200	903	0	0	0	0	0	0	0	603	903	0
583	0	0	0	0	0	0	0	200	300	0	0	0	0	0	0	0	200	903	0	0	0	0	0	0	0	603	903	0
583	1	0	0	0	0	0	0	200	300	0	0	0	0	0	0	0	200	903	0	0	0	0	0	0	0	603	903	0
583	2	0	0	0	0	0	0	200	300	0	0	0	0	0	0	0	200	903	0	0	0	0	0	0	0	603	903	0
583	3	0	0	0	0	0	0	200	300	0	0	0	0	0	0	0	200	903	0	0	0	0	0	0	0	603	903	0
583	4	0	0	0	0	0	0	200	300	0	0	0	0	0	0	0	200	903	0	0	0	0	0	0	0	603	903	0
583	5	0	0	0	0	0	0	200	300	0	0	0	0	0	0	0	200	903	0	0	0	0	0	0	0	603	903	0
583	6	0	0	0	0	0	0	200	300	0	0	0	0	0	0	0	200	903	0	0	0	0	0	0	0	603	903	0
583	7	0	0	0	0	0	0	200	300	0	0	0	0	0	0	0	200	903	0	0	0	0	0	0	0	603	903	0
583	8	0	0	0	0	0	0	200	300	0	0	0	0	0	0	0	200	903	0	0	0	0	0	0	0	603	903	0
583	9	0	0	0	0	0	0	200	300	0	0	0	0	0	0	0	200	903	0	0	0	0	0	0	0	603	903	0
584	0	0	0	0	0	0	0	200	300	0	0	0	0	0	0	0	200	903	0	0	0	0	0	0	0	603	903	0
584	1	0	0	0	0	0	0	200	300	0	0	0	0	0	0	0	200	903	0	0	0	0	0	0	0	603	903	0
584	2	0	0	0	0	0	0	200	300	0	0	0	0	0	0	0	200	903	0	0	0	0	0	0	0	603	903	0
584	3	0	0	0	0	0	0	200	300	0	0	0	0	0	0	0	200	903	0	0	0	0	0	0	0	603	903	0
584	4	0	0	0	0	0	0	200	300	0	0	0	0	0	0	0	200	903	0	0	0	0	0	0	0	603	903	0
584	5	0	0	0	0	0	0	200	300	0	0	0	0	0	0	0	200	903	0	0	0	0	0	0	0	603	903	0
584	6	0	0	0	0	0	0	200	300	0	0	0	0	0	0	0	200	903	0	0	0	0	0	0	0	603	903	0
584	7	0	0	0	0	0	0	200	300	0	0	0	0	0	0	0	200	903	0	0	0	0	0	0	0	603	903	0
584	8	0	0	0	0	0	0	200	300	0	0	0	0	0	0	0	200	903	0	0	0	0	0	0	0	603	903	0
584	9	0	0	0	0	0	0	200	300	0	0	0	0	0	0	0	200	903	0	0	0	0	0	0	0	603	903	0
585	0	0	0	0	0	0	0	200	300	0	0	0	0	0	0	0	200	903	0	0	0	0	0	0	0	603	903	0
585	1	0	0	0	0	0	0	200	300	0	0	0	0	0	0	0	200	903	0	0	0	0	0	0	0	603	903	0
585	2	0	0	0	0	0	0	200	300	0	0	0	0	0	0	0	200	903	0	0	0	0	0	0	0	603	903	0
585	3	0	0	0	0	0	0	200	300	0	0	0	0	0	0	0	200	903	0	0	0	0	0	0	0	603	903	0
585	4	0	0	0	0	0	0	200	300	0	0	0	0	0	0	0	200	903	0	0	0	0	0	0	0	603	903	0
585	5	0	0	0	0	0	0	200	300	0	0	0	0	0	0	0	200	903	0	0	0	0	0	0	0	603	903	0
585	6	0	0	0	0	0	0	200	300	0	0	0	0	0	0	0	200	903	0	0	0	0	0	0	0	603	903	0
585	7	0	0	0	0	0	0	200	300	0	0	0	0	0	0	0	200	903	0	0	0	0	0	0	0	603	903	0
585	8	0	0	0	0	0	0	200	300	0	0	0	0	0	0	0	200	903	0	0	0	0	0	0	0	603	903	0
585	9	0	0	0	0	0	0	200	300	0	0	0	0	0	0	0	200	903	0	0	0	0	0	0	0	603	903	0
586	0	0	0	0	0	0	0	200	300	0	0	0	0	0	0	0	200	903	0	0	0	0	0	0	0	603	903	0
586	1	0	0	0	0	0	0	200	300	0	0	0	0	0	0	0	200	903	0	0	0	0	0	0	0	603	903	0
586	2	0	0	0	0	0	0	200	300	0	0	0	0	0	0	0	200	903	0	0	0	0	0	0	0	603	903	0
586	3	0	0	0	0	0	0	200	300	0	0	0	0	0	0	0	200	903	0	0	0	0	0	0	0	603	903	0
586	4	0	0	0	0	0	0	200	300	0	0	0	0	0	0	0	200	903	0	0	0	0	0	0	0	603	903	0
586	5	0	0	0	0	0	0	200	300	0	0	0	0	0	0	0	200	903	0	0	0	0	0	0	0	603	903	0
586	6	0	0	0	0	0	0	200	300	0	0	0	0	0	0	0	200	903	0	0	0	0	0	0	0	603	903	0
586	7	0	0	0	0	0	0	200	300	0	0	0	0	0	0	0	200	903	0	0	0	0	0	0	0	603	903	0
586	8	0	0	0	0	0	0	200	300	0	0	0	0	0	0	0	200	903	0	0	0	0	0	0	0	603	903	0
586	9	0	0	0	0	0	0	200	300	0	0	0	0	0	0	0	200	903	0	0	0	0	0	0	0	603	903	0
587	0	0	0	0	0	0	0	200	300	0	0	0	0	0	0	0	200	903	0	0	0	0	0	0	0	603	903	0
587	1	0	0	0	0	0	0	200	300	0	0	0	0	0	0	0	200	903	0	0	0	0	0	0	0	603	903	0
587	2	0	0	0	0	0	0	200	300	0	0	0	0	0	0	0	200	903	0	0	0	0	0	0	0	603	903	0
587	3	0	0	0	0	0	0	200	300	0	0	0	0	0	0	0	200	903	0	0	0	0	0	0	0	603	903	0
587	4	0	0	0	0	0	0	200	300	0	0	0	0	0	0	0	200	903	0	0	0	0	0	0	0	603	903	0
587	5	0	0	0	0	0	0	200	300	0	0	0	0	0	0	0	200	903	0	0	0	0	0	0	0	603	903	0
587	6	0	0	0	0	0	0	200	300	0	0	0	0	0	0	0	200	903	0	0	0	0	0	0	0	603	903	0
587	7	0	0	0	0	0	0	200	300	0	0	0	0	0	0	0	200	903	0	0	0	0	0	0	0	603	903	0
587	8	0	0	0	0	0	0	200	300	0	0	0	0	0	0	0	200	903	0	0	0	0	0	0	0	603	903	0
587	9	0	0	0	0	0	0	200	300	0	0	0	0	0	0	0	200	903	0	0	0	0	0	0	0	603	903	0
588	0	0	0	0	0	0	0	200	300	0	0	0	0	0	0	0	200	903	0	0	0	0	0	0	0	603	903	0
588	1	0	0	0	0	0	0	200	300	0	0	0	0	0	0	0	200	903	0	0	0	0	0	0	0	603	903	0
588	2	0	0	0	0	0	0	200	300	0	0	0	0	0	0	0	200	903	0	0	0	0	0	0	0	603	903	0
588	3	0	0	0	0	0	0	200	300	0	0	0	0	0	0	0	200	903	0	0	0	0	0	0	0	603	903	0
588	4	0	0	0	0	0	0	200	300	0	0	0	0	0	0	0	200	903	0	0	0	0	0	0	0	603	903	0
588	5	0	0	0	0	0	0	200	300	0	0	0	0	0	0	0	200	903	0	0	0	0	0	0	0	603	903	0
588	6	0	0	0	0	0	0	200	300	0	0	0	0	0	0	0	200	903	0	0	0	0	0	0	0	603	903	0
588	7	0	0	0	0	0	0	200	300	0	0	0	0	0	0	0	200	903	0	0	0	0	0	0	0	603	903	0
588	8	0	0	0	0	0	0	200	300	0	0	0	0	0	0	0	200	903	0	0	0	0	0	0	0	603	903	0
588	9	0	0	0	0	0	0	200	300	0	0	0	0	0	0	0	200	903	0	0	0	0	0	0	0	603	903	0
589	0	0	0	0	0	0	0	200	300	0	0	0	0	0	0	0	200	903	0	0	0	0	0	0	0	603	903	0
589	1	0	0	0	0	0	0	200	300	0	0	0	0	0	0	0	200	903	0	0	0	0	0	0	0	603	903	0
589	2	0	0	0	0	0	0	200	300	0	0	0	0	0	0	0	200	903	0	0	0	0	0	0	0	603	903	0
589	3	0	0	0	0	0	0	200	300	0	0	0	0	0	0	0	200	903	0	0	0	0	0	0	0	603	903	0
589	4	0	0	0	0	0	0	200	300	0	0	0	0	0	0	0	200	903	0	0	0	0	0	0	0	603	903	0
589	5	0	0	0	0	0	0	200	300	0	0	0	0	0	0	0	200	903	0	0	0	0	0	0	0	603	903	0
589	6	0	0	0	0	0	0	200	300	0	0	0	0	0	0	0	200	903	0	0	0	0	0	0	0	603	903	0
589	7	0	0	0	0	0	0	200	300	0	0	0	0	0	0	0	200	903	0	0	0	0	0	0	0	603	903	0
589	8	0	0	0	0	0	0	200	300	0	0	0	0	0	0	0	200	903	0	0	0	0	0	0	0	603	903	0
589	9	0	0	0	0	0	0	200	300	0	0	0	0	0	0	0	200	903	0	0	0	0	0	0	0	603	903	0
590	0	0	0	0	0	0	0	200	300	0	0	0	0	0	0	0	200	903	0	0	0	0	0	0	0	603	903	0
590	1	0	0	0	0	0	0	200	300	0	0	0	0	0	0	0	200	903	0	0	0	0	0	0	0	603	903	0
590	2	0	0	0	0	0	0	200	300	0	0	0	0	0	0	0	200	903	0	0	0	0	0	0	0	603	903	0
590	3	0	0	0	0	0	0	200	300	0	0	0	0	0	0	0	200	903	0	0	0	0	0	0	0	603	903	0
590	4	0	0	0	0	0	0	200	300	0	0	0	0	0	0	0	200	903	0	0	0	0	0	0	0	603	903	0
590	5	0	0	0	0	0	0	200	300	0	0	0	0	0	0	0	200	903	0	0	0	0	0	0	0	603	903	0
590	6	0	0	0	0	0	0	200	300	0	0	0	0	0	0	0	200	903	0	0	0	0	0	0	0	603	903	0
590	7	0	0	0	0	0	0	200	300	0	0	0	0	0	0	0	200	903	0	0	0	0	0	0	0	603	903	0
590	8	0	0	0	0	0	0	200	300	0	0	0	0	0	0	0	200	903	0	0	0	0	0	0	0	603	903	0
590	9	0	0	0	0	0	0	200	300	0	0	0	0	0	0	0	200	903	0	0	0	0	0	0	0	603	903	0
591	0	0	0	0	0	0	0	200	300	0	0	0	0	0	0	0	200	903	0	0	0	0	0	0	0	603	903	0
591	1	0	0	0	0	0	0	200	300	0	0	0	0	0	0	0	200	903	0	0	0	0	0	0	0	603	903	0
591	2	0	0	0	0	0	0	200	300	0	0	0	0	0	0	0	200	903	0	0	0	0	0	0	0	603	903	0
591	3	0	0	0	0	0	0	200	300	0	0	0	0	0	0	0	200	903	0	0	0	0	0	0	0	603	903	0
591	4	0	0	0	0	0	0	200	300	0	0	0	0	0	0	0	200	903	0	0	0	0	0	0	0	603	903	0
591	5	0	0	0	0	0	0	200	300	0	0	0	0	0	0	0	200	903	0	0	0	0	0	0	0	603	903	0
591	6	0	0	0	0	0	0	200	300	0	0	0	0	0	0	0	200	903	0	0	0	0	0	0	0	603	903	0
591	7	0	0	0	0	0	0	200	300	0	0	0	0	0	0	0	200	903	0	0	0	0	0	0	0	603	903	0
591	8	0	0	0	0	0	0	200	300	0	0	0	0	0	0	0	200	903	0	0	0	0	0	0	0	603	903	0
591	9	0	0	0	0	0	0	200	300	0	0	0	0	0	0	0	200	903	0	0	0	0	0	0	0	603	903	0
592	0	0	0	0	0	0	0	200	300	0	0	0	0	0	0	0	200	903	0	0	0	0	0	0	0	603	903	0
592	1	0	0	0	0	0	0	200	300	0	0	0	0	0	0	0	200	903	0	0	0	0	0	0	0	603	903	0
592	2	0	0	0	0	0	0	200	300	0	0	0	0	0	0	0	200	903	0	0	0	0	0	0	0	603	903	0
592	3	0	0	0	0	0	0	200	300	0	0	0	0	0	0	0	200	903	0	0	0	0	0	0	0	603	903	0
592	4	0	0	0	0	0	0	200	300	0	0	0	0	0	0	0	200	903	0	0	0	0	0	0	0	603	903	0
592	5	0	0	0	0	0	0	200	300	0	0	0	0	0	0	0	200	903	0	0	0	0	0	0	0	603	903	0
592	6	0	0	0	0	0	0	200	300	0	0	0	0	0	0	0	200	903	0	0	0	0	0	0	0	603	903	0
592	7	0	0	0	0	0	0	200	300	0	0	0	0	0	0	0	200	903	0	0	0	0	0	0	0	603	903	0
592	8	0	0	0	0	0	0	200	300	0	0	0	0	0	0	0	200	903	0	0	0	0	0	0	0	603	903	0
592	9	0	0	0	0	0	0	200	300	0	0	0	0	0	0	0	200	903	0	0	0	0	0	0	0	603	903	0
593	0	0	0	0	0	0	0	200	300	0	0	0	0	0	0	0	200	903	0	0	0	0	0	0	0	603	903	0
593	1	0	0	0	0	0	0	200	300	0	0	0	0	0	0	0	200	903	0	0	0	0	0	0	0	603	903	0
593	2	0	0	0	0	0	0	200	300	0	0	0	0	0	0	0	200	903	0	0	0	0	0	0	0	603	903	0
593	3	0	0	0	0	0	0	200	300	0	0	0	0	0	0	0	200	903	0	0	0	0	0	0	0	603	903	0
593	4	0	0	0	0	0	0	200	300	0	0	0	0	0	0	0	200	903	0	0	0	0	0	0	0	603	903	0
593	5	0	0	0	0	0	0	200	300	0	0	0	0	0	0	0	200	903	0	0	0	0	0	0	0	603	903	0
593	6	0	0	0	0	0	0	200	300	0	0	0	0	0	0	0	200	903	0	0	0	0	0	0	0	603	903	0
593	7	0	0	0	0	0	0	200	300	0	0	0	0	0	0	0	200	903	0	0	0	0	0	0	0	603	903	0
593	8	0	0	0	0	0	0	200	300	0	0	0	0	0	0	0	200	903	0	0	0	0	0	0	0	603	903	0
593	9	0	0	0	0	0	0	200	300	0	0	0	0	0	0	0	200	903	0	0	0	0	0	0	0	603	903	0
594	0	0	0	0	0	0	0	200	300	0	0	0	0	0	0	0	200	903	0	0	0	0	0	0	0	603	903	0
594	1	0	0	0	0	0	0	200	300	0	0	0	0	0	0	0	200	903	0	0	0	0	0	0	0	603	903	0
594	2	0	0	0	0	0	0	200	300	0	0	0	0	0	0	0	200	903	0	0	0	0	0	0	0	603	903	0
594	3	0	0	0	0	0	0	200	300	0	0	0	0	0	0	0	200	903	0	0	0	0	0	0	0	603	903	0
594	4	0	0	0	0	0	0	200	300	0	0	0	0	0	0	0	200	903	0	0	0	0	0	0	0	603	903	0
594	5	0	0	0	0	0	0	200	300	0	0	0	0	0	0	0	200	903	0	0	0	0	0	0	0	603	903	0
594	6	0	0	0	0	0	0	200	300	0	0	0	0	0	0	0	200	903	0	0	0	0	0	0	0	603	903	0
594	7	0	0	0	0	0	0	200	300	0	0	0	0	0	0	0	200	903	0	0	0	0	0	0	0	603	903	0
594	8	0	0	0	0	0	0	200	300	0	0	0	0	0	0	0	200	903	0	0	0	0	0	0	0	603	903	0
594	9	0	0	0	0	0	0	200	300	0	0	0	0	0	0	0	200	903	0	0	0	0	0	0	0	603	903	0
595	0	0	0	0	0	0	0	200	300	0	0	0	0	0	0	0	200	903	0	0	0	0	0	0	0	603	903	0
595	1	0	0	0	0	0	0	200	300	0	0	0	0	0	0	0	200	903	0	0	0	0	0	0	0	603	903	0
595	2	0	0	0	0	0	0	200	300	0	0	0	0	0	0	0	200	903	0	0	0	0	0	0	0	603	903	0
595	3	0	0	0	0	0	0	200	300	0	0	0	0	0	0	0	200	903	0	0	0	0	0	0	0	603	903	0
595	4	0	0	0	0	0	0	200	300	0	0	0	0	0	0	0	200	903	0	0	0	0	0	0	0	603	903	0
595	5	0	0	0	0	0	0	200	300	0	0	0	0	0	0	0	200	903	0	0	0	0	0	0	0	603	903	0
595	6	0	0	0	0	0	0	200	300	0	0	0	0	0	0	0	200	903	0	0	0	0	0	0	0	603	903	0
595	7	0	0	0	0	0	0	200	300	0	0	0	0	0	0	0	200	903	0	0	0	0	0	0	0	603	903	0
595	8	0	0	0	0	0	0	200	300	0	0	0	0	0	0	0	200	903	0	0	0	0	0	0	0	603	903	0
595	9	0	0	0	0	0	0	200	300	0	0	0	0	0	0	0	200	903	0	0	0	0	0	0	0	603	903	0
596	0	0	0	0	0	0	0	200	300	0	0	0	0	0	0	0	200	903	0	0	0	0	0	0	0	603	903	0
596	1	0	0	0	0	0	0	200	300	0	0	0	0	0	0	0	200	903	0	0	0	0	0	0	0	603	903	0
596	2	0	0	0	0	0	0	200	300	0	0	0	0	0	0	0	200	903	0	0	0	0	0	0	0	603	903	0
596	3	0	0	0	0	0	0	200	300	0	0	0	0	0	0	0	200	903	0	0	0	0	0	0	0	603	903	0
596	4	0	0	0	0	0	0	200	300	0	0	0	0	0	0	0	200	903	0	0	0	0	0	0	0	603	903	0
596	5	0	0	0	0	0	0	200	300	0	0	0	0	0	0	0	200	903	0	0	0	0	0	0	0	603	903	0
596	6	0	0	0	0	0	0	200	300	0	0	0	0	0	0	0	200	903	0	0	0	0	0	0	0	603	903	0
596	7	0	0	0	0	0	0	200	300	0	0	0	0	0	0	0	200	903	0	0	0	0	0	0	0	603	903	0
596	8	0	0	0	0	0	0	200	300	0	0	0	0	0	0	0	200	903	0	0	0	0	0	0	0	603	903	0
596	9	0	0	0	0	0	0	200	300	0	0	0	0	0	0	0	200	903	0	0	0	0	0	0	0	603	903	0
597	0	0	0	0	0	0	0	200	300	0	0	0	0	0	0	0	200	903	0	0	0	0	0	0	0	603	903	0
597	1	0	0	0	0	0	0	200	300	0	0	0	0	0	0	0	200	903	0	0	0	0	0	0	0	603	903	0
597	2	0	0	0	0	0	0	200	300	0	0	0	0	0	0	0	200	903	0	0	0	0	0	0	0	603	903	0
597	3	0	0	0	0	0	0	200	300	0	0	0	0	0	0	0	200	903	0	0	0	0	0	0	0	603	903	0
597	4	0	0	0	0	0	0	200	300	0	0	0	0	0	0	0	200	903	0	0	0	0	0	0	0	603	903	0
597	5	0	0	0	0	0	0	200	300	0	0	0	0	0	0	0	200	903	0	0	0	0	0	0	0	603	903	0
597	6	0	0	0	0	0	0	200	300	0	0	0	0	0	0	0	200	903	0	0	0	0	0	0	0	603	903	0
597	7	0	0	0	0	0	0	200	300	0	0	0	0	0	0	0	200	903	0	0	0	0	0	0	0	603	903	0
597	8	0	0	0	0	0	0	200	300	0	0	0	0	0	0	0	200	903	0	0	0	0	0	0	0	603	903	0
597	9	0	0	0	0	0	0	200	300	0	0	0	0	0	0	0	200	903	0	0	0	0	0	0	0	603	903	0
598	0	0	0	0	0	0	0	200	300	0	0	0	0	0	0	0	200	903	0	0	0	0	0	0	0	603	903	0
598	1	0	0	0	0	0	0	200	300	0	0	0	0	0	0	0	200	903	0	0	0	0	0	0	0	603	903	0
598	2	0	0	0	0	0	0	200	300	0	0	0	0	0	0	0	200	903	0	0	0	0	0	0	0	603	903	0
598	3	0	0	0	0	0	0	200	300	0	0	0	0	0	0	0	200	903	0	0	0	0	0	0	0	603	903	0
598	4	0	0	0	0	0	0	200	300	0	0	0	0	0	0	0	200	903	0	0	0	0	0	0	0	603	903	0
598	5	0	0	0	0	0	0	200	300	0	0	0	0	0	0	0	200	903	0	0	0	0	0	0	0	603	903	0
598	6	0	0	0	0	0	0	200	300	0	0	0	0	0	0	0	200	903	0	0	0	0	0	0	0	603	903	0
598	7	0	0	0	0	0	0	200	300	0	0	0	0	0	0	0	200	903	0	0	0	0	0	0	0	603	903	0
598	8	0	0	0	0	0	0	200	300	0	0	0	0	0	0	0	200	903	0	0	0	0	0	0	0	603	903	0
598	9	0	0	0	0	0	0	200	300	0	0	0	0	0	0	0	200	903	0	0	0	0	0	0	0	603	903	0
599	0	0	0	0	0	0	0	200	300	0	0	0	0	0	0	0	200	903	0	0	0	0	0	0	0	603	903	0
599	1	0	0	0	0	0	0	200	300	0	0	0	0	0	0	0	200	903	0	0	0	0	0	0	0	603	903	0
599	2	0	0	0	0	0	0	200	300	0	0	0	0	0	0	0	200	903	0	0	0	0	0	0	0	603	903	0
599	3	0	0	0	0	0	0	200	300	0	0	0	0	0	0	0	200	903	0	0	0	0	0	0	0	603	903	0
599	4	0	0	0	0	0	0	200	300	0	0	0	0	0	0	0	200	903	0	0	0	0	0	0	0	603	903	0
599	5	0	0	0	0	0	0	200	300	0	0	0	0	0	0	0	200	903	0	0	0	0	0	0	0	603	903	0
599	6	0	0	0	0	0	0	200	300	0	0	0	0	0	0	0	200	903	0	0	0	0	0	0	0	603	903	0
599	7	0	0	0	0	0	0	200	300	0	0	0	0	0	0	0	200	903	0	0	0	0	0	0	0	603	903	0
599	8	0	0	0	0	0	0	200	300	0	0	0	0	0	0	0	200	903	0	0	0	0	0	0	0	603	903	0
599	9	0	0	0	0	0	0	200	300	0	0	0	0	0	0	0	200	903	0	0	0	0	0	0	0	603	903	0
600	0	0	0	0	0	0	0	200	300	0	0	0	0	0	0	0	200	903	0	0	0	0	0	0	0	603	903	0
600	1	0	0	0	0	0	0	200	300	0	0	0	0	0	0	0	200	903	0	0	0	0	0	0	0	603	903	0
600	2	0	0	0	0	0	0	200	300	0	0	0	0	0	0	0	200	903	0	0	0	0	0	0	0	603	903	0
600	3	0	0	0	0	0	0	200	300	0	0	0	0	0	0	0	200	903	0	0	0	0	0	0	0	603	903	0
600	4	0	0	0	0	0	0	200	300	0	0	0	0	0	0	0	200	903	0	0	0	0	0	0	0	603	903	0
600	5	0	0	0	0	0	0	200	300	0	0	0	0	0	0	0	200	903	0	0	0	0	0	0	0	603	903	0
600	6	0	0	0	0	0	0	200	300	0	0	0	0	0	0	0	200	903	0	0	0	0	0	0	0	603	903	0
600	7	0	0	0	0	0	0	200	300	0	0	0	0	0	0	0	200	903	0	0	0	0	0	0	0	603	903	0
600	8	0	0	0	0	0	0	200	300	0	0	0	0	0	0	0	200	903	0	0	0	0	0	0	0	603	903	0
600	9	0	0	0	0	0	0	200	300	0	0	0	0	0	0	0	200	903	0	0	0	0	0	0	0	603	903	0
601	0	0	0	0	0	0	0	200	300	0	0	0	0	0	0	0	200	903	0	0	0	0	0	0	0	603	903	0
601	1	0	0	0	0	0	0	200	300	0	0	0	0	0	0	0	200	903	0	0	0	0	0	0	0	603	903	0
601	2	0	0	0	0	0	0	200	300	0	0	0	0	0	0	0	200	903	0	0	0	0	0	0	0	603	903	0
601	3	0	0	0	0	0	0	200	300	0	0	0	0	0	0	0	200	903	0	0	0	0	0	0	0	603	903	0
601	4	0	0	0	0	0	0	200	300	0	0	0	0	0	0	0	200	903	0	0	0	0	0	0	0	603	903	0
601	5	0	0	0	0	0	0	200	300	0	0	0	0	0	0	0	200	903	0	0	0	0	0	0	0	603	903	0
601	6	0	0	0	0	0	0	200	300	0	0	0	0	0	0	0	200	903	0	0	0	0	0	0	0	603	903	0
601	7	0	0	0	0	0	0	200	300	0	0	0	0	0	0	0	200	903	0	0	0	0	0	0	0	603	903	0
601	8	0	0	0	0	0	0	200	300	0	0	0	0	0	0	0	200	903	0	0	0	0	0	0	0	603	903	0
601	9	0	0	0	0	0	0	200	300	0	0	0	0	0	0	0	200	903	0	0	0	0	0	0	0	603	903	0
602	0	0	0	0	0	0	0	200	300	0	0	0	0	0	0	0	200	903	0	0	0	0	0	0	0	603	903	0
602	1	0	0	0	0	0	0	200	300	0	0	0	0	0	0	0	200	903	0	0	0	0	0	0	0	603	903	0
602	2	0	0	0	0	0	0	200	300	0	0	0	0	0	0	0	200	903	0	0	0	0	0	0	0	603	903	0
602	3	0	0	0	0	0	0	200	300	0	0	0	0	0	0	0	200	903	0	0	0	0	0	0	0	603	903	0
602	4	0	0	0	0	0	0	200	300	0	0	0	0	0	0	0	200	903	0	0	0	0	0	0	0	603	903	0
602	5	0	0	0	0	0	0	200	300	0	0	0	0	0	0	0	200	903	0	0	0	0	0	0	0	603	903	0
602	6	0	0	0	0	0	0	200	300	0	0	0	0	0	0	0	200	903	0	0	0	0	0	0	0	603	903	0
602	7	0	0	0	0	0	0	200	300	0	0	0	0	0	0	0	200	903	0	0	0	0	0	0	0	603	903	0
602	8	0	0	0	0	0	0	200	300	0	0	0	0	0	0	0	200	903	0	0	0	0	0	0	0	603	903	0
602	9	0	0	0	0	0	0	200	300	0	0	0	0	0	0	0	200	903	0	0	0	0	0	0	0	603	903	0
603	0	0	0	0	0	0	0	200	300	0	0	0	0	0	0	0	200	903	0	0	0	0	0	0	0	603	903	0
603	1	0	0	0	0	0	0	200	300	0	0	0	0	0	0	0	200	903	0	0	0	0	0	0	0	603	903	0
603	2	0	0	0	0	0	0	200	300	0	0	0	0	0	0	0	200	903	0	0	0	0	0	0	0	603	903	0
603	3	0	0	0	0	0	0	200	300	0	0	0	0	0	0	0	200	903	0	0	0	0	0	0	0	603	903	0
603	4	0	0	0	0	0	0	200	300	0	0	0	0	0	0	0	200	903	0	0	0	0	0	0	0	603	903	0
603	5	0	0	0	0	0	0	200	300	0	0	0	0	0	0	0	200	903	0	0	0	0	0	0	0	603	903	0
603	6	0	0	0	0	0	0	200	300	0	0	0	0	0	0	0	200	903	0	0	0	0	0	0	0	603	903	0
603	7	0	0	0	0	0	0	200	300	0	0	0	0	0	0	0	200	903	0	0	0	0	0	0	0	603	903	0
603	8	0	0	0	0	0	0	200	300	0	0	0	0	0	0	0	200	903	0	0	0	0	0	0	0	603	903	0
603	9	0	0	0	0	0	0	200	300	0	0	0	0	0	0	0	200	903	0	0	0	0	0	0	0	603	903	0
604	0	0	0	0	0	0	0	200	300	0	0	0	0	0	0	0	200	903	0	0	0	0	0	0	0	603	903	0
604	1	0	0	0	0	0	0	200	300	0	0	0	0	0	0	0	200	903	0	0	0	0	0	0	0	603	903	0
604	2	0	0	0	0	0	0	200	300	0	0	0	0	0	0	0	200	903	0	0	0	0	0	0	0	603	903	0
604	3	0	0	0	0	0	0	200	300	0	0	0	0	0	0	0	200	903	0	0	0	0	0	0	0	603	903	0
604	4	0	0	0	0	0	0	200	300	0	0	0	0	0	0	0	200	903	0	0	0	0	0	0	0	603	903	0
604	5	0	0	0	0	0	0	200	300	0	0	0	0	0	0	0	200	903	0	0	0	0	0	0	0	603	903	0
604	6	0	0	0	0	0	0	200	300	0	0	0	0	0	0	0	200	903	0	0	0	0	0	0	0	603	903	0
604	7	0	0	0	0	0	0	200	300	0	0	0	0	0	0	0	200	903	0	0	0	0	0	0	0	603	903	0
604	8	0	0	0	0	0	0	200	300	0	0	0	0	0	0	0	200	903	0	0	0	0	0	0	0	603	903	0
604	9	0	0	0	0	0	0	200	300	0	0	0	0	0	0	0	200	903	0	0	0	0	0	0	0	603	903	0
605	0	0	0	0	0	0	0	200	300	0	0	0	0	0	0	0	200	903	0	0	0	0	0	0	0	603	903	0
605	1	0	0	0	0	0	0	200	300	0	0	0	0	0	0	0	200	903	0	0	0	0	0	0	0	603	903	0
605	2	0	0	0	0	0	0	200	300	0	0	0	0	0	0	0	200	903	0	0	0	0	0	0	0	603	903	0
605	3	0	0	0	0	0	0	200	300	0	0	0	0	0	0	0	200	903	0	0	0	0	0	0	0	603	903	0
605	4	0	0	0	0	0	0	200	300	0	0	0	0	0	0	0	200	903	0	0	0	0	0	0	0	603	903	0
605	5	0	0	0	0	0	0	200	300	0	0	0	0	0	0	0	200	903	0	0	0	0	0	0	0	603	903	0
605	6	0	0	0	0	0	0	200	300	0	0	0	0	0	0	0	200	903	0	0	0	0	0	0	0	603	903	0
605	7	0	0	0	0	0	0	200	300	0	0	0	0	0	0	0	200	903	0	0	0	0	0	0	0	603	903	0
605	8	0	0	0	0	0	0	200	300	0	0	0	0	0	0	0	200	903	0	0	0	0	0	0	0	603	903	0
605	9	0	0	0	0	0	0	200	300	0	0	0	0	0	0	0	200	903	0	0	0	0	0	0	0	603	903	0
606	0	0	0	0	0	0	0	200	300	0	0	0	0	0	0	0	200	903	0	0	0	0	0	0	0	603	903	0
606	1	0	0	0	0	0	0	200	300	0	0	0	0	0	0	0	200	903	0	0	0	0	0	0	0	603	903	0
606	2	0	0	0	0	0	0	200	300	0	0	0	0	0	0	0	200	903	0	0	0	0	0	0	0	603	903	0
606	3	0	0	0	0	0	0	200	300	0	0	0	0	0	0	0	200	903	0	0	0	0	0	0	0	603	903	0
606	4	0	0	0	0	0	0	200	300	0	0	0	0	0	0	0	200	903	0	0	0	0	0	0	0	603	903	0
606	5	0	0	0	0	0	0	200	300	0	0	0	0	0	0	0	200	903	0	0	0	0	0	0	0	603	903	0
606	6	0	0	0	0	0	0	200	300	0	0	0	0	0	0	0	200	903	0	0	0	0	0	0	0	603	903	0
606	7	0	0	0	0	0	0	200	300	0	0	0	0	0	0	0	200	903	0	0	0	0	0	0	0	603	903	0
606	8	0	0	0	0	0	0	200	300	0	0	0	0	0	0	0	200	903	0	0	0	0	0	0	0	603	903	0
606	9	0	0	0	0	0	0	200	300	0	0	0	0	0	0	0	200	903	0	0	0	0	0	0	0	603	903	0
607	0	0	0	0	0	0	0	200	300	0	0	0	0	0	0	0	200	903	0	0	0	0	0	0	0	603	903	0
607	1	0	0	0	0	0	0	200	300	0	0	0	0	0	0	0	200	903	0	0	0	0	0	0	0	603	903	0
607	2	0	0	0	0	0	0	200	300	0	0	0	0	0	0	0	200	903	0	0	0	0	0	0	0	603	903	0
607	3	0	0	0	0	0	0	200	300	0	0	0	0	0	0	0	200	903	0	0	0	0	0	0	0	603	903	0
607	4	0	0	0	0	0	0	200	300	0	0	0	0	0	0	0	200	903	0	0	0	0	0	0	0	603	903	0
607	5	0	0	0	0	0	0	200	300	0	0	0	0	0	0	0	200	903	0	0	0	0	0	0	0	603	903	0
607	6	0	0	0	0	0	0	200	300	0	0	0	0	0	0	0	200	903	0	0	0	0	0	0	0	603	903	0
607	7	0	0	0	0	0	0	200	300	0	0	0	0	0	0	0	200	903	0	0	0	0	0	0	0	603	903	0
607	8	0	0	0	0	0	0	200	300	0	0	0	0	0	0	0	200	903	0	0	0	0	0	0	0	603	903	0
607	9	0	0	0	0	0	0	200	300	0	0	0	0	0	0	0	200	903	0	0	0	0	0	0	0	603	903	0
608	0	0	0	0	0	0	0	200	300	0	0	0	0	0	0	0	200	903	0	0	0	0	0	0	0	603	903	0
608	1	0	0	0	0	0	0	200	300	0	0	0	0	0	0	0	200	903	0	0	0	0	0	0	0	603	903	0
608	2	0	0	0	0	0	0	200	300	0	0	0	0	0	0	0	200	903	0	0	0	0	0	0	0	603	903	0
608	3	0	0	0	0	0	0	200	300	0	0	0	0	0	0	0	200	903	0	0	0	0	0	0	0	603	903	0
608	4	0	0	0	0	0	0	200	300	0	0	0	0	0	0	0	200	903	0	0	0	0	0	0	0	603	903	0
608	5	0	0	0	0	0	0	200	300	0	0	0	0	0	0	0	200	903	0	0	0	0	0	0	0	603	903	0
608	6	0	0	0	0	0	0	200	300	0	0	0	0	0	0	0	200	903	0	0	0	0	0	0	0	603	903	0
608	7	0	0	0	0	0	0	200	300	0	0	0	0	0	0	0	200	903	0	0	0	0	0	0	0	603	903	0
608	8	0	0	0	0	0	0	200	300	0	0	0	0	0	0	0	200	903	0	0	0	0	0	0	0	603	903	0
608	9	0	0	0	0	0	0	200	300	0	0	0	0	0	0	0	200	903	0	0	0	0	0	0	0	603	903	0
609	0	0	0	0	0	0	0	200	300	0	0	0	0	0	0	0	200	903	0	0	0	0	0	0	0	603	903	0
609	1	0	0	0	0	0	0	200	300	0	0	0	0	0	0	0	200	903	0	0	0	0	0	0	0	603	903	0
609	2	0	0	0	0	0	0	200	300	0	0	0	0	0	0	0	200	903	0	0	0	0	0	0	0	603	903	0
609	3	0	0	0	0	0	0	200	300	0	0	0	0	0	0	0	200	903	0	0	0	0	0	0	0	603	903	0
609	4	0	0	0	0	0	0	200	300	0	0	0	0	0	0	0	200	903	0	0	0	0	0	0	0	603	903	0
609	5	0	0	0	0	0	0	200	300	0	0	0	0	0	0	0	200	903	0	0	0	0	0	0	0	603	903	0
609	6	0	0	0	0	0	0	200	300	0	0	0	0	0	0	0	200	903	0	0	0	0	0	0	0	603	903	0
609	7	0	0	0	0	0	0	200	300	0	0	0	0	0	0	0	200	903	0	0	0	0	0	0	0	603	903	0
609	8	0	0	0	0	0	0	200	300	0	0	0	0	0	0	0	200	903	0	0	0	0	0	0	0	603	903	0
609	9	0	0	0	0	0	0	200	300	0	0	0	0	0	0	0	200	903	0	0	0	0	0	0	0	603	903	0
610	0	0	0	0	0	0	0	200	300	0	0	0	0	0	0	0	200	903	0	0	0	0	0	0	0	603	903	0
610	1	0	0	0	0	0	0	200	300	0	0	0	0	0	0	0	200	903	0	0	0	0	0	0	0	603	903	0
610	2	0	0	0	0	0	0	200	300	0	0	0	0	0	0	0	200	903	0	0	0	0	0	0	0	603	903	0
610	3	0	0	0	0	0	0	200	300	0	0	0	0	0	0	0	200	903	0	0	0	0	0	0	0	603	903	0
610	4	0	0	0	0	0	0	200	300	0	0	0	0	0	0	0	200	903	0	0	0	0	0	0	0	603	903	0
610	5	0	0	0	0	0	0	200	300	0	0	0	0	0	0	0	200	903	0	0	0	0	0	0	0	603	903	0
610	6	0	0	0	0	0	0	200	300	0	0	0	0	0	0	0	200	903	0	0	0	0	0	0	0	603	903	0
610	7	0	0	0	0	0	0	200	300	0	0	0	0	0	0	0	200	903	0	0	0	0	0	0	0	603	903	0
610	8	0	0	0	0	0	0	200	300	0	0	0	0	0	0	0	200	903	0	0	0	0	0	0	0	603	903	0
610	9	0	0	0	0	0	0	200	300	0	0	0	0	0	0	0	200	903	0	0	0	0	0	0	0	603	903	0
611	0	0	0	0	0	0	0	200	300	0	0	0	0	0	0	0	200	903	0	0	0	0	0	0	0	603	903	0
611	1	0	0	0	0	0	0	200	300	0	0	0	0	0	0	0	200	903	0	0	0	0	0	0	0	603	903	0
611	2	0	0	0	0	0	0	200	300	0	0	0	0	0	0	0	200	903	0	0	0	0	0	0	0	603	903	0
611	3	0	0	0	0	0	0	200	300	0	0	0	0	0	0	0	200	903	0	0	0	0	0	0	0	603	903	0
611	4	0	0	0	0	0	0	200	300	0	0	0	0	0	0	0	200	903	0	0	0	0	0	0	0	603	903	0
611	5	0	0	0	0	0	0	200	300	0	0	0	0	0	0	0	200	903	0	0	0	0	0	0	0	603	903	0
611	6	0	0	0	0	0	0	200	300	0	0	0	0	0	0	0	200	903	0	0	0	0	0	0	0	603	903	0
611	7	0	0	0	0	0	0	200	300	0	0	0	0	0	0	0	200	903	0	0	0	0	0	0	0	603	903	0
611	8	0	0	0	0	0	0	200	300	0	0	0	0	0	0	0	200	903	0	0	0	0	0	0	0	603	903	0
611	9	0	0	0	0	0	0	200	300	0	0	0	0	0	0	0	200	903	0	0	0	0	0	0	0	603	903	0
612	0	0	0	0	0	0	0	200	300	0	0	0	0	0	0	0	200	903	0	0	0	0	0	0	0	603	903	0
612	1	0	0	0	0	0	0	200	300	0	0	0	0	0	0	0	200	903	0	0	0	0	0	0	0	603	903	0
612	2	0	0	0	0	0	0	200	300	0	0	0	0	0	0	0	200	903	0	0	0	0	0	0	0	603	903	0
612	3	0	0	0	0	0	0	200	300	0	0	0	0	0	0	0	200	903	0	0	0	0	0	0	0	603	903	0
612	4	0	0	0	0	0	0	200	300	0	0	0	0	0	0	0	200	903	0	0	0	0	0	0	0	603	903	0
612	5	0	0	0	0	0	0	200	300	0	0	0	0	0	0	0	200	903	0	0	0	0	0	0	0	603	903	0
612	6	0	0	0	0	0	0	200	300	0	0	0	0	0	0	0	200	903	0	0	0	0	0	0	0	603	903	0
612	7	0	0	0	0	0	0	200	300	0	0	0	0	0	0	0	200	903	0	0	0	0	0	0	0	603	903	0
612	8	0	0	0	0	0	0	200	300	0	0	0	0	0	0	0	200	903	0	0	0	0	0	0	0	603	903	0
612	9	0	0	0	0	0	0	200	300	0	0	0	0	0	0	0	200	903	0	0	0	0	0	0	0	603	903	0
613	0	0	0	0	0	0	0	200	300	0	0	0	0	0	0	0	200	903	0	0	0	0	0	0	0	603	903	0
613	1	0	0	0	0	0	0	200	300	0	0	0	0	0	0	0	200	903	0	0	0	0	0	0	0	603	903	0
613	2	0	0	0	0	0	0	200	300	0	0	0	0	0	0	0	200	903	0	0	0	0	0	0	0	603	903	0
613	3	0	0	0	0	0	0	200	300	0	0	0	0	0	0	0	200	903	0	0	0	0	0	0	0	603	903	0
613	4	0	0	0	0	0	0	200	300	0	0	0	0	0	0	0	200	903	0	0	0	0	0	0	0	603	903	0
613	5	0	0	0	0	0	0	200	300	0	0	0	0	0	0	0	200	903	0	0	0	0	0	0	0	603	903	0
613	6	0	0	0	0	0	0	200	300	0	0	0	0	0	0	0	200	903	0	0	0	0	0	0	0	603	903	0
613	7	0	0	0	0	0	0	200	300	0	0	0	0	0	0	0	200	903	0	0	0	0	0	0	0	603	903	0
613	8	0	0	0	0	0	0	200	300	0	0	0	0	0	0	0	200	903	0	0	0	0	0	0	0	603	903	0
613	9	0	0	0	0	0	0	200	300	0	0	0	0	0	0	0	200	903	0	0	0	0	0	0	0	603	903	0
614	0	0	0	0	0	0	0	200	300	0	0	0	0	0	0	0	200	903	0	0	0	0	0	0	0	603	903	0
614	1	0	0	0	0	0	0	200	300	0	0	0	0	0	0	0	200	903	0	0	0	0	0	0	0	603	903	0
614	2	0	0	0	0	0	0	200	300	0	0	0	0	0	0	0	200	903	0	0	0	0	0	0	0	603	903	0
614	3	0	0	0	0	0	0	200	300	0	0	0	0	0	0	0	200	903	0	0	0	0	0	0	0	603	903	0
614	4	0	0	0	0	0	0	200	300	0	0	0	0	0	0	0	200	903	0	0	0	0	0	0	0	603	903	0
614	5	0	0	0	0	0	0	200	300	0	0	0	0	0	0	0	200	903	0	0	0	0	0	0	0	603	903	0
614	6	0	0	0	0	0	0	200	300	0	0	0	0	0	0	0	200	903	0	0	0	0	0	0	0	603	903	0
614	7	0	0	0	0	0	0	200	300	0	0	0	0	0	0	0	200	903	0	0	0	0	0	0	0	603	903	0
614	8	0	0	0	0	0	0	200	300	0	0	0	0	0	0	0	200	903	0	0	0	0	0	0	0	603	903	0
614	9	0	0	0	0	0	0	200	300	0	0	0	0	0	0	0	200	903	0	0	0	0	0	0	0	603	903	0
615	0	0	0	0	0	0	0	200	300	0	0	0	0	0	0	0	200	903	0	0	0	0	0	0	0	603	903	0
615	1	0	0	0	0	0	0	200	300	0	0	0	0	0	0	0	200	903	0	0	0	0	0	0	0	603	903	0
615	2	0	0	0	0	0	0	200	300	0	0	0	0	0	0	0	200	903	0	0	0	0	0	0	0	603	903	0
615	3	0	0	0	0	0	0	200	300	0	0	0	0	0	0	0	200	903	0	0	0	0	0	0	0	603	903	0
615	4	0	0	0	0	0	0	200	300	0	0	0	0	0	0	0	200	903	0	0	0	0	0	0	0	603	903	0
615	5	0	0	0	0	0	0	200	300	0	0	0	0	0	0	0	200	903	0	0	0	0	0	0	0	603	903	0
615	6	0	0	0	0	0	0	200	300	0	0	0	0	0	0	0	200	903	0	0	0	0	0	0	0	603	903	0
615	7	0	0	0	0	0	0	200	300	0	0	0	0	0	0	0	200	903	0	0	0	0	0	0	0	603	903	0
615	8	0	0	0	0	0	0	200	300	0	0	0	0	0	0	0	200	903	0	0	0	0	0	0	0	603	903	0
615	9	0	0	0	0	0	0	200	300	0	0	0	0	0	0	0	200	903	0	0	0	0	0	0	0	603	903	0
616	0	0	0	0	0	0	0	200	300	0	0	0	0	0	0	0	200	903	0	0	0	0	0	0	0	603	903	0
616	1	0	0	0	0	0	0	200	300	0	0	0	0	0	0	0	200	903	0	0	0	0	0	0	0	603	903	0
616	2	0	0	0	0	0	0	200	300	0	0	0	0	0	0	0	200	903	0	0	0	0	0	0	0	603	903	0
616	3	0	0	0	0	0	0	200	300	0	0	0	0	0	0	0	200	903	0	0	0	0	0	0	0	603	903	0
616	4	0	0	0	0	0	0	200	300	0	0	0	0	0	0	0	200	903	0	0	0	0	0	0	0	603	903	0
616	5	0	0	0	0	0	0	200	300	0	0	0	0	0	0	0	200	903	0	0	0	0	0	0	0	603	903	0
616	6	0	0	0	0	0	0	200	300	0	0	0	0	0	0	0	200	903	0	0	0	0	0	0	0	603	903	0
616	7	0	0	0	0	0	0	200	300	0	0	0	0	0	0	0	200	903	0	0	0	0	0	0	0	603	903	0
616	8	0	0	0	0	0	0	200	300	0	0	0	0	0	0	0	200	903	0	0	0	0	0	0	0	603	903	0
616	9	0	0	0	0	0	0	200	300	0	0	0	0	0	0	0	200	903	0	0	0	0	0	0	0	603	903	0
617	0	0	0	0	0	0	0	200	300	0	0	0	0	0	0	0	200	903	0	0	0	0	0	0	0	603	903	0
617	1	0	0	0	0	0	0	200	300	0	0	0	0	0	0	0	200	903	0	0	0	0	0	0	0	603	903	0
617	2	0	0	0	0	0	0	200	300	0	0	0	0	0	0	0	200	903	0	0	0	0	0	0	0	603	903	0
617	3	0	0	0	0	0	0	200	300	0	0	0	0	0	0	0	200	903	0	0	0	0	0	0	0	603	903	0
617	4	0	0	0	0	0	0	200	300	0	0	0	0	0	0	0	200	903	0	0	0	0	0	0	0	603	903	0
617	5	0	0	0	0	0	0	200	300	0	0	0	0	0	0	0	200	903	0	0	0	0	0	0	0	603	903	0
617	6	0	0	0	0	0	0	200	300	0	0	0	0	0	0	0	200	903	0	0	0	0	0	0	0	603	903	0
617	7	0	0	0	0	0	0	200	300	0	0	0	0	0	0	0	200	903	0	0	0	0	0	0	0	603	903	0
617	8	0	0	0	0	0	0	200	300	0	0	0	0	0	0	0	200	903	0	0	0	0	0	0	0	603	903	0
617	9	0	0	0	0	0	0	200	300	0	0	0	0	0	0	0	200	903	0	0	0	0	0	0	0	603	903	0
618	0	0	0	0	0	0	0	200	300	0	0	0	0	0	0	0	200	903	0	0	0	0	0	0	0	603	903	0
618	1	0	0	0	0	0	0	200	300	0	0	0	0	0	0	0	200	903	0	0	0	0	0	0	0	603	903	0
618	2	0	0	0	0	0	0	200	300	0	0	0	0	0	0	0	200	903	0	0	0	0	0	0	0	603	903	0
618	3	0	0	0	0	0	0	200	300	0	0	0	0	0	0	0	200	903	0	0	0	0	0	0	0	603	903	0
618	4	0	0	0	0	0	0	200	300	0	0	0	0	0	0	0	200	903	0	0	0	0	0	0	0	603	903	0
618	5	0	0	0	0	0	0	200	300	0	0	0	0	0	0	0	200	903	0	0	0	0	0	0	0	603	903	0
618	6	0	0	0	0	0	0	200	300	0	0	0	0	0	0	0	200	903	0	0	0	0	0	0	0	603	903	0
618	7	0	0	0	0	0	0	200	300	0	0	0	0	0	0	0	200	903	0	0	0	0	0	0	0	603	903	0
618	8	0	0	0	0	0	0	200	300	0	0	0	0	0	0	0	200	903	0	0	0	0	0	0	0	603	903	0
618	9	0	0	0	0	0	0	200	300	0	0	0	0	0	0	0	200	903	0	0	0	0	0	0	0	603	903	0
619	0	0	0	0	0	0	0	200	300	0	0	0	0	0	0	0	200	903	0	0	0	0	0	0	0	603	903	0
619	1	0	0	0	0	0	0	200	300	0	0	0	0	0	0	0	200	903	0	0	0	0	0	0	0	603	903	0
619	2	0	0	0	0	0	0	200	300	0	0	0	0	0	0	0	200	903	0	0	0	0	0	0	0	603	903	0
619	3	0	0	0	0	0	0	200	300	0	0	0	0	0	0	0	200	903	0	0	0	0	0	0	0	603	903	0
619	4	0	0	0	0	0	0	200	300	0	0	0	0	0	0	0	200	903	0	0	0	0	0	0	0	603	903	0
619	5	0	0	0	0	0	0	200	300	0	0	0	0	0	0	0	200	903	0	0	0	0	0	0	0	603	903	0
619	6	0	0	0	0	0	0	200	300	0	0	0	0	0	0	0	200	903	0	0	0	0	0	0	0	603	903	0
619	7	0	0	0	0	0	0	200	300	0	0	0	0	0	0	0	200	903	0	0	0	0	0	0	0	603	903	0
619	8	0	0	0	0	0	0	200	300	0	0	0	0	0	0	0	200	903	0	0	0	0	0	0	0	603	903	0
619	9	0	0	0	0	0	0	200	300	0	0	0	0	0	0	0	200	903	0	0	0	0	0	0	0	603	903	0
620	0	0	0	0	0	0	0	200	300	0	0	0	0	0	0	0	200	903	0	0	0	0	0	0	0	603	903	0
620	1	0	0	0	0	0	0	200	300	0	0	0	0	0	0	0	200	903	0	0	0	0	0	0	0	603	903	0
620	2	0	0	0	0	0	0	200	300	0	0	0	0	0	0	0	200	903	0	0	0	0	0	0	0	603	903	0
620	3	0	0	0	0	0	0	200	300	0	0	0	0	0	0	0	200	903	0	0	0	0	0	0	0	603	903	0
620	4	0	0	0	0	0	0	200	300	0	0	0	0	0	0	0	200	903	0	0	0	0	0	0	0	603	903	0
620	5	0	0	0	0	0	0	200	300	0	0	0	0	0	0	0	200	903	0	0	0	0	0	0	0	603	903	0
620	6	0	0	0	0	0	0	200	300	0	0	0	0	0	0	0	200	903	0	0	0	0	0	0	0	603	903	0
620	7	0	0	0	0	0	0	200	300	0	0	0	0	0	0	0	200	903	0	0	0	0	0	0	0	603	903	0
620	8	0	0	0	0	0	0	200	300	0	0	0	0	0	0	0	200	903	0	0	0	0	0	0	0	603	903	0
620	9	0	0	0	0	0	0	200	300	0	0	0	0	0	0	0	200	903	0	0	0	0	0	0	0	603	903	0
621	0	0	0	0	0	0	0	200	300	0	0	0	0	0	0	0	200	903	0	0	0	0	0	0	0	603	903	0
621	1	0	0	0	0	0	0	200	300	0	0	0	0	0	0	0	200	903	0	0	0	0	0	0	0	603	903	0
621	2	0	0	0	0	0	0	200	300	0	0	0	0	0	0	0	200	903	0	0	0	0	0	0	0	603	903	0
621	3	0	0	0	0	0	0	200	300	0	0	0	0	0	0	0	200	903	0	0	0	0	0	0	0	603	903	0
621	4	0	0	0	0	0	0	200	300	0	0	0	0	0	0	0	200	903	0	0	0	0	0	0	0	603	903	0
621	5	0	0	0	0	0	0	200	300	0	0	0	0	0	0	0	200	903	0	0	0	0	0	0	0	603	903	0
621	6	0	0	0	0	0	0	200	300	0	0	0	0	0	0	0	200	903	0	0	0	0	0	0	0	603	903	0
621	7	0	0	0	0	0	0	200	300	0	0	0	0	0	0	0	200	903	0	0	0	0	0	0	0	603	903	0
621	8	0	0	0	0	0	0	200	300	0	0	0	0	0	0	0	200	903	0	0	0	0	0	0	0	603	903	0
621	9	0	0	0	0	0	0	200	300	0	0	0	0	0	0	0	200	903	0	0	0	0	0	0	0	603	903	0
622	0	0	0	0	0	0	0	200	300	0	0	0	0	0	0	0	200	903	0	0	0	0	0	0	0	603	903	0
622	1	0	0	0	0	0	0	200	300	0	0	0	0	0	0	0	200	903	0	0	0	0	0	0	0	603	903	0
622	2	0	0	0	0	0	0	200	300	0	0	0	0	0	0	0	200	903	0	0	0	0	0	0	0	603	903	0
622	3	0	0	0	0	0	0	200	300	0	0	0	0	0	0	0	200	903	0	0	0	0	0	0	0	603	903	0
622	4	0	0	0	0	0	0	200	300	0	0	0	0	0	0	0	200	903	0	0	0	0	0	0	0	603	903	0
622	5	0	0	0	0	0	0	200	300	0	0	0	0	0	0	0	200	903	0	0	0	0	0	0	0	603	903	0
622	6	0	0	0	0	0	0	200	300	0	0	0	0	0	0	0	200	903	0	0	0	0	0	0	0	603	903	0
622	7	0	0	0	0	0	0	200	300	0	0	0	0	0	0	0	200	903	0	0	0	0	0	0	0	603	903	0
622	8	0	0	0	0	0	0	200	300	0	0	0	0	0	0	0	200	903	0	0	0	0	0	0	0	603	903	0
622	9	0	0	0	0	0	0	200	300	0	0	0	0	0	0	0	200	903	0	0	0	0	0	0	0	603	903	0
623	0	0	0	0	0	0	0	200	300	0	0	0	0	0	0	0	200	903	0	0	0	0	0	0	0	603	903	0
623	1	0	0	0	0	0	0	200	300	0	0	0	0	0	0	0	200	903	0	0	0	0	0	0	0	603	903	0
623	2	0	0	0	0	0	0	200	300	0	0	0	0	0	0	0	200	903	0	0	0	0	0	0	0	603	903	0
623	3	0	0	0	0	0	0	200	300	0	0	0	0	0	0	0	200	903	0	0	0	0	0	0	0	603	903	0
623	4	0	0	0	0	0	0	200	300	0	0	0	0	0	0	0	200	903	0	0	0	0	0	0	0	603	903	0
623	5	0	0	0	0	0	0	200	300	0	0	0	0	0	0	0	200	903	0	0	0	0	0	0	0	603	903	0
623	6	0	0	0	0	0	0	200	300	0	0	0	0	0	0	0	200	903	0	0	0	0	0	0	0	603	903	0
623	7	0	0	0	0	0	0	200	300	0	0	0	0	0	0	0	200	903	0	0	0	0	0	0	0	603	903	0
623	8	0	0	0	0	0	0	200	300	0	0	0	0	0	0	0	200	903	0	0	0	0	0	0	0	603	903	0
623	9	0	0	0	0	0	0	200	300	0	0	0	0	0	0	0	200	903	0	0	0	0	0	0	0	603	903	0
624	0	0	0	0	0	0	0	200	300	0	0	0	0	0	0	0	200	903	0	0	0	0	0	0	0	603	903	0
624	1	0	0	0	0	0	0	200	300	0	0	0	0	0	0	0	200	903	0	0	0	0	0	0	0	603	903	0
624	2	0	0	0	0	0	0	200	300	0	0	0	0	0	0	0	200	903	0	0	0	0	0	0	0	603	903	0
624	3	0	0	0	0	0	0	200	300	0	0	0	0	0	0	0	200	903	0	0	0	0	0	0	0	603	903	0
624	4	0	0	0	0	0	0	200	300	0	0	0	0	0	0	0	200	903	0	0	0	0	0	0	0	603	903	0
624	5	0	0	0	0	0	0	200	300	0	0	0	0	0	0	0	200	903	0	0	0	0	0	0	0	603	903	0
624	6	0	0	0	0	0	0	200	300	0	0	0	0	0	0	0	200	903	0	0	0	0	0	0	0	603	903	0
624	7	0	0	0	0	0	0	200	300	0	0	0	0	0	0	0	200	903	0	0	0	0	0	0	0	603	903	0
624	8	0	0	0	0	0	0	200	300	0	0	0	0	0	0	0	200	903	0	0	0	0	0	0	0	603	903	0
624	9	0	0	0	0	0	0	200	300	0	0	0	0	0	0	0	200	903	0	0	0	0	0	0	0	603	903	0
625	0	0	0	0	0	0	0	200	300	0	0	0	0	0	0	0	200	903	0	0	0	0	0	0	0	603	903	0
625	1	0	0	0	0	0	0	200	300	0	0	0	0	0	0	0	200	903	0	0	0	0	0	0	0	603	903	0
625	2	0	0	0	0	0	0	200	300	0	0	0	0	0	0	0	200	903	0	0	0	0	0	0	0	603	903	0
625	3	0	0	0	0	0	0	200	300	0	0	0	0	0	0	0	200	903	0	0	0	0	0	0	0	603	903	0
625	4	0	0	0	0	0	0	200	300	0	0	0	0	0	0	0	200	903	0	0	0	0	0	0	0	603	903	0
625	5	0	0	0	0	0	0	200	300	0	0	0	0	0	0	0	200	903	0	0	0	0	0	0	0	603	903	0
625	6	0	0	0	0	0	0	200	300	0	0	0	0	0	0	0	200	903	0	0	0	0	0	0	0	603	903	0
625	7	0	0	0	0	0	0	200	300	0	0	0	0	0	0	0	200	903	0	0	0	0	0	0	0	603	903	0
625	8	0	0	0	0	0	0	200	300	0	0	0	0	0	0	0	200	903	0	0	0	0	0	0	0	603	903	0
625	9	0	0	0	0	0	0	200	300	0	0	0	0	0	0	0	200	903	0	0	0	0	0	0	0	603	903	0
626	0	0	0	0	0	0	0	200	300	0	0	0	0	0	0	0	200	903	0	0	0	0	0	0	0	603	903	0
626	1	0	0	0	0	0	0	200	300	0	0	0	0	0	0	0	200	903	0	0	0	0	0	0	0	603	903	0
626	2	0	0	0	0	0	0	200	300	0	0	0	0	0	0	0	200	903	0	0	0	0	0	0	0	603	903	0
626	3	0	0	0	0	0	0	200	300	0	0	0	0	0	0	0	200	903	0	0	0	0	0	0	0	603	903	0
626	4	0	0	0	0	0	0	200	300	0	0	0	0	0	0	0	200	903	0	0	0	0	0	0	0	603	903	0
626	5	0	0	0	0	0	0	200	300	0	0	0	0	0	0	0	200	903	0	0	0	0	0	0	0	603	903	0
626	6	0	0	0	0	0	0	200	300	0	0	0	0	0	0	0	200	903	0	0	0	0	0	0	0	603	903	0
626	7	0	0	0	0	0	0	200	300	0	0	0	0	0	0	0	200	903	0	0	0	0	0	0	0	603	903	0
626	8	0	0	0	0	0	0	200	300	0	0	0	0	0	0	0	200	903	0	0	0	0	0	0	0	603	903	0
626	9	0	0	0	0	0	0	200	300	0	0	0	0	0	0	0	200	903	0	0	0	0	0	0	0	603	903	0
627	0	0	0	0	0	0	0	200	300	0	0	0	0	0	0	0	200	903	0	0	0	0	0	0	0	603	903	0
627	1	0	0	0	0	0	0	200	300	0	0	0	0	0	0	0	200	903	0	0	0	0	0	0	0	603	903	0
627	2	0	0	0	0	0	0	200	300	0	0	0	0	0	0	0	200	903	0	0	0	0	0	0	0	603	903	0
627	3	0	0	0	0	0	0	200	300	0	0	0	0	0	0	0	200	903	0	0	0	0	0	0	0	603	903	0
627	4	0	0	0	0	0	0	200	300	0	0	0	0	0	0	0	200	903	0	0	0	0	0	0	0	603	903	0
627	5	0	0	0	0	0	0	200	300	0	0	0	0	0	0	0	200	903	0	0	0	0	0	0	0	603	903	0
627	6	0	0	0	0	0	0	200	300	0	0	0	0	0	0	0	200	903	0	0	0	0	0	0	0	603	903	0
627	7	0	0	0	0	0	0	200	300	0	0	0	0	0	0	0	200	903	0	0	0	0	0	0	0	603	903	0
627	8	0	0	0	0	0	0	200	300	0	0	0	0	0	0	0	200	903	0	0	0	0	0	0	0	603	903	0
627	9	0	0	0	0	0	0	200	300	0	0	0	0	0	0	0	200	903	0	0	0	0	0	0	0	603	903	0
628	0	0	0	0	0	0	0	200	300	0	0	0	0	0	0	0	200	903	0	0	0	0	0	0	0	603	903	0
628	1	0	0	0	0	0	0	200	300	0	0	0	0	0	0	0	200	903	0	0	0	0	0	0	0	603	903	0
628	2	0	0	0	0	0	0	200	300	0	0	0	0	0	0	0	200	903	0	0	0	0	0	0	0	603	903	0
628	3	0	0	0	0	0	0	200	300	0	0	0	0	0	0	0	200	903	0	0	0	0	0	0	0	603	903	0
628	4	0	0	0	0	0	0	200	300	0	0	0	0	0	0	0	200	903	0	0	0	0	0	0	0	603	903	0
628	5	0	0	0	0	0	0	200	300	0	0	0	0	0	0	0	200	903	0	0	0	0	0	0	0	603	903	0
628	6	0	0	0	0	0	0	200	300	0	0	0	0	0	0	0	200	903	0	0	0	0	0	0	0	603	903	0
628	7	0	0	0	0	0	0	200	300	0	0	0	0	0	0	0	200	903	0	0	0	0	0	0	0	603	903	0
628	8	0	0	0	0	0	0	200	300	0	0	0	0	0	0	0	200	903	0	0	0	0	0	0	0	603	903	0
628	9	0	0	0	0	0	0	200	300	0	0	0	0	0	0	0	200	903	0	0	0	0	0	0	0	603	903	0
629	0	0	0	0	0	0	0	200	300	0	0	0	0	0	0	0	200	903	0	0	0	0	0	0	0	603	903	0
629	1	0	0	0	0	0	0	200	300	0	0	0	0	0	0	0	200	903	0	0	0	0	0	0	0	603	903	0
629	2	0	0	0	0	0	0	200	300	0	0	0	0	0	0	0	200	903	0	0	0	0	0	0	0	603	903	0
629	3	0	0	0	0	0	0	200	300	0	0	0	0	0	0	0	200	903	0	0	0	0	0	0	0	603	903	0
629	4	0	0	0	0	0	0	200	300	0	0	0	0	0	0	0	200	903	0	0	0	0	0	0	0	603	903	0
629	5	0	0	0	0	0	0	200	300	0	0	0	0	0	0	0	200	903	0	0	0	0	0	0	0	603	903	0
629	6	0	0	0	0	0	0	200	300	0	0	0	0	0	0	0	200	903	0	0	0	0	0	0	0	603	903	0
629	7	0	0	0	0	0	0	200	300	0	0	0	0	0	0	0	200	903	0	0	0	0	0	0	0	603	903	0
629	8	0	0	0	0	0	0	200	300	0	0	0	0	0	0	0	200	903	0	0	0	0	0	0	0	603	903	0
629	9	0	0	0	0	0	0	200	300	0	0	0	0	0	0	0	200	903	0	0	0	0	0	0	0	603	903	0
630	0	0	0	0	0	0	0	200	300	0	0	0	0	0	0	0	200	903	0	0	0	0	0	0	0	603	903	0
630	1	0	0	0	0	0	0	200	300	0	0	0	0	0	0	0	200	903	0	0	0	0	0	0	0	603	903	0
630	2	0	0	0	0	0	0	200	300	0	0	0	0	0	0	0	200	903	0	0	0	0	0	0	0	603	903	0
630	3	0	0	0	0	0	0	200	300	0	0	0	0	0	0	0	200	903	0	0	0	0	0	0	0	603	903	0
630	4	0	0	0	0	0	0	200	300	0	0	0	0	0	0	0	200	903	0	0	0	0	0	0	0	603	903	0
630	5	0	0	0	0	0	0	200	300	0	0	0	0	0	0	0	200	903	0	0	0	0	0	0	0	603	903	0
630	6	0	0	0	0	0	0	200	300	0	0	0	0	0	0	0	200	903	0	0	0	0	0	0	0	603	903	0
630	7	0	0	0	0	0	0	200	300	0	0	0	0	0	0	0	200	903	0	0	0	0	0	0	0	603	903	0
630	8	0	0	0	0	0	0	200	300	0	0	0	0	0	0	0	200	903	0	0	0	0	0	0	0	603	903	0
630	9	0	0	0	0	0	0	200	300	0	0	0	0	0	0	0	200	903	0	0	0	0	0	0	0	603	903	0
631	0	0	0	0	0	0	0	200	300	0	0	0	0	0	0	0	200	903	0	0	0	0	0	0	0	603	903	0
631	1	0	0	0	0	0	0	200	300	0	0	0	0	0	0	0	200	903	0	0	0	0	0	0	0	603	903	0
631	2	0	0	0	0	0	0	200	300	0	0	0	0	0	0	0	200	903	0	0	0	0	0	0	0	603	903	0
631	3	0	0	0	0	0	0	200	300	0	0	0	0	0	0	0	200	903	0	0	0	0	0	0	0	603	903	0
631	4	0	0	0	0	0	0	200	300	0	0	0	0	0	0	0	200	903	0	0	0	0	0	0	0	603	903	0
631	5	0	0	0	0	0	0	200	300	0	0	0	0	0	0	0	200	903	0	0	0	0	0	0	0	603	903	0
631	6	0	0	0	0	0	0	200	300	0	0	0	0	0	0	0	200	903	0	0	0	0	0	0	0	603	903	0
631	7	0	0	0	0	0	0	200	300	0	0	0	0	0	0	0	200	903	0	0	0	0	0	0	0	603	903	0
631	8	0	0	0	0	0	0	200	300	0	0	0	0	0	0	0	200	903	0	0	0	0	0	0	0	603	903	0
631	9	0	0	0	0	0	0	200	300	0	0	0	0	0	0	0	200	903	0	0	0	0	0	0	0	603	903	0
632	0	0	0	0	0	0	0	200	300	0	0	0	0	0	0	0	200	903	0	0	0	0	0	0	0	603	903	0
632	1	0	0	0	0	0	0	200	300	0	0	0	0	0	0	0	200	903	0	0	0	0	0	0	0	603	903	0
632	2	0	0	0	0	0	0	200	300	0	0	0	0	0	0	0	200	903	0	0	0	0	0	0	0	603	903	0
632	3	0	0	0	0	0	0	200	300	0	0	0	0	0	0	0	200	903	0	0	0	0	0	0	0	603	903	0
632	4	0	0	0	0	0	0	200	300	0	0	0	0	0	0	0	200	903	0	0	0	0	0	0	0	603	903	0
632	5	0	0	0	0	0	0	200	300	0	0	0	0	0	0	0	200	903	0	0	0	0	0	0	0	603	903	0
632	6	0	0	0	0	0	0	200	300	0	0	0	0	0	0	0	200	903	0	0	0	0	0	0	0	603	903	0
632	7	0	0	0	0	0	0	200	300	0	0	0	0	0	0	0	200	903	0	0	0	0	0	0	0	603	903	0
632	8	0	0	0	0	0	0	200	300	0	0	0	0	0	0	0	200	903	0	0	0	0	0	0	0	603	903	0
632	9	0	0	0	0	0	0	200	300	0	0	0	0	0	0	0	200	903	0	0	0	0	0	0	0	603	903	0
633	0	0	0	0	0	0	0	200	300	0	0	0	0	0	0	0	200	903	0	0	0	0	0	0	0	603	903	0
633	1	0	0	0	0	0	0	200	300	0	0	0	0	0	0	0	200	903	0	0	0	0	0	0	0	603	903	0
633	2	0	0	0	0	0	0	200	300	0	0	0	0	0	0	0	200	903	0	0	0	0	0	0	0	603	903	0
633	3	0	0	0	0	0	0	200	300	0	0	0	0	0	0	0	200	903	0	0	0	0	0	0	0	603	903	0
633	4	0	0	0	0	0	0	200	300	0	0	0	0	0	0	0	200	903	0	0	0	0	0	0	0	603	903	0
633	5	0	0	0	0	0	0	200	300	0	0	0	0	0	0	0	200	903	0	0	0	0	0	0	0	603	903	0
633	6	0	0	0	0	0	0	200	300	0	0	0	0	0	0	0	200	903	0	0	0	0	0	0	0	603	903	0
633	7	0	0	0	0	0	0	200	300	0	0	0	0	0	0	0	200	903	0	0	0	0	0	0	0	603	903	0
633	8	0	0	0	0	0	0	200	300	0	0	0	0	0	0	0	200	903	0	0	0	0	0	0	0	603	903	0
633	9	0	0	0	0	0	0	200	300	0	0	0	0	0	0	0	200	903	0	0	0	0	0	0	0	603	903	0
634	0	0	0	0	0	0	0	200	300	0	0	0	0	0	0	0	200	903	0	0	0	0	0	0	0	603	903	0
634	1	0	0	0	0	0	0	200	300	0	0	0	0	0	0	0	200	903	0	0	0	0	0	0	0	603	903	0
634	2	0	0	0	0	0	0	200	300	0	0	0	0	0	0	0	200	903	0	0	0	0	0	0	0	603	903	0
634	3	0	0	0	0	0	0	200	300	0	0	0	0	0	0	0	200	903	0	0	0	0	0	0	0	603	903	0
634	4	0	0	0	0	0	0	200	300	0	0	0	0	0	0	0	200	903	0	0	0	0	0	0	0	603	903	0
634	5	0	0	0	0	0	0	200	300	0	0	0	0	0	0	0	200	903	0	0	0	0	0	0	0	603	903	0
634	6	0	0	0	0	0	0	200	300	0	0	0	0	0	0	0	200	903	0	0	0	0	0	0	0	603	903	0
634	7	0	0	0	0	0	0	200	300	0	0	0	0	0	0	0	200	903	0	0	0	0	0	0	0	603	903	0
634	8	0	0	0	0	0	0	200	300	0	0	0	0	0	0	0	200	903	0	0	0	0	0	0	0	603	903	0
634	9	0	0	0	0	0	0	200	300	0	0	0	0	0	0	0	200	903	0	0	0	0	0	0	0	603	903	0
635	0	0	0	0	0	0	0	200	300	0	0	0	0	0	0	0	200	903	0	0	0	0	0	0	0	603	903	0
635	1	0	0	0	0	0	0	200	300	0	0	0	0	0	0	0	200	903	0	0	0	0	0	0	0	603	903	0
635	2	0	0	0	0	0	0	200	300	0	0	0	0	0	0	0	200	903	0	0	0	0	0	0	0	603	903	0
635	3	0	0	0	0	0	0	200	300	0	0	0	0	0	0	0	200	903	0	0	0	0	0	0	0	603	903	0
635	4	0	0	0	0	0	0	200	300	0	0	0	0	0	0	0	200	903	0	0	0	0	0	0	0	603	903	0
635	5	0	0	0	0	0	0	200	300	0	0	0	0	0	0	0	200	903	0	0	0	0	0	0	0	603	903	0
635	6	0	0	0	0	0	0	200	300	0	0	0	0	0	0	0	200	903	0	0	0	0	0	0	0	603	903	0
635	7	0	0	0	0	0	0	200	300	0	0	0	0	0	0	0	200	903	0	0	0	0	0	0	0	603	903	0
635	8	0	0	0	0	0	0	200	300	0	0	0	0	0	0	0	200	903	0	0	0	0	0	0	0	603	903	0
635	9	0	0	0	0	0	0	200	300	0	0	0	0	0	0	0	200	903	0	0	0	0	0	0	0	603	903	0
636	0	0	0	0	0	0	0	200	300	0	0	0	0	0	0	0	200	903	0	0	0	0	0	0	0	603	903	0
636	1	0	0	0	0	0	0	200	300	0	0	0	0	0	0	0	200	903	0	0	0	0	0	0	0	603	903	0
636	2	0	0	0	0	0	0	200	300	0	0	0	0	0	0	0	200	903	0	0	0	0	0	0	0	603	903	0
636	3	0	0	0	0	0	0	200	300	0	0	0	0	0	0	0	200	903	0	0	0	0	0	0	0	603	903	0
636	4	0	0	0	0	0	0	200	300	0	0	0	0	0	0	0	200	903	0	0	0	0	0	0	0	603	903	0
636	5	0	0	0	0	0	0	200	300	0	0	0	0	0	0	0	200	903	0	0	0	0	0	0	0	603	903	0
636	6	0	0	0	0	0	0	200	300	0	0	0	0	0	0	0	200	903	0	0	0	0	0	0	0	603	903	0
636	7	0	0	0	0	0	0	200	300	0	0	0	0	0	0	0	200	903	0	0	0	0	0	0	0	603	903	0
636	8	0	0	0	0	0	0	200	300	0	0	0	0	0	0	0	200	903	0	0	0	0	0	0	0	603	903	0
636	9	0	0	0	0	0	0	200	300	0	0	0	0	0	0	0	200	903	0	0	0	0	0	0	0	603	903	0
637	0	0	0	0	0	0	0	200	300	0	0	0	0	0	0	0	200	903	0	0	0	0	0	0	0	603	903	0
637	1	0	0	0	0	0	0	200	300	0	0	0	0	0	0	0	200	903	0	0	0	0	0	0	0	603	903	0
637	2	0	0	0	0	0	0	200	300	0	0	0	0	0	0	0	200	903	0	0	0	0	0	0	0	603	903	0
637	3	0	0	0	0	0	0	200	300	0	0	0	0	0	0	0	200	903	0	0	0	0	0	0	0	603	903	0
637	4	0	0	0	0	0	0	200	300	0	0	0	0	0	0	0	200	903	0	0	0	0	0	0	0	603	903	0
637	5	0	0	0	0	0	0	200	300	0	0	0	0	0	0	0	200	903	0	0	0	0	0	0	0	603	903	0
637	6	0	0	0	0	0	0	200	300	0	0	0	0	0	0	0	200	903	0	0	0	0	0	0	0	603	903	0
637	7	0	0	0	0	0	0	200	300	0	0	0	0	0	0	0	200	903	0	0	0	0	0	0	0	603	903	0
637	8	0	0	0	0	0	0	200	300	0	0	0	0	0	0	0	200	903	0	0	0	0	0	0	0	603	903	0
637	9	0	0	0	0	0	0	200	300	0	0	0	0	0	0	0	200	903	0	0	0	0	0	0	0	603	903	0
638	0	0	0	0	0	0	0	200	300	0	0	0	0	0	0	0	200	903	0	0	0	0	0	0	0	603	903	0
638	1	0	0	0	0	0	0	200	300	0	0	0	0	0	0	0	200	903	0	0	0	0	0	0	0	603	903	0
638	2	0	0	0	0	0	0	200	300	0	0	0	0	0	0	0	200	903	0	0	0	0	0	0	0	603	903	0
638	3	0	0	0	0	0	0	200	300	0	0	0	0	0	0	0	200	903	0	0	0	0	0	0	0	603	903	0
638	4	0	0	0	0	0	0	200	300	0	0	0	0	0	0	0	200	903	0	0	0	0	0	0	0	603	903	0
638	5	0	0	0	0	0	0	200	300	0	0	0	0	0	0	0	200	903	0	0	0	0	0	0	0	603	903	0
638	6	0	0	0	0	0	0	200	300	0	0	0	0	0	0	0	200	903	0	0	0	0	0	0	0	603	903	0
638	7	0	0	0	0	0	0	200	300	0	0	0	0	0	0	0	200	903	0	0	0	0	0	0	0	603	903	0
638	8	0	0	0	0	0	0	200	300	0	0	0	0	0	0	0	200	903	0	0	0	0	0	0	0	603	903	0
638	9	0	0	0	0	0	0	200	300	0	0	0	0	0	0	0	200	903	0	0	0	0	0	0	0	603	903	0
639	0	0	0	0	0	0	0	200	300	0	0	0	0	0	0	0	200	903	0	0	0	0	0	0	0	603	903	0
639	1	0	0	0	0	0	0	200	300	0	0	0	0	0	0	0	200	903	0	0	0	0	0	0	0	603	903	0
639	2	0	0	0	0	0	0	200	300	0	0	0	0	0	0	0	200	903	0	0	0	0	0	0	0	603	903	0
639	3	0	0	0	0	0	0	200	300	0	0	0	0	0	0	0	200	903	0	0	0	0	0	0	0	603	903	0
639	4	0	0	0	0	0	0	200	300	0	0	0	0	0	0	0	200	903	0	0	0	0	0	0	0	603	903	0
639	5	0	0	0	0	0	0	200	300	0	0	0	0	0	0	0	200	903	0	0	0	0	0	0	0	603	903	0
639	6	0	0	0	0	0	0	200	300	0	0	0	0	0	0	0	200	903	0	0	0	0	0	0	0	603	903	0
639	7	0	0	0	0	0	0	200	300	0	0	0	0	0	0	0	200	903	0	0	0	0	0	0	0	603	903	0
639	8	0	0	0	0	0	0	200	300	0	0	0	0	0	0	0	200	903	0	0	0	0	0	0	0	603	903	0
639	9	0	0	0	0	0	0	200	300	0	0	0	0	0	0	0	200	903	0	0	0	0	0	0	0	603	903	0
640	0	0	0	0	0	0	0	200	300	0	0	0	0	0	0	0	200	903	0	0	0	0	0	0	0	603	903	0
640	1	0	0	0	0	0	0	200	300	0	0	0	0	0	0	0	200	903	0	0	0	0	0	0	0	603	903	0
640	2	0	0	0	0	0	0	200	300	0	0	0	0	0	0	0	200	903	0	0	0	0	0	0	0	603	903	0
640	3	0	0	0	0	0	0	200	300	0	0	0	0	0	0	0	200	903	0	0	0	0	0	0	0	603	903	0
640	4	0	0	0	0	0	0	200	300	0	0	0	0	0	0	0	200	903	0	0	0	0	0	0	0	603	903	0
640	5	0	0	0	0	0	0	200	300	0	0	0	0	0	0	0	200	903	0	0	0	0	0	0	0	603	903	0
640	6	0	0	0	0	0	0	200	300	0	0	0	0	0	0	0	200	903	0	0	0	0	0	0	0	603	903	0
640	7	0	0	0	0	0	0	200	300	0	0	0	0	0	0	0	200	903	0	0	0	0	0	0	0	603	903	0
640	8	0	0	0	0	0	0	200	300	0	0	0	0	0	0	0	200	903	0	0	0	0	0	0	0	603	903	0
640	9	0	0	0	0	0	0	200	300	0	0	0	0	0	0	0	200	903	0	0	0	0	0	0	0	603	903	0
641	0	0	0	0	0	0	0	200	300	0	0	0	0	0	0	0	200	903	0	0	0	0	0	0	0	603	903	0
641	1	0	0	0	0	0	0	200	300	0	0	0	0	0	0	0	200	903	0	0	0	0	0	0	0	603	903	0
641	2	0	0	0	0	0	0	200	300	0	0	0	0	0	0	0	200	903	0	0	0	0	0	0	0	603	903	0
641	3	0	0	0	0	0	0	200	300	0	0	0	0	0	0	0	200	903	0	0	0	0	0	0	0	603	903	0
641	4	0	0	0	0	0	0	200	300	0	0	0	0	0	0	0	200	903	0	0	0	0	0	0	0	603	903	0
641	5	0	0	0	0	0	0	200	300	0	0	0	0	0	0	0	200	903	0	0	0	0	0	0	0	603	903	0
641	6	0	0	0	0	0	0	200	300	0	0	0	0	0	0	0	200	903	0	0	0	0	0	0	0	603	903	0
641	7	0	0	0	0	0	0	200	300	0	0	0	0	0	0	0	200	903	0	0	0	0	0	0	0	603	903	0
641	8	0	0	0	0	0	0	200	300	0	0	0	0	0	0	0	200	903	0	0	0	0	0	0	0	603	903	0
641	9	0	0	0	0	0	0	200	300	0	0	0	0	0	0	0	200	903	0	0	0	0	0	0	0	603	903	0
642	0	0	0	0	0	0	0	200	300	0	0	0	0	0	0	0	200	903	0	0	0	0	0	0	0	603	903	0
642	1	0	0	0	0	0	0	200	300	0	0	0	0	0	0	0	200	903	0	0	0	0	0	0	0	603	903	0
642	2	0	0	0	0	0	0	200	300	0	0	0	0	0	0	0	200	903	0	0	0	0	0	0	0	603	903	0
642	3	0	0	0	0	0	0	200	300	0	0	0	0	0	0	0	200	903	0	0	0	0	0	0	0	603	903	0
642	4	0	0	0	0	0	0	200	300	0	0	0	0	0	0	0	200	903	0	0	0	0	0	0	0	603	903	0
642	5	0	0	0	0	0	0	200	300	0	0	0	0	0	0	0	200	903	0	0	0	0	0	0	0	603	903	0
642	6	0	0	0	0	0	0	200	300	0	0	0	0	0	0	0	200	903	0	0	0	0	0	0	0	603	903	0
642	7	0	0	0	0	0	0	200	300	0	0	0	0	0	0	0	200	903	0	0	0	0	0	0	0	603	903	0
642	8	0	0	0	0	0	0	200	300	0	0	0	0	0	0	0	200	903	0	0	0	0	0	0	0	603	903	0
642	9	0	0	0	0	0	0	200	300	0	0	0	0	0	0	0	200	903	0	0	0	0	0	0	0	603	903	0
643	0	0	0	0	0	0	0	200	300	0	0	0	0	0	0	0	200	903	0	0	0	0	0	0	0	603	903	0
643	1	0	0	0	0	0	0	200	300	0	0	0	0	0	0	0	200	903	0	0	0	0	0	0	0	603	903	0
643	2	0	0	0	0	0	0	200	300	0	0	0	0	0	0	0	200	903	0	0	0	0	0	0	0	603	903	0
643	3	0	0	0	0	0	0	200	300	0	0	0	0	0	0	0	200	903	0	0	0	0	0	0	0	603	903	0
643	4	0	0	0	0	0	0	200	300	0	0	0	0	0	0	0	200	903	0	0	0	0	0	0	0	603	903	0
643	5	0	0	0	0	0	0	200	300	0	0	0	0	0	0	0	200	903	0	0	0	0	0	0	0	603	903	0
643	6	0	0	0	0	0	0	200	300	0	0	0	0	0	0	0	200	903	0	0	0	0	0	0	0	603	903	0
643	7	0	0	0	0	0	0	200	300	0	0	0	0	0	0	0	200	903	0	0	0	0	0	0	0	603	903	0
643	8	0	0	0	0	0	0	200	300	0	0	0	0	0	0	0	200	903	0	0	0	0	0	0	0	603	903	0
643	9	0	0	0	0	0	0	200	300	0	0	0	0	0	0	0	200	903	0	0	0	0	0	0	0	603	903	0
644	0	0	0	0	0	0	0	200	300	0	0	0	0	0	0	0	200	903	0	0	0	0	0	0	0	603	903	0
644	1	0	0	0	0	0	0	200	300	0	0	0	0	0	0	0	200	903	0	0	0	0	0	0	0	603	903	0
644	2	0	0	0	0	0	0	200	300	0	0	0	0	0	0	0	200	903	0	0	0	0	0	0	0	603	903	0
644	3	0	0	0	0	0	0	200	300	0	0	0	0	0	0	0	200	903	0	0	0	0	0	0	0	603	903	0
644	4	0	0	0	0	0	0	200	300	0	0	0	0	0	0	0	200	903	0	0	0	0	0	0	0	603	903	0
644	5	0	0	0	0	0	0	200	300	0	0	0	0	0	0	0	200	903	0	0	0	0	0	0	0	603	903	0
644	6	0	0	0	0	0	0	200	300	0	0	0	0	0	0	0	200	903	0	0	0	0	0	0	0	603	903	0
644	7	0	0	0	0	0	0	200	300	0	0	0	0	0	0	0	200	903	0	0	0	0	0	0	0	603	903	0
644	8	0	0	0	0	0	0	200	300	0	0	0	0	0	0	0	200	903	0	0	0	0	0	0	0	603	903	0
644	9	0	0	0	0	0	0	200	300	0	0	0	0	0	0	0	200	903	0	0	0	0	0	0	0	603	903	0
645	0	0	0	0	0	0	0	200	300	0	0	0	0	0	0	0	200	903	0	0	0	0	0	0	0	603	903	0
645	1	0	0	0	0	0	0	200	300	0	0	0	0	0	0	0	200	903	0	0	0	0	0	0	0	603	903	0
645	2	0	0	0	0	0	0	200	300	0	0	0	0	0	0	0	200	903	0	0	0	0	0	0	0	603	903	0
645	3	0	0	0	0	0	0	200	300	0	0	0	0	0	0	0	200	903	0	0	0	0	0	0	0	603	903	0
645	4	0	0	0	0	0	0	200	300	0	0	0	0	0	0	0	200	903	0	0	0	0	0	0	0	603	903	0
645	5	0	0	0	0	0	0	200	300	0	0	0	0	0	0	0	200	903	0	0	0	0	0	0	0	603	903	0
645	6	0	0	0	0	0	0	200	300	0	0	0	0	0	0	0	200	903	0	0	0	0	0	0	0	603	903	0
645	7	0	0	0	0	0	0	200	300	0	0	0	0	0	0	0	200	903	0	0	0	0	0	0	0	603	903	0
645	8	0	0	0	0	0	0	200	300	0	0	0	0	0	0	0	200	903	0	0	0	0	0	0	0	603	903	0
645	9	0	0	0	0	0	0	200	300	0	0	0	0	0	0	0	200	903	0	0	0	0	0	0	0	603	903	0
646	0	0	0	0	0	0	0	200	300	0	0	0	0	0	0	0	200	903	0	0	0	0	0	0	0	603	903	0
646	1	0	0	0	0	0	0	200	300	0	0	0	0	0	0	0	200	903	0	0	0	0	0	0	0	603	903	0
646	2	0	0	0	0	0	0	200	300	0	0	0	0	0	0	0	200	903	0	0	0	0	0	0	0	603	903	0
646	3	0	0	0	0	0	0	200	300	0	0	0	0	0	0	0	200	903	0	0	0	0	0	0	0	603	903	0
646	4	0	0	0	0	0	0	200	300	0	0	0	0	0	0	0	200	903	0	0	0	0	0	0	0	603	903	0
646	5	0	0	0	0	0	0	200	300	0	0	0	0	0	0	0	200	903	0	0	0	0	0	0	0	603	903	0
646	6	0	0	0	0	0	0	200	300	0	0	0	0	0	0	0	200	903	0	0	0	0	0	0	0	603	903	0
646	7	0	0	0	0	0	0	200	300	0	0	0	0	0	0	0	200	903	0	0	0	0	0	0	0	603	903	0
646	8	0	0	0	0	0	0	200	300	0	0	0	0	0	0	0	200	903	0	0	0	0	0	0	0	603	903	0
646	9	0	0	0	0	0	0	200	300	0	0	0	0	0	0	0	200	903	0	0	0	0	0	0	0	603	903	0
647	0	0	0	0	0	0	0	200	300	0	0	0	0	0	0	0	200	903	0	0	0	0	0	0	0	603	903	0
647	1	0	0	0	0	0	0	200	300	0	0	0	0	0	0	0	200	903	0	0	0	0	0	0	0	603	903	0
647	2	0	0	0	0	0	0	200	300	0	0	0	0	0	0	0	200	903	0	0	0	0	0	0	0	603	903	0
647	3	0	0	0	0	0	0	200	300	0	0	0	0	0	0	0	200	903	0	0	0	0	0	0	0	603	903	0
647	4	0	0	0	0	0	0	200	300	0	0	0	0	0	0	0	200	903	0	0	0	0	0	0	0	603	903	0
647	5	0	0	0	0	0	0	200	300	0	0	0	0	0	0	0	200	903	0	0	0	0	0	0	0	603	903	0
647	6	0	0	0	0	0	0	200	300	0	0	0	0	0	0	0	200	903	0	0	0	0	0	0	0	603	903	0
647	7	0	0	0	0	0	0	200	300	0	0	0	0	0	0	0	200	903	0	0	0	0	0	0	0	603	903	0
647	8	0	0	0	0	0	0	200	300	0	0	0	0	0	0	0	200	903	0	0	0	0	0	0	0	603	903	0
647	9	0	0	0	0	0	0	200	300	0	0	0	0	0	0	0	200	903	0	0	0	0	0	0	0	603	903	0
648	0	0	0	0	0	0	0	200	300	0	0	0	0	0	0	0	200	903	0	0	0	0	0	0	0	603	903	0
648	1	0	0	0	0	0	0	200	300	0	0	0	0	0	0	0	200	903	0	0	0	0	0	0	0	603	903	0
648	2	0	0	0	0	0	0	200	300	0	0	0	0	0	0	0	200	903	0	0	0	0	0	0	0	603	903	0
648	3	0	0	0	0	0	0	200	300	0	0	0	0	0	0	0	200	903	0	0	0	0	0	0	0	603	903	0
648	4	0	0	0	0	0	0	200	300	0	0	0	0	0	0	0	200	903	0	0	0	0	0	0	0	603	903	0
648	5	0	0	0	0	0	0	200	300	0	0	0	0	0	0	0	200	903	0	0	0	0	0	0	0	603	903	0
648	6	0	0	0	0	0	0	200	300	0	0	0	0	0	0	0	200	903	0	0	0	0	0	0	0	603	903	0
648	7	0	0	0	0	0	0	200	300	0	0	0	0	0	0	0	200	903	0	0	0	0	0	0	0	603	903	0
648	8	0	0	0	0	0	0	200	300	0	0	0	0	0	0	0	200	903	0	0	0	0	0	0	0	603	903	0
648	9	0	0	0	0	0	0	200	300	0	0	0	0	0	0	0	200	903	0	0	0	0	0	0	0	603	903	0
649	0	0	0	0	0	0	0	200	300	0	0	0	0	0	0	0	200	903	0	0	0	0	0	0	0	603	903	0
649	1	0	0	0	0	0	0	200	300	0	0	0	0	0	0	0	200	903	0	0	0	0	0	0	0	603	903	0
649	2	0	0	0	0	0	0	200	300	0	0	0	0	0	0	0	200	903	0	0	0	0	0	0	0	603	903	0
649	3	0	0	0	0	0	0	200	300	0	0	0	0	0	0	0	200	903	0	0	0	0	0	0	0	603	903	0
649	4	0	0	0	0	0	0	200	300	0	0	0	0	0	0	0	200	903	0	0	0	0	0	0	0	603	903	0
649	5	0	0	0	0	0	0	200	300	0	0	0	0	0	0	0	200	903	0	0	0	0	0	0	0	603	903	0
649	6	0	0	0	0	0	0	200	300	0	0	0	0	0	0	0	200	903	0	0	0	0	0	0	0	603	903	0
649	7	0	0	0	0	0	0	200	300	0	0	0	0	0	0	0	200	903	0	0	0	0	0	0	0	603	903	0
649	8	0	0	0	0	0	0	200	300	0	0	0	0	0	0	0	200	903	0	0	0	0	0	0	0	603	903	0
649	9	0	0	0	0	0	0	200	300	0	0	0	0	0	0	0	200	903	0	0	0	0	0	0	0	603	903	0
650	0	0	0	0	0	0	0	200	300	0	0	0	0	0	0	0	200	903	0	0	0	0	0	0	0	603	903	0
650	1	0	0	0	0	0	0	200	300	0	0	0	0	0	0	0	200	903	0	0	0	0	0	0	0	603	903	0
650	2	0	0	0	0	0	0	200	300	0	0	0	0	0	0	0	200	903	0	0	0	0	0	0	0	603	903	0
650	3	0	0	0	0	0	0	200	300	0	0	0	0	0	0	0	200	903	0	0	0	0	0	0	0	603	903	0
650	4	0	0	0	0	0	0	200	300	0	0	0	0	0	0	0	200	903	0	0	0	0	0	0	0	603	903	0
650	5	0	0	0	0	0	0	200	300	0	0	0	0	0	0	0	200	903	0	0	0	0	0	0	0	603	903	0
650	6	0	0	0	0	0	0	200	300	0	0	0	0	0	0	0	200	903	0	0	0	0	0	0	0	603	903	0
650	7	0	0	0	0	0	0	200	300	0	0	0	0	0	0	0	200	903	0	0	0	0	0	0	0	603	903	0
650	8	0	0	0	0	0	0	200	300	0	0	0	0	0	0	0	200	903	0	0	0	0	0	0	0	603	903	0
650	9	0	0	0	0	0	0	200	300	0	0	0	0	0	0	0	200	903	0	0	0	0	0	0	0	603	903	0
651	0	0	0	0	0	0	0	200	300	0	0	0	0	0	0	0	200	903	0	0	0	0	0	0	0	603	903	0
651	1	0	0	0	0	0	0	200	300	0	0	0	0	0	0	0	200	903	0	0	0	0	0	0	0	603	903	0
651	2	0	0	0	0	0	0	200	300	0	0	0	0	0	0	0	200	903	0	0	0	0	0	0	0	603	903	0
651	3	0	0	0	0	0	0	200	300	0	0	0	0	0	0	0	200	903	0	0	0	0	0	0	0	603	903	0
651	4	0	0	0	0	0	0	200	300	0	0	0	0	0	0	0	200	903	0	0	0	0	0	0	0	603	903	0
651	5	0	0	0	0	0	0	200	300	0	0	0	0	0	0	0	200	903	0	0	0	0	0	0	0	603	903	0
651	6	0	0	0	0	0	0	200	300	0	0	0	0	0	0	0	200	903	0	0	0	0	0	0	0	603	903	0
651	7	0	0	0	0	0	0	200	300	0	0	0	0	0	0	0	200	903	0	0	0	0	0	0	0	603	903	0
651	8	0	0	0	0	0	0	200	300	0	0	0	0	0	0	0	200	903	0	0	0	0	0	0	0	603	903	0
651	9	0	0	0	0	0	0	200	300	0	0	0	0	0	0	0	200	903	0	0	0	0	0	0	0	603	903	0
652	0	0	0	0	0	0	0	200	300	0	0	0	0	0	0	0	200	903	0	0	0	0	0	0	0	603	903	0
652	1	0	0	0	0	0	0	200	300	0	0	0	0	0	0	0	200	903	0	0	0	0	0	0	0	603	903	0
652	2	0	0	0	0	0	0	200	300	0	0	0	0	0	0	0	200	903	0	0	0	0	0	0	0	603	903	0
652	3	0	0	0	0	0	0	200	300	0	0	0	0	0	0	0	200	903	0	0	0	0	0	0	0	603	903	0
652	4	0	0	0	0	0	0	200	300	0	0	0	0	0	0	0	200	903	0	0	0	0	0	0	0	603	903	0
652	5	0	0	0	0	0	0	200	300	0	0	0	0	0	0	0	200	903	0	0	0	0	0	0	0	603	903	0
652	6	0	0	0	0	0	0	200	300	0	0	0	0	0	0	0	200	903	0	0	0	0	0	0	0	603	903	0
652	7	0	0	0	0	0	0	200	300	0	0	0	0	0	0	0	200	903	0	0	0	0	0	0	0	603	903	0
652	8	0	0	0	0	0	0	200	300	0	0	0	0	0	0	0	200	903	0	0	0	0	0	0	0	603	903	0
652	9	0	0	0	0	0	0	200	300	0	0	0	0	0	0	0	200	903	0	0	0	0	0	0	0	603	903	0
653	0	0	0	0	0	0	0	200	300	0	0	0	0	0	0	0	200	903	0	0	0	0	0	0	0	603	903	0
653	1	0	0	0	0	0	0	200	300	0	0	0	0	0	0	0	200	903	0	0	0	0	0	0	0	603	903	0
653	2	0	0	0	0	0	0	200	300	0	0	0	0	0	0	0	200	903	0	0	0	0	0	0	0	603	903	0
653	3	0	0	0	0	0	0	200	300	0	0	0	0	0	0	0	200	903	0	0	0	0	0	0	0	603	903	0
653	4	0	0	0	0	0	0	200	300	0	0	0	0	0	0	0	200	903	0	0	0	0	0	0	0	603	903	0
653	5	0	0	0	0	0	0	200	300	0	0	0	0	0	0	0	200	903	0	0	0	0	0	0	0	603	903	0
653	6	0	0	0	0	0	0	200	300	0	0	0	0	0	0	0	200	903	0	0	0	0	0	0	0	603	903	0
653	7	0	0	0	0	0	0	200	300	0	0	0	0	0	0	0	200	903	0	0	0	0	0	0	0	603	903	0
653	8	0	0	0	0	0	0	200	300	0	0	0	0	0	0	0	200	903	0	0	0	0	0	0	0	603	903	0
653	9	0	0	0	0	0	0	200	300	0	0	0	0	0	0	0	200	903	0	0	0	0	0	0	0	603	903	0
654	0	0	0	0	0	0	0	200	300	0	0	0	0	0	0	0	200	903	0	0	0	0	0	0	0	603	903	0
654	1	0	0	0	0	0	0	200	300	0	0	0	0	0	0	0	200	903	0	0	0	0	0	0	0	603	903	0
654	2	0	0	0	0	0	0	200	300	0	0	0	0	0	0	0	200	903	0	0	0	0	0	0	0	603	903	0
654	3	0	0	0	0	0	0	200	300	0	0	0	0	0	0	0	200	903	0	0	0	0	0	0	0	603	903	0
654	4	0	0	0	0	0	0	200	300	0	0	0	0	0	0	0	200	903	0	0	0	0	0	0	0	603	903	0
654	5	0	0	0	0	0	0	200	300	0	0	0	0	0	0	0	200	903	0	0	0	0	0	0	0	603	903	0
654	6	0	0	0	0	0	0	200	300	0	0	0	0	0	0	0	200	903	0	0	0	0	0	0	0	603	903	0
654	7	0	0	0	0	0	0	200	300	0	0	0	0	0	0	0	200	903	0	0	0	0	0	0	0	603	903	0
654	8	0	0	0	0	0	0	200	300	0	0	0	0	0	0	0	200	903	0	0	0	0	0	0	0	603	903	0
654	9	0	0	0	0	0	0	200	300	0	0	0	0	0	0	0	200	903	0	0	0	0	0	0	0	603	903	0
655	0	0	0	0	0	0	0	200	300	0	0	0	0	0	0	0	200	903	0	0	0	0	0	0	0	603	903	0
655	1	0	0	0	0	0	0	200	300	0	0	0	0	0	0	0	200	903	0	0	0	0	0	0	0	603	903	0
655	2	0	0	0	0	0	0	200	300	0	0	0	0	0	0	0	200	903	0	0	0	0	0	0	0	603	903	0
655	3	0	0	0	0	0	0	200	300	0	0	0	0	0	0	0	200	903	0	0	0	0	0	0	0	603	903	0
655	4	0	0	0	0	0	0	200	300	0	0	0	0	0	0	0	200	903	0	0	0	0	0	0	0	603	903	0
655	5	0	0	0	0	0	0	200	300	0	0	0	0	0	0	0	200	903	0	0	0	0	0	0	0	603	903	0
655	6	0	0	0	0	0	0	200	300	0	0	0	0	0	0	0	200	903	0	0	0	0	0	0	0	603	903	0
655	7	0	0	0	0	0	0	200	300	0	0	0	0	0	0	0	200	903	0	0	0	0	0	0	0	603	903	0
655	8	0	0	0	0	0	0	200	300	0	0	0	0	0	0	0	200	903	0	0	0	0	0	0	0	603	903	0
655	9	0	0	0	0	0	0	200	300	0	0	0	0	0	0	0	200	903	0	0	0	0	0	0	0	603	903	0
656	0	0	0	0	0	0	0	200	300	0	0	0	0	0	0	0	200	903	0	0	0	0	0	0	0	603	903	0
656	1	0	0	0	0	0	0	200	300	0	0	0	0	0	0	0	200	903	0	0	0	0	0	0	0	603	903	0
656	2	0	0	0	0	0	0	200	300	0	0	0	0	0	0	0	200	903	0	0	0	0	0	0	0	603	903	0
656	3	0	0	0	0	0	0	200	300	0	0	0	0	0	0	0	200	903	0	0	0	0	0	0	0	603	903	0
656	4	0	0	0	0	0	0	200	300	0	0	0	0	0	0	0	200	903	0	0	0	0	0	0	0	603	903	0
656	5	0	0	0	0	0	0	200	300	0	0	0	0	0	0	0	200	903	0	0	0	0	0	0	0	603	903	0
656	6	0	0	0	0	0	0	200	300	0	0	0	0	0	0	0	200	903	0	0	0	0	0	0	0	603	903	0
656	7	0	0	0	0	0	0	200	300	0	0	0	0	0	0	0	200	903	0	0	0	0	0	0	0	603	903	0
656	8	0	0	0	0	0	0	200	300	0	0	0	0	0	0	0	200	903	0	0	0	0	0	0	0	603	903	0
656	9	0	0	0	0	0	0	200	300	0	0	0	0	0	0	0	200	903	0	0	0	0	0	0	0	603	903	0
657	0	0	0	0	0	0	0	200	300	0	0	0	0	0	0	0	200	903	0	0	0	0	0	0	0	603	903	0
657	1	0	0	0	0	0	0	200	300	0	0	0	0	0	0	0	200	903	0	0	0	0	0	0	0	603	903	0
657	2	0	0	0	0	0	0	200	300	0	0	0	0	0	0	0	200	903	0	0	0	0	0	0	0	603	903	0
657	3	0	0	0	0	0	0	200	300	0	0	0	0	0	0	0	200	903	0	0	0	0	0	0	0	603	903	0
657	4	0	0	0	0	0	0	200	300	0	0	0	0	0	0	0	200	903	0	0	0	0	0	0	0	603	903	0
657	5	0	0	0	0	0	0	200	300	0	0	0	0	0	0	0	200	903	0	0	0	0	0	0	0	603	903	0
657	6	0	0	0	0	0	0	200	300	0	0	0	0	0	0	0	200	903	0	0	0	0	0	0	0	603	903	0
657	7	0	0	0	0	0	0	200	300	0	0	0	0	0	0	0	200	903	0	0	0	0	0	0	0	603	903	0
657	8	0	0	0	0	0	0	200	300	0	0	0	0	0	0	0	200	903	0	0	0	0	0	0	0	603	903	0
657	9	0	0	0	0	0	0	200	300	0	0	0	0	0	0	0	200	903	0	0	0	0	0	0	0	603	903	0
658	0	0	0	0	0	0	0	200	300	0	0	0	0	0	0	0	200	903	0	0	0	0	0	0	0	603	903	0
658	1	0	0	0	0	0	0	200	300	0	0	0	0	0	0	0	200	903	0	0	0	0	0	0	0	603	903	0
658	2	0	0	0	0	0	0	200	300	0	0	0	0	0	0	0	200	903	0	0	0	0	0	0	0	603	903	0
658	3	0	0	0	0	0	0	200	300	0	0	0	0	0	0	0	200	903	0	0	0	0	0	0	0	603	903	0
658	4	0	0	0	0	0	0	200	300	0	0	0	0	0	0	0	200	903	0	0	0	0	0	0	0	603	903	0
658	5	0	0	0	0	0	0	200	300	0	0	0	0	0	0	0	200	903	0	0	0	0	0	0	0	603	903	0
658	6	0	0	0	0	0	0	200	300	0	0	0	0	0	0	0	200	903	0	0	0	0	0	0	0	603	903	0
658	7	0	0	0	0	0	0	200	300	0	0	0	0	0	0	0	200	903	0	0	0	0	0	0	0	603	903	0
658	8	0	0	0	0	0	0	200	300	0	0	0	0	0	0	0	200	903	0	0	0	0	0	0	0	603	903	0
658	9	0	0	0	0	0	0	200	300	0	0	0	0	0	0	0	200	903	0	0	0	0	0	0	0	603	903	0
659	0	0	0	0	0	0	0	200	300	0	0	0	0	0	0	0	200	903	0	0	0	0	0	0	0	603	903	0
659	1	0	0	0	0	0	0	200	300	0	4.65424	-5.08682	-17.7499	-1848.82	248.095	-425.263	213.977	1007.16	0	0	0	0	0	0	0	603	903	0
659	2	0	0	0	0	0	0	200	300	0	0	0	0	0	0	0	200	903	0	0	0	0	0	0	0	603	903	0
659	3	0	0	0	0	0	0	200	300	0	4.95941	-4.93423	-18.6654	-2123.47	3.95477	-608.369	200.212	1016.77	0	0	0	0	0	0	0	603	903	0
659	4	0	0	0	0	0	0	200	300	0	7.40082	-3.25577	-22.0224	-2764.34	-423.291	-379.487	180.779	1028.52	0	0	0	0	0	0	0	603	903	0
659	5	0	0	0	0	0	0	200	300	0	6.18011	-0.204009	-24.7689	-2855.9	3.95477	-745.698	200.16	1018.3	0	0	0	0	0	0	0	603	903	0
659	6	0	0	0	0	0	0	200	300	0	6.63788	0.55893	-30.5673	-3496.77	-118.116	-425.263	196.136	1017.4	0	0	0	0	0	0	0	603	903	0
659	7	0	0	0	0	0	0	200	300	0	8.01117	1.47446	-36.0604	-4046.08	64.9899	-837.251	201.802	1015.2	0	0	0	0	0	0	0	603	903	0
659	8	0	0	0	0	0	0	200	300	0	7.70599	4.22104	-44.3002	-4412.29	248.095	-654.145	205.6	1002.6	0	0	0	0	0	0	0	603	903	0
659	9	0	0	0	0	0	0	200	300	0	7.55341	6.81503	-48.2675	-4595.4	-57.0804	-745.698	198.817	998.207	0	0	0	0	0	0	0	603	903	0
660	0	0	0	0	0	0	0	200	300	0	8.16376	4.6788	-53.7606	-5419.37	187.06	-974.58	203.48	1003.81	0	0	0	0	0	0	0	603	903	0
660	1	0	0	0	0	0	0	200	300	0	9.53705	7.73056	-62.0004	-6426.45	3.95477	-1020.36	200.064	1006.65	0	0	0	0	0	0	0	603	903	0
660	2	0	0	0	0	0	0	200	300	0	11.0629	9.7142	-68.1039	-7891.3	370.166	-974.58	205.435	1018.87	0	0	0	0	0	0	0	603	903	0
660	3	0	0	0	0	0	0	200	300	0	11.5207	10.9349	-78.1747	-8165.95	126.025	-1020.36	201.612	1007.46	0	0	0	0	0	0	0	603	903	0
660	4	0	0	0	0	0	0	200	300	0	11.3681	11.0875	-89.4662	-8715.27	126.025	-1157.69	201.409	1000.41	0	0	0	0	0	0	0	603	903	0
660	5	0	0	0	0	0	0	200	300	0	15.1828	13.9867	-100.453	-9813.9	248.095	-1249.24	202.47	1000.7	0	0	0	0	0	0	0	603	903	0
660	6	0	0	0	0	0	0	200	300	0	16.0983	16.2755	-110.218	-10454.8	614.307	-1478.12	205.574	997.855	0	0	0	0	0	0	0	603	903	0
660	7	0	0	0	0	0	0	200	300	0	17.4716	15.2074	-120.899	-11461.9	-57.0804	-1432.34	199.528	997.805	0	0	0	0	0	0	0	603	903	0
660	8	0	0	0	0	0	0	200	300	0	18.6923	17.0384	-133.717	-12560.5	492.236	-1752.78	203.681	996.934	0	0	0	0	0	0	0	603	903	0
660	9	0	0	0	0	0	0	200	300	0	21.2863	17.4962	-145.619	-13476	309.131	-1798.55	202.123	995.543	0	0	0	0	0	0	0	603	903	0
661	0	0	0	0	0	0	0	200	300	0	25.5588	17.0384	-154.774	-14391.5	370.166	-1844.33	202.392	995.984	0	0	0	0	0	0	0	603	903	0
661	1	0	0	0	0	0	0	200	300	0	23.1174	14.597	-166.065	-15581.7	126.025	-1752.78	200.759	996.829	0	0	0	0	0	0	0	603	903	0
661	2	0	0	0	0	0	0	200	300	0	23.27	14.2918	-177.967	-16039.5	309.131	-1661.23	201.737	993.126	0	0	0	0	0	0	0	603	903	0
661	3	0	0	0	0	0	0	200	300	0	24.7958	11.3927	-188.038	-16222.6	431.201	-1661.23	202.293	989.273	0	0	0	0	0	0	0	603	903	0
661	4	0	0	0	0	0	0	200	300	0	27.0847	6.96762	-197.804	-16588.8	126.025	-1661.23	200.637	986.865	0	0	0	0	0	0	0	603	903	0
661	5	0	0	0	0	0	0	200	300	0	26.7795	4.06845	-204.517	-18053.7	370.166	-1569.67	201.81	991.274	0	0	0	0	0	0	0	603	903	0
661	6	0	0	0	0	0	0	200	300	0	27.3898	2.84775	-215.809	-18786.1	3.95477	-1569.67	200.018	990.05	0	0	0	0	0	0	0	603	903	0
661	7	0	0	0	0	0	0	200	300	0	29.3735	-2.49283	-224.049	-19060.7	-57.0804	-1752.78	199.745	988.074	0	0	0	0	0	0	0	603	903	0
661	8	0	0	0	0	0	0	200	300	0	28.3054	-5.69717	-231.373	-19518.5	431.201	-1661.23	201.864	987.359	0	0	0	0	0	0	0	603	903	0
661	9	0	0	0	0	0	0	200	300	0	28.4579	-8.90152	-243.885	-19610.1	309.131	-1340.79	201.268	983.407	0	0	0	0	0	0	0	603	903	0
662	0	0	0	0	0	0	0	200	300	0	30.1364	-13.4792	-252.125	-20434	187.06	-1523.9	200.742	984.047	0	0	0	0	0	0	0	603	903	0
662	1	0	0	0	0	0	0	200	300	0	29.8312	-17.4464	-260.059	-20434	126.025	-1569.67	200.485	981.575	0	0	0	0	0	0	0	603	903	0
662	2	0	0	0	0	0	0	200	300	0	30.289	-20.4982	-266.163	-21532.7	370.166	-1523.9	201.391	983.9	0	0	0	0	0	0	0	603	903	0
662	3	0	0	0	0	0	0	200	300	0	30.8994	-24.0077	-276.234	-21532.7	-301.221	-1523.9	198.91	980.951	0	0	0	0	0	0	0	603	903	0
662	4	0	0	0	0	0	0	200	300	0	33.3408	-28.5854	-281.422	-21441.1	-57.0804	-1478.12	199.797	979.189	0	0	0	0	0	0	0	603	903	0
662	5	0	0	0	0	0	0	200	300	0	32.883	-32.2475	-287.22	-22722.8	-57.0804	-1432.34	199.801	982.113	0	0	0	0	0	0	0	603	903	0
662	6	0	0	0	0	0	0	200	300	0	31.3571	-34.5363	-293.934	-22448.2	187.06	-1523.9	200.636	979.372	0	0	0	0	0	0	0	603	903	0
662	7	0	0	0	0	0	0	200	300	0	31.5097	-37.7406	-303.7	-22265.1	-423.291	-1432.34	198.606	976.313	0	0	0	0	0	0	0	603	903	0
662	8	0	0	0	0	0	0	200	300	0	33.1882	-42.9286	-307.972	-22173.5	-789.502	-1523.9	197.436	974.999	0	0	0	0	0	0	0	603	903	0
662	9	0	0	0	0	0	0	200	300	0	33.3408	-45.0648	-312.55	-22906	-57.0804	-1432.34	199.817	976.287	0	0	0	0	0	0	0	603	903	0
663	0	0	0	0	0	0	0	200	300	0	32.2726	-46.7433	-319.874	-22631.3	-362.256	-1569.67	198.868	973.751	0	0	0	0	0	0	0	603	903	0
663	1	0	0	0	0	0	0	200	300	0	31.5097	-50.4054	-326.893	-22997.5	-301.221	-1523.9	199.079	973.352	0	0	0	0	0	0	0	603	903	0
663	2	0	0	0	0	0	0	200	300	0	33.4933	-53.9149	-332.386	-22631.3	-606.397	-1478.12	198.176	971.087	0	0	0	0	0	0	0	603	903	0
663	3	0	0	0	0	0	0	200	300	0	31.9675	-56.6615	-337.269	-23089.1	-118.116	-1432.34	199.65	971.459	0	0	0	0	0	0	0	603	903	0
663	4	0	0	0	0	0	0	200	300	0	31.2045	-58.0348	-344.288	-23363.7	-484.327	-1249.24	198.593	970.861	0	0	0	0	0	0	0	603	903	0
663	5	0	0	0	0	0	0	200	300	0	32.7304	-60.7814	-352.223	-24096.1	-301.221	-1203.46	199.145	971.412	0	0	0	0	0	0	0	603	903	0
663	6	0	0	0	0	0	0	200	300	0	30.4416	-62.6125	-360.462	-23455.3	-728.467	-1066.13	197.979	968.07	0	0	0	0	0	0	0	603	903	0
663	7	0	0	0	0	0	0	200	300	0	31.9675	-67.3427	-366.261	-23913	-1216.75	-1432.34	196.678	968.29	0	0	0	0	0	0	0	603	903	0
663	8	0	0	0	0	0	0	200	300	0	30.289	-67.3427	-374.5	-24645.5	-789.502	-1295.01	197.892	968.809	0	0	0	0	0	0	0	603	903	0
663	9	0	0	0	0	0	0	200	300	0	28.3054	-71.1574	-383.656	-24462.3	-606.397	-1249.24	198.419	966.761	0	0	0	0	0	0	0	603	903	0
664	0	0	0	0	0	0	0	200	300	0	27.695	-72.6833	-389.454	-24553.9	-1155.71	-1020.36	197.032	966.047	0	0	0	0	0	0	0	603	903	0
664	1	0	0	0	0	0	0	200	300	0	28.0002	-74.2091	-396.473	-24187.7	-1521.92	-974.58	196.161	964.007	0	0	0	0	0	0	0	603	903	0
664	2	0	0	0	0	0	0	200	300	0	27.3898	-76.9557	-404.408	-25011.7	-1155.71	-837.251	197.142	964.848	0	0	0	0	0	0	0	603	903	0
664	3	0	0	0	0	0	0	200	300	0	24.9484	-79.0919	-411.121	-25469.4	-1460.89	-791.474	196.447	964.951	0	0	0	0	0	0	0	603	903	0
664	4	0	0	0	0	0	0	200	300	0	25.2536	-81.3808	-418.141	-25835.6	-1521.92	-654.145	196.36	964.787	0	0	0	0	0	0	0	603	903	0
664	5	0	0	0	0	0	0	200	300	0	24.1855	-83.3644	-423.634	-25286.3	-1766.06	-608.369	195.831	962.689	0	0	0	0	0	0	0	603	903	0
664	6	0	0	0	0	0	0	200	300	0	23.5751	-85.3481	-431.873	-25286.3	-1705.03	-699.922	196.052	961.55	0	0	0	0	0	0	0	603	903	0
664	7	0	0	0	0	0	0	200	300	0	22.6596	-87.1791	-438.282	-25561	-1888.14	-654.145	195.692	961.321	0	0	0	0	0	0	0	603	903	0
664	8	0	0	0	0	0	0	200	300	0	20.3708	-89.1628	-443.165	-25744.1	-1888.14	-654.145	195.739	961.091	0	0	0	0	0	0	0	603	903	0
664	9	0	0	0	0	0	0	200	300	0	20.8286	-91.4516	-449.268	-25561	-2193.31	-333.711	195.118	959.895	0	0	0	0	0	0	0	603	903	0
665	0	0	0	0	0	0	0	200	300	0	20.0656	-91.299	-454.151	-25469.4	-2132.28	-699.922	195.305	959.081	0	0	0	0	0	0	0	603	903	0
665	1	0	0	0	0	0	0	200	300	0	19.6078	-92.9774	-459.339	-25927.2	-2620.56	124.053	194.295	959.445	0	0	0	0	0	0	0	603	903	0
665	2	0	0	0	0	0	0	200	300	0	18.2346	-94.9611	-462.696	-25744.1	-2986.77	-379.487	193.545	958.639	0	0	0	0	0	0	0	603	903	0
665	3	0	0	0	0	0	0	200	300	0	17.6242	-96.1818	-467.579	-25377.9	-2315.38	78.2768	195.048	957.275	0	0	0	0	0	0	0	603	903	0
665	4	0	0	0	0	0	0	200	300	0	17.9294	-97.2499	-473.683	-25286.3	-2742.63	78.2768	194.21	956.383	0	0	0	0	0	0	0	603	903	0
665	5	0	0	0	0	0	0	200	300	0	17.319	-98.9284	-475.514	-25561	-2681.59	124.053	194.361	956.755	0	0	0	0	0	0	0	603	903	0
665	6	0	0	0	0	0	0	200	300	0	16.8613	-99.6913	-478.565	-25927.2	-2681.59	215.606	194.397	957.177	0	0	0	0	0	0	0	603	903	0
665	7	0	0	0	0	0	0	200	300	0	17.1664	-99.9965	-483.143	-25561	-2498.49	398.711	194.829	955.906	0	0	0	0	0	0	0	603	903	0
665	8	0	0	0	0	0	0	200	300	0	15.9457	-101.065	-485.584	-25469.4	-3108.84	215.606	193.598	955.451	0	0	0	0	0	0	0	603	903	0
665	9	0	0	0	0	0	0	200	300	0	16.2509	-102.438	-488.026	-25194.8	-2986.77	307.159	193.88	954.626	0	0	0	0	0	0	0	603	903	0
666	0	0	0	0	0	0	0	200	300	0	15.9457	-102.59	-489.857	-25286.3	-2986.77	536.04	193.903	954.62	0	0	0	0	0	0	0	603	903	0
666	1	0	0	0	0	0	0	200	300	0	13.6569	-103.201	-492.909	-25103.2	-3047.8	581.817	193.817	953.929	0	0	0	0	0	0	0	603	903	0
666	2	0	0	0	0	0	0	200	300	0	17.4716	-105.795	-495.045	-25286.3	-3108.84	1039.58	193.72	954.079	0	0	0	0	0	0	0	603	903	0
666	3	0	0	0	0	0	0	200	300	0	14.2673	-106.558	-498.402	-24553.9	-3169.87	902.251	193.64	952.265	0	0	0	0	0	0	0	603	903	0
666	4	0	0	0	0	0	0	200	300	0	15.0302	-106.253	-499.317	-24828.6	-2986.77	902.251	194.018	952.725	0	0	0	0	0	0	0	603	903	0
666	5	0	0	0	0	0	0	200	300	0	14.725	-107.321	-502.979	-24737	-3414.01	810.699	193.212	952.181	0	0	0	0	0	0	0	603	903	0
666	6	0	0	0	0	0	0	200	300	0	13.5043	-109.61	-503.285	-23913	-3230.91	1039.58	193.58	950.514	0	0	0	0	0	0	0	603	903	0
666	7	0	0	0	0	0	0	200	300	0	12.7414	-110.525	-503.895	-24096.1	-3352.98	1268.46	193.346	950.82	0	0	0	0	0	0	0	603	903	0
666	8	0	0	0	0	0	0	200	300	0	14.1147	-110.525	-505.421	-24187.7	-3597.12	1176.91	192.883	950.857	0	0	0	0	0	0	0	603	903	0
666	9	0	0	0	0	0	0	200	300	0	15.0302	-111.898	-508.473	-23913	-3719.19	1451.57	192.686	950.029	0	0	0	0	0	0	0	603	903	0
667	0	0	0	0	0	0	0	200	300	0	13.8095	-113.272	-508.473	-23729.9	-3658.16	1405.79	192.806	949.669	0	0	0	0	0	0	0	603	903	0
667	1	0	0	0	0	0	0	200	300	0	13.8095	-114.34	-508.778	-23821.5	-3658.16	1634.67	192.81	949.821	0	0	0	0	0	0	0	603	903	0
667	2	0	0	0	0	0	0	200	300	0	13.0466	-114.34	-509.083	-23089.1	-4085.4	1634.67	191.975	948.354	0	0	0	0	0	0	0	603	903	0
667	3	0	0	0	0	0	0	200	300	0	13.6569	-115.866	-511.524	-23363.7	-3963.33	1909.33	192.252	948.675	0	0	0	0	0	0	0	603	903	0
667	4	0	0	0	0	0	0	200	300	0	10.4526	-116.781	-513.05	-23272.2	-3963.33	1726.23	192.275	948.36	0	0	0	0	0	0	0	603	903	0
667	5	0	0	0	0	0	0	200	300	0	9.84222	-117.544	-512.745	-23363.7	-3780.23	1817.78	192.627	948.566	0	0	0	0	0	0	0	603	903	0
667	6	0	0	0	0	0	0	200	300	0	9.38446	-118.154	-512.44	-22906	-4573.68	1680.45	191.075	947.7	0	0	0	0	0	0	0	603	903	0
667	7	0	0	0	0	0	0	200	300	0	10.1474	-117.086	-509.693	-22265.1	-3719.19	1909.33	192.703	946.683	0	0	0	0	0	0	0	603	903	0
667	8	0	0	0	0	0	0	200	300	0	8.77411	-118.765	-513.966	-22539.7	-4085.4	2046.66	192.051	946.855	0	0	0	0	0	0	0	603	903	0
667	9	0	0	0	0	0	0	200	300	0	6.94305	-119.68	-514.576	-21624.2	-4512.65	1909.33	191.23	945.023	0	0	0	0	0	0	0	603	903	0
668	0	0	0	0	0	0	0	200	300	0	6.3327	-121.206	-514.881	-22173.5	-4451.61	2092.44	191.354	946.065	0	0	0	0	0	0	0	603	903	0
668	1	0	0	0	0	0	0	200	300	0	4.04388	-121.206	-516.407	-21624.2	-4146.44	2046.66	191.971	944.874	0	0	0	0	0	0	0	603	903	0
668	2	0	0	0	0	0	0	200	300	0	4.19647	-121.817	-519.459	-21532.7	-4268.51	2367.1	191.783	944.452	0	0	0	0	0	0	0	603	903	0
668	3	0	0	0	0	0	0	200	300	0	4.04388	-123.495	-519.154	-21349.6	-5061.96	2183.99	190.25	944.124	0	0	0	0	0	0	0	603	903	0
668	4	0	0	0	0	0	0	200	300	0	1.90765	-123.648	-519.154	-21715.8	-4512.65	2870.64	191.308	944.829	0	0	0	0	0	0	0	603	903	0
668	5	0	0	0	0	0	0	200	300	0	0.229187	-123.342	-520.68	-21166.4	-4390.58	2504.42	191.568	943.652	0	0	0	0	0	0	0	603	903	0
668	6	0	0	0	0	0	0	200	300	0	0.839539	-124.716	-523.121	-20891.8	-4939.89	2412.87	190.557	942.937	0	0	0	0	0	0	0	603	903	0
668	7	0	0	0	0	0	0	200	300	0	0.381775	-125.936	-525.257	-20617.1	-5489.21	2595.98	189.549	942.252	0	0	0	0	0	0	0	603	903	0
668	8	0	0	0	0	0	0	200	300	0	-2.97516	-126.852	-524.952	-20891.8	-5245.07	2550.2	190.008	942.798	0	0	0	0	0	0	0	603	903	0
668	9	0	0	0	0	0	0	200	300	0	-1.60187	-126.852	-528.309	-20617.1	-5367.14	2687.53	189.841	942.025	0	0	0	0	0	0	0	603	903	0
669	0	0	0	0	0	0	0	200	300	0	-4.9588	-128.225	-531.056	-19884.7	-5245.07	2595.98	190.123	940.444	0	0	0	0	0	0	0	603	903	0
669	1	0	0	0	0	0	0	200	300	0	-4.19586	-129.446	-533.497	-20342.5	-5489.21	2962.19	189.711	941.13	0	0	0	0	0	0	0	603	903	0
669	2	0	0	0	0	0	0	200	300	0	-6.02692	-130.056	-535.328	-20067.8	-5306.1	2870.64	190.088	940.487	0	0	0	0	0	0	0	603	903	0
669	3	0	0	0	0	0	0	200	300	0	-7.40021	-129.904	-533.192	-19884.7	-5794.38	2824.86	189.133	940.294	0	0	0	0	0	0	0	603	903	0
669	4	0	0	0	0	0	0	200	300	0	-7.40021	-130.972	-540.516	-20250.9	-5733.35	3191.07	189.393	940.466	0	0	0	0	0	0	0	603	903	0
669	5	0	0	0	0	0	0	200	300	0	-7.70538	-133.718	-542.652	-19793.2	-5916.46	3053.74	189.097	939.475	0	0	0	0	0	0	0	603	903	0
669	6	0	0	0	0	0	0	200	300	0	-8.62091	-133.108	-550.587	-19426.9	-6282.67	3053.74	188.589	938.284	0	0	0	0	0	0	0	603	903	0
669	7	0	0	0	0	0	0	200	300	0	-9.53644	-134.481	-549.671	-19610.1	-6160.6	3145.29	188.792	938.676	0	0	0	0	0	0	0	603	903	0
669	8	0	0	0	0	0	0	200	300	0	-11.3675	-134.634	-555.775	-19610.1	-6099.56	2962.19	189.025	938.284	0	0	0	0	0	0	0	603	903	0
669	9	0	0	0	0	0	0	200	300	0	-13.046	-136.77	-557.301	-18786.1	-6221.63	3191.07	188.836	936.709	0	0	0	0	0	0	0	603	903	0
670	0	0	0	0	0	0	0	200	300	0	-11.9778	-136.465	-563.099	-19152.3	-7015.09	3145.29	187.542	937.012	0	0	0	0	0	0	0	603	903	0
670	1	0	0	0	0	0	0	200	300	0	-13.046	-140.89	-567.677	-18877.6	-6770.95	2870.64	188.073	936.254	0	0	0	0	0	0	0	603	903	0
670	2	0	0	0	0	0	0	200	300	0	-15.3348	-138.296	-570.728	-18969.2	-6587.84	3236.85	188.457	936.237	0	0	0	0	0	0	0	603	903	0
670	3	0	0	0	0	0	0	200	300	0	-17.1658	-141.043	-575.611	-17412.8	-7015.09	3419.95	187.813	933.251	0	0	0	0	0	0	0	603	903	0
670	4	0	0	0	0	0	0	200	300	0	-15.0296	-141.653	-579.884	-18694.5	-7015.09	3557.28	187.903	935.238	0	0	0	0	0	0	0	603	903	0
670	5	0	0	0	0	0	0	200	300	0	-15.9451	-143.179	-584.461	-18419.9	-7137.16	3374.18	187.788	934.516	0	0	0	0	0	0	0	603	903	0
670	6	0	0	0	0	0	0	200	300	0	-17.0132	-143.637	-585.072	-18969.2	-7198.19	3465.73	187.697	935.422	0	0	0	0	0	0	0	603	903	0
670	7	0	0	0	0	0	0	200	300	0	-17.471	-143.942	-589.954	-18328.3	-7564.4	3374.18	187.178	934.067	0	0	0	0	0	0	0	603	903	0
670	8	0	0	0	0	0	0	200	300	0	-17.3184	-145.62	-590.87	-18145.2	-7076.12	3465.73	188.024	933.709	0	0	0	0	0	0	0	603	903	0
670	9	0	0	0	0	0	0	200	300	0	-14.877	-145.163	-593.311	-18145.2	-7259.23	3831.94	187.765	933.583	0	0	0	0	0	0	0	603	903	0
671	0	0	0	0	0	0	0	200	300	0	-17.471	-144.705	-596.668	-18145.2	-7381.3	3557.28	187.629	933.411	0	0	0	0	0	0	0	603	903	0
671	1	0	0	0	0	0	0	200	300	0	-16.0977	-143.789	-600.025	-18419.9	-7381.3	4015.04	187.698	933.699	0	0	0	0	0	0	0	603	903	0
671	2	0	0	0	0	0	0	200	300	0	-18.3865	-144.094	-600.941	-17687.4	-7381.3	3740.39	187.717	932.433	0	0	0	0	0	0	0	603	903	0
671	3	0	0	0	0	0	0	200	300	0	-15.9451	-143.179	-602.161	-17870.6	-7869.58	3786.16	186.931	932.677	0	0	0	0	0	0	0	603	903	0
671	4	0	0	0	0	0	0	200	300	0	-16.2503	-141.348	-604.908	-18328.3	-8113.72	4060.82	186.587	933.299	0	0	0	0	0	0	0	603	903	0
671	5	0	0	0	0	0	0	200	300	0	-16.2503	-141.043	-607.044	-18145.2	-7198.19	3694.61	188.142	932.891	0	0	0	0	0	0	0	603	903	0
671	6	0	0	0	0	0	0	200	300	0	-17.7762	-140.585	-609.181	-17504.3	-7930.62	3831.94	186.982	931.734	0	0	0	0	0	0	0	603	903	0
671	7	0	0	0	0	0	0	200	300	0	-16.5555	-140.127	-610.096	-17504.3	-7747.51	4015.04	187.301	931.691	0	0	0	0	0	0	0	603	903	0
671	8	0	0	0	0	0	0	200	300	0	-17.9288	-139.059	-613.148	-17962.1	-7869.58	3877.72	187.165	932.295	0	0	0	0	0	0	0	603	903	0
671	9	0	0	0	0	0	0	200	300	0	-17.471	-138.296	-615.589	-18053.7	-7686.47	3740.39	187.514	932.328	0	0	0	0	0	0	0	603	903	0
672	0	0	0	0	0	0	0	200	300	0	-17.9288	-137.533	-617.725	-17687.4	-8296.83	4015.04	186.569	931.633	0	0	0	0	0	0	0	603	903	0
672	1	0	0	0	0	0	0	200	300	0	-17.471	-137.991	-618.031	-17504.3	-7686.47	3786.16	187.563	931.323	0	0	0	0	0	0	0	603	903	0
672	2	0	0	0	0	0	0	200	300	0	-17.6236	-137.533	-621.693	-17870.6	-7808.54	4060.82	187.44	931.745	0	0	0	0	0	0	0	603	903	0
672	3	0	0	0	0	0	0	200	300	0	-18.9969	-136.77	-624.439	-17870.6	-8052.69	4015.04	187.104	931.619	0	0	0	0	0	0	0	603	903	0
672	4	0	0	0	0	0	0	200	300	0	-19.7598	-137.381	-627.186	-17046.6	-8174.76	4060.82	186.966	930.18	0	0	0	0	0	0	0	603	903	0
672	5	0	0	0	0	0	0	200	300	0	-18.2339	-137.381	-626.576	-16314.1	-8174.76	3923.49	186.953	929.037	0	0	0	0	0	0	0	603	903	0
672	6	0	0	0	0	0	0	200	300	0	-18.8443	-136.312	-629.322	-17138.1	-8296.83	3877.72	186.816	930.233	0	0	0	0	0	0	0	603	903	0
672	7	0	0	0	0	0	0	200	300	0	-20.6754	-135.855	-632.679	-17046.6	-8418.9	3923.49	186.693	929.943	0	0	0	0	0	0	0	603	903	0
672	8	0	0	0	0	0	0	200	300	0	-20.8279	-136.465	-635.12	-17870.6	-8113.72	3694.61	187.225	931.137	0	0	0	0	0	0	0	603	903	0
672	9	0	0	0	0	0	0	200	300	0	-19.1495	-136.16	-637.562	-17138.1	-8602	3923.49	186.508	929.881	0	0	0	0	0	0	0	603	903	0
673	0	0	0	0	0	0	0	200	300	0	-20.8279	-135.855	-635.426	-17138.1	-8724.07	3740.39	186.271	929.971	0	0	0	0	0	0	0	603	903	0
673	1	0	0	0	0	0	0	200	300	0	-21.2857	-134.176	-638.783	-17138.1	-8296.83	3831.94	187.012	929.829	0	0	0	0	0	0	0	603	903	0
673	2	0	0	0	0	0	0	200	300	0	-22.659	-136.007	-642.445	-17321.2	-8113.72	4015.04	187.371	929.961	0	0	0	0	0	0	0	603	903	0
673	3	0	0	0	0	0	0	200	300	0	-22.8116	-134.329	-648.548	-16955	-9090.28	4106.6	185.984	929.143	0	0	0	0	0	0	0	603	903	0
673	4	0	0	0	0	0	0	200	300	0	-22.3538	-133.871	-648.243	-16863.5	-8785.11	3694.61	186.448	929.014	0	0	0	0	0	0	0	603	903	0
673	5	0	0	0	0	0	0	200	300	0	-22.659	-132.498	-649.464	-17687.4	-8663.04	3831.94	186.661	930.234	0	0	0	0	0	0	0	603	903	0
673	6	0	0	0	0	0	0	200	300	0	-24.0323	-134.176	-652.821	-16863.5	-8785.11	3740.39	186.543	928.832	0	0	0	0	0	0	0	603	903	0
673	7	0	0	0	0	0	0	200	300	0	-24.0323	-132.803	-656.178	-17229.7	-8907.18	3923.49	186.426	929.258	0	0	0	0	0	0	0	603	903	0
673	8	0	0	0	0	0	0	200	300	0	-22.659	-132.04	-656.178	-16771.9	-8663.04	3831.94	186.798	928.56	0	0	0	0	0	0	0	603	903	0
673	9	0	0	0	0	0	0	200	300	0	-22.8116	-132.04	-662.281	-17138.1	-8235.79	3740.39	187.565	928.878	0	0	0	0	0	0	0	603	903	0
674	0	0	0	0	0	0	0	200	300	0	-23.4219	-131.735	-664.723	-17595.9	-9151.32	3648.83	186.233	929.471	0	0	0	0	0	0	0	603	903	0
674	1	0	0	0	0	0	0	200	300	0	-23.5745	-130.972	-666.248	-17779	-8724.07	3465.73	186.906	929.685	0	0	0	0	0	0	0	603	903	0
674	2	0	0	0	0	0	0	200	300	0	-21.7435	-129.599	-668.69	-17504.3	-8907.18	3877.72	186.68	929.177	0	0	0	0	0	0	0	603	903	0
674	3	0	0	0	0	0	0	200	300	0	-19.7598	-128.225	-671.742	-17138.1	-8968.21	3557.28	186.649	928.513	0	0	0	0	0	0	0	603	903	0
674	4	0	0	0	0	0	0	200	300	0	-22.2012	-128.988	-670.826	-17412.8	-9212.35	3557.28	186.267	928.957	0	0	0	0	0	0	0	603	903	0
674	5	0	0	0	0	0	0	200	300	0	-23.1168	-126.394	-674.488	-17687.4	-8479.93	3511.51	187.428	929.224	0	0	0	0	0	0	0	603	903	0
674	6	0	0	0	0	0	0	200	300	0	-21.7435	-127.767	-676.93	-17595.9	-8968.21	3740.39	186.752	928.994	0	0	0	0	0	0	0	603	903	0
674	7	0	0	0	0	0	0	200	300	0	-20.6754	-125.784	-679.981	-17504.3	-8907.18	3603.06	186.901	928.742	0	0	0	0	0	0	0	603	903	0
674	8	0	0	0	0	0	0	200	300	0	-20.6754	-124.868	-683.643	-18328.3	-9151.32	3557.28	186.614	929.81	0	0	0	0	0	0	0	603	903	0
674	9	0	0	0	0	0	0	200	300	0	-21.4383	-124.716	-685.474	-17870.6	-9029.25	3328.4	186.828	929.07	0	0	0	0	0	0	0	603	903	0
675	0	0	0	0	0	0	0	200	300	0	-19.7598	-124.105	-686.085	-18053.7	-9090.28	3603.06	186.751	929.314	0	0	0	0	0	0	0	603	903	0
675	1	0	0	0	0	0	0	200	300	0	-19.9124	-122.732	-687.916	-17687.4	-8663.04	3282.62	187.407	928.712	0	0	0	0	0	0	0	603	903	0
675	2	0	0	0	0	0	0	200	300	0	-20.065	-121.511	-690.968	-17687.4	-8785.11	3374.18	187.286	928.598	0	0	0	0	0	0	0	603	903	0
675	3	0	0	0	0	0	0	200	300	0	-19.9124	-120.901	-692.799	-18511.4	-8968.21	3328.4	187.055	929.72	0	0	0	0	0	0	0	603	903	0
675	4	0	0	0	0	0	0	200	300	0	-20.8279	-119.833	-693.714	-17870.6	-8785.11	3282.62	187.336	928.761	0	0	0	0	0	0	0	603	903	0
675	5	0	0	0	0	0	0	200	300	0	-20.3702	-118.46	-696.461	-18053.7	-8846.14	3145.29	187.298	928.922	0	0	0	0	0	0	0	603	903	0
675	6	0	0	0	0	0	0	200	300	0	-19.6072	-117.849	-700.733	-17779	-9456.49	2824.86	186.505	928.372	0	0	0	0	0	0	0	603	903	0
675	7	0	0	0	0	0	0	200	300	0	-17.6236	-118.002	-702.259	-17962.1	-8785.11	3053.74	187.49	928.578	0	0	0	0	0	0	0	603	903	0
675	8	0	0	0	0	0	0	200	300	0	-20.6754	-116.781	-703.48	-18236.8	-8724.07	3007.97	187.599	928.924	0	0	0	0	0	0	0	603	903	0
675	9	0	0	0	0	0	0	200	300	0	-19.1495	-115.56	-705.921	-18694.5	-8968.21	3328.4	187.296	929.482	0	0	0	0	0	0	0	603	903	0
676	0	0	0	0	0	0	0	200	300	0	-20.3702	-113.882	-709.278	-18419.9	-9029.25	2870.64	187.27	928.97	0	0	0	0	0	0	0	603	903	0
676	1	0	0	0	0	0	0	200	300	0	-19.3021	-113.882	-708.973	-18694.5	-9029.25	2916.41	187.264	929.368	0	0	0	0	0	0	0	603	903	0
676	2	0	0	0	0	0	0	200	300	0	-19.1495	-112.204	-710.499	-18694.5	-9273.39	2733.31	186.948	929.312	0	0	0	0	0	0	0	603	903	0
676	3	0	0	0	0	0	0	200	300	0	-20.9805	-111.441	-710.804	-18877.6	-9029.25	2733.31	187.297	929.558	0	0	0	0	0	0	0	603	903	0
676	4	0	0	0	0	0	0	200	300	0	-20.3702	-110.525	-714.771	-18877.6	-8846.14	2824.86	187.624	929.411	0	0	0	0	0	0	0	603	903	0
676	5	0	0	0	0	0	0	200	300	0	-19.6072	-110.983	-715.992	-18603	-8785.11	2733.31	187.73	928.982	0	0	0	0	0	0	0	603	903	0
676	6	0	0	0	0	0	0	200	300	0	-19.6072	-109.457	-717.823	-19335.4	-9273.39	2870.64	187.081	929.936	0	0	0	0	0	0	0	603	903	0
676	7	0	0	0	0	0	0	200	300	0	-21.4383	-107.931	-717.823	-18236.8	-9273.39	2733.31	187.081	928.406	0	0	0	0	0	0	0	603	903	0
676	8	0	0	0	0	0	0	200	300	0	-21.2857	-106.863	-720.265	-18786.1	-8968.21	2733.31	187.549	929.082	0	0	0	0	0	0	0	603	903	0
676	9	0	0	0	0	0	0	200	300	0	-19.7598	-106.863	-721.79	-18877.6	-9151.32	2733.31	187.321	929.154	0	0	0	0	0	0	0	603	903	0
677	0	0	0	0	0	0	0	200	300	0	-19.3021	-106.1	-722.706	-19152.3	-9090.28	2824.86	187.422	929.501	0	0	0	0	0	0	0	603	903	0
677	1	0	0	0	0	0	0	200	300	0	-21.2857	-104.422	-723.927	-19060.7	-9212.35	2687.53	187.274	929.33	0	0	0	0	0	0	0	603	903	0
677	2	0	0	0	0	0	0	200	300	0	-19.4547	-104.269	-726.063	-19152.3	-8785.11	2595.98	187.9	929.378	0	0	0	0	0	0	0	603	903	0
677	3	0	0	0	0	0	0	200	300	0	-18.6917	-103.201	-727.284	-19060.7	-9273.39	2595.98	187.249	929.208	0	0	0	0	0	0	0	603	903	0
677	4	0	0	0	0	0	0	200	300	0	-19.4547	-102.743	-725.758	-19060.7	-8602	2367.1	188.148	929.263	0	0	0	0	0	0	0	603	903	0
677	5	0	0	0	0	0	0	200	300	0	-19.6072	-100.912	-727.589	-19335.4	-8724.07	2641.75	188.01	929.575	0	0	0	0	0	0	0	603	903	0
677	6	0	0	0	0	0	0	200	300	0	-20.2176	-100.302	-728.809	-19518.5	-9090.28	2367.1	187.527	929.781	0	0	0	0	0	0	0	603	903	0
677	7	0	0	0	0	0	0	200	300	0	-21.4383	-100.454	-729.725	-19060.7	-8907.18	2733.31	187.794	929.12	0	0	0	0	0	0	0	603	903	0
677	8	0	0	0	0	0	0	200	300	0	-20.9805	-99.6913	-728.809	-18969.2	-9029.25	2229.77	187.611	929.028	0	0	0	0	0	0	0	603	903	0
677	9	0	0	0	0	0	0	200	300	0	-19.9124	-98.318	-730.335	-19335.4	-9395.46	2321.32	187.135	929.475	0	0	0	0	0	0	0	603	903	0
678	0	0	0	0	0	0	0	200	300	0	-21.2857	-96.7921	-731.556	-18969.2	-8846.14	2183.99	187.908	928.93	0	0	0	0	0	0	0	603	903	0
678	1	0	0	0	0	0	0	200	300	0	-21.5909	-96.9447	-731.556	-19335.4	-8907.18	2275.54	187.824	929.431	0	0	0	0	0	0	0	603	903	0
678	2	0	0	0	0	0	0	200	300	0	-20.3702	-96.1818	-731.251	-18877.6	-8846.14	2229.77	187.903	928.816	0	0	0	0	0	0	0	603	903	0
678	3	0	0	0	0	0	0	200	300	0	-20.2176	-94.9611	-729.725	-19243.8	-9090.28	2183.99	187.543	929.371	0	0	0	0	0	0	0	603	903	0
678	4	0	0	0	0	0	0	200	300	0	-19.9124	-94.5033	-732.166	-19610.1	-9151.32	2321.32	187.501	929.784	0	0	0	0	0	0	0	603	903	0
678	5	0	0	0	0	0	0	200	300	0	-19.9124	-94.0456	-733.082	-19243.8	-9029.25	2183.99	187.683	929.251	0	0	0	0	0	0	0	603	903	0
678	6	0	0	0	0	0	0	200	300	0	-20.8279	-93.7404	-733.387	-18877.6	-9151.32	2138.21	187.522	928.74	0	0	0	0	0	0	0	603	903	0
678	7	0	0	0	0	0	0	200	300	0	-20.6754	-91.9093	-733.082	-18603	-8602	2229.77	188.266	928.376	0	0	0	0	0	0	0	603	903	0
678	8	0	0	0	0	0	0	200	300	0	-19.7598	-91.4516	-734.608	-19518.5	-8663.04	2229.77	188.207	929.57	0	0	0	0	0	0	0	603	903	0
678	9	0	0	0	0	0	0	200	300	0	-20.6754	-91.1464	-735.218	-19060.7	-8968.21	1909.33	187.802	928.925	0	0	0	0	0	0	0	603	903	0
679	0	0	0	0	0	0	0	200	300	0	-20.9805	-90.536	-734.608	-18877.6	-8724.07	2138.21	188.124	928.698	0	0	0	0	0	0	0	603	903	0
679	1	0	0	0	0	0	0	200	300	0	-19.9124	-88.705	-734.913	-18511.4	-8968.21	1497.34	187.797	928.189	0	0	0	0	0	0	0	603	903	0
679	2	0	0	0	0	0	0	200	300	0	-19.4547	-88.8576	-734.913	-18969.2	-9273.39	2000.88	187.382	928.811	0	0	0	0	0	0	0	603	903	0
679	3	0	0	0	0	0	0	200	300	0	-20.2176	-88.5524	-736.744	-18694.5	-8846.14	2000.88	187.993	928.375	0	0	0	0	0	0	0	603	903	0
679	4	0	0	0	0	0	0	200	300	0	-20.6754	-88.3998	-735.523	-18603	-8724.07	2092.44	188.139	928.292	0	0	0	0	0	0	0	603	903	0
679	5	0	0	0	0	0	0	200	300	0	-20.5228	-86.8739	-735.523	-18603	-8907.18	2000.88	187.89	928.292	0	0	0	0	0	0	0	603	903	0
679	6	0	0	0	0	0	0	200	300	0	-19.4547	-85.8058	-736.439	-18328.3	-8907.18	2000.88	187.905	927.888	0	0	0	0	0	0	0	603	903	0
679	7	0	0	0	0	0	0	200	300	0	-18.5391	-85.8058	-736.744	-19060.7	-8663.04	1909.33	188.241	928.872	0	0	0	0	0	0	0	603	903	0
679	8	0	0	0	0	0	0	200	300	0	-19.7598	-85.3481	-736.134	-18419.9	-9029.25	1863.56	187.734	928.023	0	0	0	0	0	0	0	603	903	0
679	9	0	0	0	0	0	0	200	300	0	-19.3021	-83.517	-736.134	-18145.2	-8907.18	1909.33	187.9	927.649	0	0	0	0	0	0	0	603	903	0
680	0	0	0	0	0	0	0	200	300	0	-19.9124	-82.1437	-737.354	-18236.8	-8602	1726.23	188.334	927.733	0	0	0	0	0	0	0	603	903	0
680	1	0	0	0	0	0	0	200	300	0	-18.3865	-83.2118	-737.049	-18053.7	-8540.97	1863.56	188.412	927.495	0	0	0	0	0	0	0	603	903	0
680	2	0	0	0	0	0	0	200	300	0	-18.3865	-82.2963	-736.744	-18328.3	-8907.18	1634.67	187.91	927.878	0	0	0	0	0	0	0	603	903	0
680	3	0	0	0	0	0	0	200	300	0	-19.4547	-80.7704	-735.828	-17779	-8357.86	1772	188.642	927.162	0	0	0	0	0	0	0	603	903	0
680	4	0	0	0	0	0	0	200	300	0	-19.4547	-80.1601	-737.354	-18145.2	-8663.04	1588.9	188.251	927.609	0	0	0	0	0	0	0	603	903	0
680	5	0	0	0	0	0	0	200	300	0	-17.471	-81.3808	-735.828	-17779	-8663.04	1680.45	188.227	927.162	0	0	0	0	0	0	0	603	903	0
680	6	0	0	0	0	0	0	200	300	0	-15.64	-79.8549	-736.134	-17504.3	-8540.97	1817.78	188.398	926.779	0	0	0	0	0	0	0	603	903	0
680	7	0	0	0	0	0	0	200	300	0	-18.3865	-78.7868	-735.523	-17595.9	-8235.79	1909.33	188.803	926.923	0	0	0	0	0	0	0	603	903	0
680	8	0	0	0	0	0	0	200	300	0	-18.8443	-77.7187	-737.049	-17779	-8846.14	1772	187.998	927.122	0	0	0	0	0	0	0	603	903	0
680	9	0	0	0	0	0	0	200	300	0	-18.6917	-78.4816	-735.218	-17138.1	-9090.28	1726.23	187.636	926.31	0	0	0	0	0	0	0	603	903	0
681	0	0	0	0	0	0	0	200	300	0	-16.8607	-77.8712	-733.692	-17412.8	-7991.65	1817.78	189.108	926.733	0	0	0	0	0	0	0	603	903	0
681	1	0	0	0	0	0	0	200	300	0	-17.3184	-76.3454	-732.777	-17138.1	-8663.04	1588.9	188.178	926.388	0	0	0	0	0	0	0	603	903	0
681	2	0	0	0	0	0	0	200	300	0	-18.3865	-75.8876	-733.997	-16588.8	-8479.93	1634.67	188.447	925.601	0	0	0	0	0	0	0	603	903	0
681	3	0	0	0	0	0	0	200	300	0	-19.4547	-75.735	-733.082	-16680.4	-8296.83	1680.45	188.682	925.754	0	0	0	0	0	0	0	603	903	0
681	4	0	0	0	0	0	0	200	300	0	-17.6236	-75.735	-730.946	-16771.9	-8052.69	1588.9	188.983	925.945	0	0	0	0	0	0	0	603	903	0
681	5	0	0	0	0	0	0	200	300	0	-15.0296	-74.9721	-731.861	-16314.1	-8663.04	1634.67	188.163	925.291	0	0	0	0	0	0	0	603	903	0
681	6	0	0	0	0	0	0	200	300	0	-17.471	-74.3617	-730.641	-16863.5	-8174.76	1543.12	188.812	926.08	0	0	0	0	0	0	0	603	903	0
681	7	0	0	0	0	0	0	200	300	0	-17.6236	-74.0565	-731.556	-16588.8	-8540.97	1955.11	188.325	925.676	0	0	0	0	0	0	0	603	903	0
681	8	0	0	0	0	0	0	200	300	0	-18.0814	-72.6833	-727.284	-16222.6	-8663.04	1680.45	188.089	925.306	0	0	0	0	0	0	0	603	903	0
681	9	0	0	0	0	0	0	200	300	0	-17.3184	-74.9721	-728.199	-16131	-8479.93	1680.45	188.355	925.152	0	0	0	0	0	0	0	603	903	0
682	0	0	0	0	0	0	0	200	300	0	-17.9288	-72.9884	-727.589	-16222.6	-8296.83	2138.21	188.597	925.296	0	0	0	0	0	0	0	603	903	0
682	1	0	0	0	0	0	0	200	300	0	-18.9969	-71.9203	-729.42	-15764.8	-8357.86	1863.56	188.542	924.613	0	0	0	0	0	0	0	603	903	0
682	2	0	0	0	0	0	0	200	300	0	-18.9969	-71.7677	-726.368	-15581.7	-8235.79	1772	188.662	924.452	0	0	0	0	0	0	0	603	903	0
682	3	0	0	0	0	0	0	200	300	0	-17.471	-71.9203	-725.147	-15581.7	-7808.54	1772	189.232	924.488	0	0	0	0	0	0	0	603	903	0
682	4	0	0	0	0	0	0	200	300	0	-15.7925	-69.7841	-723.316	-15215.5	-7991.65	1543.12	188.951	924.036	0	0	0	0	0	0	0	603	903	0
682	5	0	0	0	0	0	0	200	300	0	-18.6917	-70.2419	-724.232	-16039.5	-8235.79	1634.67	188.628	925.147	0	0	0	0	0	0	0	603	903	0
682	6	0	0	0	0	0	0	200	300	0	-17.6236	-69.7841	-723.011	-15215.5	-8235.79	1817.78	188.609	924.045	0	0	0	0	0	0	0	603	903	0
682	7	0	0	0	0	0	0	200	300	0	-17.7762	-69.4789	-721.18	-14940.9	-7625.44	1588.9	189.426	923.717	0	0	0	0	0	0	0	603	903	0
682	8	0	0	0	0	0	0	200	300	0	-18.9969	-68.716	-720.875	-14483.1	-8540.97	1726.23	188.152	923.091	0	0	0	0	0	0	0	603	903	0
682	9	0	0	0	0	0	0	200	300	0	-18.0814	-67.953	-720.875	-14757.8	-7930.62	1634.67	188.999	923.472	0	0	0	0	0	0	0	603	903	0
683	0	0	0	0	0	0	0	200	300	0	-18.6917	-68.1056	-719.654	-14574.6	-8052.69	1726.23	188.81	923.252	0	0	0	0	0	0	0	603	903	0
683	1	0	0	0	0	0	0	200	300	0	-19.1495	-67.6479	-716.602	-13750.7	-8479.93	1588.9	188.166	922.189	0	0	0	0	0	0	0	603	903	0
683	2	0	0	0	0	0	0	200	300	0	-17.7762	-67.0375	-716.297	-13659.1	-8113.72	1680.45	188.673	922.069	0	0	0	0	0	0	0	603	903	0
683	3	0	0	0	0	0	0	200	300	0	-17.1658	-66.2746	-715.687	-13933.8	-7869.58	1497.34	189.004	922.469	0	0	0	0	0	0	0	603	903	0
683	4	0	0	0	0	0	0	200	300	0	-17.6236	-66.7323	-715.077	-14025.3	-8235.79	1680.45	188.483	922.614	0	0	0	0	0	0	0	603	903	0
683	5	0	0	0	0	0	0	200	300	0	-19.1495	-66.2746	-712.94	-13476	-8296.83	1634.67	188.363	921.902	0	0	0	0	0	0	0	603	903	0
683	6	0	0	0	0	0	0	200	300	0	-19.1495	-65.5116	-712.025	-13476	-7625.44	1680.45	189.29	921.926	0	0	0	0	0	0	0	603	903	0
683	7	0	0	0	0	0	0	200	300	0	-17.9288	-64.2909	-711.414	-13292.9	-8113.72	1497.34	188.595	921.685	0	0	0	0	0	0	0	603	903	0
683	8	0	0	0	0	0	0	200	300	0	-18.0814	-64.7487	-710.804	-13292.9	-8174.76	1405.79	188.499	921.701	0	0	0	0	0	0	0	603	903	0
683	9	0	0	0	0	0	0	200	300	0	-18.3865	-63.6806	-708.363	-13018.2	-7991.65	1726.23	188.718	921.378	0	0	0	0	0	0	0	603	903	0
684	0	0	0	0	0	0	0	200	300	0	-17.1658	-63.0702	-705.311	-12835.1	-8235.79	1405.79	188.323	921.198	0	0	0	0	0	0	0	603	903	0
684	1	0	0	0	0	0	0	200	300	0	-18.5391	-61.6969	-705.616	-12285.8	-8052.69	1497.34	188.588	920.411	0	0	0	0	0	0	0	603	903	0
684	2	0	0	0	0	0	0	200	300	0	-18.3865	-62.3073	-707.447	-12194.3	-7381.3	1726.23	189.566	920.237	0	0	0	0	0	0	0	603	903	0
684	3	0	0	0	0	0	0	200	300	0	-16.8607	-63.0702	-705.311	-11919.6	-8174.76	1680.45	188.41	919.9	0	0	0	0	0	0	0	603	903	0
684	4	0	0	0	0	0	0	200	300	0	-18.8443	-61.6969	-703.48	-11370.3	-7869.58	1222.69	188.813	919.163	0	0	0	0	0	0	0	603	903	0
684	5	0	0	0	0	0	0	200	300	0	-18.6917	-61.6969	-702.259	-12011.2	-7869.58	1588.9	188.794	920.104	0	0	0	0	0	0	0	603	903	0
684	6	0	0	0	0	0	0	200	300	0	-16.5555	-60.4762	-702.87	-11370.3	-7869.58	1268.46	188.804	919.177	0	0	0	0	0	0	0	603	903	0
684	7	0	0	0	0	0	0	200	300	0	-17.1658	-61.0866	-703.785	-11370.3	-8052.69	1451.57	188.558	919.156	0	0	0	0	0	0	0	603	903	0
684	8	0	0	0	0	0	0	200	300	0	-17.9288	-60.4762	-701.038	-11187.2	-7625.44	1497.34	189.123	918.958	0	0	0	0	0	0	0	603	903	0
684	9	0	0	0	0	0	0	200	300	0	-18.9969	-60.0185	-699.207	-11187.2	-7625.44	1497.34	189.094	919	0	0	0	0	0	0	0	603	903	0
685	0	0	0	0	0	0	0	200	300	0	-18.5391	-58.9503	-699.818	-10821	-7930.62	1360.02	188.668	918.463	0	0	0	0	0	0	0	603	903	0
685	1	0	0	0	0	0	0	200	300	0	-17.9288	-59.2555	-699.207	-10912.5	-7625.44	1314.24	189.094	918.607	0	0	0	0	0	0	0	603	903	0
685	2	0	0	0	0	0	0	200	300	0	-17.3184	-58.6452	-697.987	-10729.4	-7747.51	1451.57	188.9	918.372	0	0	0	0	0	0	0	603	903	0
685	3	0	0	0	0	0	0	200	300	0	-18.8443	-58.1874	-696.461	-10088.6	-7930.62	1268.46	188.613	917.486	0	0	0	0	0	0	0	603	903	0
685	4	0	0	0	0	0	0	200	300	0	-18.8443	-57.8822	-696.766	-9813.9	-7564.4	1451.57	189.144	917.085	0	0	0	0	0	0	0	603	903	0
685	5	0	0	0	0	0	0	200	300	0	-18.0814	-57.4245	-693.409	-8989.93	-7320.26	1314.24	189.443	915.965	0	0	0	0	0	0	0	603	903	0
685	6	0	0	0	0	0	0	200	300	0	-17.3184	-57.7296	-696.156	-9447.69	-7869.58	1588.9	188.696	916.571	0	0	0	0	0	0	0	603	903	0
685	7	0	0	0	0	0	0	200	300	0	-18.3865	-56.3564	-693.104	-9356.14	-7686.47	1360.02	188.91	916.499	0	0	0	0	0	0	0	603	903	0
685	8	0	0	0	0	0	0	200	300	0	-18.8443	-56.3564	-692.799	-9356.14	-7381.3	1085.36	189.346	916.505	0	0	0	0	0	0	0	603	903	0
685	9	0	0	0	0	0	0	200	300	0	-17.6236	-55.2882	-693.409	-8989.93	-7686.47	993.804	188.915	915.965	0	0	0	0	0	0	0	603	903	0
686	0	0	0	0	0	0	0	200	300	0	-15.7925	-56.2038	-691.273	-8989.93	-7442.33	1176.91	189.234	916.005	0	0	0	0	0	0	0	603	903	0
686	1	0	0	0	0	0	0	200	300	0	-17.7762	-55.5934	-690.968	-8623.72	-7869.58	1039.58	188.611	915.481	0	0	0	0	0	0	0	603	903	0
686	2	0	0	0	0	0	0	200	300	0	-18.8443	-54.2201	-689.137	-8257.51	-7564.4	1131.13	189.023	914.982	0	0	0	0	0	0	0	603	903	0
686	3	0	0	0	0	0	0	200	300	0	-18.9969	-54.0675	-690.052	-8532.17	-7503.37	1131.13	189.126	915.365	0	0	0	0	0	0	0	603	903	0
686	4	0	0	0	0	0	0	200	300	0	-17.9288	-53.9149	-689.137	-8257.51	-7381.3	902.251	189.289	914.982	0	0	0	0	0	0	0	603	903	0
686	5	0	0	0	0	0	0	200	300	0	-17.3184	-53.152	-687.611	-8532.17	-7503.37	1222.69	189.088	915.409	0	0	0	0	0	0	0	603	903	0
686	6	0	0	0	0	0	0	200	300	0	-18.8443	-52.8468	-685.78	-7433.53	-7198.19	1039.58	189.504	913.84	0	0	0	0	0	0	0	603	903	0
686	7	0	0	0	0	0	0	200	300	0	-18.5391	-52.3891	-687.306	-7891.3	-7198.19	1176.91	189.527	914.482	0	0	0	0	0	0	0	603	903	0
686	8	0	0	0	0	0	0	200	300	0	-19.4547	-51.0158	-687.306	-7433.53	-7320.26	948.028	189.349	913.816	0	0	0	0	0	0	0	603	903	0
686	9	0	0	0	0	0	0	200	300	0	-17.9288	-52.3891	-686.085	-7250.43	-7320.26	1222.69	189.33	913.568	0	0	0	0	0	0	0	603	903	0
687	0	0	0	0	0	0	0	200	300	0	-17.1658	-51.6261	-684.864	-7250.43	-7564.4	993.804	188.955	913.587	0	0	0	0	0	0	0	603	903	0
687	1	0	0	0	0	0	0	200	300	0	-18.3865	-49.9477	-683.338	-7616.64	-6954.05	856.475	189.823	914.146	0	0	0	0	0	0	0	603	903	0
687	2	0	0	0	0	0	0	200	300	0	-18.8443	-49.3373	-683.949	-6701.11	-7625.44	810.699	188.851	912.798	0	0	0	0	0	0	0	603	903	0
687	3	0	0	0	0	0	0	200	300	0	-17.6236	-49.9477	-683.033	-6701.11	-7442.33	764.922	189.104	912.811	0	0	0	0	0	0	0	603	903	0
687	4	0	0	0	0	0	0	200	300	0	-17.6236	-48.8795	-681.812	-6792.67	-7381.3	948.028	189.174	912.963	0	0	0	0	0	0	0	603	903	0
687	5	0	0	0	0	0	0	200	300	0	-18.6917	-47.964	-679.981	-6792.67	-7869.58	764.922	188.427	912.99	0	0	0	0	0	0	0	603	903	0
687	6	0	0	0	0	0	0	200	300	0	-18.6917	-47.2011	-681.507	-6243.35	-7320.26	810.699	189.259	912.161	0	0	0	0	0	0	0	603	903	0
687	7	0	0	0	0	0	0	200	300	0	-17.7762	-47.0485	-679.371	-5968.69	-7259.23	536.04	189.315	911.786	0	0	0	0	0	0	0	603	903	0
687	8	0	0	0	0	0	0	200	300	0	-17.6236	-46.5907	-678.455	-6426.45	-7381.3	902.251	189.12	912.472	0	0	0	0	0	0	0	603	903	0
687	9	0	0	0	0	0	0	200	300	0	-19.6072	-45.2174	-677.845	-5877.14	-7503.37	810.699	188.931	911.67	0	0	0	0	0	0	0	603	903	0
688	0	0	0	0	0	0	0	200	300	0	-18.9969	-44.6071	-679.066	-6243.35	-7259.23	810.699	189.31	912.194	0	0	0	0	0	0	0	603	903	0
688	1	0	0	0	0	0	0	200	300	0	-17.9288	-44.1493	-679.066	-5510.93	-7442.33	673.37	189.04	911.116	0	0	0	0	0	0	0	603	903	0
688	2	0	0	0	0	0	0	200	300	0	-17.9288	-43.539	-676.319	-5327.82	-7564.4	719.146	188.815	910.878	0	0	0	0	0	0	0	603	903	0
688	3	0	0	0	0	0	0	200	300	0	-19.3021	-43.0812	-675.404	-5327.82	-7259.23	856.475	189.252	910.888	0	0	0	0	0	0	0	603	903	0
688	4	0	0	0	0	0	0	200	300	0	-17.3184	-41.8605	-676.319	-5236.27	-7076.12	398.711	189.537	910.742	0	0	0	0	0	0	0	603	903	0
688	5	0	0	0	0	0	0	200	300	0	-17.7762	-41.0976	-676.014	-5510.93	-7686.47	490.264	188.63	911.152	0	0	0	0	0	0	0	603	903	0
688	6	0	0	0	0	0	0	200	300	0	-15.4874	-40.7924	-673.573	-4870.06	-7564.4	444.488	188.77	910.23	0	0	0	0	0	0	0	603	903	0
688	7	0	0	0	0	0	0	200	300	0	-18.3865	-39.7243	-674.183	-4961.61	-7442.33	444.488	188.961	910.359	0	0	0	0	0	0	0	603	903	0
688	8	0	0	0	0	0	0	200	300	0	-17.7762	-39.5717	-674.183	-4503.85	-7259.23	398.711	189.233	909.68	0	0	0	0	0	0	0	603	903	0
688	9	0	0	0	0	0	0	200	300	0	-17.471	-38.9613	-672.047	-4412.29	-7381.3	536.04	189.017	909.565	0	0	0	0	0	0	0	603	903	0
689	0	0	0	0	0	0	0	200	300	0	-17.1658	-37.7406	-672.352	-4229.19	-7259.23	307.159	189.203	909.29	0	0	0	0	0	0	0	603	903	0
689	1	0	0	0	0	0	0	200	300	0	-18.0814	-37.2829	-669.911	-4686.95	-6893.02	444.488	189.711	909.996	0	0	0	0	0	0	0	603	903	0
689	2	0	0	0	0	0	0	200	300	0	-17.3184	-37.2829	-671.436	-4412.29	-7381.3	261.382	189.007	909.571	0	0	0	0	0	0	0	603	903	0
689	3	0	0	0	0	0	0	200	300	0	-18.6917	-36.5199	-671.742	-4320.74	-7137.16	536.04	189.375	909.432	0	0	0	0	0	0	0	603	903	0
689	4	0	0	0	0	0	0	200	300	0	-16.4029	-36.5199	-672.047	-3771.42	-7320.26	261.382	189.108	908.612	0	0	0	0	0	0	0	603	903	0
689	5	0	0	0	0	0	0	200	300	0	-18.3865	-35.9096	-670.521	-3954.53	-7137.16	-59.0523	189.356	908.898	0	0	0	0	0	0	0	603	903	0
689	6	0	0	0	0	0	0	200	300	0	-17.1658	-35.1466	-671.131	-3771.42	-7686.47	78.2768	188.547	908.62	0	0	0	0	0	0	0	603	903	0
689	7	0	0	0	0	0	0	200	300	0	-17.6236	-34.6889	-670.521	-3405.21	-6954.05	-59.0523	189.629	908.078	0	0	0	0	0	0	0	603	903	0
689	8	0	0	0	0	0	0	200	300	0	-15.7925	-34.0785	-670.521	-3405.21	-7686.47	-13.276	188.537	908.078	0	0	0	0	0	0	0	603	903	0
689	9	0	0	0	0	0	0	200	300	0	-16.5555	-32.8578	-668.385	-3496.77	-7503.37	-104.829	188.774	908.232	0	0	0	0	0	0	0	603	903	0
690	0	0	0	0	0	0	0	200	300	0	-17.0132	-32.2475	-668.995	-3588.32	-7198.19	-104.829	189.24	908.364	0	0	0	0	0	0	0	603	903	0
690	1	0	0	0	0	0	0	200	300	0	-18.6917	-31.6371	-668.69	-3039	-7503.37	-150.605	188.779	907.545	0	0	0	0	0	0	0	603	903	0
690	2	0	0	0	0	0	0	200	300	0	-15.9451	-31.6371	-668.69	-3039	-7259.23	78.2768	189.144	907.545	0	0	0	0	0	0	0	603	903	0
690	3	0	0	0	0	0	0	200	300	0	-16.4029	-31.3319	-667.774	-2672.79	-7198.19	124.053	189.221	907.003	0	0	0	0	0	0	0	603	903	0
690	4	0	0	0	0	0	0	200	300	0	-17.3184	-29.9586	-666.248	-2855.9	-6954.05	-59.0523	189.562	907.287	0	0	0	0	0	0	0	603	903	0
690	5	0	0	0	0	0	0	200	300	0	-17.0132	-29.3483	-668.079	-2489.69	-7381.3	169.83	188.951	906.727	0	0	0	0	0	0	0	603	903	0
690	6	0	0	0	0	0	0	200	300	0	-15.9451	-29.3483	-665.638	-2947.45	-6954.05	-104.829	189.553	907.428	0	0	0	0	0	0	0	603	903	0
690	7	0	0	0	0	0	0	200	300	0	-15.9451	-29.0431	-668.079	-2215.03	-7381.3	-59.0523	188.951	906.315	0	0	0	0	0	0	0	603	903	0
690	8	0	0	0	0	0	0	200	300	0	-16.2503	-29.1957	-664.417	-2123.47	-7198.19	-59.0523	189.166	906.196	0	0	0	0	0	0	0	603	903	0
690	9	0	0	0	0	0	0	200	300	0	-15.1822	-27.8224	-665.943	-2031.92	-7625.44	-196.381	188.549	906.051	0	0	0	0	0	0	0	603	903	0
691	0	0	0	0	0	0	0	200	300	0	-16.7081	-26.4491	-666.554	-1391.05	-6831.98	-150.605	189.75	905.087	0	0	0	0	0	0	0	603	903	0
691	1	0	0	0	0	0	0	200	300	0	-14.2667	-26.9069	-666.859	-1665.71	-7259.23	124.053	189.114	905.498	0	0	0	0	0	0	0	603	903	0
691	2	0	0	0	0	0	0	200	300	0	-14.4193	-25.8388	-665.638	-1574.16	-7381.3	-333.711	188.911	905.365	0	0	0	0	0	0	0	603	903	0
691	3	0	0	0	0	0	0	200	300	0	-15.7925	-25.381	-664.417	-1574.16	-7137.16	-242.158	189.258	905.369	0	0	0	0	0	0	0	603	903	0
691	4	0	0	0	0	0	0	200	300	0	-16.8607	-24.4655	-664.723	-1391.05	-7198.19	-608.369	189.171	905.093	0	0	0	0	0	0	0	603	903	0
691	5	0	0	0	0	0	0	200	300	0	-15.4874	-24.9232	-664.723	-933.289	-7076.12	-287.934	189.355	904.404	0	0	0	0	0	0	0	603	903	0
691	6	0	0	0	0	0	0	200	300	0	-15.3348	-23.7025	-665.028	-933.289	-7381.3	-379.487	188.901	904.403	0	0	0	0	0	0	0	603	903	0
691	7	0	0	0	0	0	0	200	300	0	-16.5555	-23.3974	-663.807	-933.289	-7015.09	-150.605	189.432	904.406	0	0	0	0	0	0	0	603	903	0
691	8	0	0	0	0	0	0	200	300	0	-16.2503	-23.2448	-664.417	-750.183	-7503.37	-242.158	188.707	904.129	0	0	0	0	0	0	0	603	903	0
691	9	0	0	0	0	0	0	200	300	0	-15.3348	-22.4818	-662.891	-658.631	-7320.26	-333.711	188.957	903.994	0	0	0	0	0	0	0	603	903	0
692	0	0	0	0	0	0	0	200	300	0	-13.6563	-21.7189	-662.891	-567.078	-7137.16	-242.158	189.233	903.856	0	0	0	0	0	0	0	603	903	0
692	1	0	0	0	0	0	0	200	300	0	-14.877	-20.956	-662.891	-292.419	-7320.26	-516.816	188.957	903.441	0	0	0	0	0	0	0	603	903	0
692	2	0	0	0	0	0	0	200	300	0	-16.2503	-20.956	-663.502	-292.419	-7259.23	-562.593	189.059	903.441	0	0	0	0	0	0	0	603	903	0
692	3	0	0	0	0	0	0	200	300	0	-17.0132	-20.6508	-661.671	531.555	-7076.12	-425.263	189.306	902.197	0	0	0	0	0	0	0	603	903	0
692	4	0	0	0	0	0	0	200	300	0	-14.7244	-21.2611	-662.281	989.319	-7076.12	-379.487	189.316	901.506	0	0	0	0	0	0	0	603	903	0
692	5	0	0	0	0	0	0	200	300	0	-14.7244	-20.4982	-660.755	531.555	-7381.3	-562.593	188.829	902.196	0	0	0	0	0	0	0	603	903	0
692	6	0	0	0	0	0	0	200	300	0	-16.0977	-20.0404	-661.671	440.003	-7198.19	-699.922	189.121	902.335	0	0	0	0	0	0	0	603	903	0
692	7	0	0	0	0	0	0	200	300	0	-14.5718	-19.7353	-663.502	531.555	-7259.23	-562.593	189.059	902.199	0	0	0	0	0	0	0	603	903	0
692	8	0	0	0	0	0	0	200	300	0	-15.0296	-20.193	-661.366	1263.98	-7686.47	-516.816	188.378	901.089	0	0	0	0	0	0	0	603	903	0
692	9	0	0	0	0	0	0	200	300	0	-14.4193	-19.4301	-661.671	1172.42	-7137.16	-242.158	189.213	901.228	0	0	0	0	0	0	0	603	903	0
693	0	0	0	0	0	0	0	200	300	0	-14.877	-19.4301	-660.45	1080.87	-7076.12	-379.487	189.286	901.363	0	0	0	0	0	0	0	603	903	0
693	1	0	0	0	0	0	0	200	300	0	-15.64	-19.4301	-661.366	1447.08	-7198.19	-471.04	189.116	900.812	0	0	0	0	0	0	0	603	903	0
693	2	0	0	0	0	0	0	200	300	0	-15.0296	-18.5146	-657.703	2179.5	-7381.3	-379.487	188.777	899.686	0	0	0	0	0	0	0	603	903	0
693	3	0	0	0	0	0	0	200	300	0	-14.4193	-19.4301	-660.145	1721.74	-7015.09	-562.593	189.373	900.392	0	0	0	0	0	0	0	603	903	0
693	4	0	0	0	0	0	0	200	300	0	-14.7244	-18.8197	-658.924	2087.95	-7686.47	-745.698	188.335	899.831	0	0	0	0	0	0	0	603	903	0
693	5	0	0	0	0	0	0	200	300	0	-15.4874	-17.7516	-658.619	1721.74	-7381.3	-516.816	188.793	900.386	0	0	0	0	0	0	0	603	903	0
693	6	0	0	0	0	0	0	200	300	0	-15.9451	-17.7516	-660.45	2911.93	-7259.23	-837.251	189.009	898.591	0	0	0	0	0	0	0	603	903	0
693	7	0	0	0	0	0	0	200	300	0	-14.1141	-18.0568	-658.619	2728.82	-7015.09	-654.145	189.349	898.857	0	0	0	0	0	0	0	603	903	0
693	8	0	0	0	0	0	0	200	300	0	-14.1141	-17.2939	-658.314	3003.48	-7503.37	-699.922	188.602	898.438	0	0	0	0	0	0	0	603	903	0
693	9	0	0	0	0	0	0	200	300	0	-15.3348	-17.2939	-657.703	2911.93	-7137.16	-379.487	189.148	898.573	0	0	0	0	0	0	0	603	903	0
694	0	0	0	0	0	0	0	200	300	0	-15.1822	-16.6835	-658.619	3369.69	-7503.37	-516.816	188.607	897.884	0	0	0	0	0	0	0	603	903	0
694	1	0	0	0	0	0	0	200	300	0	-14.5718	-16.9887	-654.957	3735.9	-7442.33	-837.251	188.637	897.296	0	0	0	0	0	0	0	603	903	0
694	2	0	0	0	0	0	0	200	300	0	-14.2667	-16.3783	-659.229	3644.35	-7564.4	-654.145	188.525	897.472	0	0	0	0	0	0	0	603	903	0
694	3	0	0	0	0	0	0	200	300	0	-14.4193	-15.9206	-657.398	4010.56	-6770.95	-699.922	189.7	896.899	0	0	0	0	0	0	0	603	903	0
694	4	0	0	0	0	0	0	200	300	0	-15.4874	-17.2939	-658.009	3827.45	-7503.37	-425.263	188.597	897.183	0	0	0	0	0	0	0	603	903	0
694	5	0	0	0	0	0	0	200	300	0	-15.9451	-15.1576	-656.483	4926.09	-7503.37	-608.369	188.57	895.496	0	0	0	0	0	0	0	603	903	0
694	6	0	0	0	0	0	0	200	300	0	-14.2667	-15.6154	-655.872	4742.98	-7198.19	-379.487	189.025	895.768	0	0	0	0	0	0	0	603	903	0
694	7	0	0	0	0	0	0	200	300	0	-14.2667	-15.005	-654.957	5017.64	-7808.54	-837.251	188.078	895.339	0	0	0	0	0	0	0	603	903	0
694	8	0	0	0	0	0	0	200	300	0	-15.1822	-15.1576	-654.957	4376.77	-7381.3	-883.027	188.73	896.318	0	0	0	0	0	0	0	603	903	0
694	9	0	0	0	0	0	0	200	300	0	-13.8089	-14.5473	-655.567	5200.75	-7686.47	-791.474	188.275	895.067	0	0	0	0	0	0	0	603	903	0
695	0	0	0	0	0	0	0	200	300	0	-12.5882	-14.3947	-655.262	5383.85	-7320.26	-791.474	188.828	894.784	0	0	0	0	0	0	0	603	903	0
695	1	0	0	0	0	0	0	200	300	0	-11.9778	-14.3947	-654.041	5566.96	-7625.44	-791.474	188.341	894.488	0	0	0	0	0	0	0	603	903	0
695	2	0	0	0	0	0	0	200	300	0	-14.877	-13.6317	-654.041	5750.06	-6954.05	-928.804	189.368	894.208	0	0	0	0	0	0	0	603	903	0
695	3	0	0	0	0	0	0	200	300	0	-14.5718	-13.6317	-654.957	5841.62	-7381.3	-699.922	188.73	894.081	0	0	0	0	0	0	0	603	903	0
695	4	0	0	0	0	0	0	200	300	0	-15.0296	-12.8688	-654.652	6299.38	-7503.37	-883.027	188.538	893.378	0	0	0	0	0	0	0	603	903	0
695	5	0	0	0	0	0	0	200	300	0	-14.4193	-13.6317	-651.6	6482.48	-7686.47	-791.474	188.204	893.052	0	0	0	0	0	0	0	603	903	0
695	6	0	0	0	0	0	0	200	300	0	-14.877	-13.4792	-650.379	6207.83	-7808.54	-1020.36	187.994	893.455	0	0	0	0	0	0	0	603	903	0
695	7	0	0	0	0	0	0	200	300	0	-15.64	-12.411	-651.6	6207.83	-7625.44	-425.263	188.297	893.473	0	0	0	0	0	0	0	603	903	0
695	8	0	0	0	0	0	0	200	300	0	-15.64	-12.1059	-652.21	7123.35	-7564.4	-791.474	188.402	892.078	0	0	0	0	0	0	0	603	903	0
695	9	0	0	0	0	0	0	200	300	0	-15.1822	-11.9533	-651.6	7123.35	-7320.26	-837.251	188.766	892.068	0	0	0	0	0	0	0	603	903	0
696	0	0	0	0	0	0	0	200	300	0	-14.877	-11.1903	-651.6	7398.01	-7625.44	-791.474	188.297	891.646	0	0	0	0	0	0	0	603	903	0
696	1	0	0	0	0	0	0	200	300	0	-15.1822	-11.6481	-650.074	7214.91	-7564.4	-1020.36	188.364	891.901	0	0	0	0	0	0	0	603	903	0
696	2	0	0	0	0	0	0	200	300	0	-15.1822	-10.7326	-651.6	7398.01	-7442.33	-1066.13	188.578	891.646	0	0	0	0	0	0	0	603	903	0
696	3	0	0	0	0	0	0	200	300	0	-15.64	-10.1222	-650.684	7947.33	-7320.26	-837.251	188.75	890.786	0	0	0	0	0	0	0	603	903	0
696	4	0	0	0	0	0	0	200	300	0	-15.0296	-10.7326	-650.379	8496.64	-7625.44	-974.58	188.275	889.936	0	0	0	0	0	0	0	603	903	0
696	5	0	0	0	0	0	0	200	300	0	-14.7244	-11.0377	-650.074	8862.85	-7320.26	-1066.13	188.739	889.366	0	0	0	0	0	0	0	603	903	0
696	6	0	0	0	0	0	0	200	300	0	-12.4356	-11.0377	-647.938	8405.09	-7442.33	-1111.91	188.514	890.028	0	0	0	0	0	0	0	603	903	0
696	7	0	0	0	0	0	0	200	300	0	-14.4193	-9.66446	-649.769	8588.2	-7625.44	-1020.36	188.264	889.783	0	0	0	0	0	0	0	603	903	0
696	8	0	0	0	0	0	0	200	300	0	-15.4874	-9.20669	-649.464	8679.75	-7625.44	-1111.91	188.259	889.636	0	0	0	0	0	0	0	603	903	0
696	9	0	0	0	0	0	0	200	300	0	-14.4193	-8.74893	-648.243	9229.06	-7808.54	-1020.36	187.954	888.763	0	0	0	0	0	0	0	603	903	0
697	0	0	0	0	0	0	0	200	300	0	-14.4193	-8.44376	-646.107	9229.06	-7625.44	-1111.91	188.198	888.716	0	0	0	0	0	0	0	603	903	0
697	1	0	0	0	0	0	0	200	300	0	-15.64	-8.29117	-648.548	9229.06	-7808.54	-1066.13	187.96	888.77	0	0	0	0	0	0	0	603	903	0
697	2	0	0	0	0	0	0	200	300	0	-15.9451	-8.13858	-647.328	9503.72	-7381.3	-837.251	188.597	888.319	0	0	0	0	0	0	0	603	903	0
697	3	0	0	0	0	0	0	200	300	0	-13.9615	-7.52823	-647.328	10053	-7991.65	-1020.36	187.654	887.47	0	0	0	0	0	0	0	603	903	0
697	4	0	0	0	0	0	0	200	300	0	-15.1822	-6.76529	-643.971	10327.7	-7564.4	-1157.69	188.254	886.963	0	0	0	0	0	0	0	603	903	0
697	5	0	0	0	0	0	0	200	300	0	-14.1141	-6.46011	-645.496	9320.62	-7381.3	-1020.36	188.565	888.561	0	0	0	0	0	0	0	603	903	0
697	6	0	0	0	0	0	0	200	300	0	-15.0296	-6.46011	-645.802	10419.2	-7442.33	-1295.01	188.476	886.866	0	0	0	0	0	0	0	603	903	0
697	7	0	0	0	0	0	0	200	300	0	-15.0296	-6.00235	-643.971	9961.49	-7869.58	-1386.57	187.78	887.531	0	0	0	0	0	0	0	603	903	0
697	8	0	0	0	0	0	0	200	300	0	-13.8089	-5.392	-644.276	11426.3	-8052.69	-1249.24	187.501	885.265	0	0	0	0	0	0	0	603	903	0
697	9	0	0	0	0	0	0	200	300	0	-14.1141	-5.392	-644.581	10877	-7320.26	-1386.57	188.643	886.125	0	0	0	0	0	0	0	603	903	0
698	0	0	0	0	0	0	0	200	300	0	-14.877	-4.93423	-644.886	10877	-7686.47	-1295.01	188.081	886.133	0	0	0	0	0	0	0	603	903	0
698	1	0	0	0	0	0	0	200	300	0	-13.1985	-4.78165	-643.055	11060.1	-7381.3	-1203.46	188.522	885.801	0	0	0	0	0	0	0	603	903	0
698	2	0	0	0	0	0	0	200	300	0	-14.877	-4.01871	-642.445	11517.9	-7991.65	-974.58	187.561	885.072	0	0	0	0	0	0	0	603	903	0
698	3	0	0	0	0	0	0	200	300	0	-12.8934	-3.71353	-642.75	12250.3	-7808.54	-1432.34	187.851	883.941	0	0	0	0	0	0	0	603	903	0
698	4	0	0	0	0	0	0	200	300	0	-14.2667	-4.01871	-643.971	12158.8	-7869.58	-1340.79	187.78	884.119	0	0	0	0	0	0	0	603	903	0
698	5	0	0	0	0	0	0	200	300	0	-15.0296	-4.01871	-643.665	11975.6	-7503.37	-1157.69	188.343	884.395	0	0	0	0	0	0	0	603	903	0
698	6	0	0	0	0	0	0	200	300	0	-14.4193	-3.40836	-643.36	12433.4	-7381.3	-1249.24	188.527	883.674	0	0	0	0	0	0	0	603	903	0
698	7	0	0	0	0	0	0	200	300	0	-13.1985	-2.95059	-643.36	12891.2	-7808.54	-1432.34	187.863	882.963	0	0	0	0	0	0	0	603	903	0
698	8	0	0	0	0	0	0	200	300	0	-13.8089	-2.95059	-640.919	12708.1	-7381.3	-1249.24	188.483	883.172	0	0	0	0	0	0	0	603	903	0
698	9	0	0	0	0	0	0	200	300	0	-14.5718	-3.10318	-644.276	12525	-7503.37	-1569.67	188.354	883.56	0	0	0	0	0	0	0	603	903	0
699	0	0	0	0	0	0	0	200	300	0	-14.2667	-1.88248	-640.614	12708.1	-7686.47	-1523.9	188.001	883.163	0	0	0	0	0	0	0	603	903	0
699	1	0	0	0	0	0	0	200	300	0	-12.8934	-1.42471	-641.224	13257.4	-8174.76	-1569.67	187.251	882.325	0	0	0	0	0	0	0	603	903	0
699	2	0	0	0	0	0	0	200	300	0	-13.3511	-1.27212	-642.75	13623.6	-7320.26	-1523.9	188.611	881.804	0	0	0	0	0	0	0	603	903	0
699	3	0	0	0	0	0	0	200	300	0	-13.3511	-1.88248	-642.445	13623.6	-7747.51	-1432.34	187.941	881.794	0	0	0	0	0	0	0	603	903	0
699	4	0	0	0	0	0	0	200	300	0	-10.7571	-0.509185	-642.14	13715.1	-7442.33	-1615.45	188.41	881.641	0	0	0	0	0	0	0	603	903	0
699	5	0	0	0	0	0	0	200	300	0	-12.5882	-0.356597	-641.529	14356	-7564.4	-1432.34	188.209	880.622	0	0	0	0	0	0	0	603	903	0
699	6	0	0	0	0	0	0	200	300	0	-12.7408	0.711518	-642.445	14813.8	-7747.51	-1661.23	187.941	879.942	0	0	0	0	0	0	0	603	903	0
699	7	0	0	0	0	0	0	200	300	0	-11.9778	0.55893	-642.14	14447.6	-7747.51	-1569.67	187.935	880.501	0	0	0	0	0	0	0	603	903	0
699	8	0	0	0	0	0	0	200	300	0	-13.5037	0.711518	-641.529	14630.7	-7381.3	-1615.45	188.494	880.194	0	0	0	0	0	0	0	603	903	0
699	9	0	0	0	0	0	0	200	300	0	-13.1985	0.711518	-639.393	14813.8	-7503.37	-1523.9	188.265	879.832	0	0	0	0	0	0	0	603	903	0
700	0	0	0	0	0	0	0	200	300	0	-12.1304	0.864106	-640.614	15546.2	-8113.72	-1569.67	187.334	878.732	0	0	0	0	0	0	0	603	903	0
700	1	0	0	0	0	0	0	200	300	0	-12.283	1.62705	-643.971	15454.7	-8052.69	-1569.67	187.495	879.001	0	0	0	0	0	0	0	603	903	0
700	2	0	0	0	0	0	0	200	300	0	-12.283	1.16928	-643.36	15363.1	-7503.37	-1844.33	188.337	879.121	0	0	0	0	0	0	0	603	903	0
700	3	0	0	0	0	0	0	200	300	0	-10.6046	2.08481	-642.445	15454.7	-7747.51	-1569.67	187.941	878.944	0	0	0	0	0	0	0	603	903	0
700	4	0	0	0	0	0	0	200	300	0	-11.5201	2.84775	-643.055	15912.4	-7869.58	-1661.23	187.762	878.255	0	0	0	0	0	0	0	603	903	0
700	5	0	0	0	0	0	0	200	300	0	-9.23126	2.69516	-643.971	16187.1	-7625.44	-1752.78	188.159	877.864	0	0	0	0	0	0	0	603	903	0
700	6	0	0	0	0	0	0	200	300	0	-10.6046	3.00034	-644.886	16461.7	-7686.47	-1661.23	188.081	877.473	0	0	0	0	0	0	0	603	903	0
700	7	0	0	0	0	0	0	200	300	0	-11.0623	3.00034	-643.36	17011	-7564.4	-1386.57	188.242	876.559	0	0	0	0	0	0	0	603	903	0
700	8	0	0	0	0	0	0	200	300	0	-11.6727	2.84775	-642.75	16919.5	-7625.44	-1569.67	188.136	876.676	0	0	0	0	0	0	0	603	903	0
700	9	0	0	0	0	0	0	200	300	0	-11.0623	3.4581	-641.834	17285.7	-7381.3	-1752.78	188.5	876.068	0	0	0	0	0	0	0	603	903	0
701	0	0	0	0	0	0	0	200	300	0	-10.7571	4.22104	-644.581	17011	-7930.62	-1478.12	187.696	876.609	0	0	0	0	0	0	0	603	903	0
701	1	0	0	0	0	0	0	200	300	0	-12.1304	4.52622	-645.496	17011	-8174.76	-2164.77	187.336	876.647	0	0	0	0	0	0	0	603	903	0
701	2	0	0	0	0	0	0	200	300	0	-11.9778	4.06845	-643.665	18475.9	-7503.37	-1981.66	188.343	874.296	0	0	0	0	0	0	0	603	903	0
701	3	0	0	0	0	0	0	200	300	0	-11.0623	5.13657	-644.886	18567.4	-7930.62	-1798.55	187.702	874.208	0	0	0	0	0	0	0	603	903	0
701	4	0	0	0	0	0	0	200	300	0	-11.3675	5.28915	-645.496	18659	-7686.47	-1798.55	188.092	874.094	0	0	0	0	0	0	0	603	903	0
701	5	0	0	0	0	0	0	200	300	0	-11.6727	5.28915	-647.328	18292.8	-7930.62	-1707	187.749	874.741	0	0	0	0	0	0	0	603	903	0
701	6	0	0	0	0	0	0	200	300	0	-12.283	5.59433	-643.665	18842.1	-7930.62	-1615.45	187.679	873.727	0	0	0	0	0	0	0	603	903	0
701	7	0	0	0	0	0	0	200	300	0	-10.452	6.05209	-644.886	18750.5	-7747.51	-1798.55	187.986	873.924	0	0	0	0	0	0	0	603	903	0
701	8	0	0	0	0	0	0	200	300	0	-8.46832	6.66245	-647.633	19391.4	-7808.54	-2027.44	187.943	873.058	0	0	0	0	0	0	0	603	903	0
701	9	0	0	0	0	0	0	200	300	0	-9.68903	6.50986	-647.938	19116.8	-7869.58	-1890.11	187.854	873.496	0	0	0	0	0	0	0	603	903	0
702	0	0	0	0	0	0	0	200	300	0	-12.283	6.81503	-646.412	19940.7	-8113.72	-1707	187.448	872.152	0	0	0	0	0	0	0	603	903	0
702	1	0	0	0	0	0	0	200	300	0	-12.1304	5.89951	-644.276	20306.9	-7930.62	-1890.11	187.691	871.481	0	0	0	0	0	0	0	603	903	0
702	2	0	0	0	0	0	0	200	300	0	-10.6046	6.96762	-648.243	20673.2	-7503.37	-1798.55	188.425	871.109	0	0	0	0	0	0	0	603	903	0
702	3	0	0	0	0	0	0	200	300	0	-10.7571	8.03574	-649.769	20398.5	-8052.69	-1981.66	187.607	871.607	0	0	0	0	0	0	0	603	903	0
702	4	0	0	0	0	0	0	200	300	0	-11.8253	8.03574	-648.548	20947.8	-8235.79	-1844.33	187.301	870.701	0	0	0	0	0	0	0	603	903	0
702	5	0	0	0	0	0	0	200	300	0	-11.5201	8.34091	-647.022	20764.7	-7991.65	-2164.77	187.649	870.907	0	0	0	0	0	0	0	603	903	0
702	6	0	0	0	0	0	0	200	300	0	-10.2994	8.79868	-647.633	21314	-7747.51	-2027.44	188.037	870.089	0	0	0	0	0	0	0	603	903	0
702	7	0	0	0	0	0	0	200	300	0	-10.6046	8.95126	-650.074	21405.6	-8357.86	-1981.66	187.143	870.072	0	0	0	0	0	0	0	603	903	0
702	8	0	0	0	0	0	0	200	300	0	-10.9097	8.95126	-650.684	21222.5	-7930.62	-1844.33	187.812	870.384	0	0	0	0	0	0	0	603	903	0
702	9	0	0	0	0	0	0	200	300	0	-12.1304	9.7142	-650.074	22229.6	-8052.69	-2210.54	187.613	868.805	0	0	0	0	0	0	0	603	903	0
703	0	0	0	0	0	0	0	200	300	0	-11.5201	10.172	-650.074	22138	-8052.69	-2164.77	187.613	868.945	0	0	0	0	0	0	0	603	903	0
703	1	0	0	0	0	0	0	200	300	0	-11.6727	10.9349	-652.21	22138	-8113.72	-2073.21	187.56	869.057	0	0	0	0	0	0	0	603	903	0
703	2	0	0	0	0	0	0	200	300	0	-11.0623	10.9349	-652.516	22595.8	-7991.65	-2347.87	187.753	868.371	0	0	0	0	0	0	0	603	903	0
703	3	0	0	0	0	0	0	200	300	0	-11.5201	11.0875	-653.431	23236.6	-8418.9	-1569.67	187.116	867.439	0	0	0	0	0	0	0	603	903	0
703	4	0	0	0	0	0	0	200	300	0	-10.2994	11.2401	-650.684	22962	-8296.83	-2347.87	187.249	867.711	0	0	0	0	0	0	0	603	903	0
703	5	0	0	0	0	0	0	200	300	0	-10.6046	11.6978	-654.347	23511.3	-8296.83	-2164.77	187.32	867.069	0	0	0	0	0	0	0	603	903	0
703	6	0	0	0	0	0	0	200	300	0	-11.2149	11.6978	-651.905	23877.5	-8357.86	-2256.32	187.179	866.373	0	0	0	0	0	0	0	603	903	0
703	7	0	0	0	0	0	0	200	300	0	-10.2994	10.9349	-655.567	23694.4	-8663.04	-2118.99	186.785	866.857	0	0	0	0	0	0	0	603	903	0
703	8	0	0	0	0	0	0	200	300	0	-12.1304	12.9185	-654.347	24152.2	-8296.83	-2073.21	187.32	866.09	0	0	0	0	0	0	0	603	903	0
703	9	0	0	0	0	0	0	200	300	0	-12.4356	12.9185	-655.567	24518.4	-8479.93	-2210.54	187.065	865.6	0	0	0	0	0	0	0	603	903	0
704	0	0	0	0	0	0	0	200	300	0	-11.3675	13.2237	-655.567	24793	-8846.14	-2302.09	186.506	865.181	0	0	0	0	0	0	0	603	903	0
704	1	0	0	0	0	0	0	200	300	0	-11.3675	13.2237	-658.009	24518.4	-8418.9	-2118.99	187.205	865.739	0	0	0	0	0	0	0	603	903	0
704	2	0	0	0	0	0	0	200	300	0	-12.7408	13.8341	-657.093	24976.1	-8052.69	-2164.77	187.745	864.99	0	0	0	0	0	0	0	603	903	0
704	3	0	0	0	0	0	0	200	300	0	-12.5882	13.8341	-657.398	25433.9	-8357.86	-2073.21	187.286	864.311	0	0	0	0	0	0	0	603	903	0
704	4	0	0	0	0	0	0	200	300	0	-11.0623	14.9022	-659.535	25891.7	-8663.04	-2210.54	186.865	863.743	0	0	0	0	0	0	0	603	903	0
704	5	0	0	0	0	0	0	200	300	0	-11.3675	14.2918	-660.145	25617	-8479.93	-2302.09	187.154	864.195	0	0	0	0	0	0	0	603	903	0
704	6	0	0	0	0	0	0	200	300	0	-11.9778	14.9022	-660.145	26166.3	-8846.14	-2210.54	186.6	863.363	0	0	0	0	0	0	0	603	903	0
704	7	0	0	0	0	0	0	200	300	0	-10.452	16.1229	-661.06	26349.4	-8663.04	-2485.2	186.895	863.141	0	0	0	0	0	0	0	603	903	0
704	8	0	0	0	0	0	0	200	300	0	-13.046	16.4281	-662.586	26715.6	-8540.97	-2439.42	187.11	862.68	0	0	0	0	0	0	0	603	903	0
704	9	0	0	0	0	0	0	200	300	0	-12.283	16.5807	-663.807	27356.5	-8602	-2302.09	187.041	861.789	0	0	0	0	0	0	0	603	903	0
705	0	0	0	0	0	0	0	200	300	0	-11.6727	16.8858	-663.502	27265	-8785.11	-1935.88	186.76	861.907	0	0	0	0	0	0	0	603	903	0
705	1	0	0	0	0	0	0	200	300	0	-12.8934	17.6488	-665.028	27356.5	-8785.11	-2302.09	186.79	861.864	0	0	0	0	0	0	0	603	903	0
705	2	0	0	0	0	0	0	200	300	0	-12.7408	17.8014	-667.164	27539.6	-8663.04	-2393.65	187.015	861.721	0	0	0	0	0	0	0	603	903	0
705	3	0	0	0	0	0	0	200	300	0	-11.9778	17.8014	-667.469	27997.4	-8907.18	-2439.42	186.655	861.055	0	0	0	0	0	0	0	603	903	0
705	4	0	0	0	0	0	0	200	300	0	-12.1304	17.3436	-668.69	27997.4	-8846.14	-2118.99	186.771	861.131	0	0	0	0	0	0	0	603	903	0
705	5	0	0	0	0	0	0	200	300	0	-13.1985	18.8695	-670.521	28455.1	-9029.25	-2256.32	186.534	860.563	0	0	0	0	0	0	0	603	903	0
705	6	0	0	0	0	0	0	200	300	0	-13.5037	19.0221	-672.047	28821.3	-9395.46	-2027.44	186.02	860.114	0	0	0	0	0	0	0	603	903	0
705	7	0	0	0	0	0	0	200	300	0	-12.283	19.1747	-672.962	29828.4	-9822.71	-2256.32	185.404	858.676	0	0	0	0	0	0	0	603	903	0
705	8	0	0	0	0	0	0	200	300	0	-9.9942	19.4798	-671.742	29370.7	-9029.25	-2302.09	186.558	859.277	0	0	0	0	0	0	0	603	903	0
705	9	0	0	0	0	0	0	200	300	0	-11.9778	20.3954	-674.488	29370.7	-9395.46	-2027.44	186.07	859.455	0	0	0	0	0	0	0	603	903	0
706	0	0	0	0	0	0	0	200	300	0	-12.5882	21.3109	-674.793	30011.5	-9395.46	-2485.2	186.077	858.525	0	0	0	0	0	0	0	603	903	0
706	1	0	0	0	0	0	0	200	300	0	-12.7408	20.0902	-677.845	30744	-9090.28	-2347.87	186.589	857.645	0	0	0	0	0	0	0	603	903	0
706	2	0	0	0	0	0	0	200	300	0	-12.4356	20.0902	-676.93	30744	-9212.35	-2256.32	186.391	857.583	0	0	0	0	0	0	0	603	903	0
706	3	0	0	0	0	0	0	200	300	0	-11.3675	21.3109	-678.15	31476.4	-9395.46	-2210.54	186.145	856.585	0	0	0	0	0	0	0	603	903	0
706	4	0	0	0	0	0	0	200	300	0	-11.9778	21.7686	-680.286	31476.4	-9395.46	-2347.87	186.189	856.731	0	0	0	0	0	0	0	603	903	0
706	5	0	0	0	0	0	0	200	300	0	-13.046	21.7686	-679.371	31476.4	-9639.6	-2210.54	185.811	856.668	0	0	0	0	0	0	0	603	903	0
706	6	0	0	0	0	0	0	200	300	0	-12.8934	21.1583	-683.643	32208.8	-9883.74	-2256.32	185.543	855.887	0	0	0	0	0	0	0	603	903	0
706	7	0	0	0	0	0	0	200	300	0	-11.3675	22.6842	-680.897	32391.9	-9700.63	-2164.77	185.753	855.428	0	0	0	0	0	0	0	603	903	0
706	8	0	0	0	0	0	0	200	300	0	-11.9778	22.379	-683.949	32025.7	-9517.53	-2347.87	186.084	856.175	0	0	0	0	0	0	0	603	903	0
706	9	0	0	0	0	0	0	200	300	0	-13.6563	24.8204	-686.085	32941.2	-9822.71	-2393.65	185.683	854.987	0	0	0	0	0	0	0	603	903	0
707	0	0	0	0	0	0	0	200	300	0	-10.6046	22.9893	-687.306	32941.2	-10005.8	-2256.32	185.442	855.072	0	0	0	0	0	0	0	603	903	0
707	1	0	0	0	0	0	0	200	300	0	-13.5037	24.2101	-687.306	33582.1	-9883.74	-2256.32	185.62	854.14	0	0	0	0	0	0	0	603	903	0
707	2	0	0	0	0	0	0	200	300	0	-11.3675	25.2782	-688.526	33490.5	-10127.9	-2302.09	185.29	854.359	0	0	0	0	0	0	0	603	903	0
707	3	0	0	0	0	0	0	200	300	0	-11.9778	26.0411	-691.273	33856.8	-10127.9	-2576.75	185.349	854.023	0	0	0	0	0	0	0	603	903	0
707	4	0	0	0	0	0	0	200	300	0	-13.1985	25.5833	-693.104	34497.6	-10005.8	-2576.75	185.564	853.227	0	0	0	0	0	0	0	603	903	0
707	5	0	0	0	0	0	0	200	300	0	-11.6727	25.8885	-693.409	34772.3	-10127.9	-2393.65	185.394	852.853	0	0	0	0	0	0	0	603	903	0
707	6	0	0	0	0	0	0	200	300	0	-12.8934	26.804	-693.714	34955.4	-10433.1	-2118.99	184.961	852.611	0	0	0	0	0	0	0	603	903	0
707	7	0	0	0	0	0	0	200	300	0	-12.1304	27.567	-696.461	35230.1	-10311	-2302.09	185.195	852.416	0	0	0	0	0	0	0	603	903	0
707	8	0	0	0	0	0	0	200	300	0	-11.9778	27.1092	-698.292	35046.9	-10311	-2210.54	185.234	852.81	0	0	0	0	0	0	0	603	903	0
707	9	0	0	0	0	0	0	200	300	0	-13.9615	28.3299	-698.597	35687.8	-11043.4	-2485.2	184.192	851.915	0	0	0	0	0	0	0	603	903	0
708	0	0	0	0	0	0	0	200	300	0	-11.3675	28.7877	-699.207	35779.4	-11043.4	-2347.87	184.206	851.829	0	0	0	0	0	0	0	603	903	0
708	1	0	0	0	0	0	0	200	300	0	-10.452	29.2455	-702.564	36328.7	-10799.3	-2347.87	184.629	851.291	0	0	0	0	0	0	0	603	903	0
708	2	0	0	0	0	0	0	200	300	0	-10.2994	29.5506	-703.785	36603.3	-10799.3	-2347.87	184.655	850.991	0	0	0	0	0	0	0	603	903	0
708	3	0	0	0	0	0	0	200	300	0	-11.2149	28.3299	-707.752	36511.8	-11104.4	-2393.65	184.31	851.412	0	0	0	0	0	0	0	603	903	0
708	4	0	0	0	0	0	0	200	300	0	-13.046	30.161	-703.48	37061.1	-10799.3	-2393.65	184.649	850.318	0	0	0	0	0	0	0	603	903	0
708	5	0	0	0	0	0	0	200	300	0	-13.046	29.7032	-705.921	37335.8	-10738.2	-2347.87	184.788	850.111	0	0	0	0	0	0	0	603	903	0
708	6	0	0	0	0	0	0	200	300	0	-12.283	32.9076	-708.363	37793.5	-11592.7	-2439.42	183.634	849.647	0	0	0	0	0	0	0	603	903	0
708	7	0	0	0	0	0	0	200	300	0	-12.4356	31.6869	-709.583	37244.2	-10982.4	-2485.2	184.523	850.513	0	0	0	0	0	0	0	603	903	0
708	8	0	0	0	0	0	0	200	300	0	-13.9615	32.755	-709.583	38983.7	-11165.5	-2302.09	184.265	848.061	0	0	0	0	0	0	0	603	903	0
708	9	0	0	0	0	0	0	200	300	0	-13.5037	33.6705	-712.33	38434.4	-11226.5	-2256.32	184.24	849.044	0	0	0	0	0	0	0	603	903	0
709	0	0	0	0	0	0	0	200	300	0	-13.5037	34.2809	-715.077	39075.3	-11348.6	-2347.87	184.13	848.355	0	0	0	0	0	0	0	603	903	0
709	1	0	0	0	0	0	0	200	300	0	-11.0623	34.8912	-714.771	39075.3	-11531.7	-2393.65	183.867	848.332	0	0	0	0	0	0	0	603	903	0
709	2	0	0	0	0	0	0	200	300	0	-13.5037	36.4171	-715.992	39166.8	-12325.1	-2485.2	182.786	848.297	0	0	0	0	0	0	0	603	903	0
709	3	0	0	0	0	0	0	200	300	0	-13.6563	36.2645	-715.687	39441.5	-11409.6	-2347.87	184.058	847.89	0	0	0	0	0	0	0	603	903	0
709	4	0	0	0	0	0	0	200	300	0	-13.8089	37.18	-719.044	40082.3	-11714.8	-2393.65	183.708	847.256	0	0	0	0	0	0	0	603	903	0
709	5	0	0	0	0	0	0	200	300	0	-13.3511	37.3326	-719.044	40265.4	-12142	-2393.65	183.114	847.001	0	0	0	0	0	0	0	603	903	0
709	6	0	0	0	0	0	0	200	300	0	-13.3511	37.7904	-720.57	40173.9	-12264.1	-2302.09	182.98	847.247	0	0	0	0	0	0	0	603	903	0
709	7	0	0	0	0	0	0	200	300	0	-14.1141	39.3163	-720.875	40540.1	-12447.2	-2347.87	182.733	846.763	0	0	0	0	0	0	0	603	903	0
709	8	0	0	0	0	0	0	200	300	0	-14.4193	39.9266	-723.316	41181	-12386.2	-2439.42	182.876	846.067	0	0	0	0	0	0	0	603	903	0
709	9	0	0	0	0	0	0	200	300	0	-13.046	40.0792	-724.842	41455.6	-12386.2	-2439.42	182.912	845.807	0	0	0	0	0	0	0	603	903	0
710	0	0	0	0	0	0	0	200	300	0	-13.6563	40.8421	-725.147	41089.4	-12264.1	-2347.87	183.087	846.336	0	0	0	0	0	0	0	603	903	0
710	1	0	0	0	0	0	0	200	300	0	-15.64	41.6051	-726.673	41913.4	-12569.3	-2347.87	182.703	845.322	0	0	0	0	0	0	0	603	903	0
710	2	0	0	0	0	0	0	200	300	0	-15.3348	42.2154	-726.673	42371.2	-12691.4	-2347.87	182.535	844.692	0	0	0	0	0	0	0	603	903	0
710	3	0	0	0	0	0	0	200	300	0	-13.9615	42.368	-726.673	42645.8	-12447.2	-2027.44	182.871	844.314	0	0	0	0	0	0	0	603	903	0
710	4	0	0	0	0	0	0	200	300	0	-13.5037	42.368	-730.641	42371.2	-12447.2	-2347.87	182.964	845.008	0	0	0	0	0	0	0	603	903	0
710	5	0	0	0	0	0	0	200	300	0	-15.0296	43.7413	-730.03	42645.8	-13484.8	-2393.65	181.528	844.583	0	0	0	0	0	0	0	603	903	0
710	6	0	0	0	0	0	0	200	300	0	-15.64	43.5887	-730.03	43378.2	-12813.4	-2302.09	182.448	843.58	0	0	0	0	0	0	0	603	903	0
710	7	0	0	0	0	0	0	200	300	0	-13.9615	45.4198	-732.472	43744.4	-12630.3	-2393.65	182.757	843.278	0	0	0	0	0	0	0	603	903	0
710	8	0	0	0	0	0	0	200	300	0	-14.877	45.2672	-733.997	43652.9	-13179.6	-2530.98	182.044	843.527	0	0	0	0	0	0	0	603	903	0
710	9	0	0	0	0	0	0	200	300	0	-16.0977	46.0301	-733.692	43836	-13545.8	-2210.54	181.537	843.253	0	0	0	0	0	0	0	603	903	0
711	0	0	0	0	0	0	0	200	300	0	-15.7925	47.556	-734.303	44934.6	-13118.6	-2530.98	182.135	841.806	0	0	0	0	0	0	0	603	903	0
711	1	0	0	0	0	0	0	200	300	0	-14.7244	48.1664	-734.913	44385.3	-13118.6	-2485.2	182.149	842.605	0	0	0	0	0	0	0	603	903	0
711	2	0	0	0	0	0	0	200	300	0	-14.7244	48.3189	-737.049	44934.6	-13545.8	-2393.65	181.622	842.034	0	0	0	0	0	0	0	603	903	0
711	3	0	0	0	0	0	0	200	300	0	-16.0977	48.3189	-737.66	44110.7	-12935.5	-2393.65	182.464	843.202	0	0	0	0	0	0	0	603	903	0
711	4	0	0	0	0	0	0	200	300	0	-15.7925	49.6922	-738.575	45392.4	-13667.9	-2256.32	181.494	841.541	0	0	0	0	0	0	0	603	903	0
711	5	0	0	0	0	0	0	200	300	0	-15.0296	50.6078	-739.185	45850.2	-13484.8	-2576.75	181.757	840.972	0	0	0	0	0	0	0	603	903	0
711	6	0	0	0	0	0	0	200	300	0	-15.0296	49.8448	-741.322	45941.7	-13362.7	-2393.65	181.974	841.027	0	0	0	0	0	0	0	603	903	0
711	7	0	0	0	0	0	0	200	300	0	-17.6236	51.2181	-740.711	46216.4	-13179.6	-2302.09	182.207	840.605	0	0	0	0	0	0	0	603	903	0
711	8	0	0	0	0	0	0	200	300	0	-15.64	51.8285	-740.406	46948.8	-13973.1	-2302.09	181.128	839.591	0	0	0	0	0	0	0	603	903	0
711	9	0	0	0	0	0	0	200	300	0	-15.1822	52.1336	-739.796	47498.1	-13790	-2485.2	181.36	838.796	0	0	0	0	0	0	0	603	903	0
712	0	0	0	0	0	0	0	200	300	0	-15.1822	53.5069	-742.848	47406.6	-14095.2	-2256.32	181.025	839.183	0	0	0	0	0	0	0	603	903	0
712	1	0	0	0	0	0	0	200	300	0	-16.8607	53.8121	-745.289	47223.4	-14034.1	-2576.75	181.17	839.637	0	0	0	0	0	0	0	603	903	0
712	2	0	0	0	0	0	0	200	300	0	-17.0132	53.5069	-745.594	48505.2	-13912.1	-2393.65	181.341	837.944	0	0	0	0	0	0	0	603	903	0
712	3	0	0	0	0	0	0	200	300	0	-16.0977	55.338	-746.51	47681.2	-14034.1	-2576.75	181.2	839.128	0	0	0	0	0	0	0	603	903	0
712	4	0	0	0	0	0	0	200	300	0	-16.2503	55.9483	-747.73	48688.3	-14156.2	-2302.09	181.068	837.885	0	0	0	0	0	0	0	603	903	0
712	5	0	0	0	0	0	0	200	300	0	-17.3184	55.6432	-748.036	48230.5	-14034.1	-2439.42	181.239	838.524	0	0	0	0	0	0	0	603	903	0
712	6	0	0	0	0	0	0	200	300	0	-17.1658	56.8639	-746.815	49512.3	-14217.2	-2576.75	180.963	836.702	0	0	0	0	0	0	0	603	903	0
712	7	0	0	0	0	0	0	200	300	0	-15.3348	56.8639	-748.036	49237.6	-14583.5	-2439.42	180.504	837.177	0	0	0	0	0	0	0	603	903	0
712	8	0	0	0	0	0	0	200	300	0	-16.7081	57.3216	-748.951	48871.4	-14217.2	-2576.75	181.017	837.747	0	0	0	0	0	0	0	603	903	0
712	9	0	0	0	0	0	0	200	300	0	-17.0132	59.1527	-750.782	49329.2	-14522.4	-2393.65	180.657	837.296	0	0	0	0	0	0	0	603	903	0
713	0	0	0	0	0	0	0	200	300	0	-18.3865	58.3897	-751.392	50153.1	-14827.6	-2530.98	180.267	836.253	0	0	0	0	0	0	0	603	903	0
713	1	0	0	0	0	0	0	200	300	0	-16.0977	58.6949	-751.087	50885.6	-14461.4	-2530.98	180.746	835.251	0	0	0	0	0	0	0	603	903	0
713	2	0	0	0	0	0	0	200	300	0	-14.877	60.6786	-750.172	50794	-14644.5	-2393.65	180.479	835.29	0	0	0	0	0	0	0	603	903	0
713	3	0	0	0	0	0	0	200	300	0	-17.1658	60.9837	-752.003	50427.8	-14766.6	-2576.75	180.364	835.942	0	0	0	0	0	0	0	603	903	0
713	4	0	0	0	0	0	0	200	300	0	-17.9288	61.1363	-752.918	51160.2	-15071.7	-2714.08	179.982	835.051	0	0	0	0	0	0	0	603	903	0
713	5	0	0	0	0	0	0	200	300	0	-18.0814	60.526	-752.613	51618	-14766.6	-2576.75	180.38	834.415	0	0	0	0	0	0	0	603	903	0
713	6	0	0	0	0	0	0	200	300	0	-17.3184	62.2044	-751.087	51709.5	-15010.7	-2439.42	180.015	834.154	0	0	0	0	0	0	0	603	903	0
713	7	0	0	0	0	0	0	200	300	0	-17.3184	62.6622	-754.139	51709.5	-14827.6	-2530.98	180.338	834.432	0	0	0	0	0	0	0	603	903	0
713	8	0	0	0	0	0	0	200	300	0	-18.2339	63.4251	-756.275	52075.8	-14766.6	-2256.32	180.475	834.142	0	0	0	0	0	0	0	603	903	0
713	9	0	0	0	0	0	0	200	300	0	-18.8443	63.12	-755.97	53082.8	-14949.7	-2118.99	180.225	832.782	0	0	0	0	0	0	0	603	903	0
714	0	0	0	0	0	0	0	200	300	0	-17.7762	63.2726	-755.97	52808.2	-15315.9	-2347.87	179.74	833.145	0	0	0	0	0	0	0	603	903	0
714	1	0	0	0	0	0	0	200	300	0	-18.0814	64.6458	-755.97	53357.5	-15010.7	-2393.65	180.144	832.419	0	0	0	0	0	0	0	603	903	0
714	2	0	0	0	0	0	0	200	300	0	-15.64	65.4088	-757.191	53082.8	-14949.7	-2622.53	180.256	832.895	0	0	0	0	0	0	0	603	903	0
714	3	0	0	0	0	0	0	200	300	0	-19.1495	65.4088	-757.191	54456.1	-15682.1	-2576.75	179.289	831.081	0	0	0	0	0	0	0	603	903	0
714	4	0	0	0	0	0	0	200	300	0	-16.4029	65.1036	-756.58	54364.6	-15315.9	-2622.53	179.756	831.144	0	0	0	0	0	0	0	603	903	0
714	5	0	0	0	0	0	0	200	300	0	-19.1495	66.3243	-755.665	54273	-15315.9	-2576.75	179.732	831.178	0	0	0	0	0	0	0	603	903	0
714	6	0	0	0	0	0	0	200	300	0	-19.1495	65.5614	-755.97	54547.7	-15682.1	-2668.31	179.256	830.844	0	0	0	0	0	0	0	603	903	0
714	7	0	0	0	0	0	0	200	300	0	-17.7762	66.1717	-754.444	55463.2	-16109.3	-2439.42	178.647	829.485	0	0	0	0	0	0	0	603	903	0
714	8	0	0	0	0	0	0	200	300	0	-18.5391	65.714	-759.327	55737.9	-15376.9	-2485.2	179.749	829.596	0	0	0	0	0	0	0	603	903	0
714	9	0	0	0	0	0	0	200	300	0	-19.3021	67.2398	-758.411	55554.8	-15560	-2485.2	179.483	829.749	0	0	0	0	0	0	0	603	903	0
715	0	0	0	0	0	0	0	200	300	0	-20.065	66.7821	-759.022	55097	-15621	-2530.98	179.42	830.411	0	0	0	0	0	0	0	603	903	0
715	1	0	0	0	0	0	0	200	300	0	-18.6917	68.9183	-760.548	56195.6	-15499	-2164.77	179.621	829.112	0	0	0	0	0	0	0	603	903	0
715	2	0	0	0	0	0	0	200	300	0	-18.5391	68.4605	-761.158	56836.5	-15682.1	-2302.09	179.397	828.329	0	0	0	0	0	0	0	603	903	0
715	3	0	0	0	0	0	0	200	300	0	-19.7598	69.6812	-759.327	56836.5	-16048.3	-2439.42	178.865	828.149	0	0	0	0	0	0	0	603	903	0
715	4	0	0	0	0	0	0	200	300	0	-20.2176	71.2071	-759.632	56561.8	-15499	-2485.2	179.597	828.541	0	0	0	0	0	0	0	603	903	0
715	5	0	0	0	0	0	0	200	300	0	-19.3021	71.3597	-760.243	56744.9	-15804.2	-2485.2	179.212	828.359	0	0	0	0	0	0	0	603	903	0
715	6	0	0	0	0	0	0	200	300	0	-18.8443	71.2071	-761.768	57660.5	-16292.4	-2485.2	178.612	827.307	0	0	0	0	0	0	0	603	903	0
715	7	0	0	0	0	0	0	200	300	0	-20.2176	71.6649	-761.463	58026.7	-16048.3	-2256.32	178.924	826.796	0	0	0	0	0	0	0	603	903	0
715	8	0	0	0	0	0	0	200	300	0	-20.3702	72.5804	-761.768	57660.5	-15865.2	-2439.42	179.173	827.307	0	0	0	0	0	0	0	603	903	0
715	9	0	0	0	0	0	0	200	300	0	-20.5228	72.733	-761.768	58759.1	-15987.3	-2439.42	179.013	825.865	0	0	0	0	0	0	0	603	903	0
716	0	0	0	0	0	0	0	200	300	0	-19.1495	72.2752	-762.989	58576	-16109.3	-2210.54	178.887	826.228	0	0	0	0	0	0	0	603	903	0
716	1	0	0	0	0	0	0	200	300	0	-20.5228	73.0382	-761.768	59125.3	-15926.2	-2393.65	179.093	825.384	0	0	0	0	0	0	0	603	903	0
716	2	0	0	0	0	0	0	200	300	0	-20.6754	73.6485	-758.717	59125.3	-15621	-2210.54	179.411	825.072	0	0	0	0	0	0	0	603	903	0
716	3	0	0	0	0	0	0	200	300	0	-19.6072	73.3434	-762.379	60132.4	-16170.4	-2576.75	178.79	824.125	0	0	0	0	0	0	0	603	903	0
716	4	0	0	0	0	0	0	200	300	0	-20.065	73.9537	-762.989	60315.5	-15865.2	-2439.42	179.207	823.948	0	0	0	0	0	0	0	603	903	0
716	5	0	0	0	0	0	0	200	300	0	-20.9805	74.4115	-763.905	60040.8	-15865.2	-2347.87	179.231	824.403	0	0	0	0	0	0	0	603	903	0
716	6	0	0	0	0	0	0	200	300	0	-21.4383	75.1744	-762.989	59857.7	-15865.2	-2302.09	179.207	824.548	0	0	0	0	0	0	0	603	903	0
716	7	0	0	0	0	0	0	200	300	0	-20.2176	75.6322	-763.294	60956.4	-15987.3	-2256.32	179.055	823.14	0	0	0	0	0	0	0	603	903	0
716	8	0	0	0	0	0	0	200	300	0	-20.2176	75.9373	-764.515	61047.9	-15865.2	-2256.32	179.248	823.148	0	0	0	0	0	0	0	603	903	0
716	9	0	0	0	0	0	0	200	300	0	-21.1331	75.9373	-762.684	60498.6	-16353.5	-2302.09	178.558	823.677	0	0	0	0	0	0	0	603	903	0
717	0	0	0	0	0	0	0	200	300	0	-18.2339	75.327	-764.21	61139.5	-16902.8	-2393.65	177.882	822.997	0	0	0	0	0	0	0	603	903	0
717	1	0	0	0	0	0	0	200	300	0	-20.3702	76.5477	-763.905	62055	-15926.2	-2302.09	179.152	821.766	0	0	0	0	0	0	0	603	903	0
717	2	0	0	0	0	0	0	200	300	0	-20.6754	78.2262	-764.82	62695.9	-16109.3	-2256.32	178.937	821.025	0	0	0	0	0	0	0	603	903	0
717	3	0	0	0	0	0	0	200	300	0	-19.3021	78.0736	-764.21	62055	-16109.3	-2164.77	178.92	821.799	0	0	0	0	0	0	0	603	903	0
717	4	0	0	0	0	0	0	200	300	0	-21.4383	78.0736	-766.346	62421.2	-16048.3	-2210.54	179.059	821.547	0	0	0	0	0	0	0	603	903	0
717	5	0	0	0	0	0	0	200	300	0	-20.5228	78.5313	-764.82	62421.2	-16414.5	-2347.87	178.538	821.384	0	0	0	0	0	0	0	603	903	0
717	6	0	0	0	0	0	0	200	300	0	-19.6072	80.515	-764.82	63336.7	-16536.6	-2347.87	178.378	820.187	0	0	0	0	0	0	0	603	903	0
717	7	0	0	0	0	0	0	200	300	0	-19.7598	78.2262	-764.82	63062.1	-15987.3	-2302.09	179.097	820.547	0	0	0	0	0	0	0	603	903	0
717	8	0	0	0	0	0	0	200	300	0	-20.9805	80.3624	-766.346	62879	-16048.3	-2393.65	179.059	820.95	0	0	0	0	0	0	0	603	903	0
717	9	0	0	0	0	0	0	200	300	0	-21.1331	79.752	-766.651	63611.4	-16353.5	-2302.09	178.669	820.027	0	0	0	0	0	0	0	603	903	0
718	0	0	0	0	0	0	0	200	300	0	-19.7598	79.9046	-766.041	63794.5	-15987.3	-2118.99	179.13	819.722	0	0	0	0	0	0	0	603	903	0
718	1	0	0	0	0	0	0	200	300	0	-20.2176	81.5831	-766.041	65076.3	-15865.2	-2393.65	179.289	818.049	0	0	0	0	0	0	0	603	903	0
718	2	0	0	0	0	0	0	200	300	0	-20.9805	81.8883	-767.567	64618.5	-15987.3	-2302.09	179.172	818.814	0	0	0	0	0	0	0	603	903	0
718	3	0	0	0	0	0	0	200	300	0	-21.1331	82.346	-766.956	64160.7	-16048.3	-2347.87	179.075	819.344	0	0	0	0	0	0	0	603	903	0
718	4	0	0	0	0	0	0	200	300	0	-19.7598	82.346	-765.736	64618.5	-15804.2	-2393.65	179.361	818.613	0	0	0	0	0	0	0	603	903	0
718	5	0	0	0	0	0	0	200	300	0	-19.9124	83.5667	-765.736	65717.1	-16658.7	-2027.44	178.245	817.178	0	0	0	0	0	0	0	603	903	0
718	6	0	0	0	0	0	0	200	300	0	-21.1331	83.7193	-767.567	65625.5	-15743.1	-2347.87	179.49	817.502	0	0	0	0	0	0	0	603	903	0
718	7	0	0	0	0	0	0	200	300	0	-18.9969	84.1771	-764.82	65167.8	-15743.1	-2210.54	179.416	817.793	0	0	0	0	0	0	0	603	903	0
718	8	0	0	0	0	0	0	200	300	0	-20.5228	83.109	-767.567	66083.3	-15926.2	-2118.99	179.251	816.906	0	0	0	0	0	0	0	603	903	0
718	9	0	0	0	0	0	0	200	300	0	-19.1495	85.2452	-766.041	66358	-16597.6	-2164.77	178.333	816.375	0	0	0	0	0	0	0	603	903	0
719	0	0	0	0	0	0	0	200	300	0	-19.1495	86.1607	-766.651	66174.9	-15743.1	-2485.2	179.465	816.683	0	0	0	0	0	0	0	603	903	0
719	1	0	0	0	0	0	0	200	300	0	-19.7598	87.0763	-766.651	65900.2	-16109.3	-2118.99	178.987	817.041	0	0	0	0	0	0	0	603	903	0
719	2	0	0	0	0	0	0	200	300	0	-20.3702	86.3133	-767.262	66998.9	-16048.3	-2439.42	179.084	815.678	0	0	0	0	0	0	0	603	903	0
719	3	0	0	0	0	0	0	200	300	0	-18.8443	86.4659	-766.651	67090.4	-15987.3	-2118.99	179.147	815.489	0	0	0	0	0	0	0	603	903	0
719	4	0	0	0	0	0	0	200	300	0	-18.5391	88.1444	-766.346	68189	-16048.3	-1981.66	179.059	814.021	0	0	0	0	0	0	0	603	903	0
719	5	0	0	0	0	0	0	200	300	0	-19.9124	88.9073	-766.956	67090.4	-15804.2	-2256.32	179.394	815.524	0	0	0	0	0	0	0	603	903	0
719	6	0	0	0	0	0	0	200	300	0	-19.3021	88.7547	-765.125	67639.7	-15682.1	-2302.09	179.504	814.597	0	0	0	0	0	0	0	603	903	0
719	7	0	0	0	0	0	0	200	300	0	-17.9288	89.2125	-766.346	67273.5	-15376.9	-1844.33	179.935	815.215	0	0	0	0	0	0	0	603	903	0
719	8	0	0	0	0	0	0	200	300	0	-17.471	89.8228	-766.346	68463.7	-15987.3	-2164.77	179.138	813.662	0	0	0	0	0	0	0	603	903	0
719	9	0	0	0	0	0	0	200	300	0	-19.3021	91.1961	-765.431	68097.5	-15499	-2347.87	179.751	814.034	0	0	0	0	0	0	0	603	903	0
720	0	0	0	0	0	0	0	200	300	0	-18.8443	91.5013	-767.567	68005.9	-15499	-2164.77	179.808	814.401	0	0	0	0	0	0	0	603	903	0
720	1	0	0	0	0	0	0	200	300	0	-17.7762	91.8065	-766.346	69287.7	-15804.2	-2439.42	179.377	812.587	0	0	0	0	0	0	0	603	903	0
720	2	0	0	0	0	0	0	200	300	0	-17.3184	91.8065	-764.82	69013	-14766.6	-2164.77	180.693	812.766	0	0	0	0	0	0	0	603	903	0
720	3	0	0	0	0	0	0	200	300	0	-18.2339	94.2479	-764.82	68738.4	-15254.8	-2347.87	180.054	813.125	0	0	0	0	0	0	0	603	903	0
720	4	0	0	0	0	0	0	200	300	0	-17.7762	94.0953	-765.431	68829.9	-15865.2	-2210.54	179.273	813.077	0	0	0	0	0	0	0	603	903	0
720	5	0	0	0	0	0	0	200	300	0	-16.7081	94.7057	-765.125	69928.5	-15743.1	-2485.2	179.424	811.605	0	0	0	0	0	0	0	603	903	0
720	6	0	0	0	0	0	0	200	300	0	-15.0296	94.5531	-763.294	69379.2	-15132.8	-2393.65	180.174	812.106	0	0	0	0	0	0	0	603	903	0
720	7	0	0	0	0	0	0	200	300	0	-15.4874	96.2315	-760.548	69287.7	-15499	-2347.87	179.621	811.898	0	0	0	0	0	0	0	603	903	0
720	8	0	0	0	0	0	0	200	300	0	-17.9288	94.2479	-760.853	69379.2	-15376.9	-2347.87	179.79	811.814	0	0	0	0	0	0	0	603	903	0
720	9	0	0	0	0	0	0	200	300	0	-17.1658	97.6048	-763.294	69745.4	-15010.7	-2256.32	180.334	811.626	0	0	0	0	0	0	0	603	903	0
721	0	0	0	0	0	0	0	200	300	0	-15.9451	97.7574	-761.768	70020.1	-15499	-2256.32	179.654	811.082	0	0	0	0	0	0	0	603	903	0
721	1	0	0	0	0	0	0	200	300	0	-15.7925	98.0626	-759.937	69653.9	-15376.9	-2256.32	179.766	811.343	0	0	0	0	0	0	0	603	903	0
721	2	0	0	0	0	0	0	200	300	0	-16.4029	99.2833	-759.632	69928.5	-15010.7	-2439.42	180.24	810.944	0	0	0	0	0	0	0	603	903	0
721	3	-6.9577	-2.28622	-12.1674	-1020.35	1278.69	342.408	305.092	383.86	0	-16.5555	100.046	-759.937	70477.8	-15010.7	-2347.87	180.247	810.258	0	0	0	0	0	0	0	603	903	0
721	4	-7.56805	-1.37069	-17.6605	-928.8	1583.86	388.184	289.684	352.592	0	-15.4874	100.351	-759.022	70752.5	-15560	-2576.75	179.5	809.785	0	0	0	0	0	0	0	603	903	0
721	5	-3.29559	2.13883	-19.4916	-1478.12	973.511	1029.05	249.945	375.834	0	-15.0296	99.1307	-755.055	70294.8	-14644.5	-2393.65	180.605	809.901	0	0	0	0	0	0	0	603	903	0
721	6	-2.22747	7.4794	-17.9657	-928.8	1461.79	754.395	281.366	351.699	0	-16.5555	101.572	-756.886	70020.1	-15193.8	-2210.54	179.926	810.489	0	0	0	0	0	0	0	603	903	0
721	7	-1.46453	7.32682	-19.1864	-1661.22	1461.79	617.066	276.189	386.583	0	-15.9451	102.793	-755.97	70477.8	-15376.9	-2485.2	179.659	809.772	0	0	0	0	0	0	0	603	903	0
721	8	-1.9223	5.64835	-21.6278	-1295.01	1583.86	525.513	273.233	359.877	0	-14.4193	104.166	-756.886	71210.3	-15254.8	-2714.08	179.845	808.917	0	0	0	0	0	0	0	603	903	0
721	9	-3.29559	6.71647	-23.764	-1386.56	1705.93	937.501	271.786	358.347	0	-14.1141	104.166	-755.055	71759.6	-14949.7	-2714.08	180.201	807.961	0	0	0	0	0	0	0	603	903	0
722	0	-2.83782	10.5312	-26.2054	-1752.77	1828	891.724	269.757	366.886	0	-15.1822	105.387	-754.139	70294.8	-15071.7	-2439.42	180.015	809.788	0	0	0	0	0	0	0	603	903	0
722	1	-1.00677	12.057	-28.0365	-2118.99	1889.04	937.501	267.378	375.58	0	-15.7925	106.913	-753.224	70752.5	-14949.7	-2439.42	180.152	809.067	0	0	0	0	0	0	0	603	903	0
722	2	-1.9223	9.46305	-32.9193	-1661.22	2011.11	1212.16	261.092	350.463	0	-13.8089	107.218	-754.139	70569.4	-14522.4	-2164.77	180.743	809.424	0	0	0	0	0	0	0	603	903	0
722	3	-1.46453	10.9889	-35.3607	-1203.46	2743.53	1166.38	277.587	334.034	0	-13.3511	106.913	-752.613	72034.3	-14461.4	-2530.98	180.785	807.288	0	0	0	0	0	0	0	603	903	0
722	4	1.73981	13.7355	-39.0228	-1935.88	2560.43	983.277	265.614	349.609	0	-15.0296	108.286	-749.867	71118.7	-14888.6	-2439.42	180.145	808.158	0	0	0	0	0	0	0	603	903	0
722	5	-0.549005	14.651	-39.9383	-2118.99	2743.53	891.724	268.694	353.056	0	-13.8089	109.964	-748.646	70752.5	-14522.4	-2439.42	180.602	808.493	0	0	0	0	0	0	0	603	903	0
722	6	-1.15936	15.5666	-44.8212	-2485.2	3048.71	1303.71	268.019	355.447	0	-13.046	110.88	-748.951	71668.1	-14583.5	-2622.53	180.528	807.309	0	0	0	0	0	0	0	603	903	0
722	7	2.19758	18.7709	-51.2299	-1935.88	3475.95	1349.49	267.85	337.788	0	-12.5882	110.27	-747.425	71668.1	-14766.6	-2439.42	180.243	807.113	0	0	0	0	0	0	0	603	903	0
722	8	3.1131	19.3813	-57.3334	-2668.3	3842.16	1578.37	267.014	346.54	0	-14.1141	110.727	-743.458	71210.3	-14461.4	-2714.08	180.549	807.217	0	0	0	0	0	0	0	603	903	0
722	9	1.8924	18.7709	-61.3007	-2576.75	3659.06	1395.26	259.69	342.035	0	-11.9778	112.711	-742.848	71301.8	-14217.2	-2576.75	180.861	807.016	0	0	0	0	0	0	0	603	903	0
723	0	3.1131	17.5502	-64.9628	-2759.85	4269.41	1441.04	265.721	342.484	0	-12.4356	110.88	-740.406	72125.8	-14400.3	-2622.53	180.551	805.586	0	0	0	0	0	0	0	603	903	0
723	1	0.213934	17.8554	-68.6249	-3126.07	4452.51	1166.38	264.882	345.553	0	-11.5201	113.779	-742.542	71668.1	-14827.6	-2485.2	180.031	806.483	0	0	0	0	0	0	0	603	903	0
723	2	1.58723	20.2968	-74.4232	-2851.41	4452.51	1257.94	259.827	338.313	0	-11.8253	114.084	-740.711	71393.4	-14095.2	-2805.64	180.971	806.615	0	0	0	0	0	0	0	603	903	0
723	3	1.58723	18.6183	-84.494	-3217.62	4818.73	1212.16	257.03	338.081	0	-11.2149	114.695	-737.965	70935.6	-14400.3	-2576.75	180.486	806.877	0	0	0	0	0	0	0	603	903	0
723	4	-0.24383	19.0761	-89.682	-3675.38	5551.15	1486.82	261.898	340.982	0	-12.4356	116.526	-737.049	71576.5	-14766.6	-2668.31	179.965	805.888	0	0	0	0	0	0	0	603	903	0
723	5	-3.44818	20.4494	-96.701	-3675.38	6039.43	1624.15	262.455	338.008	0	-11.3675	116.678	-735.523	71668.1	-13851	-2302.09	181.168	805.562	0	0	0	0	0	0	0	603	903	0
723	6	-4.82147	19.839	-100.668	-2942.96	5917.36	1532.59	258.781	329.234	0	-10.9097	117.289	-734.303	71484.9	-14217.2	-2576.75	180.638	805.649	0	0	0	0	0	0	0	603	903	0
723	7	-6.19476	17.245	-106.772	-3126.07	6222.54	1715.7	258.279	329.278	0	-11.9778	117.594	-730.03	71484.9	-14095.2	-2668.31	180.692	805.08	0	0	0	0	0	0	0	603	903	0
723	8	-6.34735	13.7355	-114.706	-3583.83	6344.61	1349.49	255.312	331.244	0	-11.9778	118.662	-726.368	71668.1	-14034.1	-2485.2	180.679	804.334	0	0	0	0	0	0	0	603	903	0
723	9	-6.34735	14.4984	-123.862	-4041.59	6954.96	1212.16	256.151	332.63	0	-10.7571	117.594	-725.147	71210.3	-13973.1	-2759.86	180.731	804.799	0	0	0	0	0	0	0	603	903	0
724	0	-6.19476	12.82	-126.913	-3309.17	6954.96	1120.61	254.801	326.074	0	-9.38385	120.035	-726.063	70844.1	-14034.1	-2668.31	180.671	805.427	0	0	0	0	0	0	0	603	903	0
724	1	-9.09393	10.5312	-134.238	-3034.51	7382.2	1166.38	254.994	322.606	0	-11.0623	120.188	-724.537	71759.6	-13606.9	-2530.98	181.22	803.958	0	0	0	0	0	0	0	603	903	0
724	2	-11.2302	7.78458	-141.257	-3217.62	7260.13	1212.16	251.397	322.779	0	-11.0623	121.103	-722.401	71576.5	-13606.9	-2530.98	181.164	803.919	0	0	0	0	0	0	0	603	903	0
724	3	-10.3146	5.80094	-147.971	-3858.49	8053.59	937.501	254.427	326.076	0	-10.1468	122.477	-719.959	72217.3	-13606.9	-2759.86	181.1	802.692	0	0	0	0	0	0	0	603	903	0
724	4	-12.756	3.51212	-153.769	-3400.72	7870.48	708.619	251.184	322.116	0	-9.38385	123.087	-718.739	71301.8	-13240.7	-2622.53	181.578	803.796	0	0	0	0	0	0	0	603	903	0
724	5	-13.9767	0.918126	-162.619	-3492.28	8236.69	800.172	250.65	321.475	0	-10.1468	123.087	-717.213	71301.8	-13240.7	-2530.98	181.539	803.585	0	0	0	0	0	0	0	603	903	0
724	6	-15.35	-1.52328	-169.333	-3309.17	8602.91	342.408	250.805	319.542	0	-9.84161	123.545	-713.856	71118.7	-13423.8	-2622.53	181.195	803.374	0	0	0	0	0	0	0	603	903	0
724	7	-17.6388	-4.72763	-177.267	-3034.51	8419.8	113.526	247.498	317.118	0	-8.7735	124.918	-710.499	71210.3	-13484.8	-2576.75	181.021	802.774	0	0	0	0	0	0	0	603	903	0
724	8	-19.7751	-7.32162	-183.676	-3217.62	8786.01	159.302	247.834	317.518	0	-8.62091	123.85	-708.668	71210.3	-13179.6	-2851.41	181.402	802.515	0	0	0	0	0	0	0	603	903	0
724	9	-21.6061	-10.2208	-189.169	-2302.09	9030.15	-252.685	247.736	312.169	0	-9.53644	126.139	-707.142	70844.1	-13423.8	-2576.75	181.017	802.816	0	0	0	0	0	0	0	603	903	0
725	0	-22.5217	-12.6622	-195.578	-2759.85	9213.26	-252.685	247.108	314.111	0	-9.38385	124.46	-706.226	70661	-13240.7	-2622.53	181.252	802.946	0	0	0	0	0	0	0	603	903	0
725	1	-24.6579	-15.1036	-203.513	-2393.64	9762.57	-756.225	247.97	311.762	0	-8.46832	125.986	-702.564	71301.8	-12813.4	-2530.98	181.762	801.512	0	0	0	0	0	0	0	603	903	0
725	2	-26.7941	-19.6812	-211.752	-2576.75	9823.61	-802.001	246.392	312.169	0	-7.85797	127.665	-699.207	71576.5	-12996.5	-2622.53	181.412	800.632	0	0	0	0	0	0	0	603	903	0
725	3	-30.3036	-23.6485	-219.687	-2759.85	9640.5	-893.554	243.883	312.563	0	-8.46832	127.512	-698.292	70935.6	-12813.4	-2576.75	181.65	801.416	0	0	0	0	0	0	0	603	903	0
725	4	-32.8976	-24.7166	-226.096	-2485.2	10189.8	-1397.09	245.069	310.992	0	-8.7735	127.97	-695.545	70477.8	-12813.4	-2485.2	181.578	801.673	0	0	0	0	0	0	0	603	903	0
725	5	-33.8132	-28.0736	-233.725	-1935.88	10495	-1351.32	244.903	308.283	0	-7.09503	128.122	-692.188	70477.8	-12752.4	-2714.08	181.577	801.181	0	0	0	0	0	0	0	603	903	0
725	6	-32.8976	-32.4986	-241.354	-1661.22	10617.1	-1900.63	243.99	306.883	0	-6.94244	129.343	-688.831	70844.1	-12874.5	-2530.98	181.31	800.153	0	0	0	0	0	0	0	603	903	0
725	7	-36.5597	-35.703	-250.51	-1844.33	11166.4	-1763.31	244.575	307.362	0	-8.01056	129.496	-687.916	70294.8	-12203.1	-2668.31	182.261	800.815	0	0	0	0	0	0	0	603	903	0
725	8	-38.5434	-37.3814	-258.749	-1203.46	11288.5	-2129.52	243.627	304.651	0	-7.40021	128.58	-685.169	70294.8	-12386.2	-2530.98	181.922	800.405	0	0	0	0	0	0	0	603	903	0
725	9	-38.5434	-40.2806	-266.684	-1569.67	11410.5	-2266.85	242.787	305.886	0	-6.33209	129.496	-681.812	70020.1	-12935.5	-2439.42	181.028	800.303	0	0	0	0	0	0	0	603	903	0
726	0	-42.3581	-42.4168	-273.703	-379.484	11837.8	-2587.28	243.25	301.386	0	-3.7381	130.564	-679.066	70020.1	-12203.1	-2073.21	182.03	799.888	0	0	0	0	0	0	0	603	903	0
726	1	-41.5951	-47.1471	-281.943	-654.142	12265	-2770.39	243.502	302.32	0	-5.56915	131.174	-675.709	69653.9	-11958.9	-2347.87	182.302	799.917	0	0	0	0	0	0	0	603	903	0
726	2	-42.9684	-49.2833	-294.15	-837.248	12265	-3182.37	241.697	302.846	0	-6.1795	129.953	-672.962	69013	-12264.1	-2347.87	181.776	800.449	0	0	0	0	0	0	0	603	903	0
726	3	-44.9521	-52.1825	-303	-287.931	12875.4	-3136.6	242.493	300.95	0	-6.48468	130.259	-669.911	69379.2	-11653.8	-2439.42	182.604	799.435	0	0	0	0	0	0	0	603	903	0
726	4	-46.6305	-55.2342	-311.545	444.491	13302.6	-3090.82	242.699	298.573	0	-5.26398	130.411	-666.554	69379.2	-11775.8	-2347.87	182.333	798.914	0	0	0	0	0	0	0	603	903	0
726	5	-46.3254	-57.8282	-316.428	719.149	13424.7	-3182.37	242.426	297.727	0	-4.65363	131.022	-666.248	68921.4	-12081	-2439.42	181.867	799.553	0	0	0	0	0	0	0	603	903	0
726	6	-47.2409	-61.0326	-324.973	1543.12	13729.9	-3914.8	242.249	295.252	0	-5.72174	130.259	-661.366	68921.4	-11836.9	-2302.09	182.102	798.789	0	0	0	0	0	0	0	603	903	0
726	7	-46.7831	-62.1007	-334.433	1085.36	14462.3	-3960.57	243.244	296.755	0	-5.56915	131.327	-657.398	68738.4	-11531.7	-2347.87	182.459	798.439	0	0	0	0	0	0	0	603	903	0
726	8	-46.478	-66.068	-345.724	993.807	14828.5	-4006.35	242.891	297.125	0	-3.43292	131.479	-653.431	68829.9	-11958.9	-2302.09	181.698	797.664	0	0	0	0	0	0	0	603	903	0
726	9	-47.5461	-66.5257	-355.49	2000.89	15072.6	-4281.01	242.4	294.371	0	-2.82257	131.632	-650.99	67822.8	-11714.8	-2256.32	182.005	798.816	0	0	0	0	0	0	0	603	903	0
727	0	-48.6142	-69.5775	-364.645	2092.44	15805.1	-4372.56	243.344	294.262	0	-3.89069	131.479	-648.243	68097.5	-11592.7	-1981.66	182.117	797.951	0	0	0	0	0	0	0	603	903	0
727	1	-49.072	-72.6292	-373.19	2000.89	15988.2	-4509.89	242.842	294.638	0	-4.34845	131.022	-643.055	67914.4	-11531.7	-2210.54	182.067	797.388	0	0	0	0	0	0	0	603	903	0
727	2	-47.6987	-74.1551	-382.956	2183.99	16720.6	-4692.99	243.662	294.297	0	-3.43292	131.937	-639.088	68005.9	-11226.5	-2210.54	182.434	796.589	0	0	0	0	0	0	0	603	903	0
727	3	-48.4616	-76.2913	-390.585	4015.05	17025.8	-4830.32	243.59	289.72	0	-2.97516	131.937	-636.341	68189	-10738.2	-1523.9	183.125	795.842	0	0	0	0	0	0	0	603	903	0
727	4	-48.4616	-79.0379	-400.961	4106.6	17514	-5196.53	243.68	289.758	0	-3.58551	131.327	-634.205	67365.1	-10921.3	-1981.66	182.779	796.78	0	0	0	0	0	0	0	603	903	0
727	5	-48.6142	-81.9371	-408.591	3923.5	17697.1	-5196.53	243.313	290.397	0	-2.82257	131.327	-629.322	66541.1	-11104.4	-2118.99	182.355	797.265	0	0	0	0	0	0	0	603	903	0
727	6	-49.3771	-82.8526	-418.661	3831.94	18429.6	-5425.42	244.02	290.847	0	-1.60187	132.547	-625.66	66815.7	-11409.6	-1981.66	181.764	796.208	0	0	0	0	0	0	0	603	903	0
727	7	-48.1564	-84.2259	-424.765	4472.81	18734.7	-5196.53	244.106	289.47	0	-0.228577	132.395	-623.219	66907.3	-10677.2	-1981.66	182.868	795.642	0	0	0	0	0	0	0	603	903	0
727	8	-48.1564	-86.5147	-431.784	5479.89	19039.9	-5516.97	244.096	287.309	0	-1.29669	130.869	-618.946	66174.9	-10860.3	-1752.78	182.454	796.085	0	0	0	0	0	0	0	603	903	0
727	9	-46.9357	-88.8036	-440.329	5754.55	20077.5	-5608.52	245.597	286.931	0	-2.21222	130.869	-615.284	65991.8	-10738.2	-1844.33	182.548	795.746	0	0	0	0	0	0	0	603	903	0
728	0	-47.2409	-90.0243	-448.569	5663	19955.4	-5700.07	244.487	287.375	0	-1.44928	131.479	-611.927	65991.8	-10555.1	-1752.78	182.751	795.157	0	0	0	0	0	0	0	603	903	0
728	1	-46.3254	-91.3975	-453.146	5754.55	20504.8	-5700.07	245.25	287.301	0	-0.381165	131.327	-607.044	65350.9	-10555.1	-1752.78	182.612	795.346	0	0	0	0	0	0	0	603	903	0
728	2	-47.2409	-93.2286	-461.996	5937.65	20748.9	-5974.73	244.911	287.148	0	-0.0759888	129.801	-603.687	65991.8	-10311	-1661.23	182.92	793.686	0	0	0	0	0	0	0	603	903	0
728	3	-45.1047	-95.8226	-466.574	7310.95	21176.1	-6295.17	245.386	284.331	0	-0.68634	129.953	-597.889	64618.5	-10250	-1615.45	182.856	794.922	0	0	0	0	0	0	0	603	903	0
728	4	-45.4098	-97.5011	-473.288	7494.05	21481.3	-5471.19	245.387	284.166	0	1.75507	130.564	-594.227	64160.7	-10677.2	-1478.12	182.032	795.027	0	0	0	0	0	0	0	603	903	0
728	5	-44.3417	-98.1114	-479.697	7860.26	21542.4	-6432.5	244.908	283.614	0	-0.228577	130.564	-590.87	64343.8	-10555.1	-1249.24	182.136	794.103	0	0	0	0	0	0	0	603	903	0
728	6	-43.2736	-100.4	-487.936	7860.26	22213.7	-6340.94	245.526	283.891	0	-0.0759888	128.885	-586.598	64343.8	-9822.71	-1661.23	183.255	793.31	0	0	0	0	0	0	0	603	903	0
728	7	-43.121	-101.621	-491.904	8775.79	22396.9	-6340.94	245.531	282.16	0	0.381775	126.749	-583.851	63428.3	-9761.67	-1615.45	183.281	794.362	0	0	0	0	0	0	0	603	903	0
728	8	-43.5788	-102.689	-496.786	8958.9	23190.3	-6524.05	246.681	281.966	0	-0.228577	128.58	-577.747	63519.8	-9700.63	-1111.91	183.21	793.056	0	0	0	0	0	0	0	603	903	0
728	9	-41.7477	-104.673	-501.059	8958.9	23129.3	-6524.05	246.161	282.12	0	1.2973	125.528	-572.559	62970.5	-9517.53	-1157.69	183.377	793.019	0	0	0	0	0	0	0	603	903	0
729	0	-41.4426	-106.046	-504.721	10240.6	23556.5	-6752.93	246.672	279.71	0	1.2973	127.359	-569.508	63062.1	-9273.39	-1478.12	183.717	792.269	0	0	0	0	0	0	0	603	903	0
729	1	-40.3744	-106.962	-508.994	9782.87	24105.8	-6752.93	247.36	280.78	0	2.06024	127.054	-564.625	62329.7	-9578.56	-1020.36	183.036	792.609	0	0	0	0	0	0	0	603	903	0
729	2	-39.1537	-108.03	-515.097	10240.6	24594.1	-7027.59	247.747	280.119	0	1.75507	127.207	-558.827	61963.5	-9761.67	-1478.12	182.532	792.119	0	0	0	0	0	0	0	603	903	0
729	3	-39.0012	-109.556	-520.895	10515.3	24105.8	-6798.71	246.278	279.813	0	0.839539	126.444	-553.639	61322.6	-9029.25	-1203.46	183.691	792.237	0	0	0	0	0	0	0	603	903	0
729	4	-39.3063	-110.929	-524.252	11247.7	25082.4	-7119.14	247.844	278.545	0	1.60248	126.444	-550.892	61871.9	-9334.42	-1340.79	183.056	790.688	0	0	0	0	0	0	0	603	903	0
729	5	-36.4072	-111.844	-526.389	11430.8	25387.6	-7348.02	248.23	278.284	0	2.67059	125.223	-545.704	60773.3	-9273.39	-1203.46	183.007	791.633	0	0	0	0	0	0	0	603	903	0
729	6	-36.8649	-113.065	-530.051	12071.7	25265.5	-7576.91	247.666	277.225	0	5.41718	124.613	-540.211	60681.7	-9212.35	-928.804	182.947	790.67	0	0	0	0	0	0	0	603	903	0
729	7	-34.7287	-114.591	-534.323	11980.1	25936.9	-7485.35	248.542	277.579	0	3.12836	124.46	-534.718	60040.8	-8907.18	-1020.36	183.342	790.715	0	0	0	0	0	0	0	603	903	0
729	8	-32.1347	-116.117	-538.29	13078.8	25936.9	-7576.91	248.184	275.703	0	2.51801	124.155	-531.056	59308.4	-8846.14	-883.027	183.342	791.32	0	0	0	0	0	0	0	603	903	0
729	9	-32.8976	-117.032	-541.953	12712.6	26181	-7348.02	248.309	276.543	0	3.12836	123.24	-526.478	59857.7	-8357.86	-699.922	184.125	789.305	0	0	0	0	0	0	0	603	903	0
730	0	-33.3554	-117.643	-545.92	13078.8	26486.2	-7760.01	248.517	276.043	0	4.04388	121.561	-520.985	59033.8	-8540.97	-883.027	183.606	789.688	0	0	0	0	0	0	0	603	903	0
730	1	-29.3881	-118.863	-545.92	13353.4	26913.5	-7851.56	249.299	275.54	0	4.34906	123.697	-515.797	59216.9	-8785.11	-745.698	182.968	788.193	0	0	0	0	0	0	0	603	903	0
730	2	-31.8295	-120.694	-547.141	14269	26608.3	-7897.34	248.632	273.921	0	3.8913	121.714	-511.524	57935.1	-7930.62	-471.04	184.496	789.74	0	0	0	0	0	0	0	603	903	0
730	3	-29.8459	-121.457	-548.972	14543.6	27218.6	-8355.1	249.581	273.508	0	5.56976	120.493	-506.947	57568.9	-8052.69	-608.369	184.115	789.44	0	0	0	0	0	0	0	603	903	0
730	4	-28.4726	-121.915	-548.666	14269	27401.7	-7897.34	249.942	273.993	0	4.34906	120.035	-499.012	57294.3	-8174.76	-654.145	183.618	788.185	0	0	0	0	0	0	0	603	903	0
730	5	-27.4045	-122.22	-556.296	14452.1	27706.9	-7988.89	249.806	274.021	0	5.41718	120.34	-495.045	57019.6	-8602	-745.698	182.624	787.819	0	0	0	0	0	0	0	603	903	0
730	6	-26.4889	-122.831	-558.432	15276	27767.9	-7805.79	249.725	272.645	0	4.95941	119.272	-489.857	56928.1	-7930.62	-516.816	183.81	786.786	0	0	0	0	0	0	0	603	903	0
730	7	-25.8786	-123.746	-558.432	15825.4	27890	-7988.89	249.943	271.661	0	4.50165	117.899	-484.364	55737.9	-7869.58	-379.487	183.753	787.926	0	0	0	0	0	0	0	603	903	0
730	8	-24.5053	-124.204	-558.737	15642.2	28073.1	-8080.44	250.244	272.004	0	6.02753	117.441	-477.65	55188.6	-7747.51	-516.816	183.78	787.458	0	0	0	0	0	0	0	603	903	0
730	9	-23.132	-125.119	-558.432	15642.2	28195.2	-8400.88	250.49	271.989	0	5.112	117.594	-469.105	54913.9	-7808.54	-333.711	183.354	785.939	0	0	0	0	0	0	0	603	903	0
731	0	-21.6061	-124.051	-558.737	15825.4	28195.2	-8355.1	250.462	271.677	0	6.18011	117.441	-466.969	54273	-7930.62	-379.487	183.017	786.776	0	0	0	0	0	0	0	603	903	0
731	1	-19.7751	-125.119	-562.094	16374.7	28256.2	-8034.67	250.27	270.868	0	6.18011	115.61	-459.034	54364.6	-7137.16	-471.04	184.452	784.568	0	0	0	0	0	0	0	603	903	0
731	2	-18.8596	-125.272	-559.653	17015.5	28744.5	-8080.44	251.361	269.596	0	5.87494	115.152	-455.067	53449	-7442.33	-425.263	183.646	785.547	0	0	0	0	0	0	0	603	903	0
731	3	-18.4018	-125.577	-564.536	17015.5	28805.5	-8217.77	251.025	269.859	0	8.16376	115.458	-445.606	52167.3	-7076.12	-150.605	184.12	785.93	0	0	0	0	0	0	0	603	903	0
731	4	-17.0285	-124.662	-563.01	16924	29049.7	-8172	251.597	269.94	0	6.3327	114.847	-442.555	52442	-7564.4	-333.711	182.907	784.502	0	0	0	0	0	0	0	603	903	0
731	5	-14.4345	-125.272	-563.925	16924	29049.7	-7805.79	251.513	269.989	0	7.24823	113.474	-435.23	51709.5	-6954.05	-654.145	184.022	784.19	0	0	0	0	0	0	0	603	903	0
731	6	-13.0612	-124.967	-565.146	17748	29721.1	-7988.89	252.59	268.596	0	8.01117	113.016	-429.737	50885.6	-7076.12	-242.158	183.534	784.589	0	0	0	0	0	0	0	603	903	0
731	7	-10.7724	-124.814	-564.23	17656.4	29293.8	-8126.22	251.918	268.707	0	6.79047	113.321	-421.497	50244.7	-6404.74	-242.158	184.805	783.795	0	0	0	0	0	0	0	603	903	0
731	8	-10.162	-125.272	-565.756	17931.1	29415.9	-7760.01	251.994	268.306	0	7.70599	111.033	-417.225	50153.1	-6648.88	261.382	184.064	782.794	0	0	0	0	0	0	0	603	903	0
731	9	-8.94134	-125.272	-564.841	17931.1	29965.2	-7897.34	253.051	268.255	0	8.01117	110.575	-410.511	48688.3	-6465.77	-104.829	184.249	784.396	0	0	0	0	0	0	0	603	903	0
732	0	-6.65252	-125.272	-563.925	17931.1	29965.2	-7760.01	253.137	268.203	0	8.77411	109.354	-403.797	48688.3	-6770.95	-59.0523	183.232	782.424	0	0	0	0	0	0	0	603	903	0
732	1	-5.43182	-125.119	-564.23	17931.1	30148.3	-7668.46	253.433	268.22	0	7.70599	109.812	-397.694	47955.9	-6099.56	-104.829	184.663	782.415	0	0	0	0	0	0	0	603	903	0
732	2	-2.99041	-125.577	-565.756	18755	30392.5	-7439.58	253.72	266.85	0	9.99481	107.676	-391.285	47131.9	-6343.7	78.2768	183.788	782.546	0	0	0	0	0	0	0	603	903	0
732	3	-1.46453	-125.882	-565.451	19121.2	30392.5	-7210.69	253.749	266.184	0	8.31635	106.455	-385.792	47040.3	-6526.81	-104.829	183.082	781.068	0	0	0	0	0	0	0	603	903	0
732	4	0.0613462	-126.035	-564.23	18846.6	30392.5	-7485.35	253.865	266.598	0	10.1474	105.539	-378.163	46399.5	-5977.49	261.382	184.193	780.303	0	0	0	0	0	0	0	603	903	0
732	5	-0.24383	-126.035	-566.672	19121.2	30819.7	-7439.58	254.387	266.257	0	9.99481	104.929	-373.585	45117.8	-5550.24	32.5004	185.143	782.23	0	0	0	0	0	0	0	603	903	0
732	6	2.04499	-126.34	-567.282	18938.1	30514.5	-7485.35	253.791	266.616	0	8.77411	103.556	-366.566	44843.1	-5794.38	124.053	184.193	780.667	0	0	0	0	0	0	0	603	903	0
732	7	3.72346	-126.035	-565.756	20403	30636.6	-7348.02	254.152	263.937	0	9.99481	101.572	-360.767	44110.7	-5794.38	169.83	183.939	780.731	0	0	0	0	0	0	0	603	903	0
732	8	6.62263	-126.34	-567.587	20128.3	31430.1	-6981.81	255.375	264.537	0	10.6052	100.199	-353.138	43652.9	-5733.35	352.935	183.765	779.386	0	0	0	0	0	0	0	603	903	0
732	9	8.1485	-127.103	-570.029	20311.4	31246.9	-7439.58	254.816	264.368	0	10.7578	99.4359	-347.035	43286.7	-5489.21	261.382	184.183	778.267	0	0	0	0	0	0	0	603	903	0
733	0	9.06403	-126.951	-567.892	20677.6	31613.2	-7302.25	255.668	263.589	0	9.53705	97.91	-341.236	42279.6	-5428.17	581.817	184.093	779.099	0	0	0	0	0	0	0	603	903	0
733	1	10.4373	-127.713	-572.47	20586.1	31674.2	-6890.26	255.329	264.04	0	12.7414	95.316	-333.607	41455.6	-5000.93	444.488	185.01	778.735	0	0	0	0	0	0	0	603	903	0
733	2	12.421	-127.713	-571.555	21318.5	31735.2	-7027.59	255.524	262.701	0	11.2155	93.485	-327.198	41089.4	-5000.93	352.935	184.716	777.42	0	0	0	0	0	0	0	603	903	0
733	3	14.4046	-129.087	-573.08	21410.1	32101.4	-6890.26	256.016	262.64	0	12.2836	90.891	-317.738	40357	-5184.03	581.817	183.685	775.986	0	0	0	0	0	0	0	603	903	0
733	4	16.2357	-129.392	-573.691	20952.3	32650.8	-6936.04	256.914	263.478	0	12.894	91.0435	-312.245	39349.9	-5428.17	719.146	182.616	776.977	0	0	0	0	0	0	0	603	903	0
733	5	18.2193	-129.545	-577.353	22050.9	32528.7	-6752.93	256.341	261.807	0	11.8259	90.128	-305.225	38892.2	-4756.79	261.382	184.415	775.579	0	0	0	0	0	0	0	603	903	0
733	6	18.6771	-130.307	-579.184	21959.4	32528.7	-6936.04	256.163	262.086	0	14.8776	89.2125	-299.122	37518.9	-4756.79	810.699	184.098	777.57	0	0	0	0	0	0	0	603	903	0
733	7	19.8978	-130.613	-578.574	22874.9	33200.1	-6890.26	257.383	260.463	0	12.2836	87.2289	-292.713	37244.2	-4512.65	719.146	184.583	775.762	0	0	0	0	0	0	0	603	903	0
733	8	20.5081	-132.291	-578.879	22966.5	32772.8	-6844.48	256.614	260.326	0	13.6569	84.94	-287.525	36694.9	-4268.51	902.251	185.154	775.377	0	0	0	0	0	0	0	603	903	0
733	9	22.7969	-132.291	-579.184	22417.1	33261.1	-6615.6	257.428	261.295	0	13.8095	83.4142	-279.286	36145.6	-4512.65	856.475	183.842	773.578	0	0	0	0	0	0	0	603	903	0
734	0	23.8651	-132.291	-581.32	22142.5	33566.3	-6844.48	257.742	261.91	0	13.1992	82.1935	-271.351	34863.8	-4329.54	764.922	184.045	774.518	0	0	0	0	0	0	0	603	903	0
734	1	23.8651	-131.986	-584.372	22966.5	33505.3	-6844.48	257.336	260.699	0	13.3517	80.6676	-266.163	34680.7	-3963.33	993.804	185.109	772.701	0	0	0	0	0	0	0	603	903	0
734	2	25.2383	-133.512	-586.203	23790.4	33749.4	-6936.04	257.573	259.416	0	14.2673	78.0736	-259.144	33307.4	-3902.3	856.475	184.942	774.471	0	0	0	0	0	0	0	603	903	0
734	3	25.2383	-131.681	-586.813	24065.1	34054.6	-6844.48	258.033	258.99	0	15.3354	76.7003	-252.43	33399	-4329.54	856.475	182.849	770.69	0	0	0	0	0	0	0	603	903	0
734	4	26.7642	-132.596	-585.898	23790.4	34481.8	-6661.38	258.853	259.395	0	14.1147	75.1744	-244.495	31934.1	-3658.16	902.251	185.038	772.388	0	0	0	0	0	0	0	603	903	0
734	5	27.3746	-132.291	-586.508	24065.1	34115.6	-6661.38	258.167	258.969	0	14.8776	73.3434	-239.918	31293.3	-3658.16	856.475	184.752	772.567	0	0	0	0	0	0	0	603	903	0
734	6	27.8323	-131.376	-589.56	24431.3	34664.9	-6524.05	258.798	258.56	0	14.8776	70.7494	-232.594	30927.1	-3108.84	948.028	186.634	770.034	0	0	0	0	0	0	0	603	903	0
734	7	27.8323	-131.376	-592.612	25163.7	34359.8	-6615.6	257.98	257.538	0	17.4716	68.308	-224.659	30103.1	-3902.3	993.804	182.63	769.006	0	0	0	0	0	0	0	603	903	0
734	8	28.5953	-130.765	-593.832	24980.6	34481.8	-6661.38	258.067	257.933	0	15.3354	67.2398	-219.471	28912.9	-3352.98	902.251	184.722	771.261	0	0	0	0	0	0	0	603	903	0
734	9	29.053	-130.765	-595.969	24980.6	34970.1	-6707.15	258.678	258.084	0	16.2509	64.951	-213.673	28272	-3414.01	1039.58	184.022	770.685	0	0	0	0	0	0	0	603	903	0
735	0	30.1212	-130.002	-595.969	25255.3	34787	-6661.38	258.371	257.623	0	14.5724	63.12	-207.569	27905.8	-3414.01	856.475	183.552	768.559	0	0	0	0	0	0	0	603	903	0
735	1	30.8841	-129.545	-597.8	25163.7	34848	-6478.27	258.294	257.906	0	15.1828	59.9156	-199.94	27173.4	-3352.98	1085.36	183.23	767.092	0	0	0	0	0	0	0	603	903	0
735	2	32.2574	-129.545	-599.02	26262.4	35153.2	-6661.38	258.685	256.158	0	15.7932	57.6268	-195.667	25891.7	-3169.87	948.028	183.8	770.675	0	0	0	0	0	0	0	603	903	0
735	3	31.647	-130.155	-601.767	25987.7	35275.3	-6569.83	258.62	256.814	0	13.8095	58.0846	-187.733	24701.5	-3108.84	993.804	183.44	771.422	0	0	0	0	0	0	0	603	903	0
735	4	31.1893	-129.85	-603.903	25804.6	35275.3	-6478.27	258.412	257.27	0	14.4199	54.8802	-183.46	24884.6	-3047.8	1543.12	183.387	767.36	0	0	0	0	0	0	0	603	903	0
735	5	33.4781	-129.239	-603.903	25987.7	35580.5	-6478.27	258.917	256.967	0	14.8776	53.6595	-176.441	24243.7	-2864.7	902.251	183.764	765.596	0	0	0	0	0	0	0	603	903	0
735	6	31.9522	-129.545	-603.598	26628.6	35519.4	-6478.27	258.846	255.884	0	15.488	49.9974	-168.812	23511.3	-3169.87	993.804	181.222	763.725	0	0	0	0	0	0	0	603	903	0
735	7	32.8677	-128.934	-608.481	26994.8	36007.7	-6066.29	259.176	255.636	0	13.8095	49.5396	-166.676	22778.9	-2681.59	810.699	183.911	766.334	0	0	0	0	0	0	0	603	903	0
735	8	33.0203	-128.782	-611.227	27086.3	35824.6	-6432.5	258.611	255.685	0	16.2509	46.9456	-161.183	22046.4	-2498.49	948.028	184.499	766.221	0	0	0	0	0	0	0	603	903	0
735	9	33.3255	-128.782	-613.364	26994.8	36373.9	-6386.72	259.302	255.989	0	12.894	45.5724	-154.469	21863.3	-2376.42	719.146	184.616	761.461	0	0	0	0	0	0	0	603	903	0
736	0	33.7833	-128.782	-614.89	28185	36068.7	-5837.4	258.659	254.163	0	13.6569	42.9784	-150.501	21130.9	-2498.49	1039.58	183.399	762.597	0	0	0	0	0	0	0	603	903	0
736	1	33.4781	-128.476	-615.195	27544.1	35946.7	-6295.17	258.431	255.227	0	13.5043	42.2154	-146.534	20306.9	-2437.45	948.028	183.366	764.418	0	0	0	0	0	0	0	603	903	0
736	2	34.0884	-127.866	-617.331	27910.3	36434.9	-5883.18	259.02	254.789	0	12.894	39.9266	-141.956	19574.5	-2132.28	1268.46	184.979	765.109	0	0	0	0	0	0	0	603	903	0
736	3	34.3936	-128.019	-620.993	28093.4	36862.2	-6112.06	259.36	254.76	0	12.131	39.774	-135.853	19391.4	-2681.59	1039.58	180.261	760.262	0	0	0	0	0	0	0	603	903	0
736	4	35.4617	-128.019	-624.35	27635.7	37045.3	-5700.07	259.334	255.737	0	12.2836	35.5016	-128.834	18659	-2132.28	948.028	183.449	758.17	0	0	0	0	0	0	0	603	903	0
736	5	34.241	-127.713	-626.181	27635.7	36740.1	-6157.84	258.673	255.866	0	12.5888	35.1964	-126.087	17651.9	-2071.24	948.028	183.573	763.002	0	0	0	0	0	0	0	603	903	0
736	6	34.8514	-127.256	-627.707	28093.4	37045.3	-5974.73	259.017	255.244	0	10.9103	32.4498	-123.036	17377.3	-2132.28	856.475	182.669	761.762	0	0	0	0	0	0	0	603	903	0
736	7	33.7833	-128.324	-630.759	28825.8	36862.2	-5928.96	258.441	254.3	0	10.4526	31.5343	-118.153	16919.5	-1949.17	1131.13	183.503	759.8	0	0	0	0	0	0	0	603	903	0
736	8	34.6988	-126.951	-631.674	28734.3	37411.5	-5928.96	259.226	254.511	0	11.2155	29.2455	-113.88	16736.4	-1949.17	810.699	182.884	756.035	0	0	0	0	0	0	0	603	903	0
736	9	36.835	-126.34	-635.031	28642.7	37106.3	-5928.96	258.432	254.896	0	10.3	28.0247	-108.082	15820.9	-1827.1	856.475	183.095	756.622	0	0	0	0	0	0	0	603	903	0
737	0	34.3936	-125.425	-638.388	29008.9	37655.7	-5745.85	258.986	254.559	0	9.68964	26.6515	-105.641	15363.1	-1705.03	581.817	183.86	757.572	0	0	0	0	0	0	0	603	903	0
737	1	34.0884	-125.119	-642.355	29466.7	37594.6	-5883.18	258.526	254.127	0	9.38446	25.2782	-100.758	14356	-1399.85	856.475	186.107	760.519	0	0	0	0	0	0	0	603	903	0
737	2	34.0884	-124.051	-641.745	29649.8	38143.9	-5837.4	259.438	253.798	0	10.3	24.3626	-96.4853	14264.5	-1705.03	948.028	182.329	755.159	0	0	0	0	0	0	0	603	903	0
737	3	34.0884	-124.967	-641.745	29924.5	38388.1	-5425.42	259.818	253.37	0	8.62152	23.7523	-93.1283	13440.5	-1705.03	764.922	181.692	758.678	0	0	0	0	0	0	0	603	903	0
737	4	33.6307	-123.746	-648.154	29741.4	38205	-5654.3	258.944	254.114	0	8.77411	21.1583	-90.0766	12708.1	-1460.89	719.146	183.782	761.919	0	0	0	0	0	0	0	603	903	0
737	5	33.3255	-122.525	-650.9	29558.3	38021.9	-5745.85	258.414	254.589	0	7.55341	20.3954	-83.973	12433.4	-1155.71	581.817	186.237	754.936	0	0	0	0	0	0	0	603	903	0
737	6	34.3936	-121.457	-653.036	30382.2	38510.1	-5471.19	258.971	253.475	0	7.09564	18.7169	-81.8368	11975.6	-1643.99	764.922	179.911	756.664	0	0	0	0	0	0	0	603	903	0
737	7	32.8677	-121.305	-655.783	30473.8	38449.1	-5608.52	258.631	253.531	0	7.85858	19.0221	-79.3954	11792.5	-1521.92	490.264	180.831	754.471	0	0	0	0	0	0	0	603	903	0
737	8	32.1048	-120.694	-656.699	30107.6	38571.2	-5333.86	258.735	254.153	0	8.01117	16.8858	-76.0385	11060.1	-1155.71	581.817	184.801	757.546	0	0	0	0	0	0	0	603	903	0
737	9	32.8677	-119.474	-659.445	30473.8	38998.4	-5288.09	259.138	253.789	0	6.3327	15.5125	-72.0712	10419.2	-1582.96	490.264	178.036	758.431	0	0	0	0	0	0	0	603	903	0
738	0	31.7996	-119.931	-661.887	30199.1	38693.2	-5471.19	258.459	254.374	0	5.26459	14.2918	-69.3246	9961.49	-1460.89	673.37	178.927	759.307	0	0	0	0	0	0	0	603	903	0
738	1	31.4945	-117.795	-665.244	31023.1	39181.5	-5425.42	258.898	253.366	0	4.80682	13.3763	-67.7987	10053	-1033.64	627.593	184.754	754.722	0	0	0	0	0	0	0	603	903	0
738	2	30.5789	-117.795	-668.295	31114.7	39303.6	-5013.43	258.812	253.442	0	5.72235	11.8504	-62.9159	9778.38	-972.608	581.817	184.541	747.58	0	0	0	0	0	0	0	603	903	0
738	3	31.0367	-117.185	-669.211	31114.7	38998.4	-5059.2	258.275	253.505	0	5.72235	10.9349	-59.8642	8954.41	-1094.68	719.146	181.714	753.421	0	0	0	0	0	0	0	603	903	0
738	4	29.9686	-115.506	-671.347	30748.5	39486.7	-4830.32	258.817	254.199	0	4.50165	10.172	-56.5072	8588.2	-850.538	856.475	184.948	751.016	0	0	0	0	0	0	0	603	903	0
738	5	30.1212	-115.049	-673.483	32030.2	39303.6	-5379.64	258.359	252.441	0	3.58612	8.4935	-56.5072	8038.88	-1155.71	673.37	179.548	760.737	0	0	0	0	0	0	0	603	903	0
738	6	30.7315	-114.286	-678.976	31023.1	39242.6	-4921.87	257.797	254.309	0	3.73871	8.34091	-53.7606	8221.98	-1460.89	398.711	172.826	750.063	0	0	0	0	0	0	0	603	903	0
738	7	29.053	-113.981	-680.807	31572.4	39547.7	-5059.2	258.089	253.625	0	4.19647	7.42538	-50.0985	8038.88	-850.538	810.699	183.023	742.539	0	0	0	0	0	0	0	603	903	0
738	8	28.1375	-112.76	-683.249	31297.8	39914	-5013.43	258.418	254.193	0	2.51801	6.96762	-47.9623	7855.78	-606.397	490.264	187.357	739.209	0	0	0	0	0	0	0	603	903	0
738	9	28.5953	-111.844	-683.249	31114.7	39425.7	-4555.66	257.703	254.461	0	2.97577	5.44174	-46.4364	6757.14	-728.467	490.264	184.313	757.486	0	0	0	0	0	0	0	603	903	0
739	0	27.5272	-111.387	-685.69	32030.2	39975	-4921.87	258.299	253.288	0	3.8913	4.83139	-44.6054	6940.25	-728.467	261.382	183.669	747.408	0	0	0	0	0	0	0	603	903	0
739	1	27.9849	-110.776	-688.132	32121.7	40097.1	-4876.1	258.269	253.32	0	5.56976	4.37363	-42.164	6390.93	-667.432	398.711	184.171	751.427	0	0	0	0	0	0	0	603	903	0
739	2	27.3746	-109.861	-691.794	31664	39852.9	-4692.99	257.608	254.229	0	2.36542	4.22104	-38.807	6116.27	-911.573	398.711	176.51	745.393	0	0	0	0	0	0	0	603	903	0
739	3	29.5108	-108.335	-693.625	31755.5	40341.2	-4509.89	258.16	254.218	0	2.97577	3.15292	-37.8915	5658.51	-484.327	307.159	187.218	753.666	0	0	0	0	0	0	0	603	903	0
739	4	26.3065	-108.03	-696.677	32030.2	40341.2	-4601.44	257.905	254.024	0	1.90765	1.93222	-37.2811	5383.85	-667.432	307.159	182.097	758.588	0	0	0	0	0	0	0	603	903	0
739	5	26.4591	-108.03	-697.287	32762.6	40280.2	-4464.11	257.767	253.014	0	2.82318	0.864106	-33.3139	5566.96	-667.432	627.593	179.965	735.894	0	0	0	0	0	0	0	603	903	0
739	6	27.3746	-106.809	-700.034	32854.2	40585.3	-4418.33	257.976	253.068	0	2.36542	1.47446	-33.0087	4651.43	-1094.68	490.264	166.837	762.085	0	0	0	0	0	0	0	603	903	0
739	7	26.1539	-105.893	-701.865	32213.3	40646.4	-4418.33	257.912	254.103	0	0.534363	0.253754	-27.8207	5109.19	-545.362	444.488	180.397	719.353	0	0	0	0	0	0	0	603	903	0
739	8	25.8487	-105.13	-706.442	32304.8	40219.1	-4418.33	256.932	254.271	0	1.44989	-0.0514216	-28.4311	4285.22	-545.362	352.935	180.818	752.277	0	0	0	0	0	0	0	603	903	0
739	9	24.1702	-103.299	-707.053	33037.3	40768.4	-4189.45	257.66	253.275	0	2.51801	1.01669	-24.7689	4102.11	-484.327	169.83	180.446	737.385	0	0	0	0	0	0	0	603	903	0
740	0	24.628	-103.147	-711.02	32762.6	40585.3	-4189.45	257.08	253.922	0	1.44989	1.16928	-27.8207	3827.45	-301.221	261.382	189.173	765.424	0	0	0	0	0	0	0	603	903	0
740	1	23.7125	-103.147	-710.104	33403.5	41012.6	-3823.24	257.756	252.96	0	0.839539	-0.661773	-24.4638	3735.9	-606.397	261.382	175.212	750.288	0	0	0	0	0	0	0	603	903	0
740	2	24.7806	-102.079	-711.325	32304.8	41012.6	-3914.8	257.657	254.585	0	0.686951	-0.509185	-22.6327	3919.01	-423.291	78.2768	181.297	729.843	0	0	0	0	0	0	0	603	903	0
740	3	24.0176	-100.4	-714.987	32671.1	40829.5	-4052.12	257.105	254.305	0	0	0	0	0	0	0	200	903	0	0	0	0	0	0	0	603	903	0
740	4	24.1702	-99.9425	-717.429	33220.4	40829.5	-4143.68	256.911	253.695	0	1.60248	-0.814361	-21.412	3461.24	-301.221	307.159	185.932	741.35	0	0	0	0	0	0	0	603	903	0
740	5	22.4918	-98.7218	-720.786	33861.2	41012.6	-4189.45	256.9	253.022	0	0.534363	-1.5773	-19.581	2911.93	-606.397	536.04	169.031	754.288	0	0	0	0	0	0	0	603	903	0
740	6	24.0176	-99.3321	-719.26	33311.9	41012.6	-3640.14	257.021	253.686	0	0	0	0	0	0	0	200	903	0	0	0	0	0	0	0	603	903	0
740	7	21.8814	-97.0433	-722.311	33403.5	41317.8	-3960.57	257.202	253.755	0	0	0	0	0	0	0	200	903	0	0	0	0	0	0	0	603	903	0
740	8	22.4918	-95.3648	-723.532	33403.5	41195.7	-3731.69	256.937	253.833	0	0	0	0	0	0	0	200	903	0	0	0	0	0	0	0	603	903	0
740	9	22.1866	-94.6019	-726.584	33128.8	41378.8	-3731.69	256.95	254.405	0	0	0	0	0	0	0	200	903	0	0	0	0	0	0	0	603	903	0
741	0	22.9495	-95.0597	-725.668	33403.5	41439.8	-3457.03	257.106	253.969	0	0	0	0	0	0	0	200	903	0	0	0	0	0	0	0	603	903	0
741	1	21.5762	-94.7545	-729.025	32945.7	41378.8	-3594.36	256.759	254.809	0	0	0	0	0	0	0	200	903	0	0	0	0	0	0	0	603	903	0
741	2	20.6607	-93.2286	-728.415	34227.5	41317.8	-3594.36	256.723	253.011	0	0	0	0	0	0	0	200	903	0	0	0	0	0	0	0	603	903	0
741	3	21.1185	-93.076	-730.246	33495	41622.9	-3228.15	256.999	254.132	0	0	0	0	0	0	0	200	903	0	0	0	0	0	0	0	603	903	0
741	4	20.5081	-90.3294	-730.551	34044.4	41256.7	-3548.58	256.473	253.399	0	0	0	0	0	0	0	200	903	0	0	0	0	0	0	0	603	903	0
741	5	21.1185	-90.9398	-733.908	33678.1	41622.9	-3228.15	256.714	254.111	0	0	0	0	0	0	0	200	903	0	0	0	0	0	0	0	603	903	0
741	6	19.5926	-90.3294	-733.908	33495	41439.8	-3411.26	256.465	254.361	0	0	0	0	0	0	0	200	903	0	0	0	0	0	0	0	603	903	0
741	7	20.6607	-89.2613	-731.772	33128.8	41806	-3045.04	257.13	254.728	0	0	0	0	0	0	0	200	903	0	0	0	0	0	0	0	603	903	0
741	8	18.5245	-87.5828	-734.824	34319	41928.1	-3319.7	257.059	253.296	0	0	0	0	0	0	0	200	903	0	0	0	0	0	0	0	603	903	0
741	9	20.3555	-87.1251	-734.213	34227.5	41500.9	-3090.82	256.524	253.382	0	0	0	0	0	0	0	200	903	0	0	0	0	0	0	0	603	903	0
742	0	20.6607	-87.888	-737.875	34135.9	41684	-3319.7	256.492	253.738	0	0	0	0	0	0	0	200	903	0	0	0	0	0	0	0	603	903	0
742	1	19.44	-86.057	-737.57	33586.6	41745	-2999.27	256.598	254.463	0	0	0	0	0	0	0	200	903	0	0	0	0	0	0	0	603	903	0
742	2	18.0667	-85.1414	-739.096	33678.1	41622.9	-2861.94	256.316	254.433	0	0	0	0	0	0	0	200	903	0	0	0	0	0	0	0	603	903	0
742	3	18.6771	-83.7682	-736.655	34135.9	41745	-2724.61	256.668	253.661	0	0	0	0	0	0	0	200	903	0	0	0	0	0	0	0	603	903	0
742	4	17.7615	-83.3104	-736.96	33861.2	41378.8	-2816.16	256.148	254.053	0	0	0	0	0	0	0	200	903	0	0	0	0	0	0	0	603	903	0
742	5	17.609	-83.1578	-737.875	33586.6	41561.9	-2907.72	256.326	254.482	0	0	0	0	0	0	0	200	903	0	0	0	0	0	0	0	603	903	0
742	6	18.3719	-81.6319	-740.317	33678.1	41745	-2770.39	256.388	254.508	0	0	0	0	0	0	0	200	903	0	0	0	0	0	0	0	603	903	0
742	7	17.609	-80.7164	-735.739	34776.8	41317.8	-2953.49	256.158	252.732	0	0	0	0	0	0	0	200	903	0	0	0	0	0	0	0	603	903	0
742	8	16.6934	-80.4112	-739.706	33769.7	41561.9	-2907.72	256.187	254.347	0	0	0	0	0	0	0	200	903	0	0	0	0	0	0	0	603	903	0
742	9	16.6934	-80.106	-738.791	34502.1	41561.9	-2633.06	256.257	253.299	0	0	0	0	0	0	0	200	903	0	0	0	0	0	0	0	603	903	0
743	0	16.2357	-79.0379	-735.129	34227.5	41684	-2633.06	256.703	253.44	0	0	0	0	0	0	0	200	903	0	0	0	0	0	0	0	603	903	0
743	1	16.2357	-79.6483	-738.486	33769.7	41195.7	-2358.4	255.784	254.272	0	0	0	0	0	0	0	200	903	0	0	0	0	0	0	0	603	903	0
743	2	16.6934	-77.2069	-740.012	34227.5	41195.7	-2770.39	255.669	253.747	0	0	0	0	0	0	0	200	903	0	0	0	0	0	0	0	603	903	0
743	3	16.5408	-77.2069	-735.739	34227.5	41195.7	-2587.28	255.992	253.479	0	0	0	0	0	0	0	200	903	0	0	0	0	0	0	0	603	903	0
743	4	15.1675	-76.5965	-739.706	33769.7	41195.7	-2724.61	255.692	254.347	0	0	0	0	0	0	0	200	903	0	0	0	0	0	0	0	603	903	0
743	5	14.7098	-75.5284	-738.181	33495	41378.8	-2633.06	256.055	254.625	0	0	0	0	0	0	0	200	903	0	0	0	0	0	0	0	603	903	0
743	6	15.015	-74.3077	-736.96	33769.7	41256.7	-2312.62	255.982	254.177	0	0	0	0	0	0	0	200	903	0	0	0	0	0	0	0	603	903	0
743	7	15.9305	-74.4603	-736.655	34319	41622.9	-2495.73	256.503	253.412	0	0	0	0	0	0	0	200	903	0	0	0	0	0	0	0	603	903	0
743	8	15.1675	-73.8499	-737.875	34135.9	41439.8	-2633.06	256.161	253.738	0	0	0	0	0	0	0	200	903	0	0	0	0	0	0	0	603	903	0
743	9	14.8624	-73.087	-736.349	33495	41134.7	-2312.62	255.863	254.512	0	0	0	0	0	0	0	200	903	0	0	0	0	0	0	0	603	903	0
744	0	14.8624	-72.0189	-737.265	33678.1	41073.6	-2312.62	255.711	254.32	0	0	0	0	0	0	0	200	903	0	0	0	0	0	0	0	603	903	0
744	1	15.015	-70.7982	-734.824	34319	41439.8	-2633.06	256.394	253.296	0	0	0	0	0	0	0	200	903	0	0	0	0	0	0	0	603	903	0
744	2	16.0831	-70.9508	-733.298	34410.6	41073.6	-2221.07	256.012	253.074	0	0	0	0	0	0	0	200	903	0	0	0	0	0	0	0	603	903	0
744	3	16.2357	-70.6456	-733.298	34319	41439.8	-1900.63	256.512	253.199	0	0	0	0	0	0	0	200	903	0	0	0	0	0	0	0	603	903	0
744	4	16.6934	-70.493	-734.213	33861.2	41012.6	-2083.74	255.859	253.881	0	0	0	0	0	0	0	200	903	0	0	0	0	0	0	0	603	903	0
744	5	15.7779	-70.3404	-734.213	34135.9	40707.4	-2221.07	255.444	253.507	0	0	0	0	0	0	0	200	903	0	0	0	0	0	0	0	603	903	0
744	6	15.9305	-68.5094	-731.161	34319	41134.7	-1992.19	256.259	253.062	0	0	0	0	0	0	0	200	903	0	0	0	0	0	0	0	603	903	0
744	7	15.7779	-68.2042	-730.551	34593.7	41134.7	-2175.29	256.306	252.647	0	0	0	0	0	0	0	200	903	0	0	0	0	0	0	0	603	903	0
744	8	16.846	-67.7464	-728.72	33769.7	41012.6	-1625.98	256.28	253.659	0	0	0	0	0	0	0	200	903	0	0	0	0	0	0	0	603	903	0
744	9	17.3038	-66.068	-730.551	34044.4	41073.6	-1992.19	256.223	253.399	0	0	0	0	0	0	0	200	903	0	0	0	0	0	0	0	603	903	0
745	0	17.4564	-65.305	-729.025	34319	40951.6	-1809.08	256.173	252.925	0	0	0	0	0	0	0	200	903	0	0	0	0	0	0	0	603	903	0
745	1	17.3038	-65.7628	-728.415	34685.2	40707.4	-1580.2	255.885	252.383	0	0	0	0	0	0	0	200	903	0	0	0	0	0	0	0	603	903	0
745	2	16.846	-65.1524	-726.584	34776.8	41134.7	-1717.53	256.614	252.137	0	0	0	0	0	0	0	200	903	0	0	0	0	0	0	0	603	903	0
745	3	17.9141	-64.6947	-725.363	33861.2	40707.4	-1717.53	256.12	253.318	0	0	0	0	0	0	0	200	903	0	0	0	0	0	0	0	603	903	0
745	4	18.2193	-63.6266	-724.753	34227.5	40585.3	-1809.08	255.999	252.774	0	0	0	0	0	0	0	200	903	0	0	0	0	0	0	0	603	903	0
745	5	18.3719	-63.3214	-724.753	34410.6	40707.4	-1625.98	256.167	252.521	0	0	0	0	0	0	0	200	903	0	0	0	0	0	0	0	603	903	0
745	6	19.1348	-62.5584	-724.448	34685.2	40646.4	-1442.87	256.107	252.122	0	0	0	0	0	0	0	200	903	0	0	0	0	0	0	0	603	903	0
745	7	18.6771	-62.2533	-720.786	34959.9	40829.5	-1580.2	256.646	251.498	0	0	0	0	0	0	0	200	903	0	0	0	0	0	0	0	603	903	0
745	8	18.9822	-61.6429	-724.142	34410.6	40585.3	-1580.2	256.046	252.481	0	0	0	0	0	0	0	200	903	0	0	0	0	0	0	0	603	903	0
745	9	19.44	-61.6429	-721.091	34319	40646.4	-1168.21	256.368	252.407	0	0	0	0	0	0	0	200	903	0	0	0	0	0	0	0	603	903	0
746	0	20.8133	-60.88	-722.311	34959.9	40402.2	-1397.09	255.935	251.6	0	0	0	0	0	0	0	200	903	0	0	0	0	0	0	0	603	903	0
746	1	21.1185	-61.0326	-719.565	34776.8	40646.4	-1625.98	256.487	251.67	0	0	0	0	0	0	0	200	903	0	0	0	0	0	0	0	603	903	0
746	2	21.2711	-60.88	-719.87	35051.4	40524.3	-1580.2	256.294	251.309	0	0	0	0	0	0	0	200	903	0	0	0	0	0	0	0	603	903	0
746	3	21.4237	-60.117	-718.954	34593.7	40707.4	-1305.54	256.62	251.883	0	0	0	0	0	0	0	200	903	0	0	0	0	0	0	0	603	903	0
746	4	21.5762	-59.3541	-719.565	34593.7	40585.3	-1168.21	256.403	251.924	0	0	0	0	0	0	0	200	903	0	0	0	0	0	0	0	603	903	0
746	5	22.3392	-58.5912	-714.987	35600.7	40707.4	-1305.54	256.934	250.208	0	0	0	0	0	0	0	200	903	0	0	0	0	0	0	0	603	903	0
746	6	22.7969	-59.2015	-714.682	35326.1	40768.4	-847.778	257.044	250.571	0	0	0	0	0	0	0	200	903	0	0	0	0	0	0	0	603	903	0
746	7	23.1021	-59.0489	-712.241	35051.4	40829.5	-1488.65	257.325	250.787	0	0	0	0	0	0	0	200	903	0	0	0	0	0	0	0	603	903	0
746	8	23.8651	-57.8282	-714.987	35234.5	40707.4	-1351.32	256.934	250.72	0	0	0	0	0	0	0	200	903	0	0	0	0	0	0	0	603	903	0
746	9	25.2383	-59.6593	-711.935	35234.5	40097.1	-847.778	256.321	250.509	0	0	0	0	0	0	0	200	903	0	0	0	0	0	0	0	603	903	0
747	0	24.0176	-57.523	-712.546	35967	40829.5	-1442.87	257.301	249.523	0	0	0	0	0	0	0	200	903	0	0	0	0	0	0	0	603	903	0
747	1	24.628	-58.1334	-711.02	36058.5	40463.3	-1213.99	256.909	249.286	0	0	0	0	0	0	0	200	903	0	0	0	0	0	0	0	603	903	0
747	2	24.0176	-57.3704	-707.358	35692.3	40646.4	-1168.21	257.462	249.541	0	0	0	0	0	0	0	200	903	0	0	0	0	0	0	0	603	903	0
747	3	25.3909	-57.523	-709.799	35417.6	40646.4	-939.331	257.265	250.102	0	0	0	0	0	0	0	200	903	0	0	0	0	0	0	0	603	903	0
747	4	26.4591	-57.3704	-709.494	35509.2	40463.3	-1076.66	257.031	249.951	0	0	0	0	0	0	0	200	903	0	0	0	0	0	0	0	603	903	0
747	5	26.0013	-56.4549	-707.663	36150.1	40646.4	-1076.66	257.437	248.916	0	0	0	0	0	0	0	200	903	0	0	0	0	0	0	0	603	903	0
747	6	25.2383	-56.7601	-707.968	36150.1	40646.4	-1213.99	257.413	248.938	0	0	0	0	0	0	0	200	903	0	0	0	0	0	0	0	603	903	0
747	7	27.6798	-56.3023	-705.527	35783.8	40646.4	-893.554	257.611	249.281	0	0	0	0	0	0	0	200	903	0	0	0	0	0	0	0	603	903	0
747	8	26.3065	-55.2342	-704.916	35967	40280.2	-664.672	257.142	248.977	0	0	0	0	0	0	0	200	903	0	0	0	0	0	0	0	603	903	0
747	9	27.3746	-54.7765	-703.391	35967	40768.4	-527.343	257.96	248.866	0	0	0	0	0	0	0	200	903	0	0	0	0	0	0	0	603	903	0
748	0	27.9849	-55.0816	-704.001	36333.2	40402.2	-893.554	257.389	248.39	0	0	0	0	0	0	0	200	903	0	0	0	0	0	0	0	603	903	0
748	1	27.3746	-54.7765	-702.17	36516.3	40463.3	-1030.88	257.626	247.995	0	0	0	0	0	0	0	200	903	0	0	0	0	0	0	0	603	903	0
748	2	27.5272	-54.929	-701.865	36241.6	40707.4	-1030.88	257.999	248.364	0	0	0	0	0	0	0	200	903	0	0	0	0	0	0	0	603	903	0
748	3	28.1375	-53.4032	-699.118	36424.7	40402.2	-939.331	257.79	247.899	0	0	0	0	0	0	0	200	903	0	0	0	0	0	0	0	603	903	0
748	4	27.0694	-52.4876	-698.508	37065.6	40768.4	-985.107	258.365	246.936	0	0	0	0	0	0	0	200	903	0	0	0	0	0	0	0	603	903	0
748	5	28.4427	-52.9454	-698.203	36607.8	40463.3	-618.896	257.953	247.568	0	0	0	0	0	0	0	200	903	0	0	0	0	0	0	0	603	903	0
748	6	29.816	-54.1661	-700.949	36974	40280.2	-710.449	257.465	247.251	0	0	0	0	0	0	0	200	903	0	0	0	0	0	0	0	603	903	0
748	7	28.4427	-52.7928	-699.118	36882.5	40402.2	-939.331	257.79	247.244	0	0	0	0	0	0	0	200	903	0	0	0	0	0	0	0	603	903	0
748	8	28.2901	-51.5721	-696.982	36607.8	40463.3	-893.554	258.055	247.477	0	0	0	0	0	0	0	200	903	0	0	0	0	0	0	0	603	903	0
748	9	28.1375	-51.2669	-696.677	37157.1	39730.8	-985.107	257.029	246.665	0	0	0	0	0	0	0	200	903	0	0	0	0	0	0	0	603	903	0
749	0	28.7479	-51.1143	-692.404	37523.4	40341.2	-618.896	258.263	245.807	0	0	0	0	0	0	0	200	903	0	0	0	0	0	0	0	603	903	0
749	1	28.4427	-51.2669	-690.268	37798	40280.2	-939.331	258.354	245.242	0	0	0	0	0	0	0	200	903	0	0	0	0	0	0	0	603	903	0
749	2	29.5108	-49.4359	-692.099	37340.2	40219.1	-710.449	258.112	246.048	0	0	0	0	0	0	0	200	903	0	0	0	0	0	0	0	603	903	0
749	3	29.3582	-50.504	-694.235	36699.4	40585.3	-390.014	258.461	247.137	0	0	0	0	0	0	0	200	903	0	0	0	0	0	0	0	603	903	0
749	4	28.2901	-48.8255	-690.268	37889.6	39852.9	-527.343	257.735	245.109	0	0	0	0	0	0	0	200	903	0	0	0	0	0	0	0	603	903	0
749	5	29.053	-49.2833	-690.878	37431.8	39730.8	-573.12	257.508	245.82	0	0	0	0	0	0	0	200	903	0	0	0	0	0	0	0	603	903	0
749	6	28.5953	-49.1307	-687.827	37065.6	40219.1	-664.672	258.473	246.112	0	0	0	0	0	0	0	200	903	0	0	0	0	0	0	0	603	903	0
749	7	29.3582	-47.4522	-685.995	36607.8	39975	-161.132	258.273	246.635	0	0	0	0	0	0	0	200	903	0	0	0	0	0	0	0	603	903	0
749	8	29.9686	-47.2996	-686.301	37798	39914	-573.12	258.158	244.925	0	0	0	0	0	0	0	200	903	0	0	0	0	0	0	0	603	903	0
749	9	29.816	-46.9945	-686.911	37248.7	40341.2	-618.896	258.728	245.774	0	0	0	0	0	0	0	200	903	0	0	0	0	0	0	0	603	903	0
750	0	30.8841	-48.6729	-686.301	37706.5	40158.1	-252.685	258.514	245.058	0	0	0	0	0	0	0	200	903	0	0	0	0	0	0	0	603	903	0
750	1	28.9005	-46.5367	-685.995	37340.2	39975	-435.79	258.273	245.568	0	0	0	0	0	0	0	200	903	0	0	0	0	0	0	0	603	903	0
750	2	29.053	-45.6212	-684.47	37340.2	39914	-298.461	258.314	245.446	0	0	0	0	0	0	0	200	903	0	0	0	0	0	0	0	603	903	0
750	3	28.9005	-44.7057	-682.333	37981.1	39914	-664.672	258.496	244.336	0	0	0	0	0	0	0	200	903	0	0	0	0	0	0	0	603	903	0
750	4	29.2056	-45.0108	-681.113	38072.7	39181.5	-298.461	257.526	244.102	0	0	0	0	0	0	0	200	903	0	0	0	0	0	0	0	603	903	0
750	5	29.053	-44.7057	-683.554	37523.4	39852.9	-573.12	258.303	245.105	0	0	0	0	0	0	0	200	903	0	0	0	0	0	0	0	603	903	0
750	6	28.9005	-43.6375	-682.639	37981.1	39914	-115.356	258.47	244.361	0	0	0	0	0	0	0	200	903	0	0	0	0	0	0	0	603	903	0
750	7	29.5108	-43.7901	-681.723	37706.5	39242.6	-527.343	257.564	244.689	0	0	0	0	0	0	0	200	903	0	0	0	0	0	0	0	603	903	0
750	8	27.8323	-41.8065	-679.892	38255.8	39791.9	-161.132	258.527	243.733	0	0	0	0	0	0	0	200	903	0	0	0	0	0	0	0	603	903	0
750	9	28.2901	-42.4168	-680.502	38072.7	39791.9	-161.132	258.474	244.052	0	0	0	0	0	0	0	200	903	0	0	0	0	0	0	0	603	903	0
751	0	28.9005	-41.6539	-679.892	37981.1	39181.5	-23.8032	257.629	244.137	0	0	0	0	0	0	0	200	903	0	0	0	0	0	0	0	603	903	0
751	1	28.2901	-41.1961	-676.23	37614.9	39730.8	-23.8032	258.753	244.376	0	0	0	0	0	0	0	200	903	0	0	0	0	0	0	0	603	903	0
751	2	27.222	-40.4332	-678.976	37798	39486.7	21.9732	258.156	244.331	0	0	0	0	0	0	0	200	903	0	0	0	0	0	0	0	603	903	0
751	3	27.5272	-40.2806	-676.84	37614.9	39120.5	-23.8032	257.799	244.426	0	0	0	0	0	0	0	200	903	0	0	0	0	0	0	0	603	903	0
751	4	27.8323	-41.3487	-676.23	38713.5	39608.8	21.9732	258.573	242.751	0	0	0	0	0	0	0	200	903	0	0	0	0	0	0	0	603	903	0
751	5	27.6798	-39.0599	-675.314	37889.6	39730.8	21.9732	258.833	243.893	0	0	0	0	0	0	0	200	903	0	0	0	0	0	0	0	603	903	0
751	6	27.3746	-38.4496	-677.145	38072.7	39059.5	159.302	257.683	243.775	0	0	0	0	0	0	0	200	903	0	0	0	0	0	0	0	603	903	0
751	7	26.6116	-37.534	-676.535	38438.9	39486.7	205.079	258.366	243.183	0	0	0	0	0	0	0	200	903	0	0	0	0	0	0	0	603	903	0
751	8	26.1539	-37.2288	-676.23	38713.5	39303.6	342.408	258.122	242.751	0	0	0	0	0	0	0	200	903	0	0	0	0	0	0	0	603	903	0
751	9	25.6961	-36.0081	-673.178	38988.2	39181.5	-69.5796	258.204	242.083	0	0	0	0	0	0	0	200	903	0	0	0	0	0	0	0	603	903	0
752	0	26.0013	-35.703	-673.788	37798	39303.6	250.855	258.332	243.902	0	0	0	0	0	0	0	200	903	0	0	0	0	0	0	0	603	903	0
752	1	26.1539	-34.7874	-673.788	38072.7	39486.7	342.408	258.604	243.495	0	0	0	0	0	0	0	200	903	0	0	0	0	0	0	0	603	903	0
752	2	26.1539	-33.8719	-675.009	38805.1	39303.6	479.737	258.227	242.512	0	0	0	0	0	0	0	200	903	0	0	0	0	0	0	0	603	903	0
752	3	25.5435	-34.3297	-671.347	38988.2	39303.6	296.631	258.544	241.925	0	0	0	0	0	0	0	200	903	0	0	0	0	0	0	0	603	903	0
752	4	24.9332	-34.0245	-673.788	38072.7	39791.9	433.961	259.057	243.495	0	0	0	0	0	0	0	200	903	0	0	0	0	0	0	0	603	903	0
752	5	25.6961	-32.6512	-673.178	38988.2	38998.4	342.408	257.932	242.083	0	0	0	0	0	0	0	200	903	0	0	0	0	0	0	0	603	903	0
752	6	24.1702	-33.109	-671.957	38255.8	39486.7	433.961	258.764	243.068	0	0	0	0	0	0	0	200	903	0	0	0	0	0	0	0	603	903	0
752	7	24.628	-31.7357	-672.263	39079.7	38876.4	479.737	257.829	241.868	0	0	0	0	0	0	0	200	903	0	0	0	0	0	0	0	603	903	0
752	8	24.4754	-31.8883	-670.737	39354.4	38937.4	159.302	258.052	241.327	0	0	0	0	0	0	0	200	903	0	0	0	0	0	0	0	603	903	0
752	9	24.7806	-31.2779	-673.178	38530.4	39059.5	617.066	258.022	242.763	0	0	0	0	0	0	0	200	903	0	0	0	0	0	0	0	603	903	0
753	0	24.4754	-29.752	-671.957	38896.6	39303.6	479.737	258.491	242.114	0	0	0	0	0	0	0	200	903	0	0	0	0	0	0	0	603	903	0
753	1	23.2547	-29.752	-672.263	38713.5	38815.3	708.619	257.738	242.413	0	0	0	0	0	0	0	200	903	0	0	0	0	0	0	0	603	903	0
753	2	22.7969	-29.5995	-670.126	39995.3	38998.4	617.066	258.196	240.317	0	0	0	0	0	0	0	200	903	0	0	0	0	0	0	0	603	903	0
753	3	23.8651	-29.5995	-669.821	39446	38998.4	617.066	258.222	241.11	0	0	0	0	0	0	0	200	903	0	0	0	0	0	0	0	603	903	0
753	4	22.7969	-28.6839	-669.211	38805.1	38754.3	479.737	257.91	242.014	0	0	0	0	0	0	0	200	903	0	0	0	0	0	0	0	603	903	0
753	5	24.1702	-27.4632	-671.652	38805.1	39120.5	1029.05	258.245	242.224	0	0	0	0	0	0	0	200	903	0	0	0	0	0	0	0	603	903	0
753	6	21.5762	-26.3951	-671.347	39629.1	38937.4	708.619	257.999	240.971	0	0	0	0	0	0	0	200	903	0	0	0	0	0	0	0	603	903	0
753	7	22.6444	-26.7003	-671.957	38988.2	38998.4	800.172	258.037	241.978	0	0	0	0	0	0	0	200	903	0	0	0	0	0	0	0	603	903	0
753	8	22.034	-26.5477	-669.516	40178.4	39181.5	937.501	258.522	239.989	0	0	0	0	0	0	0	200	903	0	0	0	0	0	0	0	603	903	0
753	9	23.1021	-25.1744	-668.295	39995.3	39059.5	617.066	258.446	240.153	0	0	0	0	0	0	0	200	903	0	0	0	0	0	0	0	603	903	0
754	0	22.4918	-26.7003	-669.211	39262.9	38571.2	937.501	257.637	241.33	0	0	0	0	0	0	0	200	903	0	0	0	0	0	0	0	603	903	0
754	1	22.034	-24.7166	-671.042	40269.9	39303.6	891.724	258.571	239.989	0	0	0	0	0	0	0	200	903	0	0	0	0	0	0	0	603	903	0
754	2	22.034	-24.5641	-668.906	39995.3	38937.4	1120.61	258.211	240.208	0	0	0	0	0	0	0	200	903	0	0	0	0	0	0	0	603	903	0
754	3	21.5762	-23.9537	-671.347	39812.2	38876.4	937.501	257.908	240.698	0	0	0	0	0	0	0	200	903	0	0	0	0	0	0	0	603	903	0
754	4	22.4918	-22.733	-669.516	39720.6	39120.5	1074.83	258.431	240.673	0	0	0	0	0	0	0	200	903	0	0	0	0	0	0	0	603	903	0
754	5	21.1185	-22.2752	-667.075	40453	39120.5	1120.61	258.645	239.358	0	0	0	0	0	0	0	200	903	0	0	0	0	0	0	0	603	903	0
754	6	21.4237	-22.8856	-668.906	40178.4	38327	1120.61	257.298	239.934	0	0	0	0	0	0	0	200	903	0	0	0	0	0	0	0	603	903	0
754	7	21.5762	-23.8011	-671.042	40453	38998.4	1257.94	258.116	239.716	0	0	0	0	0	0	0	200	903	0	0	0	0	0	0	0	603	903	0
754	8	21.7288	-21.9701	-669.516	39903.7	39120.5	800.172	258.431	240.399	0	0	0	0	0	0	0	200	903	0	0	0	0	0	0	0	603	903	0
754	9	21.2711	-20.9019	-670.737	40086.8	38632.2	1074.83	257.597	240.235	0	0	0	0	0	0	0	200	903	0	0	0	0	0	0	0	603	903	0
755	0	22.6444	-20.139	-668.906	41093.9	39120.5	1532.59	258.484	238.565	0	0	0	0	0	0	0	200	903	0	0	0	0	0	0	0	603	903	0
755	1	21.1185	-20.5968	-669.516	41185.5	39181.5	1349.49	258.522	238.485	0	0	0	0	0	0	0	200	903	0	0	0	0	0	0	0	603	903	0
755	2	22.034	-20.7494	-668.6	40910.8	38327	1257.94	257.324	238.811	0	0	0	0	0	0	0	200	903	0	0	0	0	0	0	0	603	903	0
755	3	22.1866	-18.7657	-668.906	40269.9	39303.6	1303.71	258.758	239.797	0	0	0	0	0	0	0	200	903	0	0	0	0	0	0	0	603	903	0
755	4	21.8814	-18.7657	-671.042	40910.8	39059.5	1303.71	258.207	239.034	0	0	0	0	0	0	0	200	903	0	0	0	0	0	0	0	603	903	0
755	5	21.5762	-18.7657	-671.042	41551.7	38632.2	1395.26	257.57	238.079	0	0	0	0	0	0	0	200	903	0	0	0	0	0	0	0	603	903	0
755	6	20.8133	-19.5287	-671.957	41734.8	38998.4	1303.71	258.037	237.891	0	0	0	0	0	0	0	200	903	0	0	0	0	0	0	0	603	903	0
755	7	20.5081	-17.6976	-669.821	41185.5	39120.5	1669.92	258.404	238.513	0	0	0	0	0	0	0	200	903	0	0	0	0	0	0	0	603	903	0
755	8	21.7288	-17.2398	-669.211	41551.7	38876.4	1212.16	258.093	237.909	0	0	0	0	0	0	0	200	903	0	0	0	0	0	0	0	603	903	0
755	9	22.3392	-16.6295	-669.516	42284.1	39364.6	1486.82	258.796	236.844	0	0	0	0	0	0	0	200	903	0	0	0	0	0	0	0	603	903	0
756	0	22.1866	-17.2398	-672.568	42101	38937.4	2036.13	257.894	237.403	0	0	0	0	0	0	0	200	903	0	0	0	0	0	0	0	603	903	0
756	1	22.9495	-16.7821	-669.821	41826.3	38876.4	1441.04	258.04	237.556	0	0	0	0	0	0	0	200	903	0	0	0	0	0	0	0	603	903	0
756	2	21.5762	-15.5614	-672.263	41277	39303.6	1532.59	258.465	238.6	0	0	0	0	0	0	0	200	903	0	0	0	0	0	0	0	603	903	0
756	3	21.2711	-14.7984	-670.432	41734.8	38815.3	1532.59	257.896	237.749	0	0	0	0	0	0	0	200	903	0	0	0	0	0	0	0	603	903	0
756	4	22.034	-14.6458	-668.906	42467.2	38998.4	2173.46	258.302	236.512	0	0	0	0	0	0	0	200	903	0	0	0	0	0	0	0	603	903	0
756	5	22.4918	-15.5614	-671.347	42741.9	39059.5	1624.15	258.181	236.334	0	0	0	0	0	0	0	200	903	0	0	0	0	0	0	0	603	903	0
756	6	22.7969	-14.3407	-671.347	42375.6	39181.5	1669.92	258.363	236.88	0	0	0	0	0	0	0	200	903	0	0	0	0	0	0	0	603	903	0
756	7	22.3392	-14.0355	-668.295	42467.2	39059.5	1715.7	258.446	236.454	0	0	0	0	0	0	0	200	903	0	0	0	0	0	0	0	603	903	0
756	8	21.7288	-13.12	-672.263	43382.7	39059.5	1807.25	258.102	235.468	0	0	0	0	0	0	0	200	903	0	0	0	0	0	0	0	603	903	0
756	9	23.2547	-13.8829	-669.821	43108.1	39120.5	1853.03	258.404	235.642	0	0	0	0	0	0	0	200	903	0	0	0	0	0	0	0	603	903	0
757	0	22.1866	-13.2725	-668.6	42650.3	38632.2	1807.25	257.781	236.21	0	0	0	0	0	0	0	200	903	0	0	0	0	0	0	0	603	903	0
757	1	22.9495	-12.357	-669.211	43565.8	38876.4	1624.15	258.093	234.9	0	0	0	0	0	0	0	200	903	0	0	0	0	0	0	0	603	903	0
757	2	24.1702	-13.8829	-670.432	43565.8	39120.5	1807.25	258.351	235.018	0	0	0	0	0	0	0	200	903	0	0	0	0	0	0	0	603	903	0
757	3	23.2547	-11.1363	-670.737	43932	39364.6	2036.13	258.689	234.502	0	0	0	0	0	0	0	200	903	0	0	0	0	0	0	0	603	903	0
757	4	22.1866	-11.4415	-672.263	44023.6	39059.5	1944.58	258.102	234.514	0	0	0	0	0	0	0	200	903	0	0	0	0	0	0	0	603	903	0
757	5	23.7125	-10.9837	-668.906	43840.5	39181.5	1990.36	258.576	234.459	0	0	0	0	0	0	0	200	903	0	0	0	0	0	0	0	603	903	0
757	6	22.034	-10.3734	-669.821	43840.5	38937.4	1990.36	258.131	234.549	0	0	0	0	0	0	0	200	903	0	0	0	0	0	0	0	603	903	0
757	7	23.7125	-9.45785	-667.99	43748.9	39181.5	2219.24	258.656	234.507	0	0	0	0	0	0	0	200	903	0	0	0	0	0	0	0	603	903	0
757	8	24.9332	-9.91561	-669.516	44115.2	39242.6	2448.12	258.613	234.109	0	0	0	0	0	0	0	200	903	0	0	0	0	0	0	0	603	903	0
757	9	23.4073	-9.91561	-670.126	44939.1	39425.7	2127.69	258.833	232.939	0	0	0	0	0	0	0	200	903	0	0	0	0	0	0	0	603	903	0
758	0	22.4918	-9.30526	-671.042	44298.3	39181.5	2219.24	258.389	233.986	0	0	0	0	0	0	0	200	903	0	0	0	0	0	0	0	603	903	0
758	1	23.5599	-8.23715	-668.295	44572.9	39364.6	2081.91	258.903	233.304	0	0	0	0	0	0	0	200	903	0	0	0	0	0	0	0	603	903	0
758	2	22.7969	-7.77938	-669.211	44298.3	39364.6	2081.91	258.823	233.805	0	0	0	0	0	0	0	200	903	0	0	0	0	0	0	0	603	903	0
758	3	22.9495	-8.08456	-667.99	45488.4	39181.5	2356.57	258.656	231.903	0	0	0	0	0	0	0	200	903	0	0	0	0	0	0	0	603	903	0
758	4	23.4073	-8.08456	-666.159	45488.4	39486.7	2081.91	259.275	231.715	0	0	0	0	0	0	0	200	903	0	0	0	0	0	0	0	603	903	0
758	5	22.9495	-7.32162	-669.821	45671.6	39242.6	2127.69	258.587	231.815	0	0	0	0	0	0	0	200	903	0	0	0	0	0	0	0	603	903	0
758	6	23.1021	-6.25351	-670.126	45580	39669.8	2310.79	259.198	231.983	0	0	0	0	0	0	0	200	903	0	0	0	0	0	0	0	603	903	0
758	7	22.4918	-6.25351	-669.516	45671.6	39425.7	2402.34	258.887	231.784	0	0	0	0	0	0	0	200	903	0	0	0	0	0	0	0	603	903	0
758	8	22.6444	-5.64315	-667.99	46587.1	39669.8	2402.34	259.387	230.258	0	0	0	0	0	0	0	200	903	0	0	0	0	0	0	0	603	903	0
758	9	22.9495	-6.86386	-668.295	46495.5	39486.7	2493.9	259.086	230.427	0	0	0	0	0	0	0	200	903	0	0	0	0	0	0	0	603	903	0
759	0	24.3228	-6.25351	-667.99	46312.4	39425.7	2265.02	259.021	230.669	0	0	0	0	0	0	0	200	903	0	0	0	0	0	0	0	603	903	0
759	1	23.5599	-5.0328	-669.211	46495.5	39669.8	2265.02	259.279	230.522	0	0	0	0	0	0	0	200	903	0	0	0	0	0	0	0	603	903	0
759	2	22.9495	-4.42245	-669.516	47227.9	39669.8	2310.79	259.251	229.46	0	0	0	0	0	0	0	200	903	0	0	0	0	0	0	0	603	903	0
759	3	24.4754	-5.0328	-667.685	47044.8	39364.6	2814.33	258.957	229.54	0	0	0	0	0	0	0	200	903	0	0	0	0	0	0	0	603	903	0
759	4	22.6444	-5.79574	-667.685	47777.3	39669.8	2356.57	259.414	228.443	0	0	0	0	0	0	0	200	903	0	0	0	0	0	0	0	603	903	0
759	5	23.8651	-4.57504	-667.685	46861.7	39791.9	2310.79	259.597	229.815	0	0	0	0	0	0	0	200	903	0	0	0	0	0	0	0	603	903	0
759	6	23.4073	-3.20175	-669.821	47411.1	39730.8	2356.57	259.316	229.218	0	0	0	0	0	0	0	200	903	0	0	0	0	0	0	0	603	903	0
759	7	24.1702	-3.04916	-667.38	47777.3	39730.8	2539.67	259.533	228.411	0	0	0	0	0	0	0	200	903	0	0	0	0	0	0	0	603	903	0
759	8	22.7969	-3.35434	-668.906	48235	39486.7	2585.45	259.032	227.89	0	0	0	0	0	0	0	200	903	0	0	0	0	0	0	0	603	903	0
759	9	22.9495	-2.43881	-668.295	49150.6	38754.3	2539.67	257.99	226.454	0	0	0	0	0	0	0	200	903	0	0	0	0	0	0	0	603	903	0
760	0	23.7125	-1.98104	-669.821	47960.4	39975	2448.12	259.68	228.398	0	0	0	0	0	0	0	200	903	0	0	0	0	0	0	0	603	903	0
760	1	23.2547	-2.28622	-671.652	48509.7	39852.9	2448.12	259.336	227.776	0	0	0	0	0	0	0	200	903	0	0	0	0	0	0	0	603	903	0
760	2	23.8651	-1.2181	-669.821	49150.6	39120.5	2631.23	258.404	226.621	0	0	0	0	0	0	0	200	903	0	0	0	0	0	0	0	603	903	0
760	3	22.4918	-0.912929	-670.737	49425.2	39852.9	2585.45	259.417	226.312	0	0	0	0	0	0	0	200	903	0	0	0	0	0	0	0	603	903	0
760	4	24.9332	-0.760341	-668.906	48601.2	39914	2585.45	259.671	227.342	0	0	0	0	0	0	0	200	903	0	0	0	0	0	0	0	603	903	0
760	5	21.7288	0.307774	-669.516	49150.6	39730.8	2265.02	259.343	226.588	0	0	0	0	0	0	0	200	903	0	0	0	0	0	0	0	603	903	0
760	6	23.1021	0.460362	-669.211	49516.8	40158.1	2539.67	260.008	226.007	0	0	0	0	0	0	0	200	903	0	0	0	0	0	0	0	603	903	0
760	7	23.8651	-0.760341	-671.957	49974.5	40280.2	2585.45	259.945	225.628	0	0	0	0	0	0	0	200	903	0	0	0	0	0	0	0	603	903	0
760	8	23.7125	0.460362	-672.263	50340.7	40036	2448.12	259.554	225.117	0	0	0	0	0	0	0	200	903	0	0	0	0	0	0	0	603	903	0
760	9	22.4918	0.765538	-672.873	49791.4	40280.2	2860.11	259.863	226.002	0	0	0	0	0	0	0	200	903	0	0	0	0	0	0	0	603	903	0
761	0	22.1866	2.13883	-668.906	50523.8	39975	2539.67	259.762	224.468	0	0	0	0	0	0	0	200	903	0	0	0	0	0	0	0	603	903	0
761	1	22.3392	2.13883	-667.075	50890.1	40158.1	2631.23	260.2	223.712	0	0	0	0	0	0	0	200	903	0	0	0	0	0	0	0	603	903	0
761	2	22.4918	1.83365	-670.737	50798.5	40280.2	2585.45	260.054	224.265	0	0	0	0	0	0	0	200	903	0	0	0	0	0	0	0	603	903	0
761	3	22.6444	2.13883	-672.263	51530.9	39975	2677	259.463	223.347	0	0	0	0	0	0	0	200	903	0	0	0	0	0	0	0	603	903	0
761	4	24.3228	1.37589	-671.652	51805.6	39791.9	2585.45	259.245	222.868	0	0	0	0	0	0	0	200	903	0	0	0	0	0	0	0	603	903	0
761	5	22.1866	2.29142	-672.263	51622.5	40402.2	2722.78	260.099	223.211	0	0	0	0	0	0	0	200	903	0	0	0	0	0	0	0	603	903	0
761	6	22.3392	3.66471	-672.263	52354.9	40280.2	2402.34	259.917	222.121	0	0	0	0	0	0	0	200	903	0	0	0	0	0	0	0	603	903	0
761	7	22.3392	3.05436	-671.347	52171.8	40158.1	2814.33	259.817	222.288	0	0	0	0	0	0	0	200	903	0	0	0	0	0	0	0	603	903	0
761	8	22.034	3.35953	-672.568	52080.2	40280.2	2905.89	259.89	222.565	0	0	0	0	0	0	0	200	903	0	0	0	0	0	0	0	603	903	0
761	9	22.7969	4.88541	-673.483	52812.7	40219.1	2677	259.718	221.583	0	0	0	0	0	0	0	200	903	0	0	0	0	0	0	0	603	903	0
762	0	21.2711	5.038	-672.873	52446.5	40280.2	2722.78	259.863	222.056	0	0	0	0	0	0	0	200	903	0	0	0	0	0	0	0	603	903	0
762	1	21.8814	4.88541	-675.314	53636.6	40768.4	2677	260.37	220.575	0	0	0	0	0	0	0	200	903	0	0	0	0	0	0	0	603	903	0
762	2	22.9495	3.96988	-673.788	53728.2	40524.3	3043.21	260.144	220.26	0	0	0	0	0	0	0	200	903	0	0	0	0	0	0	0	603	903	0
762	3	23.1021	4.88541	-673.788	53728.2	40951.6	2951.66	260.778	220.26	0	0	0	0	0	0	0	200	903	0	0	0	0	0	0	0	603	903	0
762	4	22.9495	5.34317	-674.704	53636.6	41012.6	3180.54	260.786	220.503	0	0	0	0	0	0	0	200	903	0	0	0	0	0	0	0	603	903	0
762	5	22.4918	5.80094	-676.535	54460.6	40646.4	2814.33	260.08	219.501	0	0	0	0	0	0	0	200	903	0	0	0	0	0	0	0	603	903	0
762	6	22.3392	5.95353	-673.178	54643.7	41012.6	2768.56	260.924	218.827	0	0	0	0	0	0	0	200	903	0	0	0	0	0	0	0	603	903	0
762	7	21.8814	5.64835	-677.756	54277.5	41012.6	2768.56	260.512	219.916	0	0	0	0	0	0	0	200	903	0	0	0	0	0	0	0	603	903	0
762	8	22.034	6.86905	-675.925	55284.6	40951.6	2768.56	260.586	218.209	0	0	0	0	0	0	0	200	903	0	0	0	0	0	0	0	603	903	0
762	9	22.4918	5.34317	-675.314	55193	41134.7	3134.77	260.912	218.271	0	0	0	0	0	0	0	200	903	0	0	0	0	0	0	0	603	903	0
763	0	22.4918	7.32682	-677.451	56383.2	41134.7	2814.33	260.72	216.771	0	0	0	0	0	0	0	200	903	0	0	0	0	0	0	0	603	903	0
763	1	23.2547	5.95353	-679.282	56291.7	41012.6	2997.44	260.376	217.131	0	0	0	0	0	0	0	200	903	0	0	0	0	0	0	0	603	903	0
763	2	22.1866	6.56388	-681.418	57481.9	41317.8	2814.33	260.635	215.644	0	0	0	0	0	0	0	200	903	0	0	0	0	0	0	0	603	903	0
763	3	22.034	7.02164	-680.197	56383.2	41195.7	2860.11	260.564	217.108	0	0	0	0	0	0	0	200	903	0	0	0	0	0	0	0	603	903	0
763	4	22.3392	7.63199	-680.807	56657.9	41378.8	2585.45	260.779	216.778	0	0	0	0	0	0	0	200	903	0	0	0	0	0	0	0	603	903	0
763	5	22.6444	7.4794	-680.502	57390.3	41622.9	2768.56	261.165	215.665	0	0	0	0	0	0	0	200	903	0	0	0	0	0	0	0	603	903	0
763	6	22.7969	7.32682	-680.807	57390.3	41256.7	2905.89	260.6	215.703	0	0	0	0	0	0	0	200	903	0	0	0	0	0	0	0	603	903	0
763	7	23.8651	7.63199	-681.113	58397.4	41561.9	3043.21	261.021	214.262	0	0	0	0	0	0	0	200	903	0	0	0	0	0	0	0	603	903	0
763	8	22.1866	7.78458	-682.639	57939.6	41500.9	3043.21	260.795	215.124	0	0	0	0	0	0	0	200	903	0	0	0	0	0	0	0	603	903	0
763	9	22.1866	8.24234	-682.944	58397.4	40829.5	2768.56	259.785	214.492	0	0	0	0	0	0	0	200	903	0	0	0	0	0	0	0	603	903	0
764	0	22.034	8.08976	-683.859	58855.1	41684	3134.77	260.954	213.937	0	0	0	0	0	0	0	200	903	0	0	0	0	0	0	0	603	903	0
764	1	22.1866	8.24234	-682.639	58763.6	41622.9	2997.44	260.974	213.917	0	0	0	0	0	0	0	200	903	0	0	0	0	0	0	0	603	903	0
764	2	22.6444	7.93717	-683.554	59679.1	41073.6	2951.66	260.088	212.693	0	0	0	0	0	0	0	200	903	0	0	0	0	0	0	0	603	903	0
764	3	22.9495	8.54752	-683.554	59496	41806	2951.66	261.16	212.961	0	0	0	0	0	0	0	200	903	0	0	0	0	0	0	0	603	903	0
764	4	23.5599	9.00528	-684.775	59770.7	42294.3	2951.66	261.764	212.715	0	0	0	0	0	0	0	200	903	0	0	0	0	0	0	0	603	903	0
764	5	22.034	8.8527	-685.69	60777.8	41806	3180.54	260.969	211.363	0	0	0	0	0	0	0	200	903	0	0	0	0	0	0	0	603	903	0
764	6	22.3392	8.54752	-685.385	60869.3	42233.3	2951.66	261.62	211.19	0	0	0	0	0	0	0	200	903	0	0	0	0	0	0	0	603	903	0
764	7	22.1866	8.08976	-684.775	61693.3	41867.1	2997.44	261.14	209.907	0	0	0	0	0	0	0	200	903	0	0	0	0	0	0	0	603	903	0
764	8	22.7969	8.54752	-683.859	61144	42050.2	2860.11	261.49	210.59	0	0	0	0	0	0	0	200	903	0	0	0	0	0	0	0	603	903	0
764	9	23.2547	9.15787	-686.301	61418.6	42172.3	3134.77	261.449	210.508	0	0	0	0	0	0	0	200	903	0	0	0	0	0	0	0	603	903	0
765	0	24.1702	9.76822	-686.911	61418.6	42172.3	3363.65	261.394	210.587	0	0	0	0	0	0	0	200	903	0	0	0	0	0	0	0	603	903	0
765	1	23.1021	8.24234	-689.047	62517.3	41989.1	2860.11	260.938	209.27	0	0	0	0	0	0	0	200	903	0	0	0	0	0	0	0	603	903	0
765	2	22.3392	8.8527	-687.521	63066.6	42416.4	3088.99	261.695	208.27	0	0	0	0	0	0	0	200	903	0	0	0	0	0	0	0	603	903	0
765	3	22.6444	9.00528	-686.606	62334.2	42416.4	3180.54	261.777	209.214	0	0	0	0	0	0	0	200	903	0	0	0	0	0	0	0	603	903	0
765	4	23.1021	9.31046	-687.827	62608.8	42355.4	3043.21	261.579	208.976	0	0	0	0	0	0	0	200	903	0	0	0	0	0	0	0	603	903	0
765	5	23.2547	10.3786	-687.521	62883.5	42416.4	3088.99	261.695	208.536	0	0	0	0	0	0	0	200	903	0	0	0	0	0	0	0	603	903	0
[truncated: 2,474 more rows]
