# Supplementary material for: The Effects of an Extemporaneous Speech Dual-task on Older Adult Gait Control
Source: Research Square preprint supplement (doi:10.21203/rs.3.rs-7674245/v1), 2025-11-18
Supplement: Supplementary file 125 [file Over10ground7.xlsx]

## Sheet: Sheet1
Trajectories
		10:LFHD			10:RFHD			10:LBHD			10:RBHD			10:C7			10:T10			10:CLAV			10:STRN			10:RBAK			10:LSHO			10:LUPA			10:LELB			10:LFRM			10:LWRA			10:LWRB			10:LFIN
Frame	Sub Frame	X	Y	Z	X	Y	Z	X	Y	Z	X	Y	Z	X	Y	Z	X	Y	Z	X	Y	Z	X	Y	Z	X	Y	Z	X	Y	Z	X	Y	Z	X	Y	Z	X	Y	Z	X	Y	Z	X	Y	Z	X	Y	Z
		mm	mm	mm	mm	mm	mm	mm	mm	mm	mm	mm	mm	mm	mm	mm	mm	mm	mm	mm	mm	mm	mm	mm	mm	mm	mm	mm	mm	mm	mm	mm	mm	mm	mm	mm	mm	mm	mm	mm	mm	mm	mm	mm	mm	mm	mm	mm	mm
516	0	285.481	2266.63	1593.3	180.625	2273.44	1587.98	312.386	2427.11	1562.84	193.948	2438.02	1557.78	249.37	2452.69	1431.47	278.296	2550.09	1155.3	251.083	2294.32	1328.13	253.39	2197.7	1125.37	195.378	2547.86	1242.64	402.942	2349.92	1397.75	524.777	2357	1167.82	537.74	2373.25	1070.72	553.795	2291.94	938.94	509.414	2258.83	841.801	568.081	2304.31	823.583	560.606	2241.73	766.051
517	0	284.838	2255.95	1595.2	179.793	2262.95	1589.64	311.68	2416.41	1564.55	193.332	2427.4	1559.25	248.34	2441.81	1433.31	276.383	2539.81	1157.35	251.086	2283.65	1329.57	254.034	2187.01	1126.26	193.498	2537.04	1244.69	402.556	2340.22	1399	524.105	2348.83	1168.78	536.969	2364.77	1071.96	553.378	2284.59	939.553	509.313	2252.04	842.073	567.352	2298.07	824.304	560.57	2235.97	766.197
518	0	284.213	2245.48	1597.01	179.422	2252.17	1591.23	311.169	2405.71	1566.36	192.753	2416.75	1560.87	247.363	2430.87	1435.12	274.522	2529.9	1159.29	251.036	2272.92	1331.17	254.761	2176.45	1127.54	191.599	2526.19	1246.72	402.355	2330.41	1400.49	523.57	2341.1	1169.81	536.079	2356.48	1073.38	553.091	2277.3	940.45	509.413	2245.51	842.617	567.643	2291.77	825.317	560.976	2230.28	766.733
519	0	284	2234.73	1598.64	178.828	2241.5	1592.8	310.669	2395.2	1567.96	192.422	2406.05	1562.24	246.402	2420.2	1436.81	272.578	2520.01	1160.84	251.289	2262.32	1332.55	255.523	2165.99	1128.53	189.704	2515.28	1248.62	402.142	2320.86	1401.74	522.852	2333.74	1170.6	535.303	2348.43	1074.71	552.84	2270.41	941.129	509.763	2238.74	842.972	567.542	2285.82	826.314	561.779	2224.68	767.153
520	0	283.764	2224.17	1600.07	178.706	2230.77	1594.29	310.274	2384.59	1569.24	191.94	2395.48	1563.52	245.577	2409.49	1438.2	270.953	2509.95	1162.26	251.549	2251.71	1333.97	256.511	2155.68	1129.49	187.992	2504.5	1250.34	402.021	2311.32	1402.86	522.273	2326.53	1171.53	534.458	2340.74	1075.56	552.634	2263.65	941.829	510.017	2231.86	843.315	567.336	2280.11	826.755	562.652	2219.11	767.549
521	0	283.537	2213.54	1601.2	178.463	2220	1595.39	309.874	2373.99	1570.3	191.606	2384.73	1564.7	244.683	2398.86	1439.56	269.366	2499.86	1163.71	251.734	2241.19	1335.15	257.263	2145.49	1130.32	186.202	2493.68	1251.92	401.817	2301.92	1403.83	521.572	2319.44	1172.39	533.672	2333.19	1076.55	552.412	2256.94	942.376	510.284	2225.2	843.583	567.695	2274.36	827.823	563.474	2213.72	768.124
522	0	283.529	2202.86	1602.26	178.386	2209.2	1596.48	309.612	2363.44	1571.4	191.211	2374.1	1565.79	243.894	2388.3	1440.77	267.543	2489.48	1164.7	252.035	2230.72	1336.23	258.105	2135.29	1131.12	184.442	2482.95	1253.23	401.659	2292.6	1404.77	521.094	2312.4	1173.44	533.063	2325.72	1077.88	552.078	2250.49	943.081	510.217	2220.49	843.306	567.323	2268.95	828.312	564.432	2208.36	768.764
523	0	283.435	2192.23	1603.07	178.378	2198.41	1597.34	309.338	2352.81	1572.4	191.042	2363.27	1566.74	243.096	2377.73	1441.72	265.962	2479.05	1165.85	252.341	2220.36	1337.08	258.82	2125.2	1131.89	182.936	2472.14	1254.44	401.576	2283.18	1405.65	520.693	2305.4	1174.38	532.574	2318.53	1078.75	552.016	2244.18	943.544	510.336	2214.69	843.451	568	2263.28	829.388	565.469	2203.08	769.367
524	0	283.507	2181.55	1603.73	178.311	2187.59	1598.03	309.152	2342.2	1573.07	190.647	2352.36	1567.54	242.385	2367.33	1442.69	264.264	2468.56	1166.69	252.501	2210.11	1337.58	259.563	2115.03	1132.48	181.326	2461.5	1255.5	401.488	2273.83	1406.37	520.398	2298.47	1174.93	531.962	2311.58	1079.47	551.945	2237.78	943.952	510.544	2208.8	843.363	568.163	2257.76	830.06	566.375	2197.63	769.935
525	0	283.588	2170.81	1604.18	178.393	2176.62	1598.42	308.869	2331.56	1573.65	190.472	2341.73	1568.25	241.634	2356.78	1443.36	262.997	2458.24	1167.54	252.787	2200.17	1337.79	260.358	2104.96	1133.1	179.928	2450.72	1256.48	401.521	2264.34	1407.07	520.27	2291.26	1175.81	530.792	2304.62	1079.95	551.952	2231.66	944.2	510.733	2203.36	843.27	568.135	2252.33	830.393	567.219	2192.22	770.394
526	0	283.61	2160.19	1604.4	178.517	2165.88	1598.62	308.756	2320.91	1574.09	190.187	2330.9	1568.53	240.992	2346.39	1443.73	261.769	2447.75	1167.85	253.061	2189.91	1338.07	260.844	2094.93	1133.6	178.568	2440.2	1256.95	401.511	2255.06	1407.4	520.133	2284.14	1176.24	530.973	2297.67	1080.6	552.028	2225.5	944.355	510.678	2197.83	842.944	568.504	2246.74	830.897	567.67	2186.57	770.427
527	0	283.796	2149.54	1604.35	178.641	2155.02	1598.79	308.676	2310.37	1574.09	189.996	2320.2	1568.77	240.444	2335.88	1443.85	260.719	2437.29	1167.99	253.187	2179.64	1338.12	261.501	2084.86	1133.87	177.626	2429.62	1257.18	401.609	2245.65	1407.49	520.136	2276.89	1176.6	531.093	2290.66	1081.08	552.326	2219.5	944.235	510.79	2191.98	842.741	568.79	2241.5	831.037	568.128	2181.88	770.106
528	0	283.986	2138.82	1604.16	178.798	2144.2	1598.55	308.451	2299.63	1574.14	189.945	2309.45	1568.83	240.024	2325.54	1443.94	259.853	2427.03	1168.28	253.329	2169.39	1337.87	261.892	2074.87	1133.67	176.482	2419.12	1257.56	401.499	2235.99	1407.34	520.035	2269.49	1176.72	530.902	2283.68	1081.3	552.513	2213.3	943.851	511.007	2186.25	841.957	569.107	2235.94	830.855	568.493	2176.62	769.752
529	0	283.887	2128.19	1603.88	178.742	2133.39	1598.25	308.282	2289.08	1573.99	189.779	2298.67	1568.66	239.483	2315.14	1443.87	258.903	2417.06	1168.33	253.424	2159.03	1337.75	262.124	2064.96	1133.43	175.614	2408.65	1257.44	401.444	2226.34	1407.16	520.133	2261.83	1177.04	530.407	2276.43	1081.24	552.909	2207.22	943.561	511.346	2180.74	841.362	569.15	2230.48	830.639	568.763	2171.34	769.217
530	0	284.179	2117.42	1603.29	178.941	2122.58	1597.74	308.324	2278.86	1573.58	189.59	2287.88	1568.32	239.208	2304.65	1443.42	257.965	2407.22	1167.91	253.412	2148.78	1337.15	262.396	2054.87	1132.94	175	2398.27	1257.23	401.434	2216.47	1406.59	520.071	2254.22	1176.7	530.146	2269.29	1080.97	553.393	2201.17	942.842	511.789	2175.31	840.603	569.652	2225.15	830.201	568.96	2166.42	768.166
531	0	284.391	2106.99	1602.58	179.123	2111.82	1597.16	308.167	2267.96	1572.93	189.668	2277.27	1567.77	238.994	2294.16	1442.79	257.181	2397.34	1167.38	253.747	2138.48	1336.52	262.73	2044.92	1132.33	174.543	2387.95	1256.79	401.402	2206.52	1405.76	520.146	2246.39	1176.28	530.276	2261.98	1080.6	553.967	2195.01	942.038	512.223	2169.37	839.8	570.459	2219.55	829.645	569.647	2161.65	767.097
532	0	284.591	2096.09	1601.77	179.392	2101	1596.36	307.943	2257.39	1572.22	189.555	2266.48	1567.2	238.652	2283.61	1442.29	256.631	2387.59	1166.94	253.627	2127.86	1335.74	262.748	2034.75	1131.3	174.035	2377.55	1256.52	401.443	2196.35	1404.8	520.09	2238.21	1175.73	530.096	2254.47	1080.07	554.271	2188.75	941.138	512.756	2163.37	838.743	570.148	2214.3	828.658	569.894	2156.66	765.798
533	0	284.715	2085.47	1600.87	179.498	2090.2	1595.54	308.028	2246.79	1571.43	189.38	2255.69	1566.51	238.531	2272.95	1441.6	256.412	2377.61	1166.43	253.579	2117.51	1334.89	262.511	2024.14	1130.1	173.849	2367.23	1256.01	401.528	2185.94	1403.97	520.133	2229.83	1175.22	530.437	2246.69	1079.85	554.697	2182.33	940.208	513.173	2157.45	837.233	570.316	2208.74	827.896	570.641	2152.13	764.565
534	0	284.974	2074.78	1599.66	179.765	2079.41	1594.44	308.235	2236.15	1570.4	189.51	2244.95	1565.53	238.616	2262.24	1440.61	256.387	2367.7	1165.76	253.687	2106.88	1333.66	262.324	2013.88	1128.84	173.902	2356.83	1255.19	401.611	2175.43	1402.8	520.235	2221.4	1174.54	528.555	2239	1077.95	555.007	2175.87	938.782	513.52	2151.3	835.812	570.816	2203.26	826.914	570.589	2147.16	762.699
535	0	285.309	2064.1	1598.26	180.007	2068.69	1593.21	308.389	2225.6	1569.1	189.662	2234.35	1564.36	238.664	2251.57	1439.54	256.372	2357.46	1164.79	253.762	2096.44	1332.4	262.344	2003.57	1127.22	173.858	2346.5	1254.31	401.549	2164.77	1401.38	520.189	2212.55	1173.33	528.673	2230.98	1077.15	555.318	2169.27	937.406	514.093	2145.42	834.326	570.299	2197.96	825.557	571.039	2142.16	760.915
536	0	285.601	2053.36	1596.83	180.284	2057.84	1591.78	308.581	2214.94	1567.64	189.924	2223.44	1563.07	238.796	2240.86	1438.28	256.5	2347.26	1163.78	253.569	2085.83	1330.97	262.187	1993.14	1125.48	174.025	2335.95	1253.27	401.618	2153.88	1399.96	520.386	2203.31	1172.09	528.649	2222.76	1076.17	555.705	2162.38	936.049	514.387	2139.35	832.598	570.344	2192.18	824.289	571.259	2137.06	759.015
537	0	285.934	2042.64	1595.24	180.602	2046.98	1590.33	308.612	2203.97	1566.08	189.982	2212.52	1561.62	238.918	2229.95	1436.91	256.73	2336.7	1162.45	253.465	2075	1329.3	261.932	1982.77	1123.77	174.197	2325.54	1252.04	401.658	2142.95	1398.51	520.47	2194.04	1170.96	528.795	2214.3	1075.19	555.72	2155.31	934.431	514.647	2133.43	830.761	570.863	2186.21	823.365	571.53	2131.93	757.29
538	0	286.442	2031.82	1593.41	181	2036.01	1588.7	308.97	2193.41	1564.2	190.234	2201.68	1559.85	239.258	2219.26	1435.19	257.219	2326.16	1160.86	253.487	2064.3	1327.55	261.752	1972.17	1121.64	174.797	2315.11	1250.5	401.84	2131.88	1396.62	520.762	2184.39	1169.55	528.965	2205.69	1073.88	555.925	2148.09	932.693	514.737	2127.04	828.876	571.222	2180.15	821.918	571.716	2126.62	755.167
539	0	286.859	2021.07	1591.36	181.485	2025.19	1586.77	309.352	2182.68	1562.06	190.69	2190.94	1557.92	239.536	2208.31	1433.36	257.799	2315.64	1159.14	253.466	2053.48	1325.44	261.4	1961.45	1119.51	175.335	2304.57	1248.75	401.923	2120.72	1394.58	520.854	2174.63	1167.81	531.139	2196.93	1073.62	555.991	2140.43	930.704	514.762	2120.89	826.486	571.036	2173.69	819.912	571.72	2120.9	752.957
540	0	287.379	2010.16	1589.29	182.04	2014.26	1584.83	309.735	2171.92	1559.94	190.957	2179.94	1555.99	240.024	2197.48	1431.41	258.516	2304.96	1157.39	253.519	2042.69	1323.36	261.278	1950.66	1117.38	175.861	2294.07	1246.82	402.297	2109.49	1392.62	521.207	2164.47	1166.23	530.737	2187.82	1071.77	555.746	2132.53	928.564	515.114	2114.56	824.542	571.459	2167.04	818.386	571.782	2115.07	750.674
541	0	288.007	1999.34	1587.12	182.484	2003.27	1582.87	310.263	2161.14	1557.79	191.4	2168.9	1553.79	240.434	2186.47	1429.35	259.179	2294.3	1155.46	253.665	2031.78	1321.21	260.996	1939.76	1115.37	176.479	2283.48	1244.85	402.511	2098.32	1390.39	521.772	2154	1164.59	530.938	2178.6	1070.12	556.014	2124.47	926.561	514.968	2107.74	822.099	571.961	2159.94	816.882	571.566	2108.71	748.268
542	0	288.819	1988.39	1584.94	183.061	1992.29	1580.63	310.811	2150.21	1555.49	191.931	2157.92	1551.64	241.046	2175.67	1427.26	259.689	2283.65	1153.33	253.893	2020.81	1319	260.686	1928.63	1113	177.204	2272.92	1242.92	402.978	2087.05	1388.21	522.243	2143.45	1162.72	531.337	2169.32	1068.37	556.103	2116.11	924.317	515.329	2100.48	820.087	572.414	2152.42	815.016	571.356	2102.47	745.739
543	0	289.409	1977.33	1582.62	183.782	1981.26	1578.47	311.519	2139.33	1553.15	192.575	2147	1549.45	241.671	2164.68	1425.21	260.196	2272.81	1151.23	254.151	2009.75	1316.61	260.534	1917.61	1110.85	177.91	2262.26	1240.92	403.41	2075.67	1385.87	522.771	2132.62	1160.61	531.763	2159.78	1066.48	556.155	2107.39	921.975	515.321	2092.97	817.444	572.769	2144.54	812.942	571.077	2095.42	743.114
544	0	290.137	1966.29	1580.48	184.518	1970.2	1576.39	312.372	2128.19	1550.92	193.464	2135.81	1547.32	242.421	2153.73	1423.13	260.917	2261.59	1149.1	254.434	1998.88	1314.47	260.347	1906.39	1108.71	178.623	2251.48	1238.81	403.914	2064.44	1383.62	523.435	2121.7	1158.57	532.124	2150.15	1064.42	556.308	2098.61	919.576	515.474	2085.05	815.403	573.6	2136.27	811.177	570.829	2088.26	740.414
545	0	291.037	1955.18	1578.33	185.373	1959.1	1574.25	313.365	2117.25	1548.84	194.147	2124.67	1545.26	243.193	2142.56	1421.06	261.723	2250.31	1147.15	254.962	1987.72	1312.29	260.02	1895.02	1106.66	179.305	2240.5	1236.78	404.564	2053.1	1381.42	524.113	2110.58	1156.42	532.663	2140.07	1062.42	556.435	2089.44	917.157	516.004	2077.64	813.294	574.35	2127.61	809.183	570.439	2080.69	737.553
546	0	292.012	1943.98	1576.26	186.278	1947.96	1572.33	314.261	2105.83	1546.79	195.135	2113.53	1543.3	243.881	2131.41	1419.05	262.251	2239.07	1144.95	255.57	1976.44	1310.32	259.915	1883.63	1104.66	179.959	2229.67	1234.97	405.236	2041.76	1379.13	524.756	2099.33	1154.2	533.405	2129.87	1060.48	556.963	2079.89	914.839	515.672	2069.61	810.226	575.022	2118.6	806.963	570.791	2073.02	735.158
547	0	292.891	1932.77	1574.1	187.493	1936.83	1570.35	315.307	2094.59	1544.72	196.333	2102.53	1541.51	244.701	2120.29	1416.99	262.657	2227.64	1142.64	255.993	1965.33	1308.19	259.935	1872.11	1102.81	180.654	2218.48	1232.84	405.877	2030.54	1376.68	525.374	2088.04	1151.94	533.397	2119.17	1057.97	557.195	2070.21	912.452	515.631	2061.04	807.509	575.76	2109.05	804.813	570.198	2064.51	732.287
548	0	294.171	1921.5	1572.12	188.502	1925.57	1568.55	316.335	2082.99	1542.6	197.668	2091.4	1539.61	245.671	2109.11	1414.86	263.207	2216.22	1140.37	256.763	1953.99	1306.49	259.83	1860.45	1101.09	181.234	2207.23	1230.63	406.711	2019.33	1374.26	526.04	2076.84	1149.72	533.658	2108.41	1055.48	557.391	2059.99	909.852	515.52	2051.71	805.081	576.608	2099.54	802.705	570.089	2055.69	729.711
549	0	295.48	1910.13	1570.1	189.774	1914.29	1566.96	317.833	2072.04	1540.62	198.932	2080.1	1537.81	246.531	2097.92	1412.87	263.73	2205.01	1138.2	257.461	1942.55	1304.66	260.083	1848.74	1099.48	181.799	2195.74	1228.58	407.571	2008.13	1371.99	526.643	2065.72	1147.39	534.407	2097.5	1053.36	557.989	2049.71	907.696	515.608	2042.08	802.61	576.68	2089.07	800.098	570.098	2046.37	726.983
550	0	296.728	1898.72	1568.22	191.193	1903	1565.27	319.241	2060.71	1538.74	200.359	2068.77	1536.26	247.47	2086.68	1411	263.793	2193.31	1135.9	258.07	1931.05	1303.05	260.399	1836.88	1098.04	182.439	2184.13	1226.69	408.42	1996.76	1369.87	527.015	2054.59	1145.05	534.795	2086.21	1051.08	558.162	2038.83	905.25	515.858	2031.97	800.26	577.463	2078.51	798.112	570.366	2036.31	724.624
551	0	298.111	1887.34	1566.54	192.564	1891.61	1563.76	320.814	2049.3	1537.11	201.737	2057.46	1534.9	248.68	2075.44	1409.29	264.155	2181.72	1133.84	258.989	1919.47	1301.64	260.816	1825.01	1096.72	182.927	2172.31	1224.85	409.404	1985.47	1367.86	527.345	2043.58	1142.8	535.269	2074.9	1048.79	558.388	2027.73	903.106	516.076	2021.73	797.904	578.683	2068.13	796.389	570.112	2026.48	722.027
552	0	299.749	1875.98	1565.04	194.218	1880.4	1562.49	322.509	2037.9	1535.64	203.39	2046.18	1533.67	249.902	2064.15	1407.61	264.968	2169.93	1131.86	259.877	1907.44	1300.27	261.175	1812.85	1095.74	183.431	2160.47	1222.96	410.614	1974.45	1366.17	527.708	2032.65	1140.44	535.788	2063.62	1046.67	558.781	2016.27	900.838	516.324	2010.61	795.784	579.457	2056.86	794.509	570.384	2015.56	719.641
553	0	301.463	1864.58	1563.57	195.895	1869.1	1561.38	324.29	2026.53	1534.07	205.306	2034.86	1532.52	251.229	2052.82	1405.99	265.58	2157.43	1129.53	261.027	1895.76	1298.97	261.914	1800.56	1095.04	184.086	2148.39	1221.03	411.933	1963.01	1364.19	528.543	2021.8	1138.38	536.182	2052.25	1044.36	559.329	2004.73	898.839	516.734	1999.17	793.864	579.681	2045.23	792.183	570.612	2004.3	717.451
554	0	302.922	1853.12	1562.53	197.764	1857.88	1560.65	326.031	2015.02	1532.71	207.155	2023.58	1531.56	252.549	2041.37	1404.69	266.135	2144.63	1127.5	262.161	1883.93	1297.92	262.465	1787.96	1094.3	184.751	2136.3	1219.51	413.19	1951.47	1362.37	529.012	2010.7	1136.24	536.732	2040.62	1042.35	559.584	1992.72	896.665	516.887	1987.3	791.44	579.846	2033.41	790.323	571.007	1992.33	715.474
555	0	305.038	1841.74	1561.95	199.672	1846.59	1560.52	327.738	2003.18	1531.59	209.027	2012.24	1530.82	254.031	2029.69	1403.64	266.704	2131.69	1125.89	263.291	1871.95	1297.45	263.216	1775.41	1094.08	185.528	2124.1	1218.27	414.696	1939.9	1360.94	529.842	1999.44	1134.58	537.109	2028.84	1040.3	560.331	1980.61	895.105	517.342	1975.02	789.821	580.166	2021.18	788.317	571.513	1979.97	713.77
556	0	307.014	1830.32	1561.58	201.666	1835.22	1560.61	330.103	1992.11	1530.79	211.116	2000.69	1530.39	255.627	2017.87	1402.97	266.928	2118.28	1124.46	264.549	1859.77	1297.12	263.715	1762.62	1094.05	186.297	2111.9	1217.48	415.887	1927.74	1359.5	530.28	1987.8	1132.72	537.239	2016.94	1038.31	560.892	1968.37	893.223	517.48	1962.43	787.909	580.682	2008.87	786.781	571.698	1967.34	711.888
557	0	308.989	1818.83	1561.75	203.859	1823.86	1561.08	332.175	1980.55	1530.14	213.275	1989.17	1530.22	257.038	2005.81	1402.74	267.39	2105.7	1123.82	265.836	1847.5	1297.14	264.22	1749.62	1094.36	186.963	2099.6	1217.19	417.28	1915.93	1358.55	530.984	1975.96	1131.33	537.985	2004.63	1037.07	561.029	1956.22	891.563	517.897	1949.3	786.666	580.513	1996.06	784.989	572.161	1954.21	710.655
558	0	311.4	1807.33	1562.05	206.118	1812.34	1561.83	334.214	1968.84	1529.81	215.475	1977.57	1530.33	258.346	1993.57	1402.96	267.71	2093.2	1123.77	267.126	1835.08	1297.56	264.63	1736.45	1094.88	187.243	2087.23	1217.33	418.594	1904.01	1357.94	531.68	1963.63	1130.36	538.856	1992.2	1036.48	561.229	1943.28	890.348	518.047	1935.92	785.364	580.099	1982.67	783.414	572.456	1940.45	709.6
559	0	313.684	1795.65	1562.88	208.621	1800.66	1563.26	336.499	1957.14	1529.98	217.782	1965.78	1530.99	259.533	1981.28	1403.76	267.662	2080.69	1124.47	268.402	1822.7	1298.48	265.227	1723.35	1096.08	187.44	2074.74	1218.41	419.58	1892.15	1357.92	532.274	1950.95	1130.11	539.061	1979.3	1035.84	561.916	1930.22	890.009	518.466	1921.83	785.044	580.425	1969.68	783.235	572.892	1926.23	709.423
560	0	316.17	1784.02	1563.98	211.106	1788.97	1564.85	338.812	1945.38	1530.42	219.964	1953.9	1531.92	260.668	1968.85	1404.88	267.156	2068.59	1125.4	269.652	1810.29	1299.56	265.768	1710.19	1097.35	187.3	2062.07	1219.87	420.724	1880.2	1358.3	531.911	1937.98	1129.36	537.942	1966.02	1034.85	562.332	1916.95	889.9	518.907	1907.34	785.004	580.532	1955.76	782.873	573.246	1911.65	709.233
561	0	318.641	1772.3	1565.32	213.663	1777.11	1566.66	340.896	1933.44	1531.15	222.064	1941.95	1533.41	261.666	1956.51	1406.39	267.111	2056.28	1127.26	270.824	1797.94	1301.05	266.435	1697.29	1098.91	186.993	2049.38	1221.79	421.935	1868.32	1359.22	532.291	1924.71	1129.73	536.828	1952.99	1034.44	562.799	1903.14	890.505	519.512	1892.57	785.632	580.007	1941.1	782.589	573.842	1896.82	709.865
562	0	320.957	1760.32	1566.71	216.099	1765.29	1568.76	343.125	1921.61	1532.23	224.272	1930.12	1535.09	262.532	1944.22	1408.1	266.82	2043.24	1129.2	271.922	1785.71	1302.73	267.223	1684.62	1100.92	186.675	2036.66	1223.94	422.759	1856.62	1360.4	532.356	1911.44	1130.3	536.469	1939.59	1035.01	562.904	1889	891.398	519.871	1877.27	786.548	579.944	1926.19	783.311	574.215	1881.36	710.902
563	0	323.135	1748.52	1568.28	218.356	1753.41	1571.05	345.223	1909.69	1533.62	226.51	1918.37	1537.32	263.385	1932.22	1410.03	266.427	2030.78	1130.96	273.047	1773.64	1304.85	267.927	1672.14	1103.31	186.471	2024.01	1226.15	423.609	1845.21	1362.06	531.78	1898.04	1130.85	536.574	1926.15	1036.31	562.881	1874.64	892.702	520.201	1861.55	788.06	579.039	1910.89	784.121	574.625	1865.47	712.249
564	0	325.075	1736.48	1569.97	220.421	1741.58	1573.44	347.151	1897.8	1535.37	228.428	1906.54	1539.81	264.241	1920.5	1412.13	265.292	2017.41	1132.55	274.143	1761.7	1307.04	268.718	1660.1	1105.66	186.202	2011.45	1228.43	424.548	1833.75	1363.81	531.354	1884.87	1131.84	535.731	1912.67	1037.27	562.934	1859.86	894.45	520.656	1845.62	789.76	579.263	1895.82	785.679	575.148	1849.34	714.095
565	0	326.742	1724.47	1571.89	222.134	1729.68	1575.84	348.943	1885.9	1537.42	230.22	1894.78	1542.58	264.828	1908.92	1414.18	264.568	2004.05	1134.4	275.133	1750.03	1309.51	269.565	1648.33	1108.44	186.049	1999.03	1230.64	425.31	1822.4	1365.88	530.969	1871.66	1133.13	535.339	1899.27	1038.92	562.968	1845.01	896.486	520.923	1829.2	791.753	578.891	1879.78	787.217	575.621	1832.87	716.306
566	0	328.19	1712.49	1573.99	223.391	1718.03	1578.24	350.391	1873.74	1539.72	231.982	1883.21	1545.41	265.632	1897.51	1416.21	264.34	1991.47	1136.15	275.754	1738.38	1311.93	270.366	1637.03	1111.18	186.136	1986.86	1232.73	426.189	1811.15	1368.04	530.684	1858.73	1134.62	535.764	1885.71	1040.8	563.142	1830.04	898.754	521.158	1812.69	794.167	578.587	1863.82	788.991	575.895	1815.77	718.654
567	0	329.25	1700.68	1575.88	224.355	1706.51	1580.57	351.974	1862.07	1542.16	233.532	1871.76	1548.15	266.676	1886.15	1418.16	264.458	1979.85	1137.83	276.697	1727	1314.38	271.044	1625.78	1113.94	186.507	1974.88	1234.63	427.228	1799.96	1370.18	530.62	1845.94	1136.07	535.679	1872.35	1042.26	562.917	1815.04	900.717	521.252	1796.07	796.551	577.347	1847.16	790.315	576.272	1798.61	721.086
568	0	329.91	1688.95	1577.88	225.265	1695.05	1582.76	353.247	1850.45	1544.36	234.747	1860.41	1550.68	267.641	1874.88	1420.09	264.705	1968.55	1139.6	277.24	1715.5	1316.64	271.614	1615.14	1116.36	186.913	1963.11	1236.58	428.022	1788.71	1372.21	530.497	1832.94	1137.64	535.598	1858.94	1043.65	562.973	1799.92	902.878	521.342	1779.13	799.004	576.962	1830.86	792.004	576.369	1781.22	723.433
569	0	330.39	1677.44	1579.92	225.82	1683.81	1584.84	354.226	1838.89	1546.54	235.795	1849.17	1553.03	268.484	1863.61	1422.09	264.964	1957.06	1141.5	277.951	1704.31	1319.02	272.274	1604.64	1118.59	187.493	1951.65	1238.62	428.852	1777.32	1374.19	530.671	1819.89	1139.26	536.114	1845.5	1045.39	562.708	1784.72	904.897	521.06	1762.21	801.279	576.036	1814.24	793.497	576.204	1763.29	726.138
570	0	331.224	1666.08	1581.83	226.224	1672.66	1586.91	355.031	1827.34	1548.5	236.45	1837.99	1555.08	269.29	1852.25	1423.96	265.484	1945.4	1143.29	278.446	1692.86	1321.17	272.618	1594.32	1120.83	188.096	1940.1	1240.57	429.714	1765.99	1376.15	531.063	1806.97	1141.09	536.605	1831.97	1046.86	562.717	1769.77	906.867	521.073	1744.82	804.294	575.768	1797.64	795.508	575.865	1745.24	728.793
571	0	331.531	1654.74	1583.54	226.814	1661.63	1588.76	355.76	1816.27	1549.92	237.152	1826.82	1556.62	270.012	1840.9	1425.47	266.343	1934.14	1145.03	278.935	1681.8	1322.78	272.965	1583.78	1122.75	189.261	1929.54	1242.4	430.178	1754.64	1377.63	531.568	1794.36	1142.35	537.44	1818.67	1047.88	562.639	1754.71	908.322	520.469	1728.26	806.469	574.374	1780.74	796.22	575.553	1726.81	731.287
572	0	331.894	1643.71	1585.24	227.197	1650.66	1590.56	355.563	1804.18	1550.98	237.717	1815.72	1557.94	270.593	1829.5	1426.98	267.268	1922.94	1146.82	279.336	1670.59	1324.43	273.122	1572.96	1124.45	190.028	1918.55	1244.07	430.904	1743.1	1379.18	532.734	1781.79	1144.01	538.355	1805.33	1048.92	562.846	1739.6	910.062	520.022	1710.97	809.101	574.129	1763.93	797.771	574.985	1708.36	733.733
573	0	332.424	1632.69	1586.74	227.608	1639.72	1592.14	356.107	1793.54	1552.16	237.907	1804.78	1559.27	271.093	1818.07	1428.56	268.059	1912.03	1148.67	279.633	1659.22	1325.86	273.126	1561.81	1125.65	190.822	1907.85	1246	431.112	1731.33	1380.46	533.745	1769.18	1145.58	539.348	1792.08	1050.08	562.885	1724.28	911.817	519.274	1694.26	811.484	573.17	1746.62	799.014	573.941	1689.75	736.321
574	0	332.627	1621.86	1588.29	228.066	1628.76	1593.79	356.178	1782.23	1553.03	238.135	1793.74	1560.12	271.536	1806.66	1429.98	269.039	1901.38	1150.36	279.511	1647.89	1327.1	272.873	1550.46	1126.7	191.565	1897.15	1247.62	431.303	1719.6	1381.67	534.762	1756.61	1146.99	540.487	1778.77	1051.12	562.944	1708.92	913.564	518.566	1677.44	814.148	572.822	1729.4	800.518	573.096	1671.02	739.109
575	0	333.388	1610.97	1589.45	228.387	1617.72	1595.24	356.166	1771.26	1553.52	238.348	1782.59	1560.96	271.887	1795.15	1431.22	270.058	1890.94	1151.86	279.819	1636.56	1327.93	272.539	1539.06	1127.31	192.264	1886.39	1249.14	431.473	1707.71	1382.6	535.866	1744.22	1148.15	541.847	1765.62	1051.84	563.228	1693.59	914.99	517.845	1660.32	816.67	571.688	1712.03	801.224	571.877	1652.19	741.567
576	0	333.426	1600.12	1590.58	228.921	1606.78	1596.49	356.353	1760.33	1554.09	238.448	1771.47	1561.76	272.152	1783.65	1432.53	270.967	1880.27	1153.47	279.572	1625.2	1328.71	271.971	1527.59	1127.77	193.012	1875.77	1250.66	431.545	1695.68	1383.46	536.997	1731.88	1149.41	543.38	1752.62	1052.69	563.391	1678.19	916.56	517.151	1643.56	819.248	571.308	1694.49	802.572	570.579	1633.26	744.167
577	0	333.806	1589.18	1591.79	229.129	1595.7	1597.83	356.448	1749.37	1554.83	238.337	1760.39	1562.57	272.523	1772.16	1433.87	272.131	1870.12	1155.21	279.396	1613.97	1329.52	271.31	1516.44	1128.08	193.717	1865.19	1252.14	431.434	1683.6	1384.51	537.952	1719.5	1150.57	545.054	1739.14	1053.97	563.352	1662.73	918.224	516.305	1626.59	822.109	570.79	1677.02	804.214	569.251	1614.54	746.887
578	0	334.024	1578.04	1592.68	229.363	1584.63	1598.81	356.364	1738.28	1555.32	238.389	1749.07	1563.31	272.678	1760.68	1435.04	273.358	1859.73	1156.74	279.052	1602.55	1330.17	270.6	1505.24	1128.21	194.612	1854.64	1253.59	431.231	1671.41	1385.37	538.706	1706.99	1151.5	546.527	1725.72	1054.85	563.144	1647.11	919.863	515.271	1609.83	824.828	569.63	1659.64	805.426	567.778	1595.78	749.711
579	0	334.131	1567.05	1593.2	229.429	1573.39	1599.52	356.481	1727.18	1555.75	238.302	1737.88	1563.72	273.028	1749.41	1436.08	274.585	1849.3	1158.22	278.66	1591.61	1330.45	269.612	1494.22	1128.06	195.668	1844.26	1254.8	431.127	1659.31	1386	539.304	1694.48	1152.27	547.691	1712.25	1055.27	562.92	1631.56	921.27	514.185	1593.37	827.324	569.287	1642.16	806.726	566.297	1577.13	752.304
580	0	334.075	1555.91	1593.5	229.471	1562.25	1600.06	356.444	1715.9	1555.96	238.284	1726.72	1564.18	273.553	1738.07	1436.91	275.782	1838.74	1159.3	278.302	1580.92	1330.37	268.687	1483.57	1127.93	196.744	1833.8	1255.73	431.131	1646.82	1386.59	540.221	1681.97	1153.08	548.957	1698.66	1055.96	562.558	1616	922.864	513	1577.04	829.78	568.14	1624.81	807.846	564.819	1558.67	755.202
581	0	333.919	1544.59	1593.88	229.212	1550.98	1600.38	356.231	1704.51	1556.11	238.306	1715.58	1564.39	273.823	1726.97	1437.54	276.808	1828.35	1160.1	277.697	1570.25	1330.59	267.648	1473.14	1127.88	197.678	1823.56	1256.49	430.724	1635.08	1387.25	540.533	1669.29	1154.25	549.631	1685.09	1056.55	562.243	1600.52	924.807	511.731	1560.56	832.571	567.562	1607.61	809.855	563.23	1540.66	758.224
582	0	333.437	1533.26	1593.79	229.031	1539.87	1600.45	356.299	1693.32	1556.22	238.116	1704.27	1564.48	274.116	1715.84	1437.86	278.179	1818.1	1160.89	277.106	1559.35	1330.5	266.675	1462.92	1127.45	198.872	1813.16	1257.06	430.437	1623.15	1387.63	541.178	1656.59	1155	550.755	1671.79	1057.2	561.614	1584.97	926.426	510.558	1544.45	835.155	566.461	1590.68	811.427	561.459	1522.69	760.855
583	0	333.171	1521.88	1593.65	228.653	1528.63	1600.34	356.146	1681.95	1555.98	238.222	1693.11	1564.4	274.566	1704.9	1438.1	279.334	1807.86	1161.28	276.566	1548.71	1330.33	265.821	1452.97	1126.98	199.922	1802.97	1257.35	430.098	1611.3	1387.9	541.746	1643.74	1155.6	551.437	1658.56	1057.62	561.219	1569.93	928.103	509.369	1528.57	837.566	565.302	1573.78	812.604	559.974	1505.07	763.582
584	0	332.673	1510.35	1593.32	228.276	1517.37	1600.04	356.08	1670.54	1555.89	238.019	1681.96	1564.34	274.691	1694.02	1438.16	280.379	1797.43	1161.62	275.999	1538.03	1329.95	264.751	1442.92	1126.31	200.905	1792.69	1257.57	429.675	1599.45	1387.96	542.042	1630.8	1155.88	552.358	1645.54	1057.95	560.337	1554.84	929.456	508.204	1512.86	839.801	564.458	1557.19	814.038	558.244	1487.67	766.038
585	0	332.301	1498.97	1592.91	227.82	1506.13	1599.76	355.919	1659.03	1555.69	238.019	1670.7	1564.23	275.041	1683.05	1438	281.219	1786.88	1161.5	275.272	1527.33	1329.68	264.024	1433.03	1125.86	202.048	1782.57	1257.54	429.44	1587.66	1388.07	542.26	1617.68	1156.08	553.176	1632.66	1058.23	559.749	1540.15	930.778	506.885	1497.18	841.995	564.021	1540.69	815.529	556.815	1470.26	768.595
586	0	331.907	1487.54	1592.25	227.352	1494.85	1599.22	355.636	1647.53	1555.37	237.759	1659.49	1564.09	275.134	1672.2	1437.81	282.267	1776.65	1161.61	274.88	1516.73	1329.14	263.155	1423.08	1125.07	202.856	1772.28	1257.29	429.041	1576.02	1387.88	542.391	1604.66	1155.99	553.752	1619.8	1058.07	559.213	1525.55	931.825	505.552	1481.63	843.675	562.458	1524.67	816.467	555.22	1453.7	770.802
587	0	331.601	1476.09	1591.63	226.975	1483.59	1598.62	355.518	1636.17	1555.02	237.445	1648.35	1563.96	275.148	1661.29	1437.46	283.179	1766.23	1161.48	274.207	1505.97	1328.6	262.225	1412.88	1124.25	203.533	1762	1257.06	428.679	1564.42	1387.66	542.474	1591.67	1155.93	553.991	1606.85	1057.81	558.357	1511.12	932.592	504.306	1466.52	845.325	561.182	1509.31	817.142	553.511	1437.16	772.727
588	0	331.025	1464.72	1590.71	226.533	1472.37	1597.85	355.168	1624.81	1554.52	237.309	1637.14	1563.59	275.188	1650.42	1436.86	283.763	1755.79	1160.91	273.633	1495.23	1327.83	261.444	1402.87	1123.3	204.292	1751.7	1256.56	428.295	1552.91	1387.11	542.412	1578.81	1155.34	554.184	1594.14	1057.11	557.742	1497.06	932.99	502.952	1451.48	846.554	560.309	1493.43	817.792	551.721	1421.08	774.167
589	0	330.582	1453.47	1589.71	225.981	1461.17	1597.1	354.907	1613.58	1553.84	236.965	1626.03	1563.07	275.109	1639.57	1436.13	284.251	1745.18	1160.18	272.852	1484.62	1327.07	260.571	1392.52	1122.45	204.895	1741.34	1255.83	427.891	1541.47	1386.49	542.388	1566.01	1154.72	554.436	1581.39	1056.52	557.137	1483.25	933.137	501.577	1436.66	847.637	558.56	1478.56	817.941	550.095	1405.34	775.323
590	0	329.988	1442.01	1588.63	225.498	1449.91	1596.09	354.513	1602.41	1552.97	236.695	1614.85	1562.32	274.975	1628.51	1435.39	284.709	1734.66	1159.5	272.214	1473.74	1326.11	259.767	1382.14	1121.34	205.475	1730.89	1255.05	427.329	1530.06	1385.56	542.339	1553.29	1153.97	554.285	1568.59	1055.52	556.441	1469.55	932.868	500.472	1422.04	848.364	556.92	1463.53	817.815	548.379	1389.92	776.133
591	0	329.396	1430.8	1587.63	224.884	1438.73	1595.04	354.143	1591.28	1552.08	236.117	1603.64	1561.52	274.666	1617.41	1434.59	285.406	1724.39	1158.85	271.558	1462.8	1325.02	258.857	1371.48	1120.09	205.64	1720.33	1254.27	427.001	1518.6	1384.71	542.242	1540.65	1153.13	554.119	1555.63	1054.46	555.551	1455.74	932.495	499.055	1407.25	848.828	555.482	1448.59	817.574	546.718	1374.78	776.629
592	0	328.661	1419.41	1586.5	224.22	1427.61	1593.85	353.563	1579.86	1551.1	235.628	1592.43	1560.39	274.434	1606.42	1433.63	285.677	1713.71	1157.97	270.873	1451.88	1323.96	257.95	1360.9	1118.78	205.779	1709.62	1253.31	426.399	1507.15	1383.61	541.972	1527.91	1152.1	554.087	1542.71	1053.49	554.633	1442.19	931.906	497.994	1392.59	849.313	553.629	1434.37	817.067	544.983	1360.06	776.782
593	0	327.823	1408.25	1585.15	223.376	1416.46	1592.53	352.85	1568.46	1549.79	235.138	1581.31	1559.01	274.09	1595.22	1432.47	285.83	1702.89	1156.85	270.207	1440.68	1322.64	257.289	1350.12	1117.31	205.879	1698.82	1252.09	425.76	1495.71	1382.25	541.619	1515.35	1150.7	553.366	1529.9	1051.64	553.891	1428.7	930.895	496.819	1378.48	849.063	551.84	1420.25	815.957	543.453	1345.71	776.24
594	0	326.953	1396.92	1583.9	222.45	1405.21	1591.19	352.165	1557.1	1548.51	234.31	1570.02	1557.66	273.612	1583.97	1431.25	285.843	1691.95	1155.8	269.597	1429.61	1321.25	256.415	1339.22	1115.68	205.837	1687.93	1251.01	425.307	1484.1	1380.97	541.352	1502.84	1149.37	552.936	1516.9	1050.16	552.92	1415.27	929.769	495.922	1364.73	848.56	550.603	1406.13	814.859	541.932	1331.61	775.434
595	0	325.931	1385.53	1582.72	221.493	1393.96	1589.76	351.505	1545.76	1547.26	233.551	1558.8	1556.2	272.92	1572.77	1430	285.598	1680.89	1154.74	269.054	1418.32	1319.69	255.688	1328.3	1113.93	205.517	1676.82	1249.79	424.704	1472.49	1379.62	540.847	1490.44	1147.93	552.414	1503.95	1048.63	551.872	1401.71	928.605	494.465	1350.71	847.639	548.303	1392.4	813.518	540.164	1317.67	774.344
596	0	325.013	1374.27	1581.31	220.476	1382.72	1588.24	350.752	1534.4	1545.84	232.689	1547.49	1554.47	272.404	1561.3	1428.65	285.373	1669.69	1153.39	268.324	1406.9	1318.18	255.022	1317.18	1112.25	205.222	1665.68	1248.4	423.922	1460.97	1378.09	540.242	1478.09	1146.32	551.713	1490.69	1046.91	550.658	1388.3	927.05	493.332	1337.12	846.558	546.946	1378.91	812.194	538.614	1304.12	772.945
597	0	323.99	1363	1579.63	219.414	1371.42	1586.55	349.815	1523	1544.05	231.744	1536.02	1552.61	271.734	1549.91	1427.23	284.976	1658.42	1151.92	267.621	1395.56	1316.39	254.32	1305.97	1110.25	204.842	1654.23	1246.8	423.236	1449.3	1376.36	539.416	1465.82	1144.33	550.921	1477.61	1044.92	549.52	1375.01	925.286	492.157	1323.45	845.088	545.596	1365.4	810.272	536.923	1290.84	770.85
598	0	323.003	1351.56	1578.16	218.425	1360.15	1584.79	348.851	1511.7	1542.24	230.787	1524.71	1550.7	270.881	1538.39	1425.52	284.637	1647.1	1150.48	266.899	1384.12	1314.71	253.807	1294.72	1108.43	204.217	1642.79	1245.23	422.52	1437.67	1374.75	538.513	1453.52	1142.48	549.906	1464.29	1042.89	548.286	1361.56	923.485	490.754	1310.04	843.419	543.81	1352.12	808.306	535.535	1277.76	768.959
599	0	321.792	1340.2	1576.43	217.35	1348.89	1583.01	347.625	1500.01	1540.4	229.63	1513.28	1548.75	270.292	1526.94	1423.49	284.003	1635.64	1148.79	266.216	1372.59	1312.87	253.199	1283.27	1106.45	203.509	1631.37	1243.38	421.624	1426.22	1372.95	537.398	1441.2	1140.4	548.838	1450.85	1041.1	546.73	1348.25	921.554	489.313	1297	841.371	541.956	1339.1	806.241	533.667	1264.87	766.673
600	0	320.608	1328.79	1574.84	216.124	1337.51	1581.18	346.467	1488.86	1538.58	228.589	1501.87	1546.71	269.468	1515.4	1421.55	283.25	1624.16	1146.74	265.377	1361.09	1311.14	252.883	1271.88	1104.63	202.774	1619.84	1241.35	420.67	1414.75	1371.18	536.305	1429.04	1138.5	548.012	1437.6	1039.39	545.54	1335.12	919.688	488.027	1284.18	839.498	540.658	1326.23	804.324	532.141	1252.17	764.523
601	0	319.437	1317.34	1573.03	214.826	1326.09	1579.22	345.275	1477.28	1536.86	227.298	1490.45	1544.76	268.429	1503.9	1419.56	282.437	1612.63	1144.79	264.478	1349.57	1309.18	252.456	1260.39	1102.53	201.856	1608.2	1239.43	419.88	1403.32	1369.42	535.019	1416.86	1136.45	546.361	1424.07	1037.17	544.018	1321.92	917.562	486.405	1271.51	837.076	539.807	1313.26	802.382	530.326	1239.75	761.908
602	0	318.007	1305.91	1571.29	213.423	1314.51	1577.29	343.811	1465.83	1534.94	225.98	1478.98	1542.8	267.275	1492.37	1417.7	281.628	1600.85	1142.82	263.693	1338	1307.45	252.258	1248.92	1100.66	200.809	1596.51	1237.14	418.859	1391.95	1367.72	533.818	1404.7	1134.64	545.193	1410.85	1035.31	542.472	1308.81	915.594	484.826	1259.12	834.763	538.4	1300.9	800.289	529.004	1227.53	759.508
603	0	316.449	1294.5	1569.61	211.949	1303.14	1575.39	342.607	1454.46	1533.56	224.505	1467.59	1540.97	266.078	1480.94	1415.72	280.297	1588.93	1140.61	262.716	1326.37	1305.67	251.819	1237.2	1098.93	199.836	1584.8	1235.06	417.8	1380.5	1366.12	532.266	1392.26	1132.84	543.774	1397.64	1033.68	540.86	1295.89	913.836	483.161	1246.82	832.507	537.275	1288.3	798.493	527.297	1215.45	757.124
604	0	314.868	1282.99	1567.95	210.33	1291.77	1573.38	341.018	1442.89	1532.06	222.934	1456.13	1539.21	265.019	1469.61	1413.94	279.518	1577.32	1138.72	261.583	1314.71	1303.99	251.538	1225.36	1097.38	198.59	1572.87	1232.86	416.772	1369.03	1364.66	531.025	1379.86	1131.34	542.629	1384.7	1032.23	539.424	1283.3	911.989	481.706	1234.85	830.29	536.763	1275.84	796.787	525.685	1203.53	754.787
605	0	313.078	1271.55	1566.32	208.599	1280.38	1571.53	339.284	1431.45	1530.51	221.302	1444.72	1537.51	263.608	1458.14	1411.98	278.376	1565.25	1136.61	260.602	1303.09	1302.32	251.252	1213.4	1095.71	197.413	1561.01	1230.68	415.594	1357.69	1363.22	529.727	1367.43	1129.82	541.164	1371.97	1030.54	538.048	1270.7	910.391	480.212	1223.13	827.988	535.679	1263.75	795.033	524.187	1191.97	752.36
606	0	311.238	1260.13	1564.9	206.614	1269.07	1569.67	337.695	1420.06	1529.28	219.491	1433.36	1535.81	262.156	1446.6	1410.16	277.067	1553.07	1134.35	259.45	1291.27	1300.7	250.789	1201.27	1094.36	196.218	1548.87	1228.37	414.45	1346.17	1361.98	528.324	1354.95	1128.45	539.65	1359.5	1029.04	536.455	1258.36	908.885	478.927	1211.62	825.928	534.883	1251.82	793.455	522.858	1180.33	750.346
607	0	309.159	1248.78	1563.49	204.575	1257.7	1568.05	335.83	1408.53	1527.97	217.741	1421.97	1534.09	260.697	1435.1	1408.26	276.18	1541.12	1132.29	258.299	1279.53	1299.29	250.357	1189.1	1093.11	195.038	1536.8	1225.94	413.143	1334.64	1360.78	527.007	1342.45	1127.27	538.301	1347.39	1027.82	535.248	1246.31	907.498	477.49	1200.3	824.082	534.63	1239.78	792.174	521.516	1169.08	748.398
608	0	307.083	1237.42	1562.03	202.528	1246.49	1566.15	333.961	1397.3	1526.57	215.735	1410.65	1532.33	259.184	1423.74	1406.23	274.643	1528.26	1129.57	256.976	1267.64	1297.83	249.716	1176.65	1091.86	193.748	1524.63	1223.38	411.67	1323.09	1359.47	525.564	1330.01	1126.05	537.072	1335.41	1026.81	534.028	1234.49	906.078	476.639	1189.25	822.133	533.854	1228.51	790.88	520.275	1158.02	746.397
609	0	304.871	1226.04	1560.84	200.345	1235.13	1564.61	331.901	1385.92	1525.34	213.779	1399.34	1530.61	257.577	1412.4	1404.19	273.771	1515.76	1127.32	255.794	1255.74	1296.52	249.068	1163.98	1090.88	192.526	1512.15	1220.72	410.171	1311.66	1358.42	524.158	1317.57	1125.01	535.438	1323.5	1025.68	532.846	1223.11	904.97	475.223	1178.39	820.12	533.916	1217.06	789.766	519.475	1147.16	744.892
610	0	302.678	1214.79	1559.67	198.077	1223.78	1563.06	329.811	1374.57	1524.11	211.718	1388.11	1528.98	255.76	1401.02	1402.18	272.426	1502.32	1124.47	254.424	1243.67	1295.33	248.249	1151.2	1090.04	191.229	1499.67	1217.85	408.495	1300.1	1357.36	522.88	1305.34	1124.22	534.442	1311.94	1025.15	531.896	1211.82	903.826	474.477	1167.84	818.4	533.078	1206.33	788.457	518.789	1136.6	743.182
611	0	300.685	1203.59	1558.97	195.923	1212.49	1561.98	327.562	1363.4	1523.01	209.484	1376.75	1527.47	253.852	1389.66	1400.49	271.428	1488.64	1122.07	252.875	1231.59	1294.46	247.463	1138.21	1089.71	189.762	1487.14	1215.16	406.794	1288.66	1356.57	521.476	1293.22	1123.62	533.157	1300.38	1024.58	531.226	1200.9	902.907	474.031	1157.43	816.997	533.246	1195.81	787.631	518.495	1126.43	741.791
612	0	298.549	1192.41	1558.47	193.845	1201.18	1561.27	325.256	1352.13	1522.16	207.08	1365.3	1526.4	251.765	1378.13	1399.02	270.417	1474.97	1120.06	251.32	1219.39	1293.75	246.563	1125.17	1089.31	188.35	1474.58	1212.81	405.051	1277	1356.05	520.068	1281.09	1123.03	531.626	1289.11	1023.87	530.518	1190.19	901.838	473.963	1147.29	815.547	533.522	1185.6	786.561	518.401	1116.52	740.232
613	0	296.478	1181.24	1558.48	191.712	1189.81	1561.08	323.008	1340.92	1521.72	204.647	1353.76	1525.76	249.61	1366.13	1398.24	269.459	1461.26	1118.98	249.984	1207.25	1293.54	245.675	1112.02	1089.43	186.848	1461.88	1211.26	403.385	1265.44	1355.99	519.001	1269.47	1123.23	530.516	1277.96	1024.01	530.171	1179.92	901.244	474.192	1137.37	814.353	533.155	1176.08	785.728	519.096	1107.04	739.236
614	0	294.315	1170.03	1558.88	189.441	1178.36	1561.24	320.541	1329.62	1521.53	202.066	1342.18	1525.23	247.451	1354.02	1397.89	268.702	1447.53	1118.3	248.057	1194.7	1293.66	244.809	1098.69	1089.83	185.325	1449.1	1210.17	401.563	1253.47	1356.28	517.504	1257.92	1123.46	529.004	1267.06	1024.25	529.867	1169.98	900.822	474.532	1127.77	813.403	533.755	1167.02	785.431	519.804	1098.07	738.274
615	0	292.114	1158.9	1559.52	187.379	1166.96	1561.71	317.865	1318.25	1521.44	199.578	1330.67	1524.86	245.33	1341.65	1397.86	267.871	1434.56	1118.14	246.423	1182.35	1294.17	243.834	1084.96	1090.64	184.064	1436.51	1209.62	399.717	1241.18	1356.73	516.02	1246.91	1123.97	527.56	1256.32	1024.82	529.769	1160.48	900.689	475.078	1118.4	812.916	534.167	1158.58	785.378	521.055	1090.01	737.495
616	0	289.989	1147.68	1560.57	185.139	1155.48	1562.49	315.343	1307.08	1521.64	196.972	1318.93	1524.87	243.454	1329.32	1398.25	266.454	1422.49	1118.34	244.603	1169.81	1294.87	242.812	1071.05	1091.58	182.869	1423.94	1209.69	397.85	1228.63	1357.71	514.716	1236.32	1124.87	526.244	1245.66	1026.09	529.631	1151.2	900.87	475.801	1109.51	812.513	533.723	1150.82	785.373	522.599	1082.12	737.298
617	0	287.693	1136.35	1562.27	182.891	1143.84	1563.82	312.689	1295.51	1522.32	194.449	1307.31	1525.2	241.634	1316.95	1399.24	265.334	1411.02	1119.4	242.782	1157.19	1296.05	241.704	1057.4	1093.06	181.926	1411.64	1210.29	396.102	1215.9	1359.33	513.178	1225.83	1126.54	525.249	1235.27	1028.18	529.542	1142.36	901.653	476.544	1101.06	812.679	534.19	1143.56	786.264	524.392	1074.8	737.751
618	0	285.425	1124.94	1564.14	180.551	1132.25	1565.32	310.247	1284.07	1523.73	191.863	1295.4	1525.95	240	1304.8	1400.49	264.665	1399.68	1120.89	241.104	1144.82	1297.69	240.528	1043.96	1094.92	181.164	1399.08	1211.42	394.168	1203.02	1361.37	511.797	1215.57	1128.64	523.804	1224.98	1030.52	529.48	1133.79	902.958	477.274	1092.86	813.232	535.22	1136.85	788.177	526.196	1067.98	738.597
619	0	283.306	1113.52	1566.43	178.42	1120.39	1567.09	307.763	1272.57	1525.31	189.355	1283.51	1527.1	238.312	1292.4	1402.31	263.819	1387.18	1122.82	239.413	1132.54	1299.61	239.53	1030.89	1097.08	180.547	1386.77	1212.85	392.346	1190.35	1363.75	510.443	1205.21	1131.24	522.619	1214.88	1033.31	529.307	1125.45	904.509	478.028	1085.2	814.191	534.971	1130.03	789.551	528.076	1061.65	739.801
620	0	281.168	1101.83	1568.93	176.165	1108.54	1569.07	305.417	1260.76	1527.74	186.941	1271.49	1528.8	236.876	1280.38	1404.36	263.087	1374.23	1125.1	237.935	1120.41	1301.79	238.336	1018.12	1099.63	179.786	1374.27	1214.62	390.709	1177.96	1366.65	509.343	1194.86	1134.5	521.631	1204.9	1036.59	529.202	1117.09	906.745	478.688	1077.72	815.422	535.519	1123.4	791.604	529.762	1055.69	741.343
621	0	278.981	1090.19	1571.65	174.123	1096.68	1571.18	303.194	1249.25	1530.59	184.622	1259.64	1530.98	235.287	1268.52	1406.56	262.466	1361.01	1127.48	236.456	1108.43	1304.25	237.331	1005.89	1102.52	179.16	1361.91	1216.6	389.229	1165.71	1369.89	508.17	1184.21	1138.03	520.747	1195.1	1040.36	529.19	1109.06	909.432	479.393	1070.7	817.122	536.18	1116.93	794.484	531.269	1049.75	743.314
622	0	276.945	1078.38	1574.4	172.077	1084.71	1573.44	301.125	1237.53	1533.75	182.601	1247.74	1533.48	233.789	1256.79	1408.85	261.882	1348.52	1129.64	235.458	1096.91	1307.03	236.445	994.173	1105.57	178.542	1349.62	1218.58	387.776	1153.9	1373.13	507.381	1173.59	1141.84	519.991	1185.53	1044.25	529.057	1101.09	912.342	480.105	1063.8	819.202	536.767	1110.61	797.73	532.566	1044.06	745.521
623	0	275.194	1066.63	1577.03	170.346	1072.79	1575.51	299.264	1225.99	1536.94	180.629	1235.93	1536.25	232.598	1245.38	1411.2	261.368	1336.93	1131.88	234.445	1085.33	1309.63	235.739	982.854	1108.4	177.741	1337.29	1220.58	386.503	1142.26	1376.35	506.743	1162.81	1145.5	519.275	1176.13	1047.87	529.194	1093.1	915.335	480.674	1057.06	821.119	537.444	1103.9	800.651	533.517	1038.33	747.443
624	0	273.608	1054.88	1579.64	168.825	1060.91	1577.64	297.525	1214.42	1540.24	178.883	1224.04	1538.99	231.183	1233.87	1413.44	260.391	1325.47	1134.09	233.608	1073.93	1312.31	235.065	971.801	1111.31	176.947	1325.15	1222.53	385.389	1130.96	1379.39	506.273	1152	1149.22	518.897	1166.89	1051.76	529.366	1085.08	918.476	481.116	1050.29	823.331	538.504	1097.1	803.889	534.437	1032.61	749.673
625	0	272.19	1043.13	1582.14	167.319	1048.98	1579.72	295.926	1202.87	1543.41	177.381	1212.45	1541.73	230.314	1222.33	1415.6	259.286	1313.92	1136.27	232.727	1062.67	1314.86	234.492	960.942	1114.18	175.931	1313.02	1224.53	384.393	1119.78	1382.32	505.985	1141.18	1152.84	518.749	1157.77	1055.64	529.513	1077.15	921.564	481.595	1043.71	825.602	539.496	1090.29	807.34	534.832	1026.75	751.604
626	0	270.953	1031.45	1584.43	166.017	1037.25	1581.73	294.627	1191.35	1546.24	176.183	1200.78	1544.11	229.24	1210.84	1417.77	257.986	1302.8	1138.53	232.189	1051.44	1317.36	234.28	950.071	1116.78	174.972	1301.1	1226.47	383.666	1108.81	1385.04	505.877	1130.25	1156.17	518.815	1148.78	1059.17	529.862	1069.21	924.451	482.126	1037.18	827.884	540.701	1083.34	810.454	535.284	1020.85	753.427
627	0	269.982	1019.85	1586.54	165.119	1025.64	1583.48	293.496	1179.94	1548.81	175.039	1189.17	1546.44	228.253	1199.41	1420	256.479	1291.37	1141.09	231.695	1040.21	1319.43	234.243	939.266	1119.06	173.912	1289.46	1228.67	383.05	1097.88	1387.54	505.79	1119.28	1159.31	518.877	1139.71	1062.31	530.265	1061.23	926.994	482.681	1030.52	829.755	541.947	1076.1	813.008	535.465	1014.82	754.901
628	0	269.251	1008.39	1588.47	164.242	1014.04	1585.26	292.75	1168.41	1551.23	174.036	1177.66	1548.63	227.456	1187.91	1421.96	255.001	1280.17	1143.67	231.334	1029.06	1321.55	234.483	928.54	1121.18	172.736	1277.91	1230.8	382.528	1087.13	1389.9	505.941	1108.73	1162.34	519.09	1130.46	1065.34	530.955	1053.26	929.473	483.309	1023.78	831.665	543.042	1069.01	815.608	535.843	1008.77	756.458
629	0	268.429	996.867	1590.38	163.49	1002.5	1586.98	292.052	1157.03	1553.3	173.334	1166.24	1550.35	226.182	1176.75	1423.91	253.509	1269.09	1145.93	231.07	1017.9	1323.41	234.722	917.5	1122.96	171.414	1266.4	1232.85	382.087	1076.41	1391.92	505.896	1098.5	1164.83	519.383	1121.29	1067.98	531.659	1045.2	931.608	484.051	1017.04	833.323	544.506	1061.78	817.775	536.166	1002.72	757.605
630	0	267.778	985.407	1592.31	162.847	991.017	1588.62	291.447	1145.6	1555.03	172.778	1154.76	1552.05	225.416	1165.52	1426.01	252.114	1258.14	1147.86	230.896	1006.69	1325.02	235.298	906.489	1124.49	170.09	1255.09	1234.82	381.747	1065.77	1393.63	506.066	1088.68	1166.94	519.471	1111.94	1070.16	532.552	1037.19	933.342	485.002	1010.34	834.765	545.703	1054.97	819.714	536.694	996.601	758.566
631	0	267.185	973.915	1594.03	162.35	979.629	1590.29	291.097	1134.2	1556.92	172.39	1143.45	1553.59	224.632	1154.19	1427.87	250.839	1247.37	1149.88	230.94	995.383	1326.49	235.961	895.448	1125.68	168.792	1243.81	1237.01	381.64	1055.34	1395.19	506.003	1079.36	1168.56	520.03	1102.7	1072.39	533.333	1029.11	934.882	486.003	1003.41	835.886	547.16	1047.79	821.272	537.372	990.397	759.271
632	0	266.864	962.631	1595.71	162.062	968.261	1591.92	290.849	1122.86	1558.54	172.036	1132	1555.15	223.911	1142.72	1429.61	249.441	1236.75	1151.93	231.108	984.228	1328.01	236.729	884.398	1126.79	167.463	1232.59	1239.22	381.484	1044.82	1396.68	506.019	1070.38	1170.1	520.315	1093.53	1074.32	533.961	1021.54	936.242	487.195	996.254	837.078	548.012	1040.98	822.884	538.378	984.316	760.082
633	0	266.596	951.206	1597.41	161.742	956.844	1593.54	290.583	1111.42	1560.17	171.783	1120.66	1556.69	223.258	1131.29	1431.43	247.894	1226.09	1153.69	231.287	972.948	1329.46	237.69	873.298	1127.79	165.986	1221.47	1241.29	381.337	1034.46	1397.92	506.004	1061.82	1171.36	520.276	1084.53	1075.92	534.873	1013.81	937.425	488.46	988.978	838.052	549.471	1034.17	824.188	539.587	978.18	760.834
634	0	266.506	940.083	1598.75	161.618	945.48	1594.99	290.356	1100	1561.56	171.76	1109.17	1557.98	222.587	1119.81	1432.91	246.58	1215.5	1155.34	231.598	961.687	1330.63	238.645	862.212	1128.49	164.436	1210.32	1243.17	381.236	1024.08	1399.1	505.947	1053.51	1172.41	519.807	1075.69	1077.13	535.549	1006.08	938.331	489.897	981.408	838.813	550.675	1027.45	825.261	541.185	972.126	761.297
635	0	266.619	928.501	1600.27	161.578	934.015	1596.3	290.176	1088.61	1562.85	171.585	1097.78	1559.44	221.836	1108.36	1434.64	245.342	1204.95	1157.31	232.022	950.58	1331.82	239.729	851.248	1129.27	163.015	1199.1	1245.23	381.269	1013.75	1400.25	505.794	1045.25	1173.65	519.988	1066.89	1078.53	536.265	998.41	939.343	491.125	974.653	839.384	551.516	1020.86	826.34	542.956	965.925	762.158
636	0	266.665	917.146	1601.46	161.602	922.485	1597.6	290.184	1077.25	1564.24	171.534	1086.31	1560.85	220.953	1096.76	1436.11	243.975	1194.51	1158.91	232.294	939.467	1332.85	240.836	840.392	1130.02	161.431	1187.71	1247.09	381.026	1003.39	1401.31	505.587	1037.09	1175.01	519.024	1058.38	1079.75	536.708	990.708	940.373	492.311	967.481	839.888	552.343	1014.14	827.706	544.823	959.52	763.124
637	0	266.479	905.785	1602.52	161.548	910.926	1598.75	289.986	1065.7	1565.25	171.438	1074.89	1561.84	220.481	1085.47	1437.32	242.833	1183.8	1160.5	232.739	928.387	1333.81	241.912	829.552	1130.69	160.134	1176.5	1248.6	381.18	993.241	1402.58	505.356	1028.93	1176.27	518.551	1049.76	1080.94	537.21	983.125	941.299	493.674	961.318	840.254	553.567	1007.59	829.031	546.768	953.214	764.022
638	0	266.808	894.3	1603.08	161.802	899.474	1599.44	289.826	1054.28	1565.93	171.329	1063.31	1562.8	219.841	1074.12	1438.52	241.714	1173.51	1161.95	233.223	917.357	1334.43	243.106	818.859	1131.13	158.934	1165.24	1250.13	381.127	982.936	1403.42	505.029	1020.77	1177.25	518.205	1041.24	1082.08	537.603	975.517	942.084	494.604	953.458	840.688	554.42	1000.91	829.946	548.64	946.644	764.818
639	0	267.005	882.931	1603.8	161.997	887.931	1600.11	290.016	1042.93	1566.69	171.431	1051.6	1563.46	219.344	1062.77	1439.52	240.632	1162.93	1163.18	233.671	906.431	1335.11	244.183	808.239	1131.73	157.806	1154.12	1251.36	381.329	972.802	1404.36	504.836	1012.52	1178.36	517.971	1032.9	1083.34	538.04	967.869	943.122	495.767	946.237	841.168	555.125	994.039	831.075	550.636	940.04	765.931
640	0	267.131	871.32	1604.28	162.114	876.325	1600.63	290.047	1031.41	1567.34	171.312	1040.12	1563.95	218.862	1051.58	1440.31	239.748	1152.4	1164.2	234.051	895.51	1335.6	245.282	797.758	1132.18	156.871	1142.96	1252.42	381.262	962.501	1405.04	504.452	1004.19	1179.11	517.176	1024.48	1084.1	538.335	960.172	943.838	496.71	938.671	841.551	556.006	987.314	832.248	552.49	933.28	766.819
641	0	267.179	859.765	1604.7	162.258	864.63	1600.87	290.043	1019.99	1567.62	171.376	1028.57	1564.35	218.618	1040.31	1440.94	238.938	1141.71	1165.06	234.549	884.622	1335.97	246.291	787.299	1132.53	156.133	1131.9	1253.2	381.523	952.394	1405.59	504.232	995.736	1179.82	516.99	1016.33	1085.04	538.82	952.523	944.527	497.568	931.337	841.925	556.932	980.578	833.136	554.114	926.382	767.642
642	0	267.469	848.244	1604.6	162.49	853.012	1600.87	290.041	1008.5	1567.75	171.548	1017.01	1564.59	218.316	1029.09	1441.39	238.137	1130.85	1165.49	235.052	873.761	1336.08	247.296	776.909	1132.53	155.394	1120.84	1253.91	381.732	942.099	1405.89	503.883	987.062	1180.06	516.235	1007.98	1085.28	539.292	944.827	944.83	498.644	923.957	841.698	557.29	973.518	833.666	555.634	919.282	768.164
643	0	267.593	836.737	1604.64	162.617	841.333	1600.88	290.464	997.125	1568.26	171.631	1005.37	1564.8	218.13	1017.9	1441.52	237.841	1120.2	1166.08	235.55	862.865	1336.2	248.224	766.639	1132.52	154.9	1109.85	1254.42	382.057	931.69	1406.13	503.753	978.348	1180.5	516.024	999.737	1085.81	539.832	937.027	945.121	499.484	916.313	841.901	557.711	966.136	834.105	557.129	912.039	768.652
644	0	267.677	825.164	1604.44	162.735	829.798	1600.64	290.693	985.518	1568.58	171.788	993.836	1565.01	218.255	1006.83	1441.75	237.499	1109.54	1166.45	236.122	851.987	1336.19	249.103	756.376	1132.38	154.549	1098.83	1254.72	382.419	921.295	1406.23	503.621	969.487	1180.75	515.383	991.168	1085.97	540.4	929.293	945.254	500.351	908.311	841.87	558.58	958.801	834.622	558.305	904.693	768.916
645	0	268.164	813.463	1604.18	163.085	818.269	1600.22	290.75	973.777	1568.63	172.119	982.413	1565.1	218.437	995.941	1441.9	237.14	1098.88	1166.62	236.802	841.114	1336.01	249.895	745.892	1131.93	154.254	1087.92	1255.05	382.845	910.826	1406.25	503.8	960.312	1180.87	515.558	982.606	1086.43	541.149	921.365	945.213	501.326	900.424	841.618	558.811	951.529	834.607	559.651	897.484	768.872
646	0	268.438	802.152	1603.59	163.441	806.785	1599.68	291.101	962.361	1568.67	172.403	971.023	1565.04	218.697	984.736	1441.88	236.993	1088.02	1166.78	237.254	830.077	1335.55	250.864	735.384	1131.47	154.249	1076.89	1255.15	383.414	900.237	1406.02	504.083	951.062	1180.95	515.113	973.588	1086.29	541.76	913.434	944.836	502.348	892.383	841.045	559.11	944.052	834.279	560.483	890.366	768.422
647	0	268.969	790.526	1603.12	163.77	795.259	1599.06	291.777	951.203	1568.57	172.791	959.535	1564.75	218.915	973.603	1441.59	237.164	1077.39	1166.71	237.83	819.178	1335.01	251.411	724.683	1130.87	154.289	1065.92	1255.02	383.854	889.469	1405.65	504.285	941.544	1180.79	515.466	964.672	1086.35	542.574	905.427	944.432	503.467	884.111	840.54	559.28	936.381	833.906	561.306	882.981	767.815
648	0	269.41	779.171	1602.28	164.374	783.923	1598.26	292.127	939.81	1568.01	173.25	948.136	1564.23	219.39	962.398	1440.94	237.295	1066.88	1166.22	238.425	808.118	1334.39	252	714.006	1130.1	154.426	1054.91	1254.63	384.394	878.636	1404.96	504.661	931.701	1180.25	515.106	955.22	1085.59	543.36	897.151	943.798	504.479	875.338	840.172	559.754	928.798	833.374	562.13	875.557	766.993
649	0	269.997	767.799	1601.27	165.112	772.387	1597.31	292.654	928.404	1567.19	173.765	936.679	1563.55	219.924	951.262	1440.16	237.543	1056.13	1165.67	239.015	797.05	1333.53	252.617	703.24	1129	154.873	1043.97	1254	384.839	867.572	1403.85	505.034	921.646	1179.37	515.212	945.645	1084.81	544.083	888.516	942.94	505.465	866.323	839.194	559.916	920.862	832.423	562.997	868.042	765.895
650	0	270.734	756.401	1600.24	165.702	760.911	1596.31	293.12	916.993	1566.16	174.419	925.407	1562.62	220.441	939.86	1439.24	238.002	1045.43	1164.91	239.478	785.823	1332.5	252.998	692.392	1127.89	155.317	1033.02	1253.2	385.54	856.478	1402.86	505.731	911.322	1178.49	515.483	936.018	1083.91	544.854	879.77	941.996	506.489	857.953	838.069	560.289	912.701	831.537	563.768	860.403	764.681
651	0	271.379	745.052	1598.94	166.433	749.568	1595.04	293.975	905.883	1565.08	175.189	914.082	1561.49	221.149	928.645	1438.13	238.461	1034.59	1163.95	239.827	774.547	1331.23	253.285	681.419	1126.46	155.914	1021.91	1252.29	386.044	845.092	1401.58	506.377	900.823	1177.37	515.891	926.016	1082.9	545.41	870.619	940.758	507.556	848.648	837.17	560.674	904.32	830.45	564.132	852.434	763.158
652	0	272.345	733.824	1597.56	167.273	738.296	1593.81	294.423	894.337	1563.58	175.968	902.655	1560.17	221.987	917.324	1436.89	239.276	1023.72	1162.94	240.577	763.351	1329.98	253.628	670.719	1124.69	156.762	1010.95	1251.27	386.795	833.736	1400.21	507.122	890.126	1176.13	516.599	915.854	1081.89	546.143	861.211	939.508	508.437	838.996	836.053	561.175	895.625	829.152	564.724	844.274	761.541
653	0	273.284	722.352	1595.98	168.314	726.994	1592.22	295.743	883.222	1562.23	176.923	891.279	1558.79	222.488	906.041	1435.69	240.005	1012.68	1161.8	241.189	752.028	1328.26	253.929	659.343	1123.01	157.58	999.776	1250.2	387.522	822.082	1398.6	507.802	879.034	1174.63	517.458	905.55	1080.69	546.715	851.633	937.638	509.67	830.305	834.135	561.821	886.573	827.682	565.041	835.79	759.549
654	0	274.315	711.028	1594.37	169.216	715.502	1590.69	296.666	871.748	1560.69	177.885	879.925	1557.2	223.898	894.597	1434.26	240.918	1001.57	1160.59	241.92	740.725	1326.66	254.252	648.142	1121.27	158.497	988.587	1248.87	388.418	810.439	1396.99	508.805	867.987	1173.2	518.329	894.997	1079.48	547.334	841.807	936.091	509.25	822.643	831.534	562.481	877.31	826.155	565.357	826.952	757.694
655	0	275.312	699.671	1592.67	170.347	704.268	1589.05	297.831	860.487	1558.88	178.981	868.609	1555.6	224.953	883.247	1432.68	241.967	990.468	1158.98	242.568	729.255	1324.89	254.452	636.761	1119.27	159.64	977.54	1247.48	389.299	798.678	1395.08	509.691	856.633	1171.48	519.08	884.188	1077.82	547.598	831.603	933.858	509.627	813.268	829.505	563.33	867.867	824.526	565.598	817.917	755.554
656	0	276.672	688.402	1590.87	171.441	693.012	1587.33	299.162	849.051	1556.96	180.222	857.339	1553.73	226.46	871.931	1430.85	243.045	979.078	1157.14	243.467	717.793	1322.99	254.864	625.392	1117.37	160.848	966.22	1245.75	390.47	786.879	1392.97	510.725	845.26	1169.48	520.172	873.461	1075.94	548.593	821.348	932.141	510.266	803.818	827.369	564.122	858.142	822.427	566.013	808.628	753.176
657	0	278.021	677.015	1588.92	172.902	681.874	1585.35	300.644	837.704	1554.97	181.742	846.041	1551.71	227.644	860.379	1428.79	244.39	967.864	1155.11	244.483	706.26	1321.03	255.144	613.757	1115.28	162.344	955.087	1243.77	391.688	775.094	1390.92	511.756	833.596	1167.21	520.889	862.342	1073.7	548.886	810.815	929.441	510.886	794.409	824.851	564.984	848.368	820.262	566.398	799.173	750.781
658	0	278.982	665.758	1587.08	174.261	670.579	1583.66	301.979	826.294	1552.82	183.369	834.718	1549.82	229.194	849.172	1426.99	245.632	956.21	1153.06	245.492	694.671	1319.14	255.473	602.13	1113.38	163.658	943.716	1241.85	392.793	763.219	1388.68	512.946	821.876	1165	521.814	851.289	1071.64	549.751	800.262	927.355	511.155	785.563	822.164	565.823	838.213	818.256	566.981	789.557	748.448
659	0	280.465	654.281	1585.04	175.728	659.249	1581.84	303.824	815.014	1550.85	185.036	823.478	1547.73	230.647	837.652	1424.81	247.214	944.633	1151.01	246.635	683.032	1317.3	255.899	590.23	1111.55	165.334	932.429	1239.85	394.074	751.349	1386.37	513.962	810.037	1162.58	522.549	839.871	1069.2	550.255	789.547	924.798	511.836	775.46	819.644	566.952	827.823	816.195	567.574	779.663	745.889
660	0	282.187	642.908	1583.18	177.574	648.006	1579.97	305.437	803.419	1548.63	186.707	812.085	1545.83	232.019	826.155	1422.85	248.533	932.836	1148.87	247.977	671.33	1315.3	256.483	578.235	1109.7	166.65	920.94	1237.91	395.576	739.585	1384.1	515.156	798.033	1160.28	523.793	828.528	1067.02	551.48	778.6	922.433	512.696	765.202	817.067	567.262	817.202	813.562	568.231	769.362	743.299
661	0	284.088	631.601	1581.35	179.308	636.603	1578.34	307.432	792.14	1546.55	188.781	800.768	1543.92	233.939	814.656	1421.04	249.92	920.767	1146.65	249.2	659.578	1313.48	257.066	566.479	1107.9	168.142	909.405	1236.02	397.152	727.795	1382.01	516.408	786.015	1157.9	524.642	816.799	1064.63	552.566	767.33	920.134	513.338	754.572	814.414	568.325	806.395	811.112	569.068	758.726	740.707
662	0	285.99	620.231	1579.46	181.188	625.305	1576.73	309.479	780.639	1544.71	190.607	789.335	1542.13	235.394	803.073	1419.1	251.464	908.848	1144.49	250.664	647.801	1311.76	257.823	554.238	1106.31	169.716	897.828	1234.09	398.722	716.045	1379.81	517.702	774.021	1155.54	526.004	805.294	1062.47	553.376	755.922	917.377	514.202	743.766	811.918	569.761	795.226	808.913	570.032	747.924	738.217
663	0	288.002	608.817	1577.71	183.302	613.94	1575.09	311.491	769.119	1542.71	192.635	778.088	1540.5	237.234	791.316	1417.3	252.895	896.632	1142.44	252.104	635.949	1310.02	258.678	542.64	1104.57	171.105	886.048	1232.26	400.479	704.306	1377.74	518.828	761.965	1153.14	526.784	793.309	1059.93	554.408	744.378	914.869	515.067	732.373	809.359	570.9	783.673	806.585	570.284	737.174	735.19
664	0	290.197	597.236	1575.92	185.467	602.661	1573.37	313.772	757.66	1540.68	194.957	766.52	1538.71	239.355	780.05	1415.36	254.229	884.27	1140.18	253.788	624.11	1308.29	259.582	530.19	1103.06	172.708	874.212	1230.27	402.247	692.585	1375.47	520.072	749.948	1150.49	528.079	781.398	1057.51	555.365	732.46	912.283	515.894	720.88	806.44	572.089	771.879	804.158	571.325	725.68	732.582
665	0	292.352	585.822	1574.19	187.55	591.081	1572.08	316.02	746.026	1538.88	197.044	755.156	1537.06	241.158	768.494	1413.51	255.682	871.847	1137.65	255.309	612.161	1306.81	260.589	517.885	1101.84	174.088	862.173	1228.16	404.125	680.962	1373.41	521.147	738.001	1147.9	528.96	769.24	1054.8	556.279	720.341	909.81	516.772	708.888	804.095	573.044	759.656	801.766	572.074	713.968	729.993
666	0	294.698	574.322	1572.51	189.809	579.672	1570.63	318.205	734.462	1536.99	199.583	743.686	1535.39	243.273	756.751	1411.46	257.221	859.372	1135.21	257.116	600.239	1305.45	261.665	505.289	1100.84	175.671	850.068	1226.05	405.953	669.214	1371.2	522.624	726.165	1145.39	530.049	756.924	1052.15	557.239	707.997	907.258	517.542	696.692	801.576	574.174	747.298	799.304	573.028	701.769	727.449
667	0	297.072	562.679	1571.02	192.349	568.22	1569.26	320.678	723.005	1535.22	201.987	732.166	1534.07	245.377	745.357	1409.59	258.66	846.605	1132.89	258.982	588.243	1304.31	262.94	492.557	1100.14	177.462	837.942	1223.94	408.078	657.614	1369.32	524.054	714.241	1143.06	531.401	744.695	1049.73	558.46	695.406	904.923	518.435	684.087	799.324	575.265	734.54	796.826	573.888	689.132	725.022
668	0	299.324	551.045	1569.69	194.532	556.69	1568.22	323.116	711.215	1533.82	204.384	720.614	1533.04	247.843	733.69	1407.83	259.957	833.736	1130.67	260.894	576.014	1303.18	264.224	479.314	1099.46	179.042	825.624	1222.09	410.284	645.946	1367.59	525.55	702.3	1140.81	532.619	732.039	1047.33	559.452	682.429	902.539	519.224	671.245	796.735	576.205	721.234	794.461	574.718	676.094	722.594
669	0	301.784	539.355	1568.96	196.907	545.04	1567.65	325.617	699.437	1532.89	206.832	709.098	1532.25	250.092	722.308	1406.84	261.435	820.845	1128.71	262.842	563.77	1302.58	265.458	466.271	1099.36	180.884	813.503	1220.58	412.504	634.186	1366.07	527.133	690.195	1138.81	534.006	719.433	1045.21	560.584	669.281	900.457	520.192	658.058	794.952	577.398	707.931	792.383	575.595	662.713	720.576
670	0	304.237	527.676	1568.4	199.343	533.438	1567.31	328.173	687.775	1532.18	209.524	697.408	1531.8	252.494	710.548	1405.91	262.846	808.176	1127.29	264.771	551.431	1302.28	266.722	453.169	1099.38	182.583	801.201	1219.47	414.671	622.446	1364.62	528.895	677.982	1136.95	535.155	706.419	1043	561.622	655.895	898.385	521.057	644.63	792.921	578.532	694.34	790.371	576.311	648.812	718.603
671	0	306.742	515.842	1568.3	201.832	521.777	1567.43	330.712	675.819	1531.85	211.869	685.65	1531.71	254.66	698.71	1405.68	264.249	795.5	1126.59	266.868	538.98	1302.29	267.947	439.711	1099.74	184.075	788.754	1218.89	416.933	610.33	1363.79	530.464	665.453	1135.4	536.148	693.085	1041.12	562.786	642.262	896.737	522.019	630.729	791.338	579.458	680.374	788.498	577.245	634.749	716.938
672	0	309.23	504.073	1568.73	204.322	509.911	1567.9	333.314	663.967	1532.1	214.577	673.819	1531.86	256.871	686.659	1406	265.755	782.954	1126.51	268.814	526.499	1302.74	269.297	426.417	1100.48	185.444	776.393	1219.06	418.98	598.176	1363.35	531.948	652.635	1134.37	537.106	679.597	1039.76	563.853	628.436	895.598	522.92	616.59	790.068	580.39	666.202	787.201	578.05	620.248	715.799
673	0	311.767	492.209	1569.55	206.78	498.107	1568.94	335.751	652.025	1532.68	216.922	661.977	1532.5	258.911	674.361	1406.59	267.188	770.434	1126.77	270.726	513.911	1303.7	270.611	413.198	1101.77	186.846	763.974	1219.75	421.106	586.095	1363.49	533.313	639.597	1133.82	537.914	665.825	1038.91	564.984	614.421	895.06	523.976	602.115	789.652	581.232	651.831	786.475	578.986	605.552	715.23
674	0	314.261	480.313	1570.62	209.37	486.191	1570.17	338.105	640.084	1533.43	219.462	649.956	1533.55	260.847	662.006	1407.64	268.236	758.244	1127.74	272.68	501.434	1304.92	272.12	399.951	1103.3	187.938	751.257	1220.99	422.973	573.893	1363.95	534.548	626.333	1133.56	538.746	652.075	1038.55	566.086	600.22	895.006	524.9	587.061	789.698	582.012	637.121	786.1	579.967	590.508	715.145
675	0	316.728	468.495	1572.12	211.887	474.4	1571.82	340.694	628.166	1534.56	221.853	638.12	1534.96	262.806	649.817	1408.96	269.084	746.051	1129.24	274.516	488.899	1306.43	273.712	387.644	1104.78	189.048	738.557	1222.66	424.933	561.737	1364.91	535.551	612.919	1133.82	539.616	638.141	1038.78	567.019	585.656	895.438	525.911	571.786	790.137	582.712	621.987	786.331	581.102	575.318	715.562
676	0	319.063	456.466	1573.87	214.214	462.488	1573.79	342.881	616.033	1536.12	224.206	626.034	1536.64	264.618	637.615	1410.73	270.25	733.462	1131.06	276.379	476.515	1308.41	275.076	374.923	1106.95	189.97	725.799	1224.69	426.719	549.606	1366.52	536.412	599.288	1134.64	540.292	624.114	1039.66	568.02	570.978	896.684	527.007	556.046	791.467	583.515	606.798	787.305	582.171	559.578	716.858
677	0	321.148	444.514	1575.88	216.395	450.639	1576.02	345.211	604.148	1537.94	226.514	614.301	1538.8	266.581	625.329	1412.83	271.239	720.729	1132.68	278.126	464.305	1310.64	276.581	362.443	1109.54	191.103	713.075	1226.88	428.427	537.504	1368.36	537.156	585.456	1135.71	540.895	609.994	1040.91	568.801	556.047	898.333	528.024	540.199	793.351	584.171	591.153	788.818	583.046	543.4	718.628
678	0	323.263	432.537	1577.99	218.343	438.864	1578.41	347.387	591.981	1540.17	228.675	602.334	1541.39	268.3	613.215	1414.8	271.964	707.748	1134.64	279.928	452.2	1313.06	277.955	350.473	1112.05	192.437	700.526	1229.1	430.284	525.427	1370.64	537.879	571.606	1137.26	541.512	595.863	1042.48	569.576	540.826	900.4	528.897	523.832	795.326	584.744	575.104	790.541	584.103	526.905	720.681
679	0	324.945	420.565	1580.12	220.15	427.045	1580.69	349.533	580.018	1542.56	230.891	590.826	1543.93	270.259	601.44	1416.96	272.926	694.664	1136.55	281.52	440.217	1315.53	279.521	338.702	1114.63	193.951	688.2	1231.29	431.952	513.343	1372.85	538.703	557.607	1138.85	542.561	581.834	1044.44	570.348	525.618	902.611	529.852	507.57	797.598	585.439	559.005	792.471	585.086	510.219	723.03
680	0	326.53	408.539	1582.55	221.693	415.478	1583.3	351.503	568.007	1545.23	232.919	578.973	1546.62	272.089	589.565	1419.18	274.238	681.965	1138.54	283.042	428.38	1318.23	280.924	327.204	1117.53	195.385	676	1233.55	433.8	501.415	1375.55	539.797	543.744	1141.05	543.676	567.774	1046.73	571.276	510.091	905.216	530.656	490.84	800.567	585.902	542.485	794.789	585.875	493.043	725.84
681	0	327.704	396.735	1584.8	222.922	403.925	1585.55	353.447	556.058	1547.86	234.836	567.534	1549.41	274.323	578.064	1421.33	275.563	669.711	1140.56	284.64	416.611	1320.81	282.151	315.993	1120.2	197.035	663.984	1235.74	435.453	489.441	1377.95	541.018	529.826	1143.24	544.973	553.622	1048.88	572.093	494.598	907.7	531.391	474.081	803.166	586.484	525.979	797.053	586.765	475.261	728.755
682	0	328.511	384.579	1586.98	224.368	392.425	1587.8	355.116	544.183	1550.37	236.776	556.158	1551.93	275.917	566.355	1423.42	276.932	658.029	1142.56	286.093	404.929	1323.26	283.403	304.646	1122.9	198.855	652.214	1237.79	437.087	477.466	1380.38	542.453	515.979	1145.4	546.091	539.273	1050.59	573.022	478.952	910.158	532.141	457.087	806.089	586.838	508.979	799.014	587.325	457.828	731.349
683	0	329.569	372.881	1589.09	225.401	381.016	1589.94	356.697	532.42	1552.64	238.329	544.63	1554.15	278.172	554.791	1425.41	278.607	646.709	1144.44	287.581	393.312	1325.62	284.441	293.897	1125.2	200.468	640.536	1239.86	438.592	465.464	1382.51	543.824	502.007	1147.39	547.693	525.042	1052.39	574.214	463.37	912.455	532.667	440.008	808.645	587.35	491.909	801.001	587.616	439.911	733.844
684	0	330.783	361.343	1591.17	226.506	369.623	1592.09	358.136	520.85	1554.78	239.877	533.333	1556.29	279.807	543.376	1427.25	280.491	635.286	1146.36	288.785	381.739	1327.8	285.25	282.829	1127.71	202.465	629.108	1241.8	440.141	453.525	1384.61	545.651	488.19	1149.54	549.999	511.012	1054.45	575.285	447.453	914.804	533.281	422.785	811.736	588.068	474.676	802.928	587.983	421.647	736.707
685	0	331.808	349.81	1592.99	227.772	358.241	1593.94	359.308	509.262	1556.65	240.943	521.898	1558.31	281.411	531.695	1429.08	282.392	623.834	1148.34	290.045	370.111	1329.85	285.958	271.667	1129.83	204.309	617.939	1243.69	441.484	441.484	1386.49	547.43	474.405	1151.43	551.76	496.736	1055.94	576.28	431.456	916.894	533.771	405.52	814.488	588.59	457.052	804.693	588.024	402.998	739.213
686	0	333.095	338.423	1594.83	228.764	346.867	1595.89	360.555	497.896	1558.24	242.299	510.488	1560.01	282.987	520.137	1430.87	284.377	612.699	1150.3	291.096	358.516	1331.53	286.419	260.23	1131.49	205.993	606.724	1245.77	442.695	429.406	1388.2	549.206	460.632	1153.29	553.904	482.581	1057.47	577.375	415.346	919.042	534.472	387.924	817.524	589.219	439.103	806.388	588.109	384.119	741.843
687	0	334.066	327.124	1596.4	229.943	335.485	1597.58	361.565	486.455	1559.92	243.184	499.025	1561.7	284.109	508.439	1432.61	286.249	601.529	1152.29	291.938	346.937	1333.15	286.626	248.658	1133.05	207.81	595.733	1247.65	443.612	417.097	1389.71	551.013	447.052	1155.07	556.048	468.443	1058.92	578.464	399.136	921.151	534.664	370.88	820.278	590.068	421.388	808.142	587.942	365.033	744.598
688	0	335.318	315.814	1597.77	231.118	324.127	1599.28	362.43	475.276	1561.09	244.166	487.747	1563.04	285.585	496.898	1434.17	288.104	590.154	1154.07	292.645	335.354	1334.58	286.68	237.338	1134.33	209.569	584.907	1249.38	444.545	404.873	1391.06	552.856	433.657	1156.7	558.217	454.272	1060.12	579.628	383.046	923.201	534.891	353.396	823.23	590.49	402.866	809.868	587.743	345.755	747.341
689	0	336.434	304.587	1599.15	232.11	312.728	1600.76	363.258	463.943	1562.3	245.068	476.332	1564.42	286.804	485.162	1435.76	290.075	578.88	1155.83	293.237	323.746	1335.89	286.613	225.942	1135.27	211.323	574.025	1251.18	445.309	392.512	1392.33	554.594	420.323	1158.21	560.412	440.179	1061.2	580.648	366.798	925.18	535.198	336.088	826.128	591.099	384.609	811.488	587.581	326.372	750.158
690	0	337.403	293.352	1600.43	233.226	301.275	1602.18	363.936	452.739	1563.25	245.957	465.085	1565.78	287.659	473.468	1437.25	291.942	567.575	1157.53	293.537	312.222	1336.8	286.373	214.599	1135.92	212.956	563.225	1252.87	445.99	380.078	1393.5	556.416	407.196	1159.64	562.704	426.041	1062.26	581.657	350.459	927.114	535.34	318.642	828.7	591.715	366.291	813.12	587.154	306.582	752.961
691	0	338.38	282.055	1601.58	234.095	289.924	1603.49	364.717	441.53	1564.21	246.653	453.662	1566.86	289.124	461.723	1438.57	293.762	556.205	1159.25	293.727	300.76	1337.73	285.977	203.343	1136.59	214.855	552.557	1254.52	446.599	367.706	1394.63	558.01	394.082	1161	564.975	411.985	1063.43	582.679	334.139	929.17	535.679	301.284	831.683	592.575	348.111	814.954	587.359	287.208	756.162
692	0	339.376	270.911	1602.58	234.882	278.545	1604.53	365.273	430.154	1565.03	246.77	442.043	1567.61	290.048	450.143	1439.71	295.722	545.049	1160.71	293.882	289.335	1338.42	285.392	192.087	1136.88	216.814	541.946	1255.99	446.98	355.062	1395.38	559.439	381.074	1162.01	566.914	397.775	1064.27	583.424	317.739	931.001	535.631	283.98	834.361	592.98	329.844	816.634	587.12	267.769	759.027
693	0	340.133	259.56	1603.34	235.728	267.174	1605.35	365.948	418.873	1565.65	247.523	430.703	1568.42	291.438	438.343	1440.87	297.731	534.302	1162.1	293.945	278.005	1339	284.751	181.011	1137.2	218.756	531.374	1257.35	447.39	342.543	1396.22	560.803	368.089	1163.11	568.701	383.402	1065.09	584.198	301.362	932.934	535.801	266.683	836.958	593.576	311.503	818.15	587.16	248.501	762.135
694	0	340.479	248.034	1603.78	236.274	255.821	1605.96	366.473	407.383	1566.17	248.539	419.403	1569.25	292.43	426.777	1441.72	299.711	523.684	1163.38	293.843	266.721	1339.36	283.975	170.115	1137.26	220.605	520.698	1258.56	447.822	329.902	1396.91	562.055	355.066	1164.05	570.63	369.104	1066.02	584.966	285.013	934.801	536.035	248.762	839.572	594.003	293.41	819.865	587.107	229.345	765.06
695	0	340.952	236.622	1604.15	236.841	244.542	1606.43	367.233	396.013	1566.77	248.871	408.019	1569.65	293.498	415.51	1442.62	301.745	513.191	1164.49	293.827	255.558	1339.72	283.153	159.454	1137.29	222.472	510.094	1259.51	448.187	317.463	1397.52	563.276	342.019	1165.12	572.436	354.749	1067.02	585.579	268.702	936.737	536.067	232.164	841.951	594.283	275.503	821.674	587.138	210.347	768.118
696	0	341.403	225.101	1604.15	237.286	233.072	1606.58	367.702	384.5	1566.96	249.306	396.552	1569.97	294.675	404.009	1443.17	303.687	502.689	1165.28	293.76	244.453	1339.79	282.294	149.003	1136.98	224.267	499.557	1260.31	448.43	304.913	1397.83	564.358	328.885	1165.8	574.022	340.297	1067.51	586.075	252.297	938.317	536.369	214.995	844.132	594.553	257.601	823.219	587.141	191.421	770.632
697	0	341.906	213.525	1604.03	237.669	221.723	1606.49	368.256	372.967	1566.92	250.071	385.233	1570.02	295.694	392.78	1443.3	305.643	492.126	1165.84	293.691	233.354	1339.71	281.482	138.553	1136.61	225.966	488.958	1260.69	448.673	292.681	1397.91	565.141	315.541	1166.15	575.327	325.774	1067.78	586.671	236.017	939.794	536.593	197.808	846.243	594.828	239.769	824.495	587.346	172.89	773.103
698	0	342.106	202.037	1603.69	238.011	210.222	1606.17	368.769	361.476	1566.83	250.502	373.743	1569.97	296.638	381.654	1443.42	307.214	481.441	1166.05	293.502	222.292	1339.44	280.68	128.341	1136.19	227.602	478.421	1260.85	448.784	280.452	1397.8	565.869	301.991	1166.27	576.757	311.355	1067.96	587.036	219.736	941.041	537.149	181.022	847.936	596.365	221.976	826.146	587.375	154.274	775.259
699	0	342.467	190.426	1603.08	238.296	198.758	1605.69	369.157	349.878	1566.53	250.921	362.367	1569.85	297.487	370.587	1443.27	308.733	470.85	1166.02	293.399	211.32	1339.09	279.941	118.179	1135.7	229.18	467.957	1260.82	449	268.419	1397.63	566.582	288.397	1166.25	577.967	296.863	1067.87	587.566	203.624	942.134	537.299	163.718	849.805	596.829	204.442	827.362	587.481	136.099	777.337
700	0	342.745	178.811	1602.2	238.602	187.293	1604.94	369.708	338.45	1566.06	251.403	350.959	1569.51	298.187	359.437	1442.86	310.062	460.207	1165.78	293.232	200.368	1338.38	279.343	107.79	1135	230.5	457.461	1260.56	449.056	256.558	1397.12	567.192	274.716	1165.83	578.794	282.347	1067.36	588.058	187.54	942.754	537.534	146.511	850.895	597.136	186.948	828.111	587.636	117.878	778.818
701	0	343.081	167.246	1601.15	238.965	175.779	1604.08	369.969	326.824	1565.36	251.683	339.356	1569.04	298.919	348.328	1442.19	311.425	449.544	1165.47	293.175	189.31	1337.62	278.927	97.4254	1134.39	231.71	447.004	1260.14	449.22	244.71	1396.4	567.632	260.815	1165.14	579.598	267.808	1066.67	588.424	171.535	943.16	537.729	129.529	851.877	597.328	169.524	828.405	587.625	99.9818	780.044
702	0	343.309	155.642	1600.12	239.103	164.384	1603.26	370.326	315.36	1564.69	252.127	328.122	1568.46	299.377	337.121	1441.38	312.598	438.883	1164.93	293.065	178.331	1336.94	278.189	87.5068	1133.23	232.818	436.391	1259.59	449.365	233.023	1395.76	568.136	246.894	1164.47	580.217	253.247	1065.9	588.862	155.699	943.49	537.894	112.635	852.808	597.61	152.266	828.725	587.869	82.2258	781.251
703	0	343.384	144.106	1598.81	239.287	152.803	1602.14	370.632	303.811	1563.86	252.262	316.615	1567.75	299.746	325.848	1440.44	313.464	428.113	1164.23	292.842	167.295	1335.85	277.814	76.6725	1132.13	233.553	425.807	1258.86	449.439	221.463	1394.75	568.434	232.899	1163.5	580.753	238.612	1065	589.177	139.889	943.329	538.007	95.8819	853.263	597.826	135.42	828.906	587.818	64.7002	781.945
704	0	343.461	132.463	1597.43	239.321	141.32	1600.83	370.831	292.232	1562.89	252.596	305.179	1566.9	300.065	314.66	1439.45	314.129	417.281	1163.44	292.567	156.271	1334.76	277.491	66.0921	1130.63	234.191	415.019	1258.04	449.491	209.855	1393.64	568.468	218.771	1162.26	581.01	223.903	1063.83	589.333	124.074	943.026	538.16	79.1583	853.404	597.683	118.488	828.616	587.947	47.3095	782.454
705	0	343.933	121.24	1596.17	239.307	129.891	1599.41	371.095	280.787	1561.73	252.879	293.929	1566.04	300.447	303.382	1438.31	314.68	406.404	1162.46	292.463	145.003	1333.38	277.226	55.3144	1129.2	234.703	404.273	1257.03	449.416	198.258	1392.19	568.507	204.631	1160.88	580.995	209.21	1062.33	589.379	108.394	942.404	538.113	62.5891	853.569	597.203	101.774	827.573	588.073	30.2611	782.648
706	0	343.829	109.637	1594.77	239.165	118.46	1598.02	371.132	269.141	1560.46	252.896	282.408	1564.66	300.572	291.978	1437	315.097	395.546	1161.37	292.394	133.771	1332.09	276.953	44.6479	1127.57	235.182	393.424	1255.85	449.401	186.736	1390.88	568.475	190.53	1159.53	580.928	194.546	1060.98	589.331	92.8684	941.793	538.107	46.0687	853.255	597.38	85.3447	827.367	588.095	13.3979	782.644
707	0	343.567	98.0618	1593.11	238.9	107.085	1596.41	371.17	257.567	1558.97	253.092	271.136	1562.99	300.608	280.6	1435.52	315.344	384.603	1160.09	292.208	122.397	1330.61	276.894	33.8092	1125.74	235.413	382.351	1254.53	449.273	175.024	1389.1	568.155	176.43	1157.78	580.663	179.764	1059.29	589.235	77.3621	940.974	538.348	29.8542	852.845	597.014	68.9961	826.354	588.04	-3.31468	782.431
708	0	343.373	86.6324	1591.58	238.739	95.6855	1594.7	371.113	246.063	1557.28	252.893	259.653	1561.46	300.518	269.057	1434	315.27	373.499	1158.69	292.092	110.837	1328.81	276.977	22.6868	1123.77	235.453	371.202	1253.13	449.324	163.547	1387.44	567.716	162.215	1156.01	580.179	164.891	1057.45	588.855	61.8095	940.006	537.886	13.5233	852.28	596.653	52.7901	825.37	588.045	-19.6971	781.947
709	0	343.005	75.058	1589.8	238.395	84.2178	1592.91	370.832	234.509	1555.42	252.709	248.2	1559.4	300.543	257.447	1432.45	315.218	362.468	1157.37	291.927	99.2464	1327.04	276.95	11.5191	1121.67	235.354	359.908	1251.68	449.149	151.984	1385.63	567.225	148.279	1154.14	579.817	150.206	1055.78	588.362	46.3728	938.982	537.588	-2.41271	851.476	596.255	36.7545	824.392	587.808	-36.0011	781.343
710	0	342.667	63.6826	1588.09	237.94	72.6988	1591.1	370.445	223.043	1553.43	252.424	236.593	1557.47	300.255	245.782	1430.61	314.953	351.303	1155.8	291.664	87.6041	1325.3	276.954	0.108978	1119.81	235.123	348.456	1250.04	448.955	140.368	1383.83	566.637	134.337	1152.33	579.159	135.414	1054.05	587.708	31.0043	937.901	537.097	-18.2245	850.541	595.915	20.8954	823.403	587.63	-52.0403	780.625
711	0	342.233	52.1294	1586.1	237.619	61.0443	1589.11	369.911	211.44	1551.35	251.88	224.987	1555.22	299.882	234.002	1428.85	314.498	340.019	1154.17	291.531	75.8364	1323.13	277.054	-11.5278	1117.54	234.58	336.887	1248.31	448.638	128.722	1381.78	565.802	120.58	1150.35	578.677	120.699	1052.42	586.858	15.671	936.804	536.569	-33.9281	849.535	595.42	5.08021	822.142	587.243	-67.9337	779.756
712	0	341.917	40.5155	1584.24	237.169	49.4187	1587.08	369.362	199.871	1549.24	251.205	213.29	1553.11	299.378	222.232	1427.03	313.994	328.649	1152.44	291.245	64.0755	1321.18	277.058	-23.1884	1115.27	233.984	325.211	1246.45	448.296	117.179	1379.97	565.045	107.118	1148.54	577.75	105.986	1050.56	585.984	0.458322	935.621	535.859	-49.3363	848.269	594.697	-10.5048	821.018	586.605	-83.7114	778.854
713	0	341.313	28.9903	1582.14	236.671	37.6335	1585.09	368.606	188.277	1547.05	250.571	201.562	1550.8	298.693	210.497	1424.98	313.276	317.03	1150.57	290.796	52.1414	1319.08	277.081	-35.0841	1113.16	233.226	313.305	1244.55	447.793	105.554	1377.95	564.172	93.9523	1146.69	576.993	91.4276	1048.88	584.944	-14.6132	934.471	534.945	-64.4447	847.04	594.206	-25.9617	820.002	585.875	-99.2354	777.948
714	0	340.772	17.318	1580.1	235.919	25.8482	1582.99	367.841	176.695	1544.77	249.561	189.723	1548.52	298.014	198.637	1422.88	312.527	305.329	1148.48	290.432	40.2266	1317	277.17	-46.8745	1111.08	232.43	301.48	1242.34	447.201	94.025	1376.01	563.267	80.9895	1144.69	576.094	77.1529	1047.16	583.811	-29.4809	933.283	533.79	-79.4375	845.888	593.534	-41.1979	818.837	584.983	-114.551	777.027
715	0	340.126	5.69968	1578.01	235.306	13.967	1580.84	366.988	165.064	1542.6	248.615	177.952	1546.15	297.111	186.804	1420.6	311.693	293.505	1146.28	289.989	28.1658	1314.92	277.231	-58.8131	1108.81	231.481	289.447	1240.11	446.542	82.4618	1373.96	562.357	68.2386	1142.57	575.102	62.9479	1045.18	582.571	-44.1368	931.966	532.622	-94.0314	844.518	592.675	-56.5003	817.59	583.894	-129.749	775.935
716	0	339.21	-6.09882	1575.88	234.408	2.10248	1578.69	366.154	153.529	1540.57	247.626	165.975	1544.06	296.04	174.959	1418.51	310.668	281.502	1144.12	289.389	16.1754	1312.81	277.4	-70.9058	1106.56	230.446	277.364	1237.75	445.87	70.9943	1371.95	561.419	55.703	1140.64	574.559	49.213	1043.48	581.272	-58.6704	930.708	531.273	-108.502	843.207	591.847	-71.6416	816.522	582.56	-144.799	775.071
717	0	338.239	-17.9813	1573.93	233.332	-9.80585	1576.55	365.024	141.672	1538.61	246.568	154.14	1541.88	294.888	163.118	1416.36	309.667	269.46	1141.87	288.757	4.06252	1310.85	277.388	-82.944	1104.75	229.284	265.139	1235.42	444.984	59.369	1370.13	560.514	43.3673	1138.89	573.657	35.8643	1041.94	579.924	-72.8764	929.718	529.912	-122.772	842.268	590.877	-86.3353	815.731	581.058	-159.633	774.242
718	0	337.004	-29.7604	1571.77	232.22	-21.7136	1574.45	363.823	129.904	1536.54	245.269	142.347	1539.82	293.718	151.219	1414.11	308.555	257.159	1139.43	288.005	-8.03012	1308.93	277.463	-95.2669	1102.73	227.989	252.771	1232.84	444.033	47.8591	1368.15	559.589	31.1396	1137.02	572.529	22.5093	1040.15	578.581	-86.8296	928.541	528.405	-136.781	841.089	590.04	-101.025	814.675	579.466	-174.197	773.429
719	0	335.812	-41.7226	1569.87	230.884	-33.616	1572.27	362.483	117.993	1534.58	244.064	130.29	1537.83	292.38	139.324	1411.93	307.36	244.747	1137.08	287.299	-20.259	1306.98	277.499	-107.739	1100.81	226.685	240.377	1230.44	443.178	36.2044	1366.49	558.67	18.9658	1135.37	571.538	9.80862	1038.4	577.36	-100.446	927.568	526.917	-150.341	840.13	588.666	-115.33	813.758	577.809	-188.532	772.76
720	0	334.226	-53.6364	1568.01	229.455	-45.5942	1570.25	360.947	105.96	1532.73	242.523	118.467	1535.74	291.01	127.419	1409.81	306.248	232.284	1134.74	286.331	-32.4923	1305.05	277.299	-120.254	1099.05	225.182	227.895	1227.91	442.014	24.4034	1364.86	557.698	6.81	1133.91	570.495	-2.74956	1036.9	576.003	-113.685	926.581	525.317	-163.844	839.398	587.436	-129.269	812.933	575.967	-202.512	772.165
721	0	332.681	-65.5503	1566.31	227.75	-57.4171	1568.42	359.518	94.0657	1531.1	241.178	106.528	1533.92	289.517	115.447	1407.68	305.183	219.562	1132.3	285.389	-44.8607	1303.54	277.025	-133.075	1097.62	224.029	215.36	1225.4	440.733	12.6143	1363.45	556.914	-5.12398	1132.78	569.49	-14.871	1035.68	574.867	-126.57	925.821	523.819	-176.845	838.822	586.311	-142.652	812.372	574.349	-216.252	771.926
722	0	330.978	-77.5601	1564.62	226.073	-69.4054	1566.54	357.829	82.0216	1529.32	239.243	94.485	1531.83	287.871	103.439	1405.59	304.034	206.649	1129.82	284.256	-57.1622	1301.77	276.715	-146.118	1096.03	222.825	202.661	1222.73	439.419	0.553586	1361.94	555.991	-17.2427	1131.56	568.447	-26.7667	1034.29	573.708	-139.066	924.793	522.475	-189.687	838.209	584.949	-155.694	811.478	572.642	-229.533	771.38
723	0	329.119	-89.4621	1563.03	224.32	-81.2784	1564.8	356.052	70.0206	1527.67	237.871	82.6103	1530.18	286.252	91.4414	1403.61	302.937	193.457	1127.35	283.163	-69.6587	1300.33	276.339	-159.189	1094.84	221.558	189.884	1220.16	438.08	-11.4939	1360.77	555.189	-29.2308	1130.62	567.401	-38.4728	1032.99	572.641	-151.204	923.949	521.203	-202.159	837.66	583.272	-168.347	810.384	571.313	-242.355	771.072
724	0	327.333	-101.43	1561.79	222.388	-93.1824	1563.44	354.285	58.0851	1526.16	236.051	70.6949	1528.36	284.481	79.4159	1401.72	302.077	180.06	1125.02	281.773	-82.1089	1299.03	275.649	-172.373	1093.69	220.344	177.087	1217.62	436.431	-23.5331	1359.69	554.277	-41.263	1129.86	566.52	-49.9853	1031.99	571.684	-162.921	922.998	520.027	-214.358	837.333	581.562	-180.249	809.507	569.874	-254.726	770.624
725	0	325.444	-113.366	1560.86	220.478	-105.187	1562.44	352.386	46.1837	1524.88	233.816	58.5957	1526.92	282.572	67.5888	1400.08	301.267	166.564	1122.74	280.347	-94.8097	1298.13	274.911	-185.736	1093.13	219.236	164.26	1215.21	434.863	-35.7043	1358.96	553.514	-53.1577	1129.39	565.698	-61.3488	1031.27	570.811	-174.207	922.239	518.989	-226.037	836.898	580.124	-191.672	808.564	568.741	-266.591	770.356
726	0	323.44	-125.186	1560.47	218.492	-117.163	1561.8	350.345	34.1341	1523.93	231.858	46.4338	1525.84	280.698	55.3994	1399	300.636	152.912	1121.14	278.749	-107.425	1297.38	274.103	-199.353	1092.57	218.155	151.464	1213.29	433.1	-48.0358	1358.36	552.43	-65.1525	1129	564.729	-72.4891	1030.58	569.935	-185.304	921.289	518.101	-237.576	836.509	578.69	-202.599	807.59	567.721	-277.891	769.787
727	0	321.488	-137.174	1560.55	216.553	-129.195	1561.73	348.343	22.2645	1523.3	229.828	34.2965	1525.07	278.794	42.8982	1398.34	300.302	139.292	1120.29	277.213	-120.351	1297.25	273.258	-213.086	1092.51	217.204	138.604	1212.09	431.377	-60.5402	1358.34	551.348	-76.9639	1129.1	563.485	-83.5295	1030.29	569.07	-196.016	920.763	517.456	-248.508	836.466	577.205	-212.921	806.775	566.831	-288.461	769.498
728	0	319.56	-149.124	1561.01	214.556	-141.315	1562.04	346.144	10.3034	1523.15	227.66	22.1338	1524.57	276.968	30.305	1398.15	300.209	125.782	1120.11	275.47	-133.072	1297.58	272.196	-226.994	1093.04	216.511	125.71	1211.29	429.707	-73.468	1358.87	550.132	-88.5943	1129.49	562.444	-94.2135	1030.76	568.336	-206.166	920.424	516.666	-258.889	836.461	575.865	-222.377	806.37	566.12	-298.336	769.306
729	0	317.528	-161.057	1561.84	212.517	-153.452	1562.71	343.949	-1.73148	1523.39	225.494	9.87227	1524.55	275.241	17.7146	1398.44	299.935	112.477	1120.21	273.913	-145.968	1298.39	271.045	-240.979	1093.91	215.799	112.933	1210.98	427.854	-86.4648	1359.85	548.868	-99.872	1130.38	561.344	-104.889	1031.51	567.516	-215.815	920.331	516.131	-268.76	836.65	574.299	-231.281	805.978	565.49	-307.406	769.091
730	0	315.511	-173.097	1563.02	210.54	-165.656	1563.62	341.815	-13.8047	1524.18	223.238	-2.46387	1525.04	273.742	5.24705	1399.26	299.388	99.3345	1120.85	272.208	-158.725	1299.35	269.881	-254.91	1095.31	215.327	100.148	1211.28	426.183	-99.758	1361.36	547.488	-111.18	1131.65	560.026	-115.499	1032.79	566.829	-225.21	920.693	515.733	-278.213	837.067	572.939	-239.638	805.888	565.205	-315.89	769.049
731	0	313.435	-185.261	1564.53	208.487	-177.856	1564.87	339.659	-25.9362	1525.48	220.984	-14.7583	1526.05	272.192	-7.04911	1400.46	298.895	86.1956	1121.98	270.606	-171.371	1300.79	268.499	-268.737	1097.09	214.87	87.3873	1212.02	424.317	-112.966	1363.38	546.005	-122.426	1133.43	559.12	-125.563	1034.75	566.023	-234.296	921.401	515.257	-287.074	837.532	571.597	-247.321	806.266	565.008	-323.501	769.192
732	0	311.36	-197.265	1566.48	206.401	-189.989	1566.53	337.594	-38.0437	1527.28	218.765	-27.0224	1527.43	270.741	-19.2405	1401.9	298.385	72.8873	1123.39	268.9	-183.653	1302.65	267.252	-282.129	1099.62	214.411	74.6439	1212.98	422.642	-125.942	1365.92	544.676	-133.618	1135.81	558.006	-135.582	1037.18	565.375	-242.719	922.581	514.813	-295.334	838.356	570.505	-254.46	807.19	564.881	-330.596	769.439
733	0	309.34	-209.427	1568.63	204.343	-202.179	1568.31	335.636	-50.1621	1529.51	217.007	-39.1869	1529.15	269.247	-31.5149	1403.56	297.912	59.5188	1124.84	267.328	-196.021	1304.45	265.82	-295.268	1101.99	213.959	61.8999	1214.08	420.812	-138.499	1368.42	543.28	-144.506	1138.41	556.783	-145.713	1039.75	564.465	-251.284	923.789	514.337	-303.313	839.022	569.42	-261.47	808.132	564.638	-337.156	769.587
734	0	307.33	-221.592	1571	202.492	-214.256	1570.42	333.761	-62.2447	1532.08	215.164	-51.2615	1531.5	267.829	-43.6354	1405.4	297.575	46.3432	1126.62	265.884	-208.017	1306.78	264.689	-307.864	1104.94	213.519	49.1666	1215.58	419.289	-150.952	1371.31	542.032	-155.633	1141.43	555.347	-155.709	1042.5	563.547	-259.644	925.407	513.852	-310.875	839.932	568.475	-268.275	809.514	564.421	-343.293	769.83
735	0	305.324	-233.576	1573.57	200.451	-226.395	1572.48	331.913	-74.2354	1534.92	213.312	-63.2763	1533.83	266.308	-55.504	1407.49	297.036	33.5465	1128.52	264.643	-219.993	1309.28	263.595	-320.311	1107.8	212.718	36.3828	1217.14	417.763	-163.048	1374.25	540.745	-166.848	1144.46	554.28	-165.529	1045.66	562.627	-267.996	927.2	513.174	-318.056	840.808	567.9	-274.955	811.251	563.869	-349.229	770.22
736	0	303.574	-245.54	1576.05	198.727	-238.311	1574.89	330.206	-86.059	1537.87	211.598	-75.293	1536.48	264.863	-67.3401	1409.65	296.203	21.3151	1130.4	263.35	-231.733	1311.92	262.712	-332.394	1110.94	211.825	23.7821	1218.81	416.408	-174.835	1377.27	539.647	-177.907	1147.7	553.179	-174.911	1048.86	561.921	-275.979	929.308	512.549	-324.836	841.929	567.697	-281.435	813.305	563.3	-354.874	770.712
737	0	301.888	-257.476	1578.48	196.974	-250.191	1576.95	328.594	-97.9385	1540.48	209.933	-87.1648	1538.79	263.493	-79.272	1411.6	295.134	9.42924	1132.54	262.305	-243.506	1314.33	261.962	-344.418	1113.67	210.904	11.1913	1220.61	415.121	-186.532	1379.97	538.566	-188.889	1150.63	552.168	-184.236	1051.74	561.073	-284.057	931.193	512.018	-331.583	842.687	567.601	-288.183	815.126	562.501	-360.537	770.897
738	0	300.261	-269.195	1580.94	195.451	-261.901	1579.25	326.994	-109.743	1543.1	208.609	-98.8431	1541.22	262.163	-90.9245	1413.8	293.749	-2.42549	1134.83	261.357	-255.238	1316.85	261.367	-356.22	1116.51	209.771	-1.12353	1222.41	414.059	-198.077	1382.79	537.693	-199.627	1153.67	551.032	-193.336	1054.6	560.489	-291.868	933.211	511.449	-337.991	843.682	567.797	-294.923	817.076	561.79	-366	771.216
739	0	298.8	-280.948	1583.26	193.906	-273.553	1581.23	325.745	-121.45	1545.59	207.11	-110.589	1543.27	260.976	-102.655	1415.86	292.315	-14.3472	1137.09	260.352	-266.75	1319.07	260.93	-367.881	1119.12	208.647	-13.3281	1224.41	413.005	-209.406	1385.34	536.822	-210.221	1156.41	550.22	-202.26	1057.54	559.941	-299.644	935.003	510.889	-344.256	844.436	568.231	-301.527	819.21	561.057	-371.482	771.5
740	0	297.417	-292.504	1585.55	192.49	-285.143	1583.36	324.545	-133.104	1547.78	206.028	-122.103	1545.19	259.89	-114.414	1417.91	290.996	-26.2122	1139.42	259.733	-278.408	1321.28	260.725	-379.468	1121.33	207.321	-25.331	1226.43	412.198	-220.714	1387.72	536.24	-220.657	1159.16	549.396	-211.116	1060.1	559.678	-307.422	936.681	510.666	-350.678	845.222	568.867	-308.102	820.987	560.462	-376.938	771.598
741	0	296.113	-304.147	1587.71	191.316	-296.633	1585.16	323.493	-144.884	1549.85	204.959	-133.733	1546.99	259.059	-126.084	1420.04	289.637	-38.0685	1141.55	259.092	-289.987	1323.2	260.763	-390.961	1123.19	206.12	-37.1432	1228.61	411.556	-231.968	1389.84	535.74	-230.912	1161.33	548.686	-220.16	1062.21	559.433	-315.069	937.968	510.568	-356.674	845.609	569.352	-314.894	822.311	559.965	-382.473	771.402
742	0	295.048	-315.747	1589.96	190.114	-308.093	1587.14	322.608	-156.453	1551.9	204.175	-145.158	1548.83	257.945	-137.617	1422.17	288.329	-49.7304	1143.6	258.635	-301.522	1325.09	260.867	-402.335	1125.06	204.787	-48.8286	1230.73	411.037	-242.95	1391.77	535.324	-241.034	1163.48	548.122	-229.118	1064.26	559.375	-322.831	939.069	510.472	-362.607	845.792	570.005	-321.474	823.562	559.8	-387.856	771.153
743	0	293.914	-327.202	1592.04	189.068	-319.467	1589.03	321.961	-168.015	1554.04	203.293	-156.68	1550.44	257.085	-149.206	1424.1	287.137	-61.4199	1145.52	258.324	-312.956	1327.07	261.06	-413.57	1126.7	203.435	-60.3546	1232.88	410.629	-253.894	1393.67	535.056	-250.797	1165.26	547.641	-238.252	1066.2	559.391	-330.396	940.012	510.461	-368.619	845.887	570.815	-327.741	824.792	559.839	-393.033	770.938
744	0	293.15	-338.797	1594.14	188.295	-330.888	1590.85	321.24	-179.621	1556	202.88	-168.055	1552.41	256.439	-160.823	1426.24	285.67	-72.9467	1147.36	258.281	-324.515	1328.83	261.441	-424.896	1128.05	202.025	-71.8556	1235.22	410.392	-264.691	1395.28	534.695	-260.468	1166.53	547.274	-247.411	1067.69	559.439	-337.932	940.554	510.625	-374.842	845.687	571.439	-334.048	825.532	560.148	-398.296	770.561
745	0	292.534	-350.256	1596.11	187.582	-342.363	1592.78	320.771	-191.163	1558.02	202.358	-179.52	1554.18	255.625	-172.267	1428.37	284.241	-84.0264	1149.6	258.201	-335.873	1330.58	261.778	-436.137	1129.32	200.523	-83.3258	1237.39	410.136	-275.425	1396.87	534.454	-269.656	1167.69	546.842	-256.687	1069.13	559.318	-345.557	941.055	510.898	-380.776	845.432	572.023	-340.024	826.083	560.793	-403.271	770.341
746	0	291.989	-361.825	1597.94	187.1	-353.806	1594.55	320.228	-202.676	1559.95	201.797	-191.074	1556.14	254.725	-183.791	1430.22	282.513	-94.7105	1151.6	258.229	-347.253	1332.19	262.21	-447.305	1130.54	199.073	-94.7185	1239.63	409.801	-286.004	1398.31	534.124	-278.549	1168.87	546.468	-265.795	1070.66	559.38	-352.932	941.658	511.29	-386.827	845.226	572.643	-346.003	826.81	561.445	-408.293	770.103
747	0	291.725	-373.209	1599.77	186.842	-365.302	1596.41	319.906	-214.085	1561.92	201.524	-202.429	1557.97	254.044	-195.368	1432.13	280.929	-105.21	1153.63	258.292	-358.495	1333.96	262.645	-458.35	1131.92	197.509	-106.187	1241.75	409.613	-296.521	1399.89	533.825	-287.001	1170.25	546.102	-274.689	1072.26	559.465	-360.308	942.355	511.813	-392.848	845.402	573.374	-351.786	827.679	562.47	-413.307	770.108
748	0	291.506	-384.833	1601.34	186.633	-376.956	1597.93	319.528	-225.514	1563.6	201.179	-214.025	1559.94	253.236	-206.66	1433.97	279.402	-115.653	1155.66	258.484	-369.832	1335.44	263.148	-469.395	1133.05	195.975	-117.501	1243.81	409.388	-306.959	1401.23	533.485	-295.389	1171.67	545.654	-283.57	1073.74	559.472	-367.567	942.936	512.397	-398.828	845.282	574.094	-357.817	828.452	563.547	-418.62	770.221
749	0	291.437	-396.255	1602.71	186.593	-388.582	1599.53	319.169	-236.939	1565.26	200.762	-225.645	1561.69	252.468	-217.954	1435.8	277.806	-126.075	1157.54	258.524	-380.872	1336.79	263.622	-480.361	1134.31	194.462	-128.87	1245.93	409.241	-317.327	1402.75	533.158	-303.78	1173.13	545.245	-292.24	1075.29	559.634	-374.807	943.912	513.221	-404.887	845.445	574.862	-363.776	829.482	564.747	-424.024	770.594
750	0	291.381	-407.8	1603.94	186.491	-400.218	1600.82	318.866	-248.311	1566.79	200.609	-237.146	1563.35	251.591	-229.289	1437.23	276.336	-136.6	1159.1	258.673	-391.991	1338.01	263.952	-491.178	1135.59	192.962	-140.203	1247.55	408.925	-327.583	1403.99	532.744	-312.046	1174.6	544.895	-300.617	1077.01	559.72	-381.932	944.759	513.856	-410.958	845.691	575.684	-369.727	830.738	565.939	-429.31	771.084
751	0	291.513	-419.352	1605.02	186.567	-411.88	1601.98	318.588	-259.694	1567.99	200.165	-248.745	1564.77	250.966	-240.413	1438.49	274.952	-147.135	1160.49	258.701	-402.896	1339.16	264.303	-502.015	1136.85	191.634	-151.556	1249.1	408.822	-337.88	1405.14	532.5	-320.394	1175.89	544.674	-308.884	1078.58	559.876	-389.129	945.689	514.223	-416.924	845.989	576.559	-375.784	831.842	567.166	-434.82	771.674
752	0	291.498	-430.869	1605.76	186.611	-423.629	1602.95	318.371	-271.103	1569.03	199.925	-260.407	1565.94	250.222	-251.522	1439.65	273.639	-157.834	1161.55	258.841	-413.929	1340.05	264.699	-512.718	1137.76	190.417	-162.732	1250.41	408.654	-348.249	1405.99	532.118	-328.736	1176.96	544.315	-316.992	1079.8	560.025	-396.332	946.399	514.923	-423.28	846.203	577.366	-382.078	832.682	568.352	-440.577	772.022
753	0	291.598	-442.396	1606.46	186.713	-435.257	1603.72	318.089	-282.528	1569.99	199.743	-271.917	1567.13	249.58	-262.645	1440.55	272.403	-168.733	1162.46	258.857	-424.725	1340.92	264.895	-523.427	1138.81	189.168	-173.991	1251.42	408.489	-358.471	1406.89	531.985	-337.128	1178.1	544.191	-325.04	1081.13	560.319	-403.388	947.219	515.45	-429.45	846.547	578.168	-388.382	833.806	569.339	-446.399	772.609
754	0	291.53	-453.984	1606.88	186.581	-446.939	1604.29	317.837	-293.96	1570.86	199.557	-283.485	1568.09	249.001	-273.632	1441.27	271.48	-179.837	1163.09	258.889	-435.662	1341.6	265.073	-533.943	1139.59	188.164	-185.123	1252.35	408.322	-368.868	1407.46	531.753	-345.479	1179.07	544.29	-332.902	1082.4	560.586	-410.661	947.854	515.962	-435.728	846.691	578.971	-394.471	834.651	570.357	-452.246	773.019
755	0	291.539	-465.472	1607.09	186.591	-458.588	1604.62	317.639	-305.396	1571.38	199.123	-295.042	1568.68	248.596	-284.669	1441.75	270.606	-191.104	1163.48	258.839	-446.552	1342.02	265.164	-544.445	1140.1	187.235	-196.201	1253.03	408.235	-379.289	1407.86	531.717	-353.916	1179.69	544.194	-340.871	1083.11	560.896	-417.812	948.169	516.571	-442.255	846.71	579.643	-401.121	835.221	571.33	-458.484	773.262
756	0	291.452	-477.083	1607.14	186.525	-470.226	1604.67	317.411	-316.884	1571.71	198.959	-306.517	1569.19	248.142	-295.694	1442.03	269.872	-202.293	1163.86	258.802	-457.625	1342.19	265.173	-554.891	1140.3	186.431	-207.392	1253.37	408.156	-389.785	1408.07	531.682	-362.375	1180.18	544.102	-349.007	1083.66	561.378	-425.181	948.359	517.012	-448.86	846.439	580.253	-407.842	835.502	572.058	-464.602	773.15
757	0	291.395	-488.59	1607.01	186.488	-481.8	1604.6	317.209	-328.29	1571.87	198.768	-318.007	1569.49	247.727	-306.851	1442.09	269.202	-213.092	1164.13	258.607	-468.534	1342.27	265.033	-565.25	1140.2	185.671	-218.474	1253.58	408.056	-400.371	1408.13	531.644	-370.915	1180.61	544.206	-357.15	1084.15	561.802	-432.499	948.306	517.552	-455.605	846.235	580.623	-414.558	835.675	572.675	-471.06	773.033
758	0	291.32	-500.029	1606.69	186.374	-493.34	1604.38	317.056	-339.698	1571.81	198.613	-329.468	1569.45	247.395	-318.103	1441.95	268.648	-223.841	1164.02	258.496	-479.693	1342.13	264.865	-575.716	1139.98	185.189	-229.511	1253.6	407.986	-411.015	1408.02	531.659	-379.559	1180.82	544.347	-365.215	1084.39	562.28	-439.756	947.966	517.898	-462.655	845.887	581.07	-421.157	835.593	573.495	-477.362	772.5
759	0	291.292	-511.563	1606.03	186.421	-504.845	1603.86	316.868	-351.211	1571.27	198.546	-341.09	1568.99	247.147	-329.469	1441.56	268.269	-234.492	1163.76	258.202	-490.88	1341.49	264.605	-586.278	1139.16	184.673	-240.384	1253.52	407.815	-422.248	1407.29	531.573	-388.467	1180.52	544.356	-373.747	1084.08	562.775	-447.419	947.203	518.526	-469.837	844.953	581.331	-427.936	834.92	573.901	-484.02	771.62
760	0	291.313	-523.062	1605.31	186.384	-516.354	1603.19	316.785	-362.66	1570.52	198.303	-352.49	1568.4	246.911	-340.866	1440.98	267.899	-244.99	1163.34	257.982	-502.068	1340.65	264.173	-596.956	1138.14	184.482	-251.422	1253.18	407.701	-433.315	1406.52	531.528	-397.507	1180.1	544.394	-382.298	1083.67	563.35	-455.208	946.306	519.001	-477.298	844.092	581.474	-434.815	834.051	574.392	-490.581	770.633
761	0	291.314	-534.517	1604.39	186.334	-527.855	1602.3	316.706	-374.133	1569.6	198.224	-363.987	1567.54	246.794	-352.428	1440.25	267.601	-255.265	1162.9	257.636	-513.294	1339.74	263.7	-607.756	1136.88	184.218	-262.359	1252.68	407.424	-444.794	1405.39	531.684	-406.864	1179.54	544.517	-391.117	1083.2	563.638	-462.68	945.244	519.613	-485.303	843.389	581.481	-441.792	833.125	574.72	-497.519	769.362
762	0	291.328	-545.992	1603.26	186.355	-539.387	1601.19	316.666	-385.571	1568.33	198.119	-375.57	1566.32	246.785	-364.027	1439.31	267.307	-265.549	1162.18	257.284	-524.603	1338.45	263.146	-618.677	1135.31	184.227	-273.338	1252.04	407.318	-456.438	1404.19	531.807	-416.441	1178.84	544.581	-400.016	1082.42	563.961	-470.593	943.98	520.154	-493.162	842.103	581.4	-449.081	831.885	575.015	-504.306	768.053
763	0	291.417	-557.641	1601.76	186.489	-550.841	1599.83	316.646	-397.233	1566.7	198.176	-387.176	1564.86	246.767	-375.688	1438.13	267.176	-276.697	1161.11	257.03	-536.143	1336.77	262.509	-629.718	1133.14	184.37	-284.384	1251.2	407.057	-468.416	1402.45	531.756	-426.393	1177.63	544.606	-409.332	1081.23	564.168	-478.87	942.309	519.961	-500.646	839.891	581.368	-456.476	830.312	575.129	-511.62	766.139
764	0	291.453	-569.267	1600.23	186.491	-562.542	1598.41	316.737	-408.932	1565.09	198.332	-398.911	1563.27	246.841	-387.449	1436.89	267.538	-287.102	1160.4	256.709	-547.516	1335.05	261.783	-640.902	1131	184.508	-295.451	1250.25	407.036	-480.385	1400.93	531.88	-436.705	1176.46	544.566	-418.659	1080.09	564.402	-487.215	940.84	520.176	-508.597	838.364	581.317	-464.023	828.896	575.194	-518.85	764.422
765	0	291.528	-580.951	1598.55	186.555	-574.17	1596.71	316.847	-420.629	1563.16	198.399	-410.517	1561.56	246.987	-399.244	1435.4	267.937	-298.249	1159.18	256.313	-558.963	1333.12	261.013	-652.054	1128.69	185.022	-306.794	1249.02	406.947	-492.454	1399.1	532.126	-447.255	1175.13	544.703	-428.217	1078.86	564.521	-495.824	939.055	520.15	-516.556	836.467	581.155	-471.886	827.227	575.256	-526.192	762.528
766	0	291.685	-592.796	1596.49	186.686	-585.847	1594.94	317.064	-432.451	1561.17	198.613	-422.274	1559.56	247.161	-411.148	1433.67	268.361	-309.426	1157.76	256.015	-570.686	1330.94	260.229	-663.507	1126.09	185.288	-317.819	1247.7	406.801	-504.814	1396.97	532.24	-458.19	1173.49	544.666	-437.966	1077.28	564.52	-504.627	937.003	520.146	-524.959	834.391	580.897	-479.796	825.216	574.896	-533.894	760.034
767	0	291.826	-604.683	1594.27	186.897	-597.656	1592.58	317.305	-444.413	1558.81	198.734	-434.014	1557.46	247.446	-423.002	1431.78	268.813	-320.8	1156.1	255.717	-582.363	1328.43	259.468	-675.055	1123.27	185.724	-329.057	1246.01	406.632	-517.239	1394.59	532.289	-469.449	1171.49	544.579	-448.082	1075.37	564.347	-513.713	934.679	520.075	-533.639	831.956	580.535	-488.192	823.196	574.876	-541.976	757.768
768	0	292.059	-616.647	1592.1	187.111	-609.495	1590.6	317.649	-456.392	1556.5	199.301	-445.922	1555.25	247.734	-434.88	1429.69	269.406	-332.263	1154.16	255.425	-593.948	1326.03	258.608	-686.589	1120.53	186.431	-340.585	1244.01	406.608	-529.576	1392.3	532.387	-480.988	1169.49	544.543	-458.226	1073.4	564.246	-523.001	932.318	519.836	-542.26	829.749	580.336	-496.549	820.96	574.322	-549.754	755.016
769	0	292.397	-628.647	1589.62	187.39	-621.456	1588.23	318.091	-468.427	1554.01	199.74	-457.807	1552.87	248.087	-446.784	1427.51	270.057	-343.862	1152.02	255.145	-605.774	1323.57	257.821	-698.303	1117.77	186.955	-351.717	1242.09	406.592	-542.263	1389.75	532.617	-492.649	1167.45	544.465	-468.608	1071.38	563.964	-532.375	929.814	519.475	-551.109	827.276	580.121	-505.162	818.762	574.21	-558.158	752.543
770	0	292.831	-640.819	1587.06	187.838	-633.477	1585.84	318.623	-480.51	1551.45	200.26	-469.828	1550.5	248.562	-458.757	1425.21	270.847	-355.474	1150.09	254.957	-617.639	1320.86	257.067	-710.156	1114.94	187.605	-363.105	1239.93	406.515	-554.896	1387.11	532.709	-504.791	1165.1	544.418	-479.325	1069.13	563.773	-542.171	927.087	519.128	-560.165	824.494	579.746	-514.247	816.249	573.714	-566.63	749.585
771	0	293.355	-652.936	1584.37	188.373	-645.584	1583.28	319.193	-492.718	1548.74	200.809	-481.909	1548.13	249.079	-470.698	1422.86	271.545	-367.245	1147.81	254.953	-629.539	1318.1	256.377	-722.175	1112.17	188.455	-374.819	1237.51	406.605	-567.356	1384.52	532.905	-517.049	1162.67	544.288	-490.209	1066.73	563.52	-552.088	924.328	518.779	-569.418	821.604	579.224	-523.612	813.371	573.231	-575.395	746.641
772	0	293.993	-665.131	1581.79	189.05	-657.639	1580.89	319.874	-504.92	1546.25	201.478	-493.973	1545.73	249.58	-482.654	1420.52	272.241	-379.037	1145.39	254.871	-641.512	1315.55	255.771	-734.167	1109.59	189.107	-386.168	1235.37	406.843	-579.886	1382	533.155	-529.398	1160.21	544.178	-501.264	1064.34	563.216	-562.242	921.549	518.373	-579.01	818.711	578.905	-532.917	810.869	572.772	-584.365	743.599
773	0	294.734	-677.457	1579.15	189.686	-669.785	1578.48	320.692	-517.115	1543.65	202.244	-506.16	1543.33	250.19	-494.711	1417.99	272.911	-391.045	1143.03	255.013	-653.482	1313	255.263	-746.339	1107.26	189.794	-397.853	1232.88	407.12	-592.249	1379.47	533.309	-541.801	1157.61	544.074	-512.664	1061.79	562.944	-572.64	918.592	517.965	-588.814	815.712	578.521	-542.653	807.983	571.998	-593.552	740.323
774	0	295.574	-689.862	1576.42	190.575	-682.04	1575.9	321.56	-529.456	1540.97	203.094	-518.392	1541.01	250.769	-506.601	1415.57	273.481	-403.187	1140.39	255.31	-665.352	1310.2	254.868	-758.718	1104.75	190.453	-409.657	1230.39	407.31	-604.897	1376.44	533.276	-554.371	1154.67	543.815	-524.514	1058.84	562.753	-583.49	915.367	517.581	-599.402	812.581	578.232	-552.887	804.93	571.524	-603.176	736.957
775	0	296.487	-702.203	1573.85	191.539	-694.259	1573.61	322.547	-541.903	1538.46	204.137	-530.585	1538.73	251.449	-518.634	1413.12	274.165	-415.479	1137.82	255.67	-677.6	1308.05	254.636	-771.128	1102.71	191.131	-421.607	1227.98	407.925	-617.051	1374.02	533.421	-566.887	1151.87	543.637	-536.477	1055.93	562.461	-594.54	912.299	517.147	-609.614	809.325	577.794	-563.214	801.907	571.066	-613.04	733.604
776	0	297.433	-714.616	1571.36	192.44	-706.565	1571.34	323.692	-554.269	1536.06	204.993	-542.885	1536.51	252.245	-530.69	1410.59	274.762	-428.087	1135.2	255.979	-689.761	1305.7	254.415	-783.676	1100.64	191.741	-433.699	1225.37	408.742	-629.297	1371.57	533.517	-579.361	1148.98	543.502	-548.714	1053.1	562.15	-605.893	909.119	516.738	-620.371	806.016	577.665	-573.934	799.052	570.31	-623.102	730.081
777	0	298.483	-727.076	1569.06	193.561	-718.819	1569.1	324.934	-566.781	1533.81	206.597	-555.106	1534.48	252.991	-542.789	1408.24	274.968	-440.313	1132.49	256.553	-701.936	1303.57	254.316	-796.341	1098.83	192.302	-445.913	1222.93	409.338	-641.489	1368.89	533.623	-591.909	1146.05	543.318	-561.235	1050.17	561.695	-617.678	905.966	516.575	-631.56	803.034	577.641	-585.183	796.121	570.062	-633.712	726.83
778	0	299.601	-739.582	1566.63	194.694	-731.204	1567	326.288	-579.337	1531.54	207.981	-567.522	1532.5	253.849	-554.916	1405.95	275.337	-452.921	1129.97	257.056	-714.35	1301.47	254.362	-809.254	1096.9	192.725	-458.378	1220.46	410.064	-653.747	1366.35	533.634	-604.412	1143.02	542.998	-573.912	1046.98	561.485	-629.858	902.8	516.074	-643.314	799.62	577.498	-596.844	793.073	569.447	-644.688	723.031
779	0	300.897	-752.115	1564.44	195.916	-743.498	1565.04	327.737	-591.824	1529.47	209.231	-579.769	1530.74	254.739	-567.116	1403.59	275.488	-465.838	1127.15	257.904	-726.699	1299.63	254.552	-822.255	1095.45	193.073	-471.044	1218.05	411.055	-665.8	1364.08	533.771	-616.811	1140.12	542.673	-586.583	1044.07	561.154	-642.296	899.943	515.799	-655.414	796.721	577.518	-608.97	790.319	568.897	-655.977	719.834
780	0	302.322	-764.677	1562.32	197.25	-755.838	1563.17	329.336	-604.346	1527.48	211.062	-592.049	1529.03	255.587	-579.326	1401.31	275.637	-478.953	1124.51	258.624	-739.165	1297.81	254.71	-835.484	1094.11	193.278	-483.846	1215.58	411.876	-677.819	1361.6	533.834	-629.082	1137.23	542.497	-599.3	1041.22	560.819	-654.963	896.942	515.639	-667.393	793.568	577.486	-621.558	787.512	568.583	-667.981	716.615
781	0	303.813	-777.167	1560.27	198.916	-768.214	1561.5	331.036	-616.928	1525.37	212.81	-604.415	1527.32	256.645	-591.541	1399.23	275.724	-492.309	1121.58	259.669	-751.624	1295.98	255.215	-848.868	1092.75	193.487	-496.81	1213.13	412.996	-689.848	1359.26	533.996	-641.461	1134.31	542.227	-612.202	1038.17	560.561	-668.003	894.154	515.47	-679.808	790.572	577.5	-634.711	784.729	567.905	-680.347	713.477
782	0	305.399	-789.766	1558.48	200.557	-780.611	1559.97	332.826	-629.52	1523.49	214.488	-616.863	1525.93	257.537	-603.83	1397.14	275.553	-506.037	1118.94	260.504	-764.484	1294.49	255.77	-862.47	1091.75	193.555	-509.939	1210.91	413.99	-701.861	1357.05	534.151	-653.804	1131.48	541.938	-625.17	1035.16	560.362	-681.306	891.385	515.172	-691.084	786.998	577.444	-648.149	781.97	567.473	-693.256	710.497
783	0	307.148	-802.298	1557.11	202.206	-792.993	1559.07	334.605	-642.063	1521.93	216.326	-629.383	1524.69	258.448	-616.177	1395.53	275.146	-519.855	1116.58	261.634	-777.49	1293.48	256.316	-876.127	1091.07	193.498	-523.105	1208.9	415.11	-713.855	1355.04	534.367	-665.993	1128.88	541.78	-638.048	1032.55	560.196	-694.653	888.833	514.995	-704.08	784.482	577.519	-661.763	779.364	567.158	-706.617	707.825
784	0	309.054	-814.814	1556.08	204.094	-805.571	1558.51	336.414	-654.729	1520.45	217.909	-641.764	1523.71	259.335	-628.77	1394.24	274.42	-533.666	1114.64	262.631	-790.498	1292.71	256.978	-889.929	1090.66	193.389	-536.238	1207.28	416.218	-725.938	1353.24	534.485	-678.365	1126.41	541.446	-651.044	1029.76	560	-708.242	886.271	514.698	-717.945	781.98	577.548	-675.694	777.08	566.867	-720.526	705.316
785	0	310.996	-827.496	1555.4	206.063	-818.135	1558.24	338.159	-667.505	1519.25	219.778	-654.427	1523.09	260.198	-641.551	1393.56	273.93	-547.164	1113.38	263.544	-803.52	1292.13	257.654	-904.029	1090.32	193.032	-549.358	1206.46	417.235	-738.299	1351.65	534.432	-690.873	1124.09	540.927	-664.375	1027.15	559.846	-722.137	883.966	514.518	-732.372	779.725	577.284	-690.137	774.767	566.713	-734.845	703.009
786	0	313.055	-840.133	1555.29	208.117	-830.768	1558.6	339.941	-680.201	1518.58	221.862	-667.309	1522.91	260.908	-654.536	1393.34	273.235	-560.485	1112.87	264.594	-816.86	1292.3	258.342	-918.171	1090.68	192.414	-562.571	1206.24	418.346	-750.451	1350.69	534.323	-703.454	1122.34	540.381	-677.726	1025.17	559.767	-735.984	882.371	514.229	-746.982	778.19	577.1	-704.478	772.982	566.584	-749.565	701.557
787	0	315.037	-852.753	1555.55	210.187	-843.529	1559.44	341.754	-692.892	1518.44	223.656	-680.036	1523.28	261.538	-667.577	1393.62	272.227	-573.598	1113.01	265.622	-829.905	1292.69	259.033	-932.316	1091.52	191.667	-575.872	1206.73	419.239	-762.705	1350.22	533.895	-715.92	1121.15	539.656	-691.123	1023.71	559.761	-750.029	881.31	514.122	-761.629	777.03	576.813	-719.147	771.807	566.64	-764.818	700.857
788	0	317.291	-865.213	1556.22	212.264	-856.391	1560.61	343.558	-705.617	1518.7	225.418	-692.852	1524.11	262.068	-680.664	1394.46	271.224	-586.539	1113.95	266.594	-843.041	1293.71	259.833	-946.31	1092.7	190.65	-589.23	1208.02	420.053	-774.939	1350.2	533.461	-728.956	1120.19	538.812	-704.67	1022.7	559.624	-764.207	880.783	514.07	-776.875	776.571	576.533	-733.923	771.128	566.895	-780.344	700.462
789	0	319.312	-878.071	1557.26	214.488	-869.362	1562.2	345.185	-718.392	1519.28	227.133	-705.854	1525.42	262.501	-693.58	1395.97	270.21	-599.837	1115.49	267.484	-856.264	1294.91	260.642	-960.075	1094.15	189.537	-602.599	1209.61	420.667	-787.168	1350.67	532.681	-742.117	1119.72	537.638	-718.47	1022.15	559.274	-778.611	880.824	514.149	-792.79	776.634	575.785	-749.145	770.975	566.982	-796.305	700.681
790	0	321.453	-890.7	1558.65	216.571	-882.104	1564.31	346.784	-731.142	1520.44	228.755	-718.678	1527.37	262.688	-706.421	1397.56	268.821	-613.087	1117.2	268.315	-869.099	1296.93	261.483	-973.232	1096.36	188.381	-616.062	1211.87	421.199	-799.094	1352.06	531.684	-755.227	1120.23	536.472	-732.096	1022.66	559.027	-793.063	881.951	513.939	-809.929	778.186	575.159	-764.307	771.718	567.323	-812.501	702.225
791	0	323.35	-903.37	1560.11	218.572	-894.97	1566.54	348.339	-743.811	1522.03	230.306	-731.455	1529.7	262.849	-719.098	1399.5	267.277	-626.609	1118.78	268.981	-881.742	1299.05	262.16	-986.089	1098.77	187.24	-629.498	1214.17	421.685	-810.724	1353.84	530.709	-768.324	1121.21	535.333	-745.688	1023.73	558.54	-807.728	883.459	513.843	-826.215	779.769	574.465	-779.743	773.148	567.742	-829.009	704.192
792	0	324.999	-916.047	1561.75	220.239	-907.746	1569.09	349.694	-756.587	1523.77	231.382	-744.18	1532.47	262.946	-731.472	1401.64	265.831	-640.555	1120.66	269.582	-894.166	1301.59	262.901	-998.677	1101.53	186.382	-642.865	1216.42	422.012	-822.455	1355.91	529.662	-781.544	1122.54	534.062	-759.389	1025.08	558.079	-822.585	885.712	513.88	-843.129	782.258	573.603	-795.606	774.969	568.151	-845.955	706.785
793	0	326.375	-928.798	1563.44	221.698	-920.521	1571.51	350.884	-769.257	1526.04	233.024	-756.85	1535.56	262.956	-743.613	1403.91	264.827	-654.099	1122.7	270.123	-906.42	1304.01	263.483	-1010.91	1104.47	185.498	-656.034	1218.62	422.24	-834.133	1358.34	528.485	-794.778	1124.24	532.981	-773.024	1026.97	557.495	-837.678	888.209	513.534	-860.41	785.07	572.441	-811.735	777.122	568.144	-863.184	709.733
794	0	327.424	-941.338	1565.52	222.743	-932.965	1574.18	352.005	-781.763	1528.5	233.819	-769.203	1538.73	263.048	-755.619	1406.08	264.196	-666.739	1124.77	270.493	-918.393	1306.85	263.938	-1022.67	1107.65	184.983	-668.878	1220.75	422.588	-845.573	1361.07	527.697	-807.72	1126.46	532.111	-786.425	1029.29	556.937	-852.699	891.191	513.252	-877.369	788.407	571.458	-827.929	779.804	568.084	-880.644	713.295
795	0	328.038	-953.944	1567.48	223.469	-945.301	1576.64	352.781	-794.173	1530.97	235.13	-781.489	1541.74	263.161	-767.403	1408.33	263.797	-678.869	1126.6	270.735	-930.267	1309.41	264.29	-1034.2	1110.75	184.676	-681.448	1222.96	422.839	-857.152	1363.49	527.087	-820.632	1128.6	531.554	-799.846	1031.69	556.372	-867.91	893.978	512.864	-894.267	791.552	570.146	-844.674	782.338	567.802	-898.455	716.736
796	0	328.379	-966.342	1569.46	223.926	-957.475	1579.01	353.522	-806.59	1533.35	235.63	-793.462	1544.61	263.443	-779.193	1410.49	263.808	-690.959	1128.66	271.028	-942.086	1311.96	264.648	-1045.38	1113.59	184.583	-693.73	1224.9	423.146	-868.789	1366	526.616	-833.614	1130.54	531.147	-813.178	1033.42	555.885	-883.3	896.819	512.44	-911.831	795.212	568.822	-861.578	784.59	567.309	-916.674	720.201
797	0	328.54	-978.513	1571.66	224.118	-969.358	1581.4	354.024	-818.878	1535.63	236.16	-805.368	1547.23	263.711	-790.891	1412.68	263.824	-703.019	1130.77	271.088	-953.765	1314.38	264.829	-1056.5	1116.39	184.751	-705.749	1226.94	423.389	-880.403	1368.46	526.392	-846.45	1132.76	531.19	-826.587	1035.64	555.43	-898.654	899.739	511.652	-929.238	798.858	567.603	-878.673	787.008	566.486	-935.112	723.929
798	0	328.521	-990.487	1573.76	224.152	-981.157	1583.66	354.406	-830.881	1537.97	236.621	-817.231	1549.52	263.801	-802.566	1414.92	264.187	-714.841	1132.88	271.173	-965.409	1316.75	264.816	-1067.67	1118.94	185.145	-717.407	1229.19	423.541	-892.145	1370.81	526.633	-859.223	1135.29	531.632	-840.109	1037.84	555.054	-914.128	902.657	510.827	-946.549	802.619	566.51	-895.903	789.794	565.514	-953.797	727.799
799	0	328.5	-1002.33	1575.78	224.155	-992.883	1585.89	354.532	-842.762	1539.88	236.751	-828.928	1551.73	264.071	-814.456	1416.88	264.847	-726.502	1135.17	271.149	-977.049	1318.9	264.772	-1079.01	1121.16	185.683	-728.921	1231.23	423.726	-903.982	1373.08	526.97	-872.02	1137.4	532.102	-853.635	1039.77	554.802	-929.754	905.452	510.023	-963.827	806.325	565.427	-913.35	792.328	564.255	-972.894	731.635
800	0	328.43	-1014.09	1577.6	224.091	-1004.52	1587.77	354.51	-854.496	1541.6	236.7	-840.562	1553.57	264.357	-826.234	1418.95	265.445	-737.898	1137.28	271.023	-988.674	1320.6	264.426	-1090.78	1122.95	186.343	-740.171	1233.31	423.81	-916.05	1374.95	527.448	-884.891	1139.48	532.998	-867.256	1041.57	554.42	-945.47	907.995	508.72	-981.182	809.919	564.177	-931.16	794.525	562.726	-991.935	735.379
801	0	328.321	-1025.56	1579.56	224.093	-1016.02	1589.75	354.32	-866.054	1543.31	236.626	-852.088	1555.31	264.285	-837.902	1420.94	266.075	-749.113	1139.38	270.743	-1000.17	1322.47	263.994	-1102.4	1124.66	187.03	-751.145	1235.52	423.792	-928.254	1376.96	528.245	-897.64	1141.73	534.072	-880.635	1043.45	554.21	-961.085	910.885	507.573	-998.256	813.969	562.965	-948.767	797.034	561.061	-1010.99	739.445
802	0	328.248	-1036.92	1581.4	223.932	-1027.55	1591.66	354.125	-877.464	1544.98	236.335	-863.626	1556.85	264.357	-849.651	1422.86	266.962	-760.198	1141.69	270.359	-1011.73	1324.05	263.341	-1113.98	1125.98	187.805	-762.04	1237.44	423.657	-940.585	1378.75	529.227	-910.354	1144.01	535.115	-894.183	1045.3	553.884	-976.737	913.7	506.268	-1015.32	817.966	561.922	-966.571	799.633	559.241	-1030.27	743.579
803	0	328.32	-1048.35	1583.1	223.952	-1039.03	1593.3	353.806	-888.903	1546.38	235.974	-875.076	1558.39	264.459	-861.446	1424.73	267.931	-771.12	1143.76	270.076	-1023.3	1325.43	262.638	-1125.56	1127	188.484	-772.916	1239.62	423.395	-952.931	1380.33	530.145	-923.217	1146	536.362	-907.708	1046.99	553.611	-992.422	916.325	505.115	-1032.25	821.897	560.807	-984.263	802.019	557.304	-1049.44	747.617
804	0	328.165	-1059.71	1584.54	223.911	-1050.6	1594.86	353.287	-900.229	1547.54	235.509	-886.796	1559.81	264.508	-873.192	1426.56	268.977	-781.925	1145.82	269.531	-1034.87	1326.56	261.735	-1137.08	1127.68	189.409	-783.602	1241.52	422.956	-965.478	1381.77	531.094	-936.131	1147.88	537.686	-921.385	1048.48	553.212	-1008.19	918.793	503.787	-1049.25	825.712	559.539	-1002.11	804.202	555.306	-1068.58	751.64
805	0	328.046	-1070.99	1586.07	223.809	-1062.02	1596.5	352.919	-911.512	1548.89	235.139	-898.218	1561.11	264.711	-884.987	1428.09	270.05	-792.779	1147.85	268.88	-1046.22	1327.83	260.637	-1148.25	1128.4	190.529	-794.233	1243.27	422.575	-977.943	1383.34	532.18	-948.968	1149.95	539.17	-935.002	1050.26	552.863	-1023.77	921.569	502.256	-1065.31	829.617	558.417	-1019.56	806.706	553.35	-1087.42	755.826
806	0	327.935	-1082.4	1587.33	223.579	-1073.59	1597.86	352.532	-922.801	1550.08	234.701	-909.671	1562.3	264.863	-896.662	1429.67	271.003	-803.61	1149.58	268.144	-1057.54	1328.85	259.429	-1159.39	1128.9	191.24	-804.857	1245.09	422.046	-990.496	1384.65	533.052	-961.881	1151.81	540.556	-948.863	1051.86	552.436	-1039.45	924.081	500.773	-1081.64	833.21	557.233	-1037.02	809.129	551.23	-1106.04	759.919
807	0	327.668	-1093.77	1588.43	223.309	-1085.07	1598.93	352.066	-934.18	1551.11	234.171	-921.134	1563.44	264.864	-908.127	1431.06	272.121	-814.302	1151.25	267.395	-1068.79	1329.7	258.128	-1170.29	1129.36	192.117	-815.336	1246.61	421.558	-1003	1385.94	534.026	-975.188	1153.51	541.879	-962.948	1053.33	551.891	-1055.61	926.464	499.279	-1097.9	836.629	556.033	-1054.44	811.405	549.212	-1124.48	763.818
808	0	327.3	-1105.24	1589.23	222.945	-1096.58	1599.8	351.68	-945.593	1551.94	233.785	-932.735	1564.35	264.958	-919.514	1432.28	273.129	-825.038	1152.77	266.544	-1079.89	1330.36	256.727	-1181.02	1129.58	193.115	-825.869	1248.01	420.914	-1015.34	1387	534.817	-988.413	1155.17	543.328	-977.143	1054.83	551.316	-1071.39	929.002	497.767	-1114.1	839.852	554.947	-1071.82	813.697	547.088	-1142.73	767.401
809	0	326.861	-1116.57	1589.98	222.519	-1107.92	1600.59	351.221	-956.973	1552.73	233.44	-943.979	1565.15	265.159	-930.837	1433.23	274.109	-835.704	1153.99	265.705	-1090.81	1331.01	255.226	-1191.37	1129.82	194.011	-836.509	1249.08	420.359	-1027.72	1388.18	535.489	-1001.74	1156.78	544.506	-991.335	1056.34	550.703	-1086.99	931.504	496.293	-1129.98	843.124	554.02	-1088.97	816.088	545.097	-1160.54	771.027
810	0	326.378	-1128.01	1590.39	222.024	-1119.28	1601.11	350.859	-968.445	1553.31	233.06	-955.4	1565.8	265.296	-941.977	1434.06	275.214	-846.289	1154.9	264.852	-1101.65	1331.39	253.792	-1201.55	1130	195.014	-846.847	1249.96	419.718	-1040.06	1388.87	535.945	-1015.21	1158.02	545.546	-1005.65	1057.55	549.924	-1102.91	933.652	494.871	-1145.89	845.927	553.226	-1106.17	818.277	543.013	-1178.17	774.184
811	0	325.821	-1139.58	1590.67	221.543	-1130.6	1601.34	350.382	-980.006	1553.71	232.719	-966.717	1566.34	265.261	-953.126	1434.63	276.003	-856.932	1155.83	264.036	-1112.58	1331.65	252.432	-1211.81	1129.91	195.819	-857.308	1250.74	419.075	-1052.1	1389.46	536.28	-1028.97	1158.89	546.38	-1020.09	1058.41	549.14	-1118.72	935.707	493.495	-1161.81	848.421	552.443	-1123.38	820.184	540.908	-1195.65	776.929
812	0	325.132	-1151.03	1590.83	220.912	-1141.96	1601.55	350.034	-991.443	1554.16	232.421	-978	1566.69	265.413	-964.169	1435.1	276.805	-867.424	1156.42	263.185	-1123.4	1331.91	251.128	-1221.48	1129.66	196.605	-867.76	1251.24	418.499	-1064.03	1390.02	536.455	-1042.75	1159.71	547.143	-1034.35	1059.35	548.403	-1134.42	937.586	492.063	-1177.6	850.707	551.692	-1140.45	822.168	538.938	-1212.86	779.454
813	0	324.51	-1162.52	1590.87	220.295	-1153.27	1601.51	349.664	-1002.85	1554.42	232.079	-989.184	1566.85	265.511	-975.191	1435.33	277.465	-877.925	1156.66	262.359	-1134.19	1331.9	249.83	-1231.46	1129.43	197.354	-878.036	1251.55	418.033	-1075.84	1390.28	536.432	-1056.57	1160.12	547.728	-1048.62	1059.83	547.62	-1150.08	939.096	490.751	-1193.36	852.627	551.098	-1157.43	823.843	537.067	-1229.85	781.555
814	0	323.931	-1173.85	1590.67	219.689	-1164.56	1601.37	349.322	-1014.24	1554.38	231.779	-1000.35	1566.93	265.615	-986.168	1435.3	278.046	-888.449	1156.83	261.662	-1144.94	1331.72	248.594	-1241.63	1129.12	197.865	-888.497	1251.79	417.503	-1087.46	1390.2	536.308	-1070.5	1160.04	548.06	-1062.92	1059.89	546.973	-1165.5	940.33	489.572	-1209.08	854.186	550.401	-1174.22	825.022	535.297	-1246.55	783.27
815	0	323.306	-1185.36	1590.29	219.046	-1175.89	1601.06	348.877	-1025.62	1554.18	231.409	-1011.65	1566.93	265.582	-997.168	1435.35	278.524	-898.922	1156.99	260.856	-1155.76	1331.41	247.493	-1251.63	1128.46	198.381	-898.921	1251.89	417.012	-1099.26	1389.91	535.97	-1084.61	1159.72	548.125	-1077.38	1059.7	546.139	-1180.94	941.067	488.293	-1224.59	855.158	549.633	-1190.91	825.954	533.651	-1263.16	784.382
816	0	322.763	-1196.62	1589.94	218.542	-1187.06	1600.72	348.537	-1036.87	1554.06	231.285	-1022.93	1566.71	265.483	-1008.07	1435.19	278.785	-909.384	1157.04	260.124	-1166.51	1331.07	246.341	-1261.82	1127.99	198.695	-909.39	1251.87	416.516	-1110.67	1389.76	535.603	-1098.54	1159.44	548.04	-1091.62	1059.53	545.423	-1196.19	941.654	487.136	-1240.01	856.106	549.071	-1207.08	826.848	532.173	-1279.35	785.61
817	0	322.269	-1207.95	1589.38	218.123	-1198.27	1600.12	348.079	-1048.09	1553.66	230.598	-1034.15	1566.41	265.36	-1019.16	1434.88	278.861	-919.845	1156.89	259.361	-1177.35	1330.39	245.405	-1271.95	1127.13	198.749	-919.969	1251.67	415.925	-1122.25	1389.03	534.976	-1112.43	1158.74	547.624	-1105.98	1058.96	544.532	-1211.28	941.794	486.107	-1255.42	856.494	548.34	-1223.12	827.164	530.879	-1295.58	786.228
818	0	321.88	-1219.08	1588.66	217.73	-1209.6	1599.58	347.579	-1059.41	1553.05	230.416	-1045.35	1565.86	265.068	-1030.32	1434.35	278.907	-930.139	1156.59	258.702	-1188.32	1329.83	244.394	-1282.55	1126.31	198.821	-930.553	1251.46	415.448	-1133.68	1388.38	534.331	-1126.36	1157.85	546.981	-1120.41	1057.97	543.687	-1226.27	941.564	484.782	-1270.62	856.502	547.467	-1238.91	826.996	529.778	-1311.43	786.504
819	0	321.415	-1230.41	1587.82	217.263	-1220.94	1598.76	347.032	-1070.67	1552.35	229.639	-1056.57	1565.29	264.822	-1041.52	1433.74	278.748	-940.501	1156.32	257.931	-1199.34	1329	243.521	-1293.08	1125.01	198.625	-941.197	1251.14	414.801	-1145.14	1387.41	533.545	-1140.39	1156.74	546.229	-1134.83	1056.91	542.579	-1241.07	940.976	483.772	-1285.67	855.938	546.761	-1254.44	826.616	528.702	-1327.07	786.373
820	0	320.957	-1241.61	1586.97	216.637	-1232.18	1598.03	346.485	-1081.87	1551.56	229.147	-1067.76	1564.49	264.365	-1052.76	1433.05	278.306	-951.223	1155.9	257.295	-1210.36	1328.14	242.738	-1303.66	1123.86	198.338	-952.031	1250.59	414.194	-1156.43	1386.49	532.615	-1154.13	1155.59	545.285	-1149.06	1055.85	541.728	-1255.82	940.392	483.08	-1300.59	855.596	546.011	-1269.67	826.157	527.934	-1342.42	786.304
821	0	320.436	-1252.87	1585.93	216.284	-1243.58	1597.03	345.888	-1093.01	1550.45	228.511	-1079.04	1563.59	263.787	-1064.11	1432.29	277.803	-961.88	1155.26	256.541	-1221.45	1326.93	242.043	-1313.98	1122.2	197.861	-963.003	1250.01	413.555	-1167.91	1385.24	531.482	-1167.81	1154.16	544.123	-1163.37	1054.45	540.552	-1270.3	939.294	481.879	-1315.36	854.537	545.064	-1284.66	825.309	527.078	-1357.65	785.571
822	0	319.884	-1264.25	1584.64	215.798	-1254.89	1595.89	345.239	-1104.35	1549.22	227.788	-1090.38	1562.44	263.28	-1075.46	1431.33	277.391	-972.617	1154.59	255.848	-1232.63	1325.67	241.413	-1324.75	1120.5	197.264	-974.052	1249.1	412.872	-1179.3	1383.82	530.263	-1181.5	1152.51	542.661	-1177.74	1052.77	539.457	-1284.92	938.121	481.033	-1330.15	853.266	544.164	-1299.53	824.094	526.405	-1372.59	784.727
823	0	319.255	-1275.5	1583.42	215.093	-1266.35	1594.57	344.536	-1115.64	1547.93	227.069	-1101.78	1561.13	262.559	-1086.86	1430.07	276.679	-983.459	1153.72	255.195	-1243.86	1324.38	240.669	-1335.61	1118.87	196.492	-985.13	1248.22	412.156	-1190.73	1382.39	528.893	-1195.04	1150.8	541.215	-1191.91	1051.15	538.081	-1299.23	936.821	479.752	-1344.68	851.814	543.034	-1313.99	822.818	525.753	-1387.33	783.666
824	0	318.548	-1286.83	1581.96	214.283	-1277.69	1593.28	343.776	-1126.94	1546.48	226.279	-1113.14	1559.63	261.927	-1098.25	1428.78	275.739	-994.314	1152.29	254.421	-1255.12	1322.98	239.914	-1346.71	1117.18	195.717	-996.339	1247.03	411.324	-1201.87	1380.78	527.393	-1208.28	1148.92	539.613	-1205.9	1049.44	536.625	-1313.41	935.451	478.888	-1358.95	850.223	542.165	-1328.18	821.443	525.115	-1401.59	782.415
825	0	317.653	-1298.21	1580.4	213.576	-1289.06	1591.63	342.87	-1138.37	1544.85	225.521	-1124.58	1557.98	261.224	-1109.64	1427.43	274.797	-1005.43	1150.92	253.727	-1266.48	1321.27	239.363	-1357.71	1115.27	194.842	-1007.81	1245.72	410.589	-1213.37	1379.01	525.798	-1221.47	1146.85	537.846	-1219.99	1047.5	535.011	-1327.67	933.793	477.726	-1373.24	848.381	541.074	-1342.48	819.775	524.32	-1415.83	780.698
826	0	316.77	-1309.67	1578.86	212.666	-1300.46	1589.96	341.951	-1149.86	1543.13	224.635	-1135.89	1556.2	260.207	-1121.19	1425.81	273.779	-1016.7	1149.58	253.031	-1277.97	1319.53	238.823	-1368.94	1113.37	193.741	-1019.26	1244.25	409.896	-1224.5	1377.27	524.188	-1234.47	1144.7	536.008	-1234.05	1045.47	533.489	-1341.58	932.037	476.526	-1387.14	846.22	539.792	-1356.42	817.893	523.535	-1429.9	779.01
827	0	315.771	-1321.05	1577.27	211.578	-1311.8	1588.43	340.885	-1161.27	1541.38	223.625	-1147.33	1554.51	259.184	-1132.69	1424.1	272.754	-1028.08	1147.96	252.272	-1289.44	1317.9	238.433	-1379.58	1111.36	192.657	-1030.69	1242.61	409.059	-1235.64	1375.6	522.539	-1247.19	1142.67	534.25	-1247.67	1043.67	531.887	-1355.35	930.331	475.192	-1400.78	844.303	538.89	-1370.1	816.372	522.55	-1443.63	777.228
828	0	314.656	-1332.43	1575.55	210.434	-1323.26	1586.58	339.803	-1172.66	1539.65	222.401	-1158.79	1552.5	258.12	-1144.14	1422.42	271.458	-1039.56	1146.16	251.399	-1300.96	1316.13	237.772	-1391.32	1109.51	191.485	-1042.21	1240.89	408.099	-1247.11	1373.72	520.771	-1259.52	1140.33	532.453	-1261.24	1041.71	530.079	-1368.97	928.415	473.526	-1414.13	841.933	537.684	-1383.61	814.491	521.402	-1457.13	775.226
829	0	313.464	-1343.85	1573.79	209.173	-1334.77	1584.8	338.654	-1184.15	1537.81	221.071	-1170.26	1550.56	256.964	-1155.75	1420.47	270.25	-1051.19	1144.33	250.558	-1312.55	1314.3	237.288	-1402.81	1107.54	190.003	-1053.98	1238.92	407.158	-1258.22	1371.72	519.145	-1271.82	1138.07	530.376	-1274.77	1039.6	528.267	-1382.55	926.465	472.243	-1426.94	839.37	536.275	-1396.91	812.483	520.302	-1470.41	773.174
830	0	312.086	-1355.3	1571.87	207.925	-1346.23	1582.76	337.191	-1195.51	1535.86	219.703	-1181.77	1548.58	255.541	-1167.15	1418.67	268.924	-1062.81	1142.41	249.617	-1324.18	1312.29	236.779	-1414.46	1105.46	188.761	-1065.67	1236.97	406.042	-1269.56	1369.66	517.389	-1283.87	1135.77	528.475	-1288.14	1037.47	526.176	-1395.81	924.38	470.284	-1440.56	837.331	534.936	-1410.18	810.482	518.858	-1483.46	770.904
831	0	310.652	-1366.57	1570.24	206.512	-1357.59	1580.95	335.782	-1206.86	1534.1	218.114	-1193.18	1546.63	254.389	-1178.64	1416.73	267.405	-1074.51	1140.39	248.577	-1335.72	1310.57	236.245	-1426.19	1103.77	187.132	-1077.5	1234.97	405.07	-1280.76	1368	515.851	-1295.45	1133.82	526.639	-1300.87	1035.68	524.53	-1408.78	922.651	469.108	-1452.53	834.915	533.55	-1422.93	808.805	517.104	-1495.99	768.869
832	0	309.142	-1378.05	1568.32	204.93	-1369.11	1578.99	334.218	-1218.21	1532.27	216.566	-1204.66	1544.65	252.969	-1190.15	1414.68	265.949	-1086.23	1138.44	247.456	-1347.43	1308.62	235.693	-1438.14	1101.85	185.693	-1089.28	1232.83	403.694	-1292.05	1366.11	514.3	-1307.05	1131.7	524.814	-1313.75	1033.72	522.622	-1421.55	920.694	467.22	-1465.01	832.597	532.131	-1435.64	806.931	515.49	-1508.54	766.716
833	0	307.602	-1389.43	1566.57	203.315	-1380.6	1577.11	332.38	-1229.7	1530.32	214.914	-1216.07	1542.82	251.428	-1201.7	1412.73	264.307	-1098.05	1136.14	246.309	-1359.15	1306.78	235.136	-1450.2	1100.07	183.93	-1101.17	1230.64	402.412	-1303.37	1364.35	512.728	-1318.52	1129.72	522.947	-1326.2	1031.74	520.817	-1434.04	918.817	465.436	-1477.11	830.438	530.688	-1448.45	805.17	513.752	-1520.56	764.571
834	0	305.728	-1400.82	1564.81	201.441	-1392.05	1575.25	330.641	-1241.01	1528.66	212.971	-1227.61	1540.82	249.644	-1213.06	1410.76	262.684	-1110.08	1133.98	244.914	-1370.84	1304.9	234.417	-1462.29	1098.34	182.388	-1113.1	1228.25	400.916	-1314.72	1362.63	511.156	-1329.82	1127.87	521.131	-1338.22	1029.96	519.014	-1446.3	917.154	463.208	-1488.92	828.493	529.181	-1460.73	803.602	511.617	-1532.55	762.649
835	0	303.883	-1412.18	1563.18	199.485	-1403.46	1573.49	328.601	-1252.37	1527.02	210.999	-1239.07	1538.97	247.766	-1224.58	1408.66	261.097	-1122.21	1131.56	243.5	-1382.54	1303.33	233.676	-1474.4	1096.92	180.524	-1125.17	1225.88	399.31	-1326.07	1361.06	509.658	-1341.06	1126.31	519.436	-1349.88	1028.33	517.254	-1458.08	915.627	461.477	-1500.47	826.867	527.679	-1472.68	802.225	509.353	-1544.23	760.797
836	0	301.777	-1423.64	1561.51	197.421	-1415.01	1571.63	326.659	-1263.82	1525.38	208.884	-1250.53	1537.1	245.943	-1236.05	1406.63	259.593	-1134.63	1129.33	241.958	-1394.37	1301.63	232.887	-1486.71	1095.32	178.882	-1137.3	1223.4	397.581	-1337.53	1359.39	508.202	-1352.51	1124.63	517.836	-1361.35	1026.57	515.432	-1469.66	913.936	459.327	-1511.95	825.095	526.064	-1484.64	800.643	507.112	-1555.81	758.954
837	0	299.695	-1435.11	1560.01	195.264	-1426.51	1569.84	324.449	-1275.19	1523.82	206.719	-1261.93	1535.41	243.902	-1247.52	1404.56	257.906	-1147.27	1126.67	240.388	-1406.21	1300.05	231.919	-1499.18	1093.99	177.154	-1149.54	1220.78	395.867	-1349.05	1357.89	506.871	-1364.07	1123.26	516.252	-1372.71	1024.91	513.734	-1481.06	912.418	457.803	-1522.87	823.442	524.192	-1496.18	799.007	504.901	-1567.04	757.341
838	0	297.457	-1446.43	1558.73	192.993	-1437.88	1568.34	322.142	-1286.56	1522.44	204.362	-1273.3	1533.78	241.897	-1258.89	1402.63	256.374	-1159.95	1124.32	238.637	-1418.07	1298.64	230.832	-1511.7	1092.94	175.476	-1161.87	1218.23	394.091	-1360.51	1356.8	505.372	-1375.28	1122.21	514.974	-1383.67	1023.76	512.252	-1492.09	911.111	455.729	-1533.81	822.37	522.498	-1507.18	797.876	502.69	-1578.06	755.986
839	0	295.053	-1457.74	1557.5	190.564	-1449.29	1566.9	319.788	-1297.87	1521.3	201.953	-1284.73	1532.25	239.693	-1270.37	1400.82	254.594	-1173.14	1121.9	236.84	-1430.02	1297.39	229.594	-1524.48	1092.03	173.738	-1174.2	1215.63	392.066	-1371.98	1355.67	504.075	-1386.77	1121.32	513.692	-1394.52	1022.71	510.704	-1502.89	909.849	453.961	-1544.4	821.109	520.781	-1517.89	796.661	500.53	-1588.63	754.516
840	0	292.593	-1469.13	1556.57	188.188	-1460.77	1565.83	317.18	-1309.37	1520.09	199.474	-1296.31	1530.91	237.467	-1281.93	1399.32	252.867	-1186.55	1119.77	234.921	-1442.1	1296.28	228.299	-1537.29	1091.28	172.146	-1186.56	1213.34	389.968	-1383.66	1354.67	502.653	-1398.23	1120.56	512.192	-1405.25	1021.61	509.282	-1513.53	908.682	452.181	-1554.85	819.859	518.895	-1528.35	795.247	498.568	-1599.12	753.321
841	0	290.069	-1480.47	1556.2	185.621	-1472.32	1565.14	314.586	-1320.85	1519.23	196.856	-1307.82	1529.86	235.043	-1293.77	1398.24	251.422	-1200.02	1118.46	232.897	-1454.23	1295.62	226.872	-1550.2	1090.79	170.558	-1198.9	1211.52	387.815	-1395.43	1354.05	501.178	-1409.63	1120.08	510.643	-1415.9	1020.87	507.791	-1523.82	907.517	450.439	-1564.91	818.844	517.061	-1538.38	793.992	496.58	-1608.95	752.068
842	0	287.529	-1491.8	1556.31	182.923	-1483.76	1565.03	311.744	-1332.21	1518.88	193.999	-1319.42	1529.08	232.685	-1305.72	1397.63	250.208	-1213.48	1117.49	230.813	-1466.39	1295.46	225.449	-1563.19	1090.87	169.016	-1211.36	1210.15	385.74	-1407.37	1354.12	499.75	-1420.66	1120.26	509.277	-1426.18	1020.84	506.465	-1533.65	906.752	449.119	-1574.38	818.24	515.406	-1547.54	793.215	494.959	-1618.39	751.248
843	0	284.891	-1503.3	1556.64	180.3	-1495.37	1565.08	308.824	-1343.74	1518.82	190.977	-1331.09	1528.55	230.389	-1317.85	1397.42	249.398	-1226.47	1117.15	228.579	-1478.62	1295.52	223.918	-1576.42	1091.09	167.584	-1223.71	1209.35	383.521	-1419.66	1354.42	498.24	-1431.88	1120.63	507.769	-1436.68	1021	505.098	-1543.36	906.213	447.77	-1583.65	817.48	513.701	-1556.45	792.451	493.563	-1627.44	750.575
844	0	282.215	-1514.76	1557.57	177.597	-1507.06	1565.6	305.853	-1355.2	1519.11	188.018	-1342.82	1528.59	228.284	-1330.04	1397.72	248.756	-1238.93	1117.42	226.492	-1490.94	1296.06	222.38	-1589.9	1091.93	166.495	-1235.97	1209.27	381.324	-1432.27	1355.34	496.737	-1442.85	1121.59	506.168	-1447.12	1021.73	503.873	-1552.7	906.19	446.613	-1592.78	817.499	512.096	-1564.97	791.999	492.358	-1635.88	750.12
845	0	279.489	-1526.29	1558.84	174.728	-1518.74	1566.48	302.926	-1366.68	1519.97	184.973	-1354.63	1528.95	226.255	-1342.15	1398.49	247.868	-1250.63	1117.91	224.207	-1503.17	1296.94	220.732	-1603.33	1093.09	165.438	-1248.15	1209.68	379.155	-1445.06	1356.89	495.158	-1453.7	1123.07	504.707	-1457.38	1023.21	502.461	-1561.72	906.44	445.352	-1601.25	817.658	510.586	-1572.84	792.031	491.397	-1643.79	750.076
846	0	276.71	-1537.67	1560.61	171.92	-1530.49	1567.83	299.949	-1378.15	1521.46	181.891	-1366.38	1529.79	224.392	-1354.25	1399.75	247.041	-1262.22	1118.94	222.07	-1515.3	1298.47	219.021	-1616.49	1094.96	164.598	-1260.26	1210.61	376.932	-1457.82	1359.09	493.61	-1464.47	1125.24	503.21	-1467.36	1025.45	501.226	-1570.36	907.423	444.543	-1609.53	818.42	509.073	-1580	792.907	490.587	-1651.11	750.507
847	0	273.876	-1549.27	1562.5	169.131	-1542.35	1569.23	296.893	-1389.83	1523.3	178.797	-1378.41	1531.14	222.52	-1366.22	1401.24	246.808	-1274.22	1120.81	219.993	-1527.35	1300.12	217.333	-1629.51	1096.96	163.83	-1272.32	1211.8	374.713	-1470.77	1361.47	491.901	-1475.5	1127.66	501.533	-1477.4	1027.83	500.006	-1579.06	908.7	443.3	-1617.51	819.326	507.803	-1587.22	793.935	489.859	-1658.11	750.99
848	0	271.106	-1560.95	1564.91	166.29	-1554.29	1571	293.895	-1401.42	1525.74	175.838	-1390.26	1533	220.387	-1378.1	1403.06	246.627	-1287.09	1122.47	218.061	-1539.27	1302.25	215.663	-1641.93	1099.44	163.045	-1284.53	1213.21	372.434	-1483.3	1364.37	490.273	-1486.65	1130.66	499.883	-1487.4	1030.75	498.688	-1587.44	910.32	442.345	-1625.15	820.52	506.588	-1594.17	795.401	489.1	-1664.44	751.463
849	0	268.277	-1572.58	1567.46	163.463	-1566.12	1572.89	291.174	-1412.9	1528.69	172.984	-1401.99	1535.2	218.751	-1389.67	1405.2	246.136	-1300.22	1124.43	216.105	-1551.05	1304.61	213.951	-1653.89	1102.12	162.239	-1296.6	1214.92	370.139	-1495.7	1367.46	488.568	-1497.87	1133.98	498.389	-1497.2	1034.1	497.347	-1595.82	912.362	441.245	-1632.41	821.85	505.661	-1600.87	797.514	488.559	-1670.71	752.496
850	0	265.651	-1584.21	1570.28	160.809	-1577.91	1575.26	288.562	-1424.38	1531.97	170.291	-1413.82	1537.75	216.848	-1401.1	1407.41	245.525	-1313.43	1126.52	214.441	-1562.48	1307.37	212.424	-1665.37	1105.18	161.311	-1308.66	1216.67	368.243	-1507.48	1370.87	486.846	-1508.94	1137.49	496.927	-1506.96	1037.65	496.139	-1603.96	914.731	440.255	-1639.36	823.51	504.695	-1607.43	799.744	487.911	-1676.37	753.601
851	0	263.186	-1595.87	1573.15	158.268	-1589.67	1577.54	285.988	-1435.92	1535.18	167.792	-1425.51	1540.49	215.058	-1412.44	1409.82	244.701	-1326.15	1128.71	212.826	-1573.9	1310.08	211.042	-1676.86	1108.25	160.207	-1320.69	1218.63	366.228	-1519.07	1374.04	485.108	-1520.26	1140.84	495.32	-1516.67	1041.04	494.925	-1612.12	917.18	439.342	-1646.38	825.138	503.866	-1614.27	802.042	486.896	-1682.25	754.542
852	0	260.771	-1607.47	1575.92	155.886	-1601.25	1579.9	283.721	-1447.43	1538.63	165.453	-1437	1543.58	213.168	-1423.73	1412.2	243.389	-1338.17	1130.85	211.261	-1585.19	1312.89	209.66	-1688.05	1111.35	158.97	-1332.7	1220.6	364.341	-1530.4	1377.35	483.523	-1531.62	1144.46	493.775	-1526.2	1044.6	493.575	-1620.36	919.794	438.771	-1653.45	827.048	503.422	-1621.3	804.839	485.937	-1688.01	755.77
853	0	258.555	-1618.85	1578.85	153.668	-1612.72	1582.44	281.456	-1458.63	1541.96	163.234	-1448.4	1546.41	211.369	-1434.94	1414.6	241.983	-1349.44	1133.23	209.785	-1596.28	1315.72	208.45	-1698.94	1114.47	157.445	-1344.64	1222.77	362.741	-1541.56	1380.72	481.925	-1542.7	1148.03	492.391	-1535.26	1048.26	492.663	-1628.63	922.522	438.037	-1660.16	829.139	503.103	-1628.2	807.718	484.988	-1693.59	757.031
854	0	256.497	-1630.22	1581.49	151.665	-1624.07	1584.85	279.708	-1469.99	1545.14	161.402	-1459.7	1549.15	209.773	-1446.17	1417.05	240.278	-1360.38	1135.74	208.514	-1607.38	1318.4	207.423	-1709.81	1117.39	155.908	-1356.46	1224.98	361.165	-1552.5	1383.71	480.531	-1553.78	1151.42	490.981	-1544.19	1051.59	491.789	-1636.78	925.072	437.147	-1667.07	831.125	503.032	-1635.55	810.556	484.12	-1699.48	758.161
855	0	254.639	-1641.46	1584.08	149.947	-1635.28	1587.09	277.946	-1481.28	1547.81	159.656	-1470.81	1551.79	208.018	-1457.35	1419.56	238.278	-1371.33	1138.32	207.189	-1618.38	1321	206.621	-1720.72	1120.05	154.13	-1368.11	1227.35	359.702	-1563.35	1386.57	479.176	-1564.7	1154.61	489.597	-1553.06	1054.66	491.025	-1644.45	927.844	436.692	-1674.13	833.105	502.747	-1642.92	813.157	483.266	-1705.38	759.375
856	0	252.872	-1652.67	1586.52	148.025	-1646.35	1589.43	276.404	-1492.51	1550.34	158.101	-1481.92	1554.02	206.307	-1468.59	1421.94	236.162	-1382.32	1141.12	205.873	-1629.37	1323.28	205.934	-1731.58	1122.46	152.598	-1379.55	1229.69	358.284	-1574.15	1389.37	477.89	-1575.28	1157.49	488.237	-1561.63	1057.5	490.325	-1652.45	930.123	436.13	-1681.25	834.931	502.743	-1650.38	815.713	482.489	-1711.52	760.47
857	0	251.249	-1663.76	1588.93	146.374	-1657.27	1591.52	274.974	-1503.55	1552.59	156.675	-1492.98	1556.02	204.827	-1479.67	1424.24	234.233	-1393.64	1143.5	204.753	-1640.31	1325.63	205.492	-1742.35	1124.85	150.619	-1390.91	1232.09	357.079	-1584.71	1391.89	476.769	-1585.57	1160.24	487.314	-1570.31	1060.4	489.871	-1660.34	932.427	435.874	-1688.47	836.817	502.75	-1657.71	818.244	482.05	-1717.68	761.632
858	0	249.643	-1674.83	1591.09	144.862	-1668.2	1593.5	273.723	-1514.64	1554.57	155.383	-1503.87	1557.81	203.34	-1490.82	1426.42	232.366	-1404.92	1145.84	203.824	-1651.37	1327.48	205.171	-1753.25	1126.58	148.97	-1402.12	1234.41	356.061	-1595.47	1393.89	475.683	-1595.61	1162.31	486.077	-1578.94	1062.43	489.328	-1668.36	933.998	435.537	-1696.05	838.228	502.509	-1665.05	819.919	481.706	-1724.21	762.504
859	0	248.093	-1685.79	1593.15	143.319	-1679.15	1595.44	272.422	-1525.83	1556.42	154.254	-1514.96	1559.44	201.939	-1501.96	1428.57	230.627	-1415.98	1148.07	202.971	-1662.31	1329.31	205.048	-1764.04	1128.22	147.181	-1413.29	1236.66	355.058	-1605.77	1395.79	474.844	-1605.24	1164.34	485.247	-1587.84	1064.43	489.002	-1676.39	935.706	435.407	-1704.01	839.706	502.284	-1672.46	821.599	481.495	-1730.74	763.388
860	0	246.707	-1696.82	1595.3	142.043	-1689.94	1597.15	271.238	-1536.84	1558.48	152.949	-1525.76	1561.18	200.53	-1513.04	1430.65	228.705	-1426.32	1150.55	202.174	-1673.1	1330.86	205.017	-1774.61	1129.53	145.45	-1424.17	1238.96	354.122	-1616.06	1397.68	474.063	-1614.39	1166.04	484.458	-1596.61	1066.35	488.622	-1684.4	937.006	435.286	-1712.39	840.94	502.199	-1679.71	823.129	481.484	-1737.38	764.233
861	0	245.555	-1707.7	1597.19	140.813	-1700.7	1599.01	270.062	-1547.74	1560.33	151.792	-1536.66	1562.85	199.143	-1524.08	1432.54	226.7	-1436.39	1152.53	201.553	-1684.01	1332.72	205.125	-1785.18	1130.86	143.598	-1434.95	1241.24	353.445	-1626.24	1399.25	473.555	-1622.91	1167.59	483.603	-1605.04	1067.97	488.316	-1692.29	938.423	435.03	-1720.1	842.02	501.98	-1686.8	824.521	481.725	-1744.38	765.236
862	0	244.353	-1718.64	1598.82	139.477	-1711.7	1600.72	269.163	-1558.8	1561.9	150.932	-1547.39	1564.41	197.858	-1535.03	1434.41	224.901	-1446.51	1154.61	201.094	-1694.76	1334.02	205.359	-1795.86	1131.86	141.559	-1445.8	1243.36	352.675	-1636.48	1400.65	472.877	-1631.25	1168.67	482.952	-1613.95	1069.24	487.8	-1700.22	939.184	434.941	-1726.71	842.358	501.774	-1694.26	825.487	481.93	-1751.63	766.102
863	0	243.274	-1729.55	1600.47	138.475	-1722.52	1602.17	268.249	-1569.7	1563.57	149.821	-1558.35	1565.99	196.504	-1545.98	1436.19	223.101	-1456.67	1156.46	200.699	-1705.47	1335.39	205.666	-1806.39	1132.9	139.61	-1456.57	1245.29	352	-1646.42	1401.88	472.21	-1639.14	1169.78	482.243	-1622.52	1070.43	487.674	-1708.08	940.229	434.92	-1734.43	843.28	501.513	-1701.49	826.344	482.312	-1759.05	767.053
864	0	242.274	-1740.47	1601.87	137.479	-1733.44	1603.41	267.127	-1580.56	1565.02	148.802	-1569.25	1567.33	195.106	-1556.85	1437.68	221.31	-1466.72	1158.08	200.256	-1716.1	1336.68	205.946	-1816.7	1133.88	137.757	-1467.28	1247.12	351.183	-1656.23	1403.18	471.598	-1646.82	1170.83	481.629	-1630.8	1071.8	487.411	-1715.9	941.238	434.888	-1742.2	844.095	501.379	-1708.71	827.543	482.743	-1766.58	768.038
865	0	241.477	-1751.35	1603.05	136.72	-1744.37	1604.56	266.165	-1591.21	1566.31	147.876	-1580.17	1568.57	193.684	-1567.64	1439.13	219.544	-1476.7	1159.79	199.777	-1726.69	1337.85	206.314	-1827.03	1134.69	135.644	-1477.94	1248.88	350.501	-1665.93	1404.36	470.926	-1654.34	1172.09	480.901	-1638.94	1072.91	487.199	-1723.77	942.164	435.089	-1750.16	845.056	501.426	-1716.35	828.586	483.105	-1774.33	769.279
866	0	240.693	-1762.25	1604	135.804	-1755.51	1605.6	265.245	-1602.01	1567.27	146.929	-1591.07	1569.62	192.465	-1578.39	1440.51	217.79	-1486.75	1161.15	199.547	-1737.36	1338.75	206.661	-1837.29	1135.31	133.584	-1488.69	1250.45	349.829	-1675.6	1405.32	470.4	-1661.77	1173.09	480.205	-1647.17	1073.89	487.087	-1731.69	943.005	435.408	-1758.04	845.676	501.25	-1723.94	829.312	483.607	-1782.28	770.38
867	0	239.937	-1773.12	1604.83	135.119	-1766.51	1606.46	264.184	-1612.99	1568.2	145.872	-1602.08	1570.54	191.194	-1589.06	1441.61	216.072	-1496.79	1162.28	199.209	-1747.69	1339.5	206.888	-1847.53	1135.98	131.87	-1499.36	1251.7	349.152	-1685.26	1406.25	469.224	-1668.5	1174.11	479.676	-1655.17	1074.94	486.891	-1739.35	943.868	435.541	-1765.95	846.614	501.143	-1731.49	830.28	484.051	-1790.31	771.63
868	0	239.316	-1783.89	1605.56	134.525	-1777.42	1607.11	263.245	-1623.4	1569.03	144.947	-1613.07	1571.33	189.907	-1599.72	1442.53	214.457	-1506.94	1163.45	198.773	-1758.03	1340.19	207.104	-1857.77	1136.78	130.119	-1509.82	1252.89	348.433	-1694.68	1407.2	468.959	-1675.84	1175.51	479.054	-1662.88	1076.28	486.841	-1747.27	945.073	435.422	-1773.69	847.715	501.351	-1739.21	831.64	484.555	-1798.28	773.034
869	0	238.669	-1794.81	1605.86	133.906	-1788.48	1607.53	262.506	-1634.16	1569.69	144.063	-1624.04	1571.92	188.559	-1610.31	1443.2	212.913	-1517.15	1164.51	198.436	-1768.47	1340.59	207.227	-1868.21	1137.2	128.499	-1520.32	1253.71	347.765	-1704.33	1407.78	468.535	-1683.23	1176.55	478.53	-1670.86	1077.25	486.941	-1755.3	945.917	435.86	-1782.05	848.468	501.406	-1747.03	832.414	485.051	-1806.47	774.065
870	0	238.101	-1805.67	1606.23	133.329	-1799.45	1607.85	261.583	-1645.34	1570.07	143.221	-1634.96	1572.43	187.474	-1620.88	1443.8	211.378	-1527.36	1165.26	198.009	-1778.79	1341.05	207.312	-1878.65	1137.9	127.066	-1530.93	1254.38	347.19	-1714.09	1408.42	468.073	-1690.8	1177.36	478.089	-1678.72	1078.05	486.879	-1763.14	946.749	436.111	-1790.24	849.415	501.306	-1754.79	833.199	485.648	-1814.63	775.181
871	0	237.5	-1816.52	1606.38	132.661	-1810.33	1607.98	260.636	-1656.07	1570.36	142.426	-1645.87	1572.74	186.358	-1631.41	1444.14	209.834	-1537.2	1165.66	197.581	-1789.12	1341.17	207.113	-1888.85	1138.25	125.635	-1541.39	1254.85	346.558	-1723.89	1408.82	467.69	-1698.42	1178.25	477.713	-1686.68	1078.95	487.127	-1771.12	947.532	436.092	-1798.48	850.091	501.298	-1762.65	833.992	486.079	-1822.85	776.096
872	0	236.885	-1827.38	1606.41	132.043	-1821.16	1608.05	260.083	-1666.39	1570.63	141.769	-1656.66	1572.96	185.375	-1641.9	1444.32	208.511	-1547.03	1165.89	197.159	-1799.37	1341.34	206.918	-1898.77	1138.27	124.613	-1551.73	1255.16	345.941	-1733.6	1409.06	467.302	-1706.19	1178.95	477.43	-1694.56	1079.64	487.389	-1779.09	948.19	436.674	-1806.86	850.844	501.279	-1770.52	834.561	486.658	-1831.07	776.978
873	0	236.229	-1838.22	1605.96	131.385	-1832.15	1607.73	259.301	-1677.6	1570.44	141.1	-1667.5	1572.99	184.494	-1652.32	1444.31	207.267	-1556.76	1165.88	196.785	-1809.79	1340.95	206.723	-1908.66	1137.85	123.53	-1562.02	1255.32	345.294	-1743.72	1408.91	466.824	-1714.28	1179.11	477.143	-1702.82	1079.93	487.498	-1787.21	948.305	436.977	-1815.33	850.981	501.185	-1778.61	834.637	487.157	-1839.43	777.225
874	0	235.679	-1849.07	1605.83	130.882	-1842.79	1607.38	258.872	-1688.09	1570.41	140.449	-1678.19	1572.94	183.617	-1662.87	1444.3	206.338	-1566.29	1165.98	196.327	-1820.02	1340.69	206.444	-1918.51	1137.5	122.79	-1572.45	1255.18	344.727	-1753.78	1408.84	466.389	-1722.49	1179.29	476.965	-1711.12	1080.3	487.767	-1795.26	948.481	437.309	-1823.88	851.283	501.142	-1786.56	834.79	487.748	-1847.69	777.517
875	0	235.013	-1859.84	1605.22	130.044	-1853.67	1606.93	258.103	-1698.74	1570.27	139.806	-1688.98	1572.64	182.988	-1673.43	1443.98	205.335	-1575.99	1165.79	195.672	-1830.37	1340.29	205.893	-1928.2	1136.77	122.076	-1582.71	1255.05	344.164	-1763.95	1408.57	465.959	-1730.78	1179.46	476.719	-1719.38	1080.53	487.992	-1803.51	948.408	437.576	-1832.45	851.261	501.212	-1794.45	834.905	488.192	-1855.92	777.488
876	0	234.491	-1870.59	1604.66	129.521	-1864.33	1606.28	257.623	-1709.42	1569.77	139.298	-1699.65	1572.16	182.324	-1684.13	1443.59	204.632	-1585.56	1165.59	195.21	-1840.79	1339.66	205.398	-1937.96	1135.93	121.401	-1592.99	1254.71	343.654	-1774.41	1408.13	465.546	-1739.39	1179.3	476.247	-1727.72	1080.3	488.249	-1811.78	948.18	437.963	-1841.11	851.083	500.972	-1802.25	834.391	488.863	-1864.18	777.436
877	0	233.817	-1881.37	1603.79	129.025	-1875.14	1605.53	256.938	-1720.2	1569.15	138.676	-1710.44	1571.52	181.899	-1694.67	1443.04	204.343	-1595.47	1165.24	194.644	-1851.18	1338.77	204.772	-1948.11	1134.82	121.203	-1603.13	1254.36	343.191	-1785.07	1407.24	465.077	-1748.59	1178.75	475.863	-1736.56	1079.77	488.351	-1820.17	947.374	438.293	-1849.91	850.424	501.008	-1810.58	833.728	489.501	-1872.46	776.753
878	0	233.292	-1892.08	1603.08	128.413	-1885.83	1604.76	256.523	-1730.87	1568.35	138.281	-1721.08	1570.82	181.447	-1705.46	1442.37	204.245	-1605.59	1164.74	193.984	-1861.48	1337.91	203.996	-1958.26	1133.89	120.976	-1613.38	1253.81	342.631	-1795.87	1406.58	464.729	-1757.97	1178.36	475.555	-1745.39	1079.31	488.67	-1828.67	946.814	438.636	-1858.52	849.823	500.814	-1818.55	832.948	489.893	-1881.18	776.376
879	0	232.765	-1902.87	1602.12	127.841	-1896.56	1603.71	256.002	-1741.67	1567.41	137.643	-1731.87	1569.82	180.956	-1716.22	1441.48	204.2	-1615.85	1164.05	193.319	-1872.25	1336.96	203.137	-1968.6	1132.64	120.792	-1623.73	1253.11	342.15	-1806.6	1405.5	464.436	-1767.69	1177.76	475.295	-1754.46	1078.76	488.862	-1837.2	945.871	438.913	-1867.24	848.955	500.582	-1826.54	832.062	490.377	-1889.28	775.348
880	0	232.273	-1913.7	1600.93	127.311	-1907.4	1602.5	255.666	-1752.53	1566.23	137.205	-1742.63	1568.51	180.779	-1726.89	1440.33	203.962	-1626.31	1163.13	192.78	-1882.92	1335.62	202.335	-1979.09	1131.11	120.907	-1634.09	1252.17	341.663	-1817.74	1404.18	464.241	-1777.93	1176.78	475.163	-1764.12	1077.8	489.005	-1846.07	944.595	439.235	-1876.11	847.724	500.383	-1834.68	830.665	490.692	-1896.81	773.392
881	0	231.838	-1924.6	1599.65	126.9	-1918.21	1601.15	254.9	-1763.28	1564.77	136.812	-1753.51	1567.21	180.572	-1737.77	1439.29	204.26	-1636.78	1162.21	192.193	-1893.59	1334.2	201.507	-1989.66	1129.5	120.866	-1644.55	1251.16	341.219	-1829.12	1402.88	463.987	-1788.59	1175.67	474.821	-1773.65	1076.6	489.043	-1854.99	943.236	439.485	-1885.01	846.265	500.173	-1842.98	829.174	490.939	-1905.12	771.926
882	0	231.391	-1935.39	1598.16	126.448	-1929.07	1599.74	254.604	-1774.04	1563.36	136.534	-1764.28	1565.74	180.337	-1748.6	1438.07	204.387	-1647.4	1161.2	191.559	-1904.19	1332.65	200.629	-2000.31	1127.91	121.035	-1654.97	1249.93	340.79	-1840.44	1401.55	463.934	-1799.44	1174.62	474.723	-1783.49	1075.68	488.869	-1863.79	941.599	439.658	-1893.77	844.732	499.983	-1851.15	827.731	491.316	-1913.51	770.479
883	0	231.091	-1946.34	1596.79	126.16	-1939.81	1598.3	254.276	-1784.93	1561.9	136.129	-1775.19	1564.19	180.237	-1759.45	1436.67	204.492	-1657.98	1159.75	191.051	-1914.95	1331.08	199.804	-2010.99	1126.28	121.279	-1665.4	1248.69	340.428	-1851.94	1400.28	463.96	-1810.61	1173.63	474.857	-1793.54	1074.9	489.022	-1872.94	940.246	439.88	-1902.57	843.238	500.069	-1859.63	826.542	491.617	-1921.52	768.667
884	0	230.777	-1957.33	1594.83	125.902	-1950.76	1596.6	254.202	-1795.94	1560.13	136.065	-1786.15	1562.49	180.19	-1770.42	1435.04	204.874	-1668.76	1158.42	190.621	-1925.93	1329.13	198.963	-2021.93	1124.21	121.459	-1676.12	1247.36	340.033	-1863.69	1398.62	463.8	-1822.16	1172.08	474.654	-1803.88	1073.41	488.998	-1882.43	938.364	440.012	-1911.55	841.13	500.222	-1868.45	824.836	491.653	-1929.69	766.382
885	0	230.575	-1968.41	1593.16	125.581	-1961.68	1594.86	254.001	-1807.09	1558.23	135.986	-1797.13	1560.79	180.302	-1781.47	1433.42	205.374	-1679.62	1156.91	190.172	-1936.85	1327.31	198.17	-2032.86	1122.42	121.964	-1686.74	1245.73	339.791	-1875.12	1396.91	463.95	-1834	1170.61	474.766	-1814.4	1072.01	488.941	-1891.91	936.523	440.066	-1920.45	839.119	500.323	-1877.07	823.072	491.682	-1938.04	764.212
886	0	230.423	-1979.5	1591.29	125.479	-1972.63	1592.89	253.975	-1818.08	1556.29	135.895	-1808.14	1558.71	180.349	-1792.52	1431.63	206.133	-1690.52	1155.1	189.783	-1947.88	1325.28	197.39	-2043.92	1120.45	122.282	-1697.56	1243.84	339.59	-1886.65	1395.03	463.922	-1845.75	1168.91	474.666	-1824.73	1070.46	488.869	-1901.57	934.44	440.017	-1929.33	836.821	500.391	-1885.88	821.161	491.686	-1946.46	761.801
887	0	230.389	-1990.6	1589.38	125.415	-1983.74	1591.09	254.058	-1829.28	1554.2	135.965	-1819.14	1556.78	180.53	-1803.72	1429.61	207.111	-1701.46	1153.28	189.476	-1958.94	1323.32	196.691	-2055	1118.51	122.683	-1708.32	1242.06	339.413	-1898.14	1393.06	463.789	-1857.51	1166.79	474.742	-1835.57	1068.74	488.715	-1911.34	932.239	439.998	-1938.24	834.457	500.529	-1894.98	819.083	491.676	-1954.98	759.377
888	0	230.368	-2001.82	1587.25	125.443	-1994.96	1588.94	254.157	-1840.59	1551.96	136.107	-1830.34	1554.6	180.815	-1814.84	1427.68	207.867	-1712.53	1151.29	189.295	-1970.23	1321.16	196.164	-2066.34	1116.35	123.368	-1719.25	1240.21	339.34	-1909.87	1390.81	463.846	-1869.8	1164.53	474.775	-1846.62	1066.53	488.685	-1921.43	929.734	439.978	-1947.45	831.565	500.568	-1904.37	816.611	491.671	-1963.6	756.232
889	0	230.349	-2012.93	1585.28	125.647	-2006.06	1587.09	254.311	-1851.86	1549.87	136.343	-1841.54	1552.6	181.033	-1826.05	1425.71	208.201	-1723.83	1149.4	189.227	-1981.44	1319.28	195.647	-2077.63	1114.53	123.816	-1730.26	1238.18	339.371	-1921.34	1388.77	463.846	-1881.88	1162.53	474.696	-1857.56	1064.51	488.663	-1931.45	927.396	439.963	-1956.49	828.958	500.927	-1913.77	814.345	491.599	-1972.33	753.608
890	0	230.572	-2024.14	1583.21	125.827	-2017.25	1585	254.575	-1863.05	1547.9	136.556	-1852.8	1550.49	181.372	-1837.32	1423.68	208.432	-1735.13	1147.32	189.212	-1992.73	1317.25	195.186	-2089.07	1112.52	124.109	-1741.45	1236.12	339.451	-1932.91	1386.7	463.863	-1893.73	1160.55	474.749	-1868.76	1062.61	488.756	-1941.92	925.021	439.92	-1965.71	826.175	501.031	-1923.06	812.082	491.259	-1981.14	750.556
891	0	230.962	-2035.52	1581.37	126.203	-2028.59	1583.26	254.874	-1874.7	1545.89	136.946	-1864.14	1548.55	181.732	-1848.7	1421.72	208.708	-1746.74	1145.17	189.386	-2004.17	1315.3	194.893	-2100.68	1110.73	124.583	-1752.64	1234.33	339.7	-1944.45	1384.57	463.944	-1905.73	1158.39	474.699	-1880.14	1060.46	488.845	-1952.28	922.527	439.973	-1975.26	823.413	501.363	-1932.9	809.723	491.204	-1989.98	747.57
892	0	231.477	-2046.87	1579.49	126.731	-2039.91	1581.42	255.503	-1885.92	1543.91	137.496	-1875.45	1546.67	182.228	-1860.12	1419.78	209.05	-1758.22	1143.21	189.638	-2015.7	1313.31	194.587	-2112.52	1108.92	124.929	-1764.01	1232.34	340.028	-1956.12	1382.4	463.983	-1917.54	1156.04	474.642	-1891.63	1058.18	488.686	-1962.69	919.873	440.046	-1984.97	820.533	501.536	-1942.75	807.153	491.219	-1999.16	744.469
893	0	232.112	-2058.23	1577.7	127.41	-2051.2	1579.55	256.119	-1897.22	1542.09	138.119	-1886.91	1544.87	182.774	-1871.66	1417.88	209.073	-1769.82	1141.25	189.916	-2027.24	1311.47	194.333	-2124.3	1107.33	125.138	-1775.7	1230.36	340.482	-1967.63	1380.46	464.146	-1929.23	1153.98	474.479	-1902.91	1056.03	488.609	-1973.26	917.461	440.129	-1994.74	817.859	502.064	-1952.78	804.997	491.202	-2008.46	741.712
894	0	232.845	-2069.65	1575.9	128.188	-2062.62	1577.93	256.844	-1908.67	1540.37	138.914	-1898.24	1543.06	183.354	-1883.16	1416.1	209.218	-1781.56	1139.25	190.348	-2038.84	1309.76	194.182	-2136.11	1105.72	125.506	-1787.23	1228.59	341.117	-1979.47	1378.48	464.259	-1940.78	1151.9	474.365	-1914.37	1054.01	488.673	-1984.08	915.075	440.308	-2004.67	815.129	502.491	-1962.98	802.907	491.366	-2017.91	738.775
895	0	233.746	-2081.2	1574.15	128.953	-2074.18	1576.21	257.722	-1920.24	1538.37	139.748	-1909.76	1541.34	184.065	-1894.95	1414.26	209.172	-1793.4	1137.06	190.922	-2050.6	1307.95	194.185	-2148.26	1104.09	125.542	-1799.05	1226.77	341.792	-1991.17	1376.35	464.652	-1952.73	1149.53	474.37	-1926.17	1051.6	488.787	-1995.07	912.483	440.567	-2015.03	812.325	503.335	-1973.99	800.563	491.863	-2028.17	736.113
896	0	234.677	-2092.64	1572.36	130.027	-2085.65	1574.61	258.703	-1931.84	1536.55	140.818	-1921.3	1539.69	184.795	-1906.43	1412.26	209.085	-1805.5	1134.84	191.501	-2062.46	1306.25	194.155	-2160.44	1102.63	125.94	-1811.03	1224.81	342.5	-2002.61	1374.22	464.806	-1964.13	1147.28	474.218	-1937.7	1049.19	488.838	-2006.18	910.065	440.867	-2025.55	809.646	503.839	-1984.58	798.206	492.15	-2038.18	733.313
897	0	235.77	-2104.3	1570.78	131.089	-2097.12	1573.17	259.85	-1943.42	1534.9	141.957	-1932.77	1538.1	185.555	-1918.06	1410.41	208.975	-1817.92	1132.54	192.066	-2074.42	1304.7	194.166	-2172.75	1101.32	125.968	-1823.12	1222.86	343.219	-2014.25	1372.1	464.745	-1975.13	1144.76	474.15	-1949.14	1046.96	488.976	-2017.43	907.702	441.089	-2036.23	806.948	504.143	-1995.27	795.965	492.529	-2048.39	730.506
898	0	237.089	-2115.95	1569.28	132.463	-2108.61	1571.78	261.094	-1954.98	1533.1	143.244	-1944.45	1536.63	186.439	-1929.72	1408.55	209.19	-1830.5	1130.15	192.794	-2086.47	1303.38	194.381	-2185.11	1100.33	126.313	-1835.49	1220.78	344.158	-2025.86	1370.15	464.934	-1986.16	1142.37	474.061	-1960.62	1044.59	489.211	-2028.81	905.368	441.464	-2047.18	804.491	504.745	-2006.36	793.859	493.028	-2058.89	727.917
899	0	238.338	-2127.56	1567.43	133.809	-2120.27	1570.49	262.573	-1966.79	1531.43	144.597	-1955.95	1535.23	187.399	-1941.44	1406.7	209.254	-1843.45	1127.75	193.56	-2098.62	1301.87	194.567	-2197.79	1099.04	126.559	-1847.85	1218.77	345.1	-2037.72	1367.94	465.166	-1997.57	1139.88	474.044	-1972.58	1042.07	489.65	-2040.64	902.903	441.876	-2058.43	801.677	505.353	-2017.92	791.446	493.419	-2069.86	725.259
900	0	239.895	-2139.47	1566.44	135.023	-2131.76	1569.54	264.093	-1978.52	1529.91	146.273	-1967.55	1534.22	188.294	-1953.22	1405.04	209.167	-1856.57	1125.34	194.316	-2110.91	1300.84	194.704	-2210.49	1098.31	126.952	-1860.5	1216.71	346.03	-2049.22	1366.1	465.417	-2008.65	1137.61	474.054	-1984.31	1039.87	489.97	-2052.13	900.695	442.268	-2069.82	799.431	505.751	-2029.17	789.228	493.9	-2080.82	722.909
901	0	241.296	-2151.06	1565.11	136.623	-2143.38	1568.59	265.767	-1990.29	1528.66	147.834	-1979.2	1533.16	189.393	-1964.96	1403.53	209.273	-1870	1123.13	195.132	-2123.25	1299.88	194.782	-2223.36	1097.59	127.216	-1873.08	1215	347.102	-2060.99	1364.23	465.85	-2019.82	1135.59	474.147	-1996.09	1037.84	490.321	-2063.81	898.503	442.696	-2081.47	796.994	506.258	-2040.65	787.329	494.514	-2092.09	720.466
902	0	242.936	-2162.89	1564.44	138.28	-2154.82	1568.17	267.432	-2002.27	1527.46	149.733	-1990.8	1532.37	190.429	-1976.81	1402.36	209.199	-1883.68	1121.14	195.975	-2135.7	1299.24	194.935	-2236.38	1097.33	127.743	-1885.79	1213.33	348.341	-2072.84	1362.53	466.213	-2031.25	1133.6	474.226	-2008.17	1035.74	490.801	-2075.62	896.426	443.282	-2093.35	794.954	506.554	-2052.34	785.18	495.239	-2103.72	718.562
903	0	244.481	-2174.7	1563.82	139.989	-2166.59	1567.86	269.22	-2014.26	1526.46	151.366	-2002.6	1531.83	191.546	-1988.92	1401.57	209.423	-1897.14	1119.76	196.79	-2148.4	1298.72	194.962	-2249.81	1097.1	127.892	-1898.32	1212.22	349.549	-2085.07	1360.95	466.411	-2042.88	1131.57	473.897	-2020.29	1033.53	491.287	-2087.62	894.327	443.763	-2105.46	792.708	506.724	-2064.01	783.064	495.867	-2115.65	716.448
904	0	246.296	-2186.6	1564.04	141.756	-2178.23	1568.3	270.98	-2026.12	1525.91	153.159	-2014.39	1531.53	192.576	-2001.1	1401.43	209.556	-1910.16	1118.9	197.67	-2160.96	1298.75	195.026	-2263.31	1097.67	127.971	-1911.07	1211.81	350.495	-2096.85	1359.87	466.715	-2054.57	1130.16	473.672	-2032.38	1031.93	491.858	-2099.54	892.811	444.417	-2117.69	791.006	506.955	-2075.8	781.495	496.759	-2127.58	714.909
905	0	248.191	-2198.4	1564.48	143.54	-2190.04	1569.1	272.787	-2038.12	1525.71	155.11	-2026.32	1531.65	193.488	-2013.53	1401.65	209.411	-1922.99	1118.89	198.449	-2173.69	1299.32	194.929	-2277.01	1098.47	127.877	-1923.56	1211.99	351.474	-2109.06	1359.17	466.817	-2066.45	1129.14	473.254	-2044.64	1030.74	492.326	-2111.62	891.539	445.074	-2130.43	789.833	507.298	-2087.7	780.305	497.529	-2139.73	713.847
906	0	250.106	-2210.35	1565.33	145.544	-2201.84	1570.2	274.599	-2050.27	1525.78	156.85	-2038.33	1532.2	194.243	-2026.33	1402.54	208.852	-1935.67	1119.49	199.266	-2186.53	1300.12	194.95	-2290.83	1099.58	127.488	-1936.36	1213.11	352.386	-2121.41	1358.91	466.642	-2078.77	1128.19	472.737	-2057.42	1029.74	492.789	-2123.99	890.806	445.781	-2143.33	788.945	507.522	-2100.13	779.458	498.535	-2152.25	713.14
907	0	251.992	-2222.33	1566.56	147.535	-2213.79	1571.8	276.441	-2062.44	1526.39	158.725	-2050.32	1533.19	195.107	-2039.2	1403.8	208.017	-1948.24	1120.87	199.983	-2199.29	1301.35	195.056	-2304.48	1101.08	126.844	-1949.01	1214.72	353.089	-2133.69	1359.2	466.383	-2091.35	1127.88	472.094	-2070.25	1029.42	493.081	-2136.53	890.624	446.57	-2156.65	788.944	507.86	-2112.56	779.336	499.455	-2164.86	712.939
908	0	253.93	-2234.23	1568.08	149.467	-2225.81	1573.8	278.02	-2074.44	1527.35	160.448	-2062.57	1534.58	195.558	-2051.73	1405.43	207.436	-1961.12	1122.97	200.702	-2211.82	1303.18	195.15	-2317.73	1103.03	126.243	-1961.72	1216.96	353.716	-2145.75	1360.13	465.993	-2104.01	1128.32	471.368	-2083.16	1029.89	493.348	-2149.22	891.282	447.27	-2169.91	789.478	507.933	-2125.01	779.957	500.548	-2177.54	713.596
909	0	255.832	-2246.19	1569.7	151.496	-2237.86	1576.11	279.652	-2086.49	1528.56	161.986	-2074.64	1536.44	195.895	-2064.1	1407.26	206.804	-1974.09	1125.15	201.256	-2224.33	1305.12	195.409	-2330.54	1105.22	125.275	-1974.68	1219	354.27	-2157.69	1361.48	465.384	-2116.91	1129.24	470.605	-2096.23	1030.95	493.478	-2162.16	892.507	447.906	-2183.36	790.455	507.996	-2137.79	781.031	501.553	-2190.47	714.848
910	0	257.634	-2258.36	1571.21	153.361	-2250.07	1578.31	281.08	-2098.66	1529.8	163.702	-2086.88	1538.68	196.142	-2076.44	1409.12	205.374	-1986.96	1126.7	201.886	-2236.54	1307.21	195.65	-2343	1107.41	124.466	-1987.35	1221.59	354.504	-2169.57	1363.03	464.49	-2130.05	1130.11	469.611	-2109.48	1032.01	493.435	-2175.53	894.003	448.542	-2197.44	791.905	508.193	-2151.03	782.551	502.63	-2203.93	716.302
911	0	259.36	-2270.45	1572.95	155.069	-2262.12	1580.74	282.455	-2110.78	1531.55	165.088	-2099.04	1541.21	196.658	-2088.25	1411.04	203.83	-1999.98	1128.2	202.284	-2248.65	1309.65	195.889	-2354.91	1109.95	123.86	-2000.09	1223.66	354.865	-2181.15	1365.05	463.626	-2143.04	1131.39	469.081	-2122.42	1033.83	493.264	-2188.87	896.15	449.18	-2210.8	793.396	508.301	-2164.53	784.559	503.647	-2217.43	718.578
912	0	260.684	-2282.42	1574.26	156.535	-2274.22	1582.97	283.563	-2122.78	1533.16	166.299	-2111.04	1543.64	196.942	-2099.91	1412.87	202.966	-2012.94	1130.01	202.641	-2260.46	1311.84	196.051	-2366.42	1112.32	123.116	-2012.39	1225.88	355.247	-2192.79	1367.08	462.835	-2156.12	1133.02	468.381	-2135.48	1035.89	493.021	-2202.47	898.305	449.393	-2225.42	795.808	508.578	-2178.45	787.08	504.385	-2231.39	720.825
913	0	261.873	-2294.58	1575.9	157.858	-2286.16	1584.96	284.684	-2134.81	1535.05	167.378	-2122.98	1546.33	197.558	-2111.61	1414.77	202.657	-2025.25	1131.65	202.995	-2271.98	1314.04	196.266	-2377.54	1114.89	122.823	-2024.69	1227.64	355.536	-2204.11	1369.07	462.055	-2169.15	1134.52	467.879	-2148.42	1037.77	492.932	-2216.27	900.678	449.785	-2239.87	798.106	508.608	-2192.63	789.253	504.876	-2245.67	723.165
914	0	262.615	-2306.35	1576.86	158.78	-2298.18	1586.79	285.551	-2146.82	1536.91	168.332	-2134.81	1548.71	198.052	-2123.05	1416.61	202.42	-2036.64	1133.57	203.55	-2283.04	1315.69	196.394	-2388.25	1116.91	122.826	-2036.42	1229.69	355.875	-2215.75	1370.89	461.506	-2182.26	1135.92	467.599	-2161.54	1039.56	492.769	-2230.35	902.875	449.943	-2254.66	800.197	508.609	-2207.25	791.371	505.364	-2260.57	725.422
915	0	263.319	-2318.41	1578.58	159.412	-2309.87	1588.56	286.155	-2158.56	1538.76	169.118	-2146.49	1550.94	198.559	-2134.43	1418.33	202.437	-2047.7	1135.28	203.657	-2294.41	1317.72	196.385	-2398.51	1118.99	122.789	-2047.91	1231.38	356.304	-2227.17	1372.82	461.278	-2195.14	1137.69	467.722	-2174.47	1041.52	492.763	-2244.28	905.123	450.012	-2269.38	802.599	508.704	-2221.92	793.647	505.476	-2275.52	727.791
916	0	263.554	-2330.04	1579.76	159.809	-2321.45	1590.12	286.73	-2170.3	1540.48	169.728	-2158.18	1552.82	199.05	-2145.8	1419.95	202.889	-2058.86	1137	203.744	-2305.8	1319.43	196.39	-2408.55	1120.61	123.17	-2059.32	1233.22	356.64	-2238.64	1374.39	461.375	-2208.11	1139.33	468.079	-2187.35	1043.17	492.792	-2258.5	907.059	449.883	-2284.31	804.631	508.624	-2236.88	795.578	505.541	-2291.01	730.042
917	0	263.868	-2341.72	1581.19	160.128	-2332.88	1591.48	287.031	-2182.01	1541.88	170.04	-2169.56	1554.37	199.596	-2157.22	1421.46	203.402	-2070.16	1138.66	203.782	-2317.05	1321.04	196.264	-2418.76	1122.2	123.734	-2070.27	1234.84	357.076	-2250.32	1375.97	461.419	-2220.9	1140.41	468.495	-2200.51	1044.19	492.858	-2272.61	908.791	449.729	-2299.36	806.724	508.373	-2252.26	797.089	505.237	-2306.85	732.172
918	0	263.997	-2353.37	1582.43	160.252	-2344.38	1592.9	287.253	-2193.66	1543.06	170.356	-2181.07	1555.71	200.092	-2168.51	1422.88	204.004	-2081.31	1140.13	203.697	-2328.36	1322.36	196.014	-2429.41	1123.44	124.288	-2080.98	1236.47	357.206	-2261.81	1377.03	461.808	-2233.67	1141.47	468.959	-2213.81	1044.97	492.956	-2286.88	910.208	449.395	-2314.46	808.67	508.044	-2267.6	798.255	504.742	-2323.06	734.079
919	0	264.158	-2364.95	1583.95	160.335	-2355.73	1594.16	287.28	-2204.98	1544.26	170.591	-2192.43	1556.85	200.472	-2179.99	1424.33	204.848	-2092.18	1141.79	203.672	-2339.47	1323.65	195.699	-2440.56	1124.61	125.186	-2091.66	1238.12	357.236	-2273.43	1378.17	462.475	-2246.2	1142.77	470.36	-2226.89	1046.28	493.112	-2301.17	911.76	448.946	-2329.54	810.819	507.828	-2283.06	799.622	504.022	-2339.3	736.215
920	0	264.138	-2376.13	1584.98	160.404	-2367.06	1595.27	287.221	-2216.31	1545.41	170.466	-2203.82	1557.89	200.755	-2191.37	1425.82	205.687	-2102.75	1143.45	203.552	-2350.68	1324.7	195.317	-2452.12	1125.34	125.851	-2102.1	1239.77	357.337	-2285.19	1379.3	463.252	-2258.8	1144.1	471.372	-2239.87	1047.25	493.17	-2315.58	913.152	448.418	-2344.71	812.858	507.738	-2298.76	801.019	503.138	-2355.83	738.334
921	0	264.301	-2387.56	1586.13	160.599	-2378.44	1596.4	287.147	-2227.64	1546.53	170.342	-2215.25	1559.09	200.946	-2202.77	1427.22	206.529	-2113.24	1145.56	203.472	-2361.74	1325.38	194.854	-2464.04	1125.99	126.391	-2112.45	1241.69	357.226	-2297.08	1380.24	464.282	-2271.67	1145.37	472.209	-2253.26	1047.95	493.157	-2330.13	914.61	447.816	-2359.87	814.898	507.247	-2314.56	802.045	502.156	-2372.86	740.571
922	0	264.376	-2398.7	1587.21	160.65	-2389.88	1597.61	286.927	-2238.74	1547.59	170.111	-2226.62	1560.25	200.959	-2214.21	1428.84	207.233	-2123.67	1147.3	203.224	-2372.9	1326.33	194.15	-2475.91	1126.9	127.209	-2122.81	1243.31	356.967	-2308.88	1381.32	465.147	-2284.17	1146.82	473.249	-2266.21	1048.99	493.071	-2344.56	916.238	447.027	-2374.84	817.071	506.973	-2330.47	803.547	501.193	-2389.79	743.021
923	0	264.474	-2409.87	1588.2	160.742	-2401.19	1598.52	286.677	-2249.89	1548.73	169.879	-2237.96	1561.4	201.249	-2225.59	1430.19	208.117	-2133.93	1149.12	202.929	-2383.97	1327.13	193.383	-2487.37	1127.82	128.115	-2133.2	1245.11	356.691	-2320.69	1382.41	466.12	-2296.58	1148.41	474.44	-2279.24	1050.19	492.864	-2358.99	917.911	446.145	-2389.81	819.279	506.339	-2346.04	804.833	499.895	-2406.67	745.723
924	0	264.589	-2421.14	1589.21	160.832	-2412.53	1599.49	286.321	-2260.94	1549.76	169.538	-2249.33	1562.45	201.286	-2236.94	1431.51	208.978	-2144.23	1150.83	202.673	-2395.04	1327.89	192.773	-2497.82	1127.76	128.601	-2143.46	1246.54	356.404	-2332.47	1383.51	467.08	-2308.98	1149.92	475.845	-2292.55	1051.47	492.737	-2373.51	919.68	445.255	-2404.68	821.688	506.018	-2361.74	806.444	498.522	-2423.45	748.083
925	0	264.531	-2432.38	1589.68	160.87	-2423.99	1600.12	286.062	-2272.22	1550.56	169.204	-2260.67	1563.34	201.219	-2248.16	1432.57	209.841	-2154.34	1152.36	202.221	-2406	1328.28	191.891	-2507.84	1127.67	129.332	-2153.77	1248.11	355.991	-2344.36	1384.37	467.69	-2321.36	1150.89	476.902	-2306	1052.37	492.429	-2388.1	921.221	444.294	-2419.68	823.844	505.3	-2377.73	807.613	497.406	-2440.42	750.781
926	0	264.386	-2443.57	1590.32	160.791	-2435.17	1600.7	285.73	-2283.3	1551.31	168.89	-2271.93	1563.99	201.507	-2259.24	1433.5	210.604	-2164.55	1153.44	201.706	-2416.66	1328.74	191.035	-2517.77	1127.8	130.17	-2164.05	1249.18	355.7	-2355.96	1385.33	468.531	-2333.56	1152.33	477.834	-2318.98	1053.44	492.042	-2402.52	922.891	443.384	-2434.41	826.204	504.498	-2393.24	808.978	495.803	-2456.85	753.354
927	0	264.104	-2454.84	1590.66	160.347	-2446.9	1601.31	285.218	-2294.44	1551.78	168.608	-2283.2	1564.37	201.342	-2270.25	1434.19	211.513	-2174.65	1154.53	201.26	-2427.34	1329.12	190.122	-2527.68	1127.71	130.999	-2174.22	1249.95	355.405	-2367.6	1386.11	469.189	-2345.75	1153.66	478.825	-2332.24	1054.52	491.509	-2417.07	924.428	442.392	-2449.22	828.3	504.131	-2408.94	810.631	494.634	-2473.85	755.985
928	0	263.76	-2466.26	1591.05	160.046	-2457.96	1601.4	285.003	-2305.77	1552.18	168.345	-2294.41	1564.8	201.709	-2281.27	1434.94	212.447	-2185.08	1155.41	200.815	-2437.9	1329.39	189.293	-2537.36	1127.6	131.728	-2184.3	1250.83	354.992	-2378.95	1386.78	469.615	-2358.12	1154.55	479.645	-2345.56	1055.34	491.16	-2431.68	926.11	441.556	-2464.04	830.479	503.201	-2424.67	811.708	493.396	-2490.18	758.486
929	0	263.247	-2477.54	1590.93	159.525	-2469.18	1601.21	284.821	-2317.11	1552.58	168.058	-2305.66	1565.05	201.613	-2292.01	1435.35	213.248	-2195.12	1156.27	200.315	-2448.36	1329.37	188.522	-2546.96	1127.18	132.224	-2194.35	1251.82	354.684	-2390.43	1387.28	470.017	-2370.57	1155.36	480.526	-2359	1056.1	490.785	-2446.58	927.63	440.615	-2479.11	832.164	503.1	-2440.73	813.344	491.958	-2506.59	760.559
930	0	262.682	-2488.84	1590.96	158.987	-2480.26	1601.14	284.498	-2328.4	1552.98	167.771	-2316.73	1565.35	201.764	-2302.55	1435.83	213.776	-2205.02	1156.98	199.872	-2458.77	1329.58	187.769	-2556.29	1126.89	132.93	-2204.48	1252.41	354.454	-2401.64	1387.81	470.342	-2382.81	1156.19	481.354	-2372.25	1056.96	490.383	-2461.06	929.035	439.748	-2494.06	834.073	502.868	-2456.58	814.866	490.8	-2522.64	762.624
931	0	261.987	-2500.29	1590.79	158.402	-2491.46	1600.86	284.262	-2339.59	1553.31	167.581	-2327.81	1565.5	201.854	-2313.21	1436.11	214.304	-2214.89	1157.52	199.43	-2469.13	1329.35	187.175	-2565.6	1126.4	133.545	-2214.49	1252.71	354.125	-2412.73	1388.04	470.366	-2395.15	1156.76	482.066	-2385.57	1057.59	489.978	-2475.8	930.235	438.912	-2509.13	835.652	502.148	-2472.15	816.057	489.227	-2538.63	764.246
932	0	261.371	-2511.64	1590.48	157.677	-2502.82	1600.77	284.173	-2350.9	1553.44	167.42	-2338.86	1565.61	201.977	-2323.89	1436.22	214.779	-2224.84	1157.88	199.123	-2479.52	1329.22	186.542	-2574.86	1125.65	134.02	-2224.73	1252.91	354.048	-2423.88	1388.13	470.448	-2407.72	1156.76	482.557	-2399.04	1057.68	489.656	-2490.48	931.218	438.13	-2524.24	837.039	501.689	-2488.24	816.995	487.954	-2554.71	765.648
933	0	260.772	-2523.01	1590.06	157.039	-2513.91	1600.19	283.939	-2362.18	1553.52	167.331	-2349.87	1565.69	202.155	-2334.44	1436.26	215.036	-2234.69	1158.08	198.772	-2489.89	1328.83	186.074	-2584.12	1125	134.481	-2234.85	1253.15	353.891	-2434.84	1387.92	470.907	-2420.74	1156.98	482.898	-2412.36	1057.56	489.29	-2505.07	931.923	437.319	-2539.34	838.141	501.131	-2504	817.758	486.764	-2570.55	766.916
934	0	260.216	-2534.31	1589.68	156.502	-2524.94	1599.6	283.753	-2373.43	1553.56	167.23	-2360.79	1565.58	202.168	-2345.03	1436.08	215.165	-2244.47	1158.18	198.427	-2500.21	1328.54	185.659	-2593.5	1124.25	134.55	-2244.83	1253.09	353.537	-2445.56	1387.66	470.377	-2432.76	1156.46	483.002	-2425.56	1057.36	488.83	-2519.52	932.54	436.493	-2554.3	839.055	500.498	-2519.46	818.373	485.953	-2586.23	768.399
935	0	259.808	-2545.52	1588.89	156.153	-2535.93	1598.83	283.835	-2384.68	1553.37	167.095	-2371.69	1565.33	201.987	-2355.68	1435.71	215.099	-2254.44	1158.03	198.109	-2510.68	1327.87	185.345	-2603.27	1123.4	134.606	-2255.11	1252.9	353.405	-2456.46	1387.25	470.123	-2445.35	1155.83	483.016	-2438.96	1056.81	488.269	-2534.06	932.765	435.645	-2570.06	839.864	499.859	-2534.97	818.631	484.855	-2601.77	769.326
936	0	259.353	-2556.66	1588.1	155.71	-2547.02	1598.05	283.548	-2395.66	1552.89	166.925	-2382.66	1565.01	201.839	-2366.38	1435.39	215.044	-2264.44	1157.87	197.822	-2521.13	1327.18	185.082	-2613.23	1122.42	134.407	-2265.35	1252.95	352.895	-2467.17	1386.5	469.954	-2458.07	1155.21	483.173	-2452.85	1056.26	487.714	-2548.5	932.816	434.947	-2584.32	840.178	499.197	-2550.5	818.696	483.33	-2617.13	769.591
[truncated: 69 more columns]

## Sheet: Sheet2
Devices
		025370 - Force			025370 - Moment			025370 - CoP			027571 - Force			027571 - Moment			027571 - CoP			037720 - Force			037720 - Moment			037720 - CoP
Frame	Sub Frame	Fx	Fy	Fz	Mx	My	Mz	Cx	Cy	Cz	Fx	Fy	Fz	Mx	My	Mz	Cx	Cy	Cz	Fx	Fy	Fz	Mx	My	Mz	Cx	Cy	Cz
		N	N	N	N.mm	N.mm	N.mm	mm	mm	mm	N	N	N	N.mm	N.mm	N.mm	mm	mm	mm	N	N	N	N.mm	N.mm	N.mm	mm	mm	mm
516	0	0	0	0	0	0	0	200	300	0	0	0	0	0	0	0	200	903	0	0	0	0	0	0	0	603	903	0
516	1	0	0	0	0	0	0	200	300	0	0	0	0	0	0	0	200	903	0	0	0	0	0	0	0	603	903	0
516	2	0	0	0	0	0	0	200	300	0	0	0	0	0	0	0	200	903	0	0	0	0	0	0	0	603	903	0
516	3	0	0	0	0	0	0	200	300	0	0	0	0	0	0	0	200	903	0	0	0	0	0	0	0	603	903	0
516	4	0	0	0	0	0	0	200	300	0	0	0	0	0	0	0	200	903	0	0	0	0	0	0	0	603	903	0
516	5	0	0	0	0	0	0	200	300	0	0	0	0	0	0	0	200	903	0	0	0	0	0	0	0	603	903	0
516	6	0	0	0	0	0	0	200	300	0	0	0	0	0	0	0	200	903	0	0	0	0	0	0	0	603	903	0
516	7	0	0	0	0	0	0	200	300	0	0	0	0	0	0	0	200	903	0	0	0	0	0	0	0	603	903	0
516	8	0	0	0	0	0	0	200	300	0	0	0	0	0	0	0	200	903	0	0	0	0	0	0	0	603	903	0
516	9	0	0	0	0	0	0	200	300	0	0	0	0	0	0	0	200	903	0	0	0	0	0	0	0	603	903	0
517	0	0	0	0	0	0	0	200	300	0	0	0	0	0	0	0	200	903	0	0	0	0	0	0	0	603	903	0
517	1	0	0	0	0	0	0	200	300	0	0	0	0	0	0	0	200	903	0	0	0	0	0	0	0	603	903	0
517	2	0	0	0	0	0	0	200	300	0	0	0	0	0	0	0	200	903	0	0	0	0	0	0	0	603	903	0
517	3	0	0	0	0	0	0	200	300	0	0	0	0	0	0	0	200	903	0	0	0	0	0	0	0	603	903	0
517	4	0	0	0	0	0	0	200	300	0	0	0	0	0	0	0	200	903	0	0	0	0	0	0	0	603	903	0
517	5	0	0	0	0	0	0	200	300	0	0	0	0	0	0	0	200	903	0	0	0	0	0	0	0	603	903	0
517	6	0	0	0	0	0	0	200	300	0	0	0	0	0	0	0	200	903	0	0	0	0	0	0	0	603	903	0
517	7	0	0	0	0	0	0	200	300	0	0	0	0	0	0	0	200	903	0	0	0	0	0	0	0	603	903	0
517	8	0	0	0	0	0	0	200	300	0	0	0	0	0	0	0	200	903	0	0	0	0	0	0	0	603	903	0
517	9	0	0	0	0	0	0	200	300	0	0	0	0	0	0	0	200	903	0	0	0	0	0	0	0	603	903	0
518	0	0	0	0	0	0	0	200	300	0	0	0	0	0	0	0	200	903	0	0	0	0	0	0	0	603	903	0
518	1	0	0	0	0	0	0	200	300	0	0	0	0	0	0	0	200	903	0	0	0	0	0	0	0	603	903	0
518	2	0	0	0	0	0	0	200	300	0	0	0	0	0	0	0	200	903	0	0	0	0	0	0	0	603	903	0
518	3	0	0	0	0	0	0	200	300	0	0	0	0	0	0	0	200	903	0	0	0	0	0	0	0	603	903	0
518	4	0	0	0	0	0	0	200	300	0	0	0	0	0	0	0	200	903	0	0	0	0	0	0	0	603	903	0
518	5	0	0	0	0	0	0	200	300	0	0	0	0	0	0	0	200	903	0	0	0	0	0	0	0	603	903	0
518	6	0	0	0	0	0	0	200	300	0	0	0	0	0	0	0	200	903	0	0	0	0	0	0	0	603	903	0
518	7	0	0	0	0	0	0	200	300	0	0	0	0	0	0	0	200	903	0	0	0	0	0	0	0	603	903	0
518	8	0	0	0	0	0	0	200	300	0	0	0	0	0	0	0	200	903	0	0	0	0	0	0	0	603	903	0
518	9	0	0	0	0	0	0	200	300	0	0	0	0	0	0	0	200	903	0	0	0	0	0	0	0	603	903	0
519	0	0	0	0	0	0	0	200	300	0	0	0	0	0	0	0	200	903	0	0	0	0	0	0	0	603	903	0
519	1	0	0	0	0	0	0	200	300	0	0	0	0	0	0	0	200	903	0	0	0	0	0	0	0	603	903	0
519	2	0	0	0	0	0	0	200	300	0	0	0	0	0	0	0	200	903	0	0	0	0	0	0	0	603	903	0
519	3	0	0	0	0	0	0	200	300	0	0	0	0	0	0	0	200	903	0	0	0	0	0	0	0	603	903	0
519	4	0	0	0	0	0	0	200	300	0	0	0	0	0	0	0	200	903	0	0	0	0	0	0	0	603	903	0
519	5	0	0	0	0	0	0	200	300	0	0	0	0	0	0	0	200	903	0	0	0	0	0	0	0	603	903	0
519	6	0	0	0	0	0	0	200	300	0	0	0	0	0	0	0	200	903	0	0	0	0	0	0	0	603	903	0
519	7	0	0	0	0	0	0	200	300	0	0	0	0	0	0	0	200	903	0	0	0	0	0	0	0	603	903	0
519	8	0	0	0	0	0	0	200	300	0	0	0	0	0	0	0	200	903	0	0	0	0	0	0	0	603	903	0
519	9	0	0	0	0	0	0	200	300	0	0	0	0	0	0	0	200	903	0	0	0	0	0	0	0	603	903	0
520	0	0	0	0	0	0	0	200	300	0	0	0	0	0	0	0	200	903	0	0	0	0	0	0	0	603	903	0
520	1	0	0	0	0	0	0	200	300	0	0	0	0	0	0	0	200	903	0	0	0	0	0	0	0	603	903	0
520	2	0	0	0	0	0	0	200	300	0	0	0	0	0	0	0	200	903	0	0	0	0	0	0	0	603	903	0
520	3	0	0	0	0	0	0	200	300	0	0	0	0	0	0	0	200	903	0	0	0	0	0	0	0	603	903	0
520	4	0	0	0	0	0	0	200	300	0	0	0	0	0	0	0	200	903	0	0	0	0	0	0	0	603	903	0
520	5	0	0	0	0	0	0	200	300	0	0	0	0	0	0	0	200	903	0	0	0	0	0	0	0	603	903	0
520	6	0	0	0	0	0	0	200	300	0	0	0	0	0	0	0	200	903	0	0	0	0	0	0	0	603	903	0
520	7	0	0	0	0	0	0	200	300	0	0	0	0	0	0	0	200	903	0	0	0	0	0	0	0	603	903	0
520	8	0	0	0	0	0	0	200	300	0	0	0	0	0	0	0	200	903	0	0	0	0	0	0	0	603	903	0
520	9	0	0	0	0	0	0	200	300	0	0	0	0	0	0	0	200	903	0	0	0	0	0	0	0	603	903	0
521	0	0	0	0	0	0	0	200	300	0	0	0	0	0	0	0	200	903	0	0	0	0	0	0	0	603	903	0
521	1	0	0	0	0	0	0	200	300	0	0	0	0	0	0	0	200	903	0	0	0	0	0	0	0	603	903	0
521	2	0	0	0	0	0	0	200	300	0	0	0	0	0	0	0	200	903	0	0	0	0	0	0	0	603	903	0
521	3	0	0	0	0	0	0	200	300	0	0	0	0	0	0	0	200	903	0	0	0	0	0	0	0	603	903	0
521	4	0	0	0	0	0	0	200	300	0	0	0	0	0	0	0	200	903	0	0	0	0	0	0	0	603	903	0
521	5	0	0	0	0	0	0	200	300	0	0	0	0	0	0	0	200	903	0	0	0	0	0	0	0	603	903	0
521	6	0	0	0	0	0	0	200	300	0	0	0	0	0	0	0	200	903	0	0	0	0	0	0	0	603	903	0
521	7	0	0	0	0	0	0	200	300	0	0	0	0	0	0	0	200	903	0	0	0	0	0	0	0	603	903	0
521	8	0	0	0	0	0	0	200	300	0	0	0	0	0	0	0	200	903	0	0	0	0	0	0	0	603	903	0
521	9	0	0	0	0	0	0	200	300	0	0	0	0	0	0	0	200	903	0	0	0	0	0	0	0	603	903	0
522	0	0	0	0	0	0	0	200	300	0	0	0	0	0	0	0	200	903	0	0	0	0	0	0	0	603	903	0
522	1	0	0	0	0	0	0	200	300	0	0	0	0	0	0	0	200	903	0	0	0	0	0	0	0	603	903	0
522	2	0	0	0	0	0	0	200	300	0	0	0	0	0	0	0	200	903	0	0	0	0	0	0	0	603	903	0
522	3	0	0	0	0	0	0	200	300	0	0	0	0	0	0	0	200	903	0	0	0	0	0	0	0	603	903	0
522	4	0	0	0	0	0	0	200	300	0	0	0	0	0	0	0	200	903	0	0	0	0	0	0	0	603	903	0
522	5	0	0	0	0	0	0	200	300	0	0	0	0	0	0	0	200	903	0	0	0	0	0	0	0	603	903	0
522	6	0	0	0	0	0	0	200	300	0	0	0	0	0	0	0	200	903	0	0	0	0	0	0	0	603	903	0
522	7	0	0	0	0	0	0	200	300	0	0	0	0	0	0	0	200	903	0	0	0	0	0	0	0	603	903	0
522	8	0	0	0	0	0	0	200	300	0	0	0	0	0	0	0	200	903	0	0	0	0	0	0	0	603	903	0
522	9	0	0	0	0	0	0	200	300	0	0	0	0	0	0	0	200	903	0	0	0	0	0	0	0	603	903	0
523	0	0	0	0	0	0	0	200	300	0	0	0	0	0	0	0	200	903	0	0	0	0	0	0	0	603	903	0
523	1	0	0	0	0	0	0	200	300	0	0	0	0	0	0	0	200	903	0	0	0	0	0	0	0	603	903	0
523	2	0	0	0	0	0	0	200	300	0	0	0	0	0	0	0	200	903	0	0	0	0	0	0	0	603	903	0
523	3	0	0	0	0	0	0	200	300	0	0	0	0	0	0	0	200	903	0	0	0	0	0	0	0	603	903	0
523	4	0	0	0	0	0	0	200	300	0	0	0	0	0	0	0	200	903	0	0	0	0	0	0	0	603	903	0
523	5	0	0	0	0	0	0	200	300	0	0	0	0	0	0	0	200	903	0	0	0	0	0	0	0	603	903	0
523	6	0	0	0	0	0	0	200	300	0	0	0	0	0	0	0	200	903	0	0	0	0	0	0	0	603	903	0
523	7	0	0	0	0	0	0	200	300	0	0	0	0	0	0	0	200	903	0	0	0	0	0	0	0	603	903	0
523	8	0	0	0	0	0	0	200	300	0	0	0	0	0	0	0	200	903	0	0	0	0	0	0	0	603	903	0
523	9	0	0	0	0	0	0	200	300	0	0	0	0	0	0	0	200	903	0	0	0	0	0	0	0	603	903	0
524	0	0	0	0	0	0	0	200	300	0	0	0	0	0	0	0	200	903	0	0	0	0	0	0	0	603	903	0
524	1	0	0	0	0	0	0	200	300	0	0	0	0	0	0	0	200	903	0	0	0	0	0	0	0	603	903	0
524	2	0	0	0	0	0	0	200	300	0	0	0	0	0	0	0	200	903	0	0	0	0	0	0	0	603	903	0
524	3	0	0	0	0	0	0	200	300	0	0	0	0	0	0	0	200	903	0	0	0	0	0	0	0	603	903	0
524	4	0	0	0	0	0	0	200	300	0	0	0	0	0	0	0	200	903	0	0	0	0	0	0	0	603	903	0
524	5	0	0	0	0	0	0	200	300	0	0	0	0	0	0	0	200	903	0	0	0	0	0	0	0	603	903	0
524	6	0	0	0	0	0	0	200	300	0	0	0	0	0	0	0	200	903	0	0	0	0	0	0	0	603	903	0
524	7	0	0	0	0	0	0	200	300	0	0	0	0	0	0	0	200	903	0	0	0	0	0	0	0	603	903	0
524	8	0	0	0	0	0	0	200	300	0	0	0	0	0	0	0	200	903	0	0	0	0	0	0	0	603	903	0
524	9	0	0	0	0	0	0	200	300	0	0	0	0	0	0	0	200	903	0	0	0	0	0	0	0	603	903	0
525	0	0	0	0	0	0	0	200	300	0	0	0	0	0	0	0	200	903	0	0	0	0	0	0	0	603	903	0
525	1	0	0	0	0	0	0	200	300	0	0	0	0	0	0	0	200	903	0	0	0	0	0	0	0	603	903	0
525	2	0	0	0	0	0	0	200	300	0	0	0	0	0	0	0	200	903	0	0	0	0	0	0	0	603	903	0
525	3	0	0	0	0	0	0	200	300	0	0	0	0	0	0	0	200	903	0	0	0	0	0	0	0	603	903	0
525	4	0	0	0	0	0	0	200	300	0	0	0	0	0	0	0	200	903	0	0	0	0	0	0	0	603	903	0
525	5	0	0	0	0	0	0	200	300	0	0	0	0	0	0	0	200	903	0	0	0	0	0	0	0	603	903	0
525	6	0	0	0	0	0	0	200	300	0	0	0	0	0	0	0	200	903	0	0	0	0	0	0	0	603	903	0
525	7	0	0	0	0	0	0	200	300	0	0	0	0	0	0	0	200	903	0	0	0	0	0	0	0	603	903	0
525	8	0	0	0	0	0	0	200	300	0	0	0	0	0	0	0	200	903	0	0	0	0	0	0	0	603	903	0
525	9	0	0	0	0	0	0	200	300	0	0	0	0	0	0	0	200	903	0	0	0	0	0	0	0	603	903	0
526	0	0	0	0	0	0	0	200	300	0	0	0	0	0	0	0	200	903	0	0	0	0	0	0	0	603	903	0
526	1	0	0	0	0	0	0	200	300	0	0	0	0	0	0	0	200	903	0	0	0	0	0	0	0	603	903	0
526	2	0	0	0	0	0	0	200	300	0	0	0	0	0	0	0	200	903	0	0	0	0	0	0	0	603	903	0
526	3	0	0	0	0	0	0	200	300	0	0	0	0	0	0	0	200	903	0	0	0	0	0	0	0	603	903	0
526	4	0	0	0	0	0	0	200	300	0	0	0	0	0	0	0	200	903	0	0	0	0	0	0	0	603	903	0
526	5	0	0	0	0	0	0	200	300	0	0	0	0	0	0	0	200	903	0	0	0	0	0	0	0	603	903	0
526	6	0	0	0	0	0	0	200	300	0	0	0	0	0	0	0	200	903	0	0	0	0	0	0	0	603	903	0
526	7	0	0	0	0	0	0	200	300	0	0	0	0	0	0	0	200	903	0	0	0	0	0	0	0	603	903	0
526	8	0	0	0	0	0	0	200	300	0	0	0	0	0	0	0	200	903	0	0	0	0	0	0	0	603	903	0
526	9	0	0	0	0	0	0	200	300	0	0	0	0	0	0	0	200	903	0	0	0	0	0	0	0	603	903	0
527	0	0	0	0	0	0	0	200	300	0	0	0	0	0	0	0	200	903	0	0	0	0	0	0	0	603	903	0
527	1	0	0	0	0	0	0	200	300	0	0	0	0	0	0	0	200	903	0	0	0	0	0	0	0	603	903	0
527	2	0	0	0	0	0	0	200	300	0	0	0	0	0	0	0	200	903	0	0	0	0	0	0	0	603	903	0
527	3	0	0	0	0	0	0	200	300	0	0	0	0	0	0	0	200	903	0	0	0	0	0	0	0	603	903	0
527	4	0	0	0	0	0	0	200	300	0	0	0	0	0	0	0	200	903	0	0	0	0	0	0	0	603	903	0
527	5	0	0	0	0	0	0	200	300	0	0	0	0	0	0	0	200	903	0	0	0	0	0	0	0	603	903	0
527	6	0	0	0	0	0	0	200	300	0	0	0	0	0	0	0	200	903	0	0	0	0	0	0	0	603	903	0
527	7	0	0	0	0	0	0	200	300	0	0	0	0	0	0	0	200	903	0	0	0	0	0	0	0	603	903	0
527	8	0	0	0	0	0	0	200	300	0	0	0	0	0	0	0	200	903	0	0	0	0	0	0	0	603	903	0
527	9	0	0	0	0	0	0	200	300	0	0	0	0	0	0	0	200	903	0	0	0	0	0	0	0	603	903	0
528	0	0	0	0	0	0	0	200	300	0	0	0	0	0	0	0	200	903	0	0	0	0	0	0	0	603	903	0
528	1	0	0	0	0	0	0	200	300	0	0	0	0	0	0	0	200	903	0	0	0	0	0	0	0	603	903	0
528	2	0	0	0	0	0	0	200	300	0	0	0	0	0	0	0	200	903	0	0	0	0	0	0	0	603	903	0
528	3	0	0	0	0	0	0	200	300	0	0	0	0	0	0	0	200	903	0	0	0	0	0	0	0	603	903	0
528	4	0	0	0	0	0	0	200	300	0	0	0	0	0	0	0	200	903	0	0	0	0	0	0	0	603	903	0
528	5	0	0	0	0	0	0	200	300	0	0	0	0	0	0	0	200	903	0	0	0	0	0	0	0	603	903	0
528	6	0	0	0	0	0	0	200	300	0	0	0	0	0	0	0	200	903	0	0	0	0	0	0	0	603	903	0
528	7	0	0	0	0	0	0	200	300	0	0	0	0	0	0	0	200	903	0	0	0	0	0	0	0	603	903	0
528	8	0	0	0	0	0	0	200	300	0	0	0	0	0	0	0	200	903	0	0	0	0	0	0	0	603	903	0
528	9	0	0	0	0	0	0	200	300	0	0	0	0	0	0	0	200	903	0	0	0	0	0	0	0	603	903	0
529	0	0	0	0	0	0	0	200	300	0	0	0	0	0	0	0	200	903	0	0	0	0	0	0	0	603	903	0
529	1	0	0	0	0	0	0	200	300	0	0	0	0	0	0	0	200	903	0	0	0	0	0	0	0	603	903	0
529	2	0	0	0	0	0	0	200	300	0	0	0	0	0	0	0	200	903	0	0	0	0	0	0	0	603	903	0
529	3	0	0	0	0	0	0	200	300	0	0	0	0	0	0	0	200	903	0	0	0	0	0	0	0	603	903	0
529	4	0	0	0	0	0	0	200	300	0	0	0	0	0	0	0	200	903	0	0	0	0	0	0	0	603	903	0
529	5	0	0	0	0	0	0	200	300	0	0	0	0	0	0	0	200	903	0	0	0	0	0	0	0	603	903	0
529	6	0	0	0	0	0	0	200	300	0	0	0	0	0	0	0	200	903	0	0	0	0	0	0	0	603	903	0
529	7	0	0	0	0	0	0	200	300	0	0	0	0	0	0	0	200	903	0	0	0	0	0	0	0	603	903	0
529	8	0	0	0	0	0	0	200	300	0	0	0	0	0	0	0	200	903	0	0	0	0	0	0	0	603	903	0
529	9	0	0	0	0	0	0	200	300	0	0	0	0	0	0	0	200	903	0	0	0	0	0	0	0	603	903	0
530	0	0	0	0	0	0	0	200	300	0	0	0	0	0	0	0	200	903	0	0	0	0	0	0	0	603	903	0
530	1	0	0	0	0	0	0	200	300	0	0	0	0	0	0	0	200	903	0	0	0	0	0	0	0	603	903	0
530	2	0	0	0	0	0	0	200	300	0	0	0	0	0	0	0	200	903	0	0	0	0	0	0	0	603	903	0
530	3	0	0	0	0	0	0	200	300	0	0	0	0	0	0	0	200	903	0	0	0	0	0	0	0	603	903	0
530	4	0	0	0	0	0	0	200	300	0	0	0	0	0	0	0	200	903	0	0	0	0	0	0	0	603	903	0
530	5	0	0	0	0	0	0	200	300	0	0	0	0	0	0	0	200	903	0	0	0	0	0	0	0	603	903	0
530	6	0	0	0	0	0	0	200	300	0	0	0	0	0	0	0	200	903	0	0	0	0	0	0	0	603	903	0
530	7	0	0	0	0	0	0	200	300	0	0	0	0	0	0	0	200	903	0	0	0	0	0	0	0	603	903	0
530	8	0	0	0	0	0	0	200	300	0	0	0	0	0	0	0	200	903	0	0	0	0	0	0	0	603	903	0
530	9	0	0	0	0	0	0	200	300	0	0	0	0	0	0	0	200	903	0	0	0	0	0	0	0	603	903	0
531	0	0	0	0	0	0	0	200	300	0	0	0	0	0	0	0	200	903	0	0	0	0	0	0	0	603	903	0
531	1	0	0	0	0	0	0	200	300	0	0	0	0	0	0	0	200	903	0	0	0	0	0	0	0	603	903	0
531	2	0	0	0	0	0	0	200	300	0	0	0	0	0	0	0	200	903	0	0	0	0	0	0	0	603	903	0
531	3	0	0	0	0	0	0	200	300	0	0	0	0	0	0	0	200	903	0	0	0	0	0	0	0	603	903	0
531	4	0	0	0	0	0	0	200	300	0	0	0	0	0	0	0	200	903	0	0	0	0	0	0	0	603	903	0
531	5	0	0	0	0	0	0	200	300	0	0	0	0	0	0	0	200	903	0	0	0	0	0	0	0	603	903	0
531	6	0	0	0	0	0	0	200	300	0	0	0	0	0	0	0	200	903	0	0	0	0	0	0	0	603	903	0
531	7	0	0	0	0	0	0	200	300	0	0	0	0	0	0	0	200	903	0	0	0	0	0	0	0	603	903	0
531	8	0	0	0	0	0	0	200	300	0	0	0	0	0	0	0	200	903	0	0	0	0	0	0	0	603	903	0
531	9	0	0	0	0	0	0	200	300	0	0	0	0	0	0	0	200	903	0	0	0	0	0	0	0	603	903	0
532	0	0	0	0	0	0	0	200	300	0	0	0	0	0	0	0	200	903	0	0	0	0	0	0	0	603	903	0
532	1	0	0	0	0	0	0	200	300	0	0	0	0	0	0	0	200	903	0	0	0	0	0	0	0	603	903	0
532	2	0	0	0	0	0	0	200	300	0	0	0	0	0	0	0	200	903	0	0	0	0	0	0	0	603	903	0
532	3	0	0	0	0	0	0	200	300	0	0	0	0	0	0	0	200	903	0	0	0	0	0	0	0	603	903	0
532	4	0	0	0	0	0	0	200	300	0	0	0	0	0	0	0	200	903	0	0	0	0	0	0	0	603	903	0
532	5	0	0	0	0	0	0	200	300	0	0	0	0	0	0	0	200	903	0	0	0	0	0	0	0	603	903	0
532	6	0	0	0	0	0	0	200	300	0	0	0	0	0	0	0	200	903	0	0	0	0	0	0	0	603	903	0
532	7	0	0	0	0	0	0	200	300	0	0	0	0	0	0	0	200	903	0	0	0	0	0	0	0	603	903	0
532	8	0	0	0	0	0	0	200	300	0	0	0	0	0	0	0	200	903	0	0	0	0	0	0	0	603	903	0
532	9	0	0	0	0	0	0	200	300	0	0	0	0	0	0	0	200	903	0	0	0	0	0	0	0	603	903	0
533	0	0	0	0	0	0	0	200	300	0	0	0	0	0	0	0	200	903	0	0	0	0	0	0	0	603	903	0
533	1	0	0	0	0	0	0	200	300	0	0	0	0	0	0	0	200	903	0	0	0	0	0	0	0	603	903	0
533	2	0	0	0	0	0	0	200	300	0	0	0	0	0	0	0	200	903	0	0	0	0	0	0	0	603	903	0
533	3	0	0	0	0	0	0	200	300	0	0	0	0	0	0	0	200	903	0	0	0	0	0	0	0	603	903	0
533	4	0	0	0	0	0	0	200	300	0	0	0	0	0	0	0	200	903	0	0	0	0	0	0	0	603	903	0
533	5	0	0	0	0	0	0	200	300	0	0	0	0	0	0	0	200	903	0	0	0	0	0	0	0	603	903	0
533	6	0	0	0	0	0	0	200	300	0	0	0	0	0	0	0	200	903	0	0	0	0	0	0	0	603	903	0
533	7	0	0	0	0	0	0	200	300	0	0	0	0	0	0	0	200	903	0	0	0	0	0	0	0	603	903	0
533	8	0	0	0	0	0	0	200	300	0	0	0	0	0	0	0	200	903	0	0	0	0	0	0	0	603	903	0
533	9	0	0	0	0	0	0	200	300	0	0	0	0	0	0	0	200	903	0	0	0	0	0	0	0	603	903	0
534	0	0	0	0	0	0	0	200	300	0	0	0	0	0	0	0	200	903	0	0	0	0	0	0	0	603	903	0
534	1	0	0	0	0	0	0	200	300	0	0	0	0	0	0	0	200	903	0	0	0	0	0	0	0	603	903	0
534	2	0	0	0	0	0	0	200	300	0	0	0	0	0	0	0	200	903	0	0	0	0	0	0	0	603	903	0
534	3	0	0	0	0	0	0	200	300	0	0	0	0	0	0	0	200	903	0	0	0	0	0	0	0	603	903	0
534	4	0	0	0	0	0	0	200	300	0	0	0	0	0	0	0	200	903	0	0	0	0	0	0	0	603	903	0
534	5	0	0	0	0	0	0	200	300	0	0	0	0	0	0	0	200	903	0	0	0	0	0	0	0	603	903	0
534	6	0	0	0	0	0	0	200	300	0	0	0	0	0	0	0	200	903	0	0	0	0	0	0	0	603	903	0
534	7	0	0	0	0	0	0	200	300	0	0	0	0	0	0	0	200	903	0	0	0	0	0	0	0	603	903	0
534	8	0	0	0	0	0	0	200	300	0	0	0	0	0	0	0	200	903	0	0	0	0	0	0	0	603	903	0
534	9	0	0	0	0	0	0	200	300	0	0	0	0	0	0	0	200	903	0	0	0	0	0	0	0	603	903	0
535	0	0	0	0	0	0	0	200	300	0	0	0	0	0	0	0	200	903	0	0	0	0	0	0	0	603	903	0
535	1	0	0	0	0	0	0	200	300	0	0	0	0	0	0	0	200	903	0	0	0	0	0	0	0	603	903	0
535	2	0	0	0	0	0	0	200	300	0	0	0	0	0	0	0	200	903	0	0	0	0	0	0	0	603	903	0
535	3	0	0	0	0	0	0	200	300	0	0	0	0	0	0	0	200	903	0	0	0	0	0	0	0	603	903	0
535	4	0	0	0	0	0	0	200	300	0	0	0	0	0	0	0	200	903	0	0	0	0	0	0	0	603	903	0
535	5	0	0	0	0	0	0	200	300	0	0	0	0	0	0	0	200	903	0	0	0	0	0	0	0	603	903	0
535	6	0	0	0	0	0	0	200	300	0	0	0	0	0	0	0	200	903	0	0	0	0	0	0	0	603	903	0
535	7	0	0	0	0	0	0	200	300	0	0	0	0	0	0	0	200	903	0	0	0	0	0	0	0	603	903	0
535	8	0	0	0	0	0	0	200	300	0	0	0	0	0	0	0	200	903	0	0	0	0	0	0	0	603	903	0
535	9	0	0	0	0	0	0	200	300	0	0	0	0	0	0	0	200	903	0	0	0	0	0	0	0	603	903	0
536	0	0	0	0	0	0	0	200	300	0	0	0	0	0	0	0	200	903	0	0	0	0	0	0	0	603	903	0
536	1	0	0	0	0	0	0	200	300	0	0	0	0	0	0	0	200	903	0	0	0	0	0	0	0	603	903	0
536	2	0	0	0	0	0	0	200	300	0	0	0	0	0	0	0	200	903	0	0	0	0	0	0	0	603	903	0
536	3	0	0	0	0	0	0	200	300	0	0	0	0	0	0	0	200	903	0	0	0	0	0	0	0	603	903	0
536	4	0	0	0	0	0	0	200	300	0	0	0	0	0	0	0	200	903	0	0	0	0	0	0	0	603	903	0
536	5	0	0	0	0	0	0	200	300	0	0	0	0	0	0	0	200	903	0	0	0	0	0	0	0	603	903	0
536	6	0	0	0	0	0	0	200	300	0	0	0	0	0	0	0	200	903	0	0	0	0	0	0	0	603	903	0
536	7	0	0	0	0	0	0	200	300	0	0	0	0	0	0	0	200	903	0	0	0	0	0	0	0	603	903	0
536	8	0	0	0	0	0	0	200	300	0	0	0	0	0	0	0	200	903	0	0	0	0	0	0	0	603	903	0
536	9	0	0	0	0	0	0	200	300	0	0	0	0	0	0	0	200	903	0	0	0	0	0	0	0	603	903	0
537	0	0	0	0	0	0	0	200	300	0	0	0	0	0	0	0	200	903	0	0	0	0	0	0	0	603	903	0
537	1	0	0	0	0	0	0	200	300	0	0	0	0	0	0	0	200	903	0	0	0	0	0	0	0	603	903	0
537	2	0	0	0	0	0	0	200	300	0	0	0	0	0	0	0	200	903	0	0	0	0	0	0	0	603	903	0
537	3	0	0	0	0	0	0	200	300	0	0	0	0	0	0	0	200	903	0	0	0	0	0	0	0	603	903	0
537	4	0	0	0	0	0	0	200	300	0	0	0	0	0	0	0	200	903	0	0	0	0	0	0	0	603	903	0
537	5	0	0	0	0	0	0	200	300	0	0	0	0	0	0	0	200	903	0	0	0	0	0	0	0	603	903	0
537	6	0	0	0	0	0	0	200	300	0	0	0	0	0	0	0	200	903	0	0	0	0	0	0	0	603	903	0
537	7	0	0	0	0	0	0	200	300	0	0	0	0	0	0	0	200	903	0	0	0	0	0	0	0	603	903	0
537	8	0	0	0	0	0	0	200	300	0	0	0	0	0	0	0	200	903	0	0	0	0	0	0	0	603	903	0
537	9	0	0	0	0	0	0	200	300	0	0	0	0	0	0	0	200	903	0	0	0	0	0	0	0	603	903	0
538	0	0	0	0	0	0	0	200	300	0	0	0	0	0	0	0	200	903	0	0	0	0	0	0	0	603	903	0
538	1	0	0	0	0	0	0	200	300	0	0	0	0	0	0	0	200	903	0	0	0	0	0	0	0	603	903	0
538	2	0	0	0	0	0	0	200	300	0	0	0	0	0	0	0	200	903	0	0	0	0	0	0	0	603	903	0
538	3	0	0	0	0	0	0	200	300	0	0	0	0	0	0	0	200	903	0	0	0	0	0	0	0	603	903	0
538	4	0	0	0	0	0	0	200	300	0	0	0	0	0	0	0	200	903	0	0	0	0	0	0	0	603	903	0
538	5	0	0	0	0	0	0	200	300	0	0	0	0	0	0	0	200	903	0	0	0	0	0	0	0	603	903	0
538	6	0	0	0	0	0	0	200	300	0	0	0	0	0	0	0	200	903	0	0	0	0	0	0	0	603	903	0
538	7	0	0	0	0	0	0	200	300	0	0	0	0	0	0	0	200	903	0	0	0	0	0	0	0	603	903	0
538	8	0	0	0	0	0	0	200	300	0	0	0	0	0	0	0	200	903	0	0	0	0	0	0	0	603	903	0
538	9	0	0	0	0	0	0	200	300	0	0	0	0	0	0	0	200	903	0	0	0	0	0	0	0	603	903	0
539	0	0	0	0	0	0	0	200	300	0	0	0	0	0	0	0	200	903	0	0	0	0	0	0	0	603	903	0
539	1	0	0	0	0	0	0	200	300	0	0	0	0	0	0	0	200	903	0	0	0	0	0	0	0	603	903	0
539	2	0	0	0	0	0	0	200	300	0	0	0	0	0	0	0	200	903	0	0	0	0	0	0	0	603	903	0
539	3	0	0	0	0	0	0	200	300	0	0	0	0	0	0	0	200	903	0	0	0	0	0	0	0	603	903	0
539	4	0	0	0	0	0	0	200	300	0	0	0	0	0	0	0	200	903	0	0	0	0	0	0	0	603	903	0
539	5	0	0	0	0	0	0	200	300	0	0	0	0	0	0	0	200	903	0	0	0	0	0	0	0	603	903	0
539	6	0	0	0	0	0	0	200	300	0	0	0	0	0	0	0	200	903	0	0	0	0	0	0	0	603	903	0
539	7	0	0	0	0	0	0	200	300	0	0	0	0	0	0	0	200	903	0	0	0	0	0	0	0	603	903	0
539	8	0	0	0	0	0	0	200	300	0	0	0	0	0	0	0	200	903	0	0	0	0	0	0	0	603	903	0
539	9	0	0	0	0	0	0	200	300	0	0	0	0	0	0	0	200	903	0	0	0	0	0	0	0	603	903	0
540	0	0	0	0	0	0	0	200	300	0	0	0	0	0	0	0	200	903	0	0	0	0	0	0	0	603	903	0
540	1	0	0	0	0	0	0	200	300	0	0	0	0	0	0	0	200	903	0	0	0	0	0	0	0	603	903	0
540	2	0	0	0	0	0	0	200	300	0	0	0	0	0	0	0	200	903	0	0	0	0	0	0	0	603	903	0
540	3	0	0	0	0	0	0	200	300	0	0	0	0	0	0	0	200	903	0	0	0	0	0	0	0	603	903	0
540	4	0	0	0	0	0	0	200	300	0	0	0	0	0	0	0	200	903	0	0	0	0	0	0	0	603	903	0
540	5	0	0	0	0	0	0	200	300	0	0	0	0	0	0	0	200	903	0	0	0	0	0	0	0	603	903	0
540	6	0	0	0	0	0	0	200	300	0	0	0	0	0	0	0	200	903	0	0	0	0	0	0	0	603	903	0
540	7	0	0	0	0	0	0	200	300	0	0	0	0	0	0	0	200	903	0	0	0	0	0	0	0	603	903	0
540	8	0	0	0	0	0	0	200	300	0	0	0	0	0	0	0	200	903	0	0	0	0	0	0	0	603	903	0
540	9	0	0	0	0	0	0	200	300	0	0	0	0	0	0	0	200	903	0	0	0	0	0	0	0	603	903	0
541	0	0	0	0	0	0	0	200	300	0	0	0	0	0	0	0	200	903	0	0	0	0	0	0	0	603	903	0
541	1	0	0	0	0	0	0	200	300	0	0	0	0	0	0	0	200	903	0	0	0	0	0	0	0	603	903	0
541	2	0	0	0	0	0	0	200	300	0	0	0	0	0	0	0	200	903	0	0	0	0	0	0	0	603	903	0
541	3	0	0	0	0	0	0	200	300	0	0	0	0	0	0	0	200	903	0	0	0	0	0	0	0	603	903	0
541	4	0	0	0	0	0	0	200	300	0	0	0	0	0	0	0	200	903	0	0	0	0	0	0	0	603	903	0
541	5	0	0	0	0	0	0	200	300	0	0	0	0	0	0	0	200	903	0	0	0	0	0	0	0	603	903	0
541	6	0	0	0	0	0	0	200	300	0	0	0	0	0	0	0	200	903	0	0	0	0	0	0	0	603	903	0
541	7	0	0	0	0	0	0	200	300	0	0	0	0	0	0	0	200	903	0	0	0	0	0	0	0	603	903	0
541	8	0	0	0	0	0	0	200	300	0	0	0	0	0	0	0	200	903	0	0	0	0	0	0	0	603	903	0
541	9	0	0	0	0	0	0	200	300	0	0	0	0	0	0	0	200	903	0	0	0	0	0	0	0	603	903	0
542	0	0	0	0	0	0	0	200	300	0	0	0	0	0	0	0	200	903	0	0	0	0	0	0	0	603	903	0
542	1	0	0	0	0	0	0	200	300	0	0	0	0	0	0	0	200	903	0	0	0	0	0	0	0	603	903	0
542	2	0	0	0	0	0	0	200	300	0	0	0	0	0	0	0	200	903	0	0	0	0	0	0	0	603	903	0
542	3	0	0	0	0	0	0	200	300	0	0	0	0	0	0	0	200	903	0	0	0	0	0	0	0	603	903	0
542	4	0	0	0	0	0	0	200	300	0	0	0	0	0	0	0	200	903	0	0	0	0	0	0	0	603	903	0
542	5	0	0	0	0	0	0	200	300	0	0	0	0	0	0	0	200	903	0	0	0	0	0	0	0	603	903	0
542	6	0	0	0	0	0	0	200	300	0	0	0	0	0	0	0	200	903	0	0	0	0	0	0	0	603	903	0
542	7	0	0	0	0	0	0	200	300	0	0	0	0	0	0	0	200	903	0	0	0	0	0	0	0	603	903	0
542	8	0	0	0	0	0	0	200	300	0	0	0	0	0	0	0	200	903	0	0	0	0	0	0	0	603	903	0
542	9	0	0	0	0	0	0	200	300	0	0	0	0	0	0	0	200	903	0	0	0	0	0	0	0	603	903	0
543	0	0	0	0	0	0	0	200	300	0	0	0	0	0	0	0	200	903	0	0	0	0	0	0	0	603	903	0
543	1	0	0	0	0	0	0	200	300	0	0	0	0	0	0	0	200	903	0	0	0	0	0	0	0	603	903	0
543	2	0	0	0	0	0	0	200	300	0	0	0	0	0	0	0	200	903	0	0	0	0	0	0	0	603	903	0
543	3	0	0	0	0	0	0	200	300	0	0	0	0	0	0	0	200	903	0	0	0	0	0	0	0	603	903	0
543	4	0	0	0	0	0	0	200	300	0	0	0	0	0	0	0	200	903	0	0	0	0	0	0	0	603	903	0
543	5	0	0	0	0	0	0	200	300	0	0	0	0	0	0	0	200	903	0	0	0	0	0	0	0	603	903	0
543	6	0	0	0	0	0	0	200	300	0	0	0	0	0	0	0	200	903	0	0	0	0	0	0	0	603	903	0
543	7	0	0	0	0	0	0	200	300	0	0	0	0	0	0	0	200	903	0	0	0	0	0	0	0	603	903	0
543	8	0	0	0	0	0	0	200	300	0	0	0	0	0	0	0	200	903	0	0	0	0	0	0	0	603	903	0
543	9	0	0	0	0	0	0	200	300	0	0	0	0	0	0	0	200	903	0	0	0	0	0	0	0	603	903	0
544	0	0	0	0	0	0	0	200	300	0	0	0	0	0	0	0	200	903	0	0	0	0	0	0	0	603	903	0
544	1	0	0	0	0	0	0	200	300	0	0	0	0	0	0	0	200	903	0	0	0	0	0	0	0	603	903	0
544	2	0	0	0	0	0	0	200	300	0	0	0	0	0	0	0	200	903	0	0	0	0	0	0	0	603	903	0
544	3	0	0	0	0	0	0	200	300	0	0	0	0	0	0	0	200	903	0	0	0	0	0	0	0	603	903	0
544	4	0	0	0	0	0	0	200	300	0	0	0	0	0	0	0	200	903	0	0	0	0	0	0	0	603	903	0
544	5	0	0	0	0	0	0	200	300	0	0	0	0	0	0	0	200	903	0	0	0	0	0	0	0	603	903	0
544	6	0	0	0	0	0	0	200	300	0	0	0	0	0	0	0	200	903	0	0	0	0	0	0	0	603	903	0
544	7	0	0	0	0	0	0	200	300	0	0	0	0	0	0	0	200	903	0	0	0	0	0	0	0	603	903	0
544	8	0	0	0	0	0	0	200	300	0	0	0	0	0	0	0	200	903	0	0	0	0	0	0	0	603	903	0
544	9	0	0	0	0	0	0	200	300	0	0	0	0	0	0	0	200	903	0	0	0	0	0	0	0	603	903	0
545	0	0	0	0	0	0	0	200	300	0	0	0	0	0	0	0	200	903	0	0	0	0	0	0	0	603	903	0
545	1	0	0	0	0	0	0	200	300	0	0	0	0	0	0	0	200	903	0	0	0	0	0	0	0	603	903	0
545	2	0	0	0	0	0	0	200	300	0	0	0	0	0	0	0	200	903	0	0	0	0	0	0	0	603	903	0
545	3	0	0	0	0	0	0	200	300	0	0	0	0	0	0	0	200	903	0	0	0	0	0	0	0	603	903	0
545	4	0	0	0	0	0	0	200	300	0	0	0	0	0	0	0	200	903	0	0	0	0	0	0	0	603	903	0
545	5	0	0	0	0	0	0	200	300	0	0	0	0	0	0	0	200	903	0	0	0	0	0	0	0	603	903	0
545	6	0	0	0	0	0	0	200	300	0	0	0	0	0	0	0	200	903	0	0	0	0	0	0	0	603	903	0
545	7	0	0	0	0	0	0	200	300	0	0	0	0	0	0	0	200	903	0	0	0	0	0	0	0	603	903	0
545	8	0	0	0	0	0	0	200	300	0	0	0	0	0	0	0	200	903	0	0	0	0	0	0	0	603	903	0
545	9	0	0	0	0	0	0	200	300	0	0	0	0	0	0	0	200	903	0	0	0	0	0	0	0	603	903	0
546	0	0	0	0	0	0	0	200	300	0	0	0	0	0	0	0	200	903	0	0	0	0	0	0	0	603	903	0
546	1	0	0	0	0	0	0	200	300	0	0	0	0	0	0	0	200	903	0	0	0	0	0	0	0	603	903	0
546	2	0	0	0	0	0	0	200	300	0	0	0	0	0	0	0	200	903	0	0	0	0	0	0	0	603	903	0
546	3	0	0	0	0	0	0	200	300	0	0	0	0	0	0	0	200	903	0	0	0	0	0	0	0	603	903	0
546	4	0	0	0	0	0	0	200	300	0	0	0	0	0	0	0	200	903	0	0	0	0	0	0	0	603	903	0
546	5	0	0	0	0	0	0	200	300	0	0	0	0	0	0	0	200	903	0	0	0	0	0	0	0	603	903	0
546	6	0	0	0	0	0	0	200	300	0	0	0	0	0	0	0	200	903	0	0	0	0	0	0	0	603	903	0
546	7	0	0	0	0	0	0	200	300	0	0	0	0	0	0	0	200	903	0	0	0	0	0	0	0	603	903	0
546	8	0	0	0	0	0	0	200	300	0	0	0	0	0	0	0	200	903	0	0	0	0	0	0	0	603	903	0
546	9	0	0	0	0	0	0	200	300	0	0	0	0	0	0	0	200	903	0	0	0	0	0	0	0	603	903	0
547	0	0	0	0	0	0	0	200	300	0	0	0	0	0	0	0	200	903	0	0	0	0	0	0	0	603	903	0
547	1	0	0	0	0	0	0	200	300	0	0	0	0	0	0	0	200	903	0	0	0	0	0	0	0	603	903	0
547	2	0	0	0	0	0	0	200	300	0	0	0	0	0	0	0	200	903	0	0	0	0	0	0	0	603	903	0
547	3	0	0	0	0	0	0	200	300	0	0	0	0	0	0	0	200	903	0	0	0	0	0	0	0	603	903	0
547	4	0	0	0	0	0	0	200	300	0	0	0	0	0	0	0	200	903	0	0	0	0	0	0	0	603	903	0
547	5	0	0	0	0	0	0	200	300	0	0	0	0	0	0	0	200	903	0	0	0	0	0	0	0	603	903	0
547	6	0	0	0	0	0	0	200	300	0	0	0	0	0	0	0	200	903	0	0	0	0	0	0	0	603	903	0
547	7	0	0	0	0	0	0	200	300	0	0	0	0	0	0	0	200	903	0	0	0	0	0	0	0	603	903	0
547	8	0	0	0	0	0	0	200	300	0	0	0	0	0	0	0	200	903	0	0	0	0	0	0	0	603	903	0
547	9	0	0	0	0	0	0	200	300	0	0	0	0	0	0	0	200	903	0	0	0	0	0	0	0	603	903	0
548	0	0	0	0	0	0	0	200	300	0	0	0	0	0	0	0	200	903	0	0	0	0	0	0	0	603	903	0
548	1	0	0	0	0	0	0	200	300	0	0	0	0	0	0	0	200	903	0	0	0	0	0	0	0	603	903	0
548	2	0	0	0	0	0	0	200	300	0	0	0	0	0	0	0	200	903	0	0	0	0	0	0	0	603	903	0
548	3	0	0	0	0	0	0	200	300	0	0	0	0	0	0	0	200	903	0	0	0	0	0	0	0	603	903	0
548	4	0	0	0	0	0	0	200	300	0	0	0	0	0	0	0	200	903	0	0	0	0	0	0	0	603	903	0
548	5	0	0	0	0	0	0	200	300	0	0	0	0	0	0	0	200	903	0	0	0	0	0	0	0	603	903	0
548	6	0	0	0	0	0	0	200	300	0	0	0	0	0	0	0	200	903	0	0	0	0	0	0	0	603	903	0
548	7	0	0	0	0	0	0	200	300	0	0	0	0	0	0	0	200	903	0	0	0	0	0	0	0	603	903	0
548	8	0	0	0	0	0	0	200	300	0	0	0	0	0	0	0	200	903	0	0	0	0	0	0	0	603	903	0
548	9	0	0	0	0	0	0	200	300	0	0	0	0	0	0	0	200	903	0	0	0	0	0	0	0	603	903	0
549	0	0	0	0	0	0	0	200	300	0	0	0	0	0	0	0	200	903	0	0	0	0	0	0	0	603	903	0
549	1	0	0	0	0	0	0	200	300	0	0	0	0	0	0	0	200	903	0	0	0	0	0	0	0	603	903	0
549	2	0	0	0	0	0	0	200	300	0	0	0	0	0	0	0	200	903	0	0	0	0	0	0	0	603	903	0
549	3	0	0	0	0	0	0	200	300	0	0	0	0	0	0	0	200	903	0	0	0	0	0	0	0	603	903	0
549	4	0	0	0	0	0	0	200	300	0	0	0	0	0	0	0	200	903	0	0	0	0	0	0	0	603	903	0
549	5	0	0	0	0	0	0	200	300	0	0	0	0	0	0	0	200	903	0	0	0	0	0	0	0	603	903	0
549	6	0	0	0	0	0	0	200	300	0	0	0	0	0	0	0	200	903	0	0	0	0	0	0	0	603	903	0
549	7	0	0	0	0	0	0	200	300	0	0	0	0	0	0	0	200	903	0	0	0	0	0	0	0	603	903	0
549	8	0	0	0	0	0	0	200	300	0	0	0	0	0	0	0	200	903	0	0	0	0	0	0	0	603	903	0
549	9	0	0	0	0	0	0	200	300	0	0	0	0	0	0	0	200	903	0	0	0	0	0	0	0	603	903	0
550	0	0	0	0	0	0	0	200	300	0	0	0	0	0	0	0	200	903	0	0	0	0	0	0	0	603	903	0
550	1	0	0	0	0	0	0	200	300	0	0	0	0	0	0	0	200	903	0	0	0	0	0	0	0	603	903	0
550	2	0	0	0	0	0	0	200	300	0	0	0	0	0	0	0	200	903	0	0	0	0	0	0	0	603	903	0
550	3	0	0	0	0	0	0	200	300	0	0	0	0	0	0	0	200	903	0	0	0	0	0	0	0	603	903	0
550	4	0	0	0	0	0	0	200	300	0	0	0	0	0	0	0	200	903	0	0	0	0	0	0	0	603	903	0
550	5	0	0	0	0	0	0	200	300	0	0	0	0	0	0	0	200	903	0	0	0	0	0	0	0	603	903	0
550	6	0	0	0	0	0	0	200	300	0	0	0	0	0	0	0	200	903	0	0	0	0	0	0	0	603	903	0
550	7	0	0	0	0	0	0	200	300	0	0	0	0	0	0	0	200	903	0	0	0	0	0	0	0	603	903	0
550	8	0	0	0	0	0	0	200	300	0	0	0	0	0	0	0	200	903	0	0	0	0	0	0	0	603	903	0
550	9	0	0	0	0	0	0	200	300	0	0	0	0	0	0	0	200	903	0	0	0	0	0	0	0	603	903	0
551	0	0	0	0	0	0	0	200	300	0	0	0	0	0	0	0	200	903	0	0	0	0	0	0	0	603	903	0
551	1	0	0	0	0	0	0	200	300	0	0	0	0	0	0	0	200	903	0	0	0	0	0	0	0	603	903	0
551	2	0	0	0	0	0	0	200	300	0	0	0	0	0	0	0	200	903	0	0	0	0	0	0	0	603	903	0
551	3	0	0	0	0	0	0	200	300	0	0	0	0	0	0	0	200	903	0	0	0	0	0	0	0	603	903	0
551	4	0	0	0	0	0	0	200	300	0	0	0	0	0	0	0	200	903	0	0	0	0	0	0	0	603	903	0
551	5	0	0	0	0	0	0	200	300	0	0	0	0	0	0	0	200	903	0	0	0	0	0	0	0	603	903	0
551	6	0	0	0	0	0	0	200	300	0	0	0	0	0	0	0	200	903	0	0	0	0	0	0	0	603	903	0
551	7	0	0	0	0	0	0	200	300	0	0	0	0	0	0	0	200	903	0	0	0	0	0	0	0	603	903	0
551	8	0	0	0	0	0	0	200	300	0	0	0	0	0	0	0	200	903	0	0	0	0	0	0	0	603	903	0
551	9	0	0	0	0	0	0	200	300	0	0	0	0	0	0	0	200	903	0	0	0	0	0	0	0	603	903	0
552	0	0	0	0	0	0	0	200	300	0	0	0	0	0	0	0	200	903	0	0	0	0	0	0	0	603	903	0
552	1	0	0	0	0	0	0	200	300	0	0	0	0	0	0	0	200	903	0	0	0	0	0	0	0	603	903	0
552	2	0	0	0	0	0	0	200	300	0	0	0	0	0	0	0	200	903	0	0	0	0	0	0	0	603	903	0
552	3	0	0	0	0	0	0	200	300	0	0	0	0	0	0	0	200	903	0	0	0	0	0	0	0	603	903	0
552	4	0	0	0	0	0	0	200	300	0	0	0	0	0	0	0	200	903	0	0	0	0	0	0	0	603	903	0
552	5	0	0	0	0	0	0	200	300	0	0	0	0	0	0	0	200	903	0	0	0	0	0	0	0	603	903	0
552	6	0	0	0	0	0	0	200	300	0	0	0	0	0	0	0	200	903	0	0	0	0	0	0	0	603	903	0
552	7	0	0	0	0	0	0	200	300	0	0	0	0	0	0	0	200	903	0	0	0	0	0	0	0	603	903	0
552	8	0	0	0	0	0	0	200	300	0	0	0	0	0	0	0	200	903	0	0	0	0	0	0	0	603	903	0
552	9	0	0	0	0	0	0	200	300	0	0	0	0	0	0	0	200	903	0	0	0	0	0	0	0	603	903	0
553	0	0	0	0	0	0	0	200	300	0	0	0	0	0	0	0	200	903	0	0	0	0	0	0	0	603	903	0
553	1	0	0	0	0	0	0	200	300	0	0	0	0	0	0	0	200	903	0	0	0	0	0	0	0	603	903	0
553	2	0	0	0	0	0	0	200	300	0	0	0	0	0	0	0	200	903	0	0	0	0	0	0	0	603	903	0
553	3	0	0	0	0	0	0	200	300	0	0	0	0	0	0	0	200	903	0	0	0	0	0	0	0	603	903	0
553	4	0	0	0	0	0	0	200	300	0	0	0	0	0	0	0	200	903	0	0	0	0	0	0	0	603	903	0
553	5	0	0	0	0	0	0	200	300	0	0	0	0	0	0	0	200	903	0	0	0	0	0	0	0	603	903	0
553	6	0	0	0	0	0	0	200	300	0	0	0	0	0	0	0	200	903	0	0	0	0	0	0	0	603	903	0
553	7	0	0	0	0	0	0	200	300	0	0	0	0	0	0	0	200	903	0	0	0	0	0	0	0	603	903	0
553	8	0	0	0	0	0	0	200	300	0	0	0	0	0	0	0	200	903	0	0	0	0	0	0	0	603	903	0
553	9	0	0	0	0	0	0	200	300	0	0	0	0	0	0	0	200	903	0	0	0	0	0	0	0	603	903	0
554	0	0	0	0	0	0	0	200	300	0	0	0	0	0	0	0	200	903	0	0	0	0	0	0	0	603	903	0
554	1	0	0	0	0	0	0	200	300	0	0	0	0	0	0	0	200	903	0	0	0	0	0	0	0	603	903	0
554	2	0	0	0	0	0	0	200	300	0	0	0	0	0	0	0	200	903	0	0	0	0	0	0	0	603	903	0
554	3	0	0	0	0	0	0	200	300	0	0	0	0	0	0	0	200	903	0	0	0	0	0	0	0	603	903	0
554	4	0	0	0	0	0	0	200	300	0	0	0	0	0	0	0	200	903	0	0	0	0	0	0	0	603	903	0
554	5	0	0	0	0	0	0	200	300	0	0	0	0	0	0	0	200	903	0	0	0	0	0	0	0	603	903	0
554	6	0	0	0	0	0	0	200	300	0	0	0	0	0	0	0	200	903	0	0	0	0	0	0	0	603	903	0
554	7	0	0	0	0	0	0	200	300	0	0	0	0	0	0	0	200	903	0	0	0	0	0	0	0	603	903	0
554	8	0	0	0	0	0	0	200	300	0	0	0	0	0	0	0	200	903	0	0	0	0	0	0	0	603	903	0
554	9	0	0	0	0	0	0	200	300	0	0	0	0	0	0	0	200	903	0	0	0	0	0	0	0	603	903	0
555	0	0	0	0	0	0	0	200	300	0	0	0	0	0	0	0	200	903	0	0	0	0	0	0	0	603	903	0
555	1	0	0	0	0	0	0	200	300	0	0	0	0	0	0	0	200	903	0	0	0	0	0	0	0	603	903	0
555	2	0	0	0	0	0	0	200	300	0	0	0	0	0	0	0	200	903	0	0	0	0	0	0	0	603	903	0
555	3	0	0	0	0	0	0	200	300	0	0	0	0	0	0	0	200	903	0	0	0	0	0	0	0	603	903	0
555	4	0	0	0	0	0	0	200	300	0	0	0	0	0	0	0	200	903	0	0	0	0	0	0	0	603	903	0
555	5	0	0	0	0	0	0	200	300	0	0	0	0	0	0	0	200	903	0	0	0	0	0	0	0	603	903	0
555	6	0	0	0	0	0	0	200	300	0	0	0	0	0	0	0	200	903	0	0	0	0	0	0	0	603	903	0
555	7	0	0	0	0	0	0	200	300	0	0	0	0	0	0	0	200	903	0	0	0	0	0	0	0	603	903	0
555	8	0	0	0	0	0	0	200	300	0	0	0	0	0	0	0	200	903	0	0	0	0	0	0	0	603	903	0
555	9	0	0	0	0	0	0	200	300	0	0	0	0	0	0	0	200	903	0	0	0	0	0	0	0	603	903	0
556	0	0	0	0	0	0	0	200	300	0	0	0	0	0	0	0	200	903	0	0	0	0	0	0	0	603	903	0
556	1	0	0	0	0	0	0	200	300	0	0	0	0	0	0	0	200	903	0	0	0	0	0	0	0	603	903	0
556	2	0	0	0	0	0	0	200	300	0	0	0	0	0	0	0	200	903	0	0	0	0	0	0	0	603	903	0
556	3	0	0	0	0	0	0	200	300	0	0	0	0	0	0	0	200	903	0	0	0	0	0	0	0	603	903	0
556	4	0	0	0	0	0	0	200	300	0	0	0	0	0	0	0	200	903	0	0	0	0	0	0	0	603	903	0
556	5	0	0	0	0	0	0	200	300	0	0	0	0	0	0	0	200	903	0	0	0	0	0	0	0	603	903	0
556	6	0	0	0	0	0	0	200	300	0	0	0	0	0	0	0	200	903	0	0	0	0	0	0	0	603	903	0
556	7	0	0	0	0	0	0	200	300	0	0	0	0	0	0	0	200	903	0	0	0	0	0	0	0	603	903	0
556	8	0	0	0	0	0	0	200	300	0	0	0	0	0	0	0	200	903	0	0	0	0	0	0	0	603	903	0
556	9	0	0	0	0	0	0	200	300	0	0	0	0	0	0	0	200	903	0	0	0	0	0	0	0	603	903	0
557	0	0	0	0	0	0	0	200	300	0	0	0	0	0	0	0	200	903	0	0	0	0	0	0	0	603	903	0
557	1	0	0	0	0	0	0	200	300	0	0	0	0	0	0	0	200	903	0	0	0	0	0	0	0	603	903	0
557	2	0	0	0	0	0	0	200	300	0	0	0	0	0	0	0	200	903	0	0	0	0	0	0	0	603	903	0
557	3	0	0	0	0	0	0	200	300	0	0	0	0	0	0	0	200	903	0	0	0	0	0	0	0	603	903	0
557	4	0	0	0	0	0	0	200	300	0	0	0	0	0	0	0	200	903	0	0	0	0	0	0	0	603	903	0
557	5	0	0	0	0	0	0	200	300	0	0	0	0	0	0	0	200	903	0	0	0	0	0	0	0	603	903	0
557	6	0	0	0	0	0	0	200	300	0	0	0	0	0	0	0	200	903	0	0	0	0	0	0	0	603	903	0
557	7	0	0	0	0	0	0	200	300	0	0	0	0	0	0	0	200	903	0	0	0	0	0	0	0	603	903	0
557	8	0	0	0	0	0	0	200	300	0	0	0	0	0	0	0	200	903	0	0	0	0	0	0	0	603	903	0
557	9	0	0	0	0	0	0	200	300	0	0	0	0	0	0	0	200	903	0	0	0	0	0	0	0	603	903	0
558	0	0	0	0	0	0	0	200	300	0	0	0	0	0	0	0	200	903	0	0	0	0	0	0	0	603	903	0
558	1	0	0	0	0	0	0	200	300	0	0	0	0	0	0	0	200	903	0	0	0	0	0	0	0	603	903	0
558	2	0	0	0	0	0	0	200	300	0	0	0	0	0	0	0	200	903	0	0	0	0	0	0	0	603	903	0
558	3	0	0	0	0	0	0	200	300	0	0	0	0	0	0	0	200	903	0	0	0	0	0	0	0	603	903	0
558	4	0	0	0	0	0	0	200	300	0	0	0	0	0	0	0	200	903	0	0	0	0	0	0	0	603	903	0
558	5	0	0	0	0	0	0	200	300	0	0	0	0	0	0	0	200	903	0	0	0	0	0	0	0	603	903	0
558	6	0	0	0	0	0	0	200	300	0	0	0	0	0	0	0	200	903	0	0	0	0	0	0	0	603	903	0
558	7	0	0	0	0	0	0	200	300	0	0	0	0	0	0	0	200	903	0	0	0	0	0	0	0	603	903	0
558	8	0	0	0	0	0	0	200	300	0	0	0	0	0	0	0	200	903	0	0	0	0	0	0	0	603	903	0
558	9	0	0	0	0	0	0	200	300	0	0	0	0	0	0	0	200	903	0	0	0	0	0	0	0	603	903	0
559	0	0	0	0	0	0	0	200	300	0	0	0	0	0	0	0	200	903	0	0	0	0	0	0	0	603	903	0
559	1	0	0	0	0	0	0	200	300	0	0	0	0	0	0	0	200	903	0	0	0	0	0	0	0	603	903	0
559	2	0	0	0	0	0	0	200	300	0	0	0	0	0	0	0	200	903	0	0	0	0	0	0	0	603	903	0
559	3	0	0	0	0	0	0	200	300	0	0	0	0	0	0	0	200	903	0	0	0	0	0	0	0	603	903	0
559	4	0	0	0	0	0	0	200	300	0	0	0	0	0	0	0	200	903	0	0	0	0	0	0	0	603	903	0
559	5	0	0	0	0	0	0	200	300	0	0	0	0	0	0	0	200	903	0	0	0	0	0	0	0	603	903	0
559	6	0	0	0	0	0	0	200	300	0	0	0	0	0	0	0	200	903	0	0	0	0	0	0	0	603	903	0
559	7	0	0	0	0	0	0	200	300	0	0	0	0	0	0	0	200	903	0	0	0	0	0	0	0	603	903	0
559	8	0	0	0	0	0	0	200	300	0	0	0	0	0	0	0	200	903	0	0	0	0	0	0	0	603	903	0
559	9	0	0	0	0	0	0	200	300	0	0	0	0	0	0	0	200	903	0	0	0	0	0	0	0	603	903	0
560	0	0	0	0	0	0	0	200	300	0	0	0	0	0	0	0	200	903	0	0	0	0	0	0	0	603	903	0
560	1	0	0	0	0	0	0	200	300	0	0	0	0	0	0	0	200	903	0	0	0	0	0	0	0	603	903	0
560	2	0	0	0	0	0	0	200	300	0	0	0	0	0	0	0	200	903	0	0	0	0	0	0	0	603	903	0
560	3	0	0	0	0	0	0	200	300	0	0	0	0	0	0	0	200	903	0	0	0	0	0	0	0	603	903	0
560	4	0	0	0	0	0	0	200	300	0	0	0	0	0	0	0	200	903	0	0	0	0	0	0	0	603	903	0
560	5	0	0	0	0	0	0	200	300	0	0	0	0	0	0	0	200	903	0	0	0	0	0	0	0	603	903	0
560	6	0	0	0	0	0	0	200	300	0	0	0	0	0	0	0	200	903	0	0	0	0	0	0	0	603	903	0
560	7	0	0	0	0	0	0	200	300	0	0	0	0	0	0	0	200	903	0	0	0	0	0	0	0	603	903	0
560	8	0	0	0	0	0	0	200	300	0	0	0	0	0	0	0	200	903	0	0	0	0	0	0	0	603	903	0
560	9	0	0	0	0	0	0	200	300	0	0	0	0	0	0	0	200	903	0	0	0	0	0	0	0	603	903	0
561	0	0	0	0	0	0	0	200	300	0	0	0	0	0	0	0	200	903	0	0	0	0	0	0	0	603	903	0
561	1	0	0	0	0	0	0	200	300	0	0	0	0	0	0	0	200	903	0	0	0	0	0	0	0	603	903	0
561	2	0	0	0	0	0	0	200	300	0	0	0	0	0	0	0	200	903	0	0	0	0	0	0	0	603	903	0
561	3	0	0	0	0	0	0	200	300	0	0	0	0	0	0	0	200	903	0	0	0	0	0	0	0	603	903	0
561	4	0	0	0	0	0	0	200	300	0	0	0	0	0	0	0	200	903	0	0	0	0	0	0	0	603	903	0
561	5	0	0	0	0	0	0	200	300	0	0	0	0	0	0	0	200	903	0	0	0	0	0	0	0	603	903	0
561	6	0	0	0	0	0	0	200	300	0	0	0	0	0	0	0	200	903	0	0	0	0	0	0	0	603	903	0
561	7	0	0	0	0	0	0	200	300	0	0	0	0	0	0	0	200	903	0	0	0	0	0	0	0	603	903	0
561	8	0	0	0	0	0	0	200	300	0	0	0	0	0	0	0	200	903	0	0	0	0	0	0	0	603	903	0
561	9	0	0	0	0	0	0	200	300	0	0	0	0	0	0	0	200	903	0	0	0	0	0	0	0	603	903	0
562	0	0	0	0	0	0	0	200	300	0	0	0	0	0	0	0	200	903	0	0	0	0	0	0	0	603	903	0
562	1	0	0	0	0	0	0	200	300	0	0	0	0	0	0	0	200	903	0	0	0	0	0	0	0	603	903	0
562	2	0	0	0	0	0	0	200	300	0	0	0	0	0	0	0	200	903	0	0	0	0	0	0	0	603	903	0
562	3	0	0	0	0	0	0	200	300	0	0	0	0	0	0	0	200	903	0	0	0	0	0	0	0	603	903	0
562	4	0	0	0	0	0	0	200	300	0	0	0	0	0	0	0	200	903	0	0	0	0	0	0	0	603	903	0
562	5	0	0	0	0	0	0	200	300	0	0	0	0	0	0	0	200	903	0	0	0	0	0	0	0	603	903	0
562	6	0	0	0	0	0	0	200	300	0	0	0	0	0	0	0	200	903	0	0	0	0	0	0	0	603	903	0
562	7	0	0	0	0	0	0	200	300	0	0	0	0	0	0	0	200	903	0	0	0	0	0	0	0	603	903	0
562	8	0	0	0	0	0	0	200	300	0	0	0	0	0	0	0	200	903	0	0	0	0	0	0	0	603	903	0
562	9	0	0	0	0	0	0	200	300	0	0	0	0	0	0	0	200	903	0	0	0	0	0	0	0	603	903	0
563	0	0	0	0	0	0	0	200	300	0	0	0	0	0	0	0	200	903	0	0	0	0	0	0	0	603	903	0
563	1	0	0	0	0	0	0	200	300	0	0	0	0	0	0	0	200	903	0	0	0	0	0	0	0	603	903	0
563	2	0	0	0	0	0	0	200	300	0	0	0	0	0	0	0	200	903	0	0	0	0	0	0	0	603	903	0
563	3	0	0	0	0	0	0	200	300	0	0	0	0	0	0	0	200	903	0	0	0	0	0	0	0	603	903	0
563	4	0	0	0	0	0	0	200	300	0	0	0	0	0	0	0	200	903	0	0	0	0	0	0	0	603	903	0
563	5	0	0	0	0	0	0	200	300	0	0	0	0	0	0	0	200	903	0	0	0	0	0	0	0	603	903	0
563	6	0	0	0	0	0	0	200	300	0	0	0	0	0	0	0	200	903	0	0	0	0	0	0	0	603	903	0
563	7	0	0	0	0	0	0	200	300	0	0	0	0	0	0	0	200	903	0	0	0	0	0	0	0	603	903	0
563	8	0	0	0	0	0	0	200	300	0	0	0	0	0	0	0	200	903	0	0	0	0	0	0	0	603	903	0
563	9	0	0	0	0	0	0	200	300	0	0	0	0	0	0	0	200	903	0	0	0	0	0	0	0	603	903	0
564	0	0	0	0	0	0	0	200	300	0	0	0	0	0	0	0	200	903	0	0	0	0	0	0	0	603	903	0
564	1	0	0	0	0	0	0	200	300	0	0	0	0	0	0	0	200	903	0	0	0	0	0	0	0	603	903	0
564	2	0	0	0	0	0	0	200	300	0	0	0	0	0	0	0	200	903	0	0	0	0	0	0	0	603	903	0
564	3	0	0	0	0	0	0	200	300	0	0	0	0	0	0	0	200	903	0	0	0	0	0	0	0	603	903	0
564	4	0	0	0	0	0	0	200	300	0	0	0	0	0	0	0	200	903	0	0	0	0	0	0	0	603	903	0
564	5	0	0	0	0	0	0	200	300	0	0	0	0	0	0	0	200	903	0	0	0	0	0	0	0	603	903	0
564	6	0	0	0	0	0	0	200	300	0	0	0	0	0	0	0	200	903	0	0	0	0	0	0	0	603	903	0
564	7	0	0	0	0	0	0	200	300	0	0	0	0	0	0	0	200	903	0	0	0	0	0	0	0	603	903	0
564	8	0	0	0	0	0	0	200	300	0	0	0	0	0	0	0	200	903	0	0	0	0	0	0	0	603	903	0
564	9	0	0	0	0	0	0	200	300	0	0	0	0	0	0	0	200	903	0	0	0	0	0	0	0	603	903	0
565	0	0	0	0	0	0	0	200	300	0	0	0	0	0	0	0	200	903	0	0	0	0	0	0	0	603	903	0
565	1	0	0	0	0	0	0	200	300	0	0	0	0	0	0	0	200	903	0	0	0	0	0	0	0	603	903	0
565	2	0	0	0	0	0	0	200	300	0	0	0	0	0	0	0	200	903	0	0	0	0	0	0	0	603	903	0
565	3	0	0	0	0	0	0	200	300	0	0	0	0	0	0	0	200	903	0	0	0	0	0	0	0	603	903	0
565	4	0	0	0	0	0	0	200	300	0	0	0	0	0	0	0	200	903	0	0	0	0	0	0	0	603	903	0
565	5	0	0	0	0	0	0	200	300	0	0	0	0	0	0	0	200	903	0	0	0	0	0	0	0	603	903	0
565	6	0	0	0	0	0	0	200	300	0	0	0	0	0	0	0	200	903	0	0	0	0	0	0	0	603	903	0
565	7	0	0	0	0	0	0	200	300	0	0	0	0	0	0	0	200	903	0	0	0	0	0	0	0	603	903	0
565	8	0	0	0	0	0	0	200	300	0	0	0	0	0	0	0	200	903	0	0	0	0	0	0	0	603	903	0
565	9	0	0	0	0	0	0	200	300	0	0	0	0	0	0	0	200	903	0	0	0	0	0	0	0	603	903	0
566	0	0	0	0	0	0	0	200	300	0	0	0	0	0	0	0	200	903	0	0	0	0	0	0	0	603	903	0
566	1	0	0	0	0	0	0	200	300	0	0	0	0	0	0	0	200	903	0	0	0	0	0	0	0	603	903	0
566	2	0	0	0	0	0	0	200	300	0	0	0	0	0	0	0	200	903	0	0	0	0	0	0	0	603	903	0
566	3	0	0	0	0	0	0	200	300	0	0	0	0	0	0	0	200	903	0	0	0	0	0	0	0	603	903	0
566	4	0	0	0	0	0	0	200	300	0	0	0	0	0	0	0	200	903	0	0	0	0	0	0	0	603	903	0
566	5	0	0	0	0	0	0	200	300	0	0	0	0	0	0	0	200	903	0	0	0	0	0	0	0	603	903	0
566	6	0	0	0	0	0	0	200	300	0	0	0	0	0	0	0	200	903	0	0	0	0	0	0	0	603	903	0
566	7	0	0	0	0	0	0	200	300	0	0	0	0	0	0	0	200	903	0	0	0	0	0	0	0	603	903	0
566	8	0	0	0	0	0	0	200	300	0	0	0	0	0	0	0	200	903	0	0	0	0	0	0	0	603	903	0
566	9	0	0	0	0	0	0	200	300	0	0	0	0	0	0	0	200	903	0	0	0	0	0	0	0	603	903	0
567	0	0	0	0	0	0	0	200	300	0	0	0	0	0	0	0	200	903	0	0	0	0	0	0	0	603	903	0
567	1	0	0	0	0	0	0	200	300	0	0	0	0	0	0	0	200	903	0	0	0	0	0	0	0	603	903	0
567	2	0	0	0	0	0	0	200	300	0	0	0	0	0	0	0	200	903	0	0	0	0	0	0	0	603	903	0
567	3	0	0	0	0	0	0	200	300	0	0	0	0	0	0	0	200	903	0	0	0	0	0	0	0	603	903	0
567	4	0	0	0	0	0	0	200	300	0	0	0	0	0	0	0	200	903	0	0	0	0	0	0	0	603	903	0
567	5	0	0	0	0	0	0	200	300	0	0	0	0	0	0	0	200	903	0	0	0	0	0	0	0	603	903	0
567	6	0	0	0	0	0	0	200	300	0	0	0	0	0	0	0	200	903	0	0	0	0	0	0	0	603	903	0
567	7	0	0	0	0	0	0	200	300	0	0	0	0	0	0	0	200	903	0	0	0	0	0	0	0	603	903	0
567	8	0	0	0	0	0	0	200	300	0	0	0	0	0	0	0	200	903	0	0	0	0	0	0	0	603	903	0
567	9	0	0	0	0	0	0	200	300	0	0	0	0	0	0	0	200	903	0	0	0	0	0	0	0	603	903	0
568	0	0	0	0	0	0	0	200	300	0	0	0	0	0	0	0	200	903	0	0	0	0	0	0	0	603	903	0
568	1	0	0	0	0	0	0	200	300	0	0	0	0	0	0	0	200	903	0	0	0	0	0	0	0	603	903	0
568	2	0	0	0	0	0	0	200	300	0	0	0	0	0	0	0	200	903	0	0	0	0	0	0	0	603	903	0
568	3	0	0	0	0	0	0	200	300	0	0	0	0	0	0	0	200	903	0	0	0	0	0	0	0	603	903	0
568	4	0	0	0	0	0	0	200	300	0	0	0	0	0	0	0	200	903	0	0	0	0	0	0	0	603	903	0
568	5	0	0	0	0	0	0	200	300	0	0	0	0	0	0	0	200	903	0	0	0	0	0	0	0	603	903	0
568	6	0	0	0	0	0	0	200	300	0	0	0	0	0	0	0	200	903	0	0	0	0	0	0	0	603	903	0
568	7	0	0	0	0	0	0	200	300	0	0	0	0	0	0	0	200	903	0	0	0	0	0	0	0	603	903	0
568	8	0	0	0	0	0	0	200	300	0	0	0	0	0	0	0	200	903	0	0	0	0	0	0	0	603	903	0
568	9	0	0	0	0	0	0	200	300	0	0	0	0	0	0	0	200	903	0	0	0	0	0	0	0	603	903	0
569	0	0	0	0	0	0	0	200	300	0	0	0	0	0	0	0	200	903	0	0	0	0	0	0	0	603	903	0
569	1	0	0	0	0	0	0	200	300	0	0	0	0	0	0	0	200	903	0	0	0	0	0	0	0	603	903	0
569	2	0	0	0	0	0	0	200	300	0	0	0	0	0	0	0	200	903	0	0	0	0	0	0	0	603	903	0
569	3	0	0	0	0	0	0	200	300	0	0	0	0	0	0	0	200	903	0	0	0	0	0	0	0	603	903	0
569	4	0	0	0	0	0	0	200	300	0	0	0	0	0	0	0	200	903	0	0	0	0	0	0	0	603	903	0
569	5	0	0	0	0	0	0	200	300	0	0	0	0	0	0	0	200	903	0	0	0	0	0	0	0	603	903	0
569	6	0	0	0	0	0	0	200	300	0	0	0	0	0	0	0	200	903	0	0	0	0	0	0	0	603	903	0
569	7	0	0	0	0	0	0	200	300	0	0	0	0	0	0	0	200	903	0	0	0	0	0	0	0	603	903	0
569	8	0	0	0	0	0	0	200	300	0	0	0	0	0	0	0	200	903	0	0	0	0	0	0	0	603	903	0
569	9	0	0	0	0	0	0	200	300	0	0	0	0	0	0	0	200	903	0	0	0	0	0	0	0	603	903	0
570	0	0	0	0	0	0	0	200	300	0	0	0	0	0	0	0	200	903	0	0	0	0	0	0	0	603	903	0
570	1	0	0	0	0	0	0	200	300	0	0	0	0	0	0	0	200	903	0	0	0	0	0	0	0	603	903	0
570	2	0	0	0	0	0	0	200	300	0	0	0	0	0	0	0	200	903	0	0	0	0	0	0	0	603	903	0
570	3	0	0	0	0	0	0	200	300	0	0	0	0	0	0	0	200	903	0	0	0	0	0	0	0	603	903	0
570	4	0	0	0	0	0	0	200	300	0	0	0	0	0	0	0	200	903	0	0	0	0	0	0	0	603	903	0
570	5	0	0	0	0	0	0	200	300	0	0	0	0	0	0	0	200	903	0	0	0	0	0	0	0	603	903	0
570	6	0	0	0	0	0	0	200	300	0	0	0	0	0	0	0	200	903	0	0	0	0	0	0	0	603	903	0
570	7	0	0	0	0	0	0	200	300	0	0	0	0	0	0	0	200	903	0	0	0	0	0	0	0	603	903	0
570	8	0	0	0	0	0	0	200	300	0	0	0	0	0	0	0	200	903	0	0	0	0	0	0	0	603	903	0
570	9	0	0	0	0	0	0	200	300	0	0	0	0	0	0	0	200	903	0	0	0	0	0	0	0	603	903	0
571	0	0	0	0	0	0	0	200	300	0	0	0	0	0	0	0	200	903	0	0	0	0	0	0	0	603	903	0
571	1	0	0	0	0	0	0	200	300	0	0	0	0	0	0	0	200	903	0	0	0	0	0	0	0	603	903	0
571	2	0	0	0	0	0	0	200	300	0	0	0	0	0	0	0	200	903	0	0	0	0	0	0	0	603	903	0
571	3	0	0	0	0	0	0	200	300	0	0	0	0	0	0	0	200	903	0	0	0	0	0	0	0	603	903	0
571	4	0	0	0	0	0	0	200	300	0	0	0	0	0	0	0	200	903	0	0	0	0	0	0	0	603	903	0
571	5	0	0	0	0	0	0	200	300	0	0	0	0	0	0	0	200	903	0	0	0	0	0	0	0	603	903	0
571	6	0	0	0	0	0	0	200	300	0	0	0	0	0	0	0	200	903	0	0	0	0	0	0	0	603	903	0
571	7	0	0	0	0	0	0	200	300	0	0	0	0	0	0	0	200	903	0	0	0	0	0	0	0	603	903	0
571	8	0	0	0	0	0	0	200	300	0	0	0	0	0	0	0	200	903	0	0	0	0	0	0	0	603	903	0
571	9	0	0	0	0	0	0	200	300	0	0	0	0	0	0	0	200	903	0	0	0	0	0	0	0	603	903	0
572	0	0	0	0	0	0	0	200	300	0	0	0	0	0	0	0	200	903	0	0	0	0	0	0	0	603	903	0
572	1	0	0	0	0	0	0	200	300	0	0	0	0	0	0	0	200	903	0	0	0	0	0	0	0	603	903	0
572	2	0	0	0	0	0	0	200	300	0	0	0	0	0	0	0	200	903	0	0	0	0	0	0	0	603	903	0
572	3	0	0	0	0	0	0	200	300	0	0	0	0	0	0	0	200	903	0	0	0	0	0	0	0	603	903	0
572	4	0	0	0	0	0	0	200	300	0	0	0	0	0	0	0	200	903	0	0	0	0	0	0	0	603	903	0
572	5	0	0	0	0	0	0	200	300	0	0	0	0	0	0	0	200	903	0	0	0	0	0	0	0	603	903	0
572	6	0	0	0	0	0	0	200	300	0	0	0	0	0	0	0	200	903	0	0	0	0	0	0	0	603	903	0
572	7	0	0	0	0	0	0	200	300	0	0	0	0	0	0	0	200	903	0	0	0	0	0	0	0	603	903	0
572	8	0	0	0	0	0	0	200	300	0	0	0	0	0	0	0	200	903	0	0	0	0	0	0	0	603	903	0
572	9	0	0	0	0	0	0	200	300	0	0	0	0	0	0	0	200	903	0	0	0	0	0	0	0	603	903	0
573	0	0	0	0	0	0	0	200	300	0	0	0	0	0	0	0	200	903	0	0	0	0	0	0	0	603	903	0
573	1	0	0	0	0	0	0	200	300	0	0	0	0	0	0	0	200	903	0	0	0	0	0	0	0	603	903	0
573	2	0	0	0	0	0	0	200	300	0	0	0	0	0	0	0	200	903	0	0	0	0	0	0	0	603	903	0
573	3	0	0	0	0	0	0	200	300	0	0	0	0	0	0	0	200	903	0	0	0	0	0	0	0	603	903	0
573	4	0	0	0	0	0	0	200	300	0	0	0	0	0	0	0	200	903	0	0	0	0	0	0	0	603	903	0
573	5	0	0	0	0	0	0	200	300	0	0	0	0	0	0	0	200	903	0	0	0	0	0	0	0	603	903	0
573	6	0	0	0	0	0	0	200	300	0	0	0	0	0	0	0	200	903	0	0	0	0	0	0	0	603	903	0
573	7	0	0	0	0	0	0	200	300	0	0	0	0	0	0	0	200	903	0	0	0	0	0	0	0	603	903	0
573	8	0	0	0	0	0	0	200	300	0	0	0	0	0	0	0	200	903	0	0	0	0	0	0	0	603	903	0
573	9	0	0	0	0	0	0	200	300	0	0	0	0	0	0	0	200	903	0	0	0	0	0	0	0	603	903	0
574	0	0	0	0	0	0	0	200	300	0	0	0	0	0	0	0	200	903	0	0	0	0	0	0	0	603	903	0
574	1	0	0	0	0	0	0	200	300	0	0	0	0	0	0	0	200	903	0	0	0	0	0	0	0	603	903	0
574	2	0	0	0	0	0	0	200	300	0	0	0	0	0	0	0	200	903	0	0	0	0	0	0	0	603	903	0
574	3	0	0	0	0	0	0	200	300	0	0	0	0	0	0	0	200	903	0	0	0	0	0	0	0	603	903	0
574	4	0	0	0	0	0	0	200	300	0	0	0	0	0	0	0	200	903	0	0	0	0	0	0	0	603	903	0
574	5	0	0	0	0	0	0	200	300	0	0	0	0	0	0	0	200	903	0	0	0	0	0	0	0	603	903	0
574	6	0	0	0	0	0	0	200	300	0	0	0	0	0	0	0	200	903	0	0	0	0	0	0	0	603	903	0
574	7	0	0	0	0	0	0	200	300	0	0	0	0	0	0	0	200	903	0	0	0	0	0	0	0	603	903	0
574	8	0	0	0	0	0	0	200	300	0	0	0	0	0	0	0	200	903	0	0	0	0	0	0	0	603	903	0
574	9	0	0	0	0	0	0	200	300	0	0	0	0	0	0	0	200	903	0	0	0	0	0	0	0	603	903	0
575	0	0	0	0	0	0	0	200	300	0	0	0	0	0	0	0	200	903	0	0	0	0	0	0	0	603	903	0
575	1	0	0	0	0	0	0	200	300	0	0	0	0	0	0	0	200	903	0	0	0	0	0	0	0	603	903	0
575	2	0	0	0	0	0	0	200	300	0	0	0	0	0	0	0	200	903	0	0	0	0	0	0	0	603	903	0
575	3	0	0	0	0	0	0	200	300	0	0	0	0	0	0	0	200	903	0	0	0	0	0	0	0	603	903	0
575	4	0	0	0	0	0	0	200	300	0	0	0	0	0	0	0	200	903	0	0	0	0	0	0	0	603	903	0
575	5	0	0	0	0	0	0	200	300	0	0	0	0	0	0	0	200	903	0	0	0	0	0	0	0	603	903	0
575	6	0	0	0	0	0	0	200	300	0	0	0	0	0	0	0	200	903	0	0	0	0	0	0	0	603	903	0
575	7	0	0	0	0	0	0	200	300	0	0	0	0	0	0	0	200	903	0	0	0	0	0	0	0	603	903	0
575	8	0	0	0	0	0	0	200	300	0	0	0	0	0	0	0	200	903	0	0	0	0	0	0	0	603	903	0
575	9	0	0	0	0	0	0	200	300	0	0	0	0	0	0	0	200	903	0	0	0	0	0	0	0	603	903	0
576	0	0	0	0	0	0	0	200	300	0	0	0	0	0	0	0	200	903	0	0	0	0	0	0	0	603	903	0
576	1	0	0	0	0	0	0	200	300	0	0	0	0	0	0	0	200	903	0	0	0	0	0	0	0	603	903	0
576	2	0	0	0	0	0	0	200	300	0	0	0	0	0	0	0	200	903	0	0	0	0	0	0	0	603	903	0
576	3	0	0	0	0	0	0	200	300	0	0	0	0	0	0	0	200	903	0	0	0	0	0	0	0	603	903	0
576	4	0	0	0	0	0	0	200	300	0	0	0	0	0	0	0	200	903	0	0	0	0	0	0	0	603	903	0
576	5	0	0	0	0	0	0	200	300	0	0	0	0	0	0	0	200	903	0	0	0	0	0	0	0	603	903	0
576	6	0	0	0	0	0	0	200	300	0	0	0	0	0	0	0	200	903	0	0	0	0	0	0	0	603	903	0
576	7	0	0	0	0	0	0	200	300	0	0	0	0	0	0	0	200	903	0	0	0	0	0	0	0	603	903	0
576	8	0	0	0	0	0	0	200	300	0	0	0	0	0	0	0	200	903	0	0	0	0	0	0	0	603	903	0
576	9	0	0	0	0	0	0	200	300	0	0	0	0	0	0	0	200	903	0	0	0	0	0	0	0	603	903	0
577	0	0	0	0	0	0	0	200	300	0	0	0	0	0	0	0	200	903	0	0	0	0	0	0	0	603	903	0
577	1	0	0	0	0	0	0	200	300	0	0	0	0	0	0	0	200	903	0	0	0	0	0	0	0	603	903	0
577	2	0	0	0	0	0	0	200	300	0	0	0	0	0	0	0	200	903	0	0	0	0	0	0	0	603	903	0
577	3	0	0	0	0	0	0	200	300	0	0	0	0	0	0	0	200	903	0	0	0	0	0	0	0	603	903	0
577	4	0	0	0	0	0	0	200	300	0	0	0	0	0	0	0	200	903	0	0	0	0	0	0	0	603	903	0
577	5	0	0	0	0	0	0	200	300	0	0	0	0	0	0	0	200	903	0	0	0	0	0	0	0	603	903	0
577	6	0	0	0	0	0	0	200	300	0	0	0	0	0	0	0	200	903	0	0	0	0	0	0	0	603	903	0
577	7	0	0	0	0	0	0	200	300	0	0	0	0	0	0	0	200	903	0	0	0	0	0	0	0	603	903	0
577	8	0	0	0	0	0	0	200	300	0	0	0	0	0	0	0	200	903	0	0	0	0	0	0	0	603	903	0
577	9	0	0	0	0	0	0	200	300	0	0	0	0	0	0	0	200	903	0	0	0	0	0	0	0	603	903	0
578	0	0	0	0	0	0	0	200	300	0	0	0	0	0	0	0	200	903	0	0	0	0	0	0	0	603	903	0
578	1	0	0	0	0	0	0	200	300	0	0	0	0	0	0	0	200	903	0	0	0	0	0	0	0	603	903	0
578	2	0	0	0	0	0	0	200	300	0	0	0	0	0	0	0	200	903	0	0	0	0	0	0	0	603	903	0
578	3	0	0	0	0	0	0	200	300	0	0	0	0	0	0	0	200	903	0	0	0	0	0	0	0	603	903	0
578	4	0	0	0	0	0	0	200	300	0	0	0	0	0	0	0	200	903	0	0	0	0	0	0	0	603	903	0
578	5	0	0	0	0	0	0	200	300	0	0	0	0	0	0	0	200	903	0	0	0	0	0	0	0	603	903	0
578	6	0	0	0	0	0	0	200	300	0	0	0	0	0	0	0	200	903	0	0	0	0	0	0	0	603	903	0
578	7	0	0	0	0	0	0	200	300	0	0	0	0	0	0	0	200	903	0	0	0	0	0	0	0	603	903	0
578	8	0	0	0	0	0	0	200	300	0	0	0	0	0	0	0	200	903	0	0	0	0	0	0	0	603	903	0
578	9	0	0	0	0	0	0	200	300	0	0	0	0	0	0	0	200	903	0	0	0	0	0	0	0	603	903	0
579	0	0	0	0	0	0	0	200	300	0	0	0	0	0	0	0	200	903	0	0	0	0	0	0	0	603	903	0
579	1	0	0	0	0	0	0	200	300	0	0	0	0	0	0	0	200	903	0	0	0	0	0	0	0	603	903	0
579	2	0	0	0	0	0	0	200	300	0	0	0	0	0	0	0	200	903	0	0	0	0	0	0	0	603	903	0
579	3	0	0	0	0	0	0	200	300	0	0	0	0	0	0	0	200	903	0	0	0	0	0	0	0	603	903	0
579	4	0	0	0	0	0	0	200	300	0	0	0	0	0	0	0	200	903	0	0	0	0	0	0	0	603	903	0
579	5	0	0	0	0	0	0	200	300	0	0	0	0	0	0	0	200	903	0	0	0	0	0	0	0	603	903	0
579	6	0	0	0	0	0	0	200	300	0	0	0	0	0	0	0	200	903	0	0	0	0	0	0	0	603	903	0
579	7	0	0	0	0	0	0	200	300	0	0	0	0	0	0	0	200	903	0	0	0	0	0	0	0	603	903	0
579	8	0	0	0	0	0	0	200	300	0	0	0	0	0	0	0	200	903	0	0	0	0	0	0	0	603	903	0
579	9	0	0	0	0	0	0	200	300	0	0	0	0	0	0	0	200	903	0	0	0	0	0	0	0	603	903	0
580	0	0	0	0	0	0	0	200	300	0	0	0	0	0	0	0	200	903	0	0	0	0	0	0	0	603	903	0
580	1	0	0	0	0	0	0	200	300	0	0	0	0	0	0	0	200	903	0	0	0	0	0	0	0	603	903	0
580	2	0	0	0	0	0	0	200	300	0	0	0	0	0	0	0	200	903	0	0	0	0	0	0	0	603	903	0
580	3	0	0	0	0	0	0	200	300	0	0	0	0	0	0	0	200	903	0	0	0	0	0	0	0	603	903	0
580	4	0	0	0	0	0	0	200	300	0	0	0	0	0	0	0	200	903	0	0	0	0	0	0	0	603	903	0
580	5	0	0	0	0	0	0	200	300	0	0	0	0	0	0	0	200	903	0	0	0	0	0	0	0	603	903	0
580	6	0	0	0	0	0	0	200	300	0	0	0	0	0	0	0	200	903	0	0	0	0	0	0	0	603	903	0
580	7	0	0	0	0	0	0	200	300	0	0	0	0	0	0	0	200	903	0	0	0	0	0	0	0	603	903	0
580	8	0	0	0	0	0	0	200	300	0	0	0	0	0	0	0	200	903	0	0	0	0	0	0	0	603	903	0
580	9	0	0	0	0	0	0	200	300	0	0	0	0	0	0	0	200	903	0	0	0	0	0	0	0	603	903	0
581	0	0	0	0	0	0	0	200	300	0	0	0	0	0	0	0	200	903	0	0	0	0	0	0	0	603	903	0
581	1	0	0	0	0	0	0	200	300	0	0	0	0	0	0	0	200	903	0	0	0	0	0	0	0	603	903	0
581	2	0	0	0	0	0	0	200	300	0	0	0	0	0	0	0	200	903	0	0	0	0	0	0	0	603	903	0
581	3	0	0	0	0	0	0	200	300	0	0	0	0	0	0	0	200	903	0	0	0	0	0	0	0	603	903	0
581	4	0	0	0	0	0	0	200	300	0	0	0	0	0	0	0	200	903	0	0	0	0	0	0	0	603	903	0
581	5	0	0	0	0	0	0	200	300	0	0	0	0	0	0	0	200	903	0	0	0	0	0	0	0	603	903	0
581	6	0	0	0	0	0	0	200	300	0	0	0	0	0	0	0	200	903	0	0	0	0	0	0	0	603	903	0
581	7	0	0	0	0	0	0	200	300	0	0	0	0	0	0	0	200	903	0	0	0	0	0	0	0	603	903	0
581	8	0	0	0	0	0	0	200	300	0	0	0	0	0	0	0	200	903	0	0	0	0	0	0	0	603	903	0
581	9	0	0	0	0	0	0	200	300	0	0	0	0	0	0	0	200	903	0	0	0	0	0	0	0	603	903	0
582	0	0	0	0	0	0	0	200	300	0	0	0	0	0	0	0	200	903	0	0	0	0	0	0	0	603	903	0
582	1	0	0	0	0	0	0	200	300	0	0	0	0	0	0	0	200	903	0	0	0	0	0	0	0	603	903	0
582	2	0	0	0	0	0	0	200	300	0	0	0	0	0	0	0	200	903	0	0	0	0	0	0	0	603	903	0
582	3	0	0	0	0	0	0	200	300	0	0	0	0	0	0	0	200	903	0	0	0	0	0	0	0	603	903	0
582	4	0	0	0	0	0	0	200	300	0	0	0	0	0	0	0	200	903	0	0	0	0	0	0	0	603	903	0
582	5	0	0	0	0	0	0	200	300	0	0	0	0	0	0	0	200	903	0	0	0	0	0	0	0	603	903	0
582	6	0	0	0	0	0	0	200	300	0	0	0	0	0	0	0	200	903	0	0	0	0	0	0	0	603	903	0
582	7	0	0	0	0	0	0	200	300	0	0	0	0	0	0	0	200	903	0	0	0	0	0	0	0	603	903	0
582	8	0	0	0	0	0	0	200	300	0	0	0	0	0	0	0	200	903	0	0	0	0	0	0	0	603	903	0
582	9	0	0	0	0	0	0	200	300	0	0	0	0	0	0	0	200	903	0	0	0	0	0	0	0	603	903	0
583	0	0	0	0	0	0	0	200	300	0	0	0	0	0	0	0	200	903	0	0	0	0	0	0	0	603	903	0
583	1	0	0	0	0	0	0	200	300	0	0	0	0	0	0	0	200	903	0	0	0	0	0	0	0	603	903	0
583	2	0	0	0	0	0	0	200	300	0	0	0	0	0	0	0	200	903	0	0	0	0	0	0	0	603	903	0
583	3	0	0	0	0	0	0	200	300	0	0	0	0	0	0	0	200	903	0	0	0	0	0	0	0	603	903	0
583	4	0	0	0	0	0	0	200	300	0	0	0	0	0	0	0	200	903	0	0	0	0	0	0	0	603	903	0
583	5	0	0	0	0	0	0	200	300	0	0	0	0	0	0	0	200	903	0	0	0	0	0	0	0	603	903	0
583	6	0	0	0	0	0	0	200	300	0	0	0	0	0	0	0	200	903	0	0	0	0	0	0	0	603	903	0
583	7	0	0	0	0	0	0	200	300	0	0	0	0	0	0	0	200	903	0	0	0	0	0	0	0	603	903	0
583	8	0	0	0	0	0	0	200	300	0	0	0	0	0	0	0	200	903	0	0	0	0	0	0	0	603	903	0
583	9	0	0	0	0	0	0	200	300	0	0	0	0	0	0	0	200	903	0	0	0	0	0	0	0	603	903	0
584	0	0	0	0	0	0	0	200	300	0	0	0	0	0	0	0	200	903	0	0	0	0	0	0	0	603	903	0
584	1	0	0	0	0	0	0	200	300	0	0	0	0	0	0	0	200	903	0	0	0	0	0	0	0	603	903	0
584	2	0	0	0	0	0	0	200	300	0	0	0	0	0	0	0	200	903	0	0	0	0	0	0	0	603	903	0
584	3	0	0	0	0	0	0	200	300	0	0	0	0	0	0	0	200	903	0	0	0	0	0	0	0	603	903	0
584	4	0	0	0	0	0	0	200	300	0	0	0	0	0	0	0	200	903	0	0	0	0	0	0	0	603	903	0
584	5	0	0	0	0	0	0	200	300	0	0	0	0	0	0	0	200	903	0	0	0	0	0	0	0	603	903	0
584	6	0	0	0	0	0	0	200	300	0	0	0	0	0	0	0	200	903	0	0	0	0	0	0	0	603	903	0
584	7	0	0	0	0	0	0	200	300	0	0	0	0	0	0	0	200	903	0	0	0	0	0	0	0	603	903	0
584	8	0	0	0	0	0	0	200	300	0	0	0	0	0	0	0	200	903	0	0	0	0	0	0	0	603	903	0
584	9	0	0	0	0	0	0	200	300	0	0	0	0	0	0	0	200	903	0	0	0	0	0	0	0	603	903	0
585	0	0	0	0	0	0	0	200	300	0	0	0	0	0	0	0	200	903	0	0	0	0	0	0	0	603	903	0
585	1	0	0	0	0	0	0	200	300	0	0	0	0	0	0	0	200	903	0	0	0	0	0	0	0	603	903	0
585	2	0	0	0	0	0	0	200	300	0	0	0	0	0	0	0	200	903	0	0	0	0	0	0	0	603	903	0
585	3	0	0	0	0	0	0	200	300	0	0	0	0	0	0	0	200	903	0	0	0	0	0	0	0	603	903	0
585	4	0	0	0	0	0	0	200	300	0	0	0	0	0	0	0	200	903	0	0	0	0	0	0	0	603	903	0
585	5	0	0	0	0	0	0	200	300	0	0	0	0	0	0	0	200	903	0	0	0	0	0	0	0	603	903	0
585	6	0	0	0	0	0	0	200	300	0	0	0	0	0	0	0	200	903	0	0	0	0	0	0	0	603	903	0
585	7	0	0	0	0	0	0	200	300	0	0	0	0	0	0	0	200	903	0	0	0	0	0	0	0	603	903	0
585	8	0	0	0	0	0	0	200	300	0	0	0	0	0	0	0	200	903	0	0	0	0	0	0	0	603	903	0
585	9	0	0	0	0	0	0	200	300	0	0	0	0	0	0	0	200	903	0	0	0	0	0	0	0	603	903	0
586	0	0	0	0	0	0	0	200	300	0	0	0	0	0	0	0	200	903	0	0	0	0	0	0	0	603	903	0
586	1	0	0	0	0	0	0	200	300	0	0	0	0	0	0	0	200	903	0	0	0	0	0	0	0	603	903	0
586	2	0	0	0	0	0	0	200	300	0	0	0	0	0	0	0	200	903	0	0	0	0	0	0	0	603	903	0
586	3	0	0	0	0	0	0	200	300	0	0	0	0	0	0	0	200	903	0	0	0	0	0	0	0	603	903	0
586	4	0	0	0	0	0	0	200	300	0	0	0	0	0	0	0	200	903	0	0	0	0	0	0	0	603	903	0
586	5	0	0	0	0	0	0	200	300	0	0	0	0	0	0	0	200	903	0	0	0	0	0	0	0	603	903	0
586	6	0	0	0	0	0	0	200	300	0	0	0	0	0	0	0	200	903	0	0	0	0	0	0	0	603	903	0
586	7	0	0	0	0	0	0	200	300	0	0	0	0	0	0	0	200	903	0	0	0	0	0	0	0	603	903	0
586	8	0	0	0	0	0	0	200	300	0	0	0	0	0	0	0	200	903	0	0	0	0	0	0	0	603	903	0
586	9	0	0	0	0	0	0	200	300	0	0	0	0	0	0	0	200	903	0	0	0	0	0	0	0	603	903	0
587	0	0	0	0	0	0	0	200	300	0	0	0	0	0	0	0	200	903	0	0	0	0	0	0	0	603	903	0
587	1	0	0	0	0	0	0	200	300	0	0	0	0	0	0	0	200	903	0	0	0	0	0	0	0	603	903	0
587	2	0	0	0	0	0	0	200	300	0	0	0	0	0	0	0	200	903	0	0	0	0	0	0	0	603	903	0
587	3	0	0	0	0	0	0	200	300	0	0	0	0	0	0	0	200	903	0	0	0	0	0	0	0	603	903	0
587	4	0	0	0	0	0	0	200	300	0	0	0	0	0	0	0	200	903	0	0	0	0	0	0	0	603	903	0
587	5	0	0	0	0	0	0	200	300	0	0	0	0	0	0	0	200	903	0	0	0	0	0	0	0	603	903	0
587	6	0	0	0	0	0	0	200	300	0	0	0	0	0	0	0	200	903	0	0	0	0	0	0	0	603	903	0
587	7	0	0	0	0	0	0	200	300	0	0	0	0	0	0	0	200	903	0	0	0	0	0	0	0	603	903	0
587	8	0	0	0	0	0	0	200	300	0	0	0	0	0	0	0	200	903	0	0	0	0	0	0	0	603	903	0
587	9	0	0	0	0	0	0	200	300	0	0	0	0	0	0	0	200	903	0	0	0	0	0	0	0	603	903	0
588	0	0	0	0	0	0	0	200	300	0	0	0	0	0	0	0	200	903	0	0	0	0	0	0	0	603	903	0
588	1	0	0	0	0	0	0	200	300	0	0	0	0	0	0	0	200	903	0	0	0	0	0	0	0	603	903	0
588	2	0	0	0	0	0	0	200	300	0	0	0	0	0	0	0	200	903	0	0	0	0	0	0	0	603	903	0
588	3	0	0	0	0	0	0	200	300	0	0	0	0	0	0	0	200	903	0	0	0	0	0	0	0	603	903	0
588	4	0	0	0	0	0	0	200	300	0	0	0	0	0	0	0	200	903	0	0	0	0	0	0	0	603	903	0
588	5	0	0	0	0	0	0	200	300	0	0	0	0	0	0	0	200	903	0	0	0	0	0	0	0	603	903	0
588	6	0	0	0	0	0	0	200	300	0	0	0	0	0	0	0	200	903	0	0	0	0	0	0	0	603	903	0
588	7	0	0	0	0	0	0	200	300	0	0	0	0	0	0	0	200	903	0	0	0	0	0	0	0	603	903	0
588	8	0	0	0	0	0	0	200	300	0	0	0	0	0	0	0	200	903	0	0	0	0	0	0	0	603	903	0
588	9	0	0	0	0	0	0	200	300	0	0	0	0	0	0	0	200	903	0	0	0	0	0	0	0	603	903	0
589	0	0	0	0	0	0	0	200	300	0	0	0	0	0	0	0	200	903	0	0	0	0	0	0	0	603	903	0
589	1	0	0	0	0	0	0	200	300	0	0	0	0	0	0	0	200	903	0	0	0	0	0	0	0	603	903	0
589	2	0	0	0	0	0	0	200	300	0	0	0	0	0	0	0	200	903	0	0	0	0	0	0	0	603	903	0
589	3	0	0	0	0	0	0	200	300	0	0	0	0	0	0	0	200	903	0	0	0	0	0	0	0	603	903	0
589	4	0	0	0	0	0	0	200	300	0	0	0	0	0	0	0	200	903	0	0	0	0	0	0	0	603	903	0
589	5	0	0	0	0	0	0	200	300	0	0	0	0	0	0	0	200	903	0	0	0	0	0	0	0	603	903	0
589	6	0	0	0	0	0	0	200	300	0	0	0	0	0	0	0	200	903	0	0	0	0	0	0	0	603	903	0
589	7	0	0	0	0	0	0	200	300	0	0	0	0	0	0	0	200	903	0	0	0	0	0	0	0	603	903	0
589	8	0	0	0	0	0	0	200	300	0	0	0	0	0	0	0	200	903	0	0	0	0	0	0	0	603	903	0
589	9	0	0	0	0	0	0	200	300	0	0	0	0	0	0	0	200	903	0	0	0	0	0	0	0	603	903	0
590	0	0	0	0	0	0	0	200	300	0	0	0	0	0	0	0	200	903	0	0	0	0	0	0	0	603	903	0
590	1	0	0	0	0	0	0	200	300	0	0	0	0	0	0	0	200	903	0	0	0	0	0	0	0	603	903	0
590	2	0	0	0	0	0	0	200	300	0	0	0	0	0	0	0	200	903	0	0	0	0	0	0	0	603	903	0
590	3	0	0	0	0	0	0	200	300	0	0	0	0	0	0	0	200	903	0	0	0	0	0	0	0	603	903	0
590	4	0	0	0	0	0	0	200	300	0	0	0	0	0	0	0	200	903	0	0	0	0	0	0	0	603	903	0
590	5	0	0	0	0	0	0	200	300	0	0	0	0	0	0	0	200	903	0	0	0	0	0	0	0	603	903	0
590	6	0	0	0	0	0	0	200	300	0	0	0	0	0	0	0	200	903	0	0	0	0	0	0	0	603	903	0
590	7	0	0	0	0	0	0	200	300	0	0	0	0	0	0	0	200	903	0	0	0	0	0	0	0	603	903	0
590	8	0	0	0	0	0	0	200	300	0	0	0	0	0	0	0	200	903	0	0	0	0	0	0	0	603	903	0
590	9	0	0	0	0	0	0	200	300	0	0	0	0	0	0	0	200	903	0	0	0	0	0	0	0	603	903	0
591	0	0	0	0	0	0	0	200	300	0	0	0	0	0	0	0	200	903	0	0	0	0	0	0	0	603	903	0
591	1	0	0	0	0	0	0	200	300	0	0	0	0	0	0	0	200	903	0	0	0	0	0	0	0	603	903	0
591	2	0	0	0	0	0	0	200	300	0	0	0	0	0	0	0	200	903	0	0	0	0	0	0	0	603	903	0
591	3	0	0	0	0	0	0	200	300	0	0	0	0	0	0	0	200	903	0	0	0	0	0	0	0	603	903	0
591	4	0	0	0	0	0	0	200	300	0	0	0	0	0	0	0	200	903	0	0	0	0	0	0	0	603	903	0
591	5	0	0	0	0	0	0	200	300	0	0	0	0	0	0	0	200	903	0	0	0	0	0	0	0	603	903	0
591	6	0	0	0	0	0	0	200	300	0	0	0	0	0	0	0	200	903	0	0	0	0	0	0	0	603	903	0
591	7	0	0	0	0	0	0	200	300	0	0	0	0	0	0	0	200	903	0	0	0	0	0	0	0	603	903	0
591	8	0	0	0	0	0	0	200	300	0	0	0	0	0	0	0	200	903	0	0	0	0	0	0	0	603	903	0
591	9	0	0	0	0	0	0	200	300	0	0	0	0	0	0	0	200	903	0	0	0	0	0	0	0	603	903	0
592	0	0	0	0	0	0	0	200	300	0	0	0	0	0	0	0	200	903	0	0	0	0	0	0	0	603	903	0
592	1	0	0	0	0	0	0	200	300	0	0	0	0	0	0	0	200	903	0	0	0	0	0	0	0	603	903	0
592	2	0	0	0	0	0	0	200	300	0	0	0	0	0	0	0	200	903	0	0	0	0	0	0	0	603	903	0
592	3	0	0	0	0	0	0	200	300	0	0	0	0	0	0	0	200	903	0	0	0	0	0	0	0	603	903	0
592	4	0	0	0	0	0	0	200	300	0	0	0	0	0	0	0	200	903	0	0	0	0	0	0	0	603	903	0
592	5	0	0	0	0	0	0	200	300	0	0	0	0	0	0	0	200	903	0	0	0	0	0	0	0	603	903	0
592	6	0	0	0	0	0	0	200	300	0	0	0	0	0	0	0	200	903	0	0	0	0	0	0	0	603	903	0
592	7	0	0	0	0	0	0	200	300	0	0	0	0	0	0	0	200	903	0	0	0	0	0	0	0	603	903	0
592	8	0	0	0	0	0	0	200	300	0	0	0	0	0	0	0	200	903	0	0	0	0	0	0	0	603	903	0
592	9	0	0	0	0	0	0	200	300	0	0	0	0	0	0	0	200	903	0	0	0	0	0	0	0	603	903	0
593	0	0	0	0	0	0	0	200	300	0	0	0	0	0	0	0	200	903	0	0	0	0	0	0	0	603	903	0
593	1	0	0	0	0	0	0	200	300	0	0	0	0	0	0	0	200	903	0	0	0	0	0	0	0	603	903	0
593	2	0	0	0	0	0	0	200	300	0	0	0	0	0	0	0	200	903	0	0	0	0	0	0	0	603	903	0
593	3	0	0	0	0	0	0	200	300	0	0	0	0	0	0	0	200	903	0	0	0	0	0	0	0	603	903	0
593	4	0	0	0	0	0	0	200	300	0	0	0	0	0	0	0	200	903	0	0	0	0	0	0	0	603	903	0
593	5	0	0	0	0	0	0	200	300	0	0	0	0	0	0	0	200	903	0	0	0	0	0	0	0	603	903	0
593	6	0	0	0	0	0	0	200	300	0	0	0	0	0	0	0	200	903	0	0	0	0	0	0	0	603	903	0
593	7	0	0	0	0	0	0	200	300	0	0	0	0	0	0	0	200	903	0	0	0	0	0	0	0	603	903	0
593	8	0	0	0	0	0	0	200	300	0	0	0	0	0	0	0	200	903	0	0	0	0	0	0	0	603	903	0
593	9	0	0	0	0	0	0	200	300	0	0	0	0	0	0	0	200	903	0	0	0	0	0	0	0	603	903	0
594	0	0	0	0	0	0	0	200	300	0	0	0	0	0	0	0	200	903	0	0	0	0	0	0	0	603	903	0
594	1	0	0	0	0	0	0	200	300	0	0	0	0	0	0	0	200	903	0	0	0	0	0	0	0	603	903	0
594	2	0	0	0	0	0	0	200	300	0	0	0	0	0	0	0	200	903	0	0	0	0	0	0	0	603	903	0
594	3	0	0	0	0	0	0	200	300	0	0	0	0	0	0	0	200	903	0	0	0	0	0	0	0	603	903	0
594	4	0	0	0	0	0	0	200	300	0	0	0	0	0	0	0	200	903	0	0	0	0	0	0	0	603	903	0
594	5	0	0	0	0	0	0	200	300	0	0	0	0	0	0	0	200	903	0	0	0	0	0	0	0	603	903	0
594	6	0	0	0	0	0	0	200	300	0	0	0	0	0	0	0	200	903	0	0	0	0	0	0	0	603	903	0
594	7	0	0	0	0	0	0	200	300	0	0	0	0	0	0	0	200	903	0	0	0	0	0	0	0	603	903	0
594	8	0	0	0	0	0	0	200	300	0	0	0	0	0	0	0	200	903	0	0	0	0	0	0	0	603	903	0
594	9	0	0	0	0	0	0	200	300	0	0	0	0	0	0	0	200	903	0	0	0	0	0	0	0	603	903	0
595	0	0	0	0	0	0	0	200	300	0	0	0	0	0	0	0	200	903	0	0	0	0	0	0	0	603	903	0
595	1	0	0	0	0	0	0	200	300	0	0	0	0	0	0	0	200	903	0	0	0	0	0	0	0	603	903	0
595	2	0	0	0	0	0	0	200	300	0	0	0	0	0	0	0	200	903	0	0	0	0	0	0	0	603	903	0
595	3	0	0	0	0	0	0	200	300	0	0	0	0	0	0	0	200	903	0	0	0	0	0	0	0	603	903	0
595	4	0	0	0	0	0	0	200	300	0	0	0	0	0	0	0	200	903	0	0	0	0	0	0	0	603	903	0
595	5	0	0	0	0	0	0	200	300	0	0	0	0	0	0	0	200	903	0	0	0	0	0	0	0	603	903	0
595	6	0	0	0	0	0	0	200	300	0	0	0	0	0	0	0	200	903	0	0	0	0	0	0	0	603	903	0
595	7	0	0	0	0	0	0	200	300	0	0	0	0	0	0	0	200	903	0	0	0	0	0	0	0	603	903	0
595	8	0	0	0	0	0	0	200	300	0	0	0	0	0	0	0	200	903	0	0	0	0	0	0	0	603	903	0
595	9	0	0	0	0	0	0	200	300	0	0	0	0	0	0	0	200	903	0	0	0	0	0	0	0	603	903	0
596	0	0	0	0	0	0	0	200	300	0	0	0	0	0	0	0	200	903	0	0	0	0	0	0	0	603	903	0
596	1	0	0	0	0	0	0	200	300	0	0	0	0	0	0	0	200	903	0	0	0	0	0	0	0	603	903	0
596	2	0	0	0	0	0	0	200	300	0	0	0	0	0	0	0	200	903	0	0	0	0	0	0	0	603	903	0
596	3	0	0	0	0	0	0	200	300	0	0	0	0	0	0	0	200	903	0	0	0	0	0	0	0	603	903	0
596	4	0	0	0	0	0	0	200	300	0	0	0	0	0	0	0	200	903	0	0	0	0	0	0	0	603	903	0
596	5	0	0	0	0	0	0	200	300	0	0	0	0	0	0	0	200	903	0	0	0	0	0	0	0	603	903	0
596	6	0	0	0	0	0	0	200	300	0	0	0	0	0	0	0	200	903	0	0	0	0	0	0	0	603	903	0
596	7	0	0	0	0	0	0	200	300	0	0	0	0	0	0	0	200	903	0	0	0	0	0	0	0	603	903	0
596	8	0	0	0	0	0	0	200	300	0	0	0	0	0	0	0	200	903	0	0	0	0	0	0	0	603	903	0
596	9	0	0	0	0	0	0	200	300	0	0	0	0	0	0	0	200	903	0	0	0	0	0	0	0	603	903	0
597	0	0	0	0	0	0	0	200	300	0	0	0	0	0	0	0	200	903	0	0	0	0	0	0	0	603	903	0
597	1	0	0	0	0	0	0	200	300	0	0	0	0	0	0	0	200	903	0	0	0	0	0	0	0	603	903	0
597	2	0	0	0	0	0	0	200	300	0	0	0	0	0	0	0	200	903	0	0	0	0	0	0	0	603	903	0
597	3	0	0	0	0	0	0	200	300	0	0	0	0	0	0	0	200	903	0	0	0	0	0	0	0	603	903	0
597	4	0	0	0	0	0	0	200	300	0	0	0	0	0	0	0	200	903	0	0	0	0	0	0	0	603	903	0
597	5	0	0	0	0	0	0	200	300	0	0	0	0	0	0	0	200	903	0	0	0	0	0	0	0	603	903	0
597	6	0	0	0	0	0	0	200	300	0	0	0	0	0	0	0	200	903	0	0	0	0	0	0	0	603	903	0
597	7	0	0	0	0	0	0	200	300	0	0	0	0	0	0	0	200	903	0	0	0	0	0	0	0	603	903	0
597	8	0	0	0	0	0	0	200	300	0	0	0	0	0	0	0	200	903	0	0	0	0	0	0	0	603	903	0
597	9	0	0	0	0	0	0	200	300	0	0	0	0	0	0	0	200	903	0	0	0	0	0	0	0	603	903	0
598	0	0	0	0	0	0	0	200	300	0	0	0	0	0	0	0	200	903	0	0	0	0	0	0	0	603	903	0
598	1	0	0	0	0	0	0	200	300	0	0	0	0	0	0	0	200	903	0	0	0	0	0	0	0	603	903	0
598	2	0	0	0	0	0	0	200	300	0	0	0	0	0	0	0	200	903	0	0	0	0	0	0	0	603	903	0
598	3	0	0	0	0	0	0	200	300	0	0	0	0	0	0	0	200	903	0	0	0	0	0	0	0	603	903	0
598	4	0	0	0	0	0	0	200	300	0	0	0	0	0	0	0	200	903	0	0	0	0	0	0	0	603	903	0
598	5	0	0	0	0	0	0	200	300	0	0	0	0	0	0	0	200	903	0	0	0	0	0	0	0	603	903	0
598	6	0	0	0	0	0	0	200	300	0	0	0	0	0	0	0	200	903	0	0	0	0	0	0	0	603	903	0
598	7	0	0	0	0	0	0	200	300	0	0	0	0	0	0	0	200	903	0	0	0	0	0	0	0	603	903	0
598	8	0	0	0	0	0	0	200	300	0	0	0	0	0	0	0	200	903	0	0	0	0	0	0	0	603	903	0
598	9	0	0	0	0	0	0	200	300	0	0	0	0	0	0	0	200	903	0	0	0	0	0	0	0	603	903	0
599	0	0	0	0	0	0	0	200	300	0	0	0	0	0	0	0	200	903	0	0	0	0	0	0	0	603	903	0
599	1	0	0	0	0	0	0	200	300	0	0	0	0	0	0	0	200	903	0	0	0	0	0	0	0	603	903	0
599	2	0	0	0	0	0	0	200	300	0	0	0	0	0	0	0	200	903	0	0	0	0	0	0	0	603	903	0
599	3	0	0	0	0	0	0	200	300	0	0	0	0	0	0	0	200	903	0	0	0	0	0	0	0	603	903	0
599	4	0	0	0	0	0	0	200	300	0	0	0	0	0	0	0	200	903	0	0	0	0	0	0	0	603	903	0
599	5	0	0	0	0	0	0	200	300	0	0	0	0	0	0	0	200	903	0	0	0	0	0	0	0	603	903	0
599	6	0	0	0	0	0	0	200	300	0	0	0	0	0	0	0	200	903	0	0	0	0	0	0	0	603	903	0
599	7	0	0	0	0	0	0	200	300	0	0	0	0	0	0	0	200	903	0	0	0	0	0	0	0	603	903	0
599	8	0	0	0	0	0	0	200	300	0	0	0	0	0	0	0	200	903	0	0	0	0	0	0	0	603	903	0
599	9	0	0	0	0	0	0	200	300	0	0	0	0	0	0	0	200	903	0	0	0	0	0	0	0	603	903	0
600	0	0	0	0	0	0	0	200	300	0	0	0	0	0	0	0	200	903	0	0	0	0	0	0	0	603	903	0
600	1	0	0	0	0	0	0	200	300	0	0	0	0	0	0	0	200	903	0	0	0	0	0	0	0	603	903	0
600	2	0	0	0	0	0	0	200	300	0	0	0	0	0	0	0	200	903	0	0	0	0	0	0	0	603	903	0
600	3	0	0	0	0	0	0	200	300	0	0	0	0	0	0	0	200	903	0	0	0	0	0	0	0	603	903	0
600	4	0	0	0	0	0	0	200	300	0	0	0	0	0	0	0	200	903	0	0	0	0	0	0	0	603	903	0
600	5	0	0	0	0	0	0	200	300	0	0	0	0	0	0	0	200	903	0	0	0	0	0	0	0	603	903	0
600	6	0	0	0	0	0	0	200	300	0	0	0	0	0	0	0	200	903	0	0	0	0	0	0	0	603	903	0
600	7	0	0	0	0	0	0	200	300	0	0	0	0	0	0	0	200	903	0	0	0	0	0	0	0	603	903	0
600	8	0	0	0	0	0	0	200	300	0	0	0	0	0	0	0	200	903	0	0	0	0	0	0	0	603	903	0
600	9	0	0	0	0	0	0	200	300	0	0	0	0	0	0	0	200	903	0	0	0	0	0	0	0	603	903	0
601	0	0	0	0	0	0	0	200	300	0	0	0	0	0	0	0	200	903	0	0	0	0	0	0	0	603	903	0
601	1	0	0	0	0	0	0	200	300	0	0	0	0	0	0	0	200	903	0	0	0	0	0	0	0	603	903	0
601	2	0	0	0	0	0	0	200	300	0	0	0	0	0	0	0	200	903	0	0	0	0	0	0	0	603	903	0
601	3	0	0	0	0	0	0	200	300	0	0	0	0	0	0	0	200	903	0	0	0	0	0	0	0	603	903	0
601	4	0	0	0	0	0	0	200	300	0	0	0	0	0	0	0	200	903	0	0	0	0	0	0	0	603	903	0
601	5	0	0	0	0	0	0	200	300	0	0	0	0	0	0	0	200	903	0	0	0	0	0	0	0	603	903	0
601	6	0	0	0	0	0	0	200	300	0	0	0	0	0	0	0	200	903	0	0	0	0	0	0	0	603	903	0
601	7	0	0	0	0	0	0	200	300	0	0	0	0	0	0	0	200	903	0	0	0	0	0	0	0	603	903	0
601	8	0	0	0	0	0	0	200	300	0	0	0	0	0	0	0	200	903	0	0	0	0	0	0	0	603	903	0
601	9	0	0	0	0	0	0	200	300	0	0	0	0	0	0	0	200	903	0	0	0	0	0	0	0	603	903	0
602	0	0	0	0	0	0	0	200	300	0	0	0	0	0	0	0	200	903	0	0	0	0	0	0	0	603	903	0
602	1	0	0	0	0	0	0	200	300	0	0	0	0	0	0	0	200	903	0	0	0	0	0	0	0	603	903	0
602	2	0	0	0	0	0	0	200	300	0	0	0	0	0	0	0	200	903	0	0	0	0	0	0	0	603	903	0
602	3	0	0	0	0	0	0	200	300	0	0	0	0	0	0	0	200	903	0	0	0	0	0	0	0	603	903	0
602	4	0	0	0	0	0	0	200	300	0	0	0	0	0	0	0	200	903	0	0	0	0	0	0	0	603	903	0
602	5	0	0	0	0	0	0	200	300	0	0	0	0	0	0	0	200	903	0	0	0	0	0	0	0	603	903	0
602	6	0	0	0	0	0	0	200	300	0	0	0	0	0	0	0	200	903	0	0	0	0	0	0	0	603	903	0
602	7	0	0	0	0	0	0	200	300	0	0	0	0	0	0	0	200	903	0	0	0	0	0	0	0	603	903	0
602	8	0	0	0	0	0	0	200	300	0	0	0	0	0	0	0	200	903	0	0	0	0	0	0	0	603	903	0
602	9	0	0	0	0	0	0	200	300	0	0	0	0	0	0	0	200	903	0	0	0	0	0	0	0	603	903	0
603	0	0	0	0	0	0	0	200	300	0	0	0	0	0	0	0	200	903	0	0	0	0	0	0	0	603	903	0
603	1	0	0	0	0	0	0	200	300	0	0	0	0	0	0	0	200	903	0	0	0	0	0	0	0	603	903	0
603	2	0	0	0	0	0	0	200	300	0	0	0	0	0	0	0	200	903	0	0	0	0	0	0	0	603	903	0
603	3	0	0	0	0	0	0	200	300	0	0	0	0	0	0	0	200	903	0	0	0	0	0	0	0	603	903	0
603	4	0	0	0	0	0	0	200	300	0	0	0	0	0	0	0	200	903	0	0	0	0	0	0	0	603	903	0
603	5	0	0	0	0	0	0	200	300	0	0	0	0	0	0	0	200	903	0	0	0	0	0	0	0	603	903	0
603	6	0	0	0	0	0	0	200	300	0	0	0	0	0	0	0	200	903	0	0	0	0	0	0	0	603	903	0
603	7	0	0	0	0	0	0	200	300	0	0	0	0	0	0	0	200	903	0	0	0	0	0	0	0	603	903	0
603	8	0	0	0	0	0	0	200	300	0	0	0	0	0	0	0	200	903	0	0	0	0	0	0	0	603	903	0
603	9	0	0	0	0	0	0	200	300	0	0	0	0	0	0	0	200	903	0	0	0	0	0	0	0	603	903	0
604	0	0	0	0	0	0	0	200	300	0	0	0	0	0	0	0	200	903	0	0	0	0	0	0	0	603	903	0
604	1	0	0	0	0	0	0	200	300	0	0	0	0	0	0	0	200	903	0	0	0	0	0	0	0	603	903	0
604	2	0	0	0	0	0	0	200	300	0	0	0	0	0	0	0	200	903	0	0	0	0	0	0	0	603	903	0
604	3	0	0	0	0	0	0	200	300	0	0	0	0	0	0	0	200	903	0	0	0	0	0	0	0	603	903	0
604	4	0	0	0	0	0	0	200	300	0	0	0	0	0	0	0	200	903	0	0	0	0	0	0	0	603	903	0
604	5	0	0	0	0	0	0	200	300	0	0	0	0	0	0	0	200	903	0	0	0	0	0	0	0	603	903	0
604	6	0	0	0	0	0	0	200	300	0	0	0	0	0	0	0	200	903	0	0	0	0	0	0	0	603	903	0
604	7	0	0	0	0	0	0	200	300	0	0	0	0	0	0	0	200	903	0	0	0	0	0	0	0	603	903	0
604	8	0	0	0	0	0	0	200	300	0	0	0	0	0	0	0	200	903	0	0	0	0	0	0	0	603	903	0
604	9	0	0	0	0	0	0	200	300	0	0	0	0	0	0	0	200	903	0	0	0	0	0	0	0	603	903	0
605	0	0	0	0	0	0	0	200	300	0	0	0	0	0	0	0	200	903	0	0	0	0	0	0	0	603	903	0
605	1	0	0	0	0	0	0	200	300	0	0	0	0	0	0	0	200	903	0	0	0	0	0	0	0	603	903	0
605	2	0	0	0	0	0	0	200	300	0	0	0	0	0	0	0	200	903	0	0	0	0	0	0	0	603	903	0
605	3	0	0	0	0	0	0	200	300	0	0	0	0	0	0	0	200	903	0	0	0	0	0	0	0	603	903	0
605	4	0	0	0	0	0	0	200	300	0	0	0	0	0	0	0	200	903	0	0	0	0	0	0	0	603	903	0
605	5	0	0	0	0	0	0	200	300	0	0	0	0	0	0	0	200	903	0	0	0	0	0	0	0	603	903	0
605	6	0	0	0	0	0	0	200	300	0	0	0	0	0	0	0	200	903	0	0	0	0	0	0	0	603	903	0
605	7	0	0	0	0	0	0	200	300	0	0	0	0	0	0	0	200	903	0	0	0	0	0	0	0	603	903	0
605	8	0	0	0	0	0	0	200	300	0	0	0	0	0	0	0	200	903	0	0	0	0	0	0	0	603	903	0
605	9	0	0	0	0	0	0	200	300	0	0	0	0	0	0	0	200	903	0	0	0	0	0	0	0	603	903	0
606	0	0	0	0	0	0	0	200	300	0	0	0	0	0	0	0	200	903	0	0	0	0	0	0	0	603	903	0
606	1	0	0	0	0	0	0	200	300	0	0	0	0	0	0	0	200	903	0	0	0	0	0	0	0	603	903	0
606	2	0	0	0	0	0	0	200	300	0	0	0	0	0	0	0	200	903	0	0	0	0	0	0	0	603	903	0
606	3	0	0	0	0	0	0	200	300	0	0	0	0	0	0	0	200	903	0	0	0	0	0	0	0	603	903	0
606	4	0	0	0	0	0	0	200	300	0	0	0	0	0	0	0	200	903	0	0	0	0	0	0	0	603	903	0
606	5	0	0	0	0	0	0	200	300	0	0	0	0	0	0	0	200	903	0	0	0	0	0	0	0	603	903	0
606	6	0	0	0	0	0	0	200	300	0	0	0	0	0	0	0	200	903	0	0	0	0	0	0	0	603	903	0
606	7	0	0	0	0	0	0	200	300	0	0	0	0	0	0	0	200	903	0	0	0	0	0	0	0	603	903	0
606	8	0	0	0	0	0	0	200	300	0	0	0	0	0	0	0	200	903	0	0	0	0	0	0	0	603	903	0
606	9	0	0	0	0	0	0	200	300	0	0	0	0	0	0	0	200	903	0	0	0	0	0	0	0	603	903	0
607	0	0	0	0	0	0	0	200	300	0	0	0	0	0	0	0	200	903	0	0	0	0	0	0	0	603	903	0
607	1	0	0	0	0	0	0	200	300	0	0	0	0	0	0	0	200	903	0	0	0	0	0	0	0	603	903	0
607	2	0	0	0	0	0	0	200	300	0	0	0	0	0	0	0	200	903	0	0	0	0	0	0	0	603	903	0
607	3	0	0	0	0	0	0	200	300	0	0	0	0	0	0	0	200	903	0	0	0	0	0	0	0	603	903	0
607	4	0	0	0	0	0	0	200	300	0	0	0	0	0	0	0	200	903	0	0	0	0	0	0	0	603	903	0
607	5	0	0	0	0	0	0	200	300	0	0	0	0	0	0	0	200	903	0	0	0	0	0	0	0	603	903	0
607	6	0	0	0	0	0	0	200	300	0	0	0	0	0	0	0	200	903	0	0	0	0	0	0	0	603	903	0
607	7	0	0	0	0	0	0	200	300	0	0	0	0	0	0	0	200	903	0	0	0	0	0	0	0	603	903	0
607	8	0	0	0	0	0	0	200	300	0	0	0	0	0	0	0	200	903	0	0	0	0	0	0	0	603	903	0
607	9	0	0	0	0	0	0	200	300	0	0	0	0	0	0	0	200	903	0	0	0	0	0	0	0	603	903	0
608	0	0	0	0	0	0	0	200	300	0	0	0	0	0	0	0	200	903	0	0	0	0	0	0	0	603	903	0
608	1	0	0	0	0	0	0	200	300	0	0	0	0	0	0	0	200	903	0	0	0	0	0	0	0	603	903	0
608	2	0	0	0	0	0	0	200	300	0	0	0	0	0	0	0	200	903	0	0	0	0	0	0	0	603	903	0
608	3	0	0	0	0	0	0	200	300	0	0	0	0	0	0	0	200	903	0	0	0	0	0	0	0	603	903	0
608	4	0	0	0	0	0	0	200	300	0	0	0	0	0	0	0	200	903	0	0	0	0	0	0	0	603	903	0
608	5	0	0	0	0	0	0	200	300	0	0	0	0	0	0	0	200	903	0	0	0	0	0	0	0	603	903	0
608	6	0	0	0	0	0	0	200	300	0	0	0	0	0	0	0	200	903	0	0	0	0	0	0	0	603	903	0
608	7	0	0	0	0	0	0	200	300	0	8.77411	-2.95059	-19.581	-2489.69	64.9899	-1203.46	203.319	1030.15	0	0	0	0	0	0	0	603	903	0
608	8	0	0	0	0	0	0	200	300	0	10.6052	-2.34024	-19.8861	-2855.9	248.095	-1157.69	212.476	1046.61	0	0	0	0	0	0	0	603	903	0
608	9	0	0	0	0	0	0	200	300	0	0	0	0	0	0	0	200	903	0	0	0	0	0	0	0	603	903	0
609	0	0	0	0	0	0	0	200	300	0	0	0	0	0	0	0	200	903	0	0	0	0	0	0	0	603	903	0
609	1	0	0	0	0	0	0	200	300	0	8.46893	-0.356597	-18.3603	-3130.55	309.131	-1249.24	216.837	1073.51	0	0	0	0	0	0	0	603	903	0
609	2	0	0	0	0	0	0	200	300	0	9.99481	1.16928	-23.2431	-3222.11	64.9899	-1066.13	202.796	1041.63	0	0	0	0	0	0	0	603	903	0
609	3	0	0	0	0	0	0	200	300	0	6.94305	4.52622	-25.6845	-4320.74	187.06	-1432.34	207.283	1071.22	0	0	0	0	0	0	0	603	903	0
609	4	0	0	0	0	0	0	200	300	0	7.09564	8.18832	-29.0414	-4870.06	126.025	-1295.01	204.34	1070.69	0	0	0	0	0	0	0	603	903	0
609	5	0	0	0	0	0	0	200	300	0	9.23187	10.172	-34.8397	-5144.72	431.201	-1066.13	212.377	1050.67	0	0	0	0	0	0	0	603	903	0
609	6	0	0	0	0	0	0	200	300	0	11.6733	12.766	-40.6381	-6243.35	431.201	-1157.69	210.611	1056.63	0	0	0	0	0	0	0	603	903	0
609	7	0	0	0	0	0	0	200	300	0	10.4526	13.5289	-47.9623	-7067.32	553.271	-1340.79	211.536	1050.35	0	0	0	0	0	0	0	603	903	0
609	8	0	0	0	0	0	0	200	300	0	9.84222	13.9867	-53.1503	-7708.19	675.342	-1066.13	212.706	1048.03	0	0	0	0	0	0	0	603	903	0
609	9	0	0	0	0	0	0	200	300	0	11.9785	15.6651	-61.0849	-9173.04	614.307	-1523.9	210.057	1053.17	0	0	0	0	0	0	0	603	903	0
610	0	0	0	0	0	0	0	200	300	0	13.6569	16.7332	-68.1039	-9813.9	492.236	-1432.34	207.228	1047.1	0	0	0	0	0	0	0	603	903	0
610	1	0	0	0	0	0	0	200	300	0	13.0466	15.6651	-77.2592	-11278.7	1041.55	-1432.34	213.481	1048.99	0	0	0	0	0	0	0	603	903	0
610	2	0	0	0	0	0	0	200	300	0	12.5888	15.36	-83.3627	-12468.9	1285.69	-1844.33	215.423	1052.57	0	0	0	0	0	0	0	603	903	0
610	3	0	0	0	0	0	0	200	300	0	16.2509	17.4962	-93.4335	-13659.1	1224.66	-1661.23	213.107	1049.19	0	0	0	0	0	0	0	603	903	0
610	4	0	0	0	0	0	0	200	300	0	19.913	18.4117	-104.725	-14300	1346.73	-1981.66	212.86	1039.55	0	0	0	0	0	0	0	603	903	0
610	5	0	0	0	0	0	0	200	300	0	21.4389	17.191	-114.796	-16314.1	1957.08	-2256.32	217.048	1045.11	0	0	0	0	0	0	0	603	903	0
610	6	0	0	0	0	0	0	200	300	0	20.5234	17.9539	-124.561	-17870.6	1773.97	-2439.42	214.242	1046.47	0	0	0	0	0	0	0	603	903	0
610	7	0	0	0	0	0	0	200	300	0	26.0165	19.0221	-136.463	-19335.4	1957.08	-2485.2	214.341	1044.69	0	0	0	0	0	0	0	603	903	0
610	8	0	0	0	0	0	0	200	300	0	27.3898	17.191	-148.975	-20708.7	2323.29	-2805.64	215.595	1042.01	0	0	0	0	0	0	0	603	903	0
610	9	0	0	0	0	0	0	200	300	0	29.6786	15.5125	-160.572	-21624.2	2140.19	-2897.19	213.328	1037.67	0	0	0	0	0	0	0	603	903	0
611	0	0	0	0	0	0	0	200	300	0	31.2045	13.3763	-170.338	-23546.8	2201.22	-2805.64	212.923	1041.24	0	0	0	0	0	0	0	603	903	0
611	1	0	0	0	0	0	0	200	300	0	32.883	11.3927	-181.019	-23913	2811.57	-3354.95	215.532	1035.1	0	0	0	0	0	0	0	603	903	0
611	2	0	0	0	0	0	0	200	300	0	35.7822	7.57797	-192.921	-25561	3482.96	-3309.18	218.054	1035.49	0	0	0	0	0	0	0	603	903	0
611	3	0	0	0	0	0	0	200	300	0	37.7658	4.37363	-203.602	-26201.8	2994.68	-3171.85	214.709	1031.69	0	0	0	0	0	0	0	603	903	0
611	4	0	0	0	0	0	0	200	300	0	39.902	1.16928	-213.368	-27392	3421.92	-3354.95	216.038	1031.38	0	0	0	0	0	0	0	603	903	0
611	5	0	0	0	0	0	0	200	300	0	40.665	-1.72989	-222.218	-28856.9	2994.68	-3354.95	213.476	1032.86	0	0	0	0	0	0	0	603	903	0
611	6	0	0	0	0	0	0	200	300	0	42.3434	-5.69717	-231.678	-29497.7	3299.85	-3492.28	214.243	1030.32	0	0	0	0	0	0	0	603	903	0
611	7	0	0	0	0	0	0	200	300	0	40.665	-10.4274	-242.054	-30138.6	3360.89	-3492.28	213.885	1027.51	0	0	0	0	0	0	0	603	903	0
611	8	0	0	0	0	0	0	200	300	0	44.1745	-13.174	-248.463	-30962.6	3666.06	-3629.61	214.755	1027.62	0	0	0	0	0	0	0	603	903	0
611	9	0	0	0	0	0	0	200	300	0	42.8012	-17.599	-253.956	-32335.9	3971.24	-3354.95	215.638	1030.33	0	0	0	0	0	0	0	603	903	0
612	0	0	0	0	0	0	0	200	300	0	44.4797	-21.5663	-262.806	-32885.2	3360.89	-3263.4	212.788	1028.13	0	0	0	0	0	0	0	603	903	0
612	1	0	0	0	0	0	0	200	300	0	40.665	-25.381	-272.572	-32976.8	3788.14	-3309.18	213.898	1023.98	0	0	0	0	0	0	0	603	903	0
612	2	0	0	0	0	0	0	200	300	0	43.8693	-29.1957	-281.117	-33343	3910.21	-3080.29	213.91	1021.61	0	0	0	0	0	0	0	603	903	0
612	3	0	0	0	0	0	0	200	300	0	43.8693	-33.7733	-286.305	-34258.5	3727.1	-2988.74	213.018	1022.66	0	0	0	0	0	0	0	603	903	0
612	4	0	0	0	0	0	0	200	300	0	42.8012	-35.757	-292.408	-35357.1	3849.17	-3171.85	213.164	1023.92	0	0	0	0	0	0	0	603	903	0
612	5	0	0	0	0	0	0	200	300	0	42.6486	-39.2665	-302.784	-35357.1	3666.06	-3171.85	212.108	1019.77	0	0	0	0	0	0	0	603	903	0
612	6	0	0	0	0	0	0	200	300	0	42.9538	-42.9286	-310.719	-36181.1	3910.21	-3080.29	212.584	1019.44	0	0	0	0	0	0	0	603	903	0
612	7	0	0	0	0	0	0	200	300	0	43.7167	-45.6752	-317.433	-36730.4	3605.03	-3171.85	211.357	1018.71	0	0	0	0	0	0	0	603	903	0
612	8	0	0	0	0	0	0	200	300	0	41.7331	-48.727	-323.841	-37462.8	4093.31	-3171.85	212.64	1018.68	0	0	0	0	0	0	0	603	903	0
612	9	0	0	0	0	0	0	200	300	0	42.3434	-52.0839	-332.996	-37645.9	3971.24	-2988.74	211.926	1016.05	0	0	0	0	0	0	0	603	903	0
613	0	0	0	0	0	0	0	200	300	0	42.1909	-56.5089	-340.931	-37371.3	4093.31	-3263.4	212.006	1012.62	0	0	0	0	0	0	0	603	903	0
613	1	0	0	0	0	0	0	200	300	0	42.0383	-59.4081	-347.035	-38561.5	4276.42	-3034.52	212.323	1014.12	0	0	0	0	0	0	0	603	903	0
613	2	0	0	0	0	0	0	200	300	0	40.9702	-62.1547	-354.664	-39110.8	3849.17	-3217.62	210.853	1013.28	0	0	0	0	0	0	0	603	903	0
613	3	0	0	0	0	0	0	200	300	0	40.2072	-64.4435	-363.514	-40301	3421.92	-3034.52	209.413	1013.86	0	0	0	0	0	0	0	603	903	0
613	4	0	0	0	0	0	0	200	300	0	39.4443	-68.5634	-371.754	-40209.4	3849.17	-2897.19	210.354	1011.16	0	0	0	0	0	0	0	603	903	0
613	5	0	0	0	0	0	0	200	300	0	40.0546	-71.7677	-379.383	-40575.6	4032.28	-2759.86	210.629	1009.95	0	0	0	0	0	0	0	603	903	0
613	6	0	0	0	0	0	0	200	300	0	37.1555	-74.9721	-387.928	-42132	3788.14	-2805.64	209.765	1011.61	0	0	0	0	0	0	0	603	903	0
613	7	0	0	0	0	0	0	200	300	0	36.2399	-77.2609	-395.558	-42315.1	3788.14	-2530.98	209.577	1009.98	0	0	0	0	0	0	0	603	903	0
613	8	0	0	0	0	0	0	200	300	0	33.6459	-79.8549	-405.934	-42498.2	3788.14	-2256.32	209.332	1007.69	0	0	0	0	0	0	0	603	903	0
613	9	0	0	0	0	0	0	200	300	0	32.4252	-82.4489	-410.206	-42772.9	3482.96	-2256.32	208.491	1007.27	0	0	0	0	0	0	0	603	903	0
614	0	0	0	0	0	0	0	200	300	0	30.1364	-84.8903	-421.497	-44054.6	3605.03	-2256.32	208.553	1007.52	0	0	0	0	0	0	0	603	903	0
614	1	0	0	0	0	0	0	200	300	0	27.5424	-87.3317	-430.348	-44695.5	3543.99	-2164.77	208.235	1006.86	0	0	0	0	0	0	0	603	903	0
614	2	0	0	0	0	0	0	200	300	0	25.4062	-90.3835	-436.756	-44603.9	3360.89	-2256.32	207.695	1005.13	0	0	0	0	0	0	0	603	903	0
614	3	0	0	0	0	0	0	200	300	0	24.9484	-92.5197	-444.996	-45061.7	3177.78	-2302.09	207.141	1004.26	0	0	0	0	0	0	0	603	903	0
614	4	0	0	0	0	0	0	200	300	0	22.6596	-94.0456	-453.541	-45977.2	2933.64	-1844.33	206.468	1004.37	0	0	0	0	0	0	0	603	903	0
614	5	0	0	0	0	0	0	200	300	0	19.6078	-97.4025	-461.17	-46068.8	2872.61	-1752.78	206.229	1002.9	0	0	0	0	0	0	0	603	903	0
614	6	0	0	0	0	0	0	200	300	0	17.6242	-99.8439	-466.663	-45794.1	2872.61	-1569.67	206.156	1001.13	0	0	0	0	0	0	0	603	903	0
614	7	0	0	0	0	0	0	200	300	0	17.1664	-101.217	-473.072	-46251.9	2933.64	-1478.12	206.201	1000.77	0	0	0	0	0	0	0	603	903	0
614	8	0	0	0	0	0	0	200	300	0	15.3354	-102.133	-480.702	-47075.9	2628.47	-1295.01	205.468	1000.93	0	0	0	0	0	0	0	603	903	0
614	9	0	0	0	0	0	0	200	300	0	12.2836	-104.879	-487.11	-47625.2	2811.57	-1157.69	205.772	1000.77	0	0	0	0	0	0	0	603	903	0
615	0	0	0	0	0	0	0	200	300	0	11.3681	-107.016	-492.298	-47167.4	2567.43	-883.027	205.215	998.811	0	0	0	0	0	0	0	603	903	0
615	1	0	0	0	0	0	0	200	300	0	10.7578	-108.084	-496.571	-46526.6	2567.43	-928.804	205.17	996.696	0	0	0	0	0	0	0	603	903	0
615	2	0	0	0	0	0	0	200	300	0	9.84222	-109.915	-501.759	-48632.3	1896.04	-837.251	203.779	999.924	0	0	0	0	0	0	0	603	903	0
615	3	0	0	0	0	0	0	200	300	0	6.94305	-112.356	-507.862	-47808.3	2262.26	-928.804	204.454	997.136	0	0	0	0	0	0	0	603	903	0
615	4	0	0	0	0	0	0	200	300	0	5.41718	-114.492	-511.829	-48815.4	2445.36	-471.04	204.778	998.374	0	0	0	0	0	0	0	603	903	0
615	5	0	0	0	0	0	0	200	300	0	5.56976	-114.492	-516.712	-48632.3	1896.04	-471.04	203.669	997.119	0	0	0	0	0	0	0	603	903	0
615	6	0	0	0	0	0	0	200	300	0	4.19647	-116.476	-522.205	-48357.6	2018.11	-333.711	203.865	995.603	0	0	0	0	0	0	0	603	903	0
615	7	0	0	0	0	0	0	200	300	0	4.34906	-118.154	-527.393	-49181.6	2140.19	32.5004	204.058	996.254	0	0	0	0	0	0	0	603	903	0
615	8	0	0	0	0	0	0	200	300	0	5.56976	-119.986	-529.835	-48540.7	1896.04	32.5004	203.579	994.615	0	0	0	0	0	0	0	603	903	0
615	9	0	0	0	0	0	0	200	300	0	2.06024	-121.359	-533.802	-48632.3	1957.08	169.83	203.666	994.105	0	0	0	0	0	0	0	603	903	0
616	0	0	0	0	0	0	0	200	300	0	2.36542	-123.342	-538.38	-48540.7	1896.04	398.711	203.522	993.161	0	0	0	0	0	0	0	603	903	0
616	1	0	0	0	0	0	0	200	300	0	2.51801	-125.631	-541.126	-49639.4	1651.9	398.711	203.053	994.733	0	0	0	0	0	0	0	603	903	0
616	2	0	0	0	0	0	0	200	300	0	2.36542	-126.547	-543.568	-49273.1	1407.76	627.593	202.59	993.648	0	0	0	0	0	0	0	603	903	0
616	3	0	0	0	0	0	0	200	300	0	0.686951	-127.767	-546.009	-49181.6	1957.08	764.922	203.584	993.075	0	0	0	0	0	0	0	603	903	0
616	4	0	0	0	0	0	0	200	300	0	2.51801	-129.446	-550.282	-48723.8	1529.83	764.922	202.78	991.544	0	0	0	0	0	0	0	603	903	0
616	5	0	0	0	0	0	0	200	300	0	4.04388	-131.124	-552.418	-48266.1	1712.94	902.251	203.101	990.372	0	0	0	0	0	0	0	603	903	0
616	6	0	0	0	0	0	0	200	300	0	3.8913	-133.108	-554.249	-48906.9	1773.97	1314.24	203.201	991.24	0	0	0	0	0	0	0	603	903	0
616	7	0	0	0	0	0	0	200	300	0	3.58612	-133.566	-556.995	-48815.4	1773.97	1176.91	203.185	990.641	0	0	0	0	0	0	0	603	903	0
616	8	0	0	0	0	0	0	200	300	0	2.67059	-134.939	-560.658	-48632.3	1346.73	1268.46	202.402	989.742	0	0	0	0	0	0	0	603	903	0
616	9	0	0	0	0	0	0	200	300	0	4.95941	-136.007	-563.099	-48357.6	1224.66	1131.13	202.175	988.878	0	0	0	0	0	0	0	603	903	0
617	0	0	0	0	0	0	0	200	300	0	2.97577	-137.991	-562.489	-48449.2	1468.8	1405.79	202.611	989.134	0	0	0	0	0	0	0	603	903	0
617	1	0	0	0	0	0	0	200	300	0	1.60248	-137.838	-566.456	-48998.5	919.482	1726.23	201.623	989.5	0	0	0	0	0	0	0	603	903	0
617	2	0	0	0	0	0	0	200	300	0	0.992126	-138.906	-569.203	-48266.1	1468.8	1680.45	202.58	987.796	0	0	0	0	0	0	0	603	903	0
617	3	0	0	0	0	0	0	200	300	0	1.60248	-140.737	-571.644	-48449.2	1224.66	1909.33	202.142	987.754	0	0	0	0	0	0	0	603	903	0
617	4	0	0	0	0	0	0	200	300	0	1.44989	-141.5	-571.034	-48174.5	980.517	1909.33	201.717	987.364	0	0	0	0	0	0	0	603	903	0
617	5	0	0	0	0	0	0	200	300	0	-0.381165	-141.348	-572.559	-47442.1	919.482	1909.33	201.606	985.86	0	0	0	0	0	0	0	603	903	0
617	6	0	0	0	0	0	0	200	300	0	-0.838928	-141.043	-572.559	-48082.9	1102.59	1909.33	201.926	986.979	0	0	0	0	0	0	0	603	903	0
617	7	0	0	0	0	0	0	200	300	0	-0.991516	-141.5	-573.475	-47899.8	797.412	1909.33	201.39	986.526	0	0	0	0	0	0	0	603	903	0
617	8	0	0	0	0	0	0	200	300	0	0.0765991	-142.874	-578.968	-47899.8	553.271	2000.88	200.956	985.733	0	0	0	0	0	0	0	603	903	0
617	9	0	0	0	0	0	0	200	300	0	-3.12775	-143.026	-581.41	-47899.8	736.377	2183.99	201.267	985.386	0	0	0	0	0	0	0	603	903	0
618	0	0	0	0	0	0	0	200	300	0	-4.19586	-145.01	-584.461	-48174.5	858.447	2000.88	201.469	985.426	0	0	0	0	0	0	0	603	903	0
618	1	0	0	0	0	0	0	200	300	0	-6.48468	-145.925	-585.682	-47075.9	309.131	2321.32	200.528	983.378	0	0	0	0	0	0	0	603	903	0
618	2	0	0	0	0	0	0	200	300	0	-6.63727	-146.383	-587.208	-47350.5	736.377	2458.65	201.254	983.637	0	0	0	0	0	0	0	603	903	0
618	3	0	0	0	0	0	0	200	300	0	-7.40021	-146.841	-591.48	-47899.8	248.095	2275.54	200.419	983.983	0	0	0	0	0	0	0	603	903	0
618	4	0	0	0	0	0	0	200	300	0	-10.452	-148.519	-593.311	-47075.9	-301.221	2595.98	199.492	982.344	0	0	0	0	0	0	0	603	903	0
618	5	0	0	0	0	0	0	200	300	0	-11.6727	-148.977	-596.363	-47625.2	3.95477	2687.53	200.007	982.859	0	0	0	0	0	0	0	603	903	0
618	6	0	0	0	0	0	0	200	300	0	-12.5882	-148.977	-599.11	-47442.1	-57.0804	2916.41	199.905	982.188	0	0	0	0	0	0	0	603	903	0
618	7	0	0	0	0	0	0	200	300	0	-12.4356	-150.198	-603.687	-47533.6	-850.538	2962.19	198.591	981.739	0	0	0	0	0	0	0	603	903	0
618	8	0	0	0	0	0	0	200	300	0	-16.2503	-151.876	-607.044	-47625.2	-362.256	2779.08	199.403	981.454	0	0	0	0	0	0	0	603	903	0
618	9	0	0	0	0	0	0	200	300	0	-19.9124	-153.25	-611.012	-47899.8	-545.362	3191.07	199.107	981.394	0	0	0	0	0	0	0	603	903	0
619	0	0	0	0	0	0	0	200	300	0	-21.7435	-152.944	-615.894	-47350.5	-1033.64	3053.74	198.322	979.881	0	0	0	0	0	0	0	603	903	0
619	1	0	0	0	0	0	0	200	300	0	-23.4219	-154.165	-620.777	-46984.3	-1094.68	3328.4	198.237	978.686	0	0	0	0	0	0	0	603	903	0
619	2	0	0	0	0	0	0	200	300	0	-25.7108	-156.301	-625.355	-47899.8	-789.502	3282.62	198.738	979.596	0	0	0	0	0	0	0	603	903	0
619	3	0	0	0	0	0	0	200	300	0	-28.4573	-157.522	-626.576	-47625.2	-1399.85	3557.28	197.766	979.009	0	0	0	0	0	0	0	603	903	0
619	4	0	0	0	0	0	0	200	300	0	-29.5255	-158.438	-631.153	-47259	-1460.89	3603.06	197.685	977.877	0	0	0	0	0	0	0	603	903	0
619	5	0	0	0	0	0	0	200	300	0	-30.2884	-159.201	-636.036	-46068.8	-1460.89	3511.51	197.703	975.431	0	0	0	0	0	0	0	603	903	0
619	6	0	0	0	0	0	0	200	300	0	-31.9669	-161.489	-639.393	-47442.1	-1277.78	3648.83	198.002	977.199	0	0	0	0	0	0	0	603	903	0
619	7	0	0	0	0	0	0	200	300	0	-33.9505	-161.184	-641.834	-46251.9	-2010.21	4060.82	196.868	975.062	0	0	0	0	0	0	0	603	903	0
619	8	0	0	0	0	0	0	200	300	0	-35.3238	-161.184	-644.276	-47075.9	-1766.06	3969.27	197.259	976.068	0	0	0	0	0	0	0	603	903	0
619	9	0	0	0	0	0	0	200	300	0	-33.4927	-160.726	-647.328	-46892.8	-1827.1	3969.27	197.177	975.441	0	0	0	0	0	0	0	603	903	0
620	0	0	0	0	0	0	0	200	300	0	-32.5772	-160.421	-646.412	-46709.7	-1705.03	4060.82	197.362	975.26	0	0	0	0	0	0	0	603	903	0
620	1	0	0	0	0	0	0	200	300	0	-34.7134	-160.879	-651.295	-47259	-2071.24	4381.26	196.82	975.562	0	0	0	0	0	0	0	603	903	0
620	2	0	0	0	0	0	0	200	300	0	-35.3238	-160.421	-651.905	-47533.6	-2193.31	4289.7	196.636	975.915	0	0	0	0	0	0	0	603	903	0
620	3	0	0	0	0	0	0	200	300	0	-35.3238	-159.201	-654.041	-47350.5	-2437.45	4335.48	196.273	975.397	0	0	0	0	0	0	0	603	903	0
620	4	0	0	0	0	0	0	200	300	0	-34.1031	-157.675	-655.567	-46801.2	-2498.49	4106.6	196.189	974.39	0	0	0	0	0	0	0	603	903	0
620	5	0	0	0	0	0	0	200	300	0	-33.7979	-157.675	-656.178	-46251.9	-1827.1	4427.03	197.216	973.487	0	0	0	0	0	0	0	603	903	0
620	6	0	0	0	0	0	0	200	300	0	-34.4083	-156.301	-657.398	-46343.5	-2559.52	4381.26	196.107	973.495	0	0	0	0	0	0	0	603	903	0
620	7	0	0	0	0	0	0	200	300	0	-35.3238	-154.318	-658.314	-47350.5	-2498.49	4518.58	196.205	974.927	0	0	0	0	0	0	0	603	903	0
620	8	0	0	0	0	0	0	200	300	0	-33.9505	-153.555	-660.45	-46892.8	-2498.49	4610.14	196.217	974.001	0	0	0	0	0	0	0	603	903	0
620	9	0	0	0	0	0	0	200	300	0	-33.7979	-153.25	-660.755	-46435	-2620.56	4427.03	196.034	973.276	0	0	0	0	0	0	0	603	903	0
621	0	0	0	0	0	0	0	200	300	0	-34.5609	-152.334	-661.366	-47075.9	-2315.38	4884.8	196.499	974.18	0	0	0	0	0	0	0	603	903	0
621	1	0	0	0	0	0	0	200	300	0	-32.5772	-150.503	-658.314	-47167.4	-2254.35	4655.91	196.576	974.649	0	0	0	0	0	0	0	603	903	0
621	2	0	0	0	0	0	0	200	300	0	-35.0186	-148.825	-658.314	-46892.8	-2315.38	4747.47	196.483	974.232	0	0	0	0	0	0	0	603	903	0
621	3	0	0	0	0	0	0	200	300	0	-33.7979	-150.045	-662.891	-46068.8	-3047.8	4976.35	195.402	972.497	0	0	0	0	0	0	0	603	903	0
621	4	0	0	0	0	0	0	200	300	0	-34.7134	-149.588	-664.417	-46984.3	-2437.45	4793.24	196.331	973.715	0	0	0	0	0	0	0	603	903	0
621	5	0	0	0	0	0	0	200	300	0	-36.2393	-149.588	-665.638	-46984.3	-2681.59	4839.02	195.971	973.585	0	0	0	0	0	0	0	603	903	0
621	6	0	0	0	0	0	0	200	300	0	-37.9178	-148.825	-667.774	-46251.9	-2742.63	4655.91	195.893	972.263	0	0	0	0	0	0	0	603	903	0
621	7	0	0	0	0	0	0	200	300	0	-36.8497	-148.367	-669.911	-46435	-2925.73	4930.57	195.633	972.315	0	0	0	0	0	0	0	603	903	0
621	8	0	0	0	0	0	0	200	300	0	-37.3074	-148.519	-671.436	-46526.6	-2803.66	4701.69	195.824	972.294	0	0	0	0	0	0	0	603	903	0
621	9	0	0	0	0	0	0	200	300	0	-39.4437	-148.672	-671.436	-46892.8	-3047.8	4793.24	195.461	972.84	0	0	0	0	0	0	0	603	903	0
622	0	0	0	0	0	0	0	200	300	0	-38.8333	-146.688	-672.962	-46892.8	-3169.87	4701.69	195.29	972.681	0	0	0	0	0	0	0	603	903	0
622	1	0	0	0	0	0	0	200	300	0	-41.1221	-146.994	-674.793	-46435	-3291.94	4747.47	195.122	971.814	0	0	0	0	0	0	0	603	903	0
622	2	0	0	0	0	0	0	200	300	0	-41.1221	-146.994	-677.54	-46984.3	-3169.87	4839.02	195.322	972.346	0	0	0	0	0	0	0	603	903	0
622	3	0	0	0	0	0	0	200	300	0	-42.1902	-146.688	-678.455	-46984.3	-3475.05	4884.8	194.878	972.252	0	0	0	0	0	0	0	603	903	0
622	4	0	0	0	0	0	0	200	300	0	-44.3265	-145.163	-680.286	-46068.8	-3291.94	5067.9	195.161	970.72	0	0	0	0	0	0	0	603	903	0
622	5	0	0	0	0	0	0	200	300	0	-44.1739	-144.4	-683.643	-46618.1	-3291.94	5022.12	195.185	971.191	0	0	0	0	0	0	0	603	903	0
622	6	0	0	0	0	0	0	200	300	0	-44.9368	-144.857	-685.474	-46801.2	-3658.16	5022.12	194.663	971.276	0	0	0	0	0	0	0	603	903	0
622	7	0	0	0	0	0	0	200	300	0	-44.0213	-144.247	-685.78	-46892.8	-3352.98	5022.12	195.111	971.379	0	0	0	0	0	0	0	603	903	0
622	8	0	0	0	0	0	0	200	300	0	-44.7842	-142.416	-687.306	-47533.6	-3475.05	4930.57	194.944	972.159	0	0	0	0	0	0	0	603	903	0
622	9	0	0	0	0	0	0	200	300	0	-45.242	-142.111	-690.357	-47625.2	-4085.4	5067.9	194.082	971.986	0	0	0	0	0	0	0	603	903	0
623	0	0	0	0	0	0	0	200	300	0	-46.9205	-141.806	-691.273	-47167.4	-3658.16	5067.9	194.708	971.233	0	0	0	0	0	0	0	603	903	0
623	1	0	0	0	0	0	0	200	300	0	-45.8524	-140.585	-692.494	-46251.9	-3780.23	5159.45	194.541	969.79	0	0	0	0	0	0	0	603	903	0
623	2	0	0	0	0	0	0	200	300	0	-46.3101	-138.906	-693.104	-46984.3	-3780.23	5022.12	194.546	970.788	0	0	0	0	0	0	0	603	903	0
623	3	0	0	0	0	0	0	200	300	0	-46.7679	-138.906	-695.24	-47625.2	-3841.26	5159.45	194.475	971.502	0	0	0	0	0	0	0	603	903	0
623	4	0	0	0	0	0	0	200	300	0	-45.5472	-137.533	-697.376	-47899.8	-3780.23	5067.9	194.579	971.686	0	0	0	0	0	0	0	603	903	0
623	5	0	0	0	0	0	0	200	300	0	-47.0731	-136.007	-695.24	-47625.2	-3780.23	4930.57	194.563	971.502	0	0	0	0	0	0	0	603	903	0
623	6	0	0	0	0	0	0	200	300	0	-45.5472	-134.329	-697.682	-47442.1	-4146.44	5067.9	194.057	971	0	0	0	0	0	0	0	603	903	0
623	7	0	0	0	0	0	0	200	300	0	-46.0049	-133.108	-698.597	-46801.2	-3963.33	5022.12	194.327	969.993	0	0	0	0	0	0	0	603	903	0
623	8	0	0	0	0	0	0	200	300	0	-46.9205	-133.108	-700.123	-47350.5	-3902.3	4930.57	194.426	970.632	0	0	0	0	0	0	0	603	903	0
623	9	0	0	0	0	0	0	200	300	0	-47.2256	-132.193	-701.344	-47991.4	-4146.44	4839.02	194.088	971.428	0	0	0	0	0	0	0	603	903	0
624	0	0	0	0	0	0	0	200	300	0	-46.1575	-130.209	-703.175	-48082.9	-3841.26	5067.9	194.537	971.38	0	0	0	0	0	0	0	603	903	0
624	1	0	0	0	0	0	0	200	300	0	-45.8524	-128.53	-705.006	-47625.2	-4024.37	5022.12	194.292	970.553	0	0	0	0	0	0	0	603	903	0
624	2	0	0	0	0	0	0	200	300	0	-45.5472	-128.53	-705.006	-48357.6	-4146.44	4930.57	194.119	971.592	0	0	0	0	0	0	0	603	903	0
624	3	0	0	0	0	0	0	200	300	0	-46.3101	-126.394	-704.701	-47991.4	-4390.58	4976.35	193.77	971.102	0	0	0	0	0	0	0	603	903	0
624	4	0	0	0	0	0	0	200	300	0	-44.7842	-125.631	-704.09	-48815.4	-4207.47	5022.12	194.024	972.331	0	0	0	0	0	0	0	603	903	0
624	5	0	0	0	0	0	0	200	300	0	-46.0049	-124.105	-706.837	-48540.7	-4329.54	5251.01	193.875	971.673	0	0	0	0	0	0	0	603	903	0
624	6	0	0	0	0	0	0	200	300	0	-46.1575	-124.105	-708.057	-48449.2	-4451.61	4930.57	193.713	971.426	0	0	0	0	0	0	0	603	903	0
624	7	0	0	0	0	0	0	200	300	0	-46.1575	-122.732	-712.025	-49181.6	-4390.58	5205.23	193.834	972.073	0	0	0	0	0	0	0	603	903	0
624	8	0	0	0	0	0	0	200	300	0	-48.2938	-123.342	-712.33	-48174.5	-4390.58	4747.47	193.836	970.63	0	0	0	0	0	0	0	603	903	0
624	9	0	0	0	0	0	0	200	300	0	-48.2938	-121.817	-712.94	-48998.5	-4268.51	4884.8	194.013	971.727	0	0	0	0	0	0	0	603	903	0
625	0	0	0	0	0	0	0	200	300	0	-46.6153	-120.138	-715.992	-48906.9	-4207.47	4701.69	194.124	971.307	0	0	0	0	0	0	0	603	903	0
625	1	0	0	0	0	0	0	200	300	0	-46.9205	-119.986	-717.213	-49181.6	-3902.3	4701.69	194.559	971.573	0	0	0	0	0	0	0	603	903	0
625	2	0	0	0	0	0	0	200	300	0	-47.9886	-118.46	-717.823	-49364.7	-4634.72	4839.02	193.543	971.77	0	0	0	0	0	0	0	603	903	0
625	3	0	0	0	0	0	0	200	300	0	-48.4464	-117.239	-717.823	-49547.8	-4268.51	4427.03	194.054	972.025	0	0	0	0	0	0	0	603	903	0
625	4	0	0	0	0	0	0	200	300	0	-47.9886	-116.629	-719.959	-49364.7	-4329.54	4793.24	193.986	971.566	0	0	0	0	0	0	0	603	903	0
625	5	0	0	0	0	0	0	200	300	0	-48.2938	-116.018	-721.79	-49364.7	-4817.82	4610.14	193.325	971.392	0	0	0	0	0	0	0	603	903	0
625	6	0	0	0	0	0	0	200	300	0	-48.5989	-115.408	-719.959	-50005.6	-4207.47	5022.12	194.156	972.456	0	0	0	0	0	0	0	603	903	0
625	7	0	0	0	0	0	0	200	300	0	-49.0567	-113.424	-721.79	-49181.6	-4207.47	4930.57	194.171	971.138	0	0	0	0	0	0	0	603	903	0
625	8	0	0	0	0	0	0	200	300	0	-49.8196	-112.204	-723.316	-49914	-4390.58	4884.8	193.93	972.007	0	0	0	0	0	0	0	603	903	0
625	9	0	0	0	0	0	0	200	300	0	-48.4464	-111.593	-724.842	-49822.5	-4207.47	4701.69	194.195	971.736	0	0	0	0	0	0	0	603	903	0
626	0	0	0	0	0	0	0	200	300	0	-46.4627	-110.22	-722.096	-49456.2	-4207.47	5022.12	194.173	971.49	0	0	0	0	0	0	0	603	903	0
626	1	0	0	0	0	0	0	200	300	0	-48.7515	-108.999	-722.706	-50646.4	-4695.75	4747.47	193.503	973.079	0	0	0	0	0	0	0	603	903	0
626	2	0	0	0	0	0	0	200	300	0	-50.2774	-107.321	-724.842	-50371.8	-4634.72	4564.36	193.606	972.494	0	0	0	0	0	0	0	603	903	0
626	3	0	0	0	0	0	0	200	300	0	-50.1248	-107.626	-725.453	-49914	-4146.44	4655.91	194.284	971.804	0	0	0	0	0	0	0	603	903	0
626	4	0	0	0	0	0	0	200	300	0	-48.7515	-105.642	-727.894	-49090	-4817.82	4747.47	193.381	970.441	0	0	0	0	0	0	0	603	903	0
626	5	0	0	0	0	0	0	200	300	0	-49.0567	-105.795	-724.537	-49273.1	-4512.65	4655.91	193.772	971.006	0	0	0	0	0	0	0	603	903	0
626	6	0	0	0	0	0	0	200	300	0	-49.6671	-105.337	-726.368	-50188.7	-4451.61	4610.14	193.871	972.095	0	0	0	0	0	0	0	603	903	0
626	7	0	0	0	0	0	0	200	300	0	-49.9722	-102.743	-726.673	-50280.2	-4329.54	4564.36	194.042	972.192	0	0	0	0	0	0	0	603	903	0
626	8	0	0	0	0	0	0	200	300	0	-48.1412	-103.048	-727.284	-49914	-4634.72	4839.02	193.627	971.631	0	0	0	0	0	0	0	603	903	0
626	9	0	0	0	0	0	0	200	300	0	-48.4464	-101.522	-726.368	-50188.7	-4390.58	4747.47	193.955	972.095	0	0	0	0	0	0	0	603	903	0
627	0	0	0	0	0	0	0	200	300	0	-48.7515	-99.9965	-726.673	-50738	-4451.61	4655.91	193.874	972.822	0	0	0	0	0	0	0	603	903	0
627	1	0	0	0	0	0	0	200	300	0	-49.5145	-98.6232	-727.589	-50921.1	-4573.68	4472.81	193.714	972.986	0	0	0	0	0	0	0	603	903	0
627	2	0	0	0	0	0	0	200	300	0	-49.3619	-99.6913	-727.589	-50371.8	-4329.54	4610.14	194.049	972.231	0	0	0	0	0	0	0	603	903	0
627	3	0	0	0	0	0	0	200	300	0	-48.2938	-98.318	-727.589	-50463.3	-4756.79	4655.91	193.462	972.357	0	0	0	0	0	0	0	603	903	0
627	4	0	0	0	0	0	0	200	300	0	-48.5989	-96.487	-727.284	-50097.1	-4268.51	4381.26	194.131	971.883	0	0	0	0	0	0	0	603	903	0
627	5	0	0	0	0	0	0	200	300	0	-49.3619	-95.5714	-728.504	-50463.3	-4146.44	4701.69	194.308	972.27	0	0	0	0	0	0	0	603	903	0
627	6	0	0	0	0	0	0	200	300	0	-47.9886	-95.2663	-727.284	-50463.3	-4329.54	4427.03	194.047	972.386	0	0	0	0	0	0	0	603	903	0
627	7	0	0	0	0	0	0	200	300	0	-49.2093	-94.5033	-728.199	-50371.8	-4329.54	4564.36	194.054	972.173	0	0	0	0	0	0	0	603	903	0
627	8	0	0	0	0	0	0	200	300	0	-47.3782	-92.8249	-727.589	-50463.3	-4146.44	4381.26	194.301	972.357	0	0	0	0	0	0	0	603	903	0
627	9	0	0	0	0	0	0	200	300	0	-48.4464	-92.2145	-729.115	-51470.4	-4146.44	4472.81	194.313	973.593	0	0	0	0	0	0	0	603	903	0
628	0	0	0	0	0	0	0	200	300	0	-49.0567	-91.6042	-729.115	-50829.5	-4878.86	4335.48	193.309	972.714	0	0	0	0	0	0	0	603	903	0
628	1	0	0	0	0	0	0	200	300	0	-49.2093	-91.1464	-727.284	-50463.3	-3963.33	4243.93	194.551	972.386	0	0	0	0	0	0	0	603	903	0
628	2	0	0	0	0	0	0	200	300	0	-47.5308	-89.4679	-728.199	-50371.8	-4085.4	4518.58	194.39	972.173	0	0	0	0	0	0	0	603	903	0
628	3	0	0	0	0	0	0	200	300	0	-47.6834	-88.3998	-729.725	-51104.2	-4085.4	4198.15	194.401	973.032	0	0	0	0	0	0	0	603	903	0
628	4	0	0	0	0	0	0	200	300	0	-48.2938	-88.5524	-729.725	-51012.6	-3902.3	4427.03	194.652	972.907	0	0	0	0	0	0	0	603	903	0
628	5	0	0	0	0	0	0	200	300	0	-48.1412	-87.6369	-729.115	-50554.9	-4085.4	4198.15	194.397	972.337	0	0	0	0	0	0	0	603	903	0
628	6	0	0	0	0	0	0	200	300	0	-46.7679	-86.8739	-728.504	-50738	-4024.37	4335.48	194.476	972.647	0	0	0	0	0	0	0	603	903	0
628	7	0	0	0	0	0	0	200	300	0	-47.0731	-84.4325	-728.809	-51195.7	-4390.58	3923.49	193.976	973.246	0	0	0	0	0	0	0	603	903	0
628	8	0	0	0	0	0	0	200	300	0	-47.836	-84.7377	-728.809	-50188.7	-3658.16	3831.94	194.981	971.864	0	0	0	0	0	0	0	603	903	0
628	9	0	0	0	0	0	0	200	300	0	-46.7679	-83.9748	-727.284	-51378.8	-3963.33	3969.27	194.551	973.645	0	0	0	0	0	0	0	603	903	0
629	0	0	0	0	0	0	0	200	300	0	-46.0049	-82.4489	-726.978	-49364.7	-3902.3	3831.94	194.632	970.904	0	0	0	0	0	0	0	603	903	0
629	1	0	0	0	0	0	0	200	300	0	-45.242	-82.4489	-729.725	-50554.9	-3780.23	4106.6	194.82	972.279	0	0	0	0	0	0	0	603	903	0
629	2	0	0	0	0	0	0	200	300	0	-46.7679	-81.5334	-729.115	-50005.6	-3963.33	3969.27	194.564	971.584	0	0	0	0	0	0	0	603	903	0
629	3	0	0	0	0	0	0	200	300	0	-46.4627	-81.2282	-727.284	-50738	-3658.16	3923.49	194.97	972.764	0	0	0	0	0	0	0	603	903	0
629	4	0	0	0	0	0	0	200	300	0	-47.2256	-79.5497	-726.978	-50280.2	-3475.05	3694.61	195.22	972.163	0	0	0	0	0	0	0	603	903	0
629	5	0	0	0	0	0	0	200	300	0	-44.7842	-77.8712	-725.453	-50646.4	-3475.05	3831.94	195.21	972.814	0	0	0	0	0	0	0	603	903	0
629	6	0	0	0	0	0	0	200	300	0	-44.1739	-77.8712	-724.842	-51012.6	-3902.3	3923.49	194.616	973.378	0	0	0	0	0	0	0	603	903	0
629	7	0	0	0	0	0	0	200	300	0	-45.242	-76.3454	-726.673	-50646.4	-3352.98	4015.04	195.386	972.696	0	0	0	0	0	0	0	603	903	0
629	8	0	0	0	0	0	0	200	300	0	-45.3946	-77.4135	-724.537	-50280.2	-3475.05	3877.72	195.204	972.396	0	0	0	0	0	0	0	603	903	0
629	9	0	0	0	0	0	0	200	300	0	-44.7842	-74.3617	-722.706	-50005.6	-3291.94	3740.39	195.445	972.192	0	0	0	0	0	0	0	603	903	0
630	0	0	0	0	0	0	0	200	300	0	-43.7161	-76.8031	-723.927	-50738	-3047.8	3603.06	195.79	973.087	0	0	0	0	0	0	0	603	903	0
630	1	0	0	0	0	0	0	200	300	0	-44.4791	-74.6669	-726.063	-50646.4	-3047.8	4243.93	195.802	972.755	0	0	0	0	0	0	0	603	903	0
630	2	0	0	0	0	0	0	200	300	0	-44.1739	-73.5988	-720.57	-50097.1	-3047.8	3511.51	195.77	972.524	0	0	0	0	0	0	0	603	903	0
630	3	0	0	0	0	0	0	200	300	0	-42.648	-72.6833	-723.927	-50005.6	-3536.08	3557.28	195.115	972.075	0	0	0	0	0	0	0	603	903	0
630	4	0	0	0	0	0	0	200	300	0	-42.648	-72.6833	-721.79	-50280.2	-3047.8	3511.51	195.777	972.66	0	0	0	0	0	0	0	603	903	0
630	5	0	0	0	0	0	0	200	300	0	-43.7161	-71.9203	-720.875	-50005.6	-2681.59	3236.85	196.28	972.368	0	0	0	0	0	0	0	603	903	0
630	6	0	0	0	0	0	0	200	300	0	-43.4109	-70.8522	-721.18	-49914	-2986.77	3419.95	195.859	972.212	0	0	0	0	0	0	0	603	903	0
630	7	0	0	0	0	0	0	200	300	0	-41.7325	-70.8522	-721.485	-49273.1	-2681.59	3419.95	196.283	971.294	0	0	0	0	0	0	0	603	903	0
630	8	0	0	0	0	0	0	200	300	0	-41.5799	-70.2419	-720.875	-49730.9	-2925.73	3465.73	195.941	971.987	0	0	0	0	0	0	0	603	903	0
630	9	0	0	0	0	0	0	200	300	0	-42.9532	-69.7841	-717.518	-49181.6	-3108.84	3465.73	195.667	971.544	0	0	0	0	0	0	0	603	903	0
631	0	0	0	0	0	0	0	200	300	0	-42.4954	-68.2582	-714.466	-49273.1	-2681.59	3374.18	196.247	971.965	0	0	0	0	0	0	0	603	903	0
631	1	0	0	0	0	0	0	200	300	0	-40.6644	-67.3427	-717.213	-49273.1	-2803.66	3328.4	196.091	971.701	0	0	0	0	0	0	0	603	903	0
631	2	0	0	0	0	0	0	200	300	0	-39.4437	-68.2582	-715.382	-48815.4	-2681.59	3419.95	196.252	971.237	0	0	0	0	0	0	0	603	903	0
631	3	0	0	0	0	0	0	200	300	0	-40.2066	-66.4272	-711.414	-49273.1	-2864.7	3603.06	195.973	972.261	0	0	0	0	0	0	0	603	903	0
631	4	0	0	0	0	0	0	200	300	0	-41.1221	-66.7323	-710.194	-49090	-2681.59	3145.29	196.224	972.122	0	0	0	0	0	0	0	603	903	0
631	5	0	0	0	0	0	0	200	300	0	-40.9695	-65.359	-712.94	-48174.5	-2925.73	3236.85	195.896	970.572	0	0	0	0	0	0	0	603	903	0
631	6	0	0	0	0	0	0	200	300	0	-40.2066	-64.7487	-706.226	-48357.6	-2681.59	3236.85	196.203	971.473	0	0	0	0	0	0	0	603	903	0
631	7	0	0	0	0	0	0	200	300	0	-39.4437	-64.5961	-710.194	-48449.2	-2620.56	3374.18	196.31	971.22	0	0	0	0	0	0	0	603	903	0
631	8	0	0	0	0	0	0	200	300	0	-40.6644	-65.359	-707.752	-48266.1	-2498.49	3191.07	196.47	971.196	0	0	0	0	0	0	0	603	903	0
631	9	0	0	0	0	0	0	200	300	0	-39.5963	-64.1383	-707.752	-47899.8	-2498.49	3282.62	196.47	970.679	0	0	0	0	0	0	0	603	903	0
632	0	0	0	0	0	0	0	200	300	0	-38.8333	-62.3073	-708.363	-47625.2	-2193.31	2916.41	196.904	970.233	0	0	0	0	0	0	0	603	903	0
632	1	0	0	0	0	0	0	200	300	0	-38.8333	-63.2228	-706.226	-48266.1	-2254.35	3145.29	196.808	971.344	0	0	0	0	0	0	0	603	903	0
632	2	0	0	0	0	0	0	200	300	0	-39.9014	-62.6125	-704.395	-47808.3	-2803.66	2916.41	196.02	970.871	0	0	0	0	0	0	0	603	903	0
632	3	0	0	0	0	0	0	200	300	0	-39.4437	-62.1547	-702.259	-47259	-2254.35	3007.97	196.79	970.296	0	0	0	0	0	0	0	603	903	0
632	4	0	0	0	0	0	0	200	300	0	-38.0704	-60.934	-702.564	-47533.6	-2376.42	3099.52	196.618	970.657	0	0	0	0	0	0	0	603	903	0
632	5	0	0	0	0	0	0	200	300	0	-37.9178	-61.2392	-702.564	-47442.1	-2193.31	2962.19	196.878	970.527	0	0	0	0	0	0	0	603	903	0
632	6	0	0	0	0	0	0	200	300	0	-38.9859	-60.934	-700.123	-47167.4	-2254.35	3145.29	196.78	970.37	0	0	0	0	0	0	0	603	903	0
632	7	0	0	0	0	0	0	200	300	0	-38.6807	-60.1711	-698.902	-46709.7	-2010.21	2733.31	197.124	969.833	0	0	0	0	0	0	0	603	903	0
632	8	0	0	0	0	0	0	200	300	0	-37.3074	-58.9503	-699.207	-46435	-2071.24	2962.19	197.038	969.411	0	0	0	0	0	0	0	603	903	0
632	9	0	0	0	0	0	0	200	300	0	-37.1548	-59.2555	-698.292	-46892.8	-2193.31	2824.86	196.859	970.154	0	0	0	0	0	0	0	603	903	0
633	0	0	0	0	0	0	0	200	300	0	-38.223	-58.1874	-694.63	-47075.9	-2010.21	3145.29	197.106	970.771	0	0	0	0	0	0	0	603	903	0
633	1	0	0	0	0	0	0	200	300	0	-35.3238	-57.8822	-693.714	-46801.2	-2254.35	2962.19	196.75	970.465	0	0	0	0	0	0	0	603	903	0
633	2	0	0	0	0	0	0	200	300	0	-38.0704	-56.5089	-694.325	-45702.6	-1949.17	2687.53	197.193	968.823	0	0	0	0	0	0	0	603	903	0
633	3	0	0	0	0	0	0	200	300	0	-36.8497	-57.1193	-692.188	-45794.1	-1766.06	2687.53	197.449	969.159	0	0	0	0	0	0	0	603	903	0
633	4	0	0	0	0	0	0	200	300	0	-37.46	-56.8141	-690.968	-45519.5	-2315.38	2733.31	196.649	968.878	0	0	0	0	0	0	0	603	903	0
633	5	0	0	0	0	0	0	200	300	0	-37.7652	-57.2719	-688.526	-45977.2	-1643.99	2916.41	197.612	969.776	0	0	0	0	0	0	0	603	903	0
633	6	0	0	0	0	0	0	200	300	0	-37.6126	-54.6779	-688.831	-45611	-1766.06	3007.97	197.436	969.215	0	0	0	0	0	0	0	603	903	0
633	7	0	0	0	0	0	0	200	300	0	-36.6971	-53.7624	-688.831	-45427.9	-1582.96	2916.41	197.702	968.949	0	0	0	0	0	0	0	603	903	0
633	8	0	0	0	0	0	0	200	300	0	-35.0186	-53.6098	-687.916	-44970.2	-2254.35	3053.74	196.723	968.372	0	0	0	0	0	0	0	603	903	0
633	9	0	0	0	0	0	0	200	300	0	-36.6971	-53.4572	-685.169	-45336.4	-1949.17	2641.75	197.155	969.168	0	0	0	0	0	0	0	603	903	0
634	0	0	0	0	0	0	0	200	300	0	-36.0867	-52.5417	-684.559	-45153.3	-1705.03	2733.31	197.509	968.96	0	0	0	0	0	0	0	603	903	0
634	1	0	0	0	0	0	0	200	300	0	-37.0023	-51.9313	-684.254	-44603.9	-1705.03	2824.86	197.508	968.186	0	0	0	0	0	0	0	603	903	0
634	2	0	0	0	0	0	0	200	300	0	-35.7816	-52.3891	-682.118	-44329.3	-1827.1	2779.08	197.321	967.988	0	0	0	0	0	0	0	603	903	0
634	3	0	0	0	0	0	0	200	300	0	-36.2393	-51.6261	-683.949	-44603.9	-1460.89	2641.75	197.864	968.215	0	0	0	0	0	0	0	603	903	0
634	4	0	0	0	0	0	0	200	300	0	-37.7652	-52.2365	-680.592	-44603.9	-1338.82	2550.2	198.033	968.537	0	0	0	0	0	0	0	603	903	0
634	5	0	0	0	0	0	0	200	300	0	-36.8497	-49.7951	-680.592	-43963.1	-1460.89	2595.98	197.854	967.595	0	0	0	0	0	0	0	603	903	0
634	6	0	0	0	0	0	0	200	300	0	-35.0186	-49.0321	-679.371	-44146.2	-1460.89	2458.65	197.85	967.981	0	0	0	0	0	0	0	603	903	0
634	7	0	0	0	0	0	0	200	300	0	-35.1712	-49.9477	-679.066	-44146.2	-1460.89	2733.31	197.849	968.01	0	0	0	0	0	0	0	603	903	0
634	8	0	0	0	0	0	0	200	300	0	-36.6971	-48.5744	-676.624	-44054.6	-1582.96	2458.65	197.661	968.109	0	0	0	0	0	0	0	603	903	0
634	9	0	0	0	0	0	0	200	300	0	-36.5445	-48.1166	-677.235	-43505.3	-1094.68	2641.75	198.384	967.24	0	0	0	0	0	0	0	603	903	0
635	0	0	0	0	0	0	0	200	300	0	-35.629	-47.6588	-677.54	-43139.1	-1399.85	2550.2	197.934	966.67	0	0	0	0	0	0	0	603	903	0
635	1	0	0	0	0	0	0	200	300	0	-35.0186	-47.3537	-676.319	-43413.8	-1338.82	2550.2	198.02	967.191	0	0	0	0	0	0	0	603	903	0
635	2	0	0	0	0	0	0	200	300	0	-36.2393	-46.4381	-675.099	-43230.7	-1521.92	2458.65	197.746	967.036	0	0	0	0	0	0	0	603	903	0
635	3	0	0	0	0	0	0	200	300	0	-36.2393	-45.8278	-673.267	-42772.9	-1643.99	2367.1	197.558	966.53	0	0	0	0	0	0	0	603	903	0
635	4	0	0	0	0	0	0	200	300	0	-34.2557	-45.2174	-674.488	-42681.3	-1643.99	2550.2	197.563	966.28	0	0	0	0	0	0	0	603	903	0
635	5	0	0	0	0	0	0	200	300	0	-34.7134	-44.6071	-673.267	-42772.9	-1521.92	2321.32	197.74	966.53	0	0	0	0	0	0	0	603	903	0
635	6	0	0	0	0	0	0	200	300	0	-35.7816	-44.7597	-669.911	-42589.8	-1216.75	2321.32	198.184	966.575	0	0	0	0	0	0	0	603	903	0
635	7	0	0	0	0	0	0	200	300	0	-36.0867	-43.8441	-671.436	-42681.3	-1216.75	2183.99	198.188	966.567	0	0	0	0	0	0	0	603	903	0
635	8	0	0	0	0	0	0	200	300	0	-35.0186	-43.539	-671.436	-41765.8	-1399.85	2275.54	197.915	965.204	0	0	0	0	0	0	0	603	903	0
635	9	0	0	0	0	0	0	200	300	0	-35.0186	-42.776	-671.436	-41765.8	-1155.71	2412.87	198.279	965.204	0	0	0	0	0	0	0	603	903	0
636	0	0	0	0	0	0	0	200	300	0	-36.3919	-42.3183	-669.3	-42223.6	-972.608	2321.32	198.547	966.086	0	0	0	0	0	0	0	603	903	0
636	1	0	0	0	0	0	0	200	300	0	-34.2557	-41.5553	-668.385	-42223.6	-1521.92	2275.54	197.723	966.173	0	0	0	0	0	0	0	603	903	0
636	2	0	0	0	0	0	0	200	300	0	-35.0186	-40.3346	-668.079	-41216.5	-911.573	2412.87	198.636	964.694	0	0	0	0	0	0	0	603	903	0
636	3	0	0	0	0	0	0	200	300	0	-35.4764	-40.945	-667.774	-41491.1	-1277.78	2321.32	198.087	965.134	0	0	0	0	0	0	0	603	903	0
636	4	0	0	0	0	0	0	200	300	0	-34.4083	-39.8769	-665.943	-41857.4	-1399.85	2183.99	197.898	965.854	0	0	0	0	0	0	0	603	903	0
636	5	0	0	0	0	0	0	200	300	0	-35.7816	-38.9613	-666.248	-42040.5	-1033.64	2321.32	198.449	966.1	0	0	0	0	0	0	0	603	903	0
636	6	0	0	0	0	0	0	200	300	0	-35.629	-38.5036	-666.554	-40850.3	-1033.64	2138.21	198.449	964.286	0	0	0	0	0	0	0	603	903	0
636	7	0	0	0	0	0	0	200	300	0	-35.0186	-38.0458	-665.028	-39843.2	-1216.75	2000.88	198.17	962.912	0	0	0	0	0	0	0	603	903	0
636	8	0	0	0	0	0	0	200	300	0	-34.5609	-37.588	-664.112	-41399.6	-1277.78	2138.21	198.076	965.338	0	0	0	0	0	0	0	603	903	0
636	9	0	0	0	0	0	0	200	300	0	-36.3919	-36.5199	-665.333	-41033.4	-728.467	2046.66	198.905	964.674	0	0	0	0	0	0	0	603	903	0
637	0	0	0	0	0	0	0	200	300	0	-34.2557	-35.4518	-663.807	-41033.4	-1155.71	2138.21	198.259	964.815	0	0	0	0	0	0	0	603	903	0
637	1	0	0	0	0	0	0	200	300	0	-35.7816	-34.994	-662.586	-40117.9	-1277.78	2092.44	198.072	963.547	0	0	0	0	0	0	0	603	903	0
637	2	0	0	0	0	0	0	200	300	0	-34.5609	-34.994	-662.891	-40392.5	-1155.71	2046.66	198.257	963.934	0	0	0	0	0	0	0	603	903	0
637	3	0	0	0	0	0	0	200	300	0	-34.866	-34.5363	-661.976	-40484.1	-1094.68	1955.11	198.346	964.156	0	0	0	0	0	0	0	603	903	0
637	4	0	0	0	0	0	0	200	300	0	-35.9341	-33.3156	-661.06	-40301	-1460.89	2000.88	197.79	963.964	0	0	0	0	0	0	0	603	903	0
637	5	0	0	0	0	0	0	200	300	0	-35.3238	-32.2475	-662.281	-40026.3	-1094.68	2183.99	198.347	963.437	0	0	0	0	0	0	0	603	903	0
637	6	0	0	0	0	0	0	200	300	0	-35.1712	-31.9423	-661.671	-39568.6	-850.538	1863.56	198.715	962.801	0	0	0	0	0	0	0	603	903	0
637	7	0	0	0	0	0	0	200	300	0	-35.1712	-31.3319	-660.145	-40301	-1094.68	2000.88	198.342	964.049	0	0	0	0	0	0	0	603	903	0
637	8	0	0	0	0	0	0	200	300	0	-35.7816	-30.569	-659.229	-39019.2	-1216.75	2000.88	198.154	962.189	0	0	0	0	0	0	0	603	903	0
637	9	0	0	0	0	0	0	200	300	0	-35.4764	-30.1112	-659.535	-39934.8	-972.608	1772	198.525	963.55	0	0	0	0	0	0	0	603	903	0
638	0	0	0	0	0	0	0	200	300	0	-35.0186	-28.8905	-658.314	-39110.8	-1094.68	1817.78	198.337	962.411	0	0	0	0	0	0	0	603	903	0
638	1	0	0	0	0	0	0	200	300	0	-32.8824	-28.4328	-656.178	-39202.3	-1094.68	1909.33	198.332	962.744	0	0	0	0	0	0	0	603	903	0
638	2	0	0	0	0	0	0	200	300	0	-33.6453	-27.6698	-655.872	-39385.4	-1094.68	1909.33	198.331	963.051	0	0	0	0	0	0	0	603	903	0
638	3	0	0	0	0	0	0	200	300	0	-35.629	-26.2965	-655.567	-39110.8	-606.397	1680.45	199.075	962.659	0	0	0	0	0	0	0	603	903	0
638	4	0	0	0	0	0	0	200	300	0	-35.629	-26.9069	-656.178	-38744.6	-972.608	1634.67	198.518	962.046	0	0	0	0	0	0	0	603	903	0
638	5	0	0	0	0	0	0	200	300	0	-35.1712	-25.8388	-654.957	-38286.8	-728.467	1497.34	198.888	961.457	0	0	0	0	0	0	0	603	903	0
638	6	0	0	0	0	0	0	200	300	0	-34.866	-25.0758	-651.905	-39019.2	-606.397	1817.78	199.07	962.854	0	0	0	0	0	0	0	603	903	0
638	7	0	0	0	0	0	0	200	300	0	-35.629	-24.3129	-653.126	-38469.9	-1338.82	1680.45	197.95	961.901	0	0	0	0	0	0	0	603	903	0
638	8	0	0	0	0	0	0	200	300	0	-35.4764	-23.8551	-649.769	-37920.6	-423.291	1680.45	199.349	961.36	0	0	0	0	0	0	0	603	903	0
638	9	0	0	0	0	0	0	200	300	0	-33.9505	-23.2448	-653.126	-37005.1	-911.573	1772	198.604	959.659	0	0	0	0	0	0	0	603	903	0
639	0	0	0	0	0	0	0	200	300	0	-34.4083	-22.1767	-651.6	-38012.1	-1216.75	1634.67	198.133	961.337	0	0	0	0	0	0	0	603	903	0
639	1	0	0	0	0	0	0	200	300	0	-35.4764	-21.4137	-651.905	-37645.9	-728.467	1680.45	198.883	960.748	0	0	0	0	0	0	0	603	903	0
639	2	0	0	0	0	0	0	200	300	0	-35.9341	-20.6508	-651.905	-36913.5	-728.467	1268.46	198.883	959.624	0	0	0	0	0	0	0	603	903	0
639	3	0	0	0	0	0	0	200	300	0	-34.7134	-20.4982	-651.295	-36455.8	-972.608	1543.12	198.507	958.974	0	0	0	0	0	0	0	603	903	0
639	4	0	0	0	0	0	0	200	300	0	-34.4083	-19.5827	-650.379	-37371.3	-1094.68	1497.34	198.317	960.461	0	0	0	0	0	0	0	603	903	0
639	5	0	0	0	0	0	0	200	300	0	-35.629	-18.6671	-649.159	-37188.2	-728.467	1497.34	198.878	960.287	0	0	0	0	0	0	0	603	903	0
639	6	0	0	0	0	0	0	200	300	0	-35.3238	-17.9042	-650.074	-37371.3	-850.538	1680.45	198.692	960.488	0	0	0	0	0	0	0	603	903	0
639	7	0	0	0	0	0	0	200	300	0	-34.4083	-17.4464	-648.853	-37005.1	-1033.64	1543.12	198.407	960.032	0	0	0	0	0	0	0	603	903	0
639	8	0	0	0	0	0	0	200	300	0	-32.7298	-16.6835	-647.328	-37005.1	-484.327	1497.34	199.252	960.166	0	0	0	0	0	0	0	603	903	0
639	9	0	0	0	0	0	0	200	300	0	-34.2557	-15.768	-647.633	-37005.1	-362.256	1405.79	199.441	960.139	0	0	0	0	0	0	0	603	903	0
640	0	0	0	0	0	0	0	200	300	0	-34.866	-14.6999	-647.633	-37279.7	-911.573	1634.67	198.592	960.563	0	0	0	0	0	0	0	603	903	0
640	1	0	0	0	0	0	0	200	300	0	-34.866	-14.6999	-647.328	-36089.6	-850.538	1543.12	198.686	958.752	0	0	0	0	0	0	0	603	903	0
640	2	0	0	0	0	0	0	200	300	0	-34.1031	-14.2421	-646.717	-36272.7	-606.397	1176.91	199.062	959.087	0	0	0	0	0	0	0	603	903	0
640	3	0	0	0	0	0	0	200	300	0	-34.1031	-13.6317	-644.581	-36455.8	-1216.75	1360.02	198.112	959.557	0	0	0	0	0	0	0	603	903	0
640	4	0	0	0	0	0	0	200	300	0	-35.0186	-13.0214	-644.886	-35906.4	-484.327	1176.91	199.249	958.679	0	0	0	0	0	0	0	603	903	0
640	5	0	0	0	0	0	0	200	300	0	-34.5609	-12.8688	-643.971	-35723.3	-667.432	1497.34	198.964	958.474	0	0	0	0	0	0	0	603	903	0
640	6	0	0	0	0	0	0	200	300	0	-33.4927	-12.1059	-645.496	-34624.7	-911.573	1360.02	198.588	956.641	0	0	0	0	0	0	0	603	903	0
640	7	0	0	0	0	0	0	200	300	0	-33.3401	-11.3429	-643.971	-35540.2	-728.467	993.804	198.869	958.189	0	0	0	0	0	0	0	603	903	0
640	8	0	0	0	0	0	0	200	300	0	-34.2557	-9.96963	-643.665	-35631.8	-789.502	1131.13	198.773	958.358	0	0	0	0	0	0	0	603	903	0
640	9	0	0	0	0	0	0	200	300	0	-33.7979	-10.1222	-643.36	-35631.8	-850.538	1131.13	198.678	958.384	0	0	0	0	0	0	0	603	903	0
641	0	0	0	0	0	0	0	200	300	0	-32.8824	-9.51187	-643.36	-34990.9	-667.432	1314.24	198.963	957.388	0	0	0	0	0	0	0	603	903	0
641	1	0	0	0	0	0	0	200	300	0	-32.5772	-9.35928	-642.445	-34716.2	-484.327	1268.46	199.246	957.038	0	0	0	0	0	0	0	603	903	0
641	2	0	0	0	0	0	0	200	300	0	-32.4246	-8.59634	-642.445	-35082.5	-423.291	1405.79	199.341	957.608	0	0	0	0	0	0	0	603	903	0
641	3	0	0	0	0	0	0	200	300	0	-30.7462	-7.98599	-641.834	-34716.2	-850.538	1451.57	198.675	957.089	0	0	0	0	0	0	0	603	903	0
641	4	0	0	0	0	0	0	200	300	0	-33.1876	-7.68082	-641.529	-34350	-301.221	1176.91	199.53	956.544	0	0	0	0	0	0	0	603	903	0
641	5	0	0	0	0	0	0	200	300	0	-31.3565	-7.37564	-641.529	-34166.9	-240.186	1131.13	199.626	956.259	0	0	0	0	0	0	0	603	903	0
641	6	0	0	0	0	0	0	200	300	0	-32.1194	-6.00235	-639.698	-34899.4	-728.467	993.804	198.861	957.556	0	0	0	0	0	0	0	603	903	0
641	7	0	0	0	0	0	0	200	300	0	-32.8824	-5.54459	-640.003	-34350	-606.397	1085.36	199.053	956.672	0	0	0	0	0	0	0	603	903	0
641	8	0	0	0	0	0	0	200	300	0	-33.3401	-5.54459	-639.698	-33800.7	-484.327	1039.58	199.243	955.839	0	0	0	0	0	0	0	603	903	0
641	9	0	0	0	0	0	0	200	300	0	-32.1194	-4.93423	-638.172	-33526.1	-606.397	902.251	199.05	955.535	0	0	0	0	0	0	0	603	903	0
642	0	0	0	0	0	0	0	200	300	0	-32.7298	-3.86612	-638.172	-33526.1	-301.221	993.804	199.528	955.535	0	0	0	0	0	0	0	603	903	0
642	1	0	0	0	0	0	0	200	300	0	-32.8824	-4.01871	-638.172	-32702.1	-179.151	993.804	199.719	954.243	0	0	0	0	0	0	0	603	903	0
642	2	0	0	0	0	0	0	200	300	0	-32.7298	-3.86612	-640.614	-33251.4	-667.432	1039.58	198.958	954.906	0	0	0	0	0	0	0	603	903	0
642	3	0	0	0	0	0	0	200	300	0	-31.9669	-2.95059	-637.257	-33343	-484.327	993.804	199.24	955.323	0	0	0	0	0	0	0	603	903	0
642	4	0	0	0	0	0	0	200	300	0	-31.3565	-1.27212	-636.952	-32885.2	-728.467	1222.69	198.856	954.629	0	0	0	0	0	0	0	603	903	0
642	5	0	0	0	0	0	0	200	300	0	-32.8824	-1.88248	-637.562	-32976.8	-240.186	902.251	199.623	954.723	0	0	0	0	0	0	0	603	903	0
642	6	0	0	0	0	0	0	200	300	0	-32.4246	-1.5773	-637.867	-33159.9	-728.467	1085.36	198.858	954.986	0	0	0	0	0	0	0	603	903	0
642	7	0	0	0	0	0	0	200	300	0	-31.5091	-1.27212	-636.341	-32427.4	-423.291	948.028	199.335	953.959	0	0	0	0	0	0	0	603	903	0
642	8	0	0	0	0	0	0	200	300	0	-29.678	-0.814361	-636.952	-31878.1	-484.327	1039.58	199.24	953.048	0	0	0	0	0	0	0	603	903	0
642	9	0	0	0	0	0	0	200	300	0	-32.4246	-0.0514216	-637.867	-31878.1	-423.291	902.251	199.336	952.976	0	0	0	0	0	0	0	603	903	0
643	0	0	0	0	0	0	0	200	300	0	-31.3565	-0.204009	-637.867	-31969.7	-423.291	993.804	199.336	953.12	0	0	0	0	0	0	0	603	903	0
643	1	0	0	0	0	0	0	200	300	0	-32.5772	0.406342	-636.341	-31420.4	-301.221	948.028	199.527	952.377	0	0	0	0	0	0	0	603	903	0
643	2	0	0	0	0	0	0	200	300	0	-31.5091	1.01669	-636.341	-31328.8	-484.327	902.251	199.239	952.233	0	0	0	0	0	0	0	603	903	0
643	3	0	0	0	0	0	0	200	300	0	-31.0513	1.47446	-637.562	-31420.4	-850.538	902.251	198.666	952.282	0	0	0	0	0	0	0	603	903	0
643	4	0	0	0	0	0	0	200	300	0	-32.7298	2.08481	-637.257	-30230.2	-118.116	902.251	199.815	950.438	0	0	0	0	0	0	0	603	903	0
643	5	0	0	0	0	0	0	200	300	0	-32.272	1.16928	-635.731	-30962.6	-240.186	764.922	199.622	951.704	0	0	0	0	0	0	0	603	903	0
643	6	0	0	0	0	0	0	200	300	0	-31.8143	1.77963	-634.815	-30230.2	-484.327	948.028	199.237	950.62	0	0	0	0	0	0	0	603	903	0
643	7	0	0	0	0	0	0	200	300	0	-31.2039	2.08481	-635.731	-30230.2	-240.186	1085.36	199.622	950.552	0	0	0	0	0	0	0	603	903	0
643	8	0	0	0	0	0	0	200	300	0	-31.3565	2.54257	-636.036	-30230.2	-423.291	948.028	199.335	950.529	0	0	0	0	0	0	0	603	903	0
643	9	0	0	0	0	0	0	200	300	0	-32.4246	2.38998	-633.9	-30413.3	-423.291	764.922	199.332	950.978	0	0	0	0	0	0	0	603	903	0
644	0	0	0	0	0	0	0	200	300	0	-31.9669	3.4581	-633.9	-29497.7	-606.397	810.699	199.043	949.534	0	0	0	0	0	0	0	603	903	0
644	1	0	0	0	0	0	0	200	300	0	-31.0513	3.76328	-634.205	-28490.7	-423.291	673.37	199.333	947.923	0	0	0	0	0	0	0	603	903	0
644	2	0	0	0	0	0	0	200	300	0	-31.2039	3.30551	-635.731	-29040	-484.327	764.922	199.238	948.68	0	0	0	0	0	0	0	603	903	0
644	3	0	0	0	0	0	0	200	300	0	-32.5772	3.30551	-633.9	-29040	-362.256	627.593	199.429	948.812	0	0	0	0	0	0	0	603	903	0
644	4	0	0	0	0	0	0	200	300	0	-32.5772	3.76328	-633.289	-28948.4	-240.186	902.251	199.621	948.711	0	0	0	0	0	0	0	603	903	0
644	5	0	0	0	0	0	0	200	300	0	-31.2039	4.22104	-635.426	-28216	-301.221	902.251	199.526	947.405	0	0	0	0	0	0	0	603	903	0
644	6	0	0	0	0	0	0	200	300	0	-31.5091	4.06845	-635.12	-28399.1	-423.291	902.251	199.334	947.715	0	0	0	0	0	0	0	603	903	0
644	7	0	0	0	0	0	0	200	300	0	-31.0513	4.6788	-633.595	-28582.2	-423.291	948.028	199.332	948.111	0	0	0	0	0	0	0	603	903	0
644	8	0	0	0	0	0	0	200	300	0	-31.9669	5.28915	-631.764	-28307.6	-179.151	810.699	199.716	947.807	0	0	0	0	0	0	0	603	903	0
644	9	0	0	0	0	0	0	200	300	0	-31.5091	5.28915	-634.205	-27666.7	-606.397	902.251	199.044	946.624	0	0	0	0	0	0	0	603	903	0
645	0	0	0	0	0	0	0	200	300	0	-30.8987	5.28915	-631.764	-27392	-484.327	673.37	199.233	946.358	0	0	0	0	0	0	0	603	903	0
645	1	0	0	0	0	0	0	200	300	0	-28.6099	5.44174	-632.374	-27300.5	-301.221	673.37	199.524	946.172	0	0	0	0	0	0	0	603	903	0
645	2	0	0	0	0	0	0	200	300	0	-31.2039	5.89951	-631.764	-26934.3	-301.221	856.475	199.523	945.634	0	0	0	0	0	0	0	603	903	0
645	3	0	0	0	0	0	0	200	300	0	-32.272	5.59433	-629.627	-26842.7	-606.397	536.04	199.037	945.633	0	0	0	0	0	0	0	603	903	0
645	4	0	0	0	0	0	0	200	300	0	-32.272	5.13657	-628.407	-26293.4	-240.186	764.922	199.618	944.841	0	0	0	0	0	0	0	603	903	0
645	5	0	0	0	0	0	0	200	300	0	-30.5936	4.83139	-632.069	-25927.2	3.95477	810.699	200.006	944.02	0	0	0	0	0	0	0	603	903	0
645	6	0	0	0	0	0	0	200	300	0	-29.678	6.66245	-628.101	-26201.8	-606.397	856.475	199.035	944.716	0	0	0	0	0	0	0	603	903	0
645	7	0	0	0	0	0	0	200	300	0	-31.5091	5.89951	-630.848	-25194.8	-606.397	902.251	199.039	942.938	0	0	0	0	0	0	0	603	903	0
645	8	0	0	0	0	0	0	200	300	0	-31.5091	6.50986	-630.543	-25011.7	-118.116	673.37	199.813	942.667	0	0	0	0	0	0	0	603	903	0
645	9	0	0	0	0	0	0	200	300	0	-30.8987	6.96762	-631.764	-24096.1	-484.327	536.04	199.233	941.141	0	0	0	0	0	0	0	603	903	0
646	0	0	0	0	0	0	0	200	300	0	-30.5936	7.2728	-630.543	-24828.6	-423.291	810.699	199.329	942.376	0	0	0	0	0	0	0	603	903	0
646	1	0	0	0	0	0	0	200	300	0	-31.3565	6.50986	-632.374	-25103.2	-484.327	536.04	199.234	942.697	0	0	0	0	0	0	0	603	903	0
646	2	0	0	0	0	0	0	200	300	0	-30.441	7.2728	-631.153	-24828.6	-179.151	490.264	199.716	942.338	0	0	0	0	0	0	0	603	903	0
646	3	0	0	0	0	0	0	200	300	0	-31.3565	6.96762	-632.374	-24279.2	-423.291	673.37	199.331	941.394	0	0	0	0	0	0	0	603	903	0
646	4	0	0	0	0	0	0	200	300	0	-29.8306	7.12021	-630.848	-23913	-240.186	581.817	199.619	940.906	0	0	0	0	0	0	0	603	903	0
646	5	0	0	0	0	0	0	200	300	0	-30.2884	7.2728	-630.848	-24279.2	-179.151	673.37	199.716	941.487	0	0	0	0	0	0	0	603	903	0
646	6	0	0	0	0	0	0	200	300	0	-31.2039	8.18832	-632.069	-23546.8	-484.327	490.264	199.234	940.254	0	0	0	0	0	0	0	603	903	0
646	7	0	0	0	0	0	0	200	300	0	-31.3565	7.57797	-631.458	-23455.3	-789.502	398.711	198.75	940.145	0	0	0	0	0	0	0	603	903	0
646	8	0	0	0	0	0	0	200	300	0	-30.441	7.88315	-630.848	-22722.8	-545.362	490.264	199.136	939.02	0	0	0	0	0	0	0	603	903	0
646	9	0	0	0	0	0	0	200	300	0	-30.2884	8.4935	-630.238	-22906	-606.397	444.488	199.038	939.345	0	0	0	0	0	0	0	603	903	0
647	0	0	0	0	0	0	0	200	300	0	-30.7462	8.79868	-632.374	-22082	-423.291	581.817	199.331	937.919	0	0	0	0	0	0	0	603	903	0
647	1	0	0	0	0	0	0	200	300	0	-29.678	8.4935	-631.458	-22173.5	-240.186	536.04	199.62	938.115	0	0	0	0	0	0	0	603	903	0
647	2	0	0	0	0	0	0	200	300	0	-30.7462	9.10385	-630.848	-21715.8	-423.291	764.922	199.329	937.423	0	0	0	0	0	0	0	603	903	0
647	3	0	0	0	0	0	0	200	300	0	-29.678	9.7142	-631.153	-21349.6	-606.397	490.264	199.039	936.826	0	0	0	0	0	0	0	603	903	0
647	4	0	0	0	0	0	0	200	300	0	-29.8306	10.3246	-631.153	-21807.3	-301.221	398.711	199.523	937.552	0	0	0	0	0	0	0	603	903	0
647	5	0	0	0	0	0	0	200	300	0	-31.3565	10.6297	-631.764	-20342.5	-423.291	398.711	199.33	935.2	0	0	0	0	0	0	0	603	903	0
647	6	0	0	0	0	0	0	200	300	0	-31.0513	10.4771	-629.932	-20983.3	-301.221	398.711	199.522	936.311	0	0	0	0	0	0	0	603	903	0
647	7	0	0	0	0	0	0	200	300	0	-30.1358	11.0875	-630.543	-20708.7	-545.362	444.488	199.135	935.843	0	0	0	0	0	0	0	603	903	0
647	8	0	0	0	0	0	0	200	300	0	-30.441	11.5453	-631.764	-20342.5	-118.116	352.935	199.813	935.2	0	0	0	0	0	0	0	603	903	0
647	9	0	0	0	0	0	0	200	300	0	-29.3729	10.7823	-632.679	-20525.6	-728.467	673.37	198.849	935.442	0	0	0	0	0	0	0	603	903	0
648	0	0	0	0	0	0	0	200	300	0	-30.7462	11.5453	-631.153	-19701.6	-179.151	352.935	199.716	934.215	0	0	0	0	0	0	0	603	903	0
648	1	0	0	0	0	0	0	200	300	0	-30.1358	12.1556	-632.069	-19610.1	-57.0804	444.488	199.91	934.025	0	0	0	0	0	0	0	603	903	0
648	2	0	0	0	0	0	0	200	300	0	-29.2203	12.766	-632.374	-18969.2	-545.362	352.935	199.138	932.997	0	0	0	0	0	0	0	603	903	0
648	3	0	0	0	0	0	0	200	300	0	-29.5255	12.9185	-633.9	-18694.5	-545.362	398.711	199.14	932.491	0	0	0	0	0	0	0	603	903	0
648	4	0	0	0	0	0	0	200	300	0	-29.9832	10.9349	-634.205	-18877.6	-667.432	444.488	198.948	932.766	0	0	0	0	0	0	0	603	903	0
648	5	0	0	0	0	0	0	200	300	0	-29.2203	12.6134	-630.848	-18511.4	-545.362	307.159	199.136	932.344	0	0	0	0	0	0	0	603	903	0
648	6	0	0	0	0	0	0	200	300	0	-30.441	12.766	-632.984	-18145.2	-484.327	307.159	199.235	931.666	0	0	0	0	0	0	0	603	903	0
648	7	0	0	0	0	0	0	200	300	0	-29.5255	14.1393	-633.595	-17870.6	-484.327	398.711	199.236	931.205	0	0	0	0	0	0	0	603	903	0
648	8	0	0	0	0	0	0	200	300	0	-28.7625	13.5289	-633.595	-17779	-240.186	444.488	199.621	931.061	0	0	0	0	0	0	0	603	903	0
648	9	0	0	0	0	0	0	200	300	0	-29.9832	14.4444	-633.9	-16771.9	-545.362	261.382	199.14	929.458	0	0	0	0	0	0	0	603	903	0
649	0	0	0	0	0	0	0	200	300	0	-29.8306	14.2918	-633.9	-17595.9	-179.151	124.053	199.717	930.758	0	0	0	0	0	0	0	603	903	0
649	1	0	0	0	0	0	0	200	300	0	-28.6099	15.2074	-634.815	-16680.4	-484.327	261.382	199.237	929.276	0	0	0	0	0	0	0	603	903	0
649	2	0	0	0	0	0	0	200	300	0	-26.9315	15.5125	-633.9	-16405.7	-667.432	-13.276	198.947	928.881	0	0	0	0	0	0	0	603	903	0
649	3	0	0	0	0	0	0	200	300	0	-28.4573	15.36	-635.426	-16405.7	-423.291	215.606	199.334	928.819	0	0	0	0	0	0	0	603	903	0
649	4	0	0	0	0	0	0	200	300	0	-29.3729	16.4281	-633.9	-16039.5	-484.327	-13.276	199.236	928.303	0	0	0	0	0	0	0	603	903	0
649	5	0	0	0	0	0	0	200	300	0	-29.9832	14.597	-636.952	-15581.7	-667.432	398.711	198.952	927.463	0	0	0	0	0	0	0	603	903	0
649	6	0	0	0	0	0	0	200	300	0	-28.9151	17.191	-636.341	-14849.3	-362.256	352.935	199.431	926.336	0	0	0	0	0	0	0	603	903	0
649	7	0	0	0	0	0	0	200	300	0	-29.2203	15.5125	-638.783	-15124	-362.256	307.159	199.433	926.676	0	0	0	0	0	0	0	603	903	0
649	8	0	0	0	0	0	0	200	300	0	-29.9832	16.4281	-638.783	-14849.3	-728.467	215.606	198.86	926.246	0	0	0	0	0	0	0	603	903	0
649	9	0	0	0	0	0	0	200	300	0	-29.678	17.3436	-638.477	-14025.3	3.95477	32.5004	200.006	924.967	0	0	0	0	0	0	0	603	903	0
650	0	0	0	0	0	0	0	200	300	0	-28.1522	17.6488	-639.698	-13567.6	-362.256	169.83	199.434	924.209	0	0	0	0	0	0	0	603	903	0
650	1	0	0	0	0	0	0	200	300	0	-28.9151	16.8858	-639.698	-13201.4	-606.397	-13.276	199.052	923.637	0	0	0	0	0	0	0	603	903	0
650	2	0	0	0	0	0	0	200	300	0	-30.1358	17.9539	-640.003	-13659.1	-545.362	-13.276	199.148	924.342	0	0	0	0	0	0	0	603	903	0
650	3	0	0	0	0	0	0	200	300	0	-28.1522	18.8695	-640.919	-13201.4	-362.256	169.83	199.435	923.598	0	0	0	0	0	0	0	603	903	0
650	4	0	0	0	0	0	0	200	300	0	-30.441	18.5643	-640.003	-12652	-423.291	-13.276	199.339	922.769	0	0	0	0	0	0	0	603	903	0
650	5	0	0	0	0	0	0	200	300	0	-28.7625	20.3954	-642.75	-12468.9	-423.291	-104.829	199.341	922.399	0	0	0	0	0	0	0	603	903	0
650	6	0	0	0	0	0	0	200	300	0	-28.4573	19.0221	-643.971	-12468.9	-301.221	-13.276	199.532	922.363	0	0	0	0	0	0	0	603	903	0
650	7	0	0	0	0	0	0	200	300	0	-29.5255	20.2428	-644.581	-12011.2	-911.573	124.053	198.586	921.634	0	0	0	0	0	0	0	603	903	0
650	8	0	0	0	0	0	0	200	300	0	-30.1358	20.5479	-645.191	-11461.9	-728.467	-104.829	198.871	920.765	0	0	0	0	0	0	0	603	903	0
650	9	0	0	0	0	0	0	200	300	0	-28.7625	21.1583	-646.412	-11095.6	-545.362	32.5004	199.156	920.165	0	0	0	0	0	0	0	603	903	0
651	0	0	0	0	0	0	0	200	300	0	-28.9151	21.3109	-648.243	-11095.6	-606.397	32.5004	199.065	920.117	0	0	0	0	0	0	0	603	903	0
651	1	0	0	0	0	0	0	200	300	0	-30.8987	21.0057	-647.328	-10180.1	-911.573	32.5004	198.592	918.726	0	0	0	0	0	0	0	603	903	0
651	2	0	0	0	0	0	0	200	300	0	-30.2884	22.379	-648.243	-10637.9	-301.221	-104.829	199.535	919.41	0	0	0	0	0	0	0	603	903	0
651	3	0	0	0	0	0	0	200	300	0	-29.8306	22.379	-649.769	-9722.35	-545.362	-150.605	199.161	917.963	0	0	0	0	0	0	0	603	903	0
651	4	0	0	0	0	0	0	200	300	0	-29.678	22.5316	-648.548	-9905.46	-850.538	32.5004	198.689	918.273	0	0	0	0	0	0	0	603	903	0
651	5	0	0	0	0	0	0	200	300	0	-30.7462	21.9212	-650.379	-9447.69	-728.467	-150.605	198.88	917.526	0	0	0	0	0	0	0	603	903	0
651	6	0	0	0	0	0	0	200	300	0	-28.1522	22.8368	-651.6	-9356.14	-850.538	-104.829	198.695	917.359	0	0	0	0	0	0	0	603	903	0
651	7	0	0	0	0	0	0	200	300	0	-30.5936	22.8368	-652.821	-8623.72	-850.538	-59.0523	198.697	916.21	0	0	0	0	0	0	0	603	903	0
651	8	0	0	0	0	0	0	200	300	0	-29.9832	24.2101	-654.347	-8440.61	-728.467	-196.381	198.887	915.899	0	0	0	0	0	0	0	603	903	0
651	9	0	0	0	0	0	0	200	300	0	-30.5936	23.9049	-655.872	-7891.3	-667.432	-59.0523	198.982	915.032	0	0	0	0	0	0	0	603	903	0
652	0	0	0	0	0	0	0	200	300	0	-31.8143	23.9049	-655.262	-7982.85	-423.291	-13.276	199.354	915.183	0	0	0	0	0	0	0	603	903	0
652	1	0	0	0	0	0	0	200	300	0	-31.5091	23.9049	-658.009	-7525.09	-728.467	-13.276	198.893	914.436	0	0	0	0	0	0	0	603	903	0
652	2	0	0	0	0	0	0	200	300	0	-30.5936	24.8204	-658.924	-6334.9	-240.186	-242.158	199.635	912.614	0	0	0	0	0	0	0	603	903	0
652	3	0	0	0	0	0	0	200	300	0	-29.8306	24.8204	-660.145	-6426.45	-911.573	-196.381	198.619	912.735	0	0	0	0	0	0	0	603	903	0
652	4	0	0	0	0	0	0	200	300	0	-31.5091	25.1256	-660.45	-6243.35	-1094.68	-150.605	198.343	912.453	0	0	0	0	0	0	0	603	903	0
652	5	0	0	0	0	0	0	200	300	0	-30.5936	25.7359	-661.366	-6151.8	-728.467	-150.605	198.899	912.302	0	0	0	0	0	0	0	603	903	0
652	6	0	0	0	0	0	0	200	300	0	-32.272	25.4308	-662.281	-5419.37	-728.467	-425.263	198.9	911.183	0	0	0	0	0	0	0	603	903	0
652	7	0	0	0	0	0	0	200	300	0	-30.8987	25.4308	-663.807	-5144.72	-1094.68	-242.158	198.351	910.75	0	0	0	0	0	0	0	603	903	0
652	8	0	0	0	0	0	0	200	300	0	-31.2039	25.8885	-665.638	-5144.72	-1705.03	-59.0523	197.439	910.729	0	0	0	0	0	0	0	603	903	0
652	9	0	0	0	0	0	0	200	300	0	-32.272	26.1937	-664.723	-4320.74	-484.327	-333.711	199.271	909.5	0	0	0	0	0	0	0	603	903	0
653	0	0	0	0	0	0	0	200	300	0	-32.5772	27.2618	-665.028	-4137.63	-972.608	-196.381	198.538	909.222	0	0	0	0	0	0	0	603	903	0
653	1	0	0	0	0	0	0	200	300	0	-31.5091	27.7196	-667.164	-3313.66	-1033.64	-379.487	198.451	907.967	0	0	0	0	0	0	0	603	903	0
653	2	0	0	0	0	0	0	200	300	0	-31.8143	27.2618	-669.3	-3588.32	-850.538	-562.593	198.729	908.361	0	0	0	0	0	0	0	603	903	0
653	3	0	0	0	0	0	0	200	300	0	-31.6617	27.7196	-669.605	-3039	-972.608	-333.711	198.548	907.539	0	0	0	0	0	0	0	603	903	0
653	4	0	0	0	0	0	0	200	300	0	-31.9669	28.6351	-671.131	-3405.21	-911.573	-379.487	198.642	908.074	0	0	0	0	0	0	0	603	903	0
653	5	0	0	0	0	0	0	200	300	0	-33.1876	29.2455	-672.962	-2123.47	-1033.64	-242.158	198.464	906.155	0	0	0	0	0	0	0	603	903	0
653	6	0	0	0	0	0	0	200	300	0	-32.8824	28.9403	-675.099	-1757.26	-789.502	-471.04	198.831	905.603	0	0	0	0	0	0	0	603	903	0
653	7	0	0	0	0	0	0	200	300	0	-32.5772	29.8558	-673.878	-1940.37	-1155.71	-425.263	198.285	905.879	0	0	0	0	0	0	0	603	903	0
653	8	0	0	0	0	0	0	200	300	0	-34.866	30.4662	-673.573	-1299.5	-728.467	-562.593	198.919	904.929	0	0	0	0	0	0	0	603	903	0
653	9	0	0	0	0	0	0	200	300	0	-33.3401	29.0929	-675.404	-750.183	-850.538	-104.829	198.741	904.111	0	0	0	0	0	0	0	603	903	0
654	0	0	0	0	0	0	0	200	300	0	-33.035	30.7713	-676.014	-658.631	-1338.82	-425.263	198.02	903.974	0	0	0	0	0	0	0	603	903	0
654	1	0	0	0	0	0	0	200	300	0	-32.7298	29.7032	-680.286	-750.183	-667.432	-425.263	199.019	904.103	0	0	0	0	0	0	0	603	903	0
654	2	0	0	0	0	0	0	200	300	0	-34.7134	31.2291	-680.592	73.7915	-1094.68	-516.816	198.392	902.892	0	0	0	0	0	0	0	603	903	0
654	3	0	0	0	0	0	0	200	300	0	-34.7134	31.2291	-680.286	348.45	-1338.82	-745.698	198.032	902.488	0	0	0	0	0	0	0	603	903	0
654	4	0	0	0	0	0	0	200	300	0	-33.6453	32.2972	-680.286	897.766	-1155.71	-425.263	198.301	901.68	0	0	0	0	0	0	0	603	903	0
654	5	0	0	0	0	0	0	200	300	0	-32.1194	30.9239	-685.169	1355.53	-972.608	-608.369	198.581	901.022	0	0	0	0	0	0	0	603	903	0
654	6	0	0	0	0	0	0	200	300	0	-34.2557	32.4498	-683.643	1447.08	-1277.78	-150.605	198.131	900.883	0	0	0	0	0	0	0	603	903	0
654	7	0	0	0	0	0	0	200	300	0	-35.7816	31.8394	-687	2179.5	-1399.85	-745.698	197.962	899.828	0	0	0	0	0	0	0	603	903	0
654	8	0	0	0	0	0	0	200	300	0	-35.629	33.9757	-687	2362.61	-1094.68	-516.816	198.407	899.561	0	0	0	0	0	0	0	603	903	0
654	9	0	0	0	0	0	0	200	300	0	-34.866	33.9757	-688.831	3186.59	-1338.82	-516.816	198.056	898.374	0	0	0	0	0	0	0	603	903	0
655	0	0	0	0	0	0	0	200	300	0	-35.1712	34.1283	-688.831	3186.59	-1277.78	-654.145	198.145	898.374	0	0	0	0	0	0	0	603	903	0
655	1	0	0	0	0	0	0	200	300	0	-35.7816	35.5016	-690.052	3186.59	-1338.82	-516.816	198.06	898.382	0	0	0	0	0	0	0	603	903	0
655	2	0	0	0	0	0	0	200	300	0	-33.9505	35.9593	-692.188	4102.11	-1643.99	-608.369	197.625	897.074	0	0	0	0	0	0	0	603	903	0
655	3	0	0	0	0	0	0	200	300	0	-35.0186	35.6541	-694.63	4193.66	-1277.78	-379.487	198.16	896.963	0	0	0	0	0	0	0	603	903	0
655	4	0	0	0	0	0	0	200	300	0	-36.3919	35.9593	-694.325	5109.19	-972.608	-654.145	198.599	895.641	0	0	0	0	0	0	0	603	903	0
655	5	0	0	0	0	0	0	200	300	0	-36.0867	36.5697	-695.24	5475.4	-911.573	-608.369	198.689	895.125	0	0	0	0	0	0	0	603	903	0
655	6	0	0	0	0	0	0	200	300	0	-36.8497	37.7904	-697.987	5658.51	-1399.85	-791.474	197.994	894.893	0	0	0	0	0	0	0	603	903	0
655	7	0	0	0	0	0	0	200	300	0	-36.8497	37.18	-698.292	6848.7	-1216.75	-837.251	198.258	893.192	0	0	0	0	0	0	0	603	903	0
655	8	0	0	0	0	0	0	200	300	0	-36.0867	37.943	-698.902	6665.59	-1521.92	-562.593	197.822	893.463	0	0	0	0	0	0	0	603	903	0
655	9	0	0	0	0	0	0	200	300	0	-35.3238	38.4007	-699.207	6757.14	-1705.03	-883.027	197.561	893.336	0	0	0	0	0	0	0	603	903	0
656	0	0	0	0	0	0	0	200	300	0	-36.8497	39.3163	-702.564	7031.8	-1460.89	-654.145	197.921	892.991	0	0	0	0	0	0	0	603	903	0
656	1	0	0	0	0	0	0	200	300	0	-37.1548	38.7059	-702.87	7398.01	-1338.82	-699.922	198.095	892.475	0	0	0	0	0	0	0	603	903	0
656	2	0	0	0	0	0	0	200	300	0	-37.46	39.1637	-704.701	7855.78	-1827.1	-425.263	197.407	891.852	0	0	0	0	0	0	0	603	903	0
656	3	0	0	0	0	0	0	200	300	0	-37.3074	40.3844	-705.311	8496.64	-1521.92	-608.369	197.842	890.953	0	0	0	0	0	0	0	603	903	0
656	4	0	0	0	0	0	0	200	300	0	-37.0023	40.8421	-706.532	8862.85	-1277.78	-745.698	198.191	890.456	0	0	0	0	0	0	0	603	903	0
656	5	0	0	0	0	0	0	200	300	0	-38.223	40.6895	-708.057	8496.64	-1643.99	-608.369	197.678	891	0	0	0	0	0	0	0	603	903	0
656	6	0	0	0	0	0	0	200	300	0	-36.8497	41.2999	-707.447	9045.96	-1705.03	-699.922	197.59	890.213	0	0	0	0	0	0	0	603	903	0
656	7	0	0	0	0	0	0	200	300	0	-37.6126	42.368	-708.363	9503.72	-1643.99	-883.027	197.679	889.584	0	0	0	0	0	0	0	603	903	0
656	8	0	0	0	0	0	0	200	300	0	-37.1548	43.7413	-710.804	10236.1	-1338.82	-883.027	198.116	888.599	0	0	0	0	0	0	0	603	903	0
656	9	0	0	0	0	0	0	200	300	0	-37.46	42.8258	-712.025	10236.1	-1705.03	-1066.13	197.605	888.624	0	0	0	0	0	0	0	603	903	0
657	0	0	0	0	0	0	0	200	300	0	-38.8333	43.4361	-710.804	10693.9	-1460.89	-928.804	197.945	887.955	0	0	0	0	0	0	0	603	903	0
657	1	0	0	0	0	0	0	200	300	0	-38.9859	44.3517	-709.278	10968.6	-1277.78	-837.251	198.198	887.536	0	0	0	0	0	0	0	603	903	0
657	2	0	0	0	0	0	0	200	300	0	-38.8333	43.4361	-715.382	11792.5	-1949.17	-883.027	197.275	886.516	0	0	0	0	0	0	0	603	903	0
657	3	0	0	0	0	0	0	200	300	0	-37.7652	45.4198	-715.077	11792.5	-1582.96	-883.027	197.786	886.509	0	0	0	0	0	0	0	603	903	0
657	4	0	0	0	0	0	0	200	300	0	-37.46	46.4879	-715.992	12158.8	-1827.1	-1066.13	197.448	886.018	0	0	0	0	0	0	0	603	903	0
657	5	0	0	0	0	0	0	200	300	0	-39.5963	46.6405	-715.687	12891.2	-1827.1	-1157.69	197.447	884.988	0	0	0	0	0	0	0	603	903	0
657	6	0	0	0	0	0	0	200	300	0	-39.1385	47.556	-716.908	13165.8	-2010.21	-974.58	197.196	884.635	0	0	0	0	0	0	0	603	903	0
657	7	0	0	0	0	0	0	200	300	0	-38.5281	48.0138	-719.654	13898.3	-1827.1	-1020.36	197.461	883.688	0	0	0	0	0	0	0	603	903	0
657	8	0	0	0	0	0	0	200	300	0	-38.5281	47.7086	-720.875	13715.1	-1766.06	-745.698	197.55	883.974	0	0	0	0	0	0	0	603	903	0
657	9	0	0	0	0	0	0	200	300	0	-38.8333	48.7767	-721.485	13989.8	-2132.28	-928.804	197.045	883.61	0	0	0	0	0	0	0	603	903	0
658	0	0	0	0	0	0	0	200	300	0	-37.0023	49.5396	-722.096	14447.6	-1521.92	-745.698	197.892	882.992	0	0	0	0	0	0	0	603	903	0
658	1	0	0	0	0	0	0	200	300	0	-39.7488	50.15	-724.842	14905.3	-1582.96	-1249.24	197.816	882.437	0	0	0	0	0	0	0	603	903	0
658	2	0	0	0	0	0	0	200	300	0	-38.5281	50.15	-724.537	15088.4	-1888.14	-1020.36	197.394	882.175	0	0	0	0	0	0	0	603	903	0
658	3	0	0	0	0	0	0	200	300	0	-38.223	50.3026	-724.537	15271.5	-1888.14	-837.251	197.394	881.922	0	0	0	0	0	0	0	603	903	0
658	4	0	0	0	0	0	0	200	300	0	-40.054	52.2862	-725.758	15729.3	-2071.24	-1203.46	197.146	881.327	0	0	0	0	0	0	0	603	903	0
658	5	0	0	0	0	0	0	200	300	0	-39.7488	52.5914	-728.809	16461.7	-2254.35	-1249.24	196.907	880.413	0	0	0	0	0	0	0	603	903	0
658	6	0	0	0	0	0	0	200	300	0	-38.9859	52.5914	-726.673	17560.4	-1705.03	-1295.01	197.654	878.835	0	0	0	0	0	0	0	603	903	0
658	7	0	0	0	0	0	0	200	300	0	-38.6807	51.2181	-730.03	17743.5	-1521.92	-791.474	197.915	878.695	0	0	0	0	0	0	0	603	903	0
658	8	0	0	0	0	0	0	200	300	0	-40.2066	53.6595	-728.199	17377.3	-2071.24	-1295.01	197.156	879.137	0	0	0	0	0	0	0	603	903	0
658	9	0	0	0	0	0	0	200	300	0	-38.8333	52.744	-730.946	17285.7	-1705.03	-1340.79	197.667	879.352	0	0	0	0	0	0	0	603	903	0
659	0	0	0	0	0	0	0	200	300	0	-39.5963	55.6432	-733.997	18109.7	-2010.21	-1249.24	197.261	878.327	0	0	0	0	0	0	0	603	903	0
659	1	0	0	0	0	0	0	200	300	0	-38.8333	55.338	-734.303	18659	-2010.21	-1523.9	197.262	877.59	0	0	0	0	0	0	0	603	903	0
659	2	0	0	0	0	0	0	200	300	0	-38.8333	55.338	-734.913	18567.4	-2254.35	-1111.91	196.933	877.735	0	0	0	0	0	0	0	603	903	0
659	3	0	0	0	0	0	0	200	300	0	-40.2066	56.2535	-735.523	18567.4	-1827.1	-1295.01	197.516	877.756	0	0	0	0	0	0	0	603	903	0
659	4	0	0	0	0	0	0	200	300	0	-40.6644	56.4061	-737.66	19116.8	-2254.35	-791.474	196.944	877.085	0	0	0	0	0	0	0	603	903	0
659	5	0	0	0	0	0	0	200	300	0	-39.5963	56.7113	-739.185	20032.3	-2193.31	-1203.46	197.033	875.9	0	0	0	0	0	0	0	603	903	0
659	6	0	0	0	0	0	0	200	300	0	-38.223	57.3216	-737.965	20581.6	-2010.21	-1249.24	197.276	875.11	0	0	0	0	0	0	0	603	903	0
659	7	0	0	0	0	0	0	200	300	0	-39.5963	59.0001	-740.711	20123.8	-2315.38	-1340.79	196.874	875.832	0	0	0	0	0	0	0	603	903	0
659	8	0	0	0	0	0	0	200	300	0	-40.5118	59.3053	-739.796	21222.5	-2132.28	-1340.79	197.118	874.313	0	0	0	0	0	0	0	603	903	0
659	9	0	0	0	0	0	0	200	300	0	-40.9695	59.3053	-742.542	21039.4	-2498.49	-1295.01	196.635	874.666	0	0	0	0	0	0	0	603	903	0
660	0	0	0	0	0	0	0	200	300	0	-39.9014	59.763	-740.101	21222.5	-2071.24	-1478.12	197.201	874.325	0	0	0	0	0	0	0	603	903	0
660	1	0	0	0	0	0	0	200	300	0	-39.9014	61.1363	-739.796	21863.3	-2010.21	-1432.34	197.283	873.447	0	0	0	0	0	0	0	603	903	0
660	2	0	0	0	0	0	0	200	300	0	-41.7325	60.0682	-743.153	22046.4	-2071.24	-1203.46	197.213	873.334	0	0	0	0	0	0	0	603	903	0
660	3	0	0	0	0	0	0	200	300	0	-39.9014	61.2889	-745.594	22412.7	-1705.03	-1478.12	197.713	872.94	0	0	0	0	0	0	0	603	903	0
660	4	0	0	0	0	0	0	200	300	0	-41.1221	61.7467	-748.036	22778.9	-2132.28	-1432.34	197.15	872.548	0	0	0	0	0	0	0	603	903	0
660	5	0	0	0	0	0	0	200	300	0	-40.2066	62.6622	-745.899	23328.2	-1827.1	-1569.67	197.55	871.725	0	0	0	0	0	0	0	603	903	0
660	6	0	0	0	0	0	0	200	300	0	-40.6644	63.7303	-747.425	23236.6	-2071.24	-1203.46	197.229	871.911	0	0	0	0	0	0	0	603	903	0
660	7	0	0	0	0	0	0	200	300	0	-41.2747	64.4933	-748.646	23694.4	-2498.49	-1478.12	196.663	871.35	0	0	0	0	0	0	0	603	903	0
660	8	0	0	0	0	0	0	200	300	0	-41.1221	63.5777	-749.256	24152.2	-2132.28	-1386.57	197.154	870.765	0	0	0	0	0	0	0	603	903	0
660	9	0	0	0	0	0	0	200	300	0	-40.6644	64.4933	-749.256	24335.3	-2071.24	-1615.45	197.236	870.521	0	0	0	0	0	0	0	603	903	0
661	0	0	0	0	0	0	0	200	300	0	-40.817	64.4933	-750.172	24793	-2315.38	-1340.79	196.914	869.95	0	0	0	0	0	0	0	603	903	0
661	1	0	0	0	0	0	0	200	300	0	-40.5118	65.714	-752.613	25067.7	-2315.38	-1111.91	196.924	869.693	0	0	0	0	0	0	0	603	903	0
661	2	0	0	0	0	0	0	200	300	0	-38.6807	65.5614	-750.172	25800.1	-2071.24	-1340.79	197.239	868.608	0	0	0	0	0	0	0	603	903	0
661	3	0	0	0	0	0	0	200	300	0	-41.7325	65.5614	-754.444	25983.2	-2315.38	-1386.57	196.931	868.56	0	0	0	0	0	0	0	603	903	0
661	4	0	0	0	0	0	0	200	300	0	-40.817	67.0872	-752.918	26532.5	-2376.42	-1249.24	196.844	867.76	0	0	0	0	0	0	0	603	903	0
661	5	0	0	0	0	0	0	200	300	0	-40.5118	68.1554	-752.918	26349.4	-2010.21	-1386.57	197.33	868.004	0	0	0	0	0	0	0	603	903	0
661	6	0	0	0	0	0	0	200	300	0	-41.7325	68.7657	-754.749	26898.7	-2254.35	-1523.9	197.013	867.361	0	0	0	0	0	0	0	603	903	0
661	7	0	0	0	0	0	0	200	300	0	-41.8851	68.308	-754.749	26257.9	-2071.24	-1523.9	197.256	868.21	0	0	0	0	0	0	0	603	903	0
661	8	0	0	0	0	0	0	200	300	0	-40.9695	69.2235	-753.834	28088.9	-2254.35	-1661.23	197.01	865.739	0	0	0	0	0	0	0	603	903	0
661	9	0	0	0	0	0	0	200	300	0	-39.5963	70.4442	-754.139	27905.8	-2498.49	-1890.11	196.687	865.996	0	0	0	0	0	0	0	603	903	0
662	0	0	0	0	0	0	0	200	300	0	-41.2747	71.0545	-755.97	27814.3	-2254.35	-1478.12	197.018	866.207	0	0	0	0	0	0	0	603	903	0
662	1	0	0	0	0	0	0	200	300	0	-42.3428	70.9019	-756.58	28272	-1643.99	-1661.23	197.827	865.632	0	0	0	0	0	0	0	603	903	0
662	2	0	0	0	0	0	0	200	300	0	-42.0377	70.7494	-755.665	28729.8	-2010.21	-1295.01	197.34	864.981	0	0	0	0	0	0	0	603	903	0
662	3	0	0	0	0	0	0	200	300	0	-41.5799	72.5804	-756.275	29187.6	-2498.49	-1523.9	196.696	864.406	0	0	0	0	0	0	0	603	903	0
662	4	0	0	0	0	0	0	200	300	0	-40.9695	72.8856	-756.886	29645.3	-1888.14	-1478.12	197.505	863.833	0	0	0	0	0	0	0	603	903	0
662	5	0	0	0	0	0	0	200	300	0	-42.4954	73.0382	-757.801	29279.1	-2132.28	-1523.9	197.186	864.363	0	0	0	0	0	0	0	603	903	0
662	6	0	0	0	0	0	0	200	300	0	-40.6644	73.0382	-756.886	29828.4	-2132.28	-1569.67	197.183	863.591	0	0	0	0	0	0	0	603	903	0
662	7	0	0	0	0	0	0	200	300	0	-42.1902	74.5641	-758.411	30194.6	-2193.31	-1523.9	197.108	863.187	0	0	0	0	0	0	0	603	903	0
662	8	0	0	0	0	0	0	200	300	0	-41.7325	75.4796	-759.022	30377.8	-1766.06	-1478.12	197.673	862.978	0	0	0	0	0	0	0	603	903	0
662	9	0	0	0	0	0	0	200	300	0	-41.8851	75.327	-760.243	30469.3	-2498.49	-1249.24	196.714	862.922	0	0	0	0	0	0	0	603	903	0
663	0	0	0	0	0	0	0	200	300	0	-42.9532	76.0899	-758.717	30560.9	-2315.38	-1615.45	196.948	862.72	0	0	0	0	0	0	0	603	903	0
663	1	0	0	0	0	0	0	200	300	0	-43.1058	77.0055	-758.717	31018.6	-2010.21	-1661.23	197.351	862.117	0	0	0	0	0	0	0	603	903	0
663	2	0	0	0	0	0	0	200	300	0	-41.5799	78.0736	-760.243	31751	-2254.35	-1707	197.035	861.236	0	0	0	0	0	0	0	603	903	0
663	3	0	0	0	0	0	0	200	300	0	-41.7325	78.0736	-757.801	31201.7	-2376.42	-1707	196.864	861.826	0	0	0	0	0	0	0	603	903	0
663	4	0	0	0	0	0	0	200	300	0	-42.3428	79.2943	-757.801	31567.9	-2254.35	-1707	197.025	861.343	0	0	0	0	0	0	0	603	903	0
663	5	0	0	0	0	0	0	200	300	0	-42.3428	80.6676	-756.275	32208.8	-1888.14	-1752.78	197.503	860.411	0	0	0	0	0	0	0	603	903	0
663	6	0	0	0	0	0	0	200	300	0	-42.8006	79.4469	-756.886	32575	-2559.52	-1707	196.618	859.962	0	0	0	0	0	0	0	603	903	0
663	7	0	0	0	0	0	0	200	300	0	-41.1221	81.5831	-755.97	33032.8	-1766.06	-1752.78	197.664	859.304	0	0	0	0	0	0	0	603	903	0
663	8	0	0	0	0	0	0	200	300	0	-41.7325	81.2779	-758.717	32758.1	-1949.17	-1432.34	197.431	859.824	0	0	0	0	0	0	0	603	903	0
663	9	0	0	0	0	0	0	200	300	0	-42.8006	82.9564	-758.717	32300.4	-2071.24	-1615.45	197.27	860.428	0	0	0	0	0	0	0	603	903	0
664	0	0	0	0	0	0	0	200	300	0	-42.1902	83.8719	-758.411	33399	-1949.17	-1707	197.43	858.962	0	0	0	0	0	0	0	603	903	0
664	1	0	0	0	0	0	0	200	300	0	-41.5799	85.0926	-759.632	33856.8	-1766.06	-1798.55	197.675	858.43	0	0	0	0	0	0	0	603	903	0
664	2	0	0	0	0	0	0	200	300	0	-41.5799	84.4823	-758.717	34039.9	-2071.24	-1661.23	197.27	858.135	0	0	0	0	0	0	0	603	903	0
664	3	0	0	0	0	0	0	200	300	0	-43.2584	85.5504	-758.411	33673.6	-2132.28	-1752.78	197.188	858.6	0	0	0	0	0	0	0	603	903	0
664	4	0	0	0	0	0	0	200	300	0	-41.5799	86.7711	-757.496	34039.9	-1949.17	-1798.55	197.427	858.063	0	0	0	0	0	0	0	603	903	0
664	5	0	0	0	0	0	0	200	300	0	-42.648	87.2289	-759.632	34314.5	-2193.31	-1523.9	197.113	857.828	0	0	0	0	0	0	0	603	903	0
664	6	0	0	0	0	0	0	200	300	0	-41.4273	87.9918	-759.022	35138.5	-1949.17	-1523.9	197.432	856.706	0	0	0	0	0	0	0	603	903	0
664	7	0	0	0	0	0	0	200	300	0	-40.817	88.6021	-757.191	34497.6	-1460.89	-1615.45	198.071	857.44	0	0	0	0	0	0	0	603	903	0
664	8	0	0	0	0	0	0	200	300	0	-42.0377	90.128	-757.801	35230.1	-1827.1	-1935.88	197.589	856.51	0	0	0	0	0	0	0	603	903	0
664	9	0	0	0	0	0	0	200	300	0	-40.6644	91.1961	-758.411	34772.3	-1827.1	-1981.66	197.591	857.151	0	0	0	0	0	0	0	603	903	0
665	0	0	0	0	0	0	0	200	300	0	-41.7325	91.0435	-757.801	35230.1	-1949.17	-1798.55	197.428	856.51	0	0	0	0	0	0	0	603	903	0
665	1	0	0	0	0	0	0	200	300	0	-41.2747	92.1117	-756.275	35687.8	-1705.03	-1981.66	197.745	855.811	0	0	0	0	0	0	0	603	903	0
665	2	-2.53265	-6.55868	-13.6932	-2393.64	2072.14	-1213.99	351.326	474.805	0	-40.6644	93.7901	-754.444	35779.4	-2193.31	-2027.44	197.093	855.575	0	0	0	0	0	0	0	603	903	0
665	3	2.80793	-9.15267	-17.6605	-2210.54	2804.57	-1809.08	358.804	425.168	0	-41.8851	91.6539	-755.665	36237.1	-1399.85	-1935.88	198.148	855.046	0	0	0	0	0	0	0	603	903	0
665	4	4.94416	-7.16903	-15.2191	-1386.56	2438.35	-802.001	360.217	391.107	0	-40.817	93.9427	-756.886	36420.2	-1399.85	-1798.55	198.151	854.882	0	0	0	0	0	0	0	603	903	0
665	5	3.87604	-5.18539	-10.9466	-2485.2	2072.14	-756.225	389.295	527.028	0	-39.9014	94.8582	-755.055	36328.7	-2010.21	-1981.66	197.338	854.886	0	0	0	0	0	0	0	603	903	0
665	6	0	0	0	0	0	0	200	300	0	-40.054	95.316	-753.529	36878	-1399.85	-1981.66	198.142	854.06	0	0	0	0	0	0	0	603	903	0
665	7	-3.143	-5.49057	-15.2191	-2576.75	2133.18	-756.225	340.165	469.31	0	-40.817	96.9945	-752.918	36878	-1705.03	-1844.33	197.735	854.02	0	0	0	0	0	0	0	603	903	0
665	8	-0.24383	-3.20175	-17.9657	-2302.09	2438.35	159.302	335.723	428.138	0	-41.4273	97.1471	-752.613	36878	-1888.14	-2164.77	197.491	854	0	0	0	0	0	0	0	603	903	0
665	9	2.50275	-3.04916	-18.576	-1752.77	2926.64	-206.909	357.549	394.357	0	-39.5963	96.8419	-748.646	37244.2	-1521.92	-1844.33	197.967	853.251	0	0	0	0	0	0	0	603	903	0
666	0	4.63898	0.307774	-18.2709	-2759.85	3598.02	67.7495	396.927	451.052	0	-38.0704	97.4522	-751.087	37518.9	-1277.78	-1798.55	198.299	853.047	0	0	0	0	0	0	0	603	903	0
666	1	4.63898	3.20694	-21.933	-3126.07	3353.88	571.29	352.915	442.528	0	-39.2911	98.3678	-749.561	36878	-1766.06	-2073.21	197.644	853.801	0	0	0	0	0	0	0	603	903	0
666	2	1.73981	4.27506	-28.0365	-4041.59	4208.37	388.184	350.103	444.155	0	-40.3592	100.351	-748.341	37793.5	-1338.82	-1935.88	198.211	852.497	0	0	0	0	0	0	0	603	903	0
666	3	0.366522	5.038	-33.5297	-4865.57	4757.69	205.079	341.895	445.112	0	-40.3592	100.046	-748.646	37976.6	-1277.78	-1981.66	198.293	852.273	0	0	0	0	0	0	0	603	903	0
666	4	2.80793	6.2587	-36.5814	-4590.91	5795.29	937.501	358.422	425.498	0	-38.9859	100.504	-748.036	38251.3	-1766.06	-1935.88	197.639	851.864	0	0	0	0	0	0	0	603	903	0
666	5	5.85969	7.93717	-40.2435	-4774.02	7077.03	891.724	375.855	418.628	0	-38.3755	98.8255	-745.899	37885.1	-1216.75	-2118.99	198.369	852.209	0	0	0	0	0	0	0	603	903	0
666	6	6.47004	9.00528	-45.1263	-5231.78	7870.48	617.066	374.41	415.936	0	-38.3755	101.267	-744.679	37702	-1338.82	-1935.88	198.202	852.372	0	0	0	0	0	0	0	603	903	0
666	7	6.62263	10.0734	-57.0282	-5964.2	8724.98	937.501	352.994	404.583	0	-36.5445	101.725	-744.068	38251.3	-1399.85	-2027.44	198.119	851.592	0	0	0	0	0	0	0	603	903	0
666	8	5.40192	11.4467	-66.7938	-7978.36	9701.54	1898.8	345.246	419.448	0	-37.7652	102.488	-745.289	38709.1	-1033.64	-2164.77	198.613	851.062	0	0	0	0	0	0	0	603	903	0
666	9	4.94416	11.9045	-73.2025	-8069.92	10800.2	1029.05	347.538	410.241	0	-38.8333	102.335	-743.458	39166.8	-789.502	-2164.77	198.938	850.318	0	0	0	0	0	0	0	603	903	0
667	0	4.18122	12.6674	-79.306	-9077	11471.6	1120.61	344.649	414.455	0	-36.5445	102.488	-741.322	38159.7	-1033.64	-2027.44	198.606	851.525	0	0	0	0	0	0	0	603	903	0
667	1	7.38556	12.82	-86.3251	-9351.65	13485.7	1624.15	356.22	408.331	0	-37.7652	104.319	-742.237	38709.1	-1216.75	-2027.44	198.361	850.848	0	0	0	0	0	0	0	603	903	0
667	2	6.62263	12.9726	-95.7855	-9992.52	14401.2	1578.37	350.349	404.322	0	-37.46	104.776	-739.796	38983.7	-911.573	-2073.21	198.768	850.305	0	0	0	0	0	0	0	603	903	0
667	3	6.31745	12.6674	-104.636	-10908.1	15560.9	1257.94	348.715	404.248	0	-35.9341	105.234	-738.27	38892.2	-1338.82	-1890.11	198.187	850.32	0	0	0	0	0	0	0	603	903	0
667	4	6.62263	11.2941	-115.927	-11732	17025.8	1853.03	346.866	401.202	0	-35.4764	104.014	-732.777	39807.7	-667.432	-2164.77	199.089	848.676	0	0	0	0	0	0	0	603	903	0
667	5	3.72346	13.1252	-126.913	-13013.8	18307.5	1944.58	344.252	402.54	0	-36.3919	105.845	-733.997	39441.5	-1338.82	-2118.99	198.176	849.265	0	0	0	0	0	0	0	603	903	0
667	6	1.8924	14.0407	-136.679	-13288.4	19833.4	1807.25	345.109	397.224	0	-36.8497	106.76	-733.692	39258.4	-789.502	-2210.54	198.924	849.492	0	0	0	0	0	0	0	603	903	0
667	7	0.976874	12.3622	-143.698	-14387.1	21176.1	2036.13	347.366	400.12	0	-35.7816	107.37	-733.997	39990.8	-789.502	-2118.99	198.924	848.516	0	0	0	0	0	0	0	603	903	0
667	8	1.28205	9.46305	-151.022	-15302.6	22213.7	1807.25	347.089	401.327	0	-35.0186	107.37	-731.861	40265.4	-606.397	-1981.66	199.171	847.982	0	0	0	0	0	0	0	603	903	0
667	9	-0.854181	6.86905	-163.229	-15943.5	23190.3	1532.59	342.072	397.675	0	-34.5609	107.523	-729.115	39624.6	-789.502	-2302.09	198.917	848.654	0	0	0	0	0	0	0	603	903	0
668	0	-1.61712	5.80094	-169.943	-16035	24594.1	845.948	344.72	394.355	0	-34.7134	109.049	-727.284	39899.2	-728.467	-2439.42	198.998	848.139	0	0	0	0	0	0	0	603	903	0
668	1	-1.15936	0.460362	-183.066	-17316.7	25021.4	800.172	336.68	394.593	0	-34.866	109.659	-726.368	39441.5	-301.221	-2256.32	199.585	848.7	0	0	0	0	0	0	0	603	903	0
668	2	-3.60076	-0.760341	-185.507	-17866.1	26669.3	433.961	343.764	396.309	0	-33.1876	109.812	-725.147	40631.7	-789.502	-2164.77	198.911	846.968	0	0	0	0	0	0	0	603	903	0
668	3	-5.43182	-2.5914	-198.935	-18049.2	28439.3	67.7495	342.958	390.729	0	-33.3401	109.812	-722.096	40723.2	-667.432	-2302.09	199.076	846.604	0	0	0	0	0	0	0	603	903	0
668	4	-6.49993	-5.0328	-208.701	-19697.1	29171.8	205.079	339.778	394.38	0	-33.1876	111.033	-719.959	40173.9	-362.256	-1844.33	199.497	847.2	0	0	0	0	0	0	0	603	903	0
668	5	-8.78875	-8.54232	-214.194	-19605.6	30453.5	-252.685	342.177	391.532	0	-34.4083	111.643	-719.349	40448.5	-57.0804	-2118.99	199.921	846.771	0	0	0	0	0	0	0	603	903	0
668	6	-11.2302	-14.3407	-226.706	-19971.8	31308	-1076.66	338.1	388.096	0	-32.8824	110.727	-718.128	40448.5	-362.256	-2164.77	199.496	846.675	0	0	0	0	0	0	0	603	903	0
668	7	-9.70428	-17.2398	-235.556	-20612.6	32467.7	-1625.98	337.834	387.506	0	-30.2884	111.643	-714.466	40814.8	-57.0804	-2027.44	199.92	845.874	0	0	0	0	0	0	0	603	903	0
668	8	-11.6879	-20.5968	-245.627	-21253.5	33688.4	-1809.08	337.153	386.528	0	-31.9669	112.406	-710.194	40540.1	-118.116	-2073.21	199.834	845.917	0	0	0	0	0	0	0	603	903	0
668	9	-13.6716	-23.6485	-254.477	-21802.8	35092.2	-2221.07	337.899	385.677	0	-31.5091	110.575	-708.363	40723.2	-911.573	-2393.65	198.713	845.511	0	0	0	0	0	0	0	603	903	0
669	0	-15.1974	-27.7684	-262.106	-22718.4	35336.3	-2907.72	334.817	386.676	0	-32.5772	112.864	-707.752	40448.5	-362.256	-2256.32	199.488	845.849	0	0	0	0	0	0	0	603	903	0
669	1	-16.8759	-33.4142	-267.905	-22901.5	36740.1	-3045.04	337.139	385.484	0	-32.1194	113.474	-706.226	40082.3	-240.186	-2256.32	199.66	846.244	0	0	0	0	0	0	0	603	903	0
669	2	-19.1647	-34.1771	-274.619	-22718.4	38327	-3548.58	339.565	382.727	0	-31.0513	113.932	-702.87	41547.2	-301.221	-2164.77	199.571	843.889	0	0	0	0	0	0	0	603	903	0
669	3	-20.8432	-38.4496	-285.3	-23176.1	39120.5	-3960.57	337.121	381.234	0	-29.2203	114.695	-701.038	40997.9	3.95477	-1935.88	200.006	844.518	0	0	0	0	0	0	0	603	903	0
669	4	-20.6906	-42.1117	-295.37	-23725.4	40036	-4555.66	335.545	380.324	0	-31.5091	115.61	-698.292	41272.5	-240.186	-2118.99	199.656	843.895	0	0	0	0	0	0	0	603	903	0
669	5	-21.7587	-45.4686	-303.915	-24641	41378.8	-4738.77	336.152	381.078	0	-31.3565	114.389	-695.85	40540.1	3.95477	-1935.88	200.006	844.74	0	0	0	0	0	0	0	603	903	0
669	6	-24.5053	-48.0626	-311.545	-25190.3	41806	-5333.86	334.19	380.856	0	-30.7462	115.305	-691.578	41089.4	-301.221	-2164.77	199.564	843.586	0	0	0	0	0	0	0	603	903	0
669	7	-24.3527	-50.0462	-321.921	-25648	43637.1	-5883.18	335.552	379.672	0	-29.8306	116.373	-688.831	40906.3	-57.0804	-2027.44	199.917	843.615	0	0	0	0	0	0	0	603	903	0
669	8	-26.3364	-52.1825	-328.94	-25648	45224	-6020.51	337.484	377.972	0	-29.0677	116.678	-686.085	40631.7	-240.186	-1935.88	199.65	843.778	0	0	0	0	0	0	0	603	903	0
669	9	-27.2519	-55.3868	-336.874	-26105.8	46322.6	-6249.39	337.507	377.494	0	-29.9832	116.373	-681.507	40631.7	-57.0804	-2118.99	199.916	843.38	0	0	0	0	0	0	0	603	903	0
670	0	-26.4889	-59.2015	-347.25	-25831.2	47482.3	-6936.04	336.738	374.388	0	-29.0677	115.763	-682.423	41181	553.271	-1798.55	200.811	842.655	0	0	0	0	0	0	0	603	903	0
670	1	-24.6579	-63.6266	-356.406	-26838.2	48825.1	-7348.02	336.993	375.302	0	-28.7625	117.441	-676.624	41821.9	187.06	-2027.44	200.276	841.19	0	0	0	0	0	0	0	603	903	0
670	2	-27.7097	-64.8473	-366.782	-27479.1	49801.6	-7485.35	335.78	374.92	0	-25.4056	117.746	-673.878	41181	126.025	-1935.88	200.187	841.89	0	0	0	0	0	0	0	603	903	0
670	3	-28.6252	-66.2205	-376.547	-27204.4	51144.4	-8217.77	335.825	372.247	0	-27.5418	118.509	-671.436	40631.7	-118.116	-1798.55	199.824	842.485	0	0	0	0	0	0	0	603	903	0
670	4	-27.8622	-69.5775	-386.313	-28394.6	52853.4	-8583.98	336.815	373.502	0	-27.9996	117.899	-668.079	40540.1	187.06	-2027.44	200.28	842.318	0	0	0	0	0	0	0	603	903	0
670	5	-28.6252	-71.1034	-392.722	-27845.3	54013.1	-8950.19	337.535	370.903	0	-27.847	118.357	-663.502	40997.9	-57.0804	-1707	199.914	841.21	0	0	0	0	0	0	0	603	903	0
670	6	-27.8622	-73.8499	-399.435	-28577.7	54501.4	-9133.3	336.446	371.545	0	-26.7789	119.272	-658.924	40631.7	248.095	-1935.88	200.377	841.336	0	0	0	0	0	0	0	603	903	0
670	7	-26.7941	-75.5284	-411.032	-28394.6	56393.4	-9499.51	337.2	369.081	0	-25.8633	119.272	-658.314	40814.8	187.06	-1707	200.284	841.001	0	0	0	0	0	0	0	603	903	0
670	8	-25.1157	-76.9017	-417.746	-29035.5	57614.1	-10094.6	337.917	369.505	0	-26.7789	119.73	-653.126	40631.7	370.166	-1981.66	200.567	840.789	0	0	0	0	0	0	0	603	903	0
670	9	-26.4889	-80.106	-428.122	-29676.4	58590.7	-10506.6	336.855	369.318	0	-25.4056	117.899	-651.295	40540.1	370.166	-1569.67	200.568	840.755	0	0	0	0	0	0	0	603	903	0
671	0	-26.4889	-81.7845	-435.141	-30042.6	59811.4	-10186.2	337.453	369.041	0	-25.4056	118.815	-646.107	40997.9	187.06	-1615.45	200.29	839.546	0	0	0	0	0	0	0	603	903	0
671	1	-25.8786	-82.7	-443.686	-30408.8	60910	-10781.3	337.282	368.537	0	-25.4056	120.035	-642.14	40723.2	431.201	-1752.78	200.672	839.582	0	0	0	0	0	0	0	603	903	0
671	2	-26.0312	-84.3785	-449.789	-29767.9	61642.5	-11284.8	337.047	366.182	0	-24.7952	120.34	-640.308	40357	675.342	-1890.11	201.055	839.973	0	0	0	0	0	0	0	603	903	0
671	3	-25.2682	-87.1251	-455.893	-29401.7	63229.4	-11559.5	338.694	364.493	0	-25.253	120.188	-633.9	40357	675.342	-1707	201.065	839.335	0	0	0	0	0	0	0	603	903	0
671	4	-24.0475	-87.7354	-463.522	-29951	64083.9	-11651	338.254	364.616	0	-24.3375	119.883	-629.932	40082.3	309.131	-1295.01	200.491	839.37	0	0	0	0	0	0	0	603	903	0
671	5	-21.4535	-88.4984	-471.457	-31141.2	64999.4	-11971.4	337.869	366.053	0	-23.5745	120.951	-625.965	39807.7	370.166	-1569.67	200.591	839.406	0	0	0	0	0	0	0	603	903	0
671	6	-21.7587	-89.7191	-478.476	-30408.8	65914.9	-12246.1	337.76	363.553	0	-23.2693	121.409	-623.219	39990.8	736.377	-1523.9	201.182	838.832	0	0	0	0	0	0	0	603	903	0
671	7	-22.8268	-90.9398	-483.969	-31232.8	67135.6	-11971.4	338.719	364.535	0	-24.6426	120.34	-618.641	40265.4	248.095	-1249.24	200.401	837.913	0	0	0	0	0	0	0	603	903	0
671	8	-22.2165	-92.7708	-486.411	-31599	67440.8	-12383.4	338.65	364.964	0	-21.5909	120.493	-612.843	39899.2	858.447	-1340.79	201.401	837.895	0	0	0	0	0	0	0	603	903	0
671	9	-21.301	-92.7708	-493.735	-30683.4	68600.5	-12887	338.942	362.146	0	-22.9642	121.103	-609.791	40173.9	797.412	-1523.9	201.308	837.119	0	0	0	0	0	0	0	603	903	0
672	0	-19.1647	-94.6019	-499.533	-30866.6	69393.9	-12887	338.918	361.791	0	-21.4383	119.577	-602.772	39899.2	675.342	-1386.57	201.12	836.807	0	0	0	0	0	0	0	603	903	0
672	1	-19.4699	-95.2122	-502.585	-30775	69699.1	-13070.1	338.681	361.233	0	-20.5228	122.019	-600.941	39441.5	492.236	-1340.79	200.819	837.367	0	0	0	0	0	0	0	603	903	0
672	2	-17.6388	-95.8226	-509.299	-31599	70858.8	-13299	339.13	362.044	0	-21.5909	121.866	-596.363	39716.1	736.377	-1340.79	201.235	836.403	0	0	0	0	0	0	0	603	903	0
672	3	-17.4863	-96.4329	-512.045	-31507.4	71408.1	-13619.4	339.457	361.532	0	-19.1495	120.951	-591.48	39075.3	553.271	-1295.01	200.935	836.937	0	0	0	0	0	0	0	603	903	0
672	4	-18.0966	-97.3485	-516.318	-31049.7	71774.3	-13344.7	339.012	360.137	0	-21.1331	121.866	-586.903	39441.5	614.307	-1523.9	201.047	835.797	0	0	0	0	0	0	0	603	903	0
672	5	-18.2492	-98.4166	-518.454	-30225.7	72445.7	-13939.8	339.734	358.3	0	-19.3021	121.409	-582.935	39258.4	858.447	-1295.01	201.473	835.654	0	0	0	0	0	0	0	603	903	0
672	6	-17.944	-98.7218	-516.928	-30591.9	72750.9	-14306	340.737	359.18	0	-18.8443	121.409	-578.663	38892.2	614.307	-1111.91	201.062	835.79	0	0	0	0	0	0	0	603	903	0
672	7	-15.9604	-100.705	-523.642	-30591.9	73117.1	-14168.7	339.632	358.421	0	-19.9124	120.798	-571.949	38983.7	919.482	-1111.91	201.608	834.841	0	0	0	0	0	0	0	603	903	0
672	8	-15.5026	-101.774	-526.083	-30225.7	73544.3	-14443.4	339.796	357.454	0	-19.3021	122.019	-567.066	38342.8	858.447	-1203.46	201.514	835.384	0	0	0	0	0	0	0	603	903	0
672	9	-14.7397	-102.994	-529.135	-30866.6	73788.5	-14901.1	339.451	358.334	0	-18.0814	121.409	-562.794	39075.3	919.482	-745.698	201.634	833.569	0	0	0	0	0	0	0	603	903	0
673	0	-15.1974	-102.689	-530.356	-30225.7	73910.5	-14992.7	339.36	356.991	0	-15.4874	120.646	-556.08	38251.3	736.377	-928.804	201.324	834.213	0	0	0	0	0	0	0	603	903	0
673	1	-11.9931	-104.215	-530.661	-30317.2	74887.1	-15175.8	341.12	357.131	0	-17.471	118.967	-552.113	37976.6	614.307	-928.804	201.113	834.216	0	0	0	0	0	0	0	603	903	0
673	2	-13.6716	-105.13	-532.187	-29218.6	74704	-15038.5	340.372	354.903	0	-18.0814	120.646	-547.535	37610.4	1041.55	-883.027	201.902	834.31	0	0	0	0	0	0	0	603	903	0
673	3	-11.9931	-106.199	-532.797	-29493.3	75131.2	-15633.5	341.013	355.356	0	-17.9288	120.34	-541.432	38342.8	736.377	-837.251	201.36	832.183	0	0	0	0	0	0	0	603	903	0
673	4	-11.9931	-107.572	-535.239	-29035.5	75253.3	-15450.4	340.598	354.248	0	-15.9451	120.188	-537.159	37152.6	1102.59	-928.804	202.053	833.835	0	0	0	0	0	0	0	603	903	0
673	5	-11.8405	-107.419	-535.849	-29584.8	75436.4	-15725.1	340.779	355.211	0	-15.3348	119.12	-532.887	37427.3	980.517	-974.58	201.84	832.765	0	0	0	0	0	0	0	603	903	0
673	6	-10.925	-108.182	-536.154	-29127	75375.4	-16274.4	340.585	354.326	0	-15.9451	119.12	-526.783	37061.1	1102.59	-837.251	202.093	832.646	0	0	0	0	0	0	0	603	903	0
673	7	-11.6879	-108.793	-537.68	-29035.5	75863.7	-16503.3	341.094	354.001	0	-15.3348	119.73	-520.985	36878	980.517	-745.698	201.882	832.215	0	0	0	0	0	0	0	603	903	0
673	8	-10.162	-108.793	-537.375	-28028.4	75863.7	-16274.4	341.175	352.158	0	-15.64	119.425	-517.017	37244.2	1224.66	-883.027	202.369	830.963	0	0	0	0	0	0	0	603	903	0
673	9	-10.925	-109.861	-534.018	-27479.1	76168.8	-16228.6	342.633	351.457	0	-14.1141	117.594	-513.05	36786.4	1224.66	-791.474	202.387	831.299	0	0	0	0	0	0	0	603	903	0
674	0	-8.63616	-110.471	-537.07	-27296	76168.8	-16823.7	341.823	350.824	0	-13.8089	116.678	-502.674	36878	736.377	-699.922	201.465	829.636	0	0	0	0	0	0	0	603	903	0
674	1	-8.48358	-111.234	-538.901	-27570.7	76168.8	-16778	341.341	351.161	0	-14.7244	115.458	-496.571	36054	1346.73	-471.04	202.712	830.394	0	0	0	0	0	0	0	603	903	0
674	2	-8.48358	-111.539	-535.239	-27479.1	76352	-16915.3	342.65	351.34	0	-13.6563	115	-494.74	35779.4	1285.69	-654.145	202.599	830.68	0	0	0	0	0	0	0	603	903	0
674	3	-8.1784	-112.607	-539.206	-27845.3	76535	-17235.7	341.94	351.641	0	-13.8089	116.526	-487.721	36237.1	1346.73	-516.816	202.761	828.701	0	0	0	0	0	0	0	603	903	0
674	4	-6.80511	-113.218	-537.68	-27296	76290.9	-17373	341.889	350.766	0	-11.9778	115.915	-483.143	36054	1163.62	-608.369	202.408	828.376	0	0	0	0	0	0	0	603	903	0
674	5	-6.19476	-113.218	-537.68	-26838.2	76229.9	-16915.3	341.776	349.915	0	-11.6727	115.305	-474.903	35230.1	1590.87	-654.145	203.35	828.816	0	0	0	0	0	0	0	603	903	0
674	6	-4.21111	-113.523	-536.459	-25373.4	76596.1	-17601.9	342.781	347.298	0	-11.8253	115.305	-470.326	34497.6	1407.76	-425.263	202.993	829.652	0	0	0	0	0	0	0	603	903	0
674	7	-1.00677	-115.049	-537.375	-25739.6	76657.1	-17739.3	342.651	347.899	0	-10.452	115.152	-464.832	34955.4	1285.69	-562.593	202.766	827.8	0	0	0	0	0	0	0	603	903	0
674	8	-1.9223	-115.049	-539.206	-26197.4	76535	-17601.9	341.94	348.585	0	-11.3675	113.474	-459.95	34406.1	1407.76	-516.816	203.061	828.196	0	0	0	0	0	0	0	603	903	0
674	9	-1.00677	-115.354	-537.985	-26197.4	77328.5	-17922.4	343.737	348.695	0	-10.9097	113.016	-452.32	34680.7	1346.73	-562.593	202.977	826.327	0	0	0	0	0	0	0	603	903	0
675	0	0.213934	-115.812	-537.68	-25648	76962.3	-18059.7	343.138	347.701	0	-10.1468	113.169	-446.217	33673.6	1651.9	-379.487	203.702	827.535	0	0	0	0	0	0	0	603	903	0
675	1	0.976874	-115.659	-537.07	-25190.3	76718.2	-18151.2	342.846	346.903	0	-10.1468	113.016	-441.334	33399	1651.9	-287.934	203.743	827.323	0	0	0	0	0	0	0	603	903	0
675	2	3.41828	-115.354	-536.154	-24915.6	76657.1	-18013.9	342.976	346.471	0	-9.68903	111.033	-434.925	33307.4	1835.01	-196.381	204.219	826.418	0	0	0	0	0	0	0	603	903	0
675	3	5.85969	-115.506	-537.07	-24549.4	77267.5	-18242.8	343.869	345.71	0	-7.70538	111.338	-427.296	33215.9	1407.76	-150.605	203.295	825.265	0	0	0	0	0	0	0	603	903	0
675	4	8.45368	-116.727	-539.816	-24091.6	78060.9	-17968.1	344.607	344.629	0	-7.85797	111.185	-420.887	32391.9	1712.94	-333.711	204.07	826.039	0	0	0	0	0	0	0	603	903	0
675	5	8.91144	-117.032	-536.459	-24549.4	77694.7	-18059.7	344.829	345.762	0	-8.31573	110.422	-415.394	32117.2	1773.97	-425.263	204.271	825.682	0	0	0	0	0	0	0	603	903	0
675	6	10.7425	-115.812	-541.647	-23633.9	78060.9	-18059.7	344.118	343.633	0	-6.02692	107.218	-405.018	31751	1712.94	-516.816	204.229	824.606	0	0	0	0	0	0	0	603	903	0
675	7	13.1839	-117.49	-541.037	-24000.1	78244	-18563.2	344.619	344.359	0	-7.09503	106.76	-401.966	31842.6	1651.9	-104.829	204.11	823.783	0	0	0	0	0	0	0	603	903	0
675	8	15.1675	-118.253	-538.901	-23450.8	78732.3	-18563.2	346.098	343.516	0	-6.63727	107.065	-396.168	31567.9	1773.97	-104.829	204.478	823.317	0	0	0	0	0	0	0	603	903	0
675	9	17.1512	-119.931	-543.478	-23450.8	78854.4	-18517.5	345.092	343.149	0	-6.1795	106.76	-388.538	30560.9	1529.83	-13.276	203.937	824.344	0	0	0	0	0	0	0	603	903	0
676	0	18.3719	-119.779	-545.92	-22901.5	79281.6	-19021	345.226	341.95	0	-6.48468	105.997	-383.35	30560.9	1651.9	124.053	204.309	823.28	0	0	0	0	0	0	0	603	903	0
676	1	20.5081	-120.694	-547.446	-22535.3	79281.6	-18654.8	344.821	341.164	0	-5.87433	104.624	-375.111	30011.5	1835.01	124.053	204.892	822.993	0	0	0	0	0	0	0	603	903	0
676	2	20.8133	-120.847	-548.361	-22626.8	79830.9	-18975.2	345.581	341.263	0	-3.7381	103.556	-369.007	29645.3	1529.83	124.053	204.146	822.662	0	0	0	0	0	0	0	603	903	0
676	3	22.7969	-121.763	-547.141	-22809.9	80197.1	-19295.7	346.575	341.689	0	-3.58551	101.114	-360.767	29279.1	1346.73	307.159	203.733	821.842	0	0	0	0	0	0	0	603	903	0
676	4	22.7969	-122.678	-550.497	-22443.7	80746.5	-19570.3	346.679	340.77	0	-4.50104	101.42	-355.274	29096	1773.97	215.606	204.993	821.103	0	0	0	0	0	0	0	603	903	0
676	5	24.1702	-122.983	-551.108	-22077.5	80868.6	-19890.7	346.738	340.06	0	-5.11139	100.504	-349.781	29096	2018.11	169.83	205.77	819.817	0	0	0	0	0	0	0	603	903	0
676	6	26.9168	-124.662	-553.549	-21894.4	80868.6	-19570.3	346.091	339.553	0	-3.43292	97.6048	-343.372	28455.1	1712.94	32.5004	204.989	820.13	0	0	0	0	0	0	0	603	903	0
676	7	26.1539	-125.272	-555.38	-21436.6	81417.8	-19707.6	346.598	338.598	0	-1.29669	96.3841	-336.659	27997.4	1590.87	444.488	204.725	819.838	0	0	0	0	0	0	0	603	903	0
676	8	26.4591	-124.204	-557.516	-22077.5	81478.9	-19570.3	346.146	339.6	0	-0.991516	95.316	-328.724	27356.5	2079.15	261.382	206.325	819.78	0	0	0	0	0	0	0	603	903	0
676	9	26.9168	-124.204	-559.348	-22169	81967.2	-19890.7	346.541	339.634	0	-1.29669	94.2479	-324.146	26898.7	1224.66	398.711	203.778	820.017	0	0	0	0	0	0	0	603	903	0
677	0	27.8323	-126.188	-560.263	-21802.8	82455.5	-19616.1	347.173	338.915	0	-0.991516	91.5013	-316.212	26807.2	1651.9	307.159	205.224	818.224	0	0	0	0	0	0	0	603	903	0
677	1	27.8323	-123.899	-562.399	-20887.3	82943.8	-20028.1	347.482	337.14	0	1.44989	89.3651	-310.719	26532.5	1957.08	536.04	206.299	817.609	0	0	0	0	0	0	0	603	903	0
677	2	29.053	-123.441	-562.704	-20704.2	82882.7	-20073.9	347.293	336.794	0	0.686951	88.9073	-301.563	26441	2018.11	490.264	206.692	815.32	0	0	0	0	0	0	0	603	903	0
677	3	29.2056	-124.357	-566.977	-21070.4	83248.9	-19845	346.829	337.163	0	0.381775	85.703	-297.596	25525.5	1773.97	810.699	205.961	817.228	0	0	0	0	0	0	0	603	903	0
677	4	29.2056	-124.357	-564.536	-20978.9	83676.2	-19753.4	348.221	337.161	0	3.12836	86.0081	-290.882	24884.6	1835.01	673.37	206.308	817.451	0	0	0	0	0	0	0	603	903	0
677	5	29.6634	-124.509	-570.639	-21436.6	83798.2	-19112.5	346.85	337.566	0	1.44989	83.4142	-284.168	24976.1	1896.04	536.04	206.672	815.108	0	0	0	0	0	0	0	603	903	0
677	6	30.7315	-123.746	-570.029	-21436.6	84469.6	-19845	348.185	337.606	0	2.97577	81.7357	-278.065	24426.8	1529.83	764.922	205.502	815.154	0	0	0	0	0	0	0	603	903	0
677	7	30.2737	-123.441	-571.86	-21345.1	84774.8	-19570.3	348.244	337.326	0	3.43353	80.8202	-269.825	24152.2	1896.04	627.593	207.027	813.49	0	0	0	0	0	0	0	603	903	0
677	8	31.0367	-123.441	-575.217	-20246.4	84652.7	-20028.1	347.167	335.198	0	3.8913	78.9891	-265.553	23145.1	1773.97	764.922	206.68	815.842	0	0	0	0	0	0	0	603	903	0
677	9	33.7833	-122.983	-578.574	-20154.9	85690.3	-19936.5	348.106	334.835	0	3.73871	76.3951	-259.144	23145.1	1590.87	764.922	206.139	813.686	0	0	0	0	0	0	0	603	903	0
678	0	33.0203	-122.831	-581.625	-20338	85934.4	-19570.3	347.749	334.968	0	4.50165	74.1063	-252.125	22412.7	1529.83	810.699	206.068	814.105	0	0	0	0	0	0	0	603	903	0
678	1	32.7152	-122.068	-582.541	-20521.1	85934.4	-19478.8	347.517	335.227	0	4.80682	73.1908	-245.716	22504.2	1896.04	764.922	207.716	811.414	0	0	0	0	0	0	0	603	903	0
678	2	33.4781	-122.678	-586.508	-20338	86361.7	-19295.7	347.247	334.676	0	6.02753	71.2071	-240.528	21863.3	1712.94	902.251	207.122	812.103	0	0	0	0	0	0	0	603	903	0
678	3	33.6307	-121.915	-586.813	-19239.4	87033.1	-19753.4	348.315	332.786	0	5.112	69.5287	-234.425	21405.6	1407.76	902.251	206.005	811.689	0	0	0	0	0	0	0	603	903	0
678	4	35.9195	-121.152	-590.781	-20978.9	86727.9	-18975.2	346.802	335.51	0	5.87494	67.0872	-227.1	21405.6	1712.94	764.922	207.543	808.744	0	0	0	0	0	0	0	603	903	0
678	5	36.0721	-121.152	-591.086	-20063.3	87887.6	-19524.5	348.688	333.943	0	7.24823	66.3243	-220.692	20764.7	1346.73	1039.58	206.102	808.911	0	0	0	0	0	0	0	603	903	0
678	6	36.835	-120.389	-596.274	-20154.9	88375.9	-19295.7	348.214	333.801	0	8.16376	64.4933	-213.978	20215.4	1407.76	810.699	206.579	808.526	0	0	0	0	0	0	0	603	903	0
678	7	38.5135	-120.847	-597.495	-20063.3	88436.9	-19295.7	348.013	333.579	0	8.01117	62.0518	-209.095	19116.8	1835.01	1085.36	208.776	811.574	0	0	0	0	0	0	0	603	903	0
678	8	37.2928	-119.931	-600.546	-19514	89169.3	-19066.8	348.48	332.494	0	6.3327	60.2208	-201.771	18750.5	1407.76	1222.69	206.977	810.07	0	0	0	0	0	0	0	603	903	0
678	9	38.3609	-119.779	-601.462	-19971.8	89535.5	-19158.3	348.863	333.205	0	6.79047	59.0001	-195.362	18659	1468.8	1176.91	207.518	807.49	0	0	0	0	0	0	0	603	903	0
679	0	38.2083	-118.711	-602.682	-20429.5	89596.6	-19066.8	348.663	333.898	0	8.16376	54.8802	-191.09	18384.3	1285.69	1039.58	206.728	806.792	0	0	0	0	0	0	0	603	903	0
679	1	39.429	-118.406	-605.429	-20521.1	90145.9	-18792.1	348.896	333.895	0	7.70599	55.1854	-184.986	18201.2	1590.87	1176.91	208.6	804.608	0	0	0	0	0	0	0	603	903	0
679	2	40.9549	-118.253	-611.533	-19880.2	90634.2	-18975.2	348.208	332.509	0	7.24823	53.3543	-178.578	16736.4	1224.66	902.251	206.858	809.279	0	0	0	0	0	0	0	603	903	0
679	3	39.7342	-118.1	-613.669	-19697.1	90695.2	-18883.7	347.792	332.097	0	8.16376	51.3707	-171.253	16553.3	1102.59	1085.36	206.438	806.34	0	0	0	0	0	0	0	603	903	0
679	4	40.8023	-117.643	-615.5	-19422.5	91244.5	-18700.6	348.245	331.556	0	7.24823	50.3026	-166.065	16278.6	1285.69	1131.13	207.742	804.975	0	0	0	0	0	0	0	603	903	0
679	5	40.6497	-116.575	-617.636	-20338	91732.8	-18700.6	348.522	332.929	0	7.70599	48.7767	-161.488	16187.1	919.482	993.804	205.694	802.763	0	0	0	0	0	0	0	603	903	0
679	6	40.8023	-115.506	-619.772	-20063.3	91793.8	-18563.2	348.109	332.372	0	7.85858	46.1827	-157.215	14905.3	858.447	1268.46	205.46	808.192	0	0	0	0	0	0	0	603	903	0
679	7	41.8704	-114.743	-620.688	-20612.6	92526.2	-18242.8	349.071	333.209	0	5.87494	44.6568	-151.722	15271.5	1285.69	1131.13	208.474	802.345	0	0	0	0	0	0	0	603	903	0
679	8	42.1756	-114.591	-624.045	-19971.8	92587.3	-17968.1	348.366	332.004	0	6.3327	43.7413	-145.008	14264.5	1285.69	1085.36	208.866	804.63	0	0	0	0	0	0	0	603	903	0
679	9	42.023	-113.828	-627.707	-19697.1	92648.3	-17601.9	347.598	331.38	0	8.01117	42.368	-141.346	14081.4	736.377	948.028	205.21	803.377	0	0	0	0	0	0	0	603	903	0
680	0	42.6334	-112.76	-625.266	-20246.4	93380.7	-17785	349.346	332.381	0	6.94305	39.4688	-136.158	13715.1	1285.69	902.251	209.443	802.27	0	0	0	0	0	0	0	603	903	0
680	1	42.4808	-111.539	-631.674	-20429.5	93502.8	-17601.9	348.024	332.342	0	8.31635	38.2481	-130.665	12982.7	797.412	1314.24	206.103	803.641	0	0	0	0	0	0	0	603	903	0
680	2	43.0911	-111.387	-632.59	-20429.5	93930.1	-17556.2	348.485	332.295	0	6.94305	37.943	-124.256	12616.5	553.271	948.028	204.453	801.464	0	0	0	0	0	0	0	603	903	0
680	3	42.4808	-109.861	-631.979	-20795.8	94357.3	-17510.4	349.304	332.906	0	5.87494	36.1119	-121.51	12616.5	919.482	993.804	207.567	799.169	0	0	0	0	0	0	0	603	903	0
680	4	42.786	-109.556	-636.252	-20154.9	94662.5	-17189.9	348.781	331.678	0	6.63788	34.2809	-114.796	12158.8	858.447	810.699	207.478	797.084	0	0	0	0	0	0	0	603	903	0
680	5	43.0911	-108.487	-640.219	-20063.3	94967.6	-17098.4	348.336	331.338	0	6.18011	30.4662	-109.303	11151.7	736.377	948.028	206.737	800.974	0	0	0	0	0	0	0	603	903	0
680	6	43.3963	-107.724	-642.05	-19239.4	95211.8	-17281.5	348.293	329.966	0	5.41718	31.3817	-106.556	11060.1	736.377	1085.36	206.911	799.204	0	0	0	0	0	0	0	603	903	0
680	7	43.2437	-107.877	-644.492	-20063.3	95761.1	-16915.3	348.584	331.13	0	6.79047	27.8722	-102.894	10785.5	1163.62	902.251	211.309	798.179	0	0	0	0	0	0	0	603	903	0
680	8	43.0911	-106.351	-645.407	-20246.4	95455.9	-16228.6	347.9	331.37	0	4.80682	28.0247	-100.147	10236.1	675.342	993.804	206.743	800.789	0	0	0	0	0	0	0	603	903	0
680	9	42.9385	-106.199	-645.712	-20704.2	96371.5	-16503.3	349.248	332.064	0	5.87494	25.8885	-95.5697	9869.93	675.342	1222.69	207.066	799.725	0	0	0	0	0	0	0	603	903	0
681	0	43.3963	-104.52	-649.985	-20246.4	96432.5	-16640.6	348.361	331.149	0	6.18011	24.973	-91.9076	10053	858.447	948.028	209.34	793.618	0	0	0	0	0	0	0	603	903	0
681	1	44.0067	-104.825	-653.342	-20429.5	96493.6	-15999.8	347.692	331.269	0	5.56976	24.5152	-87.33	9412.17	919.482	810.699	210.529	795.223	0	0	0	0	0	0	0	603	903	0
681	2	44.3118	-103.757	-655.173	-20154.9	97348	-15954	348.584	330.763	0	4.80682	22.8368	-85.1937	8588.2	614.307	810.699	207.211	802.192	0	0	0	0	0	0	0	603	903	0
681	3	43.0911	-103.605	-657.919	-19971.8	97897.3	-16274.4	348.798	330.356	0	3.8913	21.3109	-81.8368	9045.96	675.342	810.699	208.252	792.464	0	0	0	0	0	0	0	603	903	0
681	4	43.3963	-102.079	-658.224	-19788.7	97470.1	-15175.8	348.08	330.064	0	5.26459	20.0902	-76.0385	8496.64	675.342	764.922	208.882	791.259	0	0	0	0	0	0	0	603	903	0
681	5	42.786	-101.316	-660.056	-19788.7	98324.6	-15496.2	348.964	329.98	0	5.112	19.4798	-72.9867	8038.88	431.201	902.251	205.908	792.858	0	0	0	0	0	0	0	603	903	0
681	6	43.2437	-100.4	-662.497	-20795.8	98873.9	-15542	349.244	331.39	0	5.112	17.8014	-71.1557	7672.67	492.236	810.699	206.918	795.171	0	0	0	0	0	0	0	603	903	0
681	7	42.6334	-99.1795	-666.464	-20429.5	98690.8	-15679.3	348.081	330.654	0	4.04388	16.1229	-68.1039	7123.35	492.236	902.251	207.228	798.405	0	0	0	0	0	0	0	603	903	0
681	8	43.3963	-98.1114	-667.38	-20429.5	99240.1	-15084.2	348.701	330.612	0	3.73871	15.2074	-64.1366	7123.35	492.236	948.028	207.675	791.935	0	0	0	0	0	0	0	603	903	0
681	9	42.4808	-97.5011	-671.042	-20063.3	98873.9	-15175.8	347.344	329.899	0	4.50165	14.2918	-60.7797	6848.7	614.307	1039.58	210.107	790.319	0	0	0	0	0	0	0	603	903	0
682	0	43.2437	-96.8907	-670.432	-19971.8	99911.5	-14534.9	349.026	329.789	0	4.19647	13.2237	-59.559	6482.48	309.131	719.146	205.19	794.159	0	0	0	0	0	0	0	603	903	0
682	1	42.1756	-96.2804	-670.432	-19147.8	100461	-14534.9	349.845	328.56	0	3.73871	11.2401	-55.8969	5933.17	-118.116	948.028	197.887	796.855	0	0	0	0	0	0	0	603	903	0
682	2	43.2437	-95.67	-674.399	-19788.7	99911.5	-14580.7	348.149	329.343	0	2.97577	11.0875	-50.7089	5658.51	431.201	902.251	208.503	791.412	0	0	0	0	0	0	0	603	903	0
682	3	42.6334	-94.2967	-678.976	-20612.6	100583	-14397.6	348.139	330.358	0	2.97577	9.25644	-46.7416	5566.96	675.342	764.922	214.448	783.899	0	0	0	0	0	0	0	603	903	0
682	4	41.7178	-94.4493	-677.145	-20429.5	101010	-14580.7	349.171	330.17	0	4.04388	8.64609	-47.9623	5658.51	492.236	856.475	210.263	785.022	0	0	0	0	0	0	0	603	903	0
682	5	41.5653	-92.7708	-682.333	-20795.8	101132	-14077.2	348.215	330.477	0	3.58612	7.88315	-44.9105	5109.19	187.06	902.251	204.165	789.236	0	0	0	0	0	0	0	603	903	0
682	6	40.9549	-91.7027	-683.554	-20154.9	101071	-13985.6	347.861	329.485	0	3.73871	6.35727	-43.3847	4468.32	431.201	902.251	209.939	800.007	0	0	0	0	0	0	0	603	903	0
682	7	41.4127	-90.6346	-680.807	-20063.3	101804	-14031.4	349.534	329.47	0	4.19647	6.35727	-40.6381	4376.77	553.271	673.37	213.615	795.299	0	0	0	0	0	0	0	603	903	0
682	8	41.5653	-91.245	-686.606	-19605.6	102292	-13665.2	348.982	328.554	0	2.36542	5.59433	-38.5019	3919.01	309.131	856.475	208.029	801.213	0	0	0	0	0	0	0	603	903	0
682	9	41.4127	-91.0924	-690.573	-19697.1	102231	-13482.1	348.038	328.523	0	2.51801	4.52622	-37.2811	4285.22	-57.0804	810.699	198.469	788.057	0	0	0	0	0	0	0	603	903	0
683	0	42.023	-89.5665	-689.352	-20338	102597	-13390.5	348.831	329.503	0	3.43353	3.76328	-34.8397	3827.45	553.271	948.028	215.88	793.141	0	0	0	0	0	0	0	603	903	0
683	1	40.192	-88.1932	-695.151	-19788.7	102902	-13161.6	348.029	328.467	0	2.51801	1.77963	-32.3983	3644.35	-118.116	856.475	196.354	790.514	0	0	0	0	0	0	0	603	903	0
683	2	40.9549	-87.888	-695.761	-20612.6	103146	-12612.3	348.25	329.626	0	2.06024	1.77963	-31.1776	4102.11	492.236	673.37	215.788	771.428	0	0	0	0	0	0	0	603	903	0
683	3	40.3446	-86.8199	-695.761	-19697.1	103390	-13344.7	348.601	328.31	0	3.12836	0.55893	-30.8725	3552.8	431.201	948.028	213.967	787.92	0	0	0	0	0	0	0	603	903	0
683	4	41.5653	-86.5147	-699.118	-19605.6	103818	-13115.8	348.498	328.043	0	3.28094	0.101166	-28.4311	3552.8	248.095	719.146	208.726	778.038	0	0	0	0	0	0	0	603	903	0
683	5	41.4127	-86.057	-703.391	-19788.7	103940	-12703.9	347.77	328.133	0	2.82318	-0.966949	-26.9052	2545.72	126.025	764.922	204.684	808.382	0	0	0	0	0	0	0	603	903	0
683	6	41.1075	-85.7518	-704.916	-19788.7	104428	-12658.1	348.143	328.072	0	3.8913	-1.27212	-25.0741	2911.93	64.9899	581.817	202.592	786.867	0	0	0	0	0	0	0	603	903	0
683	7	40.192	-84.9889	-708.273	-20429.5	104550	-12566.5	347.613	328.844	0	2.21283	-2.03506	-24.4638	3461.24	736.377	673.37	230.101	761.516	0	0	0	0	0	0	0	603	903	0
683	8	41.8704	-82.8526	-706.747	-19697.1	104611	-12383.4	348.018	327.87	0	3.12836	-2.798	-24.7689	2637.27	187.06	902.251	207.552	796.525	0	0	0	0	0	0	0	603	903	0
683	9	40.4971	-82.5474	-709.189	-20154.9	105588	-11605.2	348.885	328.42	0	2.82318	-2.95059	-21.412	2362.61	248.095	719.146	211.587	792.66	0	0	0	0	0	0	0	603	903	0
684	0	40.4971	-81.9371	-709.799	-19605.6	105649	-12383.4	348.843	327.621	0	1.44989	-3.25577	-21.1068	1904.85	492.236	993.804	223.321	812.752	0	0	0	0	0	0	0	603	903	0
684	1	42.1756	-81.9371	-712.851	-20063.3	105466	-12154.5	347.949	328.145	0	0.839539	-4.47647	-19.2758	2728.82	309.131	719.146	216.037	761.433	0	0	0	0	0	0	0	603	903	0
684	2	40.9549	-82.0897	-715.903	-19788.7	105344	-11879.9	347.148	327.642	0	0	0	0	0	0	0	200	903	0	0	0	0	0	0	0	603	903	0
684	3	40.0394	-79.1905	-716.208	-20612.6	106320	-11742.6	348.449	328.78	0	2.97577	-6.46011	-18.6654	1996.4	431.201	764.922	223.102	796.043	0	0	0	0	0	0	0	603	903	0
684	4	39.7342	-78.5802	-718.649	-19971.8	106442	-11742.6	348.114	327.791	0	0	0	0	0	0	0	200	903	0	0	0	0	0	0	0	603	903	0
684	5	39.8868	-78.1224	-718.039	-19880.2	106564	-11605.2	348.41	327.687	0	0	0	0	0	0	0	200	903	0	0	0	0	0	0	0	603	903	0
684	6	41.5653	-76.7491	-719.565	-19788.7	107053	-11101.7	348.774	327.501	0	0	0	0	0	0	0	200	903	0	0	0	0	0	0	0	603	903	0
684	7	39.8868	-76.1388	-721.396	-19514	107053	-11055.9	348.397	327.05	0	0	0	0	0	0	0	200	903	0	0	0	0	0	0	0	603	903	0
684	8	39.8868	-75.8336	-723.837	-19971.8	107175	-11055.9	348.065	327.592	0	0	0	0	0	0	0	200	903	0	0	0	0	0	0	0	603	903	0
684	9	39.1238	-74.9181	-724.448	-20246.4	107419	-10827	348.277	327.947	0	0	0	0	0	0	0	200	903	0	0	0	0	0	0	0	603	903	0
685	0	39.7342	-74.0025	-725.363	-20429.5	107358	-10827	348.006	328.165	0	0	0	0	0	0	0	200	903	0	0	0	0	0	0	0	603	903	0
685	1	39.1238	-72.3241	-725.668	-20154.9	107663	-10643.9	348.364	327.774	0	0	0	0	0	0	0	200	903	0	0	0	0	0	0	0	603	903	0
685	2	38.6661	-72.7818	-726.584	-20154.9	107663	-10506.6	348.177	327.739	0	0	0	0	0	0	0	200	903	0	0	0	0	0	0	0	603	903	0
685	3	39.8868	-71.2559	-727.499	-19788.7	107968	-10048.8	348.41	327.201	0	0	0	0	0	0	0	200	903	0	0	0	0	0	0	0	603	903	0
685	4	39.7342	-71.2559	-730.551	-18964.7	108151	-10140.4	348.041	325.959	0	0	0	0	0	0	0	200	903	0	0	0	0	0	0	0	603	903	0
685	5	39.7342	-70.1878	-731.161	-19697.1	108151	-9591.06	347.917	326.939	0	0	0	0	0	0	0	200	903	0	0	0	0	0	0	0	603	903	0
685	6	38.3609	-68.3568	-730.246	-19971.8	108273	-9911.5	348.27	327.349	0	0	0	0	0	0	0	200	903	0	0	0	0	0	0	0	603	903	0
685	7	39.2764	-67.5938	-730.551	-20429.5	108579	-9819.95	348.626	327.965	0	0	0	0	0	0	0	200	903	0	0	0	0	0	0	0	603	903	0
685	8	37.9031	-66.8309	-731.161	-18506.9	108212	-9911.5	348.001	325.312	0	0	0	0	0	0	0	200	903	0	0	0	0	0	0	0	603	903	0
685	9	38.3609	-65.9154	-730.856	-20154.9	108456	-9728.39	348.396	327.577	0	0	0	0	0	0	0	200	903	0	0	0	0	0	0	0	603	903	0
686	0	38.6661	-64.9998	-732.382	-19697.1	108640	-9407.96	348.337	326.895	0	0	0	0	0	0	0	200	903	0	0	0	0	0	0	0	603	903	0
686	1	38.2083	-64.2369	-734.213	-19056.2	108884	-9407.96	348.3	325.955	0	0	0	0	0	0	0	200	903	0	0	0	0	0	0	0	603	903	0
686	2	38.0557	-64.2369	-733.603	-19147.8	108517	-9316.41	347.924	326.101	0	0	0	0	0	0	0	200	903	0	0	0	0	0	0	0	603	903	0
686	3	36.9876	-64.8473	-732.993	-19239.4	108884	-9270.63	348.547	326.248	0	0	0	0	0	0	0	200	903	0	0	0	0	0	0	0	603	903	0
686	4	36.2247	-62.711	-731.772	-19788.7	108762	-8858.64	348.628	327.042	0	0	0	0	0	0	0	200	903	0	0	0	0	0	0	0	603	903	0
686	5	36.3773	-61.1851	-731.161	-19330.9	108273	-8858.64	348.084	326.439	0	0	0	0	0	0	0	200	903	0	0	0	0	0	0	0	603	903	0
686	6	37.598	-60.88	-729.941	-19514	108517	-8629.76	348.666	326.734	0	0	0	0	0	0	0	200	903	0	0	0	0	0	0	0	603	903	0
686	7	37.2928	-60.4222	-731.772	-19605.6	108029	-8675.54	347.627	326.792	0	0	0	0	0	0	0	200	903	0	0	0	0	0	0	0	603	903	0
686	8	36.835	-59.2015	-732.382	-18873.1	108334	-8583.98	347.921	325.77	0	0	0	0	0	0	0	200	903	0	0	0	0	0	0	0	603	903	0
686	9	36.6824	-59.6593	-729.636	-18781.6	108579	-8309.33	348.812	325.741	0	0	0	0	0	0	0	200	903	0	0	0	0	0	0	0	603	903	0
687	0	35.9195	-60.2696	-731.772	-18232.3	107602	-8583.98	347.043	324.915	0	0	0	0	0	0	0	200	903	0	0	0	0	0	0	0	603	903	0
687	1	36.6824	-58.286	-729.636	-19239.4	108334	-8034.67	348.477	326.368	0	0	0	0	0	0	0	200	903	0	0	0	0	0	0	0	603	903	0
687	2	35.3092	-57.3704	-729.33	-18323.8	108090	-8446.65	348.205	325.124	0	0	0	0	0	0	0	200	903	0	0	0	0	0	0	0	603	903	0
687	3	35.9195	-57.3704	-727.805	-19056.2	108334	-8400.88	348.851	326.183	0	0	0	0	0	0	0	200	903	0	0	0	0	0	0	0	603	903	0
687	4	35.9195	-56.6075	-727.499	-18232.3	107419	-8034.67	347.655	325.062	0	0	0	0	0	0	0	200	903	0	0	0	0	0	0	0	603	903	0
687	5	35.3092	-56.9127	-728.11	-17957.6	107724	-8126.22	347.95	324.663	0	0	0	0	0	0	0	200	903	0	0	0	0	0	0	0	603	903	0
687	6	36.6824	-56.6075	-726.279	-18232.3	107785	-8217.77	348.407	325.104	0	0	0	0	0	0	0	200	903	0	0	0	0	0	0	0	603	903	0
687	7	34.6988	-55.5394	-727.194	-17866.1	107785	-8217.77	348.22	324.569	0	0	0	0	0	0	0	200	903	0	0	0	0	0	0	0	603	903	0
687	8	36.0721	-55.5394	-724.753	-18323.8	107663	-7714.23	348.551	325.283	0	0	0	0	0	0	0	200	903	0	0	0	0	0	0	0	603	903	0
687	9	34.6988	-54.7765	-724.448	-17957.6	107358	-7897.34	348.193	324.788	0	0	0	0	0	0	0	200	903	0	0	0	0	0	0	0	603	903	0
688	0	35.004	-54.3187	-723.837	-18232.3	107297	-7439.58	348.233	325.188	0	0	0	0	0	0	0	200	903	0	0	0	0	0	0	0	603	903	0
688	1	34.5462	-53.4032	-722.006	-17225.2	106870	-7576.91	348.017	323.857	0	0	0	0	0	0	0	200	903	0	0	0	0	0	0	0	603	903	0
688	2	35.1566	-53.2506	-722.311	-16584.3	106870	-7393.8	347.955	322.96	0	0	0	0	0	0	0	200	903	0	0	0	0	0	0	0	603	903	0
688	3	34.6988	-53.098	-719.565	-17042.1	106747	-7302.25	348.35	323.684	0	0	0	0	0	0	0	200	903	0	0	0	0	0	0	0	603	903	0
688	4	33.9359	-52.0299	-720.48	-17499.9	106870	-7348.02	348.331	324.289	0	0	0	0	0	0	0	200	903	0	0	0	0	0	0	0	603	903	0
688	5	35.004	-51.1143	-718.039	-16675.9	106808	-7210.69	348.75	323.224	0	0	0	0	0	0	0	200	903	0	0	0	0	0	0	0	603	903	0
688	6	33.9359	-50.3514	-716.513	-16675.9	106442	-7164.92	348.556	323.274	0	0	0	0	0	0	0	200	903	0	0	0	0	0	0	0	603	903	0
688	7	34.5462	-49.2833	-715.903	-15760.3	106442	-7302.25	348.683	322.015	0	0	0	0	0	0	0	200	903	0	0	0	0	0	0	0	603	903	0
688	8	34.8514	-49.1307	-713.766	-16309.7	105954	-7302.25	348.444	322.85	0	0	0	0	0	0	0	200	903	0	0	0	0	0	0	0	603	903	0
688	9	34.0884	-48.8255	-713.461	-16492.8	106076	-7027.59	348.678	323.117	0	0	0	0	0	0	0	200	903	0	0	0	0	0	0	0	603	903	0
689	0	34.5462	-49.7411	-707.358	-16035	105588	-6798.71	349.271	322.669	0	0	0	0	0	0	0	200	903	0	0	0	0	0	0	0	603	903	0
689	1	34.0884	-47.6048	-711.325	-16126.6	105649	-7027.59	348.524	322.671	0	0	0	0	0	0	0	200	903	0	0	0	0	0	0	0	603	903	0
689	2	33.7833	-46.3841	-708.884	-15211	105405	-6890.26	348.691	321.458	0	0	0	0	0	0	0	200	903	0	0	0	0	0	0	0	603	903	0
689	3	33.9359	-45.6212	-707.663	-15668.8	105405	-6707.15	348.948	322.142	0	0	0	0	0	0	0	200	903	0	0	0	0	0	0	0	603	903	0
689	4	34.6988	-45.316	-707.358	-15211	105527	-6524.05	349.184	321.504	0	0	0	0	0	0	0	200	903	0	0	0	0	0	0	0	603	903	0
689	5	36.2247	-46.5367	-710.715	-14753.3	105038	-6661.38	347.793	320.758	0	0	0	0	0	0	0	200	903	0	0	0	0	0	0	0	603	903	0
689	6	34.8514	-44.8582	-705.527	-15027.9	104855	-6615.6	348.62	321.3	0	0	0	0	0	0	0	200	903	0	0	0	0	0	0	0	603	903	0
689	7	33.9359	-44.0953	-703.391	-14753.3	104855	-6295.17	349.071	320.974	0	0	0	0	0	0	0	200	903	0	0	0	0	0	0	0	603	903	0
689	8	34.241	-43.0272	-702.17	-15119.5	104550	-6661.38	348.896	321.533	0	0	0	0	0	0	0	200	903	0	0	0	0	0	0	0	603	903	0
689	9	34.5462	-42.1117	-699.118	-15027.9	104245	-6112.06	349.109	321.496	0	0	0	0	0	0	0	200	903	0	0	0	0	0	0	0	603	903	0
690	0	35.1566	-41.3487	-697.592	-14844.8	104184	-6157.84	349.348	321.28	0	0	0	0	0	0	0	200	903	0	0	0	0	0	0	0	603	903	0
690	1	35.4617	-41.0435	-696.677	-14112.4	104062	-5974.73	349.369	320.257	0	0	0	0	0	0	0	200	903	0	0	0	0	0	0	0	603	903	0
690	2	35.004	-41.1961	-695.761	-13654.6	103696	-6157.84	349.039	319.625	0	0	0	0	0	0	0	200	903	0	0	0	0	0	0	0	603	903	0
690	3	35.004	-42.2642	-695.456	-13471.5	103635	-6157.84	349.017	319.371	0	0	0	0	0	0	0	200	903	0	0	0	0	0	0	0	603	903	0
690	4	34.3936	-39.9754	-692.709	-13929.3	103635	-5791.63	349.608	320.108	0	0	0	0	0	0	0	200	903	0	0	0	0	0	0	0	603	903	0
690	5	35.004	-38.7547	-690.268	-13563.1	102658	-5974.73	348.722	319.649	0	0	0	0	0	0	0	200	903	0	0	0	0	0	0	0	603	903	0
690	6	34.3936	-40.128	-688.437	-13654.6	103085	-5928.96	349.738	319.834	0	0	0	0	0	0	0	200	903	0	0	0	0	0	0	0	603	903	0
690	7	33.4781	-37.9918	-686.301	-12556	102658	-5791.63	349.582	318.295	0	0	0	0	0	0	0	200	903	0	0	0	0	0	0	0	603	903	0
690	8	34.6988	-37.2288	-684.164	-12739.1	101804	-5745.85	348.8	318.62	0	0	0	0	0	0	0	200	903	0	0	0	0	0	0	0	603	903	0
690	9	34.241	-37.534	-684.775	-12281.3	102353	-5700.07	349.47	317.935	0	0	0	0	0	0	0	200	903	0	0	0	0	0	0	0	603	903	0
691	0	33.7833	-38.4496	-681.723	-12189.8	102292	-5516.97	350.049	317.881	0	0	0	0	0	0	0	200	903	0	0	0	0	0	0	0	603	903	0
691	1	33.6307	-37.2288	-682.028	-12281.3	101559	-4921.87	348.908	318.007	0	0	0	0	0	0	0	200	903	0	0	0	0	0	0	0	603	903	0
691	2	34.241	-36.0081	-676.84	-11915.1	101254	-5608.52	349.599	317.604	0	0	0	0	0	0	0	200	903	0	0	0	0	0	0	0	603	903	0
691	3	32.7152	-35.703	-676.23	-12006.7	100949	-5425.42	349.282	317.755	0	0	0	0	0	0	0	200	903	0	0	0	0	0	0	0	603	903	0
691	4	33.1729	-34.6349	-672.873	-11732	100827	-5242.31	349.846	317.436	0	0	0	0	0	0	0	200	903	0	0	0	0	0	0	0	603	903	0
691	5	33.4781	-34.4823	-672.263	-11091.2	100461	-5104.98	349.437	316.498	0	0	0	0	0	0	0	200	903	0	0	0	0	0	0	0	603	903	0
691	6	33.1729	-34.1771	-671.347	-11182.7	100522	-5333.86	349.732	316.657	0	0	0	0	0	0	0	200	903	0	0	0	0	0	0	0	603	903	0
691	7	34.0884	-34.1771	-667.99	-10816.5	100034	-4876.1	349.753	316.193	0	0	0	0	0	0	0	200	903	0	0	0	0	0	0	0	603	903	0
691	8	32.2574	-33.4142	-667.99	-10358.7	99789.5	-4876.1	349.388	315.507	0	0	0	0	0	0	0	200	903	0	0	0	0	0	0	0	603	903	0
691	9	32.1048	-31.7357	-664.328	-10175.6	99606.3	-4921.87	349.935	315.317	0	0	0	0	0	0	0	200	903	0	0	0	0	0	0	0	603	903	0
692	0	32.2574	-31.7357	-662.497	-10450.3	99240.1	-4601.44	349.797	315.774	0	0	0	0	0	0	0	200	903	0	0	0	0	0	0	0	603	903	0
692	1	32.1048	-31.1253	-659.75	-10541.8	99057	-4601.44	350.143	315.979	0	0	0	0	0	0	0	200	903	0	0	0	0	0	0	0	603	903	0
692	2	32.1048	-31.1253	-659.14	-9717.87	99057	-4235.23	350.282	314.743	0	0	0	0	0	0	0	200	903	0	0	0	0	0	0	0	603	903	0
692	3	32.2574	-30.8202	-658.224	-9351.65	98629.8	-4784.55	349.842	314.207	0	0	0	0	0	0	0	200	903	0	0	0	0	0	0	0	603	903	0
692	4	31.0367	-30.8202	-657.614	-9077	98507.7	-4418.33	349.796	313.803	0	0	0	0	0	0	0	200	903	0	0	0	0	0	0	0	603	903	0
692	5	30.8841	-29.9046	-655.783	-8893.89	98385.6	-4509.89	350.028	313.562	0	0	0	0	0	0	0	200	903	0	0	0	0	0	0	0	603	903	0
692	6	31.647	-28.9891	-652.121	-8893.89	98629.8	-4418.33	351.245	313.638	0	0	0	0	0	0	0	200	903	0	0	0	0	0	0	0	603	903	0
692	7	30.7315	-28.6839	-650.9	-8802.34	97531.1	-4509.89	349.84	313.523	0	0	0	0	0	0	0	200	903	0	0	0	0	0	0	0	603	903	0
692	8	30.7315	-27.7684	-648.459	-8253.02	98202.5	-4509.89	351.44	312.727	0	0	0	0	0	0	0	200	903	0	0	0	0	0	0	0	603	903	0
692	9	32.1048	-28.5313	-649.68	-7886.81	97531.1	-3777.47	350.122	312.14	0	0	0	0	0	0	0	200	903	0	0	0	0	0	0	0	603	903	0
693	0	30.4263	-28.2262	-647.849	-8344.57	97348	-4418.33	350.264	312.88	0	0	0	0	0	0	0	200	903	0	0	0	0	0	0	0	603	903	0
693	1	29.6634	-27.4632	-645.712	-8161.47	97287	-3731.69	350.666	312.639	0	0	0	0	0	0	0	200	903	0	0	0	0	0	0	0	603	903	0
693	2	29.6634	-26.2425	-645.102	-7886.81	96981.8	-4097.9	350.336	312.226	0	0	0	0	0	0	0	200	903	0	0	0	0	0	0	0	603	903	0
693	3	30.5789	-25.9373	-642.05	-7520.6	96798.7	-3731.69	350.765	311.713	0	0	0	0	0	0	0	200	903	0	0	0	0	0	0	0	603	903	0
693	4	29.053	-25.7848	-639.609	-7154.39	96676.6	-3823.24	351.15	311.186	0	0	0	0	0	0	0	200	903	0	0	0	0	0	0	0	603	903	0
693	5	30.4263	-25.9373	-638.998	-6788.18	96310.4	-3823.24	350.721	310.623	0	0	0	0	0	0	0	200	903	0	0	0	0	0	0	0	603	903	0
693	6	30.1212	-25.0218	-639.609	-6696.62	96310.4	-3685.91	350.577	310.47	0	0	0	0	0	0	0	200	903	0	0	0	0	0	0	0	603	903	0
693	7	29.6634	-24.1063	-638.693	-7154.39	96188.4	-3548.58	350.602	311.202	0	0	0	0	0	0	0	200	903	0	0	0	0	0	0	0	603	903	0
693	8	29.2056	-24.1063	-638.083	-6696.62	96432.5	-3365.48	351.128	310.495	0	0	0	0	0	0	0	200	903	0	0	0	0	0	0	0	603	903	0
693	9	29.6634	-22.8856	-634.421	-6147.31	96005.3	-3594.36	351.327	309.69	0	0	0	0	0	0	0	200	903	0	0	0	0	0	0	0	603	903	0
694	0	29.053	-22.733	-635.031	-6055.75	96188.4	-3182.37	351.47	309.536	0	0	0	0	0	0	0	200	903	0	0	0	0	0	0	0	603	903	0
694	1	29.053	-22.8856	-632.285	-5323.33	95944.2	-3548.58	351.742	308.419	0	0	0	0	0	0	0	200	903	0	0	0	0	0	0	0	603	903	0
694	2	29.816	-22.733	-632.285	-5689.54	96127.3	-3548.58	352.032	308.998	0	0	0	0	0	0	0	200	903	0	0	0	0	0	0	0	603	903	0
694	3	29.2056	-22.5804	-633.505	-5781.1	95761.1	-3365.48	351.161	309.126	0	0	0	0	0	0	0	200	903	0	0	0	0	0	0	0	603	903	0
694	4	29.053	-21.8175	-629.538	-5781.1	95761.1	-3365.48	352.113	309.183	0	0	0	0	0	0	0	200	903	0	0	0	0	0	0	0	603	903	0
694	5	28.5953	-21.0545	-632.285	-5323.33	95517	-3136.6	351.066	308.419	0	0	0	0	0	0	0	200	903	0	0	0	0	0	0	0	603	903	0
694	6	29.3582	-20.5968	-627.707	-5597.99	95150.8	-3457.03	351.585	308.918	0	0	0	0	0	0	0	200	903	0	0	0	0	0	0	0	603	903	0
694	7	28.2901	-20.139	-628.317	-4590.91	95639.1	-3228.15	352.215	307.307	0	0	0	0	0	0	0	200	903	0	0	0	0	0	0	0	603	903	0
694	8	28.2901	-20.5968	-627.402	-4682.46	95761.1	-3365.48	352.631	307.463	0	0	0	0	0	0	0	200	903	0	0	0	0	0	0	0	603	903	0
694	9	29.3582	-21.8175	-626.791	-4316.25	95211.8	-3045.04	351.904	306.886	0	0	0	0	0	0	0	200	903	0	0	0	0	0	0	0	603	903	0
695	0	28.9005	-19.6812	-628.317	-4590.91	95333.9	-2953.49	351.729	307.307	0	0	0	0	0	0	0	200	903	0	0	0	0	0	0	0	603	903	0
695	1	28.4427	-18.4605	-622.214	-3950.04	95517	-2907.72	353.512	306.348	0	0	0	0	0	0	0	200	903	0	0	0	0	0	0	0	603	903	0
695	2	27.6798	-20.2916	-626.486	-4499.36	95028.7	-2953.49	351.685	307.182	0	0	0	0	0	0	0	200	903	0	0	0	0	0	0	0	603	903	0
695	3	28.9005	-17.8502	-623.74	-3675.38	95150.8	-2999.27	352.549	305.892	0	0	0	0	0	0	0	200	903	0	0	0	0	0	0	0	603	903	0
695	4	28.5953	-18.9183	-624.655	-3126.07	94906.6	-2312.62	351.934	305.004	0	0	0	0	0	0	0	200	903	0	0	0	0	0	0	0	603	903	0
695	5	28.7479	-18.0028	-622.214	-3583.83	94967.6	-2816.16	352.629	305.76	0	0	0	0	0	0	0	200	903	0	0	0	0	0	0	0	603	903	0
695	6	28.9005	-17.3924	-622.214	-3858.49	94845.6	-2953.49	352.432	306.201	0	0	0	0	0	0	0	200	903	0	0	0	0	0	0	0	603	903	0
695	7	28.5953	-16.3243	-624.35	-2027.43	95150.8	-2724.61	352.4	303.247	0	0	0	0	0	0	0	200	903	0	0	0	0	0	0	0	603	903	0
695	8	29.816	-16.3243	-620.078	-3217.62	95089.7	-2541.5	353.351	305.189	0	0	0	0	0	0	0	200	903	0	0	0	0	0	0	0	603	903	0
695	9	28.1375	-15.714	-622.824	-2485.2	94967.6	-2724.61	352.479	303.99	0	0	0	0	0	0	0	200	903	0	0	0	0	0	0	0	603	903	0
696	0	28.2901	-16.4769	-620.688	-1935.88	95333.9	-2633.06	353.594	303.119	0	0	0	0	0	0	0	200	903	0	0	0	0	0	0	0	603	903	0
696	1	28.5953	-16.9347	-619.467	-2485.2	94967.6	-2358.4	353.305	304.012	0	0	0	0	0	0	0	200	903	0	0	0	0	0	0	0	603	903	0
696	2	28.4427	-16.1717	-619.772	-2393.64	94967.6	-2724.61	353.23	303.862	0	0	0	0	0	0	0	200	903	0	0	0	0	0	0	0	603	903	0
696	3	29.3582	-14.6458	-620.993	-1661.22	95028.7	-2633.06	353.027	302.675	0	0	0	0	0	0	0	200	903	0	0	0	0	0	0	0	603	903	0
696	4	28.4427	-14.6458	-620.688	-2118.99	95089.7	-2633.06	353.201	303.414	0	0	0	0	0	0	0	200	903	0	0	0	0	0	0	0	603	903	0
696	5	29.5108	-14.6458	-619.467	-1295.01	94845.6	-2495.73	353.108	302.091	0	0	0	0	0	0	0	200	903	0	0	0	0	0	0	0	603	903	0
696	6	30.5789	-14.7984	-619.467	-562.589	94845.6	-2266.85	353.108	300.908	0	0	0	0	0	0	0	200	903	0	0	0	0	0	0	0	603	903	0
696	7	29.2056	-14.3407	-618.552	-1111.91	94967.6	-2037.96	353.532	301.798	0	0	0	0	0	0	0	200	903	0	0	0	0	0	0	0	603	903	0
696	8	30.2737	-14.3407	-619.162	-1386.56	94784.6	-2404.17	353.085	302.239	0	0	0	0	0	0	0	200	903	0	0	0	0	0	0	0	603	903	0
696	9	29.6634	-12.9674	-616.721	-287.931	94906.6	-2221.07	353.889	300.467	0	0	0	0	0	0	0	200	903	0	0	0	0	0	0	0	603	903	0
697	0	30.7315	-13.12	-619.772	-1203.46	95272.9	-2312.62	353.722	301.942	0	0	0	0	0	0	0	200	903	0	0	0	0	0	0	0	603	903	0
697	1	30.2737	-12.9674	-617.636	-287.931	95455.9	-2175.29	354.55	300.466	0	0	0	0	0	0	0	200	903	0	0	0	0	0	0	0	603	903	0
697	2	29.9686	-12.9674	-618.552	-379.484	95150.8	-1854.86	353.828	300.614	0	0	0	0	0	0	0	200	903	0	0	0	0	0	0	0	603	903	0
697	3	32.1048	-12.357	-618.246	444.491	95272.9	-2358.4	354.102	299.281	0	0	0	0	0	0	0	200	903	0	0	0	0	0	0	0	603	903	0
697	4	30.5789	-12.5096	-617.941	169.833	95578	-2358.4	354.672	299.725	0	0	0	0	0	0	0	200	903	0	0	0	0	0	0	0	603	903	0
697	5	30.8841	-11.4415	-618.552	1543.12	95089.7	-2129.52	353.73	297.505	0	0	0	0	0	0	0	200	903	0	0	0	0	0	0	0	603	903	0
697	6	31.1893	-11.5941	-617.026	536.044	95639.1	-2083.74	355	299.131	0	0	0	0	0	0	0	200	903	0	0	0	0	0	0	0	603	903	0
697	7	31.647	-11.8993	-619.467	1176.91	95517	-1946.41	354.192	298.1	0	0	0	0	0	0	0	200	903	0	0	0	0	0	0	0	603	903	0
697	8	32.8677	-12.2044	-618.552	1634.68	95394.9	-2083.74	354.223	297.357	0	0	0	0	0	0	0	200	903	0	0	0	0	0	0	0	603	903	0
697	9	31.4945	-11.8993	-620.078	993.807	95700.1	-1946.41	354.336	298.397	0	0	0	0	0	0	0	200	903	0	0	0	0	0	0	0	603	903	0
698	0	31.4945	-11.4415	-617.941	993.807	95700.1	-1946.41	354.869	298.392	0	0	0	0	0	0	0	200	903	0	0	0	0	0	0	0	603	903	0
698	1	32.5626	-11.1363	-618.552	1451.57	95578	-1992.19	354.519	297.653	0	0	0	0	0	0	0	200	903	0	0	0	0	0	0	0	603	903	0
698	2	32.8677	-10.6786	-619.467	1543.12	95944.2	-1854.86	354.882	297.509	0	0	0	0	0	0	0	200	903	0	0	0	0	0	0	0	603	903	0
698	3	34.5462	-11.5941	-618.857	2092.44	96371.5	-1900.63	355.725	296.619	0	0	0	0	0	0	0	200	903	0	0	0	0	0	0	0	603	903	0
698	4	33.0203	-10.8311	-620.078	2550.2	95883.2	-1717.53	354.631	295.887	0	0	0	0	0	0	0	200	903	0	0	0	0	0	0	0	603	903	0
698	5	32.5626	-10.8311	-620.383	3740.39	96005.3	-1442.87	354.752	293.971	0	0	0	0	0	0	0	200	903	0	0	0	0	0	0	0	603	903	0
698	6	32.5626	-10.3734	-620.078	2733.31	96432.5	-1488.65	355.517	295.592	0	0	0	0	0	0	0	200	903	0	0	0	0	0	0	0	603	903	0
698	7	34.241	-10.3734	-620.383	2916.42	96310.4	-1946.41	355.244	295.299	0	0	0	0	0	0	0	200	903	0	0	0	0	0	0	0	603	903	0
698	8	33.0203	-11.4415	-619.467	2367.1	96493.6	-1717.53	355.769	296.179	0	0	0	0	0	0	0	200	903	0	0	0	0	0	0	0	603	903	0
698	9	33.9359	-9.30526	-619.772	3374.18	96249.4	-1809.08	355.298	294.556	0	0	0	0	0	0	0	200	903	0	0	0	0	0	0	0	603	903	0
699	0	34.5462	-8.54232	-618.552	4289.71	96432.5	-1809.08	355.9	293.065	0	0	0	0	0	0	0	200	903	0	0	0	0	0	0	0	603	903	0
699	1	34.3936	-9.00009	-621.298	4106.6	96676.6	-1717.53	355.604	293.39	0	0	0	0	0	0	0	200	903	0	0	0	0	0	0	0	603	903	0
699	2	34.3936	-9.45785	-617.941	4472.81	97226	-1717.53	357.339	292.762	0	0	0	0	0	0	0	200	903	0	0	0	0	0	0	0	603	903	0
699	3	34.241	-9.76303	-622.519	4198.15	96920.8	-1580.2	355.691	293.256	0	0	0	0	0	0	0	200	903	0	0	0	0	0	0	0	603	903	0
699	4	34.8514	-9.15267	-621.909	4564.36	96981.8	-1442.87	355.942	292.661	0	0	0	0	0	0	0	200	903	0	0	0	0	0	0	0	603	903	0
699	5	34.3936	-7.6268	-620.688	4381.26	97470.1	-1397.09	357.036	292.941	0	0	0	0	0	0	0	200	903	0	0	0	0	0	0	0	603	903	0
699	6	35.004	-7.6268	-622.214	4655.92	97042.8	-1488.65	355.964	292.517	0	0	0	0	0	0	0	200	903	0	0	0	0	0	0	0	603	903	0
699	7	35.6143	-7.16903	-622.519	5296.79	97287	-1534.42	356.28	291.491	0	0	0	0	0	0	0	200	903	0	0	0	0	0	0	0	603	903	0
699	8	35.1566	-7.6268	-624.655	5846.1	97409.1	-939.331	355.941	290.641	0	0	0	0	0	0	0	200	903	0	0	0	0	0	0	0	603	903	0
699	9	35.3092	-7.77938	-625.266	5846.1	97958.4	-1397.09	356.667	290.65	0	0	0	0	0	0	0	200	903	0	0	0	0	0	0	0	603	903	0
700	0	35.6143	-7.01644	-626.181	5663	97714.3	-1076.66	356.048	290.956	0	0	0	0	0	0	0	200	903	0	0	0	0	0	0	0	603	903	0
700	1	35.1566	-6.55868	-624.655	6395.42	97958.4	-1122.44	356.82	289.762	0	0	0	0	0	0	0	200	903	0	0	0	0	0	0	0	603	903	0
700	2	36.3773	-5.94833	-626.181	6212.31	98080.5	-1030.88	356.633	290.079	0	0	0	0	0	0	0	200	903	0	0	0	0	0	0	0	603	903	0
700	3	36.3773	-6.25351	-626.486	6303.87	98080.5	-1259.77	356.556	289.938	0	0	0	0	0	0	0	200	903	0	0	0	0	0	0	0	603	903	0
700	4	35.4617	-5.49057	-627.707	6578.52	98385.6	-1076.66	356.738	289.52	0	0	0	0	0	0	0	200	903	0	0	0	0	0	0	0	603	903	0
700	5	36.2247	-6.25351	-626.486	6944.73	98324.6	-756.225	356.946	288.915	0	0	0	0	0	0	0	200	903	0	0	0	0	0	0	0	603	903	0
700	6	35.4617	-7.16903	-629.233	7494.05	98019.4	-1076.66	355.776	288.09	0	0	0	0	0	0	0	200	903	0	0	0	0	0	0	0	603	903	0
700	7	36.3773	-5.18539	-628.317	7036.29	98812.9	-710.449	357.266	288.801	0	0	0	0	0	0	0	200	903	0	0	0	0	0	0	0	603	903	0
700	8	35.6143	-3.96469	-629.538	8134.92	98996	-893.554	357.252	287.078	0	0	0	0	0	0	0	200	903	0	0	0	0	0	0	0	603	903	0
700	9	36.5299	-4.42245	-628.928	7585.6	98751.8	-664.672	357.016	287.939	0	0	0	0	0	0	0	200	903	0	0	0	0	0	0	0	603	903	0
701	0	36.6824	-3.96469	-631.369	8592.68	99179.1	-802.001	357.086	286.39	0	0	0	0	0	0	0	200	903	0	0	0	0	0	0	0	603	903	0
701	1	36.2247	-4.26986	-632.285	8592.68	99362.2	-756.225	357.148	286.41	0	0	0	0	0	0	0	200	903	0	0	0	0	0	0	0	603	903	0
701	2	34.241	-3.8121	-633.505	8409.58	99057	-573.12	356.363	286.725	0	0	0	0	0	0	0	200	903	0	0	0	0	0	0	0	603	903	0
701	3	36.2247	-3.50692	-629.233	9599.76	99240.1	-481.567	357.716	284.744	0	0	0	0	0	0	0	200	903	0	0	0	0	0	0	0	603	903	0
701	4	34.6988	-3.20175	-633.2	8501.13	99545.3	-527.343	357.21	286.574	0	0	0	0	0	0	0	200	903	0	0	0	0	0	0	0	603	903	0
701	5	35.6143	-2.43881	-634.116	8867.34	99850.5	-481.567	357.464	286.016	0	0	0	0	0	0	0	200	903	0	0	0	0	0	0	0	603	903	0
701	6	36.5299	-4.57504	-637.778	9325.11	99972.5	-115.356	356.751	285.379	0	0	0	0	0	0	0	200	903	0	0	0	0	0	0	0	603	903	0
701	7	35.004	-1.82846	-636.862	10057.5	100095	-298.461	357.168	284.208	0	0	0	0	0	0	0	200	903	0	0	0	0	0	0	0	603	903	0
701	8	34.6988	-1.98104	-637.473	10423.7	100400	-298.461	357.497	283.648	0	0	0	0	0	0	0	200	903	0	0	0	0	0	0	0	603	903	0
701	9	33.9359	-1.67587	-638.998	10057.5	100156	-298.461	356.739	284.26	0	0	0	0	0	0	0	200	903	0	0	0	0	0	0	0	603	903	0
702	0	33.9359	-1.52328	-637.778	9782.87	100766	296.631	357.996	284.661	0	0	0	0	0	0	0	200	903	0	0	0	0	0	0	0	603	903	0
702	1	35.004	-1.06552	-638.388	10423.7	100522	-206.909	357.462	283.672	0	0	0	0	0	0	0	200	903	0	0	0	0	0	0	0	603	903	0
702	2	34.8514	-0.455165	-638.388	10881.5	100217	-115.356	356.984	282.955	0	0	0	0	0	0	0	200	903	0	0	0	0	0	0	0	603	903	0
702	3	34.5462	0.155186	-640.829	11613.9	101132	159.302	357.815	281.877	0	0	0	0	0	0	0	200	903	0	0	0	0	0	0	0	603	903	0
702	4	33.1729	0.307774	-641.135	12071.7	101315	250.855	358.025	281.171	0	0	0	0	0	0	0	200	903	0	0	0	0	0	0	0	603	903	0
702	5	34.0884	0.00259839	-642.355	11522.4	101254	250.855	357.63	282.062	0	0	0	0	0	0	0	200	903	0	0	0	0	0	0	0	603	903	0
702	6	33.7833	0.307774	-643.271	11888.6	101254	342.408	357.405	281.519	0	0	0	0	0	0	0	200	903	0	0	0	0	0	0	0	603	903	0
702	7	33.4781	1.37589	-642.661	11522.4	101621	479.737	358.125	282.071	0	0	0	0	0	0	0	200	903	0	0	0	0	0	0	0	603	903	0
702	8	33.3255	1.68107	-642.966	11888.6	101437	433.961	357.765	281.51	0	0	0	0	0	0	0	200	903	0	0	0	0	0	0	0	603	903	0
702	9	35.004	1.52848	-643.881	11888.6	101682	433.961	357.92	281.536	0	0	0	0	0	0	0	200	903	0	0	0	0	0	0	0	603	903	0
703	0	33.3255	2.59659	-646.933	12529.5	101315	571.29	356.609	280.633	0	0	0	0	0	0	0	200	903	0	0	0	0	0	0	0	603	903	0
703	1	32.5626	1.68107	-647.543	13170.3	102170	845.948	357.781	279.661	0	0	0	0	0	0	0	200	903	0	0	0	0	0	0	0	603	903	0
703	2	32.8677	2.59659	-648.154	13078.8	102048	708.619	357.444	279.822	0	0	0	0	0	0	0	200	903	0	0	0	0	0	0	0	603	903	0
703	3	32.2574	3.05436	-646.017	13719.6	102292	708.619	358.342	278.763	0	0	0	0	0	0	0	200	903	0	0	0	0	0	0	0	603	903	0
703	4	32.5626	3.20694	-643.271	13170.3	102719	937.501	359.683	279.526	0	0	0	0	0	0	0	200	903	0	0	0	0	0	0	0	603	903	0
703	5	32.5626	4.12247	-648.154	13628.1	102597	1029.05	358.291	278.974	0	0	0	0	0	0	0	200	903	0	0	0	0	0	0	0	603	903	0
703	6	33.6307	5.34317	-650.595	12987.2	102963	983.277	358.26	280.038	0	0	0	0	0	0	0	200	903	0	0	0	0	0	0	0	603	903	0
703	7	32.41	4.58024	-651.205	14635.2	102841	1166.38	357.924	277.526	0	0	0	0	0	0	0	200	903	0	0	0	0	0	0	0	603	903	0
703	8	31.1893	5.34317	-651.205	15184.5	102963	1212.16	358.112	276.682	0	0	0	0	0	0	0	200	903	0	0	0	0	0	0	0	603	903	0
703	9	31.1893	5.49576	-651.816	14909.8	103390	1120.61	358.619	277.126	0	0	0	0	0	0	0	200	903	0	0	0	0	0	0	0	603	903	0
704	0	31.4945	5.49576	-651.816	15367.6	103696	1303.71	359.087	276.423	0	0	0	0	0	0	0	200	903	0	0	0	0	0	0	0	603	903	0
704	1	31.7996	6.41129	-650.9	15184.5	103696	1624.15	359.311	276.672	0	0	0	0	0	0	0	200	903	0	0	0	0	0	0	0	603	903	0
704	2	32.1048	6.41129	-654.562	15276	103879	1578.37	358.7	276.662	0	0	0	0	0	0	0	200	903	0	0	0	0	0	0	0	603	903	0
704	3	32.5626	7.93717	-656.088	15184.5	104001	1441.04	358.517	276.856	0	0	0	0	0	0	0	200	903	0	0	0	0	0	0	0	603	903	0
704	4	31.0367	7.78458	-656.699	15184.5	103268	1624.15	357.254	276.878	0	0	0	0	0	0	0	200	903	0	0	0	0	0	0	0	603	903	0
704	5	30.8841	8.08976	-656.088	16008.5	104184	1669.92	358.796	275.6	0	0	0	0	0	0	0	200	903	0	0	0	0	0	0	0	603	903	0
704	6	31.4945	7.4794	-657.309	17015.5	104428	1990.36	358.872	274.113	0	0	0	0	0	0	0	200	903	0	0	0	0	0	0	0	603	903	0
704	7	30.7315	8.54752	-657.614	16557.8	104062	2081.91	358.242	274.821	0	0	0	0	0	0	0	200	903	0	0	0	0	0	0	0	603	903	0
704	8	31.7996	8.8527	-658.224	16649.3	104794	2265.02	359.208	274.706	0	0	0	0	0	0	0	200	903	0	0	0	0	0	0	0	603	903	0
704	9	31.3419	9.92081	-658.53	17290.2	104733	2219.24	359.041	273.744	0	0	0	0	0	0	0	200	903	0	0	0	0	0	0	0	603	903	0
705	0	31.9522	10.226	-661.276	16832.4	104733	2356.57	358.381	274.546	0	0	0	0	0	0	0	200	903	0	0	0	0	0	0	0	603	903	0
705	1	30.8841	10.5312	-662.192	17656.4	105161	2265.02	358.807	273.336	0	0	0	0	0	0	0	200	903	0	0	0	0	0	0	0	603	903	0
705	2	30.5789	11.1415	-661.276	17839.5	105344	2722.78	359.304	273.023	0	0	0	0	0	0	0	200	903	0	0	0	0	0	0	0	603	903	0
705	3	31.0367	10.3786	-662.802	17839.5	105405	2448.12	359.029	273.085	0	0	0	0	0	0	0	200	903	0	0	0	0	0	0	0	603	903	0
705	4	30.2737	10.9889	-662.497	18938.1	105405	2539.67	359.102	271.414	0	0	0	0	0	0	0	200	903	0	0	0	0	0	0	0	603	903	0
705	5	31.4945	11.2941	-663.412	17656.4	105893	2493.9	359.619	273.385	0	0	0	0	0	0	0	200	903	0	0	0	0	0	0	0	603	903	0
705	6	31.0367	12.2096	-663.718	18663.5	105588	2539.67	359.085	271.88	0	0	0	0	0	0	0	200	903	0	0	0	0	0	0	0	603	903	0
705	7	31.647	13.2777	-665.549	18480.4	106381	2677	359.84	272.233	0	0	0	0	0	0	0	200	903	0	0	0	0	0	0	0	603	903	0
705	8	31.0367	13.5829	-667.685	19487.5	106259	2631.23	359.146	270.813	0	0	0	0	0	0	0	200	903	0	0	0	0	0	0	0	603	903	0
705	9	30.4263	13.5829	-667.38	20311.4	106320	2860.11	359.31	269.565	0	0	0	0	0	0	0	200	903	0	0	0	0	0	0	0	603	903	0
706	0	30.8841	12.82	-667.99	19853.7	106442	3134.77	359.347	270.279	0	0	0	0	0	0	0	200	903	0	0	0	0	0	0	0	603	903	0
706	1	30.2737	13.4303	-667.38	19945.2	106686	3043.21	359.859	270.114	0	0	0	0	0	0	0	200	903	0	0	0	0	0	0	0	603	903	0
706	2	31.4945	15.1088	-666.769	20769.2	106625	3272.1	359.913	268.851	0	0	0	0	0	0	0	200	903	0	0	0	0	0	0	0	603	903	0
706	3	31.1893	15.5666	-668.6	20219.9	106931	3226.32	359.932	269.758	0	0	0	0	0	0	0	200	903	0	0	0	0	0	0	0	603	903	0
706	4	32.7152	15.5666	-671.347	20769.2	106931	3317.87	359.278	269.063	0	0	0	0	0	0	0	200	903	0	0	0	0	0	0	0	603	903	0
706	5	31.1893	16.4821	-673.788	21043.9	107297	3317.87	359.244	268.768	0	0	0	0	0	0	0	200	903	0	0	0	0	0	0	0	603	903	0
706	6	31.4945	16.1769	-673.483	21593.2	107541	3546.75	359.679	267.938	0	0	0	0	0	0	0	200	903	0	0	0	0	0	0	0	603	903	0
706	7	30.7315	16.6347	-674.094	21501.6	107297	3638.31	359.172	268.103	0	0	0	0	0	0	0	200	903	0	0	0	0	0	0	0	603	903	0
706	8	31.1893	17.0924	-672.263	21776.3	107724	3500.98	360.241	267.608	0	0	0	0	0	0	0	200	903	0	0	0	0	0	0	0	603	903	0
706	9	31.3419	17.7028	-674.094	21410.1	107968	3592.53	360.168	268.239	0	0	0	0	0	0	0	200	903	0	0	0	0	0	0	0	603	903	0
707	0	31.647	17.5502	-675.009	22050.9	108395	3729.86	360.584	267.332	0	0	0	0	0	0	0	200	903	0	0	0	0	0	0	0	603	903	0
707	1	33.3255	19.0761	-675.62	22417.1	108640	3775.64	360.8	266.82	0	0	0	0	0	0	0	200	903	0	0	0	0	0	0	0	603	903	0
707	2	31.4945	18.3131	-677.451	22874.9	108151	3912.97	359.644	266.234	0	0	0	0	0	0	0	200	903	0	0	0	0	0	0	0	603	903	0
707	3	31.647	19.0761	-678.061	23058	108823	3912.97	360.491	265.994	0	0	0	0	0	0	0	200	903	0	0	0	0	0	0	0	603	903	0
707	4	31.647	18.6183	-678.976	23149.6	108823	4462.28	360.275	265.905	0	0	0	0	0	0	0	200	903	0	0	0	0	0	0	0	603	903	0
707	5	31.647	20.2968	-678.061	23149.6	108884	4004.52	360.581	265.859	0	0	0	0	0	0	0	200	903	0	0	0	0	0	0	0	603	903	0
707	6	31.7996	19.9916	-674.704	23424.2	109311	4324.95	362.013	265.282	0	0	0	0	0	0	0	200	903	0	0	0	0	0	0	0	603	903	0
707	7	32.1048	21.0597	-678.671	24065.1	109372	4279.18	361.156	264.541	0	0	0	0	0	0	0	200	903	0	0	0	0	0	0	0	603	903	0
707	8	33.9359	21.0597	-681.418	24156.6	109433	4462.28	360.596	264.549	0	0	0	0	0	0	0	200	903	0	0	0	0	0	0	0	603	903	0
707	9	32.7152	21.8227	-682.944	24339.8	109616	4233.4	360.505	264.361	0	0	0	0	0	0	0	200	903	0	0	0	0	0	0	0	603	903	0
708	0	32.8677	21.8227	-683.249	25346.8	109677	4645.39	360.523	262.902	0	0	0	0	0	0	0	200	903	0	0	0	0	0	0	0	603	903	0
708	1	32.41	22.7382	-683.249	24522.9	109677	4920.05	360.523	264.108	0	0	0	0	0	0	0	200	903	0	0	0	0	0	0	0	603	903	0
708	2	32.2574	23.6537	-683.249	25163.7	110226	4828.49	361.327	263.17	0	0	0	0	0	0	0	200	903	0	0	0	0	0	0	0	603	903	0
708	3	32.7152	23.9589	-685.69	25255.3	110165	4691.16	360.664	263.168	0	0	0	0	0	0	0	200	903	0	0	0	0	0	0	0	603	903	0
708	4	33.1729	24.7218	-683.859	25804.6	110471	5011.6	361.54	262.266	0	0	0	0	0	0	0	200	903	0	0	0	0	0	0	0	603	903	0
708	5	33.6307	24.1115	-687.521	25896.2	110654	5194.7	360.946	262.334	0	0	0	0	0	0	0	200	903	0	0	0	0	0	0	0	603	903	0
708	6	33.4781	24.7218	-687.216	26445.5	110471	5011.6	360.751	261.518	0	0	0	0	0	0	0	200	903	0	0	0	0	0	0	0	603	903	0
708	7	32.8677	25.4848	-689.047	25621.5	111020	5332.03	361.121	262.816	0	0	0	0	0	0	0	200	903	0	0	0	0	0	0	0	603	903	0
708	8	33.9359	26.5529	-686.606	26537	110837	5469.36	361.427	261.35	0	0	0	0	0	0	0	200	903	0	0	0	0	0	0	0	603	903	0
708	9	34.0884	26.4003	-687.827	26628.6	111386	5423.59	361.939	261.286	0	0	0	0	0	0	0	200	903	0	0	0	0	0	0	0	603	903	0
709	0	34.241	27.621	-689.352	27086.3	111203	5515.14	361.315	260.708	0	0	0	0	0	0	0	200	903	0	0	0	0	0	0	0	603	903	0
709	1	34.0884	27.3158	-689.352	26994.8	111386	5606.69	361.581	260.84	0	0	0	0	0	0	0	200	903	0	0	0	0	0	0	0	603	903	0
709	2	34.0884	27.3158	-692.099	27269.4	111569	5881.35	361.204	260.599	0	0	0	0	0	0	0	200	903	0	0	0	0	0	0	0	603	903	0
709	3	34.3936	28.6891	-694.235	27269.4	111813	5835.57	361.06	260.72	0	0	0	0	0	0	0	200	903	0	0	0	0	0	0	0	603	903	0
709	4	34.5462	28.9943	-693.625	27635.7	111569	5881.35	360.849	260.158	0	0	0	0	0	0	0	200	903	0	0	0	0	0	0	0	603	903	0
709	5	33.4781	28.5365	-690.878	27727.2	112180	5972.9	362.372	259.867	0	0	0	0	0	0	0	200	903	0	0	0	0	0	0	0	603	903	0
709	6	34.6988	30.5202	-693.93	28734.3	112729	6568	362.45	258.592	0	0	0	0	0	0	0	200	903	0	0	0	0	0	0	0	603	903	0
709	7	35.3092	29.7572	-695.151	28825.8	112119	6339.11	361.287	258.533	0	0	0	0	0	0	0	200	903	0	0	0	0	0	0	0	603	903	0
709	8	35.4617	30.9779	-695.761	29100.5	112912	6384.89	362.286	258.175	0	0	0	0	0	0	0	200	903	0	0	0	0	0	0	0	603	903	0
709	9	35.3092	31.2831	-697.592	28825.8	112729	6430.67	361.597	258.678	0	0	0	0	0	0	0	200	903	0	0	0	0	0	0	0	603	903	0
710	0	35.1566	32.5038	-697.592	29008.9	112973	6522.22	361.947	258.416	0	0	0	0	0	0	0	200	903	0	0	0	0	0	0	0	603	903	0
710	1	35.004	31.4357	-699.118	29100.5	113278	6888.43	362.03	258.375	0	0	0	0	0	0	0	200	903	0	0	0	0	0	0	0	603	903	0
710	2	36.2247	34.0297	-697.592	30016	112973	6568	361.947	256.972	0	0	0	0	0	0	0	200	903	0	0	0	0	0	0	0	603	903	0
710	3	35.6143	33.5719	-699.728	30199.1	112912	6934.21	361.365	256.842	0	0	0	0	0	0	0	200	903	0	0	0	0	0	0	0	603	903	0
710	4	36.0721	33.4193	-699.728	31023.1	113889	7117.31	362.761	255.664	0	0	0	0	0	0	0	200	903	0	0	0	0	0	0	0	603	903	0
710	5	36.3773	34.1823	-700.339	30290.7	114072	7025.76	362.881	256.749	0	0	0	0	0	0	0	200	903	0	0	0	0	0	0	0	603	903	0
710	6	36.2247	35.2504	-703.085	31023.1	114072	7300.42	362.244	255.876	0	0	0	0	0	0	0	200	903	0	0	0	0	0	0	0	603	903	0
710	7	36.6824	34.7926	-701.254	30931.6	114255	7254.64	362.929	255.891	0	0	0	0	0	0	0	200	903	0	0	0	0	0	0	0	603	903	0
710	8	35.3092	36.3185	-704.306	31755.5	114072	7391.97	361.963	254.912	0	0	0	0	0	0	0	200	903	0	0	0	0	0	0	0	603	903	0
710	9	37.4454	35.7082	-703.696	31664	114377	7346.19	362.537	255.003	0	0	0	0	0	0	0	200	903	0	0	0	0	0	0	0	603	903	0
711	0	36.3773	36.3185	-705.222	32121.7	114499	7803.96	362.359	254.452	0	0	0	0	0	0	0	200	903	0	0	0	0	0	0	0	603	903	0
711	1	36.2247	37.3866	-705.527	31847.1	114804	7529.3	362.721	254.861	0	0	0	0	0	0	0	200	903	0	0	0	0	0	0	0	603	903	0
711	2	36.6824	38.4547	-707.968	32304.8	114865	7803.96	362.246	254.37	0	0	0	0	0	0	0	200	903	0	0	0	0	0	0	0	603	903	0
711	3	36.835	39.0651	-709.494	32854.2	115048	7712.4	362.155	253.694	0	0	0	0	0	0	0	200	903	0	0	0	0	0	0	0	603	903	0
711	4	38.2083	39.828	-708.578	33128.8	115292	8078.61	362.709	253.246	0	0	0	0	0	0	0	200	903	0	0	0	0	0	0	0	603	903	0
711	5	36.3773	39.6754	-710.41	33586.6	115598	7803.96	362.72	252.722	0	0	0	0	0	0	0	200	903	0	0	0	0	0	0	0	603	903	0
711	6	37.2928	40.1332	-709.189	33861.2	115598	8307.5	363	252.254	0	0	0	0	0	0	0	200	903	0	0	0	0	0	0	0	603	903	0
711	7	36.6824	40.1332	-710.715	33403.5	115781	8215.94	362.907	253	0	0	0	0	0	0	0	200	903	0	0	0	0	0	0	0	603	903	0
711	8	37.1402	41.2013	-710.41	33952.8	116086	8307.5	363.407	252.207	0	0	0	0	0	0	0	200	903	0	0	0	0	0	0	0	603	903	0
711	9	37.4454	41.9643	-710.104	33861.2	116330	8582.15	363.821	252.315	0	0	0	0	0	0	0	200	903	0	0	0	0	0	0	0	603	903	0
712	0	37.4454	41.8117	-714.682	34593.7	116208	8261.72	362.601	251.596	0	0	0	0	0	0	0	200	903	0	0	0	0	0	0	0	603	903	0
712	1	36.3773	43.9479	-715.292	35143	116269	8856.81	362.547	250.869	0	0	0	0	0	0	0	200	903	0	0	0	0	0	0	0	603	903	0
712	2	36.9876	43.3376	-717.429	35692.3	116452	8719.48	362.319	250.25	0	0	0	0	0	0	0	200	903	0	0	0	0	0	0	0	603	903	0
712	3	36.835	43.3376	-716.513	35509.2	116879	8856.81	363.122	250.442	0	0	0	0	0	0	0	200	903	0	0	0	0	0	0	0	603	903	0
712	4	36.9876	44.7108	-716.208	35326.1	116696	9039.92	362.936	250.676	0	0	0	0	0	0	0	200	903	0	0	0	0	0	0	0	603	903	0
712	5	37.7506	46.0841	-716.208	36241.6	117184	9085.69	363.618	249.398	0	0	0	0	0	0	0	200	903	0	0	0	0	0	0	0	603	903	0
712	6	38.8187	46.5419	-720.48	36058.5	117062	9360.35	362.478	249.952	0	0	0	0	0	0	0	200	903	0	0	0	0	0	0	0	603	903	0
712	7	37.7506	47.9152	-721.091	36882.5	117490	9039.92	362.933	248.852	0	0	0	0	0	0	0	200	903	0	0	0	0	0	0	0	603	903	0
712	8	38.2083	47.9152	-721.396	36974	117673	9589.24	363.118	248.747	0	0	0	0	0	0	0	200	903	0	0	0	0	0	0	0	603	903	0
712	9	37.4454	47.61	-722.617	37706.5	117612	9680.79	362.758	247.82	0	0	0	0	0	0	0	200	903	0	0	0	0	0	0	0	603	903	0
713	0	37.598	47.3048	-721.091	37431.8	117978	9863.9	363.61	248.09	0	0	0	0	0	0	0	200	903	0	0	0	0	0	0	0	603	903	0
713	1	37.4454	48.8307	-719.87	37065.6	118100	9772.34	364.057	248.511	0	0	0	0	0	0	0	200	903	0	0	0	0	0	0	0	603	903	0
713	2	38.3609	49.7463	-721.701	37431.8	118161	9863.9	363.726	248.134	0	0	0	0	0	0	0	200	903	0	0	0	0	0	0	0	603	903	0
713	3	38.6661	49.8988	-720.786	37706.5	118283	10184.3	364.103	247.687	0	0	0	0	0	0	0	200	903	0	0	0	0	0	0	0	603	903	0
713	4	38.2083	51.5773	-726.279	38713.5	118466	10001.2	363.114	246.696	0	0	0	0	0	0	0	200	903	0	0	0	0	0	0	0	603	903	0
713	5	37.7506	51.2721	-726.584	38805.1	118161	10321.7	362.625	246.592	0	0	0	0	0	0	0	200	903	0	0	0	0	0	0	0	603	903	0
713	6	37.7506	52.1877	-727.194	39720.6	118832	10275.9	363.412	245.378	0	0	0	0	0	0	0	200	903	0	0	0	0	0	0	0	603	903	0
713	7	38.9713	51.8825	-726.279	38896.6	118832	10413.2	363.618	246.444	0	0	0	0	0	0	0	200	903	0	0	0	0	0	0	0	603	903	0
713	8	38.5135	52.9506	-723.532	39262.9	118893	10642.1	364.324	245.734	0	0	0	0	0	0	0	200	903	0	0	0	0	0	0	0	603	903	0
713	9	38.6661	53.4084	-726.279	39354.4	119077	10916.8	363.954	245.814	0	0	0	0	0	0	0	200	903	0	0	0	0	0	0	0	603	903	0
714	0	38.8187	54.0187	-729.025	39720.6	118649	10550.5	362.751	245.515	0	0	0	0	0	0	0	200	903	0	0	0	0	0	0	0	603	903	0
714	1	39.1238	54.7817	-729.636	40636.1	119016	10687.9	363.116	244.306	0	0	0	0	0	0	0	200	903	0	0	0	0	0	0	0	603	903	0
714	2	38.3609	54.3239	-730.551	40636.1	119443	10916.8	363.497	244.376	0	0	0	0	0	0	0	200	903	0	0	0	0	0	0	0	603	903	0
714	3	39.429	54.6291	-730.551	41002.4	119504	11008.3	363.58	243.875	0	0	0	0	0	0	0	200	903	0	0	0	0	0	0	0	603	903	0
714	4	38.8187	56.4601	-730.551	40819.3	119321	11237.2	363.33	244.125	0	0	0	0	0	0	0	200	903	0	0	0	0	0	0	0	603	903	0
714	5	39.1238	57.8334	-731.161	41368.6	119382	11374.5	363.277	243.421	0	0	0	0	0	0	0	200	903	0	0	0	0	0	0	0	603	903	0
714	6	39.2764	58.2912	-730.246	41460.1	119870	11878.1	364.15	243.224	0	0	0	0	0	0	0	200	903	0	0	0	0	0	0	0	603	903	0
714	7	38.5135	58.2912	-733.298	41826.3	119504	11786.5	362.968	242.961	0	0	0	0	0	0	0	200	903	0	0	0	0	0	0	0	603	903	0
714	8	38.0557	58.9015	-730.856	42284.1	119809	11786.5	363.93	242.144	0	0	0	0	0	0	0	200	903	0	0	0	0	0	0	0	603	903	0
714	9	38.8187	58.9015	-734.518	42833.4	119870	11832.3	363.195	241.685	0	0	0	0	0	0	0	200	903	0	0	0	0	0	0	0	603	903	0
715	0	38.3609	59.8171	-732.382	42833.4	120175	11923.8	364.088	241.515	0	0	0	0	0	0	0	200	903	0	0	0	0	0	0	0	603	903	0
715	1	38.6661	61.0378	-733.603	42375.6	119870	11878.1	363.399	242.236	0	0	0	0	0	0	0	200	903	0	0	0	0	0	0	0	603	903	0
715	2	38.6661	62.5636	-733.603	43382.7	120480	12244.3	364.231	240.863	0	0	0	0	0	0	0	200	903	0	0	0	0	0	0	0	603	903	0
715	3	40.8023	63.0214	-737.265	43016.5	120602	12290	363.581	241.654	0	0	0	0	0	0	0	200	903	0	0	0	0	0	0	0	603	903	0
715	4	39.1238	63.4792	-736.96	44389.8	120114	12610.5	362.986	239.766	0	0	0	0	0	0	0	200	903	0	0	0	0	0	0	0	603	903	0
715	5	38.3609	63.6317	-736.044	44023.6	120602	12793.6	363.852	240.189	0	0	0	0	0	0	0	200	903	0	0	0	0	0	0	0	603	903	0
[truncated: 2,214 more rows]
