# Supplementary material for: The Effects of an Extemporaneous Speech Dual-task on Older Adult Gait Control
Source: Research Square preprint supplement (doi:10.21203/rs.3.rs-7674245/v1), 2025-11-18
Supplement: Supplementary file 127 [file Over1ground.xlsx]

## Sheet: Sheet1
Trajectories
		01:LFHD			01:RFHD			01:LBHD			01:RBHD			01:C7			01:T10			01:CLAV			01:STRN			01:RBAK			01:LSHO			01:LUPA			01:LELB			01:LFRM			01:LWRA			01:LWRB			01:LFIN
Frame	Sub Frame	X	Y	Z	X	Y	Z	X	Y	Z	X	Y	Z	X	Y	Z	X	Y	Z	X	Y	Z	X	Y	Z	X	Y	Z	X	Y	Z	X	Y	Z	X	Y	Z	X	Y	Z	X	Y	Z	X	Y	Z	X	Y	Z
		mm	mm	mm	mm	mm	mm	mm	mm	mm	mm	mm	mm	mm	mm	mm	mm	mm	mm	mm	mm	mm	mm	mm	mm	mm	mm	mm	mm	mm	mm	mm	mm	mm	mm	mm	mm	mm	mm	mm	mm	mm	mm	mm	mm	mm	mm	mm	mm
159	0	339.366	2773.65	1543.43	236.178	2763.9	1544.32	338.519	2947.51	1548.07	211.3	2913.32	1555.96	273.489	2983.27	1427.03	262.713	3103.38	1188.15	271.313	2855.13	1307.98	279.541	2826.37	1123.9	219.69	3096.45	1265.23	441.128	2928.54	1354.72	514.301	3032.75	1151.45	519.771	3052.34	1074.17	562.666	3041.02	952.793	544.113	2967.26	845.296	580.882	3029.91	845.082	608.338	2975.78	781.669
160	0	342.977	2758.16	1543.88	239.836	2748.34	1544.91	342.01	2932.07	1548.15	214.816	2897.9	1556.24	276.174	2967.6	1427.31	262.927	3087.11	1188.32	274.707	2839.05	1308.31	282.693	2809.41	1124.14	220.312	3079.94	1265.65	443.847	2914.56	1353.97	514.728	3019.59	1150.38	519.646	3038.91	1073.14	562.455	3028.86	951.711	544.812	2955.26	843.967	580.67	3018.34	843.814	608.694	2964.89	780.144
161	0	346.411	2742.74	1544.43	243.312	2732.85	1545.6	345.341	2916.69	1548.46	218.169	2882.52	1556.73	278.728	2952.06	1427.77	263.171	3071.01	1188.68	277.884	2823.12	1308.84	285.668	2792.66	1124.58	220.931	3063.62	1266.26	446.407	2900.58	1353.46	515.156	3006.28	1149.55	519.565	3025.36	1072.33	562.272	3016.41	950.852	545.434	2942.89	842.926	580.463	3006.37	842.792	608.986	2953.49	778.908
162	0	349.669	2727.38	1545.09	246.606	2717.45	1546.39	348.51	2901.37	1548.97	221.36	2867.2	1557.42	281.153	2936.65	1428.4	263.447	3055.08	1189.24	280.845	2807.35	1309.55	288.464	2776.1	1125.23	221.547	3047.49	1267.04	448.809	2886.57	1353.19	515.584	2992.83	1148.97	519.529	3011.67	1071.75	562.119	3003.64	950.215	545.979	2930.15	842.174	580.261	2993.99	842.016	609.214	2941.57	777.959
163	0	352.748	2712.09	1545.84	249.718	2702.13	1547.28	351.517	2886.12	1549.7	224.387	2851.93	1558.32	283.447	2921.38	1429.21	263.755	3039.31	1189.99	283.589	2791.74	1310.46	291.079	2759.75	1126.09	222.161	3031.54	1268.01	451.051	2872.56	1353.17	516.015	2979.25	1148.63	519.539	2997.86	1071.41	561.995	2990.58	949.8	546.446	2917.03	841.709	580.064	2981.19	841.483	609.379	2929.13	777.298
164	0	355.649	2696.87	1546.69	252.646	2686.89	1548.28	354.36	2870.92	1550.64	227.249	2836.72	1559.42	285.611	2906.23	1430.19	264.095	3023.7	1190.92	286.115	2776.29	1311.56	293.509	2743.6	1127.15	222.774	3015.79	1269.15	453.133	2858.54	1353.38	516.447	2965.52	1148.53	519.594	2983.93	1071.29	561.902	2977.2	949.604	546.836	2903.53	841.53	579.875	2967.98	841.191	609.482	2916.18	776.921
165	0	358.369	2681.72	1547.63	255.388	2671.74	1549.37	357.035	2855.79	1551.79	229.942	2821.56	1560.71	287.642	2891.23	1431.33	264.468	3008.27	1192.04	288.42	2760.99	1312.84	295.748	2727.66	1128.4	223.387	3000.23	1270.46	455.055	2844.5	1353.82	516.883	2951.67	1148.66	519.697	2969.86	1071.39	561.841	2963.53	949.623	547.15	2889.65	841.632	579.694	2954.36	841.136	609.523	2902.72	776.826
166	0	360.905	2666.64	1548.67	257.941	2656.66	1550.56	359.538	2840.73	1553.13	232.462	2806.46	1562.19	289.54	2876.35	1432.63	264.878	2993	1193.32	290.502	2745.86	1314.29	297.785	2711.95	1129.82	224.001	2984.86	1271.93	456.813	2830.45	1354.48	517.325	2937.67	1149.02	519.85	2955.67	1071.7	561.815	2949.55	949.852	547.388	2875.41	842.009	579.525	2940.32	841.31	609.507	2888.73	777.007
167	0	363.254	2651.64	1549.8	260.302	2641.68	1551.84	361.864	2825.74	1554.66	234.804	2791.42	1563.84	291.302	2861.61	1434.09	265.324	2977.91	1194.78	292.359	2730.89	1315.91	299.61	2696.46	1131.42	224.62	2969.69	1273.55	458.407	2816.38	1355.36	517.775	2923.55	1149.6	520.054	2941.36	1072.23	561.825	2935.26	950.284	547.553	2860.79	842.653	579.37	2925.87	841.706	609.434	2874.22	777.457
168	0	365.41	2636.72	1551.01	262.466	2626.78	1553.2	364.005	2810.83	1556.37	236.962	2776.46	1565.66	292.928	2846.99	1435.69	265.809	2963	1196.39	293.987	2716.09	1317.68	301.209	2681.21	1133.16	225.245	2954.72	1275.31	459.833	2802.29	1356.44	518.236	2909.29	1150.38	520.312	2926.93	1072.94	561.875	2920.68	950.908	547.646	2845.8	843.555	579.233	2911	842.312	609.307	2859.19	778.169
169	0	367.369	2621.89	1552.3	264.428	2611.98	1554.64	365.957	2796	1558.24	238.929	2761.56	1567.63	294.414	2832.51	1437.42	266.335	2948.26	1198.14	295.386	2701.45	1319.58	302.568	2666.21	1135.03	225.878	2939.95	1277.2	461.088	2788.18	1357.71	518.712	2894.92	1151.35	520.627	2912.37	1073.84	561.966	2905.79	951.716	547.668	2830.45	844.703	579.117	2895.73	843.116	609.13	2843.64	779.132
170	0	369.128	2607.14	1553.67	266.185	2597.27	1556.15	367.711	2781.25	1560.25	240.7	2746.74	1569.73	295.758	2818.16	1439.27	266.901	2933.7	1200.02	296.555	2686.97	1321.61	303.675	2651.47	1137.01	226.519	2925.38	1279.2	462.172	2774.05	1359.15	519.206	2880.42	1152.5	521	2897.7	1074.91	562.103	2890.62	952.694	547.622	2814.74	846.086	579.026	2880.04	844.105	608.903	2827.57	780.335
171	0	370.681	2592.48	1555.12	267.733	2582.66	1557.72	369.264	2766.59	1562.4	242.268	2732.01	1571.95	296.96	2803.93	1441.22	267.508	2919.32	1202.01	297.494	2672.66	1323.74	304.518	2636.97	1139.07	227.17	2911.01	1281.29	463.083	2759.89	1360.75	519.722	2865.81	1153.82	521.433	2882.91	1076.13	562.285	2875.15	953.832	547.51	2798.69	847.691	578.961	2863.94	845.267	608.631	2811	781.768
172	0	372.026	2577.91	1556.62	269.069	2568.15	1559.35	370.61	2752.03	1564.66	243.629	2717.36	1574.25	298.018	2789.82	1443.27	268.153	2905.11	1204.1	298.207	2658.51	1325.95	305.091	2622.73	1141.21	227.83	2896.84	1283.47	463.822	2745.7	1362.49	520.262	2851.09	1155.28	521.928	2868	1077.48	562.516	2859.39	955.116	547.334	2782.29	849.505	578.924	2847.45	846.588	608.313	2793.92	783.419
173	0	373.161	2563.44	1558.17	270.19	2553.73	1561.01	371.748	2737.55	1567.02	244.78	2702.8	1576.63	298.932	2775.83	1445.4	268.836	2891.08	1206.27	298.701	2644.52	1328.23	305.392	2608.73	1143.39	228.497	2882.85	1285.71	464.393	2731.48	1364.35	520.829	2836.26	1156.87	522.486	2852.98	1078.96	562.794	2843.36	956.534	547.097	2765.56	851.517	578.918	2830.56	848.057	607.95	2776.37	785.276
174	0	374.085	2549.05	1559.77	271.097	2539.41	1562.69	372.677	2723.17	1569.45	245.719	2688.33	1579.06	299.704	2761.95	1447.58	269.551	2877.21	1208.5	298.982	2630.68	1330.56	305.423	2594.97	1145.62	229.169	2869.05	1287.99	464.8	2717.24	1366.32	521.425	2821.33	1158.57	523.105	2837.84	1080.54	563.12	2827.05	958.073	546.8	2748.52	853.712	578.941	2813.29	849.661	607.54	2758.34	787.327
175	0	374.799	2534.76	1561.4	271.792	2525.19	1564.39	373.398	2708.87	1571.93	246.448	2673.95	1581.52	300.335	2748.18	1449.8	270.296	2863.5	1210.78	299.062	2616.98	1332.92	305.193	2581.42	1147.88	229.844	2855.43	1290.3	465.05	2702.98	1368.38	522.049	2806.31	1160.36	523.786	2822.6	1082.2	563.492	2810.48	959.719	546.446	2731.17	856.08	578.991	2795.64	851.391	607.083	2739.86	789.561
176	0	375.306	2520.56	1563.04	272.276	2511.06	1566.09	373.917	2694.66	1574.46	246.969	2659.66	1583.99	300.829	2734.51	1452.05	271.065	2849.94	1213.08	298.955	2603.43	1335.3	304.72	2568.08	1150.15	230.517	2841.97	1292.61	465.154	2688.72	1370.52	522.702	2791.2	1162.24	524.527	2807.25	1083.94	563.907	2793.66	961.459	546.036	2713.54	858.608	579.066	2777.63	853.236	606.575	2720.95	791.967
177	0	375.611	2506.44	1564.69	272.555	2497.02	1567.76	374.238	2680.53	1577	247.289	2645.47	1586.45	301.191	2720.93	1454.31	271.853	2836.52	1215.38	298.676	2590	1337.68	304.024	2554.91	1152.43	231.187	2828.65	1294.91	465.123	2674.46	1372.72	523.383	2776.01	1164.18	525.325	2791.79	1085.73	564.36	2776.59	963.281	545.572	2695.62	861.285	579.161	2759.27	855.186	606.011	2701.63	794.534
178	0	375.72	2492.4	1566.32	272.636	2483.07	1569.4	374.372	2666.47	1579.54	247.414	2631.36	1588.88	301.428	2707.45	1456.55	272.653	2823.22	1217.67	298.243	2576.7	1340.05	303.132	2541.91	1154.71	231.848	2815.48	1297.17	464.968	2660.23	1374.97	524.09	2760.74	1166.16	526.179	2776.24	1087.55	564.848	2759.29	965.172	545.055	2677.45	864.101	579.271	2740.58	857.234	605.388	2681.94	797.251
179	0	375.64	2478.43	1567.92	272.525	2469.19	1570.99	374.327	2652.48	1582.06	247.354	2617.33	1591.26	301.545	2694.05	1458.76	273.458	2810.03	1219.91	297.673	2563.51	1342.39	302.075	2529.04	1156.98	232.497	2802.43	1299.38	464.705	2646.02	1377.24	524.822	2745.41	1168.17	527.084	2760.59	1089.39	565.364	2741.77	967.116	544.487	2659.04	867.042	579.388	2721.58	859.37	604.7	2661.89	800.108
180	0	375.38	2464.52	1569.47	272.232	2455.39	1572.5	374.116	2638.56	1584.54	247.119	2603.38	1593.56	301.552	2680.73	1460.91	274.262	2796.93	1222.1	296.988	2550.42	1344.67	300.887	2516.27	1159.23	233.128	2789.48	1301.51	464.345	2631.86	1379.52	525.576	2730.02	1170.2	528.038	2744.86	1091.23	565.902	2724.04	969.1	543.867	2640.4	870.097	579.504	2702.28	861.583	603.942	2641.5	803.094
181	0	374.951	2450.69	1570.96	271.767	2441.66	1573.91	373.751	2624.69	1586.96	246.722	2589.51	1595.76	301.455	2667.48	1462.99	275.056	2783.91	1224.2	296.206	2537.43	1346.9	299.602	2503.6	1161.44	233.738	2776.62	1303.54	463.901	2617.76	1381.78	526.349	2714.58	1172.21	529.036	2729.04	1093.06	566.455	2706.12	971.107	543.196	2621.54	873.253	579.61	2682.7	863.864	603.108	2620.82	806.198
182	0	374.362	2436.9	1572.35	271.14	2428	1575.22	373.245	2610.86	1589.29	246.175	2575.71	1597.85	301.264	2654.3	1464.97	275.832	2770.96	1226.19	295.345	2524.51	1349.03	298.257	2490.98	1163.6	234.32	2763.83	1305.46	463.386	2603.71	1384.01	527.137	2699.1	1174.19	530.074	2713.15	1094.84	567.016	2688.02	973.122	542.473	2602.49	876.495	579.698	2662.87	866.201	602.194	2599.86	809.409
183	0	373.625	2423.17	1573.65	270.363	2414.39	1576.41	372.611	2597.08	1591.51	245.492	2561.97	1599.81	300.987	2641.18	1466.83	276.58	2758.07	1228.05	294.425	2511.66	1351.07	296.885	2478.41	1165.67	234.871	2751.11	1307.24	462.81	2589.74	1386.19	527.937	2683.59	1176.13	531.147	2697.19	1096.57	567.576	2669.76	975.128	541.696	2583.26	879.807	579.758	2642.79	868.58	601.195	2578.65	812.715
184	0	372.751	2409.48	1574.82	269.447	2400.84	1577.44	371.863	2583.33	1593.6	244.686	2548.3	1601.6	300.631	2628.11	1468.55	277.291	2745.21	1229.77	293.461	2498.86	1352.97	295.519	2465.87	1167.65	235.382	2738.42	1308.86	462.183	2575.83	1388.27	528.743	2668.07	1177.98	532.25	2681.16	1098.22	568.128	2651.34	977.107	540.865	2563.87	883.174	579.78	2622.5	870.99	600.108	2557.2	816.105
185	0	371.751	2395.83	1575.85	268.403	2387.35	1578.32	371.014	2569.61	1595.54	243.77	2534.68	1603.22	300.205	2615.08	1470.11	277.956	2732.38	1231.31	292.47	2486.1	1354.72	294.186	2453.33	1169.5	235.849	2725.76	1310.31	461.512	2561.99	1390.25	529.551	2652.52	1179.75	533.378	2665.07	1099.76	568.664	2632.79	979.041	539.977	2544.32	886.577	579.756	2602.01	873.413	598.93	2535.56	819.565
186	0	370.635	2382.21	1576.73	267.243	2373.9	1579.03	370.075	2555.91	1597.3	242.757	2521.12	1604.64	299.713	2602.08	1471.49	278.564	2719.57	1232.67	291.464	2473.37	1356.31	292.912	2440.8	1171.19	236.263	2713.11	1311.57	460.805	2548.22	1392.1	530.354	2636.98	1181.39	534.525	2648.92	1101.19	569.177	2614.11	980.913	539.029	2524.65	889.997	579.676	2581.35	875.836	597.657	2513.74	823.083
187	0	369.414	2368.62	1577.43	265.976	2360.49	1579.55	369.058	2542.24	1598.86	241.658	2507.61	1605.85	299.161	2589.11	1472.68	279.104	2706.77	1233.83	290.454	2460.66	1357.69	291.718	2428.25	1172.69	236.617	2700.46	1312.63	460.066	2534.52	1393.78	531.146	2621.43	1182.89	535.683	2632.72	1102.47	569.659	2595.32	982.706	538.018	2504.87	893.414	579.533	2560.54	878.242	596.289	2491.77	826.644
188	0	368.097	2355.06	1577.95	264.612	2347.13	1579.88	367.974	2528.58	1600.21	240.485	2494.15	1606.83	298.553	2576.16	1473.66	279.566	2693.96	1234.78	289.45	2447.94	1358.85	290.618	2415.69	1173.97	236.903	2687.81	1313.48	459.299	2520.88	1395.28	531.919	2605.89	1184.23	536.846	2616.47	1103.59	570.104	2576.44	984.404	536.941	2484.99	896.808	579.317	2539.59	880.615	594.825	2469.67	830.234
189	0	366.691	2341.53	1578.28	263.159	2333.8	1580	366.829	2514.93	1601.32	239.245	2480.74	1607.56	297.891	2563.21	1474.42	279.94	2681.15	1235.5	288.455	2435.22	1359.78	289.624	2403.09	1175	237.111	2675.13	1314.1	458.505	2507.29	1396.56	532.665	2590.36	1185.38	538.004	2600.18	1104.53	570.503	2557.47	985.989	535.797	2465.03	900.158	579.023	2518.53	882.939	593.265	2447.47	833.838
190	0	365.203	2328.01	1578.4	261.626	2320.51	1579.9	365.633	2501.3	1602.18	237.947	2467.37	1608.05	297.176	2550.27	1474.94	280.214	2668.32	1235.99	287.475	2422.48	1360.45	288.742	2390.46	1175.76	237.232	2662.43	1314.48	457.686	2493.76	1397.62	533.375	2574.85	1186.34	539.148	2583.84	1105.29	570.85	2538.43	987.449	534.582	2445.01	903.445	578.643	2497.38	885.197	591.609	2425.19	837.44
191	0	363.64	2314.52	1578.31	260.017	2307.25	1579.59	364.389	2487.69	1602.78	236.595	2454.04	1608.27	296.405	2537.33	1475.22	280.379	2655.47	1236.23	286.51	2409.71	1360.84	287.972	2377.78	1176.23	237.256	2649.69	1314.63	456.839	2480.27	1398.44	534.04	2559.34	1187.07	540.267	2567.46	1105.83	571.137	2519.33	988.771	533.294	2424.95	906.647	578.173	2476.16	887.375	589.858	2402.87	841.022
192	0	362.005	2301.04	1578	258.339	2294.02	1579.06	363.1	2474.08	1603.11	235.194	2440.75	1608.23	295.578	2524.37	1475.25	280.425	2642.6	1236.23	285.556	2396.91	1360.96	287.311	2365.06	1176.4	237.175	2636.91	1314.53	455.963	2466.82	1398.99	534.649	2543.85	1187.58	541.348	2551.04	1106.16	571.356	2500.2	989.943	531.932	2404.87	909.746	577.607	2454.9	889.458	588.014	2380.53	844.569
193	0	360.302	2287.58	1577.47	256.594	2280.81	1578.3	361.768	2460.49	1603.17	233.745	2427.5	1607.93	294.69	2511.41	1475.03	280.343	2629.7	1235.98	284.61	2384.07	1360.78	286.751	2352.27	1176.25	236.979	2624.08	1314.19	455.055	2453.41	1399.28	535.19	2528.37	1187.84	542.378	2534.58	1106.26	571.5	2481.03	990.957	530.494	2384.79	912.724	576.941	2433.62	891.434	586.079	2358.19	848.062
194	0	358.532	2274.15	1576.72	254.784	2267.64	1577.32	360.39	2446.91	1602.96	232.248	2414.28	1607.37	293.736	2498.43	1474.56	280.127	2616.77	1235.48	283.663	2371.19	1360.31	286.278	2339.41	1175.8	236.661	2611.21	1313.59	454.109	2440.03	1399.3	535.653	2512.9	1187.86	543.344	2518.08	1106.14	571.56	2461.85	991.807	528.978	2364.73	915.565	576.172	2412.34	893.292	584.055	2335.9	851.485
195	0	356.695	2260.73	1575.76	252.911	2254.48	1576.13	358.965	2433.36	1602.48	230.701	2401.1	1606.55	292.712	2485.44	1473.84	279.771	2603.8	1234.72	282.705	2358.25	1359.56	285.878	2326.47	1175.04	236.214	2598.3	1312.75	453.12	2426.68	1399.06	536.025	2497.43	1187.64	544.228	2501.56	1105.8	571.527	2442.67	992.489	527.385	2344.7	918.254	575.297	2391.09	895.021	581.945	2313.67	854.82
196	0	354.791	2247.34	1574.58	250.973	2241.35	1574.73	357.487	2419.82	1601.74	229.098	2387.94	1605.49	291.611	2472.44	1472.88	279.272	2590.78	1233.71	281.725	2345.27	1358.54	285.529	2313.43	1173.99	235.633	2585.33	1311.66	452.082	2413.36	1398.55	536.293	2481.97	1187.17	545.014	2485	1105.23	571.393	2423.52	993	525.715	2324.73	920.778	574.314	2369.89	896.614	579.754	2291.54	858.051
197	0	352.816	2233.97	1573.2	248.968	2228.24	1573.14	355.949	2406.31	1600.77	227.436	2374.82	1604.2	290.426	2459.43	1471.68	278.631	2577.72	1232.46	280.71	2332.24	1357.25	285.208	2300.3	1172.68	234.918	2572.32	1310.32	450.986	2400.05	1397.79	536.444	2466.5	1186.46	545.685	2468.42	1104.44	571.147	2404.4	993.343	523.967	2304.84	923.128	573.22	2348.78	898.066	577.485	2269.55	861.163
198	0	350.768	2220.62	1571.64	246.892	2215.15	1571.37	354.343	2392.83	1599.57	225.706	2361.72	1602.7	289.154	2446.42	1470.26	277.85	2564.6	1230.96	279.643	2319.17	1355.73	284.89	2287.06	1171.13	234.069	2559.26	1308.74	449.825	2386.76	1396.8	536.465	2451.04	1185.53	546.223	2451.83	1103.46	570.781	2385.35	993.52	522.142	2285.04	925.296	572.014	2327.77	899.371	575.142	2247.71	864.14
199	0	348.642	2207.31	1569.91	244.74	2202.08	1569.43	352.661	2379.39	1598.16	223.9	2348.65	1601.01	287.787	2433.41	1468.63	276.934	2551.42	1229.23	278.511	2306.05	1354	284.547	2273.71	1169.37	233.088	2546.16	1306.94	448.59	2373.47	1395.6	536.342	2435.58	1184.39	546.611	2435.24	1102.28	570.285	2366.38	993.538	520.24	2265.37	927.275	570.696	2306.9	900.528	572.732	2226.07	866.969
200	0	346.433	2194.02	1568.03	242.508	2189.03	1567.34	350.893	2365.98	1596.58	222.011	2335.6	1599.15	286.323	2420.41	1466.82	275.893	2538.17	1227.28	277.296	2292.89	1352.09	284.148	2260.23	1167.44	231.982	2533.01	1304.92	447.272	2360.19	1394.21	536.063	2420.13	1183.05	546.83	2418.66	1100.94	569.65	2347.52	993.404	518.263	2245.84	929.064	569.263	2286.19	901.536	570.26	2204.65	869.638
201	0	344.135	2180.76	1566.04	240.189	2176	1565.14	349.03	2352.61	1594.84	220.029	2322.58	1597.16	284.758	2407.42	1464.84	274.737	2524.85	1225.12	275.984	2279.68	1350.03	283.663	2246.62	1165.39	230.761	2519.82	1302.7	445.863	2346.9	1392.65	535.616	2404.69	1181.55	546.865	2402.1	1099.44	568.867	2328.78	993.129	516.211	2226.48	930.66	567.715	2265.68	902.396	567.731	2183.49	872.137
202	0	341.743	2167.52	1563.94	237.776	2162.98	1562.85	347.063	2339.27	1592.99	217.947	2309.58	1595.05	283.091	2394.44	1462.72	273.481	2511.45	1222.78	274.56	2266.44	1347.87	283.062	2232.88	1163.26	229.437	2506.59	1300.29	444.355	2333.6	1390.96	534.988	2389.27	1179.9	546.701	2385.58	1097.82	567.928	2310.2	992.726	514.087	2207.3	932.066	566.052	2245.4	903.112	565.154	2162.61	874.455
203	0	339.251	2154.31	1561.79	235.266	2149.97	1560.5	344.984	2325.98	1591.06	215.757	2296.59	1592.87	281.32	2381.47	1460.49	272.142	2497.96	1220.27	273.01	2253.17	1345.65	282.312	2219.01	1161.09	228.023	2493.32	1297.72	442.742	2320.27	1389.18	534.171	2373.88	1178.14	546.323	2369.13	1096.09	566.826	2291.8	992.21	511.892	2188.34	933.286	564.274	2225.39	903.687	562.534	2142.06	876.586
204	0	336.656	2141.12	1559.61	232.653	2136.98	1558.12	342.786	2312.72	1589.08	213.453	2283.63	1590.64	279.446	2368.52	1458.18	270.737	2484.38	1217.63	271.323	2239.86	1343.4	281.386	2205	1158.93	226.536	2480.01	1295.02	441.017	2306.91	1387.34	533.155	2358.53	1176.29	545.72	2352.75	1094.3	565.555	2273.61	991.597	509.627	2169.61	934.324	562.381	2205.66	904.13	559.88	2121.86	878.525
205	0	333.953	2127.95	1557.45	229.933	2123.99	1555.75	340.466	2299.49	1587.09	211.032	2270.67	1588.41	277.473	2355.59	1455.82	269.285	2470.7	1214.89	269.488	2226.51	1341.17	280.257	2190.87	1156.83	224.994	2466.66	1292.22	439.179	2293.49	1385.47	531.936	2343.23	1174.39	544.884	2336.47	1092.48	564.112	2255.65	990.907	507.295	2151.15	935.191	560.375	2186.28	904.446	557.198	2102.04	880.267
206	0	331.143	2114.79	1555.32	227.105	2111.01	1553.43	338.019	2286.28	1585.14	208.49	2257.72	1586.21	275.404	2342.66	1453.46	267.807	2456.93	1212.08	267.5	2213.14	1339	278.901	2176.61	1154.82	223.415	2453.28	1289.35	437.224	2280.03	1383.63	530.509	2328	1172.47	543.809	2320.31	1090.65	562.495	2237.95	990.16	504.899	2132.96	935.894	558.258	2167.25	904.647	554.495	2082.65	881.811
207	0	328.225	2101.64	1553.29	224.17	2098.03	1551.19	335.448	2273.1	1583.25	205.83	2244.78	1584.08	273.245	2329.74	1451.12	266.322	2443.05	1209.24	265.354	2199.73	1336.94	277.3	2162.23	1152.95	221.818	2439.86	1286.46	435.152	2266.49	1381.84	528.873	2312.85	1170.58	542.494	2304.29	1088.85	560.705	2220.54	989.377	502.442	2115.1	936.448	556.031	2148.63	904.743	551.779	2063.69	883.156
208	0	325.201	2088.48	1551.38	221.13	2085.03	1549.07	332.754	2259.93	1581.47	203.053	2231.83	1582.05	271.002	2316.81	1448.86	264.848	2429.08	1206.44	263.049	2186.28	1335.02	275.442	2147.74	1151.26	220.22	2426.4	1283.59	432.967	2252.87	1380.14	527.031	2297.79	1168.76	540.939	2288.43	1087.13	558.745	2203.43	988.584	499.927	2097.56	936.863	553.699	2130.44	904.747	549.054	2045.22	884.305
209	0	322.078	2075.31	1549.63	217.991	2072.03	1547.11	329.944	2246.76	1579.84	200.166	2218.87	1580.16	268.685	2303.88	1446.71	263.403	2415.02	1203.7	260.59	2172.81	1333.28	273.321	2133.15	1149.79	218.638	2412.91	1280.78	430.673	2239.16	1378.59	524.991	2282.83	1167.05	539.153	2272.75	1085.52	556.621	2186.66	987.804	497.359	2080.39	937.156	551.266	2112.71	904.674	546.327	2027.26	885.261
210	0	318.861	2062.13	1548.07	214.761	2059	1545.35	327.025	2233.58	1578.38	197.176	2205.89	1578.46	266.301	2290.92	1444.71	262.001	2400.87	1201.08	257.983	2159.31	1331.76	270.941	2118.49	1148.57	217.088	2399.38	1278.1	428.277	2225.35	1377.21	522.763	2267.98	1165.48	537.144	2257.26	1084.05	554.341	2170.25	987.063	494.741	2063.61	937.342	548.738	2095.47	904.54	543.601	2009.83	886.03
211	0	315.562	2048.92	1546.74	211.45	2045.96	1543.81	324.01	2220.38	1577.14	194.096	2192.88	1576.96	263.863	2277.94	1442.9	260.655	2386.64	1198.63	255.242	2145.77	1330.48	268.312	2103.76	1147.61	215.583	2385.81	1275.57	425.788	2211.44	1376.05	520.362	2253.25	1164.11	534.927	2241.98	1082.77	551.918	2154.21	986.387	492.081	2047.24	937.437	546.124	2078.76	904.363	540.883	1992.96	886.618
212	0	312.192	2035.68	1545.67	208.071	2032.88	1542.53	320.91	2207.16	1576.14	190.938	2179.85	1575.7	261.382	2264.92	1441.32	259.375	2372.35	1196.4	252.381	2132.21	1329.47	265.454	2089	1146.96	214.134	2372.21	1273.26	423.22	2197.42	1375.14	517.807	2238.63	1162.96	532.523	2226.93	1081.72	549.365	2138.56	985.801	489.384	2031.3	937.457	543.433	2062.59	904.16	538.174	1976.67	887.035
213	0	308.766	2022.4	1544.88	204.638	2019.77	1541.53	317.743	2193.91	1575.4	187.718	2166.78	1574.71	258.873	2251.85	1439.99	258.168	2358	1194.43	249.422	2118.63	1328.74	262.398	2074.23	1146.61	212.75	2358.59	1271.2	420.587	2183.31	1374.5	515.123	2224.13	1162.09	529.952	2212.11	1080.93	546.7	2123.32	985.331	486.658	2015.81	937.421	540.678	2046.97	903.952	535.479	1960.99	887.29
214	0	305.3	2009.09	1544.4	201.169	2006.62	1540.84	314.525	2180.63	1574.94	184.453	2153.68	1573.99	256.35	2238.72	1438.96	257.039	2343.63	1192.77	246.39	2105.02	1328.33	259.18	2059.48	1146.59	211.437	2344.94	1269.44	417.907	2169.09	1374.17	512.336	2209.75	1161.52	527.244	2197.52	1080.43	543.943	2108.49	985	483.911	2000.8	937.343	537.873	2031.94	903.758	532.8	1945.92	887.394
215	0	301.811	1995.75	1544.23	197.681	1993.45	1540.47	311.275	2167.32	1574.79	181.161	2140.54	1573.58	253.829	2225.54	1438.23	255.988	2329.24	1191.45	243.311	2091.39	1328.22	255.847	2044.78	1146.89	210.198	2331.27	1268.01	415.199	2154.78	1374.17	509.478	2195.48	1161.29	524.428	2183.19	1080.23	541.116	2094.08	984.828	481.155	1986.27	937.239	535.036	2017.48	903.597	530.142	1931.48	887.358
216	0	298.318	1982.37	1544.39	194.194	1980.24	1540.42	308.014	2153.97	1574.93	177.863	2127.37	1573.46	251.326	2212.29	1437.82	255.015	2314.86	1190.5	240.218	2077.76	1328.43	252.449	2030.16	1147.51	209.034	2317.58	1266.94	412.485	2140.4	1374.5	506.583	2181.32	1161.4	521.536	2169.1	1080.37	538.245	2080.08	984.834	478.4	1972.25	937.124	532.187	2003.61	903.486	527.509	1917.67	887.195
217	0	294.841	1968.95	1544.89	190.726	1967	1540.71	304.764	2140.59	1575.38	174.581	2114.17	1573.65	248.858	2198.98	1437.75	254.115	2300.5	1189.94	237.142	2064.12	1328.96	249.041	2015.66	1148.43	207.945	2303.89	1266.24	409.787	2125.95	1375.17	503.686	2167.27	1161.88	518.604	2155.27	1080.85	535.355	2066.5	985.028	475.663	1958.72	937.01	529.348	1990.32	903.443	524.907	1904.48	886.915
218	0	291.401	1955.52	1545.71	187.299	1953.75	1541.33	301.547	2127.18	1576.12	171.335	2100.95	1574.13	246.44	2185.61	1438	253.281	2286.18	1189.76	234.116	2050.49	1329.78	245.683	2001.29	1149.62	206.925	2290.2	1265.94	407.129	2111.46	1376.19	500.824	2153.31	1162.72	515.667	2141.68	1081.68	532.475	2053.33	985.421	472.957	1945.71	936.905	526.545	1977.59	903.479	522.344	1891.92	886.532
219	0	288.018	1942.06	1546.85	183.931	1940.48	1542.27	298.385	2113.77	1577.14	168.147	2087.72	1574.89	244.087	2172.17	1438.58	252.503	2271.92	1189.98	231.173	2036.86	1330.88	242.429	1987.1	1151.07	205.969	2276.51	1266.01	404.533	2096.94	1377.52	498.032	2139.44	1163.92	512.76	2128.33	1082.84	529.635	2040.56	986.014	470.301	1933.2	936.816	523.805	1965.43	903.607	519.83	1879.95	886.056
220	0	284.712	1928.6	1548.3	180.643	1927.21	1543.51	295.302	2100.34	1578.42	165.04	2074.49	1575.92	241.814	2158.69	1439.48	251.77	2257.73	1190.59	228.345	2023.25	1332.24	239.337	1973.08	1152.73	205.068	2262.84	1266.47	402.022	2082.42	1379.16	495.344	2125.67	1165.46	509.917	2115.22	1084.32	526.864	2028.17	986.805	467.716	1921.18	936.749	521.157	1953.79	903.832	517.381	1868.56	885.497
221	0	281.504	1915.14	1550.05	177.454	1913.94	1545.05	292.318	2086.92	1579.94	162.034	2061.28	1577.19	239.633	2145.15	1440.66	251.069	2243.63	1191.56	225.66	2009.65	1333.84	236.454	1959.25	1154.58	204.211	2249.19	1267.3	399.617	2067.93	1381.08	492.791	2111.98	1167.33	507.17	2102.35	1086.11	524.191	2016.16	987.786	465.224	1909.65	936.705	518.63	1942.66	904.158	515.013	1857.73	884.865
222	0	278.412	1901.68	1552.05	174.383	1900.69	1546.85	289.453	2073.52	1581.68	159.15	2048.09	1578.68	237.552	2131.57	1442.12	250.386	2229.64	1192.87	223.145	1996.07	1335.63	233.825	1945.62	1156.55	203.387	2235.56	1268.46	397.336	2053.48	1383.25	490.398	2098.39	1169.47	504.545	2089.69	1088.17	521.644	2004.5	988.945	462.849	1898.58	936.683	516.255	1932.01	904.585	512.748	1847.43	884.171
223	0	275.455	1888.25	1554.3	171.447	1887.47	1548.89	286.728	2060.14	1583.6	156.404	2034.93	1580.35	235.581	2117.96	1443.81	249.707	2215.75	1194.49	220.82	1982.52	1337.59	231.485	1932.17	1158.63	202.585	2221.96	1269.93	395.196	2039.1	1385.62	488.185	2084.91	1171.87	502.065	2077.26	1090.48	519.248	1993.18	990.266	460.615	1887.95	936.68	514.061	1921.81	905.109	510.612	1837.62	883.424
224	0	272.648	1874.85	1556.76	168.663	1874.27	1551.14	284.157	2046.8	1585.66	153.814	2021.81	1582.19	233.724	2104.33	1445.72	249.02	2201.98	1196.39	218.702	1968.99	1339.68	229.458	1918.9	1160.77	201.793	2208.4	1271.68	393.21	2024.8	1388.17	486.168	2071.53	1174.47	499.749	2065.02	1092.99	517.027	1982.17	991.729	458.551	1877.74	936.692	512.076	1912.02	905.725	508.637	1828.27	882.633
225	0	270.008	1861.48	1559.39	166.044	1861.11	1553.57	281.756	2033.51	1587.84	151.393	2008.73	1584.15	231.985	2090.68	1447.8	248.313	2188.33	1198.52	216.803	1955.49	1341.88	227.76	1905.78	1162.94	201	2194.88	1273.67	391.387	2010.62	1390.85	484.351	2058.28	1177.23	497.609	2052.99	1095.66	515	1971.47	993.312	456.681	1867.91	936.713	510.327	1902.62	906.423	506.853	1819.35	881.807
226	0	267.545	1848.15	1562.16	163.602	1847.99	1556.13	279.534	2020.26	1590.11	149.152	1995.71	1586.21	230.364	2077.03	1450.03	247.575	2174.8	1200.85	215.131	1942.02	1344.13	226.397	1892.79	1165.11	200.196	2181.4	1275.87	389.736	1996.55	1393.62	482.736	2045.17	1180.12	495.653	2041.15	1098.47	513.184	1961.05	994.994	455.034	1858.45	936.737	508.835	1893.58	907.191	505.297	1810.81	880.956
227	0	265.271	1834.87	1565.03	161.349	1834.91	1558.81	277.499	2007.07	1592.43	147.099	1982.74	1588.35	228.86	2063.37	1452.36	246.8	2161.39	1203.33	213.685	1928.58	1346.42	225.363	1879.91	1167.25	199.373	2167.97	1278.22	388.258	1982.63	1396.44	481.317	2032.22	1183.07	493.882	2029.49	1101.36	511.59	1950.91	996.75	453.635	1849.31	936.757	507.62	1884.86	908.017	504.004	1802.65	880.088
228	0	263.193	1821.64	1567.97	159.29	1821.88	1561.56	275.656	1993.93	1594.76	145.238	1969.82	1590.52	227.47	2049.73	1454.76	245.981	2148.1	1205.91	212.464	1915.16	1348.72	224.646	1867.11	1169.35	198.524	2154.58	1280.69	386.954	1968.84	1399.27	480.082	2019.45	1186.06	492.294	2018.01	1104.3	510.229	1941.02	998.555	452.508	1840.46	936.767	506.695	1876.44	908.885	503.009	1794.81	879.213
229	0	261.315	1808.46	1570.93	157.431	1808.88	1564.35	274.007	1980.85	1597.09	143.572	1956.94	1592.7	226.189	2036.1	1457.2	245.117	2134.91	1208.57	211.459	1901.77	1350.99	224.225	1854.37	1171.39	197.645	2141.23	1283.23	385.819	1955.2	1402.09	479.015	2006.88	1189.05	490.883	2006.71	1107.26	509.102	1931.37	1000.39	451.673	1831.89	936.758	506.07	1868.29	909.78	502.345	1787.28	878.339
230	0	259.64	1795.33	1573.89	155.775	1795.93	1567.14	272.548	1967.83	1599.38	142.098	1944.1	1594.87	225.013	2022.49	1459.64	244.209	2121.82	1211.25	210.659	1888.4	1353.22	224.073	1841.66	1173.36	196.736	2127.93	1285.8	384.848	1941.7	1404.85	478.098	1994.52	1191.99	489.639	1995.56	1110.2	508.212	1921.94	1002.22	451.149	1823.54	936.724	505.747	1860.41	910.684	502.041	1780.02	877.472
231	0	258.166	1782.25	1576.8	154.319	1783	1569.9	271.276	1954.85	1601.61	140.814	1931.3	1596.99	223.935	2008.91	1462.05	243.261	2108.81	1213.91	210.049	1875.06	1355.38	224.16	1828.97	1175.25	195.796	2114.67	1288.38	384.032	1928.35	1407.52	477.313	1982.39	1194.86	488.551	1984.58	1113.09	507.554	1912.74	1004.03	450.948	1815.41	936.656	505.725	1852.76	911.581	502.12	1773.03	876.618
232	0	256.892	1769.21	1579.63	153.062	1770.1	1572.6	270.185	1941.92	1603.75	139.712	1918.52	1599.05	222.951	1995.36	1464.4	242.279	2095.88	1216.53	209.615	1861.74	1357.45	224.452	1816.27	1177.03	194.831	2101.44	1290.91	383.362	1915.12	1410.08	476.639	1970.5	1197.63	487.606	1973.74	1115.9	507.124	1903.74	1005.8	451.08	1807.45	936.547	505.996	1845.33	912.453	502.6	1766.26	875.78
233	0	255.811	1756.21	1582.35	151.997	1757.22	1575.19	269.265	1929.03	1605.77	138.786	1905.76	1601.02	222.054	1981.83	1466.66	241.272	2083.01	1219.05	209.337	1848.43	1359.41	224.914	1803.56	1178.72	193.847	2088.25	1293.36	382.824	1902.02	1412.51	476.059	1958.85	1200.28	486.79	1963.05	1118.61	506.91	1894.94	1007.51	451.549	1799.64	936.389	506.548	1838.11	913.282	503.491	1759.72	874.96
234	0	254.916	1743.24	1584.92	151.119	1744.34	1577.66	268.507	1916.17	1607.65	138.025	1893	1602.87	221.24	1968.32	1468.79	240.253	2070.2	1221.46	209.199	1835.14	1361.25	225.51	1790.82	1180.29	192.852	2075.08	1295.71	382.409	1889.03	1414.77	475.557	1947.44	1202.78	486.091	1952.48	1121.2	506.903	1886.31	1009.13	452.352	1791.96	936.171	507.365	1831.08	914.049	504.794	1753.38	874.155
235	0	254.199	1730.3	1587.32	150.418	1731.48	1579.98	267.901	1903.33	1609.38	137.419	1880.24	1604.58	220.506	1954.84	1470.77	239.234	2057.41	1223.72	209.181	1821.86	1362.94	226.207	1778.06	1181.72	191.858	2061.94	1297.92	382.104	1876.13	1416.85	475.119	1936.24	1205.12	485.495	1942.04	1123.64	507.088	1877.85	1010.65	453.484	1784.39	935.883	508.427	1824.22	914.737	506.503	1747.21	873.362
236	0	253.652	1717.37	1589.52	149.887	1718.61	1582.11	267.435	1890.5	1610.93	136.957	1867.47	1606.13	219.849	1941.38	1472.58	238.23	2044.66	1225.81	209.266	1808.59	1364.47	226.974	1765.26	1183.02	190.877	2048.81	1299.96	381.897	1863.3	1418.73	474.737	1925.25	1207.27	484.993	1931.7	1125.91	507.453	1869.53	1012.05	454.931	1776.91	935.513	509.712	1817.53	915.33	508.604	1741.21	872.572
237	0	253.265	1704.46	1591.5	149.516	1705.72	1584.04	267.1	1877.68	1612.27	136.63	1854.68	1607.5	219.267	1927.93	1474.19	237.257	2031.91	1227.7	209.438	1795.32	1365.82	227.78	1752.43	1184.16	189.921	2035.7	1301.82	381.778	1850.52	1420.38	474.403	1914.44	1209.24	484.575	1921.44	1128	507.981	1861.35	1013.31	456.678	1769.49	935.049	511.196	1810.97	915.808	511.073	1735.36	871.775
238	0	253.03	1691.56	1593.22	149.296	1692.82	1585.74	266.884	1864.86	1613.4	136.428	1841.87	1608.67	218.762	1914.49	1475.58	236.331	2019.17	1229.36	209.68	1782.04	1366.96	228.601	1739.57	1185.12	189.007	2022.6	1303.47	381.736	1837.78	1421.78	474.114	1903.77	1210.99	484.235	1911.26	1129.88	508.658	1853.27	1014.41	458.703	1762.13	934.474	512.856	1804.54	916.156	513.883	1729.64	870.957
239	0	252.938	1678.65	1594.67	149.219	1679.9	1587.18	266.781	1852.02	1614.28	136.342	1829.02	1609.62	218.335	1901.06	1476.72	235.469	2006.43	1230.78	209.98	1768.77	1367.89	229.413	1726.69	1185.89	188.149	2009.5	1304.89	381.763	1825.05	1422.92	473.868	1893.21	1212.51	483.967	1901.12	1131.54	509.47	1845.29	1015.34	460.983	1754.8	933.775	514.666	1798.2	916.357	516.999	1724.03	870.103
240	0	252.984	1665.74	1595.83	149.28	1666.94	1588.35	266.783	1839.18	1614.9	136.365	1816.13	1610.32	217.989	1887.63	1477.61	234.685	1993.66	1231.93	210.325	1755.48	1368.57	230.196	1713.79	1186.44	187.361	1996.41	1306.05	381.851	1812.31	1423.78	473.668	1882.73	1213.8	483.769	1891.02	1132.97	510.402	1837.36	1016.08	463.491	1747.49	932.933	516.605	1791.95	916.396	520.384	1718.51	869.192
241	0	253.162	1652.82	1596.69	149.471	1653.95	1589.23	266.886	1826.31	1615.24	136.492	1803.19	1610.76	217.728	1874.19	1478.21	233.995	1980.88	1232.8	210.705	1742.18	1369	230.935	1700.86	1186.75	186.66	1983.31	1306.95	381.997	1799.54	1424.34	473.516	1872.27	1214.84	483.639	1880.92	1134.14	511.443	1829.48	1016.61	466.199	1740.19	931.93	518.65	1785.76	916.258	523.997	1713.05	868.205
242	0	253.468	1639.88	1597.21	149.791	1640.92	1589.81	267.086	1813.42	1615.29	136.721	1790.21	1610.93	217.558	1860.75	1478.51	233.413	1968.06	1233.37	211.114	1728.87	1369.15	231.616	1687.93	1186.8	186.061	1970.2	1307.56	382.196	1786.73	1424.59	473.42	1861.81	1215.61	483.577	1870.8	1135.05	512.58	1821.61	1016.92	469.079	1732.89	930.749	520.782	1779.59	915.928	527.797	1707.64	867.118
243	0	253.9	1626.92	1597.41	150.235	1627.85	1590.07	267.383	1800.49	1615.02	137.05	1777.19	1610.81	217.485	1847.3	1478.51	232.952	1955.21	1233.63	211.545	1715.53	1369.01	232.228	1674.97	1186.57	185.578	1957.08	1307.88	382.447	1773.86	1424.5	473.385	1851.3	1216.09	483.585	1860.65	1135.67	513.805	1813.72	1016.99	472.1	1725.57	929.37	522.985	1773.42	915.391	531.742	1702.25	865.909
244	0	254.458	1613.94	1597.25	150.804	1614.74	1590.01	267.78	1787.54	1614.43	137.481	1764.11	1610.39	217.518	1833.83	1478.18	232.621	1942.31	1233.56	211.996	1702.18	1368.57	232.764	1662.01	1186.05	185.223	1943.95	1307.88	382.753	1760.92	1424.07	473.42	1840.71	1216.27	483.666	1850.44	1135.98	515.109	1805.78	1016.81	475.236	1718.22	927.776	525.244	1767.23	914.635	535.794	1696.86	864.552
245	0	255.143	1600.93	1596.75	151.498	1601.58	1589.63	268.28	1774.56	1613.51	138.017	1750.98	1609.66	217.665	1820.35	1477.53	232.43	1929.37	1233.16	212.467	1688.8	1367.8	233.219	1649.02	1185.21	185.01	1930.79	1307.55	383.117	1747.89	1423.29	473.532	1830	1216.14	483.823	1840.14	1135.98	516.486	1797.77	1016.37	478.459	1710.82	925.948	527.547	1760.99	913.648	539.913	1691.44	863.023
246	0	255.959	1587.89	1595.91	152.321	1588.38	1588.92	268.89	1761.54	1612.24	138.664	1737.81	1608.62	217.936	1806.85	1476.55	232.386	1916.38	1232.41	212.96	1675.4	1366.7	233.59	1636.01	1184.06	184.948	1917.61	1306.9	383.543	1734.77	1422.15	473.729	1819.15	1215.67	484.061	1829.74	1135.66	517.93	1789.66	1015.65	481.744	1703.37	923.873	529.886	1754.65	912.418	544.064	1685.97	861.299
247	0	256.908	1574.82	1594.72	153.277	1575.14	1587.89	269.618	1748.49	1610.64	139.429	1724.58	1607.27	218.339	1793.33	1475.24	232.491	1903.33	1231.33	213.479	1661.96	1365.28	233.879	1622.98	1182.58	185.046	1904.39	1305.92	384.04	1721.55	1420.64	474.02	1808.13	1214.86	484.383	1819.21	1134.99	519.438	1781.41	1014.65	485.067	1695.84	921.535	532.253	1748.21	910.938	548.217	1680.41	859.357
248	0	257.998	1561.71	1593.2	154.369	1561.85	1586.55	270.474	1735.4	1608.71	140.322	1711.31	1605.62	218.886	1779.79	1473.61	232.749	1890.22	1229.9	214.031	1648.5	1363.52	234.088	1609.91	1180.78	185.311	1891.14	1304.61	384.616	1708.23	1418.76	474.413	1796.92	1213.7	484.795	1808.53	1133.98	521.004	1773.01	1013.36	488.407	1688.21	918.926	534.643	1741.62	909.201	552.341	1674.75	857.178
249	0	259.233	1548.57	1591.36	155.606	1548.51	1584.92	271.468	1722.27	1606.45	141.352	1698	1603.67	219.585	1766.23	1471.67	233.157	1877.05	1228.14	214.625	1635	1361.45	234.224	1596.79	1178.66	185.745	1877.84	1302.98	385.281	1694.8	1416.53	474.913	1785.51	1212.17	485.3	1797.68	1132.62	522.626	1764.42	1011.77	491.744	1680.47	916.04	537.051	1734.85	907.205	556.411	1668.96	854.745
250	0	260.622	1535.38	1589.24	156.994	1535.13	1583.02	272.611	1709.1	1603.89	142.529	1684.64	1601.46	220.445	1752.64	1469.45	233.713	1863.8	1226.07	215.272	1621.45	1359.07	234.298	1583.63	1176.23	186.35	1864.49	1301.04	386.045	1681.27	1413.95	475.527	1773.87	1210.28	485.902	1786.65	1130.91	524.3	1755.62	1009.89	495.06	1672.59	912.875	539.473	1727.88	904.95	560.405	1663	852.044
251	0	262.172	1522.15	1586.85	158.54	1521.7	1580.88	273.916	1695.89	1601.05	143.864	1671.23	1598.99	221.474	1739.01	1466.96	234.41	1850.46	1223.71	215.985	1607.86	1356.41	234.323	1570.4	1173.52	187.124	1851.08	1298.82	386.921	1667.64	1411.05	476.258	1762.01	1208.04	486.602	1775.42	1128.86	526.023	1746.59	1007.73	498.341	1664.56	909.438	541.907	1720.68	902.442	564.302	1656.86	849.07
252	0	263.89	1508.85	1584.24	160.251	1508.21	1578.53	275.392	1682.62	1597.96	145.368	1657.77	1596.32	222.678	1725.35	1464.25	235.24	1837.04	1221.08	216.778	1594.21	1353.51	234.316	1557.09	1170.56	188.06	1837.6	1296.34	387.918	1653.91	1407.84	477.11	1749.91	1205.45	487.402	1763.97	1126.49	527.791	1737.31	1005.29	501.57	1656.35	905.738	544.349	1713.21	899.691	568.084	1650.51	845.821
253	0	265.782	1495.5	1581.44	162.135	1494.67	1576.02	277.05	1669.29	1594.67	147.051	1644.26	1593.47	224.061	1711.64	1461.34	236.191	1823.51	1218.22	217.665	1580.5	1350.38	234.297	1543.69	1167.39	189.152	1824.04	1293.65	389.047	1640.09	1404.37	478.081	1737.57	1202.53	488.301	1752.29	1123.81	529.598	1727.75	1002.59	504.736	1647.93	901.795	546.794	1705.46	896.714	571.734	1643.91	842.302
254	0	267.856	1482.08	1578.5	164.199	1481.07	1573.38	278.899	1655.91	1591.22	148.92	1630.69	1590.48	225.626	1697.88	1458.29	237.252	1809.88	1215.17	218.661	1566.72	1347.1	234.291	1530.18	1164.04	190.387	1810.38	1290.77	390.318	1626.19	1400.67	479.171	1725	1199.32	489.295	1740.36	1120.85	531.436	1717.89	999.659	507.825	1639.29	897.634	549.236	1697.39	893.532	575.239	1637.05	838.528
255	0	270.116	1468.58	1575.47	166.446	1467.39	1570.67	280.945	1642.45	1587.66	150.985	1617.05	1587.42	227.373	1684.06	1455.13	238.405	1796.12	1211.97	219.781	1552.85	1343.7	234.322	1516.56	1160.58	191.752	1796.62	1287.76	391.737	1612.22	1396.79	480.374	1712.19	1195.85	490.378	1728.18	1117.65	533.298	1707.73	996.522	510.826	1630.38	893.29	551.668	1688.98	890.172	578.584	1629.89	834.52
256	0	272.567	1455	1572.4	168.883	1453.64	1567.94	283.193	1628.9	1584.05	153.248	1603.34	1584.33	229.297	1670.17	1451.92	239.636	1782.23	1208.7	221.039	1538.89	1340.24	234.42	1502.79	1157.06	193.228	1782.74	1284.67	393.31	1598.19	1392.78	481.682	1699.15	1192.15	491.543	1715.75	1114.24	535.172	1697.25	993.216	513.728	1621.2	888.802	554.079	1680.2	886.669	581.757	1622.41	830.311
257	0	275.21	1441.32	1569.36	171.51	1439.79	1565.25	285.645	1615.27	1580.44	155.714	1589.54	1581.26	231.395	1656.2	1448.72	240.925	1768.2	1205.39	222.448	1524.83	1336.8	234.614	1488.88	1153.54	194.798	1768.73	1281.56	395.039	1584.1	1388.71	483.085	1685.9	1188.29	492.78	1703.05	1110.67	537.047	1686.43	989.781	516.519	1611.7	884.218	556.458	1671.04	883.062	584.747	1614.56	825.94
258	0	278.045	1427.54	1566.38	174.328	1425.86	1562.63	288.299	1601.53	1576.9	158.38	1575.65	1578.28	233.656	1642.14	1445.59	242.253	1754.01	1202.11	224.016	1510.65	1333.43	234.933	1474.8	1150.1	196.438	1754.58	1278.49	396.925	1569.97	1384.63	484.569	1672.44	1184.32	494.074	1690.09	1106.99	538.907	1675.27	986.261	519.188	1601.87	879.591	558.789	1661.46	879.393	587.542	1606.33	821.454
259	0	281.069	1413.65	1563.54	177.334	1411.81	1560.17	291.152	1587.69	1573.49	161.244	1561.66	1575.44	236.068	1627.99	1442.57	243.601	1739.68	1198.93	225.752	1496.34	1330.2	235.406	1460.53	1146.8	198.128	1740.28	1275.52	398.964	1555.81	1380.61	486.12	1658.79	1180.3	495.411	1676.88	1103.26	540.739	1663.76	982.707	521.724	1591.67	874.978	561.058	1651.45	875.711	590.132	1597.68	816.909
260	0	284.275	1399.64	1560.88	180.522	1397.66	1557.89	294.194	1573.73	1570.26	164.299	1547.55	1572.8	238.617	1613.72	1439.73	244.948	1725.18	1195.91	227.66	1481.91	1327.18	236.058	1446.07	1143.71	199.845	1725.81	1272.71	401.148	1541.62	1376.72	487.718	1644.96	1176.29	496.774	1663.41	1099.54	542.524	1651.9	979.169	524.117	1581.09	870.442	563.244	1641	872.066	592.508	1588.59	812.364
261	0	287.656	1385.51	1558.45	183.886	1383.38	1555.85	297.414	1559.64	1567.27	167.534	1533.33	1570.41	241.285	1599.35	1437.12	246.276	1710.53	1193.1	229.74	1467.34	1324.43	236.912	1431.41	1140.9	201.566	1711.18	1270.11	403.467	1527.42	1373.01	489.343	1630.97	1172.37	498.144	1649.71	1095.89	544.247	1639.69	975.701	526.357	1570.09	866.044	565.33	1630.08	868.508	594.661	1579.01	807.882
262	0	291.198	1371.27	1556.29	187.412	1368.99	1554.1	300.797	1545.43	1564.57	170.935	1518.98	1568.32	244.052	1584.86	1434.78	247.567	1695.72	1190.56	231.989	1452.64	1322	237.986	1416.53	1138.43	203.271	1696.38	1267.79	405.906	1513.21	1369.56	490.976	1616.84	1168.6	499.505	1635.77	1092.37	545.89	1627.12	972.353	528.433	1558.65	861.847	567.292	1618.7	865.087	596.584	1568.92	803.527
263	0	294.886	1356.9	1554.44	191.086	1354.47	1552.66	304.324	1531.09	1562.21	174.484	1504.5	1566.57	246.898	1570.26	1432.76	248.807	1680.77	1188.34	234.397	1437.81	1319.95	239.291	1401.45	1136.34	204.939	1681.41	1265.78	408.448	1498.99	1366.42	492.596	1602.57	1165.05	500.837	1621.61	1089.03	547.437	1614.2	969.175	530.337	1546.76	857.913	569.112	1606.83	861.851	598.269	1558.3	799.362
264	0	298.701	1342.41	1552.93	194.889	1339.82	1551.57	307.972	1516.63	1560.22	178.161	1489.88	1565.19	249.797	1555.54	1431.09	249.984	1665.69	1186.49	236.952	1422.86	1318.31	240.836	1386.17	1134.69	206.555	1666.28	1264.14	411.072	1484.79	1363.64	494.184	1588.19	1161.77	502.124	1607.25	1085.93	548.873	1600.93	966.215	532.061	1534.39	854.298	570.77	1594.46	858.846	599.709	1547.12	795.447
265	0	302.621	1327.81	1551.78	198.8	1325.05	1550.85	311.717	1502.04	1558.63	181.939	1475.14	1564.21	252.727	1540.73	1429.81	251.088	1650.5	1185.04	239.637	1407.8	1317.11	242.619	1370.7	1133.51	208.102	1651.01	1262.9	413.756	1470.59	1361.26	495.722	1573.72	1158.81	503.351	1592.7	1083.11	550.185	1587.32	963.513	533.598	1521.53	851.053	572.247	1581.6	856.11	600.901	1535.34	791.836
266	0	306.62	1313.1	1551.01	202.793	1310.18	1550.51	315.53	1487.34	1557.46	185.793	1460.28	1563.66	255.662	1525.82	1428.93	252.114	1635.21	1184.01	242.431	1392.65	1316.38	244.636	1355.08	1132.8	209.57	1635.62	1262.07	416.475	1456.41	1359.32	497.194	1559.16	1156.23	504.505	1577.98	1080.63	551.364	1573.37	961.105	534.942	1508.17	848.224	573.529	1568.24	853.677	601.839	1522.96	788.575
267	0	310.671	1298.31	1550.61	206.842	1295.19	1550.55	319.379	1472.53	1556.73	189.692	1445.31	1563.53	258.578	1510.84	1428.47	253.06	1619.85	1183.42	245.31	1377.43	1316.12	246.873	1339.33	1132.59	210.949	1620.12	1261.67	419.205	1442.25	1357.84	498.59	1544.53	1154.05	505.578	1563.1	1078.49	552.401	1559.09	959.018	536.091	1494.3	845.847	574.604	1554.38	851.573	602.522	1509.95	785.702
268	0	314.744	1283.43	1550.59	210.916	1280.13	1550.97	323.232	1457.64	1556.43	193.604	1430.24	1563.82	261.451	1495.81	1428.41	253.926	1604.43	1183.28	248.245	1362.16	1316.33	249.313	1323.49	1132.85	212.234	1604.53	1261.71	421.921	1428.12	1356.82	499.899	1529.83	1152.29	506.563	1548.09	1076.74	553.293	1544.49	957.272	537.041	1479.9	843.948	575.463	1540.01	849.817	602.947	1496.29	783.244
269	0	318.807	1268.5	1550.93	214.982	1264.99	1551.74	327.055	1442.69	1556.56	197.494	1415.08	1564.53	264.259	1480.74	1428.77	254.715	1589	1183.56	251.207	1346.86	1316.98	251.929	1307.6	1133.57	213.423	1588.9	1262.16	424.597	1414.03	1356.28	501.119	1515.09	1150.98	507.458	1532.96	1075.39	554.04	1529.57	955.878	537.794	1464.99	842.546	576.104	1525.14	848.418	603.118	1481.99	781.218
270	0	322.827	1253.53	1551.6	219.009	1249.8	1552.86	330.814	1427.68	1557.09	201.33	1399.87	1565.62	266.981	1465.65	1429.5	255.436	1573.57	1184.27	254.167	1331.57	1318.06	254.693	1291.7	1134.72	214.52	1573.24	1263.02	427.213	1399.97	1356.2	502.248	1500.31	1150.1	508.265	1517.73	1074.42	554.645	1514.35	954.839	538.35	1449.55	841.646	576.528	1509.77	847.377	603.035	1467.01	779.63
271	0	326.771	1238.53	1552.6	222.963	1234.58	1554.28	334.476	1412.65	1558.01	205.076	1384.62	1567.08	269.601	1450.58	1430.6	256.098	1558.17	1185.36	257.094	1316.31	1319.52	257.567	1275.84	1136.25	215.528	1557.59	1264.26	429.746	1385.94	1356.56	503.288	1485.5	1149.65	508.989	1502.41	1073.84	555.114	1498.83	954.147	538.713	1433.61	841.245	576.74	1493.91	846.688	602.705	1451.37	778.478
272	0	330.607	1223.54	1553.88	226.81	1219.35	1555.97	338.009	1397.62	1559.28	208.701	1369.35	1568.86	272.104	1435.55	1432.03	256.715	1542.82	1186.81	259.959	1301.09	1321.33	260.512	1260.04	1138.12	216.458	1541.98	1265.84	432.177	1371.96	1357.33	504.247	1470.65	1149.61	509.639	1487.02	1073.62	555.458	1483.02	953.79	538.889	1417.16	841.331	576.75	1477.56	846.338	602.133	1435.07	777.751
273	0	334.303	1208.57	1555.42	230.519	1204.14	1557.9	341.384	1382.62	1560.87	212.173	1354.1	1570.93	274.478	1420.56	1433.75	257.299	1527.55	1188.58	262.732	1285.96	1323.44	263.483	1244.37	1140.26	217.32	1526.43	1267.72	434.492	1358.01	1358.47	505.132	1455.78	1149.94	510.227	1471.56	1073.75	555.688	1466.94	953.749	538.885	1400.23	841.884	576.573	1460.74	846.305	601.33	1418.1	777.429
274	0	337.831	1193.64	1557.17	234.062	1188.97	1560.03	344.575	1367.65	1562.73	215.466	1338.88	1573.23	276.715	1405.65	1435.73	257.867	1512.39	1190.62	265.39	1270.92	1325.79	266.433	1228.83	1142.63	218.128	1510.97	1269.85	436.678	1344.1	1359.94	505.955	1440.89	1150.61	510.767	1456.05	1074.19	555.82	1450.58	953.997	538.707	1382.83	842.877	576.227	1443.45	846.568	600.307	1400.48	777.491
275	0	341.164	1178.76	1559.11	237.412	1173.86	1562.32	347.562	1352.75	1564.81	218.557	1323.71	1575.72	278.807	1390.83	1437.92	258.432	1497.33	1192.88	267.909	1255.99	1328.33	269.317	1213.47	1145.17	218.892	1495.63	1272.19	438.724	1330.22	1361.68	506.728	1425.98	1151.58	511.272	1440.48	1074.9	555.868	1433.96	954.507	538.367	1365	844.276	575.73	1425.71	847.099	599.075	1382.23	777.909
276	0	344.282	1163.96	1561.2	240.546	1158.83	1564.72	350.328	1337.92	1567.08	221.426	1308.62	1578.35	280.753	1376.1	1440.27	259.009	1482.42	1195.33	270.27	1241.19	1331	272.086	1198.31	1147.81	219.627	1480.43	1274.7	440.626	1316.37	1363.66	507.466	1411.05	1152.8	511.76	1424.88	1075.85	555.852	1417.08	955.248	537.874	1346.75	846.047	575.105	1407.54	847.871	597.651	1363.37	778.659
277	0	347.167	1149.24	1563.41	243.448	1143.88	1567.21	352.861	1323.18	1569.49	224.061	1293.63	1581.08	282.552	1361.47	1442.76	259.608	1467.65	1197.91	272.461	1226.52	1333.77	274.7	1183.36	1150.52	220.343	1465.37	1277.33	442.379	1302.55	1365.81	508.18	1396.08	1154.23	512.247	1409.24	1076.99	555.786	1399.96	956.191	537.238	1328.12	848.152	574.375	1388.95	848.858	596.051	1343.91	779.714
278	0	349.807	1134.61	1565.69	246.103	1129.04	1569.73	355.155	1308.54	1572	226.453	1278.74	1583.85	284.204	1346.96	1445.34	260.238	1453.02	1200.59	274.47	1211.99	1336.57	277.121	1168.63	1153.24	221.05	1450.48	1280.05	443.984	1288.76	1368.09	508.884	1381.09	1155.83	512.747	1393.56	1078.29	555.69	1382.6	957.306	536.471	1309.13	850.553	573.564	1369.97	850.035	594.292	1323.9	781.052
279	0	352.193	1120.07	1568.02	248.505	1114.3	1572.27	357.21	1294	1574.56	228.599	1263.95	1586.62	285.713	1332.55	1447.97	260.905	1438.56	1203.33	276.292	1197.61	1339.38	279.316	1154.13	1155.93	221.757	1435.75	1282.8	445.444	1274.98	1370.45	509.59	1366.07	1157.54	513.276	1377.83	1079.7	555.578	1365.01	958.566	535.584	1289.83	853.215	572.693	1350.61	851.38	592.395	1303.36	782.652
280	0	354.324	1105.63	1570.37	250.65	1099.68	1574.78	359.028	1279.57	1577.14	230.501	1249.29	1589.37	287.084	1318.25	1450.61	261.613	1424.25	1206.09	277.926	1183.36	1342.14	281.264	1139.86	1158.56	222.469	1421.19	1285.57	446.765	1261.22	1372.86	510.308	1351	1159.34	513.847	1362.07	1081.19	555.466	1347.2	959.945	534.588	1270.25	856.102	571.783	1330.9	852.873	590.379	1282.33	784.498
281	0	356.201	1091.28	1572.71	252.54	1085.17	1577.24	360.618	1265.22	1579.71	232.165	1234.74	1592.05	288.325	1304.05	1453.24	262.363	1410.09	1208.84	279.375	1169.25	1344.83	282.948	1125.81	1161.1	223.19	1406.79	1288.31	447.955	1247.46	1375.28	511.047	1335.9	1161.18	514.47	1346.26	1082.73	555.366	1329.18	961.423	533.497	1250.42	859.184	570.855	1310.87	854.499	588.266	1260.86	786.579
282	0	357.831	1077.01	1575	254.181	1070.77	1579.61	361.991	1250.97	1582.24	233.602	1220.31	1594.65	289.443	1289.96	1455.83	263.155	1396.07	1211.55	280.643	1155.26	1347.43	284.364	1111.96	1163.54	223.925	1392.56	1291	449.021	1233.72	1377.67	511.813	1320.74	1163.03	515.156	1330.4	1084.28	555.29	1310.96	962.979	532.321	1230.38	862.431	569.925	1290.54	856.246	586.077	1238.98	788.885
283	0	359.223	1062.83	1577.22	255.582	1056.46	1581.88	363.162	1236.8	1584.7	234.825	1205.98	1597.13	290.447	1275.95	1458.35	263.985	1382.19	1214.19	281.741	1141.4	1349.91	285.513	1098.3	1165.86	224.673	1378.49	1293.62	449.974	1219.97	1380.01	512.612	1305.54	1164.88	515.91	1314.49	1085.84	555.248	1292.55	964.597	531.073	1210.16	865.818	569.007	1269.93	858.103	583.835	1216.75	791.409
284	0	360.39	1048.71	1579.35	256.756	1042.25	1584.03	364.147	1222.7	1587.08	235.85	1191.74	1599.49	291.346	1262.02	1460.78	264.848	1368.43	1216.75	282.679	1127.64	1352.26	286.406	1084.8	1168.05	225.435	1364.56	1296.15	450.823	1206.23	1382.27	513.447	1290.28	1166.7	516.739	1298.53	1087.36	555.245	1273.96	966.263	529.767	1189.8	869.32	568.115	1249.08	860.063	581.56	1194.22	794.146
285	0	361.348	1034.65	1581.37	257.719	1028.13	1586.03	364.964	1208.65	1589.35	236.694	1177.59	1601.69	292.149	1248.16	1463.1	265.739	1354.78	1219.2	283.47	1113.97	1354.47	287.061	1071.45	1170.11	226.209	1350.76	1298.56	451.577	1192.48	1384.44	514.32	1274.97	1168.46	517.643	1282.51	1088.85	555.288	1255.22	967.965	528.414	1169.33	872.918	567.257	1228.02	862.118	579.275	1171.42	797.089
286	0	362.114	1020.64	1583.26	258.487	1014.07	1587.87	365.629	1194.65	1591.5	237.375	1163.52	1603.74	292.865	1234.37	1465.3	266.649	1341.24	1221.53	284.126	1100.39	1356.52	287.499	1058.21	1172.02	226.992	1337.07	1300.84	452.244	1178.73	1386.51	515.232	1259.61	1170.16	518.625	1266.43	1090.28	555.379	1236.33	969.692	527.029	1148.78	876.59	566.44	1206.78	864.262	577	1148.42	800.233
287	0	362.706	1006.67	1585	259.078	1000.07	1589.53	366.161	1180.68	1593.51	237.911	1149.51	1605.61	293.502	1220.63	1467.35	267.57	1327.77	1223.71	284.662	1086.88	1358.41	287.748	1045.07	1173.8	227.778	1323.49	1302.98	452.833	1164.97	1388.45	516.181	1244.19	1171.78	519.681	1250.29	1091.63	555.52	1217.31	971.434	525.626	1128.18	880.319	565.671	1185.39	866.488	574.755	1125.26	803.569
288	0	363.142	992.724	1586.57	259.511	986.124	1591.01	366.576	1166.74	1595.36	238.319	1135.54	1607.3	294.066	1206.93	1469.24	268.491	1314.38	1225.75	285.091	1073.42	1360.12	287.839	1032	1175.43	228.562	1309.99	1304.97	453.349	1151.2	1390.25	517.166	1228.73	1173.32	520.81	1234.09	1092.91	555.713	1198.18	973.179	524.218	1107.54	884.087	564.954	1163.88	868.788	572.559	1101.99	807.084
289	0	363.439	978.797	1587.97	259.804	972.212	1592.3	366.889	1152.81	1597.05	238.616	1121.61	1608.8	294.563	1193.25	1470.95	269.402	1301.04	1227.62	285.427	1060.01	1361.66	287.801	1018.98	1176.9	229.337	1296.55	1306.79	453.797	1137.42	1391.91	518.184	1213.22	1174.74	522.007	1217.83	1094.1	555.956	1178.96	974.919	522.821	1086.9	887.875	564.291	1142.29	871.151	570.43	1078.66	810.763
290	0	363.617	964.88	1589.17	259.974	958.325	1593.37	367.113	1138.88	1598.56	238.816	1107.71	1610.11	294.999	1179.6	1472.49	270.29	1287.75	1229.32	285.681	1046.62	1363.01	287.666	1006	1178.21	230.094	1283.17	1308.43	454.181	1123.63	1393.41	519.232	1197.66	1176.06	523.265	1201.51	1095.19	556.25	1159.66	976.642	521.446	1066.28	891.665	563.684	1120.64	873.566	568.383	1055.31	814.587
291	0	363.688	950.963	1590.17	260.037	944.454	1594.24	367.26	1124.95	1599.87	238.933	1093.83	1611.21	295.375	1165.96	1473.83	271.143	1274.49	1230.83	285.864	1033.25	1364.17	287.465	993.046	1179.34	230.823	1269.83	1309.89	454.504	1109.82	1394.74	520.303	1182.06	1177.26	524.578	1185.12	1096.17	556.592	1140.31	978.336	520.109	1045.69	895.438	563.137	1098.96	876.019	566.433	1031.99	818.533
292	0	363.669	937.041	1590.96	260.007	930.591	1594.89	367.34	1111.01	1600.98	238.976	1079.95	1612.09	295.694	1152.32	1474.98	271.948	1261.25	1232.16	285.988	1019.89	1365.12	287.224	980.103	1180.28	231.515	1256.51	1311.16	454.768	1096	1395.89	521.394	1166.42	1178.32	525.937	1168.68	1097.03	556.981	1120.91	979.991	518.821	1025.15	899.171	562.649	1077.29	878.494	564.592	1008.74	822.573
293	0	363.57	923.108	1591.53	259.896	916.728	1595.32	367.36	1097.06	1601.87	238.956	1066.07	1612.76	295.956	1138.67	1475.91	272.691	1248.02	1233.28	286.059	1006.53	1365.85	286.967	967.166	1181.01	232.157	1243.2	1312.23	454.973	1082.17	1396.85	522.498	1150.74	1179.25	527.335	1152.17	1097.77	557.413	1101.5	981.591	517.595	1004.68	902.845	562.222	1055.64	880.973	562.87	985.581	826.678
294	0	363.401	909.161	1591.89	259.714	902.859	1595.53	367.324	1083.09	1602.54	238.877	1052.19	1613.2	296.161	1125	1476.62	273.361	1234.8	1234.2	286.085	993.15	1366.37	286.717	954.227	1181.53	232.74	1229.89	1313.1	455.121	1068.32	1397.62	523.608	1135.02	1180.02	528.76	1135.6	1098.37	557.887	1082.08	983.125	516.441	984.281	906.436	561.858	1034.05	883.436	561.275	962.561	830.814
295	0	363.168	895.194	1592.01	259.467	888.978	1595.51	367.237	1069.1	1602.97	238.745	1038.3	1613.42	296.307	1111.3	1477.12	273.945	1221.56	1234.91	286.07	979.748	1366.65	286.489	941.281	1181.81	233.251	1216.56	1313.75	455.211	1054.46	1398.17	524.716	1119.27	1180.63	530.204	1118.97	1098.84	558.4	1062.66	984.576	515.369	963.976	909.92	561.559	1012.53	885.861	559.815	939.704	834.946
296	0	362.877	881.206	1591.91	259.161	875.083	1595.26	367.1	1055.08	1603.17	238.562	1024.39	1613.4	296.389	1097.58	1477.38	274.431	1208.32	1235.4	286.019	966.313	1366.69	286.295	928.32	1181.84	233.68	1203.21	1314.2	455.241	1040.58	1398.52	525.812	1103.48	1181.08	531.655	1102.29	1099.16	558.947	1043.27	985.932	514.386	943.772	913.273	561.327	991.115	888.226	558.494	917.035	839.039
297	0	362.528	867.195	1591.57	258.798	861.169	1594.78	366.913	1041.05	1603.11	238.329	1010.47	1613.14	296.406	1083.82	1477.41	274.81	1195.05	1235.67	285.931	952.84	1366.49	286.142	915.337	1181.61	234.014	1189.82	1314.43	455.21	1026.68	1398.64	526.887	1087.65	1181.34	533.101	1085.56	1099.32	559.525	1023.92	987.177	513.499	923.679	916.472	561.162	969.818	890.508	557.315	894.575	843.054
298	0	362.123	853.16	1591	258.379	847.235	1594.08	366.674	1026.99	1602.8	238.043	996.522	1612.64	296.351	1070.02	1477.2	275.072	1181.75	1235.72	285.807	939.322	1366.03	286.032	902.323	1181.12	234.244	1176.4	1314.43	455.114	1012.77	1398.53	527.931	1071.79	1181.43	534.53	1068.78	1099.32	560.129	1004.62	988.297	512.712	903.706	919.49	561.067	948.658	892.684	556.281	872.343	846.956
299	0	361.658	839.1	1590.2	257.901	833.28	1593.15	366.378	1012.9	1602.24	237.702	982.559	1611.9	296.219	1056.18	1476.76	275.208	1168.41	1235.53	285.642	925.755	1365.31	285.962	889.265	1180.36	234.361	1162.92	1314.21	454.951	998.843	1398.19	528.931	1055.9	1181.32	535.93	1051.96	1099.16	560.755	985.39	989.277	512.029	883.864	922.305	561.042	927.655	894.729	555.392	850.355	850.708
300	0	361.129	825.016	1589.17	257.36	819.303	1592	366.021	998.793	1601.43	237.3	968.575	1610.91	296.003	1042.29	1476.07	275.214	1155.03	1235.11	285.432	912.134	1364.34	285.927	876.152	1179.33	234.355	1149.4	1313.75	454.716	984.896	1397.62	529.874	1039.99	1181.01	537.286	1035.11	1098.83	561.395	966.238	990.104	511.45	864.161	924.893	561.088	906.823	896.622	554.648	828.625	854.277
301	0	360.53	810.908	1587.92	256.75	805.303	1590.63	365.596	984.66	1600.36	236.832	954.571	1609.69	295.698	1028.36	1475.16	275.084	1141.6	1234.45	285.169	898.456	1363.12	285.915	862.97	1178.04	234.221	1135.82	1313.06	454.405	970.93	1396.81	530.748	1024.05	1180.5	538.584	1018.23	1098.32	562.043	947.182	990.765	510.976	844.607	927.232	561.204	886.18	898.341	554.048	807.164	857.631
302	0	359.853	796.777	1586.46	256.065	791.283	1589.05	365.095	970.505	1599.05	236.288	940.547	1608.24	295.295	1014.39	1474	274.816	1128.11	1233.56	284.845	884.718	1361.65	285.911	849.706	1176.49	233.952	1122.18	1312.14	454.012	956.942	1395.78	531.538	1008.09	1179.79	539.809	1001.34	1097.64	562.69	928.237	991.249	510.605	825.21	929.302	561.39	865.743	899.865	553.59	785.984	860.739
303	0	359.088	782.624	1584.78	255.295	777.241	1587.27	364.51	956.328	1597.51	235.662	926.506	1606.57	294.788	1000.38	1472.62	274.408	1114.55	1232.42	284.45	870.92	1359.94	285.899	836.346	1174.7	233.547	1108.49	1310.97	453.53	942.931	1394.52	532.229	992.125	1178.88	540.944	984.439	1096.78	563.327	909.42	991.546	510.334	805.982	931.085	561.643	845.527	901.177	553.272	765.095	863.576
304	0	358.226	768.451	1582.91	254.431	763.18	1585.29	363.831	942.132	1595.75	234.942	912.448	1604.69	294.17	986.336	1471.03	273.863	1100.92	1231.04	283.972	857.061	1358.01	285.86	822.875	1172.68	233.003	1094.72	1309.58	452.954	928.893	1393.04	532.807	976.157	1177.77	541.972	967.548	1095.75	563.943	890.748	991.649	510.157	786.932	932.566	561.958	825.55	902.26	553.092	744.51	866.118
305	0	357.257	754.258	1580.87	253.463	749.101	1583.14	363.049	927.917	1593.79	234.119	898.374	1602.62	293.434	972.266	1469.22	273.183	1087.21	1229.44	283.399	843.141	1355.87	285.771	809.279	1170.47	232.321	1080.9	1307.94	452.275	914.826	1391.37	533.258	960.195	1176.47	542.876	950.677	1094.55	564.528	872.239	991.552	510.07	768.072	933.734	562.329	805.83	903.099	553.046	724.241	868.344
306	0	356.169	740.046	1578.66	252.38	735.005	1580.83	362.155	913.685	1591.65	233.184	884.286	1600.37	292.575	958.174	1467.22	272.373	1073.41	1227.6	282.719	829.161	1353.55	285.611	795.547	1168.08	231.505	1067.02	1306.09	451.488	900.726	1389.51	533.565	944.252	1174.99	543.639	933.844	1093.2	565.069	853.914	991.253	510.064	749.415	934.579	562.75	786.388	903.685	553.131	704.302	870.24
307	0	354.954	725.817	1576.31	251.173	720.892	1578.38	361.138	899.439	1589.36	232.125	870.185	1597.97	291.587	944.065	1465.05	271.442	1059.52	1225.54	281.92	815.121	1351.08	285.356	781.667	1165.55	230.559	1053.07	1304.01	450.584	886.589	1387.49	533.715	928.338	1173.34	544.243	917.064	1091.7	565.552	835.793	990.752	510.131	730.976	935.096	563.21	767.244	904.009	553.342	684.709	871.793
308	0	353.601	711.57	1573.84	249.83	706.763	1575.82	359.988	885.177	1586.94	230.934	856.071	1595.45	290.466	929.945	1462.73	270.398	1045.54	1223.28	280.99	801.024	1348.49	284.984	767.628	1162.92	229.491	1039.07	1301.74	449.559	872.411	1385.33	533.694	912.466	1171.54	544.671	900.355	1090.06	565.962	817.898	990.053	510.262	712.772	935.286	563.698	748.421	904.068	553.674	665.479	872.996
309	0	352.104	697.306	1571.29	248.345	692.617	1573.16	358.699	870.9	1584.43	229.602	841.943	1592.84	289.211	915.819	1460.28	269.252	1031.45	1220.84	279.917	786.872	1345.81	284.473	753.424	1160.22	228.31	1025	1299.28	448.407	858.186	1383.06	533.488	896.648	1169.6	544.906	883.736	1088.3	566.286	800.253	989.164	510.443	694.818	935.151	564.2	729.944	903.862	554.12	646.634	873.846
310	0	350.455	683.022	1568.68	246.709	678.454	1570.44	357.261	856.607	1581.87	228.122	827.801	1590.16	287.819	901.689	1457.73	268.018	1017.26	1218.23	278.691	772.666	1343.08	283.801	739.049	1157.49	227.026	1010.89	1296.66	447.122	843.908	1380.7	533.085	880.897	1167.55	544.934	867.228	1086.45	566.508	782.88	988.097	510.664	677.137	934.7	564.701	711.839	903.393	554.672	628.196	874.345
311	0	348.65	668.717	1566.05	244.919	664.272	1567.69	355.67	842.295	1579.29	226.488	813.642	1587.46	286.292	887.558	1455.12	266.71	1002.96	1215.5	277.305	758.409	1340.34	282.948	724.5	1154.78	225.654	996.722	1293.91	445.703	829.57	1378.31	532.474	865.225	1165.42	544.74	850.849	1084.53	566.613	765.804	986.866	510.911	659.749	933.946	565.181	694.134	902.673	555.318	610.19	874.498
312	0	346.688	654.389	1563.42	242.971	650.067	1564.95	353.92	827.963	1576.74	224.696	799.462	1584.77	284.634	873.427	1452.48	265.343	988.552	1212.67	275.752	744.104	1337.62	281.898	709.779	1152.13	224.207	982.508	1291.07	444.148	815.166	1375.9	531.648	849.644	1163.24	544.313	834.622	1082.56	566.585	749.05	985.491	511.167	642.679	932.904	565.622	676.858	901.711	556.047	592.644	874.316
313	0	344.569	640.033	1560.85	240.865	635.835	1562.25	352.011	813.605	1574.24	222.746	785.256	1582.14	282.848	859.293	1449.85	263.935	974.043	1209.78	274.028	729.752	1334.98	280.635	694.891	1149.58	222.702	968.25	1288.17	442.457	800.686	1373.53	530.598	834.167	1161.05	543.643	818.566	1080.58	566.411	732.64	983.996	511.418	625.951	931.597	566.003	660.039	900.527	556.843	575.587	873.815
314	0	342.296	625.646	1558.36	238.603	621.572	1559.63	349.942	799.218	1571.86	220.638	771.019	1579.6	280.942	845.155	1447.27	262.503	959.434	1206.89	272.133	715.356	1332.46	279.148	679.842	1147.18	221.154	953.951	1285.27	440.632	786.124	1371.24	529.323	818.805	1158.88	542.724	802.702	1078.62	566.076	716.599	982.405	511.645	609.592	930.049	566.3	643.709	899.139	557.688	559.051	873.013
315	0	339.875	611.223	1555.99	236.193	607.273	1557.13	347.715	784.794	1569.62	218.375	756.744	1577.19	278.926	831.008	1444.79	261.065	944.731	1204.03	270.069	700.92	1330.09	277.429	664.645	1144.96	219.583	939.616	1282.39	438.678	771.473	1369.06	527.821	803.567	1156.77	541.552	787.049	1076.71	565.568	700.947	980.75	511.83	593.629	928.288	566.491	627.895	897.574	558.563	543.065	871.933
316	0	337.315	596.76	1553.77	233.641	592.931	1554.77	345.338	770.328	1567.57	215.965	742.423	1574.95	276.811	816.849	1442.45	259.639	929.943	1201.27	267.84	686.448	1327.91	275.473	649.317	1142.98	218.005	925.25	1279.61	436.602	756.727	1367.05	526.096	788.464	1154.76	540.128	771.625	1074.9	564.877	685.706	979.061	511.953	578.089	926.346	566.551	612.626	895.859	559.442	527.662	870.599
317	0	334.627	582.253	1551.75	230.96	578.541	1552.61	342.818	755.813	1565.74	213.417	728.048	1572.93	274.611	802.671	1440.28	258.243	915.08	1198.64	265.457	671.943	1325.97	273.284	633.88	1141.26	216.44	910.856	1276.96	434.414	741.882	1365.24	524.153	773.502	1152.9	538.454	756.445	1073.22	563.993	670.893	977.374	511.996	562.999	924.256	566.458	597.926	894.025	560.301	512.87	869.04
318	0	331.826	567.696	1549.95	228.164	564.099	1550.66	340.167	741.245	1564.17	210.742	713.614	1571.15	272.342	788.472	1438.34	256.892	900.155	1196.21	262.933	657.413	1324.3	270.868	618.358	1139.84	214.904	896.442	1274.51	432.126	726.936	1363.67	522.006	758.688	1151.23	536.541	741.525	1071.71	562.912	656.521	975.722	511.937	548.384	922.054	566.189	583.818	892.107	561.111	498.717	867.284
319	0	328.929	553.089	1548.4	225.269	549.6	1548.95	337.4	726.618	1562.9	207.957	699.113	1569.65	270.023	774.247	1436.65	255.604	885.182	1194.02	260.285	642.862	1322.92	268.238	602.782	1138.75	213.416	882.013	1272.29	429.754	711.89	1362.39	519.67	744.026	1149.8	534.4	726.876	1070.4	561.63	642.602	974.142	511.757	534.265	919.778	565.727	570.318	890.141	561.841	485.227	865.363
320	0	325.953	538.428	1547.12	222.296	535.042	1547.52	334.536	711.93	1561.95	205.079	684.543	1568.45	267.671	759.994	1435.25	254.391	870.176	1192.12	257.535	628.3	1321.87	265.414	587.186	1138.01	211.99	867.575	1270.35	427.316	696.749	1361.41	517.165	729.518	1148.63	532.048	712.507	1069.34	560.148	629.141	972.669	511.436	520.663	917.464	565.053	557.437	888.165	562.46	472.417	863.307
321	0	322.92	523.715	1546.14	219.264	520.426	1546.38	331.593	697.179	1561.34	202.128	669.901	1567.58	265.308	745.712	1434.18	253.264	855.153	1190.54	254.707	613.734	1321.16	262.424	571.606	1137.65	210.641	853.135	1268.73	424.832	681.523	1360.78	514.519	715.165	1147.77	529.506	698.425	1068.55	558.469	616.141	971.338	510.959	507.591	915.15	564.156	545.18	886.217	562.935	460.3	861.145
322	0	319.852	508.951	1545.45	216.196	505.754	1545.53	328.597	682.367	1561.08	199.128	655.19	1567.05	262.955	731.403	1433.44	252.231	840.131	1189.31	251.83	599.173	1320.81	259.3	556.082	1137.65	209.379	838.701	1267.46	422.325	666.225	1360.51	511.76	700.963	1147.24	526.799	684.634	1068.06	556.602	603.598	970.177	510.31	495.06	912.872	563.029	533.544	884.336	563.234	448.88	858.908
323	0	316.771	494.14	1545.08	213.117	491.031	1545	325.573	667.498	1561.19	196.104	640.413	1566.87	260.631	717.068	1433.05	251.296	825.124	1188.46	248.935	584.628	1320.82	256.082	540.65	1138.04	208.214	824.278	1266.56	419.82	650.872	1360.61	508.923	686.91	1147.07	523.957	671.136	1067.89	554.558	591.505	969.216	509.475	483.075	910.665	561.668	522.518	882.558	563.327	438.153	856.622
324	0	313.703	479.29	1545.02	210.05	476.264	1544.77	322.548	652.58	1561.66	193.082	625.578	1567.03	258.356	702.713	1433.01	250.46	810.15	1188.01	246.054	570.106	1321.2	252.815	525.349	1138.79	207.149	809.873	1266.05	417.344	635.484	1361.08	506.046	672.999	1147.26	521.011	657.931	1068.06	552.352	579.848	968.478	508.448	471.633	908.562	560.079	512.082	880.919	563.185	428.107	854.314
325	0	310.673	464.409	1545.27	207.021	461.464	1544.86	319.55	637.622	1562.48	190.091	610.696	1567.53	256.15	688.34	1433.33	249.719	795.222	1187.95	243.22	555.617	1321.93	249.547	510.211	1139.9	206.185	795.491	1265.93	414.921	620.084	1361.93	503.168	659.224	1147.83	517.995	645.014	1068.56	550.003	568.609	967.978	507.223	460.726	906.59	558.272	502.208	879.449	562.784	418.72	852.005
326	0	307.703	449.506	1545.81	204.054	446.64	1545.24	316.609	622.635	1563.64	187.158	595.781	1568.36	254.026	673.956	1434	249.065	780.356	1188.28	240.468	541.167	1323.01	246.331	495.264	1141.32	205.319	781.138	1266.19	412.577	604.699	1363.14	500.329	645.58	1148.76	514.944	632.381	1069.39	547.534	557.766	967.73	505.801	450.339	904.775	556.264	492.862	878.179	562.105	409.958	849.719
327	0	304.82	434.593	1546.64	201.174	431.806	1545.92	313.753	607.633	1565.11	184.312	580.846	1569.5	252	659.565	1434.99	248.486	765.565	1188.99	237.828	526.762	1324.39	243.221	480.529	1143.02	204.543	766.818	1266.83	410.336	589.354	1364.69	497.568	632.06	1150.05	511.894	620.023	1070.56	544.97	547.293	967.738	504.187	440.45	903.139	554.077	484	877.129	561.136	401.783	847.473
328	0	302.046	419.681	1547.73	198.403	416.975	1546.86	311.009	592.631	1566.86	181.577	565.909	1570.93	250.082	645.172	1436.28	247.968	750.86	1190.06	235.33	512.404	1326.06	240.268	466.017	1144.97	203.847	752.535	1267.82	408.22	574.075	1366.54	494.922	618.663	1151.67	508.88	607.931	1072.04	542.337	537.163	968.003	502.39	431.031	901.697	551.739	475.575	876.319	559.871	394.148	845.284
329	0	299.401	404.782	1549.05	195.762	402.158	1548.05	308.403	577.642	1568.84	178.979	550.983	1572.6	248.279	630.781	1437.86	247.493	736.253	1191.46	233.002	498.096	1327.98	237.524	451.734	1147.12	203.217	738.291	1269.14	406.249	558.885	1368.67	492.422	605.386	1153.6	505.931	596.094	1073.8	539.663	527.343	968.519	500.428	422.048	900.46	549.282	467.535	875.759	558.315	386.999	843.166
330	0	296.904	389.907	1550.59	193.269	387.367	1549.47	305.958	562.68	1571.04	176.54	536.085	1574.5	246.599	616.396	1439.68	247.044	721.751	1193.16	230.867	483.839	1330.11	235.034	437.673	1149.4	202.637	724.09	1270.76	404.437	543.807	1371.03	490.095	592.233	1155.8	503.078	584.5	1075.82	536.977	517.803	969.274	498.319	413.465	899.436	546.743	459.827	875.455	556.481	380.28	841.135
331	0	294.573	375.065	1552.32	190.941	372.613	1551.08	303.691	547.757	1573.39	174.276	521.227	1576.58	245.043	602.019	1441.71	246.603	707.361	1195.14	228.943	469.63	1332.4	232.836	423.822	1151.79	202.09	709.932	1272.65	402.796	528.86	1373.59	487.959	579.208	1158.23	500.344	573.134	1078.07	534.308	508.509	970.251	496.091	405.239	898.624	544.158	452.397	875.406	554.39	373.932	839.2
332	0	292.42	360.266	1554.19	188.79	357.903	1552.85	301.619	532.882	1575.86	172.202	506.419	1578.8	243.613	587.656	1443.92	246.152	693.089	1197.34	227.243	455.468	1334.82	230.961	410.161	1154.23	201.559	695.817	1274.77	401.335	514.062	1376.28	486.026	566.319	1160.85	497.748	561.981	1080.51	531.682	499.429	971.431	493.773	397.327	898.02	541.566	445.192	875.604	552.076	367.897	837.372
333	0	290.456	345.516	1556.17	186.826	343.245	1554.75	299.75	518.065	1578.41	170.329	491.67	1581.13	242.306	573.309	1446.25	245.674	678.934	1199.73	225.778	441.352	1337.31	229.432	396.663	1156.67	201.027	681.745	1277.07	400.058	499.424	1379.08	484.299	553.577	1163.61	495.304	551.026	1083.1	529.125	490.534	972.789	491.399	389.683	897.617	539.005	438.164	876.037	549.578	362.115	835.66
334	0	288.688	330.821	1558.22	185.055	328.642	1556.73	298.091	503.31	1581	168.661	476.985	1583.52	241.119	558.983	1448.69	245.156	664.897	1202.27	224.55	427.278	1339.83	228.258	383.299	1159.08	200.479	667.716	1279.51	398.963	484.958	1381.94	482.773	540.994	1166.48	493.02	540.254	1085.8	526.661	481.794	974.299	489.006	382.261	897.401	536.511	431.265	876.686	546.946	356.532	834.071
335	0	287.119	316.184	1560.31	183.483	314.095	1558.76	296.644	488.62	1583.59	167.202	462.365	1585.94	240.048	544.681	1451.17	244.586	650.975	1204.9	223.557	413.246	1342.35	227.443	370.037	1161.43	199.9	653.727	1282.05	398.049	470.669	1384.8	481.436	528.584	1169.39	490.9	529.647	1088.57	524.309	473.182	975.931	486.634	375.015	897.353	534.119	424.456	877.526	544.235	351.096	832.61
336	0	285.753	301.606	1562.4	182.111	299.606	1560.8	295.405	473.996	1586.13	165.948	447.809	1588.35	239.087	530.409	1453.67	243.956	637.163	1207.58	222.795	399.253	1344.83	226.977	356.846	1163.69	199.28	639.777	1284.65	397.308	456.559	1387.63	480.271	516.359	1172.32	488.941	519.191	1091.36	522.086	464.674	977.653	484.324	367.901	897.454	531.859	417.702	878.529	541.505	345.76	831.278
337	0	284.586	287.089	1564.43	180.938	285.171	1562.81	294.37	459.437	1588.61	164.894	433.314	1590.71	238.228	516.169	1456.14	243.26	623.453	1210.27	222.252	385.298	1347.22	226.844	343.695	1165.83	198.609	625.864	1287.25	396.73	442.629	1390.38	479.254	504.331	1175.21	487.138	508.867	1094.15	520.008	456.249	979.432	482.118	360.877	897.679	529.756	410.973	879.661	538.818	340.48	830.076
338	0	283.617	272.63	1566.39	179.96	270.787	1564.74	293.53	444.939	1590.98	164.033	418.874	1592.98	237.464	501.967	1458.55	242.498	609.837	1212.92	221.916	371.38	1349.51	227.019	330.558	1167.83	197.882	611.985	1289.82	396.303	428.873	1393.02	478.36	492.509	1178.02	485.482	498.658	1096.88	518.083	447.889	981.235	480.055	353.902	897.999	527.831	404.247	880.886	536.237	335.22	829
339	0	282.84	258.228	1568.22	179.174	256.45	1566.56	292.872	430.499	1593.22	163.355	404.481	1595.14	236.788	487.805	1460.86	241.67	596.305	1215.48	221.769	357.497	1351.65	227.469	317.412	1169.68	197.098	598.138	1292.31	396.015	415.285	1395.52	477.563	480.901	1180.73	483.961	488.546	1099.52	516.319	439.577	983.026	478.175	346.939	898.385	526.1	397.505	882.164	533.822	329.945	828.042
340	0	282.247	243.88	1569.89	178.574	242.152	1568.23	292.385	416.111	1595.3	162.847	390.128	1597.16	236.191	473.685	1463.03	240.782	582.848	1217.93	221.793	343.648	1353.63	228.159	304.239	1171.37	196.257	584.32	1294.69	395.85	401.855	1397.85	476.837	469.505	1183.28	482.562	478.512	1102.04	514.722	431.298	984.771	476.511	339.957	898.804	524.572	390.734	883.455	531.631	324.627	827.193
341	0	281.831	229.581	1571.38	178.151	227.89	1569.72	292.055	401.771	1597.2	162.497	375.807	1599	235.666	459.608	1465.03	239.842	569.453	1220.21	221.969	329.832	1355.43	229.048	291.028	1172.89	195.364	570.531	1296.91	395.793	388.569	1399.96	476.158	458.317	1185.65	481.274	468.536	1104.4	513.293	423.041	986.436	475.093	332.925	899.222	523.253	383.925	884.716	529.714	319.242	826.438
342	0	281.584	215.33	1572.65	177.899	213.655	1571	291.869	387.474	1598.88	162.294	361.508	1600.64	235.208	445.575	1466.84	238.86	556.108	1222.3	222.277	316.044	1357.02	230.098	277.772	1174.22	194.427	556.767	1298.95	395.83	375.413	1401.85	475.507	447.326	1187.82	480.084	458.598	1106.58	512.031	414.793	987.988	473.947	325.818	899.605	522.142	377.071	885.907	528.112	313.769	825.76
343	0	281.496	201.121	1573.67	177.809	199.444	1572.04	291.813	373.213	1600.34	162.224	347.226	1602.06	234.81	431.583	1468.43	237.849	542.802	1224.16	222.697	302.284	1358.38	231.265	264.469	1175.35	193.456	543.028	1300.78	395.946	362.371	1403.48	474.869	436.513	1189.75	478.982	448.675	1108.55	510.935	406.541	989.397	473.09	318.616	899.919	521.238	370.166	886.987	526.859	308.188	825.137
344	0	281.559	186.952	1574.42	177.872	185.251	1572.82	291.875	358.986	1601.55	162.276	332.953	1603.25	234.468	417.631	1469.76	236.823	529.521	1225.76	223.209	288.547	1359.5	232.512	251.123	1176.27	192.464	529.31	1302.36	396.128	349.425	1404.83	474.235	425.853	1191.43	477.96	438.745	1110.28	510.002	398.271	990.632	472.532	311.3	900.129	520.533	363.205	887.919	525.977	302.483	824.546
345	0	281.764	172.82	1574.9	178.082	171.072	1573.33	292.044	344.79	1602.49	162.44	318.686	1604.17	234.181	403.716	1470.83	235.798	516.254	1227.09	223.797	274.829	1360.36	233.803	237.737	1176.96	191.466	515.612	1303.68	396.366	336.555	1405.9	473.601	415.317	1192.84	477.012	428.787	1111.76	509.227	389.971	991.668	472.279	303.855	900.201	520.02	356.182	888.668	525.478	296.639	823.96
346	0	282.105	158.724	1575.07	178.429	156.904	1573.55	292.31	330.622	1603.14	162.709	304.42	1604.83	233.946	389.833	1471.61	234.791	502.987	1228.12	224.443	261.125	1360.95	235.106	224.316	1177.42	190.479	501.93	1304.72	396.649	323.741	1406.65	472.968	404.869	1193.96	476.135	418.778	1112.97	508.607	381.625	992.48	472.327	296.27	900.106	519.688	349.088	889.203	525.365	290.641	823.352
347	0	282.574	144.661	1574.94	178.908	142.747	1573.48	292.668	316.483	1603.51	163.075	290.155	1605.21	233.766	375.979	1472.09	233.817	489.707	1228.84	225.135	247.431	1361.25	236.391	210.866	1177.63	189.52	488.261	1305.46	396.973	310.964	1407.08	472.342	394.472	1194.77	475.33	408.696	1113.88	508.137	373.215	993.048	472.668	288.535	899.813	519.527	341.913	889.498	525.628	284.476	822.693
348	0	283.166	130.632	1574.49	179.514	128.598	1573.11	293.112	302.373	1603.56	163.534	275.892	1605.29	233.644	362.148	1472.26	232.894	476.402	1229.22	225.862	233.739	1361.26	237.636	197.39	1177.58	188.61	474.6	1305.89	397.332	298.203	1407.18	471.734	384.086	1195.28	474.598	398.521	1114.49	507.812	364.723	993.354	473.287	280.643	899.297	519.527	334.645	889.531	526.251	278.13	821.951
349	0	283.878	116.636	1573.74	180.241	114.46	1572.44	293.639	288.295	1603.31	164.084	261.634	1605.09	233.586	348.336	1472.11	232.038	463.059	1229.27	226.616	220.044	1360.97	238.823	183.889	1177.25	187.766	460.941	1306	397.726	285.439	1406.95	471.157	373.668	1195.46	473.945	388.232	1114.79	507.629	356.129	993.382	474.166	272.587	898.536	519.681	327.267	889.285	527.209	271.591	821.098
350	0	284.706	102.673	1572.68	181.088	100.335	1571.49	294.249	274.252	1602.73	164.725	247.385	1604.59	233.598	334.537	1471.63	231.264	449.667	1228.96	227.39	206.339	1360.38	239.936	170.361	1176.64	187.008	447.276	1305.78	398.157	272.654	1406.37	470.629	363.178	1195.32	473.379	377.811	1114.76	507.585	347.412	993.122	475.281	264.36	897.509	519.978	319.763	888.749	528.471	264.846	820.105
351	0	285.651	88.7447	1571.33	182.051	86.2235	1570.26	294.944	260.246	1601.84	165.458	233.149	1603.8	233.691	320.747	1470.83	230.587	436.214	1228.31	228.184	192.617	1359.48	240.966	156.8	1175.74	186.355	433.598	1305.22	398.628	259.828	1405.44	470.168	352.578	1194.85	472.907	367.237	1114.4	507.676	338.55	992.566	476.608	255.957	896.203	520.412	312.112	887.913	530.002	257.882	818.943
352	0	286.711	74.8498	1569.7	183.131	72.1301	1568.77	295.728	246.282	1600.64	166.288	218.934	1602.72	233.876	306.961	1469.7	230.02	422.688	1227.3	228.998	178.87	1358.29	241.906	143.198	1174.55	185.823	419.897	1304.33	399.147	246.946	1404.18	469.793	341.831	1194.04	472.541	356.495	1113.71	507.9	329.52	991.708	478.12	247.372	894.605	520.977	304.293	886.776	531.765	250.688	817.589
353	0	287.886	60.9882	1567.82	184.328	58.0572	1567.05	296.607	232.362	1599.12	167.219	204.746	1601.37	234.165	293.173	1468.27	229.574	409.08	1225.95	229.836	165.09	1356.8	242.756	129.543	1173.09	185.429	406.161	1303.12	399.721	233.993	1402.57	469.524	330.901	1192.9	472.289	345.567	1112.69	508.254	320.301	990.549	479.789	238.598	892.709	521.668	296.284	885.337	533.72	243.252	816.02
354	0	289.18	47.1583	1565.7	185.642	44.0074	1565.11	297.588	218.488	1597.32	168.259	190.591	1599.76	234.572	279.379	1466.53	229.259	395.379	1224.27	230.704	151.268	1355.03	243.515	115.822	1171.35	185.186	392.38	1301.58	400.363	220.955	1400.64	469.379	319.761	1191.42	472.162	334.437	1111.34	508.737	310.869	989.09	481.589	229.628	890.514	522.48	288.062	883.602	535.83	235.563	814.219
355	0	290.594	33.3575	1563.38	187.075	29.9824	1562.99	298.681	204.661	1595.24	169.415	176.474	1597.91	235.11	265.571	1464.52	229.084	381.577	1222.27	231.612	137.396	1353	244.191	102.021	1169.36	185.106	378.54	1299.74	401.082	207.822	1398.4	469.374	308.382	1189.62	472.17	323.091	1109.67	509.346	301.205	987.338	483.492	220.454	888.022	523.411	279.605	881.58	538.057	227.61	812.173
356	0	292.129	19.582	1560.9	188.63	15.9829	1560.72	299.895	190.879	1592.91	170.696	162.399	1595.84	235.794	251.745	1462.25	229.053	367.665	1219.98	232.569	123.464	1350.73	244.793	88.1263	1167.14	185.196	364.629	1297.62	401.893	194.585	1395.87	469.524	296.743	1187.51	472.319	311.512	1107.69	510.077	291.286	985.306	485.474	211.066	885.243	524.455	270.891	879.285	540.366	219.382	809.875
357	0	293.791	5.82631	1558.29	190.308	2.00788	1558.34	301.239	177.139	1590.35	172.109	148.369	1593.59	236.636	237.893	1459.76	229.172	353.634	1217.42	233.59	109.464	1348.27	245.334	74.122	1164.71	185.464	350.636	1295.24	402.808	181.235	1393.07	469.838	284.826	1185.1	472.616	299.688	1105.43	510.927	281.093	983.009	487.513	201.453	882.19	525.61	261.898	876.735	542.724	210.87	807.325
358	0	295.58	-7.91628	1555.6	192.112	-11.945	1555.89	302.725	163.435	1587.62	173.664	134.383	1591.18	237.649	224.008	1457.09	229.442	339.478	1214.64	234.687	95.3859	1345.63	245.833	59.9948	1162.12	185.909	336.548	1292.64	403.839	167.769	1390.03	470.326	272.616	1182.4	473.064	287.605	1102.89	511.893	270.607	980.469	489.587	191.603	878.886	526.871	252.606	873.955	545.104	202.061	804.528
359	0	297.499	-21.6538	1552.87	194.044	-25.8797	1553.42	304.361	149.758	1584.74	175.369	120.439	1588.65	238.842	210.083	1454.28	229.862	325.189	1211.67	235.875	81.2218	1342.86	246.31	45.732	1159.41	186.531	322.356	1289.85	404.997	154.181	1386.79	470.989	260.102	1179.46	473.665	275.25	1100.12	512.969	259.811	977.714	491.677	181.503	875.356	528.233	242.995	870.971	547.479	192.947	801.5
360	0	299.551	-35.3954	1550.16	196.106	-39.802	1550.96	306.155	136.098	1581.75	177.229	106.532	1586.06	240.222	196.109	1451.37	230.43	310.762	1208.57	237.165	66.9638	1340.01	246.792	31.3224	1156.61	187.326	308.05	1286.94	406.292	140.472	1383.4	471.828	247.278	1176.3	474.417	262.612	1097.14	514.15	248.688	974.776	493.767	171.137	871.635	529.69	233.046	867.819	549.828	183.514	798.263
361	0	301.736	-49.1506	1547.5	198.3	-53.7188	1548.58	308.114	122.444	1578.72	179.25	92.6546	1583.44	241.794	182.078	1448.42	231.14	296.195	1205.39	238.571	52.6055	1337.13	247.304	16.7565	1153.78	188.284	293.623	1283.94	407.73	126.641	1379.9	472.838	234.142	1172.95	475.315	249.681	1094.01	515.427	237.224	971.693	495.843	160.489	867.763	531.236	222.74	864.536	552.133	173.751	794.848
362	0	304.054	-62.9293	1544.95	200.624	-67.6382	1546.3	310.242	108.782	1575.7	181.434	78.7991	1580.84	243.556	167.984	1445.48	231.984	281.486	1202.19	240.101	38.1423	1334.27	247.874	2.02708	1150.97	189.395	279.071	1280.93	409.315	112.688	1376.35	474.011	220.694	1169.48	476.353	236.449	1090.75	516.794	225.405	968.508	497.893	149.542	863.787	532.864	212.061	861.169	554.38	163.642	791.294
363	0	306.503	-76.7407	1542.55	203.079	-81.5687	1544.19	312.54	95.0986	1572.72	183.783	64.9549	1578.32	245.505	153.82	1442.6	232.951	266.638	1199.03	241.761	23.572	1331.49	248.531	-12.8706	1148.24	190.643	264.394	1277.95	411.044	98.6181	1372.79	475.334	206.938	1165.93	477.52	222.909	1087.42	518.242	213.221	965.269	499.906	138.276	859.758	534.564	200.99	857.763	556.556	153.173	787.646
364	0	309.081	-90.5931	1540.35	205.661	-95.5189	1542.27	315.005	81.3826	1569.86	186.293	51.1112	1575.92	247.631	139.58	1439.85	234.028	251.656	1195.98	243.551	8.8954	1328.84	249.3	-27.9379	1145.64	192.013	249.592	1275.09	412.915	84.4348	1369.3	476.792	192.882	1162.35	478.806	209.059	1084.08	519.76	200.661	962.028	501.874	126.672	855.735	536.327	189.511	854.372	558.653	142.325	783.957
365	0	311.781	-104.493	1538.39	208.365	-109.497	1540.61	317.633	67.6226	1567.16	188.958	37.257	1573.7	249.921	125.263	1437.28	235.198	236.551	1193.1	245.47	-5.88325	1326.38	250.2	-43.1721	1143.23	193.483	234.673	1272.39	414.917	70.1447	1365.94	478.367	178.537	1158.82	480.194	194.898	1080.79	521.339	187.717	958.837	503.79	114.71	851.778	538.142	177.607	851.05	560.665	131.078	780.283
366	0	314.597	-118.445	1536.71	211.184	-123.509	1539.22	320.411	53.8098	1564.67	191.768	23.3818	1571.7	252.358	110.869	1434.94	236.444	221.337	1190.46	247.509	-20.7558	1324.17	251.248	-58.5658	1141.07	195.035	219.646	1269.91	417.037	55.7558	1362.75	480.039	163.917	1155.39	481.672	180.429	1077.59	522.968	174.385	955.751	505.648	102.368	847.949	540	165.263	847.851	562.586	119.411	776.684
367	0	317.518	-132.451	1535.34	214.108	-137.561	1538.14	323.326	39.9383	1562.44	194.71	9.4763	1569.97	254.917	96.402	1432.87	237.747	206.031	1188.1	249.653	-35.71	1322.25	252.452	-74.1059	1139.2	196.646	204.526	1267.73	419.256	41.278	1359.8	481.785	149.039	1152.12	483.221	165.659	1074.55	524.636	160.659	952.823	507.446	89.6257	844.312	541.89	152.461	844.83	564.414	107.298	773.221
368	0	320.53	-146.51	1534.29	217.125	-151.656	1537.39	326.359	26.0054	1560.5	197.765	-4.46713	1568.54	257.573	81.8685	1431.13	239.089	190.655	1186.09	251.886	-50.7298	1320.66	253.812	-89.773	1137.68	198.295	189.33	1265.87	421.552	26.7234	1357.15	483.585	133.92	1149.08	484.825	150.599	1071.72	526.333	146.54	950.104	509.18	76.4629	840.928	543.801	139.189	842.039	566.147	94.7135	769.954
369	0	323.618	-160.617	1533.59	220.22	-165.795	1537	329.485	12.0122	1558.9	200.912	-18.4536	1567.46	260.296	67.2792	1429.74	240.45	175.232	1184.45	254.183	-65.7953	1319.45	255.319	-105.541	1136.53	199.96	174.079	1264.4	423.898	12.1058	1354.84	485.417	118.583	1146.32	486.468	135.261	1069.16	528.049	132.027	947.642	510.85	62.8599	837.855	545.722	125.432	839.525	567.784	81.6306	766.939
370	0	326.763	-174.766	1533.25	223.374	-179.974	1536.97	332.677	-2.03637	1557.66	204.125	-32.4853	1566.74	263.055	52.6478	1428.73	241.812	159.789	1183.24	256.518	-80.8835	1318.64	256.957	-121.379	1135.8	201.619	158.797	1263.33	426.268	-2.55945	1352.91	487.259	103.049	1143.89	488.135	119.664	1066.89	529.774	117.125	945.477	512.455	48.7991	835.146	547.644	111.178	837.329	569.325	68.0211	764.228
371	0	329.942	-188.947	1533.26	226.566	-194.189	1537.3	335.904	-16.1315	1556.79	207.375	-46.5613	1566.41	265.816	37.9904	1428.12	243.158	144.351	1182.46	258.861	-95.9695	1318.24	258.701	-137.247	1135.49	203.254	143.51	1262.69	428.629	-17.2553	1351.39	489.094	87.3418	1141.83	489.81	103.827	1064.97	531.5	101.838	943.646	513.996	34.265	832.847	549.558	96.4171	835.487	570.771	53.8568	761.867
372	0	333.132	-203.147	1533.64	229.774	-208.432	1538	339.132	-30.2608	1556.32	210.629	-60.6773	1566.46	268.544	23.3249	1427.92	244.47	128.947	1182.13	261.18	-111.027	1318.27	260.522	-153.104	1135.62	204.845	128.244	1262.49	430.951	-31.9643	1350.3	490.904	71.486	1140.18	491.483	87.775	1063.42	533.22	86.1752	942.174	515.474	19.2451	830.996	551.455	81.1411	834.026	572.124	39.1108	759.896
373	0	336.307	-217.352	1534.36	232.969	-222.691	1539.04	342.323	-44.4093	1556.23	213.854	-74.8256	1566.91	271.207	8.66987	1428.12	245.737	113.603	1182.24	263.445	-126.03	1318.73	262.385	-168.905	1136.19	206.377	113.025	1262.73	433.206	-46.6685	1349.66	492.676	55.5068	1138.95	493.141	71.533	1062.26	534.927	70.1465	941.08	516.89	3.73041	829.621	553.328	65.3458	832.961	573.386	23.7579	758.343
374	0	339.436	-231.546	1535.4	236.126	-236.956	1540.43	345.442	-58.5598	1556.53	217.014	-88.9957	1567.74	273.774	-5.95607	1428.72	246.946	98.3425	1182.79	265.625	-140.954	1319.59	264.252	-184.605	1137.16	207.838	97.8768	1263.4	435.364	-61.3511	1349.46	494.396	39.43	1138.15	494.778	55.1288	1061.49	536.617	53.7653	940.375	518.247	-12.2837	828.743	555.17	49.03	832.302	574.559	7.77603	757.232
375	0	342.492	-245.715	1536.76	239.213	-251.211	1542.12	348.451	-72.6942	1557.2	220.073	-103.175	1568.94	276.216	-20.5357	1429.7	248.09	83.1897	1183.76	267.691	-155.777	1320.85	266.084	-200.162	1138.53	209.217	82.8232	1264.47	437.4	-75.9962	1349.69	496.057	23.2814	1137.79	496.388	38.591	1061.12	538.283	37.047	940.058	519.545	-28.7973	828.37	556.973	32.1968	832.046	575.65	-8.85257	756.575
376	0	345.444	-259.842	1538.41	242.201	-265.443	1544.1	351.315	-86.7945	1558.22	222.997	-117.349	1570.46	278.511	-35.0538	1431.03	249.165	68.1642	1185.12	269.618	-170.48	1322.46	267.843	-215.539	1140.24	210.509	67.8837	1265.93	439.294	-90.5905	1350.34	497.651	7.0865	1137.85	497.967	21.9483	1061.13	539.924	20.0093	940.121	520.785	-45.8057	828.501	558.73	14.8537	832.184	576.66	-26.1405	756.379
377	0	348.262	-273.915	1540.32	245.059	-279.637	1546.33	354.001	-100.844	1559.56	225.753	-131.502	1572.3	280.639	-49.4981	1432.68	250.169	53.2822	1186.82	271.385	-185.049	1324.39	269.492	-230.704	1142.27	211.709	53.0743	1267.72	441.029	-105.123	1351.37	499.175	-9.12998	1138.3	499.514	5.22839	1061.51	541.535	2.67177	940.549	521.968	-63.2989	829.127	560.435	-2.98685	832.697	577.596	-44.0939	756.644
378	0	350.919	-287.922	1542.47	247.76	-293.781	1548.79	356.482	-114.83	1561.18	228.312	-145.62	1574.39	282.586	-63.8597	1434.62	251.106	38.5562	1188.83	272.974	-199.474	1326.6	271	-245.636	1144.55	212.819	38.4069	1269.81	442.591	-119.585	1352.74	500.626	-25.3449	1139.13	501.029	-11.5424	1062.23	543.114	-14.9443	941.32	523.092	-81.2619	830.23	562.081	-21.3081	833.563	578.46	-62.7121	757.363
379	0	353.39	-301.856	1544.81	250.276	-307.863	1551.43	358.733	-128.739	1563.05	230.65	-159.688	1576.71	284.344	-78.1331	1436.8	251.981	23.9945	1191.11	274.375	-213.751	1329.04	272.338	-260.322	1147.03	213.843	23.889	1272.15	443.975	-133.974	1354.43	502.004	-41.5375	1140.3	502.514	-28.3402	1063.26	544.656	-32.8168	942.407	524.155	-99.675	831.788	563.659	-40.0888	834.752	579.259	-81.9866	758.527
380	0	355.653	-315.711	1547.34	252.584	-321.875	1554.23	360.737	-142.566	1565.14	232.748	-173.694	1579.21	285.908	-92.3164	1439.19	252.802	9.60126	1193.61	275.58	-227.88	1331.67	273.484	-274.758	1149.68	214.787	9.5237	1274.7	445.178	-148.286	1356.37	503.311	-57.6897	1141.76	503.972	-45.1439	1064.57	546.161	-50.9229	943.779	525.154	-118.514	833.771	565.161	-59.3034	836.234	579.994	-101.901	760.121
381	0	357.688	-329.486	1550	254.665	-335.81	1557.14	362.484	-156.306	1567.4	234.592	-187.628	1581.83	287.279	-106.411	1441.73	253.577	-4.62376	1196.28	276.587	-241.866	1334.43	274.421	-288.948	1152.43	215.658	-4.6898	1277.41	446.201	-162.524	1358.54	504.55	-73.7868	1143.48	505.405	-61.9356	1066.11	547.624	-69.2396	945.403	526.087	-137.751	836.146	566.58	-78.9234	837.978	580.669	-122.43	762.129
382	0	359.483	-343.181	1552.77	256.503	-349.663	1560.12	363.97	-169.961	1569.79	236.175	-201.484	1584.54	288.462	-120.421	1444.39	254.317	-18.6845	1199.07	277.4	-255.716	1337.28	275.137	-302.903	1155.24	216.467	-18.7562	1280.22	447.051	-176.692	1360.87	505.725	-89.8176	1145.41	506.818	-78.7008	1067.85	549.044	-87.7443	947.245	526.947	-157.354	838.879	567.908	-98.9171	839.95	581.286	-143.543	764.533
383	0	361.028	-356.801	1555.62	258.088	-363.435	1563.15	365.195	-183.535	1572.26	237.496	-215.258	1587.3	289.466	-134.353	1447.12	255.033	-32.5886	1201.94	278.023	-269.444	1340.17	275.629	-316.643	1158.06	217.223	-32.6836	1283.11	447.737	-190.798	1363.33	506.84	-105.774	1147.51	508.214	-95.4284	1069.75	550.415	-106.415	949.27	527.73	-177.29	841.935	569.136	-119.251	842.121	581.843	-165.198	767.313
384	0	362.32	-370.353	1558.52	259.414	-377.128	1566.19	366.169	-197.036	1574.79	238.56	-228.947	1590.05	290.301	-148.214	1449.89	255.734	-46.3467	1204.85	278.469	-283.061	1343.07	275.9	-330.188	1160.87	217.937	-46.4825	1286.02	448.272	-204.849	1365.87	507.9	-121.653	1149.74	509.595	-112.111	1071.77	551.737	-125.23	951.444	528.431	-197.524	845.275	570.259	-139.89	844.461	582.34	-187.351	770.447
385	0	363.36	-383.845	1561.42	260.483	-390.744	1569.2	366.902	-210.473	1577.33	239.377	-242.555	1592.75	290.982	-162.015	1452.65	256.429	-59.9719	1207.75	278.749	-296.585	1345.92	275.955	-343.563	1163.63	218.618	-60.166	1288.91	448.668	-218.855	1368.45	508.91	-137.452	1152.05	510.965	-128.743	1073.87	553.005	-144.171	953.734	529.046	-218.02	848.866	571.27	-160.799	846.943	582.775	-209.949	773.911
386	0	364.152	-397.287	1564.3	261.297	-404.292	1572.15	367.412	-223.858	1579.83	239.96	-256.085	1595.39	291.521	-175.765	1455.36	257.124	-73.4793	1210.61	278.878	-310.032	1348.7	275.81	-356.794	1166.31	219.275	-73.7484	1291.74	448.941	-232.828	1371.03	509.876	-153.174	1154.42	512.326	-145.325	1076.01	554.216	-163.218	956.109	529.569	-238.743	852.671	572.164	-181.943	849.542	583.144	-232.937	777.679
387	0	364.705	-410.691	1567.12	261.865	-417.779	1575	367.717	-237.204	1582.28	240.326	-269.545	1597.91	291.932	-189.475	1458	257.826	-86.8852	1213.39	278.872	-323.418	1351.38	275.481	-369.907	1168.88	219.914	-87.2449	1294.48	449.104	-246.78	1373.58	510.801	-168.821	1156.79	513.678	-161.857	1078.17	555.369	-182.354	958.538	529.998	-259.655	856.656	572.938	-203.286	852.235	583.442	-256.255	781.725
388	0	365.033	-424.067	1569.86	262.2	-431.213	1577.74	367.837	-250.523	1584.63	240.494	-282.942	1600.29	292.23	-203.155	1460.52	258.537	-100.207	1216.05	278.746	-336.76	1353.92	274.992	-382.927	1171.31	220.542	-100.671	1297.09	449.171	-260.721	1376.06	511.692	-184.401	1159.14	515.023	-178.343	1080.31	556.46	-201.565	960.994	530.331	-280.723	860.787	573.59	-224.795	855	583.665	-279.842	786.017
389	0	365.15	-437.425	1572.48	262.316	-444.605	1580.33	367.794	-263.826	1586.85	240.485	-296.286	1602.51	292.428	-216.815	1462.91	259.258	-113.461	1218.58	278.516	-350.073	1356.29	274.365	-395.877	1173.59	221.161	-114.043	1299.56	449.154	-274.662	1378.45	512.552	-199.922	1161.44	516.362	-194.792	1082.39	557.488	-220.836	963.45	530.565	-301.913	865.033	574.116	-246.437	857.815	583.806	-303.638	790.521
390	0	365.073	-450.775	1574.95	262.231	-457.964	1582.75	367.607	-277.126	1588.91	240.317	-309.588	1604.54	292.537	-230.465	1465.13	259.987	-126.663	1220.93	278.197	-363.372	1358.48	273.629	-408.779	1175.7	221.772	-127.375	1301.85	449.064	-288.614	1380.72	513.386	-215.393	1163.65	517.693	-211.21	1084.4	558.451	-240.155	965.881	530.702	-323.194	869.36	574.519	-268.183	860.662	583.859	-327.582	795.201
391	0	364.82	-464.125	1577.26	261.961	-471.299	1584.97	367.295	-290.43	1590.8	240.01	-322.856	1606.35	292.566	-244.113	1467.15	260.719	-139.831	1223.1	277.802	-376.671	1360.46	272.81	-421.65	1177.61	222.375	-140.681	1303.94	448.91	-302.586	1382.84	514.196	-230.828	1165.76	519.015	-227.609	1086.31	559.349	-259.513	968.263	530.74	-344.535	873.736	574.797	-290.004	863.519	583.818	-351.614	800.019
392	0	364.407	-477.483	1579.37	261.526	-484.619	1586.99	366.874	-303.748	1592.47	239.58	-336.102	1607.95	292.525	-257.766	1468.97	261.447	-152.978	1225.05	277.345	-389.981	1362.21	271.936	-434.509	1179.3	222.965	-153.973	1305.81	448.699	-316.585	1384.79	514.986	-246.24	1167.73	520.327	-244.002	1088.09	560.18	-278.901	970.574	530.684	-365.91	878.13	574.954	-311.874	866.366	583.678	-375.68	804.932
393	0	363.853	-490.854	1581.26	260.943	-497.932	1588.77	366.357	-317.084	1593.92	239.044	-349.335	1609.29	292.419	-271.431	1470.56	262.164	-166.117	1226.78	276.834	-403.313	1363.7	271.034	-447.366	1180.75	223.536	-167.262	1307.45	448.436	-330.617	1386.56	515.756	-261.643	1169.54	521.626	-260.4	1089.73	560.943	-298.311	972.793	530.533	-387.29	882.508	574.992	-333.768	869.183	583.432	-399.727	809.896
394	0	363.173	-504.243	1582.93	260.228	-511.246	1590.31	365.758	-330.443	1595.13	238.412	-362.563	1610.39	292.251	-285.113	1471.91	262.857	-179.26	1228.26	276.281	-416.674	1364.94	270.129	-460.235	1181.95	224.082	-180.557	1308.84	448.125	-344.685	1388.12	516.509	-277.055	1171.17	522.907	-276.819	1091.2	561.638	-317.738	974.901	530.29	-408.653	886.84	574.914	-355.664	871.948	583.076	-423.707	814.868
395	0	362.381	-517.652	1584.35	259.398	-524.567	1591.59	365.083	-343.828	1596.08	237.696	-375.795	1611.21	292.025	-298.815	1473	263.515	-192.416	1229.49	275.691	-430.073	1365.89	269.245	-473.124	1182.87	224.593	-193.866	1309.98	447.767	-358.791	1389.46	517.244	-292.492	1172.61	524.167	-293.271	1092.49	562.263	-337.175	976.879	529.959	-429.975	891.092	574.725	-377.541	874.642	582.606	-447.578	819.801
396	0	361.491	-531.084	1585.5	258.466	-537.899	1592.6	364.339	-357.24	1596.76	236.902	-389.035	1611.77	291.741	-312.539	1473.83	264.125	-205.593	1230.46	275.071	-443.513	1366.56	268.403	-486.041	1183.51	225.059	-207.193	1310.85	447.363	-372.936	1390.56	517.96	-307.972	1173.84	525.398	-309.771	1093.58	562.817	-356.618	978.713	529.541	-451.235	895.233	574.43	-399.38	877.242	582.018	-471.301	824.652
397	0	360.511	-544.538	1586.39	257.442	-551.245	1593.34	363.529	-370.679	1597.16	236.035	-402.289	1612.04	291.397	-326.286	1474.39	264.672	-218.799	1231.16	274.425	-456.999	1366.93	267.617	-498.995	1183.84	225.467	-220.544	1311.46	446.912	-387.116	1391.42	518.654	-323.512	1174.85	526.594	-326.329	1094.47	563.3	-376.063	980.387	529.038	-472.414	899.232	574.033	-421.162	879.729	581.311	-494.844	829.377
398	0	359.449	-558.015	1587	256.336	-564.609	1593.8	362.655	-384.145	1597.29	235.098	-415.56	1612.03	290.993	-340.055	1474.68	265.143	-232.039	1231.59	273.753	-470.532	1367	266.902	-511.992	1183.87	225.806	-233.921	1311.8	446.413	-401.329	1392.03	519.322	-339.13	1175.62	527.746	-342.957	1095.15	563.708	-395.505	981.888	528.451	-493.493	903.058	573.542	-442.871	882.083	580.483	-518.18	833.936
399	0	358.312	-571.513	1587.34	255.153	-577.991	1593.97	361.716	-397.634	1597.15	234.092	-428.85	1611.74	290.523	-353.844	1474.69	265.523	-245.316	1231.75	273.058	-484.113	1366.78	266.264	-525.042	1183.58	226.064	-247.326	1311.86	445.861	-415.569	1392.39	519.958	-354.84	1176.16	528.846	-359.663	1095.6	564.039	-414.938	983.206	527.781	-514.456	906.683	572.962	-464.489	884.287	579.534	-541.286	838.293
400	0	357.102	-585.029	1587.4	253.898	-591.391	1593.86	360.711	-411.145	1596.72	233.017	-442.16	1611.17	289.985	-367.649	1474.43	265.8	-258.635	1231.62	272.335	-497.74	1366.25	265.704	-538.153	1182.99	226.227	-260.762	1311.65	445.254	-429.831	1392.48	520.554	-370.656	1176.46	529.882	-376.451	1095.84	564.291	-434.355	984.333	527.028	-535.285	910.078	572.301	-486	886.323	578.465	-564.142	842.412
401	0	355.82	-598.562	1587.18	252.573	-604.808	1593.47	359.638	-424.675	1596.03	231.869	-455.489	1610.32	289.372	-381.467	1473.89	265.961	-271.997	1231.23	271.582	-511.412	1365.43	265.22	-551.334	1182.09	226.285	-274.227	1311.17	444.587	-444.109	1392.32	521.101	-386.586	1176.52	530.843	-393.323	1095.85	564.459	-453.748	985.26	526.19	-555.966	913.219	571.563	-507.39	888.177	577.279	-586.735	846.265
402	0	354.466	-612.108	1586.69	251.179	-618.24	1592.8	358.491	-438.218	1595.08	230.646	-468.835	1609.2	288.68	-395.291	1473.09	265.996	-285.405	1230.55	270.792	-525.126	1364.33	264.801	-564.594	1180.91	226.228	-287.723	1310.42	443.853	-458.397	1391.91	521.588	-402.636	1176.34	531.716	-410.278	1095.63	564.538	-473.106	985.982	525.267	-576.483	916.083	570.756	-528.64	889.835	575.978	-609.05	849.825
403	0	353.037	-625.663	1585.94	249.712	-631.684	1591.86	357.267	-451.773	1593.88	229.345	-482.196	1607.82	287.902	-409.117	1472.02	265.897	-298.862	1229.61	269.958	-538.877	1362.96	264.433	-577.941	1179.45	226.046	-301.249	1309.41	443.048	-472.688	1391.25	522.001	-418.808	1175.92	532.486	-427.309	1095.19	564.524	-492.416	986.497	524.258	-596.823	918.651	569.883	-549.735	891.286	574.567	-631.079	853.073
404	0	351.529	-639.225	1584.94	248.17	-645.138	1590.67	355.96	-465.335	1592.44	227.961	-495.567	1606.2	287.032	-422.938	1470.71	265.658	-312.368	1228.4	269.07	-552.663	1361.33	264.098	-591.386	1177.75	225.732	-314.804	1308.13	442.164	-486.979	1390.34	522.327	-435.095	1175.27	533.139	-444.406	1094.54	564.41	-511.664	986.801	523.158	-616.971	920.904	568.951	-570.657	892.52	573.051	-652.811	855.991
405	0	349.938	-652.792	1583.71	246.549	-658.597	1589.24	354.567	-478.9	1590.78	226.489	-508.947	1604.35	286.064	-436.749	1469.15	265.275	-325.926	1226.93	268.118	-566.478	1359.48	263.771	-604.934	1175.82	225.282	-328.388	1306.59	441.194	-501.264	1389.21	522.549	-451.488	1174.4	533.659	-461.556	1093.67	564.19	-530.83	986.897	521.968	-636.912	922.833	567.961	-591.388	893.53	571.435	-674.237	858.569
406	0	348.257	-666.359	1582.27	244.842	-672.059	1587.58	353.08	-492.466	1588.92	224.924	-522.331	1602.3	284.992	-450.546	1467.38	264.748	-339.54	1225.21	267.09	-580.319	1357.41	263.426	-618.593	1173.69	224.692	-342.002	1304.81	440.131	-515.542	1387.87	522.65	-467.971	1173.31	534.031	-478.74	1092.61	563.856	-549.894	986.786	520.685	-656.632	924.427	566.914	-611.906	894.312	569.727	-695.348	860.799
407	0	346.481	-679.928	1580.64	243.044	-685.521	1585.73	351.496	-506.031	1586.88	223.261	-535.717	1600.05	283.81	-464.324	1465.4	264.076	-353.211	1223.26	265.973	-594.183	1355.16	263.034	-632.367	1171.39	223.961	-355.643	1302.8	438.968	-529.812	1386.32	522.614	-484.521	1172.03	534.239	-495.937	1091.37	563.4	-568.831	986.473	519.307	-676.115	925.684	565.812	-632.19	894.864	567.933	-716.131	862.678
408	0	344.601	-693.496	1578.84	241.148	-698.983	1583.71	349.809	-519.594	1584.69	221.496	-549.103	1597.65	282.513	-478.08	1463.24	263.263	-366.942	1221.08	264.754	-608.067	1352.76	262.567	-646.258	1168.95	223.091	-369.313	1300.58	437.698	-544.072	1384.61	522.422	-501.113	1170.56	534.267	-513.121	1089.95	562.813	-587.616	985.967	517.833	-695.344	926.603	564.651	-652.214	895.185	566.063	-736.573	864.207
409	0	342.613	-707.065	1576.9	239.147	-712.444	1581.55	348.014	-533.155	1582.37	219.622	-562.489	1595.13	281.096	-491.814	1460.93	262.316	-380.739	1218.71	263.421	-621.968	1350.24	261.993	-660.269	1166.41	222.086	-383.012	1298.16	436.313	-558.325	1382.74	522.058	-517.715	1168.93	534.099	-530.263	1088.38	562.086	-606.218	985.278	516.264	-714.302	927.191	563.429	-671.951	895.279	564.124	-756.659	865.393
410	0	340.508	-720.638	1574.86	237.033	-725.904	1579.28	346.106	-546.717	1579.97	217.636	-575.876	1592.51	279.555	-505.524	1458.49	261.242	-394.603	1216.17	261.962	-635.886	1347.64	261.283	-674.398	1163.8	220.951	-396.74	1295.57	434.808	-572.575	1380.75	521.504	-534.292	1167.16	533.723	-547.334	1086.67	561.212	-624.606	984.419	514.599	-732.968	927.457	562.138	-691.372	895.151	562.124	-776.367	866.244
411	0	338.282	-734.218	1572.76	234.802	-739.366	1576.94	344.083	-560.284	1577.51	215.532	-589.265	1589.83	277.888	-519.215	1455.97	260.051	-408.538	1213.49	260.365	-649.82	1344.99	260.409	-688.644	1161.17	219.693	-410.499	1292.85	433.178	-586.825	1378.67	520.745	-550.808	1165.27	533.124	-564.299	1084.87	560.179	-642.746	983.406	512.838	-751.321	927.418	560.771	-710.444	894.811	560.073	-795.676	866.773
412	0	335.929	-747.81	1570.63	232.447	-752.835	1574.56	341.939	-573.859	1575.04	213.308	-602.663	1587.15	276.092	-532.889	1453.39	258.753	-422.548	1210.71	258.621	-663.771	1342.34	259.347	-703.003	1158.55	218.323	-424.29	1290.03	431.418	-601.082	1376.53	519.768	-567.223	1163.3	532.291	-581.126	1082.98	558.981	-660.604	982.259	510.982	-769.339	927.092	559.32	-729.133	894.27	557.977	-814.559	866.998
413	0	333.445	-761.419	1568.5	229.963	-766.315	1572.19	339.673	-587.45	1572.6	210.96	-616.073	1584.48	274.168	-546.552	1450.81	257.361	-436.635	1207.86	256.723	-677.739	1339.72	258.072	-717.472	1155.99	216.851	-438.115	1287.14	429.525	-615.353	1374.37	518.561	-583.502	1161.27	531.216	-597.779	1081.05	557.609	-678.145	981.001	509.033	-786.996	926.504	557.773	-747.402	893.544	555.842	-832.988	866.938
414	0	330.827	-775.054	1566.43	227.348	-779.813	1569.87	337.282	-601.064	1570.24	208.486	-629.504	1581.89	272.117	-560.211	1448.26	255.889	-450.8	1205	254.664	-691.727	1337.19	256.568	-732.044	1153.53	215.29	-451.976	1284.25	427.499	-629.644	1372.25	517.116	-599.606	1159.23	529.891	-614.225	1079.1	556.056	-695.332	979.657	506.991	-804.268	925.682	556.12	-765.214	892.653	553.675	-850.93	866.616
415	0	328.076	-788.722	1564.45	224.6	-793.336	1567.64	334.764	-614.709	1568	205.886	-642.964	1579.41	269.943	-573.874	1445.8	254.351	-465.042	1202.18	252.443	-705.736	1334.79	254.82	-746.712	1151.22	213.651	-465.875	1281.39	425.342	-643.965	1370.19	515.428	-615.502	1157.21	528.313	-630.429	1077.19	554.318	-712.132	978.257	504.856	-821.126	924.658	554.35	-782.532	891.619	551.478	-868.352	866.057
416	0	325.191	-802.429	1562.6	221.719	-806.893	1565.54	332.121	-628.393	1565.92	203.158	-656.463	1577.1	267.651	-587.55	1443.46	252.763	-479.36	1199.45	250.06	-719.768	1332.57	252.821	-761.466	1149.09	211.949	-479.813	1278.61	423.056	-658.321	1368.25	513.495	-631.161	1155.26	526.483	-646.361	1075.34	552.391	-728.512	976.833	502.628	-837.543	923.467	552.452	-799.319	890.469	549.252	-885.221	865.291
417	0	322.178	-816.185	1560.93	218.708	-820.494	1563.62	329.353	-642.125	1564.06	200.307	-670.01	1574.99	265.247	-601.248	1441.29	251.139	-493.75	1196.85	247.52	-733.823	1330.55	250.568	-776.294	1147.2	210.198	-493.793	1275.97	420.647	-672.721	1366.47	511.322	-646.557	1153.43	524.403	-661.992	1073.6	550.273	-744.443	975.417	500.309	-853.492	922.145	550.416	-815.541	889.231	546.998	-901.503	864.345
418	0	319.04	-829.997	1559.46	215.572	-834.145	1561.9	326.464	-655.914	1562.44	197.335	-683.615	1573.11	262.741	-614.977	1439.34	249.494	-508.203	1194.46	244.831	-747.903	1328.8	248.07	-791.18	1145.59	208.41	-507.813	1273.52	418.125	-687.168	1364.9	508.914	-661.67	1151.76	522.081	-677.298	1072.02	547.968	-759.9	974.044	497.898	-868.947	920.73	548.235	-831.167	887.938	544.711	-917.166	863.249
419	0	315.788	-843.871	1558.24	212.32	-847.856	1560.42	323.458	-669.767	1561.12	194.248	-697.289	1571.52	260.144	-628.744	1437.65	247.842	-522.713	1192.3	242.007	-762.007	1327.34	245.338	-806.107	1144.3	206.6	-521.873	1271.31	415.501	-701.666	1363.58	506.285	-676.487	1150.29	519.53	-692.258	1070.63	545.479	-774.86	972.75	495.394	-883.883	919.26	545.904	-846.169	886.623	542.388	-932.182	862.034
420	0	312.431	-857.812	1557.3	208.961	-861.634	1559.22	320.342	-683.69	1560.13	191.054	-711.039	1570.24	257.469	-642.555	1436.26	246.198	-537.267	1190.44	239.063	-776.132	1326.21	242.396	-821.053	1143.36	204.78	-535.97	1269.37	412.79	-716.216	1362.56	503.453	-691.001	1149.08	516.766	-706.856	1069.47	542.814	-789.311	971.57	492.799	-898.28	917.772	543.421	-860.529	885.322	540.022	-946.526	860.728
421	0	308.983	-871.823	1556.64	205.509	-875.485	1558.3	317.126	-697.689	1559.49	187.765	-724.872	1569.3	254.731	-656.417	1435.18	244.573	-551.854	1188.91	236.02	-790.277	1325.43	239.273	-835.993	1142.79	202.964	-550.102	1267.76	410.009	-730.817	1361.86	500.441	-705.212	1148.15	513.808	-721.082	1068.59	539.985	-803.241	970.537	490.114	-912.119	916.301	540.787	-874.231	884.068	537.605	-960.179	859.36
422	0	305.46	-885.908	1556.3	201.981	-889.413	1557.69	313.822	-711.765	1559.22	184.394	-738.793	1568.7	251.948	-670.332	1434.46	242.979	-566.459	1187.75	232.905	-804.437	1325.02	236.007	-850.901	1142.62	201.163	-564.264	1266.51	407.177	-745.464	1361.53	497.277	-719.125	1147.55	510.684	-734.932	1068.02	537.007	-816.649	969.682	487.341	-925.388	914.882	538.01	-887.271	882.896	535.128	-973.129	857.954
423	0	301.881	-900.066	1556.28	198.395	-903.419	1557.4	310.444	-725.919	1559.33	180.957	-752.804	1568.47	249.136	-684.302	1434.1	241.425	-581.07	1186.99	229.743	-818.607	1325	232.642	-865.748	1142.85	199.388	-578.45	1265.64	404.317	-760.151	1361.57	493.993	-732.754	1147.3	507.42	-748.405	1067.78	533.898	-829.54	969.033	484.482	-938.081	913.543	535.1	-899.652	881.84	532.583	-985.371	856.534
424	0	298.265	-914.294	1556.58	194.772	-917.503	1557.43	307.012	-740.149	1559.83	177.471	-766.905	1568.61	246.316	-698.327	1434.11	239.917	-595.669	1186.63	226.567	-832.783	1325.37	229.226	-880.507	1143.47	197.647	-592.653	1265.16	401.45	-774.867	1362	490.628	-746.118	1147.44	504.051	-761.509	1067.89	530.681	-841.924	968.612	481.545	-950.196	912.31	532.074	-911.385	880.93	529.962	-996.91	855.118
425	0	294.636	-928.589	1557.19	191.135	-931.662	1557.77	303.543	-754.45	1560.7	173.96	-781.091	1569.1	243.505	-712.403	1434.49	238.461	-610.244	1186.69	223.407	-846.958	1326.1	225.814	-895.151	1144.47	195.948	-606.868	1265.09	398.601	-789.602	1362.83	487.221	-759.24	1147.96	500.61	-774.256	1068.37	527.382	-853.821	968.438	478.536	-961.738	911.204	528.952	-922.493	880.192	527.259	-1007.76	853.724
426	0	291.016	-942.944	1558.11	187.508	-945.891	1558.41	300.063	-768.815	1561.94	170.445	-795.356	1569.92	240.724	-726.527	1435.23	237.059	-624.78	1187.17	220.297	-861.126	1327.2	222.46	-909.655	1145.81	194.295	-621.085	1265.42	395.792	-804.341	1364.04	483.814	-772.148	1148.88	497.134	-786.662	1069.21	524.028	-865.254	968.522	475.466	-972.722	910.241	525.76	-933.006	879.649	524.471	-1017.94	852.363
427	0	287.431	-957.352	1559.32	183.917	-960.182	1559.33	296.595	-783.237	1563.5	166.951	-809.691	1571.07	237.991	-740.694	1436.31	235.709	-639.264	1188.04	217.269	-875.283	1328.62	219.217	-924	1147.47	192.692	-635.298	1266.14	393.048	-819.068	1365.62	480.451	-784.872	1150.18	493.662	-798.747	1070.42	520.651	-876.253	968.869	472.349	-983.165	909.432	522.529	-942.963	879.315	521.597	-1027.48	851.044
428	0	283.906	-971.802	1560.78	180.388	-974.526	1560.5	293.165	-797.705	1565.37	163.505	-824.087	1572.5	235.321	-754.897	1437.7	234.409	-653.684	1189.29	214.354	-889.424	1330.33	216.138	-938.172	1149.38	191.138	-649.499	1267.22	390.39	-833.766	1367.54	477.173	-797.442	1151.85	490.231	-810.535	1071.97	517.281	-886.851	969.477	469.201	-993.096	908.78	519.291	-952.409	879.202	518.642	-1036.42	849.773
429	0	280.465	-986.287	1562.47	176.946	-988.913	1561.91	289.801	-812.208	1567.5	160.133	-838.53	1574.18	232.73	-769.129	1439.38	233.153	-668.028	1190.88	211.582	-903.543	1332.3	213.271	-952.164	1151.5	189.632	-663.679	1268.64	387.839	-848.417	1369.76	474.022	-809.888	1153.86	486.878	-822.054	1073.85	513.953	-897.085	970.338	466.042	-1002.54	908.288	516.082	-961.395	879.314	515.616	-1044.81	848.551
430	0	277.133	-1000.79	1564.35	173.615	-1003.33	1563.5	286.529	-826.736	1569.84	156.86	-853.009	1576.06	230.231	-783.383	1441.31	231.933	-682.287	1192.79	208.977	-917.639	1334.46	210.658	-965.975	1153.77	188.169	-677.833	1270.36	385.413	-863.004	1372.25	471.033	-822.236	1156.17	483.635	-833.33	1076.02	510.698	-906.994	971.436	462.896	-1011.55	907.949	512.94	-969.974	879.647	512.534	-1052.69	847.38
431	0	273.934	-1015.31	1566.38	170.42	-1017.78	1565.25	283.375	-841.277	1572.35	153.712	-867.511	1578.12	227.834	-797.65	1443.44	230.741	-696.453	1194.95	206.562	-931.708	1336.77	208.333	-979.612	1156.13	186.745	-691.953	1272.35	383.126	-877.51	1374.96	468.236	-834.51	1158.75	480.533	-844.393	1078.45	507.548	-916.615	972.752	459.788	-1020.15	907.755	509.9	-978.2	880.194	509.419	-1060.12	846.257
432	0	270.887	-1029.84	1568.54	167.38	-1032.23	1567.13	280.364	-855.821	1574.98	150.71	-882.023	1580.31	225.549	-811.925	1445.74	229.568	-710.519	1197.34	204.354	-945.748	1339.19	206.323	-993.09	1158.54	185.353	-706.033	1274.56	380.993	-891.92	1377.83	465.657	-846.727	1161.54	477.598	-855.271	1081.1	504.532	-925.987	974.262	456.749	-1028.39	907.693	506.999	-986.127	880.938	506.298	-1067.15	845.18
433	0	268.01	-1044.35	1570.77	164.514	-1046.69	1569.09	277.516	-870.357	1577.68	147.874	-896.534	1582.57	223.382	-826.198	1448.17	228.406	-724.483	1199.9	202.366	-959.759	1341.66	204.644	-1006.43	1160.93	183.987	-720.068	1276.95	379.023	-906.221	1380.82	463.312	-858.896	1164.5	474.851	-865.99	1083.92	501.678	-935.147	975.937	453.808	-1036.33	907.749	504.27	-993.806	881.861	503.207	-1073.83	844.147
434	0	265.318	-1058.86	1573.03	161.837	-1061.13	1571.09	274.849	-884.879	1580.41	145.22	-911.035	1584.89	221.338	-840.462	1450.67	227.245	-738.341	1202.59	200.603	-973.738	1344.13	203.306	-1019.65	1163.28	182.64	-734.054	1279.47	377.22	-920.404	1383.87	461.21	-871.022	1167.58	472.306	-876.578	1086.86	499.008	-944.127	977.746	450.999	-1043.99	907.904	501.743	-1001.28	882.938	500.184	-1080.21	843.152
435	0	262.824	-1073.33	1575.3	159.359	-1075.57	1573.11	272.378	-899.377	1583.13	142.761	-925.515	1587.2	219.418	-854.711	1453.22	226.079	-752.094	1205.35	199.067	-987.685	1346.57	202.307	-1032.78	1165.54	181.308	-747.989	1282.07	375.589	-934.459	1386.94	459.352	-883.104	1170.73	469.973	-887.055	1089.89	496.543	-952.958	979.657	448.354	-1051.44	908.14	499.442	-1008.6	884.14	497.273	-1086.35	842.194
436	0	260.534	-1087.78	1577.52	157.088	-1089.98	1575.1	270.111	-913.845	1585.78	140.505	-939.969	1589.49	217.624	-868.938	1455.76	224.903	-765.745	1208.15	197.756	-1001.6	1348.93	201.637	-1045.85	1167.68	179.985	-761.87	1284.71	374.129	-948.384	1389.98	457.732	-895.134	1173.89	467.857	-897.444	1092.96	494.297	-961.667	981.638	445.907	-1058.71	908.435	497.389	-1015.79	885.437	494.521	-1092.28	841.269
437	0	258.453	-1102.2	1579.67	155.027	-1104.36	1577.04	268.054	-928.279	1588.35	138.457	-954.39	1591.71	215.955	-883.136	1458.26	223.715	-779.299	1210.93	196.66	-1015.48	1351.19	201.276	-1058.89	1169.7	178.669	-775.696	1287.36	372.835	-962.176	1392.94	456.337	-907.099	1177.03	465.957	-907.761	1096.02	492.283	-970.276	983.653	443.688	-1065.84	908.768	495.598	-1022.88	886.795	491.975	-1098.05	840.373
438	0	256.582	-1116.57	1581.72	153.178	-1118.71	1578.89	266.208	-942.673	1590.79	136.617	-968.774	1593.83	214.408	-897.3	1460.69	222.513	-792.762	1213.66	195.768	-1029.32	1353.32	201.201	-1071.91	1171.56	177.358	-789.468	1289.96	371.702	-975.839	1395.8	455.148	-918.985	1180.1	464.266	-918.022	1099.04	490.507	-978.803	985.671	441.727	-1072.89	909.118	494.079	-1029.9	888.18	489.682	-1103.69	839.504
439	0	254.918	-1130.9	1583.63	151.536	-1133.02	1580.63	264.57	-957.025	1593.08	134.983	-983.118	1595.84	212.981	-911.426	1463	221.301	-806.143	1216.29	195.065	-1043.13	1355.29	201.379	-1084.95	1173.26	176.054	-803.187	1292.48	370.722	-989.377	1398.5	454.144	-930.776	1183.06	462.776	-928.24	1101.98	488.972	-987.264	987.659	440.051	-1079.88	909.462	492.837	-1036.86	889.56	487.686	-1109.24	838.657
440	0	253.457	-1145.19	1585.39	150.095	-1147.29	1582.23	263.135	-971.331	1595.2	133.548	-997.42	1597.7	211.668	-925.512	1465.18	220.083	-819.451	1218.79	194.531	-1056.91	1357.09	201.774	-1098.02	1174.8	174.759	-816.856	1294.88	369.883	-1002.8	1401.03	453.298	-942.455	1185.87	461.475	-938.425	1104.8	487.677	-995.671	989.585	438.68	-1086.84	909.778	491.871	-1043.77	890.901	486.025	-1114.73	837.829
441	0	252.192	-1159.43	1586.96	148.849	-1161.52	1583.67	261.893	-985.591	1597.11	132.304	-1011.68	1599.4	210.466	-939.554	1467.18	218.867	-832.698	1221.13	194.148	-1070.66	1358.7	202.346	-1111.13	1176.16	173.481	-830.479	1297.14	369.175	-1016.12	1403.35	452.586	-954.01	1188.52	460.347	-948.588	1107.48	486.617	-1004.03	991.422	437.632	-1093.82	910.044	491.177	-1050.65	892.17	484.732	-1120.18	837.016
442	0	251.112	-1173.63	1588.33	147.786	-1175.71	1584.93	260.833	-999.803	1598.81	131.241	-1025.9	1600.91	209.371	-953.554	1469	217.663	-845.894	1223.27	193.895	-1084.37	1360.11	203.053	-1124.3	1177.35	172.225	-844.058	1299.21	368.584	-1029.35	1405.43	451.984	-965.43	1190.97	459.378	-958.737	1109.98	485.785	-1012.36	993.141	436.918	-1100.82	910.238	490.745	-1057.49	893.339	483.834	-1125.62	836.21
443	0	250.209	-1187.78	1589.48	146.897	-1189.86	1586	259.942	-1013.97	1600.27	130.346	-1040.07	1602.22	208.377	-967.514	1470.6	216.481	-859.051	1225.2	193.752	-1098.06	1361.31	203.852	-1137.51	1178.35	171.001	-857.6	1301.09	368.099	-1042.51	1407.27	451.466	-976.714	1193.2	458.55	-968.881	1112.29	485.172	-1020.66	994.718	436.543	-1107.87	910.339	490.564	-1064.31	894.38	483.346	-1131.08	835.404
444	0	249.471	-1201.88	1590.4	146.17	-1203.97	1586.86	259.208	-1028.08	1601.48	129.608	-1054.21	1603.31	207.481	-981.435	1471.96	215.336	-872.184	1226.88	193.697	-1111.72	1362.3	204.703	-1150.78	1179.17	169.82	-871.11	1302.74	367.706	-1055.61	1408.82	451.015	-987.865	1195.19	457.849	-979.031	1114.38	484.765	-1028.94	996.129	436.506	-1114.99	910.326	490.619	-1071.11	895.269	483.276	-1136.57	834.59
445	0	248.888	-1215.94	1591.08	145.594	-1218.05	1587.51	258.617	-1042.15	1602.44	129.015	-1068.31	1604.17	206.679	-995.324	1473.08	214.24	-885.303	1228.3	193.714	-1125.37	1363.05	205.567	-1164.1	1179.79	168.695	-884.595	1304.15	367.396	-1068.68	1410.1	450.613	-998.893	1196.92	457.26	-989.197	1116.23	484.551	-1037.22	997.353	436.801	-1122.2	910.179	490.894	-1077.9	895.984	483.622	-1142.11	833.754
446	0	248.451	-1229.95	1591.51	145.159	-1232.08	1587.92	258.158	-1056.17	1603.12	128.556	-1082.37	1604.79	205.97	-1009.18	1473.93	213.207	-898.422	1229.44	193.785	-1139	1363.57	206.409	-1177.45	1180.21	167.636	-898.061	1305.29	367.156	-1081.73	1411.07	450.25	-1009.82	1198.38	456.77	-999.391	1117.83	484.518	-1045.5	998.375	437.416	-1129.49	909.879	491.371	-1084.69	896.507	484.373	-1147.73	832.884
447	0	248.151	-1243.93	1591.68	144.858	-1246.09	1588.1	257.819	-1070.15	1603.52	128.22	-1096.4	1605.16	205.351	-1023.02	1474.5	212.252	-911.553	1230.3	193.897	-1152.63	1363.84	207.198	-1190.83	1180.41	166.658	-911.515	1306.16	366.98	-1094.78	1411.72	449.916	-1020.66	1199.57	456.368	-1009.63	1119.17	484.65	-1053.79	999.177	438.331	-1136.9	909.406	492.032	-1091.49	896.822	485.509	-1153.43	831.965
448	0	247.981	-1257.87	1591.59	144.683	-1260.07	1588.04	257.593	-1084.09	1603.64	127.999	-1110.4	1605.27	204.824	-1036.85	1474.79	211.388	-924.708	1230.86	194.037	-1166.26	1363.86	207.91	-1204.23	1180.38	165.772	-924.966	1306.75	366.861	-1107.86	1412.06	449.61	-1031.46	1200.47	456.045	-1019.92	1120.23	484.934	-1062.12	999.747	439.526	-1144.41	908.744	492.858	-1098.31	896.918	487.004	-1159.25	830.979
449	0	247.937	-1271.77	1591.24	144.63	-1274.01	1587.75	257.471	-1097.98	1603.46	127.888	-1124.38	1605.11	204.387	-1050.67	1474.79	210.626	-937.901	1231.11	194.197	-1179.9	1363.62	208.525	-1217.64	1180.12	164.99	-938.422	1307.05	366.794	-1120.98	1412.08	449.332	-1042.24	1201.08	455.796	-1030.29	1121	485.358	-1070.51	1000.08	440.975	-1152.04	907.877	493.834	-1105.17	896.784	488.825	-1165.18	829.909
450	0	248.015	-1285.64	1590.63	144.696	-1287.94	1587.21	257.45	-1111.84	1602.99	127.883	-1138.33	1604.7	204.046	-1064.49	1474.5	209.977	-951.14	1231.06	194.373	-1193.55	1363.12	209.031	-1231.05	1179.6	164.325	-951.892	1307.05	366.778	-1134.16	1411.76	449.085	-1053.04	1201.38	455.618	-1040.75	1121.47	485.91	-1078.97	1000.15	442.648	-1159.8	906.792	494.943	-1112.1	896.415	490.933	-1171.25	828.733
451	0	248.215	-1299.48	1589.76	144.881	-1301.85	1586.44	257.528	-1125.66	1602.22	127.982	-1152.26	1604.01	203.804	-1078.32	1473.91	209.45	-964.438	1230.69	194.562	-1207.23	1362.35	209.421	-1244.48	1178.83	163.786	-965.386	1306.75	366.815	-1147.41	1411.12	448.878	-1063.91	1201.39	455.509	-1051.32	1121.65	486.577	-1087.53	999.977	444.516	-1167.7	905.477	496.17	-1119.11	895.806	493.288	-1177.48	827.434
452	0	248.538	-1313.29	1588.65	145.186	-1315.74	1585.44	257.707	-1139.45	1601.16	128.187	-1166.18	1603.06	203.666	-1092.16	1473.03	209.052	-977.804	1230.01	194.767	-1220.95	1361.31	209.693	-1257.9	1177.79	163.382	-978.913	1306.16	366.907	-1160.74	1410.15	448.721	-1074.88	1201.08	455.471	-1062.02	1121.52	487.351	-1096.21	999.54	446.549	-1175.73	903.923	497.501	-1126.24	894.954	495.845	-1183.87	825.991
453	0	248.987	-1327.09	1587.3	145.616	-1329.62	1584.21	257.989	-1153.21	1599.81	128.501	-1180.08	1601.85	203.642	-1106.03	1471.87	208.787	-991.247	1229.04	194.991	-1234.7	1360	209.851	-1271.34	1176.48	163.12	-992.484	1305.26	367.061	-1174.16	1408.86	448.625	-1086	1200.48	455.507	-1072.87	1121.09	488.223	-1105.05	998.842	448.714	-1183.91	902.124	498.926	-1133.52	893.861	498.562	-1190.44	824.386
454	0	249.567	-1340.86	1585.72	146.176	-1343.49	1582.78	258.382	-1166.94	1598.19	128.931	-1193.97	1600.38	203.738	-1119.93	1470.44	208.66	-1004.77	1227.77	195.243	-1248.5	1358.42	209.907	-1284.81	1174.91	163.007	-1006.11	1304.08	367.286	-1187.69	1407.26	448.605	-1097.29	1199.56	455.621	-1083.89	1120.35	489.186	-1114.06	997.884	450.982	-1192.25	900.078	500.435	-1140.96	892.529	501.394	-1197.22	822.602
455	0	250.283	-1354.62	1583.93	146.872	-1357.36	1581.16	258.893	-1180.65	1596.3	129.483	-1207.85	1598.69	203.965	-1133.86	1468.74	208.671	-1018.39	1226.21	195.534	-1262.36	1356.6	209.874	-1298.31	1173.09	163.045	-1019.8	1302.62	367.592	-1201.32	1405.36	448.674	-1108.79	1198.35	455.818	-1095.1	1119.31	490.233	-1123.28	996.669	453.325	-1200.76	897.783	502.019	-1148.61	890.962	504.302	-1204.2	820.626
456	0	251.144	-1368.38	1581.96	147.714	-1371.23	1579.36	259.533	-1194.35	1594.17	130.169	-1221.73	1596.77	204.332	-1147.83	1466.81	208.821	-1032.11	1224.4	195.877	-1276.27	1354.53	209.771	-1311.85	1171.02	163.238	-1033.56	1300.91	367.991	-1215.06	1403.18	448.845	-1120.52	1196.83	456.105	-1106.51	1117.98	491.358	-1132.72	995.203	455.715	-1209.45	895.245	503.67	-1156.49	889.167	507.247	-1211.42	818.447
457	0	252.159	-1382.13	1579.83	148.71	-1385.1	1577.41	260.313	-1208.04	1591.82	130.998	-1235.6	1594.66	204.851	-1161.84	1464.66	209.108	-1045.94	1222.33	196.288	-1290.26	1352.25	209.621	-1325.47	1168.74	163.586	-1047.41	1298.94	368.495	-1228.9	1400.73	449.131	-1132.52	1195.03	456.487	-1118.15	1116.36	492.557	-1142.42	993.495	458.129	-1218.34	892.472	505.382	-1164.63	887.153	510.193	-1218.88	816.058
458	0	253.335	-1395.88	1577.56	149.868	-1398.98	1575.34	261.245	-1221.73	1589.28	131.981	-1249.48	1592.38	205.532	-1175.9	1462.32	209.529	-1059.88	1220.06	196.784	-1304.32	1349.78	209.452	-1339.17	1166.26	164.086	-1061.35	1296.77	369.118	-1242.84	1398.06	449.544	-1144.78	1192.95	456.968	-1130.03	1114.46	493.823	-1152.39	991.555	460.545	-1227.44	889.476	507.15	-1173.07	884.933	513.11	-1226.61	813.458
459	0	254.682	-1409.63	1575.19	151.2	-1412.88	1573.18	262.342	-1235.42	1586.59	133.131	-1263.37	1589.97	206.383	-1190.02	1459.82	210.079	-1073.93	1217.59	197.383	-1318.45	1347.14	209.292	-1352.97	1163.63	164.737	-1075.39	1294.4	369.872	-1256.89	1395.17	450.091	-1157.33	1190.61	457.553	-1142.16	1112.32	495.153	-1162.67	989.401	462.944	-1236.78	886.275	508.968	-1181.83	882.522	515.971	-1234.62	810.653
460	0	256.207	-1423.4	1572.76	152.712	-1426.79	1570.97	263.616	-1249.12	1583.77	134.458	-1277.27	1587.46	207.412	-1204.18	1457.2	210.753	-1088.11	1214.97	198.105	-1332.68	1344.39	209.174	-1366.89	1160.87	165.531	-1089.54	1291.88	370.771	-1271.01	1392.12	450.779	-1170.17	1188.03	458.241	-1154.56	1109.94	496.54	-1173.26	987.052	465.31	-1246.36	882.893	510.829	-1190.93	879.939	518.753	-1242.94	807.653
461	0	257.919	-1437.2	1570.3	154.413	-1440.73	1568.73	265.078	-1262.84	1580.88	135.973	-1291.18	1584.89	208.626	-1218.41	1454.51	211.541	-1102.42	1212.24	198.966	-1346.99	1341.55	209.132	-1380.95	1158.03	166.461	-1103.8	1289.25	371.825	-1285.22	1388.94	451.609	-1183.31	1185.24	459.035	-1167.23	1107.35	497.979	-1184.18	984.531	467.628	-1256.22	879.356	512.727	-1200.41	877.208	521.438	-1251.59	804.475
462	0	259.822	-1451.01	1567.86	156.309	-1454.69	1566.52	266.736	-1276.59	1577.96	137.683	-1305.12	1582.31	210.028	-1232.69	1451.77	212.435	-1116.85	1209.44	199.985	-1361.4	1338.69	209.198	-1395.15	1155.15	167.519	-1118.19	1286.56	373.042	-1299.5	1385.66	452.582	-1196.72	1182.28	459.931	-1180.18	1104.6	499.464	-1195.46	981.866	469.889	-1266.38	875.698	514.655	-1210.28	874.355	524.012	-1260.59	801.145
463	0	261.92	-1464.87	1565.47	158.402	-1468.69	1564.36	268.599	-1290.37	1575.06	139.597	-1319.09	1579.77	211.619	-1247.04	1449.05	213.423	-1131.42	1206.61	201.173	-1375.9	1335.84	209.407	-1409.52	1152.3	168.692	-1132.7	1283.84	374.428	-1313.84	1382.35	453.693	-1210.41	1179.17	460.924	-1193.41	1101.7	500.985	-1207.09	979.089	472.081	-1276.86	871.957	516.605	-1220.56	871.413	526.462	-1269.96	797.692
464	0	264.214	-1478.76	1563.18	160.696	-1482.73	1562.31	270.669	-1304.2	1572.22	141.716	-1333.09	1577.3	213.396	-1261.44	1446.39	214.493	-1146.12	1203.82	202.545	-1390.5	1333.06	209.789	-1424.07	1149.52	169.968	-1147.33	1281.16	375.987	-1328.23	1379.04	454.932	-1224.35	1175.97	462.009	-1206.93	1098.71	502.536	-1219.09	976.236	474.198	-1287.69	868.176	518.566	-1231.28	868.414	528.782	-1279.74	794.155
465	0	266.702	-1492.7	1561.02	163.187	-1496.81	1560.41	272.948	-1318.08	1569.49	144.042	-1347.14	1574.96	215.355	-1275.91	1443.83	215.629	-1160.95	1201.1	204.105	-1405.2	1330.4	210.371	-1438.79	1146.86	171.334	-1162.09	1278.56	377.717	-1342.65	1375.79	456.29	-1238.54	1172.72	463.175	-1220.73	1095.67	504.107	-1231.47	973.345	476.232	-1298.88	864.401	520.529	-1242.46	865.399	530.965	-1289.94	790.577
466	0	269.378	-1506.68	1559.05	165.871	-1510.95	1558.69	275.433	-1332.02	1566.94	146.571	-1361.23	1572.8	217.485	-1290.44	1441.42	216.819	-1175.91	1198.51	205.858	-1419.99	1327.93	211.176	-1453.71	1144.39	172.774	-1176.98	1276.09	379.615	-1357.1	1372.65	457.751	-1252.96	1169.47	464.413	-1234.8	1092.62	505.688	-1244.23	970.458	478.178	-1310.47	860.682	522.482	-1254.1	862.407	533.008	-1300.6	787.006
467	0	272.234	-1520.72	1557.28	168.74	-1525.13	1557.18	278.117	-1346.02	1564.59	149.296	-1375.37	1570.86	219.776	-1305.03	1439.21	218.048	-1190.99	1196.11	207.8	-1434.88	1325.68	212.22	-1468.82	1142.15	174.273	-1191.98	1273.81	381.671	-1371.57	1369.67	459.3	-1267.57	1166.27	465.71	-1249.13	1089.61	507.269	-1257.37	967.617	480.032	-1322.47	857.07	524.411	-1266.22	859.48	534.911	-1311.74	783.493
468	0	275.256	-1534.82	1555.77	171.78	-1539.36	1555.93	280.988	-1360.09	1562.49	152.206	-1389.56	1569.18	222.211	-1319.68	1437.24	219.302	-1206.17	1193.92	209.924	-1449.84	1323.71	213.51	-1484.11	1140.19	175.817	-1207.09	1271.75	383.874	-1386.04	1366.9	460.918	-1282.36	1163.18	467.055	-1263.72	1086.69	508.839	-1270.9	964.864	481.789	-1334.92	853.617	526.303	-1278.83	856.66	536.672	-1323.39	780.092
469	0	278.428	-1548.97	1554.52	174.975	-1553.65	1554.96	284.031	-1374.23	1560.69	155.286	-1403.8	1567.79	224.772	-1334.37	1435.55	220.569	-1221.45	1192.01	212.217	-1464.87	1322.05	215.047	-1499.58	1138.56	177.391	-1222.3	1269.98	386.208	-1400.52	1364.39	462.586	-1297.3	1160.25	468.433	-1278.55	1083.92	510.389	-1284.79	962.242	483.447	-1347.82	850.375	528.145	-1291.94	853.989	538.293	-1335.58	776.856
470	0	281.731	-1563.18	1553.57	178.307	-1567.99	1554.29	287.227	-1388.43	1559.21	158.514	-1418.1	1566.74	227.438	-1349.1	1434.17	221.836	-1236.8	1190.41	214.66	-1479.96	1320.75	216.822	-1515.21	1137.3	178.982	-1237.58	1268.51	388.651	-1414.98	1362.17	464.286	-1312.36	1157.52	469.833	-1293.59	1081.33	511.908	-1299.06	959.791	485.003	-1361.2	847.39	529.921	-1305.56	851.506	539.776	-1348.33	773.837
471	0	285.142	-1577.45	1552.93	181.75	-1582.38	1553.92	290.551	-1402.7	1558.08	161.869	-1432.45	1566.03	230.187	-1363.85	1433.12	223.096	-1252.2	1189.14	217.231	-1495.09	1319.84	218.818	-1530.99	1136.44	180.576	-1252.92	1267.4	391.183	-1429.43	1360.29	466	-1327.54	1155.06	471.244	-1308.84	1078.96	513.387	-1313.69	957.548	486.456	-1375.07	844.71	531.618	-1319.68	849.247	541.121	-1361.67	771.083
472	0	288.635	-1591.76	1552.61	185.281	-1596.81	1553.88	293.977	-1417.03	1557.32	165.324	-1446.84	1565.68	232.994	-1378.62	1432.43	224.338	-1267.64	1188.24	219.901	-1510.24	1319.32	221.01	-1546.87	1135.99	182.162	-1268.3	1266.65	393.776	-1443.86	1358.76	467.712	-1342.8	1152.89	472.655	-1324.28	1076.86	514.82	-1328.68	955.544	487.804	-1389.45	842.374	533.224	-1334.3	847.243	542.332	-1375.62	768.639
473	0	292.181	-1606.11	1552.61	188.869	-1611.27	1554.16	297.475	-1431.41	1556.94	168.849	-1461.28	1565.71	235.832	-1393.39	1432.11	225.556	-1283.08	1187.72	222.642	-1525.38	1319.21	223.365	-1562.82	1135.96	183.729	-1283.69	1266.29	396.405	-1458.25	1357.61	469.407	-1358.13	1151.05	474.058	-1339.88	1075.05	516.199	-1344.01	953.808	489.048	-1404.33	840.416	534.728	-1349.43	845.519	543.413	-1390.19	766.542
474	0	295.752	-1620.5	1552.92	192.486	-1625.77	1554.75	301.013	-1445.84	1556.93	172.412	-1475.75	1566.11	238.676	-1408.13	1432.15	226.743	-1298.5	1187.59	225.42	-1540.49	1319.51	225.847	-1578.8	1136.36	185.266	-1299.06	1266.33	399.04	-1472.61	1356.85	471.074	-1373.52	1149.56	475.446	-1355.62	1073.56	517.521	-1359.67	952.36	490.189	-1419.72	838.863	536.121	-1365.05	844.097	544.364	-1405.4	764.821
475	0	299.316	-1634.92	1553.54	196.101	-1640.28	1555.65	304.557	-1460.3	1557.31	175.979	-1490.25	1566.87	241.499	-1422.85	1432.56	227.895	-1313.87	1187.85	228.203	-1555.56	1320.21	228.415	-1594.76	1137.16	186.765	-1314.4	1266.75	401.653	-1486.92	1356.48	472.705	-1388.95	1148.44	476.816	-1371.5	1072.39	518.783	-1375.65	951.215	491.227	-1435.63	837.735	537.397	-1381.17	842.987	545.191	-1421.27	763.5
476	0	302.844	-1649.35	1554.44	199.681	-1654.81	1556.82	308.071	-1474.77	1558.04	179.518	-1504.76	1567.98	244.277	-1437.52	1433.32	229.009	-1329.17	1188.5	230.958	-1570.55	1321.29	231.025	-1610.64	1138.34	188.219	-1329.67	1267.56	404.219	-1501.17	1356.5	474.292	-1404.4	1147.69	478.165	-1387.48	1071.56	519.984	-1391.95	950.38	492.166	-1452.05	837.043	538.552	-1397.78	842.197	545.897	-1437.79	762.592
477	0	306.305	-1663.78	1555.6	203.196	-1669.33	1558.26	311.522	-1489.25	1559.12	182.993	-1519.28	1569.41	246.987	-1452.13	1434.42	230.083	-1344.38	1189.5	233.655	-1585.45	1322.72	233.635	-1626.41	1139.87	189.622	-1344.85	1268.73	406.712	-1515.37	1356.88	475.833	-1419.89	1147.3	479.493	-1403.56	1071.07	521.125	-1408.54	949.855	493.006	-1468.97	836.791	539.586	-1414.86	841.726	546.485	-1454.96	762.104
478	0	309.669	-1678.2	1557.01	206.616	-1683.83	1559.92	314.876	-1503.73	1560.51	186.373	-1533.8	1571.13	249.608	-1466.66	1435.82	231.119	-1359.46	1190.84	236.265	-1600.25	1324.46	236.201	-1642	1141.7	190.973	-1359.92	1270.25	409.11	-1529.51	1357.6	477.326	-1435.39	1147.27	480.803	-1419.71	1070.89	522.209	-1425.41	949.636	493.751	-1486.37	836.975	540.498	-1432.4	841.568	546.96	-1472.79	762.036
479	0	312.911	-1692.61	1558.64	209.913	-1698.32	1561.78	318.103	-1518.18	1562.18	189.627	-1548.29	1573.11	252.123	-1481.12	1437.5	232.118	-1374.4	1192.5	238.763	-1614.92	1326.48	238.685	-1657.39	1143.79	192.27	-1374.86	1272.06	411.394	-1543.59	1358.64	478.774	-1450.89	1147.57	482.097	-1435.91	1071.03	523.238	-1442.55	949.711	494.403	-1504.24	837.585	541.293	-1450.38	841.71	547.325	-1491.26	762.384
480	0	316.006	-1706.99	1560.45	213.061	-1712.77	1563.82	321.176	-1532.61	1564.09	192.728	-1562.76	1575.3	254.518	-1495.48	1439.43	233.087	-1389.19	1194.43	241.127	-1629.46	1328.74	241.047	-1672.53	1146.08	193.516	-1389.67	1274.16	413.551	-1557.6	1359.96	480.177	-1466.41	1148.17	483.38	-1452.16	1071.44	524.217	-1459.95	950.065	494.964	-1522.56	838.604	541.974	-1468.79	842.139	547.586	-1510.35	763.135
481	0	318.934	-1721.33	1562.41	216.038	-1727.17	1565.99	324.069	-1546.98	1566.22	195.653	-1577.19	1577.68	256.782	-1509.75	1441.57	234.03	-1403.8	1196.61	243.34	-1643.86	1331.18	243.255	-1687.41	1148.53	194.714	-1404.32	1276.48	415.57	-1571.55	1361.52	481.54	-1481.92	1149.04	484.656	-1468.45	1072.12	525.151	-1477.58	950.678	495.434	-1541.29	840.011	542.548	-1487.61	842.835	547.748	-1530.05	764.278
482	0	321.676	-1735.63	1564.5	218.826	-1741.53	1568.26	326.766	-1561.31	1568.51	198.384	-1591.57	1580.19	258.91	-1523.94	1443.88	234.957	-1418.24	1198.99	245.39	-1658.13	1333.77	245.28	-1702.02	1151.09	195.872	-1418.81	1279	417.443	-1585.45	1363.28	482.866	-1497.43	1150.16	485.931	-1484.76	1073.02	526.043	-1495.43	951.53	495.816	-1560.41	841.783	543.018	-1506.82	843.779	547.814	-1550.33	765.798
483	0	324.219	-1749.88	1566.69	221.411	-1755.82	1570.6	329.254	-1575.58	1570.93	200.908	-1605.9	1582.79	260.897	-1538.03	1446.33	235.875	-1432.5	1201.54	247.269	-1672.25	1336.45	247.098	-1716.34	1153.7	196.995	-1433.14	1281.67	419.169	-1599.29	1365.22	484.161	-1512.93	1151.48	487.21	-1501.08	1074.12	526.898	-1513.48	952.598	496.11	-1579.88	843.893	543.391	-1526.38	844.952	547.789	-1571.14	767.677
484	0	326.556	-1764.08	1568.95	223.783	-1770.06	1572.99	331.524	-1589.79	1573.45	203.216	-1620.17	1585.45	262.743	-1552.03	1448.88	236.794	-1446.58	1204.21	248.974	-1686.25	1339.2	248.692	-1730.38	1156.35	198.091	-1447.31	1284.46	420.748	-1613.08	1367.28	485.427	-1528.43	1152.97	488.496	-1517.42	1075.38	527.719	-1531.73	953.858	496.316	-1599.67	846.316	543.674	-1546.28	846.334	547.677	-1592.46	769.901
485	0	328.68	-1778.22	1571.25	225.938	-1784.22	1575.38	333.577	-1603.94	1576.02	205.306	-1634.38	1588.13	264.451	-1565.96	1451.49	237.721	-1460.48	1206.98	250.505	-1700.12	1341.96	250.052	-1744.17	1158.98	199.167	-1461.33	1287.33	422.185	-1626.83	1369.43	486.67	-1543.91	1154.6	489.794	-1533.76	1076.79	528.51	-1550.15	955.289	496.435	-1619.74	849.022	543.87	-1566.47	847.907	547.482	-1614.24	772.452
486	0	330.592	-1792.32	1573.56	227.873	-1798.32	1577.76	335.414	-1618.02	1578.62	207.181	-1648.52	1590.8	266.026	-1579.81	1454.14	238.665	-1474.21	1209.8	251.866	-1713.87	1344.71	251.173	-1757.71	1161.57	200.23	-1475.2	1290.23	423.486	-1640.56	1371.64	487.893	-1559.39	1156.34	491.107	-1550.11	1078.3	529.273	-1568.72	956.868	496.468	-1640.05	851.987	543.987	-1586.94	849.656	547.208	-1636.43	775.314
487	0	332.294	-1806.36	1575.85	229.593	-1812.35	1580.09	337.045	-1632.05	1581.22	208.849	-1662.6	1593.42	267.475	-1593.59	1456.78	239.632	-1487.78	1212.65	253.066	-1727.52	1347.42	252.06	-1771.03	1164.1	201.286	-1488.93	1293.14	424.659	-1654.25	1373.88	489.1	-1574.85	1158.16	492.436	-1566.45	1079.88	530.011	-1587.44	958.575	496.417	-1660.56	855.183	544.028	-1607.65	851.565	546.857	-1658.97	778.471
488	0	333.793	-1820.35	1578.11	231.105	-1826.32	1582.36	338.482	-1646.03	1583.77	210.319	-1676.61	1595.97	268.806	-1607.31	1459.4	240.624	-1501.2	1215.49	254.114	-1741.08	1350.05	252.722	-1784.17	1166.55	202.34	-1502.54	1296.03	425.716	-1667.93	1376.13	490.292	-1590.31	1160.03	493.783	-1582.8	1081.53	530.724	-1606.28	960.39	496.283	-1681.23	858.586	544	-1628.58	853.62	546.431	-1681.82	781.903
489	0	335.098	-1834.3	1580.29	232.419	-1840.22	1584.53	339.741	-1659.96	1586.27	211.608	-1690.56	1598.43	270.026	-1620.98	1461.96	241.644	-1514.5	1218.29	255.023	-1754.55	1352.59	253.176	-1797.15	1168.91	203.393	-1516.03	1298.86	426.667	-1681.6	1378.35	491.472	-1605.76	1161.92	495.147	-1599.14	1083.2	531.413	-1625.23	962.294	496.071	-1702.03	862.17	543.906	-1649.68	855.811	545.932	-1704.92	785.594
490	0	336.223	-1848.2	1582.39	233.548	-1854.07	1586.6	340.839	-1673.85	1588.67	212.731	-1704.45	1600.77	271.146	-1634.6	1464.43	242.689	-1527.68	1221.03	255.808	-1767.95	1355.01	253.448	-1809.99	1171.15	204.446	-1529.42	1301.6	427.523	-1695.26	1380.53	492.643	-1621.2	1163.82	496.529	-1615.49	1084.87	532.078	-1644.27	964.268	495.784	-1722.93	865.912	543.753	-1670.93	858.123	545.362	-1728.21	789.52
491	0	337.179	-1862.07	1584.37	234.506	-1867.85	1588.53	341.794	-1687.7	1590.97	213.706	-1718.28	1602.97	272.174	-1648.18	1466.8	243.755	-1540.76	1223.67	256.483	-1781.29	1357.29	253.563	-1822.73	1173.29	205.498	-1542.72	1304.24	428.295	-1708.92	1382.65	493.807	-1636.64	1165.71	497.927	-1631.83	1086.53	532.72	-1663.39	966.294	495.427	-1743.89	869.788	543.545	-1692.31	860.545	544.721	-1751.63	793.659
492	0	337.983	-1875.91	1586.22	235.308	-1881.59	1590.31	342.624	-1701.52	1593.14	214.552	-1732.06	1605.02	273.119	-1661.72	1469.04	244.836	-1553.75	1226.18	257.063	-1794.58	1359.42	253.554	-1835.39	1175.29	206.546	-1555.95	1306.73	428.995	-1722.57	1384.68	494.966	-1652.07	1167.55	499.339	-1648.18	1088.16	533.339	-1682.57	968.353	495.007	-1764.88	873.772	543.289	-1713.77	863.063	544.012	-1775.13	797.985
493	0	338.65	-1889.72	1587.91	235.97	-1895.27	1591.92	343.348	-1715.31	1595.15	215.285	-1745.79	1606.9	273.989	-1675.22	1471.13	245.922	-1566.68	1228.56	257.564	-1807.82	1361.39	253.454	-1848	1177.15	207.585	-1569.12	1309.08	429.633	-1736.22	1386.61	496.122	-1667.5	1169.33	500.763	-1664.54	1089.73	533.935	-1701.8	970.429	494.532	-1785.88	877.84	542.99	-1735.3	865.663	543.236	-1798.66	802.468
494	0	339.196	-1903.51	1589.43	236.51	-1908.92	1593.35	343.981	-1729.08	1597	215.923	-1759.47	1608.6	274.79	-1688.7	1473.05	247.002	-1579.56	1230.76	258	-1821.03	1363.18	253.299	-1860.56	1178.86	208.606	-1582.23	1311.24	430.218	-1749.86	1388.42	497.275	-1682.93	1171.03	502.198	-1680.9	1091.22	534.51	-1721.07	972.5	494.009	-1806.85	881.966	542.654	-1756.87	868.329	542.398	-1822.18	807.077
495	0	339.636	-1917.27	1590.76	236.941	-1922.52	1594.59	344.538	-1742.83	1598.66	216.48	-1773.11	1610.1	275.529	-1702.14	1474.79	248.061	-1592.4	1232.79	258.384	-1834.21	1364.77	253.121	-1873.1	1180.39	209.603	-1595.3	1313.21	430.757	-1763.5	1390.1	498.428	-1698.37	1172.62	503.64	-1697.27	1092.62	535.062	-1740.36	974.549	493.446	-1827.78	886.122	542.288	-1778.46	871.043	541.499	-1845.64	811.779
496	0	339.983	-1931.01	1591.89	237.278	-1936.1	1595.62	345.03	-1756.55	1600.13	216.971	-1786.71	1611.39	276.21	-1715.57	1476.32	249.085	-1605.21	1234.6	258.729	-1847.37	1366.15	252.953	-1885.64	1181.74	210.565	-1608.34	1314.98	431.259	-1777.13	1391.62	499.58	-1713.81	1174.1	505.086	-1713.64	1093.91	535.595	-1759.65	976.556	492.85	-1848.65	890.283	541.898	-1800.03	873.785	540.547	-1869	816.538
497	0	340.252	-1944.74	1592.79	237.535	-1949.64	1596.43	345.467	-1770.26	1601.37	217.404	-1800.27	1612.46	276.837	-1728.96	1477.64	250.058	-1618	1236.2	259.044	-1860.51	1367.32	252.824	-1898.17	1182.89	211.482	-1621.36	1316.52	431.726	-1790.74	1392.97	500.732	-1729.26	1175.43	506.534	-1730.03	1095.06	536.108	-1778.94	978.502	492.231	-1869.44	894.417	541.492	-1821.58	876.534	539.546	-1892.23	821.317
498	0	340.452	-1958.46	1593.48	237.721	-1963.16	1597.02	345.857	-1783.95	1602.39	217.79	-1813.8	1613.31	277.413	-1742.34	1478.74	250.965	-1630.78	1237.57	259.339	-1873.64	1368.26	252.759	-1910.72	1183.81	212.342	-1634.37	1317.83	432.165	-1804.35	1394.13	501.88	-1744.71	1176.6	507.978	-1746.44	1096.07	536.603	-1798.21	980.367	491.596	-1890.12	898.496	541.077	-1843.08	879.268	538.507	-1915.3	826.081
499	0	340.595	-1972.16	1593.92	237.847	-1976.65	1597.38	346.206	-1797.62	1603.16	218.135	-1827.3	1613.92	277.937	-1755.7	1479.6	251.791	-1643.56	1238.7	259.619	-1886.76	1368.95	252.777	-1923.29	1184.5	213.134	-1647.36	1318.9	432.575	-1817.93	1395.09	503.023	-1760.17	1177.59	509.414	-1762.86	1096.92	537.081	-1817.45	982.135	490.95	-1910.69	902.491	540.659	-1864.51	881.964	537.438	-1938.19	830.793
500	0	340.686	-1985.85	1594.13	237.92	-1990.13	1597.5	346.516	-1811.27	1603.69	218.443	-1840.78	1614.29	278.41	-1769.05	1480.21	252.521	-1656.35	1239.57	259.887	-1899.89	1369.41	252.891	-1935.9	1184.93	213.846	-1660.36	1319.72	432.956	-1831.5	1395.83	504.156	-1775.64	1178.38	510.838	-1779.29	1097.59	537.543	-1836.65	983.786	490.301	-1931.14	906.37	540.245	-1885.85	884.598	536.349	-1960.88	835.42
501	0	340.732	-1999.52	1594.09	237.946	-2003.59	1597.38	346.789	-1824.9	1603.96	218.716	-1854.23	1614.41	278.83	-1782.38	1480.58	253.142	-1669.15	1240.18	260.146	-1913.02	1369.6	253.109	-1948.54	1185.1	214.467	-1673.36	1320.28	433.308	-1845.04	1396.34	505.272	-1791.12	1178.97	512.242	-1795.74	1098.08	537.991	-1855.8	985.306	489.655	-1951.44	910.107	539.844	-1907.08	887.148	535.255	-1983.35	839.927
502	0	340.737	-2013.19	1593.8	237.927	-2017.04	1597.03	347.026	-1838.51	1603.97	218.955	-1867.67	1614.28	279.193	-1795.71	1480.69	253.643	-1681.97	1240.54	260.393	-1926.16	1369.54	253.432	-1961.22	1185	214.987	-1686.37	1320.6	433.627	-1858.57	1396.62	506.364	-1806.61	1179.34	513.62	-1812.21	1098.37	538.425	-1874.88	986.681	489.017	-1971.58	913.671	539.461	-1928.19	889.592	534.166	-2005.58	844.286
503	0	340.7	-2026.85	1593.26	237.866	-2030.48	1596.43	347.223	-1852.1	1603.72	219.157	-1881.08	1613.9	279.496	-1809.03	1480.55	254.016	-1694.82	1240.63	260.625	-1939.31	1369.22	253.855	-1973.97	1184.63	215.395	-1699.39	1320.66	433.907	-1872.08	1396.65	507.423	-1822.11	1179.49	514.963	-1828.68	1098.46	538.845	-1893.89	987.899	488.392	-1991.56	917.038	539.104	-1949.15	891.909	533.099	-2027.56	848.467
504	0	340.622	-2040.5	1592.49	237.762	-2043.91	1595.6	347.379	-1865.67	1603.2	219.319	-1894.49	1613.28	279.733	-1822.35	1480.16	254.254	-1707.69	1240.46	260.835	-1952.49	1368.64	254.366	-1986.78	1183.99	215.685	-1712.43	1320.46	434.142	-1885.57	1396.43	508.438	-1837.61	1179.41	516.262	-1845.16	1098.35	539.251	-1912.8	988.95	487.785	-2011.36	920.182	538.781	-1969.94	894.081	532.067	-2049.28	852.446
505	0	340.501	-2054.14	1591.47	237.612	-2057.34	1594.55	347.489	-1879.22	1602.43	219.435	-1907.89	1612.42	279.896	-1835.67	1479.52	254.353	-1720.6	1240.03	261.016	-1965.68	1367.81	254.949	-1999.67	1183.08	215.849	-1725.5	1320.01	434.324	-1899.05	1395.97	509.397	-1853.11	1179.1	517.505	-1861.64	1098.04	539.642	-1931.61	989.826	487.203	-2030.96	923.082	538.497	-1990.55	896.089	531.086	-2070.72	856.2
506	0	340.331	-2067.78	1590.22	237.413	-2070.77	1593.27	347.546	-1892.76	1601.4	219.498	-1921.29	1611.32	279.98	-1849	1478.64	254.311	-1733.55	1239.35	261.158	-1978.91	1366.73	255.584	-2012.64	1181.91	215.883	-1738.59	1319.32	434.445	-1912.52	1395.27	510.286	-1868.61	1178.56	518.683	-1878.1	1097.52	540.018	-1950.3	990.522	486.651	-2050.37	925.72	538.259	-2010.96	897.92	530.173	-2091.87	859.71
507	0	340.107	-2081.41	1588.75	237.16	-2084.2	1591.78	347.543	-1906.29	1600.13	219.501	-1934.69	1610.01	279.975	-1862.33	1477.53	254.131	-1746.55	1238.42	261.249	-1992.16	1365.41	256.248	-2025.71	1180.49	215.783	-1751.72	1318.38	434.496	-1926	1394.34	511.093	-1884.09	1177.81	519.782	-1894.55	1096.82	540.377	-1968.85	991.034	486.135	-2069.56	928.078	538.072	-2031.14	899.558	529.344	-2112.73	862.96
508	0	339.822	-2095.04	1587.07	236.846	-2097.63	1590.09	347.471	-1919.82	1598.64	219.431	-1948.09	1608.48	279.873	-1875.68	1476.19	253.815	-1759.59	1237.24	261.277	-2005.45	1363.86	256.913	-2038.87	1178.85	215.549	-1764.88	1317.21	434.468	-1939.49	1393.18	511.803	-1899.56	1176.86	520.789	-1910.96	1095.93	540.716	-1987.24	991.361	485.662	-2088.53	930.144	537.941	-2051.07	900.995	528.615	-2133.27	865.936
509	0	339.467	-2108.67	1585.21	236.462	-2111.06	1588.22	347.32	-1933.34	1596.93	219.28	-1961.51	1606.76	279.666	-1889.04	1474.64	253.371	-1772.7	1235.84	261.229	-2018.78	1362.11	257.553	-2052.14	1177.01	215.182	-1778.09	1315.81	434.352	-1952.99	1391.81	512.4	-1914.99	1175.7	521.693	-1927.33	1094.86	541.032	-2005.46	991.503	485.238	-2107.26	931.909	537.868	-2070.74	902.219	528.004	-2153.49	868.627
510	0	339.034	-2122.3	1583.17	236.002	-2124.51	1586.18	347.08	-1946.86	1595.02	219.036	-1974.94	1604.87	279.346	-1902.42	1472.9	252.806	-1785.87	1234.21	261.094	-2032.15	1360.17	258.139	-2065.52	1174.97	214.685	-1791.34	1314.19	434.138	-1966.51	1390.26	512.872	-1930.39	1174.37	522.479	-1943.63	1093.64	541.324	-2023.49	991.463	484.872	-2125.75	933.367	537.858	-2090.11	903.225	527.524	-2173.36	871.024
511	0	338.513	-2135.93	1580.98	235.454	-2137.97	1584	346.74	-1960.38	1592.95	218.686	-1988.4	1602.81	278.905	-1915.82	1470.97	252.131	-1799.1	1232.39	260.858	-2045.57	1358.07	258.644	-2079.01	1172.78	214.063	-1804.65	1312.38	433.82	-1980.08	1388.54	513.206	-1945.73	1172.87	523.135	-1959.85	1092.27	541.586	-2041.3	991.246	484.569	-2143.99	934.514	537.911	-2109.16	904.009	527.193	-2192.87	873.122
512	0	337.894	-2149.57	1578.66	234.811	-2151.44	1581.69	346.287	-1973.92	1590.73	218.22	-2001.88	1600.63	278.337	-1929.24	1468.9	251.357	-1812.42	1230.38	260.511	-2059.04	1355.83	259.04	-2092.62	1170.46	213.323	-1818.01	1310.38	433.391	-1993.68	1386.67	513.39	-1961.02	1171.22	523.649	-1975.97	1090.77	541.816	-2058.88	990.857	484.335	-2161.95	935.352	538.028	-2127.87	904.567	527.021	-2212.01	874.917
513	0	337.168	-2163.22	1576.25	234.062	-2164.94	1579.27	345.712	-1987.47	1588.39	217.626	-2015.39	1598.33	277.636	-1942.7	1466.69	250.498	-1825.82	1228.2	260.041	-2072.57	1353.47	259.305	-2106.35	1168.04	212.474	-1831.42	1308.21	432.845	-2007.34	1384.69	513.415	-1976.22	1169.46	524.011	-1991.98	1089.17	542.008	-2076.2	990.306	484.176	-2179.64	935.885	538.207	-2146.21	904.901	527.02	-2230.75	876.409
514	0	336.326	-2176.88	1573.76	233.199	-2178.46	1576.79	345.004	-2001.04	1585.97	216.895	-2028.93	1595.94	276.798	-1956.18	1464.37	249.566	-1839.3	1225.88	259.44	-2086.15	1351.03	259.417	-2120.19	1165.55	211.527	-1844.9	1305.89	432.177	-2021.05	1382.61	513.273	-1991.34	1167.59	524.211	-2007.85	1087.47	542.159	-2093.23	989.602	484.097	-2197.03	936.119	538.446	-2164.16	905.012	527.197	-2249.07	877.597
515	0	335.361	-2190.56	1571.23	232.213	-2192.02	1574.25	344.154	-2014.64	1583.49	216.02	-2042.51	1593.5	275.821	-1969.7	1461.97	248.577	-1852.88	1223.44	258.701	-2099.8	1348.54	259.359	-2134.15	1163.02	210.492	-1858.44	1303.45	431.385	-2034.83	1380.48	512.959	-2006.36	1165.65	524.242	-2023.56	1085.72	542.264	-2109.97	988.758	484.099	-2214.11	936.066	538.741	-2181.69	904.906	527.557	-2266.96	878.487
516	0	334.266	-2204.27	1568.69	231.098	-2205.61	1571.7	343.155	-2028.28	1580.99	214.993	-2056.14	1591.03	274.704	-1983.26	1459.53	247.543	-1866.55	1220.92	257.818	-2113.51	1346.02	259.119	-2148.21	1160.48	209.381	-1872.05	1300.92	430.467	-2048.68	1378.31	512.472	-2021.28	1163.66	524.098	-2039.11	1083.92	542.317	-2126.37	987.786	484.185	-2230.86	935.738	539.085	-2198.78	904.591	528.1	-2284.4	879.082
517	0	333.035	-2218.01	1566.17	229.847	-2219.24	1569.16	342.002	-2041.96	1578.5	213.811	-2069.81	1588.57	273.448	-1996.86	1457.07	246.479	-1880.32	1218.33	256.79	-2127.29	1343.52	258.687	-2162.39	1157.97	208.208	-1885.72	1298.31	429.422	-2062.6	1376.15	511.81	-2036.07	1161.66	523.774	-2054.46	1082.11	542.313	-2142.43	986.705	484.353	-2247.28	935.152	539.472	-2215.41	904.074	528.824	-2301.35	879.39
518	0	331.665	-2231.79	1563.71	228.456	-2232.92	1566.66	340.692	-2055.69	1576.06	212.471	-2083.52	1586.13	272.057	-2010.5	1454.62	245.397	-1894.19	1215.72	255.615	-2141.13	1341.07	258.059	-2176.67	1155.53	206.985	-1899.46	1295.67	428.252	-2076.59	1374.03	510.977	-2050.74	1159.66	523.27	-2069.62	1080.31	542.246	-2158.12	985.531	484.602	-2263.33	934.326	539.892	-2231.56	903.37	529.722	-2317.8	879.421
519	0	330.154	-2245.62	1561.33	226.924	-2246.65	1564.24	339.223	-2069.47	1573.71	210.976	-2097.29	1583.77	270.536	-2024.19	1452.23	244.311	-1908.16	1213.13	254.297	-2155.04	1338.7	257.237	-2191.04	1153.18	205.726	-1913.26	1293.04	426.956	-2090.65	1371.98	509.975	-2065.27	1157.71	522.584	-2084.56	1078.55	542.112	-2173.43	984.284	484.928	-2279.01	933.281	540.335	-2247.2	902.492	530.783	-2333.73	879.186
520	0	328.501	-2259.5	1559.07	225.248	-2260.44	1561.91	337.598	-2083.31	1571.48	209.326	-2111.12	1581.51	268.892	-2037.93	1449.92	243.23	-1922.22	1210.57	252.838	-2169.02	1336.45	256.225	-2205.51	1150.96	204.444	-1927.12	1290.43	425.538	-2104.77	1370.04	508.81	-2079.66	1155.84	521.717	-2099.27	1076.87	541.905	-2188.33	982.985	485.323	-2294.29	932.039	540.788	-2262.31	901.457	531.991	-2349.1	878.697
521	0	326.708	-2273.43	1556.96	223.431	-2274.28	1559.73	335.818	-2097.21	1569.41	207.527	-2125	1579.39	267.133	-2051.72	1447.73	242.167	-1936.38	1208.11	251.247	-2183.07	1334.36	255.033	-2220.08	1148.92	203.149	-1941.04	1287.9	424.001	-2118.95	1368.24	507.488	-2093.89	1154.08	520.674	-2113.73	1075.28	541.62	-2202.82	981.658	485.781	-2309.16	930.621	541.24	-2276.88	900.284	533.33	-2363.89	877.969
522	0	324.777	-2287.43	1555.03	221.474	-2288.19	1557.7	333.89	-2111.18	1567.53	205.585	-2138.95	1577.43	265.267	-2065.57	1445.7	241.129	-1950.62	1205.76	249.53	-2197.18	1332.45	253.672	-2234.72	1147.08	201.855	-1955.01	1285.48	422.347	-2133.17	1366.61	506.018	-2107.98	1152.45	519.456	-2127.95	1073.82	541.252	-2216.86	980.326	486.294	-2323.6	929.053	541.677	-2290.89	898.992	534.778	-2378.09	877.015
523	0	322.713	-2301.5	1553.3	219.383	-2302.17	1555.87	331.821	-2125.22	1565.88	203.508	-2152.97	1575.68	263.305	-2079.46	1443.85	240.126	-1964.95	1203.58	247.697	-2211.35	1330.76	252.159	-2249.46	1145.49	200.571	-1969.04	1283.2	420.58	-2147.43	1365.19	504.405	-2121.89	1151.01	518.069	-2141.91	1072.51	540.797	-2230.46	979.013	486.85	-2337.59	927.359	542.087	-2304.31	897.604	536.313	-2391.66	875.852
524	0	320.52	-2315.64	1551.81	217.16	-2316.22	1554.25	329.617	-2139.33	1564.49	201.306	-2167.05	1574.17	261.259	-2093.41	1442.22	239.165	-1979.35	1201.59	245.759	-2225.58	1329.33	250.51	-2264.27	1144.17	199.309	-1983.1	1281.11	418.704	-2161.71	1364.01	502.659	-2135.64	1149.77	516.518	-2155.61	1071.4	540.25	-2243.61	977.744	487.44	-2351.11	925.56	542.456	-2317.15	896.141	537.913	-2404.58	874.496
525	0	318.204	-2329.87	1550.57	214.813	-2330.34	1552.87	327.286	-2153.52	1563.38	198.987	-2181.21	1572.91	259.138	-2107.41	1440.84	238.252	-1993.82	1199.83	243.726	-2239.87	1328.17	248.743	-2279.15	1143.17	198.076	-1997.21	1279.23	416.723	-2176.01	1363.09	500.786	-2149.22	1148.77	514.808	-2169.03	1070.49	539.609	-2256.29	976.542	488.053	-2364.14	923.681	542.772	-2329.38	894.625	539.554	-2416.84	872.963
526	0	315.771	-2344.18	1549.6	212.347	-2344.54	1551.75	324.838	-2167.79	1562.58	196.561	-2195.44	1571.94	256.952	-2121.47	1439.73	237.393	-2008.35	1198.34	241.609	-2254.21	1327.32	246.876	-2294.1	1142.51	196.882	-2011.35	1277.61	414.638	-2190.31	1362.46	498.794	-2162.62	1148.05	512.944	-2182.18	1069.83	538.869	-2268.49	975.43	488.68	-2376.68	921.743	543.025	-2341	893.078	541.215	-2428.42	871.268
527	0	313.226	-2358.57	1548.92	209.767	-2358.82	1550.9	322.279	-2182.14	1562.11	194.035	-2209.75	1571.28	254.713	-2135.59	1438.91	236.593	-2022.92	1197.13	239.416	-2268.6	1326.8	244.926	-2309.11	1142.22	195.734	-2025.51	1276.26	412.454	-2204.61	1362.15	496.69	-2175.84	1147.61	510.93	-2195.04	1069.42	538.029	-2280.21	974.426	489.31	-2388.7	919.763	543.205	-2351.99	891.519	542.876	-2439.29	869.426
528	0	310.574	-2373.06	1548.54	207.079	-2373.18	1550.35	319.617	-2196.57	1561.99	191.417	-2224.14	1570.94	252.427	-2149.76	1438.4	235.855	-2037.55	1196.23	237.156	-2283.03	1326.62	242.908	-2324.18	1142.32	194.637	-2039.71	1275.21	410.172	-2218.89	1362.18	494.479	-2188.88	1147.49	508.773	-2207.62	1069.29	537.088	-2291.45	973.549	489.935	-2400.2	917.757	543.303	-2362.35	889.965	544.519	-2449.45	867.449
529	0	307.818	-2387.63	1548.46	204.286	-2387.62	1550.09	316.858	-2211.08	1562.22	188.713	-2238.62	1570.93	250.101	-2164	1438.22	235.182	-2052.21	1195.66	234.836	-2297.51	1326.8	240.835	-2339.29	1142.81	193.596	-2053.92	1274.48	407.793	-2233.16	1362.55	492.167	-2201.73	1147.71	506.475	-2219.91	1069.45	536.042	-2302.21	972.812	490.548	-2411.17	915.74	543.313	-2372.06	888.432	546.132	-2458.88	865.348
530	0	304.963	-2402.3	1548.7	201.393	-2402.14	1550.15	314.005	-2225.68	1562.82	185.927	-2253.17	1571.27	247.742	-2178.29	1438.37	234.578	-2066.9	1195.44	232.461	-2312.03	1327.35	238.717	-2354.45	1143.73	192.617	-2068.15	1274.07	405.319	-2247.41	1363.27	489.756	-2214.39	1148.27	504.04	-2231.92	1069.92	534.892	-2312.47	972.226	491.144	-2421.6	913.719	543.23	-2381.13	886.928	547.702	-2467.59	863.13
531	0	302.011	-2417.06	1549.26	198.4	-2416.75	1550.51	311.062	-2240.36	1563.79	183.062	-2267.8	1571.95	245.352	-2192.64	1438.86	234.043	-2081.62	1195.56	230.034	-2326.59	1328.27	236.56	-2369.65	1145.06	191.7	-2082.4	1274.01	402.752	-2261.65	1364.37	487.25	-2226.86	1149.18	501.47	-2243.63	1070.69	533.637	-2322.24	971.798	491.719	-2431.48	911.703	543.05	-2389.54	885.464	549.222	-2475.56	860.8
532	0	298.962	-2431.91	1550.14	195.31	-2431.43	1551.18	308.032	-2255.12	1565.13	180.12	-2282.52	1572.99	242.934	-2207.05	1439.69	233.578	-2096.38	1196.04	227.558	-2341.18	1329.56	234.368	-2384.88	1146.82	190.847	-2096.67	1274.29	400.091	-2275.85	1365.83	484.651	-2239.15	1150.46	498.767	-2255.05	1071.79	532.277	-2331.52	971.533	492.27	-2440.81	909.694	542.772	-2397.31	884.043	550.687	-2482.78	858.362
533	0	295.818	-2446.85	1551.34	192.124	-2446.2	1552.17	304.914	-2269.97	1566.85	177.102	-2297.32	1574.39	240.489	-2221.52	1440.87	233.185	-2111.15	1196.88	225.033	-2355.81	1331.23	232.144	-2400.15	1149.01	190.06	-2110.95	1274.92	397.338	-2290.04	1367.66	481.959	-2251.25	1152.1	495.932	-2266.19	1073.19	530.812	-2340.31	971.432	492.796	-2449.59	907.695	542.395	-2404.42	882.667	552.095	-2489.27	855.818
534	0	292.579	-2461.89	1552.86	188.841	-2461.06	1553.47	301.711	-2284.9	1568.95	174.008	-2312.2	1576.14	238.017	-2236.04	1442.39	232.862	-2125.96	1198.08	222.459	-2370.48	1333.28	229.888	-2415.45	1151.62	189.338	-2125.24	1275.9	394.492	-2304.21	1369.86	479.176	-2263.15	1154.11	492.964	-2277.03	1074.92	529.241	-2348.61	971.496	493.296	-2457.83	905.707	541.918	-2410.88	881.338	553.446	-2495.02	853.167
[truncated: 69 more columns]

## Sheet: Sheet2
Devices
		025370 - Force			025370 - Moment			025370 - CoP			027571 - Force			027571 - Moment			027571 - CoP			037720 - Force			037720 - Moment			037720 - CoP
Frame	Sub Frame	Fx	Fy	Fz	Mx	My	Mz	Cx	Cy	Cz	Fx	Fy	Fz	Mx	My	Mz	Cx	Cy	Cz	Fx	Fy	Fz	Mx	My	Mz	Cx	Cy	Cz
		N	N	N	N.mm	N.mm	N.mm	mm	mm	mm	N	N	N	N.mm	N.mm	N.mm	mm	mm	mm	N	N	N	N.mm	N.mm	N.mm	mm	mm	mm
159	0	0	0	0	0	0	0	200	300	0	0	0	0	0	0	0	200	903	0	0	0	0	0	0	0	603	903	0
159	1	0	0	0	0	0	0	200	300	0	0	0	0	0	0	0	200	903	0	0	0	0	0	0	0	603	903	0
159	2	0	0	0	0	0	0	200	300	0	0	0	0	0	0	0	200	903	0	0	0	0	0	0	0	603	903	0
159	3	0	0	0	0	0	0	200	300	0	0	0	0	0	0	0	200	903	0	0	0	0	0	0	0	603	903	0
159	4	0	0	0	0	0	0	200	300	0	0	0	0	0	0	0	200	903	0	0	0	0	0	0	0	603	903	0
159	5	0	0	0	0	0	0	200	300	0	0	0	0	0	0	0	200	903	0	0	0	0	0	0	0	603	903	0
159	6	0	0	0	0	0	0	200	300	0	0	0	0	0	0	0	200	903	0	0	0	0	0	0	0	603	903	0
159	7	0	0	0	0	0	0	200	300	0	0	0	0	0	0	0	200	903	0	0	0	0	0	0	0	603	903	0
159	8	0	0	0	0	0	0	200	300	0	0	0	0	0	0	0	200	903	0	0	0	0	0	0	0	603	903	0
159	9	0	0	0	0	0	0	200	300	0	0	0	0	0	0	0	200	903	0	0	0	0	0	0	0	603	903	0
160	0	0	0	0	0	0	0	200	300	0	0	0	0	0	0	0	200	903	0	0	0	0	0	0	0	603	903	0
160	1	0	0	0	0	0	0	200	300	0	0	0	0	0	0	0	200	903	0	0	0	0	0	0	0	603	903	0
160	2	0	0	0	0	0	0	200	300	0	0	0	0	0	0	0	200	903	0	0	0	0	0	0	0	603	903	0
160	3	0	0	0	0	0	0	200	300	0	0	0	0	0	0	0	200	903	0	0	0	0	0	0	0	603	903	0
160	4	0	0	0	0	0	0	200	300	0	0	0	0	0	0	0	200	903	0	0	0	0	0	0	0	603	903	0
160	5	0	0	0	0	0	0	200	300	0	0	0	0	0	0	0	200	903	0	0	0	0	0	0	0	603	903	0
160	6	0	0	0	0	0	0	200	300	0	0	0	0	0	0	0	200	903	0	0	0	0	0	0	0	603	903	0
160	7	0	0	0	0	0	0	200	300	0	0	0	0	0	0	0	200	903	0	0	0	0	0	0	0	603	903	0
160	8	0	0	0	0	0	0	200	300	0	0	0	0	0	0	0	200	903	0	0	0	0	0	0	0	603	903	0
160	9	0	0	0	0	0	0	200	300	0	0	0	0	0	0	0	200	903	0	0	0	0	0	0	0	603	903	0
161	0	0	0	0	0	0	0	200	300	0	0	0	0	0	0	0	200	903	0	0	0	0	0	0	0	603	903	0
161	1	0	0	0	0	0	0	200	300	0	0	0	0	0	0	0	200	903	0	0	0	0	0	0	0	603	903	0
161	2	0	0	0	0	0	0	200	300	0	0	0	0	0	0	0	200	903	0	0	0	0	0	0	0	603	903	0
161	3	0	0	0	0	0	0	200	300	0	0	0	0	0	0	0	200	903	0	0	0	0	0	0	0	603	903	0
161	4	0	0	0	0	0	0	200	300	0	0	0	0	0	0	0	200	903	0	0	0	0	0	0	0	603	903	0
161	5	0	0	0	0	0	0	200	300	0	0	0	0	0	0	0	200	903	0	0	0	0	0	0	0	603	903	0
161	6	0	0	0	0	0	0	200	300	0	0	0	0	0	0	0	200	903	0	0	0	0	0	0	0	603	903	0
161	7	0	0	0	0	0	0	200	300	0	0	0	0	0	0	0	200	903	0	0	0	0	0	0	0	603	903	0
161	8	0	0	0	0	0	0	200	300	0	0	0	0	0	0	0	200	903	0	0	0	0	0	0	0	603	903	0
161	9	0	0	0	0	0	0	200	300	0	0	0	0	0	0	0	200	903	0	0	0	0	0	0	0	603	903	0
162	0	0	0	0	0	0	0	200	300	0	0	0	0	0	0	0	200	903	0	0	0	0	0	0	0	603	903	0
162	1	0	0	0	0	0	0	200	300	0	0	0	0	0	0	0	200	903	0	0	0	0	0	0	0	603	903	0
162	2	0	0	0	0	0	0	200	300	0	0	0	0	0	0	0	200	903	0	0	0	0	0	0	0	603	903	0
162	3	0	0	0	0	0	0	200	300	0	0	0	0	0	0	0	200	903	0	0	0	0	0	0	0	603	903	0
162	4	0	0	0	0	0	0	200	300	0	0	0	0	0	0	0	200	903	0	0	0	0	0	0	0	603	903	0
162	5	0	0	0	0	0	0	200	300	0	0	0	0	0	0	0	200	903	0	0	0	0	0	0	0	603	903	0
162	6	0	0	0	0	0	0	200	300	0	0	0	0	0	0	0	200	903	0	0	0	0	0	0	0	603	903	0
162	7	0	0	0	0	0	0	200	300	0	0	0	0	0	0	0	200	903	0	0	0	0	0	0	0	603	903	0
162	8	0	0	0	0	0	0	200	300	0	0	0	0	0	0	0	200	903	0	0	0	0	0	0	0	603	903	0
162	9	0	0	0	0	0	0	200	300	0	0	0	0	0	0	0	200	903	0	0	0	0	0	0	0	603	903	0
163	0	0	0	0	0	0	0	200	300	0	0	0	0	0	0	0	200	903	0	0	0	0	0	0	0	603	903	0
163	1	0	0	0	0	0	0	200	300	0	0	0	0	0	0	0	200	903	0	0	0	0	0	0	0	603	903	0
163	2	0	0	0	0	0	0	200	300	0	0	0	0	0	0	0	200	903	0	0	0	0	0	0	0	603	903	0
163	3	0	0	0	0	0	0	200	300	0	0	0	0	0	0	0	200	903	0	0	0	0	0	0	0	603	903	0
163	4	0	0	0	0	0	0	200	300	0	0	0	0	0	0	0	200	903	0	0	0	0	0	0	0	603	903	0
163	5	0	0	0	0	0	0	200	300	0	0	0	0	0	0	0	200	903	0	0	0	0	0	0	0	603	903	0
163	6	0	0	0	0	0	0	200	300	0	0	0	0	0	0	0	200	903	0	0	0	0	0	0	0	603	903	0
163	7	0	0	0	0	0	0	200	300	0	0	0	0	0	0	0	200	903	0	0	0	0	0	0	0	603	903	0
163	8	0	0	0	0	0	0	200	300	0	0	0	0	0	0	0	200	903	0	0	0	0	0	0	0	603	903	0
163	9	0	0	0	0	0	0	200	300	0	0	0	0	0	0	0	200	903	0	0	0	0	0	0	0	603	903	0
164	0	0	0	0	0	0	0	200	300	0	0	0	0	0	0	0	200	903	0	0	0	0	0	0	0	603	903	0
164	1	0	0	0	0	0	0	200	300	0	0	0	0	0	0	0	200	903	0	0	0	0	0	0	0	603	903	0
164	2	0	0	0	0	0	0	200	300	0	0	0	0	0	0	0	200	903	0	0	0	0	0	0	0	603	903	0
164	3	0	0	0	0	0	0	200	300	0	0	0	0	0	0	0	200	903	0	0	0	0	0	0	0	603	903	0
164	4	0	0	0	0	0	0	200	300	0	0	0	0	0	0	0	200	903	0	0	0	0	0	0	0	603	903	0
164	5	0	0	0	0	0	0	200	300	0	0	0	0	0	0	0	200	903	0	0	0	0	0	0	0	603	903	0
164	6	0	0	0	0	0	0	200	300	0	0	0	0	0	0	0	200	903	0	0	0	0	0	0	0	603	903	0
164	7	0	0	0	0	0	0	200	300	0	0	0	0	0	0	0	200	903	0	0	0	0	0	0	0	603	903	0
164	8	0	0	0	0	0	0	200	300	0	0	0	0	0	0	0	200	903	0	0	0	0	0	0	0	603	903	0
164	9	0	0	0	0	0	0	200	300	0	0	0	0	0	0	0	200	903	0	0	0	0	0	0	0	603	903	0
165	0	0	0	0	0	0	0	200	300	0	0	0	0	0	0	0	200	903	0	0	0	0	0	0	0	603	903	0
165	1	0	0	0	0	0	0	200	300	0	0	0	0	0	0	0	200	903	0	0	0	0	0	0	0	603	903	0
165	2	0	0	0	0	0	0	200	300	0	0	0	0	0	0	0	200	903	0	0	0	0	0	0	0	603	903	0
165	3	0	0	0	0	0	0	200	300	0	0	0	0	0	0	0	200	903	0	0	0	0	0	0	0	603	903	0
165	4	0	0	0	0	0	0	200	300	0	0	0	0	0	0	0	200	903	0	0	0	0	0	0	0	603	903	0
165	5	0	0	0	0	0	0	200	300	0	0	0	0	0	0	0	200	903	0	0	0	0	0	0	0	603	903	0
165	6	0	0	0	0	0	0	200	300	0	0	0	0	0	0	0	200	903	0	0	0	0	0	0	0	603	903	0
165	7	0	0	0	0	0	0	200	300	0	0	0	0	0	0	0	200	903	0	0	0	0	0	0	0	603	903	0
165	8	0	0	0	0	0	0	200	300	0	0	0	0	0	0	0	200	903	0	0	0	0	0	0	0	603	903	0
165	9	0	0	0	0	0	0	200	300	0	0	0	0	0	0	0	200	903	0	0	0	0	0	0	0	603	903	0
166	0	0	0	0	0	0	0	200	300	0	0	0	0	0	0	0	200	903	0	0	0	0	0	0	0	603	903	0
166	1	0	0	0	0	0	0	200	300	0	0	0	0	0	0	0	200	903	0	0	0	0	0	0	0	603	903	0
166	2	0	0	0	0	0	0	200	300	0	0	0	0	0	0	0	200	903	0	0	0	0	0	0	0	603	903	0
166	3	0	0	0	0	0	0	200	300	0	0	0	0	0	0	0	200	903	0	0	0	0	0	0	0	603	903	0
166	4	0	0	0	0	0	0	200	300	0	0	0	0	0	0	0	200	903	0	0	0	0	0	0	0	603	903	0
166	5	0	0	0	0	0	0	200	300	0	0	0	0	0	0	0	200	903	0	0	0	0	0	0	0	603	903	0
166	6	0	0	0	0	0	0	200	300	0	0	0	0	0	0	0	200	903	0	0	0	0	0	0	0	603	903	0
166	7	0	0	0	0	0	0	200	300	0	0	0	0	0	0	0	200	903	0	0	0	0	0	0	0	603	903	0
166	8	0	0	0	0	0	0	200	300	0	0	0	0	0	0	0	200	903	0	0	0	0	0	0	0	603	903	0
166	9	0	0	0	0	0	0	200	300	0	0	0	0	0	0	0	200	903	0	0	0	0	0	0	0	603	903	0
167	0	0	0	0	0	0	0	200	300	0	0	0	0	0	0	0	200	903	0	0	0	0	0	0	0	603	903	0
167	1	0	0	0	0	0	0	200	300	0	0	0	0	0	0	0	200	903	0	0	0	0	0	0	0	603	903	0
167	2	0	0	0	0	0	0	200	300	0	0	0	0	0	0	0	200	903	0	0	0	0	0	0	0	603	903	0
167	3	0	0	0	0	0	0	200	300	0	0	0	0	0	0	0	200	903	0	0	0	0	0	0	0	603	903	0
167	4	0	0	0	0	0	0	200	300	0	0	0	0	0	0	0	200	903	0	0	0	0	0	0	0	603	903	0
167	5	0	0	0	0	0	0	200	300	0	0	0	0	0	0	0	200	903	0	0	0	0	0	0	0	603	903	0
167	6	0	0	0	0	0	0	200	300	0	0	0	0	0	0	0	200	903	0	0	0	0	0	0	0	603	903	0
167	7	0	0	0	0	0	0	200	300	0	0	0	0	0	0	0	200	903	0	0	0	0	0	0	0	603	903	0
167	8	0	0	0	0	0	0	200	300	0	0	0	0	0	0	0	200	903	0	0	0	0	0	0	0	603	903	0
167	9	0	0	0	0	0	0	200	300	0	0	0	0	0	0	0	200	903	0	0	0	0	0	0	0	603	903	0
168	0	0	0	0	0	0	0	200	300	0	0	0	0	0	0	0	200	903	0	0	0	0	0	0	0	603	903	0
168	1	0	0	0	0	0	0	200	300	0	0	0	0	0	0	0	200	903	0	0	0	0	0	0	0	603	903	0
168	2	0	0	0	0	0	0	200	300	0	0	0	0	0	0	0	200	903	0	0	0	0	0	0	0	603	903	0
168	3	0	0	0	0	0	0	200	300	0	0	0	0	0	0	0	200	903	0	0	0	0	0	0	0	603	903	0
168	4	0	0	0	0	0	0	200	300	0	0	0	0	0	0	0	200	903	0	0	0	0	0	0	0	603	903	0
168	5	0	0	0	0	0	0	200	300	0	0	0	0	0	0	0	200	903	0	0	0	0	0	0	0	603	903	0
168	6	0	0	0	0	0	0	200	300	0	0	0	0	0	0	0	200	903	0	0	0	0	0	0	0	603	903	0
168	7	0	0	0	0	0	0	200	300	0	0	0	0	0	0	0	200	903	0	0	0	0	0	0	0	603	903	0
168	8	0	0	0	0	0	0	200	300	0	0	0	0	0	0	0	200	903	0	0	0	0	0	0	0	603	903	0
168	9	0	0	0	0	0	0	200	300	0	0	0	0	0	0	0	200	903	0	0	0	0	0	0	0	603	903	0
169	0	0	0	0	0	0	0	200	300	0	0	0	0	0	0	0	200	903	0	0	0	0	0	0	0	603	903	0
169	1	0	0	0	0	0	0	200	300	0	0	0	0	0	0	0	200	903	0	0	0	0	0	0	0	603	903	0
169	2	0	0	0	0	0	0	200	300	0	0	0	0	0	0	0	200	903	0	0	0	0	0	0	0	603	903	0
169	3	0	0	0	0	0	0	200	300	0	0	0	0	0	0	0	200	903	0	0	0	0	0	0	0	603	903	0
169	4	0	0	0	0	0	0	200	300	0	0	0	0	0	0	0	200	903	0	0	0	0	0	0	0	603	903	0
169	5	0	0	0	0	0	0	200	300	0	0	0	0	0	0	0	200	903	0	0	0	0	0	0	0	603	903	0
169	6	0	0	0	0	0	0	200	300	0	0	0	0	0	0	0	200	903	0	0	0	0	0	0	0	603	903	0
169	7	0	0	0	0	0	0	200	300	0	0	0	0	0	0	0	200	903	0	0	0	0	0	0	0	603	903	0
169	8	0	0	0	0	0	0	200	300	0	0	0	0	0	0	0	200	903	0	0	0	0	0	0	0	603	903	0
169	9	0	0	0	0	0	0	200	300	0	0	0	0	0	0	0	200	903	0	0	0	0	0	0	0	603	903	0
170	0	0	0	0	0	0	0	200	300	0	0	0	0	0	0	0	200	903	0	0	0	0	0	0	0	603	903	0
170	1	0	0	0	0	0	0	200	300	0	0	0	0	0	0	0	200	903	0	0	0	0	0	0	0	603	903	0
170	2	0	0	0	0	0	0	200	300	0	0	0	0	0	0	0	200	903	0	0	0	0	0	0	0	603	903	0
170	3	0	0	0	0	0	0	200	300	0	0	0	0	0	0	0	200	903	0	0	0	0	0	0	0	603	903	0
170	4	0	0	0	0	0	0	200	300	0	0	0	0	0	0	0	200	903	0	0	0	0	0	0	0	603	903	0
170	5	0	0	0	0	0	0	200	300	0	0	0	0	0	0	0	200	903	0	0	0	0	0	0	0	603	903	0
170	6	0	0	0	0	0	0	200	300	0	0	0	0	0	0	0	200	903	0	0	0	0	0	0	0	603	903	0
170	7	0	0	0	0	0	0	200	300	0	0	0	0	0	0	0	200	903	0	0	0	0	0	0	0	603	903	0
170	8	0	0	0	0	0	0	200	300	0	0	0	0	0	0	0	200	903	0	0	0	0	0	0	0	603	903	0
170	9	0	0	0	0	0	0	200	300	0	0	0	0	0	0	0	200	903	0	0	0	0	0	0	0	603	903	0
171	0	0	0	0	0	0	0	200	300	0	0	0	0	0	0	0	200	903	0	0	0	0	0	0	0	603	903	0
171	1	0	0	0	0	0	0	200	300	0	0	0	0	0	0	0	200	903	0	0	0	0	0	0	0	603	903	0
171	2	0	0	0	0	0	0	200	300	0	0	0	0	0	0	0	200	903	0	0	0	0	0	0	0	603	903	0
171	3	0	0	0	0	0	0	200	300	0	0	0	0	0	0	0	200	903	0	0	0	0	0	0	0	603	903	0
171	4	0	0	0	0	0	0	200	300	0	0	0	0	0	0	0	200	903	0	0	0	0	0	0	0	603	903	0
171	5	0	0	0	0	0	0	200	300	0	0	0	0	0	0	0	200	903	0	0	0	0	0	0	0	603	903	0
171	6	0	0	0	0	0	0	200	300	0	0	0	0	0	0	0	200	903	0	0	0	0	0	0	0	603	903	0
171	7	0	0	0	0	0	0	200	300	0	0	0	0	0	0	0	200	903	0	0	0	0	0	0	0	603	903	0
171	8	0	0	0	0	0	0	200	300	0	0	0	0	0	0	0	200	903	0	0	0	0	0	0	0	603	903	0
171	9	0	0	0	0	0	0	200	300	0	0	0	0	0	0	0	200	903	0	0	0	0	0	0	0	603	903	0
172	0	0	0	0	0	0	0	200	300	0	0	0	0	0	0	0	200	903	0	0	0	0	0	0	0	603	903	0
172	1	0	0	0	0	0	0	200	300	0	0	0	0	0	0	0	200	903	0	0	0	0	0	0	0	603	903	0
172	2	0	0	0	0	0	0	200	300	0	0	0	0	0	0	0	200	903	0	0	0	0	0	0	0	603	903	0
172	3	0	0	0	0	0	0	200	300	0	0	0	0	0	0	0	200	903	0	0	0	0	0	0	0	603	903	0
172	4	0	0	0	0	0	0	200	300	0	0	0	0	0	0	0	200	903	0	0	0	0	0	0	0	603	903	0
172	5	0	0	0	0	0	0	200	300	0	0	0	0	0	0	0	200	903	0	0	0	0	0	0	0	603	903	0
172	6	0	0	0	0	0	0	200	300	0	0	0	0	0	0	0	200	903	0	0	0	0	0	0	0	603	903	0
172	7	0	0	0	0	0	0	200	300	0	0	0	0	0	0	0	200	903	0	0	0	0	0	0	0	603	903	0
172	8	0	0	0	0	0	0	200	300	0	0	0	0	0	0	0	200	903	0	0	0	0	0	0	0	603	903	0
172	9	0	0	0	0	0	0	200	300	0	0	0	0	0	0	0	200	903	0	0	0	0	0	0	0	603	903	0
173	0	0	0	0	0	0	0	200	300	0	0	0	0	0	0	0	200	903	0	0	0	0	0	0	0	603	903	0
173	1	0	0	0	0	0	0	200	300	0	0	0	0	0	0	0	200	903	0	0	0	0	0	0	0	603	903	0
173	2	0	0	0	0	0	0	200	300	0	0	0	0	0	0	0	200	903	0	0	0	0	0	0	0	603	903	0
173	3	0	0	0	0	0	0	200	300	0	0	0	0	0	0	0	200	903	0	0	0	0	0	0	0	603	903	0
173	4	0	0	0	0	0	0	200	300	0	0	0	0	0	0	0	200	903	0	0	0	0	0	0	0	603	903	0
173	5	0	0	0	0	0	0	200	300	0	0	0	0	0	0	0	200	903	0	0	0	0	0	0	0	603	903	0
173	6	0	0	0	0	0	0	200	300	0	0	0	0	0	0	0	200	903	0	0	0	0	0	0	0	603	903	0
173	7	0	0	0	0	0	0	200	300	0	0	0	0	0	0	0	200	903	0	0	0	0	0	0	0	603	903	0
173	8	0	0	0	0	0	0	200	300	0	0	0	0	0	0	0	200	903	0	0	0	0	0	0	0	603	903	0
173	9	0	0	0	0	0	0	200	300	0	0	0	0	0	0	0	200	903	0	0	0	0	0	0	0	603	903	0
174	0	0	0	0	0	0	0	200	300	0	0	0	0	0	0	0	200	903	0	0	0	0	0	0	0	603	903	0
174	1	0	0	0	0	0	0	200	300	0	0	0	0	0	0	0	200	903	0	0	0	0	0	0	0	603	903	0
174	2	0	0	0	0	0	0	200	300	0	0	0	0	0	0	0	200	903	0	0	0	0	0	0	0	603	903	0
174	3	0	0	0	0	0	0	200	300	0	0	0	0	0	0	0	200	903	0	0	0	0	0	0	0	603	903	0
174	4	0	0	0	0	0	0	200	300	0	0	0	0	0	0	0	200	903	0	0	0	0	0	0	0	603	903	0
174	5	0	0	0	0	0	0	200	300	0	0	0	0	0	0	0	200	903	0	0	0	0	0	0	0	603	903	0
174	6	0	0	0	0	0	0	200	300	0	0	0	0	0	0	0	200	903	0	0	0	0	0	0	0	603	903	0
174	7	0	0	0	0	0	0	200	300	0	0	0	0	0	0	0	200	903	0	0	0	0	0	0	0	603	903	0
174	8	0	0	0	0	0	0	200	300	0	0	0	0	0	0	0	200	903	0	0	0	0	0	0	0	603	903	0
174	9	0	0	0	0	0	0	200	300	0	0	0	0	0	0	0	200	903	0	0	0	0	0	0	0	603	903	0
175	0	0	0	0	0	0	0	200	300	0	0	0	0	0	0	0	200	903	0	0	0	0	0	0	0	603	903	0
175	1	0	0	0	0	0	0	200	300	0	0	0	0	0	0	0	200	903	0	0	0	0	0	0	0	603	903	0
175	2	0	0	0	0	0	0	200	300	0	0	0	0	0	0	0	200	903	0	0	0	0	0	0	0	603	903	0
175	3	0	0	0	0	0	0	200	300	0	0	0	0	0	0	0	200	903	0	0	0	0	0	0	0	603	903	0
175	4	0	0	0	0	0	0	200	300	0	0	0	0	0	0	0	200	903	0	0	0	0	0	0	0	603	903	0
175	5	0	0	0	0	0	0	200	300	0	0	0	0	0	0	0	200	903	0	0	0	0	0	0	0	603	903	0
175	6	0	0	0	0	0	0	200	300	0	0	0	0	0	0	0	200	903	0	0	0	0	0	0	0	603	903	0
175	7	0	0	0	0	0	0	200	300	0	0	0	0	0	0	0	200	903	0	0	0	0	0	0	0	603	903	0
175	8	0	0	0	0	0	0	200	300	0	0	0	0	0	0	0	200	903	0	0	0	0	0	0	0	603	903	0
175	9	0	0	0	0	0	0	200	300	0	0	0	0	0	0	0	200	903	0	0	0	0	0	0	0	603	903	0
176	0	0	0	0	0	0	0	200	300	0	0	0	0	0	0	0	200	903	0	0	0	0	0	0	0	603	903	0
176	1	0	0	0	0	0	0	200	300	0	0	0	0	0	0	0	200	903	0	0	0	0	0	0	0	603	903	0
176	2	0	0	0	0	0	0	200	300	0	0	0	0	0	0	0	200	903	0	0	0	0	0	0	0	603	903	0
176	3	0	0	0	0	0	0	200	300	0	0	0	0	0	0	0	200	903	0	0	0	0	0	0	0	603	903	0
176	4	0	0	0	0	0	0	200	300	0	0	0	0	0	0	0	200	903	0	0	0	0	0	0	0	603	903	0
176	5	0	0	0	0	0	0	200	300	0	0	0	0	0	0	0	200	903	0	0	0	0	0	0	0	603	903	0
176	6	0	0	0	0	0	0	200	300	0	0	0	0	0	0	0	200	903	0	0	0	0	0	0	0	603	903	0
176	7	0	0	0	0	0	0	200	300	0	0	0	0	0	0	0	200	903	0	0	0	0	0	0	0	603	903	0
176	8	0	0	0	0	0	0	200	300	0	0	0	0	0	0	0	200	903	0	0	0	0	0	0	0	603	903	0
176	9	0	0	0	0	0	0	200	300	0	0	0	0	0	0	0	200	903	0	0	0	0	0	0	0	603	903	0
177	0	0	0	0	0	0	0	200	300	0	0	0	0	0	0	0	200	903	0	0	0	0	0	0	0	603	903	0
177	1	0	0	0	0	0	0	200	300	0	0	0	0	0	0	0	200	903	0	0	0	0	0	0	0	603	903	0
177	2	0	0	0	0	0	0	200	300	0	0	0	0	0	0	0	200	903	0	0	0	0	0	0	0	603	903	0
177	3	0	0	0	0	0	0	200	300	0	0	0	0	0	0	0	200	903	0	0	0	0	0	0	0	603	903	0
177	4	0	0	0	0	0	0	200	300	0	0	0	0	0	0	0	200	903	0	0	0	0	0	0	0	603	903	0
177	5	0	0	0	0	0	0	200	300	0	0	0	0	0	0	0	200	903	0	0	0	0	0	0	0	603	903	0
177	6	0	0	0	0	0	0	200	300	0	0	0	0	0	0	0	200	903	0	0	0	0	0	0	0	603	903	0
177	7	0	0	0	0	0	0	200	300	0	0	0	0	0	0	0	200	903	0	0	0	0	0	0	0	603	903	0
177	8	0	0	0	0	0	0	200	300	0	0	0	0	0	0	0	200	903	0	0	0	0	0	0	0	603	903	0
177	9	0	0	0	0	0	0	200	300	0	0	0	0	0	0	0	200	903	0	0	0	0	0	0	0	603	903	0
178	0	0	0	0	0	0	0	200	300	0	0	0	0	0	0	0	200	903	0	0	0	0	0	0	0	603	903	0
178	1	0	0	0	0	0	0	200	300	0	0	0	0	0	0	0	200	903	0	0	0	0	0	0	0	603	903	0
178	2	0	0	0	0	0	0	200	300	0	0	0	0	0	0	0	200	903	0	0	0	0	0	0	0	603	903	0
178	3	0	0	0	0	0	0	200	300	0	0	0	0	0	0	0	200	903	0	0	0	0	0	0	0	603	903	0
178	4	0	0	0	0	0	0	200	300	0	0	0	0	0	0	0	200	903	0	0	0	0	0	0	0	603	903	0
178	5	0	0	0	0	0	0	200	300	0	0	0	0	0	0	0	200	903	0	0	0	0	0	0	0	603	903	0
178	6	0	0	0	0	0	0	200	300	0	0	0	0	0	0	0	200	903	0	0	0	0	0	0	0	603	903	0
178	7	0	0	0	0	0	0	200	300	0	0	0	0	0	0	0	200	903	0	0	0	0	0	0	0	603	903	0
178	8	0	0	0	0	0	0	200	300	0	0	0	0	0	0	0	200	903	0	0	0	0	0	0	0	603	903	0
178	9	0	0	0	0	0	0	200	300	0	0	0	0	0	0	0	200	903	0	0	0	0	0	0	0	603	903	0
179	0	0	0	0	0	0	0	200	300	0	0	0	0	0	0	0	200	903	0	0	0	0	0	0	0	603	903	0
179	1	0	0	0	0	0	0	200	300	0	0	0	0	0	0	0	200	903	0	0	0	0	0	0	0	603	903	0
179	2	0	0	0	0	0	0	200	300	0	0	0	0	0	0	0	200	903	0	0	0	0	0	0	0	603	903	0
179	3	0	0	0	0	0	0	200	300	0	0	0	0	0	0	0	200	903	0	0	0	0	0	0	0	603	903	0
179	4	0	0	0	0	0	0	200	300	0	0	0	0	0	0	0	200	903	0	0	0	0	0	0	0	603	903	0
179	5	0	0	0	0	0	0	200	300	0	0	0	0	0	0	0	200	903	0	0	0	0	0	0	0	603	903	0
179	6	0	0	0	0	0	0	200	300	0	0	0	0	0	0	0	200	903	0	0	0	0	0	0	0	603	903	0
179	7	0	0	0	0	0	0	200	300	0	0	0	0	0	0	0	200	903	0	0	0	0	0	0	0	603	903	0
179	8	0	0	0	0	0	0	200	300	0	0	0	0	0	0	0	200	903	0	0	0	0	0	0	0	603	903	0
179	9	0	0	0	0	0	0	200	300	0	0	0	0	0	0	0	200	903	0	0	0	0	0	0	0	603	903	0
180	0	0	0	0	0	0	0	200	300	0	0	0	0	0	0	0	200	903	0	0	0	0	0	0	0	603	903	0
180	1	0	0	0	0	0	0	200	300	0	0	0	0	0	0	0	200	903	0	0	0	0	0	0	0	603	903	0
180	2	0	0	0	0	0	0	200	300	0	0	0	0	0	0	0	200	903	0	0	0	0	0	0	0	603	903	0
180	3	0	0	0	0	0	0	200	300	0	0	0	0	0	0	0	200	903	0	0	0	0	0	0	0	603	903	0
180	4	0	0	0	0	0	0	200	300	0	0	0	0	0	0	0	200	903	0	0	0	0	0	0	0	603	903	0
180	5	0	0	0	0	0	0	200	300	0	0	0	0	0	0	0	200	903	0	0	0	0	0	0	0	603	903	0
180	6	0	0	0	0	0	0	200	300	0	0	0	0	0	0	0	200	903	0	0	0	0	0	0	0	603	903	0
180	7	0	0	0	0	0	0	200	300	0	0	0	0	0	0	0	200	903	0	0	0	0	0	0	0	603	903	0
180	8	0	0	0	0	0	0	200	300	0	0	0	0	0	0	0	200	903	0	0	0	0	0	0	0	603	903	0
180	9	0	0	0	0	0	0	200	300	0	0	0	0	0	0	0	200	903	0	0	0	0	0	0	0	603	903	0
181	0	0	0	0	0	0	0	200	300	0	0	0	0	0	0	0	200	903	0	0	0	0	0	0	0	603	903	0
181	1	0	0	0	0	0	0	200	300	0	0	0	0	0	0	0	200	903	0	0	0	0	0	0	0	603	903	0
181	2	0	0	0	0	0	0	200	300	0	0	0	0	0	0	0	200	903	0	0	0	0	0	0	0	603	903	0
181	3	0	0	0	0	0	0	200	300	0	0	0	0	0	0	0	200	903	0	0	0	0	0	0	0	603	903	0
181	4	0	0	0	0	0	0	200	300	0	0	0	0	0	0	0	200	903	0	0	0	0	0	0	0	603	903	0
181	5	0	0	0	0	0	0	200	300	0	0	0	0	0	0	0	200	903	0	0	0	0	0	0	0	603	903	0
181	6	0	0	0	0	0	0	200	300	0	0	0	0	0	0	0	200	903	0	0	0	0	0	0	0	603	903	0
181	7	0	0	0	0	0	0	200	300	0	0	0	0	0	0	0	200	903	0	0	0	0	0	0	0	603	903	0
181	8	0	0	0	0	0	0	200	300	0	0	0	0	0	0	0	200	903	0	0	0	0	0	0	0	603	903	0
181	9	0	0	0	0	0	0	200	300	0	0	0	0	0	0	0	200	903	0	0	0	0	0	0	0	603	903	0
182	0	0	0	0	0	0	0	200	300	0	0	0	0	0	0	0	200	903	0	0	0	0	0	0	0	603	903	0
182	1	0	0	0	0	0	0	200	300	0	0	0	0	0	0	0	200	903	0	0	0	0	0	0	0	603	903	0
182	2	0	0	0	0	0	0	200	300	0	0	0	0	0	0	0	200	903	0	0	0	0	0	0	0	603	903	0
182	3	0	0	0	0	0	0	200	300	0	0	0	0	0	0	0	200	903	0	0	0	0	0	0	0	603	903	0
182	4	0	0	0	0	0	0	200	300	0	0	0	0	0	0	0	200	903	0	0	0	0	0	0	0	603	903	0
182	5	0	0	0	0	0	0	200	300	0	0	0	0	0	0	0	200	903	0	0	0	0	0	0	0	603	903	0
182	6	0	0	0	0	0	0	200	300	0	0	0	0	0	0	0	200	903	0	0	0	0	0	0	0	603	903	0
182	7	0	0	0	0	0	0	200	300	0	0	0	0	0	0	0	200	903	0	0	0	0	0	0	0	603	903	0
182	8	0	0	0	0	0	0	200	300	0	0	0	0	0	0	0	200	903	0	0	0	0	0	0	0	603	903	0
182	9	0	0	0	0	0	0	200	300	0	0	0	0	0	0	0	200	903	0	0	0	0	0	0	0	603	903	0
183	0	0	0	0	0	0	0	200	300	0	0	0	0	0	0	0	200	903	0	0	0	0	0	0	0	603	903	0
183	1	0	0	0	0	0	0	200	300	0	0	0	0	0	0	0	200	903	0	0	0	0	0	0	0	603	903	0
183	2	0	0	0	0	0	0	200	300	0	0	0	0	0	0	0	200	903	0	0	0	0	0	0	0	603	903	0
183	3	0	0	0	0	0	0	200	300	0	0	0	0	0	0	0	200	903	0	0	0	0	0	0	0	603	903	0
183	4	0	0	0	0	0	0	200	300	0	0	0	0	0	0	0	200	903	0	0	0	0	0	0	0	603	903	0
183	5	0	0	0	0	0	0	200	300	0	0	0	0	0	0	0	200	903	0	0	0	0	0	0	0	603	903	0
183	6	0	0	0	0	0	0	200	300	0	0	0	0	0	0	0	200	903	0	0	0	0	0	0	0	603	903	0
183	7	0	0	0	0	0	0	200	300	0	0	0	0	0	0	0	200	903	0	0	0	0	0	0	0	603	903	0
183	8	0	0	0	0	0	0	200	300	0	0	0	0	0	0	0	200	903	0	0	0	0	0	0	0	603	903	0
183	9	0	0	0	0	0	0	200	300	0	0	0	0	0	0	0	200	903	0	0	0	0	0	0	0	603	903	0
184	0	0	0	0	0	0	0	200	300	0	0	0	0	0	0	0	200	903	0	0	0	0	0	0	0	603	903	0
184	1	0	0	0	0	0	0	200	300	0	0	0	0	0	0	0	200	903	0	0	0	0	0	0	0	603	903	0
184	2	0	0	0	0	0	0	200	300	0	0	0	0	0	0	0	200	903	0	0	0	0	0	0	0	603	903	0
184	3	0	0	0	0	0	0	200	300	0	0	0	0	0	0	0	200	903	0	0	0	0	0	0	0	603	903	0
184	4	0	0	0	0	0	0	200	300	0	0	0	0	0	0	0	200	903	0	0	0	0	0	0	0	603	903	0
184	5	0	0	0	0	0	0	200	300	0	0	0	0	0	0	0	200	903	0	0	0	0	0	0	0	603	903	0
184	6	0	0	0	0	0	0	200	300	0	0	0	0	0	0	0	200	903	0	0	0	0	0	0	0	603	903	0
184	7	0	0	0	0	0	0	200	300	0	0	0	0	0	0	0	200	903	0	0	0	0	0	0	0	603	903	0
184	8	0	0	0	0	0	0	200	300	0	0	0	0	0	0	0	200	903	0	0	0	0	0	0	0	603	903	0
184	9	0	0	0	0	0	0	200	300	0	0	0	0	0	0	0	200	903	0	0	0	0	0	0	0	603	903	0
185	0	0	0	0	0	0	0	200	300	0	0	0	0	0	0	0	200	903	0	0	0	0	0	0	0	603	903	0
185	1	0	0	0	0	0	0	200	300	0	0	0	0	0	0	0	200	903	0	0	0	0	0	0	0	603	903	0
185	2	0	0	0	0	0	0	200	300	0	0	0	0	0	0	0	200	903	0	0	0	0	0	0	0	603	903	0
185	3	0	0	0	0	0	0	200	300	0	0	0	0	0	0	0	200	903	0	0	0	0	0	0	0	603	903	0
185	4	0	0	0	0	0	0	200	300	0	0	0	0	0	0	0	200	903	0	0	0	0	0	0	0	603	903	0
185	5	0	0	0	0	0	0	200	300	0	0	0	0	0	0	0	200	903	0	0	0	0	0	0	0	603	903	0
185	6	0	0	0	0	0	0	200	300	0	0	0	0	0	0	0	200	903	0	0	0	0	0	0	0	603	903	0
185	7	0	0	0	0	0	0	200	300	0	0	0	0	0	0	0	200	903	0	0	0	0	0	0	0	603	903	0
185	8	0	0	0	0	0	0	200	300	0	0	0	0	0	0	0	200	903	0	0	0	0	0	0	0	603	903	0
185	9	0	0	0	0	0	0	200	300	0	0	0	0	0	0	0	200	903	0	0	0	0	0	0	0	603	903	0
186	0	0	0	0	0	0	0	200	300	0	0	0	0	0	0	0	200	903	0	0	0	0	0	0	0	603	903	0
186	1	0	0	0	0	0	0	200	300	0	0	0	0	0	0	0	200	903	0	0	0	0	0	0	0	603	903	0
186	2	0	0	0	0	0	0	200	300	0	0	0	0	0	0	0	200	903	0	0	0	0	0	0	0	603	903	0
186	3	0	0	0	0	0	0	200	300	0	0	0	0	0	0	0	200	903	0	0	0	0	0	0	0	603	903	0
186	4	0	0	0	0	0	0	200	300	0	0	0	0	0	0	0	200	903	0	0	0	0	0	0	0	603	903	0
186	5	0	0	0	0	0	0	200	300	0	0	0	0	0	0	0	200	903	0	0	0	0	0	0	0	603	903	0
186	6	0	0	0	0	0	0	200	300	0	0	0	0	0	0	0	200	903	0	0	0	0	0	0	0	603	903	0
186	7	0	0	0	0	0	0	200	300	0	0	0	0	0	0	0	200	903	0	0	0	0	0	0	0	603	903	0
186	8	0	0	0	0	0	0	200	300	0	0	0	0	0	0	0	200	903	0	0	0	0	0	0	0	603	903	0
186	9	0	0	0	0	0	0	200	300	0	0	0	0	0	0	0	200	903	0	0	0	0	0	0	0	603	903	0
187	0	0	0	0	0	0	0	200	300	0	0	0	0	0	0	0	200	903	0	0	0	0	0	0	0	603	903	0
187	1	0	0	0	0	0	0	200	300	0	0	0	0	0	0	0	200	903	0	0	0	0	0	0	0	603	903	0
187	2	0	0	0	0	0	0	200	300	0	0	0	0	0	0	0	200	903	0	0	0	0	0	0	0	603	903	0
187	3	0	0	0	0	0	0	200	300	0	0	0	0	0	0	0	200	903	0	0	0	0	0	0	0	603	903	0
187	4	0	0	0	0	0	0	200	300	0	0	0	0	0	0	0	200	903	0	0	0	0	0	0	0	603	903	0
187	5	0	0	0	0	0	0	200	300	0	0	0	0	0	0	0	200	903	0	0	0	0	0	0	0	603	903	0
187	6	0	0	0	0	0	0	200	300	0	0	0	0	0	0	0	200	903	0	0	0	0	0	0	0	603	903	0
187	7	0	0	0	0	0	0	200	300	0	0	0	0	0	0	0	200	903	0	0	0	0	0	0	0	603	903	0
187	8	0	0	0	0	0	0	200	300	0	0	0	0	0	0	0	200	903	0	0	0	0	0	0	0	603	903	0
187	9	0	0	0	0	0	0	200	300	0	0	0	0	0	0	0	200	903	0	0	0	0	0	0	0	603	903	0
188	0	0	0	0	0	0	0	200	300	0	0	0	0	0	0	0	200	903	0	0	0	0	0	0	0	603	903	0
188	1	0	0	0	0	0	0	200	300	0	0	0	0	0	0	0	200	903	0	0	0	0	0	0	0	603	903	0
188	2	0	0	0	0	0	0	200	300	0	0	0	0	0	0	0	200	903	0	0	0	0	0	0	0	603	903	0
188	3	0	0	0	0	0	0	200	300	0	0	0	0	0	0	0	200	903	0	0	0	0	0	0	0	603	903	0
188	4	0	0	0	0	0	0	200	300	0	0	0	0	0	0	0	200	903	0	0	0	0	0	0	0	603	903	0
188	5	0	0	0	0	0	0	200	300	0	0	0	0	0	0	0	200	903	0	0	0	0	0	0	0	603	903	0
188	6	0	0	0	0	0	0	200	300	0	0	0	0	0	0	0	200	903	0	0	0	0	0	0	0	603	903	0
188	7	0	0	0	0	0	0	200	300	0	0	0	0	0	0	0	200	903	0	0	0	0	0	0	0	603	903	0
188	8	0	0	0	0	0	0	200	300	0	0	0	0	0	0	0	200	903	0	0	0	0	0	0	0	603	903	0
188	9	0	0	0	0	0	0	200	300	0	0	0	0	0	0	0	200	903	0	0	0	0	0	0	0	603	903	0
189	0	0	0	0	0	0	0	200	300	0	0	0	0	0	0	0	200	903	0	0	0	0	0	0	0	603	903	0
189	1	0	0	0	0	0	0	200	300	0	0	0	0	0	0	0	200	903	0	0	0	0	0	0	0	603	903	0
189	2	0	0	0	0	0	0	200	300	0	0	0	0	0	0	0	200	903	0	0	0	0	0	0	0	603	903	0
189	3	0	0	0	0	0	0	200	300	0	0	0	0	0	0	0	200	903	0	0	0	0	0	0	0	603	903	0
189	4	0	0	0	0	0	0	200	300	0	0	0	0	0	0	0	200	903	0	0	0	0	0	0	0	603	903	0
189	5	0	0	0	0	0	0	200	300	0	0	0	0	0	0	0	200	903	0	0	0	0	0	0	0	603	903	0
189	6	0	0	0	0	0	0	200	300	0	0	0	0	0	0	0	200	903	0	0	0	0	0	0	0	603	903	0
189	7	0	0	0	0	0	0	200	300	0	0	0	0	0	0	0	200	903	0	0	0	0	0	0	0	603	903	0
189	8	0	0	0	0	0	0	200	300	0	0	0	0	0	0	0	200	903	0	0	0	0	0	0	0	603	903	0
189	9	0	0	0	0	0	0	200	300	0	0	0	0	0	0	0	200	903	0	0	0	0	0	0	0	603	903	0
190	0	0	0	0	0	0	0	200	300	0	0	0	0	0	0	0	200	903	0	0	0	0	0	0	0	603	903	0
190	1	0	0	0	0	0	0	200	300	0	0	0	0	0	0	0	200	903	0	0	0	0	0	0	0	603	903	0
190	2	0	0	0	0	0	0	200	300	0	0	0	0	0	0	0	200	903	0	0	0	0	0	0	0	603	903	0
190	3	0	0	0	0	0	0	200	300	0	0	0	0	0	0	0	200	903	0	0	0	0	0	0	0	603	903	0
190	4	0	0	0	0	0	0	200	300	0	0	0	0	0	0	0	200	903	0	0	0	0	0	0	0	603	903	0
190	5	0	0	0	0	0	0	200	300	0	0	0	0	0	0	0	200	903	0	0	0	0	0	0	0	603	903	0
190	6	0	0	0	0	0	0	200	300	0	0	0	0	0	0	0	200	903	0	0	0	0	0	0	0	603	903	0
190	7	0	0	0	0	0	0	200	300	0	0	0	0	0	0	0	200	903	0	0	0	0	0	0	0	603	903	0
190	8	0	0	0	0	0	0	200	300	0	0	0	0	0	0	0	200	903	0	0	0	0	0	0	0	603	903	0
190	9	0	0	0	0	0	0	200	300	0	0	0	0	0	0	0	200	903	0	0	0	0	0	0	0	603	903	0
191	0	0	0	0	0	0	0	200	300	0	0	0	0	0	0	0	200	903	0	0	0	0	0	0	0	603	903	0
191	1	0	0	0	0	0	0	200	300	0	0	0	0	0	0	0	200	903	0	0	0	0	0	0	0	603	903	0
191	2	0	0	0	0	0	0	200	300	0	0	0	0	0	0	0	200	903	0	0	0	0	0	0	0	603	903	0
191	3	0	0	0	0	0	0	200	300	0	0	0	0	0	0	0	200	903	0	0	0	0	0	0	0	603	903	0
191	4	0	0	0	0	0	0	200	300	0	0	0	0	0	0	0	200	903	0	0	0	0	0	0	0	603	903	0
191	5	0	0	0	0	0	0	200	300	0	0	0	0	0	0	0	200	903	0	0	0	0	0	0	0	603	903	0
191	6	0	0	0	0	0	0	200	300	0	0	0	0	0	0	0	200	903	0	0	0	0	0	0	0	603	903	0
191	7	0	0	0	0	0	0	200	300	0	0	0	0	0	0	0	200	903	0	0	0	0	0	0	0	603	903	0
191	8	0	0	0	0	0	0	200	300	0	0	0	0	0	0	0	200	903	0	0	0	0	0	0	0	603	903	0
191	9	0	0	0	0	0	0	200	300	0	0	0	0	0	0	0	200	903	0	0	0	0	0	0	0	603	903	0
192	0	0	0	0	0	0	0	200	300	0	0	0	0	0	0	0	200	903	0	0	0	0	0	0	0	603	903	0
192	1	0	0	0	0	0	0	200	300	0	0	0	0	0	0	0	200	903	0	0	0	0	0	0	0	603	903	0
192	2	0	0	0	0	0	0	200	300	0	0	0	0	0	0	0	200	903	0	0	0	0	0	0	0	603	903	0
192	3	0	0	0	0	0	0	200	300	0	0	0	0	0	0	0	200	903	0	0	0	0	0	0	0	603	903	0
192	4	0	0	0	0	0	0	200	300	0	0	0	0	0	0	0	200	903	0	0	0	0	0	0	0	603	903	0
192	5	0	0	0	0	0	0	200	300	0	0	0	0	0	0	0	200	903	0	0	0	0	0	0	0	603	903	0
192	6	0	0	0	0	0	0	200	300	0	0	0	0	0	0	0	200	903	0	0	0	0	0	0	0	603	903	0
192	7	0	0	0	0	0	0	200	300	0	0	0	0	0	0	0	200	903	0	0	0	0	0	0	0	603	903	0
192	8	0	0	0	0	0	0	200	300	0	0	0	0	0	0	0	200	903	0	0	0	0	0	0	0	603	903	0
192	9	0	0	0	0	0	0	200	300	0	0	0	0	0	0	0	200	903	0	0	0	0	0	0	0	603	903	0
193	0	0	0	0	0	0	0	200	300	0	0	0	0	0	0	0	200	903	0	0	0	0	0	0	0	603	903	0
193	1	0	0	0	0	0	0	200	300	0	0	0	0	0	0	0	200	903	0	0	0	0	0	0	0	603	903	0
193	2	0	0	0	0	0	0	200	300	0	0	0	0	0	0	0	200	903	0	0	0	0	0	0	0	603	903	0
193	3	0	0	0	0	0	0	200	300	0	0	0	0	0	0	0	200	903	0	0	0	0	0	0	0	603	903	0
193	4	0	0	0	0	0	0	200	300	0	0	0	0	0	0	0	200	903	0	0	0	0	0	0	0	603	903	0
193	5	0	0	0	0	0	0	200	300	0	0	0	0	0	0	0	200	903	0	0	0	0	0	0	0	603	903	0
193	6	0	0	0	0	0	0	200	300	0	0	0	0	0	0	0	200	903	0	0	0	0	0	0	0	603	903	0
193	7	0	0	0	0	0	0	200	300	0	0	0	0	0	0	0	200	903	0	0	0	0	0	0	0	603	903	0
193	8	0	0	0	0	0	0	200	300	0	0	0	0	0	0	0	200	903	0	0	0	0	0	0	0	603	903	0
193	9	0	0	0	0	0	0	200	300	0	0	0	0	0	0	0	200	903	0	0	0	0	0	0	0	603	903	0
194	0	0	0	0	0	0	0	200	300	0	0	0	0	0	0	0	200	903	0	0	0	0	0	0	0	603	903	0
194	1	0	0	0	0	0	0	200	300	0	0	0	0	0	0	0	200	903	0	0	0	0	0	0	0	603	903	0
194	2	0	0	0	0	0	0	200	300	0	0	0	0	0	0	0	200	903	0	0	0	0	0	0	0	603	903	0
194	3	0	0	0	0	0	0	200	300	0	0	0	0	0	0	0	200	903	0	0	0	0	0	0	0	603	903	0
194	4	0	0	0	0	0	0	200	300	0	0	0	0	0	0	0	200	903	0	0	0	0	0	0	0	603	903	0
194	5	0	0	0	0	0	0	200	300	0	0	0	0	0	0	0	200	903	0	0	0	0	0	0	0	603	903	0
194	6	0	0	0	0	0	0	200	300	0	0	0	0	0	0	0	200	903	0	0	0	0	0	0	0	603	903	0
194	7	0	0	0	0	0	0	200	300	0	0	0	0	0	0	0	200	903	0	0	0	0	0	0	0	603	903	0
194	8	0	0	0	0	0	0	200	300	0	0	0	0	0	0	0	200	903	0	0	0	0	0	0	0	603	903	0
194	9	0	0	0	0	0	0	200	300	0	0	0	0	0	0	0	200	903	0	0	0	0	0	0	0	603	903	0
195	0	0	0	0	0	0	0	200	300	0	0	0	0	0	0	0	200	903	0	0	0	0	0	0	0	603	903	0
195	1	0	0	0	0	0	0	200	300	0	0	0	0	0	0	0	200	903	0	0	0	0	0	0	0	603	903	0
195	2	0	0	0	0	0	0	200	300	0	0	0	0	0	0	0	200	903	0	0	0	0	0	0	0	603	903	0
195	3	0	0	0	0	0	0	200	300	0	0	0	0	0	0	0	200	903	0	0	0	0	0	0	0	603	903	0
195	4	0	0	0	0	0	0	200	300	0	0	0	0	0	0	0	200	903	0	0	0	0	0	0	0	603	903	0
195	5	0	0	0	0	0	0	200	300	0	0	0	0	0	0	0	200	903	0	0	0	0	0	0	0	603	903	0
195	6	0	0	0	0	0	0	200	300	0	0	0	0	0	0	0	200	903	0	0	0	0	0	0	0	603	903	0
195	7	0	0	0	0	0	0	200	300	0	0	0	0	0	0	0	200	903	0	0	0	0	0	0	0	603	903	0
195	8	0	0	0	0	0	0	200	300	0	0	0	0	0	0	0	200	903	0	0	0	0	0	0	0	603	903	0
195	9	0	0	0	0	0	0	200	300	0	0	0	0	0	0	0	200	903	0	0	0	0	0	0	0	603	903	0
196	0	0	0	0	0	0	0	200	300	0	0	0	0	0	0	0	200	903	0	0	0	0	0	0	0	603	903	0
196	1	0	0	0	0	0	0	200	300	0	0	0	0	0	0	0	200	903	0	0	0	0	0	0	0	603	903	0
196	2	0	0	0	0	0	0	200	300	0	0	0	0	0	0	0	200	903	0	0	0	0	0	0	0	603	903	0
196	3	0	0	0	0	0	0	200	300	0	0	0	0	0	0	0	200	903	0	0	0	0	0	0	0	603	903	0
196	4	0	0	0	0	0	0	200	300	0	0	0	0	0	0	0	200	903	0	0	0	0	0	0	0	603	903	0
196	5	0	0	0	0	0	0	200	300	0	0	0	0	0	0	0	200	903	0	0	0	0	0	0	0	603	903	0
196	6	0	0	0	0	0	0	200	300	0	0	0	0	0	0	0	200	903	0	0	0	0	0	0	0	603	903	0
196	7	0	0	0	0	0	0	200	300	0	0	0	0	0	0	0	200	903	0	0	0	0	0	0	0	603	903	0
196	8	0	0	0	0	0	0	200	300	0	0	0	0	0	0	0	200	903	0	0	0	0	0	0	0	603	903	0
196	9	0	0	0	0	0	0	200	300	0	0	0	0	0	0	0	200	903	0	0	0	0	0	0	0	603	903	0
197	0	0	0	0	0	0	0	200	300	0	0	0	0	0	0	0	200	903	0	0	0	0	0	0	0	603	903	0
197	1	0	0	0	0	0	0	200	300	0	0	0	0	0	0	0	200	903	0	0	0	0	0	0	0	603	903	0
197	2	0	0	0	0	0	0	200	300	0	0	0	0	0	0	0	200	903	0	0	0	0	0	0	0	603	903	0
197	3	0	0	0	0	0	0	200	300	0	0	0	0	0	0	0	200	903	0	0	0	0	0	0	0	603	903	0
197	4	0	0	0	0	0	0	200	300	0	0	0	0	0	0	0	200	903	0	0	0	0	0	0	0	603	903	0
197	5	0	0	0	0	0	0	200	300	0	0	0	0	0	0	0	200	903	0	0	0	0	0	0	0	603	903	0
197	6	0	0	0	0	0	0	200	300	0	0	0	0	0	0	0	200	903	0	0	0	0	0	0	0	603	903	0
197	7	0	0	0	0	0	0	200	300	0	0	0	0	0	0	0	200	903	0	0	0	0	0	0	0	603	903	0
197	8	0	0	0	0	0	0	200	300	0	0	0	0	0	0	0	200	903	0	0	0	0	0	0	0	603	903	0
197	9	0	0	0	0	0	0	200	300	0	0	0	0	0	0	0	200	903	0	0	0	0	0	0	0	603	903	0
198	0	0	0	0	0	0	0	200	300	0	0	0	0	0	0	0	200	903	0	0	0	0	0	0	0	603	903	0
198	1	0	0	0	0	0	0	200	300	0	0	0	0	0	0	0	200	903	0	0	0	0	0	0	0	603	903	0
198	2	0	0	0	0	0	0	200	300	0	0	0	0	0	0	0	200	903	0	0	0	0	0	0	0	603	903	0
198	3	0	0	0	0	0	0	200	300	0	0	0	0	0	0	0	200	903	0	0	0	0	0	0	0	603	903	0
198	4	0	0	0	0	0	0	200	300	0	0	0	0	0	0	0	200	903	0	0	0	0	0	0	0	603	903	0
198	5	0	0	0	0	0	0	200	300	0	0	0	0	0	0	0	200	903	0	0	0	0	0	0	0	603	903	0
198	6	0	0	0	0	0	0	200	300	0	0	0	0	0	0	0	200	903	0	0	0	0	0	0	0	603	903	0
198	7	0	0	0	0	0	0	200	300	0	0	0	0	0	0	0	200	903	0	0	0	0	0	0	0	603	903	0
198	8	0	0	0	0	0	0	200	300	0	0	0	0	0	0	0	200	903	0	0	0	0	0	0	0	603	903	0
198	9	0	0	0	0	0	0	200	300	0	0	0	0	0	0	0	200	903	0	0	0	0	0	0	0	603	903	0
199	0	0	0	0	0	0	0	200	300	0	0	0	0	0	0	0	200	903	0	0	0	0	0	0	0	603	903	0
199	1	0	0	0	0	0	0	200	300	0	0	0	0	0	0	0	200	903	0	0	0	0	0	0	0	603	903	0
199	2	0	0	0	0	0	0	200	300	0	0	0	0	0	0	0	200	903	0	0	0	0	0	0	0	603	903	0
199	3	0	0	0	0	0	0	200	300	0	0	0	0	0	0	0	200	903	0	0	0	0	0	0	0	603	903	0
199	4	0	0	0	0	0	0	200	300	0	0	0	0	0	0	0	200	903	0	0	0	0	0	0	0	603	903	0
199	5	0	0	0	0	0	0	200	300	0	0	0	0	0	0	0	200	903	0	0	0	0	0	0	0	603	903	0
199	6	0	0	0	0	0	0	200	300	0	0	0	0	0	0	0	200	903	0	0	0	0	0	0	0	603	903	0
199	7	0	0	0	0	0	0	200	300	0	0	0	0	0	0	0	200	903	0	0	0	0	0	0	0	603	903	0
199	8	0	0	0	0	0	0	200	300	0	0	0	0	0	0	0	200	903	0	0	0	0	0	0	0	603	903	0
199	9	0	0	0	0	0	0	200	300	0	0	0	0	0	0	0	200	903	0	0	0	0	0	0	0	603	903	0
200	0	0	0	0	0	0	0	200	300	0	0	0	0	0	0	0	200	903	0	0	0	0	0	0	0	603	903	0
200	1	0	0	0	0	0	0	200	300	0	0	0	0	0	0	0	200	903	0	0	0	0	0	0	0	603	903	0
200	2	0	0	0	0	0	0	200	300	0	0	0	0	0	0	0	200	903	0	0	0	0	0	0	0	603	903	0
200	3	0	0	0	0	0	0	200	300	0	0	0	0	0	0	0	200	903	0	0	0	0	0	0	0	603	903	0
200	4	0	0	0	0	0	0	200	300	0	0	0	0	0	0	0	200	903	0	0	0	0	0	0	0	603	903	0
200	5	0	0	0	0	0	0	200	300	0	0	0	0	0	0	0	200	903	0	0	0	0	0	0	0	603	903	0
200	6	0	0	0	0	0	0	200	300	0	0	0	0	0	0	0	200	903	0	0	0	0	0	0	0	603	903	0
200	7	0	0	0	0	0	0	200	300	0	0	0	0	0	0	0	200	903	0	0	0	0	0	0	0	603	903	0
200	8	0	0	0	0	0	0	200	300	0	0	0	0	0	0	0	200	903	0	0	0	0	0	0	0	603	903	0
200	9	0	0	0	0	0	0	200	300	0	0	0	0	0	0	0	200	903	0	0	0	0	0	0	0	603	903	0
201	0	0	0	0	0	0	0	200	300	0	0	0	0	0	0	0	200	903	0	0	0	0	0	0	0	603	903	0
201	1	0	0	0	0	0	0	200	300	0	0	0	0	0	0	0	200	903	0	0	0	0	0	0	0	603	903	0
201	2	0	0	0	0	0	0	200	300	0	0	0	0	0	0	0	200	903	0	0	0	0	0	0	0	603	903	0
201	3	0	0	0	0	0	0	200	300	0	0	0	0	0	0	0	200	903	0	0	0	0	0	0	0	603	903	0
201	4	0	0	0	0	0	0	200	300	0	0	0	0	0	0	0	200	903	0	0	0	0	0	0	0	603	903	0
201	5	0	0	0	0	0	0	200	300	0	0	0	0	0	0	0	200	903	0	0	0	0	0	0	0	603	903	0
201	6	0	0	0	0	0	0	200	300	0	0	0	0	0	0	0	200	903	0	0	0	0	0	0	0	603	903	0
201	7	0	0	0	0	0	0	200	300	0	0	0	0	0	0	0	200	903	0	0	0	0	0	0	0	603	903	0
201	8	0	0	0	0	0	0	200	300	0	0	0	0	0	0	0	200	903	0	0	0	0	0	0	0	603	903	0
201	9	0	0	0	0	0	0	200	300	0	0	0	0	0	0	0	200	903	0	0	0	0	0	0	0	603	903	0
202	0	0	0	0	0	0	0	200	300	0	0	0	0	0	0	0	200	903	0	0	0	0	0	0	0	603	903	0
202	1	0	0	0	0	0	0	200	300	0	0	0	0	0	0	0	200	903	0	0	0	0	0	0	0	603	903	0
202	2	0	0	0	0	0	0	200	300	0	0	0	0	0	0	0	200	903	0	0	0	0	0	0	0	603	903	0
202	3	0	0	0	0	0	0	200	300	0	0	0	0	0	0	0	200	903	0	0	0	0	0	0	0	603	903	0
202	4	0	0	0	0	0	0	200	300	0	0	0	0	0	0	0	200	903	0	0	0	0	0	0	0	603	903	0
202	5	0	0	0	0	0	0	200	300	0	0	0	0	0	0	0	200	903	0	0	0	0	0	0	0	603	903	0
202	6	0	0	0	0	0	0	200	300	0	0	0	0	0	0	0	200	903	0	0	0	0	0	0	0	603	903	0
202	7	0	0	0	0	0	0	200	300	0	0	0	0	0	0	0	200	903	0	0	0	0	0	0	0	603	903	0
202	8	0	0	0	0	0	0	200	300	0	0	0	0	0	0	0	200	903	0	0	0	0	0	0	0	603	903	0
202	9	0	0	0	0	0	0	200	300	0	0	0	0	0	0	0	200	903	0	0	0	0	0	0	0	603	903	0
203	0	0	0	0	0	0	0	200	300	0	0	0	0	0	0	0	200	903	0	0	0	0	0	0	0	603	903	0
203	1	0	0	0	0	0	0	200	300	0	0	0	0	0	0	0	200	903	0	0	0	0	0	0	0	603	903	0
203	2	0	0	0	0	0	0	200	300	0	0	0	0	0	0	0	200	903	0	0	0	0	0	0	0	603	903	0
203	3	0	0	0	0	0	0	200	300	0	0	0	0	0	0	0	200	903	0	0	0	0	0	0	0	603	903	0
203	4	0	0	0	0	0	0	200	300	0	0	0	0	0	0	0	200	903	0	0	0	0	0	0	0	603	903	0
203	5	0	0	0	0	0	0	200	300	0	0	0	0	0	0	0	200	903	0	0	0	0	0	0	0	603	903	0
203	6	0	0	0	0	0	0	200	300	0	0	0	0	0	0	0	200	903	0	0	0	0	0	0	0	603	903	0
203	7	0	0	0	0	0	0	200	300	0	0	0	0	0	0	0	200	903	0	0	0	0	0	0	0	603	903	0
203	8	0	0	0	0	0	0	200	300	0	0	0	0	0	0	0	200	903	0	0	0	0	0	0	0	603	903	0
203	9	0	0	0	0	0	0	200	300	0	0	0	0	0	0	0	200	903	0	0	0	0	0	0	0	603	903	0
204	0	0	0	0	0	0	0	200	300	0	0	0	0	0	0	0	200	903	0	0	0	0	0	0	0	603	903	0
204	1	0	0	0	0	0	0	200	300	0	0	0	0	0	0	0	200	903	0	0	0	0	0	0	0	603	903	0
204	2	0	0	0	0	0	0	200	300	0	0	0	0	0	0	0	200	903	0	0	0	0	0	0	0	603	903	0
204	3	0	0	0	0	0	0	200	300	0	0	0	0	0	0	0	200	903	0	0	0	0	0	0	0	603	903	0
204	4	0	0	0	0	0	0	200	300	0	0	0	0	0	0	0	200	903	0	0	0	0	0	0	0	603	903	0
204	5	0	0	0	0	0	0	200	300	0	0	0	0	0	0	0	200	903	0	0	0	0	0	0	0	603	903	0
204	6	0	0	0	0	0	0	200	300	0	0	0	0	0	0	0	200	903	0	0	0	0	0	0	0	603	903	0
204	7	0	0	0	0	0	0	200	300	0	0	0	0	0	0	0	200	903	0	0	0	0	0	0	0	603	903	0
204	8	0	0	0	0	0	0	200	300	0	0	0	0	0	0	0	200	903	0	0	0	0	0	0	0	603	903	0
204	9	0	0	0	0	0	0	200	300	0	0	0	0	0	0	0	200	903	0	0	0	0	0	0	0	603	903	0
205	0	0	0	0	0	0	0	200	300	0	0	0	0	0	0	0	200	903	0	0	0	0	0	0	0	603	903	0
205	1	0	0	0	0	0	0	200	300	0	0	0	0	0	0	0	200	903	0	0	0	0	0	0	0	603	903	0
205	2	0	0	0	0	0	0	200	300	0	0	0	0	0	0	0	200	903	0	0	0	0	0	0	0	603	903	0
205	3	0	0	0	0	0	0	200	300	0	0	0	0	0	0	0	200	903	0	0	0	0	0	0	0	603	903	0
205	4	0	0	0	0	0	0	200	300	0	0	0	0	0	0	0	200	903	0	0	0	0	0	0	0	603	903	0
205	5	0	0	0	0	0	0	200	300	0	0	0	0	0	0	0	200	903	0	0	0	0	0	0	0	603	903	0
205	6	0	0	0	0	0	0	200	300	0	0	0	0	0	0	0	200	903	0	0	0	0	0	0	0	603	903	0
205	7	0	0	0	0	0	0	200	300	0	0	0	0	0	0	0	200	903	0	0	0	0	0	0	0	603	903	0
205	8	0	0	0	0	0	0	200	300	0	0	0	0	0	0	0	200	903	0	0	0	0	0	0	0	603	903	0
205	9	0	0	0	0	0	0	200	300	0	0	0	0	0	0	0	200	903	0	0	0	0	0	0	0	603	903	0
206	0	0	0	0	0	0	0	200	300	0	0	0	0	0	0	0	200	903	0	0	0	0	0	0	0	603	903	0
206	1	0	0	0	0	0	0	200	300	0	0	0	0	0	0	0	200	903	0	0	0	0	0	0	0	603	903	0
206	2	0	0	0	0	0	0	200	300	0	0	0	0	0	0	0	200	903	0	0	0	0	0	0	0	603	903	0
206	3	0	0	0	0	0	0	200	300	0	0	0	0	0	0	0	200	903	0	0	0	0	0	0	0	603	903	0
206	4	0	0	0	0	0	0	200	300	0	0	0	0	0	0	0	200	903	0	0	0	0	0	0	0	603	903	0
206	5	0	0	0	0	0	0	200	300	0	0	0	0	0	0	0	200	903	0	0	0	0	0	0	0	603	903	0
206	6	0	0	0	0	0	0	200	300	0	0	0	0	0	0	0	200	903	0	0	0	0	0	0	0	603	903	0
206	7	0	0	0	0	0	0	200	300	0	0	0	0	0	0	0	200	903	0	0	0	0	0	0	0	603	903	0
206	8	0	0	0	0	0	0	200	300	0	0	0	0	0	0	0	200	903	0	0	0	0	0	0	0	603	903	0
206	9	0	0	0	0	0	0	200	300	0	0	0	0	0	0	0	200	903	0	0	0	0	0	0	0	603	903	0
207	0	0	0	0	0	0	0	200	300	0	0	0	0	0	0	0	200	903	0	0	0	0	0	0	0	603	903	0
207	1	0	0	0	0	0	0	200	300	0	0	0	0	0	0	0	200	903	0	0	0	0	0	0	0	603	903	0
207	2	0	0	0	0	0	0	200	300	0	0	0	0	0	0	0	200	903	0	0	0	0	0	0	0	603	903	0
207	3	0	0	0	0	0	0	200	300	0	0	0	0	0	0	0	200	903	0	0	0	0	0	0	0	603	903	0
207	4	0	0	0	0	0	0	200	300	0	0	0	0	0	0	0	200	903	0	0	0	0	0	0	0	603	903	0
207	5	0	0	0	0	0	0	200	300	0	0	0	0	0	0	0	200	903	0	0	0	0	0	0	0	603	903	0
207	6	0	0	0	0	0	0	200	300	0	0	0	0	0	0	0	200	903	0	0	0	0	0	0	0	603	903	0
207	7	0	0	0	0	0	0	200	300	0	0	0	0	0	0	0	200	903	0	0	0	0	0	0	0	603	903	0
207	8	0	0	0	0	0	0	200	300	0	0	0	0	0	0	0	200	903	0	0	0	0	0	0	0	603	903	0
207	9	0	0	0	0	0	0	200	300	0	0	0	0	0	0	0	200	903	0	0	0	0	0	0	0	603	903	0
208	0	0	0	0	0	0	0	200	300	0	0	0	0	0	0	0	200	903	0	0	0	0	0	0	0	603	903	0
208	1	0	0	0	0	0	0	200	300	0	0	0	0	0	0	0	200	903	0	0	0	0	0	0	0	603	903	0
208	2	0	0	0	0	0	0	200	300	0	0	0	0	0	0	0	200	903	0	0	0	0	0	0	0	603	903	0
208	3	0	0	0	0	0	0	200	300	0	0	0	0	0	0	0	200	903	0	0	0	0	0	0	0	603	903	0
208	4	0	0	0	0	0	0	200	300	0	0	0	0	0	0	0	200	903	0	0	0	0	0	0	0	603	903	0
208	5	0	0	0	0	0	0	200	300	0	0	0	0	0	0	0	200	903	0	0	0	0	0	0	0	603	903	0
208	6	0	0	0	0	0	0	200	300	0	0	0	0	0	0	0	200	903	0	0	0	0	0	0	0	603	903	0
208	7	0	0	0	0	0	0	200	300	0	0	0	0	0	0	0	200	903	0	0	0	0	0	0	0	603	903	0
208	8	0	0	0	0	0	0	200	300	0	0	0	0	0	0	0	200	903	0	0	0	0	0	0	0	603	903	0
208	9	0	0	0	0	0	0	200	300	0	0	0	0	0	0	0	200	903	0	0	0	0	0	0	0	603	903	0
209	0	0	0	0	0	0	0	200	300	0	0	0	0	0	0	0	200	903	0	0	0	0	0	0	0	603	903	0
209	1	0	0	0	0	0	0	200	300	0	0	0	0	0	0	0	200	903	0	0	0	0	0	0	0	603	903	0
209	2	0	0	0	0	0	0	200	300	0	0	0	0	0	0	0	200	903	0	0	0	0	0	0	0	603	903	0
209	3	0	0	0	0	0	0	200	300	0	0	0	0	0	0	0	200	903	0	0	0	0	0	0	0	603	903	0
209	4	0	0	0	0	0	0	200	300	0	0	0	0	0	0	0	200	903	0	0	0	0	0	0	0	603	903	0
209	5	0	0	0	0	0	0	200	300	0	0	0	0	0	0	0	200	903	0	0	0	0	0	0	0	603	903	0
209	6	0	0	0	0	0	0	200	300	0	0	0	0	0	0	0	200	903	0	0	0	0	0	0	0	603	903	0
209	7	0	0	0	0	0	0	200	300	0	0	0	0	0	0	0	200	903	0	0	0	0	0	0	0	603	903	0
209	8	0	0	0	0	0	0	200	300	0	0	0	0	0	0	0	200	903	0	0	0	0	0	0	0	603	903	0
209	9	0	0	0	0	0	0	200	300	0	0	0	0	0	0	0	200	903	0	0	0	0	0	0	0	603	903	0
210	0	0	0	0	0	0	0	200	300	0	0	0	0	0	0	0	200	903	0	0	0	0	0	0	0	603	903	0
210	1	0	0	0	0	0	0	200	300	0	0	0	0	0	0	0	200	903	0	0	0	0	0	0	0	603	903	0
210	2	0	0	0	0	0	0	200	300	0	0	0	0	0	0	0	200	903	0	0	0	0	0	0	0	603	903	0
210	3	0	0	0	0	0	0	200	300	0	0	0	0	0	0	0	200	903	0	0	0	0	0	0	0	603	903	0
210	4	0	0	0	0	0	0	200	300	0	0	0	0	0	0	0	200	903	0	0	0	0	0	0	0	603	903	0
210	5	0	0	0	0	0	0	200	300	0	0	0	0	0	0	0	200	903	0	0	0	0	0	0	0	603	903	0
210	6	0	0	0	0	0	0	200	300	0	0	0	0	0	0	0	200	903	0	0	0	0	0	0	0	603	903	0
210	7	0	0	0	0	0	0	200	300	0	0	0	0	0	0	0	200	903	0	0	0	0	0	0	0	603	903	0
210	8	0	0	0	0	0	0	200	300	0	0	0	0	0	0	0	200	903	0	0	0	0	0	0	0	603	903	0
210	9	0	0	0	0	0	0	200	300	0	0	0	0	0	0	0	200	903	0	0	0	0	0	0	0	603	903	0
211	0	0	0	0	0	0	0	200	300	0	0	0	0	0	0	0	200	903	0	0	0	0	0	0	0	603	903	0
211	1	0	0	0	0	0	0	200	300	0	0	0	0	0	0	0	200	903	0	0	0	0	0	0	0	603	903	0
211	2	0	0	0	0	0	0	200	300	0	0	0	0	0	0	0	200	903	0	0	0	0	0	0	0	603	903	0
211	3	0	0	0	0	0	0	200	300	0	0	0	0	0	0	0	200	903	0	0	0	0	0	0	0	603	903	0
211	4	0	0	0	0	0	0	200	300	0	0	0	0	0	0	0	200	903	0	0	0	0	0	0	0	603	903	0
211	5	0	0	0	0	0	0	200	300	0	0	0	0	0	0	0	200	903	0	0	0	0	0	0	0	603	903	0
211	6	0	0	0	0	0	0	200	300	0	0	0	0	0	0	0	200	903	0	0	0	0	0	0	0	603	903	0
211	7	0	0	0	0	0	0	200	300	0	0	0	0	0	0	0	200	903	0	0	0	0	0	0	0	603	903	0
211	8	0	0	0	0	0	0	200	300	0	0	0	0	0	0	0	200	903	0	0	0	0	0	0	0	603	903	0
211	9	0	0	0	0	0	0	200	300	0	0	0	0	0	0	0	200	903	0	0	0	0	0	0	0	603	903	0
212	0	0	0	0	0	0	0	200	300	0	0	0	0	0	0	0	200	903	0	0	0	0	0	0	0	603	903	0
212	1	0	0	0	0	0	0	200	300	0	0	0	0	0	0	0	200	903	0	0	0	0	0	0	0	603	903	0
212	2	0	0	0	0	0	0	200	300	0	0	0	0	0	0	0	200	903	0	0	0	0	0	0	0	603	903	0
212	3	0	0	0	0	0	0	200	300	0	0	0	0	0	0	0	200	903	0	0	0	0	0	0	0	603	903	0
212	4	0	0	0	0	0	0	200	300	0	0	0	0	0	0	0	200	903	0	0	0	0	0	0	0	603	903	0
212	5	0	0	0	0	0	0	200	300	0	0	0	0	0	0	0	200	903	0	0	0	0	0	0	0	603	903	0
212	6	0	0	0	0	0	0	200	300	0	0	0	0	0	0	0	200	903	0	0	0	0	0	0	0	603	903	0
212	7	0	0	0	0	0	0	200	300	0	0	0	0	0	0	0	200	903	0	0	0	0	0	0	0	603	903	0
212	8	0	0	0	0	0	0	200	300	0	0	0	0	0	0	0	200	903	0	0	0	0	0	0	0	603	903	0
212	9	0	0	0	0	0	0	200	300	0	0	0	0	0	0	0	200	903	0	0	0	0	0	0	0	603	903	0
213	0	0	0	0	0	0	0	200	300	0	0	0	0	0	0	0	200	903	0	0	0	0	0	0	0	603	903	0
213	1	0	0	0	0	0	0	200	300	0	0	0	0	0	0	0	200	903	0	0	0	0	0	0	0	603	903	0
213	2	0	0	0	0	0	0	200	300	0	0	0	0	0	0	0	200	903	0	0	0	0	0	0	0	603	903	0
213	3	0	0	0	0	0	0	200	300	0	0	0	0	0	0	0	200	903	0	0	0	0	0	0	0	603	903	0
213	4	0	0	0	0	0	0	200	300	0	0	0	0	0	0	0	200	903	0	0	0	0	0	0	0	603	903	0
213	5	0	0	0	0	0	0	200	300	0	0	0	0	0	0	0	200	903	0	0	0	0	0	0	0	603	903	0
213	6	0	0	0	0	0	0	200	300	0	0	0	0	0	0	0	200	903	0	0	0	0	0	0	0	603	903	0
213	7	0	0	0	0	0	0	200	300	0	0	0	0	0	0	0	200	903	0	0	0	0	0	0	0	603	903	0
213	8	0	0	0	0	0	0	200	300	0	0	0	0	0	0	0	200	903	0	0	0	0	0	0	0	603	903	0
213	9	0	0	0	0	0	0	200	300	0	0	0	0	0	0	0	200	903	0	0	0	0	0	0	0	603	903	0
214	0	0	0	0	0	0	0	200	300	0	0	0	0	0	0	0	200	903	0	0	0	0	0	0	0	603	903	0
214	1	0	0	0	0	0	0	200	300	0	0	0	0	0	0	0	200	903	0	0	0	0	0	0	0	603	903	0
214	2	0	0	0	0	0	0	200	300	0	0	0	0	0	0	0	200	903	0	0	0	0	0	0	0	603	903	0
214	3	0	0	0	0	0	0	200	300	0	0	0	0	0	0	0	200	903	0	0	0	0	0	0	0	603	903	0
214	4	0	0	0	0	0	0	200	300	0	0	0	0	0	0	0	200	903	0	0	0	0	0	0	0	603	903	0
214	5	0	0	0	0	0	0	200	300	0	0	0	0	0	0	0	200	903	0	0	0	0	0	0	0	603	903	0
214	6	0	0	0	0	0	0	200	300	0	0	0	0	0	0	0	200	903	0	0	0	0	0	0	0	603	903	0
214	7	0	0	0	0	0	0	200	300	0	0	0	0	0	0	0	200	903	0	0	0	0	0	0	0	603	903	0
214	8	0	0	0	0	0	0	200	300	0	0	0	0	0	0	0	200	903	0	0	0	0	0	0	0	603	903	0
214	9	0	0	0	0	0	0	200	300	0	0	0	0	0	0	0	200	903	0	0	0	0	0	0	0	603	903	0
215	0	0	0	0	0	0	0	200	300	0	0	0	0	0	0	0	200	903	0	0	0	0	0	0	0	603	903	0
215	1	0	0	0	0	0	0	200	300	0	0	0	0	0	0	0	200	903	0	0	0	0	0	0	0	603	903	0
215	2	0	0	0	0	0	0	200	300	0	0	0	0	0	0	0	200	903	0	0	0	0	0	0	0	603	903	0
215	3	0	0	0	0	0	0	200	300	0	0	0	0	0	0	0	200	903	0	0	0	0	0	0	0	603	903	0
215	4	0	0	0	0	0	0	200	300	0	0	0	0	0	0	0	200	903	0	0	0	0	0	0	0	603	903	0
215	5	0	0	0	0	0	0	200	300	0	0	0	0	0	0	0	200	903	0	0	0	0	0	0	0	603	903	0
215	6	0	0	0	0	0	0	200	300	0	0	0	0	0	0	0	200	903	0	0	0	0	0	0	0	603	903	0
215	7	0	0	0	0	0	0	200	300	0	0	0	0	0	0	0	200	903	0	0	0	0	0	0	0	603	903	0
215	8	0	0	0	0	0	0	200	300	0	0	0	0	0	0	0	200	903	0	0	0	0	0	0	0	603	903	0
215	9	0	0	0	0	0	0	200	300	0	0	0	0	0	0	0	200	903	0	0	0	0	0	0	0	603	903	0
216	0	0	0	0	0	0	0	200	300	0	0	0	0	0	0	0	200	903	0	0	0	0	0	0	0	603	903	0
216	1	0	0	0	0	0	0	200	300	0	0	0	0	0	0	0	200	903	0	0	0	0	0	0	0	603	903	0
216	2	0	0	0	0	0	0	200	300	0	0	0	0	0	0	0	200	903	0	0	0	0	0	0	0	603	903	0
216	3	0	0	0	0	0	0	200	300	0	0	0	0	0	0	0	200	903	0	0	0	0	0	0	0	603	903	0
216	4	0	0	0	0	0	0	200	300	0	0	0	0	0	0	0	200	903	0	0	0	0	0	0	0	603	903	0
216	5	0	0	0	0	0	0	200	300	0	0	0	0	0	0	0	200	903	0	0	0	0	0	0	0	603	903	0
216	6	0	0	0	0	0	0	200	300	0	0	0	0	0	0	0	200	903	0	0	0	0	0	0	0	603	903	0
216	7	0	0	0	0	0	0	200	300	0	0	0	0	0	0	0	200	903	0	0	0	0	0	0	0	603	903	0
216	8	0	0	0	0	0	0	200	300	0	0	0	0	0	0	0	200	903	0	0	0	0	0	0	0	603	903	0
216	9	0	0	0	0	0	0	200	300	0	0	0	0	0	0	0	200	903	0	0	0	0	0	0	0	603	903	0
217	0	0	0	0	0	0	0	200	300	0	0	0	0	0	0	0	200	903	0	0	0	0	0	0	0	603	903	0
217	1	0	0	0	0	0	0	200	300	0	0	0	0	0	0	0	200	903	0	0	0	0	0	0	0	603	903	0
217	2	0	0	0	0	0	0	200	300	0	0	0	0	0	0	0	200	903	0	0	0	0	0	0	0	603	903	0
217	3	0	0	0	0	0	0	200	300	0	0	0	0	0	0	0	200	903	0	0	0	0	0	0	0	603	903	0
217	4	0	0	0	0	0	0	200	300	0	0	0	0	0	0	0	200	903	0	0	0	0	0	0	0	603	903	0
217	5	0	0	0	0	0	0	200	300	0	0	0	0	0	0	0	200	903	0	0	0	0	0	0	0	603	903	0
217	6	0	0	0	0	0	0	200	300	0	0	0	0	0	0	0	200	903	0	0	0	0	0	0	0	603	903	0
217	7	0	0	0	0	0	0	200	300	0	0	0	0	0	0	0	200	903	0	0	0	0	0	0	0	603	903	0
217	8	0	0	0	0	0	0	200	300	0	0	0	0	0	0	0	200	903	0	0	0	0	0	0	0	603	903	0
217	9	0	0	0	0	0	0	200	300	0	0	0	0	0	0	0	200	903	0	0	0	0	0	0	0	603	903	0
218	0	0	0	0	0	0	0	200	300	0	0	0	0	0	0	0	200	903	0	0	0	0	0	0	0	603	903	0
218	1	0	0	0	0	0	0	200	300	0	0	0	0	0	0	0	200	903	0	0	0	0	0	0	0	603	903	0
218	2	0	0	0	0	0	0	200	300	0	0	0	0	0	0	0	200	903	0	0	0	0	0	0	0	603	903	0
218	3	0	0	0	0	0	0	200	300	0	0	0	0	0	0	0	200	903	0	0	0	0	0	0	0	603	903	0
218	4	0	0	0	0	0	0	200	300	0	0	0	0	0	0	0	200	903	0	0	0	0	0	0	0	603	903	0
218	5	0	0	0	0	0	0	200	300	0	0	0	0	0	0	0	200	903	0	0	0	0	0	0	0	603	903	0
218	6	0	0	0	0	0	0	200	300	0	0	0	0	0	0	0	200	903	0	0	0	0	0	0	0	603	903	0
218	7	0	0	0	0	0	0	200	300	0	0	0	0	0	0	0	200	903	0	0	0	0	0	0	0	603	903	0
218	8	0	0	0	0	0	0	200	300	0	0	0	0	0	0	0	200	903	0	0	0	0	0	0	0	603	903	0
218	9	0	0	0	0	0	0	200	300	0	0	0	0	0	0	0	200	903	0	0	0	0	0	0	0	603	903	0
219	0	0	0	0	0	0	0	200	300	0	0	0	0	0	0	0	200	903	0	0	0	0	0	0	0	603	903	0
219	1	0	0	0	0	0	0	200	300	0	0	0	0	0	0	0	200	903	0	0	0	0	0	0	0	603	903	0
219	2	0	0	0	0	0	0	200	300	0	0	0	0	0	0	0	200	903	0	0	0	0	0	0	0	603	903	0
219	3	0	0	0	0	0	0	200	300	0	0	0	0	0	0	0	200	903	0	0	0	0	0	0	0	603	903	0
219	4	0	0	0	0	0	0	200	300	0	0	0	0	0	0	0	200	903	0	0	0	0	0	0	0	603	903	0
219	5	0	0	0	0	0	0	200	300	0	0	0	0	0	0	0	200	903	0	0	0	0	0	0	0	603	903	0
219	6	0	0	0	0	0	0	200	300	0	0	0	0	0	0	0	200	903	0	0	0	0	0	0	0	603	903	0
219	7	0	0	0	0	0	0	200	300	0	0	0	0	0	0	0	200	903	0	0	0	0	0	0	0	603	903	0
219	8	0	0	0	0	0	0	200	300	0	0	0	0	0	0	0	200	903	0	0	0	0	0	0	0	603	903	0
219	9	0	0	0	0	0	0	200	300	0	0	0	0	0	0	0	200	903	0	0	0	0	0	0	0	603	903	0
220	0	0	0	0	0	0	0	200	300	0	0	0	0	0	0	0	200	903	0	0	0	0	0	0	0	603	903	0
220	1	0	0	0	0	0	0	200	300	0	0	0	0	0	0	0	200	903	0	0	0	0	0	0	0	603	903	0
220	2	0	0	0	0	0	0	200	300	0	0	0	0	0	0	0	200	903	0	0	0	0	0	0	0	603	903	0
220	3	0	0	0	0	0	0	200	300	0	0	0	0	0	0	0	200	903	0	0	0	0	0	0	0	603	903	0
220	4	0	0	0	0	0	0	200	300	0	0	0	0	0	0	0	200	903	0	0	0	0	0	0	0	603	903	0
220	5	0	0	0	0	0	0	200	300	0	0	0	0	0	0	0	200	903	0	0	0	0	0	0	0	603	903	0
220	6	0	0	0	0	0	0	200	300	0	0	0	0	0	0	0	200	903	0	0	0	0	0	0	0	603	903	0
220	7	0	0	0	0	0	0	200	300	0	0	0	0	0	0	0	200	903	0	0	0	0	0	0	0	603	903	0
220	8	0	0	0	0	0	0	200	300	0	0	0	0	0	0	0	200	903	0	0	0	0	0	0	0	603	903	0
220	9	0	0	0	0	0	0	200	300	0	0	0	0	0	0	0	200	903	0	0	0	0	0	0	0	603	903	0
221	0	0	0	0	0	0	0	200	300	0	0	0	0	0	0	0	200	903	0	0	0	0	0	0	0	603	903	0
221	1	0	0	0	0	0	0	200	300	0	0	0	0	0	0	0	200	903	0	0	0	0	0	0	0	603	903	0
221	2	0	0	0	0	0	0	200	300	0	0	0	0	0	0	0	200	903	0	0	0	0	0	0	0	603	903	0
221	3	0	0	0	0	0	0	200	300	0	0	0	0	0	0	0	200	903	0	0	0	0	0	0	0	603	903	0
221	4	0	0	0	0	0	0	200	300	0	0	0	0	0	0	0	200	903	0	0	0	0	0	0	0	603	903	0
221	5	0	0	0	0	0	0	200	300	0	0	0	0	0	0	0	200	903	0	0	0	0	0	0	0	603	903	0
221	6	0	0	0	0	0	0	200	300	0	0	0	0	0	0	0	200	903	0	0	0	0	0	0	0	603	903	0
221	7	0	0	0	0	0	0	200	300	0	0	0	0	0	0	0	200	903	0	0	0	0	0	0	0	603	903	0
221	8	0	0	0	0	0	0	200	300	0	0	0	0	0	0	0	200	903	0	0	0	0	0	0	0	603	903	0
221	9	0	0	0	0	0	0	200	300	0	0	0	0	0	0	0	200	903	0	0	0	0	0	0	0	603	903	0
222	0	0	0	0	0	0	0	200	300	0	0	0	0	0	0	0	200	903	0	0	0	0	0	0	0	603	903	0
222	1	0	0	0	0	0	0	200	300	0	0	0	0	0	0	0	200	903	0	0	0	0	0	0	0	603	903	0
222	2	0	0	0	0	0	0	200	300	0	0	0	0	0	0	0	200	903	0	0	0	0	0	0	0	603	903	0
222	3	0	0	0	0	0	0	200	300	0	0	0	0	0	0	0	200	903	0	0	0	0	0	0	0	603	903	0
222	4	0	0	0	0	0	0	200	300	0	0	0	0	0	0	0	200	903	0	0	0	0	0	0	0	603	903	0
222	5	0	0	0	0	0	0	200	300	0	0	0	0	0	0	0	200	903	0	0	0	0	0	0	0	603	903	0
222	6	0	0	0	0	0	0	200	300	0	0	0	0	0	0	0	200	903	0	0	0	0	0	0	0	603	903	0
222	7	0	0	0	0	0	0	200	300	0	0	0	0	0	0	0	200	903	0	0	0	0	0	0	0	603	903	0
222	8	0	0	0	0	0	0	200	300	0	0	0	0	0	0	0	200	903	0	0	0	0	0	0	0	603	903	0
222	9	0	0	0	0	0	0	200	300	0	0	0	0	0	0	0	200	903	0	0	0	0	0	0	0	603	903	0
223	0	0	0	0	0	0	0	200	300	0	0	0	0	0	0	0	200	903	0	0	0	0	0	0	0	603	903	0
223	1	0	0	0	0	0	0	200	300	0	0	0	0	0	0	0	200	903	0	0	0	0	0	0	0	603	903	0
223	2	0	0	0	0	0	0	200	300	0	0	0	0	0	0	0	200	903	0	0	0	0	0	0	0	603	903	0
223	3	0	0	0	0	0	0	200	300	0	0	0	0	0	0	0	200	903	0	0	0	0	0	0	0	603	903	0
223	4	0	0	0	0	0	0	200	300	0	0	0	0	0	0	0	200	903	0	0	0	0	0	0	0	603	903	0
223	5	0	0	0	0	0	0	200	300	0	0	0	0	0	0	0	200	903	0	0	0	0	0	0	0	603	903	0
223	6	0	0	0	0	0	0	200	300	0	0	0	0	0	0	0	200	903	0	0	0	0	0	0	0	603	903	0
223	7	0	0	0	0	0	0	200	300	0	0	0	0	0	0	0	200	903	0	0	0	0	0	0	0	603	903	0
223	8	0	0	0	0	0	0	200	300	0	0	0	0	0	0	0	200	903	0	0	0	0	0	0	0	603	903	0
223	9	0	0	0	0	0	0	200	300	0	0	0	0	0	0	0	200	903	0	0	0	0	0	0	0	603	903	0
224	0	0	0	0	0	0	0	200	300	0	0	0	0	0	0	0	200	903	0	0	0	0	0	0	0	603	903	0
224	1	0	0	0	0	0	0	200	300	0	0	0	0	0	0	0	200	903	0	0	0	0	0	0	0	603	903	0
224	2	0	0	0	0	0	0	200	300	0	0	0	0	0	0	0	200	903	0	0	0	0	0	0	0	603	903	0
224	3	0	0	0	0	0	0	200	300	0	0	0	0	0	0	0	200	903	0	0	0	0	0	0	0	603	903	0
224	4	0	0	0	0	0	0	200	300	0	0	0	0	0	0	0	200	903	0	0	0	0	0	0	0	603	903	0
224	5	0	0	0	0	0	0	200	300	0	0	0	0	0	0	0	200	903	0	0	0	0	0	0	0	603	903	0
224	6	0	0	0	0	0	0	200	300	0	0	0	0	0	0	0	200	903	0	0	0	0	0	0	0	603	903	0
224	7	0	0	0	0	0	0	200	300	0	0	0	0	0	0	0	200	903	0	0	0	0	0	0	0	603	903	0
224	8	0	0	0	0	0	0	200	300	0	0	0	0	0	0	0	200	903	0	0	0	0	0	0	0	603	903	0
224	9	0	0	0	0	0	0	200	300	0	0	0	0	0	0	0	200	903	0	0	0	0	0	0	0	603	903	0
225	0	0	0	0	0	0	0	200	300	0	0	0	0	0	0	0	200	903	0	0	0	0	0	0	0	603	903	0
225	1	0	0	0	0	0	0	200	300	0	0	0	0	0	0	0	200	903	0	0	0	0	0	0	0	603	903	0
225	2	0	0	0	0	0	0	200	300	0	0	0	0	0	0	0	200	903	0	0	0	0	0	0	0	603	903	0
225	3	0	0	0	0	0	0	200	300	0	0	0	0	0	0	0	200	903	0	0	0	0	0	0	0	603	903	0
225	4	0	0	0	0	0	0	200	300	0	0	0	0	0	0	0	200	903	0	0	0	0	0	0	0	603	903	0
225	5	0	0	0	0	0	0	200	300	0	0	0	0	0	0	0	200	903	0	0	0	0	0	0	0	603	903	0
225	6	0	0	0	0	0	0	200	300	0	0	0	0	0	0	0	200	903	0	0	0	0	0	0	0	603	903	0
225	7	0	0	0	0	0	0	200	300	0	0	0	0	0	0	0	200	903	0	0	0	0	0	0	0	603	903	0
225	8	0	0	0	0	0	0	200	300	0	0	0	0	0	0	0	200	903	0	0	0	0	0	0	0	603	903	0
225	9	0	0	0	0	0	0	200	300	0	0	0	0	0	0	0	200	903	0	0	0	0	0	0	0	603	903	0
226	0	0	0	0	0	0	0	200	300	0	0	0	0	0	0	0	200	903	0	0	0	0	0	0	0	603	903	0
226	1	0	0	0	0	0	0	200	300	0	0	0	0	0	0	0	200	903	0	0	0	0	0	0	0	603	903	0
226	2	0	0	0	0	0	0	200	300	0	0	0	0	0	0	0	200	903	0	0	0	0	0	0	0	603	903	0
226	3	0	0	0	0	0	0	200	300	0	0	0	0	0	0	0	200	903	0	0	0	0	0	0	0	603	903	0
226	4	0	0	0	0	0	0	200	300	0	0	0	0	0	0	0	200	903	0	0	0	0	0	0	0	603	903	0
226	5	0	0	0	0	0	0	200	300	0	0	0	0	0	0	0	200	903	0	0	0	0	0	0	0	603	903	0
226	6	0	0	0	0	0	0	200	300	0	0	0	0	0	0	0	200	903	0	0	0	0	0	0	0	603	903	0
226	7	0	0	0	0	0	0	200	300	0	0	0	0	0	0	0	200	903	0	0	0	0	0	0	0	603	903	0
226	8	0	0	0	0	0	0	200	300	0	0	0	0	0	0	0	200	903	0	0	0	0	0	0	0	603	903	0
226	9	0	0	0	0	0	0	200	300	0	0	0	0	0	0	0	200	903	0	0	0	0	0	0	0	603	903	0
227	0	0	0	0	0	0	0	200	300	0	0	0	0	0	0	0	200	903	0	0	0	0	0	0	0	603	903	0
227	1	0	0	0	0	0	0	200	300	0	0	0	0	0	0	0	200	903	0	0	0	0	0	0	0	603	903	0
227	2	0	0	0	0	0	0	200	300	0	0	0	0	0	0	0	200	903	0	0	0	0	0	0	0	603	903	0
227	3	0	0	0	0	0	0	200	300	0	0	0	0	0	0	0	200	903	0	0	0	0	0	0	0	603	903	0
227	4	0	0	0	0	0	0	200	300	0	0	0	0	0	0	0	200	903	0	0	0	0	0	0	0	603	903	0
227	5	0	0	0	0	0	0	200	300	0	0	0	0	0	0	0	200	903	0	0	0	0	0	0	0	603	903	0
227	6	0	0	0	0	0	0	200	300	0	0	0	0	0	0	0	200	903	0	0	0	0	0	0	0	603	903	0
227	7	0	0	0	0	0	0	200	300	0	0	0	0	0	0	0	200	903	0	0	0	0	0	0	0	603	903	0
227	8	0	0	0	0	0	0	200	300	0	0	0	0	0	0	0	200	903	0	0	0	0	0	0	0	603	903	0
227	9	0	0	0	0	0	0	200	300	0	0	0	0	0	0	0	200	903	0	0	0	0	0	0	0	603	903	0
228	0	0	0	0	0	0	0	200	300	0	0	0	0	0	0	0	200	903	0	0	0	0	0	0	0	603	903	0
228	1	0	0	0	0	0	0	200	300	0	0	0	0	0	0	0	200	903	0	0	0	0	0	0	0	603	903	0
228	2	0	0	0	0	0	0	200	300	0	0	0	0	0	0	0	200	903	0	0	0	0	0	0	0	603	903	0
228	3	0	0	0	0	0	0	200	300	0	0	0	0	0	0	0	200	903	0	0	0	0	0	0	0	603	903	0
228	4	0	0	0	0	0	0	200	300	0	0	0	0	0	0	0	200	903	0	0	0	0	0	0	0	603	903	0
228	5	0	0	0	0	0	0	200	300	0	0	0	0	0	0	0	200	903	0	0	0	0	0	0	0	603	903	0
228	6	0	0	0	0	0	0	200	300	0	0	0	0	0	0	0	200	903	0	0	0	0	0	0	0	603	903	0
228	7	0	0	0	0	0	0	200	300	0	0	0	0	0	0	0	200	903	0	0	0	0	0	0	0	603	903	0
228	8	0	0	0	0	0	0	200	300	0	0	0	0	0	0	0	200	903	0	0	0	0	0	0	0	603	903	0
228	9	0	0	0	0	0	0	200	300	0	0	0	0	0	0	0	200	903	0	0	0	0	0	0	0	603	903	0
229	0	0	0	0	0	0	0	200	300	0	0	0	0	0	0	0	200	903	0	0	0	0	0	0	0	603	903	0
229	1	0	0	0	0	0	0	200	300	0	0	0	0	0	0	0	200	903	0	0	0	0	0	0	0	603	903	0
229	2	0	0	0	0	0	0	200	300	0	0	0	0	0	0	0	200	903	0	0	0	0	0	0	0	603	903	0
229	3	0	0	0	0	0	0	200	300	0	0	0	0	0	0	0	200	903	0	0	0	0	0	0	0	603	903	0
229	4	0	0	0	0	0	0	200	300	0	0	0	0	0	0	0	200	903	0	0	0	0	0	0	0	603	903	0
229	5	0	0	0	0	0	0	200	300	0	0	0	0	0	0	0	200	903	0	0	0	0	0	0	0	603	903	0
229	6	0	0	0	0	0	0	200	300	0	0	0	0	0	0	0	200	903	0	0	0	0	0	0	0	603	903	0
229	7	0	0	0	0	0	0	200	300	0	0	0	0	0	0	0	200	903	0	0	0	0	0	0	0	603	903	0
229	8	0	0	0	0	0	0	200	300	0	0	0	0	0	0	0	200	903	0	0	0	0	0	0	0	603	903	0
229	9	0	0	0	0	0	0	200	300	0	0	0	0	0	0	0	200	903	0	0	0	0	0	0	0	603	903	0
230	0	0	0	0	0	0	0	200	300	0	0	0	0	0	0	0	200	903	0	0	0	0	0	0	0	603	903	0
230	1	0	0	0	0	0	0	200	300	0	0	0	0	0	0	0	200	903	0	0	0	0	0	0	0	603	903	0
230	2	0	0	0	0	0	0	200	300	0	0	0	0	0	0	0	200	903	0	0	0	0	0	0	0	603	903	0
230	3	0	0	0	0	0	0	200	300	0	0	0	0	0	0	0	200	903	0	0	0	0	0	0	0	603	903	0
230	4	0	0	0	0	0	0	200	300	0	0	0	0	0	0	0	200	903	0	0	0	0	0	0	0	603	903	0
230	5	0	0	0	0	0	0	200	300	0	0	0	0	0	0	0	200	903	0	0	0	0	0	0	0	603	903	0
230	6	0	0	0	0	0	0	200	300	0	0	0	0	0	0	0	200	903	0	0	0	0	0	0	0	603	903	0
230	7	0	0	0	0	0	0	200	300	0	0	0	0	0	0	0	200	903	0	0	0	0	0	0	0	603	903	0
230	8	0	0	0	0	0	0	200	300	0	0	0	0	0	0	0	200	903	0	0	0	0	0	0	0	603	903	0
230	9	0	0	0	0	0	0	200	300	0	0	0	0	0	0	0	200	903	0	0	0	0	0	0	0	603	903	0
231	0	0	0	0	0	0	0	200	300	0	0	0	0	0	0	0	200	903	0	0	0	0	0	0	0	603	903	0
231	1	0	0	0	0	0	0	200	300	0	0	0	0	0	0	0	200	903	0	0	0	0	0	0	0	603	903	0
231	2	0	0	0	0	0	0	200	300	0	0	0	0	0	0	0	200	903	0	0	0	0	0	0	0	603	903	0
231	3	0	0	0	0	0	0	200	300	0	0	0	0	0	0	0	200	903	0	0	0	0	0	0	0	603	903	0
231	4	0	0	0	0	0	0	200	300	0	0	0	0	0	0	0	200	903	0	0	0	0	0	0	0	603	903	0
231	5	0	0	0	0	0	0	200	300	0	0	0	0	0	0	0	200	903	0	0	0	0	0	0	0	603	903	0
231	6	0	0	0	0	0	0	200	300	0	0	0	0	0	0	0	200	903	0	0	0	0	0	0	0	603	903	0
231	7	0	0	0	0	0	0	200	300	0	0	0	0	0	0	0	200	903	0	0	0	0	0	0	0	603	903	0
231	8	0	0	0	0	0	0	200	300	0	0	0	0	0	0	0	200	903	0	0	0	0	0	0	0	603	903	0
231	9	0	0	0	0	0	0	200	300	0	0	0	0	0	0	0	200	903	0	0	0	0	0	0	0	603	903	0
232	0	0	0	0	0	0	0	200	300	0	0	0	0	0	0	0	200	903	0	0	0	0	0	0	0	603	903	0
232	1	0	0	0	0	0	0	200	300	0	0	0	0	0	0	0	200	903	0	0	0	0	0	0	0	603	903	0
232	2	0	0	0	0	0	0	200	300	0	0	0	0	0	0	0	200	903	0	0	0	0	0	0	0	603	903	0
232	3	0	0	0	0	0	0	200	300	0	0	0	0	0	0	0	200	903	0	0	0	0	0	0	0	603	903	0
232	4	0	0	0	0	0	0	200	300	0	0	0	0	0	0	0	200	903	0	0	0	0	0	0	0	603	903	0
232	5	0	0	0	0	0	0	200	300	0	0	0	0	0	0	0	200	903	0	0	0	0	0	0	0	603	903	0
232	6	0	0	0	0	0	0	200	300	0	0	0	0	0	0	0	200	903	0	0	0	0	0	0	0	603	903	0
232	7	0	0	0	0	0	0	200	300	0	0	0	0	0	0	0	200	903	0	0	0	0	0	0	0	603	903	0
232	8	0	0	0	0	0	0	200	300	0	0	0	0	0	0	0	200	903	0	0	0	0	0	0	0	603	903	0
232	9	0	0	0	0	0	0	200	300	0	0	0	0	0	0	0	200	903	0	0	0	0	0	0	0	603	903	0
233	0	0	0	0	0	0	0	200	300	0	0	0	0	0	0	0	200	903	0	0	0	0	0	0	0	603	903	0
233	1	0	0	0	0	0	0	200	300	0	0	0	0	0	0	0	200	903	0	0	0	0	0	0	0	603	903	0
233	2	0	0	0	0	0	0	200	300	0	0	0	0	0	0	0	200	903	0	0	0	0	0	0	0	603	903	0
233	3	0	0	0	0	0	0	200	300	0	0	0	0	0	0	0	200	903	0	0	0	0	0	0	0	603	903	0
233	4	0	0	0	0	0	0	200	300	0	0	0	0	0	0	0	200	903	0	0	0	0	0	0	0	603	903	0
233	5	0	0	0	0	0	0	200	300	0	0	0	0	0	0	0	200	903	0	0	0	0	0	0	0	603	903	0
233	6	0	0	0	0	0	0	200	300	0	0	0	0	0	0	0	200	903	0	0	0	0	0	0	0	603	903	0
233	7	0	0	0	0	0	0	200	300	0	0	0	0	0	0	0	200	903	0	0	0	0	0	0	0	603	903	0
233	8	0	0	0	0	0	0	200	300	0	0	0	0	0	0	0	200	903	0	0	0	0	0	0	0	603	903	0
233	9	0	0	0	0	0	0	200	300	0	0	0	0	0	0	0	200	903	0	0	0	0	0	0	0	603	903	0
234	0	0	0	0	0	0	0	200	300	0	0	0	0	0	0	0	200	903	0	0	0	0	0	0	0	603	903	0
234	1	0	0	0	0	0	0	200	300	0	0	0	0	0	0	0	200	903	0	0	0	0	0	0	0	603	903	0
234	2	0	0	0	0	0	0	200	300	0	0	0	0	0	0	0	200	903	0	0	0	0	0	0	0	603	903	0
234	3	0	0	0	0	0	0	200	300	0	0	0	0	0	0	0	200	903	0	0	0	0	0	0	0	603	903	0
234	4	0	0	0	0	0	0	200	300	0	0	0	0	0	0	0	200	903	0	0	0	0	0	0	0	603	903	0
234	5	0	0	0	0	0	0	200	300	0	0	0	0	0	0	0	200	903	0	0	0	0	0	0	0	603	903	0
234	6	0	0	0	0	0	0	200	300	0	0	0	0	0	0	0	200	903	0	0	0	0	0	0	0	603	903	0
234	7	0	0	0	0	0	0	200	300	0	0	0	0	0	0	0	200	903	0	0	0	0	0	0	0	603	903	0
234	8	0	0	0	0	0	0	200	300	0	0	0	0	0	0	0	200	903	0	0	0	0	0	0	0	603	903	0
234	9	0	0	0	0	0	0	200	300	0	0	0	0	0	0	0	200	903	0	0	0	0	0	0	0	603	903	0
235	0	0	0	0	0	0	0	200	300	0	0	0	0	0	0	0	200	903	0	0	0	0	0	0	0	603	903	0
235	1	0	0	0	0	0	0	200	300	0	0	0	0	0	0	0	200	903	0	0	0	0	0	0	0	603	903	0
235	2	0	0	0	0	0	0	200	300	0	0	0	0	0	0	0	200	903	0	0	0	0	0	0	0	603	903	0
235	3	0	0	0	0	0	0	200	300	0	0	0	0	0	0	0	200	903	0	0	0	0	0	0	0	603	903	0
235	4	0	0	0	0	0	0	200	300	0	0	0	0	0	0	0	200	903	0	0	0	0	0	0	0	603	903	0
235	5	0	0	0	0	0	0	200	300	0	0	0	0	0	0	0	200	903	0	0	0	0	0	0	0	603	903	0
235	6	0	0	0	0	0	0	200	300	0	0	0	0	0	0	0	200	903	0	0	0	0	0	0	0	603	903	0
235	7	0	0	0	0	0	0	200	300	0	0	0	0	0	0	0	200	903	0	0	0	0	0	0	0	603	903	0
235	8	0	0	0	0	0	0	200	300	0	0	0	0	0	0	0	200	903	0	0	0	0	0	0	0	603	903	0
235	9	0	0	0	0	0	0	200	300	0	0	0	0	0	0	0	200	903	0	0	0	0	0	0	0	603	903	0
236	0	0	0	0	0	0	0	200	300	0	0	0	0	0	0	0	200	903	0	0	0	0	0	0	0	603	903	0
236	1	0	0	0	0	0	0	200	300	0	0	0	0	0	0	0	200	903	0	0	0	0	0	0	0	603	903	0
236	2	0	0	0	0	0	0	200	300	0	0	0	0	0	0	0	200	903	0	0	0	0	0	0	0	603	903	0
236	3	0	0	0	0	0	0	200	300	0	0	0	0	0	0	0	200	903	0	0	0	0	0	0	0	603	903	0
236	4	0	0	0	0	0	0	200	300	0	0	0	0	0	0	0	200	903	0	0	0	0	0	0	0	603	903	0
236	5	0	0	0	0	0	0	200	300	0	0	0	0	0	0	0	200	903	0	0	0	0	0	0	0	603	903	0
236	6	0	0	0	0	0	0	200	300	0	0	0	0	0	0	0	200	903	0	0	0	0	0	0	0	603	903	0
236	7	0	0	0	0	0	0	200	300	0	0	0	0	0	0	0	200	903	0	0	0	0	0	0	0	603	903	0
236	8	0	0	0	0	0	0	200	300	0	0	0	0	0	0	0	200	903	0	0	0	0	0	0	0	603	903	0
236	9	0	0	0	0	0	0	200	300	0	0	0	0	0	0	0	200	903	0	0	0	0	0	0	0	603	903	0
237	0	0	0	0	0	0	0	200	300	0	0	0	0	0	0	0	200	903	0	0	0	0	0	0	0	603	903	0
237	1	0	0	0	0	0	0	200	300	0	0	0	0	0	0	0	200	903	0	0	0	0	0	0	0	603	903	0
237	2	0	0	0	0	0	0	200	300	0	0	0	0	0	0	0	200	903	0	0	0	0	0	0	0	603	903	0
237	3	0	0	0	0	0	0	200	300	0	0	0	0	0	0	0	200	903	0	0	0	0	0	0	0	603	903	0
237	4	0	0	0	0	0	0	200	300	0	0	0	0	0	0	0	200	903	0	0	0	0	0	0	0	603	903	0
237	5	0	0	0	0	0	0	200	300	0	0	0	0	0	0	0	200	903	0	0	0	0	0	0	0	603	903	0
237	6	0	0	0	0	0	0	200	300	0	0	0	0	0	0	0	200	903	0	0	0	0	0	0	0	603	903	0
237	7	0	0	0	0	0	0	200	300	0	0	0	0	0	0	0	200	903	0	0	0	0	0	0	0	603	903	0
237	8	0	0	0	0	0	0	200	300	0	0	0	0	0	0	0	200	903	0	0	0	0	0	0	0	603	903	0
237	9	0	0	0	0	0	0	200	300	0	0	0	0	0	0	0	200	903	0	0	0	0	0	0	0	603	903	0
238	0	0	0	0	0	0	0	200	300	0	0	0	0	0	0	0	200	903	0	0	0	0	0	0	0	603	903	0
238	1	0	0	0	0	0	0	200	300	0	0	0	0	0	0	0	200	903	0	0	0	0	0	0	0	603	903	0
238	2	0	0	0	0	0	0	200	300	0	0	0	0	0	0	0	200	903	0	0	0	0	0	0	0	603	903	0
238	3	0	0	0	0	0	0	200	300	0	0	0	0	0	0	0	200	903	0	0	0	0	0	0	0	603	903	0
238	4	0	0	0	0	0	0	200	300	0	0	0	0	0	0	0	200	903	0	0	0	0	0	0	0	603	903	0
238	5	0	0	0	0	0	0	200	300	0	0	0	0	0	0	0	200	903	0	0	0	0	0	0	0	603	903	0
238	6	0	0	0	0	0	0	200	300	0	0	0	0	0	0	0	200	903	0	0	0	0	0	0	0	603	903	0
238	7	0	0	0	0	0	0	200	300	0	0	0	0	0	0	0	200	903	0	0	0	0	0	0	0	603	903	0
238	8	0	0	0	0	0	0	200	300	0	0	0	0	0	0	0	200	903	0	0	0	0	0	0	0	603	903	0
238	9	0	0	0	0	0	0	200	300	0	0	0	0	0	0	0	200	903	0	0	0	0	0	0	0	603	903	0
239	0	0	0	0	0	0	0	200	300	0	0	0	0	0	0	0	200	903	0	0	0	0	0	0	0	603	903	0
239	1	0	0	0	0	0	0	200	300	0	0	0	0	0	0	0	200	903	0	0	0	0	0	0	0	603	903	0
239	2	0	0	0	0	0	0	200	300	0	0	0	0	0	0	0	200	903	0	0	0	0	0	0	0	603	903	0
239	3	0	0	0	0	0	0	200	300	0	0	0	0	0	0	0	200	903	0	0	0	0	0	0	0	603	903	0
239	4	0	0	0	0	0	0	200	300	0	0	0	0	0	0	0	200	903	0	0	0	0	0	0	0	603	903	0
239	5	0	0	0	0	0	0	200	300	0	0	0	0	0	0	0	200	903	0	0	0	0	0	0	0	603	903	0
239	6	0	0	0	0	0	0	200	300	0	0	0	0	0	0	0	200	903	0	0	0	0	0	0	0	603	903	0
239	7	0	0	0	0	0	0	200	300	0	0	0	0	0	0	0	200	903	0	0	0	0	0	0	0	603	903	0
239	8	0	0	0	0	0	0	200	300	0	0	0	0	0	0	0	200	903	0	0	0	0	0	0	0	603	903	0
239	9	0	0	0	0	0	0	200	300	0	0	0	0	0	0	0	200	903	0	0	0	0	0	0	0	603	903	0
240	0	0	0	0	0	0	0	200	300	0	0	0	0	0	0	0	200	903	0	0	0	0	0	0	0	603	903	0
240	1	0	0	0	0	0	0	200	300	0	0	0	0	0	0	0	200	903	0	0	0	0	0	0	0	603	903	0
240	2	0	0	0	0	0	0	200	300	0	0	0	0	0	0	0	200	903	0	0	0	0	0	0	0	603	903	0
240	3	0	0	0	0	0	0	200	300	0	0	0	0	0	0	0	200	903	0	0	0	0	0	0	0	603	903	0
240	4	0	0	0	0	0	0	200	300	0	0	0	0	0	0	0	200	903	0	0	0	0	0	0	0	603	903	0
240	5	0	0	0	0	0	0	200	300	0	0	0	0	0	0	0	200	903	0	0	0	0	0	0	0	603	903	0
240	6	0	0	0	0	0	0	200	300	0	0	0	0	0	0	0	200	903	0	0	0	0	0	0	0	603	903	0
240	7	0	0	0	0	0	0	200	300	0	0	0	0	0	0	0	200	903	0	0	0	0	0	0	0	603	903	0
240	8	0	0	0	0	0	0	200	300	0	0	0	0	0	0	0	200	903	0	0	0	0	0	0	0	603	903	0
240	9	0	0	0	0	0	0	200	300	0	0	0	0	0	0	0	200	903	0	0	0	0	0	0	0	603	903	0
241	0	0	0	0	0	0	0	200	300	0	0	0	0	0	0	0	200	903	0	0	0	0	0	0	0	603	903	0
241	1	0	0	0	0	0	0	200	300	0	0	0	0	0	0	0	200	903	0	0	0	0	0	0	0	603	903	0
241	2	0	0	0	0	0	0	200	300	0	0	0	0	0	0	0	200	903	0	0	0	0	0	0	0	603	903	0
241	3	0	0	0	0	0	0	200	300	0	0	0	0	0	0	0	200	903	0	0	0	0	0	0	0	603	903	0
241	4	0	0	0	0	0	0	200	300	0	0	0	0	0	0	0	200	903	0	0	0	0	0	0	0	603	903	0
241	5	0	0	0	0	0	0	200	300	0	0	0	0	0	0	0	200	903	0	0	0	0	0	0	0	603	903	0
241	6	0	0	0	0	0	0	200	300	0	0	0	0	0	0	0	200	903	0	0	0	0	0	0	0	603	903	0
241	7	0	0	0	0	0	0	200	300	0	0	0	0	0	0	0	200	903	0	0	0	0	0	0	0	603	903	0
241	8	0	0	0	0	0	0	200	300	0	0	0	0	0	0	0	200	903	0	0	0	0	0	0	0	603	903	0
241	9	0	0	0	0	0	0	200	300	0	0	0	0	0	0	0	200	903	0	0	0	0	0	0	0	603	903	0
242	0	0	0	0	0	0	0	200	300	0	0	0	0	0	0	0	200	903	0	0	0	0	0	0	0	603	903	0
242	1	0	0	0	0	0	0	200	300	0	0	0	0	0	0	0	200	903	0	0	0	0	0	0	0	603	903	0
242	2	0	0	0	0	0	0	200	300	0	0	0	0	0	0	0	200	903	0	0	0	0	0	0	0	603	903	0
242	3	0	0	0	0	0	0	200	300	0	0	0	0	0	0	0	200	903	0	0	0	0	0	0	0	603	903	0
242	4	0	0	0	0	0	0	200	300	0	0	0	0	0	0	0	200	903	0	0	0	0	0	0	0	603	903	0
242	5	0	0	0	0	0	0	200	300	0	0	0	0	0	0	0	200	903	0	0	0	0	0	0	0	603	903	0
242	6	0	0	0	0	0	0	200	300	0	0	0	0	0	0	0	200	903	0	0	0	0	0	0	0	603	903	0
242	7	0	0	0	0	0	0	200	300	0	0	0	0	0	0	0	200	903	0	0	0	0	0	0	0	603	903	0
242	8	0	0	0	0	0	0	200	300	0	0	0	0	0	0	0	200	903	0	0	0	0	0	0	0	603	903	0
242	9	0	0	0	0	0	0	200	300	0	0	0	0	0	0	0	200	903	0	0	0	0	0	0	0	603	903	0
243	0	0	0	0	0	0	0	200	300	0	0	0	0	0	0	0	200	903	0	0	0	0	0	0	0	603	903	0
243	1	0	0	0	0	0	0	200	300	0	0	0	0	0	0	0	200	903	0	0	0	0	0	0	0	603	903	0
243	2	0	0	0	0	0	0	200	300	0	0	0	0	0	0	0	200	903	0	0	0	0	0	0	0	603	903	0
243	3	0	0	0	0	0	0	200	300	0	0	0	0	0	0	0	200	903	0	0	0	0	0	0	0	603	903	0
243	4	0	0	0	0	0	0	200	300	0	0	0	0	0	0	0	200	903	0	0	0	0	0	0	0	603	903	0
243	5	0	0	0	0	0	0	200	300	0	0	0	0	0	0	0	200	903	0	0	0	0	0	0	0	603	903	0
243	6	0	0	0	0	0	0	200	300	0	0	0	0	0	0	0	200	903	0	0	0	0	0	0	0	603	903	0
243	7	0	0	0	0	0	0	200	300	0	0	0	0	0	0	0	200	903	0	0	0	0	0	0	0	603	903	0
243	8	0	0	0	0	0	0	200	300	0	0	0	0	0	0	0	200	903	0	0	0	0	0	0	0	603	903	0
243	9	0	0	0	0	0	0	200	300	0	0	0	0	0	0	0	200	903	0	0	0	0	0	0	0	603	903	0
244	0	0	0	0	0	0	0	200	300	0	0	0	0	0	0	0	200	903	0	0	0	0	0	0	0	603	903	0
244	1	0	0	0	0	0	0	200	300	0	0	0	0	0	0	0	200	903	0	0	0	0	0	0	0	603	903	0
244	2	0	0	0	0	0	0	200	300	0	0	0	0	0	0	0	200	903	0	0	0	0	0	0	0	603	903	0
244	3	0	0	0	0	0	0	200	300	0	0	0	0	0	0	0	200	903	0	0	0	0	0	0	0	603	903	0
244	4	0	0	0	0	0	0	200	300	0	0	0	0	0	0	0	200	903	0	0	0	0	0	0	0	603	903	0
244	5	0	0	0	0	0	0	200	300	0	0	0	0	0	0	0	200	903	0	0	0	0	0	0	0	603	903	0
244	6	0	0	0	0	0	0	200	300	0	0	0	0	0	0	0	200	903	0	0	0	0	0	0	0	603	903	0
244	7	0	0	0	0	0	0	200	300	0	0	0	0	0	0	0	200	903	0	0	0	0	0	0	0	603	903	0
244	8	0	0	0	0	0	0	200	300	0	0	0	0	0	0	0	200	903	0	0	0	0	0	0	0	603	903	0
244	9	0	0	0	0	0	0	200	300	0	0	0	0	0	0	0	200	903	0	0	0	0	0	0	0	603	903	0
245	0	0	0	0	0	0	0	200	300	0	0	0	0	0	0	0	200	903	0	0	0	0	0	0	0	603	903	0
245	1	0	0	0	0	0	0	200	300	0	0	0	0	0	0	0	200	903	0	0	0	0	0	0	0	603	903	0
245	2	0	0	0	0	0	0	200	300	0	0	0	0	0	0	0	200	903	0	0	0	0	0	0	0	603	903	0
245	3	0	0	0	0	0	0	200	300	0	0	0	0	0	0	0	200	903	0	0	0	0	0	0	0	603	903	0
245	4	0	0	0	0	0	0	200	300	0	0	0	0	0	0	0	200	903	0	0	0	0	0	0	0	603	903	0
245	5	0	0	0	0	0	0	200	300	0	0	0	0	0	0	0	200	903	0	0	0	0	0	0	0	603	903	0
245	6	0	0	0	0	0	0	200	300	0	0	0	0	0	0	0	200	903	0	0	0	0	0	0	0	603	903	0
245	7	0	0	0	0	0	0	200	300	0	0	0	0	0	0	0	200	903	0	0	0	0	0	0	0	603	903	0
245	8	0	0	0	0	0	0	200	300	0	0	0	0	0	0	0	200	903	0	0	0	0	0	0	0	603	903	0
245	9	0	0	0	0	0	0	200	300	0	0	0	0	0	0	0	200	903	0	0	0	0	0	0	0	603	903	0
246	0	0	0	0	0	0	0	200	300	0	0	0	0	0	0	0	200	903	0	0	0	0	0	0	0	603	903	0
246	1	0	0	0	0	0	0	200	300	0	0	0	0	0	0	0	200	903	0	0	0	0	0	0	0	603	903	0
246	2	0	0	0	0	0	0	200	300	0	0	0	0	0	0	0	200	903	0	0	0	0	0	0	0	603	903	0
246	3	0	0	0	0	0	0	200	300	0	0	0	0	0	0	0	200	903	0	0	0	0	0	0	0	603	903	0
246	4	0	0	0	0	0	0	200	300	0	0	0	0	0	0	0	200	903	0	0	0	0	0	0	0	603	903	0
246	5	0	0	0	0	0	0	200	300	0	0	0	0	0	0	0	200	903	0	0	0	0	0	0	0	603	903	0
246	6	0	0	0	0	0	0	200	300	0	0	0	0	0	0	0	200	903	0	0	0	0	0	0	0	603	903	0
246	7	0	0	0	0	0	0	200	300	0	0	0	0	0	0	0	200	903	0	0	0	0	0	0	0	603	903	0
246	8	0	0	0	0	0	0	200	300	0	0	0	0	0	0	0	200	903	0	0	0	0	0	0	0	603	903	0
246	9	0	0	0	0	0	0	200	300	0	0	0	0	0	0	0	200	903	0	0	0	0	0	0	0	603	903	0
247	0	0	0	0	0	0	0	200	300	0	0	0	0	0	0	0	200	903	0	0	0	0	0	0	0	603	903	0
247	1	0	0	0	0	0	0	200	300	0	0	0	0	0	0	0	200	903	0	0	0	0	0	0	0	603	903	0
247	2	0	0	0	0	0	0	200	300	0	0	0	0	0	0	0	200	903	0	0	0	0	0	0	0	603	903	0
247	3	0	0	0	0	0	0	200	300	0	0	0	0	0	0	0	200	903	0	0	0	0	0	0	0	603	903	0
247	4	0	0	0	0	0	0	200	300	0	0	0	0	0	0	0	200	903	0	0	0	0	0	0	0	603	903	0
247	5	0	0	0	0	0	0	200	300	0	0	0	0	0	0	0	200	903	0	0	0	0	0	0	0	603	903	0
247	6	0	0	0	0	0	0	200	300	0	0	0	0	0	0	0	200	903	0	0	0	0	0	0	0	603	903	0
247	7	0	0	0	0	0	0	200	300	0	0	0	0	0	0	0	200	903	0	0	0	0	0	0	0	603	903	0
247	8	0	0	0	0	0	0	200	300	0	0	0	0	0	0	0	200	903	0	0	0	0	0	0	0	603	903	0
247	9	0	0	0	0	0	0	200	300	0	0	0	0	0	0	0	200	903	0	0	0	0	0	0	0	603	903	0
248	0	0	0	0	0	0	0	200	300	0	0	0	0	0	0	0	200	903	0	0	0	0	0	0	0	603	903	0
248	1	0	0	0	0	0	0	200	300	0	0	0	0	0	0	0	200	903	0	0	0	0	0	0	0	603	903	0
248	2	0	0	0	0	0	0	200	300	0	0	0	0	0	0	0	200	903	0	0	0	0	0	0	0	603	903	0
248	3	0	0	0	0	0	0	200	300	0	0	0	0	0	0	0	200	903	0	0	0	0	0	0	0	603	903	0
248	4	0	0	0	0	0	0	200	300	0	0	0	0	0	0	0	200	903	0	0	0	0	0	0	0	603	903	0
248	5	0	0	0	0	0	0	200	300	0	0	0	0	0	0	0	200	903	0	0	0	0	0	0	0	603	903	0
248	6	0	0	0	0	0	0	200	300	0	0	0	0	0	0	0	200	903	0	0	0	0	0	0	0	603	903	0
248	7	0	0	0	0	0	0	200	300	0	0	0	0	0	0	0	200	903	0	0	0	0	0	0	0	603	903	0
248	8	0	0	0	0	0	0	200	300	0	0	0	0	0	0	0	200	903	0	0	0	0	0	0	0	603	903	0
248	9	0	0	0	0	0	0	200	300	0	0	0	0	0	0	0	200	903	0	0	0	0	0	0	0	603	903	0
249	0	0	0	0	0	0	0	200	300	0	0	0	0	0	0	0	200	903	0	0	0	0	0	0	0	603	903	0
249	1	0	0	0	0	0	0	200	300	0	0	0	0	0	0	0	200	903	0	0	0	0	0	0	0	603	903	0
249	2	0	0	0	0	0	0	200	300	0	0	0	0	0	0	0	200	903	0	0	0	0	0	0	0	603	903	0
249	3	0	0	0	0	0	0	200	300	0	0	0	0	0	0	0	200	903	0	0	0	0	0	0	0	603	903	0
249	4	0	0	0	0	0	0	200	300	0	0	0	0	0	0	0	200	903	0	0	0	0	0	0	0	603	903	0
249	5	0	0	0	0	0	0	200	300	0	0	0	0	0	0	0	200	903	0	0	0	0	0	0	0	603	903	0
249	6	0	0	0	0	0	0	200	300	0	0	0	0	0	0	0	200	903	0	0	0	0	0	0	0	603	903	0
249	7	0	0	0	0	0	0	200	300	0	0	0	0	0	0	0	200	903	0	0	0	0	0	0	0	603	903	0
249	8	0	0	0	0	0	0	200	300	0	0	0	0	0	0	0	200	903	0	0	0	0	0	0	0	603	903	0
249	9	0	0	0	0	0	0	200	300	0	0	0	0	0	0	0	200	903	0	0	0	0	0	0	0	603	903	0
250	0	0	0	0	0	0	0	200	300	0	0	0	0	0	0	0	200	903	0	0	0	0	0	0	0	603	903	0
250	1	0	0	0	0	0	0	200	300	0	0	0	0	0	0	0	200	903	0	0	0	0	0	0	0	603	903	0
250	2	0	0	0	0	0	0	200	300	0	0	0	0	0	0	0	200	903	0	0	0	0	0	0	0	603	903	0
250	3	0	0	0	0	0	0	200	300	0	0	0	0	0	0	0	200	903	0	0	0	0	0	0	0	603	903	0
250	4	0	0	0	0	0	0	200	300	0	0	0	0	0	0	0	200	903	0	0	0	0	0	0	0	603	903	0
250	5	0	0	0	0	0	0	200	300	0	0	0	0	0	0	0	200	903	0	0	0	0	0	0	0	603	903	0
250	6	0	0	0	0	0	0	200	300	0	0	0	0	0	0	0	200	903	0	0	0	0	0	0	0	603	903	0
250	7	0	0	0	0	0	0	200	300	0	0	0	0	0	0	0	200	903	0	0	0	0	0	0	0	603	903	0
250	8	0	0	0	0	0	0	200	300	0	0	0	0	0	0	0	200	903	0	0	0	0	0	0	0	603	903	0
250	9	0	0	0	0	0	0	200	300	0	0	0	0	0	0	0	200	903	0	0	0	0	0	0	0	603	903	0
251	0	0	0	0	0	0	0	200	300	0	0	0	0	0	0	0	200	903	0	0	0	0	0	0	0	603	903	0
251	1	0	0	0	0	0	0	200	300	0	0	0	0	0	0	0	200	903	0	0	0	0	0	0	0	603	903	0
251	2	0	0	0	0	0	0	200	300	0	0	0	0	0	0	0	200	903	0	0	0	0	0	0	0	603	903	0
251	3	0	0	0	0	0	0	200	300	0	0	0	0	0	0	0	200	903	0	0	0	0	0	0	0	603	903	0
251	4	0	0	0	0	0	0	200	300	0	0	0	0	0	0	0	200	903	0	0	0	0	0	0	0	603	903	0
251	5	0	0	0	0	0	0	200	300	0	0	0	0	0	0	0	200	903	0	0	0	0	0	0	0	603	903	0
251	6	0	0	0	0	0	0	200	300	0	0	0	0	0	0	0	200	903	0	0	0	0	0	0	0	603	903	0
251	7	0	0	0	0	0	0	200	300	0	0	0	0	0	0	0	200	903	0	0	0	0	0	0	0	603	903	0
251	8	0	0	0	0	0	0	200	300	0	0	0	0	0	0	0	200	903	0	0	0	0	0	0	0	603	903	0
251	9	0	0	0	0	0	0	200	300	0	0	0	0	0	0	0	200	903	0	0	0	0	0	0	0	603	903	0
252	0	0	0	0	0	0	0	200	300	0	0	0	0	0	0	0	200	903	0	0	0	0	0	0	0	603	903	0
252	1	0	0	0	0	0	0	200	300	0	0	0	0	0	0	0	200	903	0	0	0	0	0	0	0	603	903	0
252	2	0	0	0	0	0	0	200	300	0	0	0	0	0	0	0	200	903	0	0	0	0	0	0	0	603	903	0
252	3	0	0	0	0	0	0	200	300	0	0	0	0	0	0	0	200	903	0	0	0	0	0	0	0	603	903	0
252	4	0	0	0	0	0	0	200	300	0	0	0	0	0	0	0	200	903	0	0	0	0	0	0	0	603	903	0
252	5	0	0	0	0	0	0	200	300	0	0	0	0	0	0	0	200	903	0	0	0	0	0	0	0	603	903	0
252	6	0	0	0	0	0	0	200	300	0	0	0	0	0	0	0	200	903	0	0	0	0	0	0	0	603	903	0
252	7	0	0	0	0	0	0	200	300	0	0	0	0	0	0	0	200	903	0	0	0	0	0	0	0	603	903	0
252	8	0	0	0	0	0	0	200	300	0	0	0	0	0	0	0	200	903	0	0	0	0	0	0	0	603	903	0
252	9	0	0	0	0	0	0	200	300	0	0	0	0	0	0	0	200	903	0	0	0	0	0	0	0	603	903	0
253	0	0	0	0	0	0	0	200	300	0	0	0	0	0	0	0	200	903	0	0	0	0	0	0	0	603	903	0
253	1	0	0	0	0	0	0	200	300	0	0	0	0	0	0	0	200	903	0	0	0	0	0	0	0	603	903	0
253	2	0	0	0	0	0	0	200	300	0	0	0	0	0	0	0	200	903	0	0	0	0	0	0	0	603	903	0
253	3	0	0	0	0	0	0	200	300	0	0	0	0	0	0	0	200	903	0	0	0	0	0	0	0	603	903	0
253	4	0	0	0	0	0	0	200	300	0	0	0	0	0	0	0	200	903	0	0	0	0	0	0	0	603	903	0
253	5	0	0	0	0	0	0	200	300	0	0	0	0	0	0	0	200	903	0	0	0	0	0	0	0	603	903	0
253	6	0	0	0	0	0	0	200	300	0	0	0	0	0	0	0	200	903	0	0	0	0	0	0	0	603	903	0
253	7	0	0	0	0	0	0	200	300	0	0	0	0	0	0	0	200	903	0	0	0	0	0	0	0	603	903	0
253	8	0	0	0	0	0	0	200	300	0	0	0	0	0	0	0	200	903	0	0	0	0	0	0	0	603	903	0
253	9	0	0	0	0	0	0	200	300	0	0	0	0	0	0	0	200	903	0	0	0	0	0	0	0	603	903	0
254	0	0	0	0	0	0	0	200	300	0	0	0	0	0	0	0	200	903	0	0	0	0	0	0	0	603	903	0
254	1	0	0	0	0	0	0	200	300	0	0	0	0	0	0	0	200	903	0	0	0	0	0	0	0	603	903	0
254	2	0	0	0	0	0	0	200	300	0	0	0	0	0	0	0	200	903	0	0	0	0	0	0	0	603	903	0
254	3	0	0	0	0	0	0	200	300	0	0	0	0	0	0	0	200	903	0	0	0	0	0	0	0	603	903	0
254	4	0	0	0	0	0	0	200	300	0	0	0	0	0	0	0	200	903	0	0	0	0	0	0	0	603	903	0
254	5	0	0	0	0	0	0	200	300	0	0	0	0	0	0	0	200	903	0	0	0	0	0	0	0	603	903	0
254	6	0	0	0	0	0	0	200	300	0	0	0	0	0	0	0	200	903	0	0	0	0	0	0	0	603	903	0
254	7	0	0	0	0	0	0	200	300	0	0	0	0	0	0	0	200	903	0	0	0	0	0	0	0	603	903	0
254	8	0	0	0	0	0	0	200	300	0	0	0	0	0	0	0	200	903	0	0	0	0	0	0	0	603	903	0
254	9	0	0	0	0	0	0	200	300	0	0	0	0	0	0	0	200	903	0	0	0	0	0	0	0	603	903	0
255	0	0	0	0	0	0	0	200	300	0	0	0	0	0	0	0	200	903	0	0	0	0	0	0	0	603	903	0
255	1	0	0	0	0	0	0	200	300	0	0	0	0	0	0	0	200	903	0	0	0	0	0	0	0	603	903	0
255	2	0	0	0	0	0	0	200	300	0	0	0	0	0	0	0	200	903	0	0	0	0	0	0	0	603	903	0
255	3	0	0	0	0	0	0	200	300	0	0	0	0	0	0	0	200	903	0	0	0	0	0	0	0	603	903	0
255	4	0	0	0	0	0	0	200	300	0	0	0	0	0	0	0	200	903	0	0	0	0	0	0	0	603	903	0
255	5	0	0	0	0	0	0	200	300	0	0	0	0	0	0	0	200	903	0	0	0	0	0	0	0	603	903	0
255	6	0	0	0	0	0	0	200	300	0	0	0	0	0	0	0	200	903	0	0	0	0	0	0	0	603	903	0
255	7	0	0	0	0	0	0	200	300	0	0	0	0	0	0	0	200	903	0	0	0	0	0	0	0	603	903	0
255	8	0	0	0	0	0	0	200	300	0	0	0	0	0	0	0	200	903	0	0	0	0	0	0	0	603	903	0
255	9	0	0	0	0	0	0	200	300	0	0	0	0	0	0	0	200	903	0	0	0	0	0	0	0	603	903	0
256	0	0	0	0	0	0	0	200	300	0	0	0	0	0	0	0	200	903	0	0	0	0	0	0	0	603	903	0
256	1	0	0	0	0	0	0	200	300	0	0	0	0	0	0	0	200	903	0	0	0	0	0	0	0	603	903	0
256	2	0	0	0	0	0	0	200	300	0	0	0	0	0	0	0	200	903	0	0	0	0	0	0	0	603	903	0
256	3	0	0	0	0	0	0	200	300	0	0	0	0	0	0	0	200	903	0	0	0	0	0	0	0	603	903	0
256	4	0	0	0	0	0	0	200	300	0	0	0	0	0	0	0	200	903	0	0	0	0	0	0	0	603	903	0
256	5	0	0	0	0	0	0	200	300	0	0	0	0	0	0	0	200	903	0	0	0	0	0	0	0	603	903	0
256	6	0	0	0	0	0	0	200	300	0	0	0	0	0	0	0	200	903	0	0	0	0	0	0	0	603	903	0
256	7	0	0	0	0	0	0	200	300	0	0	0	0	0	0	0	200	903	0	0	0	0	0	0	0	603	903	0
256	8	0	0	0	0	0	0	200	300	0	0	0	0	0	0	0	200	903	0	0	0	0	0	0	0	603	903	0
256	9	0	0	0	0	0	0	200	300	0	0	0	0	0	0	0	200	903	0	0	0	0	0	0	0	603	903	0
257	0	0	0	0	0	0	0	200	300	0	0	0	0	0	0	0	200	903	0	0	0	0	0	0	0	603	903	0
257	1	0	0	0	0	0	0	200	300	0	0	0	0	0	0	0	200	903	0	0	0	0	0	0	0	603	903	0
257	2	0	0	0	0	0	0	200	300	0	0	0	0	0	0	0	200	903	0	0	0	0	0	0	0	603	903	0
257	3	0	0	0	0	0	0	200	300	0	0	0	0	0	0	0	200	903	0	0	0	0	0	0	0	603	903	0
257	4	0	0	0	0	0	0	200	300	0	0	0	0	0	0	0	200	903	0	0	0	0	0	0	0	603	903	0
257	5	0	0	0	0	0	0	200	300	0	0	0	0	0	0	0	200	903	0	0	0	0	0	0	0	603	903	0
257	6	0	0	0	0	0	0	200	300	0	0	0	0	0	0	0	200	903	0	0	0	0	0	0	0	603	903	0
257	7	0	0	0	0	0	0	200	300	0	0	0	0	0	0	0	200	903	0	0	0	0	0	0	0	603	903	0
257	8	0	0	0	0	0	0	200	300	0	0	0	0	0	0	0	200	903	0	0	0	0	0	0	0	603	903	0
257	9	0	0	0	0	0	0	200	300	0	0	0	0	0	0	0	200	903	0	0	0	0	0	0	0	603	903	0
258	0	0	0	0	0	0	0	200	300	0	0	0	0	0	0	0	200	903	0	0	0	0	0	0	0	603	903	0
258	1	0	0	0	0	0	0	200	300	0	0	0	0	0	0	0	200	903	0	0	0	0	0	0	0	603	903	0
258	2	0	0	0	0	0	0	200	300	0	0	0	0	0	0	0	200	903	0	0	0	0	0	0	0	603	903	0
258	3	0	0	0	0	0	0	200	300	0	0	0	0	0	0	0	200	903	0	0	0	0	0	0	0	603	903	0
258	4	0	0	0	0	0	0	200	300	0	0	0	0	0	0	0	200	903	0	0	0	0	0	0	0	603	903	0
258	5	0	0	0	0	0	0	200	300	0	0	0	0	0	0	0	200	903	0	0	0	0	0	0	0	603	903	0
258	6	0	0	0	0	0	0	200	300	0	0	0	0	0	0	0	200	903	0	0	0	0	0	0	0	603	903	0
258	7	0	0	0	0	0	0	200	300	0	0	0	0	0	0	0	200	903	0	0	0	0	0	0	0	603	903	0
258	8	0	0	0	0	0	0	200	300	0	0	0	0	0	0	0	200	903	0	0	0	0	0	0	0	603	903	0
258	9	0	0	0	0	0	0	200	300	0	0	0	0	0	0	0	200	903	0	0	0	0	0	0	0	603	903	0
259	0	0	0	0	0	0	0	200	300	0	0	0	0	0	0	0	200	903	0	0	0	0	0	0	0	603	903	0
259	1	0	0	0	0	0	0	200	300	0	0	0	0	0	0	0	200	903	0	0	0	0	0	0	0	603	903	0
259	2	0	0	0	0	0	0	200	300	0	0	0	0	0	0	0	200	903	0	0	0	0	0	0	0	603	903	0
259	3	0	0	0	0	0	0	200	300	0	0	0	0	0	0	0	200	903	0	0	0	0	0	0	0	603	903	0
259	4	0	0	0	0	0	0	200	300	0	0	0	0	0	0	0	200	903	0	0	0	0	0	0	0	603	903	0
259	5	0	0	0	0	0	0	200	300	0	0	0	0	0	0	0	200	903	0	0	0	0	0	0	0	603	903	0
259	6	0	0	0	0	0	0	200	300	0	0	0	0	0	0	0	200	903	0	0	0	0	0	0	0	603	903	0
259	7	0	0	0	0	0	0	200	300	0	0	0	0	0	0	0	200	903	0	0	0	0	0	0	0	603	903	0
259	8	0	0	0	0	0	0	200	300	0	0	0	0	0	0	0	200	903	0	0	0	0	0	0	0	603	903	0
259	9	0	0	0	0	0	0	200	300	0	0	0	0	0	0	0	200	903	0	0	0	0	0	0	0	603	903	0
260	0	0	0	0	0	0	0	200	300	0	0	0	0	0	0	0	200	903	0	0	0	0	0	0	0	603	903	0
260	1	0	0	0	0	0	0	200	300	0	0	0	0	0	0	0	200	903	0	0	0	0	0	0	0	603	903	0
260	2	0	0	0	0	0	0	200	300	0	0	0	0	0	0	0	200	903	0	0	0	0	0	0	0	603	903	0
260	3	0	0	0	0	0	0	200	300	0	0	0	0	0	0	0	200	903	0	0	0	0	0	0	0	603	903	0
260	4	0	0	0	0	0	0	200	300	0	0	0	0	0	0	0	200	903	0	0	0	0	0	0	0	603	903	0
260	5	0	0	0	0	0	0	200	300	0	0	0	0	0	0	0	200	903	0	0	0	0	0	0	0	603	903	0
260	6	0	0	0	0	0	0	200	300	0	0	0	0	0	0	0	200	903	0	0	0	0	0	0	0	603	903	0
260	7	0	0	0	0	0	0	200	300	0	0	0	0	0	0	0	200	903	0	0	0	0	0	0	0	603	903	0
260	8	0	0	0	0	0	0	200	300	0	0	0	0	0	0	0	200	903	0	0	0	0	0	0	0	603	903	0
260	9	0	0	0	0	0	0	200	300	0	0	0	0	0	0	0	200	903	0	0	0	0	0	0	0	603	903	0
261	0	0	0	0	0	0	0	200	300	0	0	0	0	0	0	0	200	903	0	0	0	0	0	0	0	603	903	0
261	1	0	0	0	0	0	0	200	300	0	0	0	0	0	0	0	200	903	0	0	0	0	0	0	0	603	903	0
261	2	0	0	0	0	0	0	200	300	0	0	0	0	0	0	0	200	903	0	0	0	0	0	0	0	603	903	0
261	3	0	0	0	0	0	0	200	300	0	0	0	0	0	0	0	200	903	0	0	0	0	0	0	0	603	903	0
261	4	0	0	0	0	0	0	200	300	0	0	0	0	0	0	0	200	903	0	0	0	0	0	0	0	603	903	0
261	5	0	0	0	0	0	0	200	300	0	0	0	0	0	0	0	200	903	0	0	0	0	0	0	0	603	903	0
261	6	0	0	0	0	0	0	200	300	0	0	0	0	0	0	0	200	903	0	0	0	0	0	0	0	603	903	0
261	7	0	0	0	0	0	0	200	300	0	0	0	0	0	0	0	200	903	0	0	0	0	0	0	0	603	903	0
261	8	0	0	0	0	0	0	200	300	0	0	0	0	0	0	0	200	903	0	0	0	0	0	0	0	603	903	0
261	9	0	0	0	0	0	0	200	300	0	0	0	0	0	0	0	200	903	0	0	0	0	0	0	0	603	903	0
262	0	0	0	0	0	0	0	200	300	0	0	0	0	0	0	0	200	903	0	0	0	0	0	0	0	603	903	0
262	1	0	0	0	0	0	0	200	300	0	0	0	0	0	0	0	200	903	0	0	0	0	0	0	0	603	903	0
262	2	0	0	0	0	0	0	200	300	0	0	0	0	0	0	0	200	903	0	0	0	0	0	0	0	603	903	0
262	3	0	0	0	0	0	0	200	300	0	0	0	0	0	0	0	200	903	0	0	0	0	0	0	0	603	903	0
262	4	0	0	0	0	0	0	200	300	0	0	0	0	0	0	0	200	903	0	0	0	0	0	0	0	603	903	0
262	5	0	0	0	0	0	0	200	300	0	0	0	0	0	0	0	200	903	0	0	0	0	0	0	0	603	903	0
262	6	0	0	0	0	0	0	200	300	0	0	0	0	0	0	0	200	903	0	0	0	0	0	0	0	603	903	0
262	7	0	0	0	0	0	0	200	300	0	0	0	0	0	0	0	200	903	0	0	0	0	0	0	0	603	903	0
262	8	0	0	0	0	0	0	200	300	0	0	0	0	0	0	0	200	903	0	0	0	0	0	0	0	603	903	0
262	9	0	0	0	0	0	0	200	300	0	0	0	0	0	0	0	200	903	0	0	0	0	0	0	0	603	903	0
263	0	0	0	0	0	0	0	200	300	0	0	0	0	0	0	0	200	903	0	0	0	0	0	0	0	603	903	0
263	1	0	0	0	0	0	0	200	300	0	0	0	0	0	0	0	200	903	0	0	0	0	0	0	0	603	903	0
263	2	0	0	0	0	0	0	200	300	0	0	0	0	0	0	0	200	903	0	0	0	0	0	0	0	603	903	0
263	3	0	0	0	0	0	0	200	300	0	0	0	0	0	0	0	200	903	0	0	0	0	0	0	0	603	903	0
263	4	0	0	0	0	0	0	200	300	0	0	0	0	0	0	0	200	903	0	0	0	0	0	0	0	603	903	0
263	5	0	0	0	0	0	0	200	300	0	0	0	0	0	0	0	200	903	0	0	0	0	0	0	0	603	903	0
263	6	0	0	0	0	0	0	200	300	0	0	0	0	0	0	0	200	903	0	0	0	0	0	0	0	603	903	0
263	7	0	0	0	0	0	0	200	300	0	0	0	0	0	0	0	200	903	0	0	0	0	0	0	0	603	903	0
263	8	0	0	0	0	0	0	200	300	0	0	0	0	0	0	0	200	903	0	0	0	0	0	0	0	603	903	0
263	9	0	0	0	0	0	0	200	300	0	0	0	0	0	0	0	200	903	0	0	0	0	0	0	0	603	903	0
264	0	0	0	0	0	0	0	200	300	0	0	0	0	0	0	0	200	903	0	0	0	0	0	0	0	603	903	0
264	1	0	0	0	0	0	0	200	300	0	0	0	0	0	0	0	200	903	0	0	0	0	0	0	0	603	903	0
264	2	0	0	0	0	0	0	200	300	0	0	0	0	0	0	0	200	903	0	0	0	0	0	0	0	603	903	0
264	3	0	0	0	0	0	0	200	300	0	0	0	0	0	0	0	200	903	0	0	0	0	0	0	0	603	903	0
264	4	0	0	0	0	0	0	200	300	0	0	0	0	0	0	0	200	903	0	0	0	0	0	0	0	603	903	0
264	5	0	0	0	0	0	0	200	300	0	0	0	0	0	0	0	200	903	0	0	0	0	0	0	0	603	903	0
264	6	0	0	0	0	0	0	200	300	0	0	0	0	0	0	0	200	903	0	0	0	0	0	0	0	603	903	0
264	7	0	0	0	0	0	0	200	300	0	0	0	0	0	0	0	200	903	0	0	0	0	0	0	0	603	903	0
264	8	0	0	0	0	0	0	200	300	0	-2.73255	-1.94122	-19.109	-7558.78	1984.25	757.324	303.839	1298.56	0	0	0	0	0	0	0	603	903	0
264	9	0	0	0	0	0	0	200	300	0	-3.03772	-1.63604	-32.8419	-11587.1	3693.23	1581.3	312.455	1255.82	0	0	0	0	0	0	0	603	903	0
265	0	0	0	0	0	0	0	200	300	0	-3.95325	-1.63604	-42.6075	-13875.9	3693.23	2405.27	286.68	1228.67	0	0	0	0	0	0	0	603	903	0
265	1	0	0	0	0	0	0	200	300	0	-10.8197	-6.82403	-56.3404	-18270.5	5402.21	2313.72	295.885	1227.29	0	0	0	0	0	0	0	603	903	0
265	2	0	0	0	0	0	0	200	300	0	-14.0241	-8.5025	-72.8199	-23031.2	7294.3	2405.27	300.169	1219.28	0	0	0	0	0	0	0	603	903	0
265	3	0	0	0	0	0	0	200	300	0	-7.46277	-6.82403	-84.7217	-27059.5	7965.69	3183.47	294.022	1222.39	0	0	0	0	0	0	0	603	903	0
265	4	0	0	0	0	0	0	200	300	0	-12.0404	-9.26544	-101.812	-31728.7	10285	3320.8	301.02	1214.64	0	0	0	0	0	0	0	603	903	0
265	5	0	0	0	0	0	0	200	300	0	-21.3483	-12.775	-115.239	-36306.4	11505.7	3687.01	299.842	1218.05	0	0	0	0	0	0	0	603	903	0
265	6	0	0	0	0	0	0	200	300	0	-21.0431	-12.4698	-130.803	-40975.5	12787.5	5334.96	297.761	1216.26	0	0	0	0	0	0	0	603	903	0
265	7	0	0	0	0	0	0	200	300	0	-20.8905	-13.0801	-147.283	-45644.7	15045.8	5060.3	302.156	1212.91	0	0	0	0	0	0	0	603	903	0
265	8	0	0	0	0	0	0	200	300	0	-24.0949	-16.2845	-164.983	-50588.6	17059.9	5884.28	303.404	1209.63	0	0	0	0	0	0	0	603	903	0
265	9	0	0	0	0	0	0	200	300	0	-29.2828	-21.0147	-177.8	-54891.5	17670.3	6387.82	299.383	1211.73	0	0	0	0	0	0	0	603	903	0
266	0	0	0	0	0	0	0	200	300	0	-33.4027	-24.5242	-196.111	-59286.1	19928.6	6479.37	301.619	1205.31	0	0	0	0	0	0	0	603	903	0
266	1	0	0	0	0	0	0	200	300	0	-32.945	-27.7286	-210.454	-63406	21942.8	6937.14	304.264	1204.28	0	0	0	0	0	0	0	603	903	0
266	2	0	0	0	0	0	0	200	300	0	-33.4027	-30.0174	-222.051	-66793.4	22553.1	7852.66	301.567	1203.8	0	0	0	0	0	0	0	603	903	0
266	3	0	0	0	0	0	0	200	300	0	-40.7269	-34.2899	-234.868	-71554.2	24140	7303.35	302.781	1207.66	0	0	0	0	0	0	0	603	903	0
266	4	0	0	0	0	0	0	200	300	0	-42.7106	-36.4261	-248.296	-75307.8	25604.9	7623.78	303.122	1206.3	0	0	0	0	0	0	0	603	903	0
266	5	0	0	0	0	0	0	200	300	0	-37.9804	-38.4097	-261.113	-77871.3	26276.2	8356.2	300.632	1201.23	0	0	0	0	0	0	0	603	903	0
266	6	0	0	0	0	0	0	200	300	0	-43.9313	-42.5296	-269.658	-81624.9	28229.4	7623.78	304.686	1205.7	0	0	0	0	0	0	0	603	903	0
266	7	0	0	0	0	0	0	200	300	0	-46.8304	-45.2762	-279.119	-83639.1	29205.9	7211.79	304.636	1202.65	0	0	0	0	0	0	0	603	903	0
266	8	0	0	0	0	0	0	200	300	0	-44.0839	-49.2435	-287.358	-86843.5	29938.4	7944.22	304.185	1205.21	0	0	0	0	0	0	0	603	903	0
266	9	0	0	0	0	0	0	200	300	0	-43.3209	-52.2952	-298.04	-89223.8	30976	6662.48	303.932	1202.37	0	0	0	0	0	0	0	603	903	0
267	0	0	0	0	0	0	0	200	300	0	-45.3046	-54.7366	-306.585	-92062	32013.6	6616.7	304.42	1203.28	0	0	0	0	0	0	0	603	903	0
267	1	0	0	0	0	0	0	200	300	0	-44.9994	-57.3306	-308.416	-94259.3	32807	6250.49	306.373	1208.62	0	0	0	0	0	0	0	603	903	0
267	2	0	0	0	0	0	0	200	300	0	-44.389	-60.9927	-321.843	-94625.5	33051.2	5472.29	302.693	1197.01	0	0	0	0	0	0	0	603	903	0
267	3	0	0	0	0	0	0	200	300	0	-42.558	-61.1453	-328.252	-96456.5	34332.9	5243.41	304.593	1196.85	0	0	0	0	0	0	0	603	903	0
267	4	0	0	0	0	0	0	200	300	0	-43.0158	-62.6712	-334.661	-98196	34760.1	5197.63	303.867	1196.42	0	0	0	0	0	0	0	603	903	0
267	5	0	0	0	0	0	0	200	300	0	-42.7106	-67.4014	-340.154	-101034	35187.4	3641.24	303.446	1200.02	0	0	0	0	0	0	0	603	903	0
267	6	0	0	0	0	0	0	200	300	0	-38.5907	-68.317	-345.952	-102133	36225	2817.26	304.711	1198.22	0	0	0	0	0	0	0	603	903	0
267	7	0	0	0	0	0	0	200	300	0	-32.7924	-68.317	-352.056	-104238	36896.4	2130.61	304.803	1199.09	0	0	0	0	0	0	0	603	903	0
267	8	0	0	0	0	0	0	200	300	0	-33.0975	-71.8265	-356.633	-105612	37140.5	757.324	304.142	1199.14	0	0	0	0	0	0	0	603	903	0
267	9	0	0	0	0	0	0	200	300	0	-33.5553	-71.5213	-359.99	-106344	37201.6	574.219	303.34	1198.41	0	0	0	0	0	0	0	603	903	0
268	0	0	0	0	0	0	0	200	300	0	-33.0975	-70.4532	-362.127	-106710	38544.3	986.206	306.439	1197.68	0	0	0	0	0	0	0	603	903	0
268	1	0	0	0	0	0	0	200	300	0	-30.8087	-71.6739	-367.009	-108267	38239.2	-112.427	304.191	1198	0	0	0	0	0	0	0	603	903	0
268	2	0	0	0	0	0	0	200	300	0	-31.1139	-72.8946	-371.282	-109274	38849.5	162.231	304.636	1197.32	0	0	0	0	0	0	0	603	903	0
268	3	0	0	0	0	0	0	200	300	0	-29.8932	-71.0635	-373.723	-110373	39704	-295.533	306.239	1198.33	0	0	0	0	0	0	0	603	903	0
268	4	0	0	0	0	0	0	200	300	0	-29.8932	-71.9791	-378.911	-110281	40253.3	-707.52	306.234	1194.05	0	0	0	0	0	0	0	603	903	0
268	5	0	0	0	0	0	0	200	300	0	-28.6725	-71.9791	-381.047	-111746	40619.5	-1211.06	306.6	1196.26	0	0	0	0	0	0	0	603	903	0
268	6	0	0	0	0	0	0	200	300	0	-28.5199	-71.6739	-385.32	-112295	41168.8	-1211.06	306.843	1194.43	0	0	0	0	0	0	0	603	903	0
268	7	0	0	0	0	0	0	200	300	0	-29.1303	-71.0635	-389.898	-114859	41901.3	-1668.82	307.467	1197.59	0	0	0	0	0	0	0	603	903	0
268	8	0	0	0	0	0	0	200	300	0	-27.6044	-72.2842	-396.001	-114218	42389.5	-1668.82	307.044	1191.43	0	0	0	0	0	0	0	603	903	0
268	9	0	0	0	0	0	0	200	300	0	-25.7733	-73.3524	-401.189	-117147	42572.6	-1806.15	306.116	1195	0	0	0	0	0	0	0	603	903	0
269	0	0	0	0	0	0	0	200	300	0	-25.7733	-73.1998	-406.987	-118338	44098.5	-2630.13	308.354	1193.76	0	0	0	0	0	0	0	603	903	0
269	1	0	0	0	0	0	0	200	300	0	-23.7897	-72.4368	-411.26	-119162	44037.5	-2859.01	307.079	1192.75	0	0	0	0	0	0	0	603	903	0
269	2	0	0	0	0	0	0	200	300	0	-22.2638	-73.8101	-415.837	-120352	44953	-2996.34	308.102	1192.42	0	0	0	0	0	0	0	603	903	0
269	3	0	0	0	0	0	0	200	300	0	-21.0431	-73.1998	-420.11	-121725	45624.4	-4003.42	308.601	1192.75	0	0	0	0	0	0	0	603	903	0
269	4	0	0	0	0	0	0	200	300	0	-18.9069	-75.1834	-424.993	-122274	46051.7	-3728.76	308.359	1190.71	0	0	0	0	0	0	0	603	903	0
269	5	0	0	0	0	0	0	200	300	0	-19.212	-75.336	-425.908	-123007	46295.8	-4140.75	308.699	1191.81	0	0	0	0	0	0	0	603	903	0
269	6	0	0	0	0	0	0	200	300	0	-18.4491	-76.5567	-428.96	-123098	47089.2	-4781.62	309.775	1189.97	0	0	0	0	0	0	0	603	903	0
269	7	0	0	0	0	0	0	200	300	0	-17.2284	-76.0989	-431.707	-124014	47150.3	-4873.17	309.218	1190.26	0	0	0	0	0	0	0	603	903	0
269	8	0	0	0	0	0	0	200	300	0	-17.381	-78.3878	-436.895	-123648	47516.5	-4873.17	308.76	1186.01	0	0	0	0	0	0	0	603	903	0
269	9	0	0	0	0	0	0	200	300	0	-15.5499	-79.1507	-433.843	-124289	48004.8	-5376.71	310.65	1189.48	0	0	0	0	0	0	0	603	903	0
270	0	0	0	0	0	0	0	200	300	0	-14.787	-80.0662	-435.674	-123831	48004.8	-5880.25	310.185	1187.23	0	0	0	0	0	0	0	603	903	0
270	1	0	0	0	0	0	0	200	300	0	-12.0404	-81.5921	-436.589	-124472	47699.6	-5788.7	309.255	1188.1	0	0	0	0	0	0	0	603	903	0
270	2	0	0	0	0	0	0	200	300	0	-11.8878	-81.8973	-433.232	-123648	48493.1	-6658.45	311.933	1188.41	0	0	0	0	0	0	0	603	903	0
270	3	0	0	0	0	0	0	200	300	0	-9.90418	-83.4232	-437.81	-124105	48187.9	-6704.23	310.066	1186.47	0	0	0	0	0	0	0	603	903	0
270	4	0	0	0	0	0	0	200	300	0	-11.2775	-84.949	-437.81	-123831	48004.8	-7024.66	309.647	1185.84	0	0	0	0	0	0	0	603	903	0
270	5	0	0	0	0	0	0	200	300	0	-9.44641	-86.6275	-435.979	-123465	48554.1	-7802.86	311.368	1186.19	0	0	0	0	0	0	0	603	903	0
270	6	0	0	0	0	0	0	200	300	0	-7.61536	-87.0853	-436.284	-123098	48676.2	-7528.2	311.57	1185.15	0	0	0	0	0	0	0	603	903	0
270	7	0	0	0	0	0	0	200	300	0	-7.31018	-88.6111	-438.115	-123373	48676.2	-8214.84	311.104	1184.6	0	0	0	0	0	0	0	603	903	0
270	8	0	0	0	0	0	0	200	300	0	-5.17395	-89.3741	-436.284	-123465	48920.3	-8901.49	312.129	1185.99	0	0	0	0	0	0	0	603	903	0
270	9	0	0	0	0	0	0	200	300	0	-3.95325	-89.9844	-435.674	-121817	48859.3	-8993.04	312.146	1182.6	0	0	0	0	0	0	0	603	903	0
271	0	0	0	0	0	0	0	200	300	0	-3.3429	-91.5103	-437.2	-122549	48493.1	-8626.83	310.917	1183.3	0	0	0	0	0	0	0	603	903	0
271	1	0	0	0	0	0	0	200	300	0	-3.49549	-92.5784	-436.284	-121450	49286.5	-9725.46	312.969	1181.37	0	0	0	0	0	0	0	603	903	0
271	2	0	0	0	0	0	0	200	300	0	-1.96961	-92.4258	-437.81	-122091	49286.5	-9954.35	312.575	1181.87	0	0	0	0	0	0	0	603	903	0
271	3	0	0	0	0	0	0	200	300	0	-1.05408	-94.1043	-435.369	-122458	49469.6	-10183.2	313.627	1184.27	0	0	0	0	0	0	0	603	903	0
271	4	0	0	0	0	0	0	200	300	0	-0.901492	-95.7828	-439.336	-122824	49530.7	-10732.5	312.74	1182.57	0	0	0	0	0	0	0	603	903	0
271	5	0	0	0	0	0	0	200	300	0	0.166623	-95.9354	-440.862	-123098	49469.6	-10320.6	312.211	1182.22	0	0	0	0	0	0	0	603	903	0
271	6	0	0	0	0	0	0	200	300	0	-0.443728	-96.088	-439.946	-122549	50018.9	-11236.1	313.693	1181.55	0	0	0	0	0	0	0	603	903	0
271	7	0	0	0	0	0	0	200	300	0	3.21838	-98.0716	-443.303	-123190	50568.3	-11739.6	314.071	1180.89	0	0	0	0	0	0	0	603	903	0
271	8	0	0	0	0	0	0	200	300	0	3.06579	-98.3768	-444.524	-123556	50812.4	-12014.3	314.307	1180.95	0	0	0	0	0	0	0	603	903	0
271	9	0	0	0	0	0	0	200	300	0	1.6925	-98.3768	-447.881	-123922	50873.4	-12014.3	313.587	1179.69	0	0	0	0	0	0	0	603	903	0
272	0	0	0	0	0	0	0	200	300	0	3.37097	-100.818	-450.017	-124289	51117.6	-12517.8	313.59	1179.19	0	0	0	0	0	0	0	603	903	0
272	1	0	0	0	0	0	0	200	300	0	4.43908	-100.818	-452.153	-124380	51972.1	-12838.3	314.943	1178.08	0	0	0	0	0	0	0	603	903	0
272	2	0	0	0	0	0	0	200	300	0	4.89685	-102.497	-455.51	-125753	51911	-12975.6	313.962	1179.07	0	0	0	0	0	0	0	603	903	0
272	3	0	0	0	0	0	0	200	300	0	6.7279	-103.565	-458.562	-125937	52704.5	-13250.2	314.934	1177.63	0	0	0	0	0	0	0	603	903	0
272	4	0	0	0	0	0	0	200	300	0	7.64343	-103.717	-460.088	-126303	52948.6	-13891.1	315.084	1177.52	0	0	0	0	0	0	0	603	903	0
272	5	0	0	0	0	0	0	200	300	0	7.03308	-103.412	-465.276	-127218	53803.1	-13753.8	315.637	1176.43	0	0	0	0	0	0	0	603	903	0
272	6	0	0	0	0	0	0	200	300	0	5.96496	-105.548	-467.412	-127401	53253.8	-14394.7	313.933	1175.57	0	0	0	0	0	0	0	603	903	0
272	7	0	0	0	0	0	0	200	300	0	7.64343	-106.464	-471.074	-128408	54657.6	-14532	316.028	1175.59	0	0	0	0	0	0	0	603	903	0
272	8	0	0	0	0	0	0	200	300	0	8.10119	-106.006	-475.347	-129232	54901.8	-14760.9	315.498	1174.87	0	0	0	0	0	0	0	603	903	0
272	9	0	0	0	0	0	0	200	300	0	8.40637	-107.532	-478.398	-130697	55206.9	-14852.4	315.399	1176.2	0	0	0	0	0	0	0	603	903	0
273	0	0	0	0	0	0	0	200	300	0	9.16931	-107.532	-481.145	-131247	56000.4	-15218.6	316.39	1175.78	0	0	0	0	0	0	0	603	903	0
273	1	0	0	0	0	0	0	200	300	0	8.55896	-108.448	-487.859	-131887	56488.7	-15127.1	315.789	1173.34	0	0	0	0	0	0	0	603	903	0
273	2	0	0	0	0	0	0	200	300	0	12.0685	-108.448	-492.742	-133169	57221.1	-15172.9	316.128	1173.26	0	0	0	0	0	0	0	603	903	0
273	3	0	0	0	0	0	0	200	300	0	8.55896	-108.448	-506.475	-136099	59235.2	-15722.2	316.956	1171.72	0	0	0	0	0	0	0	603	903	0
273	4	0	0	0	0	0	0	200	300	0	12.3737	-110.584	-519.902	-139028	61249.4	-16317.3	317.809	1170.41	0	0	0	0	0	0	0	603	903	0
273	5	0	0	0	0	0	0	200	300	0	19.3927	-115.314	-526.006	-138571	61737.7	-17599	317.371	1166.44	0	0	0	0	0	0	0	603	903	0
273	6	0	0	0	0	0	0	200	300	0	18.4772	-122.791	-529.363	-140219	62164.9	-18331.4	317.434	1167.88	0	0	0	0	0	0	0	603	903	0
273	7	0	0	0	0	0	0	200	300	0	14.2047	-121.723	-539.739	-141958	64484.3	-18606.1	319.473	1166.01	0	0	0	0	0	0	0	603	903	0
273	8	0	0	0	0	0	0	200	300	0	23.5126	-117.755	-549.504	-144522	64911.5	-19430.1	318.127	1166	0	0	0	0	0	0	0	603	903	0
273	9	0	0	0	0	0	0	200	300	0	28.548	-124.317	-552.251	-144430	66132.2	-19613.2	319.75	1164.53	0	0	0	0	0	0	0	603	903	0
274	0	0	0	0	0	0	0	200	300	0	20.9186	-130.268	-562.017	-147451	67169.8	-20757.6	319.516	1165.36	0	0	0	0	0	0	0	603	903	0
274	1	0	0	0	0	0	0	200	300	0	23.5126	-128.589	-572.393	-148459	67475	-20482.9	317.882	1162.36	0	0	0	0	0	0	0	603	903	0
274	2	0	0	0	0	0	0	200	300	0	29.9213	-129.2	-574.834	-149466	68512.6	-21032.2	319.187	1163.02	0	0	0	0	0	0	0	603	903	0
274	3	0	0	0	0	0	0	200	300	0	26.7169	-133.472	-581.243	-150473	69611.2	-21032.2	319.763	1161.88	0	0	0	0	0	0	0	603	903	0
274	4	0	0	0	0	0	0	200	300	0	23.0548	-131.641	-584.294	-152487	69489.1	-20849.1	318.928	1163.98	0	0	0	0	0	0	0	603	903	0
274	5	0	0	0	0	0	0	200	300	0	24.2755	-130.115	-589.788	-152487	70160.6	-20940.7	318.959	1161.55	0	0	0	0	0	0	0	603	903	0
274	6	0	0	0	0	0	0	200	300	0	27.6324	-131.641	-594.06	-153860	70587.8	-20803.3	318.823	1162	0	0	0	0	0	0	0	603	903	0
274	7	0	0	0	0	0	0	200	300	0	26.5643	-129.505	-595.891	-153769	71381.3	-20986.4	319.789	1161.05	0	0	0	0	0	0	0	603	903	0
274	8	0	0	0	0	0	0	200	300	0	23.8177	-125.995	-597.722	-155233	71442.2	-20803.3	319.524	1162.71	0	0	0	0	0	0	0	603	903	0
274	9	0	0	0	0	0	0	200	300	0	24.5807	-125.537	-604.741	-155783	72235.8	-20299.8	319.449	1160.6	0	0	0	0	0	0	0	603	903	0
275	0	0	0	0	0	0	0	200	300	0	27.6324	-124.317	-606.572	-155966	72235.8	-20116.7	319.088	1160.13	0	0	0	0	0	0	0	603	903	0
275	1	0	0	0	0	0	0	200	300	0	23.6652	-121.265	-606.267	-156881	73029.2	-19567.4	320.457	1161.77	0	0	0	0	0	0	0	603	903	0
275	2	0	0	0	0	0	0	200	300	0	21.6815	-117.908	-609.014	-157614	73517.4	-19567.4	320.716	1161.8	0	0	0	0	0	0	0	603	903	0
275	3	0	0	0	0	0	0	200	300	0	24.8859	-121.265	-616.948	-158346	73578.5	-19018.1	319.262	1159.66	0	0	0	0	0	0	0	603	903	0
275	4	0	0	0	0	0	0	200	300	0	23.6652	-119.434	-618.169	-158346	74188.9	-19475.8	320.014	1159.15	0	0	0	0	0	0	0	603	903	0
275	5	0	0	0	0	0	0	200	300	0	22.9022	-116.687	-621.831	-158804	74921.3	-19430.1	320.485	1158.38	0	0	0	0	0	0	0	603	903	0
275	6	0	0	0	0	0	0	200	300	0	22.7496	-118.976	-625.188	-160177	75165.4	-19430.1	320.229	1159.21	0	0	0	0	0	0	0	603	903	0
275	7	0	0	0	0	0	0	200	300	0	24.2755	-121.112	-630.071	-160543	75775.8	-19384.3	320.266	1157.8	0	0	0	0	0	0	0	603	903	0
275	8	0	0	0	0	0	0	200	300	0	25.0385	-118.976	-633.733	-161001	76752.4	-19933.6	321.112	1157.05	0	0	0	0	0	0	0	603	903	0
275	9	0	0	0	0	0	0	200	300	0	23.9703	-120.655	-634.343	-161184	77240.6	-20162.5	321.765	1157.1	0	0	0	0	0	0	0	603	903	0
276	0	0	0	0	0	0	0	200	300	0	25.4962	-124.317	-640.142	-162466	77423.7	-20437.1	320.948	1156.8	0	0	0	0	0	0	0	603	903	0
276	1	0	0	0	0	0	0	200	300	0	26.7169	-123.401	-642.583	-163015	78339.3	-20574.5	321.913	1156.69	0	0	0	0	0	0	0	603	903	0
276	2	0	0	0	0	0	0	200	300	0	27.4799	-122.638	-647.161	-163198	78278.2	-20849.1	320.956	1155.18	0	0	0	0	0	0	0	603	903	0
276	3	0	0	0	0	0	0	200	300	0	27.6324	-125.385	-646.55	-163198	79010.6	-20986.4	322.203	1155.41	0	0	0	0	0	0	0	603	903	0
276	4	0	0	0	0	0	0	200	300	0	29.3109	-125.385	-650.823	-164297	79315.8	-21169.6	321.87	1155.45	0	0	0	0	0	0	0	603	903	0
276	5	0	0	0	0	0	0	200	300	0	29.6161	-123.859	-656.011	-164663	79865.1	-21215.3	321.744	1154.01	0	0	0	0	0	0	0	603	903	0
276	6	0	0	0	0	0	0	200	300	0	30.5316	-123.249	-654.485	-164572	80048.3	-21306.9	322.307	1154.45	0	0	0	0	0	0	0	603	903	0
276	7	0	0	0	0	0	0	200	300	0	32.5153	-123.554	-657.232	-165121	80292.4	-21673.1	322.168	1154.24	0	0	0	0	0	0	0	603	903	0
276	8	0	0	0	0	0	0	200	300	0	33.736	-121.723	-656.316	-165121	80536.5	-21718.9	322.71	1154.59	0	0	0	0	0	0	0	603	903	0
276	9	0	0	0	0	0	0	200	300	0	32.973	-119.739	-660.894	-165762	80963.7	-21673.1	322.507	1153.82	0	0	0	0	0	0	0	603	903	0
277	0	0	0	0	0	0	0	200	300	0	34.6515	-119.129	-660.283	-165853	81329.9	-21856.2	323.174	1154.19	0	0	0	0	0	0	0	603	903	0
277	1	0	0	0	0	0	0	200	300	0	36.0248	-118.366	-660.283	-166037	81329.9	-21902	323.174	1154.46	0	0	0	0	0	0	0	603	903	0
277	2	0	0	0	0	0	0	200	300	0	36.33	-116.077	-664.251	-166586	81940.3	-22039.3	323.358	1153.79	0	0	0	0	0	0	0	603	903	0
277	3	0	0	0	0	0	0	200	300	0	35.8722	-115.161	-665.166	-166220	82062.4	-21764.7	323.371	1152.89	0	0	0	0	0	0	0	603	903	0
277	4	0	0	0	0	0	0	200	300	0	37.7032	-114.551	-665.166	-166677	82245.5	-21627.3	323.647	1153.58	0	0	0	0	0	0	0	603	903	0
277	5	0	0	0	0	0	0	200	300	0	36.7877	-112.415	-668.523	-166769	82550.6	-21902	323.482	1152.46	0	0	0	0	0	0	0	603	903	0
277	6	0	0	0	0	0	0	200	300	0	37.8558	-110.431	-669.439	-167318	82733.8	-21261.1	323.587	1152.94	0	0	0	0	0	0	0	603	903	0
277	7	0	0	0	0	0	0	200	300	0	38.161	-111.652	-670.964	-167318	83405.1	-21718.9	324.306	1152.37	0	0	0	0	0	0	0	603	903	0
277	8	0	0	0	0	0	0	200	300	0	39.0765	-110.126	-671.88	-166769	83100	-21718.9	323.683	1151.21	0	0	0	0	0	0	0	603	903	0
277	9	0	0	0	0	0	0	200	300	0	38.4662	-108.448	-673.711	-167227	83344.2	-21490	323.709	1151.22	0	0	0	0	0	0	0	603	903	0
278	0	0	0	0	0	0	0	200	300	0	39.3817	-108.905	-675.542	-167776	84198.6	-21902	324.639	1151.36	0	0	0	0	0	0	0	603	903	0
278	1	0	0	0	0	0	0	200	300	0	39.5343	-107.99	-677.068	-167685	84259.6	-21902	324.448	1150.66	0	0	0	0	0	0	0	603	903	0
278	2	0	0	0	0	0	0	200	300	0	41.6705	-106.617	-676.763	-167502	84259.6	-21535.8	324.504	1150.5	0	0	0	0	0	0	0	603	903	0
278	3	0	0	0	0	0	0	200	300	0	39.0765	-106.769	-679.815	-167776	84564.9	-21902	324.394	1149.8	0	0	0	0	0	0	0	603	903	0
278	4	0	0	0	0	0	0	200	300	0	39.9921	-105.091	-679.509	-168142	85114.1	-21810.4	325.258	1150.45	0	0	0	0	0	0	0	603	903	0
278	5	0	0	0	0	0	0	200	300	0	40.2972	-105.701	-681.035	-166586	85114.1	-21856.2	324.978	1147.61	0	0	0	0	0	0	0	603	903	0
278	6	0	0	0	0	0	0	200	300	0	41.9757	-104.328	-683.477	-168783	85419.4	-21535.8	324.978	1149.95	0	0	0	0	0	0	0	603	903	0
278	7	0	0	0	0	0	0	200	300	0	41.2128	-105.854	-684.697	-168692	85785.6	-21673.1	325.29	1149.37	0	0	0	0	0	0	0	603	903	0
278	8	0	0	0	0	0	0	200	300	0	41.5179	-104.023	-684.392	-168234	85846.5	-21627.3	325.435	1148.82	0	0	0	0	0	0	0	603	903	0
278	9	0	0	0	0	0	0	200	300	0	42.1283	-103.107	-686.834	-168692	85907.6	-21627.3	325.078	1148.61	0	0	0	0	0	0	0	603	903	0
279	0	0	0	0	0	0	0	200	300	0	42.7386	-103.412	-688.359	-168875	86212.8	-21627.3	325.244	1148.33	0	0	0	0	0	0	0	603	903	0
279	1	0	0	0	0	0	0	200	300	0	42.1283	-102.802	-686.223	-168783	86518	-21627.3	326.078	1148.96	0	0	0	0	0	0	0	603	903	0
279	2	0	0	0	0	0	0	200	300	0	42.4335	-100.971	-687.749	-168417	86456.9	-21718.9	325.71	1147.88	0	0	0	0	0	0	0	603	903	0
279	3	0	0	0	0	0	0	200	300	0	44.8749	-100.208	-688.359	-168600	86823.1	-21535.8	326.131	1147.93	0	0	0	0	0	0	0	603	903	0
279	4	0	0	0	0	0	0	200	300	0	43.8068	-100.971	-689.275	-168600	86884.2	-21123.8	326.052	1147.6	0	0	0	0	0	0	0	603	903	0
279	5	0	0	0	0	0	0	200	300	0	42.5861	-98.5294	-689.58	-168417	86579	-21398.4	325.553	1147.23	0	0	0	0	0	0	0	603	903	0
279	6	0	0	0	0	0	0	200	300	0	43.5016	-97.4612	-690.19	-167227	87494.5	-21352.7	326.769	1145.29	0	0	0	0	0	0	0	603	903	0
279	7	0	0	0	0	0	0	200	300	0	43.349	-96.8509	-689.885	-167227	87494.5	-20894.9	326.825	1145.4	0	0	0	0	0	0	0	603	903	0
279	8	0	0	0	0	0	0	200	300	0	44.2645	-94.7147	-687.444	-168051	87067.2	-20666	326.654	1147.46	0	0	0	0	0	0	0	603	903	0
279	9	0	0	0	0	0	0	200	300	0	43.5016	-94.7147	-689.58	-167318	87616.6	-21078	327.058	1145.64	0	0	0	0	0	0	0	603	903	0
280	0	0	0	0	0	0	0	200	300	0	43.8068	-93.9517	-688.97	-167318	87555.5	-20254	327.082	1145.85	0	0	0	0	0	0	0	603	903	0
280	1	0	0	0	0	0	0	200	300	0	44.5697	-92.8836	-687.749	-167410	87067.2	-20849.1	326.597	1146.42	0	0	0	0	0	0	0	603	903	0
280	2	0	0	0	0	0	0	200	300	0	44.1119	-93.494	-689.885	-167135	87860.8	-20849.1	327.356	1145.27	0	0	0	0	0	0	0	603	903	0
280	3	0	0	0	0	0	0	200	300	0	44.7223	-92.8836	-689.275	-166586	87982.8	-20528.7	327.645	1144.68	0	0	0	0	0	0	0	603	903	0
280	4	0	0	0	0	0	0	200	300	0	46.0956	-92.1207	-687.749	-166311	87677.6	-20711.8	327.485	1144.82	0	0	0	0	0	0	0	603	903	0
280	5	0	0	0	0	0	0	200	300	0	44.2645	-91.2051	-688.054	-166494	87860.8	-20666	327.695	1144.98	0	0	0	0	0	0	0	603	903	0
280	6	0	0	0	0	0	0	200	300	0	43.8068	-91.5103	-688.359	-166128	88104.9	-20666	327.993	1144.34	0	0	0	0	0	0	0	603	903	0
280	7	0	0	0	0	0	0	200	300	0	44.5697	-90.4422	-686.834	-164206	87677.6	-20437.1	327.655	1142.08	0	0	0	0	0	0	0	603	903	0
280	8	0	0	0	0	0	0	200	300	0	44.4171	-90.137	-687.139	-165487	87982.8	-20254	328.042	1143.84	0	0	0	0	0	0	0	603	903	0
280	9	0	0	0	0	0	0	200	300	0	43.8068	-89.0689	-687.139	-164938	88104.9	-20070.9	328.22	1143.04	0	0	0	0	0	0	0	603	903	0
281	0	0	0	0	0	0	0	200	300	0	44.4171	-88.4586	-685.003	-164114	87555.5	-19796.3	327.818	1142.58	0	0	0	0	0	0	0	603	903	0
281	1	0	0	0	0	0	0	200	300	0	44.2645	-87.8482	-683.477	-163382	87616.6	-19979.4	328.193	1142.05	0	0	0	0	0	0	0	603	903	0
281	2	0	0	0	0	0	0	200	300	0	44.8749	-88.306	-683.477	-163473	87616.6	-19933.6	328.193	1142.18	0	0	0	0	0	0	0	603	903	0
281	3	0	0	0	0	0	0	200	300	0	46.0956	-87.3904	-680.425	-163198	87738.7	-19704.7	328.947	1142.85	0	0	0	0	0	0	0	603	903	0
281	4	0	0	0	0	0	0	200	300	0	45.3326	-86.3223	-681.951	-162191	87616.6	-19613.2	328.479	1140.83	0	0	0	0	0	0	0	603	903	0
281	5	0	0	0	0	0	0	200	300	0	46.5533	-87.2379	-680.73	-161642	87433.5	-19658.9	328.441	1140.45	0	0	0	0	0	0	0	603	903	0
281	6	0	0	0	0	0	0	200	300	0	44.2645	-86.1697	-678.899	-161367	87616.6	-19704.7	329.057	1140.69	0	0	0	0	0	0	0	603	903	0
281	7	0	0	0	0	0	0	200	300	0	46.5533	-84.1861	-677.983	-161367	87433.5	-19430.1	328.961	1141.01	0	0	0	0	0	0	0	603	903	0
281	8	0	0	0	0	0	0	200	300	0	45.6378	-84.949	-677.373	-159994	88165.9	-19567.4	330.159	1139.2	0	0	0	0	0	0	0	603	903	0
281	9	0	0	0	0	0	0	200	300	0	46.2482	-85.1016	-675.542	-159079	87311.4	-19567.4	329.246	1138.48	0	0	0	0	0	0	0	603	903	0
282	0	0	0	0	0	0	0	200	300	0	45.18	-84.0335	-674.321	-159262	87433.5	-19246.9	329.661	1139.18	0	0	0	0	0	0	0	603	903	0
282	1	0	0	0	0	0	0	200	300	0	46.5533	-83.7283	-674.321	-158529	87982.8	-19292.7	330.476	1138.09	0	0	0	0	0	0	0	603	903	0
282	2	0	0	0	0	0	0	200	300	0	44.8749	-83.8809	-672.185	-157705	87494.5	-18926.5	330.164	1137.62	0	0	0	0	0	0	0	603	903	0
282	3	0	0	0	0	0	0	200	300	0	46.0956	-81.7447	-670.659	-156973	86884.2	-19201.2	329.55	1137.06	0	0	0	0	0	0	0	603	903	0
282	4	0	0	0	0	0	0	200	300	0	46.7059	-81.2869	-669.133	-156607	87616.6	-18789.2	330.94	1137.04	0	0	0	0	0	0	0	603	903	0
282	5	0	0	0	0	0	0	200	300	0	46.8585	-82.5076	-667.607	-156149	87677.6	-18972.3	331.331	1136.89	0	0	0	0	0	0	0	603	903	0
282	6	0	0	0	0	0	0	200	300	0	45.4852	-80.2188	-666.692	-155508	87189.3	-18743.4	330.779	1136.25	0	0	0	0	0	0	0	603	903	0
282	7	0	0	0	0	0	0	200	300	0	45.943	-79.9136	-668.828	-155050	87616.6	-18835	331	1134.82	0	0	0	0	0	0	0	603	903	0
282	8	0	0	0	0	0	0	200	300	0	45.943	-79.9136	-665.166	-154409	87555.5	-18972.3	331.63	1135.14	0	0	0	0	0	0	0	603	903	0
282	9	0	0	0	0	0	0	200	300	0	46.2482	-79.1507	-663.945	-154318	86945.2	-18835	330.952	1135.43	0	0	0	0	0	0	0	603	903	0
283	0	0	0	0	0	0	0	200	300	0	46.5533	-77.6248	-662.725	-151937	87372.5	-18377.2	331.838	1132.26	0	0	0	0	0	0	0	603	903	0
283	1	0	0	0	0	0	0	200	300	0	47.0111	-78.5403	-660.894	-151114	87250.4	-18743.4	332.019	1131.65	0	0	0	0	0	0	0	603	903	0
283	2	0	0	0	0	0	0	200	300	0	46.2482	-77.1671	-659.063	-151022	87067.2	-18606.1	332.108	1132.15	0	0	0	0	0	0	0	603	903	0
283	3	0	0	0	0	0	0	200	300	0	46.2482	-76.5567	-657.232	-151022	87067.2	-18423	332.476	1132.78	0	0	0	0	0	0	0	603	903	0
283	4	0	0	0	0	0	0	200	300	0	47.774	-76.5567	-656.926	-150198	87189.3	-17965.2	332.723	1131.64	0	0	0	0	0	0	0	603	903	0
283	5	0	0	0	0	0	0	200	300	0	47.4689	-75.0308	-656.316	-150198	86456.9	-17827.9	331.731	1131.85	0	0	0	0	0	0	0	603	903	0
283	6	0	0	0	0	0	0	200	300	0	47.4689	-74.7256	-654.485	-149649	86640.1	-17873.7	332.379	1131.65	0	0	0	0	0	0	0	603	903	0
283	7	0	0	0	0	0	0	200	300	0	46.8585	-75.1834	-651.738	-148550	86701	-18056.8	333.03	1130.93	0	0	0	0	0	0	0	603	903	0
283	8	0	0	0	0	0	0	200	300	0	47.1637	-73.9627	-651.433	-147543	86579	-17965.2	332.905	1129.49	0	0	0	0	0	0	0	603	903	0
283	9	0	0	0	0	0	0	200	300	0	46.8585	-73.6575	-649.907	-146536	86640.1	-17736.3	333.311	1128.47	0	0	0	0	0	0	0	603	903	0
284	0	0	0	0	0	0	0	200	300	0	46.4008	-73.1998	-647.161	-145987	86334.8	-17690.6	333.406	1128.58	0	0	0	0	0	0	0	603	903	0
284	1	0	0	0	0	0	0	200	300	0	47.0111	-72.1317	-646.856	-146170	86090.7	-17599	333.091	1128.97	0	0	0	0	0	0	0	603	903	0
284	2	0	0	0	0	0	0	200	300	0	46.2482	-70.4532	-646.55	-145712	86456.9	-17324.3	333.72	1128.37	0	0	0	0	0	0	0	603	903	0
284	3	0	0	0	0	0	0	200	300	0	45.943	-70.9109	-643.804	-144888	86090.7	-17003.9	333.722	1128.05	0	0	0	0	0	0	0	603	903	0
284	4	0	0	0	0	0	0	200	300	0	46.0956	-70.6058	-641.362	-143789	85846.5	-16820.8	333.85	1127.19	0	0	0	0	0	0	0	603	903	0
284	5	0	0	0	0	0	0	200	300	0	45.0275	-69.2325	-638.311	-143606	85968.6	-16820.8	334.681	1127.98	0	0	0	0	0	0	0	603	903	0
284	6	0	0	0	0	0	0	200	300	0	45.7904	-69.5377	-638.005	-142691	86273.8	-16363	335.224	1126.65	0	0	0	0	0	0	0	603	903	0
284	7	0	0	0	0	0	0	200	300	0	45.6378	-67.7066	-637.7	-141684	86029.7	-16500.4	334.906	1125.18	0	0	0	0	0	0	0	603	903	0
284	8	0	0	0	0	0	0	200	300	0	46.5533	-67.7066	-636.785	-141317	85541.4	-16363	334.333	1124.92	0	0	0	0	0	0	0	603	903	0
284	9	0	0	0	0	0	0	200	300	0	45.18	-67.554	-633.428	-140768	85846.5	-16591.9	335.527	1125.23	0	0	0	0	0	0	0	603	903	0
285	0	0	0	0	0	0	0	200	300	0	44.8749	-66.9437	-632.512	-140676	85724.5	-16408.8	335.53	1125.41	0	0	0	0	0	0	0	603	903	0
285	1	0	0	0	0	0	0	200	300	0	45.0275	-65.5704	-630.681	-139303	84747.9	-16088.4	334.375	1123.88	0	0	0	0	0	0	0	603	903	0
285	2	0	0	0	0	0	0	200	300	0	45.0275	-66.6385	-629.766	-138571	85358.3	-16088.4	335.54	1123.04	0	0	0	0	0	0	0	603	903	0
285	3	0	0	0	0	0	0	200	300	0	45.18	-65.5704	-628.85	-138388	85297.3	-16271.5	335.64	1123.06	0	0	0	0	0	0	0	603	903	0
285	4	0	0	0	0	0	0	200	300	0	44.2645	-64.3497	-628.85	-137381	85297.3	-16088.4	335.64	1121.46	0	0	0	0	0	0	0	603	903	0
285	5	0	0	0	0	0	0	200	300	0	46.4008	-64.8074	-626.104	-136648	85053.1	-15493.3	335.845	1121.25	0	0	0	0	0	0	0	603	903	0
285	6	0	0	0	0	0	0	200	300	0	44.2645	-64.5023	-624.578	-136190	85236.2	-15859.5	336.47	1121.05	0	0	0	0	0	0	0	603	903	0
285	7	0	0	0	0	0	0	200	300	0	44.2645	-63.129	-623.967	-135366	84686.9	-15905.3	335.723	1119.94	0	0	0	0	0	0	0	603	903	0
285	8	0	0	0	0	0	0	200	300	0	45.6378	-64.1971	-621.221	-133444	84625.8	-15081.3	336.225	1117.81	0	0	0	0	0	0	0	603	903	0
285	9	0	0	0	0	0	0	200	300	0	45.3326	-63.129	-618.779	-134268	84870	-15722.2	337.157	1119.99	0	0	0	0	0	0	0	603	903	0
286	0	0	0	0	0	0	0	200	300	0	45.4852	-62.6712	-614.202	-133627	84503.8	-15539.1	337.583	1120.56	0	0	0	0	0	0	0	603	903	0
286	1	0	0	0	0	0	0	200	300	0	45.18	-62.5186	-615.422	-132620	84381.7	-15813.7	337.112	1118.49	0	0	0	0	0	0	0	603	903	0
286	2	0	0	0	0	0	0	200	300	0	46.2482	-62.0608	-615.422	-131979	84381.7	-15584.8	337.112	1117.45	0	0	0	0	0	0	0	603	903	0
286	3	0	0	0	0	0	0	200	300	0	46.8585	-60.8401	-610.234	-132345	84015.5	-15539.1	337.677	1119.88	0	0	0	0	0	0	0	603	903	0
286	4	0	0	0	0	0	0	200	300	0	46.4008	-61.4505	-611.15	-130789	84015.5	-15630.6	337.471	1117	0	0	0	0	0	0	0	603	903	0
286	5	0	0	0	0	0	0	200	300	0	46.0956	-60.6876	-610.54	-130239	84137.6	-15676.4	337.809	1116.32	0	0	0	0	0	0	0	603	903	0
286	6	0	0	0	0	0	0	200	300	0	47.4689	-60.535	-608.098	-129049	84015.5	-15447.5	338.161	1115.22	0	0	0	0	0	0	0	603	903	0
286	7	0	0	0	0	0	0	200	300	0	46.8585	-60.3824	-605.962	-129324	83527.2	-15356	337.842	1116.42	0	0	0	0	0	0	0	603	903	0
286	8	0	0	0	0	0	0	200	300	0	45.3326	-59.6194	-605.046	-128683	83405.1	-14898.2	337.849	1115.68	0	0	0	0	0	0	0	603	903	0
286	9	0	0	0	0	0	0	200	300	0	46.5533	-58.3987	-604.131	-127310	83283.1	-15356	337.856	1113.73	0	0	0	0	0	0	0	603	903	0
287	0	0	0	0	0	0	0	200	300	0	46.2482	-59.0091	-599.858	-126303	83588.3	-15172.9	339.347	1113.55	0	0	0	0	0	0	0	603	903	0
287	1	0	0	0	0	0	0	200	300	0	46.5533	-58.2462	-599.248	-125845	83283.1	-15310.2	338.979	1113	0	0	0	0	0	0	0	603	903	0
287	2	0	0	0	0	0	0	200	300	0	45.7904	-57.941	-600.774	-125112	82916.9	-14944	338.017	1111.25	0	0	0	0	0	0	0	603	903	0
287	3	0	0	0	0	0	0	200	300	0	46.5533	-57.3306	-596.502	-123648	82916.9	-14532	339.005	1110.29	0	0	0	0	0	0	0	603	903	0
287	4	0	0	0	0	0	0	200	300	0	46.2482	-56.8729	-594.976	-124563	82611.7	-14852.4	338.849	1112.36	0	0	0	0	0	0	0	603	903	0
287	5	0	0	0	0	0	0	200	300	0	45.0275	-56.4151	-593.755	-124289	82550.6	-14623.5	339.032	1112.33	0	0	0	0	0	0	0	603	903	0
287	6	0	0	0	0	0	0	200	300	0	45.4852	-55.6522	-592.534	-122732	82306.5	-14532	338.906	1110.13	0	0	0	0	0	0	0	603	903	0
287	7	0	0	0	0	0	0	200	300	0	46.2482	-55.9573	-589.177	-122549	81696.2	-14303.1	338.661	1111	0	0	0	0	0	0	0	603	903	0
287	8	0	0	0	0	0	0	200	300	0	44.7223	-55.8047	-589.788	-121908	82367.6	-14257.3	339.656	1109.7	0	0	0	0	0	0	0	603	903	0
287	9	0	0	0	0	0	0	200	300	0	45.943	-56.2625	-587.651	-121725	82062.4	-13982.7	339.645	1110.14	0	0	0	0	0	0	0	603	903	0
288	0	0	0	0	0	0	0	200	300	0	44.8749	-54.584	-583.684	-120718	82123.5	-13891.1	340.698	1109.82	0	0	0	0	0	0	0	603	903	0
288	1	0	0	0	0	0	0	200	300	0	45.18	-53.5159	-585.515	-120077	81635.2	-14028.4	339.425	1108.08	0	0	0	0	0	0	0	603	903	0
288	2	0	0	0	0	0	0	200	300	0	43.6542	-54.4315	-583.379	-119436	81879.3	-14028.4	340.354	1107.73	0	0	0	0	0	0	0	603	903	0
288	3	0	0	0	0	0	0	200	300	0	43.8068	-53.0582	-579.717	-118612	81329.9	-13799.6	340.293	1107.6	0	0	0	0	0	0	0	603	903	0
288	4	0	0	0	0	0	0	200	300	0	44.2645	-53.2108	-580.938	-118154	81635.2	-13479.1	340.523	1106.39	0	0	0	0	0	0	0	603	903	0
288	5	0	0	0	0	0	0	200	300	0	44.5697	-52.2952	-579.412	-118063	81329.9	-13570.7	340.366	1106.76	0	0	0	0	0	0	0	603	903	0
288	6	0	0	0	0	0	0	200	300	0	45.943	-52.1426	-576.97	-117605	80841.7	-13433.4	340.114	1106.83	0	0	0	0	0	0	0	603	903	0
288	7	0	0	0	0	0	0	200	300	0	44.1119	-51.3797	-576.055	-116873	81329.9	-13250.2	341.184	1105.88	0	0	0	0	0	0	0	603	903	0
288	8	0	0	0	0	0	0	200	300	0	43.8068	-50.9219	-576.36	-116873	81207.9	-13250.2	340.898	1105.78	0	0	0	0	0	0	0	603	903	0
288	9	0	0	0	0	0	0	200	300	0	43.349	-51.3797	-573.919	-116232	80841.7	-13158.7	340.859	1105.52	0	0	0	0	0	0	0	603	903	0
289	0	0	0	0	0	0	0	200	300	0	43.5016	-50.3116	-573.308	-114950	81146.9	-12975.6	341.542	1103.5	0	0	0	0	0	0	0	603	903	0
289	1	0	0	0	0	0	0	200	300	0	46.0956	-49.5486	-571.477	-114767	80780.7	-13021.4	341.354	1103.83	0	0	0	0	0	0	0	603	903	0
289	2	0	0	0	0	0	0	200	300	0	43.5016	-49.5486	-571.172	-114584	81085.8	-13067.1	341.964	1103.61	0	0	0	0	0	0	0	603	903	0
289	3	0	0	0	0	0	0	200	300	0	44.1119	-48.1754	-569.951	-113668	80353.4	-12609.4	340.983	1102.44	0	0	0	0	0	0	0	603	903	0
289	4	0	0	0	0	0	0	200	300	0	44.1119	-48.4805	-567.815	-113485	80597.5	-12884	341.943	1102.86	0	0	0	0	0	0	0	603	903	0
289	5	0	0	0	0	0	0	200	300	0	44.4171	-47.565	-565.374	-113028	80780.7	-12975.6	342.88	1102.92	0	0	0	0	0	0	0	603	903	0
289	6	0	0	0	0	0	0	200	300	0	43.9593	-47.565	-566.594	-112661	80597.5	-12426.3	342.249	1101.84	0	0	0	0	0	0	0	603	903	0
289	7	0	0	0	0	0	0	200	300	0	44.2645	-46.8021	-564.763	-111563	80414.5	-12472.1	342.386	1100.54	0	0	0	0	0	0	0	603	903	0
289	8	0	0	0	0	0	0	200	300	0	44.2645	-46.0391	-563.237	-111288	80597.5	-12243.2	343.097	1100.59	0	0	0	0	0	0	0	603	903	0
289	9	0	0	0	0	0	0	200	300	0	44.7223	-45.1236	-562.322	-111380	80475.5	-12472.1	343.113	1101.07	0	0	0	0	0	0	0	603	903	0
290	0	0	0	0	0	0	0	200	300	0	45.0275	-45.1236	-562.322	-110464	80048.3	-12426.3	342.353	1099.44	0	0	0	0	0	0	0	603	903	0
290	1	0	0	0	0	0	0	200	300	0	44.7223	-45.1236	-559.575	-110006	80475.5	-12517.8	343.815	1099.59	0	0	0	0	0	0	0	603	903	0
290	2	0	0	0	0	0	0	200	300	0	43.5016	-43.9029	-559.27	-108908	80597.5	-12105.8	344.112	1097.73	0	0	0	0	0	0	0	603	903	0
290	3	0	0	0	0	0	0	200	300	0	43.8068	-44.2081	-558.049	-109274	79865.1	-11785.4	343.115	1098.81	0	0	0	0	0	0	0	603	903	0
290	4	0	0	0	0	0	0	200	300	0	43.5016	-44.8184	-557.134	-108908	80109.2	-12105.8	343.788	1098.48	0	0	0	0	0	0	0	603	903	0
290	5	0	0	0	0	0	0	200	300	0	44.4171	-42.377	-556.523	-108175	79682	-12151.6	343.178	1097.38	0	0	0	0	0	0	0	603	903	0
290	6	0	0	0	0	0	0	200	300	0	43.9593	-42.8348	-554.998	-107992	79926.2	-11785.4	344.012	1097.58	0	0	0	0	0	0	0	603	903	0
290	7	0	0	0	0	0	0	200	300	0	44.4171	-42.2244	-553.777	-107534	80048.3	-11739.6	344.55	1097.18	0	0	0	0	0	0	0	603	903	0
290	8	0	0	0	0	0	0	200	300	0	44.2645	-41.9192	-551.946	-106436	79865.1	-11281.9	344.697	1095.84	0	0	0	0	0	0	0	603	903	0
290	9	0	0	0	0	0	0	200	300	0	44.2645	-40.6985	-551.336	-106070	79376.8	-11510.7	343.972	1095.39	0	0	0	0	0	0	0	603	903	0
291	0	0	0	0	0	0	0	200	300	0	43.1964	-41.0037	-550.115	-105154	79437.9	-11510.7	344.402	1094.15	0	0	0	0	0	0	0	603	903	0
291	1	0	0	0	0	0	0	200	300	0	43.1964	-40.2408	-547.979	-105520	79804.1	-11556.5	345.634	1095.56	0	0	0	0	0	0	0	603	903	0
291	2	0	0	0	0	0	0	200	300	0	43.349	-39.4778	-545.842	-104696	79254.8	-11419.2	345.197	1094.81	0	0	0	0	0	0	0	603	903	0
291	3	0	0	0	0	0	0	200	300	0	43.6542	-39.3253	-547.368	-105062	79132.7	-11144.5	344.569	1094.94	0	0	0	0	0	0	0	603	903	0
291	4	0	0	0	0	0	0	200	300	0	44.4171	-38.5623	-545.842	-103964	79560	-11190.3	345.756	1093.46	0	0	0	0	0	0	0	603	903	0
291	5	0	0	0	0	0	0	200	300	0	43.5016	-37.952	-546.758	-103598	79010.6	-10824.1	344.508	1092.48	0	0	0	0	0	0	0	603	903	0
291	6	0	0	0	0	0	0	200	300	0	42.5861	-37.952	-544.622	-103231	79193.8	-10824.1	345.411	1092.55	0	0	0	0	0	0	0	603	903	0
291	7	0	0	0	0	0	0	200	300	0	42.4335	-36.4261	-543.096	-103048	78827.6	-10229	345.145	1092.74	0	0	0	0	0	0	0	603	903	0
291	8	0	0	0	0	0	0	200	300	0	42.1283	-37.0364	-542.485	-102407	78827.6	-10686.8	345.308	1091.77	0	0	0	0	0	0	0	603	903	0
291	9	0	0	0	0	0	0	200	300	0	43.0438	-36.4261	-540.654	-102133	78522.3	-10595.2	345.236	1091.91	0	0	0	0	0	0	0	603	903	0
292	0	0	0	0	0	0	0	200	300	0	42.1283	-36.4261	-540.96	-102041	78949.6	-10274.8	345.944	1091.63	0	0	0	0	0	0	0	603	903	0
292	1	0	0	0	0	0	0	200	300	0	41.6705	-35.5106	-541.265	-101309	78461.3	-10457.9	344.959	1090.17	0	0	0	0	0	0	0	603	903	0
292	2	0	0	0	0	0	0	200	300	0	41.8231	-36.5787	-540.654	-99935.5	78583.4	-10091.7	345.349	1087.84	0	0	0	0	0	0	0	603	903	0
292	3	0	0	0	0	0	0	200	300	0	41.5179	-34.595	-534.246	-100760	77667.8	-10137.5	345.379	1091.6	0	0	0	0	0	0	0	603	903	0
292	4	0	0	0	0	0	0	200	300	0	41.5179	-34.1373	-537.908	-100393	78278.2	-10091.7	345.523	1089.64	0	0	0	0	0	0	0	603	903	0
292	5	0	0	0	0	0	0	200	300	0	40.9076	-33.3743	-536.992	-99935.5	78095.1	-9771.24	345.431	1089.1	0	0	0	0	0	0	0	603	903	0
292	6	0	0	0	0	0	0	200	300	0	40.9076	-33.9847	-534.246	-98836.9	78095.1	-9679.69	346.178	1088	0	0	0	0	0	0	0	603	903	0
292	7	0	0	0	0	0	0	200	300	0	41.3654	-33.0691	-535.466	-99477.7	78034	-9542.36	345.731	1088.78	0	0	0	0	0	0	0	603	903	0
292	8	0	0	0	0	0	0	200	300	0	40.2972	-32.1536	-535.466	-98653.8	78095.1	-9405.03	345.845	1087.24	0	0	0	0	0	0	0	603	903	0
292	9	0	0	0	0	0	0	200	300	0	40.4498	-32.4588	-533.025	-98012.9	77973.1	-9313.48	346.284	1086.88	0	0	0	0	0	0	0	603	903	0
293	0	0	0	0	0	0	0	200	300	0	40.9076	-32.1536	-533.635	-97555.2	77973.1	-9130.37	346.117	1085.81	0	0	0	0	0	0	0	603	903	0
293	1	0	0	0	0	0	0	200	300	0	39.3817	-31.0855	-532.109	-97829.8	77667.8	-9176.15	345.962	1086.85	0	0	0	0	0	0	0	603	903	0
293	2	0	0	0	0	0	0	200	300	0	39.8395	-31.0855	-531.499	-96914.2	78156.1	-8443.73	347.048	1085.34	0	0	0	0	0	0	0	603	903	0
293	3	0	0	0	0	0	0	200	300	0	40.2972	-30.17	-530.889	-95724.1	77912	-8947.27	346.758	1083.31	0	0	0	0	0	0	0	603	903	0
293	4	0	0	0	0	0	0	200	300	0	40.2972	-30.4752	-530.584	-96365	77179.6	-8581.05	345.462	1084.62	0	0	0	0	0	0	0	603	903	0
293	5	0	0	0	0	0	0	200	300	0	38.7714	-29.407	-528.753	-96273.4	77912	-8626.83	347.351	1085.08	0	0	0	0	0	0	0	603	903	0
293	6	0	0	0	0	0	0	200	300	0	39.6869	-28.4915	-527.227	-95449.4	77912	-8214.84	347.777	1084.04	0	0	0	0	0	0	0	603	903	0
293	7	0	0	0	0	0	0	200	300	0	39.6869	-29.2545	-527.837	-95357.9	77423.7	-8214.84	346.681	1083.66	0	0	0	0	0	0	0	603	903	0
293	8	0	0	0	0	0	0	200	300	0	38.9239	-28.9493	-526.921	-94900.1	77179.6	-8306.4	346.473	1083.1	0	0	0	0	0	0	0	603	903	0
293	9	0	0	0	0	0	0	200	300	0	39.5343	-27.4234	-525.701	-95266.3	77728.9	-8169.07	347.858	1084.22	0	0	0	0	0	0	0	603	903	0
294	0	0	0	0	0	0	0	200	300	0	39.0765	-28.0337	-525.396	-93801.5	77484.8	-7665.53	347.479	1081.54	0	0	0	0	0	0	0	603	903	0
294	1	0	0	0	0	0	0	200	300	0	41.0602	-26.813	-524.48	-93526.8	76874.4	-7802.86	346.573	1081.32	0	0	0	0	0	0	0	603	903	0
294	2	0	0	0	0	0	0	200	300	0	36.6351	-27.1182	-523.565	-93526.8	77301.6	-7711.31	347.645	1081.63	0	0	0	0	0	0	0	603	903	0
294	3	0	0	0	0	0	0	200	300	0	38.161	-26.2027	-524.175	-92977.5	76996.5	-7757.08	346.891	1080.38	0	0	0	0	0	0	0	603	903	0
294	4	0	0	0	0	0	0	200	300	0	38.4662	-26.5079	-522.649	-91970.4	77057.5	-7299.32	347.436	1078.97	0	0	0	0	0	0	0	603	903	0
294	5	0	0	0	0	0	0	200	300	0	38.4662	-24.5242	-522.039	-92977.5	77240.6	-7299.32	347.96	1081.1	0	0	0	0	0	0	0	603	903	0
294	6	0	0	0	0	0	0	200	300	0	37.8558	-25.1346	-522.649	-92153.5	76813.3	-7299.32	346.969	1079.32	0	0	0	0	0	0	0	603	903	0
294	7	0	0	0	0	0	0	200	300	0	37.8558	-24.982	-519.902	-91878.8	76996.5	-7161.99	348.098	1079.72	0	0	0	0	0	0	0	603	903	0
294	8	0	0	0	0	0	0	200	300	0	37.7032	-24.3716	-520.513	-91421.1	77179.6	-7116.21	348.276	1078.64	0	0	0	0	0	0	0	603	903	0
294	9	0	0	0	0	0	0	200	300	0	37.0929	-23.4561	-517.766	-91146.4	76996.5	-7070.44	348.709	1079.04	0	0	0	0	0	0	0	603	903	0
295	0	0	0	0	0	0	0	200	300	0	35.7196	-23.3035	-519.597	-90688.7	76203	-6612.67	346.658	1077.54	0	0	0	0	0	0	0	603	903	0
295	1	0	0	0	0	0	0	200	300	0	37.5507	-23.1509	-518.682	-90688.7	77057.5	-6704.23	348.564	1077.84	0	0	0	0	0	0	0	603	903	0
295	2	0	0	0	0	0	0	200	300	0	36.9403	-22.5406	-518.071	-90597.2	77301.6	-6612.67	349.21	1077.87	0	0	0	0	0	0	0	603	903	0
295	3	0	0	0	0	0	0	200	300	0	38.0084	-21.1673	-517.766	-90414	75775.8	-6475.35	346.351	1077.62	0	0	0	0	0	0	0	603	903	0
295	4	0	0	0	0	0	0	200	300	0	36.9403	-21.7776	-516.24	-89590	76874.4	-6383.79	348.912	1076.54	0	0	0	0	0	0	0	603	903	0
295	5	0	0	0	0	0	0	200	300	0	36.4825	-20.8621	-516.851	-89132.3	76874.4	-5926.03	348.736	1075.45	0	0	0	0	0	0	0	603	903	0
295	6	0	0	0	0	0	0	200	300	0	35.7196	-20.5569	-516.545	-89498.5	76325.1	-5926.03	347.761	1076.26	0	0	0	0	0	0	0	603	903	0
295	7	0	0	0	0	0	0	200	300	0	35.567	-19.794	-515.02	-88399.9	76874.4	-6017.58	349.265	1074.64	0	0	0	0	0	0	0	603	903	0
295	8	0	0	0	0	0	0	200	300	0	36.7877	-19.4888	-513.799	-88308.3	76691.3	-6063.36	349.263	1074.87	0	0	0	0	0	0	0	603	903	0
295	9	0	0	0	0	0	0	200	300	0	36.0248	-19.0311	-513.799	-88674.5	76630.3	-5834.48	349.145	1075.59	0	0	0	0	0	0	0	603	903	0
296	0	0	0	0	0	0	0	200	300	0	34.8041	-18.5733	-515.63	-87850.5	76630.3	-5651.37	348.615	1073.38	0	0	0	0	0	0	0	603	903	0
296	1	0	0	0	0	0	0	200	300	0	36.7877	-17.9629	-514.714	-87484.3	76569.2	-5651.37	348.761	1072.97	0	0	0	0	0	0	0	603	903	0
296	2	0	0	0	0	0	0	200	300	0	34.9567	-17.6578	-513.189	-86477.3	76386.1	-5468.27	348.846	1071.51	0	0	0	0	0	0	0	603	903	0
296	3	0	0	0	0	0	0	200	300	0	34.9567	-17.2	-512.273	-87209.7	76569.2	-5330.94	349.47	1073.24	0	0	0	0	0	0	0	603	903	0
296	4	0	0	0	0	0	0	200	300	0	34.3463	-16.5897	-512.883	-86660.3	76447.1	-5147.83	349.054	1071.97	0	0	0	0	0	0	0	603	903	0
296	5	0	0	0	0	0	0	200	300	0	36.1774	-15.369	-511.968	-85927.9	75897.9	-5010.5	348.247	1070.84	0	0	0	0	0	0	0	603	903	0
296	6	0	0	0	0	0	0	200	300	0	35.2618	-15.6741	-511.968	-86568.8	76325.1	-4918.95	349.082	1072.09	0	0	0	0	0	0	0	603	903	0
296	7	0	0	0	0	0	0	200	300	0	35.1092	-14.9112	-511.357	-85836.4	76447.1	-5056.28	349.498	1070.86	0	0	0	0	0	0	0	603	903	0
296	8	0	0	0	0	0	0	200	300	0	35.1092	-15.369	-512.273	-85561.7	76080.9	-4415.41	348.516	1070.02	0	0	0	0	0	0	0	603	903	0
296	9	0	0	0	0	0	0	200	300	0	37.2455	-13.6905	-510.442	-85378.6	76203	-4964.73	349.288	1070.26	0	0	0	0	0	0	0	603	903	0
297	0	0	0	0	0	0	0	200	300	0	34.8041	-14.4534	-511.663	-85104	76019.9	-4781.62	348.574	1069.33	0	0	0	0	0	0	0	603	903	0
297	1	0	0	0	0	0	0	200	300	0	34.4989	-14.7586	-509.526	-85195.5	76080.9	-4461.18	349.317	1070.21	0	0	0	0	0	0	0	603	903	0
297	2	0	0	0	0	0	0	200	300	0	35.1092	-12.6224	-510.747	-84188.4	76019.9	-4369.63	348.841	1067.83	0	0	0	0	0	0	0	603	903	0
297	3	0	0	0	0	0	0	200	300	0	35.4144	-12.9275	-509.832	-84463.1	76203	-4369.63	349.467	1068.67	0	0	0	0	0	0	0	603	903	0
297	4	0	0	0	0	0	0	200	300	0	33.736	-12.4698	-509.526	-84280	76935.4	-4094.97	350.994	1068.41	0	0	0	0	0	0	0	603	903	0
297	5	0	0	0	0	0	0	200	300	0	34.3463	-13.2327	-509.221	-84096.9	75958.9	-3774.54	349.167	1068.15	0	0	0	0	0	0	0	603	903	0
297	6	0	0	0	0	0	0	200	300	0	34.6515	-11.2491	-509.832	-83639.1	76569.2	-3728.76	350.185	1067.05	0	0	0	0	0	0	0	603	903	0
297	7	0	0	0	0	0	0	200	300	0	35.1092	-10.9439	-509.526	-84005.4	75958.9	-3682.99	349.077	1067.87	0	0	0	0	0	0	0	603	903	0
297	8	0	0	0	0	0	0	200	300	0	34.3463	-10.7913	-508.001	-83456	76080.9	-3591.43	349.765	1067.28	0	0	0	0	0	0	0	603	903	0
297	9	0	0	0	0	0	0	200	300	0	34.0411	-10.181	-506.78	-83181.4	76264.1	-3728.76	350.488	1067.14	0	0	0	0	0	0	0	603	903	0
298	0	0	0	0	0	0	0	200	300	0	34.9567	-9.57061	-509.526	-83181.4	76203	-3225.22	349.557	1066.25	0	0	0	0	0	0	0	603	903	0
298	1	0	0	0	0	0	0	200	300	0	34.1937	-8.80767	-507.39	-82540.5	75897.9	-3225.22	349.585	1065.68	0	0	0	0	0	0	0	603	903	0
298	2	0	0	0	0	0	0	200	300	0	35.7196	-8.19732	-506.78	-82723.6	76203	-3271	350.367	1066.23	0	0	0	0	0	0	0	603	903	0
298	3	0	0	0	0	0	0	200	300	0	33.2782	-7.58697	-506.169	-82449	76203	-2904.79	350.548	1065.89	0	0	0	0	0	0	0	603	903	0
298	4	0	0	0	0	0	0	200	300	0	32.8204	-7.58697	-508.001	-82174.3	75531.7	-2950.56	348.684	1064.76	0	0	0	0	0	0	0	603	903	0
298	5	0	0	0	0	0	0	200	300	0	32.6678	-6.67144	-507.39	-81899.6	76142	-2904.79	350.066	1064.41	0	0	0	0	0	0	0	603	903	0
298	6	0	0	0	0	0	0	200	300	0	30.5316	-5.9085	-507.39	-81350.3	76508.2	-2630.13	350.788	1063.33	0	0	0	0	0	0	0	603	903	0
298	7	0	0	0	0	0	0	200	300	0	32.8204	-6.21368	-508.001	-81258.7	75348.5	-2172.36	348.324	1062.96	0	0	0	0	0	0	0	603	903	0
298	8	0	0	0	0	0	0	200	300	0	32.2101	-6.21368	-507.695	-81624.9	76508.2	-2218.14	350.697	1063.78	0	0	0	0	0	0	0	603	903	0
298	9	0	0	0	0	0	0	200	300	0	31.5997	-4.07745	-509.526	-81624.9	76019.9	-2172.36	349.197	1063.2	0	0	0	0	0	0	0	603	903	0
299	0	0	0	0	0	0	0	200	300	0	30.379	-4.38263	-508.306	-81075.7	76203	-1806.15	349.916	1062.5	0	0	0	0	0	0	0	603	903	0
299	1	0	0	0	0	0	0	200	300	0	31.4471	-4.07745	-509.832	-80892.5	76264.1	-1806.15	349.587	1061.67	0	0	0	0	0	0	0	603	903	0
299	2	0	0	0	0	0	0	200	300	0	30.379	-3.61969	-511.357	-81533.4	76386.1	-1531.5	349.379	1062.45	0	0	0	0	0	0	0	603	903	0
299	3	0	0	0	0	0	0	200	300	0	31.7523	-2.85675	-510.442	-81258.7	76142	-1531.5	349.169	1062.19	0	0	0	0	0	0	0	603	903	0
299	4	0	0	0	0	0	0	200	300	0	32.0575	-1.78863	-510.747	-80801	76325.1	-1302.61	349.438	1061.2	0	0	0	0	0	0	0	603	903	0
299	5	0	0	0	0	0	0	200	300	0	31.2946	-1.17828	-510.747	-81441.9	76142	-1119.51	349.08	1062.46	0	0	0	0	0	0	0	603	903	0
299	6	0	0	0	0	0	0	200	300	0	29.0057	-1.63604	-513.494	-81167.2	76203	-982.178	348.401	1061.07	0	0	0	0	0	0	0	603	903	0
299	7	0	0	0	0	0	0	200	300	0	29.6161	-0.415341	-509.221	-81258.7	76264.1	-890.626	349.766	1062.57	0	0	0	0	0	0	0	603	903	0
299	8	0	0	0	0	0	0	200	300	0	29.7687	-0.110165	-513.189	-80251.7	76569.2	-753.297	349.203	1059.38	0	0	0	0	0	0	0	603	903	0
299	9	0	0	0	0	0	0	200	300	0	29.9213	0.195011	-512.883	-81350.3	76447.1	-615.967	349.054	1061.61	0	0	0	0	0	0	0	603	903	0
300	0	0	0	0	0	0	0	200	300	0	28.7006	-0.262753	-511.968	-81075.7	76691.3	-478.638	349.797	1061.36	0	0	0	0	0	0	0	603	903	0
300	1	0	0	0	0	0	0	200	300	0	29.3109	2.02607	-516.545	-80617.9	76752.4	-112.427	348.588	1059.07	0	0	0	0	0	0	0	603	903	0
300	2	0	0	0	0	0	0	200	300	0	30.379	1.72089	-515.325	-80801	76996.5	-112.427	349.414	1059.8	0	0	0	0	0	0	0	603	903	0
300	3	0	0	0	0	0	0	200	300	0	29.1583	2.94159	-514.714	-80892.5	76935.4	-112.427	349.472	1060.16	0	0	0	0	0	0	0	603	903	0
300	4	0	0	0	0	0	0	200	300	0	29.1583	2.63642	-516.24	-80892.5	77118.6	162.231	349.385	1059.7	0	0	0	0	0	0	0	603	903	0
300	5	0	0	0	0	0	0	200	300	0	29.7687	3.39936	-516.851	-80343.2	77240.6	-66.6507	349.445	1058.45	0	0	0	0	0	0	0	603	903	0
300	6	0	0	0	0	0	0	200	300	0	29.4635	4.31488	-517.156	-80892.5	76996.5	-20.8743	348.885	1059.42	0	0	0	0	0	0	0	603	903	0
300	7	0	0	0	0	0	0	200	300	0	28.0902	3.70453	-517.461	-81167.2	77484.8	345.337	349.74	1059.86	0	0	0	0	0	0	0	603	903	0
300	8	0	0	0	0	0	0	200	300	0	28.548	4.46747	-519.902	-80160.1	77484.8	253.784	349.037	1057.18	0	0	0	0	0	0	0	603	903	0
300	9	0	0	0	0	0	0	200	300	0	29.3109	5.23041	-517.766	-80526.3	76996.5	299.56	348.709	1058.53	0	0	0	0	0	0	0	603	903	0
301	0	0	0	0	0	0	0	200	300	0	27.4799	6.14594	-518.987	-79336.1	77851	436.889	350.006	1055.87	0	0	0	0	0	0	0	603	903	0
301	1	0	0	0	0	0	0	200	300	0	27.9376	6.90888	-519.902	-80343.2	77789.9	482.666	349.624	1057.54	0	0	0	0	0	0	0	603	903	0
301	2	0	0	0	0	0	0	200	300	0	29.1583	6.45111	-521.123	-79793.9	77789.9	711.548	349.274	1056.12	0	0	0	0	0	0	0	603	903	0
301	3	0	0	0	0	0	0	200	300	0	29.6161	8.12958	-521.123	-80617.9	77667.8	665.771	349.039	1057.7	0	0	0	0	0	0	0	603	903	0
301	4	0	0	0	0	0	0	200	300	0	28.8531	8.58735	-523.565	-80343.2	78217.2	848.877	349.394	1056.45	0	0	0	0	0	0	0	603	903	0
301	5	0	0	0	0	0	0	200	300	0	28.8531	8.12958	-521.733	-79793.9	77728.9	1123.53	348.982	1055.94	0	0	0	0	0	0	0	603	903	0
301	6	0	0	0	0	0	0	200	300	0	29.4635	9.35028	-523.87	-80251.7	78156.1	1123.53	349.19	1056.19	0	0	0	0	0	0	0	603	903	0
301	7	0	0	0	0	0	0	200	300	0	31.2946	9.96064	-524.48	-80434.8	78217.2	986.206	349.133	1056.36	0	0	0	0	0	0	0	603	903	0
301	8	0	0	0	0	0	0	200	300	0	29.0057	10.4184	-525.396	-80160.1	77973.1	1215.09	348.408	1055.57	0	0	0	0	0	0	0	603	903	0
301	9	0	0	0	0	0	0	200	300	0	29.4635	9.80805	-521.428	-80343.2	78156.1	1077.76	349.889	1057.08	0	0	0	0	0	0	0	603	903	0
302	0	0	0	0	0	0	0	200	300	0	29.9213	10.7236	-526.616	-79336.1	77545.8	1443.97	347.253	1053.65	0	0	0	0	0	0	0	603	903	0
302	1	0	0	0	0	0	0	200	300	0	29.6161	11.3339	-527.532	-80068.5	78339.3	1398.19	348.502	1054.78	0	0	0	0	0	0	0	603	903	0
302	2	0	0	0	0	0	0	200	300	0	28.2428	11.7917	-526.311	-79427.7	78766.5	1398.19	349.658	1053.91	0	0	0	0	0	0	0	603	903	0
302	3	0	0	0	0	0	0	200	300	0	30.379	12.0969	-528.447	-80068.5	78766.5	1535.52	349.053	1054.52	0	0	0	0	0	0	0	603	903	0
302	4	0	0	0	0	0	0	200	300	0	29.4635	12.7072	-529.058	-80251.7	78461.3	1718.63	348.304	1054.69	0	0	0	0	0	0	0	603	903	0
302	5	0	0	0	0	0	0	200	300	0	29.7687	13.9279	-529.668	-79977	78400.3	1764.4	348.018	1053.99	0	0	0	0	0	0	0	603	903	0
302	6	0	0	0	0	0	0	200	300	0	30.379	13.4702	-530.584	-79610.8	79560	1672.85	349.948	1053.04	0	0	0	0	0	0	0	603	903	0
302	7	0	0	0	0	0	0	200	300	0	30.6842	14.8434	-531.499	-79885.5	78644.4	1810.18	347.967	1053.3	0	0	0	0	0	0	0	603	903	0
302	8	0	0	0	0	0	0	200	300	0	29.9213	14.6909	-532.415	-80068.5	79132.7	2084.84	348.63	1053.39	0	0	0	0	0	0	0	603	903	0
302	9	0	0	0	0	0	0	200	300	0	29.9213	15.1486	-533.025	-79519.3	79498.9	1810.18	349.147	1052.18	0	0	0	0	0	0	0	603	903	0
303	0	0	0	0	0	0	0	200	300	0	31.2946	16.3693	-533.635	-79702.3	79132.7	1947.51	348.29	1052.36	0	0	0	0	0	0	0	603	903	0
303	1	0	0	0	0	0	0	200	300	0	30.5316	16.6745	-533.94	-79793.9	79437.9	1855.96	348.777	1052.44	0	0	0	0	0	0	0	603	903	0
303	2	0	0	0	0	0	0	200	300	0	30.6842	17.4374	-536.382	-79336.1	79865.1	2039.06	348.896	1050.91	0	0	0	0	0	0	0	603	903	0
303	3	0	0	0	0	0	0	200	300	0	31.5997	18.0478	-535.466	-79885.5	79743	2039.06	348.923	1052.19	0	0	0	0	0	0	0	603	903	0
303	4	0	0	0	0	0	0	200	300	0	30.8368	18.2004	-536.687	-79885.5	79498.9	2084.84	348.129	1051.85	0	0	0	0	0	0	0	603	903	0
303	5	0	0	0	0	0	0	200	300	0	30.9894	19.1159	-537.603	-80160.1	80048.3	2222.17	348.899	1052.11	0	0	0	0	0	0	0	603	903	0
303	6	0	0	0	0	0	0	200	300	0	31.7523	18.8107	-539.128	-78603.7	80597.5	2176.39	349.496	1048.8	0	0	0	0	0	0	0	603	903	0
303	7	0	0	0	0	0	0	200	300	0	32.0575	18.8107	-540.349	-80068.5	79743	2130.61	347.577	1051.18	0	0	0	0	0	0	0	603	903	0
303	8	0	0	0	0	0	0	200	300	0	32.0575	20.184	-540.044	-79977	80536.5	2267.94	349.13	1051.09	0	0	0	0	0	0	0	603	903	0
303	9	0	0	0	0	0	0	200	300	0	32.2101	20.6418	-542.18	-79153.1	80536.5	2084.84	348.542	1048.99	0	0	0	0	0	0	0	603	903	0
304	0	0	0	0	0	0	0	200	300	0	32.5153	20.4892	-544.622	-79793.9	80231.3	2542.6	347.316	1049.51	0	0	0	0	0	0	0	603	903	0
304	1	0	0	0	0	0	0	200	300	0	31.7523	21.4047	-543.401	-79885.5	81085.8	2313.72	349.219	1050.01	0	0	0	0	0	0	0	603	903	0
304	2	0	0	0	0	0	0	200	300	0	32.3627	21.8625	-545.232	-78969.9	81269	2405.27	349.054	1047.84	0	0	0	0	0	0	0	603	903	0
304	3	0	0	0	0	0	0	200	300	0	34.0411	23.0832	-544.927	-80068.5	80841.7	2451.05	348.353	1049.93	0	0	0	0	0	0	0	603	903	0
304	4	0	0	0	0	0	0	200	300	0	32.3627	22.6254	-547.673	-79610.8	80963.7	2496.83	347.832	1048.36	0	0	0	0	0	0	0	603	903	0
304	5	0	0	0	0	0	0	200	300	0	32.973	22.778	-547.063	-80068.5	81391	2679.93	348.778	1049.36	0	0	0	0	0	0	0	603	903	0
304	6	0	0	0	0	0	0	200	300	0	32.8204	23.541	-550.42	-78329	81452	2588.38	347.982	1045.31	0	0	0	0	0	0	0	603	903	0
304	7	0	0	0	0	0	0	200	300	0	33.736	23.2358	-550.725	-80068.5	81574.1	2679.93	348.121	1048.39	0	0	0	0	0	0	0	603	903	0
304	8	0	0	0	0	0	0	200	300	0	32.5153	23.3884	-551.641	-79885.5	81757.2	2725.71	348.207	1047.81	0	0	0	0	0	0	0	603	903	0
304	9	0	0	0	0	0	0	200	300	0	33.4308	23.2358	-553.777	-79519.3	81574.1	2679.93	347.305	1046.59	0	0	0	0	0	0	0	603	903	0
305	0	0	0	0	0	0	0	200	300	0	34.6515	24.6091	-552.556	-79610.8	82245.5	3000.37	348.846	1047.08	0	0	0	0	0	0	0	603	903	0
305	1	0	0	0	0	0	0	200	300	0	33.2782	25.2194	-555.913	-80343.2	82550.6	2725.71	348.496	1047.52	0	0	0	0	0	0	0	603	903	0
305	2	0	0	0	0	0	0	200	300	0	33.4308	26.135	-558.355	-80343.2	81696.2	3320.8	346.316	1046.89	0	0	0	0	0	0	0	603	903	0
305	3	0	0	0	0	0	0	200	300	0	33.8885	26.4401	-558.66	-79610.8	82367.6	3000.37	347.438	1045.5	0	0	0	0	0	0	0	603	903	0
305	4	0	0	0	0	0	0	200	300	0	34.3463	26.7453	-559.88	-79885.5	82855.9	3046.14	347.989	1045.68	0	0	0	0	0	0	0	603	903	0
305	5	0	0	0	0	0	0	200	300	0	34.0411	27.6608	-558.965	-80709.5	83100	3137.7	348.668	1047.39	0	0	0	0	0	0	0	603	903	0
305	6	0	0	0	0	0	0	200	300	0	34.1937	28.4238	-563.543	-79793.9	82855.9	3275.03	347.027	1044.59	0	0	0	0	0	0	0	603	903	0
305	7	0	0	0	0	0	0	200	300	0	35.8722	28.4238	-563.848	-80160.1	83588.3	3137.7	348.246	1045.17	0	0	0	0	0	0	0	603	903	0
305	8	0	0	0	0	0	0	200	300	0	32.6678	29.1867	-564.458	-79977	83954.5	3320.8	348.735	1044.69	0	0	0	0	0	0	0	603	903	0
305	9	0	0	0	0	0	0	200	300	0	33.2782	29.9496	-565.984	-80984.1	83588.3	3503.91	347.687	1046.09	0	0	0	0	0	0	0	603	903	0
306	0	0	0	0	0	0	0	200	300	0	33.8885	30.2548	-567.815	-79977	84259.6	3641.24	348.393	1043.85	0	0	0	0	0	0	0	603	903	0
306	1	0	0	0	0	0	0	200	300	0	33.736	29.4919	-571.172	-80068.5	83954.5	3503.91	346.986	1043.18	0	0	0	0	0	0	0	603	903	0
306	2	0	0	0	0	0	0	200	300	0	33.2782	32.2385	-569.646	-80160.1	84320.7	3732.79	348.023	1043.72	0	0	0	0	0	0	0	603	903	0
306	3	0	0	0	0	0	0	200	300	0	33.1256	32.5436	-572.393	-80343.2	84686.9	3778.57	347.953	1043.36	0	0	0	0	0	0	0	603	903	0
306	4	0	0	0	0	0	0	200	300	0	33.2782	32.8488	-575.139	-80343.2	84809	4236.33	347.458	1042.69	0	0	0	0	0	0	0	603	903	0
306	5	0	0	0	0	0	0	200	300	0	34.0411	33.4592	-574.529	-80801	84198.6	4007.45	346.553	1043.64	0	0	0	0	0	0	0	603	903	0
306	6	0	0	0	0	0	0	200	300	0	32.8204	32.2385	-576.36	-81167.2	85114.1	4282.1	347.675	1043.83	0	0	0	0	0	0	0	603	903	0
306	7	0	0	0	0	0	0	200	300	0	33.1256	34.2221	-575.75	-80801	85236.2	4465.21	348.044	1043.34	0	0	0	0	0	0	0	603	903	0
306	8	0	0	0	0	0	0	200	300	0	33.736	35.4428	-579.107	-80434.8	85175.2	4510.99	347.08	1041.89	0	0	0	0	0	0	0	603	903	0
306	9	0	0	0	0	0	0	200	300	0	34.0411	36.5109	-580.938	-81441.9	85724.5	4556.76	347.562	1043.19	0	0	0	0	0	0	0	603	903	0
307	0	0	0	0	0	0	0	200	300	0	32.6678	36.9687	-582.463	-81258.7	86029.7	4602.54	347.7	1042.51	0	0	0	0	0	0	0	603	903	0
307	1	0	0	0	0	0	0	200	300	0	33.2782	37.579	-583.684	-81167.2	85602.4	4785.64	346.659	1042.06	0	0	0	0	0	0	0	603	903	0
307	2	0	0	0	0	0	0	200	300	0	34.3463	38.6472	-585.515	-80892.5	86090.7	4922.97	347.034	1041.16	0	0	0	0	0	0	0	603	903	0
307	3	0	0	0	0	0	0	200	300	0	33.1256	39.8679	-588.262	-81533.4	86151.8	4877.2	346.451	1041.6	0	0	0	0	0	0	0	603	903	0
307	4	0	0	0	0	0	0	200	300	0	32.8204	39.8679	-589.482	-81441.9	86273.8	5060.3	346.355	1041.16	0	0	0	0	0	0	0	603	903	0
307	5	0	0	0	0	0	0	200	300	0	34.0411	41.2412	-589.788	-80892.5	86395.9	5243.41	346.487	1040.16	0	0	0	0	0	0	0	603	903	0
307	6	0	0	0	0	0	0	200	300	0	33.4308	41.6989	-594.06	-81258.7	87006.3	5655.4	346.46	1039.79	0	0	0	0	0	0	0	603	903	0
307	7	0	0	0	0	0	0	200	300	0	32.973	42.6144	-594.67	-80709.5	86579	5472.29	345.592	1038.72	0	0	0	0	0	0	0	603	903	0
307	8	0	0	0	0	0	0	200	300	0	32.973	43.53	-594.976	-81167.2	86823.1	5701.17	345.927	1039.42	0	0	0	0	0	0	0	603	903	0
307	9	0	0	0	0	0	0	200	300	0	33.4308	43.0722	-593.755	-81624.9	86823.1	5701.17	346.227	1040.47	0	0	0	0	0	0	0	603	903	0
308	0	0	0	0	0	0	0	200	300	0	33.4308	44.7507	-599.858	-81899.6	87067.2	6021.61	345.146	1039.53	0	0	0	0	0	0	0	603	903	0
308	1	0	0	0	0	0	0	200	300	0	33.1256	45.8188	-599.553	-82449	87372.5	6296.27	345.729	1040.52	0	0	0	0	0	0	0	603	903	0
308	2	0	0	0	0	0	0	200	300	0	33.1256	47.3447	-600.774	-81624.9	87189.3	6204.71	345.128	1038.87	0	0	0	0	0	0	0	603	903	0
308	3	0	0	0	0	0	0	200	300	0	32.973	47.955	-602.3	-82449	87738.7	6570.93	345.673	1039.89	0	0	0	0	0	0	0	603	903	0
308	4	0	0	0	0	0	0	200	300	0	32.0575	48.4128	-604.741	-82082.8	88165.9	6479.37	345.791	1038.73	0	0	0	0	0	0	0	603	903	0
308	5	0	0	0	0	0	0	200	300	0	32.973	51.0068	-605.352	-82357.4	87738.7	6708.25	344.938	1039.05	0	0	0	0	0	0	0	603	903	0
308	6	0	0	0	0	0	0	200	300	0	32.5153	50.7016	-608.098	-82174.3	88349	6982.91	345.288	1038.13	0	0	0	0	0	0	0	603	903	0
308	7	0	0	0	0	0	0	200	300	0	32.973	49.0231	-607.183	-82723.6	88349	7120.24	345.507	1039.24	0	0	0	0	0	0	0	603	903	0
308	8	0	0	0	0	0	0	200	300	0	32.3627	52.3801	-610.54	-82540.5	88776.2	7440.68	345.406	1038.19	0	0	0	0	0	0	0	603	903	0
308	9	0	0	0	0	0	0	200	300	0	33.1256	54.2111	-611.76	-81624.9	88593.2	7303.35	344.817	1036.43	0	0	0	0	0	0	0	603	903	0
309	0	0	0	0	0	0	0	200	300	0	32.3627	54.5163	-614.202	-83089.8	88776.2	7532.23	344.539	1038.28	0	0	0	0	0	0	0	603	903	0
309	1	0	0	0	0	0	0	200	300	0	32.973	55.8896	-609.624	-83364.4	89142.4	8173.1	346.225	1039.75	0	0	0	0	0	0	0	603	903	0
309	2	0	0	0	0	0	0	200	300	0	32.2101	56.8051	-616.643	-82265.8	89081.5	7989.99	344.462	1036.41	0	0	0	0	0	0	0	603	903	0
309	3	0	0	0	0	0	0	200	300	0	31.7523	57.7206	-616.643	-82723.6	88959.4	8127.32	344.264	1037.15	0	0	0	0	0	0	0	603	903	0
309	4	0	0	0	0	0	0	200	300	0	30.5316	58.7888	-617.559	-82998.2	89752.8	8310.42	345.335	1037.4	0	0	0	0	0	0	0	603	903	0
309	5	0	0	0	0	0	0	200	300	0	30.8368	58.9413	-619.39	-82540.5	89691.8	8401.98	344.807	1036.26	0	0	0	0	0	0	0	603	903	0
309	6	0	0	0	0	0	0	200	300	0	30.8368	60.4672	-621.221	-82632	89569.7	8722.41	344.183	1036.02	0	0	0	0	0	0	0	603	903	0
309	7	0	0	0	0	0	0	200	300	0	29.9213	61.8405	-621.526	-82906.7	89874.9	8859.74	344.604	1036.39	0	0	0	0	0	0	0	603	903	0
309	8	0	0	0	0	0	0	200	300	0	29.7687	63.8242	-622.136	-82632	90302.2	8905.52	345.148	1035.82	0	0	0	0	0	0	0	603	903	0
309	9	0	0	0	0	0	0	200	300	0	30.6842	64.7397	-623.967	-82540.5	89813.9	9225.95	343.94	1035.28	0	0	0	0	0	0	0	603	903	0
310	0	0	0	0	0	0	0	200	300	0	30.379	62.9086	-624.273	-83181.4	90302.2	9729.49	344.652	1036.25	0	0	0	0	0	0	0	603	903	0
310	1	0	0	0	0	0	0	200	300	0	30.9894	67.4863	-625.493	-82998.2	90485.2	9409.06	344.662	1035.69	0	0	0	0	0	0	0	603	903	0
310	2	0	0	0	0	0	0	200	300	0	29.7687	68.5544	-628.24	-82449	90180.1	9958.37	343.544	1034.24	0	0	0	0	0	0	0	603	903	0
310	3	0	0	0	0	0	0	200	300	0	29.4635	68.5544	-628.24	-82632	90851.4	10049.9	344.613	1034.53	0	0	0	0	0	0	0	603	903	0
310	4	0	0	0	0	0	0	200	300	0	29.0057	70.0803	-630.376	-83089.8	90790.4	10370.4	344.026	1034.81	0	0	0	0	0	0	0	603	903	0
310	5	0	0	0	0	0	0	200	300	0	29.1583	71.6061	-630.376	-82998.2	90363.1	10461.9	343.348	1034.66	0	0	0	0	0	0	0	603	903	0
310	6	0	0	0	0	0	0	200	300	0	28.548	72.2165	-630.376	-82449	90973.5	10599.2	344.316	1033.79	0	0	0	0	0	0	0	603	903	0
310	7	0	0	0	0	0	0	200	300	0	29.6161	73.2846	-630.986	-83547.6	91095.6	10736.6	344.37	1035.41	0	0	0	0	0	0	0	603	903	0
310	8	0	0	0	0	0	0	200	300	0	27.6324	73.895	-634.038	-83181.4	90363.1	11102.8	342.52	1034.19	0	0	0	0	0	0	0	603	903	0
310	9	0	0	0	0	0	0	200	300	0	28.7006	76.1838	-636.785	-82723.6	91156.7	11194.3	343.151	1032.91	0	0	0	0	0	0	0	603	903	0
311	0	0	0	0	0	0	0	200	300	0	28.3954	76.7941	-636.174	-83639.1	91644.9	11469	344.056	1034.47	0	0	0	0	0	0	0	603	903	0
311	1	0	0	0	0	0	0	200	300	0	28.3954	78.4726	-637.09	-82906.7	90546.3	11606.3	342.125	1033.13	0	0	0	0	0	0	0	603	903	0
311	2	0	0	0	0	0	0	200	300	0	27.4799	79.6933	-637.09	-83089.8	91828	11743.7	344.137	1033.42	0	0	0	0	0	0	0	603	903	0
311	3	0	0	0	0	0	0	200	300	0	27.6324	80.3036	-640.142	-82815.2	91828	11881	343.449	1032.37	0	0	0	0	0	0	0	603	903	0
311	4	0	0	0	0	0	0	200	300	0	27.3273	82.4399	-640.447	-83272.9	91644.9	12155.6	343.095	1033.02	0	0	0	0	0	0	0	603	903	0
311	5	0	0	0	0	0	0	200	300	0	28.8531	83.2028	-643.193	-83639.1	92011.1	12201.4	343.054	1033.04	0	0	0	0	0	0	0	603	903	0
311	6	0	0	0	0	0	0	200	300	0	28.548	83.9658	-643.193	-83181.4	92194.2	12293	343.338	1032.33	0	0	0	0	0	0	0	603	903	0
311	7	0	0	0	0	0	0	200	300	0	28.3954	86.102	-644.414	-83456	91889.1	12521.9	342.593	1032.51	0	0	0	0	0	0	0	603	903	0
311	8	0	0	0	0	0	0	200	300	0	26.4117	87.1701	-648.076	-83456	92316.3	12659.2	342.447	1031.78	0	0	0	0	0	0	0	603	903	0
311	9	0	0	0	0	0	0	200	300	0	27.6324	84.8813	-647.771	-83547.6	92377.4	12750.7	342.608	1031.98	0	0	0	0	0	0	0	603	903	0
312	0	0	0	0	0	0	0	200	300	0	28.0902	89.1537	-648.992	-83639.1	92621.5	12979.6	342.716	1031.88	0	0	0	0	0	0	0	603	903	0
312	1	0	0	0	0	0	0	200	300	0	28.0902	91.4426	-650.518	-84005.4	92499.4	13025.4	342.194	1032.14	0	0	0	0	0	0	0	603	903	0
312	2	0	0	0	0	0	0	200	300	0	27.9376	91.29	-652.349	-83639.1	93476	13483.2	343.291	1031.21	0	0	0	0	0	0	0	603	903	0
312	3	0	0	0	0	0	0	200	300	0	30.9894	93.121	-651.738	-83272.9	93476	13391.6	343.426	1030.77	0	0	0	0	0	0	0	603	903	0
312	4	0	0	0	0	0	0	200	300	0	29.1583	94.7995	-656.011	-83364.4	93109.8	13620.5	341.933	1030.08	0	0	0	0	0	0	0	603	903	0
312	5	0	0	0	0	0	0	200	300	0	27.9376	95.4099	-656.011	-83272.9	93598.1	13528.9	342.678	1029.94	0	0	0	0	0	0	0	603	903	0
312	6	0	0	0	0	0	0	200	300	0	28.3954	96.1728	-656.011	-83089.8	93659	13757.8	342.771	1029.66	0	0	0	0	0	0	0	603	903	0
312	7	0	0	0	0	0	0	200	300	0	29.1583	98.4616	-656.621	-82449	93414.9	13849.4	342.266	1028.57	0	0	0	0	0	0	0	603	903	0
312	8	0	0	0	0	0	0	200	300	0	29.1583	99.9875	-658.757	-83456	94025.3	14078.3	342.731	1029.69	0	0	0	0	0	0	0	603	903	0
312	9	0	0	0	0	0	0	200	300	0	29.3109	100.445	-659.063	-83730.6	94086.3	14032.5	342.758	1030.05	0	0	0	0	0	0	0	603	903	0
313	0	0	0	0	0	0	0	200	300	0	28.8531	102.581	-661.199	-83181.4	94025.3	14215.6	342.204	1028.8	0	0	0	0	0	0	0	603	903	0
313	1	0	0	0	0	0	0	200	300	0	33.1256	103.955	-662.114	-83639.1	94086.3	14581.8	342.1	1029.32	0	0	0	0	0	0	0	603	903	0
313	2	0	0	0	0	0	0	200	300	0	30.2264	104.26	-663.335	-82998.2	94635.6	14764.9	342.666	1028.12	0	0	0	0	0	0	0	603	903	0
313	3	0	0	0	0	0	0	200	300	0	31.142	106.701	-661.809	-83272.9	94147.3	14490.2	342.258	1028.83	0	0	0	0	0	0	0	603	903	0
313	4	0	0	0	0	0	0	200	300	0	32.2101	107.464	-663.64	-83272.9	94635.6	14627.6	342.601	1028.48	0	0	0	0	0	0	0	603	903	0
313	5	0	0	0	0	0	0	200	300	0	33.4308	108.838	-665.471	-83181.4	94635.6	14764.9	342.208	1028	0	0	0	0	0	0	0	603	903	0
313	6	0	0	0	0	0	0	200	300	0	35.2618	109.753	-667.607	-83181.4	94513.5	15222.7	341.571	1027.6	0	0	0	0	0	0	0	603	903	0
313	7	0	0	0	0	0	0	200	300	0	33.2782	110.211	-665.166	-82723.6	94513.5	14719.1	342.09	1027.37	0	0	0	0	0	0	0	603	903	0
313	8	0	0	0	0	0	0	200	300	0	34.0411	111.279	-667.302	-82540.5	95062.9	14948	342.459	1026.69	0	0	0	0	0	0	0	603	903	0
313	9	0	0	0	0	0	0	200	300	0	33.8885	113.415	-666.997	-81899.6	95001.8	15131.1	342.432	1025.79	0	0	0	0	0	0	0	603	903	0
314	0	0	0	0	0	0	0	200	300	0	33.5834	115.857	-668.218	-82540.5	94757.7	15360	341.807	1026.52	0	0	0	0	0	0	0	603	903	0
314	1	0	0	0	0	0	0	200	300	0	34.6515	116.772	-668.218	-82632	94818.8	15497.3	341.898	1026.66	0	0	0	0	0	0	0	603	903	0
314	2	0	0	0	0	0	0	200	300	0	33.4308	117.383	-667.607	-82632	95429.1	15817.8	342.942	1026.77	0	0	0	0	0	0	0	603	903	0
314	3	0	0	0	0	0	0	200	300	0	35.1092	120.282	-668.218	-82540.5	94757.7	16046.6	341.807	1026.52	0	0	0	0	0	0	0	603	903	0
314	4	0	0	0	0	0	0	200	300	0	35.1092	120.892	-669.744	-81991.1	95307	15909.3	342.304	1025.42	0	0	0	0	0	0	0	603	903	0
314	5	0	0	0	0	0	0	200	300	0	32.8204	122.723	-670.049	-81991.1	95062.9	16184	341.875	1025.37	0	0	0	0	0	0	0	603	903	0
314	6	0	0	0	0	0	0	200	300	0	32.2101	122.113	-669.439	-81624.9	94940.8	16687.5	341.822	1024.93	0	0	0	0	0	0	0	603	903	0
314	7	0	0	0	0	0	0	200	300	0	31.7523	124.859	-670.049	-81624.9	94818.8	16412.8	341.51	1024.82	0	0	0	0	0	0	0	603	903	0
314	8	0	0	0	0	0	0	200	300	0	33.4308	124.707	-671.575	-81533.4	95123.9	16824.8	341.643	1024.41	0	0	0	0	0	0	0	603	903	0
314	9	0	0	0	0	0	0	200	300	0	32.973	125.927	-669.133	-81716.5	94757.7	16824.8	341.613	1025.12	0	0	0	0	0	0	0	603	903	0
315	0	0	0	0	0	0	0	200	300	0	33.2782	126.843	-672.49	-81350.3	94879.8	16962.2	341.087	1023.97	0	0	0	0	0	0	0	603	903	0
315	1	0	0	0	0	0	0	200	300	0	32.6678	128.369	-672.49	-81350.3	94879.8	17236.8	341.087	1023.97	0	0	0	0	0	0	0	603	903	0
315	2	0	0	0	0	0	0	200	300	0	32.2101	129.437	-672.185	-80434.8	94696.7	17465.7	340.879	1022.66	0	0	0	0	0	0	0	603	903	0
315	3	0	0	0	0	0	0	200	300	0	31.7523	130.963	-671.88	-81075.7	94574.6	17740.4	340.761	1023.67	0	0	0	0	0	0	0	603	903	0
315	4	0	0	0	0	0	0	200	300	0	30.8368	132.641	-671.27	-80251.7	95246	17923.5	341.889	1022.55	0	0	0	0	0	0	0	603	903	0
315	5	0	0	0	0	0	0	200	300	0	32.5153	132.489	-672.795	-80343.2	94940.8	17648.8	341.114	1022.42	0	0	0	0	0	0	0	603	903	0
315	6	0	0	0	0	0	0	200	300	0	31.9049	133.862	-672.185	-80160.1	94574.6	18289.7	340.697	1022.25	0	0	0	0	0	0	0	603	903	0
315	7	0	0	0	0	0	0	200	300	0	30.9894	135.083	-673.711	-80526.3	94879.8	18381.2	340.832	1022.53	0	0	0	0	0	0	0	603	903	0
315	8	0	0	0	0	0	0	200	300	0	31.4471	131.878	-674.321	-80068.5	95001.8	18518.6	340.885	1021.74	0	0	0	0	0	0	0	603	903	0
315	9	0	0	0	0	0	0	200	300	0	32.0575	136.761	-673.406	-79885.5	94696.7	18472.8	340.624	1021.63	0	0	0	0	0	0	0	603	903	0
316	0	0	0	0	0	0	0	200	300	0	31.5997	138.134	-673.406	-79977	94513.5	18289.7	340.352	1021.77	0	0	0	0	0	0	0	603	903	0
316	1	0	0	0	0	0	0	200	300	0	33.2782	137.219	-673.101	-79885.5	94452.6	18564.3	340.325	1021.68	0	0	0	0	0	0	0	603	903	0
316	2	0	0	0	0	0	0	200	300	0	31.7523	139.05	-670.659	-79336.1	94635.6	18655.9	341.108	1021.3	0	0	0	0	0	0	0	603	903	0
316	3	0	0	0	0	0	0	200	300	0	31.5997	140.728	-674.932	-79427.7	94452.6	19067.9	339.944	1020.68	0	0	0	0	0	0	0	603	903	0
316	4	0	0	0	0	0	0	200	300	0	31.142	140.576	-674.321	-78969.9	94818.8	19067.9	340.614	1020.11	0	0	0	0	0	0	0	603	903	0
316	5	0	0	0	0	0	0	200	300	0	31.2946	141.491	-674.627	-79061.5	94513.5	19113.6	340.098	1020.19	0	0	0	0	0	0	0	603	903	0
316	6	0	0	0	0	0	0	200	300	0	32.8204	141.949	-674.016	-78329	94269.4	19159.4	339.862	1019.21	0	0	0	0	0	0	0	603	903	0
316	7	0	0	0	0	0	0	200	300	0	31.7523	143.475	-673.711	-78786.9	94635.6	19159.4	340.469	1019.94	0	0	0	0	0	0	0	603	903	0
316	8	9.19506	-14.2653	-19.2319	-4975.98	-389.409	-1259.08	179.752	558.736	0	31.5997	144.238	-672.795	-77962.8	94818.8	19342.5	340.933	1018.88	0	0	0	0	0	0	0	603	903	0
316	9	11.1787	-17.1645	-23.1992	-4152.01	-999.76	-1671.07	156.905	478.972	0	32.0575	146.069	-672.795	-77962.8	94513.5	19113.6	340.479	1018.88	0	0	0	0	0	0	0	603	903	0
317	0	2.63378	-10.4506	-19.2319	-2595.61	-511.479	-755.538	173.405	434.964	0	33.1256	146.679	-672.795	-78237.5	94696.7	19159.4	340.751	1019.29	0	0	0	0	0	0	0	603	903	0
317	1	4.61742	-6.48331	-7.33001	-2870.27	-267.338	-526.656	163.528	691.578	0	32.2101	147.595	-673.711	-78054.4	94391.5	19251	340.107	1018.86	0	0	0	0	0	0	0	603	903	0
317	2	9.04247	-6.94107	-7.33001	-1496.98	-328.373	-1396.41	155.202	504.226	0	33.2782	149.121	-674.016	-77322	94086.3	19846.1	339.591	1017.72	0	0	0	0	0	0	0	603	903	0
317	3	5.22777	-9.68765	-13.7387	-2687.16	98.873	-297.775	207.197	495.591	0	33.5834	149.579	-671.88	-77138.9	94208.4	19708.7	340.216	1017.81	0	0	0	0	0	0	0	603	903	0
317	4	5.68553	-11.0609	-19.537	-2504.06	37.8378	-801.315	201.937	428.17	0	32.8204	148.205	-672.49	-76314.9	93842.2	19846.1	339.544	1016.48	0	0	0	0	0	0	0	603	903	0
317	5	11.1787	-12.1291	-18.0112	-3602.69	-877.69	-1671.07	151.27	500.025	0	32.5153	150.799	-673.101	-77505.1	94025.3	19617.2	339.69	1018.15	0	0	0	0	0	0	0	603	903	0
317	6	4.31224	-10.4506	-15.5698	-4243.56	-145.268	-1167.53	190.67	572.552	0	34.3463	152.173	-672.49	-76223.4	93781.1	19754.5	339.454	1016.35	0	0	0	0	0	0	0	603	903	0
317	7	9.19506	-11.8239	-18.6215	-2961.82	-267.338	-1121.75	185.644	459.054	0	34.4989	152.325	-671.27	-76772.6	94208.4	19617.2	340.344	1017.37	0	0	0	0	0	0	0	603	903	0
317	8	13.3149	-16.8593	-21.9784	-4884.43	-572.514	-1350.63	173.951	522.237	0	34.0411	152.935	-670.049	-76589.6	94147.3	19800.3	340.508	1017.3	0	0	0	0	0	0	0	603	903	0
317	9	9.65282	-13.0446	-24.4199	-3968.9	-328.373	-1304.85	186.553	462.528	0	34.3463	153.698	-671.575	-75491	93476	19800.3	339.189	1015.41	0	0	0	0	0	0	0	603	903	0
318	0	7.82176	-15.7912	-26.2509	-5250.64	-694.584	-1442.18	173.541	500.018	0	34.8041	154.004	-670.964	-75765.6	93842.2	19663	339.862	1015.92	0	0	0	0	0	0	0	603	903	0
318	1	12.8572	-21.2843	-29.6078	-6807.04	-1304.94	-1671.07	155.926	529.907	0	32.973	155.224	-668.218	-75857.2	93842.2	19708.7	340.437	1016.52	0	0	0	0	0	0	0	603	903	0
318	2	11.1787	-23.1154	-37.8476	-6807.04	-999.76	-1396.41	173.585	479.854	0	34.4989	155.529	-667.913	-75491	93231.9	20349.6	339.587	1016.03	0	0	0	0	0	0	0	603	903	0
318	3	12.3994	-25.5568	-40.289	-7081.7	-694.584	-1213.3	182.76	475.772	0	34.4989	157.055	-666.997	-73751.5	93292.8	19983.4	339.87	1013.57	0	0	0	0	0	0	0	603	903	0
318	4	12.7046	-32.2707	-41.2045	-8729.64	-1793.22	-1259.08	156.48	511.861	0	34.0411	157.818	-665.776	-74758.5	92743.6	19754.5	339.301	1015.29	0	0	0	0	0	0	0	603	903	0
318	5	8.5847	-34.7121	-50.665	-10011.4	-1488.04	-435.104	170.63	497.6	0	33.2782	158.581	-665.166	-74575.4	92804.6	20258.1	339.521	1015.12	0	0	0	0	0	0	0	603	903	0
318	6	5.07518	-37.0009	-56.1581	-10560.7	-1610.11	-297.775	171.329	488.053	0	33.736	158.581	-663.335	-73843	92621.5	20349.6	339.63	1014.32	0	0	0	0	0	0	0	603	903	0
318	7	8.73729	-40.9682	-67.1445	-12025.5	-2525.64	205.766	162.385	479.1	0	34.8041	160.26	-663.03	-73568.3	92011.1	20303.8	338.774	1013.96	0	0	0	0	0	0	0	603	903	0
318	8	7.364	-39.1371	-73.8583	-13856.6	-2037.36	114.213	172.415	487.611	0	32.6678	160.26	-661.809	-73202.1	92194.2	20395.4	339.306	1013.61	0	0	0	0	0	0	0	603	903	0
318	9	5.07518	-35.3224	-86.0654	-15321.4	-2342.53	205.766	172.782	478.021	0	32.8204	160.87	-660.588	-72744.3	91828	20258.1	339.009	1013.12	0	0	0	0	0	0	0	603	903	0
319	0	9.50023	-33.4914	-99.7983	-18983.5	-3441.17	-847.091	165.519	490.219	0	34.1937	162.396	-656.316	-71645.7	92133.2	20166.5	340.379	1012.16	0	0	0	0	0	0	0	603	903	0
319	1	11.3313	-29.3715	-112.005	-20631.5	-3013.92	-1304.85	173.091	484.201	0	34.1937	161.023	-652.959	-72011.9	91889.1	20624.3	340.727	1013.29	0	0	0	0	0	0	0	603	903	0
319	2	10.7209	-26.6249	-122.076	-22462.6	-3380.13	-1350.63	172.311	484.005	0	32.3627	163.006	-654.79	-72103.5	91095.6	20532.7	339.122	1013.12	0	0	0	0	0	0	0	603	903	0
319	3	16.3667	-28.3034	-131.537	-24568.3	-3563.24	-1762.62	172.911	486.779	0	31.9049	163.769	-652.349	-71004.8	91156.7	20670	339.736	1011.84	0	0	0	0	0	0	0	603	903	0
319	4	15.9089	-29.8293	-143.744	-27314.9	-4051.52	-2083.05	171.814	490.025	0	34.9567	165.295	-650.518	-70638.6	90973.5	21219.4	339.848	1011.59	0	0	0	0	0	0	0	603	903	0
319	5	13.4675	-29.3715	-156.866	-29054.4	-3929.45	-1579.51	174.95	485.218	0	33.4308	165.143	-647.771	-70821.8	89874.9	20441.2	338.745	1012.33	0	0	0	0	0	0	0	603	903	0
319	6	15.6037	-32.4232	-164.801	-30061.4	-4295.66	-1762.62	173.934	482.411	0	32.0575	165.6	-645.635	-70272.4	90180.1	20898.9	339.677	1011.84	0	0	0	0	0	0	0	603	903	0
319	7	18.8081	-34.4069	-176.092	-31709.4	-4661.87	-2128.83	173.526	480.073	0	32.6678	165.905	-644.414	-69356.9	89874.9	21127.8	339.468	1010.63	0	0	0	0	0	0	0	603	903	0
319	8	19.7236	-32.2707	-185.858	-33906.7	-4783.94	-2495.04	174.26	482.433	0	33.736	166.363	-641.973	-69540	88837.3	20807.4	338.382	1011.32	0	0	0	0	0	0	0	603	903	0
319	9	25.0642	-28.9137	-200.811	-36012.4	-4967.05	-3273.24	175.265	479.334	0	33.1256	168.194	-636.785	-69173.8	89142.4	20990.5	339.988	1011.63	0	0	0	0	0	0	0	603	903	0
320	0	29.6418	-25.862	-212.103	-39491.4	-5943.61	-3868.33	171.978	486.19	0	31.7523	168.194	-635.869	-67525.9	88959.4	20853.1	339.902	1009.19	0	0	0	0	0	0	0	603	903	0
320	1	30.8625	-23.5732	-226.751	-40956.2	-5760.5	-4692.31	174.596	480.622	0	32.6678	168.957	-634.648	-67525.9	87921.7	20853.1	338.536	1009.4	0	0	0	0	0	0	0	603	903	0
320	2	36.8135	-20.2162	-241.705	-44435.2	-6431.89	-5012.74	173.39	483.841	0	31.5997	169.262	-630.071	-67434.3	88532.1	20944.7	340.511	1010.03	0	0	0	0	0	0	0	603	903	0
320	3	38.9497	-17.0119	-260.626	-46907.1	-6431.89	-5424.73	175.321	479.979	0	31.9049	170.025	-626.714	-66793.4	87250.4	21402.5	339.219	1009.58	0	0	0	0	0	0	0	603	903	0
320	4	37.1186	-16.2489	-272.223	-49379.1	-6859.14	-5470.51	174.803	481.392	0	32.5153	168.957	-624.578	-65786.3	86701	21356.7	338.815	1008.33	0	0	0	0	0	0	0	603	903	0
320	5	38.7971	-20.2162	-282.599	-50203	-6798.1	-5058.52	175.944	477.648	0	31.5997	168.499	-621.831	-65328.6	86273.8	21219.4	338.742	1008.06	0	0	0	0	0	0	0	603	903	0
320	6	42.4592	-25.4042	-292.975	-52400.3	-7835.7	-5424.73	173.255	478.856	0	30.5316	169.11	-620	-64596.1	86334.8	21677.1	339.25	1007.19	0	0	0	0	0	0	0	603	903	0
320	7	42.4592	-25.5568	-307.928	-54689.1	-7408.45	-5150.07	175.941	477.604	0	30.0739	169.72	-615.422	-64138.4	85419.4	21127.8	338.798	1007.22	0	0	0	0	0	0	0	603	903	0
320	8	43.8325	-28.7611	-321.051	-56794.8	-7957.77	-4692.31	175.213	476.903	0	30.8368	168.957	-611.455	-63680.6	85053.1	21127.8	339.1	1007.15	0	0	0	0	0	0	0	603	903	0
320	9	45.3584	-35.1698	-332.342	-57710.4	-8995.37	-4005.66	172.933	473.647	0	30.2264	170.025	-609.319	-63222.9	84198.6	21310.9	338.185	1006.76	0	0	0	0	0	0	0	603	903	0
321	0	43.5273	-38.3742	-344.244	-58625.9	-8629.16	-4005.66	174.933	470.303	0	28.7006	170.178	-606.572	-62948.2	83771.4	21219.4	338.106	1006.78	0	0	0	0	0	0	0	603	903	0
321	1	44.2903	-42.494	-356.451	-61189.4	-9117.44	-3731	174.422	471.663	0	28.3954	170.331	-600.774	-62032.6	83038.9	21219.4	338.22	1006.25	0	0	0	0	0	0	0	603	903	0
321	2	45.2058	-48.5976	-366.217	-63386.6	-9788.83	-3547.9	173.27	473.085	0	28.0902	168.652	-591.924	-61117.1	82611.7	21402.5	339.565	1006.25	0	0	0	0	0	0	0	603	903	0
321	3	43.8325	-54.7011	-373.846	-64119.1	-9788.83	-2449.26	173.816	471.512	0	28.7006	169.72	-593.755	-61391.8	81879.3	21585.6	337.901	1006.4	0	0	0	0	0	0	0	603	903	0
321	4	43.3747	-59.1261	-382.391	-64851.5	-10216.1	-2678.15	173.284	469.595	0	27.785	169.262	-587.346	-60293.2	81329.9	21631.4	338.47	1005.65	0	0	0	0	0	0	0	603	903	0
321	5	44.4429	-65.0771	-389.105	-65583.9	-10643.3	-1991.5	172.647	468.551	0	25.954	170.178	-585.21	-59194.5	80597.5	21768.7	337.724	1004.15	0	0	0	0	0	0	0	603	903	0
321	6	45.2058	-72.859	-398.871	-67414.9	-10765.4	-2037.28	173.01	469.015	0	25.4962	168.499	-580.022	-58828.3	80780.7	21814.5	339.272	1004.42	0	0	0	0	0	0	0	603	903	0
321	7	46.1213	-76.9789	-406.805	-67414.9	-10887.5	-1854.17	173.237	465.718	0	23.9703	168.805	-573.919	-58187.4	79315.8	21494	338.201	1004.39	0	0	0	0	0	0	0	603	903	0
321	8	46.5791	-82.6247	-414.435	-68788.2	-11497.8	-1762.62	172.257	465.981	0	23.9703	168.957	-570.562	-57546.6	78888.5	21677.1	338.265	1003.86	0	0	0	0	0	0	0	603	903	0
321	9	46.4265	-84.4557	-420.233	-68971.3	-11192.6	-1533.74	173.366	464.127	0	24.1229	168.347	-565.068	-56631.1	78156.1	21585.6	338.313	1003.22	0	0	0	0	0	0	0	603	903	0
322	0	44.5954	-90.7118	-427.862	-69246	-11742	-1579.51	172.557	461.842	0	23.9703	168.347	-559.88	-56722.6	77240.6	21494	337.959	1004.31	0	0	0	0	0	0	0	603	903	0
322	1	48.105	-94.9843	-433.661	-71077.1	-11986.1	-984.42	172.361	463.9	0	23.0548	167.431	-555.303	-55898.6	76874.4	21539.8	338.437	1003.66	0	0	0	0	0	0	0	603	903	0
322	2	46.1213	-96.0524	-438.238	-70619.3	-12352.3	-1121.75	171.814	461.144	0	21.9867	166.821	-550.115	-54708.4	76019.9	21631.4	338.189	1002.45	0	0	0	0	0	0	0	603	903	0
322	3	46.1213	-99.1042	-444.342	-71626.4	-12474.4	-1030.2	171.926	461.197	0	22.4445	165.753	-543.706	-54067.6	74311	21356.7	336.675	1002.44	0	0	0	0	0	0	0	603	903	0
322	4	45.6636	-102.156	-448.614	-72450.4	-12596.4	-709.762	171.921	461.498	0	19.6979	166.211	-539.434	-52877.4	74555.1	21494	338.21	1001.02	0	0	0	0	0	0	0	603	903	0
322	5	45.2058	-103.834	-457.769	-72541.9	-13145.8	-343.551	171.283	458.468	0	18.172	164.227	-534.246	-53152.1	73395.4	21677.1	337.381	1002.49	0	0	0	0	0	0	0	603	903	0
322	6	43.0696	-103.834	-462.652	-74189.9	-13145.8	22.6601	171.586	460.358	0	18.172	163.464	-527.532	-51870.3	72968.2	21585.6	338.32	1001.33	0	0	0	0	0	0	0	603	903	0
322	7	42.3066	-103.224	-466.009	-73823.7	-13328.9	-68.8927	171.398	458.417	0	18.3246	163.464	-522.344	-51504.1	71076	21768.7	336.071	1001.6	0	0	0	0	0	0	0	603	903	0
322	8	40.7808	-104.902	-471.808	-74556.1	-13939.2	388.871	170.456	458.022	0	18.6298	161.633	-516.545	-51046.3	71320.2	21173.6	338.071	1001.82	0	0	0	0	0	0	0	603	903	0
322	9	39.56	-103.987	-475.164	-74373	-13939.2	663.53	170.664	456.52	0	18.172	160.26	-508.001	-49398.4	70038.5	20990.5	337.871	1000.24	0	0	0	0	0	0	0	603	903	0
323	0	36.9661	-104.292	-480.047	-75196.9	-14671.6	526.201	169.437	456.645	0	16.1884	160.107	-503.728	-48482.8	69000.8	21402.5	336.98	999.248	0	0	0	0	0	0	0	603	903	0
323	1	37.8816	-103.682	-486.151	-76661.8	-14915.8	983.964	169.319	457.691	0	13.5944	158.581	-497.014	-47842	68695.7	20853.1	338.217	999.259	0	0	0	0	0	0	0	603	903	0
323	2	34.6772	-101.851	-495.306	-77394.2	-14915.8	938.188	169.886	456.255	0	13.7469	156.903	-488.469	-46743.4	67352.9	20761.6	337.886	998.694	0	0	0	0	0	0	0	603	903	0
323	3	33.6091	-100.477	-509.649	-78035.1	-16197.5	1441.73	168.218	453.115	0	13.4418	157.055	-482.366	-46468.7	66254.3	20807.4	337.353	999.335	0	0	0	0	0	0	0	603	903	0
323	4	28.4211	-101.393	-517.889	-78492.8	-16380.6	1579.06	168.37	451.563	0	12.984	155.072	-476.873	-45919.4	64972.6	20715.8	336.247	999.293	0	0	0	0	0	0	0	603	903	0
323	5	24.9116	-102.766	-525.213	-79866.1	-16929.9	2036.82	167.766	452.064	0	10.8478	154.309	-470.159	-45461.6	64667.4	20303.8	337.544	999.694	0	0	0	0	0	0	0	603	903	0
323	6	23.3857	-102.156	-532.232	-79957.7	-17296.1	2219.93	167.503	450.231	0	9.47448	152.935	-462.224	-43447.5	63690.8	20486.9	337.792	996.997	0	0	0	0	0	0	0	603	903	0
323	7	21.0969	-102.461	-537.42	-81056.3	-17601.3	2769.24	167.249	450.825	0	9.93225	149.884	-457.647	-42715	62592.2	20441.2	336.77	996.336	0	0	0	0	0	0	0	603	903	0
323	8	14.2305	-104.445	-543.829	-81056.3	-18272.7	2723.47	166.4	449.047	0	9.47448	149.579	-446.965	-42989.7	62164.9	20258.1	339.082	999.181	0	0	0	0	0	0	0	603	903	0
323	9	13.7727	-107.191	-548.712	-80781.7	-18394.8	3272.78	166.476	447.221	0	7.49084	147.442	-442.083	-41707.9	60455.9	20212.3	336.753	997.344	0	0	0	0	0	0	0	603	903	0
324	0	10.4158	-108.565	-551.153	-82246.5	-18944.1	3227.01	165.628	449.226	0	6.42273	145.611	-432.317	-40060	59967.7	19983.4	338.712	995.664	0	0	0	0	0	0	0	603	903	0
324	1	8.88988	-110.548	-555.731	-81605.6	-18944.1	3959.43	165.911	446.844	0	5.81238	144.696	-424.688	-40151.6	58685.9	19983.4	338.186	997.544	0	0	0	0	0	0	0	603	903	0
324	2	3.5493	-115.126	-560.003	-81056.3	-19432.4	4096.76	165.3	444.743	0	4.74426	142.254	-417.669	-38595.1	57404.2	20075	337.44	995.406	0	0	0	0	0	0	0	603	903	0
324	3	1.26049	-117.415	-559.393	-80873.2	-19615.5	4371.42	164.934	444.573	0	3.67614	139.355	-408.513	-38045.8	56610.7	19434.1	338.577	996.133	0	0	0	0	0	0	0	603	903	0
324	4	-2.40162	-118.788	-562.445	-80598.5	-19981.7	4371.42	164.473	443.3	0	4.13391	138.134	-401.494	-37130.3	55390	19067.9	337.96	995.48	0	0	0	0	0	0	0	603	903	0
324	5	-2.55421	-121.077	-563.971	-81056.3	-19920.7	4783.4	164.678	443.724	0	2.76062	134.93	-390.203	-36489.5	53986.2	18976.3	338.354	996.514	0	0	0	0	0	0	0	603	903	0
324	6	-7.43702	-123.976	-563.971	-80873.2	-20531	5103.84	163.596	443.4	0	1.99768	132.184	-384.71	-35390.8	53192.8	18701.7	338.267	994.994	0	0	0	0	0	0	0	603	903	0
324	7	-8.81032	-125.502	-566.107	-79774.6	-20225.8	5515.82	164.272	440.918	0	0.929563	131.573	-376.47	-34292.2	52155.2	18564.3	338.537	994.089	0	0	0	0	0	0	0	603	903	0
324	8	-10.9465	-126.112	-566.107	-79866.1	-20592.1	5836.26	163.625	441.08	0	0.776975	127.148	-364.873	-32827.4	50568.3	18198.1	338.591	992.969	0	0	0	0	0	0	0	603	903	0
324	9	-13.388	-128.401	-568.853	-79957.7	-20897.2	5882.04	163.264	440.559	0	0.471799	125.164	-358.464	-33010.5	48981.3	18243.9	336.642	995.089	0	0	0	0	0	0	0	603	903	0
325	0	-15.6768	-130.69	-569.769	-79499.9	-20897.2	6477.13	163.323	439.53	0	1.38733	124.707	-349.614	-31911.8	48432	17740.4	338.53	994.277	0	0	0	0	0	0	0	603	903	0
325	1	-18.4234	-130.079	-571.295	-79408.4	-20714.1	6385.58	163.742	438.997	0	-0.443728	122.265	-341.985	-30263.9	46906.1	17648.8	337.159	991.495	0	0	0	0	0	0	0	603	903	0
325	2	-19.9492	-130.385	-572.21	-79042.2	-21385.5	6431.35	162.627	438.135	0	-0.291141	119.214	-331.609	-29623	45624.4	17465.7	337.585	992.331	0	0	0	0	0	0	0	603	903	0
325	3	-22.0855	-132.826	-570.99	-78675.9	-21080.3	6843.34	163.081	437.789	0	-2.73255	117.23	-323.98	-28707.5	44464.7	17191	337.245	991.609	0	0	0	0	0	0	0	603	903	0
325	4	-24.0691	-133.589	-569.464	-78859	-21873.8	6751.79	161.589	438.479	0	-2.73255	113.263	-316.045	-27791.9	43122	16779.1	336.443	990.937	0	0	0	0	0	0	0	603	903	0
325	5	-23.3062	-131.453	-573.126	-78950.6	-21751.7	7026.44	162.047	437.754	0	-2.42737	110.974	-304.448	-26876.4	42084.4	16229.7	338.232	991.279	0	0	0	0	0	0	0	603	903	0
325	6	-24.2217	-130.385	-578.314	-77852	-21751.7	7026.44	162.388	434.619	0	-0.138553	109.906	-297.734	-25503.1	41351.9	15955.1	338.889	988.657	0	0	0	0	0	0	0	603	903	0
325	7	-26.0527	-132.368	-577.093	-77577.3	-21995.9	7301.11	161.885	434.428	0	-3.03772	106.396	-288.884	-25136.9	40070.2	15634.6	338.707	990.014	0	0	0	0	0	0	0	603	903	0
325	8	-27.2735	-132.368	-574.347	-77394.2	-22117.9	7758.87	161.49	434.752	0	-1.96961	104.565	-282.17	-24038.3	38727.4	15497.3	337.248	988.191	0	0	0	0	0	0	0	603	903	0
325	9	-28.189	-130.995	-579.535	-77943.5	-21873.8	7484.21	162.256	434.493	0	-2.88513	102.734	-272.71	-22848.1	38239.2	15222.7	340.219	986.782	0	0	0	0	0	0	0	603	903	0
326	0	-28.9519	-129.927	-577.093	-78401.3	-22301	7758.87	161.356	435.855	0	-2.57996	99.8349	-265.386	-21932.6	37323.6	14764.9	340.639	985.644	0	0	0	0	0	0	0	603	903	0
326	1	-29.7149	-131.605	-579.229	-76753.4	-22056.9	7529.99	161.92	432.509	0	-1.51184	95.1047	-258.977	-22024.1	35980.9	14581.8	338.934	988.043	0	0	0	0	0	0	0	603	903	0
326	2	-28.4942	-131.605	-585.943	-77119.6	-22911.4	7758.87	160.898	431.616	0	-2.27478	94.0366	-248.906	-21108.6	35248.4	14078.3	341.613	987.805	0	0	0	0	0	0	0	603	903	0
326	3	-30.02	-130.842	-596.014	-77485.8	-23338.6	8079.3	160.842	430.007	0	-2.57996	92.2055	-242.803	-19643.7	33966.7	13620.5	339.894	983.904	0	0	0	0	0	0	0	603	903	0
326	4	-34.5977	-136.488	-603.949	-77760.4	-24071.1	8857.5	160.144	428.753	0	-1.81702	88.8486	-234.868	-19094.4	32684.9	13757.8	339.163	984.299	0	0	0	0	0	0	0	603	903	0
326	5	-39.9382	-141.676	-607.306	-77028	-24132.1	8903.28	160.264	426.836	0	-2.27478	86.8649	-226.934	-18911.3	32074.6	12750.7	341.339	986.334	0	0	0	0	0	0	0	603	903	0
326	6	-39.9382	-142.134	-608.831	-77028	-24864.5	8857.5	159.16	426.518	0	-2.1222	84.8813	-221.746	-18178.9	31037	12659.2	339.967	984.981	0	0	0	0	0	0	0	603	903	0
326	7	-41.6167	-141.524	-617.682	-76936.4	-24742.4	9727.25	159.943	424.557	0	-2.1222	82.8976	-213.506	-16897.2	29816.3	12384.5	339.651	982.141	0	0	0	0	0	0	0	603	903	0
326	8	-44.6685	-147.017	-621.954	-77302.6	-25291.8	9773.03	159.335	424.29	0	1.53991	79.6933	-205.877	-16805.6	28839.7	11835.2	340.083	984.63	0	0	0	0	0	0	0	603	903	0
326	9	-48.3306	-150.679	-625.921	-77668.9	-25658	9956.13	159.008	424.087	0	-1.51184	74.9631	-197.637	-16347.8	27924.2	11377.4	341.29	985.717	0	0	0	0	0	0	0	603	903	0
327	0	-47.1099	-150.984	-631.109	-77302.6	-25596.9	9956.13	159.441	422.487	0	-1.20667	74.0475	-193.059	-15523.9	27008.7	10873.9	339.898	983.41	0	0	0	0	0	0	0	603	903	0
327	1	-45.4314	-153.12	-639.959	-76844.9	-25902.1	10185	159.525	420.078	0	0.0140353	72.2165	-185.43	-14150.6	25971.1	10736.6	340.059	979.312	0	0	0	0	0	0	0	603	903	0
327	2	-43.9055	-159.987	-646.368	-78309.7	-25902.1	9910.36	159.927	421.153	0	0.776975	67.0285	-175.054	-14242.1	25177.6	10324.6	343.828	984.359	0	0	0	0	0	0	0	603	903	0
327	3	-44.2107	-160.444	-650.335	-77577.3	-26085.2	9635.7	159.89	419.288	0	-0.291141	66.5707	-170.781	-13875.9	24140	10233	341.35	984.25	0	0	0	0	0	0	0	603	903	0
327	4	-42.6848	-156.935	-649.725	-78309.7	-26024.2	10047.7	159.946	420.528	0	0.0140353	64.8923	-164.373	-13143.5	23346.6	9500.61	342.034	982.962	0	0	0	0	0	0	0	603	903	0
327	5	-42.3797	-159.682	-658.88	-77394.2	-26024.2	9361.04	160.502	417.463	0	1.6925	63.3664	-157.354	-12228	22553.1	9180.18	343.328	980.71	0	0	0	0	0	0	0	603	903	0
327	6	-40.396	-164.259	-660.406	-77394.2	-25902.1	9315.26	160.779	417.192	0	2.45544	59.8569	-150.64	-12411.1	22064.8	9042.85	346.474	985.389	0	0	0	0	0	0	0	603	903	0
327	7	-40.396	-160.75	-662.848	-77943.5	-26085.2	9498.37	160.647	417.589	0	1.23474	58.6362	-143.621	-11861.8	20661	8401.98	343.858	985.591	0	0	0	0	0	0	0	603	903	0
327	8	-39.9382	-156.935	-666.815	-78218.2	-26329.4	8811.72	160.515	417.301	0	1.99768	58.1784	-136.907	-10763.1	19867.6	8401.98	345.117	981.617	0	0	0	0	0	0	0	603	903	0
327	9	-40.8538	-159.071	-670.782	-78767.5	-26329.4	8994.83	160.748	417.426	0	4.2865	56.4999	-131.719	-10305.4	19135.1	8081.54	345.273	981.238	0	0	0	0	0	0	0	603	903	0
328	0	-41.1589	-160.75	-674.749	-77668.9	-26451.4	8994.83	160.798	415.108	0	0.929563	52.8378	-124.395	-10213.8	17670.3	7669.56	342.05	985.108	0	0	0	0	0	0	0	603	903	0
328	1	-38.1072	-156.935	-679.937	-77394.2	-26207.3	8857.5	161.456	413.825	0	1.53991	52.8378	-117.986	-9572.94	17365.1	7486.45	347.18	984.136	0	0	0	0	0	0	0	603	903	0
328	2	-40.0908	-154.341	-682.074	-78401.3	-26756.6	8491.29	160.772	414.945	0	1.99768	51.6171	-112.798	-8932.07	16510.6	7120.24	346.374	982.187	0	0	0	0	0	0	0	603	903	0
328	3	-43.7529	-155.714	-686.956	-77943.5	-26756.6	8765.95	161.051	413.462	0	2.15027	46.7343	-108.831	-8657.41	15350.9	6708.25	341.054	982.549	0	0	0	0	0	0	0	603	903	0
328	4	-42.3797	-154.494	-687.262	-77852	-26878.7	8445.51	160.89	413.279	0	0.624387	47.1921	-99.9805	-8199.65	14923.7	6525.15	349.266	985.012	0	0	0	0	0	0	0	603	903	0
328	5	-45.1262	-150.831	-693.06	-76844.9	-27183.9	8628.62	160.777	410.878	0	0.319211	46.124	-96.6236	-7833.44	13947.1	6342.04	344.345	984.072	0	0	0	0	0	0	0	603	903	0
328	6	-45.7366	-152.663	-695.501	-77485.8	-27244.9	8720.17	160.827	411.41	0	0.776975	42.767	-91.1304	-7284.12	13031.6	6433.6	343	982.931	0	0	0	0	0	0	0	603	903	0
328	7	-46.8047	-154.341	-698.858	-77852	-27305.9	8537.06	160.928	411.399	0	1.53991	41.2412	-81.9752	-6643.25	12116.1	5746.95	347.802	984.04	0	0	0	0	0	0	0	603	903	0
328	8	-48.6358	-151.9	-705.267	-78035.1	-27916.3	8628.62	160.417	410.646	0	-0.596316	40.6308	-81.3648	-6551.7	11749.9	5609.62	344.41	983.523	0	0	0	0	0	0	0	603	903	0
328	9	-48.6358	-150.069	-709.539	-77394.2	-27916.3	8903.28	160.656	409.077	0	-1.05408	37.579	-76.1768	-6277.04	10834.3	5243.41	342.226	985.401	0	0	0	0	0	0	0	603	903	0
329	0	-51.0772	-153.731	-712.591	-77119.6	-28221.5	8674.39	160.396	408.224	0	0.929563	35.4428	-70.3785	-6002.38	10163	5334.96	344.404	988.287	0	0	0	0	0	0	0	603	903	0
329	1	-50.9246	-155.257	-716.559	-77577.3	-28160.4	8674.39	160.7	408.264	0	0.0140353	33.7643	-67.3267	-4445.98	9735.71	4968.75	344.604	969.036	0	0	0	0	0	0	0	603	903	0
329	2	-51.6875	-153.425	-719.61	-76753.4	-28038.3	8857.5	161.037	406.66	0	-1.96961	33.4592	-62.7491	-5636.17	8637.08	4510.99	337.645	992.821	0	0	0	0	0	0	0	603	903	0
329	3	-51.0772	-153.883	-719.61	-77577.3	-28526.6	9132.16	160.358	407.805	0	-1.51184	30.56	-56.6456	-4812.19	8331.9	4282.1	347.088	987.953	0	0	0	0	0	0	0	603	903	0
329	4	-51.6875	-156.172	-723.883	-77028	-28587.7	8674.39	160.508	406.41	0	-0.138553	27.966	-53.5938	-4629.09	7843.62	4053.22	346.353	989.374	0	0	0	0	0	0	0	603	903	0
329	5	-49.2461	-157.24	-730.291	-76844.9	-28343.5	8765.95	161.189	405.225	0	-1.05408	27.8134	-50.2369	-4903.75	7172.23	3961.67	342.768	1000.61	0	0	0	0	0	0	0	603	903	0
329	6	-49.3987	-155.867	-731.817	-78126.6	-28648.7	8811.72	160.853	406.757	0	-2.57996	26.5927	-43.8282	-3896.67	6683.95	3687.01	352.504	991.908	0	0	0	0	0	0	0	603	903	0
329	7	-50.9246	-155.714	-733.648	-76204	-28587.7	8491.29	161.034	403.87	0	-2.27478	25.0668	-41.692	-3530.45	5951.53	3503.91	342.75	987.68	0	0	0	0	0	0	0	603	903	0
329	8	-51.8401	-157.24	-736.09	-77577.3	-28587.7	8308.18	161.163	405.391	0	-1.66443	23.2358	-37.7247	-3896.67	5646.35	3366.58	349.673	1006.29	0	0	0	0	0	0	0	603	903	0
329	9	-51.0772	-153.883	-737.005	-76478.7	-28221.5	8216.63	161.708	403.77	0	-1.81702	23.2358	-33.7574	-3530.45	4913.93	3137.7	345.566	1007.58	0	0	0	0	0	0	0	603	903	0
330	0	-50.3142	-153.425	-740.057	-77028	-28343.5	8308.18	161.701	404.084	0	-3.49549	21.2521	-30.0953	-3438.9	4913.93	3000.37	363.279	1017.27	0	0	0	0	0	0	0	603	903	0
330	1	-49.2461	-153.425	-741.888	-77394.2	-28404.6	8216.63	161.713	404.321	0	-3.19031	19.4211	-27.3487	-2981.14	4242.54	2679.93	355.128	1012	0	0	0	0	0	0	0	603	903	0
330	2	-50.3142	-153.273	-744.635	-76021	-28709.7	7941.97	161.445	402.092	0	-1.96961	18.2004	-24.2969	-2523.37	4059.44	3091.92	367.076	1006.86	0	0	0	0	0	0	0	603	903	0
330	3	-49.0935	-149.458	-749.823	-77302.6	-28404.6	7941.97	162.118	403.095	0	-2.57996	18.5056	-20.94	-2614.93	3388.05	2863.04	361.798	1027.88	0	0	0	0	0	0	0	603	903	0
330	4	-49.2461	-150.069	-751.043	-76478.7	-28648.7	7850.42	161.855	401.83	0	-3.49549	15.9116	-18.4986	-2798.03	3143.91	2313.72	369.954	1054.26	0	0	0	0	0	0	0	603	903	0
330	5	-50.009	-150.374	-755.621	-76387.2	-28709.7	7850.42	162.005	401.092	0	-3.49549	13.3176	-15.752	-2248.72	2838.74	2084.84	380.214	1045.76	0	0	0	0	0	0	0	603	903	0
330	6	-50.9246	-149.153	-756.231	-76844.9	-28587.7	7529.99	162.197	401.616	0	-2.42737	13.6227	-14.2261	-2157.16	2655.63	1993.29	386.673	1054.63	0	0	0	0	0	0	0	603	903	0
330	7	-50.9246	-147.017	-757.757	-75563.1	-28953.9	7529.99	161.79	399.719	0	0	0	0	0	0	0	200	903	0	0	0	0	0	0	0	603	903	0
330	8	-51.0772	-146.712	-755.316	-77211.1	-28526.6	7575.76	162.232	402.224	0	0	0	0	0	0	0	200	903	0	0	0	0	0	0	0	603	903	0
330	9	-50.009	-146.864	-761.114	-76570.2	-28526.6	8125.08	162.52	400.603	0	0	0	0	0	0	0	200	903	0	0	0	0	0	0	0	603	903	0
331	0	-49.8565	-146.254	-760.809	-76295.6	-28831.8	7484.21	162.104	400.282	0	0	0	0	0	0	0	200	903	0	0	0	0	0	0	0	603	903	0
331	1	-49.8565	-144.118	-765.387	-76570.2	-28221.5	7118	163.128	400.041	0	0	0	0	0	0	0	200	903	0	0	0	0	0	0	0	603	903	0
331	2	-50.4668	-144.575	-763.861	-75105.4	-28892.8	7072.22	162.175	398.323	0	0	0	0	0	0	0	200	903	0	0	0	0	0	0	0	603	903	0
331	3	-50.9246	-142.287	-767.523	-76753.4	-28953.9	6934.89	162.276	400.001	0	0	0	0	0	0	0	200	903	0	0	0	0	0	0	0	603	903	0
331	4	-51.3823	-139.998	-765.997	-75929.4	-28648.7	6522.9	162.599	399.125	0	0	0	0	0	0	0	200	903	0	0	0	0	0	0	0	603	903	0
331	5	-50.4668	-139.54	-770.269	-75746.3	-28526.6	6660.23	162.965	398.337	0	0	0	0	0	0	0	200	903	0	0	0	0	0	0	0	603	903	0
331	6	-50.9246	-139.54	-768.438	-76570.2	-27977.3	6843.34	163.592	399.644	0	0	0	0	0	0	0	200	903	0	0	0	0	0	0	0	603	903	0
331	7	-48.4832	-137.251	-774.237	-76753.4	-28465.6	6477.13	163.234	399.134	0	0	0	0	0	0	0	200	903	0	0	0	0	0	0	0	603	903	0
331	8	-47.4151	-134.81	-776.678	-75654.7	-28160.4	6294.02	163.742	397.408	0	0	0	0	0	0	0	200	903	0	0	0	0	0	0	0	603	903	0
331	9	-48.6358	-134.962	-779.12	-75837.8	-28404.6	6156.69	163.543	397.338	0	0	0	0	0	0	0	200	903	0	0	0	0	0	0	0	603	903	0
332	0	-48.9409	-134.199	-773.016	-75929.4	-28160.4	6202.47	163.571	398.225	0	0	0	0	0	0	0	200	903	0	0	0	0	0	0	0	603	903	0
332	1	-49.5513	-132.826	-781.256	-76204	-28160.4	6339.8	163.955	397.54	0	0	0	0	0	0	0	200	903	0	0	0	0	0	0	0	603	903	0
332	2	-48.4832	-130.537	-779.73	-76295.6	-28465.6	6065.14	163.493	397.849	0	0	0	0	0	0	0	200	903	0	0	0	0	0	0	0	603	903	0
332	3	-49.2461	-129.469	-779.73	-75013.8	-27855.2	5836.26	164.276	396.205	0	0	0	0	0	0	0	200	903	0	0	0	0	0	0	0	603	903	0
332	4	-49.0935	-129.469	-777.594	-75471.6	-28282.5	5927.81	163.628	397.058	0	0	0	0	0	0	0	200	903	0	0	0	0	0	0	0	603	903	0
332	5	-48.0254	-128.248	-780.951	-76204	-27611.1	5836.26	164.644	397.579	0	0	0	0	0	0	0	200	903	0	0	0	0	0	0	0	603	903	0
332	6	-48.7883	-126.112	-780.951	-75196.9	-27855.2	5332.72	164.332	396.289	0	0	0	0	0	0	0	200	903	0	0	0	0	0	0	0	603	903	0
332	7	-47.8728	-124.739	-784.308	-75929.4	-27855.2	5698.93	164.484	396.811	0	0	0	0	0	0	0	200	903	0	0	0	0	0	0	0	603	903	0
332	8	-48.0254	-123.976	-780.34	-74830.7	-27428	5378.5	164.851	395.895	0	0	0	0	0	0	0	200	903	0	0	0	0	0	0	0	603	903	0
332	9	-48.7883	-122.603	-784.613	-75013.8	-27794.2	5561.6	164.576	395.606	0	0	0	0	0	0	0	200	903	0	0	0	0	0	0	0	603	903	0
333	0	-49.2461	-122.145	-778.814	-75563.1	-27611.1	5149.61	164.547	397.023	0	0	0	0	0	0	0	200	903	0	0	0	0	0	0	0	603	903	0
333	1	-48.7883	-120.772	-780.035	-75105.4	-27672.1	5149.61	164.525	396.285	0	0	0	0	0	0	0	200	903	0	0	0	0	0	0	0	603	903	0
333	2	-48.7883	-118.178	-777.899	-75654.7	-27550.1	5561.6	164.584	397.255	0	0	0	0	0	0	0	200	903	0	0	0	0	0	0	0	603	903	0
333	3	-47.7202	-117.11	-778.204	-74006.7	-27305.9	5103.84	164.912	395.099	0	0	0	0	0	0	0	200	903	0	0	0	0	0	0	0	603	903	0
333	4	-46.0418	-117.262	-779.73	-74556.1	-27489	5012.28	164.745	395.618	0	0	0	0	0	0	0	200	903	0	0	0	0	0	0	0	603	903	0
333	5	-47.4151	-114.973	-778.814	-74556.1	-26817.6	4737.63	165.566	395.73	0	0	0	0	0	0	0	200	903	0	0	0	0	0	0	0	603	903	0
333	6	-48.178	-113.6	-776.678	-74006.7	-27244.9	4829.18	164.921	395.286	0	0	0	0	0	0	0	200	903	0	0	0	0	0	0	0	603	903	0
333	7	-47.4151	-112.074	-774.542	-73732.1	-27122.8	4737.63	164.982	395.194	0	0	0	0	0	0	0	200	903	0	0	0	0	0	0	0	603	903	0
333	8	-47.2625	-111.311	-772.406	-73549	-26695.6	4554.52	165.438	395.221	0	0	0	0	0	0	0	200	903	0	0	0	0	0	0	0	603	903	0
333	9	-47.7202	-111.159	-770.575	-73182.8	-26756.6	4600.3	165.277	394.972	0	0	0	0	0	0	0	200	903	0	0	0	0	0	0	0	603	903	0
334	0	-47.2625	-109.022	-767.218	-73732.1	-26268.3	4554.52	165.762	396.103	0	0	0	0	0	0	0	200	903	0	0	0	0	0	0	0	603	903	0
334	1	-46.6521	-108.107	-767.523	-73365.9	-26146.3	4462.97	165.934	395.588	0	0	0	0	0	0	0	200	903	0	0	0	0	0	0	0	603	903	0
334	2	-46.4995	-105.971	-764.776	-72358.8	-26451.4	4005.2	165.413	394.614	0	0	0	0	0	0	0	200	903	0	0	0	0	0	0	0	603	903	0
334	3	-46.0418	-104.75	-763.25	-72175.7	-26024.2	4417.19	165.903	394.564	0	0	0	0	0	0	0	200	903	0	0	0	0	0	0	0	603	903	0
334	4	-46.9573	-103.529	-761.114	-72999.7	-26085.2	4005.2	165.728	395.912	0	0	0	0	0	0	0	200	903	0	0	0	0	0	0	0	603	903	0
334	5	-46.6521	-102.614	-760.199	-72267.2	-25963.2	4005.2	165.847	395.064	0	0	0	0	0	0	0	200	903	0	0	0	0	0	0	0	603	903	0
334	6	-46.6521	-100.172	-756.842	-71717.9	-25596.9	3913.65	166.179	394.759	0	0	0	0	0	0	0	200	903	0	0	0	0	0	0	0	603	903	0
334	7	-46.1943	-99.1042	-750.738	-70436.2	-25413.8	3730.55	166.148	393.823	0	0	0	0	0	0	0	200	903	0	0	0	0	0	0	0	603	903	0
334	8	-45.2788	-98.9516	-750.128	-70802.4	-25413.8	3822.1	166.121	394.387	0	0	0	0	0	0	0	200	903	0	0	0	0	0	0	0	603	903	0
334	9	-43.1426	-96.3576	-748.907	-71168.6	-24986.6	3593.22	166.636	395.03	0	0	0	0	0	0	0	200	903	0	0	0	0	0	0	0	603	903	0
335	0	-45.2788	-94.8317	-746.161	-71534.8	-25108.7	3364.33	166.35	395.871	0	0	0	0	0	0	0	200	903	0	0	0	0	0	0	0	603	903	0
335	1	-44.3633	-94.2213	-740.973	-70070	-24803.5	3776.32	166.526	394.565	0	0	0	0	0	0	0	200	903	0	0	0	0	0	0	0	603	903	0
335	2	-46.0418	-93.9162	-740.362	-69703.8	-24864.5	3501.66	166.416	394.148	0	0	0	0	0	0	0	200	903	0	0	0	0	0	0	0	603	903	0
335	3	-46.1943	-91.3222	-739.142	-70161.6	-24559.3	3455.89	166.773	394.923	0	0	0	0	0	0	0	200	903	0	0	0	0	0	0	0	603	903	0
335	4	-45.1262	-90.1015	-732.428	-70070	-24010	3455.89	167.219	395.668	0	0	0	0	0	0	0	200	903	0	0	0	0	0	0	0	603	903	0
335	5	-45.7366	-88.423	-731.207	-68879.8	-24254.2	3272.78	166.83	394.2	0	0	0	0	0	0	0	200	903	0	0	0	0	0	0	0	603	903	0
335	6	-43.9055	-88.1178	-726.324	-69062.9	-23826.9	3272.78	167.195	395.086	0	0	0	0	0	0	0	200	903	0	0	0	0	0	0	0	603	903	0
335	7	-44.3633	-85.5238	-723.578	-68879.8	-24071.1	3181.23	166.733	395.193	0	0	0	0	0	0	0	200	903	0	0	0	0	0	0	0	603	903	0
335	8	-43.9055	-84.3031	-721.441	-68971.3	-23949	3364.33	166.804	395.602	0	0	0	0	0	0	0	200	903	0	0	0	0	0	0	0	603	903	0
335	9	-44.3633	-82.4721	-718.084	-67689.6	-22972.4	3089.68	168.009	394.264	0	0	0	0	0	0	0	200	903	0	0	0	0	0	0	0	603	903	0
336	0	-45.1262	-82.0143	-713.812	-67414.9	-23704.8	3318.56	166.791	394.444	0	0	0	0	0	0	0	200	903	0	0	0	0	0	0	0	603	903	0
336	1	-44.3633	-80.4884	-710.76	-67872.7	-22972.4	2998.12	167.679	395.493	0	0	0	0	0	0	0	200	903	0	0	0	0	0	0	0	603	903	0
336	2	-44.5159	-77.8944	-705.877	-67689.6	-23094.5	2631.91	167.283	395.894	0	0	0	0	0	0	0	200	903	0	0	0	0	0	0	0	603	903	0
336	3	-44.2107	-77.2841	-702.52	-65767	-23094.5	2906.57	167.126	393.616	0	0	0	0	0	0	0	200	903	0	0	0	0	0	0	0	603	903	0
336	4	-43.6004	-76.216	-698.553	-66591	-22850.4	2540.36	167.289	395.327	0	0	0	0	0	0	0	200	903	0	0	0	0	0	0	0	603	903	0
336	5	-43.2952	-74.9953	-696.722	-66041.7	-22789.3	2815.02	167.291	394.789	0	0	0	0	0	0	0	200	903	0	0	0	0	0	0	0	603	903	0
336	6	-43.6004	-73.3168	-692.755	-66133.3	-22545.2	2540.36	167.456	395.464	0	0	0	0	0	0	0	200	903	0	0	0	0	0	0	0	603	903	0
336	7	-42.99	-73.3168	-690.619	-65675.4	-22362.1	2631.91	167.62	395.097	0	0	0	0	0	0	0	200	903	0	0	0	0	0	0	0	603	903	0
336	8	-44.2107	-70.8754	-686.346	-65217.7	-22179	2540.36	167.685	395.022	0	0	0	0	0	0	0	200	903	0	0	0	0	0	0	0	603	903	0
336	9	-44.2107	-70.5702	-682.684	-64027.5	-21873.8	2448.81	167.959	393.788	0	0	0	0	0	0	0	200	903	0	0	0	0	0	0	0	603	903	0
337	0	-43.9055	-69.0443	-677.496	-64668.4	-21751.7	2403.03	167.894	395.452	0	0	0	0	0	0	0	200	903	0	0	0	0	0	0	0	603	903	0
337	1	-43.9055	-67.9762	-674.444	-64302.2	-21690.7	2357.25	167.839	395.341	0	0	0	0	0	0	0	200	903	0	0	0	0	0	0	0	603	903	0
337	2	-42.6848	-65.84	-670.782	-63020.4	-21751.7	2311.48	167.573	393.951	0	0	0	0	0	0	0	200	903	0	0	0	0	0	0	0	603	903	0
337	3	-41.7693	-65.0771	-667.73	-63020.4	-21507.6	2174.15	167.79	394.38	0	0	0	0	0	0	0	200	903	0	0	0	0	0	0	0	603	903	0
337	4	-42.5322	-64.0089	-665.289	-63020.4	-21324.5	2082.6	167.947	394.726	0	0	0	0	0	0	0	200	903	0	0	0	0	0	0	0	603	903	0
337	5	-42.0745	-62.6357	-661.627	-62837.3	-21141.4	2357.25	168.046	394.974	0	0	0	0	0	0	0	200	903	0	0	0	0	0	0	0	603	903	0
337	6	-43.1426	-60.9572	-658.27	-61830.2	-20897.2	2311.48	168.254	393.928	0	0	0	0	0	0	0	200	903	0	0	0	0	0	0	0	603	903	0
337	7	-43.2952	-61.2624	-655.829	-61280.9	-20775.2	1991.04	168.322	393.441	0	0	0	0	0	0	0	200	903	0	0	0	0	0	0	0	603	903	0
337	8	-42.3797	-59.7365	-649.725	-61555.6	-20653.1	2036.82	168.213	394.741	0	0	0	0	0	0	0	200	903	0	0	0	0	0	0	0	603	903	0
337	9	-42.99	-57.7528	-647.894	-61006.3	-20592.1	1945.27	168.217	394.161	0	0	0	0	0	0	0	200	903	0	0	0	0	0	0	0	603	903	0
338	0	-42.0745	-56.9899	-644.842	-61189.4	-19798.6	1945.27	169.297	394.89	0	0	0	0	0	0	0	200	903	0	0	0	0	0	0	0	603	903	0
338	1	-41.9219	-55.9218	-641.18	-59633	-20225.8	1991.04	168.455	393.005	0	0	0	0	0	0	0	200	903	0	0	0	0	0	0	0	603	903	0
338	2	-41.0064	-55.464	-638.739	-59358.3	-19981.7	1853.72	168.717	392.931	0	0	0	0	0	0	0	200	903	0	0	0	0	0	0	0	603	903	0
338	3	-41.4641	-54.2433	-636.908	-59816.1	-19310.3	1716.39	169.681	393.916	0	0	0	0	0	0	0	200	903	0	0	0	0	0	0	0	603	903	0
338	4	-42.8374	-52.2597	-633.246	-59175.2	-19981.7	2036.82	168.446	393.448	0	0	0	0	0	0	0	200	903	0	0	0	0	0	0	0	603	903	0
338	5	-42.2271	-50.8864	-630.194	-58351.2	-19432.4	1807.94	169.164	392.593	0	0	0	0	0	0	0	200	903	0	0	0	0	0	0	0	603	903	0
338	6	-42.3797	-50.5812	-625.616	-57801.9	-19737.6	1121.29	168.451	392.392	0	0	0	0	0	0	0	200	903	0	0	0	0	0	0	0	603	903	0
338	7	-41.3115	-51.1916	-623.48	-57161.1	-19432.4	1533.28	168.832	391.681	0	0	0	0	0	0	0	200	903	0	0	0	0	0	0	0	603	903	0
338	8	-40.7012	-49.2079	-619.207	-57801.9	-19066.2	1487.5	169.209	393.348	0	0	0	0	0	0	0	200	903	0	0	0	0	0	0	0	603	903	0
338	9	-41.0064	-47.2243	-617.376	-57527.3	-19188.2	1395.95	168.92	393.18	0	0	0	0	0	0	0	200	903	0	0	0	0	0	0	0	603	903	0
339	0	-40.7012	-46.3087	-614.63	-55330	-18822	1487.5	169.377	390.022	0	0	0	0	0	0	0	200	903	0	0	0	0	0	0	0	603	903	0
339	1	-40.7012	-45.5458	-613.409	-55970.9	-18700	1395.95	169.515	391.246	0	0	0	0	0	0	0	200	903	0	0	0	0	0	0	0	603	903	0
339	2	-41.3115	-45.6984	-610.663	-56062.4	-18761	1258.62	169.278	391.806	0	0	0	0	0	0	0	200	903	0	0	0	0	0	0	0	603	903	0
339	3	-41.0064	-44.9355	-606.39	-55146.9	-18394.8	1807.94	169.665	390.943	0	0	0	0	0	0	0	200	903	0	0	0	0	0	0	0	603	903	0
339	4	-41.1589	-43.257	-602.118	-55421.6	-18761	1212.85	168.842	392.044	0	0	0	0	0	0	0	200	903	0	0	0	0	0	0	0	603	903	0
339	5	-41.4641	-42.0363	-597.235	-54780.7	-18333.8	1121.29	169.302	391.724	0	0	0	0	0	0	0	200	903	0	0	0	0	0	0	0	603	903	0
339	6	-39.9382	-41.4259	-598.456	-53865.2	-18394.8	1212.85	169.263	390.007	0	0	0	0	0	0	0	200	903	0	0	0	0	0	0	0	603	903	0
339	7	-40.0908	-41.4259	-592.047	-53407.4	-18211.7	1075.52	169.239	390.208	0	0	0	0	0	0	0	200	903	0	0	0	0	0	0	0	603	903	0
339	8	-39.7857	-40.5104	-594.488	-53956.7	-17784.4	1029.74	170.084	390.762	0	0	0	0	0	0	0	200	903	0	0	0	0	0	0	0	603	903	0
339	9	-40.0908	-39.4423	-588.08	-53590.5	-17845.5	1121.29	169.655	391.128	0	0	0	0	0	0	0	200	903	0	0	0	0	0	0	0	603	903	0
340	0	-41.1589	-38.3742	-588.995	-52217.2	-17967.5	800.859	169.495	388.655	0	0	0	0	0	0	0	200	903	0	0	0	0	0	0	0	603	903	0
340	1	-39.3279	-38.3742	-585.943	-52583.4	-17540.3	1029.74	170.065	389.742	0	0	0	0	0	0	0	200	903	0	0	0	0	0	0	0	603	903	0
340	2	-39.7857	-38.8319	-582.892	-52034.1	-17906.5	846.635	169.28	389.269	0	0	0	0	0	0	0	200	903	0	0	0	0	0	0	0	603	903	0
340	3	-40.2434	-36.8483	-578.009	-52308.8	-17784.4	571.977	169.232	390.498	0	0	0	0	0	0	0	200	903	0	0	0	0	0	0	0	603	903	0
340	4	-39.0227	-35.475	-579.535	-52125.7	-17296.1	938.188	170.155	389.944	0	0	0	0	0	0	0	200	903	0	0	0	0	0	0	0	603	903	0
340	5	-38.565	-34.8647	-574.347	-50660.8	-17235.1	1075.52	169.992	388.206	0	0	0	0	0	0	0	200	903	0	0	0	0	0	0	0	603	903	0
340	6	-38.7175	-35.1698	-576.178	-51027	-17052	800.859	170.405	388.561	0	0	0	0	0	0	0	200	903	0	0	0	0	0	0	0	603	903	0
340	7	-38.8701	-34.1017	-570.379	-51027	-16868.9	938.188	170.425	389.462	0	0	0	0	0	0	0	200	903	0	0	0	0	0	0	0	603	903	0
340	8	-39.7857	-32.881	-571.6	-49928.4	-17418.2	709.306	169.527	387.349	0	0	0	0	0	0	0	200	903	0	0	0	0	0	0	0	603	903	0
340	9	-39.7857	-31.9655	-570.074	-50203	-16746.8	983.964	170.623	388.064	0	0	0	0	0	0	0	200	903	0	0	0	0	0	0	0	603	903	0
341	0	-39.9382	-32.5758	-566.412	-48280.4	-16624.8	434.647	170.649	385.239	0	0	0	0	0	0	0	200	903	0	0	0	0	0	0	0	603	903	0
341	1	-39.7857	-32.1181	-564.886	-49287.5	-16807.9	709.306	170.246	387.252	0	0	0	0	0	0	0	200	903	0	0	0	0	0	0	0	603	903	0
341	2	-39.1753	-30.8974	-562.445	-47639.6	-16746.8	571.977	170.225	384.701	0	0	0	0	0	0	0	200	903	0	0	0	0	0	0	0	603	903	0
341	3	-38.565	-29.9818	-561.834	-48372	-16746.8	480.424	170.193	386.097	0	0	0	0	0	0	0	200	903	0	0	0	0	0	0	0	603	903	0
341	4	-37.802	-30.1344	-560.614	-47548	-16502.7	571.977	170.563	384.814	0	0	0	0	0	0	0	200	903	0	0	0	0	0	0	0	603	903	0
341	5	-38.2598	-29.8293	-559.698	-47364.9	-16502.7	709.306	170.515	384.626	0	0	0	0	0	0	0	200	903	0	0	0	0	0	0	0	603	903	0
341	6	-39.6331	-28.3034	-558.172	-47822.7	-16624.8	434.647	170.216	385.677	0	0	0	0	0	0	0	200	903	0	0	0	0	0	0	0	603	903	0
341	7	-39.4805	-28.9137	-554.815	-47548	-16258.5	388.871	170.696	385.701	0	0	0	0	0	0	0	200	903	0	0	0	0	0	0	0	603	903	0
341	8	-39.1753	-28.456	-552.374	-46632.5	-16380.6	388.871	170.345	384.422	0	0	0	0	0	0	0	200	903	0	0	0	0	0	0	0	603	903	0
341	9	-39.0227	-28.1508	-548.407	-46449.4	-16258.5	388.871	170.353	384.699	0	0	0	0	0	0	0	200	903	0	0	0	0	0	0	0	603	903	0
342	0	-38.2598	-26.3197	-549.627	-46540.9	-16197.5	343.095	170.53	384.677	0	0	0	0	0	0	0	200	903	0	0	0	0	0	0	0	603	903	0
342	1	-38.565	-28.3034	-545.05	-46449.4	-16014.4	343.095	170.618	385.22	0	0	0	0	0	0	0	200	903	0	0	0	0	0	0	0	603	903	0
342	2	-37.802	-25.2516	-547.186	-45350.7	-15770.3	159.989	171.179	382.88	0	0	0	0	0	0	0	200	903	0	0	0	0	0	0	0	603	903	0
342	3	-36.8865	-27.9982	-544.745	-44893	-16258.5	571.977	170.154	382.411	0	0	0	0	0	0	0	200	903	0	0	0	0	0	0	0	603	903	0
342	4	-38.7175	-24.7939	-544.439	-45259.2	-15648.2	205.766	171.258	383.13	0	0	0	0	0	0	0	200	903	0	0	0	0	0	0	0	603	903	0
342	5	-37.4968	-25.4042	-541.082	-45167.6	-15587.2	68.4365	171.193	383.476	0	0	0	0	0	0	0	200	903	0	0	0	0	0	0	0	603	903	0
342	6	-37.802	-23.7257	-539.862	-43885.9	-15831.3	297.318	170.675	381.291	0	0	0	0	0	0	0	200	903	0	0	0	0	0	0	0	603	903	0
342	7	-37.1917	-24.1835	-538.946	-43336.6	-15831.3	68.4365	170.625	380.41	0	0	0	0	0	0	0	200	903	0	0	0	0	0	0	0	603	903	0
342	8	-36.8865	-22.505	-537.726	-43245	-15648.2	114.213	170.899	380.422	0	0	0	0	0	0	0	200	903	0	0	0	0	0	0	0	603	903	0
342	9	-36.4287	-22.3524	-537.42	-43336.6	-15343	434.647	171.451	380.638	0	0	0	0	0	0	0	200	903	0	0	0	0	0	0	0	603	903	0
343	0	-36.4287	-22.6576	-536.505	-43153.5	-15526.1	22.6601	171.061	380.434	0	0	0	0	0	0	0	200	903	0	0	0	0	0	0	0	603	903	0
343	1	-37.802	-22.505	-534.979	-43061.9	-15159.9	68.4365	171.663	380.493	0	0	0	0	0	0	0	200	903	0	0	0	0	0	0	0	603	903	0
343	2	-37.1917	-21.7421	-534.674	-42421	-15404.1	-23.1163	171.19	379.34	0	0	0	0	0	0	0	200	903	0	0	0	0	0	0	0	603	903	0
343	3	-37.0391	-22.3524	-531.622	-42695.7	-15098.9	68.4365	171.598	380.312	0	0	0	0	0	0	0	200	903	0	0	0	0	0	0	0	603	903	0
343	4	-36.8865	-20.3688	-531.012	-41597.1	-15282	-160.445	171.221	378.336	0	0	0	0	0	0	0	200	903	0	0	0	0	0	0	0	603	903	0
343	5	-36.1235	-21.2843	-529.181	-41139.3	-15343	-68.8927	171.006	377.742	0	0	0	0	0	0	0	200	903	0	0	0	0	0	0	0	603	903	0
343	6	-35.3606	-20.2162	-528.875	-41505.5	-15159.9	-251.998	171.336	378.479	0	0	0	0	0	0	0	200	903	0	0	0	0	0	0	0	603	903	0
343	7	-35.8184	-19.6059	-528.57	-41322.4	-14610.6	-389.327	172.358	378.178	0	0	0	0	0	0	0	200	903	0	0	0	0	0	0	0	603	903	0
343	8	-34.9028	-19.4533	-526.129	-40223.8	-14976.8	-114.669	171.534	376.452	0	0	0	0	0	0	0	200	903	0	0	0	0	0	0	0	603	903	0
343	9	-36.1235	-19.3007	-525.824	-39949.1	-14915.8	-160.445	171.633	375.974	0	0	0	0	0	0	0	200	903	0	0	0	0	0	0	0	603	903	0
344	0	-35.6658	-18.9955	-527.044	-40132.2	-14610.6	-297.775	172.278	376.146	0	0	0	0	0	0	0	200	903	0	0	0	0	0	0	0	603	903	0
344	1	-35.5132	-18.3852	-522.467	-39857.6	-14732.7	-389.327	171.802	376.287	0	0	0	0	0	0	0	200	903	0	0	0	0	0	0	0	603	903	0
344	2	-34.9028	-18.08	-523.077	-38850.5	-14549.6	-343.551	172.185	374.273	0	0	0	0	0	0	0	200	903	0	0	0	0	0	0	0	603	903	0
344	3	-33.0718	-18.3852	-521.551	-38942	-14549.6	-618.209	172.103	374.666	0	0	0	0	0	0	0	200	903	0	0	0	0	0	0	0	603	903	0
344	4	-33.5296	-17.7748	-520.941	-38392.7	-14732.7	-526.656	171.719	373.699	0	0	0	0	0	0	0	200	903	0	0	0	0	0	0	0	603	903	0
344	5	-32.9192	-17.1645	-520.941	-38575.8	-14305.4	-480.88	172.539	374.05	0	0	0	0	0	0	0	200	903	0	0	0	0	0	0	0	603	903	0
344	6	-32.3088	-16.8593	-520.331	-37751.9	-14122.3	-663.985	172.859	372.554	0	0	0	0	0	0	0	200	903	0	0	0	0	0	0	0	603	903	0
344	7	-33.6821	-18.3852	-519.11	-36836.3	-14732.7	-618.209	171.619	370.961	0	0	0	0	0	0	0	200	903	0	0	0	0	0	0	0	603	903	0
344	8	-32.9192	-19.1481	-518.499	-36927.9	-14061.3	-755.538	172.881	371.221	0	0	0	0	0	0	0	200	903	0	0	0	0	0	0	0	603	903	0
344	9	-32.9192	-16.8593	-515.448	-37385.7	-14427.5	-1075.97	172.01	372.53	0	0	0	0	0	0	0	200	903	0	0	0	0	0	0	0	603	903	0
345	0	-31.2407	-16.7067	-513.311	-37202.6	-14427.5	-572.433	171.893	372.476	0	0	0	0	0	0	0	200	903	0	0	0	0	0	0	0	603	903	0
345	1	-31.2407	-16.4015	-513.311	-36195.5	-14061.3	-984.42	172.607	370.514	0	0	0	0	0	0	0	200	903	0	0	0	0	0	0	0	603	903	0
345	2	-30.4778	-16.4015	-514.837	-36012.4	-14244.4	-892.867	172.332	369.949	0	0	0	0	0	0	0	200	903	0	0	0	0	0	0	0	603	903	0
345	3	-30.3252	-15.7912	-513.922	-35920.8	-13939.2	-892.867	172.877	369.896	0	0	0	0	0	0	0	200	903	0	0	0	0	0	0	0	603	903	0
345	4	-30.02	-15.6386	-509.039	-36561.7	-13756.1	-938.644	172.976	371.825	0	0	0	0	0	0	0	200	903	0	0	0	0	0	0	0	603	903	0
345	5	-30.783	-15.0282	-512.701	-35371.5	-14122.3	-1030.2	172.455	368.991	0	0	0	0	0	0	0	200	903	0	0	0	0	0	0	0	603	903	0
345	6	-28.7993	-15.3334	-510.26	-34181.3	-13878.2	-938.644	172.802	366.988	0	0	0	0	0	0	0	200	903	0	0	0	0	0	0	0	603	903	0
345	7	-30.1726	-15.486	-510.565	-35096.8	-13695.1	-1167.53	173.177	368.741	0	0	0	0	0	0	0	200	903	0	0	0	0	0	0	0	603	903	0
345	8	-29.2571	-14.5705	-506.598	-35096.8	-13817.1	-1259.08	172.726	369.28	0	0	0	0	0	0	0	200	903	0	0	0	0	0	0	0	603	903	0
345	9	-28.0364	-14.4179	-509.649	-33723.6	-13939.2	-1304.85	172.649	366.17	0	0	0	0	0	0	0	200	903	0	0	0	0	0	0	0	603	903	0
346	0	-27.8838	-13.8075	-507.513	-33082.7	-13634	-1350.63	173.136	365.186	0	0	0	0	0	0	0	200	903	0	0	0	0	0	0	0	603	903	0
346	1	-28.0364	-13.9601	-508.429	-33998.2	-13634	-1030.2	173.184	366.869	0	0	0	0	0	0	0	200	903	0	0	0	0	0	0	0	603	903	0
346	2	-26.6631	-13.1972	-508.734	-32808	-14061.3	-1121.75	172.36	364.49	0	0	0	0	0	0	0	200	903	0	0	0	0	0	0	0	603	903	0
346	3	-28.189	-12.5868	-506.903	-33082.7	-13878.2	-1442.18	172.622	365.264	0	0	0	0	0	0	0	200	903	0	0	0	0	0	0	0	603	903	0
346	4	-28.0364	-13.5023	-507.818	-32624.9	-13695.1	-1167.53	173.032	364.245	0	0	0	0	0	0	0	200	903	0	0	0	0	0	0	0	603	903	0
346	5	-28.0364	-13.9601	-504.156	-31617.8	-13512	-1350.63	173.199	362.714	0	0	0	0	0	0	0	200	903	0	0	0	0	0	0	0	603	903	0
346	6	-27.2735	-12.5868	-503.241	-31984	-13512	-1396.41	173.15	363.556	0	0	0	0	0	0	0	200	903	0	0	0	0	0	0	0	603	903	0
346	7	-26.5105	-11.6713	-504.156	-32167.1	-13389.9	-1304.85	173.441	363.804	0	0	0	0	0	0	0	200	903	0	0	0	0	0	0	0	603	903	0
346	8	-26.0527	-11.6713	-502.02	-31709.4	-13450.9	-1121.75	173.206	363.164	0	0	0	0	0	0	0	200	903	0	0	0	0	0	0	0	603	903	0
346	9	-25.7476	-13.8075	-504.156	-31343.2	-13512	-1396.41	173.199	362.17	0	0	0	0	0	0	0	200	903	0	0	0	0	0	0	0	603	903	0
347	0	-26.9683	-12.1291	-499.273	-31800.9	-13389.9	-1625.29	173.181	363.694	0	0	0	0	0	0	0	200	903	0	0	0	0	0	0	0	603	903	0
347	1	-27.2735	-11.2135	-501.41	-31343.2	-13817.1	-1350.63	172.443	362.51	0	0	0	0	0	0	0	200	903	0	0	0	0	0	0	0	603	903	0
347	2	-24.5269	-10.4506	-500.189	-30244.5	-13267.8	-984.42	173.474	360.466	0	0	0	0	0	0	0	200	903	0	0	0	0	0	0	0	603	903	0
347	3	-27.1209	-10.9084	-498.968	-29969.9	-13634	-1671.07	172.676	360.064	0	0	0	0	0	0	0	200	903	0	0	0	0	0	0	0	603	903	0
347	4	-25.4424	-10.7558	-499.273	-30244.5	-13206.8	-1396.41	173.548	360.577	0	0	0	0	0	0	0	200	903	0	0	0	0	0	0	0	603	903	0
347	5	-25.595	-9.53506	-497.442	-30061.4	-13450.9	-1579.51	172.96	360.432	0	0	0	0	0	0	0	200	903	0	0	0	0	0	0	0	603	903	0
347	6	-25.1372	-9.68765	-498.968	-28962.8	-13084.7	-1304.85	173.776	358.045	0	0	0	0	0	0	0	200	903	0	0	0	0	0	0	0	603	903	0
347	7	-25.1372	-9.84024	-497.747	-28596.6	-13267.8	-1487.96	173.344	357.452	0	0	0	0	0	0	0	200	903	0	0	0	0	0	0	0	603	903	0
347	8	-26.0527	-9.99283	-498.053	-29329	-13389.9	-1716.84	173.116	358.887	0	0	0	0	0	0	0	200	903	0	0	0	0	0	0	0	603	903	0
347	9	-25.7476	-8.77213	-495.916	-29054.4	-13206.8	-1671.07	173.369	358.587	0	0	0	0	0	0	0	200	903	0	0	0	0	0	0	0	603	903	0
348	0	-25.595	-8.16177	-494.085	-27681.1	-13450.9	-1533.74	172.776	356.025	0	0	0	0	0	0	0	200	903	0	0	0	0	0	0	0	603	903	0
348	1	-25.9002	-9.0773	-491.644	-27498	-13145.8	-1716.84	173.262	355.931	0	0	0	0	0	0	0	200	903	0	0	0	0	0	0	0	603	903	0
348	2	-24.5269	-8.31436	-493.17	-27498	-12962.7	-1533.74	173.716	355.758	0	0	0	0	0	0	0	200	903	0	0	0	0	0	0	0	603	903	0
348	3	-23.9165	-8.46695	-493.475	-27681.1	-13328.9	-1259.08	172.99	356.094	0	0	0	0	0	0	0	200	903	0	0	0	0	0	0	0	603	903	0
348	4	-24.832	-8.77213	-493.17	-27314.9	-12901.6	-1716.84	173.839	355.386	0	0	0	0	0	0	0	200	903	0	0	0	0	0	0	0	603	903	0
348	5	-25.9002	-7.24625	-492.254	-26307.8	-13206.8	-1716.84	173.171	353.444	0	0	0	0	0	0	0	200	903	0	0	0	0	0	0	0	603	903	0
348	6	-25.2898	-8.00919	-492.865	-26307.8	-13206.8	-1442.18	173.204	353.377	0	0	0	0	0	0	0	200	903	0	0	0	0	0	0	0	603	903	0
348	7	-26.3579	-7.70401	-490.423	-26582.4	-13328.9	-1442.18	172.822	354.203	0	0	0	0	0	0	0	200	903	0	0	0	0	0	0	0	603	903	0
348	8	-26.0527	-6.63589	-490.423	-25941.6	-12962.7	-1625.29	173.568	352.896	0	0	0	0	0	0	0	200	903	0	0	0	0	0	0	0	603	903	0
348	9	-24.3743	-6.17813	-487.982	-25392.2	-12962.7	-1075.97	173.436	352.035	0	0	0	0	0	0	0	200	903	0	0	0	0	0	0	0	603	903	0
349	0	-24.6795	-7.24625	-487.982	-24934.5	-13450.9	-1854.17	172.436	351.097	0	0	0	0	0	0	0	200	903	0	0	0	0	0	0	0	603	903	0
349	1	-24.6795	-6.63589	-488.897	-25209.1	-12962.7	-1442.18	173.486	351.563	0	0	0	0	0	0	0	200	903	0	0	0	0	0	0	0	603	903	0
349	2	-25.1372	-5.41519	-487.982	-24751.4	-13084.7	-1762.62	173.186	350.722	0	0	0	0	0	0	0	200	903	0	0	0	0	0	0	0	603	903	0
349	3	-26.2053	-6.33072	-488.287	-24110.5	-12901.6	-1854.17	173.578	349.378	0	0	0	0	0	0	0	200	903	0	0	0	0	0	0	0	603	903	0
349	4	-25.7476	-6.02554	-487.066	-22828.8	-13084.7	-1487.96	173.136	346.87	0	0	0	0	0	0	0	200	903	0	0	0	0	0	0	0	603	903	0
349	5	-27.1209	-5.87296	-485.235	-23835.8	-13267.8	-1899.95	172.657	349.122	0	0	0	0	0	0	0	200	903	0	0	0	0	0	0	0	603	903	0
349	6	-25.7476	-5.11002	-484.625	-23103.4	-12840.6	-1671.07	173.504	347.673	0	0	0	0	0	0	0	200	903	0	0	0	0	0	0	0	603	903	0
349	7	-25.4424	-6.17813	-483.099	-23286.5	-13206.8	-1854.17	172.662	348.202	0	0	0	0	0	0	0	200	903	0	0	0	0	0	0	0	603	903	0
349	8	-24.832	-4.19449	-484.625	-22737.2	-12901.6	-1899.95	173.378	346.917	0	0	0	0	0	0	0	200	903	0	0	0	0	0	0	0	603	903	0
349	9	-25.4424	-4.80484	-483.404	-22187.9	-13328.9	-1945.72	172.427	345.899	0	0	0	0	0	0	0	200	903	0	0	0	0	0	0	0	603	903	0
350	0	-25.4424	-4.49966	-479.742	-22187.9	-13023.7	-1854.17	172.853	346.25	0	0	0	0	0	0	0	200	903	0	0	0	0	0	0	0	603	903	0
350	1	-26.0527	-3.58414	-482.489	-22462.6	-13084.7	-1899.95	172.881	346.556	0	0	0	0	0	0	0	200	903	0	0	0	0	0	0	0	603	903	0
350	2	-24.6795	-3.43155	-483.099	-20814.6	-13084.7	-1625.29	172.915	343.086	0	0	0	0	0	0	0	200	903	0	0	0	0	0	0	0	603	903	0
350	3	-26.2053	-4.0419	-480.352	-21272.4	-13084.7	-1991.5	172.76	344.285	0	0	0	0	0	0	0	200	903	0	0	0	0	0	0	0	603	903	0
350	4	-26.2053	-4.80484	-480.352	-20539.9	-12962.7	-2037.28	173.014	342.76	0	0	0	0	0	0	0	200	903	0	0	0	0	0	0	0	603	903	0
350	5	-25.4424	-4.49966	-479.742	-21180.8	-13023.7	-1991.5	172.853	344.15	0	0	0	0	0	0	0	200	903	0	0	0	0	0	0	0	603	903	0
350	6	-25.1372	-2.66861	-481.878	-20814.6	-12901.6	-1671.07	173.226	343.195	0	0	0	0	0	0	0	200	903	0	0	0	0	0	0	0	603	903	0
350	7	-25.9002	-2.51602	-481.268	-20082.2	-13450.9	-2128.83	172.051	341.728	0	0	0	0	0	0	0	200	903	0	0	0	0	0	0	0	603	903	0
350	8	-26.2053	-2.51602	-480.963	-19349.8	-12840.6	-1991.5	173.302	340.231	0	0	0	0	0	0	0	200	903	0	0	0	0	0	0	0	603	903	0
350	9	-26.2053	-3.73673	-480.658	-19624.4	-13267.8	-2403.49	172.397	340.828	0	0	0	0	0	0	0	200	903	0	0	0	0	0	0	0	603	903	0
351	0	-25.9002	-1.44791	-480.047	-18800.4	-13206.8	-1899.95	172.489	339.164	0	0	0	0	0	0	0	200	903	0	0	0	0	0	0	0	603	903	0
351	1	-26.6631	-1.60049	-475.164	-19532.9	-13084.7	-2266.16	172.463	341.108	0	0	0	0	0	0	0	200	903	0	0	0	0	0	0	0	603	903	0
351	2	-25.4424	-2.8212	-479.132	-17884.9	-13145.8	-2266.16	172.563	337.328	0	0	0	0	0	0	0	200	903	0	0	0	0	0	0	0	603	903	0
351	3	-23.9165	-3.12637	-478.216	-18068	-13023.7	-2128.83	172.766	337.782	0	0	0	0	0	0	0	200	903	0	0	0	0	0	0	0	603	903	0
351	4	-25.2898	-1.75308	-480.963	-18159.6	-12962.7	-2266.16	173.049	337.757	0	0	0	0	0	0	0	200	903	0	0	0	0	0	0	0	603	903	0
351	5	-25.9002	-0.837555	-480.352	-18342.7	-13145.8	-2220.38	172.633	338.186	0	0	0	0	0	0	0	200	903	0	0	0	0	0	0	0	603	903	0
351	6	-27.1209	-0.227204	-480.047	-16877.8	-12901.6	-2266.16	173.124	335.159	0	0	0	0	0	0	0	200	903	0	0	0	0	0	0	0	603	903	0
351	7	-25.1372	-1.44791	-478.216	-16694.7	-13389.9	-2266.16	172	334.91	0	0	0	0	0	0	0	200	903	0	0	0	0	0	0	0	603	903	0
351	8	-26.5105	-0.227204	-477.911	-16969.4	-13084.7	-2220.38	172.621	335.507	0	0	0	0	0	0	0	200	903	0	0	0	0	0	0	0	603	903	0
351	9	-26.5105	0.535736	-478.216	-16694.7	-13328.9	-1899.95	172.128	334.91	0	0	0	0	0	0	0	200	903	0	0	0	0	0	0	0	603	903	0
352	0	-25.2898	0.383148	-479.437	-15046.8	-13267.8	-2449.26	172.326	331.384	0	0	0	0	0	0	0	200	903	0	0	0	0	0	0	0	603	903	0
352	1	-25.9002	-0.837555	-479.132	-15229.9	-13328.9	-2311.94	172.181	331.786	0	0	0	0	0	0	0	200	903	0	0	0	0	0	0	0	603	903	0
352	2	-25.4424	-1.75308	-477.911	-15138.3	-13267.8	-2220.38	172.238	331.676	0	0	0	0	0	0	0	200	903	0	0	0	0	0	0	0	603	903	0
352	3	-26.9683	0.535736	-479.437	-15504.5	-13267.8	-2495.04	172.326	332.339	0	0	0	0	0	0	0	200	903	0	0	0	0	0	0	0	603	903	0
352	4	-25.1372	1.14609	-480.352	-14955.2	-13267.8	-2495.04	172.379	331.134	0	0	0	0	0	0	0	200	903	0	0	0	0	0	0	0	603	903	0
352	5	-27.426	1.90903	-478.216	-15046.8	-13084.7	-2632.37	172.638	331.464	0	0	0	0	0	0	0	200	903	0	0	0	0	0	0	0	603	903	0
352	6	-25.9002	1.29868	-478.827	-14039.7	-13328.9	-2723.92	172.163	329.321	0	0	0	0	0	0	0	200	903	0	0	0	0	0	0	0	603	903	0
352	7	-25.2898	1.45126	-480.352	-14863.7	-13389.9	-2815.48	172.125	330.943	0	0	0	0	0	0	0	200	903	0	0	0	0	0	0	0	603	903	0
352	8	-25.1372	3.28232	-480.352	-14131.3	-13206.8	-2907.03	172.506	329.419	0	0	0	0	0	0	0	200	903	0	0	0	0	0	0	0	603	903	0
352	9	-25.595	2.51938	-480.963	-13765	-13817.1	-2678.15	171.272	328.62	0	0	0	0	0	0	0	200	903	0	0	0	0	0	0	0	603	903	0
353	0	-26.3579	2.06161	-481.878	-13398.8	-13328.9	-2586.59	172.34	327.805	0	0	0	0	0	0	0	200	903	0	0	0	0	0	0	0	603	903	0
353	1	-27.5786	2.51938	-480.047	-13673.5	-13817.1	-3044.36	171.217	328.484	0	0	0	0	0	0	0	200	903	0	0	0	0	0	0	0	603	903	0
353	2	-25.7476	3.12973	-481.573	-11750.9	-13267.8	-2586.59	172.449	324.401	0	0	0	0	0	0	0	200	903	0	0	0	0	0	0	0	603	903	0
353	3	-25.2898	3.89267	-480.658	-12574.9	-13512	-3273.24	171.889	326.162	0	0	0	0	0	0	0	200	903	0	0	0	0	0	0	0	603	903	0
353	4	-25.4424	3.28232	-482.794	-12300.2	-13450.9	-2495.04	172.139	325.477	0	0	0	0	0	0	0	200	903	0	0	0	0	0	0	0	603	903	0
353	5	-25.9002	3.43491	-483.404	-11842.4	-13878.2	-3319.02	171.291	324.498	0	0	0	0	0	0	0	200	903	0	0	0	0	0	0	0	603	903	0
353	6	-25.7476	3.12973	-485.235	-11842.4	-13634	-3044.36	171.902	324.406	0	0	0	0	0	0	0	200	903	0	0	0	0	0	0	0	603	903	0
353	7	-26.3579	4.65561	-485.235	-12025.5	-13756.1	-3135.91	171.651	324.783	0	0	0	0	0	0	0	200	903	0	0	0	0	0	0	0	603	903	0
353	8	-26.0527	5.11337	-485.846	-10743.8	-13695.1	-3227.46	171.812	322.114	0	0	0	0	0	0	0	200	903	0	0	0	0	0	0	0	603	903	0
353	9	-26.5105	4.50302	-484.015	-11110	-13817.1	-3227.46	171.453	322.954	0	0	0	0	0	0	0	200	903	0	0	0	0	0	0	0	603	903	0
354	0	-26.3579	5.87631	-486.456	-10835.4	-13389.9	-3364.79	172.475	322.274	0	0	0	0	0	0	0	200	903	0	0	0	0	0	0	0	603	903	0
354	1	-26.0527	4.96078	-487.066	-11293.1	-13878.2	-3502.12	171.507	323.186	0	0	0	0	0	0	0	200	903	0	0	0	0	0	0	0	603	903	0
354	2	-24.5269	6.48666	-488.897	-10469.1	-14183.4	-3456.34	170.989	321.414	0	0	0	0	0	0	0	200	903	0	0	0	0	0	0	0	603	903	0
354	3	-26.0527	7.70737	-491.644	-10102.9	-14183.4	-3868.33	171.151	320.549	0	0	0	0	0	0	0	200	903	0	0	0	0	0	0	0	603	903	0
354	4	-25.2898	7.09702	-492.254	-9828.27	-14061.3	-3502.12	171.435	319.966	0	0	0	0	0	0	0	200	903	0	0	0	0	0	0	0	603	903	0
354	5	-26.2053	7.55478	-492.254	-10011.4	-14244.4	-3776.78	171.063	320.338	0	0	0	0	0	0	0	200	903	0	0	0	0	0	0	0	603	903	0
354	6	-27.2735	8.16513	-495.001	-9828.27	-14305.4	-3502.12	171.1	319.855	0	0	0	0	0	0	0	200	903	0	0	0	0	0	0	0	603	903	0
354	7	-27.1209	9.08066	-494.391	-8638.09	-14305.4	-3822.56	171.065	317.472	0	0	0	0	0	0	0	200	903	0	0	0	0	0	0	0	603	903	0
354	8	-26.8157	8.77548	-496.832	-9278.96	-14549.6	-3685.23	170.715	318.676	0	0	0	0	0	0	0	200	903	0	0	0	0	0	0	0	603	903	0
354	9	-27.1209	7.85995	-498.663	-9095.85	-14427.5	-3914.11	171.068	318.24	0	0	0	0	0	0	0	200	903	0	0	0	0	0	0	0	603	903	0
355	0	-26.5105	9.53842	-500.189	-8546.54	-14366.5	-3822.56	171.278	317.087	0	0	0	0	0	0	0	200	903	0	0	0	0	0	0	0	603	903	0
355	1	-26.2053	10.6065	-500.494	-8729.64	-14976.8	-4097.22	170.076	317.442	0	0	0	0	0	0	0	200	903	0	0	0	0	0	0	0	603	903	0
355	2	-24.9846	11.9798	-503.851	-8088.78	-14244.4	-4188.77	171.729	316.054	0	0	0	0	0	0	0	200	903	0	0	0	0	0	0	0	603	903	0
355	3	-26.0527	10.4539	-505.987	-8271.88	-14793.7	-3868.33	170.763	316.348	0	0	0	0	0	0	0	200	903	0	0	0	0	0	0	0	603	903	0
355	4	-26.6631	10.9117	-507.208	-8088.78	-14793.7	-3639.45	170.833	315.948	0	0	0	0	0	0	0	200	903	0	0	0	0	0	0	0	603	903	0
355	5	-27.2735	12.8954	-509.039	-8363.43	-14732.7	-4188.77	171.058	316.43	0	0	0	0	0	0	0	200	903	0	0	0	0	0	0	0	603	903	0
355	6	-27.5786	12.4376	-510.26	-6990.14	-14793.7	-4097.22	171.007	313.699	0	0	0	0	0	0	0	200	903	0	0	0	0	0	0	0	603	903	0
355	7	-28.0364	11.9798	-512.396	-6440.83	-15465.1	-4280.32	169.818	312.57	0	0	0	0	0	0	0	200	903	0	0	0	0	0	0	0	603	903	0
355	8	-28.189	12.7428	-512.396	-7081.7	-15037.9	-3822.56	170.652	313.821	0	0	0	0	0	0	0	200	903	0	0	0	0	0	0	0	603	903	0
355	9	-28.4942	12.4376	-513.311	-7356.35	-15037.9	-4234.54	170.704	314.331	0	0	0	0	0	0	0	200	903	0	0	0	0	0	0	0	603	903	0
356	0	-27.426	13.6583	-516.974	-6715.48	-14976.8	-4326.1	171.03	312.99	0	0	0	0	0	0	0	200	903	0	0	0	0	0	0	0	603	903	0
356	1	-28.4942	14.5738	-517.279	-6440.83	-15159.9	-4326.1	170.693	312.451	0	0	0	0	0	0	0	200	903	0	0	0	0	0	0	0	603	903	0
356	2	-27.8838	14.4212	-520.636	-5799.96	-15648.2	-3822.56	169.944	311.14	0	0	0	0	0	0	0	200	903	0	0	0	0	0	0	0	603	903	0
356	3	-28.3416	14.1161	-523.077	-6440.83	-15465.1	-4326.1	170.434	312.313	0	0	0	0	0	0	0	200	903	0	0	0	0	0	0	0	603	903	0
356	4	-29.8674	15.3368	-521.246	-5891.51	-15343	-4326.1	170.565	311.303	0	0	0	0	0	0	0	200	903	0	0	0	0	0	0	0	603	903	0
356	5	-29.8674	15.6419	-526.129	-5433.75	-15648.2	-4417.65	170.258	310.328	0	0	0	0	0	0	0	200	903	0	0	0	0	0	0	0	603	903	0
356	6	-30.02	16.4049	-522.772	-4609.77	-15587.2	-4326.1	170.184	308.818	0	0	0	0	0	0	0	200	903	0	0	0	0	0	0	0	603	903	0
356	7	-30.783	14.879	-528.57	-4975.98	-15770.3	-4875.41	170.164	309.414	0	0	0	0	0	0	0	200	903	0	0	0	0	0	0	0	603	903	0
356	8	-30.1726	16.7101	-529.486	-4792.88	-15770.3	-4463.43	170.216	309.052	0	0	0	0	0	0	0	200	903	0	0	0	0	0	0	0	603	903	0
356	9	-29.5623	17.9308	-531.927	-4518.22	-16258.5	-4509.2	169.435	308.494	0	0	0	0	0	0	0	200	903	0	0	0	0	0	0	0	603	903	0
357	0	-30.1726	17.7782	-534.369	-4152.01	-16136.5	-4646.53	169.803	307.77	0	0	0	0	0	0	0	200	903	0	0	0	0	0	0	0	603	903	0
357	1	-29.8674	16.7101	-536.505	-3785.79	-15953.4	-4646.53	170.264	307.056	0	0	0	0	0	0	0	200	903	0	0	0	0	0	0	0	603	903	0
357	2	-30.9356	17.6256	-535.589	-4060.45	-16197.5	-4509.2	169.758	307.581	0	0	0	0	0	0	0	200	903	0	0	0	0	0	0	0	603	903	0
357	3	-31.3933	18.5411	-540.777	-4152.01	-16014.4	-4463.43	170.386	307.678	0	0	0	0	0	0	0	200	903	0	0	0	0	0	0	0	603	903	0
357	4	-31.3933	18.9989	-542.914	-3328.03	-16197.5	-4692.31	170.166	306.13	0	0	0	0	0	0	0	200	903	0	0	0	0	0	0	0	603	903	0
357	5	-31.8511	19.4566	-544.745	-3144.93	-16563.7	-4738.08	169.594	305.773	0	0	0	0	0	0	0	200	903	0	0	0	0	0	0	0	603	903	0
357	6	-32.0037	19.7618	-544.134	-3236.48	-16258.5	-4921.19	170.12	305.948	0	0	0	0	0	0	0	200	903	0	0	0	0	0	0	0	603	903	0
357	7	-30.6304	20.2196	-550.543	-3144.93	-17052	-5012.74	169.027	305.712	0	0	0	0	0	0	0	200	903	0	0	0	0	0	0	0	603	903	0
357	8	-28.189	21.7455	-556.952	-2961.82	-16868.9	-5333.18	169.712	305.318	0	0	0	0	0	0	0	200	903	0	0	0	0	0	0	0	603	903	0
357	9	-29.5623	22.5084	-556.952	-2870.27	-16441.7	-5745.17	170.479	305.154	0	0	0	0	0	0	0	200	903	0	0	0	0	0	0	0	603	903	0
358	0	-28.3416	22.3558	-558.172	-2320.95	-16991	-4921.19	169.56	304.158	0	0	0	0	0	0	0	200	903	0	0	0	0	0	0	0	603	903	0
358	1	-30.02	22.0506	-563.665	-2504.06	-16807.9	-5745.17	170.181	304.442	0	0	0	0	0	0	0	200	903	0	0	0	0	0	0	0	603	903	0
358	2	-28.7993	24.6446	-563.36	-2778.71	-17113	-5882.49	169.623	304.932	0	0	0	0	0	0	0	200	903	0	0	0	0	0	0	0	603	903	0
358	3	-29.2571	25.4076	-567.328	-2961.82	-17052	-5745.17	169.943	305.221	0	0	0	0	0	0	0	200	903	0	0	0	0	0	0	0	603	903	0
358	4	-28.9519	26.4757	-571.295	-2137.85	-17052	-6019.82	170.152	303.742	0	0	0	0	0	0	0	200	903	0	0	0	0	0	0	0	603	903	0
358	5	-28.189	27.2386	-572.821	-2229.4	-17479.3	-5974.05	169.486	303.892	0	0	0	0	0	0	0	200	903	0	0	0	0	0	0	0	603	903	0
[truncated: 1,764 more rows]
