# Supplementary material for: The Effects of an Extemporaneous Speech Dual-task on Older Adult Gait Control
Source: Research Square preprint supplement (doi:10.21203/rs.3.rs-7674245/v1), 2025-11-18
Supplement: Supplementary file 129 [file Over1ground01.xlsx]

## Sheet: Sheet1
Trajectories
		01:LFHD			01:RFHD			01:LBHD			01:RBHD			01:C7			01:T10			01:CLAV			01:STRN			01:RBAK			01:LSHO			01:LUPA			01:LELB			01:LFRM			01:LWRA			01:LWRB			01:LFIN
Frame	Sub Frame	X	Y	Z	X	Y	Z	X	Y	Z	X	Y	Z	X	Y	Z	X	Y	Z	X	Y	Z	X	Y	Z	X	Y	Z	X	Y	Z	X	Y	Z	X	Y	Z	X	Y	Z	X	Y	Z	X	Y	Z	X	Y	Z
		mm	mm	mm	mm	mm	mm	mm	mm	mm	mm	mm	mm	mm	mm	mm	mm	mm	mm	mm	mm	mm	mm	mm	mm	mm	mm	mm	mm	mm	mm	mm	mm	mm	mm	mm	mm	mm	mm	mm	mm	mm	mm	mm	mm	mm	mm	mm	mm
129	0	265.575	-1995.27	1601.41	367.754	-1984.3	1597.07	269.174	-2169.32	1586.4	394.826	-2131.97	1590.25	323.971	-2190.35	1461.41	310.775	-2293.62	1213.23	317.63	-2054.87	1353.43	294.331	-2014.5	1173.46	362.006	-2292.36	1286.29	151.981	-2126.72	1410.08	59.1261	-2195.36	1202.28	47.5787	-2207.48	1119.13	19.8676	-2128.32	1017.02	66.5922	-2021.25	957.556	13.6572	-2062.22	932.222	21.6615	-1990.8	879.748
130	0	266.306	-1981.56	1603.88	368.507	-1970.69	1599.28	269.911	-2155.66	1589.38	395.697	-2118.55	1592.83	324.569	-2177.02	1464.28	311.734	-2280.98	1216.3	317.483	-2041.9	1356.01	293.011	-2001.62	1175.77	362.849	-2279.37	1289.29	152.162	-2113.9	1413.32	59.4858	-2185.07	1205.68	47.6136	-2196.83	1122.83	18.6242	-2120.1	1019.55	63.821	-2013.53	958.075	11.1863	-2055.45	933.746	18.6962	-1984.92	879.595
131	0	266.864	-1967.86	1606.05	369.088	-1957.05	1601.23	270.497	-2141.98	1592.05	396.4	-2105.09	1595.17	325.072	-2163.68	1466.86	312.614	-2268.31	1219.09	317.293	-2028.91	1358.32	291.781	-1988.75	1177.85	363.622	-2266.35	1292.04	152.286	-2101.08	1416.21	59.8332	-2174.76	1208.79	47.6343	-2186.19	1126.21	17.3284	-2111.91	1021.82	60.9318	-2005.88	958.359	8.65772	-2048.75	935.035	15.53	-1979.09	879.333
132	0	267.252	-1954.14	1607.91	369.497	-1943.38	1602.91	270.931	-2128.29	1594.43	396.934	-2091.59	1597.26	325.479	-2150.33	1469.17	313.417	-2255.62	1221.61	317.061	-2015.9	1360.37	290.641	-1975.89	1179.71	364.323	-2253.32	1294.52	152.355	-2088.28	1418.75	60.1683	-2164.43	1211.59	47.6408	-2175.56	1129.3	15.9806	-2103.73	1023.84	57.9252	-1998.29	958.406	6.07195	-2042.13	936.087	12.1638	-1973.31	878.961
133	0	267.468	-1940.42	1609.47	369.734	-1929.7	1604.34	271.214	-2114.58	1596.5	397.3	-2078.04	1599.1	325.792	-2136.98	1471.19	314.142	-2242.9	1223.86	316.788	-2002.87	1362.16	289.591	-1963.03	1181.33	364.954	-2240.28	1296.74	152.368	-2075.5	1420.94	60.4897	-2154.07	1214.1	47.6326	-2164.92	1132.07	14.5812	-2095.57	1025.6	54.8025	-1990.76	958.218	3.43011	-2035.58	936.902	8.60001	-1967.58	878.477
134	0	267.514	-1926.69	1610.73	369.801	-1915.99	1605.5	271.347	-2100.87	1598.26	397.5	-2064.45	1600.69	326.008	-2123.62	1472.93	314.789	-2230.16	1225.82	316.472	-1989.82	1363.69	288.633	-1950.18	1182.72	365.513	-2227.23	1298.7	152.325	-2062.72	1422.79	60.7945	-2143.68	1216.31	47.6093	-2154.29	1134.53	13.1316	-2087.43	1027.1	51.5665	-1983.29	957.791	0.73457	-2029.11	937.479	4.8433	-1961.9	877.88
135	0	267.392	-1912.96	1611.68	369.699	-1902.26	1606.4	271.332	-2087.14	1599.72	397.535	-2050.81	1602.02	326.13	-2110.24	1474.39	315.357	-2217.39	1227.51	316.116	-1976.76	1364.95	287.764	-1937.33	1183.87	365.999	-2214.16	1300.4	152.225	-2049.95	1424.28	61.0776	-2133.25	1218.21	47.5696	-2143.66	1136.68	11.6339	-2079.31	1028.35	48.2222	-1975.89	957.124	-2.01076	-2022.7	937.816	0.901694	-1956.26	877.163
136	0	267.103	-1899.23	1612.33	369.429	-1888.5	1607.03	271.17	-2073.4	1600.87	397.408	-2037.14	1603.09	326.156	-2096.86	1475.56	315.845	-2204.59	1228.91	315.717	-1963.67	1365.93	286.985	-1924.5	1184.77	366.411	-2201.07	1301.83	152.067	-2037.19	1425.43	61.3317	-2122.76	1219.8	47.5117	-2133.02	1138.52	10.091	-2071.19	1029.33	44.7764	-1968.54	956.214	-4.80021	-2016.35	937.908	-3.21301	-1950.67	876.323
137	0	266.649	-1885.49	1612.67	368.993	-1874.73	1607.39	270.866	-2059.65	1601.71	397.124	-2023.43	1603.9	326.087	-2083.46	1476.44	316.252	-2191.76	1230.02	315.277	-1950.55	1366.63	286.292	-1911.68	1185.41	366.747	-2187.96	1302.99	151.849	-2024.42	1426.22	61.5485	-2112.19	1221.08	47.4332	-2122.36	1140.03	8.50708	-2063.08	1030.05	41.2388	-1961.25	955.057	-7.62623	-2010.07	937.753	-7.4849	-1945.11	875.35
138	0	266.034	-1871.76	1612.7	368.396	-1860.93	1607.49	270.423	-2045.9	1602.23	396.686	-2009.68	1604.44	325.921	-2070.05	1477.02	316.576	-2178.9	1230.85	314.793	-1937.42	1367.05	285.684	-1898.88	1185.79	367.004	-2174.84	1303.87	151.568	-2011.64	1426.66	61.7183	-2101.53	1222.05	47.3312	-2111.68	1141.22	6.88698	-2054.97	1030.49	37.6215	-1954	953.65	-10.4795	-2003.84	937.346	-11.8939	-1939.59	874.235
139	0	265.261	-1858.02	1612.43	367.639	-1847.12	1607.31	269.845	-2032.14	1602.42	396.1	-1995.9	1604.7	325.658	-2056.63	1477.3	316.814	-2166	1231.37	314.266	-1924.26	1367.18	285.153	-1886.08	1185.89	367.179	-2161.7	1304.47	151.222	-1998.85	1426.74	61.8315	-2090.75	1222.69	47.2019	-2100.97	1142.08	5.23645	-2046.85	1030.66	33.9389	-1946.8	951.987	-13.3491	-1997.64	936.682	-16.416	-1934.09	872.965
140	0	264.335	-1844.28	1611.85	366.728	-1833.29	1606.85	269.136	-2018.38	1602.3	395.371	-1982.08	1604.68	325.295	-2043.19	1477.29	316.965	-2153.06	1231.6	313.693	-1911.07	1367	284.693	-1873.29	1185.69	367.268	-2148.53	1304.78	150.806	-1986.04	1426.47	61.8782	-2079.85	1223.01	47.0411	-2090.22	1142.6	3.56197	-2038.71	1030.55	30.2077	-1939.62	950.064	-16.2228	-1991.47	935.758	-21.0239	-1928.61	871.53
141	0	263.259	-1830.55	1610.97	365.665	-1819.45	1606.12	268.3	-2004.63	1601.85	394.503	-1968.24	1604.37	324.832	-2029.73	1476.97	317.024	-2140.08	1231.51	313.07	-1897.86	1366.52	284.293	-1860.51	1185.2	367.266	-2135.34	1304.8	150.316	-1973.2	1425.85	61.8493	-2068.81	1222.99	46.8435	-2079.41	1142.78	1.87054	-2030.53	1030.16	26.4463	-1932.46	947.879	-19.0874	-1985.32	934.57	-25.6871	-1923.14	869.914
142	0	262.038	-1816.83	1609.79	364.457	-1805.6	1605.12	267.341	-1990.88	1601.07	393.502	-1954.38	1603.76	324.266	-2016.25	1476.34	316.99	-2127.06	1231.12	312.393	-1884.6	1365.73	283.943	-1847.72	1184.39	367.169	-2122.11	1304.52	149.746	-1960.33	1424.88	61.7363	-2057.63	1222.62	46.6036	-2068.54	1142.61	0.169553	-2022.31	1029.48	22.6745	-1925.31	945.43	-21.9289	-1979.16	933.117	-30.3734	-1917.67	868.105
143	0	260.676	-1803.11	1608.33	363.105	-1791.74	1603.85	266.261	-1977.14	1599.97	392.372	-1940.49	1602.87	323.591	-2002.75	1475.42	316.86	-2113.98	1230.41	311.655	-1871.32	1364.63	283.628	-1834.91	1183.27	366.972	-2108.85	1303.93	149.09	-1947.41	1423.57	61.5318	-2046.28	1221.92	46.3159	-2057.59	1142.1	-1.53334	-2014.03	1028.51	18.9129	-1918.15	942.715	-24.7335	-1972.97	931.397	-35.0493	-1912.18	866.091
144	0	259.177	-1789.41	1606.59	361.615	-1777.88	1602.33	265.062	-1963.42	1598.56	391.115	-1926.6	1601.68	322.806	-1989.22	1474.2	316.631	-2100.85	1229.4	310.85	-1857.99	1363.22	283.331	-1822.08	1181.84	366.672	-2095.54	1303.05	148.342	-1934.45	1421.92	61.2295	-2034.79	1220.87	45.9754	-2046.55	1141.24	-3.23041	-2005.67	1027.26	15.1827	-1910.97	939.738	-27.487	-1966.74	929.414	-39.6808	-1906.65	863.861
145	0	257.543	-1775.72	1604.59	359.989	-1764.02	1600.56	263.745	-1949.71	1596.83	389.734	-1912.7	1600.21	321.905	-1975.66	1472.69	316.302	-2087.66	1228.08	309.969	-1844.61	1361.5	283.037	-1809.2	1180.1	366.264	-2082.18	1301.86	147.497	-1921.44	1419.95	60.8247	-2023.13	1219.47	45.5777	-2035.41	1140.04	-4.91394	-1997.23	1025.72	11.5047	-1903.74	936.504	-30.176	-1960.44	927.172	-44.2344	-1901.08	861.407
146	0	255.777	-1762.04	1602.36	358.23	-1750.16	1598.56	262.308	-1936.02	1594.81	388.229	-1898.79	1598.47	320.883	-1962.07	1470.91	315.872	-2074.39	1226.46	309.002	-1831.18	1359.5	282.724	-1796.27	1178.06	365.746	-2068.77	1300.38	146.546	-1908.38	1417.67	60.3139	-2011.32	1217.74	45.1196	-2024.15	1138.51	-6.57632	-1988.67	1023.9	7.8994	-1896.45	933.022	-32.7874	-1954.04	924.681	-48.6779	-1895.45	858.724
147	0	253.881	-1748.38	1599.91	356.34	-1736.31	1596.36	260.749	-1922.34	1592.52	386.6	-1884.89	1596.47	319.734	-1948.44	1468.87	315.342	-2061.06	1224.56	307.937	-1817.69	1357.22	282.372	-1783.27	1175.74	365.116	-2055.28	1298.62	145.483	-1895.27	1415.11	59.6952	-1999.35	1215.67	44.5989	-2012.78	1136.65	-8.21012	-1979.99	1021.82	4.38634	-1889.09	929.305	-35.3092	-1947.52	921.951	-52.9807	-1889.72	855.81
148	0	251.855	-1734.73	1597.28	354.32	-1722.47	1593.98	259.065	-1908.69	1589.98	384.843	-1870.99	1594.24	318.454	-1934.77	1466.6	314.713	-2047.64	1222.4	306.763	-1804.14	1354.69	281.959	-1770.19	1173.17	364.372	-2041.72	1296.6	144.302	-1882.11	1412.28	58.9684	-1987.24	1213.29	44.0148	-2001.27	1134.49	-9.80812	-1971.16	1019.47	0.983967	-1881.61	925.371	-37.73	-1940.86	919	-57.1145	-1883.88	852.671
149	0	249.7	-1721.09	1594.5	352.17	-1708.64	1591.45	257.251	-1895.05	1587.22	382.958	-1857.1	1591.8	317.038	-1921.06	1464.13	313.988	-2034.13	1220	305.468	-1790.52	1351.94	281.461	-1757	1170.36	363.516	-2028.06	1294.34	142.994	-1868.9	1409.21	58.135	-1974.98	1210.61	43.3679	-1989.62	1132.04	-11.3634	-1962.18	1016.89	-2.29063	-1874.01	921.24	-40.0397	-1934.03	915.847	-61.0539	-1877.91	849.316
150	0	247.414	-1707.46	1591.62	349.89	-1694.81	1588.82	255.303	-1881.42	1584.27	380.939	-1843.22	1589.19	315.48	-1907.3	1461.48	313.17	-2020.52	1217.39	304.039	-1776.82	1349.01	280.854	-1743.7	1167.37	362.548	-2014.32	1291.88	141.554	-1855.64	1405.95	57.1986	-1962.59	1207.65	42.6602	-1977.83	1129.33	-12.8692	-1953.01	1014.1	-5.42177	-1866.26	916.94	-42.2289	-1926.99	912.517	-64.7758	-1871.78	845.76
151	0	244.996	-1693.84	1588.67	347.479	-1681	1586.12	253.215	-1867.8	1581.19	378.783	-1829.36	1586.44	313.777	-1893.48	1458.71	312.263	-2006.8	1214.61	302.463	-1763.04	1345.94	280.114	-1730.26	1164.22	361.471	-2000.46	1289.25	139.974	-1842.33	1402.52	56.1646	-1950.07	1204.46	41.895	-1965.89	1126.39	-14.3192	-1943.65	1011.12	-8.39532	-1858.34	912.502	-44.2892	-1919.72	909.038	-68.2603	-1865.45	842.024
152	0	242.447	-1680.23	1585.71	344.936	-1667.19	1583.4	250.983	-1854.18	1578	376.485	-1815.5	1583.61	311.924	-1879.6	1455.84	311.273	-1992.95	1211.7	300.731	-1749.17	1342.77	279.216	-1716.67	1160.97	360.288	-1986.49	1286.5	138.25	-1828.97	1398.98	55.0402	-1937.42	1201.06	41.0768	-1953.79	1123.26	-15.7073	-1934.07	1007.98	-11.1988	-1850.21	907.96	-46.2132	-1912.2	905.441	-71.4906	-1858.9	838.136
153	0	239.764	-1666.61	1582.78	342.262	-1653.39	1580.71	248.602	-1840.56	1574.78	374.043	-1801.64	1580.74	309.92	-1865.66	1452.94	310.205	-1978.98	1208.72	298.833	-1735.21	1339.56	278.141	-1702.93	1157.67	359.003	-1972.4	1283.67	136.375	-1815.57	1395.36	53.8345	-1924.67	1197.5	40.2113	-1941.52	1119.98	-17.0278	-1924.26	1004.71	-13.8213	-1841.85	903.355	-47.9941	-1904.39	901.762	-74.4524	-1852.1	834.129
154	0	236.95	-1652.98	1579.93	339.456	-1639.59	1578.1	246.069	-1826.93	1571.55	371.453	-1787.79	1577.87	307.763	-1851.64	1450.05	309.064	-1964.87	1205.7	296.763	-1721.15	1336.37	276.867	-1689.02	1154.38	357.62	-1958.18	1280.81	134.347	-1802.11	1391.73	52.5578	-1911.79	1193.83	39.3049	-1929.09	1116.6	-18.2755	-1914.2	1001.37	-16.254	-1833.24	898.729	-49.6263	-1896.28	898.039	-77.135	-1845.02	830.041
155	0	234.004	-1639.34	1577.22	336.519	-1625.79	1575.62	243.381	-1813.28	1568.39	368.714	-1773.95	1575.07	305.454	-1837.54	1447.21	307.855	-1950.6	1202.72	294.515	-1706.98	1333.25	275.38	-1674.92	1151.15	356.143	-1943.81	1277.99	132.165	-1788.59	1388.13	51.2216	-1898.82	1190.11	38.3649	-1916.49	1113.16	-19.4459	-1903.89	997.98	-18.4899	-1824.34	894.128	-51.1047	-1887.83	894.312	-79.5304	-1837.63	825.915
156	0	230.93	-1625.67	1574.7	333.456	-1611.98	1573.32	240.538	-1799.6	1565.35	365.827	-1760.09	1572.39	302.995	-1823.37	1444.49	306.58	-1936.19	1199.81	292.09	-1692.7	1330.26	273.67	-1660.62	1148.06	354.577	-1929.31	1275.25	129.828	-1775.02	1384.63	49.8375	-1885.73	1186.39	37.3987	-1903.72	1109.72	-20.5349	-1893.29	994.594	-20.5239	-1815.14	889.6	-52.4255	-1879.02	890.622	-81.6338	-1829.89	821.796
157	0	227.733	-1611.98	1572.41	330.27	-1598.15	1571.24	237.543	-1785.89	1562.47	362.795	-1746.23	1569.86	300.39	-1809.11	1441.92	305.245	-1921.62	1197.05	289.491	-1678.31	1327.47	271.73	-1646.13	1145.16	352.926	-1914.67	1272.66	127.341	-1761.39	1381.26	48.4172	-1872.54	1182.74	36.4137	-1890.77	1106.33	-21.5397	-1882.41	991.252	-22.3532	-1805.61	885.191	-53.5858	-1869.83	887.012	-83.4436	-1821.77	817.731
158	0	224.421	-1598.25	1570.39	326.967	-1584.3	1569.43	234.4	-1772.14	1559.81	359.622	-1732.35	1567.56	297.646	-1794.77	1439.57	303.849	-1906.9	1194.47	286.725	-1663.81	1324.92	269.564	-1631.43	1142.51	351.194	-1899.88	1270.27	124.71	-1747.68	1378.08	46.9713	-1859.25	1179.2	35.4169	-1877.64	1103.03	-22.4586	-1871.22	987.999	-23.977	-1795.72	880.95	-54.5845	-1860.24	883.52	-84.9611	-1813.23	813.767
159	0	221.001	-1584.49	1568.69	323.558	-1570.43	1567.92	231.116	-1758.34	1557.42	356.317	-1718.45	1565.51	294.77	-1780.36	1437.48	302.394	-1892.02	1192.15	283.804	-1649.21	1322.67	267.181	-1616.52	1140.17	349.384	-1884.97	1268.13	121.944	-1733.91	1375.15	45.5089	-1845.84	1175.83	34.4148	-1864.33	1099.89	-23.2912	-1859.73	984.876	-25.3968	-1785.45	876.921	-55.4218	-1850.23	880.186	-86.1909	-1804.26	809.951
160	0	217.486	-1570.67	1567.34	320.054	-1556.53	1566.76	227.702	-1744.49	1555.33	352.89	-1704.52	1563.76	291.774	-1765.86	1435.67	300.882	-1877	1190.11	280.743	-1634.5	1320.77	264.597	-1601.42	1138.2	347.503	-1869.93	1266.29	119.056	-1720.05	1372.5	44.0368	-1832.32	1172.7	33.4124	-1850.83	1096.95	-24.0388	-1847.9	981.921	-26.6162	-1774.77	873.147	-56.1003	-1839.78	877.046	-87.1403	-1794.82	806.324
161	0	213.89	-1556.81	1566.36	316.468	-1542.6	1565.96	224.17	-1730.58	1553.59	349.355	-1690.57	1562.35	288.672	-1751.3	1434.2	299.313	-1861.86	1188.4	277.563	-1619.69	1319.25	261.836	-1586.12	1136.63	345.554	-1854.78	1264.79	116.061	-1706.12	1370.17	42.5596	-1818.67	1169.84	32.4136	-1837.15	1094.24	-24.7041	-1835.75	979.171	-27.6407	-1763.67	869.666	-56.6244	-1828.87	874.13	-87.8197	-1784.88	802.925
162	0	210.229	-1542.9	1565.77	312.816	-1528.64	1565.54	220.539	-1716.62	1552.23	345.728	-1676.59	1561.29	285.478	-1736.67	1433.08	297.692	-1846.6	1187.06	274.288	-1604.81	1318.14	258.927	-1570.65	1135.49	343.546	-1839.53	1263.65	112.981	-1692.12	1368.19	41.0794	-1804.89	1167.29	31.421	-1823.27	1091.8	-25.2921	-1823.25	976.656	-28.4778	-1752.12	866.51	-57.0015	-1817.49	871.467	-88.2422	-1774.42	799.789
163	0	206.522	-1528.94	1565.57	309.116	-1514.64	1565.51	216.825	-1702.59	1551.25	342.027	-1662.58	1560.61	282.212	-1721.99	1432.33	296.021	-1831.25	1186.12	270.943	-1589.85	1317.46	255.906	-1555.04	1134.82	341.487	-1824.21	1262.92	109.834	-1678.03	1366.59	39.5961	-1790.96	1165.1	30.4351	-1809.2	1089.67	-25.8094	-1810.4	974.401	-29.1369	-1740.1	863.706	-57.2413	-1805.63	869.077	-88.4237	-1763.41	796.942
164	0	202.787	-1514.92	1565.78	305.387	-1500.61	1565.87	213.053	-1688.5	1550.67	338.274	-1648.54	1560.32	278.893	-1707.27	1431.98	294.309	-1815.85	1185.59	267.558	-1574.84	1317.22	252.809	-1539.31	1134.61	339.387	-1808.83	1262.6	106.647	-1663.86	1365.37	38.1076	-1776.87	1163.27	29.4553	-1794.94	1087.86	-26.2646	-1797.19	972.426	-29.6286	-1727.61	861.275	-57.3561	-1793.26	866.978	-88.3823	-1751.83	794.406
165	0	199.046	-1500.86	1566.37	301.652	-1486.55	1566.61	209.245	-1674.36	1550.5	334.493	-1634.46	1560.42	275.544	-1692.53	1432	292.562	-1800.4	1185.47	264.165	-1559.8	1317.41	249.676	-1523.52	1134.86	337.259	-1793.42	1262.7	103.443	-1649.63	1364.55	36.6108	-1762.61	1161.82	28.4793	-1780.49	1086.38	-26.6679	-1783.62	970.744	-29.9649	-1714.62	859.231	-57.361	-1780.39	865.178	-88.1387	-1739.67	792.193
166	0	195.321	-1486.75	1567.32	297.93	-1472.45	1567.71	205.428	-1660.17	1550.72	330.708	-1620.36	1560.89	272.187	-1677.77	1432.41	290.793	-1784.96	1185.78	260.793	-1544.74	1318.04	246.547	-1507.7	1135.55	335.115	-1778.01	1263.21	100.249	-1635.32	1364.11	35.1018	-1748.18	1160.75	27.5036	-1765.84	1085.25	-27.031	-1769.68	969.36	-30.1587	-1701.13	857.578	-57.2732	-1766.99	863.682	-87.7154	-1726.89	790.312
167	0	191.635	-1472.61	1568.62	294.246	-1458.33	1569.15	201.629	-1645.94	1551.33	326.945	-1606.23	1561.74	268.847	-1663.01	1433.19	289.013	-1769.54	1186.5	257.475	-1529.69	1319.06	243.461	-1491.9	1136.65	332.969	-1762.62	1264.13	97.0914	-1620.96	1364.06	33.5769	-1733.57	1160.06	26.5235	-1751.01	1084.45	-27.3667	-1755.37	968.276	-30.2238	-1687.13	856.317	-57.1117	-1753.08	862.487	-87.1364	-1713.49	788.76
168	0	188.011	-1458.43	1570.23	290.622	-1444.19	1570.9	197.875	-1631.67	1552.28	323.23	-1592.08	1562.93	265.546	-1648.28	1434.32	287.235	-1754.18	1187.6	254.241	-1514.67	1320.45	240.456	-1476.17	1138.12	330.834	-1747.27	1265.42	93.9945	-1606.55	1364.36	32.0331	-1718.77	1159.72	25.5337	-1735.99	1083.98	-27.6884	-1740.69	967.483	-30.1744	-1672.62	855.44	-56.8969	-1738.63	861.587	-86.4269	-1699.45	787.534
169	0	184.471	-1444.22	1572.11	287.082	-1430.03	1572.91	194.194	-1617.38	1553.57	319.589	-1577.92	1564.43	262.308	-1633.58	1435.77	285.473	-1738.9	1189.08	251.12	-1499.69	1322.18	237.567	-1460.56	1139.91	328.724	-1731.99	1267.07	90.9826	-1592.1	1365	30.4688	-1703.8	1159.72	24.5282	-1720.79	1083.81	-28.0096	-1725.64	966.971	-30.0243	-1657.6	854.934	-56.6492	-1723.65	860.967	-85.6126	-1684.76	786.621
170	0	181.038	-1430.01	1574.21	283.647	-1415.86	1575.15	190.613	-1603.07	1555.14	316.048	-1563.75	1566.22	259.155	-1618.92	1437.5	283.738	-1723.75	1190.88	248.137	-1484.77	1324.19	234.826	-1445.09	1141.97	326.648	-1716.8	1269.03	88.0773	-1577.63	1365.95	28.8835	-1688.65	1160.01	23.5007	-1705.42	1083.93	-28.3437	-1710.21	966.72	-29.7874	-1642.07	854.78	-56.3888	-1708.13	860.611	-84.7191	-1669.42	786.007
171	0	177.734	-1415.78	1576.51	280.34	-1401.69	1577.58	187.156	-1588.76	1556.96	312.629	-1549.58	1568.25	256.105	-1604.32	1439.48	282.041	-1708.73	1192.97	245.315	-1469.94	1326.44	232.263	-1429.81	1144.24	324.615	-1701.72	1271.27	85.2975	-1563.13	1367.17	27.2784	-1673.34	1160.57	22.4453	-1689.89	1084.3	-28.7031	-1694.43	966.711	-29.4768	-1626.04	854.956	-56.1346	-1692.09	860.498	-83.7712	-1653.41	785.674
172	0	174.578	-1401.55	1578.96	277.18	-1387.52	1580.16	183.845	-1574.46	1559	309.355	-1535.42	1570.48	253.176	-1589.79	1441.68	280.39	-1693.87	1195.32	242.674	-1455.19	1328.89	229.901	-1414.73	1146.66	322.632	-1686.76	1273.72	82.6588	-1548.62	1368.61	25.6562	-1657.88	1161.35	21.3561	-1674.21	1084.89	-29.0988	-1678.29	966.917	-29.1043	-1609.52	855.435	-55.9033	-1675.52	860.604	-82.7924	-1636.74	785.602
173	0	171.588	-1387.34	1581.51	274.187	-1373.37	1582.84	180.699	-1560.17	1561.2	306.243	-1521.28	1572.87	250.382	-1575.34	1444.04	278.79	-1679.18	1197.86	240.228	-1440.55	1331.48	227.764	-1399.88	1149.19	320.702	-1671.94	1276.36	80.1736	-1534.11	1370.26	24.0207	-1642.28	1162.32	20.2278	-1658.38	1085.67	-29.5406	-1661.8	967.315	-28.6809	-1592.53	856.191	-55.7092	-1658.45	860.904	-81.8036	-1619.42	785.774
174	0	168.779	-1373.14	1584.12	271.376	-1359.25	1585.59	177.734	-1545.91	1563.52	303.311	-1507.16	1575.37	247.735	-1560.96	1446.53	277.244	-1664.68	1200.57	237.988	-1426.02	1334.17	225.866	-1385.25	1151.78	318.826	-1657.27	1279.12	77.8503	-1519.61	1372.05	22.3767	-1626.57	1163.44	19.056	-1642.42	1086.6	-30.0361	-1644.97	967.875	-28.216	-1575.08	857.196	-55.5636	-1640.88	861.375	-80.8236	-1601.46	786.169
175	0	166.163	-1358.96	1586.77	268.76	-1345.15	1588.36	174.961	-1531.67	1565.92	300.568	-1493.08	1577.95	245.243	-1546.66	1449.11	275.749	-1650.36	1203.39	235.959	-1411.6	1336.9	224.22	-1370.85	1154.37	317.005	-1642.75	1281.97	75.694	-1505.11	1373.96	20.7293	-1610.76	1164.66	17.8367	-1626.33	1087.64	-30.5912	-1627.82	968.573	-27.7177	-1557.2	858.422	-55.4746	-1622.82	861.991	-79.8674	-1582.86	786.773
176	0	163.752	-1344.82	1589.4	266.35	-1331.08	1591.12	172.389	-1517.47	1568.37	298.025	-1479.03	1580.56	242.911	-1532.45	1451.73	274.303	-1636.23	1206.28	234.143	-1397.3	1339.65	222.831	-1356.65	1156.95	315.235	-1628.39	1284.86	73.706	-1490.63	1375.95	19.0836	-1594.86	1165.96	16.567	-1610.13	1088.77	-31.2098	-1610.36	969.381	-27.1927	-1538.9	859.843	-55.447	-1604.31	862.73	-78.9466	-1563.65	787.57
177	0	161.55	-1330.7	1592	264.152	-1317.06	1593.83	170.022	-1503.32	1570.81	295.686	-1465.03	1583.16	240.742	-1518.31	1454.36	272.9	-1622.29	1209.2	232.537	-1383.1	1342.37	221.699	-1342.66	1159.47	313.513	-1614.19	1287.74	71.8847	-1476.17	1377.99	17.4441	-1578.89	1167.31	15.2447	-1593.83	1089.96	-31.8936	-1592.6	970.277	-26.6468	-1520.22	861.434	-55.4826	-1585.36	863.571	-78.0691	-1543.86	788.547
178	0	159.56	-1316.63	1594.54	262.17	-1303.08	1596.47	167.859	-1489.21	1573.23	293.552	-1451.08	1585.71	238.734	-1504.25	1456.96	271.529	-1608.51	1212.1	231.135	-1369.01	1345.03	220.818	-1328.83	1161.92	311.835	-1600.13	1290.59	70.2254	-1461.72	1380.04	15.8145	-1562.85	1168.69	13.8686	-1577.43	1091.17	-32.643	-1574.57	971.236	-26.0843	-1501.18	863.174	-55.5809	-1565.99	864.496	-77.2387	-1523.51	789.693
179	0	157.783	-1302.59	1596.98	260.405	-1289.16	1599.02	165.899	-1475.14	1575.59	291.622	-1437.18	1588.19	236.886	-1490.25	1459.51	270.182	-1594.88	1214.96	229.927	-1355.02	1347.59	220.175	-1315.16	1164.27	310.196	-1586.21	1293.35	68.7212	-1447.29	1382.07	14.1972	-1546.78	1170.06	12.4379	-1560.94	1092.39	-33.4565	-1556.27	972.24	-25.5091	-1481.81	865.041	-55.7387	-1546.24	865.488	-76.4558	-1502.64	791
180	0	156.215	-1288.59	1599.31	258.852	-1275.28	1601.43	164.134	-1461.12	1577.85	289.89	-1423.34	1590.56	235.193	-1476.32	1461.96	268.848	-1581.39	1217.72	228.901	-1341.11	1350.04	219.75	-1301.61	1166.52	308.591	-1572.43	1296.01	67.3632	-1432.89	1384.07	12.5931	-1530.66	1171.42	10.9524	-1544.37	1093.58	-34.3313	-1537.74	973.27	-24.9245	-1462.14	867.018	-55.9515	-1526.12	866.533	-75.7173	-1481.28	792.458
181	0	154.85	-1274.63	1601.51	257.507	-1261.45	1603.71	162.559	-1447.15	1580	288.35	-1409.55	1592.8	233.648	-1462.45	1464.3	267.518	-1568.01	1220.37	228.04	-1327.3	1352.36	219.52	-1288.15	1168.64	307.018	-1558.77	1298.54	66.1415	-1418.5	1386	11.0017	-1514.52	1172.74	9.41265	-1527.73	1094.74	-35.2635	-1518.97	974.309	-24.3332	-1442.19	869.09	-56.2132	-1505.67	867.62	-75.0177	-1459.48	794.06
182	0	153.68	-1260.71	1603.55	256.36	-1247.68	1605.81	161.162	-1433.22	1582.01	286.994	-1395.82	1594.89	232.245	-1448.63	1466.49	266.181	-1554.72	1222.86	227.331	-1313.55	1354.51	219.457	-1274.78	1170.63	305.474	-1545.21	1300.9	65.045	-1404.12	1387.86	9.42124	-1498.36	1174.02	7.81941	-1511.03	1095.85	-36.2482	-1500.01	975.342	-23.7383	-1421.99	871.24	-56.5173	-1484.92	868.739	-74.3494	-1437.27	795.799
183	0	152.696	-1246.83	1605.42	255.402	-1233.95	1607.74	159.934	-1419.34	1583.87	285.81	-1382.14	1596.79	230.976	-1434.85	1468.52	264.833	-1541.51	1225.18	226.754	-1299.87	1356.5	219.528	-1261.45	1172.48	303.957	-1531.75	1303.08	64.0629	-1389.77	1389.61	7.84859	-1482.19	1175.23	6.174	-1494.27	1096.88	-37.2802	-1480.86	976.357	-23.1423	-1401.57	873.456	-56.8566	-1463.89	869.88	-73.7036	-1414.69	797.664
184	0	151.885	-1232.98	1607.12	254.622	-1220.27	1609.46	158.863	-1405.49	1585.55	284.788	-1368.5	1598.51	229.833	-1421.11	1470.37	263.468	-1528.34	1227.3	226.292	-1286.24	1358.29	219.701	-1248.17	1174.17	302.469	-1518.36	1305.05	63.184	-1375.42	1391.24	6.27996	-1466.01	1176.38	4.47822	-1477.45	1097.83	-38.3536	-1461.54	977.341	-22.5483	-1380.96	875.727	-57.2242	-1442.62	871.036	-73.071	-1391.8	799.649
185	0	151.238	-1219.16	1608.61	254.008	-1206.62	1610.98	157.937	-1391.67	1587.04	283.918	-1354.9	1600.01	228.806	-1407.41	1472.01	262.085	-1515.2	1229.19	225.929	-1272.65	1359.88	219.94	-1234.9	1175.69	301.011	-1505.04	1306.81	62.3983	-1361.1	1392.74	4.71118	-1449.82	1177.44	2.73443	-1460.59	1098.68	-39.4624	-1442.08	978.283	-21.9591	-1360.19	878.04	-57.6131	-1421.13	872.201	-72.4427	-1368.64	801.743
186	0	150.743	-1205.36	1609.9	253.547	-1193.01	1612.27	157.147	-1377.88	1588.33	283.187	-1341.35	1601.29	227.89	-1393.72	1473.44	260.688	-1502.07	1230.85	225.648	-1259.09	1361.26	220.212	-1221.65	1177.03	299.586	-1491.76	1308.33	61.6965	-1346.78	1394.1	3.13829	-1433.63	1178.41	0.945709	-1443.69	1099.42	-40.6003	-1422.49	979.174	-21.3776	-1339.27	880.383	-58.0169	-1399.46	873.366	-71.8105	-1345.26	803.934
187	0	150.388	-1191.59	1610.97	253.228	-1179.43	1613.33	156.481	-1364.12	1589.41	282.585	-1327.82	1602.34	227.077	-1380.06	1474.64	259.281	-1488.94	1232.25	225.433	-1245.56	1362.41	220.485	-1208.39	1178.17	298.2	-1478.53	1309.61	61.0705	-1332.47	1395.3	1.55812	-1417.44	1179.27	-0.884018	-1426.75	1100.04	-41.761	-1402.79	980.004	-20.8068	-1318.24	882.747	-58.4298	-1377.63	874.527	-71.1676	-1321.69	806.213
188	0	150.163	-1177.83	1611.82	253.04	-1165.88	1614.15	155.931	-1350.38	1590.26	282.104	-1314.32	1603.14	226.361	-1366.41	1475.6	257.873	-1475.79	1233.39	225.271	-1232.04	1363.32	220.73	-1195.13	1179.1	296.859	-1465.31	1310.63	60.5139	-1318.18	1396.33	-0.031251	-1401.25	1180.01	-2.74975	-1409.78	1100.53	-42.9384	-1383	980.766	-20.2493	-1297.11	885.118	-58.8464	-1355.67	875.677	-70.5091	-1297.99	808.565
189	0	150.059	-1164.09	1612.43	252.974	-1152.35	1614.72	155.487	-1336.65	1590.89	281.735	-1300.84	1603.7	225.738	-1352.78	1476.33	256.475	-1462.63	1234.27	225.151	-1218.53	1363.98	220.921	-1181.86	1179.79	295.57	-1452.11	1311.41	60.0218	-1303.9	1397.18	-1.62993	-1385.05	1180.63	-4.64523	-1392.78	1100.89	-44.126	-1363.14	981.453	-19.7078	-1275.92	887.485	-59.262	-1333.62	876.809	-69.8318	-1274.19	810.979
190	0	150.068	-1150.36	1612.82	253.02	-1138.82	1615.04	155.144	-1322.92	1591.28	281.469	-1287.37	1604.01	225.205	-1339.14	1476.8	255.098	-1449.43	1234.87	225.063	-1205.01	1364.39	221.039	-1168.59	1180.23	294.342	-1438.92	1311.92	59.5911	-1289.62	1397.85	-3.23584	-1368.85	1181.1	-6.56276	-1375.75	1101.1	-45.3175	-1343.24	982.061	-19.1844	-1254.68	889.837	-59.6727	-1311.49	877.92	-69.1348	-1250.34	813.441
191	0	150.182	-1136.62	1612.96	253.172	-1125.31	1615.11	154.895	-1309.2	1591.43	281.302	-1273.91	1604.07	224.759	-1325.52	1477.03	253.758	-1436.19	1235.19	225	-1191.49	1364.54	221.069	-1155.29	1180.42	293.185	-1425.71	1312.17	59.2203	-1275.36	1398.31	-4.84441	-1352.65	1181.42	-8.49306	-1358.69	1101.16	-46.5063	-1323.29	982.584	-18.6809	-1233.43	892.162	-60.075	-1289.33	879.003	-68.419	-1226.48	815.938
192	0	150.397	-1122.89	1612.86	253.423	-1111.79	1614.93	154.736	-1295.47	1591.35	281.229	-1260.45	1603.87	224.4	-1311.89	1477	252.468	-1422.92	1235.25	224.958	-1177.96	1364.42	220.999	-1141.98	1180.33	292.108	-1412.5	1312.16	58.9094	-1261.11	1398.59	-6.4484	-1336.43	1181.58	-10.4252	-1341.61	1101.07	-47.6857	-1303.34	983.019	-18.1988	-1212.18	894.449	-60.4658	-1267.15	880.053	-67.6873	-1202.64	818.457
193	0	150.706	-1109.14	1612.53	253.768	-1098.27	1614.49	154.663	-1281.74	1591.04	281.245	-1246.99	1603.43	224.13	-1298.26	1476.73	251.242	-1409.6	1235.04	224.935	-1164.41	1364.05	220.827	-1128.66	1179.97	291.124	-1399.26	1311.9	58.6603	-1246.87	1398.66	-8.03779	-1320.2	1181.59	-12.3464	-1324.52	1100.83	-48.8485	-1283.38	983.366	-17.7388	-1190.95	896.685	-60.8426	-1244.98	881.067	-66.9442	-1178.87	820.985
194	0	151.108	-1095.39	1611.96	254.205	-1084.74	1613.81	154.676	-1268	1590.5	281.35	-1233.52	1602.75	223.951	-1284.63	1476.23	250.096	-1396.24	1234.57	224.932	-1150.83	1363.42	220.554	-1115.3	1179.34	290.241	-1385.99	1311.39	58.4758	-1232.65	1398.53	-9.59991	-1303.96	1181.42	-14.2424	-1307.41	1100.44	-49.9875	-1263.45	983.625	-17.3014	-1169.78	898.861	-61.203	-1222.86	882.04	-66.1956	-1155.21	823.511
195	0	151.599	-1081.62	1611.16	254.729	-1071.19	1612.89	154.774	-1254.23	1589.74	281.543	-1220.03	1601.84	223.865	-1270.99	1475.49	249.043	-1382.82	1233.84	224.953	-1137.24	1362.54	220.186	-1101.92	1178.44	289.471	-1372.69	1310.64	58.36	-1218.44	1398.2	-11.1196	-1287.7	1181.09	-16.0974	-1290.3	1099.89	-51.0946	-1243.57	983.796	-16.8867	-1148.67	900.967	-61.5449	-1200.81	882.97	-65.4487	-1131.68	826.023
196	0	152.179	-1067.83	1610.15	255.341	-1057.63	1611.74	154.958	-1240.46	1588.78	281.824	-1206.53	1600.71	223.878	-1257.35	1474.53	248.095	-1369.35	1232.87	225.002	-1123.61	1361.42	219.736	-1088.5	1177.3	288.825	-1359.35	1309.66	58.3181	-1204.25	1397.68	-12.5798	-1271.43	1180.6	-17.8941	-1273.18	1099.2	-52.1618	-1223.74	983.882	-16.4943	-1127.67	902.994	-61.8661	-1178.86	883.854	-64.7112	-1108.32	828.51
197	0	152.847	-1054.02	1608.93	256.038	-1044.04	1610.38	155.23	-1226.66	1587.62	282.194	-1193	1599.38	223.995	-1243.71	1473.35	247.265	-1355.83	1231.67	225.087	-1109.95	1360.09	219.221	-1075.03	1175.92	288.31	-1345.97	1308.45	58.3556	-1190.09	1396.98	-13.9616	-1255.16	1179.96	-19.6146	-1256.07	1098.37	-53.1801	-1204	983.887	-16.1232	-1106.79	904.934	-62.1645	-1157.04	884.692	-63.991	-1085.16	830.963
198	0	153.603	-1040.19	1607.51	256.822	-1030.43	1608.81	155.592	-1212.84	1586.29	282.655	-1179.45	1597.87	224.22	-1230.06	1471.99	246.561	-1342.24	1230.24	225.217	-1096.26	1358.56	218.66	-1061.5	1174.33	287.934	-1332.54	1307.02	58.4785	-1175.95	1396.12	-15.2453	-1238.89	1179.16	-21.2402	-1238.99	1097.4	-54.1404	-1184.36	983.815	-15.7724	-1086.06	906.782	-62.4379	-1135.38	885.483	-63.2961	-1062.24	833.372
199	0	154.448	-1026.33	1605.92	257.694	-1016.79	1607.06	156.05	-1198.99	1584.8	283.212	-1165.86	1596.19	224.559	-1216.41	1470.44	245.993	-1328.59	1228.6	225.402	-1082.54	1356.85	218.076	-1047.9	1172.56	287.704	-1319.06	1305.4	58.6928	-1161.83	1395.09	-16.411	-1222.62	1178.22	-22.752	-1221.94	1096.33	-55.0332	-1164.85	983.673	-15.4403	-1065.49	908.532	-62.6836	-1113.9	886.226	-62.6342	-1039.58	835.73
200	0	155.383	-1012.46	1604.18	258.653	-1003.13	1605.16	156.606	-1185.13	1583.18	283.867	-1152.25	1594.36	225.015	-1202.76	1468.73	245.565	-1314.87	1226.78	225.652	-1068.78	1354.99	217.494	-1034.22	1170.65	287.622	-1305.53	1303.59	59.0042	-1147.74	1393.93	-17.4388	-1206.39	1177.15	-24.1318	-1204.94	1095.14	-55.8487	-1145.5	983.465	-15.125	-1045.12	910.18	-62.899	-1092.65	886.922	-62.0122	-1017.22	838.029
201	0	156.411	-998.558	1602.3	259.704	-989.43	1603.11	157.265	-1171.25	1581.44	284.624	-1138.61	1592.42	225.593	-1189.1	1466.88	245.283	-1301.07	1224.77	225.978	-1054.98	1353.02	216.94	-1020.44	1168.63	287.69	-1291.93	1301.6	59.4178	-1133.66	1392.65	-18.3105	-1190.19	1175.97	-25.3621	-1188.01	1093.87	-56.5768	-1126.32	983.201	-14.8243	-1024.96	911.726	-63.0808	-1071.63	887.571	-61.4359	-995.18	840.261
202	0	157.534	-984.639	1600.32	260.846	-975.704	1600.95	158.033	-1157.36	1579.61	285.488	-1124.94	1590.37	226.295	-1175.44	1464.91	245.146	-1287.19	1222.61	226.391	-1041.15	1350.96	216.441	-1006.56	1166.53	287.907	-1278.27	1299.46	59.9381	-1119.61	1391.26	-19.0089	-1174.06	1174.69	-26.4272	-1171.16	1092.52	-57.2077	-1107.33	982.885	-14.5355	-1005.04	913.168	-63.2255	-1050.9	888.176	-60.9101	-973.49	842.421
203	0	158.752	-970.701	1598.25	262.083	-961.947	1598.71	158.912	-1143.44	1577.72	286.46	-1111.24	1588.26	227.122	-1161.77	1462.83	245.155	-1273.23	1220.32	226.9	-1027.27	1348.85	216.023	-992.558	1164.41	288.269	-1264.54	1297.18	60.5684	-1105.58	1389.8	-19.5196	-1158.01	1173.33	-27.313	-1154.42	1091.11	-57.7316	-1088.58	982.528	-14.2555	-985.38	914.507	-63.3289	-1030.47	888.738	-60.4382	-952.177	844.503
204	0	160.068	-956.745	1596.14	263.415	-948.162	1596.42	159.908	-1129.51	1575.79	287.545	-1097.5	1586.11	228.073	-1148.09	1460.69	245.303	-1259.18	1217.91	227.514	-1013.35	1346.73	215.711	-978.427	1162.28	288.769	-1250.74	1294.79	61.3107	-1091.55	1388.28	-19.8307	-1142.06	1171.91	-28.008	-1137.81	1089.67	-58.1393	-1070.08	982.135	-13.9809	-966.006	915.744	-63.3867	-1010.37	889.257	-60.022	-931.268	846.502
205	0	161.482	-942.773	1594.01	264.844	-934.348	1594.1	161.021	-1115.57	1573.85	288.744	-1083.74	1583.93	229.147	-1134.39	1458.5	245.585	-1245.03	1215.42	228.242	-999.38	1344.62	215.527	-964.159	1160.21	289.399	-1236.87	1292.31	62.166	-1077.53	1386.73	-19.9333	-1126.24	1170.44	-28.5034	-1121.35	1088.21	-58.4223	-1051.85	981.718	-13.7078	-946.939	916.883	-63.394	-990.644	889.736	-59.6617	-910.788	848.413
206	0	162.994	-928.786	1591.89	266.369	-920.507	1591.8	162.255	-1101.62	1571.92	290.058	-1069.94	1581.77	230.34	-1120.68	1456.29	245.99	-1230.79	1212.88	229.089	-985.366	1342.55	215.492	-949.749	1158.21	290.148	-1222.93	1289.76	63.1334	-1063.51	1385.17	-19.8216	-1110.56	1168.94	-28.7931	-1105.06	1086.75	-58.5732	-1033.92	981.284	-13.432	-928.203	917.927	-63.3456	-971.309	890.178	-59.3559	-890.761	850.233
207	0	164.604	-914.786	1589.81	267.991	-906.639	1589.54	163.609	-1087.65	1570.04	291.488	-1056.11	1579.66	231.645	-1106.94	1454.09	246.507	-1216.45	1210.31	230.059	-971.303	1340.57	215.622	-935.195	1156.32	291.002	-1208.92	1287.19	64.2105	-1049.47	1383.63	-19.4934	-1095.05	1167.45	-28.8748	-1088.97	1085.32	-58.5859	-1016.32	980.843	-13.1488	-909.82	918.88	-63.2365	-952.395	890.583	-59.1014	-871.212	851.958
208	0	166.309	-900.772	1587.81	269.706	-892.744	1587.35	165.083	-1073.68	1568.22	293.031	-1042.25	1577.61	233.055	-1093.18	1451.94	247.121	-1202.02	1207.74	231.153	-957.19	1338.7	215.93	-920.497	1154.58	291.948	-1194.84	1284.61	65.3934	-1035.42	1382.15	-18.9497	-1079.73	1165.98	-28.7489	-1073.09	1083.94	-58.4563	-999.065	980.408	-12.8533	-891.812	919.748	-63.0618	-933.931	890.957	-58.8935	-852.163	853.585
209	0	168.107	-886.745	1585.92	271.513	-878.824	1585.28	166.673	-1059.69	1566.5	294.684	-1028.37	1575.65	234.56	-1079.39	1449.85	247.816	-1187.49	1205.22	232.372	-943.027	1336.97	216.426	-905.66	1153.01	292.968	-1180.69	1282.07	66.676	-1021.34	1380.73	-18.1949	-1064.62	1164.57	-28.4195	-1057.44	1082.64	-58.1822	-982.179	979.988	-12.5402	-874.202	920.534	-62.8169	-915.942	891.301	-58.7256	-833.638	855.111
210	0	169.991	-872.705	1584.16	273.405	-864.877	1583.34	168.375	-1045.69	1564.9	296.442	-1014.45	1573.82	236.15	-1065.55	1447.86	248.577	-1172.88	1202.79	233.711	-928.816	1335.39	217.113	-890.693	1151.63	294.046	-1166.47	1279.6	68.0507	-1007.22	1379.42	-17.2372	-1049.72	1163.23	-27.8941	-1042.04	1081.44	-57.7638	-965.679	979.598	-12.2042	-857.01	921.246	-62.4978	-898.452	891.619	-58.5901	-815.659	856.533
211	0	171.956	-858.651	1582.57	275.377	-850.903	1581.58	170.183	-1031.67	1563.45	298.299	-1000.5	1572.15	237.812	-1051.68	1446.01	249.384	-1158.2	1200.46	235.163	-914.557	1334.01	217.99	-875.607	1150.46	295.164	-1152.2	1277.24	69.5078	-993.06	1378.24	-16.0884	-1035.05	1162	-27.183	-1026.9	1080.37	-57.2041	-949.583	979.251	-11.8401	-840.258	921.888	-62.1014	-881.482	891.918	-58.4777	-798.246	857.848
212	0	173.993	-844.581	1581.17	277.42	-836.901	1580	172.088	-1017.64	1562.17	300.245	-986.512	1570.64	239.53	-1037.76	1444.31	250.219	-1143.45	1198.3	236.719	-900.254	1332.83	219.052	-860.422	1149.52	296.303	-1137.87	1275.02	71.0353	-978.846	1377.21	-14.7641	-1020.6	1160.91	-26.3	-1012.03	1079.46	-56.5086	-933.904	978.962	-11.4426	-823.964	922.466	-61.6259	-865.054	892.201	-58.3784	-781.419	859.054
213	0	176.094	-830.494	1579.99	279.526	-822.87	1578.64	174.08	-1003.59	1561.08	302.271	-972.494	1569.34	241.289	-1023.79	1442.81	251.064	-1128.66	1196.33	238.366	-885.913	1331.88	220.285	-845.159	1148.82	297.444	-1123.5	1272.98	72.6198	-964.575	1376.37	-13.2836	-1006.39	1159.99	-25.2613	-997.442	1078.73	-55.6859	-918.651	978.746	-11.007	-808.146	922.986	-61.0705	-849.182	892.475	-58.2811	-765.198	860.148
214	0	178.247	-816.387	1579.03	281.682	-808.809	1577.51	176.146	-989.513	1560.21	304.363	-958.441	1568.25	243.073	-1009.78	1441.52	251.9	-1113.84	1194.58	240.087	-871.539	1331.16	221.672	-829.846	1148.38	298.569	-1109.1	1271.17	74.2455	-950.243	1375.73	-11.6703	-992.399	1159.27	-24.086	-983.135	1078.21	-54.7473	-903.832	978.618	-10.5296	-792.821	923.452	-60.4363	-833.882	892.747	-58.1744	-749.599	861.125
215	0	180.438	-802.259	1578.32	283.877	-794.717	1576.63	178.271	-975.415	1559.57	306.507	-944.353	1567.4	244.862	-995.719	1440.47	252.707	-1099.01	1193.1	241.862	-857.142	1330.69	223.19	-814.516	1148.19	299.659	-1094.69	1269.6	75.8952	-935.85	1375.33	-9.95112	-978.623	1158.79	-22.7955	-969.113	1077.92	-53.7065	-889.449	978.595	-10.0073	-778.002	923.87	-59.726	-819.163	893.024	-58.047	-734.636	861.983
216	0	182.655	-788.108	1577.86	286.095	-780.595	1576.01	180.44	-961.29	1559.18	308.686	-930.229	1566.79	246.639	-981.614	1439.68	253.469	-1084.19	1191.91	243.67	-842.73	1330.47	224.811	-799.203	1148.25	300.696	-1080.26	1268.31	77.5504	-921.396	1375.17	-8.15677	-965.045	1158.56	-21.4133	-955.371	1077.88	-52.5794	-875.502	978.691	-9.4385	-763.7	924.243	-58.9446	-805.031	893.312	-57.8877	-720.322	862.717
217	0	184.881	-773.931	1577.66	288.322	-766.441	1575.65	182.633	-947.136	1559.04	310.882	-916.071	1566.44	248.384	-967.469	1439.16	254.171	-1069.41	1191.04	245.487	-828.315	1330.51	226.503	-783.944	1148.58	301.664	-1065.84	1267.33	79.1919	-906.887	1375.28	-6.32094	-951.647	1158.63	-19.9643	-941.904	1078.12	-51.3837	-861.988	978.918	-8.8234	-749.923	924.575	-58.099	-791.488	893.62	-57.686	-706.665	863.321
218	0	187.099	-759.728	1577.72	290.54	-752.257	1575.54	184.829	-932.953	1559.18	313.076	-901.88	1566.35	250.078	-953.291	1438.93	254.798	-1054.68	1190.5	247.288	-813.909	1330.8	228.229	-768.778	1149.14	302.549	-1051.45	1266.66	80.7999	-892.33	1375.66	-4.47982	-938.404	1159	-18.4751	-928.703	1078.63	-50.1388	-848.899	979.286	-8.16387	-736.674	924.869	-57.1987	-778.53	893.954	-57.4328	-693.668	863.79
219	0	189.292	-745.498	1578.04	292.732	-738.044	1575.69	187.006	-918.74	1559.58	315.246	-887.658	1566.52	251.704	-939.088	1438.98	255.342	-1040.03	1190.3	249.046	-799.524	1331.34	229.953	-753.741	1149.94	303.34	-1037.09	1266.33	82.355	-877.736	1376.33	-2.67118	-925.292	1159.69	-16.9727	-915.756	1079.43	-48.8649	-836.225	979.804	-7.46392	-723.954	925.127	-56.2559	-766.149	894.32	-57.1206	-681.331	864.118
220	0	191.44	-731.241	1578.6	294.877	-723.805	1576.08	189.141	-904.498	1560.25	317.37	-873.409	1566.95	253.245	-924.868	1439.32	255.794	-1025.47	1190.45	250.736	-785.174	1332.12	231.637	-738.867	1150.95	304.027	-1022.79	1266.34	83.8387	-863.119	1377.27	-0.933125	-912.285	1160.71	-15.4841	-903.049	1080.51	-47.5831	-823.953	980.474	-6.72983	-711.758	925.349	-55.2848	-754.332	894.723	-56.7445	-669.647	864.297
221	0	193.524	-716.958	1579.39	296.958	-709.543	1576.7	191.208	-890.229	1561.18	319.425	-859.138	1567.63	254.687	-910.642	1439.94	256.153	-1011.02	1190.94	252.333	-770.87	1333.12	233.244	-724.184	1152.15	304.608	-1008.55	1266.69	85.2336	-848.495	1378.48	0.697366	-899.354	1162.04	-14.0357	-890.565	1081.88	-46.3148	-812.067	981.298	-5.97016	-700.076	925.535	-54.3024	-743.06	895.169	-56.3021	-658.604	864.323
222	0	195.523	-702.653	1580.39	298.953	-695.262	1577.52	193.186	-875.937	1562.35	321.39	-844.849	1568.54	256.016	-896.422	1440.83	256.421	-996.696	1191.76	253.816	-756.622	1334.33	234.738	-709.716	1153.53	305.081	-994.377	1267.36	86.5242	-833.884	1379.95	2.18604	-886.478	1163.69	-12.6523	-878.288	1083.52	-45.0809	-800.548	982.273	-5.19576	-688.896	925.685	-53.3273	-732.31	895.658	-55.7945	-648.184	864.189
223	0	197.419	-688.329	1581.57	300.844	-680.968	1578.53	195.049	-861.625	1563.75	323.243	-830.549	1569.68	257.224	-882.217	1441.97	256.603	-982.497	1192.89	255.165	-742.442	1335.73	236.089	-695.476	1155.04	305.451	-980.29	1268.34	87.6972	-819.304	1381.66	3.50309	-873.633	1165.63	-11.3561	-866.198	1085.41	-43.9016	-789.376	983.39	-4.41964	-678.199	925.797	-52.3801	-722.054	896.193	-55.2267	-638.365	863.892
224	0	199.192	-673.991	1582.92	302.61	-666.667	1579.71	196.776	-847.301	1565.36	324.963	-816.243	1571.02	258.303	-868.038	1443.35	256.708	-968.434	1194.31	256.363	-728.336	1337.29	237.269	-681.471	1156.67	305.724	-966.291	1269.61	88.7417	-804.777	1383.58	4.62483	-860.804	1167.83	-10.1662	-854.278	1087.53	-42.7961	-778.53	984.639	-3.65673	-667.964	925.869	-51.4818	-712.263	896.774	-54.6082	-629.119	863.431
225	0	200.825	-659.645	1584.41	304.235	-652.363	1581.03	198.349	-832.97	1567.16	326.533	-801.938	1572.54	259.249	-853.895	1444.93	256.751	-954.507	1195.98	257.397	-714.31	1338.99	238.256	-667.698	1158.39	305.911	-952.384	1271.14	89.6498	-790.32	1385.68	5.53511	-847.982	1170.25	-9.09788	-842.51	1089.85	-41.7813	-767.988	986.008	-2.92351	-658.167	925.9	-50.6539	-702.902	897.398	-53.9524	-620.414	862.808
226	0	202.3	-645.298	1586	305.703	-638.065	1582.46	199.751	-818.641	1569.1	327.936	-787.641	1574.21	260.061	-839.796	1446.69	256.745	-940.716	1197.86	258.261	-700.369	1340.81	239.035	-654.145	1160.18	306.025	-938.57	1272.89	90.4164	-775.953	1387.93	6.22637	-835.165	1172.86	-8.1619	-830.879	1092.34	-40.8723	-757.728	987.479	-2.23765	-648.779	925.887	-49.9174	-693.939	898.062	-53.2776	-612.217	862.028
227	0	203.605	-630.958	1587.67	306.999	-623.778	1583.98	200.971	-804.321	1571.17	329.162	-773.359	1576.02	260.739	-825.747	1448.59	256.707	-927.055	1199.93	258.95	-686.513	1342.73	239.597	-640.793	1162.01	306.081	-924.849	1274.84	91.0395	-761.689	1390.29	6.70021	-822.359	1175.61	-7.36435	-819.37	1094.96	-40.0816	-747.727	989.036	-1.61744	-639.771	925.828	-49.2917	-685.339	898.761	-52.6059	-604.49	861.1
228	0	204.73	-616.633	1589.4	308.113	-609.509	1585.57	201.999	-790.019	1573.33	330.201	-759.097	1577.92	261.288	-811.754	1450.62	256.653	-913.517	1202.15	259.465	-672.743	1344.7	239.94	-627.618	1163.86	306.094	-911.218	1276.95	91.52	-747.539	1392.74	6.96719	-809.576	1178.46	-6.70659	-807.971	1097.69	-39.4187	-737.965	990.657	-1.08137	-631.112	925.72	-48.7944	-677.067	899.489	-51.963	-597.196	860.036
229	0	205.666	-602.332	1591.14	309.039	-595.264	1587.2	202.832	-775.743	1575.55	331.049	-744.862	1579.91	261.712	-797.82	1452.72	256.597	-900.093	1204.46	259.81	-659.056	1346.71	240.071	-614.589	1165.72	306.077	-897.67	1279.17	91.8618	-733.512	1395.22	7.04615	-796.838	1181.36	-6.18535	-796.671	1100.48	-38.8901	-728.42	992.324	-0.647468	-622.77	925.562	-48.4399	-669.092	900.238	-51.3775	-590.296	858.852
230	0	206.41	-588.061	1592.88	309.773	-581.05	1588.84	203.47	-761.501	1577.79	331.706	-730.659	1581.94	262.019	-783.946	1454.88	256.552	-886.769	1206.84	259.996	-645.449	1348.74	240.002	-601.674	1167.57	306.044	-884.2	1281.47	92.0709	-719.61	1397.71	6.96281	-784.168	1184.28	-5.7932	-785.463	1103.29	-38.4994	-719.075	994.014	-0.332818	-614.714	925.351	-48.2396	-661.383	900.998	-50.8792	-583.752	857.566
231	0	206.964	-573.829	1594.58	310.315	-566.871	1590.47	203.918	-747.301	1580.01	332.175	-716.493	1583.99	262.215	-770.133	1457.05	256.528	-873.534	1209.24	260.033	-631.915	1350.76	239.751	-588.84	1169.39	306.005	-870.8	1283.81	92.1557	-705.832	1400.16	6.74785	-771.596	1187.15	-5.51912	-774.341	1106.09	-38.2471	-709.911	995.706	-0.15297	-606.912	925.083	-48.201	-653.913	901.76	-50.4988	-577.526	856.197
232	0	207.33	-559.642	1596.22	310.671	-552.733	1592.07	204.185	-733.148	1582.19	332.463	-702.368	1586.03	262.31	-756.377	1459.19	256.529	-860.373	1211.62	259.936	-618.447	1352.74	239.34	-576.054	1171.17	305.969	-857.46	1286.15	92.1263	-692.173	1402.55	6.43475	-759.15	1189.96	-5.34927	-763.298	1108.85	-38.1308	-700.912	997.378	-0.121464	-599.334	924.755	-48.3278	-646.654	902.51	-50.2655	-571.582	854.765
233	0	207.516	-545.505	1597.78	310.847	-538.639	1593.61	204.28	-719.046	1584.29	332.581	-688.288	1588.02	262.311	-742.676	1461.29	256.557	-847.271	1213.95	259.722	-605.037	1354.66	238.799	-563.287	1172.89	305.939	-844.171	1288.45	91.9939	-678.624	1404.83	6.05743	-746.854	1192.66	-5.26786	-752.331	1111.54	-38.1456	-692.062	999.009	-0.249398	-591.949	924.362	-48.6196	-639.585	903.236	-50.2065	-565.882	853.289
234	0	207.533	-531.42	1599.23	310.854	-524.592	1595.07	204.217	-704.999	1586.29	332.539	-674.254	1589.95	262.229	-729.025	1463.3	256.612	-834.214	1216.19	259.407	-591.676	1356.49	238.156	-550.517	1174.54	305.919	-830.923	1290.68	91.7705	-665.173	1406.98	5.64811	-734.731	1195.22	-5.25803	-741.435	1114.11	-38.2843	-683.345	1000.58	-0.545091	-584.73	923.897	-49.0721	-632.682	903.922	-50.3453	-560.393	851.787
235	0	207.393	-517.391	1600.55	310.706	-510.594	1596.43	204.012	-691.008	1588.14	332.353	-660.268	1591.77	262.072	-715.417	1465.19	256.687	-821.189	1218.3	259.01	-578.354	1358.21	237.442	-537.722	1176.09	305.906	-817.707	1292.8	91.4685	-651.806	1408.96	5.23538	-722.793	1197.61	-5.30275	-730.605	1116.55	-38.5381	-674.747	1002.06	-1.01383	-577.648	923.355	-49.6777	-625.925	904.552	-50.7005	-555.08	850.272
236	0	207.111	-503.417	1601.72	310.417	-496.643	1597.66	203.68	-677.073	1589.83	332.037	-646.33	1593.46	261.848	-701.846	1466.94	256.774	-808.183	1220.27	258.548	-565.06	1359.8	236.69	-524.888	1177.53	305.898	-804.513	1294.78	91.1002	-638.506	1410.74	4.84289	-711.043	1199.81	-5.38567	-719.834	1118.83	-38.8965	-666.252	1003.43	-1.65776	-570.677	922.727	-50.4261	-619.296	905.109	-51.2852	-549.911	848.753
237	0	206.702	-489.498	1602.72	310.003	-482.741	1598.74	203.238	-663.192	1591.33	331.607	-632.438	1594.99	261.564	-688.304	1468.51	256.863	-795.185	1222.05	258.038	-551.785	1361.23	235.93	-512.008	1178.82	305.889	-791.333	1296.59	90.6772	-625.256	1412.31	4.48844	-699.476	1201.79	-5.49185	-709.113	1120.92	-39.3487	-657.846	1004.68	-2.47587	-563.792	922.002	-51.3044	-612.774	905.575	-52.1064	-544.855	847.236
238	0	206.181	-475.632	1603.53	309.478	-468.884	1599.66	202.701	-649.363	1592.61	331.079	-618.589	1596.35	261.228	-674.783	1469.89	256.942	-782.185	1223.63	257.495	-538.519	1362.47	235.188	-499.076	1179.96	305.871	-778.159	1298.2	90.2106	-612.038	1413.62	4.18363	-688.075	1203.54	-5.6084	-698.431	1122.8	-39.883	-649.511	1005.78	-3.46413	-556.967	921.171	-52.2984	-606.341	905.933	-53.1643	-539.882	845.722
239	0	205.563	-461.814	1604.13	308.858	-455.069	1600.39	202.086	-635.58	1593.66	330.467	-604.781	1597.49	260.847	-661.275	1471.04	257	-769.173	1224.98	256.932	-525.251	1363.51	234.49	-486.092	1180.9	305.836	-764.984	1299.6	89.7103	-598.834	1414.68	3.93398	-676.815	1205.03	-5.72494	-687.777	1124.45	-40.4883	-641.231	1006.72	-4.61572	-550.179	920.222	-53.3931	-599.977	906.166	-54.4531	-534.963	844.207
240	0	204.861	-448.041	1604.51	308.156	-441.292	1600.92	201.405	-621.839	1594.45	329.785	-591.007	1598.41	260.424	-647.773	1471.95	257.022	-756.143	1226.08	256.362	-511.973	1364.32	233.855	-473.059	1181.63	305.776	-751.801	1300.75	89.1846	-585.627	1415.45	3.73931	-665.664	1206.26	-5.83396	-677.133	1125.85	-41.1539	-632.984	1007.48	-5.92137	-543.404	919.144	-54.5733	-593.66	906.257	-55.9609	-530.069	842.682
241	0	204.087	-434.308	1604.66	307.383	-427.546	1601.24	200.671	-608.135	1594.97	329.045	-577.263	1599.09	259.965	-634.268	1472.61	256.997	-743.087	1226.93	255.793	-498.677	1364.89	233.298	-459.984	1182.11	305.68	-738.604	1301.65	88.6406	-572.403	1415.92	3.59445	-654.583	1207.22	-5.93092	-666.485	1126.98	-41.8699	-624.751	1008.04	-7.36971	-536.62	917.926	-55.8242	-587.368	906.191	-57.6705	-525.176	841.134
242	0	203.25	-420.608	1604.56	306.549	-413.827	1601.32	199.895	-594.462	1595.21	328.257	-563.541	1599.5	259.472	-620.754	1472.99	256.915	-730	1227.49	255.233	-485.355	1365.18	232.829	-446.871	1182.34	305.541	-725.388	1302.27	88.0835	-559.146	1416.09	3.49014	-643.53	1207.89	-6.01429	-655.812	1127.85	-42.6278	-616.509	1008.39	-8.94781	-529.802	916.557	-57.1324	-581.078	905.956	-59.5604	-520.255	839.55
243	0	202.358	-406.937	1604.21	305.66	-400.126	1601.15	199.085	-580.814	1595.15	327.43	-549.835	1599.64	258.947	-607.223	1473.09	256.766	-716.877	1227.78	254.686	-472.001	1365.19	232.452	-433.726	1182.3	305.349	-712.147	1302.61	87.5163	-545.846	1415.95	3.41398	-632.462	1208.27	-6.08533	-645.095	1128.42	-43.4204	-608.233	1008.52	-10.6416	-522.929	915.026	-58.4858	-574.762	905.538	-61.6059	-515.282	837.911
244	0	201.416	-393.288	1603.6	304.723	-386.439	1600.74	198.247	-567.185	1594.8	326.569	-536.139	1599.49	258.391	-593.671	1472.89	256.541	-703.712	1227.77	254.153	-458.61	1364.91	232.168	-420.555	1181.95	305.098	-698.878	1302.66	86.9405	-532.492	1415.49	3.35145	-621.34	1208.36	-6.14784	-634.314	1128.71	-44.2422	-599.899	1008.43	-12.4365	-515.978	913.327	-59.8741	-568.393	904.931	-63.78	-510.231	836.199
245	0	200.426	-379.655	1602.72	303.739	-372.757	1600.08	197.387	-553.57	1594.14	325.677	-522.444	1599.06	257.804	-580.092	1472.41	256.237	-690.502	1227.46	253.632	-445.176	1364.33	231.97	-407.359	1181.31	304.78	-685.575	1302.41	86.3553	-519.078	1414.71	3.28686	-610.125	1208.15	-6.20778	-623.449	1128.69	-45.089	-591.48	1008.1	-14.3177	-508.927	911.452	-61.289	-561.942	904.128	-66.0549	-505.077	834.396
246	0	199.389	-366.033	1601.59	302.709	-359.074	1599.15	196.504	-539.962	1593.18	324.757	-508.744	1598.35	257.182	-566.481	1471.63	255.85	-677.241	1226.85	253.12	-431.695	1363.44	231.849	-394.139	1180.36	304.393	-672.232	1301.86	85.7577	-505.6	1413.62	3.20422	-598.782	1207.65	-6.27274	-612.48	1128.38	-45.958	-582.95	1007.53	-16.2706	-501.752	909.397	-62.7243	-555.379	903.124	-68.4028	-499.793	832.485
247	0	198.304	-352.416	1600.21	301.631	-345.383	1597.98	195.599	-526.358	1591.93	323.808	-495.033	1597.34	256.524	-552.835	1470.56	255.38	-663.924	1225.95	252.608	-418.163	1362.25	231.79	-380.891	1179.11	303.932	-658.845	1301.01	85.143	-492.054	1412.23	3.08801	-587.285	1206.86	-6.35149	-601.389	1127.77	-46.8476	-574.283	1006.73	-18.2811	-494.43	907.16	-64.1756	-548.672	901.921	-70.7972	-494.354	830.45
248	0	197.167	-338.798	1598.58	300.502	-331.679	1596.57	194.669	-512.751	1590.39	322.827	-481.305	1596.07	255.825	-539.15	1469.22	254.828	-650.545	1224.76	252.089	-404.577	1360.76	231.776	-367.609	1177.56	303.396	-645.406	1299.87	84.5047	-478.442	1410.54	2.92381	-575.612	1205.77	-6.45333	-590.158	1126.86	-47.7574	-565.453	1005.69	-20.3362	-486.939	904.743	-65.6401	-541.789	900.519	-73.2137	-488.732	828.28
249	0	195.973	-325.175	1596.72	299.317	-317.956	1594.92	193.708	-499.137	1588.58	321.808	-467.555	1594.53	255.08	-525.423	1467.61	254.199	-637.098	1223.29	251.549	-390.932	1358.99	231.785	-354.284	1175.73	302.786	-631.908	1298.46	83.8346	-464.767	1408.58	2.69885	-563.746	1204.4	-6.58764	-578.773	1125.67	-48.6873	-556.436	1004.43	-22.4238	-479.256	902.151	-67.1165	-534.699	898.923	-75.6307	-482.9	825.965
250	0	194.718	-311.541	1594.66	298.07	-304.209	1593.07	192.71	-485.51	1586.53	320.746	-453.779	1592.74	254.282	-511.65	1465.75	253.499	-623.575	1221.56	250.975	-377.226	1356.95	231.794	-340.906	1173.63	302.104	-618.343	1296.77	83.1233	-451.031	1406.37	2.40246	-551.679	1202.75	-6.76332	-567.22	1124.2	-49.6379	-547.209	1002.94	-24.5328	-471.355	899.389	-68.6039	-527.37	897.141	-78.0295	-476.828	823.503
251	0	193.392	-297.89	1592.42	296.753	-290.433	1591.04	191.667	-471.867	1584.25	319.632	-439.971	1590.73	253.426	-497.828	1463.67	252.736	-609.968	1219.58	250.352	-363.452	1354.67	231.78	-327.461	1171.3	301.354	-604.701	1294.85	82.3604	-437.242	1403.92	2.02638	-539.407	1200.84	-6.98837	-555.488	1122.46	-50.6096	-537.751	1001.24	-26.6535	-463.215	896.471	-70.1021	-519.774	895.185	-80.3953	-470.488	820.893
252	0	191.99	-284.217	1590.02	295.36	-276.623	1588.84	190.568	-458.202	1581.77	318.458	-426.128	1588.53	252.503	-483.953	1461.4	251.918	-596.267	1217.37	249.664	-349.607	1352.17	231.716	-313.937	1168.76	300.541	-590.971	1292.7	81.5352	-423.405	1401.27	1.56501	-526.931	1198.69	-7.26948	-543.569	1120.48	-51.6028	-528.041	999.344	-28.7772	-454.812	893.411	-71.6107	-511.879	893.066	-82.7164	-463.847	818.141
253	0	190.503	-270.516	1587.51	293.882	-262.775	1586.52	189.403	-444.509	1579.13	317.214	-412.245	1586.17	251.509	-470.02	1458.96	251.055	-582.463	1214.97	248.893	-335.685	1349.5	231.576	-300.318	1166.06	299.671	-577.144	1290.37	80.6367	-409.528	1398.44	1.01552	-514.259	1196.3	-7.61175	-531.455	1118.27	-52.6171	-518.064	997.27	-30.8962	-446.123	890.227	-73.1286	-503.661	890.802	-84.9844	-456.877	815.261
254	0	188.924	-256.782	1584.92	292.312	-248.884	1584.12	188.16	-430.782	1576.37	315.888	-398.32	1583.69	250.436	-456.026	1456.4	250.158	-568.546	1212.4	248.025	-321.681	1346.7	231.335	-286.589	1163.22	298.752	-563.209	1287.88	79.6544	-395.617	1395.48	0.37786	-501.399	1193.71	-8.01847	-519.142	1115.87	-53.6517	-507.804	995.037	-33.0038	-437.124	886.944	-74.6541	-495.094	888.412	-87.194	-449.545	812.269
255	0	187.244	-243.008	1582.29	290.642	-234.946	1581.68	186.828	-417.015	1573.52	314.473	-384.349	1581.12	249.278	-441.965	1453.75	249.238	-554.506	1209.72	247.042	-307.589	1343.8	230.967	-272.736	1160.29	297.79	-549.153	1285.28	78.579	-381.679	1392.42	-0.345312	-488.363	1190.94	-8.49099	-506.627	1113.29	-54.7048	-497.249	992.671	-35.0937	-427.794	883.587	-76.1843	-486.155	885.918	-89.3419	-441.82	809.189
256	0	185.459	-229.188	1579.67	288.866	-220.957	1579.23	185.396	-403.201	1570.64	312.957	-370.327	1578.51	248.03	-427.834	1451.06	248.304	-540.333	1206.96	245.931	-293.403	1340.85	230.45	-258.745	1157.32	296.795	-534.969	1282.61	77.4023	-367.719	1389.31	-1.14887	-475.166	1188.03	-9.02872	-493.91	1110.58	-55.7738	-486.387	990.197	-37.1602	-418.109	880.187	-77.7149	-476.823	883.346	-91.4266	-433.672	806.048
257	0	183.561	-215.316	1577.11	286.979	-206.913	1576.83	183.854	-389.333	1567.76	311.332	-356.251	1575.92	246.69	-413.628	1448.38	247.369	-526.022	1204.16	244.681	-279.119	1337.92	229.765	-244.6	1154.37	295.775	-520.645	1279.91	76.1183	-353.744	1386.17	-2.02554	-461.823	1185.02	-9.62919	-480.992	1107.77	-56.855	-475.21	987.648	-39.1976	-408.049	876.778	-79.2405	-467.08	880.723	-93.4479	-425.072	802.879
258	0	181.549	-201.385	1574.63	284.975	-192.81	1574.52	182.193	-375.405	1564.95	309.591	-342.118	1573.37	245.254	-399.344	1445.75	246.44	-511.565	1201.39	243.283	-264.733	1335.04	228.895	-230.29	1151.47	294.738	-506.177	1277.25	74.7231	-339.755	1383.07	-2.9663	-448.346	1181.94	-10.2882	-467.875	1104.9	-57.9439	-463.712	985.055	-41.2006	-397.593	873.397	-80.7545	-456.91	878.079	-95.4056	-415.989	799.717
259	0	179.418	-187.392	1572.31	282.853	-178.645	1572.35	180.405	-361.41	1562.24	307.728	-327.925	1570.94	243.723	-384.981	1443.22	245.528	-496.96	1198.68	241.733	-250.242	1332.27	227.828	-215.805	1148.69	293.692	-491.559	1274.66	73.2158	-325.758	1380.05	-3.96085	-434.75	1178.85	-11	-454.563	1102.01	-59.0352	-451.886	982.453	-43.1633	-386.722	870.083	-82.2492	-446.297	875.446	-97.2997	-406.396	796.602
260	0	177.17	-173.33	1570.16	280.614	-164.415	1570.36	178.488	-347.344	1559.68	305.74	-313.669	1568.66	242.099	-370.537	1440.83	244.641	-482.208	1196.1	240.03	-235.646	1329.67	226.558	-201.136	1146.07	292.645	-476.79	1272.2	71.5983	-311.753	1377.15	-4.99814	-421.046	1175.79	-11.7578	-441.059	1099.15	-60.123	-439.73	979.879	-45.08	-375.417	866.877	-83.716	-435.228	872.857	-99.1295	-396.268	793.574
261	0	174.806	-159.198	1568.24	278.257	-150.119	1568.59	176.439	-333.202	1557.33	303.627	-299.349	1566.59	240.386	-356.015	1438.64	243.784	-467.311	1193.69	238.176	-220.947	1327.28	225.084	-186.28	1143.67	291.604	-461.872	1269.93	69.8757	-297.744	1374.42	-6.06682	-407.244	1172.81	-12.5536	-427.37	1096.37	-61.201	-427.239	977.37	-46.9443	-363.662	863.819	-85.146	-423.694	870.347	-100.893	-385.58	790.673
262	0	172.331	-144.994	1566.58	275.789	-135.758	1567.09	174.26	-318.982	1555.22	301.39	-284.965	1564.76	238.591	-341.419	1436.69	242.965	-452.278	1191.51	236.18	-206.15	1325.16	223.41	-171.237	1141.53	290.575	-446.812	1267.89	68.0567	-283.73	1371.9	-7.15568	-393.349	1169.97	-13.3793	-413.5	1093.71	-62.2628	-414.414	974.963	-48.7497	-351.442	860.952	-86.53	-411.683	867.949	-102.589	-374.311	787.94
263	0	169.753	-130.719	1565.21	273.215	-121.333	1565.87	171.957	-304.685	1553.4	299.035	-270.519	1563.23	236.721	-326.755	1435.01	242.186	-437.12	1189.6	234.054	-191.261	1323.33	221.547	-156.015	1139.7	289.565	-431.62	1266.12	66.1527	-269.716	1369.64	-8.25398	-379.368	1167.31	-14.2263	-399.455	1091.21	-63.3024	-401.251	972.692	-50.4892	-338.743	858.316	-87.859	-399.188	865.696	-104.212	-362.443	785.415
264	0	167.081	-116.377	1564.17	270.546	-106.848	1564.98	169.538	-290.314	1551.91	296.572	-256.014	1562.02	234.789	-312.031	1433.64	241.453	-421.853	1188	231.814	-176.294	1321.85	219.511	-140.625	1138.22	288.58	-416.311	1264.67	64.1782	-255.702	1367.66	-9.3518	-365.3	1164.89	-15.0866	-385.242	1088.91	-64.3139	-387.752	970.593	-52.1559	-325.556	855.949	-89.125	-386.201	863.62	-105.758	-349.958	783.132
265	0	164.327	-101.974	1563.45	267.792	-92.3092	1564.43	167.016	-275.876	1550.77	294.011	-241.455	1561.17	232.808	-297.261	1432.61	240.767	-406.495	1186.75	229.48	-161.261	1320.75	217.322	-125.089	1137.13	287.624	-400.903	1263.57	62.15	-241.692	1366.01	-10.4403	-351.145	1162.74	-15.9527	-370.867	1086.86	-65.2925	-373.917	968.697	-53.7425	-311.87	853.885	-90.3208	-372.717	861.751	-107.222	-336.843	781.127
266	0	161.507	-87.5179	1563.09	264.969	-77.7241	1564.24	164.409	-261.38	1550.01	291.369	-226.85	1560.7	230.791	-282.458	1431.93	240.129	-391.069	1185.87	227.074	-146.18	1320.04	215.006	-109.431	1136.44	286.702	-385.418	1262.84	60.087	-227.69	1364.71	-11.512	-336.902	1160.9	-16.8178	-356.336	1085.07	-66.234	-359.745	967.031	-55.2419	-297.681	852.157	-91.4407	-358.732	860.115	-108.598	-323.088	779.427
267	0	158.637	-73.0214	1563.08	262.094	-63.1037	1564.41	161.735	-246.838	1549.64	288.664	-212.211	1560.62	228.756	-267.637	1431.63	239.54	-375.599	1185.39	224.623	-131.071	1319.74	212.592	-93.6861	1136.18	285.819	-369.883	1262.51	58.009	-213.699	1363.78	-12.5608	-322.568	1159.4	-17.6766	-341.658	1083.59	-67.1358	-345.239	965.62	-56.6473	-282.984	850.791	-92.4806	-344.242	858.735	-109.881	-308.684	778.058
268	0	155.737	-58.4986	1563.43	259.184	-48.4606	1564.94	159.017	-232.268	1549.67	285.919	-197.549	1560.95	226.719	-252.817	1431.7	239	-360.112	1185.31	222.152	-115.956	1319.86	210.112	-77.8914	1136.35	284.977	-354.323	1262.58	55.9367	-199.724	1363.23	-13.582	-308.142	1158.26	-18.5248	-326.84	1082.43	-67.9963	-330.401	964.481	-57.9521	-267.781	849.808	-93.4383	-329.245	857.631	-111.064	-293.628	777.04
269	0	152.828	-43.9658	1564.12	256.262	-33.8097	1565.83	156.283	-217.687	1550.1	283.157	-182.878	1561.68	224.698	-238.016	1432.15	238.504	-344.635	1185.63	219.689	-100.859	1320.4	207.6	-62.089	1136.95	284.177	-338.768	1263.05	53.8905	-185.769	1363.07	-14.5725	-293.624	1157.49	-19.36	-311.892	1081.59	-68.8152	-315.234	963.629	-59.1505	-252.073	849.225	-94.3135	-313.741	856.817	-112.142	-277.916	776.386
270	0	149.932	-29.4412	1565.15	253.35	-19.1668	1567.06	153.559	-203.115	1550.92	280.405	-168.215	1562.8	222.709	-223.252	1432.97	238.05	-329.195	1186.35	217.264	-85.8019	1321.35	205.089	-46.3226	1137.97	283.42	-323.247	1263.9	51.8903	-171.839	1363.29	-15.5306	-279.015	1157.1	-20.1814	-296.825	1081.1	-69.5937	-299.743	963.072	-60.2371	-235.868	849.052	-95.1075	-297.732	856.301	-113.111	-261.55	776.104
271	0	147.073	-14.9439	1566.49	250.47	-4.54902	1568.62	150.874	-188.574	1552.11	277.688	-153.575	1564.29	220.769	-208.54	1434.13	237.631	-313.818	1187.44	214.901	-70.8073	1322.68	202.618	-30.6357	1139.38	282.704	-307.789	1265.12	49.9546	-157.936	1363.9	-16.4562	-264.322	1157.08	-20.9897	-281.649	1080.93	-70.3342	-283.933	962.81	-61.2072	-219.175	849.292	-95.8232	-281.223	856.09	-113.967	-244.535	776.199
272	0	144.273	-0.492997	1568.12	247.645	10.0265	1570.47	148.256	-174.084	1553.64	275.036	-138.977	1566.13	218.892	-193.897	1435.61	237.238	-298.529	1188.87	212.628	-55.8955	1324.37	200.22	-15.0692	1141.16	282.025	-292.419	1266.69	48.0999	-144.061	1364.86	-17.3501	-249.551	1157.42	-21.7877	-266.376	1081.08	-71.0402	-267.811	962.841	-62.0572	-202.007	849.943	-96.4645	-264.22	856.181	-114.709	-226.878	776.668
273	0	141.554	13.8932	1570.01	244.9	24.5432	1572.59	145.735	-159.667	1555.48	272.473	-124.435	1568.26	217.092	-179.333	1437.39	236.863	-283.351	1190.63	210.468	-41.084	1326.38	197.931	0.340508	1143.25	281.377	-277.162	1268.56	46.3407	-130.214	1366.15	-18.2149	-234.712	1158.1	-22.5796	-251.019	1081.54	-71.716	-251.388	963.156	-62.784	-184.381	850.998	-97.0364	-246.732	856.569	-115.334	-208.591	777.505
274	0	138.939	28.198	1572.14	242.255	38.986	1574.94	143.336	-145.338	1557.6	270.025	-109.966	1570.66	215.379	-164.858	1439.43	236.494	-268.302	1192.65	208.441	-26.3868	1328.68	195.783	15.563	1145.61	280.753	-262.039	1270.69	44.6889	-116.392	1367.74	-19.0539	-219.817	1159.09	-23.3713	-235.589	1082.29	-72.3667	-234.671	963.741	-63.3856	-166.317	852.442	-97.544	-228.772	857.246	-115.844	-189.691	778.701
275	0	136.448	42.4074	1574.46	239.731	53.3417	1577.5	141.083	-131.115	1559.94	267.715	-95.5802	1573.28	213.762	-150.478	1441.69	236.118	-253.397	1194.92	206.566	-11.814	1331.22	193.806	30.5752	1148.19	280.145	-247.067	1273.06	43.1538	-102.59	1369.6	-19.8718	-204.877	1160.36	-24.1697	-220.098	1083.28	-72.9976	-217.674	964.578	-63.8605	-147.839	854.257	-97.9927	-210.356	858.197	-116.24	-170.197	780.244
276	0	134.096	56.5107	1576.96	237.346	67.6001	1580.22	138.995	-117.006	1562.45	265.562	-81.2892	1576.07	212.249	-136.193	1444.12	235.724	-238.65	1197.38	204.856	2.6286	1333.94	192.026	45.3621	1150.94	279.542	-232.258	1275.61	41.7418	-88.8009	1371.68	-20.6737	-189.902	1161.86	-24.9825	-204.555	1084.51	-73.6142	-200.408	965.649	-64.2083	-128.973	856.423	-98.3875	-191.502	859.406	-116.523	-150.133	782.118
277	0	131.901	70.501	1579.58	235.117	81.7538	1583.06	137.087	-103.02	1565.1	263.581	-67.0996	1578.98	210.844	-122.004	1446.7	235.298	-224.067	1199.99	203.323	16.939	1336.8	190.465	59.9168	1153.8	278.935	-217.621	1278.3	40.4566	-75.0178	1373.93	-21.4657	-174.903	1163.57	-25.8181	-188.97	1085.92	-74.2218	-182.888	966.928	-64.4293	-109.747	858.914	-98.7329	-172.232	860.855	-116.695	-129.528	784.308
278	0	129.873	84.3755	1582.3	233.055	95.799	1585.98	135.372	-89.1573	1567.83	261.785	-53.0152	1581.96	209.549	-107.905	1449.37	234.829	-209.651	1202.71	201.973	31.1189	1339.75	189.137	74.2398	1156.72	278.315	-203.159	1281.08	39.2993	-61.2314	1376.33	-22.254	-159.886	1165.44	-26.685	-173.35	1087.49	-74.8256	-165.126	968.394	-64.5242	-90.1926	861.703	-99.0329	-152.569	862.526	-116.761	-108.415	786.798
279	0	128.023	98.1357	1585.07	231.171	109.736	1588.96	133.854	-75.416	1570.6	260.18	-39.0363	1584.95	208.364	-93.8913	1452.1	234.306	-195.403	1205.49	200.809	45.1732	1342.73	188.053	88.339	1159.64	277.673	-188.871	1283.92	38.2684	-47.4321	1378.82	-23.0451	-144.856	1167.44	-27.5913	-157.698	1089.18	-75.4299	-147.137	970.02	-64.4948	-70.3409	864.761	-99.2906	-132.539	864.397	-116.721	-86.8313	789.569
280	0	126.356	111.787	1587.87	229.473	123.566	1591.94	132.534	-61.7888	1573.36	258.769	-25.1604	1587.93	207.288	-79.9547	1454.85	233.722	-181.319	1208.3	199.83	59.1096	1345.7	187.217	102.228	1162.53	277.001	-174.755	1286.78	37.3606	-33.6108	1381.36	-23.8454	-129.814	1169.53	-28.5448	-142.019	1090.96	-76.0386	-128.934	971.782	-64.3431	-50.225	868.06	-99.5086	-112.17	866.449	-116.578	-64.815	792.603
281	0	124.876	125.339	1590.66	227.964	137.297	1594.89	131.41	-48.2646	1576.07	257.552	-11.3824	1590.83	206.317	-66.0867	1457.57	233.069	-167.39	1211.1	199.032	72.9374	1348.62	186.626	115.925	1165.33	276.292	-160.802	1289.6	36.5704	-19.7585	1383.91	-24.6613	-114.759	1171.66	-29.5523	-126.313	1092.79	-76.6546	-110.533	973.656	-64.072	-29.878	871.568	-99.6886	-91.4889	868.661	-116.331	-42.4087	795.881
282	0	123.585	138.803	1593.41	226.646	150.936	1597.77	130.474	-34.8295	1578.7	256.523	2.3052	1593.62	205.447	-52.278	1460.24	232.343	-153.608	1213.85	198.408	86.6675	1351.43	186.271	129.452	1168.02	275.541	-147.002	1292.37	35.8912	-5.86743	1386.44	-25.4988	-99.6886	1173.82	-30.6199	-110.579	1094.65	-77.2802	-91.9466	975.617	-63.6847	-9.33293	875.255	-99.8319	-70.5253	871.014	-115.981	-19.6565	799.383
283	0	122.479	152.193	1596.07	225.518	164.493	1600.55	129.714	-21.4672	1581.2	255.674	15.9116	1596.28	204.671	-38.5196	1462.82	231.542	-139.959	1216.52	197.948	100.312	1354.12	186.139	142.834	1170.57	274.745	-133.344	1295.04	35.3156	8.06882	1388.91	-26.3635	-84.5959	1175.95	-31.7523	-94.8132	1096.5	-77.9163	-73.1885	977.641	-63.1848	11.3781	879.091	-99.9389	-49.3081	873.488	-115.525	3.39652	803.087
284	0	121.557	165.526	1598.62	224.578	177.981	1603.2	129.118	-8.16002	1583.56	254.996	29.4469	1598.75	203.984	-24.8029	1465.27	230.666	-126.431	1219.07	197.642	113.882	1356.63	186.212	156.094	1172.95	273.901	-119.814	1297.59	34.8355	22.0553	1391.28	-27.2607	-69.4742	1178.04	-32.9532	-79.0114	1098.32	-78.5631	-54.272	979.705	-62.5765	32.2241	883.046	-100.009	-27.8661	876.063	-114.962	26.7047	806.97
285	0	120.813	178.816	1601.04	223.82	191.411	1605.69	128.671	5.10977	1585.74	254.476	42.9222	1601.03	203.379	-11.1198	1467.57	229.718	-113.008	1221.48	197.475	127.39	1358.95	186.465	169.259	1175.15	273.012	-106.397	1299.98	34.4426	36.0951	1393.54	-28.1952	-54.3149	1180.06	-34.2247	-63.1671	1100.07	-79.2196	-35.2098	981.788	-61.8637	53.1753	887.09	-100.042	-6.22755	878.72	-114.288	50.2225	811.007
286	0	120.24	192.081	1603.29	223.238	204.796	1607.98	128.357	18.3595	1587.72	254.101	56.3482	1603.09	202.849	2.53701	1469.7	228.705	-99.6743	1223.73	197.435	140.848	1361.05	186.874	182.351	1177.14	272.079	-93.0772	1302.19	34.129	50.1901	1395.66	-29.1706	-39.1091	1181.98	-35.5675	-47.2726	1101.75	-79.8837	-16.0145	983.866	-61.0509	74.2038	891.194	-100.035	15.5797	881.44	-113.498	73.9053	815.173
287	0	119.831	205.335	1605.34	222.824	218.147	1610.06	128.16	31.6053	1589.48	253.858	69.7354	1604.91	202.388	16.1737	1471.63	227.634	-86.4157	1225.78	197.506	154.267	1362.92	187.41	195.392	1178.91	271.107	-79.8393	1304.2	33.887	64.34	1397.61	-30.1901	-23.8472	1183.78	-36.981	-31.3195	1103.31	-80.5524	3.30142	985.921	-60.1421	95.2834	895.329	-99.9865	37.5285	884.203	-112.588	97.7095	819.44
288	0	119.576	218.592	1607.19	222.571	231.476	1611.91	128.066	44.8611	1591.02	253.735	83.0938	1606.47	201.991	29.7956	1473.34	226.515	-73.217	1227.63	197.673	167.656	1364.53	188.045	208.402	1180.44	270.103	-66.668	1305.99	33.7098	78.543	1399.38	-31.2552	-8.51975	1185.43	-38.4626	-15.2988	1104.75	-81.2215	22.7259	987.931	-59.1412	116.39	899.467	-99.8929	59.5923	886.99	-111.554	121.593	823.781
289	0	119.467	231.862	1608.81	222.469	244.793	1613.5	128.062	58.1387	1592.31	253.719	96.4319	1607.77	201.653	43.4067	1474.82	225.361	-60.0641	1229.24	197.923	181.025	1365.87	188.749	221.395	1181.73	269.078	-53.5484	1307.55	33.5914	92.7959	1400.94	-32.366	6.88235	1186.92	-40.0084	0.798333	1106.04	-81.8858	42.2466	989.879	-58.0517	137.5	903.581	-99.7501	81.7452	889.782	-110.392	145.517	828.167
290	0	119.494	245.154	1610.18	222.509	258.105	1614.83	128.136	71.447	1593.35	253.8	109.757	1608.8	201.37	57.0101	1476.06	224.187	-46.9441	1230.62	198.242	194.382	1366.93	189.492	234.385	1182.77	268.04	-40.4669	1308.87	33.5268	107.094	1402.3	-33.5212	22.3677	1188.22	-41.6123	16.9806	1107.18	-82.5391	61.8512	991.748	-56.8765	158.594	907.645	-99.5535	103.962	892.562	-109.099	169.443	832.568
291	0	119.648	258.475	1611.31	222.681	271.419	1615.89	128.28	84.7921	1594.14	253.969	123.076	1609.55	201.141	70.6075	1477.05	223.007	-33.8449	1231.75	198.616	207.734	1367.71	190.248	247.382	1183.54	267.003	-27.4108	1309.93	33.5124	121.43	1403.42	-34.7173	37.9441	1189.34	-43.2664	33.2557	1108.14	-83.1742	81.527	993.522	-55.6182	179.651	911.635	-99.2979	126.217	895.31	-107.671	193.334	836.958
292	0	119.921	271.829	1612.17	222.977	284.741	1616.67	128.486	98.1772	1594.67	254.218	136.392	1610.02	200.963	84.1996	1477.78	221.84	-20.7556	1232.62	199.035	221.087	1368.2	190.992	260.393	1184.04	265.98	-14.3684	1310.72	33.5455	135.798	1404.32	-35.9489	53.6182	1190.25	-44.9609	49.6297	1108.91	-83.7833	101.261	995.188	-54.2785	200.654	915.529	-98.9774	148.486	898.011	-106.108	217.158	841.308
293	0	120.304	285.217	1612.77	223.387	298.073	1617.18	128.749	111.603	1594.94	254.54	149.71	1610.23	200.838	97.7858	1478.25	220.702	-7.66664	1233.24	199.487	234.446	1368.41	191.7	273.423	1184.26	264.986	-1.32981	1311.26	33.6251	150.187	1404.98	-37.2084	69.3955	1190.95	-46.6837	66.1068	1109.5	-84.3574	121.038	996.735	-52.8589	221.583	919.306	-98.5861	170.743	900.649	-104.408	240.883	845.595
294	0	120.789	298.638	1613.11	223.904	311.416	1617.4	129.066	125.067	1594.96	254.932	163.029	1610.16	200.767	111.364	1478.46	219.612	5.43071	1233.59	199.966	247.814	1368.33	192.355	286.478	1184.2	264.036	11.7139	1311.53	33.751	164.589	1405.41	-38.4858	85.2793	1191.43	-48.4207	82.6883	1109.89	-84.887	140.844	998.155	-51.3605	242.423	922.948	-98.1176	192.965	903.211	-102.571	264.478	849.794
295	0	121.369	312.089	1613.19	224.519	324.77	1617.35	129.436	138.564	1594.74	255.391	176.352	1609.83	200.753	124.932	1478.41	218.589	18.5441	1233.68	200.464	261.193	1367.98	192.942	299.56	1183.86	263.148	24.7703	1311.54	33.9247	178.992	1405.6	-39.7691	101.271	1191.7	-50.1559	99.3727	1110.09	-85.362	160.661	999.44	-49.7839	263.157	926.44	-97.5657	215.126	905.684	-100.601	287.916	853.885
296	0	122.037	325.565	1613.02	225.225	338.134	1617.02	129.859	152.09	1594.28	255.914	189.676	1609.26	200.8	138.485	1478.11	217.649	31.6806	1233.51	200.978	274.583	1367.36	193.451	312.674	1183.25	262.335	37.8457	1311.29	34.1485	193.384	1405.57	-41.044	117.369	1191.76	-51.8716	116.155	1110.09	-85.7716	180.472	1000.59	-48.1299	283.769	929.768	-96.9244	237.202	908.059	-98.4988	311.169	857.85
297	0	122.789	339.059	1612.6	226.016	351.506	1616.45	130.338	165.635	1593.6	256.501	203	1608.44	200.914	152.019	1477.56	216.81	44.8463	1233.08	201.506	287.986	1366.49	193.876	325.827	1182.39	261.616	50.9453	1310.78	34.426	207.753	1405.32	-42.2943	133.568	1191.61	-53.5482	133.025	1109.9	-86.1048	200.256	1001.59	-46.399	304.242	932.925	-96.1879	259.166	910.328	-96.2702	334.211	861.675
298	0	123.619	352.565	1611.94	226.886	364.881	1615.62	130.875	179.191	1592.71	257.152	216.321	1607.41	201.102	165.528	1476.78	216.087	58.0473	1232.4	202.048	301.4	1365.38	194.218	339.025	1181.28	261.005	64.0731	1310.02	34.7617	222.085	1404.86	-43.502	149.859	1191.26	-55.1652	149.971	1109.53	-86.3504	219.991	1002.46	-44.5919	324.559	935.903	-95.351	280.993	912.483	-93.9206	357.018	865.349
299	0	124.523	366.075	1611.06	227.83	378.255	1614.57	131.474	192.749	1591.63	257.869	229.636	1606.17	201.37	179.006	1475.78	215.496	71.2891	1231.48	202.608	314.821	1364.07	194.482	352.276	1179.96	260.517	77.2324	1309.02	35.1608	236.369	1404.21	-44.6477	166.228	1190.73	-56.7009	166.974	1108.98	-86.497	239.655	1003.19	-42.7095	344.704	938.698	-94.4091	302.655	914.522	-91.4571	379.565	868.86
300	0	125.499	379.58	1609.97	228.844	391.624	1613.3	132.14	206.3	1590.37	258.654	242.942	1604.75	201.727	192.446	1474.56	215.048	84.5772	1230.32	203.191	328.249	1362.58	194.677	365.59	1178.46	260.165	90.4255	1307.78	35.6293	250.591	1403.38	-45.711	182.657	1190.03	-58.1331	184.014	1108.26	-86.5335	259.221	1003.79	-40.753	364.66	941.309	-93.358	324.127	916.442	-88.8882	401.83	872.205
301	0	126.544	393.072	1608.7	229.926	404.983	1611.84	132.878	219.833	1588.96	259.509	256.234	1603.16	202.18	205.844	1473.15	214.753	97.9172	1228.93	203.804	341.678	1360.92	194.819	378.976	1176.8	259.96	103.654	1306.32	36.1733	264.741	1402.39	-46.6709	199.12	1189.17	-59.4397	201.065	1107.39	-86.449	278.663	1004.25	-38.724	384.409	943.737	-92.1947	345.381	918.242	-86.2237	423.79	875.379
302	0	127.658	406.545	1607.25	231.073	418.328	1610.21	133.695	233.341	1587.41	260.438	269.51	1601.44	202.737	219.194	1471.55	214.62	111.314	1227.33	204.455	355.107	1359.14	194.926	392.445	1175.02	259.912	116.92	1304.65	36.799	278.807	1401.25	-47.5063	215.59	1188.16	-60.5989	218.099	1106.38	-86.2333	297.951	1004.6	-36.6249	403.933	945.986	-90.9168	366.388	919.922	-83.4743	445.422	878.381
303	0	128.839	419.991	1605.64	232.284	431.657	1608.42	134.596	246.816	1585.75	261.444	282.768	1599.6	203.406	232.491	1469.8	214.652	124.774	1225.51	205.155	368.532	1357.26	195.021	406.008	1173.16	260.027	130.223	1302.76	37.5125	292.782	1399.99	-48.1961	232.033	1187.03	-61.5898	235.083	1105.24	-85.8772	317.058	1004.82	-34.4585	423.214	948.06	-89.5229	387.12	921.482	-80.6522	466.705	881.21
304	0	130.088	433.406	1603.91	233.557	444.966	1606.52	135.587	260.251	1584	262.532	296.006	1597.67	204.192	245.733	1467.9	214.854	138.3	1223.5	205.915	381.95	1355.32	195.128	419.671	1171.26	260.31	143.564	1300.69	38.3194	306.658	1398.62	-48.7201	248.412	1185.78	-62.393	251.984	1103.99	-85.3723	335.952	1004.95	-32.2283	442.233	949.964	-88.0125	407.549	922.925	-77.7702	487.618	883.867
305	0	131.403	446.785	1602.08	234.892	458.253	1604.51	136.675	273.644	1582.18	263.705	309.224	1595.68	205.1	258.917	1465.88	215.223	151.898	1221.31	206.747	395.358	1353.35	195.273	433.444	1169.36	260.763	156.944	1298.45	39.2246	320.433	1397.17	-49.0593	264.687	1184.44	-62.9909	268.767	1102.65	-84.7119	354.602	1004.97	-29.9386	460.972	951.706	-86.3864	427.645	924.251	-74.8418	508.138	886.355
306	0	132.786	460.126	1600.16	236.289	471.52	1602.44	137.865	286.99	1580.32	264.967	322.424	1593.66	206.135	272.046	1463.77	215.757	165.57	1218.96	207.66	408.756	1351.38	195.485	447.329	1167.49	261.382	170.361	1296.05	40.232	334.106	1395.65	-49.196	280.817	1183.01	-63.3684	285.397	1101.22	-83.8906	372.978	1004.9	-27.5942	479.41	953.293	-84.6466	447.378	925.463	-71.881	528.246	888.675
307	0	134.237	473.429	1598.19	237.748	484.768	1600.32	139.162	300.291	1578.44	266.321	335.607	1591.62	207.297	285.12	1461.58	216.45	179.32	1216.48	208.667	422.143	1349.43	195.789	461.331	1165.69	262.164	183.816	1293.52	41.3441	347.678	1394.1	-49.1152	296.76	1181.52	-63.5131	301.839	1099.74	-82.9053	391.05	1004.74	-25.2009	497.529	954.73	-82.7962	466.72	926.561	-68.9018	547.92	890.827
308	0	135.755	486.695	1596.2	239.268	498	1598.19	140.57	313.547	1576.57	267.771	348.78	1589.61	208.586	298.144	1459.35	217.291	193.146	1213.89	209.776	435.519	1347.55	196.211	475.448	1163.98	263.101	197.308	1290.88	42.5618	361.155	1392.52	-48.8042	312.475	1179.97	-63.4158	318.059	1098.2	-81.7545	408.789	1004.52	-22.7649	515.309	956.026	-80.8395	485.642	927.545	-65.9184	567.139	892.813
309	0	137.34	499.928	1594.2	240.849	511.221	1596.07	142.091	326.762	1574.74	269.317	361.947	1587.64	210	311.125	1457.11	218.269	207.049	1211.22	210.994	448.886	1345.75	196.772	489.677	1162.4	264.182	210.835	1288.17	43.8845	374.546	1390.94	-48.2536	327.927	1178.39	-63.0709	334.025	1096.65	-80.4395	426.167	1004.23	-20.2934	532.731	957.185	-78.7823	504.115	928.418	-62.9445	585.882	894.631
310	0	138.991	513.133	1592.23	242.49	524.436	1594	143.726	339.943	1572.97	270.96	375.115	1585.75	211.532	324.069	1454.88	219.368	221.024	1208.51	212.326	462.245	1344.06	197.492	504.012	1160.97	265.392	224.395	1285.42	45.3091	387.86	1389.39	-47.4578	343.081	1176.8	-62.4766	349.709	1095.08	-78.9637	443.157	1003.89	-17.7941	549.777	958.213	-76.6315	522.113	929.179	-59.9933	604.127	896.279
311	0	140.706	526.317	1590.32	244.189	537.652	1591.99	145.474	353.097	1571.29	272.7	388.293	1583.97	213.176	336.987	1452.69	220.572	235.066	1205.79	213.774	475.599	1342.51	198.384	518.44	1159.7	266.715	237.985	1282.66	46.8305	401.111	1387.89	-46.4155	357.91	1175.21	-61.6351	365.086	1093.54	-77.3333	459.737	1003.5	-15.2751	566.427	959.114	-74.3956	539.609	929.827	-57.0774	621.853	897.753
312	0	142.482	539.489	1588.5	245.944	550.879	1590.09	147.33	366.234	1569.73	274.532	401.49	1582.31	214.919	349.887	1450.59	221.86	249.165	1203.11	215.336	488.949	1341.1	199.455	532.949	1158.61	268.131	251.6	1279.93	48.4411	414.313	1386.46	-45.1299	372.396	1173.66	-60.5525	380.135	1092.04	-75.5569	475.885	1003.08	-12.7455	582.664	959.891	-72.0842	556.581	930.364	-54.2087	639.038	899.047
313	0	144.315	552.658	1586.78	247.751	564.123	1588.31	149.29	379.363	1568.3	276.453	414.713	1580.81	216.749	362.781	1448.59	223.211	263.31	1200.51	217.007	502.299	1339.87	200.709	547.52	1157.72	269.62	265.234	1277.28	50.1306	427.483	1385.14	-43.6093	386.524	1172.17	-59.2394	394.84	1090.61	-73.6461	491.583	1002.63	-10.2147	598.471	960.547	-69.7087	573.004	930.789	-51.3981	655.662	900.154
314	0	146.199	565.835	1585.2	249.607	577.394	1586.67	151.343	392.497	1567.05	278.454	427.973	1579.48	218.65	375.678	1446.74	224.601	277.487	1198.03	218.777	515.649	1338.82	202.141	562.13	1157.04	271.156	278.881	1274.75	51.8863	440.634	1383.94	-41.8674	400.292	1170.76	-57.7103	409.19	1089.28	-71.6147	506.818	1002.18	-7.69271	613.833	961.084	-67.2817	588.861	931.102	-48.6556	671.703	901.066
315	0	148.128	579.031	1583.77	251.504	590.7	1585.21	153.477	405.647	1566	280.525	441.277	1578.36	220.604	388.589	1445.06	226.006	291.679	1195.71	220.634	529	1337.96	203.739	576.754	1156.57	272.715	292.532	1272.38	53.6927	453.784	1382.9	-39.9235	413.703	1169.47	-55.9838	423.18	1088.08	-69.4791	521.578	1001.73	-5.19014	628.735	961.501	-64.8173	604.136	931.306	-45.9902	687.144	901.774
316	0	150.095	592.257	1582.53	253.438	604.047	1583.93	155.677	418.825	1565.16	282.653	454.631	1577.45	222.589	401.523	1443.59	227.399	305.87	1193.61	222.559	542.353	1337.32	205.485	591.362	1156.32	274.271	306.178	1270.21	55.5324	466.946	1382.04	-37.8023	426.772	1168.34	-54.0824	436.809	1087.03	-67.2584	535.857	1001.3	-2.71814	643.166	961.798	-62.3313	618.816	931.401	-43.4099	701.965	902.268
317	0	152.09	605.524	1581.48	255.398	617.442	1582.86	157.925	432.043	1564.56	284.824	468.041	1576.78	224.585	414.487	1442.35	228.756	320.038	1191.77	224.532	555.706	1336.9	207.353	605.922	1156.29	275.798	319.81	1268.29	57.3859	480.132	1381.38	-35.5341	439.519	1167.39	-52.032	450.084	1086.16	-64.9734	549.652	1000.89	-0.288544	657.115	961.976	-59.8409	632.891	931.39	-40.9219	716.152	902.537
318	0	154.102	618.839	1580.65	257.376	630.888	1582.01	160.199	445.31	1564.21	287.018	481.511	1576.36	226.567	427.488	1441.37	230.054	334.164	1190.21	226.528	569.057	1336.69	209.314	620.4	1156.47	277.271	333.417	1266.65	59.2322	493.35	1380.95	-33.1546	451.974	1166.66	-49.8621	463.014	1085.5	-62.6475	562.966	1000.53	2.08608	670.574	962.031	-57.3648	646.357	931.276	-38.5328	729.69	902.572
319	0	156.119	632.213	1580.05	259.36	644.388	1581.38	162.476	458.636	1564.14	289.216	495.039	1576.19	228.514	440.53	1440.66	231.272	348.23	1188.98	228.521	582.403	1336.71	211.33	634.762	1156.86	278.667	346.99	1265.32	61.0498	506.607	1380.77	-30.7043	464.175	1166.18	-47.6048	475.614	1085.07	-60.3053	575.802	1000.22	4.39226	683.538	961.965	-54.9232	659.214	931.065	-36.2489	742.571	902.364
320	0	158.126	645.649	1579.68	261.337	657.942	1580.98	164.731	472.025	1564.34	291.395	508.627	1576.28	230.403	453.613	1440.24	232.391	362.216	1188.1	230.481	595.739	1336.95	213.363	648.977	1157.45	279.966	360.518	1264.34	62.8167	519.903	1380.86	-28.2277	476.162	1165.98	-45.2945	487.904	1084.9	-57.9732	588.172	999.966	6.61554	696.007	961.774	-52.5378	671.467	930.762	-34.0763	754.789	901.905
321	0	160.109	659.151	1579.55	263.293	671.548	1580.82	166.936	485.483	1564.83	293.532	522.269	1576.63	232.212	466.738	1440.12	233.398	376.106	1187.58	232.381	609.058	1337.42	215.368	663.014	1158.22	281.153	373.992	1263.71	64.5116	533.236	1381.21	-25.7721	487.983	1166.08	-42.9669	499.906	1084.99	-55.6784	600.089	999.79	8.74034	707.981	961.459	-50.2316	683.124	930.373	-32.0219	766.342	901.192
322	0	162.049	672.722	1579.66	265.212	685.203	1580.88	169.066	499.01	1565.59	295.602	535.96	1577.23	233.922	479.901	1440.3	234.287	389.885	1187.43	234.19	622.356	1338.09	217.303	676.848	1159.17	282.215	387.405	1263.45	66.114	546.598	1381.84	-23.3861	499.684	1166.48	-40.6582	511.646	1085.37	-53.4486	611.569	999.695	10.7499	719.465	961.02	-48.0286	694.2	929.906	-30.0933	777.236	900.22
323	0	163.93	686.358	1580	267.077	698.901	1581.16	171.093	512.604	1566.63	297.582	549.694	1578.08	235.515	493.098	1440.78	235.054	403.542	1187.66	235.882	635.625	1338.97	219.125	690.46	1160.26	283.148	400.751	1263.56	67.6051	559.979	1382.74	-21.1175	511.314	1167.21	-38.4037	523.15	1086.03	-51.3117	622.632	999.687	12.626	730.47	960.456	-45.9535	704.713	929.368	-28.3002	787.48	898.991
324	0	165.732	700.058	1580.55	268.867	712.636	1581.65	172.993	526.263	1567.93	299.448	563.463	1579.17	236.978	506.323	1441.55	235.702	417.068	1188.25	237.432	648.858	1340.04	220.791	703.84	1161.48	283.951	414.024	1264.03	68.9685	573.365	1383.9	-19.0114	522.917	1168.24	-36.2372	534.447	1086.98	-49.2946	633.299	999.769	14.3496	741.006	959.77	-44.0314	714.684	928.768	-26.6541	797.087	897.51
325	0	167.434	713.813	1581.32	270.565	726.401	1582.34	174.743	539.979	1569.47	301.178	577.26	1580.47	238.3	519.567	1442.6	236.238	430.456	1189.19	238.818	662.05	1341.29	222.265	716.983	1162.82	284.626	427.222	1264.86	70.19	586.741	1385.32	-17.1075	534.531	1169.58	-34.1892	545.564	1088.19	-47.4232	643.593	999.943	15.9001	751.089	958.964	-42.2874	724.138	928.112	-25.1695	806.077	895.786
326	0	169.019	727.618	1582.27	272.149	740.188	1583.21	176.324	553.746	1571.24	302.753	591.074	1581.99	239.472	532.823	1443.91	236.674	443.703	1190.47	240.023	675.195	1342.7	223.516	729.896	1164.26	285.181	440.341	1266.02	71.2587	600.09	1386.96	-15.4383	546.187	1171.2	-32.2863	556.528	1089.66	-45.7213	653.537	1000.21	17.2565	760.738	958.043	-40.7462	733.102	927.411	-23.864	814.474	893.832
327	0	170.468	741.461	1583.38	273.601	753.99	1584.24	177.719	567.552	1573.2	304.155	604.9	1583.69	240.489	546.083	1445.46	237.024	456.81	1192.04	241.034	688.289	1344.25	224.518	742.592	1165.77	285.627	453.383	1267.48	72.1669	613.395	1388.81	-14.027	557.906	1173.07	-30.5503	567.362	1091.37	-44.2105	663.155	1000.56	18.3971	769.972	957.009	-39.4311	741.603	926.671	-22.7581	822.304	891.665
328	0	171.763	755.334	1584.64	274.902	767.8	1585.42	178.918	581.388	1575.35	305.37	618.73	1585.56	241.349	559.339	1447.22	237.303	469.779	1193.89	241.846	701.327	1345.92	225.255	755.095	1167.35	285.976	466.347	1269.23	72.9103	626.643	1390.83	-12.8862	569.696	1175.17	-28.9971	578.09	1093.3	-42.9091	672.47	1001	19.3004	778.814	955.87	-38.3639	749.672	925.901	-21.8752	829.597	889.307
329	0	172.889	769.225	1586.02	276.036	781.61	1586.72	179.913	595.243	1577.63	306.39	632.558	1587.58	242.053	572.583	1449.17	237.527	482.615	1195.98	242.456	714.307	1347.7	225.722	767.432	1168.99	286.24	479.237	1271.23	73.4883	639.821	1393	-12.0176	581.554	1177.46	-27.6364	588.729	1095.4	-41.832	681.503	1001.51	19.9459	787.288	954.63	-37.5638	757.337	925.109	-21.2408	836.388	886.784
330	0	173.834	783.123	1587.49	276.988	795.414	1588.12	180.699	609.106	1580.02	307.206	646.379	1589.71	242.603	585.81	1451.28	237.709	495.326	1198.26	242.868	727.229	1349.57	225.919	779.636	1170.67	286.434	492.055	1273.43	73.9036	652.919	1395.28	-11.4118	593.467	1179.89	-26.4719	599.295	1097.66	-40.9904	690.277	1002.08	20.3143	795.417	953.296	-37.0471	764.625	924.299	-20.8815	842.709	884.122
331	0	174.589	797.017	1589.02	277.747	809.208	1589.59	181.277	622.966	1582.5	307.817	660.189	1591.95	243.006	599.012	1453.5	237.862	507.922	1200.7	243.09	740.091	1351.5	225.859	791.742	1172.39	286.57	504.807	1275.81	74.162	665.93	1397.63	-11.0495	605.409	1182.43	-25.5011	609.799	1100.03	-40.3911	698.809	1002.71	20.3888	803.227	951.874	-36.8264	771.565	923.479	-20.8239	848.598	881.352
332	0	175.147	810.898	1590.58	278.306	822.985	1591.11	181.652	636.815	1585.02	308.224	673.985	1594.25	243.268	612.185	1455.81	237.997	520.413	1203.25	243.136	752.894	1353.48	225.561	803.783	1174.13	286.659	517.497	1278.31	74.272	678.85	1400.02	-10.9032	617.35	1185.04	-24.7161	620.251	1102.49	-40.0371	707.119	1003.39	20.1557	810.742	950.368	-36.9101	778.182	922.651	-21.0931	854.089	878.503
333	0	175.506	824.756	1592.14	278.66	836.742	1592.65	181.828	650.644	1587.54	308.43	687.764	1596.59	243.397	625.324	1458.17	238.119	532.814	1205.88	243.021	765.64	1355.47	225.052	815.789	1175.89	286.711	530.132	1280.9	74.2443	691.68	1402.42	-10.9393	629.253	1187.66	-24.1041	630.656	1104.99	-39.9267	715.224	1004.09	19.6048	817.985	948.784	-37.3024	784.501	921.819	-21.7114	859.221	875.603
334	0	175.667	838.585	1593.67	278.809	850.474	1594.18	181.818	664.445	1590.05	308.443	701.525	1598.94	243.403	638.427	1460.54	238.233	545.136	1208.54	242.763	778.332	1357.46	224.366	827.787	1177.64	286.731	542.717	1283.54	74.091	704.422	1404.77	-11.1206	641.08	1190.27	-23.6488	641.017	1107.5	-40.0547	723.141	1004.81	18.7307	824.982	947.125	-38.0023	790.548	920.982	-22.6968	864.029	872.679
335	0	175.634	852.377	1595.14	278.757	864.181	1595.68	181.631	678.215	1592.49	308.272	715.267	1601.26	243.294	651.492	1462.88	238.338	557.394	1211.18	242.381	790.974	1359.41	223.54	839.797	1179.38	286.724	555.259	1286.16	73.8253	717.082	1407.06	-11.4091	652.797	1192.83	-23.3312	651.338	1109.99	-40.412	730.886	1005.53	17.5325	831.755	945.392	-39.0044	796.346	920.139	-24.0618	868.551	869.754
336	0	175.415	866.128	1596.51	278.511	877.858	1597.11	181.281	691.947	1594.85	307.929	728.988	1603.54	243.08	664.518	1465.16	238.432	569.601	1213.77	241.894	803.572	1361.32	222.612	851.834	1181.09	286.692	567.764	1288.75	73.4604	729.67	1409.24	-11.7682	664.374	1195.28	-23.1311	661.621	1112.42	-40.9864	738.475	1006.23	16.0144	838.326	943.585	-40.2982	801.917	919.287	-25.8121	872.821	866.849
337	0	175.018	879.833	1597.76	278.08	891.506	1598.44	180.782	705.639	1597.07	307.427	742.689	1605.72	242.769	677.505	1467.34	238.51	581.769	1216.25	241.321	816.13	1363.14	221.621	863.905	1182.73	286.633	580.238	1291.25	73.0093	742.194	1411.27	-12.1652	675.791	1197.6	-23.0284	671.868	1114.74	-41.763	745.925	1006.89	14.1859	844.718	941.702	-41.8685	807.284	918.419	-27.9463	876.874	863.979
338	0	174.456	893.492	1598.86	277.477	905.122	1599.65	180.147	719.289	1599.14	306.78	756.368	1607.79	242.372	690.457	1469.38	238.562	593.912	1218.6	240.681	828.655	1364.84	220.606	876.014	1184.28	286.545	592.687	1293.62	72.4841	754.668	1413.14	-12.5723	687.036	1199.75	-23.0041	682.083	1116.94	-42.7247	753.254	1007.5	12.0612	850.951	939.739	-43.6961	812.469	917.528	-30.4551	880.743	861.153
339	0	173.743	907.1	1599.79	276.716	918.705	1600.71	179.392	732.897	1601.02	306.002	770.024	1609.71	241.894	703.375	1471.26	238.581	606.04	1220.77	239.989	841.155	1366.41	219.599	888.158	1185.72	286.423	605.116	1295.82	71.8956	767.104	1414.8	-12.9683	698.11	1201.71	-23.0411	692.271	1118.98	-43.8533	760.48	1008.03	9.65944	857.047	937.692	-45.7578	817.497	916.604	-33.3215	884.46	858.375
340	0	172.891	920.659	1600.51	275.812	932.256	1601.59	178.529	746.461	1602.69	305.107	783.656	1611.44	241.342	716.264	1472.93	238.555	618.164	1222.73	239.258	853.639	1367.81	218.631	900.332	1187.01	286.26	617.531	1297.83	71.2532	779.516	1416.22	-13.3385	709.023	1203.43	-23.1254	702.441	1120.83	-45.1295	767.622	1008.46	7.00368	863.024	935.552	-48.0276	822.389	915.633	-36.5211	888.056	855.646
341	0	171.916	934.169	1601.02	274.782	945.774	1602.27	177.57	759.981	1604.11	304.109	797.263	1612.96	240.722	729.13	1474.37	238.472	630.293	1224.46	238.501	866.113	1369.01	217.723	912.528	1188.12	286.048	629.937	1299.61	70.5642	791.92	1417.39	-13.6754	719.796	1204.9	-23.2465	712.6	1122.45	-46.5337	774.701	1008.77	4.12052	868.904	933.313	-50.4771	827.172	914.604	-40.023	891.559	852.958
342	0	170.832	947.631	1601.28	273.64	959.259	1602.73	176.528	773.459	1605.26	303.021	810.843	1614.24	240.038	741.977	1475.56	238.322	642.436	1225.91	237.724	878.588	1369.98	216.894	924.739	1189.02	285.777	642.34	1301.13	69.8337	804.329	1418.28	-13.9779	730.455	1206.09	-23.3974	722.762	1123.84	-48.0469	781.74	1008.95	1.03933	874.706	930.965	-53.0768	831.868	913.503	-43.7901	894.996	850.303
343	0	169.651	961.045	1601.29	272.403	972.711	1602.96	175.412	786.894	1606.12	301.854	824.393	1615.26	239.291	754.812	1476.46	238.093	654.602	1227.08	236.935	891.071	1370.71	216.153	936.958	1189.68	285.439	654.744	1302.37	69.0647	816.756	1418.87	-14.2515	741.036	1206.99	-23.5751	732.938	1124.96	-49.6508	788.76	1008.98	-2.20861	880.451	928.501	-55.7966	836.507	912.314	-47.7807	898.393	847.668
344	0	168.385	974.414	1601.04	271.083	986.129	1602.93	174.23	800.288	1606.68	300.617	837.911	1615.98	238.482	767.641	1477.08	237.773	666.798	1227.94	236.134	903.571	1371.17	215.504	949.18	1190.06	285.022	667.154	1303.31	68.2577	829.217	1419.15	-14.5066	751.576	1207.59	-23.7801	743.144	1125.8	-51.3285	795.787	1008.84	-5.59088	886.16	925.911	-58.6071	841.115	911.026	-51.9499	901.775	845.036
345	0	167.045	987.74	1600.52	269.692	999.513	1602.63	172.988	813.642	1606.91	299.318	851.396	1616.41	237.61	780.472	1477.38	237.353	679.03	1228.47	235.323	916.097	1371.33	214.944	961.406	1190.16	284.517	679.578	1303.93	67.4111	841.722	1419.1	-14.7584	762.114	1207.87	-24.0161	753.394	1126.35	-53.0648	802.846	1008.51	-9.07479	891.854	923.19	-61.4801	845.721	909.623	-56.2504	905.167	842.389
346	0	165.638	1001.03	1599.71	268.238	1012.86	1602.07	171.691	826.956	1606.81	297.962	864.845	1616.51	236.672	793.311	1477.35	236.824	691.307	1228.67	234.497	928.655	1371.18	214.466	973.638	1189.95	283.913	692.021	1304.21	66.5214	854.283	1418.73	-15.0253	772.689	1207.82	-24.2894	763.706	1126.59	-54.8463	809.961	1007.98	-12.6281	897.555	920.33	-64.3892	850.357	908.095	-60.6346	908.593	839.709
347	0	164.169	1014.27	1598.64	266.729	1026.18	1601.23	170.339	840.232	1606.38	296.551	878.256	1616.29	235.664	806.164	1477.01	236.179	703.633	1228.53	233.652	941.254	1370.72	214.057	985.883	1189.41	283.203	704.489	1304.17	65.5828	866.909	1418.01	-15.3279	783.337	1207.46	-24.6084	774.094	1126.52	-56.6614	817.157	1007.25	-16.2198	903.287	917.328	-67.3111	855.056	906.432	-65.0554	912.078	836.977
348	0	162.642	1027.49	1597.29	265.168	1039.46	1600.12	168.932	853.472	1605.61	295.087	891.628	1615.73	234.58	819.037	1476.33	235.412	716.014	1228.05	232.779	953.901	1369.93	213.699	998.15	1188.55	282.379	716.991	1303.78	64.5883	879.607	1416.96	-15.6878	794.091	1206.77	-24.9827	784.573	1126.13	-58.501	824.461	1006.3	-19.8206	909.074	914.18	-70.2249	859.849	904.626	-69.4677	915.646	834.174
349	0	161.057	1040.67	1595.69	263.555	1052.72	1598.75	167.466	866.678	1604.5	293.567	904.959	1614.85	233.413	831.937	1475.33	234.522	728.458	1227.24	231.868	966.601	1368.81	213.375	1010.45	1187.36	281.434	729.535	1303.06	63.5294	892.383	1415.58	-16.1265	804.978	1205.76	-25.4229	795.157	1125.42	-60.3573	831.898	1005.13	-23.4036	914.941	910.887	-73.1133	864.772	902.67	-73.8294	919.326	831.285
350	0	159.412	1053.82	1593.84	261.889	1065.94	1597.12	165.936	879.853	1603.07	291.986	918.249	1613.64	232.155	844.869	1474.02	233.506	740.969	1226.09	230.907	979.36	1367.36	213.063	1022.8	1185.85	280.367	742.128	1302.01	62.3965	905.24	1413.87	-16.6646	816.023	1204.43	-25.9393	805.859	1124.4	-62.2247	839.491	1003.74	-26.9447	920.916	907.451	-75.962	869.859	900.562	-78.1028	923.146	828.296
351	0	157.702	1066.96	1591.76	260.165	1079.13	1595.26	164.335	893	1601.34	290.338	931.499	1612.12	230.799	857.837	1472.42	232.367	753.553	1224.62	229.883	992.184	1365.61	212.739	1035.22	1184.03	279.175	754.781	1300.64	61.1796	918.178	1411.86	-17.3206	827.242	1202.81	-26.5414	816.69	1123.07	-64.0989	847.263	1002.12	-30.4228	927.025	903.878	-78.7602	875.146	898.302	-82.2548	927.135	825.195
352	0	155.921	1080.07	1589.47	258.376	1092.29	1593.17	162.653	906.123	1599.31	288.614	944.711	1610.32	229.335	870.846	1470.53	231.109	766.216	1222.86	228.781	1005.08	1363.55	212.38	1047.71	1181.92	277.86	767.502	1298.97	59.8681	931.194	1409.55	-18.1101	838.648	1200.9	-27.2379	827.658	1121.45	-65.9768	855.238	1000.29	-33.8202	933.299	900.175	-81.4997	880.668	895.893	-86.2578	931.325	821.977
353	0	154.06	1093.18	1587.01	256.514	1105.44	1590.9	160.879	919.228	1597.02	286.804	957.889	1608.25	227.756	883.899	1468.4	229.739	778.964	1220.83	227.586	1018.04	1361.23	211.96	1060.29	1179.55	276.425	780.301	1297.03	58.4513	944.285	1406.98	-19.0452	850.248	1198.71	-28.0355	838.771	1119.54	-67.8562	863.436	998.243	-37.1226	939.767	896.355	-84.1751	886.458	893.34	-90.0899	935.752	818.64
354	0	152.11	1106.28	1584.4	254.569	1118.57	1588.46	159.002	932.321	1594.5	284.897	971.038	1605.94	226.053	897	1466.05	228.264	791.803	1218.55	226.281	1031.08	1358.67	211.456	1072.98	1176.93	274.878	793.186	1294.85	56.9192	957.444	1404.16	-20.1336	862.045	1196.27	-28.9391	850.033	1117.37	-69.7355	871.876	996.003	-40.3188	946.46	892.432	-86.7831	892.55	890.654	-93.7351	940.451	815.186
355	0	150.061	1119.38	1581.67	252.529	1131.69	1585.89	157.01	945.41	1591.79	282.881	984.164	1603.44	224.22	910.152	1463.52	226.697	804.738	1216.06	224.851	1044.2	1355.9	210.841	1085.78	1174.12	273.226	806.166	1292.45	55.2625	970.662	1401.13	-21.3788	874.035	1193.59	-29.951	861.45	1114.96	-71.6131	880.574	993.581	-43.401	953.408	888.426	-89.3219	898.976	887.846	-97.1833	945.46	811.625
356	0	147.902	1132.49	1578.86	250.383	1144.82	1583.23	154.89	958.504	1588.92	280.744	997.276	1600.79	222.25	923.358	1460.84	225.051	817.773	1213.41	223.281	1057.4	1352.96	210.092	1098.7	1171.14	271.48	819.248	1289.89	53.4728	983.929	1397.93	-22.7792	886.211	1190.7	-31.0712	873.021	1112.34	-73.4875	889.547	990.998	-46.3641	960.643	884.358	-91.7909	905.765	884.932	-100.43	950.819	807.97
357	0	145.622	1145.63	1576.02	248.119	1157.95	1580.53	152.631	971.61	1585.95	278.475	1010.38	1598.03	220.141	936.619	1458.07	223.339	830.915	1210.63	221.557	1070.68	1349.91	209.184	1111.75	1168.04	269.651	832.44	1287.21	51.5436	997.233	1394.6	-24.3287	898.563	1187.63	-32.2968	884.748	1109.54	-75.357	898.808	988.277	-49.2054	968.196	880.255	-94.19	912.945	881.933	-103.475	956.566	804.241
358	0	143.212	1158.79	1573.18	245.729	1171.09	1577.81	150.223	984.741	1582.92	276.063	1023.49	1595.21	217.888	949.938	1455.24	221.578	844.165	1207.77	219.666	1084.04	1346.8	208.098	1124.93	1164.87	267.752	845.747	1284.46	49.4701	1010.56	1391.17	-26.0166	911.076	1184.41	-33.6226	896.63	1106.58	-77.219	908.367	985.446	-51.9245	976.097	876.146	-96.5188	920.541	878.87	-106.322	962.743	800.464
359	0	140.665	1172	1570.38	243.203	1184.27	1575.13	147.657	997.905	1579.9	273.501	1036.62	1592.39	215.491	963.315	1452.42	219.783	857.527	1204.89	217.6	1097.49	1343.67	206.813	1138.25	1161.69	265.795	859.173	1281.69	47.2497	1023.91	1387.71	-27.8282	923.733	1181.09	-35.0408	908.664	1103.52	-79.0703	918.235	982.535	-54.5225	984.375	872.065	-98.7769	928.575	875.77	-108.981	969.388	796.67
360	0	137.974	1185.25	1567.67	240.535	1197.48	1572.53	144.928	1011.11	1576.92	270.781	1049.78	1589.62	212.952	976.751	1449.66	217.97	871.001	1202.05	215.352	1111.01	1340.59	205.314	1151.71	1158.54	263.794	872.719	1278.96	44.8823	1037.25	1384.25	-29.7453	936.514	1177.7	-36.5413	920.848	1100.39	-80.907	928.419	979.578	-57.0019	993.057	868.049	-100.963	937.067	872.661	-111.461	976.541	792.895
361	0	135.137	1198.55	1565.1	237.721	1210.74	1570.05	142.033	1024.37	1574.05	267.9	1062.97	1586.96	210.274	990.245	1446.99	216.152	884.586	1199.29	212.92	1124.62	1337.62	203.592	1165.31	1155.5	261.761	886.385	1276.33	42.3705	1050.59	1380.85	-31.7475	949.398	1174.29	-38.1126	933.177	1097.24	-82.7243	938.923	976.612	-59.3659	1002.17	864.135	-103.074	946.031	869.576	-113.774	984.238	789.178
362	0	132.152	1211.91	1562.69	234.759	1224.05	1567.74	138.97	1037.7	1571.35	264.857	1076.22	1584.46	207.463	1003.79	1444.48	214.341	898.281	1196.68	210.305	1138.29	1334.81	201.64	1179.05	1152.61	259.704	900.168	1273.85	39.7195	1063.92	1377.56	-33.8125	962.365	1170.91	-39.7417	945.648	1094.12	-84.517	949.753	973.676	-61.6185	1011.74	860.366	-105.108	955.482	866.547	-115.932	992.512	785.562
363	0	129.024	1225.35	1560.5	231.652	1237.42	1565.65	135.744	1051.09	1568.86	261.656	1089.52	1582.17	204.527	1017.4	1442.18	212.546	912.079	1194.27	207.513	1152.04	1332.22	199.46	1192.94	1149.94	257.633	914.062	1271.57	36.9376	1077.22	1374.43	-35.9178	975.396	1167.62	-41.4149	958.256	1091.07	-86.2793	960.909	970.81	-63.7636	1021.78	856.782	-107.059	965.431	863.61	-117.949	1001.39	782.092
364	0	125.758	1238.85	1558.55	228.407	1250.86	1563.8	132.361	1064.56	1566.63	258.301	1102.89	1580.14	201.476	1031.05	1440.13	210.774	925.972	1192.1	204.554	1165.85	1329.91	197.059	1206.95	1147.55	255.555	928.058	1269.56	34.0359	1090.49	1371.51	-38.0413	988.472	1164.47	-43.1186	970.996	1088.14	-88.0054	972.394	968.052	-65.8055	1032.32	853.427	-108.923	975.883	860.799	-119.837	1010.91	778.812
365	0	122.363	1252.42	1556.88	225.032	1264.37	1562.22	128.833	1078.11	1564.72	254.805	1116.33	1578.41	198.321	1044.74	1438.36	209.028	939.951	1190.23	201.444	1179.7	1327.92	194.451	1221.1	1145.49	253.473	942.144	1267.85	31.0282	1103.73	1368.86	-40.1625	1001.58	1161.52	-44.8399	983.865	1085.38	-89.6898	984.207	965.442	-67.7483	1043.36	850.341	-110.696	986.846	858.151	-121.606	1021.09	775.766
366	0	118.855	1266.07	1555.51	221.541	1277.94	1560.96	125.173	1091.74	1563.15	251.18	1129.85	1577.03	195.078	1058.46	1436.92	207.306	954.004	1188.69	198.202	1193.6	1326.3	191.657	1235.37	1143.82	251.392	956.305	1266.47	27.9308	1116.94	1366.51	-42.2637	1014.71	1158.81	-46.5668	996.861	1082.84	-91.3277	996.349	963.018	-69.5959	1054.93	847.563	-112.371	998.322	855.697	-123.264	1031.94	772.995
367	0	115.25	1279.79	1554.47	217.952	1291.58	1560.02	121.4	1105.45	1561.96	247.444	1143.43	1576.01	191.762	1072.2	1435.83	205.608	968.114	1187.52	194.849	1207.53	1325.08	188.703	1249.73	1142.57	249.311	970.522	1265.47	24.7624	1130.11	1364.51	-44.3305	1027.86	1156.4	-48.2894	1009.98	1080.55	-92.915	1008.82	960.814	-71.3519	1067.02	845.129	-113.946	1010.31	853.469	-124.82	1043.47	770.539
368	0	111.567	1293.57	1553.76	214.283	1305.28	1559.42	117.535	1119.23	1561.17	243.618	1157.09	1575.39	188.392	1085.96	1435.11	203.927	982.264	1186.74	191.412	1221.47	1324.29	185.619	1264.16	1141.78	247.233	984.778	1264.87	21.5431	1143.26	1362.88	-46.3524	1041.02	1154.33	-50	1023.22	1078.56	-94.4495	1021.61	958.859	-73.0199	1079.65	843.07	-115.417	1022.81	851.495	-126.278	1055.7	768.428
369	0	107.829	1307.4	1553.4	210.557	1319.04	1559.17	113.602	1133.07	1560.8	239.726	1170.8	1575.17	184.985	1099.72	1434.77	202.259	996.437	1186.36	187.919	1235.41	1323.94	182.439	1278.64	1141.46	245.158	999.05	1264.68	18.2945	1156.38	1361.64	-48.3234	1054.2	1152.63	-51.6935	1036.57	1076.89	-95.9304	1034.73	957.179	-74.6033	1092.82	841.412	-116.783	1035.83	849.8	-127.642	1068.62	766.689
370	0	104.061	1321.28	1553.39	206.8	1332.83	1559.26	109.629	1146.97	1560.85	235.794	1184.57	1575.35	181.562	1113.47	1434.81	200.596	1010.61	1186.4	184.4	1249.33	1324.03	179.199	1293.13	1141.61	243.084	1013.32	1264.89	15.0386	1169.48	1360.81	-50.2419	1067.4	1151.32	-53.368	1050.05	1075.56	-97.359	1048.17	955.793	-76.1053	1106.53	840.174	-118.046	1049.35	848.4	-128.914	1082.23	765.342
371	0	100.289	1335.19	1553.71	203.037	1346.66	1559.69	105.645	1160.91	1561.3	231.851	1198.38	1575.93	178.143	1127.2	1435.24	198.931	1024.77	1186.85	180.885	1263.21	1324.56	175.936	1307.6	1142.23	241.013	1027.55	1265.51	11.7978	1182.55	1360.4	-52.1106	1080.63	1150.43	-55.0242	1063.64	1074.58	-98.7386	1061.93	954.714	-77.5292	1120.76	839.369	-119.21	1063.38	847.308	-130.097	1096.53	764.397
372	0	96.5407	1349.11	1554.35	199.297	1360.51	1560.44	101.679	1174.87	1562.15	227.926	1212.22	1576.88	174.748	1140.89	1436.03	197.257	1038.89	1187.69	177.403	1277.04	1325.52	172.685	1322	1143.29	238.943	1041.74	1266.52	8.59372	1195.61	1360.39	-53.936	1093.92	1149.95	-56.6661	1077.34	1073.97	-100.075	1076.01	953.948	-78.8783	1135.52	839.001	-120.281	1077.9	846.531	-131.19	1111.5	763.858
373	0	92.8428	1363.04	1555.29	195.607	1374.36	1561.5	97.761	1188.85	1563.37	224.049	1226.07	1578.19	171.398	1154.55	1437.16	195.568	1052.94	1188.9	173.984	1290.81	1326.86	169.483	1336.31	1144.75	236.874	1055.86	1267.89	5.44712	1208.66	1360.78	-55.7277	1107.25	1149.87	-58.3002	1091.16	1073.7	-101.374	1090.41	953.493	-80.1557	1150.79	839.068	-121.268	1092.92	846.07	-132.197	1127.12	763.722
374	0	89.2224	1376.96	1556.51	191.995	1388.19	1562.83	93.9222	1202.81	1564.93	220.249	1239.92	1579.82	168.111	1168.14	1438.61	193.857	1066.92	1190.45	170.656	1304.5	1328.55	166.362	1350.49	1146.58	234.806	1069.9	1269.59	2.37738	1221.7	1361.54	-57.4977	1120.66	1150.18	-59.9354	1105.09	1073.78	-102.647	1105.11	953.343	-81.3646	1166.55	839.559	-122.182	1108.42	845.918	-133.118	1143.39	763.977
375	0	85.7049	1390.84	1557.98	188.485	1402	1564.4	90.1906	1216.75	1566.78	216.554	1253.74	1581.73	164.904	1181.68	1440.34	192.121	1080.81	1192.3	167.443	1318.1	1330.55	163.352	1364.52	1148.71	232.738	1083.82	1271.59	-0.597955	1234.73	1362.65	-59.2592	1134.15	1150.85	-61.5822	1119.14	1074.17	-103.903	1120.13	953.485	-82.508	1182.78	840.457	-123.037	1124.4	846.064	-133.957	1160.28	764.606
376	0	82.3142	1404.68	1559.67	185.103	1415.77	1566.18	86.5926	1230.64	1568.88	212.991	1267.53	1583.88	161.794	1195.15	1442.32	190.355	1094.58	1194.42	164.366	1331.6	1332.81	160.478	1378.37	1151.08	230.671	1097.63	1273.83	-3.46349	1247.77	1364.06	-61.0261	1147.74	1151.83	-63.2523	1133.29	1074.85	-105.153	1135.45	953.9	-83.5886	1199.46	841.739	-123.846	1140.83	846.494	-134.719	1177.76	765.588
377	0	79.0715	1418.47	1561.54	181.871	1429.48	1568.14	83.1517	1244.47	1571.19	209.583	1281.27	1586.22	158.795	1208.54	1444.5	188.558	1108.23	1196.76	161.444	1345	1335.28	157.763	1392.02	1153.63	228.605	1111.31	1276.28	-6.20626	1260.8	1365.73	-62.8115	1161.42	1153.08	-64.9576	1147.56	1075.79	-106.408	1151.08	954.567	-84.6093	1216.57	843.379	-124.626	1157.72	847.188	-135.409	1195.81	766.899
378	0	75.9953	1432.18	1563.56	178.806	1443.12	1570.24	79.8878	1258.23	1573.66	206.349	1294.94	1588.71	155.919	1221.87	1446.84	186.728	1121.74	1199.27	158.692	1358.29	1337.89	155.225	1405.46	1156.3	226.542	1124.85	1278.88	-8.81595	1273.84	1367.62	-64.6272	1175.22	1154.56	-66.7097	1161.95	1076.94	-107.681	1166.99	955.461	-85.5726	1234.08	845.344	-125.391	1175.03	848.125	-136.035	1214.4	768.514
379	0	73.1004	1445.82	1565.69	175.923	1456.68	1572.44	76.817	1271.91	1576.24	203.306	1308.53	1591.29	153.174	1235.11	1449.31	184.868	1135.11	1201.91	156.12	1371.47	1340.59	152.876	1418.7	1159.02	224.483	1138.25	1281.6	-11.2851	1286.88	1369.69	-66.4831	1189.14	1156.23	-68.519	1176.45	1078.28	-108.981	1183.19	956.557	-86.4812	1251.95	847.601	-126.156	1192.76	849.283	-136.606	1233.5	770.405
380	0	70.3982	1459.37	1567.91	173.235	1470.16	1574.7	73.9507	1285.49	1578.89	200.466	1322.05	1593.92	150.569	1248.28	1451.85	182.979	1148.34	1204.64	153.735	1384.55	1343.34	150.724	1431.73	1161.74	222.43	1151.5	1284.39	-13.6091	1299.92	1371.89	-68.3862	1203.18	1158.03	-70.3946	1191.06	1079.76	-110.32	1199.67	957.828	-87.3379	1270.16	850.116	-126.935	1210.87	850.638	-137.132	1253.08	772.548
381	0	67.8964	1472.83	1570.17	170.748	1483.55	1576.99	71.2962	1298.98	1581.56	197.836	1335.47	1596.56	148.108	1261.38	1454.44	181.063	1161.41	1207.41	151.537	1397.52	1346.08	148.774	1444.56	1164.41	220.386	1164.61	1287.2	-15.7862	1312.97	1374.19	-70.3409	1217.35	1159.92	-72.3431	1205.79	1081.35	-111.703	1216.41	959.248	-88.1457	1288.67	852.854	-127.741	1229.36	852.168	-137.624	1273.11	774.92
382	0	65.5986	1486.19	1572.44	168.466	1496.84	1579.28	68.856	1312.37	1584.21	195.42	1348.8	1599.17	145.792	1274.4	1457.03	179.125	1174.34	1210.19	149.527	1410.39	1348.77	147.023	1457.2	1167	218.352	1177.58	1290.01	-17.8175	1326.01	1376.53	-72.3484	1231.66	1161.86	-74.3691	1220.63	1083.02	-113.139	1233.41	960.792	-88.908	1307.44	855.783	-128.584	1248.19	853.852	-138.091	1293.54	777.499
383	0	63.5055	1499.46	1574.7	166.39	1510.04	1581.54	66.6287	1325.66	1586.82	193.216	1362.03	1601.71	143.62	1287.35	1459.6	177.17	1187.12	1212.94	147.698	1423.16	1351.38	145.464	1469.67	1169.46	216.333	1190.41	1292.77	-19.7064	1339.05	1378.88	-74.4071	1246.08	1163.82	-76.4746	1235.58	1084.72	-114.632	1250.64	962.438	-89.6286	1326.44	858.87	-129.472	1267.33	855.671	-138.546	1314.34	780.266
384	0	61.614	1512.64	1576.92	164.516	1523.14	1583.73	64.6087	1338.84	1589.34	191.22	1375.16	1604.16	141.591	1300.24	1462.1	175.201	1199.76	1215.62	146.043	1435.84	1353.87	144.087	1481.99	1171.78	214.329	1203.11	1295.45	-21.4588	1352.08	1381.22	-76.513	1260.63	1165.77	-78.6595	1250.64	1086.44	-116.185	1268.1	964.163	-90.3122	1345.65	862.086	-130.413	1286.76	857.607	-138.997	1335.47	783.204
385	0	59.9182	1525.73	1579.07	162.838	1536.15	1585.84	62.7872	1351.94	1591.76	189.424	1388.2	1606.48	139.698	1313.06	1464.52	173.225	1212.28	1218.22	144.549	1448.45	1356.21	142.878	1494.17	1173.94	212.345	1215.7	1298.03	-23.082	1365.1	1383.51	-78.6602	1275.3	1167.69	-80.9211	1265.81	1088.14	-117.798	1285.76	965.948	-90.9638	1365.01	865.404	-131.411	1306.45	859.643	-139.453	1356.88	786.299
386	0	58.4096	1538.73	1581.12	161.347	1549.07	1587.84	61.1526	1364.94	1594.05	187.815	1401.15	1608.66	137.936	1325.82	1466.83	171.246	1224.68	1220.7	143.205	1460.97	1358.4	141.818	1506.23	1175.93	210.382	1228.17	1300.48	-24.585	1378.11	1385.73	-80.8412	1290.07	1169.56	-83.255	1281.08	1089.81	-119.471	1303.62	967.776	-91.5892	1384.51	868.799	-132.469	1326.36	861.765	-139.923	1378.54	789.535
387	0	57.0777	1551.65	1583.07	160.032	1561.9	1589.71	59.6909	1377.87	1596.2	186.382	1414.01	1610.68	136.297	1338.52	1469	169.271	1236.96	1223.05	141.995	1473.42	1360.41	140.888	1518.2	1177.74	208.445	1240.54	1302.79	-25.9775	1391.1	1387.86	-83.0481	1304.94	1171.35	-85.6552	1296.45	1091.43	-121.202	1321.63	969.63	-92.195	1404.11	872.248	-133.586	1346.47	863.958	-140.413	1400.39	792.898
388	0	55.9103	1564.5	1584.89	158.882	1574.66	1591.43	58.3868	1390.72	1598.19	185.107	1426.78	1612.52	134.771	1351.18	1471.03	167.307	1249.15	1225.24	140.904	1485.81	1362.24	140.068	1530.08	1179.38	206.535	1252.82	1304.93	-27.2698	1404.07	1389.88	-85.2727	1319.88	1173.06	-88.1142	1311.91	1092.98	-122.986	1339.8	971.494	-92.788	1423.79	875.731	-134.763	1366.74	866.211	-140.927	1422.4	796.373
389	0	54.8941	1577.28	1586.55	157.882	1587.35	1592.98	57.224	1403.5	1600	183.977	1439.48	1614.16	133.351	1363.78	1472.89	165.36	1261.26	1227.26	139.916	1498.14	1363.88	139.333	1541.9	1180.84	204.658	1265.02	1306.89	-28.4724	1417.01	1391.77	-87.507	1334.88	1174.68	-90.6237	1327.46	1094.45	-124.82	1358.09	973.355	-93.3756	1443.51	879.229	-135.996	1387.15	868.51	-141.469	1444.51	799.946
390	0	54.0151	1590	1588.06	157.018	1599.97	1594.37	56.186	1416.22	1601.63	182.973	1452.1	1615.61	132.026	1376.33	1474.57	163.438	1273.29	1229.1	139.015	1510.42	1365.31	138.663	1553.67	1182.12	202.817	1277.15	1308.66	-29.5956	1429.92	1393.52	-89.7438	1349.93	1176.19	-93.1747	1343.08	1095.83	-126.697	1376.48	975.198	-93.965	1463.26	882.724	-137.282	1407.66	870.843	-142.042	1466.7	803.6
391	0	53.2591	1602.66	1589.39	156.276	1612.52	1595.56	55.2566	1428.89	1603.06	182.08	1464.66	1616.85	130.787	1388.84	1476.06	161.55	1285.27	1230.75	138.184	1522.65	1366.54	138.035	1565.4	1183.23	201.016	1289.23	1310.24	-30.6492	1442.79	1395.13	-91.9769	1365.01	1177.6	-95.7578	1358.76	1097.11	-128.611	1394.95	977.012	-94.5633	1483.01	886.2	-138.615	1428.24	873.197	-142.645	1488.92	807.318
392	0	52.6119	1615.29	1590.55	155.641	1625.03	1596.57	54.4208	1441.51	1604.3	181.283	1477.16	1617.88	129.627	1401.31	1477.35	159.703	1297.19	1232.19	137.41	1534.85	1367.57	137.429	1577.09	1184.16	199.263	1301.27	1311.61	-31.6422	1455.63	1396.57	-94.2007	1380.1	1178.88	-98.3635	1374.51	1098.27	-130.556	1413.47	978.783	-95.177	1502.75	889.641	-139.991	1448.86	875.559	-143.279	1511.14	811.081
393	0	52.06	1627.86	1591.51	155.098	1637.49	1597.37	53.6643	1454.09	1605.33	180.567	1489.6	1618.69	128.537	1413.75	1478.44	157.908	1309.07	1233.42	136.678	1547	1368.4	136.825	1588.76	1184.9	197.562	1313.26	1312.77	-32.5826	1468.43	1397.84	-96.4104	1395.19	1180.03	-100.982	1390.31	1099.3	-132.524	1432.03	980.499	-95.8119	1522.44	893.031	-141.404	1469.5	877.916	-143.944	1533.31	814.87
394	0	51.5906	1640.41	1592.27	154.635	1649.91	1597.97	52.9745	1466.64	1606.15	179.921	1502	1619.29	127.511	1426.16	1479.32	156.174	1320.93	1234.45	135.977	1559.14	1369.01	136.206	1600.41	1185.46	195.92	1325.23	1313.72	-33.4776	1481.2	1398.93	-98.6018	1410.26	1181.05	-103.605	1406.14	1100.21	-134.507	1450.61	982.149	-96.4727	1542.08	896.356	-142.847	1490.13	880.255	-144.637	1555.4	818.664
395	0	51.192	1652.93	1592.84	154.24	1662.3	1598.37	52.3406	1479.17	1606.76	179.332	1514.36	1619.67	126.543	1438.54	1479.99	154.512	1332.76	1235.26	135.295	1571.25	1369.42	135.557	1612.04	1185.82	194.344	1337.19	1314.46	-34.3328	1493.92	1399.83	-100.771	1425.3	1181.92	-106.223	1422.01	1100.98	-136.499	1469.17	983.723	-97.1633	1561.64	899.6	-144.313	1510.71	882.561	-145.359	1577.39	822.442
396	0	50.8536	1665.42	1593.2	153.901	1674.66	1598.56	51.7534	1491.67	1607.16	178.792	1526.68	1619.83	125.63	1450.9	1480.44	152.931	1344.59	1235.86	134.623	1583.35	1369.62	134.865	1623.67	1185.98	192.843	1349.14	1314.99	-35.1525	1506.6	1400.54	-102.912	1440.31	1182.64	-108.825	1437.9	1101.61	-138.492	1487.71	985.209	-97.8858	1581.12	902.749	-145.798	1531.23	884.822	-146.107	1599.24	826.183
397	0	50.5665	1677.89	1593.36	153.61	1686.99	1598.55	51.2055	1504.15	1607.35	178.294	1538.97	1619.78	124.77	1463.25	1480.69	151.441	1356.41	1236.25	133.955	1595.44	1369.6	134.121	1635.29	1185.93	191.424	1361.09	1315.31	-35.9397	1519.24	1401.04	-105.022	1455.27	1183.21	-111.404	1453.8	1102.1	-140.479	1506.21	986.598	-98.6418	1600.5	905.789	-147.295	1551.66	887.023	-146.878	1620.93	829.866
398	0	50.3231	1690.34	1593.32	153.359	1699.31	1598.34	50.6915	1516.61	1607.33	177.832	1551.24	1619.52	123.961	1475.58	1480.72	150.051	1368.24	1236.44	133.287	1607.53	1369.38	133.318	1646.91	1185.67	190.094	1373.04	1315.43	-36.6957	1531.83	1401.35	-107.094	1470.18	1183.6	-113.948	1469.71	1102.43	-142.451	1524.63	987.883	-99.4311	1619.75	908.707	-148.798	1571.98	889.152	-147.673	1642.44	833.472
399	0	50.1178	1702.79	1593.08	153.143	1711.61	1597.93	50.2077	1529.07	1607.1	177.403	1563.5	1619.06	123.204	1487.92	1480.55	148.769	1380.07	1236.42	132.615	1619.63	1368.95	132.452	1658.54	1185.2	188.863	1385.02	1315.35	-37.4202	1544.39	1401.46	-109.122	1485.04	1183.83	-116.448	1485.6	1102.62	-144.401	1542.97	989.056	-100.253	1638.87	911.491	-150.304	1592.16	891.195	-148.49	1663.74	836.981
400	0	49.9467	1715.22	1592.65	152.958	1723.91	1597.33	49.7524	1541.51	1606.66	177.005	1575.74	1618.39	122.501	1500.25	1480.18	147.604	1391.93	1236.2	131.94	1631.74	1368.31	131.523	1670.18	1184.51	187.737	1397.01	1315.08	-38.1115	1556.92	1401.36	-111.097	1499.85	1183.9	-118.893	1501.47	1102.66	-146.322	1561.21	990.11	-101.106	1657.85	914.129	-151.806	1612.18	893.143	-149.328	1684.8	840.377
401	0	49.8079	1727.65	1592.03	152.804	1736.19	1596.55	49.3256	1553.95	1606.03	176.638	1587.97	1617.53	121.857	1512.58	1479.62	146.561	1403.81	1235.78	131.266	1643.88	1367.48	130.534	1681.85	1183.62	186.722	1409.04	1314.61	-38.7661	1569.41	1401.07	-113.01	1514.6	1183.79	-121.272	1517.31	1102.54	-148.206	1579.33	991.041	-101.987	1676.66	916.61	-153.302	1632.02	894.982	-150.186	1705.62	843.642
402	0	49.7014	1740.07	1591.23	152.681	1748.47	1595.59	48.9295	1566.39	1605.21	176.305	1600.2	1616.49	121.275	1524.91	1478.86	145.644	1415.72	1235.18	130.597	1656.03	1366.45	129.491	1693.56	1182.52	185.826	1421.1	1313.96	-39.3795	1581.86	1400.59	-114.852	1529.3	1183.52	-123.572	1533.1	1102.28	-150.044	1597.3	991.843	-102.894	1695.3	918.924	-154.786	1651.66	896.704	-151.065	1726.17	846.761
403	0	49.6293	1752.48	1590.26	152.591	1760.75	1594.46	48.5678	1578.82	1604.2	176.008	1612.42	1615.28	120.763	1537.25	1477.93	144.857	1427.67	1234.4	129.94	1668.22	1365.24	128.403	1705.32	1181.24	185.054	1433.19	1313.13	-39.9456	1594.29	1399.92	-116.61	1543.94	1183.1	-125.782	1548.83	1101.88	-151.83	1615.12	992.513	-103.823	1713.75	921.061	-156.254	1671.07	898.297	-151.965	1746.42	849.721
404	0	49.5956	1764.89	1589.13	152.541	1773.02	1593.18	48.2464	1591.25	1603.02	175.753	1624.64	1613.91	120.327	1549.6	1476.82	144.2	1439.66	1233.43	129.306	1680.44	1363.86	127.282	1717.14	1179.77	184.408	1445.33	1312.12	-40.4574	1606.7	1399.08	-118.274	1558.51	1182.51	-127.888	1564.49	1101.35	-153.554	1632.76	993.049	-104.77	1731.99	923.015	-157.703	1690.23	899.754	-152.887	1766.37	852.51
405	0	49.6061	1777.3	1587.85	152.536	1785.28	1591.77	47.9729	1603.67	1601.68	175.548	1636.85	1612.38	119.974	1561.95	1475.55	143.673	1451.71	1232.29	128.704	1692.69	1362.33	126.143	1729.04	1178.15	183.891	1457.52	1310.93	-40.907	1619.09	1398.08	-119.83	1573.02	1181.79	-129.878	1580.05	1100.68	-155.208	1650.2	993.448	-105.731	1750.01	924.778	-159.128	1709.13	901.066	-153.832	1786	855.114
406	0	49.6686	1789.7	1586.45	152.585	1797.54	1590.22	47.7563	1616.09	1600.19	175.401	1649.07	1610.73	119.712	1574.31	1474.13	143.271	1463.81	1230.98	128.149	1704.98	1360.65	125.002	1741.03	1176.39	183.502	1469.75	1309.58	-41.2864	1631.46	1396.92	-121.267	1587.45	1180.92	-131.737	1595.51	1099.88	-156.784	1667.43	993.709	-106.702	1767.8	926.343	-160.524	1727.73	902.226	-154.801	1805.28	857.524
407	0	49.792	1802.09	1584.92	152.697	1809.8	1588.57	47.6076	1628.5	1598.57	175.321	1661.28	1608.96	119.548	1586.68	1472.57	142.991	1475.98	1229.51	127.651	1717.32	1358.84	123.879	1753.11	1174.5	183.241	1482.04	1308.06	-41.5869	1643.83	1395.63	-122.573	1601.8	1179.92	-133.454	1610.86	1098.98	-158.273	1684.42	993.833	-107.679	1785.33	927.705	-161.886	1746.03	903.226	-155.795	1824.2	859.731
408	0	49.9868	1814.47	1583.31	152.883	1822.04	1586.83	47.5383	1640.9	1596.84	175.321	1673.49	1607.09	119.49	1599.04	1470.89	142.823	1488.22	1227.88	127.227	1729.69	1356.94	122.794	1765.31	1172.53	183.103	1494.38	1306.38	-41.8004	1656.2	1394.22	-123.734	1616.06	1178.81	-135.015	1626.06	1097.96	-159.668	1701.16	993.82	-108.656	1802.6	928.861	-163.207	1763.99	904.06	-156.814	1842.74	861.725
409	0	50.2641	1826.84	1581.61	153.155	1834.28	1585.02	47.5612	1653.28	1595.01	175.412	1685.69	1605.14	119.544	1611.41	1469.09	142.76	1500.54	1226.1	126.89	1742.1	1354.96	121.768	1777.63	1170.49	183.082	1506.77	1304.56	-41.919	1668.57	1392.72	-124.742	1630.22	1177.59	-136.408	1641.12	1096.85	-160.958	1717.63	993.673	-109.627	1819.59	929.807	-164.48	1781.6	904.724	-157.858	1860.89	863.498
410	0	50.6357	1839.19	1579.87	153.524	1846.51	1583.16	47.6891	1665.66	1593.11	175.606	1697.89	1603.13	119.715	1623.78	1467.21	142.788	1512.94	1224.19	126.654	1754.56	1352.92	120.824	1790.08	1168.41	183.17	1519.22	1302.6	-41.9357	1680.95	1391.13	-125.585	1644.26	1176.27	-137.621	1656.02	1095.66	-162.137	1733.81	993.394	-110.587	1836.29	930.541	-165.7	1798.84	905.214	-158.925	1878.62	865.045
411	0	51.1133	1851.54	1578.09	154.002	1858.73	1581.28	47.9348	1678.02	1591.17	175.915	1710.08	1601.08	120.005	1636.15	1465.25	142.896	1525.43	1222.16	126.531	1767.05	1350.85	119.982	1802.66	1166.32	183.355	1531.71	1300.51	-41.8445	1693.35	1389.49	-126.254	1658.17	1174.88	-138.645	1670.74	1094.39	-163.196	1749.69	992.99	-111.528	1852.67	931.062	-166.856	1815.68	905.527	-160.014	1895.92	866.357
412	0	51.7083	1863.86	1576.32	154.601	1870.94	1579.39	48.3103	1690.36	1589.2	176.351	1722.25	1599.01	120.418	1648.51	1463.24	143.069	1538.02	1220.01	126.535	1779.59	1348.79	119.265	1815.39	1164.26	183.626	1544.26	1298.31	-41.6407	1705.77	1387.81	-126.744	1671.95	1173.42	-139.471	1685.28	1093.07	-164.126	1765.25	992.467	-112.444	1868.72	931.371	-167.941	1832.1	905.661	-161.119	1912.77	867.43
413	0	52.4311	1876.17	1574.56	155.33	1883.13	1577.53	48.8265	1702.68	1587.24	176.925	1734.42	1596.96	120.954	1660.87	1461.19	143.29	1550.7	1217.78	126.676	1792.17	1346.75	118.694	1828.26	1162.24	183.968	1556.85	1296.01	-41.321	1718.23	1386.13	-127.047	1685.59	1171.92	-140.092	1699.62	1091.72	-164.922	1780.47	991.833	-113.326	1884.42	931.468	-168.946	1848.09	905.618	-162.234	1929.15	868.26
414	0	53.2908	1888.47	1572.86	156.2	1895.32	1575.71	49.4924	1714.98	1585.32	177.645	1746.57	1594.93	121.611	1673.23	1459.14	143.544	1563.49	1215.48	126.962	1804.78	1344.77	118.287	1841.28	1160.31	184.367	1569.49	1293.65	-40.8839	1730.74	1384.46	-127.16	1699.08	1170.39	-140.502	1713.76	1090.34	-165.576	1795.35	991.1	-114.166	1899.77	931.357	-169.86	1863.63	905.399	-163.353	1945.05	868.845
415	0	54.2947	1900.75	1571.24	157.216	1907.49	1573.97	50.3149	1727.26	1583.46	178.517	1758.71	1592.97	122.385	1685.59	1457.11	143.814	1576.38	1213.14	127.399	1817.44	1342.87	118.059	1854.44	1158.49	184.806	1582.18	1291.23	-40.3293	1743.29	1382.84	-127.083	1712.42	1168.85	-140.7	1727.69	1088.96	-166.084	1809.87	990.28	-114.954	1914.73	931.045	-170.674	1878.7	905.012	-164.466	1960.44	869.183
416	0	55.4473	1913.01	1569.73	158.384	1919.64	1572.32	51.2981	1739.53	1581.69	179.547	1770.83	1591.08	123.271	1697.94	1455.13	144.084	1589.37	1210.78	127.991	1830.13	1341.08	118.025	1867.75	1156.8	185.271	1594.91	1288.79	-39.6593	1755.9	1381.29	-126.814	1725.61	1167.33	-140.683	1741.4	1087.61	-166.439	1824.02	989.388	-115.681	1929.3	930.537	-171.379	1893.28	904.462	-165.56	1975.32	869.274
417	0	56.751	1925.27	1568.35	159.705	1931.79	1570.8	52.4435	1751.78	1580.05	180.736	1782.94	1589.31	124.263	1710.29	1453.21	144.337	1602.45	1208.44	128.737	1842.85	1339.43	118.192	1881.19	1155.29	185.743	1607.67	1286.36	-38.8776	1768.57	1379.85	-126.357	1738.64	1165.86	-140.454	1754.91	1086.3	-166.639	1837.79	988.444	-116.338	1943.46	929.845	-171.965	1907.36	903.76	-166.624	1989.66	869.124
418	0	58.2046	1937.51	1567.13	161.177	1943.93	1569.42	53.7494	1764.01	1578.55	182.081	1795.04	1587.67	125.352	1722.65	1451.39	144.561	1615.63	1206.14	129.635	1855.6	1337.95	118.564	1894.76	1153.98	186.21	1620.48	1283.97	-37.9899	1781.31	1378.54	-125.717	1751.54	1164.47	-140.016	1768.2	1085.07	-166.682	1851.18	987.465	-116.913	1957.2	928.981	-172.423	1920.93	902.921	-167.641	2003.44	868.736
419	0	59.8041	1949.75	1566.1	162.798	1956.06	1568.21	55.2108	1776.23	1577.23	183.578	1807.12	1586.18	126.527	1735.01	1449.7	144.741	1628.89	1203.93	130.679	1868.38	1336.66	119.14	1908.44	1152.89	186.656	1633.31	1281.65	-37.004	1794.12	1377.39	-124.9	1764.29	1163.18	-139.375	1781.28	1083.94	-166.566	1864.19	986.473	-117.397	1970.5	927.96	-172.746	1933.97	901.961	-168.597	2016.65	868.118
420	0	61.5421	1961.98	1565.26	164.557	1968.19	1567.18	56.82	1788.44	1576.12	185.22	1819.21	1584.87	127.777	1747.37	1448.16	144.867	1642.23	1201.83	131.859	1881.18	1335.58	119.913	1922.22	1152.05	187.069	1646.17	1279.44	-35.9297	1807.01	1376.43	-123.918	1776.92	1162.03	-138.541	1794.14	1082.94	-166.292	1876.8	985.492	-117.78	1983.34	926.799	-172.928	1946.48	900.9	-169.474	2029.28	867.281
421	0	63.408	1974.2	1564.65	166.445	1980.32	1566.37	58.5661	1800.65	1575.22	186.996	1831.29	1583.76	129.088	1759.75	1446.8	144.93	1655.63	1199.89	133.16	1893.99	1334.74	120.868	1936.08	1151.47	187.437	1659.04	1277.36	-34.7791	1819.97	1375.7	-122.783	1789.43	1161.06	-137.526	1806.79	1082.1	-165.864	1889.02	984.545	-118.053	1995.73	925.518	-172.963	1958.46	899.76	-170.254	2041.32	866.239
422	0	65.3882	1986.43	1564.28	168.448	1992.45	1565.77	60.4353	1812.85	1574.56	188.891	1843.37	1582.87	130.445	1772.13	1445.64	144.921	1669.08	1198.12	134.567	1906.82	1334.14	121.986	1950	1151.17	187.749	1671.93	1275.46	-33.5658	1833	1375.21	-121.511	1801.84	1160.29	-136.344	1819.24	1081.45	-165.287	1900.86	983.657	-118.209	2007.65	924.142	-172.849	1969.89	898.566	-170.92	2052.75	865.007
423	0	67.4665	1998.66	1564.15	170.548	2004.59	1565.4	62.4113	1825.06	1574.16	190.891	1855.46	1582.21	131.833	1784.53	1444.71	144.835	1682.56	1196.58	136.058	1919.65	1333.81	123.24	1963.94	1151.16	187.996	1684.82	1273.76	-32.3056	1846.1	1374.98	-120.122	1814.17	1159.76	-135.013	1831.48	1081	-164.567	1912.31	982.853	-118.241	2019.1	922.693	-172.584	1980.8	897.346	-171.454	2063.58	863.605
424	0	69.6244	2010.89	1564.27	172.727	2016.73	1565.28	64.4753	1837.27	1574.03	192.976	1867.55	1581.79	133.235	1796.94	1444	144.667	1696.06	1195.28	137.612	1932.48	1333.74	124.6	1977.87	1151.45	188.17	1697.71	1272.3	-31.0156	1859.27	1375.04	-118.64	1826.41	1159.5	-133.554	1843.53	1080.79	-163.713	1923.39	982.155	-118.143	2030.07	921.198	-172.171	1991.17	896.126	-171.84	2073.8	862.052
425	0	71.8415	2023.13	1564.65	174.963	2028.88	1565.39	66.6066	1849.48	1574.16	195.126	1879.66	1581.61	134.632	1809.36	1443.55	144.416	1709.56	1194.24	139.203	1945.3	1333.93	126.031	1991.77	1152.02	188.267	1710.58	1271.09	-29.7139	1872.49	1375.39	-117.089	1838.59	1159.52	-131.989	1855.37	1080.83	-162.738	1934.11	981.586	-117.913	2040.57	919.684	-171.613	2001.04	894.935	-172.063	2083.42	860.371
426	0	74.096	2035.37	1565.28	177.235	2041.04	1565.74	68.7823	1861.7	1574.56	197.319	1891.78	1581.68	136.007	1821.8	1443.36	144.08	1723.03	1193.5	140.806	1958.1	1334.39	127.493	2005.59	1152.87	188.28	1723.43	1270.16	-28.4194	1885.77	1376.04	-115.5	1850.72	1159.84	-130.344	1867.02	1081.12	-161.654	1944.47	981.162	-117.549	2050.61	918.178	-170.918	2010.41	893.801	-172.11	2092.45	858.586
427	0	76.365	2047.62	1566.16	179.521	2053.21	1566.32	70.9784	1873.93	1575.23	199.531	1903.91	1581.99	137.342	1834.24	1443.42	143.661	1736.47	1193.06	142.392	1970.88	1335.11	128.949	2019.32	1153.97	188.209	1736.25	1269.52	-27.1511	1899.07	1376.98	-113.904	1862.8	1160.48	-128.646	1878.48	1081.69	-160.48	1954.5	980.901	-117.054	2060.19	916.706	-170.095	2019.3	892.749	-171.97	2100.91	856.722
428	0	78.6252	2059.88	1567.27	181.795	2065.4	1567.13	73.1695	1886.16	1576.14	201.736	1916.06	1582.52	138.619	1846.7	1443.74	143.164	1749.85	1192.92	143.936	1983.63	1336.06	130.358	2032.91	1155.3	188.053	1749.03	1269.18	-25.9277	1912.41	1378.21	-112.334	1874.84	1161.43	-126.924	1889.75	1082.53	-159.231	1964.21	980.812	-116.433	2069.34	915.293	-169.158	2027.75	891.803	-171.639	2108.81	854.801
429	0	80.8532	2072.15	1568.59	184.036	2077.59	1568.14	75.3297	1898.41	1577.29	203.911	1928.22	1583.28	139.824	1859.17	1444.31	142.594	1763.16	1193.08	145.411	1996.35	1337.24	131.683	2046.35	1156.83	187.814	1761.76	1269.14	-24.7672	1925.75	1379.72	-110.825	1886.84	1162.68	-125.207	1900.84	1083.62	-157.928	1973.61	980.903	-115.692	2078.06	913.96	-168.122	2035.78	890.984	-171.112	2116.2	852.847
430	0	83.0257	2084.42	1570.11	186.22	2089.79	1569.33	77.4329	1910.66	1578.65	206.03	1940.39	1584.23	140.941	1871.64	1445.11	141.96	1776.39	1193.54	146.793	2009.02	1338.61	132.89	2059.62	1158.53	187.497	1774.44	1269.4	-23.6862	1939.08	1381.47	-109.409	1898.8	1164.21	-123.523	1911.75	1084.97	-156.591	1982.74	981.175	-114.842	2086.4	912.726	-167.004	2043.44	890.308	-170.392	2123.1	850.884
431	0	85.1204	2096.7	1571.8	188.325	2102	1570.7	79.4535	1922.92	1580.21	208.068	1952.57	1585.36	141.958	1884.11	1446.13	141.272	1789.51	1194.28	148.059	2021.64	1340.14	133.95	2072.69	1160.35	187.109	1787.07	1269.93	-22.7	1952.39	1383.45	-108.117	1910.73	1166.02	-121.901	1922.49	1086.56	-155.243	1991.62	981.627	-113.897	2094.37	911.607	-165.824	2050.76	889.787	-169.487	2129.55	848.931
432	0	87.1159	2108.98	1573.63	190.33	2114.2	1572.21	81.367	1935.18	1581.92	210.002	1964.75	1586.65	142.866	1896.58	1447.36	140.544	1802.54	1195.29	149.192	2034.22	1341.82	134.837	2085.57	1162.26	186.657	1799.63	1270.73	-21.8215	1965.66	1385.61	-106.976	1922.6	1168.05	-120.365	1933.06	1088.35	-153.904	2000.27	982.252	-112.873	2102.01	910.617	-164.605	2057.78	889.428	-168.408	2135.6	847.009
433	0	88.9925	2121.26	1575.59	192.215	2126.41	1573.84	83.1505	1947.46	1583.76	211.809	1976.94	1588.07	143.656	1909.05	1448.75	139.788	1815.45	1196.52	150.176	2046.74	1343.61	135.534	2098.26	1164.22	186.151	1812.12	1271.78	-21.0614	1978.87	1387.92	-106.01	1934.41	1170.28	-118.939	1943.48	1090.33	-152.595	2008.71	983.039	-111.789	2109.35	909.761	-163.369	2064.55	889.236	-167.173	2141.31	845.136
434	0	90.7321	2133.55	1577.62	193.962	2138.62	1575.56	84.7834	1959.73	1585.71	213.469	1989.13	1589.59	144.324	1921.5	1450.3	139.019	1828.23	1197.97	151.001	2059.21	1345.48	136.03	2110.77	1166.21	185.602	1824.55	1273.04	-20.4277	1992.01	1390.34	-105.233	1946.16	1172.67	-117.641	1953.74	1092.45	-151.337	2016.97	983.974	-110.667	2116.44	909.045	-162.139	2071.11	889.209	-165.807	2146.71	843.328
435	0	92.3191	2145.84	1579.72	195.556	2150.82	1577.36	86.2482	1972.01	1587.71	214.966	2001.31	1591.2	144.866	1933.94	1451.97	138.251	1840.9	1199.59	151.659	2071.63	1347.4	136.322	2123.1	1168.18	185.021	1836.91	1274.48	-19.9256	2005.06	1392.83	-104.654	1957.83	1175.18	-116.487	1963.85	1094.7	-150.149	2025.08	985.039	-109.528	2123.3	908.469	-160.938	2077.51	889.341	-164.336	2151.87	841.599
436	0	93.74	2158.12	1581.84	196.984	2163.02	1579.2	87.5303	1984.3	1589.76	216.284	2013.49	1592.87	145.282	1946.36	1453.73	137.496	1853.45	1201.35	152.15	2084	1349.35	136.412	2135.28	1170.13	184.42	1849.2	1276.09	-19.5571	2018.02	1395.36	-104.275	1969.39	1177.75	-115.487	1973.83	1097.03	-149.047	2033.06	986.217	-108.397	2129.98	908.028	-159.789	2083.77	889.622	-162.794	2156.83	839.963
437	0	94.9845	2170.41	1583.96	198.235	2175.21	1581.07	88.6188	1996.59	1591.8	217.413	2025.66	1594.57	145.574	1958.76	1455.56	136.768	1865.87	1203.21	152.475	2096.31	1351.29	136.31	2147.32	1172.02	183.809	1861.44	1277.81	-19.3219	2030.86	1397.87	-104.09	1980.85	1180.37	-114.647	1983.67	1099.4	-148.046	2040.93	987.485	-107.299	2136.52	907.715	-158.711	2089.95	890.039	-161.215	2161.65	838.429
438	0	96.0446	2182.7	1586.04	199.302	2187.4	1582.93	89.5066	2008.88	1593.83	218.345	2037.83	1596.29	145.747	1971.13	1457.42	136.075	1878.17	1205.15	152.64	2108.58	1353.21	136.031	2159.25	1173.83	183.2	1873.61	1279.62	-19.2165	2043.6	1400.34	-104.083	1992.16	1182.97	-113.967	1993.39	1101.8	-147.157	2048.72	988.821	-106.257	2142.95	907.52	-157.723	2096.08	890.575	-159.639	2166.38	837.005
439	0	96.9157	2194.98	1588.07	200.179	2199.58	1584.76	90.1904	2021.17	1595.79	219.075	2050	1598	145.805	1983.48	1459.29	135.427	1890.37	1207.13	152.654	2120.79	1355.07	135.596	2171.09	1175.56	182.601	1885.72	1281.49	-19.2354	2056.22	1402.73	-104.236	2003.33	1185.53	-113.445	2003	1104.18	-146.39	2056.44	990.202	-105.295	2149.31	907.427	-156.843	2102.18	891.212	-158.103	2171.05	835.696
440	0	97.5959	2207.26	1590	200.866	2211.76	1586.54	90.671	2033.47	1597.68	219.605	2062.16	1599.68	145.757	1995.81	1461.13	134.828	1902.45	1209.1	152.531	2132.96	1356.87	135.026	2182.86	1177.2	182.02	1897.78	1283.38	-19.3707	2068.73	1405.01	-104.524	2014.33	1188.01	-113.073	2012.51	1106.52	-145.751	2064.11	991.603	-104.435	2155.62	907.42	-156.083	2108.29	891.927	-156.648	2175.71	834.504
441	0	98.0863	2219.55	1591.81	201.362	2223.94	1588.24	90.9522	2045.77	1599.46	219.936	2074.33	1601.3	145.609	2008.11	1462.93	134.28	1914.45	1211.05	152.283	2145.09	1358.58	134.348	2194.57	1178.73	181.462	1909.78	1285.25	-19.613	2081.13	1407.15	-104.919	2025.15	1190.39	-112.84	2021.92	1108.78	-145.242	2071.76	993.001	-103.697	2161.93	907.48	-155.453	2114.43	892.696	-155.311	2180.41	833.429
442	0	98.3905	2231.83	1593.49	201.672	2236.12	1589.85	91.0413	2058.08	1601.12	220.074	2086.49	1602.86	145.371	2020.38	1464.65	133.784	1926.35	1212.94	151.926	2157.18	1360.19	133.588	2206.25	1180.15	180.933	1921.75	1287.08	-19.9519	2093.43	1409.13	-105.391	2035.78	1192.63	-112.735	2031.25	1110.94	-144.866	2079.39	994.372	-103.097	2168.26	907.583	-154.963	2120.6	893.495	-154.126	2185.18	832.463
443	0	98.5144	2244.11	1595.01	201.802	2248.3	1591.35	90.9484	2070.39	1602.64	220.029	2098.66	1604.33	145.053	2032.62	1466.27	133.336	1938.18	1214.73	151.476	2169.24	1361.67	132.772	2217.91	1181.44	180.433	1933.67	1288.83	-20.376	2105.63	1410.92	-105.913	2046.22	1194.71	-112.741	2040.52	1112.98	-144.62	2087.02	995.691	-102.65	2174.63	907.707	-154.615	2126.85	894.296	-153.124	2190.04	831.6
444	0	98.466	2256.39	1596.36	201.758	2260.48	1592.72	90.6858	2082.71	1603.99	219.811	2110.84	1605.7	144.662	2044.85	1467.77	132.932	1949.95	1216.41	150.949	2181.26	1363.02	131.926	2229.55	1182.6	179.962	1945.56	1290.48	-20.8737	2117.75	1412.52	-106.459	2056.47	1196.62	-112.843	2049.74	1114.88	-144.501	2094.67	996.935	-102.367	2181.07	907.826	-154.412	2133.16	895.073	-152.333	2195.03	830.825
445	0	98.2547	2268.68	1597.51	201.551	2272.68	1593.93	90.2671	2095.03	1605.17	219.433	2123.02	1606.94	144.208	2057.05	1469.12	132.564	1961.67	1217.94	150.359	2193.26	1364.22	131.072	2241.19	1183.63	179.52	1957.42	1292	-21.4336	2129.8	1413.89	-107.006	2066.54	1198.33	-113.027	2058.92	1116.61	-144.502	2102.34	998.081	-102.256	2187.59	907.914	-154.353	2139.56	895.799	-151.771	2200.16	830.122
446	0	97.8909	2280.97	1598.45	201.19	2284.89	1594.98	89.7075	2107.35	1606.16	218.909	2135.22	1608.03	143.699	2069.24	1470.31	132.225	1973.35	1219.31	149.721	2205.25	1365.25	130.231	2252.84	1184.5	179.102	1969.25	1293.38	-22.0449	2141.79	1415.03	-107.538	2076.46	1199.83	-113.276	2068.09	1118.17	-144.618	2110.06	999.109	-102.319	2194.21	907.945	-154.436	2146.06	896.447	-151.453	2205.46	829.472
447	0	97.3859	2293.25	1599.18	200.687	2297.11	1595.85	89.0222	2119.68	1606.94	218.253	2147.43	1608.97	143.142	2081.41	1471.31	131.903	1985	1220.49	149.047	2217.22	1366.11	129.42	2264.5	1185.21	178.704	1981.06	1294.58	-22.6976	2153.74	1415.93	-108.043	2086.26	1201.12	-113.577	2077.27	1119.52	-144.841	2117.83	999.997	-102.558	2200.96	907.894	-154.656	2152.66	896.993	-151.388	2210.95	828.852
448	0	96.7512	2305.55	1599.69	200.053	2309.34	1596.53	88.2265	2132.01	1607.51	217.479	2159.66	1609.74	142.543	2093.58	1472.12	131.591	1996.64	1221.48	148.35	2229.19	1366.78	128.654	2276.16	1185.75	178.318	1992.86	1295.6	-23.3829	2165.66	1416.59	-108.513	2095.96	1202.17	-113.919	2086.48	1120.67	-145.163	2125.68	1000.73	-102.969	2207.83	907.733	-155.006	2159.37	897.411	-151.577	2216.62	828.237
449	0	95.998	2317.84	1599.96	199.299	2321.6	1597.01	87.3352	2144.34	1607.86	216.602	2171.9	1610.32	141.907	2105.75	1472.72	131.276	2008.28	1222.25	147.637	2241.16	1367.24	127.943	2287.84	1186.09	177.939	2004.66	1296.42	-24.0935	2177.58	1416.98	-108.948	2105.61	1202.99	-114.293	2095.73	1121.6	-145.576	2133.61	1001.28	-103.548	2214.84	907.439	-155.479	2166.2	897.68	-152.015	2222.5	827.601
450	0	95.1372	2330.13	1600	198.434	2333.88	1597.28	86.3617	2156.68	1607.97	215.636	2184.16	1610.69	141.239	2117.92	1473.1	130.948	2019.93	1222.79	146.916	2253.15	1367.5	127.293	2299.54	1186.24	177.557	2016.45	1297.02	-24.8238	2189.5	1417.12	-109.349	2115.25	1203.57	-114.69	2105.06	1122.3	-146.072	2141.64	1001.64	-104.286	2222.01	906.989	-156.069	2173.16	897.779	-152.693	2228.59	826.916
451	0	94.179	2342.43	1599.8	197.471	2346.17	1597.34	85.3183	2169.01	1607.84	214.591	2196.44	1610.85	140.539	2130.11	1473.24	130.597	2031.61	1223.09	146.191	2265.15	1367.53	126.709	2311.25	1186.18	177.164	2028.25	1297.4	-25.57	2201.43	1416.99	-109.723	2124.93	1203.9	-115.108	2114.48	1122.75	-146.644	2149.79	1001.8	-105.173	2229.35	906.363	-156.767	2180.26	897.691	-153.596	2234.9	826.154
452	0	93.1323	2354.72	1599.37	196.416	2358.49	1597.18	84.2151	2181.34	1607.47	213.478	2208.74	1610.79	139.808	2142.31	1473.15	130.215	2043.32	1223.16	145.467	2277.18	1367.32	126.189	2322.99	1185.89	176.751	2040.06	1297.55	-26.33	2213.4	1416.6	-110.079	2134.68	1203.97	-115.542	2124.02	1122.96	-147.284	2158.07	1001.73	-106.196	2236.86	905.543	-157.565	2187.5	897.4	-154.705	2241.42	825.288
453	0	92.0049	2367.02	1598.71	195.278	2370.82	1596.81	83.0604	2193.67	1606.84	212.306	2221.06	1610.49	139.046	2154.55	1472.82	129.792	2055.08	1222.97	144.743	2289.25	1366.88	125.733	2334.76	1185.37	176.308	2051.9	1297.47	-27.1039	2225.42	1415.95	-110.429	2144.55	1203.8	-115.994	2133.7	1122.91	-147.989	2166.5	1001.44	-107.344	2244.56	904.512	-158.456	2194.91	896.894	-155.999	2248.17	824.293
454	0	90.8033	2379.32	1597.82	194.064	2383.18	1596.21	81.8602	2205.99	1605.96	211.08	2233.39	1609.96	138.249	2166.81	1472.24	129.322	2066.89	1222.54	144.018	2301.35	1366.19	125.334	2346.56	1184.62	175.827	2063.76	1297.15	-27.8934	2237.5	1415.03	-110.784	2154.57	1203.37	-116.465	2143.53	1122.6	-148.751	2175.1	1000.92	-108.603	2252.44	903.259	-159.432	2202.5	896.164	-157.456	2255.14	823.145
455	0	89.5321	2391.61	1596.71	192.778	2395.55	1595.41	80.6181	2218.31	1604.83	209.805	2245.74	1609.19	137.414	2179.12	1471.42	128.798	2078.77	1221.86	143.288	2313.51	1365.26	124.985	2358.41	1183.62	175.3	2075.67	1296.59	-28.702	2249.64	1413.86	-111.158	2164.78	1202.68	-116.957	2153.53	1122.03	-149.569	2183.89	1000.15	-109.96	2260.53	901.775	-160.488	2210.27	895.202	-159.053	2262.34	821.824
456	0	88.1947	2403.91	1595.4	191.423	2407.95	1594.41	79.335	2230.62	1603.45	208.483	2258.1	1608.18	136.534	2191.46	1470.36	128.217	2090.71	1220.94	142.548	2325.72	1364.09	124.677	2370.31	1182.39	174.718	2087.63	1295.8	-29.5349	2261.86	1412.43	-111.565	2175.2	1201.72	-117.474	2163.72	1121.2	-150.438	2192.87	999.138	-111.402	2268.83	900.054	-161.616	2218.24	894.006	-160.765	2269.78	820.313
457	0	86.7925	2416.2	1593.88	190.002	2420.36	1593.2	78.01	2242.93	1601.83	207.113	2270.47	1606.93	135.604	2203.86	1469.07	127.577	2102.74	1219.77	141.79	2337.98	1362.67	124.399	2382.27	1180.93	174.077	2099.64	1294.77	-30.3986	2274.16	1410.75	-112.016	2185.86	1200.51	-118.022	2174.12	1120.1	-151.355	2202.07	997.883	-112.917	2277.35	898.093	-162.812	2226.43	892.574	-162.57	2277.44	818.596
458	0	85.3258	2428.5	1592.19	188.515	2432.78	1591.82	76.6395	2255.24	1599.97	205.693	2282.85	1605.46	134.615	2216.31	1467.56	126.875	2114.85	1218.38	141.008	2350.32	1361.02	124.138	2394.3	1179.24	173.372	2111.73	1293.52	-31.3006	2286.54	1408.84	-112.522	2196.76	1199.04	-118.605	2184.74	1118.74	-152.319	2211.49	996.386	-114.492	2286.09	895.895	-164.071	2234.85	890.908	-164.447	2285.35	816.666
459	0	83.7932	2440.81	1590.34	186.962	2445.22	1590.28	75.2183	2267.54	1597.9	204.218	2295.24	1603.77	133.561	2228.81	1465.84	126.113	2127.05	1216.76	140.189	2362.72	1359.15	123.881	2406.42	1177.34	172.601	2123.91	1292.06	-32.2491	2299.01	1406.7	-113.094	2207.92	1197.31	-119.229	2195.57	1117.12	-153.328	2221.15	994.654	-116.118	2295.07	893.464	-165.386	2243.51	889.015	-166.377	2293.5	814.518
460	0	82.1921	2453.13	1588.35	185.339	2457.68	1588.59	73.7394	2279.85	1595.62	202.684	2307.65	1601.88	132.434	2241.37	1463.93	125.293	2139.34	1214.94	139.325	2375.2	1357.08	123.611	2418.62	1175.23	171.762	2136.17	1290.4	-33.2531	2311.56	1404.36	-113.739	2219.34	1195.34	-119.897	2206.65	1115.26	-154.379	2231.06	992.695	-117.784	2304.29	890.811	-166.754	2252.43	886.903	-168.344	2301.91	812.151
461	0	80.5189	2465.46	1586.24	183.645	2470.15	1586.77	72.1949	2292.17	1593.17	201.083	2320.07	1599.82	131.225	2253.99	1461.86	124.419	2151.73	1212.93	138.403	2387.76	1354.83	123.313	2430.93	1172.95	170.857	2148.53	1288.55	-34.3212	2324.2	1401.82	-114.464	2231.02	1193.12	-120.612	2217.96	1113.15	-155.471	2241.23	990.522	-119.483	2313.76	887.949	-168.17	2261.62	884.583	-170.332	2310.57	809.572
462	0	78.7694	2477.81	1584.04	181.876	2482.65	1584.86	70.5758	2304.5	1590.55	199.409	2332.5	1597.6	129.929	2266.67	1459.64	123.496	2164.22	1210.76	137.412	2400.41	1352.43	122.97	2443.34	1170.51	169.888	2161	1286.54	-35.462	2336.91	1399.12	-115.272	2242.95	1190.67	-121.378	2229.52	1110.83	-156.602	2251.66	988.15	-121.205	2323.5	884.897	-169.628	2271.09	882.074	-172.329	2319.51	806.793
463	0	76.9387	2490.19	1581.77	180.028	2495.16	1582.88	68.8732	2316.84	1587.82	197.653	2344.96	1595.27	128.538	2279.41	1457.31	122.53	2176.82	1208.45	136.341	2413.14	1349.9	122.566	2455.88	1167.95	168.86	2173.58	1284.4	-36.6835	2349.69	1396.27	-116.164	2255.14	1188	-122.196	2241.32	1108.31	-157.767	2262.37	985.601	-122.944	2333.5	881.677	-171.123	2280.85	879.393	-174.326	2328.73	803.83
464	0	75.0221	2502.61	1579.48	178.095	2507.7	1580.86	67.0785	2329.22	1584.99	195.809	2357.44	1592.84	127.05	2292.21	1454.9	121.529	2189.53	1206.04	135.178	2425.96	1347.28	122.084	2468.54	1165.29	167.777	2186.29	1282.14	-37.9926	2362.53	1393.31	-117.139	2267.57	1185.14	-123.063	2253.36	1105.6	-158.963	2273.34	982.897	-124.693	2343.79	878.316	-172.649	2290.91	876.565	-176.316	2338.23	800.709
465	0	73.015	2515.07	1577.18	176.076	2520.27	1578.84	65.1838	2341.63	1582.12	193.868	2369.95	1590.37	125.461	2305.08	1452.44	120.503	2202.35	1203.55	133.915	2438.87	1344.61	121.508	2481.33	1162.57	166.648	2199.12	1279.82	-39.3946	2375.42	1390.28	-118.194	2280.22	1182.12	-123.979	2265.65	1102.74	-160.185	2284.59	980.066	-126.446	2354.36	874.847	-174.201	2301.28	873.617	-178.29	2348.04	797.458
466	0	70.9134	2527.57	1574.92	173.964	2532.87	1576.84	63.1825	2354.09	1579.23	191.825	2382.5	1587.9	123.772	2318	1449.98	119.461	2215.29	1201.03	132.543	2451.87	1341.93	120.826	2494.25	1159.83	165.481	2212.08	1277.46	-40.8934	2388.36	1387.19	-119.321	2293.09	1178.96	-124.939	2278.17	1099.77	-161.428	2296.12	977.141	-128.198	2365.22	871.306	-175.77	2311.97	870.582	-180.246	2358.17	794.112
467	0	68.7144	2540.14	1572.74	171.759	2545.51	1574.91	61.0697	2366.6	1576.38	189.675	2395.1	1585.45	121.983	2330.99	1447.55	118.415	2228.34	1198.52	131.058	2464.97	1339.29	120.025	2507.31	1157.12	164.283	2225.16	1275.11	-42.4906	2401.33	1384.11	-120.513	2306.16	1175.7	-125.937	2290.92	1096.71	-162.686	2307.92	974.155	-129.942	2376.39	867.733	-177.348	2322.98	867.495	-182.177	2368.63	790.713
468	0	66.4167	2552.77	1570.66	169.459	2558.2	1573.09	58.8429	2379.17	1573.61	187.417	2407.75	1583.09	120.099	2344.04	1445.2	117.375	2241.52	1196.05	129.454	2478.16	1336.73	119.098	2520.52	1154.49	163.066	2238.38	1272.81	-44.1856	2414.32	1381.06	-121.758	2319.4	1172.38	-126.967	2303.89	1093.6	-163.951	2319.99	971.147	-131.672	2387.88	864.173	-178.928	2334.32	864.393	-184.079	2379.43	787.305
469	0	64.0207	2565.48	1568.73	167.062	2570.94	1571.4	56.5017	2391.81	1570.96	185.049	2420.45	1580.85	118.126	2357.14	1442.96	116.352	2254.82	1193.68	127.733	2491.44	1334.31	118.039	2533.87	1151.99	161.84	2251.72	1270.6	-45.975	2427.32	1378.09	-123.044	2332.81	1169.05	-128.021	2317.07	1090.49	-165.216	2332.33	968.156	-133.381	2399.68	860.67	-180.499	2345.99	861.317	-185.948	2390.6	783.936
470	0	61.5287	2578.26	1566.98	164.572	2583.74	1569.89	54.0489	2404.53	1568.48	182.574	2433.22	1578.78	116.073	2370.31	1440.88	115.357	2268.24	1191.45	125.896	2504.8	1332.07	116.847	2547.37	1149.66	160.614	2265.19	1268.53	-47.8533	2440.32	1375.25	-124.358	2346.34	1165.76	-129.089	2330.43	1087.43	-166.472	2344.93	965.225	-135.063	2411.8	857.274	-182.051	2358	858.31	-187.779	2402.13	780.656
471	0	58.9457	2591.11	1565.44	161.993	2596.6	1568.58	51.4899	2417.32	1566.21	179.996	2446.05	1576.92	113.951	2383.52	1438.99	114.399	2281.78	1189.4	123.951	2518.26	1330.06	115.525	2561.02	1147.57	159.398	2278.77	1266.64	-49.8119	2453.32	1372.57	-125.684	2359.99	1162.56	-130.163	2343.98	1084.46	-167.711	2357.79	962.395	-136.711	2424.26	854.034	-183.574	2370.34	855.414	-189.567	2414.06	777.517
472	0	56.279	2604.05	1564.14	159.33	2609.52	1567.51	48.8333	2430.19	1564.19	177.325	2458.96	1575.3	111.772	2396.79	1437.33	113.485	2295.42	1187.56	121.907	2531.78	1328.32	114.081	2574.8	1145.75	158.203	2292.46	1264.98	-51.8399	2466.32	1370.1	-127.009	2373.72	1159.51	-131.233	2357.69	1081.62	-168.925	2370.9	959.706	-138.317	2437.05	850.997	-185.057	2383.02	852.671	-191.304	2426.38	774.568
473	0	53.5389	2617.06	1563.1	156.593	2622.51	1566.7	46.0911	2443.15	1562.46	174.57	2471.93	1573.97	109.552	2410.1	1435.93	112.623	2309.17	1185.98	119.778	2545.38	1326.89	112.527	2588.73	1144.25	157.035	2306.25	1263.56	-53.9239	2479.3	1367.88	-128.317	2387.52	1156.66	-132.29	2371.54	1078.97	-170.106	2384.24	957.2	-139.873	2450.18	848.211	-186.487	2396.03	850.121	-192.985	2439.11	771.86
474	0	50.7383	2630.15	1562.34	153.795	2635.56	1566.17	43.278	2456.18	1561.04	171.746	2484.97	1572.94	107.305	2423.44	1434.81	111.817	2323	1184.69	117.579	2559.03	1325.8	110.877	2602.77	1143.12	155.904	2320.12	1262.44	-56.0483	2492.26	1365.94	-129.598	2401.37	1154.05	-133.328	2385.51	1076.54	-171.248	2397.83	954.911	-141.371	2463.65	845.718	-187.854	2409.39	847.801	-194.6	2452.27	769.436
475	0	47.8926	2643.3	1561.88	150.949	2648.67	1565.94	40.412	2469.28	1559.96	168.871	2498.07	1572.24	105.05	2436.82	1434	111.069	2336.91	1183.71	115.33	2572.73	1325.08	109.15	2616.93	1142.38	154.816	2334.06	1261.63	-58.1955	2505.2	1364.31	-130.838	2415.23	1151.74	-134.34	2399.6	1074.36	-172.343	2411.64	952.873	-142.802	2477.45	843.558	-189.148	2423.07	845.745	-196.142	2465.85	767.337
476	0	45.0198	2656.51	1561.73	148.072	2661.83	1566.01	37.5133	2482.45	1559.23	165.963	2511.24	1571.89	102.803	2450.23	1433.51	110.38	2350.89	1183.07	113.052	2586.47	1324.74	107.369	2631.17	1142.05	153.777	2348.05	1261.15	-60.3467	2518.13	1363.01	-132.03	2429.1	1149.76	-135.321	2413.78	1072.49	-173.386	2425.66	951.113	-144.158	2491.6	841.764	-190.358	2437.09	843.981	-197.6	2479.87	765.596
477	0	42.1398	2669.77	1561.89	145.184	2675.05	1566.39	34.6049	2495.68	1558.86	163.046	2524.45	1571.88	100.583	2463.64	1433.35	109.75	2364.9	1182.76	110.768	2600.22	1324.8	105.556	2645.48	1142.14	152.793	2362.08	1261.01	-62.482	2531.04	1362.07	-133.167	2442.96	1148.14	-136.268	2428.03	1070.92	-174.373	2439.89	949.653	-145.43	2506.07	840.363	-191.476	2451.43	842.531	-198.965	2494.32	764.24
478	0	39.2744	2683.07	1562.35	142.305	2688.3	1567.07	31.7111	2508.95	1558.84	160.142	2537.71	1572.22	98.4083	2477.07	1433.51	109.178	2378.94	1182.81	108.503	2613.97	1325.24	103.735	2659.83	1142.64	151.867	2376.12	1261.22	-64.5812	2543.94	1361.48	-134.245	2456.79	1146.9	-137.181	2442.35	1069.7	-175.302	2454.33	948.511	-146.61	2520.88	839.376	-192.496	2466.1	841.414	-200.228	2509.22	763.289
479	0	36.4463	2696.39	1563.11	139.46	2701.58	1568.05	28.8578	2522.26	1559.18	157.278	2551	1572.9	96.296	2490.49	1434	108.66	2392.97	1183.2	106.282	2627.72	1326.06	101.93	2674.19	1143.55	151.001	2390.16	1261.77	-66.6242	2556.82	1361.25	-135.261	2470.6	1146.05	-138.059	2456.72	1068.82	-176.172	2468.96	947.695	-147.691	2536	838.814	-193.412	2481.09	840.637	-201.378	2524.55	762.753
480	0	33.679	2709.72	1564.14	136.67	2714.88	1569.29	26.0713	2535.59	1559.85	154.479	2564.3	1573.9	94.263	2503.9	1434.79	108.193	2406.98	1183.92	104.13	2641.44	1327.24	100.164	2688.52	1144.82	150.198	2404.17	1262.64	-68.5914	2569.7	1361.37	-136.216	2484.37	1145.6	-138.905	2471.13	1068.29	-176.981	2483.77	947.21	-148.666	2551.43	838.683	-194.223	2496.38	840.206	-202.407	2540.3	762.635
481	0	30.9963	2723.04	1565.43	133.962	2728.19	1570.79	23.378	2548.92	1560.84	151.773	2577.62	1575.2	92.3248	2517.29	1435.88	107.771	2420.95	1184.96	102.07	2655.12	1328.74	98.4593	2702.8	1146.44	149.457	2418.14	1263.83	-70.4645	2582.58	1361.83	-137.113	2498.12	1145.54	-139.722	2485.56	1068.1	-177.731	2498.77	947.052	-149.528	2567.16	838.979	-194.927	2511.98	840.118	-203.307	2556.48	762.932
482	0	28.4211	2736.34	1566.95	131.358	2741.5	1572.52	20.8033	2562.24	1562.1	149.183	2590.92	1576.76	90.4954	2530.65	1437.24	107.389	2434.85	1186.3	100.125	2668.74	1330.53	96.8378	2716.99	1148.34	148.778	2432.05	1265.3	-72.2265	2595.45	1362.61	-137.954	2511.84	1145.84	-140.514	2500.02	1068.25	-178.423	2513.94	947.212	-150.272	2583.17	839.691	-195.525	2527.88	840.364	-204.071	2573.07	763.632
483	0	25.9755	2749.62	1568.68	128.882	2754.79	1574.44	18.3714	2575.55	1563.62	146.735	2604.21	1578.56	88.7872	2543.98	1438.83	107.04	2448.67	1187.9	98.3157	2682.31	1332.56	95.3189	2731.08	1150.47	148.156	2445.87	1267.02	-73.862	2608.33	1363.68	-138.746	2525.54	1146.48	-141.287	2514.49	1068.71	-179.062	2529.27	947.676	-150.894	2599.45	840.804	-196.02	2544.07	840.929	-204.693	2590.06	764.718
484	0	23.6798	2762.85	1570.59	126.556	2768.06	1576.53	16.1044	2588.82	1565.35	144.45	2617.47	1580.54	87.2106	2557.28	1440.63	106.716	2462.37	1189.74	96.661	2695.8	1334.8	93.9213	2745.02	1152.79	147.59	2459.6	1268.97	-75.3581	2621.22	1365.01	-139.492	2539.23	1147.42	-142.045	2528.96	1069.46	-179.648	2544.77	948.426	-151.389	2615.97	842.296	-196.416	2560.53	841.797	-205.168	2607.43	766.17
485	0	21.5524	2776.04	1572.63	124.4	2781.3	1578.75	14.0218	2602.04	1567.25	142.347	2630.69	1582.69	85.7739	2570.54	1442.61	106.41	2475.95	1191.78	95.176	2709.21	1337.19	92.662	2758.81	1155.24	147.074	2473.22	1271.12	-76.7039	2634.13	1366.57	-140.2	2552.93	1148.64	-142.793	2543.45	1070.47	-180.187	2560.41	949.44	-151.755	2632.72	844.14	-196.718	2577.26	842.946	-205.493	2625.15	767.962
486	0	19.6089	2789.17	1574.79	122.431	2794.5	1581.06	12.1399	2615.22	1569.29	140.444	2643.86	1584.95	84.4832	2583.76	1444.74	106.116	2489.39	1193.99	93.8734	2722.54	1339.68	91.5562	2772.43	1157.76	146.603	2486.72	1273.41	-77.8909	2647.06	1368.32	-140.875	2566.64	1150.09	-143.535	2557.93	1071.71	-180.682	2576.21	950.694	-151.991	2649.68	846.306	-196.929	2594.24	844.352	-205.666	2643.21	770.069
487	0	17.8624	2802.23	1577.02	120.665	2807.66	1583.44	10.472	2628.33	1571.43	138.753	2656.98	1587.28	83.3426	2596.94	1446.97	105.827	2502.68	1196.33	92.7622	2735.79	1342.24	90.6176	2785.88	1160.29	146.173	2500.09	1275.83	-78.9136	2660.01	1370.24	-141.521	2580.37	1151.74	-144.276	2572.42	1073.15	-181.135	2592.14	952.162	-152.095	2666.83	848.764	-197.055	2611.45	845.992	-205.688	2661.57	772.464
488	0	16.3232	2815.23	1579.3	119.113	2820.78	1585.85	9.02767	2641.39	1573.63	137.283	2670.05	1589.66	82.3539	2610.08	1449.28	105.536	2515.82	1198.77	91.8479	2748.95	1344.81	89.8572	2799.13	1162.81	145.779	2513.33	1278.32	-79.7689	2672.98	1372.28	-142.142	2594.14	1153.55	-145.019	2586.91	1074.76	-181.549	2608.2	953.818	-152.067	2684.13	851.479	-197.101	2628.88	847.84	-205.558	2680.21	775.117
489	0	14.9983	2828.18	1581.6	117.784	2833.86	1588.26	7.81292	2654.38	1575.85	136.042	2683.06	1592.03	81.5167	2623.18	1451.63	105.236	2528.8	1201.27	91.1326	2762.03	1347.36	89.2835	2812.2	1165.26	145.413	2526.44	1280.87	-80.4563	2685.98	1374.4	-142.741	2607.96	1155.48	-145.764	2601.41	1076.5	-181.928	2624.39	955.635	-151.909	2701.57	854.419	-197.07	2646.51	849.871	-205.278	2699.11	778.002
490	0	13.8923	2841.06	1583.88	116.684	2846.89	1590.64	6.8301	2667.3	1578.07	135.03	2696.01	1594.38	80.8289	2636.24	1454	104.923	2541.63	1203.81	90.6147	2775.03	1349.85	88.9022	2825.1	1167.62	145.072	2539.42	1283.44	-80.978	2699.01	1376.59	-143.321	2621.84	1157.51	-146.514	2615.91	1078.34	-182.273	2640.68	957.587	-151.623	2719.13	857.55	-196.967	2664.31	852.061	-204.852	2718.22	781.091
491	0	13.0068	2853.88	1586.12	115.817	2859.88	1592.95	6.078	2680.17	1580.26	134.248	2708.91	1596.67	80.2863	2649.27	1456.35	104.592	2554.3	1206.35	90.2897	2787.96	1352.26	88.7154	2837.81	1169.86	144.749	2552.27	1285.99	-81.3386	2712.07	1378.8	-143.884	2635.78	1159.59	-147.268	2630.41	1080.26	-182.585	2657.09	959.647	-151.211	2736.79	860.841	-196.793	2682.27	854.385	-204.283	2737.51	784.358
492	0	12.3412	2866.66	1588.3	115.183	2872.83	1595.18	5.55218	2692.98	1582.38	133.691	2721.76	1598.86	79.8836	2662.26	1458.65	104.239	2566.84	1208.86	90.1501	2800.81	1354.55	88.7217	2850.37	1171.97	144.44	2565.01	1288.5	-81.5447	2725.17	1381.01	-144.428	2649.78	1161.71	-148.025	2644.92	1082.22	-182.865	2673.58	961.79	-150.675	2754.51	864.26	-196.552	2700.37	856.821	-203.573	2756.95	787.776
493	0	11.8925	2879.39	1590.39	114.779	2885.75	1597.3	5.24528	2705.74	1584.43	133.355	2734.57	1600.95	79.6141	2675.23	1460.88	103.862	2579.24	1211.31	90.1862	2813.6	1356.72	88.916	2862.78	1173.94	144.14	2577.62	1290.94	-81.6043	2738.29	1383.19	-144.956	2663.85	1163.84	-148.786	2659.44	1084.2	-183.112	2690.16	963.991	-150.02	2772.28	867.777	-196.243	2718.58	859.346	-202.729	2776.52	791.32
494	0	11.6558	2892.1	1592.37	114.601	2898.65	1599.28	5.14751	2718.46	1586.37	133.231	2747.35	1602.91	79.4706	2688.15	1463.02	103.458	2591.53	1213.67	90.3865	2826.32	1358.73	89.2894	2875.06	1175.76	143.845	2590.14	1293.28	-81.527	2751.44	1385.32	-145.468	2677.97	1165.95	-149.547	2673.97	1086.18	-183.325	2706.81	966.228	-149.251	2790.09	871.364	-195.869	2736.89	861.938	-201.753	2796.17	794.964
495	0	11.6243	2904.77	1594.22	114.643	2911.52	1601.1	5.2472	2731.14	1588.2	133.309	2760.1	1604.72	79.4453	2701.05	1465.04	103.029	2603.73	1215.92	90.7384	2838.99	1360.59	89.8291	2887.23	1177.43	143.552	2602.57	1295.5	-81.3229	2764.63	1387.38	-145.962	2692.16	1168.03	-150.308	2688.5	1088.12	-183.504	2723.52	968.476	-148.371	2807.91	874.993	-195.428	2755.26	864.574	-200.649	2815.87	798.682
496	0	11.7901	2917.44	1595.92	114.894	2924.37	1602.76	5.53133	2743.81	1589.89	133.578	2772.83	1606.36	79.5306	2713.91	1466.91	102.577	2615.85	1218.04	91.2286	2851.61	1362.27	90.519	2899.31	1178.94	143.261	2614.92	1297.58	-81.0023	2777.84	1389.35	-146.441	2706.4	1170.06	-151.066	2703.05	1090.01	-183.646	2740.28	970.714	-147.387	2825.72	878.636	-194.922	2773.69	867.235	-199.422	2835.61	802.448
497	0	12.144	2930.09	1597.46	115.345	2937.21	1604.23	5.98609	2756.45	1591.44	134.027	2785.55	1607.82	79.7189	2726.75	1468.63	102.104	2627.91	1220	91.8436	2864.18	1363.77	91.3403	2911.32	1180.29	142.97	2627.2	1299.49	-80.5757	2791.08	1391.21	-146.903	2720.68	1172.01	-151.819	2717.61	1091.83	-183.75	2757.07	972.919	-146.302	2843.51	882.268	-194.35	2792.15	869.897	-198.075	2855.34	806.235
498	0	12.676	2942.74	1598.83	115.985	2950.04	1605.51	6.59735	2769.09	1592.83	134.644	2798.26	1609.1	80.0035	2739.55	1470.17	101.618	2639.93	1221.78	92.5701	2876.71	1365.08	92.2718	2923.27	1181.48	142.683	2639.43	1301.21	-80.0531	2804.34	1392.94	-147.35	2735	1173.86	-152.567	2732.19	1093.56	-183.814	2773.88	975.072	-145.123	2861.26	885.863	-193.713	2810.63	872.541	-196.613	2875.04	810.015
499	0	13.3757	2955.4	1600.01	116.8	2962.85	1606.57	7.35117	2781.72	1594.05	135.415	2810.98	1610.18	80.3782	2752.33	1471.53	101.124	2651.92	1223.37	93.3951	2889.21	1366.2	93.2909	2935.2	1182.51	142.401	2651.62	1302.74	-79.4436	2817.62	1394.53	-147.782	2749.34	1175.61	-153.306	2746.78	1095.18	-183.836	2790.71	977.151	-143.856	2878.97	889.396	-193.01	2829.11	875.146	-195.039	2894.7	813.763
500	0	14.2321	2968.06	1600.99	117.777	2975.65	1607.42	8.23408	2794.36	1595.09	136.329	2823.7	1611.06	80.8379	2765.08	1472.68	100.633	2663.92	1224.76	94.3066	2901.68	1367.11	94.3748	2947.11	1183.37	142.132	2663.79	1304.06	-78.7556	2830.92	1395.96	-148.199	2763.71	1177.24	-154.037	2761.4	1096.67	-183.816	2807.55	979.138	-142.506	2896.62	892.843	-192.243	2847.58	877.691	-193.358	2914.28	817.452
501	0	15.2346	2980.74	1601.78	118.902	2988.44	1608.05	9.23341	2807.01	1595.95	137.372	2836.43	1611.72	81.3785	2777.81	1473.63	100.154	2675.93	1225.93	95.2935	2914.13	1367.82	95.5007	2959.01	1184.04	141.88	2675.94	1305.16	-77.9962	2844.25	1397.22	-148.601	2778.09	1178.72	-154.755	2776.04	1098.02	-183.75	2824.39	981.016	-141.079	2914.19	896.181	-191.413	2866.01	880.157	-191.574	2933.77	821.055
502	0	16.3726	2993.43	1602.35	120.162	3001.21	1608.46	10.3375	2819.67	1596.61	138.535	2849.17	1612.18	81.997	2790.53	1474.35	99.7007	2687.96	1226.88	96.3456	2926.57	1368.31	96.6473	2970.93	1184.53	141.655	2688.08	1306.03	-77.1712	2857.58	1398.3	-148.985	2792.49	1180.05	-155.458	2790.7	1099.22	-183.639	2841.21	982.769	-139.58	2931.69	899.387	-190.522	2884.41	882.526	-189.694	2953.15	824.549
503	0	17.6361	3006.14	1602.71	121.544	3013.97	1608.65	11.5358	2832.34	1597.08	139.805	2861.91	1612.41	82.6916	2803.22	1474.85	99.2846	2700.04	1227.59	97.4542	2939	1368.58	97.7955	2982.88	1184.82	141.466	2700.22	1306.67	-76.2853	2870.93	1399.19	-149.35	2806.89	1181.21	-156.143	2805.39	1100.25	-183.481	2858.02	984.382	-138.014	2949.09	902.44	-189.572	2902.76	884.78	-187.721	2972.4	827.909
504	0	19.0155	3018.86	1602.87	123.036	3026.7	1608.61	12.819	2845.03	1597.33	141.173	2874.66	1612.43	83.4613	2815.9	1475.13	98.9194	2712.16	1228.07	98.612	2951.43	1368.62	98.9288	2994.85	1184.9	141.323	2712.37	1307.07	-75.3417	2884.28	1399.88	-149.69	2821.3	1182.19	-156.803	2820.11	1101.11	-183.275	2874.81	985.843	-136.387	2966.4	905.32	-188.565	2921.04	886.902	-185.662	2991.52	831.114
505	0	20.5022	3031.6	1602.8	124.627	3039.41	1608.35	14.1794	2857.73	1597.39	142.63	2887.41	1612.23	84.3065	2828.57	1475.17	98.6188	2724.33	1228.31	99.8132	2963.87	1368.45	100.034	3006.87	1184.77	141.238	2724.53	1307.23	-74.3423	2897.64	1400.37	-150.001	2835.71	1182.99	-157.434	2834.85	1101.78	-183.017	2891.56	987.14	-134.702	2983.61	908.007	-187.504	2939.25	888.878	-183.524	3010.5	834.143
506	0	22.0884	3044.34	1602.53	126.306	3052.09	1607.87	15.6104	2870.44	1597.23	144.166	2900.16	1611.81	85.2278	2841.23	1474.99	98.3963	2736.57	1228.31	101.054	2976.32	1368.04	101.103	3018.94	1184.41	141.222	2736.71	1307.15	-73.2879	2910.99	1400.65	-150.274	2850.13	1183.59	-158.028	2849.63	1102.27	-182.707	2908.28	988.265	-132.966	3000.71	910.485	-186.392	2957.38	890.696	-181.315	3029.31	836.978
507	0	23.7669	3057.09	1602.04	128.067	3064.74	1607.18	17.1068	2883.16	1596.87	145.776	2912.9	1611.19	86.2268	2853.88	1474.58	98.2651	2748.86	1228.08	102.33	2988.78	1367.42	102.13	3031.07	1183.82	141.286	2748.92	1306.84	-72.1785	2924.33	1400.72	-150.501	2864.55	1184	-158.575	2864.44	1102.56	-182.341	2924.96	989.21	-131.183	3017.69	912.74	-185.233	2975.42	892.343	-179.042	3047.97	839.604
508	0	25.5321	3069.85	1601.35	129.901	3077.36	1606.29	18.6649	2895.9	1596.3	147.454	2925.62	1610.35	87.3057	2866.52	1473.95	98.2373	2761.21	1227.62	103.643	3001.26	1366.58	103.116	3043.25	1183.01	141.442	2761.15	1306.29	-71.0127	2937.65	1400.58	-150.669	2878.98	1184.21	-159.065	2879.27	1102.67	-181.916	2941.59	989.971	-129.358	3034.56	914.759	-184.03	2993.36	893.809	-176.714	3066.45	842.007
509	0	27.3788	3082.6	1600.47	131.803	3089.94	1605.2	20.2823	2908.63	1595.53	149.195	2938.33	1609.31	88.4669	2879.14	1473.11	98.3242	2773.61	1226.93	104.991	3013.76	1365.53	104.062	3055.51	1181.98	141.7	2773.41	1305.51	-69.7886	2950.95	1400.24	-150.768	2893.41	1184.21	-159.486	2894.12	1102.58	-181.428	2958.15	990.543	-127.496	3051.29	916.532	-182.784	3011.18	895.088	-174.342	3084.75	844.176
510	0	29.3031	3095.35	1599.39	133.769	3102.47	1603.92	21.958	2921.37	1594.58	150.996	2951	1608.09	89.713	2891.76	1472.07	98.5356	2786.06	1226.02	106.377	3026.28	1364.28	104.978	3067.84	1180.75	142.071	2785.7	1304.52	-68.5036	2964.22	1399.7	-150.784	2907.85	1184.01	-159.826	2908.98	1102.3	-180.872	2974.65	990.927	-125.601	3067.9	918.053	-181.5	3028.87	896.173	-171.936	3102.86	846.103
511	0	31.3021	3108.09	1598.14	135.797	3114.97	1602.46	23.6923	2934.1	1593.44	152.855	2963.65	1606.68	91.0466	2904.35	1470.83	98.8795	2798.54	1224.91	107.804	3038.82	1362.84	105.873	3080.24	1179.33	142.564	2798.01	1303.3	-67.1547	2977.44	1398.98	-150.702	2922.28	1183.62	-160.069	2923.85	1101.83	-180.244	2991.07	991.123	-123.679	3084.38	919.316	-180.179	3046.43	897.059	-169.506	3120.77	847.78
512	0	33.3736	3120.8	1596.72	137.885	3127.42	1600.85	25.4868	2946.82	1592.14	154.773	2976.26	1605.11	92.4705	2916.92	1469.41	99.3624	2811.06	1223.59	109.278	3051.38	1361.25	106.763	3092.73	1177.74	143.185	2810.36	1301.89	-65.7383	2990.63	1398.07	-150.508	2936.7	1183.03	-160.201	2938.72	1101.18	-179.537	3007.39	991.133	-121.734	3100.71	920.321	-178.822	3063.83	897.744	-167.065	3138.48	849.204
513	0	35.5162	3133.5	1595.16	140.032	3139.83	1599.09	27.3441	2959.52	1590.69	156.751	2988.84	1603.4	93.9869	2929.47	1467.82	99.9884	2823.6	1222.07	110.803	3063.95	1359.5	107.662	3105.3	1176	143.939	2822.73	1300.27	-64.2508	3003.77	1397	-150.189	2951.11	1182.26	-160.205	2953.57	1100.37	-178.746	3023.6	990.963	-119.771	3116.9	921.068	-177.431	3081.07	898.228	-164.626	3155.98	850.374
514	0	37.729	3146.17	1593.46	142.241	3152.2	1597.21	29.2678	2972.2	1589.1	158.79	3001.38	1601.55	95.598	2941.99	1466.09	100.759	2836.16	1220.38	112.387	3076.54	1357.64	108.591	3117.96	1174.15	144.832	2835.14	1298.48	-62.6885	3016.85	1395.78	-149.73	2965.49	1181.32	-160.066	2968.39	1099.39	-177.864	3039.69	990.619	-117.794	3132.93	921.561	-176.005	3098.11	898.513	-162.199	3173.25	851.291
515	0	40.012	3158.81	1591.66	144.511	3164.53	1595.21	31.2624	2984.86	1587.4	160.894	3013.88	1599.6	97.3053	2954.47	1464.23	101.675	2848.73	1218.53	114.037	3089.13	1355.68	109.567	3130.7	1172.2	145.865	2847.57	1296.52	-61.0476	3029.88	1394.44	-149.117	2979.84	1180.21	-159.767	2983.17	1098.27	-176.886	3055.64	990.11	-115.809	3148.81	921.808	-174.544	3114.94	898.602	-159.797	3190.28	851.958
516	0	42.3651	3171.42	1589.77	146.846	3176.84	1593.14	33.3329	2997.48	1585.61	163.067	3026.34	1597.56	99.1096	2966.92	1462.26	102.733	2861.33	1216.53	115.76	3101.72	1353.65	110.611	3143.52	1170.19	147.036	2860.03	1294.41	-59.3247	3042.85	1392.98	-148.339	2994.14	1178.96	-159.293	2997.89	1097.01	-175.805	3071.42	989.448	-113.817	3164.51	921.819	-173.047	3131.55	898.503	-157.431	3207.06	852.381
517	0	44.7891	3183.99	1587.82	149.248	3189.11	1591.01	35.4845	3010.07	1583.76	165.313	3038.76	1595.47	101.011	2979.33	1460.21	103.928	2873.93	1214.4	117.564	3114.32	1351.58	111.742	3156.42	1168.16	148.343	2872.52	1292.17	-57.5163	3055.76	1391.45	-147.383	3008.37	1177.58	-158.629	3012.54	1095.65	-174.614	3087.02	988.646	-111.823	3180.04	921.607	-171.512	3147.91	898.224	-155.112	3223.56	852.571
518	0	47.2846	3196.51	1585.84	151.72	3201.36	1588.85	37.7225	3022.62	1581.87	167.637	3051.14	1593.35	103.009	2991.71	1458.1	105.253	2886.56	1212.17	119.457	3126.91	1349.51	112.98	3169.4	1166.13	149.781	2885.04	1289.82	-55.6199	3068.62	1389.85	-146.241	3022.52	1176.09	-157.761	3027.09	1094.19	-173.309	3102.43	987.721	-109.828	3195.37	921.187	-169.938	3163.99	897.778	-152.847	3239.78	852.537
519	0	49.8523	3209	1583.85	154.262	3213.59	1586.69	40.0513	3035.13	1579.98	170.044	3063.49	1591.24	105.101	3004.04	1455.97	106.701	2899.21	1209.86	121.446	3139.49	1347.47	114.343	3182.45	1164.15	151.342	2897.58	1287.4	-53.6331	3081.43	1388.23	-144.903	3036.57	1174.52	-156.679	3041.53	1092.67	-171.884	3117.61	986.692	-107.835	3210.5	920.579	-168.32	3179.78	897.179	-150.643	3255.7	852.294
520	0	52.4926	3221.45	1581.89	156.879	3225.81	1584.55	42.475	3047.6	1578.11	172.536	3075.8	1589.15	107.285	3016.33	1453.83	108.259	2911.89	1207.51	123.537	3152.06	1345.48	115.848	3195.56	1162.24	153.017	2910.14	1284.94	-51.5546	3094.2	1386.61	-143.363	3050.51	1172.88	-155.374	3055.85	1091.11	-170.334	3132.55	985.579	-105.843	3225.41	919.803	-166.655	3195.25	896.445	-148.505	3271.29	851.857
521	0	55.2057	3233.87	1579.99	159.57	3238.02	1582.48	44.9959	3060.03	1576.3	175.117	3088.1	1587.12	109.556	3028.58	1451.74	109.916	2924.6	1205.14	125.735	3164.63	1343.59	117.511	3208.74	1160.44	154.795	2922.72	1282.46	-49.384	3106.93	1385.02	-141.618	3064.32	1171.22	-153.839	3070.02	1089.53	-168.657	3147.24	984.406	-103.853	3240.09	918.883	-164.94	3210.39	895.595	-146.433	3286.53	851.244
522	0	57.9909	3246.24	1578.17	162.336	3250.23	1580.49	47.6151	3072.43	1574.59	177.788	3100.37	1585.2	111.909	3040.8	1449.7	111.66	2937.36	1202.78	128.042	3177.17	1341.82	119.343	3221.97	1158.79	156.663	2935.31	1280	-47.1221	3119.62	1383.5	-139.666	3077.99	1169.57	-152.072	3084.03	1087.98	-166.849	3161.65	983.196	-101.863	3254.52	917.845	-163.171	3225.16	894.652	-144.428	3301.4	850.473
523	0	60.8467	3258.59	1576.48	165.176	3262.45	1578.62	50.3317	3084.79	1573	180.549	3112.62	1583.39	114.338	3053	1447.77	113.475	2950.16	1200.49	130.461	3189.7	1340.21	121.355	3235.25	1157.31	158.606	2947.92	1277.61	-44.7711	3132.3	1382.07	-137.51	3091.49	1167.95	-150.074	3097.87	1086.48	-164.91	3175.77	981.978	-99.8702	3268.69	916.714	-161.344	3239.56	893.64	-142.485	3315.87	849.564
524	0	63.7703	3270.91	1574.92	168.087	3274.68	1576.89	53.143	3097.12	1571.56	183.399	3124.87	1581.74	116.835	3065.16	1445.96	115.347	2963.01	1198.28	132.989	3202.21	1338.78	123.553	3248.57	1156.04	160.609	2960.54	1275.3	-42.3349	3144.96	1380.77	-135.154	3104.83	1166.41	-147.85	3111.52	1085.05	-162.841	3189.59	980.777	-97.8718	3282.58	915.52	-159.454	3253.57	892.583	-140.597	3329.94	848.539
525	0	66.758	3283.2	1573.53	171.065	3286.92	1575.34	56.0438	3109.44	1570.3	186.331	3137.12	1580.28	119.391	3077.31	1444.31	117.26	2975.9	1196.2	135.624	3214.7	1337.56	125.938	3261.91	1155	162.657	2973.17	1273.13	-39.8192	3157.62	1379.62	-132.607	3118	1164.99	-145.407	3124.99	1083.75	-160.644	3203.09	979.621	-95.8641	3296.18	914.288	-157.5	3267.18	891.508	-138.754	3343.57	847.419
526	0	69.8043	3295.48	1572.34	174.104	3299.19	1573.98	59.0268	3121.74	1569.26	189.341	3149.37	1579.03	121.994	3089.43	1442.84	119.2	2988.85	1194.28	138.358	3227.17	1336.57	128.507	3275.26	1154.22	164.732	2985.8	1271.13	-37.2316	3170.28	1378.67	-129.882	3130.99	1163.7	-142.758	3138.25	1082.59	-158.324	3216.28	978.536	-93.8426	3309.48	913.049	-155.477	3280.36	890.441	-136.946	3356.75	846.224
527	0	72.9022	3307.76	1571.35	177.198	3311.47	1572.83	62.0822	3134.03	1568.46	192.418	3161.63	1578.01	124.635	3101.55	1441.59	121.15	3001.84	1192.56	141.181	3239.6	1335.84	131.251	3288.61	1153.73	166.819	2998.42	1269.32	-34.5817	3182.94	1377.93	-126.996	3143.81	1162.61	-139.919	3151.31	1081.6	-155.887	3229.15	977.55	-91.8027	3322.45	911.828	-153.384	3293.13	889.408	-135.159	3369.46	844.978
528	0	76.0433	3320.02	1570.59	180.337	3323.78	1571.9	65.1978	3146.31	1567.91	195.553	3173.9	1577.24	127.299	3113.65	1440.57	123.097	3014.87	1191.07	144.08	3252.01	1335.37	134.155	3301.94	1153.52	168.901	3011.03	1267.74	-31.881	3195.61	1377.42	-123.969	3156.46	1161.72	-136.91	3164.16	1080.81	-153.343	3241.69	976.685	-89.7398	3335.11	910.653	-151.22	3305.48	888.434	-133.377	3381.69	843.7
529	0	79.2175	3332.3	1570.07	183.511	3336.11	1571.22	68.3595	3158.61	1567.63	198.731	3186.2	1576.73	129.975	3125.75	1439.79	125.027	3027.91	1189.83	147.039	3264.38	1335.19	137.197	3315.22	1153.62	170.965	3023.62	1266.42	-29.1431	3208.29	1377.16	-120.827	3168.95	1161.08	-133.755	3176.81	1080.25	-150.702	3253.92	975.964	-87.6494	3347.42	909.545	-148.986	3317.4	887.542	-131.585	3393.45	842.41
530	0	82.4131	3344.57	1569.79	186.71	3348.46	1570.78	71.5508	3170.91	1567.63	201.936	3198.51	1576.5	132.649	3137.85	1439.28	126.928	3040.97	1188.87	150.038	3276.72	1335.28	140.35	3328.43	1154.02	172.995	3036.2	1265.37	-26.3829	3220.98	1377.18	-117.598	3181.3	1160.7	-130.481	3189.26	1079.94	-147.976	3265.83	975.406	-85.5276	3359.4	908.527	-146.684	3328.91	886.753	-129.767	3404.71	841.127
531	0	85.6172	3356.86	1569.75	189.921	3360.83	1570.58	74.7535	3183.23	1567.92	205.153	3210.85	1576.54	135.307	3149.94	1439.03	128.789	3054.03	1188.2	153.057	3289.02	1335.66	143.583	3341.56	1154.72	174.982	3048.75	1264.61	-23.6168	3233.67	1377.46	-114.313	3193.52	1160.6	-127.117	3201.51	1079.88	-145.182	3277.45	975.026	-83.3717	3371.04	907.617	-144.317	3340.03	886.084	-127.908	3415.5	839.869
532	0	88.8155	3369.17	1569.94	193.13	3373.22	1570.62	77.9484	3195.57	1568.47	208.363	3223.21	1576.85	137.935	3162.03	1439.05	130.601	3067.06	1187.82	156.071	3301.28	1336.31	146.857	3354.58	1155.69	176.916	3061.26	1264.14	-20.8621	3246.37	1378.02	-111.006	3205.63	1160.79	-123.695	3213.57	1080.08	-142.336	3288.77	974.834	-81.18	3382.34	906.83	-141.892	3350.75	885.55	-125.992	3425.81	838.651
533	0	91.9928	3381.49	1570.37	196.323	3385.62	1570.9	81.115	3207.93	1569.3	211.545	3235.59	1577.43	140.521	3174.13	1439.34	132.36	3080.05	1187.75	159.056	3313.51	1337.22	150.132	3367.47	1156.92	178.79	3073.74	1263.98	-18.1369	3259.06	1378.84	-107.715	3217.66	1161.28	-120.248	3225.45	1080.55	-139.455	3299.82	974.837	-78.9528	3393.31	906.177	-139.416	3361.11	885.163	-124.009	3435.68	837.487
534	0	95.133	3393.83	1571.01	199.486	3398.03	1571.39	84.2327	3220.31	1570.38	214.681	3247.99	1578.25	143.052	3186.23	1439.88	134.062	3092.99	1187.98	161.988	3325.69	1338.37	153.366	3380.22	1158.37	180.601	3086.17	1264.1	-15.459	3271.73	1379.93	-104.475	3229.61	1162.07	-116.808	3237.16	1081.28	-136.559	3310.61	975.037	-76.6921	3403.95	905.666	-136.899	3371.14	884.929	-121.95	3445.11	836.391
535	0	98.22	3406.18	1571.85	202.602	3410.43	1572.09	87.2814	3232.72	1571.68	217.751	3260.41	1579.3	145.517	3198.32	1440.67	135.706	3105.85	1188.49	164.841	3337.84	1339.73	156.514	3392.81	1160.01	182.347	3098.56	1264.52	-12.8461	3284.39	1381.25	-101.321	3241.51	1163.13	-113.41	3248.7	1082.27	-133.668	3321.17	975.431	-74.4024	3414.29	905.302	-134.352	3380.84	884.851	-119.811	3454.14	835.372
536	0	101.238	3418.55	1572.87	205.657	3422.81	1572.97	90.2417	3245.14	1573.19	220.735	3272.84	1580.55	147.907	3210.42	1441.68	137.296	3118.63	1189.27	167.593	3349.95	1341.28	159.535	3405.24	1161.81	184.031	3110.9	1265.2	-10.3152	3297	1382.8	-98.2895	3253.38	1164.45	-110.084	3260.09	1083.48	-130.802	3331.51	976.012	-72.0905	3424.34	905.084	-131.788	3390.26	884.928	-117.59	3462.8	834.441
537	0	104.17	3430.93	1574.04	208.635	3435.17	1574.01	93.0958	3257.58	1574.87	223.616	3285.27	1581.98	150.213	3222.52	1442.89	138.834	3131.31	1190.31	170.223	3362.02	1342.98	162.388	3417.5	1163.71	185.656	3123.19	1266.14	-7.88163	3309.57	1384.53	-95.4091	3265.22	1166.01	-106.859	3271.34	1084.91	-127.979	3341.65	976.767	-69.7655	3434.11	905.012	-129.223	3399.43	885.156	-115.294	3471.13	833.604
538	0	107.003	3443.32	1575.34	211.525	3447.49	1575.19	95.8277	3270.03	1576.69	226.379	3297.71	1583.56	152.429	3234.62	1444.28	140.326	3143.87	1191.58	172.71	3374.06	1344.8	165.039	3429.59	1165.68	187.228	3135.42	1267.3	-5.55932	3322.09	1386.43	-92.706	3277.04	1167.78	-103.762	3282.45	1086.53	-125.221	3351.61	977.683	-67.439	3443.63	905.079	-126.671	3408.38	885.525	-112.931	3479.18	832.869
539	0	109.722	3455.72	1576.74	214.312	3459.77	1576.48	98.4241	3282.5	1578.62	229.009	3310.14	1585.26	154.547	3246.72	1445.82	141.781	3156.32	1193.05	175.039	3386.07	1346.7	167.458	3441.52	1167.68	188.752	3147.59	1268.67	-3.36	3334.53	1388.46	-90.2001	3288.84	1169.72	-100.815	3293.42	1088.3	-122.544	3361.41	978.742	-65.1252	3452.93	905.277	-124.151	3417.13	886.026	-110.518	3486.98	832.239
540	0	112.316	3468.12	1578.21	216.987	3472.01	1577.86	100.874	3294.97	1580.63	231.496	3322.57	1587.05	156.566	3258.81	1447.49	143.206	3168.64	1194.69	177.198	3398.05	1348.66	169.622	3453.3	1169.68	190.237	3159.71	1270.21	-1.29311	3346.89	1390.58	-87.9045	3300.6	1171.8	-98.0352	3304.27	1090.2	-119.965	3371.07	979.924	-62.8398	3462.02	905.597	-121.68	3425.73	886.646	-108.074	3494.58	831.717
541	0	114.774	3480.52	1579.73	219.541	3484.19	1579.29	103.169	3307.44	1582.69	233.83	3334.99	1588.9	158.481	3270.9	1449.26	144.61	3180.83	1196.47	179.178	3410	1350.64	171.515	3464.96	1171.64	191.69	3171.77	1271.9	0.634362	3359.17	1392.77	-85.8255	3312.33	1173.98	-95.4364	3315	1092.21	-117.501	3380.6	981.208	-60.6005	3470.94	906.025	-119.275	3434.19	887.371	-105.624	3502.02	831.305
542	0	117.086	3492.91	1581.28	221.965	3496.33	1580.75	105.304	3319.9	1584.76	236.005	3347.39	1590.78	160.291	3282.97	1451.09	145.999	3192.9	1198.35	180.974	3421.92	1352.61	173.132	3476.49	1173.54	193.119	3183.77	1273.7	2.41798	3371.34	1394.99	-83.9621	3324	1176.22	-93.0268	3325.61	1094.27	-115.164	3390.03	982.572	-58.4263	3479.71	906.55	-116.954	3442.54	888.183	-103.196	3509.35	831.001
543	0	119.245	3505.3	1582.81	224.253	3508.41	1582.23	107.275	3332.36	1586.82	238.017	3359.78	1592.67	161.997	3295.03	1452.97	147.382	3204.84	1200.31	182.583	3433.81	1354.54	174.471	3487.94	1175.35	194.53	3195.72	1275.58	4.05576	3383.42	1397.21	-82.3068	3335.58	1178.5	-90.8102	3336.11	1096.38	-112.965	3399.36	983.993	-56.3366	3488.36	907.157	-114.735	3450.82	889.068	-100.82	3516.61	830.804
544	0	121.245	3517.68	1584.31	226.399	3520.44	1583.68	109.083	3344.81	1588.84	239.865	3372.15	1594.53	163.6	3307.08	1454.86	148.765	3216.67	1202.3	184.009	3445.68	1356.42	175.543	3499.31	1177.08	195.93	3207.61	1277.51	5.54808	3395.38	1399.4	-80.8464	3347.06	1180.76	-88.7861	3346.49	1098.49	-110.914	3408.6	985.45	-54.3513	3496.92	907.832	-112.634	3459.04	890.008	-98.5269	3523.83	830.711
545	0	123.081	3530.04	1585.76	228.397	3532.44	1585.09	110.729	3357.24	1590.81	241.548	3384.5	1596.35	165.101	3319.1	1456.73	150.152	3228.39	1204.3	185.256	3457.53	1358.22	176.361	3510.63	1178.69	197.325	3219.46	1279.46	6.89732	3407.22	1401.53	-79.5631	3358.41	1182.98	-86.95	3356.75	1100.57	-109.018	3417.77	986.92	-52.4895	3505.41	908.559	-110.667	3467.22	890.986	-96.3499	3531.04	830.715
546	0	124.751	3542.37	1587.13	230.242	3544.39	1586.44	112.215	3369.64	1592.69	243.068	3396.84	1598.1	166.502	3331.1	1458.57	151.548	3240	1206.28	186.332	3469.34	1359.93	176.946	3521.92	1180.2	198.717	3231.25	1281.39	8.1076	3418.95	1403.58	-78.4362	3369.6	1185.14	-85.2947	3366.9	1102.61	-107.282	3426.87	988.383	-50.7696	3513.86	909.323	-108.846	3475.38	891.986	-94.3196	3538.29	830.808
547	0	126.252	3554.69	1588.41	231.929	3556.33	1587.72	113.547	3382.02	1594.47	244.428	3409.16	1599.77	167.808	3343.07	1460.34	152.953	3251.53	1208.21	187.245	3481.13	1361.53	177.322	3533.2	1181.59	200.11	3243.01	1283.29	9.18431	3430.57	1405.52	-77.4434	3380.61	1187.19	-83.8106	3376.93	1104.58	-105.71	3435.91	989.82	-49.2084	3522.28	910.109	-107.183	3483.54	892.992	-92.4648	3545.59	830.982
548	0	127.582	3566.98	1589.57	233.452	3568.24	1588.89	114.729	3394.38	1596.14	245.632	3421.47	1601.34	169.022	3355	1462.04	154.37	3262.98	1210.06	188.005	3492.9	1363.02	177.517	3544.49	1182.87	201.504	3254.73	1285.12	10.1337	3442.07	1407.34	-76.5621	3391.42	1189.13	-82.487	3386.85	1106.46	-104.304	3444.9	991.213	-47.821	3530.7	910.904	-105.69	3491.69	893.989	-90.8119	3552.97	831.227
549	0	128.743	3579.23	1590.61	234.806	3580.16	1589.96	115.766	3406.69	1597.68	246.685	3433.76	1602.8	170.145	3366.91	1463.63	155.796	3274.36	1211.81	188.624	3504.63	1364.38	177.559	3555.79	1184.03	202.9	3266.42	1286.87	10.9625	3453.46	1409.01	-75.7708	3402.01	1190.92	-81.3127	3396.65	1108.23	-103.064	3453.83	992.545	-46.6204	3539.12	911.692	-104.374	3499.87	894.964	-89.3835	3560.43	831.531
550	0	129.733	3591.45	1591.51	235.985	3592.09	1590.91	116.664	3418.97	1599.07	247.59	3446.03	1604.14	171.182	3378.78	1465.11	157.231	3285.68	1213.44	189.111	3516.35	1365.6	177.476	3567.12	1185.07	204.295	3278.08	1288.51	11.6774	3464.75	1410.53	-75.0497	3412.37	1192.55	-80.2765	3406.34	1109.87	-101.991	3462.72	993.801	-45.6176	3547.58	912.463	-103.243	3508.06	895.904	-88.1988	3568.01	831.884
551	0	130.553	3603.64	1592.27	236.987	3604.04	1591.72	117.427	3431.22	1600.32	248.352	3458.29	1605.35	172.135	3390.62	1466.46	158.671	3296.95	1214.94	189.477	3528.03	1366.69	177.295	3578.48	1185.98	205.69	3289.71	1290.02	12.2846	3475.93	1411.88	-74.3818	3422.49	1194.01	-79.3681	3415.92	1111.37	-101.083	3471.56	994.97	-44.8212	3556.06	913.205	-102.301	3516.28	896.797	-87.2728	3575.7	832.273
552	0	131.203	3615.78	1592.87	237.806	3616.02	1592.4	118.059	3443.42	1601.4	248.975	3470.54	1606.41	173.005	3402.42	1467.67	160.115	3308.18	1216.28	189.73	3539.7	1367.64	177.038	3589.88	1186.78	207.083	3301.33	1291.4	12.7899	3487.02	1413.05	-73.7529	3432.36	1195.29	-78.5785	3425.39	1112.73	-100.34	3480.35	996.042	-44.2379	3564.6	913.907	-101.553	3524.53	897.636	-86.6169	3583.51	832.689
553	0	131.684	3627.88	1593.3	238.44	3628.03	1592.94	118.563	3455.58	1602.33	249.461	3482.78	1607.33	173.795	3414.18	1468.73	161.559	3319.37	1217.46	189.878	3551.34	1368.44	176.726	3601.32	1187.46	208.47	3312.92	1292.63	13.198	3498.02	1414.04	-73.152	3441.99	1196.38	-77.8998	3434.74	1113.93	-99.7587	3489.11	997.006	-43.8728	3573.19	914.562	-101	3532.82	898.411	-86.2395	3591.45	833.121
554	0	131.995	3639.94	1593.58	238.888	3640.09	1593.34	118.941	3467.69	1603.08	249.814	3495	1608.1	174.505	3425.91	1469.64	163.002	3330.53	1218.47	189.926	3562.96	1369.09	176.374	3612.81	1188.01	209.852	3324.5	1293.7	13.5129	3508.92	1414.83	-72.5708	3451.36	1197.26	-77.326	3443.99	1114.96	-99.3392	3497.83	997.859	-43.7293	3581.83	915.164	-100.646	3541.14	899.117	-86.1459	3599.51	833.563
555	0	132.136	3651.95	1593.68	239.149	3652.18	1593.58	119.196	3479.76	1603.67	250.035	3507.2	1608.72	175.137	3437.6	1470.39	164.442	3341.67	1219.3	189.878	3574.56	1369.59	175.994	3624.34	1188.44	211.226	3336.06	1294.6	13.7373	3519.75	1415.44	-72.004	3460.49	1197.95	-76.8525	3453.14	1115.83	-99.08	3506.5	998.593	-43.8094	3590.53	915.708	-100.491	3549.5	899.749	-86.3394	3607.71	834.008
556	0	132.107	3663.92	1593.61	239.222	3664.31	1593.67	119.329	3491.79	1604.08	250.127	3519.4	1609.19	175.69	3449.26	1470.98	165.877	3352.77	1219.96	189.738	3586.14	1369.94	175.593	3635.91	1188.74	212.592	3347.61	1295.35	13.8733	3530.49	1415.84	-71.4479	3469.38	1198.43	-76.4762	3462.18	1116.53	-98.9803	3515.14	999.208	-44.1144	3599.3	916.191	-100.535	3557.9	900.305	-86.8219	3616.04	834.452
557	0	131.906	3675.84	1593.38	239.109	3676.46	1593.62	119.34	3503.77	1604.32	250.089	3531.58	1609.5	176.166	3460.89	1471.41	167.307	3363.86	1220.44	189.507	3597.71	1370.14	175.176	3647.52	1188.92	213.949	3359.15	1295.92	13.9218	3541.14	1416.05	-70.9009	3478.03	1198.7	-76.1954	3471.12	1117.05	-99.0395	3523.74	999.701	-44.6449	3608.13	916.61	-100.779	3566.34	900.783	-87.5942	3624.51	834.892
558	0	131.534	3687.71	1592.97	238.81	3688.66	1593.41	119.23	3515.7	1604.39	249.923	3543.74	1609.66	176.564	3472.48	1471.68	168.731	3374.92	1220.73	189.186	3609.25	1370.18	174.746	3659.17	1188.97	215.298	3370.67	1296.33	13.8836	3551.72	1416.06	-70.3621	3486.43	1198.77	-76.009	3479.95	1117.41	-99.2573	3532.3	1000.07	-45.4013	3617.02	916.966	-101.224	3574.81	901.182	-88.6568	3633.1	835.328
559	0	130.99	3699.53	1592.39	238.325	3700.88	1593.05	118.999	3527.59	1604.28	249.628	3555.89	1609.66	176.884	3484.04	1471.78	170.15	3385.96	1220.85	188.776	3620.77	1370.07	174.302	3670.87	1188.89	216.637	3382.19	1296.57	13.7587	3562.21	1415.87	-69.8313	3494.59	1198.63	-75.9168	3488.68	1117.58	-99.6337	3540.82	1000.32	-46.3835	3625.98	917.257	-101.868	3583.32	901.501	-90.0095	3641.83	835.759
[truncated: 69 more columns]

## Sheet: Sheet2
Devices
		025370 - Force			025370 - Moment			025370 - CoP			027571 - Force			027571 - Moment			027571 - CoP			037720 - Force			037720 - Moment			037720 - CoP
Frame	Sub Frame	Fx	Fy	Fz	Mx	My	Mz	Cx	Cy	Cz	Fx	Fy	Fz	Mx	My	Mz	Cx	Cy	Cz	Fx	Fy	Fz	Mx	My	Mz	Cx	Cy	Cz
		N	N	N	N.mm	N.mm	N.mm	mm	mm	mm	N	N	N	N.mm	N.mm	N.mm	mm	mm	mm	N	N	N	N.mm	N.mm	N.mm	mm	mm	mm
129	0	0	0	0	0	0	0	200	300	0	0	0	0	0	0	0	200	903	0	0	0	0	0	0	0	603	903	0
129	1	0	0	0	0	0	0	200	300	0	0	0	0	0	0	0	200	903	0	0	0	0	0	0	0	603	903	0
129	2	0	0	0	0	0	0	200	300	0	0	0	0	0	0	0	200	903	0	0	0	0	0	0	0	603	903	0
129	3	0	0	0	0	0	0	200	300	0	0	0	0	0	0	0	200	903	0	0	0	0	0	0	0	603	903	0
129	4	0	0	0	0	0	0	200	300	0	0	0	0	0	0	0	200	903	0	0	0	0	0	0	0	603	903	0
129	5	0	0	0	0	0	0	200	300	0	0	0	0	0	0	0	200	903	0	0	0	0	0	0	0	603	903	0
129	6	0	0	0	0	0	0	200	300	0	0	0	0	0	0	0	200	903	0	0	0	0	0	0	0	603	903	0
129	7	0	0	0	0	0	0	200	300	0	0	0	0	0	0	0	200	903	0	0	0	0	0	0	0	603	903	0
129	8	0	0	0	0	0	0	200	300	0	0	0	0	0	0	0	200	903	0	0	0	0	0	0	0	603	903	0
129	9	0	0	0	0	0	0	200	300	0	0	0	0	0	0	0	200	903	0	0	0	0	0	0	0	603	903	0
130	0	0	0	0	0	0	0	200	300	0	0	0	0	0	0	0	200	903	0	0	0	0	0	0	0	603	903	0
130	1	0	0	0	0	0	0	200	300	0	0	0	0	0	0	0	200	903	0	0	0	0	0	0	0	603	903	0
130	2	0	0	0	0	0	0	200	300	0	0	0	0	0	0	0	200	903	0	0	0	0	0	0	0	603	903	0
130	3	0	0	0	0	0	0	200	300	0	0	0	0	0	0	0	200	903	0	0	0	0	0	0	0	603	903	0
130	4	0	0	0	0	0	0	200	300	0	0	0	0	0	0	0	200	903	0	0	0	0	0	0	0	603	903	0
130	5	0	0	0	0	0	0	200	300	0	0	0	0	0	0	0	200	903	0	0	0	0	0	0	0	603	903	0
130	6	0	0	0	0	0	0	200	300	0	0	0	0	0	0	0	200	903	0	0	0	0	0	0	0	603	903	0
130	7	0	0	0	0	0	0	200	300	0	0	0	0	0	0	0	200	903	0	0	0	0	0	0	0	603	903	0
130	8	0	0	0	0	0	0	200	300	0	0	0	0	0	0	0	200	903	0	0	0	0	0	0	0	603	903	0
130	9	0	0	0	0	0	0	200	300	0	0	0	0	0	0	0	200	903	0	0	0	0	0	0	0	603	903	0
131	0	0	0	0	0	0	0	200	300	0	0	0	0	0	0	0	200	903	0	0	0	0	0	0	0	603	903	0
131	1	0	0	0	0	0	0	200	300	0	0	0	0	0	0	0	200	903	0	0	0	0	0	0	0	603	903	0
131	2	0	0	0	0	0	0	200	300	0	0	0	0	0	0	0	200	903	0	0	0	0	0	0	0	603	903	0
131	3	0	0	0	0	0	0	200	300	0	0	0	0	0	0	0	200	903	0	0	0	0	0	0	0	603	903	0
131	4	0	0	0	0	0	0	200	300	0	0	0	0	0	0	0	200	903	0	0	0	0	0	0	0	603	903	0
131	5	0	0	0	0	0	0	200	300	0	0	0	0	0	0	0	200	903	0	0	0	0	0	0	0	603	903	0
131	6	0	0	0	0	0	0	200	300	0	0	0	0	0	0	0	200	903	0	0	0	0	0	0	0	603	903	0
131	7	0	0	0	0	0	0	200	300	0	0	0	0	0	0	0	200	903	0	0	0	0	0	0	0	603	903	0
131	8	0	0	0	0	0	0	200	300	0	0	0	0	0	0	0	200	903	0	0	0	0	0	0	0	603	903	0
131	9	0	0	0	0	0	0	200	300	0	0	0	0	0	0	0	200	903	0	0	0	0	0	0	0	603	903	0
132	0	0	0	0	0	0	0	200	300	0	0	0	0	0	0	0	200	903	0	0	0	0	0	0	0	603	903	0
132	1	0	0	0	0	0	0	200	300	0	0	0	0	0	0	0	200	903	0	0	0	0	0	0	0	603	903	0
132	2	0	0	0	0	0	0	200	300	0	0	0	0	0	0	0	200	903	0	0	0	0	0	0	0	603	903	0
132	3	0	0	0	0	0	0	200	300	0	0	0	0	0	0	0	200	903	0	0	0	0	0	0	0	603	903	0
132	4	0	0	0	0	0	0	200	300	0	0	0	0	0	0	0	200	903	0	0	0	0	0	0	0	603	903	0
132	5	0	0	0	0	0	0	200	300	0	0	0	0	0	0	0	200	903	0	0	0	0	0	0	0	603	903	0
132	6	0	0	0	0	0	0	200	300	0	0	0	0	0	0	0	200	903	0	0	0	0	0	0	0	603	903	0
132	7	0	0	0	0	0	0	200	300	0	0	0	0	0	0	0	200	903	0	0	0	0	0	0	0	603	903	0
132	8	0	0	0	0	0	0	200	300	0	0	0	0	0	0	0	200	903	0	0	0	0	0	0	0	603	903	0
132	9	0	0	0	0	0	0	200	300	0	0	0	0	0	0	0	200	903	0	0	0	0	0	0	0	603	903	0
133	0	0	0	0	0	0	0	200	300	0	0	0	0	0	0	0	200	903	0	0	0	0	0	0	0	603	903	0
133	1	0	0	0	0	0	0	200	300	0	0	0	0	0	0	0	200	903	0	0	0	0	0	0	0	603	903	0
133	2	0	0	0	0	0	0	200	300	0	0	0	0	0	0	0	200	903	0	0	0	0	0	0	0	603	903	0
133	3	0	0	0	0	0	0	200	300	0	0	0	0	0	0	0	200	903	0	0	0	0	0	0	0	603	903	0
133	4	0	0	0	0	0	0	200	300	0	0	0	0	0	0	0	200	903	0	0	0	0	0	0	0	603	903	0
133	5	0	0	0	0	0	0	200	300	0	0	0	0	0	0	0	200	903	0	0	0	0	0	0	0	603	903	0
133	6	0	0	0	0	0	0	200	300	0	0	0	0	0	0	0	200	903	0	0	0	0	0	0	0	603	903	0
133	7	0	0	0	0	0	0	200	300	0	0	0	0	0	0	0	200	903	0	0	0	0	0	0	0	603	903	0
133	8	0	0	0	0	0	0	200	300	0	0	0	0	0	0	0	200	903	0	0	0	0	0	0	0	603	903	0
133	9	0	0	0	0	0	0	200	300	0	0	0	0	0	0	0	200	903	0	0	0	0	0	0	0	603	903	0
134	0	0	0	0	0	0	0	200	300	0	0	0	0	0	0	0	200	903	0	0	0	0	0	0	0	603	903	0
134	1	0	0	0	0	0	0	200	300	0	0	0	0	0	0	0	200	903	0	0	0	0	0	0	0	603	903	0
134	2	0	0	0	0	0	0	200	300	0	0	0	0	0	0	0	200	903	0	0	0	0	0	0	0	603	903	0
134	3	0	0	0	0	0	0	200	300	0	0	0	0	0	0	0	200	903	0	0	0	0	0	0	0	603	903	0
134	4	0	0	0	0	0	0	200	300	0	0	0	0	0	0	0	200	903	0	0	0	0	0	0	0	603	903	0
134	5	0	0	0	0	0	0	200	300	0	0	0	0	0	0	0	200	903	0	0	0	0	0	0	0	603	903	0
134	6	0	0	0	0	0	0	200	300	0	0	0	0	0	0	0	200	903	0	0	0	0	0	0	0	603	903	0
134	7	0	0	0	0	0	0	200	300	0	0	0	0	0	0	0	200	903	0	0	0	0	0	0	0	603	903	0
134	8	0	0	0	0	0	0	200	300	0	0	0	0	0	0	0	200	903	0	0	0	0	0	0	0	603	903	0
134	9	0	0	0	0	0	0	200	300	0	0	0	0	0	0	0	200	903	0	0	0	0	0	0	0	603	903	0
135	0	0	0	0	0	0	0	200	300	0	0	0	0	0	0	0	200	903	0	0	0	0	0	0	0	603	903	0
135	1	0	0	0	0	0	0	200	300	0	0	0	0	0	0	0	200	903	0	0	0	0	0	0	0	603	903	0
135	2	0	0	0	0	0	0	200	300	0	0	0	0	0	0	0	200	903	0	0	0	0	0	0	0	603	903	0
135	3	0	0	0	0	0	0	200	300	0	0	0	0	0	0	0	200	903	0	0	0	0	0	0	0	603	903	0
135	4	0	0	0	0	0	0	200	300	0	0	0	0	0	0	0	200	903	0	0	0	0	0	0	0	603	903	0
135	5	0	0	0	0	0	0	200	300	0	0	0	0	0	0	0	200	903	0	0	0	0	0	0	0	603	903	0
135	6	0	0	0	0	0	0	200	300	0	0	0	0	0	0	0	200	903	0	0	0	0	0	0	0	603	903	0
135	7	0	0	0	0	0	0	200	300	0	0	0	0	0	0	0	200	903	0	0	0	0	0	0	0	603	903	0
135	8	0	0	0	0	0	0	200	300	0	0	0	0	0	0	0	200	903	0	0	0	0	0	0	0	603	903	0
135	9	0	0	0	0	0	0	200	300	0	0	0	0	0	0	0	200	903	0	0	0	0	0	0	0	603	903	0
136	0	0	0	0	0	0	0	200	300	0	0	0	0	0	0	0	200	903	0	0	0	0	0	0	0	603	903	0
136	1	0	0	0	0	0	0	200	300	0	0	0	0	0	0	0	200	903	0	0	0	0	0	0	0	603	903	0
136	2	0	0	0	0	0	0	200	300	0	0	0	0	0	0	0	200	903	0	0	0	0	0	0	0	603	903	0
136	3	0	0	0	0	0	0	200	300	0	0	0	0	0	0	0	200	903	0	0	0	0	0	0	0	603	903	0
136	4	0	0	0	0	0	0	200	300	0	0	0	0	0	0	0	200	903	0	0	0	0	0	0	0	603	903	0
136	5	0	0	0	0	0	0	200	300	0	0	0	0	0	0	0	200	903	0	0	0	0	0	0	0	603	903	0
136	6	0	0	0	0	0	0	200	300	0	0	0	0	0	0	0	200	903	0	0	0	0	0	0	0	603	903	0
136	7	0	0	0	0	0	0	200	300	0	0	0	0	0	0	0	200	903	0	0	0	0	0	0	0	603	903	0
136	8	0	0	0	0	0	0	200	300	0	0	0	0	0	0	0	200	903	0	0	0	0	0	0	0	603	903	0
136	9	0	0	0	0	0	0	200	300	0	0	0	0	0	0	0	200	903	0	0	0	0	0	0	0	603	903	0
137	0	0	0	0	0	0	0	200	300	0	0	0	0	0	0	0	200	903	0	0	0	0	0	0	0	603	903	0
137	1	0	0	0	0	0	0	200	300	0	0	0	0	0	0	0	200	903	0	0	0	0	0	0	0	603	903	0
137	2	0	0	0	0	0	0	200	300	0	0	0	0	0	0	0	200	903	0	0	0	0	0	0	0	603	903	0
137	3	0	0	0	0	0	0	200	300	0	0	0	0	0	0	0	200	903	0	0	0	0	0	0	0	603	903	0
137	4	0	0	0	0	0	0	200	300	0	0	0	0	0	0	0	200	903	0	0	0	0	0	0	0	603	903	0
137	5	0	0	0	0	0	0	200	300	0	0	0	0	0	0	0	200	903	0	0	0	0	0	0	0	603	903	0
137	6	0	0	0	0	0	0	200	300	0	0	0	0	0	0	0	200	903	0	0	0	0	0	0	0	603	903	0
137	7	0	0	0	0	0	0	200	300	0	0	0	0	0	0	0	200	903	0	0	0	0	0	0	0	603	903	0
137	8	0	0	0	0	0	0	200	300	0	0	0	0	0	0	0	200	903	0	0	0	0	0	0	0	603	903	0
137	9	0	0	0	0	0	0	200	300	0	0	0	0	0	0	0	200	903	0	0	0	0	0	0	0	603	903	0
138	0	0	0	0	0	0	0	200	300	0	0	0	0	0	0	0	200	903	0	0	0	0	0	0	0	603	903	0
138	1	0	0	0	0	0	0	200	300	0	0	0	0	0	0	0	200	903	0	0	0	0	0	0	0	603	903	0
138	2	0	0	0	0	0	0	200	300	0	0	0	0	0	0	0	200	903	0	0	0	0	0	0	0	603	903	0
138	3	0	0	0	0	0	0	200	300	0	0	0	0	0	0	0	200	903	0	0	0	0	0	0	0	603	903	0
138	4	0	0	0	0	0	0	200	300	0	0	0	0	0	0	0	200	903	0	0	0	0	0	0	0	603	903	0
138	5	0	0	0	0	0	0	200	300	0	0	0	0	0	0	0	200	903	0	0	0	0	0	0	0	603	903	0
138	6	0	0	0	0	0	0	200	300	0	0	0	0	0	0	0	200	903	0	0	0	0	0	0	0	603	903	0
138	7	0	0	0	0	0	0	200	300	0	0	0	0	0	0	0	200	903	0	0	0	0	0	0	0	603	903	0
138	8	0	0	0	0	0	0	200	300	0	0	0	0	0	0	0	200	903	0	0	0	0	0	0	0	603	903	0
138	9	0	0	0	0	0	0	200	300	0	0	0	0	0	0	0	200	903	0	0	0	0	0	0	0	603	903	0
139	0	0	0	0	0	0	0	200	300	0	0	0	0	0	0	0	200	903	0	0	0	0	0	0	0	603	903	0
139	1	0	0	0	0	0	0	200	300	0	0	0	0	0	0	0	200	903	0	0	0	0	0	0	0	603	903	0
139	2	0	0	0	0	0	0	200	300	0	0	0	0	0	0	0	200	903	0	0	0	0	0	0	0	603	903	0
139	3	0	0	0	0	0	0	200	300	0	0	0	0	0	0	0	200	903	0	0	0	0	0	0	0	603	903	0
139	4	0	0	0	0	0	0	200	300	0	0	0	0	0	0	0	200	903	0	0	0	0	0	0	0	603	903	0
139	5	0	0	0	0	0	0	200	300	0	0	0	0	0	0	0	200	903	0	0	0	0	0	0	0	603	903	0
139	6	0	0	0	0	0	0	200	300	0	0	0	0	0	0	0	200	903	0	0	0	0	0	0	0	603	903	0
139	7	0	0	0	0	0	0	200	300	0	0	0	0	0	0	0	200	903	0	0	0	0	0	0	0	603	903	0
139	8	0	0	0	0	0	0	200	300	0	0	0	0	0	0	0	200	903	0	0	0	0	0	0	0	603	903	0
139	9	0	0	0	0	0	0	200	300	0	0	0	0	0	0	0	200	903	0	0	0	0	0	0	0	603	903	0
140	0	0	0	0	0	0	0	200	300	0	0	0	0	0	0	0	200	903	0	0	0	0	0	0	0	603	903	0
140	1	0	0	0	0	0	0	200	300	0	0	0	0	0	0	0	200	903	0	0	0	0	0	0	0	603	903	0
140	2	0	0	0	0	0	0	200	300	0	0	0	0	0	0	0	200	903	0	0	0	0	0	0	0	603	903	0
140	3	0	0	0	0	0	0	200	300	0	0	0	0	0	0	0	200	903	0	0	0	0	0	0	0	603	903	0
140	4	0	0	0	0	0	0	200	300	0	0	0	0	0	0	0	200	903	0	0	0	0	0	0	0	603	903	0
140	5	0	0	0	0	0	0	200	300	0	0	0	0	0	0	0	200	903	0	0	0	0	0	0	0	603	903	0
140	6	0	0	0	0	0	0	200	300	0	0	0	0	0	0	0	200	903	0	0	0	0	0	0	0	603	903	0
140	7	0	0	0	0	0	0	200	300	0	0	0	0	0	0	0	200	903	0	0	0	0	0	0	0	603	903	0
140	8	0	0	0	0	0	0	200	300	0	0	0	0	0	0	0	200	903	0	0	0	0	0	0	0	603	903	0
140	9	0	0	0	0	0	0	200	300	0	0	0	0	0	0	0	200	903	0	0	0	0	0	0	0	603	903	0
141	0	0	0	0	0	0	0	200	300	0	0	0	0	0	0	0	200	903	0	0	0	0	0	0	0	603	903	0
141	1	0	0	0	0	0	0	200	300	0	0	0	0	0	0	0	200	903	0	0	0	0	0	0	0	603	903	0
141	2	0	0	0	0	0	0	200	300	0	0	0	0	0	0	0	200	903	0	0	0	0	0	0	0	603	903	0
141	3	0	0	0	0	0	0	200	300	0	0	0	0	0	0	0	200	903	0	0	0	0	0	0	0	603	903	0
141	4	0	0	0	0	0	0	200	300	0	0	0	0	0	0	0	200	903	0	0	0	0	0	0	0	603	903	0
141	5	0	0	0	0	0	0	200	300	0	0	0	0	0	0	0	200	903	0	0	0	0	0	0	0	603	903	0
141	6	0	0	0	0	0	0	200	300	0	0	0	0	0	0	0	200	903	0	0	0	0	0	0	0	603	903	0
141	7	0	0	0	0	0	0	200	300	0	0	0	0	0	0	0	200	903	0	0	0	0	0	0	0	603	903	0
141	8	0	0	0	0	0	0	200	300	0	0	0	0	0	0	0	200	903	0	0	0	0	0	0	0	603	903	0
141	9	0	0	0	0	0	0	200	300	0	0	0	0	0	0	0	200	903	0	0	0	0	0	0	0	603	903	0
142	0	0	0	0	0	0	0	200	300	0	0	0	0	0	0	0	200	903	0	0	0	0	0	0	0	603	903	0
142	1	0	0	0	0	0	0	200	300	0	0	0	0	0	0	0	200	903	0	0	0	0	0	0	0	603	903	0
142	2	0	0	0	0	0	0	200	300	0	0	0	0	0	0	0	200	903	0	0	0	0	0	0	0	603	903	0
142	3	0	0	0	0	0	0	200	300	0	0	0	0	0	0	0	200	903	0	0	0	0	0	0	0	603	903	0
142	4	0	0	0	0	0	0	200	300	0	0	0	0	0	0	0	200	903	0	0	0	0	0	0	0	603	903	0
142	5	0	0	0	0	0	0	200	300	0	0	0	0	0	0	0	200	903	0	0	0	0	0	0	0	603	903	0
142	6	0	0	0	0	0	0	200	300	0	0	0	0	0	0	0	200	903	0	0	0	0	0	0	0	603	903	0
142	7	0	0	0	0	0	0	200	300	0	0	0	0	0	0	0	200	903	0	0	0	0	0	0	0	603	903	0
142	8	0	0	0	0	0	0	200	300	0	0	0	0	0	0	0	200	903	0	0	0	0	0	0	0	603	903	0
142	9	0	0	0	0	0	0	200	300	0	0	0	0	0	0	0	200	903	0	0	0	0	0	0	0	603	903	0
143	0	0	0	0	0	0	0	200	300	0	0	0	0	0	0	0	200	903	0	0	0	0	0	0	0	603	903	0
143	1	0	0	0	0	0	0	200	300	0	0	0	0	0	0	0	200	903	0	0	0	0	0	0	0	603	903	0
143	2	0	0	0	0	0	0	200	300	0	0	0	0	0	0	0	200	903	0	0	0	0	0	0	0	603	903	0
143	3	0	0	0	0	0	0	200	300	0	0	0	0	0	0	0	200	903	0	0	0	0	0	0	0	603	903	0
143	4	0	0	0	0	0	0	200	300	0	0	0	0	0	0	0	200	903	0	0	0	0	0	0	0	603	903	0
143	5	0	0	0	0	0	0	200	300	0	0	0	0	0	0	0	200	903	0	0	0	0	0	0	0	603	903	0
143	6	0	0	0	0	0	0	200	300	0	0	0	0	0	0	0	200	903	0	0	0	0	0	0	0	603	903	0
143	7	0	0	0	0	0	0	200	300	0	0	0	0	0	0	0	200	903	0	0	0	0	0	0	0	603	903	0
143	8	0	0	0	0	0	0	200	300	0	0	0	0	0	0	0	200	903	0	0	0	0	0	0	0	603	903	0
143	9	0	0	0	0	0	0	200	300	0	0	0	0	0	0	0	200	903	0	0	0	0	0	0	0	603	903	0
144	0	0	0	0	0	0	0	200	300	0	0	0	0	0	0	0	200	903	0	0	0	0	0	0	0	603	903	0
144	1	0	0	0	0	0	0	200	300	0	0	0	0	0	0	0	200	903	0	0	0	0	0	0	0	603	903	0
144	2	0	0	0	0	0	0	200	300	0	0	0	0	0	0	0	200	903	0	0	0	0	0	0	0	603	903	0
144	3	0	0	0	0	0	0	200	300	0	0	0	0	0	0	0	200	903	0	0	0	0	0	0	0	603	903	0
144	4	0	0	0	0	0	0	200	300	0	0	0	0	0	0	0	200	903	0	0	0	0	0	0	0	603	903	0
144	5	0	0	0	0	0	0	200	300	0	0	0	0	0	0	0	200	903	0	0	0	0	0	0	0	603	903	0
144	6	0	0	0	0	0	0	200	300	0	0	0	0	0	0	0	200	903	0	0	0	0	0	0	0	603	903	0
144	7	0	0	0	0	0	0	200	300	0	0	0	0	0	0	0	200	903	0	0	0	0	0	0	0	603	903	0
144	8	0	0	0	0	0	0	200	300	0	0	0	0	0	0	0	200	903	0	0	0	0	0	0	0	603	903	0
144	9	0	0	0	0	0	0	200	300	0	0	0	0	0	0	0	200	903	0	0	0	0	0	0	0	603	903	0
145	0	0	0	0	0	0	0	200	300	0	0	0	0	0	0	0	200	903	0	0	0	0	0	0	0	603	903	0
145	1	0	0	0	0	0	0	200	300	0	0	0	0	0	0	0	200	903	0	0	0	0	0	0	0	603	903	0
145	2	0	0	0	0	0	0	200	300	0	0	0	0	0	0	0	200	903	0	0	0	0	0	0	0	603	903	0
145	3	0	0	0	0	0	0	200	300	0	0	0	0	0	0	0	200	903	0	0	0	0	0	0	0	603	903	0
145	4	0	0	0	0	0	0	200	300	0	0	0	0	0	0	0	200	903	0	0	0	0	0	0	0	603	903	0
145	5	0	0	0	0	0	0	200	300	0	0	0	0	0	0	0	200	903	0	0	0	0	0	0	0	603	903	0
145	6	0	0	0	0	0	0	200	300	0	0	0	0	0	0	0	200	903	0	0	0	0	0	0	0	603	903	0
145	7	0	0	0	0	0	0	200	300	0	0	0	0	0	0	0	200	903	0	0	0	0	0	0	0	603	903	0
145	8	0	0	0	0	0	0	200	300	0	0	0	0	0	0	0	200	903	0	0	0	0	0	0	0	603	903	0
145	9	0	0	0	0	0	0	200	300	0	0	0	0	0	0	0	200	903	0	0	0	0	0	0	0	603	903	0
146	0	0	0	0	0	0	0	200	300	0	0	0	0	0	0	0	200	903	0	0	0	0	0	0	0	603	903	0
146	1	0	0	0	0	0	0	200	300	0	0	0	0	0	0	0	200	903	0	0	0	0	0	0	0	603	903	0
146	2	0	0	0	0	0	0	200	300	0	0	0	0	0	0	0	200	903	0	0	0	0	0	0	0	603	903	0
146	3	0	0	0	0	0	0	200	300	0	0	0	0	0	0	0	200	903	0	0	0	0	0	0	0	603	903	0
146	4	0	0	0	0	0	0	200	300	0	0	0	0	0	0	0	200	903	0	0	0	0	0	0	0	603	903	0
146	5	0	0	0	0	0	0	200	300	0	0	0	0	0	0	0	200	903	0	0	0	0	0	0	0	603	903	0
146	6	0	0	0	0	0	0	200	300	0	0	0	0	0	0	0	200	903	0	0	0	0	0	0	0	603	903	0
146	7	0	0	0	0	0	0	200	300	0	0	0	0	0	0	0	200	903	0	0	0	0	0	0	0	603	903	0
146	8	0	0	0	0	0	0	200	300	0	0	0	0	0	0	0	200	903	0	0	0	0	0	0	0	603	903	0
146	9	0	0	0	0	0	0	200	300	0	0	0	0	0	0	0	200	903	0	0	0	0	0	0	0	603	903	0
147	0	0	0	0	0	0	0	200	300	0	0	0	0	0	0	0	200	903	0	0	0	0	0	0	0	603	903	0
147	1	0	0	0	0	0	0	200	300	0	0	0	0	0	0	0	200	903	0	0	0	0	0	0	0	603	903	0
147	2	0	0	0	0	0	0	200	300	0	0	0	0	0	0	0	200	903	0	0	0	0	0	0	0	603	903	0
147	3	0	0	0	0	0	0	200	300	0	0	0	0	0	0	0	200	903	0	0	0	0	0	0	0	603	903	0
147	4	0	0	0	0	0	0	200	300	0	0	0	0	0	0	0	200	903	0	0	0	0	0	0	0	603	903	0
147	5	0	0	0	0	0	0	200	300	0	0	0	0	0	0	0	200	903	0	0	0	0	0	0	0	603	903	0
147	6	0	0	0	0	0	0	200	300	0	0	0	0	0	0	0	200	903	0	0	0	0	0	0	0	603	903	0
147	7	0	0	0	0	0	0	200	300	0	0	0	0	0	0	0	200	903	0	0	0	0	0	0	0	603	903	0
147	8	0	0	0	0	0	0	200	300	0	0	0	0	0	0	0	200	903	0	0	0	0	0	0	0	603	903	0
147	9	0	0	0	0	0	0	200	300	0	0	0	0	0	0	0	200	903	0	0	0	0	0	0	0	603	903	0
148	0	0	0	0	0	0	0	200	300	0	0	0	0	0	0	0	200	903	0	0	0	0	0	0	0	603	903	0
148	1	0	0	0	0	0	0	200	300	0	0	0	0	0	0	0	200	903	0	0	0	0	0	0	0	603	903	0
148	2	0	0	0	0	0	0	200	300	0	0	0	0	0	0	0	200	903	0	0	0	0	0	0	0	603	903	0
148	3	0	0	0	0	0	0	200	300	0	0	0	0	0	0	0	200	903	0	0	0	0	0	0	0	603	903	0
148	4	0	0	0	0	0	0	200	300	0	0	0	0	0	0	0	200	903	0	0	0	0	0	0	0	603	903	0
148	5	0	0	0	0	0	0	200	300	0	0	0	0	0	0	0	200	903	0	0	0	0	0	0	0	603	903	0
148	6	0	0	0	0	0	0	200	300	0	0	0	0	0	0	0	200	903	0	0	0	0	0	0	0	603	903	0
148	7	0	0	0	0	0	0	200	300	0	0	0	0	0	0	0	200	903	0	0	0	0	0	0	0	603	903	0
148	8	0	0	0	0	0	0	200	300	0	0	0	0	0	0	0	200	903	0	0	0	0	0	0	0	603	903	0
148	9	0	0	0	0	0	0	200	300	0	0	0	0	0	0	0	200	903	0	0	0	0	0	0	0	603	903	0
149	0	0	0	0	0	0	0	200	300	0	0	0	0	0	0	0	200	903	0	0	0	0	0	0	0	603	903	0
149	1	0	0	0	0	0	0	200	300	0	0	0	0	0	0	0	200	903	0	0	0	0	0	0	0	603	903	0
149	2	0	0	0	0	0	0	200	300	0	0	0	0	0	0	0	200	903	0	0	0	0	0	0	0	603	903	0
149	3	0	0	0	0	0	0	200	300	0	0	0	0	0	0	0	200	903	0	0	0	0	0	0	0	603	903	0
149	4	0	0	0	0	0	0	200	300	0	0	0	0	0	0	0	200	903	0	0	0	0	0	0	0	603	903	0
149	5	0	0	0	0	0	0	200	300	0	0	0	0	0	0	0	200	903	0	0	0	0	0	0	0	603	903	0
149	6	0	0	0	0	0	0	200	300	0	0	0	0	0	0	0	200	903	0	0	0	0	0	0	0	603	903	0
149	7	0	0	0	0	0	0	200	300	0	0	0	0	0	0	0	200	903	0	0	0	0	0	0	0	603	903	0
149	8	0	0	0	0	0	0	200	300	0	0	0	0	0	0	0	200	903	0	0	0	0	0	0	0	603	903	0
149	9	0	0	0	0	0	0	200	300	0	0	0	0	0	0	0	200	903	0	0	0	0	0	0	0	603	903	0
150	0	0	0	0	0	0	0	200	300	0	0	0	0	0	0	0	200	903	0	0	0	0	0	0	0	603	903	0
150	1	0	0	0	0	0	0	200	300	0	0	0	0	0	0	0	200	903	0	0	0	0	0	0	0	603	903	0
150	2	0	0	0	0	0	0	200	300	0	0	0	0	0	0	0	200	903	0	0	0	0	0	0	0	603	903	0
150	3	0	0	0	0	0	0	200	300	0	0	0	0	0	0	0	200	903	0	0	0	0	0	0	0	603	903	0
150	4	0	0	0	0	0	0	200	300	0	0	0	0	0	0	0	200	903	0	0	0	0	0	0	0	603	903	0
150	5	0	0	0	0	0	0	200	300	0	0	0	0	0	0	0	200	903	0	0	0	0	0	0	0	603	903	0
150	6	0	0	0	0	0	0	200	300	0	0	0	0	0	0	0	200	903	0	0	0	0	0	0	0	603	903	0
150	7	0	0	0	0	0	0	200	300	0	0	0	0	0	0	0	200	903	0	0	0	0	0	0	0	603	903	0
150	8	0	0	0	0	0	0	200	300	0	0	0	0	0	0	0	200	903	0	0	0	0	0	0	0	603	903	0
150	9	0	0	0	0	0	0	200	300	0	0	0	0	0	0	0	200	903	0	0	0	0	0	0	0	603	903	0
151	0	0	0	0	0	0	0	200	300	0	0	0	0	0	0	0	200	903	0	0	0	0	0	0	0	603	903	0
151	1	0	0	0	0	0	0	200	300	0	0	0	0	0	0	0	200	903	0	0	0	0	0	0	0	603	903	0
151	2	0	0	0	0	0	0	200	300	0	0	0	0	0	0	0	200	903	0	0	0	0	0	0	0	603	903	0
151	3	0	0	0	0	0	0	200	300	0	0	0	0	0	0	0	200	903	0	0	0	0	0	0	0	603	903	0
151	4	0	0	0	0	0	0	200	300	0	0	0	0	0	0	0	200	903	0	0	0	0	0	0	0	603	903	0
151	5	0	0	0	0	0	0	200	300	0	0	0	0	0	0	0	200	903	0	0	0	0	0	0	0	603	903	0
151	6	0	0	0	0	0	0	200	300	0	0	0	0	0	0	0	200	903	0	0	0	0	0	0	0	603	903	0
151	7	0	0	0	0	0	0	200	300	0	0	0	0	0	0	0	200	903	0	0	0	0	0	0	0	603	903	0
151	8	0	0	0	0	0	0	200	300	0	0	0	0	0	0	0	200	903	0	0	0	0	0	0	0	603	903	0
151	9	0	0	0	0	0	0	200	300	0	0	0	0	0	0	0	200	903	0	0	0	0	0	0	0	603	903	0
152	0	0	0	0	0	0	0	200	300	0	0	0	0	0	0	0	200	903	0	0	0	0	0	0	0	603	903	0
152	1	0	0	0	0	0	0	200	300	0	0	0	0	0	0	0	200	903	0	0	0	0	0	0	0	603	903	0
152	2	0	0	0	0	0	0	200	300	0	0	0	0	0	0	0	200	903	0	0	0	0	0	0	0	603	903	0
152	3	0	0	0	0	0	0	200	300	0	0	0	0	0	0	0	200	903	0	0	0	0	0	0	0	603	903	0
152	4	0	0	0	0	0	0	200	300	0	0	0	0	0	0	0	200	903	0	0	0	0	0	0	0	603	903	0
152	5	0	0	0	0	0	0	200	300	0	0	0	0	0	0	0	200	903	0	0	0	0	0	0	0	603	903	0
152	6	0	0	0	0	0	0	200	300	0	0	0	0	0	0	0	200	903	0	0	0	0	0	0	0	603	903	0
152	7	0	0	0	0	0	0	200	300	0	0	0	0	0	0	0	200	903	0	0	0	0	0	0	0	603	903	0
152	8	0	0	0	0	0	0	200	300	0	0	0	0	0	0	0	200	903	0	0	0	0	0	0	0	603	903	0
152	9	0	0	0	0	0	0	200	300	0	0	0	0	0	0	0	200	903	0	0	0	0	0	0	0	603	903	0
153	0	0	0	0	0	0	0	200	300	0	0	0	0	0	0	0	200	903	0	0	0	0	0	0	0	603	903	0
153	1	0	0	0	0	0	0	200	300	0	0	0	0	0	0	0	200	903	0	0	0	0	0	0	0	603	903	0
153	2	0	0	0	0	0	0	200	300	0	0	0	0	0	0	0	200	903	0	0	0	0	0	0	0	603	903	0
153	3	0	0	0	0	0	0	200	300	0	0	0	0	0	0	0	200	903	0	0	0	0	0	0	0	603	903	0
153	4	0	0	0	0	0	0	200	300	0	0	0	0	0	0	0	200	903	0	0	0	0	0	0	0	603	903	0
153	5	0	0	0	0	0	0	200	300	0	0	0	0	0	0	0	200	903	0	0	0	0	0	0	0	603	903	0
153	6	0	0	0	0	0	0	200	300	0	0	0	0	0	0	0	200	903	0	0	0	0	0	0	0	603	903	0
153	7	0	0	0	0	0	0	200	300	0	0	0	0	0	0	0	200	903	0	0	0	0	0	0	0	603	903	0
153	8	0	0	0	0	0	0	200	300	0	0	0	0	0	0	0	200	903	0	0	0	0	0	0	0	603	903	0
153	9	0	0	0	0	0	0	200	300	0	0	0	0	0	0	0	200	903	0	0	0	0	0	0	0	603	903	0
154	0	0	0	0	0	0	0	200	300	0	0	0	0	0	0	0	200	903	0	0	0	0	0	0	0	603	903	0
154	1	0	0	0	0	0	0	200	300	0	0	0	0	0	0	0	200	903	0	0	0	0	0	0	0	603	903	0
154	2	0	0	0	0	0	0	200	300	0	0	0	0	0	0	0	200	903	0	0	0	0	0	0	0	603	903	0
154	3	0	0	0	0	0	0	200	300	0	0	0	0	0	0	0	200	903	0	0	0	0	0	0	0	603	903	0
154	4	0	0	0	0	0	0	200	300	0	0	0	0	0	0	0	200	903	0	0	0	0	0	0	0	603	903	0
154	5	0	0	0	0	0	0	200	300	0	0	0	0	0	0	0	200	903	0	0	0	0	0	0	0	603	903	0
154	6	0	0	0	0	0	0	200	300	0	0	0	0	0	0	0	200	903	0	0	0	0	0	0	0	603	903	0
154	7	0	0	0	0	0	0	200	300	0	0	0	0	0	0	0	200	903	0	0	0	0	0	0	0	603	903	0
154	8	0	0	0	0	0	0	200	300	0	0	0	0	0	0	0	200	903	0	0	0	0	0	0	0	603	903	0
154	9	0	0	0	0	0	0	200	300	0	0	0	0	0	0	0	200	903	0	0	0	0	0	0	0	603	903	0
155	0	0	0	0	0	0	0	200	300	0	0	0	0	0	0	0	200	903	0	0	0	0	0	0	0	603	903	0
155	1	0	0	0	0	0	0	200	300	0	0	0	0	0	0	0	200	903	0	0	0	0	0	0	0	603	903	0
155	2	0	0	0	0	0	0	200	300	0	0	0	0	0	0	0	200	903	0	0	0	0	0	0	0	603	903	0
155	3	0	0	0	0	0	0	200	300	0	0	0	0	0	0	0	200	903	0	0	0	0	0	0	0	603	903	0
155	4	0	0	0	0	0	0	200	300	0	0	0	0	0	0	0	200	903	0	0	0	0	0	0	0	603	903	0
155	5	0	0	0	0	0	0	200	300	0	0	0	0	0	0	0	200	903	0	0	0	0	0	0	0	603	903	0
155	6	0	0	0	0	0	0	200	300	0	0	0	0	0	0	0	200	903	0	0	0	0	0	0	0	603	903	0
155	7	0	0	0	0	0	0	200	300	0	0	0	0	0	0	0	200	903	0	0	0	0	0	0	0	603	903	0
155	8	0	0	0	0	0	0	200	300	0	0	0	0	0	0	0	200	903	0	0	0	0	0	0	0	603	903	0
155	9	0	0	0	0	0	0	200	300	0	0	0	0	0	0	0	200	903	0	0	0	0	0	0	0	603	903	0
156	0	0	0	0	0	0	0	200	300	0	0	0	0	0	0	0	200	903	0	0	0	0	0	0	0	603	903	0
156	1	0	0	0	0	0	0	200	300	0	0	0	0	0	0	0	200	903	0	0	0	0	0	0	0	603	903	0
156	2	0	0	0	0	0	0	200	300	0	0	0	0	0	0	0	200	903	0	0	0	0	0	0	0	603	903	0
156	3	0	0	0	0	0	0	200	300	0	0	0	0	0	0	0	200	903	0	0	0	0	0	0	0	603	903	0
156	4	0	0	0	0	0	0	200	300	0	0	0	0	0	0	0	200	903	0	0	0	0	0	0	0	603	903	0
156	5	0	0	0	0	0	0	200	300	0	0	0	0	0	0	0	200	903	0	0	0	0	0	0	0	603	903	0
156	6	0	0	0	0	0	0	200	300	0	0	0	0	0	0	0	200	903	0	0	0	0	0	0	0	603	903	0
156	7	0	0	0	0	0	0	200	300	0	0	0	0	0	0	0	200	903	0	0	0	0	0	0	0	603	903	0
156	8	0	0	0	0	0	0	200	300	0	0	0	0	0	0	0	200	903	0	0	0	0	0	0	0	603	903	0
156	9	0	0	0	0	0	0	200	300	0	0	0	0	0	0	0	200	903	0	0	0	0	0	0	0	603	903	0
157	0	0	0	0	0	0	0	200	300	0	0	0	0	0	0	0	200	903	0	0	0	0	0	0	0	603	903	0
157	1	0	0	0	0	0	0	200	300	0	0	0	0	0	0	0	200	903	0	0	0	0	0	0	0	603	903	0
157	2	0	0	0	0	0	0	200	300	0	0	0	0	0	0	0	200	903	0	0	0	0	0	0	0	603	903	0
157	3	0	0	0	0	0	0	200	300	0	0	0	0	0	0	0	200	903	0	0	0	0	0	0	0	603	903	0
157	4	0	0	0	0	0	0	200	300	0	0	0	0	0	0	0	200	903	0	0	0	0	0	0	0	603	903	0
157	5	0	0	0	0	0	0	200	300	0	0	0	0	0	0	0	200	903	0	0	0	0	0	0	0	603	903	0
157	6	0	0	0	0	0	0	200	300	0	0	0	0	0	0	0	200	903	0	0	0	0	0	0	0	603	903	0
157	7	0	0	0	0	0	0	200	300	0	0	0	0	0	0	0	200	903	0	0	0	0	0	0	0	603	903	0
157	8	0	0	0	0	0	0	200	300	0	0	0	0	0	0	0	200	903	0	0	0	0	0	0	0	603	903	0
157	9	0	0	0	0	0	0	200	300	0	0	0	0	0	0	0	200	903	0	0	0	0	0	0	0	603	903	0
158	0	0	0	0	0	0	0	200	300	0	0	0	0	0	0	0	200	903	0	0	0	0	0	0	0	603	903	0
158	1	0	0	0	0	0	0	200	300	0	0	0	0	0	0	0	200	903	0	0	0	0	0	0	0	603	903	0
158	2	0	0	0	0	0	0	200	300	0	0	0	0	0	0	0	200	903	0	0	0	0	0	0	0	603	903	0
158	3	0	0	0	0	0	0	200	300	0	0	0	0	0	0	0	200	903	0	0	0	0	0	0	0	603	903	0
158	4	0	0	0	0	0	0	200	300	0	0	0	0	0	0	0	200	903	0	0	0	0	0	0	0	603	903	0
158	5	0	0	0	0	0	0	200	300	0	0	0	0	0	0	0	200	903	0	0	0	0	0	0	0	603	903	0
158	6	0	0	0	0	0	0	200	300	0	0	0	0	0	0	0	200	903	0	0	0	0	0	0	0	603	903	0
158	7	0	0	0	0	0	0	200	300	0	0	0	0	0	0	0	200	903	0	0	0	0	0	0	0	603	903	0
158	8	0	0	0	0	0	0	200	300	0	0	0	0	0	0	0	200	903	0	0	0	0	0	0	0	603	903	0
158	9	0	0	0	0	0	0	200	300	0	0	0	0	0	0	0	200	903	0	0	0	0	0	0	0	603	903	0
159	0	0	0	0	0	0	0	200	300	0	0	0	0	0	0	0	200	903	0	0	0	0	0	0	0	603	903	0
159	1	0	0	0	0	0	0	200	300	0	0	0	0	0	0	0	200	903	0	0	0	0	0	0	0	603	903	0
159	2	0	0	0	0	0	0	200	300	0	0	0	0	0	0	0	200	903	0	0	0	0	0	0	0	603	903	0
159	3	0	0	0	0	0	0	200	300	0	0	0	0	0	0	0	200	903	0	0	0	0	0	0	0	603	903	0
159	4	0	0	0	0	0	0	200	300	0	0	0	0	0	0	0	200	903	0	0	0	0	0	0	0	603	903	0
159	5	0	0	0	0	0	0	200	300	0	0	0	0	0	0	0	200	903	0	0	0	0	0	0	0	603	903	0
159	6	0	0	0	0	0	0	200	300	0	0	0	0	0	0	0	200	903	0	0	0	0	0	0	0	603	903	0
159	7	0	0	0	0	0	0	200	300	0	0	0	0	0	0	0	200	903	0	0	0	0	0	0	0	603	903	0
159	8	0	0	0	0	0	0	200	300	0	0	0	0	0	0	0	200	903	0	0	0	0	0	0	0	603	903	0
159	9	0	0	0	0	0	0	200	300	0	0	0	0	0	0	0	200	903	0	0	0	0	0	0	0	603	903	0
160	0	0	0	0	0	0	0	200	300	0	0	0	0	0	0	0	200	903	0	0	0	0	0	0	0	603	903	0
160	1	0	0	0	0	0	0	200	300	0	0	0	0	0	0	0	200	903	0	0	0	0	0	0	0	603	903	0
160	2	0	0	0	0	0	0	200	300	0	0	0	0	0	0	0	200	903	0	0	0	0	0	0	0	603	903	0
160	3	0	0	0	0	0	0	200	300	0	0	0	0	0	0	0	200	903	0	0	0	0	0	0	0	603	903	0
160	4	0	0	0	0	0	0	200	300	0	0	0	0	0	0	0	200	903	0	0	0	0	0	0	0	603	903	0
160	5	0	0	0	0	0	0	200	300	0	0	0	0	0	0	0	200	903	0	0	0	0	0	0	0	603	903	0
160	6	0	0	0	0	0	0	200	300	0	0	0	0	0	0	0	200	903	0	0	0	0	0	0	0	603	903	0
160	7	0	0	0	0	0	0	200	300	0	0	0	0	0	0	0	200	903	0	0	0	0	0	0	0	603	903	0
160	8	0	0	0	0	0	0	200	300	0	0	0	0	0	0	0	200	903	0	0	0	0	0	0	0	603	903	0
160	9	0	0	0	0	0	0	200	300	0	0	0	0	0	0	0	200	903	0	0	0	0	0	0	0	603	903	0
161	0	0	0	0	0	0	0	200	300	0	0	0	0	0	0	0	200	903	0	0	0	0	0	0	0	603	903	0
161	1	0	0	0	0	0	0	200	300	0	0	0	0	0	0	0	200	903	0	0	0	0	0	0	0	603	903	0
161	2	0	0	0	0	0	0	200	300	0	0	0	0	0	0	0	200	903	0	0	0	0	0	0	0	603	903	0
161	3	0	0	0	0	0	0	200	300	0	0	0	0	0	0	0	200	903	0	0	0	0	0	0	0	603	903	0
161	4	0	0	0	0	0	0	200	300	0	0	0	0	0	0	0	200	903	0	0	0	0	0	0	0	603	903	0
161	5	0	0	0	0	0	0	200	300	0	0	0	0	0	0	0	200	903	0	0	0	0	0	0	0	603	903	0
161	6	0	0	0	0	0	0	200	300	0	0	0	0	0	0	0	200	903	0	0	0	0	0	0	0	603	903	0
161	7	0	0	0	0	0	0	200	300	0	0	0	0	0	0	0	200	903	0	0	0	0	0	0	0	603	903	0
161	8	0	0	0	0	0	0	200	300	0	0	0	0	0	0	0	200	903	0	0	0	0	0	0	0	603	903	0
161	9	0	0	0	0	0	0	200	300	0	0	0	0	0	0	0	200	903	0	0	0	0	0	0	0	603	903	0
162	0	0	0	0	0	0	0	200	300	0	0	0	0	0	0	0	200	903	0	0	0	0	0	0	0	603	903	0
162	1	0	0	0	0	0	0	200	300	0	0	0	0	0	0	0	200	903	0	0	0	0	0	0	0	603	903	0
162	2	0	0	0	0	0	0	200	300	0	0	0	0	0	0	0	200	903	0	0	0	0	0	0	0	603	903	0
162	3	0	0	0	0	0	0	200	300	0	0	0	0	0	0	0	200	903	0	0	0	0	0	0	0	603	903	0
162	4	0	0	0	0	0	0	200	300	0	0	0	0	0	0	0	200	903	0	0	0	0	0	0	0	603	903	0
162	5	0	0	0	0	0	0	200	300	0	0	0	0	0	0	0	200	903	0	0	0	0	0	0	0	603	903	0
162	6	0	0	0	0	0	0	200	300	0	0	0	0	0	0	0	200	903	0	0	0	0	0	0	0	603	903	0
162	7	0	0	0	0	0	0	200	300	0	0	0	0	0	0	0	200	903	0	0	0	0	0	0	0	603	903	0
162	8	0	0	0	0	0	0	200	300	0	0	0	0	0	0	0	200	903	0	0	0	0	0	0	0	603	903	0
162	9	0	0	0	0	0	0	200	300	0	0	0	0	0	0	0	200	903	0	0	0	0	0	0	0	603	903	0
163	0	0	0	0	0	0	0	200	300	0	0	0	0	0	0	0	200	903	0	0	0	0	0	0	0	603	903	0
163	1	0	0	0	0	0	0	200	300	0	0	0	0	0	0	0	200	903	0	0	0	0	0	0	0	603	903	0
163	2	0	0	0	0	0	0	200	300	0	0	0	0	0	0	0	200	903	0	0	0	0	0	0	0	603	903	0
163	3	0	0	0	0	0	0	200	300	0	0	0	0	0	0	0	200	903	0	0	0	0	0	0	0	603	903	0
163	4	0	0	0	0	0	0	200	300	0	0	0	0	0	0	0	200	903	0	0	0	0	0	0	0	603	903	0
163	5	0	0	0	0	0	0	200	300	0	0	0	0	0	0	0	200	903	0	0	0	0	0	0	0	603	903	0
163	6	0	0	0	0	0	0	200	300	0	0	0	0	0	0	0	200	903	0	0	0	0	0	0	0	603	903	0
163	7	0	0	0	0	0	0	200	300	0	0	0	0	0	0	0	200	903	0	0	0	0	0	0	0	603	903	0
163	8	0	0	0	0	0	0	200	300	0	0	0	0	0	0	0	200	903	0	0	0	0	0	0	0	603	903	0
163	9	0	0	0	0	0	0	200	300	0	0	0	0	0	0	0	200	903	0	0	0	0	0	0	0	603	903	0
164	0	0	0	0	0	0	0	200	300	0	0	0	0	0	0	0	200	903	0	0	0	0	0	0	0	603	903	0
164	1	0	0	0	0	0	0	200	300	0	0	0	0	0	0	0	200	903	0	0	0	0	0	0	0	603	903	0
164	2	0	0	0	0	0	0	200	300	0	0	0	0	0	0	0	200	903	0	0	0	0	0	0	0	603	903	0
164	3	0	0	0	0	0	0	200	300	0	0	0	0	0	0	0	200	903	0	0	0	0	0	0	0	603	903	0
164	4	0	0	0	0	0	0	200	300	0	0	0	0	0	0	0	200	903	0	0	0	0	0	0	0	603	903	0
164	5	0	0	0	0	0	0	200	300	0	0	0	0	0	0	0	200	903	0	0	0	0	0	0	0	603	903	0
164	6	0	0	0	0	0	0	200	300	0	0	0	0	0	0	0	200	903	0	0	0	0	0	0	0	603	903	0
164	7	0	0	0	0	0	0	200	300	0	0	0	0	0	0	0	200	903	0	0	0	0	0	0	0	603	903	0
164	8	0	0	0	0	0	0	200	300	0	0	0	0	0	0	0	200	903	0	0	0	0	0	0	0	603	903	0
164	9	0	0	0	0	0	0	200	300	0	0	0	0	0	0	0	200	903	0	0	0	0	0	0	0	603	903	0
165	0	0	0	0	0	0	0	200	300	0	0	0	0	0	0	0	200	903	0	0	0	0	0	0	0	603	903	0
165	1	0	0	0	0	0	0	200	300	0	0	0	0	0	0	0	200	903	0	0	0	0	0	0	0	603	903	0
165	2	0	0	0	0	0	0	200	300	0	0	0	0	0	0	0	200	903	0	0	0	0	0	0	0	603	903	0
165	3	0	0	0	0	0	0	200	300	0	0	0	0	0	0	0	200	903	0	0	0	0	0	0	0	603	903	0
165	4	0	0	0	0	0	0	200	300	0	0	0	0	0	0	0	200	903	0	0	0	0	0	0	0	603	903	0
165	5	0	0	0	0	0	0	200	300	0	0	0	0	0	0	0	200	903	0	0	0	0	0	0	0	603	903	0
165	6	0	0	0	0	0	0	200	300	0	0	0	0	0	0	0	200	903	0	0	0	0	0	0	0	603	903	0
165	7	0	0	0	0	0	0	200	300	0	0	0	0	0	0	0	200	903	0	0	0	0	0	0	0	603	903	0
165	8	0	0	0	0	0	0	200	300	0	0	0	0	0	0	0	200	903	0	0	0	0	0	0	0	603	903	0
165	9	0	0	0	0	0	0	200	300	0	0	0	0	0	0	0	200	903	0	0	0	0	0	0	0	603	903	0
166	0	0	0	0	0	0	0	200	300	0	0	0	0	0	0	0	200	903	0	0	0	0	0	0	0	603	903	0
166	1	0	0	0	0	0	0	200	300	0	0	0	0	0	0	0	200	903	0	0	0	0	0	0	0	603	903	0
166	2	0	0	0	0	0	0	200	300	0	0	0	0	0	0	0	200	903	0	0	0	0	0	0	0	603	903	0
166	3	0	0	0	0	0	0	200	300	0	0	0	0	0	0	0	200	903	0	0	0	0	0	0	0	603	903	0
166	4	0	0	0	0	0	0	200	300	0	0	0	0	0	0	0	200	903	0	0	0	0	0	0	0	603	903	0
166	5	0	0	0	0	0	0	200	300	0	0	0	0	0	0	0	200	903	0	0	0	0	0	0	0	603	903	0
166	6	0	0	0	0	0	0	200	300	0	0	0	0	0	0	0	200	903	0	0	0	0	0	0	0	603	903	0
166	7	0	0	0	0	0	0	200	300	0	0	0	0	0	0	0	200	903	0	0	0	0	0	0	0	603	903	0
166	8	0	0	0	0	0	0	200	300	0	0	0	0	0	0	0	200	903	0	0	0	0	0	0	0	603	903	0
166	9	0	0	0	0	0	0	200	300	0	0	0	0	0	0	0	200	903	0	0	0	0	0	0	0	603	903	0
167	0	0	0	0	0	0	0	200	300	0	0	0	0	0	0	0	200	903	0	0	0	0	0	0	0	603	903	0
167	1	0	0	0	0	0	0	200	300	0	0	0	0	0	0	0	200	903	0	0	0	0	0	0	0	603	903	0
167	2	0	0	0	0	0	0	200	300	0	0	0	0	0	0	0	200	903	0	0	0	0	0	0	0	603	903	0
167	3	0	0	0	0	0	0	200	300	0	0	0	0	0	0	0	200	903	0	0	0	0	0	0	0	603	903	0
167	4	0	0	0	0	0	0	200	300	0	0	0	0	0	0	0	200	903	0	0	0	0	0	0	0	603	903	0
167	5	0	0	0	0	0	0	200	300	0	0	0	0	0	0	0	200	903	0	0	0	0	0	0	0	603	903	0
167	6	0	0	0	0	0	0	200	300	0	0	0	0	0	0	0	200	903	0	0	0	0	0	0	0	603	903	0
167	7	0	0	0	0	0	0	200	300	0	0	0	0	0	0	0	200	903	0	0	0	0	0	0	0	603	903	0
167	8	0	0	0	0	0	0	200	300	0	0	0	0	0	0	0	200	903	0	0	0	0	0	0	0	603	903	0
167	9	0	0	0	0	0	0	200	300	0	0	0	0	0	0	0	200	903	0	0	0	0	0	0	0	603	903	0
168	0	0	0	0	0	0	0	200	300	0	0	0	0	0	0	0	200	903	0	0	0	0	0	0	0	603	903	0
168	1	0	0	0	0	0	0	200	300	0	0	0	0	0	0	0	200	903	0	0	0	0	0	0	0	603	903	0
168	2	0	0	0	0	0	0	200	300	0	0	0	0	0	0	0	200	903	0	0	0	0	0	0	0	603	903	0
168	3	0	0	0	0	0	0	200	300	0	0	0	0	0	0	0	200	903	0	0	0	0	0	0	0	603	903	0
168	4	0	0	0	0	0	0	200	300	0	0	0	0	0	0	0	200	903	0	0	0	0	0	0	0	603	903	0
168	5	0	0	0	0	0	0	200	300	0	0	0	0	0	0	0	200	903	0	0	0	0	0	0	0	603	903	0
168	6	0	0	0	0	0	0	200	300	0	0	0	0	0	0	0	200	903	0	0	0	0	0	0	0	603	903	0
168	7	0	0	0	0	0	0	200	300	0	0	0	0	0	0	0	200	903	0	0	0	0	0	0	0	603	903	0
168	8	0	0	0	0	0	0	200	300	0	0	0	0	0	0	0	200	903	0	0	0	0	0	0	0	603	903	0
168	9	0	0	0	0	0	0	200	300	0	0	0	0	0	0	0	200	903	0	0	0	0	0	0	0	603	903	0
169	0	0	0	0	0	0	0	200	300	0	0	0	0	0	0	0	200	903	0	0	0	0	0	0	0	603	903	0
169	1	0	0	0	0	0	0	200	300	0	0	0	0	0	0	0	200	903	0	0	0	0	0	0	0	603	903	0
169	2	0	0	0	0	0	0	200	300	0	0	0	0	0	0	0	200	903	0	0	0	0	0	0	0	603	903	0
169	3	0	0	0	0	0	0	200	300	0	0	0	0	0	0	0	200	903	0	0	0	0	0	0	0	603	903	0
169	4	0	0	0	0	0	0	200	300	0	0	0	0	0	0	0	200	903	0	0	0	0	0	0	0	603	903	0
169	5	0	0	0	0	0	0	200	300	0	0	0	0	0	0	0	200	903	0	0	0	0	0	0	0	603	903	0
169	6	0	0	0	0	0	0	200	300	0	0	0	0	0	0	0	200	903	0	0	0	0	0	0	0	603	903	0
169	7	0	0	0	0	0	0	200	300	0	0	0	0	0	0	0	200	903	0	0	0	0	0	0	0	603	903	0
169	8	0	0	0	0	0	0	200	300	0	0	0	0	0	0	0	200	903	0	0	0	0	0	0	0	603	903	0
169	9	0	0	0	0	0	0	200	300	0	0	0	0	0	0	0	200	903	0	0	0	0	0	0	0	603	903	0
170	0	0	0	0	0	0	0	200	300	0	0	0	0	0	0	0	200	903	0	0	0	0	0	0	0	603	903	0
170	1	0	0	0	0	0	0	200	300	0	0	0	0	0	0	0	200	903	0	0	0	0	0	0	0	603	903	0
170	2	0	0	0	0	0	0	200	300	0	0	0	0	0	0	0	200	903	0	0	0	0	0	0	0	603	903	0
170	3	0	0	0	0	0	0	200	300	0	0	0	0	0	0	0	200	903	0	0	0	0	0	0	0	603	903	0
170	4	0	0	0	0	0	0	200	300	0	0	0	0	0	0	0	200	903	0	0	0	0	0	0	0	603	903	0
170	5	0	0	0	0	0	0	200	300	0	0	0	0	0	0	0	200	903	0	0	0	0	0	0	0	603	903	0
170	6	0	0	0	0	0	0	200	300	0	0	0	0	0	0	0	200	903	0	0	0	0	0	0	0	603	903	0
170	7	0	0	0	0	0	0	200	300	0	0	0	0	0	0	0	200	903	0	0	0	0	0	0	0	603	903	0
170	8	0	0	0	0	0	0	200	300	0	0	0	0	0	0	0	200	903	0	0	0	0	0	0	0	603	903	0
170	9	0	0	0	0	0	0	200	300	0	0	0	0	0	0	0	200	903	0	0	0	0	0	0	0	603	903	0
171	0	0	0	0	0	0	0	200	300	0	0	0	0	0	0	0	200	903	0	0	0	0	0	0	0	603	903	0
171	1	0	0	0	0	0	0	200	300	0	0	0	0	0	0	0	200	903	0	0	0	0	0	0	0	603	903	0
171	2	0	0	0	0	0	0	200	300	0	0	0	0	0	0	0	200	903	0	0	0	0	0	0	0	603	903	0
171	3	0	0	0	0	0	0	200	300	0	0	0	0	0	0	0	200	903	0	0	0	0	0	0	0	603	903	0
171	4	0	0	0	0	0	0	200	300	0	0	0	0	0	0	0	200	903	0	0	0	0	0	0	0	603	903	0
171	5	0	0	0	0	0	0	200	300	0	0	0	0	0	0	0	200	903	0	0	0	0	0	0	0	603	903	0
171	6	0	0	0	0	0	0	200	300	0	0	0	0	0	0	0	200	903	0	0	0	0	0	0	0	603	903	0
171	7	0	0	0	0	0	0	200	300	0	0	0	0	0	0	0	200	903	0	0	0	0	0	0	0	603	903	0
171	8	0	0	0	0	0	0	200	300	0	0	0	0	0	0	0	200	903	0	0	0	0	0	0	0	603	903	0
171	9	0	0	0	0	0	0	200	300	0	0	0	0	0	0	0	200	903	0	0	0	0	0	0	0	603	903	0
172	0	0	0	0	0	0	0	200	300	0	0	0	0	0	0	0	200	903	0	0	0	0	0	0	0	603	903	0
172	1	0	0	0	0	0	0	200	300	0	0	0	0	0	0	0	200	903	0	0	0	0	0	0	0	603	903	0
172	2	0	0	0	0	0	0	200	300	0	0	0	0	0	0	0	200	903	0	0	0	0	0	0	0	603	903	0
172	3	0	0	0	0	0	0	200	300	0	0	0	0	0	0	0	200	903	0	0	0	0	0	0	0	603	903	0
172	4	0	0	0	0	0	0	200	300	0	0	0	0	0	0	0	200	903	0	0	0	0	0	0	0	603	903	0
172	5	0	0	0	0	0	0	200	300	0	0	0	0	0	0	0	200	903	0	0	0	0	0	0	0	603	903	0
172	6	0	0	0	0	0	0	200	300	0	0	0	0	0	0	0	200	903	0	0	0	0	0	0	0	603	903	0
172	7	0	0	0	0	0	0	200	300	0	0	0	0	0	0	0	200	903	0	0	0	0	0	0	0	603	903	0
172	8	0	0	0	0	0	0	200	300	0	0	0	0	0	0	0	200	903	0	0	0	0	0	0	0	603	903	0
172	9	0	0	0	0	0	0	200	300	0	0	0	0	0	0	0	200	903	0	0	0	0	0	0	0	603	903	0
173	0	0	0	0	0	0	0	200	300	0	0	0	0	0	0	0	200	903	0	0	0	0	0	0	0	603	903	0
173	1	0	0	0	0	0	0	200	300	0	0	0	0	0	0	0	200	903	0	0	0	0	0	0	0	603	903	0
173	2	0	0	0	0	0	0	200	300	0	0	0	0	0	0	0	200	903	0	0	0	0	0	0	0	603	903	0
173	3	0	0	0	0	0	0	200	300	0	0	0	0	0	0	0	200	903	0	0	0	0	0	0	0	603	903	0
173	4	0	0	0	0	0	0	200	300	0	0	0	0	0	0	0	200	903	0	0	0	0	0	0	0	603	903	0
173	5	0	0	0	0	0	0	200	300	0	0	0	0	0	0	0	200	903	0	0	0	0	0	0	0	603	903	0
173	6	0	0	0	0	0	0	200	300	0	0	0	0	0	0	0	200	903	0	0	0	0	0	0	0	603	903	0
173	7	0	0	0	0	0	0	200	300	0	0	0	0	0	0	0	200	903	0	0	0	0	0	0	0	603	903	0
173	8	0	0	0	0	0	0	200	300	0	0	0	0	0	0	0	200	903	0	0	0	0	0	0	0	603	903	0
173	9	0	0	0	0	0	0	200	300	0	0	0	0	0	0	0	200	903	0	0	0	0	0	0	0	603	903	0
174	0	0	0	0	0	0	0	200	300	0	0	0	0	0	0	0	200	903	0	0	0	0	0	0	0	603	903	0
174	1	0	0	0	0	0	0	200	300	0	0	0	0	0	0	0	200	903	0	0	0	0	0	0	0	603	903	0
174	2	0	0	0	0	0	0	200	300	0	0	0	0	0	0	0	200	903	0	0	0	0	0	0	0	603	903	0
174	3	0	0	0	0	0	0	200	300	0	0	0	0	0	0	0	200	903	0	0	0	0	0	0	0	603	903	0
174	4	0	0	0	0	0	0	200	300	0	0	0	0	0	0	0	200	903	0	0	0	0	0	0	0	603	903	0
174	5	0	0	0	0	0	0	200	300	0	0	0	0	0	0	0	200	903	0	0	0	0	0	0	0	603	903	0
174	6	0	0	0	0	0	0	200	300	0	0	0	0	0	0	0	200	903	0	0	0	0	0	0	0	603	903	0
174	7	0	0	0	0	0	0	200	300	0	0	0	0	0	0	0	200	903	0	0	0	0	0	0	0	603	903	0
174	8	0	0	0	0	0	0	200	300	0	0	0	0	0	0	0	200	903	0	0	0	0	0	0	0	603	903	0
174	9	0	0	0	0	0	0	200	300	0	0	0	0	0	0	0	200	903	0	0	0	0	0	0	0	603	903	0
175	0	0	0	0	0	0	0	200	300	0	0	0	0	0	0	0	200	903	0	0	0	0	0	0	0	603	903	0
175	1	0	0	0	0	0	0	200	300	0	0	0	0	0	0	0	200	903	0	0	0	0	0	0	0	603	903	0
175	2	0	0	0	0	0	0	200	300	0	0	0	0	0	0	0	200	903	0	0	0	0	0	0	0	603	903	0
175	3	0	0	0	0	0	0	200	300	0	0	0	0	0	0	0	200	903	0	0	0	0	0	0	0	603	903	0
175	4	0	0	0	0	0	0	200	300	0	0	0	0	0	0	0	200	903	0	0	0	0	0	0	0	603	903	0
175	5	0	0	0	0	0	0	200	300	0	0	0	0	0	0	0	200	903	0	0	0	0	0	0	0	603	903	0
175	6	0	0	0	0	0	0	200	300	0	0	0	0	0	0	0	200	903	0	0	0	0	0	0	0	603	903	0
175	7	0	0	0	0	0	0	200	300	0	0	0	0	0	0	0	200	903	0	0	0	0	0	0	0	603	903	0
175	8	0	0	0	0	0	0	200	300	0	0	0	0	0	0	0	200	903	0	0	0	0	0	0	0	603	903	0
175	9	0	0	0	0	0	0	200	300	0	0	0	0	0	0	0	200	903	0	0	0	0	0	0	0	603	903	0
176	0	0	0	0	0	0	0	200	300	0	0	0	0	0	0	0	200	903	0	0	0	0	0	0	0	603	903	0
176	1	0	0	0	0	0	0	200	300	0	0	0	0	0	0	0	200	903	0	0	0	0	0	0	0	603	903	0
176	2	0	0	0	0	0	0	200	300	0	0	0	0	0	0	0	200	903	0	0	0	0	0	0	0	603	903	0
176	3	0	0	0	0	0	0	200	300	0	0	0	0	0	0	0	200	903	0	0	0	0	0	0	0	603	903	0
176	4	0	0	0	0	0	0	200	300	0	0	0	0	0	0	0	200	903	0	0	0	0	0	0	0	603	903	0
176	5	0	0	0	0	0	0	200	300	0	0	0	0	0	0	0	200	903	0	0	0	0	0	0	0	603	903	0
176	6	0	0	0	0	0	0	200	300	0	0	0	0	0	0	0	200	903	0	0	0	0	0	0	0	603	903	0
176	7	0	0	0	0	0	0	200	300	0	0	0	0	0	0	0	200	903	0	0	0	0	0	0	0	603	903	0
176	8	0	0	0	0	0	0	200	300	0	0	0	0	0	0	0	200	903	0	0	0	0	0	0	0	603	903	0
176	9	0	0	0	0	0	0	200	300	0	0	0	0	0	0	0	200	903	0	0	0	0	0	0	0	603	903	0
177	0	0	0	0	0	0	0	200	300	0	0	0	0	0	0	0	200	903	0	0	0	0	0	0	0	603	903	0
177	1	0	0	0	0	0	0	200	300	0	0	0	0	0	0	0	200	903	0	0	0	0	0	0	0	603	903	0
177	2	0	0	0	0	0	0	200	300	0	0	0	0	0	0	0	200	903	0	0	0	0	0	0	0	603	903	0
177	3	0	0	0	0	0	0	200	300	0	0	0	0	0	0	0	200	903	0	0	0	0	0	0	0	603	903	0
177	4	0	0	0	0	0	0	200	300	0	0	0	0	0	0	0	200	903	0	0	0	0	0	0	0	603	903	0
177	5	0	0	0	0	0	0	200	300	0	0	0	0	0	0	0	200	903	0	0	0	0	0	0	0	603	903	0
177	6	0	0	0	0	0	0	200	300	0	0	0	0	0	0	0	200	903	0	0	0	0	0	0	0	603	903	0
177	7	0	0	0	0	0	0	200	300	0	0	0	0	0	0	0	200	903	0	0	0	0	0	0	0	603	903	0
177	8	0	0	0	0	0	0	200	300	0	0	0	0	0	0	0	200	903	0	0	0	0	0	0	0	603	903	0
177	9	0	0	0	0	0	0	200	300	0	0	0	0	0	0	0	200	903	0	0	0	0	0	0	0	603	903	0
178	0	0	0	0	0	0	0	200	300	0	0	0	0	0	0	0	200	903	0	0	0	0	0	0	0	603	903	0
178	1	0	0	0	0	0	0	200	300	0	0	0	0	0	0	0	200	903	0	0	0	0	0	0	0	603	903	0
178	2	0	0	0	0	0	0	200	300	0	0	0	0	0	0	0	200	903	0	0	0	0	0	0	0	603	903	0
178	3	0	0	0	0	0	0	200	300	0	0	0	0	0	0	0	200	903	0	0	0	0	0	0	0	603	903	0
178	4	0	0	0	0	0	0	200	300	0	0	0	0	0	0	0	200	903	0	0	0	0	0	0	0	603	903	0
178	5	0	0	0	0	0	0	200	300	0	0	0	0	0	0	0	200	903	0	0	0	0	0	0	0	603	903	0
178	6	0	0	0	0	0	0	200	300	0	0	0	0	0	0	0	200	903	0	0	0	0	0	0	0	603	903	0
178	7	0	0	0	0	0	0	200	300	0	0	0	0	0	0	0	200	903	0	0	0	0	0	0	0	603	903	0
178	8	0	0	0	0	0	0	200	300	0	0	0	0	0	0	0	200	903	0	0	0	0	0	0	0	603	903	0
178	9	0	0	0	0	0	0	200	300	0	0	0	0	0	0	0	200	903	0	0	0	0	0	0	0	603	903	0
179	0	0	0	0	0	0	0	200	300	0	0	0	0	0	0	0	200	903	0	0	0	0	0	0	0	603	903	0
179	1	0	0	0	0	0	0	200	300	0	0	0	0	0	0	0	200	903	0	0	0	0	0	0	0	603	903	0
179	2	0	0	0	0	0	0	200	300	0	0	0	0	0	0	0	200	903	0	0	0	0	0	0	0	603	903	0
179	3	0	0	0	0	0	0	200	300	0	0	0	0	0	0	0	200	903	0	0	0	0	0	0	0	603	903	0
179	4	0	0	0	0	0	0	200	300	0	0	0	0	0	0	0	200	903	0	0	0	0	0	0	0	603	903	0
179	5	0	0	0	0	0	0	200	300	0	0	0	0	0	0	0	200	903	0	0	0	0	0	0	0	603	903	0
179	6	0	0	0	0	0	0	200	300	0	0	0	0	0	0	0	200	903	0	0	0	0	0	0	0	603	903	0
179	7	0	0	0	0	0	0	200	300	0	0	0	0	0	0	0	200	903	0	0	0	0	0	0	0	603	903	0
179	8	0	0	0	0	0	0	200	300	0	0	0	0	0	0	0	200	903	0	0	0	0	0	0	0	603	903	0
179	9	0	0	0	0	0	0	200	300	0	0	0	0	0	0	0	200	903	0	0	0	0	0	0	0	603	903	0
180	0	0	0	0	0	0	0	200	300	0	0	0	0	0	0	0	200	903	0	0	0	0	0	0	0	603	903	0
180	1	0	0	0	0	0	0	200	300	0	0	0	0	0	0	0	200	903	0	0	0	0	0	0	0	603	903	0
180	2	0	0	0	0	0	0	200	300	0	0	0	0	0	0	0	200	903	0	0	0	0	0	0	0	603	903	0
180	3	0	0	0	0	0	0	200	300	0	0	0	0	0	0	0	200	903	0	0	0	0	0	0	0	603	903	0
180	4	0	0	0	0	0	0	200	300	0	0	0	0	0	0	0	200	903	0	0	0	0	0	0	0	603	903	0
180	5	0	0	0	0	0	0	200	300	0	0	0	0	0	0	0	200	903	0	0	0	0	0	0	0	603	903	0
180	6	0	0	0	0	0	0	200	300	0	0	0	0	0	0	0	200	903	0	0	0	0	0	0	0	603	903	0
180	7	0	0	0	0	0	0	200	300	0	0	0	0	0	0	0	200	903	0	0	0	0	0	0	0	603	903	0
180	8	0	0	0	0	0	0	200	300	0	0	0	0	0	0	0	200	903	0	0	0	0	0	0	0	603	903	0
180	9	0	0	0	0	0	0	200	300	0	0	0	0	0	0	0	200	903	0	0	0	0	0	0	0	603	903	0
181	0	0	0	0	0	0	0	200	300	0	0	0	0	0	0	0	200	903	0	0	0	0	0	0	0	603	903	0
181	1	0	0	0	0	0	0	200	300	0	0	0	0	0	0	0	200	903	0	0	0	0	0	0	0	603	903	0
181	2	0	0	0	0	0	0	200	300	0	0	0	0	0	0	0	200	903	0	0	0	0	0	0	0	603	903	0
181	3	0	0	0	0	0	0	200	300	0	0	0	0	0	0	0	200	903	0	0	0	0	0	0	0	603	903	0
181	4	0	0	0	0	0	0	200	300	0	0	0	0	0	0	0	200	903	0	0	0	0	0	0	0	603	903	0
181	5	0	0	0	0	0	0	200	300	0	0	0	0	0	0	0	200	903	0	0	0	0	0	0	0	603	903	0
181	6	0	0	0	0	0	0	200	300	0	0	0	0	0	0	0	200	903	0	0	0	0	0	0	0	603	903	0
181	7	0	0	0	0	0	0	200	300	0	0	0	0	0	0	0	200	903	0	0	0	0	0	0	0	603	903	0
181	8	0	0	0	0	0	0	200	300	0	0	0	0	0	0	0	200	903	0	0	0	0	0	0	0	603	903	0
181	9	0	0	0	0	0	0	200	300	0	0	0	0	0	0	0	200	903	0	0	0	0	0	0	0	603	903	0
182	0	0	0	0	0	0	0	200	300	0	0	0	0	0	0	0	200	903	0	0	0	0	0	0	0	603	903	0
182	1	0	0	0	0	0	0	200	300	0	0	0	0	0	0	0	200	903	0	0	0	0	0	0	0	603	903	0
182	2	0	0	0	0	0	0	200	300	0	0	0	0	0	0	0	200	903	0	0	0	0	0	0	0	603	903	0
182	3	0	0	0	0	0	0	200	300	0	0	0	0	0	0	0	200	903	0	0	0	0	0	0	0	603	903	0
182	4	0	0	0	0	0	0	200	300	0	0	0	0	0	0	0	200	903	0	0	0	0	0	0	0	603	903	0
182	5	0	0	0	0	0	0	200	300	0	0	0	0	0	0	0	200	903	0	0	0	0	0	0	0	603	903	0
182	6	0	0	0	0	0	0	200	300	0	0	0	0	0	0	0	200	903	0	0	0	0	0	0	0	603	903	0
182	7	0	0	0	0	0	0	200	300	0	0	0	0	0	0	0	200	903	0	0	0	0	0	0	0	603	903	0
182	8	0	0	0	0	0	0	200	300	0	0	0	0	0	0	0	200	903	0	0	0	0	0	0	0	603	903	0
182	9	0	0	0	0	0	0	200	300	0	0	0	0	0	0	0	200	903	0	0	0	0	0	0	0	603	903	0
183	0	0	0	0	0	0	0	200	300	0	0	0	0	0	0	0	200	903	0	0	0	0	0	0	0	603	903	0
183	1	0	0	0	0	0	0	200	300	0	0	0	0	0	0	0	200	903	0	0	0	0	0	0	0	603	903	0
183	2	0	0	0	0	0	0	200	300	0	0	0	0	0	0	0	200	903	0	0	0	0	0	0	0	603	903	0
183	3	0	0	0	0	0	0	200	300	0	0	0	0	0	0	0	200	903	0	0	0	0	0	0	0	603	903	0
183	4	0	0	0	0	0	0	200	300	0	0	0	0	0	0	0	200	903	0	0	0	0	0	0	0	603	903	0
183	5	0	0	0	0	0	0	200	300	0	0	0	0	0	0	0	200	903	0	0	0	0	0	0	0	603	903	0
183	6	0	0	0	0	0	0	200	300	0	0	0	0	0	0	0	200	903	0	0	0	0	0	0	0	603	903	0
183	7	0	0	0	0	0	0	200	300	0	0	0	0	0	0	0	200	903	0	0	0	0	0	0	0	603	903	0
183	8	0	0	0	0	0	0	200	300	0	0	0	0	0	0	0	200	903	0	0	0	0	0	0	0	603	903	0
183	9	0	0	0	0	0	0	200	300	0	0	0	0	0	0	0	200	903	0	0	0	0	0	0	0	603	903	0
184	0	0	0	0	0	0	0	200	300	0	0	0	0	0	0	0	200	903	0	0	0	0	0	0	0	603	903	0
184	1	0	0	0	0	0	0	200	300	0	0	0	0	0	0	0	200	903	0	0	0	0	0	0	0	603	903	0
184	2	0	0	0	0	0	0	200	300	0	0	0	0	0	0	0	200	903	0	0	0	0	0	0	0	603	903	0
184	3	0	0	0	0	0	0	200	300	0	0	0	0	0	0	0	200	903	0	0	0	0	0	0	0	603	903	0
184	4	0	0	0	0	0	0	200	300	0	0	0	0	0	0	0	200	903	0	0	0	0	0	0	0	603	903	0
184	5	0	0	0	0	0	0	200	300	0	0	0	0	0	0	0	200	903	0	0	0	0	0	0	0	603	903	0
184	6	0	0	0	0	0	0	200	300	0	0	0	0	0	0	0	200	903	0	0	0	0	0	0	0	603	903	0
184	7	0	0	0	0	0	0	200	300	0	0	0	0	0	0	0	200	903	0	0	0	0	0	0	0	603	903	0
184	8	0	0	0	0	0	0	200	300	0	0	0	0	0	0	0	200	903	0	0	0	0	0	0	0	603	903	0
184	9	0	0	0	0	0	0	200	300	0	0	0	0	0	0	0	200	903	0	0	0	0	0	0	0	603	903	0
185	0	0	0	0	0	0	0	200	300	0	0	0	0	0	0	0	200	903	0	0	0	0	0	0	0	603	903	0
185	1	0	0	0	0	0	0	200	300	0	0	0	0	0	0	0	200	903	0	0	0	0	0	0	0	603	903	0
185	2	0	0	0	0	0	0	200	300	0	0	0	0	0	0	0	200	903	0	0	0	0	0	0	0	603	903	0
185	3	0	0	0	0	0	0	200	300	0	0	0	0	0	0	0	200	903	0	0	0	0	0	0	0	603	903	0
185	4	0	0	0	0	0	0	200	300	0	0	0	0	0	0	0	200	903	0	0	0	0	0	0	0	603	903	0
185	5	0	0	0	0	0	0	200	300	0	0	0	0	0	0	0	200	903	0	0	0	0	0	0	0	603	903	0
185	6	0	0	0	0	0	0	200	300	0	0	0	0	0	0	0	200	903	0	0	0	0	0	0	0	603	903	0
185	7	0	0	0	0	0	0	200	300	0	0	0	0	0	0	0	200	903	0	0	0	0	0	0	0	603	903	0
185	8	0	0	0	0	0	0	200	300	0	0	0	0	0	0	0	200	903	0	0	0	0	0	0	0	603	903	0
185	9	0	0	0	0	0	0	200	300	0	0	0	0	0	0	0	200	903	0	0	0	0	0	0	0	603	903	0
186	0	0	0	0	0	0	0	200	300	0	0	0	0	0	0	0	200	903	0	0	0	0	0	0	0	603	903	0
186	1	0	0	0	0	0	0	200	300	0	0	0	0	0	0	0	200	903	0	0	0	0	0	0	0	603	903	0
186	2	0	0	0	0	0	0	200	300	0	0	0	0	0	0	0	200	903	0	0	0	0	0	0	0	603	903	0
186	3	0	0	0	0	0	0	200	300	0	0	0	0	0	0	0	200	903	0	0	0	0	0	0	0	603	903	0
186	4	0	0	0	0	0	0	200	300	0	0	0	0	0	0	0	200	903	0	0	0	0	0	0	0	603	903	0
186	5	0	0	0	0	0	0	200	300	0	0	0	0	0	0	0	200	903	0	0	0	0	0	0	0	603	903	0
186	6	0	0	0	0	0	0	200	300	0	0	0	0	0	0	0	200	903	0	0	0	0	0	0	0	603	903	0
186	7	0	0	0	0	0	0	200	300	0	0	0	0	0	0	0	200	903	0	0	0	0	0	0	0	603	903	0
186	8	0	0	0	0	0	0	200	300	0	0	0	0	0	0	0	200	903	0	0	0	0	0	0	0	603	903	0
186	9	0	0	0	0	0	0	200	300	0	0	0	0	0	0	0	200	903	0	0	0	0	0	0	0	603	903	0
187	0	0	0	0	0	0	0	200	300	0	0	0	0	0	0	0	200	903	0	0	0	0	0	0	0	603	903	0
187	1	0	0	0	0	0	0	200	300	0	0	0	0	0	0	0	200	903	0	0	0	0	0	0	0	603	903	0
187	2	0	0	0	0	0	0	200	300	0	0	0	0	0	0	0	200	903	0	0	0	0	0	0	0	603	903	0
187	3	0	0	0	0	0	0	200	300	0	0	0	0	0	0	0	200	903	0	0	0	0	0	0	0	603	903	0
187	4	0	0	0	0	0	0	200	300	0	0	0	0	0	0	0	200	903	0	0	0	0	0	0	0	603	903	0
187	5	0	0	0	0	0	0	200	300	0	0	0	0	0	0	0	200	903	0	0	0	0	0	0	0	603	903	0
187	6	0	0	0	0	0	0	200	300	0	0	0	0	0	0	0	200	903	0	0	0	0	0	0	0	603	903	0
187	7	0	0	0	0	0	0	200	300	0	0	0	0	0	0	0	200	903	0	0	0	0	0	0	0	603	903	0
187	8	0	0	0	0	0	0	200	300	0	0	0	0	0	0	0	200	903	0	0	0	0	0	0	0	603	903	0
187	9	0	0	0	0	0	0	200	300	0	0	0	0	0	0	0	200	903	0	0	0	0	0	0	0	603	903	0
188	0	0	0	0	0	0	0	200	300	0	0	0	0	0	0	0	200	903	0	0	0	0	0	0	0	603	903	0
188	1	0	0	0	0	0	0	200	300	0	0	0	0	0	0	0	200	903	0	0	0	0	0	0	0	603	903	0
188	2	0	0	0	0	0	0	200	300	0	0	0	0	0	0	0	200	903	0	0	0	0	0	0	0	603	903	0
188	3	0	0	0	0	0	0	200	300	0	0	0	0	0	0	0	200	903	0	0	0	0	0	0	0	603	903	0
188	4	0	0	0	0	0	0	200	300	0	0	0	0	0	0	0	200	903	0	0	0	0	0	0	0	603	903	0
188	5	0	0	0	0	0	0	200	300	0	0	0	0	0	0	0	200	903	0	0	0	0	0	0	0	603	903	0
188	6	0	0	0	0	0	0	200	300	0	0	0	0	0	0	0	200	903	0	0	0	0	0	0	0	603	903	0
188	7	0	0	0	0	0	0	200	300	0	0	0	0	0	0	0	200	903	0	0	0	0	0	0	0	603	903	0
188	8	0	0	0	0	0	0	200	300	0	0	0	0	0	0	0	200	903	0	0	0	0	0	0	0	603	903	0
188	9	0	0	0	0	0	0	200	300	0	0	0	0	0	0	0	200	903	0	0	0	0	0	0	0	603	903	0
189	0	0	0	0	0	0	0	200	300	0	0	0	0	0	0	0	200	903	0	0	0	0	0	0	0	603	903	0
189	1	0	0	0	0	0	0	200	300	0	0	0	0	0	0	0	200	903	0	0	0	0	0	0	0	603	903	0
189	2	0	0	0	0	0	0	200	300	0	0	0	0	0	0	0	200	903	0	0	0	0	0	0	0	603	903	0
189	3	0	0	0	0	0	0	200	300	0	0	0	0	0	0	0	200	903	0	0	0	0	0	0	0	603	903	0
189	4	0	0	0	0	0	0	200	300	0	0	0	0	0	0	0	200	903	0	0	0	0	0	0	0	603	903	0
189	5	0	0	0	0	0	0	200	300	0	0	0	0	0	0	0	200	903	0	0	0	0	0	0	0	603	903	0
189	6	0	0	0	0	0	0	200	300	0	0	0	0	0	0	0	200	903	0	0	0	0	0	0	0	603	903	0
189	7	0	0	0	0	0	0	200	300	0	0	0	0	0	0	0	200	903	0	0	0	0	0	0	0	603	903	0
189	8	0	0	0	0	0	0	200	300	0	0	0	0	0	0	0	200	903	0	0	0	0	0	0	0	603	903	0
189	9	0	0	0	0	0	0	200	300	0	0	0	0	0	0	0	200	903	0	0	0	0	0	0	0	603	903	0
190	0	0	0	0	0	0	0	200	300	0	0	0	0	0	0	0	200	903	0	0	0	0	0	0	0	603	903	0
190	1	0	0	0	0	0	0	200	300	0	0	0	0	0	0	0	200	903	0	0	0	0	0	0	0	603	903	0
190	2	0	0	0	0	0	0	200	300	0	0	0	0	0	0	0	200	903	0	0	0	0	0	0	0	603	903	0
190	3	0	0	0	0	0	0	200	300	0	0	0	0	0	0	0	200	903	0	0	0	0	0	0	0	603	903	0
190	4	0	0	0	0	0	0	200	300	0	0	0	0	0	0	0	200	903	0	0	0	0	0	0	0	603	903	0
190	5	0	0	0	0	0	0	200	300	0	0	0	0	0	0	0	200	903	0	0	0	0	0	0	0	603	903	0
190	6	0	0	0	0	0	0	200	300	0	0	0	0	0	0	0	200	903	0	0	0	0	0	0	0	603	903	0
190	7	0	0	0	0	0	0	200	300	0	0	0	0	0	0	0	200	903	0	0	0	0	0	0	0	603	903	0
190	8	0	0	0	0	0	0	200	300	0	0	0	0	0	0	0	200	903	0	0	0	0	0	0	0	603	903	0
190	9	0	0	0	0	0	0	200	300	0	0	0	0	0	0	0	200	903	0	0	0	0	0	0	0	603	903	0
191	0	0	0	0	0	0	0	200	300	0	0	0	0	0	0	0	200	903	0	0	0	0	0	0	0	603	903	0
191	1	0	0	0	0	0	0	200	300	0	0	0	0	0	0	0	200	903	0	0	0	0	0	0	0	603	903	0
191	2	0	0	0	0	0	0	200	300	0	0	0	0	0	0	0	200	903	0	0	0	0	0	0	0	603	903	0
191	3	0	0	0	0	0	0	200	300	0	0	0	0	0	0	0	200	903	0	0	0	0	0	0	0	603	903	0
191	4	0	0	0	0	0	0	200	300	0	0	0	0	0	0	0	200	903	0	0	0	0	0	0	0	603	903	0
191	5	0	0	0	0	0	0	200	300	0	0	0	0	0	0	0	200	903	0	0	0	0	0	0	0	603	903	0
191	6	0	0	0	0	0	0	200	300	0	0	0	0	0	0	0	200	903	0	0	0	0	0	0	0	603	903	0
191	7	0	0	0	0	0	0	200	300	0	0	0	0	0	0	0	200	903	0	0	0	0	0	0	0	603	903	0
191	8	0	0	0	0	0	0	200	300	0	0	0	0	0	0	0	200	903	0	0	0	0	0	0	0	603	903	0
191	9	0	0	0	0	0	0	200	300	0	0	0	0	0	0	0	200	903	0	0	0	0	0	0	0	603	903	0
192	0	0	0	0	0	0	0	200	300	0	0	0	0	0	0	0	200	903	0	0	0	0	0	0	0	603	903	0
192	1	0	0	0	0	0	0	200	300	0	0	0	0	0	0	0	200	903	0	0	0	0	0	0	0	603	903	0
192	2	0	0	0	0	0	0	200	300	0	0	0	0	0	0	0	200	903	0	0	0	0	0	0	0	603	903	0
192	3	0	0	0	0	0	0	200	300	0	0	0	0	0	0	0	200	903	0	0	0	0	0	0	0	603	903	0
192	4	0	0	0	0	0	0	200	300	0	0	0	0	0	0	0	200	903	0	0	0	0	0	0	0	603	903	0
192	5	0	0	0	0	0	0	200	300	0	0	0	0	0	0	0	200	903	0	0	0	0	0	0	0	603	903	0
192	6	0	0	0	0	0	0	200	300	0	0	0	0	0	0	0	200	903	0	0	0	0	0	0	0	603	903	0
192	7	0	0	0	0	0	0	200	300	0	0	0	0	0	0	0	200	903	0	0	0	0	0	0	0	603	903	0
192	8	0	0	0	0	0	0	200	300	0	0	0	0	0	0	0	200	903	0	0	0	0	0	0	0	603	903	0
192	9	0	0	0	0	0	0	200	300	0	0	0	0	0	0	0	200	903	0	0	0	0	0	0	0	603	903	0
193	0	0	0	0	0	0	0	200	300	0	0	0	0	0	0	0	200	903	0	0	0	0	0	0	0	603	903	0
193	1	0	0	0	0	0	0	200	300	0	0	0	0	0	0	0	200	903	0	0	0	0	0	0	0	603	903	0
193	2	0	0	0	0	0	0	200	300	0	0	0	0	0	0	0	200	903	0	0	0	0	0	0	0	603	903	0
193	3	0	0	0	0	0	0	200	300	0	0	0	0	0	0	0	200	903	0	0	0	0	0	0	0	603	903	0
193	4	0	0	0	0	0	0	200	300	0	0	0	0	0	0	0	200	903	0	0	0	0	0	0	0	603	903	0
193	5	0	0	0	0	0	0	200	300	0	0	0	0	0	0	0	200	903	0	0	0	0	0	0	0	603	903	0
193	6	0	0	0	0	0	0	200	300	0	0	0	0	0	0	0	200	903	0	0	0	0	0	0	0	603	903	0
193	7	0	0	0	0	0	0	200	300	0	0	0	0	0	0	0	200	903	0	0	0	0	0	0	0	603	903	0
193	8	0	0	0	0	0	0	200	300	0	0	0	0	0	0	0	200	903	0	0	0	0	0	0	0	603	903	0
193	9	0	0	0	0	0	0	200	300	0	0	0	0	0	0	0	200	903	0	0	0	0	0	0	0	603	903	0
194	0	0	0	0	0	0	0	200	300	0	0	0	0	0	0	0	200	903	0	0	0	0	0	0	0	603	903	0
194	1	0	0	0	0	0	0	200	300	0	0	0	0	0	0	0	200	903	0	0	0	0	0	0	0	603	903	0
194	2	0	0	0	0	0	0	200	300	0	0	0	0	0	0	0	200	903	0	0	0	0	0	0	0	603	903	0
194	3	0	0	0	0	0	0	200	300	0	0	0	0	0	0	0	200	903	0	0	0	0	0	0	0	603	903	0
194	4	0	0	0	0	0	0	200	300	0	0	0	0	0	0	0	200	903	0	0	0	0	0	0	0	603	903	0
194	5	0	0	0	0	0	0	200	300	0	0	0	0	0	0	0	200	903	0	0	0	0	0	0	0	603	903	0
194	6	0	0	0	0	0	0	200	300	0	0	0	0	0	0	0	200	903	0	0	0	0	0	0	0	603	903	0
194	7	0	0	0	0	0	0	200	300	0	0	0	0	0	0	0	200	903	0	0	0	0	0	0	0	603	903	0
194	8	0	0	0	0	0	0	200	300	0	0	0	0	0	0	0	200	903	0	0	0	0	0	0	0	603	903	0
194	9	0	0	0	0	0	0	200	300	0	0	0	0	0	0	0	200	903	0	0	0	0	0	0	0	603	903	0
195	0	0	0	0	0	0	0	200	300	0	0	0	0	0	0	0	200	903	0	0	0	0	0	0	0	603	903	0
195	1	0	0	0	0	0	0	200	300	0	0	0	0	0	0	0	200	903	0	0	0	0	0	0	0	603	903	0
195	2	0	0	0	0	0	0	200	300	0	0	0	0	0	0	0	200	903	0	0	0	0	0	0	0	603	903	0
195	3	0	0	0	0	0	0	200	300	0	0	0	0	0	0	0	200	903	0	0	0	0	0	0	0	603	903	0
195	4	0	0	0	0	0	0	200	300	0	0	0	0	0	0	0	200	903	0	0	0	0	0	0	0	603	903	0
195	5	0	0	0	0	0	0	200	300	0	0	0	0	0	0	0	200	903	0	0	0	0	0	0	0	603	903	0
195	6	0	0	0	0	0	0	200	300	0	0	0	0	0	0	0	200	903	0	0	0	0	0	0	0	603	903	0
195	7	0	0	0	0	0	0	200	300	0	0	0	0	0	0	0	200	903	0	0	0	0	0	0	0	603	903	0
195	8	0	0	0	0	0	0	200	300	0	0	0	0	0	0	0	200	903	0	0	0	0	0	0	0	603	903	0
195	9	0	0	0	0	0	0	200	300	0	0	0	0	0	0	0	200	903	0	0	0	0	0	0	0	603	903	0
196	0	0	0	0	0	0	0	200	300	0	0	0	0	0	0	0	200	903	0	0	0	0	0	0	0	603	903	0
196	1	0	0	0	0	0	0	200	300	0	0	0	0	0	0	0	200	903	0	0	0	0	0	0	0	603	903	0
196	2	0	0	0	0	0	0	200	300	0	0	0	0	0	0	0	200	903	0	0	0	0	0	0	0	603	903	0
196	3	0	0	0	0	0	0	200	300	0	0	0	0	0	0	0	200	903	0	0	0	0	0	0	0	603	903	0
196	4	0	0	0	0	0	0	200	300	0	0	0	0	0	0	0	200	903	0	0	0	0	0	0	0	603	903	0
196	5	0	0	0	0	0	0	200	300	0	0	0	0	0	0	0	200	903	0	0	0	0	0	0	0	603	903	0
196	6	0	0	0	0	0	0	200	300	0	0	0	0	0	0	0	200	903	0	0	0	0	0	0	0	603	903	0
196	7	0	0	0	0	0	0	200	300	0	0	0	0	0	0	0	200	903	0	0	0	0	0	0	0	603	903	0
196	8	0	0	0	0	0	0	200	300	0	0	0	0	0	0	0	200	903	0	0	0	0	0	0	0	603	903	0
196	9	0	0	0	0	0	0	200	300	0	0	0	0	0	0	0	200	903	0	0	0	0	0	0	0	603	903	0
197	0	0	0	0	0	0	0	200	300	0	0	0	0	0	0	0	200	903	0	0	0	0	0	0	0	603	903	0
197	1	0	0	0	0	0	0	200	300	0	0	0	0	0	0	0	200	903	0	0	0	0	0	0	0	603	903	0
197	2	0	0	0	0	0	0	200	300	0	0	0	0	0	0	0	200	903	0	0	0	0	0	0	0	603	903	0
197	3	0	0	0	0	0	0	200	300	0	0	0	0	0	0	0	200	903	0	0	0	0	0	0	0	603	903	0
197	4	0	0	0	0	0	0	200	300	0	0	0	0	0	0	0	200	903	0	0	0	0	0	0	0	603	903	0
197	5	0	0	0	0	0	0	200	300	0	0	0	0	0	0	0	200	903	0	0	0	0	0	0	0	603	903	0
197	6	0	0	0	0	0	0	200	300	0	0	0	0	0	0	0	200	903	0	0	0	0	0	0	0	603	903	0
197	7	0	0	0	0	0	0	200	300	0	0	0	0	0	0	0	200	903	0	0	0	0	0	0	0	603	903	0
197	8	0	0	0	0	0	0	200	300	0	0	0	0	0	0	0	200	903	0	0	0	0	0	0	0	603	903	0
197	9	0	0	0	0	0	0	200	300	0	0	0	0	0	0	0	200	903	0	0	0	0	0	0	0	603	903	0
198	0	0	0	0	0	0	0	200	300	0	0	0	0	0	0	0	200	903	0	0	0	0	0	0	0	603	903	0
198	1	0	0	0	0	0	0	200	300	0	0	0	0	0	0	0	200	903	0	0	0	0	0	0	0	603	903	0
198	2	0	0	0	0	0	0	200	300	0	0	0	0	0	0	0	200	903	0	0	0	0	0	0	0	603	903	0
198	3	0	0	0	0	0	0	200	300	0	0	0	0	0	0	0	200	903	0	0	0	0	0	0	0	603	903	0
198	4	0	0	0	0	0	0	200	300	0	0	0	0	0	0	0	200	903	0	0	0	0	0	0	0	603	903	0
198	5	0	0	0	0	0	0	200	300	0	0	0	0	0	0	0	200	903	0	0	0	0	0	0	0	603	903	0
198	6	0	0	0	0	0	0	200	300	0	0	0	0	0	0	0	200	903	0	0	0	0	0	0	0	603	903	0
198	7	0	0	0	0	0	0	200	300	0	0	0	0	0	0	0	200	903	0	0	0	0	0	0	0	603	903	0
198	8	0	0	0	0	0	0	200	300	0	0	0	0	0	0	0	200	903	0	0	0	0	0	0	0	603	903	0
198	9	0	0	0	0	0	0	200	300	0	0	0	0	0	0	0	200	903	0	0	0	0	0	0	0	603	903	0
199	0	0	0	0	0	0	0	200	300	0	0	0	0	0	0	0	200	903	0	0	0	0	0	0	0	603	903	0
199	1	0	0	0	0	0	0	200	300	0	0	0	0	0	0	0	200	903	0	0	0	0	0	0	0	603	903	0
199	2	0	0	0	0	0	0	200	300	0	0	0	0	0	0	0	200	903	0	0	0	0	0	0	0	603	903	0
199	3	0	0	0	0	0	0	200	300	0	0	0	0	0	0	0	200	903	0	0	0	0	0	0	0	603	903	0
199	4	0	0	0	0	0	0	200	300	0	0	0	0	0	0	0	200	903	0	0	0	0	0	0	0	603	903	0
199	5	0	0	0	0	0	0	200	300	0	0	0	0	0	0	0	200	903	0	0	0	0	0	0	0	603	903	0
199	6	0	0	0	0	0	0	200	300	0	0	0	0	0	0	0	200	903	0	0	0	0	0	0	0	603	903	0
199	7	0	0	0	0	0	0	200	300	0	0	0	0	0	0	0	200	903	0	0	0	0	0	0	0	603	903	0
199	8	0	0	0	0	0	0	200	300	0	0	0	0	0	0	0	200	903	0	0	0	0	0	0	0	603	903	0
199	9	0	0	0	0	0	0	200	300	0	0	0	0	0	0	0	200	903	0	0	0	0	0	0	0	603	903	0
200	0	0	0	0	0	0	0	200	300	0	0	0	0	0	0	0	200	903	0	0	0	0	0	0	0	603	903	0
200	1	0	0	0	0	0	0	200	300	0	0	0	0	0	0	0	200	903	0	0	0	0	0	0	0	603	903	0
200	2	0	0	0	0	0	0	200	300	0	0	0	0	0	0	0	200	903	0	0	0	0	0	0	0	603	903	0
200	3	0	0	0	0	0	0	200	300	0	0	0	0	0	0	0	200	903	0	0	0	0	0	0	0	603	903	0
200	4	0	0	0	0	0	0	200	300	0	0	0	0	0	0	0	200	903	0	0	0	0	0	0	0	603	903	0
200	5	0	0	0	0	0	0	200	300	0	0	0	0	0	0	0	200	903	0	0	0	0	0	0	0	603	903	0
200	6	0	0	0	0	0	0	200	300	0	0	0	0	0	0	0	200	903	0	0	0	0	0	0	0	603	903	0
200	7	0	0	0	0	0	0	200	300	0	0	0	0	0	0	0	200	903	0	0	0	0	0	0	0	603	903	0
200	8	0	0	0	0	0	0	200	300	0	0	0	0	0	0	0	200	903	0	0	0	0	0	0	0	603	903	0
200	9	0	0	0	0	0	0	200	300	0	0	0	0	0	0	0	200	903	0	0	0	0	0	0	0	603	903	0
201	0	0	0	0	0	0	0	200	300	0	0	0	0	0	0	0	200	903	0	0	0	0	0	0	0	603	903	0
201	1	0	0	0	0	0	0	200	300	0	0	0	0	0	0	0	200	903	0	0	0	0	0	0	0	603	903	0
201	2	0	0	0	0	0	0	200	300	0	0	0	0	0	0	0	200	903	0	0	0	0	0	0	0	603	903	0
201	3	0	0	0	0	0	0	200	300	0	0	0	0	0	0	0	200	903	0	0	0	0	0	0	0	603	903	0
201	4	0	0	0	0	0	0	200	300	0	0	0	0	0	0	0	200	903	0	0	0	0	0	0	0	603	903	0
201	5	0	0	0	0	0	0	200	300	0	0	0	0	0	0	0	200	903	0	0	0	0	0	0	0	603	903	0
201	6	0	0	0	0	0	0	200	300	0	0	0	0	0	0	0	200	903	0	0	0	0	0	0	0	603	903	0
201	7	0	0	0	0	0	0	200	300	0	0	0	0	0	0	0	200	903	0	0	0	0	0	0	0	603	903	0
201	8	0	0	0	0	0	0	200	300	0	0	0	0	0	0	0	200	903	0	0	0	0	0	0	0	603	903	0
201	9	0	0	0	0	0	0	200	300	0	0	0	0	0	0	0	200	903	0	0	0	0	0	0	0	603	903	0
202	0	0	0	0	0	0	0	200	300	0	0	0	0	0	0	0	200	903	0	0	0	0	0	0	0	603	903	0
202	1	0	0	0	0	0	0	200	300	0	0	0	0	0	0	0	200	903	0	0	0	0	0	0	0	603	903	0
202	2	0	0	0	0	0	0	200	300	0	0	0	0	0	0	0	200	903	0	0	0	0	0	0	0	603	903	0
202	3	0	0	0	0	0	0	200	300	0	0	0	0	0	0	0	200	903	0	0	0	0	0	0	0	603	903	0
202	4	0	0	0	0	0	0	200	300	0	0	0	0	0	0	0	200	903	0	0	0	0	0	0	0	603	903	0
202	5	0	0	0	0	0	0	200	300	0	0	0	0	0	0	0	200	903	0	0	0	0	0	0	0	603	903	0
202	6	0	0	0	0	0	0	200	300	0	0	0	0	0	0	0	200	903	0	0	0	0	0	0	0	603	903	0
202	7	0	0	0	0	0	0	200	300	0	0	0	0	0	0	0	200	903	0	0	0	0	0	0	0	603	903	0
202	8	0	0	0	0	0	0	200	300	0	0	0	0	0	0	0	200	903	0	0	0	0	0	0	0	603	903	0
202	9	0	0	0	0	0	0	200	300	0	0	0	0	0	0	0	200	903	0	0	0	0	0	0	0	603	903	0
203	0	0	0	0	0	0	0	200	300	0	0	0	0	0	0	0	200	903	0	0	0	0	0	0	0	603	903	0
203	1	0	0	0	0	0	0	200	300	0	0	0	0	0	0	0	200	903	0	0	0	0	0	0	0	603	903	0
203	2	0	0	0	0	0	0	200	300	0	0	0	0	0	0	0	200	903	0	0	0	0	0	0	0	603	903	0
203	3	0	0	0	0	0	0	200	300	0	0	0	0	0	0	0	200	903	0	0	0	0	0	0	0	603	903	0
203	4	0	0	0	0	0	0	200	300	0	0	0	0	0	0	0	200	903	0	0	0	0	0	0	0	603	903	0
203	5	0	0	0	0	0	0	200	300	0	0	0	0	0	0	0	200	903	0	0	0	0	0	0	0	603	903	0
203	6	0	0	0	0	0	0	200	300	0	0	0	0	0	0	0	200	903	0	0	0	0	0	0	0	603	903	0
203	7	0	0	0	0	0	0	200	300	0	0	0	0	0	0	0	200	903	0	0	0	0	0	0	0	603	903	0
203	8	0	0	0	0	0	0	200	300	0	0	0	0	0	0	0	200	903	0	0	0	0	0	0	0	603	903	0
203	9	0	0	0	0	0	0	200	300	0	0	0	0	0	0	0	200	903	0	0	0	0	0	0	0	603	903	0
204	0	0	0	0	0	0	0	200	300	0	0	0	0	0	0	0	200	903	0	0	0	0	0	0	0	603	903	0
204	1	0	0	0	0	0	0	200	300	0	0	0	0	0	0	0	200	903	0	0	0	0	0	0	0	603	903	0
204	2	0	0	0	0	0	0	200	300	0	0	0	0	0	0	0	200	903	0	0	0	0	0	0	0	603	903	0
204	3	0	0	0	0	0	0	200	300	0	0	0	0	0	0	0	200	903	0	0	0	0	0	0	0	603	903	0
204	4	0	0	0	0	0	0	200	300	0	0	0	0	0	0	0	200	903	0	0	0	0	0	0	0	603	903	0
204	5	0	0	0	0	0	0	200	300	0	0	0	0	0	0	0	200	903	0	0	0	0	0	0	0	603	903	0
204	6	0	0	0	0	0	0	200	300	0	0	0	0	0	0	0	200	903	0	0	0	0	0	0	0	603	903	0
204	7	0	0	0	0	0	0	200	300	0	0	0	0	0	0	0	200	903	0	0	0	0	0	0	0	603	903	0
204	8	0	0	0	0	0	0	200	300	0	0	0	0	0	0	0	200	903	0	0	0	0	0	0	0	603	903	0
204	9	0	0	0	0	0	0	200	300	0	0	0	0	0	0	0	200	903	0	0	0	0	0	0	0	603	903	0
205	0	0	0	0	0	0	0	200	300	0	0	0	0	0	0	0	200	903	0	0	0	0	0	0	0	603	903	0
205	1	0	0	0	0	0	0	200	300	0	0	0	0	0	0	0	200	903	0	0	0	0	0	0	0	603	903	0
205	2	0	0	0	0	0	0	200	300	0	0	0	0	0	0	0	200	903	0	0	0	0	0	0	0	603	903	0
205	3	0	0	0	0	0	0	200	300	0	0	0	0	0	0	0	200	903	0	0	0	0	0	0	0	603	903	0
205	4	0	0	0	0	0	0	200	300	0	0	0	0	0	0	0	200	903	0	0	0	0	0	0	0	603	903	0
205	5	0	0	0	0	0	0	200	300	0	0	0	0	0	0	0	200	903	0	0	0	0	0	0	0	603	903	0
205	6	0	0	0	0	0	0	200	300	0	0	0	0	0	0	0	200	903	0	0	0	0	0	0	0	603	903	0
205	7	0	0	0	0	0	0	200	300	0	0	0	0	0	0	0	200	903	0	0	0	0	0	0	0	603	903	0
205	8	0	0	0	0	0	0	200	300	0	0	0	0	0	0	0	200	903	0	0	0	0	0	0	0	603	903	0
205	9	0	0	0	0	0	0	200	300	0	0	0	0	0	0	0	200	903	0	0	0	0	0	0	0	603	903	0
206	0	0	0	0	0	0	0	200	300	0	0	0	0	0	0	0	200	903	0	0	0	0	0	0	0	603	903	0
206	1	0	0	0	0	0	0	200	300	0	0	0	0	0	0	0	200	903	0	0	0	0	0	0	0	603	903	0
206	2	0	0	0	0	0	0	200	300	0	0	0	0	0	0	0	200	903	0	0	0	0	0	0	0	603	903	0
206	3	0	0	0	0	0	0	200	300	0	0	0	0	0	0	0	200	903	0	0	0	0	0	0	0	603	903	0
206	4	0	0	0	0	0	0	200	300	0	0	0	0	0	0	0	200	903	0	0	0	0	0	0	0	603	903	0
206	5	0	0	0	0	0	0	200	300	0	0	0	0	0	0	0	200	903	0	0	0	0	0	0	0	603	903	0
206	6	0	0	0	0	0	0	200	300	0	0	0	0	0	0	0	200	903	0	0	0	0	0	0	0	603	903	0
206	7	0	0	0	0	0	0	200	300	0	0	0	0	0	0	0	200	903	0	0	0	0	0	0	0	603	903	0
206	8	0	0	0	0	0	0	200	300	0	0	0	0	0	0	0	200	903	0	0	0	0	0	0	0	603	903	0
206	9	0	0	0	0	0	0	200	300	0	0	0	0	0	0	0	200	903	0	0	0	0	0	0	0	603	903	0
207	0	0	0	0	0	0	0	200	300	0	0	0	0	0	0	0	200	903	0	0	0	0	0	0	0	603	903	0
207	1	0	0	0	0	0	0	200	300	0	0	0	0	0	0	0	200	903	0	0	0	0	0	0	0	603	903	0
207	2	0	0	0	0	0	0	200	300	0	0	0	0	0	0	0	200	903	0	0	0	0	0	0	0	603	903	0
207	3	0	0	0	0	0	0	200	300	0	0	0	0	0	0	0	200	903	0	0	0	0	0	0	0	603	903	0
207	4	0	0	0	0	0	0	200	300	0	0	0	0	0	0	0	200	903	0	0	0	0	0	0	0	603	903	0
207	5	0	0	0	0	0	0	200	300	0	0	0	0	0	0	0	200	903	0	0	0	0	0	0	0	603	903	0
207	6	0	0	0	0	0	0	200	300	0	0	0	0	0	0	0	200	903	0	0	0	0	0	0	0	603	903	0
207	7	0	0	0	0	0	0	200	300	0	0	0	0	0	0	0	200	903	0	0	0	0	0	0	0	603	903	0
207	8	0	0	0	0	0	0	200	300	0	0	0	0	0	0	0	200	903	0	0	0	0	0	0	0	603	903	0
207	9	0	0	0	0	0	0	200	300	0	0	0	0	0	0	0	200	903	0	0	0	0	0	0	0	603	903	0
208	0	0	0	0	0	0	0	200	300	0	0	0	0	0	0	0	200	903	0	0	0	0	0	0	0	603	903	0
208	1	0	0	0	0	0	0	200	300	0	0	0	0	0	0	0	200	903	0	0	0	0	0	0	0	603	903	0
208	2	0	0	0	0	0	0	200	300	0	0	0	0	0	0	0	200	903	0	0	0	0	0	0	0	603	903	0
208	3	0	0	0	0	0	0	200	300	0	0	0	0	0	0	0	200	903	0	0	0	0	0	0	0	603	903	0
208	4	0	0	0	0	0	0	200	300	0	0	0	0	0	0	0	200	903	0	0	0	0	0	0	0	603	903	0
208	5	0	0	0	0	0	0	200	300	0	0	0	0	0	0	0	200	903	0	0	0	0	0	0	0	603	903	0
208	6	0	0	0	0	0	0	200	300	0	0	0	0	0	0	0	200	903	0	0	0	0	0	0	0	603	903	0
208	7	0	0	0	0	0	0	200	300	0	0	0	0	0	0	0	200	903	0	0	0	0	0	0	0	603	903	0
208	8	0	0	0	0	0	0	200	300	0	0	0	0	0	0	0	200	903	0	0	0	0	0	0	0	603	903	0
208	9	0	0	0	0	0	0	200	300	0	0	0	0	0	0	0	200	903	0	0	0	0	0	0	0	603	903	0
209	0	0	0	0	0	0	0	200	300	0	0	0	0	0	0	0	200	903	0	0	0	0	0	0	0	603	903	0
209	1	0	0	0	0	0	0	200	300	0	0	0	0	0	0	0	200	903	0	0	0	0	0	0	0	603	903	0
209	2	0	0	0	0	0	0	200	300	0	0	0	0	0	0	0	200	903	0	0	0	0	0	0	0	603	903	0
209	3	0	0	0	0	0	0	200	300	0	0	0	0	0	0	0	200	903	0	0	0	0	0	0	0	603	903	0
209	4	0	0	0	0	0	0	200	300	0	0	0	0	0	0	0	200	903	0	0	0	0	0	0	0	603	903	0
209	5	0	0	0	0	0	0	200	300	0	0	0	0	0	0	0	200	903	0	0	0	0	0	0	0	603	903	0
209	6	0	0	0	0	0	0	200	300	0	0	0	0	0	0	0	200	903	0	0	0	0	0	0	0	603	903	0
209	7	0	0	0	0	0	0	200	300	0	0	0	0	0	0	0	200	903	0	0	0	0	0	0	0	603	903	0
209	8	0	0	0	0	0	0	200	300	0	0	0	0	0	0	0	200	903	0	0	0	0	0	0	0	603	903	0
209	9	0	0	0	0	0	0	200	300	0	0	0	0	0	0	0	200	903	0	0	0	0	0	0	0	603	903	0
210	0	0	0	0	0	0	0	200	300	0	0	0	0	0	0	0	200	903	0	0	0	0	0	0	0	603	903	0
210	1	0	0	0	0	0	0	200	300	0	0	0	0	0	0	0	200	903	0	0	0	0	0	0	0	603	903	0
210	2	0	0	0	0	0	0	200	300	0	0	0	0	0	0	0	200	903	0	0	0	0	0	0	0	603	903	0
210	3	0	0	0	0	0	0	200	300	0	0	0	0	0	0	0	200	903	0	0	0	0	0	0	0	603	903	0
210	4	0	0	0	0	0	0	200	300	0	0	0	0	0	0	0	200	903	0	0	0	0	0	0	0	603	903	0
210	5	0	0	0	0	0	0	200	300	0	0	0	0	0	0	0	200	903	0	0	0	0	0	0	0	603	903	0
210	6	0	0	0	0	0	0	200	300	0	0	0	0	0	0	0	200	903	0	0	0	0	0	0	0	603	903	0
210	7	0	0	0	0	0	0	200	300	0	0	0	0	0	0	0	200	903	0	0	0	0	0	0	0	603	903	0
210	8	0	0	0	0	0	0	200	300	0	0	0	0	0	0	0	200	903	0	0	0	0	0	0	0	603	903	0
210	9	0	0	0	0	0	0	200	300	0	0	0	0	0	0	0	200	903	0	0	0	0	0	0	0	603	903	0
211	0	0	0	0	0	0	0	200	300	0	0	0	0	0	0	0	200	903	0	0	0	0	0	0	0	603	903	0
211	1	0	0	0	0	0	0	200	300	0	0	0	0	0	0	0	200	903	0	0	0	0	0	0	0	603	903	0
211	2	0	0	0	0	0	0	200	300	0	0	0	0	0	0	0	200	903	0	0	0	0	0	0	0	603	903	0
211	3	0	0	0	0	0	0	200	300	0	0	0	0	0	0	0	200	903	0	0	0	0	0	0	0	603	903	0
211	4	0	0	0	0	0	0	200	300	0	0	0	0	0	0	0	200	903	0	0	0	0	0	0	0	603	903	0
211	5	0	0	0	0	0	0	200	300	0	0	0	0	0	0	0	200	903	0	0	0	0	0	0	0	603	903	0
211	6	0	0	0	0	0	0	200	300	0	0	0	0	0	0	0	200	903	0	0	0	0	0	0	0	603	903	0
211	7	0	0	0	0	0	0	200	300	0	0	0	0	0	0	0	200	903	0	0	0	0	0	0	0	603	903	0
211	8	0	0	0	0	0	0	200	300	0	0	0	0	0	0	0	200	903	0	0	0	0	0	0	0	603	903	0
211	9	0	0	0	0	0	0	200	300	0	0	0	0	0	0	0	200	903	0	0	0	0	0	0	0	603	903	0
212	0	0	0	0	0	0	0	200	300	0	0	0	0	0	0	0	200	903	0	0	0	0	0	0	0	603	903	0
212	1	0	0	0	0	0	0	200	300	0	0	0	0	0	0	0	200	903	0	0	0	0	0	0	0	603	903	0
212	2	0	0	0	0	0	0	200	300	0	0	0	0	0	0	0	200	903	0	0	0	0	0	0	0	603	903	0
212	3	0	0	0	0	0	0	200	300	0	0	0	0	0	0	0	200	903	0	0	0	0	0	0	0	603	903	0
212	4	0	0	0	0	0	0	200	300	0	0	0	0	0	0	0	200	903	0	0	0	0	0	0	0	603	903	0
212	5	0	0	0	0	0	0	200	300	0	0	0	0	0	0	0	200	903	0	0	0	0	0	0	0	603	903	0
212	6	0	0	0	0	0	0	200	300	0	0	0	0	0	0	0	200	903	0	0	0	0	0	0	0	603	903	0
212	7	0	0	0	0	0	0	200	300	0	0	0	0	0	0	0	200	903	0	0	0	0	0	0	0	603	903	0
212	8	0	0	0	0	0	0	200	300	0	0	0	0	0	0	0	200	903	0	0	0	0	0	0	0	603	903	0
212	9	0	0	0	0	0	0	200	300	0	0	0	0	0	0	0	200	903	0	0	0	0	0	0	0	603	903	0
213	0	0	0	0	0	0	0	200	300	0	0	0	0	0	0	0	200	903	0	0	0	0	0	0	0	603	903	0
213	1	0	0	0	0	0	0	200	300	0	0	0	0	0	0	0	200	903	0	0	0	0	0	0	0	603	903	0
213	2	0	0	0	0	0	0	200	300	0	0	0	0	0	0	0	200	903	0	0	0	0	0	0	0	603	903	0
213	3	0	0	0	0	0	0	200	300	0	0	0	0	0	0	0	200	903	0	0	0	0	0	0	0	603	903	0
213	4	0	0	0	0	0	0	200	300	0	0	0	0	0	0	0	200	903	0	0	0	0	0	0	0	603	903	0
213	5	0	0	0	0	0	0	200	300	0	0	0	0	0	0	0	200	903	0	0	0	0	0	0	0	603	903	0
213	6	0	0	0	0	0	0	200	300	0	0	0	0	0	0	0	200	903	0	0	0	0	0	0	0	603	903	0
213	7	0	0	0	0	0	0	200	300	0	0	0	0	0	0	0	200	903	0	0	0	0	0	0	0	603	903	0
213	8	0	0	0	0	0	0	200	300	0	0	0	0	0	0	0	200	903	0	0	0	0	0	0	0	603	903	0
213	9	0	0	0	0	0	0	200	300	0	0	0	0	0	0	0	200	903	0	0	0	0	0	0	0	603	903	0
214	0	0	0	0	0	0	0	200	300	0	0	0	0	0	0	0	200	903	0	0	0	0	0	0	0	603	903	0
214	1	0	0	0	0	0	0	200	300	0	0	0	0	0	0	0	200	903	0	0	0	0	0	0	0	603	903	0
214	2	0	0	0	0	0	0	200	300	0	0	0	0	0	0	0	200	903	0	0	0	0	0	0	0	603	903	0
214	3	0	0	0	0	0	0	200	300	0	0	0	0	0	0	0	200	903	0	0	0	0	0	0	0	603	903	0
214	4	0	0	0	0	0	0	200	300	0	0	0	0	0	0	0	200	903	0	0	0	0	0	0	0	603	903	0
214	5	0	0	0	0	0	0	200	300	0	0	0	0	0	0	0	200	903	0	0	0	0	0	0	0	603	903	0
214	6	0	0	0	0	0	0	200	300	0	0	0	0	0	0	0	200	903	0	0	0	0	0	0	0	603	903	0
214	7	0	0	0	0	0	0	200	300	0	0	0	0	0	0	0	200	903	0	0	0	0	0	0	0	603	903	0
214	8	0	0	0	0	0	0	200	300	0	0	0	0	0	0	0	200	903	0	0	0	0	0	0	0	603	903	0
214	9	0	0	0	0	0	0	200	300	0	0	0	0	0	0	0	200	903	0	0	0	0	0	0	0	603	903	0
215	0	0	0	0	0	0	0	200	300	0	0	0	0	0	0	0	200	903	0	0	0	0	0	0	0	603	903	0
215	1	0	0	0	0	0	0	200	300	0	0	0	0	0	0	0	200	903	0	0	0	0	0	0	0	603	903	0
215	2	0	0	0	0	0	0	200	300	0	0	0	0	0	0	0	200	903	0	0	0	0	0	0	0	603	903	0
215	3	0	0	0	0	0	0	200	300	0	0	0	0	0	0	0	200	903	0	0	0	0	0	0	0	603	903	0
215	4	0	0	0	0	0	0	200	300	0	0	0	0	0	0	0	200	903	0	0	0	0	0	0	0	603	903	0
215	5	0	0	0	0	0	0	200	300	0	0	0	0	0	0	0	200	903	0	0	0	0	0	0	0	603	903	0
215	6	0	0	0	0	0	0	200	300	0	0	0	0	0	0	0	200	903	0	0	0	0	0	0	0	603	903	0
215	7	0	0	0	0	0	0	200	300	0	0	0	0	0	0	0	200	903	0	0	0	0	0	0	0	603	903	0
215	8	0	0	0	0	0	0	200	300	0	0	0	0	0	0	0	200	903	0	0	0	0	0	0	0	603	903	0
215	9	0	0	0	0	0	0	200	300	0	0	0	0	0	0	0	200	903	0	0	0	0	0	0	0	603	903	0
216	0	0	0	0	0	0	0	200	300	0	0	0	0	0	0	0	200	903	0	0	0	0	0	0	0	603	903	0
216	1	0	0	0	0	0	0	200	300	0	0	0	0	0	0	0	200	903	0	0	0	0	0	0	0	603	903	0
216	2	0	0	0	0	0	0	200	300	0	0	0	0	0	0	0	200	903	0	0	0	0	0	0	0	603	903	0
216	3	0	0	0	0	0	0	200	300	0	0	0	0	0	0	0	200	903	0	0	0	0	0	0	0	603	903	0
216	4	0	0	0	0	0	0	200	300	0	0	0	0	0	0	0	200	903	0	0	0	0	0	0	0	603	903	0
216	5	0	0	0	0	0	0	200	300	0	0	0	0	0	0	0	200	903	0	0	0	0	0	0	0	603	903	0
216	6	0	0	0	0	0	0	200	300	0	0	0	0	0	0	0	200	903	0	0	0	0	0	0	0	603	903	0
216	7	0	0	0	0	0	0	200	300	0	0	0	0	0	0	0	200	903	0	0	0	0	0	0	0	603	903	0
216	8	0	0	0	0	0	0	200	300	0	0	0	0	0	0	0	200	903	0	0	0	0	0	0	0	603	903	0
216	9	0	0	0	0	0	0	200	300	0	0	0	0	0	0	0	200	903	0	0	0	0	0	0	0	603	903	0
217	0	0	0	0	0	0	0	200	300	0	0	0	0	0	0	0	200	903	0	0	0	0	0	0	0	603	903	0
217	1	0	0	0	0	0	0	200	300	0	0	0	0	0	0	0	200	903	0	0	0	0	0	0	0	603	903	0
217	2	0	0	0	0	0	0	200	300	0	0	0	0	0	0	0	200	903	0	0	0	0	0	0	0	603	903	0
217	3	0	0	0	0	0	0	200	300	0	0	0	0	0	0	0	200	903	0	0	0	0	0	0	0	603	903	0
217	4	0	0	0	0	0	0	200	300	0	0	0	0	0	0	0	200	903	0	0	0	0	0	0	0	603	903	0
217	5	0	0	0	0	0	0	200	300	0	0	0	0	0	0	0	200	903	0	0	0	0	0	0	0	603	903	0
217	6	0	0	0	0	0	0	200	300	0	0	0	0	0	0	0	200	903	0	0	0	0	0	0	0	603	903	0
217	7	0	0	0	0	0	0	200	300	0	0	0	0	0	0	0	200	903	0	0	0	0	0	0	0	603	903	0
217	8	0	0	0	0	0	0	200	300	0	0	0	0	0	0	0	200	903	0	0	0	0	0	0	0	603	903	0
217	9	0	0	0	0	0	0	200	300	0	0	0	0	0	0	0	200	903	0	0	0	0	0	0	0	603	903	0
218	0	0	0	0	0	0	0	200	300	0	0	0	0	0	0	0	200	903	0	0	0	0	0	0	0	603	903	0
218	1	0	0	0	0	0	0	200	300	0	0	0	0	0	0	0	200	903	0	0	0	0	0	0	0	603	903	0
218	2	0	0	0	0	0	0	200	300	0	0	0	0	0	0	0	200	903	0	0	0	0	0	0	0	603	903	0
218	3	0	0	0	0	0	0	200	300	0	0	0	0	0	0	0	200	903	0	0	0	0	0	0	0	603	903	0
218	4	0	0	0	0	0	0	200	300	0	0	0	0	0	0	0	200	903	0	0	0	0	0	0	0	603	903	0
218	5	0	0	0	0	0	0	200	300	0	0	0	0	0	0	0	200	903	0	0	0	0	0	0	0	603	903	0
218	6	0	0	0	0	0	0	200	300	0	0	0	0	0	0	0	200	903	0	0	0	0	0	0	0	603	903	0
218	7	0	0	0	0	0	0	200	300	0	0	0	0	0	0	0	200	903	0	0	0	0	0	0	0	603	903	0
218	8	0	0	0	0	0	0	200	300	0	0	0	0	0	0	0	200	903	0	0	0	0	0	0	0	603	903	0
218	9	0	0	0	0	0	0	200	300	0	0	0	0	0	0	0	200	903	0	0	0	0	0	0	0	603	903	0
219	0	0	0	0	0	0	0	200	300	0	0	0	0	0	0	0	200	903	0	0	0	0	0	0	0	603	903	0
219	1	0	0	0	0	0	0	200	300	0	0	0	0	0	0	0	200	903	0	0	0	0	0	0	0	603	903	0
219	2	0	0	0	0	0	0	200	300	0	0	0	0	0	0	0	200	903	0	0	0	0	0	0	0	603	903	0
219	3	0	0	0	0	0	0	200	300	0	0	0	0	0	0	0	200	903	0	0	0	0	0	0	0	603	903	0
219	4	0	0	0	0	0	0	200	300	0	0	0	0	0	0	0	200	903	0	0	0	0	0	0	0	603	903	0
219	5	0	0	0	0	0	0	200	300	0	0	0	0	0	0	0	200	903	0	0	0	0	0	0	0	603	903	0
219	6	0	0	0	0	0	0	200	300	0	0	0	0	0	0	0	200	903	0	0	0	0	0	0	0	603	903	0
219	7	0	0	0	0	0	0	200	300	0	0	0	0	0	0	0	200	903	0	0	0	0	0	0	0	603	903	0
219	8	0	0	0	0	0	0	200	300	0	0	0	0	0	0	0	200	903	0	0	0	0	0	0	0	603	903	0
219	9	0	0	0	0	0	0	200	300	0	0	0	0	0	0	0	200	903	0	0	0	0	0	0	0	603	903	0
220	0	0	0	0	0	0	0	200	300	0	0	0	0	0	0	0	200	903	0	0	0	0	0	0	0	603	903	0
220	1	0	0	0	0	0	0	200	300	0	0	0	0	0	0	0	200	903	0	0	0	0	0	0	0	603	903	0
220	2	0	0	0	0	0	0	200	300	0	0	0	0	0	0	0	200	903	0	0	0	0	0	0	0	603	903	0
220	3	0	0	0	0	0	0	200	300	0	0	0	0	0	0	0	200	903	0	0	0	0	0	0	0	603	903	0
220	4	0	0	0	0	0	0	200	300	0	0	0	0	0	0	0	200	903	0	0	0	0	0	0	0	603	903	0
220	5	0	0	0	0	0	0	200	300	0	0	0	0	0	0	0	200	903	0	0	0	0	0	0	0	603	903	0
220	6	0	0	0	0	0	0	200	300	0	0	0	0	0	0	0	200	903	0	0	0	0	0	0	0	603	903	0
220	7	0	0	0	0	0	0	200	300	0	0	0	0	0	0	0	200	903	0	0	0	0	0	0	0	603	903	0
220	8	0	0	0	0	0	0	200	300	0	0	0	0	0	0	0	200	903	0	0	0	0	0	0	0	603	903	0
220	9	0	0	0	0	0	0	200	300	0	0	0	0	0	0	0	200	903	0	0	0	0	0	0	0	603	903	0
221	0	0	0	0	0	0	0	200	300	0	0	0	0	0	0	0	200	903	0	0	0	0	0	0	0	603	903	0
221	1	0	0	0	0	0	0	200	300	0	0	0	0	0	0	0	200	903	0	0	0	0	0	0	0	603	903	0
221	2	0	0	0	0	0	0	200	300	0	0	0	0	0	0	0	200	903	0	0	0	0	0	0	0	603	903	0
221	3	0	0	0	0	0	0	200	300	0	0	0	0	0	0	0	200	903	0	0	0	0	0	0	0	603	903	0
221	4	0	0	0	0	0	0	200	300	0	0	0	0	0	0	0	200	903	0	0	0	0	0	0	0	603	903	0
221	5	0	0	0	0	0	0	200	300	0	0	0	0	0	0	0	200	903	0	0	0	0	0	0	0	603	903	0
221	6	0	0	0	0	0	0	200	300	0	0	0	0	0	0	0	200	903	0	0	0	0	0	0	0	603	903	0
221	7	0	0	0	0	0	0	200	300	0	0	0	0	0	0	0	200	903	0	0	0	0	0	0	0	603	903	0
221	8	0	0	0	0	0	0	200	300	0	0	0	0	0	0	0	200	903	0	0	0	0	0	0	0	603	903	0
221	9	0	0	0	0	0	0	200	300	0	0	0	0	0	0	0	200	903	0	0	0	0	0	0	0	603	903	0
222	0	0	0	0	0	0	0	200	300	0	0	0	0	0	0	0	200	903	0	0	0	0	0	0	0	603	903	0
222	1	0	0	0	0	0	0	200	300	0	0	0	0	0	0	0	200	903	0	0	0	0	0	0	0	603	903	0
222	2	0	0	0	0	0	0	200	300	0	0	0	0	0	0	0	200	903	0	0	0	0	0	0	0	603	903	0
222	3	0	0	0	0	0	0	200	300	0	0	0	0	0	0	0	200	903	0	0	0	0	0	0	0	603	903	0
222	4	0	0	0	0	0	0	200	300	0	0	0	0	0	0	0	200	903	0	0	0	0	0	0	0	603	903	0
222	5	0	0	0	0	0	0	200	300	0	0	0	0	0	0	0	200	903	0	0	0	0	0	0	0	603	903	0
222	6	0	0	0	0	0	0	200	300	0	0	0	0	0	0	0	200	903	0	0	0	0	0	0	0	603	903	0
222	7	0	0	0	0	0	0	200	300	0	0	0	0	0	0	0	200	903	0	0	0	0	0	0	0	603	903	0
222	8	0	0	0	0	0	0	200	300	0	0	0	0	0	0	0	200	903	0	0	0	0	0	0	0	603	903	0
222	9	0	0	0	0	0	0	200	300	0	0	0	0	0	0	0	200	903	0	0	0	0	0	0	0	603	903	0
223	0	0	0	0	0	0	0	200	300	0	0	0	0	0	0	0	200	903	0	0	0	0	0	0	0	603	903	0
223	1	0	0	0	0	0	0	200	300	0	0	0	0	0	0	0	200	903	0	0	0	0	0	0	0	603	903	0
223	2	0	0	0	0	0	0	200	300	0	0	0	0	0	0	0	200	903	0	0	0	0	0	0	0	603	903	0
223	3	0	0	0	0	0	0	200	300	0	0	0	0	0	0	0	200	903	0	0	0	0	0	0	0	603	903	0
223	4	0	0	0	0	0	0	200	300	0	0	0	0	0	0	0	200	903	0	0	0	0	0	0	0	603	903	0
223	5	0	0	0	0	0	0	200	300	0	0	0	0	0	0	0	200	903	0	0	0	0	0	0	0	603	903	0
223	6	0	0	0	0	0	0	200	300	0	0	0	0	0	0	0	200	903	0	0	0	0	0	0	0	603	903	0
223	7	0	0	0	0	0	0	200	300	0	0	0	0	0	0	0	200	903	0	0	0	0	0	0	0	603	903	0
223	8	0	0	0	0	0	0	200	300	0	0	0	0	0	0	0	200	903	0	0	0	0	0	0	0	603	903	0
223	9	0	0	0	0	0	0	200	300	0	0	0	0	0	0	0	200	903	0	0	0	0	0	0	0	603	903	0
224	0	0	0	0	0	0	0	200	300	0	0	0	0	0	0	0	200	903	0	0	0	0	0	0	0	603	903	0
224	1	0	0	0	0	0	0	200	300	0	0	0	0	0	0	0	200	903	0	0	0	0	0	0	0	603	903	0
224	2	0	0	0	0	0	0	200	300	0	0	0	0	0	0	0	200	903	0	0	0	0	0	0	0	603	903	0
224	3	0	0	0	0	0	0	200	300	0	0	0	0	0	0	0	200	903	0	0	0	0	0	0	0	603	903	0
224	4	0	0	0	0	0	0	200	300	0	0	0	0	0	0	0	200	903	0	0	0	0	0	0	0	603	903	0
224	5	0	0	0	0	0	0	200	300	0	0	0	0	0	0	0	200	903	0	0	0	0	0	0	0	603	903	0
224	6	0	0	0	0	0	0	200	300	0	0	0	0	0	0	0	200	903	0	0	0	0	0	0	0	603	903	0
224	7	0	0	0	0	0	0	200	300	0	0	0	0	0	0	0	200	903	0	0	0	0	0	0	0	603	903	0
224	8	0	0	0	0	0	0	200	300	0	0	0	0	0	0	0	200	903	0	0	0	0	0	0	0	603	903	0
224	9	0	0	0	0	0	0	200	300	0	0	0	0	0	0	0	200	903	0	0	0	0	0	0	0	603	903	0
225	0	0	0	0	0	0	0	200	300	0	0	0	0	0	0	0	200	903	0	0	0	0	0	0	0	603	903	0
225	1	0	0	0	0	0	0	200	300	0	0	0	0	0	0	0	200	903	0	0	0	0	0	0	0	603	903	0
225	2	0	0	0	0	0	0	200	300	0	0	0	0	0	0	0	200	903	0	0	0	0	0	0	0	603	903	0
225	3	0	0	0	0	0	0	200	300	0	0	0	0	0	0	0	200	903	0	0	0	0	0	0	0	603	903	0
225	4	0	0	0	0	0	0	200	300	0	0	0	0	0	0	0	200	903	0	0	0	0	0	0	0	603	903	0
225	5	0	0	0	0	0	0	200	300	0	0	0	0	0	0	0	200	903	0	0	0	0	0	0	0	603	903	0
225	6	0	0	0	0	0	0	200	300	0	0	0	0	0	0	0	200	903	0	0	0	0	0	0	0	603	903	0
225	7	0	0	0	0	0	0	200	300	0	0	0	0	0	0	0	200	903	0	0	0	0	0	0	0	603	903	0
225	8	0	0	0	0	0	0	200	300	0	0	0	0	0	0	0	200	903	0	0	0	0	0	0	0	603	903	0
225	9	0	0	0	0	0	0	200	300	0	0	0	0	0	0	0	200	903	0	0	0	0	0	0	0	603	903	0
226	0	0	0	0	0	0	0	200	300	0	0	0	0	0	0	0	200	903	0	0	0	0	0	0	0	603	903	0
226	1	0	0	0	0	0	0	200	300	0	0	0	0	0	0	0	200	903	0	0	0	0	0	0	0	603	903	0
226	2	0	0	0	0	0	0	200	300	0	0	0	0	0	0	0	200	903	0	0	0	0	0	0	0	603	903	0
226	3	0	0	0	0	0	0	200	300	0	0	0	0	0	0	0	200	903	0	0	0	0	0	0	0	603	903	0
226	4	0	0	0	0	0	0	200	300	0	0	0	0	0	0	0	200	903	0	0	0	0	0	0	0	603	903	0
226	5	0	0	0	0	0	0	200	300	0	0	0	0	0	0	0	200	903	0	0	0	0	0	0	0	603	903	0
226	6	0	0	0	0	0	0	200	300	0	0	0	0	0	0	0	200	903	0	0	0	0	0	0	0	603	903	0
226	7	0	0	0	0	0	0	200	300	0	0	0	0	0	0	0	200	903	0	0	0	0	0	0	0	603	903	0
226	8	0	0	0	0	0	0	200	300	0	0	0	0	0	0	0	200	903	0	0	0	0	0	0	0	603	903	0
226	9	0	0	0	0	0	0	200	300	0	0	0	0	0	0	0	200	903	0	0	0	0	0	0	0	603	903	0
227	0	0	0	0	0	0	0	200	300	0	0	0	0	0	0	0	200	903	0	0	0	0	0	0	0	603	903	0
227	1	0	0	0	0	0	0	200	300	0	0	0	0	0	0	0	200	903	0	0	0	0	0	0	0	603	903	0
227	2	0	0	0	0	0	0	200	300	0	0	0	0	0	0	0	200	903	0	0	0	0	0	0	0	603	903	0
227	3	0	0	0	0	0	0	200	300	0	0	0	0	0	0	0	200	903	0	0	0	0	0	0	0	603	903	0
227	4	0	0	0	0	0	0	200	300	0	0	0	0	0	0	0	200	903	0	0	0	0	0	0	0	603	903	0
227	5	0	0	0	0	0	0	200	300	0	0	0	0	0	0	0	200	903	0	0	0	0	0	0	0	603	903	0
227	6	0	0	0	0	0	0	200	300	0	0	0	0	0	0	0	200	903	0	0	0	0	0	0	0	603	903	0
227	7	0	0	0	0	0	0	200	300	0	0	0	0	0	0	0	200	903	0	0	0	0	0	0	0	603	903	0
227	8	0	0	0	0	0	0	200	300	0	0	0	0	0	0	0	200	903	0	0	0	0	0	0	0	603	903	0
227	9	0	0	0	0	0	0	200	300	0	0	0	0	0	0	0	200	903	0	0	0	0	0	0	0	603	903	0
228	0	0	0	0	0	0	0	200	300	0	0	0	0	0	0	0	200	903	0	0	0	0	0	0	0	603	903	0
228	1	0	0	0	0	0	0	200	300	0	0	0	0	0	0	0	200	903	0	0	0	0	0	0	0	603	903	0
228	2	0	0	0	0	0	0	200	300	0	0	0	0	0	0	0	200	903	0	0	0	0	0	0	0	603	903	0
228	3	0	0	0	0	0	0	200	300	0	0	0	0	0	0	0	200	903	0	0	0	0	0	0	0	603	903	0
228	4	0	0	0	0	0	0	200	300	0	0	0	0	0	0	0	200	903	0	0	0	0	0	0	0	603	903	0
228	5	0	0	0	0	0	0	200	300	0	0	0	0	0	0	0	200	903	0	0	0	0	0	0	0	603	903	0
228	6	0	0	0	0	0	0	200	300	0	0	0	0	0	0	0	200	903	0	0	0	0	0	0	0	603	903	0
228	7	0	0	0	0	0	0	200	300	0	0	0	0	0	0	0	200	903	0	0	0	0	0	0	0	603	903	0
228	8	0	0	0	0	0	0	200	300	0	0	0	0	0	0	0	200	903	0	0	0	0	0	0	0	603	903	0
228	9	0	0	0	0	0	0	200	300	0	0	0	0	0	0	0	200	903	0	0	0	0	0	0	0	603	903	0
229	0	0	0	0	0	0	0	200	300	0	0	0	0	0	0	0	200	903	0	0	0	0	0	0	0	603	903	0
229	1	0	0	0	0	0	0	200	300	0	0	0	0	0	0	0	200	903	0	0	0	0	0	0	0	603	903	0
229	2	0	0	0	0	0	0	200	300	0	0	0	0	0	0	0	200	903	0	0	0	0	0	0	0	603	903	0
229	3	0	0	0	0	0	0	200	300	0	0	0	0	0	0	0	200	903	0	0	0	0	0	0	0	603	903	0
229	4	0	0	0	0	0	0	200	300	0	0	0	0	0	0	0	200	903	0	0	0	0	0	0	0	603	903	0
229	5	0	0	0	0	0	0	200	300	0	0	0	0	0	0	0	200	903	0	0	0	0	0	0	0	603	903	0
229	6	0	0	0	0	0	0	200	300	0	0	0	0	0	0	0	200	903	0	0	0	0	0	0	0	603	903	0
229	7	0	0	0	0	0	0	200	300	0	0	0	0	0	0	0	200	903	0	0	0	0	0	0	0	603	903	0
229	8	0	0	0	0	0	0	200	300	0	0	0	0	0	0	0	200	903	0	0	0	0	0	0	0	603	903	0
229	9	0	0	0	0	0	0	200	300	0	0	0	0	0	0	0	200	903	0	0	0	0	0	0	0	603	903	0
230	0	0	0	0	0	0	0	200	300	0	0	0	0	0	0	0	200	903	0	0	0	0	0	0	0	603	903	0
230	1	0	0	0	0	0	0	200	300	0	0	0	0	0	0	0	200	903	0	0	0	0	0	0	0	603	903	0
230	2	0	0	0	0	0	0	200	300	0	0	0	0	0	0	0	200	903	0	0	0	0	0	0	0	603	903	0
230	3	0	0	0	0	0	0	200	300	0	0	0	0	0	0	0	200	903	0	0	0	0	0	0	0	603	903	0
230	4	0	0	0	0	0	0	200	300	0	0	0	0	0	0	0	200	903	0	0	0	0	0	0	0	603	903	0
230	5	0	0	0	0	0	0	200	300	0	0	0	0	0	0	0	200	903	0	0	0	0	0	0	0	603	903	0
230	6	0	0	0	0	0	0	200	300	0	0	0	0	0	0	0	200	903	0	0	0	0	0	0	0	603	903	0
230	7	0	0	0	0	0	0	200	300	0	0	0	0	0	0	0	200	903	0	0	0	0	0	0	0	603	903	0
230	8	0	0	0	0	0	0	200	300	0	0	0	0	0	0	0	200	903	0	0	0	0	0	0	0	603	903	0
230	9	0	0	0	0	0	0	200	300	0	0	0	0	0	0	0	200	903	0	0	0	0	0	0	0	603	903	0
231	0	0	0	0	0	0	0	200	300	0	0	0	0	0	0	0	200	903	0	0	0	0	0	0	0	603	903	0
231	1	0	0	0	0	0	0	200	300	0	0	0	0	0	0	0	200	903	0	0	0	0	0	0	0	603	903	0
231	2	0	0	0	0	0	0	200	300	0	0	0	0	0	0	0	200	903	0	0	0	0	0	0	0	603	903	0
231	3	0	0	0	0	0	0	200	300	0	0	0	0	0	0	0	200	903	0	0	0	0	0	0	0	603	903	0
231	4	0	0	0	0	0	0	200	300	0	0	0	0	0	0	0	200	903	0	0	0	0	0	0	0	603	903	0
231	5	0	0	0	0	0	0	200	300	0	0	0	0	0	0	0	200	903	0	0	0	0	0	0	0	603	903	0
231	6	0	0	0	0	0	0	200	300	0	0	0	0	0	0	0	200	903	0	0	0	0	0	0	0	603	903	0
231	7	0	0	0	0	0	0	200	300	0	0	0	0	0	0	0	200	903	0	0	0	0	0	0	0	603	903	0
231	8	0	0	0	0	0	0	200	300	0	0	0	0	0	0	0	200	903	0	0	0	0	0	0	0	603	903	0
231	9	0	0	0	0	0	0	200	300	0	0	0	0	0	0	0	200	903	0	0	0	0	0	0	0	603	903	0
232	0	0	0	0	0	0	0	200	300	0	0	0	0	0	0	0	200	903	0	0	0	0	0	0	0	603	903	0
232	1	0	0	0	0	0	0	200	300	0	0	0	0	0	0	0	200	903	0	0	0	0	0	0	0	603	903	0
232	2	0	0	0	0	0	0	200	300	0	0	0	0	0	0	0	200	903	0	0	0	0	0	0	0	603	903	0
232	3	0	0	0	0	0	0	200	300	0	0	0	0	0	0	0	200	903	0	0	0	0	0	0	0	603	903	0
232	4	0	0	0	0	0	0	200	300	0	0	0	0	0	0	0	200	903	0	0	0	0	0	0	0	603	903	0
232	5	0	0	0	0	0	0	200	300	0	0	0	0	0	0	0	200	903	0	0	0	0	0	0	0	603	903	0
232	6	0	0	0	0	0	0	200	300	0	0	0	0	0	0	0	200	903	0	0	0	0	0	0	0	603	903	0
232	7	0	0	0	0	0	0	200	300	0	0	0	0	0	0	0	200	903	0	0	0	0	0	0	0	603	903	0
232	8	0	0	0	0	0	0	200	300	0	0	0	0	0	0	0	200	903	0	0	0	0	0	0	0	603	903	0
232	9	0	0	0	0	0	0	200	300	0	0	0	0	0	0	0	200	903	0	0	0	0	0	0	0	603	903	0
233	0	0	0	0	0	0	0	200	300	0	0	0	0	0	0	0	200	903	0	0	0	0	0	0	0	603	903	0
233	1	0	0	0	0	0	0	200	300	0	0	0	0	0	0	0	200	903	0	0	0	0	0	0	0	603	903	0
233	2	0	0	0	0	0	0	200	300	0	0	0	0	0	0	0	200	903	0	0	0	0	0	0	0	603	903	0
233	3	0	0	0	0	0	0	200	300	0	0	0	0	0	0	0	200	903	0	0	0	0	0	0	0	603	903	0
233	4	0	0	0	0	0	0	200	300	0	0	0	0	0	0	0	200	903	0	0	0	0	0	0	0	603	903	0
233	5	0	0	0	0	0	0	200	300	0	0	0	0	0	0	0	200	903	0	0	0	0	0	0	0	603	903	0
233	6	0	0	0	0	0	0	200	300	0	0	0	0	0	0	0	200	903	0	0	0	0	0	0	0	603	903	0
233	7	0	0	0	0	0	0	200	300	0	0	0	0	0	0	0	200	903	0	0	0	0	0	0	0	603	903	0
233	8	0	0	0	0	0	0	200	300	0	0	0	0	0	0	0	200	903	0	0	0	0	0	0	0	603	903	0
233	9	0	0	0	0	0	0	200	300	0	0	0	0	0	0	0	200	903	0	0	0	0	0	0	0	603	903	0
234	0	0	0	0	0	0	0	200	300	0	0	0	0	0	0	0	200	903	0	0	0	0	0	0	0	603	903	0
234	1	0	0	0	0	0	0	200	300	0	0	0	0	0	0	0	200	903	0	0	0	0	0	0	0	603	903	0
234	2	0	0	0	0	0	0	200	300	0	0	0	0	0	0	0	200	903	0	0	0	0	0	0	0	603	903	0
234	3	0	0	0	0	0	0	200	300	0	0	0	0	0	0	0	200	903	0	0	0	0	0	0	0	603	903	0
234	4	0	0	0	0	0	0	200	300	0	0	0	0	0	0	0	200	903	0	0	0	0	0	0	0	603	903	0
234	5	0	0	0	0	0	0	200	300	0	0	0	0	0	0	0	200	903	0	0	0	0	0	0	0	603	903	0
234	6	0	0	0	0	0	0	200	300	0	0	0	0	0	0	0	200	903	0	0	0	0	0	0	0	603	903	0
234	7	0	0	0	0	0	0	200	300	0	0	0	0	0	0	0	200	903	0	0	0	0	0	0	0	603	903	0
234	8	0	0	0	0	0	0	200	300	0	0	0	0	0	0	0	200	903	0	0	0	0	0	0	0	603	903	0
234	9	0	0	0	0	0	0	200	300	0	0	0	0	0	0	0	200	903	0	0	0	0	0	0	0	603	903	0
235	0	0	0	0	0	0	0	200	300	0	0	0	0	0	0	0	200	903	0	0	0	0	0	0	0	603	903	0
235	1	0	0	0	0	0	0	200	300	0	0	0	0	0	0	0	200	903	0	0	0	0	0	0	0	603	903	0
235	2	0	0	0	0	0	0	200	300	0	0	0	0	0	0	0	200	903	0	0	0	0	0	0	0	603	903	0
235	3	0	0	0	0	0	0	200	300	0	0	0	0	0	0	0	200	903	0	0	0	0	0	0	0	603	903	0
235	4	0	0	0	0	0	0	200	300	0	0	0	0	0	0	0	200	903	0	0	0	0	0	0	0	603	903	0
235	5	0	0	0	0	0	0	200	300	0	0	0	0	0	0	0	200	903	0	0	0	0	0	0	0	603	903	0
235	6	0	0	0	0	0	0	200	300	0	0	0	0	0	0	0	200	903	0	0	0	0	0	0	0	603	903	0
235	7	0	0	0	0	0	0	200	300	0	0	0	0	0	0	0	200	903	0	0	0	0	0	0	0	603	903	0
235	8	0	0	0	0	0	0	200	300	0	0	0	0	0	0	0	200	903	0	0	0	0	0	0	0	603	903	0
235	9	0	0	0	0	0	0	200	300	0	0	0	0	0	0	0	200	903	0	0	0	0	0	0	0	603	903	0
236	0	0	0	0	0	0	0	200	300	0	0	0	0	0	0	0	200	903	0	0	0	0	0	0	0	603	903	0
236	1	0	0	0	0	0	0	200	300	0	0	0	0	0	0	0	200	903	0	0	0	0	0	0	0	603	903	0
236	2	0	0	0	0	0	0	200	300	0	0	0	0	0	0	0	200	903	0	0	0	0	0	0	0	603	903	0
236	3	0	0	0	0	0	0	200	300	0	0	0	0	0	0	0	200	903	0	0	0	0	0	0	0	603	903	0
236	4	0	0	0	0	0	0	200	300	0	0	0	0	0	0	0	200	903	0	0	0	0	0	0	0	603	903	0
236	5	0	0	0	0	0	0	200	300	0	0	0	0	0	0	0	200	903	0	0	0	0	0	0	0	603	903	0
236	6	0	0	0	0	0	0	200	300	0	0	0	0	0	0	0	200	903	0	0	0	0	0	0	0	603	903	0
236	7	0	0	0	0	0	0	200	300	0	0	0	0	0	0	0	200	903	0	0	0	0	0	0	0	603	903	0
236	8	0	0	0	0	0	0	200	300	0	0	0	0	0	0	0	200	903	0	0	0	0	0	0	0	603	903	0
236	9	0	0	0	0	0	0	200	300	0	0	0	0	0	0	0	200	903	0	0	0	0	0	0	0	603	903	0
237	0	0	0	0	0	0	0	200	300	0	0	0	0	0	0	0	200	903	0	0	0	0	0	0	0	603	903	0
237	1	0	0	0	0	0	0	200	300	0	0	0	0	0	0	0	200	903	0	0	0	0	0	0	0	603	903	0
237	2	0	0	0	0	0	0	200	300	0	0	0	0	0	0	0	200	903	0	0	0	0	0	0	0	603	903	0
237	3	0	0	0	0	0	0	200	300	0	0	0	0	0	0	0	200	903	0	0	0	0	0	0	0	603	903	0
237	4	0	0	0	0	0	0	200	300	0	0	0	0	0	0	0	200	903	0	0	0	0	0	0	0	603	903	0
237	5	0	0	0	0	0	0	200	300	0	0	0	0	0	0	0	200	903	0	0	0	0	0	0	0	603	903	0
237	6	0	0	0	0	0	0	200	300	0	0	0	0	0	0	0	200	903	0	0	0	0	0	0	0	603	903	0
237	7	0	0	0	0	0	0	200	300	0	0	0	0	0	0	0	200	903	0	0	0	0	0	0	0	603	903	0
237	8	0	0	0	0	0	0	200	300	0	0	0	0	0	0	0	200	903	0	0	0	0	0	0	0	603	903	0
237	9	0	0	0	0	0	0	200	300	0	0	0	0	0	0	0	200	903	0	0	0	0	0	0	0	603	903	0
238	0	0	0	0	0	0	0	200	300	0	0	0	0	0	0	0	200	903	0	0	0	0	0	0	0	603	903	0
238	1	0	0	0	0	0	0	200	300	0	0	0	0	0	0	0	200	903	0	0	0	0	0	0	0	603	903	0
238	2	0	0	0	0	0	0	200	300	0	0	0	0	0	0	0	200	903	0	0	0	0	0	0	0	603	903	0
238	3	0	0	0	0	0	0	200	300	0	0	0	0	0	0	0	200	903	0	0	0	0	0	0	0	603	903	0
238	4	0	0	0	0	0	0	200	300	0	0	0	0	0	0	0	200	903	0	0	0	0	0	0	0	603	903	0
238	5	0	0	0	0	0	0	200	300	0	0	0	0	0	0	0	200	903	0	0	0	0	0	0	0	603	903	0
238	6	0	0	0	0	0	0	200	300	0	0	0	0	0	0	0	200	903	0	0	0	0	0	0	0	603	903	0
238	7	0	0	0	0	0	0	200	300	0	0	0	0	0	0	0	200	903	0	0	0	0	0	0	0	603	903	0
238	8	0	0	0	0	0	0	200	300	0	0	0	0	0	0	0	200	903	0	0	0	0	0	0	0	603	903	0
238	9	0	0	0	0	0	0	200	300	0	0	0	0	0	0	0	200	903	0	0	0	0	0	0	0	603	903	0
239	0	0	0	0	0	0	0	200	300	0	0	0	0	0	0	0	200	903	0	0	0	0	0	0	0	603	903	0
239	1	0	0	0	0	0	0	200	300	0	0	0	0	0	0	0	200	903	0	0	0	0	0	0	0	603	903	0
239	2	0	0	0	0	0	0	200	300	0	0	0	0	0	0	0	200	903	0	0	0	0	0	0	0	603	903	0
239	3	0	0	0	0	0	0	200	300	0	0	0	0	0	0	0	200	903	0	0	0	0	0	0	0	603	903	0
239	4	0	0	0	0	0	0	200	300	0	0	0	0	0	0	0	200	903	0	0	0	0	0	0	0	603	903	0
239	5	0	0	0	0	0	0	200	300	0	0	0	0	0	0	0	200	903	0	0	0	0	0	0	0	603	903	0
239	6	0	0	0	0	0	0	200	300	0	0	0	0	0	0	0	200	903	0	0	0	0	0	0	0	603	903	0
239	7	0	0	0	0	0	0	200	300	0	0	0	0	0	0	0	200	903	0	0	0	0	0	0	0	603	903	0
239	8	0	0	0	0	0	0	200	300	0	0	0	0	0	0	0	200	903	0	0	0	0	0	0	0	603	903	0
239	9	0	0	0	0	0	0	200	300	0	0	0	0	0	0	0	200	903	0	0	0	0	0	0	0	603	903	0
240	0	0	0	0	0	0	0	200	300	0	0	0	0	0	0	0	200	903	0	0	0	0	0	0	0	603	903	0
240	1	0	0	0	0	0	0	200	300	0	0	0	0	0	0	0	200	903	0	0	0	0	0	0	0	603	903	0
240	2	0	0	0	0	0	0	200	300	0	0	0	0	0	0	0	200	903	0	0	0	0	0	0	0	603	903	0
240	3	0	0	0	0	0	0	200	300	0	0	0	0	0	0	0	200	903	0	0	0	0	0	0	0	603	903	0
240	4	0	0	0	0	0	0	200	300	0	0	0	0	0	0	0	200	903	0	0	0	0	0	0	0	603	903	0
240	5	0	0	0	0	0	0	200	300	0	0	0	0	0	0	0	200	903	0	0	0	0	0	0	0	603	903	0
240	6	0	0	0	0	0	0	200	300	0	0	0	0	0	0	0	200	903	0	0	0	0	0	0	0	603	903	0
240	7	0	0	0	0	0	0	200	300	0	0	0	0	0	0	0	200	903	0	0	0	0	0	0	0	603	903	0
240	8	0	0	0	0	0	0	200	300	0	0	0	0	0	0	0	200	903	0	0	0	0	0	0	0	603	903	0
240	9	0	0	0	0	0	0	200	300	0	0	0	0	0	0	0	200	903	0	0	0	0	0	0	0	603	903	0
241	0	0	0	0	0	0	0	200	300	0	0	0	0	0	0	0	200	903	0	0	0	0	0	0	0	603	903	0
241	1	0	0	0	0	0	0	200	300	0	0	0	0	0	0	0	200	903	0	0	0	0	0	0	0	603	903	0
241	2	0	0	0	0	0	0	200	300	0	0	0	0	0	0	0	200	903	0	0	0	0	0	0	0	603	903	0
241	3	0	0	0	0	0	0	200	300	0	0	0	0	0	0	0	200	903	0	0	0	0	0	0	0	603	903	0
241	4	0	0	0	0	0	0	200	300	0	0	0	0	0	0	0	200	903	0	0	0	0	0	0	0	603	903	0
241	5	0	0	0	0	0	0	200	300	0	0	0	0	0	0	0	200	903	0	0	0	0	0	0	0	603	903	0
241	6	0	0	0	0	0	0	200	300	0	0	0	0	0	0	0	200	903	0	0	0	0	0	0	0	603	903	0
241	7	0	0	0	0	0	0	200	300	0	0	0	0	0	0	0	200	903	0	0	0	0	0	0	0	603	903	0
241	8	0	0	0	0	0	0	200	300	0	0	0	0	0	0	0	200	903	0	0	0	0	0	0	0	603	903	0
241	9	0	0	0	0	0	0	200	300	0	0	0	0	0	0	0	200	903	0	0	0	0	0	0	0	603	903	0
242	0	0	0	0	0	0	0	200	300	0	0	0	0	0	0	0	200	903	0	0	0	0	0	0	0	603	903	0
242	1	0	0	0	0	0	0	200	300	0	0	0	0	0	0	0	200	903	0	0	0	0	0	0	0	603	903	0
242	2	0	0	0	0	0	0	200	300	0	0	0	0	0	0	0	200	903	0	0	0	0	0	0	0	603	903	0
242	3	0	0	0	0	0	0	200	300	0	0	0	0	0	0	0	200	903	0	0	0	0	0	0	0	603	903	0
242	4	0	0	0	0	0	0	200	300	0	0	0	0	0	0	0	200	903	0	0	0	0	0	0	0	603	903	0
242	5	0	0	0	0	0	0	200	300	0	0	0	0	0	0	0	200	903	0	0	0	0	0	0	0	603	903	0
242	6	0	0	0	0	0	0	200	300	0	0	0	0	0	0	0	200	903	0	0	0	0	0	0	0	603	903	0
242	7	0	0	0	0	0	0	200	300	0	0	0	0	0	0	0	200	903	0	0	0	0	0	0	0	603	903	0
242	8	0	0	0	0	0	0	200	300	0	0	0	0	0	0	0	200	903	0	0	0	0	0	0	0	603	903	0
242	9	0	0	0	0	0	0	200	300	0	0	0	0	0	0	0	200	903	0	0	0	0	0	0	0	603	903	0
243	0	0	0	0	0	0	0	200	300	0	0	0	0	0	0	0	200	903	0	0	0	0	0	0	0	603	903	0
243	1	0	0	0	0	0	0	200	300	0	0	0	0	0	0	0	200	903	0	0	0	0	0	0	0	603	903	0
243	2	0	0	0	0	0	0	200	300	0	0	0	0	0	0	0	200	903	0	0	0	0	0	0	0	603	903	0
243	3	0	0	0	0	0	0	200	300	0	0	0	0	0	0	0	200	903	0	0	0	0	0	0	0	603	903	0
243	4	0	0	0	0	0	0	200	300	0	0	0	0	0	0	0	200	903	0	0	0	0	0	0	0	603	903	0
243	5	0	0	0	0	0	0	200	300	0	0	0	0	0	0	0	200	903	0	0	0	0	0	0	0	603	903	0
243	6	0	0	0	0	0	0	200	300	0	0	0	0	0	0	0	200	903	0	0	0	0	0	0	0	603	903	0
243	7	0	0	0	0	0	0	200	300	0	0	0	0	0	0	0	200	903	0	0	0	0	0	0	0	603	903	0
243	8	0	0	0	0	0	0	200	300	0	0	0	0	0	0	0	200	903	0	0	0	0	0	0	0	603	903	0
243	9	0	0	0	0	0	0	200	300	0	0	0	0	0	0	0	200	903	0	0	0	0	0	0	0	603	903	0
244	0	0	0	0	0	0	0	200	300	0	0	0	0	0	0	0	200	903	0	0	0	0	0	0	0	603	903	0
244	1	0	0	0	0	0	0	200	300	0	0	0	0	0	0	0	200	903	0	0	0	0	0	0	0	603	903	0
244	2	0	0	0	0	0	0	200	300	0	0	0	0	0	0	0	200	903	0	0	0	0	0	0	0	603	903	0
244	3	0	0	0	0	0	0	200	300	0	0	0	0	0	0	0	200	903	0	0	0	0	0	0	0	603	903	0
244	4	0	0	0	0	0	0	200	300	0	0	0	0	0	0	0	200	903	0	0	0	0	0	0	0	603	903	0
244	5	0	0	0	0	0	0	200	300	0	0	0	0	0	0	0	200	903	0	0	0	0	0	0	0	603	903	0
244	6	0	0	0	0	0	0	200	300	0	0	0	0	0	0	0	200	903	0	0	0	0	0	0	0	603	903	0
244	7	0	0	0	0	0	0	200	300	0	0	0	0	0	0	0	200	903	0	0	0	0	0	0	0	603	903	0
244	8	0	0	0	0	0	0	200	300	0	0	0	0	0	0	0	200	903	0	0	0	0	0	0	0	603	903	0
244	9	0	0	0	0	0	0	200	300	0	0	0	0	0	0	0	200	903	0	0	0	0	0	0	0	603	903	0
245	0	0	0	0	0	0	0	200	300	0	0	0	0	0	0	0	200	903	0	0	0	0	0	0	0	603	903	0
245	1	0	0	0	0	0	0	200	300	0	0	0	0	0	0	0	200	903	0	0	0	0	0	0	0	603	903	0
245	2	0	0	0	0	0	0	200	300	0	0	0	0	0	0	0	200	903	0	0	0	0	0	0	0	603	903	0
245	3	0	0	0	0	0	0	200	300	0	0	0	0	0	0	0	200	903	0	0	0	0	0	0	0	603	903	0
245	4	0	0	0	0	0	0	200	300	0	0	0	0	0	0	0	200	903	0	0	0	0	0	0	0	603	903	0
245	5	0	0	0	0	0	0	200	300	0	0	0	0	0	0	0	200	903	0	0	0	0	0	0	0	603	903	0
245	6	0	0	0	0	0	0	200	300	0	0	0	0	0	0	0	200	903	0	0	0	0	0	0	0	603	903	0
245	7	0	0	0	0	0	0	200	300	0	0	0	0	0	0	0	200	903	0	0	0	0	0	0	0	603	903	0
245	8	0	0	0	0	0	0	200	300	0	0	0	0	0	0	0	200	903	0	0	0	0	0	0	0	603	903	0
245	9	0	0	0	0	0	0	200	300	0	0	0	0	0	0	0	200	903	0	0	0	0	0	0	0	603	903	0
246	0	0	0	0	0	0	0	200	300	0	0	0	0	0	0	0	200	903	0	0	0	0	0	0	0	603	903	0
246	1	0	0	0	0	0	0	200	300	0	0	0	0	0	0	0	200	903	0	0	0	0	0	0	0	603	903	0
246	2	0	0	0	0	0	0	200	300	0	0	0	0	0	0	0	200	903	0	0	0	0	0	0	0	603	903	0
246	3	0	0	0	0	0	0	200	300	0	0	0	0	0	0	0	200	903	0	0	0	0	0	0	0	603	903	0
246	4	0	0	0	0	0	0	200	300	0	0	0	0	0	0	0	200	903	0	0	0	0	0	0	0	603	903	0
246	5	0	0	0	0	0	0	200	300	0	0	0	0	0	0	0	200	903	0	0	0	0	0	0	0	603	903	0
246	6	0	0	0	0	0	0	200	300	0	0	0	0	0	0	0	200	903	0	0	0	0	0	0	0	603	903	0
246	7	0	0	0	0	0	0	200	300	0	0	0	0	0	0	0	200	903	0	0	0	0	0	0	0	603	903	0
246	8	0	0	0	0	0	0	200	300	0	0	0	0	0	0	0	200	903	0	0	0	0	0	0	0	603	903	0
246	9	0	0	0	0	0	0	200	300	0	0	0	0	0	0	0	200	903	0	0	0	0	0	0	0	603	903	0
247	0	0	0	0	0	0	0	200	300	0	0	0	0	0	0	0	200	903	0	0	0	0	0	0	0	603	903	0
247	1	0	0	0	0	0	0	200	300	0	0	0	0	0	0	0	200	903	0	0	0	0	0	0	0	603	903	0
247	2	0	0	0	0	0	0	200	300	0	0	0	0	0	0	0	200	903	0	0	0	0	0	0	0	603	903	0
247	3	0	0	0	0	0	0	200	300	0	0	0	0	0	0	0	200	903	0	0	0	0	0	0	0	603	903	0
247	4	0	0	0	0	0	0	200	300	0	0	0	0	0	0	0	200	903	0	0	0	0	0	0	0	603	903	0
247	5	0	0	0	0	0	0	200	300	0	0	0	0	0	0	0	200	903	0	0	0	0	0	0	0	603	903	0
247	6	0	0	0	0	0	0	200	300	0	0	0	0	0	0	0	200	903	0	0	0	0	0	0	0	603	903	0
247	7	0	0	0	0	0	0	200	300	0	0	0	0	0	0	0	200	903	0	0	0	0	0	0	0	603	903	0
247	8	0	0	0	0	0	0	200	300	0	0	0	0	0	0	0	200	903	0	0	0	0	0	0	0	603	903	0
247	9	0	0	0	0	0	0	200	300	0	0	0	0	0	0	0	200	903	0	0	0	0	0	0	0	603	903	0
248	0	0	0	0	0	0	0	200	300	0	0	0	0	0	0	0	200	903	0	0	0	0	0	0	0	603	903	0
248	1	0	0	0	0	0	0	200	300	0	0	0	0	0	0	0	200	903	0	0	0	0	0	0	0	603	903	0
248	2	0	0	0	0	0	0	200	300	0	0	0	0	0	0	0	200	903	0	0	0	0	0	0	0	603	903	0
248	3	0	0	0	0	0	0	200	300	0	0	0	0	0	0	0	200	903	0	0	0	0	0	0	0	603	903	0
248	4	0	0	0	0	0	0	200	300	0	0	0	0	0	0	0	200	903	0	0	0	0	0	0	0	603	903	0
248	5	0	0	0	0	0	0	200	300	0	0	0	0	0	0	0	200	903	0	0	0	0	0	0	0	603	903	0
248	6	0	0	0	0	0	0	200	300	0	0	0	0	0	0	0	200	903	0	0	0	0	0	0	0	603	903	0
248	7	0	0	0	0	0	0	200	300	0	0	0	0	0	0	0	200	903	0	0	0	0	0	0	0	603	903	0
248	8	0	0	0	0	0	0	200	300	0	0	0	0	0	0	0	200	903	0	0	0	0	0	0	0	603	903	0
248	9	0	0	0	0	0	0	200	300	0	0	0	0	0	0	0	200	903	0	0	0	0	0	0	0	603	903	0
249	0	0	0	0	0	0	0	200	300	0	0	0	0	0	0	0	200	903	0	0	0	0	0	0	0	603	903	0
249	1	0	0	0	0	0	0	200	300	0	0	0	0	0	0	0	200	903	0	0	0	0	0	0	0	603	903	0
249	2	0	0	0	0	0	0	200	300	0	0	0	0	0	0	0	200	903	0	0	0	0	0	0	0	603	903	0
249	3	0	0	0	0	0	0	200	300	0	0	0	0	0	0	0	200	903	0	0	0	0	0	0	0	603	903	0
249	4	0	0	0	0	0	0	200	300	0	0	0	0	0	0	0	200	903	0	0	0	0	0	0	0	603	903	0
249	5	0	0	0	0	0	0	200	300	0	0	0	0	0	0	0	200	903	0	0	0	0	0	0	0	603	903	0
249	6	0	0	0	0	0	0	200	300	0	0	0	0	0	0	0	200	903	0	0	0	0	0	0	0	603	903	0
249	7	0	0	0	0	0	0	200	300	0	0	0	0	0	0	0	200	903	0	0	0	0	0	0	0	603	903	0
249	8	0	0	0	0	0	0	200	300	0	0	0	0	0	0	0	200	903	0	0	0	0	0	0	0	603	903	0
249	9	0	0	0	0	0	0	200	300	0	0	0	0	0	0	0	200	903	0	0	0	0	0	0	0	603	903	0
250	0	0	0	0	0	0	0	200	300	0	0	0	0	0	0	0	200	903	0	0	0	0	0	0	0	603	903	0
250	1	0	0	0	0	0	0	200	300	0	0	0	0	0	0	0	200	903	0	0	0	0	0	0	0	603	903	0
250	2	0	0	0	0	0	0	200	300	0	0	0	0	0	0	0	200	903	0	0	0	0	0	0	0	603	903	0
250	3	0	0	0	0	0	0	200	300	0	0	0	0	0	0	0	200	903	0	0	0	0	0	0	0	603	903	0
250	4	0	0	0	0	0	0	200	300	0	0	0	0	0	0	0	200	903	0	0	0	0	0	0	0	603	903	0
250	5	0	0	0	0	0	0	200	300	0	0	0	0	0	0	0	200	903	0	0	0	0	0	0	0	603	903	0
250	6	0	0	0	0	0	0	200	300	0	0	0	0	0	0	0	200	903	0	0	0	0	0	0	0	603	903	0
250	7	0	0	0	0	0	0	200	300	0	0	0	0	0	0	0	200	903	0	0	0	0	0	0	0	603	903	0
250	8	0	0	0	0	0	0	200	300	0	0	0	0	0	0	0	200	903	0	0	0	0	0	0	0	603	903	0
250	9	0	0	0	0	0	0	200	300	0	0	0	0	0	0	0	200	903	0	0	0	0	0	0	0	603	903	0
251	0	0	0	0	0	0	0	200	300	0	0	0	0	0	0	0	200	903	0	0	0	0	0	0	0	603	903	0
251	1	0	0	0	0	0	0	200	300	0	0	0	0	0	0	0	200	903	0	0	0	0	0	0	0	603	903	0
251	2	0	0	0	0	0	0	200	300	0	0	0	0	0	0	0	200	903	0	0	0	0	0	0	0	603	903	0
251	3	0	0	0	0	0	0	200	300	0	0	0	0	0	0	0	200	903	0	0	0	0	0	0	0	603	903	0
251	4	0	0	0	0	0	0	200	300	0	0	0	0	0	0	0	200	903	0	0	0	0	0	0	0	603	903	0
251	5	0	0	0	0	0	0	200	300	0	0	0	0	0	0	0	200	903	0	0	0	0	0	0	0	603	903	0
251	6	0	0	0	0	0	0	200	300	0	0	0	0	0	0	0	200	903	0	0	0	0	0	0	0	603	903	0
251	7	0	0	0	0	0	0	200	300	0	0	0	0	0	0	0	200	903	0	0	0	0	0	0	0	603	903	0
251	8	0	0	0	0	0	0	200	300	0	0	0	0	0	0	0	200	903	0	0	0	0	0	0	0	603	903	0
251	9	0	0	0	0	0	0	200	300	0	0	0	0	0	0	0	200	903	0	0	0	0	0	0	0	603	903	0
252	0	0	0	0	0	0	0	200	300	0	0	0	0	0	0	0	200	903	0	0	0	0	0	0	0	603	903	0
252	1	0	0	0	0	0	0	200	300	0	0	0	0	0	0	0	200	903	0	0	0	0	0	0	0	603	903	0
252	2	0	0	0	0	0	0	200	300	0	0	0	0	0	0	0	200	903	0	0	0	0	0	0	0	603	903	0
252	3	0	0	0	0	0	0	200	300	0	0	0	0	0	0	0	200	903	0	0	0	0	0	0	0	603	903	0
252	4	0	0	0	0	0	0	200	300	0	0	0	0	0	0	0	200	903	0	0	0	0	0	0	0	603	903	0
252	5	0	0	0	0	0	0	200	300	0	0	0	0	0	0	0	200	903	0	0	0	0	0	0	0	603	903	0
252	6	0	0	0	0	0	0	200	300	0	0	0	0	0	0	0	200	903	0	0	0	0	0	0	0	603	903	0
252	7	0	0	0	0	0	0	200	300	0	0	0	0	0	0	0	200	903	0	0	0	0	0	0	0	603	903	0
252	8	0	0	0	0	0	0	200	300	0	0	0	0	0	0	0	200	903	0	0	0	0	0	0	0	603	903	0
252	9	0	0	0	0	0	0	200	300	0	0	0	0	0	0	0	200	903	0	0	0	0	0	0	0	603	903	0
253	0	0	0	0	0	0	0	200	300	0	0	0	0	0	0	0	200	903	0	0	0	0	0	0	0	603	903	0
253	1	0	0	0	0	0	0	200	300	0	0	0	0	0	0	0	200	903	0	0	0	0	0	0	0	603	903	0
253	2	0	0	0	0	0	0	200	300	0	0	0	0	0	0	0	200	903	0	0	0	0	0	0	0	603	903	0
253	3	0	0	0	0	0	0	200	300	0	0	0	0	0	0	0	200	903	0	0	0	0	0	0	0	603	903	0
253	4	0	0	0	0	0	0	200	300	0	0	0	0	0	0	0	200	903	0	0	0	0	0	0	0	603	903	0
253	5	0	0	0	0	0	0	200	300	0	0	0	0	0	0	0	200	903	0	0	0	0	0	0	0	603	903	0
253	6	0	0	0	0	0	0	200	300	0	0	0	0	0	0	0	200	903	0	0	0	0	0	0	0	603	903	0
253	7	0	0	0	0	0	0	200	300	0	0	0	0	0	0	0	200	903	0	0	0	0	0	0	0	603	903	0
253	8	0	0	0	0	0	0	200	300	0	0	0	0	0	0	0	200	903	0	0	0	0	0	0	0	603	903	0
253	9	0	0	0	0	0	0	200	300	0	0	0	0	0	0	0	200	903	0	0	0	0	0	0	0	603	903	0
254	0	0	0	0	0	0	0	200	300	0	0	0	0	0	0	0	200	903	0	0	0	0	0	0	0	603	903	0
254	1	0	0	0	0	0	0	200	300	0	0	0	0	0	0	0	200	903	0	0	0	0	0	0	0	603	903	0
254	2	0	0	0	0	0	0	200	300	0	0	0	0	0	0	0	200	903	0	0	0	0	0	0	0	603	903	0
254	3	0	0	0	0	0	0	200	300	0	0	0	0	0	0	0	200	903	0	0	0	0	0	0	0	603	903	0
254	4	0	0	0	0	0	0	200	300	0	0	0	0	0	0	0	200	903	0	0	0	0	0	0	0	603	903	0
254	5	0	0	0	0	0	0	200	300	0	0	0	0	0	0	0	200	903	0	0	0	0	0	0	0	603	903	0
254	6	0	0	0	0	0	0	200	300	0	0	0	0	0	0	0	200	903	0	0	0	0	0	0	0	603	903	0
254	7	0	0	0	0	0	0	200	300	0	0	0	0	0	0	0	200	903	0	0	0	0	0	0	0	603	903	0
254	8	0	0	0	0	0	0	200	300	0	0	0	0	0	0	0	200	903	0	0	0	0	0	0	0	603	903	0
254	9	0	0	0	0	0	0	200	300	0	0	0	0	0	0	0	200	903	0	0	0	0	0	0	0	603	903	0
255	0	0	0	0	0	0	0	200	300	0	0	0	0	0	0	0	200	903	0	0	0	0	0	0	0	603	903	0
255	1	0	0	0	0	0	0	200	300	0	0	0	0	0	0	0	200	903	0	0	0	0	0	0	0	603	903	0
255	2	0	0	0	0	0	0	200	300	0	0	0	0	0	0	0	200	903	0	0	0	0	0	0	0	603	903	0
255	3	0	0	0	0	0	0	200	300	0	0	0	0	0	0	0	200	903	0	0	0	0	0	0	0	603	903	0
255	4	0	0	0	0	0	0	200	300	0	0	0	0	0	0	0	200	903	0	0	0	0	0	0	0	603	903	0
255	5	0	0	0	0	0	0	200	300	0	0	0	0	0	0	0	200	903	0	0	0	0	0	0	0	603	903	0
255	6	0	0	0	0	0	0	200	300	0	0	0	0	0	0	0	200	903	0	0	0	0	0	0	0	603	903	0
255	7	0	0	0	0	0	0	200	300	0	0	0	0	0	0	0	200	903	0	0	0	0	0	0	0	603	903	0
255	8	0	0	0	0	0	0	200	300	0	0	0	0	0	0	0	200	903	0	0	0	0	0	0	0	603	903	0
255	9	0	0	0	0	0	0	200	300	0	0	0	0	0	0	0	200	903	0	0	0	0	0	0	0	603	903	0
256	0	0	0	0	0	0	0	200	300	0	0	0	0	0	0	0	200	903	0	0	0	0	0	0	0	603	903	0
256	1	0	0	0	0	0	0	200	300	0	0	0	0	0	0	0	200	903	0	0	0	0	0	0	0	603	903	0
256	2	0	0	0	0	0	0	200	300	0	0	0	0	0	0	0	200	903	0	0	0	0	0	0	0	603	903	0
256	3	0	0	0	0	0	0	200	300	0	0	0	0	0	0	0	200	903	0	0	0	0	0	0	0	603	903	0
256	4	0	0	0	0	0	0	200	300	0	0	0	0	0	0	0	200	903	0	0	0	0	0	0	0	603	903	0
256	5	0	0	0	0	0	0	200	300	0	0	0	0	0	0	0	200	903	0	0	0	0	0	0	0	603	903	0
256	6	0	0	0	0	0	0	200	300	0	0	0	0	0	0	0	200	903	0	0	0	0	0	0	0	603	903	0
256	7	0	0	0	0	0	0	200	300	0	0	0	0	0	0	0	200	903	0	0	0	0	0	0	0	603	903	0
256	8	0	0	0	0	0	0	200	300	0	0	0	0	0	0	0	200	903	0	0	0	0	0	0	0	603	903	0
256	9	0	0	0	0	0	0	200	300	0	0	0	0	0	0	0	200	903	0	0	0	0	0	0	0	603	903	0
257	0	0	0	0	0	0	0	200	300	0	0	0	0	0	0	0	200	903	0	0	0	0	0	0	0	603	903	0
257	1	0	0	0	0	0	0	200	300	0	0	0	0	0	0	0	200	903	0	0	0	0	0	0	0	603	903	0
257	2	0	0	0	0	0	0	200	300	0	0	0	0	0	0	0	200	903	0	0	0	0	0	0	0	603	903	0
257	3	0	0	0	0	0	0	200	300	0	0	0	0	0	0	0	200	903	0	0	0	0	0	0	0	603	903	0
257	4	0	0	0	0	0	0	200	300	0	0	0	0	0	0	0	200	903	0	0	0	0	0	0	0	603	903	0
257	5	0	0	0	0	0	0	200	300	0	0	0	0	0	0	0	200	903	0	0	0	0	0	0	0	603	903	0
257	6	0	0	0	0	0	0	200	300	0	0	0	0	0	0	0	200	903	0	0	0	0	0	0	0	603	903	0
257	7	0	0	0	0	0	0	200	300	0	0	0	0	0	0	0	200	903	0	0	0	0	0	0	0	603	903	0
257	8	0	0	0	0	0	0	200	300	0	0	0	0	0	0	0	200	903	0	0	0	0	0	0	0	603	903	0
257	9	0	0	0	0	0	0	200	300	0	0	0	0	0	0	0	200	903	0	0	0	0	0	0	0	603	903	0
258	0	0	0	0	0	0	0	200	300	0	0	0	0	0	0	0	200	903	0	0	0	0	0	0	0	603	903	0
258	1	0	0	0	0	0	0	200	300	0	0	0	0	0	0	0	200	903	0	0	0	0	0	0	0	603	903	0
258	2	0	0	0	0	0	0	200	300	0	0	0	0	0	0	0	200	903	0	0	0	0	0	0	0	603	903	0
258	3	0	0	0	0	0	0	200	300	0	0	0	0	0	0	0	200	903	0	0	0	0	0	0	0	603	903	0
258	4	0	0	0	0	0	0	200	300	0	0	0	0	0	0	0	200	903	0	0	0	0	0	0	0	603	903	0
258	5	0	0	0	0	0	0	200	300	0	0	0	0	0	0	0	200	903	0	0	0	0	0	0	0	603	903	0
258	6	0	0	0	0	0	0	200	300	0	0	0	0	0	0	0	200	903	0	0	0	0	0	0	0	603	903	0
258	7	0	0	0	0	0	0	200	300	0	0	0	0	0	0	0	200	903	0	0	0	0	0	0	0	603	903	0
258	8	0	0	0	0	0	0	200	300	0	0	0	0	0	0	0	200	903	0	0	0	0	0	0	0	603	903	0
258	9	0	0	0	0	0	0	200	300	0	0	0	0	0	0	0	200	903	0	0	0	0	0	0	0	603	903	0
259	0	0	0	0	0	0	0	200	300	0	0	0	0	0	0	0	200	903	0	0	0	0	0	0	0	603	903	0
259	1	0	0	0	0	0	0	200	300	0	0	0	0	0	0	0	200	903	0	0	0	0	0	0	0	603	903	0
259	2	0	0	0	0	0	0	200	300	0	0	0	0	0	0	0	200	903	0	0	0	0	0	0	0	603	903	0
259	3	0	0	0	0	0	0	200	300	0	0	0	0	0	0	0	200	903	0	0	0	0	0	0	0	603	903	0
259	4	0	0	0	0	0	0	200	300	0	0	0	0	0	0	0	200	903	0	0	0	0	0	0	0	603	903	0
259	5	0	0	0	0	0	0	200	300	0	0	0	0	0	0	0	200	903	0	0	0	0	0	0	0	603	903	0
259	6	0	0	0	0	0	0	200	300	0	0	0	0	0	0	0	200	903	0	0	0	0	0	0	0	603	903	0
259	7	0	0	0	0	0	0	200	300	0	0	0	0	0	0	0	200	903	0	0	0	0	0	0	0	603	903	0
259	8	0	0	0	0	0	0	200	300	0	0	0	0	0	0	0	200	903	0	0	0	0	0	0	0	603	903	0
259	9	0	0	0	0	0	0	200	300	0	0	0	0	0	0	0	200	903	0	0	0	0	0	0	0	603	903	0
260	0	0	0	0	0	0	0	200	300	0	0	0	0	0	0	0	200	903	0	0	0	0	0	0	0	603	903	0
260	1	0	0	0	0	0	0	200	300	0	0	0	0	0	0	0	200	903	0	0	0	0	0	0	0	603	903	0
260	2	0	0	0	0	0	0	200	300	0	0	0	0	0	0	0	200	903	0	0	0	0	0	0	0	603	903	0
260	3	0	0	0	0	0	0	200	300	0	0	0	0	0	0	0	200	903	0	0	0	0	0	0	0	603	903	0
260	4	0	0	0	0	0	0	200	300	0	0	0	0	0	0	0	200	903	0	0	0	0	0	0	0	603	903	0
260	5	0	0	0	0	0	0	200	300	0	0	0	0	0	0	0	200	903	0	0	0	0	0	0	0	603	903	0
260	6	0	0	0	0	0	0	200	300	0	0	0	0	0	0	0	200	903	0	0	0	0	0	0	0	603	903	0
260	7	0	0	0	0	0	0	200	300	0	0	0	0	0	0	0	200	903	0	0	0	0	0	0	0	603	903	0
260	8	0	0	0	0	0	0	200	300	0	0	0	0	0	0	0	200	903	0	0	0	0	0	0	0	603	903	0
260	9	0	0	0	0	0	0	200	300	0	0	0	0	0	0	0	200	903	0	0	0	0	0	0	0	603	903	0
261	0	0	0	0	0	0	0	200	300	0	0	0	0	0	0	0	200	903	0	0	0	0	0	0	0	603	903	0
261	1	0	0	0	0	0	0	200	300	0	0	0	0	0	0	0	200	903	0	0	0	0	0	0	0	603	903	0
261	2	0	0	0	0	0	0	200	300	0	0	0	0	0	0	0	200	903	0	0	0	0	0	0	0	603	903	0
261	3	0	0	0	0	0	0	200	300	0	0	0	0	0	0	0	200	903	0	0	0	0	0	0	0	603	903	0
261	4	0	0	0	0	0	0	200	300	0	0	0	0	0	0	0	200	903	0	0	0	0	0	0	0	603	903	0
261	5	0	0	0	0	0	0	200	300	0	0	0	0	0	0	0	200	903	0	0	0	0	0	0	0	603	903	0
261	6	0	0	0	0	0	0	200	300	0	0	0	0	0	0	0	200	903	0	0	0	0	0	0	0	603	903	0
261	7	0	0	0	0	0	0	200	300	0	0	0	0	0	0	0	200	903	0	0	0	0	0	0	0	603	903	0
261	8	0	0	0	0	0	0	200	300	0	0	0	0	0	0	0	200	903	0	0	0	0	0	0	0	603	903	0
261	9	0	0	0	0	0	0	200	300	0	0	0	0	0	0	0	200	903	0	0	0	0	0	0	0	603	903	0
262	0	0	0	0	0	0	0	200	300	0	0	0	0	0	0	0	200	903	0	0	0	0	0	0	0	603	903	0
262	1	0	0	0	0	0	0	200	300	0	0	0	0	0	0	0	200	903	0	0	0	0	0	0	0	603	903	0
262	2	0	0	0	0	0	0	200	300	0	0	0	0	0	0	0	200	903	0	0	0	0	0	0	0	603	903	0
262	3	0	0	0	0	0	0	200	300	0	0	0	0	0	0	0	200	903	0	0	0	0	0	0	0	603	903	0
262	4	0	0	0	0	0	0	200	300	0	0	0	0	0	0	0	200	903	0	0	0	0	0	0	0	603	903	0
262	5	0	0	0	0	0	0	200	300	0	0	0	0	0	0	0	200	903	0	0	0	0	0	0	0	603	903	0
262	6	2.78636	6.33408	-11.9076	3355.32	-206.303	1212.85	182.675	18.2214	0	0	0	0	0	0	0	200	903	0	0	0	0	0	0	0	603	903	0
262	7	5.22777	8.62289	-17.706	3904.64	343.014	1853.72	219.373	79.4737	0	0	0	0	0	0	0	200	903	0	0	0	0	0	0	0	603	903	0
262	8	4.9226	4.50302	-14.6542	2897.56	465.084	938.188	231.737	102.272	0	0	0	0	0	0	0	200	903	0	0	0	0	0	0	0	603	903	0
262	9	2.93895	3.43491	-10.0766	2531.35	-84.2325	800.859	191.641	48.7895	0	0	0	0	0	0	0	200	903	0	0	0	0	0	0	0	603	903	0
263	0	-1.4861	6.18149	-9.16106	2073.58	37.8378	1304.4	204.13	73.6527	0	0	0	0	0	0	0	200	903	0	0	0	0	0	0	0	603	903	0
263	1	2.17601	8.47031	-13.4335	3629.98	37.8378	709.306	202.817	29.7821	0	0	0	0	0	0	0	200	903	0	0	0	0	0	0	0	603	903	0
263	2	4.00707	6.63925	-17.0956	3904.64	37.8378	571.977	202.213	71.6004	0	0	0	0	0	0	0	200	903	0	0	0	0	0	0	0	603	903	0
263	3	4.15966	5.87631	-19.2319	4637.06	220.943	1441.73	211.488	58.8868	0	0	0	0	0	0	0	200	903	0	0	0	0	0	0	0	603	903	0
263	4	2.02342	7.70737	-19.2319	4820.16	-206.303	251.542	189.273	49.3658	0	0	0	0	0	0	0	200	903	0	0	0	0	0	0	0	603	903	0
263	5	-1.18092	6.94443	-21.9784	6010.35	-389.408	-526.656	182.282	26.5344	0	0	0	0	0	0	0	200	903	0	0	0	0	0	0	0	603	903	0
263	6	-5.30079	4.50302	-25.0302	6376.56	-267.338	-389.327	189.319	45.2454	0	0	0	0	0	0	0	200	903	0	0	0	0	0	0	0	603	903	0
263	7	-5.45338	1.14609	-29.913	7749.85	-267.338	-847.091	191.063	40.9205	0	0	0	0	0	0	0	200	903	0	0	0	0	0	0	0	603	903	0
263	8	-3.9275	-0.227204	-34.1855	9764.02	-938.725	-1396.41	172.54	14.3812	0	0	0	0	0	0	0	200	903	0	0	0	0	0	0	0	603	903	0
263	9	-4.99562	-2.05826	-41.8149	12693.7	-694.584	-1075.97	183.389	-3.56909	0	0	0	0	0	0	0	200	903	0	0	0	0	0	0	0	603	903	0
264	0	-5.30079	-6.78848	-50.9701	13609.2	-999.76	-755.538	180.385	32.996	0	0	0	0	0	0	0	200	903	0	0	0	0	0	0	0	603	903	0
264	1	-4.23268	-7.24625	-57.3788	15806.5	-1427.01	-892.867	175.13	24.524	0	0	0	0	0	0	0	200	903	0	0	0	0	0	0	0	603	903	0
264	2	-4.69044	-6.48331	-65.3134	18278.4	-1671.15	-618.209	174.413	20.1429	0	0	0	0	0	0	0	200	903	0	0	0	0	0	0	0	603	903	0
264	3	-3.62233	-7.09366	-71.7221	20384.1	-1732.18	-755.538	175.849	15.79	0	0	0	0	0	0	0	200	903	0	0	0	0	0	0	0	603	903	0
264	4	-4.69044	-7.09366	-79.6567	22398.3	-1915.29	-938.644	175.956	18.8145	0	0	0	0	0	0	0	200	903	0	0	0	0	0	0	0	603	903	0
264	5	-5.14821	-5.87296	-89.7275	24870.2	-1854.25	-435.104	179.335	22.8249	0	0	0	0	0	0	0	200	903	0	0	0	0	0	0	0	603	903	0
264	6	-4.69044	-4.49966	-94.3051	26975.9	-2281.5	-618.209	175.807	13.9505	0	0	0	0	0	0	0	200	903	0	0	0	0	0	0	0	603	903	0
264	7	-4.69044	-6.63589	-102.24	28807	-2525.64	-618.209	175.297	18.2406	0	0	0	0	0	0	0	200	903	0	0	0	0	0	0	0	603	903	0
264	8	-3.16456	-9.0773	-109.259	31278.9	-2647.71	-297.775	175.767	13.717	0	0	0	0	0	0	0	200	903	0	0	0	0	0	0	0	603	903	0
264	9	-1.33351	-9.99283	-118.719	34208.6	-2891.85	343.095	175.641	11.8528	0	0	0	0	0	0	0	200	903	0	0	0	0	0	0	0	603	903	0
265	0	0.497546	-10.9084	-130.011	37138.3	-2769.78	571.977	178.696	14.3444	0	0	0	0	0	0	0	200	903	0	0	0	0	0	0	0	603	903	0
265	1	1.1079	-14.2653	-140.081	38694.7	-2769.78	1212.85	180.227	23.7701	0	0	0	0	0	0	0	200	903	0	0	0	0	0	0	0	603	903	0
265	2	3.70189	-16.5541	-147.711	41532.8	-2830.82	2357.25	180.835	18.8236	0	0	0	0	0	0	0	200	903	0	0	0	0	0	0	0	603	903	0
265	3	8.43212	-15.6386	-155.035	43913.2	-2647.71	3135.45	182.922	16.7532	0	0	0	0	0	0	0	200	903	0	0	0	0	0	0	0	603	903	0
265	4	9.65282	-13.9601	-162.359	45835.8	-2525.64	3364.33	184.444	17.689	0	0	0	0	0	0	0	200	903	0	0	0	0	0	0	0	603	903	0
265	5	10.4158	-15.3334	-169.684	48582.4	-2403.57	4234.09	185.835	13.6882	0	0	0	0	0	0	0	200	903	0	0	0	0	0	0	0	603	903	0
265	6	12.8572	-13.0446	-180.365	51420.5	-2281.5	4920.73	187.351	14.9081	0	0	0	0	0	0	0	200	903	0	0	0	0	0	0	0	603	903	0
265	7	16.8244	-9.22989	-188.299	53617.8	-2098.39	5286.94	188.856	15.2523	0	0	0	0	0	0	0	200	903	0	0	0	0	0	0	0	603	903	0
265	8	19.2659	-4.95743	-199.286	55174.2	-2159.43	6248.25	189.164	23.1401	0	0	0	0	0	0	0	200	903	0	0	0	0	0	0	0	603	903	0
265	9	23.6909	-4.19449	-205.999	57463	-1610.11	6843.34	192.184	21.0527	0	0	0	0	0	0	0	200	903	0	0	0	0	0	0	0	603	903	0
266	0	24.6064	-0.532379	-212.103	60301.1	-1610.11	6980.67	192.409	15.6987	0	0	0	0	0	0	0	200	903	0	0	0	0	0	0	0	603	903	0
266	1	24.6064	4.8082	-222.479	61399.8	-1671.15	7026.44	192.489	24.0198	0	0	0	0	0	0	0	200	903	0	0	0	0	0	0	0	603	903	0
266	2	29.3367	6.48666	-229.193	63688.6	-1304.94	8399.74	194.306	22.1179	0	0	0	0	0	0	0	200	903	0	0	0	0	0	0	0	603	903	0
266	3	32.9988	8.16513	-238.043	66709.8	-1304.94	9269.49	194.518	19.7572	0	0	0	0	0	0	0	200	903	0	0	0	0	0	0	0	603	903	0
266	4	37.2712	11.9798	-248.114	68907.1	-816.654	9681.47	196.709	22.2762	0	0	0	0	0	0	0	200	903	0	0	0	0	0	0	0	603	903	0
266	5	41.6963	17.7782	-255.743	70371.9	-999.76	9773.03	196.091	24.8336	0	0	0	0	0	0	0	200	903	0	0	0	0	0	0	0	603	903	0
266	6	42.154	20.067	-266.119	72111.5	-999.76	10459.7	196.243	29.0256	0	0	0	0	0	0	0	200	903	0	0	0	0	0	0	0	603	903	0
266	7	41.0859	24.9498	-272.833	74766.4	-1121.83	10322.3	195.888	25.9626	0	0	0	0	0	0	0	200	903	0	0	0	0	0	0	0	603	903	0
266	8	43.3747	29.3748	-280.768	76963.7	-999.76	10642.8	196.439	25.881	0	0	0	0	0	0	0	200	903	0	0	0	0	0	0	0	603	903	0
266	9	47.0369	33.1895	-286.261	76414.4	-1182.87	10780.1	195.868	33.06	0	0	0	0	0	0	0	200	903	0	0	0	0	0	0	0	603	903	0
267	0	47.9524	35.9361	-291.754	79618.7	-999.76	10825.9	196.573	27.103	0	0	0	0	0	0	0	200	903	0	0	0	0	0	0	0	603	903	0
267	1	47.1894	37.9198	-298.773	80351.2	-1060.8	10825.9	196.45	31.0627	0	0	0	0	0	0	0	200	903	0	0	0	0	0	0	0	603	903	0
267	2	49.936	43.2603	-304.571	81632.9	-1304.94	11192.1	195.715	31.9742	0	0	0	0	0	0	0	200	903	0	0	0	0	0	0	0	603	903	0
267	3	48.7153	45.8543	-310.064	82456.9	-1365.97	10734.3	195.595	34.0653	0	0	0	0	0	0	0	200	903	0	0	0	0	0	0	0	603	903	0
267	4	49.6308	47.3802	-316.473	84471.1	-938.725	10780.1	197.034	33.0861	0	0	0	0	0	0	0	200	903	0	0	0	0	0	0	0	603	903	0
267	5	51.1567	47.2276	-321.661	85478.1	-1549.08	10963.2	195.184	34.2603	0	0	0	0	0	0	0	200	903	0	0	0	0	0	0	0	603	903	0
267	6	50.8516	54.3993	-327.765	87126.1	-1182.87	10597	196.391	34.1809	0	0	0	0	0	0	0	200	903	0	0	0	0	0	0	0	603	903	0
267	7	48.8679	57.2984	-333.258	87950	-1610.11	10642.8	195.169	36.09	0	0	0	0	0	0	0	200	903	0	0	0	0	0	0	0	603	903	0
267	8	48.4101	57.7562	-335.394	89048.7	-1610.11	10459.7	195.199	34.4953	0	0	0	0	0	0	0	200	903	0	0	0	0	0	0	0	603	903	0
267	9	48.4101	60.1976	-340.277	89689.6	-1610.11	10047.7	195.268	36.4217	0	0	0	0	0	0	0	200	903	0	0	0	0	0	0	0	603	903	0
268	0	49.6308	64.0123	-346.685	90605.1	-2037.36	9727.25	194.123	38.6534	0	0	0	0	0	0	0	200	903	0	0	0	0	0	0	0	603	903	0
268	1	49.1731	63.8597	-348.822	92436.1	-2159.43	9177.93	193.809	35.0047	0	0	0	0	0	0	0	200	903	0	0	0	0	0	0	0	603	903	0
268	2	46.7317	64.1649	-357.977	93809.4	-2159.43	8903.28	193.968	37.9457	0	0	0	0	0	0	0	200	903	0	0	0	0	0	0	0	603	903	0
268	3	46.5791	66.7589	-358.893	93626.4	-2281.5	8857.5	193.643	39.1243	0	0	0	0	0	0	0	200	903	0	0	0	0	0	0	0	603	903	0
268	4	47.1894	69.0477	-370.184	96189.8	-2647.71	8811.72	192.848	40.1567	0	0	0	0	0	0	0	200	903	0	0	0	0	0	0	0	603	903	0
268	5	46.4265	67.6744	-378.729	98387.1	-2891.85	8491.29	192.364	40.2177	0	0	0	0	0	0	0	200	903	0	0	0	0	0	0	0	603	903	0
268	6	45.8162	68.5899	-391.241	101042	-2830.82	8765.95	192.765	41.7395	0	0	0	0	0	0	0	200	903	0	0	0	0	0	0	0	603	903	0
268	7	45.9687	70.8788	-400.091	102324	-3685.31	7896.2	190.789	44.2488	0	0	0	0	0	0	0	200	903	0	0	0	0	0	0	0	603	903	0
268	8	43.9851	74.3883	-409.247	105070	-3624.27	7484.21	191.144	43.2588	0	0	0	0	0	0	0	200	903	0	0	0	0	0	0	0	603	903	0
268	9	39.56	73.9305	-420.233	107542	-3990.48	6706.01	190.504	44.0886	0	0	0	0	0	0	0	200	903	0	0	0	0	0	0	0	603	903	0
269	0	40.323	73.6253	-429.693	108824	-3929.45	6568.68	190.855	46.7401	0	0	0	0	0	0	0	200	903	0	0	0	0	0	0	0	603	903	0
269	1	39.7126	74.9986	-439.459	110289	-4539.8	6522.9	189.67	49.0348	0	0	0	0	0	0	0	200	903	0	0	0	0	0	0	0	603	903	0
269	2	37.1186	78.0504	-449.225	112395	-4783.94	6019.36	189.351	49.803	0	0	0	0	0	0	0	200	903	0	0	0	0	0	0	0	603	903	0
269	3	34.8298	77.8978	-455.328	113860	-5028.08	5790.48	188.957	49.9396	0	0	0	0	0	0	0	200	903	0	0	0	0	0	0	0	603	903	0
269	4	34.2195	80.6444	-461.737	115050	-5455.33	5470.05	188.185	50.8328	0	0	0	0	0	0	0	200	903	0	0	0	0	0	0	0	603	903	0
269	5	31.6255	83.391	-469.061	116606	-5333.26	5103.84	188.63	51.4053	0	0	0	0	0	0	0	200	903	0	0	0	0	0	0	0	603	903	0
269	6	30.7099	83.8487	-471.808	118620	-5638.43	4966.51	188.049	48.5834	0	0	0	0	0	0	0	200	903	0	0	0	0	0	0	0	603	903	0
269	7	30.2522	84.4591	-479.437	118712	-6065.68	4646.07	187.348	52.3934	0	0	0	0	0	0	0	200	903	0	0	0	0	0	0	0	603	903	0
269	8	28.4211	86.5953	-486.151	120268	-5882.57	4508.74	187.9	52.6114	0	0	0	0	0	0	0	200	903	0	0	0	0	0	0	0	603	903	0
269	9	26.8953	89.4945	-491.949	121733	-6676.03	4005.2	186.429	52.5495	0	0	0	0	0	0	0	200	903	0	0	0	0	0	0	0	603	903	0
270	0	24.6064	90.5626	-493.78	121184	-6553.96	3776.32	186.727	54.5796	0	0	0	0	0	0	0	200	903	0	0	0	0	0	0	0	603	903	0
270	1	21.2495	91.6307	-500.189	122282	-6859.14	3227.01	186.287	55.5276	0	0	0	0	0	0	0	200	903	0	0	0	0	0	0	0	603	903	0
270	2	21.0969	93.7669	-503.241	123015	-7103.28	3089.68	185.885	55.5548	0	0	0	0	0	0	0	200	903	0	0	0	0	0	0	0	603	903	0
270	3	18.8081	94.3773	-505.987	123564	-7408.45	2952.35	185.358	55.796	0	0	0	0	0	0	0	200	903	0	0	0	0	0	0	0	603	903	0
270	4	16.977	95.9032	-508.429	123289	-7103.28	2631.91	186.029	57.5089	0	0	0	0	0	0	0	200	903	0	0	0	0	0	0	0	603	903	0
270	5	14.5356	94.9876	-509.955	123839	-7957.77	2082.6	184.395	57.1573	0	0	0	0	0	0	0	200	903	0	0	0	0	0	0	0	603	903	0
270	6	14.383	97.2765	-513.006	124388	-7896.73	2128.37	184.607	57.5311	0	0	0	0	0	0	0	200	903	0	0	0	0	0	0	0	603	903	0
270	7	12.2468	97.8868	-516.974	125670	-7835.7	1441.73	184.843	56.9126	0	0	0	0	0	0	0	200	903	0	0	0	0	0	0	0	603	903	0
270	8	10.4158	98.192	-516.058	124754	-8262.95	1167.07	183.988	58.2553	0	0	0	0	0	0	0	200	903	0	0	0	0	0	0	0	603	903	0
270	9	8.73729	97.8868	-519.72	125120	-8507.09	1029.74	183.631	59.2541	0	0	0	0	0	0	0	200	903	0	0	0	0	0	0	0	603	903	0
271	0	7.51659	98.9549	-520.941	125761	-8262.95	709.306	184.138	58.588	0	0	0	0	0	0	0	200	903	0	0	0	0	0	0	0	603	903	0
271	1	7.51659	98.4972	-521.551	125029	-8507.09	434.647	183.689	60.2749	0	0	0	0	0	0	0	200	903	0	0	0	0	0	0	0	603	903	0
271	2	6.29589	98.9549	-520.941	124846	-8568.12	251.542	183.553	60.3455	0	0	0	0	0	0	0	200	903	0	0	0	0	0	0	0	603	903	0
271	3	5.99071	99.5653	-523.687	125212	-9178.48	205.766	182.473	60.9031	0	0	0	0	0	0	0	200	903	0	0	0	0	0	0	0	603	903	0
271	4	5.99071	99.4127	-524.603	125761	-8934.33	-114.669	182.969	60.2733	0	0	0	0	0	0	0	200	903	0	0	0	0	0	0	0	603	903	0
271	5	5.83812	99.7179	-531.927	125578	-9422.62	-206.222	182.286	63.9183	0	0	0	0	0	0	0	200	903	0	0	0	0	0	0	0	603	903	0
271	6	4.77001	100.939	-538.336	127226	-9849.86	-709.762	181.703	63.6676	0	0	0	0	0	0	0	200	903	0	0	0	0	0	0	0	603	903	0
271	7	0.0397824	103.99	-543.524	127043	-10155	-1762.62	181.316	66.2603	0	0	0	0	0	0	0	200	903	0	0	0	0	0	0	0	603	903	0
271	8	-2.09645	109.026	-547.186	126952	-10704.4	-2403.49	180.437	67.992	0	0	0	0	0	0	0	200	903	0	0	0	0	0	0	0	603	903	0
271	9	-3.62233	110.704	-547.186	127592	-10643.3	-2403.49	180.549	66.8207	0	0	0	0	0	0	0	200	903	0	0	0	0	0	0	0	603	903	0
272	0	-3.62233	110.857	-553.9	128050	-11070.6	-2952.8	180.013	68.8208	0	0	0	0	0	0	0	200	903	0	0	0	0	0	0	0	603	903	0
272	1	-2.7068	114.366	-558.172	128966	-10948.5	-3410.57	180.385	68.9501	0	0	0	0	0	0	0	200	903	0	0	0	0	0	0	0	603	903	0
272	2	-4.69044	120.47	-562.445	127776	-11253.7	-2907.03	179.992	72.8212	0	0	0	0	0	0	0	200	903	0	0	0	0	0	0	0	603	903	0
272	3	-3.9275	123.979	-565.497	129149	-11558.8	-3593.67	179.56	71.6188	0	0	0	0	0	0	0	200	903	0	0	0	0	0	0	0	603	903	0
272	4	-5.45338	125.2	-571.295	129698	-11314.7	-4005.66	180.195	72.9752	0	0	0	0	0	0	0	200	903	0	0	0	0	0	0	0	603	903	0
272	5	-1.63868	127.336	-571.905	130339	-11314.7	-3135.91	180.216	72.0968	0	0	0	0	0	0	0	200	903	0	0	0	0	0	0	0	603	903	0
272	6	-1.18092	131.456	-577.398	130064	-11497.8	-2769.7	180.087	74.7408	0	0	0	0	0	0	0	200	903	0	0	0	0	0	0	0	603	903	0
272	7	-1.33351	132.677	-581.976	131163	-11436.8	-3410.57	180.348	74.6247	0	0	0	0	0	0	0	200	903	0	0	0	0	0	0	0	603	903	0
272	8	-1.33351	132.524	-582.586	131621	-11619.9	-2861.25	180.055	74.0751	0	0	0	0	0	0	0	200	903	0	0	0	0	0	0	0	603	903	0
272	9	0.19237	132.219	-585.333	131895	-12230.2	-2220.38	179.106	74.666	0	0	0	0	0	0	0	200	903	0	0	0	0	0	0	0	603	903	0
273	0	1.71825	132.524	-588.08	131712	-11680.9	-2998.58	180.137	76.0299	0	0	0	0	0	0	0	200	903	0	0	0	0	0	0	0	603	903	0
273	1	0.95531	130.998	-589.605	133543	-11803	-2723.92	179.982	73.5039	0	0	0	0	0	0	0	200	903	0	0	0	0	0	0	0	603	903	0
273	2	-0.875745	126.573	-594.488	133360	-12535.4	-2540.82	178.914	75.6721	0	0	0	0	0	0	0	200	903	0	0	0	0	0	0	0	603	903	0
273	3	-2.55421	127.794	-599.676	133177	-12230.2	-3044.36	179.605	77.9183	0	0	0	0	0	0	0	200	903	0	0	0	0	0	0	0	603	903	0
273	4	-3.01198	125.963	-602.118	133726	-12779.5	-2998.58	178.776	77.9065	0	0	0	0	0	0	0	200	903	0	0	0	0	0	0	0	603	903	0
273	5	-3.77491	123.674	-605.169	134825	-12779.5	-2723.92	178.883	77.2109	0	0	0	0	0	0	0	200	903	0	0	0	0	0	0	0	603	903	0
273	6	-7.13185	122.453	-605.78	134367	-12840.6	-3685.23	178.803	78.1911	0	0	0	0	0	0	0	200	903	0	0	0	0	0	0	0	603	903	0
273	7	-8.19996	122.453	-610.968	135191	-13695.1	-3547.9	177.585	78.726	0	0	0	0	0	0	0	200	903	0	0	0	0	0	0	0	603	903	0
273	8	-10.3362	123.064	-614.935	136015	-13756.1	-3731	177.63	78.8135	0	0	0	0	0	0	0	200	903	0	0	0	0	0	0	0	603	903	0
273	9	-11.2517	122.606	-618.902	136565	-14000.3	-4051.44	177.379	79.3438	0	0	0	0	0	0	0	200	903	0	0	0	0	0	0	0	603	903	0
274	0	-11.7095	122.606	-621.649	136290	-14366.5	-4738.08	176.89	80.7605	0	0	0	0	0	0	0	200	903	0	0	0	0	0	0	0	603	903	0
274	1	-14.3035	126.421	-628.058	136565	-13939.2	-4692.31	177.806	82.5603	0	0	0	0	0	0	0	200	903	0	0	0	0	0	0	0	603	903	0
274	2	-16.7449	126.573	-631.414	137389	-14732.7	-5012.74	176.667	82.4115	0	0	0	0	0	0	0	200	903	0	0	0	0	0	0	0	603	903	0
274	3	-18.8811	128.099	-634.466	137938	-15037.9	-5836.72	176.298	82.5923	0	0	0	0	0	0	0	200	903	0	0	0	0	0	0	0	603	903	0
274	4	-19.4915	130.541	-638.739	138396	-15037.9	-5928.27	176.457	83.3299	0	0	0	0	0	0	0	200	903	0	0	0	0	0	0	0	603	903	0
274	5	-19.1863	132.524	-640.265	139220	-15037.9	-6157.15	176.513	82.5592	0	0	0	0	0	0	0	200	903	0	0	0	0	0	0	0	603	903	0
274	6	-22.5432	130.693	-643.622	139586	-15709.2	-6706.47	175.592	83.1244	0	0	0	0	0	0	0	200	903	0	0	0	0	0	0	0	603	903	0
274	7	-22.8484	133.287	-645.147	139220	-15587.2	-6569.14	175.839	84.2049	0	0	0	0	0	0	0	200	903	0	0	0	0	0	0	0	603	903	0
274	8	-23.4588	134.203	-650.03	140501	-16014.4	-7210.01	175.364	83.8542	0	0	0	0	0	0	0	200	903	0	0	0	0	0	0	0	603	903	0
274	9	-22.3906	133.287	-652.777	140959	-16136.5	-6981.13	175.28	84.0623	0	0	0	0	0	0	0	200	903	0	0	0	0	0	0	0	603	903	0
275	0	-23.7639	132.372	-656.439	140868	-16014.4	-7210.01	175.604	85.4065	0	0	0	0	0	0	0	200	903	0	0	0	0	0	0	0	603	903	0
275	1	-24.3743	132.829	-660.101	141142	-16624.8	-6935.35	174.815	86.1808	0	0	0	0	0	0	0	200	903	0	0	0	0	0	0	0	603	903	0
275	2	-26.9683	132.524	-661.322	142332	-16380.6	-7576.22	175.23	84.7759	0	0	0	0	0	0	0	200	903	0	0	0	0	0	0	0	603	903	0
275	3	-26.5105	130.541	-664.068	142790	-16868.9	-7347.34	174.598	84.9767	0	0	0	0	0	0	0	200	903	0	0	0	0	0	0	0	603	903	0
275	4	-27.8838	130.235	-665.594	141966	-16991	-7576.22	174.472	86.7076	0	0	0	0	0	0	0	200	903	0	0	0	0	0	0	0	603	903	0
275	5	-28.3416	129.625	-667.425	143614	-17235.1	-7805.1	174.177	84.8236	0	0	0	0	0	0	0	200	903	0	0	0	0	0	0	0	603	903	0
275	6	-28.4942	127.794	-668.646	143431	-16807.9	-7805.1	174.863	85.4904	0	0	0	0	0	0	0	200	903	0	0	0	0	0	0	0	603	903	0
275	7	-29.8674	126.879	-671.393	143248	-17113	-7713.55	174.511	86.6406	0	0	0	0	0	0	0	200	903	0	0	0	0	0	0	0	603	903	0
275	8	-30.3252	125.505	-673.834	143156	-17662.4	-8262.87	173.788	87.5494	0	0	0	0	0	0	0	200	903	0	0	0	0	0	0	0	603	903	0
275	9	-30.783	126.116	-673.834	143065	-17418.2	-8491.75	174.151	87.6854	0	0	0	0	0	0	0	200	903	0	0	0	0	0	0	0	603	903	0
276	0	-34.2925	125.658	-678.412	143889	-17845.5	-8720.63	173.695	87.9033	0	0	0	0	0	0	0	200	903	0	0	0	0	0	0	0	603	903	0
276	1	-33.2244	125.658	-678.717	143889	-17662.4	-8491.75	173.977	87.9987	0	0	0	0	0	0	0	200	903	0	0	0	0	0	0	0	603	903	0
276	2	-35.5132	124.59	-681.768	144713	-17906.5	-8857.96	173.735	87.7392	0	0	0	0	0	0	0	200	903	0	0	0	0	0	0	0	603	903	0
276	3	-36.1235	123.979	-680.548	145079	-18333.8	-8400.2	173.06	86.8202	0	0	0	0	0	0	0	200	903	0	0	0	0	0	0	0	603	903	0
276	4	-36.2761	123.064	-683.905	144530	-18089.6	-8903.74	173.55	88.6699	0	0	0	0	0	0	0	200	903	0	0	0	0	0	0	0	603	903	0
276	5	-34.9028	123.674	-690.313	144530	-18089.6	-9132.62	173.795	90.6319	0	0	0	0	0	0	0	200	903	0	0	0	0	0	0	0	603	903	0
276	6	-37.3442	122.759	-691.229	145445	-18516.9	-8857.96	173.212	89.5847	0	0	0	0	0	0	0	200	903	0	0	0	0	0	0	0	603	903	0
276	7	-37.1917	121.538	-688.788	145811	-18516.9	-9086.84	173.117	88.3071	0	0	0	0	0	0	0	200	903	0	0	0	0	0	0	0	603	903	0
276	8	-39.1753	120.622	-694.281	145628	-18822	-9269.95	172.89	90.2458	0	0	0	0	0	0	0	200	903	0	0	0	0	0	0	0	603	903	0
276	9	-39.7857	120.47	-693.06	147185	-18638.9	-8812.18	173.106	87.6307	0	0	0	0	0	0	0	200	903	0	0	0	0	0	0	0	603	903	0
277	0	-40.0908	117.876	-697.027	147002	-18638.9	-9041.07	173.259	89.102	0	0	0	0	0	0	0	200	903	0	0	0	0	0	0	0	603	903	0
277	1	-38.565	117.876	-700.384	147368	-18883.1	-9132.62	173.039	89.5901	0	0	0	0	0	0	0	200	903	0	0	0	0	0	0	0	603	903	0
277	2	-40.2434	115.74	-700.995	146727	-19310.3	-8857.96	172.453	90.6876	0	0	0	0	0	0	0	200	903	0	0	0	0	0	0	0	603	903	0
277	3	-39.6331	115.434	-704.352	147368	-18761	-9041.07	173.364	90.7753	0	0	0	0	0	0	0	200	903	0	0	0	0	0	0	0	603	903	0
277	4	-40.2434	114.061	-705.877	147642	-19188.2	-9361.5	172.816	90.8384	0	0	0	0	0	0	0	200	903	0	0	0	0	0	0	0	603	903	0
277	5	-40.2434	114.061	-708.624	147917	-19249.3	-8491.75	172.836	91.2615	0	0	0	0	0	0	0	200	903	0	0	0	0	0	0	0	603	903	0
277	6	-41.1589	112.688	-709.845	148833	-19005.1	-8949.51	173.226	90.3307	0	0	0	0	0	0	0	200	903	0	0	0	0	0	0	0	603	903	0
277	7	-41.1589	111.162	-710.15	149016	-19188.2	-8949.51	172.98	90.1629	0	0	0	0	0	0	0	200	903	0	0	0	0	0	0	0	603	903	0
277	8	-41.0064	109.941	-710.455	148833	-19249.3	-8720.63	172.906	90.5109	0	0	0	0	0	0	0	200	903	0	0	0	0	0	0	0	603	903	0
277	9	-41.1589	107.958	-712.591	148375	-19066.2	-8766.41	173.244	91.7813	0	0	0	0	0	0	0	200	903	0	0	0	0	0	0	0	603	903	0
278	0	-40.396	107.805	-712.896	148283	-19127.2	-8949.51	173.17	91.9987	0	0	0	0	0	0	0	200	903	0	0	0	0	0	0	0	603	903	0
278	1	-38.8701	106.889	-714.117	149107	-19554.5	-8674.85	172.617	91.2006	0	0	0	0	0	0	0	200	903	0	0	0	0	0	0	0	603	903	0
278	2	-40.5486	106.279	-716.253	149107	-19127.2	-8720.63	173.295	91.8233	0	0	0	0	0	0	0	200	903	0	0	0	0	0	0	0	603	903	0
278	3	-41.1589	105.058	-716.864	149840	-19188.2	-8629.08	173.233	90.9788	0	0	0	0	0	0	0	200	903	0	0	0	0	0	0	0	603	903	0
278	4	-42.0745	102.159	-718.084	150297	-19493.4	-8766.41	172.854	90.6967	0	0	0	0	0	0	0	200	903	0	0	0	0	0	0	0	603	903	0
278	5	-42.8374	101.549	-717.474	149565	-19310.3	-8629.08	173.086	91.5395	0	0	0	0	0	0	0	200	903	0	0	0	0	0	0	0	603	903	0
278	6	-43.1426	101.091	-717.474	149748	-19432.4	-8720.63	172.916	91.2842	0	0	0	0	0	0	0	200	903	0	0	0	0	0	0	0	603	903	0
278	7	-41.1589	99.5653	-717.474	150297	-19371.4	-8720.63	173.001	90.5186	0	0	0	0	0	0	0	200	903	0	0	0	0	0	0	0	603	903	0
278	8	-41.3115	98.4972	-718.084	149474	-19127.2	-8491.75	173.364	91.844	0	0	0	0	0	0	0	200	903	0	0	0	0	0	0	0	603	903	0
278	9	-41.3115	97.8868	-720.831	149565	-19554.5	-8445.97	172.872	92.5103	0	0	0	0	0	0	0	200	903	0	0	0	0	0	0	0	603	903	0
279	0	-41.4641	98.192	-720.831	150572	-19432.4	-8766.41	173.042	91.1132	0	0	0	0	0	0	0	200	903	0	0	0	0	0	0	0	603	903	0
279	1	-42.2271	95.4454	-720.831	150389	-19371.4	-8262.87	173.126	91.3672	0	0	0	0	0	0	0	200	903	0	0	0	0	0	0	0	603	903	0
279	2	-42.3797	94.9876	-721.441	149382	-19249.3	-8583.3	173.318	92.9396	0	0	0	0	0	0	0	200	903	0	0	0	0	0	0	0	603	903	0
279	3	-42.0745	93.3092	-719	149931	-19554.5	-8629.08	172.803	91.4724	0	0	0	0	0	0	0	200	903	0	0	0	0	0	0	0	603	903	0
279	4	-41.9219	91.3255	-719.305	149931	-19493.4	-7759.32	172.9	91.5609	0	0	0	0	0	0	0	200	903	0	0	0	0	0	0	0	603	903	0
279	5	-41.3115	90.41	-718.084	149199	-19310.3	-8354.42	173.109	92.2265	0	0	0	0	0	0	0	200	903	0	0	0	0	0	0	0	603	903	0
279	6	-39.7857	88.5789	-719.305	149290	-19127.2	-7988.21	173.409	92.452	0	0	0	0	0	0	0	200	903	0	0	0	0	0	0	0	603	903	0
279	7	-40.8538	88.7315	-719	148283	-19005.1	-7896.65	173.567	93.7644	0	0	0	0	0	0	0	200	903	0	0	0	0	0	0	0	603	903	0
279	8	-40.8538	87.816	-720.221	148833	-19188.2	-7622	173.358	93.3514	0	0	0	0	0	0	0	200	903	0	0	0	0	0	0	0	603	903	0
279	9	-41.4641	87.0531	-717.169	148924	-19127.2	-7713.55	173.33	92.3444	0	0	0	0	0	0	0	200	903	0	0	0	0	0	0	0	603	903	0
280	0	-41.3115	85.5272	-716.559	149382	-18700	-7530.44	173.903	91.5286	0	0	0	0	0	0	0	200	903	0	0	0	0	0	0	0	603	903	0
280	1	-42.5322	84.1539	-714.422	148466	-19005.1	-7667.77	173.398	92.1867	0	0	0	0	0	0	0	200	903	0	0	0	0	0	0	0	603	903	0
280	2	-41.9219	83.391	-714.117	148192	-19127.2	-7072.68	173.216	92.4826	0	0	0	0	0	0	0	200	903	0	0	0	0	0	0	0	603	903	0
280	3	-40.396	81.8651	-712.591	147826	-18883.1	-7393.11	173.501	92.5521	0	0	0	0	0	0	0	200	903	0	0	0	0	0	0	0	603	903	0
280	4	-40.5486	82.628	-709.845	148375	-18638.9	-7255.78	173.742	90.9756	0	0	0	0	0	0	0	200	903	0	0	0	0	0	0	0	603	903	0
280	5	-40.7012	80.034	-711.676	147734	-18883.1	-6935.35	173.467	92.4138	0	0	0	0	0	0	0	200	903	0	0	0	0	0	0	0	603	903	0
280	6	-39.9382	79.5763	-708.929	146086	-18455.8	-7072.68	173.967	93.9341	0	0	0	0	0	0	0	200	903	0	0	0	0	0	0	0	603	903	0
280	7	-41.6167	78.3556	-709.539	146819	-19005.1	-7072.68	173.215	93.0791	0	0	0	0	0	0	0	200	903	0	0	0	0	0	0	0	603	903	0
280	8	-39.0227	76.8297	-704.962	146544	-18455.8	-6706.47	173.82	92.1251	0	0	0	0	0	0	0	200	903	0	0	0	0	0	0	0	603	903	0
280	9	-40.5486	75.609	-704.962	145537	-18211.7	-6981.13	174.166	93.5537	0	0	0	0	0	0	0	200	903	0	0	0	0	0	0	0	603	903	0
281	0	-38.8701	73.6253	-704.962	145262	-18333.8	-6431.81	173.993	93.9434	0	0	0	0	0	0	0	200	903	0	0	0	0	0	0	0	603	903	0
281	1	-39.3279	74.2357	-701.605	145354	-18211.7	-6569.14	174.043	92.8269	0	0	0	0	0	0	0	200	903	0	0	0	0	0	0	0	603	903	0
281	2	-39.0227	73.3202	-702.215	145262	-18150.6	-6477.59	174.152	93.1374	0	0	0	0	0	0	0	200	903	0	0	0	0	0	0	0	603	903	0
281	3	-38.565	72.7098	-699.164	143706	-18394.8	-6294.48	173.69	94.4606	0	0	0	0	0	0	0	200	903	0	0	0	0	0	0	0	603	903	0
281	4	-39.1753	72.252	-698.553	144072	-18761	-6202.93	173.143	93.7567	0	0	0	0	0	0	0	200	903	0	0	0	0	0	0	0	603	903	0
281	5	-38.8701	70.2684	-696.112	143065	-18089.6	-6065.6	174.013	94.4801	0	0	0	0	0	0	0	200	903	0	0	0	0	0	0	0	603	903	0
281	6	-38.7175	69.9632	-692.45	142515	-18150.6	-6065.6	173.788	94.1865	0	0	0	0	0	0	0	200	903	0	0	0	0	0	0	0	603	903	0
281	7	-38.565	66.7589	-688.788	141417	-17723.4	-6019.82	174.269	94.6872	0	0	0	0	0	0	0	200	903	0	0	0	0	0	0	0	603	903	0
281	8	-36.7339	69.0477	-688.788	141142	-17540.3	-6157.15	174.535	95.0859	0	0	0	0	0	0	0	200	903	0	0	0	0	0	0	0	603	903	0
281	9	-37.1917	66.9115	-687.567	140501	-18211.7	-5836.72	173.513	95.6543	0	0	0	0	0	0	0	200	903	0	0	0	0	0	0	0	603	903	0
282	0	-36.7339	67.827	-685.736	139677	-17723.4	-5882.49	174.154	96.3102	0	0	0	0	0	0	0	200	903	0	0	0	0	0	0	0	603	903	0
282	1	-37.1917	67.3692	-681.158	139769	-17601.3	-5836.72	174.16	94.807	0	0	0	0	0	0	0	200	903	0	0	0	0	0	0	0	603	903	0
282	2	-36.4287	65.233	-680.548	138945	-17906.5	-5516.28	173.688	95.8336	0	0	0	0	0	0	0	200	903	0	0	0	0	0	0	0	603	903	0
282	3	-37.3442	65.3856	-678.106	137572	-17479.3	-5653.61	174.223	97.1238	0	0	0	0	0	0	0	200	903	0	0	0	0	0	0	0	603	903	0
282	4	-36.5813	65.0804	-674.444	136748	-17418.2	-5516.28	174.174	97.2439	0	0	0	0	0	0	0	200	903	0	0	0	0	0	0	0	603	903	0
282	5	-36.2761	64.6227	-667.425	135924	-17662.4	-5195.85	173.537	96.3462	0	0	0	0	0	0	0	200	903	0	0	0	0	0	0	0	603	903	0
282	6	-33.9873	63.7071	-667.73	135008	-17174.1	-5287.4	174.28	97.8104	0	0	0	0	0	0	0	200	903	0	0	0	0	0	0	0	603	903	0
282	7	-34.5977	63.7071	-666.51	134001	-17174.1	-5241.62	174.233	98.9511	0	0	0	0	0	0	0	200	903	0	0	0	0	0	0	0	603	903	0
282	8	-34.5977	63.8597	-665.594	134367	-17357.2	-5058.52	173.922	98.1242	0	0	0	0	0	0	0	200	903	0	0	0	0	0	0	0	603	903	0
282	9	-34.1399	62.3338	-663.153	133177	-16929.9	-4646.53	174.471	99.1758	0	0	0	0	0	0	0	200	903	0	0	0	0	0	0	0	603	903	0
283	0	-34.5977	62.3338	-659.185	132353	-17113	-5150.07	174.039	99.2171	0	0	0	0	0	0	0	200	903	0	0	0	0	0	0	0	603	903	0
283	1	-34.2925	61.8761	-656.439	131804	-17174.1	-4692.31	173.838	99.2139	0	0	0	0	0	0	0	200	903	0	0	0	0	0	0	0	603	903	0
283	2	-34.5977	60.9605	-650.641	131071	-16991	-4921.19	173.886	98.5501	0	0	0	0	0	0	0	200	903	0	0	0	0	0	0	0	603	903	0
283	3	-35.0554	60.6554	-648.504	129423	-16929.9	-4783.86	173.894	100.428	0	0	0	0	0	0	0	200	903	0	0	0	0	0	0	0	603	903	0
283	4	-32.4614	60.045	-645.758	128599	-16868.9	-4417.65	173.877	100.855	0	0	0	0	0	0	0	200	903	0	0	0	0	0	0	0	603	903	0
283	5	-33.0718	59.5872	-642.706	128416	-16685.8	-4646.53	174.038	100.194	0	0	0	0	0	0	0	200	903	0	0	0	0	0	0	0	603	903	0
283	6	-32.0037	57.451	-641.485	127409	-16746.8	-4509.2	173.894	101.384	0	0	0	0	0	0	0	200	903	0	0	0	0	0	0	0	603	903	0
283	7	-32.4614	59.2821	-638.128	126677	-16746.8	-4417.65	173.756	101.487	0	0	0	0	0	0	0	200	903	0	0	0	0	0	0	0	603	903	0
283	8	-33.377	58.214	-636.297	126036	-16502.7	-4371.87	174.064	101.923	0	0	0	0	0	0	0	200	903	0	0	0	0	0	0	0	603	903	0
283	9	-32.614	57.451	-633.246	125212	-16197.5	-4280.32	174.421	102.269	0	0	0	0	0	0	0	200	903	0	0	0	0	0	0	0	603	903	0
284	0	-33.0718	56.2303	-629.583	123930	-16502.7	-4188.77	173.788	103.155	0	0	0	0	0	0	0	200	903	0	0	0	0	0	0	0	603	903	0
284	1	-32.614	57.451	-626.227	123106	-16258.5	-4051.44	174.037	103.416	0	0	0	0	0	0	0	200	903	0	0	0	0	0	0	0	603	903	0
284	2	-31.5459	55.7726	-623.175	123015	-16258.5	-4326.1	173.91	102.6	0	0	0	0	0	0	0	200	903	0	0	0	0	0	0	0	603	903	0
284	3	-30.9356	54.3993	-621.039	121092	-16014.4	-3685.23	174.214	105.017	0	0	0	0	0	0	0	200	903	0	0	0	0	0	0	0	603	903	0
284	4	-30.6304	55.1622	-620.123	120634	-16441.7	-4097.22	173.486	105.467	0	0	0	0	0	0	0	200	903	0	0	0	0	0	0	0	603	903	0
284	5	-30.783	54.2467	-615.545	120909	-16380.6	-3868.33	173.388	103.574	0	0	0	0	0	0	0	200	903	0	0	0	0	0	0	0	603	903	0
284	6	-31.2407	53.1786	-614.019	119810	-16014.4	-3731	173.919	104.875	0	0	0	0	0	0	0	200	903	0	0	0	0	0	0	0	603	903	0
284	7	-31.2407	52.8734	-610.357	118620	-16319.6	-3776.78	173.262	105.654	0	0	0	0	0	0	0	200	903	0	0	0	0	0	0	0	603	903	0
284	8	-31.0881	52.8734	-608.221	117247	-15953.4	-3868.33	173.77	107.23	0	0	0	0	0	0	0	200	903	0	0	0	0	0	0	0	603	903	0
284	9	-29.5623	51.1949	-607	117613	-15709.2	-3410.57	174.12	106.239	0	0	0	0	0	0	0	200	903	0	0	0	0	0	0	0	603	903	0
285	0	-29.2571	50.432	-602.728	115782	-15831.3	-3685.23	173.734	107.903	0	0	0	0	0	0	0	200	903	0	0	0	0	0	0	0	603	903	0
285	1	-27.5786	51.0423	-603.033	116057	-15648.2	-3685.23	174.051	107.545	0	0	0	0	0	0	0	200	903	0	0	0	0	0	0	0	603	903	0
285	2	-28.7993	49.3639	-599.371	115507	-15709.2	-3319.02	173.79	107.286	0	0	0	0	0	0	0	200	903	0	0	0	0	0	0	0	603	903	0
285	3	-27.426	48.4483	-596.624	115324	-15648.2	-2998.58	173.772	106.705	0	0	0	0	0	0	0	200	903	0	0	0	0	0	0	0	603	903	0
285	4	-30.1726	48.7535	-594.793	113585	-15770.3	-3639.45	173.486	109.035	0	0	0	0	0	0	0	200	903	0	0	0	0	0	0	0	603	903	0
285	5	-27.426	47.075	-592.047	112944	-15587.2	-3227.46	173.672	109.231	0	0	0	0	0	0	0	200	903	0	0	0	0	0	0	0	603	903	0
285	6	-29.4097	47.075	-589.3	112852	-15648.2	-3319.02	173.446	108.498	0	0	0	0	0	0	0	200	903	0	0	0	0	0	0	0	603	903	0
285	7	-28.9519	46.6173	-585.943	111571	-15465.1	-2815.48	173.607	109.588	0	0	0	0	0	0	0	200	903	0	0	0	0	0	0	0	603	903	0
285	8	-28.0364	47.075	-585.028	111021	-15648.2	-3227.46	173.252	110.229	0	0	0	0	0	0	0	200	903	0	0	0	0	0	0	0	603	903	0
285	9	-26.9683	46.4647	-587.164	111113	-15404.1	-3135.91	173.765	110.763	0	0	0	0	0	0	0	200	903	0	0	0	0	0	0	0	603	903	0
286	0	-27.2735	45.244	-582.586	110106	-15343	-2952.8	173.664	111.005	0	0	0	0	0	0	0	200	903	0	0	0	0	0	0	0	603	903	0
286	1	-26.6631	44.9388	-578.619	108916	-15709.2	-2998.58	172.85	111.766	0	0	0	0	0	0	0	200	903	0	0	0	0	0	0	0	603	903	0
286	2	-28.3416	44.6336	-578.619	108000	-15587.2	-3090.13	173.061	113.348	0	0	0	0	0	0	0	200	903	0	0	0	0	0	0	0	603	903	0
286	3	-27.2735	44.1759	-573.431	108733	-15343	-3044.36	173.243	110.383	0	0	0	0	0	0	0	200	903	0	0	0	0	0	0	0	603	903	0
286	4	-28.3416	42.1922	-574.347	107359	-15282	-2723.92	173.392	113.076	0	0	0	0	0	0	0	200	903	0	0	0	0	0	0	0	603	903	0
286	5	-28.189	43.7181	-569.464	106627	-15526.1	-3090.13	172.736	112.759	0	0	0	0	0	0	0	200	903	0	0	0	0	0	0	0	603	903	0
286	6	-27.426	42.65	-569.464	105070	-15404.1	-2998.58	172.95	115.492	0	0	0	0	0	0	0	200	903	0	0	0	0	0	0	0	603	903	0
286	7	-25.7476	41.5819	-570.074	105711	-15465.1	-3044.36	172.872	114.566	0	0	0	0	0	0	0	200	903	0	0	0	0	0	0	0	603	903	0
286	8	-27.7312	41.4293	-567.328	104521	-15465.1	-3181.69	172.74	115.766	0	0	0	0	0	0	0	200	903	0	0	0	0	0	0	0	603	903	0
286	9	-26.6631	41.4293	-561.224	104155	-15221	-3090.13	172.879	114.415	0	0	0	0	0	0	0	200	903	0	0	0	0	0	0	0	603	903	0
287	0	-28.0364	40.6664	-563.665	103697	-15526.1	-3135.91	172.455	116.031	0	0	0	0	0	0	0	200	903	0	0	0	0	0	0	0	603	903	0
287	1	-28.4942	39.9034	-558.172	102965	-15465.1	-3044.36	172.293	115.532	0	0	0	0	0	0	0	200	903	0	0	0	0	0	0	0	603	903	0
287	2	-28.7993	38.9879	-557.867	102232	-15159.9	-3090.13	172.825	116.744	0	0	0	0	0	0	0	200	903	0	0	0	0	0	0	0	603	903	0
287	3	-28.9519	39.4456	-554.205	101408	-15648.2	-3135.91	171.765	117.02	0	0	0	0	0	0	0	200	903	0	0	0	0	0	0	0	603	903	0
287	4	-27.8838	38.3775	-555.121	100218	-15037.9	-2632.37	172.911	119.466	0	0	0	0	0	0	0	200	903	0	0	0	0	0	0	0	603	903	0
287	5	-26.3579	38.0724	-556.646	100310	-15526.1	-3181.69	172.108	119.796	0	0	0	0	0	0	0	200	903	0	0	0	0	0	0	0	603	903	0
287	6	-27.7312	38.0724	-552.984	99668.8	-15343	-3273.24	172.254	119.762	0	0	0	0	0	0	0	200	903	0	0	0	0	0	0	0	603	903	0
287	7	-28.4942	38.0724	-545.66	99760.3	-15404.1	-3273.24	171.77	117.175	0	0	0	0	0	0	0	200	903	0	0	0	0	0	0	0	603	903	0
287	8	-29.2571	36.3939	-548.712	98844.9	-15343	-2907.03	172.038	119.86	0	0	0	0	0	0	0	200	903	0	0	0	0	0	0	0	603	903	0
287	9	-28.7993	36.8517	-545.66	98020.9	-15526.1	-3090.13	171.546	120.363	0	0	0	0	0	0	0	200	903	0	0	0	0	0	0	0	603	903	0
288	0	-29.8674	36.3939	-543.829	98020.9	-15892.3	-2998.58	170.777	119.758	0	0	0	0	0	0	0	200	903	0	0	0	0	0	0	0	603	903	0
288	1	-29.8674	35.4784	-539.251	97380	-15343	-3227.46	171.548	119.416	0	0	0	0	0	0	0	200	903	0	0	0	0	0	0	0	603	903	0
288	2	-28.6467	34.868	-540.777	96189.8	-15465.1	-3364.79	171.402	122.127	0	0	0	0	0	0	0	200	903	0	0	0	0	0	0	0	603	903	0
288	3	-26.6631	35.4784	-538.946	95182.8	-15465.1	-3135.91	171.305	123.391	0	0	0	0	0	0	0	200	903	0	0	0	0	0	0	0	603	903	0
288	4	-28.6467	34.868	-538.336	96006.7	-15282	-3135.91	171.613	121.66	0	0	0	0	0	0	0	200	903	0	0	0	0	0	0	0	603	903	0
288	5	-28.189	33.4947	-533.453	94908	-15465.1	-2952.8	171.009	122.087	0	0	0	0	0	0	0	200	903	0	0	0	0	0	0	0	603	903	0
288	6	-29.5623	33.9525	-535.894	94358.8	-15404.1	-3135.91	171.255	123.923	0	0	0	0	0	0	0	200	903	0	0	0	0	0	0	0	603	903	0
288	7	-29.7149	32.8844	-532.232	92985.5	-15465.1	-3044.36	170.943	125.292	0	0	0	0	0	0	0	200	903	0	0	0	0	0	0	0	603	903	0
288	8	-29.2571	32.274	-530.706	93626.4	-15343	-2540.82	171.089	123.582	0	0	0	0	0	0	0	200	903	0	0	0	0	0	0	0	603	903	0
288	9	-30.3252	32.1214	-524.603	92436.1	-15953.4	-2998.58	169.59	123.798	0	0	0	0	0	0	0	200	903	0	0	0	0	0	0	0	603	903	0
289	0	-28.189	33.3421	-527.35	91062.9	-14915.8	-2952.8	171.716	127.32	0	0	0	0	0	0	0	200	903	0	0	0	0	0	0	0	603	903	0
289	1	-27.2735	32.7318	-526.739	91703.7	-15404.1	-2678.15	170.756	125.903	0	0	0	0	0	0	0	200	903	0	0	0	0	0	0	0	603	903	0
289	2	-27.8838	31.9688	-525.824	90971.3	-15221	-2723.92	171.053	126.993	0	0	0	0	0	0	0	200	903	0	0	0	0	0	0	0	603	903	0
289	3	-29.8674	31.8163	-522.162	90055.8	-15221	-2907.03	170.85	127.533	0	0	0	0	0	0	0	200	903	0	0	0	0	0	0	0	603	903	0
289	4	-28.9519	32.274	-522.467	89231.8	-15404.1	-2861.25	170.517	129.211	0	0	0	0	0	0	0	200	903	0	0	0	0	0	0	0	603	903	0
289	5	-27.7312	31.0533	-518.499	88774	-15343	-2586.59	170.409	128.787	0	0	0	0	0	0	0	200	903	0	0	0	0	0	0	0	603	903	0
289	6	-28.4942	30.443	-518.805	87950	-15221	-2540.82	170.661	130.476	0	0	0	0	0	0	0	200	903	0	0	0	0	0	0	0	603	903	0
289	7	-26.9683	30.9007	-516.363	87400.8	-15221	-2678.15	170.523	130.738	0	0	0	0	0	0	0	200	903	0	0	0	0	0	0	0	603	903	0
289	8	-26.9683	31.3585	-515.753	88133.2	-15282	-2495.04	170.37	129.117	0	0	0	0	0	0	0	200	903	0	0	0	0	0	0	0	603	903	0
289	9	-27.426	29.3748	-514.532	87400.8	-15098.9	-2449.26	170.655	130.135	0	0	0	0	0	0	0	200	903	0	0	0	0	0	0	0	603	903	0
290	0	-26.2053	29.9852	-513.922	86851.4	-15037.9	-2449.26	170.739	131.003	0	0	0	0	0	0	0	200	903	0	0	0	0	0	0	0	603	903	0
290	1	-27.2735	29.2223	-512.091	85844.3	-15587.2	-1991.5	169.562	132.365	0	0	0	0	0	0	0	200	903	0	0	0	0	0	0	0	603	903	0
290	2	-26.9683	28.6119	-511.48	85295.1	-15098.9	-2083.05	170.48	133.239	0	0	0	0	0	0	0	200	903	0	0	0	0	0	0	0	603	903	0
290	3	-27.2735	27.3912	-509.649	84928.8	-15221	-1808.4	170.134	133.358	0	0	0	0	0	0	0	200	903	0	0	0	0	0	0	0	603	903	0
290	4	-25.9002	28.3067	-507.818	84654.1	-15098.9	-1854.17	170.267	133.298	0	0	0	0	0	0	0	200	903	0	0	0	0	0	0	0	603	903	0
290	5	-25.1372	27.6964	-509.955	84928.8	-14915.8	-1808.4	170.751	133.458	0	0	0	0	0	0	0	200	903	0	0	0	0	0	0	0	603	903	0
290	6	-24.832	25.255	-507.818	84287.9	-15159.9	-1854.17	170.147	134.02	0	0	0	0	0	0	0	200	903	0	0	0	0	0	0	0	603	903	0
290	7	-22.8484	27.086	-505.377	84013.3	-14732.7	-1716.84	170.848	133.761	0	0	0	0	0	0	0	200	903	0	0	0	0	0	0	0	603	903	0
290	8	-24.6795	26.3231	-506.292	82914.6	-15159.9	-1625.29	170.057	136.232	0	0	0	0	0	0	0	200	903	0	0	0	0	0	0	0	603	903	0
290	9	-25.595	25.7127	-501.715	82456.9	-15159.9	-1808.4	169.784	135.65	0	0	0	0	0	0	0	200	903	0	0	0	0	0	0	0	603	903	0
291	0	-25.2898	25.4076	-505.072	82182.2	-15159.9	-1579.51	169.985	137.286	0	0	0	0	0	0	0	200	903	0	0	0	0	0	0	0	603	903	0
291	1	-25.2898	26.0179	-500.799	81724.5	-15037.9	-1350.63	169.972	136.812	0	0	0	0	0	0	0	200	903	0	0	0	0	0	0	0	603	903	0
291	2	-24.6795	25.4076	-502.63	82182.2	-15282	-1671.07	169.596	136.496	0	0	0	0	0	0	0	200	903	0	0	0	0	0	0	0	603	903	0
291	3	-24.3743	24.3394	-499.273	81541.4	-15159.9	-1167.53	169.636	136.68	0	0	0	0	0	0	0	200	903	0	0	0	0	0	0	0	603	903	0
291	4	-23.6113	23.5765	-501.41	80534.3	-15221	-1396.41	169.644	139.384	0	0	0	0	0	0	0	200	903	0	0	0	0	0	0	0	603	903	0
291	5	-22.0855	24.1869	-504.767	80168.1	-15404.1	-1259.08	169.483	141.178	0	0	0	0	0	0	0	200	903	0	0	0	0	0	0	0	603	903	0
291	6	-22.6958	22.8136	-501.104	79527.2	-15098.9	-1121.75	169.869	141.296	0	0	0	0	0	0	0	200	903	0	0	0	0	0	0	0	603	903	0
291	7	-23.9165	22.5084	-498.358	79893.4	-15282	-892.867	169.335	139.687	0	0	0	0	0	0	0	200	903	0	0	0	0	0	0	0	603	903	0
291	8	-24.0691	23.4239	-500.189	79069.5	-15282	-1075.97	169.448	141.921	0	0	0	0	0	0	0	200	903	0	0	0	0	0	0	0	603	903	0
291	9	-21.6277	22.5084	-498.968	79893.4	-15098.9	-1030.2	169.74	139.883	0	0	0	0	0	0	0	200	903	0	0	0	0	0	0	0	603	903	0
292	0	-23.9165	21.2877	-498.053	79069.5	-15098.9	-709.762	169.684	141.243	0	0	0	0	0	0	0	200	903	0	0	0	0	0	0	0	603	903	0
292	1	-23.3062	21.898	-496.222	78520.1	-15404.1	-984.42	168.957	141.764	0	0	0	0	0	0	0	200	903	0	0	0	0	0	0	0	603	903	0
292	2	-22.2381	20.2196	-498.053	77787.7	-15221	-847.091	169.439	143.816	0	0	0	0	0	0	0	200	903	0	0	0	0	0	0	0	603	903	0
292	3	-22.5432	20.2196	-498.358	78428.6	-15221	-526.656	169.458	142.626	0	0	0	0	0	0	0	200	903	0	0	0	0	0	0	0	603	903	0
292	4	-22.8484	20.2196	-498.053	77055.3	-15709.2	-984.42	168.459	145.287	0	0	0	0	0	0	0	200	903	0	0	0	0	0	0	0	603	903	0
292	5	-23.1536	20.8299	-497.442	77055.3	-15221	-663.985	169.402	145.097	0	0	0	0	0	0	0	200	903	0	0	0	0	0	0	0	603	903	0
292	6	-21.7803	19.6092	-495.611	77421.5	-15343	-480.88	169.042	143.786	0	0	0	0	0	0	0	200	903	0	0	0	0	0	0	0	603	903	0
292	7	-22.8484	18.9989	-495.611	76872.2	-15526.1	-526.656	168.673	144.894	0	0	0	0	0	0	0	200	903	0	0	0	0	0	0	0	603	903	0
292	8	-21.6277	18.8463	-495.306	76048.2	-15404.1	-709.762	168.9	146.462	0	0	0	0	0	0	0	200	903	0	0	0	0	0	0	0	603	903	0
292	9	-21.7803	19.4566	-495.001	76139.8	-15343	-572.433	169.004	146.183	0	0	0	0	0	0	0	200	903	0	0	0	0	0	0	0	603	903	0
293	0	-21.0173	19.1515	-495.611	75773.6	-15648.2	-343.551	168.426	147.111	0	0	0	0	0	0	0	200	903	0	0	0	0	0	0	0	603	903	0
293	1	-21.6277	18.2359	-495.916	75956.6	-15526.1	-663.985	168.692	146.836	0	0	0	0	0	0	0	200	903	0	0	0	0	0	0	0	603	903	0
293	2	-22.3906	18.2359	-495.611	74217.1	-15648.2	-389.327	168.426	150.251	0	0	0	0	0	0	0	200	903	0	0	0	0	0	0	0	603	903	0
293	3	-22.6958	19.304	-495.306	75315.8	-15648.2	-480.88	168.407	147.941	0	0	0	0	0	0	0	200	903	0	0	0	0	0	0	0	603	903	0
293	4	-22.6958	17.3204	-493.17	74674.9	-15587.2	-114.669	168.394	148.582	0	0	0	0	0	0	0	200	903	0	0	0	0	0	0	0	603	903	0
293	5	-22.3906	17.3204	-492.254	73942.5	-15770.3	-343.551	167.963	149.788	0	0	0	0	0	0	0	200	903	0	0	0	0	0	0	0	603	903	0
293	6	-22.3906	16.7101	-493.475	73576.3	-16014.4	-343.551	167.548	150.902	0	0	0	0	0	0	0	200	903	0	0	0	0	0	0	0	603	903	0
293	7	-19.0337	17.9308	-494.085	73576.3	-15709.2	-572.433	168.205	151.086	0	0	0	0	0	0	0	200	903	0	0	0	0	0	0	0	603	903	0
293	8	-21.3225	17.0152	-495.611	72752.3	-15953.4	-297.775	167.811	153.207	0	0	0	0	0	0	0	200	903	0	0	0	0	0	0	0	603	903	0
293	9	-20.407	17.3204	-495.001	72477.7	-16197.5	114.213	167.278	153.581	0	0	0	0	0	0	0	200	903	0	0	0	0	0	0	0	603	903	0
294	0	-23.1536	16.5575	-494.085	73026.9	-15892.3	-297.775	167.835	152.198	0	0	0	0	0	0	0	200	903	0	0	0	0	0	0	0	603	903	0
294	1	-22.5432	15.7945	-494.085	72752.3	-16197.5	-251.998	167.217	152.754	0	0	0	0	0	0	0	200	903	0	0	0	0	0	0	0	603	903	0
294	2	-22.8484	15.7945	-492.56	72203	-16014.4	-206.222	167.487	153.413	0	0	0	0	0	0	0	200	903	0	0	0	0	0	0	0	603	903	0
294	3	-21.9329	15.9471	-493.17	71470.5	-16197.5	-160.445	167.156	155.079	0	0	0	0	0	0	0	200	903	0	0	0	0	0	0	0	603	903	0
294	4	-21.3225	15.1842	-492.865	71745.2	-16258.5	-68.8927	167.012	154.432	0	0	0	0	0	0	0	200	903	0	0	0	0	0	0	0	603	903	0
294	5	-21.9329	14.1161	-494.696	71745.2	-16624.8	-160.445	166.394	154.971	0	0	0	0	0	0	0	200	903	0	0	0	0	0	0	0	603	903	0
294	6	-22.0855	15.3368	-494.696	71287.4	-16319.6	-68.8927	167.011	155.896	0	0	0	0	0	0	0	200	903	0	0	0	0	0	0	0	603	903	0
294	7	-22.6958	15.1842	-495.306	71287.4	-16380.6	-389.327	166.928	156.074	0	0	0	0	0	0	0	200	903	0	0	0	0	0	0	0	603	903	0
294	8	-22.8484	13.6583	-495.611	71104.3	-16380.6	-23.1163	166.949	156.532	0	0	0	0	0	0	0	200	903	0	0	0	0	0	0	0	603	903	0
294	9	-23.9165	13.6583	-492.865	70097.3	-16136.5	-435.104	167.26	157.776	0	0	0	0	0	0	0	200	903	0	0	0	0	0	0	0	603	903	0
295	0	-24.0691	14.1161	-494.696	70005.7	-16624.8	-114.669	166.394	158.487	0	0	0	0	0	0	0	200	903	0	0	0	0	0	0	0	603	903	0
295	1	-22.0855	13.6583	-494.696	70280.4	-16807.9	-206.222	166.024	157.932	0	0	0	0	0	0	0	200	903	0	0	0	0	0	0	0	603	903	0
295	2	-22.6958	10.4539	-495.306	70280.4	-16685.8	-389.327	166.312	158.107	0	0	0	0	0	0	0	200	903	0	0	0	0	0	0	0	603	903	0
295	3	-23.001	13.6583	-496.832	69090.2	-16929.9	-389.327	165.924	160.939	0	0	0	0	0	0	0	200	903	0	0	0	0	0	0	0	603	903	0
295	4	-22.8484	13.6583	-493.78	69822.6	-16868.9	205.766	165.837	158.596	0	0	0	0	0	0	0	200	903	0	0	0	0	0	0	0	603	903	0
295	5	-24.3743	12.1324	-497.747	68998.6	-16991	-297.775	165.864	161.378	0	0	0	0	0	0	0	200	903	0	0	0	0	0	0	0	603	903	0
295	6	-23.001	11.5221	-496.832	68632.4	-17113	-389.327	165.556	161.86	0	0	0	0	0	0	0	200	903	0	0	0	0	0	0	0	603	903	0
295	7	-24.832	11.9798	-496.222	68266.2	-17357.2	-68.8927	165.021	162.428	0	0	0	0	0	0	0	200	903	0	0	0	0	0	0	0	603	903	0
295	8	-24.3743	12.1324	-494.391	68907.1	-17174.1	-343.551	165.262	160.622	0	0	0	0	0	0	0	200	903	0	0	0	0	0	0	0	603	903	0
295	9	-24.5269	10.1488	-497.747	68815.6	-17540.3	-572.433	164.761	161.746	0	0	0	0	0	0	0	200	903	0	0	0	0	0	0	0	603	903	0
296	0	-22.2381	11.0643	-502.63	67625.3	-17113	-297.775	165.953	165.457	0	0	0	0	0	0	0	200	903	0	0	0	0	0	0	0	603	903	0
296	1	-24.3743	11.6747	-501.104	68083.1	-17357.2	-297.775	165.362	164.134	0	0	0	0	0	0	0	200	903	0	0	0	0	0	0	0	603	903	0
296	2	-24.2217	10.4539	-500.494	68083.1	-17357.2	-297.775	165.32	163.968	0	0	0	0	0	0	0	200	903	0	0	0	0	0	0	0	603	903	0
296	3	-26.2053	9.99619	-502.02	67442.2	-17662.4	-480.88	164.817	165.658	0	0	0	0	0	0	0	200	903	0	0	0	0	0	0	0	603	903	0
296	4	-26.3579	9.99619	-498.968	67442.2	-17845.5	-297.775	164.235	164.837	0	0	0	0	0	0	0	200	903	0	0	0	0	0	0	0	603	903	0
296	5	-26.3579	9.38583	-502.63	67350.7	-17967.5	-389.327	164.253	166.003	0	0	0	0	0	0	0	200	903	0	0	0	0	0	0	0	603	903	0
296	6	-25.7476	9.69101	-503.546	67716.9	-17906.5	-297.775	164.439	165.52	0	0	0	0	0	0	0	200	903	0	0	0	0	0	0	0	603	903	0
296	7	-25.595	9.99619	-505.682	66252.1	-18028.6	-297.775	164.348	168.985	0	0	0	0	0	0	0	200	903	0	0	0	0	0	0	0	603	903	0
296	8	-24.5269	10.3014	-506.292	67716.9	-18272.7	-251.998	163.909	166.249	0	0	0	0	0	0	0	200	903	0	0	0	0	0	0	0	603	903	0
296	9	-25.9002	9.38583	-508.123	66984.5	-18211.7	-297.775	164.159	168.173	0	0	0	0	0	0	0	200	903	0	0	0	0	0	0	0	603	903	0
297	0	-26.0527	8.62289	-509.039	66068.9	-18577.9	-251.998	163.504	170.208	0	0	0	0	0	0	0	200	903	0	0	0	0	0	0	0	603	903	0
297	1	-27.5786	6.18149	-509.955	66160.5	-18883.1	-526.656	162.971	170.262	0	0	0	0	0	0	0	200	903	0	0	0	0	0	0	0	603	903	0
297	2	-26.6631	8.62289	-509.039	66984.5	-18455.8	-343.551	163.744	168.41	0	0	0	0	0	0	0	200	903	0	0	0	0	0	0	0	603	903	0
297	3	-27.7312	8.01254	-510.26	66526.7	-18761	-389.327	163.232	169.622	0	0	0	0	0	0	0	200	903	0	0	0	0	0	0	0	603	903	0
297	4	-25.9002	8.31772	-512.701	66068.9	-18761	-206.222	163.408	171.136	0	0	0	0	0	0	0	200	903	0	0	0	0	0	0	0	603	903	0
297	5	-26.6631	8.31772	-512.396	65611.2	-18700	-480.88	163.505	171.952	0	0	0	0	0	0	0	200	903	0	0	0	0	0	0	0	603	903	0
297	6	-26.6631	7.85995	-515.753	65794.3	-19005.1	205.766	163.151	172.431	0	0	0	0	0	0	0	200	903	0	0	0	0	0	0	0	603	903	0
297	7	-26.2053	7.2496	-514.532	64787.2	-19005.1	-389.327	163.063	174.085	0	0	0	0	0	0	0	200	903	0	0	0	0	0	0	0	603	903	0
297	8	-27.5786	7.55478	-516.058	65153.4	-18883.1	-206.222	163.409	173.748	0	0	0	0	0	0	0	200	903	0	0	0	0	0	0	0	603	903	0
297	9	-27.7312	6.94443	-517.889	65061.9	-19127.2	114.213	163.067	174.371	0	0	0	0	0	0	0	200	903	0	0	0	0	0	0	0	603	903	0
298	0	-27.8838	7.2496	-516.668	65794.3	-18822	-160.445	163.57	172.657	0	0	0	0	0	0	0	200	903	0	0	0	0	0	0	0	603	903	0
298	1	-27.8838	6.18149	-517.279	64146.3	-19371.4	-160.445	162.551	175.993	0	0	0	0	0	0	0	200	903	0	0	0	0	0	0	0	603	903	0
298	2	-26.8157	5.57114	-519.11	64512.5	-19554.5	205.766	162.331	175.725	0	0	0	0	0	0	0	200	903	0	0	0	0	0	0	0	603	903	0
298	3	-26.9683	5.57114	-519.72	65061.9	-19615.5	-206.222	162.258	174.814	0	0	0	0	0	0	0	200	903	0	0	0	0	0	0	0	603	903	0
298	4	-26.8157	5.57114	-523.077	65611.2	-19310.3	-160.445	163.083	174.567	0	0	0	0	0	0	0	200	903	0	0	0	0	0	0	0	603	903	0
298	5	-27.2735	6.0289	-519.11	63963.2	-19981.7	-251.998	161.508	176.783	0	0	0	0	0	0	0	200	903	0	0	0	0	0	0	0	603	903	0
298	6	-27.426	6.0289	-524.908	64421	-19676.5	114.213	162.514	177.272	0	0	0	0	0	0	0	200	903	0	0	0	0	0	0	0	603	903	0
298	7	-28.189	4.8082	-526.129	64237.9	-20042.7	-23.1163	161.905	177.905	0	0	0	0	0	0	0	200	903	0	0	0	0	0	0	0	603	903	0
298	8	-27.5786	5.11337	-526.434	63688.6	-20225.8	22.6601	161.58	179.019	0	0	0	0	0	0	0	200	903	0	0	0	0	0	0	0	603	903	0
298	9	-27.8838	5.57114	-525.824	63322.4	-19859.6	22.6601	162.231	179.575	0	0	0	0	0	0	0	200	903	0	0	0	0	0	0	0	603	903	0
299	0	-26.8157	4.96078	-528.265	64054.8	-20347.9	159.989	161.482	178.745	0	0	0	0	0	0	0	200	903	0	0	0	0	0	0	0	603	903	0
299	1	-26.9683	2.97714	-529.181	63688.6	-20286.9	159.989	161.664	179.647	0	0	0	0	0	0	0	200	903	0	0	0	0	0	0	0	603	903	0
299	2	-27.1209	4.35043	-532.538	64237.9	-20286.9	68.4365	161.905	179.374	0	0	0	0	0	0	0	200	903	0	0	0	0	0	0	0	603	903	0
299	3	-27.1209	4.35043	-533.758	63597	-20531	-160.445	161.535	180.85	0	0	0	0	0	0	0	200	903	0	0	0	0	0	0	0	603	903	0
299	4	-27.5786	4.19785	-534.674	63505.5	-20225.8	251.542	162.172	181.226	0	0	0	0	0	0	0	200	903	0	0	0	0	0	0	0	603	903	0
299	5	-28.7993	3.12973	-535.894	62498.4	-20714.1	205.766	161.347	183.376	0	0	0	0	0	0	0	200	903	0	0	0	0	0	0	0	603	903	0
299	6	-28.9519	3.89267	-536.505	62864.6	-20836.2	-68.8927	161.163	182.826	0	0	0	0	0	0	0	200	903	0	0	0	0	0	0	0	603	903	0
299	7	-29.2571	3.89267	-536.81	63322.4	-20592.1	68.4365	161.64	182.04	0	0	0	0	0	0	0	200	903	0	0	0	0	0	0	0	603	903	0
299	8	-26.8157	3.89267	-539.862	63047.7	-21080.3	800.859	160.952	183.215	0	0	0	0	0	0	0	200	903	0	0	0	0	0	0	0	603	903	0
299	9	-28.0364	1.60385	-540.167	62589.9	-20897.2	159.989	161.313	184.129	0	0	0	0	0	0	0	200	903	0	0	0	0	0	0	0	603	903	0
300	0	-27.426	1.14609	-544.439	62589.9	-20897.2	251.542	161.617	185.038	0	0	0	0	0	0	0	200	903	0	0	0	0	0	0	0	603	903	0
300	1	-27.426	2.06161	-544.439	62956.1	-21568.6	297.318	160.384	184.365	0	0	0	0	0	0	0	200	903	0	0	0	0	0	0	0	603	903	0
300	2	-28.189	2.82455	-547.796	61949.1	-21507.6	297.318	160.738	186.912	0	0	0	0	0	0	0	200	903	0	0	0	0	0	0	0	603	903	0
300	3	-27.8838	1.90903	-549.017	62315.3	-21202.4	526.2	161.381	186.497	0	0	0	0	0	0	0	200	903	0	0	0	0	0	0	0	603	903	0
300	4	-27.8838	1.75644	-549.017	63688.6	-21751.7	571.977	160.381	183.995	0	0	0	0	0	0	0	200	903	0	0	0	0	0	0	0	603	903	0
300	5	-27.8838	1.29868	-548.102	63139.3	-21507.6	709.306	160.76	184.804	0	0	0	0	0	0	0	200	903	0	0	0	0	0	0	0	603	903	0
300	6	-26.0527	1.29868	-553.289	62498.4	-21202.4	434.647	161.679	187.042	0	0	0	0	0	0	0	200	903	0	0	0	0	0	0	0	603	903	0
300	7	-27.1209	-1.75308	-552.069	62681.5	-22179	892.411	159.826	186.461	0	0	0	0	0	0	0	200	903	0	0	0	0	0	0	0	603	903	0
300	8	-26.5105	-0.990143	-558.783	63505.5	-21629.7	709.306	161.291	186.35	0	0	0	0	0	0	0	200	903	0	0	0	0	0	0	0	603	903	0
300	9	-26.2053	0.688324	-555.426	62773	-21690.7	571.977	160.948	186.982	0	0	0	0	0	0	0	200	903	0	0	0	0	0	0	0	603	903	0
301	0	-26.0527	0.0779722	-561.529	62406.8	-22179	1121.29	160.503	188.863	0	0	0	0	0	0	0	200	903	0	0	0	0	0	0	0	603	903	0
301	1	-26.0527	-0.837555	-563.971	63780.1	-21934.8	983.964	161.106	186.909	0	0	0	0	0	0	0	200	903	0	0	0	0	0	0	0	603	903	0
301	2	-26.5105	-1.60049	-565.191	63230.8	-22179	1029.74	160.758	188.125	0	0	0	0	0	0	0	200	903	0	0	0	0	0	0	0	603	903	0
301	3	-26.3579	-1.75308	-567.328	62498.4	-22117.9	1258.62	161.014	189.837	0	0	0	0	0	0	0	200	903	0	0	0	0	0	0	0	603	903	0
301	4	-25.9002	-2.21085	-569.464	62864.6	-22362.1	1487.5	160.731	189.607	0	0	0	0	0	0	0	200	903	0	0	0	0	0	0	0	603	903	0
301	5	-25.7476	-3.27896	-573.126	63322.4	-22240	1212.85	161.195	189.514	0	0	0	0	0	0	0	200	903	0	0	0	0	0	0	0	603	903	0
301	6	-24.832	-4.65225	-574.347	63871.7	-22728.3	1350.18	160.428	188.792	0	0	0	0	0	0	0	200	903	0	0	0	0	0	0	0	603	903	0
301	7	-26.0527	-3.73673	-577.398	63597	-22362.1	1487.5	161.271	189.856	0	0	0	0	0	0	0	200	903	0	0	0	0	0	0	0	603	903	0
301	8	-26.2053	-3.88931	-579.84	63780.1	-22606.2	938.188	161.013	190.004	0	0	0	0	0	0	0	200	903	0	0	0	0	0	0	0	603	903	0
301	9	-25.7476	-5.56778	-580.145	63780.1	-23033.5	1716.39	160.297	190.062	0	0	0	0	0	0	0	200	903	0	0	0	0	0	0	0	603	903	0
302	0	-26.8157	-5.41519	-580.755	63047.7	-22911.4	1487.5	160.549	191.438	0	0	0	0	0	0	0	200	903	0	0	0	0	0	0	0	603	903	0
302	1	-25.9002	-5.56778	-584.417	63322.4	-22728.3	1807.94	161.11	191.649	0	0	0	0	0	0	0	200	903	0	0	0	0	0	0	0	603	903	0
302	2	-24.9846	-6.33072	-585.943	63963.2	-23338.6	1670.61	160.169	190.837	0	0	0	0	0	0	0	200	903	0	0	0	0	0	0	0	603	903	0
302	3	-24.9846	-8.00919	-590.826	63688.6	-23216.6	1624.83	160.705	192.204	0	0	0	0	0	0	0	200	903	0	0	0	0	0	0	0	603	903	0
302	4	-24.6795	-7.09366	-592.352	63322.4	-23399.7	1670.61	160.497	193.1	0	0	0	0	0	0	0	200	903	0	0	0	0	0	0	0	603	903	0
302	5	-26.2053	-7.8566	-593.268	63322.4	-23582.8	1762.16	160.249	193.265	0	0	0	0	0	0	0	200	903	0	0	0	0	0	0	0	603	903	0
302	6	-26.3579	-8.92471	-592.352	63505.5	-23460.7	1762.16	160.394	192.791	0	0	0	0	0	0	0	200	903	0	0	0	0	0	0	0	603	903	0
302	7	-26.2053	-9.22989	-595.709	63230.8	-23521.7	1945.27	160.515	193.856	0	0	0	0	0	0	0	200	903	0	0	0	0	0	0	0	603	903	0
302	8	-26.0527	-9.53506	-594.183	63230.8	-24071.1	1991.04	159.489	193.584	0	0	0	0	0	0	0	200	903	0	0	0	0	0	0	0	603	903	0
302	9	-24.3743	-9.68765	-598.761	63780.1	-23704.8	1991.04	160.41	193.48	0	0	0	0	0	0	0	200	903	0	0	0	0	0	0	0	603	903	0
303	0	-23.4588	-11.0609	-603.643	63780.1	-24071.1	2219.93	160.124	194.341	0	0	0	0	0	0	0	200	903	0	0	0	0	0	0	0	603	903	0
303	1	-24.6795	-11.9765	-604.864	63413.9	-24010	2219.93	160.305	195.16	0	0	0	0	0	0	0	200	903	0	0	0	0	0	0	0	603	903	0
303	2	-24.9846	-13.1972	-603.338	63322.4	-24559.3	2036.82	159.294	195.047	0	0	0	0	0	0	0	200	903	0	0	0	0	0	0	0	603	903	0
303	3	-25.7476	-13.1972	-607.306	64146.3	-24254.2	2265.7	160.063	194.376	0	0	0	0	0	0	0	200	903	0	0	0	0	0	0	0	603	903	0
303	4	-24.832	-13.8075	-605.475	64237.9	-24376.2	2036.82	159.74	193.905	0	0	0	0	0	0	0	200	903	0	0	0	0	0	0	0	603	903	0
303	5	-26.0527	-14.1127	-609.442	63413.9	-24071.1	2128.37	160.503	195.948	0	0	0	0	0	0	0	200	903	0	0	0	0	0	0	0	603	903	0
303	6	-25.2898	-14.5705	-609.442	63322.4	-24559.3	2403.03	159.702	196.098	0	0	0	0	0	0	0	200	903	0	0	0	0	0	0	0	603	903	0
303	7	-24.9846	-15.7912	-611.883	64054.8	-24620.4	2219.93	159.763	195.315	0	0	0	0	0	0	0	200	903	0	0	0	0	0	0	0	603	903	0
303	8	-24.3743	-16.7067	-615.851	63139.3	-24376.2	2265.7	160.419	197.476	0	0	0	0	0	0	0	200	903	0	0	0	0	0	0	0	603	903	0
303	9	-24.9846	-16.7067	-616.766	63230.8	-24620.4	2311.48	160.082	197.48	0	0	0	0	0	0	0	200	903	0	0	0	0	0	0	0	603	903	0
304	0	-26.2053	-18.2326	-618.292	63505.5	-24986.6	2357.25	159.588	197.289	0	0	0	0	0	0	0	200	903	0	0	0	0	0	0	0	603	903	0
304	1	-26.3579	-18.6903	-619.818	63505.5	-24681.4	2403.03	160.18	197.542	0	0	0	0	0	0	0	200	903	0	0	0	0	0	0	0	603	903	0
304	2	-26.5105	-18.8429	-620.428	63139.3	-25230.7	2174.15	159.333	198.233	0	0	0	0	0	0	0	200	903	0	0	0	0	0	0	0	603	903	0
304	3	-25.9002	-20.9792	-621.649	63139.3	-24803.5	2311.48	160.101	198.433	0	0	0	0	0	0	0	200	903	0	0	0	0	0	0	0	603	903	0
304	4	-25.595	-20.9792	-623.785	62864.6	-24925.6	2540.36	160.041	199.221	0	0	0	0	0	0	0	200	903	0	0	0	0	0	0	0	603	903	0
304	5	-25.2898	-21.5895	-622.564	64329.4	-25169.7	2631.91	159.571	196.67	0	0	0	0	0	0	0	200	903	0	0	0	0	0	0	0	603	903	0
304	6	-25.595	-21.4369	-626.227	62498.4	-25169.7	2357.25	159.807	200.198	0	0	0	0	0	0	0	200	903	0	0	0	0	0	0	0	603	903	0
304	7	-26.6631	-22.505	-626.227	63230.8	-25291.8	2723.47	159.612	199.029	0	0	0	0	0	0	0	200	903	0	0	0	0	0	0	0	603	903	0
304	8	-26.6631	-24.6413	-629.583	63139.3	-25596.9	2906.57	159.343	199.713	0	0	0	0	0	0	0	200	903	0	0	0	0	0	0	0	603	903	0
304	9	-25.595	-25.2516	-630.804	62864.6	-25291.8	2540.36	159.906	200.342	0	0	0	0	0	0	0	200	903	0	0	0	0	0	0	0	603	903	0
305	0	-26.3579	-25.4042	-632.025	62589.9	-25719	2723.47	159.307	200.969	0	0	0	0	0	0	0	200	903	0	0	0	0	0	0	0	603	903	0
305	1	-25.4424	-25.099	-632.33	63780.1	-25535.9	2906.57	159.616	199.135	0	0	0	0	0	0	0	200	903	0	0	0	0	0	0	0	603	903	0
305	2	-25.595	-27.5404	-634.161	63230.8	-25596.9	2631.91	159.637	200.292	0	0	0	0	0	0	0	200	903	0	0	0	0	0	0	0	603	903	0
305	3	-25.1372	-27.8456	-637.518	62681.5	-25474.9	2906.57	160.041	201.679	0	0	0	0	0	0	0	200	903	0	0	0	0	0	0	0	603	903	0
305	4	-26.0527	-28.6086	-635.687	62956.1	-26268.3	3043.9	158.677	200.964	0	0	0	0	0	0	0	200	903	0	0	0	0	0	0	0	603	903	0
305	5	-26.3579	-28.7611	-640.265	63230.8	-25658	2998.12	159.926	201.243	0	0	0	0	0	0	0	200	903	0	0	0	0	0	0	0	603	903	0
305	6	-27.1209	-30.4396	-637.518	63322.4	-25658	2998.12	159.753	200.674	0	0	0	0	0	0	0	200	903	0	0	0	0	0	0	0	603	903	0
305	7	-25.9002	-31.5077	-643.011	62406.8	-26085.2	3318.56	159.433	202.946	0	0	0	0	0	0	0	200	903	0	0	0	0	0	0	0	603	903	0
305	8	-26.6631	-31.6603	-641.485	62681.5	-26085.2	3227.01	159.336	202.287	0	0	0	0	0	0	0	200	903	0	0	0	0	0	0	0	603	903	0
305	9	-24.5269	-33.0336	-644.842	63322.4	-25963.1	3272.78	159.737	201.802	0	0	0	0	0	0	0	200	903	0	0	0	0	0	0	0	603	903	0
306	0	-22.6958	-35.0172	-647.894	62956.1	-26268.3	3364.33	159.456	202.83	0	0	0	0	0	0	0	200	903	0	0	0	0	0	0	0	603	903	0
306	1	-24.3743	-36.0854	-649.725	62773	-26207.3	3501.66	159.664	203.385	0	0	0	0	0	0	0	200	903	0	0	0	0	0	0	0	603	903	0
306	2	-24.0691	-37.0009	-648.81	62498.4	-26146.3	3638.99	159.701	203.672	0	0	0	0	0	0	0	200	903	0	0	0	0	0	0	0	603	903	0
306	3	-24.5269	-36.6957	-651.861	63688.6	-26085.2	3959.43	159.984	202.297	0	0	0	0	0	0	0	200	903	0	0	0	0	0	0	0	603	903	0
306	4	-24.2217	-38.6794	-652.472	63047.7	-26329.4	3730.55	159.647	203.371	0	0	0	0	0	0	0	200	903	0	0	0	0	0	0	0	603	903	0
306	5	-23.7639	-39.9001	-652.777	63047.7	-26268.3	4371.42	159.759	203.416	0	0	0	0	0	0	0	200	903	0	0	0	0	0	0	0	603	903	0
306	6	-24.5269	-42.1889	-653.692	62956.1	-26817.6	3867.87	158.975	203.691	0	0	0	0	0	0	0	200	903	0	0	0	0	0	0	0	603	903	0
306	7	-22.6958	-42.1889	-655.523	63597	-26268.3	4050.98	159.928	202.983	0	0	0	0	0	0	0	200	903	0	0	0	0	0	0	0	603	903	0
306	8	-22.6958	-43.8673	-656.134	62406.8	-26573.5	4234.09	159.5	204.887	0	0	0	0	0	0	0	200	903	0	0	0	0	0	0	0	603	903	0
306	9	-21.7803	-43.5622	-660.711	62681.5	-26695.6	4325.64	159.596	205.13	0	0	0	0	0	0	0	200	903	0	0	0	0	0	0	0	603	903	0
307	0	-22.3906	-44.9355	-660.711	63047.7	-26634.5	4325.64	159.688	204.576	0	0	0	0	0	0	0	200	903	0	0	0	0	0	0	0	603	903	0
307	1	-23.001	-46.6139	-663.153	62773	-26573.5	4279.86	159.929	205.342	0	0	0	0	0	0	0	200	903	0	0	0	0	0	0	0	603	903	0
307	2	-23.1536	-47.9872	-662.848	63047.7	-26939.7	4371.42	159.358	204.884	0	0	0	0	0	0	0	200	903	0	0	0	0	0	0	0	603	903	0
307	3	-23.1536	-47.9872	-662.848	62132.2	-26451.4	4646.07	160.094	206.265	0	0	0	0	0	0	0	200	903	0	0	0	0	0	0	0	603	903	0
307	4	-22.8484	-49.3605	-663.458	62956.1	-26512.5	4600.3	160.039	205.109	0	0	0	0	0	0	0	200	903	0	0	0	0	0	0	0	603	903	0
307	5	-21.3225	-50.8864	-664.984	63505.5	-26756.6	4508.74	159.764	204.501	0	0	0	0	0	0	0	200	903	0	0	0	0	0	0	0	603	903	0
307	6	-20.8648	-52.1071	-666.51	62498.4	-26695.6	4691.85	159.947	206.23	0	0	0	0	0	0	0	200	903	0	0	0	0	0	0	0	603	903	0
307	7	-21.3225	-52.1071	-669.256	62406.8	-26512.5	4966.51	160.385	206.752	0	0	0	0	0	0	0	200	903	0	0	0	0	0	0	0	603	903	0
307	8	-21.0173	-54.3959	-670.477	63139.3	-27305.9	5012.28	159.274	205.829	0	0	0	0	0	0	0	200	903	0	0	0	0	0	0	0	603	903	0
307	9	-20.407	-56.0744	-672.003	63139.3	-26634.5	4737.63	160.365	206.043	0	0	0	0	0	0	0	200	903	0	0	0	0	0	0	0	603	903	0
308	0	-21.3225	-55.1588	-673.224	62498.4	-27061.8	4966.51	159.803	207.165	0	0	0	0	0	0	0	200	903	0	0	0	0	0	0	0	603	903	0
308	1	-18.7285	-56.5321	-673.224	62956.1	-27122.8	5332.72	159.712	206.486	0	0	0	0	0	0	0	200	903	0	0	0	0	0	0	0	603	903	0
308	2	-21.0173	-57.6003	-673.224	62956.1	-27000.7	5103.84	159.893	206.486	0	0	0	0	0	0	0	200	903	0	0	0	0	0	0	0	603	903	0
308	3	-20.7122	-58.6684	-672.918	62132.2	-27244.9	5286.94	159.512	207.668	0	0	0	0	0	0	0	200	903	0	0	0	0	0	0	0	603	903	0
308	4	-19.7966	-58.9735	-675.36	62315.3	-27305.9	5286.94	159.568	207.73	0	0	0	0	0	0	0	200	903	0	0	0	0	0	0	0	603	903	0
308	5	-19.3389	-59.5839	-676.886	63139.3	-27000.7	5241.17	160.11	206.721	0	0	0	0	0	0	0	200	903	0	0	0	0	0	0	0	603	903	0
308	6	-18.1182	-61.5675	-679.632	63047.7	-27550.1	5378.5	159.463	207.233	0	0	0	0	0	0	0	200	903	0	0	0	0	0	0	0	603	903	0
308	7	-18.7285	-62.3305	-681.768	62498.4	-27244.9	5424.27	160.038	208.329	0	0	0	0	0	0	0	200	903	0	0	0	0	0	0	0	603	903	0
308	8	-19.9492	-63.246	-682.379	62498.4	-26878.7	5332.72	160.61	208.411	0	0	0	0	0	0	0	200	903	0	0	0	0	0	0	0	603	903	0
308	9	-19.0337	-64.0089	-683.294	62589.9	-27305.9	5378.5	160.038	208.4	0	0	0	0	0	0	0	200	903	0	0	0	0	0	0	0	603	903	0
309	0	-17.9656	-65.2296	-683.294	62223.7	-27305.9	5515.82	160.038	208.936	0	0	0	0	0	0	0	200	903	0	0	0	0	0	0	0	603	903	0
309	1	-20.2544	-65.3822	-684.21	62132.2	-27367	5470.05	160.002	209.191	0	0	0	0	0	0	0	200	903	0	0	0	0	0	0	0	603	903	0
309	2	-19.4915	-65.84	-685.431	62864.6	-27611.1	5424.27	159.717	208.285	0	0	0	0	0	0	0	200	903	0	0	0	0	0	0	0	603	903	0
309	3	-18.1182	-68.2814	-686.041	62773	-27428	5653.15	160.02	208.5	0	0	0	0	0	0	0	200	903	0	0	0	0	0	0	0	603	903	0
309	4	-18.7285	-69.5021	-688.788	62132.2	-27733.2	5424.27	159.736	209.795	0	0	0	0	0	0	0	200	903	0	0	0	0	0	0	0	603	903	0
309	5	-18.4234	-68.8918	-690.313	61766	-27672.1	5653.15	159.914	210.525	0	0	0	0	0	0	0	200	903	0	0	0	0	0	0	0	603	903	0
309	6	-19.3389	-69.5021	-689.093	62498.4	-27489	5561.6	160.108	209.303	0	0	0	0	0	0	0	200	903	0	0	0	0	0	0	0	603	903	0
309	7	-20.2544	-71.3332	-691.229	62223.7	-28099.4	5378.5	159.349	209.981	0	0	0	0	0	0	0	200	903	0	0	0	0	0	0	0	603	903	0
309	8	-18.1182	-73.0116	-691.229	61491.3	-27916.3	5424.27	159.614	211.041	0	0	0	0	0	0	0	200	903	0	0	0	0	0	0	0	603	903	0
309	9	-20.5596	-73.3168	-690.924	61857.5	-28099.4	5790.48	159.331	210.471	0	0	0	0	0	0	0	200	903	0	0	0	0	0	0	0	603	903	0
310	0	-19.9492	-74.2323	-690.924	62132.2	-28160.4	5378.5	159.242	210.074	0	0	0	0	0	0	0	200	903	0	0	0	0	0	0	0	603	903	0
310	1	-20.2544	-75.1479	-692.144	61033.6	-27611.1	5195.39	160.108	211.82	0	0	0	0	0	0	0	200	903	0	0	0	0	0	0	0	603	903	0
310	2	-19.0337	-75.9108	-695.196	61125.1	-27977.3	5744.71	159.756	212.075	0	0	0	0	0	0	0	200	903	0	0	0	0	0	0	0	603	903	0
310	3	-20.8648	-76.0634	-695.501	61674.4	-28221.4	5561.6	159.423	211.324	0	0	0	0	0	0	0	200	903	0	0	0	0	0	0	0	603	903	0
310	4	-21.9329	-77.8944	-697.027	61582.9	-27977.3	5241.17	159.862	211.649	0	0	0	0	0	0	0	200	903	0	0	0	0	0	0	0	603	903	0
310	5	-21.7803	-79.7255	-696.112	60758.9	-27977.3	5149.61	159.809	212.717	0	0	0	0	0	0	0	200	903	0	0	0	0	0	0	0	603	903	0
310	6	-21.0173	-80.3358	-695.196	60850.5	-28404.6	5286.94	159.142	212.47	0	0	0	0	0	0	0	200	903	0	0	0	0	0	0	0	603	903	0
310	7	-22.3906	-80.641	-696.112	60667.4	-27916.3	5103.84	159.897	212.848	0	0	0	0	0	0	0	200	903	0	0	0	0	0	0	0	603	903	0
310	8	-22.5432	-81.5565	-697.027	61033.6	-28099.4	5149.61	159.687	212.437	0	0	0	0	0	0	0	200	903	0	0	0	0	0	0	0	603	903	0
310	9	-22.2381	-81.8617	-697.638	60118	-28404.6	4966.51	159.285	213.826	0	0	0	0	0	0	0	200	903	0	0	0	0	0	0	0	603	903	0
311	0	-23.1536	-82.3195	-693.976	60758.9	-27794.2	5424.27	159.949	212.448	0	0	0	0	0	0	0	200	903	0	0	0	0	0	0	0	603	903	0
311	1	-22.8484	-84.9135	-698.553	60575.8	-28221.4	4874.96	159.6	213.284	0	0	0	0	0	0	0	200	903	0	0	0	0	0	0	0	603	903	0
311	2	-23.3062	-85.5238	-699.774	60118	-28038.3	5103.84	159.932	214.089	0	0	0	0	0	0	0	200	903	0	0	0	0	0	0	0	603	903	0
311	3	-24.832	-85.3712	-698.858	59934.9	-28221.4	4508.74	159.618	214.239	0	0	0	0	0	0	0	200	903	0	0	0	0	0	0	0	603	903	0
311	4	-24.3743	-87.2023	-699.164	59385.6	-28221.4	5103.84	159.635	215.062	0	0	0	0	0	0	0	200	903	0	0	0	0	0	0	0	603	903	0
311	5	-25.4424	-87.8127	-696.722	59568.7	-28709.7	4920.73	158.793	214.501	0	0	0	0	0	0	0	200	903	0	0	0	0	0	0	0	603	903	0
311	6	-26.2053	-88.7282	-693.365	59568.7	-28526.6	4829.18	158.858	214.088	0	0	0	0	0	0	0	200	903	0	0	0	0	0	0	0	603	903	0
311	7	-24.832	-89.6437	-695.807	59751.8	-28465.6	4966.51	159.09	214.126	0	0	0	0	0	0	0	200	903	0	0	0	0	0	0	0	603	903	0
311	8	-25.595	-91.1696	-696.722	59568.7	-28831.8	4646.07	158.618	214.501	0	0	0	0	0	0	0	200	903	0	0	0	0	0	0	0	603	903	0
311	9	-26.0527	-92.2377	-697.027	58561.6	-28099.4	4737.63	159.687	215.984	0	0	0	0	0	0	0	200	903	0	0	0	0	0	0	0	603	903	0
312	0	-26.9683	-94.6791	-697.027	58744.7	-28709.7	5012.28	158.811	215.721	0	0	0	0	0	0	0	200	903	0	0	0	0	0	0	0	603	903	0
312	1	-29.4097	-95.5946	-693.67	58653.2	-28831.8	4600.3	158.436	215.445	0	0	0	0	0	0	0	200	903	0	0	0	0	0	0	0	603	903	0
312	2	-29.7149	-95.1369	-694.586	59202.5	-28099.4	4508.74	159.545	214.766	0	0	0	0	0	0	0	200	903	0	0	0	0	0	0	0	603	903	0
312	3	-30.4778	-95.8998	-691.839	57646.1	-28770.8	4417.19	158.414	216.677	0	0	0	0	0	0	0	200	903	0	0	0	0	0	0	0	603	903	0
312	4	-30.4778	-96.3576	-690.619	57920.8	-28526.6	4417.19	158.694	216.132	0	0	0	0	0	0	0	200	903	0	0	0	0	0	0	0	603	903	0
312	5	-30.1726	-98.1886	-690.008	57920.8	-28343.5	4096.76	158.923	216.058	0	0	0	0	0	0	0	200	903	0	0	0	0	0	0	0	603	903	0
312	6	-30.3252	-99.1042	-687.872	57096.8	-28587.7	4462.97	158.44	216.995	0	0	0	0	0	0	0	200	903	0	0	0	0	0	0	0	603	903	0
312	7	-28.9519	-99.7145	-687.872	56822.1	-28038.3	4325.64	159.239	217.394	0	0	0	0	0	0	0	200	903	0	0	0	0	0	0	0	603	903	0
312	8	-29.8674	-101.24	-687.262	57005.2	-28465.6	4417.19	158.581	217.055	0	0	0	0	0	0	0	200	903	0	0	0	0	0	0	0	603	903	0
312	9	-31.8511	-103.834	-681.158	56730.6	-28404.6	4234.09	158.3	216.715	0	0	0	0	0	0	0	200	903	0	0	0	0	0	0	0	603	903	0
313	0	-31.2407	-104.597	-683.294	56181.2	-28038.3	4325.64	158.966	217.779	0	0	0	0	0	0	0	200	903	0	0	0	0	0	0	0	603	903	0
313	1	-28.7993	-105.971	-680.853	55265.7	-28038.3	4600.3	158.819	218.829	0	0	0	0	0	0	0	200	903	0	0	0	0	0	0	0	603	903	0
313	2	-30.1726	-106.581	-679.022	55174.2	-27855.2	4600.3	158.977	218.745	0	0	0	0	0	0	0	200	903	0	0	0	0	0	0	0	603	903	0
313	3	-30.6304	-107.496	-674.139	54808	-27916.3	4600.3	158.59	218.699	0	0	0	0	0	0	0	200	903	0	0	0	0	0	0	0	603	903	0
313	4	-28.9519	-107.039	-674.444	54899.5	-27428	4829.18	159.332	218.6	0	0	0	0	0	0	0	200	903	0	0	0	0	0	0	0	603	903	0
313	5	-28.9519	-108.412	-671.393	54808	-27672.1	4737.63	158.784	218.367	0	0	0	0	0	0	0	200	903	0	0	0	0	0	0	0	603	903	0
313	6	-28.6467	-109.48	-673.834	54716.4	-27428	4783.4	159.296	218.798	0	0	0	0	0	0	0	200	903	0	0	0	0	0	0	0	603	903	0
313	7	-28.6467	-111.006	-668.341	53617.8	-27916.3	4554.52	158.23	219.775	0	0	0	0	0	0	0	200	903	0	0	0	0	0	0	0	603	903	0
313	8	-28.7993	-109.48	-669.867	53160	-27244.9	4737.63	159.328	220.641	0	0	0	0	0	0	0	200	903	0	0	0	0	0	0	0	603	903	0
313	9	-29.2571	-111.464	-666.815	53984	-27489	4600.3	158.776	219.042	0	0	0	0	0	0	0	200	903	0	0	0	0	0	0	0	603	903	0
314	0	-28.6467	-112.837	-664.984	52885.3	-27428	5012.28	158.754	220.471	0	0	0	0	0	0	0	200	903	0	0	0	0	0	0	0	603	903	0
314	1	-28.7993	-112.227	-661.627	52610.7	-26939.7	4874.96	159.283	220.483	0	0	0	0	0	0	0	200	903	0	0	0	0	0	0	0	603	903	0
314	2	-27.5786	-113.447	-659.185	51969.8	-27183.9	4966.51	158.761	221.161	0	0	0	0	0	0	0	200	903	0	0	0	0	0	0	0	603	903	0
314	3	-26.5105	-115.278	-656.744	51054.3	-26756.6	5012.28	159.259	222.262	0	0	0	0	0	0	0	200	903	0	0	0	0	0	0	0	603	903	0
314	4	-26.3579	-116.041	-656.439	51237.4	-26878.7	5103.84	159.054	221.946	0	0	0	0	0	0	0	200	903	0	0	0	0	0	0	0	603	903	0
314	5	-26.0527	-116.041	-653.997	50596.6	-26512.5	5332.72	159.461	222.635	0	0	0	0	0	0	0	200	903	0	0	0	0	0	0	0	603	903	0
314	6	-26.0527	-116.194	-652.472	51512.1	-26329.4	5195.39	159.647	221.051	0	0	0	0	0	0	0	200	903	0	0	0	0	0	0	0	603	903	0
314	7	-26.6631	-117.415	-648.81	50413.4	-26512.5	5332.72	159.137	222.299	0	0	0	0	0	0	0	200	903	0	0	0	0	0	0	0	603	903	0
314	8	-26.0527	-117.11	-643.316	49681	-26512.5	5607.38	158.788	222.774	0	0	0	0	0	0	0	200	903	0	0	0	0	0	0	0	603	903	0
314	9	-26.9683	-117.72	-642.401	49131.7	-26390.4	5378.5	158.919	223.519	0	0	0	0	0	0	0	200	903	0	0	0	0	0	0	0	603	903	0
315	0	-26.3579	-117.415	-639.959	49314.8	-26024.2	5103.84	159.335	222.941	0	-13.4137	22.4728	-32.8419	5991.03	3937.37	208.008	319.889	720.579	0	0	0	0	0	0	0	603	903	0
315	1	-26.0527	-118.178	-636.602	49314.8	-26146.3	5149.61	158.928	222.534	0	-12.4982	27.2031	-38.6402	5441.72	3388.05	803.101	287.682	762.17	0	0	0	0	0	0	0	603	903	0
315	2	-24.3743	-118.025	-635.687	48307.7	-25535.9	5378.5	159.829	224.007	0	-4.86878	10.8762	-20.94	3519.11	2472.53	1077.76	318.077	734.943	0	0	0	0	0	0	0	603	903	0
315	3	-25.595	-119.704	-634.161	48490.8	-26085.2	5195.39	158.867	223.536	0	0	0	0	0	0	0	200	903	0	0	0	0	0	0	0	603	903	0
315	4	-24.9846	-120.466	-630.499	47850	-25963.1	5424.27	158.821	224.108	0	-5.17395	22.778	-16.9727	2878.24	2960.81	1398.19	374.445	733.42	0	0	0	0	0	0	0	603	903	0
315	5	-24.9846	-120.161	-626.227	46842.9	-25108.7	5286.94	159.905	225.198	0	-0.596316	22.0151	-32.5367	4709.29	3327.02	1993.29	302.254	758.262	0	0	0	0	0	0	0	603	903	0
315	6	-24.3743	-120.009	-623.785	46476.7	-25596.9	5515.82	158.965	225.493	0	0.624387	9.65546	-38.335	6448.8	3754.27	2267.94	297.933	734.778	0	0	0	0	0	0	0	603	903	0
315	7	-24.0691	-121.382	-620.733	46385.1	-24925.6	5424.27	159.845	225.274	0	-1.05408	14.0805	-41.692	7455.88	5036	2176.39	320.791	724.168	0	0	0	0	0	0	0	603	903	0
315	8	-24.9846	-121.687	-617.987	46476.7	-25047.6	5424.27	159.469	224.793	0	3.52356	16.5219	-53.2886	9927.8	5768.42	1535.52	308.249	716.698	0	0	0	0	0	0	0	603	903	0
315	9	-23.001	-121.687	-612.799	45286.5	-25047.6	5470.05	159.126	226.099	0	6.42273	3.24677	-73.4302	13132.1	7660.51	1398.19	304.324	724.162	0	0	0	0	0	0	0	603	903	0
316	0	-22.0855	-122.145	-608.526	44737.2	-24376.2	5698.93	159.942	226.483	0	-0.596316	-0.110165	-93.2667	15878.7	8698.11	940.43	293.261	732.749	0	0	0	0	0	0	0	603	903	0
316	1	-20.8648	-123.976	-607.611	44737.2	-24864.5	5607.38	159.078	226.372	0	-3.64807	8.73993	-103.643	19174.6	10346.1	436.889	299.824	717.993	0	0	0	0	0	0	0	603	903	0
316	2	-22.6958	-122.603	-606.085	43272.3	-24742.4	5653.15	159.177	228.604	0	-2.27478	8.58735	-113.103	21555	11627.8	162.231	302.807	712.422	0	0	0	0	0	0	0	603	903	0
316	3	-22.3906	-121.992	-598.761	43455.4	-24193.1	5561.6	159.595	227.424	0	0.776975	5.07782	-129.583	24301.6	12787.5	757.324	298.682	715.463	0	0	0	0	0	0	0	603	903	0
316	4	-21.9329	-123.976	-596.93	43180.8	-24315.2	5790.48	159.266	227.662	0	-6.24207	14.3857	-144.841	26498.8	13825.1	436.889	295.45	720.049	0	0	0	0	0	0	0	603	903	0
316	5	-22.0855	-123.518	-595.099	42906.1	-23338.6	5836.26	160.782	227.901	0	-11.2775	21.2521	-155.523	29337	14679.6	528.442	294.389	714.365	0	0	0	0	0	0	0	603	903	0
316	6	-21.4751	-123.213	-590.521	41532.8	-23582.8	5836.26	160.064	229.668	0	-5.02137	17.2849	-168.645	30801.8	16449.6	803.101	297.54	720.357	0	0	0	0	0	0	0	603	903	0
316	7	-21.1699	-123.06	-584.723	41899	-23338.6	5653.15	160.086	228.344	0	-3.64807	18.353	-182.073	33823.1	17731.3	574.219	297.386	717.233	0	0	0	0	0	0	0	603	903	0
316	8	-19.4915	-125.197	-579.84	40525.8	-23216.6	5973.59	159.96	230.109	0	-12.8033	22.9306	-197.026	36111.9	18402.7	-387.085	293.402	719.715	0	0	0	0	0	0	0	603	903	0
316	9	-17.9656	-124.434	-576.178	39976.4	-22606.2	6248.25	160.765	230.618	0	-16.0077	14.3857	-213.201	40048.6	20355.8	-387.085	295.477	715.155	0	0	0	0	0	0	0	603	903	0
317	0	-17.0501	-124.281	-573.736	39884.9	-23033.5	5790.48	159.854	230.482	0	-6.69983	8.43476	-229.07	42337.5	21759.6	-844.849	294.991	718.177	0	0	0	0	0	0	0	603	903	0
317	1	-17.813	-124.892	-569.464	39518.6	-22423.1	6019.36	160.624	230.604	0	-12.9559	11.9443	-245.549	44717.9	23407.6	-1623.05	295.327	720.887	0	0	0	0	0	0	0	603	903	0
317	2	-18.5759	-125.044	-564.276	38969.3	-22606.2	6065.14	159.938	230.939	0	-18.9069	14.8434	-261.113	48013.8	24750.4	-1668.82	294.788	719.119	0	0	0	0	0	0	0	603	903	0
317	3	-16.8975	-124.129	-559.698	37504.5	-22301	6339.8	160.155	232.992	0	-17.2284	10.571	-278.508	51218.1	26215.2	-1302.61	294.127	719.099	0	0	0	0	0	0	0	603	903	0
317	4	-14.3035	-123.366	-552.984	38053.8	-21629.7	6156.69	160.886	231.185	0	-14.3292	16.6745	-291.936	53232.3	27191.8	-890.626	293.143	720.658	0	0	0	0	0	0	0	603	903	0
317	5	-16.5923	-123.671	-549.017	37321.4	-21812.8	6110.92	160.269	232.021	0	-17.0758	28.8815	-307.805	55338	29328	70.6785	295.281	723.218	0	0	0	0	0	0	0	603	903	0
317	6	-14.7612	-123.213	-542.914	36405.9	-21568.6	6294.02	160.272	232.944	0	-18.7543	29.9496	-319.402	58359.2	30670.8	-158.203	296.026	720.286	0	0	0	0	0	0	0	603	903	0
317	7	-14.6087	-123.366	-538.946	35765	-21019.3	6065.14	160.999	233.639	0	-20.1276	28.5764	-334.966	61288.9	31098	345.337	292.839	720.029	0	0	0	0	0	0	0	603	903	0
317	8	-12.7776	-123.823	-533.453	35765	-21324.5	6385.58	160.026	232.956	0	-20.1276	39.2575	-352.056	62387.5	33478.4	1260.86	295.094	725.791	0	0	0	0	0	0	0	603	903	0
317	9	-12.9302	-123.671	-527.96	35398.8	-20470	6431.35	161.228	232.952	0	-17.8387	45.5136	-367.925	65225.7	34943.2	1260.86	294.974	725.72	0	0	0	0	0	0	0	603	903	0
318	0	-11.2517	-123.06	-523.077	34117.1	-20347.9	6522.9	161.1	234.776	0	-19.6698	43.0722	-381.047	68063.8	35858.8	1581.3	294.106	724.377	0	0	0	0	0	0	0	603	903	0
318	1	-11.7095	-123.213	-517.279	33293.1	-20103.8	6431.35	161.136	235.638	0	-24.2474	49.6335	-395.391	70444.2	37506.7	2084.84	294.86	724.837	0	0	0	0	0	0	0	603	903	0
318	2	-12.625	-123.823	-512.396	34117.1	-19859.6	6294.02	161.242	233.417	0	-25.9259	62.1457	-410.344	71176.6	38422.3	3000.37	293.634	729.544	0	0	0	0	0	0	0	603	903	0
318	3	-8.19996	-121.992	-505.072	32652.2	-19127.2	6385.58	162.13	235.351	0	-23.6371	63.6716	-420.415	73190.7	39276.7	3549.68	293.424	728.908	0	0	0	0	0	0	0	603	903	0
318	4	-9.72584	-120.466	-498.358	32011.3	-19432.4	6248.25	161.007	235.766	0	-22.8741	69.7751	-429.57	75021.8	40253.3	4099	293.706	728.356	0	0	0	0	0	0	0	603	903	0
318	5	-9.57325	-121.535	-491.339	31553.6	-18944.1	6706.01	161.444	235.78	0	-26.994	78.7778	-442.998	76120.4	41535	4419.43	293.759	731.17	0	0	0	0	0	0	0	603	903	0
318	6	-8.9629	-120.924	-485.235	30821.1	-19005.1	6431.35	160.833	236.482	0	-26.6888	84.4235	-454.9	77493.7	42084.4	5060.3	292.513	732.647	0	0	0	0	0	0	0	603	903	0
318	7	-7.43702	-119.246	-480.963	30363.4	-18638.9	6522.9	161.247	236.87	0	-24.8578	86.7123	-463.445	78958.6	42816.8	6067.38	292.388	732.627	0	0	0	0	0	0	0	603	903	0
318	8	-6.82667	-119.246	-474.859	28807	-18089.6	6385.58	161.905	239.336	0	-26.2311	94.3417	-471.685	80057.2	43976.5	6067.38	293.233	733.274	0	0	0	0	0	0	0	603	903	0
318	9	-6.97926	-119.093	-468.451	29539.4	-18028.6	6385.58	161.514	236.942	0	-30.5035	99.3771	-481.145	80331.9	44525.8	6250.49	292.541	736.04	0	0	0	0	0	0	0	603	903	0
319	0	-7.28444	-117.567	-460.821	28257.7	-17357.2	6156.69	162.334	238.68	0	-29.4354	101.208	-487.554	82437.6	45380.3	6845.58	293.077	733.916	0	0	0	0	0	0	0	603	903	0
319	1	-6.67408	-115.584	-455.328	27799.9	-17296.1	6477.13	162.014	238.945	0	-27.757	104.107	-500.676	83627.8	46173.7	7120.24	292.223	735.97	0	0	0	0	0	0	0	603	903	0
319	2	-6.06373	-116.499	-447.088	26701.3	-17174.1	6202.47	161.587	240.277	0	-30.0458	110.211	-509.221	83994	47150.3	7074.46	292.593	738.054	0	0	0	0	0	0	0	603	903	0
319	3	-5.60597	-115.584	-438.849	26792.8	-16197.5	6202.47	163.091	238.947	0	-31.7242	112.347	-517.461	85550.4	47943.7	7669.56	292.652	737.673	0	0	0	0	0	0	0	603	903	0
319	4	-3.46974	-114.668	-432.135	26060.4	-16685.8	6339.8	161.388	239.694	0	-30.9613	111.889	-528.142	87106.8	49164.4	7898.44	293.089	738.069	0	0	0	0	0	0	0	603	903	0
319	5	-2.85939	-112.837	-424.81	25236.4	-16014.4	6294.02	162.302	240.594	0	-28.2147	115.094	-537.297	87747.6	49164.4	7898.44	291.503	739.687	0	0	0	0	0	0	0	603	903	0
319	6	-3.16456	-112.379	-420.843	25144.9	-15770.3	5927.81	162.527	240.251	0	-31.1139	119.671	-543.096	88480	50263.1	8539.31	292.549	740.082	0	0	0	0	0	0	0	603	903	0
319	7	-1.79127	-111.769	-414.435	24595.6	-15465.1	6477.13	162.684	240.653	0	-30.5035	117.84	-551.641	90128	51544.8	8401.98	293.439	739.618	0	0	0	0	0	0	0	603	903	0
319	8	-1.63868	-110.09	-405.584	23496.9	-15159.9	6110.92	162.622	242.066	0	-28.2147	117.077	-562.322	91501.3	52277.2	8310.42	292.967	740.279	0	0	0	0	0	0	0	603	903	0
319	9	-1.79127	-108.412	-398.565	22947.6	-14671.6	6248.25	163.189	242.424	0	-28.9777	120.129	-567.205	92325.3	52826.6	8859.74	293.135	740.228	0	0	0	0	0	0	0	603	903	0
320	0	0.95531	-108.107	-389.41	22856.1	-14488.5	6110.92	162.794	241.306	0	-28.5199	119.824	-576.36	92966.2	54047.3	8768.19	293.773	741.701	0	0	0	0	0	0	0	603	903	0
320	1	-0.570569	-106.123	-381.781	22398.3	-13817.1	6110.92	163.809	241.332	0	-25.9259	117.84	-582.769	93240.8	54962.8	9088.62	294.313	743.004	0	0	0	0	0	0	0	603	903	0
320	2	-0.723157	-104.14	-370.794	20750.3	-13695.1	6202.47	163.066	244.038	0	-25.163	120.739	-591.008	94247.9	55756.2	9500.61	294.341	743.53	0	0	0	0	0	0	0	603	903	0
320	3	0.650134	-102.156	-364.691	20658.8	-13512	5698.93	162.95	243.353	0	-24.0949	120.739	-603.521	96262.1	56915.9	10004.2	294.307	743.499	0	0	0	0	0	0	0	603	903	0
320	4	1.1079	-100.63	-354.01	20201	-13145.8	5790.48	162.866	242.937	0	-21.9586	120.739	-616.948	97269.1	58441.8	10141.5	294.727	745.338	0	0	0	0	0	0	0	603	903	0
320	5	1.26049	-99.8671	-350.958	19834.8	-12718.5	5653.15	163.761	243.484	0	-19.3646	122.57	-625.798	98733.9	58319.7	10736.6	293.193	745.227	0	0	0	0	0	0	0	603	903	0
320	6	1.41307	-96.5102	-343.634	18553.1	-12596.4	5561.6	163.343	246.009	0	-19.0595	126.08	-634.648	99649.5	60517	10873.9	295.355	745.985	0	0	0	0	0	0	0	603	903	0
320	7	1.1079	-94.8317	-335.699	17729.1	-11986.1	6065.14	164.295	247.188	0	-16.4655	125.927	-645.33	100107	61188.4	10919.7	294.817	747.874	0	0	0	0	0	0	0	603	903	0
320	8	0.497546	-94.5265	-328.07	17820.7	-12047.1	5470.05	163.279	245.68	0	-13.4137	126.233	-651.433	101114	61310.4	11469	294.116	747.782	0	0	0	0	0	0	0	603	903	0
320	9	2.78636	-92.8481	-317.999	16813.6	-10948.5	5424.27	165.571	247.127	0	-13.8715	130.81	-655.4	101481	62653.2	11560.6	295.595	748.163	0	0	0	0	0	0	0	603	903	0
321	0	1.56566	-90.5592	-309.454	15989.6	-11009.5	5515.82	164.423	248.33	0	-8.98865	133.709	-662.419	101755	63080.5	11789.4	295.227	749.389	0	0	0	0	0	0	0	603	903	0
321	1	2.78636	-89.3385	-301.519	15898	-10948.5	5424.27	163.689	247.274	0	-9.14124	133.709	-663.945	101481	63324.6	12064.1	295.376	750.155	0	0	0	0	0	0	0	603	903	0
321	2	2.3286	-88.2704	-291.754	15440.3	-10582.3	5149.61	163.729	247.078	0	-8.3783	137.066	-669.133	101481	63996	12430.3	295.64	751.34	0	0	0	0	0	0	0	603	903	0
321	3	2.48119	-86.7445	-283.819	14341.7	-10277.1	5058.06	163.79	249.469	0	-7.1576	140.118	-673.406	101572	64362.2	12567.6	295.577	752.167	0	0	0	0	0	0	0	603	903	0
321	4	2.63378	-83.6928	-277.105	13609.2	-9971.93	5149.61	164.014	250.888	0	-4.71619	141.186	-672.49	101572	64423.2	12888.1	295.798	751.961	0	0	0	0	0	0	0	603	903	0
321	5	2.02342	-82.9298	-268.866	13426.1	-9605.72	4691.85	164.273	250.064	0	-3.64807	142.254	-675.237	100565	64789.5	13025.4	295.951	754.067	0	0	0	0	0	0	0	603	903	0
321	6	0.802722	-82.3195	-260.626	12602.2	-9605.72	4646.07	163.144	251.647	0	-3.49549	146.222	-675.237	100473	65216.7	13345.8	296.583	754.203	0	0	0	0	0	0	0	603	903	0
321	7	-0.265393	-78.1996	-252.081	12602.2	-8995.37	4646.07	164.316	250.008	0	-0.596316	148.205	-676.152	100748	64057	13940.9	294.738	753.998	0	0	0	0	0	0	0	603	903	0
321	8	0.650134	-76.8263	-241.705	11412	-8934.33	4462.97	163.036	252.786	0	1.08215	148.053	-678.594	100290	65460.8	14032.5	296.465	755.209	0	0	0	0	0	0	0	603	903	0
321	9	0.497546	-74.6901	-235.296	11228.9	-8446.05	4462.97	164.105	252.278	0	1.6925	149.121	-677.068	100107	65460.8	13895.1	296.683	755.146	0	0	0	0	0	0	0	603	903	0
322	0	-0.417981	-72.859	-226.446	10313.3	-8385.02	4325.64	162.971	254.456	0	3.21838	151.562	-678.289	100016	65399.8	14444.5	296.419	755.547	0	0	0	0	0	0	0	603	903	0
322	1	0.0397824	-69.8073	-220.343	9855.57	-7896.73	4050.98	164.162	255.272	0	6.7279	151.715	-677.678	99649.5	65949.1	14627.6	297.316	755.955	0	0	0	0	0	0	0	603	903	0
322	2	-1.4861	-68.7392	-213.324	9764.02	-8079.84	3730.55	162.124	254.229	0	6.57531	151.715	-679.509	98733.9	66010.2	15039.6	297.144	757.698	0	0	0	0	0	0	0	603	903	0
322	3	-0.723157	-67.6711	-208.746	9397.8	-7835.7	3913.65	162.463	254.98	0	7.33825	154.004	-677.373	98642.4	65460.8	15039.6	296.639	757.375	0	0	0	0	0	0	0	603	903	0
322	4	-1.79127	-65.0771	-200.506	8482.28	-7652.59	3730.55	161.834	257.696	0	8.86413	154.156	-677.983	98093.1	66193.2	15405.8	297.633	758.316	0	0	0	0	0	0	0	603	903	0
322	5	-1.63868	-63.246	-194.708	8024.51	-7347.42	3593.22	162.264	258.787	0	10.2374	153.851	-677.068	97635.3	66193.2	15817.8	297.765	758.797	0	0	0	0	0	0	0	603	903	0
322	6	-1.79127	-63.0934	-186.773	8299.17	-7225.35	3410.11	161.315	255.566	0	11.3055	153.698	-674.321	97726.9	66010.2	16000.9	297.891	758.074	0	0	0	0	0	0	0	603	903	0
322	7	-0.417981	-61.4149	-179.449	6925.88	-6920.17	3272.78	161.437	261.405	0	11.3055	156.903	-678.289	97452.2	66376.4	16229.7	297.859	759.326	0	0	0	0	0	0	0	603	903	0
322	8	-2.24904	-58.821	-172.43	6651.22	-6492.93	3181.23	162.345	261.427	0	13.5944	155.529	-678.594	97635.3	66742.6	16229.7	298.354	759.121	0	0	0	0	0	0	0	603	903	0
322	9	-3.01198	-56.5321	-166.021	7017.43	-6615	3181.23	160.156	257.732	0	13.8995	152.63	-678.289	96078.9	66254.3	16321.3	297.679	761.351	0	0	0	0	0	0	0	603	903	0
323	0	-3.01198	-55.3114	-159.918	6376.56	-6431.89	2952.35	159.78	260.126	0	14.0521	157.208	-676.152	96170.5	66803.6	16321.3	298.8	760.768	0	0	0	0	0	0	0	603	903	0
323	1	-3.16456	-53.0226	-153.204	5827.24	-5882.57	2815.02	161.603	261.964	0	15.1202	157.818	-679.204	96078.9	66498.4	16229.7	297.906	761.542	0	0	0	0	0	0	0	603	903	0
323	2	-2.85939	-51.1916	-149.237	5552.58	-5516.36	2586.14	163.036	262.793	0	17.4091	154.614	-677.983	96262.1	65888.1	16595.9	297.182	761.017	0	0	0	0	0	0	0	603	903	0
323	3	-3.77491	-48.2924	-143.133	5461.03	-5699.47	2540.36	160.181	261.847	0	14.9676	157.513	-676.763	95529.6	66803.6	16595.9	298.711	761.843	0	0	0	0	0	0	0	603	903	0
323	4	-5.60597	-47.682	-136.725	5186.37	-5150.15	2357.25	162.332	262.067	0	14.5099	158.276	-679.509	95529.6	67047.7	17328.4	298.671	762.414	0	0	0	0	0	0	0	603	903	0
323	5	-4.69044	-43.4096	-129.705	4728.61	-4967.05	2311.48	161.705	263.543	0	16.9513	156.445	-678.899	95346.5	66681.5	17053.7	298.22	762.557	0	0	0	0	0	0	0	603	903	0
323	6	-5.30079	-41.5785	-123.907	4545.5	-5394.29	2082.6	156.465	263.315	0	16.9513	157.513	-677.678	94522.6	67169.8	17603	299.118	763.52	0	0	0	0	0	0	0	603	903	0
323	7	-4.99562	-40.3578	-117.498	4453.95	-4417.73	2403.03	162.402	262.094	0	16.0358	158.886	-679.204	94156.4	67352.9	17374.1	299.164	764.373	0	0	0	0	0	0	0	603	903	0
323	8	-4.23268	-38.6794	-111.09	3813.08	-4234.63	1807.94	161.881	265.676	0	17.7142	158.276	-679.815	94797.2	66376.4	17465.7	297.639	763.554	0	0	0	0	0	0	0	603	903	0
323	9	-4.23268	-35.9328	-107.428	3172.21	-4295.66	1807.94	160.013	270.471	0	18.7823	157.818	-679.815	94522.6	67352.9	17511.5	299.075	763.958	0	0	0	0	0	0	0	603	903	0
324	0	-4.08009	-34.2543	-103.155	3538.43	-3685.31	1762.16	164.274	265.698	0	16.3409	158.276	-682.256	94339.4	67658.1	17328.4	299.168	764.724	0	0	0	0	0	0	0	603	903	0
324	1	-3.9275	-33.9491	-98.2724	3446.87	-4173.59	1395.95	157.53	264.925	0	18.0194	158.886	-682.561	94156.4	67597.1	17328.4	299.035	765.054	0	0	0	0	0	0	0	603	903	0
324	2	-4.38527	-31.6603	-92.7792	2531.35	-3380.13	1624.83	163.568	272.716	0	19.0875	156.903	-681.34	93698.6	68207.4	17465.7	300.108	765.479	0	0	0	0	0	0	0	603	903	0
324	3	-5.14821	-29.2189	-88.2016	2256.69	-3135.99	1304.4	164.445	274.414	0	19.8505	158.886	-685.613	93790.1	67963.3	17465.7	299.128	766.203	0	0	0	0	0	0	0	603	903	0
324	4	-4.69044	-28.1508	-80.8774	2256.69	-3380.13	1487.5	158.207	272.097	0	18.6298	158.429	-686.834	93423.9	68390.5	17511.5	299.574	766.979	0	0	0	0	0	0	0	603	903	0
324	5	-4.84303	-26.3197	-76.9101	2622.9	-2647.71	1258.62	165.574	265.897	0	19.8505	157.513	-689.275	94156.4	68939.9	17740.4	300.018	766.398	0	0	0	0	0	0	0	603	903	0
324	6	-3.77491	-24.7939	-73.248	2073.58	-2586.68	1258.62	164.686	271.691	0	22.2919	154.461	-693.242	94614.1	69733.3	18198.1	300.59	766.519	0	0	0	0	0	0	0	603	903	0
324	7	-2.40162	-24.4887	-68.06	1798.92	-2830.82	800.859	158.407	273.569	0	24.5807	157.971	-704.839	94614.1	70404.7	18381.2	299.888	768.765	0	0	0	0	0	0	0	603	903	0
324	8	-3.16456	-21.8947	-65.9238	2073.58	-2342.53	1258.62	164.466	268.546	0	29.3109	160.412	-709.722	94888.8	71625.4	18427	300.92	769.301	0	0	0	0	0	0	0	603	903	0
324	9	-2.7068	-22.8102	-62.5668	1524.26	-2098.39	938.188	166.462	275.638	0	32.2101	160.87	-713.384	95255	72357.8	18976.3	301.429	769.474	0	0	0	0	0	0	0	603	903	0
325	0	-4.23268	-19.7585	-58.9047	1524.26	-2159.43	617.753	163.34	274.123	0	35.2618	161.175	-720.098	95438	72602	19479.9	300.822	770.465	0	0	0	0	0	0	0	603	903	0
325	1	-3.46974	-18.08	-54.3271	1249.61	-2037.36	983.964	162.498	276.999	0	38.9239	162.854	-724.981	94705.6	73517.4	19800.3	301.406	772.368	0	0	0	0	0	0	0	603	903	0
325	2	-3.16456	-16.4015	-49.4443	1707.37	-1671.15	571.977	166.201	265.469	0	42.5861	164.38	-728.337	95621.2	74005.7	19434.1	301.609	771.713	0	0	0	0	0	0	0	603	903	0
325	3	-3.77491	-15.0282	-46.3925	1158.05	-1793.22	388.871	161.347	275.038	0	41.6705	165.6	-732	95804.3	74310.9	19663	301.518	772.12	0	0	0	0	0	0	0	603	903	0
325	4	-2.7068	-12.892	-43.3408	974.948	-1304.94	617.753	169.891	277.505	0	43.9593	166.211	-735.662	96078.9	75287.5	20166.5	302.34	772.398	0	0	0	0	0	0	0	603	903	0
325	5	-2.55421	-12.1291	-39.3735	1066.5	-1793.22	22.6601	154.456	272.913	0	45.6378	167.584	-741.46	95712.7	75226.4	20120.7	301.457	773.913	0	0	0	0	0	0	0	603	903	0
325	6	-1.4861	-11.6713	-37.5424	1341.16	-877.69	251.542	176.621	264.276	0	45.7904	166.668	-746.038	95804.3	75653.7	19983.4	301.407	774.583	0	0	0	0	0	0	0	603	903	0
325	7	-1.79127	-10.7558	-35.7114	517.184	-1365.97	159.989	161.75	285.518	0	43.8068	166.058	-747.869	96262.1	76142	20258.1	301.812	774.285	0	0	0	0	0	0	0	603	903	0
325	8	-2.24904	-9.38248	-33.8803	242.526	-1060.8	251.542	168.69	292.842	0	45.4852	167.584	-746.953	96170.5	76142	20441.2	301.937	774.25	0	0	0	0	0	0	0	603	903	0
325	9	-2.40162	-9.0773	-28.3871	608.737	-755.619	205.766	173.382	278.556	0	45.943	166.974	-750.31	95804.3	76019.9	20258.1	301.318	775.314	0	0	0	0	0	0	0	603	903	0
326	0	-3.01198	-8.00919	-24.725	700.29	-633.549	343.095	174.376	271.677	0	46.2482	165.448	-751.836	95712.7	76630.3	20395.4	301.924	775.695	0	0	0	0	0	0	0	603	903	0
326	1	-2.40162	-7.39883	-21.6733	-306.79	-511.479	114.213	176.4	314.155	0	44.8749	164.685	-748.479	96262.1	76935.4	20212.3	302.789	774.39	0	0	0	0	0	0	0	603	903	0
326	2	-1.18092	-6.63589	-20.7577	150.973	-206.303	251.542	190.061	292.727	0	45.18	162.701	-752.141	95712.7	76508.2	20395.4	301.721	775.746	0	0	0	0	0	0	0	603	903	0
326	3	-1.4861	-6.33072	-16.7905	334.079	-450.444	68.4365	173.173	280.103	0	46.2482	160.717	-753.972	95163.4	76874.4	19937.6	301.959	776.784	0	0	0	0	0	0	0	603	903	0
326	4	-1.02833	-6.17813	-17.0956	517.184	37.8378	-68.8927	202.213	269.748	0	46.0956	158.429	-752.446	95438	76691.3	19525.6	301.923	776.163	0	0	0	0	0	0	0	603	903	0
326	5	-0.875745	-5.11002	-14.9594	-306.79	-84.2325	68.4365	194.369	320.508	0	43.8068	157.666	-753.362	95346.5	76752.4	19525.6	301.88	776.439	0	0	0	0	0	0	0	603	903	0
326	6	-1.94386	-4.49966	-12.8232	-398.343	-23.1974	68.4365	198.191	331.064	0	46.0956	155.529	-753.972	95621.2	77118.6	19525.6	302.283	776.177	0	0	0	0	0	0	0	603	903	0
326	7	-2.85939	-3.43155	-10.9921	-215.238	98.873	-160.445	208.995	319.581	0	45.3326	154.309	-754.888	94797.2	77057.5	19479.9	302.078	777.422	0	0	0	0	0	0	0	603	903	0
326	8	0	0	0	0	0	0	200	300	0	45.18	154.004	-754.583	94705.6	76935.4	19251	301.958	777.493	0	0	0	0	0	0	0	603	903	0
326	9	0	0	0	0	0	0	200	300	0	45.18	152.325	-754.888	94888.8	77301.6	19663	302.402	777.301	0	0	0	0	0	0	0	603	903	0
327	0	0	0	0	0	0	0	200	300	0	43.0438	150.952	-756.108	94339.4	77545.8	19388.3	302.559	778.23	0	0	0	0	0	0	0	603	903	0
327	1	0	0	0	0	0	0	200	300	0	42.8912	152.325	-758.855	94431	77301.6	19434.1	301.866	778.561	0	0	0	0	0	0	0	603	903	0
327	2	0	0	0	0	0	0	200	300	0	42.4335	151.867	-760.686	94156.4	77851	19205.2	302.343	779.222	0	0	0	0	0	0	0	603	903	0
327	3	0	0	0	0	0	0	200	300	0	43.5016	150.189	-761.907	95438	77973.1	19388.3	302.339	777.738	0	0	0	0	0	0	0	603	903	0
327	4	0	0	0	0	0	0	200	300	0	46.0956	150.799	-760.381	94614.1	77667.8	19251	302.143	778.57	0	0	0	0	0	0	0	603	903	0
327	5	0	0	0	0	0	0	200	300	0	45.0275	150.952	-764.653	93881.7	78766.5	19296.8	303.009	780.223	0	0	0	0	0	0	0	603	903	0
327	6	0	0	0	0	0	0	200	300	0	45.6378	149.579	-767.095	93698.6	78278.2	19022.1	302.045	780.853	0	0	0	0	0	0	0	603	903	0
327	7	0	0	0	0	0	0	200	300	0	45.18	148.663	-766.484	94522.6	77912	19113.6	301.649	779.68	0	0	0	0	0	0	0	603	903	0
327	8	0	0	0	0	0	0	200	300	0	45.7904	149.731	-768.926	94431	78583.4	18610.1	302.199	780.191	0	0	0	0	0	0	0	603	903	0
327	9	0	0	0	0	0	0	200	300	0	45.18	147.442	-770.757	93973.2	79315.8	18884.8	302.906	781.077	0	0	0	0	0	0	0	603	903	0
328	0	0	0	0	0	0	0	200	300	0	46.5533	146.527	-771.062	93790.1	78217.2	18701.7	301.441	781.362	0	0	0	0	0	0	0	603	903	0
328	1	0	0	0	0	0	0	200	300	0	46.8585	146.527	-773.809	93973.2	79437.9	19159.4	302.658	781.558	0	0	0	0	0	0	0	603	903	0
328	2	0	0	0	0	0	0	200	300	0	47.774	145.764	-774.724	93515.5	79193.8	18701.7	302.222	782.292	0	0	0	0	0	0	0	603	903	0
328	3	0	0	0	0	0	0	200	300	0	48.0792	143.17	-776.555	93790.1	79132.7	18793.2	301.902	782.223	0	0	0	0	0	0	0	603	903	0
328	4	0	0	0	0	0	0	200	300	0	48.3844	143.17	-773.809	93881.7	79621	18701.7	302.895	781.676	0	0	0	0	0	0	0	603	903	0
328	5	0	0	0	0	0	0	200	300	0	50.9784	142.102	-775.945	94064.8	79621	18518.6	302.612	781.774	0	0	0	0	0	0	0	603	903	0
[truncated: 2,314 more rows]
