# Supplementary material for: The Effects of an Extemporaneous Speech Dual-task on Older Adult Gait Control
Source: Research Square preprint supplement (doi:10.21203/rs.3.rs-7674245/v1), 2025-11-18
Supplement: Supplementary file 131 [file Over1ground02.xlsx]

## Sheet: Sheet1
Trajectories
		01:LFHD			01:RFHD			01:LBHD			01:RBHD			01:C7			01:T10			01:CLAV			01:STRN			01:RBAK			01:LSHO			01:LUPA			01:LELB			01:LFRM			01:LWRA			01:LWRB			01:LFIN
Frame	Sub Frame	X	Y	Z	X	Y	Z	X	Y	Z	X	Y	Z	X	Y	Z	X	Y	Z	X	Y	Z	X	Y	Z	X	Y	Z	X	Y	Z	X	Y	Z	X	Y	Z	X	Y	Z	X	Y	Z	X	Y	Z	X	Y	Z
		mm	mm	mm	mm	mm	mm	mm	mm	mm	mm	mm	mm	mm	mm	mm	mm	mm	mm	mm	mm	mm	mm	mm	mm	mm	mm	mm	mm	mm	mm	mm	mm	mm	mm	mm	mm	mm	mm	mm	mm	mm	mm	mm	mm	mm	mm	mm	mm
291	0	189.109	3177.56	1574.3	85.0034	3169.83	1569.42	193.83	3349.34	1566.15	64.7791	3320.22	1568.4	141.268	3375.31	1436.12	156.144	3474.82	1186.99	132.538	3238.52	1327.27	148.882	3189.25	1148.77	107.585	3476.84	1260.64	307.524	3301.87	1376.54	396.086	3359.91	1163.68	409.934	3353.73	1082.37	431.189	3274.65	978.763	372.71	3172.91	914.907	431.479	3206.6	893.38	417.038	3125.7	856.544
292	0	187.125	3163.17	1576.83	83.0774	3155.48	1571.69	191.736	3335.08	1569.16	62.7272	3305.9	1570.96	139.914	3361.39	1438.92	155.802	3461.11	1189.89	131.372	3224.69	1329.86	148.033	3176.42	1150.9	106.993	3463.15	1263.4	306.242	3287.55	1380	395.133	3345.26	1167	408.651	3340.59	1085.92	429.581	3262.89	981.262	370.7	3162.96	915.624	429.74	3196.24	894.795	414.497	3116.51	855.437
293	0	185.325	3148.76	1579.27	81.3317	3141.1	1573.88	189.848	3320.78	1572.08	60.8701	3291.56	1573.49	138.661	3347.46	1441.67	155.411	3447.45	1192.77	130.353	3210.87	1332.4	147.366	3163.56	1153.02	106.386	3449.47	1266.14	305.089	3273.33	1383.36	394.269	3330.89	1170.27	407.466	3327.66	1089.39	428.156	3251.39	983.691	368.981	3153.22	916.3	428.252	3186.18	896.166	412.3	3107.65	854.365
294	0	183.71	3134.33	1581.6	79.7662	3126.7	1576	188.165	3306.43	1574.93	59.2076	3277.19	1575.96	137.51	3333.51	1444.36	154.969	3433.84	1195.61	129.48	3197.07	1334.89	146.88	3150.65	1155.13	105.763	3435.81	1268.87	304.065	3259.2	1386.61	393.495	3316.78	1173.48	406.381	3314.94	1092.78	426.913	3240.16	986.049	367.553	3143.66	916.935	427.012	3176.42	897.493	410.448	3099.11	853.33
295	0	182.278	3119.88	1583.83	78.3804	3112.29	1578.05	186.688	3292.05	1577.69	57.7389	3262.8	1578.39	136.46	3319.56	1446.99	154.478	3420.29	1198.42	128.752	3183.28	1337.33	146.572	3137.71	1157.23	105.126	3422.17	1271.58	303.169	3245.15	1389.75	392.808	3302.95	1176.63	405.392	3302.45	1096.1	425.853	3229.2	988.337	366.416	3134.31	917.529	426.023	3166.96	898.774	408.943	3090.91	852.33
296	0	181.029	3105.4	1585.96	77.1732	3097.86	1580.02	185.413	3277.63	1580.36	56.4626	3248.39	1580.76	135.51	3305.6	1449.57	153.938	3406.78	1201.2	128.167	3169.51	1339.72	146.438	3124.73	1159.31	104.475	3408.54	1274.26	302.4	3231.2	1392.78	392.205	3289.4	1179.72	404.5	3290.16	1099.35	424.975	3218.5	990.552	365.572	3125.14	918.079	425.281	3157.8	900.009	407.787	3083.03	851.366
297	0	179.96	3090.9	1587.98	76.1428	3083.41	1581.91	184.338	3263.17	1582.94	55.3762	3233.94	1583.08	134.66	3291.63	1452.08	153.354	3393.31	1203.93	127.722	3155.74	1342.04	146.47	3111.7	1161.37	103.811	3394.92	1276.92	301.756	3217.33	1395.68	391.683	3276.13	1182.74	403.701	3278.09	1102.5	424.276	3208.06	992.69	365.022	3116.16	918.584	424.787	3148.93	901.193	406.984	3075.47	850.435
298	0	179.069	3076.39	1589.89	75.2864	3068.94	1583.72	183.458	3248.67	1585.43	54.4758	3219.48	1585.34	133.907	3277.66	1454.52	152.728	3379.89	1206.6	127.411	3141.99	1344.31	146.658	3098.64	1163.4	103.136	3381.32	1279.54	301.233	3203.54	1398.46	391.236	3263.14	1185.69	402.991	3266.23	1105.57	423.756	3197.88	994.747	364.768	3107.35	919.04	424.536	3140.35	902.321	406.537	3068.22	849.534
299	0	178.352	3061.85	1591.68	74.6002	3054.45	1585.43	182.767	3234.15	1587.8	53.7563	3204.99	1587.52	133.251	3263.67	1456.87	152.066	3366.51	1209.2	127.228	3128.25	1346.49	146.986	3085.53	1165.39	102.453	3367.72	1282.1	300.828	3189.82	1401.1	390.857	3250.44	1188.55	402.366	3254.58	1108.54	423.41	3187.95	996.716	364.811	3098.72	919.441	424.526	3132.06	903.386	406.451	3061.27	848.66
300	0	177.803	3047.29	1593.33	74.0791	3039.95	1587.04	182.256	3219.58	1590.04	53.2108	3190.47	1589.6	132.688	3249.67	1459.13	151.375	3353.15	1211.73	127.164	3114.51	1348.59	147.438	3072.39	1167.32	101.766	3354.14	1284.6	300.534	3176.17	1403.58	390.54	3238.01	1191.32	401.821	3243.13	1111.39	423.235	3178.28	998.586	365.151	3090.25	919.779	424.75	3124.05	904.379	406.727	3054.6	847.805
301	0	177.415	3032.71	1594.83	73.717	3025.42	1588.52	181.916	3204.99	1592.15	52.8312	3175.93	1591.58	132.215	3235.65	1461.27	150.665	3339.83	1214.15	127.208	3100.77	1350.57	147.99	3059.2	1169.18	101.081	3340.55	1287.01	300.347	3162.57	1405.89	390.276	3225.86	1193.97	401.35	3231.86	1114.12	423.225	3168.84	1000.35	365.785	3081.92	920.043	425.201	3116.3	905.29	407.363	3048.19	846.961
302	0	177.182	3018.11	1596.17	73.5069	3010.88	1589.87	181.733	3190.38	1594.09	52.6082	3161.37	1593.44	131.83	3221.62	1463.27	149.945	3326.52	1216.44	127.351	3087.02	1352.44	148.622	3045.97	1170.93	100.405	3326.97	1289.3	300.258	3149.01	1408.01	390.06	3213.98	1196.5	400.946	3220.77	1116.71	423.374	3159.62	1001.99	366.709	3073.73	920.219	425.868	3108.81	906.105	408.356	3042.02	846.116
303	0	177.094	3003.5	1597.33	73.4405	2996.32	1591.06	181.696	3175.75	1595.84	52.5313	3146.78	1595.14	131.529	3207.56	1465.11	149.227	3313.22	1218.58	127.579	3073.27	1354.15	149.308	3032.69	1172.57	99.7453	3313.38	1291.47	300.26	3135.48	1409.91	389.883	3202.33	1198.87	400.606	3209.83	1119.14	423.674	3150.62	1003.49	367.912	3065.67	920.291	426.74	3101.55	906.809	409.694	3036.08	845.256
304	0	177.143	2988.87	1598.29	73.5096	2981.73	1592.09	181.79	3161.1	1597.39	52.5896	3132.17	1596.66	131.31	3193.48	1466.77	148.524	3299.92	1220.56	127.88	3059.5	1355.69	150.025	3019.37	1174.05	99.111	3299.78	1293.47	300.345	3121.96	1411.58	389.741	3190.9	1201.08	400.324	3199.03	1121.39	424.119	3141.82	1004.84	369.384	3057.72	920.241	427.805	3094.51	907.388	411.362	3030.32	844.363
305	0	177.319	2974.23	1599.04	73.7051	2967.13	1592.92	182.002	3146.44	1598.71	52.7719	3117.53	1597.99	131.168	3179.37	1468.22	147.849	3286.61	1222.33	128.242	3045.71	1357.04	150.747	3006.02	1175.34	98.5116	3286.17	1295.28	300.505	3108.44	1412.99	389.628	3179.65	1203.09	400.097	3188.35	1123.44	424.698	3133.18	1006.03	371.107	3049.88	920.048	429.046	3087.67	907.823	413.337	3024.72	843.418
306	0	177.614	2959.57	1599.56	74.0186	2952.5	1593.54	182.319	3131.76	1599.77	53.067	3102.87	1599.09	131.101	3165.22	1469.45	147.215	3273.28	1223.88	128.651	3031.89	1358.15	151.454	2992.62	1176.42	97.9575	3272.54	1296.89	300.732	3094.89	1414.13	389.542	3168.53	1204.88	399.922	3177.75	1125.27	425.401	3124.7	1007.02	373.059	3042.12	919.694	430.447	3081.01	908.098	415.594	3019.27	842.401
307	0	178.019	2944.89	1599.83	74.4418	2937.85	1593.93	182.728	3117.08	1600.55	53.4645	3088.18	1599.94	131.107	3151.02	1470.43	146.635	3259.93	1225.19	129.097	3018.03	1359.02	152.126	2979.18	1177.26	97.4594	3258.88	1298.26	301.019	3081.31	1414.96	389.481	3157.49	1206.44	399.798	3167.2	1126.86	426.22	3116.34	1007.82	375.217	3034.44	919.156	431.991	3074.5	908.196	418.098	3013.92	841.289
308	0	178.526	2930.2	1599.83	74.9673	2923.17	1594.07	183.22	3102.39	1601.03	53.9546	3073.47	1600.52	131.184	3136.78	1471.13	146.124	3246.54	1226.23	129.569	3004.12	1359.6	152.746	2965.7	1177.82	97.0282	3245.18	1299.37	301.359	3067.67	1415.47	389.448	3146.5	1207.73	399.724	3156.68	1128.19	427.143	3108.08	1008.4	377.551	3026.83	918.414	433.66	3068.1	908.101	420.814	3008.66	840.061
309	0	179.13	2915.49	1599.56	75.5889	2908.47	1593.95	183.786	3087.69	1601.19	54.5293	3058.72	1600.8	131.333	3122.48	1471.54	145.694	3233.1	1226.98	130.06	2990.16	1359.89	153.301	2952.19	1178.07	96.6747	3231.45	1300.21	301.746	3053.96	1415.65	389.445	3135.5	1208.73	399.701	3146.15	1129.25	428.159	3099.88	1008.75	380.031	3019.28	917.449	435.436	3061.8	907.799	423.702	3003.45	838.695
310	0	179.824	2900.77	1599.01	76.3015	2893.74	1593.57	184.418	3072.99	1601.01	55.1817	3043.95	1600.78	131.553	3108.12	1471.65	145.355	3219.6	1227.43	130.562	2976.13	1359.85	153.784	2938.64	1177.99	96.4095	3217.66	1300.75	302.177	3040.17	1415.47	389.478	3124.44	1209.43	399.73	3135.58	1130.01	429.258	3091.71	1008.86	382.625	3011.77	916.243	437.299	3055.56	907.277	426.721	2998.27	837.171
311	0	180.605	2886.04	1598.16	77.1018	2878.98	1592.9	185.112	3058.28	1600.48	55.9072	3029.15	1600.43	131.846	3093.69	1471.45	145.12	3206.04	1227.57	131.072	2962.03	1359.47	154.187	2925.04	1177.57	96.2425	3203.81	1300.99	302.648	3026.27	1414.94	389.554	3113.27	1209.81	399.813	3124.93	1130.46	430.428	3083.54	1008.72	385.301	3004.29	914.782	439.231	3049.35	906.525	429.829	2993.09	835.472
312	0	181.471	2871.28	1597.03	77.9878	2864.19	1591.96	185.864	3043.56	1599.6	56.7032	3014.33	1599.75	132.217	3079.19	1470.92	144.996	3192.39	1227.4	131.587	2947.85	1358.74	154.511	2911.4	1176.77	96.1828	3189.89	1300.91	303.16	3012.25	1414.04	389.682	3101.96	1209.86	399.952	3114.17	1130.6	431.66	3075.33	1008.31	388.025	2996.84	913.054	441.215	3043.14	905.535	432.986	2987.9	833.581
313	0	182.422	2856.51	1595.6	78.9594	2849.37	1590.74	186.674	3028.83	1598.36	57.569	2999.47	1598.74	132.669	3064.6	1470.07	144.991	3178.66	1226.9	132.111	2933.58	1357.65	154.757	2897.71	1175.61	96.2383	3175.89	1300.51	303.714	2998.1	1412.77	389.871	3090.47	1209.56	400.148	3103.27	1130.41	432.941	3067.05	1007.65	390.768	2989.4	911.05	443.233	3036.89	904.304	436.155	2982.66	831.487
314	0	183.46	2841.72	1593.9	80.0182	2834.52	1589.24	187.543	3014.1	1596.77	58.5067	2984.58	1597.41	133.208	3049.94	1468.91	145.11	3164.82	1226.08	132.645	2919.21	1356.21	154.932	2883.95	1174.07	96.415	3161.79	1299.79	304.314	2983.81	1411.15	390.13	3078.75	1208.91	400.403	3092.2	1129.89	434.262	3058.66	1006.71	393.5	2981.95	908.766	445.27	3030.57	902.832	439.299	2977.35	829.183
315	0	184.588	2826.91	1591.94	81.1673	2819.64	1587.49	188.475	2999.36	1594.85	59.5202	2969.67	1595.75	133.841	3035.19	1467.44	145.355	3150.88	1224.95	133.199	2904.74	1354.41	155.044	2870.11	1172.16	96.7176	3147.6	1298.76	304.964	2969.37	1409.18	390.468	3066.78	1207.91	400.718	3080.93	1129.04	435.612	3050.12	1005.52	396.196	2974.49	906.202	447.311	3024.15	901.123	442.389	2971.95	826.664
316	0	185.81	2812.08	1589.74	82.4116	2804.71	1585.49	189.479	2984.62	1592.61	60.6158	2954.72	1593.79	134.576	3020.34	1465.68	145.727	3136.82	1223.53	133.782	2890.16	1352.27	155.107	2856.19	1169.9	97.1482	3133.29	1297.44	305.673	2954.77	1406.88	390.893	3054.55	1206.55	401.093	3069.43	1127.87	436.982	3041.42	1004.08	398.832	2966.99	903.364	449.343	3017.58	899.184	445.397	2966.45	823.932
317	0	187.133	2797.21	1587.32	83.7572	2789.75	1583.29	190.565	2969.85	1590.08	61.8014	2939.74	1591.56	135.421	3005.41	1463.65	146.224	3122.64	1221.83	134.406	2875.46	1349.82	155.136	2842.17	1167.32	97.707	3118.85	1295.84	306.448	2940.02	1404.26	391.412	3042.02	1204.85	401.528	3057.69	1126.38	438.363	3032.5	1002.38	401.389	2959.42	900.262	451.355	3010.84	897.028	448.301	2960.81	820.991
318	0	188.565	2782.32	1584.71	85.2114	2774.75	1580.89	191.744	2955.07	1587.29	63.0865	2924.73	1589.08	136.385	2990.38	1461.39	146.839	3108.31	1219.87	135.087	2860.63	1347.08	155.15	2828.03	1164.44	98.3919	3104.29	1293.98	307.301	2925.12	1401.36	392.03	3029.19	1202.82	402.02	3045.69	1124.58	439.746	3023.34	1000.46	403.853	2951.77	896.914	453.336	3003.89	894.671	451.083	2955	817.852
319	0	190.114	2767.38	1581.96	86.7822	2759.7	1578.35	193.03	2940.25	1584.28	64.4817	2909.68	1586.39	137.475	2975.25	1458.92	147.565	3093.85	1217.7	135.84	2845.68	1344.1	155.171	2813.76	1161.3	99.1983	3089.58	1291.89	308.242	2910.06	1398.22	392.749	3016.05	1200.47	402.568	3033.4	1122.49	441.123	3013.91	998.33	406.211	2943.99	893.34	455.279	2996.68	892.132	453.73	2949.02	814.532
320	0	191.788	2752.4	1579.1	88.4779	2744.61	1575.7	194.436	2925.4	1581.09	65.9981	2894.59	1583.54	138.699	2960.02	1456.28	148.392	3079.24	1215.33	136.682	2830.59	1340.93	155.222	2799.34	1157.96	100.119	3074.73	1289.63	309.282	2894.86	1394.86	393.569	3002.59	1197.83	403.167	3020.83	1120.14	442.485	3004.18	996.009	408.455	2936.06	889.571	457.174	2989.19	889.435	456.232	2942.81	811.051
321	0	193.597	2737.38	1576.18	90.3069	2729.46	1572.98	195.976	2910.5	1577.78	67.6467	2879.46	1580.56	140.063	2944.7	1453.53	149.308	3064.47	1212.83	137.632	2815.37	1337.6	155.328	2784.77	1154.46	101.146	3059.73	1287.22	310.432	2879.54	1391.34	394.488	2988.83	1194.93	403.813	3007.96	1117.56	443.827	2994.13	993.524	410.579	2927.93	885.638	459.016	2981.37	886.609	458.581	2936.36	807.435
322	0	195.547	2722.29	1573.25	92.2768	2714.26	1570.25	197.663	2895.55	1574.39	69.4378	2864.27	1577.52	141.571	2929.28	1450.71	150.299	3049.54	1210.22	138.707	2800.01	1334.18	155.519	2770.02	1150.87	102.268	3044.57	1284.71	311.701	2864.1	1387.71	395.502	2974.76	1191.81	404.502	2994.8	1114.78	445.141	2983.73	990.906	412.578	2919.56	881.582	460.798	2973.18	883.685	460.776	2929.63	803.717
323	0	197.646	2707.15	1570.35	94.3942	2699	1567.55	199.507	2880.54	1570.98	71.3805	2849.03	1574.46	143.226	2913.76	1447.87	151.35	3034.46	1207.57	139.921	2784.51	1330.74	155.82	2755.1	1147.25	103.472	3029.25	1282.17	313.096	2848.55	1384.02	396.604	2960.4	1188.5	405.226	2981.33	1111.84	446.42	2972.95	988.186	414.45	2910.91	877.445	462.517	2964.59	880.695	462.813	2922.57	799.933
324	0	199.9	2691.93	1567.53	96.6641	2683.67	1564.94	201.516	2865.45	1567.62	73.4821	2833.73	1571.46	145.027	2898.15	1445.07	152.444	3019.21	1204.92	141.289	2768.88	1327.34	156.26	2739.99	1143.67	104.744	3013.79	1279.64	314.624	2832.92	1380.32	397.782	2945.77	1185.06	405.98	2967.56	1108.78	447.658	2961.79	985.401	416.194	2901.92	873.278	464.167	2955.56	877.676	464.694	2915.14	796.121
325	0	202.31	2676.65	1564.86	99.0893	2668.28	1562.46	203.698	2850.28	1564.36	75.7473	2818.37	1568.55	146.97	2882.44	1442.36	153.565	3003.8	1202.34	142.821	2753.11	1324.04	156.864	2724.7	1140.19	106.069	2998.17	1277.18	316.287	2817.22	1376.67	399.027	2930.9	1181.53	406.757	2953.5	1105.66	448.85	2950.22	982.586	417.808	2892.55	869.13	465.744	2946.05	874.666	466.418	2907.29	792.327
326	0	204.879	2661.28	1562.36	101.67	2652.82	1560.16	206.054	2835.03	1561.26	78.1778	2802.93	1565.81	149.05	2866.65	1439.79	154.698	2988.24	1199.87	144.523	2737.23	1320.9	157.656	2709.21	1136.88	107.432	2982.41	1274.85	318.085	2801.47	1373.14	400.323	2915.79	1177.99	407.55	2939.16	1102.51	449.991	2938.23	979.781	419.293	2882.75	865.055	467.243	2936.03	871.702	467.988	2898.98	788.594
327	0	207.603	2645.84	1560.09	104.404	2637.29	1558.09	208.584	2819.69	1558.38	80.7719	2787.42	1563.28	151.256	2850.77	1437.42	155.826	2972.54	1197.58	146.397	2721.23	1318.01	158.654	2693.54	1133.81	108.816	2966.52	1272.71	320.015	2785.69	1369.78	401.656	2900.49	1174.49	408.353	2924.55	1099.4	451.076	2925.81	977.023	420.648	2872.47	861.107	468.659	2925.46	868.821	469.404	2890.14	784.969
328	0	210.476	2630.32	1558.09	107.285	2621.69	1556.29	211.28	2804.27	1555.76	83.5239	2771.83	1561.03	153.578	2834.83	1435.3	156.935	2956.7	1195.51	148.441	2705.12	1315.4	159.872	2677.68	1131.04	110.206	2950.5	1270.8	322.068	2769.91	1366.65	403.012	2885.01	1171.09	409.16	2909.67	1096.38	452.101	2912.96	974.351	421.872	2861.67	857.341	469.989	2914.31	866.061	470.669	2880.73	781.499
329	0	213.488	2614.72	1556.38	110.304	2606.02	1554.78	214.133	2788.75	1553.46	86.4244	2756.17	1559.09	155.999	2818.82	1433.46	158.012	2940.75	1193.71	150.646	2688.94	1313.14	161.315	2661.64	1128.62	111.587	2934.37	1269.18	324.232	2754.13	1363.8	404.375	2869.39	1167.85	409.965	2894.56	1093.48	453.063	2899.66	971.802	422.965	2850.31	853.807	471.227	2902.56	863.455	471.782	2870.68	778.226
330	0	216.626	2599.04	1555	113.447	2590.29	1553.61	217.129	2773.15	1551.52	89.4593	2740.43	1557.5	158.501	2802.77	1431.95	159.047	2924.69	1192.23	152.998	2672.68	1311.26	162.984	2645.45	1126.61	112.946	2918.16	1267.89	326.494	2738.39	1361.29	405.732	2853.66	1164.83	410.766	2879.23	1090.77	453.961	2885.92	969.409	423.927	2838.35	850.556	472.368	2890.18	861.034	472.744	2859.95	775.193
331	0	219.874	2583.3	1553.97	116.697	2574.5	1552.79	220.248	2757.48	1549.96	92.6106	2724.63	1556.31	161.065	2786.69	1430.8	160.031	2908.56	1191.09	155.48	2656.39	1309.82	164.871	2629.11	1125.05	114.27	2901.87	1266.96	328.835	2722.69	1359.14	407.071	2837.84	1162.09	411.559	2863.69	1088.29	454.792	2871.74	967.205	424.757	2825.76	847.63	473.408	2877.15	858.826	473.554	2848.48	772.437
332	0	223.209	2567.51	1553.29	120.034	2558.66	1552.33	223.467	2741.74	1548.83	95.8563	2708.77	1555.53	163.669	2770.6	1430.02	160.958	2892.37	1190.33	158.069	2640.07	1308.83	166.96	2612.66	1123.97	115.549	2885.53	1266.4	331.234	2707.06	1357.39	408.382	2821.95	1159.68	412.342	2847.96	1086.07	455.558	2857.12	965.215	425.457	2812.52	845.066	474.341	2863.47	856.853	474.213	2836.22	769.988
333	0	226.607	2551.68	1552.97	123.434	2542.79	1552.23	226.76	2725.95	1548.12	99.1709	2692.87	1555.17	166.289	2754.52	1429.63	161.824	2876.15	1189.95	160.738	2623.77	1308.32	169.229	2596.12	1123.38	116.775	2869.17	1266.25	333.669	2691.52	1356.07	409.659	2806.01	1157.62	413.117	2832.07	1084.15	456.259	2842.07	963.464	426.026	2798.6	842.896	475.163	2849.12	855.132	474.721	2823.14	767.871
334	0	230.041	2535.82	1553.01	126.869	2526.91	1552.5	230.096	2710.12	1547.85	102.526	2676.94	1555.25	168.904	2738.48	1429.64	162.63	2859.93	1189.97	163.459	2607.49	1308.28	171.648	2579.54	1123.3	117.94	2852.81	1266.5	336.115	2676.08	1355.2	410.898	2790.05	1155.96	413.884	2816.03	1082.55	456.897	2826.59	961.966	426.469	2783.99	841.141	475.872	2834.11	853.675	475.076	2809.2	766.104
335	0	233.483	2519.95	1553.39	130.311	2511.02	1553.12	233.444	2694.28	1548.02	105.89	2660.99	1555.75	171.49	2722.48	1430.04	163.376	2843.73	1190.38	166.201	2591.29	1308.71	174.184	2562.94	1123.71	119.043	2836.47	1267.14	338.547	2660.74	1354.77	412.098	2774.08	1154.71	414.647	2799.86	1081.28	457.476	2810.71	960.735	426.788	2768.68	839.815	476.465	2818.44	852.487	475.281	2794.38	764.698
336	0	236.899	2504.09	1554.1	133.728	2495.14	1554.08	236.771	2678.44	1548.61	109.232	2645.05	1556.67	174.026	2706.57	1430.81	164.067	2827.58	1191.17	168.931	2575.17	1309.6	176.799	2546.37	1124.6	120.082	2820.2	1268.16	340.941	2645.53	1354.78	413.259	2758.1	1153.86	415.411	2783.59	1080.35	458	2794.44	959.776	426.987	2752.69	838.923	476.939	2802.11	851.57	475.336	2778.66	763.655
337	0	240.26	2488.27	1555.11	137.089	2479.3	1555.34	240.043	2662.63	1549.61	112.52	2629.14	1557.98	176.491	2690.76	1431.94	164.711	2811.51	1192.31	171.62	2559.17	1310.92	179.452	2529.88	1125.93	121.059	2804	1269.54	343.273	2630.44	1355.21	414.386	2742.13	1153.43	416.18	2767.22	1079.77	458.474	2777.78	959.089	427.072	2736.02	838.462	477.296	2785.15	850.919	475.245	2762.03	762.973
338	0	243.534	2472.51	1556.41	140.363	2463.52	1556.87	243.229	2646.87	1550.97	115.72	2613.29	1559.65	178.867	2675.06	1433.39	165.318	2795.53	1193.78	174.237	2543.31	1312.64	182.099	2513.5	1127.67	121.98	2787.92	1271.23	345.522	2615.48	1356.05	415.483	2726.17	1153.39	416.96	2750.78	1079.51	458.903	2760.76	958.669	427.05	2718.69	838.423	477.534	2767.58	850.525	475.012	2744.51	762.643
339	0	246.692	2456.81	1557.95	143.519	2447.8	1558.65	246.297	2631.17	1552.67	118.805	2597.51	1561.63	181.139	2659.49	1435.14	165.898	2779.68	1195.55	176.754	2527.6	1314.7	184.698	2497.28	1129.76	122.851	2771.96	1273.21	347.669	2600.65	1357.25	416.557	2710.23	1153.72	417.757	2734.28	1079.57	459.293	2743.41	958.506	426.928	2700.72	838.788	477.657	2749.42	850.376	474.643	2726.09	762.653
340	0	249.705	2441.21	1559.7	146.531	2432.18	1560.64	249.22	2615.56	1554.67	121.745	2581.82	1563.9	183.293	2644.06	1437.14	166.464	2763.97	1197.56	179.147	2512.06	1317.07	187.205	2481.23	1132.15	123.681	2756.16	1275.44	349.697	2585.94	1358.78	417.615	2694.3	1154.38	418.577	2717.74	1079.91	459.649	2725.73	958.589	426.714	2682.14	839.537	477.667	2730.7	850.458	474.145	2706.82	762.99
341	0	252.551	2425.71	1561.64	149.374	2416.67	1562.8	251.974	2600.05	1556.92	124.517	2566.24	1566.39	185.319	2628.79	1439.36	167.028	2748.41	1199.8	181.393	2496.7	1319.69	189.582	2465.39	1134.77	124.479	2740.52	1277.87	351.595	2571.34	1360.6	418.663	2678.39	1155.35	419.425	2701.15	1080.52	459.977	2707.75	958.9	426.416	2662.99	840.647	477.566	2711.46	850.755	473.526	2686.71	763.639
342	0	255.209	2410.34	1563.72	152.03	2401.28	1565.09	254.538	2584.65	1559.37	127.102	2550.78	1569.06	187.208	2613.67	1441.75	167.603	2733.01	1202.21	183.476	2481.52	1322.5	191.793	2449.78	1137.57	125.253	2725.07	1280.45	353.353	2556.84	1362.66	419.705	2662.49	1156.58	420.306	2684.54	1081.37	460.283	2689.49	959.421	426.041	2643.31	842.092	477.36	2691.72	851.251	472.794	2665.82	764.587
343	0	257.664	2395.09	1565.91	154.481	2386.01	1567.48	256.899	2569.38	1561.98	129.484	2535.45	1571.86	188.958	2598.71	1444.28	168.198	2717.79	1204.75	185.382	2466.52	1325.46	193.806	2434.41	1140.49	126.013	2709.79	1283.15	354.966	2542.43	1364.91	420.745	2646.6	1158.02	421.224	2667.91	1082.41	460.569	2670.97	960.135	425.597	2623.13	843.848	477.053	2671.53	851.932	471.96	2644.18	765.824
344	0	259.906	2379.98	1568.18	156.719	2370.88	1569.93	259.044	2554.24	1564.7	131.652	2520.27	1574.75	190.564	2583.89	1446.9	168.822	2702.74	1207.39	187.101	2451.69	1328.51	195.596	2419.29	1143.47	126.767	2694.71	1285.93	356.431	2528.1	1367.32	421.786	2630.72	1159.65	422.181	2651.26	1083.62	460.841	2652.22	961.02	425.09	2602.52	845.89	476.651	2650.91	852.784	471.032	2621.86	767.342
345	0	261.929	2365	1570.5	158.737	2355.89	1572.4	260.97	2539.24	1567.49	133.602	2505.23	1577.69	192.027	2569.23	1449.58	169.484	2687.86	1210.09	188.629	2437.03	1331.61	197.147	2404.4	1146.47	127.521	2679.81	1288.74	357.749	2513.84	1369.83	422.829	2614.84	1161.42	423.178	2634.59	1084.96	461.101	2633.24	962.059	424.527	2581.5	848.198	476.16	2629.91	853.796	470.022	2598.91	769.135
346	0	263.732	2350.16	1572.84	160.534	2341.02	1574.87	262.676	2524.36	1570.32	135.332	2490.32	1580.62	193.35	2554.7	1452.28	170.186	2673.16	1212.8	189.966	2422.54	1334.7	198.448	2389.75	1149.45	128.28	2665.09	1291.55	358.923	2499.62	1372.42	423.872	2598.96	1163.29	424.216	2617.91	1086.41	461.353	2614.06	963.233	423.913	2560.13	850.751	475.586	2608.57	854.958	468.938	2575.39	771.202
347	0	265.317	2335.45	1575.16	162.113	2326.29	1577.3	264.166	2509.62	1573.13	136.847	2475.56	1583.51	194.537	2540.3	1454.97	170.932	2658.61	1215.51	191.114	2408.18	1337.76	199.497	2375.3	1152.37	129.048	2650.54	1294.32	359.96	2485.43	1375.04	424.914	2583.06	1165.23	425.293	2601.22	1087.92	461.598	2594.7	964.524	423.254	2538.45	853.532	474.937	2586.9	856.262	467.79	2551.36	773.541
348	0	266.692	2320.87	1577.44	163.48	2311.68	1579.65	265.448	2494.99	1575.91	138.152	2460.92	1586.34	195.595	2526.01	1457.61	171.72	2644.22	1218.18	192.081	2393.95	1340.75	200.297	2361.06	1155.21	129.828	2636.16	1297.03	360.866	2471.28	1377.66	425.952	2567.16	1167.21	426.408	2584.52	1089.49	461.837	2575.16	965.914	422.553	2516.5	856.526	474.221	2564.96	857.701	466.586	2526.9	776.151
349	0	267.865	2306.4	1579.66	164.645	2297.19	1581.92	266.534	2480.48	1578.62	139.26	2446.4	1589.06	196.532	2511.83	1460.17	172.551	2629.96	1220.77	192.877	2379.84	1343.64	200.862	2346.99	1157.96	130.622	2621.91	1299.65	361.653	2457.13	1380.24	426.984	2551.24	1169.2	427.559	2567.8	1091.07	462.073	2555.47	967.386	421.814	2494.33	859.717	473.444	2542.76	859.269	465.334	2502.06	779.032
350	0	268.847	2292.04	1581.78	165.619	2282.81	1584.06	267.437	2466.08	1581.23	140.182	2432	1591.65	197.357	2497.75	1462.63	173.419	2615.83	1223.25	193.516	2365.83	1346.4	201.209	2333.06	1160.58	131.428	2607.8	1302.15	362.329	2443	1382.77	428.007	2535.31	1171.18	428.742	2551.06	1092.64	462.306	2535.64	968.924	421.041	2471.97	863.091	472.616	2520.34	860.96	464.04	2476.91	782.178
351	0	269.65	2277.78	1583.79	166.413	2268.52	1586.07	268.174	2451.77	1583.71	140.934	2417.69	1594.08	198.079	2483.75	1464.96	174.319	2601.8	1225.61	194.013	2351.9	1349.01	201.361	2319.26	1163.08	132.247	2593.8	1304.5	362.907	2428.87	1385.22	429.019	2519.36	1173.11	429.955	2534.31	1094.17	462.536	2515.68	970.509	420.236	2449.47	866.631	471.745	2497.72	862.765	462.711	2451.52	785.581
352	0	270.289	2263.6	1585.66	167.041	2254.32	1587.91	268.763	2437.55	1586.05	141.532	2403.47	1596.34	198.708	2469.81	1467.13	175.246	2587.86	1227.81	194.385	2338.04	1351.46	201.346	2305.55	1165.44	133.075	2579.9	1306.69	363.397	2414.73	1387.56	430.019	2503.4	1174.98	431.196	2517.52	1095.65	462.765	2495.61	972.125	419.402	2426.85	870.319	470.838	2474.93	864.676	461.35	2425.95	789.228
353	0	270.777	2249.48	1587.38	167.516	2240.19	1589.58	269.22	2423.39	1588.21	141.991	2389.33	1598.4	199.255	2455.94	1469.13	176.191	2574	1229.83	194.65	2324.24	1353.72	201.196	2291.91	1167.65	133.91	2566.07	1308.68	363.812	2400.59	1389.78	431.008	2487.42	1176.76	432.46	2500.7	1097.05	462.993	2475.42	973.754	418.542	2404.15	874.135	469.906	2451.99	866.683	459.96	2400.25	793.1
354	0	271.126	2235.43	1588.93	167.851	2226.14	1591.05	269.562	2409.3	1590.19	142.327	2375.27	1600.24	199.728	2442.11	1470.92	177.145	2560.19	1231.66	194.825	2310.47	1355.77	200.942	2278.33	1169.69	134.746	2552.3	1310.47	364.161	2386.45	1391.83	431.986	2471.43	1178.42	433.745	2483.84	1098.34	463.22	2455.15	975.378	417.659	2381.4	878.054	468.955	2428.93	868.772	458.544	2374.47	797.172
355	0	271.35	2221.42	1590.29	168.06	2212.14	1592.32	269.806	2395.27	1591.95	142.555	2361.26	1601.84	200.136	2428.32	1472.51	178.098	2546.43	1233.26	194.927	2296.74	1357.61	200.619	2264.77	1171.53	135.576	2538.57	1312.03	364.455	2372.3	1393.72	432.955	2455.42	1179.94	435.049	2466.94	1099.51	463.449	2434.79	976.976	416.755	2358.63	882.05	467.994	2405.77	870.927	457.104	2348.68	801.415
356	0	271.46	2207.45	1591.45	168.152	2198.18	1593.36	269.967	2381.28	1593.49	142.69	2347.31	1603.2	200.488	2414.55	1473.86	179.04	2532.69	1234.64	194.975	2283.02	1359.21	200.261	2251.23	1173.18	136.395	2524.87	1313.35	364.703	2358.15	1395.41	433.918	2439.4	1181.3	436.367	2449.99	1100.54	463.678	2414.36	978.531	415.834	2335.85	886.093	467.03	2382.54	873.131	455.643	2322.92	805.795
357	0	271.468	2193.5	1592.39	168.139	2184.27	1594.18	270.056	2367.32	1594.79	142.742	2333.39	1604.31	200.788	2400.8	1474.97	179.959	2518.98	1235.76	194.982	2269.31	1360.56	199.901	2237.69	1174.59	137.193	2511.18	1314.42	364.912	2343.99	1396.88	434.878	2423.36	1182.48	437.697	2432.99	1101.4	463.908	2393.88	980.025	414.898	2313.11	890.151	466.07	2359.26	875.364	454.162	2297.22	810.272
358	0	271.383	2179.57	1593.11	168.031	2170.39	1594.76	270.084	2353.38	1595.83	142.722	2319.52	1605.15	201.042	2387.06	1475.82	180.842	2505.26	1236.63	194.963	2255.6	1361.65	199.569	2224.14	1175.75	137.961	2497.48	1315.24	365.087	2329.83	1398.13	435.835	2407.3	1183.46	439.035	2415.91	1102.08	464.14	2373.35	981.438	413.951	2290.42	894.19	465.123	2335.96	877.605	452.663	2271.64	814.806
359	0	271.212	2165.65	1593.6	167.835	2156.54	1595.09	270.059	2339.47	1596.62	142.639	2305.67	1605.71	201.253	2373.31	1476.42	181.678	2491.55	1237.24	194.929	2241.88	1362.45	199.291	2210.57	1176.64	138.689	2483.77	1315.79	365.232	2315.68	1399.13	436.791	2391.22	1184.22	440.375	2398.77	1102.57	464.373	2352.79	982.755	412.996	2267.81	898.176	464.192	2312.65	879.832	451.15	2246.2	819.356
360	0	270.962	2151.73	1593.85	167.558	2142.7	1595.19	269.987	2325.56	1597.14	142.498	2291.85	1606	201.421	2359.56	1476.75	182.453	2477.82	1237.58	194.888	2228.13	1362.96	199.091	2196.97	1177.23	139.365	2470.05	1316.07	365.349	2301.52	1399.87	437.745	2375.1	1184.75	441.712	2381.56	1102.85	464.607	2332.21	983.96	412.038	2245.3	902.072	463.286	2289.37	882.023	449.627	2220.95	823.878
361	0	270.64	2137.8	1593.86	167.206	2128.87	1595.03	269.87	2311.66	1597.38	142.304	2278.04	1606.01	201.546	2345.8	1476.82	183.155	2464.07	1237.64	194.847	2214.36	1363.18	198.986	2183.33	1177.52	139.98	2456.29	1316.08	365.438	2287.37	1400.35	438.693	2358.95	1185.04	443.039	2364.27	1102.92	464.841	2311.64	985.039	411.081	2222.91	905.845	462.408	2266.15	884.157	448.1	2195.91	828.333
362	0	270.247	2123.87	1593.63	166.784	2115.05	1594.63	269.711	2297.76	1597.36	142.06	2264.24	1605.75	201.626	2332.02	1476.62	183.772	2450.28	1237.44	194.808	2200.56	1363.09	198.989	2169.65	1177.48	140.52	2442.5	1315.83	365.496	2273.22	1400.56	439.63	2342.76	1185.09	444.349	2346.9	1102.78	465.073	2291.08	985.982	410.129	2200.66	909.465	461.565	2243.01	886.213	446.577	2171.12	832.682
363	0	269.787	2109.92	1593.16	166.293	2101.23	1593.98	269.508	2283.85	1597.07	141.766	2250.44	1605.23	201.655	2318.22	1476.17	184.293	2436.46	1236.96	194.773	2186.72	1362.7	199.105	2155.91	1177.13	140.977	2428.68	1315.31	365.521	2259.08	1400.51	440.549	2326.52	1184.89	445.631	2329.47	1102.42	465.302	2270.55	986.779	409.187	2178.58	912.901	460.761	2219.99	888.173	445.065	2146.59	836.889
364	0	269.261	2095.96	1592.46	165.735	2087.4	1593.1	269.259	2269.93	1596.52	141.421	2236.65	1604.44	201.629	2304.4	1475.46	184.708	2422.6	1236.22	194.739	2172.84	1362.01	199.335	2142.1	1176.46	141.338	2414.81	1314.53	365.506	2244.94	1400.18	441.441	2310.23	1184.46	446.876	2311.97	1101.84	465.524	2250.08	987.425	408.26	2156.69	916.128	460.001	2197.1	890.019	443.574	2122.36	840.922
365	0	268.667	2081.98	1591.53	165.111	2073.57	1591.99	268.958	2255.99	1595.71	141.022	2222.85	1603.4	201.54	2290.56	1474.5	185.008	2408.68	1235.22	194.7	2158.91	1361.04	199.672	2128.21	1175.48	141.594	2400.89	1313.49	365.446	2230.81	1399.61	442.293	2293.88	1183.79	448.071	2294.41	1101.06	465.737	2229.69	987.915	407.353	2135.01	919.125	459.288	2174.39	891.737	442.115	2098.44	844.754
366	0	268.004	2067.99	1590.39	164.419	2059.73	1590.68	268.602	2242.04	1594.67	140.565	2209.04	1602.13	201.382	2276.69	1473.32	185.187	2394.7	1233.97	194.648	2144.93	1359.79	200.104	2114.23	1174.22	141.739	2386.93	1312.21	365.333	2216.68	1398.78	443.094	2277.48	1182.89	449.205	2276.81	1100.09	465.937	2209.39	988.248	406.471	2113.54	921.876	458.627	2151.88	893.314	440.7	2074.87	848.362
367	0	267.27	2053.97	1589.05	163.657	2045.87	1589.16	268.182	2228.07	1593.41	140.044	2195.22	1600.65	201.146	2262.8	1471.91	185.242	2380.65	1232.48	194.574	2130.91	1358.29	200.614	2100.14	1172.69	141.766	2372.92	1310.69	365.159	2202.55	1397.73	443.826	2261.04	1181.8	450.263	2259.19	1098.93	466.118	2189.22	988.426	405.621	2092.33	924.366	458.02	2129.6	894.742	439.342	2051.66	851.726
368	0	266.46	2039.94	1587.52	162.822	2032	1587.47	267.692	2214.08	1591.95	139.453	2181.4	1598.97	200.824	2248.89	1470.29	185.169	2366.53	1230.76	194.466	2116.83	1356.58	201.179	2085.94	1170.94	141.67	2358.84	1308.95	364.916	2188.41	1396.47	444.477	2244.56	1180.51	451.232	2241.57	1097.61	466.277	2169.2	988.451	404.807	2071.37	926.589	457.468	2107.59	896.011	438.053	2028.82	854.832
369	0	265.572	2025.9	1585.84	161.91	2018.12	1585.62	267.122	2200.08	1590.31	138.786	2167.56	1597.11	200.408	2234.95	1468.49	184.97	2352.32	1228.81	194.309	2102.7	1354.66	201.773	2071.61	1168.99	141.451	2344.71	1306.98	364.595	2174.27	1395.03	445.029	2228.06	1179.05	452.096	2223.96	1096.14	466.407	2149.36	988.328	404.036	2050.69	928.538	456.974	2085.88	897.116	436.847	2006.39	857.668
370	0	264.599	2011.83	1584.02	160.917	2004.22	1583.63	266.464	2186.05	1588.51	138.034	2153.7	1595.11	199.891	2220.99	1466.53	184.649	2338.02	1226.67	194.09	2088.51	1352.59	202.366	2057.13	1166.89	141.108	2330.52	1304.82	364.188	2160.11	1393.42	445.467	2211.54	1177.45	452.843	2206.4	1094.55	466.504	2129.72	988.066	403.312	2030.3	930.213	456.536	2064.49	898.053	435.737	1984.38	860.227
371	0	263.538	1997.75	1582.09	159.839	1990.3	1581.54	265.71	2172	1586.58	137.19	2139.82	1592.99	199.266	2207.01	1464.42	184.21	2323.61	1224.34	193.794	2074.27	1350.39	202.926	2042.5	1164.68	140.644	2316.25	1302.47	363.687	2145.94	1391.67	445.776	2195.04	1175.73	453.458	2188.91	1092.85	466.56	2110.31	987.672	402.641	2010.23	931.615	456.155	2043.46	898.82	434.737	1962.8	862.505
372	0	262.385	1983.66	1580.08	158.672	1976.36	1579.38	264.85	2157.94	1584.56	136.246	2125.92	1590.78	198.528	2193	1462.19	183.662	2309.1	1221.85	193.404	2059.97	1348.11	203.42	2027.71	1162.41	140.064	2301.92	1299.96	363.083	2131.74	1389.82	445.942	2178.58	1173.9	453.929	2171.52	1091.06	466.571	2091.17	987.157	402.026	1990.48	932.748	455.827	2022.83	899.417	433.858	1941.67	864.498
373	0	261.135	1969.55	1578.02	157.413	1962.39	1577.16	263.878	2143.85	1582.47	135.197	2112	1588.51	197.673	2178.96	1459.87	183.015	2294.48	1219.22	192.907	2045.6	1345.78	203.815	2012.75	1160.12	139.374	2287.51	1297.31	362.371	2117.5	1387.9	445.952	2162.18	1172.01	454.245	2154.26	1089.23	466.531	2072.31	986.533	401.472	1971.08	933.618	455.55	2002.62	899.844	433.113	1921.03	866.206
374	0	259.787	1955.43	1575.94	156.058	1948.4	1574.93	262.786	2129.74	1580.35	134.034	2098.05	1586.21	196.698	2164.9	1457.48	182.281	2279.74	1216.48	192.29	2031.17	1343.45	204.077	1997.62	1157.86	138.585	2273.02	1294.55	361.546	2103.23	1385.93	445.796	2145.86	1170.07	454.396	2137.15	1087.36	466.435	2053.77	985.813	400.98	1952.04	934.234	455.319	1982.85	900.103	432.509	1900.87	867.632
375	0	258.338	1941.29	1573.87	154.605	1934.38	1572.72	261.568	2115.61	1578.23	132.755	2084.07	1583.92	195.602	2150.79	1455.06	181.473	2264.87	1213.66	191.541	2016.68	1341.14	204.179	1982.32	1155.66	137.707	2258.45	1291.7	360.603	2088.91	1383.94	445.466	2129.67	1168.11	454.375	2120.22	1085.48	466.279	2035.57	985.012	400.552	1933.39	934.604	455.13	1963.57	900.199	432.055	1881.22	868.776
376	0	256.788	1927.13	1571.85	153.055	1920.32	1570.55	260.221	2101.46	1576.14	131.356	2070.05	1581.67	194.388	2136.66	1452.64	180.606	2249.89	1210.79	190.652	2002.12	1338.91	204.093	1966.87	1153.57	136.751	2243.8	1288.79	359.541	2074.54	1381.97	444.958	2113.61	1166.16	454.178	2103.5	1083.63	466.058	2017.73	984.144	400.189	1915.12	934.739	454.976	1944.8	900.138	431.755	1862.11	869.643
377	0	255.138	1912.94	1569.89	151.408	1906.23	1568.45	258.743	2087.28	1574.13	129.836	2055.99	1579.49	193.058	2122.48	1450.25	179.697	2234.79	1207.91	189.617	1987.49	1336.78	203.798	1951.26	1151.63	135.73	2229.08	1285.87	358.362	2060.1	1380.06	444.269	2097.71	1164.25	453.804	2087.01	1081.84	465.77	2000.29	983.228	399.888	1897.28	934.65	454.852	1926.56	899.926	431.611	1843.56	870.237
378	0	253.391	1898.73	1568.04	149.667	1892.08	1566.46	257.134	2073.06	1572.21	128.195	2041.88	1577.41	191.62	2108.26	1447.92	178.759	2219.57	1205.06	188.433	1972.8	1334.79	203.279	1935.51	1149.85	134.66	2214.28	1282.97	357.068	2045.6	1378.22	443.4	2081.99	1162.42	453.252	2070.76	1080.12	465.414	1983.26	982.28	399.646	1879.86	934.349	454.751	1908.87	899.573	431.621	1825.57	870.564
379	0	251.552	1884.49	1566.33	147.837	1877.89	1564.61	255.399	2058.82	1570.44	126.438	2027.72	1575.46	190.081	2093.98	1445.7	177.811	2204.26	1202.28	187.104	1958.05	1332.97	202.527	1919.64	1148.28	133.555	2199.41	1280.13	355.666	2031.02	1376.5	442.357	2066.47	1160.68	452.528	2054.78	1078.51	464.99	1966.66	981.32	399.46	1862.9	933.851	454.668	1891.77	899.091	431.781	1808.18	870.629
380	0	249.626	1870.21	1564.78	145.923	1863.65	1562.91	253.543	2044.53	1568.82	124.569	2013.5	1573.68	188.453	2079.66	1443.6	176.868	2188.86	1199.61	185.635	1943.24	1331.34	201.541	1903.67	1146.93	132.43	2184.48	1277.4	354.165	2016.37	1374.93	441.148	2051.16	1159.08	451.64	2039.08	1077.04	464.499	1950.5	980.368	399.323	1846.42	933.169	454.596	1875.27	898.492	432.081	1791.41	870.441
381	0	247.623	1855.89	1563.41	143.933	1849.35	1561.4	251.575	2030.21	1567.4	122.599	1999.21	1572.1	186.75	2065.28	1441.67	175.946	2173.38	1197.1	184.038	1928.38	1329.93	200.328	1887.63	1145.83	131.302	2169.5	1274.8	352.577	2001.63	1373.54	439.786	2036.05	1157.64	450.598	2023.67	1075.73	463.943	1934.8	979.445	399.229	1830.42	932.32	454.531	1859.38	897.794	432.511	1775.28	870.008
382	0	245.553	1841.52	1562.25	141.879	1834.98	1560.09	249.508	2015.83	1566.2	120.538	1984.85	1570.72	184.987	2050.84	1439.94	175.061	2157.86	1194.78	182.329	1913.47	1328.76	198.904	1871.55	1144.98	130.187	2154.49	1272.4	350.919	1986.82	1372.35	438.288	2021.17	1156.4	449.417	2008.55	1074.62	463.328	1919.57	978.573	399.169	1814.93	931.322	454.466	1844.11	897.013	433.055	1759.8	869.341
383	0	243.428	1827.1	1561.31	139.772	1820.55	1559.01	247.357	2001.4	1565.25	118.401	1970.43	1569.58	183.184	2036.35	1438.44	174.227	2142.3	1192.71	180.527	1898.53	1327.83	197.294	1855.46	1144.4	129.102	2139.45	1270.22	349.207	1971.93	1371.4	436.673	2006.49	1155.38	448.113	1993.74	1073.73	462.66	1904.82	977.772	399.134	1799.96	930.193	454.399	1829.49	896.17	433.694	1745.01	868.453
384	0	241.262	1812.61	1560.61	137.625	1806.05	1558.16	245.139	1986.92	1564.55	116.205	1955.92	1568.7	181.36	2021.81	1437.2	173.457	2126.74	1190.91	178.658	1883.56	1327.17	195.528	1839.4	1144.1	128.062	2124.41	1268.3	347.462	1956.97	1370.71	434.966	1992.02	1154.62	446.707	1979.22	1073.08	461.944	1890.55	977.065	399.116	1785.54	928.953	454.325	1815.5	895.286	434.409	1730.9	867.359
385	0	239.072	1798.07	1560.16	135.455	1791.49	1557.55	242.875	1972.37	1564.14	113.968	1941.35	1568.08	179.536	2007.21	1436.23	172.764	2111.2	1189.41	176.749	1868.59	1326.77	193.647	1823.41	1144.06	127.083	2109.37	1266.69	345.707	1941.94	1370.3	433.194	1977.74	1154.14	445.221	1965.01	1072.71	461.191	1876.75	976.473	399.106	1771.67	927.625	454.243	1802.15	894.385	435.177	1717.51	866.074
386	0	236.874	1783.47	1559.97	133.278	1776.86	1557.19	240.589	1957.76	1564.01	111.711	1926.7	1567.74	177.735	1992.58	1435.56	172.156	2095.7	1188.26	174.83	1853.62	1326.65	191.694	1807.53	1144.29	126.179	2094.36	1265.4	343.965	1926.86	1370.19	431.389	1963.65	1153.96	443.679	1951.09	1072.62	460.41	1863.43	976.016	399.094	1758.36	926.232	454.152	1789.45	893.491	435.973	1704.83	864.617
387	0	234.686	1768.8	1560.04	131.111	1762.17	1557.08	238.302	1943.1	1564.19	109.456	1911.99	1567.68	175.976	1977.91	1435.21	171.643	2080.27	1187.47	172.933	1838.67	1326.8	189.719	1791.8	1144.78	125.362	2079.39	1264.47	342.258	1911.73	1370.4	429.584	1949.72	1154.11	442.108	1937.46	1072.84	459.612	1850.57	975.713	399.074	1745.63	924.797	454.054	1777.37	892.628	436.773	1692.89	863.007
388	0	232.526	1754.07	1560.36	128.973	1747.42	1557.23	236.041	1928.37	1564.66	107.227	1897.21	1567.9	174.282	1963.21	1435.17	171.226	2064.93	1187.05	171.089	1823.75	1327.21	187.771	1776.25	1145.51	124.641	2064.48	1263.9	340.612	1896.58	1370.94	427.815	1935.96	1154.6	440.535	1924.1	1073.37	458.81	1838.18	975.58	399.04	1733.48	923.346	453.952	1765.9	891.821	437.552	1681.67	861.266
389	0	230.415	1739.28	1560.93	126.882	1732.62	1557.61	233.831	1913.58	1565.42	105.047	1882.38	1568.4	172.671	1948.5	1435.45	170.909	2049.69	1187.02	169.329	1808.87	1327.88	185.902	1760.92	1146.47	124.023	2049.63	1263.71	339.046	1881.41	1371.8	426.116	1922.32	1155.44	438.987	1911.02	1074.23	458.017	1826.23	975.631	398.986	1721.91	921.902	453.85	1755.04	891.093	438.287	1671.17	859.417
390	0	228.372	1724.44	1561.73	124.857	1717.78	1558.23	231.695	1898.75	1566.47	102.937	1867.5	1569.17	171.16	1933.79	1436.05	170.688	2034.59	1187.37	167.683	1794.06	1328.79	184.159	1745.83	1147.62	123.511	2034.86	1263.89	337.583	1866.26	1372.98	424.525	1908.81	1156.62	437.491	1898.19	1075.41	457.246	1814.71	975.875	398.913	1710.91	920.49	453.755	1744.74	890.466	438.958	1661.38	857.483
391	0	226.413	1709.56	1562.77	122.916	1702.9	1559.07	229.658	1883.87	1567.79	100.92	1852.58	1570.2	169.763	1919.08	1436.95	170.559	2019.61	1188.09	166.175	1779.32	1329.94	182.589	1730.98	1148.97	123.106	2020.18	1264.45	336.24	1851.13	1374.47	423.074	1895.42	1158.14	436.072	1885.61	1076.9	456.512	1803.61	976.322	398.82	1700.46	919.132	453.676	1735	889.96	439.549	1652.28	855.49
392	0	224.556	1694.65	1564.01	121.075	1688	1560.11	227.739	1868.95	1569.36	99.0156	1837.65	1571.47	168.492	1904.39	1438.15	170.513	2004.79	1189.17	164.826	1764.65	1331.3	181.227	1716.39	1150.47	122.804	2005.59	1265.36	335.031	1836.05	1376.25	421.792	1882.11	1159.98	434.752	1873.27	1078.7	455.828	1792.89	976.973	398.713	1690.57	917.851	453.623	1725.77	889.594	440.048	1643.85	853.463
393	0	222.816	1679.71	1565.45	119.349	1673.09	1561.35	225.956	1854.01	1571.16	97.24	1822.69	1572.97	167.354	1889.73	1439.62	170.541	1990.12	1190.58	163.653	1750.07	1332.85	180.106	1702.05	1152.1	122.6	1991.1	1266.61	333.97	1821.03	1378.3	420.703	1868.9	1162.14	433.551	1861.14	1080.78	455.207	1782.55	977.829	398.599	1681.19	916.666	453.607	1717.02	889.38	440.451	1636.05	851.429
394	0	221.206	1664.77	1567.05	117.75	1658.18	1562.76	224.324	1839.06	1573.17	95.6076	1807.74	1574.68	166.355	1875.11	1441.35	170.631	1975.6	1192.31	162.666	1735.58	1334.58	179.246	1687.93	1153.86	122.486	1976.71	1268.17	333.063	1806.1	1380.59	419.824	1855.78	1164.57	432.484	1849.23	1083.13	454.661	1772.55	978.886	398.489	1672.31	915.593	453.64	1708.71	889.331	440.758	1628.85	849.415
395	0	219.737	1649.82	1568.81	116.289	1643.28	1564.33	222.853	1824.09	1575.36	94.129	1792.8	1576.56	165.496	1860.53	1443.29	170.771	1961.24	1194.31	161.87	1721.18	1336.45	178.657	1674.03	1155.71	122.452	1962.42	1270.02	332.314	1791.25	1383.09	419.164	1842.74	1167.26	431.563	1837.52	1085.73	454.202	1762.88	980.137	398.398	1663.9	914.647	453.734	1700.82	889.452	440.981	1622.21	847.446
396	0	218.415	1634.88	1570.68	114.974	1628.4	1566.03	221.55	1809.14	1577.69	92.8113	1777.87	1578.6	164.778	1845.99	1445.43	170.95	1947.02	1196.56	161.263	1706.88	1338.46	178.34	1660.31	1157.65	122.487	1948.22	1272.11	331.724	1776.51	1385.75	418.726	1829.8	1170.16	430.793	1825.99	1088.53	453.839	1753.5	981.57	398.34	1655.92	913.837	453.902	1693.3	889.746	441.136	1616.07	845.548
397	0	217.245	1619.97	1572.66	113.807	1613.54	1567.83	220.418	1794.19	1580.13	91.658	1762.98	1580.77	164.196	1831.51	1447.72	171.156	1932.95	1199.01	160.839	1692.66	1340.57	178.283	1646.73	1159.65	122.582	1934.12	1274.42	331.288	1761.87	1388.55	418.5	1816.95	1173.24	430.176	1814.64	1091.52	453.581	1744.4	983.172	398.336	1648.33	913.171	454.155	1686.11	890.211	441.246	1610.38	843.744
398	0	216.229	1605.08	1574.71	112.793	1598.72	1569.72	219.454	1779.28	1582.65	90.6692	1748.12	1583.03	163.745	1817.08	1450.13	171.38	1919.01	1201.62	160.585	1678.52	1342.76	178.467	1633.26	1161.7	122.725	1920.09	1276.89	331	1747.33	1391.44	418.473	1804.21	1176.46	429.71	1803.45	1094.65	453.433	1735.54	984.926	398.405	1641.09	912.649	454.503	1679.22	890.842	441.343	1605.11	842.055
399	0	215.365	1590.24	1576.79	111.928	1583.94	1571.67	218.655	1764.4	1585.22	89.8414	1733.31	1585.36	163.416	1802.69	1452.63	171.615	1905.19	1204.35	160.488	1664.47	1345	178.862	1619.87	1163.78	122.909	1906.14	1279.49	330.85	1732.89	1394.37	418.623	1791.6	1179.78	429.388	1792.41	1097.89	453.399	1726.91	986.811	398.566	1634.16	912.271	454.956	1672.59	891.628	441.461	1600.19	840.497
400	0	214.648	1575.44	1578.9	111.21	1569.2	1573.65	218.014	1749.56	1587.79	89.1689	1718.55	1587.71	163.202	1788.36	1455.17	171.857	1891.47	1207.15	160.527	1650.49	1347.26	179.435	1606.52	1165.88	123.124	1892.26	1282.17	330.826	1718.55	1397.31	418.921	1779.12	1183.16	429.198	1781.52	1101.2	453.483	1718.47	988.804	398.84	1627.49	912.027	455.52	1666.2	892.555	441.638	1595.57	839.084
401	0	214.074	1560.7	1580.98	110.632	1554.52	1575.63	217.52	1734.77	1590.33	88.6433	1703.84	1590.06	163.092	1774.07	1457.71	172.103	1877.85	1209.97	160.684	1636.57	1349.52	180.147	1593.19	1167.98	123.366	1878.44	1284.89	330.913	1704.29	1400.21	419.338	1766.79	1186.54	429.128	1770.75	1104.55	453.684	1710.21	990.88	399.245	1621.05	911.907	456.2	1659.99	893.603	441.912	1591.2	837.822
402	0	213.633	1546.02	1583.02	110.187	1539.9	1577.57	217.162	1720.04	1592.8	88.2547	1689.19	1592.36	163.074	1759.83	1460.22	172.353	1864.31	1212.78	160.937	1622.71	1351.75	180.956	1579.86	1170.05	123.629	1864.66	1287.6	331.097	1690.11	1403.03	419.84	1754.62	1189.9	429.164	1760.1	1107.9	454.001	1702.09	993.012	399.797	1614.79	911.893	457	1653.96	894.75	442.32	1587.03	836.714
403	0	213.317	1531.4	1584.98	109.866	1525.33	1579.46	216.929	1705.36	1595.17	87.9921	1674.61	1594.59	163.139	1745.61	1462.65	172.609	1850.82	1215.52	161.264	1608.9	1353.91	181.821	1566.51	1172.07	123.912	1850.92	1290.25	331.362	1675.98	1405.74	420.397	1742.61	1193.2	429.289	1749.54	1111.21	454.431	1694.1	995.17	400.508	1608.66	911.965	457.92	1648.06	895.97	442.898	1583	835.756
404	0	213.115	1516.84	1586.84	109.659	1510.82	1581.26	216.808	1690.75	1597.4	87.844	1660.08	1596.71	163.275	1731.43	1464.96	172.874	1837.39	1218.16	161.646	1595.12	1355.98	182.704	1553.13	1174.01	124.214	1837.22	1292.81	331.694	1661.91	1408.28	420.978	1730.76	1196.38	429.488	1739.07	1114.45	454.971	1686.2	997.323	401.388	1602.62	912.098	458.959	1642.26	897.236	443.673	1579.07	834.938
405	0	213.017	1502.34	1588.55	109.555	1496.36	1582.93	216.788	1676.19	1599.45	87.7989	1645.61	1598.67	163.472	1717.27	1467.12	173.156	1823.99	1220.64	162.063	1581.37	1357.91	183.57	1539.72	1175.84	124.535	1823.54	1295.23	332.076	1647.86	1410.63	421.559	1719.07	1199.42	429.746	1728.66	1117.57	455.615	1678.37	999.44	402.441	1596.64	912.264	460.113	1636.55	898.516	444.668	1575.19	834.244
406	0	213.014	1487.9	1590.1	109.545	1481.96	1584.45	216.856	1661.7	1601.29	87.8456	1631.19	1600.45	163.721	1703.13	1469.09	173.459	1810.61	1222.94	162.499	1567.63	1359.68	184.389	1526.29	1177.52	124.88	1809.88	1297.48	332.495	1633.83	1412.74	422.118	1707.51	1202.28	430.05	1718.29	1120.54	456.357	1670.58	1001.49	403.669	1590.68	912.431	461.377	1630.88	899.779	445.898	1571.33	833.655
407	0	213.095	1473.52	1591.44	109.621	1467.6	1585.79	217.002	1647.26	1602.89	87.974	1616.83	1602.01	164.014	1689	1470.84	173.792	1797.24	1225.01	162.938	1553.9	1361.25	185.136	1512.83	1179.01	125.251	1796.23	1299.52	332.94	1619.8	1414.59	422.64	1696.06	1204.92	430.389	1707.94	1123.34	457.19	1662.81	1003.44	405.068	1584.69	912.569	462.745	1625.24	900.993	447.37	1567.43	833.144
408	0	213.253	1459.19	1592.56	109.773	1453.3	1586.93	217.217	1632.88	1604.2	88.175	1602.52	1603.32	164.344	1674.87	1472.34	174.163	1783.86	1226.83	163.37	1540.17	1362.59	185.794	1499.35	1180.29	125.654	1782.59	1301.31	333.4	1605.76	1416.15	423.117	1684.71	1207.33	430.754	1697.59	1125.92	458.108	1655.04	1005.25	406.631	1578.66	912.643	464.211	1619.59	902.126	449.082	1563.46	832.683
409	0	213.481	1444.9	1593.44	109.995	1439.03	1587.82	217.494	1618.55	1605.22	88.4409	1588.25	1604.36	164.706	1660.73	1473.55	174.579	1770.46	1228.37	163.785	1526.43	1363.66	186.349	1485.87	1181.3	126.094	1768.95	1302.83	333.867	1591.68	1417.39	423.547	1673.4	1209.46	431.141	1687.2	1128.26	459.105	1647.23	1006.9	408.348	1572.54	912.622	465.767	1613.91	903.147	451.024	1559.38	832.24
410	0	213.773	1430.65	1594.04	110.282	1424.79	1588.46	217.827	1604.27	1605.92	88.7656	1574.01	1605.1	165.098	1646.58	1474.47	175.05	1757.04	1229.59	164.178	1512.66	1364.43	186.795	1472.39	1182.02	126.577	1755.31	1304.06	334.336	1577.57	1418.3	423.931	1662.12	1211.31	431.546	1676.76	1130.33	460.175	1639.35	1008.37	410.207	1566.32	912.473	467.405	1608.16	904.026	453.18	1555.18	831.781
411	0	214.128	1416.44	1594.35	110.63	1410.59	1588.83	218.211	1590.03	1606.27	89.1452	1559.81	1605.52	165.52	1632.41	1475.06	175.583	1743.58	1230.49	164.546	1498.88	1364.87	187.132	1458.91	1182.42	127.112	1741.66	1304.97	334.804	1563.4	1418.84	424.278	1650.82	1212.84	431.97	1666.24	1132.11	461.313	1631.38	1009.61	412.193	1559.96	912.168	469.119	1602.32	904.737	455.528	1550.8	831.272
412	0	214.542	1402.26	1594.36	111.039	1396.41	1588.9	218.644	1575.81	1606.26	89.5773	1545.62	1605.6	165.974	1618.22	1475.32	176.185	1730.08	1231.05	164.889	1485.05	1364.97	187.363	1445.45	1182.47	127.704	1727.98	1305.54	335.272	1549.16	1419.02	424.601	1639.45	1214.05	432.416	1655.6	1133.58	462.514	1623.3	1010.62	414.29	1553.45	911.68	470.9	1596.35	905.255	458.042	1546.25	830.68
413	0	215.018	1388.09	1594.06	111.507	1382.24	1588.68	219.126	1561.63	1605.89	90.0621	1531.46	1605.34	166.464	1603.99	1475.23	176.862	1716.51	1231.25	165.213	1471.19	1364.71	187.494	1431.99	1182.15	128.362	1714.28	1305.78	335.743	1534.86	1418.82	424.915	1627.99	1214.91	432.89	1644.84	1134.71	463.774	1615.06	1011.37	416.482	1546.76	910.985	472.745	1590.23	905.559	460.694	1541.47	829.973
414	0	215.556	1373.94	1593.44	112.039	1368.08	1588.15	219.661	1547.47	1605.16	90.6018	1517.31	1604.73	166.998	1589.74	1474.8	177.621	1702.88	1231.1	165.523	1457.28	1364.07	187.538	1418.54	1181.45	129.092	1700.54	1305.66	336.223	1520.47	1418.24	425.237	1616.41	1215.42	433.397	1633.92	1135.5	465.092	1606.65	1011.84	418.754	1539.87	910.065	474.646	1583.91	905.63	463.453	1536.47	829.12
415	0	216.164	1359.8	1592.51	112.639	1353.92	1587.31	220.251	1533.32	1604.05	91.2009	1503.16	1603.77	167.585	1575.44	1474.01	178.466	1689.18	1230.59	165.83	1443.32	1363.05	187.506	1405.08	1180.36	129.9	1686.76	1305.19	336.72	1506.01	1417.27	425.588	1604.65	1215.57	433.945	1622.82	1135.94	466.464	1598.03	1012.02	421.089	1532.76	908.903	476.599	1577.38	905.455	466.291	1531.21	828.096
416	0	216.846	1345.65	1591.28	113.313	1339.76	1586.17	220.905	1519.18	1602.6	91.8662	1489.01	1602.47	168.235	1561.1	1472.89	179.399	1675.4	1229.72	166.147	1429.3	1361.66	187.414	1391.6	1178.89	130.792	1672.93	1304.38	337.248	1491.45	1415.93	425.986	1592.71	1215.36	434.542	1611.52	1136.01	467.889	1589.18	1011.9	423.474	1525.41	907.488	478.602	1570.6	905.023	469.18	1525.68	826.879
417	0	217.612	1331.51	1589.75	114.071	1325.59	1584.75	221.632	1505.04	1600.8	92.6067	1474.85	1600.84	168.962	1546.71	1471.45	180.421	1661.52	1228.52	166.489	1415.21	1359.89	187.279	1378.1	1177.05	131.772	1659.02	1303.23	337.82	1476.81	1414.23	426.452	1580.56	1214.78	435.197	1600.01	1135.72	469.367	1580.08	1011.48	425.895	1517.81	905.813	480.65	1563.53	904.328	472.096	1519.86	825.449
418	0	218.471	1317.35	1587.96	114.922	1311.41	1583.06	222.442	1490.9	1598.68	93.4332	1460.68	1598.91	169.778	1532.26	1469.69	181.531	1647.55	1226.99	166.873	1401.05	1357.78	187.12	1364.54	1174.85	132.843	1645.04	1301.76	338.452	1462.08	1412.19	427.003	1568.17	1213.83	435.918	1588.26	1135.06	470.895	1570.69	1010.75	428.344	1509.93	903.875	482.741	1556.15	903.365	475.019	1513.72	823.796
419	0	219.436	1303.17	1585.93	115.878	1297.2	1581.14	223.348	1476.74	1596.27	94.3586	1446.49	1596.69	170.699	1517.76	1467.65	182.727	1633.48	1225.15	167.32	1386.81	1355.34	186.958	1350.92	1172.34	134.008	1630.97	1299.98	339.16	1447.26	1409.82	427.656	1555.53	1212.53	436.709	1576.26	1134.04	472.472	1561	1009.71	430.809	1501.75	901.676	484.872	1548.43	902.137	477.931	1507.25	821.91
420	0	220.519	1288.97	1583.69	116.952	1282.97	1579	224.367	1462.57	1593.61	95.397	1432.27	1594.22	171.739	1503.2	1465.36	184.003	1619.29	1223.04	167.851	1372.47	1352.62	186.816	1337.2	1169.53	135.266	1616.79	1297.94	339.965	1432.37	1407.15	428.423	1542.62	1210.87	437.577	1563.99	1132.67	474.096	1550.99	1008.38	433.283	1493.25	899.222	487.041	1540.35	900.648	480.821	1500.43	819.79
421	0	221.733	1274.74	1581.29	118.156	1268.71	1576.7	225.512	1448.37	1590.72	96.5634	1418.03	1591.54	172.912	1488.58	1462.86	185.354	1604.99	1220.69	168.487	1358.04	1349.65	186.719	1323.38	1166.49	136.617	1602.51	1295.65	340.884	1417.41	1404.22	429.314	1529.46	1208.87	438.524	1551.45	1130.95	475.765	1540.64	1006.76	435.76	1484.41	896.523	489.245	1531.86	898.907	483.678	1493.22	817.44
422	0	223.091	1260.46	1578.75	119.505	1254.41	1574.26	226.801	1434.14	1587.66	97.8731	1403.75	1588.68	174.233	1473.88	1460.17	186.77	1590.56	1218.12	169.249	1343.5	1346.48	186.692	1309.42	1163.24	138.057	1588.1	1293.17	341.935	1402.38	1401.06	430.335	1516.02	1206.55	439.551	1538.62	1128.92	477.476	1529.92	1004.87	438.236	1475.21	893.594	491.48	1522.95	896.927	486.498	1485.61	814.867
423	0	224.606	1246.14	1576.14	121.011	1240.06	1571.75	228.249	1419.86	1584.48	99.3415	1389.43	1585.71	175.713	1459.11	1457.36	188.243	1576.01	1215.4	170.16	1328.86	1343.17	186.765	1295.32	1159.86	139.581	1573.57	1290.52	343.134	1387.29	1397.72	431.488	1502.31	1203.94	440.657	1525.49	1126.6	479.223	1518.83	1002.72	440.704	1465.62	890.454	493.741	1513.6	894.725	489.277	1477.56	812.087
424	0	226.291	1231.77	1573.5	122.686	1225.66	1569.21	229.871	1405.53	1581.22	100.983	1375.06	1582.67	177.362	1444.27	1454.46	189.762	1561.33	1212.56	171.237	1314.09	1339.77	186.966	1281.04	1156.39	141.185	1558.9	1287.77	344.497	1372.17	1394.24	432.771	1488.34	1201.05	441.839	1512.06	1124	481.002	1507.34	1000.35	443.162	1455.62	887.127	496.023	1503.78	892.321	492.016	1469.05	809.121
425	0	228.156	1217.34	1570.88	124.541	1211.2	1566.69	231.681	1391.15	1577.94	102.81	1360.64	1579.62	179.188	1429.35	1451.54	191.315	1546.51	1209.67	172.499	1299.21	1336.35	187.324	1266.57	1152.9	142.86	1544.1	1284.97	346.034	1357.01	1390.67	434.178	1474.1	1197.92	443.09	1498.32	1121.16	482.805	1495.45	997.775	445.604	1445.19	883.643	498.318	1493.47	889.739	494.713	1460.04	805.993
426	0	230.211	1202.84	1568.33	126.585	1196.68	1564.24	233.692	1376.69	1574.7	104.835	1346.16	1576.61	181.194	1414.35	1448.64	192.89	1531.55	1206.76	173.959	1284.2	1332.97	187.865	1251.9	1149.45	144.597	1529.15	1282.18	347.753	1341.83	1387.06	435.699	1459.61	1194.6	444.404	1484.28	1118.13	484.624	1483.15	995.029	448.025	1434.3	880.033	500.617	1482.64	887.008	497.37	1450.51	802.734
427	0	232.46	1188.26	1565.91	128.826	1182.1	1561.91	235.91	1362.16	1571.56	107.064	1331.61	1573.71	183.383	1399.28	1445.83	194.476	1516.47	1203.91	175.627	1269.07	1329.69	188.614	1237.02	1146.11	146.386	1514.06	1279.44	349.659	1326.64	1383.47	437.322	1444.88	1191.11	445.77	1469.92	1114.94	486.452	1470.42	992.146	450.42	1422.93	876.335	502.912	1471.29	884.157	499.985	1440.42	799.377
428	0	234.909	1173.61	1563.66	131.266	1167.43	1559.76	238.343	1347.55	1568.58	109.504	1316.99	1570.96	185.75	1384.13	1443.15	196.058	1501.25	1201.17	177.505	1253.82	1326.58	189.591	1221.92	1142.93	148.217	1498.83	1276.83	351.75	1311.45	1379.95	439.031	1429.91	1187.52	447.178	1455.25	1111.63	488.276	1457.25	989.162	452.779	1411.04	872.59	505.19	1459.38	881.221	502.556	1429.73	795.962
429	0	237.557	1158.87	1561.62	133.906	1152.69	1557.82	240.992	1332.85	1565.81	112.155	1302.29	1568.44	188.291	1368.91	1440.66	197.627	1485.92	1198.6	179.594	1238.46	1323.71	190.809	1206.59	1139.99	150.077	1483.48	1274.39	354.02	1296.28	1376.55	440.808	1414.72	1183.86	448.615	1440.27	1108.26	490.087	1443.64	986.116	455.095	1398.62	868.841	507.438	1446.91	878.233	505.079	1418.42	792.529
430	0	240.402	1144.04	1559.83	136.744	1137.88	1556.15	243.854	1318.06	1563.3	115.015	1287.51	1566.18	190.993	1353.63	1438.41	199.169	1470.48	1196.25	181.887	1223	1321.12	192.276	1191.05	1137.34	151.955	1468.01	1272.19	356.46	1281.12	1373.33	442.633	1399.32	1180.2	450.07	1424.99	1104.86	491.874	1429.58	983.047	457.355	1385.63	865.134	509.644	1433.85	875.23	507.546	1406.44	789.121
431	0	243.435	1129.14	1558.34	139.772	1122.98	1554.77	246.921	1303.17	1561.1	118.075	1272.65	1564.24	193.843	1338.29	1436.44	200.674	1454.94	1194.17	184.369	1207.45	1318.88	193.989	1175.3	1135.04	153.838	1452.44	1270.27	359.053	1266	1370.34	444.488	1383.72	1176.59	451.531	1409.42	1101.5	493.624	1415.07	979.995	459.548	1372.06	861.516	511.791	1420.2	872.25	509.947	1393.76	785.781
432	0	246.645	1114.15	1557.15	142.979	1108	1553.72	250.181	1288.2	1559.26	121.325	1257.72	1562.65	196.822	1322.91	1434.8	202.135	1439.32	1192.41	187.022	1191.83	1317.03	195.938	1159.37	1133.13	155.714	1436.78	1268.68	361.779	1250.92	1367.61	446.352	1367.94	1173.08	452.985	1393.56	1098.21	495.328	1400.1	977	461.66	1357.89	858.035	513.865	1405.93	869.328	512.269	1380.36	782.551
433	0	250.017	1099.08	1556.3	146.349	1092.95	1553.02	253.617	1273.15	1557.79	124.746	1242.71	1561.46	199.908	1307.5	1433.52	203.541	1423.64	1191.01	189.823	1176.16	1315.59	198.103	1143.28	1131.64	157.571	1421.05	1267.46	364.614	1235.89	1365.2	448.208	1351.98	1169.73	454.422	1377.43	1095.05	496.975	1384.68	974.099	463.676	1343.09	854.737	515.851	1391.04	866.499	514.496	1366.2	779.474
434	0	253.531	1083.95	1555.78	149.864	1077.83	1552.67	257.207	1258.01	1556.72	128.317	1227.62	1560.68	203.077	1292.07	1432.61	204.888	1407.93	1189.98	192.742	1160.47	1314.61	200.456	1127.06	1130.62	159.397	1405.28	1266.63	367.531	1220.92	1363.12	450.039	1335.87	1166.59	455.834	1361.04	1092.06	498.554	1368.79	971.329	465.58	1327.65	851.665	517.734	1375.51	863.797	516.61	1351.25	776.588
435	0	257.163	1068.76	1555.62	153.5	1062.66	1552.68	260.924	1242.82	1556.08	132.013	1212.48	1560.32	206.302	1276.65	1432.09	206.172	1392.19	1189.36	195.746	1144.78	1314.08	202.962	1110.76	1130.07	161.183	1389.49	1266.21	370.499	1206	1361.41	451.83	1319.62	1163.7	457.213	1344.41	1089.27	500.057	1352.45	968.722	467.357	1311.56	848.862	519.499	1359.34	861.252	518.591	1335.49	773.928
436	0	260.887	1053.53	1555.78	157.229	1047.43	1553.05	264.738	1227.57	1555.85	135.804	1197.29	1560.4	209.557	1261.25	1431.98	207.39	1376.47	1189.16	198.801	1129.11	1314.02	205.579	1094.43	1130	162.918	1373.7	1266.21	373.487	1191.15	1360.09	453.571	1303.23	1161.1	458.556	1327.56	1086.73	501.478	1335.66	966.306	468.993	1294.81	846.361	521.133	1342.53	858.892	520.419	1318.9	771.524
437	0	264.673	1038.26	1556.28	161.023	1032.18	1553.77	268.616	1212.29	1556.04	139.658	1182.06	1560.91	212.812	1245.89	1432.25	208.542	1360.78	1189.36	201.869	1113.49	1314.42	208.263	1078.1	1130.4	164.596	1357.95	1266.63	376.465	1176.37	1359.15	455.252	1286.73	1158.83	459.858	1310.49	1084.46	502.81	1318.43	964.108	470.473	1277.39	844.196	522.624	1325.07	856.738	522.073	1301.47	769.403
438	0	268.489	1022.99	1557.08	164.848	1016.91	1554.81	272.523	1196.99	1556.63	143.542	1166.81	1561.83	216.042	1230.59	1432.91	209.632	1345.14	1189.97	204.916	1097.96	1315.27	210.964	1061.85	1131.26	166.212	1342.25	1267.45	379.4	1161.66	1358.6	456.869	1270.13	1156.9	461.12	1293.25	1082.47	504.049	1300.77	962.145	471.785	1259.33	842.39	523.961	1306.97	854.809	523.533	1283.18	767.585
439	0	272.303	1007.72	1558.16	168.672	1001.64	1556.15	276.421	1181.69	1557.6	147.418	1151.56	1563.14	219.218	1215.37	1433.93	210.663	1329.59	1190.96	207.904	1082.53	1316.52	213.633	1045.71	1132.54	167.765	1326.63	1268.66	382.265	1147.03	1358.44	458.417	1253.45	1155.32	462.343	1275.84	1080.79	505.192	1282.68	960.433	472.918	1240.61	840.962	525.135	1288.24	853.12	524.783	1264.05	766.087
440	0	276.08	992.47	1559.49	172.461	986.381	1557.75	280.273	1166.42	1558.91	151.252	1136.32	1564.8	222.317	1200.24	1435.29	211.645	1314.15	1192.31	210.801	1067.22	1318.16	216.222	1029.74	1134.19	169.254	1311.12	1270.22	385.032	1132.47	1358.63	459.898	1236.71	1154.11	463.529	1258.29	1079.42	506.238	1264.2	958.983	473.864	1221.26	839.926	526.141	1268.89	851.682	525.805	1244.06	764.922
441	0	279.789	977.261	1561.04	176.181	971.159	1559.6	284.043	1151.18	1560.54	155.009	1121.11	1566.78	225.315	1185.21	1436.95	212.584	1298.83	1193.98	213.575	1052.05	1320.13	218.684	1013.97	1136.18	170.683	1295.73	1272.11	387.678	1117.98	1359.16	461.313	1219.92	1153.25	464.683	1240.63	1078.35	507.187	1245.33	957.802	474.616	1201.3	839.289	526.971	1248.94	850.503	526.587	1223.25	764.098
442	0	283.398	962.106	1562.78	179.801	955.985	1561.64	287.698	1136	1562.43	158.656	1105.95	1569.04	228.194	1170.3	1438.88	213.491	1283.66	1195.95	216.2	1037.04	1322.38	220.978	998.433	1138.44	172.055	1280.47	1274.27	390.182	1103.56	1360	462.666	1203.1	1152.73	465.81	1222.86	1077.58	508.04	1226.09	956.892	475.173	1180.75	839.056	527.623	1228.41	849.589	527.12	1201.62	763.624
443	0	286.878	947.021	1564.68	183.292	940.873	1563.84	291.207	1120.9	1564.56	162.162	1090.84	1571.52	230.935	1155.5	1441.04	214.376	1268.65	1198.16	218.652	1022.19	1324.88	223.066	983.163	1140.93	173.376	1265.38	1276.68	392.527	1089.2	1361.11	463.961	1186.26	1152.55	466.916	1205.02	1077.11	508.799	1206.52	956.253	475.53	1159.66	839.226	528.096	1207.32	848.942	527.398	1179.21	763.507
444	0	290.203	932.015	1566.69	186.626	925.836	1566.17	294.542	1105.88	1566.87	165.501	1075.81	1574.19	233.525	1140.83	1443.39	215.249	1253.8	1200.59	220.914	1007.52	1327.55	224.919	968.171	1143.57	174.65	1250.44	1279.29	394.701	1074.91	1362.47	465.203	1169.41	1152.67	468.005	1187.12	1076.91	509.466	1186.62	955.883	475.69	1138.05	839.796	528.388	1185.71	848.565	527.418	1156.05	763.754
445	0	293.351	917.1	1568.79	189.782	910.882	1568.58	297.68	1090.95	1569.32	168.65	1060.85	1576.99	235.95	1126.28	1445.89	216.117	1239.14	1203.19	222.973	993.011	1330.36	226.515	953.465	1146.32	175.881	1235.67	1282.06	396.695	1060.69	1364.03	466.397	1152.56	1153.07	469.084	1169.17	1076.97	510.044	1166.43	955.776	475.655	1115.97	840.762	528.502	1163.6	848.461	527.182	1132.19	764.372
446	0	296.302	902.28	1570.95	192.74	896.019	1571.04	300.603	1076.13	1571.88	171.59	1045.99	1579.88	238.204	1111.85	1448.51	216.988	1224.65	1205.93	224.819	978.675	1333.26	227.841	939.045	1149.13	177.076	1221.08	1284.94	398.504	1046.51	1365.77	467.548	1135.73	1153.72	470.154	1151.2	1077.26	510.536	1145.98	955.926	475.429	1093.48	842.117	528.44	1141.05	848.63	526.692	1107.68	765.371
447	0	299.042	887.561	1573.13	195.485	881.253	1573.51	303.298	1061.41	1574.5	174.308	1031.21	1582.82	240.281	1097.54	1451.2	217.867	1210.35	1208.76	226.45	964.503	1336.19	228.894	924.902	1151.95	178.236	1206.66	1287.91	400.128	1032.39	1367.65	468.658	1118.93	1154.6	471.22	1133.21	1077.77	510.944	1125.29	956.327	475.017	1070.6	843.857	528.206	1118.08	849.075	525.958	1082.58	766.76
448	0	301.559	872.945	1575.32	198.005	866.587	1575.97	305.755	1046.79	1577.16	176.794	1016.53	1585.77	242.178	1083.34	1453.94	218.758	1196.22	1211.65	227.868	950.487	1339.12	229.677	911.021	1154.74	179.365	1192.41	1290.91	401.569	1018.32	1369.63	469.731	1102.15	1155.68	472.283	1115.21	1078.48	511.271	1104.38	956.969	474.426	1047.4	845.972	527.806	1094.74	849.798	524.987	1056.94	768.548
449	0	303.844	858.431	1577.47	200.292	852.023	1578.38	307.971	1032.28	1579.81	179.041	1001.95	1588.69	243.895	1069.25	1456.68	219.663	1182.27	1214.56	229.078	936.62	1342.01	230.205	897.381	1157.48	180.466	1178.33	1293.91	402.833	1004.3	1371.7	470.769	1085.4	1156.93	473.343	1097.22	1079.36	511.519	1083.29	957.844	473.664	1023.93	848.455	527.245	1071.06	850.798	523.79	1030.84	770.744
450	0	305.893	844.018	1579.57	202.34	837.562	1580.72	309.946	1017.87	1582.44	181.05	987.467	1591.56	245.437	1055.26	1459.4	220.583	1168.47	1217.46	230.092	922.89	1344.83	230.499	883.96	1160.15	181.539	1164.4	1296.89	403.929	990.328	1373.82	471.772	1068.69	1158.32	474.4	1079.24	1080.38	511.69	1062.03	958.94	472.74	1000.23	851.297	526.531	1047.1	852.079	522.379	1004.34	773.354
451	0	307.704	829.703	1581.6	204.148	823.204	1582.95	311.682	1003.56	1585.01	182.82	973.083	1594.32	246.807	1041.37	1462.06	221.517	1154.82	1220.31	230.922	909.286	1347.56	230.584	870.73	1162.72	182.586	1150.62	1299.79	404.868	976.402	1375.97	472.74	1052.03	1159.82	475.453	1061.28	1081.53	511.788	1040.64	960.245	471.662	976.354	854.487	525.672	1022.89	853.637	520.768	977.516	776.381
452	0	309.276	815.482	1583.53	205.715	808.948	1585.06	313.187	989.333	1587.5	184.356	958.798	1596.98	248.014	1027.58	1464.64	222.465	1141.31	1223.09	231.584	895.799	1350.17	230.495	857.664	1165.18	183.607	1136.97	1302.61	405.662	962.521	1378.14	473.675	1035.4	1161.42	476.499	1043.34	1082.78	511.812	1019.15	961.748	470.44	952.354	858.011	524.676	998.48	855.472	518.968	950.439	779.824
453	0	310.613	801.35	1585.35	207.045	794.792	1587.03	314.468	975.195	1589.89	185.666	944.61	1599.48	249.065	1013.86	1467.11	223.422	1127.92	1225.75	232.097	882.416	1352.64	230.265	844.735	1167.52	184.602	1123.45	1305.29	406.324	948.687	1380.29	474.576	1018.83	1163.08	477.535	1025.42	1084.11	511.765	997.567	963.432	469.084	928.277	861.852	523.551	973.912	857.576	516.993	923.182	783.675
454	0	311.719	787.303	1587.05	208.142	780.736	1588.83	315.536	961.138	1592.16	186.759	930.519	1601.82	249.97	1000.23	1469.45	224.385	1114.64	1228.28	232.48	869.126	1354.95	229.933	831.917	1169.72	185.57	1110.05	1307.83	406.869	934.9	1382.41	475.442	1002.3	1164.77	478.558	1007.53	1085.48	511.649	975.927	965.28	467.605	904.166	865.99	522.305	949.228	859.942	514.856	895.818	787.921
455	0	312.602	773.335	1588.6	209.014	766.776	1590.45	316.404	947.155	1594.3	187.644	916.524	1603.97	250.739	986.667	1471.63	225.348	1101.45	1230.65	232.752	855.918	1357.09	229.534	819.187	1171.79	186.509	1096.74	1310.19	407.308	921.159	1384.47	476.274	985.822	1166.47	479.564	989.671	1086.89	511.464	954.253	967.274	466.013	880.064	870.401	520.947	924.47	862.557	512.57	868.415	792.541
456	0	313.271	759.442	1589.99	209.669	752.909	1591.88	317.083	933.242	1596.27	188.335	902.622	1605.91	251.382	973.174	1473.62	226.305	1088.35	1232.82	232.933	842.783	1359.05	229.106	806.523	1173.69	187.417	1083.52	1312.35	407.655	907.464	1386.45	477.073	969.392	1168.15	480.549	971.836	1088.29	511.212	932.567	969.392	464.319	856.012	875.058	519.485	899.68	865.405	510.148	841.043	797.508
457	0	313.736	745.618	1591.22	210.118	739.133	1593.1	317.589	919.394	1598.06	188.843	888.811	1607.63	251.907	959.744	1475.42	227.247	1075.31	1234.8	233.039	829.708	1360.8	228.684	793.909	1175.42	188.289	1070.38	1314.3	407.922	893.816	1388.34	477.838	953.01	1169.78	481.509	954.03	1089.67	510.895	910.893	971.613	462.533	832.049	879.928	517.929	874.898	868.465	507.602	813.763	802.791
458	0	314.008	731.859	1592.26	210.374	725.443	1594.09	317.933	905.607	1599.66	189.183	875.087	1609.11	252.324	946.37	1477	228.164	1062.33	1236.54	233.088	816.684	1362.33	228.297	781.329	1176.95	189.119	1057.31	1316.01	408.118	880.214	1390.1	478.569	936.673	1171.34	482.44	936.251	1091	510.513	889.253	973.912	460.666	808.209	884.976	516.286	850.162	871.716	504.945	786.635	808.35
459	0	314.101	718.159	1593.1	210.451	711.834	1594.86	318.131	891.875	1601.05	189.368	861.446	1610.34	252.64	933.048	1478.35	229.047	1049.39	1238.05	233.095	803.701	1363.64	227.976	768.771	1178.27	189.903	1044.29	1317.47	408.253	866.657	1391.73	479.267	920.381	1172.79	483.338	918.499	1092.26	510.069	867.668	976.266	458.727	784.526	890.165	514.565	825.512	875.131	502.191	759.714	814.144
460	0	314.029	704.514	1593.74	210.361	698.3	1595.39	318.196	878.195	1602.22	189.411	847.884	1611.31	252.861	919.771	1479.45	229.882	1036.49	1239.3	233.07	790.749	1364.69	227.741	756.223	1179.36	190.632	1031.31	1318.68	408.332	853.145	1393.19	479.932	904.13	1174.13	484.199	900.775	1093.43	509.564	846.162	978.647	456.728	761.031	895.454	512.775	800.983	878.68	499.353	733.051	820.125
461	0	313.805	690.919	1594.16	210.12	684.836	1595.68	318.14	864.564	1603.16	189.326	834.394	1612.01	252.994	906.534	1480.31	230.658	1023.61	1240.29	233.023	777.819	1365.49	227.61	743.676	1180.19	191.297	1018.37	1319.62	408.361	839.676	1394.46	480.562	887.917	1175.32	485.017	883.08	1094.49	509	824.754	981.032	454.677	737.752	900.801	510.922	776.611	882.334	496.444	706.688	826.248
462	0	313.443	677.37	1594.36	209.743	671.435	1595.72	317.975	850.976	1603.86	189.126	820.97	1612.45	253.041	893.333	1480.9	231.361	1010.75	1241.01	232.961	764.901	1366.03	227.595	731.12	1180.75	191.891	1005.46	1320.29	408.342	826.248	1395.54	481.155	871.739	1176.35	485.788	865.416	1095.41	508.378	803.466	983.393	452.583	714.717	906.165	509.016	752.43	886.059	493.476	680.668	832.462
463	0	312.958	663.863	1594.33	209.244	658.091	1595.51	317.713	837.429	1604.3	188.822	807.606	1612.62	253.006	880.163	1481.23	231.979	997.909	1241.45	232.887	751.987	1366.28	227.7	718.544	1181.03	192.402	992.562	1320.68	408.277	812.86	1396.4	481.708	855.595	1177.2	486.508	847.788	1096.19	507.7	782.318	985.708	450.455	691.95	911.501	507.065	728.471	889.822	490.463	655.024	838.717
464	0	312.361	650.394	1594.06	208.637	644.796	1595.05	317.363	823.92	1604.49	188.425	794.295	1612.52	252.89	867.019	1481.3	232.5	985.068	1241.63	232.801	739.071	1366.25	227.924	705.937	1181	192.822	979.676	1320.81	408.164	799.508	1397.04	482.217	839.482	1177.85	487.17	830.201	1096.8	506.967	761.33	987.952	448.3	669.474	916.77	505.076	704.766	893.59	487.418	629.787	844.966
465	0	311.666	636.959	1593.56	207.933	631.543	1594.35	316.932	810.444	1604.43	187.943	781.029	1612.16	252.692	853.897	1481.11	232.913	972.224	1241.53	232.7	726.144	1365.94	228.258	693.29	1180.68	193.141	966.792	1320.66	408.002	786.192	1397.44	482.676	823.402	1178.3	487.769	812.662	1097.25	506.182	740.524	990.101	446.126	647.308	921.93	503.058	681.343	897.329	484.354	604.984	851.161
466	0	310.883	623.556	1592.83	207.144	618.327	1593.42	316.427	796.999	1604.12	187.386	767.803	1611.55	252.411	840.795	1480.66	233.207	959.37	1241.16	232.579	713.202	1365.35	228.687	680.589	1180.07	193.349	953.902	1320.24	407.785	772.907	1397.59	483.078	807.355	1178.55	488.299	795.184	1097.51	505.344	719.918	992.136	443.94	625.473	926.944	501.018	658.23	901.005	481.283	580.638	857.256
467	0	310.019	610.181	1591.87	206.278	605.14	1592.25	315.852	783.582	1603.56	186.756	754.61	1610.69	252.045	827.708	1479.96	233.375	946.498	1240.53	232.431	700.238	1364.49	229.191	667.825	1179.16	193.439	941.001	1319.57	407.509	759.651	1397.5	483.417	791.347	1178.58	488.754	777.776	1097.6	504.457	699.534	994.037	441.747	603.985	931.777	498.965	635.453	904.589	478.218	556.769	863.208
468	0	309.082	596.832	1590.69	205.341	591.977	1590.87	315.209	770.191	1602.77	186.059	741.443	1609.61	251.59	814.635	1479.02	233.41	933.602	1239.65	232.245	687.248	1363.36	229.745	654.986	1177.98	193.402	928.082	1318.64	407.167	746.419	1397.17	483.682	775.382	1178.39	489.127	760.454	1097.49	503.52	679.391	995.786	439.555	582.861	936.395	496.905	613.036	908.048	475.171	533.394	868.976
469	0	308.076	583.505	1589.3	204.338	578.833	1589.29	314.497	756.823	1601.75	185.293	728.296	1608.32	251.044	801.574	1477.85	233.307	920.673	1238.51	232.009	674.229	1362	230.32	642.062	1176.55	193.233	915.138	1317.47	406.753	733.207	1396.6	483.863	759.471	1178	489.411	743.233	1097.21	502.534	659.51	997.368	437.37	562.113	940.768	494.846	591.005	911.354	472.154	510.527	874.521
470	0	307.003	570.2	1587.71	203.271	565.701	1587.53	313.716	743.475	1600.52	184.459	715.166	1606.84	250.401	788.523	1476.46	233.065	907.702	1237.15	231.711	661.178	1360.4	230.884	629.045	1174.89	192.928	902.162	1316.06	406.257	720.01	1395.8	483.951	743.625	1177.41	489.599	726.131	1096.74	501.499	639.911	998.769	435.197	541.757	944.869	492.794	569.383	914.478	469.178	488.181	879.808
471	0	305.864	556.913	1585.95	202.139	552.579	1585.61	312.86	730.146	1599.11	183.553	702.046	1605.19	249.657	775.479	1474.89	232.683	894.679	1235.56	231.335	648.091	1358.62	231.402	615.924	1173.04	192.485	889.15	1314.44	405.672	706.823	1394.78	483.934	727.859	1176.62	489.684	709.167	1096.09	500.417	620.615	999.978	433.041	521.803	948.674	490.754	548.19	917.394	466.255	466.369	884.802
472	0	304.656	543.642	1584.03	200.94	539.462	1583.55	311.924	716.834	1597.53	182.57	688.934	1603.39	248.807	762.442	1473.14	232.163	881.595	1233.77	230.868	634.967	1356.67	231.84	602.693	1171.03	191.904	876.094	1312.61	404.989	693.639	1393.57	483.801	712.188	1175.65	489.659	692.36	1095.28	499.286	601.642	1000.99	430.908	502.263	952.16	488.731	527.45	920.077	463.396	445.099	889.471
473	0	303.376	530.385	1581.98	199.67	526.347	1581.37	310.901	703.537	1595.8	181.503	675.824	1601.47	247.847	749.409	1471.23	231.51	868.439	1231.78	230.294	621.804	1354.58	232.164	589.345	1168.9	191.185	862.99	1310.59	404.199	680.451	1392.18	483.54	696.632	1174.51	489.516	675.733	1094.32	498.108	583.012	1001.78	428.803	483.145	955.311	486.73	507.184	922.505	460.611	424.384	893.784
474	0	302.019	517.139	1579.83	198.323	513.23	1579.11	309.784	690.252	1593.96	180.345	662.714	1599.46	246.773	736.378	1469.19	230.729	855.2	1229.62	229.6	608.598	1352.4	232.341	575.874	1166.68	190.334	849.833	1308.4	403.294	667.252	1390.63	483.143	681.21	1173.21	489.248	659.305	1093.2	496.881	564.745	1002.37	426.73	464.46	958.108	484.754	487.413	924.655	457.912	404.231	897.713
475	0	300.578	503.902	1577.61	196.893	500.109	1576.79	308.564	676.978	1592.03	179.088	649.6	1597.38	245.58	723.346	1467.04	229.83	841.87	1227.31	228.772	595.348	1350.15	232.34	562.277	1164.43	189.357	836.616	1306.05	402.267	654.035	1388.95	482.6	665.94	1171.78	488.849	643.097	1091.96	495.606	546.862	1002.74	424.694	446.215	960.538	482.805	468.159	926.509	455.306	384.651	901.232
476	0	299.048	490.67	1575.34	195.372	486.981	1574.44	307.231	663.713	1590.03	177.725	636.48	1595.26	244.266	710.309	1464.8	228.82	828.437	1224.87	227.799	582.053	1347.88	232.134	548.55	1162.18	188.259	823.336	1303.57	401.112	640.79	1387.17	481.903	650.843	1170.24	488.314	627.129	1090.61	494.282	529.381	1002.9	422.699	428.42	962.591	480.885	449.44	928.051	452.805	365.653	904.315
477	0	297.42	477.441	1573.05	193.755	473.843	1572.09	305.779	650.453	1588.01	176.246	623.349	1593.12	242.829	697.264	1462.52	227.712	814.893	1222.32	226.669	568.708	1345.62	231.7	534.692	1159.97	187.05	809.988	1300.99	399.823	627.51	1385.32	481.045	635.935	1168.6	487.636	611.421	1089.17	492.911	512.322	1002.84	420.749	411.081	964.256	478.997	431.278	929.267	450.416	347.248	906.94
478	0	295.688	464.21	1570.79	192.033	460.692	1569.78	304.201	637.196	1585.99	174.645	610.205	1591	241.266	684.206	1460.2	226.516	801.232	1219.69	225.376	555.313	1343.41	231.021	520.701	1157.84	185.74	796.568	1298.32	398.398	614.186	1383.42	480.024	621.231	1166.9	486.813	595.99	1087.65	491.493	495.701	1002.57	418.847	394.206	965.527	477.142	413.693	930.146	448.147	329.447	909.085
479	0	293.848	450.974	1568.58	190.203	447.525	1567.52	302.49	623.938	1584	172.916	597.044	1588.93	239.579	671.131	1457.88	225.244	787.447	1217	223.914	541.865	1341.28	230.084	506.577	1155.83	184.339	783.075	1295.6	396.836	600.811	1381.52	478.837	606.742	1165.15	485.841	580.852	1086.08	490.03	479.535	1002.1	416.997	377.805	966.4	475.322	396.702	930.682	446.006	312.262	910.733
480	0	291.897	437.729	1566.44	188.26	434.337	1565.35	300.642	610.676	1582.07	171.055	583.861	1586.92	237.768	658.031	1455.59	223.909	773.537	1214.3	222.28	528.362	1339.26	228.881	492.322	1153.95	182.858	769.505	1292.85	395.137	587.378	1379.64	477.483	592.478	1163.39	484.72	566.02	1084.48	488.524	463.84	1001.44	415.202	361.886	966.873	473.54	380.324	930.871	443.998	295.705	911.868
481	0	289.831	424.469	1564.43	186.204	421.125	1563.3	298.656	597.405	1580.23	169.06	570.652	1585.01	235.837	644.901	1453.36	222.524	759.501	1211.6	220.474	514.803	1337.39	227.412	477.936	1152.26	181.308	755.859	1290.1	393.305	573.881	1377.81	475.966	578.442	1161.65	483.448	551.506	1082.88	486.979	448.63	1000.61	413.464	346.459	966.948	471.797	364.575	930.714	442.129	279.79	912.479
482	0	287.652	411.191	1562.55	184.034	407.884	1561.39	296.531	584.121	1578.51	166.932	557.411	1583.21	233.789	631.736	1451.21	221.1	745.344	1208.95	218.501	501.188	1335.67	225.682	463.427	1150.76	179.702	742.138	1287.39	391.345	560.316	1376.08	474.29	564.635	1159.95	482.029	537.318	1081.3	485.397	433.918	999.607	411.788	331.533	966.628	470.097	349.471	930.217	440.403	264.533	912.559
483	0	285.363	397.889	1560.83	181.755	394.609	1559.65	294.27	570.82	1576.93	164.671	544.134	1581.57	231.633	618.529	1449.18	219.649	731.07	1206.37	216.368	487.515	1334.15	223.705	448.799	1149.48	178.051	728.344	1284.75	389.267	546.678	1374.48	472.462	551.054	1158.33	480.465	523.463	1079.78	483.784	419.713	998.462	410.177	317.119	965.921	468.445	335.027	929.39	438.822	249.948	912.105
484	0	282.97	384.558	1559.31	179.371	381.295	1558.1	291.878	557.496	1575.52	162.285	530.813	1580.09	229.376	605.273	1447.29	218.184	716.692	1203.9	214.086	473.786	1332.83	221.498	434.065	1148.43	176.367	714.481	1282.22	387.081	532.966	1373.02	470.492	537.693	1156.82	478.764	509.944	1078.34	482.147	406.024	997.194	408.633	303.23	964.838	466.844	321.254	928.246	437.389	236.054	911.118
485	0	280.48	371.194	1558	176.891	367.937	1556.75	289.363	544.145	1574.3	159.779	517.445	1578.8	227.031	591.964	1445.57	216.716	702.222	1201.59	211.672	460.002	1331.73	219.088	419.241	1147.64	174.662	700.555	1279.83	384.802	519.177	1371.76	468.392	524.54	1155.46	476.932	496.761	1077	480.491	392.858	995.823	407.161	289.879	963.393	465.301	308.163	926.806	436.104	222.867	909.608
486	0	277.905	357.793	1556.91	174.326	354.529	1555.63	286.733	530.761	1573.29	157.165	504.022	1577.71	224.61	578.596	1444.05	215.258	687.677	1199.46	209.144	446.167	1330.86	216.506	404.347	1147.1	172.95	686.574	1277.62	382.444	505.312	1370.71	466.176	511.586	1154.27	474.981	483.912	1075.8	478.826	380.217	994.376	405.763	277.077	961.604	463.822	295.76	925.093	434.967	210.405	907.589
487	0	275.257	344.349	1556.07	171.689	341.066	1554.75	284.003	517.34	1572.51	154.455	490.54	1576.85	222.13	565.166	1442.75	213.821	673.077	1197.56	206.526	432.285	1330.23	213.791	389.409	1146.81	171.245	672.546	1275.62	380.028	491.373	1369.9	463.863	498.816	1153.28	472.922	471.392	1074.77	477.161	368.103	992.879	404.444	264.838	959.493	462.414	284.052	923.134	433.978	198.685	905.08
488	0	272.55	330.859	1555.49	168.993	327.547	1554.11	281.188	503.877	1571.97	151.664	476.995	1576.22	219.61	551.669	1441.7	212.417	658.443	1195.9	203.845	418.362	1329.85	210.984	374.456	1146.79	169.559	658.482	1273.87	377.574	477.364	1369.35	461.472	486.216	1152.53	470.771	459.191	1073.93	475.506	356.514	991.359	403.208	253.174	957.085	461.087	273.04	920.962	433.134	187.724	902.108
489	0	269.801	317.321	1555.16	166.256	313.967	1553.72	278.306	490.367	1571.68	148.81	463.385	1575.83	217.07	538.107	1440.9	211.059	643.798	1194.54	201.131	404.404	1329.71	208.133	359.523	1147	167.907	644.394	1272.39	375.105	463.289	1369.08	459.026	473.77	1152.04	468.546	447.301	1073.3	473.872	345.443	989.845	402.06	242.096	954.409	459.849	262.722	918.61	432.433	177.535	898.707
490	0	267.028	303.732	1555.09	163.494	300.327	1553.58	275.377	476.807	1571.66	145.913	449.708	1575.68	214.534	524.478	1440.37	209.756	629.165	1193.47	198.417	390.42	1329.81	205.287	344.645	1147.46	166.302	630.292	1271.21	372.646	449.158	1369.11	456.552	461.464	1151.83	466.265	435.708	1072.91	472.272	334.884	988.366	401.004	231.614	951.497	458.712	253.092	916.118	431.871	168.129	894.914
491	0	264.25	290.09	1555.28	160.727	286.625	1553.67	272.424	463.193	1571.9	142.994	435.966	1575.78	212.024	510.787	1440.13	208.518	614.565	1192.74	195.736	376.421	1330.14	202.495	329.859	1148.13	164.758	616.191	1270.35	370.222	434.981	1369.44	454.077	449.283	1151.91	463.951	424.397	1072.78	470.72	324.824	986.949	400.046	221.733	948.382	457.685	244.14	913.525	431.445	159.513	890.773
492	0	261.485	276.394	1555.72	157.973	272.865	1554	269.472	449.523	1572.41	140.079	422.159	1576.11	209.565	497.037	1440.16	207.354	600.019	1192.34	193.125	362.415	1330.69	199.808	315.199	1149	163.286	602.101	1269.82	367.86	420.772	1370.07	451.631	437.212	1152.3	461.627	413.353	1072.91	469.23	315.248	985.621	399.193	212.455	945.103	456.781	235.85	910.872	431.151	151.687	886.332
493	0	258.755	262.646	1556.4	155.253	259.049	1554.55	266.547	435.796	1573.18	137.191	408.291	1576.69	207.18	483.235	1440.49	206.27	585.547	1192.28	190.616	348.414	1331.46	197.274	300.695	1150.04	161.896	588.034	1269.62	365.584	406.545	1371	449.245	425.238	1152.98	459.317	402.556	1073.32	467.816	306.139	984.407	398.452	203.777	941.696	456.013	228.202	908.2	430.986	144.646	881.644
494	0	256.08	248.846	1557.3	152.588	245.182	1555.31	263.677	422.012	1574.2	134.358	394.368	1577.48	204.892	469.39	1441.08	205.268	571.166	1192.57	188.244	334.427	1332.43	194.938	286.373	1151.23	160.596	574	1269.77	363.419	392.318	1372.21	446.952	413.348	1153.96	457.047	391.988	1074.01	466.493	297.475	983.328	397.831	195.694	938.201	455.392	221.171	905.55	430.947	138.38	876.764
495	0	253.481	234.997	1558.4	149.999	231.269	1556.24	260.89	408.17	1575.47	131.606	380.394	1578.48	202.719	455.511	1441.95	204.348	556.888	1193.19	186.039	320.465	1333.57	192.84	272.251	1152.54	159.39	560.01	1270.24	361.39	378.109	1373.69	444.782	401.531	1155.22	454.841	381.631	1074.97	465.277	289.235	982.404	397.339	188.191	934.659	454.93	214.729	902.962	431.034	132.868	871.751
496	0	250.981	221.101	1559.69	147.505	217.316	1557.35	258.213	394.272	1576.95	128.962	366.378	1579.68	200.679	441.607	1443.07	203.507	542.726	1194.13	184.027	306.536	1334.88	191.014	258.336	1153.96	158.28	546.07	1271.03	359.515	363.939	1375.43	442.765	389.78	1156.76	452.723	371.466	1076.2	464.181	281.393	981.651	396.987	181.249	931.109	454.639	208.84	900.472	431.249	128.085	866.662
497	0	248.598	207.161	1561.14	145.129	203.329	1558.6	255.674	380.322	1578.63	126.451	352.324	1581.05	198.787	427.688	1444.41	202.738	528.685	1195.37	182.23	292.646	1336.33	189.487	244.628	1155.47	157.264	532.186	1272.12	357.813	349.825	1377.38	440.927	378.087	1158.54	450.715	361.476	1077.68	463.22	273.922	981.081	396.786	174.844	927.592	454.531	203.469	898.116	431.596	123.997	861.558
498	0	246.354	193.184	1562.72	142.889	189.315	1559.97	253.297	366.322	1580.49	124.096	338.241	1582.58	197.054	413.763	1445.97	202.034	514.771	1196.88	180.664	278.801	1337.91	188.276	231.117	1157.03	156.34	518.363	1273.48	356.298	335.784	1379.52	439.29	366.452	1160.54	448.838	351.645	1079.4	462.405	266.795	980.703	396.75	168.946	924.145	454.614	198.574	895.925	432.083	120.562	856.499
499	0	244.265	179.172	1564.42	140.802	175.279	1561.44	251.104	352.278	1582.5	121.92	324.136	1584.25	195.486	399.84	1447.71	201.384	500.982	1198.63	179.339	265.004	1339.6	187.388	217.786	1158.65	155.501	504.602	1275.09	354.979	321.83	1381.82	437.872	354.876	1162.73	447.108	341.959	1081.33	461.749	259.984	980.522	396.89	163.521	920.804	454.897	194.115	893.924	432.72	117.733	851.541
500	0	242.348	165.132	1566.19	138.886	161.227	1563	249.113	338.195	1584.63	119.939	310.014	1586.02	194.089	385.924	1449.61	200.776	487.317	1200.59	178.259	251.256	1341.38	186.824	204.61	1160.3	154.738	490.902	1276.92	353.86	307.976	1384.25	436.683	343.364	1165.08	445.539	332.405	1083.45	461.26	253.46	980.538	397.221	158.529	917.604	455.386	190.046	892.135	433.521	115.458	846.74
501	0	240.617	151.07	1568.02	137.154	147.164	1564.61	247.338	324.079	1586.85	118.169	295.881	1587.89	192.861	372.022	1451.63	200.201	473.769	1202.72	177.422	237.557	1343.23	186.573	191.56	1161.99	154.043	477.261	1278.92	352.943	294.227	1386.75	435.726	331.928	1167.56	444.142	322.976	1085.74	460.945	247.195	980.748	397.755	153.927	914.572	456.086	186.325	890.575	434.501	113.678	842.146
502	0	239.083	136.991	1569.87	135.617	133.095	1566.26	245.79	309.938	1589.12	116.619	281.742	1589.82	191.8	358.137	1453.74	199.647	460.328	1204.98	176.819	223.905	1345.12	186.614	178.604	1163.68	153.406	463.674	1281.06	352.224	280.59	1389.3	434.997	320.582	1170.13	442.923	313.661	1088.16	460.811	241.161	981.145	398.505	149.671	911.733	456.998	182.906	889.254	435.677	112.331	837.805
503	0	237.753	122.9	1571.72	134.283	119.023	1567.92	244.471	295.779	1591.41	115.294	267.602	1591.79	190.901	344.27	1455.9	199.105	446.984	1207.33	176.437	210.296	1347.04	186.922	165.711	1165.39	152.816	450.136	1283.3	351.694	267.062	1391.85	434.484	309.342	1172.75	441.883	304.455	1090.68	460.859	235.33	981.719	399.48	145.712	909.107	458.123	179.746	888.178	437.066	111.35	833.754
504	0	236.631	108.803	1573.54	133.157	104.951	1569.56	243.384	281.608	1593.68	114.197	253.463	1593.76	190.156	330.422	1458.08	198.567	433.721	1209.73	176.258	196.725	1348.96	187.462	152.851	1167.09	152.265	436.639	1285.6	351.342	253.642	1394.37	434.168	298.23	1175.4	441.021	295.353	1093.26	461.088	229.674	982.455	400.69	142.002	906.704	459.456	176.801	887.346	438.682	110.669	830.024
505	0	235.718	94.7052	1575.29	132.24	90.8813	1571.17	242.524	267.432	1595.9	113.322	239.327	1595.71	189.555	316.593	1460.25	198.029	420.525	1212.14	176.262	183.186	1350.86	188.197	139.995	1168.77	151.745	423.174	1287.92	351.153	240.321	1396.81	434.027	287.264	1178.03	440.333	286.349	1095.88	461.498	224.166	983.334	402.138	138.492	904.532	460.993	174.029	886.75	440.54	110.218	826.636
506	0	235.013	80.6097	1576.96	131.531	76.8144	1572.71	241.883	253.257	1598.03	112.664	225.196	1597.61	189.087	302.779	1462.35	197.488	407.38	1214.5	176.427	169.671	1352.7	189.086	127.123	1170.41	151.247	409.732	1290.2	351.111	227.091	1399.14	434.033	276.464	1180.61	439.809	277.437	1098.49	462.081	218.78	984.336	403.827	135.132	902.588	462.724	171.391	886.377	442.649	109.931	823.602
507	0	234.511	66.52	1578.5	131.026	62.7508	1574.15	241.45	239.088	1600.03	112.213	211.071	1599.41	188.74	288.977	1464.36	196.944	394.269	1216.78	176.73	156.172	1354.47	190.088	114.215	1171.99	150.767	396.305	1292.42	351.199	213.937	1401.32	434.156	265.845	1183.1	439.44	268.611	1101.07	462.831	213.488	985.435	405.754	131.876	900.863	464.637	168.847	886.209	445.013	109.741	820.924
508	0	234.204	52.4383	1579.9	130.718	48.69	1575.48	241.21	224.931	1601.87	111.956	196.95	1601.1	188.503	275.182	1466.24	196.397	381.176	1218.94	177.148	142.681	1356.13	191.162	101.26	1173.49	150.301	382.884	1294.52	351.398	200.847	1403.31	434.366	255.417	1185.48	439.212	259.861	1103.58	463.737	208.265	986.605	407.912	128.678	899.341	466.718	166.36	886.221	447.634	109.583	818.592
509	0	234.083	38.3661	1581.12	130.599	34.6308	1576.67	241.15	210.788	1603.51	111.879	182.833	1602.64	188.363	261.388	1467.95	195.853	368.085	1220.93	177.659	129.187	1357.65	192.272	88.2484	1174.87	149.846	369.459	1296.47	351.691	187.804	1405.07	434.635	245.183	1187.72	439.111	251.178	1105.99	464.786	203.085	987.815	410.292	125.493	898	468.95	163.895	886.386	450.506	109.399	816.589
510	0	234.14	24.3043	1582.14	130.66	20.5714	1577.69	241.251	196.662	1604.93	111.966	168.717	1603.99	188.31	247.589	1469.46	195.315	354.982	1222.72	178.242	115.682	1358.99	193.384	75.178	1176.11	149.404	356.021	1298.24	352.061	174.792	1406.58	434.935	235.139	1189.77	439.122	242.547	1108.26	465.965	197.92	989.034	412.879	122.281	896.812	471.313	161.419	886.672	453.618	109.133	814.89
511	0	234.363	10.2531	1582.94	130.889	6.5093	1578.51	241.499	182.555	1606.08	112.203	154.601	1605.12	188.333	233.776	1470.73	194.792	341.851	1224.27	178.881	102.155	1360.13	194.47	62.0482	1177.18	148.975	342.564	1299.78	352.494	161.794	1407.8	435.246	225.27	1191.63	439.23	233.952	1110.36	467.259	192.744	990.231	415.654	119.004	895.745	473.787	158.899	887.043	456.952	108.735	813.46
512	0	234.742	-3.78787	1583.49	131.277	-7.55813	1579.12	241.878	168.468	1606.95	112.575	140.482	1606.02	188.424	219.943	1471.75	194.29	328.681	1225.56	179.559	88.5965	1361.04	195.506	48.8604	1178.03	148.562	329.078	1301.08	352.975	148.794	1408.72	435.55	215.552	1193.25	439.421	225.373	1112.26	468.65	187.529	991.374	418.596	115.628	894.763	476.349	156.305	887.465	460.485	108.16	812.263
513	0	235.267	-17.8193	1583.79	131.814	-21.6339	1579.5	242.372	154.402	1607.51	113.068	126.358	1606.64	188.575	206.082	1472.48	193.818	315.46	1226.56	180.264	74.9981	1361.69	196.477	35.6173	1178.64	148.172	315.558	1302.1	353.495	135.775	1409.3	435.836	205.954	1194.63	439.68	216.787	1113.94	470.123	182.248	992.43	421.681	112.12	893.83	478.977	153.605	887.9	464.191	107.372	811.253
514	0	235.93	-31.8422	1583.81	132.491	-35.7211	1579.62	242.969	140.355	1607.75	113.67	112.224	1606.98	188.782	192.185	1472.9	193.385	302.177	1227.25	180.987	61.3506	1362.04	197.373	22.3214	1178.97	147.81	301.995	1302.82	354.047	122.721	1409.54	436.097	196.437	1195.74	439.996	208.17	1115.38	471.661	176.873	993.371	424.883	108.454	892.907	481.649	150.772	888.312	468.038	106.336	810.386
515	0	236.723	-45.8577	1583.54	133.3	-49.8228	1579.48	243.658	126.328	1607.64	114.37	98.08	1607.01	189.041	178.244	1473.01	192.999	288.824	1227.6	181.722	47.646	1362.08	198.187	8.97446	1178.99	147.486	288.383	1303.23	354.626	109.617	1409.42	436.333	186.958	1196.56	440.359	199.496	1116.54	473.247	171.374	994.168	428.174	104.603	891.957	484.342	147.776	888.667	471.992	105.024	809.615
516	0	237.639	-59.8673	1582.98	134.235	-63.9417	1579.07	244.431	112.32	1607.17	115.161	83.9223	1606.73	189.352	164.254	1472.78	192.671	275.393	1227.63	182.467	33.877	1361.78	198.921	-4.42349	1178.67	147.207	274.714	1303.32	355.231	96.4505	1408.93	436.547	177.47	1197.1	440.759	190.734	1117.43	474.868	165.723	994.794	431.525	100.544	890.943	487.037	144.588	888.931	476.015	103.413	808.895
517	0	238.676	-73.8727	1582.12	135.291	-78.0807	1578.39	245.281	98.3294	1606.34	116.037	69.7493	1606.12	189.717	150.207	1472.22	192.407	261.878	1227.3	183.222	20.037	1361.13	199.579	-17.8742	1178.01	146.984	260.982	1303.08	355.862	83.2088	1408.07	436.746	167.925	1197.32	441.191	181.858	1118.01	476.508	159.89	995.227	434.909	96.2561	889.834	489.713	141.178	889.075	480.072	101.484	808.179
518	0	239.829	-87.8759	1580.97	136.465	-92.2419	1577.43	246.205	84.3543	1605.16	116.995	55.5593	1605.18	190.139	136.1	1471.31	192.217	248.273	1226.63	183.99	6.12054	1360.13	200.168	-31.3814	1176.98	146.827	247.179	1302.5	356.525	69.8822	1406.84	436.94	158.274	1197.23	441.649	172.837	1118.28	478.156	153.845	995.448	438.298	91.7178	888.598	492.354	137.516	889.073	484.125	99.2176	807.429
519	0	241.098	-101.88	1579.54	137.755	-106.428	1576.2	247.203	70.3922	1603.62	118.034	41.3508	1603.92	190.625	121.927	1470.08	192.107	234.574	1225.62	184.777	-7.87719	1358.77	200.701	-44.9513	1175.59	146.745	233.297	1301.59	357.225	56.4622	1405.26	437.143	148.473	1196.83	442.132	163.642	1118.23	479.799	147.56	995.44	441.666	86.9095	887.212	494.944	133.573	888.903	488.139	96.5986	806.605
520	0	242.482	-115.887	1577.84	139.161	-120.64	1574.71	248.276	56.4395	1601.75	119.157	27.1222	1602.35	191.182	107.687	1468.53	192.083	220.778	1224.28	185.592	-21.9601	1357.05	201.189	-58.5915	1173.83	146.748	219.329	1300.37	357.972	42.9428	1403.33	437.369	138.481	1196.11	442.638	154.246	1117.87	481.428	141.005	995.193	444.987	81.8111	885.656	497.471	129.316	888.547	492.08	93.6112	805.676
521	0	243.982	-129.901	1575.88	140.683	-134.881	1572.98	249.428	42.492	1599.56	120.366	12.8722	1600.49	191.82	93.3754	1466.68	192.149	206.879	1222.63	186.446	-36.1311	1355	201.65	-72.3115	1171.72	146.843	205.267	1298.84	358.773	29.3201	1401.07	437.632	128.26	1195.07	443.166	144.622	1117.18	483.035	134.151	994.7	448.241	76.4017	883.916	499.924	124.714	887.993	495.92	90.239	804.615
522	0	245.601	-143.928	1573.7	142.323	-149.152	1571.04	250.665	28.5439	1597.08	121.668	-1.40108	1598.36	192.548	78.9925	1464.55	192.309	192.875	1220.69	187.35	-50.3928	1352.63	202.101	-86.1216	1169.28	147.036	191.104	1297.02	359.641	15.5924	1398.51	437.946	117.778	1193.73	443.72	134.744	1116.19	484.614	126.968	993.958	451.406	70.6595	881.982	502.294	119.734	887.232	499.63	86.4643	803.401
523	0	247.339	-157.972	1571.33	144.083	-163.458	1568.91	251.994	14.5883	1594.34	123.07	-15.6997	1595.99	193.378	64.5374	1462.18	192.562	178.763	1218.49	188.319	-64.7467	1349.98	202.559	-100.032	1166.55	147.333	176.834	1294.95	360.587	1.76027	1395.67	438.324	107.01	1192.09	444.3	124.589	1114.89	486.158	119.43	992.971	454.467	64.561	879.853	504.574	114.344	886.262	503.188	82.2672	802.018
524	0	249.199	-172.04	1568.79	145.964	-177.799	1566.62	253.426	0.616885	1591.39	124.579	-30.0263	1593.42	194.32	50.0105	1459.6	192.909	164.539	1216.06	189.366	-79.1942	1347.08	203.047	-114.055	1163.57	147.735	162.449	1292.65	361.623	-12.1737	1392.6	438.779	95.933	1190.17	444.909	114.136	1113.31	487.665	111.509	991.746	457.409	58.0812	877.533	506.761	108.51	885.084	506.574	77.6252	800.459
525	0	251.184	-186.141	1566.13	147.968	-192.18	1564.22	254.97	-13.3801	1588.26	126.205	-44.3842	1590.69	195.382	35.4126	1456.86	193.348	150.199	1213.44	190.505	-93.736	1343.98	203.585	-128.199	1160.38	148.244	147.946	1290.16	362.758	-26.205	1389.33	439.319	84.5325	1187.98	445.549	103.365	1111.46	489.13	103.179	990.295	460.22	51.1932	875.032	508.849	102.201	883.706	509.774	72.5124	798.721
526	0	253.293	-200.283	1563.4	150.097	-206.604	1561.74	256.636	-27.4135	1585.01	127.955	-58.7772	1587.85	196.575	20.7445	1454	193.875	135.74	1210.68	191.752	-108.372	1340.73	204.195	-142.474	1157.05	148.857	133.319	1287.53	364.003	-40.3277	1385.91	439.952	72.7971	1185.56	446.222	92.2609	1109.38	490.55	94.416	988.637	462.89	43.8687	872.366	510.837	95.3829	882.139	512.776	66.8999	796.811
527	0	255.527	-214.474	1560.62	152.348	-221.076	1559.23	258.432	-41.495	1581.68	129.838	-73.2098	1584.95	197.904	6.00771	1451.06	194.485	121.16	1207.82	193.118	-123.103	1337.39	204.9	-156.888	1153.62	149.571	118.567	1284.8	365.366	-54.5343	1382.39	440.681	60.7206	1182.92	446.93	80.8092	1107.08	491.925	85.1974	986.791	465.412	36.0778	869.559	512.723	88.0243	880.399	515.572	60.7552	794.739
528	0	257.884	-228.725	1557.87	154.723	-235.6	1556.73	260.368	-55.637	1578.34	131.86	-87.687	1582.04	199.373	-8.79653	1448.11	195.171	106.455	1204.91	194.615	-137.927	1334.02	205.724	-171.448	1150.17	150.381	103.687	1282.03	366.852	-68.8167	1378.82	441.506	48.3011	1180.12	447.673	68.9994	1104.62	493.252	75.5022	984.785	467.78	27.7892	866.637	514.505	80.0943	878.507	518.157	54.0424	792.525
529	0	260.361	-243.044	1555.17	157.216	-250.18	1554.3	262.449	-69.8516	1575.05	134.024	-102.214	1579.18	200.984	-23.6665	1445.2	195.926	91.6262	1202.02	196.251	-152.844	1330.69	206.686	-186.159	1146.76	151.28	88.6802	1279.26	368.465	-83.1663	1375.26	442.425	35.5408	1177.18	448.451	56.8239	1102.02	494.529	65.312	982.648	469.988	18.9706	863.634	516.183	71.563	876.488	520.529	46.7229	790.192
530	0	262.955	-257.441	1552.58	159.824	-264.821	1551.98	264.68	-84.1502	1571.86	136.335	-116.796	1576.42	202.736	-38.5999	1442.38	196.742	76.6729	1199.2	198.033	-167.849	1327.45	207.805	-201.026	1143.46	152.26	73.5485	1276.55	370.205	-97.5738	1371.76	443.432	22.446	1174.16	449.261	44.2787	1099.34	495.755	54.6106	980.412	472.034	9.58892	860.587	517.755	62.4019	874.369	522.689	38.7556	787.769
531	0	265.657	-271.923	1550.15	162.541	-279.525	1549.82	267.061	-98.543	1568.82	138.79	-131.437	1573.83	204.623	-53.5938	1439.7	197.609	61.5988	1196.49	199.962	-182.941	1324.39	209.097	-216.05	1140.34	153.31	58.2967	1273.97	372.068	-112.03	1368.39	444.52	9.0264	1171.11	450.101	31.3628	1096.61	496.929	43.3846	978.112	473.915	-0.388921	857.539	519.22	52.5845	872.181	524.637	30.0978	785.29
532	0	268.46	-286.496	1547.92	165.357	-294.296	1547.85	269.592	-113.038	1566	141.387	-146.142	1571.44	206.637	-68.6438	1437.22	198.519	46.4096	1193.97	202.037	-198.112	1321.56	210.574	-231.23	1137.46	154.419	42.9314	1271.56	374.048	-126.526	1365.19	445.677	-4.70487	1168.07	450.968	18.0789	1093.89	498.048	31.6232	975.786	475.63	-10.9955	854.532	520.578	42.0863	869.955	526.376	20.706	782.79
533	0	271.353	-301.163	1545.92	168.263	-309.134	1546.13	272.266	-127.641	1563.45	144.119	-160.914	1569.32	208.767	-83.7441	1434.99	199.46	31.1139	1191.67	204.252	-213.356	1319.01	212.239	-246.565	1134.88	155.578	27.4622	1269.37	376.133	-141.053	1362.23	446.891	-18.7318	1165.11	451.858	4.433	1091.21	499.113	19.3187	973.47	477.179	-22.262	851.612	521.826	30.8854	867.725	527.909	10.537	780.308
534	0	274.324	-315.925	1544.19	171.246	-324.039	1544.67	275.074	-142.354	1561.2	146.975	-175.753	1567.5	210.998	-98.8869	1433.04	200.423	15.7234	1189.64	206.595	-228.662	1316.8	214.094	-262.048	1132.66	156.772	11.901	1267.45	378.311	-155.601	1359.55	448.149	-33.0359	1162.28	452.766	-9.566	1088.64	500.121	6.4663	971.201	478.561	-34.2175	848.826	522.964	18.9631	865.524	529.241	-0.450817	777.881
535	0	277.358	-330.78	1542.75	174.291	-339.007	1543.51	278.001	-157.177	1559.3	149.94	-190.659	1566.02	213.312	-114.063	1431.41	201.399	0.252102	1187.93	209.052	-244.018	1314.98	216.131	-277.667	1130.84	157.991	-3.73733	1265.85	380.563	-170.162	1357.2	449.439	-47.5976	1159.64	453.688	-23.9062	1086.22	501.072	-6.93576	969.015	479.778	-46.8879	846.216	523.991	6.30377	863.384	530.374	-12.2965	775.547
536	0	280.439	-345.723	1541.63	177.382	-354.035	1542.67	281.03	-172.104	1557.78	152.999	-205.63	1564.92	215.689	-129.26	1430.14	202.378	-15.2831	1186.57	211.603	-259.411	1313.57	218.337	-293.406	1129.46	159.222	-19.4356	1264.58	382.87	-184.727	1355.22	450.747	-62.3959	1157.23	454.62	-38.5732	1083.98	501.966	-20.8862	966.945	480.834	-60.2951	843.826	524.906	-7.10429	861.337	531.314	-25.0351	773.342
537	0	283.547	-360.746	1540.85	180.5	-369.115	1542.16	284.14	-187.128	1556.67	156.128	-220.661	1564.2	218.106	-144.466	1429.24	203.351	-30.8635	1185.58	214.225	-274.823	1312.61	220.691	-309.246	1128.56	160.453	-35.1745	1263.7	385.21	-199.287	1353.63	452.061	-77.4103	1155.09	455.558	-53.5505	1081.96	502.802	-35.3809	965.022	481.73	-74.4562	841.694	525.708	-21.2687	859.409	532.063	-38.6969	771.299
538	0	286.664	-375.835	1540.41	183.627	-384.239	1541.99	287.304	-202.235	1555.98	159.305	-235.743	1563.9	220.54	-159.667	1428.73	204.311	-46.4684	1184.99	216.891	-290.236	1312.11	223.17	-325.158	1128.13	161.673	-50.9327	1263.19	387.559	-213.834	1352.47	453.372	-92.6203	1153.27	456.498	-68.8199	1080.2	503.582	-50.4126	963.273	482.471	-89.3829	839.855	526.399	-36.1927	857.628	532.628	-53.3062	769.448
539	0	289.769	-390.977	1540.3	186.74	-399.394	1542.17	290.495	-217.41	1555.71	162.5	-250.868	1564	222.966	-174.847	1428.62	205.25	-62.0762	1184.79	219.573	-305.633	1312.07	225.744	-341.114	1128.19	162.87	-66.6877	1263.09	389.893	-228.361	1351.73	454.671	-108.006	1151.79	457.44	-84.3616	1078.71	504.307	-65.9716	961.721	483.064	-105.08	838.338	526.979	-51.8749	856.014	533.015	-68.8802	767.816
540	0	292.838	-406.155	1540.53	189.818	-414.569	1542.67	293.68	-232.633	1555.87	165.686	-266.024	1564.52	225.358	-189.991	1428.9	206.163	-77.6645	1184.99	222.24	-320.993	1312.49	228.379	-357.077	1128.72	164.036	-82.4167	1263.38	392.186	-242.86	1351.44	455.951	-123.55	1150.68	458.382	-100.155	1077.53	504.979	-82.0452	960.384	483.514	-121.548	837.166	527.45	-68.3091	854.588	533.228	-85.4289	766.425
541	0	295.848	-421.35	1541.08	192.836	-429.749	1543.5	296.828	-247.885	1556.44	168.831	-281.197	1565.43	227.693	-205.087	1429.56	207.046	-93.2107	1185.59	224.861	-336.298	1313.35	231.039	-373.012	1129.71	165.162	-98.0967	1264.06	394.416	-257.326	1351.58	457.208	-139.234	1149.93	459.324	-116.179	1076.64	505.6	-98.6185	959.277	483.828	-138.776	836.356	527.815	-85.4842	853.362	533.276	-102.954	765.292
542	0	298.777	-436.543	1541.94	195.772	-444.919	1544.63	299.904	-263.144	1557.4	171.903	-296.374	1566.71	229.946	-220.12	1430.58	207.895	-108.693	1186.56	227.406	-351.531	1314.62	233.687	-388.882	1131.11	166.242	-113.706	1265.11	396.559	-271.755	1352.13	458.439	-155.042	1149.55	460.267	-132.412	1076.07	506.174	-115.674	958.408	484.013	-156.75	835.919	528.077	-103.384	852.349	533.167	-121.45	764.434
543	0	301.601	-451.714	1543.09	198.603	-460.066	1546.04	302.875	-278.386	1558.73	174.871	-311.54	1568.34	232.097	-235.079	1431.95	208.711	-124.091	1187.87	229.844	-366.677	1316.27	236.284	-404.65	1132.89	167.271	-129.223	1266.51	398.594	-286.144	1353.08	459.642	-170.959	1149.54	461.212	-148.834	1075.8	506.705	-133.193	957.781	484.076	-175.447	835.86	528.239	-121.988	851.556	532.909	-140.901	763.861
544	0	304.299	-466.845	1544.49	201.307	-475.175	1547.7	305.708	-293.592	1560.38	177.705	-326.681	1570.27	234.128	-249.957	1433.62	209.495	-139.384	1189.51	232.149	-381.722	1318.26	238.792	-420.283	1134.99	168.247	-144.63	1268.22	400.504	-300.494	1354.4	460.816	-186.971	1149.87	462.162	-165.425	1075.82	507.195	-151.153	957.396	484.025	-194.837	836.18	528.307	-141.272	850.987	532.512	-161.285	763.583
545	0	306.848	-481.92	1546.12	203.863	-490.234	1549.58	308.373	-308.742	1562.33	180.375	-341.783	1572.48	236.022	-264.747	1435.56	210.25	-154.558	1191.44	234.296	-396.657	1320.54	241.173	-435.752	1137.36	169.171	-159.912	1270.21	402.272	-314.805	1356.04	461.961	-203.066	1150.52	463.118	-182.167	1076.12	507.648	-169.534	957.25	483.865	-214.883	836.874	528.283	-161.206	850.645	531.984	-182.57	763.608
546	0	309.23	-496.923	1547.96	206.251	-505.231	1551.64	310.844	-323.819	1564.53	182.857	-356.834	1574.9	237.766	-279.446	1437.75	210.981	-169.596	1193.61	236.263	-411.475	1323.06	243.392	-451.035	1139.95	170.044	-175.054	1272.45	403.886	-329.081	1357.98	463.076	-219.234	1151.46	464.085	-199.043	1076.68	508.068	-188.311	957.336	483.602	-235.546	837.933	528.172	-181.756	850.53	531.337	-204.718	763.943
547	0	311.428	-511.845	1549.96	208.457	-520.159	1553.86	313.098	-338.81	1566.94	185.129	-371.825	1577.51	239.354	-294.054	1440.13	211.694	-184.489	1196.01	238.033	-426.171	1325.78	245.416	-466.113	1142.7	170.87	-190.047	1274.89	405.338	-343.328	1360.16	464.162	-235.466	1152.66	465.064	-216.037	1077.46	508.457	-207.46	957.643	483.241	-256.778	839.348	527.979	-202.889	850.639	530.578	-227.684	764.596
548	0	313.429	-526.677	1552.1	210.466	-535.01	1556.18	315.118	-353.707	1569.52	187.174	-386.747	1580.25	240.778	-308.571	1442.67	212.398	-199.23	1198.57	239.593	-440.745	1328.63	247.217	-480.978	1145.55	171.655	-204.885	1277.49	406.622	-357.551	1362.54	465.218	-251.754	1154.08	466.056	-233.138	1078.45	508.819	-226.958	958.161	482.784	-278.531	841.105	527.706	-224.564	850.972	529.715	-251.415	765.573
549	0	315.221	-541.415	1554.34	212.268	-549.779	1558.59	316.892	-368.503	1572.21	188.98	-401.595	1583.08	242.038	-323	1445.32	213.101	-213.815	1201.27	240.934	-455.198	1331.58	248.77	-495.627	1148.45	172.407	-219.563	1280.22	407.738	-371.758	1365.08	466.245	-268.092	1155.7	467.065	-250.335	1079.61	509.154	-246.78	958.876	482.234	-300.752	843.189	527.358	-246.742	851.524	528.757	-275.853	766.881
550	0	316.798	-556.057	1556.65	213.855	-564.466	1561.03	318.415	-383.198	1574.98	190.538	-416.364	1585.95	243.136	-337.346	1448.05	213.812	-228.244	1204.06	242.052	-469.534	1334.57	250.058	-510.064	1151.37	173.133	-234.081	1283.02	408.688	-385.958	1367.74	467.241	-284.476	1157.46	468.092	-267.618	1080.91	509.464	-266.902	959.772	481.592	-323.389	845.583	526.935	-269.38	852.292	527.709	-300.935	768.526
551	0	318.154	-570.606	1558.99	215.223	-579.068	1563.48	319.685	-397.793	1577.79	191.848	-431.053	1588.81	244.077	-351.615	1450.81	214.541	-242.52	1206.9	242.949	-483.758	1337.57	251.067	-524.299	1154.27	173.843	-248.441	1285.86	409.476	-400.161	1370.47	468.207	-300.902	1159.33	469.137	-284.982	1082.33	509.751	-287.3	960.833	480.858	-346.387	848.271	526.442	-292.437	853.269	526.575	-326.594	770.513
552	0	319.289	-585.065	1561.33	216.371	-593.588	1565.89	320.709	-412.294	1580.59	192.913	-445.661	1591.64	244.871	-365.811	1453.57	215.297	-256.652	1209.75	243.629	-497.877	1340.53	251.793	-538.347	1157.1	174.545	-262.65	1288.7	410.111	-414.373	1373.23	469.142	-317.369	1161.29	470.202	-302.42	1083.83	510.014	-307.951	962.043	480.032	-369.694	851.232	525.878	-315.87	854.45	525.358	-352.761	772.843
553	0	320.205	-599.442	1563.64	217.301	-608.027	1568.24	321.495	-426.708	1583.35	193.74	-460.19	1594.38	245.529	-379.94	1456.29	216.088	-270.648	1212.57	244.102	-511.898	1343.41	252.235	-552.228	1159.85	175.25	-276.714	1291.49	410.603	-428.605	1375.98	470.048	-333.875	1163.28	471.287	-319.931	1085.38	510.254	-328.833	963.382	479.115	-393.257	854.446	525.246	-339.636	855.827	524.06	-379.362	775.515
554	0	320.906	-613.745	1565.87	218.017	-622.389	1570.48	322.06	-441.044	1586.04	194.342	-474.642	1597.01	246.062	-394.008	1458.93	216.922	-284.522	1215.33	244.378	-525.831	1346.19	252.402	-565.961	1162.49	175.965	-290.645	1294.21	410.964	-442.863	1378.69	470.926	-350.421	1165.29	472.391	-337.513	1086.95	510.471	-349.922	964.831	478.106	-417.027	857.89	524.547	-363.692	857.39	522.679	-406.325	778.522
555	0	321.401	-627.982	1568	218.526	-636.679	1572.6	322.42	-455.313	1588.61	194.733	-489.019	1599.48	246.485	-408.021	1461.46	217.802	-298.288	1217.99	244.474	-539.685	1348.83	252.306	-579.569	1165.01	176.697	-304.453	1296.81	411.207	-457.152	1381.33	471.778	-367.007	1167.27	473.514	-355.166	1088.51	510.663	-371.197	966.369	477.005	-440.957	861.539	523.782	-387.998	859.127	521.216	-433.575	781.853
556	0	321.699	-642.163	1570.01	218.839	-650.901	1574.55	322.596	-469.525	1591.04	194.931	-503.325	1601.78	246.813	-421.984	1463.84	218.732	-311.961	1220.5	244.407	-553.469	1351.31	251.967	-593.076	1167.37	177.452	-318.153	1299.27	411.346	-471.479	1383.86	472.608	-383.637	1169.21	474.656	-372.892	1090.03	510.831	-392.639	967.976	475.815	-465.001	865.365	522.951	-412.514	861.024	519.666	-461.042	785.488
557	0	321.813	-656.297	1571.86	218.967	-665.059	1576.32	322.608	-483.691	1593.3	194.955	-517.564	1603.88	247.059	-435.902	1466.05	219.71	-325.558	1222.85	244.194	-567.193	1353.6	251.409	-606.502	1169.58	178.234	-331.758	1301.54	411.394	-485.846	1386.25	473.42	-400.311	1171.05	475.815	-390.693	1091.49	510.974	-414.226	969.628	474.538	-489.12	869.34	522.057	-437.2	863.063	518.028	-488.653	789.406
558	0	321.757	-670.393	1573.52	218.923	-679.161	1577.88	322.479	-497.82	1595.36	194.826	-531.74	1605.76	247.236	-449.781	1468.05	220.735	-339.096	1224.99	243.855	-580.869	1355.69	250.66	-619.867	1171.6	179.042	-345.285	1303.61	411.362	-500.255	1388.47	474.22	-417.035	1172.79	476.99	-408.574	1092.85	511.092	-435.939	971.303	473.177	-513.274	873.43	521.1	-462.02	865.225	516.298	-516.342	793.574
559	0	321.545	-684.458	1574.98	218.721	-693.21	1579.21	322.23	-511.92	1597.2	194.564	-545.857	1607.39	247.356	-463.626	1469.83	221.798	-352.591	1226.9	243.41	-594.505	1357.54	249.751	-633.192	1173.42	179.875	-358.748	1305.44	411.263	-514.707	1390.5	475.011	-433.813	1174.38	478.179	-426.538	1094.1	511.183	-457.76	972.977	471.738	-537.43	877.603	520.083	-486.938	867.488	514.475	-544.046	797.957
560	0	321.194	-698.5	1576.21	218.377	-707.213	1580.3	321.878	-525.999	1598.8	194.188	-559.921	1608.76	247.429	-477.443	1471.36	222.89	-366.058	1228.57	242.878	-608.114	1359.14	248.716	-646.49	1175.03	180.728	-372.163	1307.01	411.108	-529.201	1392.31	475.8	-450.65	1175.8	479.38	-444.59	1095.2	511.248	-479.671	974.628	470.225	-561.555	881.822	519.007	-511.919	869.827	512.555	-571.705	802.515
561	0	320.717	-712.525	1577.2	217.905	-721.176	1581.14	321.444	-540.061	1600.13	193.715	-573.936	1609.86	247.462	-491.238	1472.63	223.998	-379.513	1229.95	242.276	-621.706	1360.48	247.591	-659.778	1176.39	181.593	-385.546	1308.31	410.904	-543.735	1393.88	476.591	-467.553	1177.04	480.59	-462.736	1096.14	511.284	-501.655	976.232	468.646	-585.622	886.051	517.874	-536.93	872.216	510.539	-599.264	807.203
562	0	320.131	-726.536	1577.94	217.32	-735.103	1581.71	320.94	-554.113	1601.2	193.161	-587.908	1610.68	247.463	-505.017	1473.62	225.106	-392.968	1231.06	241.621	-635.292	1361.53	246.409	-673.067	1177.49	182.46	-398.91	1309.33	410.659	-558.305	1395.2	477.387	-484.528	1178.06	481.804	-480.979	1096.9	511.292	-523.693	977.769	467.008	-609.604	890.253	516.689	-561.94	874.63	508.428	-626.675	811.974
563	0	319.448	-740.54	1578.41	216.635	-749.001	1582	320.379	-568.156	1601.97	192.54	-601.843	1611.2	247.433	-518.786	1474.33	226.198	-406.435	1231.86	240.928	-648.881	1362.29	245.206	-686.369	1178.31	183.316	-412.27	1310.04	410.377	-572.907	1396.23	478.191	-501.584	1178.85	483.018	-499.323	1097.47	511.27	-545.77	979.217	465.317	-633.478	894.392	515.454	-586.918	877.04	506.224	-653.891	816.781
564	0	318.683	-754.538	1578.62	215.864	-762.874	1582.02	319.771	-582.194	1602.46	191.863	-615.745	1611.43	247.373	-532.55	1474.73	227.253	-419.925	1232.35	240.209	-662.484	1362.74	244.012	-699.693	1178.84	184.147	-425.638	1310.46	410.062	-587.537	1396.99	479.002	-518.727	1179.41	484.225	-517.771	1097.82	511.217	-567.867	980.56	463.581	-657.223	898.431	514.175	-611.833	879.42	503.931	-680.875	821.576
565	0	317.844	-768.533	1578.55	215.016	-776.729	1581.77	319.121	-596.229	1602.65	191.137	-629.62	1611.36	247.281	-546.316	1474.84	228.252	-433.446	1232.53	239.475	-676.11	1362.87	242.857	-713.051	1179.05	184.937	-439.026	1310.56	409.715	-602.19	1397.44	479.819	-535.964	1179.71	485.417	-536.322	1097.96	511.131	-589.966	981.78	461.808	-680.818	902.337	512.857	-636.657	881.744	501.557	-707.589	826.311
566	0	316.941	-782.527	1578.21	214.1	-790.569	1581.24	318.435	-610.261	1602.54	190.369	-643.474	1611	247.154	-560.088	1474.65	229.173	-447.008	1232.4	238.733	-689.766	1362.7	241.767	-726.453	1178.95	185.668	-452.443	1310.36	409.335	-616.859	1397.6	480.635	-553.301	1179.76	486.586	-554.974	1097.89	511.011	-612.05	982.866	460.006	-704.245	906.078	511.505	-661.362	883.989	499.111	-734.003	830.942
567	0	315.98	-796.523	1577.59	213.124	-804.4	1580.44	317.712	-624.293	1602.14	189.561	-657.312	1610.35	246.986	-573.872	1474.16	229.996	-460.616	1231.96	237.986	-703.461	1362.21	240.761	-739.911	1178.52	186.325	-465.899	1309.85	408.919	-631.54	1397.46	481.443	-570.741	1179.57	487.719	-573.724	1097.59	510.853	-634.099	983.806	458.182	-727.486	909.626	510.126	-685.919	886.133	496.602	-760.09	835.43
568	0	314.964	-810.521	1576.72	212.09	-818.226	1579.39	316.952	-638.325	1601.46	188.714	-671.138	1609.43	246.768	-587.669	1473.39	230.703	-474.277	1231.22	237.237	-717.201	1361.41	239.855	-753.437	1177.76	186.888	-479.401	1309.06	408.464	-646.229	1397.02	482.233	-588.286	1179.12	488.804	-592.562	1097.08	510.654	-656.092	984.593	456.343	-750.525	912.955	508.726	-710.301	888.155	494.046	-785.825	839.736
569	0	313.894	-824.524	1575.6	210.999	-832.051	1578.09	316.152	-652.359	1600.5	187.826	-684.958	1608.23	246.492	-601.485	1472.34	231.275	-487.997	1230.18	236.484	-730.99	1360.32	239.057	-767.043	1176.69	187.344	-492.955	1307.97	407.963	-660.92	1396.31	482.989	-605.933	1178.45	489.827	-611.477	1096.37	510.412	-678.006	985.224	454.496	-773.345	916.045	507.313	-734.48	890.04	491.455	-811.187	843.828
570	0	312.769	-838.533	1574.24	209.851	-845.878	1576.55	315.305	-666.396	1599.28	186.892	-698.775	1606.79	246.148	-615.321	1471.03	231.698	-501.78	1228.87	235.721	-744.834	1358.94	238.369	-780.745	1175.32	187.676	-506.568	1306.61	407.411	-675.61	1395.32	483.697	-623.676	1177.55	490.773	-630.453	1095.46	510.123	-699.817	985.696	452.65	-795.932	918.876	505.893	-758.427	891.774	488.848	-836.158	847.679
571	0	311.584	-852.55	1572.66	208.643	-859.712	1574.8	314.406	-680.438	1597.82	185.908	-712.595	1605.11	245.725	-629.178	1469.47	231.96	-515.632	1227.28	234.943	-758.734	1357.31	237.784	-794.554	1173.68	187.873	-520.244	1304.99	406.798	-690.297	1394.09	484.336	-641.504	1176.44	491.624	-649.471	1094.37	509.783	-721.5	986.01	450.811	-818.268	921.437	504.474	-782.116	893.346	486.243	-860.721	851.266
572	0	310.333	-866.577	1570.88	207.367	-873.554	1572.85	313.445	-694.487	1596.14	184.864	-726.419	1603.23	245.212	-643.057	1467.68	232.053	-529.557	1225.45	234.138	-772.693	1355.44	237.292	-808.485	1171.79	187.924	-533.986	1303.13	406.118	-704.978	1392.63	484.887	-659.4	1175.15	492.364	-668.507	1093.11	509.386	-743.028	986.17	448.985	-840.34	923.719	503.061	-805.517	894.748	483.66	-884.86	854.57
573	0	309.009	-880.617	1568.92	206.018	-887.409	1570.73	312.415	-708.546	1594.26	183.754	-740.251	1601.16	244.599	-656.959	1465.69	231.972	-543.559	1223.39	233.296	-786.713	1353.37	236.872	-822.55	1169.69	187.823	-547.798	1301.04	405.361	-719.653	1390.97	485.328	-677.343	1173.69	492.974	-687.534	1091.71	508.927	-764.371	986.183	447.18	-862.131	925.716	501.661	-828.602	895.976	481.117	-908.559	857.579
574	0	307.602	-894.671	1566.8	204.587	-901.278	1568.46	311.304	-722.616	1592.22	182.566	-754.095	1598.93	243.876	-670.882	1463.52	231.717	-557.644	1221.12	232.402	-800.793	1351.12	236.501	-836.758	1167.42	187.566	-561.68	1298.74	404.518	-734.324	1389.13	485.637	-695.305	1172.09	493.437	-706.521	1090.18	508.402	-785.497	986.054	445.401	-883.625	927.428	500.279	-851.34	897.027	478.637	-931.805	860.283
575	0	306.102	-908.744	1564.57	203.063	-915.166	1566.08	310.104	-736.701	1590.05	181.291	-767.954	1596.56	243.033	-684.826	1461.2	231.291	-571.815	1218.66	231.443	-814.933	1348.74	236.149	-851.117	1165.01	187.152	-575.636	1296.27	403.58	-748.992	1387.16	485.792	-713.256	1170.37	493.734	-725.435	1088.55	507.805	-806.376	985.794	443.656	-904.805	928.857	498.92	-873.703	897.903	476.239	-954.582	862.677
576	0	304.501	-922.838	1562.24	201.439	-929.073	1563.6	308.802	-750.805	1587.77	179.918	-781.831	1594.11	242.064	-698.792	1458.75	230.701	-586.076	1216.05	230.402	-829.133	1346.26	235.782	-865.633	1162.52	186.584	-589.664	1293.64	402.539	-763.66	1385.08	485.771	-731.16	1168.56	493.851	-744.239	1086.84	507.129	-826.972	985.414	441.949	-925.655	930.011	497.586	-895.659	898.604	473.941	-976.876	864.76
577	0	302.789	-936.957	1559.84	199.704	-943.006	1561.06	307.39	-764.93	1585.42	178.438	-795.729	1591.58	240.964	-712.777	1456.21	229.958	-600.431	1213.31	229.264	-843.39	1343.72	235.366	-880.308	1159.98	185.867	-603.766	1290.88	401.388	-778.333	1382.93	485.558	-748.979	1166.67	493.771	-762.898	1085.07	506.371	-847.254	984.925	440.285	-946.157	930.898	496.279	-917.177	899.138	471.762	-998.669	866.533
578	0	300.956	-951.104	1557.43	197.851	-956.965	1558.49	305.857	-779.082	1583.05	176.841	-809.654	1589.03	239.727	-726.785	1453.62	229.074	-614.882	1210.48	228.016	-857.704	1341.16	234.864	-895.141	1157.45	185.01	-617.94	1288.02	400.119	-793.016	1380.73	485.134	-766.673	1164.74	493.484	-781.374	1083.26	505.525	-867.187	984.342	438.669	-966.29	931.53	495.002	-938.227	899.509	469.717	-1019.94	868
579	0	298.998	-965.283	1555.02	195.873	-970.957	1555.93	304.194	-793.265	1580.68	175.117	-823.609	1586.48	238.352	-740.814	1451	228.066	-629.431	1207.59	226.644	-872.073	1338.63	234.243	-910.127	1154.96	184.024	-632.185	1285.1	398.728	-807.715	1378.54	484.487	-784.201	1162.79	492.979	-799.628	1081.45	504.588	-886.737	983.677	437.105	-986.034	931.921	493.753	-958.778	899.726	467.818	-1040.68	869.17
580	0	296.908	-979.498	1552.65	193.766	-984.985	1553.4	302.396	-807.481	1578.36	173.262	-837.599	1583.97	236.84	-754.867	1448.4	226.952	-644.076	1204.68	225.136	-886.493	1336.16	233.468	-925.261	1152.57	182.923	-646.499	1282.16	397.212	-822.435	1376.39	483.609	-801.524	1160.84	492.251	-817.626	1079.66	503.557	-905.872	982.947	435.594	-1005.37	932.087	492.531	-978.8	899.798	466.074	-1060.87	870.049
581	0	294.685	-993.753	1550.37	191.526	-999.055	1550.96	300.455	-821.737	1576.13	171.268	-851.63	1581.54	235.195	-768.946	1445.86	225.752	-658.815	1201.78	223.485	-900.963	1333.79	232.513	-940.531	1150.32	181.72	-660.878	1279.23	395.57	-837.184	1374.31	482.494	-818.605	1158.93	491.298	-835.334	1077.91	502.43	-924.563	982.168	434.137	-1024.27	932.045	491.335	-998.264	899.738	464.49	-1080.48	870.651
582	0	292.327	-1008.05	1548.2	189.154	-1013.17	1548.62	298.37	-836.035	1574.02	169.135	-865.708	1579.21	233.422	-783.053	1443.41	224.485	-673.645	1198.95	221.684	-915.478	1331.57	231.352	-955.924	1148.23	180.434	-675.318	1276.35	393.803	-851.967	1372.33	481.144	-835.411	1157.08	490.123	-852.719	1076.24	501.206	-942.782	981.356	432.733	-1042.71	931.813	490.161	-1017.14	899.556	463.067	-1099.49	870.985
583	0	289.838	-1022.4	1546.17	186.651	-1027.34	1546.42	296.138	-850.381	1572.07	166.861	-879.839	1577.04	231.529	-797.193	1441.08	223.174	-688.559	1196.22	219.734	-930.035	1329.52	229.968	-971.424	1146.35	179.081	-689.814	1273.58	391.916	-866.789	1370.5	479.563	-851.913	1155.32	488.73	-869.755	1074.66	499.889	-960.502	980.53	431.38	-1060.67	931.41	489.005	-1035.41	899.267	461.802	-1117.89	871.065
584	0	287.224	-1036.79	1544.33	184.025	-1041.56	1544.39	293.765	-864.778	1570.31	164.45	-894.027	1575.04	229.528	-811.366	1438.93	221.838	-703.547	1193.64	217.635	-944.629	1327.69	228.35	-987.011	1144.71	177.681	-704.359	1270.94	389.916	-881.655	1368.84	477.762	-868.089	1153.68	487.133	-886.42	1073.21	498.48	-977.704	979.708	430.074	-1078.13	930.854	487.864	-1053.04	898.884	460.687	-1135.64	870.905
585	0	284.492	-1051.24	1542.7	181.282	-1055.83	1542.56	291.254	-879.229	1568.78	161.907	-908.278	1573.25	227.432	-825.577	1436.98	220.499	-718.599	1191.24	215.397	-959.253	1326.09	226.495	-1002.66	1143.35	176.251	-718.947	1268.48	387.812	-896.567	1367.39	475.756	-883.925	1152.18	485.345	-902.695	1071.91	496.984	-994.37	978.91	428.809	-1095.05	930.165	486.731	-1070.02	898.422	459.71	-1152.73	870.519
586	0	281.654	-1065.75	1541.29	178.434	-1070.17	1540.95	288.615	-893.738	1567.5	159.242	-922.596	1571.7	225.258	-839.827	1435.26	219.176	-733.701	1189.08	213.03	-973.901	1324.76	224.408	-1018.35	1142.27	174.812	-733.569	1266.25	385.619	-911.526	1366.18	473.567	-899.41	1150.87	483.387	-918.567	1070.79	495.41	-1010.49	978.154	427.578	-1111.41	929.361	485.602	-1086.33	897.896	458.855	-1169.13	869.92
587	0	278.723	-1080.31	1540.15	175.495	-1084.58	1539.59	285.863	-908.306	1566.5	156.468	-936.983	1570.4	223.022	-854.117	1433.81	217.886	-748.838	1187.19	210.552	-988.566	1323.72	222.104	-1034.04	1141.5	173.38	-748.216	1264.28	383.352	-926.53	1365.24	471.219	-914.544	1149.77	481.281	-934.029	1069.87	493.766	-1026.05	977.461	426.373	-1127.2	928.462	484.473	-1101.95	897.325	458.103	-1184.82	869.124
588	0	275.718	-1094.93	1539.27	172.482	-1099.04	1538.48	283.013	-922.934	1565.8	153.602	-951.441	1569.39	220.746	-868.447	1432.65	216.646	-763.993	1185.6	207.983	-1003.24	1322.98	219.604	-1049.71	1141.06	171.975	-762.878	1262.6	381.03	-941.575	1364.58	468.744	-929.335	1148.92	479.056	-949.078	1069.19	492.064	-1041.05	976.851	425.186	-1142.38	927.486	483.341	-1116.89	896.723	457.431	-1199.78	868.144
589	0	272.655	-1109.6	1538.67	169.413	-1113.56	1537.65	280.086	-937.622	1565.42	150.663	-965.969	1568.66	218.448	-882.816	1431.79	215.47	-779.148	1184.33	205.349	-1017.91	1322.56	216.94	-1065.33	1140.95	170.61	-777.544	1261.24	378.674	-956.655	1364.23	466.175	-943.796	1148.33	476.74	-963.718	1068.76	490.315	-1055.49	976.341	424.007	-1156.95	926.45	482.203	-1131.13	896.11	456.816	-1214	866.995
590	0	269.557	-1124.32	1538.37	166.31	-1128.14	1537.09	277.106	-952.367	1565.36	147.673	-980.563	1568.24	216.151	-897.222	1431.27	214.367	-794.287	1183.43	202.679	-1032.57	1322.47	214.15	-1080.84	1141.17	169.3	-792.206	1260.23	376.306	-971.761	1364.21	463.55	-957.948	1148.04	474.365	-977.956	1068.6	488.535	-1069.38	975.951	422.829	-1170.89	925.373	481.06	-1144.69	895.502	456.231	-1227.47	865.691
591	0	266.448	-1139.1	1538.35	163.196	-1142.78	1536.81	274.098	-967.165	1565.63	144.658	-995.219	1568.12	213.874	-911.661	1431.07	213.344	-809.391	1182.88	200.003	-1047.21	1322.69	211.28	-1096.23	1141.71	168.055	-806.854	1259.58	373.951	-986.881	1364.52	460.909	-971.818	1148.07	471.966	-991.802	1068.73	486.74	-1082.73	975.695	421.645	-1184.18	924.273	479.912	-1157.56	894.917	455.652	-1240.16	864.246
592	0	263.35	-1153.91	1538.62	160.094	-1157.45	1536.81	271.091	-982.013	1566.23	141.644	-1009.93	1568.3	211.637	-926.128	1431.21	212.405	-824.445	1182.72	197.354	-1061.82	1323.24	208.381	-1111.46	1142.56	166.884	-821.478	1259.3	371.633	-1002	1365.16	458.295	-985.434	1148.42	469.576	-1005.27	1069.15	484.946	-1095.55	975.587	420.449	-1196.83	923.165	478.763	-1169.77	894.372	455.054	-1252.09	862.674
593	0	260.29	-1168.76	1539.16	157.03	-1172.17	1537.07	268.112	-996.903	1567.13	138.66	-1024.69	1568.78	209.46	-940.619	1431.68	211.549	-839.431	1182.93	194.767	-1076.4	1324.08	205.507	-1126.51	1143.7	165.79	-836.071	1259.39	369.376	-1017.11	1366.13	455.75	-998.83	1149.12	467.228	-1018.38	1069.87	483.172	-1107.86	975.638	419.238	-1208.83	922.064	477.619	-1181.33	893.88	454.415	-1263.26	860.992
594	0	257.293	-1183.65	1539.97	154.028	-1186.92	1537.6	265.193	-1011.83	1568.33	135.733	-1039.49	1569.55	207.358	-955.128	1432.46	210.772	-854.337	1183.5	192.274	-1090.94	1325.22	202.714	-1141.34	1145.08	164.774	-850.626	1259.85	367.204	-1032.19	1367.43	453.315	-1012.04	1150.17	464.955	-1031.15	1070.9	481.435	-1119.67	975.854	418.013	-1220.19	920.986	476.488	-1192.27	893.457	453.719	-1273.67	859.213
595	0	254.383	-1198.55	1541.01	151.114	-1201.68	1538.37	262.361	-1026.78	1569.8	132.891	-1054.32	1570.57	205.346	-969.652	1433.55	210.065	-869.148	1184.44	189.906	-1105.43	1326.62	200.059	-1155.96	1146.69	163.834	-865.136	1260.65	365.138	-1047.22	1369.02	451.029	-1025.09	1151.55	462.785	-1043.59	1072.21	479.754	-1131.02	976.238	416.776	-1230.94	919.943	475.379	-1202.61	893.113	452.953	-1283.34	857.355
596	0	251.584	-1213.46	1542.28	148.31	-1216.47	1539.36	259.642	-1041.75	1571.52	130.159	-1069.17	1571.85	203.435	-984.184	1434.92	209.419	-883.855	1185.7	187.693	-1119.88	1328.25	197.594	-1170.34	1148.49	162.964	-879.597	1261.79	363.196	-1062.18	1370.9	448.924	-1038.02	1153.25	460.747	-1055.73	1073.81	478.146	-1141.93	976.789	415.536	-1241.08	918.947	474.305	-1212.39	892.855	452.111	-1292.31	855.434
597	0	248.917	-1228.39	1543.75	145.637	-1231.25	1540.55	257.061	-1056.73	1573.45	127.561	-1084.03	1573.34	201.636	-998.721	1436.55	208.821	-898.449	1187.28	185.658	-1134.28	1330.09	195.368	-1184.5	1150.43	162.155	-894.006	1263.24	361.396	-1077.08	1373.03	447.03	-1050.84	1155.25	458.86	-1067.59	1075.67	476.628	-1152.41	977.502	414.303	-1250.65	918.006	473.279	-1221.64	892.69	451.197	-1300.59	853.468
598	0	246.401	-1243.31	1545.38	143.115	-1246.04	1541.92	254.638	-1071.71	1575.56	125.118	-1098.89	1575.02	199.956	-1013.26	1438.4	208.257	-912.925	1189.13	183.824	-1148.64	1332.1	193.422	-1198.45	1152.47	161.399	-908.36	1264.97	359.75	-1091.88	1375.38	445.369	-1063.57	1157.52	457.143	-1079.18	1077.76	475.215	-1162.5	978.369	413.093	-1259.67	917.128	472.316	-1230.39	892.62	450.22	-1308.23	851.475
599	0	244.052	-1258.22	1547.15	140.76	-1260.82	1543.44	252.392	-1086.69	1577.82	122.846	-1113.75	1576.85	198.4	-1027.79	1440.44	207.713	-927.278	1191.22	182.204	-1162.95	1334.24	191.789	-1212.2	1154.59	160.685	-922.659	1266.95	358.269	-1106.58	1377.9	443.954	-1076.23	1160.03	455.606	-1090.52	1080.06	473.921	-1172.22	979.375	411.925	-1268.19	916.32	471.429	-1238.68	892.642	449.198	-1315.26	849.473
600	0	241.883	-1273.12	1549.02	138.585	-1275.59	1545.08	250.333	-1101.67	1580.18	120.76	-1128.59	1578.81	196.97	-1042.32	1442.64	207.175	-941.51	1193.53	180.809	-1177.22	1336.47	190.489	-1225.79	1156.74	160	-936.903	1269.14	356.957	-1121.17	1380.56	442.789	-1088.81	1162.74	454.256	-1101.62	1082.53	472.758	-1181.6	980.506	410.823	-1276.25	915.583	470.635	-1246.55	892.752	448.159	-1321.74	847.481
601	0	239.904	-1288.01	1550.97	136.6	-1290.35	1546.8	248.473	-1116.63	1582.61	118.867	-1143.43	1580.86	195.668	-1056.83	1444.96	206.632	-955.623	1196	179.644	-1191.45	1338.76	189.534	-1239.23	1158.89	159.335	-951.095	1271.5	355.819	-1135.64	1383.32	441.873	-1101.31	1165.6	453.092	-1112.51	1085.15	471.734	-1190.65	981.742	409.812	-1283.9	914.92	469.947	-1254.03	892.943	447.135	-1327.72	845.514
602	0	238.122	-1302.87	1552.95	134.811	-1305.08	1548.57	246.815	-1131.57	1585.08	117.176	-1158.24	1582.96	194.492	-1071.33	1447.37	206.071	-969.621	1198.59	178.708	-1205.64	1341.08	188.925	-1252.58	1161.01	158.678	-965.238	1273.99	354.853	-1149.99	1386.13	441.194	-1113.72	1168.57	452.108	-1123.19	1087.86	470.857	-1199.4	983.062	408.918	-1291.18	914.327	469.381	-1261.15	893.203	446.164	-1333.25	843.59
603	0	236.54	-1317.71	1554.93	133.223	-1319.8	1550.36	245.362	-1146.49	1587.54	115.688	-1173.04	1585.08	193.44	-1085.82	1449.81	205.485	-983.514	1201.26	177.994	-1219.8	1343.38	188.649	-1265.86	1163.09	158.021	-979.335	1276.56	354.056	-1164.22	1388.94	440.733	-1126.02	1171.59	451.295	-1133.66	1090.64	470.131	-1207.87	984.441	408.171	-1298.14	913.801	468.949	-1267.96	893.52	445.29	-1338.39	841.722
604	0	235.158	-1332.53	1556.88	131.838	-1334.5	1552.14	244.113	-1161.39	1589.96	114.403	-1187.82	1587.19	192.508	-1100.29	1452.27	204.868	-997.31	1203.96	177.492	-1233.94	1345.64	188.687	-1279.11	1165.1	157.357	-993.392	1279.18	353.421	-1178.32	1391.72	440.464	-1138.19	1174.63	450.637	-1143.95	1093.44	469.556	-1216.09	985.855	407.596	-1304.84	913.332	468.662	-1274.47	893.876	444.557	-1343.19	839.92
605	0	233.976	-1347.32	1558.76	130.652	-1349.18	1553.88	243.062	-1176.27	1592.31	113.318	-1202.57	1589.26	191.692	-1114.74	1454.69	204.216	-1011.02	1206.66	177.187	-1248.04	1347.83	189.008	-1292.35	1167.02	156.681	-1007.41	1281.8	352.941	-1192.31	1394.42	440.357	-1150.21	1177.62	450.115	-1154.06	1096.22	469.133	-1224.07	987.276	407.219	-1311.32	912.91	468.53	-1280.72	894.253	444.008	-1347.71	838.191
606	0	232.989	-1362.08	1560.54	129.664	-1363.84	1555.53	242.205	-1191.12	1594.56	112.428	-1217.31	1591.24	190.985	-1129.17	1457.04	203.53	-1024.66	1209.3	177.063	-1262.13	1349.92	189.576	-1305.62	1168.83	155.99	-1021.41	1284.38	352.606	-1206.18	1397	440.378	-1162.05	1180.54	449.71	-1164	1098.94	468.859	-1231.84	988.678	407.062	-1317.63	912.518	468.559	-1286.74	894.632	443.685	-1352.01	836.54
607	0	232.192	-1376.81	1562.2	128.869	-1378.48	1557.08	241.533	-1205.95	1596.66	111.725	-1232.03	1593.11	190.381	-1143.58	1459.28	202.813	-1038.24	1211.85	177.101	-1276.2	1351.87	190.35	-1318.94	1170.52	155.285	-1035.38	1286.88	352.403	-1219.96	1399.42	440.491	-1173.7	1183.34	449.398	-1173.79	1101.58	468.726	-1239.4	990.032	407.143	-1323.81	912.137	468.752	-1292.55	894.989	443.624	-1356.15	834.963
608	0	231.579	-1391.51	1563.7	128.26	-1393.1	1558.5	241.037	-1220.75	1598.59	111.201	-1246.73	1594.85	189.876	-1157.97	1461.38	202.069	-1051.77	1214.27	177.278	-1290.26	1353.68	191.286	-1332.32	1172.08	154.566	-1049.33	1289.26	352.32	-1233.64	1401.65	440.661	-1185.12	1185.96	449.158	-1183.43	1104.09	468.73	-1246.8	991.311	407.473	-1329.9	911.744	469.11	-1298.17	895.304	443.855	-1360.16	833.456
609	0	231.142	-1406.18	1565.02	127.829	-1407.71	1559.77	240.706	-1235.52	1600.33	110.848	-1261.42	1596.43	189.461	-1172.35	1463.31	201.308	-1065.27	1216.52	177.576	-1304.31	1355.3	192.339	-1345.77	1173.48	153.84	-1063.27	1291.48	352.345	-1247.25	1403.65	440.855	-1196.32	1188.39	448.969	-1192.95	1106.44	468.86	-1254.03	992.488	408.06	-1335.93	911.315	469.632	-1303.64	895.551	444.402	-1364.11	832.007
610	0	230.873	-1420.82	1566.13	127.571	-1422.31	1560.85	240.532	-1250.27	1601.84	110.656	-1276.09	1597.82	189.134	-1186.72	1465.04	200.538	-1078.76	1218.57	177.974	-1318.37	1356.73	193.465	-1359.29	1174.7	153.112	-1077.21	1293.51	352.465	-1260.8	1405.39	441.043	-1207.28	1190.59	448.81	-1202.36	1108.59	469.106	-1261.14	993.537	408.906	-1341.94	910.82	470.311	-1308.97	895.707	445.278	-1368.03	830.6
611	0	230.766	-1435.43	1567.01	127.476	-1436.89	1561.73	240.504	-1264.98	1603.11	110.615	-1290.75	1599	188.888	-1201.09	1466.54	199.771	-1092.24	1220.39	178.451	-1332.43	1357.93	194.624	-1372.89	1175.73	152.391	-1091.15	1295.33	352.667	-1274.31	1406.84	441.199	-1218.02	1192.53	448.665	-1211.69	1110.54	469.458	-1268.14	994.434	410.004	-1347.94	910.23	471.141	-1314.18	895.749	446.487	-1371.95	829.215
612	0	230.811	-1450.02	1567.66	127.539	-1451.46	1562.4	240.613	-1279.67	1604.11	110.717	-1305.4	1599.95	188.72	-1215.45	1467.79	199.019	-1105.72	1221.96	178.992	-1346.5	1358.89	195.777	-1386.56	1176.55	151.687	-1105.09	1296.9	352.941	-1287.79	1407.98	441.303	-1228.54	1194.19	448.52	-1220.97	1112.24	469.905	-1275.06	995.156	411.343	-1353.96	909.514	472.11	-1319.3	895.654	448.024	-1375.92	827.831
613	0	231.005	-1464.58	1568.05	127.752	-1466.03	1562.84	240.849	-1294.32	1604.82	110.954	-1320.03	1600.65	188.628	-1229.83	1468.76	198.295	-1119.24	1223.25	179.581	-1360.59	1359.59	196.893	-1400.28	1177.13	151.012	-1119.05	1298.22	353.277	-1301.27	1408.79	441.342	-1238.88	1195.56	448.363	-1230.22	1113.68	470.435	-1281.93	995.684	412.909	-1360.02	908.644	473.207	-1324.35	895.402	449.875	-1379.94	826.422
614	0	231.339	-1479.11	1568.17	128.11	-1480.59	1563.03	241.206	-1308.94	1605.23	111.318	-1334.66	1601.09	188.61	-1244.22	1469.44	197.614	-1132.78	1224.25	180.205	-1374.71	1360	197.948	-1414.05	1177.45	150.377	-1133.02	1299.25	353.666	-1314.75	1409.26	441.309	-1249.07	1196.62	448.188	-1239.49	1114.85	471.038	-1288.76	996	414.681	-1366.12	907.592	474.418	-1329.35	894.975	452.021	-1384.05	824.96
615	0	231.811	-1493.62	1568.02	128.608	-1495.15	1562.99	241.677	-1323.53	1605.32	111.803	-1349.28	1601.25	188.668	-1258.63	1469.82	196.988	-1146.37	1224.95	180.854	-1388.86	1360.12	198.92	-1427.86	1177.49	149.796	-1147.02	1300	354.104	-1328.27	1409.38	441.201	-1259.15	1197.35	447.992	-1248.79	1115.72	471.702	-1295.61	996.09	416.636	-1372.28	906.331	475.729	-1334.33	894.356	454.431	-1388.25	823.418
616	0	232.417	-1508.1	1567.6	129.243	-1509.7	1562.69	242.258	-1338.09	1605.1	112.406	-1363.89	1601.14	188.803	-1273.07	1469.89	196.43	-1160.02	1225.32	181.524	-1403.05	1359.93	199.797	-1441.7	1177.24	149.283	-1161.05	1300.44	354.586	-1341.83	1409.13	441.025	-1269.16	1197.76	447.775	-1258.17	1116.28	472.42	-1302.49	995.942	418.748	-1378.51	904.841	477.126	-1339.32	893.533	457.073	-1392.55	821.771
617	0	233.154	-1522.57	1566.9	130.011	-1524.25	1562.14	242.947	-1352.6	1604.55	113.123	-1378.49	1600.74	189.02	-1287.54	1469.64	195.953	-1173.73	1225.38	182.209	-1417.28	1359.43	200.572	-1455.57	1176.67	148.851	-1175.12	1300.58	355.111	-1355.45	1408.52	440.791	-1279.18	1197.84	447.542	-1267.67	1116.53	473.183	-1309.44	995.548	420.992	-1384.81	903.103	478.595	-1344.33	892.497	459.91	-1396.96	819.993
618	0	234.023	-1537	1565.94	130.913	-1538.8	1561.34	243.742	-1367.09	1603.67	113.954	-1393.08	1600.05	189.324	-1302.05	1469.07	195.568	-1187.52	1225.11	182.911	-1431.57	1358.6	201.243	-1469.45	1175.78	148.514	-1189.23	1300.4	355.681	-1369.14	1407.54	440.515	-1289.25	1197.58	447.299	-1277.31	1116.46	473.984	-1316.5	994.903	423.34	-1391.21	901.106	480.123	-1349.41	891.242	462.903	-1401.49	818.062
619	0	235.023	-1551.42	1564.71	131.947	-1553.35	1560.31	244.645	-1381.53	1602.47	114.899	-1407.66	1599.08	189.723	-1316.6	1468.18	195.286	-1201.39	1224.52	183.631	-1445.92	1357.46	201.814	-1483.36	1174.57	148.285	-1203.39	1299.91	356.301	-1382.92	1406.21	440.219	-1299.43	1197	447.055	-1287.14	1116.07	474.82	-1323.69	994.004	425.767	-1397.69	898.84	481.698	-1354.58	889.767	466.011	-1406.13	815.959
620	0	236.155	-1565.82	1563.24	133.115	-1567.89	1559.05	245.659	-1395.94	1600.96	115.961	-1422.23	1597.83	190.228	-1331.19	1466.99	195.115	-1215.35	1223.61	184.376	-1460.32	1356	202.292	-1497.3	1173.03	148.177	-1217.61	1299.12	356.977	-1396.8	1404.53	439.926	-1309.78	1196.08	446.823	-1297.18	1115.36	475.685	-1331.06	992.855	428.248	-1404.29	896.305	483.311	-1359.88	888.074	469.195	-1410.9	813.67
621	0	237.423	-1580.21	1561.54	134.418	-1582.44	1557.58	246.79	-1410.32	1599.15	117.144	-1436.78	1596.32	190.846	-1345.83	1465.5	195.064	-1229.41	1222.4	185.153	-1474.8	1354.23	202.69	-1511.27	1171.18	148.2	-1231.89	1298.04	357.717	-1410.78	1402.51	439.662	-1320.36	1194.83	446.616	-1307.46	1114.34	476.579	-1338.63	991.459	430.762	-1411.01	893.504	484.953	-1365.34	886.169	472.418	-1415.81	811.186
622	0	238.83	-1594.58	1559.64	135.86	-1596.98	1555.91	248.043	-1424.66	1597.07	118.453	-1451.32	1594.56	191.591	-1360.52	1463.74	195.138	-1243.58	1220.89	185.973	-1489.34	1352.18	203.02	-1525.29	1169.03	148.365	-1246.25	1296.67	358.532	-1424.87	1400.19	439.456	-1331.21	1193.26	446.447	-1318.02	1113	477.501	-1346.45	989.827	433.287	-1417.88	890.447	486.617	-1371	884.062	475.645	-1420.85	808.501
623	0	240.378	-1608.93	1557.55	137.443	-1611.52	1554.09	249.427	-1438.98	1594.73	119.895	-1465.84	1592.59	192.473	-1375.25	1461.72	195.342	-1257.85	1219.11	186.847	-1503.96	1349.86	203.301	-1539.37	1166.6	148.678	-1260.68	1295.05	359.432	-1439.07	1397.57	439.334	-1342.38	1191.38	446.332	-1328.87	1111.37	478.451	-1354.53	987.969	435.808	-1424.91	887.148	488.3	-1376.89	881.767	478.843	-1426.05	805.617
624	0	242.071	-1623.29	1555.31	139.171	-1626.06	1552.13	250.949	-1453.26	1592.17	121.476	-1480.34	1590.43	193.504	-1390.03	1459.49	195.68	-1272.24	1217.08	187.788	-1518.66	1347.31	203.552	-1553.53	1163.94	149.147	-1275.2	1293.18	360.43	-1453.39	1394.69	439.321	-1353.9	1189.21	446.284	-1340.03	1109.46	479.431	-1362.92	985.901	438.308	-1432.12	883.627	489.998	-1383.07	879.301	481.985	-1431.42	802.542
625	0	243.914	-1637.64	1552.96	141.045	-1640.6	1550.07	252.618	-1467.53	1589.42	123.204	-1494.83	1588.1	194.693	-1404.86	1457.06	196.151	-1286.74	1214.83	188.811	-1533.43	1344.56	203.793	-1567.78	1161.08	149.774	-1289.81	1291.1	361.536	-1467.82	1391.58	439.441	-1365.8	1186.75	446.316	-1351.53	1107.29	480.443	-1371.65	983.643	440.775	-1439.55	879.91	491.71	-1389.56	876.685	485.048	-1436.99	799.288
626	0	245.907	-1652	1550.52	143.07	-1655.14	1547.94	254.442	-1481.79	1586.52	125.085	-1509.31	1585.66	196.05	-1419.73	1454.48	196.757	-1301.37	1212.4	189.928	-1548.29	1341.66	204.048	-1582.15	1158.06	150.562	-1304.51	1288.84	362.762	-1482.37	1388.29	439.711	-1378.1	1184.03	446.44	-1363.37	1104.88	481.489	-1380.74	981.218	443.198	-1447.22	876.027	493.434	-1396.42	873.943	488.013	-1442.79	795.875
627	0	248.055	-1666.36	1548.05	145.245	-1669.68	1545.78	256.427	-1496.04	1583.52	127.126	-1523.78	1583.13	197.581	-1434.65	1451.79	197.496	-1316.11	1209.82	191.153	-1563.22	1338.64	204.34	-1596.64	1154.93	151.51	-1319.31	1286.45	364.118	-1497.01	1384.84	440.145	-1390.81	1181.08	446.666	-1375.58	1102.27	482.571	-1390.22	978.652	445.569	-1455.18	872.013	495.171	-1403.67	871.103	490.865	-1448.84	792.329
628	0	250.355	-1680.75	1545.58	147.572	-1684.23	1543.64	258.579	-1510.29	1580.45	129.329	-1538.24	1580.57	199.291	-1449.6	1449.04	198.364	-1330.98	1207.14	192.497	-1578.24	1335.57	204.693	-1611.27	1151.75	152.614	-1334.21	1283.95	365.61	-1511.76	1381.3	440.752	-1403.93	1177.94	447.002	-1388.14	1099.48	483.693	-1400.11	975.973	447.881	-1463.44	867.908	496.921	-1411.37	868.192	493.593	-1455.2	788.68
629	0	252.808	-1695.16	1543.15	150.047	-1698.79	1541.55	260.9	-1524.56	1577.37	131.698	-1552.7	1578.03	201.18	-1464.6	1446.27	199.357	-1345.97	1204.39	193.969	-1593.33	1332.5	205.133	-1626.05	1148.58	153.869	-1349.21	1281.41	367.245	-1526.61	1377.7	441.536	-1417.46	1174.63	447.452	-1401.07	1096.56	484.855	-1410.44	973.213	450.128	-1472.05	863.755	498.684	-1419.54	865.244	496.19	-1461.9	784.965
630	0	255.409	-1709.6	1540.81	152.668	-1713.36	1539.55	263.391	-1538.85	1574.33	134.233	-1567.17	1575.54	203.247	-1479.63	1443.53	200.467	-1361.08	1201.65	195.577	-1608.5	1329.48	205.681	-1641	1145.48	155.266	-1364.3	1278.87	369.023	-1541.54	1374.11	442.493	-1431.38	1171.22	448.021	-1414.37	1093.54	486.059	-1421.23	970.408	452.305	-1481.05	859.598	500.46	-1428.24	862.29	498.653	-1469	781.223
631	0	258.152	-1724.08	1538.59	155.428	-1727.95	1537.69	266.05	-1553.17	1571.39	136.93	-1581.64	1573.15	205.484	-1494.7	1440.87	201.686	-1376.31	1198.94	197.324	-1623.74	1326.57	206.358	-1656.11	1142.49	156.795	-1379.49	1276.37	370.945	-1556.54	1370.57	443.617	-1445.66	1167.74	448.707	-1428.03	1090.48	487.305	-1432.5	967.591	454.408	-1490.48	855.488	502.248	-1437.49	859.366	500.981	-1476.55	777.499
632	0	261.028	-1738.61	1536.54	158.319	-1742.56	1536	268.872	-1567.54	1568.58	139.784	-1596.13	1570.92	207.884	-1509.8	1438.34	203.004	-1391.63	1196.34	199.21	-1639.04	1323.82	207.181	-1671.39	1139.69	158.443	-1394.77	1273.97	373.005	-1571.62	1367.13	444.895	-1460.3	1164.26	449.509	-1442.04	1087.41	488.592	-1444.24	964.8	456.435	-1500.38	851.472	504.045	-1447.33	856.505	503.174	-1484.61	773.837
633	0	264.026	-1753.18	1534.69	161.329	-1757.19	1534.51	271.848	-1581.95	1565.95	142.787	-1610.64	1568.88	210.43	-1524.93	1435.99	204.411	-1407.05	1193.88	201.23	-1654.39	1321.3	208.162	-1686.84	1137.13	160.195	-1410.12	1271.72	375.193	-1586.74	1363.86	446.311	-1475.25	1160.82	450.422	-1456.39	1084.38	489.919	-1456.49	962.071	458.382	-1510.8	847.601	505.85	-1457.79	853.741	505.237	-1493.24	770.282
634	0	267.131	-1767.8	1533.06	164.445	-1771.84	1533.25	274.965	-1596.41	1563.55	145.925	-1625.17	1567.08	213.107	-1540.07	1433.85	205.892	-1422.55	1191.62	203.375	-1669.78	1319.04	209.307	-1702.45	1134.85	162.034	-1425.53	1269.67	377.496	-1601.91	1360.8	447.849	-1490.48	1157.49	451.441	-1471.07	1081.45	491.284	-1469.24	959.44	460.248	-1521.76	843.923	507.657	-1468.89	851.106	507.174	-1502.49	766.881
635	0	270.328	-1782.47	1531.69	167.651	-1786.52	1532.25	278.21	-1610.94	1561.42	149.186	-1639.72	1565.54	215.892	-1555.23	1431.98	207.434	-1438.11	1189.6	205.631	-1685.2	1317.09	210.618	-1718.21	1132.91	163.94	-1441	1267.86	379.898	-1617.11	1358	449.487	-1505.95	1154.32	452.557	-1486.05	1078.66	492.682	-1482.49	956.942	462.032	-1533.31	840.484	509.464	-1480.67	848.631	508.99	-1512.43	763.675
636	0	273.596	-1797.19	1530.6	170.928	-1801.21	1531.52	281.563	-1625.52	1559.59	152.549	-1654.3	1564.31	218.763	-1570.38	1430.4	209.021	-1453.71	1187.87	207.981	-1700.63	1315.49	212.087	-1734.09	1131.33	165.895	-1456.49	1266.33	382.377	-1632.32	1355.5	451.204	-1521.64	1151.37	453.764	-1501.31	1076.05	494.112	-1496.26	954.608	463.736	-1545.49	837.327	511.262	-1493.14	846.342	510.692	-1523.11	760.702
637	0	276.916	-1811.95	1529.79	174.255	-1815.93	1531.08	285.003	-1640.16	1558.09	155.994	-1668.91	1563.39	221.69	-1585.52	1429.14	210.637	-1469.32	1186.46	210.402	-1716.06	1314.26	213.703	-1750.08	1130.15	167.877	-1472	1265.12	384.909	-1647.53	1353.34	452.981	-1537.51	1148.68	455.051	-1516.84	1073.66	495.567	-1510.52	952.468	465.359	-1558.33	834.491	513.048	-1506.32	844.264	512.285	-1534.6	757.999
638	0	280.266	-1826.76	1529.27	177.612	-1830.66	1530.93	288.504	-1654.86	1556.94	159.499	-1683.54	1562.82	224.646	-1600.63	1428.22	212.262	-1484.93	1185.39	212.87	-1731.45	1313.43	215.447	-1766.14	1129.39	169.864	-1487.5	1264.24	387.467	-1662.72	1351.55	454.798	-1553.52	1146.31	456.41	-1532.61	1071.52	497.043	-1525.28	950.546	466.903	-1571.84	832.007	514.812	-1520.21	842.417	513.778	-1546.93	755.592
639	0	283.62	-1841.59	1529.05	180.974	-1845.4	1531.08	292.04	-1669.6	1556.15	163.035	-1698.19	1562.6	227.6	-1615.7	1427.66	213.879	-1500.5	1184.69	215.358	-1746.79	1313	217.297	-1782.23	1129.05	171.831	-1502.96	1263.74	390.023	-1677.87	1350.14	456.636	-1569.64	1144.28	457.832	-1548.59	1069.67	498.536	-1540.53	948.864	468.372	-1586.06	829.902	516.549	-1534.82	840.816	515.176	-1560.16	753.508
640	0	286.957	-1856.44	1529.11	184.32	-1860.14	1531.51	295.581	-1684.38	1555.73	166.576	-1712.85	1562.73	230.521	-1630.71	1427.47	215.468	-1516.01	1184.38	217.835	-1762.06	1312.98	219.226	-1798.3	1129.14	173.757	-1518.36	1263.6	392.547	-1692.96	1349.14	458.479	-1585.86	1142.62	459.307	-1564.76	1068.12	500.041	-1556.25	947.439	469.768	-1601.01	828.198	518.251	-1550.15	839.473	516.488	-1574.31	751.762
641	0	290.25	-1871.3	1529.45	187.623	-1874.87	1532.22	299.095	-1699.18	1555.68	170.091	-1727.53	1563.22	233.378	-1645.64	1427.65	217.011	-1531.42	1184.45	220.275	-1777.23	1313.35	221.204	-1814.31	1129.63	175.619	-1533.68	1263.85	395.009	-1707.98	1348.54	460.313	-1602.14	1141.34	460.829	-1581.09	1066.9	501.551	-1572.43	946.283	471.094	-1616.68	826.906	519.912	-1566.2	838.396	517.72	-1589.41	750.369
642	0	293.478	-1886.15	1530.05	190.862	-1889.6	1533.18	302.549	-1714	1555.98	173.551	-1742.21	1564.05	236.142	-1660.48	1428.18	218.489	-1546.71	1184.91	222.646	-1792.28	1314.11	223.2	-1830.21	1130.5	177.397	-1548.9	1264.46	397.381	-1722.89	1348.34	462.124	-1618.46	1140.45	462.388	-1597.57	1066	503.064	-1589.05	945.402	472.355	-1633.08	826.036	521.524	-1582.94	837.588	518.88	-1605.49	749.335
643	0	296.615	-1900.98	1530.89	194.013	-1904.3	1534.38	305.911	-1728.8	1556.64	176.924	-1756.88	1565.2	238.787	-1675.22	1429.06	219.889	-1561.87	1185.73	224.924	-1807.2	1315.22	225.184	-1845.93	1131.73	179.074	-1563.98	1265.45	399.636	-1737.69	1348.53	463.903	-1634.81	1139.95	463.978	-1614.16	1065.42	504.572	-1606.09	944.799	473.552	-1650.21	825.586	523.081	-1600.37	837.048	519.972	-1622.55	748.666
644	0	299.641	-1915.77	1531.95	197.054	-1918.97	1535.79	309.15	-1743.59	1557.62	180.181	-1771.55	1566.66	241.29	-1689.84	1430.27	221.197	-1576.86	1186.91	227.083	-1821.96	1316.67	227.123	-1861.46	1133.27	180.636	-1578.93	1266.77	401.75	-1752.37	1349.09	465.639	-1651.17	1139.83	465.592	-1630.84	1065.16	506.07	-1623.54	944.474	474.689	-1668.05	825.555	524.576	-1618.47	836.776	521.004	-1640.58	748.362
645	0	302.536	-1930.51	1533.2	199.964	-1933.61	1537.39	312.235	-1758.33	1558.91	183.293	-1786.19	1568.4	243.631	-1704.33	1431.78	222.406	-1591.67	1188.43	229.103	-1836.56	1318.42	228.987	-1876.73	1135.08	182.072	-1593.71	1268.42	403.702	-1766.9	1349.98	467.326	-1667.52	1140.06	467.223	-1647.6	1065.21	507.554	-1641.36	944.421	475.766	-1686.57	825.933	526.004	-1637.2	836.764	521.979	-1659.59	748.425
646	0	305.281	-1945.19	1534.62	202.725	-1948.19	1539.15	315.138	-1773.02	1560.47	186.235	-1800.81	1570.38	245.797	-1718.7	1433.57	223.512	-1606.28	1190.24	230.967	-1850.99	1320.42	230.746	-1891.73	1137.13	183.38	-1608.31	1270.36	405.475	-1781.28	1351.19	468.957	-1683.84	1140.62	468.866	-1664.41	1065.55	509.018	-1659.53	944.632	476.782	-1705.75	826.71	527.357	-1656.54	837.008	522.901	-1679.54	748.854
647	0	307.861	-1959.79	1536.19	205.321	-1962.72	1541.04	317.838	-1787.63	1562.29	188.985	-1815.38	1572.59	247.778	-1732.92	1435.6	224.515	-1620.7	1192.33	232.661	-1865.24	1322.65	232.372	-1906.43	1139.36	184.557	-1622.74	1272.55	407.058	-1795.52	1352.67	470.526	-1700.13	1141.48	470.514	-1681.25	1066.15	510.456	-1678.02	945.097	477.738	-1725.55	827.874	528.631	-1676.45	837.5	523.772	-1700.4	749.65
648	0	310.264	-1974.31	1537.88	207.739	-1977.19	1543.05	320.315	-1802.17	1564.32	191.525	-1829.91	1574.97	249.571	-1747.01	1437.84	225.419	-1634.91	1194.66	234.177	-1879.32	1325.07	233.84	-1920.82	1141.75	185.607	-1636.98	1274.98	408.442	-1809.6	1354.39	472.031	-1716.36	1142.6	472.163	-1698.11	1066.99	511.861	-1696.82	945.803	478.628	-1745.92	829.41	529.819	-1696.9	838.233	524.591	-1722.13	750.816
649	0	312.48	-1988.73	1539.68	209.969	-1991.59	1545.13	322.556	-1816.61	1566.54	193.841	-1844.39	1577.5	251.174	-1760.97	1440.26	226.232	-1648.91	1197.18	235.513	-1893.22	1327.63	235.128	-1934.91	1144.24	186.54	-1651.03	1277.59	409.625	-1823.55	1356.3	473.468	-1732.52	1143.97	473.806	-1714.98	1068.05	513.228	-1715.88	946.737	479.451	-1766.81	831.305	530.915	-1717.84	839.201	525.358	-1744.68	752.356
650	0	314.504	-2003.06	1541.56	212.003	-2005.92	1547.28	324.555	-1830.96	1568.91	195.924	-1858.81	1580.14	252.594	-1774.8	1442.83	226.965	-1662.72	1199.87	236.668	-1906.96	1330.3	236.218	-1948.7	1146.82	187.365	-1664.91	1280.35	410.608	-1837.35	1358.37	474.836	-1748.61	1145.54	475.438	-1731.84	1069.3	514.552	-1735.19	947.885	480.201	-1788.17	833.545	531.914	-1739.23	840.397	526.067	-1767.99	754.275
651	0	316.334	-2017.29	1543.5	213.839	-2020.17	1549.46	326.31	-1845.2	1571.41	197.773	-1873.17	1582.86	253.839	-1788.52	1445.5	227.631	-1676.34	1202.69	237.649	-1920.54	1333.04	237.098	-1962.22	1149.45	188.096	-1678.62	1283.22	411.397	-1851.04	1360.56	476.132	-1764.61	1147.28	477.054	-1748.69	1070.71	515.825	-1754.72	949.233	480.873	-1809.95	836.118	532.811	-1761.03	841.817	526.714	-1792	756.578
652	0	317.969	-2031.42	1545.48	215.478	-2034.34	1551.65	327.824	-1859.33	1573.98	199.388	-1887.45	1585.62	254.919	-1802.13	1448.25	228.243	-1689.79	1205.6	238.463	-1933.99	1335.82	237.762	-1975.48	1152.1	188.747	-1692.17	1286.17	412.001	-1864.61	1362.83	477.357	-1780.51	1149.16	478.649	-1765.52	1072.26	517.042	-1774.44	950.764	481.462	-1832.08	839.012	533.602	-1783.19	843.455	527.293	-1816.62	759.273
653	0	319.414	-2045.44	1547.48	216.921	-2048.42	1553.83	329.109	-1873.35	1576.62	200.778	-1901.66	1588.39	255.848	-1815.64	1451.03	228.815	-1703.07	1208.56	239.124	-1947.3	1338.62	238.211	-1988.52	1154.77	189.333	-1705.57	1289.16	412.434	-1878.1	1365.16	478.512	-1796.3	1151.15	480.218	-1782.34	1073.91	518.199	-1794.32	952.463	481.963	-1854.5	842.213	534.284	-1805.68	845.307	527.795	-1841.78	762.361
654	0	320.676	-2059.37	1549.49	218.177	-2062.42	1555.99	330.176	-1887.27	1579.27	201.952	-1915.79	1591.13	256.642	-1829.06	1453.82	229.358	-1716.22	1211.53	239.644	-1960.49	1341.39	238.452	-2001.37	1157.41	189.868	-1718.84	1292.15	412.713	-1891.5	1367.51	479.597	-1811.99	1153.23	481.757	-1799.12	1075.64	519.29	-1814.35	954.313	482.371	-1877.16	845.711	534.854	-1828.44	847.368	528.212	-1867.4	765.845
655	0	321.764	-2073.21	1551.47	219.253	-2076.33	1558.09	331.044	-1901.08	1581.91	202.925	-1929.84	1593.82	257.315	-1842.4	1456.58	229.883	-1729.25	1214.48	240.042	-1973.59	1344.11	238.5	-2014.05	1160.02	190.365	-1732	1295.1	412.857	-1904.85	1369.85	480.615	-1827.57	1155.36	483.264	-1815.89	1077.43	520.311	-1834.5	956.299	482.685	-1900	849.489	535.312	-1851.43	849.632	528.537	-1893.39	769.718
656	0	322.69	-2086.95	1553.42	220.163	-2090.15	1560.12	331.733	-1914.79	1584.51	203.714	-1943.8	1596.43	257.882	-1855.68	1459.27	230.398	-1742.18	1217.37	240.333	-1986.6	1346.76	238.375	-2026.61	1162.58	190.833	-1745.07	1297.98	412.886	-1918.14	1372.16	481.57	-1843.04	1157.51	484.736	-1832.62	1079.25	521.261	-1854.75	958.402	482.9	-1922.97	853.532	535.658	-1874.61	852.093	528.76	-1919.67	773.973
657	0	323.466	-2100.6	1555.3	220.918	-2103.88	1562.05	332.264	-1928.41	1587.03	204.338	-1957.68	1598.93	258.357	-1868.9	1461.87	230.907	-1755.03	1220.17	240.535	-1999.54	1349.31	238.105	-2039.07	1165.06	191.28	-1758.06	1300.76	412.822	-1931.4	1374.42	482.466	-1858.4	1159.66	486.17	-1849.34	1081.07	522.135	-1875.07	960.604	483.017	-1946.02	857.822	535.893	-1897.95	854.741	528.876	-1946.15	778.593
658	0	324.106	-2114.18	1557.1	221.533	-2117.53	1563.88	332.657	-1941.94	1589.45	204.816	-1971.47	1601.3	258.754	-1882.07	1464.34	231.41	-1767.82	1222.85	240.667	-2012.43	1351.73	237.719	-2051.45	1167.45	191.712	-1770.98	1303.41	412.688	-1944.63	1376.61	483.31	-1873.68	1161.79	487.566	-1866.04	1082.88	522.935	-1895.45	962.888	483.036	-1969.11	862.337	536.02	-1921.4	857.566	528.879	-1972.75	783.554
659	0	324.625	-2127.67	1558.8	222.023	-2131.09	1565.58	332.933	-1955.39	1591.74	205.167	-1985.18	1603.51	259.082	-1895.2	1466.67	231.906	-1780.57	1225.37	240.745	-2025.27	1354.01	237.251	-2063.8	1169.72	192.129	-1783.87	1305.89	412.504	-1957.83	1378.7	484.105	-1888.86	1163.86	488.922	-1882.73	1084.64	523.658	-1915.88	965.232	482.957	-1992.19	867.052	536.043	-1944.93	860.555	528.764	-1999.39	788.828
660	0	325.037	-2141.1	1560.37	222.402	-2144.56	1567.13	333.112	-1968.76	1593.88	205.411	-1998.81	1605.53	259.35	-1908.3	1468.81	232.388	-1793.29	1227.7	240.785	-2038.08	1356.12	236.737	-2076.11	1171.84	192.53	-1796.72	1308.18	412.29	-1971.02	1380.69	484.86	-1903.98	1165.85	490.239	-1899.4	1086.34	524.307	-1936.32	967.617	482.783	-2015.23	871.939	535.968	-1968.49	863.692	528.53	-2026.01	794.378
661	0	325.355	-2154.46	1561.8	222.685	-2157.96	1568.52	333.211	-1982.05	1595.82	205.563	-2012.35	1607.36	259.566	-1921.37	1470.76	232.847	-1806	1229.82	240.799	-2050.88	1358.04	236.212	-2088.43	1173.79	192.909	-1809.55	1310.25	412.061	-1984.19	1382.54	485.581	-1919.05	1167.72	491.515	-1916.08	1087.95	524.883	-1956.77	970.023	482.517	-2038.21	876.966	535.8	-1992.07	866.96	528.177	-2052.54	800.164
662	0	325.591	-2167.75	1563.06	222.885	-2171.28	1569.72	333.244	-1995.29	1597.56	205.641	-2025.82	1608.96	259.733	-1934.41	1472.48	233.272	-1818.71	1231.7	240.8	-2063.66	1359.74	235.713	-2100.75	1175.54	193.26	-1822.38	1312.09	411.829	-1997.34	1384.24	486.274	-1934.08	1169.47	492.753	-1932.75	1089.44	525.388	-1977.21	972.43	482.163	-2061.09	882.098	535.547	-2015.63	870.337	527.705	-2078.91	806.14
663	0	325.757	-2180.99	1564.14	223.013	-2184.54	1570.73	333.223	-2008.47	1599.07	205.657	-2039.21	1610.33	259.854	-1947.43	1473.96	233.649	-1831.42	1233.33	240.798	-2076.44	1361.22	235.27	-2113.1	1177.06	193.573	-1835.21	1313.67	411.603	-2010.46	1385.77	486.944	-1949.1	1171.05	493.95	-1949.43	1090.81	525.826	-1997.62	974.816	481.726	-2083.84	887.298	535.214	-2039.13	873.801	527.12	-2105.08	812.257
664	0	325.861	-2194.18	1565.02	223.079	-2197.73	1571.52	333.157	-2021.6	1600.33	205.621	-2052.53	1611.44	259.929	-1960.44	1475.18	233.964	-1844.15	1234.69	240.799	-2089.22	1362.44	234.913	-2125.48	1178.34	193.837	-1848.05	1314.98	411.387	-2023.56	1387.11	487.595	-1964.13	1172.46	495.107	-1966.13	1092.03	526.198	-2018	977.161	481.208	-2106.45	892.527	534.81	-2062.55	877.327	526.425	-2131	818.467
665	0	325.911	-2207.32	1565.68	223.09	-2210.87	1572.09	333.053	-2034.69	1601.34	205.543	-2065.78	1612.28	259.957	-1973.44	1476.13	234.2	-1856.89	1235.77	240.809	-2102.02	1363.4	234.664	-2137.91	1179.34	194.04	-1860.9	1316.01	411.183	-2036.64	1388.25	488.231	-1979.18	1173.67	496.223	-1982.84	1093.07	526.509	-2038.33	979.447	480.617	-2128.89	897.744	534.342	-2085.86	880.891	525.627	-2156.63	824.718
666	0	325.912	-2220.43	1566.11	223.051	-2223.96	1572.42	332.913	-2047.74	1602.06	205.426	-2078.97	1612.85	259.934	-1986.43	1476.8	234.345	-1869.66	1236.54	240.829	-2114.83	1364.08	234.542	-2150.4	1180.06	194.17	-1873.78	1316.74	410.986	-2049.67	1389.16	488.85	-1994.27	1174.65	497.297	-1999.56	1093.94	526.761	-2058.59	981.655	479.955	-2151.14	902.91	533.818	-2109.03	884.464	524.734	-2181.94	830.96
667	0	325.867	-2233.5	1566.3	222.966	-2237.01	1572.51	332.739	-2060.76	1602.5	205.274	-2092.1	1613.13	259.857	-1999.41	1477.18	234.383	-1882.46	1237.02	240.86	-2127.67	1364.46	234.556	-2162.96	1180.47	194.214	-1886.68	1317.18	410.793	-2062.67	1389.84	489.453	-2009.43	1175.41	498.324	-2016.3	1094.61	526.958	-2078.77	983.767	479.229	-2173.19	907.984	533.243	-2132.04	888.02	523.754	-2206.89	837.144
668	0	325.775	-2246.54	1566.24	222.835	-2250.02	1572.34	332.529	-2073.76	1602.65	205.085	-2105.18	1613.13	259.72	-2012.4	1477.27	234.304	-1895.28	1237.19	240.896	-2140.53	1364.55	234.712	-2175.6	1180.57	194.16	-1899.6	1317.31	410.597	-2075.63	1390.26	490.034	-2024.65	1175.92	499.301	-2033.05	1095.07	527.1	-2098.85	985.767	478.444	-2195.03	912.928	532.625	-2154.86	891.531	522.699	-2231.47	843.225
669	0	325.634	-2259.56	1565.93	222.656	-2263.01	1571.92	332.278	-2086.73	1602.5	204.857	-2118.22	1612.84	259.517	-2025.37	1477.06	234.097	-1908.12	1237.06	240.933	-2153.42	1364.33	235.006	-2188.33	1180.36	193.999	-1912.55	1317.14	410.388	-2088.54	1390.43	490.587	-2039.94	1176.18	500.223	-2049.81	1095.32	527.188	-2118.82	987.641	477.604	-2216.62	917.708	531.968	-2177.46	894.97	521.578	-2255.66	849.159
670	0	325.442	-2272.56	1565.37	222.425	-2275.97	1571.25	331.979	-2099.69	1602.06	204.585	-2131.23	1612.27	259.241	-2038.35	1476.57	233.757	-1921	1236.63	240.961	-2166.34	1363.82	235.429	-2201.16	1179.83	193.721	-1925.53	1316.67	410.159	-2101.41	1390.34	491.104	-2055.3	1176.19	501.081	-2066.56	1095.36	527.224	-2138.67	989.375	476.716	-2237.96	922.289	531.277	-2199.82	898.31	520.402	-2279.43	854.906
671	0	325.192	-2285.55	1564.55	222.136	-2288.92	1570.33	331.626	-2112.64	1601.34	204.26	-2144.2	1611.42	258.886	-2051.34	1475.8	233.279	-1933.9	1235.9	240.969	-2179.29	1363	235.964	-2214.09	1178.99	193.322	-1938.55	1315.9	409.9	-2114.23	1389.98	491.573	-2070.72	1175.94	501.869	-2083.3	1095.17	527.206	-2158.36	990.958	475.787	-2259.04	926.645	530.555	-2221.9	901.527	519.185	-2302.76	860.429
672	0	324.876	-2298.54	1563.5	221.781	-2301.86	1569.18	331.207	-2125.58	1600.35	203.875	-2157.15	1610.32	258.444	-2064.32	1474.76	232.664	-1946.83	1234.89	240.943	-2192.27	1361.9	236.588	-2227.13	1177.85	192.796	-1951.59	1314.86	409.602	-2127.02	1389.36	491.981	-2086.2	1175.44	502.576	-2100.01	1094.77	527.131	-2177.89	992.38	474.824	-2279.84	930.75	529.807	-2243.69	904.596	517.937	-2325.65	865.696
673	0	324.486	-2311.52	1562.23	221.351	-2314.8	1567.79	330.711	-2138.51	1599.1	203.419	-2170.09	1608.96	257.908	-2077.31	1473.46	231.915	-1959.8	1233.6	240.868	-2205.29	1360.52	237.275	-2240.28	1176.43	192.143	-1964.66	1313.54	409.255	-2139.78	1388.5	492.314	-2101.7	1174.7	503.192	-2116.68	1094.17	526.999	-2197.22	993.633	473.836	-2300.34	934.583	529.033	-2265.16	907.497	516.672	-2348.08	870.676
674	0	324.012	-2324.5	1560.74	220.837	-2327.74	1566.2	330.126	-2151.44	1597.6	202.88	-2183.02	1607.37	257.271	-2090.31	1471.93	231.037	-1972.8	1232.07	240.728	-2218.35	1358.89	237.99	-2253.54	1174.76	191.364	-1977.76	1311.97	408.851	-2152.52	1387.4	492.554	-2117.22	1173.73	503.703	-2133.28	1093.36	526.804	-2216.34	994.713	472.832	-2320.53	938.128	528.235	-2286.28	910.209	515.399	-2370.03	875.344
675	0	323.444	-2337.49	1559.08	220.228	-2340.69	1564.42	329.44	-2164.36	1595.9	202.246	-2195.94	1605.59	256.527	-2103.31	1470.19	230.041	-1985.84	1230.3	240.506	-2231.45	1357.03	238.698	-2266.93	1172.85	190.461	-1990.9	1310.17	408.379	-2165.24	1386.08	492.686	-2132.72	1172.55	504.099	-2149.8	1092.37	526.542	-2235.23	995.615	471.823	-2340.39	941.373	527.413	-2307.01	912.713	514.129	-2391.48	879.675
676	0	322.77	-2350.49	1557.25	219.511	-2353.64	1562.47	328.64	-2177.29	1594.01	201.504	-2208.87	1603.62	255.67	-2116.33	1468.25	228.938	-1998.91	1228.31	240.182	-2244.59	1354.97	239.359	-2280.42	1170.74	189.442	-2004.07	1308.15	407.831	-2177.98	1384.58	492.691	-2148.17	1171.17	504.366	-2166.21	1091.21	526.208	-2253.85	996.337	470.82	-2359.92	944.309	526.567	-2327.35	914.995	512.871	-2412.42	883.648
677	0	321.978	-2363.5	1555.29	218.676	-2366.61	1560.39	327.713	-2190.21	1591.96	200.643	-2221.81	1601.51	254.694	-2129.36	1466.16	227.74	-2012.04	1226.14	239.742	-2257.77	1352.74	239.933	-2294.03	1168.47	188.315	-2017.27	1305.95	407.199	-2190.73	1382.91	492.554	-2163.55	1169.62	504.491	-2182.5	1089.9	525.796	-2272.18	996.88	469.834	-2379.1	946.931	525.695	-2347.25	917.042	511.63	-2432.83	887.243
678	0	321.059	-2376.52	1553.24	217.712	-2379.59	1558.2	326.649	-2203.15	1589.8	199.652	-2234.76	1599.28	253.596	-2142.4	1463.93	226.464	-2025.21	1223.81	239.167	-2271	1350.38	240.378	-2307.75	1166.07	187.088	-2030.5	1303.58	406.474	-2203.52	1381.11	492.259	-2178.82	1167.93	504.463	-2198.64	1088.46	525.3	-2290.21	997.245	468.876	-2397.91	949.236	524.799	-2366.69	918.842	510.409	-2452.69	890.444
679	0	320.002	-2389.57	1551.13	216.607	-2392.59	1555.94	325.437	-2216.1	1587.55	198.518	-2247.73	1596.97	252.372	-2155.45	1461.61	225.124	-2038.45	1221.35	238.443	-2284.28	1347.93	240.656	-2321.57	1163.6	185.773	-2043.77	1301.09	405.649	-2216.37	1379.22	491.793	-2193.95	1166.13	504.269	-2214.6	1086.92	524.714	-2307.89	997.438	467.955	-2416.34	951.224	523.876	-2385.65	920.388	509.207	-2471.99	893.233
680	0	318.797	-2402.64	1548.99	215.352	-2405.6	1553.63	324.068	-2229.06	1585.27	197.235	-2260.72	1594.62	251.02	-2168.53	1459.23	223.736	-2051.74	1218.8	237.557	-2297.6	1345.43	240.728	-2335.48	1161.09	184.381	-2057.08	1298.5	404.716	-2229.29	1377.26	491.145	-2208.92	1164.24	503.901	-2230.37	1085.31	524.032	-2325.22	997.463	467.081	-2434.37	952.897	522.925	-2404.11	921.673	508.019	-2490.71	895.597
681	0	317.436	-2415.73	1546.86	213.937	-2418.64	1551.33	322.535	-2242.04	1582.98	195.793	-2273.73	1592.26	249.538	-2181.63	1456.82	222.313	-2065.1	1216.18	236.498	-2310.97	1342.93	240.563	-2349.48	1158.6	182.924	-2070.42	1295.84	403.668	-2242.3	1375.29	490.307	-2223.71	1162.3	503.348	-2245.92	1083.65	523.249	-2342.16	997.328	466.257	-2451.98	954.255	521.945	-2422.04	922.695	506.839	-2508.82	897.522
682	0	315.911	-2428.85	1544.79	212.355	-2431.71	1549.06	320.832	-2255.04	1580.73	194.188	-2286.78	1589.93	247.927	-2194.75	1454.41	220.87	-2078.54	1213.53	235.257	-2324.39	1340.47	240.132	-2363.57	1156.16	181.414	-2083.81	1293.15	402.501	-2255.4	1373.33	489.274	-2238.3	1160.35	502.605	-2261.24	1081.97	522.359	-2358.69	997.042	465.485	-2469.16	955.303	520.934	-2439.43	923.452	505.654	-2526.32	898.995
683	0	314.217	-2442	1542.79	210.599	-2444.79	1546.86	318.955	-2268.07	1578.55	192.415	-2299.85	1587.66	246.187	-2207.89	1452.05	219.419	-2092.05	1210.89	233.827	-2337.85	1338.09	239.412	-2377.72	1153.83	179.861	-2097.23	1290.46	401.209	-2268.62	1371.43	488.043	-2252.69	1158.42	501.665	-2276.32	1080.3	521.357	-2374.8	996.615	464.764	-2485.88	956.04	519.891	-2456.25	923.944	504.446	-2543.18	900.005
684	0	312.349	-2455.17	1540.92	208.664	-2457.9	1544.77	316.902	-2281.13	1576.49	190.471	-2312.96	1585.5	244.321	-2221.05	1449.77	217.969	-2105.65	1208.29	232.205	-2351.36	1335.83	238.389	-2391.94	1151.65	178.276	-2110.7	1287.81	399.789	-2281.96	1369.63	486.614	-2266.86	1156.56	500.527	-2291.13	1078.67	520.239	-2390.47	996.057	464.085	-2502.13	956.468	518.815	-2472.49	924.175	503.198	-2559.4	900.538
685	0	310.304	-2468.38	1539.19	206.546	-2471.04	1542.81	314.673	-2294.23	1574.58	188.357	-2326.11	1583.46	242.332	-2234.24	1447.61	216.529	-2119.34	1205.76	230.389	-2364.92	1333.75	237.053	-2406.21	1149.67	176.669	-2124.21	1285.24	398.237	-2295.41	1367.95	484.991	-2280.83	1154.78	499.187	-2305.67	1077.12	519.002	-2405.68	995.382	463.435	-2517.87	956.587	517.705	-2488.13	924.147	501.887	-2574.96	900.586
686	0	308.08	-2481.63	1537.64	204.243	-2484.21	1541.02	312.269	-2307.36	1572.86	186.072	-2339.3	1581.59	240.223	-2247.45	1445.58	215.105	-2133.12	1203.34	228.381	-2378.51	1331.86	235.403	-2420.53	1147.91	175.047	-2137.76	1282.76	396.547	-2308.99	1366.44	483.179	-2294.59	1153.13	497.646	-2319.93	1075.67	517.643	-2420.41	994.601	462.796	-2533.09	956.392	516.561	-2503.18	923.868	500.485	-2589.84	900.137
687	0	305.678	-2494.91	1536.3	201.752	-2497.41	1539.44	309.691	-2320.54	1571.36	183.62	-2352.53	1579.92	237.999	-2260.68	1443.74	213.702	-2146.99	1201.06	226.182	-2392.13	1330.22	233.445	-2434.9	1146.42	173.419	-2151.36	1280.41	394.714	-2322.67	1365.11	481.184	-2308.15	1151.65	495.905	-2333.91	1074.34	516.16	-2434.66	993.725	462.141	-2547.76	955.878	515.383	-2517.61	923.344	498.966	-2604.04	899.182
688	0	303.098	-2508.23	1535.19	199.073	-2510.65	1538.07	306.943	-2333.77	1570.1	181.003	-2365.81	1578.46	235.665	-2273.93	1442.09	212.323	-2160.95	1198.94	223.799	-2405.79	1328.84	231.193	-2449.3	1145.24	171.791	-2165	1278.23	392.73	-2336.45	1364.01	479.014	-2321.52	1150.35	493.967	-2347.6	1073.16	514.551	-2448.41	992.768	461.439	-2561.86	955.039	514.174	-2531.42	922.582	497.3	-2617.55	897.711
689	0	300.341	-2521.6	1534.32	196.206	-2523.92	1536.95	304.029	-2347.04	1569.12	178.224	-2379.14	1577.25	233.224	-2287.19	1440.68	210.97	-2175	1197.02	221.238	-2419.47	1327.76	228.663	-2463.73	1144.4	170.169	-2178.68	1276.23	390.588	-2350.33	1363.13	476.68	-2334.72	1149.28	491.834	-2360.99	1072.16	512.815	-2461.66	991.741	460.654	-2575.35	953.864	512.934	-2544.61	921.593	495.456	-2630.36	895.715
690	0	297.41	-2535.01	1533.72	193.151	-2537.24	1536.1	300.952	-2360.37	1568.42	175.287	-2392.51	1576.3	230.684	-2300.47	1439.51	209.645	-2189.15	1195.32	218.504	-2433.17	1327	225.875	-2478.19	1143.92	168.559	-2192.39	1274.44	388.278	-2364.27	1362.51	474.189	-2347.76	1148.45	489.51	-2374.1	1071.35	510.953	-2474.41	990.655	459.745	-2588.2	952.343	511.666	-2557.19	920.384	493.403	-2642.45	893.186
691	0	294.307	-2548.46	1533.4	189.91	-2550.6	1535.52	297.716	-2373.76	1568.04	172.196	-2405.95	1575.62	228.047	-2313.75	1438.6	208.347	-2203.38	1193.85	215.605	-2446.89	1326.58	222.852	-2492.68	1143.82	166.965	-2206.14	1272.89	385.792	-2378.27	1362.16	471.55	-2360.64	1147.89	486.998	-2386.92	1070.75	508.963	-2486.64	989.518	458.674	-2600.4	950.464	510.374	-2569.14	918.966	491.114	-2653.82	890.116
692	0	291.034	-2561.96	1533.37	186.483	-2564.01	1535.24	294.325	-2387.2	1567.99	168.953	-2419.44	1575.24	225.32	-2327.04	1437.98	207.078	-2217.71	1192.65	212.548	-2460.63	1326.52	219.612	-2507.19	1144.13	165.392	-2219.93	1271.58	383.121	-2392.31	1362.08	468.77	-2373.38	1147.61	484.302	-2399.45	1070.38	506.845	-2498.36	988.339	457.402	-2611.92	948.219	509.061	-2580.47	917.347	488.567	-2664.46	886.5
693	0	287.594	-2575.5	1533.63	182.872	-2577.47	1535.26	290.783	-2400.71	1568.27	165.562	-2432.99	1575.15	222.506	-2340.33	1437.65	205.837	-2232.12	1191.71	209.338	-2474.37	1326.81	216.171	-2521.71	1144.86	163.842	-2233.74	1270.53	380.255	-2406.38	1362.29	465.857	-2385.98	1147.62	481.424	-2411.68	1070.25	504.599	-2509.57	987.125	455.899	-2622.73	945.6	507.728	-2591.18	915.533	485.746	-2674.35	882.338
694	0	283.988	-2589.09	1534.2	179.078	-2590.97	1535.59	287.09	-2414.27	1568.89	162.024	-2446.59	1575.37	219.608	-2353.63	1437.61	204.625	-2246.61	1191.06	205.98	-2488.12	1327.48	212.542	-2536.25	1146.01	162.318	-2247.58	1269.74	377.19	-2420.47	1362.78	462.814	-2398.46	1147.95	478.367	-2423.63	1070.36	502.227	-2520.26	985.881	454.14	-2632.84	942.604	506.379	-2601.28	913.531	482.642	-2683.49	877.63
695	0	280.217	-2602.73	1535.07	175.101	-2604.53	1536.22	283.249	-2427.9	1569.86	158.341	-2460.26	1575.89	216.629	-2366.93	1437.89	203.442	-2261.2	1190.69	202.477	-2501.87	1328.53	208.736	-2550.81	1147.59	160.823	-2261.46	1269.23	373.922	-2434.56	1363.57	459.645	-2410.81	1148.59	475.134	-2435.29	1070.71	499.727	-2530.42	984.61	452.111	-2642.22	939.228	505.016	-2610.76	911.344	479.25	-2691.87	872.378
696	0	276.282	-2616.42	1536.25	170.942	-2618.14	1537.16	279.261	-2441.59	1571.18	154.514	-2473.99	1576.73	213.569	-2380.23	1438.46	202.288	-2275.86	1190.61	198.832	-2515.63	1329.95	204.756	-2565.38	1149.6	159.357	-2275.35	1269	370.448	-2448.67	1364.64	456.353	-2423.03	1149.55	471.725	-2446.67	1071.32	497.1	-2540.08	983.313	449.803	-2650.88	935.473	503.64	-2619.63	908.977	475.57	-2699.49	866.583
697	0	272.183	-2630.16	1537.74	166.602	-2631.8	1538.42	275.127	-2455.34	1572.85	150.543	-2487.78	1577.88	210.43	-2393.53	1439.35	201.164	-2290.61	1190.83	195.045	-2529.39	1331.76	200.607	-2579.96	1152.04	157.921	-2289.28	1269.05	366.767	-2462.77	1366.02	452.938	-2435.14	1150.83	468.14	-2457.75	1072.19	494.346	-2549.21	981.993	447.212	-2658.81	931.339	502.251	-2627.89	906.429	471.601	-2706.36	860.247
698	0	267.921	-2643.94	1539.54	162.082	-2645.51	1539.99	270.847	-2469.16	1574.87	146.428	-2501.62	1579.33	207.212	-2406.83	1440.54	200.069	-2305.44	1191.33	191.117	-2543.15	1333.94	196.289	-2594.55	1154.91	156.516	-2303.23	1269.38	362.88	-2476.88	1367.68	449.402	-2447.12	1152.43	464.381	-2468.55	1073.3	491.465	-2557.82	980.648	444.337	-2666.02	926.826	500.85	-2635.53	903.701	467.343	-2712.45	853.371
[truncated: 69 more columns]

## Sheet: Sheet2
Devices
		025370 - Force			025370 - Moment			025370 - CoP			027571 - Force			027571 - Moment			027571 - CoP			037720 - Force			037720 - Moment			037720 - CoP
Frame	Sub Frame	Fx	Fy	Fz	Mx	My	Mz	Cx	Cy	Cz	Fx	Fy	Fz	Mx	My	Mz	Cx	Cy	Cz	Fx	Fy	Fz	Mx	My	Mz	Cx	Cy	Cz
		N	N	N	N.mm	N.mm	N.mm	mm	mm	mm	N	N	N	N.mm	N.mm	N.mm	mm	mm	mm	N	N	N	N.mm	N.mm	N.mm	mm	mm	mm
291	0	0	0	0	0	0	0	200	300	0	0	0	0	0	0	0	200	903	0	0	0	0	0	0	0	603	903	0
291	1	0	0	0	0	0	0	200	300	0	0	0	0	0	0	0	200	903	0	0	0	0	0	0	0	603	903	0
291	2	0	0	0	0	0	0	200	300	0	0	0	0	0	0	0	200	903	0	0	0	0	0	0	0	603	903	0
291	3	0	0	0	0	0	0	200	300	0	0	0	0	0	0	0	200	903	0	0	0	0	0	0	0	603	903	0
291	4	0	0	0	0	0	0	200	300	0	0	0	0	0	0	0	200	903	0	0	0	0	0	0	0	603	903	0
291	5	0	0	0	0	0	0	200	300	0	0	0	0	0	0	0	200	903	0	0	0	0	0	0	0	603	903	0
291	6	0	0	0	0	0	0	200	300	0	0	0	0	0	0	0	200	903	0	0	0	0	0	0	0	603	903	0
291	7	0	0	0	0	0	0	200	300	0	0	0	0	0	0	0	200	903	0	0	0	0	0	0	0	603	903	0
291	8	0	0	0	0	0	0	200	300	0	0	0	0	0	0	0	200	903	0	0	0	0	0	0	0	603	903	0
291	9	0	0	0	0	0	0	200	300	0	0	0	0	0	0	0	200	903	0	0	0	0	0	0	0	603	903	0
292	0	0	0	0	0	0	0	200	300	0	0	0	0	0	0	0	200	903	0	0	0	0	0	0	0	603	903	0
292	1	0	0	0	0	0	0	200	300	0	0	0	0	0	0	0	200	903	0	0	0	0	0	0	0	603	903	0
292	2	0	0	0	0	0	0	200	300	0	0	0	0	0	0	0	200	903	0	0	0	0	0	0	0	603	903	0
292	3	0	0	0	0	0	0	200	300	0	0	0	0	0	0	0	200	903	0	0	0	0	0	0	0	603	903	0
292	4	0	0	0	0	0	0	200	300	0	0	0	0	0	0	0	200	903	0	0	0	0	0	0	0	603	903	0
292	5	0	0	0	0	0	0	200	300	0	0	0	0	0	0	0	200	903	0	0	0	0	0	0	0	603	903	0
292	6	0	0	0	0	0	0	200	300	0	0	0	0	0	0	0	200	903	0	0	0	0	0	0	0	603	903	0
292	7	0	0	0	0	0	0	200	300	0	0	0	0	0	0	0	200	903	0	0	0	0	0	0	0	603	903	0
292	8	0	0	0	0	0	0	200	300	0	0	0	0	0	0	0	200	903	0	0	0	0	0	0	0	603	903	0
292	9	0	0	0	0	0	0	200	300	0	0	0	0	0	0	0	200	903	0	0	0	0	0	0	0	603	903	0
293	0	0	0	0	0	0	0	200	300	0	0	0	0	0	0	0	200	903	0	0	0	0	0	0	0	603	903	0
293	1	0	0	0	0	0	0	200	300	0	0	0	0	0	0	0	200	903	0	0	0	0	0	0	0	603	903	0
293	2	0	0	0	0	0	0	200	300	0	0	0	0	0	0	0	200	903	0	0	0	0	0	0	0	603	903	0
293	3	0	0	0	0	0	0	200	300	0	0	0	0	0	0	0	200	903	0	0	0	0	0	0	0	603	903	0
293	4	0	0	0	0	0	0	200	300	0	0	0	0	0	0	0	200	903	0	0	0	0	0	0	0	603	903	0
293	5	0	0	0	0	0	0	200	300	0	0	0	0	0	0	0	200	903	0	0	0	0	0	0	0	603	903	0
293	6	0	0	0	0	0	0	200	300	0	0	0	0	0	0	0	200	903	0	0	0	0	0	0	0	603	903	0
293	7	0	0	0	0	0	0	200	300	0	0	0	0	0	0	0	200	903	0	0	0	0	0	0	0	603	903	0
293	8	0	0	0	0	0	0	200	300	0	0	0	0	0	0	0	200	903	0	0	0	0	0	0	0	603	903	0
293	9	0	0	0	0	0	0	200	300	0	0	0	0	0	0	0	200	903	0	0	0	0	0	0	0	603	903	0
294	0	0	0	0	0	0	0	200	300	0	0	0	0	0	0	0	200	903	0	0	0	0	0	0	0	603	903	0
294	1	0	0	0	0	0	0	200	300	0	0	0	0	0	0	0	200	903	0	0	0	0	0	0	0	603	903	0
294	2	0	0	0	0	0	0	200	300	0	0	0	0	0	0	0	200	903	0	0	0	0	0	0	0	603	903	0
294	3	0	0	0	0	0	0	200	300	0	0	0	0	0	0	0	200	903	0	0	0	0	0	0	0	603	903	0
294	4	0	0	0	0	0	0	200	300	0	0	0	0	0	0	0	200	903	0	0	0	0	0	0	0	603	903	0
294	5	0	0	0	0	0	0	200	300	0	0	0	0	0	0	0	200	903	0	0	0	0	0	0	0	603	903	0
294	6	0	0	0	0	0	0	200	300	0	0	0	0	0	0	0	200	903	0	0	0	0	0	0	0	603	903	0
294	7	0	0	0	0	0	0	200	300	0	0	0	0	0	0	0	200	903	0	0	0	0	0	0	0	603	903	0
294	8	0	0	0	0	0	0	200	300	0	0	0	0	0	0	0	200	903	0	0	0	0	0	0	0	603	903	0
294	9	0	0	0	0	0	0	200	300	0	0	0	0	0	0	0	200	903	0	0	0	0	0	0	0	603	903	0
295	0	0	0	0	0	0	0	200	300	0	0	0	0	0	0	0	200	903	0	0	0	0	0	0	0	603	903	0
295	1	0	0	0	0	0	0	200	300	0	0	0	0	0	0	0	200	903	0	0	0	0	0	0	0	603	903	0
295	2	0	0	0	0	0	0	200	300	0	0	0	0	0	0	0	200	903	0	0	0	0	0	0	0	603	903	0
295	3	0	0	0	0	0	0	200	300	0	0	0	0	0	0	0	200	903	0	0	0	0	0	0	0	603	903	0
295	4	0	0	0	0	0	0	200	300	0	0	0	0	0	0	0	200	903	0	0	0	0	0	0	0	603	903	0
295	5	0	0	0	0	0	0	200	300	0	0	0	0	0	0	0	200	903	0	0	0	0	0	0	0	603	903	0
295	6	0	0	0	0	0	0	200	300	0	0	0	0	0	0	0	200	903	0	0	0	0	0	0	0	603	903	0
295	7	0	0	0	0	0	0	200	300	0	0	0	0	0	0	0	200	903	0	0	0	0	0	0	0	603	903	0
295	8	0	0	0	0	0	0	200	300	0	0	0	0	0	0	0	200	903	0	0	0	0	0	0	0	603	903	0
295	9	0	0	0	0	0	0	200	300	0	0	0	0	0	0	0	200	903	0	0	0	0	0	0	0	603	903	0
296	0	0	0	0	0	0	0	200	300	0	0	0	0	0	0	0	200	903	0	0	0	0	0	0	0	603	903	0
296	1	0	0	0	0	0	0	200	300	0	0	0	0	0	0	0	200	903	0	0	0	0	0	0	0	603	903	0
296	2	0	0	0	0	0	0	200	300	0	0	0	0	0	0	0	200	903	0	0	0	0	0	0	0	603	903	0
296	3	0	0	0	0	0	0	200	300	0	0	0	0	0	0	0	200	903	0	0	0	0	0	0	0	603	903	0
296	4	0	0	0	0	0	0	200	300	0	0	0	0	0	0	0	200	903	0	0	0	0	0	0	0	603	903	0
296	5	0	0	0	0	0	0	200	300	0	0	0	0	0	0	0	200	903	0	0	0	0	0	0	0	603	903	0
296	6	0	0	0	0	0	0	200	300	0	0	0	0	0	0	0	200	903	0	0	0	0	0	0	0	603	903	0
296	7	0	0	0	0	0	0	200	300	0	0	0	0	0	0	0	200	903	0	0	0	0	0	0	0	603	903	0
296	8	0	0	0	0	0	0	200	300	0	0	0	0	0	0	0	200	903	0	0	0	0	0	0	0	603	903	0
296	9	0	0	0	0	0	0	200	300	0	0	0	0	0	0	0	200	903	0	0	0	0	0	0	0	603	903	0
297	0	0	0	0	0	0	0	200	300	0	0	0	0	0	0	0	200	903	0	0	0	0	0	0	0	603	903	0
297	1	0	0	0	0	0	0	200	300	0	0	0	0	0	0	0	200	903	0	0	0	0	0	0	0	603	903	0
297	2	0	0	0	0	0	0	200	300	0	0	0	0	0	0	0	200	903	0	0	0	0	0	0	0	603	903	0
297	3	0	0	0	0	0	0	200	300	0	0	0	0	0	0	0	200	903	0	0	0	0	0	0	0	603	903	0
297	4	0	0	0	0	0	0	200	300	0	0	0	0	0	0	0	200	903	0	0	0	0	0	0	0	603	903	0
297	5	0	0	0	0	0	0	200	300	0	0	0	0	0	0	0	200	903	0	0	0	0	0	0	0	603	903	0
297	6	0	0	0	0	0	0	200	300	0	0	0	0	0	0	0	200	903	0	0	0	0	0	0	0	603	903	0
297	7	0	0	0	0	0	0	200	300	0	0	0	0	0	0	0	200	903	0	0	0	0	0	0	0	603	903	0
297	8	0	0	0	0	0	0	200	300	0	0	0	0	0	0	0	200	903	0	0	0	0	0	0	0	603	903	0
297	9	0	0	0	0	0	0	200	300	0	0	0	0	0	0	0	200	903	0	0	0	0	0	0	0	603	903	0
298	0	0	0	0	0	0	0	200	300	0	0	0	0	0	0	0	200	903	0	0	0	0	0	0	0	603	903	0
298	1	0	0	0	0	0	0	200	300	0	0	0	0	0	0	0	200	903	0	0	0	0	0	0	0	603	903	0
298	2	0	0	0	0	0	0	200	300	0	0	0	0	0	0	0	200	903	0	0	0	0	0	0	0	603	903	0
298	3	0	0	0	0	0	0	200	300	0	0	0	0	0	0	0	200	903	0	0	0	0	0	0	0	603	903	0
298	4	0	0	0	0	0	0	200	300	0	0	0	0	0	0	0	200	903	0	0	0	0	0	0	0	603	903	0
298	5	0	0	0	0	0	0	200	300	0	0	0	0	0	0	0	200	903	0	0	0	0	0	0	0	603	903	0
298	6	0	0	0	0	0	0	200	300	0	0	0	0	0	0	0	200	903	0	0	0	0	0	0	0	603	903	0
298	7	0	0	0	0	0	0	200	300	0	0	0	0	0	0	0	200	903	0	0	0	0	0	0	0	603	903	0
298	8	0	0	0	0	0	0	200	300	0	0	0	0	0	0	0	200	903	0	0	0	0	0	0	0	603	903	0
298	9	0	0	0	0	0	0	200	300	0	0	0	0	0	0	0	200	903	0	0	0	0	0	0	0	603	903	0
299	0	0	0	0	0	0	0	200	300	0	0	0	0	0	0	0	200	903	0	0	0	0	0	0	0	603	903	0
299	1	0	0	0	0	0	0	200	300	0	0	0	0	0	0	0	200	903	0	0	0	0	0	0	0	603	903	0
299	2	0	0	0	0	0	0	200	300	0	0	0	0	0	0	0	200	903	0	0	0	0	0	0	0	603	903	0
299	3	0	0	0	0	0	0	200	300	0	0	0	0	0	0	0	200	903	0	0	0	0	0	0	0	603	903	0
299	4	0	0	0	0	0	0	200	300	0	0	0	0	0	0	0	200	903	0	0	0	0	0	0	0	603	903	0
299	5	0	0	0	0	0	0	200	300	0	0	0	0	0	0	0	200	903	0	0	0	0	0	0	0	603	903	0
299	6	0	0	0	0	0	0	200	300	0	0	0	0	0	0	0	200	903	0	0	0	0	0	0	0	603	903	0
299	7	0	0	0	0	0	0	200	300	0	0	0	0	0	0	0	200	903	0	0	0	0	0	0	0	603	903	0
299	8	0	0	0	0	0	0	200	300	0	0	0	0	0	0	0	200	903	0	0	0	0	0	0	0	603	903	0
299	9	0	0	0	0	0	0	200	300	0	0	0	0	0	0	0	200	903	0	0	0	0	0	0	0	603	903	0
300	0	0	0	0	0	0	0	200	300	0	0	0	0	0	0	0	200	903	0	0	0	0	0	0	0	603	903	0
300	1	0	0	0	0	0	0	200	300	0	0	0	0	0	0	0	200	903	0	0	0	0	0	0	0	603	903	0
300	2	0	0	0	0	0	0	200	300	0	0	0	0	0	0	0	200	903	0	0	0	0	0	0	0	603	903	0
300	3	0	0	0	0	0	0	200	300	0	0	0	0	0	0	0	200	903	0	0	0	0	0	0	0	603	903	0
300	4	0	0	0	0	0	0	200	300	0	0	0	0	0	0	0	200	903	0	0	0	0	0	0	0	603	903	0
300	5	0	0	0	0	0	0	200	300	0	0	0	0	0	0	0	200	903	0	0	0	0	0	0	0	603	903	0
300	6	0	0	0	0	0	0	200	300	0	0	0	0	0	0	0	200	903	0	0	0	0	0	0	0	603	903	0
300	7	0	0	0	0	0	0	200	300	0	0	0	0	0	0	0	200	903	0	0	0	0	0	0	0	603	903	0
300	8	0	0	0	0	0	0	200	300	0	0	0	0	0	0	0	200	903	0	0	0	0	0	0	0	603	903	0
300	9	0	0	0	0	0	0	200	300	0	0	0	0	0	0	0	200	903	0	0	0	0	0	0	0	603	903	0
301	0	0	0	0	0	0	0	200	300	0	0	0	0	0	0	0	200	903	0	0	0	0	0	0	0	603	903	0
301	1	0	0	0	0	0	0	200	300	0	0	0	0	0	0	0	200	903	0	0	0	0	0	0	0	603	903	0
301	2	0	0	0	0	0	0	200	300	0	0	0	0	0	0	0	200	903	0	0	0	0	0	0	0	603	903	0
301	3	0	0	0	0	0	0	200	300	0	0	0	0	0	0	0	200	903	0	0	0	0	0	0	0	603	903	0
301	4	0	0	0	0	0	0	200	300	0	0	0	0	0	0	0	200	903	0	0	0	0	0	0	0	603	903	0
301	5	0	0	0	0	0	0	200	300	0	0	0	0	0	0	0	200	903	0	0	0	0	0	0	0	603	903	0
301	6	0	0	0	0	0	0	200	300	0	0	0	0	0	0	0	200	903	0	0	0	0	0	0	0	603	903	0
301	7	0	0	0	0	0	0	200	300	0	0	0	0	0	0	0	200	903	0	0	0	0	0	0	0	603	903	0
301	8	0	0	0	0	0	0	200	300	0	0	0	0	0	0	0	200	903	0	0	0	0	0	0	0	603	903	0
301	9	0	0	0	0	0	0	200	300	0	0	0	0	0	0	0	200	903	0	0	0	0	0	0	0	603	903	0
302	0	0	0	0	0	0	0	200	300	0	0	0	0	0	0	0	200	903	0	0	0	0	0	0	0	603	903	0
302	1	0	0	0	0	0	0	200	300	0	0	0	0	0	0	0	200	903	0	0	0	0	0	0	0	603	903	0
302	2	0	0	0	0	0	0	200	300	0	0	0	0	0	0	0	200	903	0	0	0	0	0	0	0	603	903	0
302	3	0	0	0	0	0	0	200	300	0	0	0	0	0	0	0	200	903	0	0	0	0	0	0	0	603	903	0
302	4	0	0	0	0	0	0	200	300	0	0	0	0	0	0	0	200	903	0	0	0	0	0	0	0	603	903	0
302	5	0	0	0	0	0	0	200	300	0	0	0	0	0	0	0	200	903	0	0	0	0	0	0	0	603	903	0
302	6	0	0	0	0	0	0	200	300	0	0	0	0	0	0	0	200	903	0	0	0	0	0	0	0	603	903	0
302	7	0	0	0	0	0	0	200	300	0	0	0	0	0	0	0	200	903	0	0	0	0	0	0	0	603	903	0
302	8	0	0	0	0	0	0	200	300	0	0	0	0	0	0	0	200	903	0	0	0	0	0	0	0	603	903	0
302	9	0	0	0	0	0	0	200	300	0	0	0	0	0	0	0	200	903	0	0	0	0	0	0	0	603	903	0
303	0	0	0	0	0	0	0	200	300	0	0	0	0	0	0	0	200	903	0	0	0	0	0	0	0	603	903	0
303	1	0	0	0	0	0	0	200	300	0	0	0	0	0	0	0	200	903	0	0	0	0	0	0	0	603	903	0
303	2	0	0	0	0	0	0	200	300	0	0	0	0	0	0	0	200	903	0	0	0	0	0	0	0	603	903	0
303	3	0	0	0	0	0	0	200	300	0	0	0	0	0	0	0	200	903	0	0	0	0	0	0	0	603	903	0
303	4	0	0	0	0	0	0	200	300	0	0	0	0	0	0	0	200	903	0	0	0	0	0	0	0	603	903	0
303	5	0	0	0	0	0	0	200	300	0	0	0	0	0	0	0	200	903	0	0	0	0	0	0	0	603	903	0
303	6	0	0	0	0	0	0	200	300	0	0	0	0	0	0	0	200	903	0	0	0	0	0	0	0	603	903	0
303	7	0	0	0	0	0	0	200	300	0	0	0	0	0	0	0	200	903	0	0	0	0	0	0	0	603	903	0
303	8	0	0	0	0	0	0	200	300	0	0	0	0	0	0	0	200	903	0	0	0	0	0	0	0	603	903	0
303	9	0	0	0	0	0	0	200	300	0	0	0	0	0	0	0	200	903	0	0	0	0	0	0	0	603	903	0
304	0	0	0	0	0	0	0	200	300	0	0	0	0	0	0	0	200	903	0	0	0	0	0	0	0	603	903	0
304	1	0	0	0	0	0	0	200	300	0	0	0	0	0	0	0	200	903	0	0	0	0	0	0	0	603	903	0
304	2	0	0	0	0	0	0	200	300	0	0	0	0	0	0	0	200	903	0	0	0	0	0	0	0	603	903	0
304	3	0	0	0	0	0	0	200	300	0	0	0	0	0	0	0	200	903	0	0	0	0	0	0	0	603	903	0
304	4	0	0	0	0	0	0	200	300	0	0	0	0	0	0	0	200	903	0	0	0	0	0	0	0	603	903	0
304	5	0	0	0	0	0	0	200	300	0	0	0	0	0	0	0	200	903	0	0	0	0	0	0	0	603	903	0
304	6	0	0	0	0	0	0	200	300	0	0	0	0	0	0	0	200	903	0	0	0	0	0	0	0	603	903	0
304	7	0	0	0	0	0	0	200	300	0	0	0	0	0	0	0	200	903	0	0	0	0	0	0	0	603	903	0
304	8	0	0	0	0	0	0	200	300	0	0	0	0	0	0	0	200	903	0	0	0	0	0	0	0	603	903	0
304	9	0	0	0	0	0	0	200	300	0	0	0	0	0	0	0	200	903	0	0	0	0	0	0	0	603	903	0
305	0	0	0	0	0	0	0	200	300	0	0	0	0	0	0	0	200	903	0	0	0	0	0	0	0	603	903	0
305	1	0	0	0	0	0	0	200	300	0	0	0	0	0	0	0	200	903	0	0	0	0	0	0	0	603	903	0
305	2	0	0	0	0	0	0	200	300	0	0	0	0	0	0	0	200	903	0	0	0	0	0	0	0	603	903	0
305	3	0	0	0	0	0	0	200	300	0	0	0	0	0	0	0	200	903	0	0	0	0	0	0	0	603	903	0
305	4	0	0	0	0	0	0	200	300	0	0	0	0	0	0	0	200	903	0	0	0	0	0	0	0	603	903	0
305	5	0	0	0	0	0	0	200	300	0	0	0	0	0	0	0	200	903	0	0	0	0	0	0	0	603	903	0
305	6	0	0	0	0	0	0	200	300	0	0	0	0	0	0	0	200	903	0	0	0	0	0	0	0	603	903	0
305	7	0	0	0	0	0	0	200	300	0	0	0	0	0	0	0	200	903	0	0	0	0	0	0	0	603	903	0
305	8	0	0	0	0	0	0	200	300	0	0	0	0	0	0	0	200	903	0	0	0	0	0	0	0	603	903	0
305	9	0	0	0	0	0	0	200	300	0	0	0	0	0	0	0	200	903	0	0	0	0	0	0	0	603	903	0
306	0	0	0	0	0	0	0	200	300	0	0	0	0	0	0	0	200	903	0	0	0	0	0	0	0	603	903	0
306	1	0	0	0	0	0	0	200	300	0	0	0	0	0	0	0	200	903	0	0	0	0	0	0	0	603	903	0
306	2	0	0	0	0	0	0	200	300	0	0	0	0	0	0	0	200	903	0	0	0	0	0	0	0	603	903	0
306	3	0	0	0	0	0	0	200	300	0	0	0	0	0	0	0	200	903	0	0	0	0	0	0	0	603	903	0
306	4	0	0	0	0	0	0	200	300	0	0	0	0	0	0	0	200	903	0	0	0	0	0	0	0	603	903	0
306	5	0	0	0	0	0	0	200	300	0	0	0	0	0	0	0	200	903	0	0	0	0	0	0	0	603	903	0
306	6	0	0	0	0	0	0	200	300	0	0	0	0	0	0	0	200	903	0	0	0	0	0	0	0	603	903	0
306	7	0	0	0	0	0	0	200	300	0	0	0	0	0	0	0	200	903	0	0	0	0	0	0	0	603	903	0
306	8	0	0	0	0	0	0	200	300	0	0	0	0	0	0	0	200	903	0	0	0	0	0	0	0	603	903	0
306	9	0	0	0	0	0	0	200	300	0	0	0	0	0	0	0	200	903	0	0	0	0	0	0	0	603	903	0
307	0	0	0	0	0	0	0	200	300	0	0	0	0	0	0	0	200	903	0	0	0	0	0	0	0	603	903	0
307	1	0	0	0	0	0	0	200	300	0	0	0	0	0	0	0	200	903	0	0	0	0	0	0	0	603	903	0
307	2	0	0	0	0	0	0	200	300	0	0	0	0	0	0	0	200	903	0	0	0	0	0	0	0	603	903	0
307	3	0	0	0	0	0	0	200	300	0	0	0	0	0	0	0	200	903	0	0	0	0	0	0	0	603	903	0
307	4	0	0	0	0	0	0	200	300	0	0	0	0	0	0	0	200	903	0	0	0	0	0	0	0	603	903	0
307	5	0	0	0	0	0	0	200	300	0	0	0	0	0	0	0	200	903	0	0	0	0	0	0	0	603	903	0
307	6	0	0	0	0	0	0	200	300	0	0	0	0	0	0	0	200	903	0	0	0	0	0	0	0	603	903	0
307	7	0	0	0	0	0	0	200	300	0	0	0	0	0	0	0	200	903	0	0	0	0	0	0	0	603	903	0
307	8	0	0	0	0	0	0	200	300	0	0	0	0	0	0	0	200	903	0	0	0	0	0	0	0	603	903	0
307	9	0	0	0	0	0	0	200	300	0	0	0	0	0	0	0	200	903	0	0	0	0	0	0	0	603	903	0
308	0	0	0	0	0	0	0	200	300	0	0	0	0	0	0	0	200	903	0	0	0	0	0	0	0	603	903	0
308	1	0	0	0	0	0	0	200	300	0	0	0	0	0	0	0	200	903	0	0	0	0	0	0	0	603	903	0
308	2	0	0	0	0	0	0	200	300	0	0	0	0	0	0	0	200	903	0	0	0	0	0	0	0	603	903	0
308	3	0	0	0	0	0	0	200	300	0	0	0	0	0	0	0	200	903	0	0	0	0	0	0	0	603	903	0
308	4	0	0	0	0	0	0	200	300	0	0	0	0	0	0	0	200	903	0	0	0	0	0	0	0	603	903	0
308	5	0	0	0	0	0	0	200	300	0	0	0	0	0	0	0	200	903	0	0	0	0	0	0	0	603	903	0
308	6	0	0	0	0	0	0	200	300	0	0	0	0	0	0	0	200	903	0	0	0	0	0	0	0	603	903	0
308	7	0	0	0	0	0	0	200	300	0	0	0	0	0	0	0	200	903	0	0	0	0	0	0	0	603	903	0
308	8	0	0	0	0	0	0	200	300	0	0	0	0	0	0	0	200	903	0	0	0	0	0	0	0	603	903	0
308	9	0	0	0	0	0	0	200	300	0	0	0	0	0	0	0	200	903	0	0	0	0	0	0	0	603	903	0
309	0	0	0	0	0	0	0	200	300	0	0	0	0	0	0	0	200	903	0	0	0	0	0	0	0	603	903	0
309	1	0	0	0	0	0	0	200	300	0	0	0	0	0	0	0	200	903	0	0	0	0	0	0	0	603	903	0
309	2	0	0	0	0	0	0	200	300	0	0	0	0	0	0	0	200	903	0	0	0	0	0	0	0	603	903	0
309	3	0	0	0	0	0	0	200	300	0	0	0	0	0	0	0	200	903	0	0	0	0	0	0	0	603	903	0
309	4	0	0	0	0	0	0	200	300	0	0	0	0	0	0	0	200	903	0	0	0	0	0	0	0	603	903	0
309	5	0	0	0	0	0	0	200	300	0	0	0	0	0	0	0	200	903	0	0	0	0	0	0	0	603	903	0
309	6	0	0	0	0	0	0	200	300	0	0	0	0	0	0	0	200	903	0	0	0	0	0	0	0	603	903	0
309	7	0	0	0	0	0	0	200	300	0	0	0	0	0	0	0	200	903	0	0	0	0	0	0	0	603	903	0
309	8	0	0	0	0	0	0	200	300	0	0	0	0	0	0	0	200	903	0	0	0	0	0	0	0	603	903	0
309	9	0	0	0	0	0	0	200	300	0	0	0	0	0	0	0	200	903	0	0	0	0	0	0	0	603	903	0
310	0	0	0	0	0	0	0	200	300	0	0	0	0	0	0	0	200	903	0	0	0	0	0	0	0	603	903	0
310	1	0	0	0	0	0	0	200	300	0	0	0	0	0	0	0	200	903	0	0	0	0	0	0	0	603	903	0
310	2	0	0	0	0	0	0	200	300	0	0	0	0	0	0	0	200	903	0	0	0	0	0	0	0	603	903	0
310	3	0	0	0	0	0	0	200	300	0	0	0	0	0	0	0	200	903	0	0	0	0	0	0	0	603	903	0
310	4	0	0	0	0	0	0	200	300	0	0	0	0	0	0	0	200	903	0	0	0	0	0	0	0	603	903	0
310	5	0	0	0	0	0	0	200	300	0	0	0	0	0	0	0	200	903	0	0	0	0	0	0	0	603	903	0
310	6	0	0	0	0	0	0	200	300	0	0	0	0	0	0	0	200	903	0	0	0	0	0	0	0	603	903	0
310	7	0	0	0	0	0	0	200	300	0	0	0	0	0	0	0	200	903	0	0	0	0	0	0	0	603	903	0
310	8	0	0	0	0	0	0	200	300	0	0	0	0	0	0	0	200	903	0	0	0	0	0	0	0	603	903	0
310	9	0	0	0	0	0	0	200	300	0	0	0	0	0	0	0	200	903	0	0	0	0	0	0	0	603	903	0
311	0	0	0	0	0	0	0	200	300	0	0	0	0	0	0	0	200	903	0	0	0	0	0	0	0	603	903	0
311	1	0	0	0	0	0	0	200	300	0	0	0	0	0	0	0	200	903	0	0	0	0	0	0	0	603	903	0
311	2	0	0	0	0	0	0	200	300	0	0	0	0	0	0	0	200	903	0	0	0	0	0	0	0	603	903	0
311	3	0	0	0	0	0	0	200	300	0	0	0	0	0	0	0	200	903	0	0	0	0	0	0	0	603	903	0
311	4	0	0	0	0	0	0	200	300	0	0	0	0	0	0	0	200	903	0	0	0	0	0	0	0	603	903	0
311	5	0	0	0	0	0	0	200	300	0	0	0	0	0	0	0	200	903	0	0	0	0	0	0	0	603	903	0
311	6	0	0	0	0	0	0	200	300	0	0	0	0	0	0	0	200	903	0	0	0	0	0	0	0	603	903	0
311	7	0	0	0	0	0	0	200	300	0	0	0	0	0	0	0	200	903	0	0	0	0	0	0	0	603	903	0
311	8	0	0	0	0	0	0	200	300	0	0	0	0	0	0	0	200	903	0	0	0	0	0	0	0	603	903	0
311	9	0	0	0	0	0	0	200	300	0	0	0	0	0	0	0	200	903	0	0	0	0	0	0	0	603	903	0
312	0	0	0	0	0	0	0	200	300	0	0	0	0	0	0	0	200	903	0	0	0	0	0	0	0	603	903	0
312	1	0	0	0	0	0	0	200	300	0	0	0	0	0	0	0	200	903	0	0	0	0	0	0	0	603	903	0
312	2	0	0	0	0	0	0	200	300	0	0	0	0	0	0	0	200	903	0	0	0	0	0	0	0	603	903	0
312	3	0	0	0	0	0	0	200	300	0	0	0	0	0	0	0	200	903	0	0	0	0	0	0	0	603	903	0
312	4	0	0	0	0	0	0	200	300	0	0	0	0	0	0	0	200	903	0	0	0	0	0	0	0	603	903	0
312	5	0	0	0	0	0	0	200	300	0	0	0	0	0	0	0	200	903	0	0	0	0	0	0	0	603	903	0
312	6	0	0	0	0	0	0	200	300	0	0	0	0	0	0	0	200	903	0	0	0	0	0	0	0	603	903	0
312	7	0	0	0	0	0	0	200	300	0	0	0	0	0	0	0	200	903	0	0	0	0	0	0	0	603	903	0
312	8	0	0	0	0	0	0	200	300	0	0	0	0	0	0	0	200	903	0	0	0	0	0	0	0	603	903	0
312	9	0	0	0	0	0	0	200	300	0	0	0	0	0	0	0	200	903	0	0	0	0	0	0	0	603	903	0
313	0	0	0	0	0	0	0	200	300	0	0	0	0	0	0	0	200	903	0	0	0	0	0	0	0	603	903	0
313	1	0	0	0	0	0	0	200	300	0	0	0	0	0	0	0	200	903	0	0	0	0	0	0	0	603	903	0
313	2	0	0	0	0	0	0	200	300	0	0	0	0	0	0	0	200	903	0	0	0	0	0	0	0	603	903	0
313	3	0	0	0	0	0	0	200	300	0	0	0	0	0	0	0	200	903	0	0	0	0	0	0	0	603	903	0
313	4	0	0	0	0	0	0	200	300	0	0	0	0	0	0	0	200	903	0	0	0	0	0	0	0	603	903	0
313	5	0	0	0	0	0	0	200	300	0	0	0	0	0	0	0	200	903	0	0	0	0	0	0	0	603	903	0
313	6	0	0	0	0	0	0	200	300	0	0	0	0	0	0	0	200	903	0	0	0	0	0	0	0	603	903	0
313	7	0	0	0	0	0	0	200	300	0	0	0	0	0	0	0	200	903	0	0	0	0	0	0	0	603	903	0
313	8	0	0	0	0	0	0	200	300	0	0	0	0	0	0	0	200	903	0	0	0	0	0	0	0	603	903	0
313	9	0	0	0	0	0	0	200	300	0	0	0	0	0	0	0	200	903	0	0	0	0	0	0	0	603	903	0
314	0	0	0	0	0	0	0	200	300	0	0	0	0	0	0	0	200	903	0	0	0	0	0	0	0	603	903	0
314	1	0	0	0	0	0	0	200	300	0	0	0	0	0	0	0	200	903	0	0	0	0	0	0	0	603	903	0
314	2	0	0	0	0	0	0	200	300	0	0	0	0	0	0	0	200	903	0	0	0	0	0	0	0	603	903	0
314	3	0	0	0	0	0	0	200	300	0	0	0	0	0	0	0	200	903	0	0	0	0	0	0	0	603	903	0
314	4	0	0	0	0	0	0	200	300	0	0	0	0	0	0	0	200	903	0	0	0	0	0	0	0	603	903	0
314	5	0	0	0	0	0	0	200	300	0	0	0	0	0	0	0	200	903	0	0	0	0	0	0	0	603	903	0
314	6	0	0	0	0	0	0	200	300	0	0	0	0	0	0	0	200	903	0	0	0	0	0	0	0	603	903	0
314	7	0	0	0	0	0	0	200	300	0	0	0	0	0	0	0	200	903	0	0	0	0	0	0	0	603	903	0
314	8	0	0	0	0	0	0	200	300	0	0	0	0	0	0	0	200	903	0	0	0	0	0	0	0	603	903	0
314	9	0	0	0	0	0	0	200	300	0	0	0	0	0	0	0	200	903	0	0	0	0	0	0	0	603	903	0
315	0	0	0	0	0	0	0	200	300	0	0	0	0	0	0	0	200	903	0	0	0	0	0	0	0	603	903	0
315	1	0	0	0	0	0	0	200	300	0	0	0	0	0	0	0	200	903	0	0	0	0	0	0	0	603	903	0
315	2	0	0	0	0	0	0	200	300	0	0	0	0	0	0	0	200	903	0	0	0	0	0	0	0	603	903	0
315	3	0	0	0	0	0	0	200	300	0	0	0	0	0	0	0	200	903	0	0	0	0	0	0	0	603	903	0
315	4	0	0	0	0	0	0	200	300	0	0	0	0	0	0	0	200	903	0	0	0	0	0	0	0	603	903	0
315	5	0	0	0	0	0	0	200	300	0	0	0	0	0	0	0	200	903	0	0	0	0	0	0	0	603	903	0
315	6	0	0	0	0	0	0	200	300	0	0	0	0	0	0	0	200	903	0	0	0	0	0	0	0	603	903	0
315	7	0	0	0	0	0	0	200	300	0	0	0	0	0	0	0	200	903	0	0	0	0	0	0	0	603	903	0
315	8	0	0	0	0	0	0	200	300	0	0	0	0	0	0	0	200	903	0	0	0	0	0	0	0	603	903	0
315	9	0	0	0	0	0	0	200	300	0	0	0	0	0	0	0	200	903	0	0	0	0	0	0	0	603	903	0
316	0	0	0	0	0	0	0	200	300	0	0	0	0	0	0	0	200	903	0	0	0	0	0	0	0	603	903	0
316	1	0	0	0	0	0	0	200	300	0	0	0	0	0	0	0	200	903	0	0	0	0	0	0	0	603	903	0
316	2	0	0	0	0	0	0	200	300	0	0	0	0	0	0	0	200	903	0	0	0	0	0	0	0	603	903	0
316	3	0	0	0	0	0	0	200	300	0	0	0	0	0	0	0	200	903	0	0	0	0	0	0	0	603	903	0
316	4	0	0	0	0	0	0	200	300	0	0	0	0	0	0	0	200	903	0	0	0	0	0	0	0	603	903	0
316	5	0	0	0	0	0	0	200	300	0	0	0	0	0	0	0	200	903	0	0	0	0	0	0	0	603	903	0
316	6	0	0	0	0	0	0	200	300	0	0	0	0	0	0	0	200	903	0	0	0	0	0	0	0	603	903	0
316	7	0	0	0	0	0	0	200	300	0	0	0	0	0	0	0	200	903	0	0	0	0	0	0	0	603	903	0
316	8	0	0	0	0	0	0	200	300	0	0	0	0	0	0	0	200	903	0	0	0	0	0	0	0	603	903	0
316	9	0	0	0	0	0	0	200	300	0	0	0	0	0	0	0	200	903	0	0	0	0	0	0	0	603	903	0
317	0	0	0	0	0	0	0	200	300	0	0	0	0	0	0	0	200	903	0	0	0	0	0	0	0	603	903	0
317	1	0	0	0	0	0	0	200	300	0	0	0	0	0	0	0	200	903	0	0	0	0	0	0	0	603	903	0
317	2	0	0	0	0	0	0	200	300	0	0	0	0	0	0	0	200	903	0	0	0	0	0	0	0	603	903	0
317	3	0	0	0	0	0	0	200	300	0	0	0	0	0	0	0	200	903	0	0	0	0	0	0	0	603	903	0
317	4	0	0	0	0	0	0	200	300	0	0	0	0	0	0	0	200	903	0	0	0	0	0	0	0	603	903	0
317	5	0	0	0	0	0	0	200	300	0	0	0	0	0	0	0	200	903	0	0	0	0	0	0	0	603	903	0
317	6	0	0	0	0	0	0	200	300	0	0	0	0	0	0	0	200	903	0	0	0	0	0	0	0	603	903	0
317	7	0	0	0	0	0	0	200	300	0	0	0	0	0	0	0	200	903	0	0	0	0	0	0	0	603	903	0
317	8	0	0	0	0	0	0	200	300	0	0	0	0	0	0	0	200	903	0	0	0	0	0	0	0	603	903	0
317	9	0	0	0	0	0	0	200	300	0	0	0	0	0	0	0	200	903	0	0	0	0	0	0	0	603	903	0
318	0	0	0	0	0	0	0	200	300	0	0	0	0	0	0	0	200	903	0	0	0	0	0	0	0	603	903	0
318	1	0	0	0	0	0	0	200	300	0	0	0	0	0	0	0	200	903	0	0	0	0	0	0	0	603	903	0
318	2	0	0	0	0	0	0	200	300	0	0	0	0	0	0	0	200	903	0	0	0	0	0	0	0	603	903	0
318	3	0	0	0	0	0	0	200	300	0	0	0	0	0	0	0	200	903	0	0	0	0	0	0	0	603	903	0
318	4	0	0	0	0	0	0	200	300	0	0	0	0	0	0	0	200	903	0	0	0	0	0	0	0	603	903	0
318	5	0	0	0	0	0	0	200	300	0	0	0	0	0	0	0	200	903	0	0	0	0	0	0	0	603	903	0
318	6	0	0	0	0	0	0	200	300	0	0	0	0	0	0	0	200	903	0	0	0	0	0	0	0	603	903	0
318	7	0	0	0	0	0	0	200	300	0	0	0	0	0	0	0	200	903	0	0	0	0	0	0	0	603	903	0
318	8	0	0	0	0	0	0	200	300	0	0	0	0	0	0	0	200	903	0	0	0	0	0	0	0	603	903	0
318	9	0	0	0	0	0	0	200	300	0	0	0	0	0	0	0	200	903	0	0	0	0	0	0	0	603	903	0
319	0	0	0	0	0	0	0	200	300	0	0	0	0	0	0	0	200	903	0	0	0	0	0	0	0	603	903	0
319	1	0	0	0	0	0	0	200	300	0	0	0	0	0	0	0	200	903	0	0	0	0	0	0	0	603	903	0
319	2	0	0	0	0	0	0	200	300	0	0	0	0	0	0	0	200	903	0	0	0	0	0	0	0	603	903	0
319	3	0	0	0	0	0	0	200	300	0	0	0	0	0	0	0	200	903	0	0	0	0	0	0	0	603	903	0
319	4	0	0	0	0	0	0	200	300	0	0	0	0	0	0	0	200	903	0	0	0	0	0	0	0	603	903	0
319	5	0	0	0	0	0	0	200	300	0	0	0	0	0	0	0	200	903	0	0	0	0	0	0	0	603	903	0
319	6	0	0	0	0	0	0	200	300	0	0	0	0	0	0	0	200	903	0	0	0	0	0	0	0	603	903	0
319	7	0	0	0	0	0	0	200	300	0	0	0	0	0	0	0	200	903	0	0	0	0	0	0	0	603	903	0
319	8	0	0	0	0	0	0	200	300	0	0	0	0	0	0	0	200	903	0	0	0	0	0	0	0	603	903	0
319	9	0	0	0	0	0	0	200	300	0	0	0	0	0	0	0	200	903	0	0	0	0	0	0	0	603	903	0
320	0	0	0	0	0	0	0	200	300	0	0	0	0	0	0	0	200	903	0	0	0	0	0	0	0	603	903	0
320	1	0	0	0	0	0	0	200	300	0	0	0	0	0	0	0	200	903	0	0	0	0	0	0	0	603	903	0
320	2	0	0	0	0	0	0	200	300	0	0	0	0	0	0	0	200	903	0	0	0	0	0	0	0	603	903	0
320	3	0	0	0	0	0	0	200	300	0	0	0	0	0	0	0	200	903	0	0	0	0	0	0	0	603	903	0
320	4	0	0	0	0	0	0	200	300	0	0	0	0	0	0	0	200	903	0	0	0	0	0	0	0	603	903	0
320	5	0	0	0	0	0	0	200	300	0	0	0	0	0	0	0	200	903	0	0	0	0	0	0	0	603	903	0
320	6	0	0	0	0	0	0	200	300	0	0	0	0	0	0	0	200	903	0	0	0	0	0	0	0	603	903	0
320	7	0	0	0	0	0	0	200	300	0	0	0	0	0	0	0	200	903	0	0	0	0	0	0	0	603	903	0
320	8	0	0	0	0	0	0	200	300	0	0	0	0	0	0	0	200	903	0	0	0	0	0	0	0	603	903	0
320	9	0	0	0	0	0	0	200	300	0	0	0	0	0	0	0	200	903	0	0	0	0	0	0	0	603	903	0
321	0	0	0	0	0	0	0	200	300	0	0	0	0	0	0	0	200	903	0	0	0	0	0	0	0	603	903	0
321	1	0	0	0	0	0	0	200	300	0	0	0	0	0	0	0	200	903	0	0	0	0	0	0	0	603	903	0
321	2	0	0	0	0	0	0	200	300	0	0	0	0	0	0	0	200	903	0	0	0	0	0	0	0	603	903	0
321	3	0	0	0	0	0	0	200	300	0	0	0	0	0	0	0	200	903	0	0	0	0	0	0	0	603	903	0
321	4	0	0	0	0	0	0	200	300	0	0	0	0	0	0	0	200	903	0	0	0	0	0	0	0	603	903	0
321	5	0	0	0	0	0	0	200	300	0	0	0	0	0	0	0	200	903	0	0	0	0	0	0	0	603	903	0
321	6	0	0	0	0	0	0	200	300	0	0	0	0	0	0	0	200	903	0	0	0	0	0	0	0	603	903	0
321	7	0	0	0	0	0	0	200	300	0	0	0	0	0	0	0	200	903	0	0	0	0	0	0	0	603	903	0
321	8	0	0	0	0	0	0	200	300	0	0	0	0	0	0	0	200	903	0	0	0	0	0	0	0	603	903	0
321	9	0	0	0	0	0	0	200	300	0	0	0	0	0	0	0	200	903	0	0	0	0	0	0	0	603	903	0
322	0	0	0	0	0	0	0	200	300	0	0	0	0	0	0	0	200	903	0	0	0	0	0	0	0	603	903	0
322	1	0	0	0	0	0	0	200	300	0	0	0	0	0	0	0	200	903	0	0	0	0	0	0	0	603	903	0
322	2	0	0	0	0	0	0	200	300	0	0	0	0	0	0	0	200	903	0	0	0	0	0	0	0	603	903	0
322	3	0	0	0	0	0	0	200	300	0	0	0	0	0	0	0	200	903	0	0	0	0	0	0	0	603	903	0
322	4	0	0	0	0	0	0	200	300	0	0	0	0	0	0	0	200	903	0	0	0	0	0	0	0	603	903	0
322	5	0	0	0	0	0	0	200	300	0	0	0	0	0	0	0	200	903	0	0	0	0	0	0	0	603	903	0
322	6	0	0	0	0	0	0	200	300	0	0	0	0	0	0	0	200	903	0	0	0	0	0	0	0	603	903	0
322	7	0	0	0	0	0	0	200	300	0	0	0	0	0	0	0	200	903	0	0	0	0	0	0	0	603	903	0
322	8	0	0	0	0	0	0	200	300	0	0	0	0	0	0	0	200	903	0	0	0	0	0	0	0	603	903	0
322	9	0	0	0	0	0	0	200	300	0	0	0	0	0	0	0	200	903	0	0	0	0	0	0	0	603	903	0
323	0	0	0	0	0	0	0	200	300	0	0	0	0	0	0	0	200	903	0	0	0	0	0	0	0	603	903	0
323	1	0	0	0	0	0	0	200	300	0	0	0	0	0	0	0	200	903	0	0	0	0	0	0	0	603	903	0
323	2	0	0	0	0	0	0	200	300	0	0	0	0	0	0	0	200	903	0	0	0	0	0	0	0	603	903	0
323	3	0	0	0	0	0	0	200	300	0	0	0	0	0	0	0	200	903	0	0	0	0	0	0	0	603	903	0
323	4	0	0	0	0	0	0	200	300	0	0	0	0	0	0	0	200	903	0	0	0	0	0	0	0	603	903	0
323	5	0	0	0	0	0	0	200	300	0	0	0	0	0	0	0	200	903	0	0	0	0	0	0	0	603	903	0
323	6	0	0	0	0	0	0	200	300	0	0	0	0	0	0	0	200	903	0	0	0	0	0	0	0	603	903	0
323	7	0	0	0	0	0	0	200	300	0	0	0	0	0	0	0	200	903	0	0	0	0	0	0	0	603	903	0
323	8	0	0	0	0	0	0	200	300	0	0	0	0	0	0	0	200	903	0	0	0	0	0	0	0	603	903	0
323	9	0	0	0	0	0	0	200	300	0	0	0	0	0	0	0	200	903	0	0	0	0	0	0	0	603	903	0
324	0	0	0	0	0	0	0	200	300	0	0	0	0	0	0	0	200	903	0	0	0	0	0	0	0	603	903	0
324	1	0	0	0	0	0	0	200	300	0	0	0	0	0	0	0	200	903	0	0	0	0	0	0	0	603	903	0
324	2	0	0	0	0	0	0	200	300	0	0	0	0	0	0	0	200	903	0	0	0	0	0	0	0	603	903	0
324	3	0	0	0	0	0	0	200	300	0	0	0	0	0	0	0	200	903	0	0	0	0	0	0	0	603	903	0
324	4	0	0	0	0	0	0	200	300	0	0	0	0	0	0	0	200	903	0	0	0	0	0	0	0	603	903	0
324	5	0	0	0	0	0	0	200	300	0	0	0	0	0	0	0	200	903	0	0	0	0	0	0	0	603	903	0
324	6	0	0	0	0	0	0	200	300	0	0	0	0	0	0	0	200	903	0	0	0	0	0	0	0	603	903	0
324	7	0	0	0	0	0	0	200	300	0	0	0	0	0	0	0	200	903	0	0	0	0	0	0	0	603	903	0
324	8	0	0	0	0	0	0	200	300	0	0	0	0	0	0	0	200	903	0	0	0	0	0	0	0	603	903	0
324	9	0	0	0	0	0	0	200	300	0	0	0	0	0	0	0	200	903	0	0	0	0	0	0	0	603	903	0
325	0	0	0	0	0	0	0	200	300	0	0	0	0	0	0	0	200	903	0	0	0	0	0	0	0	603	903	0
325	1	0	0	0	0	0	0	200	300	0	0	0	0	0	0	0	200	903	0	0	0	0	0	0	0	603	903	0
325	2	0	0	0	0	0	0	200	300	0	0	0	0	0	0	0	200	903	0	0	0	0	0	0	0	603	903	0
325	3	0	0	0	0	0	0	200	300	0	0	0	0	0	0	0	200	903	0	0	0	0	0	0	0	603	903	0
325	4	0	0	0	0	0	0	200	300	0	0	0	0	0	0	0	200	903	0	0	0	0	0	0	0	603	903	0
325	5	0	0	0	0	0	0	200	300	0	0	0	0	0	0	0	200	903	0	0	0	0	0	0	0	603	903	0
325	6	0	0	0	0	0	0	200	300	0	0	0	0	0	0	0	200	903	0	0	0	0	0	0	0	603	903	0
325	7	0	0	0	0	0	0	200	300	0	0	0	0	0	0	0	200	903	0	0	0	0	0	0	0	603	903	0
325	8	0	0	0	0	0	0	200	300	0	0	0	0	0	0	0	200	903	0	0	0	0	0	0	0	603	903	0
325	9	0	0	0	0	0	0	200	300	0	0	0	0	0	0	0	200	903	0	0	0	0	0	0	0	603	903	0
326	0	0	0	0	0	0	0	200	300	0	0	0	0	0	0	0	200	903	0	0	0	0	0	0	0	603	903	0
326	1	0	0	0	0	0	0	200	300	0	0	0	0	0	0	0	200	903	0	0	0	0	0	0	0	603	903	0
326	2	0	0	0	0	0	0	200	300	0	0	0	0	0	0	0	200	903	0	0	0	0	0	0	0	603	903	0
326	3	0	0	0	0	0	0	200	300	0	0	0	0	0	0	0	200	903	0	0	0	0	0	0	0	603	903	0
326	4	0	0	0	0	0	0	200	300	0	0	0	0	0	0	0	200	903	0	0	0	0	0	0	0	603	903	0
326	5	0	0	0	0	0	0	200	300	0	0	0	0	0	0	0	200	903	0	0	0	0	0	0	0	603	903	0
326	6	0	0	0	0	0	0	200	300	0	0	0	0	0	0	0	200	903	0	0	0	0	0	0	0	603	903	0
326	7	0	0	0	0	0	0	200	300	0	0	0	0	0	0	0	200	903	0	0	0	0	0	0	0	603	903	0
326	8	0	0	0	0	0	0	200	300	0	0	0	0	0	0	0	200	903	0	0	0	0	0	0	0	603	903	0
326	9	0	0	0	0	0	0	200	300	0	0	0	0	0	0	0	200	903	0	0	0	0	0	0	0	603	903	0
327	0	0	0	0	0	0	0	200	300	0	0	0	0	0	0	0	200	903	0	0	0	0	0	0	0	603	903	0
327	1	0	0	0	0	0	0	200	300	0	0	0	0	0	0	0	200	903	0	0	0	0	0	0	0	603	903	0
327	2	0	0	0	0	0	0	200	300	0	0	0	0	0	0	0	200	903	0	0	0	0	0	0	0	603	903	0
327	3	0	0	0	0	0	0	200	300	0	0	0	0	0	0	0	200	903	0	0	0	0	0	0	0	603	903	0
327	4	0	0	0	0	0	0	200	300	0	0	0	0	0	0	0	200	903	0	0	0	0	0	0	0	603	903	0
327	5	0	0	0	0	0	0	200	300	0	0	0	0	0	0	0	200	903	0	0	0	0	0	0	0	603	903	0
327	6	0	0	0	0	0	0	200	300	0	0	0	0	0	0	0	200	903	0	0	0	0	0	0	0	603	903	0
327	7	0	0	0	0	0	0	200	300	0	0	0	0	0	0	0	200	903	0	0	0	0	0	0	0	603	903	0
327	8	0	0	0	0	0	0	200	300	0	0	0	0	0	0	0	200	903	0	0	0	0	0	0	0	603	903	0
327	9	0	0	0	0	0	0	200	300	0	0	0	0	0	0	0	200	903	0	0	0	0	0	0	0	603	903	0
328	0	0	0	0	0	0	0	200	300	0	0	0	0	0	0	0	200	903	0	0	0	0	0	0	0	603	903	0
328	1	0	0	0	0	0	0	200	300	0	0	0	0	0	0	0	200	903	0	0	0	0	0	0	0	603	903	0
328	2	0	0	0	0	0	0	200	300	0	0	0	0	0	0	0	200	903	0	0	0	0	0	0	0	603	903	0
328	3	0	0	0	0	0	0	200	300	0	0	0	0	0	0	0	200	903	0	0	0	0	0	0	0	603	903	0
328	4	0	0	0	0	0	0	200	300	0	0	0	0	0	0	0	200	903	0	0	0	0	0	0	0	603	903	0
328	5	0	0	0	0	0	0	200	300	0	0	0	0	0	0	0	200	903	0	0	0	0	0	0	0	603	903	0
328	6	0	0	0	0	0	0	200	300	0	0	0	0	0	0	0	200	903	0	0	0	0	0	0	0	603	903	0
328	7	0	0	0	0	0	0	200	300	0	0	0	0	0	0	0	200	903	0	0	0	0	0	0	0	603	903	0
328	8	0	0	0	0	0	0	200	300	0	0	0	0	0	0	0	200	903	0	0	0	0	0	0	0	603	903	0
328	9	0	0	0	0	0	0	200	300	0	0	0	0	0	0	0	200	903	0	0	0	0	0	0	0	603	903	0
329	0	0	0	0	0	0	0	200	300	0	0	0	0	0	0	0	200	903	0	0	0	0	0	0	0	603	903	0
329	1	0	0	0	0	0	0	200	300	0	0	0	0	0	0	0	200	903	0	0	0	0	0	0	0	603	903	0
329	2	0	0	0	0	0	0	200	300	0	0	0	0	0	0	0	200	903	0	0	0	0	0	0	0	603	903	0
329	3	0	0	0	0	0	0	200	300	0	0	0	0	0	0	0	200	903	0	0	0	0	0	0	0	603	903	0
329	4	0	0	0	0	0	0	200	300	0	0	0	0	0	0	0	200	903	0	0	0	0	0	0	0	603	903	0
329	5	0	0	0	0	0	0	200	300	0	0	0	0	0	0	0	200	903	0	0	0	0	0	0	0	603	903	0
329	6	0	0	0	0	0	0	200	300	0	0	0	0	0	0	0	200	903	0	0	0	0	0	0	0	603	903	0
329	7	0	0	0	0	0	0	200	300	0	0	0	0	0	0	0	200	903	0	0	0	0	0	0	0	603	903	0
329	8	0	0	0	0	0	0	200	300	0	0	0	0	0	0	0	200	903	0	0	0	0	0	0	0	603	903	0
329	9	0	0	0	0	0	0	200	300	0	0	0	0	0	0	0	200	903	0	0	0	0	0	0	0	603	903	0
330	0	0	0	0	0	0	0	200	300	0	0	0	0	0	0	0	200	903	0	0	0	0	0	0	0	603	903	0
330	1	0	0	0	0	0	0	200	300	0	0	0	0	0	0	0	200	903	0	0	0	0	0	0	0	603	903	0
330	2	0	0	0	0	0	0	200	300	0	0	0	0	0	0	0	200	903	0	0	0	0	0	0	0	603	903	0
330	3	0	0	0	0	0	0	200	300	0	0	0	0	0	0	0	200	903	0	0	0	0	0	0	0	603	903	0
330	4	0	0	0	0	0	0	200	300	0	0	0	0	0	0	0	200	903	0	0	0	0	0	0	0	603	903	0
330	5	0	0	0	0	0	0	200	300	0	0	0	0	0	0	0	200	903	0	0	0	0	0	0	0	603	903	0
330	6	0	0	0	0	0	0	200	300	0	0	0	0	0	0	0	200	903	0	0	0	0	0	0	0	603	903	0
330	7	0	0	0	0	0	0	200	300	0	0	0	0	0	0	0	200	903	0	0	0	0	0	0	0	603	903	0
330	8	0	0	0	0	0	0	200	300	0	0	0	0	0	0	0	200	903	0	0	0	0	0	0	0	603	903	0
330	9	0	0	0	0	0	0	200	300	0	0	0	0	0	0	0	200	903	0	0	0	0	0	0	0	603	903	0
331	0	0	0	0	0	0	0	200	300	0	0	0	0	0	0	0	200	903	0	0	0	0	0	0	0	603	903	0
331	1	0	0	0	0	0	0	200	300	0	0	0	0	0	0	0	200	903	0	0	0	0	0	0	0	603	903	0
331	2	0	0	0	0	0	0	200	300	0	0	0	0	0	0	0	200	903	0	0	0	0	0	0	0	603	903	0
331	3	0	0	0	0	0	0	200	300	0	0	0	0	0	0	0	200	903	0	0	0	0	0	0	0	603	903	0
331	4	0	0	0	0	0	0	200	300	0	0	0	0	0	0	0	200	903	0	0	0	0	0	0	0	603	903	0
331	5	0	0	0	0	0	0	200	300	0	0	0	0	0	0	0	200	903	0	0	0	0	0	0	0	603	903	0
331	6	0	0	0	0	0	0	200	300	0	0	0	0	0	0	0	200	903	0	0	0	0	0	0	0	603	903	0
331	7	0	0	0	0	0	0	200	300	0	0	0	0	0	0	0	200	903	0	0	0	0	0	0	0	603	903	0
331	8	0	0	0	0	0	0	200	300	0	0	0	0	0	0	0	200	903	0	0	0	0	0	0	0	603	903	0
331	9	0	0	0	0	0	0	200	300	0	0	0	0	0	0	0	200	903	0	0	0	0	0	0	0	603	903	0
332	0	0	0	0	0	0	0	200	300	0	0	0	0	0	0	0	200	903	0	0	0	0	0	0	0	603	903	0
332	1	0	0	0	0	0	0	200	300	0	0	0	0	0	0	0	200	903	0	0	0	0	0	0	0	603	903	0
332	2	0	0	0	0	0	0	200	300	0	0	0	0	0	0	0	200	903	0	0	0	0	0	0	0	603	903	0
332	3	0	0	0	0	0	0	200	300	0	0	0	0	0	0	0	200	903	0	0	0	0	0	0	0	603	903	0
332	4	0	0	0	0	0	0	200	300	0	0	0	0	0	0	0	200	903	0	0	0	0	0	0	0	603	903	0
332	5	0	0	0	0	0	0	200	300	0	0	0	0	0	0	0	200	903	0	0	0	0	0	0	0	603	903	0
332	6	0	0	0	0	0	0	200	300	0	0	0	0	0	0	0	200	903	0	0	0	0	0	0	0	603	903	0
332	7	0	0	0	0	0	0	200	300	0	0	0	0	0	0	0	200	903	0	0	0	0	0	0	0	603	903	0
332	8	0	0	0	0	0	0	200	300	0	0	0	0	0	0	0	200	903	0	0	0	0	0	0	0	603	903	0
332	9	0	0	0	0	0	0	200	300	0	0	0	0	0	0	0	200	903	0	0	0	0	0	0	0	603	903	0
333	0	0	0	0	0	0	0	200	300	0	0	0	0	0	0	0	200	903	0	0	0	0	0	0	0	603	903	0
333	1	0	0	0	0	0	0	200	300	0	0	0	0	0	0	0	200	903	0	0	0	0	0	0	0	603	903	0
333	2	0	0	0	0	0	0	200	300	0	0	0	0	0	0	0	200	903	0	0	0	0	0	0	0	603	903	0
333	3	0	0	0	0	0	0	200	300	0	0	0	0	0	0	0	200	903	0	0	0	0	0	0	0	603	903	0
333	4	0	0	0	0	0	0	200	300	0	0	0	0	0	0	0	200	903	0	0	0	0	0	0	0	603	903	0
333	5	0	0	0	0	0	0	200	300	0	0	0	0	0	0	0	200	903	0	0	0	0	0	0	0	603	903	0
333	6	0	0	0	0	0	0	200	300	0	0	0	0	0	0	0	200	903	0	0	0	0	0	0	0	603	903	0
333	7	0	0	0	0	0	0	200	300	0	0	0	0	0	0	0	200	903	0	0	0	0	0	0	0	603	903	0
333	8	0	0	0	0	0	0	200	300	0	0	0	0	0	0	0	200	903	0	0	0	0	0	0	0	603	903	0
333	9	0	0	0	0	0	0	200	300	0	0	0	0	0	0	0	200	903	0	0	0	0	0	0	0	603	903	0
334	0	0	0	0	0	0	0	200	300	0	0	0	0	0	0	0	200	903	0	0	0	0	0	0	0	603	903	0
334	1	0	0	0	0	0	0	200	300	0	0	0	0	0	0	0	200	903	0	0	0	0	0	0	0	603	903	0
334	2	0	0	0	0	0	0	200	300	0	0	0	0	0	0	0	200	903	0	0	0	0	0	0	0	603	903	0
334	3	0	0	0	0	0	0	200	300	0	0	0	0	0	0	0	200	903	0	0	0	0	0	0	0	603	903	0
334	4	0	0	0	0	0	0	200	300	0	0	0	0	0	0	0	200	903	0	0	0	0	0	0	0	603	903	0
334	5	0	0	0	0	0	0	200	300	0	0	0	0	0	0	0	200	903	0	0	0	0	0	0	0	603	903	0
334	6	0	0	0	0	0	0	200	300	0	0	0	0	0	0	0	200	903	0	0	0	0	0	0	0	603	903	0
334	7	0	0	0	0	0	0	200	300	0	0	0	0	0	0	0	200	903	0	0	0	0	0	0	0	603	903	0
334	8	0	0	0	0	0	0	200	300	0	0	0	0	0	0	0	200	903	0	0	0	0	0	0	0	603	903	0
334	9	0	0	0	0	0	0	200	300	0	0	0	0	0	0	0	200	903	0	0	0	0	0	0	0	603	903	0
335	0	0	0	0	0	0	0	200	300	0	0	0	0	0	0	0	200	903	0	0	0	0	0	0	0	603	903	0
335	1	0	0	0	0	0	0	200	300	0	0	0	0	0	0	0	200	903	0	0	0	0	0	0	0	603	903	0
335	2	0	0	0	0	0	0	200	300	0	0	0	0	0	0	0	200	903	0	0	0	0	0	0	0	603	903	0
335	3	0	0	0	0	0	0	200	300	0	0	0	0	0	0	0	200	903	0	0	0	0	0	0	0	603	903	0
335	4	0	0	0	0	0	0	200	300	0	0	0	0	0	0	0	200	903	0	0	0	0	0	0	0	603	903	0
335	5	0	0	0	0	0	0	200	300	0	0	0	0	0	0	0	200	903	0	0	0	0	0	0	0	603	903	0
335	6	0	0	0	0	0	0	200	300	0	0	0	0	0	0	0	200	903	0	0	0	0	0	0	0	603	903	0
335	7	0	0	0	0	0	0	200	300	0	0	0	0	0	0	0	200	903	0	0	0	0	0	0	0	603	903	0
335	8	0	0	0	0	0	0	200	300	0	0	0	0	0	0	0	200	903	0	0	0	0	0	0	0	603	903	0
335	9	0	0	0	0	0	0	200	300	0	0	0	0	0	0	0	200	903	0	0	0	0	0	0	0	603	903	0
336	0	0	0	0	0	0	0	200	300	0	0	0	0	0	0	0	200	903	0	0	0	0	0	0	0	603	903	0
336	1	0	0	0	0	0	0	200	300	0	0	0	0	0	0	0	200	903	0	0	0	0	0	0	0	603	903	0
336	2	0	0	0	0	0	0	200	300	0	0	0	0	0	0	0	200	903	0	0	0	0	0	0	0	603	903	0
336	3	0	0	0	0	0	0	200	300	0	0	0	0	0	0	0	200	903	0	0	0	0	0	0	0	603	903	0
336	4	0	0	0	0	0	0	200	300	0	0	0	0	0	0	0	200	903	0	0	0	0	0	0	0	603	903	0
336	5	0	0	0	0	0	0	200	300	0	0	0	0	0	0	0	200	903	0	0	0	0	0	0	0	603	903	0
336	6	0	0	0	0	0	0	200	300	0	0	0	0	0	0	0	200	903	0	0	0	0	0	0	0	603	903	0
336	7	0	0	0	0	0	0	200	300	0	0	0	0	0	0	0	200	903	0	0	0	0	0	0	0	603	903	0
336	8	0	0	0	0	0	0	200	300	0	0	0	0	0	0	0	200	903	0	0	0	0	0	0	0	603	903	0
336	9	0	0	0	0	0	0	200	300	0	0	0	0	0	0	0	200	903	0	0	0	0	0	0	0	603	903	0
337	0	0	0	0	0	0	0	200	300	0	0	0	0	0	0	0	200	903	0	0	0	0	0	0	0	603	903	0
337	1	0	0	0	0	0	0	200	300	0	0	0	0	0	0	0	200	903	0	0	0	0	0	0	0	603	903	0
337	2	0	0	0	0	0	0	200	300	0	0	0	0	0	0	0	200	903	0	0	0	0	0	0	0	603	903	0
337	3	0	0	0	0	0	0	200	300	0	0	0	0	0	0	0	200	903	0	0	0	0	0	0	0	603	903	0
337	4	0	0	0	0	0	0	200	300	0	0	0	0	0	0	0	200	903	0	0	0	0	0	0	0	603	903	0
337	5	0	0	0	0	0	0	200	300	0	0	0	0	0	0	0	200	903	0	0	0	0	0	0	0	603	903	0
337	6	0	0	0	0	0	0	200	300	0	0	0	0	0	0	0	200	903	0	0	0	0	0	0	0	603	903	0
337	7	0	0	0	0	0	0	200	300	0	0	0	0	0	0	0	200	903	0	0	0	0	0	0	0	603	903	0
337	8	0	0	0	0	0	0	200	300	0	0	0	0	0	0	0	200	903	0	0	0	0	0	0	0	603	903	0
337	9	0	0	0	0	0	0	200	300	0	0	0	0	0	0	0	200	903	0	0	0	0	0	0	0	603	903	0
338	0	0	0	0	0	0	0	200	300	0	0	0	0	0	0	0	200	903	0	0	0	0	0	0	0	603	903	0
338	1	0	0	0	0	0	0	200	300	0	0	0	0	0	0	0	200	903	0	0	0	0	0	0	0	603	903	0
338	2	0	0	0	0	0	0	200	300	0	0	0	0	0	0	0	200	903	0	0	0	0	0	0	0	603	903	0
338	3	0	0	0	0	0	0	200	300	0	0	0	0	0	0	0	200	903	0	0	0	0	0	0	0	603	903	0
338	4	0	0	0	0	0	0	200	300	0	0	0	0	0	0	0	200	903	0	0	0	0	0	0	0	603	903	0
338	5	0	0	0	0	0	0	200	300	0	0	0	0	0	0	0	200	903	0	0	0	0	0	0	0	603	903	0
338	6	0	0	0	0	0	0	200	300	0	0	0	0	0	0	0	200	903	0	0	0	0	0	0	0	603	903	0
338	7	0	0	0	0	0	0	200	300	0	0	0	0	0	0	0	200	903	0	0	0	0	0	0	0	603	903	0
338	8	0	0	0	0	0	0	200	300	0	0	0	0	0	0	0	200	903	0	0	0	0	0	0	0	603	903	0
338	9	0	0	0	0	0	0	200	300	0	0	0	0	0	0	0	200	903	0	0	0	0	0	0	0	603	903	0
339	0	0	0	0	0	0	0	200	300	0	0	0	0	0	0	0	200	903	0	0	0	0	0	0	0	603	903	0
339	1	0	0	0	0	0	0	200	300	0	0	0	0	0	0	0	200	903	0	0	0	0	0	0	0	603	903	0
339	2	0	0	0	0	0	0	200	300	0	0	0	0	0	0	0	200	903	0	0	0	0	0	0	0	603	903	0
339	3	0	0	0	0	0	0	200	300	0	0	0	0	0	0	0	200	903	0	0	0	0	0	0	0	603	903	0
339	4	0	0	0	0	0	0	200	300	0	0	0	0	0	0	0	200	903	0	0	0	0	0	0	0	603	903	0
339	5	0	0	0	0	0	0	200	300	0	0	0	0	0	0	0	200	903	0	0	0	0	0	0	0	603	903	0
339	6	0	0	0	0	0	0	200	300	0	0	0	0	0	0	0	200	903	0	0	0	0	0	0	0	603	903	0
339	7	0	0	0	0	0	0	200	300	0	0	0	0	0	0	0	200	903	0	0	0	0	0	0	0	603	903	0
339	8	0	0	0	0	0	0	200	300	0	0	0	0	0	0	0	200	903	0	0	0	0	0	0	0	603	903	0
339	9	0	0	0	0	0	0	200	300	0	0	0	0	0	0	0	200	903	0	0	0	0	0	0	0	603	903	0
340	0	0	0	0	0	0	0	200	300	0	0	0	0	0	0	0	200	903	0	0	0	0	0	0	0	603	903	0
340	1	0	0	0	0	0	0	200	300	0	0	0	0	0	0	0	200	903	0	0	0	0	0	0	0	603	903	0
340	2	0	0	0	0	0	0	200	300	0	0	0	0	0	0	0	200	903	0	0	0	0	0	0	0	603	903	0
340	3	0	0	0	0	0	0	200	300	0	0	0	0	0	0	0	200	903	0	0	0	0	0	0	0	603	903	0
340	4	0	0	0	0	0	0	200	300	0	0	0	0	0	0	0	200	903	0	0	0	0	0	0	0	603	903	0
340	5	0	0	0	0	0	0	200	300	0	0	0	0	0	0	0	200	903	0	0	0	0	0	0	0	603	903	0
340	6	0	0	0	0	0	0	200	300	0	0	0	0	0	0	0	200	903	0	0	0	0	0	0	0	603	903	0
340	7	0	0	0	0	0	0	200	300	0	0	0	0	0	0	0	200	903	0	0	0	0	0	0	0	603	903	0
340	8	0	0	0	0	0	0	200	300	0	0	0	0	0	0	0	200	903	0	0	0	0	0	0	0	603	903	0
340	9	0	0	0	0	0	0	200	300	0	0	0	0	0	0	0	200	903	0	0	0	0	0	0	0	603	903	0
341	0	0	0	0	0	0	0	200	300	0	0	0	0	0	0	0	200	903	0	0	0	0	0	0	0	603	903	0
341	1	0	0	0	0	0	0	200	300	0	0	0	0	0	0	0	200	903	0	0	0	0	0	0	0	603	903	0
341	2	0	0	0	0	0	0	200	300	0	0	0	0	0	0	0	200	903	0	0	0	0	0	0	0	603	903	0
341	3	0	0	0	0	0	0	200	300	0	0	0	0	0	0	0	200	903	0	0	0	0	0	0	0	603	903	0
341	4	0	0	0	0	0	0	200	300	0	0	0	0	0	0	0	200	903	0	0	0	0	0	0	0	603	903	0
341	5	0	0	0	0	0	0	200	300	0	0	0	0	0	0	0	200	903	0	0	0	0	0	0	0	603	903	0
341	6	0	0	0	0	0	0	200	300	0	0	0	0	0	0	0	200	903	0	0	0	0	0	0	0	603	903	0
341	7	0	0	0	0	0	0	200	300	0	0	0	0	0	0	0	200	903	0	0	0	0	0	0	0	603	903	0
341	8	0	0	0	0	0	0	200	300	0	0	0	0	0	0	0	200	903	0	0	0	0	0	0	0	603	903	0
341	9	0	0	0	0	0	0	200	300	0	0	0	0	0	0	0	200	903	0	0	0	0	0	0	0	603	903	0
342	0	0	0	0	0	0	0	200	300	0	0	0	0	0	0	0	200	903	0	0	0	0	0	0	0	603	903	0
342	1	0	0	0	0	0	0	200	300	0	0	0	0	0	0	0	200	903	0	0	0	0	0	0	0	603	903	0
342	2	0	0	0	0	0	0	200	300	0	0	0	0	0	0	0	200	903	0	0	0	0	0	0	0	603	903	0
342	3	0	0	0	0	0	0	200	300	0	0	0	0	0	0	0	200	903	0	0	0	0	0	0	0	603	903	0
342	4	0	0	0	0	0	0	200	300	0	0	0	0	0	0	0	200	903	0	0	0	0	0	0	0	603	903	0
342	5	0	0	0	0	0	0	200	300	0	0	0	0	0	0	0	200	903	0	0	0	0	0	0	0	603	903	0
342	6	0	0	0	0	0	0	200	300	0	0	0	0	0	0	0	200	903	0	0	0	0	0	0	0	603	903	0
342	7	0	0	0	0	0	0	200	300	0	0	0	0	0	0	0	200	903	0	0	0	0	0	0	0	603	903	0
342	8	0	0	0	0	0	0	200	300	0	0	0	0	0	0	0	200	903	0	0	0	0	0	0	0	603	903	0
342	9	0	0	0	0	0	0	200	300	0	0	0	0	0	0	0	200	903	0	0	0	0	0	0	0	603	903	0
343	0	0	0	0	0	0	0	200	300	0	0	0	0	0	0	0	200	903	0	0	0	0	0	0	0	603	903	0
343	1	0	0	0	0	0	0	200	300	0	0	0	0	0	0	0	200	903	0	0	0	0	0	0	0	603	903	0
343	2	0	0	0	0	0	0	200	300	0	0	0	0	0	0	0	200	903	0	0	0	0	0	0	0	603	903	0
343	3	0	0	0	0	0	0	200	300	0	0	0	0	0	0	0	200	903	0	0	0	0	0	0	0	603	903	0
343	4	0	0	0	0	0	0	200	300	0	0	0	0	0	0	0	200	903	0	0	0	0	0	0	0	603	903	0
343	5	0	0	0	0	0	0	200	300	0	0	0	0	0	0	0	200	903	0	0	0	0	0	0	0	603	903	0
343	6	0	0	0	0	0	0	200	300	0	0	0	0	0	0	0	200	903	0	0	0	0	0	0	0	603	903	0
343	7	0	0	0	0	0	0	200	300	0	0	0	0	0	0	0	200	903	0	0	0	0	0	0	0	603	903	0
343	8	0	0	0	0	0	0	200	300	0	0	0	0	0	0	0	200	903	0	0	0	0	0	0	0	603	903	0
343	9	0	0	0	0	0	0	200	300	0	0	0	0	0	0	0	200	903	0	0	0	0	0	0	0	603	903	0
344	0	0	0	0	0	0	0	200	300	0	0	0	0	0	0	0	200	903	0	0	0	0	0	0	0	603	903	0
344	1	0	0	0	0	0	0	200	300	0	0	0	0	0	0	0	200	903	0	0	0	0	0	0	0	603	903	0
344	2	0	0	0	0	0	0	200	300	0	0	0	0	0	0	0	200	903	0	0	0	0	0	0	0	603	903	0
344	3	0	0	0	0	0	0	200	300	0	0	0	0	0	0	0	200	903	0	0	0	0	0	0	0	603	903	0
344	4	0	0	0	0	0	0	200	300	0	0	0	0	0	0	0	200	903	0	0	0	0	0	0	0	603	903	0
344	5	0	0	0	0	0	0	200	300	0	0	0	0	0	0	0	200	903	0	0	0	0	0	0	0	603	903	0
344	6	0	0	0	0	0	0	200	300	0	0	0	0	0	0	0	200	903	0	0	0	0	0	0	0	603	903	0
344	7	0	0	0	0	0	0	200	300	0	0	0	0	0	0	0	200	903	0	0	0	0	0	0	0	603	903	0
344	8	0	0	0	0	0	0	200	300	0	0	0	0	0	0	0	200	903	0	0	0	0	0	0	0	603	903	0
344	9	0	0	0	0	0	0	200	300	0	0	0	0	0	0	0	200	903	0	0	0	0	0	0	0	603	903	0
345	0	0	0	0	0	0	0	200	300	0	0	0	0	0	0	0	200	903	0	0	0	0	0	0	0	603	903	0
345	1	0	0	0	0	0	0	200	300	0	0	0	0	0	0	0	200	903	0	0	0	0	0	0	0	603	903	0
345	2	0	0	0	0	0	0	200	300	0	0	0	0	0	0	0	200	903	0	0	0	0	0	0	0	603	903	0
345	3	0	0	0	0	0	0	200	300	0	0	0	0	0	0	0	200	903	0	0	0	0	0	0	0	603	903	0
345	4	0	0	0	0	0	0	200	300	0	0	0	0	0	0	0	200	903	0	0	0	0	0	0	0	603	903	0
345	5	0	0	0	0	0	0	200	300	0	0	0	0	0	0	0	200	903	0	0	0	0	0	0	0	603	903	0
345	6	0	0	0	0	0	0	200	300	0	0	0	0	0	0	0	200	903	0	0	0	0	0	0	0	603	903	0
345	7	0	0	0	0	0	0	200	300	0	0	0	0	0	0	0	200	903	0	0	0	0	0	0	0	603	903	0
345	8	0	0	0	0	0	0	200	300	0	0	0	0	0	0	0	200	903	0	0	0	0	0	0	0	603	903	0
345	9	0	0	0	0	0	0	200	300	0	0	0	0	0	0	0	200	903	0	0	0	0	0	0	0	603	903	0
346	0	0	0	0	0	0	0	200	300	0	0	0	0	0	0	0	200	903	0	0	0	0	0	0	0	603	903	0
346	1	0	0	0	0	0	0	200	300	0	0	0	0	0	0	0	200	903	0	0	0	0	0	0	0	603	903	0
346	2	0	0	0	0	0	0	200	300	0	0	0	0	0	0	0	200	903	0	0	0	0	0	0	0	603	903	0
346	3	0	0	0	0	0	0	200	300	0	0	0	0	0	0	0	200	903	0	0	0	0	0	0	0	603	903	0
346	4	0	0	0	0	0	0	200	300	0	0	0	0	0	0	0	200	903	0	0	0	0	0	0	0	603	903	0
346	5	0	0	0	0	0	0	200	300	0	0	0	0	0	0	0	200	903	0	0	0	0	0	0	0	603	903	0
346	6	0	0	0	0	0	0	200	300	0	0	0	0	0	0	0	200	903	0	0	0	0	0	0	0	603	903	0
346	7	0	0	0	0	0	0	200	300	0	0	0	0	0	0	0	200	903	0	0	0	0	0	0	0	603	903	0
346	8	0	0	0	0	0	0	200	300	0	0	0	0	0	0	0	200	903	0	0	0	0	0	0	0	603	903	0
346	9	0	0	0	0	0	0	200	300	0	0	0	0	0	0	0	200	903	0	0	0	0	0	0	0	603	903	0
347	0	0	0	0	0	0	0	200	300	0	0	0	0	0	0	0	200	903	0	0	0	0	0	0	0	603	903	0
347	1	0	0	0	0	0	0	200	300	0	0	0	0	0	0	0	200	903	0	0	0	0	0	0	0	603	903	0
347	2	0	0	0	0	0	0	200	300	0	0	0	0	0	0	0	200	903	0	0	0	0	0	0	0	603	903	0
347	3	0	0	0	0	0	0	200	300	0	0	0	0	0	0	0	200	903	0	0	0	0	0	0	0	603	903	0
347	4	0	0	0	0	0	0	200	300	0	0	0	0	0	0	0	200	903	0	0	0	0	0	0	0	603	903	0
347	5	0	0	0	0	0	0	200	300	0	0	0	0	0	0	0	200	903	0	0	0	0	0	0	0	603	903	0
347	6	0	0	0	0	0	0	200	300	0	0	0	0	0	0	0	200	903	0	0	0	0	0	0	0	603	903	0
347	7	0	0	0	0	0	0	200	300	0	0	0	0	0	0	0	200	903	0	0	0	0	0	0	0	603	903	0
347	8	0	0	0	0	0	0	200	300	0	0	0	0	0	0	0	200	903	0	0	0	0	0	0	0	603	903	0
347	9	0	0	0	0	0	0	200	300	0	0	0	0	0	0	0	200	903	0	0	0	0	0	0	0	603	903	0
348	0	0	0	0	0	0	0	200	300	0	0	0	0	0	0	0	200	903	0	0	0	0	0	0	0	603	903	0
348	1	0	0	0	0	0	0	200	300	0	0	0	0	0	0	0	200	903	0	0	0	0	0	0	0	603	903	0
348	2	0	0	0	0	0	0	200	300	0	0	0	0	0	0	0	200	903	0	0	0	0	0	0	0	603	903	0
348	3	0	0	0	0	0	0	200	300	0	0	0	0	0	0	0	200	903	0	0	0	0	0	0	0	603	903	0
348	4	0	0	0	0	0	0	200	300	0	0	0	0	0	0	0	200	903	0	0	0	0	0	0	0	603	903	0
348	5	0	0	0	0	0	0	200	300	0	0	0	0	0	0	0	200	903	0	0	0	0	0	0	0	603	903	0
348	6	0	0	0	0	0	0	200	300	0	0	0	0	0	0	0	200	903	0	0	0	0	0	0	0	603	903	0
348	7	0	0	0	0	0	0	200	300	0	0	0	0	0	0	0	200	903	0	0	0	0	0	0	0	603	903	0
348	8	0	0	0	0	0	0	200	300	0	0	0	0	0	0	0	200	903	0	0	0	0	0	0	0	603	903	0
348	9	0	0	0	0	0	0	200	300	0	0	0	0	0	0	0	200	903	0	0	0	0	0	0	0	603	903	0
349	0	0	0	0	0	0	0	200	300	0	0	0	0	0	0	0	200	903	0	0	0	0	0	0	0	603	903	0
349	1	0	0	0	0	0	0	200	300	0	0	0	0	0	0	0	200	903	0	0	0	0	0	0	0	603	903	0
349	2	0	0	0	0	0	0	200	300	0	0	0	0	0	0	0	200	903	0	0	0	0	0	0	0	603	903	0
349	3	0	0	0	0	0	0	200	300	0	0	0	0	0	0	0	200	903	0	0	0	0	0	0	0	603	903	0
349	4	0	0	0	0	0	0	200	300	0	0	0	0	0	0	0	200	903	0	0	0	0	0	0	0	603	903	0
349	5	0	0	0	0	0	0	200	300	0	0	0	0	0	0	0	200	903	0	0	0	0	0	0	0	603	903	0
349	6	0	0	0	0	0	0	200	300	0	0	0	0	0	0	0	200	903	0	0	0	0	0	0	0	603	903	0
349	7	0	0	0	0	0	0	200	300	0	0	0	0	0	0	0	200	903	0	0	0	0	0	0	0	603	903	0
349	8	0	0	0	0	0	0	200	300	0	0	0	0	0	0	0	200	903	0	0	0	0	0	0	0	603	903	0
349	9	0	0	0	0	0	0	200	300	0	0	0	0	0	0	0	200	903	0	0	0	0	0	0	0	603	903	0
350	0	0	0	0	0	0	0	200	300	0	0	0	0	0	0	0	200	903	0	0	0	0	0	0	0	603	903	0
350	1	0	0	0	0	0	0	200	300	0	0	0	0	0	0	0	200	903	0	0	0	0	0	0	0	603	903	0
350	2	0	0	0	0	0	0	200	300	0	0	0	0	0	0	0	200	903	0	0	0	0	0	0	0	603	903	0
350	3	0	0	0	0	0	0	200	300	0	0	0	0	0	0	0	200	903	0	0	0	0	0	0	0	603	903	0
350	4	0	0	0	0	0	0	200	300	0	0	0	0	0	0	0	200	903	0	0	0	0	0	0	0	603	903	0
350	5	0	0	0	0	0	0	200	300	0	0	0	0	0	0	0	200	903	0	0	0	0	0	0	0	603	903	0
350	6	0	0	0	0	0	0	200	300	0	0	0	0	0	0	0	200	903	0	0	0	0	0	0	0	603	903	0
350	7	0	0	0	0	0	0	200	300	0	0	0	0	0	0	0	200	903	0	0	0	0	0	0	0	603	903	0
350	8	0	0	0	0	0	0	200	300	0	0	0	0	0	0	0	200	903	0	0	0	0	0	0	0	603	903	0
350	9	0	0	0	0	0	0	200	300	0	0	0	0	0	0	0	200	903	0	0	0	0	0	0	0	603	903	0
351	0	0	0	0	0	0	0	200	300	0	0	0	0	0	0	0	200	903	0	0	0	0	0	0	0	603	903	0
351	1	0	0	0	0	0	0	200	300	0	0	0	0	0	0	0	200	903	0	0	0	0	0	0	0	603	903	0
351	2	0	0	0	0	0	0	200	300	0	0	0	0	0	0	0	200	903	0	0	0	0	0	0	0	603	903	0
351	3	0	0	0	0	0	0	200	300	0	0	0	0	0	0	0	200	903	0	0	0	0	0	0	0	603	903	0
351	4	0	0	0	0	0	0	200	300	0	0	0	0	0	0	0	200	903	0	0	0	0	0	0	0	603	903	0
351	5	0	0	0	0	0	0	200	300	0	0	0	0	0	0	0	200	903	0	0	0	0	0	0	0	603	903	0
351	6	0	0	0	0	0	0	200	300	0	0	0	0	0	0	0	200	903	0	0	0	0	0	0	0	603	903	0
351	7	0	0	0	0	0	0	200	300	0	0	0	0	0	0	0	200	903	0	0	0	0	0	0	0	603	903	0
351	8	0	0	0	0	0	0	200	300	0	0	0	0	0	0	0	200	903	0	0	0	0	0	0	0	603	903	0
351	9	0	0	0	0	0	0	200	300	0	0	0	0	0	0	0	200	903	0	0	0	0	0	0	0	603	903	0
352	0	0	0	0	0	0	0	200	300	0	0	0	0	0	0	0	200	903	0	0	0	0	0	0	0	603	903	0
352	1	0	0	0	0	0	0	200	300	0	0	0	0	0	0	0	200	903	0	0	0	0	0	0	0	603	903	0
352	2	0	0	0	0	0	0	200	300	0	0	0	0	0	0	0	200	903	0	0	0	0	0	0	0	603	903	0
352	3	0	0	0	0	0	0	200	300	0	0	0	0	0	0	0	200	903	0	0	0	0	0	0	0	603	903	0
352	4	0	0	0	0	0	0	200	300	0	0	0	0	0	0	0	200	903	0	0	0	0	0	0	0	603	903	0
352	5	0	0	0	0	0	0	200	300	0	0	0	0	0	0	0	200	903	0	0	0	0	0	0	0	603	903	0
352	6	0	0	0	0	0	0	200	300	0	0	0	0	0	0	0	200	903	0	0	0	0	0	0	0	603	903	0
352	7	0	0	0	0	0	0	200	300	0	0	0	0	0	0	0	200	903	0	0	0	0	0	0	0	603	903	0
352	8	0	0	0	0	0	0	200	300	0	0	0	0	0	0	0	200	903	0	0	0	0	0	0	0	603	903	0
352	9	0	0	0	0	0	0	200	300	0	0	0	0	0	0	0	200	903	0	0	0	0	0	0	0	603	903	0
353	0	0	0	0	0	0	0	200	300	0	0	0	0	0	0	0	200	903	0	0	0	0	0	0	0	603	903	0
353	1	0	0	0	0	0	0	200	300	0	0	0	0	0	0	0	200	903	0	0	0	0	0	0	0	603	903	0
353	2	0	0	0	0	0	0	200	300	0	0	0	0	0	0	0	200	903	0	0	0	0	0	0	0	603	903	0
353	3	0	0	0	0	0	0	200	300	0	0	0	0	0	0	0	200	903	0	0	0	0	0	0	0	603	903	0
353	4	0	0	0	0	0	0	200	300	0	0	0	0	0	0	0	200	903	0	0	0	0	0	0	0	603	903	0
353	5	0	0	0	0	0	0	200	300	0	0	0	0	0	0	0	200	903	0	0	0	0	0	0	0	603	903	0
353	6	0	0	0	0	0	0	200	300	0	0	0	0	0	0	0	200	903	0	0	0	0	0	0	0	603	903	0
353	7	0	0	0	0	0	0	200	300	0	0	0	0	0	0	0	200	903	0	0	0	0	0	0	0	603	903	0
353	8	0	0	0	0	0	0	200	300	0	0	0	0	0	0	0	200	903	0	0	0	0	0	0	0	603	903	0
353	9	0	0	0	0	0	0	200	300	0	0	0	0	0	0	0	200	903	0	0	0	0	0	0	0	603	903	0
354	0	0	0	0	0	0	0	200	300	0	0	0	0	0	0	0	200	903	0	0	0	0	0	0	0	603	903	0
354	1	0	0	0	0	0	0	200	300	0	0	0	0	0	0	0	200	903	0	0	0	0	0	0	0	603	903	0
354	2	0	0	0	0	0	0	200	300	0	0	0	0	0	0	0	200	903	0	0	0	0	0	0	0	603	903	0
354	3	0	0	0	0	0	0	200	300	0	0	0	0	0	0	0	200	903	0	0	0	0	0	0	0	603	903	0
354	4	0	0	0	0	0	0	200	300	0	0	0	0	0	0	0	200	903	0	0	0	0	0	0	0	603	903	0
354	5	0	0	0	0	0	0	200	300	0	0	0	0	0	0	0	200	903	0	0	0	0	0	0	0	603	903	0
354	6	0	0	0	0	0	0	200	300	0	0	0	0	0	0	0	200	903	0	0	0	0	0	0	0	603	903	0
354	7	0	0	0	0	0	0	200	300	0	0	0	0	0	0	0	200	903	0	0	0	0	0	0	0	603	903	0
354	8	0	0	0	0	0	0	200	300	0	0	0	0	0	0	0	200	903	0	0	0	0	0	0	0	603	903	0
354	9	0	0	0	0	0	0	200	300	0	0	0	0	0	0	0	200	903	0	0	0	0	0	0	0	603	903	0
355	0	0	0	0	0	0	0	200	300	0	0	0	0	0	0	0	200	903	0	0	0	0	0	0	0	603	903	0
355	1	0	0	0	0	0	0	200	300	0	0	0	0	0	0	0	200	903	0	0	0	0	0	0	0	603	903	0
355	2	0	0	0	0	0	0	200	300	0	0	0	0	0	0	0	200	903	0	0	0	0	0	0	0	603	903	0
355	3	0	0	0	0	0	0	200	300	0	0	0	0	0	0	0	200	903	0	0	0	0	0	0	0	603	903	0
355	4	0	0	0	0	0	0	200	300	0	0	0	0	0	0	0	200	903	0	0	0	0	0	0	0	603	903	0
355	5	0	0	0	0	0	0	200	300	0	0	0	0	0	0	0	200	903	0	0	0	0	0	0	0	603	903	0
355	6	0	0	0	0	0	0	200	300	0	0	0	0	0	0	0	200	903	0	0	0	0	0	0	0	603	903	0
355	7	0	0	0	0	0	0	200	300	0	0	0	0	0	0	0	200	903	0	0	0	0	0	0	0	603	903	0
355	8	0	0	0	0	0	0	200	300	0	0	0	0	0	0	0	200	903	0	0	0	0	0	0	0	603	903	0
355	9	0	0	0	0	0	0	200	300	0	0	0	0	0	0	0	200	903	0	0	0	0	0	0	0	603	903	0
356	0	0	0	0	0	0	0	200	300	0	0	0	0	0	0	0	200	903	0	0	0	0	0	0	0	603	903	0
356	1	0	0	0	0	0	0	200	300	0	0	0	0	0	0	0	200	903	0	0	0	0	0	0	0	603	903	0
356	2	0	0	0	0	0	0	200	300	0	0	0	0	0	0	0	200	903	0	0	0	0	0	0	0	603	903	0
356	3	0	0	0	0	0	0	200	300	0	0	0	0	0	0	0	200	903	0	0	0	0	0	0	0	603	903	0
356	4	0	0	0	0	0	0	200	300	0	0	0	0	0	0	0	200	903	0	0	0	0	0	0	0	603	903	0
356	5	0	0	0	0	0	0	200	300	0	0	0	0	0	0	0	200	903	0	0	0	0	0	0	0	603	903	0
356	6	0	0	0	0	0	0	200	300	0	0	0	0	0	0	0	200	903	0	0	0	0	0	0	0	603	903	0
356	7	0	0	0	0	0	0	200	300	0	0	0	0	0	0	0	200	903	0	0	0	0	0	0	0	603	903	0
356	8	0	0	0	0	0	0	200	300	0	0	0	0	0	0	0	200	903	0	0	0	0	0	0	0	603	903	0
356	9	0	0	0	0	0	0	200	300	0	0	0	0	0	0	0	200	903	0	0	0	0	0	0	0	603	903	0
357	0	0	0	0	0	0	0	200	300	0	0	0	0	0	0	0	200	903	0	0	0	0	0	0	0	603	903	0
357	1	0	0	0	0	0	0	200	300	0	0	0	0	0	0	0	200	903	0	0	0	0	0	0	0	603	903	0
357	2	0	0	0	0	0	0	200	300	0	0	0	0	0	0	0	200	903	0	0	0	0	0	0	0	603	903	0
357	3	0	0	0	0	0	0	200	300	0	0	0	0	0	0	0	200	903	0	0	0	0	0	0	0	603	903	0
357	4	0	0	0	0	0	0	200	300	0	0	0	0	0	0	0	200	903	0	0	0	0	0	0	0	603	903	0
357	5	0	0	0	0	0	0	200	300	0	0	0	0	0	0	0	200	903	0	0	0	0	0	0	0	603	903	0
357	6	0	0	0	0	0	0	200	300	0	0	0	0	0	0	0	200	903	0	0	0	0	0	0	0	603	903	0
357	7	0	0	0	0	0	0	200	300	0	0	0	0	0	0	0	200	903	0	0	0	0	0	0	0	603	903	0
357	8	0	0	0	0	0	0	200	300	0	0	0	0	0	0	0	200	903	0	0	0	0	0	0	0	603	903	0
357	9	0	0	0	0	0	0	200	300	0	0	0	0	0	0	0	200	903	0	0	0	0	0	0	0	603	903	0
358	0	0	0	0	0	0	0	200	300	0	0	0	0	0	0	0	200	903	0	0	0	0	0	0	0	603	903	0
358	1	0	0	0	0	0	0	200	300	0	0	0	0	0	0	0	200	903	0	0	0	0	0	0	0	603	903	0
358	2	0	0	0	0	0	0	200	300	0	0	0	0	0	0	0	200	903	0	0	0	0	0	0	0	603	903	0
358	3	0	0	0	0	0	0	200	300	0	0	0	0	0	0	0	200	903	0	0	0	0	0	0	0	603	903	0
358	4	0	0	0	0	0	0	200	300	0	0	0	0	0	0	0	200	903	0	0	0	0	0	0	0	603	903	0
358	5	0	0	0	0	0	0	200	300	0	0	0	0	0	0	0	200	903	0	0	0	0	0	0	0	603	903	0
358	6	0	0	0	0	0	0	200	300	0	0	0	0	0	0	0	200	903	0	0	0	0	0	0	0	603	903	0
358	7	0	0	0	0	0	0	200	300	0	0	0	0	0	0	0	200	903	0	0	0	0	0	0	0	603	903	0
358	8	0	0	0	0	0	0	200	300	0	0	0	0	0	0	0	200	903	0	0	0	0	0	0	0	603	903	0
358	9	0	0	0	0	0	0	200	300	0	0	0	0	0	0	0	200	903	0	0	0	0	0	0	0	603	903	0
359	0	0	0	0	0	0	0	200	300	0	0	0	0	0	0	0	200	903	0	0	0	0	0	0	0	603	903	0
359	1	0	0	0	0	0	0	200	300	0	0	0	0	0	0	0	200	903	0	0	0	0	0	0	0	603	903	0
359	2	0	0	0	0	0	0	200	300	0	0	0	0	0	0	0	200	903	0	0	0	0	0	0	0	603	903	0
359	3	0	0	0	0	0	0	200	300	0	0	0	0	0	0	0	200	903	0	0	0	0	0	0	0	603	903	0
359	4	0	0	0	0	0	0	200	300	0	0	0	0	0	0	0	200	903	0	0	0	0	0	0	0	603	903	0
359	5	0	0	0	0	0	0	200	300	0	0	0	0	0	0	0	200	903	0	0	0	0	0	0	0	603	903	0
359	6	0	0	0	0	0	0	200	300	0	0	0	0	0	0	0	200	903	0	0	0	0	0	0	0	603	903	0
359	7	0	0	0	0	0	0	200	300	0	0	0	0	0	0	0	200	903	0	0	0	0	0	0	0	603	903	0
359	8	0	0	0	0	0	0	200	300	0	0	0	0	0	0	0	200	903	0	0	0	0	0	0	0	603	903	0
359	9	0	0	0	0	0	0	200	300	0	0	0	0	0	0	0	200	903	0	0	0	0	0	0	0	603	903	0
360	0	0	0	0	0	0	0	200	300	0	0	0	0	0	0	0	200	903	0	0	0	0	0	0	0	603	903	0
360	1	0	0	0	0	0	0	200	300	0	0	0	0	0	0	0	200	903	0	0	0	0	0	0	0	603	903	0
360	2	0	0	0	0	0	0	200	300	0	0	0	0	0	0	0	200	903	0	0	0	0	0	0	0	603	903	0
360	3	0	0	0	0	0	0	200	300	0	0	0	0	0	0	0	200	903	0	0	0	0	0	0	0	603	903	0
360	4	0	0	0	0	0	0	200	300	0	0	0	0	0	0	0	200	903	0	0	0	0	0	0	0	603	903	0
360	5	0	0	0	0	0	0	200	300	0	0	0	0	0	0	0	200	903	0	0	0	0	0	0	0	603	903	0
360	6	0	0	0	0	0	0	200	300	0	0	0	0	0	0	0	200	903	0	0	0	0	0	0	0	603	903	0
360	7	0	0	0	0	0	0	200	300	0	0	0	0	0	0	0	200	903	0	0	0	0	0	0	0	603	903	0
360	8	0	0	0	0	0	0	200	300	0	0	0	0	0	0	0	200	903	0	0	0	0	0	0	0	603	903	0
360	9	0	0	0	0	0	0	200	300	0	0	0	0	0	0	0	200	903	0	0	0	0	0	0	0	603	903	0
361	0	0	0	0	0	0	0	200	300	0	0	0	0	0	0	0	200	903	0	0	0	0	0	0	0	603	903	0
361	1	0	0	0	0	0	0	200	300	0	0	0	0	0	0	0	200	903	0	0	0	0	0	0	0	603	903	0
361	2	0	0	0	0	0	0	200	300	0	0	0	0	0	0	0	200	903	0	0	0	0	0	0	0	603	903	0
361	3	0	0	0	0	0	0	200	300	0	0	0	0	0	0	0	200	903	0	0	0	0	0	0	0	603	903	0
361	4	0	0	0	0	0	0	200	300	0	0	0	0	0	0	0	200	903	0	0	0	0	0	0	0	603	903	0
361	5	0	0	0	0	0	0	200	300	0	0	0	0	0	0	0	200	903	0	0	0	0	0	0	0	603	903	0
361	6	0	0	0	0	0	0	200	300	0	0	0	0	0	0	0	200	903	0	0	0	0	0	0	0	603	903	0
361	7	0	0	0	0	0	0	200	300	0	0	0	0	0	0	0	200	903	0	0	0	0	0	0	0	603	903	0
361	8	0	0	0	0	0	0	200	300	0	0	0	0	0	0	0	200	903	0	0	0	0	0	0	0	603	903	0
361	9	0	0	0	0	0	0	200	300	0	0	0	0	0	0	0	200	903	0	0	0	0	0	0	0	603	903	0
362	0	0	0	0	0	0	0	200	300	0	0	0	0	0	0	0	200	903	0	0	0	0	0	0	0	603	903	0
362	1	0	0	0	0	0	0	200	300	0	0	0	0	0	0	0	200	903	0	0	0	0	0	0	0	603	903	0
362	2	0	0	0	0	0	0	200	300	0	0	0	0	0	0	0	200	903	0	0	0	0	0	0	0	603	903	0
362	3	0	0	0	0	0	0	200	300	0	0	0	0	0	0	0	200	903	0	0	0	0	0	0	0	603	903	0
362	4	0	0	0	0	0	0	200	300	0	0	0	0	0	0	0	200	903	0	0	0	0	0	0	0	603	903	0
362	5	0	0	0	0	0	0	200	300	0	0	0	0	0	0	0	200	903	0	0	0	0	0	0	0	603	903	0
362	6	0	0	0	0	0	0	200	300	0	0	0	0	0	0	0	200	903	0	0	0	0	0	0	0	603	903	0
362	7	0	0	0	0	0	0	200	300	0	0	0	0	0	0	0	200	903	0	0	0	0	0	0	0	603	903	0
362	8	0	0	0	0	0	0	200	300	0	0	0	0	0	0	0	200	903	0	0	0	0	0	0	0	603	903	0
362	9	0	0	0	0	0	0	200	300	0	0	0	0	0	0	0	200	903	0	0	0	0	0	0	0	603	903	0
363	0	0	0	0	0	0	0	200	300	0	0	0	0	0	0	0	200	903	0	0	0	0	0	0	0	603	903	0
363	1	0	0	0	0	0	0	200	300	0	0	0	0	0	0	0	200	903	0	0	0	0	0	0	0	603	903	0
363	2	0	0	0	0	0	0	200	300	0	0	0	0	0	0	0	200	903	0	0	0	0	0	0	0	603	903	0
363	3	0	0	0	0	0	0	200	300	0	0	0	0	0	0	0	200	903	0	0	0	0	0	0	0	603	903	0
363	4	0	0	0	0	0	0	200	300	0	0	0	0	0	0	0	200	903	0	0	0	0	0	0	0	603	903	0
363	5	0	0	0	0	0	0	200	300	0	0	0	0	0	0	0	200	903	0	0	0	0	0	0	0	603	903	0
363	6	0	0	0	0	0	0	200	300	0	0	0	0	0	0	0	200	903	0	0	0	0	0	0	0	603	903	0
363	7	0	0	0	0	0	0	200	300	0	0	0	0	0	0	0	200	903	0	0	0	0	0	0	0	603	903	0
363	8	0	0	0	0	0	0	200	300	0	0	0	0	0	0	0	200	903	0	0	0	0	0	0	0	603	903	0
363	9	0	0	0	0	0	0	200	300	0	0	0	0	0	0	0	200	903	0	0	0	0	0	0	0	603	903	0
364	0	0	0	0	0	0	0	200	300	0	0	0	0	0	0	0	200	903	0	0	0	0	0	0	0	603	903	0
364	1	0	0	0	0	0	0	200	300	0	0	0	0	0	0	0	200	903	0	0	0	0	0	0	0	603	903	0
364	2	0	0	0	0	0	0	200	300	0	0	0	0	0	0	0	200	903	0	0	0	0	0	0	0	603	903	0
364	3	0	0	0	0	0	0	200	300	0	0	0	0	0	0	0	200	903	0	0	0	0	0	0	0	603	903	0
364	4	0	0	0	0	0	0	200	300	0	0	0	0	0	0	0	200	903	0	0	0	0	0	0	0	603	903	0
364	5	0	0	0	0	0	0	200	300	0	0	0	0	0	0	0	200	903	0	0	0	0	0	0	0	603	903	0
364	6	0	0	0	0	0	0	200	300	0	0	0	0	0	0	0	200	903	0	0	0	0	0	0	0	603	903	0
364	7	0	0	0	0	0	0	200	300	0	0	0	0	0	0	0	200	903	0	0	0	0	0	0	0	603	903	0
364	8	0	0	0	0	0	0	200	300	0	0	0	0	0	0	0	200	903	0	0	0	0	0	0	0	603	903	0
364	9	0	0	0	0	0	0	200	300	0	0	0	0	0	0	0	200	903	0	0	0	0	0	0	0	603	903	0
365	0	0	0	0	0	0	0	200	300	0	0	0	0	0	0	0	200	903	0	0	0	0	0	0	0	603	903	0
365	1	0	0	0	0	0	0	200	300	0	0	0	0	0	0	0	200	903	0	0	0	0	0	0	0	603	903	0
365	2	0	0	0	0	0	0	200	300	0	0	0	0	0	0	0	200	903	0	0	0	0	0	0	0	603	903	0
365	3	0	0	0	0	0	0	200	300	0	0	0	0	0	0	0	200	903	0	0	0	0	0	0	0	603	903	0
365	4	0	0	0	0	0	0	200	300	0	0	0	0	0	0	0	200	903	0	0	0	0	0	0	0	603	903	0
365	5	0	0	0	0	0	0	200	300	0	0	0	0	0	0	0	200	903	0	0	0	0	0	0	0	603	903	0
365	6	0	0	0	0	0	0	200	300	0	0	0	0	0	0	0	200	903	0	0	0	0	0	0	0	603	903	0
365	7	0	0	0	0	0	0	200	300	0	0	0	0	0	0	0	200	903	0	0	0	0	0	0	0	603	903	0
365	8	0	0	0	0	0	0	200	300	0	0	0	0	0	0	0	200	903	0	0	0	0	0	0	0	603	903	0
365	9	0	0	0	0	0	0	200	300	0	0	0	0	0	0	0	200	903	0	0	0	0	0	0	0	603	903	0
366	0	0	0	0	0	0	0	200	300	0	0	0	0	0	0	0	200	903	0	0	0	0	0	0	0	603	903	0
366	1	0	0	0	0	0	0	200	300	0	0	0	0	0	0	0	200	903	0	0	0	0	0	0	0	603	903	0
366	2	0	0	0	0	0	0	200	300	0	0	0	0	0	0	0	200	903	0	0	0	0	0	0	0	603	903	0
366	3	0	0	0	0	0	0	200	300	0	0	0	0	0	0	0	200	903	0	0	0	0	0	0	0	603	903	0
366	4	0	0	0	0	0	0	200	300	0	0	0	0	0	0	0	200	903	0	0	0	0	0	0	0	603	903	0
366	5	0	0	0	0	0	0	200	300	0	0	0	0	0	0	0	200	903	0	0	0	0	0	0	0	603	903	0
366	6	0	0	0	0	0	0	200	300	0	0	0	0	0	0	0	200	903	0	0	0	0	0	0	0	603	903	0
366	7	0	0	0	0	0	0	200	300	0	0	0	0	0	0	0	200	903	0	0	0	0	0	0	0	603	903	0
366	8	0	0	0	0	0	0	200	300	0	0	0	0	0	0	0	200	903	0	0	0	0	0	0	0	603	903	0
366	9	0	0	0	0	0	0	200	300	0	0	0	0	0	0	0	200	903	0	0	0	0	0	0	0	603	903	0
367	0	0	0	0	0	0	0	200	300	0	0	0	0	0	0	0	200	903	0	0	0	0	0	0	0	603	903	0
367	1	0	0	0	0	0	0	200	300	0	0	0	0	0	0	0	200	903	0	0	0	0	0	0	0	603	903	0
367	2	0	0	0	0	0	0	200	300	0	0	0	0	0	0	0	200	903	0	0	0	0	0	0	0	603	903	0
367	3	0	0	0	0	0	0	200	300	0	0	0	0	0	0	0	200	903	0	0	0	0	0	0	0	603	903	0
367	4	0	0	0	0	0	0	200	300	0	0	0	0	0	0	0	200	903	0	0	0	0	0	0	0	603	903	0
367	5	0	0	0	0	0	0	200	300	0	0	0	0	0	0	0	200	903	0	0	0	0	0	0	0	603	903	0
367	6	0	0	0	0	0	0	200	300	0	0	0	0	0	0	0	200	903	0	0	0	0	0	0	0	603	903	0
367	7	0	0	0	0	0	0	200	300	0	0	0	0	0	0	0	200	903	0	0	0	0	0	0	0	603	903	0
367	8	0	0	0	0	0	0	200	300	0	0	0	0	0	0	0	200	903	0	0	0	0	0	0	0	603	903	0
367	9	0	0	0	0	0	0	200	300	0	0	0	0	0	0	0	200	903	0	0	0	0	0	0	0	603	903	0
368	0	0	0	0	0	0	0	200	300	0	0	0	0	0	0	0	200	903	0	0	0	0	0	0	0	603	903	0
368	1	0	0	0	0	0	0	200	300	0	0	0	0	0	0	0	200	903	0	0	0	0	0	0	0	603	903	0
368	2	0	0	0	0	0	0	200	300	0	0	0	0	0	0	0	200	903	0	0	0	0	0	0	0	603	903	0
368	3	0	0	0	0	0	0	200	300	0	0	0	0	0	0	0	200	903	0	0	0	0	0	0	0	603	903	0
368	4	0	0	0	0	0	0	200	300	0	0	0	0	0	0	0	200	903	0	0	0	0	0	0	0	603	903	0
368	5	0	0	0	0	0	0	200	300	0	0	0	0	0	0	0	200	903	0	0	0	0	0	0	0	603	903	0
368	6	0	0	0	0	0	0	200	300	0	0	0	0	0	0	0	200	903	0	0	0	0	0	0	0	603	903	0
368	7	0	0	0	0	0	0	200	300	0	0	0	0	0	0	0	200	903	0	0	0	0	0	0	0	603	903	0
368	8	0	0	0	0	0	0	200	300	0	0	0	0	0	0	0	200	903	0	0	0	0	0	0	0	603	903	0
368	9	0	0	0	0	0	0	200	300	0	0	0	0	0	0	0	200	903	0	0	0	0	0	0	0	603	903	0
369	0	0	0	0	0	0	0	200	300	0	0	0	0	0	0	0	200	903	0	0	0	0	0	0	0	603	903	0
369	1	0	0	0	0	0	0	200	300	0	0	0	0	0	0	0	200	903	0	0	0	0	0	0	0	603	903	0
369	2	0	0	0	0	0	0	200	300	0	0	0	0	0	0	0	200	903	0	0	0	0	0	0	0	603	903	0
369	3	0	0	0	0	0	0	200	300	0	0	0	0	0	0	0	200	903	0	0	0	0	0	0	0	603	903	0
369	4	0	0	0	0	0	0	200	300	0	0	0	0	0	0	0	200	903	0	0	0	0	0	0	0	603	903	0
369	5	0	0	0	0	0	0	200	300	0	0	0	0	0	0	0	200	903	0	0	0	0	0	0	0	603	903	0
369	6	0	0	0	0	0	0	200	300	0	0	0	0	0	0	0	200	903	0	0	0	0	0	0	0	603	903	0
369	7	0	0	0	0	0	0	200	300	0	0	0	0	0	0	0	200	903	0	0	0	0	0	0	0	603	903	0
369	8	0	0	0	0	0	0	200	300	0	0	0	0	0	0	0	200	903	0	0	0	0	0	0	0	603	903	0
369	9	0	0	0	0	0	0	200	300	0	0	0	0	0	0	0	200	903	0	0	0	0	0	0	0	603	903	0
370	0	0	0	0	0	0	0	200	300	0	0	0	0	0	0	0	200	903	0	0	0	0	0	0	0	603	903	0
370	1	0	0	0	0	0	0	200	300	0	0	0	0	0	0	0	200	903	0	0	0	0	0	0	0	603	903	0
370	2	0	0	0	0	0	0	200	300	0	0	0	0	0	0	0	200	903	0	0	0	0	0	0	0	603	903	0
370	3	0	0	0	0	0	0	200	300	0	0	0	0	0	0	0	200	903	0	0	0	0	0	0	0	603	903	0
370	4	0	0	0	0	0	0	200	300	0	0	0	0	0	0	0	200	903	0	0	0	0	0	0	0	603	903	0
370	5	0	0	0	0	0	0	200	300	0	0	0	0	0	0	0	200	903	0	0	0	0	0	0	0	603	903	0
370	6	0	0	0	0	0	0	200	300	0	0	0	0	0	0	0	200	903	0	0	0	0	0	0	0	603	903	0
370	7	0	0	0	0	0	0	200	300	0	0	0	0	0	0	0	200	903	0	0	0	0	0	0	0	603	903	0
370	8	0	0	0	0	0	0	200	300	0	0	0	0	0	0	0	200	903	0	0	0	0	0	0	0	603	903	0
370	9	0	0	0	0	0	0	200	300	0	0	0	0	0	0	0	200	903	0	0	0	0	0	0	0	603	903	0
371	0	0	0	0	0	0	0	200	300	0	0	0	0	0	0	0	200	903	0	0	0	0	0	0	0	603	903	0
371	1	0	0	0	0	0	0	200	300	0	0	0	0	0	0	0	200	903	0	0	0	0	0	0	0	603	903	0
371	2	0	0	0	0	0	0	200	300	0	0	0	0	0	0	0	200	903	0	0	0	0	0	0	0	603	903	0
371	3	0	0	0	0	0	0	200	300	0	0	0	0	0	0	0	200	903	0	0	0	0	0	0	0	603	903	0
371	4	0	0	0	0	0	0	200	300	0	0	0	0	0	0	0	200	903	0	0	0	0	0	0	0	603	903	0
371	5	0	0	0	0	0	0	200	300	0	0	0	0	0	0	0	200	903	0	0	0	0	0	0	0	603	903	0
371	6	0	0	0	0	0	0	200	300	0	0	0	0	0	0	0	200	903	0	0	0	0	0	0	0	603	903	0
371	7	0	0	0	0	0	0	200	300	0	0	0	0	0	0	0	200	903	0	0	0	0	0	0	0	603	903	0
371	8	0	0	0	0	0	0	200	300	0	0	0	0	0	0	0	200	903	0	0	0	0	0	0	0	603	903	0
371	9	0	0	0	0	0	0	200	300	0	0	0	0	0	0	0	200	903	0	0	0	0	0	0	0	603	903	0
372	0	0	0	0	0	0	0	200	300	0	0	0	0	0	0	0	200	903	0	0	0	0	0	0	0	603	903	0
372	1	0	0	0	0	0	0	200	300	0	0	0	0	0	0	0	200	903	0	0	0	0	0	0	0	603	903	0
372	2	0	0	0	0	0	0	200	300	0	0	0	0	0	0	0	200	903	0	0	0	0	0	0	0	603	903	0
372	3	0	0	0	0	0	0	200	300	0	0	0	0	0	0	0	200	903	0	0	0	0	0	0	0	603	903	0
372	4	0	0	0	0	0	0	200	300	0	0	0	0	0	0	0	200	903	0	0	0	0	0	0	0	603	903	0
372	5	0	0	0	0	0	0	200	300	0	0	0	0	0	0	0	200	903	0	0	0	0	0	0	0	603	903	0
372	6	0	0	0	0	0	0	200	300	0	0	0	0	0	0	0	200	903	0	0	0	0	0	0	0	603	903	0
372	7	0	0	0	0	0	0	200	300	0	0	0	0	0	0	0	200	903	0	0	0	0	0	0	0	603	903	0
372	8	0	0	0	0	0	0	200	300	0	0	0	0	0	0	0	200	903	0	0	0	0	0	0	0	603	903	0
372	9	0	0	0	0	0	0	200	300	0	0	0	0	0	0	0	200	903	0	0	0	0	0	0	0	603	903	0
373	0	0	0	0	0	0	0	200	300	0	0	0	0	0	0	0	200	903	0	0	0	0	0	0	0	603	903	0
373	1	0	0	0	0	0	0	200	300	0	0	0	0	0	0	0	200	903	0	0	0	0	0	0	0	603	903	0
373	2	0	0	0	0	0	0	200	300	0	0	0	0	0	0	0	200	903	0	0	0	0	0	0	0	603	903	0
373	3	0	0	0	0	0	0	200	300	0	0	0	0	0	0	0	200	903	0	0	0	0	0	0	0	603	903	0
373	4	0	0	0	0	0	0	200	300	0	0	0	0	0	0	0	200	903	0	0	0	0	0	0	0	603	903	0
373	5	0	0	0	0	0	0	200	300	0	0	0	0	0	0	0	200	903	0	0	0	0	0	0	0	603	903	0
373	6	0	0	0	0	0	0	200	300	0	0	0	0	0	0	0	200	903	0	0	0	0	0	0	0	603	903	0
373	7	0	0	0	0	0	0	200	300	0	0	0	0	0	0	0	200	903	0	0	0	0	0	0	0	603	903	0
373	8	0	0	0	0	0	0	200	300	0	0	0	0	0	0	0	200	903	0	0	0	0	0	0	0	603	903	0
373	9	0	0	0	0	0	0	200	300	0	0	0	0	0	0	0	200	903	0	0	0	0	0	0	0	603	903	0
374	0	0	0	0	0	0	0	200	300	0	0	0	0	0	0	0	200	903	0	0	0	0	0	0	0	603	903	0
374	1	0	0	0	0	0	0	200	300	0	0	0	0	0	0	0	200	903	0	0	0	0	0	0	0	603	903	0
374	2	0	0	0	0	0	0	200	300	0	0	0	0	0	0	0	200	903	0	0	0	0	0	0	0	603	903	0
374	3	0	0	0	0	0	0	200	300	0	0	0	0	0	0	0	200	903	0	0	0	0	0	0	0	603	903	0
374	4	0	0	0	0	0	0	200	300	0	0	0	0	0	0	0	200	903	0	0	0	0	0	0	0	603	903	0
374	5	0	0	0	0	0	0	200	300	0	0	0	0	0	0	0	200	903	0	0	0	0	0	0	0	603	903	0
374	6	0	0	0	0	0	0	200	300	0	0	0	0	0	0	0	200	903	0	0	0	0	0	0	0	603	903	0
374	7	0	0	0	0	0	0	200	300	0	0	0	0	0	0	0	200	903	0	0	0	0	0	0	0	603	903	0
374	8	0	0	0	0	0	0	200	300	0	0	0	0	0	0	0	200	903	0	0	0	0	0	0	0	603	903	0
374	9	0	0	0	0	0	0	200	300	0	0	0	0	0	0	0	200	903	0	0	0	0	0	0	0	603	903	0
375	0	0	0	0	0	0	0	200	300	0	0	0	0	0	0	0	200	903	0	0	0	0	0	0	0	603	903	0
375	1	0	0	0	0	0	0	200	300	0	0	0	0	0	0	0	200	903	0	0	0	0	0	0	0	603	903	0
375	2	0	0	0	0	0	0	200	300	0	0	0	0	0	0	0	200	903	0	0	0	0	0	0	0	603	903	0
375	3	0	0	0	0	0	0	200	300	0	0	0	0	0	0	0	200	903	0	0	0	0	0	0	0	603	903	0
375	4	0	0	0	0	0	0	200	300	0	0	0	0	0	0	0	200	903	0	0	0	0	0	0	0	603	903	0
375	5	0	0	0	0	0	0	200	300	0	0	0	0	0	0	0	200	903	0	0	0	0	0	0	0	603	903	0
375	6	0	0	0	0	0	0	200	300	0	0	0	0	0	0	0	200	903	0	0	0	0	0	0	0	603	903	0
375	7	0	0	0	0	0	0	200	300	0	0	0	0	0	0	0	200	903	0	0	0	0	0	0	0	603	903	0
375	8	0	0	0	0	0	0	200	300	0	0	0	0	0	0	0	200	903	0	0	0	0	0	0	0	603	903	0
375	9	0	0	0	0	0	0	200	300	0	0	0	0	0	0	0	200	903	0	0	0	0	0	0	0	603	903	0
376	0	0	0	0	0	0	0	200	300	0	0	0	0	0	0	0	200	903	0	0	0	0	0	0	0	603	903	0
376	1	0	0	0	0	0	0	200	300	0	0	0	0	0	0	0	200	903	0	0	0	0	0	0	0	603	903	0
376	2	0	0	0	0	0	0	200	300	0	0	0	0	0	0	0	200	903	0	0	0	0	0	0	0	603	903	0
376	3	0	0	0	0	0	0	200	300	0	0	0	0	0	0	0	200	903	0	0	0	0	0	0	0	603	903	0
376	4	0	0	0	0	0	0	200	300	0	0	0	0	0	0	0	200	903	0	0	0	0	0	0	0	603	903	0
376	5	0	0	0	0	0	0	200	300	0	0	0	0	0	0	0	200	903	0	0	0	0	0	0	0	603	903	0
376	6	0	0	0	0	0	0	200	300	0	0	0	0	0	0	0	200	903	0	0	0	0	0	0	0	603	903	0
376	7	0	0	0	0	0	0	200	300	0	0	0	0	0	0	0	200	903	0	0	0	0	0	0	0	603	903	0
376	8	0	0	0	0	0	0	200	300	0	0	0	0	0	0	0	200	903	0	0	0	0	0	0	0	603	903	0
376	9	0	0	0	0	0	0	200	300	0	0	0	0	0	0	0	200	903	0	0	0	0	0	0	0	603	903	0
377	0	0	0	0	0	0	0	200	300	0	0	0	0	0	0	0	200	903	0	0	0	0	0	0	0	603	903	0
377	1	0	0	0	0	0	0	200	300	0	0	0	0	0	0	0	200	903	0	0	0	0	0	0	0	603	903	0
377	2	0	0	0	0	0	0	200	300	0	0	0	0	0	0	0	200	903	0	0	0	0	0	0	0	603	903	0
377	3	0	0	0	0	0	0	200	300	0	0	0	0	0	0	0	200	903	0	0	0	0	0	0	0	603	903	0
377	4	0	0	0	0	0	0	200	300	0	0	0	0	0	0	0	200	903	0	0	0	0	0	0	0	603	903	0
377	5	0	0	0	0	0	0	200	300	0	0	0	0	0	0	0	200	903	0	0	0	0	0	0	0	603	903	0
377	6	0	0	0	0	0	0	200	300	0	0	0	0	0	0	0	200	903	0	0	0	0	0	0	0	603	903	0
377	7	0	0	0	0	0	0	200	300	0	0	0	0	0	0	0	200	903	0	0	0	0	0	0	0	603	903	0
377	8	0	0	0	0	0	0	200	300	0	0	0	0	0	0	0	200	903	0	0	0	0	0	0	0	603	903	0
377	9	0	0	0	0	0	0	200	300	0	0	0	0	0	0	0	200	903	0	0	0	0	0	0	0	603	903	0
378	0	0	0	0	0	0	0	200	300	0	0	0	0	0	0	0	200	903	0	0	0	0	0	0	0	603	903	0
378	1	0	0	0	0	0	0	200	300	0	0	0	0	0	0	0	200	903	0	0	0	0	0	0	0	603	903	0
378	2	0	0	0	0	0	0	200	300	0	0	0	0	0	0	0	200	903	0	0	0	0	0	0	0	603	903	0
378	3	0	0	0	0	0	0	200	300	0	0	0	0	0	0	0	200	903	0	0	0	0	0	0	0	603	903	0
378	4	0	0	0	0	0	0	200	300	0	0	0	0	0	0	0	200	903	0	0	0	0	0	0	0	603	903	0
378	5	0	0	0	0	0	0	200	300	0	0	0	0	0	0	0	200	903	0	0	0	0	0	0	0	603	903	0
378	6	0	0	0	0	0	0	200	300	0	0	0	0	0	0	0	200	903	0	0	0	0	0	0	0	603	903	0
378	7	0	0	0	0	0	0	200	300	0	0	0	0	0	0	0	200	903	0	0	0	0	0	0	0	603	903	0
378	8	0	0	0	0	0	0	200	300	0	0	0	0	0	0	0	200	903	0	0	0	0	0	0	0	603	903	0
378	9	0	0	0	0	0	0	200	300	0	0	0	0	0	0	0	200	903	0	0	0	0	0	0	0	603	903	0
379	0	0	0	0	0	0	0	200	300	0	0	0	0	0	0	0	200	903	0	0	0	0	0	0	0	603	903	0
379	1	0	0	0	0	0	0	200	300	0	0	0	0	0	0	0	200	903	0	0	0	0	0	0	0	603	903	0
379	2	0	0	0	0	0	0	200	300	0	0	0	0	0	0	0	200	903	0	0	0	0	0	0	0	603	903	0
379	3	0	0	0	0	0	0	200	300	0	0	0	0	0	0	0	200	903	0	0	0	0	0	0	0	603	903	0
379	4	0	0	0	0	0	0	200	300	0	0	0	0	0	0	0	200	903	0	0	0	0	0	0	0	603	903	0
379	5	0	0	0	0	0	0	200	300	0	0	0	0	0	0	0	200	903	0	0	0	0	0	0	0	603	903	0
379	6	0	0	0	0	0	0	200	300	0	0	0	0	0	0	0	200	903	0	0	0	0	0	0	0	603	903	0
379	7	0	0	0	0	0	0	200	300	0	0	0	0	0	0	0	200	903	0	0	0	0	0	0	0	603	903	0
379	8	0	0	0	0	0	0	200	300	0	0	0	0	0	0	0	200	903	0	0	0	0	0	0	0	603	903	0
379	9	0	0	0	0	0	0	200	300	0	0	0	0	0	0	0	200	903	0	0	0	0	0	0	0	603	903	0
380	0	0	0	0	0	0	0	200	300	0	0	0	0	0	0	0	200	903	0	0	0	0	0	0	0	603	903	0
380	1	0	0	0	0	0	0	200	300	0	0	0	0	0	0	0	200	903	0	0	0	0	0	0	0	603	903	0
380	2	0	0	0	0	0	0	200	300	0	0	0	0	0	0	0	200	903	0	0	0	0	0	0	0	603	903	0
380	3	0	0	0	0	0	0	200	300	0	0	0	0	0	0	0	200	903	0	0	0	0	0	0	0	603	903	0
380	4	0	0	0	0	0	0	200	300	0	0	0	0	0	0	0	200	903	0	0	0	0	0	0	0	603	903	0
380	5	0	0	0	0	0	0	200	300	0	0	0	0	0	0	0	200	903	0	0	0	0	0	0	0	603	903	0
380	6	0	0	0	0	0	0	200	300	0	0	0	0	0	0	0	200	903	0	0	0	0	0	0	0	603	903	0
380	7	0	0	0	0	0	0	200	300	0	0	0	0	0	0	0	200	903	0	0	0	0	0	0	0	603	903	0
380	8	0	0	0	0	0	0	200	300	0	0	0	0	0	0	0	200	903	0	0	0	0	0	0	0	603	903	0
380	9	0	0	0	0	0	0	200	300	0	0	0	0	0	0	0	200	903	0	0	0	0	0	0	0	603	903	0
381	0	0	0	0	0	0	0	200	300	0	0	0	0	0	0	0	200	903	0	0	0	0	0	0	0	603	903	0
381	1	0	0	0	0	0	0	200	300	0	0	0	0	0	0	0	200	903	0	0	0	0	0	0	0	603	903	0
381	2	0	0	0	0	0	0	200	300	0	0	0	0	0	0	0	200	903	0	0	0	0	0	0	0	603	903	0
381	3	0	0	0	0	0	0	200	300	0	0	0	0	0	0	0	200	903	0	0	0	0	0	0	0	603	903	0
381	4	0	0	0	0	0	0	200	300	0	0	0	0	0	0	0	200	903	0	0	0	0	0	0	0	603	903	0
381	5	0	0	0	0	0	0	200	300	0	0	0	0	0	0	0	200	903	0	0	0	0	0	0	0	603	903	0
381	6	0	0	0	0	0	0	200	300	0	0	0	0	0	0	0	200	903	0	0	0	0	0	0	0	603	903	0
381	7	0	0	0	0	0	0	200	300	0	0	0	0	0	0	0	200	903	0	0	0	0	0	0	0	603	903	0
381	8	0	0	0	0	0	0	200	300	0	0	0	0	0	0	0	200	903	0	0	0	0	0	0	0	603	903	0
381	9	0	0	0	0	0	0	200	300	0	0	0	0	0	0	0	200	903	0	0	0	0	0	0	0	603	903	0
382	0	0	0	0	0	0	0	200	300	0	0	0	0	0	0	0	200	903	0	0	0	0	0	0	0	603	903	0
382	1	0	0	0	0	0	0	200	300	0	0	0	0	0	0	0	200	903	0	0	0	0	0	0	0	603	903	0
382	2	0	0	0	0	0	0	200	300	0	0	0	0	0	0	0	200	903	0	0	0	0	0	0	0	603	903	0
382	3	0	0	0	0	0	0	200	300	0	0	0	0	0	0	0	200	903	0	0	0	0	0	0	0	603	903	0
382	4	0	0	0	0	0	0	200	300	0	0	0	0	0	0	0	200	903	0	0	0	0	0	0	0	603	903	0
382	5	0	0	0	0	0	0	200	300	0	0	0	0	0	0	0	200	903	0	0	0	0	0	0	0	603	903	0
382	6	0	0	0	0	0	0	200	300	0	0	0	0	0	0	0	200	903	0	0	0	0	0	0	0	603	903	0
382	7	0	0	0	0	0	0	200	300	0	0	0	0	0	0	0	200	903	0	0	0	0	0	0	0	603	903	0
382	8	0	0	0	0	0	0	200	300	0	0	0	0	0	0	0	200	903	0	0	0	0	0	0	0	603	903	0
382	9	0	0	0	0	0	0	200	300	0	0	0	0	0	0	0	200	903	0	0	0	0	0	0	0	603	903	0
383	0	0	0	0	0	0	0	200	300	0	0	0	0	0	0	0	200	903	0	0	0	0	0	0	0	603	903	0
383	1	0	0	0	0	0	0	200	300	0	0	0	0	0	0	0	200	903	0	0	0	0	0	0	0	603	903	0
383	2	0	0	0	0	0	0	200	300	0	0	0	0	0	0	0	200	903	0	0	0	0	0	0	0	603	903	0
383	3	0	0	0	0	0	0	200	300	0	0	0	0	0	0	0	200	903	0	0	0	0	0	0	0	603	903	0
383	4	0	0	0	0	0	0	200	300	0	0	0	0	0	0	0	200	903	0	0	0	0	0	0	0	603	903	0
383	5	0	0	0	0	0	0	200	300	0	0	0	0	0	0	0	200	903	0	0	0	0	0	0	0	603	903	0
383	6	0	0	0	0	0	0	200	300	0	0	0	0	0	0	0	200	903	0	0	0	0	0	0	0	603	903	0
383	7	0	0	0	0	0	0	200	300	0	0	0	0	0	0	0	200	903	0	0	0	0	0	0	0	603	903	0
383	8	0	0	0	0	0	0	200	300	0	0	0	0	0	0	0	200	903	0	0	0	0	0	0	0	603	903	0
383	9	0	0	0	0	0	0	200	300	0	0	0	0	0	0	0	200	903	0	0	0	0	0	0	0	603	903	0
384	0	0	0	0	0	0	0	200	300	0	0	0	0	0	0	0	200	903	0	0	0	0	0	0	0	603	903	0
384	1	0	0	0	0	0	0	200	300	0	0	0	0	0	0	0	200	903	0	0	0	0	0	0	0	603	903	0
384	2	0	0	0	0	0	0	200	300	0	0	0	0	0	0	0	200	903	0	0	0	0	0	0	0	603	903	0
384	3	0	0	0	0	0	0	200	300	0	0	0	0	0	0	0	200	903	0	0	0	0	0	0	0	603	903	0
384	4	0	0	0	0	0	0	200	300	0	0	0	0	0	0	0	200	903	0	0	0	0	0	0	0	603	903	0
384	5	0	0	0	0	0	0	200	300	0	0	0	0	0	0	0	200	903	0	0	0	0	0	0	0	603	903	0
384	6	0	0	0	0	0	0	200	300	0	0	0	0	0	0	0	200	903	0	0	0	0	0	0	0	603	903	0
384	7	0	0	0	0	0	0	200	300	0	0	0	0	0	0	0	200	903	0	0	0	0	0	0	0	603	903	0
384	8	0	0	0	0	0	0	200	300	0	0	0	0	0	0	0	200	903	0	0	0	0	0	0	0	603	903	0
384	9	0	0	0	0	0	0	200	300	0	0	0	0	0	0	0	200	903	0	0	0	0	0	0	0	603	903	0
385	0	0	0	0	0	0	0	200	300	0	0	0	0	0	0	0	200	903	0	0	0	0	0	0	0	603	903	0
385	1	0	0	0	0	0	0	200	300	0	0	0	0	0	0	0	200	903	0	0	0	0	0	0	0	603	903	0
385	2	0	0	0	0	0	0	200	300	0	0	0	0	0	0	0	200	903	0	0	0	0	0	0	0	603	903	0
385	3	0	0	0	0	0	0	200	300	0	0	0	0	0	0	0	200	903	0	0	0	0	0	0	0	603	903	0
385	4	0	0	0	0	0	0	200	300	0	0	0	0	0	0	0	200	903	0	0	0	0	0	0	0	603	903	0
385	5	0	0	0	0	0	0	200	300	0	0	0	0	0	0	0	200	903	0	0	0	0	0	0	0	603	903	0
385	6	0	0	0	0	0	0	200	300	0	0	0	0	0	0	0	200	903	0	0	0	0	0	0	0	603	903	0
385	7	0	0	0	0	0	0	200	300	0	0	0	0	0	0	0	200	903	0	0	0	0	0	0	0	603	903	0
385	8	0	0	0	0	0	0	200	300	0	0	0	0	0	0	0	200	903	0	0	0	0	0	0	0	603	903	0
385	9	0	0	0	0	0	0	200	300	0	0	0	0	0	0	0	200	903	0	0	0	0	0	0	0	603	903	0
386	0	0	0	0	0	0	0	200	300	0	0	0	0	0	0	0	200	903	0	0	0	0	0	0	0	603	903	0
386	1	0	0	0	0	0	0	200	300	0	0	0	0	0	0	0	200	903	0	0	0	0	0	0	0	603	903	0
386	2	0	0	0	0	0	0	200	300	0	0	0	0	0	0	0	200	903	0	0	0	0	0	0	0	603	903	0
386	3	0	0	0	0	0	0	200	300	0	0	0	0	0	0	0	200	903	0	0	0	0	0	0	0	603	903	0
386	4	0	0	0	0	0	0	200	300	0	0	0	0	0	0	0	200	903	0	0	0	0	0	0	0	603	903	0
386	5	0	0	0	0	0	0	200	300	0	0	0	0	0	0	0	200	903	0	0	0	0	0	0	0	603	903	0
386	6	0	0	0	0	0	0	200	300	0	0	0	0	0	0	0	200	903	0	0	0	0	0	0	0	603	903	0
386	7	0	0	0	0	0	0	200	300	0	0	0	0	0	0	0	200	903	0	0	0	0	0	0	0	603	903	0
386	8	0	0	0	0	0	0	200	300	0	0	0	0	0	0	0	200	903	0	0	0	0	0	0	0	603	903	0
386	9	0	0	0	0	0	0	200	300	0	0	0	0	0	0	0	200	903	0	0	0	0	0	0	0	603	903	0
387	0	0	0	0	0	0	0	200	300	0	0	0	0	0	0	0	200	903	0	0	0	0	0	0	0	603	903	0
387	1	0	0	0	0	0	0	200	300	0	0	0	0	0	0	0	200	903	0	0	0	0	0	0	0	603	903	0
387	2	0	0	0	0	0	0	200	300	0	0	0	0	0	0	0	200	903	0	0	0	0	0	0	0	603	903	0
387	3	0	0	0	0	0	0	200	300	0	0	0	0	0	0	0	200	903	0	0	0	0	0	0	0	603	903	0
387	4	0	0	0	0	0	0	200	300	0	0	0	0	0	0	0	200	903	0	0	0	0	0	0	0	603	903	0
387	5	0	0	0	0	0	0	200	300	0	0	0	0	0	0	0	200	903	0	0	0	0	0	0	0	603	903	0
387	6	0	0	0	0	0	0	200	300	0	0	0	0	0	0	0	200	903	0	0	0	0	0	0	0	603	903	0
387	7	0	0	0	0	0	0	200	300	0	0	0	0	0	0	0	200	903	0	0	0	0	0	0	0	603	903	0
387	8	0	0	0	0	0	0	200	300	0	0	0	0	0	0	0	200	903	0	0	0	0	0	0	0	603	903	0
387	9	0	0	0	0	0	0	200	300	0	0	0	0	0	0	0	200	903	0	0	0	0	0	0	0	603	903	0
388	0	0	0	0	0	0	0	200	300	0	0	0	0	0	0	0	200	903	0	0	0	0	0	0	0	603	903	0
388	1	0	0	0	0	0	0	200	300	0	0	0	0	0	0	0	200	903	0	0	0	0	0	0	0	603	903	0
388	2	0	0	0	0	0	0	200	300	0	0	0	0	0	0	0	200	903	0	0	0	0	0	0	0	603	903	0
388	3	0	0	0	0	0	0	200	300	0	0	0	0	0	0	0	200	903	0	0	0	0	0	0	0	603	903	0
388	4	0	0	0	0	0	0	200	300	0	0	0	0	0	0	0	200	903	0	0	0	0	0	0	0	603	903	0
388	5	0	0	0	0	0	0	200	300	0	0	0	0	0	0	0	200	903	0	0	0	0	0	0	0	603	903	0
388	6	0	0	0	0	0	0	200	300	0	0	0	0	0	0	0	200	903	0	0	0	0	0	0	0	603	903	0
388	7	0	0	0	0	0	0	200	300	0	0	0	0	0	0	0	200	903	0	0	0	0	0	0	0	603	903	0
388	8	0	0	0	0	0	0	200	300	0	0	0	0	0	0	0	200	903	0	0	0	0	0	0	0	603	903	0
388	9	0	0	0	0	0	0	200	300	0	0	0	0	0	0	0	200	903	0	0	0	0	0	0	0	603	903	0
389	0	0	0	0	0	0	0	200	300	0	0	0	0	0	0	0	200	903	0	0	0	0	0	0	0	603	903	0
389	1	0	0	0	0	0	0	200	300	0	0	0	0	0	0	0	200	903	0	0	0	0	0	0	0	603	903	0
389	2	0	0	0	0	0	0	200	300	0	0	0	0	0	0	0	200	903	0	0	0	0	0	0	0	603	903	0
389	3	0	0	0	0	0	0	200	300	0	0	0	0	0	0	0	200	903	0	0	0	0	0	0	0	603	903	0
389	4	0	0	0	0	0	0	200	300	0	0	0	0	0	0	0	200	903	0	0	0	0	0	0	0	603	903	0
389	5	0	0	0	0	0	0	200	300	0	0	0	0	0	0	0	200	903	0	0	0	0	0	0	0	603	903	0
389	6	0	0	0	0	0	0	200	300	0	0	0	0	0	0	0	200	903	0	0	0	0	0	0	0	603	903	0
389	7	0	0	0	0	0	0	200	300	0	0	0	0	0	0	0	200	903	0	0	0	0	0	0	0	603	903	0
389	8	0	0	0	0	0	0	200	300	0	0	0	0	0	0	0	200	903	0	0	0	0	0	0	0	603	903	0
389	9	0	0	0	0	0	0	200	300	0	0	0	0	0	0	0	200	903	0	0	0	0	0	0	0	603	903	0
390	0	0	0	0	0	0	0	200	300	0	0	0	0	0	0	0	200	903	0	0	0	0	0	0	0	603	903	0
390	1	0	0	0	0	0	0	200	300	0	0	0	0	0	0	0	200	903	0	0	0	0	0	0	0	603	903	0
390	2	0	0	0	0	0	0	200	300	0	0	0	0	0	0	0	200	903	0	0	0	0	0	0	0	603	903	0
390	3	0	0	0	0	0	0	200	300	0	0	0	0	0	0	0	200	903	0	0	0	0	0	0	0	603	903	0
390	4	0	0	0	0	0	0	200	300	0	0	0	0	0	0	0	200	903	0	0	0	0	0	0	0	603	903	0
390	5	0	0	0	0	0	0	200	300	0	0	0	0	0	0	0	200	903	0	0	0	0	0	0	0	603	903	0
390	6	0	0	0	0	0	0	200	300	0	0	0	0	0	0	0	200	903	0	0	0	0	0	0	0	603	903	0
390	7	0	0	0	0	0	0	200	300	0	0	0	0	0	0	0	200	903	0	0	0	0	0	0	0	603	903	0
390	8	0	0	0	0	0	0	200	300	0	0	0	0	0	0	0	200	903	0	0	0	0	0	0	0	603	903	0
390	9	0	0	0	0	0	0	200	300	0	0	0	0	0	0	0	200	903	0	0	0	0	0	0	0	603	903	0
391	0	0	0	0	0	0	0	200	300	0	0	0	0	0	0	0	200	903	0	0	0	0	0	0	0	603	903	0
391	1	0	0	0	0	0	0	200	300	0	0	0	0	0	0	0	200	903	0	0	0	0	0	0	0	603	903	0
391	2	0	0	0	0	0	0	200	300	0	0	0	0	0	0	0	200	903	0	0	0	0	0	0	0	603	903	0
391	3	0	0	0	0	0	0	200	300	0	0	0	0	0	0	0	200	903	0	0	0	0	0	0	0	603	903	0
391	4	0	0	0	0	0	0	200	300	0	0	0	0	0	0	0	200	903	0	0	0	0	0	0	0	603	903	0
391	5	0	0	0	0	0	0	200	300	0	0	0	0	0	0	0	200	903	0	0	0	0	0	0	0	603	903	0
391	6	0	0	0	0	0	0	200	300	0	0	0	0	0	0	0	200	903	0	0	0	0	0	0	0	603	903	0
391	7	0	0	0	0	0	0	200	300	0	0	0	0	0	0	0	200	903	0	0	0	0	0	0	0	603	903	0
391	8	0	0	0	0	0	0	200	300	0	0	0	0	0	0	0	200	903	0	0	0	0	0	0	0	603	903	0
391	9	0	0	0	0	0	0	200	300	0	0	0	0	0	0	0	200	903	0	0	0	0	0	0	0	603	903	0
392	0	0	0	0	0	0	0	200	300	0	0	0	0	0	0	0	200	903	0	0	0	0	0	0	0	603	903	0
392	1	0	0	0	0	0	0	200	300	0	0	0	0	0	0	0	200	903	0	0	0	0	0	0	0	603	903	0
392	2	0	0	0	0	0	0	200	300	0	0	0	0	0	0	0	200	903	0	0	0	0	0	0	0	603	903	0
392	3	0	0	0	0	0	0	200	300	0	0	0	0	0	0	0	200	903	0	0	0	0	0	0	0	603	903	0
392	4	0	0	0	0	0	0	200	300	0	0	0	0	0	0	0	200	903	0	0	0	0	0	0	0	603	903	0
392	5	0	0	0	0	0	0	200	300	0	0	0	0	0	0	0	200	903	0	0	0	0	0	0	0	603	903	0
392	6	0	0	0	0	0	0	200	300	0	0	0	0	0	0	0	200	903	0	0	0	0	0	0	0	603	903	0
392	7	0	0	0	0	0	0	200	300	0	0	0	0	0	0	0	200	903	0	0	0	0	0	0	0	603	903	0
392	8	0	0	0	0	0	0	200	300	0	0	0	0	0	0	0	200	903	0	0	0	0	0	0	0	603	903	0
392	9	0	0	0	0	0	0	200	300	0	0	0	0	0	0	0	200	903	0	0	0	0	0	0	0	603	903	0
393	0	0	0	0	0	0	0	200	300	0	0	0	0	0	0	0	200	903	0	0	0	0	0	0	0	603	903	0
393	1	0	0	0	0	0	0	200	300	0	0	0	0	0	0	0	200	903	0	0	0	0	0	0	0	603	903	0
393	2	0	0	0	0	0	0	200	300	0	0	0	0	0	0	0	200	903	0	0	0	0	0	0	0	603	903	0
393	3	0	0	0	0	0	0	200	300	0	0	0	0	0	0	0	200	903	0	0	0	0	0	0	0	603	903	0
393	4	0	0	0	0	0	0	200	300	0	0	0	0	0	0	0	200	903	0	0	0	0	0	0	0	603	903	0
393	5	0	0	0	0	0	0	200	300	0	0	0	0	0	0	0	200	903	0	0	0	0	0	0	0	603	903	0
393	6	0	0	0	0	0	0	200	300	0	0	0	0	0	0	0	200	903	0	0	0	0	0	0	0	603	903	0
393	7	0	0	0	0	0	0	200	300	0	0	0	0	0	0	0	200	903	0	0	0	0	0	0	0	603	903	0
393	8	0	0	0	0	0	0	200	300	0	0	0	0	0	0	0	200	903	0	0	0	0	0	0	0	603	903	0
393	9	0	0	0	0	0	0	200	300	0	0	0	0	0	0	0	200	903	0	0	0	0	0	0	0	603	903	0
394	0	0	0	0	0	0	0	200	300	0	0	0	0	0	0	0	200	903	0	0	0	0	0	0	0	603	903	0
394	1	0	0	0	0	0	0	200	300	0	0	0	0	0	0	0	200	903	0	0	0	0	0	0	0	603	903	0
394	2	0	0	0	0	0	0	200	300	0	0	0	0	0	0	0	200	903	0	0	0	0	0	0	0	603	903	0
394	3	0	0	0	0	0	0	200	300	0	0	0	0	0	0	0	200	903	0	0	0	0	0	0	0	603	903	0
394	4	0	0	0	0	0	0	200	300	0	0	0	0	0	0	0	200	903	0	0	0	0	0	0	0	603	903	0
394	5	0	0	0	0	0	0	200	300	0	0	0	0	0	0	0	200	903	0	0	0	0	0	0	0	603	903	0
394	6	0	0	0	0	0	0	200	300	0	0	0	0	0	0	0	200	903	0	0	0	0	0	0	0	603	903	0
394	7	0	0	0	0	0	0	200	300	0	0	0	0	0	0	0	200	903	0	0	0	0	0	0	0	603	903	0
394	8	0	0	0	0	0	0	200	300	0	0	0	0	0	0	0	200	903	0	0	0	0	0	0	0	603	903	0
394	9	0	0	0	0	0	0	200	300	0	0	0	0	0	0	0	200	903	0	0	0	0	0	0	0	603	903	0
395	0	0	0	0	0	0	0	200	300	0	0	0	0	0	0	0	200	903	0	0	0	0	0	0	0	603	903	0
395	1	0	0	0	0	0	0	200	300	0	0	0	0	0	0	0	200	903	0	0	0	0	0	0	0	603	903	0
395	2	0	0	0	0	0	0	200	300	0	0	0	0	0	0	0	200	903	0	0	0	0	0	0	0	603	903	0
395	3	0	0	0	0	0	0	200	300	0	0	0	0	0	0	0	200	903	0	0	0	0	0	0	0	603	903	0
395	4	0	0	0	0	0	0	200	300	0	0	0	0	0	0	0	200	903	0	0	0	0	0	0	0	603	903	0
395	5	0	0	0	0	0	0	200	300	0	0	0	0	0	0	0	200	903	0	0	0	0	0	0	0	603	903	0
395	6	0	0	0	0	0	0	200	300	0	0	0	0	0	0	0	200	903	0	0	0	0	0	0	0	603	903	0
395	7	0	0	0	0	0	0	200	300	0	0	0	0	0	0	0	200	903	0	0	0	0	0	0	0	603	903	0
395	8	0	0	0	0	0	0	200	300	0	0	0	0	0	0	0	200	903	0	0	0	0	0	0	0	603	903	0
395	9	0	0	0	0	0	0	200	300	0	0	0	0	0	0	0	200	903	0	0	0	0	0	0	0	603	903	0
396	0	0	0	0	0	0	0	200	300	0	0	0	0	0	0	0	200	903	0	0	0	0	0	0	0	603	903	0
396	1	0	0	0	0	0	0	200	300	0	0	0	0	0	0	0	200	903	0	0	0	0	0	0	0	603	903	0
396	2	0	0	0	0	0	0	200	300	0	0	0	0	0	0	0	200	903	0	0	0	0	0	0	0	603	903	0
396	3	0	0	0	0	0	0	200	300	0	0	0	0	0	0	0	200	903	0	0	0	0	0	0	0	603	903	0
396	4	0	0	0	0	0	0	200	300	0	0	0	0	0	0	0	200	903	0	0	0	0	0	0	0	603	903	0
396	5	0	0	0	0	0	0	200	300	0	0	0	0	0	0	0	200	903	0	0	0	0	0	0	0	603	903	0
396	6	0	0	0	0	0	0	200	300	0	0	0	0	0	0	0	200	903	0	0	0	0	0	0	0	603	903	0
396	7	0	0	0	0	0	0	200	300	0	0	0	0	0	0	0	200	903	0	0	0	0	0	0	0	603	903	0
396	8	0	0	0	0	0	0	200	300	0	0	0	0	0	0	0	200	903	0	0	0	0	0	0	0	603	903	0
396	9	0	0	0	0	0	0	200	300	0	0	0	0	0	0	0	200	903	0	0	0	0	0	0	0	603	903	0
397	0	0	0	0	0	0	0	200	300	0	0	0	0	0	0	0	200	903	0	0	0	0	0	0	0	603	903	0
397	1	0	0	0	0	0	0	200	300	0	0	0	0	0	0	0	200	903	0	0	0	0	0	0	0	603	903	0
397	2	0	0	0	0	0	0	200	300	0	0	0	0	0	0	0	200	903	0	0	0	0	0	0	0	603	903	0
397	3	0	0	0	0	0	0	200	300	0	0	0	0	0	0	0	200	903	0	0	0	0	0	0	0	603	903	0
397	4	0	0	0	0	0	0	200	300	0	0	0	0	0	0	0	200	903	0	0	0	0	0	0	0	603	903	0
397	5	0	0	0	0	0	0	200	300	0	0	0	0	0	0	0	200	903	0	0	0	0	0	0	0	603	903	0
397	6	0	0	0	0	0	0	200	300	0	0	0	0	0	0	0	200	903	0	0	0	0	0	0	0	603	903	0
397	7	0	0	0	0	0	0	200	300	0	0	0	0	0	0	0	200	903	0	0	0	0	0	0	0	603	903	0
397	8	0	0	0	0	0	0	200	300	0	0	0	0	0	0	0	200	903	0	0	0	0	0	0	0	603	903	0
397	9	0	0	0	0	0	0	200	300	0	0	0	0	0	0	0	200	903	0	0	0	0	0	0	0	603	903	0
398	0	0	0	0	0	0	0	200	300	0	0	0	0	0	0	0	200	903	0	0	0	0	0	0	0	603	903	0
398	1	0	0	0	0	0	0	200	300	0	0	0	0	0	0	0	200	903	0	0	0	0	0	0	0	603	903	0
398	2	0	0	0	0	0	0	200	300	0	0	0	0	0	0	0	200	903	0	0	0	0	0	0	0	603	903	0
398	3	0	0	0	0	0	0	200	300	0	0	0	0	0	0	0	200	903	0	0	0	0	0	0	0	603	903	0
398	4	0	0	0	0	0	0	200	300	0	0	0	0	0	0	0	200	903	0	0	0	0	0	0	0	603	903	0
398	5	0	0	0	0	0	0	200	300	0	0	0	0	0	0	0	200	903	0	0	0	0	0	0	0	603	903	0
398	6	0	0	0	0	0	0	200	300	0	0	0	0	0	0	0	200	903	0	0	0	0	0	0	0	603	903	0
398	7	0	0	0	0	0	0	200	300	0	0	0	0	0	0	0	200	903	0	0	0	0	0	0	0	603	903	0
398	8	0	0	0	0	0	0	200	300	0	0	0	0	0	0	0	200	903	0	0	0	0	0	0	0	603	903	0
398	9	0	0	0	0	0	0	200	300	0	0	0	0	0	0	0	200	903	0	0	0	0	0	0	0	603	903	0
399	0	0	0	0	0	0	0	200	300	0	0	0	0	0	0	0	200	903	0	0	0	0	0	0	0	603	903	0
399	1	0	0	0	0	0	0	200	300	0	0	0	0	0	0	0	200	903	0	0	0	0	0	0	0	603	903	0
399	2	0	0	0	0	0	0	200	300	0	0	0	0	0	0	0	200	903	0	0	0	0	0	0	0	603	903	0
399	3	0	0	0	0	0	0	200	300	0	0	0	0	0	0	0	200	903	0	0	0	0	0	0	0	603	903	0
399	4	0	0	0	0	0	0	200	300	0	0	0	0	0	0	0	200	903	0	0	0	0	0	0	0	603	903	0
399	5	0	0	0	0	0	0	200	300	0	0	0	0	0	0	0	200	903	0	0	0	0	0	0	0	603	903	0
399	6	0	0	0	0	0	0	200	300	0	0	0	0	0	0	0	200	903	0	0	0	0	0	0	0	603	903	0
399	7	0	0	0	0	0	0	200	300	0	0	0	0	0	0	0	200	903	0	0	0	0	0	0	0	603	903	0
399	8	0	0	0	0	0	0	200	300	0	0	0	0	0	0	0	200	903	0	0	0	0	0	0	0	603	903	0
399	9	0	0	0	0	0	0	200	300	0	0	0	0	0	0	0	200	903	0	0	0	0	0	0	0	603	903	0
400	0	0	0	0	0	0	0	200	300	0	0	0	0	0	0	0	200	903	0	0	0	0	0	0	0	603	903	0
400	1	0	0	0	0	0	0	200	300	0	0	0	0	0	0	0	200	903	0	0	0	0	0	0	0	603	903	0
400	2	0	0	0	0	0	0	200	300	0	0	0	0	0	0	0	200	903	0	0	0	0	0	0	0	603	903	0
400	3	0	0	0	0	0	0	200	300	0	0	0	0	0	0	0	200	903	0	0	0	0	0	0	0	603	903	0
400	4	0	0	0	0	0	0	200	300	0	0	0	0	0	0	0	200	903	0	0	0	0	0	0	0	603	903	0
400	5	0	0	0	0	0	0	200	300	0	0	0	0	0	0	0	200	903	0	0	0	0	0	0	0	603	903	0
400	6	0	0	0	0	0	0	200	300	0	0	0	0	0	0	0	200	903	0	0	0	0	0	0	0	603	903	0
400	7	0	0	0	0	0	0	200	300	0	0	0	0	0	0	0	200	903	0	0	0	0	0	0	0	603	903	0
400	8	0	0	0	0	0	0	200	300	0	0	0	0	0	0	0	200	903	0	0	0	0	0	0	0	603	903	0
400	9	0	0	0	0	0	0	200	300	0	0	0	0	0	0	0	200	903	0	0	0	0	0	0	0	603	903	0
401	0	0	0	0	0	0	0	200	300	0	0	0	0	0	0	0	200	903	0	0	0	0	0	0	0	603	903	0
401	1	0	0	0	0	0	0	200	300	0	0	0	0	0	0	0	200	903	0	0	0	0	0	0	0	603	903	0
401	2	0	0	0	0	0	0	200	300	0	0	0	0	0	0	0	200	903	0	0	0	0	0	0	0	603	903	0
401	3	0	0	0	0	0	0	200	300	0	0	0	0	0	0	0	200	903	0	0	0	0	0	0	0	603	903	0
401	4	0	0	0	0	0	0	200	300	0	0	0	0	0	0	0	200	903	0	0	0	0	0	0	0	603	903	0
401	5	0	0	0	0	0	0	200	300	0	0	0	0	0	0	0	200	903	0	0	0	0	0	0	0	603	903	0
401	6	0	0	0	0	0	0	200	300	0	0	0	0	0	0	0	200	903	0	0	0	0	0	0	0	603	903	0
401	7	0	0	0	0	0	0	200	300	0	0	0	0	0	0	0	200	903	0	0	0	0	0	0	0	603	903	0
401	8	0	0	0	0	0	0	200	300	0	0	0	0	0	0	0	200	903	0	0	0	0	0	0	0	603	903	0
401	9	0	0	0	0	0	0	200	300	0	0	0	0	0	0	0	200	903	0	0	0	0	0	0	0	603	903	0
402	0	0	0	0	0	0	0	200	300	0	0	0	0	0	0	0	200	903	0	0	0	0	0	0	0	603	903	0
402	1	0	0	0	0	0	0	200	300	0	0	0	0	0	0	0	200	903	0	0	0	0	0	0	0	603	903	0
402	2	0	0	0	0	0	0	200	300	0	0	0	0	0	0	0	200	903	0	0	0	0	0	0	0	603	903	0
402	3	0	0	0	0	0	0	200	300	0	0	0	0	0	0	0	200	903	0	0	0	0	0	0	0	603	903	0
402	4	0	0	0	0	0	0	200	300	0	0	0	0	0	0	0	200	903	0	0	0	0	0	0	0	603	903	0
402	5	0	0	0	0	0	0	200	300	0	0	0	0	0	0	0	200	903	0	0	0	0	0	0	0	603	903	0
402	6	0	0	0	0	0	0	200	300	0	0	0	0	0	0	0	200	903	0	0	0	0	0	0	0	603	903	0
402	7	0	0	0	0	0	0	200	300	0	0	0	0	0	0	0	200	903	0	0	0	0	0	0	0	603	903	0
402	8	0	0	0	0	0	0	200	300	0	0	0	0	0	0	0	200	903	0	0	0	0	0	0	0	603	903	0
402	9	0	0	0	0	0	0	200	300	0	0	0	0	0	0	0	200	903	0	0	0	0	0	0	0	603	903	0
403	0	0	0	0	0	0	0	200	300	0	0	0	0	0	0	0	200	903	0	0	0	0	0	0	0	603	903	0
403	1	0	0	0	0	0	0	200	300	0	0	0	0	0	0	0	200	903	0	0	0	0	0	0	0	603	903	0
403	2	0	0	0	0	0	0	200	300	0	0	0	0	0	0	0	200	903	0	0	0	0	0	0	0	603	903	0
403	3	0	0	0	0	0	0	200	300	0	0	0	0	0	0	0	200	903	0	0	0	0	0	0	0	603	903	0
403	4	0	0	0	0	0	0	200	300	0	0	0	0	0	0	0	200	903	0	0	0	0	0	0	0	603	903	0
403	5	0	0	0	0	0	0	200	300	0	0	0	0	0	0	0	200	903	0	0	0	0	0	0	0	603	903	0
403	6	0	0	0	0	0	0	200	300	0	0	0	0	0	0	0	200	903	0	0	0	0	0	0	0	603	903	0
403	7	0	0	0	0	0	0	200	300	0	0	0	0	0	0	0	200	903	0	0	0	0	0	0	0	603	903	0
403	8	0	0	0	0	0	0	200	300	0	0	0	0	0	0	0	200	903	0	0	0	0	0	0	0	603	903	0
403	9	0	0	0	0	0	0	200	300	0	0	0	0	0	0	0	200	903	0	0	0	0	0	0	0	603	903	0
404	0	0	0	0	0	0	0	200	300	0	0	0	0	0	0	0	200	903	0	0	0	0	0	0	0	603	903	0
404	1	0	0	0	0	0	0	200	300	0	0	0	0	0	0	0	200	903	0	0	0	0	0	0	0	603	903	0
404	2	0	0	0	0	0	0	200	300	0	0	0	0	0	0	0	200	903	0	0	0	0	0	0	0	603	903	0
404	3	0	0	0	0	0	0	200	300	0	0	0	0	0	0	0	200	903	0	0	0	0	0	0	0	603	903	0
404	4	0	0	0	0	0	0	200	300	0	0	0	0	0	0	0	200	903	0	0	0	0	0	0	0	603	903	0
404	5	0	0	0	0	0	0	200	300	0	0	0	0	0	0	0	200	903	0	0	0	0	0	0	0	603	903	0
404	6	0	0	0	0	0	0	200	300	0	0	0	0	0	0	0	200	903	0	0	0	0	0	0	0	603	903	0
404	7	0	0	0	0	0	0	200	300	0	0	0	0	0	0	0	200	903	0	0	0	0	0	0	0	603	903	0
404	8	0	0	0	0	0	0	200	300	0	0	0	0	0	0	0	200	903	0	0	0	0	0	0	0	603	903	0
404	9	0	0	0	0	0	0	200	300	0	0	0	0	0	0	0	200	903	0	0	0	0	0	0	0	603	903	0
405	0	0	0	0	0	0	0	200	300	0	0	0	0	0	0	0	200	903	0	0	0	0	0	0	0	603	903	0
405	1	0	0	0	0	0	0	200	300	0	0	0	0	0	0	0	200	903	0	0	0	0	0	0	0	603	903	0
405	2	0	0	0	0	0	0	200	300	0	0	0	0	0	0	0	200	903	0	0	0	0	0	0	0	603	903	0
405	3	0	0	0	0	0	0	200	300	0	0	0	0	0	0	0	200	903	0	0	0	0	0	0	0	603	903	0
405	4	0	0	0	0	0	0	200	300	0	0	0	0	0	0	0	200	903	0	0	0	0	0	0	0	603	903	0
405	5	0	0	0	0	0	0	200	300	0	0	0	0	0	0	0	200	903	0	0	0	0	0	0	0	603	903	0
405	6	0	0	0	0	0	0	200	300	0	0	0	0	0	0	0	200	903	0	0	0	0	0	0	0	603	903	0
405	7	0	0	0	0	0	0	200	300	0	0	0	0	0	0	0	200	903	0	0	0	0	0	0	0	603	903	0
405	8	0	0	0	0	0	0	200	300	0	0	0	0	0	0	0	200	903	0	0	0	0	0	0	0	603	903	0
405	9	0	0	0	0	0	0	200	300	0	0	0	0	0	0	0	200	903	0	0	0	0	0	0	0	603	903	0
406	0	0	0	0	0	0	0	200	300	0	0	0	0	0	0	0	200	903	0	0	0	0	0	0	0	603	903	0
406	1	0	0	0	0	0	0	200	300	0	0	0	0	0	0	0	200	903	0	0	0	0	0	0	0	603	903	0
406	2	0	0	0	0	0	0	200	300	0	0	0	0	0	0	0	200	903	0	0	0	0	0	0	0	603	903	0
406	3	0	0	0	0	0	0	200	300	0	0	0	0	0	0	0	200	903	0	0	0	0	0	0	0	603	903	0
406	4	0	0	0	0	0	0	200	300	0	0	0	0	0	0	0	200	903	0	0	0	0	0	0	0	603	903	0
406	5	0	0	0	0	0	0	200	300	0	0	0	0	0	0	0	200	903	0	0	0	0	0	0	0	603	903	0
406	6	0	0	0	0	0	0	200	300	0	0	0	0	0	0	0	200	903	0	0	0	0	0	0	0	603	903	0
406	7	0	0	0	0	0	0	200	300	0	0	0	0	0	0	0	200	903	0	0	0	0	0	0	0	603	903	0
406	8	0	0	0	0	0	0	200	300	0	0	0	0	0	0	0	200	903	0	0	0	0	0	0	0	603	903	0
406	9	0	0	0	0	0	0	200	300	0	0	0	0	0	0	0	200	903	0	0	0	0	0	0	0	603	903	0
407	0	0	0	0	0	0	0	200	300	0	0	0	0	0	0	0	200	903	0	0	0	0	0	0	0	603	903	0
407	1	0	0	0	0	0	0	200	300	0	0	0	0	0	0	0	200	903	0	0	0	0	0	0	0	603	903	0
407	2	0	0	0	0	0	0	200	300	0	0	0	0	0	0	0	200	903	0	0	0	0	0	0	0	603	903	0
407	3	0	0	0	0	0	0	200	300	0	0	0	0	0	0	0	200	903	0	0	0	0	0	0	0	603	903	0
407	4	0	0	0	0	0	0	200	300	0	0	0	0	0	0	0	200	903	0	0	0	0	0	0	0	603	903	0
407	5	0	0	0	0	0	0	200	300	0	0	0	0	0	0	0	200	903	0	0	0	0	0	0	0	603	903	0
407	6	0	0	0	0	0	0	200	300	0	0	0	0	0	0	0	200	903	0	0	0	0	0	0	0	603	903	0
407	7	0	0	0	0	0	0	200	300	0	0	0	0	0	0	0	200	903	0	0	0	0	0	0	0	603	903	0
407	8	0	0	0	0	0	0	200	300	0	0	0	0	0	0	0	200	903	0	0	0	0	0	0	0	603	903	0
407	9	0	0	0	0	0	0	200	300	0	0	0	0	0	0	0	200	903	0	0	0	0	0	0	0	603	903	0
408	0	0	0	0	0	0	0	200	300	0	0	0	0	0	0	0	200	903	0	0	0	0	0	0	0	603	903	0
408	1	0	0	0	0	0	0	200	300	0	0	0	0	0	0	0	200	903	0	0	0	0	0	0	0	603	903	0
408	2	0	0	0	0	0	0	200	300	0	0	0	0	0	0	0	200	903	0	0	0	0	0	0	0	603	903	0
408	3	0	0	0	0	0	0	200	300	0	0	0	0	0	0	0	200	903	0	0	0	0	0	0	0	603	903	0
408	4	0	0	0	0	0	0	200	300	0	0	0	0	0	0	0	200	903	0	0	0	0	0	0	0	603	903	0
408	5	0	0	0	0	0	0	200	300	0	0	0	0	0	0	0	200	903	0	0	0	0	0	0	0	603	903	0
408	6	0	0	0	0	0	0	200	300	0	0	0	0	0	0	0	200	903	0	0	0	0	0	0	0	603	903	0
408	7	0	0	0	0	0	0	200	300	0	0	0	0	0	0	0	200	903	0	0	0	0	0	0	0	603	903	0
408	8	0	0	0	0	0	0	200	300	0	0	0	0	0	0	0	200	903	0	0	0	0	0	0	0	603	903	0
408	9	0	0	0	0	0	0	200	300	0	0	0	0	0	0	0	200	903	0	0	0	0	0	0	0	603	903	0
409	0	0	0	0	0	0	0	200	300	0	0	0	0	0	0	0	200	903	0	0	0	0	0	0	0	603	903	0
409	1	0	0	0	0	0	0	200	300	0	0	0	0	0	0	0	200	903	0	0	0	0	0	0	0	603	903	0
409	2	0	0	0	0	0	0	200	300	0	0	0	0	0	0	0	200	903	0	0	0	0	0	0	0	603	903	0
409	3	0	0	0	0	0	0	200	300	0	0	0	0	0	0	0	200	903	0	0	0	0	0	0	0	603	903	0
409	4	0	0	0	0	0	0	200	300	0	0	0	0	0	0	0	200	903	0	0	0	0	0	0	0	603	903	0
409	5	0	0	0	0	0	0	200	300	0	0	0	0	0	0	0	200	903	0	0	0	0	0	0	0	603	903	0
409	6	0	0	0	0	0	0	200	300	0	0	0	0	0	0	0	200	903	0	0	0	0	0	0	0	603	903	0
409	7	0	0	0	0	0	0	200	300	0	0	0	0	0	0	0	200	903	0	0	0	0	0	0	0	603	903	0
409	8	0	0	0	0	0	0	200	300	0	0	0	0	0	0	0	200	903	0	0	0	0	0	0	0	603	903	0
409	9	0	0	0	0	0	0	200	300	0	0	0	0	0	0	0	200	903	0	0	0	0	0	0	0	603	903	0
410	0	0	0	0	0	0	0	200	300	0	0	0	0	0	0	0	200	903	0	0	0	0	0	0	0	603	903	0
410	1	0	0	0	0	0	0	200	300	0	0	0	0	0	0	0	200	903	0	0	0	0	0	0	0	603	903	0
410	2	0	0	0	0	0	0	200	300	0	0	0	0	0	0	0	200	903	0	0	0	0	0	0	0	603	903	0
410	3	0	0	0	0	0	0	200	300	0	0	0	0	0	0	0	200	903	0	0	0	0	0	0	0	603	903	0
410	4	0	0	0	0	0	0	200	300	0	0	0	0	0	0	0	200	903	0	0	0	0	0	0	0	603	903	0
410	5	0	0	0	0	0	0	200	300	0	0	0	0	0	0	0	200	903	0	0	0	0	0	0	0	603	903	0
410	6	0	0	0	0	0	0	200	300	0	0	0	0	0	0	0	200	903	0	0	0	0	0	0	0	603	903	0
410	7	0	0	0	0	0	0	200	300	0	0	0	0	0	0	0	200	903	0	0	0	0	0	0	0	603	903	0
410	8	0	0	0	0	0	0	200	300	0	0	0	0	0	0	0	200	903	0	0	0	0	0	0	0	603	903	0
410	9	0	0	0	0	0	0	200	300	0	0	0	0	0	0	0	200	903	0	0	0	0	0	0	0	603	903	0
411	0	0	0	0	0	0	0	200	300	0	0	0	0	0	0	0	200	903	0	0	0	0	0	0	0	603	903	0
411	1	0	0	0	0	0	0	200	300	0	0	0	0	0	0	0	200	903	0	0	0	0	0	0	0	603	903	0
411	2	0	0	0	0	0	0	200	300	0	0	0	0	0	0	0	200	903	0	0	0	0	0	0	0	603	903	0
411	3	0	0	0	0	0	0	200	300	0	0	0	0	0	0	0	200	903	0	0	0	0	0	0	0	603	903	0
411	4	0	0	0	0	0	0	200	300	0	0	0	0	0	0	0	200	903	0	0	0	0	0	0	0	603	903	0
411	5	0	0	0	0	0	0	200	300	0	0	0	0	0	0	0	200	903	0	0	0	0	0	0	0	603	903	0
411	6	0	0	0	0	0	0	200	300	0	0	0	0	0	0	0	200	903	0	0	0	0	0	0	0	603	903	0
411	7	0	0	0	0	0	0	200	300	0	0	0	0	0	0	0	200	903	0	0	0	0	0	0	0	603	903	0
411	8	0	0	0	0	0	0	200	300	0	0	0	0	0	0	0	200	903	0	0	0	0	0	0	0	603	903	0
411	9	0	0	0	0	0	0	200	300	0	0	0	0	0	0	0	200	903	0	0	0	0	0	0	0	603	903	0
412	0	0	0	0	0	0	0	200	300	0	0	0	0	0	0	0	200	903	0	0	0	0	0	0	0	603	903	0
412	1	0	0	0	0	0	0	200	300	0	0	0	0	0	0	0	200	903	0	0	0	0	0	0	0	603	903	0
412	2	0	0	0	0	0	0	200	300	0	0	0	0	0	0	0	200	903	0	0	0	0	0	0	0	603	903	0
412	3	0	0	0	0	0	0	200	300	0	0	0	0	0	0	0	200	903	0	0	0	0	0	0	0	603	903	0
412	4	0	0	0	0	0	0	200	300	0	0	0	0	0	0	0	200	903	0	0	0	0	0	0	0	603	903	0
412	5	0	0	0	0	0	0	200	300	0	0	0	0	0	0	0	200	903	0	0	0	0	0	0	0	603	903	0
412	6	0	0	0	0	0	0	200	300	0	0	0	0	0	0	0	200	903	0	0	0	0	0	0	0	603	903	0
412	7	0	0	0	0	0	0	200	300	0	0	0	0	0	0	0	200	903	0	0	0	0	0	0	0	603	903	0
412	8	0	0	0	0	0	0	200	300	0	0	0	0	0	0	0	200	903	0	0	0	0	0	0	0	603	903	0
412	9	0	0	0	0	0	0	200	300	0	0	0	0	0	0	0	200	903	0	0	0	0	0	0	0	603	903	0
413	0	0	0	0	0	0	0	200	300	0	0	0	0	0	0	0	200	903	0	0	0	0	0	0	0	603	903	0
413	1	0	0	0	0	0	0	200	300	0	0	0	0	0	0	0	200	903	0	0	0	0	0	0	0	603	903	0
413	2	0	0	0	0	0	0	200	300	0	0	0	0	0	0	0	200	903	0	0	0	0	0	0	0	603	903	0
413	3	0	0	0	0	0	0	200	300	0	0	0	0	0	0	0	200	903	0	0	0	0	0	0	0	603	903	0
413	4	0	0	0	0	0	0	200	300	0	0	0	0	0	0	0	200	903	0	0	0	0	0	0	0	603	903	0
413	5	0	0	0	0	0	0	200	300	0	0	0	0	0	0	0	200	903	0	0	0	0	0	0	0	603	903	0
413	6	0	0	0	0	0	0	200	300	0	0	0	0	0	0	0	200	903	0	0	0	0	0	0	0	603	903	0
413	7	0	0	0	0	0	0	200	300	0	0	0	0	0	0	0	200	903	0	0	0	0	0	0	0	603	903	0
413	8	0	0	0	0	0	0	200	300	0	0	0	0	0	0	0	200	903	0	0	0	0	0	0	0	603	903	0
413	9	0	0	0	0	0	0	200	300	0	0	0	0	0	0	0	200	903	0	0	0	0	0	0	0	603	903	0
414	0	0	0	0	0	0	0	200	300	0	0	0	0	0	0	0	200	903	0	0	0	0	0	0	0	603	903	0
414	1	0	0	0	0	0	0	200	300	0	0	0	0	0	0	0	200	903	0	0	0	0	0	0	0	603	903	0
414	2	0	0	0	0	0	0	200	300	0	0	0	0	0	0	0	200	903	0	0	0	0	0	0	0	603	903	0
414	3	0	0	0	0	0	0	200	300	0	0	0	0	0	0	0	200	903	0	0	0	0	0	0	0	603	903	0
414	4	0	0	0	0	0	0	200	300	0	0	0	0	0	0	0	200	903	0	0	0	0	0	0	0	603	903	0
414	5	0	0	0	0	0	0	200	300	0	0	0	0	0	0	0	200	903	0	0	0	0	0	0	0	603	903	0
414	6	0	0	0	0	0	0	200	300	0	0	0	0	0	0	0	200	903	0	0	0	0	0	0	0	603	903	0
414	7	0	0	0	0	0	0	200	300	0	0	0	0	0	0	0	200	903	0	0	0	0	0	0	0	603	903	0
414	8	0	0	0	0	0	0	200	300	0	0	0	0	0	0	0	200	903	0	0	0	0	0	0	0	603	903	0
414	9	0	0	0	0	0	0	200	300	0	0	0	0	0	0	0	200	903	0	0	0	0	0	0	0	603	903	0
415	0	0	0	0	0	0	0	200	300	0	0	0	0	0	0	0	200	903	0	0	0	0	0	0	0	603	903	0
415	1	0	0	0	0	0	0	200	300	0	0	0	0	0	0	0	200	903	0	0	0	0	0	0	0	603	903	0
415	2	0	0	0	0	0	0	200	300	0	0	0	0	0	0	0	200	903	0	0	0	0	0	0	0	603	903	0
415	3	0	0	0	0	0	0	200	300	0	0	0	0	0	0	0	200	903	0	0	0	0	0	0	0	603	903	0
415	4	0	0	0	0	0	0	200	300	0	0	0	0	0	0	0	200	903	0	0	0	0	0	0	0	603	903	0
415	5	0	0	0	0	0	0	200	300	0	0	0	0	0	0	0	200	903	0	0	0	0	0	0	0	603	903	0
415	6	0	0	0	0	0	0	200	300	0	0	0	0	0	0	0	200	903	0	0	0	0	0	0	0	603	903	0
415	7	0	0	0	0	0	0	200	300	0	0	0	0	0	0	0	200	903	0	0	0	0	0	0	0	603	903	0
415	8	0	0	0	0	0	0	200	300	0	0	0	0	0	0	0	200	903	0	0	0	0	0	0	0	603	903	0
415	9	0	0	0	0	0	0	200	300	0	0	0	0	0	0	0	200	903	0	0	0	0	0	0	0	603	903	0
416	0	0	0	0	0	0	0	200	300	0	0	0	0	0	0	0	200	903	0	0	0	0	0	0	0	603	903	0
416	1	0	0	0	0	0	0	200	300	0	0	0	0	0	0	0	200	903	0	0	0	0	0	0	0	603	903	0
416	2	0	0	0	0	0	0	200	300	0	0	0	0	0	0	0	200	903	0	0	0	0	0	0	0	603	903	0
416	3	0	0	0	0	0	0	200	300	0	0	0	0	0	0	0	200	903	0	0	0	0	0	0	0	603	903	0
416	4	0	0	0	0	0	0	200	300	0	0	0	0	0	0	0	200	903	0	0	0	0	0	0	0	603	903	0
416	5	0	0	0	0	0	0	200	300	0	0	0	0	0	0	0	200	903	0	0	0	0	0	0	0	603	903	0
416	6	0	0	0	0	0	0	200	300	0	0	0	0	0	0	0	200	903	0	0	0	0	0	0	0	603	903	0
416	7	0	0	0	0	0	0	200	300	0	0	0	0	0	0	0	200	903	0	0	0	0	0	0	0	603	903	0
416	8	0	0	0	0	0	0	200	300	0	0	0	0	0	0	0	200	903	0	0	0	0	0	0	0	603	903	0
416	9	0	0	0	0	0	0	200	300	0	0	0	0	0	0	0	200	903	0	0	0	0	0	0	0	603	903	0
417	0	0	0	0	0	0	0	200	300	0	0	0	0	0	0	0	200	903	0	0	0	0	0	0	0	603	903	0
417	1	0	0	0	0	0	0	200	300	0	0	0	0	0	0	0	200	903	0	0	0	0	0	0	0	603	903	0
417	2	0	0	0	0	0	0	200	300	0	0	0	0	0	0	0	200	903	0	0	0	0	0	0	0	603	903	0
417	3	0	0	0	0	0	0	200	300	0	0	0	0	0	0	0	200	903	0	0	0	0	0	0	0	603	903	0
417	4	0	0	0	0	0	0	200	300	0	0	0	0	0	0	0	200	903	0	0	0	0	0	0	0	603	903	0
417	5	0	0	0	0	0	0	200	300	0	0	0	0	0	0	0	200	903	0	0	0	0	0	0	0	603	903	0
417	6	0	0	0	0	0	0	200	300	0	0	0	0	0	0	0	200	903	0	0	0	0	0	0	0	603	903	0
417	7	0	0	0	0	0	0	200	300	0	0	0	0	0	0	0	200	903	0	0	0	0	0	0	0	603	903	0
417	8	0	0	0	0	0	0	200	300	0	0	0	0	0	0	0	200	903	0	0	0	0	0	0	0	603	903	0
417	9	0	0	0	0	0	0	200	300	0	0	0	0	0	0	0	200	903	0	0	0	0	0	0	0	603	903	0
418	0	0	0	0	0	0	0	200	300	0	0	0	0	0	0	0	200	903	0	0	0	0	0	0	0	603	903	0
418	1	0	0	0	0	0	0	200	300	0	0	0	0	0	0	0	200	903	0	0	0	0	0	0	0	603	903	0
418	2	0	0	0	0	0	0	200	300	0	0	0	0	0	0	0	200	903	0	0	0	0	0	0	0	603	903	0
418	3	0	0	0	0	0	0	200	300	0	0	0	0	0	0	0	200	903	0	0	0	0	0	0	0	603	903	0
418	4	0	0	0	0	0	0	200	300	0	0	0	0	0	0	0	200	903	0	0	0	0	0	0	0	603	903	0
418	5	0	0	0	0	0	0	200	300	0	0	0	0	0	0	0	200	903	0	0	0	0	0	0	0	603	903	0
418	6	0	0	0	0	0	0	200	300	0	0	0	0	0	0	0	200	903	0	0	0	0	0	0	0	603	903	0
418	7	0	0	0	0	0	0	200	300	0	0	0	0	0	0	0	200	903	0	0	0	0	0	0	0	603	903	0
418	8	0	0	0	0	0	0	200	300	0	0	0	0	0	0	0	200	903	0	0	0	0	0	0	0	603	903	0
418	9	0	0	0	0	0	0	200	300	0	0	0	0	0	0	0	200	903	0	0	0	0	0	0	0	603	903	0
419	0	0	0	0	0	0	0	200	300	0	0	0	0	0	0	0	200	903	0	0	0	0	0	0	0	603	903	0
419	1	0	0	0	0	0	0	200	300	0	0	0	0	0	0	0	200	903	0	0	0	0	0	0	0	603	903	0
419	2	0	0	0	0	0	0	200	300	0	0	0	0	0	0	0	200	903	0	0	0	0	0	0	0	603	903	0
419	3	0	0	0	0	0	0	200	300	0	0	0	0	0	0	0	200	903	0	0	0	0	0	0	0	603	903	0
419	4	0	0	0	0	0	0	200	300	0	0	0	0	0	0	0	200	903	0	0	0	0	0	0	0	603	903	0
419	5	0	0	0	0	0	0	200	300	0	0	0	0	0	0	0	200	903	0	0	0	0	0	0	0	603	903	0
419	6	0	0	0	0	0	0	200	300	0	0	0	0	0	0	0	200	903	0	0	0	0	0	0	0	603	903	0
419	7	0	0	0	0	0	0	200	300	0	0	0	0	0	0	0	200	903	0	0	0	0	0	0	0	603	903	0
419	8	0	0	0	0	0	0	200	300	0	0	0	0	0	0	0	200	903	0	0	0	0	0	0	0	603	903	0
419	9	0	0	0	0	0	0	200	300	0	0	0	0	0	0	0	200	903	0	0	0	0	0	0	0	603	903	0
420	0	0	0	0	0	0	0	200	300	0	0	0	0	0	0	0	200	903	0	0	0	0	0	0	0	603	903	0
420	1	0	0	0	0	0	0	200	300	0	0	0	0	0	0	0	200	903	0	0	0	0	0	0	0	603	903	0
420	2	0	0	0	0	0	0	200	300	0	0	0	0	0	0	0	200	903	0	0	0	0	0	0	0	603	903	0
420	3	0	0	0	0	0	0	200	300	0	0	0	0	0	0	0	200	903	0	0	0	0	0	0	0	603	903	0
420	4	0	0	0	0	0	0	200	300	0	0	0	0	0	0	0	200	903	0	0	0	0	0	0	0	603	903	0
420	5	0	0	0	0	0	0	200	300	0	0	0	0	0	0	0	200	903	0	0	0	0	0	0	0	603	903	0
420	6	0	0	0	0	0	0	200	300	0	0	0	0	0	0	0	200	903	0	0	0	0	0	0	0	603	903	0
420	7	0	0	0	0	0	0	200	300	0	0	0	0	0	0	0	200	903	0	0	0	0	0	0	0	603	903	0
420	8	0	0	0	0	0	0	200	300	0	0	0	0	0	0	0	200	903	0	0	0	0	0	0	0	603	903	0
420	9	0	0	0	0	0	0	200	300	0	0	0	0	0	0	0	200	903	0	0	0	0	0	0	0	603	903	0
421	0	0	0	0	0	0	0	200	300	0	0	0	0	0	0	0	200	903	0	0	0	0	0	0	0	603	903	0
421	1	0	0	0	0	0	0	200	300	0	0	0	0	0	0	0	200	903	0	0	0	0	0	0	0	603	903	0
421	2	0	0	0	0	0	0	200	300	0	0	0	0	0	0	0	200	903	0	0	0	0	0	0	0	603	903	0
421	3	0	0	0	0	0	0	200	300	0	0	0	0	0	0	0	200	903	0	0	0	0	0	0	0	603	903	0
421	4	0	0	0	0	0	0	200	300	0	0	0	0	0	0	0	200	903	0	0	0	0	0	0	0	603	903	0
421	5	0	0	0	0	0	0	200	300	0	0	0	0	0	0	0	200	903	0	0	0	0	0	0	0	603	903	0
421	6	0	0	0	0	0	0	200	300	0	0	0	0	0	0	0	200	903	0	0	0	0	0	0	0	603	903	0
421	7	0	0	0	0	0	0	200	300	0	0	0	0	0	0	0	200	903	0	0	0	0	0	0	0	603	903	0
421	8	0	0	0	0	0	0	200	300	0	0	0	0	0	0	0	200	903	0	0	0	0	0	0	0	603	903	0
421	9	0	0	0	0	0	0	200	300	0	0	0	0	0	0	0	200	903	0	0	0	0	0	0	0	603	903	0
422	0	0	0	0	0	0	0	200	300	0	0	0	0	0	0	0	200	903	0	0	0	0	0	0	0	603	903	0
422	1	0	0	0	0	0	0	200	300	0	0	0	0	0	0	0	200	903	0	0	0	0	0	0	0	603	903	0
422	2	0	0	0	0	0	0	200	300	0	0	0	0	0	0	0	200	903	0	0	0	0	0	0	0	603	903	0
422	3	0	0	0	0	0	0	200	300	0	0	0	0	0	0	0	200	903	0	0	0	0	0	0	0	603	903	0
422	4	0	0	0	0	0	0	200	300	0	0	0	0	0	0	0	200	903	0	0	0	0	0	0	0	603	903	0
422	5	0	0	0	0	0	0	200	300	0	0	0	0	0	0	0	200	903	0	0	0	0	0	0	0	603	903	0
422	6	0	0	0	0	0	0	200	300	0	0	0	0	0	0	0	200	903	0	0	0	0	0	0	0	603	903	0
422	7	0	0	0	0	0	0	200	300	0	0	0	0	0	0	0	200	903	0	0	0	0	0	0	0	603	903	0
422	8	0	0	0	0	0	0	200	300	0	0	0	0	0	0	0	200	903	0	0	0	0	0	0	0	603	903	0
422	9	0	0	0	0	0	0	200	300	0	0	0	0	0	0	0	200	903	0	0	0	0	0	0	0	603	903	0
423	0	0	0	0	0	0	0	200	300	0	0	0	0	0	0	0	200	903	0	0	0	0	0	0	0	603	903	0
423	1	0	0	0	0	0	0	200	300	0	0	0	0	0	0	0	200	903	0	0	0	0	0	0	0	603	903	0
423	2	0	0	0	0	0	0	200	300	0	0	0	0	0	0	0	200	903	0	0	0	0	0	0	0	603	903	0
423	3	0	0	0	0	0	0	200	300	0	0	0	0	0	0	0	200	903	0	0	0	0	0	0	0	603	903	0
423	4	0	0	0	0	0	0	200	300	0	0	0	0	0	0	0	200	903	0	0	0	0	0	0	0	603	903	0
423	5	0	0	0	0	0	0	200	300	0	0	0	0	0	0	0	200	903	0	0	0	0	0	0	0	603	903	0
423	6	0	0	0	0	0	0	200	300	0	0	0	0	0	0	0	200	903	0	0	0	0	0	0	0	603	903	0
423	7	0	0	0	0	0	0	200	300	0	0	0	0	0	0	0	200	903	0	0	0	0	0	0	0	603	903	0
423	8	0	0	0	0	0	0	200	300	0	0	0	0	0	0	0	200	903	0	0	0	0	0	0	0	603	903	0
423	9	0	0	0	0	0	0	200	300	0	0	0	0	0	0	0	200	903	0	0	0	0	0	0	0	603	903	0
424	0	0	0	0	0	0	0	200	300	0	0	0	0	0	0	0	200	903	0	0	0	0	0	0	0	603	903	0
424	1	0	0	0	0	0	0	200	300	0	0	0	0	0	0	0	200	903	0	0	0	0	0	0	0	603	903	0
424	2	0	0	0	0	0	0	200	300	0	0	0	0	0	0	0	200	903	0	0	0	0	0	0	0	603	903	0
424	3	0	0	0	0	0	0	200	300	0	0	0	0	0	0	0	200	903	0	0	0	0	0	0	0	603	903	0
424	4	0	0	0	0	0	0	200	300	0	0	0	0	0	0	0	200	903	0	0	0	0	0	0	0	603	903	0
424	5	0	0	0	0	0	0	200	300	0	0	0	0	0	0	0	200	903	0	0	0	0	0	0	0	603	903	0
424	6	0	0	0	0	0	0	200	300	0	0	0	0	0	0	0	200	903	0	0	0	0	0	0	0	603	903	0
424	7	0	0	0	0	0	0	200	300	0	0	0	0	0	0	0	200	903	0	0	0	0	0	0	0	603	903	0
424	8	0	0	0	0	0	0	200	300	0	0	0	0	0	0	0	200	903	0	0	0	0	0	0	0	603	903	0
424	9	0	0	0	0	0	0	200	300	0	0	0	0	0	0	0	200	903	0	0	0	0	0	0	0	603	903	0
425	0	0	0	0	0	0	0	200	300	0	0	0	0	0	0	0	200	903	0	0	0	0	0	0	0	603	903	0
425	1	0	0	0	0	0	0	200	300	0	0	0	0	0	0	0	200	903	0	0	0	0	0	0	0	603	903	0
425	2	0	0	0	0	0	0	200	300	0	0	0	0	0	0	0	200	903	0	0	0	0	0	0	0	603	903	0
425	3	0	0	0	0	0	0	200	300	0	0	0	0	0	0	0	200	903	0	0	0	0	0	0	0	603	903	0
425	4	0	0	0	0	0	0	200	300	0	0	0	0	0	0	0	200	903	0	0	0	0	0	0	0	603	903	0
425	5	0	0	0	0	0	0	200	300	0	0	0	0	0	0	0	200	903	0	0	0	0	0	0	0	603	903	0
425	6	0	0	0	0	0	0	200	300	0	0	0	0	0	0	0	200	903	0	0	0	0	0	0	0	603	903	0
425	7	0	0	0	0	0	0	200	300	0	0	0	0	0	0	0	200	903	0	0	0	0	0	0	0	603	903	0
425	8	0	0	0	0	0	0	200	300	0	0	0	0	0	0	0	200	903	0	0	0	0	0	0	0	603	903	0
425	9	0	0	0	0	0	0	200	300	0	0	0	0	0	0	0	200	903	0	0	0	0	0	0	0	603	903	0
426	0	0	0	0	0	0	0	200	300	0	0	0	0	0	0	0	200	903	0	0	0	0	0	0	0	603	903	0
426	1	0	0	0	0	0	0	200	300	0	0	0	0	0	0	0	200	903	0	0	0	0	0	0	0	603	903	0
426	2	0	0	0	0	0	0	200	300	0	0	0	0	0	0	0	200	903	0	0	0	0	0	0	0	603	903	0
426	3	0	0	0	0	0	0	200	300	0	0	0	0	0	0	0	200	903	0	0	0	0	0	0	0	603	903	0
426	4	0	0	0	0	0	0	200	300	0	0	0	0	0	0	0	200	903	0	0	0	0	0	0	0	603	903	0
426	5	0	0	0	0	0	0	200	300	0	0	0	0	0	0	0	200	903	0	0	0	0	0	0	0	603	903	0
426	6	0	0	0	0	0	0	200	300	0	0	0	0	0	0	0	200	903	0	0	0	0	0	0	0	603	903	0
426	7	0	0	0	0	0	0	200	300	0	0	0	0	0	0	0	200	903	0	0	0	0	0	0	0	603	903	0
426	8	0	0	0	0	0	0	200	300	0	0	0	0	0	0	0	200	903	0	0	0	0	0	0	0	603	903	0
426	9	0	0	0	0	0	0	200	300	0	0	0	0	0	0	0	200	903	0	0	0	0	0	0	0	603	903	0
427	0	0	0	0	0	0	0	200	300	0	0	0	0	0	0	0	200	903	0	0	0	0	0	0	0	603	903	0
427	1	0	0	0	0	0	0	200	300	0	0	0	0	0	0	0	200	903	0	0	0	0	0	0	0	603	903	0
427	2	0	0	0	0	0	0	200	300	0	0	0	0	0	0	0	200	903	0	0	0	0	0	0	0	603	903	0
427	3	0	0	0	0	0	0	200	300	0	0	0	0	0	0	0	200	903	0	0	0	0	0	0	0	603	903	0
427	4	0	0	0	0	0	0	200	300	0	0	0	0	0	0	0	200	903	0	0	0	0	0	0	0	603	903	0
427	5	0	0	0	0	0	0	200	300	0	0	0	0	0	0	0	200	903	0	0	0	0	0	0	0	603	903	0
427	6	0	0	0	0	0	0	200	300	0	0	0	0	0	0	0	200	903	0	0	0	0	0	0	0	603	903	0
427	7	0	0	0	0	0	0	200	300	0	0	0	0	0	0	0	200	903	0	0	0	0	0	0	0	603	903	0
427	8	0	0	0	0	0	0	200	300	0	0	0	0	0	0	0	200	903	0	0	0	0	0	0	0	603	903	0
427	9	0	0	0	0	0	0	200	300	0	0	0	0	0	0	0	200	903	0	0	0	0	0	0	0	603	903	0
428	0	0	0	0	0	0	0	200	300	0	0	0	0	0	0	0	200	903	0	0	0	0	0	0	0	603	903	0
428	1	0	0	0	0	0	0	200	300	0	0	0	0	0	0	0	200	903	0	0	0	0	0	0	0	603	903	0
428	2	0	0	0	0	0	0	200	300	0	0	0	0	0	0	0	200	903	0	0	0	0	0	0	0	603	903	0
428	3	0	0	0	0	0	0	200	300	0	0	0	0	0	0	0	200	903	0	0	0	0	0	0	0	603	903	0
428	4	0	0	0	0	0	0	200	300	0	0	0	0	0	0	0	200	903	0	0	0	0	0	0	0	603	903	0
428	5	0	0	0	0	0	0	200	300	0	0	0	0	0	0	0	200	903	0	0	0	0	0	0	0	603	903	0
428	6	0	0	0	0	0	0	200	300	0	0	0	0	0	0	0	200	903	0	0	0	0	0	0	0	603	903	0
428	7	0	0	0	0	0	0	200	300	0	0	0	0	0	0	0	200	903	0	0	0	0	0	0	0	603	903	0
428	8	0	0	0	0	0	0	200	300	0	0	0	0	0	0	0	200	903	0	0	0	0	0	0	0	603	903	0
428	9	0	0	0	0	0	0	200	300	0	0	0	0	0	0	0	200	903	0	0	0	0	0	0	0	603	903	0
429	0	0	0	0	0	0	0	200	300	0	0	0	0	0	0	0	200	903	0	0	0	0	0	0	0	603	903	0
429	1	0	0	0	0	0	0	200	300	0	0	0	0	0	0	0	200	903	0	0	0	0	0	0	0	603	903	0
429	2	0	0	0	0	0	0	200	300	0	0	0	0	0	0	0	200	903	0	0	0	0	0	0	0	603	903	0
429	3	0	0	0	0	0	0	200	300	0	0	0	0	0	0	0	200	903	0	0	0	0	0	0	0	603	903	0
429	4	0	0	0	0	0	0	200	300	0	0	0	0	0	0	0	200	903	0	0	0	0	0	0	0	603	903	0
429	5	0	0	0	0	0	0	200	300	0	0	0	0	0	0	0	200	903	0	0	0	0	0	0	0	603	903	0
429	6	0	0	0	0	0	0	200	300	0	0	0	0	0	0	0	200	903	0	0	0	0	0	0	0	603	903	0
429	7	0	0	0	0	0	0	200	300	0	0	0	0	0	0	0	200	903	0	0	0	0	0	0	0	603	903	0
429	8	0	0	0	0	0	0	200	300	0	0	0	0	0	0	0	200	903	0	0	0	0	0	0	0	603	903	0
429	9	0	0	0	0	0	0	200	300	0	0	0	0	0	0	0	200	903	0	0	0	0	0	0	0	603	903	0
430	0	0	0	0	0	0	0	200	300	0	0	0	0	0	0	0	200	903	0	0	0	0	0	0	0	603	903	0
430	1	0	0	0	0	0	0	200	300	0	0	0	0	0	0	0	200	903	0	0	0	0	0	0	0	603	903	0
430	2	0	0	0	0	0	0	200	300	0	0	0	0	0	0	0	200	903	0	0	0	0	0	0	0	603	903	0
430	3	0	0	0	0	0	0	200	300	0	0	0	0	0	0	0	200	903	0	0	0	0	0	0	0	603	903	0
430	4	0	0	0	0	0	0	200	300	0	-2.1222	-15.369	-19.7193	-3896.67	1740.1	-387.085	288.244	1100.61	0	0	0	0	0	0	0	603	903	0
430	5	0	0	0	0	0	0	200	300	0	0.624387	-11.8594	-18.1934	-3255.8	519.401	436.889	228.549	1081.95	0	0	0	0	0	0	0	603	903	0
430	6	0	0	0	0	0	0	200	300	0	0	0	0	0	0	0	200	903	0	0	0	0	0	0	0	603	903	0
430	7	0	0	0	0	0	0	200	300	0	0	0	0	0	0	0	200	903	0	0	0	0	0	0	0	603	903	0
430	8	0	0	0	0	0	0	200	300	0	0	0	0	0	0	0	200	903	0	0	0	0	0	0	0	603	903	0
430	9	0	0	0	0	0	0	200	300	0	0	0	0	0	0	0	200	903	0	0	0	0	0	0	0	603	903	0
431	0	0	0	0	0	0	0	200	300	0	0	0	0	0	0	0	200	903	0	0	0	0	0	0	0	603	903	0
431	1	0	0	0	0	0	0	200	300	0	0	0	0	0	0	0	200	903	0	0	0	0	0	0	0	603	903	0
431	2	0	0	0	0	0	0	200	300	0	0	0	0	0	0	0	200	903	0	0	0	0	0	0	0	603	903	0
431	3	0	0	0	0	0	0	200	300	0	0	0	0	0	0	0	200	903	0	0	0	0	0	0	0	603	903	0
431	4	0	0	0	0	0	0	200	300	0	0	0	0	0	0	0	200	903	0	0	0	0	0	0	0	603	903	0
431	5	0	0	0	0	0	0	200	300	0	0	0	0	0	0	0	200	903	0	0	0	0	0	0	0	603	903	0
431	6	0	0	0	0	0	0	200	300	0	1.6925	-9.87579	-16.3624	-4262.88	1434.93	-524.415	287.697	1163.53	0	0	0	0	0	0	0	603	903	0
431	7	0	0	0	0	0	0	200	300	0	3.67614	-11.0965	-19.4141	-3988.22	1251.82	-799.073	264.48	1108.43	0	0	0	0	0	0	0	603	903	0
431	8	0	0	0	0	0	0	200	300	0	5.96496	-16.4371	-25.2125	-4079.77	1495.96	-982.178	259.334	1064.82	0	0	0	0	0	0	0	603	903	0
431	9	0	0	0	0	0	0	200	300	0	4.43908	-17.0474	-26.7383	-5269.96	1740.1	-1119.51	265.079	1100.09	0	0	0	0	0	0	0	603	903	0
432	0	0	0	0	0	0	0	200	300	0	8.55896	-14.606	-30.0953	-4537.53	1923.21	-1211.06	263.904	1053.77	0	0	0	0	0	0	0	603	903	0
432	1	0	0	0	0	0	0	200	300	0	11.0004	-19.6414	-32.2315	-4720.64	2289.42	-1943.48	271.031	1049.46	0	0	0	0	0	0	0	603	903	0
432	2	0	0	0	0	0	0	200	300	0	9.93225	-24.3716	-40.1661	-5727.72	2655.63	-2263.92	266.116	1045.6	0	0	0	0	0	0	0	603	903	0
432	3	0	0	0	0	0	0	200	300	0	12.3737	-21.6251	-45.3541	-6826.36	2594.6	-2309.69	257.208	1053.51	0	0	0	0	0	0	0	603	903	0
432	4	0	0	0	0	0	0	200	300	0	14.8151	-22.0828	-51.1524	-7284.12	3510.13	-2721.68	268.621	1045.4	0	0	0	0	0	0	0	603	903	0
432	5	0	0	0	0	0	0	200	300	0	13.5944	-23.9139	-56.3404	-8291.2	3449.09	-2492.8	261.219	1050.16	0	0	0	0	0	0	0	603	903	0
432	6	0	0	0	0	0	0	200	300	0	10.6952	-21.0147	-64.5801	-8657.41	3876.34	-1760.38	260.024	1037.06	0	0	0	0	0	0	0	603	903	0
432	7	0	0	0	0	0	0	200	300	0	9.3219	-15.6741	-72.2095	-10030.7	4425.65	-1943.48	261.289	1041.91	0	0	0	0	0	0	0	603	903	0
432	8	0	0	0	0	0	0	200	300	0	10.0848	-15.8267	-83.8062	-11037.8	4791.86	-1394.17	257.178	1034.71	0	0	0	0	0	0	0	603	903	0
432	9	0	0	0	0	0	0	200	300	0	10.2374	-12.4698	-91.1304	-12044.9	5341.18	-890.626	258.61	1035.17	0	0	0	0	0	0	0	603	903	0
433	0	0	0	0	0	0	0	200	300	0	7.18567	-7.43438	-104.253	-13601.3	5890.49	-1165.28	256.502	1033.46	0	0	0	0	0	0	0	603	903	0
433	1	0	0	0	0	0	0	200	300	0	6.11755	-5.60333	-117.986	-14516.8	6317.74	-524.415	253.547	1026.04	0	0	0	0	0	0	0	603	903	0
433	2	0	0	0	0	0	0	200	300	0	7.18567	-6.21368	-125.92	-15432.3	6378.78	391.113	250.657	1025.56	0	0	0	0	0	0	0	603	903	0
433	3	0	0	0	0	0	0	200	300	0	-0.443728	-4.07745	-132.329	-17080.3	7111.2	116.455	253.739	1032.07	0	0	0	0	0	0	0	603	903	0
433	4	0	0	0	0	0	0	200	300	0	-3.03772	-2.55157	-149.114	-18178.9	7233.27	391.113	248.508	1024.91	0	0	0	0	0	0	0	603	903	0
433	5	0	0	0	0	0	0	200	300	0	-0.901492	-1.78863	-163.762	-19094.4	7904.65	1398.19	248.269	1019.6	0	0	0	0	0	0	0	603	903	0
433	6	0	0	0	0	0	0	200	300	0	-4.25843	-0.720516	-178.411	-21291.7	8698.11	1169.31	248.753	1022.34	0	0	0	0	0	0	0	603	903	0
433	7	0	0	0	0	0	0	200	300	0	-10.2094	3.39936	-189.092	-22298.8	8759.15	1947.51	246.322	1020.93	0	0	0	0	0	0	0	603	903	0
433	8	0	0	0	0	0	0	200	300	0	-10.2094	6.6037	-202.214	-23031.2	9186.39	2634.16	245.429	1016.9	0	0	0	0	0	0	0	603	903	0
433	9	0	0	0	0	0	0	200	300	0	-9.75159	5.23041	-219.304	-24953.8	9857.78	2588.38	244.95	1016.79	0	0	0	0	0	0	0	603	903	0
434	0	0	0	0	0	0	0	200	300	0	-17.6862	7.67182	-234.868	-26601.8	10285	2817.26	243.791	1016.26	0	0	0	0	0	0	0	603	903	0
434	1	0	0	0	0	0	0	200	300	0	-22.2638	10.2658	-251.348	-27517.3	10285	3870.12	240.92	1012.48	0	0	0	0	0	0	0	603	903	0
434	2	0	0	0	0	0	0	200	300	0	-25.0104	5.84076	-262.639	-28615.9	11322.6	3503.91	243.111	1011.96	0	0	0	0	0	0	0	603	903	0
434	3	0	0	0	0	0	0	200	300	0	-26.6888	2.78901	-279.119	-29897.7	11688.8	3595.46	241.878	1010.11	0	0	0	0	0	0	0	603	903	0
434	4	0	0	0	0	0	0	200	300	0	-28.9777	2.33124	-293.157	-30996.3	11688.8	4327.88	239.872	1008.73	0	0	0	0	0	0	0	603	903	0
434	5	0	0	0	0	0	0	200	300	0	-33.2501	-4.07745	-305.364	-31362.5	12726.4	3458.13	241.676	1005.71	0	0	0	0	0	0	0	603	903	0
434	6	0	0	0	0	0	0	200	300	0	-32.6398	-11.8594	-313.909	-32461.1	13153.7	3275.03	241.903	1006.41	0	0	0	0	0	0	0	603	903	0
434	7	0	0	0	0	0	0	200	300	0	-34.0131	-12.4698	-325.2	-33193.6	12848.5	4007.45	239.51	1005.07	0	0	0	0	0	0	0	603	903	0
434	8	0	0	0	0	0	0	200	300	0	-37.8278	-17.8104	-334.661	-33559.8	13153.7	3000.37	239.305	1003.28	0	0	0	0	0	0	0	603	903	0
434	9	0	0	0	0	0	0	200	300	0	-38.1329	-26.0501	-341.069	-33285.1	13642	2679.93	239.998	1000.59	0	0	0	0	0	0	0	603	903	0
435	0	0	0	0	0	0	0	200	300	0	-36.4545	-30.3226	-347.783	-33834.4	13580.9	2954.59	239.05	1000.29	0	0	0	0	0	0	0	603	903	0
435	1	0	0	0	0	0	0	200	300	0	-40.1166	-36.1209	-355.718	-34933	14252.3	2725.71	240.066	1001.2	0	0	0	0	0	0	0	603	903	0
435	2	0	0	0	0	0	0	200	300	0	-40.2692	-41.1563	-360.601	-35207.7	14130.2	1718.63	239.185	1000.64	0	0	0	0	0	0	0	603	903	0
435	3	0	0	0	0	0	0	200	300	0	-39.5062	-46.9546	-366.704	-34658.4	14191.3	2130.61	238.7	997.513	0	0	0	0	0	0	0	603	903	0
435	4	0	0	0	0	0	0	200	300	0	-40.4218	-51.5323	-372.503	-35024.6	14740.6	1123.53	239.572	997.025	0	0	0	0	0	0	0	603	903	0
435	5	0	0	0	0	0	0	200	300	0	-40.8795	-55.0418	-378.301	-34841.5	14679.6	711.548	238.804	995.1	0	0	0	0	0	0	0	603	903	0
435	6	0	0	0	0	0	0	200	300	0	-38.5907	-60.8401	-382.573	-35482.4	14923.7	1215.09	239.009	995.747	0	0	0	0	0	0	0	603	903	0
435	7	0	0	0	0	0	0	200	300	0	-38.8959	-64.6548	-387.456	-35299.2	15045.8	391.113	238.832	994.105	0	0	0	0	0	0	0	603	903	0
435	8	0	0	0	0	0	0	200	300	0	-37.9804	-67.554	-391.729	-36123.3	15351	-66.6507	239.188	995.215	0	0	0	0	0	0	0	603	903	0
435	9	0	0	0	0	0	0	200	300	0	-37.6752	-72.2842	-396.306	-35940.1	15778.2	162.231	239.813	993.688	0	0	0	0	0	0	0	603	903	0
436	0	0	0	0	0	0	0	200	300	0	-37.6752	-73.6575	-405.767	-36397.9	15656.1	-158.203	238.584	992.702	0	0	0	0	0	0	0	603	903	0
436	1	0	0	0	0	0	0	200	300	0	-37.8278	-73.8101	-415.227	-36489.5	16754.8	-890.626	240.351	990.878	0	0	0	0	0	0	0	603	903	0
436	2	0	0	0	0	0	0	200	300	0	-38.1329	-76.4041	-424.688	-37313.4	17365.1	-295.533	240.889	990.861	0	0	0	0	0	0	0	603	903	0
436	3	0	0	0	0	0	0	200	300	0	-37.2174	-79.4559	-432.622	-37679.6	17243	-1073.73	239.857	990.096	0	0	0	0	0	0	0	603	903	0
436	4	0	0	0	0	0	0	200	300	0	-37.37	-81.1343	-443.608	-37130.3	18463.7	-1439.94	241.622	986.701	0	0	0	0	0	0	0	603	903	0
436	5	0	0	0	0	0	0	200	300	0	-35.0812	-79.4559	-453.069	-38503.6	18830	-1027.95	241.561	987.984	0	0	0	0	0	0	0	603	903	0
436	6	0	0	0	0	0	0	200	300	0	-36.4545	-81.1343	-461.919	-37862.7	19562.4	-1348.39	242.35	984.968	0	0	0	0	0	0	0	603	903	0
436	7	0	0	0	0	0	0	200	300	0	-36.9122	-82.5076	-468.633	-38137.4	19989.6	-1623.05	242.655	984.38	0	0	0	0	0	0	0	603	903	0
436	8	0	0	0	0	0	0	200	300	0	-33.7079	-82.2025	-478.398	-37954.3	20783.1	-1485.72	243.443	982.336	0	0	0	0	0	0	0	603	903	0
436	9	0	0	0	0	0	0	200	300	0	-33.2501	-82.8128	-485.112	-38228.9	20966.2	-1897.71	243.219	981.804	0	0	0	0	0	0	0	603	903	0
437	0	0	0	0	0	0	0	200	300	0	-33.7079	-84.949	-493.047	-38412	21637.6	-2218.14	243.885	980.907	0	0	0	0	0	0	0	603	903	0
437	1	0	0	0	0	0	0	200	300	0	-31.4191	-84.3387	-498.54	-38412	21698.6	-1989.26	243.524	980.049	0	0	0	0	0	0	0	603	903	0
437	2	0	0	0	0	0	0	200	300	0	-30.0458	-86.0172	-502.507	-39052.9	22492.1	-2218.14	244.76	980.716	0	0	0	0	0	0	0	603	903	0
437	3	0	0	0	0	0	0	200	300	0	-27.1466	-88.4586	-507.39	-38778.3	22736.2	-2630.13	244.81	979.427	0	0	0	0	0	0	0	603	903	0
437	4	0	0	0	0	0	0	200	300	0	-25.6207	-91.0526	-511.663	-38137.4	22858.3	-1943.48	244.674	977.536	0	0	0	0	0	0	0	603	903	0
437	5	0	0	0	0	0	0	200	300	0	-26.5363	-90.9	-512.578	-38503.6	23773.8	-2492.8	246.381	978.118	0	0	0	0	0	0	0	603	903	0
437	6	0	0	0	0	0	0	200	300	0	-25.163	-91.6629	-516.545	-38320.5	23468.6	-2447.02	245.434	977.186	0	0	0	0	0	0	0	603	903	0
437	7	0	0	0	0	0	0	200	300	0	-21.9586	-94.1043	-514.714	-37588.1	23834.8	-2355.47	246.307	976.027	0	0	0	0	0	0	0	603	903	0
437	8	0	0	0	0	0	0	200	300	0	-20.4327	-94.8672	-517.766	-38045.8	24262.1	-2492.8	246.859	976.481	0	0	0	0	0	0	0	603	903	0
437	9	0	0	0	0	0	0	200	300	0	-19.8224	-95.0198	-518.682	-38137.4	24201.1	-3087.89	246.659	976.528	0	0	0	0	0	0	0	603	903	0
438	0	0	0	0	0	0	0	200	300	0	-15.5499	-96.5457	-519.902	-36947.2	23834.8	-2813.23	245.845	974.066	0	0	0	0	0	0	0	603	903	0
438	1	0	0	0	0	0	0	200	300	0	-15.7025	-98.3768	-519.902	-36764.1	24872.4	-2721.68	247.841	973.713	0	0	0	0	0	0	0	603	903	0
438	2	0	0	0	0	0	0	200	300	0	-14.3292	-98.5294	-517.766	-36397.9	24628.3	-3362.55	247.566	973.298	0	0	0	0	0	0	0	603	903	0
438	3	0	0	0	0	0	0	200	300	0	-13.5663	-98.3768	-517.766	-35757	24628.3	-2675.91	247.566	972.06	0	0	0	0	0	0	0	603	903	0
438	4	0	0	0	0	0	0	200	300	0	-12.193	-100.055	-516.851	-35482.4	24872.4	-2996.34	248.123	971.651	0	0	0	0	0	0	0	603	903	0
438	5	0	0	0	0	0	0	200	300	0	-9.29383	-98.6819	-515.02	-35116.1	24750.4	-3042.12	248.057	971.184	0	0	0	0	0	0	0	603	903	0
438	6	0	0	0	0	0	0	200	300	0	-8.22571	-98.3768	-511.663	-35757	24933.5	-3042.12	248.73	972.884	0	0	0	0	0	0	0	603	903	0
438	7	0	0	0	0	0	0	200	300	0	-9.14124	-99.7501	-511.052	-35024.6	25360.7	-2996.34	249.625	971.534	0	0	0	0	0	0	0	603	903	0
438	8	0	0	0	0	0	0	200	300	0	-7.61536	-98.9871	-509.832	-34658.4	24933.5	-3316.77	248.905	970.98	0	0	0	0	0	0	0	603	903	0
438	9	0	0	0	0	0	0	200	300	0	-5.47913	-98.0716	-506.78	-34017.5	25238.6	-3087.89	249.802	970.125	0	0	0	0	0	0	0	603	903	0
439	0	0	0	0	0	0	0	200	300	0	-6.24207	-98.5294	-505.254	-33742.9	25116.6	-3179.45	249.711	969.784	0	0	0	0	0	0	0	603	903	0
439	1	0	0	0	0	0	0	200	300	0	-5.63172	-99.7501	-502.507	-32827.4	25177.6	-3362.55	250.104	968.327	0	0	0	0	0	0	0	603	903	0
439	2	0	0	0	0	0	0	200	300	0	-2.73255	-98.5294	-499.761	-32918.9	24628.3	-3133.67	249.28	968.869	0	0	0	0	0	0	0	603	903	0
439	3	0	0	0	0	0	0	200	300	0	-4.10584	-97.7664	-497.319	-32918.9	25665.9	-3362.55	251.608	969.193	0	0	0	0	0	0	0	603	903	0
439	4	0	0	0	0	0	0	200	300	0	-1.35926	-100.055	-504.338	-32278	25360.7	-3591.43	250.285	967.001	0	0	0	0	0	0	0	603	903	0
439	5	0	0	0	0	0	0	200	300	0	0.166623	-101.123	-510.747	-31454.1	27130.7	-3545.66	253.12	964.584	0	0	0	0	0	0	0	603	903	0
439	6	0	0	0	0	0	0	200	300	0	5.35461	-104.328	-515.02	-30721.6	27558	-4094.97	253.509	962.651	0	0	0	0	0	0	0	603	903	0
439	7	0	0	0	0	0	0	200	300	0	5.04944	-111.347	-517.766	-29897.7	27435.9	-4415.41	252.989	960.744	0	0	0	0	0	0	0	603	903	0
439	8	0	0	0	0	0	0	200	300	0	3.98132	-113.941	-520.818	-29531.4	28046.3	-4690.06	253.85	959.702	0	0	0	0	0	0	0	603	903	0
439	9	0	0	0	0	0	0	200	300	0	9.47448	-116.23	-524.785	-28890.6	28473.5	-5147.83	254.257	958.052	0	0	0	0	0	0	0	603	903	0
440	0	0	0	0	0	0	0	200	300	0	13.4418	-117.45	-526.311	-28707.5	28534.5	-5422.49	254.216	957.545	0	0	0	0	0	0	0	603	903	0
440	1	0	0	0	0	0	0	200	300	0	10.8478	-122.028	-530.889	-28615.9	28839.7	-5422.49	254.324	956.902	0	0	0	0	0	0	0	603	903	0
440	2	0	0	0	0	0	0	200	300	0	12.8314	-126.911	-531.804	-28158.2	29755.2	-5880.25	255.952	955.948	0	0	0	0	0	0	0	603	903	0
440	3	0	0	0	0	0	0	200	300	0	16.0358	-128.742	-537.603	-27608.8	29389	-6246.46	254.667	954.356	0	0	0	0	0	0	0	603	903	0
440	4	0	0	0	0	0	0	200	300	0	16.6461	-133.014	-540.654	-27608.8	30060.4	-6063.36	255.6	954.066	0	0	0	0	0	0	0	603	903	0
440	5	0	0	0	0	0	0	200	300	0	13.5944	-133.777	-541.875	-27059.5	30243.5	-6475.35	255.813	952.937	0	0	0	0	0	0	0	603	903	0
440	6	0	0	0	0	0	0	200	300	0	13.8995	-135.303	-544.622	-26784.9	30548.7	-6475.35	256.092	952.181	0	0	0	0	0	0	0	603	903	0
440	7	0	0	0	0	0	0	200	300	0	13.8995	-135.761	-546.758	-26510.2	30853.9	-6246.46	256.431	951.486	0	0	0	0	0	0	0	603	903	0
440	8	0	0	0	0	0	0	200	300	0	15.578	-133.319	-550.725	-26510.2	31281.1	-6246.46	256.8	951.137	0	0	0	0	0	0	0	603	903	0
440	9	0	0	0	0	0	0	200	300	0	16.0358	-134.082	-549.504	-25777.8	31525.3	-6841.56	257.37	949.911	0	0	0	0	0	0	0	603	903	0
441	0	0	0	0	0	0	0	200	300	0	16.7987	-134.082	-554.082	-25777.8	31708.4	-6063.36	257.227	949.523	0	0	0	0	0	0	0	603	903	0
441	1	0	0	0	0	0	0	200	300	0	18.9349	-132.556	-556.218	-25686.2	32501.8	-6383.79	258.434	949.18	0	0	0	0	0	0	0	603	903	0
441	2	0	0	0	0	0	0	200	300	0	21.2238	-130.42	-559.27	-24862.3	32623.9	-6429.57	258.333	947.455	0	0	0	0	0	0	0	603	903	0
441	3	0	0	0	0	0	0	200	300	0	20.4608	-128.131	-559.88	-24679.2	32684.9	-6246.46	258.378	947.079	0	0	0	0	0	0	0	603	903	0
441	4	0	0	0	0	0	0	200	300	0	20.6134	-130.115	-565.374	-23763.6	33783.6	-6200.69	259.754	945.032	0	0	0	0	0	0	0	603	903	0
441	5	0	0	0	0	0	0	200	300	0	23.0548	-128.589	-568.425	-23855.2	33722.6	-6017.58	259.326	944.967	0	0	0	0	0	0	0	603	903	0
441	6	0	0	0	0	0	0	200	300	0	24.1229	-128.742	-570.867	-23214.3	34332.9	-6246.46	260.142	943.665	0	0	0	0	0	0	0	603	903	0
441	7	0	0	0	0	0	0	200	300	0	25.8014	-129.2	-576.055	-23122.8	34638.1	-6429.57	260.13	943.14	0	0	0	0	0	0	0	603	903	0
441	8	0	0	0	0	0	0	200	300	0	27.9376	-130.878	-579.107	-23214.3	35187.4	-6933.11	260.762	943.086	0	0	0	0	0	0	0	603	903	0
441	9	0	0	0	0	0	0	200	300	0	27.6324	-131.488	-583.074	-22298.8	35492.6	-6841.56	260.871	941.244	0	0	0	0	0	0	0	603	903	0
442	0	0	0	0	0	0	0	200	300	0	29.0057	-133.625	-588.567	-21841	36102.9	-6750	261.34	940.109	0	0	0	0	0	0	0	603	903	0
442	1	0	0	0	0	0	0	200	300	0	28.7006	-135.608	-591.314	-21383.3	36347.1	-7299.32	261.468	939.162	0	0	0	0	0	0	0	603	903	0
442	2	0	0	0	0	0	0	200	300	0	28.8531	-135.761	-592.839	-21383.3	36713.3	-7207.77	261.928	939.069	0	0	0	0	0	0	0	603	903	0
442	3	0	0	0	0	0	0	200	300	0	30.2264	-136.371	-598.027	-20284.6	37445.7	-7299.32	262.615	936.919	0	0	0	0	0	0	0	603	903	0
442	4	0	0	0	0	0	0	200	300	0	31.142	-138.05	-603.826	-21108.6	37689.8	-7482.43	262.418	937.958	0	0	0	0	0	0	0	603	903	0
442	5	0	0	0	0	0	0	200	300	0	30.2264	-138.507	-607.183	-20650.8	37995	-7299.32	262.576	937.011	0	0	0	0	0	0	0	603	903	0
442	6	0	0	0	0	0	0	200	300	0	31.7523	-136.676	-611.76	-19826.9	38422.3	-7299.32	262.806	935.41	0	0	0	0	0	0	0	603	903	0
442	7	0	0	0	0	0	0	200	300	0	32.2101	-138.355	-614.812	-19552.2	39154.7	-7711.31	263.686	934.802	0	0	0	0	0	0	0	603	903	0
442	8	0	0	0	0	0	0	200	300	0	33.2782	-137.592	-618.474	-19826.9	39032.6	-7802.86	263.111	935.058	0	0	0	0	0	0	0	603	903	0
442	9	0	0	0	0	0	0	200	300	0	33.736	-137.287	-623.967	-19369.1	39765	-7253.54	263.729	934.042	0	0	0	0	0	0	0	603	903	0
443	0	0	0	0	0	0	0	200	300	0	34.6515	-136.371	-623.967	-18178.9	40314.4	-7665.53	264.61	932.134	0	0	0	0	0	0	0	603	903	0
443	1	0	0	0	0	0	0	200	300	0	35.8722	-137.287	-632.207	-18270.5	40375.4	-7665.53	263.864	931.9	0	0	0	0	0	0	0	603	903	0
443	2	0	0	0	0	0	0	200	300	0	35.4144	-136.676	-634.954	-18270.5	41229.9	-7940.19	264.934	931.774	0	0	0	0	0	0	0	603	903	0
443	3	0	0	0	0	0	0	200	300	0	37.8558	-136.676	-640.752	-17538	41229.9	-7894.41	264.346	930.371	0	0	0	0	0	0	0	603	903	0
443	4	0	0	0	0	0	0	200	300	0	36.9403	-136.371	-643.193	-17446.5	41596.1	-7940.19	264.671	930.125	0	0	0	0	0	0	0	603	903	0
443	5	0	0	0	0	0	0	200	300	0	36.7877	-137.287	-645.635	-16805.6	42145.4	-7711.31	265.277	929.03	0	0	0	0	0	0	0	603	903	0
443	6	0	0	0	0	0	0	200	300	0	36.7877	-137.592	-649.602	-16714.1	42328.5	-8031.74	265.161	928.73	0	0	0	0	0	0	0	603	903	0
443	7	0	0	0	0	0	0	200	300	0	35.567	-137.744	-651.738	-15798.5	42267.5	-8077.51	264.853	927.241	0	0	0	0	0	0	0	603	903	0
443	8	0	0	0	0	0	0	200	300	0	37.8558	-137.744	-652.959	-16164.7	42999.9	-7802.86	265.854	927.756	0	0	0	0	0	0	0	603	903	0
443	9	0	0	0	0	0	0	200	300	0	37.3981	-134.845	-652.044	-15981.6	43610.2	-8260.62	266.882	927.51	0	0	0	0	0	0	0	603	903	0
444	0	0	0	0	0	0	0	200	300	0	37.7032	-136.371	-660.588	-15615.4	42511.6	-7848.64	264.354	926.639	0	0	0	0	0	0	0	603	903	0
444	1	0	0	0	0	0	0	200	300	0	38.7714	-136.371	-663.03	-14699.9	44281.6	-8169.07	266.787	925.171	0	0	0	0	0	0	0	603	903	0
444	2	0	0	0	0	0	0	200	300	0	40.755	-134.845	-665.776	-14333.7	44525.8	-8306.4	266.878	924.529	0	0	0	0	0	0	0	603	903	0
444	3	0	0	0	0	0	0	200	300	0	39.5343	-135.608	-669.133	-14425.2	44464.7	-7940.19	266.451	924.558	0	0	0	0	0	0	0	603	903	0
444	4	0	0	0	0	0	0	200	300	0	38.9239	-135.15	-670.659	-13875.9	45136.1	-8123.29	267.301	923.69	0	0	0	0	0	0	0	603	903	0
444	5	0	0	0	0	0	0	200	300	0	40.4498	-135.913	-674.016	-12868.8	45258.2	-7940.19	267.147	922.093	0	0	0	0	0	0	0	603	903	0
444	6	0	0	0	0	0	0	200	300	0	41.3654	-136.066	-675.542	-13051.9	45319.2	-8260.62	267.086	922.321	0	0	0	0	0	0	0	603	903	0
444	7	0	0	0	0	0	0	200	300	0	41.0602	-136.676	-678.594	-12868.8	45990.6	-8260.62	267.773	921.964	0	0	0	0	0	0	0	603	903	0
444	8	0	0	0	0	0	0	200	300	0	41.6705	-137.744	-679.815	-12411.1	45990.6	-8535.28	267.652	921.257	0	0	0	0	0	0	0	603	903	0
444	9	0	0	0	0	0	0	200	300	0	43.0438	-135.608	-680.12	-11587.1	45685.4	-8489.5	267.173	920.037	0	0	0	0	0	0	0	603	903	0
445	0	0	0	0	0	0	0	200	300	0	42.4335	-136.676	-683.171	-11861.8	46723	-8214.84	268.391	920.363	0	0	0	0	0	0	0	603	903	0
445	1	0	0	0	0	0	0	200	300	0	43.5016	-135.913	-683.782	-11587.1	45929.6	-8764.16	267.17	919.946	0	0	0	0	0	0	0	603	903	0
445	2	0	0	0	0	0	0	200	300	0	42.7386	-135.456	-684.392	-10671.6	46967.2	-8214.84	268.626	918.593	0	0	0	0	0	0	0	603	903	0
445	3	0	0	0	0	0	0	200	300	0	43.5016	-134.54	-687.139	-10305.4	47150.3	-8260.62	268.618	917.998	0	0	0	0	0	0	0	603	903	0
445	4	0	0	0	0	0	0	200	300	0	41.5179	-135.15	-688.359	-10122.3	46539.9	-8214.84	267.61	917.705	0	0	0	0	0	0	0	603	903	0
445	5	0	0	0	0	0	0	200	300	0	42.1283	-132.862	-686.223	-10122.3	47211.3	-8169.07	268.799	917.751	0	0	0	0	0	0	0	603	903	0
445	6	0	0	0	0	0	0	200	300	0	42.1283	-133.319	-690.801	-9206.73	47638.6	-7985.97	268.961	916.328	0	0	0	0	0	0	0	603	903	0
445	7	0	0	0	0	0	0	200	300	0	41.9757	-132.556	-691.106	-9847.6	47638.6	-8123.29	268.931	917.249	0	0	0	0	0	0	0	603	903	0
445	8	0	0	0	0	0	0	200	300	0	41.3654	-132.404	-691.411	-9115.17	47638.6	-7985.97	268.9	916.183	0	0	0	0	0	0	0	603	903	0
445	9	0	0	0	0	0	0	200	300	0	41.3654	-130.42	-692.632	-8932.07	48126.9	-8123.29	269.484	915.896	0	0	0	0	0	0	0	603	903	0
446	0	0	0	0	0	0	0	200	300	0	41.5179	-129.352	-693.547	-8016.54	48493.1	-8214.84	269.92	914.559	0	0	0	0	0	0	0	603	903	0
446	1	0	0	0	0	0	0	200	300	0	41.6705	-129.352	-694.158	-8840.52	48004.8	-8214.84	269.155	915.736	0	0	0	0	0	0	0	603	903	0
446	2	0	0	0	0	0	0	200	300	0	42.2809	-128.284	-695.378	-8199.65	48676.2	-7940.19	270	914.792	0	0	0	0	0	0	0	603	903	0
446	3	0	0	0	0	0	0	200	300	0	41.8231	-126.911	-697.515	-7558.78	47577.5	-7482.43	268.21	913.837	0	0	0	0	0	0	0	603	903	0
446	4	0	0	0	0	0	0	200	300	0	41.0602	-126.911	-699.651	-7192.57	48676.2	-8031.74	269.572	913.28	0	0	0	0	0	0	0	603	903	0
446	5	0	0	0	0	0	0	200	300	0	40.6024	-126.148	-698.43	-7375.67	49164.4	-7940.19	270.393	913.56	0	0	0	0	0	0	0	603	903	0
446	6	0	0	0	0	0	0	200	300	0	40.4498	-125.385	-701.177	-7375.67	49469.6	-7848.64	270.552	913.519	0	0	0	0	0	0	0	603	903	0
446	7	0	0	0	0	0	0	200	300	0	40.9076	-124.317	-703.008	-6551.7	49164.4	-7848.64	269.934	912.32	0	0	0	0	0	0	0	603	903	0
446	8	0	0	0	0	0	0	200	300	0	40.6024	-122.943	-703.008	-6734.8	49652.7	-7802.86	270.629	912.58	0	0	0	0	0	0	0	603	903	0
446	9	0	0	0	0	0	0	200	300	0	40.2972	-121.418	-703.618	-6551.7	49835.8	-7848.64	270.828	912.312	0	0	0	0	0	0	0	603	903	0
447	0	0	0	0	0	0	0	200	300	0	40.4498	-121.875	-706.67	-6185.48	49164.4	-7573.98	269.572	911.753	0	0	0	0	0	0	0	603	903	0
447	1	0	0	0	0	0	0	200	300	0	42.4335	-120.807	-706.06	-6002.38	50324.1	-7757.08	271.275	911.501	0	0	0	0	0	0	0	603	903	0
447	2	0	0	0	0	0	0	200	300	0	40.1446	-119.892	-707.586	-6093.93	49103.4	-7665.53	269.396	911.612	0	0	0	0	0	0	0	603	903	0
447	3	0	0	0	0	0	0	200	300	0	40.1446	-118.976	-707.586	-5269.96	50018.9	-7573.98	270.69	910.448	0	0	0	0	0	0	0	603	903	0
447	4	0	0	0	0	0	0	200	300	0	40.2972	-118.061	-708.196	-5269.96	50446.2	-7619.75	271.232	910.441	0	0	0	0	0	0	0	603	903	0
447	5	0	0	0	0	0	0	200	300	0	40.4498	-117.298	-709.417	-5269.96	50324.1	-7070.44	270.937	910.429	0	0	0	0	0	0	0	603	903	0
447	6	0	0	0	0	0	0	200	300	0	41.3654	-115.924	-710.942	-5269.96	50385.2	-7573.98	270.871	910.413	0	0	0	0	0	0	0	603	903	0
447	7	0	0	0	0	0	0	200	300	0	40.755	-114.246	-712.163	-4537.53	50751.4	-6841.56	271.264	909.372	0	0	0	0	0	0	0	603	903	0
447	8	0	0	0	0	0	0	200	300	0	40.1446	-114.246	-707.891	-4903.75	50263.1	-7619.75	271.004	909.927	0	0	0	0	0	0	0	603	903	0
447	9	0	0	0	0	0	0	200	300	0	40.1446	-113.025	-712.163	-4720.64	50629.3	-7436.65	271.092	909.629	0	0	0	0	0	0	0	603	903	0
448	0	0	0	0	0	0	0	200	300	0	39.8395	-113.025	-710.637	-4445.98	51117.6	-7070.44	271.932	909.256	0	0	0	0	0	0	0	603	903	0
448	1	0	0	0	0	0	0	200	300	0	42.1283	-112.11	-710.637	-4079.77	50690.3	-7253.54	271.331	908.741	0	0	0	0	0	0	0	603	903	0
448	2	0	0	0	0	0	0	200	300	0	40.1446	-109.211	-710.942	-4537.53	50873.4	-7299.32	271.558	909.382	0	0	0	0	0	0	0	603	903	0
448	3	0	0	0	0	0	0	200	300	0	39.6869	-109.973	-711.858	-3530.45	51178.6	-7024.66	271.894	907.96	0	0	0	0	0	0	0	603	903	0
448	4	0	0	0	0	0	0	200	300	0	40.6024	-109.363	-711.248	-3255.8	50446.2	-6978.89	270.926	907.578	0	0	0	0	0	0	0	603	903	0
448	5	0	0	0	0	0	0	200	300	0	40.6024	-107.685	-710.332	-3438.9	51056.5	-6750	271.877	907.841	0	0	0	0	0	0	0	603	903	0
448	6	0	0	0	0	0	0	200	300	0	40.4498	-107.379	-709.111	-3438.9	51300.7	-6704.23	272.345	907.85	0	0	0	0	0	0	0	603	903	0
448	7	0	0	0	0	0	0	200	300	0	39.8395	-107.074	-708.806	-2706.48	51117.6	-6933.11	272.118	906.818	0	0	0	0	0	0	0	603	903	0
448	8	0	0	0	0	0	0	200	300	0	42.2809	-105.396	-708.196	-2431.82	51178.6	-7161.99	272.266	906.434	0	0	0	0	0	0	0	603	903	0
448	9	0	0	0	0	0	0	200	300	0	40.2972	-105.396	-708.806	-2614.93	51666.9	-6750	272.893	906.689	0	0	0	0	0	0	0	603	903	0
449	0	0	0	0	0	0	0	200	300	0	39.8395	-105.091	-707.891	-1607.85	51972.1	-6292.24	273.418	905.271	0	0	0	0	0	0	0	603	903	0
449	1	0	0	0	0	0	0	200	300	0	40.6024	-105.091	-706.365	-1790.95	51178.6	-6841.56	272.454	905.536	0	0	0	0	0	0	0	603	903	0
449	2	0	0	0	0	0	0	200	300	0	39.9921	-103.412	-704.534	-1333.19	51544.8	-6658.45	273.162	904.892	0	0	0	0	0	0	0	603	903	0
449	3	0	0	0	0	0	0	200	300	0	40.755	-102.954	-704.839	-1516.29	51544.8	-5880.25	273.13	905.151	0	0	0	0	0	0	0	603	903	0
449	4	0	0	0	0	0	0	200	300	0	39.5343	-102.802	-702.703	-875.425	51361.7	-6429.57	273.092	904.246	0	0	0	0	0	0	0	603	903	0
449	5	0	0	0	0	0	0	200	300	0	40.4498	-101.886	-700.566	-875.425	51361.7	-6292.24	273.315	904.25	0	0	0	0	0	0	0	603	903	0
449	6	0	0	0	0	0	0	200	300	0	39.0765	-101.581	-701.177	-600.767	51544.8	-5788.7	273.512	903.857	0	0	0	0	0	0	0	603	903	0
449	7	0	0	0	0	0	0	200	300	0	38.9239	-99.9026	-698.125	-234.556	50873.4	-6383.79	272.872	903.336	0	0	0	0	0	0	0	603	903	0
449	8	0	0	0	0	0	0	200	300	0	38.6188	-99.9026	-696.294	40.1024	51605.9	-6063.36	274.115	902.942	0	0	0	0	0	0	0	603	903	0
449	9	0	0	0	0	0	0	200	300	0	39.2291	-98.0716	-695.378	406.313	51361.7	-6109.13	273.862	902.416	0	0	0	0	0	0	0	603	903	0
450	0	0	0	0	0	0	0	200	300	0	39.5343	-98.6819	-694.158	223.208	51239.6	-5742.92	273.816	902.678	0	0	0	0	0	0	0	603	903	0
450	1	0	0	0	0	0	0	200	300	0	37.8558	-96.6983	-691.716	955.63	51056.5	-6063.36	273.811	901.619	0	0	0	0	0	0	0	603	903	0
450	2	0	0	0	0	0	0	200	300	0	40.1446	-96.2405	-691.106	1138.74	51300.7	-5742.92	274.23	901.352	0	0	0	0	0	0	0	603	903	0
450	3	0	0	0	0	0	0	200	300	0	36.7877	-94.2569	-686.528	1321.84	51117.6	-5742.92	274.458	901.075	0	0	0	0	0	0	0	603	903	0
450	4	0	0	0	0	0	0	200	300	0	36.4825	-94.5621	-686.528	1596.5	51239.6	-5651.37	274.636	900.675	0	0	0	0	0	0	0	603	903	0
450	5	0	0	0	0	0	0	200	300	0	37.3981	-93.1888	-685.918	1504.95	51178.6	-5514.04	274.613	900.806	0	0	0	0	0	0	0	603	903	0
450	6	0	0	0	0	0	0	200	300	0	36.1774	-93.3414	-683.477	2145.82	50629.3	-5651.37	274.076	899.86	0	0	0	0	0	0	0	603	903	0
450	7	0	0	0	0	0	0	200	300	0	37.8558	-92.1207	-681.951	1962.71	51483.8	-5285.16	275.495	900.122	0	0	0	0	0	0	0	603	903	0
450	8	0	0	0	0	0	0	200	300	0	35.8722	-90.5948	-679.815	2878.24	51239.6	-5239.38	275.373	898.766	0	0	0	0	0	0	0	603	903	0
450	9	0	0	0	0	0	0	200	300	0	36.4825	-89.9844	-678.289	2695.13	50568.3	-5147.83	274.553	899.027	0	0	0	0	0	0	0	603	903	0
451	0	0	0	0	0	0	0	200	300	0	35.4144	-88.9163	-675.542	2695.13	50995.5	-4964.73	275.488	899.01	0	0	0	0	0	0	0	603	903	0
451	1	0	0	0	0	0	0	200	300	0	35.4144	-86.7801	-674.321	2878.24	50873.4	-5102.05	275.444	898.732	0	0	0	0	0	0	0	603	903	0
451	2	0	0	0	0	0	0	200	300	0	35.8722	-87.6956	-672.185	2969.79	50507.2	-5056.28	275.139	898.582	0	0	0	0	0	0	0	603	903	0
451	3	0	0	0	0	0	0	200	300	0	34.3463	-86.1697	-670.964	3244.45	50690.3	-4690.06	275.548	898.164	0	0	0	0	0	0	0	603	903	0
451	4	0	0	0	0	0	0	200	300	0	34.3463	-84.949	-668.828	3427.56	50812.4	-4873.17	275.972	897.875	0	0	0	0	0	0	0	603	903	0
451	5	0	0	0	0	0	0	200	300	0	34.9567	-84.7964	-665.776	4434.64	50202	-4873.17	275.404	896.339	0	0	0	0	0	0	0	603	903	0
451	6	0	0	0	0	0	0	200	300	0	35.4144	-84.4913	-664.556	3885.32	50446.2	-4690.06	275.91	897.154	0	0	0	0	0	0	0	603	903	0
451	7	0	0	0	0	0	0	200	300	0	34.6515	-82.355	-663.03	4434.64	50812.4	-4598.51	276.637	896.312	0	0	0	0	0	0	0	603	903	0
451	8	0	0	0	0	0	0	200	300	0	34.8041	-81.5921	-662.419	4159.98	50141	-4598.51	275.694	896.72	0	0	0	0	0	0	0	603	903	0
451	9	0	0	0	0	0	0	200	300	0	36.0248	-80.524	-661.199	4709.3	50690.3	-4369.63	276.664	895.878	0	0	0	0	0	0	0	603	903	0
452	0	0	0	0	0	0	0	200	300	0	35.8722	-79.3033	-657.842	4983.95	50080	-4598.51	276.128	895.424	0	0	0	0	0	0	0	603	903	0
452	1	0	0	0	0	0	0	200	300	0	36.0248	-79.4559	-656.316	5167.06	49591.7	-4461.18	275.561	895.127	0	0	0	0	0	0	0	603	903	0
452	2	0	0	0	0	0	0	200	300	0	35.567	-78.5403	-653.569	5991.03	50263.1	-4552.73	276.906	893.833	0	0	0	0	0	0	0	603	903	0
452	3	0	0	0	0	0	0	200	300	0	35.2618	-77.0145	-651.128	5350.16	50141	-4003.42	277.006	894.783	0	0	0	0	0	0	0	603	903	0
452	4	0	0	0	0	0	0	200	300	0	34.6515	-75.6412	-649.297	5533.27	49713.8	-4323.85	276.566	894.478	0	0	0	0	0	0	0	603	903	0
452	5	0	0	0	0	0	0	200	300	0	34.8041	-75.6412	-647.771	5716.38	50202	-4278.08	277.5	894.175	0	0	0	0	0	0	0	603	903	0
452	6	0	0	0	0	0	0	200	300	0	35.8722	-75.336	-643.193	6174.14	49896.9	-4003.42	277.577	893.401	0	0	0	0	0	0	0	603	903	0
452	7	0	0	0	0	0	0	200	300	0	36.0248	-72.742	-643.499	5716.38	48920.3	-4003.42	276.022	894.117	0	0	0	0	0	0	0	603	903	0
452	8	0	0	0	0	0	0	200	300	0	36.7877	-72.8946	-641.057	6265.69	49957.9	-4140.75	277.931	893.226	0	0	0	0	0	0	0	603	903	0
452	9	0	0	0	0	0	0	200	300	0	36.33	-71.6739	-637.09	7272.77	49469.6	-3820.31	277.649	891.584	0	0	0	0	0	0	0	603	903	0
453	0	0	0	0	0	0	0	200	300	0	35.8722	-70.3006	-635.259	7364.32	49530.7	-3820.31	277.969	891.407	0	0	0	0	0	0	0	603	903	0
453	1	0	0	0	0	0	0	200	300	0	35.4144	-69.2325	-632.817	6448.8	49774.8	-4186.52	278.656	892.809	0	0	0	0	0	0	0	603	903	0
453	2	0	0	0	0	0	0	200	300	0	36.33	-69.2325	-630.681	7547.43	49591.7	-3682.99	278.632	891.033	0	0	0	0	0	0	0	603	903	0
453	3	0	0	0	0	0	0	200	300	0	36.6351	-67.4014	-627.935	7547.43	49103.4	-3408.33	278.198	890.981	0	0	0	0	0	0	0	603	903	0
453	4	0	0	0	0	0	0	200	300	0	36.1774	-66.7911	-627.935	7913.64	49774.8	-3682.99	279.267	890.397	0	0	0	0	0	0	0	603	903	0
453	5	0	0	0	0	0	0	200	300	0	36.1774	-66.7911	-622.747	7730.54	48981.3	-3728.76	278.654	890.586	0	0	0	0	0	0	0	603	903	0
453	6	0	0	0	0	0	0	200	300	0	36.7877	-66.0281	-620.916	8554.51	48981.3	-3591.43	278.886	889.223	0	0	0	0	0	0	0	603	903	0
453	7	0	0	0	0	0	0	200	300	0	37.0929	-64.6548	-618.474	8005.19	48554.1	-3362.55	278.506	890.057	0	0	0	0	0	0	0	603	903	0
453	8	0	0	0	0	0	0	200	300	0	38.3136	-64.8074	-617.253	8737.61	48798.2	-3225.22	279.057	888.844	0	0	0	0	0	0	0	603	903	0
453	9	0	0	0	0	0	0	200	300	0	37.2455	-64.0445	-613.897	9195.38	48493.1	-3179.45	278.992	888.021	0	0	0	0	0	0	0	603	903	0
454	0	0	0	0	0	0	0	200	300	0	36.6351	-62.9764	-611.455	9103.82	49164.4	-3316.77	280.406	888.111	0	0	0	0	0	0	0	603	903	0
454	1	0	0	0	0	0	0	200	300	0	36.33	-62.2134	-609.319	9470.03	48554.1	-3316.77	279.686	887.458	0	0	0	0	0	0	0	603	903	0
454	2	0	0	0	0	0	0	200	300	0	36.9403	-62.2134	-605.657	9744.69	48493.1	-3042.12	280.067	886.911	0	0	0	0	0	0	0	603	903	0
454	3	0	0	0	0	0	0	200	300	0	37.0929	-60.535	-603.215	9927.8	48371	-3042.12	280.189	886.542	0	0	0	0	0	0	0	603	903	0
454	4	0	0	0	0	0	0	200	300	0	35.4144	-59.6194	-596.196	9744.69	48371	-2950.56	281.133	886.655	0	0	0	0	0	0	0	603	903	0
454	5	0	0	0	0	0	0	200	300	0	35.7196	-59.4669	-598.027	10294	48432	-2813.23	280.986	885.787	0	0	0	0	0	0	0	603	903	0
454	6	0	0	0	0	0	0	200	300	0	36.4825	-59.1617	-594.976	10477.1	48493.1	-2767.46	281.504	885.391	0	0	0	0	0	0	0	603	903	0
454	7	0	0	0	0	0	0	200	300	0	36.1774	-57.941	-594.06	10477.1	47699.6	-2721.68	280.294	885.364	0	0	0	0	0	0	0	603	903	0
454	8	0	0	0	0	0	0	200	300	0	37.2455	-56.4151	-591.314	10568.7	47821.7	-2675.91	280.874	885.127	0	0	0	0	0	0	0	603	903	0
454	9	0	0	0	0	0	0	200	300	0	36.0248	-56.5677	-584.6	11575.7	48248.9	-2492.8	282.533	883.199	0	0	0	0	0	0	0	603	903	0
455	0	0	0	0	0	0	0	200	300	0	36.0248	-55.9573	-586.126	11301.1	47394.4	-2492.8	280.861	883.719	0	0	0	0	0	0	0	603	903	0
455	1	0	0	0	0	0	0	200	300	0	34.1937	-55.4996	-582.769	11758.9	47760.6	-2492.8	281.955	882.823	0	0	0	0	0	0	0	603	903	0
455	2	0	0	0	0	0	0	200	300	0	35.567	-54.8892	-579.717	11850.4	47638.6	-2263.92	282.176	882.558	0	0	0	0	0	0	0	603	903	0
455	3	0	0	0	0	0	0	200	300	0	36.0248	-53.3633	-577.886	11942	47150.3	-2355.47	281.591	882.335	0	0	0	0	0	0	0	603	903	0
455	4	0	0	0	0	0	0	200	300	0	35.1092	-53.6685	-576.665	11850.4	46967.2	-2447.02	281.446	882.45	0	0	0	0	0	0	0	603	903	0
455	5	0	0	0	0	0	0	200	300	0	35.8722	-53.0582	-573.613	12308.2	47394.4	-2172.36	282.624	881.543	0	0	0	0	0	0	0	603	903	0
455	6	0	0	0	0	0	0	200	300	0	35.4144	-52.1426	-570.867	13132.1	46845.1	-2218.14	282.06	879.996	0	0	0	0	0	0	0	603	903	0
455	7	0	0	0	0	0	0	200	300	0	35.2618	-51.0745	-570.256	12765.9	46906.1	-1714.6	282.254	880.614	0	0	0	0	0	0	0	603	903	0
455	8	0	0	0	0	0	0	200	300	0	34.6515	-50.0064	-564.763	12765.9	47028.2	-2035.03	283.271	880.396	0	0	0	0	0	0	0	603	903	0
455	9	0	0	0	0	0	0	200	300	0	35.567	-50.0064	-565.068	13132.1	46601	-1760.38	282.47	879.76	0	0	0	0	0	0	0	603	903	0
456	0	0	0	0	0	0	0	200	300	0	35.567	-50.0064	-562.932	13223.7	46478.9	-1760.38	282.566	879.509	0	0	0	0	0	0	0	603	903	0
456	1	0	0	0	0	0	0	200	300	0	34.4989	-49.3961	-562.017	14047.7	46784.1	-1806.15	283.243	878.005	0	0	0	0	0	0	0	603	903	0
456	2	0	0	0	0	0	0	200	300	0	34.3463	-48.4805	-558.965	13589.9	46784.1	-1623.05	283.698	878.687	0	0	0	0	0	0	0	603	903	0
456	3	0	0	0	0	0	0	200	300	0	34.6515	-46.6495	-557.744	14139.2	46112.7	-1760.38	282.677	877.649	0	0	0	0	0	0	0	603	903	0
456	4	0	0	0	0	0	0	200	300	0	33.8885	-47.565	-555.303	13956.1	46662	-1531.5	284.03	877.868	0	0	0	0	0	0	0	603	903	0
456	5	0	0	0	0	0	0	200	300	0	33.4308	-46.4969	-554.082	14047.7	46784.1	-1851.93	284.435	877.647	0	0	0	0	0	0	0	603	903	0
456	6	0	0	0	0	0	0	200	300	0	34.9567	-46.0391	-552.556	14413.9	46173.7	-1531.5	283.564	876.914	0	0	0	0	0	0	0	603	903	0
456	7	0	0	0	0	0	0	200	300	0	34.8041	-45.5814	-549.81	14688.5	46417.9	-1531.5	284.425	876.284	0	0	0	0	0	0	0	603	903	0
456	8	0	0	0	0	0	0	200	300	0	32.973	-44.5132	-546.453	14413.9	46234.8	-1439.94	284.609	876.623	0	0	0	0	0	0	0	603	903	0
456	9	0	0	0	0	0	0	200	300	0	34.6515	-44.0555	-545.537	15146.3	45929.6	-1439.94	284.191	875.236	0	0	0	0	0	0	0	603	903	0
457	0	0	0	0	0	0	0	200	300	0	34.0411	-43.4451	-545.537	15421	46417.9	-1211.06	285.087	874.733	0	0	0	0	0	0	0	603	903	0
457	1	0	0	0	0	0	0	200	300	0	34.8041	-44.2081	-544.011	15054.8	46173.7	-1211.06	284.876	875.326	0	0	0	0	0	0	0	603	903	0
457	2	0	0	0	0	0	0	200	300	0	34.0411	-42.5296	-540.654	15970.3	45685.4	-1211.06	284.5	873.461	0	0	0	0	0	0	0	603	903	0
457	3	0	0	0	0	0	0	200	300	0	34.0411	-42.2244	-541.265	15695.6	45929.6	-1119.51	284.856	874.002	0	0	0	0	0	0	0	603	903	0
457	4	0	0	0	0	0	0	200	300	0	32.5153	-42.2244	-540.349	16244.9	46295.8	-982.178	285.678	872.936	0	0	0	0	0	0	0	603	903	0
457	5	0	0	0	0	0	0	200	300	0	32.973	-41.3089	-537.297	16061.8	45563.4	-1027.95	284.801	873.106	0	0	0	0	0	0	0	603	903	0
457	6	0	0	0	0	0	0	200	300	0	34.3463	-40.0882	-533.94	16885.8	46234.8	-982.178	286.592	871.375	0	0	0	0	0	0	0	603	903	0
457	7	0	0	0	0	0	0	200	300	0	33.4308	-39.783	-536.077	16977.4	45441.3	-661.744	284.766	871.33	0	0	0	0	0	0	0	603	903	0
457	8	0	0	0	0	0	0	200	300	0	33.1256	-39.9356	-532.72	16702.7	45502.3	-890.626	285.415	871.646	0	0	0	0	0	0	0	603	903	0
457	9	0	0	0	0	0	0	200	300	0	33.4308	-38.8675	-530.584	16977.4	45807.5	-661.744	286.334	871.003	0	0	0	0	0	0	0	603	903	0
458	0	0	0	0	0	0	0	200	300	0	33.1256	-39.0201	-531.499	16885.8	45563.4	-387.085	285.726	871.23	0	0	0	0	0	0	0	603	903	0
458	1	0	0	0	0	0	0	200	300	0	34.8041	-38.8675	-529.058	17252	45075.1	-524.415	285.199	870.391	0	0	0	0	0	0	0	603	903	0
458	2	0	0	0	0	0	0	200	300	0	33.5834	-38.2571	-526.311	17709.8	45563.4	-524.415	286.571	869.351	0	0	0	0	0	0	0	603	903	0
458	3	0	0	0	0	0	0	200	300	0	33.2782	-37.3416	-526.006	17984.4	45441.3	-615.967	286.389	868.809	0	0	0	0	0	0	0	603	903	0
458	4	0	0	0	0	0	0	200	300	0	32.2101	-37.0364	-525.09	17343.6	44586.8	-524.415	284.913	869.97	0	0	0	0	0	0	0	603	903	0
458	5	0	0	0	0	0	0	200	300	0	32.8204	-36.5787	-522.649	18076	45380.3	-295.533	286.827	868.415	0	0	0	0	0	0	0	603	903	0
458	6	0	0	0	0	0	0	200	300	0	33.1256	-35.8157	-521.733	18167.5	44831	-478.638	285.927	868.178	0	0	0	0	0	0	0	603	903	0
458	7	0	0	0	0	0	0	200	300	0	33.1256	-35.5106	-520.208	17709.8	44647.8	-341.309	285.827	868.956	0	0	0	0	0	0	0	603	903	0
458	8	0	0	0	0	0	0	200	300	0	30.9894	-33.9847	-519.902	18533.8	45075.1	-341.309	286.699	867.352	0	0	0	0	0	0	0	603	903	0
458	9	0	0	0	0	0	0	200	300	0	32.2101	-35.2054	-516.545	19083.1	45197.2	-66.6507	287.499	866.056	0	0	0	0	0	0	0	603	903	0
459	0	0	0	0	0	0	0	200	300	0	31.9049	-33.9847	-516.851	18625.3	44892	-158.203	286.857	866.964	0	0	0	0	0	0	0	603	903	0
459	1	0	0	0	0	0	0	200	300	0	32.973	-34.4424	-517.156	18625.3	44708.9	70.6785	286.451	866.985	0	0	0	0	0	0	0	603	903	0
459	2	0	0	0	0	0	0	200	300	0	31.4471	-33.2217	-513.494	19815.5	44769.9	-203.98	287.187	864.411	0	0	0	0	0	0	0	603	903	0
459	3	0	0	0	0	0	0	200	300	0	31.4471	-32.9166	-513.189	19174.6	44403.7	-158.203	286.525	865.636	0	0	0	0	0	0	0	603	903	0
459	4	0	0	0	0	0	0	200	300	0	29.6161	-32.6114	-510.442	18808.4	44342.7	24.9021	286.871	866.153	0	0	0	0	0	0	0	603	903	0
459	5	0	0	0	0	0	0	200	300	0	30.2264	-32.4588	-511.052	19907	44769.9	70.6785	287.603	864.047	0	0	0	0	0	0	0	603	903	0
459	6	0	0	0	0	0	0	200	300	0	31.7523	-31.0855	-509.526	19907	43976.5	162.231	286.309	863.93	0	0	0	0	0	0	0	603	903	0
459	7	0	0	0	0	0	0	200	300	0	30.8368	-30.3226	-509.526	20090.2	44098.5	208.008	286.548	863.571	0	0	0	0	0	0	0	603	903	0
459	8	0	0	0	0	0	0	200	300	0	29.6161	-30.4752	-507.39	19815.5	44281.6	162.231	287.273	863.946	0	0	0	0	0	0	0	603	903	0
459	9	0	0	0	0	0	0	200	300	0	29.7687	-31.3907	-506.78	20639.5	44220.6	391.113	287.258	862.273	0	0	0	0	0	0	0	603	903	0
460	0	0	0	0	0	0	0	200	300	0	30.2264	-27.576	-504.338	20273.3	43366.1	436.889	285.986	862.802	0	0	0	0	0	0	0	603	903	0
460	1	0	0	0	0	0	0	200	300	0	28.3954	-28.7967	-504.338	20364.8	44037.5	116.455	287.317	862.621	0	0	0	0	0	0	0	603	903	0
460	2	0	0	0	0	0	0	200	300	0	28.8531	-28.4915	-502.813	20822.6	43610.2	482.666	286.733	861.588	0	0	0	0	0	0	0	603	903	0
460	3	0	0	0	0	0	0	200	300	0	29.7687	-28.1863	-502.202	20914.1	44098.5	757.324	287.81	861.355	0	0	0	0	0	0	0	603	903	0
460	4	0	0	0	0	0	0	200	300	0	29.6161	-27.8812	-500.371	20822.6	43976.5	940.43	287.888	861.386	0	0	0	0	0	0	0	603	903	0
460	5	0	0	0	0	0	0	200	300	0	28.7006	-27.4234	-500.676	21005.7	43671.3	665.771	287.225	861.045	0	0	0	0	0	0	0	603	903	0
460	6	0	0	0	0	0	0	200	300	0	29.3109	-26.9656	-496.099	21463.4	43915.4	894.654	288.522	859.736	0	0	0	0	0	0	0	603	903	0
460	7	0	0	0	0	0	0	200	300	0	29.3109	-26.0501	-498.54	21005.7	43732.3	1169.31	287.721	860.866	0	0	0	0	0	0	0	603	903	0
460	8	0	0	0	0	0	0	200	300	0	29.4635	-25.7449	-498.845	21280.3	43244	848.877	286.688	860.341	0	0	0	0	0	0	0	603	903	0
460	9	0	0	0	0	0	0	200	300	0	29.1583	-25.4398	-497.014	22012.8	43305.1	940.43	287.13	858.71	0	0	0	0	0	0	0	603	903	0
461	0	0	0	0	0	0	0	200	300	0	28.2428	-24.982	-495.183	22379	43549.2	1123.53	287.946	857.807	0	0	0	0	0	0	0	603	903	0
461	1	0	0	0	0	0	0	200	300	0	27.4799	-24.0665	-495.183	21097.2	43122	1123.53	287.083	860.395	0	0	0	0	0	0	0	603	903	0
461	2	0	0	0	0	0	0	200	300	0	28.0902	-24.8294	-493.047	22470.5	43671.3	1169.31	288.574	857.425	0	0	0	0	0	0	0	603	903	0
461	3	0	0	0	0	0	0	200	300	0	28.3954	-23.1509	-493.047	22470.5	43122	1169.31	287.46	857.425	0	0	0	0	0	0	0	603	903	0
461	4	0	0	0	0	0	0	200	300	0	27.4799	-22.8458	-493.352	22104.3	42938.9	1352.42	287.035	858.196	0	0	0	0	0	0	0	603	903	0
461	5	0	0	0	0	0	0	200	300	0	27.6324	-22.9983	-491.216	22104.3	42999.9	1443.97	287.538	858.001	0	0	0	0	0	0	0	603	903	0
461	6	0	0	0	0	0	0	200	300	0	27.9376	-23.1509	-490.911	22928.3	43060.9	1443.97	287.716	856.294	0	0	0	0	0	0	0	603	903	0
461	7	0	0	0	0	0	0	200	300	0	28.2428	-22.6932	-490.3	21738.1	42755.8	1398.19	287.203	858.664	0	0	0	0	0	0	0	603	903	0
461	8	0	0	0	0	0	0	200	300	0	26.7169	-21.3199	-489.385	22745.2	43183	1535.52	288.239	856.523	0	0	0	0	0	0	0	603	903	0
461	9	0	0	0	0	0	0	200	300	0	27.3273	-21.6251	-489.385	23202.9	42938.9	1581.3	287.741	855.588	0	0	0	0	0	0	0	603	903	0
462	0	0	0	0	0	0	0	200	300	0	28.7006	-20.8621	-487.859	23569.2	42816.8	1627.08	287.765	854.689	0	0	0	0	0	0	0	603	903	0
462	1	0	0	0	0	0	0	200	300	0	26.4117	-20.7095	-488.774	22928.3	43060.9	2176.39	288.1	856.09	0	0	0	0	0	0	0	603	903	0
462	2	0	0	0	0	0	0	200	300	0	25.6488	-20.5569	-488.164	23477.6	43183	1627.08	288.46	854.906	0	0	0	0	0	0	0	603	903	0
462	3	0	0	0	0	0	0	200	300	0	27.6324	-19.794	-487.554	23935.4	42389.5	1810.18	286.943	853.907	0	0	0	0	0	0	0	603	903	0
462	4	0	0	0	0	0	0	200	300	0	25.8014	-19.1837	-486.028	23660.7	42633.7	1810.18	287.719	854.318	0	0	0	0	0	0	0	603	903	0
462	5	0	0	0	0	0	0	200	300	0	25.4962	-18.2681	-487.249	24484.7	42877.8	1810.18	288	852.749	0	0	0	0	0	0	0	603	903	0
462	6	0	0	0	0	0	0	200	300	0	26.5643	-19.1837	-486.943	24301.6	42267.5	2084.84	286.802	853.094	0	0	0	0	0	0	0	603	903	0
462	7	0	0	0	0	0	0	200	300	0	26.4117	-17.8104	-486.333	24393.1	42633.7	1993.29	287.664	852.843	0	0	0	0	0	0	0	603	903	0
462	8	0	0	0	0	0	0	200	300	0	25.8014	-17.2	-486.333	24210	42633.7	2176.39	287.664	853.219	0	0	0	0	0	0	0	603	903	0
462	9	0	0	0	0	0	0	200	300	0	26.1066	-16.8948	-485.112	25217.1	42328.5	2084.84	287.255	851.018	0	0	0	0	0	0	0	603	903	0
463	0	0	0	0	0	0	0	200	300	0	25.6488	-18.2681	-484.807	24576.2	42023.3	2176.39	286.681	852.307	0	0	0	0	0	0	0	603	903	0
463	1	0	0	0	0	0	0	200	300	0	24.8859	-16.4371	-481.755	24667.8	42755.8	2222.17	288.75	851.796	0	0	0	0	0	0	0	603	903	0
463	2	0	0	0	0	0	0	200	300	0	25.191	-16.2845	-486.028	25583.3	41901.3	2130.61	286.212	850.362	0	0	0	0	0	0	0	603	903	0
463	3	0	0	0	0	0	0	200	300	0	27.3273	-15.9793	-485.418	25491.8	42389.5	2222.17	287.326	850.485	0	0	0	0	0	0	0	603	903	0
463	4	0	0	0	0	0	0	200	300	0	24.2755	-15.369	-483.892	25125.6	42145.4	2313.72	287.097	851.076	0	0	0	0	0	0	0	603	903	0
463	5	0	0	0	0	0	0	200	300	0	24.5807	-15.369	-484.502	25949.5	42206.4	2542.6	287.113	849.441	0	0	0	0	0	0	0	603	903	0
463	6	0	0	0	0	0	0	200	300	0	25.0385	-14.606	-484.502	26407.3	42023.3	2405.27	286.735	848.496	0	0	0	0	0	0	0	603	903	0
463	7	0	0	0	0	0	0	200	300	0	24.7333	-14.7586	-483.892	25766.4	41962.3	2817.26	286.718	849.752	0	0	0	0	0	0	0	603	903	0
463	8	0	0	0	0	0	0	200	300	0	23.9703	-13.5379	-479.314	25949.5	41779.2	2405.27	287.165	848.861	0	0	0	0	0	0	0	603	903	0
463	9	0	0	0	0	0	0	200	300	0	24.2755	-13.5379	-484.197	26590.4	42084.4	2679.93	286.916	848.084	0	0	0	0	0	0	0	603	903	0
464	0	0	0	0	0	0	0	200	300	0	23.6652	-13.3853	-483.892	26773.5	41535.1	2725.71	285.835	847.67	0	0	0	0	0	0	0	603	903	0
464	1	0	0	0	0	0	0	200	300	0	22.1393	-12.9275	-483.586	26224.2	41535.1	2725.71	285.89	848.771	0	0	0	0	0	0	0	603	903	0
464	2	0	0	0	0	0	0	200	300	0	22.7496	-11.7068	-482.671	26773.5	41779.2	2771.49	286.558	847.531	0	0	0	0	0	0	0	603	903	0
464	3	0	0	0	0	0	0	200	300	0	23.0548	-12.3172	-483.586	27322.8	41229.9	3046.14	285.259	846.5	0	0	0	0	0	0	0	603	903	0
464	4	0	0	0	0	0	0	200	300	0	21.9867	-12.1646	-483.586	26590.4	41535.1	2954.59	285.89	848.014	0	0	0	0	0	0	0	603	903	0
464	5	0	0	0	0	0	0	200	300	0	21.6815	-11.5543	-479.009	26773.5	41779.2	3046.14	287.22	847.106	0	0	0	0	0	0	0	603	903	0
464	6	0	0	0	0	0	0	200	300	0	23.36	-10.7913	-484.807	27689	41596.1	3229.25	285.799	845.887	0	0	0	0	0	0	0	603	903	0
464	7	0	0	0	0	0	0	200	300	0	21.6815	-10.6387	-484.197	27231.3	41596.1	3137.7	285.907	846.76	0	0	0	0	0	0	0	603	903	0
464	8	0	0	0	0	0	0	200	300	0	20.9186	-10.0284	-483.586	27414.4	41596.1	3503.91	286.016	846.31	0	0	0	0	0	0	0	603	903	0
464	9	0	0	0	0	0	0	200	300	0	21.3763	-10.0284	-484.197	27963.7	41657.1	3320.8	286.033	845.247	0	0	0	0	0	0	0	603	903	0
465	0	0	0	0	0	0	0	200	300	0	23.6652	-9.41803	-481.145	28146.8	41596.1	3595.46	286.452	844.5	0	0	0	0	0	0	0	603	903	0
465	1	0	0	0	0	0	0	200	300	0	20.4608	-8.65509	-482.976	27689	41413	3412.35	285.745	845.67	0	0	0	0	0	0	0	603	903	0
465	2	0	0	0	0	0	0	200	300	0	20.1556	-8.19732	-483.281	28696.1	41718.2	3641.24	286.323	843.622	0	0	0	0	0	0	0	603	903	0
465	3	0	0	0	0	0	0	200	300	0	21.5289	-8.19732	-485.723	28604.6	41229.9	3824.34	284.884	844.109	0	0	0	0	0	0	0	603	903	0
465	4	0	0	0	0	0	0	200	300	0	21.3763	-7.73956	-485.112	28421.4	41718.2	3687.01	285.997	844.413	0	0	0	0	0	0	0	603	903	0
465	5	0	0	0	0	0	0	200	300	0	20.766	-7.43438	-483.586	28604.6	41046.8	3870.12	284.88	843.849	0	0	0	0	0	0	0	603	903	0
465	6	0	0	0	0	0	0	200	300	0	20.766	-7.43438	-485.112	29153.9	41351.9	4236.33	285.242	842.903	0	0	0	0	0	0	0	603	903	0
465	7	0	0	0	0	0	0	200	300	0	20.9186	-6.67144	-485.112	28604.6	41107.8	3732.79	284.739	844.035	0	0	0	0	0	0	0	603	903	0
465	8	0	0	0	0	0	0	200	300	0	22.597	-6.67144	-484.197	28970.8	41351.9	3961.67	285.403	843.167	0	0	0	0	0	0	0	603	903	0
465	9	0	0	0	0	0	0	200	300	0	20.766	-6.21368	-486.028	29703.2	41229.9	3503.91	284.83	841.886	0	0	0	0	0	0	0	603	903	0
466	0	0	0	0	0	0	0	200	300	0	20.6134	-5.9085	-487.249	29520.1	41229.9	4236.33	284.618	842.415	0	0	0	0	0	0	0	603	903	0
466	1	0	0	0	0	0	0	200	300	0	19.3927	-6.36627	-488.469	29886.3	41657.1	3961.67	285.281	841.816	0	0	0	0	0	0	0	603	903	0
466	2	0	0	0	0	0	0	200	300	0	19.8505	-5.45074	-486.333	29611.6	41107.8	4190.55	284.526	842.112	0	0	0	0	0	0	0	603	903	0
466	3	0	0	0	0	0	0	200	300	0	20.766	-4.84039	-486.028	30435.6	41107.8	4327.88	284.579	840.379	0	0	0	0	0	0	0	603	903	0
466	4	0	0	0	0	0	0	200	300	0	20.4608	-4.07745	-487.554	29794.8	41107.8	4556.76	284.314	841.889	0	0	0	0	0	0	0	603	903	0
466	5	0	0	0	0	0	0	200	300	0	21.0712	-3.31451	-486.943	29886.3	41168.8	4373.66	284.545	841.625	0	0	0	0	0	0	0	603	903	0
466	6	0	0	0	0	0	0	200	300	0	20.3082	-3.4671	-488.469	31259.6	40985.7	4465.21	283.906	839.005	0	0	0	0	0	0	0	603	903	0
466	7	0	0	0	0	0	0	200	300	0	19.6979	-3.16192	-486.638	30527.2	41290.9	4602.54	284.849	840.269	0	0	0	0	0	0	0	603	903	0
466	8	0	0	0	0	0	0	200	300	0	18.7823	-2.09381	-487.859	30435.6	40863.7	4373.66	283.761	840.614	0	0	0	0	0	0	0	603	903	0
466	9	0	0	0	0	0	0	200	300	0	19.5453	-2.2464	-490.911	31351.2	41107.8	4877.2	283.738	839.137	0	0	0	0	0	0	0	603	903	0
467	0	0	0	0	0	0	0	200	300	0	21.8341	-1.78863	-492.437	31442.7	41474	4510.99	284.222	839.149	0	0	0	0	0	0	0	603	903	0
467	1	0	0	0	0	0	0	200	300	0	18.9349	-1.33087	-494.878	31259.6	41290.9	4602.54	283.437	839.834	0	0	0	0	0	0	0	603	903	0
467	2	0	0	0	0	0	0	200	300	0	18.9349	-1.33087	-492.131	31076.5	41168.8	4739.87	283.654	839.853	0	0	0	0	0	0	0	603	903	0
467	3	0	0	0	0	0	0	200	300	0	20.1556	-1.17828	-493.657	32083.6	41718.2	4922.97	284.508	838.008	0	0	0	0	0	0	0	603	903	0
467	4	0	0	0	0	0	0	200	300	0	19.8505	-0.873104	-494.573	31442.7	41596.1	5151.85	284.105	839.425	0	0	0	0	0	0	0	603	903	0
467	5	0	0	0	0	0	0	200	300	0	19.2401	-1.48346	-497.014	31992	41351.9	4877.2	283.201	838.632	0	0	0	0	0	0	0	603	903	0
467	6	0	0	0	0	0	0	200	300	0	19.6979	0.195011	-497.93	32449.8	41779.2	4877.2	283.906	837.831	0	0	0	0	0	0	0	603	903	0
467	7	0	0	0	0	0	0	200	300	0	21.3763	0.95795	-498.845	33090.6	41474	5106.08	283.14	836.666	0	0	0	0	0	0	0	603	903	0
467	8	0	0	0	0	0	0	200	300	0	18.7823	1.41571	-500.066	32175.1	41657.1	5334.96	283.303	838.658	0	0	0	0	0	0	0	603	903	0
467	9	0	0	0	0	0	0	200	300	0	17.8668	1.41571	-500.676	32907.5	41840.2	5472.29	283.567	837.274	0	0	0	0	0	0	0	603	903	0
468	0	0	0	0	0	0	0	200	300	0	19.5453	2.17865	-501.897	33090.6	41413	5289.19	282.513	837.069	0	0	0	0	0	0	0	603	903	0
468	1	0	0	0	0	0	0	200	300	0	18.9349	1.72089	-500.982	32999.1	41901.3	5197.63	283.638	837.131	0	0	0	0	0	0	0	603	903	0
468	2	0	0	0	0	0	0	200	300	0	18.9349	2.48383	-503.118	33273.7	41962.3	5334.96	283.405	836.865	0	0	0	0	0	0	0	603	903	0
468	3	0	0	0	0	0	0	200	300	0	18.0194	2.33124	-504.949	33823.1	41962.3	5655.4	283.102	836.017	0	0	0	0	0	0	0	603	903	0
468	4	0	0	0	0	0	0	200	300	0	21.8341	3.09418	-507.695	34097.7	42084.4	5655.4	282.893	835.838	0	0	0	0	0	0	0	603	903	0
468	5	0	0	0	0	0	0	200	300	0	18.172	3.55194	-508.306	33823.1	42450.6	5426.52	283.514	836.459	0	0	0	0	0	0	0	603	903	0
468	6	0	0	0	0	0	0	200	300	0	18.3246	3.70453	-508.916	34189.3	42328.5	5563.85	283.174	835.819	0	0	0	0	0	0	0	603	903	0
468	7	0	0	0	0	0	0	200	300	0	20.003	3.70453	-509.221	34830.2	42816.8	5655.4	284.083	834.601	0	0	0	0	0	0	0	603	903	0
468	8	0	0	0	0	0	0	200	300	0	19.5453	4.62006	-509.832	34372.4	43060.9	5655.4	284.461	835.581	0	0	0	0	0	0	0	603	903	0
468	9	0	0	0	0	0	0	200	300	0	18.9349	5.68818	-512.883	34555.5	42389.5	5746.95	282.649	835.625	0	0	0	0	0	0	0	603	903	0
469	0	0	0	0	0	0	0	200	300	0	18.9349	5.84076	-513.494	35196.4	42999.9	5884.28	283.74	834.457	0	0	0	0	0	0	0	603	903	0
469	1	0	0	0	0	0	0	200	300	0	19.5453	6.29853	-516.545	35654.1	42999.9	5426.52	283.245	833.976	0	0	0	0	0	0	0	603	903	0
469	2	0	0	0	0	0	0	200	300	0	20.3082	6.6037	-518.071	35287.9	42938.9	6113.16	282.882	834.886	0	0	0	0	0	0	0	603	903	0
469	3	0	0	0	0	0	0	200	300	0	20.6134	7.36664	-518.071	35379.5	43427.1	5930.06	283.825	834.709	0	0	0	0	0	0	0	603	903	0
469	4	0	0	0	0	0	0	200	300	0	19.8505	8.28217	-521.733	36569.6	43427.1	6570.93	283.236	832.907	0	0	0	0	0	0	0	603	903	0
469	5	0	0	0	0	0	0	200	300	0	20.1556	8.89252	-522.344	36935.9	43060.9	6067.39	282.438	832.288	0	0	0	0	0	0	0	603	903	0
469	6	0	0	0	0	0	0	200	300	0	19.2401	8.73993	-523.87	36020.3	43915.4	6250.49	283.829	834.242	0	0	0	0	0	0	0	603	903	0
469	7	0	0	0	0	0	0	200	300	0	18.9349	9.35028	-522.649	36661.2	43732.3	5930.06	283.674	832.855	0	0	0	0	0	0	0	603	903	0
469	8	0	0	0	0	0	0	200	300	0	20.003	9.35028	-528.142	37119	43122	6204.71	281.648	832.718	0	0	0	0	0	0	0	603	903	0
469	9	0	0	0	0	0	0	200	300	0	20.1556	9.96064	-529.668	36935.9	43976.5	6387.82	283.026	833.266	0	0	0	0	0	0	0	603	903	0
470	0	0	0	0	0	0	0	200	300	0	21.0712	10.2658	-530.278	37393.6	43976.5	6204.71	282.931	832.483	0	0	0	0	0	0	0	603	903	0
470	1	0	0	0	0	0	0	200	300	0	20.9186	11.0288	-531.194	37851.4	43366.1	6525.15	281.639	831.743	0	0	0	0	0	0	0	603	903	0
470	2	0	0	0	0	0	0	200	300	0	20.3082	11.4865	-534.551	37759.8	44586.8	6570.93	283.41	832.362	0	0	0	0	0	0	0	603	903	0
470	3	0	0	0	0	0	0	200	300	0	20.3082	11.0288	-535.466	38034.5	44281.6	6937.14	282.697	831.969	0	0	0	0	0	0	0	603	903	0
470	4	0	0	0	0	0	0	200	300	0	19.6979	12.7072	-535.161	38675.4	44281.6	6708.25	282.745	830.731	0	0	0	0	0	0	0	603	903	0
470	5	0	0	0	0	0	0	200	300	0	22.4445	13.7753	-539.128	38766.9	44892	6845.58	283.268	831.093	0	0	0	0	0	0	0	603	903	0
470	6	0	0	0	0	0	0	200	300	0	19.8505	13.165	-540.96	38583.8	44831	6845.58	282.873	831.675	0	0	0	0	0	0	0	603	903	0
470	7	0	0	0	0	0	0	200	300	0	20.1556	14.5383	-542.485	39041.6	44708.9	7074.47	282.415	831.032	0	0	0	0	0	0	0	603	903	0
470	8	0	0	0	0	0	0	200	300	0	20.9186	14.996	-544.316	39499.3	45197.2	6891.36	283.035	830.433	0	0	0	0	0	0	0	603	903	0
470	9	0	0	0	0	0	0	200	300	0	21.0712	15.6064	-545.842	39957.1	45319.2	6845.58	283.026	829.797	0	0	0	0	0	0	0	603	903	0
471	0	0	0	0	0	0	0	200	300	0	22.597	15.9116	-544.622	39682.4	45380.3	6799.81	283.324	830.138	0	0	0	0	0	0	0	603	903	0
471	1	0	0	0	0	0	0	200	300	0	19.2401	16.3693	-549.199	40506.4	46051.7	7166.02	283.852	829.245	0	0	0	0	0	0	0	603	903	0
471	2	0	0	0	0	0	0	200	300	0	23.5126	16.9797	-552.861	40506.4	45441.3	7303.35	282.193	829.733	0	0	0	0	0	0	0	603	903	0
471	3	0	0	0	0	0	0	200	300	0	20.3082	17.8952	-555.303	40964.2	45685.4	7257.57	282.271	829.231	0	0	0	0	0	0	0	603	903	0
471	4	0	0	0	0	0	0	200	300	0	21.3763	18.353	-556.218	40872.6	45929.6	7303.35	282.575	829.517	0	0	0	0	0	0	0	603	903	0
471	5	0	0	0	0	0	0	200	300	0	21.5289	18.6581	-557.439	41422	46601	7440.68	283.598	828.692	0	0	0	0	0	0	0	603	903	0
471	6	0	0	0	0	0	0	200	300	0	21.6815	19.7263	-560.186	41238.9	46112.7	7349.12	282.317	829.384	0	0	0	0	0	0	0	603	903	0
471	7	0	0	0	0	0	0	200	300	0	20.9186	18.8107	-562.932	41788.2	46662	7623.78	282.891	828.767	0	0	0	0	0	0	0	603	903	0
471	8	0	0	0	0	0	0	200	300	0	20.766	20.0314	-560.796	42154.4	46478.9	7532.23	282.88	827.831	0	0	0	0	0	0	0	603	903	0
471	9	0	0	0	0	0	0	200	300	0	22.2919	21.8625	-567.205	42612.1	46601	7761.11	282.159	827.874	0	0	0	0	0	0	0	603	903	0
472	0	0	0	0	0	0	0	200	300	0	20.9186	21.8625	-567.205	42886.8	47150.3	7623.78	283.127	827.389	0	0	0	0	0	0	0	603	903	0
472	1	0	0	0	0	0	0	200	300	0	20.9186	22.6254	-569.036	42703.7	46906.1	7761.11	282.431	827.954	0	0	0	0	0	0	0	603	903	0
472	2	0	0	0	0	0	0	200	300	0	22.597	23.9987	-571.782	43069.9	47150.3	7669.56	282.462	827.674	0	0	0	0	0	0	0	603	903	0
472	3	0	0	0	0	0	0	200	300	0	21.6815	24.3039	-574.224	43436.1	47516.5	7669.56	282.749	827.357	0	0	0	0	0	0	0	603	903	0
472	4	0	0	0	0	0	0	200	300	0	23.36	23.2358	-577.886	43527.7	47394.4	7989.99	282.014	827.678	0	0	0	0	0	0	0	603	903	0
472	5	0	0	0	0	0	0	200	300	0	21.6815	25.8298	-575.139	43985.4	47821.7	7852.66	283.148	826.522	0	0	0	0	0	0	0	603	903	0
472	6	0	0	0	0	0	0	200	300	0	22.7496	26.4401	-580.632	44717.9	47943.7	8401.98	282.572	825.984	0	0	0	0	0	0	0	603	903	0
472	7	0	0	0	0	0	0	200	300	0	20.766	26.4401	-583.684	44534.8	47882.7	8081.54	282.035	826.701	0	0	0	0	0	0	0	603	903	0
472	8	0	0	0	0	0	0	200	300	0	21.0712	27.0505	-585.21	44992.5	48126.9	8218.87	282.239	826.117	0	0	0	0	0	0	0	603	903	0
472	9	0	0	0	0	0	0	200	300	0	21.9867	28.5764	-587.041	45450.3	48676.2	8081.54	282.918	825.577	0	0	0	0	0	0	0	603	903	0
473	0	0	0	0	0	0	0	200	300	0	21.8341	28.8815	-588.872	45267.2	48432	8173.1	282.245	826.129	0	0	0	0	0	0	0	603	903	0
473	1	0	0	0	0	0	0	200	300	0	21.2238	29.3393	-591.619	45175.6	48676.2	8218.87	282.276	826.641	0	0	0	0	0	0	0	603	903	0
473	2	0	0	0	0	0	0	200	300	0	20.1556	30.7126	-594.365	46457.3	49042.4	8401.98	282.512	824.837	0	0	0	0	0	0	0	603	903	0
473	3	0	0	0	0	0	0	200	300	0	21.8341	32.0859	-598.333	46548.9	48798.2	8310.42	281.557	825.202	0	0	0	0	0	0	0	603	903	0
473	4	0	0	0	0	0	0	200	300	0	21.0712	32.3911	-598.638	46640.4	49164.4	8585.08	282.127	825.089	0	0	0	0	0	0	0	603	903	0
473	5	0	0	0	0	0	0	200	300	0	23.0548	33.7643	-599.248	46732	48554.1	8676.64	281.025	825.016	0	0	0	0	0	0	0	603	903	0
473	6	0	0	0	0	0	0	200	300	0	21.2238	34.5273	-603.215	47830.6	49347.6	8676.64	281.808	823.707	0	0	0	0	0	0	0	603	903	0
473	7	0	0	0	0	0	0	200	300	0	21.9867	34.5273	-605.962	47830.6	49408.6	8859.74	281.537	824.067	0	0	0	0	0	0	0	603	903	0
473	8	0	0	0	0	0	0	200	300	0	20.003	34.9851	-606.572	47006.7	49957.9	8813.96	282.361	825.504	0	0	0	0	0	0	0	603	903	0
473	9	0	0	0	0	0	0	200	300	0	20.766	36.8161	-608.403	48105.3	49774.8	8859.74	281.812	823.932	0	0	0	0	0	0	0	603	903	0
474	0	0	0	0	0	0	0	200	300	0	21.2238	36.5109	-608.709	48380	49957.9	9225.95	282.072	823.52	0	0	0	0	0	0	0	603	903	0
474	1	0	0	0	0	0	0	200	300	0	21.6815	37.579	-613.591	48563.1	50141	9088.62	281.717	823.854	0	0	0	0	0	0	0	603	903	0
474	2	0	0	0	0	0	0	200	300	0	20.1556	39.7153	-616.033	48563.1	50324.1	9271.73	281.691	824.168	0	0	0	0	0	0	0	603	903	0
474	3	0	0	0	0	0	0	200	300	0	20.3082	40.3256	-617.253	49570.2	50507.2	9134.4	281.826	822.692	0	0	0	0	0	0	0	603	903	0
474	4	0	0	0	0	0	0	200	300	0	20.9186	40.0205	-619.695	49478.6	50446.2	9409.06	281.405	823.157	0	0	0	0	0	0	0	603	903	0
474	5	0	0	0	0	0	0	200	300	0	20.766	41.6989	-621.221	49387.1	50934.5	9729.49	281.991	823.5	0	0	0	0	0	0	0	603	903	0
474	6	0	0	0	0	0	0	200	300	0	20.4608	41.8515	-623.662	49661.7	50812.4	9454.83	281.474	823.371	0	0	0	0	0	0	0	603	903	0
474	7	0	0	0	0	0	0	200	300	0	21.5289	43.3774	-626.409	50211	51361.7	9775.27	281.994	822.843	0	0	0	0	0	0	0	603	903	0
474	8	0	0	0	0	0	0	200	300	0	21.0712	43.3774	-627.324	50027.9	51117.6	9729.49	281.485	823.252	0	0	0	0	0	0	0	603	903	0
474	9	0	0	0	0	0	0	200	300	0	20.003	44.7507	-628.24	50668.8	51361.7	9912.6	281.755	822.348	0	0	0	0	0	0	0	603	903	0
475	0	0	0	0	0	0	0	200	300	0	20.6134	46.5817	-631.902	51035	51850	9683.72	282.054	822.236	0	0	0	0	0	0	0	603	903	0
475	1	0	0	0	0	0	0	200	300	0	21.6815	45.8188	-635.564	51401.2	51544.8	10004.2	281.101	822.125	0	0	0	0	0	0	0	603	903	0
475	2	0	0	0	0	0	0	200	300	0	20.003	47.955	-632.817	51309.7	51605.9	9912.6	281.549	821.919	0	0	0	0	0	0	0	603	903	0
475	3	0	0	0	0	0	0	200	300	0	19.8505	48.8705	-637.7	50851.9	52216.2	10095.7	281.882	823.257	0	0	0	0	0	0	0	603	903	0
475	4	0	0	0	0	0	0	200	300	0	21.0712	49.7861	-639.531	51675.9	52094.1	10233	281.457	822.197	0	0	0	0	0	0	0	603	903	0
475	5	0	0	0	0	0	0	200	300	0	20.6134	50.3964	-641.057	51950.5	51972.1	10370.4	281.072	821.961	0	0	0	0	0	0	0	603	903	0
475	6	0	0	0	0	0	0	200	300	0	21.5289	52.0749	-641.668	52133.6	52521.4	10416.1	281.851	821.753	0	0	0	0	0	0	0	603	903	0
475	7	0	0	0	0	0	0	200	300	0	20.1556	52.8378	-643.804	53506.9	52643.5	10507.7	281.769	819.889	0	0	0	0	0	0	0	603	903	0
475	8	0	0	0	0	0	0	200	300	0	21.2238	51.4645	-645.33	52408.3	52887.6	10599.2	281.954	821.788	0	0	0	0	0	0	0	603	903	0
475	9	0	0	0	0	0	0	200	300	0	19.0875	54.8215	-644.414	52957.6	53070.7	10645	282.355	820.821	0	0	0	0	0	0	0	603	903	0
476	0	0	0	0	0	0	0	200	300	0	20.003	56.4999	-648.381	53598.5	52582.4	10416.1	281.098	820.335	0	0	0	0	0	0	0	603	903	0
476	1	0	0	0	0	0	0	200	300	0	22.2919	56.6525	-650.212	53598.5	53131.7	10507.7	281.714	820.568	0	0	0	0	0	0	0	603	903	0
476	2	0	0	0	0	0	0	200	300	0	19.0875	57.4155	-651.128	53873.1	53192.8	10553.5	281.693	820.262	0	0	0	0	0	0	0	603	903	0
476	3	0	0	0	0	0	0	200	300	0	18.9349	57.1103	-652.654	54147.8	52948.6	10919.7	281.128	820.034	0	0	0	0	0	0	0	603	903	0
476	4	0	0	0	0	0	0	200	300	0	19.6979	59.5517	-654.79	53690	53559	10736.6	281.796	821.004	0	0	0	0	0	0	0	603	903	0
476	5	0	0	0	0	0	0	200	300	0	20.003	60.1621	-655.4	54239.3	53742.1	10965.5	281.999	820.242	0	0	0	0	0	0	0	603	903	0
476	6	0	0	0	0	0	0	200	300	0	19.0875	61.9931	-655.4	54605.6	53375.9	11194.3	281.44	819.684	0	0	0	0	0	0	0	603	903	0
476	7	0	0	0	0	0	0	200	300	0	18.6298	63.519	-661.199	55978.9	53742.1	11148.6	281.28	818.337	0	0	0	0	0	0	0	603	903	0
476	8	0	0	0	0	0	0	200	300	0	19.3927	61.6879	-660.283	55338	53925.2	11057	281.67	819.191	0	0	0	0	0	0	0	603	903	0
476	9	0	0	0	0	0	0	200	300	0	20.3082	65.0449	-658.147	55887.3	53436.9	11469	281.193	818.084	0	0	0	0	0	0	0	603	903	0
477	0	0	0	0	0	0	0	200	300	0	20.766	66.113	-663.03	55704.2	54108.3	11194.3	281.608	818.985	0	0	0	0	0	0	0	603	903	0
477	1	0	0	0	0	0	0	200	300	0	18.7823	66.4182	-665.471	56345.1	54108.3	11148.6	281.308	818.331	0	0	0	0	0	0	0	603	903	0
477	2	0	0	0	0	0	0	200	300	0	20.4608	66.5707	-666.692	56802.8	53925.2	11331.7	280.885	817.799	0	0	0	0	0	0	0	603	903	0
477	3	0	0	0	0	0	0	200	300	0	19.3927	69.1647	-667.607	56711.3	54535.5	11194.3	281.688	818.053	0	0	0	0	0	0	0	603	903	0
477	4	0	0	0	0	0	0	200	300	0	20.1556	70.2328	-670.049	56802.8	54657.6	11926.8	281.573	818.226	0	0	0	0	0	0	0	603	903	0
477	5	0	0	0	0	0	0	200	300	0	17.7142	69.1647	-666.387	57443.7	54291.4	11514.8	281.471	816.798	0	0	0	0	0	0	0	603	903	0
477	6	0	0	0	0	0	0	200	300	0	21.9867	71.4536	-672.795	57718.3	54779.7	11560.6	281.421	817.211	0	0	0	0	0	0	0	603	903	0
477	7	0	0	0	0	0	0	200	300	0	20.003	73.5898	-673.101	56985.9	54779.7	11652.1	281.384	818.338	0	0	0	0	0	0	0	603	903	0
477	8	0	0	0	0	0	0	200	300	0	18.172	73.4372	-675.847	57809.9	54596.6	11743.7	280.782	817.463	0	0	0	0	0	0	0	603	903	0
477	9	0	0	0	0	0	0	200	300	0	20.1556	74.3527	-676.152	57809.9	55206.9	11560.6	281.649	817.502	0	0	0	0	0	0	0	603	903	0
478	0	0	0	0	0	0	0	200	300	0	18.9349	75.2682	-677.678	58725.4	55329	11606.3	281.645	816.343	0	0	0	0	0	0	0	603	903	0
478	1	0	0	0	0	0	0	200	300	0	19.0875	76.0312	-681.646	58176.1	54718.6	11926.8	280.274	817.654	0	0	0	0	0	0	0	603	903	0
478	2	0	0	0	0	0	0	200	300	0	18.7823	76.3364	-681.035	58908.5	55512.1	11881	281.511	816.502	0	0	0	0	0	0	0	603	903	0
478	3	0	0	0	0	0	0	200	300	0	20.1556	79.3881	-682.866	59183.2	55451.1	11743.7	281.203	816.331	0	0	0	0	0	0	0	603	903	0
478	4	0	0	0	0	0	0	200	300	0	19.0875	79.6933	-685.003	59457.9	55206.9	11743.7	280.594	816.201	0	0	0	0	0	0	0	603	903	0
478	5	0	0	0	0	0	0	200	300	0	21.0712	77.7097	-685.918	59549.4	56000.4	11972.5	281.643	816.183	0	0	0	0	0	0	0	603	903	0
478	6	0	0	0	0	0	0	200	300	0	20.766	81.2192	-686.223	60648	55878.3	12155.6	281.429	814.621	0	0	0	0	0	0	0	603	903	0
478	7	0	0	0	0	0	0	200	300	0	20.9186	82.8976	-689.58	60648	55023.8	12201.4	279.793	815.051	0	0	0	0	0	0	0	603	903	0
478	8	0	0	0	0	0	0	200	300	0	20.3082	82.1347	-690.19	59824.1	56183.5	12018.3	281.403	816.322	0	0	0	0	0	0	0	603	903	0
478	9	0	0	0	0	0	0	200	300	0	20.4608	83.3554	-690.19	61288.9	56244.5	12476.1	281.491	814.2	0	0	0	0	0	0	0	603	903	0
479	0	0	0	0	0	0	0	200	300	0	22.2919	83.3554	-691.716	61197.3	56061.4	12064.1	281.047	814.528	0	0	0	0	0	0	0	603	903	0
479	1	0	0	0	0	0	0	200	300	0	22.4445	85.3391	-693.853	61014.2	56793.8	12155.6	281.853	815.065	0	0	0	0	0	0	0	603	903	0
479	2	0	0	0	0	0	0	200	300	0	21.9867	85.9494	-694.158	61288.9	56610.7	12018.3	281.553	814.708	0	0	0	0	0	0	0	603	903	0
479	3	0	0	0	0	0	0	200	300	0	22.9022	87.4753	-694.463	61197.3	56183.5	12247.2	280.902	814.878	0	0	0	0	0	0	0	603	903	0
479	4	0	0	0	0	0	0	200	300	0	23.36	88.8486	-697.82	61838.2	56976.9	12109.9	281.65	814.384	0	0	0	0	0	0	0	603	903	0
479	5	0	0	0	0	0	0	200	300	0	22.597	87.4753	-694.768	62112.9	57160.1	12521.9	282.272	813.599	0	0	0	0	0	0	0	603	903	0
479	6	0	0	0	0	0	0	200	300	0	23.2074	90.9848	-697.515	62753.8	56854.9	12521.9	281.511	813.032	0	0	0	0	0	0	0	603	903	0
479	7	0	0	0	0	0	0	200	300	0	25.4962	91.4426	-700.566	62936.9	57282.1	12796.5	281.765	813.163	0	0	0	0	0	0	0	603	903	0
479	8	0	0	0	0	0	0	200	300	0	25.3436	91.9003	-701.177	62845.3	57343.2	12659.2	281.781	813.372	0	0	0	0	0	0	0	603	903	0
479	9	0	0	0	0	0	0	200	300	0	26.8695	92.6633	-701.482	63303.1	57099	12521.9	281.398	812.758	0	0	0	0	0	0	0	603	903	0
480	0	0	0	0	0	0	0	200	300	0	26.1066	94.7995	-700.566	63394.6	57465.2	12659.2	282.027	812.51	0	0	0	0	0	0	0	603	903	0
480	1	0	0	0	0	0	0	200	300	0	26.1066	94.4943	-704.229	64493.2	57404.2	13117	281.514	811.42	0	0	0	0	0	0	0	603	903	0
480	2	0	0	0	0	0	0	200	300	0	26.4117	95.715	-703.008	63120	57160.1	12796.5	281.308	813.214	0	0	0	0	0	0	0	603	903	0
480	3	0	0	0	0	0	0	200	300	0	26.4117	98.0038	-703.618	64310.1	57770.4	12750.7	282.105	811.601	0	0	0	0	0	0	0	603	903	0
480	4	0	0	0	0	0	0	200	300	0	28.7006	98.4616	-704.534	64310.1	57831.4	12888.1	282.085	811.72	0	0	0	0	0	0	0	603	903	0
480	5	0	0	0	0	0	0	200	300	0	29.0057	98.9194	-704.229	64127	57709.4	13025.4	281.947	811.94	0	0	0	0	0	0	0	603	903	0
480	6	0	0	0	0	0	0	200	300	0	32.2101	99.8349	-704.534	64310.1	57892.5	13391.6	282.171	811.72	0	0	0	0	0	0	0	603	903	0
480	7	0	0	0	0	0	0	200	300	0	31.2946	101.056	-705.449	64951	57587.3	13437.4	281.632	810.93	0	0	0	0	0	0	0	603	903	0
480	8	0	0	0	0	0	0	200	300	0	31.5997	101.971	-706.06	64767.9	57648.3	13345.8	281.648	811.269	0	0	0	0	0	0	0	603	903	0
480	9	0	0	0	0	0	0	200	300	0	30.8368	103.344	-704.229	64493.2	57953.5	13620.5	282.294	811.42	0	0	0	0	0	0	0	603	903	0
481	0	0	0	0	0	0	0	200	300	0	31.9049	105.175	-706.06	65408.8	57526.3	13620.5	281.475	810.361	0	0	0	0	0	0	0	603	903	0
481	1	0	0	0	0	0	0	200	300	0	32.2101	105.633	-705.144	65134.1	57648.3	13712	281.754	810.63	0	0	0	0	0	0	0	603	903	0
481	2	0	0	0	0	0	0	200	300	0	32.2101	107.007	-704.229	65500.3	57404.2	13528.9	281.514	809.99	0	0	0	0	0	0	0	603	903	0
481	3	0	0	0	0	0	0	200	300	0	31.142	109.753	-702.703	65134.1	57221.1	13528.9	281.43	810.309	0	0	0	0	0	0	0	603	903	0
481	4	0	0	0	0	0	0	200	300	0	31.9049	110.516	-702.092	66049.6	57831.4	13620.5	282.37	808.925	0	0	0	0	0	0	0	603	903	0
481	5	0	0	0	0	0	0	200	300	0	32.6678	111.432	-701.787	65225.7	57160.1	13666.3	281.449	810.058	0	0	0	0	0	0	0	603	903	0
481	6	0	0	0	0	0	0	200	300	0	30.8368	112.805	-703.008	65683.4	57404.2	13940.9	281.655	809.568	0	0	0	0	0	0	0	603	903	0
481	7	0	0	0	0	0	0	200	300	0	31.2946	114.178	-702.703	66141.2	56915.9	13849.4	280.996	808.876	0	0	0	0	0	0	0	603	903	0
481	8	0	0	0	0	0	0	200	300	0	31.7523	113.873	-701.482	66324.3	56976.9	14078.3	281.224	808.451	0	0	0	0	0	0	0	603	903	0
481	9	0	0	0	0	0	0	200	300	0	31.2946	115.704	-696.904	66049.6	57343.2	13849.4	282.283	808.224	0	0	0	0	0	0	0	603	903	0
482	0	0	0	0	0	0	0	200	300	0	33.1256	115.094	-701.787	66415.9	57099	14444.5	281.362	808.362	0	0	0	0	0	0	0	603	903	0
482	1	0	0	0	0	0	0	200	300	0	32.2101	116.314	-700.566	66507.4	56732.8	14078.3	280.981	808.066	0	0	0	0	0	0	0	603	903	0
482	2	0	0	0	0	0	0	200	300	0	31.9049	116.772	-699.346	67148.3	57160.1	14215.6	281.734	806.984	0	0	0	0	0	0	0	603	903	0
482	3	0	0	0	0	0	0	200	300	0	30.5316	117.23	-697.82	66598.9	57282.1	14261.4	282.087	807.561	0	0	0	0	0	0	0	603	903	0
482	4	0	0	0	0	0	0	200	300	0	30.379	118.145	-698.125	67148.3	56915.9	14124	281.527	806.816	0	0	0	0	0	0	0	603	903	0
482	5	0	0	0	0	0	0	200	300	0	31.142	119.214	-697.515	67056.8	57099	14169.8	281.861	806.863	0	0	0	0	0	0	0	603	903	0
482	6	0	0	0	0	0	0	200	300	0	31.2946	120.434	-696.599	67148.3	56732.8	14215.6	281.443	806.606	0	0	0	0	0	0	0	603	903	0
482	7	0	0	0	0	0	0	200	300	0	31.7523	121.96	-697.515	67148.3	57160.1	14078.3	281.948	806.732	0	0	0	0	0	0	0	603	903	0
482	8	0	0	0	0	0	0	200	300	0	32.973	122.265	-693.547	67606	56854.9	14215.6	281.977	805.521	0	0	0	0	0	0	0	603	903	0
482	9	0	0	0	0	0	0	200	300	0	30.9894	123.791	-695.684	67514.5	56549.7	14673.3	281.287	805.952	0	0	0	0	0	0	0	603	903	0
483	0	0	0	0	0	0	0	200	300	0	30.379	124.707	-694.463	67789.2	57160.1	14169.8	282.308	805.386	0	0	0	0	0	0	0	603	903	0
483	1	0	0	0	0	0	0	200	300	0	30.379	124.859	-693.853	67789.2	56671.8	14444.5	281.677	805.3	0	0	0	0	0	0	0	603	903	0
483	2	0	0	0	0	0	0	200	300	0	31.4471	124.402	-690.496	67972.2	56793.8	14581.8	282.251	804.56	0	0	0	0	0	0	0	603	903	0
483	3	0	0	0	0	0	0	200	300	0	31.9049	126.69	-692.632	67697.6	56976.9	14307.1	282.262	805.26	0	0	0	0	0	0	0	603	903	0
483	4	0	0	0	0	0	0	200	300	0	31.2946	127.148	-692.327	67423	56488.7	14398.7	281.593	805.614	0	0	0	0	0	0	0	603	903	0
483	5	0	0	0	0	0	0	200	300	0	31.5997	127.606	-688.97	68521.6	56366.6	14352.9	281.813	803.545	0	0	0	0	0	0	0	603	903	0
483	6	0	0	0	0	0	0	200	300	0	32.973	129.132	-688.97	67972.2	56793.8	14581.8	282.433	804.342	0	0	0	0	0	0	0	603	903	0
483	7	0	0	0	0	0	0	200	300	0	31.7523	130.505	-687.749	68338.4	56366.6	14444.5	281.958	803.635	0	0	0	0	0	0	0	603	903	0
483	8	0	0	0	0	0	0	200	300	0	34.0411	130.963	-686.223	67789.2	56244.5	14627.6	281.962	804.214	0	0	0	0	0	0	0	603	903	0
483	9	0	0	0	0	0	0	200	300	0	32.6678	132.184	-684.392	68613.1	56366.6	15085.3	282.36	802.746	0	0	0	0	0	0	0	603	903	0
484	0	0	0	0	0	0	0	200	300	0	32.973	133.404	-684.087	68246.9	55573.1	14673.3	281.237	803.237	0	0	0	0	0	0	0	603	903	0
484	1	0	0	0	0	0	0	200	300	0	32.2101	133.099	-682.866	68246.9	55878.3	14856.5	281.829	803.058	0	0	0	0	0	0	0	603	903	0
484	2	0	0	0	0	0	0	200	300	0	31.9049	134.625	-681.035	68613.1	56305.6	14719.1	282.676	802.252	0	0	0	0	0	0	0	603	903	0
484	3	0	0	0	0	0	0	200	300	0	33.1256	135.54	-679.815	67880.7	55634.2	14948	281.837	803.148	0	0	0	0	0	0	0	603	903	0
484	4	0	0	0	0	0	0	200	300	0	33.4308	135.388	-678.289	68430	55817.3	14810.7	282.291	802.114	0	0	0	0	0	0	0	603	903	0
484	5	0	0	0	0	0	0	200	300	0	34.1937	136.609	-675.847	68430	55756.2	14902.2	282.498	801.749	0	0	0	0	0	0	0	603	903	0
484	6	0	0	0	0	0	0	200	300	0	33.4308	138.134	-673.711	68704.6	55390	14948	282.216	801.021	0	0	0	0	0	0	0	603	903	0
484	7	0	0	0	0	0	0	200	300	0	33.1256	139.05	-671.88	68338.4	55390	14948	282.44	801.288	0	0	0	0	0	0	0	603	903	0
484	8	0	0	0	0	0	0	200	300	0	32.8204	138.745	-670.659	68704.6	55268	15039.6	282.408	800.557	0	0	0	0	0	0	0	603	903	0
484	9	0	0	0	0	0	0	200	300	0	32.8204	140.881	-668.828	68430	53986.2	15039.6	280.718	800.687	0	0	0	0	0	0	0	603	903	0
485	0	0	0	0	0	0	0	200	300	0	32.8204	140.728	-667.302	68704.6	54901.8	15222.7	282.274	800.041	0	0	0	0	0	0	0	603	903	0
485	1	0	0	0	0	0	0	200	300	0	32.6678	140.576	-665.776	68338.4	54962.8	14993.8	282.554	800.355	0	0	0	0	0	0	0	603	903	0
485	2	0	0	0	0	0	0	200	300	0	32.2101	139.813	-659.673	67972.2	54108.3	15314.2	282.023	799.961	0	0	0	0	0	0	0	603	903	0
485	3	0	0	0	0	0	0	200	300	0	31.2946	142.254	-660.588	68613.1	54413.5	14993.8	282.371	799.133	0	0	0	0	0	0	0	603	903	0
485	4	4.61742	-7.39883	-14.6542	-489.896	-694.584	205.766	152.602	333.43	0	32.3627	142.865	-660.283	68246.9	54047.3	15131.1	281.855	799.64	0	0	0	0	0	0	0	603	903	0
485	5	12.3994	-16.4015	-29.913	-123.685	-1671.15	1350.18	144.133	304.135	0	31.142	143.322	-654.485	68338.4	53681.1	14948	282.02	798.584	0	0	0	0	0	0	0	603	903	0
485	6	7.51659	-18.2326	-30.2182	-123.685	-1488.04	1304.4	150.757	304.093	0	32.8204	143.933	-653.264	68338.4	53925.2	15176.9	282.547	798.389	0	0	0	0	0	0	0	603	903	0
485	7	2.3286	-9.53506	-19.2319	-215.238	-694.584	571.977	163.884	311.192	0	31.142	144.696	-652.654	68430	53497.9	15039.6	281.97	798.151	0	0	0	0	0	0	0	603	903	0
485	8	6.60106	-5.41519	-7.02483	-673.001	-572.514	388.871	118.501	395.803	0	30.9894	143.933	-645.33	69345.5	52887.6	14902.2	281.954	795.543	0	0	0	0	0	0	0	603	903	0
485	9	5.99071	-9.53506	-12.518	-489.896	-694.584	571.977	144.513	339.135	0	30.0739	146.832	-645.33	67880.7	53070.7	15176.9	282.238	797.812	0	0	0	0	0	0	0	603	903	0
486	0	3.5493	-13.8075	-19.2319	-123.685	-694.584	938.188	163.884	306.431	0	29.1583	146.832	-643.499	68246.9	52765.5	15314.2	281.998	796.944	0	0	0	0	0	0	0	603	903	0
486	1	5.68553	-14.5705	-25.0302	-215.238	-1427.01	1121.29	142.989	308.599	0	30.5316	146.527	-641.362	68063.8	51911	15131.1	280.939	796.876	0	0	0	0	0	0	0	603	903	0
486	2	5.53295	-12.7394	-20.1474	-489.896	-1488.04	1258.62	126.142	324.316	0	29.1583	146.832	-638.921	67789.2	52582.4	15222.7	282.299	796.901	0	0	0	0	0	0	0	603	903	0
486	3	0.650134	-13.9601	-20.7577	-32.1323	-1060.8	1167.07	148.896	301.548	0	28.548	146.985	-634.954	67514.5	51544.8	15039.6	281.179	796.67	0	0	0	0	0	0	0	603	903	0
486	4	2.93895	-21.5895	-28.6923	-32.1323	-1365.97	1075.52	152.392	301.12	0	28.2428	147.595	-629.766	67880.7	51544.8	15176.9	281.848	795.213	0	0	0	0	0	0	0	603	903	0
486	5	6.29589	-22.0473	-35.4062	242.526	-1915.29	1762.16	145.905	293.15	0	28.7006	148.205	-627.629	67972.2	51361.7	15039.6	281.834	794.7	0	0	0	0	0	0	0	603	903	0
486	6	-3.16456	-21.2843	-38.4579	-215.238	-2281.5	1991.04	140.675	305.597	0	28.0902	148.968	-626.714	67697.6	51117.6	14948	281.564	794.98	0	0	0	0	0	0	0	603	903	0
486	7	-2.85939	-23.268	-44.5615	-489.896	-2891.85	1304.4	135.104	310.994	0	26.5643	149.273	-623.052	67239.8	50751.4	15039.6	281.456	795.08	0	0	0	0	0	0	0	603	903	0
486	8	-3.16456	-25.2516	-57.0737	150.973	-3807.38	2174.15	133.29	297.355	0	27.6324	147.9	-619.39	67239.8	49957.9	15039.6	280.657	794.442	0	0	0	0	0	0	0	603	903	0
486	9	-4.84303	-22.9628	-67.4496	608.737	-4173.59	2403.03	138.123	290.975	0	27.1747	150.189	-614.812	66690.5	50018.9	15131.1	281.356	794.527	0	0	0	0	0	0	0	603	903	0
487	0	-2.40162	-24.4887	-76.2997	517.184	-4661.87	1350.18	138.901	293.222	0	25.954	150.341	-614.202	66415.9	49713.8	15268.4	280.94	794.866	0	0	0	0	0	0	0	603	903	0
487	1	-0.265393	-25.099	-84.8447	-123.685	-5760.51	1579.06	132.105	301.458	0	25.4962	149.426	-611.15	66507.4	49713.8	15268.4	281.345	794.177	0	0	0	0	0	0	0	603	903	0
487	2	-2.40162	-22.505	-98.5776	425.632	-6187.75	2174.15	137.23	295.682	0	26.8695	148.358	-606.267	66965.1	49225.5	15085.3	281.194	792.545	0	0	0	0	0	0	0	603	903	0
487	3	-0.570569	-23.4206	-113.531	517.184	-7225.35	1624.83	136.358	295.445	0	24.7333	148.663	-601.69	66049.6	48981.3	15039.6	281.406	793.226	0	0	0	0	0	0	0	603	903	0
487	4	5.07518	-25.7094	-122.381	883.395	-7469.49	1807.94	138.965	292.782	0	24.1229	150.799	-598.943	65683.4	49103.4	14810.7	281.983	793.334	0	0	0	0	0	0	0	603	903	0
487	5	5.22777	-26.4723	-131.842	1707.37	-8262.95	2128.37	137.327	287.05	0	24.7333	149.579	-594.976	65225.7	48187.9	15039.6	280.991	793.373	0	0	0	0	0	0	0	603	903	0
487	6	9.04247	-26.1671	-144.964	1341.16	-8690.2	2265.7	140.053	290.748	0	23.0548	151.104	-591.314	66232.7	47943.7	14673.3	281.08	790.991	0	0	0	0	0	0	0	603	903	0
487	7	11.9416	-29.3715	-159.918	974.948	-9666.76	1853.72	139.552	293.903	0	22.1393	150.952	-585.21	64767.9	47943.7	14810.7	281.926	792.325	0	0	0	0	0	0	0	603	903	0
487	8	12.3994	-28.9137	-174.566	1341.16	-10155	2723.47	141.827	292.317	0	22.1393	150.647	-580.938	65317.2	47089.3	14719.1	281.057	790.566	0	0	0	0	0	0	0	603	903	0
487	9	12.8572	-29.6767	-186.163	1798.92	-11375.7	2448.81	138.894	290.337	0	21.9867	151.104	-579.717	64951	46784.1	14719.1	280.702	790.961	0	0	0	0	0	0	0	603	903	0
488	0	16.5193	-28.7611	-195.318	1524.26	-12047.1	2219.93	138.321	292.196	0	20.3082	151.104	-575.444	63760.8	46601	14810.7	280.983	792.197	0	0	0	0	0	0	0	603	903	0
488	1	16.6719	-26.9301	-216.07	2073.58	-12779.6	2540.36	140.855	290.403	0	19.5453	150.799	-569.951	64218.6	45929.6	14719.1	280.585	790.326	0	0	0	0	0	0	0	603	903	0
488	2	18.8081	-24.7939	-233.465	2348.24	-13878.2	2448.81	140.556	289.942	0	19.5453	151.562	-563.848	63577.7	45563.4	14307.1	280.808	790.243	0	0	0	0	0	0	0	603	903	0
488	3	20.9443	-24.0309	-250.86	2806	-14976.8	2265.7	140.298	288.814	0	18.7823	151.867	-561.101	63760.8	45624.4	14581.8	281.312	789.365	0	0	0	0	0	0	0	603	903	0
488	4	23.8435	-23.4206	-262.762	3538.43	-15831.3	2906.57	139.75	286.534	0	18.0194	151.257	-557.134	62662.2	44769.9	14490.2	280.358	790.528	0	0	0	0	0	0	0	603	903	0
488	5	24.759	-26.6249	-278.326	3355.32	-16441.7	3227.01	140.927	287.945	0	18.172	150.647	-551.946	62570.6	44525.8	14398.7	280.671	789.636	0	0	0	0	0	0	0	603	903	0
488	6	26.4375	-29.5241	-296.331	4087.74	-17479.3	2952.35	141.015	286.206	0	18.7823	150.494	-546.148	62570.6	43793.4	14078.3	280.186	788.433	0	0	0	0	0	0	0	603	903	0
488	7	28.8789	-29.3715	-316.473	4911.72	-18394.8	4005.2	141.876	284.48	0	15.8832	150.341	-540.654	61929.8	43610.2	14215.6	280.662	788.454	0	0	0	0	0	0	0	603	903	0
488	8	29.4892	-30.8974	-328.985	5644.14	-19554.5	4508.74	140.561	282.844	0	13.8995	150.494	-535.161	61105.8	42938.9	13986.7	280.235	788.818	0	0	0	0	0	0	0	603	903	0
488	9	31.9307	-37.1535	-347.296	6010.35	-20164.8	4737.63	141.938	282.694	0	13.1366	149.579	-531.194	60464.9	42877.8	14169.8	280.72	789.172	0	0	0	0	0	0	0	603	903	0
489	0	34.3721	-40.8156	-362.555	7017.43	-20897.2	4874.96	142.361	280.645	0	14.8151	148.51	-526.616	60281.8	42206.4	13940.9	280.147	788.53	0	0	0	0	0	0	0	603	903	0
489	1	36.5083	-43.257	-378.119	7841.4	-21446.6	6019.36	143.281	279.262	0	13.1366	148.816	-519.292	59732.5	41596.1	13620.5	280.102	787.973	0	0	0	0	0	0	0	603	903	0
489	2	38.0342	-47.682	-387.884	8024.51	-22179	6431.35	142.821	279.312	0	11.6107	148.51	-512.273	59274.8	40863.7	13895.1	279.769	787.291	0	0	0	0	0	0	0	603	903	0
489	3	39.2549	-56.227	-403.143	9123.15	-23521.7	6797.56	141.654	277.37	0	11.6107	147.137	-509.526	59183.2	40802.6	13620.5	280.08	786.847	0	0	0	0	0	0	0	603	903	0
489	4	40.7808	-60.0417	-415.045	9397.81	-23826.9	7850.42	142.592	277.357	0	11.6107	145.611	-504.033	58725.4	40558.5	13712	280.468	786.489	0	0	0	0	0	0	0	603	903	0
489	5	43.2222	-62.4831	-428.778	10588	-24132.1	7987.75	143.719	275.307	0	11.0004	146.832	-495.183	57809.9	39826.1	13117	280.427	786.256	0	0	0	0	0	0	0	603	903	0
489	6	44.748	-70.265	-438.849	11045.8	-24986.6	8216.63	143.063	274.83	0	11.153	145.306	-490.606	56802.8	39459.9	13254.3	280.431	787.219	0	0	0	0	0	0	0	603	903	0
489	7	43.9851	-76.8263	-446.783	11961.3	-25413.8	9040.6	143.118	273.228	0	9.47448	143.628	-483.892	57169	38788.5	12705	280.159	784.856	0	0	0	0	0	0	0	603	903	0
489	8	45.0532	-80.9462	-456.854	11961.3	-26207.3	9589.92	142.635	273.818	0	8.71154	142.865	-477.788	56619.7	38727.4	12979.6	281.056	784.496	0	0	0	0	0	0	0	603	903	0
489	9	47.9524	-83.8454	-464.178	12968.4	-26329.4	9498.37	143.277	272.062	0	7.18567	143.17	-471.99	55887.3	37811.9	12842.3	280.112	784.592	0	0	0	0	0	0	0	603	903	0
490	0	45.9687	-89.3385	-472.418	13700.8	-26939.7	10047.7	142.975	270.999	0	6.57531	140.118	-465.886	55154.9	37079.5	12750.7	279.589	784.613	0	0	0	0	0	0	0	603	903	0
490	1	49.3257	-93.611	-480.658	14158.5	-27367	10597	143.064	270.543	0	6.88049	139.813	-457.647	53964.7	37262.6	12201.4	281.422	785.082	0	0	0	0	0	0	0	603	903	0
490	2	49.0205	-96.6628	-488.897	14982.5	-27916.3	10597	142.9	269.354	0	5.81238	139.05	-451.848	53506.9	36225	12476.1	280.171	784.582	0	0	0	0	0	0	0	603	903	0
490	3	48.7153	-97.7309	-501.41	15165.6	-28465.6	10963.2	143.229	269.754	0	3.37097	137.829	-445.134	52499.8	35980.9	12064.1	280.831	785.058	0	0	0	0	0	0	0	603	903	0
490	4	48.4101	-100.935	-505.072	16172.7	-28953.9	11146.3	142.674	267.979	0	3.98132	134.167	-439.641	52591.4	35309.5	12247.2	280.314	783.377	0	0	0	0	0	0	0	603	903	0
490	5	48.7153	-103.529	-507.208	16905.1	-29198	10963.2	142.434	266.67	0	3.21838	135.54	-429.876	51675.9	34455	11881	280.151	782.789	0	0	0	0	0	0	0	603	903	0
[truncated: 2,084 more rows]
