# Supplementary material for: The Effects of an Extemporaneous Speech Dual-task on Older Adult Gait Control
Source: Research Square preprint supplement (doi:10.21203/rs.3.rs-7674245/v1), 2025-11-18
Supplement: Supplementary file 133 [file Over1ground03.xlsx]

## Sheet: Sheet1
Trajectories
		01:LFHD			01:RFHD			01:LBHD			01:RBHD			01:C7			01:T10			01:CLAV			01:STRN			01:RBAK			01:LSHO			01:LUPA			01:LELB			01:LFRM			01:LWRA			01:LWRB			01:LFIN
Frame	Sub Frame	X	Y	Z	X	Y	Z	X	Y	Z	X	Y	Z	X	Y	Z	X	Y	Z	X	Y	Z	X	Y	Z	X	Y	Z	X	Y	Z	X	Y	Z	X	Y	Z	X	Y	Z	X	Y	Z	X	Y	Z	X	Y	Z
		mm	mm	mm	mm	mm	mm	mm	mm	mm	mm	mm	mm	mm	mm	mm	mm	mm	mm	mm	mm	mm	mm	mm	mm	mm	mm	mm	mm	mm	mm	mm	mm	mm	mm	mm	mm	mm	mm	mm	mm	mm	mm	mm	mm	mm	mm	mm	mm
295	0	173.074	-2272.58	1564.95	274.112	-2264.99	1561.49	166.167	-2440.15	1606.36	295.537	-2412.56	1603.9	225	-2508.87	1471.66	220.407	-2623.74	1228.26	226.945	-2382.64	1358	207.711	-2346.46	1174.39	267.378	-2620.7	1304.06	56.7913	-2445.59	1409.46	-20.3933	-2543.46	1199.98	-27.4958	-2557.11	1122.31	-62.6317	-2530.29	1000.71	-26.8058	-2453.25	900.458	-74.4526	-2506.19	895.527	-69.3194	-2462.02	815.634
296	0	172.305	-2258.77	1561.35	273.483	-2251.02	1558.01	165.985	-2426.42	1602.88	294.79	-2397.85	1600.46	224.824	-2494.7	1468.26	220.234	-2610.12	1225.14	226.881	-2368.58	1354.48	208.094	-2332.82	1171.24	267.163	-2607.14	1301.01	56.7949	-2431.58	1405.94	-20.3802	-2531.6	1197.89	-27.063	-2545.87	1119.86	-62.9122	-2521.47	997.841	-27.9188	-2445.83	896.614	-75.1688	-2499.21	892.516	-70.6158	-2456.09	812.299
297	0	171.368	-2244.85	1557.92	272.686	-2236.97	1554.72	165.6	-2412.63	1599.46	293.904	-2383.15	1597.13	224.475	-2480.4	1464.93	220.002	-2596.29	1222.05	226.672	-2354.35	1351.03	208.41	-2318.99	1168.1	266.866	-2593.39	1297.99	56.6369	-2417.46	1402.4	-20.4653	-2519.46	1195.64	-26.7228	-2534.34	1117.33	-63.2303	-2512.3	994.958	-29.0282	-2438.07	892.75	-75.9003	-2491.85	889.487	-71.9101	-2449.75	808.934
298	0	170.262	-2230.83	1554.67	271.72	-2222.84	1551.6	165.011	-2398.76	1596.1	292.877	-2368.48	1593.9	223.954	-2465.98	1461.67	219.712	-2582.28	1218.97	226.321	-2339.96	1347.64	208.658	-2304.97	1164.96	266.488	-2579.44	1295	56.3172	-2403.23	1398.85	-20.6487	-2507.05	1193.25	-26.4749	-2522.52	1114.73	-63.5859	-2502.77	992.064	-30.134	-2429.95	888.867	-76.647	-2484.1	886.442	-73.2022	-2443.02	805.542
299	0	168.989	-2216.7	1551.58	270.587	-2208.65	1548.67	164.218	-2384.83	1592.8	291.71	-2353.83	1590.79	223.261	-2451.44	1458.5	219.364	-2568.06	1215.92	225.825	-2325.42	1344.32	208.836	-2290.75	1161.84	266.027	-2565.3	1292.04	55.8358	-2388.9	1395.3	-20.9303	-2494.37	1190.71	-26.3191	-2510.4	1112.04	-63.9789	-2492.89	989.159	-31.2359	-2421.49	884.967	-77.4087	-2475.97	883.383	-74.4919	-2435.88	802.124
300	0	167.548	-2202.46	1548.66	269.286	-2194.38	1545.93	163.221	-2370.84	1589.56	290.402	-2339.19	1587.79	222.397	-2436.77	1455.4	218.96	-2553.65	1212.9	225.185	-2310.72	1341.07	208.94	-2276.33	1158.73	265.486	-2550.95	1289.12	55.1927	-2374.47	1391.73	-21.3091	-2481.42	1188.03	-26.2548	-2497.99	1109.29	-64.4088	-2482.65	986.248	-32.3336	-2412.67	881.054	-78.1851	-2467.45	880.312	-75.7784	-2428.33	798.685
301	0	165.94	-2188.11	1545.92	267.818	-2180.03	1543.38	162.021	-2356.77	1586.39	288.952	-2324.56	1584.91	221.363	-2421.98	1452.4	218.499	-2539.05	1209.92	224.4	-2295.86	1337.9	208.964	-2261.72	1155.65	264.866	-2536.41	1286.24	54.388	-2359.93	1388.18	-21.7831	-2468.2	1185.22	-26.2805	-2485.29	1106.47	-64.8747	-2472.05	983.335	-33.4262	-2403.5	877.137	-78.9754	-2458.54	877.236	-77.0606	-2420.38	795.233
302	0	164.168	-2173.65	1543.37	266.184	-2165.61	1541.02	160.62	-2342.62	1583.3	287.359	-2309.95	1582.16	220.16	-2407.06	1449.49	217.985	-2524.25	1206.98	223.47	-2280.84	1334.82	208.9	-2246.91	1152.62	264.169	-2521.66	1283.42	53.4225	-2345.29	1384.65	-22.3499	-2454.7	1182.29	-26.394	-2472.3	1103.6	-65.3755	-2461.1	980.43	-34.513	-2393.96	873.226	-79.7787	-2449.23	874.164	-78.3369	-2412.02	791.779
303	0	162.233	-2159.08	1541.02	264.385	-2151.1	1538.88	159.018	-2328.4	1580.32	285.623	-2295.33	1579.55	218.794	-2392.02	1446.7	217.42	-2509.25	1204.12	222.394	-2265.66	1331.86	208.735	-2231.89	1149.66	263.399	-2506.72	1280.68	52.2973	-2330.55	1381.15	-23.0054	-2440.94	1179.27	-26.5921	-2459.02	1100.7	-65.9096	-2449.78	977.544	-35.5925	-2384.05	869.341	-80.5935	-2439.52	871.108	-79.605	-2403.23	788.339
304	0	160.141	-2144.4	1538.87	262.424	-2136.52	1536.95	157.222	-2314.1	1577.44	283.741	-2280.71	1577.1	217.267	-2376.84	1444.04	216.807	-2494.07	1201.34	221.174	-2250.33	1329.03	208.457	-2216.67	1146.79	262.561	-2491.58	1278.03	51.0152	-2315.71	1377.72	-23.7443	-2426.91	1176.18	-26.8707	-2445.44	1097.78	-66.4748	-2438.1	974.692	-36.6631	-2373.76	865.5	-81.4181	-2429.4	868.086	-80.862	-2394	784.933
305	0	157.895	-2129.62	1536.95	260.305	-2121.85	1535.26	155.234	-2299.71	1574.71	281.716	-2266.08	1574.83	215.589	-2361.55	1441.53	216.152	-2478.69	1198.69	219.811	-2234.84	1326.37	208.051	-2201.24	1144.05	261.661	-2476.25	1275.52	49.5808	-2300.78	1374.39	-24.5596	-2412.62	1173.06	-27.2246	-2431.58	1094.86	-67.0686	-2426.05	971.893	-37.723	-2363.07	861.731	-82.2501	-2418.85	865.117	-82.1046	-2384.31	781.586
306	0	155.504	-2114.73	1535.25	258.035	-2107.09	1533.82	153.065	-2285.23	1572.14	279.547	-2251.41	1572.76	213.766	-2346.13	1439.2	215.461	-2463.13	1196.19	218.309	-2219.2	1323.89	207.503	-2185.6	1141.48	260.705	-2460.73	1273.16	48.0009	-2285.74	1371.19	-25.4423	-2398.08	1169.94	-27.6479	-2417.43	1091.99	-67.688	-2413.63	969.168	-38.7701	-2351.97	858.064	-83.0872	-2407.86	862.223	-83.3284	-2374.16	778.324
307	0	152.976	-2099.73	1533.81	255.619	-2092.24	1532.64	150.722	-2270.66	1569.77	277.239	-2236.72	1570.91	211.812	-2330.59	1437.08	214.74	-2447.41	1193.87	216.674	-2203.41	1321.63	206.801	-2169.76	1139.11	259.701	-2445.03	1270.99	46.2858	-2270.62	1368.15	-26.3818	-2383.29	1166.86	-28.1342	-2403	1089.19	-68.3299	-2400.82	966.54	-39.8018	-2340.43	854.532	-83.9264	-2396.41	859.43	-84.5288	-2363.51	775.18
308	0	150.324	-2084.65	1532.63	253.07	-2077.3	1531.73	148.22	-2255.99	1567.62	274.799	-2221.97	1569.3	209.74	-2314.94	1435.18	213.995	-2431.52	1191.77	214.914	-2187.5	1319.62	205.937	-2153.71	1136.98	258.657	-2429.16	1269.04	44.4491	-2255.41	1365.31	-27.3664	-2368.27	1163.87	-28.6768	-2388.3	1086.5	-68.9911	-2387.63	964.035	-40.8155	-2328.43	851.171	-84.7647	-2384.5	856.765	-85.7003	-2352.34	772.185
309	0	147.561	-2069.48	1531.72	250.398	-2062.27	1531.11	145.573	-2241.22	1565.71	272.235	-2207.17	1567.96	207.566	-2299.19	1433.54	213.234	-2415.48	1189.92	213.042	-2171.46	1317.89	204.907	-2137.46	1135.13	257.582	-2413.13	1267.35	42.508	-2240.12	1362.71	-28.3842	-2353.03	1161.02	-29.2688	-2373.32	1083.94	-69.6681	-2374.05	961.68	-41.8083	-2315.96	848.018	-85.5988	-2372.1	854.256	-86.8371	-2340.63	769.371
310	0	144.705	-2054.23	1531.1	247.618	-2047.15	1530.78	142.8	-2226.35	1564.08	269.56	-2192.31	1566.92	205.309	-2283.35	1432.18	212.462	-2399.33	1188.36	211.074	-2155.32	1316.48	203.714	-2121.03	1133.61	256.485	-2396.97	1265.95	40.483	-2224.76	1360.39	-29.424	-2337.58	1158.35	-29.9039	-2358.08	1081.57	-70.3581	-2360.08	959.5	-42.777	-2302.99	845.109	-86.4257	-2359.19	851.93	-87.933	-2328.35	766.772
311	0	141.773	-2038.92	1530.76	244.748	-2031.95	1530.75	139.924	-2211.38	1562.76	266.792	-2177.39	1566.18	202.991	-2267.44	1431.13	211.686	-2383.07	1187.11	209.026	-2139.1	1315.4	202.368	-2104.43	1132.44	255.377	-2380.69	1264.86	38.3974	-2209.33	1358.38	-30.4754	-2321.93	1155.92	-30.576	-2342.58	1079.41	-71.058	-2345.7	957.521	-43.7183	-2289.5	842.481	-87.2425	-2345.75	849.814	-88.9819	-2315.47	764.417
312	0	138.786	-2023.56	1530.72	241.808	-2016.67	1531.02	136.968	-2196.32	1561.75	263.948	-2162.39	1565.76	200.635	-2251.46	1430.39	210.912	-2366.74	1186.2	206.921	-2122.82	1314.67	200.883	-2087.7	1131.65	254.269	-2364.32	1264.12	36.2766	-2193.84	1356.7	-31.5294	-2306.1	1153.75	-31.2798	-2326.84	1077.49	-71.7656	-2330.93	955.766	-44.6291	-2275.48	840.166	-88.0466	-2331.77	847.932	-89.9778	-2301.97	762.335
313	0	135.768	-2008.16	1530.96	238.819	-2001.31	1531.59	133.96	-2181.17	1561.08	261.052	-2147.33	1565.68	198.266	-2235.45	1430	210.148	-2350.36	1185.65	204.783	-2106.51	1314.31	199.281	-2070.88	1131.25	253.171	-2347.9	1263.74	34.1477	-2178.3	1355.38	-32.5786	-2290.11	1151.89	-32.0111	-2310.86	1075.84	-72.4788	-2315.74	954.255	-45.5061	-2260.91	838.194	-88.8361	-2317.23	846.306	-90.9153	-2287.83	760.55
314	0	132.743	-1992.74	1531.48	235.806	-1985.89	1532.45	130.93	-2165.94	1560.76	258.127	-2132.2	1565.94	195.91	-2219.42	1429.94	209.399	-2333.96	1185.48	202.637	-2090.2	1314.33	197.587	-2053.99	1131.26	252.095	-2331.44	1263.73	32.0383	-2162.73	1354.44	-33.6172	-2273.96	1150.36	-32.7661	-2294.66	1074.49	-73.1962	-2300.15	953.007	-46.3464	-2245.78	836.59	-89.6094	-2302.12	844.953	-91.7898	-2273.01	759.083
315	0	129.735	-1977.3	1532.28	232.793	-1970.42	1533.58	127.909	-2150.65	1560.78	255.201	-2117	1566.54	193.593	-2203.39	1430.24	208.672	-2317.58	1185.69	200.509	-2073.9	1314.73	195.83	-2037.1	1131.67	251.053	-2314.99	1264.11	29.9758	-2147.15	1353.89	-34.6409	-2257.66	1149.2	-33.5425	-2278.25	1073.45	-73.9168	-2284.15	952.033	-47.147	-2230.07	835.374	-90.3655	-2286.42	843.886	-92.5975	-2257.49	757.949
316	0	126.769	-1961.87	1533.32	229.807	-1954.91	1534.97	124.929	-2135.31	1561.16	252.302	-2101.75	1567.46	191.339	-2187.39	1430.87	207.972	-2301.23	1186.28	198.426	-2057.67	1315.49	194.042	-2020.25	1132.46	250.055	-2298.57	1264.85	27.9859	-2131.56	1353.73	-35.6468	-2241.24	1148.4	-34.3386	-2261.65	1072.73	-74.6401	-2267.75	951.341	-47.9053	-2213.78	834.559	-91.1038	-2270.14	843.114	-93.3361	-2241.27	757.161
317	0	123.872	-1946.45	1534.61	226.876	-1939.38	1536.6	122.022	-2119.93	1561.87	249.459	-2086.45	1568.7	189.173	-2171.43	1431.84	207.305	-2284.96	1187.24	196.415	-2041.51	1316.61	192.255	-2003.49	1133.63	249.109	-2282.21	1265.97	26.0927	-2115.99	1353.96	-36.6329	-2224.69	1147.97	-35.1536	-2244.88	1072.32	-75.3662	-2250.95	950.936	-48.6187	-2196.92	834.155	-91.8242	-2253.26	842.641	-94.0039	-2224.31	756.724
318	0	121.069	-1931.07	1536.1	224.025	-1923.83	1538.44	119.221	-2104.53	1562.91	246.702	-2071.11	1570.24	187.116	-2155.54	1433.12	206.673	-2268.79	1188.55	194.499	-2025.45	1318.05	190.502	-1986.89	1135.13	248.221	-2265.95	1267.42	24.3168	-2100.45	1354.57	-37.598	-2208.05	1147.91	-35.9877	-2227.95	1072.24	-76.0951	-2233.77	950.815	-49.2845	-2179.49	834.163	-92.5265	-2235.79	842.466	-94.6007	-2206.63	756.641
319	0	118.383	-1915.72	1537.79	221.282	-1908.29	1540.46	116.556	-2089.12	1564.25	244.06	-2055.74	1572.05	185.186	-2139.74	1434.7	206.077	-2252.75	1190.2	192.703	-2009.52	1319.81	188.817	-1970.47	1136.93	247.396	-2249.8	1269.2	22.6757	-2084.95	1355.54	-38.5415	-2191.33	1148.21	-36.8416	-2210.89	1072.47	-76.8273	-2216.2	950.973	-49.9003	-2161.49	834.58	-93.2104	-2217.73	842.585	-95.1271	-2188.2	756.909
320	0	115.838	-1900.43	1539.64	218.672	-1892.76	1542.63	114.054	-2073.72	1565.87	241.559	-2040.34	1574.11	183.398	-2124.03	1436.54	205.516	-2236.85	1192.14	191.044	-1993.73	1321.83	187.231	-1954.29	1138.98	246.633	-2233.8	1271.27	21.1826	-2069.51	1356.84	-39.4635	-2174.54	1148.84	-37.7166	-2193.71	1072.98	-77.5633	-2198.28	951.397	-50.4633	-2142.95	835.394	-93.8754	-2199.1	842.986	-95.5846	-2169.04	757.523
321	0	113.453	-1885.19	1541.62	216.217	-1877.26	1544.93	111.739	-2058.34	1567.73	239.225	-2024.95	1576.37	181.763	-2108.42	1438.62	204.987	-2221.11	1194.35	189.539	-1978.09	1324.08	185.773	-1938.36	1141.25	245.932	-2217.95	1273.59	19.8466	-2054.14	1358.44	-40.3643	-2157.7	1149.78	-38.6147	-2176.44	1073.77	-78.3034	-2180.01	952.074	-50.971	-2123.88	836.594	-94.5203	-2179.91	843.659	-95.9752	-2149.16	758.477
322	0	111.248	-1870.01	1543.72	213.938	-1861.81	1547.32	109.631	-2042.99	1569.81	237.079	-2009.55	1578.8	180.288	-2092.94	1440.89	204.482	-2205.55	1196.78	188.202	-1962.62	1326.53	184.47	-1922.7	1143.69	245.287	-2202.27	1276.12	18.6724	-2038.83	1360.31	-41.2444	-2140.84	1151.01	-39.5379	-2159.09	1074.8	-79.048	-2161.41	952.986	-51.4203	-2104.31	838.158	-95.1433	-2160.19	844.586	-96.3015	-2128.56	759.759
323	0	109.238	-1854.91	1545.89	211.854	-1846.41	1549.76	107.746	-2027.7	1572.07	235.138	-1994.17	1581.36	178.976	-2077.58	1443.33	203.994	-2190.18	1199.4	187.04	-1947.31	1329.13	183.346	-1907.33	1146.25	244.69	-2186.77	1278.82	17.6604	-2023.6	1362.4	-42.1046	-2123.97	1152.47	-40.4885	-2141.69	1076.05	-79.7972	-2142.51	954.112	-51.8083	-2084.27	840.067	-95.7421	-2139.96	845.751	-96.5662	-2107.27	761.359
324	0	107.436	-1839.87	1548.13	209.978	-1831.07	1552.23	106.093	-2012.45	1574.46	233.416	-1978.82	1584.02	177.827	-2062.34	1445.89	203.513	-2174.99	1202.17	186.059	-1932.17	1331.85	182.42	-1892.24	1148.89	244.132	-2171.46	1281.65	16.8075	-2008.45	1364.69	-42.946	-2107.11	1154.15	-41.4688	-2124.24	1077.48	-80.5508	-2123.32	955.43	-52.1319	-2063.8	842.295	-96.3135	-2119.24	847.135	-96.7715	-2085.33	763.267
325	0	105.849	-1824.9	1550.39	208.323	-1815.8	1554.7	104.677	-1997.27	1576.96	231.92	-1963.51	1586.72	176.837	-2047.22	1448.54	203.029	-2159.99	1205.03	185.259	-1917.18	1334.63	181.707	-1877.41	1151.58	243.603	-2156.33	1284.56	16.1075	-1993.37	1367.11	-43.7699	-2090.27	1155.99	-42.4809	-2106.76	1079.06	-81.3085	-2103.87	956.916	-52.3882	-2042.91	844.816	-96.8539	-2098.09	848.717	-96.9192	-2062.77	765.469
326	0	104.485	-1809.99	1552.65	206.895	-1800.6	1557.14	103.497	-1982.16	1579.52	230.654	-1948.24	1589.44	175.998	-2032.22	1451.23	202.531	-2145.16	1207.95	184.639	-1902.36	1337.44	181.215	-1862.84	1154.27	243.091	-2141.39	1287.51	15.5513	-1978.37	1369.64	-44.5778	-2073.46	1157.97	-43.5262	-2089.27	1080.76	-82.0692	-2084.19	958.547	-52.5743	-2021.67	847.604	-97.3592	-2076.52	850.477	-97.0102	-2039.62	767.953
327	0	103.347	-1795.15	1554.88	205.7	-1785.48	1559.51	102.548	-1967.11	1582.1	229.617	-1933.03	1592.12	175.302	-2017.33	1453.93	202.009	-2130.51	1210.89	184.193	-1887.67	1340.25	180.948	-1848.48	1156.94	242.586	-2126.61	1290.46	15.1285	-1963.43	1372.24	-45.3719	-2056.69	1160.04	-44.606	-2071.76	1082.54	-82.8319	-2064.29	960.296	-52.6878	-2000.09	850.63	-97.8248	-2054.58	852.394	-97.0443	-2015.95	770.705
328	0	102.433	-1780.37	1557.07	204.738	-1770.44	1561.8	101.821	-1952.12	1584.67	228.804	-1917.89	1594.74	174.737	-2002.55	1456.61	201.452	-2116.02	1213.8	183.912	-1873.12	1343.01	180.903	-1834.32	1159.55	242.075	-2112	1293.37	14.8272	-1948.54	1374.85	-46.1548	-2039.98	1162.17	-45.7207	-2054.26	1084.38	-83.5947	-2044.21	962.14	-52.7268	-1978.23	853.866	-98.2462	-2032.32	854.449	-97.0198	-1991.79	773.709
329	0	101.741	-1765.64	1559.18	204.007	-1755.48	1563.98	101.302	-1937.21	1587.18	228.207	-1902.81	1597.26	174.291	-1987.86	1459.21	200.853	-2101.67	1216.65	183.787	-1858.68	1345.69	181.072	-1820.33	1162.09	241.551	-2097.55	1296.2	14.6351	-1933.7	1377.44	-46.9296	-2023.31	1164.32	-46.8698	-2036.75	1086.23	-84.3556	-2023.95	964.053	-52.6903	-1956.12	857.283	-98.6185	-2009.76	856.619	-96.9341	-1967.22	776.949
330	0	101.266	-1750.95	1561.2	203.502	-1740.61	1566.02	100.978	-1922.35	1589.61	227.812	-1887.81	1599.65	173.951	-1973.27	1461.72	200.207	-2087.45	1219.39	183.804	-1844.35	1348.26	181.439	-1806.46	1164.52	241.004	-2083.22	1298.91	14.5396	-1918.89	1379.98	-47.6997	-2006.7	1166.46	-48.0523	-2019.26	1088.07	-85.112	-2003.55	966.011	-52.5779	-1933.8	860.853	-98.937	-1986.95	858.885	-96.7832	-1942.28	780.406
331	0	100.999	-1736.31	1563.1	203.216	-1725.81	1567.91	100.831	-1907.55	1591.93	227.608	-1872.89	1601.88	173.705	-1958.76	1464.1	199.51	-2073.34	1221.99	183.949	-1830.11	1350.69	181.986	-1792.7	1166.83	240.429	-2069.02	1301.46	14.5287	-1904.11	1382.44	-48.4688	-1990.14	1168.55	-49.2664	-2001.76	1089.86	-85.861	-1983.02	967.99	-52.39	-1911.31	864.549	-99.1971	-1963.92	861.226	-96.5625	-1917.04	784.059
332	0	100.93	-1721.7	1564.86	203.137	-1711.1	1569.63	100.842	-1892.81	1594.1	227.579	-1858.06	1603.92	173.54	-1944.32	1466.32	198.762	-2059.32	1224.42	184.209	-1815.95	1352.95	182.689	-1779.02	1168.99	239.823	-2054.92	1303.84	14.5909	-1889.35	1384.77	-49.2404	-1973.62	1170.57	-50.5095	-1984.27	1091.58	-86.5991	-1962.39	969.967	-52.1277	-1888.68	868.34	-99.3945	-1940.72	863.622	-96.2663	-1891.56	787.885
333	0	101.049	-1707.13	1566.46	203.256	-1696.47	1571.16	100.995	-1878.12	1596.1	227.709	-1843.31	1605.76	173.445	-1929.94	1468.35	197.967	-2045.38	1226.65	184.568	-1801.86	1355.02	183.522	-1765.39	1170.98	239.185	-2040.91	1306.01	14.7153	-1874.6	1386.96	-50.0179	-1957.14	1172.48	-51.778	-1966.76	1093.2	-87.3226	-1941.66	971.918	-51.7927	-1865.94	872.201	-99.525	-1917.38	866.054	-95.8891	-1865.9	791.857
334	0	101.343	-1692.58	1567.9	203.559	-1681.91	1572.49	101.272	-1863.47	1597.91	227.983	-1828.64	1607.38	173.41	-1915.62	1470.18	197.128	-2031.48	1228.67	185.011	-1787.81	1356.88	184.454	-1751.8	1172.78	238.517	-2026.97	1307.95	14.8925	-1859.85	1388.97	-50.8042	-1940.67	1174.26	-53.0677	-1949.25	1094.7	-88.0271	-1920.86	973.824	-51.3867	-1843.13	876.102	-99.5851	-1893.93	868.5	-95.425	-1840.12	795.948
335	0	101.8	-1678.06	1569.14	204.032	-1667.42	1573.61	101.657	-1848.87	1599.51	228.384	-1814.06	1608.75	173.427	-1901.34	1471.78	196.257	-2017.63	1230.44	185.523	-1773.8	1358.5	185.455	-1738.21	1174.37	237.823	-2013.09	1309.65	15.1142	-1845.1	1390.79	-51.6016	-1924.22	1175.89	-54.3735	-1931.71	1096.06	-88.7079	-1900	975.663	-50.9115	-1820.28	880.015	-99.5712	-1870.4	870.942	-94.8683	-1814.28	800.128
336	0	102.406	-1663.55	1570.19	204.662	-1653.01	1574.51	102.136	-1834.3	1600.88	228.898	-1799.56	1609.87	173.49	-1887.1	1473.14	195.363	-2003.81	1231.95	186.09	-1759.82	1359.88	186.494	-1724.64	1175.74	237.111	-1999.24	1311.08	15.3734	-1830.34	1392.4	-52.4112	-1907.76	1177.34	-55.6894	-1914.15	1097.26	-89.3596	-1879.09	977.418	-50.3686	-1797.42	883.913	-99.4805	-1846.83	873.362	-94.2135	-1788.43	804.365
337	0	103.148	-1649.07	1571.03	205.434	-1638.65	1575.18	102.696	-1819.77	1602.01	229.513	-1785.14	1610.74	173.592	-1872.9	1474.26	194.46	-1989.99	1233.19	186.701	-1745.85	1360.99	187.54	-1711.05	1176.86	236.39	-1985.42	1312.24	15.6645	-1815.57	1393.78	-53.2332	-1891.27	1178.6	-57.0086	-1896.54	1098.27	-89.9768	-1858.14	979.071	-49.7591	-1774.56	887.768	-99.3106	-1823.23	875.739	-93.4561	-1762.61	808.628
338	0	104.014	-1634.61	1571.66	206.336	-1624.36	1575.63	103.326	-1805.28	1602.89	230.215	-1770.8	1611.34	173.731	-1858.72	1475.11	193.565	-1976.18	1234.16	187.342	-1731.9	1361.82	188.566	-1697.44	1177.72	235.671	-1971.62	1313.12	15.9834	-1800.79	1394.92	-54.0659	-1874.75	1179.65	-58.3233	-1878.87	1099.1	-90.5532	-1837.16	980.607	-49.0835	-1751.74	891.553	-99.0597	-1799.63	878.058	-92.5918	-1736.89	812.884
339	0	104.991	-1620.16	1572.07	207.353	-1610.12	1575.84	104.017	-1790.81	1603.51	230.994	-1756.53	1611.67	173.906	-1844.56	1475.7	192.692	-1962.36	1234.85	188.005	-1717.94	1362.37	189.544	-1683.81	1178.3	234.967	-1957.82	1313.73	16.3273	-1786	1395.81	-54.9058	-1858.16	1180.47	-59.625	-1861.15	1099.72	-91.0824	-1816.16	982.013	-48.3415	-1728.98	895.241	-98.7266	-1776.07	880.3	-91.6175	-1711.28	817.1
340	0	106.069	-1605.73	1572.26	208.474	-1595.94	1575.81	104.761	-1776.38	1603.88	231.842	-1742.33	1611.74	174.116	-1830.41	1476.02	191.861	-1948.52	1235.25	188.681	-1703.97	1362.63	190.452	-1670.15	1178.59	234.293	-1944.02	1314.05	16.6951	-1771.19	1396.45	-55.7473	-1841.51	1181.07	-60.9041	-1843.35	1100.13	-91.5576	-1795.16	983.279	-47.5325	-1706.29	898.806	-98.3109	-1752.55	882.452	-90.5311	-1685.84	821.245
341	0	107.237	-1591.32	1572.22	209.687	-1581.8	1575.55	105.555	-1761.97	1603.98	232.751	-1728.19	1611.54	174.362	-1816.27	1476.08	191.088	-1934.66	1235.38	189.364	-1690	1362.61	191.271	-1656.44	1178.59	233.663	-1930.2	1314.09	17.0867	-1756.38	1396.83	-56.5825	-1824.76	1181.43	-62.1501	-1825.48	1100.32	-91.9718	-1774.15	984.395	-46.655	-1683.71	902.225	-97.8128	-1729.09	884.5	-89.3313	-1660.59	825.288
342	0	108.486	-1576.93	1571.96	210.983	-1567.71	1575.07	106.393	-1747.58	1603.84	233.714	-1714.11	1611.09	174.646	-1802.15	1475.88	190.39	-1920.77	1235.23	190.051	-1676.01	1362.3	191.989	-1642.69	1178.3	233.092	-1916.37	1313.86	17.5035	-1741.57	1396.96	-57.4013	-1807.92	1181.56	-63.3518	-1807.53	1100.31	-92.3176	-1753.16	985.356	-45.7074	-1661.24	905.473	-97.233	-1705.73	886.43	-88.0183	-1635.56	829.202
343	0	109.807	-1562.56	1571.48	212.352	-1553.65	1574.36	107.273	-1733.22	1603.45	234.728	-1700.08	1610.39	174.973	-1788.03	1475.42	189.782	-1906.84	1234.8	190.738	-1662	1361.71	192.598	-1628.89	1177.72	232.593	-1902.51	1313.36	17.948	-1726.75	1396.83	-58.1915	-1790.97	1181.44	-64.497	-1789.49	1100.08	-92.5878	-1732.18	986.157	-44.6877	-1638.91	908.532	-96.5727	-1682.47	888.232	-86.5933	-1610.77	832.96
344	0	111.194	-1548.21	1570.79	213.786	-1539.62	1573.44	108.194	-1718.89	1602.82	235.789	-1686.1	1609.46	175.347	-1773.92	1474.72	189.28	-1892.88	1234.12	191.429	-1647.96	1360.85	193.096	-1615.01	1176.86	232.18	-1888.62	1312.61	18.424	-1711.94	1396.47	-58.9389	-1773.92	1181.1	-65.5725	-1771.37	1099.64	-92.7749	-1711.23	986.797	-43.594	-1616.73	911.382	-95.8333	-1659.33	889.898	-85.0589	-1586.24	836.538
345	0	112.642	-1533.88	1569.9	215.28	-1525.63	1572.32	109.156	-1704.58	1601.96	236.896	-1672.16	1608.31	175.773	-1759.81	1473.78	188.895	-1878.88	1233.18	192.124	-1633.9	1359.75	193.489	-1601.05	1175.74	231.865	-1874.7	1311.6	18.936	-1697.14	1395.87	-59.6277	-1756.75	1180.54	-66.5649	-1753.17	1099	-92.8716	-1690.33	987.274	-42.4245	-1594.72	914.008	-95.0165	-1636.34	891.419	-83.4192	-1562	839.917
346	0	114.146	-1519.57	1568.82	216.83	-1511.67	1571.01	110.162	-1690.29	1600.89	238.048	-1658.27	1606.95	176.256	-1745.72	1472.62	188.637	-1864.82	1231.99	192.829	-1619.82	1358.41	193.785	-1587.01	1174.38	231.658	-1860.75	1310.35	19.4897	-1682.35	1395.05	-60.2414	-1739.49	1179.76	-67.4601	-1734.9	1098.18	-92.8708	-1669.48	987.593	-41.1778	-1572.9	916.397	-94.1239	-1613.52	892.79	-81.6796	-1538.05	843.079
347	0	115.705	-1505.29	1567.57	218.433	-1497.74	1569.53	111.214	-1676.03	1599.62	239.247	-1644.4	1605.4	176.803	-1731.63	1471.25	188.512	-1850.71	1230.57	193.552	-1605.7	1356.87	194.002	-1572.85	1172.81	231.566	-1846.75	1308.87	20.0913	-1667.58	1394.03	-60.7627	-1722.13	1178.79	-68.2436	-1716.58	1097.18	-92.7657	-1648.71	987.755	-39.8531	-1551.28	918.541	-93.1573	-1590.87	894.008	-79.8469	-1514.42	846.01
348	0	117.316	-1491.03	1566.16	220.086	-1483.83	1567.9	112.315	-1661.79	1598.17	240.495	-1630.57	1603.69	177.419	-1717.56	1469.68	188.525	-1836.54	1228.93	194.301	-1591.55	1355.15	194.16	-1558.59	1171.07	231.596	-1832.71	1307.18	20.7477	-1652.82	1392.83	-61.1747	-1704.69	1177.63	-68.9014	-1698.21	1096.02	-92.5499	-1628.04	987.767	-38.4505	-1529.87	920.432	-92.1183	-1568.44	895.069	-77.9292	-1491.12	848.699
349	0	118.98	-1476.81	1564.61	221.79	-1469.94	1566.14	113.471	-1647.59	1596.57	241.794	-1616.77	1601.83	178.112	-1703.5	1467.94	188.676	-1822.31	1227.07	195.087	-1577.37	1353.28	194.285	-1544.19	1169.17	231.75	-1818.62	1305.27	21.4662	-1638.08	1391.46	-61.4609	-1687.2	1176.31	-69.4194	-1679.82	1094.71	-92.2175	-1607.48	987.637	-36.9709	-1508.7	922.07	-91.0085	-1546.23	895.974	-75.9357	-1468.16	851.139
350	0	120.697	-1462.61	1562.96	223.545	-1456.08	1564.28	114.687	-1633.41	1594.83	243.151	-1602.99	1599.86	178.887	-1689.45	1466.03	188.965	-1807.99	1225.02	195.921	-1563.15	1351.29	194.404	-1529.66	1167.18	232.028	-1804.48	1303.18	22.2544	-1623.36	1389.94	-61.6059	-1669.67	1174.85	-69.7842	-1661.43	1093.27	-91.7634	-1587.06	987.372	-35.4161	-1487.78	923.455	-89.8292	-1524.27	896.725	-73.8771	-1445.55	853.326
351	0	122.469	-1448.44	1561.23	225.354	-1442.24	1562.34	115.969	-1619.27	1592.98	244.571	-1589.24	1597.78	179.75	-1675.4	1463.99	189.386	-1793.59	1222.79	196.817	-1548.89	1349.21	194.548	-1514.99	1165.11	232.431	-1790.28	1300.91	23.1201	-1608.65	1388.31	-61.5958	-1652.13	1173.26	-69.9836	-1643.06	1091.73	-91.1833	-1566.81	986.982	-33.7891	-1467.12	924.591	-88.5818	-1502.6	897.323	-71.7646	-1423.32	855.258
352	0	124.299	-1434.31	1559.44	227.219	-1428.41	1560.37	117.325	-1605.16	1591.04	246.058	-1575.52	1595.63	180.707	-1661.37	1461.84	189.933	-1779.1	1220.4	197.787	-1534.57	1347.07	194.749	-1500.16	1163.01	232.954	-1776.01	1298.47	24.071	-1593.94	1386.57	-61.4188	-1634.61	1171.58	-70.0066	-1624.75	1090.1	-90.4737	-1546.75	986.478	-32.0939	-1446.74	925.487	-87.2673	-1481.22	897.773	-69.6104	-1401.48	856.939
353	0	126.188	-1420.21	1557.64	229.142	-1414.61	1558.38	118.762	-1591.09	1589.03	247.619	-1561.83	1593.44	181.762	-1647.33	1459.6	190.597	-1764.5	1217.86	198.844	-1520.21	1344.92	195.04	-1485.19	1160.91	233.591	-1761.68	1295.9	25.1144	-1579.23	1384.77	-61.0649	-1617.14	1169.81	-69.8438	-1606.52	1088.4	-89.6325	-1526.92	985.873	-30.3357	-1426.66	926.154	-85.887	-1460.18	898.08	-67.4272	-1380.05	858.372
354	0	128.14	-1406.14	1555.86	231.126	-1400.83	1556.41	120.286	-1577.05	1586.99	249.261	-1548.16	1591.23	182.921	-1633.3	1457.29	191.368	-1749.79	1215.21	200.001	-1505.79	1342.77	195.451	-1470.05	1158.85	234.337	-1747.27	1293.22	26.2574	-1564.51	1382.93	-60.5265	-1599.75	1167.99	-69.4879	-1588.42	1086.67	-88.6582	-1507.35	985.18	-28.5202	-1406.9	926.606	-84.4418	-1439.51	898.253	-65.228	-1359.04	859.566
355	0	130.157	-1392.11	1554.12	233.174	-1387.06	1554.51	121.903	-1563.06	1584.93	250.989	-1534.51	1589.02	184.186	-1619.25	1454.94	192.233	-1734.96	1212.48	201.269	-1491.31	1340.67	196.01	-1454.76	1156.87	235.183	-1732.78	1290.45	27.5058	-1549.77	1381.07	-59.7984	-1582.48	1166.15	-68.9339	-1570.46	1084.91	-87.5513	-1488.06	984.412	-26.6543	-1387.47	926.859	-82.9331	-1419.22	898.299	-63.0256	-1338.48	860.53
356	0	132.24	-1378.11	1552.47	235.289	-1373.3	1552.69	123.62	-1549.12	1582.89	252.808	-1520.88	1586.85	185.56	-1605.18	1452.59	193.18	-1720.01	1209.68	202.657	-1476.76	1338.63	196.745	-1439.32	1154.99	236.121	-1718.21	1287.62	28.8648	-1535	1379.22	-58.878	-1565.35	1164.3	-68.1793	-1552.69	1083.16	-86.3134	-1469.1	983.586	-24.7452	-1368.39	926.93	-81.3623	-1399.35	898.227	-60.8327	-1318.38	861.274
357	0	134.392	-1364.14	1550.94	237.471	-1359.55	1551	125.44	-1535.21	1580.9	254.722	-1507.28	1584.74	187.045	-1591.08	1450.25	194.196	-1704.93	1206.86	204.174	-1462.15	1336.69	197.675	-1423.73	1153.23	237.142	-1703.55	1284.76	30.3374	-1520.2	1377.42	-57.7655	-1548.39	1162.48	-67.2247	-1535.14	1081.45	-84.9476	-1450.48	982.718	-22.8008	-1349.68	926.84	-79.7314	-1379.94	898.049	-58.6615	-1298.77	861.813
358	0	136.613	-1350.19	1549.56	239.721	-1345.81	1549.47	127.368	-1521.34	1578.97	256.734	-1493.68	1582.71	188.639	-1576.95	1447.97	195.268	-1689.72	1204.06	205.823	-1447.46	1334.88	198.818	-1408	1151.63	238.235	-1688.8	1281.91	31.925	-1505.35	1375.68	-56.4638	-1531.64	1160.71	-66.0734	-1517.84	1079.79	-83.459	-1432.25	981.826	-20.8291	-1331.36	926.608	-78.0427	-1361.01	897.776	-56.5233	-1279.66	862.16
359	0	138.902	-1336.28	1548.37	242.039	-1332.08	1548.13	129.404	-1507.52	1577.14	258.844	-1480.1	1580.8	190.34	-1562.76	1445.78	196.382	-1674.39	1201.3	207.604	-1432.7	1333.21	200.182	-1392.15	1150.2	239.391	-1673.96	1279.11	33.6262	-1490.44	1374.05	-54.979	-1515.11	1159.02	-64.7321	-1500.81	1078.22	-81.854	-1414.42	980.928	-18.8384	-1313.46	926.257	-76.2996	-1342.58	897.422	-54.4283	-1261.09	862.331
360	0	141.256	-1322.38	1547.39	244.421	-1318.34	1547.01	131.549	-1493.73	1575.43	261.052	-1466.52	1579.03	192.146	-1548.52	1443.7	197.527	-1658.95	1198.64	209.516	-1417.87	1331.71	201.768	-1376.18	1148.97	240.6	-1659.03	1276.39	35.4368	-1475.48	1372.54	-53.3204	-1498.83	1157.44	-63.2105	-1484.09	1076.77	-80.1411	-1397.02	980.045	-16.8372	-1295.98	925.808	-74.5064	-1324.7	897.001	-52.3859	-1243.07	862.34
361	0	143.673	-1308.51	1546.65	246.865	-1304.59	1546.12	133.799	-1479.97	1573.87	263.356	-1452.94	1577.42	194.048	-1534.22	1441.78	198.688	-1643.41	1196.11	211.549	-1402.96	1330.4	203.57	-1360.13	1147.94	241.85	-1644.03	1273.79	37.3493	-1460.45	1371.19	-51.5005	-1482.82	1155.99	-61.5218	-1467.69	1075.45	-78.3302	-1380.09	979.196	-14.8336	-1278.96	925.283	-72.6684	-1307.37	896.529	-50.4039	-1225.62	862.205
362	0	146.147	-1294.64	1546.16	249.365	-1290.84	1545.5	136.151	-1466.23	1572.48	265.75	-1439.35	1575.99	196.038	-1519.85	1440.03	199.854	-1627.78	1193.76	213.693	-1388	1329.29	205.572	-1344.02	1147.12	243.13	-1628.95	1271.36	39.3527	-1445.36	1370.03	-49.5353	-1467.08	1154.72	-59.6818	-1451.64	1074.31	-76.4332	-1363.62	978.403	-12.8362	-1262.42	924.702	-70.7921	-1290.62	896.021	-48.4887	-1208.77	861.94
363	0	148.672	-1280.78	1545.95	251.914	-1277.06	1545.15	138.597	-1452.51	1571.29	268.228	-1425.75	1574.77	198.105	-1505.4	1438.49	201.013	-1612.08	1191.62	215.931	-1372.97	1328.39	207.748	-1327.87	1146.54	244.429	-1613.82	1269.14	41.4329	-1430.2	1369.09	-47.444	-1451.63	1153.65	-57.7098	-1435.94	1073.36	-74.4636	-1347.65	977.687	-10.853	-1246.36	924.088	-68.8856	-1274.47	895.497	-46.6455	-1192.54	861.561
364	0	151.24	-1266.92	1546.02	254.505	-1263.26	1545.08	141.128	-1438.81	1570.32	270.78	-1412.12	1573.76	200.234	-1490.88	1437.2	202.152	-1596.34	1189.74	218.241	-1357.89	1327.72	210.065	-1311.72	1146.18	245.734	-1598.63	1267.16	43.5722	-1414.99	1368.39	-45.2492	-1436.46	1152.8	-55.6277	-1420.62	1072.63	-72.4365	-1332.18	977.069	-8.89239	-1230.81	923.459	-66.9583	-1258.94	894.973	-44.8779	-1176.94	861.085
365	0	153.841	-1253.05	1546.39	257.128	-1249.44	1545.29	143.731	-1425.1	1569.59	273.395	-1398.47	1572.99	202.408	-1476.29	1436.16	203.261	-1580.59	1188.16	220.599	-1342.78	1327.29	212.48	-1295.61	1146.06	247.031	-1583.42	1265.47	45.7505	-1399.72	1367.95	-42.9769	-1421.57	1152.21	-53.4598	-1405.67	1072.15	-70.3687	-1317.21	976.57	-6.96263	-1215.78	922.835	-65.0213	-1244.04	894.469	-43.1883	-1162	860.523
366	0	156.465	-1239.18	1547.05	259.771	-1235.59	1545.79	146.39	-1411.38	1569.12	276.057	-1384.78	1572.47	204.609	-1461.62	1435.41	204.329	-1564.85	1186.9	222.977	-1327.64	1327.1	214.947	-1279.57	1146.17	248.308	-1568.19	1264.09	47.9451	-1384.41	1367.81	-40.6556	-1406.96	1151.9	-51.2329	-1391.09	1071.94	-68.2784	-1302.77	976.209	-5.07216	-1201.29	922.232	-63.087	-1229.76	894.003	-41.5777	-1147.74	859.89
367	0	159.098	-1225.28	1548	262.421	-1221.7	1546.56	149.088	-1397.64	1568.93	278.75	-1371.06	1572.2	206.815	-1446.89	1434.96	205.345	-1549.14	1185.99	225.344	-1312.49	1327.15	217.412	-1263.64	1146.51	249.553	-1552.97	1263.05	50.1319	-1369.07	1367.97	-38.3165	-1392.61	1151.89	-48.9754	-1376.88	1072.02	-66.1852	-1288.83	976.004	-3.22968	-1187.35	921.665	-61.17	-1216.12	893.593	-40.0463	-1134.15	859.198
368	0	161.728	-1211.35	1549.22	265.065	-1207.77	1547.59	151.804	-1383.87	1569.01	281.456	-1357.28	1572.19	209.007	-1432.11	1434.83	206.303	-1533.5	1185.45	227.668	-1297.34	1327.45	219.821	-1247.85	1147.07	250.754	-1537.77	1262.37	52.286	-1353.72	1368.44	-35.9927	-1378.51	1152.21	-46.7168	-1363.03	1072.39	-64.1096	-1275.39	975.971	-1.44436	-1173.96	921.148	-59.2861	-1203.11	893.255	-38.5939	-1121.25	858.456
369	0	164.337	-1197.39	1550.7	267.686	-1193.81	1548.86	154.516	-1370.07	1569.39	284.152	-1343.47	1572.44	211.162	-1417.28	1435.01	207.196	-1517.94	1185.3	229.917	-1282.21	1328	222.12	-1232.23	1147.83	251.903	-1522.61	1262.06	54.3821	-1338.37	1369.25	-33.7185	-1364.63	1152.86	-44.4873	-1349.54	1073.08	-62.0732	-1262.45	976.122	0.273989	-1161.13	920.692	-57.453	-1190.72	893.007	-37.22	-1109.04	857.674
370	0	166.91	-1183.4	1552.43	270.267	-1179.81	1550.35	157.2	-1356.22	1570.07	286.817	-1329.6	1572.95	213.259	-1402.42	1435.51	208.021	-1502.49	1185.53	232.06	-1267.12	1328.78	224.257	-1216.82	1148.79	252.993	-1507.5	1262.13	56.3961	-1323.04	1370.38	-31.5279	-1350.96	1153.86	-42.3169	-1336.38	1074.08	-60.0979	-1250	976.467	1.91468	-1148.85	920.305	-55.6895	-1178.94	892.862	-35.9251	-1097.51	856.859
371	0	169.429	-1169.37	1554.37	272.791	-1165.77	1552.04	159.829	-1342.32	1571.03	289.425	-1315.68	1573.71	215.28	-1387.55	1436.32	208.78	-1487.17	1186.15	234.066	-1252.08	1329.8	226.185	-1201.62	1149.92	254.018	-1492.47	1262.58	58.3049	-1307.76	1371.83	-29.4541	-1337.47	1155.2	-40.2344	-1323.55	1075.39	-58.2057	-1238	977.013	3.46599	-1137.11	919.994	-54.0158	-1167.74	892.832	-34.7108	-1086.66	856.018
372	0	171.875	-1155.3	1556.51	275.238	-1151.7	1553.91	162.378	-1328.37	1572.28	291.955	-1301.71	1574.71	217.207	-1372.68	1437.43	209.475	-1471.98	1187.14	235.908	-1237.1	1331.04	227.863	-1186.66	1151.23	254.979	-1477.52	1263.4	60.0878	-1292.55	1373.58	-27.5277	-1324.14	1156.87	-38.2666	-1311.01	1077.01	-56.4184	-1226.45	977.762	4.91493	-1125.91	919.763	-52.4531	-1157.1	892.926	-33.5809	-1076.46	855.157
373	0	174.229	-1141.19	1558.81	277.59	-1137.59	1555.92	164.823	-1314.36	1573.8	294.381	-1287.69	1575.95	219.026	-1357.83	1438.83	210.114	-1456.96	1188.47	237.565	-1222.2	1332.49	229.259	-1171.93	1152.68	255.878	-1462.66	1264.56	61.7268	-1277.43	1375.62	-25.7755	-1310.96	1158.86	-36.4376	-1298.75	1078.93	-54.7569	-1215.32	978.712	6.24722	-1115.23	919.614	-51.0228	-1147	893.152	-32.5423	-1066.91	854.282
374	0	176.473	-1127.05	1561.25	279.827	-1123.46	1558.06	167.139	-1300.29	1575.58	296.68	-1273.63	1577.4	220.724	-1343	1440.49	210.704	-1442.09	1190.14	239.019	-1207.38	1334.14	230.35	-1157.43	1154.28	256.717	-1447.9	1266.05	63.2075	-1262.43	1377.93	-24.2191	-1297.9	1161.16	-34.7678	-1286.75	1081.13	-53.2411	-1204.59	979.859	7.44721	-1105.04	919.546	-49.7465	-1137.39	893.514	-31.6051	-1057.97	853.4
375	0	178.587	-1112.87	1563.8	281.931	-1109.31	1560.29	169.305	-1286.18	1577.58	298.834	-1259.53	1579.06	222.293	-1328.23	1442.4	211.258	-1427.39	1192.09	240.256	-1192.66	1335.98	231.123	-1143.15	1156	257.505	-1433.24	1267.83	64.519	-1247.57	1380.48	-22.8742	-1284.97	1163.74	-33.2736	-1275	1083.59	-51.889	-1194.23	981.192	8.49805	-1095.33	919.559	-48.6453	-1128.26	894.012	-30.7833	-1049.6	852.518
376	0	180.556	-1098.66	1566.43	283.887	-1095.14	1562.61	171.303	-1272.02	1579.79	300.822	-1245.39	1580.9	223.728	-1313.51	1444.51	211.785	-1412.86	1194.3	241.272	-1178.03	1337.98	231.577	-1129.06	1157.85	258.248	-1418.68	1269.88	65.6545	-1232.85	1383.22	-21.7496	-1272.15	1166.56	-31.9665	-1263.47	1086.27	-50.7163	-1184.22	982.7	9.38187	-1086.06	919.648	-47.739	-1119.56	894.643	-30.0952	-1041.78	851.643
377	0	182.365	-1084.43	1569.1	285.678	-1080.95	1564.97	173.118	-1257.82	1582.16	302.632	-1231.23	1582.89	225.025	-1298.85	1446.79	212.299	-1398.48	1196.73	242.064	-1163.5	1340.13	231.718	-1115.14	1159.82	258.955	-1404.22	1272.14	66.6115	-1218.29	1386.14	-20.847	-1259.45	1169.59	-30.8532	-1252.14	1089.16	-49.7364	-1174.53	984.365	10.0802	-1077.21	919.806	-47.0461	-1111.26	895.402	-29.5623	-1034.47	850.782
378	0	184.001	-1070.19	1571.8	287.295	-1066.76	1567.36	174.738	-1243.59	1584.67	304.251	-1217.05	1585.02	226.184	-1284.27	1449.22	212.808	-1384.26	1199.33	242.639	-1149.07	1342.4	231.564	-1101.35	1161.88	259.635	-1389.86	1274.58	67.3914	-1203.89	1389.17	-20.1611	-1246.88	1172.79	-29.9355	-1241.01	1092.21	-48.9598	-1165.13	986.168	10.5744	-1068.75	920.026	-46.5827	-1103.32	896.278	-29.2096	-1027.62	849.941
379	0	185.455	-1055.94	1574.49	288.727	-1052.57	1569.76	176.158	-1229.34	1587.27	305.673	-1202.86	1587.25	227.207	-1269.77	1451.74	213.323	-1370.17	1202.06	243.006	-1134.74	1344.77	231.14	-1087.67	1164.04	260.295	-1375.58	1277.16	67.9995	-1189.66	1392.29	-19.6802	-1234.46	1176.12	-29.2104	-1230.05	1095.38	-48.3938	-1156.01	988.084	10.8464	-1060.63	920.297	-46.362	-1095.72	897.259	-29.0639	-1021.19	849.128
380	0	186.722	-1041.7	1577.14	289.97	-1038.39	1572.15	177.375	-1215.08	1589.93	306.895	-1188.67	1589.54	228.1	-1255.35	1454.32	213.85	-1356.22	1204.86	243.181	-1120.5	1347.2	230.479	-1074.06	1166.26	260.943	-1361.38	1279.82	68.4447	-1175.6	1395.44	-19.3869	-1222.19	1179.53	-28.6705	-1219.26	1098.65	-48.0425	-1147.14	990.089	10.8792	-1052.82	920.605	-46.3943	-1088.42	898.326	-29.1531	-1015.13	848.347
381	0	187.799	-1027.47	1579.72	291.022	-1024.22	1574.49	178.391	-1200.83	1592.59	307.917	-1174.48	1591.87	228.869	-1241.01	1456.91	214.393	-1342.37	1207.69	243.182	-1106.35	1349.66	229.618	-1060.49	1168.54	261.582	-1347.25	1282.52	68.739	-1161.68	1398.57	-19.2599	-1210.09	1182.98	-28.3047	-1208.63	1101.96	-47.907	-1138.49	992.152	10.6577	-1045.3	920.934	-46.6859	-1081.39	899.459	-29.5047	-1009.41	847.601
382	0	188.687	-1013.26	1582.21	291.884	-1010.06	1576.77	179.211	-1186.59	1595.22	308.744	-1160.31	1594.19	229.521	-1226.74	1459.47	214.954	-1328.62	1210.51	243.031	-1092.27	1352.13	228.599	-1046.94	1170.84	262.218	-1333.18	1285.22	68.8963	-1147.91	1401.65	-19.2748	-1198.19	1186.42	-28.0988	-1198.13	1105.28	-47.9849	-1130.06	994.244	10.1691	-1038.02	921.266	-47.2396	-1074.6	900.634	-30.1442	-1003.98	846.888
383	0	189.389	-999.074	1584.58	292.561	-995.932	1578.97	179.843	-1172.37	1597.76	309.384	-1146.15	1596.46	230.065	-1212.54	1461.97	215.531	-1314.94	1213.25	242.75	-1078.25	1354.55	227.463	-1033.37	1173.14	262.851	-1319.16	1287.85	68.9325	-1134.27	1404.61	-19.4058	-1186.5	1189.8	-28.0362	-1187.78	1108.56	-48.271	-1121.81	996.33	9.40406	-1030.94	921.578	-48.054	-1068.02	901.823	-31.0937	-998.781	846.204
384	0	189.912	-984.921	1586.81	293.059	-981.826	1581.06	180.298	-1158.18	1600.18	309.847	-1132.01	1598.65	230.51	-1198.39	1464.34	216.122	-1301.32	1215.88	242.361	-1064.29	1356.9	226.254	-1019.79	1175.39	263.481	-1305.17	1290.39	68.8643	-1120.73	1407.42	-19.6273	-1175.02	1193.07	-28.0989	-1177.54	1111.75	-48.7573	-1113.73	998.379	8.35669	-1024.05	921.847	-49.1238	-1061.63	902.998	-32.371	-993.787	845.543
385	0	190.264	-970.804	1588.86	293.388	-967.747	1583	180.59	-1144.03	1602.42	310.144	-1117.9	1600.71	230.865	-1184.3	1466.57	216.721	-1287.74	1218.35	241.889	-1050.37	1359.12	225.013	-1006.16	1177.55	264.106	-1291.21	1292.78	68.7086	-1107.28	1410.03	-19.9143	-1163.76	1196.19	-28.2683	-1167.42	1114.82	-49.4334	-1105.79	1000.35	7.02533	-1017.29	922.046	-50.4401	-1055.41	904.127	-33.9879	-988.953	844.892
386	0	190.455	-956.723	1590.71	293.558	-953.693	1584.79	180.731	-1129.92	1604.45	310.289	-1103.81	1602.6	231.141	-1170.25	1468.59	217.321	-1274.19	1220.62	241.355	-1036.47	1361.19	223.778	-992.502	1179.59	264.723	-1277.27	1294.98	68.4819	-1093.89	1412.4	-20.2439	-1152.71	1199.12	-28.526	-1157.38	1117.73	-50.2865	-1097.98	1002.22	5.41272	-1010.65	922.148	-51.9905	-1049.33	905.178	-35.9499	-984.242	844.236
387	0	190.495	-942.678	1592.34	293.58	-939.664	1586.38	180.737	-1115.85	1606.22	310.296	-1089.76	1604.29	231.344	-1156.22	1470.39	217.913	-1260.65	1222.65	240.778	-1022.59	1363.05	222.583	-978.796	1181.44	265.328	-1263.34	1296.96	68.1996	-1080.55	1414.48	-20.5958	-1141.85	1201.82	-28.8543	-1147.42	1120.44	-51.3025	-1090.27	1003.95	3.52612	-1004.09	922.126	-53.7598	-1043.37	906.12	-38.2555	-979.62	843.557
388	0	190.396	-928.667	1593.72	293.466	-925.655	1587.76	180.622	-1101.82	1607.7	310.179	-1075.72	1605.73	231.484	-1142.21	1471.92	218.488	-1247.1	1224.41	240.178	-1008.71	1364.67	221.456	-965.052	1183.08	265.914	-1249.41	1298.68	67.8755	-1067.23	1416.24	-20.9532	-1131.15	1204.25	-29.2372	-1137.52	1122.9	-52.4658	-1082.65	1005.51	1.37726	-997.597	921.95	-55.7303	-1037.51	906.923	-40.896	-975.056	842.835
389	0	190.168	-914.686	1594.83	293.225	-911.663	1588.89	180.399	-1087.83	1608.86	309.949	-1061.71	1606.9	231.566	-1128.21	1473.16	219.037	-1233.53	1225.87	239.568	-994.815	1366.02	220.42	-951.275	1184.45	266.476	-1235.47	1300.11	67.5213	-1053.91	1417.65	-21.3025	-1120.59	1206.38	-29.6605	-1127.65	1125.1	-53.7602	-1075.08	1006.87	-1.01789	-991.137	921.594	-57.8823	-1031.73	907.558	-43.8558	-970.522	842.046
390	0	189.82	-900.732	1595.64	292.867	-897.68	1589.77	180.08	-1073.87	1609.67	309.62	-1047.71	1607.77	231.594	-1114.2	1474.08	219.55	-1219.94	1227	238.961	-980.898	1367.05	219.493	-937.474	1185.51	267.005	-1221.51	1301.23	67.1462	-1040.57	1418.69	-21.6342	-1110.11	1208.17	-30.1124	-1117.8	1127	-55.1693	-1067.56	1008	-3.63957	-984.692	921.032	-60.195	-1026.01	908	-47.1128	-965.995	841.167
391	0	189.361	-886.796	1596.15	292.401	-883.7	1590.36	179.677	-1059.94	1610.12	309.201	-1033.71	1608.32	231.574	-1100.18	1474.66	220.018	-1206.32	1227.78	238.365	-966.949	1367.74	218.686	-923.656	1186.22	267.494	-1207.54	1302.01	66.7565	-1027.2	1419.33	-21.943	-1099.68	1209.62	-30.5833	-1107.92	1128.58	-56.6765	-1060.05	1008.89	-6.46475	-978.241	920.242	-62.6468	-1020.32	908.227	-50.6388	-961.452	840.175
392	0	188.798	-872.872	1596.34	291.834	-869.715	1590.65	179.197	-1046.03	1610.19	308.701	-1019.72	1608.53	231.503	-1086.13	1474.89	220.433	-1192.64	1228.19	237.784	-952.957	1368.07	218.004	-909.829	1186.55	267.934	-1193.54	1302.45	66.3557	-1013.78	1419.58	-22.2273	-1089.25	1210.69	-31.0663	-1098.01	1129.81	-58.2659	-1052.52	1009.51	-9.46779	-971.765	919.205	-65.2156	-1014.64	908.221	-54.4012	-956.877	839.048
393	0	188.136	-858.952	1596.19	291.171	-855.716	1590.62	178.646	-1032.13	1609.88	308.125	-1005.71	1608.38	231.383	-1072.05	1474.77	220.785	-1178.92	1228.24	237.22	-938.916	1368.01	217.446	-896	1186.48	268.316	-1179.51	1302.54	65.9439	-1000.3	1419.4	-22.4895	-1078.78	1211.38	-31.5567	-1088.04	1130.69	-59.9224	-1044.96	1009.85	-12.6211	-965.249	917.905	-67.8796	-1008.94	907.969	-58.3633	-952.253	837.765
394	0	187.378	-845.029	1595.71	290.415	-841.696	1590.28	178.028	-1018.23	1609.18	307.476	-991.69	1607.87	231.208	-1057.94	1474.29	221.07	-1165.14	1227.91	236.671	-924.819	1367.57	217.008	-882.169	1185.99	268.63	-1165.45	1302.26	65.5179	-986.75	1418.82	-22.7354	-1068.22	1211.68	-32.052	-1077.97	1131.21	-61.6314	-1037.33	1009.9	-15.896	-958.674	916.333	-70.6173	-1003.22	907.461	-62.4858	-947.564	836.308
395	0	186.525	-831.092	1594.89	289.566	-827.648	1589.61	177.342	-1004.33	1608.1	306.756	-977.641	1607.02	230.973	-1043.78	1473.45	221.279	-1151.29	1227.21	236.13	-910.661	1366.73	216.676	-868.336	1185.08	268.867	-1151.35	1301.62	65.0718	-973.119	1417.84	-22.9736	-1057.54	1211.59	-32.5514	-1067.78	1131.35	-63.3799	-1029.6	1009.65	-19.2633	-952.023	914.481	-73.4082	-997.422	906.695	-66.728	-942.797	834.663
396	0	185.578	-817.135	1593.75	288.625	-813.564	1588.63	176.586	-990.407	1606.66	305.96	-963.559	1605.81	230.669	-1029.58	1472.26	221.41	-1137.37	1226.15	235.587	-896.438	1365.51	216.438	-854.496	1183.75	269.018	-1137.19	1300.64	64.5963	-959.406	1416.46	-23.215	-1046.69	1211.1	-33.0558	-1057.44	1131.13	-65.1555	-1021.76	1009.11	-22.6941	-945.281	912.351	-76.2326	-991.537	905.671	-71.0489	-937.937	832.819
397	0	184.534	-803.149	1592.3	287.589	-799.438	1587.34	175.756	-976.462	1604.87	305.086	-949.436	1604.28	230.287	-1015.32	1470.75	221.456	-1123.37	1224.74	235.031	-882.146	1363.91	216.273	-840.638	1182.03	269.075	-1122.99	1299.32	64.08	-945.608	1414.71	-23.4719	-1035.64	1210.23	-33.5672	-1046.94	1130.54	-66.9473	-1013.78	1008.28	-26.1603	-938.429	909.946	-79.0721	-985.533	904.395	-75.4079	-932.972	830.771
398	0	183.389	-789.127	1590.56	286.455	-785.267	1585.76	174.842	-962.484	1602.77	304.125	-935.269	1602.44	229.815	-1001.02	1468.93	221.417	-1109.29	1223.01	234.446	-867.782	1361.97	216.16	-826.747	1179.93	269.031	-1108.73	1297.68	63.5091	-931.725	1412.61	-23.7576	-1024.38	1208.99	-34.0887	-1036.25	1129.6	-68.7451	-1005.62	1007.17	-29.635	-931.45	907.276	-81.9094	-979.381	902.876	-79.7664	-927.884	828.518
399	0	182.138	-775.062	1588.56	285.216	-771.045	1583.91	173.835	-948.466	1600.38	303.069	-921.054	1600.33	229.24	-986.663	1466.83	221.289	-1095.11	1220.97	233.816	-853.344	1359.72	216.073	-812.808	1177.51	268.879	-1094.4	1295.75	62.8684	-917.758	1410.19	-24.0853	-1012.88	1207.39	-34.6236	-1025.35	1128.32	-70.54	-997.259	1005.78	-33.0933	-924.323	904.355	-84.7285	-973.05	901.128	-84.0878	-922.657	826.063
400	0	180.775	-760.947	1586.32	283.867	-756.771	1581.84	172.724	-934.399	1597.75	301.907	-906.786	1597.98	228.55	-972.253	1464.48	221.071	-1080.84	1218.65	233.12	-838.828	1357.19	215.985	-798.798	1174.8	268.614	-1080	1293.56	62.1414	-903.712	1407.49	-24.468	-1001.12	1205.46	-35.1758	-1014.23	1126.71	-72.3238	-988.678	1004.14	-36.5121	-917.028	901.205	-87.5148	-966.51	899.168	-88.3383	-917.269	823.414
401	0	179.293	-746.778	1583.9	282.401	-742.442	1579.57	171.496	-920.279	1594.92	300.627	-892.466	1595.42	227.731	-957.789	1461.93	220.763	-1066.46	1216.1	232.341	-824.233	1354.43	215.867	-784.696	1171.86	268.232	-1065.51	1291.13	61.3117	-889.59	1404.55	-24.9169	-989.109	1203.22	-35.7492	-1002.86	1124.81	-74.0889	-979.851	1002.27	-39.8707	-909.542	897.848	-90.2546	-959.729	897.019	-92.4876	-911.698	820.587
402	0	177.684	-732.549	1581.32	280.809	-728.058	1577.16	170.136	-906.1	1591.93	299.216	-878.092	1592.71	226.771	-943.267	1459.21	220.365	-1051.97	1213.35	231.457	-809.556	1351.51	215.689	-770.479	1168.75	267.732	-1050.94	1288.52	60.363	-875.397	1401.41	-25.4422	-976.833	1200.71	-36.3475	-991.235	1122.64	-75.8286	-970.753	1000.2	-43.1503	-901.84	894.313	-92.9354	-952.678	894.703	-96.5086	-905.917	817.6
403	0	175.942	-718.258	1578.65	279.084	-713.618	1574.64	168.631	-891.857	1588.83	297.663	-863.665	1589.89	225.658	-928.688	1456.37	219.877	-1037.36	1210.44	230.45	-794.792	1348.46	215.421	-756.122	1165.53	267.113	-1036.26	1285.76	59.28	-861.139	1398.12	-26.0513	-964.295	1197.96	-36.974	-979.348	1120.23	-77.5367	-961.366	997.935	-46.3347	-893.895	890.635	-95.5455	-945.324	892.247	-100.378	-899.895	814.476
404	0	174.057	-703.9	1575.94	277.218	-699.123	1572.08	166.968	-877.547	1585.67	295.954	-849.185	1587.01	224.384	-914.049	1453.46	219.302	-1022.61	1207.43	229.303	-779.94	1345.36	215.035	-741.605	1162.28	266.377	-1021.48	1282.9	58.0497	-846.819	1394.72	-26.7496	-951.498	1195.01	-37.6313	-967.189	1117.62	-79.2072	-951.667	995.522	-49.4093	-885.68	886.848	-98.0739	-937.636	889.68	-104.075	-893.599	811.244
405	0	172.024	-689.475	1573.23	275.204	-684.573	1569.52	165.136	-863.167	1582.5	294.079	-834.653	1584.13	222.939	-899.348	1450.51	218.643	-1007.73	1204.36	228	-764.996	1342.27	214.504	-726.908	1159.06	265.526	-1006.59	1279.99	56.6614	-832.44	1391.27	-27.5398	-938.449	1191.89	-38.3216	-954.754	1114.84	-80.8348	-941.639	992.989	-52.362	-877.163	882.992	-100.511	-929.583	887.032	-107.584	-886.992	807.935
406	0	169.837	-674.98	1570.57	273.038	-669.969	1567.02	163.123	-848.715	1579.36	292.03	-820.071	1581.29	221.321	-884.581	1447.6	217.903	-992.714	1201.29	226.528	-749.958	1339.24	213.805	-712.017	1155.93	264.565	-991.576	1277.09	55.1081	-818.007	1387.81	-28.422	-925.159	1188.67	-39.0459	-942.041	1111.95	-82.4144	-931.265	990.369	-55.182	-868.313	879.108	-102.846	-921.135	884.334	-110.889	-880.031	804.583
407	0	167.493	-660.416	1568.03	270.714	-655.313	1564.64	160.924	-834.191	1576.32	289.799	-805.441	1578.54	219.528	-869.747	1444.76	217.088	-977.549	1198.26	224.88	-734.823	1336.33	212.919	-696.917	1152.96	263.502	-976.437	1274.24	53.3866	-803.52	1384.4	-29.3936	-911.638	1185.38	-39.8044	-929.05	1108.97	-83.9414	-920.53	987.696	-57.8606	-859.097	875.238	-105.07	-912.263	881.617	-113.981	-872.674	801.225
408	0	164.988	-645.782	1565.64	268.23	-640.606	1562.42	158.533	-819.593	1573.4	287.384	-790.764	1575.95	217.562	-854.843	1442.04	216.204	-962.24	1195.33	223.052	-719.591	1333.61	211.833	-681.602	1150.2	262.344	-961.172	1271.49	51.4985	-788.981	1381.08	-30.4499	-897.897	1182.08	-40.5963	-915.784	1105.97	-85.4113	-909.42	985.006	-60.3902	-849.481	871.428	-107.176	-902.937	878.911	-116.849	-864.875	797.896
409	0	162.323	-631.082	1563.45	265.586	-625.848	1560.42	155.95	-804.924	1570.67	284.783	-776.041	1573.54	215.43	-839.868	1439.49	215.258	-946.79	1192.56	221.046	-704.263	1331.11	210.539	-666.068	1147.7	261.101	-945.781	1268.91	49.4499	-774.39	1377.89	-31.584	-883.947	1178.81	-41.4194	-902.246	1102.97	-86.8204	-897.921	982.333	-62.7649	-839.431	867.717	-109.155	-893.13	876.248	-119.487	-856.587	794.635
410	0	159.501	-616.316	1561.51	262.785	-611.043	1558.67	153.178	-790.185	1568.14	282.001	-761.275	1571.37	213.142	-824.824	1437.15	214.26	-931.207	1189.98	218.87	-688.842	1328.89	209.038	-650.317	1145.51	259.784	-930.268	1266.53	47.2519	-759.747	1374.89	-32.7873	-869.8	1175.63	-42.271	-888.441	1100.02	-88.165	-886.024	979.711	-64.9798	-828.914	864.149	-111.001	-882.815	873.655	-121.891	-847.761	791.476
411	0	156.528	-601.491	1559.84	259.833	-596.193	1557.22	150.226	-775.38	1565.86	279.046	-746.468	1569.47	210.711	-809.711	1435.07	213.218	-915.502	1187.66	216.536	-673.335	1326.98	207.337	-634.358	1143.65	258.406	-914.642	1264.41	44.9203	-745.053	1372.1	-34.0502	-855.466	1172.58	-43.1471	-874.376	1097.18	-89.4421	-873.719	977.17	-67.0314	-817.897	860.762	-112.707	-871.969	871.16	-124.058	-838.351	788.452
412	0	153.413	-586.61	1558.47	256.738	-581.3	1556.1	147.106	-760.514	1563.86	275.928	-731.622	1567.88	208.156	-794.535	1433.27	212.143	-899.689	1185.63	214.063	-657.75	1325.4	205.451	-618.205	1142.15	256.981	-898.913	1262.59	42.4754	-730.31	1369.57	-35.3617	-840.953	1169.7	-44.0429	-860.055	1094.46	-90.6491	-860.996	974.742	-68.9169	-806.349	857.592	-114.269	-860.568	868.785	-125.987	-828.309	785.594
413	0	150.169	-571.681	1557.42	253.513	-566.368	1555.32	143.836	-745.594	1562.16	272.664	-716.741	1566.62	205.497	-779.303	1431.78	211.045	-883.789	1183.92	211.475	-642.099	1324.19	203.402	-601.881	1141.02	255.523	-883.099	1261.09	39.9412	-715.519	1367.32	-36.7106	-826.267	1167.03	-44.9533	-845.488	1091.92	-91.784	-847.85	972.452	-70.6346	-794.242	854.67	-115.683	-848.593	866.552	-127.68	-817.594	782.927
414	0	146.813	-556.711	1556.71	250.173	-551.402	1554.9	140.436	-730.626	1560.77	269.276	-701.828	1565.71	202.758	-764.023	1430.63	209.935	-867.823	1182.58	208.8	-626.399	1323.34	201.22	-585.417	1140.29	254.048	-867.217	1259.96	37.3447	-700.687	1365.38	-38.0852	-811.414	1164.61	-45.8725	-830.679	1089.58	-92.8451	-834.274	970.324	-72.1836	-781.549	852.024	-116.947	-836.024	864.478	-129.138	-806.162	780.475
415	0	143.363	-541.712	1556.33	246.738	-536.408	1554.85	136.934	-715.622	1559.72	265.787	-686.888	1565.16	199.965	-748.707	1429.84	208.824	-851.818	1181.61	206.068	-610.667	1322.87	198.937	-568.849	1139.93	252.57	-851.292	1259.2	34.7152	-685.818	1363.76	-39.474	-796.398	1162.45	-46.7944	-815.637	1087.46	-93.8315	-820.263	968.378	-73.5632	-768.251	849.676	-118.061	-822.848	862.578	-130.367	-793.979	778.255
416	0	139.842	-526.693	1556.28	243.23	-521.393	1555.16	133.359	-700.593	1559	262.226	-671.928	1564.99	197.146	-733.37	1429.41	207.724	-835.802	1181.03	203.314	-594.924	1322.78	196.593	-552.222	1139.96	251.104	-835.347	1258.84	32.0828	-670.92	1362.47	-40.8651	-781.22	1160.59	-47.7133	-800.369	1085.59	-94.7425	-805.816	966.628	-74.7737	-754.329	847.643	-119.024	-809.05	860.863	-131.372	-781.01	776.281
417	0	136.276	-511.666	1556.57	239.673	-506.365	1555.82	129.745	-685.551	1558.62	258.623	-656.955	1565.18	194.329	-718.027	1429.34	206.644	-819.803	1180.85	200.573	-579.193	1323.05	194.229	-535.587	1140.34	249.664	-819.41	1258.88	29.4777	-656.003	1361.53	-42.2472	-765.883	1159.02	-48.6234	-784.882	1083.98	-95.5781	-790.931	965.087	-75.8152	-739.77	845.937	-119.838	-794.623	859.34	-132.159	-767.23	774.561
418	0	132.694	-496.645	1557.16	236.097	-491.335	1556.83	126.125	-670.511	1558.57	255.012	-641.977	1565.74	191.542	-702.696	1429.62	205.592	-803.85	1181.07	197.879	-563.496	1323.68	191.886	-518.995	1141.07	248.262	-803.509	1259.31	26.9289	-641.076	1360.93	-43.6092	-750.392	1157.76	-49.5194	-769.186	1082.64	-96.3385	-775.609	963.763	-76.6884	-724.569	844.566	-120.507	-779.559	858.014	-132.736	-752.615	773.101
419	0	129.124	-481.644	1558.05	232.53	-476.313	1558.15	122.539	-655.488	1558.84	251.428	-627.004	1566.64	188.811	-687.392	1430.26	204.576	-787.972	1181.68	195.266	-547.856	1324.64	189.609	-502.5	1142.11	246.907	-787.671	1260.12	24.4635	-626.15	1360.67	-44.9403	-734.75	1156.79	-50.3968	-753.289	1081.57	-97.0245	-759.853	962.659	-77.3936	-708.724	843.531	-121.033	-763.857	856.887	-133.11	-737.152	771.903
420	0	125.598	-466.675	1559.21	229.003	-461.309	1559.76	119.021	-640.497	1559.42	247.906	-612.045	1567.88	186.162	-672.134	1431.23	203.598	-772.195	1182.65	192.765	-532.297	1325.91	187.438	-486.154	1143.43	245.608	-771.92	1261.29	22.1057	-611.236	1360.73	-46.2308	-718.962	1156.12	-51.2514	-737.199	1080.76	-97.637	-743.667	961.775	-77.9315	-692.239	842.832	-121.422	-747.517	855.957	-133.29	-720.83	770.967
421	0	122.145	-451.752	1560.62	225.547	-446.336	1561.64	115.607	-625.551	1560.29	244.48	-597.111	1569.41	183.616	-656.937	1432.5	202.66	-756.542	1183.96	190.405	-516.836	1327.46	185.413	-470.003	1145.01	244.368	-756.281	1262.79	19.8764	-596.341	1361.11	-47.4721	-703.036	1155.73	-52.08	-720.927	1080.22	-98.1771	-727.059	961.11	-78.3025	-675.124	842.464	-121.679	-730.546	855.222	-133.283	-703.649	770.292
422	0	118.797	-436.886	1562.25	222.192	-431.404	1563.75	112.332	-610.665	1561.43	241.182	-582.212	1571.21	181.193	-641.813	1434.05	201.76	-741.033	1185.58	188.208	-501.491	1329.26	183.569	-454.087	1146.8	243.188	-740.772	1264.6	17.7929	-581.476	1361.78	-48.6567	-686.979	1155.6	-52.8803	-704.483	1079.92	-98.6461	-710.039	960.658	-78.507	-657.396	842.418	-121.807	-712.952	854.679	-133.097	-685.614	769.874
423	0	115.581	-422.088	1564.07	218.966	-416.524	1566.05	109.226	-595.851	1562.8	238.042	-567.358	1573.26	178.91	-626.773	1435.86	200.895	-725.684	1187.49	186.195	-486.275	1331.29	181.937	-438.436	1148.78	242.067	-725.41	1266.67	15.868	-566.645	1362.72	-49.7787	-670.8	1155.72	-53.6505	-687.877	1079.86	-99.0454	-692.617	960.411	-78.5456	-639.074	842.685	-121.813	-694.749	854.323	-132.739	-666.737	769.712
424	0	112.522	-407.367	1566.07	215.896	-401.705	1568.52	106.315	-581.117	1564.4	235.086	-552.558	1575.51	176.777	-611.824	1437.89	200.057	-710.507	1189.64	184.379	-471.198	1333.51	180.539	-423.068	1150.91	241.002	-710.206	1268.98	14.1108	-551.854	1363.92	-50.8339	-654.51	1156.06	-54.39	-671.119	1080.02	-99.3762	-674.806	960.362	-78.4194	-620.184	843.257	-121.7	-675.954	854.15	-132.214	-647.04	769.804
425	0	109.644	-392.728	1568.21	213.005	-386.955	1571.13	103.62	-566.471	1566.18	232.335	-537.818	1577.92	174.805	-596.972	1440.11	199.241	-695.509	1192	182.769	-456.265	1335.89	179.393	-407.991	1153.17	239.988	-695.166	1271.49	12.526	-537.106	1365.33	-51.8194	-638.117	1156.61	-55.0987	-654.22	1080.38	-99.64	-656.622	960.5	-78.1296	-600.754	844.121	-121.473	-656.587	854.155	-131.527	-626.549	770.149
426	0	106.965	-378.175	1570.47	210.312	-372.279	1573.83	101.157	-551.918	1568.11	229.807	-523.145	1580.45	172.999	-582.217	1442.48	198.439	-680.691	1194.54	181.367	-441.479	1338.39	178.504	-393.203	1155.52	239.02	-680.294	1274.15	11.1146	-522.402	1366.95	-52.7341	-621.634	1157.35	-55.7776	-637.191	1080.92	-99.8384	-638.082	960.816	-77.6785	-580.817	845.267	-121.135	-636.674	854.335	-130.683	-605.299	770.749
427	0	104.5	-363.71	1572.81	207.833	-357.682	1576.59	98.937	-537.457	1570.18	227.514	-508.542	1583.08	171.36	-567.559	1444.98	197.644	-666.054	1197.21	180.173	-426.836	1340.99	177.873	-378.691	1157.95	238.091	-665.588	1276.93	9.87377	-507.742	1368.74	-53.5786	-605.07	1158.25	-56.4284	-620.043	1081.62	-99.9733	-619.203	961.298	-77.069	-560.406	846.687	-120.691	-616.239	854.687	-129.684	-583.33	771.606
428	0	102.26	-349.332	1575.22	205.578	-343.164	1579.4	96.9649	-523.089	1572.34	225.461	-494.012	1585.76	169.888	-552.995	1447.56	196.85	-651.589	1199.98	179.179	-412.334	1343.65	177.488	-364.435	1160.42	237.195	-651.043	1279.8	8.7976	-493.126	1370.67	-54.3551	-588.437	1159.3	-57.0538	-602.787	1082.47	-100.047	-600.005	961.935	-76.3054	-539.559	848.37	-120.142	-595.313	855.208	-128.534	-560.688	772.724
429	0	100.251	-335.036	1577.67	203.556	-328.726	1582.2	95.2398	-508.809	1574.56	223.652	-479.555	1588.45	168.577	-538.52	1450.2	196.052	-637.289	1202.82	178.375	-397.965	1346.34	177.332	-350.407	1162.93	236.326	-636.649	1282.7	7.87738	-478.552	1372.72	-55.0676	-571.747	1160.48	-57.657	-585.434	1083.45	-100.061	-580.508	962.716	-75.3932	-518.312	850.306	-119.493	-573.927	855.896	-127.233	-537.424	774.105
430	0	98.4775	-320.816	1580.13	201.768	-314.366	1584.97	93.7565	-494.609	1576.83	222.083	-465.17	1591.13	167.423	-524.129	1452.85	195.247	-623.14	1205.68	177.746	-383.721	1349.03	177.38	-336.578	1165.45	235.481	-622.396	1285.62	7.10219	-464.018	1374.87	-55.7218	-555.012	1161.78	-58.2423	-567.995	1084.52	-100.018	-560.734	963.627	-74.3392	-496.702	852.488	-118.746	-552.113	856.748	-125.784	-513.594	775.751
431	0	96.9374	-306.667	1582.58	200.216	-300.08	1587.69	92.5052	-480.483	1579.1	220.747	-450.856	1593.75	166.416	-509.816	1455.49	194.432	-609.129	1208.53	177.276	-369.59	1351.7	177.599	-322.915	1167.96	234.655	-608.27	1288.52	6.4594	-449.523	1377.08	-56.3248	-538.244	1163.16	-58.8146	-550.482	1085.68	-99.9231	-540.704	964.656	-73.1515	-474.768	854.904	-117.906	-529.906	857.762	-124.189	-489.253	777.665
432	0	95.627	-292.578	1584.98	198.894	-285.863	1590.32	91.4726	-466.42	1581.34	219.635	-436.608	1596.28	165.546	-495.573	1458.09	193.609	-595.24	1211.34	176.944	-355.563	1354.31	177.953	-309.386	1170.44	233.845	-594.258	1291.35	5.93532	-435.064	1379.33	-56.8852	-521.453	1164.61	-59.3794	-532.904	1086.89	-99.7785	-520.44	965.788	-71.8394	-452.545	857.543	-116.974	-507.339	858.933	-122.449	-464.461	779.846
433	0	94.5391	-278.541	1587.31	197.798	-271.71	1592.83	90.6431	-452.411	1583.54	218.733	-422.424	1598.7	164.802	-481.395	1460.6	192.779	-581.455	1214.08	176.731	-341.626	1356.84	178.405	-295.959	1172.88	233.052	-580.342	1294.09	5.51572	-420.64	1381.58	-57.4127	-504.653	1166.1	-59.9429	-515.272	1088.13	-99.5891	-499.966	967.007	-70.4132	-430.071	860.393	-115.956	-484.448	860.256	-120.568	-439.277	782.289
434	0	93.6644	-264.546	1589.54	196.916	-257.615	1595.19	89.9988	-438.444	1585.65	218.027	-408.299	1600.98	164.174	-467.274	1463	191.947	-567.759	1216.7	176.615	-327.768	1359.25	178.915	-282.607	1175.23	232.275	-566.509	1296.7	5.18643	-406.251	1383.81	-57.9179	-487.851	1167.62	-60.5115	-497.595	1089.38	-99.3597	-479.303	968.297	-68.8835	-407.381	863.438	-114.857	-461.269	861.723	-118.551	-413.761	784.988
435	0	92.9916	-250.584	1591.64	196.239	-243.572	1597.39	89.5213	-424.509	1587.66	217.5	-394.227	1603.08	163.649	-453.202	1465.27	191.119	-554.134	1219.18	176.576	-313.977	1361.52	179.443	-269.303	1177.48	231.518	-552.742	1299.16	4.93382	-391.896	1385.98	-58.4119	-471.057	1169.13	-61.092	-479.879	1090.61	-99.0955	-458.474	969.641	-67.2618	-384.512	866.661	-113.681	-437.836	863.324	-116.403	-387.971	787.934
436	0	92.5078	-236.647	1593.6	195.754	-229.575	1599.39	89.1916	-410.598	1589.53	217.136	-380.206	1604.99	163.218	-439.174	1467.36	190.303	-540.564	1221.48	176.594	-300.239	1363.61	179.954	-256.027	1179.59	230.783	-539.027	1301.43	4.74525	-377.574	1388.07	-58.9057	-454.276	1170.61	-61.6906	-462.133	1091.79	-98.8024	-437.5	971.019	-65.5595	-361.497	870.043	-112.434	-414.187	865.048	-114.131	-361.962	791.113
437	0	92.1992	-222.726	1595.38	195.446	-215.616	1601.17	88.9916	-396.701	1591.23	216.916	-366.229	1606.68	162.869	-425.183	1469.25	189.508	-527.035	1223.59	176.65	-286.544	1365.51	180.415	-242.76	1181.53	230.077	-525.351	1303.5	4.6095	-363.286	1390.03	-59.4098	-437.514	1172.01	-62.3132	-444.361	1092.9	-98.4859	-416.404	972.414	-63.7878	-338.37	873.56	-111.124	-390.355	866.882	-111.746	-335.791	794.51
438	0	92.0514	-208.814	1596.95	195.303	-201.692	1602.72	88.9039	-382.81	1592.74	216.826	-352.293	1608.14	162.596	-411.221	1470.93	188.746	-513.535	1225.47	176.728	-272.88	1367.17	180.796	-229.489	1183.26	229.407	-511.701	1305.33	4.51701	-349.032	1391.84	-59.9334	-420.773	1173.33	-62.965	-426.567	1093.91	-98.1518	-395.207	973.805	-61.958	-315.166	877.188	-109.758	-366.376	868.81	-109.257	-309.507	798.106
439	0	92.0498	-194.906	1598.31	195.309	-187.795	1604.01	88.9128	-368.92	1594.03	216.849	-338.392	1609.33	162.391	-397.283	1472.36	188.028	-500.052	1227.1	176.814	-259.236	1368.58	181.075	-216.205	1184.74	228.781	-498.067	1306.9	4.46015	-334.813	1393.47	-60.4843	-404.053	1174.52	-63.6497	-408.755	1094.79	-97.8054	-373.931	975.173	-60.0809	-291.916	880.902	-108.344	-342.285	870.816	-106.677	-283.162	801.882
440	0	92.1801	-180.996	1599.42	195.449	-173.922	1605.03	89.0044	-355.025	1595.09	216.97	-324.522	1610.25	162.249	-383.362	1473.53	187.368	-486.576	1228.46	176.898	-245.602	1369.71	181.234	-202.899	1185.95	228.21	-484.438	1308.21	4.4333	-320.628	1394.88	-61.0675	-387.354	1175.55	-64.3697	-390.927	1095.52	-97.4518	-352.595	976.5	-58.1671	-268.653	884.674	-106.89	-318.116	872.882	-104.02	-256.802	805.813
441	0	92.4284	-167.08	1600.28	195.71	-160.066	1605.77	89.1668	-341.121	1595.88	217.178	-310.678	1610.88	162.166	-369.454	1474.42	186.78	-473.099	1229.54	176.971	-231.969	1370.54	181.263	-189.566	1186.85	227.703	-470.807	1309.24	4.43299	-306.478	1396.04	-61.6856	-370.672	1176.4	-65.1255	-373.087	1096.08	-97.095	-331.223	977.769	-56.2267	-245.409	888.475	-105.405	-293.904	874.99	-101.301	-230.472	809.877
442	0	92.7819	-153.156	1600.86	196.078	-146.223	1606.21	89.3905	-327.205	1596.39	217.46	-296.855	1611.21	162.141	-355.552	1475.03	186.275	-459.615	1230.32	177.03	-218.327	1371.04	181.156	-176.202	1187.42	227.273	-457.167	1309.97	4.45786	-292.363	1396.95	-62.3378	-354.005	1177.05	-65.9156	-355.237	1096.45	-96.7387	-309.835	978.963	-54.2699	-222.215	892.279	-103.899	-269.684	877.123	-98.535	-204.215	814.049
443	0	93.2289	-139.221	1601.17	196.541	-132.389	1606.36	89.6681	-313.275	1596.62	217.808	-283.049	1611.24	162.174	-341.653	1475.34	185.868	-446.117	1230.81	177.073	-204.67	1371.21	180.917	-162.805	1187.62	226.931	-443.511	1310.39	4.50869	-278.283	1397.57	-63.0203	-337.352	1177.47	-66.7363	-337.381	1096.61	-96.3851	-288.453	980.067	-52.3063	-199.101	896.056	-102.379	-245.488	879.261	-95.7397	-178.071	818.304
444	0	93.7594	-125.274	1601.18	197.09	-118.56	1606.2	89.9946	-299.329	1596.54	218.215	-269.255	1610.96	162.268	-327.752	1475.35	185.571	-432.601	1230.98	177.103	-190.99	1371.04	180.552	-149.37	1187.46	226.688	-429.836	1310.52	4.58827	-264.235	1397.89	-63.7255	-320.708	1177.65	-67.5815	-319.524	1096.56	-96.0357	-267.099	981.07	-50.3456	-176.098	899.782	-100.854	-221.351	881.387	-92.932	-152.081	822.617
445	0	94.365	-111.313	1600.9	197.714	-104.73	1605.75	90.3673	-285.367	1596.16	218.675	-255.467	1610.38	162.426	-313.845	1475.06	185.394	-419.061	1230.85	177.127	-177.281	1370.52	180.075	-135.896	1186.91	226.554	-416.136	1310.33	4.70127	-250.218	1397.9	-64.4425	-304.076	1177.58	-68.4426	-301.672	1096.28	-95.6906	-245.798	981.96	-48.397	-153.233	903.43	-99.3339	-197.309	883.485	-90.1297	-126.283	826.963
446	0	95.0392	-97.3376	1600.33	198.408	-90.8975	1605.01	90.7858	-271.387	1595.48	219.186	-241.681	1609.5	162.653	-299.93	1474.47	185.346	-405.494	1230.41	177.152	-163.538	1369.66	179.507	-122.376	1185.99	226.539	-402.408	1309.85	4.85406	-236.228	1397.61	-65.1574	-287.455	1177.26	-69.3088	-283.834	1095.78	-95.3488	-224.573	982.73	-46.4698	-130.536	906.978	-97.8251	-173.395	885.538	-87.3509	-100.714	831.315
447	0	95.7779	-83.3471	1599.48	199.167	-77.0568	1603.98	91.2515	-257.39	1594.5	219.746	-227.892	1608.33	162.954	-286.004	1473.59	185.434	-391.893	1229.67	177.192	-149.756	1368.46	178.871	-108.807	1184.71	226.65	-388.649	1309.07	5.05439	-222.263	1397	-65.8536	-270.851	1176.68	-70.1669	-266.019	1095.05	-95.0078	-203.451	983.374	-44.5734	-108.034	910.404	-96.3353	-149.646	887.53	-84.6135	-75.4106	835.65
448	0	96.5791	-69.3407	1598.35	199.988	-63.2048	1602.68	91.7682	-243.374	1593.23	220.359	-214.094	1606.88	163.337	-272.065	1472.44	185.661	-378.255	1228.64	177.258	-135.933	1366.95	178.194	-95.1795	1183.09	226.892	-374.855	1307.99	5.31107	-208.316	1396.1	-66.5124	-254.27	1175.84	-71.0019	-248.239	1094.1	-94.6642	-182.458	983.887	-42.7165	-85.7519	913.69	-94.8709	-126.097	889.448	-81.9357	-50.4099	839.94
449	0	97.443	-55.3173	1596.97	200.872	-49.3376	1601.12	92.3415	-229.34	1591.69	221.027	-200.283	1605.18	163.809	-258.112	1471.02	186.028	-364.572	1227.33	177.368	-122.064	1365.13	177.507	-81.4876	1181.14	227.27	-361.023	1306.65	5.63363	-194.383	1394.91	-67.1137	-237.722	1174.77	-71.7972	-230.51	1092.95	-94.3131	-161.622	984.267	-40.908	-63.7163	916.818	-93.4378	-102.785	891.278	-79.3354	-25.7471	844.16
450	0	98.3721	-41.2758	1595.35	201.821	-35.4517	1599.34	92.9787	-215.286	1589.9	221.757	-186.454	1603.25	164.375	-244.142	1469.35	186.534	-350.838	1225.76	177.537	-108.148	1363.05	176.842	-67.7222	1178.92	227.784	-347.15	1305.04	6.03185	-180.455	1393.46	-67.6365	-221.219	1173.46	-72.5349	-212.847	1091.6	-93.9489	-140.972	984.515	-39.1563	-41.9514	919.772	-92.041	-79.7471	893.008	-76.8301	-1.4571	848.284
451	0	99.3706	-27.2147	1593.52	202.839	-21.5433	1597.35	93.6887	-201.212	1587.89	222.556	-172.602	1601.11	165.043	-230.154	1467.47	187.174	-337.046	1223.94	177.783	-94.1816	1360.74	176.233	-53.8744	1176.46	228.431	-333.233	1303.18	6.51546	-166.524	1391.76	-68.0596	-204.777	1171.95	-73.1964	-195.268	1090.07	-93.565	-120.537	984.633	-37.4694	-20.4809	922.542	-90.6845	-57.021	894.626	-74.4371	22.4257	852.287
452	0	100.445	-13.132	1591.5	203.933	-7.60886	1595.18	94.4813	-187.117	1585.69	223.433	-158.722	1598.79	165.818	-216.146	1465.39	187.939	-323.187	1221.89	178.123	-80.1635	1358.23	175.712	-39.9354	1173.8	229.208	-319.269	1301.11	7.09369	-152.582	1389.86	-68.3624	-188.41	1170.25	-73.7627	-177.794	1088.4	-93.1542	-100.348	984.623	-35.8544	0.672377	925.114	-89.3712	-34.6447	896.121	-72.1724	45.8676	856.142
453	0	101.602	0.974385	1589.33	205.11	6.35521	1592.86	95.3673	-172.998	1583.33	224.399	-144.81	1596.33	166.705	-202.116	1463.14	188.819	-309.254	1219.65	178.573	-66.0921	1355.57	175.311	-25.8965	1171	230.105	-305.255	1298.83	7.77496	-138.619	1387.78	-68.5251	-172.139	1168.39	-74.2153	-160.444	1086.59	-92.709	-80.4356	984.493	-34.3178	21.4863	927.48	-88.1032	-12.6561	897.484	-70.051	68.8358	859.823
454	0	102.85	15.1073	1587.05	206.378	20.3526	1590.44	96.3578	-158.853	1580.86	225.464	-130.862	1593.75	167.708	-188.063	1460.76	189.802	-295.237	1217.24	179.147	-51.9659	1352.8	175.061	-11.7495	1168.11	231.115	-291.188	1296.39	8.56658	-124.623	1385.56	-68.53	-155.979	1166.4	-74.5362	-143.24	1084.67	-92.2219	-60.8292	984.247	-32.8648	41.9393	929.633	-86.8812	8.90729	898.707	-68.0864	91.2983	863.302
455	0	104.199	29.2696	1584.69	207.747	34.3869	1587.94	97.4637	-144.68	1578.31	226.639	-116.874	1591.11	168.828	-173.984	1458.29	190.871	-281.128	1214.7	179.86	-37.7838	1349.97	174.99	2.51269	1165.18	232.223	-277.066	1293.81	9.47449	-110.583	1383.25	-68.3613	-139.951	1164.32	-74.7089	-126.203	1082.69	-91.6855	-41.5586	983.895	-31.4994	62.0106	931.565	-85.7049	30.0085	899.781	-66.2898	113.224	866.555
456	0	105.657	43.4649	1582.3	209.225	48.4621	1585.4	98.6952	-130.476	1575.73	227.934	-102.841	1588.43	170.067	-159.875	1455.75	192.012	-266.921	1212.05	180.724	-23.5443	1347.13	175.12	16.8964	1162.28	233.417	-262.885	1291.12	10.5031	-96.4865	1380.88	-68.0062	-124.069	1162.17	-74.7187	-109.353	1080.66	-91.0932	-22.6522	983.446	-30.2239	81.6796	933.271	-84.5729	50.6117	900.699	-64.6703	134.584	869.554
457	0	107.231	57.6967	1579.91	210.82	62.5817	1582.87	100.061	-116.237	1573.16	229.359	-88.7602	1585.76	171.422	-145.733	1453.19	193.205	-252.61	1209.33	181.746	-9.24644	1344.32	175.472	31.4067	1159.44	234.681	-248.644	1288.37	11.655	-82.3219	1378.5	-67.4548	-108.349	1159.99	-74.5533	-92.7113	1078.61	-90.4388	-4.13669	982.913	-29.0393	100.926	934.747	-83.4831	70.6825	901.457	-63.234	155.348	872.273
458	0	108.93	71.9688	1577.58	212.54	76.7495	1580.38	101.57	-101.959	1570.66	230.922	-74.6275	1583.14	172.891	-131.555	1450.66	194.434	-238.189	1206.6	182.934	5.11055	1341.6	176.061	46.0472	1156.73	235.997	-234.342	1285.6	12.9313	-68.0767	1376.15	-66.701	-92.8036	1157.81	-74.2029	-76.2949	1076.6	-89.7171	13.963	982.307	-27.9444	119.731	935.989	-82.4324	90.1882	902.05	-61.9838	175.488	874.688
459	0	110.758	86.2851	1575.35	214.391	90.9691	1577.97	103.225	-87.6385	1568.26	232.629	-60.4397	1580.61	174.469	-117.337	1448.19	195.678	-223.656	1203.88	184.291	19.5271	1339.02	176.898	60.8194	1154.18	237.35	-219.979	1282.84	14.3308	-53.7394	1373.89	-65.7422	-77.4403	1155.69	-73.6611	-60.12	1074.63	-88.9241	31.6244	981.643	-26.9366	138.075	936.996	-81.417	109.098	902.478	-60.9193	194.978	876.776
460	0	112.719	100.649	1573.25	216.374	105.244	1575.7	105.032	-73.2719	1566.01	234.482	-46.1936	1578.22	176.149	-103.075	1445.82	196.921	-209.011	1201.23	185.817	34.0031	1336.61	177.986	75.723	1151.84	238.721	-205.554	1280.13	15.8505	-39.2998	1371.75	-64.5798	-62.2643	1153.65	-72.9246	-44.2	1072.76	-88.0569	48.8277	980.938	-26.0114	155.937	937.767	-80.4328	127.385	902.74	-60.0367	213.791	878.515
461	0	114.813	115.064	1571.32	218.491	119.577	1573.58	106.988	-58.8555	1563.95	236.482	-31.8866	1576	177.923	-88.7659	1443.6	198.144	-194.256	1198.69	187.51	48.5374	1334.41	179.328	90.7547	1149.75	240.095	-191.07	1277.54	17.4854	-24.7491	1369.77	-63.2193	-47.2764	1151.74	-71.9937	-28.5454	1071.02	-87.1138	65.5561	980.207	-25.1622	173.3	938.301	-79.4753	145.024	902.84	-59.3281	231.903	879.886
462	0	117.037	129.534	1569.62	220.739	133.97	1571.67	109.092	-44.3862	1562.13	238.626	-17.5167	1573.99	179.78	-74.4068	1441.56	199.333	-179.397	1196.31	189.363	63.1282	1332.47	180.916	105.908	1147.94	241.453	-176.53	1275.09	19.228	-10.0807	1368	-61.6702	-32.4731	1149.99	-70.8721	-13.1635	1069.44	-86.0944	81.7959	979.47	-24.3815	190.145	938.601	-78.5399	161.993	902.782	-58.7826	249.29	880.875
463	0	119.387	144.059	1568.16	223.113	148.425	1569.99	111.337	-29.8616	1560.57	240.907	-3.08236	1572.22	181.71	-59.9962	1439.75	200.472	-164.44	1194.12	191.365	77.7722	1330.81	182.742	121.172	1146.45	242.782	-161.936	1272.82	21.0688	4.70898	1366.48	-59.946	-17.8467	1148.44	-69.5671	1.94162	1068.06	-84.9999	97.5371	978.745	-23.6597	206.454	938.671	-77.6222	178.273	902.574	-58.3854	265.929	881.469
464	0	121.854	158.641	1566.98	225.605	162.944	1568.58	113.714	-15.2806	1559.32	243.317	11.4169	1570.74	183.7	-45.5333	1438.19	201.549	-149.395	1192.17	193.503	92.4651	1329.46	184.787	136.532	1145.29	244.067	-147.293	1270.8	22.9958	19.6205	1365.25	-58.0639	-3.38594	1147.15	-68.0893	16.7689	1066.9	-83.8329	112.773	978.052	-22.9867	222.211	938.515	-76.7181	193.852	902.228	-58.1187	281.799	881.661
465	0	124.425	173.28	1566.1	228.202	177.525	1567.46	116.208	-0.642976	1558.4	245.842	25.9805	1569.55	185.735	-31.0184	1436.92	202.553	-134.276	1190.5	195.757	107.201	1328.45	187.031	151.969	1144.5	245.296	-132.608	1269.03	24.9952	34.6505	1364.32	-56.045	10.9238	1146.13	-66.4527	31.3204	1066	-82.5974	127.5	977.413	-22.3512	237.398	938.141	-75.8243	208.718	901.757	-57.9622	296.882	881.449
466	0	127.087	187.974	1565.55	230.888	192.168	1566.65	118.806	14.0498	1557.83	248.465	40.6066	1568.69	187.801	-16.4533	1435.96	203.478	-119.095	1189.14	198.108	121.973	1327.8	189.447	167.46	1144.08	246.459	-117.887	1267.57	27.0508	49.7922	1363.74	-53.9138	25.0998	1145.42	-64.6744	45.6006	1065.4	-81.2994	141.718	976.846	-21.7418	252.001	937.559	-74.9386	222.867	901.176	-57.8931	311.161	880.837
467	0	129.82	202.72	1565.33	233.647	206.868	1566.17	121.486	28.7949	1557.62	251.169	55.2922	1568.18	189.882	-1.84082	1435.34	204.319	-103.868	1188.11	200.529	136.773	1327.51	192.001	182.979	1144.05	247.549	-103.137	1266.44	29.1449	65.0348	1363.52	-51.6977	39.1608	1145.06	-62.7741	59.6162	1065.1	-79.9462	155.431	976.373	-21.1472	266.009	936.781	-74.0598	236.299	900.505	-57.8872	324.623	879.834
468	0	132.606	217.515	1565.45	236.457	221.622	1566.01	124.23	43.5877	1557.79	253.931	70.0328	1568.01	191.962	12.8153	1435.05	205.073	-88.6125	1187.45	202.993	151.593	1327.59	194.655	198.495	1144.41	248.562	-88.365	1265.65	31.2583	80.3641	1363.67	-49.427	53.1265	1145.07	-60.7742	73.3754	1065.14	-78.5467	168.647	976.012	-20.5565	279.41	935.821	-73.1882	249.016	899.764	-57.9195	337.26	878.456
469	0	135.421	232.352	1565.92	239.296	236.425	1566.2	127.011	58.4223	1558.33	256.729	84.8226	1568.2	194.027	27.5106	1435.12	205.744	-73.3441	1187.16	205.47	166.424	1328.05	197.368	213.977	1145.14	249.494	-73.5784	1265.23	33.3707	95.7626	1364.21	-47.1335	67.0158	1145.45	-58.6987	86.8876	1065.51	-77.1113	181.374	975.781	-19.9603	292.198	934.696	-72.3254	261.031	898.977	-57.965	349.068	876.725
470	0	138.241	247.224	1566.72	242.139	251.268	1566.72	129.807	73.2915	1559.24	259.537	99.6546	1568.74	196.06	42.2399	1435.54	206.334	-58.0805	1187.24	207.929	181.256	1328.86	200.093	229.395	1146.25	250.346	-58.7848	1265.18	35.4615	111.21	1365.13	-44.8507	80.8461	1146.23	-56.5735	100.163	1066.25	-75.652	193.625	975.694	-19.3506	304.368	933.426	-71.475	272.357	898.164	-57.9999	360.047	874.668
471	0	141.043	262.123	1567.85	244.961	266.144	1567.56	132.591	88.1872	1560.5	262.329	114.521	1569.62	198.048	56.9983	1436.31	206.853	-42.8385	1187.71	210.339	196.082	1330.02	202.781	244.718	1147.7	251.123	-43.9913	1265.5	37.5098	126.686	1366.43	-42.6119	94.6317	1147.41	-54.4249	113.211	1067.33	-74.1816	205.416	975.763	-18.7215	315.922	932.03	-70.6416	283.016	897.352	-58.0023	370.208	872.32
472	0	143.801	277.041	1569.28	247.738	281.045	1568.7	135.337	103.101	1562.08	265.08	129.413	1570.82	199.977	71.7807	1437.4	207.31	-27.6347	1188.55	212.668	210.895	1331.51	205.383	259.92	1149.46	251.831	-29.2043	1266.18	39.4953	142.166	1368.08	-40.4498	108.383	1148.96	-52.2796	126.042	1068.76	-72.7142	216.764	975.996	-18.0696	326.864	930.532	-69.8316	293.034	896.561	-57.9538	379.566	869.717
473	0	146.491	291.969	1571	250.444	295.961	1570.13	138.019	118.024	1563.97	267.764	144.321	1572.31	201.835	86.5827	1438.8	207.718	-12.4847	1189.74	214.888	225.689	1333.29	207.849	274.978	1151.49	252.477	-14.4303	1267.21	41.3987	157.627	1370.07	-38.3951	122.105	1150.88	-50.1638	138.664	1070.51	-71.2646	227.689	976.399	-17.3948	337.205	928.955	-69.0528	302.44	895.814	-57.8399	388.143	866.903
474	0	149.089	306.9	1572.96	253.056	310.883	1571.82	140.611	132.948	1566.12	270.357	159.238	1574.07	203.611	101.4	1440.49	208.091	2.59699	1191.26	216.97	240.458	1335.32	210.131	289.876	1153.74	253.074	0.325423	1268.58	43.2022	173.048	1372.36	-36.4754	135.798	1153.13	-48.1021	151.086	1072.58	-69.8478	238.211	976.972	-16.6998	346.961	927.323	-68.3139	311.27	895.131	-57.6513	395.97	863.923
475	0	151.575	321.826	1575.15	255.553	325.804	1573.74	143.093	147.867	1568.49	272.836	174.155	1576.05	205.297	116.23	1442.43	208.443	17.5973	1193.1	218.89	255.201	1337.57	212.188	304.604	1156.17	253.633	15.0578	1270.24	44.8899	188.407	1374.91	-34.714	149.455	1155.69	-46.1171	163.315	1074.92	-68.479	248.352	977.711	-15.9908	356.152	925.66	-67.6246	319.562	894.528	-57.3848	403.084	860.823
476	0	153.929	336.74	1577.51	257.915	340.715	1575.84	145.441	162.774	1571.05	275.181	189.064	1578.23	206.884	131.07	1444.58	208.789	32.5051	1195.2	220.63	269.915	1339.99	213.982	319.16	1158.72	254.165	29.7628	1272.18	46.4484	203.686	1377.68	-33.1291	163.063	1158.5	-44.2288	175.355	1077.51	-67.1728	258.136	978.609	-15.2774	364.805	923.989	-66.9951	327.358	894.019	-57.0433	409.53	857.65
477	0	156.136	351.639	1580.01	260.128	355.611	1578.1	147.64	177.664	1573.74	277.374	203.961	1580.55	208.368	145.915	1446.92	209.143	47.3113	1197.54	222.171	284.599	1342.54	215.485	333.546	1161.33	254.683	44.437	1274.36	47.8669	218.867	1380.62	-31.7329	176.605	1161.52	-42.4537	187.21	1080.3	-65.943	267.585	979.654	-14.5724	372.952	922.332	-66.4357	334.699	893.614	-56.6366	415.357	854.451
478	0	158.182	366.517	1582.61	262.177	370.486	1580.48	149.672	192.535	1576.51	279.402	218.838	1582.98	209.744	160.765	1449.4	209.519	62.0093	1200.08	223.504	299.252	1345.16	216.676	347.775	1163.95	255.201	59.0776	1276.73	49.1377	233.937	1383.68	-30.5314	190.058	1164.7	-40.8045	198.885	1083.25	-64.802	276.723	980.832	-13.8915	380.629	920.706	-65.9566	341.63	893.32	-56.1806	420.619	851.269
479	0	160.058	381.374	1585.27	264.052	385.337	1582.92	151.528	207.384	1579.32	281.252	233.695	1585.48	211.01	175.616	1451.98	209.926	76.595	1202.77	224.623	313.875	1347.8	217.544	361.86	1166.55	255.727	73.6827	1279.27	50.2563	248.885	1386.8	-29.5234	203.397	1167.99	-39.2899	210.381	1086.33	-63.7609	285.572	982.123	-13.2532	387.876	919.13	-65.5678	348.193	893.137	-55.6976	425.374	848.145
480	0	161.756	396.207	1587.94	265.748	400.163	1585.39	153.198	222.212	1582.13	282.918	248.527	1587.98	212.165	190.465	1454.62	210.376	91.0667	1205.56	225.527	328.468	1350.43	218.09	375.822	1169.06	256.274	88.2511	1281.92	51.2211	263.704	1389.93	-28.7016	216.595	1171.32	-37.9142	221.7	1089.47	-62.8288	294.154	983.508	-12.6777	394.736	917.615	-65.278	354.432	893.065	-55.2146	429.684	845.114
481	0	163.272	411.018	1590.57	267.258	414.961	1587.85	154.677	237.018	1584.89	284.394	263.335	1590.46	213.211	205.31	1457.27	210.875	105.425	1208.42	226.218	343.031	1352.98	218.32	389.681	1171.46	256.848	102.782	1284.65	52.0339	278.388	1393.03	-28.0522	229.624	1174.66	-36.6776	232.843	1092.64	-62.0127	302.492	984.962	-12.1867	401.254	916.172	-65.0951	360.387	893.095	-54.763	433.608	842.208
482	0	164.604	425.806	1593.13	268.583	429.732	1590.25	155.965	251.803	1587.55	285.679	278.119	1592.88	214.149	220.147	1459.88	211.427	119.674	1211.29	226.706	357.564	1355.43	218.253	403.458	1173.7	257.457	117.275	1287.4	52.699	292.935	1396.04	-27.5566	242.457	1177.93	-35.5762	243.814	1095.79	-61.3175	310.607	986.461	-11.8021	407.478	914.805	-65.0255	366.098	893.218	-54.3766	437.211	839.449
483	0	165.751	440.574	1595.58	269.722	444.477	1592.55	157.062	266.569	1590.08	286.776	292.881	1595.19	214.985	234.974	1462.43	212.035	133.819	1214.13	227.002	372.068	1357.74	217.913	417.176	1175.78	258.104	131.731	1290.12	53.2234	307.349	1398.91	-27.1915	255.071	1181.11	-34.6027	254.614	1098.88	-60.7458	318.519	987.979	-11.5454	413.454	913.514	-65.0738	371.6	893.419	-54.0901	440.552	836.857
484	0	166.717	455.321	1597.88	270.678	459.199	1594.73	157.974	281.318	1592.44	287.687	307.621	1597.36	215.723	249.788	1464.87	212.699	147.866	1216.89	227.121	386.541	1359.87	217.331	430.853	1177.65	258.791	146.151	1292.79	53.616	321.632	1401.61	-26.9314	267.447	1184.14	-33.7471	265.249	1101.87	-60.2981	326.249	989.488	-11.4367	419.231	912.297	-65.2424	376.928	893.682	-53.9379	443.691	834.44
485	0	167.506	470.051	1599.98	271.456	473.899	1596.74	158.706	296.05	1594.6	288.421	322.344	1599.36	216.369	264.586	1467.16	213.413	161.824	1219.53	227.081	400.987	1361.79	216.541	444.504	1179.31	259.518	160.535	1295.35	53.8875	335.792	1404.09	-26.749	279.571	1186.98	-32.9969	275.726	1104.72	-59.9727	333.818	990.963	-11.4939	424.853	911.146	-65.532	382.114	893.985	-53.9517	446.686	832.203
486	0	168.122	484.763	1601.88	272.061	488.58	1598.55	159.27	310.767	1596.52	288.986	337.051	1601.15	216.93	279.367	1469.28	214.174	175.704	1222.01	226.9	415.404	1363.48	215.582	458.142	1180.73	260.281	174.885	1297.76	54.0495	349.838	1406.32	-26.6176	291.436	1189.61	-32.3385	286.054	1107.39	-59.766	341.246	992.376	-11.7316	430.365	910.048	-65.9408	387.186	894.308	-54.1593	449.59	830.143
487	0	168.571	499.458	1603.52	272.5	503.245	1600.14	159.674	325.469	1598.17	289.391	351.746	1602.72	217.411	294.129	1471.18	214.971	189.515	1224.29	226.598	429.796	1364.91	214.493	471.776	1181.9	261.076	189.203	1300	54.1142	363.782	1408.28	-26.5119	303.042	1191.99	-31.7577	296.246	1109.87	-59.673	348.553	993.702	-12.1609	435.809	908.987	-66.4651	392.171	894.627	-54.5834	452.453	828.25
488	0	168.861	514.137	1604.9	272.78	517.895	1601.49	159.931	340.155	1599.54	289.648	366.431	1604.04	217.82	308.871	1472.84	215.795	203.269	1226.35	226.194	444.163	1366.06	213.313	485.411	1182.81	261.893	203.491	1302.02	54.0937	377.635	1409.93	-26.4095	314.398	1194.11	-31.2406	306.318	1112.12	-59.687	355.762	994.917	-12.7887	441.222	907.947	-67.0993	397.097	894.917	-55.2401	455.321	826.509
489	0	168.998	528.798	1606	272.909	532.535	1602.58	160.055	354.825	1600.61	289.768	381.108	1605.09	218.161	323.595	1474.24	216.633	216.979	1228.15	225.707	458.509	1366.93	212.079	499.048	1183.45	262.724	217.752	1303.8	53.9994	391.412	1411.26	-26.292	325.521	1195.94	-30.7743	316.287	1114.13	-59.8007	362.895	995.999	-13.6174	446.641	906.907	-67.8361	401.986	895.156	-56.1381	458.237	824.901
490	0	168.99	543.441	1606.8	272.894	547.164	1603.4	160.057	369.476	1601.36	289.764	395.779	1605.85	218.44	338.3	1475.36	217.472	230.657	1229.67	225.154	472.838	1367.49	210.824	512.687	1183.81	263.556	231.99	1305.31	53.8421	405.128	1412.26	-26.1452	336.432	1197.47	-30.3473	326.176	1115.87	-60.0055	369.976	996.929	-14.6447	452.098	905.844	-68.667	406.865	895.32	-57.279	461.236	823.401
491	0	168.845	558.063	1607.28	272.743	561.787	1603.92	159.95	384.107	1601.78	289.646	410.445	1606.32	218.659	352.988	1476.18	218.296	244.315	1230.89	224.55	487.153	1367.75	209.579	526.327	1183.88	264.375	246.207	1306.55	53.6305	418.799	1412.92	-25.96	347.164	1198.71	-29.9505	336.008	1117.34	-60.293	377.031	997.688	-15.8642	457.62	904.739	-69.5824	411.756	895.387	-58.6565	464.353	821.985
492	0	168.568	572.663	1607.46	272.461	576.403	1604.16	159.745	398.716	1601.87	289.426	425.107	1606.49	218.822	367.661	1476.7	219.092	257.967	1231.8	223.908	501.459	1367.7	208.369	539.964	1183.65	265.168	260.408	1307.49	53.3719	432.439	1413.22	-25.7325	357.752	1199.63	-29.5769	345.809	1118.52	-60.6542	384.084	998.263	-17.2654	463.236	903.568	-70.5724	416.684	895.34	-60.2578	467.616	820.626
493	0	168.166	587.238	1607.32	272.056	591.013	1604.11	159.453	413.298	1601.61	289.111	439.764	1606.35	218.927	382.321	1476.9	219.843	271.626	1232.4	223.24	515.763	1367.33	207.215	553.597	1183.12	265.919	274.598	1308.12	53.0714	446.064	1413.18	-25.4637	368.236	1200.25	-29.222	355.607	1119.41	-61.0806	391.164	998.64	-18.8343	468.967	902.313	-71.6265	421.675	895.161	-62.0638	471.05	819.294
494	0	167.644	601.785	1606.88	271.531	605.617	1603.77	159.081	427.852	1601.03	288.71	454.417	1605.91	218.975	396.97	1476.79	220.534	285.305	1232.66	222.552	530.068	1366.64	206.131	567.226	1182.3	266.611	288.784	1308.43	52.7318	459.689	1412.79	-25.1594	378.66	1200.57	-28.8842	365.429	1120.01	-61.5644	398.299	998.811	-20.5541	474.834	900.954	-72.7348	426.754	894.835	-64.0505	474.678	817.964
495	0	167.006	616.303	1606.14	270.891	620.215	1603.15	158.636	442.374	1600.11	288.227	469.063	1605.17	218.961	411.612	1476.36	221.153	299.016	1232.6	221.848	544.381	1365.66	205.127	580.854	1181.18	267.231	302.97	1308.43	52.3535	473.328	1412.07	-24.8298	389.069	1200.59	-28.564	375.306	1120.31	-62.0982	405.518	998.771	-22.4058	480.857	899.476	-73.8877	431.948	894.352	-66.1901	478.518	816.608
496	0	166.257	630.788	1605.11	270.138	634.806	1602.26	158.121	456.862	1598.88	287.666	483.7	1604.13	218.881	426.248	1475.63	221.685	312.771	1232.22	221.13	558.709	1364.37	204.209	594.486	1179.77	267.761	317.166	1308.11	51.9348	486.993	1411.02	-24.4883	399.51	1200.33	-28.2647	385.266	1120.32	-62.6759	412.85	998.514	-24.3692	487.053	897.866	-75.0764	437.285	893.704	-68.4527	482.589	815.204
497	0	165.398	645.239	1603.81	269.276	649.387	1601.11	157.538	471.314	1597.34	287.029	498.328	1602.81	218.728	440.882	1474.59	222.119	326.583	1231.51	220.397	573.057	1362.81	203.378	608.133	1178.08	268.187	331.379	1307.48	51.4719	500.698	1409.66	-24.1514	410.027	1199.79	-27.9913	395.337	1120.05	-63.2922	420.325	998.041	-26.4233	493.44	896.114	-76.2932	442.793	892.885	-70.8071	486.907	813.729
498	0	164.432	659.654	1602.27	268.305	663.957	1599.72	156.885	485.729	1595.51	286.313	512.942	1601.22	218.495	455.517	1473.27	222.445	340.463	1230.49	219.645	587.431	1360.99	202.629	621.807	1176.15	268.498	345.616	1306.55	50.9591	514.451	1408	-23.8376	420.662	1198.97	-27.7509	405.548	1119.51	-63.943	427.973	997.354	-28.5472	500.034	894.212	-77.5315	448.503	891.894	-73.2228	491.487	812.165
499	0	163.357	674.033	1600.5	267.226	678.513	1598.11	156.158	500.107	1593.42	285.517	527.541	1599.38	218.172	470.154	1471.68	222.655	354.421	1229.18	218.867	601.838	1358.92	201.956	635.525	1173.97	268.681	359.889	1305.33	50.3887	528.263	1406.08	-23.5664	431.455	1197.91	-27.5518	415.925	1118.69	-64.6255	435.823	996.456	-30.7208	506.852	892.157	-78.7862	454.443	890.732	-75.6705	496.347	810.499
500	0	162.174	688.377	1598.53	266.038	693.053	1596.31	155.352	514.45	1591.09	284.634	542.122	1597.31	217.751	484.798	1469.84	222.742	368.467	1227.59	218.053	616.284	1356.64	201.349	649.304	1171.59	268.728	374.207	1303.83	49.7522	542.138	1403.9	-23.3576	442.441	1196.59	-27.4032	426.493	1117.62	-65.3377	443.904	995.355	-32.9249	513.912	889.949	-80.0533	460.644	889.402	-78.1235	501.503	808.717
501	0	160.882	702.686	1596.4	264.739	707.575	1594.35	154.459	528.759	1588.55	283.66	556.684	1595.05	217.22	499.45	1467.78	222.702	382.611	1225.74	217.195	630.774	1354.17	200.794	663.163	1169.04	268.631	388.579	1302.08	49.0399	556.083	1401.51	-23.2304	453.652	1195.05	-27.3149	437.275	1116.31	-66.0787	452.244	994.061	-35.1421	521.231	887.59	-81.3301	467.136	887.911	-80.5583	506.972	806.815
502	0	159.478	716.963	1594.13	263.329	722.077	1592.26	153.47	543.036	1585.82	282.586	571.225	1592.61	216.571	514.113	1465.52	222.532	396.86	1223.65	216.279	645.315	1351.54	200.273	677.12	1166.34	268.388	403.017	1300.09	48.2417	570.102	1398.91	-23.2026	465.114	1193.28	-27.2968	448.294	1114.78	-66.8485	460.871	992.584	-37.3571	528.829	885.087	-82.6149	473.949	886.267	-82.9552	512.774	804.787
503	0	157.96	731.212	1591.77	261.804	736.559	1590.06	152.377	557.288	1582.95	281.405	585.746	1590.03	215.793	528.791	1463.1	222.234	411.225	1221.35	215.292	659.912	1348.79	199.768	691.194	1163.53	267.998	417.531	1297.9	47.3474	584.194	1396.15	-23.29	476.847	1191.31	-27.3579	459.57	1113.03	-67.6478	469.811	990.938	-39.5565	536.726	882.449	-83.9071	481.113	884.481	-85.2986	518.931	802.636
504	0	156.326	745.436	1589.34	260.163	751.022	1587.8	151.168	571.52	1579.97	280.109	600.246	1587.35	214.879	543.487	1460.54	221.81	425.712	1218.88	214.221	674.571	1345.96	199.256	705.401	1160.66	267.461	432.129	1295.54	46.3475	598.359	1393.26	-23.5054	488.87	1189.15	-27.5063	471.119	1111.1	-68.4778	479.088	989.139	-41.7297	544.944	879.69	-85.2068	488.656	882.566	-87.5771	525.466	800.367
505	0	154.572	759.642	1586.89	258.404	765.466	1585.51	149.835	585.737	1576.92	278.689	614.728	1584.6	213.823	558.204	1457.9	221.264	440.328	1216.26	213.052	689.296	1343.09	198.713	719.754	1157.75	266.783	446.823	1293.03	45.2335	612.597	1390.27	-23.8586	501.191	1186.83	-27.749	482.958	1109	-69.3401	488.725	987.207	-43.8683	553.506	876.827	-86.5146	496.608	880.54	-89.7834	532.403	797.99
506	0	152.696	773.834	1584.46	256.523	779.895	1583.24	148.37	599.947	1573.84	277.14	629.194	1581.83	212.62	572.947	1455.2	220.604	455.08	1213.55	211.772	704.092	1340.21	198.111	734.265	1154.86	265.97	461.619	1290.42	43.9986	626.902	1387.21	-24.3553	513.82	1184.35	-28.0907	495.1	1106.76	-70.2362	498.745	985.161	-45.966	562.436	873.879	-87.8319	504.995	878.419	-91.9135	539.77	795.519
507	0	150.699	788.02	1582.09	254.519	794.312	1581.02	146.766	614.157	1570.78	275.455	643.65	1579.07	211.268	587.717	1452.49	219.838	469.97	1210.77	210.37	718.964	1337.37	197.423	748.944	1152.01	265.034	476.525	1287.75	42.638	641.271	1384.13	-24.9971	526.757	1181.76	-28.5344	507.554	1104.41	-71.1677	509.166	983.025	-48.0188	571.761	870.873	-89.1597	513.844	876.224	-93.967	547.595	792.974
508	0	148.578	802.206	1579.82	252.393	808.721	1578.9	145.02	628.376	1567.78	273.633	658.099	1576.37	209.768	602.519	1449.8	218.979	485.002	1207.98	208.836	733.913	1334.62	196.621	763.799	1149.26	263.987	491.546	1285.07	41.1498	655.698	1381.07	-25.7817	540.002	1179.07	-29.0809	520.327	1101.97	-72.1358	520.006	980.824	-50.0241	581.505	867.834	-90.4994	523.182	873.979	-95.9458	555.91	790.378
509	0	146.335	816.398	1577.69	250.145	823.128	1576.91	143.128	642.61	1564.88	271.67	672.547	1573.76	208.125	617.355	1447.2	218.039	500.174	1205.22	207.166	748.941	1331.98	195.681	778.835	1146.63	262.842	506.684	1282.43	39.5349	670.177	1378.07	-26.7025	553.547	1176.33	-29.7286	533.424	1099.47	-73.141	531.28	978.585	-51.9809	591.696	864.794	-91.8521	533.031	871.707	-97.854	564.747	787.756
510	0	143.975	830.603	1575.73	247.778	837.538	1575.08	141.094	656.866	1562.12	269.571	687	1571.3	206.346	632.227	1444.7	217.033	515.485	1202.53	205.356	764.048	1329.51	194.578	794.055	1144.17	261.616	521.94	1279.86	37.7973	684.7	1375.17	-27.7492	567.383	1173.56	-30.474	546.845	1096.96	-74.1834	543	976.335	-53.8891	602.36	861.787	-93.2185	543.415	869.435	-99.6967	574.139	785.139
511	0	141.502	844.826	1573.98	245.296	851.958	1573.46	138.921	671.151	1559.55	267.339	701.464	1569.01	204.441	647.133	1442.37	215.976	530.926	1199.97	203.407	779.231	1327.24	193.294	809.461	1141.92	260.327	537.312	1277.41	35.9445	699.26	1372.4	-28.9086	581.497	1170.81	-31.3115	560.588	1094.46	-75.2624	555.175	974.105	-55.7493	613.525	858.848	-94.5989	554.354	867.19	-101.48	584.12	782.557
512	0	138.923	859.072	1572.47	242.708	866.391	1572.07	136.618	685.469	1557.2	264.982	715.943	1566.93	202.424	662.073	1440.23	214.883	546.489	1197.58	201.326	794.484	1325.21	191.817	825.049	1139.92	258.991	552.793	1275.14	33.9874	713.848	1369.82	-30.1648	595.873	1168.12	-32.234	574.647	1092.02	-76.3766	567.813	971.924	-57.5627	625.215	856.014	-95.9928	565.87	865.001	-103.211	594.724	780.046
513	0	136.249	873.345	1571.22	240.023	880.843	1570.94	134.196	699.822	1555.11	262.513	730.443	1565.11	200.31	677.042	1438.32	213.769	562.158	1195.41	199.122	809.8	1323.44	190.141	840.813	1138.19	257.627	568.373	1273.08	31.9399	728.457	1367.45	-31.5002	610.492	1165.54	-33.233	589.013	1089.67	-77.5241	580.917	969.821	-59.3307	637.456	853.322	-97.3994	577.977	862.894	-104.896	605.985	777.637
514	0	133.494	887.646	1570.26	237.254	895.315	1570.09	131.67	714.212	1553.3	259.945	744.965	1563.56	198.118	692.034	1436.67	212.649	577.917	1193.48	196.812	825.169	1321.98	188.27	856.74	1136.77	256.251	584.039	1271.27	29.819	743.078	1365.34	-32.8967	625.333	1163.09	-34.2993	603.675	1087.44	-78.7025	594.49	967.826	-61.0549	650.269	850.811	-98.8172	590.692	860.898	-106.54	617.935	775.366
515	0	130.672	901.976	1569.6	234.418	909.81	1569.53	129.058	728.638	1551.82	257.296	759.511	1562.31	195.869	707.04	1435.31	211.536	593.744	1191.84	194.413	840.575	1320.84	186.215	872.813	1135.68	254.881	599.773	1269.75	27.6442	757.7	1363.51	-34.336	640.375	1160.84	-35.4234	618.619	1085.37	-79.9089	608.529	965.963	-62.7363	663.675	848.516	-100.244	604.025	859.037	-108.149	630.604	773.264
516	0	127.802	916.334	1569.25	231.532	924.328	1569.28	126.382	743.097	1550.67	254.588	774.081	1561.38	193.585	722.049	1434.26	210.441	609.616	1190.5	191.949	856.003	1320.04	183.997	889.005	1134.96	253.531	615.557	1268.53	25.4372	772.315	1361.99	-35.8009	655.596	1158.8	-36.5958	633.827	1083.49	-81.1404	623.03	964.26	-64.3761	677.689	846.47	-101.678	617.987	857.336	-109.726	644.018	771.362
517	0	124.905	930.716	1569.22	228.617	938.866	1569.33	123.664	757.584	1549.87	251.842	788.672	1560.78	191.288	737.048	1433.53	209.376	625.507	1189.5	189.446	871.433	1319.59	181.643	905.283	1134.6	252.216	631.367	1267.65	23.2211	786.912	1360.81	-37.2759	670.972	1157.02	-37.8075	649.282	1081.83	-82.3939	637.988	962.736	-65.9746	692.325	844.703	-103.116	632.582	855.815	-111.274	658.202	769.685
518	0	122.003	945.119	1569.49	225.696	953.421	1569.68	120.931	772.092	1549.44	249.084	803.28	1560.52	189.002	752.025	1433.14	208.347	641.39	1188.85	186.932	886.845	1319.5	179.188	921.609	1134.62	250.946	647.178	1267.1	21.0197	801.482	1359.96	-38.7472	686.484	1155.52	-39.0505	664.965	1080.4	-83.6661	653.393	961.411	-67.5319	707.589	843.242	-104.555	647.814	854.492	-112.794	673.175	768.257
519	0	119.12	959.536	1570.07	222.794	967.986	1570.33	118.211	786.612	1549.37	246.341	817.9	1560.61	186.75	766.964	1433.08	207.363	657.237	1188.55	184.437	902.218	1319.77	176.672	937.938	1135.02	249.733	662.964	1266.91	18.8563	816.013	1359.47	-40.2037	702.111	1154.33	-40.3178	680.854	1079.23	-84.9542	669.233	960.3	-69.0472	723.485	842.107	-105.992	663.679	853.382	-114.288	688.95	767.098
520	0	116.282	973.959	1570.94	219.937	982.556	1571.27	115.533	801.135	1549.65	243.64	832.522	1561.03	184.555	781.852	1433.36	206.429	673.02	1188.6	181.989	917.531	1320.38	174.137	954.222	1135.77	248.584	678.698	1267.06	16.7536	830.499	1359.33	-41.6364	717.832	1153.44	-41.6034	696.928	1078.32	-86.2552	685.497	959.413	-70.5192	740.011	841.315	-107.423	680.174	852.496	-115.754	705.536	766.225
521	0	113.516	988.381	1572.08	217.151	997.12	1572.47	112.924	815.65	1550.28	241.009	847.14	1561.77	182.436	796.676	1433.96	205.545	688.713	1188.99	179.617	932.761	1321.33	171.625	970.409	1136.87	247.503	694.355	1267.55	14.7323	844.93	1359.54	-43.0388	733.629	1152.87	-42.903	713.164	1077.68	-87.5664	702.168	958.759	-71.9456	757.158	840.879	-108.845	697.288	851.841	-117.192	722.935	765.649
522	0	110.846	1002.79	1573.48	214.462	1011.67	1573.91	110.414	830.146	1551.25	238.476	861.742	1562.82	180.411	811.424	1434.86	204.712	704.292	1189.71	177.348	947.892	1322.59	169.18	986.454	1138.28	246.493	709.911	1268.36	12.8105	859.302	1360.08	-44.4062	749.486	1152.62	-44.2134	729.542	1077.31	-88.885	719.229	958.34	-73.3232	774.914	840.806	-110.253	715.008	851.423	-118.599	741.143	765.38
523	0	108.3	1017.18	1575.11	211.896	1026.2	1575.58	108.028	844.613	1552.52	236.065	876.32	1564.16	178.495	826.086	1436.05	203.925	719.734	1190.74	175.207	962.905	1324.14	166.843	1002.31	1139.96	245.552	725.343	1269.48	11.0037	873.612	1360.93	-45.7358	765.385	1152.68	-45.5326	746.039	1077.21	-90.2086	736.661	958.157	-74.6477	793.259	841.096	-111.642	733.317	851.241	-119.975	760.151	765.426
524	0	105.899	1031.55	1576.95	209.478	1040.69	1577.45	105.79	859.04	1554.08	233.801	890.863	1565.76	176.701	840.656	1437.51	203.18	735.023	1192.06	173.214	977.789	1325.95	164.652	1017.94	1141.89	244.677	740.632	1270.87	9.32386	887.858	1362.08	-47.0263	781.313	1153.02	-46.8598	762.636	1077.36	-91.5344	754.445	958.207	-75.9137	812.169	841.749	-113.007	752.193	851.297	-121.314	779.941	765.79
525	0	103.667	1045.88	1578.97	207.228	1055.14	1579.48	103.723	873.419	1555.88	231.705	905.361	1567.58	175.036	855.128	1439.2	202.465	750.143	1193.64	171.387	992.533	1327.99	162.641	1033.33	1144.03	243.859	755.763	1272.51	7.77952	902.043	1363.5	-48.2773	797.256	1153.64	-48.1952	779.314	1077.75	-92.8597	772.56	958.484	-77.1149	831.615	842.759	-114.343	771.612	851.586	-122.613	800.489	766.478
526	0	101.623	1060.16	1581.14	205.167	1069.54	1581.66	101.841	887.743	1557.91	229.793	919.805	1569.61	173.505	869.503	1441.1	201.771	765.085	1195.45	169.739	1007.13	1330.21	160.837	1048.44	1146.32	243.088	770.725	1274.38	6.37584	916.173	1365.16	-49.4899	813.202	1154.51	-49.5395	796.056	1078.37	-94.1816	790.984	958.979	-78.2441	851.563	844.119	-115.643	791.546	852.105	-123.865	821.765	767.491
527	0	99.7804	1074.4	1583.45	203.309	1083.89	1583.95	100.158	902.008	1560.13	228.079	934.188	1571.79	172.11	883.78	1443.18	201.084	779.841	1197.45	168.28	1021.58	1332.6	159.266	1063.27	1148.74	242.353	785.511	1276.42	5.11469	930.255	1367.03	-50.6658	829.143	1155.61	-50.8943	812.849	1079.19	-95.4971	809.696	959.685	-79.2934	871.975	845.816	-116.899	811.963	852.849	-125.065	843.732	768.831
528	0	98.1528	1088.58	1585.86	201.668	1098.16	1586.33	98.6809	916.209	1562.49	226.57	948.503	1574.1	170.85	897.963	1445.4	200.39	794.41	1199.62	167.015	1035.89	1335.11	157.943	1077.83	1151.24	241.641	800.116	1278.62	3.99498	944.3	1369.07	-51.8075	845.072	1156.91	-52.2611	829.68	1080.21	-96.8028	828.674	960.589	-80.2549	892.812	847.839	-118.105	832.831	853.812	-126.204	866.347	770.499
529	0	96.7472	1102.71	1588.35	200.25	1112.37	1588.77	97.4128	930.347	1564.97	225.272	962.746	1576.5	169.721	912.056	1447.74	199.674	808.794	1201.92	165.946	1050.05	1337.7	156.878	1092.12	1153.8	240.937	814.543	1280.94	3.01304	958.318	1371.25	-52.9186	860.986	1158.38	-53.6419	846.541	1081.38	-98.0955	847.897	961.678	-81.1208	914.031	850.175	-119.252	854.116	854.986	-127.272	889.561	772.495
530	0	95.5672	1116.79	1590.88	199.059	1126.5	1591.23	96.3515	944.421	1567.53	224.184	976.912	1578.96	168.716	926.066	1450.16	198.923	823	1204.32	165.068	1064.08	1340.34	156.077	1106.16	1156.38	240.228	828.794	1283.34	2.16298	972.32	1373.55	-54.0034	876.883	1160.01	-55.0385	863.424	1082.7	-99.3716	867.344	962.94	-81.8839	935.588	852.807	-120.334	875.781	856.366	-128.259	913.321	774.818
531	0	94.6118	1130.81	1593.44	198.095	1140.56	1593.7	95.491	958.434	1570.13	223.302	991	1581.43	167.828	939.999	1452.62	198.126	837.036	1206.79	164.378	1077.98	1343	155.534	1119.99	1158.95	239.502	842.877	1285.8	1.43719	986.32	1375.94	-55.0668	892.765	1161.76	-56.4529	880.326	1084.14	-100.628	886.995	964.36	-82.5376	957.44	855.718	-121.342	897.792	857.943	-129.154	937.569	777.462
532	0	93.8764	1144.78	1595.98	197.353	1154.55	1596.14	94.8209	972.391	1572.74	222.616	1005.01	1583.89	167.047	953.862	1455.1	197.271	850.916	1209.29	163.865	1091.77	1345.65	155.241	1133.63	1161.51	238.748	856.803	1288.27	0.826775	1000.33	1378.37	-56.1147	908.637	1163.62	-57.8865	897.245	1085.68	-101.86	906.832	965.923	-83.0766	979.543	858.891	-122.271	920.112	859.708	-129.942	962.245	780.421
533	0	93.3525	1158.7	1598.5	196.824	1168.46	1598.53	94.3282	986.294	1575.33	222.114	1018.94	1586.31	166.364	967.662	1457.56	196.353	864.655	1211.78	163.517	1105.45	1348.26	155.18	1147.1	1164.02	237.956	870.583	1290.72	0.32196	1014.35	1380.83	-57.1535	924.505	1165.54	-59.3407	914.182	1087.29	-103.065	926.837	967.612	-83.4966	1001.86	862.306	-123.114	942.706	861.651	-130.613	987.285	783.683
534	0	93.0287	1172.58	1600.96	196.496	1182.31	1600.85	93.9973	1000.15	1577.87	221.784	1032.8	1588.65	165.769	981.406	1459.97	195.366	878.268	1214.24	163.322	1119.04	1350.8	155.33	1160.44	1166.46	237.121	884.231	1293.12	-0.08751	1028.4	1383.28	-58.1902	940.378	1167.52	-60.8165	931.14	1088.95	-104.24	946.994	969.408	-83.795	1024.34	865.94	-123.866	965.539	863.761	-131.152	1012.63	787.233
535	0	92.8907	1186.42	1603.33	196.354	1196.1	1603.06	93.8111	1013.97	1580.32	221.608	1046.59	1590.89	165.251	995.101	1462.31	194.311	891.774	1216.64	163.263	1132.56	1353.24	155.664	1173.67	1168.82	236.238	897.762	1295.44	-0.412033	1042.48	1385.7	-59.2318	956.267	1169.51	-62.3143	948.124	1090.63	-105.381	967.286	971.294	-83.9702	1046.95	869.769	-124.523	988.577	866.024	-131.548	1038.2	791.051
536	0	92.9226	1200.22	1605.59	196.384	1209.82	1605.14	93.7519	1027.75	1582.67	221.57	1060.31	1593.01	164.8	1008.75	1464.54	193.189	905.191	1218.94	163.325	1146	1355.57	156.153	1186.84	1171.09	235.308	911.193	1297.65	-0.661833	1056.6	1388.07	-60.2856	972.182	1171.5	-63.8344	965.138	1092.31	-106.484	987.699	973.248	-84.0222	1069.66	873.768	-125.082	1011.79	868.425	-131.789	1063.96	795.113
537	0	93.1069	1213.99	1607.71	196.566	1223.49	1607.08	93.8018	1041.5	1584.88	221.651	1073.97	1594.97	164.409	1022.36	1466.64	192.007	918.537	1221.1	163.489	1159.39	1357.74	156.764	1199.94	1173.23	234.333	924.537	1299.72	-0.846713	1070.75	1390.34	-61.3582	988.136	1173.45	-65.3762	982.19	1093.96	-107.548	1008.22	975.25	-83.9518	1092.44	877.908	-125.541	1035.14	870.947	-131.866	1089.83	799.39
538	0	93.4255	1227.74	1609.67	196.883	1237.12	1608.84	93.9437	1055.23	1586.93	221.836	1087.58	1596.76	164.068	1035.94	1468.59	190.775	931.83	1223.12	163.738	1172.73	1359.75	157.464	1213.02	1175.23	233.319	937.812	1301.63	-0.975833	1084.93	1392.5	-62.4554	1004.14	1175.34	-66.9385	999.288	1095.55	-108.568	1028.83	977.277	-83.7607	1115.25	882.159	-125.899	1058.61	873.57	-131.771	1115.77	803.849
539	0	93.8602	1241.47	1611.46	197.317	1250.7	1610.42	94.1613	1068.93	1588.79	222.106	1101.13	1598.36	163.77	1049.49	1470.35	189.505	945.086	1224.96	164.055	1186.04	1361.57	158.219	1226.08	1177.06	232.272	951.033	1303.36	-1.0575	1099.15	1394.53	-63.5819	1020.21	1177.14	-68.5197	1016.44	1097.07	-109.543	1049.53	979.307	-83.4513	1138.06	886.489	-126.156	1082.17	876.273	-131.497	1141.72	808.456
540	0	94.3934	1255.18	1613.04	197.851	1264.25	1611.78	94.4398	1082.63	1590.46	222.447	1114.65	1599.75	163.512	1063.02	1471.91	188.212	958.32	1226.59	164.423	1199.33	1363.17	158.998	1239.14	1178.71	231.203	964.214	1304.87	-1.09897	1113.39	1396.39	-64.7403	1036.35	1178.82	-70.1171	1033.65	1098.48	-110.468	1070.3	981.317	-83.026	1160.85	890.863	-126.313	1105.78	879.034	-131.042	1167.63	813.172
541	0	95.0083	1268.87	1614.41	198.466	1277.77	1612.93	94.7662	1096.31	1591.9	222.843	1128.13	1600.91	163.287	1076.54	1473.26	186.914	971.546	1228	164.828	1212.61	1364.55	159.77	1252.21	1180.15	230.124	977.369	1306.16	-1.10633	1127.65	1398.06	-65.9314	1052.57	1180.36	-71.7267	1050.93	1099.77	-111.341	1091.13	983.284	-82.4878	1183.6	895.247	-126.371	1129.43	881.83	-130.404	1193.47	817.959
542	0	95.6895	1282.56	1615.54	199.149	1291.27	1613.85	95.1291	1109.99	1593.11	223.283	1141.59	1601.84	163.095	1090.04	1474.37	185.63	984.774	1229.18	165.255	1225.88	1365.68	160.506	1265.29	1181.36	229.051	990.51	1307.22	-1.0843	1141.93	1399.53	-67.1535	1068.88	1181.72	-73.3437	1068.29	1100.91	-112.159	1112.01	985.188	-81.8395	1206.29	899.605	-126.332	1153.09	884.636	-129.584	1219.19	822.777
543	0	96.4233	1296.24	1616.43	199.886	1304.76	1614.52	95.5192	1123.66	1594.07	223.756	1155.02	1602.53	162.933	1103.53	1475.24	184.379	998.016	1230.1	165.692	1239.16	1366.55	161.183	1278.39	1182.31	227.996	1003.65	1308.02	-1.03625	1156.22	1400.78	-68.4022	1085.29	1182.9	-74.9617	1085.73	1101.88	-112.918	1132.92	987.007	-81.084	1228.89	903.904	-126.198	1176.73	887.428	-128.585	1244.77	827.588
544	0	97.198	1309.92	1617.06	200.665	1318.23	1614.95	95.9294	1137.33	1594.78	224.253	1168.44	1602.96	162.803	1117.02	1475.86	183.181	1011.28	1230.77	166.131	1252.46	1367.15	161.779	1291.52	1182.99	226.976	1016.8	1308.57	-0.964048	1170.51	1401.78	-69.6702	1101.8	1183.87	-76.5728	1103.26	1102.66	-113.615	1153.86	988.722	-80.2241	1251.39	908.108	-125.971	1200.34	890.181	-127.414	1270.17	832.354
545	0	98.004	1323.6	1617.44	201.477	1331.69	1615.12	96.3545	1151.01	1595.22	224.767	1181.86	1603.13	162.707	1130.51	1476.22	182.056	1024.57	1231.17	166.564	1265.77	1367.46	162.281	1304.67	1183.37	226.007	1029.96	1308.86	-0.868095	1184.8	1402.53	-70.9474	1118.42	1184.61	-78.1675	1120.87	1103.25	-114.245	1174.81	990.318	-79.263	1273.77	912.186	-125.655	1223.89	892.875	-126.078	1295.38	837.041
546	0	98.8342	1337.29	1617.55	202.314	1345.15	1615.04	96.7918	1164.69	1595.39	225.294	1195.27	1603.05	162.648	1144.01	1476.31	181.022	1037.9	1231.3	166.987	1279.1	1367.49	162.677	1317.86	1183.46	225.105	1043.15	1308.89	-0.747319	1199.08	1403.01	-72.2208	1135.13	1185.11	-79.7347	1138.57	1103.64	-114.804	1195.77	991.78	-78.2037	1296.01	916.108	-125.252	1247.36	895.485	-124.587	1320.37	841.617
547	0	99.6838	1350.98	1617.39	203.172	1358.62	1614.7	97.2405	1178.38	1595.29	225.833	1208.68	1602.71	162.629	1157.51	1476.15	180.096	1051.26	1231.16	167.399	1292.47	1367.23	162.962	1331.09	1183.25	224.283	1056.37	1308.66	-0.599226	1213.34	1403.22	-73.4751	1151.94	1185.37	-81.2618	1156.36	1103.8	-115.287	1216.7	993.095	-77.0496	1318.1	919.848	-124.763	1270.73	897.994	-122.952	1345.12	846.053
548	0	100.551	1364.67	1616.98	204.048	1372.09	1614.11	97.702	1192.08	1594.92	226.383	1222.1	1602.12	162.658	1171.03	1475.72	179.291	1064.67	1230.75	167.801	1305.87	1366.69	163.138	1344.37	1182.73	223.556	1069.63	1308.16	-0.419988	1227.59	1403.17	-74.6928	1168.84	1185.38	-82.7346	1174.23	1103.76	-115.688	1237.61	994.255	-75.8044	1340.02	923.381	-124.193	1293.97	900.383	-121.185	1369.61	850.324
549	0	101.435	1378.37	1616.31	204.944	1385.57	1613.28	98.18	1205.79	1594.29	226.947	1235.52	1601.28	162.739	1184.55	1475.03	178.62	1078.12	1230.08	168.198	1319.31	1365.87	163.21	1357.71	1181.92	222.934	1082.93	1307.41	-0.204591	1241.81	1402.84	-75.8547	1185.81	1185.15	-84.1378	1192.16	1103.49	-116.001	1258.46	995.252	-74.4719	1361.76	926.688	-123.542	1317.06	902.636	-119.3	1393.82	854.408
550	0	102.34	1392.09	1615.39	205.86	1399.06	1612.22	98.6803	1219.51	1593.42	227.53	1248.97	1600.22	162.881	1198.09	1474.1	178.09	1091.62	1229.14	168.595	1332.78	1364.79	163.191	1371.12	1180.83	222.426	1096.28	1306.41	0.052983	1256.02	1402.25	-76.9406	1202.84	1184.68	-85.455	1210.15	1103.02	-116.221	1279.25	996.083	-73.0564	1383.31	929.754	-122.812	1339.97	904.741	-117.31	1417.74	858.287
551	0	103.27	1405.81	1614.24	206.802	1412.57	1610.93	99.2102	1233.24	1592.31	228.139	1262.42	1598.93	163.09	1211.64	1472.94	177.705	1105.18	1227.95	169.002	1346.3	1363.47	163.096	1384.61	1179.48	222.04	1109.68	1305.16	0.359543	1270.2	1401.42	-77.93	1219.92	1183.97	-86.6693	1228.18	1102.34	-116.339	1299.94	996.745	-71.5623	1404.64	932.565	-122.005	1362.68	906.686	-115.229	1441.35	861.947
552	0	104.232	1419.54	1612.87	207.777	1426.09	1609.44	99.7792	1246.99	1590.98	228.784	1275.9	1597.44	163.374	1225.2	1471.54	177.467	1118.8	1226.52	169.43	1359.86	1361.91	162.947	1398.18	1177.91	221.78	1123.13	1303.68	0.722452	1284.36	1400.35	-78.8023	1237.02	1183.05	-87.7634	1246.22	1101.46	-116.349	1320.51	997.239	-69.9944	1425.74	935.116	-121.12	1385.16	908.463	-113.073	1464.64	865.374
553	0	105.234	1433.27	1611.31	208.792	1439.62	1607.77	100.398	1260.74	1589.45	229.474	1289.39	1595.77	163.739	1238.77	1469.95	177.374	1132.48	1224.86	169.89	1373.46	1360.16	162.768	1411.86	1176.13	221.647	1136.64	1301.98	1.14938	1298.5	1399.07	-79.5379	1254.12	1181.92	-88.7202	1264.26	1100.41	-116.245	1340.93	997.568	-68.3576	1446.6	937.4	-120.157	1407.38	910.066	-110.856	1487.57	868.561
554	0	106.286	1447.01	1609.58	209.856	1453.16	1605.92	101.078	1274.49	1587.75	230.22	1302.89	1593.93	164.194	1252.35	1468.16	177.42	1146.23	1222.98	170.395	1387.11	1358.23	162.586	1425.65	1174.18	221.641	1150.21	1300.06	1.64801	1312.63	1397.61	-80.1184	1271.19	1180.61	-89.5233	1282.28	1099.19	-116.019	1361.18	997.736	-66.6568	1467.2	939.42	-119.117	1429.32	911.49	-108.592	1510.14	871.501
555	0	107.398	1460.76	1607.7	210.981	1466.72	1603.94	101.833	1288.26	1585.89	231.037	1316.42	1591.94	164.745	1265.95	1466.2	177.596	1160.05	1220.91	170.959	1400.81	1356.16	162.428	1439.56	1172.1	221.759	1163.84	1297.95	2.22583	1326.75	1395.97	-80.5276	1288.21	1179.13	-90.1575	1300.23	1097.83	-115.665	1381.23	997.749	-64.8971	1487.53	941.176	-117.997	1450.95	912.732	-106.294	1532.32	874.189
556	0	108.58	1474.51	1605.71	212.175	1480.29	1601.84	102.675	1302.02	1583.91	231.936	1329.95	1589.83	165.396	1279.56	1464.09	177.892	1173.95	1218.65	171.595	1414.55	1353.97	162.325	1453.59	1169.93	221.994	1177.53	1295.66	2.88979	1340.88	1394.21	-80.7516	1305.14	1177.52	-90.6092	1318.09	1096.34	-115.179	1401.05	997.615	-63.0836	1507.56	942.675	-116.797	1472.24	913.792	-103.976	1554.1	876.624
557	0	109.843	1488.25	1603.63	213.45	1493.87	1599.66	103.616	1315.78	1581.82	232.929	1343.51	1587.63	166.152	1293.18	1461.86	178.296	1187.93	1216.24	172.316	1428.34	1351.71	162.304	1467.75	1167.69	222.339	1191.29	1293.22	3.64609	1355.01	1392.34	-80.7794	1321.97	1175.79	-90.8669	1335.84	1094.75	-114.554	1420.6	997.344	-61.2208	1527.28	943.925	-115.515	1493.15	914.671	-101.65	1575.44	878.804
558	0	111.196	1501.99	1601.5	214.815	1507.46	1597.41	104.67	1329.54	1579.68	234.029	1357.08	1585.35	167.017	1306.82	1459.54	178.791	1202	1213.7	173.136	1442.18	1349.4	162.394	1482.03	1165.44	222.785	1205.11	1290.64	4.49994	1369.16	1390.39	-80.6035	1338.67	1173.96	-90.922	1353.44	1093.08	-113.788	1439.87	996.946	-59.3134	1546.67	944.936	-114.15	1513.66	915.371	-99.3261	1596.34	880.729
559	0	112.648	1515.72	1599.36	216.277	1521.06	1595.15	105.845	1343.29	1577.49	235.246	1370.66	1583.03	167.99	1320.48	1457.15	179.363	1216.16	1211.06	174.064	1456.07	1347.09	162.618	1496.45	1163.21	223.321	1219	1287.95	5.45525	1383.33	1388.41	-80.2194	1355.21	1172.08	-90.7686	1370.85	1091.36	-112.878	1458.81	996.434	-57.3656	1565.72	945.718	-112.701	1533.73	915.895	-97.0142	1616.76	882.399
560	0	114.205	1529.44	1597.23	217.844	1534.67	1592.89	107.153	1357.04	1575.3	236.589	1384.25	1580.7	169.073	1334.15	1454.73	179.995	1230.42	1208.34	175.11	1470.01	1344.79	163	1510.99	1161.03	223.933	1232.95	1285.19	6.51442	1397.54	1386.42	-79.6267	1371.57	1170.16	-90.4042	1388.06	1089.6	-111.824	1477.4	995.821	-55.381	1584.39	946.284	-111.167	1553.35	916.248	-94.7223	1636.69	883.816
561	0	115.873	1543.15	1595.16	219.521	1548.28	1590.67	108.598	1370.77	1573.13	238.065	1397.85	1578.38	170.262	1347.85	1452.31	180.669	1244.78	1205.58	176.282	1483.99	1342.56	163.558	1525.66	1158.94	224.608	1246.96	1282.38	7.6781	1411.8	1384.47	-78.8283	1387.73	1168.23	-89.8298	1405.03	1087.85	-110.629	1495.62	995.121	-53.3632	1602.68	946.646	-109.548	1572.48	916.437	-92.4568	1656.1	884.981
562	0	117.654	1556.85	1593.17	221.309	1561.9	1588.52	110.186	1384.5	1571.02	239.676	1411.47	1576.1	171.553	1361.58	1449.92	181.37	1259.23	1202.83	177.584	1498.02	1340.42	164.307	1540.45	1156.97	225.332	1261.02	1279.56	8.94497	1426.12	1382.57	-77.8309	1403.68	1166.33	-89.0499	1421.75	1086.12	-109.294	1513.44	994.35	-51.3152	1620.57	946.818	-107.845	1591.1	916.468	-90.2228	1674.97	885.896
563	0	119.549	1570.54	1591.31	223.209	1575.53	1586.49	111.917	1398.21	1569	241.425	1425.1	1573.9	172.938	1375.33	1447.6	182.079	1273.77	1200.11	179.018	1512.1	1338.4	165.255	1555.35	1155.15	226.089	1275.15	1276.76	10.3115	1440.49	1380.77	-76.6448	1419.4	1164.48	-88.0727	1438.18	1084.44	-107.826	1530.84	993.526	-49.2397	1638.03	946.813	-106.06	1609.18	916.352	-88.0236	1693.28	886.564
564	0	121.554	1584.21	1589.61	225.218	1589.16	1584.59	113.789	1411.91	1567.1	243.308	1438.74	1571.8	174.41	1389.11	1445.37	182.78	1288.4	1197.46	180.581	1526.22	1336.53	166.408	1570.35	1153.5	226.862	1289.32	1274.04	11.7718	1454.94	1379.1	-75.2836	1434.89	1162.72	-86.9099	1454.31	1082.84	-106.232	1547.8	992.666	-47.1394	1655.05	946.644	-104.197	1626.71	916.096	-85.861	1711.01	886.985
565	0	123.665	1597.87	1588.09	227.33	1602.8	1582.87	115.795	1425.61	1565.34	245.319	1452.39	1569.84	175.956	1402.93	1443.28	183.457	1303.11	1194.93	182.269	1540.38	1334.85	167.766	1585.44	1152.07	227.636	1303.54	1271.41	13.3175	1469.46	1377.59	-73.7645	1450.15	1161.08	-85.5764	1470.14	1081.35	-104.522	1564.31	991.788	-45.0171	1671.61	946.325	-102.259	1643.66	915.715	-83.7354	1728.13	887.164
566	0	125.873	1611.51	1586.79	229.538	1616.44	1581.36	117.926	1439.29	1563.76	247.449	1466.05	1568.04	177.563	1416.78	1441.36	184.094	1317.88	1192.55	184.072	1554.58	1333.36	169.32	1600.6	1150.86	228.394	1317.79	1268.94	14.9378	1484.05	1376.26	-72.1076	1465.17	1159.59	-84.0901	1485.64	1080.01	-102.708	1580.35	990.913	-42.8757	1687.7	945.868	-100.254	1660.01	915.219	-81.6461	1744.64	887.102
567	0	128.167	1625.14	1585.73	231.83	1630.09	1580.07	120.169	1452.97	1562.38	249.684	1479.72	1566.43	179.216	1430.67	1439.64	184.679	1332.7	1190.37	185.976	1568.8	1332.11	171.059	1615.81	1149.9	229.121	1332.07	1266.65	16.6195	1498.72	1375.16	-70.3359	1479.97	1158.28	-82.4717	1500.81	1078.82	-100.805	1595.92	990.06	-40.7185	1703.28	945.288	-98.1904	1675.77	914.625	-79.5913	1760.51	886.806
568	0	130.535	1638.77	1584.93	234.193	1643.74	1579.03	122.505	1466.64	1561.22	252.008	1493.4	1565.03	180.898	1444.6	1438.14	185.2	1347.57	1188.42	187.964	1583.04	1331.1	172.963	1631.04	1149.2	229.802	1346.36	1264.58	18.3472	1513.46	1374.3	-68.4752	1494.55	1157.19	-80.7443	1515.65	1077.83	-98.8268	1611.02	989.25	-38.5497	1718.36	944.597	-96.078	1690.91	913.948	-77.5684	1775.72	886.279
569	0	132.959	1652.38	1584.41	236.61	1657.39	1578.25	124.915	1480.31	1560.3	254.4	1507.09	1563.86	182.592	1458.56	1436.9	185.646	1362.44	1186.74	190.016	1597.29	1330.35	175.007	1646.26	1148.78	230.425	1360.66	1262.77	20.1037	1528.27	1373.7	-66.5533	1508.92	1156.35	-78.9328	1530.17	1077.06	-96.792	1625.63	988.502	-36.3745	1732.92	943.81	-93.9295	1705.44	913.206	-75.5748	1790.27	885.529
570	0	135.42	1665.99	1584.18	239.064	1671.05	1577.77	127.374	1493.98	1559.64	256.838	1520.79	1562.94	184.279	1472.55	1435.94	186.01	1377.32	1185.35	192.107	1611.55	1329.88	177.158	1661.45	1148.64	230.98	1374.96	1261.25	21.8703	1543.13	1373.38	-64.5996	1523.11	1155.78	-77.0637	1544.36	1076.53	-94.7195	1639.77	987.836	-34.199	1746.95	942.94	-91.7591	1719.35	912.418	-73.6077	1804.14	884.565
571	0	137.899	1679.59	1584.24	241.532	1684.71	1577.57	129.857	1507.64	1559.25	259.296	1534.49	1562.29	185.942	1486.57	1435.26	186.29	1392.17	1184.29	194.211	1625.8	1329.69	179.38	1676.55	1148.78	231.459	1389.25	1260.05	23.6276	1558.04	1373.36	-62.6449	1537.12	1155.5	-75.1642	1558.24	1076.26	-92.6295	1653.44	987.269	-32.0309	1760.43	942.002	-89.5833	1732.65	911.602	-71.6654	1817.32	883.396
572	0	140.372	1693.19	1584.6	243.993	1698.36	1577.67	132.335	1521.31	1559.13	261.747	1548.19	1561.91	187.562	1500.62	1434.9	186.484	1406.99	1183.57	196.298	1640.03	1329.77	181.632	1691.55	1149.2	231.859	1403.51	1259.19	25.3556	1572.97	1373.64	-60.7206	1550.99	1155.54	-73.262	1571.81	1076.27	-90.5429	1666.63	986.819	-29.8793	1773.37	941.009	-87.4197	1745.34	910.778	-69.7468	1829.81	882.035
573	0	142.816	1706.79	1585.25	246.423	1712.02	1578.06	134.781	1534.98	1559.29	264.164	1561.9	1561.81	189.123	1514.69	1434.84	186.596	1421.74	1183.21	198.341	1654.24	1330.14	183.871	1706.41	1149.87	232.178	1417.73	1258.68	27.0345	1587.91	1374.23	-58.8578	1564.72	1155.91	-71.3846	1585.08	1076.56	-88.4814	1679.38	986.498	-27.7549	1785.77	939.974	-85.2878	1757.43	909.965	-67.8527	1841.62	880.496
574	0	145.206	1720.4	1586.18	248.798	1725.66	1578.73	137.163	1548.66	1559.73	266.519	1575.6	1561.98	190.611	1528.76	1435.09	186.634	1436.4	1183.21	200.311	1668.4	1330.78	186.05	1721.09	1150.79	232.422	1431.91	1258.53	28.6452	1602.83	1375.12	-57.0863	1578.33	1156.61	-69.5581	1598.07	1077.15	-86.4668	1691.68	986.317	-25.6702	1797.62	938.912	-83.2077	1768.95	909.181	-65.9862	1852.74	878.795
575	0	147.517	1734	1587.37	251.094	1739.31	1579.68	139.456	1562.34	1560.44	268.784	1589.3	1562.44	192.012	1542.85	1435.66	186.607	1450.97	1183.57	202.178	1682.52	1331.67	188.125	1735.58	1151.93	232.595	1446.03	1258.75	30.1699	1617.72	1376.31	-55.4341	1591.83	1157.64	-67.8072	1610.78	1078.02	-84.5204	1703.55	986.285	-23.6393	1808.94	937.834	-81.2005	1779.9	908.441	-64.153	1863.19	876.949
576	0	149.726	1747.6	1588.81	253.287	1752.94	1580.89	141.632	1576.02	1561.4	270.935	1602.99	1563.16	193.317	1556.93	1436.52	186.531	1465.43	1184.28	203.919	1696.59	1332.81	190.051	1749.85	1153.27	232.709	1460.09	1259.31	31.5921	1632.55	1377.77	-53.9263	1605.23	1158.99	-66.1542	1623.24	1079.18	-82.6628	1715	986.404	-21.6777	1819.73	936.752	-79.2872	1790.32	907.759	-62.3619	1872.99	874.977
577	0	151.81	1761.21	1590.47	255.355	1766.57	1582.33	143.668	1589.71	1562.6	272.949	1616.68	1564.14	194.517	1571	1437.66	186.421	1479.76	1185.33	205.509	1710.59	1334.17	191.79	1763.9	1154.77	232.776	1474.08	1260.23	32.8977	1647.3	1379.48	-52.5838	1618.55	1160.64	-64.6183	1635.45	1080.61	-80.9135	1726.07	986.676	-19.8026	1830.01	935.675	-77.4888	1800.23	907.148	-60.6252	1882.15	872.9
578	0	153.749	1774.82	1592.33	257.278	1780.2	1583.98	145.545	1603.39	1564.02	274.805	1630.36	1565.35	195.607	1585.05	1439.06	186.295	1493.95	1186.69	206.931	1724.53	1335.72	193.309	1777.73	1156.41	232.81	1488	1261.46	34.075	1661.94	1381.43	-51.4225	1631.76	1162.56	-63.2152	1647.43	1082.29	-79.2903	1736.76	987.097	-18.0322	1839.8	934.613	-75.8256	1809.66	906.615	-58.9587	1890.71	870.741
579	0	155.523	1788.44	1594.35	259.037	1793.81	1585.82	147.245	1617.08	1565.64	276.489	1644.03	1566.78	196.582	1599.07	1440.7	186.17	1507.99	1188.35	208.17	1738.4	1337.45	194.581	1791.34	1158.17	232.826	1501.84	1263	35.1153	1676.47	1383.57	-50.453	1644.88	1164.73	-61.9565	1659.18	1084.2	-77.809	1747.08	987.661	-16.3854	1849.13	933.572	-74.3165	1818.62	906.165	-57.3817	1898.7	868.521
580	0	157.12	1802.06	1596.5	260.619	1807.43	1587.81	148.757	1630.76	1567.44	277.988	1657.7	1568.41	197.442	1613.06	1442.56	186.064	1521.88	1190.26	209.217	1752.19	1339.33	195.59	1804.74	1160.01	232.838	1515.6	1264.81	36.0127	1690.85	1385.88	-49.6794	1657.88	1167.11	-60.8496	1670.73	1086.31	-76.4831	1757.07	988.357	-14.882	1858.02	932.559	-72.9794	1827.17	905.802	-55.9166	1906.15	866.263
581	0	158.526	1815.68	1598.75	262.011	1821.03	1589.92	150.075	1644.44	1569.38	279.296	1671.35	1570.21	198.188	1627.01	1444.59	185.994	1535.62	1192.4	210.068	1765.91	1341.33	196.328	1817.96	1161.92	232.86	1529.27	1266.85	36.7648	1705.09	1388.32	-49.0992	1670.76	1169.66	-59.8975	1682.06	1088.59	-75.3235	1766.75	989.172	-13.5414	1866.5	931.575	-71.8298	1835.32	905.523	-54.588	1913.1	863.989
582	0	159.736	1829.3	1601.07	263.208	1834.64	1592.13	151.194	1658.11	1571.44	280.408	1685.01	1572.15	198.82	1640.91	1446.77	185.971	1549.2	1194.73	210.724	1779.55	1343.41	196.796	1831.03	1163.87	232.905	1542.87	1269.1	37.3721	1719.17	1390.84	-48.7036	1683.49	1172.34	-59.0988	1693.21	1091.01	-74.3384	1776.12	990.089	-12.3827	1874.6	930.623	-70.881	1843.1	905.324	-53.4225	1919.6	861.72
583	0	160.746	1842.92	1603.43	264.205	1848.25	1594.39	152.118	1671.78	1573.59	281.327	1698.66	1574.2	199.345	1654.77	1449.06	186.008	1562.64	1197.2	211.19	1793.12	1345.56	197.006	1843.96	1165.83	232.983	1556.38	1271.5	37.8379	1733.09	1393.42	-48.4778	1696.04	1175.1	-58.4478	1704.16	1093.52	-73.5327	1785.2	991.091	-11.4238	1882.36	929.7	-70.1439	1850.55	905.197	-52.447	1925.68	859.474
584	0	161.556	1856.54	1605.78	265.003	1861.86	1596.67	152.85	1685.43	1575.79	282.055	1712.31	1576.34	199.766	1668.57	1451.43	186.109	1575.94	1199.78	211.477	1806.62	1347.74	196.977	1856.78	1167.81	233.101	1569.82	1274.02	38.1684	1746.85	1396.02	-48.4017	1708.41	1177.9	-57.935	1714.93	1096.1	-72.9087	1794.02	992.155	-10.6812	1889.81	928.802	-69.6261	1857.69	905.131	-51.6882	1931.38	857.267
585	0	162.171	1870.17	1608.1	265.606	1875.47	1598.95	153.399	1699.08	1578.01	282.602	1725.95	1578.51	200.091	1682.31	1453.83	186.28	1589.11	1202.41	211.598	1820.04	1349.92	196.735	1869.53	1169.76	233.265	1583.19	1276.61	38.3718	1760.44	1398.59	-48.4512	1720.56	1180.7	-57.5477	1725.52	1098.7	-72.4657	1802.6	993.26	-10.1689	1896.98	927.924	-69.3325	1864.56	905.111	-51.1709	1936.77	855.111
586	0	162.597	1883.79	1610.35	266.023	1889.08	1601.18	153.776	1712.71	1580.23	282.978	1739.59	1580.7	200.327	1695.99	1456.24	186.519	1602.16	1205.06	211.57	1833.4	1352.08	196.311	1882.22	1171.69	233.476	1596.48	1279.22	38.4581	1773.88	1401.09	-48.5993	1732.48	1183.45	-57.2708	1735.94	1101.29	-72.2	1810.94	994.38	-9.89825	1903.92	927.054	-69.2647	1871.16	905.122	-50.9174	1941.86	853.013
587	0	162.846	1897.4	1612.5	266.262	1902.7	1603.34	153.994	1726.34	1582.4	283.194	1753.23	1582.87	200.481	1709.62	1458.6	186.822	1615.1	1207.68	211.411	1846.7	1354.18	195.74	1894.88	1173.56	233.733	1609.72	1281.82	38.4385	1787.18	1403.49	-48.8182	1744.15	1186.11	-57.0872	1746.2	1103.82	-72.1055	1819.08	995.49	-9.87734	1910.65	926.182	-69.4211	1877.54	905.143	-50.9456	1946.72	850.976
588	0	162.929	1911.02	1614.53	266.338	1916.32	1605.39	154.067	1739.95	1584.49	283.266	1766.87	1584.98	200.561	1723.19	1460.89	187.181	1627.96	1210.23	211.14	1859.94	1356.21	195.058	1907.52	1175.36	234.032	1622.9	1284.37	38.3253	1800.35	1405.76	-49.0801	1755.57	1188.64	-56.979	1756.31	1106.27	-72.1739	1827.02	996.565	-10.1106	1917.21	925.293	-69.7971	1883.71	905.156	-51.2688	1951.38	848.999
589	0	162.86	1924.63	1616.41	266.263	1929.95	1607.31	154.011	1753.55	1586.47	283.207	1780.51	1587	200.575	1736.71	1463.06	187.588	1640.74	1212.67	210.778	1873.14	1358.13	194.301	1920.16	1177.06	234.367	1636.03	1286.81	38.1307	1813.4	1407.85	-49.3592	1766.73	1191.02	-56.9281	1766.28	1108.61	-72.3947	1834.78	997.578	-10.5986	1923.62	924.368	-70.3851	1889.7	905.137	-51.8944	1955.87	847.075
590	0	162.655	1938.23	1618.1	266.053	1943.57	1609.07	153.84	1767.14	1588.3	283.033	1794.15	1588.88	200.531	1750.19	1465.09	188.028	1653.47	1214.95	210.343	1886.3	1359.91	193.504	1932.81	1178.65	234.73	1649.12	1289.11	37.8675	1826.35	1409.75	-49.6324	1777.64	1193.2	-56.9175	1776.12	1110.79	-72.7563	1842.39	998.503	-11.3379	1929.92	923.389	-71.1746	1895.52	905.064	-52.8238	1960.24	845.194
591	0	162.327	1951.82	1619.6	265.722	1957.2	1610.65	153.57	1780.71	1589.96	282.759	1807.78	1590.62	200.436	1763.62	1466.94	188.49	1666.14	1217.06	209.855	1899.42	1361.53	192.699	1945.47	1180.11	235.112	1662.17	1291.24	37.5477	1839.22	1411.43	-49.8802	1788.32	1195.16	-56.9313	1785.85	1112.79	-73.2458	1849.87	999.316	-12.3209	1936.14	922.336	-72.153	1901.21	904.914	-54.0517	1964.51	843.338
592	0	161.892	1965.4	1620.87	265.285	1970.82	1612.02	153.215	1794.27	1591.41	282.398	1821.4	1592.16	200.297	1777.03	1468.58	188.958	1678.79	1218.95	209.331	1912.53	1362.96	191.912	1958.15	1181.39	235.501	1675.18	1293.17	37.1829	1852.03	1412.85	-50.0878	1798.78	1196.88	-56.9557	1795.49	1114.59	-73.8495	1857.23	999.995	-13.5365	1942.29	921.185	-73.3053	1906.78	904.665	-55.5668	1968.71	841.49
593	0	161.362	1978.97	1621.89	264.754	1984.44	1613.17	152.789	1807.82	1592.62	281.964	1835.03	1593.48	200.12	1790.4	1469.99	189.417	1691.43	1220.59	208.785	1925.63	1364.17	191.168	1970.85	1182.48	235.887	1688.17	1294.87	36.7833	1864.8	1413.99	-50.245	1809.07	1198.35	-56.9795	1805.07	1116.15	-74.5539	1864.51	1000.52	-14.97	1948.4	919.915	-74.6151	1912.25	904.296	-57.3515	1972.87	839.628
594	0	160.749	1992.53	1622.66	264.141	1998.06	1614.07	152.303	1821.36	1593.58	281.468	1848.65	1594.56	199.909	1803.76	1471.14	189.854	1704.07	1221.97	208.23	1938.72	1365.15	190.484	1983.56	1183.35	236.259	1701.14	1296.31	36.3583	1877.55	1414.85	-50.3464	1819.21	1199.53	-56.9943	1814.6	1117.47	-75.3452	1871.72	1000.86	-16.6037	1954.49	918.504	-76.0648	1917.65	903.786	-59.383	1977.01	837.727
595	0	160.063	2006.07	1623.16	263.456	2011.67	1614.72	151.768	1834.88	1594.24	280.92	1862.27	1595.38	199.669	1817.11	1472.01	190.254	1716.71	1223.06	207.677	1951.82	1365.86	189.873	1996.3	1183.98	236.604	1714.1	1297.47	35.9153	1890.29	1415.4	-50.3915	1829.25	1200.43	-56.9945	1824.12	1118.53	-76.2105	1878.89	1001.01	-18.4175	1960.57	916.931	-77.636	1923	903.119	-61.6341	1981.14	835.764
596	0	159.311	2019.6	1623.38	262.705	2025.28	1615.11	151.192	1848.4	1594.61	280.328	1875.89	1595.92	199.401	1830.46	1472.59	190.606	1729.39	1223.85	207.134	1964.94	1366.29	189.344	2009.06	1184.34	236.913	1727.06	1298.35	35.4601	1903.06	1415.64	-50.384	1839.24	1201.04	-56.9777	1833.66	1119.31	-77.1374	1886.05	1000.95	-20.3894	1966.67	915.179	-79.3103	1928.32	902.277	-64.074	1985.29	833.715
597	0	158.499	2033.1	1623.3	261.896	2038.88	1615.22	150.581	1861.9	1594.66	279.697	1889.52	1596.15	199.107	1843.82	1472.86	190.898	1742.1	1224.32	206.604	1978.09	1366.43	188.901	2021.84	1184.41	237.175	1740.02	1298.92	34.9963	1915.85	1415.55	-50.3316	1849.22	1201.34	-56.9439	1843.24	1119.79	-78.1148	1893.23	1000.67	-22.4962	1972.78	913.231	-81.0693	1933.63	901.25	-66.6695	1989.46	831.558
598	0	157.631	2046.6	1622.93	261.03	2052.48	1615.04	149.938	1875.38	1594.37	279.032	1903.14	1596.08	198.785	1857.2	1472.82	191.122	1754.85	1224.47	206.091	1991.27	1366.26	188.543	2034.66	1184.17	237.381	1752.99	1299.17	34.5258	1928.69	1415.13	-50.2455	1859.24	1201.34	-56.8961	1852.88	1119.98	-79.1326	1900.44	1000.17	-24.7142	1978.93	911.075	-82.8954	1938.96	900.027	-69.3861	1993.67	829.271
599	0	156.708	2060.07	1622.26	260.109	2066.07	1614.59	149.266	1888.86	1593.75	278.332	1916.77	1595.7	198.433	1870.6	1472.47	191.27	1767.66	1224.3	205.593	2004.5	1365.77	188.268	2047.5	1183.62	237.523	1765.98	1299.12	34.0479	1941.6	1414.38	-50.1391	1869.35	1201.03	-56.8392	1862.62	1119.88	-80.182	1907.73	999.427	-27.0195	1985.14	908.701	-84.7718	1944.34	898.603	-72.1892	1997.94	826.839
600	0	155.73	2073.53	1621.3	259.133	2079.66	1613.86	148.564	1902.33	1592.79	277.599	1930.4	1595	198.047	1884.03	1471.8	191.339	1780.53	1223.8	205.108	2017.77	1364.95	188.069	2060.37	1182.75	237.594	1779	1298.74	33.5602	1954.57	1413.31	-50.0278	1879.59	1200.42	-56.7796	1872.49	1119.46	-81.2554	1915.11	998.451	-29.3888	1991.4	906.106	-86.6827	1949.79	896.975	-75.0452	2002.27	824.248
601	0	154.695	2086.98	1620.06	258.101	2093.25	1612.86	147.829	1915.78	1591.5	276.827	1944.05	1594	197.623	1897.49	1470.82	191.325	1793.48	1222.98	204.628	2031.09	1363.82	187.937	2073.29	1181.55	237.59	1792.06	1298.05	33.0582	1967.63	1411.91	-49.928	1890	1199.51	-56.7253	1882.49	1118.75	-82.3463	1922.6	997.239	-31.7999	1997.74	903.29	-88.6139	1955.33	895.145	-77.9222	2006.69	821.489
602	0	153.6	2100.41	1618.54	257.009	2106.85	1611.6	147.056	1929.24	1589.88	276.014	1957.7	1592.69	197.153	1911	1469.54	191.228	1806.5	1221.86	204.148	2044.47	1362.37	187.861	2086.26	1180.04	237.508	1805.17	1297.06	32.5353	1980.77	1410.21	-49.8563	1900.61	1198.29	-56.6844	1892.66	1117.75	-83.449	1930.25	995.798	-34.2317	2004.18	900.257	-90.5525	1961	893.117	-80.7911	2011.21	818.56
603	0	152.441	2113.84	1616.77	255.852	2120.44	1610.09	146.238	1942.69	1587.94	275.152	1971.37	1591.09	196.632	1924.56	1467.97	191.051	1819.6	1220.43	203.655	2057.91	1360.61	187.826	2099.28	1178.21	237.346	1818.35	1295.77	31.9839	1993.99	1408.21	-49.8286	1911.46	1196.79	-56.6656	1903.02	1116.46	-84.559	1938.06	994.135	-36.6651	2010.73	897.018	-92.4868	1966.82	890.9	-83.6265	2015.85	815.461
604	0	151.212	2127.27	1614.77	254.627	2134.05	1608.35	145.367	1956.15	1585.72	274.233	1985.06	1589.23	196.052	1938.17	1466.14	190.797	1832.79	1218.73	203.138	2071.42	1358.57	187.818	2112.36	1176.1	237.106	1831.61	1294.21	31.3945	2007.31	1405.93	-49.8597	1922.55	1195.01	-56.6767	1913.56	1114.9	-85.672	1946.06	992.262	-39.0826	2017.42	893.587	-94.4068	1972.82	888.506	-86.4063	2020.64	812.202
605	0	149.908	2140.71	1612.56	253.327	2147.66	1606.42	144.434	1969.62	1583.24	273.249	1998.77	1587.12	195.404	1951.83	1464.07	190.472	1846.07	1216.78	202.585	2085	1356.26	187.816	2125.51	1173.73	236.789	1844.95	1292.39	30.7573	2020.71	1403.4	-49.9622	1933.91	1192.96	-56.725	1924.31	1113.08	-86.7846	1954.27	990.194	-41.4689	2024.26	889.984	-96.3037	1979.02	885.951	-89.1129	2025.6	808.794
606	0	148.523	2154.15	1610.16	251.947	2161.3	1604.31	143.428	1983.11	1580.52	272.19	2012.5	1584.81	194.682	1965.56	1461.8	190.084	1859.45	1214.6	201.979	2098.66	1353.72	187.802	2138.74	1171.11	236.4	1858.39	1290.35	30.0615	2034.2	1400.65	-50.1462	1945.54	1190.66	-56.8165	1935.28	1111.03	-87.8934	1962.71	987.95	-43.8105	2031.29	886.235	-98.1695	1985.46	883.254	-91.7325	2030.76	805.257
607	0	147.052	2167.62	1607.63	250.481	2174.95	1602.06	142.339	1996.63	1577.61	271.048	2026.26	1582.31	193.877	1979.35	1459.34	189.642	1872.94	1212.23	201.307	2112.39	1350.99	187.753	2152.04	1168.3	235.945	1871.94	1288.11	29.2965	2047.77	1397.7	-50.4188	1957.44	1188.14	-56.9557	1946.46	1108.76	-88.9952	1971.4	985.553	-46.0958	2038.52	882.368	-99.9977	1992.17	880.438	-94.2547	2036.16	801.614
608	0	145.489	2181.12	1604.99	248.923	2188.64	1599.7	141.158	2010.18	1574.55	269.813	2040.06	1579.67	192.984	1993.22	1456.76	189.155	1886.53	1209.7	200.553	2126.21	1348.09	187.645	2165.44	1165.32	235.428	1885.61	1285.71	28.4522	2061.41	1394.6	-50.7836	1969.61	1185.42	-57.1458	1957.86	1106.31	-90.0872	1980.35	983.027	-48.3154	2045.99	878.416	-101.782	1999.16	877.529	-96.673	2041.83	797.894
609	0	143.829	2194.66	1602.29	247.268	2202.37	1597.29	139.874	2023.78	1571.38	268.476	2053.9	1576.93	191.997	2007.15	1454.08	188.634	1900.25	1207.06	199.702	2140.12	1345.09	187.453	2178.94	1162.22	234.858	1899.41	1283.19	27.5189	2075.11	1391.38	-51.241	1982.03	1182.54	-57.3879	1969.48	1103.71	-91.1662	1989.57	980.402	-50.4612	2053.73	874.414	-103.517	2006.47	874.556	-98.9833	2047.81	794.13
610	0	142.069	2208.25	1599.58	245.513	2216.13	1594.85	138.479	2037.43	1568.15	267.029	2067.78	1574.15	190.912	2021.17	1451.34	188.09	1914.08	1204.35	198.742	2154.12	1342.03	187.155	2192.56	1159.06	234.242	1913.35	1280.59	26.4885	2088.87	1388.08	-51.7877	1994.69	1179.52	-57.6816	1981.32	1100.99	-92.2292	1999.09	977.708	-52.5272	2061.75	870.403	-105.198	2014.12	871.549	-101.184	2054.14	790.359
611	0	140.206	2221.89	1596.88	243.652	2229.95	1592.43	136.967	2051.15	1564.92	265.468	2081.71	1571.35	189.726	2035.26	1448.61	187.532	1928.04	1201.61	197.661	2168.23	1338.95	186.727	2206.3	1155.88	233.589	1927.43	1277.97	25.3543	2102.68	1384.75	-52.4176	2007.56	1176.42	-58.0252	1993.37	1098.19	-93.2731	2008.9	974.978	-54.5086	2070.1	866.423	-106.819	2022.14	868.542	-103.274	2060.86	786.62
612	0	138.238	2235.59	1594.27	241.685	2243.83	1590.07	135.333	2064.94	1561.73	263.786	2095.7	1568.6	188.44	2049.43	1445.91	186.971	1942.14	1198.9	196.449	2182.43	1335.93	186.147	2220.18	1152.75	232.906	1941.65	1275.37	24.1118	2116.53	1381.45	-53.1218	2020.62	1173.27	-58.4151	2005.62	1095.35	-94.2948	2019.02	972.247	-56.4022	2078.81	862.519	-108.376	2030.55	865.568	-105.256	2068.01	782.954
613	0	136.165	2249.37	1591.77	239.61	2257.77	1587.83	133.573	2078.81	1558.64	261.983	2109.75	1565.94	187.053	2063.69	1443.31	186.417	1956.37	1196.26	195.099	2196.74	1333	185.399	2234.23	1149.72	232.201	1956.02	1272.85	22.759	2130.41	1378.21	-53.8895	2033.84	1170.13	-58.847	2018.07	1092.52	-95.2911	2029.45	969.551	-58.2059	2087.89	858.733	-109.865	2039.38	862.662	-107.13	2075.63	779.403
614	0	133.988	2263.22	1589.44	237.429	2271.78	1585.75	131.687	2092.76	1555.7	260.056	2123.87	1563.41	185.571	2078.03	1440.84	185.876	1970.74	1193.74	193.609	2211.16	1330.23	184.47	2248.44	1146.84	231.481	1970.54	1270.44	21.2964	2144.33	1375.08	-54.7082	2047.2	1167.04	-59.3156	2030.71	1089.74	-96.2588	2040.2	966.924	-59.9189	2097.38	855.11	-111.281	2048.63	859.858	-108.898	2083.75	776.009
615	0	131.712	2277.15	1587.31	235.145	2285.86	1583.86	129.679	2106.81	1552.95	258.009	2138.05	1561.07	183.997	2092.45	1438.54	185.356	1985.24	1191.38	191.978	2225.69	1327.68	183.354	2262.84	1144.19	230.754	1985.21	1268.19	19.7275	2158.26	1372.12	-55.5651	2060.67	1164.06	-59.8148	2043.54	1087.05	-97.1952	2051.28	964.402	-61.5412	2107.3	851.691	-112.619	2058.33	857.19	-110.562	2092.41	772.811
616	0	129.34	2291.16	1585.42	232.761	2300.02	1582.21	127.551	2120.94	1550.45	255.847	2152.31	1558.95	182.339	2106.95	1436.47	184.86	1999.88	1189.23	190.212	2240.32	1325.37	182.049	2277.43	1141.81	230.024	2000.02	1266.16	18.0588	2172.21	1369.37	-56.4475	2074.21	1161.23	-60.3389	2056.54	1084.49	-98.0974	2062.69	962.017	-63.074	2117.67	848.516	-113.877	2068.5	854.687	-112.123	2101.65	769.847
617	0	126.882	2305.25	1583.82	230.285	2314.25	1580.82	125.313	2135.17	1548.22	253.576	2166.63	1557.08	180.606	2121.52	1434.64	184.391	2014.65	1187.32	188.319	2255.06	1323.37	180.561	2292.23	1139.76	229.297	2014.95	1264.37	16.2999	2186.18	1366.86	-57.3433	2087.82	1158.61	-60.8819	2069.7	1082.11	-98.9634	2074.42	959.8	-64.519	2128.52	845.622	-115.05	2079.15	852.378	-113.581	2111.48	767.149
618	0	124.345	2319.41	1582.52	227.727	2328.55	1579.73	122.975	2149.48	1546.3	251.208	2181.02	1555.51	178.81	2136.16	1433.1	183.951	2029.54	1185.69	186.311	2269.89	1321.71	178.903	2307.22	1138.07	228.578	2030.01	1262.87	14.4634	2200.16	1364.64	-58.2419	2101.48	1156.24	-61.4388	2083.03	1079.93	-99.7913	2086.49	957.778	-65.8787	2139.87	843.04	-116.136	2090.28	850.287	-114.936	2121.94	764.746
619	0	121.742	2333.65	1581.54	225.097	2342.92	1578.96	120.55	2163.88	1544.71	248.754	2195.47	1554.25	176.963	2150.85	1431.87	183.54	2044.53	1184.37	184.205	2284.8	1320.41	177.094	2322.4	1136.77	227.87	2045.18	1261.68	12.5642	2214.15	1362.73	-59.1344	2115.18	1154.14	-62.0051	2096.52	1077.99	-100.58	2098.9	955.976	-67.1562	2151.72	840.797	-117.133	2101.91	848.435	-116.19	2133.04	762.661
620	0	119.085	2347.94	1580.91	222.409	2357.36	1578.53	118.055	2178.35	1543.48	246.23	2209.98	1553.32	175.079	2165.59	1430.97	183.155	2059.62	1183.38	182.02	2299.78	1319.5	175.157	2337.76	1135.89	227.178	2060.43	1260.83	10.6198	2228.14	1361.16	-60.0138	2128.9	1152.37	-62.5774	2110.16	1076.31	-101.33	2111.64	954.412	-68.3548	2164.09	838.914	-118.039	2114.04	846.839	-117.343	2144.79	760.911
621	0	116.391	2362.29	1580.63	219.679	2371.84	1578.44	115.506	2192.88	1542.61	243.655	2224.54	1552.74	173.173	2180.37	1430.4	182.797	2074.78	1182.73	179.778	2314.82	1318.99	173.118	2353.26	1135.44	226.506	2075.76	1260.32	8.64935	2242.15	1359.94	-60.8754	2142.67	1150.92	-63.1535	2123.96	1074.92	-102.041	2124.73	953.102	-69.4781	2177	837.406	-118.855	2126.68	845.509	-118.395	2157.21	759.509
622	0	113.676	2376.68	1580.7	216.925	2386.37	1578.69	112.926	2207.45	1542.11	241.047	2239.14	1552.51	171.262	2195.16	1430.18	182.463	2090	1182.44	177.504	2329.89	1318.87	171.009	2368.87	1135.42	225.856	2091.13	1260.17	6.67293	2256.16	1359.08	-61.7161	2156.47	1149.83	-63.7322	2137.9	1073.82	-102.714	2138.15	952.056	-70.5295	2190.43	836.282	-119.583	2139.83	844.452	-119.348	2170.29	758.46
623	0	110.958	2391.09	1581.1	214.164	2400.93	1579.28	110.337	2222.05	1541.97	238.429	2253.76	1552.62	169.362	2209.96	1430.3	182.149	2105.25	1182.5	175.225	2344.98	1319.15	168.859	2384.55	1135.82	225.232	2106.52	1260.39	4.71131	2270.17	1358.59	-62.5351	2170.32	1149.09	-64.3137	2152	1073.02	-103.351	2151.92	951.278	-71.5122	2204.4	835.544	-120.225	2153.48	843.671	-120.203	2184.05	757.763
624	0	108.258	2405.52	1581.84	211.418	2415.51	1580.2	107.761	2236.67	1542.18	235.825	2268.4	1553.08	167.489	2224.76	1430.75	181.854	2120.51	1182.91	172.966	2360.06	1319.81	166.703	2400.25	1136.6	224.635	2121.92	1260.95	2.78508	2284.18	1358.46	-63.3328	2184.24	1148.7	-64.8993	2166.25	1072.52	-103.956	2166.02	950.767	-72.4285	2218.91	835.19	-120.786	2167.65	843.163	-120.961	2198.47	757.412
625	0	105.595	2419.94	1582.88	208.707	2430.09	1581.43	105.225	2251.29	1542.73	233.257	2283.03	1553.86	165.659	2239.52	1431.53	181.574	2135.75	1183.65	170.755	2375.11	1320.81	164.57	2415.93	1137.75	224.068	2137.28	1261.84	0.914103	2298.19	1358.67	-64.111	2198.24	1148.65	-65.4912	2180.64	1072.32	-104.531	2180.47	950.519	-73.2801	2233.93	835.208	-121.269	2182.31	842.92	-121.626	2213.54	757.396
626	0	102.99	2434.35	1584.21	206.052	2444.65	1582.93	102.752	2265.88	1543.59	230.75	2297.66	1554.94	163.885	2254.25	1432.6	181.303	2150.95	1184.71	168.618	2390.11	1322.15	162.494	2431.54	1139.21	223.528	2152.58	1263.05	-0.883054	2312.19	1359.22	-64.8726	2212.34	1148.91	-66.0925	2195.19	1072.39	-105.079	2195.26	950.524	-74.0678	2249.48	835.584	-121.683	2197.48	842.931	-122.201	2229.26	757.698
627	0	100.464	2448.73	1585.79	203.476	2459.19	1584.69	100.367	2280.43	1544.74	228.329	2312.26	1556.3	162.183	2268.91	1433.94	181.036	2166.08	1186.05	166.579	2405.04	1323.77	160.505	2447.04	1140.95	223.015	2167.81	1264.55	-2.5896	2326.18	1360.06	-65.6209	2226.54	1149.45	-66.7067	2209.88	1072.73	-105.606	2210.38	950.768	-74.7911	2265.52	836.3	-122.032	2213.14	843.183	-122.687	2245.62	758.302
628	0	98.0366	2463.06	1587.59	200.999	2473.7	1586.66	98.0932	2294.93	1546.14	226.016	2326.82	1557.9	160.564	2283.51	1435.54	180.766	2181.12	1187.66	164.661	2419.88	1325.63	158.63	2462.39	1142.91	222.524	2182.93	1266.3	-4.19094	2340.16	1361.19	-66.3594	2240.85	1150.26	-67.3375	2224.72	1073.31	-106.113	2225.84	951.235	-75.4485	2282.05	837.331	-122.325	2229.29	843.658	-123.09	2262.6	759.185
629	0	95.7265	2477.34	1589.57	198.64	2488.15	1588.82	95.9526	2309.35	1547.76	223.833	2341.33	1559.72	159.037	2298.03	1437.34	180.486	2196.04	1189.49	162.883	2434.61	1327.71	156.897	2477.55	1145.05	222.052	2197.92	1268.27	-5.67495	2354.13	1362.55	-67.0914	2255.3	1151.28	-67.9886	2239.7	1074.1	-106.605	2241.62	951.906	-76.0375	2299.04	838.653	-122.568	2245.91	844.339	-123.41	2280.17	760.327
630	0	93.5508	2491.56	1591.71	196.417	2502.53	1591.12	93.964	2323.69	1549.57	221.798	2355.78	1561.72	157.611	2312.46	1439.33	180.188	2210.84	1191.53	161.263	2449.22	1329.96	155.331	2492.5	1147.32	221.591	2212.78	1270.43	-7.03222	2368.09	1364.13	-67.82	2269.88	1152.49	-68.6633	2254.82	1075.07	-107.086	2257.73	952.762	-76.5546	2316.47	840.239	-122.768	2262.98	845.206	-123.652	2298.32	761.706
631	0	91.5248	2505.7	1593.96	194.348	2516.84	1593.54	92.1436	2337.93	1551.53	219.927	2370.16	1563.87	156.292	2326.8	1441.47	179.864	2225.48	1193.72	159.813	2463.71	1332.33	153.951	2507.22	1149.67	221.135	2227.48	1272.74	-8.25609	2382.03	1365.88	-68.5471	2284.59	1153.86	-69.3644	2270.09	1076.21	-107.557	2274.16	953.781	-76.9958	2334.31	842.061	-122.93	2280.5	846.241	-123.819	2317.03	763.302
632	0	89.6611	2519.76	1596.29	192.444	2531.07	1596.04	90.504	2352.08	1553.61	218.234	2384.46	1566.13	155.085	2341.03	1443.72	179.507	2239.97	1196.05	158.544	2478.06	1334.79	152.776	2521.71	1152.07	220.678	2242.01	1275.16	-9.34273	2395.97	1367.77	-69.274	2299.45	1155.34	-70.094	2285.49	1077.48	-108.02	2290.89	954.942	-77.3568	2352.53	844.095	-123.06	2298.44	847.425	-123.912	2336.27	765.096
633	0	87.97	2533.75	1598.68	190.716	2545.22	1598.57	89.0541	2366.12	1555.78	216.727	2398.68	1568.46	153.992	2355.17	1446.06	179.108	2254.28	1198.47	157.46	2492.27	1337.3	151.818	2535.97	1154.47	220.211	2256.36	1277.66	-10.291	2409.89	1369.78	-70.0011	2314.44	1156.92	-70.8533	2301.02	1078.85	-108.477	2307.91	956.226	-77.6331	2371.1	846.313	-123.162	2316.79	848.741	-123.932	2356.01	767.072
634	0	86.4589	2547.65	1601.09	189.173	2559.28	1601.12	87.7986	2380.05	1558	215.412	2412.82	1570.84	153.013	2369.2	1448.45	178.663	2268.42	1200.96	156.563	2506.35	1339.82	151.084	2549.99	1156.86	219.729	2270.54	1280.22	-11.1026	2423.8	1371.86	-70.7279	2329.57	1158.55	-71.6425	2316.69	1080.3	-108.929	2325.22	957.612	-77.8206	2390	848.693	-123.238	2335.52	850.173	-123.881	2376.21	769.215
635	0	85.1321	2561.47	1603.49	187.819	2573.24	1603.64	86.7386	2393.88	1560.24	214.289	2426.86	1573.22	152.147	2383.13	1450.87	178.167	2282.38	1203.49	155.85	2520.28	1342.34	150.577	2563.79	1159.2	219.226	2284.55	1282.79	-11.7812	2437.71	1374	-71.4532	2344.82	1160.23	-72.4608	2332.49	1081.8	-109.375	2342.8	959.084	-77.916	2409.18	851.212	-123.291	2354.61	851.707	-123.759	2396.85	771.512
636	0	83.9913	2575.21	1605.86	186.656	2587.12	1606.12	85.8708	2407.61	1562.49	213.357	2440.82	1575.59	151.391	2396.96	1453.28	177.615	2296.16	1206.03	155.316	2534.09	1344.81	150.29	2577.39	1161.48	218.697	2298.38	1285.35	-12.333	2451.62	1376.16	-72.1757	2360.2	1161.93	-73.3064	2348.41	1083.34	-109.816	2360.64	960.623	-77.9168	2428.62	853.852	-123.322	2374.04	853.33	-123.565	2417.89	773.952
637	0	83.0354	2588.88	1608.17	185.681	2600.91	1608.52	85.1885	2421.24	1564.71	212.609	2454.68	1577.91	150.741	2410.71	1455.66	177.006	2309.77	1208.55	154.951	2547.78	1347.22	150.214	2590.8	1163.69	218.139	2312.04	1287.88	-12.7659	2465.52	1378.33	-72.8939	2375.69	1163.63	-74.1769	2364.45	1084.9	-110.25	2378.72	962.215	-77.8216	2448.3	856.593	-123.331	2393.78	855.03	-123.298	2439.29	776.524
638	0	82.2603	2602.48	1610.4	184.892	2614.62	1610.82	84.6819	2434.78	1566.88	212.037	2468.46	1580.16	150.191	2424.36	1457.99	176.341	2323.22	1211.03	154.743	2561.34	1349.54	150.333	2604.05	1165.81	217.549	2325.54	1290.34	-13.0891	2479.41	1380.49	-73.6066	2391.29	1165.32	-75.0691	2380.61	1086.45	-110.675	2397.02	963.843	-77.6305	2468.17	859.418	-123.317	2413.8	856.795	-122.955	2461.02	779.217
639	0	81.6598	2616.01	1612.54	184.282	2628.25	1613	84.3382	2448.25	1568.98	211.627	2482.16	1582.31	149.736	2437.93	1460.24	175.621	2336.53	1213.44	154.677	2574.8	1351.76	150.626	2617.17	1167.85	216.927	2338.9	1292.72	-13.3127	2493.3	1382.61	-74.313	2406.97	1166.98	-75.9795	2396.87	1087.98	-111.09	2415.53	965.494	-77.3445	2488.22	862.313	-123.278	2434.08	858.615	-122.536	2483.02	782.02
640	0	81.2255	2629.49	1614.56	183.841	2641.81	1615.05	84.1427	2461.64	1570.99	211.368	2495.77	1584.34	149.367	2451.42	1462.39	174.85	2349.7	1215.76	154.739	2588.16	1353.87	151.068	2630.17	1169.78	216.275	2352.13	1295	-13.4476	2507.19	1384.67	-75.0129	2422.74	1168.59	-76.9043	2413.25	1089.48	-111.494	2434.24	967.151	-76.9663	2508.42	865.261	-123.214	2454.6	860.478	-122.036	2505.27	784.921
641	0	80.9471	2642.92	1616.44	183.559	2655.3	1616.94	84.0791	2474.97	1572.89	211.243	2509.3	1586.24	149.079	2464.84	1464.41	174.036	2362.75	1217.96	154.91	2601.44	1355.84	151.633	2643.08	1171.61	215.595	2365.24	1297.15	-13.5048	2521.07	1386.67	-75.7068	2438.57	1170.16	-77.8399	2429.73	1090.92	-111.884	2453.12	968.802	-76.4995	2528.74	868.247	-123.122	2475.32	862.374	-121.454	2527.73	787.905
642	0	80.8128	2656.29	1618.17	183.424	2668.72	1618.66	84.1302	2488.25	1574.66	211.237	2522.76	1587.98	148.863	2478.19	1466.3	173.185	2375.71	1220.03	155.174	2614.64	1357.67	152.29	2655.92	1173.32	214.893	2378.24	1299.15	-13.4952	2534.95	1388.57	-76.3955	2454.46	1171.66	-78.7825	2446.3	1092.29	-112.259	2472.15	970.432	-75.9487	2549.16	871.254	-122.999	2496.23	864.29	-120.788	2550.35	790.957
643	0	80.8098	2669.63	1619.75	183.422	2682.09	1620.2	84.2787	2501.48	1576.3	211.334	2536.14	1589.56	148.711	2491.48	1468.03	172.31	2388.57	1221.95	155.513	2627.77	1359.34	153.011	2668.71	1174.91	214.176	2391.15	1300.99	-13.4291	2548.81	1390.36	-77.0805	2470.4	1173.07	-79.7286	2462.97	1093.57	-112.616	2491.32	972.025	-75.3193	2569.65	874.267	-122.844	2517.29	866.214	-120.036	2573.11	794.062
644	0	80.9248	2682.93	1621.14	183.539	2695.4	1621.54	84.5075	2514.67	1577.77	211.519	2549.46	1590.94	148.618	2504.72	1469.59	171.422	2401.36	1223.68	155.909	2640.85	1360.84	153.767	2681.46	1176.36	213.452	2403.99	1302.64	-13.3165	2562.66	1392.02	-77.763	2486.38	1174.38	-80.675	2479.71	1094.75	-112.954	2510.62	973.568	-74.6174	2590.21	877.267	-122.655	2538.49	868.132	-119.198	2595.95	797.201
645	0	81.1441	2696.19	1622.35	183.761	2708.66	1622.69	84.8002	2527.84	1579.07	211.775	2562.72	1592.14	148.577	2517.91	1470.96	170.536	2414.1	1225.23	156.347	2653.88	1362.15	154.531	2694.18	1177.65	212.732	2416.78	1304.11	-13.1659	2576.49	1393.55	-78.4441	2502.39	1175.58	-81.6185	2496.54	1095.82	-113.27	2530.01	975.047	-73.8492	2610.81	880.239	-122.429	2559.81	870.03	-118.272	2618.87	800.356
646	0	81.4545	2709.42	1623.37	184.074	2721.88	1623.62	85.142	2540.98	1580.18	212.089	2575.91	1593.12	148.582	2531.07	1472.12	169.668	2426.79	1226.57	156.811	2666.89	1363.26	155.278	2706.88	1178.77	212.028	2429.51	1305.36	-12.985	2590.29	1394.9	-79.1242	2518.43	1176.65	-82.5557	2513.45	1096.75	-113.564	2549.49	976.448	-73.0211	2631.44	883.162	-122.166	2581.21	871.895	-117.261	2641.81	803.508
647	0	81.8435	2722.62	1624.18	184.466	2735.05	1624.34	85.5191	2554.1	1581.08	212.449	2589.05	1593.89	148.628	2544.18	1473.08	168.834	2439.45	1227.69	157.289	2679.86	1364.17	155.987	2719.58	1179.69	211.352	2442.22	1306.4	-12.7801	2604.08	1396.08	-79.8029	2534.49	1177.58	-83.4834	2530.42	1097.54	-113.832	2569.04	977.756	-72.1393	2652.07	886.022	-121.865	2602.68	873.713	-116.167	2664.76	806.639
648	0	82.2997	2735.79	1624.78	184.926	2748.19	1624.84	85.9202	2567.21	1581.77	212.843	2602.14	1594.43	148.713	2557.27	1473.81	168.053	2452.09	1228.59	157.769	2692.83	1364.86	156.638	2732.27	1180.4	210.717	2454.91	1307.21	-12.5557	2617.83	1397.06	-80.4783	2550.58	1178.34	-84.3976	2547.45	1098.16	-114.074	2588.65	978.961	-71.2098	2672.69	888.799	-121.525	2624.2	875.47	-114.992	2687.69	809.729
649	0	82.8131	2748.94	1625.16	185.443	2761.28	1625.12	86.3358	2580.31	1582.24	213.264	2615.19	1594.74	148.834	2570.34	1474.31	167.34	2464.72	1229.25	158.242	2705.79	1365.31	157.216	2744.96	1180.89	210.139	2467.59	1307.79	-12.3152	2631.55	1397.83	-81.1474	2566.68	1178.92	-85.2939	2564.53	1098.62	-114.286	2608.28	980.051	-70.2382	2693.29	891.479	-121.145	2645.74	877.154	-113.742	2710.58	812.764
650	0	83.3756	2762.06	1625.32	186.009	2774.34	1625.18	86.7587	2593.4	1582.48	213.705	2628.19	1594.82	148.99	2583.39	1474.58	166.713	2477.35	1229.67	158.701	2718.75	1365.53	157.71	2757.66	1181.13	209.632	2480.27	1308.13	-12.0598	2645.24	1398.39	-81.8052	2582.81	1179.32	-86.1672	2581.66	1098.9	-114.467	2627.94	981.018	-69.2297	2713.85	894.046	-120.728	2667.28	878.755	-112.42	2733.39	815.725
651	0	83.981	2775.16	1625.26	186.619	2787.36	1625.02	87.1844	2606.48	1582.48	214.162	2641.15	1594.66	149.183	2596.42	1474.62	166.188	2489.98	1229.84	159.143	2731.72	1365.5	158.111	2770.37	1181.12	209.209	2492.97	1308.24	-11.7893	2658.88	1398.71	-82.4452	2598.95	1179.52	-87.0114	2598.82	1098.99	-114.612	2647.59	981.852	-68.1893	2734.36	896.487	-120.272	2688.8	880.263	-111.032	2756.11	818.6
652	0	84.6251	2788.23	1624.99	187.269	2800.36	1624.64	87.611	2619.56	1582.24	214.633	2654.08	1594.28	149.413	2609.45	1474.42	165.778	2502.63	1229.77	159.566	2744.71	1365.23	158.418	2783.1	1180.85	208.884	2505.68	1308.1	-11.5019	2672.48	1398.8	-83.0592	2615.1	1179.51	-87.8194	2616	1098.89	-114.72	2667.23	982.55	-67.1215	2754.81	898.793	-119.779	2710.28	881.67	-109.587	2778.73	821.376
653	0	85.3059	2801.29	1624.49	187.957	2813.32	1624.04	88.0389	2632.64	1581.75	215.117	2666.98	1593.65	149.684	2622.47	1473.98	165.497	2515.29	1229.45	159.972	2757.73	1364.72	158.629	2795.86	1180.32	208.669	2518.42	1307.73	-11.1942	2686.03	1398.65	-83.6372	2631.26	1179.3	-88.5832	2633.19	1098.6	-114.785	2686.82	983.106	-66.0307	2775.17	900.953	-119.25	2731.69	882.971	-108.09	2801.2	824.042
654	0	86.0235	2814.33	1623.78	188.686	2826.26	1623.24	88.4713	2645.72	1581.03	215.619	2679.86	1592.81	150.001	2635.5	1473.32	165.354	2527.97	1228.9	160.365	2770.77	1363.97	158.751	2808.67	1179.53	208.574	2531.19	1307.12	-10.8611	2699.54	1398.26	-84.1679	2647.42	1178.88	-89.2938	2650.38	1098.12	-114.804	2706.36	983.519	-64.9209	2795.43	902.961	-118.686	2753.02	884.161	-106.551	2823.53	826.588
655	0	86.7796	2827.35	1622.86	189.457	2839.17	1622.24	88.9137	2658.8	1580.08	216.143	2692.71	1591.74	150.369	2648.52	1472.43	165.355	2540.68	1228.11	160.752	2783.85	1362.98	158.791	2821.52	1178.49	208.608	2543.99	1306.29	-10.4966	2713	1397.65	-84.6386	2663.57	1178.25	-89.9413	2667.55	1097.45	-114.771	2725.82	983.788	-63.7961	2815.59	904.814	-118.087	2774.23	885.237	-104.978	2845.68	829.005
656	0	87.5778	2840.36	1621.75	190.276	2852.06	1621.05	89.3737	2671.88	1578.91	216.694	2705.54	1590.47	150.795	2661.55	1471.33	165.504	2553.43	1227.09	161.142	2796.95	1361.78	158.762	2834.44	1177.22	208.778	2556.84	1305.23	-10.0934	2726.41	1396.81	-85.0358	2679.69	1177.42	-90.5149	2684.69	1096.6	-114.681	2745.18	983.915	-62.6596	2835.61	906.507	-117.453	2795.31	886.198	-103.381	2867.62	831.288
657	0	88.4231	2853.36	1620.45	191.149	2864.94	1619.68	89.8606	2684.95	1577.53	217.282	2718.36	1589.01	151.285	2674.58	1470.02	165.802	2566.21	1225.85	161.546	2810.1	1360.38	158.68	2847.43	1175.74	209.086	2569.74	1303.95	-9.64369	2739.78	1395.77	-85.3452	2695.78	1176.41	-91.0031	2701.77	1095.58	-114.529	2764.41	983.904	-61.5146	2855.49	908.04	-116.786	2816.21	887.043	-101.767	2889.35	833.43
658	0	89.3217	2866.35	1618.98	192.081	2877.8	1618.14	90.3851	2698.02	1575.96	217.915	2731.17	1587.36	151.848	2687.61	1468.53	166.248	2579.05	1224.41	161.977	2823.28	1358.8	158.563	2860.51	1174.08	209.534	2582.68	1302.47	-9.13901	2753.11	1394.54	-85.5525	2711.8	1175.21	-91.3941	2718.78	1094.4	-114.309	2783.48	983.758	-60.3639	2875.2	909.415	-116.083	2836.92	887.771	-100.147	2910.83	835.424
659	0	90.2804	2879.33	1617.36	193.083	2890.65	1616.46	90.9587	2711.09	1574.22	218.603	2743.98	1585.56	152.491	2700.65	1466.86	166.835	2591.93	1222.76	162.448	2836.5	1357.05	158.432	2873.68	1172.25	210.119	2595.67	1300.79	-8.57085	2766.4	1393.13	-85.6437	2727.75	1173.85	-91.6761	2735.69	1093.08	-114.014	2802.38	983.485	-59.2097	2894.73	910.632	-115.345	2857.41	888.385	-98.5306	2932.04	837.268
660	0	91.3063	2892.31	1615.61	194.161	2903.5	1614.65	91.5933	2724.15	1572.33	219.358	2756.78	1583.63	153.22	2713.68	1465.03	167.556	2604.89	1220.94	162.975	2849.76	1355.18	158.311	2886.96	1170.3	210.838	2608.72	1298.92	-7.93076	2779.66	1391.57	-85.6057	2743.59	1172.34	-91.8373	2752.49	1091.64	-113.64	2821.08	983.091	-58.0535	2914.05	911.695	-114.569	2877.64	888.884	-96.9256	2952.94	838.956
661	0	92.4064	2905.28	1613.75	195.323	2916.34	1612.74	92.3006	2737.2	1570.32	220.188	2769.59	1581.58	154.043	2726.73	1463.07	168.401	2617.91	1218.95	163.572	2863.05	1353.2	158.225	2900.34	1168.25	211.683	2621.82	1296.89	-7.21071	2792.91	1389.89	-85.4268	2759.3	1170.7	-91.8667	2769.16	1090.08	-113.181	2839.54	982.587	-56.8963	2933.14	912.608	-113.754	2897.59	889.271	-95.3406	2973.52	840.486
662	0	93.5873	2918.25	1611.8	196.576	2929.19	1610.74	93.0916	2750.25	1568.22	221.103	2782.4	1579.45	154.965	2739.77	1461	169.355	2631.01	1216.81	164.253	2876.37	1351.14	158.199	2913.85	1166.14	212.644	2634.97	1294.72	-6.40337	2806.14	1388.11	-85.0969	2774.87	1168.96	-91.7541	2785.67	1088.44	-112.632	2857.75	981.982	-55.7384	2951.99	913.375	-112.896	2917.22	889.549	-93.783	2993.75	841.854
663	0	94.8545	2931.22	1609.79	197.926	2942.04	1608.68	93.9762	2763.3	1566.05	222.112	2795.22	1577.26	155.991	2752.82	1458.84	170.406	2644.19	1214.55	165.03	2889.73	1349.05	158.258	2927.47	1164.01	213.708	2648.19	1292.41	-5.50239	2819.36	1386.25	-84.6086	2790.27	1167.13	-91.4911	2802.01	1086.73	-111.989	2875.68	981.287	-54.5793	2970.56	914.001	-111.992	2936.5	889.719	-92.259	3013.59	843.061
664	0	96.2125	2944.2	1607.76	199.377	2954.91	1606.6	94.9628	2776.34	1563.86	223.222	2808.06	1575.04	157.123	2765.87	1456.62	171.537	2657.46	1212.19	165.917	2903.13	1346.95	158.428	2941.22	1161.89	214.863	2661.46	1290	-4.50268	2832.59	1384.36	-83.9569	2805.49	1165.25	-91.0709	2818.17	1084.98	-111.249	2893.31	980.517	-53.4179	2988.84	914.49	-111.04	2955.4	889.785	-90.7738	3033.01	844.105
665	0	97.6641	2957.18	1605.72	200.931	2967.79	1604.52	96.058	2789.38	1561.66	224.437	2820.91	1572.83	158.362	2778.92	1454.37	172.731	2670.83	1209.77	166.923	2916.55	1344.87	158.732	2955.09	1159.83	216.093	2674.79	1287.51	-3.40066	2845.84	1382.47	-83.1394	2820.52	1163.34	-90.4888	2834.11	1083.21	-110.41	2910.61	979.684	-52.2525	3006.79	914.85	-110.035	2973.88	889.751	-89.3308	3052	844.986
666	0	99.2103	2970.17	1603.72	202.588	2980.68	1602.46	97.2662	2802.41	1559.49	225.762	2833.77	1570.66	159.706	2791.98	1452.12	173.971	2684.31	1207.3	168.056	2930.01	1342.86	159.191	2969.08	1157.87	217.38	2688.18	1284.98	-2.19452	2859.12	1380.6	-82.157	2835.34	1161.44	-89.7425	2849.84	1081.46	-109.469	2927.56	978.803	-51.0806	3024.4	915.086	-108.975	2991.93	889.622	-87.9318	3070.52	845.707
667	0	100.85	2983.17	1601.78	204.347	2993.6	1600.48	98.5892	2815.45	1557.39	227.195	2846.65	1568.55	161.151	2805.04	1449.9	175.238	2697.88	1204.82	169.32	2943.49	1340.94	159.82	2983.19	1156.02	218.708	2701.62	1282.43	-0.884436	2872.43	1378.8	-81.0131	2849.95	1159.57	-88.8323	2865.33	1079.74	-108.428	2944.14	977.891	-49.8994	3041.64	915.206	-107.857	3009.51	889.403	-86.5769	3088.54	846.271
668	0	102.581	2996.18	1599.93	206.202	3006.54	1598.58	100.026	2828.49	1555.39	228.736	2859.56	1566.55	162.693	2818.12	1447.74	176.514	2711.55	1202.38	170.718	2957	1339.15	160.635	2997.41	1154.35	220.058	2715.11	1279.9	0.527219	2885.79	1377.09	-79.7144	2864.37	1157.77	-87.7611	2880.57	1078.1	-107.287	2960.34	976.966	-48.7053	3058.48	915.216	-106.677	3026.6	889.103	-85.2646	3106.04	846.683
669	0	104.398	3009.21	1598.2	208.148	3019.51	1596.82	101.575	2841.54	1553.52	230.38	2872.49	1564.68	164.321	2831.21	1445.68	177.782	2725.31	1199.99	172.249	2970.53	1337.52	161.643	3011.73	1152.86	221.412	2728.65	1277.43	2.03573	2899.21	1375.51	-78.2704	2878.58	1156.06	-86.5344	2895.57	1076.55	-106.049	2976.15	976.045	-47.4948	3074.91	915.126	-105.436	3043.18	888.73	-83.9914	3123	846.948
670	0	106.295	3022.25	1596.62	210.176	3032.51	1595.21	103.228	2854.6	1551.8	232.12	2885.44	1562.97	166.026	2844.32	1443.75	179.024	2739.17	1197.7	173.907	2984.08	1336.08	162.847	3026.14	1151.6	222.754	2742.24	1275.05	3.6339	2912.68	1374.1	-76.6933	2892.61	1154.49	-85.1606	2910.31	1075.13	-104.717	2991.55	975.146	-46.264	3090.9	914.943	-104.132	3059.23	888.294	-82.7523	3139.39	847.073
671	0	108.263	3035.32	1595.23	212.276	3045.54	1593.79	104.978	2867.67	1550.27	233.948	2898.42	1561.45	167.795	2857.46	1441.98	180.222	2753.1	1195.56	175.684	2997.65	1334.84	164.244	3040.62	1150.58	224.065	2755.87	1272.79	5.312	2926.23	1372.87	-74.9981	2906.46	1153.09	-83.6508	2924.79	1073.85	-103.299	3006.54	974.289	-45.0092	3106.43	914.678	-102.766	3074.74	887.807	-81.541	3155.21	847.066
672	0	110.292	3048.41	1594.03	214.435	3058.6	1592.57	106.814	2880.76	1548.95	235.851	2911.43	1560.14	169.613	2870.61	1440.39	181.361	2767.1	1193.58	177.569	3011.23	1333.83	165.825	3055.15	1149.82	225.329	2769.53	1270.71	7.05783	2939.85	1371.86	-73.202	2920.14	1151.88	-82.0184	2939	1072.76	-101.801	3021.11	973.494	-43.7269	3121.49	914.34	-101.341	3089.69	887.282	-80.3499	3170.43	846.935
673	0	112.371	3061.52	1593.06	216.641	3071.68	1591.58	108.723	2893.87	1547.85	237.817	2924.46	1559.07	171.465	2883.8	1439.03	182.427	2781.16	1191.81	179.545	3024.82	1333.08	167.575	3069.72	1149.34	226.531	2783.21	1268.82	8.85683	2953.54	1371.09	-71.3247	2933.68	1150.9	-80.2796	2952.95	1071.86	-100.231	3035.26	972.778	-42.4141	3136.06	913.942	-99.8585	3104.08	886.733	-79.1705	3185.05	846.69
674	0	114.486	3074.67	1592.32	218.878	3084.8	1590.84	110.688	2907.01	1547.01	239.83	2937.52	1558.25	173.331	2897.02	1437.9	183.404	2795.25	1190.27	181.594	3038.42	1332.58	169.471	3084.28	1149.15	227.658	2796.9	1267.16	10.6924	2967.31	1370.59	-69.3878	2947.1	1150.17	-78.4528	2966.65	1071.19	-98.6013	3048.99	972.16	-41.0688	3150.14	913.494	-98.325	3117.91	886.177	-77.9937	3199.05	846.342
675	0	116.625	3087.84	1591.84	221.133	3097.95	1590.35	112.694	2920.17	1546.43	241.874	2950.61	1557.69	175.196	2910.26	1437.03	184.283	2809.37	1189	183.693	3052.01	1332.36	171.487	3098.83	1149.24	228.698	2810.59	1265.77	12.5461	2981.16	1370.36	-67.415	2960.39	1149.72	-76.5587	2980.09	1070.75	-96.9229	3062.31	971.657	-39.6898	3163.71	913.009	-96.747	3131.18	885.628	-76.8104	3212.43	845.902
676	0	118.772	3101.05	1591.63	223.387	3111.12	1590.13	114.721	2933.37	1546.12	243.93	2963.73	1557.4	177.039	2923.54	1436.43	185.055	2823.49	1188.01	185.819	3065.6	1332.41	173.59	3113.32	1149.62	229.642	2824.27	1264.66	14.3984	2995.07	1370.43	-65.4316	2973.59	1149.56	-74.6196	2993.28	1070.57	-95.2094	3075.23	971.283	-38.2774	3176.78	912.501	-95.1329	3143.9	885.103	-75.6118	3225.2	845.379
677	0	120.914	3114.29	1591.67	225.626	3124.32	1590.16	116.75	2946.6	1546.08	245.98	2976.87	1557.38	178.842	2936.84	1436.11	185.714	2837.59	1187.33	187.943	3079.17	1332.73	175.744	3127.73	1150.28	230.485	2837.93	1263.85	16.2287	3009.05	1370.79	-63.464	2986.71	1149.7	-72.6596	3006.23	1070.65	-93.4756	3087.76	971.052	-36.8332	3189.34	911.982	-93.493	3156.09	884.618	-74.3896	3237.36	844.787
678	0	123.034	3127.56	1591.97	227.833	3137.54	1590.46	118.761	2959.86	1546.31	248.006	2990.04	1557.62	180.588	2950.17	1436.09	186.26	2851.66	1186.96	190.039	3092.73	1333.31	177.911	3142.03	1151.19	231.224	2851.56	1263.35	18.0164	3023.07	1371.45	-61.5394	2999.76	1150.14	-70.7034	3018.95	1071.01	-91.7374	3099.91	970.974	-35.361	3201.4	911.465	-91.8392	3167.76	884.188	-73.1369	3248.93	844.135
679	0	125.118	3140.86	1592.53	229.992	3150.78	1591.01	120.732	2973.15	1546.82	249.987	3003.23	1558.12	182.261	2963.52	1436.34	186.694	2865.68	1186.9	192.078	3106.25	1334.15	180.049	3156.19	1152.35	231.859	2865.14	1263.18	19.7411	3037.13	1372.4	-59.6853	3012.75	1150.9	-68.7765	3031.45	1071.62	-90.0116	3111.7	971.055	-33.8662	3212.98	910.963	-90.1851	3178.94	883.828	-71.8486	3259.91	843.435
680	0	127.152	3154.19	1593.34	232.087	3164.03	1591.79	122.643	2986.48	1547.58	251.906	3016.43	1558.87	183.847	2976.89	1436.87	187.022	2879.64	1187.15	194.033	3119.75	1335.22	182.117	3170.2	1153.71	232.395	2878.66	1263.32	21.383	3051.21	1373.62	-57.9282	3025.69	1151.95	-66.9036	3043.72	1072.5	-88.3155	3123.14	971.299	-32.3566	3224.08	910.486	-88.5455	3189.65	883.548	-70.5221	3270.34	842.696
681	0	129.119	3167.55	1594.36	234.105	3177.29	1592.78	124.475	2999.84	1548.57	253.744	3029.66	1559.84	185.333	2990.27	1437.67	187.254	2893.51	1187.71	195.877	3133.22	1336.51	184.074	3184.03	1155.25	232.839	2892.12	1263.77	22.9243	3065.28	1375.1	-56.2932	3038.58	1153.28	-65.1087	3055.79	1073.63	-86.6665	3134.26	971.706	-30.842	3234.72	910.046	-86.9365	3199.93	883.36	-69.1576	3280.24	841.93
682	0	131.008	3180.94	1595.59	236.031	3190.55	1593.97	126.208	3013.22	1549.79	255.485	3042.89	1561.01	186.709	3003.66	1438.72	187.405	2907.28	1188.56	197.586	3146.65	1337.98	185.882	3197.67	1156.93	233.2	2905.52	1264.51	24.3486	3079.34	1376.82	-54.8032	3051.43	1154.88	-63.4142	3067.67	1074.99	-85.0821	3145.07	972.273	-29.3347	3244.94	909.65	-85.3748	3209.79	883.271	-67.7593	3289.65	841.146
683	0	132.806	3194.34	1597.01	237.853	3203.82	1595.33	127.824	3026.63	1551.19	257.113	3056.13	1562.37	187.967	3017.04	1439.99	187.489	2920.95	1189.67	199.14	3160.03	1339.62	187.507	3211.12	1158.73	233.491	2918.85	1265.54	25.6423	3093.35	1378.74	-53.4774	3064.22	1156.71	-61.84	3079.35	1076.57	-83.5792	3155.6	972.992	-27.8488	3254.75	909.306	-83.8779	3219.29	883.285	-66.3353	3298.61	840.355
684	0	134.5	3207.77	1598.58	239.559	3217.08	1596.84	129.309	3040.07	1552.77	258.615	3069.37	1563.88	189.104	3030.43	1441.47	187.525	2934.51	1191.03	200.521	3173.37	1341.39	188.919	3224.38	1160.6	233.725	2932.12	1266.83	26.7944	3107.29	1380.83	-52.3311	3076.96	1158.74	-60.4033	3090.85	1078.33	-82.1739	3165.87	973.853	-26.4006	3264.18	909.02	-82.4631	3228.45	883.404	-64.8979	3307.14	839.566
685	0	136.081	3221.2	1600.28	241.139	3230.34	1598.47	130.65	3053.52	1554.48	259.978	3082.62	1565.52	190.116	3043.8	1443.12	187.53	2947.94	1192.61	201.715	3186.67	1343.26	190.094	3237.45	1162.51	233.916	2945.31	1268.35	27.7974	3121.16	1383.07	-51.3747	3089.62	1160.94	-59.118	3102.17	1080.26	-80.881	3175.9	974.845	-25.0078	3273.27	908.795	-81.1474	3237.3	883.628	-63.4637	3315.3	838.789
686	0	137.539	3234.65	1602.08	242.587	3243.59	1600.19	131.836	3066.98	1556.3	261.195	3095.87	1567.26	191.004	3057.16	1444.93	187.525	2961.24	1194.39	202.715	3199.92	1345.21	191.015	3250.34	1164.44	234.08	2958.45	1270.07	28.6467	3134.93	1385.41	-50.613	3102.19	1163.28	-57.9943	3113.33	1082.32	-79.7136	3185.7	975.952	-23.6897	3282.05	908.633	-79.9471	3245.89	883.951	-62.0535	3323.13	838.032
687	0	138.868	3248.09	1603.96	243.894	3256.83	1601.97	132.861	3080.46	1558.2	262.258	3109.11	1569.07	191.769	3070.5	1446.85	187.525	2974.41	1196.32	203.516	3213.13	1347.21	191.673	3263.08	1166.36	234.231	2971.53	1271.96	29.3413	3148.59	1387.81	-50.0456	3114.65	1165.71	-57.0385	3124.32	1084.49	-78.6831	3195.29	977.158	-22.4659	3290.55	908.534	-78.8776	3254.23	884.368	-60.6911	3330.66	837.306
688	0	140.061	3261.54	1605.87	245.058	3270.05	1603.79	133.72	3093.94	1560.14	263.165	3122.35	1570.93	192.416	3083.83	1448.86	187.546	2987.46	1198.38	204.119	3226.29	1349.22	192.067	3275.69	1168.25	234.382	2984.55	1274	29.8833	3162.13	1390.25	-49.6663	3126.98	1168.21	-56.2529	3135.16	1086.74	-77.7986	3204.69	978.443	-21.3566	3298.8	908.495	-77.9525	3262.37	884.869	-59.4035	3337.95	836.614
689	0	141.113	3274.99	1607.79	246.075	3283.26	1605.62	134.413	3107.42	1562.1	263.914	3135.58	1572.81	192.95	3097.12	1450.92	187.601	3000.39	1200.53	204.529	3239.41	1351.23	192.204	3288.19	1170.09	234.545	2997.54	1276.13	30.2776	3175.55	1392.69	-49.4637	3139.16	1170.74	-55.6363	3145.84	1089.03	-77.0669	3213.93	979.788	-20.3816	3306.84	908.51	-77.184	3270.33	885.441	-58.2191	3345.03	835.963
690	0	142.023	3288.42	1609.7	246.945	3296.45	1607.44	134.941	3120.9	1564.06	264.507	3148.81	1574.68	193.377	3110.4	1453.01	187.699	3013.21	1202.74	204.757	3252.49	1353.2	192.095	3300.61	1171.86	234.728	3010.48	1278.33	30.5319	3188.83	1395.1	-49.4219	3151.17	1173.26	-55.1835	3156.38	1091.34	-76.4927	3223	981.172	-19.5599	3314.71	908.573	-76.5821	3278.13	886.072	-57.1672	3351.93	835.355
691	0	142.789	3301.85	1611.56	247.668	3309.63	1609.21	135.309	3134.38	1565.97	264.946	3162.03	1576.51	193.705	3123.64	1455.09	187.846	3025.92	1204.97	204.813	3265.53	1355.12	191.761	3312.98	1173.57	234.938	3023.39	1280.56	30.6556	3201.97	1397.44	-49.5211	3162.99	1175.75	-54.8864	3166.76	1093.63	-76.0778	3231.93	982.572	-18.9091	3322.43	908.672	-76.1545	3285.79	886.745	-56.2767	3358.7	834.789
692	0	143.411	3315.25	1613.34	248.247	3322.78	1610.92	135.523	3147.84	1567.82	265.239	3175.24	1578.3	193.941	3136.85	1457.13	188.044	3038.55	1207.19	204.714	3278.53	1356.97	191.228	3325.31	1175.18	235.178	3036.27	1282.79	30.6598	3214.99	1399.69	-49.7393	3174.59	1178.16	-54.734	3177.01	1095.89	-75.822	3240.73	983.968	-18.4447	3330.03	908.798	-75.9069	3293.34	887.443	-55.5746	3365.36	834.262
693	0	143.89	3328.65	1615.02	248.685	3335.9	1612.54	135.592	3161.28	1569.58	265.391	3188.45	1580	194.093	3150.04	1459.09	188.291	3051.11	1209.35	204.475	3291.5	1358.72	190.524	3337.64	1176.71	235.449	3049.14	1284.96	30.5565	3227.89	1401.81	-50.0528	3185.98	1180.49	-54.7131	3187.13	1098.07	-75.7228	3249.41	985.336	-18.1797	3337.54	908.933	-75.8422	3300.79	888.145	-55.0857	3371.93	833.766
694	0	144.229	3342.02	1616.58	248.988	3349	1614.06	135.525	3174.71	1571.23	265.411	3201.65	1581.6	194.169	3163.19	1460.96	188.584	3063.61	1211.43	204.114	3304.45	1360.36	189.682	3349.97	1178.13	235.748	3062	1287.06	30.3581	3240.68	1403.79	-50.438	3197.13	1182.69	-54.8094	3197.12	1100.17	-75.7757	3257.97	986.653	-18.1242	3344.99	909.063	-75.9607	3308.15	888.831	-54.8308	3378.45	833.29
695	0	144.431	3355.37	1617.99	249.161	3362.06	1615.44	135.332	3188.11	1572.74	265.306	3214.83	1583.07	194.175	3176.32	1462.7	188.915	3076.08	1213.39	203.65	3317.37	1361.87	188.735	3362.32	1179.43	236.071	3074.85	1289.04	30.077	3253.38	1405.59	-50.8723	3208.06	1184.74	-55.0072	3207	1102.16	-75.9746	3266.45	987.897	-18.2852	3352.4	909.167	-76.2604	3315.44	889.479	-54.8266	3384.94	832.82
696	0	144.501	3368.69	1619.24	249.213	3375.08	1616.68	135.025	3201.49	1574.08	265.085	3228	1584.4	194.118	3189.43	1464.29	189.273	3088.52	1215.21	203.099	3330.28	1363.23	187.719	3374.7	1180.61	236.41	3087.7	1290.89	29.7248	3265.99	1407.2	-51.3348	3218.76	1186.63	-55.2909	3216.78	1104	-76.3116	3274.83	989.046	-18.666	3359.8	909.224	-76.7368	3322.68	890.068	-55.0847	3391.4	832.339
697	0	144.443	3381.99	1620.3	249.152	3388.05	1617.75	134.612	3214.85	1575.24	264.757	3241.17	1585.57	194.003	3202.52	1465.69	189.646	3100.97	1216.85	202.479	3343.18	1364.43	186.665	3387.12	1181.65	236.754	3100.56	1292.56	29.3124	3278.53	1408.6	-51.8075	3229.26	1188.34	-55.6453	3226.47	1105.69	-76.778	3283.15	990.078	-19.2663	3367.2	909.213	-77.383	3329.86	890.572	-55.6113	3397.86	831.824
698	0	144.263	3395.26	1621.16	248.986	3400.98	1618.65	134.105	3228.18	1576.2	264.329	3254.32	1586.55	193.834	3215.6	1466.9	190.021	3113.43	1218.3	201.804	3356.08	1365.45	185.605	3399.58	1182.53	237.095	3113.43	1294.03	28.8492	3291.03	1409.77	-52.2752	3239.56	1189.83	-56.0559	3236.08	1107.2	-77.364	3291.41	990.974	-20.0826	3374.63	909.11	-78.1903	3337.01	890.971	-56.4074	3404.32	831.254
699	0	143.964	3408.5	1621.81	248.725	3413.85	1619.36	133.511	3241.48	1576.94	263.81	3267.45	1587.33	193.614	3228.68	1467.9	190.384	3125.91	1219.52	201.089	3368.99	1366.27	184.564	3412.09	1183.23	237.42	3126.33	1295.29	28.3432	3303.51	1410.69	-52.7264	3249.71	1191.11	-56.51	3245.65	1108.52	-78.0596	3299.62	991.715	-21.1078	3382.09	908.892	-79.1483	3344.13	891.242	-57.4683	3410.8	830.604
700	0	143.552	3421.72	1622.25	248.376	3426.67	1619.86	132.84	3254.76	1577.45	263.204	3280.58	1587.91	193.345	3241.75	1468.66	190.72	3138.44	1220.52	200.343	3381.91	1366.89	183.565	3424.63	1183.74	237.717	3139.25	1296.32	27.8006	3315.98	1411.35	-53.1532	3259.72	1192.16	-56.9962	3255.18	1109.64	-78.8541	3307.8	992.283	-22.3319	3389.6	908.535	-80.2454	3351.24	891.365	-58.7846	3417.3	829.849
701	0	143.032	3434.91	1622.45	247.946	3439.44	1620.16	132.096	3268.02	1577.71	262.519	3293.7	1588.25	193.028	3254.84	1469.19	191.015	3151.03	1221.26	199.576	3394.86	1367.27	182.625	3437.21	1184.03	237.973	3152.2	1297.1	27.2259	3328.46	1411.74	-53.5512	3269.65	1192.96	-57.5054	3264.7	1110.53	-79.7374	3315.97	992.663	-23.742	3397.17	908.018	-81.469	3358.34	891.321	-60.342	3423.83	828.964
702	0	142.407	3448.07	1622.42	247.441	3452.14	1620.25	131.285	3281.25	1577.71	261.758	3306.81	1588.36	192.661	3267.95	1469.46	191.255	3163.67	1221.75	198.795	3407.83	1367.42	181.757	3449.82	1184.08	238.175	3165.2	1297.63	26.622	3340.97	1411.86	-53.9197	3279.52	1193.51	-58.0304	3274.25	1111.2	-80.6992	3324.14	992.842	-25.3234	3404.81	907.32	-82.8064	3365.44	891.092	-62.1224	3430.39	827.925
703	0	141.68	3461.21	1622.16	246.865	3464.8	1620.12	130.411	3294.47	1577.44	260.925	3319.92	1588.23	192.244	3281.07	1469.48	191.427	3176.4	1221.98	198.005	3420.84	1367.33	180.968	3462.47	1183.89	238.312	3178.23	1297.9	25.9898	3353.53	1411.69	-54.2616	3289.39	1193.8	-58.5665	3283.83	1111.62	-81.7301	3332.34	992.81	-27.0594	3412.53	906.423	-84.2446	3372.56	890.664	-64.1044	3436.98	826.71
704	0	140.854	3474.34	1621.66	246.218	3477.41	1619.76	129.475	3307.67	1576.91	260.021	3333.03	1587.86	191.772	3294.23	1469.23	191.52	3189.19	1221.94	197.207	3433.89	1366.98	180.259	3475.16	1183.44	238.372	3191.3	1297.91	25.3287	3366.16	1411.23	-54.5828	3299.29	1193.83	-59.111	3293.48	1111.8	-82.8209	3340.58	992.557	-28.9325	3420.33	905.309	-85.771	3379.71	890.025	-66.2643	3443.62	825.299
705	0	139.931	3487.44	1620.93	245.5	3489.98	1619.2	128.477	3320.86	1576.12	259.048	3346.14	1587.23	191.242	3307.41	1468.73	191.525	3202.08	1221.64	196.401	3446.99	1366.37	179.628	3487.88	1182.71	238.344	3204.42	1297.65	24.6367	3378.86	1410.49	-54.8925	3309.26	1193.6	-59.6629	3303.22	1111.73	-83.9636	3348.88	992.078	-30.9243	3428.21	903.965	-87.3739	3386.91	889.165	-68.5768	3450.29	823.674
706	0	138.913	3500.53	1619.97	244.707	3502.53	1618.41	127.418	3334.03	1575.05	258.004	3359.26	1586.37	190.648	3320.63	1467.97	191.431	3215.05	1221.07	195.586	3460.13	1365.51	179.068	3500.66	1181.72	238.22	3217.59	1297.14	23.9105	3391.65	1409.48	-55.2022	3319.35	1193.09	-60.2232	3313.08	1111.41	-85.1507	3357.25	991.367	-33.0163	3436.19	902.382	-89.0425	3394.16	888.08	-71.0158	3457.01	821.824
707	0	137.798	3513.61	1618.79	243.834	3515.07	1617.42	126.295	3347.21	1573.74	256.89	3372.39	1585.27	189.986	3333.88	1466.97	191.234	3228.1	1220.25	194.758	3473.33	1364.38	178.57	3513.48	1180.46	237.992	3230.81	1296.37	23.1455	3404.52	1408.19	-55.5254	3329.59	1192.33	-60.7942	3323.08	1110.83	-86.3759	3365.73	990.424	-35.1906	3444.26	900.55	-90.7671	3401.49	886.765	-73.5556	3463.78	819.737
708	0	136.587	3526.68	1617.4	242.874	3527.61	1616.22	125.106	3360.38	1572.17	255.701	3385.53	1583.94	189.249	3347.17	1465.72	190.928	3241.24	1219.18	193.913	3486.57	1363.01	178.122	3526.37	1178.94	237.653	3244.08	1295.36	22.3367	3417.5	1406.63	-55.8771	3340.02	1191.3	-61.3793	3333.24	1110	-87.6335	3374.33	989.247	-37.4298	3452.44	898.466	-92.539	3408.91	885.22	-76.171	3470.59	817.409
709	0	135.28	3539.74	1615.8	241.816	3540.17	1614.84	123.847	3373.56	1570.37	254.435	3398.69	1582.4	188.43	3360.49	1464.25	190.51	3254.46	1217.87	193.043	3499.87	1361.39	177.71	3539.32	1177.18	237.198	3257.41	1294.12	21.4782	3430.58	1404.82	-56.2727	3350.67	1190.02	-61.9825	3343.6	1108.92	-88.9189	3383.06	987.839	-39.7175	3460.72	896.127	-94.3508	3416.43	883.446	-78.8387	3477.47	814.836
710	0	133.873	3552.8	1614.01	240.653	3552.78	1613.27	122.514	3386.74	1568.34	253.087	3411.86	1580.65	187.523	3373.85	1462.55	189.979	3267.77	1216.33	192.142	3513.23	1359.54	177.317	3552.36	1175.18	236.625	3270.78	1292.65	20.5641	3443.75	1402.77	-56.7271	3361.57	1188.49	-62.6083	3354.15	1107.6	-90.2281	3391.95	986.201	-42.0387	3469.11	893.532	-96.1961	3424.07	881.446	-81.537	3484.41	812.019
711	0	132.366	3565.86	1612.04	239.373	3565.45	1611.53	121.103	3399.93	1566.11	251.654	3425.05	1578.7	186.523	3387.25	1460.65	189.334	3281.16	1214.57	191.202	3526.63	1357.48	176.929	3565.48	1172.98	235.932	3284.2	1290.97	19.5881	3457.02	1400.5	-57.2548	3372.74	1186.71	-63.2611	3364.93	1106.03	-91.558	3401	984.337	-44.38	3477.62	890.684	-98.0697	3431.84	879.225	-84.2469	3491.42	808.961
712	0	130.756	3578.91	1609.9	237.968	3578.19	1609.64	119.609	3413.12	1563.69	250.131	3438.26	1576.58	185.424	3400.68	1458.56	188.577	3294.62	1212.61	190.217	3540.08	1355.21	176.53	3578.69	1170.6	235.119	3297.66	1289.09	18.5446	3470.37	1398	-57.8686	3384.2	1184.7	-63.9452	3375.95	1104.22	-92.906	3410.24	982.252	-46.7295	3486.24	887.585	-99.9672	3439.77	876.788	-86.9518	3498.51	805.668
713	0	129.04	3591.97	1607.61	236.431	3591.02	1607.61	118.03	3426.33	1561.09	248.515	3451.48	1574.29	184.22	3414.14	1456.29	187.711	3308.17	1210.46	189.177	3553.58	1352.75	176.105	3592	1168.05	234.188	3311.18	1287.02	17.4279	3483.81	1395.31	-58.5796	3395.97	1182.45	-64.6644	3387.22	1102.18	-94.2703	3419.68	979.95	-49.0773	3494.99	884.241	-101.885	3447.85	874.142	-89.6381	3505.69	802.148
714	0	127.217	3605.03	1605.18	234.755	3603.94	1605.45	116.359	3439.56	1558.34	246.8	3464.72	1571.85	182.908	3427.62	1453.85	186.737	3321.78	1208.12	188.076	3567.13	1350.11	175.64	3605.42	1165.37	233.139	3324.74	1284.78	16.2334	3497.33	1392.43	-59.397	3408.06	1179.98	-65.4223	3398.75	1099.91	-95.6494	3429.33	977.436	-51.415	3503.87	880.656	-103.82	3456.1	871.293	-92.2945	3512.96	798.407
715	0	125.282	3618.09	1602.61	232.935	3616.96	1603.16	114.596	3452.79	1555.44	244.985	3477.98	1569.28	181.484	3441.14	1451.26	185.66	3335.47	1205.62	186.907	3580.73	1347.32	175.122	3618.93	1162.57	231.977	3338.34	1282.37	14.9568	3510.92	1389.38	-60.3276	3420.47	1177.29	-66.2215	3410.55	1097.41	-97.0421	3439.19	974.715	-53.7362	3512.88	876.836	-105.771	3464.53	868.247	-94.9126	3520.32	794.455
716	0	123.235	3631.16	1599.92	230.965	3630.08	1600.78	112.737	3466.05	1552.41	243.066	3491.25	1566.57	179.947	3454.68	1448.53	184.481	3349.22	1202.95	185.665	3594.36	1344.39	174.54	3632.55	1159.67	230.703	3352	1279.8	13.5948	3524.57	1386.16	-61.3766	3433.22	1174.38	-67.0643	3422.62	1094.69	-98.4477	3449.28	971.791	-56.0359	3522.03	872.785	-107.736	3473.15	865.009	-97.486	3527.8	790.299
717	0	121.073	3644.22	1597.12	228.843	3643.32	1598.29	110.78	3479.31	1549.26	241.041	3504.53	1563.76	178.294	3468.25	1445.66	183.206	3363.05	1200.14	184.346	3608.05	1341.31	173.887	3646.27	1156.69	229.323	3365.7	1277.09	12.145	3538.28	1382.79	-62.5473	3446.31	1171.27	-67.9522	3434.98	1091.76	-99.8657	3459.6	968.667	-58.3105	3531.31	868.509	-109.713	3481.95	861.583	-100.01	3535.38	785.947
718	0	118.796	3657.28	1594.21	226.565	3656.67	1595.72	108.723	3492.6	1545.99	238.908	3517.83	1560.83	176.525	3481.84	1442.66	181.836	3376.95	1197.18	182.945	3621.77	1338.11	173.155	3660.1	1153.64	227.837	3379.44	1274.24	10.6057	3552.04	1379.28	-63.8419	3459.74	1167.94	-68.8864	3447.62	1088.62	-101.296	3470.16	965.345	-60.5575	3540.73	864.012	-111.702	3490.95	857.974	-102.483	3543.07	781.404
719	0	116.4	3670.35	1591.2	224.129	3670.13	1593.05	106.567	3505.9	1542.62	236.668	3531.14	1557.8	174.639	3495.46	1439.53	180.374	3390.92	1194.08	181.462	3635.54	1334.79	172.34	3674.02	1150.52	226.25	3393.23	1271.25	8.97567	3565.86	1375.62	-65.2613	3473.51	1164.42	-69.8674	3460.54	1085.26	-102.737	3480.96	961.829	-62.7755	3550.3	859.296	-113.702	3500.15	854.184	-104.901	3550.88	776.674
720	0	113.887	3683.41	1588.08	221.533	3683.71	1590.31	104.31	3519.22	1539.14	234.319	3544.47	1554.66	172.637	3509.1	1436.28	178.821	3404.96	1190.84	179.894	3649.35	1331.35	171.44	3688.04	1147.36	224.561	3407.07	1268.13	7.25446	3579.73	1371.82	-66.8061	3487.63	1160.7	-70.8957	3473.76	1081.7	-104.19	3491.99	958.118	-64.9637	3560.01	854.363	-115.713	3509.55	850.214	-107.265	3558.81	771.761
721	0	111.256	3696.48	1584.87	218.776	3697.41	1587.48	101.953	3532.56	1535.56	231.86	3557.81	1551.43	170.517	3522.77	1432.91	177.177	3419.06	1187.47	178.241	3663.21	1327.8	170.453	3702.16	1144.14	222.771	3420.95	1264.87	5.44178	3593.64	1367.89	-68.4763	3502.08	1156.77	-71.9712	3487.26	1077.93	-105.655	3503.26	954.215	-67.1217	3569.86	849.214	-117.735	3519.14	846.066	-109.575	3566.86	766.665
722	0	108.506	3709.54	1581.55	215.858	3711.23	1584.57	99.4943	3545.91	1531.88	229.293	3571.16	1548.09	168.28	3536.46	1429.42	175.444	3433.24	1183.97	176.503	3677.11	1324.13	169.379	3716.37	1140.86	220.882	3434.89	1261.48	3.53753	3607.61	1363.83	-70.2719	3516.88	1152.65	-73.0941	3501.05	1073.94	-107.132	3514.78	950.118	-69.2493	3579.86	843.849	-119.768	3528.94	841.739	-111.829	3575.02	761.387
[truncated: 69 more columns]

## Sheet: Sheet2
Devices
		025370 - Force			025370 - Moment			025370 - CoP			027571 - Force			027571 - Moment			027571 - CoP			037720 - Force			037720 - Moment			037720 - CoP
Frame	Sub Frame	Fx	Fy	Fz	Mx	My	Mz	Cx	Cy	Cz	Fx	Fy	Fz	Mx	My	Mz	Cx	Cy	Cz	Fx	Fy	Fz	Mx	My	Mz	Cx	Cy	Cz
		N	N	N	N.mm	N.mm	N.mm	mm	mm	mm	N	N	N	N.mm	N.mm	N.mm	mm	mm	mm	N	N	N	N.mm	N.mm	N.mm	mm	mm	mm
295	0	0	0	0	0	0	0	200	300	0	0	0	0	0	0	0	200	903	0	0	0	0	0	0	0	603	903	0
295	1	0	0	0	0	0	0	200	300	0	0	0	0	0	0	0	200	903	0	0	0	0	0	0	0	603	903	0
295	2	0	0	0	0	0	0	200	300	0	0	0	0	0	0	0	200	903	0	0	0	0	0	0	0	603	903	0
295	3	0	0	0	0	0	0	200	300	0	0	0	0	0	0	0	200	903	0	0	0	0	0	0	0	603	903	0
295	4	0	0	0	0	0	0	200	300	0	0	0	0	0	0	0	200	903	0	0	0	0	0	0	0	603	903	0
295	5	0	0	0	0	0	0	200	300	0	0	0	0	0	0	0	200	903	0	0	0	0	0	0	0	603	903	0
295	6	0	0	0	0	0	0	200	300	0	0	0	0	0	0	0	200	903	0	0	0	0	0	0	0	603	903	0
295	7	0	0	0	0	0	0	200	300	0	0	0	0	0	0	0	200	903	0	0	0	0	0	0	0	603	903	0
295	8	0	0	0	0	0	0	200	300	0	0	0	0	0	0	0	200	903	0	0	0	0	0	0	0	603	903	0
295	9	0	0	0	0	0	0	200	300	0	0	0	0	0	0	0	200	903	0	0	0	0	0	0	0	603	903	0
296	0	0	0	0	0	0	0	200	300	0	0	0	0	0	0	0	200	903	0	0	0	0	0	0	0	603	903	0
296	1	0	0	0	0	0	0	200	300	0	0	0	0	0	0	0	200	903	0	0	0	0	0	0	0	603	903	0
296	2	0	0	0	0	0	0	200	300	0	0	0	0	0	0	0	200	903	0	0	0	0	0	0	0	603	903	0
296	3	0	0	0	0	0	0	200	300	0	0	0	0	0	0	0	200	903	0	0	0	0	0	0	0	603	903	0
296	4	0	0	0	0	0	0	200	300	0	0	0	0	0	0	0	200	903	0	0	0	0	0	0	0	603	903	0
296	5	0	0	0	0	0	0	200	300	0	0	0	0	0	0	0	200	903	0	0	0	0	0	0	0	603	903	0
296	6	0	0	0	0	0	0	200	300	0	0	0	0	0	0	0	200	903	0	0	0	0	0	0	0	603	903	0
296	7	0	0	0	0	0	0	200	300	0	0	0	0	0	0	0	200	903	0	0	0	0	0	0	0	603	903	0
296	8	0	0	0	0	0	0	200	300	0	0	0	0	0	0	0	200	903	0	0	0	0	0	0	0	603	903	0
296	9	0	0	0	0	0	0	200	300	0	0	0	0	0	0	0	200	903	0	0	0	0	0	0	0	603	903	0
297	0	0	0	0	0	0	0	200	300	0	0	0	0	0	0	0	200	903	0	0	0	0	0	0	0	603	903	0
297	1	0	0	0	0	0	0	200	300	0	0	0	0	0	0	0	200	903	0	0	0	0	0	0	0	603	903	0
297	2	0	0	0	0	0	0	200	300	0	0	0	0	0	0	0	200	903	0	0	0	0	0	0	0	603	903	0
297	3	0	0	0	0	0	0	200	300	0	0	0	0	0	0	0	200	903	0	0	0	0	0	0	0	603	903	0
297	4	0	0	0	0	0	0	200	300	0	0	0	0	0	0	0	200	903	0	0	0	0	0	0	0	603	903	0
297	5	0	0	0	0	0	0	200	300	0	0	0	0	0	0	0	200	903	0	0	0	0	0	0	0	603	903	0
297	6	0	0	0	0	0	0	200	300	0	0	0	0	0	0	0	200	903	0	0	0	0	0	0	0	603	903	0
297	7	0	0	0	0	0	0	200	300	0	0	0	0	0	0	0	200	903	0	0	0	0	0	0	0	603	903	0
297	8	0	0	0	0	0	0	200	300	0	0	0	0	0	0	0	200	903	0	0	0	0	0	0	0	603	903	0
297	9	0	0	0	0	0	0	200	300	0	0	0	0	0	0	0	200	903	0	0	0	0	0	0	0	603	903	0
298	0	0	0	0	0	0	0	200	300	0	0	0	0	0	0	0	200	903	0	0	0	0	0	0	0	603	903	0
298	1	0	0	0	0	0	0	200	300	0	0	0	0	0	0	0	200	903	0	0	0	0	0	0	0	603	903	0
298	2	0	0	0	0	0	0	200	300	0	0	0	0	0	0	0	200	903	0	0	0	0	0	0	0	603	903	0
298	3	0	0	0	0	0	0	200	300	0	0	0	0	0	0	0	200	903	0	0	0	0	0	0	0	603	903	0
298	4	0	0	0	0	0	0	200	300	0	0	0	0	0	0	0	200	903	0	0	0	0	0	0	0	603	903	0
298	5	0	0	0	0	0	0	200	300	0	0	0	0	0	0	0	200	903	0	0	0	0	0	0	0	603	903	0
298	6	0	0	0	0	0	0	200	300	0	0	0	0	0	0	0	200	903	0	0	0	0	0	0	0	603	903	0
298	7	0	0	0	0	0	0	200	300	0	0	0	0	0	0	0	200	903	0	0	0	0	0	0	0	603	903	0
298	8	0	0	0	0	0	0	200	300	0	0	0	0	0	0	0	200	903	0	0	0	0	0	0	0	603	903	0
298	9	0	0	0	0	0	0	200	300	0	0	0	0	0	0	0	200	903	0	0	0	0	0	0	0	603	903	0
299	0	0	0	0	0	0	0	200	300	0	0	0	0	0	0	0	200	903	0	0	0	0	0	0	0	603	903	0
299	1	0	0	0	0	0	0	200	300	0	0	0	0	0	0	0	200	903	0	0	0	0	0	0	0	603	903	0
299	2	0	0	0	0	0	0	200	300	0	0	0	0	0	0	0	200	903	0	0	0	0	0	0	0	603	903	0
299	3	0	0	0	0	0	0	200	300	0	0	0	0	0	0	0	200	903	0	0	0	0	0	0	0	603	903	0
299	4	0	0	0	0	0	0	200	300	0	0	0	0	0	0	0	200	903	0	0	0	0	0	0	0	603	903	0
299	5	0	0	0	0	0	0	200	300	0	0	0	0	0	0	0	200	903	0	0	0	0	0	0	0	603	903	0
299	6	0	0	0	0	0	0	200	300	0	0	0	0	0	0	0	200	903	0	0	0	0	0	0	0	603	903	0
299	7	0	0	0	0	0	0	200	300	0	0	0	0	0	0	0	200	903	0	0	0	0	0	0	0	603	903	0
299	8	0	0	0	0	0	0	200	300	0	0	0	0	0	0	0	200	903	0	0	0	0	0	0	0	603	903	0
299	9	0	0	0	0	0	0	200	300	0	0	0	0	0	0	0	200	903	0	0	0	0	0	0	0	603	903	0
300	0	0	0	0	0	0	0	200	300	0	0	0	0	0	0	0	200	903	0	0	0	0	0	0	0	603	903	0
300	1	0	0	0	0	0	0	200	300	0	0	0	0	0	0	0	200	903	0	0	0	0	0	0	0	603	903	0
300	2	0	0	0	0	0	0	200	300	0	0	0	0	0	0	0	200	903	0	0	0	0	0	0	0	603	903	0
300	3	0	0	0	0	0	0	200	300	0	0	0	0	0	0	0	200	903	0	0	0	0	0	0	0	603	903	0
300	4	0	0	0	0	0	0	200	300	0	0	0	0	0	0	0	200	903	0	0	0	0	0	0	0	603	903	0
300	5	0	0	0	0	0	0	200	300	0	0	0	0	0	0	0	200	903	0	0	0	0	0	0	0	603	903	0
300	6	0	0	0	0	0	0	200	300	0	0	0	0	0	0	0	200	903	0	0	0	0	0	0	0	603	903	0
300	7	0	0	0	0	0	0	200	300	0	0	0	0	0	0	0	200	903	0	0	0	0	0	0	0	603	903	0
300	8	0	0	0	0	0	0	200	300	0	0	0	0	0	0	0	200	903	0	0	0	0	0	0	0	603	903	0
300	9	0	0	0	0	0	0	200	300	0	0	0	0	0	0	0	200	903	0	0	0	0	0	0	0	603	903	0
301	0	0	0	0	0	0	0	200	300	0	0	0	0	0	0	0	200	903	0	0	0	0	0	0	0	603	903	0
301	1	0	0	0	0	0	0	200	300	0	0	0	0	0	0	0	200	903	0	0	0	0	0	0	0	603	903	0
301	2	0	0	0	0	0	0	200	300	0	0	0	0	0	0	0	200	903	0	0	0	0	0	0	0	603	903	0
301	3	0	0	0	0	0	0	200	300	0	0	0	0	0	0	0	200	903	0	0	0	0	0	0	0	603	903	0
301	4	0	0	0	0	0	0	200	300	0	0	0	0	0	0	0	200	903	0	0	0	0	0	0	0	603	903	0
301	5	0	0	0	0	0	0	200	300	0	0	0	0	0	0	0	200	903	0	0	0	0	0	0	0	603	903	0
301	6	0	0	0	0	0	0	200	300	0	0	0	0	0	0	0	200	903	0	0	0	0	0	0	0	603	903	0
301	7	0	0	0	0	0	0	200	300	0	0	0	0	0	0	0	200	903	0	0	0	0	0	0	0	603	903	0
301	8	0	0	0	0	0	0	200	300	0	0	0	0	0	0	0	200	903	0	0	0	0	0	0	0	603	903	0
301	9	0	0	0	0	0	0	200	300	0	0	0	0	0	0	0	200	903	0	0	0	0	0	0	0	603	903	0
302	0	0	0	0	0	0	0	200	300	0	0	0	0	0	0	0	200	903	0	0	0	0	0	0	0	603	903	0
302	1	0	0	0	0	0	0	200	300	0	0	0	0	0	0	0	200	903	0	0	0	0	0	0	0	603	903	0
302	2	0	0	0	0	0	0	200	300	0	0	0	0	0	0	0	200	903	0	0	0	0	0	0	0	603	903	0
302	3	0	0	0	0	0	0	200	300	0	0	0	0	0	0	0	200	903	0	0	0	0	0	0	0	603	903	0
302	4	0	0	0	0	0	0	200	300	0	0	0	0	0	0	0	200	903	0	0	0	0	0	0	0	603	903	0
302	5	0	0	0	0	0	0	200	300	0	0	0	0	0	0	0	200	903	0	0	0	0	0	0	0	603	903	0
302	6	0	0	0	0	0	0	200	300	0	0	0	0	0	0	0	200	903	0	0	0	0	0	0	0	603	903	0
302	7	0	0	0	0	0	0	200	300	0	0	0	0	0	0	0	200	903	0	0	0	0	0	0	0	603	903	0
302	8	0	0	0	0	0	0	200	300	0	0	0	0	0	0	0	200	903	0	0	0	0	0	0	0	603	903	0
302	9	0	0	0	0	0	0	200	300	0	0	0	0	0	0	0	200	903	0	0	0	0	0	0	0	603	903	0
303	0	0	0	0	0	0	0	200	300	0	0	0	0	0	0	0	200	903	0	0	0	0	0	0	0	603	903	0
303	1	0	0	0	0	0	0	200	300	0	0	0	0	0	0	0	200	903	0	0	0	0	0	0	0	603	903	0
303	2	0	0	0	0	0	0	200	300	0	0	0	0	0	0	0	200	903	0	0	0	0	0	0	0	603	903	0
303	3	0	0	0	0	0	0	200	300	0	0	0	0	0	0	0	200	903	0	0	0	0	0	0	0	603	903	0
303	4	0	0	0	0	0	0	200	300	0	0	0	0	0	0	0	200	903	0	0	0	0	0	0	0	603	903	0
303	5	0	0	0	0	0	0	200	300	0	0	0	0	0	0	0	200	903	0	0	0	0	0	0	0	603	903	0
303	6	0	0	0	0	0	0	200	300	0	0	0	0	0	0	0	200	903	0	0	0	0	0	0	0	603	903	0
303	7	0	0	0	0	0	0	200	300	0	0	0	0	0	0	0	200	903	0	0	0	0	0	0	0	603	903	0
303	8	0	0	0	0	0	0	200	300	0	0	0	0	0	0	0	200	903	0	0	0	0	0	0	0	603	903	0
303	9	0	0	0	0	0	0	200	300	0	0	0	0	0	0	0	200	903	0	0	0	0	0	0	0	603	903	0
304	0	0	0	0	0	0	0	200	300	0	0	0	0	0	0	0	200	903	0	0	0	0	0	0	0	603	903	0
304	1	0	0	0	0	0	0	200	300	0	0	0	0	0	0	0	200	903	0	0	0	0	0	0	0	603	903	0
304	2	0	0	0	0	0	0	200	300	0	0	0	0	0	0	0	200	903	0	0	0	0	0	0	0	603	903	0
304	3	0	0	0	0	0	0	200	300	0	0	0	0	0	0	0	200	903	0	0	0	0	0	0	0	603	903	0
304	4	0	0	0	0	0	0	200	300	0	0	0	0	0	0	0	200	903	0	0	0	0	0	0	0	603	903	0
304	5	0	0	0	0	0	0	200	300	0	0	0	0	0	0	0	200	903	0	0	0	0	0	0	0	603	903	0
304	6	0	0	0	0	0	0	200	300	0	0	0	0	0	0	0	200	903	0	0	0	0	0	0	0	603	903	0
304	7	0	0	0	0	0	0	200	300	0	0	0	0	0	0	0	200	903	0	0	0	0	0	0	0	603	903	0
304	8	0	0	0	0	0	0	200	300	0	0	0	0	0	0	0	200	903	0	0	0	0	0	0	0	603	903	0
304	9	0	0	0	0	0	0	200	300	0	0	0	0	0	0	0	200	903	0	0	0	0	0	0	0	603	903	0
305	0	0	0	0	0	0	0	200	300	0	0	0	0	0	0	0	200	903	0	0	0	0	0	0	0	603	903	0
305	1	0	0	0	0	0	0	200	300	0	0	0	0	0	0	0	200	903	0	0	0	0	0	0	0	603	903	0
305	2	0	0	0	0	0	0	200	300	0	0	0	0	0	0	0	200	903	0	0	0	0	0	0	0	603	903	0
305	3	0	0	0	0	0	0	200	300	0	0	0	0	0	0	0	200	903	0	0	0	0	0	0	0	603	903	0
305	4	0	0	0	0	0	0	200	300	0	0	0	0	0	0	0	200	903	0	0	0	0	0	0	0	603	903	0
305	5	0	0	0	0	0	0	200	300	0	0	0	0	0	0	0	200	903	0	0	0	0	0	0	0	603	903	0
305	6	0	0	0	0	0	0	200	300	0	0	0	0	0	0	0	200	903	0	0	0	0	0	0	0	603	903	0
305	7	0	0	0	0	0	0	200	300	0	0	0	0	0	0	0	200	903	0	0	0	0	0	0	0	603	903	0
305	8	0	0	0	0	0	0	200	300	0	0	0	0	0	0	0	200	903	0	0	0	0	0	0	0	603	903	0
305	9	0	0	0	0	0	0	200	300	0	0	0	0	0	0	0	200	903	0	0	0	0	0	0	0	603	903	0
306	0	0	0	0	0	0	0	200	300	0	0	0	0	0	0	0	200	903	0	0	0	0	0	0	0	603	903	0
306	1	0	0	0	0	0	0	200	300	0	0	0	0	0	0	0	200	903	0	0	0	0	0	0	0	603	903	0
306	2	0	0	0	0	0	0	200	300	0	0	0	0	0	0	0	200	903	0	0	0	0	0	0	0	603	903	0
306	3	0	0	0	0	0	0	200	300	0	0	0	0	0	0	0	200	903	0	0	0	0	0	0	0	603	903	0
306	4	0	0	0	0	0	0	200	300	0	0	0	0	0	0	0	200	903	0	0	0	0	0	0	0	603	903	0
306	5	0	0	0	0	0	0	200	300	0	0	0	0	0	0	0	200	903	0	0	0	0	0	0	0	603	903	0
306	6	0	0	0	0	0	0	200	300	0	0	0	0	0	0	0	200	903	0	0	0	0	0	0	0	603	903	0
306	7	0	0	0	0	0	0	200	300	0	0	0	0	0	0	0	200	903	0	0	0	0	0	0	0	603	903	0
306	8	0	0	0	0	0	0	200	300	0	0	0	0	0	0	0	200	903	0	0	0	0	0	0	0	603	903	0
306	9	0	0	0	0	0	0	200	300	0	0	0	0	0	0	0	200	903	0	0	0	0	0	0	0	603	903	0
307	0	0	0	0	0	0	0	200	300	0	0	0	0	0	0	0	200	903	0	0	0	0	0	0	0	603	903	0
307	1	0	0	0	0	0	0	200	300	0	0	0	0	0	0	0	200	903	0	0	0	0	0	0	0	603	903	0
307	2	0	0	0	0	0	0	200	300	0	0	0	0	0	0	0	200	903	0	0	0	0	0	0	0	603	903	0
307	3	0	0	0	0	0	0	200	300	0	0	0	0	0	0	0	200	903	0	0	0	0	0	0	0	603	903	0
307	4	0	0	0	0	0	0	200	300	0	0	0	0	0	0	0	200	903	0	0	0	0	0	0	0	603	903	0
307	5	0	0	0	0	0	0	200	300	0	0	0	0	0	0	0	200	903	0	0	0	0	0	0	0	603	903	0
307	6	0	0	0	0	0	0	200	300	0	0	0	0	0	0	0	200	903	0	0	0	0	0	0	0	603	903	0
307	7	0	0	0	0	0	0	200	300	0	0	0	0	0	0	0	200	903	0	0	0	0	0	0	0	603	903	0
307	8	0	0	0	0	0	0	200	300	0	0	0	0	0	0	0	200	903	0	0	0	0	0	0	0	603	903	0
307	9	0	0	0	0	0	0	200	300	0	0	0	0	0	0	0	200	903	0	0	0	0	0	0	0	603	903	0
308	0	0	0	0	0	0	0	200	300	0	0	0	0	0	0	0	200	903	0	0	0	0	0	0	0	603	903	0
308	1	0	0	0	0	0	0	200	300	0	0	0	0	0	0	0	200	903	0	0	0	0	0	0	0	603	903	0
308	2	0	0	0	0	0	0	200	300	0	0	0	0	0	0	0	200	903	0	0	0	0	0	0	0	603	903	0
308	3	0	0	0	0	0	0	200	300	0	0	0	0	0	0	0	200	903	0	0	0	0	0	0	0	603	903	0
308	4	0	0	0	0	0	0	200	300	0	0	0	0	0	0	0	200	903	0	0	0	0	0	0	0	603	903	0
308	5	0	0	0	0	0	0	200	300	0	0	0	0	0	0	0	200	903	0	0	0	0	0	0	0	603	903	0
308	6	0	0	0	0	0	0	200	300	0	0	0	0	0	0	0	200	903	0	0	0	0	0	0	0	603	903	0
308	7	0	0	0	0	0	0	200	300	0	0	0	0	0	0	0	200	903	0	0	0	0	0	0	0	603	903	0
308	8	0	0	0	0	0	0	200	300	0	0	0	0	0	0	0	200	903	0	0	0	0	0	0	0	603	903	0
308	9	0	0	0	0	0	0	200	300	0	0	0	0	0	0	0	200	903	0	0	0	0	0	0	0	603	903	0
309	0	0	0	0	0	0	0	200	300	0	0	0	0	0	0	0	200	903	0	0	0	0	0	0	0	603	903	0
309	1	0	0	0	0	0	0	200	300	0	0	0	0	0	0	0	200	903	0	0	0	0	0	0	0	603	903	0
309	2	0	0	0	0	0	0	200	300	0	0	0	0	0	0	0	200	903	0	0	0	0	0	0	0	603	903	0
309	3	0	0	0	0	0	0	200	300	0	0	0	0	0	0	0	200	903	0	0	0	0	0	0	0	603	903	0
309	4	0	0	0	0	0	0	200	300	0	0	0	0	0	0	0	200	903	0	0	0	0	0	0	0	603	903	0
309	5	0	0	0	0	0	0	200	300	0	0	0	0	0	0	0	200	903	0	0	0	0	0	0	0	603	903	0
309	6	0	0	0	0	0	0	200	300	0	0	0	0	0	0	0	200	903	0	0	0	0	0	0	0	603	903	0
309	7	0	0	0	0	0	0	200	300	0	0	0	0	0	0	0	200	903	0	0	0	0	0	0	0	603	903	0
309	8	0	0	0	0	0	0	200	300	0	0	0	0	0	0	0	200	903	0	0	0	0	0	0	0	603	903	0
309	9	0	0	0	0	0	0	200	300	0	0	0	0	0	0	0	200	903	0	0	0	0	0	0	0	603	903	0
310	0	0	0	0	0	0	0	200	300	0	0	0	0	0	0	0	200	903	0	0	0	0	0	0	0	603	903	0
310	1	0	0	0	0	0	0	200	300	0	0	0	0	0	0	0	200	903	0	0	0	0	0	0	0	603	903	0
310	2	0	0	0	0	0	0	200	300	0	0	0	0	0	0	0	200	903	0	0	0	0	0	0	0	603	903	0
310	3	0	0	0	0	0	0	200	300	0	0	0	0	0	0	0	200	903	0	0	0	0	0	0	0	603	903	0
310	4	0	0	0	0	0	0	200	300	0	0	0	0	0	0	0	200	903	0	0	0	0	0	0	0	603	903	0
310	5	0	0	0	0	0	0	200	300	0	0	0	0	0	0	0	200	903	0	0	0	0	0	0	0	603	903	0
310	6	0	0	0	0	0	0	200	300	0	0	0	0	0	0	0	200	903	0	0	0	0	0	0	0	603	903	0
310	7	0	0	0	0	0	0	200	300	0	0	0	0	0	0	0	200	903	0	0	0	0	0	0	0	603	903	0
310	8	0	0	0	0	0	0	200	300	0	0	0	0	0	0	0	200	903	0	0	0	0	0	0	0	603	903	0
310	9	0	0	0	0	0	0	200	300	0	0	0	0	0	0	0	200	903	0	0	0	0	0	0	0	603	903	0
311	0	0	0	0	0	0	0	200	300	0	0	0	0	0	0	0	200	903	0	0	0	0	0	0	0	603	903	0
311	1	0	0	0	0	0	0	200	300	0	0	0	0	0	0	0	200	903	0	0	0	0	0	0	0	603	903	0
311	2	0	0	0	0	0	0	200	300	0	0	0	0	0	0	0	200	903	0	0	0	0	0	0	0	603	903	0
311	3	0	0	0	0	0	0	200	300	0	0	0	0	0	0	0	200	903	0	0	0	0	0	0	0	603	903	0
311	4	0	0	0	0	0	0	200	300	0	0	0	0	0	0	0	200	903	0	0	0	0	0	0	0	603	903	0
311	5	0	0	0	0	0	0	200	300	0	0	0	0	0	0	0	200	903	0	0	0	0	0	0	0	603	903	0
311	6	0	0	0	0	0	0	200	300	0	0	0	0	0	0	0	200	903	0	0	0	0	0	0	0	603	903	0
311	7	0	0	0	0	0	0	200	300	0	0	0	0	0	0	0	200	903	0	0	0	0	0	0	0	603	903	0
311	8	0	0	0	0	0	0	200	300	0	0	0	0	0	0	0	200	903	0	0	0	0	0	0	0	603	903	0
311	9	0	0	0	0	0	0	200	300	0	0	0	0	0	0	0	200	903	0	0	0	0	0	0	0	603	903	0
312	0	0	0	0	0	0	0	200	300	0	0	0	0	0	0	0	200	903	0	0	0	0	0	0	0	603	903	0
312	1	0	0	0	0	0	0	200	300	0	0	0	0	0	0	0	200	903	0	0	0	0	0	0	0	603	903	0
312	2	0	0	0	0	0	0	200	300	0	0	0	0	0	0	0	200	903	0	0	0	0	0	0	0	603	903	0
312	3	0	0	0	0	0	0	200	300	0	0	0	0	0	0	0	200	903	0	0	0	0	0	0	0	603	903	0
312	4	0	0	0	0	0	0	200	300	0	0	0	0	0	0	0	200	903	0	0	0	0	0	0	0	603	903	0
312	5	0	0	0	0	0	0	200	300	0	0	0	0	0	0	0	200	903	0	0	0	0	0	0	0	603	903	0
312	6	0	0	0	0	0	0	200	300	0	0	0	0	0	0	0	200	903	0	0	0	0	0	0	0	603	903	0
312	7	0	0	0	0	0	0	200	300	0	0	0	0	0	0	0	200	903	0	0	0	0	0	0	0	603	903	0
312	8	0	0	0	0	0	0	200	300	0	0	0	0	0	0	0	200	903	0	0	0	0	0	0	0	603	903	0
312	9	0	0	0	0	0	0	200	300	0	0	0	0	0	0	0	200	903	0	0	0	0	0	0	0	603	903	0
313	0	0	0	0	0	0	0	200	300	0	0	0	0	0	0	0	200	903	0	0	0	0	0	0	0	603	903	0
313	1	0	0	0	0	0	0	200	300	0	0	0	0	0	0	0	200	903	0	0	0	0	0	0	0	603	903	0
313	2	0	0	0	0	0	0	200	300	0	0	0	0	0	0	0	200	903	0	0	0	0	0	0	0	603	903	0
313	3	0	0	0	0	0	0	200	300	0	0	0	0	0	0	0	200	903	0	0	0	0	0	0	0	603	903	0
313	4	0	0	0	0	0	0	200	300	0	0	0	0	0	0	0	200	903	0	0	0	0	0	0	0	603	903	0
313	5	0	0	0	0	0	0	200	300	0	0	0	0	0	0	0	200	903	0	0	0	0	0	0	0	603	903	0
313	6	0	0	0	0	0	0	200	300	0	0	0	0	0	0	0	200	903	0	0	0	0	0	0	0	603	903	0
313	7	0	0	0	0	0	0	200	300	0	0	0	0	0	0	0	200	903	0	0	0	0	0	0	0	603	903	0
313	8	0	0	0	0	0	0	200	300	0	0	0	0	0	0	0	200	903	0	0	0	0	0	0	0	603	903	0
313	9	0	0	0	0	0	0	200	300	0	0	0	0	0	0	0	200	903	0	0	0	0	0	0	0	603	903	0
314	0	0	0	0	0	0	0	200	300	0	0	0	0	0	0	0	200	903	0	0	0	0	0	0	0	603	903	0
314	1	0	0	0	0	0	0	200	300	0	0	0	0	0	0	0	200	903	0	0	0	0	0	0	0	603	903	0
314	2	0	0	0	0	0	0	200	300	0	0	0	0	0	0	0	200	903	0	0	0	0	0	0	0	603	903	0
314	3	0	0	0	0	0	0	200	300	0	0	0	0	0	0	0	200	903	0	0	0	0	0	0	0	603	903	0
314	4	0	0	0	0	0	0	200	300	0	0	0	0	0	0	0	200	903	0	0	0	0	0	0	0	603	903	0
314	5	0	0	0	0	0	0	200	300	0	0	0	0	0	0	0	200	903	0	0	0	0	0	0	0	603	903	0
314	6	0	0	0	0	0	0	200	300	0	0	0	0	0	0	0	200	903	0	0	0	0	0	0	0	603	903	0
314	7	0	0	0	0	0	0	200	300	0	0	0	0	0	0	0	200	903	0	0	0	0	0	0	0	603	903	0
314	8	0	0	0	0	0	0	200	300	0	0	0	0	0	0	0	200	903	0	0	0	0	0	0	0	603	903	0
314	9	0	0	0	0	0	0	200	300	0	0	0	0	0	0	0	200	903	0	0	0	0	0	0	0	603	903	0
315	0	0	0	0	0	0	0	200	300	0	0	0	0	0	0	0	200	903	0	0	0	0	0	0	0	603	903	0
315	1	0	0	0	0	0	0	200	300	0	0	0	0	0	0	0	200	903	0	0	0	0	0	0	0	603	903	0
315	2	0	0	0	0	0	0	200	300	0	0	0	0	0	0	0	200	903	0	0	0	0	0	0	0	603	903	0
315	3	0	0	0	0	0	0	200	300	0	0	0	0	0	0	0	200	903	0	0	0	0	0	0	0	603	903	0
315	4	0	0	0	0	0	0	200	300	0	0	0	0	0	0	0	200	903	0	0	0	0	0	0	0	603	903	0
315	5	0	0	0	0	0	0	200	300	0	0	0	0	0	0	0	200	903	0	0	0	0	0	0	0	603	903	0
315	6	0	0	0	0	0	0	200	300	0	0	0	0	0	0	0	200	903	0	0	0	0	0	0	0	603	903	0
315	7	0	0	0	0	0	0	200	300	0	0	0	0	0	0	0	200	903	0	0	0	0	0	0	0	603	903	0
315	8	0	0	0	0	0	0	200	300	0	0	0	0	0	0	0	200	903	0	0	0	0	0	0	0	603	903	0
315	9	0	0	0	0	0	0	200	300	0	0	0	0	0	0	0	200	903	0	0	0	0	0	0	0	603	903	0
316	0	0	0	0	0	0	0	200	300	0	0	0	0	0	0	0	200	903	0	0	0	0	0	0	0	603	903	0
316	1	0	0	0	0	0	0	200	300	0	0	0	0	0	0	0	200	903	0	0	0	0	0	0	0	603	903	0
316	2	0	0	0	0	0	0	200	300	0	0	0	0	0	0	0	200	903	0	0	0	0	0	0	0	603	903	0
316	3	0	0	0	0	0	0	200	300	0	0	0	0	0	0	0	200	903	0	0	0	0	0	0	0	603	903	0
316	4	0	0	0	0	0	0	200	300	0	0	0	0	0	0	0	200	903	0	0	0	0	0	0	0	603	903	0
316	5	0	0	0	0	0	0	200	300	0	0	0	0	0	0	0	200	903	0	0	0	0	0	0	0	603	903	0
316	6	0	0	0	0	0	0	200	300	0	0	0	0	0	0	0	200	903	0	0	0	0	0	0	0	603	903	0
316	7	0	0	0	0	0	0	200	300	0	0	0	0	0	0	0	200	903	0	0	0	0	0	0	0	603	903	0
316	8	0	0	0	0	0	0	200	300	0	0	0	0	0	0	0	200	903	0	0	0	0	0	0	0	603	903	0
316	9	0	0	0	0	0	0	200	300	0	0	0	0	0	0	0	200	903	0	0	0	0	0	0	0	603	903	0
317	0	0	0	0	0	0	0	200	300	0	0	0	0	0	0	0	200	903	0	0	0	0	0	0	0	603	903	0
317	1	0	0	0	0	0	0	200	300	0	0	0	0	0	0	0	200	903	0	0	0	0	0	0	0	603	903	0
317	2	0	0	0	0	0	0	200	300	0	0	0	0	0	0	0	200	903	0	0	0	0	0	0	0	603	903	0
317	3	0	0	0	0	0	0	200	300	0	0	0	0	0	0	0	200	903	0	0	0	0	0	0	0	603	903	0
317	4	0	0	0	0	0	0	200	300	0	0	0	0	0	0	0	200	903	0	0	0	0	0	0	0	603	903	0
317	5	0	0	0	0	0	0	200	300	0	0	0	0	0	0	0	200	903	0	0	0	0	0	0	0	603	903	0
317	6	0	0	0	0	0	0	200	300	0	0	0	0	0	0	0	200	903	0	0	0	0	0	0	0	603	903	0
317	7	0	0	0	0	0	0	200	300	0	0	0	0	0	0	0	200	903	0	0	0	0	0	0	0	603	903	0
317	8	0	0	0	0	0	0	200	300	0	0	0	0	0	0	0	200	903	0	0	0	0	0	0	0	603	903	0
317	9	0	0	0	0	0	0	200	300	0	0	0	0	0	0	0	200	903	0	0	0	0	0	0	0	603	903	0
318	0	0	0	0	0	0	0	200	300	0	0	0	0	0	0	0	200	903	0	0	0	0	0	0	0	603	903	0
318	1	0	0	0	0	0	0	200	300	0	0	0	0	0	0	0	200	903	0	0	0	0	0	0	0	603	903	0
318	2	0	0	0	0	0	0	200	300	0	0	0	0	0	0	0	200	903	0	0	0	0	0	0	0	603	903	0
318	3	0	0	0	0	0	0	200	300	0	0	0	0	0	0	0	200	903	0	0	0	0	0	0	0	603	903	0
318	4	0	0	0	0	0	0	200	300	0	0	0	0	0	0	0	200	903	0	0	0	0	0	0	0	603	903	0
318	5	0	0	0	0	0	0	200	300	0	0	0	0	0	0	0	200	903	0	0	0	0	0	0	0	603	903	0
318	6	0	0	0	0	0	0	200	300	0	0	0	0	0	0	0	200	903	0	0	0	0	0	0	0	603	903	0
318	7	0	0	0	0	0	0	200	300	0	0	0	0	0	0	0	200	903	0	0	0	0	0	0	0	603	903	0
318	8	0	0	0	0	0	0	200	300	0	0	0	0	0	0	0	200	903	0	0	0	0	0	0	0	603	903	0
318	9	0	0	0	0	0	0	200	300	0	0	0	0	0	0	0	200	903	0	0	0	0	0	0	0	603	903	0
319	0	0	0	0	0	0	0	200	300	0	0	0	0	0	0	0	200	903	0	0	0	0	0	0	0	603	903	0
319	1	0	0	0	0	0	0	200	300	0	0	0	0	0	0	0	200	903	0	0	0	0	0	0	0	603	903	0
319	2	0	0	0	0	0	0	200	300	0	0	0	0	0	0	0	200	903	0	0	0	0	0	0	0	603	903	0
319	3	0	0	0	0	0	0	200	300	0	0	0	0	0	0	0	200	903	0	0	0	0	0	0	0	603	903	0
319	4	0	0	0	0	0	0	200	300	0	0	0	0	0	0	0	200	903	0	0	0	0	0	0	0	603	903	0
319	5	0	0	0	0	0	0	200	300	0	0	0	0	0	0	0	200	903	0	0	0	0	0	0	0	603	903	0
319	6	0	0	0	0	0	0	200	300	0	0	0	0	0	0	0	200	903	0	0	0	0	0	0	0	603	903	0
319	7	0	0	0	0	0	0	200	300	0	0	0	0	0	0	0	200	903	0	0	0	0	0	0	0	603	903	0
319	8	0	0	0	0	0	0	200	300	0	0	0	0	0	0	0	200	903	0	0	0	0	0	0	0	603	903	0
319	9	0	0	0	0	0	0	200	300	0	0	0	0	0	0	0	200	903	0	0	0	0	0	0	0	603	903	0
320	0	0	0	0	0	0	0	200	300	0	0	0	0	0	0	0	200	903	0	0	0	0	0	0	0	603	903	0
320	1	0	0	0	0	0	0	200	300	0	0	0	0	0	0	0	200	903	0	0	0	0	0	0	0	603	903	0
320	2	0	0	0	0	0	0	200	300	0	0	0	0	0	0	0	200	903	0	0	0	0	0	0	0	603	903	0
320	3	0	0	0	0	0	0	200	300	0	0	0	0	0	0	0	200	903	0	0	0	0	0	0	0	603	903	0
320	4	0	0	0	0	0	0	200	300	0	0	0	0	0	0	0	200	903	0	0	0	0	0	0	0	603	903	0
320	5	0	0	0	0	0	0	200	300	0	0	0	0	0	0	0	200	903	0	0	0	0	0	0	0	603	903	0
320	6	0	0	0	0	0	0	200	300	0	0	0	0	0	0	0	200	903	0	0	0	0	0	0	0	603	903	0
320	7	0	0	0	0	0	0	200	300	0	0	0	0	0	0	0	200	903	0	0	0	0	0	0	0	603	903	0
320	8	0	0	0	0	0	0	200	300	0	0	0	0	0	0	0	200	903	0	0	0	0	0	0	0	603	903	0
320	9	0	0	0	0	0	0	200	300	0	0	0	0	0	0	0	200	903	0	0	0	0	0	0	0	603	903	0
321	0	0	0	0	0	0	0	200	300	0	0	0	0	0	0	0	200	903	0	0	0	0	0	0	0	603	903	0
321	1	0	0	0	0	0	0	200	300	0	0	0	0	0	0	0	200	903	0	0	0	0	0	0	0	603	903	0
321	2	0	0	0	0	0	0	200	300	0	0	0	0	0	0	0	200	903	0	0	0	0	0	0	0	603	903	0
321	3	0	0	0	0	0	0	200	300	0	0	0	0	0	0	0	200	903	0	0	0	0	0	0	0	603	903	0
321	4	0	0	0	0	0	0	200	300	0	0	0	0	0	0	0	200	903	0	0	0	0	0	0	0	603	903	0
321	5	0	0	0	0	0	0	200	300	0	0	0	0	0	0	0	200	903	0	0	0	0	0	0	0	603	903	0
321	6	0	0	0	0	0	0	200	300	0	0	0	0	0	0	0	200	903	0	0	0	0	0	0	0	603	903	0
321	7	0	0	0	0	0	0	200	300	0	0	0	0	0	0	0	200	903	0	0	0	0	0	0	0	603	903	0
321	8	0	0	0	0	0	0	200	300	0	0	0	0	0	0	0	200	903	0	0	0	0	0	0	0	603	903	0
321	9	0	0	0	0	0	0	200	300	0	0	0	0	0	0	0	200	903	0	0	0	0	0	0	0	603	903	0
322	0	0	0	0	0	0	0	200	300	0	0	0	0	0	0	0	200	903	0	0	0	0	0	0	0	603	903	0
322	1	0	0	0	0	0	0	200	300	0	0	0	0	0	0	0	200	903	0	0	0	0	0	0	0	603	903	0
322	2	0	0	0	0	0	0	200	300	0	0	0	0	0	0	0	200	903	0	0	0	0	0	0	0	603	903	0
322	3	0	0	0	0	0	0	200	300	0	0	0	0	0	0	0	200	903	0	0	0	0	0	0	0	603	903	0
322	4	0	0	0	0	0	0	200	300	0	0	0	0	0	0	0	200	903	0	0	0	0	0	0	0	603	903	0
322	5	0	0	0	0	0	0	200	300	0	0	0	0	0	0	0	200	903	0	0	0	0	0	0	0	603	903	0
322	6	0	0	0	0	0	0	200	300	0	0	0	0	0	0	0	200	903	0	0	0	0	0	0	0	603	903	0
322	7	0	0	0	0	0	0	200	300	0	0	0	0	0	0	0	200	903	0	0	0	0	0	0	0	603	903	0
322	8	0	0	0	0	0	0	200	300	0	0	0	0	0	0	0	200	903	0	0	0	0	0	0	0	603	903	0
322	9	0	0	0	0	0	0	200	300	0	0	0	0	0	0	0	200	903	0	0	0	0	0	0	0	603	903	0
323	0	0	0	0	0	0	0	200	300	0	0	0	0	0	0	0	200	903	0	0	0	0	0	0	0	603	903	0
323	1	0	0	0	0	0	0	200	300	0	0	0	0	0	0	0	200	903	0	0	0	0	0	0	0	603	903	0
323	2	0	0	0	0	0	0	200	300	0	0	0	0	0	0	0	200	903	0	0	0	0	0	0	0	603	903	0
323	3	0	0	0	0	0	0	200	300	0	0	0	0	0	0	0	200	903	0	0	0	0	0	0	0	603	903	0
323	4	0	0	0	0	0	0	200	300	0	0	0	0	0	0	0	200	903	0	0	0	0	0	0	0	603	903	0
323	5	0	0	0	0	0	0	200	300	0	0	0	0	0	0	0	200	903	0	0	0	0	0	0	0	603	903	0
323	6	0	0	0	0	0	0	200	300	0	0	0	0	0	0	0	200	903	0	0	0	0	0	0	0	603	903	0
323	7	0	0	0	0	0	0	200	300	0	0	0	0	0	0	0	200	903	0	0	0	0	0	0	0	603	903	0
323	8	0	0	0	0	0	0	200	300	0	0	0	0	0	0	0	200	903	0	0	0	0	0	0	0	603	903	0
323	9	0	0	0	0	0	0	200	300	0	0	0	0	0	0	0	200	903	0	0	0	0	0	0	0	603	903	0
324	0	0	0	0	0	0	0	200	300	0	0	0	0	0	0	0	200	903	0	0	0	0	0	0	0	603	903	0
324	1	0	0	0	0	0	0	200	300	0	0	0	0	0	0	0	200	903	0	0	0	0	0	0	0	603	903	0
324	2	0	0	0	0	0	0	200	300	0	0	0	0	0	0	0	200	903	0	0	0	0	0	0	0	603	903	0
324	3	0	0	0	0	0	0	200	300	0	0	0	0	0	0	0	200	903	0	0	0	0	0	0	0	603	903	0
324	4	0	0	0	0	0	0	200	300	0	0	0	0	0	0	0	200	903	0	0	0	0	0	0	0	603	903	0
324	5	0	0	0	0	0	0	200	300	0	0	0	0	0	0	0	200	903	0	0	0	0	0	0	0	603	903	0
324	6	0	0	0	0	0	0	200	300	0	0	0	0	0	0	0	200	903	0	0	0	0	0	0	0	603	903	0
324	7	0	0	0	0	0	0	200	300	0	0	0	0	0	0	0	200	903	0	0	0	0	0	0	0	603	903	0
324	8	0	0	0	0	0	0	200	300	0	0	0	0	0	0	0	200	903	0	0	0	0	0	0	0	603	903	0
324	9	0	0	0	0	0	0	200	300	0	0	0	0	0	0	0	200	903	0	0	0	0	0	0	0	603	903	0
325	0	0	0	0	0	0	0	200	300	0	0	0	0	0	0	0	200	903	0	0	0	0	0	0	0	603	903	0
325	1	0	0	0	0	0	0	200	300	0	0	0	0	0	0	0	200	903	0	0	0	0	0	0	0	603	903	0
325	2	0	0	0	0	0	0	200	300	0	0	0	0	0	0	0	200	903	0	0	0	0	0	0	0	603	903	0
325	3	0	0	0	0	0	0	200	300	0	0	0	0	0	0	0	200	903	0	0	0	0	0	0	0	603	903	0
325	4	0	0	0	0	0	0	200	300	0	0	0	0	0	0	0	200	903	0	0	0	0	0	0	0	603	903	0
325	5	0	0	0	0	0	0	200	300	0	0	0	0	0	0	0	200	903	0	0	0	0	0	0	0	603	903	0
325	6	0	0	0	0	0	0	200	300	0	0	0	0	0	0	0	200	903	0	0	0	0	0	0	0	603	903	0
325	7	0	0	0	0	0	0	200	300	0	0	0	0	0	0	0	200	903	0	0	0	0	0	0	0	603	903	0
325	8	0	0	0	0	0	0	200	300	0	0	0	0	0	0	0	200	903	0	0	0	0	0	0	0	603	903	0
325	9	0	0	0	0	0	0	200	300	0	0	0	0	0	0	0	200	903	0	0	0	0	0	0	0	603	903	0
326	0	0	0	0	0	0	0	200	300	0	0	0	0	0	0	0	200	903	0	0	0	0	0	0	0	603	903	0
326	1	0	0	0	0	0	0	200	300	0	0	0	0	0	0	0	200	903	0	0	0	0	0	0	0	603	903	0
326	2	0	0	0	0	0	0	200	300	0	0	0	0	0	0	0	200	903	0	0	0	0	0	0	0	603	903	0
326	3	0	0	0	0	0	0	200	300	0	0	0	0	0	0	0	200	903	0	0	0	0	0	0	0	603	903	0
326	4	0	0	0	0	0	0	200	300	0	0	0	0	0	0	0	200	903	0	0	0	0	0	0	0	603	903	0
326	5	0	0	0	0	0	0	200	300	0	0	0	0	0	0	0	200	903	0	0	0	0	0	0	0	603	903	0
326	6	0	0	0	0	0	0	200	300	0	0	0	0	0	0	0	200	903	0	0	0	0	0	0	0	603	903	0
326	7	0	0	0	0	0	0	200	300	0	0	0	0	0	0	0	200	903	0	0	0	0	0	0	0	603	903	0
326	8	0	0	0	0	0	0	200	300	0	0	0	0	0	0	0	200	903	0	0	0	0	0	0	0	603	903	0
326	9	0	0	0	0	0	0	200	300	0	0	0	0	0	0	0	200	903	0	0	0	0	0	0	0	603	903	0
327	0	0	0	0	0	0	0	200	300	0	0	0	0	0	0	0	200	903	0	0	0	0	0	0	0	603	903	0
327	1	0	0	0	0	0	0	200	300	0	0	0	0	0	0	0	200	903	0	0	0	0	0	0	0	603	903	0
327	2	0	0	0	0	0	0	200	300	0	0	0	0	0	0	0	200	903	0	0	0	0	0	0	0	603	903	0
327	3	0	0	0	0	0	0	200	300	0	0	0	0	0	0	0	200	903	0	0	0	0	0	0	0	603	903	0
327	4	0	0	0	0	0	0	200	300	0	0	0	0	0	0	0	200	903	0	0	0	0	0	0	0	603	903	0
327	5	0	0	0	0	0	0	200	300	0	0	0	0	0	0	0	200	903	0	0	0	0	0	0	0	603	903	0
327	6	0	0	0	0	0	0	200	300	0	0	0	0	0	0	0	200	903	0	0	0	0	0	0	0	603	903	0
327	7	0	0	0	0	0	0	200	300	0	0	0	0	0	0	0	200	903	0	0	0	0	0	0	0	603	903	0
327	8	0	0	0	0	0	0	200	300	0	0	0	0	0	0	0	200	903	0	0	0	0	0	0	0	603	903	0
327	9	0	0	0	0	0	0	200	300	0	0	0	0	0	0	0	200	903	0	0	0	0	0	0	0	603	903	0
328	0	0	0	0	0	0	0	200	300	0	0	0	0	0	0	0	200	903	0	0	0	0	0	0	0	603	903	0
328	1	0	0	0	0	0	0	200	300	0	0	0	0	0	0	0	200	903	0	0	0	0	0	0	0	603	903	0
328	2	0	0	0	0	0	0	200	300	0	0	0	0	0	0	0	200	903	0	0	0	0	0	0	0	603	903	0
328	3	0	0	0	0	0	0	200	300	0	0	0	0	0	0	0	200	903	0	0	0	0	0	0	0	603	903	0
328	4	0	0	0	0	0	0	200	300	0	0	0	0	0	0	0	200	903	0	0	0	0	0	0	0	603	903	0
328	5	0	0	0	0	0	0	200	300	0	0	0	0	0	0	0	200	903	0	0	0	0	0	0	0	603	903	0
328	6	0	0	0	0	0	0	200	300	0	0	0	0	0	0	0	200	903	0	0	0	0	0	0	0	603	903	0
328	7	0	0	0	0	0	0	200	300	0	0	0	0	0	0	0	200	903	0	0	0	0	0	0	0	603	903	0
328	8	0	0	0	0	0	0	200	300	0	0	0	0	0	0	0	200	903	0	0	0	0	0	0	0	603	903	0
328	9	0	0	0	0	0	0	200	300	0	0	0	0	0	0	0	200	903	0	0	0	0	0	0	0	603	903	0
329	0	0	0	0	0	0	0	200	300	0	0	0	0	0	0	0	200	903	0	0	0	0	0	0	0	603	903	0
329	1	0	0	0	0	0	0	200	300	0	0	0	0	0	0	0	200	903	0	0	0	0	0	0	0	603	903	0
329	2	0	0	0	0	0	0	200	300	0	0	0	0	0	0	0	200	903	0	0	0	0	0	0	0	603	903	0
329	3	0	0	0	0	0	0	200	300	0	0	0	0	0	0	0	200	903	0	0	0	0	0	0	0	603	903	0
329	4	0	0	0	0	0	0	200	300	0	0	0	0	0	0	0	200	903	0	0	0	0	0	0	0	603	903	0
329	5	0	0	0	0	0	0	200	300	0	0	0	0	0	0	0	200	903	0	0	0	0	0	0	0	603	903	0
329	6	0	0	0	0	0	0	200	300	0	0	0	0	0	0	0	200	903	0	0	0	0	0	0	0	603	903	0
329	7	0	0	0	0	0	0	200	300	0	0	0	0	0	0	0	200	903	0	0	0	0	0	0	0	603	903	0
329	8	0	0	0	0	0	0	200	300	0	0	0	0	0	0	0	200	903	0	0	0	0	0	0	0	603	903	0
329	9	0	0	0	0	0	0	200	300	0	0	0	0	0	0	0	200	903	0	0	0	0	0	0	0	603	903	0
330	0	0	0	0	0	0	0	200	300	0	0	0	0	0	0	0	200	903	0	0	0	0	0	0	0	603	903	0
330	1	0	0	0	0	0	0	200	300	0	0	0	0	0	0	0	200	903	0	0	0	0	0	0	0	603	903	0
330	2	0	0	0	0	0	0	200	300	0	0	0	0	0	0	0	200	903	0	0	0	0	0	0	0	603	903	0
330	3	0	0	0	0	0	0	200	300	0	0	0	0	0	0	0	200	903	0	0	0	0	0	0	0	603	903	0
330	4	0	0	0	0	0	0	200	300	0	0	0	0	0	0	0	200	903	0	0	0	0	0	0	0	603	903	0
330	5	0	0	0	0	0	0	200	300	0	0	0	0	0	0	0	200	903	0	0	0	0	0	0	0	603	903	0
330	6	0	0	0	0	0	0	200	300	0	0	0	0	0	0	0	200	903	0	0	0	0	0	0	0	603	903	0
330	7	0	0	0	0	0	0	200	300	0	0	0	0	0	0	0	200	903	0	0	0	0	0	0	0	603	903	0
330	8	0	0	0	0	0	0	200	300	0	0	0	0	0	0	0	200	903	0	0	0	0	0	0	0	603	903	0
330	9	0	0	0	0	0	0	200	300	0	0	0	0	0	0	0	200	903	0	0	0	0	0	0	0	603	903	0
331	0	0	0	0	0	0	0	200	300	0	0	0	0	0	0	0	200	903	0	0	0	0	0	0	0	603	903	0
331	1	0	0	0	0	0	0	200	300	0	0	0	0	0	0	0	200	903	0	0	0	0	0	0	0	603	903	0
331	2	0	0	0	0	0	0	200	300	0	0	0	0	0	0	0	200	903	0	0	0	0	0	0	0	603	903	0
331	3	0	0	0	0	0	0	200	300	0	0	0	0	0	0	0	200	903	0	0	0	0	0	0	0	603	903	0
331	4	0	0	0	0	0	0	200	300	0	0	0	0	0	0	0	200	903	0	0	0	0	0	0	0	603	903	0
331	5	0	0	0	0	0	0	200	300	0	0	0	0	0	0	0	200	903	0	0	0	0	0	0	0	603	903	0
331	6	0	0	0	0	0	0	200	300	0	0	0	0	0	0	0	200	903	0	0	0	0	0	0	0	603	903	0
331	7	0	0	0	0	0	0	200	300	0	0	0	0	0	0	0	200	903	0	0	0	0	0	0	0	603	903	0
331	8	0	0	0	0	0	0	200	300	0	0	0	0	0	0	0	200	903	0	0	0	0	0	0	0	603	903	0
331	9	0	0	0	0	0	0	200	300	0	0	0	0	0	0	0	200	903	0	0	0	0	0	0	0	603	903	0
332	0	0	0	0	0	0	0	200	300	0	0	0	0	0	0	0	200	903	0	0	0	0	0	0	0	603	903	0
332	1	0	0	0	0	0	0	200	300	0	0	0	0	0	0	0	200	903	0	0	0	0	0	0	0	603	903	0
332	2	0	0	0	0	0	0	200	300	0	0	0	0	0	0	0	200	903	0	0	0	0	0	0	0	603	903	0
332	3	0	0	0	0	0	0	200	300	0	0	0	0	0	0	0	200	903	0	0	0	0	0	0	0	603	903	0
332	4	0	0	0	0	0	0	200	300	0	0	0	0	0	0	0	200	903	0	0	0	0	0	0	0	603	903	0
332	5	0	0	0	0	0	0	200	300	0	0	0	0	0	0	0	200	903	0	0	0	0	0	0	0	603	903	0
332	6	0	0	0	0	0	0	200	300	0	0	0	0	0	0	0	200	903	0	0	0	0	0	0	0	603	903	0
332	7	0	0	0	0	0	0	200	300	0	0	0	0	0	0	0	200	903	0	0	0	0	0	0	0	603	903	0
332	8	0	0	0	0	0	0	200	300	0	0	0	0	0	0	0	200	903	0	0	0	0	0	0	0	603	903	0
332	9	0	0	0	0	0	0	200	300	0	0	0	0	0	0	0	200	903	0	0	0	0	0	0	0	603	903	0
333	0	0	0	0	0	0	0	200	300	0	0	0	0	0	0	0	200	903	0	0	0	0	0	0	0	603	903	0
333	1	0	0	0	0	0	0	200	300	0	0	0	0	0	0	0	200	903	0	0	0	0	0	0	0	603	903	0
333	2	0	0	0	0	0	0	200	300	0	0	0	0	0	0	0	200	903	0	0	0	0	0	0	0	603	903	0
333	3	0	0	0	0	0	0	200	300	0	0	0	0	0	0	0	200	903	0	0	0	0	0	0	0	603	903	0
333	4	0	0	0	0	0	0	200	300	0	0	0	0	0	0	0	200	903	0	0	0	0	0	0	0	603	903	0
333	5	0	0	0	0	0	0	200	300	0	0	0	0	0	0	0	200	903	0	0	0	0	0	0	0	603	903	0
333	6	0	0	0	0	0	0	200	300	0	0	0	0	0	0	0	200	903	0	0	0	0	0	0	0	603	903	0
333	7	0	0	0	0	0	0	200	300	0	0	0	0	0	0	0	200	903	0	0	0	0	0	0	0	603	903	0
333	8	0	0	0	0	0	0	200	300	0	0	0	0	0	0	0	200	903	0	0	0	0	0	0	0	603	903	0
333	9	0	0	0	0	0	0	200	300	0	0	0	0	0	0	0	200	903	0	0	0	0	0	0	0	603	903	0
334	0	0	0	0	0	0	0	200	300	0	0	0	0	0	0	0	200	903	0	0	0	0	0	0	0	603	903	0
334	1	0	0	0	0	0	0	200	300	0	0	0	0	0	0	0	200	903	0	0	0	0	0	0	0	603	903	0
334	2	0	0	0	0	0	0	200	300	0	0	0	0	0	0	0	200	903	0	0	0	0	0	0	0	603	903	0
334	3	0	0	0	0	0	0	200	300	0	0	0	0	0	0	0	200	903	0	0	0	0	0	0	0	603	903	0
334	4	0	0	0	0	0	0	200	300	0	0	0	0	0	0	0	200	903	0	0	0	0	0	0	0	603	903	0
334	5	0	0	0	0	0	0	200	300	0	0	0	0	0	0	0	200	903	0	0	0	0	0	0	0	603	903	0
334	6	0	0	0	0	0	0	200	300	0	0	0	0	0	0	0	200	903	0	0	0	0	0	0	0	603	903	0
334	7	0	0	0	0	0	0	200	300	0	0	0	0	0	0	0	200	903	0	0	0	0	0	0	0	603	903	0
334	8	0	0	0	0	0	0	200	300	0	0	0	0	0	0	0	200	903	0	0	0	0	0	0	0	603	903	0
334	9	0	0	0	0	0	0	200	300	0	0	0	0	0	0	0	200	903	0	0	0	0	0	0	0	603	903	0
335	0	0	0	0	0	0	0	200	300	0	0	0	0	0	0	0	200	903	0	0	0	0	0	0	0	603	903	0
335	1	0	0	0	0	0	0	200	300	0	0	0	0	0	0	0	200	903	0	0	0	0	0	0	0	603	903	0
335	2	0	0	0	0	0	0	200	300	0	0	0	0	0	0	0	200	903	0	0	0	0	0	0	0	603	903	0
335	3	0	0	0	0	0	0	200	300	0	0	0	0	0	0	0	200	903	0	0	0	0	0	0	0	603	903	0
335	4	0	0	0	0	0	0	200	300	0	0	0	0	0	0	0	200	903	0	0	0	0	0	0	0	603	903	0
335	5	0	0	0	0	0	0	200	300	0	0	0	0	0	0	0	200	903	0	0	0	0	0	0	0	603	903	0
335	6	0	0	0	0	0	0	200	300	0	0	0	0	0	0	0	200	903	0	0	0	0	0	0	0	603	903	0
335	7	0	0	0	0	0	0	200	300	0	0	0	0	0	0	0	200	903	0	0	0	0	0	0	0	603	903	0
335	8	0	0	0	0	0	0	200	300	0	0	0	0	0	0	0	200	903	0	0	0	0	0	0	0	603	903	0
335	9	0	0	0	0	0	0	200	300	0	0	0	0	0	0	0	200	903	0	0	0	0	0	0	0	603	903	0
336	0	0	0	0	0	0	0	200	300	0	0	0	0	0	0	0	200	903	0	0	0	0	0	0	0	603	903	0
336	1	0	0	0	0	0	0	200	300	0	0	0	0	0	0	0	200	903	0	0	0	0	0	0	0	603	903	0
336	2	0	0	0	0	0	0	200	300	0	0	0	0	0	0	0	200	903	0	0	0	0	0	0	0	603	903	0
336	3	0	0	0	0	0	0	200	300	0	0	0	0	0	0	0	200	903	0	0	0	0	0	0	0	603	903	0
336	4	0	0	0	0	0	0	200	300	0	0	0	0	0	0	0	200	903	0	0	0	0	0	0	0	603	903	0
336	5	0	0	0	0	0	0	200	300	0	0	0	0	0	0	0	200	903	0	0	0	0	0	0	0	603	903	0
336	6	0	0	0	0	0	0	200	300	0	0	0	0	0	0	0	200	903	0	0	0	0	0	0	0	603	903	0
336	7	0	0	0	0	0	0	200	300	0	0	0	0	0	0	0	200	903	0	0	0	0	0	0	0	603	903	0
336	8	0	0	0	0	0	0	200	300	0	0	0	0	0	0	0	200	903	0	0	0	0	0	0	0	603	903	0
336	9	0	0	0	0	0	0	200	300	0	0	0	0	0	0	0	200	903	0	0	0	0	0	0	0	603	903	0
337	0	0	0	0	0	0	0	200	300	0	0	0	0	0	0	0	200	903	0	0	0	0	0	0	0	603	903	0
337	1	0	0	0	0	0	0	200	300	0	0	0	0	0	0	0	200	903	0	0	0	0	0	0	0	603	903	0
337	2	0	0	0	0	0	0	200	300	0	0	0	0	0	0	0	200	903	0	0	0	0	0	0	0	603	903	0
337	3	0	0	0	0	0	0	200	300	0	0	0	0	0	0	0	200	903	0	0	0	0	0	0	0	603	903	0
337	4	0	0	0	0	0	0	200	300	0	0	0	0	0	0	0	200	903	0	0	0	0	0	0	0	603	903	0
337	5	0	0	0	0	0	0	200	300	0	0	0	0	0	0	0	200	903	0	0	0	0	0	0	0	603	903	0
337	6	0	0	0	0	0	0	200	300	0	0	0	0	0	0	0	200	903	0	0	0	0	0	0	0	603	903	0
337	7	0	0	0	0	0	0	200	300	0	0	0	0	0	0	0	200	903	0	0	0	0	0	0	0	603	903	0
337	8	0	0	0	0	0	0	200	300	0	0	0	0	0	0	0	200	903	0	0	0	0	0	0	0	603	903	0
337	9	0	0	0	0	0	0	200	300	0	0	0	0	0	0	0	200	903	0	0	0	0	0	0	0	603	903	0
338	0	0	0	0	0	0	0	200	300	0	0	0	0	0	0	0	200	903	0	0	0	0	0	0	0	603	903	0
338	1	0	0	0	0	0	0	200	300	0	0	0	0	0	0	0	200	903	0	0	0	0	0	0	0	603	903	0
338	2	0	0	0	0	0	0	200	300	0	0	0	0	0	0	0	200	903	0	0	0	0	0	0	0	603	903	0
338	3	0	0	0	0	0	0	200	300	0	0	0	0	0	0	0	200	903	0	0	0	0	0	0	0	603	903	0
338	4	0	0	0	0	0	0	200	300	0	0	0	0	0	0	0	200	903	0	0	0	0	0	0	0	603	903	0
338	5	0	0	0	0	0	0	200	300	0	0	0	0	0	0	0	200	903	0	0	0	0	0	0	0	603	903	0
338	6	0	0	0	0	0	0	200	300	0	0	0	0	0	0	0	200	903	0	0	0	0	0	0	0	603	903	0
338	7	0	0	0	0	0	0	200	300	0	0	0	0	0	0	0	200	903	0	0	0	0	0	0	0	603	903	0
338	8	0	0	0	0	0	0	200	300	0	0	0	0	0	0	0	200	903	0	0	0	0	0	0	0	603	903	0
338	9	0	0	0	0	0	0	200	300	0	0	0	0	0	0	0	200	903	0	0	0	0	0	0	0	603	903	0
339	0	0	0	0	0	0	0	200	300	0	0	0	0	0	0	0	200	903	0	0	0	0	0	0	0	603	903	0
339	1	0	0	0	0	0	0	200	300	0	0	0	0	0	0	0	200	903	0	0	0	0	0	0	0	603	903	0
339	2	0	0	0	0	0	0	200	300	0	0	0	0	0	0	0	200	903	0	0	0	0	0	0	0	603	903	0
339	3	0	0	0	0	0	0	200	300	0	0	0	0	0	0	0	200	903	0	0	0	0	0	0	0	603	903	0
339	4	0	0	0	0	0	0	200	300	0	0	0	0	0	0	0	200	903	0	0	0	0	0	0	0	603	903	0
339	5	0	0	0	0	0	0	200	300	0	0	0	0	0	0	0	200	903	0	0	0	0	0	0	0	603	903	0
339	6	0	0	0	0	0	0	200	300	0	0	0	0	0	0	0	200	903	0	0	0	0	0	0	0	603	903	0
339	7	0	0	0	0	0	0	200	300	0	0	0	0	0	0	0	200	903	0	0	0	0	0	0	0	603	903	0
339	8	0	0	0	0	0	0	200	300	0	0	0	0	0	0	0	200	903	0	0	0	0	0	0	0	603	903	0
339	9	0	0	0	0	0	0	200	300	0	0	0	0	0	0	0	200	903	0	0	0	0	0	0	0	603	903	0
340	0	0	0	0	0	0	0	200	300	0	0	0	0	0	0	0	200	903	0	0	0	0	0	0	0	603	903	0
340	1	0	0	0	0	0	0	200	300	0	0	0	0	0	0	0	200	903	0	0	0	0	0	0	0	603	903	0
340	2	0	0	0	0	0	0	200	300	0	0	0	0	0	0	0	200	903	0	0	0	0	0	0	0	603	903	0
340	3	0	0	0	0	0	0	200	300	0	0	0	0	0	0	0	200	903	0	0	0	0	0	0	0	603	903	0
340	4	0	0	0	0	0	0	200	300	0	0	0	0	0	0	0	200	903	0	0	0	0	0	0	0	603	903	0
340	5	0	0	0	0	0	0	200	300	0	0	0	0	0	0	0	200	903	0	0	0	0	0	0	0	603	903	0
340	6	0	0	0	0	0	0	200	300	0	0	0	0	0	0	0	200	903	0	0	0	0	0	0	0	603	903	0
340	7	0	0	0	0	0	0	200	300	0	0	0	0	0	0	0	200	903	0	0	0	0	0	0	0	603	903	0
340	8	0	0	0	0	0	0	200	300	0	0	0	0	0	0	0	200	903	0	0	0	0	0	0	0	603	903	0
340	9	0	0	0	0	0	0	200	300	0	0	0	0	0	0	0	200	903	0	0	0	0	0	0	0	603	903	0
341	0	0	0	0	0	0	0	200	300	0	0	0	0	0	0	0	200	903	0	0	0	0	0	0	0	603	903	0
341	1	0	0	0	0	0	0	200	300	0	0	0	0	0	0	0	200	903	0	0	0	0	0	0	0	603	903	0
341	2	0	0	0	0	0	0	200	300	0	0	0	0	0	0	0	200	903	0	0	0	0	0	0	0	603	903	0
341	3	0	0	0	0	0	0	200	300	0	0	0	0	0	0	0	200	903	0	0	0	0	0	0	0	603	903	0
341	4	0	0	0	0	0	0	200	300	0	0	0	0	0	0	0	200	903	0	0	0	0	0	0	0	603	903	0
341	5	0	0	0	0	0	0	200	300	0	0	0	0	0	0	0	200	903	0	0	0	0	0	0	0	603	903	0
341	6	0	0	0	0	0	0	200	300	0	0	0	0	0	0	0	200	903	0	0	0	0	0	0	0	603	903	0
341	7	0	0	0	0	0	0	200	300	0	0	0	0	0	0	0	200	903	0	0	0	0	0	0	0	603	903	0
341	8	0	0	0	0	0	0	200	300	0	0	0	0	0	0	0	200	903	0	0	0	0	0	0	0	603	903	0
341	9	0	0	0	0	0	0	200	300	0	0	0	0	0	0	0	200	903	0	0	0	0	0	0	0	603	903	0
342	0	0	0	0	0	0	0	200	300	0	0	0	0	0	0	0	200	903	0	0	0	0	0	0	0	603	903	0
342	1	0	0	0	0	0	0	200	300	0	0	0	0	0	0	0	200	903	0	0	0	0	0	0	0	603	903	0
342	2	0	0	0	0	0	0	200	300	0	0	0	0	0	0	0	200	903	0	0	0	0	0	0	0	603	903	0
342	3	0	0	0	0	0	0	200	300	0	0	0	0	0	0	0	200	903	0	0	0	0	0	0	0	603	903	0
342	4	0	0	0	0	0	0	200	300	0	0	0	0	0	0	0	200	903	0	0	0	0	0	0	0	603	903	0
342	5	0	0	0	0	0	0	200	300	0	0	0	0	0	0	0	200	903	0	0	0	0	0	0	0	603	903	0
342	6	0	0	0	0	0	0	200	300	0	0	0	0	0	0	0	200	903	0	0	0	0	0	0	0	603	903	0
342	7	0	0	0	0	0	0	200	300	0	0	0	0	0	0	0	200	903	0	0	0	0	0	0	0	603	903	0
342	8	0	0	0	0	0	0	200	300	0	0	0	0	0	0	0	200	903	0	0	0	0	0	0	0	603	903	0
342	9	0	0	0	0	0	0	200	300	0	0	0	0	0	0	0	200	903	0	0	0	0	0	0	0	603	903	0
343	0	0	0	0	0	0	0	200	300	0	0	0	0	0	0	0	200	903	0	0	0	0	0	0	0	603	903	0
343	1	0	0	0	0	0	0	200	300	0	0	0	0	0	0	0	200	903	0	0	0	0	0	0	0	603	903	0
343	2	0	0	0	0	0	0	200	300	0	0	0	0	0	0	0	200	903	0	0	0	0	0	0	0	603	903	0
343	3	0	0	0	0	0	0	200	300	0	0	0	0	0	0	0	200	903	0	0	0	0	0	0	0	603	903	0
343	4	0	0	0	0	0	0	200	300	0	0	0	0	0	0	0	200	903	0	0	0	0	0	0	0	603	903	0
343	5	0	0	0	0	0	0	200	300	0	0	0	0	0	0	0	200	903	0	0	0	0	0	0	0	603	903	0
343	6	0	0	0	0	0	0	200	300	0	0	0	0	0	0	0	200	903	0	0	0	0	0	0	0	603	903	0
343	7	0	0	0	0	0	0	200	300	0	0	0	0	0	0	0	200	903	0	0	0	0	0	0	0	603	903	0
343	8	0	0	0	0	0	0	200	300	0	0	0	0	0	0	0	200	903	0	0	0	0	0	0	0	603	903	0
343	9	0	0	0	0	0	0	200	300	0	0	0	0	0	0	0	200	903	0	0	0	0	0	0	0	603	903	0
344	0	0	0	0	0	0	0	200	300	0	0	0	0	0	0	0	200	903	0	0	0	0	0	0	0	603	903	0
344	1	0	0	0	0	0	0	200	300	0	0	0	0	0	0	0	200	903	0	0	0	0	0	0	0	603	903	0
344	2	0	0	0	0	0	0	200	300	0	0	0	0	0	0	0	200	903	0	0	0	0	0	0	0	603	903	0
344	3	0	0	0	0	0	0	200	300	0	0	0	0	0	0	0	200	903	0	0	0	0	0	0	0	603	903	0
344	4	0	0	0	0	0	0	200	300	0	0	0	0	0	0	0	200	903	0	0	0	0	0	0	0	603	903	0
344	5	0	0	0	0	0	0	200	300	0	0	0	0	0	0	0	200	903	0	0	0	0	0	0	0	603	903	0
344	6	0	0	0	0	0	0	200	300	0	0	0	0	0	0	0	200	903	0	0	0	0	0	0	0	603	903	0
344	7	0	0	0	0	0	0	200	300	0	0	0	0	0	0	0	200	903	0	0	0	0	0	0	0	603	903	0
344	8	0	0	0	0	0	0	200	300	0	0	0	0	0	0	0	200	903	0	0	0	0	0	0	0	603	903	0
344	9	0	0	0	0	0	0	200	300	0	0	0	0	0	0	0	200	903	0	0	0	0	0	0	0	603	903	0
345	0	0	0	0	0	0	0	200	300	0	0	0	0	0	0	0	200	903	0	0	0	0	0	0	0	603	903	0
345	1	0	0	0	0	0	0	200	300	0	0	0	0	0	0	0	200	903	0	0	0	0	0	0	0	603	903	0
345	2	0	0	0	0	0	0	200	300	0	0	0	0	0	0	0	200	903	0	0	0	0	0	0	0	603	903	0
345	3	0	0	0	0	0	0	200	300	0	0	0	0	0	0	0	200	903	0	0	0	0	0	0	0	603	903	0
345	4	0	0	0	0	0	0	200	300	0	0	0	0	0	0	0	200	903	0	0	0	0	0	0	0	603	903	0
345	5	0	0	0	0	0	0	200	300	0	0	0	0	0	0	0	200	903	0	0	0	0	0	0	0	603	903	0
345	6	0	0	0	0	0	0	200	300	0	0	0	0	0	0	0	200	903	0	0	0	0	0	0	0	603	903	0
345	7	0	0	0	0	0	0	200	300	0	0	0	0	0	0	0	200	903	0	0	0	0	0	0	0	603	903	0
345	8	0	0	0	0	0	0	200	300	0	0	0	0	0	0	0	200	903	0	0	0	0	0	0	0	603	903	0
345	9	0	0	0	0	0	0	200	300	0	0	0	0	0	0	0	200	903	0	0	0	0	0	0	0	603	903	0
346	0	0	0	0	0	0	0	200	300	0	0	0	0	0	0	0	200	903	0	0	0	0	0	0	0	603	903	0
346	1	0	0	0	0	0	0	200	300	0	0	0	0	0	0	0	200	903	0	0	0	0	0	0	0	603	903	0
346	2	0	0	0	0	0	0	200	300	0	0	0	0	0	0	0	200	903	0	0	0	0	0	0	0	603	903	0
346	3	0	0	0	0	0	0	200	300	0	0	0	0	0	0	0	200	903	0	0	0	0	0	0	0	603	903	0
346	4	0	0	0	0	0	0	200	300	0	0	0	0	0	0	0	200	903	0	0	0	0	0	0	0	603	903	0
346	5	0	0	0	0	0	0	200	300	0	0	0	0	0	0	0	200	903	0	0	0	0	0	0	0	603	903	0
346	6	0	0	0	0	0	0	200	300	0	0	0	0	0	0	0	200	903	0	0	0	0	0	0	0	603	903	0
346	7	0	0	0	0	0	0	200	300	0	0	0	0	0	0	0	200	903	0	0	0	0	0	0	0	603	903	0
346	8	0	0	0	0	0	0	200	300	0	0	0	0	0	0	0	200	903	0	0	0	0	0	0	0	603	903	0
346	9	0	0	0	0	0	0	200	300	0	0	0	0	0	0	0	200	903	0	0	0	0	0	0	0	603	903	0
347	0	0	0	0	0	0	0	200	300	0	0	0	0	0	0	0	200	903	0	0	0	0	0	0	0	603	903	0
347	1	0	0	0	0	0	0	200	300	0	0	0	0	0	0	0	200	903	0	0	0	0	0	0	0	603	903	0
347	2	0	0	0	0	0	0	200	300	0	0	0	0	0	0	0	200	903	0	0	0	0	0	0	0	603	903	0
347	3	0	0	0	0	0	0	200	300	0	0	0	0	0	0	0	200	903	0	0	0	0	0	0	0	603	903	0
347	4	0	0	0	0	0	0	200	300	0	0	0	0	0	0	0	200	903	0	0	0	0	0	0	0	603	903	0
347	5	0	0	0	0	0	0	200	300	0	0	0	0	0	0	0	200	903	0	0	0	0	0	0	0	603	903	0
347	6	0	0	0	0	0	0	200	300	0	0	0	0	0	0	0	200	903	0	0	0	0	0	0	0	603	903	0
347	7	0	0	0	0	0	0	200	300	0	0	0	0	0	0	0	200	903	0	0	0	0	0	0	0	603	903	0
347	8	0	0	0	0	0	0	200	300	0	0	0	0	0	0	0	200	903	0	0	0	0	0	0	0	603	903	0
347	9	0	0	0	0	0	0	200	300	0	0	0	0	0	0	0	200	903	0	0	0	0	0	0	0	603	903	0
348	0	0	0	0	0	0	0	200	300	0	0	0	0	0	0	0	200	903	0	0	0	0	0	0	0	603	903	0
348	1	0	0	0	0	0	0	200	300	0	0	0	0	0	0	0	200	903	0	0	0	0	0	0	0	603	903	0
348	2	0	0	0	0	0	0	200	300	0	0	0	0	0	0	0	200	903	0	0	0	0	0	0	0	603	903	0
348	3	0	0	0	0	0	0	200	300	0	0	0	0	0	0	0	200	903	0	0	0	0	0	0	0	603	903	0
348	4	0	0	0	0	0	0	200	300	0	0	0	0	0	0	0	200	903	0	0	0	0	0	0	0	603	903	0
348	5	0	0	0	0	0	0	200	300	0	0	0	0	0	0	0	200	903	0	0	0	0	0	0	0	603	903	0
348	6	0	0	0	0	0	0	200	300	0	0	0	0	0	0	0	200	903	0	0	0	0	0	0	0	603	903	0
348	7	0	0	0	0	0	0	200	300	0	0	0	0	0	0	0	200	903	0	0	0	0	0	0	0	603	903	0
348	8	0	0	0	0	0	0	200	300	0	0	0	0	0	0	0	200	903	0	0	0	0	0	0	0	603	903	0
348	9	0	0	0	0	0	0	200	300	0	0	0	0	0	0	0	200	903	0	0	0	0	0	0	0	603	903	0
349	0	0	0	0	0	0	0	200	300	0	0	0	0	0	0	0	200	903	0	0	0	0	0	0	0	603	903	0
349	1	0	0	0	0	0	0	200	300	0	0	0	0	0	0	0	200	903	0	0	0	0	0	0	0	603	903	0
349	2	0	0	0	0	0	0	200	300	0	0	0	0	0	0	0	200	903	0	0	0	0	0	0	0	603	903	0
349	3	0	0	0	0	0	0	200	300	0	0	0	0	0	0	0	200	903	0	0	0	0	0	0	0	603	903	0
349	4	0	0	0	0	0	0	200	300	0	0	0	0	0	0	0	200	903	0	0	0	0	0	0	0	603	903	0
349	5	0	0	0	0	0	0	200	300	0	0	0	0	0	0	0	200	903	0	0	0	0	0	0	0	603	903	0
349	6	0	0	0	0	0	0	200	300	0	0	0	0	0	0	0	200	903	0	0	0	0	0	0	0	603	903	0
349	7	0	0	0	0	0	0	200	300	0	0	0	0	0	0	0	200	903	0	0	0	0	0	0	0	603	903	0
349	8	0	0	0	0	0	0	200	300	0	0	0	0	0	0	0	200	903	0	0	0	0	0	0	0	603	903	0
349	9	0	0	0	0	0	0	200	300	0	0	0	0	0	0	0	200	903	0	0	0	0	0	0	0	603	903	0
350	0	0	0	0	0	0	0	200	300	0	0	0	0	0	0	0	200	903	0	0	0	0	0	0	0	603	903	0
350	1	0	0	0	0	0	0	200	300	0	0	0	0	0	0	0	200	903	0	0	0	0	0	0	0	603	903	0
350	2	0	0	0	0	0	0	200	300	0	0	0	0	0	0	0	200	903	0	0	0	0	0	0	0	603	903	0
350	3	0	0	0	0	0	0	200	300	0	0	0	0	0	0	0	200	903	0	0	0	0	0	0	0	603	903	0
350	4	0	0	0	0	0	0	200	300	0	0	0	0	0	0	0	200	903	0	0	0	0	0	0	0	603	903	0
350	5	0	0	0	0	0	0	200	300	0	0	0	0	0	0	0	200	903	0	0	0	0	0	0	0	603	903	0
350	6	0	0	0	0	0	0	200	300	0	0	0	0	0	0	0	200	903	0	0	0	0	0	0	0	603	903	0
350	7	0	0	0	0	0	0	200	300	0	0	0	0	0	0	0	200	903	0	0	0	0	0	0	0	603	903	0
350	8	0	0	0	0	0	0	200	300	0	0	0	0	0	0	0	200	903	0	0	0	0	0	0	0	603	903	0
350	9	0	0	0	0	0	0	200	300	0	0	0	0	0	0	0	200	903	0	0	0	0	0	0	0	603	903	0
351	0	0	0	0	0	0	0	200	300	0	0	0	0	0	0	0	200	903	0	0	0	0	0	0	0	603	903	0
351	1	0	0	0	0	0	0	200	300	0	0	0	0	0	0	0	200	903	0	0	0	0	0	0	0	603	903	0
351	2	0	0	0	0	0	0	200	300	0	0	0	0	0	0	0	200	903	0	0	0	0	0	0	0	603	903	0
351	3	0	0	0	0	0	0	200	300	0	0	0	0	0	0	0	200	903	0	0	0	0	0	0	0	603	903	0
351	4	0	0	0	0	0	0	200	300	0	0	0	0	0	0	0	200	903	0	0	0	0	0	0	0	603	903	0
351	5	0	0	0	0	0	0	200	300	0	0	0	0	0	0	0	200	903	0	0	0	0	0	0	0	603	903	0
351	6	0	0	0	0	0	0	200	300	0	0	0	0	0	0	0	200	903	0	0	0	0	0	0	0	603	903	0
351	7	0	0	0	0	0	0	200	300	0	0	0	0	0	0	0	200	903	0	0	0	0	0	0	0	603	903	0
351	8	0	0	0	0	0	0	200	300	0	0	0	0	0	0	0	200	903	0	0	0	0	0	0	0	603	903	0
351	9	0	0	0	0	0	0	200	300	0	0	0	0	0	0	0	200	903	0	0	0	0	0	0	0	603	903	0
352	0	0	0	0	0	0	0	200	300	0	0	0	0	0	0	0	200	903	0	0	0	0	0	0	0	603	903	0
352	1	0	0	0	0	0	0	200	300	0	0	0	0	0	0	0	200	903	0	0	0	0	0	0	0	603	903	0
352	2	0	0	0	0	0	0	200	300	0	0	0	0	0	0	0	200	903	0	0	0	0	0	0	0	603	903	0
352	3	0	0	0	0	0	0	200	300	0	0	0	0	0	0	0	200	903	0	0	0	0	0	0	0	603	903	0
352	4	0	0	0	0	0	0	200	300	0	0	0	0	0	0	0	200	903	0	0	0	0	0	0	0	603	903	0
352	5	0	0	0	0	0	0	200	300	0	0	0	0	0	0	0	200	903	0	0	0	0	0	0	0	603	903	0
352	6	0	0	0	0	0	0	200	300	0	0	0	0	0	0	0	200	903	0	0	0	0	0	0	0	603	903	0
352	7	0	0	0	0	0	0	200	300	0	0	0	0	0	0	0	200	903	0	0	0	0	0	0	0	603	903	0
352	8	0	0	0	0	0	0	200	300	0	0	0	0	0	0	0	200	903	0	0	0	0	0	0	0	603	903	0
352	9	0	0	0	0	0	0	200	300	0	0	0	0	0	0	0	200	903	0	0	0	0	0	0	0	603	903	0
353	0	0	0	0	0	0	0	200	300	0	0	0	0	0	0	0	200	903	0	0	0	0	0	0	0	603	903	0
353	1	0	0	0	0	0	0	200	300	0	0	0	0	0	0	0	200	903	0	0	0	0	0	0	0	603	903	0
353	2	0	0	0	0	0	0	200	300	0	0	0	0	0	0	0	200	903	0	0	0	0	0	0	0	603	903	0
353	3	0	0	0	0	0	0	200	300	0	0	0	0	0	0	0	200	903	0	0	0	0	0	0	0	603	903	0
353	4	0	0	0	0	0	0	200	300	0	0	0	0	0	0	0	200	903	0	0	0	0	0	0	0	603	903	0
353	5	0	0	0	0	0	0	200	300	0	0	0	0	0	0	0	200	903	0	0	0	0	0	0	0	603	903	0
353	6	0	0	0	0	0	0	200	300	0	0	0	0	0	0	0	200	903	0	0	0	0	0	0	0	603	903	0
353	7	0	0	0	0	0	0	200	300	0	0	0	0	0	0	0	200	903	0	0	0	0	0	0	0	603	903	0
353	8	0	0	0	0	0	0	200	300	0	0	0	0	0	0	0	200	903	0	0	0	0	0	0	0	603	903	0
353	9	0	0	0	0	0	0	200	300	0	0	0	0	0	0	0	200	903	0	0	0	0	0	0	0	603	903	0
354	0	0	0	0	0	0	0	200	300	0	0	0	0	0	0	0	200	903	0	0	0	0	0	0	0	603	903	0
354	1	0	0	0	0	0	0	200	300	0	0	0	0	0	0	0	200	903	0	0	0	0	0	0	0	603	903	0
354	2	0	0	0	0	0	0	200	300	0	0	0	0	0	0	0	200	903	0	0	0	0	0	0	0	603	903	0
354	3	0	0	0	0	0	0	200	300	0	0	0	0	0	0	0	200	903	0	0	0	0	0	0	0	603	903	0
354	4	0	0	0	0	0	0	200	300	0	0	0	0	0	0	0	200	903	0	0	0	0	0	0	0	603	903	0
354	5	0	0	0	0	0	0	200	300	0	0	0	0	0	0	0	200	903	0	0	0	0	0	0	0	603	903	0
354	6	0	0	0	0	0	0	200	300	0	0	0	0	0	0	0	200	903	0	0	0	0	0	0	0	603	903	0
354	7	0	0	0	0	0	0	200	300	0	0	0	0	0	0	0	200	903	0	0	0	0	0	0	0	603	903	0
354	8	0	0	0	0	0	0	200	300	0	0	0	0	0	0	0	200	903	0	0	0	0	0	0	0	603	903	0
354	9	0	0	0	0	0	0	200	300	0	0	0	0	0	0	0	200	903	0	0	0	0	0	0	0	603	903	0
355	0	0	0	0	0	0	0	200	300	0	0	0	0	0	0	0	200	903	0	0	0	0	0	0	0	603	903	0
355	1	0	0	0	0	0	0	200	300	0	0	0	0	0	0	0	200	903	0	0	0	0	0	0	0	603	903	0
355	2	0	0	0	0	0	0	200	300	0	0	0	0	0	0	0	200	903	0	0	0	0	0	0	0	603	903	0
355	3	0	0	0	0	0	0	200	300	0	0	0	0	0	0	0	200	903	0	0	0	0	0	0	0	603	903	0
355	4	0	0	0	0	0	0	200	300	0	0	0	0	0	0	0	200	903	0	0	0	0	0	0	0	603	903	0
355	5	0	0	0	0	0	0	200	300	0	0	0	0	0	0	0	200	903	0	0	0	0	0	0	0	603	903	0
355	6	0	0	0	0	0	0	200	300	0	0	0	0	0	0	0	200	903	0	0	0	0	0	0	0	603	903	0
355	7	0	0	0	0	0	0	200	300	0	0	0	0	0	0	0	200	903	0	0	0	0	0	0	0	603	903	0
355	8	0	0	0	0	0	0	200	300	0	0	0	0	0	0	0	200	903	0	0	0	0	0	0	0	603	903	0
355	9	0	0	0	0	0	0	200	300	0	0	0	0	0	0	0	200	903	0	0	0	0	0	0	0	603	903	0
356	0	0	0	0	0	0	0	200	300	0	0	0	0	0	0	0	200	903	0	0	0	0	0	0	0	603	903	0
356	1	0	0	0	0	0	0	200	300	0	0	0	0	0	0	0	200	903	0	0	0	0	0	0	0	603	903	0
356	2	0	0	0	0	0	0	200	300	0	0	0	0	0	0	0	200	903	0	0	0	0	0	0	0	603	903	0
356	3	0	0	0	0	0	0	200	300	0	0	0	0	0	0	0	200	903	0	0	0	0	0	0	0	603	903	0
356	4	0	0	0	0	0	0	200	300	0	0	0	0	0	0	0	200	903	0	0	0	0	0	0	0	603	903	0
356	5	0	0	0	0	0	0	200	300	0	0	0	0	0	0	0	200	903	0	0	0	0	0	0	0	603	903	0
356	6	0	0	0	0	0	0	200	300	0	0	0	0	0	0	0	200	903	0	0	0	0	0	0	0	603	903	0
356	7	0	0	0	0	0	0	200	300	0	0	0	0	0	0	0	200	903	0	0	0	0	0	0	0	603	903	0
356	8	0	0	0	0	0	0	200	300	0	0	0	0	0	0	0	200	903	0	0	0	0	0	0	0	603	903	0
356	9	0	0	0	0	0	0	200	300	0	0	0	0	0	0	0	200	903	0	0	0	0	0	0	0	603	903	0
357	0	0	0	0	0	0	0	200	300	0	0	0	0	0	0	0	200	903	0	0	0	0	0	0	0	603	903	0
357	1	0	0	0	0	0	0	200	300	0	0	0	0	0	0	0	200	903	0	0	0	0	0	0	0	603	903	0
357	2	0	0	0	0	0	0	200	300	0	0	0	0	0	0	0	200	903	0	0	0	0	0	0	0	603	903	0
357	3	0	0	0	0	0	0	200	300	0	0	0	0	0	0	0	200	903	0	0	0	0	0	0	0	603	903	0
357	4	0	0	0	0	0	0	200	300	0	0	0	0	0	0	0	200	903	0	0	0	0	0	0	0	603	903	0
357	5	0	0	0	0	0	0	200	300	0	0	0	0	0	0	0	200	903	0	0	0	0	0	0	0	603	903	0
357	6	0	0	0	0	0	0	200	300	0	0	0	0	0	0	0	200	903	0	0	0	0	0	0	0	603	903	0
357	7	0	0	0	0	0	0	200	300	0	0	0	0	0	0	0	200	903	0	0	0	0	0	0	0	603	903	0
357	8	0	0	0	0	0	0	200	300	0	0	0	0	0	0	0	200	903	0	0	0	0	0	0	0	603	903	0
357	9	0	0	0	0	0	0	200	300	0	0	0	0	0	0	0	200	903	0	0	0	0	0	0	0	603	903	0
358	0	0	0	0	0	0	0	200	300	0	0	0	0	0	0	0	200	903	0	0	0	0	0	0	0	603	903	0
358	1	0	0	0	0	0	0	200	300	0	0	0	0	0	0	0	200	903	0	0	0	0	0	0	0	603	903	0
358	2	0	0	0	0	0	0	200	300	0	0	0	0	0	0	0	200	903	0	0	0	0	0	0	0	603	903	0
358	3	0	0	0	0	0	0	200	300	0	0	0	0	0	0	0	200	903	0	0	0	0	0	0	0	603	903	0
358	4	0	0	0	0	0	0	200	300	0	0	0	0	0	0	0	200	903	0	0	0	0	0	0	0	603	903	0
358	5	0	0	0	0	0	0	200	300	0	0	0	0	0	0	0	200	903	0	0	0	0	0	0	0	603	903	0
358	6	0	0	0	0	0	0	200	300	0	0	0	0	0	0	0	200	903	0	0	0	0	0	0	0	603	903	0
358	7	0	0	0	0	0	0	200	300	0	0	0	0	0	0	0	200	903	0	0	0	0	0	0	0	603	903	0
358	8	0	0	0	0	0	0	200	300	0	0	0	0	0	0	0	200	903	0	0	0	0	0	0	0	603	903	0
358	9	0	0	0	0	0	0	200	300	0	0	0	0	0	0	0	200	903	0	0	0	0	0	0	0	603	903	0
359	0	0	0	0	0	0	0	200	300	0	0	0	0	0	0	0	200	903	0	0	0	0	0	0	0	603	903	0
359	1	0	0	0	0	0	0	200	300	0	0	0	0	0	0	0	200	903	0	0	0	0	0	0	0	603	903	0
359	2	0	0	0	0	0	0	200	300	0	0	0	0	0	0	0	200	903	0	0	0	0	0	0	0	603	903	0
359	3	0	0	0	0	0	0	200	300	0	0	0	0	0	0	0	200	903	0	0	0	0	0	0	0	603	903	0
359	4	0	0	0	0	0	0	200	300	0	0	0	0	0	0	0	200	903	0	0	0	0	0	0	0	603	903	0
359	5	0	0	0	0	0	0	200	300	0	0	0	0	0	0	0	200	903	0	0	0	0	0	0	0	603	903	0
359	6	0	0	0	0	0	0	200	300	0	0	0	0	0	0	0	200	903	0	0	0	0	0	0	0	603	903	0
359	7	0	0	0	0	0	0	200	300	0	0	0	0	0	0	0	200	903	0	0	0	0	0	0	0	603	903	0
359	8	0	0	0	0	0	0	200	300	0	0	0	0	0	0	0	200	903	0	0	0	0	0	0	0	603	903	0
359	9	0	0	0	0	0	0	200	300	0	0	0	0	0	0	0	200	903	0	0	0	0	0	0	0	603	903	0
360	0	0	0	0	0	0	0	200	300	0	0	0	0	0	0	0	200	903	0	0	0	0	0	0	0	603	903	0
360	1	0	0	0	0	0	0	200	300	0	0	0	0	0	0	0	200	903	0	0	0	0	0	0	0	603	903	0
360	2	0	0	0	0	0	0	200	300	0	0	0	0	0	0	0	200	903	0	0	0	0	0	0	0	603	903	0
360	3	0	0	0	0	0	0	200	300	0	0	0	0	0	0	0	200	903	0	0	0	0	0	0	0	603	903	0
360	4	0	0	0	0	0	0	200	300	0	0	0	0	0	0	0	200	903	0	0	0	0	0	0	0	603	903	0
360	5	0	0	0	0	0	0	200	300	0	0	0	0	0	0	0	200	903	0	0	0	0	0	0	0	603	903	0
360	6	0	0	0	0	0	0	200	300	0	0	0	0	0	0	0	200	903	0	0	0	0	0	0	0	603	903	0
360	7	0	0	0	0	0	0	200	300	0	0	0	0	0	0	0	200	903	0	0	0	0	0	0	0	603	903	0
360	8	0	0	0	0	0	0	200	300	0	0	0	0	0	0	0	200	903	0	0	0	0	0	0	0	603	903	0
360	9	0	0	0	0	0	0	200	300	0	0	0	0	0	0	0	200	903	0	0	0	0	0	0	0	603	903	0
361	0	0	0	0	0	0	0	200	300	0	0	0	0	0	0	0	200	903	0	0	0	0	0	0	0	603	903	0
361	1	0	0	0	0	0	0	200	300	0	0	0	0	0	0	0	200	903	0	0	0	0	0	0	0	603	903	0
361	2	0	0	0	0	0	0	200	300	0	0	0	0	0	0	0	200	903	0	0	0	0	0	0	0	603	903	0
361	3	0	0	0	0	0	0	200	300	0	0	0	0	0	0	0	200	903	0	0	0	0	0	0	0	603	903	0
361	4	0	0	0	0	0	0	200	300	0	0	0	0	0	0	0	200	903	0	0	0	0	0	0	0	603	903	0
361	5	0	0	0	0	0	0	200	300	0	0	0	0	0	0	0	200	903	0	0	0	0	0	0	0	603	903	0
361	6	0	0	0	0	0	0	200	300	0	0	0	0	0	0	0	200	903	0	0	0	0	0	0	0	603	903	0
361	7	0	0	0	0	0	0	200	300	0	0	0	0	0	0	0	200	903	0	0	0	0	0	0	0	603	903	0
361	8	0	0	0	0	0	0	200	300	0	0	0	0	0	0	0	200	903	0	0	0	0	0	0	0	603	903	0
361	9	0	0	0	0	0	0	200	300	0	0	0	0	0	0	0	200	903	0	0	0	0	0	0	0	603	903	0
362	0	0	0	0	0	0	0	200	300	0	0	0	0	0	0	0	200	903	0	0	0	0	0	0	0	603	903	0
362	1	0	0	0	0	0	0	200	300	0	0	0	0	0	0	0	200	903	0	0	0	0	0	0	0	603	903	0
362	2	0	0	0	0	0	0	200	300	0	0	0	0	0	0	0	200	903	0	0	0	0	0	0	0	603	903	0
362	3	0	0	0	0	0	0	200	300	0	0	0	0	0	0	0	200	903	0	0	0	0	0	0	0	603	903	0
362	4	0	0	0	0	0	0	200	300	0	0	0	0	0	0	0	200	903	0	0	0	0	0	0	0	603	903	0
362	5	0	0	0	0	0	0	200	300	0	0	0	0	0	0	0	200	903	0	0	0	0	0	0	0	603	903	0
362	6	0	0	0	0	0	0	200	300	0	0	0	0	0	0	0	200	903	0	0	0	0	0	0	0	603	903	0
362	7	0	0	0	0	0	0	200	300	0	0	0	0	0	0	0	200	903	0	0	0	0	0	0	0	603	903	0
362	8	0	0	0	0	0	0	200	300	0	0	0	0	0	0	0	200	903	0	0	0	0	0	0	0	603	903	0
362	9	0	0	0	0	0	0	200	300	0	0	0	0	0	0	0	200	903	0	0	0	0	0	0	0	603	903	0
363	0	0	0	0	0	0	0	200	300	0	0	0	0	0	0	0	200	903	0	0	0	0	0	0	0	603	903	0
363	1	0	0	0	0	0	0	200	300	0	0	0	0	0	0	0	200	903	0	0	0	0	0	0	0	603	903	0
363	2	0	0	0	0	0	0	200	300	0	0	0	0	0	0	0	200	903	0	0	0	0	0	0	0	603	903	0
363	3	0	0	0	0	0	0	200	300	0	0	0	0	0	0	0	200	903	0	0	0	0	0	0	0	603	903	0
363	4	0	0	0	0	0	0	200	300	0	0	0	0	0	0	0	200	903	0	0	0	0	0	0	0	603	903	0
363	5	0	0	0	0	0	0	200	300	0	0	0	0	0	0	0	200	903	0	0	0	0	0	0	0	603	903	0
363	6	0	0	0	0	0	0	200	300	0	0	0	0	0	0	0	200	903	0	0	0	0	0	0	0	603	903	0
363	7	0	0	0	0	0	0	200	300	0	0	0	0	0	0	0	200	903	0	0	0	0	0	0	0	603	903	0
363	8	0	0	0	0	0	0	200	300	0	0	0	0	0	0	0	200	903	0	0	0	0	0	0	0	603	903	0
363	9	0	0	0	0	0	0	200	300	0	0	0	0	0	0	0	200	903	0	0	0	0	0	0	0	603	903	0
364	0	0	0	0	0	0	0	200	300	0	0	0	0	0	0	0	200	903	0	0	0	0	0	0	0	603	903	0
364	1	0	0	0	0	0	0	200	300	0	0	0	0	0	0	0	200	903	0	0	0	0	0	0	0	603	903	0
364	2	0	0	0	0	0	0	200	300	0	0	0	0	0	0	0	200	903	0	0	0	0	0	0	0	603	903	0
364	3	0	0	0	0	0	0	200	300	0	0	0	0	0	0	0	200	903	0	0	0	0	0	0	0	603	903	0
364	4	0	0	0	0	0	0	200	300	0	0	0	0	0	0	0	200	903	0	0	0	0	0	0	0	603	903	0
364	5	0	0	0	0	0	0	200	300	0	0	0	0	0	0	0	200	903	0	0	0	0	0	0	0	603	903	0
364	6	0	0	0	0	0	0	200	300	0	0	0	0	0	0	0	200	903	0	0	0	0	0	0	0	603	903	0
364	7	0	0	0	0	0	0	200	300	0	0	0	0	0	0	0	200	903	0	0	0	0	0	0	0	603	903	0
364	8	0	0	0	0	0	0	200	300	0	0	0	0	0	0	0	200	903	0	0	0	0	0	0	0	603	903	0
364	9	0	0	0	0	0	0	200	300	0	0	0	0	0	0	0	200	903	0	0	0	0	0	0	0	603	903	0
365	0	0	0	0	0	0	0	200	300	0	0	0	0	0	0	0	200	903	0	0	0	0	0	0	0	603	903	0
365	1	0	0	0	0	0	0	200	300	0	0	0	0	0	0	0	200	903	0	0	0	0	0	0	0	603	903	0
365	2	0	0	0	0	0	0	200	300	0	0	0	0	0	0	0	200	903	0	0	0	0	0	0	0	603	903	0
365	3	0	0	0	0	0	0	200	300	0	0	0	0	0	0	0	200	903	0	0	0	0	0	0	0	603	903	0
365	4	0	0	0	0	0	0	200	300	0	0	0	0	0	0	0	200	903	0	0	0	0	0	0	0	603	903	0
365	5	0	0	0	0	0	0	200	300	0	0	0	0	0	0	0	200	903	0	0	0	0	0	0	0	603	903	0
365	6	0	0	0	0	0	0	200	300	0	0	0	0	0	0	0	200	903	0	0	0	0	0	0	0	603	903	0
365	7	0	0	0	0	0	0	200	300	0	0	0	0	0	0	0	200	903	0	0	0	0	0	0	0	603	903	0
365	8	0	0	0	0	0	0	200	300	0	0	0	0	0	0	0	200	903	0	0	0	0	0	0	0	603	903	0
365	9	0	0	0	0	0	0	200	300	0	0	0	0	0	0	0	200	903	0	0	0	0	0	0	0	603	903	0
366	0	0	0	0	0	0	0	200	300	0	0	0	0	0	0	0	200	903	0	0	0	0	0	0	0	603	903	0
366	1	0	0	0	0	0	0	200	300	0	0	0	0	0	0	0	200	903	0	0	0	0	0	0	0	603	903	0
366	2	0	0	0	0	0	0	200	300	0	0	0	0	0	0	0	200	903	0	0	0	0	0	0	0	603	903	0
366	3	0	0	0	0	0	0	200	300	0	0	0	0	0	0	0	200	903	0	0	0	0	0	0	0	603	903	0
366	4	0	0	0	0	0	0	200	300	0	0	0	0	0	0	0	200	903	0	0	0	0	0	0	0	603	903	0
366	5	0	0	0	0	0	0	200	300	0	0	0	0	0	0	0	200	903	0	0	0	0	0	0	0	603	903	0
366	6	0	0	0	0	0	0	200	300	0	0	0	0	0	0	0	200	903	0	0	0	0	0	0	0	603	903	0
366	7	0	0	0	0	0	0	200	300	0	0	0	0	0	0	0	200	903	0	0	0	0	0	0	0	603	903	0
366	8	0	0	0	0	0	0	200	300	0	0	0	0	0	0	0	200	903	0	0	0	0	0	0	0	603	903	0
366	9	0	0	0	0	0	0	200	300	0	0	0	0	0	0	0	200	903	0	0	0	0	0	0	0	603	903	0
367	0	0	0	0	0	0	0	200	300	0	0	0	0	0	0	0	200	903	0	0	0	0	0	0	0	603	903	0
367	1	0	0	0	0	0	0	200	300	0	0	0	0	0	0	0	200	903	0	0	0	0	0	0	0	603	903	0
367	2	0	0	0	0	0	0	200	300	0	0	0	0	0	0	0	200	903	0	0	0	0	0	0	0	603	903	0
367	3	0	0	0	0	0	0	200	300	0	0	0	0	0	0	0	200	903	0	0	0	0	0	0	0	603	903	0
367	4	0	0	0	0	0	0	200	300	0	0	0	0	0	0	0	200	903	0	0	0	0	0	0	0	603	903	0
367	5	0	0	0	0	0	0	200	300	0	0	0	0	0	0	0	200	903	0	0	0	0	0	0	0	603	903	0
367	6	0	0	0	0	0	0	200	300	0	0	0	0	0	0	0	200	903	0	0	0	0	0	0	0	603	903	0
367	7	0	0	0	0	0	0	200	300	0	0	0	0	0	0	0	200	903	0	0	0	0	0	0	0	603	903	0
367	8	0	0	0	0	0	0	200	300	0	0	0	0	0	0	0	200	903	0	0	0	0	0	0	0	603	903	0
367	9	0	0	0	0	0	0	200	300	0	0	0	0	0	0	0	200	903	0	0	0	0	0	0	0	603	903	0
368	0	0	0	0	0	0	0	200	300	0	0	0	0	0	0	0	200	903	0	0	0	0	0	0	0	603	903	0
368	1	0	0	0	0	0	0	200	300	0	0	0	0	0	0	0	200	903	0	0	0	0	0	0	0	603	903	0
368	2	0	0	0	0	0	0	200	300	0	0	0	0	0	0	0	200	903	0	0	0	0	0	0	0	603	903	0
368	3	0	0	0	0	0	0	200	300	0	0	0	0	0	0	0	200	903	0	0	0	0	0	0	0	603	903	0
368	4	0	0	0	0	0	0	200	300	0	0	0	0	0	0	0	200	903	0	0	0	0	0	0	0	603	903	0
368	5	0	0	0	0	0	0	200	300	0	0	0	0	0	0	0	200	903	0	0	0	0	0	0	0	603	903	0
368	6	0	0	0	0	0	0	200	300	0	0	0	0	0	0	0	200	903	0	0	0	0	0	0	0	603	903	0
368	7	0	0	0	0	0	0	200	300	0	0	0	0	0	0	0	200	903	0	0	0	0	0	0	0	603	903	0
368	8	0	0	0	0	0	0	200	300	0	0	0	0	0	0	0	200	903	0	0	0	0	0	0	0	603	903	0
368	9	0	0	0	0	0	0	200	300	0	0	0	0	0	0	0	200	903	0	0	0	0	0	0	0	603	903	0
369	0	0	0	0	0	0	0	200	300	0	0	0	0	0	0	0	200	903	0	0	0	0	0	0	0	603	903	0
369	1	0	0	0	0	0	0	200	300	0	0	0	0	0	0	0	200	903	0	0	0	0	0	0	0	603	903	0
369	2	0	0	0	0	0	0	200	300	0	0	0	0	0	0	0	200	903	0	0	0	0	0	0	0	603	903	0
369	3	0	0	0	0	0	0	200	300	0	0	0	0	0	0	0	200	903	0	0	0	0	0	0	0	603	903	0
369	4	0	0	0	0	0	0	200	300	0	0	0	0	0	0	0	200	903	0	0	0	0	0	0	0	603	903	0
369	5	0	0	0	0	0	0	200	300	0	0	0	0	0	0	0	200	903	0	0	0	0	0	0	0	603	903	0
369	6	0	0	0	0	0	0	200	300	0	0	0	0	0	0	0	200	903	0	0	0	0	0	0	0	603	903	0
369	7	0	0	0	0	0	0	200	300	0	0	0	0	0	0	0	200	903	0	0	0	0	0	0	0	603	903	0
369	8	0	0	0	0	0	0	200	300	0	0	0	0	0	0	0	200	903	0	0	0	0	0	0	0	603	903	0
369	9	0	0	0	0	0	0	200	300	0	0	0	0	0	0	0	200	903	0	0	0	0	0	0	0	603	903	0
370	0	0	0	0	0	0	0	200	300	0	0	0	0	0	0	0	200	903	0	0	0	0	0	0	0	603	903	0
370	1	0	0	0	0	0	0	200	300	0	0	0	0	0	0	0	200	903	0	0	0	0	0	0	0	603	903	0
370	2	0	0	0	0	0	0	200	300	0	0	0	0	0	0	0	200	903	0	0	0	0	0	0	0	603	903	0
370	3	0	0	0	0	0	0	200	300	0	0	0	0	0	0	0	200	903	0	0	0	0	0	0	0	603	903	0
370	4	0	0	0	0	0	0	200	300	0	0	0	0	0	0	0	200	903	0	0	0	0	0	0	0	603	903	0
370	5	0	0	0	0	0	0	200	300	0	0	0	0	0	0	0	200	903	0	0	0	0	0	0	0	603	903	0
370	6	0	0	0	0	0	0	200	300	0	0	0	0	0	0	0	200	903	0	0	0	0	0	0	0	603	903	0
370	7	0	0	0	0	0	0	200	300	0	0	0	0	0	0	0	200	903	0	0	0	0	0	0	0	603	903	0
370	8	0	0	0	0	0	0	200	300	0	0	0	0	0	0	0	200	903	0	0	0	0	0	0	0	603	903	0
370	9	0	0	0	0	0	0	200	300	0	0	0	0	0	0	0	200	903	0	0	0	0	0	0	0	603	903	0
371	0	0	0	0	0	0	0	200	300	0	0	0	0	0	0	0	200	903	0	0	0	0	0	0	0	603	903	0
371	1	0	0	0	0	0	0	200	300	0	0	0	0	0	0	0	200	903	0	0	0	0	0	0	0	603	903	0
371	2	0	0	0	0	0	0	200	300	0	0	0	0	0	0	0	200	903	0	0	0	0	0	0	0	603	903	0
371	3	0	0	0	0	0	0	200	300	0	0	0	0	0	0	0	200	903	0	0	0	0	0	0	0	603	903	0
371	4	0	0	0	0	0	0	200	300	0	0	0	0	0	0	0	200	903	0	0	0	0	0	0	0	603	903	0
371	5	0	0	0	0	0	0	200	300	0	0	0	0	0	0	0	200	903	0	0	0	0	0	0	0	603	903	0
371	6	0	0	0	0	0	0	200	300	0	0	0	0	0	0	0	200	903	0	0	0	0	0	0	0	603	903	0
371	7	0	0	0	0	0	0	200	300	0	0	0	0	0	0	0	200	903	0	0	0	0	0	0	0	603	903	0
371	8	0	0	0	0	0	0	200	300	0	0	0	0	0	0	0	200	903	0	0	0	0	0	0	0	603	903	0
371	9	0	0	0	0	0	0	200	300	0	0	0	0	0	0	0	200	903	0	0	0	0	0	0	0	603	903	0
372	0	0	0	0	0	0	0	200	300	0	0	0	0	0	0	0	200	903	0	0	0	0	0	0	0	603	903	0
372	1	0	0	0	0	0	0	200	300	0	0	0	0	0	0	0	200	903	0	0	0	0	0	0	0	603	903	0
372	2	0	0	0	0	0	0	200	300	0	0	0	0	0	0	0	200	903	0	0	0	0	0	0	0	603	903	0
372	3	0	0	0	0	0	0	200	300	0	0	0	0	0	0	0	200	903	0	0	0	0	0	0	0	603	903	0
372	4	0	0	0	0	0	0	200	300	0	0	0	0	0	0	0	200	903	0	0	0	0	0	0	0	603	903	0
372	5	0	0	0	0	0	0	200	300	0	0	0	0	0	0	0	200	903	0	0	0	0	0	0	0	603	903	0
372	6	0	0	0	0	0	0	200	300	0	0	0	0	0	0	0	200	903	0	0	0	0	0	0	0	603	903	0
372	7	0	0	0	0	0	0	200	300	0	0	0	0	0	0	0	200	903	0	0	0	0	0	0	0	603	903	0
372	8	0	0	0	0	0	0	200	300	0	0	0	0	0	0	0	200	903	0	0	0	0	0	0	0	603	903	0
372	9	0	0	0	0	0	0	200	300	0	0	0	0	0	0	0	200	903	0	0	0	0	0	0	0	603	903	0
373	0	0	0	0	0	0	0	200	300	0	0	0	0	0	0	0	200	903	0	0	0	0	0	0	0	603	903	0
373	1	0	0	0	0	0	0	200	300	0	0	0	0	0	0	0	200	903	0	0	0	0	0	0	0	603	903	0
373	2	0	0	0	0	0	0	200	300	0	0	0	0	0	0	0	200	903	0	0	0	0	0	0	0	603	903	0
373	3	0	0	0	0	0	0	200	300	0	0	0	0	0	0	0	200	903	0	0	0	0	0	0	0	603	903	0
373	4	0	0	0	0	0	0	200	300	0	0	0	0	0	0	0	200	903	0	0	0	0	0	0	0	603	903	0
373	5	0	0	0	0	0	0	200	300	0	0	0	0	0	0	0	200	903	0	0	0	0	0	0	0	603	903	0
373	6	0	0	0	0	0	0	200	300	0	0	0	0	0	0	0	200	903	0	0	0	0	0	0	0	603	903	0
373	7	0	0	0	0	0	0	200	300	0	0	0	0	0	0	0	200	903	0	0	0	0	0	0	0	603	903	0
373	8	0	0	0	0	0	0	200	300	0	0	0	0	0	0	0	200	903	0	0	0	0	0	0	0	603	903	0
373	9	0	0	0	0	0	0	200	300	0	0	0	0	0	0	0	200	903	0	0	0	0	0	0	0	603	903	0
374	0	0	0	0	0	0	0	200	300	0	0	0	0	0	0	0	200	903	0	0	0	0	0	0	0	603	903	0
374	1	0	0	0	0	0	0	200	300	0	0	0	0	0	0	0	200	903	0	0	0	0	0	0	0	603	903	0
374	2	0	0	0	0	0	0	200	300	0	0	0	0	0	0	0	200	903	0	0	0	0	0	0	0	603	903	0
374	3	0	0	0	0	0	0	200	300	0	0	0	0	0	0	0	200	903	0	0	0	0	0	0	0	603	903	0
374	4	0	0	0	0	0	0	200	300	0	0	0	0	0	0	0	200	903	0	0	0	0	0	0	0	603	903	0
374	5	0	0	0	0	0	0	200	300	0	0	0	0	0	0	0	200	903	0	0	0	0	0	0	0	603	903	0
374	6	0	0	0	0	0	0	200	300	0	0	0	0	0	0	0	200	903	0	0	0	0	0	0	0	603	903	0
374	7	0	0	0	0	0	0	200	300	0	0	0	0	0	0	0	200	903	0	0	0	0	0	0	0	603	903	0
374	8	0	0	0	0	0	0	200	300	0	0	0	0	0	0	0	200	903	0	0	0	0	0	0	0	603	903	0
374	9	0	0	0	0	0	0	200	300	0	0	0	0	0	0	0	200	903	0	0	0	0	0	0	0	603	903	0
375	0	0	0	0	0	0	0	200	300	0	0	0	0	0	0	0	200	903	0	0	0	0	0	0	0	603	903	0
375	1	0	0	0	0	0	0	200	300	0	0	0	0	0	0	0	200	903	0	0	0	0	0	0	0	603	903	0
375	2	0	0	0	0	0	0	200	300	0	0	0	0	0	0	0	200	903	0	0	0	0	0	0	0	603	903	0
375	3	0	0	0	0	0	0	200	300	0	0	0	0	0	0	0	200	903	0	0	0	0	0	0	0	603	903	0
375	4	0	0	0	0	0	0	200	300	0	0	0	0	0	0	0	200	903	0	0	0	0	0	0	0	603	903	0
375	5	0	0	0	0	0	0	200	300	0	0	0	0	0	0	0	200	903	0	0	0	0	0	0	0	603	903	0
375	6	0	0	0	0	0	0	200	300	0	0	0	0	0	0	0	200	903	0	0	0	0	0	0	0	603	903	0
375	7	0	0	0	0	0	0	200	300	0	0	0	0	0	0	0	200	903	0	0	0	0	0	0	0	603	903	0
375	8	0	0	0	0	0	0	200	300	0	0	0	0	0	0	0	200	903	0	0	0	0	0	0	0	603	903	0
375	9	0	0	0	0	0	0	200	300	0	0	0	0	0	0	0	200	903	0	0	0	0	0	0	0	603	903	0
376	0	0	0	0	0	0	0	200	300	0	0	0	0	0	0	0	200	903	0	0	0	0	0	0	0	603	903	0
376	1	0	0	0	0	0	0	200	300	0	0	0	0	0	0	0	200	903	0	0	0	0	0	0	0	603	903	0
376	2	0	0	0	0	0	0	200	300	0	0	0	0	0	0	0	200	903	0	0	0	0	0	0	0	603	903	0
376	3	0	0	0	0	0	0	200	300	0	0	0	0	0	0	0	200	903	0	0	0	0	0	0	0	603	903	0
376	4	0	0	0	0	0	0	200	300	0	0	0	0	0	0	0	200	903	0	0	0	0	0	0	0	603	903	0
376	5	0	0	0	0	0	0	200	300	0	0	0	0	0	0	0	200	903	0	0	0	0	0	0	0	603	903	0
376	6	0	0	0	0	0	0	200	300	0	0	0	0	0	0	0	200	903	0	0	0	0	0	0	0	603	903	0
376	7	0	0	0	0	0	0	200	300	0	0	0	0	0	0	0	200	903	0	0	0	0	0	0	0	603	903	0
376	8	0	0	0	0	0	0	200	300	0	0	0	0	0	0	0	200	903	0	0	0	0	0	0	0	603	903	0
376	9	0	0	0	0	0	0	200	300	0	0	0	0	0	0	0	200	903	0	0	0	0	0	0	0	603	903	0
377	0	0	0	0	0	0	0	200	300	0	0	0	0	0	0	0	200	903	0	0	0	0	0	0	0	603	903	0
377	1	0	0	0	0	0	0	200	300	0	0	0	0	0	0	0	200	903	0	0	0	0	0	0	0	603	903	0
377	2	0	0	0	0	0	0	200	300	0	0	0	0	0	0	0	200	903	0	0	0	0	0	0	0	603	903	0
377	3	0	0	0	0	0	0	200	300	0	0	0	0	0	0	0	200	903	0	0	0	0	0	0	0	603	903	0
377	4	0	0	0	0	0	0	200	300	0	0	0	0	0	0	0	200	903	0	0	0	0	0	0	0	603	903	0
377	5	0	0	0	0	0	0	200	300	0	0	0	0	0	0	0	200	903	0	0	0	0	0	0	0	603	903	0
377	6	0	0	0	0	0	0	200	300	0	0	0	0	0	0	0	200	903	0	0	0	0	0	0	0	603	903	0
377	7	0	0	0	0	0	0	200	300	0	0	0	0	0	0	0	200	903	0	0	0	0	0	0	0	603	903	0
377	8	0	0	0	0	0	0	200	300	0	0	0	0	0	0	0	200	903	0	0	0	0	0	0	0	603	903	0
377	9	0	0	0	0	0	0	200	300	0	0	0	0	0	0	0	200	903	0	0	0	0	0	0	0	603	903	0
378	0	0	0	0	0	0	0	200	300	0	0	0	0	0	0	0	200	903	0	0	0	0	0	0	0	603	903	0
378	1	0	0	0	0	0	0	200	300	0	0	0	0	0	0	0	200	903	0	0	0	0	0	0	0	603	903	0
378	2	0	0	0	0	0	0	200	300	0	0	0	0	0	0	0	200	903	0	0	0	0	0	0	0	603	903	0
378	3	0	0	0	0	0	0	200	300	0	0	0	0	0	0	0	200	903	0	0	0	0	0	0	0	603	903	0
378	4	0	0	0	0	0	0	200	300	0	0	0	0	0	0	0	200	903	0	0	0	0	0	0	0	603	903	0
378	5	0	0	0	0	0	0	200	300	0	0	0	0	0	0	0	200	903	0	0	0	0	0	0	0	603	903	0
378	6	0	0	0	0	0	0	200	300	0	0	0	0	0	0	0	200	903	0	0	0	0	0	0	0	603	903	0
378	7	0	0	0	0	0	0	200	300	0	0	0	0	0	0	0	200	903	0	0	0	0	0	0	0	603	903	0
378	8	0	0	0	0	0	0	200	300	0	0	0	0	0	0	0	200	903	0	0	0	0	0	0	0	603	903	0
378	9	0	0	0	0	0	0	200	300	0	0	0	0	0	0	0	200	903	0	0	0	0	0	0	0	603	903	0
379	0	0	0	0	0	0	0	200	300	0	0	0	0	0	0	0	200	903	0	0	0	0	0	0	0	603	903	0
379	1	0	0	0	0	0	0	200	300	0	0	0	0	0	0	0	200	903	0	0	0	0	0	0	0	603	903	0
379	2	0	0	0	0	0	0	200	300	0	0	0	0	0	0	0	200	903	0	0	0	0	0	0	0	603	903	0
379	3	0	0	0	0	0	0	200	300	0	0	0	0	0	0	0	200	903	0	0	0	0	0	0	0	603	903	0
379	4	0	0	0	0	0	0	200	300	0	0	0	0	0	0	0	200	903	0	0	0	0	0	0	0	603	903	0
379	5	0	0	0	0	0	0	200	300	0	0	0	0	0	0	0	200	903	0	0	0	0	0	0	0	603	903	0
379	6	0	0	0	0	0	0	200	300	0	0	0	0	0	0	0	200	903	0	0	0	0	0	0	0	603	903	0
379	7	0	0	0	0	0	0	200	300	0	0	0	0	0	0	0	200	903	0	0	0	0	0	0	0	603	903	0
379	8	0	0	0	0	0	0	200	300	0	0	0	0	0	0	0	200	903	0	0	0	0	0	0	0	603	903	0
379	9	0	0	0	0	0	0	200	300	0	0	0	0	0	0	0	200	903	0	0	0	0	0	0	0	603	903	0
380	0	0	0	0	0	0	0	200	300	0	0	0	0	0	0	0	200	903	0	0	0	0	0	0	0	603	903	0
380	1	0	0	0	0	0	0	200	300	0	0	0	0	0	0	0	200	903	0	0	0	0	0	0	0	603	903	0
380	2	0	0	0	0	0	0	200	300	0	0	0	0	0	0	0	200	903	0	0	0	0	0	0	0	603	903	0
380	3	0	0	0	0	0	0	200	300	0	0	0	0	0	0	0	200	903	0	0	0	0	0	0	0	603	903	0
380	4	0	0	0	0	0	0	200	300	0	0	0	0	0	0	0	200	903	0	0	0	0	0	0	0	603	903	0
380	5	0	0	0	0	0	0	200	300	0	0	0	0	0	0	0	200	903	0	0	0	0	0	0	0	603	903	0
380	6	0	0	0	0	0	0	200	300	0	0	0	0	0	0	0	200	903	0	0	0	0	0	0	0	603	903	0
380	7	0	0	0	0	0	0	200	300	0	0	0	0	0	0	0	200	903	0	0	0	0	0	0	0	603	903	0
380	8	0	0	0	0	0	0	200	300	0	0	0	0	0	0	0	200	903	0	0	0	0	0	0	0	603	903	0
380	9	0	0	0	0	0	0	200	300	0	0	0	0	0	0	0	200	903	0	0	0	0	0	0	0	603	903	0
381	0	0	0	0	0	0	0	200	300	0	0	0	0	0	0	0	200	903	0	0	0	0	0	0	0	603	903	0
381	1	0	0	0	0	0	0	200	300	0	0	0	0	0	0	0	200	903	0	0	0	0	0	0	0	603	903	0
381	2	0	0	0	0	0	0	200	300	0	0	0	0	0	0	0	200	903	0	0	0	0	0	0	0	603	903	0
381	3	0	0	0	0	0	0	200	300	0	0	0	0	0	0	0	200	903	0	0	0	0	0	0	0	603	903	0
381	4	0	0	0	0	0	0	200	300	0	0	0	0	0	0	0	200	903	0	0	0	0	0	0	0	603	903	0
381	5	0	0	0	0	0	0	200	300	0	0	0	0	0	0	0	200	903	0	0	0	0	0	0	0	603	903	0
381	6	0	0	0	0	0	0	200	300	0	0	0	0	0	0	0	200	903	0	0	0	0	0	0	0	603	903	0
381	7	0	0	0	0	0	0	200	300	0	0	0	0	0	0	0	200	903	0	0	0	0	0	0	0	603	903	0
381	8	0	0	0	0	0	0	200	300	0	0	0	0	0	0	0	200	903	0	0	0	0	0	0	0	603	903	0
381	9	0	0	0	0	0	0	200	300	0	0	0	0	0	0	0	200	903	0	0	0	0	0	0	0	603	903	0
382	0	0	0	0	0	0	0	200	300	0	0	0	0	0	0	0	200	903	0	0	0	0	0	0	0	603	903	0
382	1	0	0	0	0	0	0	200	300	0	0	0	0	0	0	0	200	903	0	0	0	0	0	0	0	603	903	0
382	2	0	0	0	0	0	0	200	300	0	0	0	0	0	0	0	200	903	0	0	0	0	0	0	0	603	903	0
382	3	0	0	0	0	0	0	200	300	0	0	0	0	0	0	0	200	903	0	0	0	0	0	0	0	603	903	0
382	4	0	0	0	0	0	0	200	300	0	0	0	0	0	0	0	200	903	0	0	0	0	0	0	0	603	903	0
382	5	0	0	0	0	0	0	200	300	0	0	0	0	0	0	0	200	903	0	0	0	0	0	0	0	603	903	0
382	6	0	0	0	0	0	0	200	300	0	0	0	0	0	0	0	200	903	0	0	0	0	0	0	0	603	903	0
382	7	0	0	0	0	0	0	200	300	0	0	0	0	0	0	0	200	903	0	0	0	0	0	0	0	603	903	0
382	8	0	0	0	0	0	0	200	300	0	0	0	0	0	0	0	200	903	0	0	0	0	0	0	0	603	903	0
382	9	0	0	0	0	0	0	200	300	0	0	0	0	0	0	0	200	903	0	0	0	0	0	0	0	603	903	0
383	0	0	0	0	0	0	0	200	300	0	0	0	0	0	0	0	200	903	0	0	0	0	0	0	0	603	903	0
383	1	0	0	0	0	0	0	200	300	0	0	0	0	0	0	0	200	903	0	0	0	0	0	0	0	603	903	0
383	2	0	0	0	0	0	0	200	300	0	0	0	0	0	0	0	200	903	0	0	0	0	0	0	0	603	903	0
383	3	0	0	0	0	0	0	200	300	0	0	0	0	0	0	0	200	903	0	0	0	0	0	0	0	603	903	0
383	4	0	0	0	0	0	0	200	300	0	0	0	0	0	0	0	200	903	0	0	0	0	0	0	0	603	903	0
383	5	0	0	0	0	0	0	200	300	0	0	0	0	0	0	0	200	903	0	0	0	0	0	0	0	603	903	0
383	6	0	0	0	0	0	0	200	300	0	0	0	0	0	0	0	200	903	0	0	0	0	0	0	0	603	903	0
383	7	0	0	0	0	0	0	200	300	0	0	0	0	0	0	0	200	903	0	0	0	0	0	0	0	603	903	0
383	8	0	0	0	0	0	0	200	300	0	0	0	0	0	0	0	200	903	0	0	0	0	0	0	0	603	903	0
383	9	0	0	0	0	0	0	200	300	0	0	0	0	0	0	0	200	903	0	0	0	0	0	0	0	603	903	0
384	0	0	0	0	0	0	0	200	300	0	0	0	0	0	0	0	200	903	0	0	0	0	0	0	0	603	903	0
384	1	0	0	0	0	0	0	200	300	0	0	0	0	0	0	0	200	903	0	0	0	0	0	0	0	603	903	0
384	2	0	0	0	0	0	0	200	300	0	0	0	0	0	0	0	200	903	0	0	0	0	0	0	0	603	903	0
384	3	0	0	0	0	0	0	200	300	0	0	0	0	0	0	0	200	903	0	0	0	0	0	0	0	603	903	0
384	4	0	0	0	0	0	0	200	300	0	0	0	0	0	0	0	200	903	0	0	0	0	0	0	0	603	903	0
384	5	0	0	0	0	0	0	200	300	0	0	0	0	0	0	0	200	903	0	0	0	0	0	0	0	603	903	0
384	6	0	0	0	0	0	0	200	300	0	0	0	0	0	0	0	200	903	0	0	0	0	0	0	0	603	903	0
384	7	0	0	0	0	0	0	200	300	0	0	0	0	0	0	0	200	903	0	0	0	0	0	0	0	603	903	0
384	8	0	0	0	0	0	0	200	300	0	0	0	0	0	0	0	200	903	0	0	0	0	0	0	0	603	903	0
384	9	0	0	0	0	0	0	200	300	0	0	0	0	0	0	0	200	903	0	0	0	0	0	0	0	603	903	0
385	0	0	0	0	0	0	0	200	300	0	0	0	0	0	0	0	200	903	0	0	0	0	0	0	0	603	903	0
385	1	0	0	0	0	0	0	200	300	0	0	0	0	0	0	0	200	903	0	0	0	0	0	0	0	603	903	0
385	2	0	0	0	0	0	0	200	300	0	0	0	0	0	0	0	200	903	0	0	0	0	0	0	0	603	903	0
385	3	0	0	0	0	0	0	200	300	0	0	0	0	0	0	0	200	903	0	0	0	0	0	0	0	603	903	0
385	4	0	0	0	0	0	0	200	300	0	0	0	0	0	0	0	200	903	0	0	0	0	0	0	0	603	903	0
385	5	0	0	0	0	0	0	200	300	0	0	0	0	0	0	0	200	903	0	0	0	0	0	0	0	603	903	0
385	6	0	0	0	0	0	0	200	300	0	0	0	0	0	0	0	200	903	0	0	0	0	0	0	0	603	903	0
385	7	0	0	0	0	0	0	200	300	0	0	0	0	0	0	0	200	903	0	0	0	0	0	0	0	603	903	0
385	8	0	0	0	0	0	0	200	300	0	0	0	0	0	0	0	200	903	0	0	0	0	0	0	0	603	903	0
385	9	0	0	0	0	0	0	200	300	0	0	0	0	0	0	0	200	903	0	0	0	0	0	0	0	603	903	0
386	0	0	0	0	0	0	0	200	300	0	0	0	0	0	0	0	200	903	0	0	0	0	0	0	0	603	903	0
386	1	0	0	0	0	0	0	200	300	0	0	0	0	0	0	0	200	903	0	0	0	0	0	0	0	603	903	0
386	2	0	0	0	0	0	0	200	300	0	0	0	0	0	0	0	200	903	0	0	0	0	0	0	0	603	903	0
386	3	0	0	0	0	0	0	200	300	0	0	0	0	0	0	0	200	903	0	0	0	0	0	0	0	603	903	0
386	4	0	0	0	0	0	0	200	300	0	0	0	0	0	0	0	200	903	0	0	0	0	0	0	0	603	903	0
386	5	0	0	0	0	0	0	200	300	0	0	0	0	0	0	0	200	903	0	0	0	0	0	0	0	603	903	0
386	6	0	0	0	0	0	0	200	300	0	0	0	0	0	0	0	200	903	0	0	0	0	0	0	0	603	903	0
386	7	0	0	0	0	0	0	200	300	0	0	0	0	0	0	0	200	903	0	0	0	0	0	0	0	603	903	0
386	8	0	0	0	0	0	0	200	300	0	0	0	0	0	0	0	200	903	0	0	0	0	0	0	0	603	903	0
386	9	0	0	0	0	0	0	200	300	0	0	0	0	0	0	0	200	903	0	0	0	0	0	0	0	603	903	0
387	0	0	0	0	0	0	0	200	300	0	0	0	0	0	0	0	200	903	0	0	0	0	0	0	0	603	903	0
387	1	0	0	0	0	0	0	200	300	0	0	0	0	0	0	0	200	903	0	0	0	0	0	0	0	603	903	0
387	2	0	0	0	0	0	0	200	300	0	0	0	0	0	0	0	200	903	0	0	0	0	0	0	0	603	903	0
387	3	0	0	0	0	0	0	200	300	0	0	0	0	0	0	0	200	903	0	0	0	0	0	0	0	603	903	0
387	4	0	0	0	0	0	0	200	300	0	0	0	0	0	0	0	200	903	0	0	0	0	0	0	0	603	903	0
387	5	0	0	0	0	0	0	200	300	0	0	0	0	0	0	0	200	903	0	0	0	0	0	0	0	603	903	0
387	6	0	0	0	0	0	0	200	300	0	0	0	0	0	0	0	200	903	0	0	0	0	0	0	0	603	903	0
387	7	0	0	0	0	0	0	200	300	0	0	0	0	0	0	0	200	903	0	0	0	0	0	0	0	603	903	0
387	8	0	0	0	0	0	0	200	300	0	0	0	0	0	0	0	200	903	0	0	0	0	0	0	0	603	903	0
387	9	0	0	0	0	0	0	200	300	0	0	0	0	0	0	0	200	903	0	0	0	0	0	0	0	603	903	0
388	0	0	0	0	0	0	0	200	300	0	0	0	0	0	0	0	200	903	0	0	0	0	0	0	0	603	903	0
388	1	0	0	0	0	0	0	200	300	0	0	0	0	0	0	0	200	903	0	0	0	0	0	0	0	603	903	0
388	2	0	0	0	0	0	0	200	300	0	0	0	0	0	0	0	200	903	0	0	0	0	0	0	0	603	903	0
388	3	0	0	0	0	0	0	200	300	0	0	0	0	0	0	0	200	903	0	0	0	0	0	0	0	603	903	0
388	4	0	0	0	0	0	0	200	300	0	0	0	0	0	0	0	200	903	0	0	0	0	0	0	0	603	903	0
388	5	0	0	0	0	0	0	200	300	0	0	0	0	0	0	0	200	903	0	0	0	0	0	0	0	603	903	0
388	6	0	0	0	0	0	0	200	300	0	0	0	0	0	0	0	200	903	0	0	0	0	0	0	0	603	903	0
388	7	0	0	0	0	0	0	200	300	0	0	0	0	0	0	0	200	903	0	0	0	0	0	0	0	603	903	0
388	8	0	0	0	0	0	0	200	300	0	0	0	0	0	0	0	200	903	0	0	0	0	0	0	0	603	903	0
388	9	0	0	0	0	0	0	200	300	0	0	0	0	0	0	0	200	903	0	0	0	0	0	0	0	603	903	0
389	0	0	0	0	0	0	0	200	300	0	0	0	0	0	0	0	200	903	0	0	0	0	0	0	0	603	903	0
389	1	0	0	0	0	0	0	200	300	0	0	0	0	0	0	0	200	903	0	0	0	0	0	0	0	603	903	0
389	2	0	0	0	0	0	0	200	300	0	0	0	0	0	0	0	200	903	0	0	0	0	0	0	0	603	903	0
389	3	0	0	0	0	0	0	200	300	0	0	0	0	0	0	0	200	903	0	0	0	0	0	0	0	603	903	0
389	4	0	0	0	0	0	0	200	300	0	0	0	0	0	0	0	200	903	0	0	0	0	0	0	0	603	903	0
389	5	0	0	0	0	0	0	200	300	0	0	0	0	0	0	0	200	903	0	0	0	0	0	0	0	603	903	0
389	6	0	0	0	0	0	0	200	300	0	0	0	0	0	0	0	200	903	0	0	0	0	0	0	0	603	903	0
389	7	0	0	0	0	0	0	200	300	0	0	0	0	0	0	0	200	903	0	0	0	0	0	0	0	603	903	0
389	8	0	0	0	0	0	0	200	300	0	0	0	0	0	0	0	200	903	0	0	0	0	0	0	0	603	903	0
389	9	0	0	0	0	0	0	200	300	0	0	0	0	0	0	0	200	903	0	0	0	0	0	0	0	603	903	0
390	0	0	0	0	0	0	0	200	300	0	0	0	0	0	0	0	200	903	0	0	0	0	0	0	0	603	903	0
390	1	0	0	0	0	0	0	200	300	0	0	0	0	0	0	0	200	903	0	0	0	0	0	0	0	603	903	0
390	2	0	0	0	0	0	0	200	300	0	0	0	0	0	0	0	200	903	0	0	0	0	0	0	0	603	903	0
390	3	0	0	0	0	0	0	200	300	0	0	0	0	0	0	0	200	903	0	0	0	0	0	0	0	603	903	0
390	4	0	0	0	0	0	0	200	300	0	0	0	0	0	0	0	200	903	0	0	0	0	0	0	0	603	903	0
390	5	0	0	0	0	0	0	200	300	0	0	0	0	0	0	0	200	903	0	0	0	0	0	0	0	603	903	0
390	6	0	0	0	0	0	0	200	300	0	0	0	0	0	0	0	200	903	0	0	0	0	0	0	0	603	903	0
390	7	0	0	0	0	0	0	200	300	0	0	0	0	0	0	0	200	903	0	0	0	0	0	0	0	603	903	0
390	8	0	0	0	0	0	0	200	300	0	0	0	0	0	0	0	200	903	0	0	0	0	0	0	0	603	903	0
390	9	0	0	0	0	0	0	200	300	0	0	0	0	0	0	0	200	903	0	0	0	0	0	0	0	603	903	0
391	0	0	0	0	0	0	0	200	300	0	0	0	0	0	0	0	200	903	0	0	0	0	0	0	0	603	903	0
391	1	0	0	0	0	0	0	200	300	0	0	0	0	0	0	0	200	903	0	0	0	0	0	0	0	603	903	0
391	2	0	0	0	0	0	0	200	300	0	0	0	0	0	0	0	200	903	0	0	0	0	0	0	0	603	903	0
391	3	0	0	0	0	0	0	200	300	0	0	0	0	0	0	0	200	903	0	0	0	0	0	0	0	603	903	0
391	4	0	0	0	0	0	0	200	300	0	0	0	0	0	0	0	200	903	0	0	0	0	0	0	0	603	903	0
391	5	0	0	0	0	0	0	200	300	0	0	0	0	0	0	0	200	903	0	0	0	0	0	0	0	603	903	0
391	6	0	0	0	0	0	0	200	300	0	0	0	0	0	0	0	200	903	0	0	0	0	0	0	0	603	903	0
391	7	0	0	0	0	0	0	200	300	0	0	0	0	0	0	0	200	903	0	0	0	0	0	0	0	603	903	0
391	8	0	0	0	0	0	0	200	300	0	0	0	0	0	0	0	200	903	0	0	0	0	0	0	0	603	903	0
391	9	0	0	0	0	0	0	200	300	0	0	0	0	0	0	0	200	903	0	0	0	0	0	0	0	603	903	0
392	0	0	0	0	0	0	0	200	300	0	0	0	0	0	0	0	200	903	0	0	0	0	0	0	0	603	903	0
392	1	0	0	0	0	0	0	200	300	0	0	0	0	0	0	0	200	903	0	0	0	0	0	0	0	603	903	0
392	2	0	0	0	0	0	0	200	300	0	0	0	0	0	0	0	200	903	0	0	0	0	0	0	0	603	903	0
392	3	0	0	0	0	0	0	200	300	0	0	0	0	0	0	0	200	903	0	0	0	0	0	0	0	603	903	0
392	4	0	0	0	0	0	0	200	300	0	0	0	0	0	0	0	200	903	0	0	0	0	0	0	0	603	903	0
392	5	0	0	0	0	0	0	200	300	0	0	0	0	0	0	0	200	903	0	0	0	0	0	0	0	603	903	0
392	6	0	0	0	0	0	0	200	300	0	0	0	0	0	0	0	200	903	0	0	0	0	0	0	0	603	903	0
392	7	0	0	0	0	0	0	200	300	0	0	0	0	0	0	0	200	903	0	0	0	0	0	0	0	603	903	0
392	8	0	0	0	0	0	0	200	300	0	0	0	0	0	0	0	200	903	0	0	0	0	0	0	0	603	903	0
392	9	0	0	0	0	0	0	200	300	0	0	0	0	0	0	0	200	903	0	0	0	0	0	0	0	603	903	0
393	0	0	0	0	0	0	0	200	300	0	0	0	0	0	0	0	200	903	0	0	0	0	0	0	0	603	903	0
393	1	0	0	0	0	0	0	200	300	0	0	0	0	0	0	0	200	903	0	0	0	0	0	0	0	603	903	0
393	2	0	0	0	0	0	0	200	300	0	0	0	0	0	0	0	200	903	0	0	0	0	0	0	0	603	903	0
393	3	0	0	0	0	0	0	200	300	0	0	0	0	0	0	0	200	903	0	0	0	0	0	0	0	603	903	0
393	4	0	0	0	0	0	0	200	300	0	0	0	0	0	0	0	200	903	0	0	0	0	0	0	0	603	903	0
393	5	0	0	0	0	0	0	200	300	0	0	0	0	0	0	0	200	903	0	0	0	0	0	0	0	603	903	0
393	6	0	0	0	0	0	0	200	300	0	0	0	0	0	0	0	200	903	0	0	0	0	0	0	0	603	903	0
393	7	0	0	0	0	0	0	200	300	0	0	0	0	0	0	0	200	903	0	0	0	0	0	0	0	603	903	0
393	8	0	0	0	0	0	0	200	300	0	0	0	0	0	0	0	200	903	0	0	0	0	0	0	0	603	903	0
393	9	0	0	0	0	0	0	200	300	0	0	0	0	0	0	0	200	903	0	0	0	0	0	0	0	603	903	0
394	0	0	0	0	0	0	0	200	300	0	0	0	0	0	0	0	200	903	0	0	0	0	0	0	0	603	903	0
394	1	0	0	0	0	0	0	200	300	0	0	0	0	0	0	0	200	903	0	0	0	0	0	0	0	603	903	0
394	2	0	0	0	0	0	0	200	300	0	0	0	0	0	0	0	200	903	0	0	0	0	0	0	0	603	903	0
394	3	0	0	0	0	0	0	200	300	0	0	0	0	0	0	0	200	903	0	0	0	0	0	0	0	603	903	0
394	4	0	0	0	0	0	0	200	300	0	0	0	0	0	0	0	200	903	0	0	0	0	0	0	0	603	903	0
394	5	0	0	0	0	0	0	200	300	0	0	0	0	0	0	0	200	903	0	0	0	0	0	0	0	603	903	0
394	6	0	0	0	0	0	0	200	300	0	0	0	0	0	0	0	200	903	0	0	0	0	0	0	0	603	903	0
394	7	0	0	0	0	0	0	200	300	0	0	0	0	0	0	0	200	903	0	0	0	0	0	0	0	603	903	0
394	8	0	0	0	0	0	0	200	300	0	0	0	0	0	0	0	200	903	0	0	0	0	0	0	0	603	903	0
394	9	0	0	0	0	0	0	200	300	0	0	0	0	0	0	0	200	903	0	0	0	0	0	0	0	603	903	0
395	0	0	0	0	0	0	0	200	300	0	0	0	0	0	0	0	200	903	0	0	0	0	0	0	0	603	903	0
395	1	0	0	0	0	0	0	200	300	0	0	0	0	0	0	0	200	903	0	0	0	0	0	0	0	603	903	0
395	2	0	0	0	0	0	0	200	300	0	0	0	0	0	0	0	200	903	0	0	0	0	0	0	0	603	903	0
395	3	0	0	0	0	0	0	200	300	0	0	0	0	0	0	0	200	903	0	0	0	0	0	0	0	603	903	0
395	4	0	0	0	0	0	0	200	300	0	0	0	0	0	0	0	200	903	0	0	0	0	0	0	0	603	903	0
395	5	0	0	0	0	0	0	200	300	0	0	0	0	0	0	0	200	903	0	0	0	0	0	0	0	603	903	0
395	6	0	0	0	0	0	0	200	300	0	0	0	0	0	0	0	200	903	0	0	0	0	0	0	0	603	903	0
395	7	0	0	0	0	0	0	200	300	0	0	0	0	0	0	0	200	903	0	0	0	0	0	0	0	603	903	0
395	8	0	0	0	0	0	0	200	300	0	0	0	0	0	0	0	200	903	0	0	0	0	0	0	0	603	903	0
395	9	0	0	0	0	0	0	200	300	0	0	0	0	0	0	0	200	903	0	0	0	0	0	0	0	603	903	0
396	0	0	0	0	0	0	0	200	300	0	0	0	0	0	0	0	200	903	0	0	0	0	0	0	0	603	903	0
396	1	0	0	0	0	0	0	200	300	0	0	0	0	0	0	0	200	903	0	0	0	0	0	0	0	603	903	0
396	2	0	0	0	0	0	0	200	300	0	0	0	0	0	0	0	200	903	0	0	0	0	0	0	0	603	903	0
396	3	0	0	0	0	0	0	200	300	0	0	0	0	0	0	0	200	903	0	0	0	0	0	0	0	603	903	0
396	4	0	0	0	0	0	0	200	300	0	0	0	0	0	0	0	200	903	0	0	0	0	0	0	0	603	903	0
396	5	0	0	0	0	0	0	200	300	0	0	0	0	0	0	0	200	903	0	0	0	0	0	0	0	603	903	0
396	6	0	0	0	0	0	0	200	300	0	0	0	0	0	0	0	200	903	0	0	0	0	0	0	0	603	903	0
396	7	0	0	0	0	0	0	200	300	0	0	0	0	0	0	0	200	903	0	0	0	0	0	0	0	603	903	0
396	8	0	0	0	0	0	0	200	300	0	0	0	0	0	0	0	200	903	0	0	0	0	0	0	0	603	903	0
396	9	0	0	0	0	0	0	200	300	0	0	0	0	0	0	0	200	903	0	0	0	0	0	0	0	603	903	0
397	0	0	0	0	0	0	0	200	300	0	0	0	0	0	0	0	200	903	0	0	0	0	0	0	0	603	903	0
397	1	0	0	0	0	0	0	200	300	0	0	0	0	0	0	0	200	903	0	0	0	0	0	0	0	603	903	0
397	2	0	0	0	0	0	0	200	300	0	0	0	0	0	0	0	200	903	0	0	0	0	0	0	0	603	903	0
397	3	0	0	0	0	0	0	200	300	0	0	0	0	0	0	0	200	903	0	0	0	0	0	0	0	603	903	0
397	4	0	0	0	0	0	0	200	300	0	0	0	0	0	0	0	200	903	0	0	0	0	0	0	0	603	903	0
397	5	0	0	0	0	0	0	200	300	0	0	0	0	0	0	0	200	903	0	0	0	0	0	0	0	603	903	0
397	6	0	0	0	0	0	0	200	300	0	0	0	0	0	0	0	200	903	0	0	0	0	0	0	0	603	903	0
397	7	0	0	0	0	0	0	200	300	0	0	0	0	0	0	0	200	903	0	0	0	0	0	0	0	603	903	0
397	8	0	0	0	0	0	0	200	300	0	0	0	0	0	0	0	200	903	0	0	0	0	0	0	0	603	903	0
397	9	0	0	0	0	0	0	200	300	0	0	0	0	0	0	0	200	903	0	0	0	0	0	0	0	603	903	0
398	0	0	0	0	0	0	0	200	300	0	0	0	0	0	0	0	200	903	0	0	0	0	0	0	0	603	903	0
398	1	0	0	0	0	0	0	200	300	0	0	0	0	0	0	0	200	903	0	0	0	0	0	0	0	603	903	0
398	2	0	0	0	0	0	0	200	300	0	0	0	0	0	0	0	200	903	0	0	0	0	0	0	0	603	903	0
398	3	0	0	0	0	0	0	200	300	0	0	0	0	0	0	0	200	903	0	0	0	0	0	0	0	603	903	0
398	4	0	0	0	0	0	0	200	300	0	0	0	0	0	0	0	200	903	0	0	0	0	0	0	0	603	903	0
398	5	0	0	0	0	0	0	200	300	0	0	0	0	0	0	0	200	903	0	0	0	0	0	0	0	603	903	0
398	6	0	0	0	0	0	0	200	300	0	0	0	0	0	0	0	200	903	0	0	0	0	0	0	0	603	903	0
398	7	0	0	0	0	0	0	200	300	0	0	0	0	0	0	0	200	903	0	0	0	0	0	0	0	603	903	0
398	8	0	0	0	0	0	0	200	300	0	0	0	0	0	0	0	200	903	0	0	0	0	0	0	0	603	903	0
398	9	0	0	0	0	0	0	200	300	0	0	0	0	0	0	0	200	903	0	0	0	0	0	0	0	603	903	0
399	0	0	0	0	0	0	0	200	300	0	0	0	0	0	0	0	200	903	0	0	0	0	0	0	0	603	903	0
399	1	0	0	0	0	0	0	200	300	0	0	0	0	0	0	0	200	903	0	0	0	0	0	0	0	603	903	0
399	2	0	0	0	0	0	0	200	300	0	0	0	0	0	0	0	200	903	0	0	0	0	0	0	0	603	903	0
399	3	0	0	0	0	0	0	200	300	0	0	0	0	0	0	0	200	903	0	0	0	0	0	0	0	603	903	0
399	4	0	0	0	0	0	0	200	300	0	0	0	0	0	0	0	200	903	0	0	0	0	0	0	0	603	903	0
399	5	0	0	0	0	0	0	200	300	0	0	0	0	0	0	0	200	903	0	0	0	0	0	0	0	603	903	0
399	6	0	0	0	0	0	0	200	300	0	0	0	0	0	0	0	200	903	0	0	0	0	0	0	0	603	903	0
399	7	0	0	0	0	0	0	200	300	0	0	0	0	0	0	0	200	903	0	0	0	0	0	0	0	603	903	0
399	8	0	0	0	0	0	0	200	300	0	0	0	0	0	0	0	200	903	0	0	0	0	0	0	0	603	903	0
399	9	0	0	0	0	0	0	200	300	0	0	0	0	0	0	0	200	903	0	0	0	0	0	0	0	603	903	0
400	0	0	0	0	0	0	0	200	300	0	0	0	0	0	0	0	200	903	0	0	0	0	0	0	0	603	903	0
400	1	0	0	0	0	0	0	200	300	0	0	0	0	0	0	0	200	903	0	0	0	0	0	0	0	603	903	0
400	2	0	0	0	0	0	0	200	300	0	0	0	0	0	0	0	200	903	0	0	0	0	0	0	0	603	903	0
400	3	0	0	0	0	0	0	200	300	0	0	0	0	0	0	0	200	903	0	0	0	0	0	0	0	603	903	0
400	4	0	0	0	0	0	0	200	300	0	0	0	0	0	0	0	200	903	0	0	0	0	0	0	0	603	903	0
400	5	0	0	0	0	0	0	200	300	0	0	0	0	0	0	0	200	903	0	0	0	0	0	0	0	603	903	0
400	6	0	0	0	0	0	0	200	300	0	0	0	0	0	0	0	200	903	0	0	0	0	0	0	0	603	903	0
400	7	0	0	0	0	0	0	200	300	0	0	0	0	0	0	0	200	903	0	0	0	0	0	0	0	603	903	0
400	8	0	0	0	0	0	0	200	300	0	0	0	0	0	0	0	200	903	0	0	0	0	0	0	0	603	903	0
400	9	0	0	0	0	0	0	200	300	0	0	0	0	0	0	0	200	903	0	0	0	0	0	0	0	603	903	0
401	0	0	0	0	0	0	0	200	300	0	0	0	0	0	0	0	200	903	0	0	0	0	0	0	0	603	903	0
401	1	0	0	0	0	0	0	200	300	0	0	0	0	0	0	0	200	903	0	0	0	0	0	0	0	603	903	0
401	2	0	0	0	0	0	0	200	300	0	0	0	0	0	0	0	200	903	0	0	0	0	0	0	0	603	903	0
401	3	0	0	0	0	0	0	200	300	0	0	0	0	0	0	0	200	903	0	0	0	0	0	0	0	603	903	0
401	4	0	0	0	0	0	0	200	300	0	0	0	0	0	0	0	200	903	0	0	0	0	0	0	0	603	903	0
401	5	0	0	0	0	0	0	200	300	0	0	0	0	0	0	0	200	903	0	0	0	0	0	0	0	603	903	0
401	6	0	0	0	0	0	0	200	300	0	0	0	0	0	0	0	200	903	0	0	0	0	0	0	0	603	903	0
401	7	0	0	0	0	0	0	200	300	0	0	0	0	0	0	0	200	903	0	0	0	0	0	0	0	603	903	0
401	8	0	0	0	0	0	0	200	300	0	0	0	0	0	0	0	200	903	0	0	0	0	0	0	0	603	903	0
401	9	0	0	0	0	0	0	200	300	0	0	0	0	0	0	0	200	903	0	0	0	0	0	0	0	603	903	0
402	0	0	0	0	0	0	0	200	300	0	0	0	0	0	0	0	200	903	0	0	0	0	0	0	0	603	903	0
402	1	0	0	0	0	0	0	200	300	0	0	0	0	0	0	0	200	903	0	0	0	0	0	0	0	603	903	0
402	2	0	0	0	0	0	0	200	300	0	0	0	0	0	0	0	200	903	0	0	0	0	0	0	0	603	903	0
402	3	0	0	0	0	0	0	200	300	0	0	0	0	0	0	0	200	903	0	0	0	0	0	0	0	603	903	0
402	4	0	0	0	0	0	0	200	300	0	0	0	0	0	0	0	200	903	0	0	0	0	0	0	0	603	903	0
402	5	0	0	0	0	0	0	200	300	0	0	0	0	0	0	0	200	903	0	0	0	0	0	0	0	603	903	0
402	6	0	0	0	0	0	0	200	300	0	0	0	0	0	0	0	200	903	0	0	0	0	0	0	0	603	903	0
402	7	0	0	0	0	0	0	200	300	0	0	0	0	0	0	0	200	903	0	0	0	0	0	0	0	603	903	0
402	8	0	0	0	0	0	0	200	300	0	0	0	0	0	0	0	200	903	0	0	0	0	0	0	0	603	903	0
402	9	0	0	0	0	0	0	200	300	0	0	0	0	0	0	0	200	903	0	0	0	0	0	0	0	603	903	0
403	0	0	0	0	0	0	0	200	300	0	0	0	0	0	0	0	200	903	0	0	0	0	0	0	0	603	903	0
403	1	0	0	0	0	0	0	200	300	0	0	0	0	0	0	0	200	903	0	0	0	0	0	0	0	603	903	0
403	2	0	0	0	0	0	0	200	300	0	0	0	0	0	0	0	200	903	0	0	0	0	0	0	0	603	903	0
403	3	0	0	0	0	0	0	200	300	0	0	0	0	0	0	0	200	903	0	0	0	0	0	0	0	603	903	0
403	4	0	0	0	0	0	0	200	300	0	0	0	0	0	0	0	200	903	0	0	0	0	0	0	0	603	903	0
403	5	0	0	0	0	0	0	200	300	0	0	0	0	0	0	0	200	903	0	0	0	0	0	0	0	603	903	0
403	6	0	0	0	0	0	0	200	300	0	0	0	0	0	0	0	200	903	0	0	0	0	0	0	0	603	903	0
403	7	0	0	0	0	0	0	200	300	0	0	0	0	0	0	0	200	903	0	0	0	0	0	0	0	603	903	0
403	8	0	0	0	0	0	0	200	300	0	0	0	0	0	0	0	200	903	0	0	0	0	0	0	0	603	903	0
403	9	0	0	0	0	0	0	200	300	0	0	0	0	0	0	0	200	903	0	0	0	0	0	0	0	603	903	0
404	0	0	0	0	0	0	0	200	300	0	0	0	0	0	0	0	200	903	0	0	0	0	0	0	0	603	903	0
404	1	0	0	0	0	0	0	200	300	0	0	0	0	0	0	0	200	903	0	0	0	0	0	0	0	603	903	0
404	2	0	0	0	0	0	0	200	300	0	0	0	0	0	0	0	200	903	0	0	0	0	0	0	0	603	903	0
404	3	0	0	0	0	0	0	200	300	0	0	0	0	0	0	0	200	903	0	0	0	0	0	0	0	603	903	0
404	4	0	0	0	0	0	0	200	300	0	0	0	0	0	0	0	200	903	0	0	0	0	0	0	0	603	903	0
404	5	0	0	0	0	0	0	200	300	0	0	0	0	0	0	0	200	903	0	0	0	0	0	0	0	603	903	0
404	6	0	0	0	0	0	0	200	300	0	0	0	0	0	0	0	200	903	0	0	0	0	0	0	0	603	903	0
404	7	0	0	0	0	0	0	200	300	0	0	0	0	0	0	0	200	903	0	0	0	0	0	0	0	603	903	0
404	8	0	0	0	0	0	0	200	300	0	0	0	0	0	0	0	200	903	0	0	0	0	0	0	0	603	903	0
404	9	0	0	0	0	0	0	200	300	0	0	0	0	0	0	0	200	903	0	0	0	0	0	0	0	603	903	0
405	0	0	0	0	0	0	0	200	300	0	0	0	0	0	0	0	200	903	0	0	0	0	0	0	0	603	903	0
405	1	0	0	0	0	0	0	200	300	0	0	0	0	0	0	0	200	903	0	0	0	0	0	0	0	603	903	0
405	2	0	0	0	0	0	0	200	300	0	0	0	0	0	0	0	200	903	0	0	0	0	0	0	0	603	903	0
405	3	0	0	0	0	0	0	200	300	0	0	0	0	0	0	0	200	903	0	0	0	0	0	0	0	603	903	0
405	4	0	0	0	0	0	0	200	300	0	0	0	0	0	0	0	200	903	0	0	0	0	0	0	0	603	903	0
405	5	0	0	0	0	0	0	200	300	0	0	0	0	0	0	0	200	903	0	0	0	0	0	0	0	603	903	0
405	6	0	0	0	0	0	0	200	300	0	0	0	0	0	0	0	200	903	0	0	0	0	0	0	0	603	903	0
405	7	0	0	0	0	0	0	200	300	0	0	0	0	0	0	0	200	903	0	0	0	0	0	0	0	603	903	0
405	8	0	0	0	0	0	0	200	300	0	0	0	0	0	0	0	200	903	0	0	0	0	0	0	0	603	903	0
405	9	0	0	0	0	0	0	200	300	0	0	0	0	0	0	0	200	903	0	0	0	0	0	0	0	603	903	0
406	0	0	0	0	0	0	0	200	300	0	0	0	0	0	0	0	200	903	0	0	0	0	0	0	0	603	903	0
406	1	0	0	0	0	0	0	200	300	0	0	0	0	0	0	0	200	903	0	0	0	0	0	0	0	603	903	0
406	2	0	0	0	0	0	0	200	300	0	0	0	0	0	0	0	200	903	0	0	0	0	0	0	0	603	903	0
406	3	0	0	0	0	0	0	200	300	0	0	0	0	0	0	0	200	903	0	0	0	0	0	0	0	603	903	0
406	4	0	0	0	0	0	0	200	300	0	0	0	0	0	0	0	200	903	0	0	0	0	0	0	0	603	903	0
406	5	0	0	0	0	0	0	200	300	0	0	0	0	0	0	0	200	903	0	0	0	0	0	0	0	603	903	0
406	6	0	0	0	0	0	0	200	300	0	0	0	0	0	0	0	200	903	0	0	0	0	0	0	0	603	903	0
406	7	0	0	0	0	0	0	200	300	0	0	0	0	0	0	0	200	903	0	0	0	0	0	0	0	603	903	0
406	8	0	0	0	0	0	0	200	300	0	0	0	0	0	0	0	200	903	0	0	0	0	0	0	0	603	903	0
406	9	0	0	0	0	0	0	200	300	0	0	0	0	0	0	0	200	903	0	0	0	0	0	0	0	603	903	0
407	0	0	0	0	0	0	0	200	300	0	0	0	0	0	0	0	200	903	0	0	0	0	0	0	0	603	903	0
407	1	0	0	0	0	0	0	200	300	0	0	0	0	0	0	0	200	903	0	0	0	0	0	0	0	603	903	0
407	2	0	0	0	0	0	0	200	300	0	0	0	0	0	0	0	200	903	0	0	0	0	0	0	0	603	903	0
407	3	0	0	0	0	0	0	200	300	0	0	0	0	0	0	0	200	903	0	0	0	0	0	0	0	603	903	0
407	4	0	0	0	0	0	0	200	300	0	0	0	0	0	0	0	200	903	0	0	0	0	0	0	0	603	903	0
407	5	0	0	0	0	0	0	200	300	0	0	0	0	0	0	0	200	903	0	0	0	0	0	0	0	603	903	0
407	6	0	0	0	0	0	0	200	300	0	0	0	0	0	0	0	200	903	0	0	0	0	0	0	0	603	903	0
407	7	0	0	0	0	0	0	200	300	0	0	0	0	0	0	0	200	903	0	0	0	0	0	0	0	603	903	0
407	8	0	0	0	0	0	0	200	300	0	0	0	0	0	0	0	200	903	0	0	0	0	0	0	0	603	903	0
407	9	0	0	0	0	0	0	200	300	0	0	0	0	0	0	0	200	903	0	0	0	0	0	0	0	603	903	0
408	0	0	0	0	0	0	0	200	300	0	0	0	0	0	0	0	200	903	0	0	0	0	0	0	0	603	903	0
408	1	0	0	0	0	0	0	200	300	0	0	0	0	0	0	0	200	903	0	0	0	0	0	0	0	603	903	0
408	2	0	0	0	0	0	0	200	300	0	0	0	0	0	0	0	200	903	0	0	0	0	0	0	0	603	903	0
408	3	0	0	0	0	0	0	200	300	0	0	0	0	0	0	0	200	903	0	0	0	0	0	0	0	603	903	0
408	4	0	0	0	0	0	0	200	300	0	0	0	0	0	0	0	200	903	0	0	0	0	0	0	0	603	903	0
408	5	0	0	0	0	0	0	200	300	0	0	0	0	0	0	0	200	903	0	0	0	0	0	0	0	603	903	0
408	6	0	0	0	0	0	0	200	300	0	0	0	0	0	0	0	200	903	0	0	0	0	0	0	0	603	903	0
408	7	0	0	0	0	0	0	200	300	0	0	0	0	0	0	0	200	903	0	0	0	0	0	0	0	603	903	0
408	8	0	0	0	0	0	0	200	300	0	0	0	0	0	0	0	200	903	0	0	0	0	0	0	0	603	903	0
408	9	0	0	0	0	0	0	200	300	0	0	0	0	0	0	0	200	903	0	0	0	0	0	0	0	603	903	0
409	0	0	0	0	0	0	0	200	300	0	0	0	0	0	0	0	200	903	0	0	0	0	0	0	0	603	903	0
409	1	0	0	0	0	0	0	200	300	0	0	0	0	0	0	0	200	903	0	0	0	0	0	0	0	603	903	0
409	2	0	0	0	0	0	0	200	300	0	0	0	0	0	0	0	200	903	0	0	0	0	0	0	0	603	903	0
409	3	0	0	0	0	0	0	200	300	0	0	0	0	0	0	0	200	903	0	0	0	0	0	0	0	603	903	0
409	4	0	0	0	0	0	0	200	300	0	0	0	0	0	0	0	200	903	0	0	0	0	0	0	0	603	903	0
409	5	0	0	0	0	0	0	200	300	0	0	0	0	0	0	0	200	903	0	0	0	0	0	0	0	603	903	0
409	6	0	0	0	0	0	0	200	300	0	0	0	0	0	0	0	200	903	0	0	0	0	0	0	0	603	903	0
409	7	0	0	0	0	0	0	200	300	0	0	0	0	0	0	0	200	903	0	0	0	0	0	0	0	603	903	0
409	8	0	0	0	0	0	0	200	300	0	0	0	0	0	0	0	200	903	0	0	0	0	0	0	0	603	903	0
409	9	0	0	0	0	0	0	200	300	0	0	0	0	0	0	0	200	903	0	0	0	0	0	0	0	603	903	0
410	0	0	0	0	0	0	0	200	300	0	0	0	0	0	0	0	200	903	0	0	0	0	0	0	0	603	903	0
410	1	0	0	0	0	0	0	200	300	0	0	0	0	0	0	0	200	903	0	0	0	0	0	0	0	603	903	0
410	2	0	0	0	0	0	0	200	300	0	0	0	0	0	0	0	200	903	0	0	0	0	0	0	0	603	903	0
410	3	0	0	0	0	0	0	200	300	0	0	0	0	0	0	0	200	903	0	0	0	0	0	0	0	603	903	0
410	4	0	0	0	0	0	0	200	300	0	0	0	0	0	0	0	200	903	0	0	0	0	0	0	0	603	903	0
410	5	0	0	0	0	0	0	200	300	0	0	0	0	0	0	0	200	903	0	0	0	0	0	0	0	603	903	0
410	6	0	0	0	0	0	0	200	300	0	0	0	0	0	0	0	200	903	0	0	0	0	0	0	0	603	903	0
410	7	0	0	0	0	0	0	200	300	0	0	0	0	0	0	0	200	903	0	0	0	0	0	0	0	603	903	0
410	8	0	0	0	0	0	0	200	300	0	0	0	0	0	0	0	200	903	0	0	0	0	0	0	0	603	903	0
410	9	0	0	0	0	0	0	200	300	0	0	0	0	0	0	0	200	903	0	0	0	0	0	0	0	603	903	0
411	0	0	0	0	0	0	0	200	300	0	0	0	0	0	0	0	200	903	0	0	0	0	0	0	0	603	903	0
411	1	0	0	0	0	0	0	200	300	0	0	0	0	0	0	0	200	903	0	0	0	0	0	0	0	603	903	0
411	2	0	0	0	0	0	0	200	300	0	0	0	0	0	0	0	200	903	0	0	0	0	0	0	0	603	903	0
411	3	0	0	0	0	0	0	200	300	0	0	0	0	0	0	0	200	903	0	0	0	0	0	0	0	603	903	0
411	4	0	0	0	0	0	0	200	300	0	0	0	0	0	0	0	200	903	0	0	0	0	0	0	0	603	903	0
411	5	0	0	0	0	0	0	200	300	0	0	0	0	0	0	0	200	903	0	0	0	0	0	0	0	603	903	0
411	6	0	0	0	0	0	0	200	300	0	0	0	0	0	0	0	200	903	0	0	0	0	0	0	0	603	903	0
411	7	0	0	0	0	0	0	200	300	0	0	0	0	0	0	0	200	903	0	0	0	0	0	0	0	603	903	0
411	8	0	0	0	0	0	0	200	300	0	0	0	0	0	0	0	200	903	0	0	0	0	0	0	0	603	903	0
411	9	0	0	0	0	0	0	200	300	0	0	0	0	0	0	0	200	903	0	0	0	0	0	0	0	603	903	0
412	0	0	0	0	0	0	0	200	300	0	0	0	0	0	0	0	200	903	0	0	0	0	0	0	0	603	903	0
412	1	0	0	0	0	0	0	200	300	0	0	0	0	0	0	0	200	903	0	0	0	0	0	0	0	603	903	0
412	2	0	0	0	0	0	0	200	300	0	0	0	0	0	0	0	200	903	0	0	0	0	0	0	0	603	903	0
412	3	0	0	0	0	0	0	200	300	0	0	0	0	0	0	0	200	903	0	0	0	0	0	0	0	603	903	0
412	4	0	0	0	0	0	0	200	300	0	0	0	0	0	0	0	200	903	0	0	0	0	0	0	0	603	903	0
412	5	0	0	0	0	0	0	200	300	0	0	0	0	0	0	0	200	903	0	0	0	0	0	0	0	603	903	0
412	6	0	0	0	0	0	0	200	300	0	0	0	0	0	0	0	200	903	0	0	0	0	0	0	0	603	903	0
412	7	0	0	0	0	0	0	200	300	0	0	0	0	0	0	0	200	903	0	0	0	0	0	0	0	603	903	0
412	8	0	0	0	0	0	0	200	300	0	0	0	0	0	0	0	200	903	0	0	0	0	0	0	0	603	903	0
412	9	0	0	0	0	0	0	200	300	0	0	0	0	0	0	0	200	903	0	0	0	0	0	0	0	603	903	0
413	0	0	0	0	0	0	0	200	300	0	0	0	0	0	0	0	200	903	0	0	0	0	0	0	0	603	903	0
413	1	0	0	0	0	0	0	200	300	0	0	0	0	0	0	0	200	903	0	0	0	0	0	0	0	603	903	0
413	2	0	0	0	0	0	0	200	300	0	0	0	0	0	0	0	200	903	0	0	0	0	0	0	0	603	903	0
413	3	0	0	0	0	0	0	200	300	0	0	0	0	0	0	0	200	903	0	0	0	0	0	0	0	603	903	0
413	4	0	0	0	0	0	0	200	300	0	0	0	0	0	0	0	200	903	0	0	0	0	0	0	0	603	903	0
413	5	0	0	0	0	0	0	200	300	0	0	0	0	0	0	0	200	903	0	0	0	0	0	0	0	603	903	0
413	6	0	0	0	0	0	0	200	300	0	0	0	0	0	0	0	200	903	0	0	0	0	0	0	0	603	903	0
413	7	0	0	0	0	0	0	200	300	0	0	0	0	0	0	0	200	903	0	0	0	0	0	0	0	603	903	0
413	8	0	0	0	0	0	0	200	300	0	0	0	0	0	0	0	200	903	0	0	0	0	0	0	0	603	903	0
413	9	0	0	0	0	0	0	200	300	0	0	0	0	0	0	0	200	903	0	0	0	0	0	0	0	603	903	0
414	0	0	0	0	0	0	0	200	300	0	0	0	0	0	0	0	200	903	0	0	0	0	0	0	0	603	903	0
414	1	0	0	0	0	0	0	200	300	0	0	0	0	0	0	0	200	903	0	0	0	0	0	0	0	603	903	0
414	2	0	0	0	0	0	0	200	300	0	0	0	0	0	0	0	200	903	0	0	0	0	0	0	0	603	903	0
414	3	0	0	0	0	0	0	200	300	0	0	0	0	0	0	0	200	903	0	0	0	0	0	0	0	603	903	0
414	4	0	0	0	0	0	0	200	300	0	0	0	0	0	0	0	200	903	0	0	0	0	0	0	0	603	903	0
414	5	0	0	0	0	0	0	200	300	0	0	0	0	0	0	0	200	903	0	0	0	0	0	0	0	603	903	0
414	6	0	0	0	0	0	0	200	300	0	0	0	0	0	0	0	200	903	0	0	0	0	0	0	0	603	903	0
414	7	0	0	0	0	0	0	200	300	0	0	0	0	0	0	0	200	903	0	0	0	0	0	0	0	603	903	0
414	8	0	0	0	0	0	0	200	300	0	0	0	0	0	0	0	200	903	0	0	0	0	0	0	0	603	903	0
414	9	0	0	0	0	0	0	200	300	0	0	0	0	0	0	0	200	903	0	0	0	0	0	0	0	603	903	0
415	0	0	0	0	0	0	0	200	300	0	0	0	0	0	0	0	200	903	0	0	0	0	0	0	0	603	903	0
415	1	0	0	0	0	0	0	200	300	0	0	0	0	0	0	0	200	903	0	0	0	0	0	0	0	603	903	0
415	2	0	0	0	0	0	0	200	300	0	0	0	0	0	0	0	200	903	0	0	0	0	0	0	0	603	903	0
415	3	0	0	0	0	0	0	200	300	0	0	0	0	0	0	0	200	903	0	0	0	0	0	0	0	603	903	0
415	4	0	0	0	0	0	0	200	300	0	0	0	0	0	0	0	200	903	0	0	0	0	0	0	0	603	903	0
415	5	0	0	0	0	0	0	200	300	0	0	0	0	0	0	0	200	903	0	0	0	0	0	0	0	603	903	0
415	6	0	0	0	0	0	0	200	300	0	0	0	0	0	0	0	200	903	0	0	0	0	0	0	0	603	903	0
415	7	0	0	0	0	0	0	200	300	0	0	0	0	0	0	0	200	903	0	0	0	0	0	0	0	603	903	0
415	8	0	0	0	0	0	0	200	300	0	0	0	0	0	0	0	200	903	0	0	0	0	0	0	0	603	903	0
415	9	0	0	0	0	0	0	200	300	0	0	0	0	0	0	0	200	903	0	0	0	0	0	0	0	603	903	0
416	0	0	0	0	0	0	0	200	300	0	0	0	0	0	0	0	200	903	0	0	0	0	0	0	0	603	903	0
416	1	0	0	0	0	0	0	200	300	0	0	0	0	0	0	0	200	903	0	0	0	0	0	0	0	603	903	0
416	2	0	0	0	0	0	0	200	300	0	0	0	0	0	0	0	200	903	0	0	0	0	0	0	0	603	903	0
416	3	0	0	0	0	0	0	200	300	0	0	0	0	0	0	0	200	903	0	0	0	0	0	0	0	603	903	0
416	4	0	0	0	0	0	0	200	300	0	0	0	0	0	0	0	200	903	0	0	0	0	0	0	0	603	903	0
416	5	0	0	0	0	0	0	200	300	0	0	0	0	0	0	0	200	903	0	0	0	0	0	0	0	603	903	0
416	6	0	0	0	0	0	0	200	300	0	0	0	0	0	0	0	200	903	0	0	0	0	0	0	0	603	903	0
416	7	0	0	0	0	0	0	200	300	0	0	0	0	0	0	0	200	903	0	0	0	0	0	0	0	603	903	0
416	8	0	0	0	0	0	0	200	300	0	0	0	0	0	0	0	200	903	0	0	0	0	0	0	0	603	903	0
416	9	0	0	0	0	0	0	200	300	0	0	0	0	0	0	0	200	903	0	0	0	0	0	0	0	603	903	0
417	0	0	0	0	0	0	0	200	300	0	0	0	0	0	0	0	200	903	0	0	0	0	0	0	0	603	903	0
417	1	0	0	0	0	0	0	200	300	0	0	0	0	0	0	0	200	903	0	0	0	0	0	0	0	603	903	0
417	2	0	0	0	0	0	0	200	300	0	0	0	0	0	0	0	200	903	0	0	0	0	0	0	0	603	903	0
417	3	0	0	0	0	0	0	200	300	0	0	0	0	0	0	0	200	903	0	0	0	0	0	0	0	603	903	0
417	4	0	0	0	0	0	0	200	300	0	0	0	0	0	0	0	200	903	0	0	0	0	0	0	0	603	903	0
417	5	0	0	0	0	0	0	200	300	0	0	0	0	0	0	0	200	903	0	0	0	0	0	0	0	603	903	0
417	6	0	0	0	0	0	0	200	300	0	0	0	0	0	0	0	200	903	0	0	0	0	0	0	0	603	903	0
417	7	0	0	0	0	0	0	200	300	0	0	0	0	0	0	0	200	903	0	0	0	0	0	0	0	603	903	0
417	8	0	0	0	0	0	0	200	300	0	0	0	0	0	0	0	200	903	0	0	0	0	0	0	0	603	903	0
417	9	0	0	0	0	0	0	200	300	0	0	0	0	0	0	0	200	903	0	0	0	0	0	0	0	603	903	0
418	0	0	0	0	0	0	0	200	300	0	0	0	0	0	0	0	200	903	0	0	0	0	0	0	0	603	903	0
418	1	0	0	0	0	0	0	200	300	0	0	0	0	0	0	0	200	903	0	0	0	0	0	0	0	603	903	0
418	2	0	0	0	0	0	0	200	300	0	0	0	0	0	0	0	200	903	0	0	0	0	0	0	0	603	903	0
418	3	0	0	0	0	0	0	200	300	0	0	0	0	0	0	0	200	903	0	0	0	0	0	0	0	603	903	0
418	4	0	0	0	0	0	0	200	300	0	0	0	0	0	0	0	200	903	0	0	0	0	0	0	0	603	903	0
418	5	0	0	0	0	0	0	200	300	0	0	0	0	0	0	0	200	903	0	0	0	0	0	0	0	603	903	0
418	6	0	0	0	0	0	0	200	300	0	0	0	0	0	0	0	200	903	0	0	0	0	0	0	0	603	903	0
418	7	0	0	0	0	0	0	200	300	0	0	0	0	0	0	0	200	903	0	0	0	0	0	0	0	603	903	0
418	8	0	0	0	0	0	0	200	300	0	0	0	0	0	0	0	200	903	0	0	0	0	0	0	0	603	903	0
418	9	0	0	0	0	0	0	200	300	0	0	0	0	0	0	0	200	903	0	0	0	0	0	0	0	603	903	0
419	0	0	0	0	0	0	0	200	300	0	0	0	0	0	0	0	200	903	0	0	0	0	0	0	0	603	903	0
419	1	0	0	0	0	0	0	200	300	0	0	0	0	0	0	0	200	903	0	0	0	0	0	0	0	603	903	0
419	2	0	0	0	0	0	0	200	300	0	0	0	0	0	0	0	200	903	0	0	0	0	0	0	0	603	903	0
419	3	0	0	0	0	0	0	200	300	0	0	0	0	0	0	0	200	903	0	0	0	0	0	0	0	603	903	0
419	4	0	0	0	0	0	0	200	300	0	0	0	0	0	0	0	200	903	0	0	0	0	0	0	0	603	903	0
419	5	0	0	0	0	0	0	200	300	0	0	0	0	0	0	0	200	903	0	0	0	0	0	0	0	603	903	0
419	6	0	0	0	0	0	0	200	300	0	0	0	0	0	0	0	200	903	0	0	0	0	0	0	0	603	903	0
419	7	0	0	0	0	0	0	200	300	0	0	0	0	0	0	0	200	903	0	0	0	0	0	0	0	603	903	0
419	8	0	0	0	0	0	0	200	300	0	0	0	0	0	0	0	200	903	0	0	0	0	0	0	0	603	903	0
419	9	0	0	0	0	0	0	200	300	0	0	0	0	0	0	0	200	903	0	0	0	0	0	0	0	603	903	0
420	0	0	0	0	0	0	0	200	300	0	0	0	0	0	0	0	200	903	0	0	0	0	0	0	0	603	903	0
420	1	0	0	0	0	0	0	200	300	0	0	0	0	0	0	0	200	903	0	0	0	0	0	0	0	603	903	0
420	2	0	0	0	0	0	0	200	300	0	0	0	0	0	0	0	200	903	0	0	0	0	0	0	0	603	903	0
420	3	0	0	0	0	0	0	200	300	0	0	0	0	0	0	0	200	903	0	0	0	0	0	0	0	603	903	0
420	4	0	0	0	0	0	0	200	300	0	0	0	0	0	0	0	200	903	0	0	0	0	0	0	0	603	903	0
420	5	0	0	0	0	0	0	200	300	0	0	0	0	0	0	0	200	903	0	0	0	0	0	0	0	603	903	0
420	6	0	0	0	0	0	0	200	300	0	0	0	0	0	0	0	200	903	0	0	0	0	0	0	0	603	903	0
420	7	0	0	0	0	0	0	200	300	0	0	0	0	0	0	0	200	903	0	0	0	0	0	0	0	603	903	0
420	8	0	0	0	0	0	0	200	300	0	0	0	0	0	0	0	200	903	0	0	0	0	0	0	0	603	903	0
420	9	0	0	0	0	0	0	200	300	0	0	0	0	0	0	0	200	903	0	0	0	0	0	0	0	603	903	0
421	0	0	0	0	0	0	0	200	300	0	0	0	0	0	0	0	200	903	0	0	0	0	0	0	0	603	903	0
421	1	0	0	0	0	0	0	200	300	0	0	0	0	0	0	0	200	903	0	0	0	0	0	0	0	603	903	0
421	2	0	0	0	0	0	0	200	300	0	0	0	0	0	0	0	200	903	0	0	0	0	0	0	0	603	903	0
421	3	0	0	0	0	0	0	200	300	0	0	0	0	0	0	0	200	903	0	0	0	0	0	0	0	603	903	0
421	4	0	0	0	0	0	0	200	300	0	0	0	0	0	0	0	200	903	0	0	0	0	0	0	0	603	903	0
421	5	0	0	0	0	0	0	200	300	0	0	0	0	0	0	0	200	903	0	0	0	0	0	0	0	603	903	0
421	6	0	0	0	0	0	0	200	300	0	0	0	0	0	0	0	200	903	0	0	0	0	0	0	0	603	903	0
421	7	0	0	0	0	0	0	200	300	0	0	0	0	0	0	0	200	903	0	0	0	0	0	0	0	603	903	0
421	8	0	0	0	0	0	0	200	300	0	0	0	0	0	0	0	200	903	0	0	0	0	0	0	0	603	903	0
421	9	0	0	0	0	0	0	200	300	0	0	0	0	0	0	0	200	903	0	0	0	0	0	0	0	603	903	0
422	0	0	0	0	0	0	0	200	300	0	0	0	0	0	0	0	200	903	0	0	0	0	0	0	0	603	903	0
422	1	0	0	0	0	0	0	200	300	0	0	0	0	0	0	0	200	903	0	0	0	0	0	0	0	603	903	0
422	2	0	0	0	0	0	0	200	300	0	0	0	0	0	0	0	200	903	0	0	0	0	0	0	0	603	903	0
422	3	0	0	0	0	0	0	200	300	0	0	0	0	0	0	0	200	903	0	0	0	0	0	0	0	603	903	0
422	4	0	0	0	0	0	0	200	300	0	0	0	0	0	0	0	200	903	0	0	0	0	0	0	0	603	903	0
422	5	0	0	0	0	0	0	200	300	0	0	0	0	0	0	0	200	903	0	0	0	0	0	0	0	603	903	0
422	6	0	0	0	0	0	0	200	300	0	0	0	0	0	0	0	200	903	0	0	0	0	0	0	0	603	903	0
422	7	0	0	0	0	0	0	200	300	0	0	0	0	0	0	0	200	903	0	0	0	0	0	0	0	603	903	0
422	8	0	0	0	0	0	0	200	300	0	0	0	0	0	0	0	200	903	0	0	0	0	0	0	0	603	903	0
422	9	0	0	0	0	0	0	200	300	0	0	0	0	0	0	0	200	903	0	0	0	0	0	0	0	603	903	0
423	0	0	0	0	0	0	0	200	300	0	0	0	0	0	0	0	200	903	0	0	0	0	0	0	0	603	903	0
423	1	0	0	0	0	0	0	200	300	0	0	0	0	0	0	0	200	903	0	0	0	0	0	0	0	603	903	0
423	2	0	0	0	0	0	0	200	300	0	0	0	0	0	0	0	200	903	0	0	0	0	0	0	0	603	903	0
423	3	0	0	0	0	0	0	200	300	0	0	0	0	0	0	0	200	903	0	0	0	0	0	0	0	603	903	0
423	4	0	0	0	0	0	0	200	300	0	0	0	0	0	0	0	200	903	0	0	0	0	0	0	0	603	903	0
423	5	0	0	0	0	0	0	200	300	0	0	0	0	0	0	0	200	903	0	0	0	0	0	0	0	603	903	0
423	6	0	0	0	0	0	0	200	300	0	0	0	0	0	0	0	200	903	0	0	0	0	0	0	0	603	903	0
423	7	0	0	0	0	0	0	200	300	0	0	0	0	0	0	0	200	903	0	0	0	0	0	0	0	603	903	0
423	8	0	0	0	0	0	0	200	300	0	0	0	0	0	0	0	200	903	0	0	0	0	0	0	0	603	903	0
423	9	0	0	0	0	0	0	200	300	0	0	0	0	0	0	0	200	903	0	0	0	0	0	0	0	603	903	0
424	0	0	0	0	0	0	0	200	300	0	0	0	0	0	0	0	200	903	0	0	0	0	0	0	0	603	903	0
424	1	0	0	0	0	0	0	200	300	0	0	0	0	0	0	0	200	903	0	0	0	0	0	0	0	603	903	0
424	2	0	0	0	0	0	0	200	300	0	0	0	0	0	0	0	200	903	0	0	0	0	0	0	0	603	903	0
424	3	0	0	0	0	0	0	200	300	0	0	0	0	0	0	0	200	903	0	0	0	0	0	0	0	603	903	0
424	4	0	0	0	0	0	0	200	300	0	0	0	0	0	0	0	200	903	0	0	0	0	0	0	0	603	903	0
424	5	0	0	0	0	0	0	200	300	0	0	0	0	0	0	0	200	903	0	0	0	0	0	0	0	603	903	0
424	6	0	0	0	0	0	0	200	300	0	0	0	0	0	0	0	200	903	0	0	0	0	0	0	0	603	903	0
424	7	0	0	0	0	0	0	200	300	0	0	0	0	0	0	0	200	903	0	0	0	0	0	0	0	603	903	0
424	8	0	0	0	0	0	0	200	300	0	0	0	0	0	0	0	200	903	0	0	0	0	0	0	0	603	903	0
424	9	0	0	0	0	0	0	200	300	0	0	0	0	0	0	0	200	903	0	0	0	0	0	0	0	603	903	0
425	0	0	0	0	0	0	0	200	300	0	0	0	0	0	0	0	200	903	0	0	0	0	0	0	0	603	903	0
425	1	0	0	0	0	0	0	200	300	0	0	0	0	0	0	0	200	903	0	0	0	0	0	0	0	603	903	0
425	2	0	0	0	0	0	0	200	300	0	0	0	0	0	0	0	200	903	0	0	0	0	0	0	0	603	903	0
425	3	0	0	0	0	0	0	200	300	0	0	0	0	0	0	0	200	903	0	0	0	0	0	0	0	603	903	0
425	4	0	0	0	0	0	0	200	300	0	0	0	0	0	0	0	200	903	0	0	0	0	0	0	0	603	903	0
425	5	0	0	0	0	0	0	200	300	0	0	0	0	0	0	0	200	903	0	0	0	0	0	0	0	603	903	0
425	6	0	0	0	0	0	0	200	300	0	0	0	0	0	0	0	200	903	0	0	0	0	0	0	0	603	903	0
425	7	0	0	0	0	0	0	200	300	0	0	0	0	0	0	0	200	903	0	0	0	0	0	0	0	603	903	0
425	8	0	0	0	0	0	0	200	300	0	0	0	0	0	0	0	200	903	0	0	0	0	0	0	0	603	903	0
425	9	0	0	0	0	0	0	200	300	0	0	0	0	0	0	0	200	903	0	0	0	0	0	0	0	603	903	0
426	0	0	0	0	0	0	0	200	300	0	0	0	0	0	0	0	200	903	0	0	0	0	0	0	0	603	903	0
426	1	0	0	0	0	0	0	200	300	0	0	0	0	0	0	0	200	903	0	0	0	0	0	0	0	603	903	0
426	2	0	0	0	0	0	0	200	300	0	0	0	0	0	0	0	200	903	0	0	0	0	0	0	0	603	903	0
426	3	0	0	0	0	0	0	200	300	0	0	0	0	0	0	0	200	903	0	0	0	0	0	0	0	603	903	0
426	4	0	0	0	0	0	0	200	300	0	0	0	0	0	0	0	200	903	0	0	0	0	0	0	0	603	903	0
426	5	0	0	0	0	0	0	200	300	0	0	0	0	0	0	0	200	903	0	0	0	0	0	0	0	603	903	0
426	6	0	0	0	0	0	0	200	300	0	0	0	0	0	0	0	200	903	0	0	0	0	0	0	0	603	903	0
426	7	0	0	0	0	0	0	200	300	0	0	0	0	0	0	0	200	903	0	0	0	0	0	0	0	603	903	0
426	8	0	0	0	0	0	0	200	300	0	0	0	0	0	0	0	200	903	0	0	0	0	0	0	0	603	903	0
426	9	0	0	0	0	0	0	200	300	0	0	0	0	0	0	0	200	903	0	0	0	0	0	0	0	603	903	0
427	0	0	0	0	0	0	0	200	300	0	0	0	0	0	0	0	200	903	0	0	0	0	0	0	0	603	903	0
427	1	0	0	0	0	0	0	200	300	0	0	0	0	0	0	0	200	903	0	0	0	0	0	0	0	603	903	0
427	2	0	0	0	0	0	0	200	300	0	0	0	0	0	0	0	200	903	0	0	0	0	0	0	0	603	903	0
427	3	0	0	0	0	0	0	200	300	0	0	0	0	0	0	0	200	903	0	0	0	0	0	0	0	603	903	0
427	4	0	0	0	0	0	0	200	300	0	0	0	0	0	0	0	200	903	0	0	0	0	0	0	0	603	903	0
427	5	0	0	0	0	0	0	200	300	0	0	0	0	0	0	0	200	903	0	0	0	0	0	0	0	603	903	0
427	6	0	0	0	0	0	0	200	300	0	0	0	0	0	0	0	200	903	0	0	0	0	0	0	0	603	903	0
427	7	0	0	0	0	0	0	200	300	0	0	0	0	0	0	0	200	903	0	0	0	0	0	0	0	603	903	0
427	8	0	0	0	0	0	0	200	300	0	0	0	0	0	0	0	200	903	0	0	0	0	0	0	0	603	903	0
427	9	0	0	0	0	0	0	200	300	0	0	0	0	0	0	0	200	903	0	0	0	0	0	0	0	603	903	0
428	0	0	0	0	0	0	0	200	300	0	0	0	0	0	0	0	200	903	0	0	0	0	0	0	0	603	903	0
428	1	0	0	0	0	0	0	200	300	0	0	0	0	0	0	0	200	903	0	0	0	0	0	0	0	603	903	0
428	2	0	0	0	0	0	0	200	300	0	0	0	0	0	0	0	200	903	0	0	0	0	0	0	0	603	903	0
428	3	0	0	0	0	0	0	200	300	0	0	0	0	0	0	0	200	903	0	0	0	0	0	0	0	603	903	0
428	4	0	0	0	0	0	0	200	300	0	0	0	0	0	0	0	200	903	0	0	0	0	0	0	0	603	903	0
428	5	0	0	0	0	0	0	200	300	0	0	0	0	0	0	0	200	903	0	0	0	0	0	0	0	603	903	0
428	6	0	0	0	0	0	0	200	300	0	0	0	0	0	0	0	200	903	0	0	0	0	0	0	0	603	903	0
428	7	0	0	0	0	0	0	200	300	0	0	0	0	0	0	0	200	903	0	0	0	0	0	0	0	603	903	0
428	8	0	0	0	0	0	0	200	300	0	0	0	0	0	0	0	200	903	0	0	0	0	0	0	0	603	903	0
428	9	0	0	0	0	0	0	200	300	0	0	0	0	0	0	0	200	903	0	0	0	0	0	0	0	603	903	0
429	0	0	0	0	0	0	0	200	300	0	0	0	0	0	0	0	200	903	0	0	0	0	0	0	0	603	903	0
429	1	0	0	0	0	0	0	200	300	0	0	0	0	0	0	0	200	903	0	0	0	0	0	0	0	603	903	0
429	2	0	0	0	0	0	0	200	300	0	0	0	0	0	0	0	200	903	0	0	0	0	0	0	0	603	903	0
429	3	0	0	0	0	0	0	200	300	0	0	0	0	0	0	0	200	903	0	0	0	0	0	0	0	603	903	0
429	4	0	0	0	0	0	0	200	300	0	0	0	0	0	0	0	200	903	0	0	0	0	0	0	0	603	903	0
429	5	0	0	0	0	0	0	200	300	0	0	0	0	0	0	0	200	903	0	0	0	0	0	0	0	603	903	0
429	6	0	0	0	0	0	0	200	300	0	0	0	0	0	0	0	200	903	0	0	0	0	0	0	0	603	903	0
429	7	0	0	0	0	0	0	200	300	0	0	0	0	0	0	0	200	903	0	0	0	0	0	0	0	603	903	0
429	8	0	0	0	0	0	0	200	300	0	0	0	0	0	0	0	200	903	0	0	0	0	0	0	0	603	903	0
429	9	0	0	0	0	0	0	200	300	0	0	0	0	0	0	0	200	903	0	0	0	0	0	0	0	603	903	0
430	0	0	0	0	0	0	0	200	300	0	0	0	0	0	0	0	200	903	0	0	0	0	0	0	0	603	903	0
430	1	0	0	0	0	0	0	200	300	0	0	0	0	0	0	0	200	903	0	0	0	0	0	0	0	603	903	0
430	2	0	0	0	0	0	0	200	300	0	0	0	0	0	0	0	200	903	0	0	0	0	0	0	0	603	903	0
430	3	0	0	0	0	0	0	200	300	0	0	0	0	0	0	0	200	903	0	0	0	0	0	0	0	603	903	0
430	4	0	0	0	0	0	0	200	300	0	0	0	0	0	0	0	200	903	0	0	0	0	0	0	0	603	903	0
430	5	0	0	0	0	0	0	200	300	0	0	0	0	0	0	0	200	903	0	0	0	0	0	0	0	603	903	0
430	6	0	0	0	0	0	0	200	300	0	0	0	0	0	0	0	200	903	0	0	0	0	0	0	0	603	903	0
430	7	0	0	0	0	0	0	200	300	0	0	0	0	0	0	0	200	903	0	0	0	0	0	0	0	603	903	0
430	8	0	0	0	0	0	0	200	300	0	0	0	0	0	0	0	200	903	0	0	0	0	0	0	0	603	903	0
430	9	0	0	0	0	0	0	200	300	0	0	0	0	0	0	0	200	903	0	0	0	0	0	0	0	603	903	0
431	0	0	0	0	0	0	0	200	300	0	0	0	0	0	0	0	200	903	0	0	0	0	0	0	0	603	903	0
431	1	0	0	0	0	0	0	200	300	0	0	0	0	0	0	0	200	903	0	0	0	0	0	0	0	603	903	0
431	2	0	0	0	0	0	0	200	300	0	0	0	0	0	0	0	200	903	0	0	0	0	0	0	0	603	903	0
431	3	0	0	0	0	0	0	200	300	0	0	0	0	0	0	0	200	903	0	0	0	0	0	0	0	603	903	0
431	4	0	0	0	0	0	0	200	300	0	0	0	0	0	0	0	200	903	0	0	0	0	0	0	0	603	903	0
431	5	0	0	0	0	0	0	200	300	0	0	0	0	0	0	0	200	903	0	0	0	0	0	0	0	603	903	0
431	6	0	0	0	0	0	0	200	300	0	0	0	0	0	0	0	200	903	0	0	0	0	0	0	0	603	903	0
431	7	0	0	0	0	0	0	200	300	0	0	0	0	0	0	0	200	903	0	0	0	0	0	0	0	603	903	0
431	8	0	0	0	0	0	0	200	300	0	0	0	0	0	0	0	200	903	0	0	0	0	0	0	0	603	903	0
431	9	0	0	0	0	0	0	200	300	0	0	0	0	0	0	0	200	903	0	0	0	0	0	0	0	603	903	0
432	0	0	0	0	0	0	0	200	300	0	0	0	0	0	0	0	200	903	0	0	0	0	0	0	0	603	903	0
432	1	0	0	0	0	0	0	200	300	0	0	0	0	0	0	0	200	903	0	0	0	0	0	0	0	603	903	0
432	2	0	0	0	0	0	0	200	300	0	0	0	0	0	0	0	200	903	0	0	0	0	0	0	0	603	903	0
432	3	0	0	0	0	0	0	200	300	0	0	0	0	0	0	0	200	903	0	0	0	0	0	0	0	603	903	0
432	4	0	0	0	0	0	0	200	300	0	0	0	0	0	0	0	200	903	0	0	0	0	0	0	0	603	903	0
432	5	0	0	0	0	0	0	200	300	0	0	0	0	0	0	0	200	903	0	0	0	0	0	0	0	603	903	0
432	6	0	0	0	0	0	0	200	300	0	0	0	0	0	0	0	200	903	0	0	0	0	0	0	0	603	903	0
432	7	0	0	0	0	0	0	200	300	0	0	0	0	0	0	0	200	903	0	0	0	0	0	0	0	603	903	0
432	8	0	0	0	0	0	0	200	300	0	0	0	0	0	0	0	200	903	0	0	0	0	0	0	0	603	903	0
432	9	0	0	0	0	0	0	200	300	0	0	0	0	0	0	0	200	903	0	0	0	0	0	0	0	603	903	0
433	0	0	0	0	0	0	0	200	300	0	0	0	0	0	0	0	200	903	0	0	0	0	0	0	0	603	903	0
433	1	0	0	0	0	0	0	200	300	0	0	0	0	0	0	0	200	903	0	0	0	0	0	0	0	603	903	0
433	2	0	0	0	0	0	0	200	300	0	0	0	0	0	0	0	200	903	0	0	0	0	0	0	0	603	903	0
433	3	0	0	0	0	0	0	200	300	0	0	0	0	0	0	0	200	903	0	0	0	0	0	0	0	603	903	0
433	4	0	0	0	0	0	0	200	300	0	0	0	0	0	0	0	200	903	0	0	0	0	0	0	0	603	903	0
433	5	0	0	0	0	0	0	200	300	0	0	0	0	0	0	0	200	903	0	0	0	0	0	0	0	603	903	0
433	6	0	0	0	0	0	0	200	300	0	0	0	0	0	0	0	200	903	0	0	0	0	0	0	0	603	903	0
433	7	0	0	0	0	0	0	200	300	0	0	0	0	0	0	0	200	903	0	0	0	0	0	0	0	603	903	0
433	8	0	0	0	0	0	0	200	300	0	0	0	0	0	0	0	200	903	0	0	0	0	0	0	0	603	903	0
433	9	0	0	0	0	0	0	200	300	0	0	0	0	0	0	0	200	903	0	0	0	0	0	0	0	603	903	0
434	0	0	0	0	0	0	0	200	300	0	0	0	0	0	0	0	200	903	0	0	0	0	0	0	0	603	903	0
434	1	0	0	0	0	0	0	200	300	0	0	0	0	0	0	0	200	903	0	0	0	0	0	0	0	603	903	0
434	2	0	0	0	0	0	0	200	300	0	0	0	0	0	0	0	200	903	0	0	0	0	0	0	0	603	903	0
434	3	0	0	0	0	0	0	200	300	0	0	0	0	0	0	0	200	903	0	0	0	0	0	0	0	603	903	0
434	4	0	0	0	0	0	0	200	300	0	0	0	0	0	0	0	200	903	0	0	0	0	0	0	0	603	903	0
434	5	0	0	0	0	0	0	200	300	0	0	0	0	0	0	0	200	903	0	0	0	0	0	0	0	603	903	0
434	6	0	0	0	0	0	0	200	300	0	0	0	0	0	0	0	200	903	0	0	0	0	0	0	0	603	903	0
434	7	0	0	0	0	0	0	200	300	0	0	0	0	0	0	0	200	903	0	0	0	0	0	0	0	603	903	0
434	8	0	0	0	0	0	0	200	300	0	0	0	0	0	0	0	200	903	0	0	0	0	0	0	0	603	903	0
434	9	0	0	0	0	0	0	200	300	0	0	0	0	0	0	0	200	903	0	0	0	0	0	0	0	603	903	0
435	0	0	0	0	0	0	0	200	300	0	0	0	0	0	0	0	200	903	0	0	0	0	0	0	0	603	903	0
435	1	0	0	0	0	0	0	200	300	0	0	0	0	0	0	0	200	903	0	0	0	0	0	0	0	603	903	0
435	2	0	0	0	0	0	0	200	300	0	0	0	0	0	0	0	200	903	0	0	0	0	0	0	0	603	903	0
435	3	0	0	0	0	0	0	200	300	0	0	0	0	0	0	0	200	903	0	0	0	0	0	0	0	603	903	0
435	4	0	0	0	0	0	0	200	300	0	0	0	0	0	0	0	200	903	0	0	0	0	0	0	0	603	903	0
435	5	0	0	0	0	0	0	200	300	0	0	0	0	0	0	0	200	903	0	0	0	0	0	0	0	603	903	0
435	6	0	0	0	0	0	0	200	300	0	0	0	0	0	0	0	200	903	0	0	0	0	0	0	0	603	903	0
435	7	0	0	0	0	0	0	200	300	0	0	0	0	0	0	0	200	903	0	0	0	0	0	0	0	603	903	0
435	8	0	0	0	0	0	0	200	300	0	0	0	0	0	0	0	200	903	0	0	0	0	0	0	0	603	903	0
435	9	0	0	0	0	0	0	200	300	0	0	0	0	0	0	0	200	903	0	0	0	0	0	0	0	603	903	0
436	0	0	0	0	0	0	0	200	300	0	0	0	0	0	0	0	200	903	0	0	0	0	0	0	0	603	903	0
436	1	0	0	0	0	0	0	200	300	0	0	0	0	0	0	0	200	903	0	0	0	0	0	0	0	603	903	0
436	2	0	0	0	0	0	0	200	300	0	0	0	0	0	0	0	200	903	0	0	0	0	0	0	0	603	903	0
436	3	0	0	0	0	0	0	200	300	0	0	0	0	0	0	0	200	903	0	0	0	0	0	0	0	603	903	0
436	4	0	0	0	0	0	0	200	300	0	0	0	0	0	0	0	200	903	0	0	0	0	0	0	0	603	903	0
436	5	0	0	0	0	0	0	200	300	0	0	0	0	0	0	0	200	903	0	0	0	0	0	0	0	603	903	0
436	6	0	0	0	0	0	0	200	300	0	0	0	0	0	0	0	200	903	0	0	0	0	0	0	0	603	903	0
436	7	0	0	0	0	0	0	200	300	0	0	0	0	0	0	0	200	903	0	0	0	0	0	0	0	603	903	0
436	8	0	0	0	0	0	0	200	300	0	0	0	0	0	0	0	200	903	0	0	0	0	0	0	0	603	903	0
436	9	0	0	0	0	0	0	200	300	0	0	0	0	0	0	0	200	903	0	0	0	0	0	0	0	603	903	0
437	0	0	0	0	0	0	0	200	300	0	0	0	0	0	0	0	200	903	0	0	0	0	0	0	0	603	903	0
437	1	0	0	0	0	0	0	200	300	0	0	0	0	0	0	0	200	903	0	0	0	0	0	0	0	603	903	0
437	2	0	0	0	0	0	0	200	300	0	0	0	0	0	0	0	200	903	0	0	0	0	0	0	0	603	903	0
437	3	0	0	0	0	0	0	200	300	0	0	0	0	0	0	0	200	903	0	0	0	0	0	0	0	603	903	0
437	4	0	0	0	0	0	0	200	300	0	0	0	0	0	0	0	200	903	0	0	0	0	0	0	0	603	903	0
437	5	0	0	0	0	0	0	200	300	0	0	0	0	0	0	0	200	903	0	0	0	0	0	0	0	603	903	0
437	6	0	0	0	0	0	0	200	300	0	0	0	0	0	0	0	200	903	0	0	0	0	0	0	0	603	903	0
437	7	0	0	0	0	0	0	200	300	0	0	0	0	0	0	0	200	903	0	0	0	0	0	0	0	603	903	0
437	8	0	0	0	0	0	0	200	300	0	0	0	0	0	0	0	200	903	0	0	0	0	0	0	0	603	903	0
437	9	0	0	0	0	0	0	200	300	0	0	0	0	0	0	0	200	903	0	0	0	0	0	0	0	603	903	0
438	0	0	0	0	0	0	0	200	300	0	0	0	0	0	0	0	200	903	0	0	0	0	0	0	0	603	903	0
438	1	0	0	0	0	0	0	200	300	0	0	0	0	0	0	0	200	903	0	0	0	0	0	0	0	603	903	0
438	2	0	0	0	0	0	0	200	300	0	0	0	0	0	0	0	200	903	0	0	0	0	0	0	0	603	903	0
438	3	0	0	0	0	0	0	200	300	0	0	0	0	0	0	0	200	903	0	0	0	0	0	0	0	603	903	0
438	4	0	0	0	0	0	0	200	300	0	0	0	0	0	0	0	200	903	0	0	0	0	0	0	0	603	903	0
438	5	0	0	0	0	0	0	200	300	0	0	0	0	0	0	0	200	903	0	0	0	0	0	0	0	603	903	0
438	6	0	0	0	0	0	0	200	300	0	0	0	0	0	0	0	200	903	0	0	0	0	0	0	0	603	903	0
438	7	0	0	0	0	0	0	200	300	0	0	0	0	0	0	0	200	903	0	0	0	0	0	0	0	603	903	0
438	8	0	0	0	0	0	0	200	300	0	0	0	0	0	0	0	200	903	0	0	0	0	0	0	0	603	903	0
438	9	0	0	0	0	0	0	200	300	0	0	0	0	0	0	0	200	903	0	0	0	0	0	0	0	603	903	0
439	0	0	0	0	0	0	0	200	300	0	0	0	0	0	0	0	200	903	0	0	0	0	0	0	0	603	903	0
439	1	0	0	0	0	0	0	200	300	0	0	0	0	0	0	0	200	903	0	0	0	0	0	0	0	603	903	0
439	2	0	0	0	0	0	0	200	300	0	0	0	0	0	0	0	200	903	0	0	0	0	0	0	0	603	903	0
439	3	0	0	0	0	0	0	200	300	0	0	0	0	0	0	0	200	903	0	0	0	0	0	0	0	603	903	0
439	4	0	0	0	0	0	0	200	300	0	0	0	0	0	0	0	200	903	0	0	0	0	0	0	0	603	903	0
439	5	0	0	0	0	0	0	200	300	0	0	0	0	0	0	0	200	903	0	0	0	0	0	0	0	603	903	0
439	6	0	0	0	0	0	0	200	300	0	0	0	0	0	0	0	200	903	0	0	0	0	0	0	0	603	903	0
439	7	0	0	0	0	0	0	200	300	0	0	0	0	0	0	0	200	903	0	0	0	0	0	0	0	603	903	0
439	8	0	0	0	0	0	0	200	300	0	0	0	0	0	0	0	200	903	0	0	0	0	0	0	0	603	903	0
439	9	0	0	0	0	0	0	200	300	0	0	0	0	0	0	0	200	903	0	0	0	0	0	0	0	603	903	0
440	0	0	0	0	0	0	0	200	300	0	0	0	0	0	0	0	200	903	0	0	0	0	0	0	0	603	903	0
440	1	0	0	0	0	0	0	200	300	0	0	0	0	0	0	0	200	903	0	0	0	0	0	0	0	603	903	0
440	2	0	0	0	0	0	0	200	300	0	0	0	0	0	0	0	200	903	0	0	0	0	0	0	0	603	903	0
440	3	0	0	0	0	0	0	200	300	0	0	0	0	0	0	0	200	903	0	0	0	0	0	0	0	603	903	0
440	4	0	0	0	0	0	0	200	300	0	0	0	0	0	0	0	200	903	0	0	0	0	0	0	0	603	903	0
440	5	0	0	0	0	0	0	200	300	0	0	0	0	0	0	0	200	903	0	0	0	0	0	0	0	603	903	0
440	6	0	0	0	0	0	0	200	300	0	0	0	0	0	0	0	200	903	0	0	0	0	0	0	0	603	903	0
440	7	0	0	0	0	0	0	200	300	0	0	0	0	0	0	0	200	903	0	0	0	0	0	0	0	603	903	0
440	8	0	0	0	0	0	0	200	300	0	0	0	0	0	0	0	200	903	0	0	0	0	0	0	0	603	903	0
440	9	0	0	0	0	0	0	200	300	0	0	0	0	0	0	0	200	903	0	0	0	0	0	0	0	603	903	0
441	0	0	0	0	0	0	0	200	300	0	0	0	0	0	0	0	200	903	0	0	0	0	0	0	0	603	903	0
441	1	0	0	0	0	0	0	200	300	0	0	0	0	0	0	0	200	903	0	0	0	0	0	0	0	603	903	0
441	2	0	0	0	0	0	0	200	300	0	0	0	0	0	0	0	200	903	0	0	0	0	0	0	0	603	903	0
441	3	0	0	0	0	0	0	200	300	0	0	0	0	0	0	0	200	903	0	0	0	0	0	0	0	603	903	0
441	4	0	0	0	0	0	0	200	300	0	0	0	0	0	0	0	200	903	0	0	0	0	0	0	0	603	903	0
441	5	0	0	0	0	0	0	200	300	0	0	0	0	0	0	0	200	903	0	0	0	0	0	0	0	603	903	0
441	6	0	0	0	0	0	0	200	300	0	0	0	0	0	0	0	200	903	0	0	0	0	0	0	0	603	903	0
441	7	0	0	0	0	0	0	200	300	0	0	0	0	0	0	0	200	903	0	0	0	0	0	0	0	603	903	0
441	8	0	0	0	0	0	0	200	300	0	0	0	0	0	0	0	200	903	0	0	0	0	0	0	0	603	903	0
441	9	0	0	0	0	0	0	200	300	0	0	0	0	0	0	0	200	903	0	0	0	0	0	0	0	603	903	0
442	0	0	0	0	0	0	0	200	300	0	0	0	0	0	0	0	200	903	0	0	0	0	0	0	0	603	903	0
442	1	0	0	0	0	0	0	200	300	0	0	0	0	0	0	0	200	903	0	0	0	0	0	0	0	603	903	0
442	2	0	0	0	0	0	0	200	300	0	0	0	0	0	0	0	200	903	0	0	0	0	0	0	0	603	903	0
442	3	0	0	0	0	0	0	200	300	0	0	0	0	0	0	0	200	903	0	0	0	0	0	0	0	603	903	0
442	4	0	0	0	0	0	0	200	300	0	0	0	0	0	0	0	200	903	0	0	0	0	0	0	0	603	903	0
442	5	0	0	0	0	0	0	200	300	0	0	0	0	0	0	0	200	903	0	0	0	0	0	0	0	603	903	0
442	6	0	0	0	0	0	0	200	300	0	0	0	0	0	0	0	200	903	0	0	0	0	0	0	0	603	903	0
442	7	0	0	0	0	0	0	200	300	0	0	0	0	0	0	0	200	903	0	0	0	0	0	0	0	603	903	0
442	8	0	0	0	0	0	0	200	300	0	0	0	0	0	0	0	200	903	0	0	0	0	0	0	0	603	903	0
442	9	0	0	0	0	0	0	200	300	0	0	0	0	0	0	0	200	903	0	0	0	0	0	0	0	603	903	0
443	0	0	0	0	0	0	0	200	300	0	0	0	0	0	0	0	200	903	0	0	0	0	0	0	0	603	903	0
443	1	0	0	0	0	0	0	200	300	0	0	0	0	0	0	0	200	903	0	0	0	0	0	0	0	603	903	0
443	2	0	0	0	0	0	0	200	300	0	0	0	0	0	0	0	200	903	0	0	0	0	0	0	0	603	903	0
443	3	0	0	0	0	0	0	200	300	0	0	0	0	0	0	0	200	903	0	0	0	0	0	0	0	603	903	0
443	4	0	0	0	0	0	0	200	300	0	0	0	0	0	0	0	200	903	0	0	0	0	0	0	0	603	903	0
443	5	0	0	0	0	0	0	200	300	0	0	0	0	0	0	0	200	903	0	0	0	0	0	0	0	603	903	0
443	6	0	0	0	0	0	0	200	300	0	0	0	0	0	0	0	200	903	0	0	0	0	0	0	0	603	903	0
443	7	0	0	0	0	0	0	200	300	0	0	0	0	0	0	0	200	903	0	0	0	0	0	0	0	603	903	0
443	8	0	0	0	0	0	0	200	300	0	0	0	0	0	0	0	200	903	0	0	0	0	0	0	0	603	903	0
443	9	0	0	0	0	0	0	200	300	0	0	0	0	0	0	0	200	903	0	0	0	0	0	0	0	603	903	0
444	0	0	0	0	0	0	0	200	300	0	0	0	0	0	0	0	200	903	0	0	0	0	0	0	0	603	903	0
444	1	0	0	0	0	0	0	200	300	0	0	0	0	0	0	0	200	903	0	0	0	0	0	0	0	603	903	0
444	2	0	0	0	0	0	0	200	300	0	0	0	0	0	0	0	200	903	0	0	0	0	0	0	0	603	903	0
444	3	0	0	0	0	0	0	200	300	0	0	0	0	0	0	0	200	903	0	0	0	0	0	0	0	603	903	0
444	4	0	0	0	0	0	0	200	300	0	0	0	0	0	0	0	200	903	0	0	0	0	0	0	0	603	903	0
444	5	0	0	0	0	0	0	200	300	0	0	0	0	0	0	0	200	903	0	0	0	0	0	0	0	603	903	0
444	6	0	0	0	0	0	0	200	300	0	0	0	0	0	0	0	200	903	0	0	0	0	0	0	0	603	903	0
444	7	0	0	0	0	0	0	200	300	0	0	0	0	0	0	0	200	903	0	0	0	0	0	0	0	603	903	0
444	8	0	0	0	0	0	0	200	300	0	0	0	0	0	0	0	200	903	0	0	0	0	0	0	0	603	903	0
444	9	0	0	0	0	0	0	200	300	0	0	0	0	0	0	0	200	903	0	0	0	0	0	0	0	603	903	0
445	0	0	0	0	0	0	0	200	300	0	0	0	0	0	0	0	200	903	0	0	0	0	0	0	0	603	903	0
445	1	0	0	0	0	0	0	200	300	0	0	0	0	0	0	0	200	903	0	0	0	0	0	0	0	603	903	0
445	2	0	0	0	0	0	0	200	300	0	0	0	0	0	0	0	200	903	0	0	0	0	0	0	0	603	903	0
445	3	0	0	0	0	0	0	200	300	0	0	0	0	0	0	0	200	903	0	0	0	0	0	0	0	603	903	0
445	4	0	0	0	0	0	0	200	300	0	0	0	0	0	0	0	200	903	0	0	0	0	0	0	0	603	903	0
445	5	0	0	0	0	0	0	200	300	0	0	0	0	0	0	0	200	903	0	0	0	0	0	0	0	603	903	0
445	6	0	0	0	0	0	0	200	300	0	0	0	0	0	0	0	200	903	0	0	0	0	0	0	0	603	903	0
445	7	0	0	0	0	0	0	200	300	0	0	0	0	0	0	0	200	903	0	0	0	0	0	0	0	603	903	0
445	8	0	0	0	0	0	0	200	300	0	0	0	0	0	0	0	200	903	0	0	0	0	0	0	0	603	903	0
445	9	0	0	0	0	0	0	200	300	0	0	0	0	0	0	0	200	903	0	0	0	0	0	0	0	603	903	0
446	0	0	0	0	0	0	0	200	300	0	0	0	0	0	0	0	200	903	0	0	0	0	0	0	0	603	903	0
446	1	0	0	0	0	0	0	200	300	0	0	0	0	0	0	0	200	903	0	0	0	0	0	0	0	603	903	0
446	2	0	0	0	0	0	0	200	300	0	0	0	0	0	0	0	200	903	0	0	0	0	0	0	0	603	903	0
446	3	0	0	0	0	0	0	200	300	0	0	0	0	0	0	0	200	903	0	0	0	0	0	0	0	603	903	0
446	4	0	0	0	0	0	0	200	300	0	0	0	0	0	0	0	200	903	0	0	0	0	0	0	0	603	903	0
446	5	0	0	0	0	0	0	200	300	0	0	0	0	0	0	0	200	903	0	0	0	0	0	0	0	603	903	0
446	6	0	0	0	0	0	0	200	300	0	0	0	0	0	0	0	200	903	0	0	0	0	0	0	0	603	903	0
446	7	0	0	0	0	0	0	200	300	0	0	0	0	0	0	0	200	903	0	0	0	0	0	0	0	603	903	0
446	8	0	0	0	0	0	0	200	300	0	0	0	0	0	0	0	200	903	0	0	0	0	0	0	0	603	903	0
446	9	0	0	0	0	0	0	200	300	0	0	0	0	0	0	0	200	903	0	0	0	0	0	0	0	603	903	0
447	0	0	0	0	0	0	0	200	300	0	0	0	0	0	0	0	200	903	0	0	0	0	0	0	0	603	903	0
447	1	0	0	0	0	0	0	200	300	0	0	0	0	0	0	0	200	903	0	0	0	0	0	0	0	603	903	0
447	2	0	0	0	0	0	0	200	300	0	0	0	0	0	0	0	200	903	0	0	0	0	0	0	0	603	903	0
447	3	0	0	0	0	0	0	200	300	0	0	0	0	0	0	0	200	903	0	0	0	0	0	0	0	603	903	0
447	4	0	0	0	0	0	0	200	300	0	0	0	0	0	0	0	200	903	0	0	0	0	0	0	0	603	903	0
447	5	0	0	0	0	0	0	200	300	0	0	0	0	0	0	0	200	903	0	0	0	0	0	0	0	603	903	0
447	6	0	0	0	0	0	0	200	300	0	0	0	0	0	0	0	200	903	0	0	0	0	0	0	0	603	903	0
447	7	0	0	0	0	0	0	200	300	0	0	0	0	0	0	0	200	903	0	0	0	0	0	0	0	603	903	0
447	8	0	0	0	0	0	0	200	300	0	0	0	0	0	0	0	200	903	0	0	0	0	0	0	0	603	903	0
447	9	0	0	0	0	0	0	200	300	0	0	0	0	0	0	0	200	903	0	0	0	0	0	0	0	603	903	0
448	0	0	0	0	0	0	0	200	300	0	0	0	0	0	0	0	200	903	0	0	0	0	0	0	0	603	903	0
448	1	0	0	0	0	0	0	200	300	0	0	0	0	0	0	0	200	903	0	0	0	0	0	0	0	603	903	0
448	2	0	0	0	0	0	0	200	300	0	0	0	0	0	0	0	200	903	0	0	0	0	0	0	0	603	903	0
448	3	0	0	0	0	0	0	200	300	0	0	0	0	0	0	0	200	903	0	0	0	0	0	0	0	603	903	0
448	4	0	0	0	0	0	0	200	300	0	0	0	0	0	0	0	200	903	0	0	0	0	0	0	0	603	903	0
448	5	0	0	0	0	0	0	200	300	0	0	0	0	0	0	0	200	903	0	0	0	0	0	0	0	603	903	0
448	6	0	0	0	0	0	0	200	300	0	0	0	0	0	0	0	200	903	0	0	0	0	0	0	0	603	903	0
448	7	0	0	0	0	0	0	200	300	0	0	0	0	0	0	0	200	903	0	0	0	0	0	0	0	603	903	0
448	8	0	0	0	0	0	0	200	300	0	0	0	0	0	0	0	200	903	0	0	0	0	0	0	0	603	903	0
448	9	0	0	0	0	0	0	200	300	0	0	0	0	0	0	0	200	903	0	0	0	0	0	0	0	603	903	0
449	0	0	0	0	0	0	0	200	300	0	0	0	0	0	0	0	200	903	0	0	0	0	0	0	0	603	903	0
449	1	0	0	0	0	0	0	200	300	0	0	0	0	0	0	0	200	903	0	0	0	0	0	0	0	603	903	0
449	2	0	0	0	0	0	0	200	300	0	0	0	0	0	0	0	200	903	0	0	0	0	0	0	0	603	903	0
449	3	0	0	0	0	0	0	200	300	0	0	0	0	0	0	0	200	903	0	0	0	0	0	0	0	603	903	0
449	4	0	0	0	0	0	0	200	300	0	0	0	0	0	0	0	200	903	0	0	0	0	0	0	0	603	903	0
449	5	0	0	0	0	0	0	200	300	0	0	0	0	0	0	0	200	903	0	0	0	0	0	0	0	603	903	0
449	6	0	0	0	0	0	0	200	300	0	0	0	0	0	0	0	200	903	0	0	0	0	0	0	0	603	903	0
449	7	0	0	0	0	0	0	200	300	0	0	0	0	0	0	0	200	903	0	0	0	0	0	0	0	603	903	0
449	8	0	0	0	0	0	0	200	300	0	0	0	0	0	0	0	200	903	0	0	0	0	0	0	0	603	903	0
449	9	0	0	0	0	0	0	200	300	0	0	0	0	0	0	0	200	903	0	0	0	0	0	0	0	603	903	0
450	0	0	0	0	0	0	0	200	300	0	0	0	0	0	0	0	200	903	0	0	0	0	0	0	0	603	903	0
450	1	0	0	0	0	0	0	200	300	0	0	0	0	0	0	0	200	903	0	0	0	0	0	0	0	603	903	0
450	2	0	0	0	0	0	0	200	300	0	0	0	0	0	0	0	200	903	0	0	0	0	0	0	0	603	903	0
450	3	0	0	0	0	0	0	200	300	0	0	0	0	0	0	0	200	903	0	0	0	0	0	0	0	603	903	0
450	4	0	0	0	0	0	0	200	300	0	0	0	0	0	0	0	200	903	0	0	0	0	0	0	0	603	903	0
450	5	0	0	0	0	0	0	200	300	0	0	0	0	0	0	0	200	903	0	0	0	0	0	0	0	603	903	0
450	6	0	0	0	0	0	0	200	300	0	0	0	0	0	0	0	200	903	0	0	0	0	0	0	0	603	903	0
450	7	0	0	0	0	0	0	200	300	0	0	0	0	0	0	0	200	903	0	0	0	0	0	0	0	603	903	0
450	8	0	0	0	0	0	0	200	300	0	0	0	0	0	0	0	200	903	0	0	0	0	0	0	0	603	903	0
450	9	0	0	0	0	0	0	200	300	0	0	0	0	0	0	0	200	903	0	0	0	0	0	0	0	603	903	0
451	0	0	0	0	0	0	0	200	300	0	0	0	0	0	0	0	200	903	0	0	0	0	0	0	0	603	903	0
451	1	0	0	0	0	0	0	200	300	0	0	0	0	0	0	0	200	903	0	0	0	0	0	0	0	603	903	0
451	2	0	0	0	0	0	0	200	300	0	0	0	0	0	0	0	200	903	0	0	0	0	0	0	0	603	903	0
451	3	0	0	0	0	0	0	200	300	0	0	0	0	0	0	0	200	903	0	0	0	0	0	0	0	603	903	0
451	4	0	0	0	0	0	0	200	300	0	0	0	0	0	0	0	200	903	0	0	0	0	0	0	0	603	903	0
451	5	0	0	0	0	0	0	200	300	0	0	0	0	0	0	0	200	903	0	0	0	0	0	0	0	603	903	0
451	6	0	0	0	0	0	0	200	300	0	0	0	0	0	0	0	200	903	0	0	0	0	0	0	0	603	903	0
451	7	0	0	0	0	0	0	200	300	0	0	0	0	0	0	0	200	903	0	0	0	0	0	0	0	603	903	0
451	8	0	0	0	0	0	0	200	300	0	0	0	0	0	0	0	200	903	0	0	0	0	0	0	0	603	903	0
451	9	0	0	0	0	0	0	200	300	0	0	0	0	0	0	0	200	903	0	0	0	0	0	0	0	603	903	0
452	0	0	0	0	0	0	0	200	300	0	0	0	0	0	0	0	200	903	0	0	0	0	0	0	0	603	903	0
452	1	0	0	0	0	0	0	200	300	0	0	0	0	0	0	0	200	903	0	0	0	0	0	0	0	603	903	0
452	2	0	0	0	0	0	0	200	300	0	0	0	0	0	0	0	200	903	0	0	0	0	0	0	0	603	903	0
452	3	0	0	0	0	0	0	200	300	0	0	0	0	0	0	0	200	903	0	0	0	0	0	0	0	603	903	0
452	4	0	0	0	0	0	0	200	300	0	0	0	0	0	0	0	200	903	0	0	0	0	0	0	0	603	903	0
452	5	0	0	0	0	0	0	200	300	0	0	0	0	0	0	0	200	903	0	0	0	0	0	0	0	603	903	0
452	6	0	0	0	0	0	0	200	300	0	0	0	0	0	0	0	200	903	0	0	0	0	0	0	0	603	903	0
452	7	0	0	0	0	0	0	200	300	0	0	0	0	0	0	0	200	903	0	0	0	0	0	0	0	603	903	0
452	8	0	0	0	0	0	0	200	300	0	0	0	0	0	0	0	200	903	0	0	0	0	0	0	0	603	903	0
452	9	0	0	0	0	0	0	200	300	0	0	0	0	0	0	0	200	903	0	0	0	0	0	0	0	603	903	0
453	0	0	0	0	0	0	0	200	300	0	0	0	0	0	0	0	200	903	0	0	0	0	0	0	0	603	903	0
453	1	0	0	0	0	0	0	200	300	0	0	0	0	0	0	0	200	903	0	0	0	0	0	0	0	603	903	0
453	2	0	0	0	0	0	0	200	300	0	0	0	0	0	0	0	200	903	0	0	0	0	0	0	0	603	903	0
453	3	0	0	0	0	0	0	200	300	0	0	0	0	0	0	0	200	903	0	0	0	0	0	0	0	603	903	0
453	4	0	0	0	0	0	0	200	300	0	0	0	0	0	0	0	200	903	0	0	0	0	0	0	0	603	903	0
453	5	0	0	0	0	0	0	200	300	0	0	0	0	0	0	0	200	903	0	0	0	0	0	0	0	603	903	0
453	6	0	0	0	0	0	0	200	300	0	0	0	0	0	0	0	200	903	0	0	0	0	0	0	0	603	903	0
453	7	0	0	0	0	0	0	200	300	0	0	0	0	0	0	0	200	903	0	0	0	0	0	0	0	603	903	0
453	8	0	0	0	0	0	0	200	300	0	0	0	0	0	0	0	200	903	0	0	0	0	0	0	0	603	903	0
453	9	0	0	0	0	0	0	200	300	0	0	0	0	0	0	0	200	903	0	0	0	0	0	0	0	603	903	0
454	0	0	0	0	0	0	0	200	300	0	0	0	0	0	0	0	200	903	0	0	0	0	0	0	0	603	903	0
454	1	0	0	0	0	0	0	200	300	0	0	0	0	0	0	0	200	903	0	0	0	0	0	0	0	603	903	0
454	2	0	0	0	0	0	0	200	300	0	0	0	0	0	0	0	200	903	0	0	0	0	0	0	0	603	903	0
454	3	0	0	0	0	0	0	200	300	0	0	0	0	0	0	0	200	903	0	0	0	0	0	0	0	603	903	0
454	4	0	0	0	0	0	0	200	300	0	0	0	0	0	0	0	200	903	0	0	0	0	0	0	0	603	903	0
454	5	0	0	0	0	0	0	200	300	0	0	0	0	0	0	0	200	903	0	0	0	0	0	0	0	603	903	0
454	6	0	0	0	0	0	0	200	300	0	0	0	0	0	0	0	200	903	0	0	0	0	0	0	0	603	903	0
454	7	0	0	0	0	0	0	200	300	0	0	0	0	0	0	0	200	903	0	0	0	0	0	0	0	603	903	0
454	8	0	0	0	0	0	0	200	300	0	0	0	0	0	0	0	200	903	0	0	0	0	0	0	0	603	903	0
454	9	0	0	0	0	0	0	200	300	0	0	0	0	0	0	0	200	903	0	0	0	0	0	0	0	603	903	0
455	0	0	0	0	0	0	0	200	300	0	0	0	0	0	0	0	200	903	0	0	0	0	0	0	0	603	903	0
455	1	0	0	0	0	0	0	200	300	0	0	0	0	0	0	0	200	903	0	0	0	0	0	0	0	603	903	0
455	2	0	0	0	0	0	0	200	300	0	0	0	0	0	0	0	200	903	0	0	0	0	0	0	0	603	903	0
455	3	0	0	0	0	0	0	200	300	0	0	0	0	0	0	0	200	903	0	0	0	0	0	0	0	603	903	0
455	4	0	0	0	0	0	0	200	300	0	0	0	0	0	0	0	200	903	0	0	0	0	0	0	0	603	903	0
455	5	0	0	0	0	0	0	200	300	0	0	0	0	0	0	0	200	903	0	0	0	0	0	0	0	603	903	0
455	6	0	0	0	0	0	0	200	300	0	0	0	0	0	0	0	200	903	0	0	0	0	0	0	0	603	903	0
455	7	0	0	0	0	0	0	200	300	0	0	0	0	0	0	0	200	903	0	0	0	0	0	0	0	603	903	0
455	8	0	0	0	0	0	0	200	300	0	0	0	0	0	0	0	200	903	0	0	0	0	0	0	0	603	903	0
455	9	0	0	0	0	0	0	200	300	0	0	0	0	0	0	0	200	903	0	0	0	0	0	0	0	603	903	0
456	0	0	0	0	0	0	0	200	300	0	0	0	0	0	0	0	200	903	0	0	0	0	0	0	0	603	903	0
456	1	0	0	0	0	0	0	200	300	0	0	0	0	0	0	0	200	903	0	0	0	0	0	0	0	603	903	0
456	2	0	0	0	0	0	0	200	300	0	0	0	0	0	0	0	200	903	0	0	0	0	0	0	0	603	903	0
456	3	0	0	0	0	0	0	200	300	0	0	0	0	0	0	0	200	903	0	0	0	0	0	0	0	603	903	0
456	4	0	0	0	0	0	0	200	300	0	0	0	0	0	0	0	200	903	0	0	0	0	0	0	0	603	903	0
456	5	0	0	0	0	0	0	200	300	0	0	0	0	0	0	0	200	903	0	0	0	0	0	0	0	603	903	0
456	6	0	0	0	0	0	0	200	300	0	0	0	0	0	0	0	200	903	0	0	0	0	0	0	0	603	903	0
456	7	0	0	0	0	0	0	200	300	0	0	0	0	0	0	0	200	903	0	0	0	0	0	0	0	603	903	0
456	8	0	0	0	0	0	0	200	300	0	0	0	0	0	0	0	200	903	0	0	0	0	0	0	0	603	903	0
456	9	0	0	0	0	0	0	200	300	0	0	0	0	0	0	0	200	903	0	0	0	0	0	0	0	603	903	0
457	0	0	0	0	0	0	0	200	300	0	0	0	0	0	0	0	200	903	0	0	0	0	0	0	0	603	903	0
457	1	0	0	0	0	0	0	200	300	0	0	0	0	0	0	0	200	903	0	0	0	0	0	0	0	603	903	0
457	2	0	0	0	0	0	0	200	300	0	0	0	0	0	0	0	200	903	0	0	0	0	0	0	0	603	903	0
457	3	0	0	0	0	0	0	200	300	0	0	0	0	0	0	0	200	903	0	0	0	0	0	0	0	603	903	0
457	4	0	0	0	0	0	0	200	300	0	0	0	0	0	0	0	200	903	0	0	0	0	0	0	0	603	903	0
457	5	0	0	0	0	0	0	200	300	0	0	0	0	0	0	0	200	903	0	0	0	0	0	0	0	603	903	0
457	6	0	0	0	0	0	0	200	300	0	0	0	0	0	0	0	200	903	0	0	0	0	0	0	0	603	903	0
457	7	0	0	0	0	0	0	200	300	0	0	0	0	0	0	0	200	903	0	0	0	0	0	0	0	603	903	0
457	8	0	0	0	0	0	0	200	300	0	0	0	0	0	0	0	200	903	0	0	0	0	0	0	0	603	903	0
457	9	0	0	0	0	0	0	200	300	0	0	0	0	0	0	0	200	903	0	0	0	0	0	0	0	603	903	0
458	0	0	0	0	0	0	0	200	300	0	0	0	0	0	0	0	200	903	0	0	0	0	0	0	0	603	903	0
458	1	0	0	0	0	0	0	200	300	0	0	0	0	0	0	0	200	903	0	0	0	0	0	0	0	603	903	0
458	2	0	0	0	0	0	0	200	300	0	0	0	0	0	0	0	200	903	0	0	0	0	0	0	0	603	903	0
458	3	0	0	0	0	0	0	200	300	0	0	0	0	0	0	0	200	903	0	0	0	0	0	0	0	603	903	0
458	4	0	0	0	0	0	0	200	300	0	0	0	0	0	0	0	200	903	0	0	0	0	0	0	0	603	903	0
458	5	0	0	0	0	0	0	200	300	0	0	0	0	0	0	0	200	903	0	0	0	0	0	0	0	603	903	0
458	6	0	0	0	0	0	0	200	300	0	0	0	0	0	0	0	200	903	0	0	0	0	0	0	0	603	903	0
458	7	0	0	0	0	0	0	200	300	0	0	0	0	0	0	0	200	903	0	0	0	0	0	0	0	603	903	0
458	8	0	0	0	0	0	0	200	300	0	0	0	0	0	0	0	200	903	0	0	0	0	0	0	0	603	903	0
458	9	0	0	0	0	0	0	200	300	0	0	0	0	0	0	0	200	903	0	0	0	0	0	0	0	603	903	0
459	0	0	0	0	0	0	0	200	300	0	0	0	0	0	0	0	200	903	0	0	0	0	0	0	0	603	903	0
459	1	0	0	0	0	0	0	200	300	0	0	0	0	0	0	0	200	903	0	0	0	0	0	0	0	603	903	0
459	2	0	0	0	0	0	0	200	300	0	0	0	0	0	0	0	200	903	0	0	0	0	0	0	0	603	903	0
459	3	0	0	0	0	0	0	200	300	0	0	0	0	0	0	0	200	903	0	0	0	0	0	0	0	603	903	0
459	4	0	0	0	0	0	0	200	300	0	0	0	0	0	0	0	200	903	0	0	0	0	0	0	0	603	903	0
459	5	0	0	0	0	0	0	200	300	0	0	0	0	0	0	0	200	903	0	0	0	0	0	0	0	603	903	0
459	6	0	0	0	0	0	0	200	300	0	0	0	0	0	0	0	200	903	0	0	0	0	0	0	0	603	903	0
459	7	0	0	0	0	0	0	200	300	0	0	0	0	0	0	0	200	903	0	0	0	0	0	0	0	603	903	0
459	8	0	0	0	0	0	0	200	300	0	0	0	0	0	0	0	200	903	0	0	0	0	0	0	0	603	903	0
459	9	0	0	0	0	0	0	200	300	0	0	0	0	0	0	0	200	903	0	0	0	0	0	0	0	603	903	0
460	0	0	0	0	0	0	0	200	300	0	0	0	0	0	0	0	200	903	0	0	0	0	0	0	0	603	903	0
460	1	0	0	0	0	0	0	200	300	0	0	0	0	0	0	0	200	903	0	0	0	0	0	0	0	603	903	0
460	2	0	0	0	0	0	0	200	300	0	0	0	0	0	0	0	200	903	0	0	0	0	0	0	0	603	903	0
460	3	0	0	0	0	0	0	200	300	0	0	0	0	0	0	0	200	903	0	0	0	0	0	0	0	603	903	0
460	4	0	0	0	0	0	0	200	300	0	0	0	0	0	0	0	200	903	0	0	0	0	0	0	0	603	903	0
460	5	0	0	0	0	0	0	200	300	0	0	0	0	0	0	0	200	903	0	0	0	0	0	0	0	603	903	0
460	6	0	0	0	0	0	0	200	300	0	0	0	0	0	0	0	200	903	0	0	0	0	0	0	0	603	903	0
460	7	0	0	0	0	0	0	200	300	0	0	0	0	0	0	0	200	903	0	0	0	0	0	0	0	603	903	0
460	8	0	0	0	0	0	0	200	300	0	0	0	0	0	0	0	200	903	0	0	0	0	0	0	0	603	903	0
460	9	0	0	0	0	0	0	200	300	0	0	0	0	0	0	0	200	903	0	0	0	0	0	0	0	603	903	0
461	0	0	0	0	0	0	0	200	300	0	0	0	0	0	0	0	200	903	0	0	0	0	0	0	0	603	903	0
461	1	0	0	0	0	0	0	200	300	0	0	0	0	0	0	0	200	903	0	0	0	0	0	0	0	603	903	0
461	2	0	0	0	0	0	0	200	300	0	0	0	0	0	0	0	200	903	0	0	0	0	0	0	0	603	903	0
461	3	0	0	0	0	0	0	200	300	0	0	0	0	0	0	0	200	903	0	0	0	0	0	0	0	603	903	0
461	4	0	0	0	0	0	0	200	300	0	0	0	0	0	0	0	200	903	0	0	0	0	0	0	0	603	903	0
461	5	-4.53785	3.89267	-10.6869	-123.685	1502.68	297.318	340.609	311.574	0	0	0	0	0	0	0	200	903	0	0	0	0	0	0	0	603	903	0
461	6	-5.30079	8.62289	-15.8749	425.632	1807.86	1212.85	313.881	273.188	0	0	0	0	0	0	0	200	903	0	0	0	0	0	0	0	603	903	0
461	7	-3.31715	5.41855	-13.1283	517.184	1258.54	480.424	295.864	260.606	0	0	0	0	0	0	0	200	903	0	0	0	0	0	0	0	603	903	0
461	8	0	0	0	0	0	0	200	300	0	0	0	0	0	0	0	200	903	0	0	0	0	0	0	0	603	903	0
461	9	0	0	0	0	0	0	200	300	0	0	0	0	0	0	0	200	903	0	0	0	0	0	0	0	603	903	0
462	0	0	0	0	0	0	0	200	300	0	0	0	0	0	0	0	200	903	0	0	0	0	0	0	0	603	903	0
462	1	0	0	0	0	0	0	200	300	0	0	0	0	0	0	0	200	903	0	0	0	0	0	0	0	603	903	0
462	2	-3.46974	2.06161	-10.9921	608.737	1746.82	709.306	358.916	244.621	0	0	0	0	0	0	0	200	903	0	0	0	0	0	0	0	603	903	0
462	3	-4.69044	4.19785	-10.0766	-123.685	1258.54	434.647	324.898	312.275	0	0	0	0	0	0	0	200	903	0	0	0	0	0	0	0	603	903	0
462	4	-3.01198	5.87631	-9.46624	-123.685	1258.54	388.871	332.951	313.066	0	0	0	0	0	0	0	200	903	0	0	0	0	0	0	0	603	903	0
462	5	-7.13185	5.41855	-11.9076	-32.1323	1563.72	571.977	331.32	302.698	0	0	0	0	0	0	0	200	903	0	0	0	0	0	0	0	603	903	0
462	6	-7.7422	2.97714	-12.8232	59.4205	1746.82	892.411	336.224	295.366	0	0	0	0	0	0	0	200	903	0	0	0	0	0	0	0	603	903	0
462	7	-4.99562	5.72372	-10.6869	334.079	1746.82	663.53	363.454	268.74	0	0	0	0	0	0	0	200	903	0	0	0	0	0	0	0	603	903	0
462	8	-7.43702	7.85995	-13.1283	334.079	2052	846.635	356.303	274.553	0	0	0	0	0	0	0	200	903	0	0	0	0	0	0	0	603	903	0
462	9	-8.35255	6.94443	-16.4853	425.632	1929.93	1075.52	317.07	274.181	0	0	0	0	0	0	0	200	903	0	0	0	0	0	0	0	603	903	0
463	0	-7.89479	6.48666	-16.7905	242.526	2174.07	526.201	329.482	285.556	0	0	0	0	0	0	0	200	903	0	0	0	0	0	0	0	603	903	0
463	1	-8.35255	8.77548	-19.537	608.737	2296.14	983.964	317.527	268.842	0	0	0	0	0	0	0	200	903	0	0	0	0	0	0	0	603	903	0
463	2	-8.81032	10.9117	-18.9267	791.843	2662.35	1075.52	340.666	258.163	0	0	0	0	0	0	0	200	903	0	0	0	0	0	0	0	603	903	0
463	3	-8.9629	8.31772	-21.6733	791.843	2479.24	1121.29	314.392	263.465	0	0	0	0	0	0	0	200	903	0	0	0	0	0	0	0	603	903	0
463	4	-10.794	9.8436	-24.1147	150.973	2479.24	1350.18	302.811	293.739	0	0	0	0	0	0	0	200	903	0	0	0	0	0	0	0	603	903	0
463	5	-10.3362	14.5738	-23.5043	700.29	2906.49	1441.73	323.658	270.206	0	0	0	0	0	0	0	200	903	0	0	0	0	0	0	0	603	903	0
463	6	-10.031	14.879	-25.3354	150.973	3028.56	1579.06	319.539	294.041	0	0	0	0	0	0	0	200	903	0	0	0	0	0	0	0	603	903	0
463	7	-11.5569	14.7264	-28.082	883.395	3150.63	1533.28	312.194	268.542	0	0	0	0	0	0	0	200	903	0	0	0	0	0	0	0	603	903	0
463	8	-11.0991	16.2523	-31.1337	1158.05	3883.05	1853.72	324.722	262.804	0	0	0	0	0	0	0	200	903	0	0	0	0	0	0	0	603	903	0
463	9	-10.031	18.8463	-33.27	700.29	3638.91	1807.94	309.375	278.951	0	0	0	0	0	0	0	200	903	0	0	0	0	0	0	0	603	903	0
464	0	-10.6414	20.3722	-37.8476	791.843	3944.09	2174.15	304.21	279.078	0	0	0	0	0	0	0	200	903	0	0	0	0	0	0	0	603	903	0
464	1	-12.3198	22.5084	-37.8476	1432.71	4493.4	2357.25	318.724	262.145	0	0	0	0	0	0	0	200	903	0	0	0	0	0	0	0	603	903	0
464	2	-11.4043	24.9498	-45.7822	1890.48	4310.3	2403.03	294.148	258.707	0	0	0	0	0	0	0	200	903	0	0	0	0	0	0	0	603	903	0
464	3	-11.2517	27.3912	-49.1391	1158.05	5042.72	2723.47	302.621	276.433	0	0	0	0	0	0	0	200	903	0	0	0	0	0	0	0	603	903	0
464	4	-12.9302	30.9007	-52.496	1432.71	5286.86	2906.57	300.71	272.708	0	0	0	0	0	0	0	200	903	0	0	0	0	0	0	0	603	903	0
464	5	-12.9302	31.9688	-56.4633	1249.61	5653.07	3043.9	300.119	277.869	0	0	0	0	0	0	0	200	903	0	0	0	0	0	0	0	603	903	0
464	6	-11.0991	37.1568	-62.2617	2073.58	6080.32	2998.12	297.658	266.696	0	0	0	0	0	0	0	200	903	0	0	0	0	0	0	0	603	903	0
464	7	-12.4724	39.5982	-70.1962	2165.13	6446.53	3501.66	291.836	269.156	0	0	0	0	0	0	0	200	903	0	0	0	0	0	0	0	603	903	0
464	8	-12.4724	37.6146	-77.8256	2073.58	6873.78	3227.01	288.323	273.356	0	0	0	0	0	0	0	200	903	0	0	0	0	0	0	0	603	903	0
464	9	-12.625	36.8517	-85.1498	2256.69	7911.38	3501.66	292.911	273.497	0	0	0	0	0	0	0	200	903	0	0	0	0	0	0	0	603	903	0
465	0	-16.7449	36.6991	-90.643	2714.45	8338.62	3181.23	291.994	270.053	0	0	0	0	0	0	0	200	903	0	0	0	0	0	0	0	603	903	0
465	1	-16.4397	35.9361	-104.376	3263.77	8948.97	3181.23	285.738	268.731	0	0	0	0	0	0	0	200	903	0	0	0	0	0	0	0	603	903	0
465	2	-18.1182	32.7318	-110.479	3263.77	9742.43	2815.02	288.183	270.458	0	0	0	0	0	0	0	200	903	0	0	0	0	0	0	0	603	903	0
465	3	-20.5596	32.8844	-118.109	3629.98	10413.8	3135.45	288.171	269.266	0	0	0	0	0	0	0	200	903	0	0	0	0	0	0	0	603	903	0
465	4	-21.0173	34.1051	-123.297	3629.98	11146.2	2815.02	290.402	270.559	0	0	0	0	0	0	0	200	903	0	0	0	0	0	0	0	603	903	0
465	5	-21.3225	33.037	-136.114	3904.64	11329.3	2540.36	283.234	271.314	0	0	0	0	0	0	0	200	903	0	0	0	0	0	0	0	603	903	0
465	6	-25.595	29.8326	-144.049	4911.72	12305.9	2631.91	285.429	265.902	0	0	0	0	0	0	0	200	903	0	0	0	0	0	0	0	603	903	0
465	7	-27.7312	28.3067	-156.256	5277.93	12428	2540.36	279.536	266.223	0	0	0	0	0	0	0	200	903	0	0	0	0	0	0	0	603	903	0
465	8	-29.2571	27.3912	-166.327	4179.29	13587.6	2311.48	281.693	274.873	0	0	0	0	0	0	0	200	903	0	0	0	0	0	0	0	603	903	0
465	9	-34.5977	26.0179	-177.008	4637.06	14686.3	1853.72	282.97	273.803	0	0	0	0	0	0	0	200	903	0	0	0	0	0	0	0	603	903	0
466	0	-37.802	21.5929	-191.046	5277.93	16151.1	1945.27	284.541	272.374	0	0	0	0	0	0	0	200	903	0	0	0	0	0	0	0	603	903	0
466	1	-39.1753	16.4049	-202.643	5369.48	16395.3	1807.94	280.907	273.503	0	0	0	0	0	0	0	200	903	0	0	0	0	0	0	0	603	903	0
466	2	-41.4641	15.3368	-215.765	5094.82	17677	1991.04	281.927	276.387	0	0	0	0	0	0	0	200	903	0	0	0	0	0	0	0	603	903	0
466	3	-43.4478	15.4893	-223.394	5369.48	18653.6	1807.94	283.501	275.964	0	0	0	0	0	0	0	200	903	0	0	0	0	0	0	0	603	903	0
466	4	-43.6004	14.1161	-236.822	5644.14	19202.9	2036.82	281.086	276.167	0	0	0	0	0	0	0	200	903	0	0	0	0	0	0	0	603	903	0
466	5	-45.7366	14.1161	-251.776	5461.03	20484.6	2403.03	281.361	278.31	0	0	0	0	0	0	0	200	903	0	0	0	0	0	0	0	603	903	0
466	6	-46.9573	15.0316	-265.509	5735.69	21461.2	2860.79	280.83	278.397	0	0	0	0	0	0	0	200	903	0	0	0	0	0	0	0	603	903	0
466	7	-46.1943	17.9308	-276.495	5461.03	22498.8	3089.68	281.371	280.249	0	0	0	0	0	0	0	200	903	0	0	0	0	0	0	0	603	903	0
466	8	-46.4995	20.5247	-286.566	5735.69	23536.4	3638.99	282.133	279.985	0	0	0	0	0	0	0	200	903	0	0	0	0	0	0	0	603	903	0
466	9	-48.6358	21.5929	-297.552	5369.48	24512.9	4234.09	282.382	281.954	0	0	0	0	0	0	0	200	903	0	0	0	0	0	0	0	603	903	0
467	0	-46.6521	27.3912	-305.792	5369.48	25794.7	4508.74	284.354	282.441	0	0	0	0	0	0	0	200	903	0	0	0	0	0	0	0	603	903	0
467	1	-47.4151	31.0533	-314.642	5094.82	26344	5424.27	283.727	283.808	0	0	0	0	0	0	0	200	903	0	0	0	0	0	0	0	603	903	0
467	2	-47.1099	35.631	-323.797	4545.5	26832.3	5836.26	282.868	285.962	0	0	0	0	0	0	0	200	903	0	0	0	0	0	0	0	603	903	0
467	3	-47.2625	39.7508	-329.596	4362.4	27747.8	6156.69	284.187	286.764	0	0	0	0	0	0	0	200	903	0	0	0	0	0	0	0	603	903	0
467	4	-45.4314	45.3966	-336.92	3813.08	28175.1	6431.35	283.625	288.683	0	0	0	0	0	0	0	200	903	0	0	0	0	0	0	0	603	903	0
467	5	-46.4995	49.8216	-343.939	4453.95	28480.2	7209.55	282.806	287.05	0	0	0	0	0	0	0	200	903	0	0	0	0	0	0	0	603	903	0
467	6	-48.6358	53.4837	-348.822	3721.53	29456.8	7713.09	284.447	289.331	0	0	0	0	0	0	0	200	903	0	0	0	0	0	0	0	603	903	0
467	7	-48.3306	58.5191	-355.23	3263.77	29700.9	8125.08	283.61	290.812	0	0	0	0	0	0	0	200	903	0	0	0	0	0	0	0	603	903	0
467	8	-48.6358	63.8597	-359.198	2806	30433.4	8674.39	284.726	292.188	0	0	0	0	0	0	0	200	903	0	0	0	0	0	0	0	603	903	0
467	9	-48.9409	68.1322	-359.808	3629.98	30555.4	8720.17	284.922	289.911	0	0	0	0	0	0	0	200	903	0	0	0	0	0	0	0	603	903	0
468	0	-48.0254	70.5736	-365.301	3263.77	30494.4	9544.14	283.477	291.066	0	0	0	0	0	0	0	200	903	0	0	0	0	0	0	0	603	903	0
468	1	-48.0254	72.8624	-369.574	2531.35	31532	9498.37	285.32	293.151	0	0	0	0	0	0	0	200	903	0	0	0	0	0	0	0	603	903	0
468	2	-47.1099	76.9823	-375.982	1890.48	31593	10093.5	284.028	294.972	0	0	0	0	0	0	0	200	903	0	0	0	0	0	0	0	603	903	0
468	3	-45.8892	80.3392	-373.846	1890.48	31898.2	10322.3	285.324	294.943	0	0	0	0	0	0	0	200	903	0	0	0	0	0	0	0	603	903	0
468	4	-46.4995	82.0177	-383.612	2073.58	32508.5	10688.6	284.743	294.595	0	0	0	0	0	0	0	200	903	0	0	0	0	0	0	0	603	903	0
468	5	-43.6004	83.0858	-385.138	1249.61	32691.6	10505.4	284.883	296.755	0	0	0	0	0	0	0	200	903	0	0	0	0	0	0	0	603	903	0
468	6	-44.5159	84.1539	-389.41	1798.92	33118.9	10963.2	285.049	295.38	0	0	0	0	0	0	0	200	903	0	0	0	0	0	0	0	603	903	0
468	7	-42.6848	85.5272	-391.546	608.737	34034.4	10688.6	286.923	298.445	0	0	0	0	0	0	0	200	903	0	0	0	0	0	0	0	603	903	0
468	8	-41.0064	85.5272	-400.702	425.632	34400.6	10688.6	285.851	298.938	0	0	0	0	0	0	0	200	903	0	0	0	0	0	0	0	603	903	0
468	9	-37.9546	85.5272	-409.552	242.526	35682.4	10505.4	287.125	299.408	0	0	0	0	0	0	0	200	903	0	0	0	0	0	0	0	603	903	0
469	0	-35.5132	85.3746	-419.928	150.973	36658.9	10825.9	287.298	299.64	0	0	0	0	0	0	0	200	903	0	0	0	0	0	0	0	603	903	0
469	1	-33.8347	85.3746	-427.252	-856.107	36842	10688.6	286.23	302.004	0	0	0	0	0	0	0	200	903	0	0	0	0	0	0	0	603	903	0
469	2	-31.2407	87.0531	-436.407	-1496.98	38612.1	10413.9	288.477	303.43	0	0	0	0	0	0	0	200	903	0	0	0	0	0	0	0	603	903	0
469	3	-28.7993	87.816	-443.426	-1588.53	39405.5	10642.8	288.866	303.582	0	0	0	0	0	0	0	200	903	0	0	0	0	0	0	0	603	903	0
469	4	-25.1372	87.2057	-454.413	-1405.42	39954.8	10322.3	287.926	303.093	0	0	0	0	0	0	0	200	903	0	0	0	0	0	0	0	603	903	0
469	5	-21.4751	87.0531	-460.516	-3053.37	41297.6	10413.9	289.677	306.63	0	0	0	0	0	0	0	200	903	0	0	0	0	0	0	0	603	903	0
469	6	-19.0337	89.9522	-467.535	-3144.93	41846.9	9864.58	289.505	306.727	0	0	0	0	0	0	0	200	903	0	0	0	0	0	0	0	603	903	0
469	7	-15.6768	90.7152	-473.944	-3694.24	42579.3	10001.9	289.84	307.795	0	0	0	0	0	0	0	200	903	0	0	0	0	0	0	0	603	903	0
469	8	-14.3035	92.2411	-479.742	-4152.01	43189.7	9589.92	290.027	308.655	0	0	0	0	0	0	0	200	903	0	0	0	0	0	0	0	603	903	0
469	9	-12.9302	94.0721	-485.54	-4152.01	43555.9	9864.58	289.706	308.551	0	0	0	0	0	0	0	200	903	0	0	0	0	0	0	0	603	903	0
470	0	-9.87843	96.9713	-488.897	-5525.3	44227.3	9727.25	290.463	311.302	0	0	0	0	0	0	0	200	903	0	0	0	0	0	0	0	603	903	0
470	1	-6.67408	100.176	-490.118	-5250.64	44532.5	9635.7	290.861	310.713	0	0	0	0	0	0	0	200	903	0	0	0	0	0	0	0	603	903	0
470	2	-3.9275	100.939	-496.222	-5616.85	45203.9	9498.37	291.096	311.319	0	0	0	0	0	0	0	200	903	0	0	0	0	0	0	0	603	903	0
470	3	-2.40162	102.77	-501.104	-6074.62	45875.2	9544.14	291.548	312.122	0	0	0	0	0	0	0	200	903	0	0	0	0	0	0	0	603	903	0
470	4	0.802722	104.601	-505.682	-6898.59	45814.2	9773.03	290.599	313.642	0	0	0	0	0	0	0	200	903	0	0	0	0	0	0	0	603	903	0
470	5	2.3286	108.263	-504.767	-7264.8	46790.8	9452.59	292.698	314.392	0	0	0	0	0	0	0	200	903	0	0	0	0	0	0	0	603	903	0
470	6	3.09154	109.483	-513.311	-6623.93	46485.6	9864.58	290.56	312.904	0	0	0	0	0	0	0	200	903	0	0	0	0	0	0	0	603	903	0
470	7	6.44847	110.704	-513.311	-7173.25	46912.8	10001.9	291.393	313.974	0	0	0	0	0	0	0	200	903	0	0	0	0	0	0	0	603	903	0
470	8	7.82176	111.925	-515.143	-7905.67	47462.2	9727.25	292.134	315.347	0	0	0	0	0	0	0	200	903	0	0	0	0	0	0	0	603	903	0
470	9	9.65282	114.977	-517.584	-9095.85	47706.3	9773.03	292.171	317.574	0	0	0	0	0	0	0	200	903	0	0	0	0	0	0	0	603	903	0
471	0	11.4839	115.74	-520.331	-9187.41	47950.4	10093.5	292.154	317.657	0	0	0	0	0	0	0	200	903	0	0	0	0	0	0	0	603	903	0
471	1	14.2305	116.808	-527.655	-9095.85	48255.6	9635.7	291.453	317.238	0	0	0	0	0	0	0	200	903	0	0	0	0	0	0	0	603	903	0
471	2	14.383	118.486	-527.96	-8821.19	48682.9	9864.58	292.209	316.708	0	0	0	0	0	0	0	200	903	0	0	0	0	0	0	0	603	903	0
471	3	16.3667	118.028	-526.739	-10286	49293.2	9727.25	293.582	319.528	0	0	0	0	0	0	0	200	903	0	0	0	0	0	0	0	603	903	0
471	4	15.146	119.097	-533.453	-10469.1	49110.1	9498.37	292.061	319.625	0	0	0	0	0	0	0	200	903	0	0	0	0	0	0	0	603	903	0
471	5	17.74	119.097	-534.369	-10835.4	48988	10139.2	291.675	320.277	0	0	0	0	0	0	0	200	903	0	0	0	0	0	0	0	603	903	0
471	6	16.8244	120.165	-536.2	-10560.7	49842.5	9727.25	292.955	319.695	0	0	0	0	0	0	0	200	903	0	0	0	0	0	0	0	603	903	0
471	7	17.2822	119.707	-538.946	-11110	50452.9	9818.8	293.614	320.614	0	0	0	0	0	0	0	200	903	0	0	0	0	0	0	0	603	903	0
471	8	17.5874	119.859	-550.238	-13124.2	51917.7	9956.13	294.355	323.852	0	0	0	0	0	0	0	200	903	0	0	0	0	0	0	0	603	903	0
471	9	23.0806	122.606	-566.412	-14222.8	52894.3	9910.36	293.385	325.11	0	0	0	0	0	0	0	200	903	0	0	0	0	0	0	0	603	903	0
472	0	28.5737	127.489	-570.379	-14497.5	53443.6	10093.5	293.698	325.417	0	0	0	0	0	0	0	200	903	0	0	0	0	0	0	0	603	903	0
472	1	27.5056	128.252	-574.957	-15229.9	54054	10368.1	294.014	326.489	0	0	0	0	0	0	0	200	903	0	0	0	0	0	0	0	603	903	0
472	2	27.0478	130.083	-579.84	-16603.2	54969.5	10047.7	294.801	328.634	0	0	0	0	0	0	0	200	903	0	0	0	0	0	0	0	603	903	0
472	3	32.6936	133.592	-588.69	-16328.5	55457.8	10413.9	294.205	327.737	0	0	0	0	0	0	0	200	903	0	0	0	0	0	0	0	603	903	0
472	4	33.4565	135.423	-595.099	-17884.9	56068.1	10871.7	294.217	330.054	0	0	0	0	0	0	0	200	903	0	0	0	0	0	0	0	603	903	0
472	5	34.2195	138.17	-598.456	-17793.4	56922.6	10734.3	295.116	329.732	0	0	0	0	0	0	0	200	903	0	0	0	0	0	0	0	603	903	0
472	6	33.7617	139.696	-604.864	-18892	56922.6	11192.1	294.108	331.233	0	0	0	0	0	0	0	200	903	0	0	0	0	0	0	0	603	903	0
472	7	32.6936	143.816	-615.851	-19807.5	57533	11649.9	293.42	332.163	0	0	0	0	0	0	0	200	903	0	0	0	0	0	0	0	603	903	0
472	8	29.7944	145.952	-621.954	-20631.5	58143.3	11695.6	293.485	333.172	0	0	0	0	0	0	0	200	903	0	0	0	0	0	0	0	603	903	0
472	9	27.5056	145.342	-623.48	-20631.5	58509.5	11741.4	293.843	333.091	0	0	0	0	0	0	0	200	903	0	0	0	0	0	0	0	603	903	0
473	0	26.7427	147.02	-628.058	-20356.8	58143.3	12016.1	292.576	332.412	0	0	0	0	0	0	0	200	903	0	0	0	0	0	0	0	603	903	0
473	1	26.2849	147.63	-630.194	-21821.7	58814.7	12016.1	293.328	334.627	0	0	0	0	0	0	0	200	903	0	0	0	0	0	0	0	603	903	0
473	2	25.9797	146.562	-630.499	-21272.4	59241.9	11924.5	293.96	333.739	0	0	0	0	0	0	0	200	903	0	0	0	0	0	0	0	603	903	0
473	3	24.6064	144.731	-635.077	-22737.2	59180.9	11787.2	293.187	335.802	0	0	0	0	0	0	0	200	903	0	0	0	0	0	0	0	603	903	0
473	4	25.522	146.715	-642.096	-22279.4	59608.2	11833	292.834	334.698	0	0	0	0	0	0	0	200	903	0	0	0	0	0	0	0	603	903	0
473	5	25.9797	144.884	-645.453	-23011.9	59913.3	11421	292.824	335.652	0	0	0	0	0	0	0	200	903	0	0	0	0	0	0	0	603	903	0
473	6	25.9797	143.358	-647.589	-23652.7	59974.4	11604.1	292.612	336.524	0	0	0	0	0	0	0	200	903	0	0	0	0	0	0	0	603	903	0
473	7	23.8435	141.985	-650.335	-24018.9	60035.4	11421	292.315	336.933	0	0	0	0	0	0	0	200	903	0	0	0	0	0	0	0	603	903	0
473	8	25.522	142.29	-651.251	-24659.8	60767.8	10734.3	293.309	337.865	0	0	0	0	0	0	0	200	903	0	0	0	0	0	0	0	603	903	0
473	9	26.8953	139.086	-657.049	-24293.6	60584.7	10642.8	292.207	336.974	0	0	0	0	0	0	0	200	903	0	0	0	0	0	0	0	603	903	0
474	0	28.8789	139.086	-658.575	-25209.1	61134	10597	292.828	338.278	0	0	0	0	0	0	0	200	903	0	0	0	0	0	0	0	603	903	0
474	1	29.947	138.475	-663.763	-26124.7	61439.2	10047.7	292.562	339.358	0	0	0	0	0	0	0	200	903	0	0	0	0	0	0	0	603	903	0
474	2	31.0151	140.001	-669.256	-27223.3	61683.4	9864.58	292.167	340.677	0	0	0	0	0	0	0	200	903	0	0	0	0	0	0	0	603	903	0
474	3	31.7781	139.391	-673.834	-26307.8	62110.6	9864.58	292.175	339.042	0	0	0	0	0	0	0	200	903	0	0	0	0	0	0	0	603	903	0
474	4	33.3039	137.56	-677.496	-27498	62293.7	9361.04	291.947	340.588	0	0	0	0	0	0	0	200	903	0	0	0	0	0	0	0	603	903	0
474	5	34.6772	138.78	-680.853	-27314.9	63270.3	9269.49	292.928	340.119	0	0	0	0	0	0	0	200	903	0	0	0	0	0	0	0	603	903	0
474	6	36.3557	140.154	-683.6	-28871.3	63514.4	9269.49	292.912	342.234	0	0	0	0	0	0	0	200	903	0	0	0	0	0	0	0	603	903	0
474	7	38.3393	140.001	-686.041	-29054.4	63941.6	9132.16	293.204	342.351	0	0	0	0	0	0	0	200	903	0	0	0	0	0	0	0	603	903	0
474	8	38.6445	139.848	-692.45	-29329	63941.6	8857.5	292.341	342.355	0	0	0	0	0	0	0	200	903	0	0	0	0	0	0	0	603	903	0
474	9	40.4756	141.222	-695.196	-29878.3	64368.9	8857.5	292.591	342.978	0	0	0	0	0	0	0	200	903	0	0	0	0	0	0	0	603	903	0
475	0	40.9333	141.527	-699.774	-30153	64735.1	8949.05	292.509	343.09	0	0	0	0	0	0	0	200	903	0	0	0	0	0	0	0	603	903	0
475	1	41.5437	140.001	-703.131	-31160.1	65162.4	8537.06	292.675	344.316	0	0	0	0	0	0	0	200	903	0	0	0	0	0	0	0	603	903	0
475	2	40.4756	140.611	-707.098	-31251.6	65345.5	8628.62	292.414	344.197	0	0	0	0	0	0	0	200	903	0	0	0	0	0	0	0	603	903	0
475	3	42.0015	141.527	-709.234	-31343.2	65650.6	8720.17	292.565	344.193	0	0	0	0	0	0	0	200	903	0	0	0	0	0	0	0	603	903	0
475	4	40.9333	140.459	-711.065	-31800.9	65894.8	8537.06	292.671	344.723	0	0	0	0	0	0	0	200	903	0	0	0	0	0	0	0	603	903	0
475	5	40.7808	138.628	-714.117	-32441.8	65894.8	8445.51	292.274	345.429	0	0	0	0	0	0	0	200	903	0	0	0	0	0	0	0	603	903	0
475	6	40.7808	138.628	-715.948	-32533.4	66138.9	8674.39	292.379	345.441	0	0	0	0	0	0	0	200	903	0	0	0	0	0	0	0	603	903	0
475	7	39.8652	138.17	-719.915	-33540.4	66016.8	8125.08	291.701	346.589	0	0	0	0	0	0	0	200	903	0	0	0	0	0	0	0	603	903	0
475	8	40.0178	137.407	-718.39	-32441.8	66261	7804.65	292.235	345.159	0	0	0	0	0	0	0	200	903	0	0	0	0	0	0	0	603	903	0
475	9	38.7971	134.66	-723.272	-33082.7	66566.2	8262.41	292.035	345.74	0	0	0	0	0	0	0	200	903	0	0	0	0	0	0	0	603	903	0
476	0	40.1704	132.829	-724.493	-33357.3	66444.1	7850.42	291.711	346.042	0	0	0	0	0	0	0	200	903	0	0	0	0	0	0	0	603	903	0
476	1	38.1868	132.677	-726.324	-34547.5	66993.4	7896.2	292.236	347.565	0	0	0	0	0	0	0	200	903	0	0	0	0	0	0	0	603	903	0
476	2	39.56	132.372	-726.935	-34822.2	66871.3	7621.54	291.991	347.903	0	0	0	0	0	0	0	200	903	0	0	0	0	0	0	0	603	903	0
476	3	38.6445	130.846	-729.986	-34272.9	66566.2	7392.66	291.188	346.95	0	0	0	0	0	0	0	200	903	0	0	0	0	0	0	0	603	903	0
476	4	39.56	129.625	-730.902	-34822.2	67115.5	7072.22	291.826	347.643	0	0	0	0	0	0	0	200	903	0	0	0	0	0	0	0	603	903	0
476	5	39.2549	128.557	-735.785	-35554.6	67237.5	7255.33	291.382	348.322	0	0	0	0	0	0	0	200	903	0	0	0	0	0	0	0	603	903	0
476	6	38.6445	128.252	-736.7	-36195.5	67054.5	7026.44	291.02	349.132	0	0	0	0	0	0	0	200	903	0	0	0	0	0	0	0	603	903	0
476	7	38.1868	125.505	-738.531	-35920.8	67420.7	6751.79	291.29	348.638	0	0	0	0	0	0	0	200	903	0	0	0	0	0	0	0	603	903	0
476	8	39.4075	126.116	-739.142	-35829.2	67725.8	6706.01	291.628	348.474	0	0	0	0	0	0	0	200	903	0	0	0	0	0	0	0	603	903	0
476	9	39.2549	124.742	-740.667	-36195.5	67481.7	6339.8	291.109	348.869	0	0	0	0	0	0	0	200	903	0	0	0	0	0	0	0	603	903	0
477	0	40.0178	123.216	-743.414	-37202.6	67359.6	6248.25	290.608	350.043	0	0	0	0	0	0	0	200	903	0	0	0	0	0	0	0	603	903	0
477	1	40.4756	123.522	-744.635	-37568.8	67664.8	5973.59	290.87	350.453	0	0	0	0	0	0	0	200	903	0	0	0	0	0	0	0	603	903	0
477	2	40.6282	122.148	-749.518	-37111	67847.9	5836.26	290.522	349.513	0	0	0	0	0	0	0	200	903	0	0	0	0	0	0	0	603	903	0
477	3	40.323	120.317	-744.024	-37019.4	68092	5241.17	291.519	349.756	0	0	0	0	0	0	0	200	903	0	0	0	0	0	0	0	603	903	0
477	4	40.7808	119.249	-752.264	-37843.4	67970	5561.6	290.354	350.306	0	0	0	0	0	0	0	200	903	0	0	0	0	0	0	0	603	903	0
477	5	41.6963	118.791	-751.043	-38758.9	68336.2	5378.5	290.988	351.607	0	0	0	0	0	0	0	200	903	0	0	0	0	0	0	0	603	903	0
477	6	39.8652	117.113	-753.79	-38850.5	68336.2	5195.39	290.657	351.54	0	0	0	0	0	0	0	200	903	0	0	0	0	0	0	0	603	903	0
477	7	40.1704	116.197	-753.79	-38484.3	67481.7	5286.94	289.523	351.054	0	0	0	0	0	0	0	200	903	0	0	0	0	0	0	0	603	903	0
477	8	39.4075	115.282	-755.316	-38209.6	68397.3	5103.84	290.555	350.588	0	0	0	0	0	0	0	200	903	0	0	0	0	0	0	0	603	903	0
477	9	40.1704	114.061	-758.368	-38758.9	68336.2	5195.39	290.11	351.108	0	0	0	0	0	0	0	200	903	0	0	0	0	0	0	0	603	903	0
478	0	38.4919	114.061	-759.588	-39582.9	68153.1	4691.85	289.724	352.111	0	0	0	0	0	0	0	200	903	0	0	0	0	0	0	0	603	903	0
478	1	38.1868	111.62	-760.199	-39949.1	67970	4966.51	289.411	352.551	0	0	0	0	0	0	0	200	903	0	0	0	0	0	0	0	603	903	0
478	2	37.2712	111.467	-761.419	-39491.4	67725.8	4646.07	288.947	351.865	0	0	0	0	0	0	0	200	903	0	0	0	0	0	0	0	603	903	0
478	3	36.5083	109.178	-760.809	-39766	68092	4600.3	289.5	352.268	0	0	0	0	0	0	0	200	903	0	0	0	0	0	0	0	603	903	0
478	4	36.6609	108.568	-759.893	-40223.8	67298.6	4279.86	288.563	352.933	0	0	0	0	0	0	0	200	903	0	0	0	0	0	0	0	603	903	0
478	5	37.729	107.347	-761.725	-40590	67481.7	4142.53	288.591	353.287	0	0	0	0	0	0	0	200	903	0	0	0	0	0	0	0	603	903	0
478	6	37.5764	107.042	-759.893	-41139.3	67725.8	4096.76	289.125	354.138	0	0	0	0	0	0	0	200	903	0	0	0	0	0	0	0	603	903	0
478	7	36.8135	105.974	-762.945	-40498.5	67725.8	4188.31	288.769	353.082	0	0	0	0	0	0	0	200	903	0	0	0	0	0	0	0	603	903	0
478	8	37.1186	104.143	-758.673	-40681.6	67481.7	4005.2	288.947	353.622	0	0	0	0	0	0	0	200	903	0	0	0	0	0	0	0	603	903	0
478	9	36.0505	103.227	-761.419	-40681.6	67359.6	3776.32	288.466	353.429	0	0	0	0	0	0	0	200	903	0	0	0	0	0	0	0	603	903	0
479	0	37.2712	102.617	-757.757	-41597.1	67420.7	3776.32	288.974	354.895	0	0	0	0	0	0	0	200	903	0	0	0	0	0	0	0	603	903	0
479	1	36.2031	102.77	-757.757	-41780.2	66749.3	3318.56	288.088	355.137	0	0	0	0	0	0	0	200	903	0	0	0	0	0	0	0	603	903	0
479	2	36.9661	100.939	-757.452	-42421	67054.5	3776.32	288.526	356.005	0	0	0	0	0	0	0	200	903	0	0	0	0	0	0	0	603	903	0
479	3	36.2031	98.9549	-755.926	-41505.5	66749.3	3501.66	288.301	354.907	0	0	0	0	0	0	0	200	903	0	0	0	0	0	0	0	603	903	0
479	4	35.135	98.8023	-757.757	-41780.2	66566.2	3638.99	287.846	355.137	0	0	0	0	0	0	0	200	903	0	0	0	0	0	0	0	603	903	0
479	5	35.5928	97.5816	-751.043	-42787.3	66383	3089.68	288.388	356.97	0	0	0	0	0	0	0	200	903	0	0	0	0	0	0	0	603	903	0
479	6	34.9824	97.2765	-755.316	-42421	66200	3043.9	287.645	356.163	0	0	0	0	0	0	0	200	903	0	0	0	0	0	0	0	603	903	0
479	7	35.7453	96.2083	-751.043	-42237.9	66016.8	3227.01	287.9	356.239	0	0	0	0	0	0	0	200	903	0	0	0	0	0	0	0	603	903	0
479	8	33.9143	94.6825	-751.959	-42421	66016.8	3364.33	287.793	356.414	0	0	0	0	0	0	0	200	903	0	0	0	0	0	0	0	603	903	0
479	9	33.6091	91.6307	-745.55	-42421	65528.6	2952.35	287.893	356.899	0	0	0	0	0	0	0	200	903	0	0	0	0	0	0	0	603	903	0
480	0	33.6091	92.3936	-746.771	-42695.7	65650.6	2952.35	287.913	357.174	0	0	0	0	0	0	0	200	903	0	0	0	0	0	0	0	603	903	0
480	1	34.2195	92.0885	-747.686	-42878.8	65589.6	2998.12	287.723	357.349	0	0	0	0	0	0	0	200	903	0	0	0	0	0	0	0	603	903	0
480	2	34.0669	90.5626	-745.855	-42695.7	64552	2677.69	286.548	357.244	0	0	0	0	0	0	0	200	903	0	0	0	0	0	0	0	603	903	0
480	3	33.7617	89.0367	-741.278	-41871.7	65101.3	2815.02	287.823	356.486	0	0	0	0	0	0	0	200	903	0	0	0	0	0	0	0	603	903	0
480	4	32.8462	86.2901	-741.888	-42695.7	64796.1	2769.24	287.34	357.55	0	0	0	0	0	0	0	200	903	0	0	0	0	0	0	0	603	903	0
480	5	32.541	87.3582	-739.752	-43428.1	64124.8	2769.24	286.684	358.706	0	0	0	0	0	0	0	200	903	0	0	0	0	0	0	0	603	903	0
480	6	32.3884	87.0531	-735.785	-43428.1	64124.8	2586.14	287.152	359.023	0	0	0	0	0	0	0	200	903	0	0	0	0	0	0	0	603	903	0
480	7	32.541	85.5272	-734.564	-42604.2	63819.6	2540.36	286.881	357.999	0	0	0	0	0	0	0	200	903	0	0	0	0	0	0	0	603	903	0
480	8	32.8462	83.6961	-730.902	-42878.8	63514.4	2403.03	286.899	358.666	0	0	0	0	0	0	0	200	903	0	0	0	0	0	0	0	603	903	0
480	9	33.1514	82.9332	-728.766	-43428.1	63392.3	2219.93	286.986	359.591	0	0	0	0	0	0	0	200	903	0	0	0	0	0	0	0	603	903	0
481	0	32.9988	81.8651	-727.85	-43061.9	63026.1	2403.03	286.592	359.163	0	0	0	0	0	0	0	200	903	0	0	0	0	0	0	0	603	903	0
481	1	33.6091	81.1021	-725.103	-42787.3	62782	2174.15	286.584	359.008	0	0	0	0	0	0	0	200	903	0	0	0	0	0	0	0	603	903	0
481	2	32.9988	79.8814	-721.747	-42421	62843	2174.15	287.071	358.776	0	0	0	0	0	0	0	200	903	0	0	0	0	0	0	0	603	903	0
481	3	32.8462	78.8133	-719.915	-43245	61866.5	1991.04	285.936	360.07	0	0	0	0	0	0	0	200	903	0	0	0	0	0	0	0	603	903	0
481	4	32.9988	77.8978	-715.948	-42970.4	62110.6	2128.37	286.753	360.019	0	0	0	0	0	0	0	200	903	0	0	0	0	0	0	0	603	903	0
481	5	32.8462	76.5245	-708.014	-42054.8	61561.3	1853.72	286.949	359.398	0	0	0	0	0	0	0	200	903	0	0	0	0	0	0	0	603	903	0
481	6	32.9988	75.1512	-708.929	-42237.9	61256.1	1807.94	286.407	359.58	0	0	0	0	0	0	0	200	903	0	0	0	0	0	0	0	603	903	0
481	7	34.9824	74.0831	-706.793	-43519.7	61073	1395.95	286.409	361.573	0	0	0	0	0	0	0	200	903	0	0	0	0	0	0	0	603	903	0
481	8	33.4565	73.9305	-704.962	-43245	60401.6	1579.06	285.681	361.344	0	0	0	0	0	0	0	200	903	0	0	0	0	0	0	0	603	903	0
481	9	33.1514	72.7098	-699.164	-43885.9	60218.5	1579.06	286.129	362.769	0	0	0	0	0	0	0	200	903	0	0	0	0	0	0	0	603	903	0
482	0	33.3039	71.1839	-697.943	-41871.7	60157.5	1212.85	286.193	359.993	0	0	0	0	0	0	0	200	903	0	0	0	0	0	0	0	603	903	0
482	1	34.0669	69.9632	-691.534	-43245	59547.1	1395.95	286.109	362.535	0	0	0	0	0	0	0	200	903	0	0	0	0	0	0	0	603	903	0
482	2	34.0669	70.421	-688.788	-42970.4	59608.2	1212.85	286.541	362.385	0	0	0	0	0	0	0	200	903	0	0	0	0	0	0	0	603	903	0
482	3	35.135	68.1322	-684.515	-43428.1	59241.9	1167.07	286.546	363.444	0	0	0	0	0	0	0	200	903	0	0	0	0	0	0	0	603	903	0
482	4	34.8298	67.0641	-681.463	-42970.4	58814.7	1121.29	286.306	363.056	0	0	0	0	0	0	0	200	903	0	0	0	0	0	0	0	603	903	0
482	5	34.5246	66.4537	-680.243	-42970.4	58448.5	1395.95	285.923	363.169	0	0	0	0	0	0	0	200	903	0	0	0	0	0	0	0	603	903	0
482	6	34.9824	65.8434	-677.191	-43702.8	58265.4	892.411	286.04	364.535	0	0	0	0	0	0	0	200	903	0	0	0	0	0	0	0	603	903	0
482	7	34.5246	65.3856	-674.139	-43885.9	57655	1167.07	285.524	365.099	0	0	0	0	0	0	0	200	903	0	0	0	0	0	0	0	603	903	0
482	8	34.6772	64.3175	-667.73	-42787.3	57533	663.53	286.162	364.079	0	0	0	0	0	0	0	200	903	0	0	0	0	0	0	0	603	903	0
482	9	35.4402	63.0968	-663.763	-42146.4	56983.6	755.082	285.849	363.496	0	0	0	0	0	0	0	200	903	0	0	0	0	0	0	0	603	903	0
483	0	34.6772	62.7916	-656.744	-43611.2	56495.4	892.411	286.023	366.405	0	0	0	0	0	0	0	200	903	0	0	0	0	0	0	0	603	903	0
483	1	35.5928	60.5028	-656.439	-43702.8	56190.2	571.977	285.599	366.576	0	0	0	0	0	0	0	200	903	0	0	0	0	0	0	0	603	903	0
483	2	35.4402	60.808	-652.166	-43977.5	55885	480.424	285.691	367.433	0	0	0	0	0	0	0	200	903	0	0	0	0	0	0	0	603	903	0
483	3	35.5928	59.8924	-650.03	-42512.6	55640.9	297.318	285.597	365.401	0	0	0	0	0	0	0	200	903	0	0	0	0	0	0	0	603	903	0
483	4	36.0505	58.214	-645.453	-42787.3	55762.9	251.542	286.394	366.29	0	0	0	0	0	0	0	200	903	0	0	0	0	0	0	0	603	903	0
483	5	35.4402	58.0614	-642.706	-43336.6	55274.7	205.766	286.003	367.428	0	0	0	0	0	0	0	200	903	0	0	0	0	0	0	0	603	903	0
483	6	36.3557	56.0777	-636.297	-42970.4	54969.5	388.871	286.39	367.532	0	0	0	0	0	0	0	200	903	0	0	0	0	0	0	0	603	903	0
483	7	35.4402	54.857	-633.246	-43336.6	54664.3	297.318	286.324	368.436	0	0	0	0	0	0	0	200	903	0	0	0	0	0	0	0	603	903	0
483	8	36.0505	55.3148	-631.414	-42604.2	54115	159.989	285.704	367.474	0	0	0	0	0	0	0	200	903	0	0	0	0	0	0	0	603	903	0
483	9	36.0505	53.3311	-626.227	-42512.6	53931.9	-23.1163	286.122	367.887	0	0	0	0	0	0	0	200	903	0	0	0	0	0	0	0	603	903	0
484	0	36.5083	52.1104	-625.006	-43245	53748.8	-23.1163	285.997	369.191	0	0	0	0	0	0	0	200	903	0	0	0	0	0	0	0	603	903	0
484	1	36.0505	51.8053	-621.649	-43702.8	53321.5	-68.8927	285.774	370.301	0	0	0	0	0	0	0	200	903	0	0	0	0	0	0	0	603	903	0
484	2	35.2876	51.1949	-617.987	-42970.4	53138.4	-206.222	285.986	369.533	0	0	0	0	0	0	0	200	903	0	0	0	0	0	0	0	603	903	0
484	3	36.0505	49.669	-614.63	-43153.5	52345	-343.551	285.165	370.211	0	0	0	0	0	0	0	200	903	0	0	0	0	0	0	0	603	903	0
484	4	36.0505	47.6854	-610.357	-42329.5	52406	-526.656	285.861	369.352	0	0	0	0	0	0	0	200	903	0	0	0	0	0	0	0	603	903	0
484	5	35.5928	48.1432	-606.085	-43428.1	51856.7	-435.104	285.56	371.654	0	0	0	0	0	0	0	200	903	0	0	0	0	0	0	0	603	903	0
484	6	35.135	47.838	-602.423	-43611.2	51673.6	-526.656	285.776	372.393	0	0	0	0	0	0	0	200	903	0	0	0	0	0	0	0	603	903	0
484	7	35.8979	45.8543	-600.592	-42878.8	51368.4	-526.656	285.53	371.394	0	0	0	0	0	0	0	200	903	0	0	0	0	0	0	0	603	903	0
484	8	36.8135	45.3966	-596.93	-42787.3	51368.4	-663.985	286.054	371.679	0	0	0	0	0	0	0	200	903	0	0	0	0	0	0	0	603	903	0
484	9	35.5928	44.6336	-597.235	-43428.1	50636	-847.091	284.784	372.715	0	0	0	0	0	0	0	200	903	0	0	0	0	0	0	0	603	903	0
485	0	36.3557	44.1759	-592.047	-42970.4	50880.1	-847.091	285.939	372.579	0	0	0	0	0	0	0	200	903	0	0	0	0	0	0	0	603	903	0
485	1	35.2876	41.5819	-590.216	-43245	50208.7	-892.867	285.068	373.27	0	0	0	0	0	0	0	200	903	0	0	0	0	0	0	0	603	903	0
485	2	35.7453	42.1922	-586.554	-43245	49964.6	-1075.97	285.183	373.727	0	0	0	0	0	0	0	200	903	0	0	0	0	0	0	0	603	903	0
485	3	34.8298	41.2767	-582.892	-42695.7	49903.6	-1167.53	285.614	373.248	0	0	0	0	0	0	0	200	903	0	0	0	0	0	0	0	603	903	0
485	4	35.135	40.8189	-578.314	-43977.5	49415.3	-1213.3	285.447	376.044	0	0	0	0	0	0	0	200	903	0	0	0	0	0	0	0	603	903	0
485	5	35.7453	40.8189	-578.314	-42787.3	49415.3	-1167.53	285.447	373.986	0	0	0	0	0	0	0	200	903	0	0	0	0	0	0	0	603	903	0
485	6	35.4402	37.7672	-572.821	-44160.6	49171.1	-1259.08	285.84	377.093	0	0	0	0	0	0	0	200	903	0	0	0	0	0	0	0	603	903	0
485	7	35.7453	39.1405	-574.347	-43245	48988	-1442.18	285.294	375.294	0	0	0	0	0	0	0	200	903	0	0	0	0	0	0	0	603	903	0
485	8	35.2876	37.1568	-570.685	-43336.6	48560.8	-1350.63	285.092	375.938	0	0	0	0	0	0	0	200	903	0	0	0	0	0	0	0	603	903	0
485	9	35.2876	36.6991	-568.548	-43977.5	48438.7	-1533.74	285.197	377.35	0	0	0	0	0	0	0	200	903	0	0	0	0	0	0	0	603	903	0
486	0	34.9824	35.0206	-566.107	-43885.9	47401.1	-1579.51	283.732	377.522	0	0	0	0	0	0	0	200	903	0	0	0	0	0	0	0	603	903	0
486	1	35.8979	35.9361	-562.14	-44343.7	48133.5	-1808.4	285.626	378.884	0	0	0	0	0	0	0	200	903	0	0	0	0	0	0	0	603	903	0
486	2	34.6772	35.3258	-558.172	-43702.8	47706.3	-1579.51	285.469	378.296	0	0	0	0	0	0	0	200	903	0	0	0	0	0	0	0	603	903	0
486	3	35.8979	34.1051	-557.257	-42970.4	47218	-1716.84	284.733	377.111	0	0	0	0	0	0	0	200	903	0	0	0	0	0	0	0	603	903	0
486	4	35.4402	33.3421	-554.815	-43519.7	47462.2	-1945.72	285.546	378.44	0	0	0	0	0	0	0	200	903	0	0	0	0	0	0	0	603	903	0
486	5	35.7453	32.4266	-553.9	-44435.2	46851.8	-1991.5	284.585	380.223	0	0	0	0	0	0	0	200	903	0	0	0	0	0	0	0	603	903	0
486	6	35.2876	33.4947	-549.933	-44252.1	46851.8	-1945.72	285.196	380.468	0	0	0	0	0	0	0	200	903	0	0	0	0	0	0	0	603	903	0
486	7	34.9824	31.8163	-549.627	-44343.7	46607.7	-2037.28	284.799	380.68	0	0	0	0	0	0	0	200	903	0	0	0	0	0	0	0	603	903	0
486	8	34.8298	31.8163	-548.102	-44160.6	46424.6	-1991.5	284.701	380.57	0	0	0	0	0	0	0	200	903	0	0	0	0	0	0	0	603	903	0
486	9	34.5246	31.0533	-543.829	-44984.5	45997.3	-2037.28	284.581	382.718	0	0	0	0	0	0	0	200	903	0	0	0	0	0	0	0	603	903	0
487	0	34.6772	31.8163	-538.946	-43519.7	46180.4	-2311.94	285.687	380.75	0	0	0	0	0	0	0	200	903	0	0	0	0	0	0	0	603	903	0
487	1	34.2195	29.68	-539.251	-45076.1	45142.8	-2311.94	283.714	383.59	0	0	0	0	0	0	0	200	903	0	0	0	0	0	0	0	603	903	0
487	2	35.7453	29.9852	-535.894	-44893	45692.1	-2266.16	285.263	383.772	0	0	0	0	0	0	0	200	903	0	0	0	0	0	0	0	603	903	0
487	3	34.2195	29.68	-538.336	-44801.4	45387	-2311.94	284.31	383.222	0	0	0	0	0	0	0	200	903	0	0	0	0	0	0	0	603	903	0
487	4	33.9143	29.2223	-533.148	-46174.7	45142.8	-2220.38	284.672	386.608	0	0	0	0	0	0	0	200	903	0	0	0	0	0	0	0	603	903	0
487	5	33.7617	29.3748	-534.674	-45076.1	45020.8	-2128.83	284.202	384.306	0	0	0	0	0	0	0	200	903	0	0	0	0	0	0	0	603	903	0
487	6	32.9988	27.5438	-531.622	-46357.8	44715.6	-2586.59	284.112	387.201	0	0	0	0	0	0	0	200	903	0	0	0	0	0	0	0	603	903	0
487	7	32.9988	28.7645	-528.265	-45076.1	44898.7	-2586.59	284.993	385.329	0	0	0	0	0	0	0	200	903	0	0	0	0	0	0	0	603	903	0
487	8	32.2358	26.7809	-524.908	-45991.6	44593.5	-2220.38	284.955	387.618	0	0	0	0	0	0	0	200	903	0	0	0	0	0	0	0	603	903	0
487	9	32.8462	27.086	-524.908	-46266.3	44349.4	-2449.26	284.49	388.142	0	0	0	0	0	0	0	200	903	0	0	0	0	0	0	0	603	903	0
488	0	32.0832	26.9334	-520.941	-45442.3	44166.3	-2586.59	284.782	387.231	0	0	0	0	0	0	0	200	903	0	0	0	0	0	0	0	603	903	0
488	1	32.0832	25.7127	-524.298	-46632.5	44288.3	-2723.92	284.472	388.943	0	0	0	0	0	0	0	200	903	0	0	0	0	0	0	0	603	903	0
488	2	31.4729	26.0179	-521.246	-45991.6	43922.1	-2815.48	284.264	388.234	0	0	0	0	0	0	0	200	903	0	0	0	0	0	0	0	603	903	0
488	3	31.4729	24.9498	-521.551	-46266.3	43861.1	-2495.04	284.097	388.709	0	0	0	0	0	0	0	200	903	0	0	0	0	0	0	0	603	903	0
488	4	31.1677	24.492	-520.025	-47090.2	43433.8	-2723.92	283.523	390.554	0	0	0	0	0	0	0	200	903	0	0	0	0	0	0	0	603	903	0
488	5	29.7944	24.3394	-516.974	-46449.4	43372.8	-2769.7	283.898	389.849	0	0	0	0	0	0	0	200	903	0	0	0	0	0	0	0	603	903	0
488	6	30.0996	24.492	-516.058	-46907.1	43372.8	-2632.37	284.046	390.895	0	0	0	0	0	0	0	200	903	0	0	0	0	0	0	0	603	903	0
488	7	29.7944	22.9662	-515.753	-47364.9	43006.6	-2998.58	283.386	391.836	0	0	0	0	0	0	0	200	903	0	0	0	0	0	0	0	603	903	0
488	8	29.6418	22.9662	-514.837	-47364.9	43189.7	-2861.25	283.89	392	0	0	0	0	0	0	0	200	903	0	0	0	0	0	0	0	603	903	0
488	9	28.8789	21.2877	-514.227	-48188.9	42884.5	-2540.82	283.396	393.711	0	0	0	0	0	0	0	200	903	0	0	0	0	0	0	0	603	903	0
489	0	28.7263	22.2032	-513.617	-48188.9	42884.5	-2357.71	283.495	393.823	0	0	0	0	0	0	0	200	903	0	0	0	0	0	0	0	603	903	0
489	1	27.2004	21.4403	-513.006	-48188.9	42518.3	-3044.36	282.881	393.934	0	0	0	0	0	0	0	200	903	0	0	0	0	0	0	0	603	903	0
489	2	28.4211	22.3558	-509.649	-47548	42823.5	-2907.03	284.025	393.296	0	0	0	0	0	0	0	200	903	0	0	0	0	0	0	0	603	903	0
489	3	26.5901	20.8299	-507.818	-47822.7	41908	-3044.36	282.526	394.173	0	0	0	0	0	0	0	200	903	0	0	0	0	0	0	0	603	903	0
489	4	28.5737	19.9144	-508.123	-48646.7	42579.3	-2907.03	283.797	395.738	0	0	0	0	0	0	0	200	903	0	0	0	0	0	0	0	603	903	0
489	5	26.5901	20.2196	-508.123	-48829.8	42335.2	-3044.36	283.317	396.098	0	0	0	0	0	0	0	200	903	0	0	0	0	0	0	0	603	903	0
489	6	27.353	19.9144	-506.903	-48738.2	42030	-2998.58	282.915	396.149	0	0	0	0	0	0	0	200	903	0	0	0	0	0	0	0	603	903	0
489	7	26.7427	16.8626	-505.377	-48463.6	42274.2	-3090.13	283.649	395.896	0	0	0	0	0	0	0	200	903	0	0	0	0	0	0	0	603	903	0
489	8	26.1323	18.5411	-505.987	-48646.7	41724.9	-3090.13	282.462	396.142	0	0	0	0	0	0	0	200	903	0	0	0	0	0	0	0	603	903	0
489	9	26.2849	18.8463	-502.935	-49562.2	42152.1	-2723.92	283.812	398.546	0	0	0	0	0	0	0	200	903	0	0	0	0	0	0	0	603	903	0
490	0	26.1323	18.0833	-502.63	-50019.9	41785.9	-3181.69	283.134	399.516	0	0	0	0	0	0	0	200	903	0	0	0	0	0	0	0	603	903	0
490	1	28.4211	18.0833	-501.41	-49196	41846.9	-2998.58	283.459	398.115	0	0	0	0	0	0	0	200	903	0	0	0	0	0	0	0	603	903	0
490	2	26.1323	17.1678	-500.494	-49104.4	41602.8	-3090.13	283.123	398.112	0	0	0	0	0	0	0	200	903	0	0	0	0	0	0	0	603	903	0
490	3	26.7427	15.3368	-501.104	-49562.2	41724.9	-3227.46	283.266	398.906	0	0	0	0	0	0	0	200	903	0	0	0	0	0	0	0	603	903	0
490	4	25.9797	16.5575	-499.273	-50477.7	40870.4	-3364.79	281.86	401.102	0	0	0	0	0	0	0	200	903	0	0	0	0	0	0	0	603	903	0
490	5	26.2849	17.3204	-499.579	-50569.3	41419.7	-3044.36	282.909	401.224	0	0	0	0	0	0	0	200	903	0	0	0	0	0	0	0	603	903	0
490	6	27.0478	16.7101	-496.832	-50019.9	41114.5	-3181.69	282.753	400.678	0	0	0	0	0	0	0	200	903	0	0	0	0	0	0	0	603	903	0
490	7	24.9116	16.0997	-496.222	-50294.6	41358.6	-3227.46	283.347	401.355	0	0	0	0	0	0	0	200	903	0	0	0	0	0	0	0	603	903	0
490	8	25.9797	15.4893	-494.696	-50843.9	41175.5	-3273.24	283.234	402.778	0	0	0	0	0	0	0	200	903	0	0	0	0	0	0	0	603	903	0
490	9	25.2168	15.3368	-494.696	-51301.7	40870.4	-3227.46	282.617	403.704	0	0	0	0	0	0	0	200	903	0	0	0	0	0	0	0	603	903	0
491	0	25.3694	15.7945	-495.916	-51210.1	41236.6	-3410.57	283.152	403.264	0	0	0	0	0	0	0	200	903	0	0	0	0	0	0	0	603	903	0
491	1	24.9116	13.6583	-494.391	-51576.3	41114.5	-3456.34	283.162	404.323	0	0	0	0	0	0	0	200	903	0	0	0	0	0	0	0	603	903	0
491	2	24.759	12.8954	-492.56	-51484.8	40931.4	-3410.57	283.099	404.525	0	0	0	0	0	0	0	200	903	0	0	0	0	0	0	0	603	903	0
491	3	23.9961	14.2686	-491.034	-51942.6	40382.1	-3593.67	282.239	405.782	0	0	0	0	0	0	0	200	903	0	0	0	0	0	0	0	603	903	0
491	4	24.9116	14.879	-490.728	-52034.1	40931.4	-3731	283.41	406.034	0	0	0	0	0	0	0	200	903	0	0	0	0	0	0	0	603	903	0
491	5	24.3013	14.4212	-489.203	-51759.4	40748.3	-3639.45	283.295	405.804	0	0	0	0	0	0	0	200	903	0	0	0	0	0	0	0	603	903	0
491	6	26.4375	13.2005	-489.813	-51667.9	40748.3	-3044.36	283.192	405.485	0	0	0	0	0	0	0	200	903	0	0	0	0	0	0	0	603	903	0
491	7	24.759	13.0479	-488.287	-52583.4	40748.3	-3593.67	283.452	407.69	0	0	0	0	0	0	0	200	903	0	0	0	0	0	0	0	603	903	0
491	8	24.759	13.3531	-488.592	-52491.9	40321	-3273.24	282.525	407.435	0	0	0	0	0	0	0	200	903	0	0	0	0	0	0	0	603	903	0
491	9	23.6909	11.5221	-486.151	-52766.5	40321	-3502.12	282.939	408.539	0	0	0	0	0	0	0	200	903	0	0	0	0	0	0	0	603	903	0
492	0	24.3013	12.8954	-484.625	-52675	40443.1	-3685.23	283.452	408.692	0	0	0	0	0	0	0	200	903	0	0	0	0	0	0	0	603	903	0
492	1	23.9961	12.285	-484.32	-52491.9	40260	-3914.11	283.127	408.383	0	0	0	0	0	0	0	200	903	0	0	0	0	0	0	0	603	903	0
492	2	24.3013	11.3695	-482.184	-53773.6	40260	-3731	283.495	411.521	0	0	0	0	0	0	0	200	903	0	0	0	0	0	0	0	603	903	0
492	3	24.4538	12.285	-482.184	-53773.6	40199	-3731	283.369	411.521	0	0	0	0	0	0	0	200	903	0	0	0	0	0	0	0	603	903	0
492	4	24.1487	12.1324	-483.709	-53407.4	39649.7	-3914.11	281.97	410.412	0	0	0	0	0	0	0	200	903	0	0	0	0	0	0	0	603	903	0
492	5	24.9116	11.5221	-483.709	-52858.1	40015.9	-3410.57	282.727	409.277	0	0	0	0	0	0	0	200	903	0	0	0	0	0	0	0	603	903	0
492	6	23.8435	9.38583	-482.489	-53865.2	39710.7	-4097.22	282.304	411.64	0	0	0	0	0	0	0	200	903	0	0	0	0	0	0	0	603	903	0
492	7	24.3013	10.9117	-478.827	-54780.7	39832.8	-3914.11	283.188	414.406	0	0	0	0	0	0	0	200	903	0	0	0	0	0	0	0	603	903	0
492	8	23.9961	11.0643	-481.573	-54689.1	39954.8	-3456.34	282.967	413.564	0	0	0	0	0	0	0	200	903	0	0	0	0	0	0	0	603	903	0
492	9	23.8435	11.0643	-477.301	-54780.7	39771.7	-4097.22	283.326	414.772	0	0	0	0	0	0	0	200	903	0	0	0	0	0	0	0	603	903	0
493	0	24.6064	10.4539	-478.216	-54322.9	39832.8	-3914.11	283.294	413.595	0	0	0	0	0	0	0	200	903	0	0	0	0	0	0	0	603	903	0
493	1	25.8271	10.1488	-479.437	-55787.8	39649.7	-3593.67	282.7	416.361	0	0	0	0	0	0	0	200	903	0	0	0	0	0	0	0	603	903	0
493	2	24.759	11.2169	-480.047	-54780.7	39710.7	-4005.66	282.722	414.115	0	0	0	0	0	0	0	200	903	0	0	0	0	0	0	0	603	903	0
493	3	24.3013	9.8436	-480.047	-55970.9	39283.4	-4005.66	281.832	416.595	0	0	0	0	0	0	0	200	903	0	0	0	0	0	0	0	603	903	0
493	4	24.6064	9.38583	-479.132	-55421.6	39588.6	-3639.45	282.626	415.671	0	0	0	0	0	0	0	200	903	0	0	0	0	0	0	0	603	903	0
493	5	23.6909	8.77548	-476.08	-55879.3	39344.5	-4142.99	282.643	417.374	0	0	0	0	0	0	0	200	903	0	0	0	0	0	0	0	603	903	0
493	6	24.3013	9.8436	-476.996	-56703.3	39588.6	-4097.22	282.996	418.876	0	0	0	0	0	0	0	200	903	0	0	0	0	0	0	0	603	903	0
493	7	24.3013	9.53842	-476.996	-56703.3	39283.4	-3731	282.356	418.876	0	0	0	0	0	0	0	200	903	0	0	0	0	0	0	0	603	903	0
493	8	24.759	9.53842	-476.69	-56520.2	39466.6	-4234.54	282.793	418.568	0	0	0	0	0	0	0	200	903	0	0	0	0	0	0	0	603	903	0
493	9	25.0642	8.77548	-479.437	-56428.6	39527.6	-4371.87	282.446	417.698	0	0	0	0	0	0	0	200	903	0	0	0	0	0	0	0	603	903	0
494	0	24.1487	8.77548	-478.827	-57527.3	39344.5	-4142.99	282.169	420.142	0	0	0	0	0	0	0	200	903	0	0	0	0	0	0	0	603	903	0
494	1	24.3013	8.77548	-477.301	-56611.7	39588.6	-4371.87	282.943	418.608	0	0	0	0	0	0	0	200	903	0	0	0	0	0	0	0	603	903	0
494	2	24.6064	7.40219	-476.996	-57801.9	39161.4	-4234.54	282.1	421.179	0	0	0	0	0	0	0	200	903	0	0	0	0	0	0	0	603	903	0
494	3	24.3013	8.16513	-475.164	-56886.4	39466.6	-3868.33	283.059	419.719	0	0	0	0	0	0	0	200	903	0	0	0	0	0	0	0	603	903	0
494	4	24.6064	6.94443	-475.47	-57893.5	39405.5	-4371.87	282.877	421.761	0	0	0	0	0	0	0	200	903	0	0	0	0	0	0	0	603	903	0
494	5	25.9797	7.85995	-476.08	-58534.4	39344.5	-4371.87	282.643	422.951	0	0	0	0	0	0	0	200	903	0	0	0	0	0	0	0	603	903	0
[truncated: 2,284 more rows]
