# Supplementary material for: The Effects of an Extemporaneous Speech Dual-task on Older Adult Gait Control
Source: Research Square preprint supplement (doi:10.21203/rs.3.rs-7674245/v1), 2025-11-18
Supplement: Supplementary file 135 [file Over1ground05.xlsx]

## Sheet: Sheet1
Trajectories
		01:LFHD			01:RFHD			01:LBHD			01:RBHD			01:C7			01:T10			01:CLAV			01:STRN			01:RBAK			01:LSHO			01:LUPA			01:LELB			01:LFRM			01:LWRA			01:LWRB			01:LFIN
Frame	Sub Frame	X	Y	Z	X	Y	Z	X	Y	Z	X	Y	Z	X	Y	Z	X	Y	Z	X	Y	Z	X	Y	Z	X	Y	Z	X	Y	Z	X	Y	Z	X	Y	Z	X	Y	Z	X	Y	Z	X	Y	Z	X	Y	Z
		mm	mm	mm	mm	mm	mm	mm	mm	mm	mm	mm	mm	mm	mm	mm	mm	mm	mm	mm	mm	mm	mm	mm	mm	mm	mm	mm	mm	mm	mm	mm	mm	mm	mm	mm	mm	mm	mm	mm	mm	mm	mm	mm	mm	mm	mm	mm	mm
354	0	170.27	-2313.56	1576.86	271.458	-2304.35	1576.09	167.104	-2488.6	1587.66	292.358	-2454.23	1592.31	229.593	-2527.69	1459.08	220.489	-2640.89	1217.04	230.715	-2396.51	1347.82	210.503	-2361.01	1164.13	269.405	-2637.8	1291.9	62.5996	-2463.01	1401.34	-23.4878	-2568.2	1202.06	-33.2413	-2589.18	1124.56	-73.0905	-2575.84	1001.56	-37.6693	-2511.83	892.696	-87.9388	-2562.87	894.159	-80.6992	-2525.94	810.06
355	0	168.638	-2299.83	1573.14	269.928	-2289.96	1572.57	165.912	-2474.5	1583.23	290.98	-2439.8	1588.28	228.552	-2512.87	1455.01	220.158	-2626.19	1213.05	229.474	-2381.56	1343.41	210.397	-2346.8	1159.84	268.958	-2622.94	1287.98	61.3964	-2448.62	1396.77	-23.7428	-2555.55	1198.06	-33.1776	-2576.78	1120.61	-73.2971	-2565.54	997.677	-38.6237	-2502.99	887.976	-88.4269	-2554.3	890.233	-81.4562	-2518.64	805.764
356	0	166.881	-2285.94	1569.78	268.269	-2275.48	1569.39	164.56	-2460.29	1579.13	289.477	-2425.31	1584.57	227.379	-2497.95	1451.27	219.814	-2611.35	1209.36	228.101	-2366.48	1339.35	210.073	-2332.34	1155.87	268.467	-2607.94	1284.39	60.0719	-2434.17	1392.49	-24.0558	-2542.67	1194.22	-33.1595	-2564.12	1116.86	-73.515	-2554.84	993.991	-39.5583	-2493.65	883.503	-88.8999	-2545.23	886.51	-82.2074	-2510.77	801.692
357	0	165	-2271.89	1566.77	266.482	-2260.91	1566.54	163.046	-2445.97	1575.37	287.849	-2410.75	1581.2	226.074	-2482.94	1447.87	219.459	-2596.36	1205.98	226.597	-2351.29	1335.66	209.531	-2317.64	1152.23	267.933	-2592.81	1281.12	58.6265	-2419.65	1388.51	-24.4278	-2529.58	1190.54	-33.1867	-2551.2	1113.31	-73.7441	-2543.76	990.506	-40.4731	-2483.8	879.275	-89.3577	-2535.67	882.988	-82.9528	-2502.32	797.847
358	0	162.995	-2257.68	1564.12	264.566	-2246.25	1564.03	161.374	-2431.53	1571.95	286.095	-2396.13	1578.16	224.639	-2467.82	1444.8	219.091	-2581.23	1202.92	224.962	-2335.97	1332.32	208.774	-2302.69	1148.92	267.355	-2577.54	1278.18	57.0617	-2405.07	1384.82	-24.8601	-2516.25	1187.02	-33.2584	-2538.03	1109.95	-73.9843	-2532.3	987.221	-41.368	-2473.46	875.295	-89.8004	-2525.6	879.67	-83.6926	-2493.29	794.228
359	0	160.868	-2243.31	1561.83	262.524	-2231.5	1561.86	159.543	-2416.99	1568.87	284.218	-2381.45	1575.46	223.074	-2452.61	1442.07	218.711	-2565.96	1200.17	223.201	-2320.54	1329.34	207.807	-2287.49	1145.93	266.734	-2562.13	1275.56	55.3805	-2390.42	1381.44	-25.3534	-2502.7	1183.67	-33.3725	-2524.61	1106.79	-74.2357	-2520.44	984.139	-42.2428	-2462.61	871.564	-90.2281	-2515.04	876.555	-84.4267	-2483.67	790.839
360	0	158.624	-2228.8	1559.89	260.359	-2216.66	1560.04	157.559	-2402.34	1566.13	282.22	-2366.71	1573.09	221.384	-2437.3	1439.67	218.318	-2550.55	1197.73	221.317	-2305	1326.73	206.637	-2272.05	1143.28	266.07	-2546.6	1273.28	53.588	-2375.71	1378.35	-25.9073	-2488.93	1180.5	-33.5265	-2510.93	1103.82	-74.498	-2508.2	981.262	-43.097	-2451.26	868.086	-90.6407	-2503.97	873.647	-85.1551	-2473.47	787.682
361	0	156.267	-2214.13	1558.31	258.073	-2201.74	1558.55	155.425	-2387.58	1563.73	280.104	-2351.9	1571.06	219.573	-2421.9	1437.6	217.911	-2535.01	1195.61	219.319	-2289.34	1324.48	205.275	-2256.37	1140.98	265.364	-2530.94	1271.33	51.6919	-2360.93	1375.57	-26.5201	-2474.93	1177.52	-33.7173	-2497	1101.06	-74.7711	-2495.58	978.592	-43.9303	-2439.41	864.867	-91.0384	-2492.4	870.948	-85.8775	-2462.68	784.762
362	0	153.807	-2199.32	1557.08	255.674	-2186.74	1557.42	153.149	-2372.72	1561.68	277.877	-2337.04	1569.38	217.65	-2406.42	1435.88	217.489	-2519.35	1193.82	217.219	-2273.59	1322.61	203.74	-2240.47	1139.03	264.618	-2515.16	1269.72	49.7026	-2346.09	1373.1	-27.1885	-2460.72	1174.75	-33.9416	-2482.82	1098.52	-75.0549	-2482.56	976.133	-44.7419	-2427.04	861.914	-91.4216	-2480.32	868.461	-86.5934	-2451.31	782.086
363	0	151.251	-2184.38	1556.19	253.17	-2171.67	1556.63	150.742	-2357.77	1559.98	275.546	-2322.12	1568.03	215.624	-2390.86	1434.5	217.052	-2503.57	1192.37	215.029	-2257.74	1321.1	202.05	-2224.37	1137.44	263.833	-2499.29	1268.45	47.6336	-2331.19	1370.94	-27.9087	-2446.29	1172.2	-34.1961	-2468.38	1096.19	-75.3496	-2469.16	973.89	-45.5309	-2414.17	859.233	-91.7907	-2467.73	866.192	-87.3015	-2439.33	779.661
364	0	148.612	-2169.33	1555.65	250.573	-2156.53	1556.2	148.215	-2342.72	1558.62	273.122	-2307.15	1567.03	213.509	-2375.23	1433.46	216.599	-2487.7	1191.24	212.768	-2241.82	1319.97	200.231	-2208.07	1136.23	263.014	-2483.32	1267.53	45.5012	-2316.24	1369.09	-28.6758	-2431.66	1169.9	-34.4782	-2453.71	1094.08	-75.6553	-2455.37	971.866	-46.2964	-2400.79	856.834	-92.1467	-2454.64	864.144	-88.0003	-2426.75	777.493
365	0	145.903	-2154.16	1555.45	247.894	-2141.33	1556.11	145.584	-2327.59	1557.61	270.617	-2292.13	1566.38	211.319	-2359.55	1432.77	216.129	-2471.76	1190.46	210.455	-2225.83	1319.2	198.313	-2191.63	1135.39	262.164	-2467.28	1266.95	43.3243	-2301.23	1367.57	-29.4843	-2416.83	1167.86	-34.7858	-2438.79	1092.21	-75.9727	-2441.19	970.067	-47.0373	-2386.89	854.725	-92.4907	-2441.02	862.32	-88.6875	-2413.57	775.591
366	0	143.141	-2138.91	1555.56	245.15	-2126.09	1556.36	142.869	-2312.39	1556.95	268.047	-2277.08	1566.06	209.073	-2343.83	1432.41	215.644	-2455.76	1190.03	208.113	-2209.8	1318.8	196.325	-2175.07	1134.93	261.289	-2451.19	1266.73	41.1241	-2286.17	1366.37	-30.3281	-2401.8	1166.09	-35.1179	-2423.64	1090.59	-76.3026	-2426.62	968.495	-47.7526	-2372.46	852.914	-92.8246	-2426.89	860.726	-89.3604	-2399.76	773.959
367	0	140.343	-2123.58	1555.99	242.358	-2110.82	1556.94	140.089	-2297.12	1556.62	265.429	-2261.99	1566.08	206.79	-2328.08	1432.39	215.145	-2439.74	1189.93	205.767	-2193.75	1318.76	194.3	-2158.45	1134.84	260.396	-2435.06	1266.86	38.9232	-2271.08	1365.49	-31.2011	-2386.59	1164.62	-35.4745	-2408.25	1089.2	-76.6465	-2411.66	967.153	-48.4413	-2357.52	851.409	-93.1505	-2412.23	859.363	-90.0157	-2385.34	772.604
368	0	137.528	-2108.18	1556.7	239.54	-2095.52	1557.82	137.27	-2281.81	1556.63	262.783	-2246.88	1566.42	204.492	-2312.33	1432.69	214.635	-2423.71	1190.19	203.442	-2177.71	1319.07	192.272	-2141.8	1135.11	259.493	-2418.93	1267.33	36.7449	-2255.94	1364.93	-32.0973	-2371.19	1163.44	-35.8568	-2392.64	1088.07	-77.006	-2396.31	966.043	-49.1022	-2342.06	850.215	-93.4714	-2397.04	858.233	-90.6502	-2370.28	771.527
369	0	134.717	-2092.75	1557.68	236.717	-2080.21	1559	134.437	-2266.46	1556.96	260.13	-2231.74	1567.08	202.2	-2296.58	1433.31	214.116	-2407.69	1190.77	201.162	-2161.69	1319.7	190.273	-2125.19	1135.72	258.589	-2402.81	1268.14	34.6124	-2240.79	1364.68	-33.0113	-2355.62	1162.56	-36.2668	-2376.82	1087.18	-77.3833	-2380.58	965.164	-49.7346	-2326.08	849.335	-93.7905	-2381.33	857.335	-91.2606	-2354.59	770.729
370	0	131.931	-2077.29	1558.91	233.911	-2064.89	1560.44	131.617	-2251.08	1557.59	257.494	-2216.6	1568.04	199.938	-2280.86	1434.24	213.592	-2391.73	1191.68	198.955	-2145.72	1320.65	188.335	-2108.66	1136.66	257.69	-2386.73	1269.26	32.5479	-2225.62	1364.74	-33.9386	-2339.87	1161.97	-36.7078	-2360.79	1086.54	-77.7808	-2364.47	964.512	-50.3376	-2309.58	848.77	-94.1115	-2365.09	856.667	-91.8442	-2338.25	770.207
371	0	129.193	-2061.81	1560.36	231.146	-2049.58	1562.1	128.837	-2235.7	1558.52	254.898	-2201.45	1569.28	197.727	-2265.18	1435.44	213.066	-2375.83	1192.89	196.842	-2129.82	1321.89	186.489	-2092.27	1137.88	256.806	-2370.71	1270.68	30.572	-2210.44	1365.09	-34.8758	-2323.95	1161.67	-37.1835	-2344.56	1086.15	-78.2011	-2347.98	964.084	-50.9106	-2292.58	848.517	-94.4384	-2348.31	856.225	-92.3986	-2321.27	769.956
372	0	126.523	-2046.35	1562	228.447	-2034.28	1563.97	126.126	-2220.32	1559.72	252.364	-2186.31	1570.79	195.587	-2249.56	1436.9	212.541	-2360.03	1194.38	194.847	-2114.02	1323.38	184.761	-2076.07	1139.36	255.942	-2354.77	1272.37	28.7029	-2195.28	1365.71	-35.8204	-2307.88	1161.64	-37.6984	-2328.16	1085.98	-78.6469	-2331.12	963.871	-51.4531	-2275.07	848.573	-94.775	-2331.01	856.004	-92.9223	-2303.65	769.971
373	0	123.944	-2030.91	1563.8	225.836	-2019.01	1566	123.51	-2204.97	1561.17	249.914	-2171.17	1572.53	193.537	-2234.01	1438.59	212.019	-2344.34	1196.13	192.987	-2098.34	1325.12	183.179	-2060.08	1141.07	255.105	-2338.94	1274.31	26.956	-2180.13	1366.59	-36.7705	-2291.66	1161.86	-38.2569	-2311.6	1086.03	-79.1208	-2313.9	963.865	-51.9648	-2257.07	848.928	-95.1247	-2313.2	855.995	-93.4145	-2285.38	770.242
374	0	121.473	-2015.52	1565.73	223.337	-2003.76	1568.15	121.014	-2189.64	1562.84	247.571	-2156.06	1574.48	191.592	-2218.56	1440.49	211.5	-2328.78	1198.11	191.279	-2082.8	1327.05	181.763	-2044.33	1142.96	254.296	-2323.22	1276.46	25.3433	-2165	1367.71	-37.7248	-2275.31	1162.31	-38.8634	-2294.88	1086.28	-79.6252	-2296.33	964.053	-52.4452	-2238.59	849.574	-95.4908	-2294.87	856.19	-93.8753	-2266.48	770.76
375	0	119.131	-2000.17	1567.78	220.969	-1988.55	1570.41	118.661	-2174.36	1564.7	245.353	-2140.96	1576.61	189.766	-2203.19	1442.57	210.985	-2313.35	1200.29	189.734	-2067.4	1329.16	180.532	-2028.85	1145.01	253.518	-2307.64	1278.8	23.8736	-2149.91	1369.03	-38.6816	-2258.85	1162.97	-39.5216	-2278.03	1086.71	-80.1621	-2278.43	964.425	-52.8943	-2219.66	850.498	-95.8754	-2276.05	856.581	-94.3059	-2246.95	771.516
376	0	116.932	-1984.88	1569.9	218.752	-1973.39	1572.73	116.469	-2159.13	1566.74	243.277	-2125.9	1578.88	188.067	-2187.94	1444.79	210.472	-2298.08	1202.64	188.36	-2052.15	1331.41	179.502	-2013.64	1147.16	252.772	-2292.2	1281.28	22.5521	-2134.86	1370.53	-39.639	-2242.29	1163.8	-40.2346	-2261.06	1087.3	-80.7332	-2260.2	964.965	-53.3116	-2200.29	851.689	-96.2801	-2256.74	857.155	-94.708	-2226.81	772.5
377	0	114.89	-1969.67	1572.07	216.7	-1958.27	1575.08	114.455	-2143.96	1568.91	241.357	-2110.87	1581.28	186.504	-2172.79	1447.13	209.958	-2282.95	1205.12	187.161	-2037.06	1333.77	178.681	-1998.69	1149.41	252.055	-2276.91	1283.88	21.3802	-2119.85	1372.18	-40.5948	-2225.65	1164.79	-41.0044	-2243.99	1088.04	-81.3395	-2241.67	965.661	-53.6972	-2180.52	853.132	-96.7054	-2236.98	857.903	-95.0834	-2206.07	773.704
378	0	113.016	-1954.53	1574.27	214.827	-1943.2	1577.45	112.628	-2128.86	1571.19	239.603	-2095.87	1583.75	185.079	-2157.74	1449.55	209.441	-2267.99	1207.7	186.138	-2022.13	1336.21	178.074	-1984	1151.7	251.366	-2261.77	1286.56	20.356	-2104.9	1373.96	-41.5462	-2208.95	1165.9	-41.832	-2226.82	1088.9	-81.9816	-2222.85	966.497	-54.0511	-2160.35	854.813	-97.1514	-2216.78	858.815	-95.4345	-2184.77	775.122
379	0	111.317	-1939.47	1576.48	213.14	-1928.19	1579.8	110.996	-2113.83	1573.55	238.024	-2080.92	1586.28	183.793	-2142.81	1452.03	208.917	-2253.17	1210.34	185.287	-2007.34	1338.7	177.679	-1969.54	1154.03	250.701	-2246.78	1289.28	19.4742	-2089.99	1375.83	-42.4901	-2192.21	1167.11	-42.7174	-2209.58	1089.86	-82.6597	-2203.77	967.459	-54.3735	-2139.84	856.719	-97.617	-2196.16	859.881	-95.7631	-2162.93	776.745
380	0	109.796	-1924.49	1578.67	211.645	-1913.24	1582.1	109.56	-2098.87	1575.95	236.622	-2066.01	1588.82	182.643	-2127.98	1454.53	208.383	-2238.5	1213.02	184.599	-1992.7	1341.2	177.49	-1955.3	1156.36	250.058	-2231.94	1292.01	18.7268	-2075.14	1377.76	-43.4232	-2175.45	1168.41	-43.6596	-2192.28	1090.9	-83.3733	-2184.43	968.532	-54.6647	-2118.99	858.835	-98.1008	-2175.16	861.092	-96.0707	-2140.59	778.571
381	0	108.456	-1909.6	1580.81	210.343	-1898.36	1584.35	108.319	-2083.98	1578.37	235.397	-2051.14	1591.35	181.626	-2113.25	1457.02	207.837	-2223.97	1215.7	184.065	-1978.19	1343.69	177.491	-1941.23	1158.67	249.431	-2217.23	1294.73	18.1032	-2060.34	1379.74	-44.3428	-2158.68	1169.76	-44.6572	-2174.93	1091.99	-84.1217	-2164.88	969.702	-54.9257	-2097.85	861.147	-98.601	-2153.79	862.438	-96.3581	-2117.77	780.593
382	0	107.295	-1894.78	1582.89	209.233	-1883.55	1586.51	107.266	-2069.15	1580.79	234.345	-2036.33	1593.83	180.735	-2098.61	1459.47	207.277	-2209.56	1218.34	183.67	-1963.8	1346.13	177.664	-1927.33	1160.95	248.819	-2202.65	1297.39	17.5913	-2045.6	1381.73	-45.2466	-2141.92	1171.16	-45.7082	-2157.53	1093.13	-84.9039	-2145.12	970.954	-55.1575	-2076.44	863.643	-99.1151	-2132.11	863.91	-96.6252	-2094.54	782.809
383	0	106.309	-1880.03	1584.89	208.309	-1868.79	1588.57	106.393	-2054.39	1583.16	233.46	-2021.55	1596.24	179.96	-2084.06	1461.85	206.702	-2195.27	1220.93	183.4	-1949.53	1348.51	177.982	-1913.55	1163.17	248.218	-2188.2	1299.97	17.1775	-2030.92	1383.72	-46.1335	-2125.18	1172.58	-46.8104	-2140.11	1094.29	-85.7184	-2125.18	972.275	-55.3618	-2054.8	866.308	-99.6408	-2110.13	865.5	-96.8711	-2070.92	785.211
384	0	105.49	-1865.34	1586.77	207.562	-1854.1	1590.49	105.685	-2039.68	1585.46	232.733	-2006.82	1598.54	179.293	-2069.58	1464.14	206.113	-2181.08	1223.42	183.236	-1935.35	1350.8	178.419	-1899.87	1165.32	247.627	-2173.85	1302.44	16.8478	-2016.28	1385.67	-47.0037	-2108.48	1174	-47.9617	-2122.66	1095.46	-86.5636	-2105.07	973.65	-55.5406	-2032.95	869.128	-100.175	-2087.88	867.197	-97.0939	-2046.97	787.795
385	0	104.831	-1850.71	1588.53	206.982	-1839.47	1592.27	105.129	-2025.02	1587.67	232.152	-1992.14	1600.71	178.724	-2055.18	1466.31	205.512	-2166.99	1225.8	183.161	-1921.25	1352.97	178.94	-1886.27	1167.38	247.043	-2159.6	1304.78	16.5884	-2001.71	1387.56	-47.8587	-2091.83	1175.41	-49.1604	-2105.2	1096.6	-87.4379	-2084.83	975.063	-55.6963	-2010.93	872.088	-100.716	-2065.41	868.991	-97.2912	-2022.73	790.551
386	0	104.321	-1836.13	1590.14	206.557	-1824.89	1593.89	104.709	-2010.4	1589.76	231.704	-1977.49	1602.72	178.243	-2040.83	1468.34	204.902	-2152.96	1228.02	183.155	-1907.22	1354.99	179.514	-1872.71	1169.33	246.467	-2145.43	1306.97	16.3857	-1987.18	1389.38	-48.7018	-2075.23	1176.78	-50.4049	-2087.73	1097.71	-88.3393	-2064.48	976.501	-55.8316	-1988.76	875.172	-101.26	-2042.74	870.87	-97.4602	-1998.25	793.468
387	0	103.95	-1821.59	1591.58	206.273	-1810.36	1595.31	104.406	-1995.81	1591.71	231.376	-1962.88	1604.56	177.839	-2026.54	1470.2	204.288	-2139.01	1230.08	183.201	-1893.25	1356.85	180.106	-1859.2	1171.14	245.901	-2131.33	1308.97	16.2275	-1972.7	1391.09	-49.5374	-2058.7	1178.1	-51.6941	-2070.25	1098.77	-89.2656	-2044.03	977.948	-55.9492	-1966.48	878.363	-101.804	-2019.91	872.822	-97.5978	-1973.59	796.532
388	0	103.705	-1807.08	1592.84	206.117	-1795.87	1596.54	104.204	-1981.25	1593.48	231.152	-1948.3	1606.19	177.503	-2012.29	1471.87	203.678	-2125.1	1231.95	183.281	-1879.33	1358.52	180.683	-1845.7	1172.79	245.345	-2117.29	1310.78	16.1026	-1958.27	1392.68	-50.3711	-2042.23	1179.34	-53.0267	-2052.76	1099.75	-90.2146	-2023.5	979.389	-56.0521	-1944.11	881.641	-102.345	-1996.95	874.834	-97.7012	-1948.78	799.729
389	0	103.575	-1792.58	1593.9	206.074	-1781.41	1597.54	104.086	-1966.71	1595.07	231.019	-1933.75	1607.6	177.226	-1998.07	1473.34	203.078	-2111.24	1233.61	183.378	-1865.44	1359.98	181.215	-1832.21	1174.26	244.806	-2103.29	1312.37	16.002	-1943.88	1394.13	-51.2092	-2025.82	1180.49	-54.4016	-2035.27	1100.65	-91.1836	-2002.91	980.808	-56.1429	-1921.68	884.986	-102.88	-1973.89	876.89	-97.7682	-1923.88	803.038
390	0	103.548	-1778.1	1594.74	206.13	-1766.98	1598.31	104.038	-1952.17	1596.44	230.964	-1919.23	1608.78	177.002	-1983.88	1474.59	202.498	-2097.41	1235.05	183.479	-1851.56	1361.21	181.673	-1818.72	1175.52	244.286	-2089.34	1313.73	15.9182	-1929.53	1395.41	-52.0579	-2009.48	1181.52	-55.8171	-2017.78	1101.43	-92.1697	-1982.29	982.191	-56.2243	-1899.22	888.377	-103.406	-1950.76	878.975	-97.7972	-1898.92	806.44
391	0	103.613	-1763.62	1595.35	206.273	-1752.57	1598.83	104.044	-1937.64	1597.59	230.976	-1904.73	1609.7	176.824	-1969.71	1475.6	201.949	-2083.6	1236.25	183.572	-1837.71	1362.19	182.036	-1805.23	1176.55	243.794	-2075.41	1314.86	15.8461	-1915.22	1396.51	-52.9229	-1993.19	1182.41	-57.2707	-2000.29	1102.09	-93.1696	-1961.65	983.522	-56.2987	-1876.75	891.791	-103.92	-1927.59	881.073	-97.7876	-1873.95	809.912
392	0	103.76	-1749.14	1595.73	206.49	-1738.17	1599.1	104.095	-1923.11	1598.49	231.043	-1890.24	1610.37	176.689	-1955.55	1476.37	201.441	-2069.8	1237.2	183.648	-1823.85	1362.91	182.284	-1791.72	1177.31	243.337	-2061.5	1315.74	15.7825	-1900.93	1397.41	-53.8089	-1976.94	1183.14	-58.759	-1982.79	1102.61	-94.1793	-1941	984.788	-56.368	-1854.3	895.205	-104.42	-1904.42	883.166	-97.7401	-1849.01	813.43
393	0	103.979	-1734.64	1595.86	206.771	-1723.78	1599.12	104.18	-1908.58	1599.15	231.158	-1875.76	1610.77	176.593	-1941.4	1476.9	200.986	-2056.01	1237.91	183.7	-1809.98	1363.36	182.403	-1778.19	1177.8	242.923	-2047.59	1316.38	15.7268	-1886.68	1398.1	-54.7184	-1960.73	1183.7	-60.2766	-1965.29	1102.98	-95.1943	-1920.37	985.976	-56.4339	-1831.9	898.596	-104.903	-1881.28	885.238	-97.6562	-1824.13	816.972
394	0	104.263	-1720.14	1595.75	207.107	-1709.39	1598.87	104.295	-1894.03	1599.54	231.314	-1861.29	1610.89	176.538	-1927.25	1477.17	200.597	-2042.22	1238.35	183.727	-1796.1	1363.52	182.388	-1764.64	1177.99	242.562	-2033.69	1316.76	15.6806	-1872.45	1398.57	-55.6514	-1944.55	1184.08	-61.8163	-1947.78	1103.19	-96.2093	-1899.77	987.074	-56.4977	-1809.56	901.94	-105.368	-1858.18	887.274	-97.5387	-1799.36	820.513
395	0	104.606	-1705.61	1595.39	207.49	-1694.99	1598.36	104.435	-1879.46	1599.67	231.508	-1846.82	1610.74	176.525	-1913.09	1477.18	200.284	-2028.43	1238.53	183.728	-1782.2	1363.39	182.236	-1751.07	1177.88	242.263	-2019.78	1316.88	15.6476	-1858.23	1398.8	-56.605	-1928.37	1184.26	-63.3689	-1930.27	1103.23	-97.2183	-1879.21	988.073	-56.5604	-1787.32	905.215	-105.812	-1835.17	889.259	-97.3913	-1774.72	824.029
396	0	105.004	-1691.07	1594.78	207.915	-1680.57	1597.59	104.6	-1864.88	1599.53	231.739	-1832.35	1610.33	176.557	-1898.93	1476.95	200.059	-2014.61	1238.46	183.709	-1768.28	1362.98	181.953	-1737.46	1177.46	242.038	-2005.86	1316.76	15.634	-1844.03	1398.8	-57.5729	-1912.19	1184.23	-64.9225	-1912.76	1103.09	-98.2145	-1858.72	988.964	-56.6222	-1765.2	908.4	-106.235	-1812.27	891.177	-97.2186	-1750.26	827.499
397	0	105.454	-1676.5	1593.92	208.379	-1666.14	1596.56	104.793	-1850.29	1599.13	232.007	-1817.87	1609.65	176.641	-1884.75	1476.46	199.931	-2000.78	1238.14	183.677	-1754.32	1362.28	181.551	-1723.81	1176.73	241.897	-1991.91	1316.39	15.6476	-1829.84	1398.57	-58.5456	-1896	1184	-66.4629	-1895.25	1102.78	-99.1901	-1838.31	989.742	-56.6833	-1743.22	911.475	-106.635	-1789.52	893.018	-97.026	-1726	830.9
398	0	105.957	-1661.92	1592.84	208.881	-1651.69	1595.3	105.019	-1835.68	1598.47	232.318	-1803.4	1608.73	176.783	-1870.57	1475.73	199.909	-1986.91	1237.56	183.642	-1740.32	1361.31	181.045	-1710.11	1175.71	241.849	-1977.94	1315.77	15.6981	-1815.66	1398.11	-59.5103	-1879.78	1183.58	-67.9738	-1877.75	1102.3	-100.137	-1818	990.401	-56.7431	-1721.4	914.422	-107.01	-1766.93	894.768	-96.8192	-1701.98	834.212
399	0	106.513	-1647.32	1591.53	209.423	-1637.21	1593.8	105.286	-1821.06	1597.57	232.677	-1788.91	1607.57	176.993	-1856.37	1474.78	200.001	-1973.01	1236.74	183.617	-1726.28	1360.08	180.456	-1696.34	1174.41	241.903	-1963.94	1314.92	15.7962	-1801.47	1397.42	-60.4512	-1863.54	1182.96	-69.4371	-1860.28	1101.64	-101.045	-1797.82	990.94	-56.8007	-1699.78	917.225	-107.36	-1744.54	896.42	-96.6044	-1678.22	837.418
400	0	107.129	-1632.71	1590.02	210.01	-1622.71	1592.1	105.604	-1806.43	1596.44	233.092	-1774.43	1606.18	177.28	-1842.17	1473.6	200.21	-1959.06	1235.68	183.617	-1712.2	1358.61	179.812	-1682.5	1172.86	242.067	-1949.9	1313.84	15.9538	-1787.29	1396.52	-61.3502	-1847.27	1182.15	-70.8335	-1842.83	1100.83	-101.904	-1777.77	991.358	-56.8546	-1678.37	919.87	-107.684	-1722.37	897.964	-96.3879	-1654.76	840.5
401	0	107.808	-1618.1	1588.33	210.648	-1608.18	1590.2	105.985	-1791.79	1595.1	233.573	-1759.94	1604.61	177.653	-1827.95	1472.23	200.539	-1945.06	1234.4	183.659	-1698.07	1356.93	179.139	-1668.57	1171.09	242.346	-1935.82	1312.53	16.1829	-1773.1	1395.44	-62.1871	-1830.97	1181.18	-72.1424	-1825.42	1099.87	-102.705	-1757.88	991.656	-56.903	-1657.2	922.345	-107.978	-1700.47	899.394	-96.1755	-1631.62	843.442
402	0	108.559	-1603.48	1586.48	211.346	-1593.64	1588.13	106.442	-1777.16	1593.58	234.132	-1745.45	1602.86	178.125	-1813.73	1470.67	200.988	-1930.99	1232.91	183.76	-1683.9	1355.06	178.47	-1654.53	1169.12	242.746	-1921.7	1311.02	16.4959	-1758.9	1394.17	-62.9405	-1814.66	1180.06	-73.3433	-1808.07	1098.77	-103.436	-1738.18	991.838	-56.9432	-1636.28	924.639	-108.24	-1678.84	900.705	-95.9728	-1608.84	846.231
403	0	109.39	-1588.87	1584.49	212.116	-1579.08	1585.93	106.989	-1762.54	1591.89	234.782	-1730.96	1600.95	178.703	-1799.51	1468.94	201.555	-1916.85	1231.22	183.938	-1669.68	1353.04	177.837	-1640.39	1167.01	243.268	-1907.52	1309.31	16.9044	-1744.69	1392.76	-63.5885	-1798.34	1178.8	-74.4154	-1790.8	1097.55	-104.087	-1718.69	991.908	-56.972	-1615.65	926.746	-108.468	-1657.53	901.893	-95.7841	-1586.44	848.855
404	0	110.311	-1574.27	1582.4	212.969	-1564.51	1583.61	107.641	-1747.93	1590.07	235.534	-1716.48	1598.93	179.399	-1785.28	1467.07	202.234	-1902.63	1229.33	184.212	-1655.42	1350.91	177.274	-1626.12	1164.8	243.912	-1893.29	1307.41	17.4195	-1730.46	1391.21	-64.1095	-1782.02	1177.43	-75.3389	-1773.61	1096.23	-104.645	-1699.43	991.874	-56.9855	-1595.31	928.658	-108.657	-1636.56	902.956	-95.6129	-1564.46	851.3
405	0	111.329	-1559.69	1580.24	213.918	-1549.94	1581.22	108.412	-1733.35	1588.15	236.401	-1702	1596.82	180.219	-1771.06	1465.08	203.017	-1888.32	1227.29	184.597	-1641.1	1348.69	176.814	-1611.7	1162.52	244.676	-1879	1305.35	18.051	-1716.21	1389.57	-64.4826	-1765.74	1175.96	-76.095	-1756.53	1094.83	-105.1	-1680.42	991.742	-56.9789	-1575.31	930.371	-108.803	-1615.96	903.892	-95.4605	-1542.9	853.556
406	0	112.455	-1545.14	1578.04	214.976	-1535.38	1578.8	109.314	-1718.78	1586.17	237.395	-1687.54	1594.66	181.171	-1756.83	1463	203.896	-1873.92	1225.09	185.111	-1626.74	1346.43	176.488	-1597.15	1160.23	245.554	-1864.66	1303.14	18.807	-1701.94	1387.86	-64.6885	-1749.51	1174.42	-76.6669	-1739.59	1093.36	-105.442	-1661.69	991.524	-56.9465	-1555.64	931.883	-108.9	-1595.76	904.702	-95.3267	-1521.82	855.613
407	0	113.696	-1530.61	1575.84	216.154	-1520.85	1576.37	110.361	-1704.25	1584.14	238.527	-1673.1	1592.47	182.259	-1742.61	1460.85	204.857	-1859.41	1222.77	185.767	-1612.34	1344.18	176.325	-1582.44	1157.96	246.539	-1850.25	1300.8	19.6939	-1687.65	1386.1	-64.7098	-1733.35	1172.84	-77.0403	-1722.79	1091.86	-105.662	-1643.25	991.228	-56.8818	-1536.35	933.193	-108.942	-1575.98	905.387	-95.2087	-1501.22	857.461
408	0	115.06	-1516.12	1573.66	217.462	-1506.33	1573.97	111.56	-1689.76	1582.12	239.804	-1658.67	1590.28	183.484	-1728.39	1458.67	205.888	-1844.8	1220.36	186.576	-1597.89	1341.96	176.352	-1567.57	1155.77	247.622	-1835.79	1298.37	20.7156	-1673.33	1384.33	-64.5322	-1717.29	1171.22	-77.2031	-1706.15	1090.35	-105.749	-1625.14	990.867	-56.7774	-1517.44	934.301	-108.922	-1556.64	905.95	-95.1015	-1481.14	859.093
409	0	116.551	-1501.66	1571.55	218.908	-1491.85	1571.65	112.919	-1675.29	1580.14	241.232	-1644.25	1588.14	184.847	-1714.17	1456.49	206.973	-1830.08	1217.88	187.546	-1583.39	1339.81	176.591	-1552.55	1153.69	248.791	-1821.27	1295.86	21.8737	-1658.97	1382.59	-64.1441	-1701.36	1169.61	-77.1468	-1689.71	1088.85	-105.696	-1607.37	990.454	-56.6247	-1498.94	935.209	-108.833	-1537.78	906.393	-94.9972	-1461.6	860.5
410	0	118.172	-1487.23	1569.55	220.497	-1477.4	1569.44	114.443	-1660.87	1578.23	242.815	-1629.85	1586.08	186.345	-1699.95	1454.34	208.097	-1815.26	1215.37	188.685	-1568.86	1337.78	177.058	-1537.38	1151.76	250.032	-1806.7	1293.32	23.1671	-1644.58	1380.9	-63.5374	-1685.59	1168.02	-76.866	-1673.47	1087.39	-105.497	-1589.97	990.002	-56.4144	-1480.87	935.92	-108.666	-1519.42	906.723	-94.8853	-1442.62	861.675
411	0	119.925	-1472.83	1567.67	222.23	-1462.99	1567.37	116.131	-1646.47	1576.43	244.554	-1615.46	1584.13	187.972	-1685.73	1452.25	209.242	-1800.34	1212.86	189.992	-1554.29	1335.9	177.767	-1522.05	1150.02	251.331	-1792.08	1290.77	24.5917	-1630.15	1379.3	-62.7079	-1669.98	1166.49	-76.359	-1657.44	1085.99	-105.147	-1572.94	989.526	-56.1364	-1463.25	936.439	-108.414	-1501.57	906.945	-94.7527	-1424.24	862.614
412	0	121.806	-1458.46	1565.95	224.105	-1448.62	1565.47	117.983	-1632.1	1574.77	246.444	-1601.09	1582.31	189.719	-1671.5	1450.25	210.392	-1785.33	1210.4	191.467	-1539.68	1334.2	178.722	-1506.59	1148.49	252.672	-1777.41	1288.25	26.1408	-1615.68	1377.82	-61.6553	-1654.56	1165.03	-75.6277	-1641.65	1084.69	-104.641	-1556.31	989.041	-55.7802	-1446.09	936.773	-108.068	-1484.25	907.067	-94.584	-1406.47	863.312
413	0	123.812	-1444.11	1564.42	226.119	-1434.27	1563.78	119.991	-1617.76	1573.28	248.481	-1586.71	1580.67	191.575	-1657.27	1448.39	211.529	-1770.23	1208.02	193.103	-1525.04	1332.7	179.923	-1491	1147.21	254.037	-1762.7	1285.81	27.8042	-1601.15	1376.5	-60.3836	-1639.35	1163.69	-74.678	-1626.11	1083.5	-103.98	-1540.08	988.564	-55.3346	-1429.42	936.928	-107.622	-1467.49	907.098	-94.3617	-1389.33	863.768
414	0	125.935	-1429.78	1563.09	228.262	-1419.94	1562.32	122.147	-1603.44	1571.99	250.656	-1572.34	1579.23	193.525	-1643.03	1446.69	212.637	-1755.06	1205.76	194.89	-1510.38	1331.43	181.362	-1475.32	1146.2	255.408	-1747.96	1283.48	29.5692	-1586.58	1375.35	-58.9015	-1624.36	1162.49	-73.5193	-1610.82	1082.47	-103.162	-1524.28	988.109	-54.7889	-1413.25	936.913	-107.068	-1451.29	907.046	-94.0669	-1372.85	863.983
415	0	128.165	-1415.45	1562	230.522	-1405.63	1561.11	124.437	-1589.12	1570.92	252.955	-1557.96	1578.01	195.553	-1628.78	1445.18	213.699	-1739.84	1203.66	196.813	-1495.71	1330.42	183.021	-1459.55	1145.48	256.767	-1733.21	1281.3	31.42	-1571.96	1374.42	-57.2226	-1609.58	1161.46	-72.1651	-1595.79	1081.6	-102.191	-1508.91	987.693	-54.1325	-1397.6	936.74	-106.401	-1435.68	906.923	-93.6798	-1357.05	863.959
416	0	130.49	-1401.13	1561.15	232.887	-1391.32	1560.15	126.848	-1574.8	1570.11	255.365	-1543.57	1577.03	197.64	-1614.51	1443.88	214.7	-1724.59	1201.77	198.852	-1481.02	1329.67	184.879	-1443.74	1145.05	258.096	-1718.44	1279.32	33.3382	-1557.28	1373.72	-55.3656	-1595.03	1160.64	-70.6324	-1581.03	1080.94	-101.072	-1493.98	987.333	-53.356	-1382.48	936.419	-105.615	-1420.64	906.741	-93.1805	-1341.94	863.701
417	0	132.895	-1386.8	1560.56	235.338	-1377	1559.46	129.36	-1560.47	1569.56	257.867	-1529.16	1576.3	199.764	-1600.23	1442.83	215.626	-1709.32	1200.12	200.985	-1466.34	1329.19	186.903	-1427.93	1144.93	259.375	-1703.67	1277.56	35.3034	-1542.55	1373.29	-53.3545	-1580.69	1160.06	-68.9413	-1566.54	1080.5	-99.8115	-1479.48	987.043	-52.4511	-1367.9	935.964	-104.707	-1406.2	906.511	-92.5498	-1327.54	863.219
418	0	135.365	-1372.45	1560.22	237.858	-1362.67	1559.04	131.952	-1546.12	1569.29	260.443	-1514.73	1575.84	201.904	-1585.92	1442.04	216.463	-1694.06	1198.75	203.185	-1451.66	1329	189.056	-1412.14	1145.12	260.587	-1688.92	1276.06	37.2932	-1527.77	1373.13	-51.2186	-1566.57	1159.74	-67.1156	-1552.32	1080.3	-98.4193	-1465.42	986.837	-51.4119	-1353.88	935.389	-103.677	-1392.35	906.247	-91.7698	-1313.86	862.521
419	0	137.881	-1358.08	1560.15	240.427	-1348.31	1558.89	134.602	-1531.75	1569.31	263.07	-1500.26	1575.65	204.036	-1571.6	1441.52	217.201	-1678.83	1197.67	205.423	-1437	1329.08	191.296	-1396.42	1145.6	261.715	-1674.2	1274.85	39.2843	-1512.95	1373.27	-48.9921	-1552.63	1159.71	-65.1814	-1538.37	1080.36	-96.9075	-1451.8	986.728	-50.2347	-1340.41	934.708	-102.526	-1379.09	905.96	-90.8252	-1300.91	861.623
420	0	140.424	-1343.69	1560.34	243.023	-1333.91	1558.98	137.285	-1517.35	1569.62	265.725	-1485.77	1575.74	206.135	-1557.26	1441.29	217.83	-1663.65	1196.92	207.668	-1422.37	1329.45	193.575	-1380.81	1146.36	262.745	-1659.51	1273.95	41.2528	-1498.08	1373.71	-46.7139	-1538.87	1159.98	-63.1671	-1524.69	1080.69	-95.2902	-1438.61	986.727	-48.919	-1327.51	933.936	-101.258	-1366.41	905.663	-89.7039	-1288.68	860.539
421	0	142.974	-1329.26	1560.77	245.624	-1319.47	1559.31	139.974	-1502.91	1570.22	268.383	-1471.25	1576.08	208.178	-1542.91	1441.35	218.346	-1648.53	1196.5	209.887	-1407.78	1330.07	195.845	-1365.35	1147.38	263.663	-1644.88	1273.37	43.1753	-1483.19	1374.46	-44.4263	-1525.27	1160.57	-61.1026	-1511.26	1081.29	-93.5836	-1425.85	986.842	-47.4679	-1315.16	933.09	-99.8776	-1354.31	905.368	-88.3979	-1277.17	859.288
422	0	145.51	-1314.8	1561.44	248.207	-1305	1559.86	142.644	-1488.43	1571.1	271.019	-1456.7	1576.68	210.144	-1528.55	1441.69	218.746	-1633.5	1196.42	212.051	-1393.24	1330.95	198.057	-1350.08	1148.63	264.461	-1630.31	1273.13	45.0289	-1468.27	1375.5	-42.1739	-1511.79	1161.47	-59.0183	-1498.08	1082.17	-91.8053	-1413.5	987.08	-45.8883	-1303.37	932.186	-98.3956	-1342.76	905.085	-86.9043	-1266.38	857.888
423	0	148.01	-1300.3	1562.34	250.75	-1290.48	1560.6	145.265	-1473.91	1572.25	273.608	-1442.12	1577.52	212.013	-1514.19	1442.31	219.03	-1618.57	1196.68	214.127	-1378.76	1332.06	200.162	-1335.02	1150.08	265.132	-1615.82	1273.22	46.7927	-1453.34	1376.83	-40.002	-1498.41	1162.69	-56.9447	-1485.14	1083.33	-89.9746	-1401.54	987.441	-44.1914	-1292.12	931.237	-96.8237	-1331.76	904.824	-85.2259	-1256.27	856.361
424	0	150.453	-1285.77	1563.44	253.229	-1275.94	1561.52	147.813	-1459.36	1573.64	276.125	-1427.52	1578.59	213.766	-1499.83	1443.2	219.204	-1603.74	1197.26	216.089	-1364.33	1333.37	202.119	-1320.18	1151.7	265.674	-1601.4	1273.63	48.4478	-1438.41	1378.43	-37.9545	-1485.11	1164.21	-54.911	-1472.42	1084.74	-88.1114	-1389.97	987.927	-42.3925	-1281.39	930.26	-95.1766	-1321.27	904.592	-83.3717	-1246.83	854.728
425	0	152.817	-1271.21	1564.72	255.623	-1261.37	1562.59	150.261	-1444.77	1575.25	278.546	-1412.91	1579.85	215.391	-1485.48	1444.33	219.275	-1589.04	1198.15	217.912	-1349.98	1334.87	203.888	-1305.58	1153.44	266.09	-1587.07	1274.35	49.9781	-1423.5	1380.27	-36.0718	-1471.87	1166.01	-52.9445	-1459.93	1086.4	-86.2362	-1378.76	988.535	-40.5114	-1271.16	929.266	-93.4715	-1311.27	904.396	-81.3576	-1238.04	853.012
426	0	155.083	-1256.64	1566.16	257.91	-1246.78	1563.79	152.584	-1430.16	1577.07	280.848	-1398.3	1581.29	216.875	-1471.14	1445.69	219.254	-1574.46	1199.33	219.576	-1335.69	1336.52	205.438	-1291.22	1155.28	266.385	-1572.83	1275.36	51.3703	-1408.63	1382.33	-34.3884	-1458.66	1168.07	-51.0692	-1447.63	1088.28	-84.3694	-1367.9	989.258	-38.5714	-1261.41	928.271	-91.7277	-1301.74	904.239	-79.2063	-1229.84	851.237
427	0	157.232	-1242.04	1567.74	260.07	-1232.18	1565.1	154.763	-1415.53	1579.04	283.012	-1383.69	1582.89	218.212	-1456.83	1447.25	219.156	-1560.01	1200.76	221.064	-1321.47	1338.31	206.746	-1277.07	1157.18	266.567	-1558.67	1276.64	52.6147	-1393.8	1384.57	-32.9308	-1445.47	1170.34	-49.3053	-1435.52	1090.36	-82.5312	-1357.36	990.088	-36.5993	-1252.11	927.284	-89.9665	-1292.64	904.125	-76.9469	-1222.21	849.425
428	0	159.246	-1227.44	1569.44	262.086	-1217.59	1566.51	156.779	-1400.89	1581.16	285.019	-1369.09	1584.61	219.398	-1442.53	1448.98	218.994	-1545.68	1202.42	222.367	-1307.31	1340.2	207.797	-1263.13	1159.12	266.649	-1544.6	1278.15	53.7053	-1379.03	1386.97	-31.7165	-1432.29	1172.8	-47.6687	-1423.58	1092.61	-80.7408	-1347.13	991.014	-34.6245	-1243.23	926.316	-88.2101	-1283.95	904.055	-74.6142	-1215.1	847.599
429	0	161.11	-1212.85	1571.22	263.943	-1203.02	1567.99	158.616	-1386.26	1583.37	286.857	-1354.51	1586.44	220.432	-1428.26	1450.85	218.786	-1531.48	1204.27	223.479	-1293.22	1342.16	208.587	-1249.36	1161.07	266.643	-1530.61	1279.85	54.6394	-1364.33	1389.47	-30.7522	-1419.11	1175.4	-46.1701	-1411.81	1095	-79.0165	-1337.18	992.025	-32.6782	-1234.72	925.377	-86.4817	-1275.63	904.029	-72.2478	-1208.46	845.782
430	0	162.812	-1198.26	1573.06	265.629	-1188.48	1569.54	160.265	-1371.63	1585.65	288.513	-1339.95	1588.34	221.316	-1414.02	1452.83	218.546	-1517.39	1206.27	224.401	-1279.18	1344.18	209.12	-1235.74	1163.01	266.566	-1516.69	1281.72	55.4179	-1349.71	1392.05	-30.0341	-1405.95	1178.1	-44.815	-1400.19	1097.5	-77.3747	-1327.5	993.105	-30.7921	-1226.56	924.471	-84.8045	-1267.65	904.044	-69.8907	-1202.25	843.994
431	0	164.344	-1183.69	1574.93	267.135	-1173.97	1571.13	161.72	-1357.03	1587.95	289.982	-1325.44	1590.29	222.055	-1399.81	1454.88	218.288	-1503.4	1208.38	225.137	-1265.2	1346.22	209.41	-1222.21	1164.94	266.431	-1502.84	1283.71	56.0449	-1335.17	1394.66	-29.548	-1392.81	1180.87	-43.6044	-1388.7	1100.07	-75.8304	-1318.05	994.239	-28.9977	-1218.69	923.604	-83.2011	-1259.97	904.097	-67.5874	-1196.4	842.253
432	0	165.699	-1169.16	1576.82	268.456	-1159.51	1572.75	162.976	-1342.45	1590.25	291.258	-1310.96	1592.25	222.655	-1385.63	1456.97	218.027	-1489.51	1210.56	225.697	-1251.27	1348.25	209.475	-1208.76	1166.83	266.255	-1489.04	1285.78	56.5271	-1320.71	1397.26	-29.2703	-1379.71	1183.66	-42.5344	-1377.35	1102.68	-74.3963	-1308.82	995.41	-27.3249	-1211.09	922.776	-81.6931	-1252.56	904.182	-65.3824	-1190.88	840.573
433	0	166.875	-1154.66	1578.68	269.59	-1145.1	1574.39	164.035	-1327.92	1592.51	292.344	-1296.52	1594.21	223.126	-1371.47	1459.07	217.772	-1475.7	1212.78	226.093	-1237.37	1350.27	209.342	-1195.35	1168.67	266.05	-1475.29	1287.9	56.8736	-1306.34	1399.82	-29.1701	-1366.68	1186.44	-41.5974	-1366.11	1105.3	-73.0829	-1299.78	996.6	-25.8009	-1203.71	921.986	-80.3003	-1245.39	904.293	-63.3183	-1185.62	838.965
434	0	167.871	-1140.2	1580.5	270.539	-1130.74	1576.01	164.902	-1313.43	1594.7	293.241	-1282.14	1596.12	223.478	-1357.35	1461.14	217.533	-1461.97	1214.98	226.34	-1223.51	1352.23	209.041	-1181.95	1170.45	265.83	-1461.57	1290.03	57.0953	-1292.05	1402.3	-29.2113	-1353.74	1189.16	-40.783	-1354.98	1107.89	-71.8983	-1290.91	997.789	-24.4499	-1196.52	921.229	-79.0403	-1238.42	904.421	-61.4344	-1180.58	837.438
435	0	168.691	-1125.78	1582.25	271.307	-1116.44	1577.61	165.584	-1298.99	1596.78	293.957	-1267.8	1597.97	223.719	-1343.25	1463.14	217.314	-1448.29	1217.14	226.454	-1209.67	1354.11	208.603	-1168.53	1172.16	265.605	-1447.89	1292.11	57.204	-1277.84	1404.65	-29.355	-1340.92	1191.79	-40.0784	-1343.95	1110.42	-70.8483	-1282.19	998.956	-23.2917	-1189.46	920.495	-77.9283	-1231.62	904.553	-59.7651	-1175.71	835.991
436	0	169.34	-1111.42	1583.9	271.903	-1102.2	1579.15	166.09	-1284.6	1598.72	294.497	-1253.51	1599.73	223.862	-1329.16	1465.04	217.12	-1434.65	1219.21	226.453	-1195.86	1355.89	208.063	-1155.09	1173.79	265.382	-1434.21	1294.13	57.2122	-1263.7	1406.85	-29.5625	-1328.25	1194.29	-39.4698	-1333.01	1112.85	-69.9364	-1273.59	1000.08	-22.3418	-1182.52	919.772	-76.9764	-1224.95	904.678	-58.3391	-1170.95	834.621
437	0	169.826	-1097.1	1585.42	272.335	-1088	1580.61	166.43	-1270.26	1600.49	294.874	-1239.27	1601.35	223.915	-1315.1	1466.82	216.949	-1421.04	1221.16	226.352	-1182.05	1357.54	207.453	-1141.6	1175.3	265.166	-1420.55	1296.03	57.1325	-1249.62	1408.86	-29.7969	-1315.75	1196.64	-38.943	-1322.14	1115.16	-69.164	-1265.08	1001.14	-21.6108	-1175.65	919.044	-76.1939	-1218.38	904.779	-57.1786	-1166.27	833.321
438	0	170.156	-1082.84	1586.8	272.615	-1073.86	1581.97	166.618	-1255.98	1602.07	295.096	-1225.08	1602.83	223.89	-1301.04	1468.43	216.801	-1407.45	1222.96	226.17	-1168.24	1359.04	206.803	-1128.07	1176.69	264.961	-1406.88	1297.79	56.977	-1235.59	1410.66	-30.0262	-1303.43	1198.8	-38.4843	-1311.33	1117.32	-68.5309	-1256.65	1002.11	-21.1049	-1168.81	918.292	-75.5873	-1211.87	904.839	-56.2988	-1161.61	832.077
439	0	170.341	-1068.61	1588.01	272.754	-1059.77	1583.21	166.665	-1241.74	1603.42	295.177	-1210.93	1604.13	223.794	-1286.98	1469.85	216.671	-1393.86	1224.56	225.922	-1154.43	1360.35	206.139	-1114.49	1177.93	264.766	-1393.2	1299.38	56.7571	-1221.6	1412.2	-30.2239	-1291.31	1200.75	-38.0813	-1300.56	1119.29	-68.0349	-1248.26	1002.97	-20.8254	-1161.99	917.494	-75.1597	-1205.41	904.839	-55.7085	-1156.93	830.871
440	0	170.389	-1054.44	1589.01	272.763	-1045.71	1584.3	166.583	-1227.56	1604.52	295.126	-1196.82	1605.23	223.637	-1272.93	1471.06	216.554	-1380.27	1225.95	225.621	-1140.6	1361.46	205.487	-1100.86	1178.99	264.578	-1379.51	1300.77	56.4828	-1207.64	1413.48	-30.3704	-1279.37	1202.46	-37.7234	-1289.82	1121.05	-67.673	-1239.89	1003.7	-20.77	-1155.14	916.627	-74.912	-1198.95	904.76	-55.4097	-1152.2	829.682
441	0	170.31	-1040.3	1589.81	272.652	-1031.68	1585.22	166.385	-1213.42	1605.35	294.954	-1182.74	1606.1	223.424	-1258.85	1472.02	216.443	-1366.66	1227.1	225.28	-1126.74	1362.33	204.864	-1087.19	1179.84	264.395	-1365.79	1301.93	56.1627	-1193.69	1414.45	-30.4537	-1267.62	1203.92	-37.4024	-1279.09	1122.58	-67.4407	-1231.53	1004.28	-20.9324	-1148.25	915.665	-74.8421	-1192.48	904.582	-55.3982	-1147.39	828.485
442	0	170.111	-1026.19	1590.36	272.433	-1017.68	1585.94	166.082	-1199.31	1605.89	294.672	-1168.69	1606.72	223.16	-1244.76	1472.72	216.329	-1353.03	1227.98	224.909	-1112.86	1362.95	204.286	-1073.47	1180.45	264.208	-1352.04	1302.84	55.8037	-1179.74	1415.11	-30.4689	-1256.01	1205.09	-37.1126	-1268.35	1123.84	-67.3333	-1223.13	1004.67	-21.3035	-1141.29	914.584	-74.9459	-1185.96	904.282	-55.6648	-1142.45	827.254
443	0	169.801	-1012.12	1590.67	272.112	-1003.69	1586.44	165.682	-1185.25	1606.12	294.29	-1154.66	1607.07	222.849	-1230.64	1473.13	216.203	-1339.36	1228.59	224.515	-1098.94	1363.29	203.765	-1059.73	1180.79	264.009	-1338.26	1303.48	55.4106	-1165.77	1415.44	-30.418	-1244.52	1205.96	-36.8509	-1257.57	1124.83	-67.3454	-1214.68	1004.88	-21.8718	-1134.24	913.359	-75.2174	-1179.36	903.842	-56.1955	-1137.38	825.962
444	0	169.385	-998.062	1590.71	271.695	-989.712	1586.71	165.195	-1171.2	1606.03	293.813	-1140.65	1607.15	222.492	-1216.49	1473.26	216.057	-1325.65	1228.9	224.105	-1084.97	1363.32	203.306	-1045.95	1180.84	263.79	-1324.43	1303.85	54.9862	-1151.77	1415.42	-30.3094	-1233.12	1206.53	-36.617	-1246.73	1125.53	-67.4716	-1206.16	1004.87	-22.6239	-1127.07	911.968	-75.6491	-1172.67	903.242	-56.9728	-1132.13	824.582
445	0	168.868	-984.026	1590.48	271.187	-975.732	1586.73	164.627	-1157.18	1605.61	293.249	-1126.64	1606.93	222.089	-1202.29	1473.08	215.881	-1311.89	1228.9	223.681	-1070.94	1363.04	202.913	-1032.14	1180.57	263.54	-1310.56	1303.92	54.5311	-1137.74	1415.05	-30.1565	-1221.74	1206.78	-36.413	-1235.81	1125.92	-67.7063	-1197.53	1004.64	-23.5454	-1119.78	910.388	-76.2321	-1165.86	902.466	-57.9765	-1126.7	823.088
446	0	168.252	-970.002	1589.97	270.59	-961.743	1586.49	163.982	-1143.18	1604.85	292.601	-1112.64	1606.4	221.637	-1188.05	1472.58	215.665	-1298.08	1228.59	223.244	-1056.86	1362.43	202.585	-1018.3	1179.98	263.247	-1296.64	1303.68	54.0438	-1123.65	1414.32	-29.9772	-1210.35	1206.69	-36.2431	-1224.78	1125.98	-68.0444	-1188.78	1004.17	-24.6212	-1112.33	908.604	-76.9569	-1158.91	901.498	-59.1845	-1121.06	821.458
447	0	167.538	-955.985	1589.19	269.903	-947.738	1585.97	163.264	-1129.19	1603.75	291.873	-1098.63	1605.58	221.131	-1173.75	1471.78	215.402	-1284.2	1227.96	222.791	-1042.71	1361.49	202.32	-1004.43	1179.03	262.902	-1282.66	1303.15	53.5208	-1109.5	1413.24	-29.7926	-1198.9	1206.28	-36.1131	-1213.61	1125.73	-68.4807	-1179.87	1003.45	-25.8362	-1104.72	906.6	-77.8136	-1151.8	900.327	-60.5741	-1115.21	819.671
448	0	166.727	-941.969	1588.13	269.124	-933.711	1585.18	162.473	-1115.2	1602.33	291.064	-1084.61	1604.45	220.566	-1159.39	1470.67	215.082	-1270.26	1227.02	222.317	-1028.49	1360.21	202.112	-990.525	1177.74	262.494	-1268.62	1302.31	52.9565	-1095.28	1411.81	-29.6259	-1187.34	1205.53	-36.0303	-1202.29	1125.14	-69.0106	-1170.8	1002.48	-27.1758	-1096.93	904.368	-78.7917	-1144.5	898.945	-62.1224	-1109.12	817.711
449	0	165.817	-927.951	1586.81	268.25	-919.656	1584.12	161.607	-1101.22	1600.58	290.173	-1070.59	1603.02	219.936	-1144.97	1469.25	214.699	-1256.24	1225.77	221.815	-1014.2	1358.61	201.952	-976.568	1176.09	262.015	-1254.5	1301.16	52.344	-1080.99	1410.04	-29.5008	-1175.61	1204.44	-36.0025	-1190.8	1124.23	-69.6296	-1161.54	1001.26	-28.6259	-1088.94	901.903	-79.8811	-1136.99	897.349	-63.8078	-1102.78	815.567
450	0	164.803	-913.925	1585.24	267.276	-905.569	1582.79	160.662	-1087.23	1598.54	289.197	-1056.54	1601.31	219.23	-1130.49	1467.56	214.247	-1242.14	1224.22	221.275	-999.823	1356.68	201.831	-962.554	1174.12	261.457	-1240.31	1299.73	51.6746	-1066.62	1407.96	-29.4413	-1163.68	1203.03	-36.0376	-1179.1	1122.99	-70.3336	-1152.06	999.794	-30.1737	-1080.73	899.206	-81.0716	-1129.26	895.537	-65.6098	-1096.19	813.234
451	0	163.683	-899.886	1583.45	266.196	-891.449	1581.21	159.635	-1073.23	1596.22	288.132	-1042.47	1599.34	218.441	-1115.95	1465.59	213.72	-1227.95	1222.4	220.688	-985.366	1354.46	201.736	-948.469	1171.83	260.813	-1226.03	1298.02	50.9388	-1052.17	1405.57	-29.4696	-1151.52	1201.29	-36.1434	-1167.19	1121.45	-71.1185	-1142.35	998.084	-31.8074	-1072.29	896.281	-82.3535	-1121.28	893.516	-67.5104	-1089.32	810.71
452	0	162.451	-885.832	1581.46	265.004	-877.293	1579.41	158.517	-1059.22	1593.66	286.97	-1028.38	1597.13	217.559	-1101.34	1463.39	213.116	-1213.67	1220.31	220.038	-970.823	1351.97	201.65	-934.302	1169.26	260.081	-1211.65	1296.06	50.1263	-1037.63	1402.92	-29.6057	-1139.09	1199.25	-36.3266	-1155.05	1119.6	-71.9804	-1132.39	996.145	-33.5166	-1063.61	893.143	-83.7177	-1113.04	891.294	-69.4938	-1082.17	808.002
453	0	161.102	-871.757	1579.3	263.694	-863.101	1577.41	157.301	-1045.19	1590.87	285.705	-1014.26	1594.71	216.575	-1086.66	1460.98	212.433	-1199.28	1217.99	219.313	-956.19	1349.25	201.558	-920.037	1166.45	259.258	-1197.17	1293.86	49.2266	-1023.02	1400.02	-29.8663	-1126.37	1196.92	-36.5927	-1142.66	1117.49	-72.9154	-1122.16	993.994	-35.2918	-1054.65	889.807	-85.1553	-1104.51	888.886	-71.547	-1074.71	805.121
454	0	159.631	-857.657	1577.03	262.258	-848.873	1575.25	155.978	-1031.15	1587.92	284.329	-1000.12	1592.12	215.481	-1071.91	1458.39	211.671	-1184.77	1215.47	218.497	-941.462	1346.34	201.438	-905.661	1163.43	258.346	-1182.58	1291.46	48.2292	-1008.34	1396.93	-30.2641	-1113.34	1194.32	-36.9459	-1130.02	1115.11	-73.9192	-1111.64	991.65	-37.1249	-1045.41	886.297	-86.658	-1095.67	886.311	-73.6593	-1066.93	802.085
455	0	158.031	-843.528	1574.66	260.691	-834.609	1572.98	154.538	-1017.07	1584.83	282.834	-985.94	1589.4	214.268	-1057.09	1455.66	210.833	-1170.14	1212.78	217.575	-926.636	1343.29	201.268	-891.157	1160.27	257.346	-1167.86	1288.89	47.1246	-993.584	1393.67	-30.8071	-1100	1191.48	-37.3883	-1117.11	1112.52	-74.9873	-1100.83	989.14	-39.0081	-1035.87	882.641	-88.2177	-1086.5	883.591	-75.8224	-1058.81	798.919
456	0	156.299	-829.366	1572.26	258.989	-820.31	1570.65	152.972	-1002.96	1581.65	281.213	-971.728	1586.59	212.932	-1042.2	1452.84	209.923	-1155.37	1209.96	216.532	-911.707	1340.15	201.024	-876.511	1157.03	256.265	-1153.01	1286.19	45.9043	-978.765	1390.3	-31.498	-1086.35	1188.43	-37.9202	-1103.93	1109.74	-76.115	-1089.7	986.492	-40.9347	-1026	878.872	-89.8268	-1076.99	880.753	-78.03	-1050.32	795.65
457	0	154.431	-815.166	1569.87	257.148	-805.976	1568.31	151.274	-988.81	1578.43	279.459	-957.481	1583.74	211.468	-1027.23	1449.96	208.948	-1140.46	1207.05	215.357	-896.674	1336.97	200.679	-861.708	1153.76	255.11	-1138.02	1283.41	44.5618	-963.889	1386.87	-32.3343	-1072.39	1185.21	-38.5402	-1090.47	1106.81	-77.2969	-1078.24	983.738	-42.8978	-1015.79	875.027	-91.4777	-1067.11	877.829	-80.2771	-1041.43	792.311
458	0	152.423	-800.924	1567.54	255.164	-791.607	1566.01	149.436	-974.618	1575.22	277.568	-943.195	1580.9	209.876	-1012.2	1447.09	207.917	-1125.4	1204.11	214.036	-881.532	1333.81	200.208	-846.734	1150.52	253.889	-1122.89	1280.59	43.0927	-948.962	1383.42	-33.3086	-1058.13	1181.87	-39.2446	-1076.74	1103.77	-78.5275	-1066.44	980.912	-44.891	-1005.22	871.149	-93.163	-1056.84	874.85	-82.5595	-1032.11	788.941
459	0	150.276	-786.637	1565.31	253.039	-777.202	1563.82	147.454	-960.377	1572.08	275.537	-928.868	1578.12	208.156	-997.089	1444.26	206.842	-1110.17	1201.18	212.563	-866.278	1330.74	199.587	-831.575	1147.38	252.615	-1107.61	1277.79	41.4953	-933.991	1380	-34.4087	-1043.61	1178.46	-40.0285	-1062.74	1100.66	-79.8006	-1054.3	978.051	-46.9077	-994.258	867.281	-94.8754	-1046.16	871.853	-84.8735	-1022.34	785.579
460	0	147.991	-772.301	1563.24	250.772	-762.758	1561.78	145.327	-946.083	1569.04	273.363	-914.499	1575.45	206.313	-981.906	1441.53	205.734	-1094.79	1198.32	210.932	-850.913	1327.81	198.793	-816.222	1144.41	251.298	-1092.17	1275.04	39.7713	-918.983	1376.67	-35.6185	-1028.83	1175.01	-40.8852	-1048.47	1097.54	-81.1099	-1041.81	975.193	-48.9408	-982.893	863.468	-96.6073	-1035.06	868.874	-87.2152	-1012.07	782.267
461	0	145.572	-757.913	1561.36	248.367	-748.276	1559.94	143.055	-931.732	1566.16	271.051	-900.084	1572.93	204.354	-966.65	1438.93	204.606	-1079.24	1195.56	209.143	-835.437	1325.07	197.808	-800.665	1141.64	249.952	-1076.58	1272.4	37.9254	-903.945	1373.47	-36.9193	-1013.84	1171.6	-41.8073	-1033.94	1094.45	-82.4489	-1028.95	972.377	-50.9832	-971.101	859.758	-98.3515	-1023.5	865.95	-89.58	-1001.28	779.048
462	0	143.024	-743.471	1559.71	245.831	-733.751	1558.36	140.644	-917.319	1563.49	268.604	-885.622	1570.61	202.288	-951.322	1436.52	203.473	-1063.54	1192.96	207.2	-819.852	1322.58	196.62	-784.902	1139.15	248.591	-1060.84	1269.93	35.9662	-888.881	1370.45	-38.2905	-998.66	1168.27	-42.7864	-1019.16	1091.43	-83.8109	-1015.72	969.641	-53.0272	-958.862	856.198	-100.1	-1011.48	863.118	-91.9624	-989.926	775.964
463	0	140.357	-728.974	1558.34	243.172	-719.183	1557.07	138.1	-902.844	1561.05	266.03	-871.112	1568.53	200.129	-935.928	1434.34	202.347	-1047.69	1190.57	205.112	-804.165	1320.38	195.221	-768.932	1136.97	247.227	-1044.96	1267.66	33.9054	-873.797	1367.66	-39.7109	-983.318	1165.08	-43.8139	-1004.15	1088.53	-85.1895	-1002.12	967.021	-55.0648	-946.156	852.832	-101.846	-998.983	860.415	-94.3555	-977.98	773.055
464	0	137.583	-714.421	1557.26	240.4	-704.57	1556.1	135.435	-888.305	1558.89	263.342	-856.551	1566.74	197.891	-920.472	1432.43	201.24	-1031.71	1188.43	202.891	-788.383	1318.5	193.612	-752.764	1135.14	245.873	-1028.95	1265.64	31.7587	-858.698	1365.13	-41.1602	-967.844	1162.08	-44.8815	-988.901	1085.81	-86.5781	-988.153	964.555	-57.0878	-932.964	849.704	-103.582	-985.983	857.872	-96.7511	-965.41	770.361
465	0	134.716	-699.813	1556.5	237.532	-689.91	1555.49	132.665	-873.703	1557.05	260.554	-841.941	1565.25	195.593	-904.963	1430.81	200.164	-1015.61	1186.59	200.558	-772.519	1316.99	191.804	-736.411	1133.69	244.542	-1012.83	1263.92	29.5446	-843.59	1362.9	-42.6194	-952.262	1159.32	-45.9809	-973.438	1083.28	-87.9709	-973.804	962.273	-59.0876	-919.27	846.854	-105.3	-972.471	855.522	-99.1395	-952.185	767.915
466	0	131.775	-685.152	1556.08	234.582	-675.204	1555.25	129.808	-859.039	1555.53	257.685	-827.281	1564.1	193.253	-889.409	1429.52	199.127	-999.414	1185.06	198.134	-756.587	1315.85	189.81	-719.896	1132.65	243.246	-996.612	1262.52	27.2844	-828.478	1361.01	-44.0721	-936.591	1156.83	-47.1048	-957.77	1081	-89.3622	-959.078	960.205	-61.0556	-905.058	844.318	-106.994	-958.435	853.393	-101.51	-938.283	765.749
467	0	128.778	-670.442	1555.99	231.571	-660.452	1555.38	126.886	-844.318	1554.37	254.754	-812.572	1563.31	190.895	-873.824	1428.57	198.138	-983.152	1183.9	195.647	-740.607	1315.11	187.656	-703.248	1132.01	241.995	-980.325	1261.48	25.0019	-813.369	1359.46	-45.5044	-920.847	1154.67	-48.2467	-941.909	1079	-90.747	-943.976	958.377	-62.9833	-890.317	842.126	-108.657	-943.864	851.508	-103.851	-923.68	763.889
468	0	125.747	-655.688	1556.25	228.521	-645.656	1555.88	123.925	-829.544	1553.58	251.788	-797.818	1562.89	188.539	-858.221	1427.99	197.203	-966.847	1183.1	193.126	-724.598	1314.78	185.369	-686.505	1131.79	240.8	-963.995	1260.81	22.7222	-798.267	1358.28	-46.9058	-905.038	1152.85	-49.401	-925.867	1077.29	-92.1206	-928.497	956.81	-64.8621	-875.036	840.306	-110.282	-928.75	849.887	-106.149	-908.362	762.357
469	0	122.707	-640.895	1556.83	225.455	-630.82	1556.74	120.951	-814.724	1553.17	248.811	-783.021	1562.84	186.21	-842.616	1427.78	196.329	-950.53	1182.7	190.604	-708.586	1314.84	182.985	-669.711	1131.98	239.668	-947.651	1260.53	20.4714	-783.181	1357.49	-48.2689	-889.17	1151.41	-50.5632	-909.656	1075.9	-93.4791	-912.645	955.521	-66.6841	-859.209	838.878	-111.865	-913.09	848.547	-108.393	-892.317	761.17
470	0	119.683	-626.071	1557.74	222.397	-615.947	1557.94	117.996	-799.868	1553.12	245.852	-768.187	1563.18	183.93	-827.026	1427.93	195.518	-934.229	1182.68	188.113	-692.596	1315.29	180.543	-652.914	1132.56	238.608	-931.324	1260.64	18.2754	-768.117	1357.07	-49.5892	-873.243	1150.34	-51.73	-893.288	1074.83	-94.8192	-896.423	954.521	-68.4411	-842.833	837.855	-113.4	-896.879	847.498	-110.57	-875.541	760.339
471	0	116.701	-611.224	1558.94	219.375	-601.043	1559.45	115.089	-784.985	1553.45	242.94	-753.32	1563.88	181.721	-811.467	1428.45	194.773	-917.977	1183.06	185.687	-676.652	1316.12	178.084	-636.166	1133.51	237.625	-915.046	1261.14	16.1594	-753.081	1357.04	-50.8648	-857.255	1149.66	-52.8987	-876.773	1074.1	-96.1379	-879.838	953.817	-70.1255	-825.909	837.247	-114.884	-880.118	846.748	-112.668	-858.033	759.869
472	0	113.789	-596.364	1560.41	216.416	-586.114	1561.25	112.262	-770.085	1554.13	240.106	-738.427	1564.93	179.604	-795.958	1429.32	194.095	-901.804	1183.82	183.358	-660.782	1317.31	175.653	-619.519	1134.79	236.721	-898.846	1262.02	14.1468	-738.08	1357.37	-52.0956	-841.203	1149.35	-54.0677	-860.124	1073.7	-97.4327	-862.894	953.412	-71.7302	-808.441	837.055	-116.312	-862.812	846.3	-114.676	-839.801	759.764
473	0	110.972	-581.5	1562.12	213.546	-571.168	1563.29	109.547	-755.18	1555.15	237.379	-723.514	1566.31	177.597	-780.515	1430.52	193.481	-885.736	1184.94	181.157	-645.009	1318.81	173.295	-603.023	1136.38	235.898	-882.752	1263.26	12.2588	-723.12	1358.06	-53.2831	-825.085	1149.41	-55.2359	-843.352	1073.63	-98.7013	-845.6	953.302	-73.2479	-790.44	837.277	-117.681	-844.964	846.151	-116.583	-820.855	760.021
474	0	108.278	-566.641	1564.05	210.793	-556.213	1565.53	106.974	-740.282	1556.48	234.787	-708.591	1568.01	175.716	-765.151	1432.03	192.926	-869.801	1186.4	179.111	-629.355	1320.61	171.054	-586.725	1138.24	235.154	-866.791	1264.83	10.5134	-708.205	1359.07	-54.4294	-808.898	1149.81	-56.4029	-826.467	1073.86	-99.9415	-827.966	953.48	-74.6719	-771.918	837.905	-118.988	-826.587	846.297	-118.379	-801.214	760.633
475	0	105.732	-551.797	1566.15	208.184	-541.257	1567.94	104.569	-725.4	1558.11	232.358	-693.665	1569.97	173.975	-749.881	1433.81	192.425	-854.02	1188.16	177.243	-613.839	1322.68	168.975	-570.662	1140.32	234.485	-850.984	1266.71	8.92522	-693.339	1360.39	-55.5369	-792.64	1150.52	-57.5682	-809.481	1074.37	-101.151	-810.002	953.936	-75.9954	-752.895	838.924	-120.229	-807.692	846.729	-120.055	-780.9	761.593
476	0	103.357	-536.975	1568.4	205.743	-526.311	1570.47	102.358	-710.545	1559.99	230.116	-678.745	1572.18	172.383	-734.712	1435.85	191.968	-838.412	1190.21	175.573	-598.475	1324.96	167.099	-554.866	1142.59	233.883	-835.35	1268.85	7.50526	-678.522	1361.99	-56.6077	-776.313	1151.53	-58.7317	-792.403	1075.16	-102.329	-791.722	954.654	-77.2117	-733.393	840.32	-121.402	-788.295	847.437	-121.604	-759.939	762.889
477	0	101.175	-522.183	1570.77	203.496	-511.383	1573.09	100.361	-695.724	1562.09	228.08	-663.838	1574.59	170.947	-719.653	1438.09	191.545	-822.991	1192.49	174.115	-583.274	1327.43	165.462	-539.358	1145.01	233.341	-819.902	1271.21	6.26056	-663.754	1363.82	-57.6435	-759.92	1152.78	-59.8932	-775.244	1076.18	-103.471	-773.138	955.619	-78.3142	-713.438	842.071	-122.503	-768.418	848.407	-123.019	-738.365	764.51
478	0	99.2042	-507.427	1573.22	201.464	-496.484	1575.76	98.5938	-680.946	1564.39	226.267	-648.954	1577.15	169.669	-704.706	1440.51	191.144	-807.766	1194.97	172.88	-568.243	1330.05	164.096	-524.148	1147.53	232.848	-804.649	1273.77	5.19438	-649.034	1365.86	-58.6452	-743.465	1154.26	-61.0521	-758.012	1077.41	-104.577	-754.266	956.809	-79.2967	-693.061	844.156	-123.528	-748.081	849.625	-124.292	-716.213	766.441
479	0	97.4602	-492.711	1575.72	199.664	-481.624	1578.46	97.0676	-666.215	1566.84	224.69	-634.099	1579.84	168.552	-689.873	1443.06	190.752	-792.742	1197.61	171.872	-553.382	1332.78	163.028	-509.237	1150.14	232.393	-789.595	1276.47	4.30637	-634.358	1368.07	-59.6129	-726.954	1155.92	-62.2082	-740.716	1078.82	-105.642	-735.121	958.205	-80.1528	-672.295	846.55	-124.473	-727.31	851.073	-125.417	-693.522	768.671
480	0	95.9545	-478.037	1578.25	198.112	-466.811	1581.13	95.7884	-651.534	1569.4	223.355	-619.281	1582.6	167.591	-675.152	1445.72	190.358	-777.919	1200.37	171.092	-538.69	1335.58	162.273	-494.617	1152.79	231.964	-774.741	1279.27	3.59293	-619.72	1370.41	-60.5462	-710.395	1157.73	-63.3605	-723.362	1080.38	-106.665	-715.721	959.785	-80.8771	-651.175	849.229	-125.334	-706.134	852.735	-126.389	-670.336	771.184
481	0	94.6948	-463.408	1580.76	196.819	-452.053	1583.77	94.7566	-636.905	1572.04	222.265	-604.506	1585.39	166.784	-660.54	1448.43	189.949	-763.292	1203.21	170.537	-524.161	1338.42	161.84	-480.27	1155.46	231.551	-760.082	1282.14	3.04769	-605.115	1372.84	-61.4439	-693.796	1159.66	-64.5081	-705.957	1082.06	-107.643	-696.084	961.524	-81.4643	-629.738	852.166	-126.108	-684.582	854.593	-127.201	-646.7	773.966
482	0	93.6848	-448.822	1583.25	195.79	-437.357	1586.34	93.9682	-622.326	1574.71	221.419	-589.777	1588.18	166.122	-646.029	1451.17	189.515	-748.854	1206.09	170.197	-509.786	1341.26	161.729	-466.173	1158.11	231.143	-745.611	1285.04	2.66202	-590.537	1375.33	-62.305	-677.167	1161.68	-65.6498	-688.505	1083.83	-108.572	-676.227	963.4	-81.9103	-608.022	855.336	-126.789	-662.685	856.629	-127.849	-622.663	777.002
483	0	92.9243	-434.278	1585.67	195.027	-422.726	1588.82	93.4143	-607.794	1577.39	220.809	-575.099	1590.91	165.598	-631.615	1453.89	189.048	-734.594	1208.97	170.062	-495.554	1344.06	161.929	-452.298	1160.72	230.731	-731.317	1287.91	2.42559	-575.979	1377.86	-63.1282	-660.516	1163.75	-66.7842	-671.013	1085.66	-109.449	-656.169	965.388	-82.2117	-586.065	858.712	-127.374	-640.477	858.823	-128.328	-598.273	780.274
484	0	92.4094	-419.772	1588	194.526	-408.162	1591.18	93.0826	-593.308	1580.03	220.427	-560.474	1593.56	165.204	-617.289	1456.56	188.541	-720.496	1211.82	170.119	-481.453	1346.79	162.42	-438.615	1163.28	230.309	-717.186	1290.74	2.32691	-561.433	1380.37	-63.9129	-643.854	1165.86	-67.9097	-653.482	1087.52	-110.273	-635.93	967.464	-82.366	-563.903	862.266	-127.858	-617.991	861.155	-128.632	-573.58	783.765
485	0	92.1326	-405.303	1590.23	194.279	-393.665	1593.41	92.9575	-578.863	1582.6	220.26	-545.904	1596.09	164.928	-603.043	1459.15	187.991	-706.547	1214.59	170.35	-467.467	1349.42	163.175	-425.092	1165.74	229.871	-703.205	1293.48	2.35388	-546.896	1382.84	-64.6589	-627.187	1167.95	-69.0249	-635.914	1089.39	-111.039	-615.527	969.604	-82.3722	-541.574	865.971	-128.239	-595.26	863.606	-128.757	-548.636	787.453
486	0	92.0835	-390.865	1592.32	194.275	-379.231	1595.47	93.0213	-564.453	1585.07	220.292	-531.39	1598.47	164.761	-588.868	1461.63	187.398	-692.727	1217.26	170.739	-453.583	1351.92	164.159	-411.699	1168.1	229.414	-689.356	1296.1	2.49419	-532.362	1385.25	-65.3667	-610.523	1170.03	-70.1279	-618.312	1091.23	-111.746	-594.979	971.784	-82.2299	-519.112	869.799	-128.513	-572.319	866.155	-128.699	-523.491	791.317
487	0	92.2491	-376.455	1594.25	194.499	-364.857	1597.35	93.2551	-550.074	1587.4	220.506	-516.931	1600.67	164.695	-574.757	1463.95	186.765	-679.021	1219.79	171.266	-439.784	1354.26	165.333	-398.406	1170.32	228.939	-675.622	1298.57	2.73579	-517.828	1387.55	-66.038	-593.868	1172.04	-71.2172	-600.674	1093.03	-112.39	-574.306	973.979	-81.9401	-496.55	873.722	-128.677	-549.201	868.781	-128.455	-498.194	795.331
488	0	92.6145	-362.069	1596	194.931	-350.538	1599.02	93.6396	-535.722	1589.58	220.885	-502.526	1602.66	164.72	-560.702	1466.11	186.098	-665.411	1222.15	171.912	-426.057	1356.41	166.653	-385.187	1172.38	228.449	-661.985	1300.86	3.06723	-503.291	1389.73	-66.6748	-577.223	1173.98	-72.2908	-583	1094.76	-112.97	-553.525	976.166	-81.5045	-473.919	877.71	-128.73	-525.94	871.462	-128.023	-472.795	799.469
489	0	93.1634	-347.704	1597.56	195.554	-336.266	1600.48	94.1557	-521.393	1591.56	221.411	-488.175	1604.43	164.829	-546.695	1468.07	185.406	-651.879	1224.32	172.658	-412.387	1358.35	168.076	-372.019	1174.26	227.949	-648.429	1302.94	3.47791	-488.751	1391.76	-67.28	-560.589	1175.82	-73.3468	-565.288	1096.39	-113.483	-532.653	978.323	-80.926	-451.25	881.734	-128.671	-502.566	874.177	-127.402	-447.338	803.701
490	0	93.8788	-333.359	1598.89	196.347	-322.036	1601.7	94.7857	-507.082	1593.33	222.067	-473.875	1605.95	165.015	-532.73	1469.8	184.7	-638.409	1226.27	173.485	-398.76	1360.05	169.558	-358.882	1175.93	227.446	-634.938	1304.8	3.95837	-474.209	1393.62	-67.8567	-543.965	1177.53	-74.3825	-547.536	1097.9	-113.928	-511.71	980.427	-80.2078	-428.569	885.765	-128.499	-479.112	876.902	-126.59	-421.869	807.997
491	0	94.7435	-319.032	1600	197.288	-307.843	1602.66	95.513	-492.79	1594.87	222.837	-459.625	1607.21	165.274	-518.799	1471.3	183.995	-624.987	1227.97	174.377	-385.164	1361.5	171.057	-345.762	1177.36	226.952	-621.495	1306.41	4.50044	-459.667	1395.28	-68.408	-527.343	1179.09	-75.3951	-529.74	1099.28	-114.301	-490.71	982.459	-79.3541	-405.904	889.773	-128.214	-455.607	879.618	-125.59	-396.427	812.325
492	0	95.7405	-304.721	1600.86	198.36	-293.681	1603.37	96.3234	-478.513	1596.15	223.705	-445.423	1608.19	165.602	-504.898	1472.54	183.308	-611.599	1229.42	175.316	-371.586	1362.67	172.533	-332.645	1178.54	226.477	-608.085	1307.75	5.09741	-445.127	1396.73	-68.9368	-510.718	1180.48	-76.3808	-511.898	1100.51	-114.601	-469.672	984.399	-78.3695	-383.277	893.73	-127.816	-432.08	882.303	-124.403	-371.052	816.654
493	0	96.8536	-290.429	1601.46	199.544	-279.548	1603.81	97.2049	-464.253	1597.18	224.659	-431.267	1608.9	165.997	-491.022	1473.5	182.656	-598.232	1230.59	176.289	-358.017	1363.56	173.952	-319.52	1179.44	226.037	-594.697	1308.82	5.74416	-430.594	1397.95	-69.4448	-494.078	1181.69	-77.3351	-494.008	1101.57	-114.825	-448.612	986.229	-77.2588	-360.713	897.607	-127.306	-408.56	884.937	-123.034	-345.78	820.951
494	0	98.0681	-276.155	1601.8	200.823	-265.442	1603.97	98.1479	-450.009	1597.92	225.689	-417.154	1609.31	166.46	-477.166	1474.19	182.06	-584.875	1231.48	177.283	-344.446	1364.14	175.284	-306.378	1180.04	225.647	-581.318	1309.61	6.43724	-416.074	1398.92	-69.9325	-477.413	1182.7	-78.2525	-476.069	1102.44	-114.97	-427.546	987.935	-76.0271	-338.232	901.38	-126.686	-385.072	887.5	-121.489	-320.642	825.188
495	0	99.3705	-261.901	1601.88	202.182	-251.361	1603.85	99.1453	-435.784	1598.38	226.784	-403.084	1609.43	166.99	-463.326	1474.6	181.538	-571.519	1232.08	178.29	-330.866	1364.42	176.505	-293.21	1180.34	225.322	-567.937	1310.1	7.17483	-401.572	1399.65	-70.3985	-460.712	1183.49	-79.1262	-458.081	1103.13	-115.033	-406.492	989.505	-74.6796	-315.855	905.022	-125.956	-361.645	889.976	-119.774	-295.668	829.335
496	0	100.749	-247.671	1601.68	203.611	-237.304	1603.46	100.193	-421.579	1598.54	227.938	-389.054	1609.26	167.591	-449.501	1474.71	181.111	-558.155	1232.38	179.302	-317.268	1364.39	177.598	-280.008	1180.31	225.081	-554.546	1310.29	7.95678	-387.093	1400.11	-70.8395	-443.964	1184.07	-79.9483	-440.046	1103.62	-115.009	-385.468	990.926	-73.2216	-293.602	908.512	-125.118	-338.302	892.348	-117.897	-270.887	833.367
497	0	102.195	-233.465	1601.23	205.098	-223.273	1602.81	101.288	-407.397	1598.42	229.147	-375.064	1608.81	168.267	-435.687	1474.54	180.799	-544.776	1232.38	180.316	-303.647	1364.05	178.552	-266.762	1179.97	224.939	-541.135	1310.19	8.78446	-372.643	1400.31	-71.2494	-427.16	1184.42	-80.7094	-421.971	1103.9	-114.896	-364.491	992.192	-71.6584	-271.491	911.831	-124.174	-315.07	894.604	-115.869	-246.323	837.261
498	0	103.7	-219.288	1600.51	206.636	-209.268	1601.89	102.43	-393.24	1598.02	230.407	-361.111	1608.07	169.023	-421.885	1474.08	180.618	-531.373	1232.08	181.33	-289.999	1363.4	179.365	-253.462	1179.31	224.913	-527.699	1309.79	9.66069	-358.227	1400.26	-71.6197	-410.295	1184.55	-81.3989	-403.863	1103.98	-114.688	-343.582	993.297	-69.9953	-249.541	914.961	-123.126	-291.975	896.732	-113.7	-222	840.997
499	0	105.26	-205.14	1599.54	208.22	-195.288	1600.72	103.622	-379.111	1597.33	231.72	-347.194	1607.08	169.864	-408.092	1473.34	180.586	-517.941	1231.49	182.347	-276.319	1362.47	180.039	-240.097	1178.33	225.019	-514.231	1309.11	10.5895	-343.851	1399.94	-71.9391	-393.368	1184.46	-82.0051	-385.735	1103.85	-114.379	-322.762	994.238	-68.2378	-227.771	917.891	-121.975	-269.041	898.722	-111.403	-197.941	844.559
500	0	106.872	-191.024	1598.34	209.847	-181.336	1599.31	104.867	-365.011	1596.38	233.086	-333.312	1605.83	170.796	-394.308	1472.34	180.715	-504.473	1230.62	183.371	-262.603	1361.25	180.585	-226.656	1177.07	225.269	-500.726	1308.14	11.5762	-329.517	1399.37	-72.1938	-376.381	1184.15	-82.5151	-367.602	1103.53	-113.965	-302.053	995.015	-66.3915	-206.198	920.609	-120.724	-246.296	900.569	-108.992	-174.167	847.935
501	0	108.536	-176.942	1596.91	211.518	-167.41	1597.68	106.17	-350.941	1595.17	234.508	-319.462	1604.34	171.826	-380.533	1471.09	181.017	-490.962	1229.47	184.41	-248.851	1359.77	181.019	-213.128	1175.54	225.676	-487.18	1306.91	12.6265	-315.227	1398.57	-72.3677	-359.345	1183.63	-82.9149	-349.482	1103.01	-113.439	-281.48	995.631	-64.4619	-184.842	923.109	-119.374	-223.768	902.266	-106.481	-150.7	851.115
502	0	110.253	-162.893	1595.28	213.234	-153.512	1595.85	107.538	-336.904	1593.74	235.992	-305.643	1602.64	172.961	-366.766	1469.6	181.499	-477.402	1228.06	185.473	-235.06	1358.07	181.363	-199.501	1173.77	226.247	-473.589	1305.41	13.7473	-300.984	1397.55	-72.4426	-342.276	1182.91	-83.1901	-331.4	1102.31	-112.797	-261.069	996.088	-62.4547	-163.722	925.39	-117.926	-201.485	903.814	-103.884	-127.562	854.094
503	0	112.026	-148.878	1593.47	214.999	-139.639	1593.83	108.978	-322.897	1592.09	237.542	-291.851	1600.76	174.207	-353.008	1467.9	182.164	-463.787	1226.4	186.571	-221.231	1356.15	181.642	-185.766	1171.78	226.989	-459.951	1303.68	14.9454	-286.786	1396.33	-72.3993	-325.194	1182	-83.3258	-313.38	1101.44	-112.032	-240.848	996.394	-60.3757	-142.858	927.451	-116.383	-179.477	905.21	-101.219	-104.774	856.869
504	0	113.862	-134.894	1591.5	216.819	-125.791	1591.67	110.498	-308.919	1590.26	239.165	-278.083	1598.71	175.569	-339.258	1466.01	183.012	-450.111	1224.53	187.717	-207.363	1354.06	181.888	-171.916	1169.63	227.905	-446.264	1301.73	16.2278	-272.632	1394.93	-72.2178	-308.129	1180.93	-83.3072	-295.454	1100.41	-111.139	-220.847	996.557	-58.2308	-122.272	929.297	-114.745	-157.777	906.458	-98.4996	-82.3588	859.442
505	0	115.765	-120.939	1589.41	218.701	-111.965	1589.37	112.106	-294.969	1588.28	240.869	-264.336	1596.52	177.053	-325.514	1463.96	184.038	-436.367	1222.45	188.926	-193.455	1351.83	182.131	-157.942	1167.35	228.992	-432.525	1299.58	17.6011	-258.518	1393.38	-71.8786	-291.113	1179.7	-83.1202	-277.652	1099.24	-110.112	-201.098	996.586	-56.0255	-101.984	930.934	-113.014	-136.415	907.561	-95.7429	-60.3412	861.815
506	0	117.743	-107.01	1587.22	220.654	-98.1597	1586.98	113.81	-281.042	1586.18	242.662	-250.603	1594.23	178.661	-311.775	1461.78	185.236	-422.551	1220.2	190.21	-179.51	1349.5	182.406	-143.842	1164.98	230.248	-418.733	1297.27	19.0713	-244.44	1391.71	-71.3628	-274.185	1178.33	-82.7516	-260.01	1097.96	-108.949	-181.633	996.495	-53.7655	-82.02	932.373	-111.191	-115.427	908.524	-92.9631	-38.7457	863.994
507	0	119.804	-93.0997	1584.97	222.686	-84.3703	1584.52	115.62	-267.133	1584	244.551	-236.88	1591.88	180.397	-298.038	1459.5	186.594	-408.659	1217.81	191.584	-165.528	1347.1	182.746	-129.614	1162.56	231.664	-404.888	1294.81	20.6437	-230.39	1389.95	-70.6538	-257.383	1176.86	-82.1896	-242.564	1096.58	-107.644	-162.484	996.296	-51.4561	-62.4021	933.626	-109.277	-94.8453	909.354	-90.1743	-17.5986	865.986
508	0	121.954	-79.2033	1582.7	224.807	-70.5921	1582.03	117.542	-253.237	1581.77	246.543	-223.159	1589.49	182.261	-284.301	1457.16	188.096	-394.686	1215.31	193.061	-151.51	1344.68	183.187	-115.258	1160.14	233.229	-390.99	1292.25	22.3221	-216.362	1388.14	-69.7373	-240.752	1175.29	-81.4248	-225.348	1095.12	-106.197	-143.685	996.004	-49.1024	-43.1559	934.706	-107.273	-74.7059	910.06	-87.3886	3.07267	867.797
509	0	124.2	-65.3134	1580.42	227.024	-56.8187	1579.55	119.583	-239.347	1579.53	248.646	-209.433	1587.11	184.252	-270.559	1454.8	189.726	-380.631	1212.75	194.651	-137.459	1342.29	183.758	-100.777	1157.77	234.929	-377.039	1289.63	24.1088	-202.346	1386.3	-68.6024	-224.333	1173.66	-80.4499	-208.401	1093.62	-104.607	-125.268	995.635	-46.709	-24.3071	935.628	-105.18	-55.0427	910.651	-84.6166	23.2394	869.437
510	0	126.549	-51.4219	1578.2	229.347	-43.0427	1577.11	121.748	-225.455	1577.34	250.864	-195.693	1584.77	186.365	-256.809	1452.45	191.462	-366.494	1210.16	196.365	-123.375	1339.95	184.49	-86.1781	1155.48	236.748	-363.038	1286.97	26.0044	-188.335	1384.49	-67.2417	-208.168	1172	-79.2609	-191.755	1092.1	-102.873	-107.266	995.206	-44.28	-5.88204	936.41	-103	-35.8893	911.137	-81.8664	42.8723	870.912
511	0	129.004	-37.5199	1576.05	231.779	-29.2557	1574.75	124.04	-211.553	1575.22	253.2	-181.933	1582.51	188.597	-243.046	1450.16	193.284	-352.276	1207.58	198.208	-109.262	1337.72	185.407	-71.4693	1153.33	238.668	-348.988	1284.33	28.0074	-174.318	1382.73	-65.6525	-192.294	1170.34	-77.8569	-175.443	1090.59	-100.998	-89.707	994.735	-41.819	12.0929	937.068	-100.735	-17.2781	911.529	-79.144	61.9411	872.229
512	0	131.569	-23.5985	1574.03	234.327	-15.4484	1572.51	126.46	-197.632	1573.21	255.657	-168.142	1580.37	190.937	-229.264	1447.96	195.168	-337.98	1205.07	200.184	-95.1218	1335.63	186.529	-56.6623	1151.34	240.669	-334.893	1281.75	30.1141	-160.286	1381.06	-63.8362	-176.746	1168.7	-76.2409	-159.493	1089.12	-98.9863	-72.6194	994.242	-39.3291	29.5915	937.619	-98.3892	0.760546	911.84	-76.4528	80.4155	873.396
513	0	134.242	-9.64834	1572.15	236.992	-1.61101	1570.42	129.007	-183.684	1571.37	258.233	-154.313	1578.38	193.378	-215.459	1445.89	197.091	-323.614	1202.66	202.293	-80.9576	1333.72	187.87	-41.7714	1149.56	242.728	-320.757	1279.28	32.3185	-146.231	1379.53	-61.7992	-161.551	1167.13	-74.4195	-143.931	1087.73	-96.8437	-56.027	993.746	-36.8132	46.5883	938.078	-95.9651	18.1986	912.081	-73.7935	98.2651	874.416
514	0	137.023	4.33956	1570.45	239.773	12.2665	1568.51	131.675	-169.699	1569.72	260.924	-140.438	1576.58	195.905	-201.628	1444	199.029	-309.184	1200.41	204.531	-66.7733	1332.03	189.437	-26.8142	1148.02	244.825	-306.586	1276.95	34.612	-132.146	1378.17	-59.5524	-146.732	1165.66	-72.4033	-128.775	1086.45	-94.578	-39.9502	993.267	-34.2737	63.0587	938.46	-93.4682	35.0111	912.263	-71.1646	115.46	875.293
515	0	139.906	18.3737	1568.97	242.666	26.1934	1566.82	134.456	-155.669	1568.31	263.722	-126.509	1575.01	198.504	-187.765	1442.32	200.96	-294.701	1198.36	206.889	-52.5733	1330.58	191.231	-11.8112	1146.75	246.937	-292.385	1274.81	36.9836	-118.023	1377.01	-57.112	-132.3	1164.33	-70.2069	-114.04	1085.31	-92.1994	-24.4053	992.823	-31.7129	78.98	938.779	-90.9047	51.1769	912.4	-68.5626	131.973	876.026
516	0	142.883	32.4614	1567.73	245.662	40.1784	1565.38	137.34	-141.587	1567.16	266.619	-112.52	1573.68	201.159	-173.869	1440.88	202.861	-280.178	1196.56	209.355	-38.3626	1329.42	193.243	3.2138	1145.79	249.044	-278.162	1272.91	39.42	-103.859	1376.08	-54.4986	-118.26	1163.18	-67.8486	-99.7338	1084.34	-89.7199	-9.40423	992.435	-29.1334	94.3316	939.047	-88.2824	66.6787	912.501	-65.982	147.775	876.615
517	0	145.942	46.609	1566.75	248.753	54.2283	1564.2	140.311	-127.446	1566.3	269.599	-98.4678	1572.63	203.852	-159.938	1439.71	204.714	-265.629	1195.03	211.912	-24.147	1328.55	195.458	18.2343	1145.14	251.123	-263.925	1271.29	41.9052	-89.6528	1375.42	-51.7379	-104.609	1162.24	-65.3502	-85.8585	1083.58	-87.1535	5.04596	992.12	-26.538	109.096	939.271	-85.6105	81.5037	912.578	-63.4163	162.843	877.056
518	0	149.068	60.8207	1566.04	251.922	68.3481	1563.31	143.352	-113.243	1565.75	272.647	-84.3489	1571.88	206.562	-145.971	1438.85	206.501	-251.068	1193.82	214.54	-9.93265	1328	197.851	33.2217	1144.83	253.158	-249.682	1269.96	44.4215	-75.4041	1375.05	-48.8597	-91.3307	1161.56	-62.7367	-72.4097	1083.06	-84.5164	18.9431	991.896	-23.9303	123.258	939.461	-82.9004	95.6441	912.64	-60.8584	177.157	877.346
519	0	152.243	75.099	1565.62	255.15	82.5403	1562.71	146.442	-98.9747	1565.54	275.742	-70.1631	1571.43	209.27	-131.97	1438.3	208.208	-236.511	1192.95	217.213	4.27385	1327.78	200.389	48.146	1144.86	255.13	-235.443	1268.98	46.9492	-61.117	1374.99	-45.8983	-78.4031	1161.18	-60.0361	-59.3773	1082.8	-81.8265	32.2898	991.777	-21.3149	136.807	939.619	-80.1648	109.097	912.696	-58.3012	190.698	877.478
520	0	155.448	89.4437	1565.5	258.417	96.8047	1562.42	149.556	-84.64	1565.66	278.861	-55.9118	1571.31	211.953	-117.938	1438.07	209.825	-221.976	1192.45	219.904	18.4657	1327.9	203.035	62.9774	1145.24	257.026	-221.216	1268.35	49.4675	-46.7981	1375.25	-42.8918	-65.7941	1161.11	-57.2783	-46.7454	1082.82	-79.1034	45.0936	991.775	-18.6978	149.737	939.747	-77.4189	121.865	912.753	-55.7387	203.456	877.446
521	0	158.657	103.853	1565.66	261.697	111.138	1562.42	152.669	-70.2411	1566.12	281.978	-41.5991	1571.51	214.591	-103.879	1438.19	211.345	-207.477	1192.32	222.585	32.6363	1328.35	205.743	77.6872	1145.95	258.833	-207.009	1268.08	51.9544	-32.4566	1375.84	-39.881	-53.4647	1161.39	-54.495	-34.4936	1083.13	-76.3682	57.3664	991.902	-16.087	162.046	939.847	-74.6791	133.957	912.818	-53.1669	215.425	877.241
522	0	161.846	118.321	1566.12	264.962	125.535	1562.71	155.753	-55.7823	1566.92	285.068	-27.2308	1572.02	217.164	-89.7991	1438.63	212.765	-193.03	1192.57	225.224	46.7793	1329.13	208.465	92.2496	1146.98	260.545	-192.832	1268.19	54.3879	-18.1045	1376.77	-36.9086	-41.3702	1162.02	-51.7184	-22.5972	1083.75	-73.643	69.1242	992.162	-13.4923	173.738	939.915	-71.9641	145.385	912.894	-50.5843	226.604	876.858
523	0	164.988	132.842	1566.85	268.182	139.986	1563.29	158.778	-41.2701	1568.04	288.102	-12.815	1572.84	219.653	-75.7033	1439.41	214.088	-178.648	1193.19	227.79	60.8891	1330.22	211.149	106.643	1148.32	262.157	-178.691	1268.67	56.7458	-3.75548	1378.01	-34.0176	-29.4627	1163.02	-48.9807	-11.0281	1084.68	-70.9507	80.3864	992.558	-10.9261	184.821	939.947	-69.2939	156.168	912.983	-47.9933	237.001	876.292
524	0	168.053	147.406	1567.84	271.326	154.481	1564.13	161.716	-26.7131	1569.46	291.051	1.63885	1573.95	222.039	-61.599	1440.49	215.319	-164.346	1194.18	230.252	74.9611	1331.61	213.745	120.85	1149.92	263.669	-164.594	1269.5	59.0071	10.5752	1379.56	-31.25	-17.6936	1164.38	-46.3128	0.243433	1085.91	-68.3143	91.1754	993.089	-8.40324	195.31	939.937	-66.6896	166.328	913.086	-45.4004	246.631	875.537
525	0	171.015	162.003	1569.06	274.363	169.007	1565.21	164.539	-12.1217	1571.15	293.887	16.1201	1575.33	224.308	-47.493	1441.87	216.466	-150.135	1195.51	232.582	88.9915	1333.27	216.201	134.862	1151.76	265.081	-150.545	1270.68	61.1518	24.8717	1381.39	-28.6448	-6.01645	1166.09	-43.7437	11.2486	1087.42	-65.7568	101.516	993.75	-5.94092	205.223	939.878	-64.1732	175.892	913.201	-42.8176	255.515	874.593
526	0	173.845	176.62	1570.51	277.264	183.551	1566.51	167.218	2.49236	1573.09	296.584	30.6175	1576.95	226.446	-33.3917	1443.51	217.539	-136.023	1197.15	234.754	102.978	1335.16	218.473	148.676	1153.79	266.399	-136.55	1272.17	63.162	39.1185	1383.48	-26.2362	5.61041	1168.12	-41.2991	22.0185	1089.21	-63.3003	111.434	994.532	-3.55883	214.584	939.762	-61.767	184.889	913.324	-40.2617	263.68	873.462
527	0	176.518	191.244	1572.13	279.998	198.097	1568	169.731	17.1164	1575.23	299.118	45.1195	1578.79	228.442	-19.3013	1445.38	218.553	-122.019	1199.08	236.745	116.919	1337.25	220.519	162.295	1155.98	267.631	-122.612	1273.95	65.0223	53.3006	1385.8	-24.0522	17.2212	1170.44	-39.0011	32.5831	1091.24	-60.9656	120.957	995.423	-1.27869	223.421	939.581	-59.4934	193.351	913.451	-37.7554	271.16	872.149
528	0	179.01	205.863	1573.91	282.541	212.633	1569.65	172.055	31.7372	1577.54	301.466	59.6149	1580.8	230.288	-5.2273	1447.46	219.519	-108.128	1201.26	238.536	130.813	1339.51	222.307	175.73	1158.28	268.785	-108.732	1275.98	66.7198	67.4048	1388.3	-22.1129	28.8407	1173	-36.8671	42.9704	1093.49	-58.7721	130.112	996.407	0.876167	231.764	939.327	-57.374	201.312	913.575	-35.3262	277.994	870.663
529	0	181.299	220.463	1575.82	284.869	227.144	1571.44	174.173	46.3417	1579.98	303.61	74.0931	1582.96	231.979	8.82552	1449.71	220.451	-94.3509	1203.64	240.115	144.661	1341.88	223.812	188.999	1160.65	269.871	-94.9113	1278.23	68.245	81.4193	1390.94	-20.4304	40.4835	1175.77	-34.9096	53.206	1095.92	-56.7369	138.927	997.468	2.88141	239.648	938.992	-55.4291	208.807	913.69	-33.006	284.227	869.015
530	0	183.368	235.032	1577.81	286.964	241.619	1573.33	176.072	60.9173	1582.5	305.536	88.5447	1585.23	233.509	22.8529	1452.08	221.362	-80.6887	1206.19	241.473	158.463	1344.34	225.019	202.125	1163.04	270.9	-81.1491	1280.65	69.5916	95.335	1393.68	-19.0073	52.1529	1178.68	-33.1359	63.312	1098.48	-54.8748	147.428	998.586	4.71239	247.109	938.569	-53.6778	215.871	913.787	-30.8305	289.904	867.22
531	0	185.202	249.557	1579.86	288.811	256.048	1575.29	177.741	75.4518	1585.06	307.234	102.961	1587.57	234.879	36.8514	1454.55	222.261	-67.1381	1208.86	242.607	172.22	1346.85	225.922	215.133	1165.43	271.88	-67.4439	1283.2	70.7567	109.145	1396.48	-17.8378	63.8419	1181.7	-31.5481	73.3075	1101.16	-53.198	155.643	999.741	6.345	254.184	938.052	-52.1366	222.538	913.858	-28.8369	295.077	865.297
532	0	186.792	264.03	1581.93	290.4	270.423	1577.29	179.175	89.9346	1587.63	308.696	117.336	1589.95	236.09	50.8181	1457.06	223.158	-53.6939	1211.6	243.517	185.935	1349.35	226.526	228.051	1167.78	272.823	-53.793	1285.84	71.7407	122.845	1399.29	-16.9077	75.5337	1184.76	-30.1433	83.208	1103.89	-51.7155	163.595	1000.91	7.75646	260.911	937.436	-50.82	228.845	913.894	-27.0633	299.797	863.264
533	0	188.13	278.439	1583.98	291.725	284.738	1579.29	180.373	104.356	1590.15	309.922	131.663	1592.32	237.146	64.7508	1459.59	224.059	-40.3489	1214.38	244.21	199.607	1351.82	226.842	240.908	1170.06	273.735	-40.1933	1288.53	72.5471	136.433	1402.07	-16.1959	87.2044	1187.81	-28.9141	93.026	1106.64	-50.4336	171.31	1002.08	8.92624	267.329	936.717	-49.7394	234.824	913.889	-25.5466	304.117	861.142
534	0	189.213	292.778	1586	292.783	298.99	1581.27	181.339	118.708	1592.6	310.912	145.939	1594.67	238.05	78.6483	1462.09	224.967	-27.0941	1217.15	244.696	213.24	1354.22	226.892	253.73	1172.24	274.625	-26.6405	1291.22	73.1821	149.911	1404.77	-15.6753	98.8247	1190.8	-27.8492	102.771	1109.38	-49.3555	178.811	1003.22	9.83682	273.476	935.891	-48.903	240.509	913.832	-24.3209	308.089	858.952
535	0	190.043	307.042	1587.93	293.576	313.177	1583.2	182.078	132.985	1594.94	311.671	160.162	1596.94	238.809	92.5099	1464.52	225.883	-13.9194	1219.86	244.988	226.837	1356.52	226.702	266.543	1174.31	275.497	-13.1304	1293.88	73.6542	163.283	1407.35	-15.3151	110.363	1193.7	-26.9341	112.452	1112.05	-48.4813	186.122	1004.31	10.4745	279.388	934.956	-48.3157	245.933	913.717	-23.4159	311.768	856.712
536	0	190.625	321.226	1589.76	294.112	327.301	1585.05	182.599	147.182	1597.13	312.207	174.329	1599.11	239.431	106.336	1466.86	226.806	-0.813468	1222.47	245.102	240.399	1358.69	226.305	279.367	1176.23	276.353	0.341916	1296.46	73.974	176.555	1409.78	-15.0821	121.789	1196.44	-26.1523	122.075	1114.63	-47.8081	193.262	1005.34	10.8297	285.1	933.907	-47.9791	251.127	913.535	-22.8555	315.202	854.439
537	0	190.964	335.327	1591.45	294.397	341.361	1586.79	182.913	161.297	1599.15	312.531	188.441	1601.16	239.924	120.128	1469.06	227.73	12.2354	1224.96	245.056	253.932	1360.7	225.737	292.217	1178	277.194	13.7814	1298.93	74.1533	189.737	1412.03	-14.943	133.076	1199.01	-25.4859	131.646	1117.08	-47.3304	200.256	1006.29	10.8979	290.646	932.744	-47.891	256.121	913.281	-22.6568	318.442	852.148
538	0	191.072	349.346	1592.98	294.446	355.361	1588.4	183.033	175.327	1600.97	312.655	202.499	1603.04	240.296	133.889	1471.11	228.649	25.2392	1227.28	244.869	267.439	1362.53	225.037	305.107	1179.6	278.019	27.1932	1301.25	74.2047	202.838	1414.05	-14.8659	144.202	1201.35	-24.9165	141.172	1119.38	-47.0402	207.124	1007.13	10.6792	296.058	931.463	-48.046	260.945	912.945	-22.8294	321.532	849.851
539	0	190.959	363.284	1594.32	294.271	369.303	1589.85	182.975	189.275	1602.56	312.592	216.503	1604.75	240.554	147.622	1472.96	229.554	38.2101	1229.4	244.56	280.925	1364.15	224.243	318.041	1181	278.824	40.5824	1303.39	74.1413	215.872	1415.82	-14.8216	155.154	1203.46	-24.4265	150.66	1121.48	-46.9273	213.888	1007.86	10.1789	301.363	930.06	-48.4355	265.628	912.522	-23.3747	324.515	847.555
540	0	190.641	377.142	1595.46	293.888	383.19	1591.14	182.752	203.142	1603.91	312.358	230.458	1606.26	240.708	161.33	1474.59	230.436	51.1597	1231.3	244.147	294.395	1365.55	223.391	331.021	1182.2	279.602	53.9542	1305.33	73.9759	228.851	1417.33	-14.7855	165.928	1205.3	-23.9997	160.121	1123.37	-46.9799	220.57	1008.45	9.40695	306.591	928.533	-49.0477	270.197	912.004	-24.2861	327.431	845.264
541	0	190.131	390.925	1596.37	293.316	397.025	1592.23	182.38	216.931	1604.98	311.967	244.365	1607.54	240.765	175.02	1475.99	231.283	64.0995	1232.96	243.648	307.855	1366.7	222.516	344.044	1183.17	280.347	67.3134	1307.04	73.7207	241.793	1418.54	-14.7377	176.531	1206.86	-23.6217	169.564	1125.03	-47.1849	227.193	1008.89	8.37785	311.765	926.878	-49.8685	274.68	911.386	-25.5489	330.314	842.977
542	0	189.445	404.637	1597.05	292.57	410.814	1593.12	181.875	230.646	1605.78	311.434	258.229	1608.57	240.73	188.695	1477.14	232.084	77.0405	1234.35	243.081	321.312	1367.59	221.649	357.106	1183.9	281.05	80.6649	1308.51	73.3871	254.711	1419.45	-14.6643	186.977	1208.13	-23.2807	179.004	1126.44	-47.5283	233.779	1009.18	7.11003	316.908	925.09	-50.8814	279.105	910.66	-27.1414	333.195	840.693
543	0	188.597	418.283	1597.47	291.668	424.559	1593.79	181.249	244.293	1606.28	310.773	272.054	1609.35	240.61	202.363	1478	232.828	89.993	1235.46	242.459	334.77	1368.21	220.816	370.198	1184.37	281.7	94.0135	1309.71	72.9852	267.621	1420.03	-14.5571	197.29	1209.09	-22.9678	188.455	1127.59	-47.996	240.353	1009.29	5.6253	322.043	923.167	-52.0679	283.498	909.821	-29.0352	336.102	838.403
544	0	187.604	431.868	1597.63	290.625	438.266	1594.23	180.518	257.877	1606.48	309.998	285.842	1609.86	240.409	216.028	1478.59	233.504	102.967	1236.27	241.796	348.237	1368.55	220.037	383.312	1184.58	282.287	107.364	1310.63	72.5232	280.539	1420.28	-14.4136	207.502	1209.75	-22.6775	197.935	1128.46	-48.5738	246.939	1009.23	3.94813	327.188	921.103	-53.4086	287.887	908.862	-31.1966	339.059	836.101
545	0	186.479	445.399	1597.53	289.458	451.94	1594.43	179.692	271.404	1606.36	309.121	299.6	1610.08	240.131	229.695	1478.88	234.1	115.97	1236.79	241.101	361.719	1368.59	219.33	396.443	1184.51	282.802	120.72	1311.27	72.0079	293.481	1420.2	-14.2371	217.651	1210.11	-22.4069	207.462	1129.04	-49.2479	253.562	1008.97	2.10489	332.364	918.897	-54.8828	292.296	907.779	-33.5876	342.087	833.775
546	0	185.234	458.882	1597.14	288.178	465.588	1594.38	178.782	284.881	1605.94	308.152	313.331	1610.02	239.776	243.371	1478.87	234.609	129.012	1237	240.383	375.222	1368.33	218.702	409.583	1184.15	283.232	134.089	1311.61	71.4439	306.46	1419.78	-14.0359	227.776	1210.16	-22.1565	217.057	1129.34	-50.0053	260.248	1008.53	0.123136	337.588	916.546	-56.4699	296.755	906.566	-36.1674	345.205	831.414
547	0	183.881	472.322	1596.49	286.798	479.214	1594.07	177.796	298.313	1605.2	307.099	327.039	1609.67	239.346	257.059	1478.56	235.021	142.1	1236.9	239.646	388.751	1367.77	218.159	422.732	1183.49	283.567	147.473	1311.65	70.8341	319.49	1419.03	-13.8228	237.922	1209.91	-21.9294	226.738	1129.35	-50.8339	267.023	1007.9	-1.96923	342.879	914.048	-58.1491	301.291	905.222	-38.8935	348.429	829.005
548	0	182.429	485.727	1595.57	285.326	492.826	1593.51	176.741	311.708	1604.16	305.969	340.728	1609.02	238.839	270.764	1477.94	235.329	155.241	1236.49	238.893	402.313	1366.9	217.701	435.89	1182.54	283.798	160.88	1311.39	70.179	332.581	1417.94	-13.6141	248.131	1209.36	-21.7312	236.528	1129.07	-51.7229	273.911	1007.06	-4.14462	348.256	911.404	-59.9005	305.93	903.742	-41.7232	351.776	826.539
549	0	180.887	499.1	1594.38	283.77	506.429	1592.68	175.621	325.07	1602.81	304.766	354.401	1608.09	238.253	284.49	1477.03	235.529	168.44	1235.78	238.125	415.912	1365.74	217.323	449.062	1181.29	283.916	174.314	1310.84	69.4772	345.744	1416.54	-13.4287	258.447	1208.53	-21.5692	246.446	1128.51	-52.6626	280.939	1006.03	-6.3765	353.738	908.615	-61.7049	310.702	902.125	-44.6149	355.262	824.004
550	0	179.26	512.449	1592.94	282.137	520.027	1591.6	174.437	338.406	1601.17	303.493	368.061	1606.87	237.584	298.238	1475.83	235.615	181.705	1234.77	237.338	429.554	1364.29	217.016	462.257	1179.76	283.913	187.783	1309.99	68.7255	358.986	1414.83	-13.2871	268.909	1207.42	-21.4522	256.512	1127.66	-53.6447	288.131	1004.8	-8.63991	359.346	905.685	-63.5446	315.634	900.373	-47.529	358.904	821.391
551	0	177.552	525.777	1591.26	280.428	533.624	1590.26	173.19	351.721	1599.25	302.149	381.71	1605.38	236.829	312.012	1474.35	235.585	195.041	1233.47	236.528	443.243	1362.56	216.768	475.486	1177.95	283.783	201.293	1308.86	67.9187	372.311	1412.83	-13.2103	279.552	1206.05	-21.3898	266.743	1126.54	-54.6619	295.512	1003.39	-10.912	365.101	902.619	-65.4034	320.757	898.485	-50.4289	362.719	818.693
552	0	175.764	539.09	1589.35	278.645	547.224	1588.69	171.877	365.02	1597.08	300.732	395.35	1603.64	235.983	325.813	1472.6	235.437	208.455	1231.89	235.686	456.985	1360.57	216.564	488.763	1175.88	283.523	214.853	1307.45	67.0505	385.723	1410.55	-13.2187	290.407	1204.41	-21.3915	277.156	1125.16	-55.7085	303.106	1001.79	-13.1725	371.027	899.425	-67.2668	326.1	896.465	-53.2819	366.729	815.905
553	0	173.897	552.392	1587.25	276.789	560.828	1586.9	170.493	378.308	1594.66	299.24	408.984	1601.65	235.038	339.643	1470.62	235.171	221.954	1230.05	234.802	470.783	1358.34	216.385	502.102	1173.58	283.13	228.469	1305.78	66.113	399.222	1408.02	-13.3311	301.499	1202.54	-21.4668	287.765	1123.54	-56.7796	310.935	1000.01	-15.4036	377.147	896.111	-69.1222	331.691	894.319	-56.0599	370.955	813.026
554	0	171.949	565.688	1584.97	274.856	574.436	1584.92	169.034	391.59	1592.04	297.668	422.612	1599.46	233.991	353.503	1468.41	234.788	235.543	1227.96	233.865	484.643	1355.9	216.211	515.52	1171.06	282.605	242.151	1303.87	65.0976	412.805	1405.27	-13.5639	312.848	1200.43	-21.6239	298.583	1121.67	-57.8713	319.02	998.06	-17.5909	383.488	892.69	-70.9587	337.562	892.053	-58.7399	375.424	810.057
555	0	169.917	578.982	1582.55	272.844	588.048	1582.76	167.491	404.87	1589.23	296.009	436.238	1597.08	232.835	367.396	1466.01	234.292	249.231	1225.66	232.862	498.568	1353.27	216.018	529.032	1168.37	281.951	255.908	1301.74	63.9954	426.468	1402.33	-13.9302	324.464	1198.1	-21.8697	309.62	1119.59	-58.9805	327.382	995.959	-19.7225	390.078	889.177	-72.7674	343.742	889.676	-61.304	380.164	807.002
556	0	167.797	592.279	1580.03	270.746	601.665	1580.47	165.859	418.154	1586.27	294.257	449.862	1594.55	231.565	381.323	1463.45	233.687	263.025	1223.17	231.777	512.564	1350.5	215.784	542.653	1165.54	281.171	269.749	1299.42	62.7973	440.206	1399.22	-14.4394	336.354	1195.58	-22.2095	320.883	1117.32	-60.1045	336.038	993.72	-21.7897	396.946	885.587	-74.5409	350.259	887.2	-63.7397	385.207	803.87
557	0	165.584	605.582	1577.43	268.558	615.287	1578.08	164.127	431.444	1583.2	292.406	463.488	1591.91	230.176	395.286	1460.77	232.98	276.933	1220.51	230.595	526.633	1347.61	215.48	556.397	1162.6	280.274	283.683	1296.94	61.4947	454.01	1395.98	-15.0967	348.518	1192.88	-22.6462	332.379	1114.87	-61.2412	345.007	991.359	-23.7866	404.121	881.94	-76.2735	357.143	884.638	-66.0397	390.589	800.672
558	0	163.272	618.897	1574.81	266.273	628.913	1575.64	162.289	444.748	1580.06	290.447	477.117	1589.18	228.665	409.288	1457.99	232.18	290.961	1217.73	229.303	540.782	1344.66	215.082	570.278	1159.59	279.266	297.719	1294.33	60.08	467.871	1392.64	-15.9025	360.947	1190.02	-23.1806	344.11	1112.27	-62.3885	354.304	988.896	-25.7098	411.637	878.259	-77.9609	364.422	882.007	-68.2014	396.349	797.425
559	0	160.857	632.228	1572.19	263.885	642.545	1573.18	160.336	458.07	1576.88	288.374	490.753	1586.42	227.03	423.332	1455.17	231.297	305.117	1214.86	227.885	555.013	1341.69	214.564	584.306	1156.56	278.159	311.866	1291.64	58.5469	481.782	1389.26	-16.8526	373.631	1187.04	-23.8113	356.078	1109.55	-63.5446	363.943	986.353	-27.5582	419.525	874.57	-79.5998	372.124	879.325	-70.226	402.526	794.149
560	0	158.335	645.581	1569.63	261.388	656.187	1570.77	158.261	471.415	1573.71	286.183	504.4	1583.67	225.269	437.422	1452.34	230.342	319.404	1211.95	226.329	569.33	1338.74	213.9	598.492	1153.56	276.965	326.13	1288.91	56.891	495.733	1385.87	-17.9384	386.553	1183.97	-24.5345	368.283	1106.74	-64.7074	373.936	983.755	-29.3326	427.818	870.898	-81.188	380.273	876.613	-72.1187	409.163	790.866
561	0	155.702	658.962	1567.17	258.776	669.84	1568.44	156.06	484.789	1570.6	283.867	518.061	1580.96	223.385	451.559	1449.55	229.328	333.827	1209.05	224.627	583.736	1335.87	213.068	612.846	1150.64	275.696	340.519	1286.18	55.1102	509.714	1382.51	-19.147	399.692	1180.84	-25.3446	380.72	1103.88	-65.8747	384.295	981.127	-31.0353	436.548	867.274	-82.7237	388.895	873.892	-73.8868	416.305	787.602
562	0	152.955	672.373	1564.85	256.047	683.509	1566.25	153.728	498.197	1567.6	281.426	531.741	1578.36	221.381	465.747	1446.84	228.268	348.387	1206.2	222.77	598.231	1333.11	212.048	627.376	1147.83	274.366	355.036	1283.5	53.2053	523.719	1379.22	-20.462	413.026	1177.68	-26.2339	393.389	1101.01	-67.0443	395.028	978.498	-32.6692	445.746	863.73	-84.2058	398.014	871.189	-75.5396	423.994	784.385
563	0	150.097	685.822	1562.71	253.197	697.2	1564.24	151.264	511.644	1564.73	278.859	545.444	1575.9	219.263	479.988	1444.26	227.176	363.08	1203.44	220.758	612.815	1330.52	210.828	642.086	1145.2	272.987	369.683	1280.92	51.1797	537.738	1376.06	-21.8643	426.53	1174.55	-27.1939	406.282	1098.15	-68.2135	406.145	975.894	-34.238	455.443	860.299	-85.6336	407.65	868.527	-77.0873	432.275	781.247
564	0	147.127	699.312	1560.79	250.229	710.917	1562.45	148.671	525.136	1562.06	276.167	559.174	1573.63	217.037	494.282	1441.85	226.063	377.903	1200.84	218.59	627.486	1328.14	209.397	656.981	1142.78	271.574	384.457	1278.49	49.0403	551.768	1373.06	-23.3336	440.181	1171.5	-28.215	419.396	1095.35	-69.3799	417.651	973.347	-35.7454	465.667	857.013	-87.0062	417.823	865.933	-78.5402	441.189	778.219
565	0	144.053	712.848	1559.12	247.144	724.665	1560.93	145.952	538.677	1559.61	273.356	572.935	1571.58	214.715	508.627	1439.65	224.941	392.847	1198.43	216.275	642.238	1326.02	207.755	672.06	1140.62	270.138	399.353	1276.25	46.7972	565.801	1370.25	-24.8487	453.956	1168.55	-29.287	432.724	1092.64	-70.5407	429.554	970.884	-37.1947	476.443	853.906	-88.3234	428.551	863.433	-79.9079	450.775	775.332
566	0	140.882	726.431	1557.72	243.951	738.449	1559.71	143.116	552.269	1557.42	270.434	586.73	1569.79	212.31	523.02	1437.7	223.821	407.898	1196.26	213.823	657.064	1324.18	205.906	687.319	1138.76	268.693	414.362	1274.25	44.4636	579.833	1367.69	-26.3894	467.835	1165.77	-30.4001	446.261	1090.06	-71.6933	441.857	968.533	-38.5889	487.794	851.012	-89.5847	439.849	861.053	-81.1989	461.068	772.616
567	0	137.625	740.064	1556.62	240.659	752.274	1558.8	140.173	565.915	1555.54	267.412	600.562	1568.3	209.834	537.455	1436.03	222.711	423.042	1194.36	211.251	671.952	1322.66	203.863	702.748	1137.24	267.248	429.47	1272.53	42.0559	593.86	1365.4	-27.9371	481.802	1163.19	-31.5447	460.002	1087.66	-72.835	454.564	966.321	-39.9303	499.738	848.359	-90.7899	451.729	858.817	-82.4204	472.1	770.102
568	0	134.295	753.747	1555.83	237.282	766.142	1558.23	137.139	579.614	1553.98	264.304	614.431	1567.14	207.306	551.922	1434.67	221.618	438.259	1192.78	208.58	686.889	1321.49	201.647	718.328	1136.09	265.813	444.66	1271.11	39.593	607.878	1363.41	-29.4756	495.847	1160.85	-32.712	473.942	1085.45	-73.9635	467.677	964.273	-41.2204	512.29	845.977	-91.9392	464.201	856.748	-83.5776	483.896	767.816
569	0	130.912	767.479	1555.36	233.837	780.056	1558.01	134.031	593.366	1552.77	261.128	628.34	1566.32	204.743	566.413	1433.63	220.549	453.527	1191.54	205.834	701.857	1320.69	199.286	734.035	1135.32	264.399	459.912	1270.03	37.0961	621.883	1361.75	-30.9919	509.964	1158.79	-33.8943	488.077	1083.47	-75.0764	481.2	962.412	-42.4599	525.463	843.889	-93.0327	477.272	854.866	-84.6743	496.476	765.781
570	0	127.493	781.256	1555.21	230.343	794.014	1558.14	130.871	607.166	1551.92	257.904	642.285	1565.86	202.165	580.912	1432.94	219.508	468.822	1190.65	203.042	716.837	1320.26	196.811	749.837	1134.95	263.011	475.2	1269.3	34.588	635.87	1360.43	-32.4761	524.152	1157.03	-35.0851	502.404	1081.73	-76.1718	495.131	960.755	-43.6492	539.262	842.118	-94.071	490.948	853.189	-85.7127	509.855	764.017
571	0	124.061	795.073	1555.38	226.825	808.016	1558.6	127.685	621.01	1551.45	254.656	656.264	1565.77	199.592	595.406	1432.6	218.498	484.118	1190.14	200.234	731.808	1320.22	194.26	765.693	1134.98	261.659	490.499	1268.94	32.0923	649.834	1359.47	-33.922	538.415	1155.6	-36.2792	516.918	1080.27	-77.2481	509.472	959.319	-44.7876	553.689	840.68	-95.0551	505.23	851.733	-86.6939	524.042	762.541
572	0	120.642	808.923	1555.85	223.308	822.057	1559.39	124.498	634.889	1551.36	251.41	670.272	1566.05	197.046	609.88	1432.61	217.521	499.388	1190	197.442	746.748	1320.56	191.672	781.559	1135.41	260.347	505.781	1268.95	29.6329	663.772	1358.88	-35.3263	552.759	1154.5	-37.4727	531.616	1079.08	-78.3037	524.219	958.116	-45.8742	568.744	839.586	-95.9863	520.117	850.508	-87.618	539.037	761.364
573	0	117.26	822.798	1556.61	219.82	836.13	1560.48	121.34	648.795	1551.63	248.194	684.303	1566.69	194.548	624.315	1432.97	216.578	514.605	1190.23	194.697	761.632	1321.26	189.088	797.387	1136.23	259.081	521.018	1269.33	27.2329	677.678	1358.64	-36.6887	567.194	1153.74	-38.6627	546.494	1078.18	-79.3377	539.369	957.155	-46.9075	584.418	838.845	-96.8658	535.604	849.523	-88.4846	554.837	760.493
574	0	113.944	836.687	1557.64	216.391	850.227	1561.84	118.242	662.716	1552.28	245.036	698.35	1567.69	192.117	638.696	1433.66	215.668	529.743	1190.81	192.031	776.44	1322.32	186.55	813.127	1137.41	257.863	536.181	1270.05	24.9143	691.547	1358.77	-38.0106	581.727	1153.31	-39.8475	561.547	1077.56	-80.3493	554.918	956.438	-47.8855	600.701	838.458	-97.6954	551.684	848.783	-89.2931	571.433	759.932
575	0	110.719	850.581	1558.92	213.052	864.337	1563.44	115.234	676.64	1553.26	241.967	712.404	1569.02	189.774	653.008	1434.67	214.788	544.778	1191.74	189.473	791.15	1323.7	184.097	828.73	1138.91	256.695	551.243	1271.11	22.697	705.377	1359.23	-39.2953	596.367	1153.19	-41.0262	576.771	1077.21	-81.338	570.859	955.966	-48.8056	617.576	838.423	-98.4766	568.346	848.288	-90.0428	588.809	759.68
576	0	107.615	864.467	1560.42	209.834	878.447	1565.26	112.347	690.557	1554.58	239.015	726.455	1570.65	187.534	667.237	1435.97	213.935	559.687	1192.97	187.052	805.744	1325.39	181.766	844.154	1140.71	255.578	566.18	1272.47	20.5988	719.165	1360.02	-40.5462	611.12	1153.37	-42.1985	592.159	1077.14	-82.3032	587.183	955.736	-49.6647	635.023	838.734	-99.2105	585.577	848.039	-90.7329	606.945	759.736
577	0	104.656	878.335	1562.1	206.767	892.544	1567.25	109.608	704.453	1556.18	236.208	740.494	1572.55	185.413	681.372	1437.54	213.104	574.452	1194.49	184.791	820.207	1327.34	179.592	859.361	1142.76	254.508	580.971	1274.11	18.6345	732.908	1361.12	-41.7673	625.99	1153.83	-43.3646	607.706	1077.31	-83.2444	603.879	955.742	-50.4594	653.016	839.382	-99.8982	603.359	848.031	-91.3629	625.817	760.093
578	0	101.867	892.175	1563.96	203.88	906.614	1569.38	107.044	718.319	1558.06	233.572	754.511	1574.7	183.423	695.405	1439.35	212.288	589.055	1196.25	182.71	834.528	1329.53	177.606	874.322	1145.03	253.483	595.598	1275.98	16.8159	746.608	1362.49	-42.9618	640.979	1154.53	-44.525	623.407	1077.72	-84.1611	620.935	955.975	-51.1857	671.529	840.354	-100.54	621.673	848.257	-91.9318	645.393	760.744
579	0	99.2703	905.978	1565.95	201.197	920.643	1571.62	104.676	732.144	1560.16	231.129	768.497	1577.05	181.573	709.33	1441.36	211.479	603.486	1198.23	180.827	848.699	1331.92	175.834	889.017	1147.46	252.497	610.049	1278.06	15.152	760.265	1364.1	-44.1324	656.087	1155.44	-45.6801	639.253	1078.34	-85.0525	638.338	956.424	-51.8393	690.528	841.635	-101.136	640.494	848.711	-92.4386	665.641	761.683
580	0	96.8841	919.736	1568.06	198.741	934.618	1573.93	102.524	745.921	1562.46	228.898	782.442	1579.56	179.873	723.145	1443.54	210.67	617.736	1200.39	179.153	862.715	1334.46	174.296	903.438	1150.02	251.545	624.314	1280.31	13.6483	773.883	1365.93	-45.2804	671.31	1156.54	-46.8306	655.241	1079.15	-85.9175	656.073	957.075	-52.4155	709.979	843.208	-101.686	659.796	849.384	-92.8821	686.523	762.9
581	0	94.7237	933.445	1570.24	196.528	948.528	1576.3	100.6	759.644	1564.92	226.892	796.341	1582.19	178.324	736.85	1445.86	209.853	631.801	1202.69	177.696	876.575	1337.13	173.007	917.583	1152.66	250.621	638.39	1282.69	12.3074	787.467	1367.94	-46.406	686.646	1157.79	-47.9766	671.363	1080.13	-86.7549	674.122	957.917	-52.9098	729.845	845.057	-102.187	679.553	850.265	-93.2603	707.997	764.39
582	0	92.8003	947.099	1572.49	194.573	962.364	1578.69	98.9136	773.309	1567.5	225.123	810.186	1584.91	176.93	750.448	1448.28	209.02	645.682	1205.09	176.458	890.283	1339.87	171.975	931.464	1155.35	249.717	652.278	1285.15	11.1293	801.021	1370.11	-47.5084	702.089	1159.18	-49.118	687.613	1081.25	-87.5632	692.468	958.933	-53.318	750.088	847.163	-102.64	699.733	851.345	-93.5711	730.018	766.144
583	0	91.1212	960.7	1574.77	192.881	976.12	1581.08	97.467	786.916	1570.17	223.595	823.974	1587.67	175.69	763.944	1450.77	208.165	659.382	1207.57	175.439	903.843	1342.66	171.201	945.095	1158.07	248.829	665.981	1287.68	10.111	814.552	1372.39	-48.5855	717.636	1160.67	-50.2543	703.986	1082.49	-88.3406	711.094	960.108	-53.6361	770.669	849.509	-103.041	720.306	852.614	-93.8112	752.54	768.155
584	0	89.6895	974.245	1577.05	191.456	989.792	1583.44	96.2591	800.465	1572.89	222.308	837.702	1590.44	174.602	777.345	1453.29	207.284	672.91	1210.08	174.633	917.263	1345.46	170.68	958.5	1160.77	247.951	679.509	1290.22	9.24754	828.065	1374.77	-49.6347	733.28	1162.25	-51.3847	720.475	1083.84	-89.0852	729.98	961.428	-53.8611	791.549	852.075	-103.389	741.24	854.06	-93.9772	775.512	770.415
585	0	88.5045	987.738	1579.33	190.294	1003.38	1585.75	95.2839	813.958	1575.62	221.26	851.367	1593.18	173.66	790.657	1455.81	206.374	686.276	1212.61	174.03	930.553	1348.24	170.399	971.703	1163.45	247.078	692.874	1292.75	8.5318	841.566	1377.2	-50.6531	749.015	1163.89	-52.508	737.075	1085.25	-89.7949	749.107	962.875	-53.9905	812.69	854.844	-103.681	762.503	855.672	-94.0648	798.883	772.917
586	0	87.562	1001.18	1581.56	189.388	1016.89	1587.99	94.5319	827.4	1578.34	220.442	864.971	1595.86	172.859	803.89	1458.31	205.433	699.495	1215.11	173.618	943.722	1350.97	170.34	984.733	1166.07	246.21	706.088	1295.24	7.95513	855.06	1379.67	-51.6375	764.833	1165.57	-53.6228	753.78	1086.73	-90.4676	768.456	964.432	-54.0229	834.055	857.797	-103.915	784.061	857.439	-94.0694	822.602	775.65
587	0	86.8545	1014.58	1583.73	188.728	1030.33	1590.14	93.9901	840.795	1581	219.845	878.512	1598.45	172.191	817.052	1460.75	204.461	712.583	1217.55	173.382	956.783	1353.61	170.478	997.62	1168.62	245.343	719.168	1297.66	7.50767	868.55	1382.14	-52.5853	780.729	1167.27	-54.7275	770.585	1088.23	-91.1011	788.007	966.083	-53.9578	855.609	860.914	-104.089	805.883	859.346	-93.9861	846.615	778.603
588	0	86.3718	1027.94	1585.82	188.301	1043.7	1592.18	93.6434	854.149	1583.59	219.455	891.993	1600.91	171.647	830.151	1463.1	203.463	725.558	1219.91	173.304	969.748	1356.14	170.786	1010.39	1171.09	244.48	732.132	1299.98	7.17875	882.039	1384.59	-53.4949	796.694	1168.98	-55.8204	787.483	1089.76	-91.6934	807.741	967.809	-53.7956	877.319	864.174	-104.2	827.938	861.382	-93.8097	870.871	781.762
589	0	86.1014	1041.27	1587.8	188.089	1057	1594.07	93.4751	867.467	1586.08	219.258	905.416	1603.22	171.22	843.196	1465.34	202.443	738.437	1222.16	173.366	982.629	1358.53	171.23	1023.07	1173.44	243.621	744.997	1302.16	6.95734	895.529	1386.98	-54.3653	812.72	1170.68	-56.8995	804.469	1091.27	-92.2426	827.637	969.592	-53.5377	899.153	867.558	-104.247	850.194	863.53	-93.5353	895.32	785.109
590	0	86.0294	1054.56	1589.66	188.077	1070.26	1595.82	93.4678	880.755	1588.43	219.237	918.781	1605.36	170.899	856.195	1467.43	201.409	751.239	1224.26	173.548	995.441	1360.77	171.778	1035.69	1175.67	242.772	757.782	1304.2	6.83232	909.02	1389.3	-55.1969	828.8	1172.35	-57.9632	821.536	1092.76	-92.7469	847.676	971.411	-53.1863	921.082	871.042	-104.229	872.621	865.774	-93.1585	919.912	788.626
591	0	86.1408	1067.84	1591.37	188.246	1083.48	1597.39	93.6042	894.017	1590.62	219.376	932.093	1607.31	170.676	869.156	1469.36	200.368	763.983	1226.21	173.831	1008.2	1362.83	172.394	1048.27	1177.75	241.936	770.504	1306.05	6.79292	922.511	1391.52	-55.9911	844.926	1173.95	-59.0095	838.68	1094.19	-93.2048	867.838	973.246	-52.7443	943.081	874.603	-104.143	895.191	868.097	-92.6753	944.601	792.288
592	0	86.4199	1081.08	1592.92	188.579	1096.65	1598.77	93.8672	907.258	1592.63	219.658	945.353	1609.03	170.54	882.085	1471.1	199.332	776.687	1227.96	174.193	1020.91	1364.68	173.046	1060.83	1179.66	241.12	783.18	1307.71	6.82894	936.002	1393.6	-56.7503	861.09	1175.49	-60.0365	855.894	1095.55	-93.6148	888.105	975.077	-52.2148	965.122	878.218	-103.989	917.876	870.479	-92.0827	969.344	796.071
593	0	86.8512	1094.32	1594.29	189.06	1109.79	1599.95	94.2409	920.48	1594.43	220.068	958.563	1610.52	170.485	894.99	1472.63	198.313	789.365	1229.51	174.618	1033.59	1366.3	173.701	1073.37	1181.38	240.333	795.826	1309.15	6.93104	949.491	1395.53	-57.4776	877.285	1176.92	-61.0422	873.173	1096.81	-93.9758	908.457	976.884	-51.6014	987.183	881.86	-103.767	940.646	872.902	-91.3788	994.101	799.948
594	0	87.4197	1107.53	1595.47	189.673	1122.91	1600.91	94.711	933.686	1596.01	220.59	971.724	1611.76	170.502	907.876	1473.93	197.324	802.033	1230.83	175.087	1046.25	1367.68	174.329	1085.93	1182.88	239.583	808.456	1310.36	7.09098	962.975	1397.28	-58.1761	893.507	1178.23	-62.0246	890.512	1097.96	-94.2866	928.875	978.645	-50.9077	1009.24	885.506	-103.476	963.476	875.344	-90.5629	1018.83	803.89
595	0	88.1113	1120.73	1596.44	190.404	1136	1601.65	95.2645	946.878	1597.34	221.211	984.839	1612.74	170.585	920.749	1475	196.379	814.703	1231.91	175.585	1058.9	1368.8	174.904	1098.49	1184.14	238.879	821.083	1311.32	7.30177	976.451	1398.82	-58.8491	909.749	1179.4	-62.981	907.904	1098.97	-94.5463	949.341	980.342	-50.1374	1031.28	889.129	-103.117	986.337	877.785	-89.6355	1043.51	807.868
596	0	88.9129	1133.91	1597.19	191.24	1149.06	1602.16	95.8906	960.056	1598.42	221.918	997.91	1613.45	170.729	933.614	1475.81	195.491	827.386	1232.72	176.1	1071.56	1369.65	175.404	1111.08	1185.13	238.23	833.719	1312.02	7.55781	989.918	1400.15	-59.4989	926.009	1180.4	-63.9089	925.345	1099.83	-94.7539	969.833	981.956	-49.2941	1053.27	892.704	-102.691	1009.2	880.205	-88.5987	1068.1	811.854
597	0	89.8128	1147.09	1597.71	192.172	1162.1	1602.43	96.5803	973.221	1599.23	222.7	1010.94	1613.88	170.93	946.474	1476.35	194.676	840.092	1233.28	176.619	1084.23	1370.21	175.813	1123.71	1185.83	237.648	846.372	1312.45	7.85494	1003.37	1401.23	-60.1269	942.284	1181.21	-64.8047	942.825	1100.52	-94.9085	990.334	983.47	-48.3815	1075.2	896.206	-102.197	1032.05	882.584	-87.4559	1092.57	815.818
598	0	90.801	1160.24	1598	193.188	1175.11	1602.47	97.3265	986.372	1599.77	223.55	1023.92	1614.03	171.186	959.332	1476.63	193.946	852.826	1233.55	177.135	1096.92	1370.47	176.117	1136.36	1186.23	237.142	859.05	1312.6	8.19045	1016.81	1402.05	-60.7327	958.572	1181.83	-65.6645	960.338	1101.02	-95.0089	1010.82	984.87	-47.4034	1097.04	899.613	-101.638	1054.85	884.902	-86.212	1116.89	819.735
599	0	91.8687	1173.39	1598.06	194.282	1188.09	1602.26	98.1241	999.509	1600.02	224.459	1036.87	1613.89	171.496	972.19	1476.63	193.314	865.597	1233.55	177.644	1109.64	1370.43	176.311	1149.06	1186.31	236.721	871.76	1312.48	8.56316	1030.23	1402.61	-61.3139	974.871	1182.23	-66.4834	977.874	1101.33	-95.0539	1031.28	986.141	-46.3638	1118.78	902.904	-101.015	1077.57	887.143	-84.8733	1141.05	823.58
600	0	93.009	1186.52	1597.87	195.447	1201.06	1601.8	98.97	1012.63	1600	225.423	1049.78	1613.48	171.862	985.05	1476.36	192.792	878.408	1233.27	178.143	1122.39	1370.09	176.394	1161.81	1186.07	236.394	884.506	1312.08	8.97328	1043.63	1402.9	-61.8661	991.178	1182.41	-67.2557	995.421	1101.43	-95.042	1051.68	987.275	-45.2666	1140.39	906.059	-100.329	1100.18	889.292	-83.4476	1165.02	827.332
601	0	94.2162	1199.63	1597.46	196.677	1213.99	1601.11	99.8628	1025.74	1599.69	226.438	1062.66	1612.79	172.285	997.912	1475.81	192.388	891.263	1232.7	178.634	1135.18	1369.46	176.37	1174.61	1185.51	236.171	897.291	1311.4	9.42244	1057	1402.91	-62.3827	1007.49	1182.37	-67.9747	1012.97	1101.33	-94.9716	1072	988.262	-44.1162	1161.86	909.064	-99.582	1122.67	891.333	-81.944	1188.77	830.971
602	0	95.4862	1212.73	1596.81	197.969	1226.91	1600.19	100.803	1038.83	1599.11	227.503	1075.51	1611.83	172.77	1010.78	1475.01	192.111	904.167	1231.86	179.121	1148.01	1368.53	176.248	1187.47	1184.63	236.057	910.118	1310.46	9.91354	1070.35	1402.65	-62.8547	1023.8	1182.1	-68.6328	1030.5	1101.02	-94.8405	1092.22	989.099	-42.9171	1183.16	911.905	-98.7762	1144.99	893.258	-80.3727	1212.28	834.482
603	0	96.816	1225.82	1595.93	199.319	1239.8	1599.04	101.792	1051.91	1598.28	228.617	1088.33	1610.63	173.321	1023.64	1473.95	191.967	917.121	1230.75	179.611	1160.87	1367.33	176.043	1200.4	1183.46	236.058	922.989	1309.24	10.4506	1083.67	1402.11	-63.2716	1040.1	1181.6	-69.2216	1047.99	1100.51	-94.6465	1112.31	989.783	-41.6741	1204.28	914.573	-97.9131	1167.12	895.056	-78.7448	1235.53	837.852
604	0	98.2041	1238.89	1594.85	200.726	1252.68	1597.68	102.832	1064.97	1597.2	229.783	1101.13	1609.19	173.944	1036.51	1472.64	191.958	930.128	1229.39	180.112	1173.77	1365.87	175.775	1213.4	1182.02	236.178	935.905	1307.78	11.0387	1096.97	1401.33	-63.6211	1056.39	1180.89	-69.7321	1065.43	1099.81	-94.387	1132.25	990.313	-40.3921	1225.18	917.062	-96.9943	1189.03	896.722	-77.0719	1258.49	841.071
605	0	99.6498	1251.95	1593.57	202.188	1265.53	1596.12	103.929	1078.01	1595.89	231.001	1113.91	1607.54	174.644	1049.38	1471.11	192.084	943.191	1227.77	180.637	1186.72	1364.19	175.465	1226.48	1180.33	236.421	948.865	1306.07	11.6836	1110.24	1400.31	-63.8901	1072.63	1179.97	-70.1548	1082.8	1098.92	-94.0591	1152	990.694	-39.0761	1245.85	919.369	-96.0215	1210.69	898.251	-75.3661	1281.14	844.133
606	0	101.153	1264.99	1592.11	203.706	1278.38	1594.37	105.087	1091.04	1594.39	232.277	1126.69	1605.69	175.427	1062.25	1469.38	192.345	956.314	1225.93	181.197	1199.7	1362.29	175.139	1239.65	1178.43	236.785	961.87	1304.13	12.3915	1123.48	1399.07	-64.0648	1088.83	1178.86	-70.4799	1100.07	1097.86	-93.6598	1171.55	990.931	-37.7312	1266.27	921.494	-94.996	1232.06	899.643	-73.6393	1303.46	847.032
607	0	102.716	1278.02	1590.5	205.281	1291.22	1592.46	106.312	1104.06	1592.71	233.615	1139.45	1603.69	176.299	1075.12	1467.47	192.737	969.498	1223.88	181.806	1212.71	1360.23	174.826	1252.91	1176.35	237.271	974.921	1302	13.169	1136.7	1397.64	-64.1317	1104.95	1177.59	-70.6977	1117.2	1096.64	-93.1861	1190.85	991.032	-36.3622	1286.4	923.439	-93.9193	1253.12	900.897	-71.9034	1325.42	849.766
608	0	104.339	1291.05	1588.74	206.913	1304.05	1590.41	107.609	1117.07	1590.89	235.019	1152.22	1601.55	177.265	1087.99	1465.4	193.253	982.746	1221.64	182.479	1225.76	1358.03	174.555	1266.27	1174.15	237.873	988.015	1299.68	14.0223	1149.91	1396.05	-64.0778	1120.97	1176.17	-70.7993	1134.19	1095.3	-92.6352	1209.89	991.008	-34.9739	1306.24	925.209	-92.7925	1273.82	902.015	-70.1692	1346.99	852.334
609	0	106.024	1304.07	1586.88	208.604	1316.89	1588.25	108.986	1130.08	1588.96	236.496	1165	1599.31	178.33	1100.86	1463.2	193.886	996.064	1219.24	183.229	1238.85	1355.74	174.356	1279.73	1171.86	238.588	1001.15	1297.2	14.9576	1163.09	1394.33	-63.8911	1136.86	1174.62	-70.776	1150.99	1093.85	-92.0042	1228.63	990.869	-33.5706	1325.74	926.811	-91.6169	1294.15	903.002	-68.4467	1368.14	854.737
610	0	107.774	1317.09	1584.95	210.356	1329.74	1586	110.448	1143.08	1586.95	238.049	1177.8	1597.01	179.496	1113.73	1460.91	194.624	1009.45	1216.71	184.07	1251.96	1353.39	174.258	1293.29	1169.53	239.407	1014.34	1294.59	15.9802	1176.27	1392.51	-63.5615	1152.6	1172.97	-70.6205	1167.59	1092.32	-91.2906	1247.03	990.631	-32.1563	1344.89	928.254	-90.3935	1314.06	903.863	-66.7447	1388.84	856.975
611	0	109.589	1330.12	1582.96	212.17	1342.6	1583.71	112.001	1156.09	1584.91	239.684	1190.63	1594.69	180.765	1126.6	1458.56	195.457	1022.91	1214.08	185.014	1265.11	1351.02	174.29	1306.96	1167.21	240.323	1027.57	1291.89	17.0946	1189.45	1390.64	-63.0807	1168.16	1171.26	-70.327	1183.95	1090.74	-90.4927	1265.08	990.308	-30.7343	1363.66	929.546	-89.1234	1333.52	904.604	-65.0704	1409.07	859.051
612	0	111.472	1343.17	1580.96	214.05	1355.49	1581.4	113.649	1169.12	1582.87	241.405	1203.49	1592.37	182.138	1139.49	1456.18	196.372	1036.45	1211.39	186.073	1278.29	1348.69	174.478	1320.73	1164.94	241.324	1040.84	1289.13	18.3039	1202.63	1388.74	-62.4427	1183.51	1169.52	-69.8912	1200.04	1089.13	-89.6091	1282.75	989.917	-29.3074	1382.02	930.697	-87.8076	1352.51	905.231	-63.4294	1428.79	860.965
613	0	113.423	1356.23	1578.98	215.995	1368.41	1579.11	115.395	1182.16	1580.88	243.215	1216.4	1590.11	183.613	1152.38	1453.82	197.354	1050.07	1208.68	187.256	1291.49	1346.42	174.846	1334.6	1162.78	242.4	1054.15	1286.34	19.6099	1215.82	1386.87	-61.6441	1198.62	1167.77	-69.311	1215.84	1087.52	-88.6393	1300	989.474	-27.8774	1399.95	931.716	-86.4472	1370.98	905.754	-61.8253	1447.98	862.72
614	0	115.443	1369.33	1577.05	218.008	1381.38	1576.88	117.243	1195.23	1578.97	245.115	1229.37	1587.93	185.186	1165.28	1451.5	198.388	1063.76	1205.98	188.568	1304.73	1344.27	175.413	1348.57	1160.75	243.538	1067.5	1283.56	21.0123	1229.03	1385.05	-60.6845	1213.46	1166.04	-68.5864	1231.33	1085.95	-87.5838	1316.82	988.997	-26.4457	1417.43	932.614	-85.0437	1388.91	906.178	-60.26	1466.6	864.316
615	0	117.53	1382.46	1575.19	220.087	1394.41	1574.73	119.191	1208.34	1577.19	247.105	1242.4	1585.88	186.852	1178.21	1449.27	199.459	1077.53	1203.34	190.013	1317.99	1342.27	176.193	1362.63	1158.91	244.723	1080.9	1280.84	22.5092	1242.27	1383.33	-59.5662	1228.03	1164.38	-67.7195	1246.49	1084.45	-86.4441	1333.18	988.504	-25.0129	1434.42	933.398	-83.5985	1406.28	906.514	-58.7337	1484.62	865.752
616	0	119.683	1395.64	1573.46	222.233	1407.49	1572.71	121.239	1221.5	1575.57	249.185	1255.51	1584	188.603	1191.16	1447.17	200.552	1091.38	1200.8	191.593	1331.28	1340.45	177.197	1376.77	1157.3	245.943	1094.33	1278.21	24.0965	1255.55	1381.74	-58.2943	1242.3	1162.82	-66.7148	1261.3	1083.05	-85.223	1349.06	988.014	-23.5792	1450.91	934.077	-82.1137	1423.06	906.769	-57.2447	1502.02	867.027
617	0	121.899	1408.87	1571.86	224.443	1420.65	1570.83	123.381	1234.71	1574.15	251.348	1268.7	1582.31	190.432	1204.13	1445.23	201.65	1105.29	1198.4	193.303	1344.59	1338.86	178.426	1391	1155.93	247.182	1107.79	1275.71	25.7678	1268.87	1380.33	-56.8772	1256.26	1161.39	-65.5792	1275.75	1081.78	-83.9244	1364.45	987.542	-22.1441	1466.87	934.656	-80.5919	1439.23	906.951	-55.7897	1518.78	868.138
618	0	124.172	1422.16	1570.43	226.714	1433.89	1569.14	125.612	1247.99	1572.95	253.591	1281.97	1580.85	192.326	1217.13	1443.48	202.739	1119.25	1196.17	195.137	1357.92	1337.51	179.879	1405.28	1154.85	248.425	1121.28	1273.39	27.5146	1282.24	1379.11	-55.326	1269.92	1160.12	-64.3216	1289.83	1080.67	-82.5536	1379.34	987.108	-20.7069	1482.29	935.143	-79.0363	1454.77	907.069	-54.3644	1534.85	869.081
619	0	126.496	1435.53	1569.19	229.039	1447.22	1567.66	127.923	1261.33	1572.02	255.905	1295.35	1579.64	194.272	1230.17	1441.95	203.805	1133.27	1194.17	197.084	1371.27	1336.44	181.544	1419.62	1154.08	249.657	1134.8	1271.27	29.3263	1295.67	1378.13	-53.6548	1283.26	1159.06	-62.9529	1303.53	1079.75	-81.1172	1393.72	986.726	-19.2671	1497.15	935.541	-77.4508	1469.67	907.131	-52.9633	1550.24	869.853
620	0	128.862	1448.97	1568.16	231.413	1460.64	1566.4	130.302	1274.76	1571.37	258.278	1308.82	1578.71	196.257	1243.24	1440.68	204.835	1147.33	1192.41	199.13	1384.64	1335.66	183.405	1433.98	1153.62	250.866	1148.34	1269.39	31.1902	1309.15	1377.4	-51.8807	1296.31	1158.22	-61.4863	1316.87	1079.04	-79.6231	1407.58	986.412	-17.8242	1511.43	935.854	-75.8405	1483.91	907.146	-51.5805	1564.9	870.448
621	0	131.26	1462.49	1567.35	233.826	1474.16	1565.38	132.735	1288.27	1571.02	260.698	1322.38	1578.07	198.264	1256.35	1439.67	205.816	1161.4	1190.93	201.255	1398.02	1335.18	185.438	1448.34	1153.5	252.036	1161.88	1267.79	33.092	1322.68	1376.96	-50.0234	1309.07	1157.65	-59.9366	1329.84	1078.56	-78.0804	1420.93	986.18	-16.3781	1525.12	936.085	-74.2112	1497.49	907.12	-50.2097	1578.83	870.86
622	0	133.68	1476.09	1566.77	236.266	1487.78	1564.61	135.207	1301.88	1570.98	263.15	1336.05	1577.73	200.278	1269.5	1438.96	206.74	1175.49	1189.76	203.44	1411.41	1335.02	187.612	1462.69	1153.71	253.158	1175.43	1266.49	35.0158	1336.27	1376.81	-48.105	1321.56	1157.36	-58.3202	1342.45	1078.34	-76.4996	1433.77	986.04	-14.9295	1538.22	936.236	-72.5701	1510.41	907.061	-48.8448	1592.02	871.085
623	0	136.106	1489.78	1566.44	238.721	1501.49	1564.09	137.699	1315.57	1571.26	265.617	1349.82	1577.69	202.282	1282.69	1438.54	207.599	1189.58	1188.92	205.658	1424.8	1335.16	189.891	1476.99	1154.25	254.221	1188.98	1265.5	36.9447	1349.91	1376.97	-46.1502	1333.81	1157.37	-56.6548	1354.72	1078.39	-74.8924	1446.09	986.004	-13.4801	1550.71	936.309	-70.9256	1522.68	906.978	-47.4804	1604.46	871.118
624	0	138.526	1503.56	1566.34	241.175	1515.29	1563.83	140.191	1329.35	1571.85	268.08	1363.68	1577.96	204.26	1295.92	1438.43	208.39	1203.64	1188.41	207.886	1438.19	1335.61	192.234	1491.21	1155.09	255.218	1202.52	1264.85	38.861	1363.6	1377.44	-44.1852	1345.85	1157.71	-54.9594	1366.65	1078.71	-73.2713	1457.93	986.078	-12.0326	1562.61	936.305	-69.2873	1534.3	906.875	-46.1117	1616.14	870.954
625	0	140.921	1517.41	1566.48	243.612	1529.18	1563.82	142.663	1343.22	1572.75	270.521	1377.62	1578.53	206.195	1309.18	1438.62	209.112	1217.66	1188.25	210.093	1451.57	1336.36	194.596	1505.33	1156.22	256.146	1216.05	1264.53	40.7471	1377.32	1378.22	-42.2373	1357.71	1158.37	-53.2535	1378.28	1079.32	-71.6497	1469.28	986.268	-10.5912	1573.92	936.225	-67.666	1545.28	906.761	-44.736	1627.07	870.591
626	0	143.277	1531.34	1566.85	246.013	1543.15	1564.04	145.092	1357.17	1573.95	272.918	1391.65	1579.38	208.073	1322.48	1439.12	209.766	1231.63	1188.43	212.253	1464.95	1337.37	196.931	1519.31	1157.6	257.002	1229.55	1264.56	42.5849	1391.06	1379.3	-40.3345	1369.42	1159.36	-51.5567	1389.62	1080.21	-70.042	1480.17	986.575	-9.16149	1584.65	936.069	-66.074	1555.64	906.639	-43.3519	1637.25	870.027
627	0	145.576	1545.34	1567.43	248.358	1557.18	1564.47	147.457	1371.2	1575.42	275.251	1405.74	1580.49	209.88	1335.81	1439.9	210.357	1245.54	1188.94	214.338	1478.3	1338.64	199.194	1533.15	1159.2	257.789	1243.02	1264.92	44.3575	1404.81	1380.66	-38.5045	1381.02	1160.68	-49.8887	1400.69	1081.37	-68.4628	1490.61	986.999	-7.75075	1594.8	935.837	-64.5244	1565.4	906.515	-41.9611	1646.7	869.264
628	0	147.799	1559.4	1568.21	250.629	1571.27	1565.11	149.737	1385.3	1577.13	277.5	1419.89	1581.84	211.604	1349.16	1440.95	210.895	1259.36	1189.78	216.321	1491.63	1340.12	201.337	1546.82	1160.98	258.51	1256.45	1265.6	46.0485	1418.55	1382.28	-36.7736	1392.53	1162.29	-48.2681	1411.51	1082.8	-66.9267	1500.63	987.538	-6.36799	1604.4	935.53	-63.0313	1574.6	906.393	-40.568	1655.43	868.304
629	0	149.932	1573.51	1569.16	252.805	1585.4	1565.93	151.91	1399.45	1579.06	279.646	1434.08	1583.4	213.234	1362.54	1442.26	211.387	1273.1	1190.92	218.178	1504.94	1341.8	203.319	1560.3	1162.9	259.171	1269.85	1266.59	47.6431	1432.27	1384.15	-35.1657	1403.98	1164.19	-46.7123	1422.11	1084.47	-65.4485	1510.25	988.185	-5.02394	1613.48	935.148	-61.6093	1583.25	906.275	-39.1805	1663.48	867.155
630	0	151.957	1587.66	1570.26	254.868	1599.57	1566.9	153.959	1413.65	1581.17	281.672	1448.31	1585.15	214.762	1375.94	1443.79	211.846	1286.72	1192.34	219.888	1518.22	1343.63	205.103	1573.61	1164.9	259.78	1283.2	1267.86	49.1282	1445.96	1386.22	-33.7014	1415.4	1166.34	-45.2369	1432.51	1086.36	-64.0425	1519.49	988.932	-3.73102	1622.05	934.691	-60.2736	1591.4	906.164	-37.8104	1670.88	865.824
631	0	153.86	1601.83	1571.5	256.803	1613.74	1568.01	155.867	1427.88	1583.43	283.561	1462.56	1587.05	216.182	1389.35	1445.52	212.283	1300.24	1194.02	221.434	1531.48	1345.57	206.657	1586.73	1166.96	260.347	1296.5	1269.4	50.493	1459.59	1388.46	-32.3968	1426.8	1168.7	-43.8551	1442.73	1088.44	-62.7221	1528.39	989.771	-2.5032	1630.14	934.162	-59.039	1599.06	906.061	-36.4732	1677.65	864.326
632	0	155.628	1616.02	1572.85	258.593	1627.92	1569.22	157.62	1442.14	1585.81	285.302	1476.81	1589.07	217.487	1402.77	1447.41	212.709	1313.64	1195.91	222.802	1544.7	1347.61	207.958	1599.67	1169.04	260.88	1309.76	1271.16	51.7286	1473.16	1390.84	-31.2629	1438.18	1171.24	-42.5772	1452.79	1090.69	-61.4997	1536.95	990.688	-1.35579	1637.79	933.561	-57.9204	1606.28	905.966	-35.1883	1683.83	862.674
633	0	157.252	1630.22	1574.27	260.228	1642.09	1570.51	159.208	1456.4	1588.25	286.882	1491.06	1591.18	218.676	1416.19	1449.45	213.136	1326.92	1197.99	223.983	1557.88	1349.69	208.99	1612.46	1171.1	261.389	1322.97	1273.11	52.829	1486.65	1393.31	-30.3047	1449.55	1173.92	-41.4105	1462.71	1093.07	-60.3866	1545.22	991.671	-0.305121	1645.02	932.889	-56.9317	1613.09	905.879	-33.9784	1689.47	860.886
634	0	158.722	1644.4	1575.75	261.697	1656.24	1571.86	160.623	1470.66	1590.74	288.295	1505.29	1593.35	219.746	1429.62	1451.59	213.573	1340.08	1200.21	224.972	1571.04	1351.8	209.747	1625.1	1173.11	261.883	1336.12	1275.23	53.7907	1500.05	1395.85	-29.521	1460.9	1176.68	-40.3591	1472.49	1095.56	-59.3922	1553.21	992.706	0.631843	1651.88	932.151	-56.0858	1619.52	905.797	-32.8688	1694.61	858.982
635	0	160.032	1658.56	1577.25	262.995	1670.36	1573.25	161.861	1484.9	1593.23	289.535	1519.5	1595.54	220.698	1443.03	1453.81	214.028	1353.12	1202.55	225.77	1584.15	1353.89	210.232	1637.63	1175.06	262.369	1349.23	1277.47	54.6129	1513.36	1398.4	-28.9047	1472.22	1179.49	-39.4235	1482.16	1098.11	-58.5242	1560.94	993.778	1.43802	1658.38	931.347	-55.3942	1625.61	905.72	-31.8867	1699.29	856.984
636	0	161.18	1672.69	1578.76	264.118	1684.43	1574.64	162.92	1499.12	1595.7	290.601	1533.67	1597.73	221.533	1456.44	1456.06	214.506	1366.05	1204.96	226.381	1597.24	1355.95	210.455	1650.06	1176.93	262.854	1362.29	1279.8	55.2969	1526.57	1400.94	-28.4428	1483.48	1182.31	-38.6013	1491.72	1100.69	-57.7884	1568.43	994.874	2.09673	1664.58	930.48	-54.8666	1631.39	905.644	-31.0597	1703.55	854.912
637	0	162.165	1686.79	1580.24	265.066	1698.46	1576.02	163.802	1513.31	1598.11	291.493	1547.8	1599.88	222.256	1469.84	1458.33	215.009	1378.87	1207.41	226.812	1610.28	1357.94	210.434	1662.41	1178.7	263.342	1375.3	1282.18	55.8468	1539.68	1403.44	-28.1177	1494.66	1185.09	-37.8871	1501.19	1103.27	-57.1887	1575.72	995.977	2.59227	1670.51	929.555	-54.511	1636.88	905.566	-30.4149	1707.45	852.789
638	0	162.988	1700.83	1581.68	265.843	1712.44	1577.37	164.512	1527.45	1600.43	292.215	1561.89	1601.98	222.869	1483.22	1460.56	215.537	1391.58	1209.87	227.075	1623.29	1359.85	210.193	1674.72	1180.36	263.835	1388.27	1284.57	56.2681	1552.69	1405.84	-27.9082	1505.74	1187.8	-37.2732	1510.55	1105.83	-56.7268	1582.81	997.072	2.91049	1676.19	928.573	-54.3327	1642.12	905.483	-29.9779	1711.03	850.635
639	0	163.652	1714.83	1583.05	266.452	1726.37	1578.67	165.056	1541.53	1602.64	292.772	1575.92	1603.99	223.378	1496.57	1462.74	216.088	1404.21	1212.28	227.183	1636.27	1361.65	209.761	1687	1181.91	264.336	1401.2	1286.95	56.5684	1565.6	1408.14	-27.7909	1516.7	1190.42	-36.75	1519.83	1108.33	-56.4024	1589.73	998.145	3.03936	1681.66	927.536	-54.335	1647.14	905.389	-29.7709	1714.34	848.47
640	0	164.164	1728.76	1584.32	266.903	1740.23	1579.89	165.442	1555.57	1604.71	293.173	1589.89	1605.89	223.789	1509.91	1464.84	216.656	1416.76	1214.63	227.151	1649.21	1363.33	209.169	1699.26	1183.33	264.841	1414.09	1289.26	56.756	1578.42	1410.29	-27.742	1527.51	1192.9	-36.3066	1529.03	1110.74	-56.2134	1596.49	999.181	2.96946	1686.96	926.448	-54.5185	1651.95	905.28	-29.8126	1717.41	846.312
641	0	164.53	1742.63	1585.5	267.205	1754.04	1581.02	165.68	1569.54	1606.63	293.426	1603.81	1607.66	224.108	1523.23	1466.83	217.234	1429.24	1216.87	226.996	1662.13	1364.88	208.452	1711.52	1184.63	265.348	1426.94	1291.49	56.8404	1591.16	1412.28	-27.7379	1538.16	1195.24	-35.9316	1538.14	1113.05	-56.1561	1603.11	1000.17	2.69443	1692.11	925.307	-54.8815	1656.59	905.151	-30.1164	1720.28	844.174
642	0	164.759	1756.44	1586.54	267.368	1767.79	1582.05	165.782	1583.45	1608.36	293.541	1617.67	1609.28	224.34	1536.52	1468.67	217.812	1441.67	1218.99	226.733	1675.02	1366.27	207.643	1723.79	1185.78	265.852	1439.76	1293.61	56.8314	1603.82	1414.08	-27.7577	1548.64	1197.4	-35.6135	1547.18	1115.23	-56.2251	1609.61	1001.09	2.2113	1697.14	924.116	-55.4195	1661.08	904.994	-30.6904	1723	842.067
643	0	164.858	1770.19	1587.44	267.402	1781.48	1582.96	165.758	1597.29	1609.9	293.529	1631.47	1610.74	224.491	1549.8	1470.36	218.382	1454.05	1220.96	226.381	1687.89	1367.5	206.775	1736.07	1186.79	266.347	1452.56	1295.58	56.7389	1616.43	1415.68	-27.7828	1558.94	1199.37	-35.3417	1556.15	1117.27	-56.4141	1616.01	1001.93	1.52065	1702.08	922.871	-56.1261	1665.45	904.804	-31.5366	1725.6	839.997
644	0	164.837	1783.87	1588.19	267.321	1795.12	1583.74	165.62	1611.07	1611.22	293.402	1645.22	1612.01	224.568	1563.06	1471.86	218.931	1466.41	1222.74	225.954	1700.75	1368.54	205.877	1748.36	1187.64	266.825	1465.32	1297.38	56.5725	1628.99	1417.04	-27.799	1569.07	1201.14	-35.1069	1565.06	1119.14	-56.7155	1622.33	1002.68	0.626708	1706.95	921.57	-56.9924	1669.71	904.573	-32.6507	1728.11	837.968
645	0	164.704	1797.5	1588.77	267.133	1808.7	1584.37	165.38	1624.78	1612.32	293.169	1658.91	1613.08	224.575	1576.3	1473.17	219.448	1478.74	1224.33	225.468	1713.6	1369.39	204.978	1760.66	1188.31	267.278	1478.07	1299	56.341	1641.52	1418.17	-27.7957	1579.04	1202.7	-34.9013	1573.93	1120.83	-57.1214	1628.58	1003.33	-0.462735	1711.77	920.208	-58.0079	1673.9	904.293	-34.0225	1730.56	835.979
646	0	164.467	1811.06	1589.17	266.848	1822.23	1584.85	165.047	1638.43	1613.17	292.843	1672.55	1613.94	224.518	1589.54	1474.25	219.921	1491.07	1225.7	224.936	1726.45	1370.04	204.099	1772.98	1188.8	267.697	1490.8	1300.42	56.0526	1654.04	1419.04	-27.767	1588.86	1204.04	-34.7193	1582.77	1122.34	-57.6235	1634.8	1003.87	-1.73657	1716.57	918.78	-59.1605	1678.03	903.955	-35.6361	1732.98	834.024
647	0	164.135	1824.57	1589.37	266.475	1835.72	1585.16	164.632	1652.01	1613.77	292.431	1686.14	1614.57	224.398	1602.78	1475.11	220.34	1503.4	1226.85	224.371	1739.31	1370.47	203.26	1785.3	1189.08	268.072	1503.52	1301.61	55.7142	1666.55	1419.65	-27.711	1598.57	1205.16	-34.5576	1591.6	1123.64	-58.2133	1640.99	1004.28	-3.1807	1721.37	917.278	-60.437	1682.13	903.55	-37.4706	1735.4	832.098
648	0	163.714	1838.02	1589.38	266.022	1849.17	1585.3	164.144	1665.54	1614.11	291.942	1699.68	1614.97	224.219	1616.02	1475.72	220.695	1515.75	1227.75	223.78	1752.17	1370.67	202.473	1797.63	1189.15	268.393	1516.22	1302.58	55.3314	1679.09	1419.98	-27.6298	1608.19	1206.05	-34.4155	1600.43	1124.73	-58.8828	1647.18	1004.56	-4.77845	1726.17	915.695	-61.8235	1686.22	903.07	-39.5006	1737.83	830.189
649	0	163.21	1851.43	1589.19	265.492	1862.59	1585.26	163.589	1679.01	1614.17	291.385	1713.17	1615.12	223.983	1629.26	1476.07	220.975	1528.12	1228.4	223.174	1765.06	1370.63	201.75	1809.96	1188.99	268.651	1528.92	1303.3	54.9083	1691.66	1420.05	-27.5293	1617.76	1206.72	-34.2944	1609.29	1125.6	-59.6241	1653.41	1004.7	-6.51115	1731	914.022	-63.3056	1690.33	902.504	-41.6974	1740.3	828.286
650	0	162.627	1864.79	1588.79	264.891	1875.98	1585.03	162.974	1692.43	1613.96	290.763	1726.63	1615.02	223.688	1642.52	1476.17	221.172	1540.53	1228.8	222.555	1777.97	1370.34	201.095	1822.3	1188.59	268.834	1541.63	1303.78	54.4471	1704.28	1419.83	-27.4185	1627.32	1207.15	-34.198	1618.21	1126.26	-60.4301	1659.68	1004.68	-8.35861	1735.88	912.25	-64.8689	1694.49	901.845	-44.0301	1742.83	826.377
651	0	161.968	1878.11	1588.17	264.221	1889.34	1584.6	162.302	1705.79	1613.48	290.082	1740.04	1614.67	223.332	1655.8	1476.01	221.28	1552.97	1228.93	221.929	1790.92	1369.81	200.512	1834.65	1187.93	268.935	1554.34	1304	53.9484	1716.95	1419.33	-27.3092	1636.91	1207.35	-34.132	1627.2	1126.68	-61.2942	1666.04	1004.51	-10.2998	1740.81	910.372	-66.4992	1698.71	901.084	-46.4662	1745.44	824.446
652	0	161.236	1891.39	1587.35	263.483	1902.68	1583.98	161.577	1719.1	1612.72	289.343	1753.42	1614.06	222.914	1669.1	1475.58	221.293	1565.47	1228.8	221.295	1803.9	1369.01	200	1847.02	1187.02	268.942	1567.06	1303.97	53.411	1729.7	1418.55	-27.2158	1646.57	1207.33	-34.1037	1636.29	1126.87	-62.2108	1672.5	1004.18	-12.3134	1745.82	908.38	-68.1832	1703.03	900.213	-48.9731	1748.15	822.482
653	0	160.43	1904.63	1586.32	262.677	1916	1583.16	160.797	1732.37	1611.68	288.546	1766.76	1613.2	222.428	1682.42	1474.89	221.205	1578.02	1228.4	220.652	1816.92	1367.96	199.555	1859.4	1185.85	268.849	1579.81	1303.68	52.832	1742.52	1417.5	-27.1542	1656.35	1207.07	-34.1216	1645.51	1126.83	-63.175	1679.09	1003.67	-14.3783	1750.91	906.266	-69.9081	1707.48	899.224	-51.519	1750.97	820.469
654	0	159.551	1917.85	1585.1	261.801	1929.3	1582.14	159.962	1745.59	1610.38	287.691	1780.07	1612.09	221.869	1695.77	1473.94	221.014	1590.64	1227.74	219.996	1829.98	1366.65	199.173	1871.83	1184.42	268.647	1592.58	1303.14	52.2066	1755.43	1416.17	-27.1418	1666.27	1206.58	-34.1946	1654.88	1126.56	-64.1824	1685.84	1003	-16.4744	1756.11	904.026	-71.6624	1712.08	898.113	-54.0741	1753.93	818.397
655	0	158.596	1931.03	1583.68	260.853	1942.58	1580.92	159.067	1758.77	1608.83	286.774	1793.35	1610.74	221.23	1709.15	1472.75	220.717	1603.32	1226.83	219.321	1843.09	1365.1	198.846	1884.29	1182.74	268.331	1605.4	1302.34	51.5289	1768.44	1414.59	-27.1963	1676.37	1205.87	-34.3321	1664.43	1126.05	-65.2297	1692.77	1002.15	-18.5827	1761.44	901.657	-73.4356	1716.85	896.874	-56.6109	1757.05	816.255
656	0	157.563	1944.19	1582.08	259.83	1955.85	1579.52	158.108	1771.92	1607.03	285.791	1806.6	1609.16	220.504	1722.56	1471.32	220.314	1616.08	1225.66	218.621	1856.26	1363.3	198.564	1896.82	1180.83	267.895	1618.26	1301.3	50.7917	1781.54	1412.75	-27.3354	1686.69	1204.92	-34.5429	1674.17	1125.3	-66.3138	1699.91	1001.12	-20.6862	1766.91	899.157	-75.2189	1721.84	895.505	-59.1057	1760.35	814.034
657	0	156.448	1957.33	1580.32	258.728	1969.1	1577.94	157.078	1785.03	1605.02	284.734	1819.81	1607.37	219.682	1735.99	1469.66	219.805	1628.92	1224.26	217.884	1869.47	1361.29	198.315	1909.42	1178.7	267.338	1631.18	1300.02	49.9868	1794.73	1410.68	-27.576	1697.26	1203.75	-34.835	1684.12	1124.33	-67.4322	1707.28	999.931	-22.7696	1772.56	896.529	-77.0043	1727.07	894.004	-61.5385	1763.87	811.728
658	0	155.246	1970.46	1578.41	257.54	1982.33	1576.2	155.968	1798.12	1602.8	283.598	1833	1605.39	218.756	1749.46	1467.8	219.191	1641.84	1222.63	217.101	1882.75	1359.07	198.086	1922.09	1176.36	266.657	1644.16	1298.52	49.1054	1808.01	1408.39	-27.9331	1708.08	1202.35	-35.2152	1694.31	1123.13	-68.5826	1714.92	998.57	-24.8205	1778.39	893.776	-78.7856	1732.57	892.373	-63.8937	1767.62	809.334
659	0	153.951	1983.57	1576.39	256.262	1995.55	1574.32	154.77	1811.19	1600.4	282.372	1846.17	1603.24	217.719	1762.96	1465.76	218.475	1654.86	1220.79	216.259	1896.08	1356.67	197.86	1934.87	1173.86	265.855	1657.22	1296.81	48.1388	1821.38	1405.91	-28.4194	1719.17	1200.73	-35.6882	1704.74	1121.72	-69.763	1722.83	997.048	-26.8286	1784.45	890.905	-80.5575	1738.37	890.615	-66.1601	1771.66	806.852
660	0	152.557	1996.67	1574.27	254.888	2008.75	1572.32	153.472	1824.23	1597.86	281.05	1859.32	1600.96	216.563	1776.49	1463.57	217.662	1667.97	1218.77	215.345	1909.47	1354.13	197.618	1947.75	1171.2	264.933	1670.36	1294.93	47.0781	1834.83	1403.25	-29.0443	1730.56	1198.9	-36.2571	1715.42	1120.1	-70.9712	1731.04	995.375	-28.7863	1790.76	887.928	-82.3158	1744.5	888.736	-68.3314	1776	804.283
661	0	151.06	2009.78	1572.08	253.411	2021.94	1570.24	152.065	1837.27	1595.21	279.621	1872.45	1598.56	215.282	1790.05	1461.25	216.757	1681.19	1216.6	214.344	1922.93	1351.47	197.342	1960.74	1168.44	263.898	1683.59	1292.88	45.9152	1848.34	1400.44	-29.8131	1742.23	1196.87	-36.9223	1726.36	1118.29	-72.2046	1739.57	993.56	-30.6886	1797.35	884.857	-84.0572	1750.98	886.745	-70.4055	1780.69	801.633
662	0	149.453	2022.88	1569.87	251.824	2035.12	1568.1	150.539	1850.31	1592.49	278.076	1885.56	1596.1	213.872	1803.64	1458.85	215.769	1694.52	1214.29	213.245	1936.45	1348.73	197.008	1973.86	1165.6	262.756	1696.92	1290.71	44.6428	1861.92	1397.52	-30.7269	1754.19	1194.65	-37.6819	1737.58	1116.3	-73.4605	1748.43	991.619	-32.5329	1804.25	881.711	-85.7791	1757.86	884.653	-72.3842	1785.77	798.913
663	0	147.731	2036	1567.65	250.124	2048.3	1565.95	148.885	1863.35	1589.73	276.409	1898.67	1593.6	212.329	1817.26	1456.38	214.706	1707.96	1211.88	212.035	1950.05	1345.96	196.596	1987.11	1162.72	261.516	1710.36	1288.44	43.2551	1875.54	1394.51	-31.782	1766.43	1192.25	-38.5317	1749.06	1114.15	-74.7355	1757.64	989.568	-34.3185	1811.5	878.508	-87.4792	1765.15	882.474	-74.2732	1791.28	796.136
664	0	145.891	2049.13	1565.48	248.303	2061.48	1563.82	147.094	1876.41	1586.97	274.61	1911.78	1591.11	210.653	1830.9	1453.9	213.58	1721.53	1209.42	210.701	1963.71	1343.2	196.081	2000.5	1159.86	260.189	1723.91	1286.11	41.748	1889.19	1391.47	-32.9699	1778.94	1189.71	-39.4647	1760.81	1111.87	-76.0258	1767.22	987.427	-36.0466	1819.14	875.275	-89.1555	1772.88	880.226	-76.081	1797.27	793.32
665	0	143.929	2062.28	1563.38	246.358	2074.66	1561.76	145.161	1889.48	1584.27	272.675	1924.89	1588.68	208.844	1844.58	1451.44	212.401	1735.22	1206.94	209.235	1977.44	1340.49	195.444	2014.05	1157.06	258.786	1737.58	1283.77	40.1196	1902.87	1388.41	-34.2774	1791.7	1187.05	-40.4723	1772.82	1109.49	-77.3269	1777.16	985.218	-37.7198	1827.2	872.037	-90.8059	1781.07	877.927	-77.8178	1803.79	790.484
666	0	141.843	2075.46	1561.4	244.286	2087.85	1559.8	143.082	1902.59	1581.65	270.601	1938.01	1586.33	206.906	1858.29	1449.05	211.183	1749.04	1204.49	207.631	1991.25	1337.89	194.664	2027.76	1154.37	257.32	1751.36	1281.46	38.3703	1916.56	1385.39	-35.6873	1804.69	1184.3	-41.5439	1785.09	1107.03	-78.6339	1787.5	982.965	-39.3413	1835.71	868.824	-92.4279	1789.76	875.601	-79.4951	1810.87	787.653
667	0	139.634	2088.68	1559.56	242.086	2101.06	1557.99	140.855	1915.72	1579.16	268.385	1951.15	1584.13	204.845	1872.03	1446.76	209.94	1762.99	1202.1	205.886	2005.13	1335.44	193.727	2041.63	1151.84	255.805	1765.28	1279.22	36.5034	1930.24	1382.44	-37.1791	1817.88	1181.5	-42.668	1797.62	1104.53	-79.9414	1798.22	980.694	-40.9151	1844.71	865.667	-94.0187	1798.95	873.271	-81.1244	1818.58	784.854
668	0	137.305	2101.93	1557.91	239.759	2114.3	1556.37	138.482	1928.9	1576.85	266.029	1964.31	1582.09	202.668	1885.8	1444.61	208.683	1777.07	1199.82	203.999	2019.08	1333.19	192.621	2055.67	1149.52	254.254	1779.31	1277.08	34.5247	1943.92	1379.61	-38.7302	1831.25	1178.69	-43.8321	1810.38	1102.02	-81.2436	1809.34	978.432	-42.4447	1854.24	862.601	-95.5749	1808.68	870.961	-82.7161	1826.94	782.114
669	0	134.859	2115.22	1556.48	237.308	2127.57	1554.98	135.966	1942.12	1574.75	263.538	1977.49	1580.27	200.387	1899.6	1442.65	207.426	1791.27	1197.69	201.977	2033.1	1331.17	191.34	2069.89	1147.44	252.679	1793.46	1275.11	32.4431	1957.59	1376.94	-40.3167	1844.78	1175.92	-45.0239	1823.38	1099.54	-82.5348	1820.85	976.208	-43.9336	1864.32	859.658	-97.0923	1818.96	868.698	-84.2792	1836.01	779.464
670	0	132.304	2128.55	1555.29	234.741	2140.87	1553.85	133.316	1955.39	1572.89	260.918	1990.7	1578.7	198.014	1913.43	1440.9	206.179	1805.59	1195.75	199.826	2047.19	1329.43	189.886	2084.28	1145.67	251.093	1807.72	1273.33	30.2701	1971.23	1374.47	-41.9151	1858.43	1173.23	-46.2314	1836.61	1097.14	-83.8093	1832.77	974.049	-45.3843	1874.99	856.873	-98.5663	1829.8	866.507	-85.8197	1845.81	776.934
671	0	129.648	2141.92	1554.36	232.066	2154.2	1553.01	130.542	1968.7	1571.29	258.18	2003.94	1577.4	195.563	1927.29	1439.39	204.95	1820.01	1194.05	197.562	2061.33	1328	188.267	2098.84	1144.23	249.506	1822.09	1271.78	28.02	1984.86	1372.22	-43.5032	1872.18	1170.68	-47.4439	1850.05	1094.84	-85.0616	1845.1	971.981	-46.7981	1886.26	854.276	-99.9918	1841.22	864.414	-87.3408	1856.39	774.552
672	0	126.905	2155.34	1553.72	229.296	2167.58	1552.49	127.657	1982.07	1570	255.336	2017.22	1576.4	193.05	1941.17	1438.16	203.747	1834.53	1192.6	195.2	2075.52	1326.9	186.496	2113.56	1143.16	247.928	1836.54	1270.5	25.7094	1998.45	1370.24	-45.0615	1886.02	1168.3	-48.6519	1863.69	1092.68	-86.2867	1857.83	970.032	-48.1755	1898.15	851.9	-101.363	1853.22	862.441	-88.8423	1867.77	772.348
673	0	124.089	2168.8	1553.37	226.447	2180.99	1552.29	124.68	1995.48	1569.01	252.403	2030.53	1575.73	190.492	1955.06	1437.23	202.575	1849.11	1191.44	192.763	2089.74	1326.16	184.596	2128.42	1142.47	246.369	1851.06	1269.51	23.3572	2012.02	1368.55	-46.574	1899.92	1166.14	-49.8479	1877.53	1090.69	-87.4805	1870.97	968.224	-49.5155	1910.69	849.771	-102.675	1865.81	860.612	-90.3207	1879.97	770.345
674	0	121.216	2182.3	1553.33	223.536	2194.44	1552.43	121.628	2008.94	1568.35	249.398	2043.87	1575.38	187.908	1968.97	1436.6	201.436	1863.75	1190.6	190.272	2103.98	1325.79	182.59	2143.38	1142.18	244.836	1865.64	1268.84	20.9835	2025.57	1367.17	-48.0289	1913.88	1164.22	-51.0264	1891.56	1088.91	-88.6394	1884.52	966.577	-50.8161	1923.88	847.914	-103.922	1879	858.943	-91.7691	1893	768.568
675	0	118.305	2195.83	1553.58	220.583	2207.92	1552.91	118.526	2022.44	1568.02	246.344	2057.25	1575.37	185.317	1982.87	1436.29	200.333	1878.43	1190.09	187.757	2118.23	1325.79	180.511	2158.43	1142.29	243.336	1880.25	1268.5	18.61	2039.09	1366.12	-49.4187	1927.89	1162.59	-52.1841	1905.77	1087.34	-89.7609	1898.47	965.11	-52.0741	1937.72	846.349	-105.099	1892.79	857.452	-93.1776	1906.87	767.036
676	0	115.377	2209.38	1554.13	217.61	2221.42	1553.72	115.396	2035.97	1568.02	243.261	2070.64	1575.7	182.74	1996.77	1436.31	199.265	1893.1	1189.92	185.243	2132.47	1326.16	178.391	2173.52	1142.79	241.876	1894.86	1268.5	16.2585	2052.59	1365.4	-50.7409	1941.96	1161.26	-53.3198	1920.17	1086.02	-90.8434	1912.82	963.835	-53.2855	1952.23	845.092	-106.202	1907.18	856.151	-94.5339	1921.59	765.762
677	0	112.453	2222.96	1554.96	214.64	2234.94	1554.83	112.265	2049.53	1568.33	240.176	2084.06	1576.36	180.197	2010.64	1436.64	198.23	1907.76	1190.08	182.759	2146.68	1326.88	176.265	2188.6	1143.66	240.459	1909.45	1268.83	13.9507	2066.06	1365.02	-51.9968	1956.08	1160.24	-54.4341	1934.74	1084.95	-91.886	1927.58	962.765	-54.4455	1967.39	844.154	-107.227	1922.17	855.05	-95.8241	1937.14	764.758
678	0	109.556	2236.54	1556.04	211.697	2248.47	1556.23	109.161	2063.11	1568.96	237.113	2097.49	1577.33	177.705	2024.49	1437.28	197.228	1922.38	1190.59	180.335	2160.85	1327.93	174.168	2203.64	1144.87	239.09	1924	1269.5	11.7076	2079.52	1364.96	-53.1917	1970.27	1159.53	-55.5295	1949.48	1084.14	-92.8891	1942.73	961.903	-55.549	1983.2	843.54	-108.172	1937.75	854.155	-97.0333	1953.5	764.031
679	0	106.71	2250.12	1557.37	208.805	2262	1557.89	106.11	2076.69	1569.87	234.098	2110.93	1578.59	175.285	2038.29	1438.22	196.253	1936.93	1191.41	177.996	2174.94	1329.29	172.135	2218.59	1146.39	237.771	1938.48	1270.48	9.54867	2092.96	1365.23	-54.3337	1984.54	1159.14	-56.6096	1964.39	1083.58	-93.8532	1958.28	961.254	-56.5901	1999.64	843.252	-109.036	1953.91	853.467	-98.1466	1970.67	763.582
680	0	103.937	2263.69	1558.9	205.988	2275.52	1559.77	103.14	2090.27	1571.05	231.158	2124.37	1580.13	172.951	2052.04	1439.43	195.301	1951.38	1192.53	175.769	2188.96	1330.93	170.197	2233.39	1148.18	236.502	1952.87	1271.76	7.4912	2106.38	1365.81	-55.433	1998.91	1159.03	-57.6791	1979.46	1083.26	-94.7799	1974.21	960.814	-57.563	2016.7	843.287	-109.817	1970.65	852.988	-99.1498	1988.61	763.411
681	0	101.26	2277.24	1560.62	203.268	2289.02	1561.84	100.278	2103.83	1572.47	228.317	2137.8	1581.9	170.72	2065.73	1440.89	194.367	1965.73	1193.93	173.674	2202.89	1332.81	168.384	2248.02	1150.18	235.281	1967.15	1273.3	5.55006	2119.78	1366.66	-56.5008	2013.39	1159.2	-58.7431	1994.7	1083.19	-95.6707	1990.52	960.581	-58.4616	2034.34	843.638	-110.516	1987.96	852.713	-100.03	2007.29	763.514
682	0	98.7009	2290.75	1562.49	200.669	2302.5	1564.06	97.5486	2117.37	1574.1	225.6	2151.21	1583.88	168.604	2079.34	1442.56	193.445	1979.94	1195.57	171.731	2216.7	1334.89	166.72	2262.45	1152.36	234.105	1981.3	1275.08	3.73726	2133.17	1367.77	-57.5482	2028	1159.61	-59.8068	2010.1	1083.33	-96.5277	2007.21	960.546	-59.2797	2052.55	844.295	-111.134	2005.81	852.639	-100.777	2026.69	763.883
683	0	96.279	2304.23	1564.48	198.21	2315.94	1566.38	94.9739	2130.87	1575.9	223.028	2164.6	1586.03	166.613	2092.89	1444.43	192.526	1994.01	1197.43	169.955	2230.4	1337.14	165.228	2276.64	1154.66	232.969	1995.3	1277.06	2.06175	2146.55	1369.11	-58.5853	2042.75	1160.23	-60.875	2025.66	1083.67	-97.3527	2024.26	960.7	-60.0114	2071.28	845.246	-111.673	2024.19	852.758	-101.382	2046.77	764.512
684	0	94.0126	2317.65	1566.56	195.91	2329.35	1568.79	92.5736	2144.33	1577.85	220.622	2177.96	1588.32	164.754	2106.35	1446.44	191.605	2007.92	1199.46	168.356	2243.98	1339.5	163.923	2290.59	1157.05	231.866	2009.16	1279.21	0.529368	2159.91	1370.65	-59.6205	2057.63	1161.04	-61.9518	2041.36	1084.19	-98.1473	2041.66	961.032	-60.6511	2090.51	846.475	-112.135	2043.09	853.063	-101.838	2067.48	765.392
685	0	91.9175	2331.03	1568.71	193.786	2342.7	1571.24	90.364	2157.73	1579.91	218.397	2191.28	1590.7	163.033	2119.73	1448.58	190.672	2021.67	1201.64	166.941	2257.43	1341.95	162.818	2304.29	1159.48	230.791	2022.86	1281.47	-0.857141	2173.27	1372.35	-60.6599	2072.67	1162.01	-63.0401	2057.22	1084.85	-98.9131	2059.4	961.528	-61.1936	2110.2	847.968	-112.522	2062.47	853.546	-102.141	2088.8	766.516
686	0	90.0066	2344.34	1570.9	191.85	2356.01	1573.69	88.3572	2171.08	1582.06	216.367	2204.56	1593.14	161.451	2133.03	1450.81	189.721	2035.24	1203.92	165.714	2270.76	1344.45	161.919	2317.74	1161.92	229.735	2036.39	1283.83	-2.09795	2186.61	1374.18	-61.7074	2087.86	1163.09	-64.142	2073.21	1085.65	-99.651	2077.46	962.176	-61.6344	2130.3	849.708	-112.837	2082.31	854.199	-102.29	2110.66	767.876
687	0	88.2899	2357.59	1573.1	190.114	2369.26	1576.14	86.5617	2184.36	1584.24	214.541	2217.78	1595.6	160.009	2146.25	1453.09	188.744	2048.65	1206.28	164.671	2283.97	1346.95	161.229	2330.96	1164.33	228.691	2049.76	1286.24	-3.19591	2199.96	1376.12	-62.7642	2103.2	1164.27	-65.2582	2089.35	1086.55	-100.362	2095.83	962.962	-61.97	2150.78	851.679	-113.08	2102.59	855.014	-102.286	2133.04	769.466
688	0	86.7745	2370.78	1575.28	188.586	2382.44	1578.54	84.9814	2197.58	1586.45	212.926	2230.96	1598.04	158.702	2159.4	1455.39	187.735	2061.89	1208.66	163.81	2297.06	1349.43	160.742	2343.95	1166.69	227.651	2062.98	1288.67	-4.15624	2213.3	1378.12	-63.8294	2118.68	1165.51	-66.3883	2105.61	1087.53	-101.045	2114.48	963.872	-62.1978	2171.6	853.866	-113.255	2123.27	855.981	-102.13	2155.88	771.281
689	0	85.4641	2383.91	1577.44	187.268	2395.56	1580.88	83.6165	2210.73	1588.64	211.523	2244.08	1600.44	157.528	2172.48	1457.69	186.689	2074.97	1211.05	163.121	2310.04	1351.86	160.451	2356.74	1168.97	226.609	2076.05	1291.08	-4.98613	2226.65	1380.16	-64.9002	2134.29	1166.79	-67.5308	2122	1088.57	-101.701	2133.4	964.893	-62.3166	2192.7	856.252	-113.363	2144.32	857.094	-101.827	2179.14	773.314
690	0	84.3596	2396.97	1579.53	186.162	2408.62	1583.13	82.4634	2223.83	1590.79	210.331	2257.14	1602.76	156.48	2185.49	1459.95	185.603	2087.9	1213.41	162.592	2322.92	1354.2	160.34	2369.35	1171.16	225.56	2088.98	1293.44	-5.6943	2240	1382.22	-65.9727	2150.02	1168.1	-68.6838	2138.51	1089.65	-102.329	2152.56	966.01	-62.3264	2214.07	858.822	-113.406	2165.71	858.345	-101.381	2202.77	775.562
691	0	83.4584	2409.98	1581.56	185.266	2421.61	1585.28	81.5149	2236.86	1592.87	209.344	2270.15	1604.97	155.549	2198.44	1462.14	184.475	2100.69	1215.72	162.212	2335.71	1356.44	160.393	2381.82	1173.25	224.5	2101.77	1295.73	-6.2906	2253.35	1384.27	-67.0421	2165.85	1169.41	-69.8445	2155.13	1090.74	-102.927	2171.95	967.211	-62.2288	2235.64	861.561	-113.383	2187.4	859.725	-100.799	2226.72	778.018
692	0	82.7556	2422.94	1583.48	184.573	2434.54	1587.31	80.7608	2249.84	1594.87	208.554	2283.1	1607.06	154.728	2211.33	1464.24	183.306	2113.35	1217.93	161.964	2348.42	1358.55	160.586	2394.15	1175.21	223.425	2114.45	1297.91	-6.78554	2266.71	1386.27	-68.1035	2181.76	1170.72	-71.0097	2171.85	1091.83	-103.496	2191.54	968.482	-62.0263	2257.39	864.452	-113.296	2209.36	861.226	-100.088	2250.94	780.675
693	0	82.2433	2435.85	1585.3	184.076	2447.42	1589.19	80.1885	2262.77	1596.75	207.951	2296.01	1608.99	154.006	2224.18	1466.23	182.098	2125.9	1220.04	161.832	2361.05	1360.51	160.895	2406.39	1177.05	222.334	2127.03	1299.97	-7.18988	2280.07	1388.22	-69.1522	2197.74	1171.99	-72.1763	2188.66	1092.91	-104.032	2211.31	969.809	-61.723	2279.28	867.481	-113.146	2231.54	862.839	-99.2535	2275.37	783.526
694	0	81.9117	2448.72	1586.98	183.764	2460.24	1590.92	79.7833	2275.67	1598.51	207.522	2308.86	1610.75	153.375	2236.99	1468.09	180.855	2138.35	1222.02	161.799	2373.63	1362.3	161.293	2418.54	1178.74	221.23	2139.52	1301.89	-7.51434	2293.44	1390.09	-70.1843	2213.77	1173.23	-73.341	2205.56	1093.94	-104.534	2231.23	971.18	-61.3238	2301.27	870.629	-112.934	2253.92	864.554	-98.3043	2299.98	786.558
695	0	81.7487	2461.56	1588.53	183.624	2473.02	1592.47	79.5291	2288.53	1600.12	207.251	2321.67	1612.32	152.825	2249.75	1469.8	179.584	2150.72	1223.84	161.848	2386.15	1363.91	161.751	2430.64	1180.27	220.112	2151.93	1303.65	-7.7692	2306.81	1391.86	-71.1967	2229.83	1174.41	-74.5006	2222.55	1094.93	-105.001	2251.28	972.58	-60.8345	2323.33	873.88	-112.658	2276.45	866.36	-97.2473	2324.71	789.76
696	0	81.7406	2474.38	1589.91	183.641	2485.76	1593.84	79.4092	2301.36	1601.57	207.125	2334.44	1613.69	152.348	2262.49	1471.33	178.294	2163.02	1225.5	161.961	2398.63	1365.33	162.241	2442.69	1181.63	218.987	2164.27	1305.22	-7.96412	2320.18	1393.51	-72.1875	2245.92	1175.52	-75.6519	2239.6	1095.86	-105.432	2271.44	973.998	-60.2612	2345.43	877.216	-112.322	2299.1	868.247	-96.0898	2349.52	793.115
697	0	81.8726	2487.18	1591.12	183.801	2498.46	1595.01	79.4066	2314.17	1602.85	207.126	2347.18	1614.84	151.935	2275.2	1472.69	176.994	2175.26	1226.98	162.124	2411.07	1366.55	162.736	2454.72	1182.82	217.86	2176.57	1306.61	-8.10786	2333.54	1395.03	-73.1555	2262.01	1176.54	-76.7918	2256.73	1096.71	-105.823	2291.67	975.42	-59.6108	2367.55	880.617	-111.924	2321.84	870.202	-94.839	2374.35	796.607
698	0	82.1292	2499.97	1592.14	184.088	2511.14	1595.97	79.5045	2326.96	1603.94	207.237	2359.88	1615.78	151.578	2287.88	1473.85	175.698	2187.45	1228.26	162.32	2423.48	1367.54	163.21	2466.72	1183.81	216.737	2188.83	1307.81	-8.2082	2346.9	1396.4	-74.1005	2278.1	1177.48	-77.9174	2273.9	1097.48	-106.176	2311.97	976.832	-58.8898	2389.64	884.063	-111.468	2344.63	872.213	-93.5024	2399.17	800.214
699	0	82.4942	2512.75	1592.97	184.485	2523.79	1596.72	79.687	2339.75	1604.83	207.444	2372.56	1616.49	151.272	2300.55	1474.81	174.418	2199.61	1229.35	162.538	2435.88	1368.32	163.639	2478.72	1184.59	215.628	2201.05	1308.79	-8.2718	2360.24	1397.61	-75.0227	2294.19	1178.3	-79.0253	2291.14	1098.14	-106.486	2332.31	978.223	-58.1049	2411.69	887.534	-110.955	2367.44	874.264	-92.0872	2423.94	803.915
700	0	82.9517	2525.53	1593.6	184.975	2536.43	1597.25	79.9393	2352.53	1605.52	207.73	2385.22	1616.98	151.011	2313.19	1475.57	173.168	2211.75	1230.22	162.764	2448.26	1368.86	164.005	2490.73	1185.15	214.542	2213.26	1309.57	-8.30411	2373.57	1398.65	-75.9224	2310.26	1179	-80.1121	2308.41	1098.7	-106.754	2352.67	979.581	-57.2622	2433.67	891.009	-110.387	2390.24	876.343	-90.6013	2448.61	807.686
701	0	83.4863	2538.31	1594.02	185.544	2549.05	1597.55	80.2479	2365.31	1606	208.081	2397.87	1617.23	150.793	2325.83	1476.11	171.962	2223.87	1230.89	162.989	2460.63	1369.17	164.289	2502.73	1185.48	213.489	2225.45	1310.14	-8.30941	2386.88	1399.5	-76.7997	2326.33	1179.57	-81.1737	2325.72	1099.14	-106.978	2373.02	980.893	-56.3677	2455.57	894.466	-109.767	2412.99	878.435	-89.0527	2473.15	811.505
702	0	84.0834	2551.09	1594.23	186.176	2561.67	1597.62	80.6013	2378.09	1606.28	208.485	2410.5	1617.27	150.613	2338.45	1476.44	170.816	2235.98	1231.34	163.207	2473	1369.24	164.482	2514.75	1185.57	212.48	2237.64	1310.5	-8.29078	2400.17	1400.16	-77.6537	2342.39	1180	-82.2058	2343.06	1099.46	-107.157	2393.34	982.15	-55.4265	2477.35	897.885	-109.099	2435.68	880.527	-87.4497	2497.53	815.346
703	0	84.7299	2563.88	1594.23	186.856	2574.28	1597.47	80.9897	2390.87	1606.34	208.93	2423.12	1617.08	150.471	2351.06	1476.55	169.742	2248.09	1231.59	163.412	2485.37	1369.07	164.574	2526.78	1185.42	211.525	2249.82	1310.65	-8.25012	2413.43	1400.62	-78.4828	2358.45	1180.29	-83.2031	2360.41	1099.65	-107.289	2413.62	983.342	-54.4436	2498.99	901.245	-108.386	2458.27	882.603	-85.8012	2521.73	819.185
704	0	85.4141	2576.68	1594.02	187.574	2586.9	1597.11	81.4057	2403.65	1606.19	209.407	2435.73	1616.68	150.366	2363.66	1476.46	168.752	2260.2	1231.62	163.601	2497.75	1368.68	164.564	2538.83	1185.02	210.635	2262	1310.6	-8.1882	2426.65	1400.88	-79.2841	2374.5	1180.42	-84.1599	2377.78	1099.71	-107.373	2433.84	984.46	-53.4232	2520.49	904.527	-107.632	2480.74	884.651	-84.1162	2545.7	823
705	0	86.1268	2589.48	1593.6	188.318	2599.51	1596.52	81.844	2416.42	1605.84	209.91	2448.33	1616.07	150.3	2376.25	1476.15	167.857	2272.32	1231.44	163.774	2510.13	1368.06	164.453	2550.9	1184.39	209.818	2274.2	1310.34	-8.1047	2439.84	1400.94	-80.0526	2390.54	1180.39	-85.0696	2395.15	1099.64	-107.407	2453.98	985.496	-52.3692	2541.81	907.712	-106.842	2503.06	886.657	-82.4042	2569.44	826.767
706	0	86.8606	2602.28	1592.99	189.08	2612.13	1595.74	82.3015	2429.19	1605.28	210.434	2460.92	1615.26	150.274	2388.82	1475.65	167.066	2284.46	1231.06	163.933	2522.53	1367.22	164.248	2563.01	1183.52	209.083	2286.4	1309.89	-7.99824	2453	1400.81	-80.7823	2406.58	1180.21	-85.9249	2412.5	1099.44	-107.391	2474.01	986.444	-51.2849	2562.95	910.782	-106.02	2525.21	888.609	-80.6746	2592.9	830.465
707	0	87.611	2615.08	1592.18	189.854	2624.75	1594.75	82.7772	2441.96	1604.54	210.977	2473.5	1614.28	150.291	2401.39	1474.95	166.384	2296.62	1230.48	164.084	2534.94	1366.19	163.958	2575.15	1182.44	208.437	2298.62	1309.25	-7.86652	2466.12	1400.48	-81.4649	2422.62	1179.87	-86.7181	2429.83	1099.11	-107.322	2493.92	987.297	-50.1734	2583.88	913.722	-105.169	2547.17	890.494	-78.9367	2616.09	834.073
708	0	88.3759	2627.88	1591.19	190.638	2637.38	1593.58	83.2725	2454.72	1603.62	211.538	2486.07	1613.12	150.355	2413.95	1474.07	165.816	2308.81	1229.71	164.231	2547.37	1364.97	163.599	2587.34	1181.15	207.885	2310.85	1308.41	-7.70634	2479.2	1399.96	-82.0911	2438.63	1179.39	-87.4408	2447.13	1098.64	-107.2	2513.7	988.051	-49.0377	2604.59	916.515	-104.294	2568.91	892.3	-77.1998	2638.96	837.572
709	0	89.1559	2640.66	1590.04	191.43	2650.01	1592.25	83.7903	2467.46	1602.54	212.121	2498.63	1611.8	150.469	2426.49	1473.01	165.362	2321.03	1228.75	164.383	2559.81	1363.58	163.186	2599.58	1179.69	207.429	2323.11	1307.4	-7.51376	2492.24	1399.26	-82.6502	2454.63	1178.75	-88.0847	2464.36	1098.06	-107.022	2533.31	988.701	-47.8803	2625.07	919.147	-103.398	2590.41	894.016	-75.4725	2661.51	840.942
710	0	89.9539	2653.43	1588.74	192.235	2662.63	1590.76	84.3356	2480.18	1601.3	212.728	2511.17	1610.34	150.638	2439.02	1471.79	165.02	2333.3	1227.61	164.549	2572.27	1362.05	162.74	2611.88	1178.08	207.073	2335.39	1306.2	-7.28423	2505.25	1398.39	-83.131	2470.58	1177.98	-88.6413	2481.53	1097.36	-106.787	2552.75	989.244	-46.704	2645.3	921.607	-102.485	2611.65	895.632	-73.7631	2683.71	844.166
711	0	90.7754	2666.18	1587.31	193.056	2675.24	1589.15	84.9146	2492.88	1599.92	213.366	2523.7	1608.75	150.865	2451.54	1470.41	164.787	2345.62	1226.29	164.74	2584.76	1360.39	162.282	2624.27	1176.33	206.813	2347.7	1304.84	-7.01272	2518.24	1397.37	-83.522	2486.49	1177.08	-89.1026	2498.62	1096.54	-106.495	2571.99	989.678	-45.5113	2665.25	923.883	-101.556	2632.61	897.136	-72.0788	2705.54	847.227
712	0	91.6275	2678.9	1585.77	193.902	2687.84	1587.42	85.5349	2505.55	1598.42	214.043	2536.19	1607.04	151.157	2464.04	1468.89	164.656	2358	1224.81	164.968	2597.27	1358.63	161.836	2636.73	1174.49	206.65	2360.05	1303.31	-6.69388	2531.2	1396.22	-83.8123	2502.32	1176.06	-89.4611	2515.6	1095.62	-106.144	2591.02	989.999	-44.305	2684.93	925.965	-100.615	2653.27	898.52	-70.4262	2726.99	850.11
713	0	92.5188	2691.59	1584.14	194.783	2700.42	1585.6	86.2049	2518.19	1596.82	214.767	2548.66	1605.25	151.517	2476.53	1467.25	164.619	2370.44	1223.17	165.243	2609.8	1356.79	161.424	2649.29	1172.58	206.577	2372.44	1301.63	-6.32222	2544.14	1394.94	-83.9921	2518.07	1174.93	-89.7103	2532.46	1094.61	-105.733	2609.8	990.209	-43.0877	2704.31	927.845	-99.6617	2673.59	899.773	-68.811	2748.04	852.8
714	0	93.459	2704.25	1582.45	195.708	2712.96	1583.72	86.9334	2530.8	1595.13	215.546	2561.1	1603.37	151.949	2489	1465.49	164.667	2382.96	1221.38	165.579	2622.36	1354.89	161.071	2661.94	1170.63	206.59	2384.87	1299.79	-5.8922	2557.08	1393.56	-84.0529	2533.72	1173.71	-89.8445	2549.18	1093.52	-105.262	2628.33	990.305	-41.8622	2723.37	929.517	-98.6982	2693.56	900.888	-67.238	2768.68	855.284
715	0	94.4585	2716.87	1580.73	196.689	2725.48	1581.8	87.7296	2543.37	1593.38	216.391	2573.51	1601.44	152.457	2501.47	1463.64	164.787	2395.57	1219.45	165.986	2634.95	1352.96	160.799	2674.7	1168.67	206.681	2397.35	1297.82	-5.39845	2570.02	1392.09	-83.9882	2549.24	1172.39	-89.8598	2565.74	1092.35	-104.732	2646.58	990.291	-40.6313	2742.11	930.976	-97.7247	2713.16	901.857	-65.7107	2788.87	857.548
716	0	95.5275	2729.45	1578.99	197.738	2737.96	1579.86	88.6024	2555.91	1591.58	217.31	2585.88	1599.46	153.043	2513.92	1461.72	164.97	2408.27	1217.4	166.476	2647.57	1351.02	160.631	2687.58	1166.72	206.843	2409.88	1295.73	-4.83585	2582.98	1390.57	-83.7935	2564.62	1171.01	-89.7533	2582.13	1091.12	-104.141	2664.53	990.167	-39.3976	2760.51	932.216	-96.7411	2732.36	902.673	-64.2318	2808.6	859.582
717	0	96.6757	2741.99	1577.26	198.866	2750.39	1577.93	89.56	2568.41	1589.77	218.313	2598.21	1597.46	153.711	2526.38	1459.73	165.202	2421.07	1215.24	167.06	2660.23	1349.1	160.585	2700.57	1164.8	207.066	2422.47	1293.53	-4.19973	2595.95	1389	-83.467	2579.84	1169.57	-89.5242	2598.33	1089.85	-103.492	2682.17	989.936	-38.1638	2778.54	933.237	-95.747	2751.14	903.331	-62.8027	2827.87	861.373
718	0	97.9121	2754.49	1575.56	200.083	2762.78	1576.03	90.6102	2580.88	1587.94	219.408	2610.51	1595.46	154.462	2538.83	1457.71	165.472	2433.98	1213	167.746	2672.92	1347.21	160.681	2713.68	1162.96	207.342	2435.11	1291.23	-3.48604	2608.96	1387.41	-83.0094	2594.89	1168.1	-89.1733	2614.32	1088.54	-102.785	2699.46	989.604	-36.9321	2796.2	934.038	-94.7418	2769.47	903.827	-61.4239	2846.64	862.914
719	0	99.2445	2766.95	1573.92	201.396	2775.13	1574.19	91.7592	2593.32	1586.14	220.601	2622.77	1593.48	155.295	2551.29	1455.67	165.769	2446.99	1210.68	168.543	2685.65	1345.37	160.934	2726.91	1161.2	207.662	2447.82	1288.87	-2.6915	2622.01	1385.83	-82.4236	2609.77	1166.59	-88.7033	2630.08	1087.22	-102.022	2716.41	989.177	-35.7045	2813.47	934.619	-93.7248	2787.34	904.157	-60.0947	2864.91	864.195
720	0	100.679	2779.38	1572.37	202.812	2787.45	1572.43	93.0121	2605.73	1584.38	221.899	2635.01	1591.53	156.21	2563.76	1453.63	166.08	2460.12	1208.33	169.456	2698.43	1343.6	161.355	2740.28	1159.54	208.015	2460.58	1286.45	-1.81386	2635.11	1384.28	-81.7153	2624.46	1165.09	-88.1186	2645.61	1085.89	-101.205	2732.98	988.661	-34.4826	2830.34	934.983	-92.6955	2804.73	904.323	-58.8131	2882.65	865.212
721	0	102.219	2791.78	1570.92	204.337	2799.73	1570.77	94.3723	2618.12	1582.68	223.305	2647.21	1589.63	157.206	2576.24	1451.61	166.397	2473.35	1205.95	170.489	2711.24	1341.93	161.956	2753.76	1158.01	208.392	2473.41	1284.01	-0.85209	2648.27	1382.77	-80.8923	2638.97	1163.6	-87.4256	2660.9	1084.58	-100.335	2749.17	988.067	-33.2676	2846.78	935.134	-91.6535	2821.61	904.325	-57.5764	2899.86	865.96
722	0	103.868	2804.16	1569.59	205.971	2811.98	1569.23	95.8418	2630.5	1581.06	224.822	2659.4	1587.81	158.277	2588.75	1449.65	166.709	2486.69	1203.58	171.644	2724.1	1340.37	162.741	2767.37	1156.62	208.785	2486.29	1281.57	0.193392	2661.49	1381.34	-79.9642	2653.3	1162.16	-86.6319	2675.92	1083.3	-99.4175	2764.96	987.405	-32.0602	2862.78	935.078	-90.5989	2837.97	904.167	-56.3804	2916.51	866.436
723	0	105.624	2816.52	1568.41	207.715	2824.23	1567.82	97.4203	2642.86	1579.54	226.449	2671.57	1586.08	159.421	2601.29	1447.75	167.006	2500.12	1201.24	172.919	2737	1338.93	163.711	2781.1	1155.39	209.185	2499.22	1279.16	1.32048	2674.79	1380	-78.9425	2667.44	1160.77	-85.7467	2690.68	1082.07	-98.4545	2780.33	986.688	-30.8607	2878.32	934.823	-89.5325	2853.79	903.855	-55.2204	2932.59	866.642
724	0	107.484	2828.88	1567.38	209.567	2836.47	1566.56	99.1061	2655.22	1578.15	228.185	2683.73	1584.46	160.629	2613.87	1445.95	167.282	2513.65	1198.98	174.31	2749.94	1337.62	164.863	2794.93	1154.33	209.582	2512.21	1276.81	2.52521	2688.16	1378.78	-77.84	2681.41	1159.47	-84.7805	2705.16	1080.92	-97.4511	2795.28	985.929	-29.6689	2893.39	934.378	-88.4555	2869.07	903.399	-54.091	2948.08	866.581
725	0	109.445	2841.23	1566.52	211.521	2848.73	1565.47	100.895	2667.58	1576.9	230.026	2695.9	1582.97	161.895	2626.48	1444.27	167.528	2527.25	1196.82	175.81	2762.91	1336.48	166.187	2808.86	1153.45	209.969	2525.23	1274.55	3.80153	2701.6	1377.69	-76.6707	2695.22	1158.28	-83.7446	2719.36	1079.86	-96.4125	2809.8	985.145	-28.4844	2907.98	933.755	-87.3698	2883.79	902.811	-52.9862	2962.98	866.258
726	0	111.498	2853.59	1565.85	213.573	2861.01	1564.55	102.782	2679.95	1575.81	231.966	2708.08	1581.62	163.21	2639.13	1442.74	167.738	2540.91	1194.79	177.407	2775.93	1335.49	167.669	2822.86	1152.77	210.338	2538.29	1272.42	5.14131	2715.11	1376.77	-75.4496	2708.87	1157.23	-82.6515	2733.28	1078.92	-95.3451	2823.88	984.352	-27.3066	2922.07	932.968	-86.2782	2897.94	902.104	-51.9001	2977.26	865.685
727	0	113.634	2865.97	1565.37	215.715	2873.34	1563.81	104.76	2692.33	1574.9	233.997	2720.29	1580.43	164.561	2651.82	1441.36	167.905	2554.61	1192.92	179.087	2788.97	1334.69	169.289	2836.92	1152.29	210.681	2551.38	1270.44	6.53426	2728.69	1376.03	-74.1924	2722.37	1156.34	-81.5142	2746.91	1078.11	-94.2563	2837.53	983.57	-26.1347	2935.64	932.033	-85.1844	2911.52	901.295	-50.8268	2990.91	864.873
728	0	115.841	2878.36	1565.09	217.937	2885.71	1563.26	106.817	2704.73	1574.18	236.108	2732.52	1579.42	165.938	2664.56	1440.18	168.025	2568.34	1191.26	180.833	2802.04	1334.07	171.02	2851.01	1152.01	210.99	2564.48	1268.65	7.96811	2742.32	1375.48	-72.9154	2735.73	1155.64	-80.3464	2760.25	1077.47	-93.1541	2850.73	982.817	-24.9684	2948.69	930.968	-84.0931	2924.54	900.405	-49.761	3003.93	863.839
729	0	118.107	2890.78	1565.02	220.231	2898.15	1562.89	108.941	2717.16	1573.67	238.286	2744.8	1578.59	167.327	2677.34	1439.19	168.092	2582.07	1189.81	182.622	2815.12	1333.64	172.833	2865.1	1151.95	211.26	2577.58	1267.07	9.42875	2756	1375.16	-71.6354	2748.96	1155.15	-79.1625	2773.3	1077	-92.0479	2863.49	982.111	-23.8078	2961.21	929.793	-83.0096	2936.98	899.453	-48.6977	3016.31	862.602
730	0	120.416	2903.24	1565.16	222.585	2910.65	1562.71	111.119	2729.61	1573.39	240.518	2757.12	1577.95	168.714	2690.17	1438.43	168.105	2595.79	1188.62	184.433	2828.2	1333.42	174.693	2879.15	1152.09	211.486	2590.67	1265.73	10.9005	2769.71	1375.05	-70.3695	2762.06	1154.89	-77.9776	2786.05	1076.72	-90.9475	2875.82	981.473	-22.6536	2973.19	928.531	-81.9404	2948.86	898.463	-47.6331	3028.04	861.184
731	0	122.751	2915.73	1565.51	224.988	2923.22	1562.72	113.332	2742.1	1573.32	242.785	2769.49	1577.51	170.086	2703.03	1437.9	168.061	2609.47	1187.7	186.241	2841.29	1333.4	176.562	2893.13	1152.43	211.663	2603.75	1264.66	12.3667	2783.44	1375.19	-69.1352	2775.04	1154.88	-76.8072	2798.52	1076.66	-89.8636	2887.71	980.92	-21.5075	2984.63	927.203	-80.893	2960.18	897.458	-46.5643	3039.11	859.607
732	0	125.097	2928.26	1566.06	227.426	2935.85	1562.91	115.563	2754.63	1573.49	245.069	2781.91	1577.28	171.428	2715.92	1437.62	167.963	2623.09	1187.06	188.02	2854.35	1333.57	178.4	2907.02	1152.96	211.791	2616.8	1263.87	13.8097	2797.17	1375.57	-67.9505	2787.88	1155.13	-75.6673	2810.69	1076.82	-88.8073	2899.19	980.469	-20.3725	2995.53	925.833	-79.8756	2970.95	896.461	-45.4902	3049.53	857.898
733	0	127.433	2940.83	1566.8	229.886	2948.53	1563.27	117.788	2767.19	1573.89	247.35	2794.39	1577.24	172.728	2728.84	1437.58	167.812	2636.64	1186.73	189.743	2867.4	1333.95	180.167	2920.76	1153.66	211.87	2629.81	1263.37	15.2116	2810.88	1376.2	-66.8338	2800.59	1155.66	-74.5744	2822.59	1077.21	-87.7904	2910.24	980.135	-19.2531	3005.89	924.445	-78.8976	2981.2	895.494	-44.4117	3059.31	856.083
734	0	129.741	2953.44	1567.74	232.353	2961.26	1563.81	119.987	2779.79	1574.51	249.605	2806.92	1577.42	173.973	2741.77	1437.79	167.614	2650.09	1186.7	191.384	2880.41	1334.52	181.824	2934.35	1154.53	211.904	2642.77	1263.17	16.5547	2824.56	1377.07	-65.8037	2813.17	1156.45	-73.5448	2834.2	1077.83	-86.8244	2920.9	979.929	-18.1554	3015.72	923.063	-77.9692	2990.93	894.581	-43.3321	3068.45	854.19
735	0	132	2966.1	1568.85	234.812	2973.99	1564.5	122.134	2792.42	1575.36	251.811	2819.5	1577.79	175.154	2754.7	1438.24	167.377	2663.44	1186.97	192.92	2893.38	1335.27	183.332	2947.75	1155.54	211.896	2655.67	1263.27	17.8217	2838.18	1378.18	-64.8787	2825.61	1157.5	-72.5944	2845.55	1078.68	-85.9212	2931.16	979.862	-17.0876	3025.03	921.707	-77.1014	3000.17	893.739	-42.2576	3076.97	852.246
736	0	134.192	2978.79	1570.11	237.248	2986.72	1565.35	124.208	2805.1	1576.41	253.946	2832.13	1578.35	176.261	2767.64	1438.94	167.11	2676.68	1187.54	194.328	2906.31	1336.19	184.658	2960.96	1156.67	211.854	2668.51	1263.67	18.9966	2851.72	1379.51	-64.0765	2837.91	1158.82	-71.738	2856.63	1079.77	-85.0925	2941.04	979.939	-16.0598	3033.84	920.4	-76.306	3008.94	892.989	-41.1977	3084.9	850.278
737	0	136.294	2991.52	1571.53	239.644	2999.4	1566.35	126.183	2817.8	1577.65	255.986	2844.79	1579.1	177.286	2780.56	1439.86	166.824	2689.79	1188.4	195.588	2919.17	1337.27	185.771	2973.95	1157.91	211.786	2681.28	1264.36	20.0647	2865.17	1381.05	-63.4128	2850.05	1160.38	-70.9891	2867.45	1081.07	-84.3495	2950.56	980.165	-15.0844	3042.18	919.16	-75.5951	3017.26	892.342	-40.1654	3092.26	848.315
738	0	138.29	3004.28	1573.07	241.984	3012.01	1567.49	128.038	2830.54	1579.07	257.91	2857.49	1580.02	178.223	2793.46	1441	166.533	2702.77	1189.52	196.684	2931.98	1338.51	186.65	2986.73	1159.23	211.702	2693.98	1265.33	21.0133	2878.51	1382.78	-62.9009	2862.03	1162.16	-70.3588	2878.02	1082.57	-83.7029	2959.72	980.538	-14.1756	3050.06	918.004	-74.9814	3025.16	891.812	-39.1772	3099.08	846.379
739	0	140.159	3017.06	1574.71	244.25	3024.52	1568.75	129.752	2843.3	1580.65	259.696	2870.22	1581.1	179.067	2806.34	1442.33	166.249	2715.62	1190.89	197.605	2944.72	1339.87	187.277	2999.3	1160.63	211.61	2706.61	1266.55	21.8324	2891.71	1384.68	-62.5506	2873.83	1164.15	-69.8557	2888.35	1084.26	-83.1629	2968.55	981.056	-13.3496	3057.51	916.944	-74.4776	3032.67	891.406	-38.2531	3105.4	844.495
740	0	141.884	3029.87	1576.45	246.427	3036.89	1570.14	131.307	2856.08	1582.35	261.327	2882.96	1582.33	179.817	2819.17	1443.83	165.984	2728.33	1192.47	198.343	2957.39	1341.34	187.645	3011.68	1162.09	211.521	2719.16	1268	22.5145	2904.78	1386.73	-62.3671	2885.44	1166.31	-69.4852	2898.44	1086.12	-82.7385	2977.06	981.712	-12.6242	3064.57	915.99	-74.0962	3039.82	891.127	-37.4163	3111.26	842.683
741	0	143.45	3042.68	1578.24	248.496	3049.12	1571.63	132.688	2868.87	1584.17	262.788	2895.71	1583.69	180.469	2831.96	1445.49	165.75	2740.91	1194.25	198.895	2969.99	1342.91	187.753	3023.88	1163.59	211.443	2731.65	1269.65	23.0548	2917.69	1388.88	-62.3507	2896.86	1168.61	-69.2496	2908.29	1088.12	-82.4379	2985.27	982.495	-12.0183	3071.28	915.15	-73.8492	3046.62	890.975	-36.6926	3116.7	840.961
742	0	144.844	3055.49	1580.08	250.441	3061.17	1573.22	133.884	2881.67	1586.07	264.065	2908.46	1585.16	181.024	2844.7	1447.26	165.558	2753.37	1196.18	199.263	2982.52	1344.57	187.607	3035.93	1165.12	211.386	2744.06	1271.48	23.4518	2930.45	1391.12	-62.4966	2908.06	1171.03	-69.148	2917.91	1090.23	-82.2676	2993.18	983.394	-11.5517	3077.66	914.426	-73.7482	3053.11	890.947	-36.1098	3121.77	839.341
743	0	146.054	3068.3	1581.93	252.243	3073.07	1574.88	134.885	2894.47	1588.02	265.148	2921.21	1586.71	181.483	2857.39	1449.13	165.415	2765.7	1198.24	199.45	2994.97	1346.28	187.222	3047.84	1166.69	211.354	2756.4	1273.44	23.7065	2943.04	1393.42	-62.7945	2919.02	1173.54	-69.1765	2927.29	1092.43	-82.233	3000.83	984.392	-11.2441	3083.76	913.817	-73.8033	3059.32	891.034	-35.6964	3126.51	837.836
744	0	147.071	3081.1	1583.78	253.883	3084.81	1576.6	135.688	2907.26	1589.99	266.033	2933.93	1588.34	181.848	2870.01	1451.07	165.329	2777.92	1200.37	199.467	3007.36	1348.02	186.619	3059.64	1168.27	211.354	2768.69	1275.51	23.8229	2955.48	1395.73	-63.2299	2929.75	1176.09	-69.3286	2936.45	1094.7	-82.3378	3008.22	985.471	-11.1144	3089.62	913.317	-74.0236	3065.26	891.224	-35.481	3130.96	836.448
745	0	147.89	3093.87	1585.6	255.338	3096.42	1578.34	136.292	2920.03	1591.96	266.716	2946.64	1590.01	182.122	2882.58	1453.04	165.303	2790.03	1202.56	199.325	3019.68	1349.79	185.824	3071.35	1169.86	211.388	2780.92	1277.64	23.8071	2967.75	1398.03	-63.7839	2940.21	1178.65	-69.5954	2945.39	1096.99	-82.5837	3015.37	986.611	-11.1804	3095.27	912.917	-74.4163	3070.97	891.502	-35.4904	3135.19	835.179
746	0	148.508	3106.62	1587.37	256.588	3107.94	1580.1	136.698	2932.78	1593.9	267.199	2959.32	1591.71	182.309	2895.08	1455.01	165.338	2802.04	1204.75	199.039	3031.94	1351.56	184.867	3083.01	1171.45	211.458	2793.1	1279.79	23.6674	2979.88	1400.29	-64.4349	2950.4	1181.2	-69.966	2954.11	1099.29	-82.9709	3022.3	987.789	-11.4576	3100.76	912.602	-74.9868	3076.47	891.85	-35.7491	3139.22	834.022
747	0	148.925	3119.32	1589.05	257.609	3119.42	1581.83	136.912	2945.49	1595.77	267.486	2971.96	1593.39	182.413	2907.52	1456.95	165.433	2813.97	1206.91	198.625	3044.14	1353.29	183.781	3094.62	1173.02	211.564	2805.24	1281.93	23.4136	2991.87	1402.46	-65.1595	2960.31	1183.68	-70.4279	2962.63	1101.56	-83.4977	3029.03	988.983	-11.9589	3106.12	912.355	-75.7382	3081.77	892.246	-36.2779	3143.11	832.966
748	0	149.142	3131.99	1590.64	258.38	3130.93	1583.52	136.941	2958.17	1597.54	267.583	2984.57	1595.05	182.438	2919.91	1458.83	165.583	2825.82	1209	198.099	3056.28	1354.98	182.601	3106.22	1174.55	211.704	2817.34	1284.02	23.0566	3003.73	1404.53	-65.9334	2969.93	1186.08	-70.9677	2970.96	1103.77	-84.1606	3035.58	990.167	-12.6939	3111.39	912.154	-76.6715	3086.91	892.666	-37.0931	3146.89	831.995
749	0	149.166	3144.6	1592.11	258.879	3142.53	1585.12	136.797	2970.8	1599.2	267.499	2997.15	1596.64	182.39	2932.24	1460.62	165.783	2837.61	1210.99	197.479	3068.38	1356.59	181.36	3117.8	1176.02	211.874	2829.4	1286.03	22.6078	3015.47	1406.45	-66.733	2979.28	1188.36	-71.5712	2979.11	1105.9	-84.9543	3041.97	991.316	-13.6687	3116.6	911.974	-77.7853	3091.89	893.087	-38.206	3150.6	831.088
750	0	149.005	3157.16	1593.44	259.091	3154.27	1586.62	136.491	2983.38	1600.7	267.246	3009.68	1598.15	182.272	2944.52	1462.29	166.022	2849.35	1212.86	196.782	3080.43	1358.11	180.093	3129.38	1177.42	212.069	2841.45	1287.92	22.0791	3027.12	1408.2	-67.5362	2988.36	1190.48	-72.2244	2987.12	1107.91	-85.872	3048.22	992.405	-14.8853	3121.79	911.788	-79.0756	3096.76	893.482	-39.6222	3154.27	830.221
751	0	148.666	3169.67	1594.61	259.007	3166.2	1587.98	136.034	2995.91	1602.03	266.834	3022.18	1599.54	182.089	2956.76	1463.81	166.292	2861.04	1214.56	196.023	3092.46	1359.5	178.828	3140.98	1178.7	212.284	2853.47	1289.65	21.4817	3038.69	1409.76	-68.323	2997.19	1192.43	-72.9131	2995	1109.78	-86.9056	3054.35	993.411	-16.3419	3126.97	911.567	-80.5362	3101.51	893.824	-41.3418	3157.93	829.366
752	0	148.16	3182.12	1595.61	258.63	3178.36	1589.19	135.442	3008.39	1603.17	266.277	3034.63	1600.8	181.844	2968.96	1465.17	166.579	2872.7	1216.08	195.217	3104.46	1360.74	177.593	3152.59	1179.86	212.51	2865.48	1291.22	20.8264	3050.2	1411.09	-69.0765	3005.79	1194.17	-73.6243	3002.77	1111.5	-88.0455	3060.39	994.308	-18.0325	3132.18	911.283	-82.1587	3106.19	894.089	-43.3589	3161.6	828.495
753	0	147.5	3194.52	1596.43	257.969	3190.76	1590.22	134.726	3020.82	1604.08	265.588	3047.05	1601.89	181.542	2981.14	1466.33	166.871	2884.33	1217.39	194.377	3116.46	1361.81	176.41	3164.22	1180.85	212.74	2877.48	1292.58	20.123	3061.67	1412.19	-69.783	3014.21	1195.68	-74.3455	3010.48	1113.02	-89.2815	3066.36	995.075	-19.9472	3137.44	910.906	-83.9326	3110.8	894.251	-45.6627	3165.3	827.578
754	0	146.697	3206.86	1597.05	257.04	3203.39	1591.06	133.901	3033.19	1604.77	264.78	3059.43	1602.8	181.185	2993.3	1467.28	167.154	2895.96	1218.48	193.515	3128.44	1362.69	175.296	3175.88	1181.67	212.966	2889.48	1293.73	19.3798	3073.11	1413.02	-70.4324	3022.48	1196.95	-75.0662	3018.14	1114.35	-90.6025	3072.29	995.692	-22.0725	3142.76	910.407	-85.8454	3115.36	894.289	-48.2366	3169.04	826.586
755	0	145.764	3219.14	1597.46	255.862	3216.25	1591.69	132.979	3045.51	1605.2	263.866	3071.78	1603.5	180.775	3005.44	1468.01	167.415	2907.58	1219.33	192.637	3140.43	1363.36	174.264	3187.55	1182.27	213.178	2901.47	1294.64	18.6037	3084.54	1413.58	-71.019	3030.65	1197.96	-75.7771	3025.8	1115.45	-91.9972	3078.2	996.14	-24.3913	3148.16	909.759	-87.8833	3119.91	894.181	-51.06	3172.83	825.489
756	0	144.713	3231.38	1597.65	254.461	3229.29	1592.1	131.972	3057.78	1605.37	262.858	3084.09	1603.99	180.313	3017.59	1468.5	167.64	2919.22	1219.93	191.752	3152.43	1363.8	173.322	3199.25	1182.64	213.367	2913.46	1295.31	17.8001	3095.99	1413.85	-71.5408	3038.76	1198.7	-76.4711	3033.48	1116.32	-93.4541	3084.12	996.404	-26.884	3153.65	908.939	-90.0313	3124.45	893.909	-54.1079	3176.7	824.263
757	0	143.556	3243.57	1597.63	252.864	3242.49	1592.28	130.889	3070.01	1605.28	261.766	3096.38	1604.24	179.8	3029.73	1468.75	167.818	2930.87	1220.27	190.864	3164.45	1364.01	172.474	3210.98	1182.76	213.523	2925.46	1295.73	16.9727	3107.46	1413.84	-72.0002	3046.87	1199.15	-77.1427	3041.22	1116.94	-94.962	3090.08	996.47	-29.5281	3159.24	907.923	-92.2735	3129.01	893.458	-57.3524	3180.63	822.882
758	0	142.302	3255.72	1597.39	251.105	3255.79	1592.23	129.739	3082.19	1604.92	260.6	3108.64	1604.26	179.235	3041.89	1468.74	167.938	2942.55	1220.36	189.975	3176.5	1363.97	171.717	3222.74	1182.61	213.636	2937.46	1295.9	16.1235	3118.97	1413.53	-72.4034	3055.02	1199.32	-77.7887	3049.05	1117.31	-96.51	3096.1	996.327	-32.2998	3164.94	906.693	-94.5935	3133.62	892.815	-60.7629	3184.63	821.329
759	0	140.964	3267.83	1596.93	249.216	3269.12	1591.95	128.528	3094.33	1604.29	259.368	3120.87	1604.02	178.617	3054.06	1468.48	167.989	2954.26	1220.18	189.085	3188.57	1363.67	171.046	3234.54	1182.2	213.697	2949.48	1295.8	15.2532	3130.53	1412.94	-72.7601	3063.28	1199.2	-78.4078	3057.01	1117.42	-98.0878	3102.2	995.968	-35.1739	3170.75	905.235	-96.975	3138.29	891.972	-64.3072	3188.72	819.586
760	0	139.548	3279.91	1596.25	247.229	3282.43	1591.45	127.263	3106.44	1603.39	258.076	3133.08	1603.54	177.943	3066.25	1467.97	167.966	2966.01	1219.74	188.193	3200.68	1363.12	170.455	3246.37	1181.51	213.697	2961.52	1295.45	14.3608	3142.15	1412.05	-73.0824	3071.68	1198.79	-79.0003	3065.12	1117.26	-99.6859	3108.43	995.385	-38.1245	3176.68	903.538	-99.4017	3143.04	890.921	-67.9521	3192.89	817.642
761	0	138.062	3291.96	1595.36	245.17	3295.65	1590.72	125.945	3118.52	1602.23	256.728	3145.27	1602.81	177.213	3078.46	1467.21	167.861	2977.8	1219.04	187.296	3212.83	1362.31	169.934	3258.25	1180.56	213.628	2973.57	1294.85	13.4442	3153.83	1410.89	-73.3844	3080.28	1198.1	-79.5685	3073.42	1116.83	-101.295	3114.79	994.577	-41.126	3182.74	901.595	-101.858	3147.9	889.66	-71.6644	3197.15	815.492
762	0	136.512	3303.99	1594.26	243.06	3308.76	1589.78	124.577	3130.57	1600.83	255.326	3157.44	1601.84	176.421	3090.68	1466.21	167.672	2989.64	1218.1	186.39	3225.02	1361.25	169.469	3270.18	1179.35	213.483	2985.66	1294	12.5007	3165.59	1409.46	-73.6813	3089.1	1197.13	-80.1156	3081.92	1116.14	-102.908	3121.31	993.54	-44.1533	3188.92	899.401	-104.329	3152.9	888.186	-75.4117	3201.51	813.13
763	0	134.904	3315.99	1592.97	240.917	3321.71	1588.65	123.159	3142.6	1599.18	253.871	3169.6	1600.63	175.566	3102.93	1464.97	167.397	3001.54	1216.91	185.469	3237.25	1359.95	169.049	3282.16	1177.89	213.256	2997.78	1292.92	11.5264	3177.43	1407.78	-73.9885	3098.19	1195.88	-80.6464	3090.65	1115.19	-104.518	3128.02	992.276	-47.1828	3195.24	896.958	-106.802	3158.04	886.5	-79.1626	3205.97	810.558
764	0	133.239	3327.99	1591.48	238.753	3334.49	1587.32	121.689	3154.6	1597.31	252.364	3181.74	1599.19	174.644	3115.2	1463.51	167.035	3013.49	1215.49	184.528	3249.52	1358.42	168.661	3294.2	1176.21	212.942	3009.94	1291.6	10.5173	3189.33	1405.84	-74.3215	3107.57	1194.37	-81.1658	3099.63	1113.97	-106.118	3134.94	990.785	-50.192	3201.69	894.266	-109.263	3163.35	884.604	-82.8879	3210.54	807.78
765	0	131.52	3339.97	1589.81	236.575	3347.07	1585.81	120.165	3166.6	1595.24	250.803	3193.87	1597.55	173.65	3127.49	1461.84	166.589	3025.51	1213.84	183.56	3261.82	1356.67	168.291	3306.32	1174.32	212.539	3022.14	1290.06	9.46906	3201.31	1403.68	-74.6947	3117.25	1192.6	-81.6796	3108.88	1112.49	-107.703	3142.07	989.071	-53.1609	3208.28	891.332	-111.702	3168.85	882.503	-86.5607	3215.23	804.8
766	0	129.749	3351.94	1587.97	234.389	3359.46	1584.15	118.584	3178.58	1592.97	249.186	3205.98	1595.7	172.582	3139.78	1459.95	166.061	3037.6	1211.97	182.559	3274.17	1354.73	167.927	3318.5	1172.26	212.044	3034.39	1288.3	8.3772	3213.36	1401.3	-75.1219	3127.27	1190.57	-82.1933	3118.41	1110.76	-109.269	3149.45	987.135	-56.0715	3215.02	888.16	-114.109	3174.55	880.2	-90.1572	3220.05	801.627
767	0	127.925	3363.91	1585.97	232.198	3371.67	1582.33	116.942	3190.56	1590.52	247.51	3218.09	1593.67	171.437	3152.09	1457.88	165.453	3049.76	1209.9	181.519	3286.55	1352.59	167.556	3330.75	1170.03	211.457	3046.69	1286.34	7.23752	3225.48	1398.71	-75.615	3137.62	1188.31	-82.7121	3128.23	1108.78	-110.813	3157.09	984.983	-58.9084	3221.9	884.758	-116.477	3180.48	877.701	-93.6566	3225.02	798.27
768	0	126.048	3375.87	1583.83	230.005	3383.7	1580.38	115.237	3202.53	1587.91	245.773	3230.19	1591.46	170.211	3164.41	1455.63	164.769	3061.99	1207.63	180.433	3298.97	1350.28	167.167	3343.07	1167.66	210.777	3059.05	1284.19	6.04615	3237.66	1395.93	-76.1843	3148.32	1185.82	-83.2408	3138.36	1106.56	-112.331	3164.99	982.618	-61.6586	3228.94	881.134	-118.799	3186.64	875.011	-97.0418	3230.14	794.738
769	0	124.119	3387.83	1581.54	227.81	3395.58	1578.31	113.464	3214.51	1585.16	243.971	3242.27	1589.09	168.903	3176.74	1453.2	164.012	3074.3	1205.18	179.298	3311.43	1347.81	166.75	3355.47	1165.18	210.006	3071.46	1281.85	4.79969	3249.89	1392.97	-76.8382	3159.37	1183.11	-83.7834	3148.79	1104.1	-113.822	3173.17	980.043	-64.312	3236.14	877.296	-121.071	3193.06	872.136	-100.299	3235.43	791.04
770	0	122.135	3399.79	1579.12	225.613	3407.31	1576.12	111.62	3226.48	1582.27	242.102	3254.36	1586.58	167.511	3189.06	1450.61	163.186	3086.7	1202.55	178.108	3323.92	1345.2	166.297	3367.94	1162.6	209.144	3083.93	1279.33	3.49534	3262.18	1389.83	-77.5831	3170.78	1180.18	-84.343	3159.54	1101.41	-115.284	3181.63	977.262	-66.8605	3243.5	873.25	-123.287	3199.72	869.079	-103.416	3240.88	787.186
771	0	120.096	3411.75	1576.59	223.415	3418.92	1573.84	109.704	3238.45	1579.25	240.165	3266.43	1583.92	166.033	3201.39	1447.87	162.291	3099.17	1199.74	176.86	3336.44	1342.44	165.8	3380.49	1159.93	208.193	3096.46	1276.63	2.13091	3274.53	1386.54	-78.4234	3182.55	1177.04	-84.9221	3170.61	1098.49	-116.716	3190.39	974.277	-69.2984	3251.02	869.003	-125.447	3206.66	865.845	-106.387	3246.52	783.183
772	0	118.002	3423.71	1573.93	221.215	3430.4	1571.47	107.712	3250.43	1576.12	238.158	3278.51	1581.13	164.469	3213.73	1444.97	161.332	3111.72	1196.77	175.551	3348.99	1339.56	165.255	3393.1	1157.2	207.154	3109.06	1273.77	0.704819	3286.92	1383.08	-79.3623	3194.67	1173.7	-85.5221	3182	1095.34	-118.117	3199.44	971.091	-71.622	3258.72	864.559	-127.548	3213.86	862.436	-109.206	3252.35	779.036
773	0	115.851	3435.67	1571.16	219.011	3441.78	1569.02	105.644	3262.42	1572.87	236.079	3290.57	1578.21	162.817	3226.06	1441.94	160.309	3124.35	1193.64	174.18	3361.58	1336.56	164.657	3405.79	1154.4	206.028	3121.71	1270.74	-0.783967	3299.35	1379.47	-80.4013	3207.15	1170.16	-86.1442	3193.71	1091.97	-119.487	3208.79	967.705	-73.8288	3266.58	859.921	-129.589	3221.34	858.855	-111.87	3258.36	774.75
774	0	113.643	3447.63	1568.28	216.804	3453.05	1566.49	103.499	3274.41	1569.52	233.928	3302.64	1575.17	161.079	3238.4	1438.75	159.223	3137.07	1190.35	172.744	3374.2	1333.44	164.005	3418.55	1151.55	204.815	3134.42	1267.56	-2.33605	3311.83	1375.71	-81.5414	3219.99	1166.43	-86.7889	3205.74	1088.37	-120.825	3218.43	964.12	-75.9176	3274.61	855.093	-131.57	3229.09	855.103	-114.377	3264.57	770.328
775	0	111.377	3459.6	1565.29	214.593	3464.22	1563.88	101.276	3286.41	1566.05	231.704	3314.69	1572.01	159.254	3250.74	1435.43	158.075	3149.87	1186.9	171.245	3386.85	1330.2	163.297	3431.37	1148.64	203.516	3147.2	1264.21	-3.95171	3324.35	1371.8	-82.783	3233.19	1162.5	-87.4563	3218.1	1084.56	-122.132	3228.38	960.337	-77.8878	3282.82	850.074	-133.489	3237.12	851.181	-116.726	3270.97	765.772
776	0	109.055	3471.57	1562.19	212.377	3475.28	1561.19	98.9753	3298.41	1562.48	229.408	3326.75	1568.72	157.341	3263.08	1431.97	156.865	3162.75	1183.29	169.681	3399.54	1326.85	162.532	3444.27	1145.67	202.131	3160.04	1260.7	-5.63106	3336.92	1367.75	-84.1262	3246.75	1158.37	-88.1466	3230.78	1080.52	-123.406	3238.62	956.356	-79.7393	3291.2	844.866	-135.348	3245.42	847.089	-118.916	3277.57	761.081
[truncated: 69 more columns]

## Sheet: Sheet2
Devices
		025370 - Force			025370 - Moment			025370 - CoP			027571 - Force			027571 - Moment			027571 - CoP			037720 - Force			037720 - Moment			037720 - CoP
Frame	Sub Frame	Fx	Fy	Fz	Mx	My	Mz	Cx	Cy	Cz	Fx	Fy	Fz	Mx	My	Mz	Cx	Cy	Cz	Fx	Fy	Fz	Mx	My	Mz	Cx	Cy	Cz
		N	N	N	N.mm	N.mm	N.mm	mm	mm	mm	N	N	N	N.mm	N.mm	N.mm	mm	mm	mm	N	N	N	N.mm	N.mm	N.mm	mm	mm	mm
354	0	0	0	0	0	0	0	200	300	0	0	0	0	0	0	0	200	903	0	0	0	0	0	0	0	603	903	0
354	1	0	0	0	0	0	0	200	300	0	0	0	0	0	0	0	200	903	0	0	0	0	0	0	0	603	903	0
354	2	0	0	0	0	0	0	200	300	0	0	0	0	0	0	0	200	903	0	0	0	0	0	0	0	603	903	0
354	3	0	0	0	0	0	0	200	300	0	0	0	0	0	0	0	200	903	0	0	0	0	0	0	0	603	903	0
354	4	0	0	0	0	0	0	200	300	0	0	0	0	0	0	0	200	903	0	0	0	0	0	0	0	603	903	0
354	5	0	0	0	0	0	0	200	300	0	0	0	0	0	0	0	200	903	0	0	0	0	0	0	0	603	903	0
354	6	0	0	0	0	0	0	200	300	0	0	0	0	0	0	0	200	903	0	0	0	0	0	0	0	603	903	0
354	7	0	0	0	0	0	0	200	300	0	0	0	0	0	0	0	200	903	0	0	0	0	0	0	0	603	903	0
354	8	0	0	0	0	0	0	200	300	0	0	0	0	0	0	0	200	903	0	0	0	0	0	0	0	603	903	0
354	9	0	0	0	0	0	0	200	300	0	0	0	0	0	0	0	200	903	0	0	0	0	0	0	0	603	903	0
355	0	0	0	0	0	0	0	200	300	0	0	0	0	0	0	0	200	903	0	0	0	0	0	0	0	603	903	0
355	1	0	0	0	0	0	0	200	300	0	0	0	0	0	0	0	200	903	0	0	0	0	0	0	0	603	903	0
355	2	0	0	0	0	0	0	200	300	0	0	0	0	0	0	0	200	903	0	0	0	0	0	0	0	603	903	0
355	3	0	0	0	0	0	0	200	300	0	0	0	0	0	0	0	200	903	0	0	0	0	0	0	0	603	903	0
355	4	0	0	0	0	0	0	200	300	0	0	0	0	0	0	0	200	903	0	0	0	0	0	0	0	603	903	0
355	5	0	0	0	0	0	0	200	300	0	0	0	0	0	0	0	200	903	0	0	0	0	0	0	0	603	903	0
355	6	0	0	0	0	0	0	200	300	0	0	0	0	0	0	0	200	903	0	0	0	0	0	0	0	603	903	0
355	7	0	0	0	0	0	0	200	300	0	0	0	0	0	0	0	200	903	0	0	0	0	0	0	0	603	903	0
355	8	0	0	0	0	0	0	200	300	0	0	0	0	0	0	0	200	903	0	0	0	0	0	0	0	603	903	0
355	9	0	0	0	0	0	0	200	300	0	0	0	0	0	0	0	200	903	0	0	0	0	0	0	0	603	903	0
356	0	0	0	0	0	0	0	200	300	0	0	0	0	0	0	0	200	903	0	0	0	0	0	0	0	603	903	0
356	1	0	0	0	0	0	0	200	300	0	0	0	0	0	0	0	200	903	0	0	0	0	0	0	0	603	903	0
356	2	0	0	0	0	0	0	200	300	0	0	0	0	0	0	0	200	903	0	0	0	0	0	0	0	603	903	0
356	3	0	0	0	0	0	0	200	300	0	0	0	0	0	0	0	200	903	0	0	0	0	0	0	0	603	903	0
356	4	0	0	0	0	0	0	200	300	0	0	0	0	0	0	0	200	903	0	0	0	0	0	0	0	603	903	0
356	5	0	0	0	0	0	0	200	300	0	0	0	0	0	0	0	200	903	0	0	0	0	0	0	0	603	903	0
356	6	0	0	0	0	0	0	200	300	0	0	0	0	0	0	0	200	903	0	0	0	0	0	0	0	603	903	0
356	7	0	0	0	0	0	0	200	300	0	0	0	0	0	0	0	200	903	0	0	0	0	0	0	0	603	903	0
356	8	0	0	0	0	0	0	200	300	0	0	0	0	0	0	0	200	903	0	0	0	0	0	0	0	603	903	0
356	9	0	0	0	0	0	0	200	300	0	0	0	0	0	0	0	200	903	0	0	0	0	0	0	0	603	903	0
357	0	0	0	0	0	0	0	200	300	0	0	0	0	0	0	0	200	903	0	0	0	0	0	0	0	603	903	0
357	1	0	0	0	0	0	0	200	300	0	0	0	0	0	0	0	200	903	0	0	0	0	0	0	0	603	903	0
357	2	0	0	0	0	0	0	200	300	0	0	0	0	0	0	0	200	903	0	0	0	0	0	0	0	603	903	0
357	3	0	0	0	0	0	0	200	300	0	0	0	0	0	0	0	200	903	0	0	0	0	0	0	0	603	903	0
357	4	0	0	0	0	0	0	200	300	0	0	0	0	0	0	0	200	903	0	0	0	0	0	0	0	603	903	0
357	5	0	0	0	0	0	0	200	300	0	0	0	0	0	0	0	200	903	0	0	0	0	0	0	0	603	903	0
357	6	0	0	0	0	0	0	200	300	0	0	0	0	0	0	0	200	903	0	0	0	0	0	0	0	603	903	0
357	7	0	0	0	0	0	0	200	300	0	0	0	0	0	0	0	200	903	0	0	0	0	0	0	0	603	903	0
357	8	0	0	0	0	0	0	200	300	0	0	0	0	0	0	0	200	903	0	0	0	0	0	0	0	603	903	0
357	9	0	0	0	0	0	0	200	300	0	0	0	0	0	0	0	200	903	0	0	0	0	0	0	0	603	903	0
358	0	0	0	0	0	0	0	200	300	0	0	0	0	0	0	0	200	903	0	0	0	0	0	0	0	603	903	0
358	1	0	0	0	0	0	0	200	300	0	0	0	0	0	0	0	200	903	0	0	0	0	0	0	0	603	903	0
358	2	0	0	0	0	0	0	200	300	0	0	0	0	0	0	0	200	903	0	0	0	0	0	0	0	603	903	0
358	3	0	0	0	0	0	0	200	300	0	0	0	0	0	0	0	200	903	0	0	0	0	0	0	0	603	903	0
358	4	0	0	0	0	0	0	200	300	0	0	0	0	0	0	0	200	903	0	0	0	0	0	0	0	603	903	0
358	5	0	0	0	0	0	0	200	300	0	0	0	0	0	0	0	200	903	0	0	0	0	0	0	0	603	903	0
358	6	0	0	0	0	0	0	200	300	0	0	0	0	0	0	0	200	903	0	0	0	0	0	0	0	603	903	0
358	7	0	0	0	0	0	0	200	300	0	0	0	0	0	0	0	200	903	0	0	0	0	0	0	0	603	903	0
358	8	0	0	0	0	0	0	200	300	0	0	0	0	0	0	0	200	903	0	0	0	0	0	0	0	603	903	0
358	9	0	0	0	0	0	0	200	300	0	0	0	0	0	0	0	200	903	0	0	0	0	0	0	0	603	903	0
359	0	0	0	0	0	0	0	200	300	0	0	0	0	0	0	0	200	903	0	0	0	0	0	0	0	603	903	0
359	1	0	0	0	0	0	0	200	300	0	0	0	0	0	0	0	200	903	0	0	0	0	0	0	0	603	903	0
359	2	0	0	0	0	0	0	200	300	0	0	0	0	0	0	0	200	903	0	0	0	0	0	0	0	603	903	0
359	3	0	0	0	0	0	0	200	300	0	0	0	0	0	0	0	200	903	0	0	0	0	0	0	0	603	903	0
359	4	0	0	0	0	0	0	200	300	0	0	0	0	0	0	0	200	903	0	0	0	0	0	0	0	603	903	0
359	5	0	0	0	0	0	0	200	300	0	0	0	0	0	0	0	200	903	0	0	0	0	0	0	0	603	903	0
359	6	0	0	0	0	0	0	200	300	0	0	0	0	0	0	0	200	903	0	0	0	0	0	0	0	603	903	0
359	7	0	0	0	0	0	0	200	300	0	0	0	0	0	0	0	200	903	0	0	0	0	0	0	0	603	903	0
359	8	0	0	0	0	0	0	200	300	0	0	0	0	0	0	0	200	903	0	0	0	0	0	0	0	603	903	0
359	9	0	0	0	0	0	0	200	300	0	0	0	0	0	0	0	200	903	0	0	0	0	0	0	0	603	903	0
360	0	0	0	0	0	0	0	200	300	0	0	0	0	0	0	0	200	903	0	0	0	0	0	0	0	603	903	0
360	1	0	0	0	0	0	0	200	300	0	0	0	0	0	0	0	200	903	0	0	0	0	0	0	0	603	903	0
360	2	0	0	0	0	0	0	200	300	0	0	0	0	0	0	0	200	903	0	0	0	0	0	0	0	603	903	0
360	3	0	0	0	0	0	0	200	300	0	0	0	0	0	0	0	200	903	0	0	0	0	0	0	0	603	903	0
360	4	0	0	0	0	0	0	200	300	0	0	0	0	0	0	0	200	903	0	0	0	0	0	0	0	603	903	0
360	5	0	0	0	0	0	0	200	300	0	0	0	0	0	0	0	200	903	0	0	0	0	0	0	0	603	903	0
360	6	0	0	0	0	0	0	200	300	0	0	0	0	0	0	0	200	903	0	0	0	0	0	0	0	603	903	0
360	7	0	0	0	0	0	0	200	300	0	0	0	0	0	0	0	200	903	0	0	0	0	0	0	0	603	903	0
360	8	0	0	0	0	0	0	200	300	0	0	0	0	0	0	0	200	903	0	0	0	0	0	0	0	603	903	0
360	9	0	0	0	0	0	0	200	300	0	0	0	0	0	0	0	200	903	0	0	0	0	0	0	0	603	903	0
361	0	0	0	0	0	0	0	200	300	0	0	0	0	0	0	0	200	903	0	0	0	0	0	0	0	603	903	0
361	1	0	0	0	0	0	0	200	300	0	0	0	0	0	0	0	200	903	0	0	0	0	0	0	0	603	903	0
361	2	0	0	0	0	0	0	200	300	0	0	0	0	0	0	0	200	903	0	0	0	0	0	0	0	603	903	0
361	3	0	0	0	0	0	0	200	300	0	0	0	0	0	0	0	200	903	0	0	0	0	0	0	0	603	903	0
361	4	0	0	0	0	0	0	200	300	0	0	0	0	0	0	0	200	903	0	0	0	0	0	0	0	603	903	0
361	5	0	0	0	0	0	0	200	300	0	0	0	0	0	0	0	200	903	0	0	0	0	0	0	0	603	903	0
361	6	0	0	0	0	0	0	200	300	0	0	0	0	0	0	0	200	903	0	0	0	0	0	0	0	603	903	0
361	7	0	0	0	0	0	0	200	300	0	0	0	0	0	0	0	200	903	0	0	0	0	0	0	0	603	903	0
361	8	0	0	0	0	0	0	200	300	0	0	0	0	0	0	0	200	903	0	0	0	0	0	0	0	603	903	0
361	9	0	0	0	0	0	0	200	300	0	0	0	0	0	0	0	200	903	0	0	0	0	0	0	0	603	903	0
362	0	0	0	0	0	0	0	200	300	0	0	0	0	0	0	0	200	903	0	0	0	0	0	0	0	603	903	0
362	1	0	0	0	0	0	0	200	300	0	0	0	0	0	0	0	200	903	0	0	0	0	0	0	0	603	903	0
362	2	0	0	0	0	0	0	200	300	0	0	0	0	0	0	0	200	903	0	0	0	0	0	0	0	603	903	0
362	3	0	0	0	0	0	0	200	300	0	0	0	0	0	0	0	200	903	0	0	0	0	0	0	0	603	903	0
362	4	0	0	0	0	0	0	200	300	0	0	0	0	0	0	0	200	903	0	0	0	0	0	0	0	603	903	0
362	5	0	0	0	0	0	0	200	300	0	0	0	0	0	0	0	200	903	0	0	0	0	0	0	0	603	903	0
362	6	0	0	0	0	0	0	200	300	0	0	0	0	0	0	0	200	903	0	0	0	0	0	0	0	603	903	0
362	7	0	0	0	0	0	0	200	300	0	0	0	0	0	0	0	200	903	0	0	0	0	0	0	0	603	903	0
362	8	0	0	0	0	0	0	200	300	0	0	0	0	0	0	0	200	903	0	0	0	0	0	0	0	603	903	0
362	9	0	0	0	0	0	0	200	300	0	0	0	0	0	0	0	200	903	0	0	0	0	0	0	0	603	903	0
363	0	0	0	0	0	0	0	200	300	0	0	0	0	0	0	0	200	903	0	0	0	0	0	0	0	603	903	0
363	1	0	0	0	0	0	0	200	300	0	0	0	0	0	0	0	200	903	0	0	0	0	0	0	0	603	903	0
363	2	0	0	0	0	0	0	200	300	0	0	0	0	0	0	0	200	903	0	0	0	0	0	0	0	603	903	0
363	3	0	0	0	0	0	0	200	300	0	0	0	0	0	0	0	200	903	0	0	0	0	0	0	0	603	903	0
363	4	0	0	0	0	0	0	200	300	0	0	0	0	0	0	0	200	903	0	0	0	0	0	0	0	603	903	0
363	5	0	0	0	0	0	0	200	300	0	0	0	0	0	0	0	200	903	0	0	0	0	0	0	0	603	903	0
363	6	0	0	0	0	0	0	200	300	0	0	0	0	0	0	0	200	903	0	0	0	0	0	0	0	603	903	0
363	7	0	0	0	0	0	0	200	300	0	0	0	0	0	0	0	200	903	0	0	0	0	0	0	0	603	903	0
363	8	0	0	0	0	0	0	200	300	0	0	0	0	0	0	0	200	903	0	0	0	0	0	0	0	603	903	0
363	9	0	0	0	0	0	0	200	300	0	0	0	0	0	0	0	200	903	0	0	0	0	0	0	0	603	903	0
364	0	0	0	0	0	0	0	200	300	0	0	0	0	0	0	0	200	903	0	0	0	0	0	0	0	603	903	0
364	1	0	0	0	0	0	0	200	300	0	0	0	0	0	0	0	200	903	0	0	0	0	0	0	0	603	903	0
364	2	0	0	0	0	0	0	200	300	0	0	0	0	0	0	0	200	903	0	0	0	0	0	0	0	603	903	0
364	3	0	0	0	0	0	0	200	300	0	0	0	0	0	0	0	200	903	0	0	0	0	0	0	0	603	903	0
364	4	0	0	0	0	0	0	200	300	0	0	0	0	0	0	0	200	903	0	0	0	0	0	0	0	603	903	0
364	5	0	0	0	0	0	0	200	300	0	0	0	0	0	0	0	200	903	0	0	0	0	0	0	0	603	903	0
364	6	0	0	0	0	0	0	200	300	0	0	0	0	0	0	0	200	903	0	0	0	0	0	0	0	603	903	0
364	7	0	0	0	0	0	0	200	300	0	0	0	0	0	0	0	200	903	0	0	0	0	0	0	0	603	903	0
364	8	0	0	0	0	0	0	200	300	0	0	0	0	0	0	0	200	903	0	0	0	0	0	0	0	603	903	0
364	9	0	0	0	0	0	0	200	300	0	0	0	0	0	0	0	200	903	0	0	0	0	0	0	0	603	903	0
365	0	0	0	0	0	0	0	200	300	0	0	0	0	0	0	0	200	903	0	0	0	0	0	0	0	603	903	0
365	1	0	0	0	0	0	0	200	300	0	0	0	0	0	0	0	200	903	0	0	0	0	0	0	0	603	903	0
365	2	0	0	0	0	0	0	200	300	0	0	0	0	0	0	0	200	903	0	0	0	0	0	0	0	603	903	0
365	3	0	0	0	0	0	0	200	300	0	0	0	0	0	0	0	200	903	0	0	0	0	0	0	0	603	903	0
365	4	0	0	0	0	0	0	200	300	0	0	0	0	0	0	0	200	903	0	0	0	0	0	0	0	603	903	0
365	5	0	0	0	0	0	0	200	300	0	0	0	0	0	0	0	200	903	0	0	0	0	0	0	0	603	903	0
365	6	0	0	0	0	0	0	200	300	0	0	0	0	0	0	0	200	903	0	0	0	0	0	0	0	603	903	0
365	7	0	0	0	0	0	0	200	300	0	0	0	0	0	0	0	200	903	0	0	0	0	0	0	0	603	903	0
365	8	0	0	0	0	0	0	200	300	0	0	0	0	0	0	0	200	903	0	0	0	0	0	0	0	603	903	0
365	9	0	0	0	0	0	0	200	300	0	0	0	0	0	0	0	200	903	0	0	0	0	0	0	0	603	903	0
366	0	0	0	0	0	0	0	200	300	0	0	0	0	0	0	0	200	903	0	0	0	0	0	0	0	603	903	0
366	1	0	0	0	0	0	0	200	300	0	0	0	0	0	0	0	200	903	0	0	0	0	0	0	0	603	903	0
366	2	0	0	0	0	0	0	200	300	0	0	0	0	0	0	0	200	903	0	0	0	0	0	0	0	603	903	0
366	3	0	0	0	0	0	0	200	300	0	0	0	0	0	0	0	200	903	0	0	0	0	0	0	0	603	903	0
366	4	0	0	0	0	0	0	200	300	0	0	0	0	0	0	0	200	903	0	0	0	0	0	0	0	603	903	0
366	5	0	0	0	0	0	0	200	300	0	0	0	0	0	0	0	200	903	0	0	0	0	0	0	0	603	903	0
366	6	0	0	0	0	0	0	200	300	0	0	0	0	0	0	0	200	903	0	0	0	0	0	0	0	603	903	0
366	7	0	0	0	0	0	0	200	300	0	0	0	0	0	0	0	200	903	0	0	0	0	0	0	0	603	903	0
366	8	0	0	0	0	0	0	200	300	0	0	0	0	0	0	0	200	903	0	0	0	0	0	0	0	603	903	0
366	9	0	0	0	0	0	0	200	300	0	0	0	0	0	0	0	200	903	0	0	0	0	0	0	0	603	903	0
367	0	0	0	0	0	0	0	200	300	0	0	0	0	0	0	0	200	903	0	0	0	0	0	0	0	603	903	0
367	1	0	0	0	0	0	0	200	300	0	0	0	0	0	0	0	200	903	0	0	0	0	0	0	0	603	903	0
367	2	0	0	0	0	0	0	200	300	0	0	0	0	0	0	0	200	903	0	0	0	0	0	0	0	603	903	0
367	3	0	0	0	0	0	0	200	300	0	0	0	0	0	0	0	200	903	0	0	0	0	0	0	0	603	903	0
367	4	0	0	0	0	0	0	200	300	0	0	0	0	0	0	0	200	903	0	0	0	0	0	0	0	603	903	0
367	5	0	0	0	0	0	0	200	300	0	0	0	0	0	0	0	200	903	0	0	0	0	0	0	0	603	903	0
367	6	0	0	0	0	0	0	200	300	0	0	0	0	0	0	0	200	903	0	0	0	0	0	0	0	603	903	0
367	7	0	0	0	0	0	0	200	300	0	0	0	0	0	0	0	200	903	0	0	0	0	0	0	0	603	903	0
367	8	0	0	0	0	0	0	200	300	0	0	0	0	0	0	0	200	903	0	0	0	0	0	0	0	603	903	0
367	9	0	0	0	0	0	0	200	300	0	0	0	0	0	0	0	200	903	0	0	0	0	0	0	0	603	903	0
368	0	0	0	0	0	0	0	200	300	0	0	0	0	0	0	0	200	903	0	0	0	0	0	0	0	603	903	0
368	1	0	0	0	0	0	0	200	300	0	0	0	0	0	0	0	200	903	0	0	0	0	0	0	0	603	903	0
368	2	0	0	0	0	0	0	200	300	0	0	0	0	0	0	0	200	903	0	0	0	0	0	0	0	603	903	0
368	3	0	0	0	0	0	0	200	300	0	0	0	0	0	0	0	200	903	0	0	0	0	0	0	0	603	903	0
368	4	0	0	0	0	0	0	200	300	0	0	0	0	0	0	0	200	903	0	0	0	0	0	0	0	603	903	0
368	5	0	0	0	0	0	0	200	300	0	0	0	0	0	0	0	200	903	0	0	0	0	0	0	0	603	903	0
368	6	0	0	0	0	0	0	200	300	0	0	0	0	0	0	0	200	903	0	0	0	0	0	0	0	603	903	0
368	7	0	0	0	0	0	0	200	300	0	0	0	0	0	0	0	200	903	0	0	0	0	0	0	0	603	903	0
368	8	0	0	0	0	0	0	200	300	0	0	0	0	0	0	0	200	903	0	0	0	0	0	0	0	603	903	0
368	9	0	0	0	0	0	0	200	300	0	0	0	0	0	0	0	200	903	0	0	0	0	0	0	0	603	903	0
369	0	0	0	0	0	0	0	200	300	0	0	0	0	0	0	0	200	903	0	0	0	0	0	0	0	603	903	0
369	1	0	0	0	0	0	0	200	300	0	0	0	0	0	0	0	200	903	0	0	0	0	0	0	0	603	903	0
369	2	0	0	0	0	0	0	200	300	0	0	0	0	0	0	0	200	903	0	0	0	0	0	0	0	603	903	0
369	3	0	0	0	0	0	0	200	300	0	0	0	0	0	0	0	200	903	0	0	0	0	0	0	0	603	903	0
369	4	0	0	0	0	0	0	200	300	0	0	0	0	0	0	0	200	903	0	0	0	0	0	0	0	603	903	0
369	5	0	0	0	0	0	0	200	300	0	0	0	0	0	0	0	200	903	0	0	0	0	0	0	0	603	903	0
369	6	0	0	0	0	0	0	200	300	0	0	0	0	0	0	0	200	903	0	0	0	0	0	0	0	603	903	0
369	7	0	0	0	0	0	0	200	300	0	0	0	0	0	0	0	200	903	0	0	0	0	0	0	0	603	903	0
369	8	0	0	0	0	0	0	200	300	0	0	0	0	0	0	0	200	903	0	0	0	0	0	0	0	603	903	0
369	9	0	0	0	0	0	0	200	300	0	0	0	0	0	0	0	200	903	0	0	0	0	0	0	0	603	903	0
370	0	0	0	0	0	0	0	200	300	0	0	0	0	0	0	0	200	903	0	0	0	0	0	0	0	603	903	0
370	1	0	0	0	0	0	0	200	300	0	0	0	0	0	0	0	200	903	0	0	0	0	0	0	0	603	903	0
370	2	0	0	0	0	0	0	200	300	0	0	0	0	0	0	0	200	903	0	0	0	0	0	0	0	603	903	0
370	3	0	0	0	0	0	0	200	300	0	0	0	0	0	0	0	200	903	0	0	0	0	0	0	0	603	903	0
370	4	0	0	0	0	0	0	200	300	0	0	0	0	0	0	0	200	903	0	0	0	0	0	0	0	603	903	0
370	5	0	0	0	0	0	0	200	300	0	0	0	0	0	0	0	200	903	0	0	0	0	0	0	0	603	903	0
370	6	0	0	0	0	0	0	200	300	0	0	0	0	0	0	0	200	903	0	0	0	0	0	0	0	603	903	0
370	7	0	0	0	0	0	0	200	300	0	0	0	0	0	0	0	200	903	0	0	0	0	0	0	0	603	903	0
370	8	0	0	0	0	0	0	200	300	0	0	0	0	0	0	0	200	903	0	0	0	0	0	0	0	603	903	0
370	9	0	0	0	0	0	0	200	300	0	0	0	0	0	0	0	200	903	0	0	0	0	0	0	0	603	903	0
371	0	0	0	0	0	0	0	200	300	0	0	0	0	0	0	0	200	903	0	0	0	0	0	0	0	603	903	0
371	1	0	0	0	0	0	0	200	300	0	0	0	0	0	0	0	200	903	0	0	0	0	0	0	0	603	903	0
371	2	0	0	0	0	0	0	200	300	0	0	0	0	0	0	0	200	903	0	0	0	0	0	0	0	603	903	0
371	3	0	0	0	0	0	0	200	300	0	0	0	0	0	0	0	200	903	0	0	0	0	0	0	0	603	903	0
371	4	0	0	0	0	0	0	200	300	0	0	0	0	0	0	0	200	903	0	0	0	0	0	0	0	603	903	0
371	5	0	0	0	0	0	0	200	300	0	0	0	0	0	0	0	200	903	0	0	0	0	0	0	0	603	903	0
371	6	0	0	0	0	0	0	200	300	0	0	0	0	0	0	0	200	903	0	0	0	0	0	0	0	603	903	0
371	7	0	0	0	0	0	0	200	300	0	0	0	0	0	0	0	200	903	0	0	0	0	0	0	0	603	903	0
371	8	0	0	0	0	0	0	200	300	0	0	0	0	0	0	0	200	903	0	0	0	0	0	0	0	603	903	0
371	9	0	0	0	0	0	0	200	300	0	0	0	0	0	0	0	200	903	0	0	0	0	0	0	0	603	903	0
372	0	0	0	0	0	0	0	200	300	0	0	0	0	0	0	0	200	903	0	0	0	0	0	0	0	603	903	0
372	1	0	0	0	0	0	0	200	300	0	0	0	0	0	0	0	200	903	0	0	0	0	0	0	0	603	903	0
372	2	0	0	0	0	0	0	200	300	0	0	0	0	0	0	0	200	903	0	0	0	0	0	0	0	603	903	0
372	3	0	0	0	0	0	0	200	300	0	0	0	0	0	0	0	200	903	0	0	0	0	0	0	0	603	903	0
372	4	0	0	0	0	0	0	200	300	0	0	0	0	0	0	0	200	903	0	0	0	0	0	0	0	603	903	0
372	5	0	0	0	0	0	0	200	300	0	0	0	0	0	0	0	200	903	0	0	0	0	0	0	0	603	903	0
372	6	0	0	0	0	0	0	200	300	0	0	0	0	0	0	0	200	903	0	0	0	0	0	0	0	603	903	0
372	7	0	0	0	0	0	0	200	300	0	0	0	0	0	0	0	200	903	0	0	0	0	0	0	0	603	903	0
372	8	0	0	0	0	0	0	200	300	0	0	0	0	0	0	0	200	903	0	0	0	0	0	0	0	603	903	0
372	9	0	0	0	0	0	0	200	300	0	0	0	0	0	0	0	200	903	0	0	0	0	0	0	0	603	903	0
373	0	0	0	0	0	0	0	200	300	0	0	0	0	0	0	0	200	903	0	0	0	0	0	0	0	603	903	0
373	1	0	0	0	0	0	0	200	300	0	0	0	0	0	0	0	200	903	0	0	0	0	0	0	0	603	903	0
373	2	0	0	0	0	0	0	200	300	0	0	0	0	0	0	0	200	903	0	0	0	0	0	0	0	603	903	0
373	3	0	0	0	0	0	0	200	300	0	0	0	0	0	0	0	200	903	0	0	0	0	0	0	0	603	903	0
373	4	0	0	0	0	0	0	200	300	0	0	0	0	0	0	0	200	903	0	0	0	0	0	0	0	603	903	0
373	5	0	0	0	0	0	0	200	300	0	0	0	0	0	0	0	200	903	0	0	0	0	0	0	0	603	903	0
373	6	0	0	0	0	0	0	200	300	0	0	0	0	0	0	0	200	903	0	0	0	0	0	0	0	603	903	0
373	7	0	0	0	0	0	0	200	300	0	0	0	0	0	0	0	200	903	0	0	0	0	0	0	0	603	903	0
373	8	0	0	0	0	0	0	200	300	0	0	0	0	0	0	0	200	903	0	0	0	0	0	0	0	603	903	0
373	9	0	0	0	0	0	0	200	300	0	0	0	0	0	0	0	200	903	0	0	0	0	0	0	0	603	903	0
374	0	0	0	0	0	0	0	200	300	0	0	0	0	0	0	0	200	903	0	0	0	0	0	0	0	603	903	0
374	1	0	0	0	0	0	0	200	300	0	0	0	0	0	0	0	200	903	0	0	0	0	0	0	0	603	903	0
374	2	0	0	0	0	0	0	200	300	0	0	0	0	0	0	0	200	903	0	0	0	0	0	0	0	603	903	0
374	3	0	0	0	0	0	0	200	300	0	0	0	0	0	0	0	200	903	0	0	0	0	0	0	0	603	903	0
374	4	0	0	0	0	0	0	200	300	0	0	0	0	0	0	0	200	903	0	0	0	0	0	0	0	603	903	0
374	5	0	0	0	0	0	0	200	300	0	0	0	0	0	0	0	200	903	0	0	0	0	0	0	0	603	903	0
374	6	0	0	0	0	0	0	200	300	0	0	0	0	0	0	0	200	903	0	0	0	0	0	0	0	603	903	0
374	7	0	0	0	0	0	0	200	300	0	0	0	0	0	0	0	200	903	0	0	0	0	0	0	0	603	903	0
374	8	0	0	0	0	0	0	200	300	0	0	0	0	0	0	0	200	903	0	0	0	0	0	0	0	603	903	0
374	9	0	0	0	0	0	0	200	300	0	0	0	0	0	0	0	200	903	0	0	0	0	0	0	0	603	903	0
375	0	0	0	0	0	0	0	200	300	0	0	0	0	0	0	0	200	903	0	0	0	0	0	0	0	603	903	0
375	1	0	0	0	0	0	0	200	300	0	0	0	0	0	0	0	200	903	0	0	0	0	0	0	0	603	903	0
375	2	0	0	0	0	0	0	200	300	0	0	0	0	0	0	0	200	903	0	0	0	0	0	0	0	603	903	0
375	3	0	0	0	0	0	0	200	300	0	0	0	0	0	0	0	200	903	0	0	0	0	0	0	0	603	903	0
375	4	0	0	0	0	0	0	200	300	0	0	0	0	0	0	0	200	903	0	0	0	0	0	0	0	603	903	0
375	5	0	0	0	0	0	0	200	300	0	0	0	0	0	0	0	200	903	0	0	0	0	0	0	0	603	903	0
375	6	0	0	0	0	0	0	200	300	0	0	0	0	0	0	0	200	903	0	0	0	0	0	0	0	603	903	0
375	7	0	0	0	0	0	0	200	300	0	0	0	0	0	0	0	200	903	0	0	0	0	0	0	0	603	903	0
375	8	0	0	0	0	0	0	200	300	0	0	0	0	0	0	0	200	903	0	0	0	0	0	0	0	603	903	0
375	9	0	0	0	0	0	0	200	300	0	0	0	0	0	0	0	200	903	0	0	0	0	0	0	0	603	903	0
376	0	0	0	0	0	0	0	200	300	0	0	0	0	0	0	0	200	903	0	0	0	0	0	0	0	603	903	0
376	1	0	0	0	0	0	0	200	300	0	0	0	0	0	0	0	200	903	0	0	0	0	0	0	0	603	903	0
376	2	0	0	0	0	0	0	200	300	0	0	0	0	0	0	0	200	903	0	0	0	0	0	0	0	603	903	0
376	3	0	0	0	0	0	0	200	300	0	0	0	0	0	0	0	200	903	0	0	0	0	0	0	0	603	903	0
376	4	0	0	0	0	0	0	200	300	0	0	0	0	0	0	0	200	903	0	0	0	0	0	0	0	603	903	0
376	5	0	0	0	0	0	0	200	300	0	0	0	0	0	0	0	200	903	0	0	0	0	0	0	0	603	903	0
376	6	0	0	0	0	0	0	200	300	0	0	0	0	0	0	0	200	903	0	0	0	0	0	0	0	603	903	0
376	7	0	0	0	0	0	0	200	300	0	0	0	0	0	0	0	200	903	0	0	0	0	0	0	0	603	903	0
376	8	0	0	0	0	0	0	200	300	0	0	0	0	0	0	0	200	903	0	0	0	0	0	0	0	603	903	0
376	9	0	0	0	0	0	0	200	300	0	0	0	0	0	0	0	200	903	0	0	0	0	0	0	0	603	903	0
377	0	0	0	0	0	0	0	200	300	0	0	0	0	0	0	0	200	903	0	0	0	0	0	0	0	603	903	0
377	1	0	0	0	0	0	0	200	300	0	0	0	0	0	0	0	200	903	0	0	0	0	0	0	0	603	903	0
377	2	0	0	0	0	0	0	200	300	0	0	0	0	0	0	0	200	903	0	0	0	0	0	0	0	603	903	0
377	3	0	0	0	0	0	0	200	300	0	0	0	0	0	0	0	200	903	0	0	0	0	0	0	0	603	903	0
377	4	0	0	0	0	0	0	200	300	0	0	0	0	0	0	0	200	903	0	0	0	0	0	0	0	603	903	0
377	5	0	0	0	0	0	0	200	300	0	0	0	0	0	0	0	200	903	0	0	0	0	0	0	0	603	903	0
377	6	0	0	0	0	0	0	200	300	0	0	0	0	0	0	0	200	903	0	0	0	0	0	0	0	603	903	0
377	7	0	0	0	0	0	0	200	300	0	0	0	0	0	0	0	200	903	0	0	0	0	0	0	0	603	903	0
377	8	0	0	0	0	0	0	200	300	0	0	0	0	0	0	0	200	903	0	0	0	0	0	0	0	603	903	0
377	9	0	0	0	0	0	0	200	300	0	0	0	0	0	0	0	200	903	0	0	0	0	0	0	0	603	903	0
378	0	0	0	0	0	0	0	200	300	0	0	0	0	0	0	0	200	903	0	0	0	0	0	0	0	603	903	0
378	1	0	0	0	0	0	0	200	300	0	0	0	0	0	0	0	200	903	0	0	0	0	0	0	0	603	903	0
378	2	0	0	0	0	0	0	200	300	0	0	0	0	0	0	0	200	903	0	0	0	0	0	0	0	603	903	0
378	3	0	0	0	0	0	0	200	300	0	0	0	0	0	0	0	200	903	0	0	0	0	0	0	0	603	903	0
378	4	0	0	0	0	0	0	200	300	0	0	0	0	0	0	0	200	903	0	0	0	0	0	0	0	603	903	0
378	5	0	0	0	0	0	0	200	300	0	0	0	0	0	0	0	200	903	0	0	0	0	0	0	0	603	903	0
378	6	0	0	0	0	0	0	200	300	0	0	0	0	0	0	0	200	903	0	0	0	0	0	0	0	603	903	0
378	7	0	0	0	0	0	0	200	300	0	0	0	0	0	0	0	200	903	0	0	0	0	0	0	0	603	903	0
378	8	0	0	0	0	0	0	200	300	0	0	0	0	0	0	0	200	903	0	0	0	0	0	0	0	603	903	0
378	9	0	0	0	0	0	0	200	300	0	0	0	0	0	0	0	200	903	0	0	0	0	0	0	0	603	903	0
379	0	0	0	0	0	0	0	200	300	0	0	0	0	0	0	0	200	903	0	0	0	0	0	0	0	603	903	0
379	1	0	0	0	0	0	0	200	300	0	0	0	0	0	0	0	200	903	0	0	0	0	0	0	0	603	903	0
379	2	0	0	0	0	0	0	200	300	0	0	0	0	0	0	0	200	903	0	0	0	0	0	0	0	603	903	0
379	3	0	0	0	0	0	0	200	300	0	0	0	0	0	0	0	200	903	0	0	0	0	0	0	0	603	903	0
379	4	0	0	0	0	0	0	200	300	0	0	0	0	0	0	0	200	903	0	0	0	0	0	0	0	603	903	0
379	5	0	0	0	0	0	0	200	300	0	0	0	0	0	0	0	200	903	0	0	0	0	0	0	0	603	903	0
379	6	0	0	0	0	0	0	200	300	0	0	0	0	0	0	0	200	903	0	0	0	0	0	0	0	603	903	0
379	7	0	0	0	0	0	0	200	300	0	0	0	0	0	0	0	200	903	0	0	0	0	0	0	0	603	903	0
379	8	0	0	0	0	0	0	200	300	0	0	0	0	0	0	0	200	903	0	0	0	0	0	0	0	603	903	0
379	9	0	0	0	0	0	0	200	300	0	0	0	0	0	0	0	200	903	0	0	0	0	0	0	0	603	903	0
380	0	0	0	0	0	0	0	200	300	0	0	0	0	0	0	0	200	903	0	0	0	0	0	0	0	603	903	0
380	1	0	0	0	0	0	0	200	300	0	0	0	0	0	0	0	200	903	0	0	0	0	0	0	0	603	903	0
380	2	0	0	0	0	0	0	200	300	0	0	0	0	0	0	0	200	903	0	0	0	0	0	0	0	603	903	0
380	3	0	0	0	0	0	0	200	300	0	0	0	0	0	0	0	200	903	0	0	0	0	0	0	0	603	903	0
380	4	0	0	0	0	0	0	200	300	0	0	0	0	0	0	0	200	903	0	0	0	0	0	0	0	603	903	0
380	5	0	0	0	0	0	0	200	300	0	0	0	0	0	0	0	200	903	0	0	0	0	0	0	0	603	903	0
380	6	0	0	0	0	0	0	200	300	0	0	0	0	0	0	0	200	903	0	0	0	0	0	0	0	603	903	0
380	7	0	0	0	0	0	0	200	300	0	0	0	0	0	0	0	200	903	0	0	0	0	0	0	0	603	903	0
380	8	0	0	0	0	0	0	200	300	0	0	0	0	0	0	0	200	903	0	0	0	0	0	0	0	603	903	0
380	9	0	0	0	0	0	0	200	300	0	0	0	0	0	0	0	200	903	0	0	0	0	0	0	0	603	903	0
381	0	0	0	0	0	0	0	200	300	0	0	0	0	0	0	0	200	903	0	0	0	0	0	0	0	603	903	0
381	1	0	0	0	0	0	0	200	300	0	0	0	0	0	0	0	200	903	0	0	0	0	0	0	0	603	903	0
381	2	0	0	0	0	0	0	200	300	0	0	0	0	0	0	0	200	903	0	0	0	0	0	0	0	603	903	0
381	3	0	0	0	0	0	0	200	300	0	0	0	0	0	0	0	200	903	0	0	0	0	0	0	0	603	903	0
381	4	0	0	0	0	0	0	200	300	0	0	0	0	0	0	0	200	903	0	0	0	0	0	0	0	603	903	0
381	5	0	0	0	0	0	0	200	300	0	0	0	0	0	0	0	200	903	0	0	0	0	0	0	0	603	903	0
381	6	0	0	0	0	0	0	200	300	0	0	0	0	0	0	0	200	903	0	0	0	0	0	0	0	603	903	0
381	7	0	0	0	0	0	0	200	300	0	0	0	0	0	0	0	200	903	0	0	0	0	0	0	0	603	903	0
381	8	0	0	0	0	0	0	200	300	0	0	0	0	0	0	0	200	903	0	0	0	0	0	0	0	603	903	0
381	9	0	0	0	0	0	0	200	300	0	0	0	0	0	0	0	200	903	0	0	0	0	0	0	0	603	903	0
382	0	0	0	0	0	0	0	200	300	0	0	0	0	0	0	0	200	903	0	0	0	0	0	0	0	603	903	0
382	1	0	0	0	0	0	0	200	300	0	0	0	0	0	0	0	200	903	0	0	0	0	0	0	0	603	903	0
382	2	0	0	0	0	0	0	200	300	0	0	0	0	0	0	0	200	903	0	0	0	0	0	0	0	603	903	0
382	3	0	0	0	0	0	0	200	300	0	0	0	0	0	0	0	200	903	0	0	0	0	0	0	0	603	903	0
382	4	0	0	0	0	0	0	200	300	0	0	0	0	0	0	0	200	903	0	0	0	0	0	0	0	603	903	0
382	5	0	0	0	0	0	0	200	300	0	0	0	0	0	0	0	200	903	0	0	0	0	0	0	0	603	903	0
382	6	0	0	0	0	0	0	200	300	0	0	0	0	0	0	0	200	903	0	0	0	0	0	0	0	603	903	0
382	7	0	0	0	0	0	0	200	300	0	0	0	0	0	0	0	200	903	0	0	0	0	0	0	0	603	903	0
382	8	0	0	0	0	0	0	200	300	0	0	0	0	0	0	0	200	903	0	0	0	0	0	0	0	603	903	0
382	9	0	0	0	0	0	0	200	300	0	0	0	0	0	0	0	200	903	0	0	0	0	0	0	0	603	903	0
383	0	0	0	0	0	0	0	200	300	0	0	0	0	0	0	0	200	903	0	0	0	0	0	0	0	603	903	0
383	1	0	0	0	0	0	0	200	300	0	0	0	0	0	0	0	200	903	0	0	0	0	0	0	0	603	903	0
383	2	0	0	0	0	0	0	200	300	0	0	0	0	0	0	0	200	903	0	0	0	0	0	0	0	603	903	0
383	3	0	0	0	0	0	0	200	300	0	0	0	0	0	0	0	200	903	0	0	0	0	0	0	0	603	903	0
383	4	0	0	0	0	0	0	200	300	0	0	0	0	0	0	0	200	903	0	0	0	0	0	0	0	603	903	0
383	5	0	0	0	0	0	0	200	300	0	0	0	0	0	0	0	200	903	0	0	0	0	0	0	0	603	903	0
383	6	0	0	0	0	0	0	200	300	0	0	0	0	0	0	0	200	903	0	0	0	0	0	0	0	603	903	0
383	7	0	0	0	0	0	0	200	300	0	0	0	0	0	0	0	200	903	0	0	0	0	0	0	0	603	903	0
383	8	0	0	0	0	0	0	200	300	0	0	0	0	0	0	0	200	903	0	0	0	0	0	0	0	603	903	0
383	9	0	0	0	0	0	0	200	300	0	0	0	0	0	0	0	200	903	0	0	0	0	0	0	0	603	903	0
384	0	0	0	0	0	0	0	200	300	0	0	0	0	0	0	0	200	903	0	0	0	0	0	0	0	603	903	0
384	1	0	0	0	0	0	0	200	300	0	0	0	0	0	0	0	200	903	0	0	0	0	0	0	0	603	903	0
384	2	0	0	0	0	0	0	200	300	0	0	0	0	0	0	0	200	903	0	0	0	0	0	0	0	603	903	0
384	3	0	0	0	0	0	0	200	300	0	0	0	0	0	0	0	200	903	0	0	0	0	0	0	0	603	903	0
384	4	0	0	0	0	0	0	200	300	0	0	0	0	0	0	0	200	903	0	0	0	0	0	0	0	603	903	0
384	5	0	0	0	0	0	0	200	300	0	0	0	0	0	0	0	200	903	0	0	0	0	0	0	0	603	903	0
384	6	0	0	0	0	0	0	200	300	0	0	0	0	0	0	0	200	903	0	0	0	0	0	0	0	603	903	0
384	7	0	0	0	0	0	0	200	300	0	0	0	0	0	0	0	200	903	0	0	0	0	0	0	0	603	903	0
384	8	0	0	0	0	0	0	200	300	0	0	0	0	0	0	0	200	903	0	0	0	0	0	0	0	603	903	0
384	9	0	0	0	0	0	0	200	300	0	0	0	0	0	0	0	200	903	0	0	0	0	0	0	0	603	903	0
385	0	0	0	0	0	0	0	200	300	0	0	0	0	0	0	0	200	903	0	0	0	0	0	0	0	603	903	0
385	1	0	0	0	0	0	0	200	300	0	0	0	0	0	0	0	200	903	0	0	0	0	0	0	0	603	903	0
385	2	0	0	0	0	0	0	200	300	0	0	0	0	0	0	0	200	903	0	0	0	0	0	0	0	603	903	0
385	3	0	0	0	0	0	0	200	300	0	0	0	0	0	0	0	200	903	0	0	0	0	0	0	0	603	903	0
385	4	0	0	0	0	0	0	200	300	0	0	0	0	0	0	0	200	903	0	0	0	0	0	0	0	603	903	0
385	5	0	0	0	0	0	0	200	300	0	0	0	0	0	0	0	200	903	0	0	0	0	0	0	0	603	903	0
385	6	0	0	0	0	0	0	200	300	0	0	0	0	0	0	0	200	903	0	0	0	0	0	0	0	603	903	0
385	7	0	0	0	0	0	0	200	300	0	0	0	0	0	0	0	200	903	0	0	0	0	0	0	0	603	903	0
385	8	0	0	0	0	0	0	200	300	0	0	0	0	0	0	0	200	903	0	0	0	0	0	0	0	603	903	0
385	9	0	0	0	0	0	0	200	300	0	0	0	0	0	0	0	200	903	0	0	0	0	0	0	0	603	903	0
386	0	0	0	0	0	0	0	200	300	0	0	0	0	0	0	0	200	903	0	0	0	0	0	0	0	603	903	0
386	1	0	0	0	0	0	0	200	300	0	0	0	0	0	0	0	200	903	0	0	0	0	0	0	0	603	903	0
386	2	0	0	0	0	0	0	200	300	0	0	0	0	0	0	0	200	903	0	0	0	0	0	0	0	603	903	0
386	3	0	0	0	0	0	0	200	300	0	0	0	0	0	0	0	200	903	0	0	0	0	0	0	0	603	903	0
386	4	0	0	0	0	0	0	200	300	0	0	0	0	0	0	0	200	903	0	0	0	0	0	0	0	603	903	0
386	5	0	0	0	0	0	0	200	300	0	0	0	0	0	0	0	200	903	0	0	0	0	0	0	0	603	903	0
386	6	0	0	0	0	0	0	200	300	0	0	0	0	0	0	0	200	903	0	0	0	0	0	0	0	603	903	0
386	7	0	0	0	0	0	0	200	300	0	0	0	0	0	0	0	200	903	0	0	0	0	0	0	0	603	903	0
386	8	0	0	0	0	0	0	200	300	0	0	0	0	0	0	0	200	903	0	0	0	0	0	0	0	603	903	0
386	9	0	0	0	0	0	0	200	300	0	0	0	0	0	0	0	200	903	0	0	0	0	0	0	0	603	903	0
387	0	0	0	0	0	0	0	200	300	0	0	0	0	0	0	0	200	903	0	0	0	0	0	0	0	603	903	0
387	1	0	0	0	0	0	0	200	300	0	0	0	0	0	0	0	200	903	0	0	0	0	0	0	0	603	903	0
387	2	0	0	0	0	0	0	200	300	0	0	0	0	0	0	0	200	903	0	0	0	0	0	0	0	603	903	0
387	3	0	0	0	0	0	0	200	300	0	0	0	0	0	0	0	200	903	0	0	0	0	0	0	0	603	903	0
387	4	0	0	0	0	0	0	200	300	0	0	0	0	0	0	0	200	903	0	0	0	0	0	0	0	603	903	0
387	5	0	0	0	0	0	0	200	300	0	0	0	0	0	0	0	200	903	0	0	0	0	0	0	0	603	903	0
387	6	0	0	0	0	0	0	200	300	0	0	0	0	0	0	0	200	903	0	0	0	0	0	0	0	603	903	0
387	7	0	0	0	0	0	0	200	300	0	0	0	0	0	0	0	200	903	0	0	0	0	0	0	0	603	903	0
387	8	0	0	0	0	0	0	200	300	0	0	0	0	0	0	0	200	903	0	0	0	0	0	0	0	603	903	0
387	9	0	0	0	0	0	0	200	300	0	0	0	0	0	0	0	200	903	0	0	0	0	0	0	0	603	903	0
388	0	0	0	0	0	0	0	200	300	0	0	0	0	0	0	0	200	903	0	0	0	0	0	0	0	603	903	0
388	1	0	0	0	0	0	0	200	300	0	0	0	0	0	0	0	200	903	0	0	0	0	0	0	0	603	903	0
388	2	0	0	0	0	0	0	200	300	0	0	0	0	0	0	0	200	903	0	0	0	0	0	0	0	603	903	0
388	3	0	0	0	0	0	0	200	300	0	0	0	0	0	0	0	200	903	0	0	0	0	0	0	0	603	903	0
388	4	0	0	0	0	0	0	200	300	0	0	0	0	0	0	0	200	903	0	0	0	0	0	0	0	603	903	0
388	5	0	0	0	0	0	0	200	300	0	0	0	0	0	0	0	200	903	0	0	0	0	0	0	0	603	903	0
388	6	0	0	0	0	0	0	200	300	0	0	0	0	0	0	0	200	903	0	0	0	0	0	0	0	603	903	0
388	7	0	0	0	0	0	0	200	300	0	0	0	0	0	0	0	200	903	0	0	0	0	0	0	0	603	903	0
388	8	0	0	0	0	0	0	200	300	0	0	0	0	0	0	0	200	903	0	0	0	0	0	0	0	603	903	0
388	9	0	0	0	0	0	0	200	300	0	0	0	0	0	0	0	200	903	0	0	0	0	0	0	0	603	903	0
389	0	0	0	0	0	0	0	200	300	0	0	0	0	0	0	0	200	903	0	0	0	0	0	0	0	603	903	0
389	1	0	0	0	0	0	0	200	300	0	0	0	0	0	0	0	200	903	0	0	0	0	0	0	0	603	903	0
389	2	0	0	0	0	0	0	200	300	0	0	0	0	0	0	0	200	903	0	0	0	0	0	0	0	603	903	0
389	3	0	0	0	0	0	0	200	300	0	0	0	0	0	0	0	200	903	0	0	0	0	0	0	0	603	903	0
389	4	0	0	0	0	0	0	200	300	0	0	0	0	0	0	0	200	903	0	0	0	0	0	0	0	603	903	0
389	5	0	0	0	0	0	0	200	300	0	0	0	0	0	0	0	200	903	0	0	0	0	0	0	0	603	903	0
389	6	0	0	0	0	0	0	200	300	0	0	0	0	0	0	0	200	903	0	0	0	0	0	0	0	603	903	0
389	7	0	0	0	0	0	0	200	300	0	0	0	0	0	0	0	200	903	0	0	0	0	0	0	0	603	903	0
389	8	0	0	0	0	0	0	200	300	0	0	0	0	0	0	0	200	903	0	0	0	0	0	0	0	603	903	0
389	9	0	0	0	0	0	0	200	300	0	0	0	0	0	0	0	200	903	0	0	0	0	0	0	0	603	903	0
390	0	0	0	0	0	0	0	200	300	0	0	0	0	0	0	0	200	903	0	0	0	0	0	0	0	603	903	0
390	1	0	0	0	0	0	0	200	300	0	0	0	0	0	0	0	200	903	0	0	0	0	0	0	0	603	903	0
390	2	0	0	0	0	0	0	200	300	0	0	0	0	0	0	0	200	903	0	0	0	0	0	0	0	603	903	0
390	3	0	0	0	0	0	0	200	300	0	0	0	0	0	0	0	200	903	0	0	0	0	0	0	0	603	903	0
390	4	0	0	0	0	0	0	200	300	0	0	0	0	0	0	0	200	903	0	0	0	0	0	0	0	603	903	0
390	5	0	0	0	0	0	0	200	300	0	0	0	0	0	0	0	200	903	0	0	0	0	0	0	0	603	903	0
390	6	0	0	0	0	0	0	200	300	0	0	0	0	0	0	0	200	903	0	0	0	0	0	0	0	603	903	0
390	7	0	0	0	0	0	0	200	300	0	0	0	0	0	0	0	200	903	0	0	0	0	0	0	0	603	903	0
390	8	0	0	0	0	0	0	200	300	0	0	0	0	0	0	0	200	903	0	0	0	0	0	0	0	603	903	0
390	9	0	0	0	0	0	0	200	300	0	0	0	0	0	0	0	200	903	0	0	0	0	0	0	0	603	903	0
391	0	0	0	0	0	0	0	200	300	0	0	0	0	0	0	0	200	903	0	0	0	0	0	0	0	603	903	0
391	1	0	0	0	0	0	0	200	300	0	0	0	0	0	0	0	200	903	0	0	0	0	0	0	0	603	903	0
391	2	0	0	0	0	0	0	200	300	0	0	0	0	0	0	0	200	903	0	0	0	0	0	0	0	603	903	0
391	3	0	0	0	0	0	0	200	300	0	0	0	0	0	0	0	200	903	0	0	0	0	0	0	0	603	903	0
391	4	0	0	0	0	0	0	200	300	0	0	0	0	0	0	0	200	903	0	0	0	0	0	0	0	603	903	0
391	5	0	0	0	0	0	0	200	300	0	0	0	0	0	0	0	200	903	0	0	0	0	0	0	0	603	903	0
391	6	0	0	0	0	0	0	200	300	0	0	0	0	0	0	0	200	903	0	0	0	0	0	0	0	603	903	0
391	7	0	0	0	0	0	0	200	300	0	0	0	0	0	0	0	200	903	0	0	0	0	0	0	0	603	903	0
391	8	0	0	0	0	0	0	200	300	0	0	0	0	0	0	0	200	903	0	0	0	0	0	0	0	603	903	0
391	9	0	0	0	0	0	0	200	300	0	0	0	0	0	0	0	200	903	0	0	0	0	0	0	0	603	903	0
392	0	0	0	0	0	0	0	200	300	0	0	0	0	0	0	0	200	903	0	0	0	0	0	0	0	603	903	0
392	1	0	0	0	0	0	0	200	300	0	0	0	0	0	0	0	200	903	0	0	0	0	0	0	0	603	903	0
392	2	0	0	0	0	0	0	200	300	0	0	0	0	0	0	0	200	903	0	0	0	0	0	0	0	603	903	0
392	3	0	0	0	0	0	0	200	300	0	0	0	0	0	0	0	200	903	0	0	0	0	0	0	0	603	903	0
392	4	0	0	0	0	0	0	200	300	0	0	0	0	0	0	0	200	903	0	0	0	0	0	0	0	603	903	0
392	5	0	0	0	0	0	0	200	300	0	0	0	0	0	0	0	200	903	0	0	0	0	0	0	0	603	903	0
392	6	0	0	0	0	0	0	200	300	0	0	0	0	0	0	0	200	903	0	0	0	0	0	0	0	603	903	0
392	7	0	0	0	0	0	0	200	300	0	0	0	0	0	0	0	200	903	0	0	0	0	0	0	0	603	903	0
392	8	0	0	0	0	0	0	200	300	0	0	0	0	0	0	0	200	903	0	0	0	0	0	0	0	603	903	0
392	9	0	0	0	0	0	0	200	300	0	0	0	0	0	0	0	200	903	0	0	0	0	0	0	0	603	903	0
393	0	0	0	0	0	0	0	200	300	0	0	0	0	0	0	0	200	903	0	0	0	0	0	0	0	603	903	0
393	1	0	0	0	0	0	0	200	300	0	0	0	0	0	0	0	200	903	0	0	0	0	0	0	0	603	903	0
393	2	0	0	0	0	0	0	200	300	0	0	0	0	0	0	0	200	903	0	0	0	0	0	0	0	603	903	0
393	3	0	0	0	0	0	0	200	300	0	0	0	0	0	0	0	200	903	0	0	0	0	0	0	0	603	903	0
393	4	0	0	0	0	0	0	200	300	0	0	0	0	0	0	0	200	903	0	0	0	0	0	0	0	603	903	0
393	5	0	0	0	0	0	0	200	300	0	0	0	0	0	0	0	200	903	0	0	0	0	0	0	0	603	903	0
393	6	0	0	0	0	0	0	200	300	0	0	0	0	0	0	0	200	903	0	0	0	0	0	0	0	603	903	0
393	7	0	0	0	0	0	0	200	300	0	0	0	0	0	0	0	200	903	0	0	0	0	0	0	0	603	903	0
393	8	0	0	0	0	0	0	200	300	0	0	0	0	0	0	0	200	903	0	0	0	0	0	0	0	603	903	0
393	9	0	0	0	0	0	0	200	300	0	0	0	0	0	0	0	200	903	0	0	0	0	0	0	0	603	903	0
394	0	0	0	0	0	0	0	200	300	0	0	0	0	0	0	0	200	903	0	0	0	0	0	0	0	603	903	0
394	1	0	0	0	0	0	0	200	300	0	0	0	0	0	0	0	200	903	0	0	0	0	0	0	0	603	903	0
394	2	0	0	0	0	0	0	200	300	0	0	0	0	0	0	0	200	903	0	0	0	0	0	0	0	603	903	0
394	3	0	0	0	0	0	0	200	300	0	0	0	0	0	0	0	200	903	0	0	0	0	0	0	0	603	903	0
394	4	0	0	0	0	0	0	200	300	0	0	0	0	0	0	0	200	903	0	0	0	0	0	0	0	603	903	0
394	5	0	0	0	0	0	0	200	300	0	0	0	0	0	0	0	200	903	0	0	0	0	0	0	0	603	903	0
394	6	0	0	0	0	0	0	200	300	0	0	0	0	0	0	0	200	903	0	0	0	0	0	0	0	603	903	0
394	7	0	0	0	0	0	0	200	300	0	0	0	0	0	0	0	200	903	0	0	0	0	0	0	0	603	903	0
394	8	0	0	0	0	0	0	200	300	0	0	0	0	0	0	0	200	903	0	0	0	0	0	0	0	603	903	0
394	9	0	0	0	0	0	0	200	300	0	0	0	0	0	0	0	200	903	0	0	0	0	0	0	0	603	903	0
395	0	0	0	0	0	0	0	200	300	0	0	0	0	0	0	0	200	903	0	0	0	0	0	0	0	603	903	0
395	1	0	0	0	0	0	0	200	300	0	0	0	0	0	0	0	200	903	0	0	0	0	0	0	0	603	903	0
395	2	0	0	0	0	0	0	200	300	0	0	0	0	0	0	0	200	903	0	0	0	0	0	0	0	603	903	0
395	3	0	0	0	0	0	0	200	300	0	0	0	0	0	0	0	200	903	0	0	0	0	0	0	0	603	903	0
395	4	0	0	0	0	0	0	200	300	0	0	0	0	0	0	0	200	903	0	0	0	0	0	0	0	603	903	0
395	5	0	0	0	0	0	0	200	300	0	0	0	0	0	0	0	200	903	0	0	0	0	0	0	0	603	903	0
395	6	0	0	0	0	0	0	200	300	0	0	0	0	0	0	0	200	903	0	0	0	0	0	0	0	603	903	0
395	7	0	0	0	0	0	0	200	300	0	0	0	0	0	0	0	200	903	0	0	0	0	0	0	0	603	903	0
395	8	0	0	0	0	0	0	200	300	0	0	0	0	0	0	0	200	903	0	0	0	0	0	0	0	603	903	0
395	9	0	0	0	0	0	0	200	300	0	0	0	0	0	0	0	200	903	0	0	0	0	0	0	0	603	903	0
396	0	0	0	0	0	0	0	200	300	0	0	0	0	0	0	0	200	903	0	0	0	0	0	0	0	603	903	0
396	1	0	0	0	0	0	0	200	300	0	0	0	0	0	0	0	200	903	0	0	0	0	0	0	0	603	903	0
396	2	0	0	0	0	0	0	200	300	0	0	0	0	0	0	0	200	903	0	0	0	0	0	0	0	603	903	0
396	3	0	0	0	0	0	0	200	300	0	0	0	0	0	0	0	200	903	0	0	0	0	0	0	0	603	903	0
396	4	0	0	0	0	0	0	200	300	0	0	0	0	0	0	0	200	903	0	0	0	0	0	0	0	603	903	0
396	5	0	0	0	0	0	0	200	300	0	0	0	0	0	0	0	200	903	0	0	0	0	0	0	0	603	903	0
396	6	0	0	0	0	0	0	200	300	0	0	0	0	0	0	0	200	903	0	0	0	0	0	0	0	603	903	0
396	7	0	0	0	0	0	0	200	300	0	0	0	0	0	0	0	200	903	0	0	0	0	0	0	0	603	903	0
396	8	0	0	0	0	0	0	200	300	0	0	0	0	0	0	0	200	903	0	0	0	0	0	0	0	603	903	0
396	9	0	0	0	0	0	0	200	300	0	0	0	0	0	0	0	200	903	0	0	0	0	0	0	0	603	903	0
397	0	0	0	0	0	0	0	200	300	0	0	0	0	0	0	0	200	903	0	0	0	0	0	0	0	603	903	0
397	1	0	0	0	0	0	0	200	300	0	0	0	0	0	0	0	200	903	0	0	0	0	0	0	0	603	903	0
397	2	0	0	0	0	0	0	200	300	0	0	0	0	0	0	0	200	903	0	0	0	0	0	0	0	603	903	0
397	3	0	0	0	0	0	0	200	300	0	0	0	0	0	0	0	200	903	0	0	0	0	0	0	0	603	903	0
397	4	0	0	0	0	0	0	200	300	0	0	0	0	0	0	0	200	903	0	0	0	0	0	0	0	603	903	0
397	5	0	0	0	0	0	0	200	300	0	0	0	0	0	0	0	200	903	0	0	0	0	0	0	0	603	903	0
397	6	0	0	0	0	0	0	200	300	0	0	0	0	0	0	0	200	903	0	0	0	0	0	0	0	603	903	0
397	7	0	0	0	0	0	0	200	300	0	0	0	0	0	0	0	200	903	0	0	0	0	0	0	0	603	903	0
397	8	0	0	0	0	0	0	200	300	0	0	0	0	0	0	0	200	903	0	0	0	0	0	0	0	603	903	0
397	9	0	0	0	0	0	0	200	300	0	0	0	0	0	0	0	200	903	0	0	0	0	0	0	0	603	903	0
398	0	0	0	0	0	0	0	200	300	0	0	0	0	0	0	0	200	903	0	0	0	0	0	0	0	603	903	0
398	1	0	0	0	0	0	0	200	300	0	0	0	0	0	0	0	200	903	0	0	0	0	0	0	0	603	903	0
398	2	0	0	0	0	0	0	200	300	0	0	0	0	0	0	0	200	903	0	0	0	0	0	0	0	603	903	0
398	3	0	0	0	0	0	0	200	300	0	0	0	0	0	0	0	200	903	0	0	0	0	0	0	0	603	903	0
398	4	0	0	0	0	0	0	200	300	0	0	0	0	0	0	0	200	903	0	0	0	0	0	0	0	603	903	0
398	5	0	0	0	0	0	0	200	300	0	0	0	0	0	0	0	200	903	0	0	0	0	0	0	0	603	903	0
398	6	0	0	0	0	0	0	200	300	0	0	0	0	0	0	0	200	903	0	0	0	0	0	0	0	603	903	0
398	7	0	0	0	0	0	0	200	300	0	0	0	0	0	0	0	200	903	0	0	0	0	0	0	0	603	903	0
398	8	0	0	0	0	0	0	200	300	0	0	0	0	0	0	0	200	903	0	0	0	0	0	0	0	603	903	0
398	9	0	0	0	0	0	0	200	300	0	0	0	0	0	0	0	200	903	0	0	0	0	0	0	0	603	903	0
399	0	0	0	0	0	0	0	200	300	0	0	0	0	0	0	0	200	903	0	0	0	0	0	0	0	603	903	0
399	1	0	0	0	0	0	0	200	300	0	0	0	0	0	0	0	200	903	0	0	0	0	0	0	0	603	903	0
399	2	0	0	0	0	0	0	200	300	0	0	0	0	0	0	0	200	903	0	0	0	0	0	0	0	603	903	0
399	3	0	0	0	0	0	0	200	300	0	0	0	0	0	0	0	200	903	0	0	0	0	0	0	0	603	903	0
399	4	0	0	0	0	0	0	200	300	0	0	0	0	0	0	0	200	903	0	0	0	0	0	0	0	603	903	0
399	5	0	0	0	0	0	0	200	300	0	0	0	0	0	0	0	200	903	0	0	0	0	0	0	0	603	903	0
399	6	0	0	0	0	0	0	200	300	0	0	0	0	0	0	0	200	903	0	0	0	0	0	0	0	603	903	0
399	7	0	0	0	0	0	0	200	300	0	0	0	0	0	0	0	200	903	0	0	0	0	0	0	0	603	903	0
399	8	0	0	0	0	0	0	200	300	0	0	0	0	0	0	0	200	903	0	0	0	0	0	0	0	603	903	0
399	9	0	0	0	0	0	0	200	300	0	0	0	0	0	0	0	200	903	0	0	0	0	0	0	0	603	903	0
400	0	0	0	0	0	0	0	200	300	0	0	0	0	0	0	0	200	903	0	0	0	0	0	0	0	603	903	0
400	1	0	0	0	0	0	0	200	300	0	0	0	0	0	0	0	200	903	0	0	0	0	0	0	0	603	903	0
400	2	0	0	0	0	0	0	200	300	0	0	0	0	0	0	0	200	903	0	0	0	0	0	0	0	603	903	0
400	3	0	0	0	0	0	0	200	300	0	0	0	0	0	0	0	200	903	0	0	0	0	0	0	0	603	903	0
400	4	0	0	0	0	0	0	200	300	0	0	0	0	0	0	0	200	903	0	0	0	0	0	0	0	603	903	0
400	5	0	0	0	0	0	0	200	300	0	0	0	0	0	0	0	200	903	0	0	0	0	0	0	0	603	903	0
400	6	0	0	0	0	0	0	200	300	0	0	0	0	0	0	0	200	903	0	0	0	0	0	0	0	603	903	0
400	7	0	0	0	0	0	0	200	300	0	0	0	0	0	0	0	200	903	0	0	0	0	0	0	0	603	903	0
400	8	0	0	0	0	0	0	200	300	0	0	0	0	0	0	0	200	903	0	0	0	0	0	0	0	603	903	0
400	9	0	0	0	0	0	0	200	300	0	0	0	0	0	0	0	200	903	0	0	0	0	0	0	0	603	903	0
401	0	0	0	0	0	0	0	200	300	0	0	0	0	0	0	0	200	903	0	0	0	0	0	0	0	603	903	0
401	1	0	0	0	0	0	0	200	300	0	0	0	0	0	0	0	200	903	0	0	0	0	0	0	0	603	903	0
401	2	0	0	0	0	0	0	200	300	0	0	0	0	0	0	0	200	903	0	0	0	0	0	0	0	603	903	0
401	3	0	0	0	0	0	0	200	300	0	0	0	0	0	0	0	200	903	0	0	0	0	0	0	0	603	903	0
401	4	0	0	0	0	0	0	200	300	0	0	0	0	0	0	0	200	903	0	0	0	0	0	0	0	603	903	0
401	5	0	0	0	0	0	0	200	300	0	0	0	0	0	0	0	200	903	0	0	0	0	0	0	0	603	903	0
401	6	0	0	0	0	0	0	200	300	0	0	0	0	0	0	0	200	903	0	0	0	0	0	0	0	603	903	0
401	7	0	0	0	0	0	0	200	300	0	0	0	0	0	0	0	200	903	0	0	0	0	0	0	0	603	903	0
401	8	0	0	0	0	0	0	200	300	0	0	0	0	0	0	0	200	903	0	0	0	0	0	0	0	603	903	0
401	9	0	0	0	0	0	0	200	300	0	0	0	0	0	0	0	200	903	0	0	0	0	0	0	0	603	903	0
402	0	0	0	0	0	0	0	200	300	0	0	0	0	0	0	0	200	903	0	0	0	0	0	0	0	603	903	0
402	1	0	0	0	0	0	0	200	300	0	0	0	0	0	0	0	200	903	0	0	0	0	0	0	0	603	903	0
402	2	0	0	0	0	0	0	200	300	0	0	0	0	0	0	0	200	903	0	0	0	0	0	0	0	603	903	0
402	3	0	0	0	0	0	0	200	300	0	0	0	0	0	0	0	200	903	0	0	0	0	0	0	0	603	903	0
402	4	0	0	0	0	0	0	200	300	0	0	0	0	0	0	0	200	903	0	0	0	0	0	0	0	603	903	0
402	5	0	0	0	0	0	0	200	300	0	0	0	0	0	0	0	200	903	0	0	0	0	0	0	0	603	903	0
402	6	0	0	0	0	0	0	200	300	0	0	0	0	0	0	0	200	903	0	0	0	0	0	0	0	603	903	0
402	7	0	0	0	0	0	0	200	300	0	0	0	0	0	0	0	200	903	0	0	0	0	0	0	0	603	903	0
402	8	0	0	0	0	0	0	200	300	0	0	0	0	0	0	0	200	903	0	0	0	0	0	0	0	603	903	0
402	9	0	0	0	0	0	0	200	300	0	0	0	0	0	0	0	200	903	0	0	0	0	0	0	0	603	903	0
403	0	0	0	0	0	0	0	200	300	0	0	0	0	0	0	0	200	903	0	0	0	0	0	0	0	603	903	0
403	1	0	0	0	0	0	0	200	300	0	0	0	0	0	0	0	200	903	0	0	0	0	0	0	0	603	903	0
403	2	0	0	0	0	0	0	200	300	0	0	0	0	0	0	0	200	903	0	0	0	0	0	0	0	603	903	0
403	3	0	0	0	0	0	0	200	300	0	0	0	0	0	0	0	200	903	0	0	0	0	0	0	0	603	903	0
403	4	0	0	0	0	0	0	200	300	0	0	0	0	0	0	0	200	903	0	0	0	0	0	0	0	603	903	0
403	5	0	0	0	0	0	0	200	300	0	0	0	0	0	0	0	200	903	0	0	0	0	0	0	0	603	903	0
403	6	0	0	0	0	0	0	200	300	0	0	0	0	0	0	0	200	903	0	0	0	0	0	0	0	603	903	0
403	7	0	0	0	0	0	0	200	300	0	0	0	0	0	0	0	200	903	0	0	0	0	0	0	0	603	903	0
403	8	0	0	0	0	0	0	200	300	0	0	0	0	0	0	0	200	903	0	0	0	0	0	0	0	603	903	0
403	9	0	0	0	0	0	0	200	300	0	0	0	0	0	0	0	200	903	0	0	0	0	0	0	0	603	903	0
404	0	0	0	0	0	0	0	200	300	0	0	0	0	0	0	0	200	903	0	0	0	0	0	0	0	603	903	0
404	1	0	0	0	0	0	0	200	300	0	0	0	0	0	0	0	200	903	0	0	0	0	0	0	0	603	903	0
404	2	0	0	0	0	0	0	200	300	0	0	0	0	0	0	0	200	903	0	0	0	0	0	0	0	603	903	0
404	3	0	0	0	0	0	0	200	300	0	0	0	0	0	0	0	200	903	0	0	0	0	0	0	0	603	903	0
404	4	0	0	0	0	0	0	200	300	0	0	0	0	0	0	0	200	903	0	0	0	0	0	0	0	603	903	0
404	5	0	0	0	0	0	0	200	300	0	0	0	0	0	0	0	200	903	0	0	0	0	0	0	0	603	903	0
404	6	0	0	0	0	0	0	200	300	0	0	0	0	0	0	0	200	903	0	0	0	0	0	0	0	603	903	0
404	7	0	0	0	0	0	0	200	300	0	0	0	0	0	0	0	200	903	0	0	0	0	0	0	0	603	903	0
404	8	0	0	0	0	0	0	200	300	0	0	0	0	0	0	0	200	903	0	0	0	0	0	0	0	603	903	0
404	9	0	0	0	0	0	0	200	300	0	0	0	0	0	0	0	200	903	0	0	0	0	0	0	0	603	903	0
405	0	0	0	0	0	0	0	200	300	0	0	0	0	0	0	0	200	903	0	0	0	0	0	0	0	603	903	0
405	1	0	0	0	0	0	0	200	300	0	0	0	0	0	0	0	200	903	0	0	0	0	0	0	0	603	903	0
405	2	0	0	0	0	0	0	200	300	0	0	0	0	0	0	0	200	903	0	0	0	0	0	0	0	603	903	0
405	3	0	0	0	0	0	0	200	300	0	0	0	0	0	0	0	200	903	0	0	0	0	0	0	0	603	903	0
405	4	0	0	0	0	0	0	200	300	0	0	0	0	0	0	0	200	903	0	0	0	0	0	0	0	603	903	0
405	5	0	0	0	0	0	0	200	300	0	0	0	0	0	0	0	200	903	0	0	0	0	0	0	0	603	903	0
405	6	0	0	0	0	0	0	200	300	0	0	0	0	0	0	0	200	903	0	0	0	0	0	0	0	603	903	0
405	7	0	0	0	0	0	0	200	300	0	0	0	0	0	0	0	200	903	0	0	0	0	0	0	0	603	903	0
405	8	0	0	0	0	0	0	200	300	0	0	0	0	0	0	0	200	903	0	0	0	0	0	0	0	603	903	0
405	9	0	0	0	0	0	0	200	300	0	0	0	0	0	0	0	200	903	0	0	0	0	0	0	0	603	903	0
406	0	0	0	0	0	0	0	200	300	0	0	0	0	0	0	0	200	903	0	0	0	0	0	0	0	603	903	0
406	1	0	0	0	0	0	0	200	300	0	0	0	0	0	0	0	200	903	0	0	0	0	0	0	0	603	903	0
406	2	0	0	0	0	0	0	200	300	0	0	0	0	0	0	0	200	903	0	0	0	0	0	0	0	603	903	0
406	3	0	0	0	0	0	0	200	300	0	0	0	0	0	0	0	200	903	0	0	0	0	0	0	0	603	903	0
406	4	0	0	0	0	0	0	200	300	0	0	0	0	0	0	0	200	903	0	0	0	0	0	0	0	603	903	0
406	5	0	0	0	0	0	0	200	300	0	0	0	0	0	0	0	200	903	0	0	0	0	0	0	0	603	903	0
406	6	0	0	0	0	0	0	200	300	0	0	0	0	0	0	0	200	903	0	0	0	0	0	0	0	603	903	0
406	7	0	0	0	0	0	0	200	300	0	0	0	0	0	0	0	200	903	0	0	0	0	0	0	0	603	903	0
406	8	0	0	0	0	0	0	200	300	0	0	0	0	0	0	0	200	903	0	0	0	0	0	0	0	603	903	0
406	9	0	0	0	0	0	0	200	300	0	0	0	0	0	0	0	200	903	0	0	0	0	0	0	0	603	903	0
407	0	0	0	0	0	0	0	200	300	0	0	0	0	0	0	0	200	903	0	0	0	0	0	0	0	603	903	0
407	1	0	0	0	0	0	0	200	300	0	0	0	0	0	0	0	200	903	0	0	0	0	0	0	0	603	903	0
407	2	0	0	0	0	0	0	200	300	0	0	0	0	0	0	0	200	903	0	0	0	0	0	0	0	603	903	0
407	3	0	0	0	0	0	0	200	300	0	0	0	0	0	0	0	200	903	0	0	0	0	0	0	0	603	903	0
407	4	0	0	0	0	0	0	200	300	0	0	0	0	0	0	0	200	903	0	0	0	0	0	0	0	603	903	0
407	5	0	0	0	0	0	0	200	300	0	0	0	0	0	0	0	200	903	0	0	0	0	0	0	0	603	903	0
407	6	0	0	0	0	0	0	200	300	0	0	0	0	0	0	0	200	903	0	0	0	0	0	0	0	603	903	0
407	7	0	0	0	0	0	0	200	300	0	0	0	0	0	0	0	200	903	0	0	0	0	0	0	0	603	903	0
407	8	0	0	0	0	0	0	200	300	0	0	0	0	0	0	0	200	903	0	0	0	0	0	0	0	603	903	0
407	9	0	0	0	0	0	0	200	300	0	0	0	0	0	0	0	200	903	0	0	0	0	0	0	0	603	903	0
408	0	0	0	0	0	0	0	200	300	0	0	0	0	0	0	0	200	903	0	0	0	0	0	0	0	603	903	0
408	1	0	0	0	0	0	0	200	300	0	0	0	0	0	0	0	200	903	0	0	0	0	0	0	0	603	903	0
408	2	0	0	0	0	0	0	200	300	0	0	0	0	0	0	0	200	903	0	0	0	0	0	0	0	603	903	0
408	3	0	0	0	0	0	0	200	300	0	0	0	0	0	0	0	200	903	0	0	0	0	0	0	0	603	903	0
408	4	0	0	0	0	0	0	200	300	0	0	0	0	0	0	0	200	903	0	0	0	0	0	0	0	603	903	0
408	5	0	0	0	0	0	0	200	300	0	0	0	0	0	0	0	200	903	0	0	0	0	0	0	0	603	903	0
408	6	0	0	0	0	0	0	200	300	0	0	0	0	0	0	0	200	903	0	0	0	0	0	0	0	603	903	0
408	7	0	0	0	0	0	0	200	300	0	0	0	0	0	0	0	200	903	0	0	0	0	0	0	0	603	903	0
408	8	0	0	0	0	0	0	200	300	0	0	0	0	0	0	0	200	903	0	0	0	0	0	0	0	603	903	0
408	9	0	0	0	0	0	0	200	300	0	0	0	0	0	0	0	200	903	0	0	0	0	0	0	0	603	903	0
409	0	0	0	0	0	0	0	200	300	0	0	0	0	0	0	0	200	903	0	0	0	0	0	0	0	603	903	0
409	1	0	0	0	0	0	0	200	300	0	0	0	0	0	0	0	200	903	0	0	0	0	0	0	0	603	903	0
409	2	0	0	0	0	0	0	200	300	0	0	0	0	0	0	0	200	903	0	0	0	0	0	0	0	603	903	0
409	3	0	0	0	0	0	0	200	300	0	0	0	0	0	0	0	200	903	0	0	0	0	0	0	0	603	903	0
409	4	0	0	0	0	0	0	200	300	0	0	0	0	0	0	0	200	903	0	0	0	0	0	0	0	603	903	0
409	5	0	0	0	0	0	0	200	300	0	0	0	0	0	0	0	200	903	0	0	0	0	0	0	0	603	903	0
409	6	0	0	0	0	0	0	200	300	0	0	0	0	0	0	0	200	903	0	0	0	0	0	0	0	603	903	0
409	7	0	0	0	0	0	0	200	300	0	0	0	0	0	0	0	200	903	0	0	0	0	0	0	0	603	903	0
409	8	0	0	0	0	0	0	200	300	0	0	0	0	0	0	0	200	903	0	0	0	0	0	0	0	603	903	0
409	9	0	0	0	0	0	0	200	300	0	0	0	0	0	0	0	200	903	0	0	0	0	0	0	0	603	903	0
410	0	0	0	0	0	0	0	200	300	0	0	0	0	0	0	0	200	903	0	0	0	0	0	0	0	603	903	0
410	1	0	0	0	0	0	0	200	300	0	0	0	0	0	0	0	200	903	0	0	0	0	0	0	0	603	903	0
410	2	0	0	0	0	0	0	200	300	0	0	0	0	0	0	0	200	903	0	0	0	0	0	0	0	603	903	0
410	3	0	0	0	0	0	0	200	300	0	0	0	0	0	0	0	200	903	0	0	0	0	0	0	0	603	903	0
410	4	0	0	0	0	0	0	200	300	0	0	0	0	0	0	0	200	903	0	0	0	0	0	0	0	603	903	0
410	5	0	0	0	0	0	0	200	300	0	0	0	0	0	0	0	200	903	0	0	0	0	0	0	0	603	903	0
410	6	0	0	0	0	0	0	200	300	0	0	0	0	0	0	0	200	903	0	0	0	0	0	0	0	603	903	0
410	7	0	0	0	0	0	0	200	300	0	0	0	0	0	0	0	200	903	0	0	0	0	0	0	0	603	903	0
410	8	0	0	0	0	0	0	200	300	0	0	0	0	0	0	0	200	903	0	0	0	0	0	0	0	603	903	0
410	9	0	0	0	0	0	0	200	300	0	0	0	0	0	0	0	200	903	0	0	0	0	0	0	0	603	903	0
411	0	0	0	0	0	0	0	200	300	0	0	0	0	0	0	0	200	903	0	0	0	0	0	0	0	603	903	0
411	1	0	0	0	0	0	0	200	300	0	0	0	0	0	0	0	200	903	0	0	0	0	0	0	0	603	903	0
411	2	0	0	0	0	0	0	200	300	0	0	0	0	0	0	0	200	903	0	0	0	0	0	0	0	603	903	0
411	3	0	0	0	0	0	0	200	300	0	0	0	0	0	0	0	200	903	0	0	0	0	0	0	0	603	903	0
411	4	0	0	0	0	0	0	200	300	0	0	0	0	0	0	0	200	903	0	0	0	0	0	0	0	603	903	0
411	5	0	0	0	0	0	0	200	300	0	0	0	0	0	0	0	200	903	0	0	0	0	0	0	0	603	903	0
411	6	0	0	0	0	0	0	200	300	0	0	0	0	0	0	0	200	903	0	0	0	0	0	0	0	603	903	0
411	7	0	0	0	0	0	0	200	300	0	0	0	0	0	0	0	200	903	0	0	0	0	0	0	0	603	903	0
411	8	0	0	0	0	0	0	200	300	0	0	0	0	0	0	0	200	903	0	0	0	0	0	0	0	603	903	0
411	9	0	0	0	0	0	0	200	300	0	0	0	0	0	0	0	200	903	0	0	0	0	0	0	0	603	903	0
412	0	0	0	0	0	0	0	200	300	0	0	0	0	0	0	0	200	903	0	0	0	0	0	0	0	603	903	0
412	1	0	0	0	0	0	0	200	300	0	0	0	0	0	0	0	200	903	0	0	0	0	0	0	0	603	903	0
412	2	0	0	0	0	0	0	200	300	0	0	0	0	0	0	0	200	903	0	0	0	0	0	0	0	603	903	0
412	3	0	0	0	0	0	0	200	300	0	0	0	0	0	0	0	200	903	0	0	0	0	0	0	0	603	903	0
412	4	0	0	0	0	0	0	200	300	0	0	0	0	0	0	0	200	903	0	0	0	0	0	0	0	603	903	0
412	5	0	0	0	0	0	0	200	300	0	0	0	0	0	0	0	200	903	0	0	0	0	0	0	0	603	903	0
412	6	0	0	0	0	0	0	200	300	0	0	0	0	0	0	0	200	903	0	0	0	0	0	0	0	603	903	0
412	7	0	0	0	0	0	0	200	300	0	0	0	0	0	0	0	200	903	0	0	0	0	0	0	0	603	903	0
412	8	0	0	0	0	0	0	200	300	0	0	0	0	0	0	0	200	903	0	0	0	0	0	0	0	603	903	0
412	9	0	0	0	0	0	0	200	300	0	0	0	0	0	0	0	200	903	0	0	0	0	0	0	0	603	903	0
413	0	0	0	0	0	0	0	200	300	0	0	0	0	0	0	0	200	903	0	0	0	0	0	0	0	603	903	0
413	1	0	0	0	0	0	0	200	300	0	0	0	0	0	0	0	200	903	0	0	0	0	0	0	0	603	903	0
413	2	0	0	0	0	0	0	200	300	0	0	0	0	0	0	0	200	903	0	0	0	0	0	0	0	603	903	0
413	3	0	0	0	0	0	0	200	300	0	0	0	0	0	0	0	200	903	0	0	0	0	0	0	0	603	903	0
413	4	0	0	0	0	0	0	200	300	0	0	0	0	0	0	0	200	903	0	0	0	0	0	0	0	603	903	0
413	5	0	0	0	0	0	0	200	300	0	0	0	0	0	0	0	200	903	0	0	0	0	0	0	0	603	903	0
413	6	0	0	0	0	0	0	200	300	0	0	0	0	0	0	0	200	903	0	0	0	0	0	0	0	603	903	0
413	7	0	0	0	0	0	0	200	300	0	0	0	0	0	0	0	200	903	0	0	0	0	0	0	0	603	903	0
413	8	0	0	0	0	0	0	200	300	0	0	0	0	0	0	0	200	903	0	0	0	0	0	0	0	603	903	0
413	9	0	0	0	0	0	0	200	300	0	0	0	0	0	0	0	200	903	0	0	0	0	0	0	0	603	903	0
414	0	0	0	0	0	0	0	200	300	0	0	0	0	0	0	0	200	903	0	0	0	0	0	0	0	603	903	0
414	1	0	0	0	0	0	0	200	300	0	0	0	0	0	0	0	200	903	0	0	0	0	0	0	0	603	903	0
414	2	0	0	0	0	0	0	200	300	0	0	0	0	0	0	0	200	903	0	0	0	0	0	0	0	603	903	0
414	3	0	0	0	0	0	0	200	300	0	0	0	0	0	0	0	200	903	0	0	0	0	0	0	0	603	903	0
414	4	0	0	0	0	0	0	200	300	0	0	0	0	0	0	0	200	903	0	0	0	0	0	0	0	603	903	0
414	5	0	0	0	0	0	0	200	300	0	0	0	0	0	0	0	200	903	0	0	0	0	0	0	0	603	903	0
414	6	0	0	0	0	0	0	200	300	0	0	0	0	0	0	0	200	903	0	0	0	0	0	0	0	603	903	0
414	7	0	0	0	0	0	0	200	300	0	0	0	0	0	0	0	200	903	0	0	0	0	0	0	0	603	903	0
414	8	0	0	0	0	0	0	200	300	0	0	0	0	0	0	0	200	903	0	0	0	0	0	0	0	603	903	0
414	9	0	0	0	0	0	0	200	300	0	0	0	0	0	0	0	200	903	0	0	0	0	0	0	0	603	903	0
415	0	0	0	0	0	0	0	200	300	0	0	0	0	0	0	0	200	903	0	0	0	0	0	0	0	603	903	0
415	1	0	0	0	0	0	0	200	300	0	0	0	0	0	0	0	200	903	0	0	0	0	0	0	0	603	903	0
415	2	0	0	0	0	0	0	200	300	0	0	0	0	0	0	0	200	903	0	0	0	0	0	0	0	603	903	0
415	3	0	0	0	0	0	0	200	300	0	0	0	0	0	0	0	200	903	0	0	0	0	0	0	0	603	903	0
415	4	0	0	0	0	0	0	200	300	0	0	0	0	0	0	0	200	903	0	0	0	0	0	0	0	603	903	0
415	5	0	0	0	0	0	0	200	300	0	0	0	0	0	0	0	200	903	0	0	0	0	0	0	0	603	903	0
415	6	0	0	0	0	0	0	200	300	0	0	0	0	0	0	0	200	903	0	0	0	0	0	0	0	603	903	0
415	7	0	0	0	0	0	0	200	300	0	0	0	0	0	0	0	200	903	0	0	0	0	0	0	0	603	903	0
415	8	0	0	0	0	0	0	200	300	0	0	0	0	0	0	0	200	903	0	0	0	0	0	0	0	603	903	0
415	9	0	0	0	0	0	0	200	300	0	0	0	0	0	0	0	200	903	0	0	0	0	0	0	0	603	903	0
416	0	0	0	0	0	0	0	200	300	0	0	0	0	0	0	0	200	903	0	0	0	0	0	0	0	603	903	0
416	1	0	0	0	0	0	0	200	300	0	0	0	0	0	0	0	200	903	0	0	0	0	0	0	0	603	903	0
416	2	0	0	0	0	0	0	200	300	0	0	0	0	0	0	0	200	903	0	0	0	0	0	0	0	603	903	0
416	3	0	0	0	0	0	0	200	300	0	0	0	0	0	0	0	200	903	0	0	0	0	0	0	0	603	903	0
416	4	0	0	0	0	0	0	200	300	0	0	0	0	0	0	0	200	903	0	0	0	0	0	0	0	603	903	0
416	5	0	0	0	0	0	0	200	300	0	0	0	0	0	0	0	200	903	0	0	0	0	0	0	0	603	903	0
416	6	0	0	0	0	0	0	200	300	0	0	0	0	0	0	0	200	903	0	0	0	0	0	0	0	603	903	0
416	7	0	0	0	0	0	0	200	300	0	0	0	0	0	0	0	200	903	0	0	0	0	0	0	0	603	903	0
416	8	0	0	0	0	0	0	200	300	0	0	0	0	0	0	0	200	903	0	0	0	0	0	0	0	603	903	0
416	9	0	0	0	0	0	0	200	300	0	0	0	0	0	0	0	200	903	0	0	0	0	0	0	0	603	903	0
417	0	0	0	0	0	0	0	200	300	0	0	0	0	0	0	0	200	903	0	0	0	0	0	0	0	603	903	0
417	1	0	0	0	0	0	0	200	300	0	0	0	0	0	0	0	200	903	0	0	0	0	0	0	0	603	903	0
417	2	0	0	0	0	0	0	200	300	0	0	0	0	0	0	0	200	903	0	0	0	0	0	0	0	603	903	0
417	3	0	0	0	0	0	0	200	300	0	0	0	0	0	0	0	200	903	0	0	0	0	0	0	0	603	903	0
417	4	0	0	0	0	0	0	200	300	0	0	0	0	0	0	0	200	903	0	0	0	0	0	0	0	603	903	0
417	5	0	0	0	0	0	0	200	300	0	0	0	0	0	0	0	200	903	0	0	0	0	0	0	0	603	903	0
417	6	0	0	0	0	0	0	200	300	0	0	0	0	0	0	0	200	903	0	0	0	0	0	0	0	603	903	0
417	7	0	0	0	0	0	0	200	300	0	0	0	0	0	0	0	200	903	0	0	0	0	0	0	0	603	903	0
417	8	0	0	0	0	0	0	200	300	0	0	0	0	0	0	0	200	903	0	0	0	0	0	0	0	603	903	0
417	9	0	0	0	0	0	0	200	300	0	0	0	0	0	0	0	200	903	0	0	0	0	0	0	0	603	903	0
418	0	0	0	0	0	0	0	200	300	0	0	0	0	0	0	0	200	903	0	0	0	0	0	0	0	603	903	0
418	1	0	0	0	0	0	0	200	300	0	0	0	0	0	0	0	200	903	0	0	0	0	0	0	0	603	903	0
418	2	0	0	0	0	0	0	200	300	0	0	0	0	0	0	0	200	903	0	0	0	0	0	0	0	603	903	0
418	3	0	0	0	0	0	0	200	300	0	0	0	0	0	0	0	200	903	0	0	0	0	0	0	0	603	903	0
418	4	0	0	0	0	0	0	200	300	0	0	0	0	0	0	0	200	903	0	0	0	0	0	0	0	603	903	0
418	5	0	0	0	0	0	0	200	300	0	0	0	0	0	0	0	200	903	0	0	0	0	0	0	0	603	903	0
418	6	0	0	0	0	0	0	200	300	0	0	0	0	0	0	0	200	903	0	0	0	0	0	0	0	603	903	0
418	7	0	0	0	0	0	0	200	300	0	0	0	0	0	0	0	200	903	0	0	0	0	0	0	0	603	903	0
418	8	0	0	0	0	0	0	200	300	0	0	0	0	0	0	0	200	903	0	0	0	0	0	0	0	603	903	0
418	9	0	0	0	0	0	0	200	300	0	0	0	0	0	0	0	200	903	0	0	0	0	0	0	0	603	903	0
419	0	0	0	0	0	0	0	200	300	0	0	0	0	0	0	0	200	903	0	0	0	0	0	0	0	603	903	0
419	1	0	0	0	0	0	0	200	300	0	0	0	0	0	0	0	200	903	0	0	0	0	0	0	0	603	903	0
419	2	0	0	0	0	0	0	200	300	0	0	0	0	0	0	0	200	903	0	0	0	0	0	0	0	603	903	0
419	3	0	0	0	0	0	0	200	300	0	0	0	0	0	0	0	200	903	0	0	0	0	0	0	0	603	903	0
419	4	0	0	0	0	0	0	200	300	0	0	0	0	0	0	0	200	903	0	0	0	0	0	0	0	603	903	0
419	5	0	0	0	0	0	0	200	300	0	0	0	0	0	0	0	200	903	0	0	0	0	0	0	0	603	903	0
419	6	0	0	0	0	0	0	200	300	0	0	0	0	0	0	0	200	903	0	0	0	0	0	0	0	603	903	0
419	7	0	0	0	0	0	0	200	300	0	0	0	0	0	0	0	200	903	0	0	0	0	0	0	0	603	903	0
419	8	0	0	0	0	0	0	200	300	0	0	0	0	0	0	0	200	903	0	0	0	0	0	0	0	603	903	0
419	9	0	0	0	0	0	0	200	300	0	0	0	0	0	0	0	200	903	0	0	0	0	0	0	0	603	903	0
420	0	0	0	0	0	0	0	200	300	0	0	0	0	0	0	0	200	903	0	0	0	0	0	0	0	603	903	0
420	1	0	0	0	0	0	0	200	300	0	0	0	0	0	0	0	200	903	0	0	0	0	0	0	0	603	903	0
420	2	0	0	0	0	0	0	200	300	0	0	0	0	0	0	0	200	903	0	0	0	0	0	0	0	603	903	0
420	3	0	0	0	0	0	0	200	300	0	0	0	0	0	0	0	200	903	0	0	0	0	0	0	0	603	903	0
420	4	0	0	0	0	0	0	200	300	0	0	0	0	0	0	0	200	903	0	0	0	0	0	0	0	603	903	0
420	5	0	0	0	0	0	0	200	300	0	0	0	0	0	0	0	200	903	0	0	0	0	0	0	0	603	903	0
420	6	0	0	0	0	0	0	200	300	0	0	0	0	0	0	0	200	903	0	0	0	0	0	0	0	603	903	0
420	7	0	0	0	0	0	0	200	300	0	0	0	0	0	0	0	200	903	0	0	0	0	0	0	0	603	903	0
420	8	0	0	0	0	0	0	200	300	0	0	0	0	0	0	0	200	903	0	0	0	0	0	0	0	603	903	0
420	9	0	0	0	0	0	0	200	300	0	0	0	0	0	0	0	200	903	0	0	0	0	0	0	0	603	903	0
421	0	0	0	0	0	0	0	200	300	0	0	0	0	0	0	0	200	903	0	0	0	0	0	0	0	603	903	0
421	1	0	0	0	0	0	0	200	300	0	0	0	0	0	0	0	200	903	0	0	0	0	0	0	0	603	903	0
421	2	0	0	0	0	0	0	200	300	0	0	0	0	0	0	0	200	903	0	0	0	0	0	0	0	603	903	0
421	3	0	0	0	0	0	0	200	300	0	0	0	0	0	0	0	200	903	0	0	0	0	0	0	0	603	903	0
421	4	0	0	0	0	0	0	200	300	0	0	0	0	0	0	0	200	903	0	0	0	0	0	0	0	603	903	0
421	5	0	0	0	0	0	0	200	300	0	0	0	0	0	0	0	200	903	0	0	0	0	0	0	0	603	903	0
421	6	0	0	0	0	0	0	200	300	0	0	0	0	0	0	0	200	903	0	0	0	0	0	0	0	603	903	0
421	7	0	0	0	0	0	0	200	300	0	0	0	0	0	0	0	200	903	0	0	0	0	0	0	0	603	903	0
421	8	0	0	0	0	0	0	200	300	0	0	0	0	0	0	0	200	903	0	0	0	0	0	0	0	603	903	0
421	9	0	0	0	0	0	0	200	300	0	0	0	0	0	0	0	200	903	0	0	0	0	0	0	0	603	903	0
422	0	0	0	0	0	0	0	200	300	0	0	0	0	0	0	0	200	903	0	0	0	0	0	0	0	603	903	0
422	1	0	0	0	0	0	0	200	300	0	0	0	0	0	0	0	200	903	0	0	0	0	0	0	0	603	903	0
422	2	0	0	0	0	0	0	200	300	0	0	0	0	0	0	0	200	903	0	0	0	0	0	0	0	603	903	0
422	3	0	0	0	0	0	0	200	300	0	0	0	0	0	0	0	200	903	0	0	0	0	0	0	0	603	903	0
422	4	0	0	0	0	0	0	200	300	0	0	0	0	0	0	0	200	903	0	0	0	0	0	0	0	603	903	0
422	5	0	0	0	0	0	0	200	300	0	0	0	0	0	0	0	200	903	0	0	0	0	0	0	0	603	903	0
422	6	0	0	0	0	0	0	200	300	0	0	0	0	0	0	0	200	903	0	0	0	0	0	0	0	603	903	0
422	7	0	0	0	0	0	0	200	300	0	0	0	0	0	0	0	200	903	0	0	0	0	0	0	0	603	903	0
422	8	0	0	0	0	0	0	200	300	0	0	0	0	0	0	0	200	903	0	0	0	0	0	0	0	603	903	0
422	9	0	0	0	0	0	0	200	300	0	0	0	0	0	0	0	200	903	0	0	0	0	0	0	0	603	903	0
423	0	0	0	0	0	0	0	200	300	0	0	0	0	0	0	0	200	903	0	0	0	0	0	0	0	603	903	0
423	1	0	0	0	0	0	0	200	300	0	0	0	0	0	0	0	200	903	0	0	0	0	0	0	0	603	903	0
423	2	0	0	0	0	0	0	200	300	0	0	0	0	0	0	0	200	903	0	0	0	0	0	0	0	603	903	0
423	3	0	0	0	0	0	0	200	300	0	0	0	0	0	0	0	200	903	0	0	0	0	0	0	0	603	903	0
423	4	0	0	0	0	0	0	200	300	0	0	0	0	0	0	0	200	903	0	0	0	0	0	0	0	603	903	0
423	5	0	0	0	0	0	0	200	300	0	0	0	0	0	0	0	200	903	0	0	0	0	0	0	0	603	903	0
423	6	0	0	0	0	0	0	200	300	0	0	0	0	0	0	0	200	903	0	0	0	0	0	0	0	603	903	0
423	7	0	0	0	0	0	0	200	300	0	0	0	0	0	0	0	200	903	0	0	0	0	0	0	0	603	903	0
423	8	0	0	0	0	0	0	200	300	0	0	0	0	0	0	0	200	903	0	0	0	0	0	0	0	603	903	0
423	9	0	0	0	0	0	0	200	300	0	0	0	0	0	0	0	200	903	0	0	0	0	0	0	0	603	903	0
424	0	0	0	0	0	0	0	200	300	0	0	0	0	0	0	0	200	903	0	0	0	0	0	0	0	603	903	0
424	1	0	0	0	0	0	0	200	300	0	0	0	0	0	0	0	200	903	0	0	0	0	0	0	0	603	903	0
424	2	0	0	0	0	0	0	200	300	0	0	0	0	0	0	0	200	903	0	0	0	0	0	0	0	603	903	0
424	3	0	0	0	0	0	0	200	300	0	0	0	0	0	0	0	200	903	0	0	0	0	0	0	0	603	903	0
424	4	0	0	0	0	0	0	200	300	0	0	0	0	0	0	0	200	903	0	0	0	0	0	0	0	603	903	0
424	5	0	0	0	0	0	0	200	300	0	0	0	0	0	0	0	200	903	0	0	0	0	0	0	0	603	903	0
424	6	0	0	0	0	0	0	200	300	0	0	0	0	0	0	0	200	903	0	0	0	0	0	0	0	603	903	0
424	7	0	0	0	0	0	0	200	300	0	0	0	0	0	0	0	200	903	0	0	0	0	0	0	0	603	903	0
424	8	0	0	0	0	0	0	200	300	0	0	0	0	0	0	0	200	903	0	0	0	0	0	0	0	603	903	0
424	9	0	0	0	0	0	0	200	300	0	0	0	0	0	0	0	200	903	0	0	0	0	0	0	0	603	903	0
425	0	0	0	0	0	0	0	200	300	0	0	0	0	0	0	0	200	903	0	0	0	0	0	0	0	603	903	0
425	1	0	0	0	0	0	0	200	300	0	0	0	0	0	0	0	200	903	0	0	0	0	0	0	0	603	903	0
425	2	0	0	0	0	0	0	200	300	0	0	0	0	0	0	0	200	903	0	0	0	0	0	0	0	603	903	0
425	3	0	0	0	0	0	0	200	300	0	0	0	0	0	0	0	200	903	0	0	0	0	0	0	0	603	903	0
425	4	0	0	0	0	0	0	200	300	0	0	0	0	0	0	0	200	903	0	0	0	0	0	0	0	603	903	0
425	5	0	0	0	0	0	0	200	300	0	0	0	0	0	0	0	200	903	0	0	0	0	0	0	0	603	903	0
425	6	0	0	0	0	0	0	200	300	0	0	0	0	0	0	0	200	903	0	0	0	0	0	0	0	603	903	0
425	7	0	0	0	0	0	0	200	300	0	0	0	0	0	0	0	200	903	0	0	0	0	0	0	0	603	903	0
425	8	0	0	0	0	0	0	200	300	0	0	0	0	0	0	0	200	903	0	0	0	0	0	0	0	603	903	0
425	9	0	0	0	0	0	0	200	300	0	0	0	0	0	0	0	200	903	0	0	0	0	0	0	0	603	903	0
426	0	0	0	0	0	0	0	200	300	0	0	0	0	0	0	0	200	903	0	0	0	0	0	0	0	603	903	0
426	1	0	0	0	0	0	0	200	300	0	0	0	0	0	0	0	200	903	0	0	0	0	0	0	0	603	903	0
426	2	0	0	0	0	0	0	200	300	0	0	0	0	0	0	0	200	903	0	0	0	0	0	0	0	603	903	0
426	3	0	0	0	0	0	0	200	300	0	0	0	0	0	0	0	200	903	0	0	0	0	0	0	0	603	903	0
426	4	0	0	0	0	0	0	200	300	0	0	0	0	0	0	0	200	903	0	0	0	0	0	0	0	603	903	0
426	5	0	0	0	0	0	0	200	300	0	0	0	0	0	0	0	200	903	0	0	0	0	0	0	0	603	903	0
426	6	0	0	0	0	0	0	200	300	0	0	0	0	0	0	0	200	903	0	0	0	0	0	0	0	603	903	0
426	7	0	0	0	0	0	0	200	300	0	0	0	0	0	0	0	200	903	0	0	0	0	0	0	0	603	903	0
426	8	0	0	0	0	0	0	200	300	0	0	0	0	0	0	0	200	903	0	0	0	0	0	0	0	603	903	0
426	9	0	0	0	0	0	0	200	300	0	0	0	0	0	0	0	200	903	0	0	0	0	0	0	0	603	903	0
427	0	0	0	0	0	0	0	200	300	0	0	0	0	0	0	0	200	903	0	0	0	0	0	0	0	603	903	0
427	1	0	0	0	0	0	0	200	300	0	0	0	0	0	0	0	200	903	0	0	0	0	0	0	0	603	903	0
427	2	0	0	0	0	0	0	200	300	0	0	0	0	0	0	0	200	903	0	0	0	0	0	0	0	603	903	0
427	3	0	0	0	0	0	0	200	300	0	0	0	0	0	0	0	200	903	0	0	0	0	0	0	0	603	903	0
427	4	0	0	0	0	0	0	200	300	0	0	0	0	0	0	0	200	903	0	0	0	0	0	0	0	603	903	0
427	5	0	0	0	0	0	0	200	300	0	0	0	0	0	0	0	200	903	0	0	0	0	0	0	0	603	903	0
427	6	0	0	0	0	0	0	200	300	0	0	0	0	0	0	0	200	903	0	0	0	0	0	0	0	603	903	0
427	7	0	0	0	0	0	0	200	300	0	0	0	0	0	0	0	200	903	0	0	0	0	0	0	0	603	903	0
427	8	0	0	0	0	0	0	200	300	0	0	0	0	0	0	0	200	903	0	0	0	0	0	0	0	603	903	0
427	9	0	0	0	0	0	0	200	300	0	0	0	0	0	0	0	200	903	0	0	0	0	0	0	0	603	903	0
428	0	0	0	0	0	0	0	200	300	0	0	0	0	0	0	0	200	903	0	0	0	0	0	0	0	603	903	0
428	1	0	0	0	0	0	0	200	300	0	0	0	0	0	0	0	200	903	0	0	0	0	0	0	0	603	903	0
428	2	0	0	0	0	0	0	200	300	0	0	0	0	0	0	0	200	903	0	0	0	0	0	0	0	603	903	0
428	3	0	0	0	0	0	0	200	300	0	0	0	0	0	0	0	200	903	0	0	0	0	0	0	0	603	903	0
428	4	0	0	0	0	0	0	200	300	0	0	0	0	0	0	0	200	903	0	0	0	0	0	0	0	603	903	0
428	5	0	0	0	0	0	0	200	300	0	0	0	0	0	0	0	200	903	0	0	0	0	0	0	0	603	903	0
428	6	0	0	0	0	0	0	200	300	0	0	0	0	0	0	0	200	903	0	0	0	0	0	0	0	603	903	0
428	7	0	0	0	0	0	0	200	300	0	0	0	0	0	0	0	200	903	0	0	0	0	0	0	0	603	903	0
428	8	0	0	0	0	0	0	200	300	0	0	0	0	0	0	0	200	903	0	0	0	0	0	0	0	603	903	0
428	9	0	0	0	0	0	0	200	300	0	0	0	0	0	0	0	200	903	0	0	0	0	0	0	0	603	903	0
429	0	0	0	0	0	0	0	200	300	0	0	0	0	0	0	0	200	903	0	0	0	0	0	0	0	603	903	0
429	1	0	0	0	0	0	0	200	300	0	0	0	0	0	0	0	200	903	0	0	0	0	0	0	0	603	903	0
429	2	0	0	0	0	0	0	200	300	0	0	0	0	0	0	0	200	903	0	0	0	0	0	0	0	603	903	0
429	3	0	0	0	0	0	0	200	300	0	0	0	0	0	0	0	200	903	0	0	0	0	0	0	0	603	903	0
429	4	0	0	0	0	0	0	200	300	0	0	0	0	0	0	0	200	903	0	0	0	0	0	0	0	603	903	0
429	5	0	0	0	0	0	0	200	300	0	0	0	0	0	0	0	200	903	0	0	0	0	0	0	0	603	903	0
429	6	0	0	0	0	0	0	200	300	0	0	0	0	0	0	0	200	903	0	0	0	0	0	0	0	603	903	0
429	7	0	0	0	0	0	0	200	300	0	0	0	0	0	0	0	200	903	0	0	0	0	0	0	0	603	903	0
429	8	0	0	0	0	0	0	200	300	0	0	0	0	0	0	0	200	903	0	0	0	0	0	0	0	603	903	0
429	9	0	0	0	0	0	0	200	300	0	0	0	0	0	0	0	200	903	0	0	0	0	0	0	0	603	903	0
430	0	0	0	0	0	0	0	200	300	0	0	0	0	0	0	0	200	903	0	0	0	0	0	0	0	603	903	0
430	1	0	0	0	0	0	0	200	300	0	0	0	0	0	0	0	200	903	0	0	0	0	0	0	0	603	903	0
430	2	0	0	0	0	0	0	200	300	0	0	0	0	0	0	0	200	903	0	0	0	0	0	0	0	603	903	0
430	3	0	0	0	0	0	0	200	300	0	0	0	0	0	0	0	200	903	0	0	0	0	0	0	0	603	903	0
430	4	0	0	0	0	0	0	200	300	0	0	0	0	0	0	0	200	903	0	0	0	0	0	0	0	603	903	0
430	5	0	0	0	0	0	0	200	300	0	0	0	0	0	0	0	200	903	0	0	0	0	0	0	0	603	903	0
430	6	0	0	0	0	0	0	200	300	0	0	0	0	0	0	0	200	903	0	0	0	0	0	0	0	603	903	0
430	7	0	0	0	0	0	0	200	300	0	0	0	0	0	0	0	200	903	0	0	0	0	0	0	0	603	903	0
430	8	0	0	0	0	0	0	200	300	0	0	0	0	0	0	0	200	903	0	0	0	0	0	0	0	603	903	0
430	9	0	0	0	0	0	0	200	300	0	0	0	0	0	0	0	200	903	0	0	0	0	0	0	0	603	903	0
431	0	0	0	0	0	0	0	200	300	0	0	0	0	0	0	0	200	903	0	0	0	0	0	0	0	603	903	0
431	1	0	0	0	0	0	0	200	300	0	0	0	0	0	0	0	200	903	0	0	0	0	0	0	0	603	903	0
431	2	0	0	0	0	0	0	200	300	0	0	0	0	0	0	0	200	903	0	0	0	0	0	0	0	603	903	0
431	3	0	0	0	0	0	0	200	300	0	0	0	0	0	0	0	200	903	0	0	0	0	0	0	0	603	903	0
431	4	0	0	0	0	0	0	200	300	0	0	0	0	0	0	0	200	903	0	0	0	0	0	0	0	603	903	0
431	5	0	0	0	0	0	0	200	300	0	0	0	0	0	0	0	200	903	0	0	0	0	0	0	0	603	903	0
431	6	0	0	0	0	0	0	200	300	0	0	0	0	0	0	0	200	903	0	0	0	0	0	0	0	603	903	0
431	7	0	0	0	0	0	0	200	300	0	0	0	0	0	0	0	200	903	0	0	0	0	0	0	0	603	903	0
431	8	0	0	0	0	0	0	200	300	0	0	0	0	0	0	0	200	903	0	0	0	0	0	0	0	603	903	0
431	9	0	0	0	0	0	0	200	300	0	0	0	0	0	0	0	200	903	0	0	0	0	0	0	0	603	903	0
432	0	0	0	0	0	0	0	200	300	0	0	0	0	0	0	0	200	903	0	0	0	0	0	0	0	603	903	0
432	1	0	0	0	0	0	0	200	300	0	0	0	0	0	0	0	200	903	0	0	0	0	0	0	0	603	903	0
432	2	0	0	0	0	0	0	200	300	0	0	0	0	0	0	0	200	903	0	0	0	0	0	0	0	603	903	0
432	3	0	0	0	0	0	0	200	300	0	0	0	0	0	0	0	200	903	0	0	0	0	0	0	0	603	903	0
432	4	0	0	0	0	0	0	200	300	0	0	0	0	0	0	0	200	903	0	0	0	0	0	0	0	603	903	0
432	5	0	0	0	0	0	0	200	300	0	0	0	0	0	0	0	200	903	0	0	0	0	0	0	0	603	903	0
432	6	0	0	0	0	0	0	200	300	0	0	0	0	0	0	0	200	903	0	0	0	0	0	0	0	603	903	0
432	7	0	0	0	0	0	0	200	300	0	0	0	0	0	0	0	200	903	0	0	0	0	0	0	0	603	903	0
432	8	0	0	0	0	0	0	200	300	0	0	0	0	0	0	0	200	903	0	0	0	0	0	0	0	603	903	0
432	9	0	0	0	0	0	0	200	300	0	0	0	0	0	0	0	200	903	0	0	0	0	0	0	0	603	903	0
433	0	0	0	0	0	0	0	200	300	0	0	0	0	0	0	0	200	903	0	0	0	0	0	0	0	603	903	0
433	1	0	0	0	0	0	0	200	300	0	0	0	0	0	0	0	200	903	0	0	0	0	0	0	0	603	903	0
433	2	0	0	0	0	0	0	200	300	0	0	0	0	0	0	0	200	903	0	0	0	0	0	0	0	603	903	0
433	3	0	0	0	0	0	0	200	300	0	0	0	0	0	0	0	200	903	0	0	0	0	0	0	0	603	903	0
433	4	0	0	0	0	0	0	200	300	0	0	0	0	0	0	0	200	903	0	0	0	0	0	0	0	603	903	0
433	5	0	0	0	0	0	0	200	300	0	0	0	0	0	0	0	200	903	0	0	0	0	0	0	0	603	903	0
433	6	0	0	0	0	0	0	200	300	0	0	0	0	0	0	0	200	903	0	0	0	0	0	0	0	603	903	0
433	7	0	0	0	0	0	0	200	300	0	0	0	0	0	0	0	200	903	0	0	0	0	0	0	0	603	903	0
433	8	0	0	0	0	0	0	200	300	0	0	0	0	0	0	0	200	903	0	0	0	0	0	0	0	603	903	0
433	9	0	0	0	0	0	0	200	300	0	0	0	0	0	0	0	200	903	0	0	0	0	0	0	0	603	903	0
434	0	0	0	0	0	0	0	200	300	0	0	0	0	0	0	0	200	903	0	0	0	0	0	0	0	603	903	0
434	1	0	0	0	0	0	0	200	300	0	0	0	0	0	0	0	200	903	0	0	0	0	0	0	0	603	903	0
434	2	0	0	0	0	0	0	200	300	0	0	0	0	0	0	0	200	903	0	0	0	0	0	0	0	603	903	0
434	3	0	0	0	0	0	0	200	300	0	0	0	0	0	0	0	200	903	0	0	0	0	0	0	0	603	903	0
434	4	0	0	0	0	0	0	200	300	0	0	0	0	0	0	0	200	903	0	0	0	0	0	0	0	603	903	0
434	5	0	0	0	0	0	0	200	300	0	0	0	0	0	0	0	200	903	0	0	0	0	0	0	0	603	903	0
434	6	0	0	0	0	0	0	200	300	0	0	0	0	0	0	0	200	903	0	0	0	0	0	0	0	603	903	0
434	7	0	0	0	0	0	0	200	300	0	0	0	0	0	0	0	200	903	0	0	0	0	0	0	0	603	903	0
434	8	0	0	0	0	0	0	200	300	0	0	0	0	0	0	0	200	903	0	0	0	0	0	0	0	603	903	0
434	9	0	0	0	0	0	0	200	300	0	0	0	0	0	0	0	200	903	0	0	0	0	0	0	0	603	903	0
435	0	0	0	0	0	0	0	200	300	0	0	0	0	0	0	0	200	903	0	0	0	0	0	0	0	603	903	0
435	1	0	0	0	0	0	0	200	300	0	0	0	0	0	0	0	200	903	0	0	0	0	0	0	0	603	903	0
435	2	0	0	0	0	0	0	200	300	0	0	0	0	0	0	0	200	903	0	0	0	0	0	0	0	603	903	0
435	3	0	0	0	0	0	0	200	300	0	0	0	0	0	0	0	200	903	0	0	0	0	0	0	0	603	903	0
435	4	0	0	0	0	0	0	200	300	0	0	0	0	0	0	0	200	903	0	0	0	0	0	0	0	603	903	0
435	5	0	0	0	0	0	0	200	300	0	0	0	0	0	0	0	200	903	0	0	0	0	0	0	0	603	903	0
435	6	0	0	0	0	0	0	200	300	0	0	0	0	0	0	0	200	903	0	0	0	0	0	0	0	603	903	0
435	7	0	0	0	0	0	0	200	300	0	0	0	0	0	0	0	200	903	0	0	0	0	0	0	0	603	903	0
435	8	0	0	0	0	0	0	200	300	0	0	0	0	0	0	0	200	903	0	0	0	0	0	0	0	603	903	0
435	9	0	0	0	0	0	0	200	300	0	0	0	0	0	0	0	200	903	0	0	0	0	0	0	0	603	903	0
436	0	0	0	0	0	0	0	200	300	0	0	0	0	0	0	0	200	903	0	0	0	0	0	0	0	603	903	0
436	1	0	0	0	0	0	0	200	300	0	0	0	0	0	0	0	200	903	0	0	0	0	0	0	0	603	903	0
436	2	0	0	0	0	0	0	200	300	0	0	0	0	0	0	0	200	903	0	0	0	0	0	0	0	603	903	0
436	3	0	0	0	0	0	0	200	300	0	0	0	0	0	0	0	200	903	0	0	0	0	0	0	0	603	903	0
436	4	0	0	0	0	0	0	200	300	0	0	0	0	0	0	0	200	903	0	0	0	0	0	0	0	603	903	0
436	5	0	0	0	0	0	0	200	300	0	0	0	0	0	0	0	200	903	0	0	0	0	0	0	0	603	903	0
436	6	0	0	0	0	0	0	200	300	0	0	0	0	0	0	0	200	903	0	0	0	0	0	0	0	603	903	0
436	7	0	0	0	0	0	0	200	300	0	0	0	0	0	0	0	200	903	0	0	0	0	0	0	0	603	903	0
436	8	0	0	0	0	0	0	200	300	0	0	0	0	0	0	0	200	903	0	0	0	0	0	0	0	603	903	0
436	9	0	0	0	0	0	0	200	300	0	0	0	0	0	0	0	200	903	0	0	0	0	0	0	0	603	903	0
437	0	0	0	0	0	0	0	200	300	0	0	0	0	0	0	0	200	903	0	0	0	0	0	0	0	603	903	0
437	1	0	0	0	0	0	0	200	300	0	0	0	0	0	0	0	200	903	0	0	0	0	0	0	0	603	903	0
437	2	0	0	0	0	0	0	200	300	0	0	0	0	0	0	0	200	903	0	0	0	0	0	0	0	603	903	0
437	3	0	0	0	0	0	0	200	300	0	0	0	0	0	0	0	200	903	0	0	0	0	0	0	0	603	903	0
437	4	0	0	0	0	0	0	200	300	0	0	0	0	0	0	0	200	903	0	0	0	0	0	0	0	603	903	0
437	5	0	0	0	0	0	0	200	300	0	0	0	0	0	0	0	200	903	0	0	0	0	0	0	0	603	903	0
437	6	0	0	0	0	0	0	200	300	0	0	0	0	0	0	0	200	903	0	0	0	0	0	0	0	603	903	0
437	7	0	0	0	0	0	0	200	300	0	0	0	0	0	0	0	200	903	0	0	0	0	0	0	0	603	903	0
437	8	0	0	0	0	0	0	200	300	0	0	0	0	0	0	0	200	903	0	0	0	0	0	0	0	603	903	0
437	9	0	0	0	0	0	0	200	300	0	0	0	0	0	0	0	200	903	0	0	0	0	0	0	0	603	903	0
438	0	0	0	0	0	0	0	200	300	0	0	0	0	0	0	0	200	903	0	0	0	0	0	0	0	603	903	0
438	1	0	0	0	0	0	0	200	300	0	0	0	0	0	0	0	200	903	0	0	0	0	0	0	0	603	903	0
438	2	0	0	0	0	0	0	200	300	0	0	0	0	0	0	0	200	903	0	0	0	0	0	0	0	603	903	0
438	3	0	0	0	0	0	0	200	300	0	0	0	0	0	0	0	200	903	0	0	0	0	0	0	0	603	903	0
438	4	0	0	0	0	0	0	200	300	0	0	0	0	0	0	0	200	903	0	0	0	0	0	0	0	603	903	0
438	5	0	0	0	0	0	0	200	300	0	0	0	0	0	0	0	200	903	0	0	0	0	0	0	0	603	903	0
438	6	0	0	0	0	0	0	200	300	0	0	0	0	0	0	0	200	903	0	0	0	0	0	0	0	603	903	0
438	7	0	0	0	0	0	0	200	300	0	0	0	0	0	0	0	200	903	0	0	0	0	0	0	0	603	903	0
438	8	0	0	0	0	0	0	200	300	0	0	0	0	0	0	0	200	903	0	0	0	0	0	0	0	603	903	0
438	9	0	0	0	0	0	0	200	300	0	0	0	0	0	0	0	200	903	0	0	0	0	0	0	0	603	903	0
439	0	0	0	0	0	0	0	200	300	0	0	0	0	0	0	0	200	903	0	0	0	0	0	0	0	603	903	0
439	1	0	0	0	0	0	0	200	300	0	0	0	0	0	0	0	200	903	0	0	0	0	0	0	0	603	903	0
439	2	0	0	0	0	0	0	200	300	0	0	0	0	0	0	0	200	903	0	0	0	0	0	0	0	603	903	0
439	3	0	0	0	0	0	0	200	300	0	0	0	0	0	0	0	200	903	0	0	0	0	0	0	0	603	903	0
439	4	0	0	0	0	0	0	200	300	0	0	0	0	0	0	0	200	903	0	0	0	0	0	0	0	603	903	0
439	5	0	0	0	0	0	0	200	300	0	0	0	0	0	0	0	200	903	0	0	0	0	0	0	0	603	903	0
439	6	0	0	0	0	0	0	200	300	0	0	0	0	0	0	0	200	903	0	0	0	0	0	0	0	603	903	0
439	7	0	0	0	0	0	0	200	300	0	0	0	0	0	0	0	200	903	0	0	0	0	0	0	0	603	903	0
439	8	0	0	0	0	0	0	200	300	0	0	0	0	0	0	0	200	903	0	0	0	0	0	0	0	603	903	0
439	9	0	0	0	0	0	0	200	300	0	0	0	0	0	0	0	200	903	0	0	0	0	0	0	0	603	903	0
440	0	0	0	0	0	0	0	200	300	0	0	0	0	0	0	0	200	903	0	0	0	0	0	0	0	603	903	0
440	1	0	0	0	0	0	0	200	300	0	0	0	0	0	0	0	200	903	0	0	0	0	0	0	0	603	903	0
440	2	0	0	0	0	0	0	200	300	0	0	0	0	0	0	0	200	903	0	0	0	0	0	0	0	603	903	0
440	3	0	0	0	0	0	0	200	300	0	0	0	0	0	0	0	200	903	0	0	0	0	0	0	0	603	903	0
440	4	0	0	0	0	0	0	200	300	0	0	0	0	0	0	0	200	903	0	0	0	0	0	0	0	603	903	0
440	5	0	0	0	0	0	0	200	300	0	0	0	0	0	0	0	200	903	0	0	0	0	0	0	0	603	903	0
440	6	0	0	0	0	0	0	200	300	0	0	0	0	0	0	0	200	903	0	0	0	0	0	0	0	603	903	0
440	7	0	0	0	0	0	0	200	300	0	0	0	0	0	0	0	200	903	0	0	0	0	0	0	0	603	903	0
440	8	0	0	0	0	0	0	200	300	0	0	0	0	0	0	0	200	903	0	0	0	0	0	0	0	603	903	0
440	9	0	0	0	0	0	0	200	300	0	0	0	0	0	0	0	200	903	0	0	0	0	0	0	0	603	903	0
441	0	0	0	0	0	0	0	200	300	0	0	0	0	0	0	0	200	903	0	0	0	0	0	0	0	603	903	0
441	1	0	0	0	0	0	0	200	300	0	0	0	0	0	0	0	200	903	0	0	0	0	0	0	0	603	903	0
441	2	0	0	0	0	0	0	200	300	0	0	0	0	0	0	0	200	903	0	0	0	0	0	0	0	603	903	0
441	3	0	0	0	0	0	0	200	300	0	0	0	0	0	0	0	200	903	0	0	0	0	0	0	0	603	903	0
441	4	0	0	0	0	0	0	200	300	0	0	0	0	0	0	0	200	903	0	0	0	0	0	0	0	603	903	0
441	5	0	0	0	0	0	0	200	300	0	0	0	0	0	0	0	200	903	0	0	0	0	0	0	0	603	903	0
441	6	0	0	0	0	0	0	200	300	0	0	0	0	0	0	0	200	903	0	0	0	0	0	0	0	603	903	0
441	7	0	0	0	0	0	0	200	300	0	0	0	0	0	0	0	200	903	0	0	0	0	0	0	0	603	903	0
441	8	0	0	0	0	0	0	200	300	0	0	0	0	0	0	0	200	903	0	0	0	0	0	0	0	603	903	0
441	9	0	0	0	0	0	0	200	300	0	0	0	0	0	0	0	200	903	0	0	0	0	0	0	0	603	903	0
442	0	0	0	0	0	0	0	200	300	0	0	0	0	0	0	0	200	903	0	0	0	0	0	0	0	603	903	0
442	1	0	0	0	0	0	0	200	300	0	0	0	0	0	0	0	200	903	0	0	0	0	0	0	0	603	903	0
442	2	0	0	0	0	0	0	200	300	0	0	0	0	0	0	0	200	903	0	0	0	0	0	0	0	603	903	0
442	3	0	0	0	0	0	0	200	300	0	0	0	0	0	0	0	200	903	0	0	0	0	0	0	0	603	903	0
442	4	0	0	0	0	0	0	200	300	0	0	0	0	0	0	0	200	903	0	0	0	0	0	0	0	603	903	0
442	5	0	0	0	0	0	0	200	300	0	0	0	0	0	0	0	200	903	0	0	0	0	0	0	0	603	903	0
442	6	0	0	0	0	0	0	200	300	0	0	0	0	0	0	0	200	903	0	0	0	0	0	0	0	603	903	0
442	7	0	0	0	0	0	0	200	300	0	0	0	0	0	0	0	200	903	0	0	0	0	0	0	0	603	903	0
442	8	0	0	0	0	0	0	200	300	0	0	0	0	0	0	0	200	903	0	0	0	0	0	0	0	603	903	0
442	9	0	0	0	0	0	0	200	300	0	0	0	0	0	0	0	200	903	0	0	0	0	0	0	0	603	903	0
443	0	0	0	0	0	0	0	200	300	0	0	0	0	0	0	0	200	903	0	0	0	0	0	0	0	603	903	0
443	1	0	0	0	0	0	0	200	300	0	0	0	0	0	0	0	200	903	0	0	0	0	0	0	0	603	903	0
443	2	0	0	0	0	0	0	200	300	0	0	0	0	0	0	0	200	903	0	0	0	0	0	0	0	603	903	0
443	3	0	0	0	0	0	0	200	300	0	0	0	0	0	0	0	200	903	0	0	0	0	0	0	0	603	903	0
443	4	0	0	0	0	0	0	200	300	0	0	0	0	0	0	0	200	903	0	0	0	0	0	0	0	603	903	0
443	5	0	0	0	0	0	0	200	300	0	0	0	0	0	0	0	200	903	0	0	0	0	0	0	0	603	903	0
443	6	0	0	0	0	0	0	200	300	0	0	0	0	0	0	0	200	903	0	0	0	0	0	0	0	603	903	0
443	7	0	0	0	0	0	0	200	300	0	0	0	0	0	0	0	200	903	0	0	0	0	0	0	0	603	903	0
443	8	0	0	0	0	0	0	200	300	0	0	0	0	0	0	0	200	903	0	0	0	0	0	0	0	603	903	0
443	9	0	0	0	0	0	0	200	300	0	0	0	0	0	0	0	200	903	0	0	0	0	0	0	0	603	903	0
444	0	0	0	0	0	0	0	200	300	0	0	0	0	0	0	0	200	903	0	0	0	0	0	0	0	603	903	0
444	1	0	0	0	0	0	0	200	300	0	0	0	0	0	0	0	200	903	0	0	0	0	0	0	0	603	903	0
444	2	0	0	0	0	0	0	200	300	0	0	0	0	0	0	0	200	903	0	0	0	0	0	0	0	603	903	0
444	3	0	0	0	0	0	0	200	300	0	0	0	0	0	0	0	200	903	0	0	0	0	0	0	0	603	903	0
444	4	0	0	0	0	0	0	200	300	0	0	0	0	0	0	0	200	903	0	0	0	0	0	0	0	603	903	0
444	5	0	0	0	0	0	0	200	300	0	0	0	0	0	0	0	200	903	0	0	0	0	0	0	0	603	903	0
444	6	0	0	0	0	0	0	200	300	0	0	0	0	0	0	0	200	903	0	0	0	0	0	0	0	603	903	0
444	7	0	0	0	0	0	0	200	300	0	0	0	0	0	0	0	200	903	0	0	0	0	0	0	0	603	903	0
444	8	0	0	0	0	0	0	200	300	0	0	0	0	0	0	0	200	903	0	0	0	0	0	0	0	603	903	0
444	9	0	0	0	0	0	0	200	300	0	0	0	0	0	0	0	200	903	0	0	0	0	0	0	0	603	903	0
445	0	0	0	0	0	0	0	200	300	0	0	0	0	0	0	0	200	903	0	0	0	0	0	0	0	603	903	0
445	1	0	0	0	0	0	0	200	300	0	0	0	0	0	0	0	200	903	0	0	0	0	0	0	0	603	903	0
445	2	0	0	0	0	0	0	200	300	0	0	0	0	0	0	0	200	903	0	0	0	0	0	0	0	603	903	0
445	3	0	0	0	0	0	0	200	300	0	0	0	0	0	0	0	200	903	0	0	0	0	0	0	0	603	903	0
445	4	0	0	0	0	0	0	200	300	0	0	0	0	0	0	0	200	903	0	0	0	0	0	0	0	603	903	0
445	5	0	0	0	0	0	0	200	300	0	0	0	0	0	0	0	200	903	0	0	0	0	0	0	0	603	903	0
445	6	0	0	0	0	0	0	200	300	0	0	0	0	0	0	0	200	903	0	0	0	0	0	0	0	603	903	0
445	7	0	0	0	0	0	0	200	300	0	0	0	0	0	0	0	200	903	0	0	0	0	0	0	0	603	903	0
445	8	0	0	0	0	0	0	200	300	0	0	0	0	0	0	0	200	903	0	0	0	0	0	0	0	603	903	0
445	9	0	0	0	0	0	0	200	300	0	0	0	0	0	0	0	200	903	0	0	0	0	0	0	0	603	903	0
446	0	0	0	0	0	0	0	200	300	0	0	0	0	0	0	0	200	903	0	0	0	0	0	0	0	603	903	0
446	1	0	0	0	0	0	0	200	300	0	0	0	0	0	0	0	200	903	0	0	0	0	0	0	0	603	903	0
446	2	0	0	0	0	0	0	200	300	0	0	0	0	0	0	0	200	903	0	0	0	0	0	0	0	603	903	0
446	3	0	0	0	0	0	0	200	300	0	0	0	0	0	0	0	200	903	0	0	0	0	0	0	0	603	903	0
446	4	0	0	0	0	0	0	200	300	0	0	0	0	0	0	0	200	903	0	0	0	0	0	0	0	603	903	0
446	5	0	0	0	0	0	0	200	300	0	0	0	0	0	0	0	200	903	0	0	0	0	0	0	0	603	903	0
446	6	0	0	0	0	0	0	200	300	0	0	0	0	0	0	0	200	903	0	0	0	0	0	0	0	603	903	0
446	7	0	0	0	0	0	0	200	300	0	0	0	0	0	0	0	200	903	0	0	0	0	0	0	0	603	903	0
446	8	0	0	0	0	0	0	200	300	0	0	0	0	0	0	0	200	903	0	0	0	0	0	0	0	603	903	0
446	9	0	0	0	0	0	0	200	300	0	0	0	0	0	0	0	200	903	0	0	0	0	0	0	0	603	903	0
447	0	0	0	0	0	0	0	200	300	0	0	0	0	0	0	0	200	903	0	0	0	0	0	0	0	603	903	0
447	1	0	0	0	0	0	0	200	300	0	0	0	0	0	0	0	200	903	0	0	0	0	0	0	0	603	903	0
447	2	0	0	0	0	0	0	200	300	0	0	0	0	0	0	0	200	903	0	0	0	0	0	0	0	603	903	0
447	3	0	0	0	0	0	0	200	300	0	0	0	0	0	0	0	200	903	0	0	0	0	0	0	0	603	903	0
447	4	0	0	0	0	0	0	200	300	0	0	0	0	0	0	0	200	903	0	0	0	0	0	0	0	603	903	0
447	5	0	0	0	0	0	0	200	300	0	0	0	0	0	0	0	200	903	0	0	0	0	0	0	0	603	903	0
447	6	0	0	0	0	0	0	200	300	0	0	0	0	0	0	0	200	903	0	0	0	0	0	0	0	603	903	0
447	7	0	0	0	0	0	0	200	300	0	0	0	0	0	0	0	200	903	0	0	0	0	0	0	0	603	903	0
447	8	0	0	0	0	0	0	200	300	0	0	0	0	0	0	0	200	903	0	0	0	0	0	0	0	603	903	0
447	9	0	0	0	0	0	0	200	300	0	0	0	0	0	0	0	200	903	0	0	0	0	0	0	0	603	903	0
448	0	0	0	0	0	0	0	200	300	0	0	0	0	0	0	0	200	903	0	0	0	0	0	0	0	603	903	0
448	1	0	0	0	0	0	0	200	300	0	0	0	0	0	0	0	200	903	0	0	0	0	0	0	0	603	903	0
448	2	0	0	0	0	0	0	200	300	0	0	0	0	0	0	0	200	903	0	0	0	0	0	0	0	603	903	0
448	3	0	0	0	0	0	0	200	300	0	0	0	0	0	0	0	200	903	0	0	0	0	0	0	0	603	903	0
448	4	0	0	0	0	0	0	200	300	0	0	0	0	0	0	0	200	903	0	0	0	0	0	0	0	603	903	0
448	5	0	0	0	0	0	0	200	300	0	0	0	0	0	0	0	200	903	0	0	0	0	0	0	0	603	903	0
448	6	0	0	0	0	0	0	200	300	0	0	0	0	0	0	0	200	903	0	0	0	0	0	0	0	603	903	0
448	7	0	0	0	0	0	0	200	300	0	0	0	0	0	0	0	200	903	0	0	0	0	0	0	0	603	903	0
448	8	0	0	0	0	0	0	200	300	0	0	0	0	0	0	0	200	903	0	0	0	0	0	0	0	603	903	0
448	9	0	0	0	0	0	0	200	300	0	0	0	0	0	0	0	200	903	0	0	0	0	0	0	0	603	903	0
449	0	0	0	0	0	0	0	200	300	0	0	0	0	0	0	0	200	903	0	0	0	0	0	0	0	603	903	0
449	1	0	0	0	0	0	0	200	300	0	0	0	0	0	0	0	200	903	0	0	0	0	0	0	0	603	903	0
449	2	0	0	0	0	0	0	200	300	0	0	0	0	0	0	0	200	903	0	0	0	0	0	0	0	603	903	0
449	3	0	0	0	0	0	0	200	300	0	0	0	0	0	0	0	200	903	0	0	0	0	0	0	0	603	903	0
449	4	0	0	0	0	0	0	200	300	0	0	0	0	0	0	0	200	903	0	0	0	0	0	0	0	603	903	0
449	5	0	0	0	0	0	0	200	300	0	0	0	0	0	0	0	200	903	0	0	0	0	0	0	0	603	903	0
449	6	0	0	0	0	0	0	200	300	0	0	0	0	0	0	0	200	903	0	0	0	0	0	0	0	603	903	0
449	7	0	0	0	0	0	0	200	300	0	0	0	0	0	0	0	200	903	0	0	0	0	0	0	0	603	903	0
449	8	0	0	0	0	0	0	200	300	0	0	0	0	0	0	0	200	903	0	0	0	0	0	0	0	603	903	0
449	9	0	0	0	0	0	0	200	300	0	0	0	0	0	0	0	200	903	0	0	0	0	0	0	0	603	903	0
450	0	0	0	0	0	0	0	200	300	0	0	0	0	0	0	0	200	903	0	0	0	0	0	0	0	603	903	0
450	1	0	0	0	0	0	0	200	300	0	0	0	0	0	0	0	200	903	0	0	0	0	0	0	0	603	903	0
450	2	0	0	0	0	0	0	200	300	0	0	0	0	0	0	0	200	903	0	0	0	0	0	0	0	603	903	0
450	3	0	0	0	0	0	0	200	300	0	0	0	0	0	0	0	200	903	0	0	0	0	0	0	0	603	903	0
450	4	0	0	0	0	0	0	200	300	0	0	0	0	0	0	0	200	903	0	0	0	0	0	0	0	603	903	0
450	5	0	0	0	0	0	0	200	300	0	0	0	0	0	0	0	200	903	0	0	0	0	0	0	0	603	903	0
450	6	0	0	0	0	0	0	200	300	0	0	0	0	0	0	0	200	903	0	0	0	0	0	0	0	603	903	0
450	7	0	0	0	0	0	0	200	300	0	0	0	0	0	0	0	200	903	0	0	0	0	0	0	0	603	903	0
450	8	0	0	0	0	0	0	200	300	0	0	0	0	0	0	0	200	903	0	0	0	0	0	0	0	603	903	0
450	9	0	0	0	0	0	0	200	300	0	0	0	0	0	0	0	200	903	0	0	0	0	0	0	0	603	903	0
451	0	0	0	0	0	0	0	200	300	0	0	0	0	0	0	0	200	903	0	0	0	0	0	0	0	603	903	0
451	1	0	0	0	0	0	0	200	300	0	0	0	0	0	0	0	200	903	0	0	0	0	0	0	0	603	903	0
451	2	0	0	0	0	0	0	200	300	0	0	0	0	0	0	0	200	903	0	0	0	0	0	0	0	603	903	0
451	3	0	0	0	0	0	0	200	300	0	0	0	0	0	0	0	200	903	0	0	0	0	0	0	0	603	903	0
451	4	0	0	0	0	0	0	200	300	0	0	0	0	0	0	0	200	903	0	0	0	0	0	0	0	603	903	0
451	5	0	0	0	0	0	0	200	300	0	0	0	0	0	0	0	200	903	0	0	0	0	0	0	0	603	903	0
451	6	0	0	0	0	0	0	200	300	0	0	0	0	0	0	0	200	903	0	0	0	0	0	0	0	603	903	0
451	7	0	0	0	0	0	0	200	300	0	0	0	0	0	0	0	200	903	0	0	0	0	0	0	0	603	903	0
451	8	0	0	0	0	0	0	200	300	0	0	0	0	0	0	0	200	903	0	0	0	0	0	0	0	603	903	0
451	9	0	0	0	0	0	0	200	300	0	0	0	0	0	0	0	200	903	0	0	0	0	0	0	0	603	903	0
452	0	0	0	0	0	0	0	200	300	0	0	0	0	0	0	0	200	903	0	0	0	0	0	0	0	603	903	0
452	1	0	0	0	0	0	0	200	300	0	0	0	0	0	0	0	200	903	0	0	0	0	0	0	0	603	903	0
452	2	0	0	0	0	0	0	200	300	0	0	0	0	0	0	0	200	903	0	0	0	0	0	0	0	603	903	0
452	3	0	0	0	0	0	0	200	300	0	0	0	0	0	0	0	200	903	0	0	0	0	0	0	0	603	903	0
452	4	0	0	0	0	0	0	200	300	0	0	0	0	0	0	0	200	903	0	0	0	0	0	0	0	603	903	0
452	5	0	0	0	0	0	0	200	300	0	0	0	0	0	0	0	200	903	0	0	0	0	0	0	0	603	903	0
452	6	0	0	0	0	0	0	200	300	0	0	0	0	0	0	0	200	903	0	0	0	0	0	0	0	603	903	0
452	7	0	0	0	0	0	0	200	300	0	0	0	0	0	0	0	200	903	0	0	0	0	0	0	0	603	903	0
452	8	0	0	0	0	0	0	200	300	0	0	0	0	0	0	0	200	903	0	0	0	0	0	0	0	603	903	0
452	9	0	0	0	0	0	0	200	300	0	0	0	0	0	0	0	200	903	0	0	0	0	0	0	0	603	903	0
453	0	0	0	0	0	0	0	200	300	0	0	0	0	0	0	0	200	903	0	0	0	0	0	0	0	603	903	0
453	1	0	0	0	0	0	0	200	300	0	0	0	0	0	0	0	200	903	0	0	0	0	0	0	0	603	903	0
453	2	0	0	0	0	0	0	200	300	0	0	0	0	0	0	0	200	903	0	0	0	0	0	0	0	603	903	0
453	3	0	0	0	0	0	0	200	300	0	0	0	0	0	0	0	200	903	0	0	0	0	0	0	0	603	903	0
453	4	0	0	0	0	0	0	200	300	0	0	0	0	0	0	0	200	903	0	0	0	0	0	0	0	603	903	0
453	5	0	0	0	0	0	0	200	300	0	0	0	0	0	0	0	200	903	0	0	0	0	0	0	0	603	903	0
453	6	0	0	0	0	0	0	200	300	0	0	0	0	0	0	0	200	903	0	0	0	0	0	0	0	603	903	0
453	7	0	0	0	0	0	0	200	300	0	0	0	0	0	0	0	200	903	0	0	0	0	0	0	0	603	903	0
453	8	0	0	0	0	0	0	200	300	0	0	0	0	0	0	0	200	903	0	0	0	0	0	0	0	603	903	0
453	9	0	0	0	0	0	0	200	300	0	0	0	0	0	0	0	200	903	0	0	0	0	0	0	0	603	903	0
454	0	0	0	0	0	0	0	200	300	0	0	0	0	0	0	0	200	903	0	0	0	0	0	0	0	603	903	0
454	1	0	0	0	0	0	0	200	300	0	0	0	0	0	0	0	200	903	0	0	0	0	0	0	0	603	903	0
454	2	0	0	0	0	0	0	200	300	0	0	0	0	0	0	0	200	903	0	0	0	0	0	0	0	603	903	0
454	3	0	0	0	0	0	0	200	300	0	0	0	0	0	0	0	200	903	0	0	0	0	0	0	0	603	903	0
454	4	0	0	0	0	0	0	200	300	0	0	0	0	0	0	0	200	903	0	0	0	0	0	0	0	603	903	0
454	5	0	0	0	0	0	0	200	300	0	0	0	0	0	0	0	200	903	0	0	0	0	0	0	0	603	903	0
454	6	0	0	0	0	0	0	200	300	0	0	0	0	0	0	0	200	903	0	0	0	0	0	0	0	603	903	0
454	7	0	0	0	0	0	0	200	300	0	0	0	0	0	0	0	200	903	0	0	0	0	0	0	0	603	903	0
454	8	0	0	0	0	0	0	200	300	0	0	0	0	0	0	0	200	903	0	0	0	0	0	0	0	603	903	0
454	9	0	0	0	0	0	0	200	300	0	0	0	0	0	0	0	200	903	0	0	0	0	0	0	0	603	903	0
455	0	0	0	0	0	0	0	200	300	0	0	0	0	0	0	0	200	903	0	0	0	0	0	0	0	603	903	0
455	1	0	0	0	0	0	0	200	300	0	0	0	0	0	0	0	200	903	0	0	0	0	0	0	0	603	903	0
455	2	0	0	0	0	0	0	200	300	0	0	0	0	0	0	0	200	903	0	0	0	0	0	0	0	603	903	0
455	3	0	0	0	0	0	0	200	300	0	0	0	0	0	0	0	200	903	0	0	0	0	0	0	0	603	903	0
455	4	0	0	0	0	0	0	200	300	0	0	0	0	0	0	0	200	903	0	0	0	0	0	0	0	603	903	0
455	5	0	0	0	0	0	0	200	300	0	0	0	0	0	0	0	200	903	0	0	0	0	0	0	0	603	903	0
455	6	0	0	0	0	0	0	200	300	0	0	0	0	0	0	0	200	903	0	0	0	0	0	0	0	603	903	0
455	7	0	0	0	0	0	0	200	300	0	0	0	0	0	0	0	200	903	0	0	0	0	0	0	0	603	903	0
455	8	0	0	0	0	0	0	200	300	0	0	0	0	0	0	0	200	903	0	0	0	0	0	0	0	603	903	0
455	9	0	0	0	0	0	0	200	300	0	0	0	0	0	0	0	200	903	0	0	0	0	0	0	0	603	903	0
456	0	0	0	0	0	0	0	200	300	0	0	0	0	0	0	0	200	903	0	0	0	0	0	0	0	603	903	0
456	1	0	0	0	0	0	0	200	300	0	0	0	0	0	0	0	200	903	0	0	0	0	0	0	0	603	903	0
456	2	0	0	0	0	0	0	200	300	0	0	0	0	0	0	0	200	903	0	0	0	0	0	0	0	603	903	0
456	3	0	0	0	0	0	0	200	300	0	0	0	0	0	0	0	200	903	0	0	0	0	0	0	0	603	903	0
456	4	0	0	0	0	0	0	200	300	0	0	0	0	0	0	0	200	903	0	0	0	0	0	0	0	603	903	0
456	5	0	0	0	0	0	0	200	300	0	0	0	0	0	0	0	200	903	0	0	0	0	0	0	0	603	903	0
456	6	0	0	0	0	0	0	200	300	0	0	0	0	0	0	0	200	903	0	0	0	0	0	0	0	603	903	0
456	7	0	0	0	0	0	0	200	300	0	0	0	0	0	0	0	200	903	0	0	0	0	0	0	0	603	903	0
456	8	0	0	0	0	0	0	200	300	0	0	0	0	0	0	0	200	903	0	0	0	0	0	0	0	603	903	0
456	9	0	0	0	0	0	0	200	300	0	0	0	0	0	0	0	200	903	0	0	0	0	0	0	0	603	903	0
457	0	0	0	0	0	0	0	200	300	0	0	0	0	0	0	0	200	903	0	0	0	0	0	0	0	603	903	0
457	1	0	0	0	0	0	0	200	300	0	0	0	0	0	0	0	200	903	0	0	0	0	0	0	0	603	903	0
457	2	0	0	0	0	0	0	200	300	0	0	0	0	0	0	0	200	903	0	0	0	0	0	0	0	603	903	0
457	3	0	0	0	0	0	0	200	300	0	0	0	0	0	0	0	200	903	0	0	0	0	0	0	0	603	903	0
457	4	0	0	0	0	0	0	200	300	0	0	0	0	0	0	0	200	903	0	0	0	0	0	0	0	603	903	0
457	5	0	0	0	0	0	0	200	300	0	0	0	0	0	0	0	200	903	0	0	0	0	0	0	0	603	903	0
457	6	0	0	0	0	0	0	200	300	0	0	0	0	0	0	0	200	903	0	0	0	0	0	0	0	603	903	0
457	7	0	0	0	0	0	0	200	300	0	0	0	0	0	0	0	200	903	0	0	0	0	0	0	0	603	903	0
457	8	0	0	0	0	0	0	200	300	0	0	0	0	0	0	0	200	903	0	0	0	0	0	0	0	603	903	0
457	9	0	0	0	0	0	0	200	300	0	0	0	0	0	0	0	200	903	0	0	0	0	0	0	0	603	903	0
458	0	0	0	0	0	0	0	200	300	0	0	0	0	0	0	0	200	903	0	0	0	0	0	0	0	603	903	0
458	1	0	0	0	0	0	0	200	300	0	0	0	0	0	0	0	200	903	0	0	0	0	0	0	0	603	903	0
458	2	0	0	0	0	0	0	200	300	0	0	0	0	0	0	0	200	903	0	0	0	0	0	0	0	603	903	0
458	3	0	0	0	0	0	0	200	300	0	0	0	0	0	0	0	200	903	0	0	0	0	0	0	0	603	903	0
458	4	0	0	0	0	0	0	200	300	0	0	0	0	0	0	0	200	903	0	0	0	0	0	0	0	603	903	0
458	5	0	0	0	0	0	0	200	300	0	0	0	0	0	0	0	200	903	0	0	0	0	0	0	0	603	903	0
458	6	0	0	0	0	0	0	200	300	0	0	0	0	0	0	0	200	903	0	0	0	0	0	0	0	603	903	0
458	7	0	0	0	0	0	0	200	300	0	0	0	0	0	0	0	200	903	0	0	0	0	0	0	0	603	903	0
458	8	0	0	0	0	0	0	200	300	0	0	0	0	0	0	0	200	903	0	0	0	0	0	0	0	603	903	0
458	9	0	0	0	0	0	0	200	300	0	0	0	0	0	0	0	200	903	0	0	0	0	0	0	0	603	903	0
459	0	0	0	0	0	0	0	200	300	0	0	0	0	0	0	0	200	903	0	0	0	0	0	0	0	603	903	0
459	1	0	0	0	0	0	0	200	300	0	0	0	0	0	0	0	200	903	0	0	0	0	0	0	0	603	903	0
459	2	0	0	0	0	0	0	200	300	0	0	0	0	0	0	0	200	903	0	0	0	0	0	0	0	603	903	0
459	3	0	0	0	0	0	0	200	300	0	0	0	0	0	0	0	200	903	0	0	0	0	0	0	0	603	903	0
459	4	0	0	0	0	0	0	200	300	0	0	0	0	0	0	0	200	903	0	0	0	0	0	0	0	603	903	0
459	5	0	0	0	0	0	0	200	300	0	0	0	0	0	0	0	200	903	0	0	0	0	0	0	0	603	903	0
459	6	0	0	0	0	0	0	200	300	0	0	0	0	0	0	0	200	903	0	0	0	0	0	0	0	603	903	0
459	7	0	0	0	0	0	0	200	300	0	0	0	0	0	0	0	200	903	0	0	0	0	0	0	0	603	903	0
459	8	0	0	0	0	0	0	200	300	0	0	0	0	0	0	0	200	903	0	0	0	0	0	0	0	603	903	0
459	9	0	0	0	0	0	0	200	300	0	0	0	0	0	0	0	200	903	0	0	0	0	0	0	0	603	903	0
460	0	0	0	0	0	0	0	200	300	0	0	0	0	0	0	0	200	903	0	0	0	0	0	0	0	603	903	0
460	1	0	0	0	0	0	0	200	300	0	0	0	0	0	0	0	200	903	0	0	0	0	0	0	0	603	903	0
460	2	0	0	0	0	0	0	200	300	0	0	0	0	0	0	0	200	903	0	0	0	0	0	0	0	603	903	0
460	3	0	0	0	0	0	0	200	300	0	0	0	0	0	0	0	200	903	0	0	0	0	0	0	0	603	903	0
460	4	0	0	0	0	0	0	200	300	0	0	0	0	0	0	0	200	903	0	0	0	0	0	0	0	603	903	0
460	5	0	0	0	0	0	0	200	300	0	0	0	0	0	0	0	200	903	0	0	0	0	0	0	0	603	903	0
460	6	0	0	0	0	0	0	200	300	0	0	0	0	0	0	0	200	903	0	0	0	0	0	0	0	603	903	0
460	7	0	0	0	0	0	0	200	300	0	0	0	0	0	0	0	200	903	0	0	0	0	0	0	0	603	903	0
460	8	0	0	0	0	0	0	200	300	0	0	0	0	0	0	0	200	903	0	0	0	0	0	0	0	603	903	0
460	9	0	0	0	0	0	0	200	300	0	0	0	0	0	0	0	200	903	0	0	0	0	0	0	0	603	903	0
461	0	0	0	0	0	0	0	200	300	0	0	0	0	0	0	0	200	903	0	0	0	0	0	0	0	603	903	0
461	1	0	0	0	0	0	0	200	300	0	0	0	0	0	0	0	200	903	0	0	0	0	0	0	0	603	903	0
461	2	0	0	0	0	0	0	200	300	0	0	0	0	0	0	0	200	903	0	0	0	0	0	0	0	603	903	0
461	3	0	0	0	0	0	0	200	300	0	0	0	0	0	0	0	200	903	0	0	0	0	0	0	0	603	903	0
461	4	0	0	0	0	0	0	200	300	0	0	0	0	0	0	0	200	903	0	0	0	0	0	0	0	603	903	0
461	5	0	0	0	0	0	0	200	300	0	0	0	0	0	0	0	200	903	0	0	0	0	0	0	0	603	903	0
461	6	0	0	0	0	0	0	200	300	0	0	0	0	0	0	0	200	903	0	0	0	0	0	0	0	603	903	0
461	7	0	0	0	0	0	0	200	300	0	0	0	0	0	0	0	200	903	0	0	0	0	0	0	0	603	903	0
461	8	0	0	0	0	0	0	200	300	0	0	0	0	0	0	0	200	903	0	0	0	0	0	0	0	603	903	0
461	9	0	0	0	0	0	0	200	300	0	0	0	0	0	0	0	200	903	0	0	0	0	0	0	0	603	903	0
462	0	0	0	0	0	0	0	200	300	0	0	0	0	0	0	0	200	903	0	0	0	0	0	0	0	603	903	0
462	1	0	0	0	0	0	0	200	300	0	0	0	0	0	0	0	200	903	0	0	0	0	0	0	0	603	903	0
462	2	0	0	0	0	0	0	200	300	0	0	0	0	0	0	0	200	903	0	0	0	0	0	0	0	603	903	0
462	3	0	0	0	0	0	0	200	300	0	0	0	0	0	0	0	200	903	0	0	0	0	0	0	0	603	903	0
462	4	0	0	0	0	0	0	200	300	0	0	0	0	0	0	0	200	903	0	0	0	0	0	0	0	603	903	0
462	5	0	0	0	0	0	0	200	300	0	0	0	0	0	0	0	200	903	0	0	0	0	0	0	0	603	903	0
462	6	0	0	0	0	0	0	200	300	0	0	0	0	0	0	0	200	903	0	0	0	0	0	0	0	603	903	0
462	7	0	0	0	0	0	0	200	300	0	0	0	0	0	0	0	200	903	0	0	0	0	0	0	0	603	903	0
462	8	0	0	0	0	0	0	200	300	0	0	0	0	0	0	0	200	903	0	0	0	0	0	0	0	603	903	0
462	9	0	0	0	0	0	0	200	300	0	0	0	0	0	0	0	200	903	0	0	0	0	0	0	0	603	903	0
463	0	0	0	0	0	0	0	200	300	0	0	0	0	0	0	0	200	903	0	0	0	0	0	0	0	603	903	0
463	1	0	0	0	0	0	0	200	300	0	0	0	0	0	0	0	200	903	0	0	0	0	0	0	0	603	903	0
463	2	0	0	0	0	0	0	200	300	0	0	0	0	0	0	0	200	903	0	0	0	0	0	0	0	603	903	0
463	3	0	0	0	0	0	0	200	300	0	0	0	0	0	0	0	200	903	0	0	0	0	0	0	0	603	903	0
463	4	0	0	0	0	0	0	200	300	0	0	0	0	0	0	0	200	903	0	0	0	0	0	0	0	603	903	0
463	5	0	0	0	0	0	0	200	300	0	0	0	0	0	0	0	200	903	0	0	0	0	0	0	0	603	903	0
463	6	0	0	0	0	0	0	200	300	0	0	0	0	0	0	0	200	903	0	0	0	0	0	0	0	603	903	0
463	7	0	0	0	0	0	0	200	300	0	0	0	0	0	0	0	200	903	0	0	0	0	0	0	0	603	903	0
463	8	0	0	0	0	0	0	200	300	0	0	0	0	0	0	0	200	903	0	0	0	0	0	0	0	603	903	0
463	9	0	0	0	0	0	0	200	300	0	0	0	0	0	0	0	200	903	0	0	0	0	0	0	0	603	903	0
464	0	0	0	0	0	0	0	200	300	0	0	0	0	0	0	0	200	903	0	0	0	0	0	0	0	603	903	0
464	1	0	0	0	0	0	0	200	300	0	0	0	0	0	0	0	200	903	0	0	0	0	0	0	0	603	903	0
464	2	0	0	0	0	0	0	200	300	0	0	0	0	0	0	0	200	903	0	0	0	0	0	0	0	603	903	0
464	3	0	0	0	0	0	0	200	300	0	0	0	0	0	0	0	200	903	0	0	0	0	0	0	0	603	903	0
464	4	0	0	0	0	0	0	200	300	0	0	0	0	0	0	0	200	903	0	0	0	0	0	0	0	603	903	0
464	5	0	0	0	0	0	0	200	300	0	0	0	0	0	0	0	200	903	0	0	0	0	0	0	0	603	903	0
464	6	0	0	0	0	0	0	200	300	0	0	0	0	0	0	0	200	903	0	0	0	0	0	0	0	603	903	0
464	7	0	0	0	0	0	0	200	300	0	0	0	0	0	0	0	200	903	0	0	0	0	0	0	0	603	903	0
464	8	0	0	0	0	0	0	200	300	0	0	0	0	0	0	0	200	903	0	0	0	0	0	0	0	603	903	0
464	9	0	0	0	0	0	0	200	300	0	0	0	0	0	0	0	200	903	0	0	0	0	0	0	0	603	903	0
465	0	0	0	0	0	0	0	200	300	0	0	0	0	0	0	0	200	903	0	0	0	0	0	0	0	603	903	0
465	1	0	0	0	0	0	0	200	300	0	0	0	0	0	0	0	200	903	0	0	0	0	0	0	0	603	903	0
465	2	0	0	0	0	0	0	200	300	0	0	0	0	0	0	0	200	903	0	0	0	0	0	0	0	603	903	0
465	3	0	0	0	0	0	0	200	300	0	0	0	0	0	0	0	200	903	0	0	0	0	0	0	0	603	903	0
465	4	0	0	0	0	0	0	200	300	0	0	0	0	0	0	0	200	903	0	0	0	0	0	0	0	603	903	0
465	5	0	0	0	0	0	0	200	300	0	0	0	0	0	0	0	200	903	0	0	0	0	0	0	0	603	903	0
465	6	0	0	0	0	0	0	200	300	0	0	0	0	0	0	0	200	903	0	0	0	0	0	0	0	603	903	0
465	7	0	0	0	0	0	0	200	300	0	0	0	0	0	0	0	200	903	0	0	0	0	0	0	0	603	903	0
465	8	0	0	0	0	0	0	200	300	0	0	0	0	0	0	0	200	903	0	0	0	0	0	0	0	603	903	0
465	9	0	0	0	0	0	0	200	300	0	0	0	0	0	0	0	200	903	0	0	0	0	0	0	0	603	903	0
466	0	0	0	0	0	0	0	200	300	0	0	0	0	0	0	0	200	903	0	0	0	0	0	0	0	603	903	0
466	1	0	0	0	0	0	0	200	300	0	0	0	0	0	0	0	200	903	0	0	0	0	0	0	0	603	903	0
466	2	0	0	0	0	0	0	200	300	0	0	0	0	0	0	0	200	903	0	0	0	0	0	0	0	603	903	0
466	3	0	0	0	0	0	0	200	300	0	0	0	0	0	0	0	200	903	0	0	0	0	0	0	0	603	903	0
466	4	0	0	0	0	0	0	200	300	0	0	0	0	0	0	0	200	903	0	0	0	0	0	0	0	603	903	0
466	5	0	0	0	0	0	0	200	300	0	0	0	0	0	0	0	200	903	0	0	0	0	0	0	0	603	903	0
466	6	0	0	0	0	0	0	200	300	0	0	0	0	0	0	0	200	903	0	0	0	0	0	0	0	603	903	0
466	7	0	0	0	0	0	0	200	300	0	0	0	0	0	0	0	200	903	0	0	0	0	0	0	0	603	903	0
466	8	0	0	0	0	0	0	200	300	0	0	0	0	0	0	0	200	903	0	0	0	0	0	0	0	603	903	0
466	9	0	0	0	0	0	0	200	300	0	0	0	0	0	0	0	200	903	0	0	0	0	0	0	0	603	903	0
467	0	0	0	0	0	0	0	200	300	0	0	0	0	0	0	0	200	903	0	0	0	0	0	0	0	603	903	0
467	1	0	0	0	0	0	0	200	300	0	0	0	0	0	0	0	200	903	0	0	0	0	0	0	0	603	903	0
467	2	0	0	0	0	0	0	200	300	0	0	0	0	0	0	0	200	903	0	0	0	0	0	0	0	603	903	0
467	3	0	0	0	0	0	0	200	300	0	0	0	0	0	0	0	200	903	0	0	0	0	0	0	0	603	903	0
467	4	0	0	0	0	0	0	200	300	0	0	0	0	0	0	0	200	903	0	0	0	0	0	0	0	603	903	0
467	5	0	0	0	0	0	0	200	300	0	0	0	0	0	0	0	200	903	0	0	0	0	0	0	0	603	903	0
467	6	0	0	0	0	0	0	200	300	0	0	0	0	0	0	0	200	903	0	0	0	0	0	0	0	603	903	0
467	7	0	0	0	0	0	0	200	300	0	0	0	0	0	0	0	200	903	0	0	0	0	0	0	0	603	903	0
467	8	0	0	0	0	0	0	200	300	0	0	0	0	0	0	0	200	903	0	0	0	0	0	0	0	603	903	0
467	9	0	0	0	0	0	0	200	300	0	0	0	0	0	0	0	200	903	0	0	0	0	0	0	0	603	903	0
468	0	0	0	0	0	0	0	200	300	0	0	0	0	0	0	0	200	903	0	0	0	0	0	0	0	603	903	0
468	1	0	0	0	0	0	0	200	300	0	0	0	0	0	0	0	200	903	0	0	0	0	0	0	0	603	903	0
468	2	0	0	0	0	0	0	200	300	0	0	0	0	0	0	0	200	903	0	0	0	0	0	0	0	603	903	0
468	3	0	0	0	0	0	0	200	300	0	0	0	0	0	0	0	200	903	0	0	0	0	0	0	0	603	903	0
468	4	0	0	0	0	0	0	200	300	0	0	0	0	0	0	0	200	903	0	0	0	0	0	0	0	603	903	0
468	5	0	0	0	0	0	0	200	300	0	0	0	0	0	0	0	200	903	0	0	0	0	0	0	0	603	903	0
468	6	0	0	0	0	0	0	200	300	0	0	0	0	0	0	0	200	903	0	0	0	0	0	0	0	603	903	0
468	7	0	0	0	0	0	0	200	300	0	0	0	0	0	0	0	200	903	0	0	0	0	0	0	0	603	903	0
468	8	0	0	0	0	0	0	200	300	0	0	0	0	0	0	0	200	903	0	0	0	0	0	0	0	603	903	0
468	9	0	0	0	0	0	0	200	300	0	0	0	0	0	0	0	200	903	0	0	0	0	0	0	0	603	903	0
469	0	0	0	0	0	0	0	200	300	0	0	0	0	0	0	0	200	903	0	0	0	0	0	0	0	603	903	0
469	1	0	0	0	0	0	0	200	300	0	0	0	0	0	0	0	200	903	0	0	0	0	0	0	0	603	903	0
469	2	0	0	0	0	0	0	200	300	0	0	0	0	0	0	0	200	903	0	0	0	0	0	0	0	603	903	0
469	3	0	0	0	0	0	0	200	300	0	0	0	0	0	0	0	200	903	0	0	0	0	0	0	0	603	903	0
469	4	0	0	0	0	0	0	200	300	0	0	0	0	0	0	0	200	903	0	0	0	0	0	0	0	603	903	0
469	5	0	0	0	0	0	0	200	300	0	0	0	0	0	0	0	200	903	0	0	0	0	0	0	0	603	903	0
469	6	0	0	0	0	0	0	200	300	0	0	0	0	0	0	0	200	903	0	0	0	0	0	0	0	603	903	0
469	7	0	0	0	0	0	0	200	300	0	0	0	0	0	0	0	200	903	0	0	0	0	0	0	0	603	903	0
469	8	0	0	0	0	0	0	200	300	0	0	0	0	0	0	0	200	903	0	0	0	0	0	0	0	603	903	0
469	9	0	0	0	0	0	0	200	300	0	0	0	0	0	0	0	200	903	0	0	0	0	0	0	0	603	903	0
470	0	0	0	0	0	0	0	200	300	0	0	0	0	0	0	0	200	903	0	0	0	0	0	0	0	603	903	0
470	1	0	0	0	0	0	0	200	300	0	0	0	0	0	0	0	200	903	0	0	0	0	0	0	0	603	903	0
470	2	0	0	0	0	0	0	200	300	0	0	0	0	0	0	0	200	903	0	0	0	0	0	0	0	603	903	0
470	3	0	0	0	0	0	0	200	300	0	0	0	0	0	0	0	200	903	0	0	0	0	0	0	0	603	903	0
470	4	0	0	0	0	0	0	200	300	0	0	0	0	0	0	0	200	903	0	0	0	0	0	0	0	603	903	0
470	5	0	0	0	0	0	0	200	300	0	0	0	0	0	0	0	200	903	0	0	0	0	0	0	0	603	903	0
470	6	0	0	0	0	0	0	200	300	0	0	0	0	0	0	0	200	903	0	0	0	0	0	0	0	603	903	0
470	7	0	0	0	0	0	0	200	300	0	0	0	0	0	0	0	200	903	0	0	0	0	0	0	0	603	903	0
470	8	0	0	0	0	0	0	200	300	0	0	0	0	0	0	0	200	903	0	0	0	0	0	0	0	603	903	0
470	9	0	0	0	0	0	0	200	300	0	0	0	0	0	0	0	200	903	0	0	0	0	0	0	0	603	903	0
471	0	0	0	0	0	0	0	200	300	0	0	0	0	0	0	0	200	903	0	0	0	0	0	0	0	603	903	0
471	1	0	0	0	0	0	0	200	300	0	0	0	0	0	0	0	200	903	0	0	0	0	0	0	0	603	903	0
471	2	0	0	0	0	0	0	200	300	0	0	0	0	0	0	0	200	903	0	0	0	0	0	0	0	603	903	0
471	3	0	0	0	0	0	0	200	300	0	0	0	0	0	0	0	200	903	0	0	0	0	0	0	0	603	903	0
471	4	0	0	0	0	0	0	200	300	0	0	0	0	0	0	0	200	903	0	0	0	0	0	0	0	603	903	0
471	5	0	0	0	0	0	0	200	300	0	0	0	0	0	0	0	200	903	0	0	0	0	0	0	0	603	903	0
471	6	0	0	0	0	0	0	200	300	0	0	0	0	0	0	0	200	903	0	0	0	0	0	0	0	603	903	0
471	7	0	0	0	0	0	0	200	300	0	0	0	0	0	0	0	200	903	0	0	0	0	0	0	0	603	903	0
471	8	0	0	0	0	0	0	200	300	0	0	0	0	0	0	0	200	903	0	0	0	0	0	0	0	603	903	0
471	9	0	0	0	0	0	0	200	300	0	0	0	0	0	0	0	200	903	0	0	0	0	0	0	0	603	903	0
472	0	0	0	0	0	0	0	200	300	0	0	0	0	0	0	0	200	903	0	0	0	0	0	0	0	603	903	0
472	1	0	0	0	0	0	0	200	300	0	0	0	0	0	0	0	200	903	0	0	0	0	0	0	0	603	903	0
472	2	0	0	0	0	0	0	200	300	0	0	0	0	0	0	0	200	903	0	0	0	0	0	0	0	603	903	0
472	3	0	0	0	0	0	0	200	300	0	0	0	0	0	0	0	200	903	0	0	0	0	0	0	0	603	903	0
472	4	0	0	0	0	0	0	200	300	0	0	0	0	0	0	0	200	903	0	0	0	0	0	0	0	603	903	0
472	5	0	0	0	0	0	0	200	300	0	0	0	0	0	0	0	200	903	0	0	0	0	0	0	0	603	903	0
472	6	0	0	0	0	0	0	200	300	0	0	0	0	0	0	0	200	903	0	0	0	0	0	0	0	603	903	0
472	7	0	0	0	0	0	0	200	300	0	0	0	0	0	0	0	200	903	0	0	0	0	0	0	0	603	903	0
472	8	0	0	0	0	0	0	200	300	0	0	0	0	0	0	0	200	903	0	0	0	0	0	0	0	603	903	0
472	9	0	0	0	0	0	0	200	300	0	0	0	0	0	0	0	200	903	0	0	0	0	0	0	0	603	903	0
473	0	0	0	0	0	0	0	200	300	0	0	0	0	0	0	0	200	903	0	0	0	0	0	0	0	603	903	0
473	1	0	0	0	0	0	0	200	300	0	0	0	0	0	0	0	200	903	0	0	0	0	0	0	0	603	903	0
473	2	0	0	0	0	0	0	200	300	0	0	0	0	0	0	0	200	903	0	0	0	0	0	0	0	603	903	0
473	3	0	0	0	0	0	0	200	300	0	0	0	0	0	0	0	200	903	0	0	0	0	0	0	0	603	903	0
473	4	0	0	0	0	0	0	200	300	0	0	0	0	0	0	0	200	903	0	0	0	0	0	0	0	603	903	0
473	5	0	0	0	0	0	0	200	300	0	0	0	0	0	0	0	200	903	0	0	0	0	0	0	0	603	903	0
473	6	0	0	0	0	0	0	200	300	0	0	0	0	0	0	0	200	903	0	0	0	0	0	0	0	603	903	0
473	7	0	0	0	0	0	0	200	300	0	0	0	0	0	0	0	200	903	0	0	0	0	0	0	0	603	903	0
473	8	0	0	0	0	0	0	200	300	0	0	0	0	0	0	0	200	903	0	0	0	0	0	0	0	603	903	0
473	9	0	0	0	0	0	0	200	300	0	0	0	0	0	0	0	200	903	0	0	0	0	0	0	0	603	903	0
474	0	0	0	0	0	0	0	200	300	0	0	0	0	0	0	0	200	903	0	0	0	0	0	0	0	603	903	0
474	1	0	0	0	0	0	0	200	300	0	0	0	0	0	0	0	200	903	0	0	0	0	0	0	0	603	903	0
474	2	0	0	0	0	0	0	200	300	0	0	0	0	0	0	0	200	903	0	0	0	0	0	0	0	603	903	0
474	3	0	0	0	0	0	0	200	300	0	0	0	0	0	0	0	200	903	0	0	0	0	0	0	0	603	903	0
474	4	0	0	0	0	0	0	200	300	0	0	0	0	0	0	0	200	903	0	0	0	0	0	0	0	603	903	0
474	5	0	0	0	0	0	0	200	300	0	0	0	0	0	0	0	200	903	0	0	0	0	0	0	0	603	903	0
474	6	0	0	0	0	0	0	200	300	0	0	0	0	0	0	0	200	903	0	0	0	0	0	0	0	603	903	0
474	7	0	0	0	0	0	0	200	300	0	0	0	0	0	0	0	200	903	0	0	0	0	0	0	0	603	903	0
474	8	0	0	0	0	0	0	200	300	0	0	0	0	0	0	0	200	903	0	0	0	0	0	0	0	603	903	0
474	9	0	0	0	0	0	0	200	300	0	0	0	0	0	0	0	200	903	0	0	0	0	0	0	0	603	903	0
475	0	0	0	0	0	0	0	200	300	0	0	0	0	0	0	0	200	903	0	0	0	0	0	0	0	603	903	0
475	1	0	0	0	0	0	0	200	300	0	0	0	0	0	0	0	200	903	0	0	0	0	0	0	0	603	903	0
475	2	0	0	0	0	0	0	200	300	0	0	0	0	0	0	0	200	903	0	0	0	0	0	0	0	603	903	0
475	3	0	0	0	0	0	0	200	300	0	0	0	0	0	0	0	200	903	0	0	0	0	0	0	0	603	903	0
475	4	0	0	0	0	0	0	200	300	0	0	0	0	0	0	0	200	903	0	0	0	0	0	0	0	603	903	0
475	5	0	0	0	0	0	0	200	300	0	0	0	0	0	0	0	200	903	0	0	0	0	0	0	0	603	903	0
475	6	0	0	0	0	0	0	200	300	0	0	0	0	0	0	0	200	903	0	0	0	0	0	0	0	603	903	0
475	7	0	0	0	0	0	0	200	300	0	0	0	0	0	0	0	200	903	0	0	0	0	0	0	0	603	903	0
475	8	0	0	0	0	0	0	200	300	0	0	0	0	0	0	0	200	903	0	0	0	0	0	0	0	603	903	0
475	9	0	0	0	0	0	0	200	300	0	0	0	0	0	0	0	200	903	0	0	0	0	0	0	0	603	903	0
476	0	0	0	0	0	0	0	200	300	0	0	0	0	0	0	0	200	903	0	0	0	0	0	0	0	603	903	0
476	1	0	0	0	0	0	0	200	300	0	0	0	0	0	0	0	200	903	0	0	0	0	0	0	0	603	903	0
476	2	0	0	0	0	0	0	200	300	0	0	0	0	0	0	0	200	903	0	0	0	0	0	0	0	603	903	0
476	3	0	0	0	0	0	0	200	300	0	0	0	0	0	0	0	200	903	0	0	0	0	0	0	0	603	903	0
476	4	0	0	0	0	0	0	200	300	0	0	0	0	0	0	0	200	903	0	0	0	0	0	0	0	603	903	0
476	5	0	0	0	0	0	0	200	300	0	0	0	0	0	0	0	200	903	0	0	0	0	0	0	0	603	903	0
476	6	0	0	0	0	0	0	200	300	0	0	0	0	0	0	0	200	903	0	0	0	0	0	0	0	603	903	0
476	7	0	0	0	0	0	0	200	300	0	0	0	0	0	0	0	200	903	0	0	0	0	0	0	0	603	903	0
476	8	0	0	0	0	0	0	200	300	0	0	0	0	0	0	0	200	903	0	0	0	0	0	0	0	603	903	0
476	9	0	0	0	0	0	0	200	300	0	0	0	0	0	0	0	200	903	0	0	0	0	0	0	0	603	903	0
477	0	0	0	0	0	0	0	200	300	0	0	0	0	0	0	0	200	903	0	0	0	0	0	0	0	603	903	0
477	1	0	0	0	0	0	0	200	300	0	0	0	0	0	0	0	200	903	0	0	0	0	0	0	0	603	903	0
477	2	0	0	0	0	0	0	200	300	0	0	0	0	0	0	0	200	903	0	0	0	0	0	0	0	603	903	0
477	3	0	0	0	0	0	0	200	300	0	0	0	0	0	0	0	200	903	0	0	0	0	0	0	0	603	903	0
477	4	0	0	0	0	0	0	200	300	0	0	0	0	0	0	0	200	903	0	0	0	0	0	0	0	603	903	0
477	5	0	0	0	0	0	0	200	300	0	0	0	0	0	0	0	200	903	0	0	0	0	0	0	0	603	903	0
477	6	0	0	0	0	0	0	200	300	0	0	0	0	0	0	0	200	903	0	0	0	0	0	0	0	603	903	0
477	7	0	0	0	0	0	0	200	300	0	0	0	0	0	0	0	200	903	0	0	0	0	0	0	0	603	903	0
477	8	0	0	0	0	0	0	200	300	0	0	0	0	0	0	0	200	903	0	0	0	0	0	0	0	603	903	0
477	9	0	0	0	0	0	0	200	300	0	0	0	0	0	0	0	200	903	0	0	0	0	0	0	0	603	903	0
478	0	0	0	0	0	0	0	200	300	0	0	0	0	0	0	0	200	903	0	0	0	0	0	0	0	603	903	0
478	1	0	0	0	0	0	0	200	300	0	0	0	0	0	0	0	200	903	0	0	0	0	0	0	0	603	903	0
478	2	0	0	0	0	0	0	200	300	0	0	0	0	0	0	0	200	903	0	0	0	0	0	0	0	603	903	0
478	3	0	0	0	0	0	0	200	300	0	0	0	0	0	0	0	200	903	0	0	0	0	0	0	0	603	903	0
478	4	0	0	0	0	0	0	200	300	0	0	0	0	0	0	0	200	903	0	0	0	0	0	0	0	603	903	0
478	5	0	0	0	0	0	0	200	300	0	0	0	0	0	0	0	200	903	0	0	0	0	0	0	0	603	903	0
478	6	0	0	0	0	0	0	200	300	0	0	0	0	0	0	0	200	903	0	0	0	0	0	0	0	603	903	0
478	7	0	0	0	0	0	0	200	300	0	0	0	0	0	0	0	200	903	0	0	0	0	0	0	0	603	903	0
478	8	0	0	0	0	0	0	200	300	0	0	0	0	0	0	0	200	903	0	0	0	0	0	0	0	603	903	0
478	9	0	0	0	0	0	0	200	300	0	0	0	0	0	0	0	200	903	0	0	0	0	0	0	0	603	903	0
479	0	0	0	0	0	0	0	200	300	0	0	0	0	0	0	0	200	903	0	0	0	0	0	0	0	603	903	0
479	1	0	0	0	0	0	0	200	300	0	0	0	0	0	0	0	200	903	0	0	0	0	0	0	0	603	903	0
479	2	0	0	0	0	0	0	200	300	0	0	0	0	0	0	0	200	903	0	0	0	0	0	0	0	603	903	0
479	3	0	0	0	0	0	0	200	300	0	0	0	0	0	0	0	200	903	0	0	0	0	0	0	0	603	903	0
479	4	0	0	0	0	0	0	200	300	0	0	0	0	0	0	0	200	903	0	0	0	0	0	0	0	603	903	0
479	5	0	0	0	0	0	0	200	300	0	0	0	0	0	0	0	200	903	0	0	0	0	0	0	0	603	903	0
479	6	0	0	0	0	0	0	200	300	0	0	0	0	0	0	0	200	903	0	0	0	0	0	0	0	603	903	0
479	7	0	0	0	0	0	0	200	300	0	0	0	0	0	0	0	200	903	0	0	0	0	0	0	0	603	903	0
479	8	0	0	0	0	0	0	200	300	0	0	0	0	0	0	0	200	903	0	0	0	0	0	0	0	603	903	0
479	9	0	0	0	0	0	0	200	300	0	0	0	0	0	0	0	200	903	0	0	0	0	0	0	0	603	903	0
480	0	0	0	0	0	0	0	200	300	0	0	0	0	0	0	0	200	903	0	0	0	0	0	0	0	603	903	0
480	1	0	0	0	0	0	0	200	300	0	0	0	0	0	0	0	200	903	0	0	0	0	0	0	0	603	903	0
480	2	0	0	0	0	0	0	200	300	0	0	0	0	0	0	0	200	903	0	0	0	0	0	0	0	603	903	0
480	3	0	0	0	0	0	0	200	300	0	0	0	0	0	0	0	200	903	0	0	0	0	0	0	0	603	903	0
480	4	0	0	0	0	0	0	200	300	0	0	0	0	0	0	0	200	903	0	0	0	0	0	0	0	603	903	0
480	5	0	0	0	0	0	0	200	300	0	0	0	0	0	0	0	200	903	0	0	0	0	0	0	0	603	903	0
480	6	0	0	0	0	0	0	200	300	0	0	0	0	0	0	0	200	903	0	0	0	0	0	0	0	603	903	0
480	7	0	0	0	0	0	0	200	300	0	0	0	0	0	0	0	200	903	0	0	0	0	0	0	0	603	903	0
480	8	0	0	0	0	0	0	200	300	0	0	0	0	0	0	0	200	903	0	0	0	0	0	0	0	603	903	0
480	9	0	0	0	0	0	0	200	300	0	0	0	0	0	0	0	200	903	0	0	0	0	0	0	0	603	903	0
481	0	0	0	0	0	0	0	200	300	0	0	0	0	0	0	0	200	903	0	0	0	0	0	0	0	603	903	0
481	1	0	0	0	0	0	0	200	300	0	0	0	0	0	0	0	200	903	0	0	0	0	0	0	0	603	903	0
481	2	0	0	0	0	0	0	200	300	0	0	0	0	0	0	0	200	903	0	0	0	0	0	0	0	603	903	0
481	3	0	0	0	0	0	0	200	300	0	0	0	0	0	0	0	200	903	0	0	0	0	0	0	0	603	903	0
481	4	0	0	0	0	0	0	200	300	0	0	0	0	0	0	0	200	903	0	0	0	0	0	0	0	603	903	0
481	5	0	0	0	0	0	0	200	300	0	0	0	0	0	0	0	200	903	0	0	0	0	0	0	0	603	903	0
481	6	0	0	0	0	0	0	200	300	0	0	0	0	0	0	0	200	903	0	0	0	0	0	0	0	603	903	0
481	7	0	0	0	0	0	0	200	300	0	0	0	0	0	0	0	200	903	0	0	0	0	0	0	0	603	903	0
481	8	0	0	0	0	0	0	200	300	0	0	0	0	0	0	0	200	903	0	0	0	0	0	0	0	603	903	0
481	9	0	0	0	0	0	0	200	300	0	0	0	0	0	0	0	200	903	0	0	0	0	0	0	0	603	903	0
482	0	0	0	0	0	0	0	200	300	0	0	0	0	0	0	0	200	903	0	0	0	0	0	0	0	603	903	0
482	1	0	0	0	0	0	0	200	300	0	0	0	0	0	0	0	200	903	0	0	0	0	0	0	0	603	903	0
482	2	0	0	0	0	0	0	200	300	0	0	0	0	0	0	0	200	903	0	0	0	0	0	0	0	603	903	0
482	3	0	0	0	0	0	0	200	300	0	0	0	0	0	0	0	200	903	0	0	0	0	0	0	0	603	903	0
482	4	0	0	0	0	0	0	200	300	0	0	0	0	0	0	0	200	903	0	0	0	0	0	0	0	603	903	0
482	5	0	0	0	0	0	0	200	300	0	0	0	0	0	0	0	200	903	0	0	0	0	0	0	0	603	903	0
482	6	0	0	0	0	0	0	200	300	0	0	0	0	0	0	0	200	903	0	0	0	0	0	0	0	603	903	0
482	7	0	0	0	0	0	0	200	300	0	0	0	0	0	0	0	200	903	0	0	0	0	0	0	0	603	903	0
482	8	0	0	0	0	0	0	200	300	0	0	0	0	0	0	0	200	903	0	0	0	0	0	0	0	603	903	0
482	9	0	0	0	0	0	0	200	300	0	0	0	0	0	0	0	200	903	0	0	0	0	0	0	0	603	903	0
483	0	0	0	0	0	0	0	200	300	0	0	0	0	0	0	0	200	903	0	0	0	0	0	0	0	603	903	0
483	1	0	0	0	0	0	0	200	300	0	0	0	0	0	0	0	200	903	0	0	0	0	0	0	0	603	903	0
483	2	0	0	0	0	0	0	200	300	0	0	0	0	0	0	0	200	903	0	0	0	0	0	0	0	603	903	0
483	3	0	0	0	0	0	0	200	300	0	0	0	0	0	0	0	200	903	0	0	0	0	0	0	0	603	903	0
483	4	0	0	0	0	0	0	200	300	0	0	0	0	0	0	0	200	903	0	0	0	0	0	0	0	603	903	0
483	5	0	0	0	0	0	0	200	300	0	0	0	0	0	0	0	200	903	0	0	0	0	0	0	0	603	903	0
483	6	0	0	0	0	0	0	200	300	0	0	0	0	0	0	0	200	903	0	0	0	0	0	0	0	603	903	0
483	7	0	0	0	0	0	0	200	300	0	0	0	0	0	0	0	200	903	0	0	0	0	0	0	0	603	903	0
483	8	0	0	0	0	0	0	200	300	0	0	0	0	0	0	0	200	903	0	0	0	0	0	0	0	603	903	0
483	9	0	0	0	0	0	0	200	300	0	0	0	0	0	0	0	200	903	0	0	0	0	0	0	0	603	903	0
484	0	0	0	0	0	0	0	200	300	0	0	0	0	0	0	0	200	903	0	0	0	0	0	0	0	603	903	0
484	1	0	0	0	0	0	0	200	300	0	0	0	0	0	0	0	200	903	0	0	0	0	0	0	0	603	903	0
484	2	0	0	0	0	0	0	200	300	0	0	0	0	0	0	0	200	903	0	0	0	0	0	0	0	603	903	0
484	3	0	0	0	0	0	0	200	300	0	0	0	0	0	0	0	200	903	0	0	0	0	0	0	0	603	903	0
484	4	0	0	0	0	0	0	200	300	0	0	0	0	0	0	0	200	903	0	0	0	0	0	0	0	603	903	0
484	5	0	0	0	0	0	0	200	300	0	0	0	0	0	0	0	200	903	0	0	0	0	0	0	0	603	903	0
484	6	0	0	0	0	0	0	200	300	0	0	0	0	0	0	0	200	903	0	0	0	0	0	0	0	603	903	0
484	7	0	0	0	0	0	0	200	300	0	0	0	0	0	0	0	200	903	0	0	0	0	0	0	0	603	903	0
484	8	0	0	0	0	0	0	200	300	0	0	0	0	0	0	0	200	903	0	0	0	0	0	0	0	603	903	0
484	9	0	0	0	0	0	0	200	300	0	0	0	0	0	0	0	200	903	0	0	0	0	0	0	0	603	903	0
485	0	0	0	0	0	0	0	200	300	0	0	0	0	0	0	0	200	903	0	0	0	0	0	0	0	603	903	0
485	1	0	0	0	0	0	0	200	300	0	0	0	0	0	0	0	200	903	0	0	0	0	0	0	0	603	903	0
485	2	0	0	0	0	0	0	200	300	0	0	0	0	0	0	0	200	903	0	0	0	0	0	0	0	603	903	0
485	3	0	0	0	0	0	0	200	300	0	0	0	0	0	0	0	200	903	0	0	0	0	0	0	0	603	903	0
485	4	0	0	0	0	0	0	200	300	0	0	0	0	0	0	0	200	903	0	0	0	0	0	0	0	603	903	0
485	5	0	0	0	0	0	0	200	300	0	0	0	0	0	0	0	200	903	0	0	0	0	0	0	0	603	903	0
485	6	0	0	0	0	0	0	200	300	0	0	0	0	0	0	0	200	903	0	0	0	0	0	0	0	603	903	0
485	7	0	0	0	0	0	0	200	300	0	0	0	0	0	0	0	200	903	0	0	0	0	0	0	0	603	903	0
485	8	0	0	0	0	0	0	200	300	0	0	0	0	0	0	0	200	903	0	0	0	0	0	0	0	603	903	0
485	9	0	0	0	0	0	0	200	300	0	0	0	0	0	0	0	200	903	0	0	0	0	0	0	0	603	903	0
486	0	0	0	0	0	0	0	200	300	0	0	0	0	0	0	0	200	903	0	0	0	0	0	0	0	603	903	0
486	1	0	0	0	0	0	0	200	300	0	0	0	0	0	0	0	200	903	0	0	0	0	0	0	0	603	903	0
486	2	0	0	0	0	0	0	200	300	0	0	0	0	0	0	0	200	903	0	0	0	0	0	0	0	603	903	0
486	3	0	0	0	0	0	0	200	300	0	0	0	0	0	0	0	200	903	0	0	0	0	0	0	0	603	903	0
486	4	0	0	0	0	0	0	200	300	0	0	0	0	0	0	0	200	903	0	0	0	0	0	0	0	603	903	0
486	5	0	0	0	0	0	0	200	300	0	0	0	0	0	0	0	200	903	0	0	0	0	0	0	0	603	903	0
486	6	0	0	0	0	0	0	200	300	0	0	0	0	0	0	0	200	903	0	0	0	0	0	0	0	603	903	0
486	7	0	0	0	0	0	0	200	300	0	0	0	0	0	0	0	200	903	0	0	0	0	0	0	0	603	903	0
486	8	0	0	0	0	0	0	200	300	0	0	0	0	0	0	0	200	903	0	0	0	0	0	0	0	603	903	0
486	9	0	0	0	0	0	0	200	300	0	0	0	0	0	0	0	200	903	0	0	0	0	0	0	0	603	903	0
487	0	0	0	0	0	0	0	200	300	0	0	0	0	0	0	0	200	903	0	0	0	0	0	0	0	603	903	0
487	1	0	0	0	0	0	0	200	300	0	0	0	0	0	0	0	200	903	0	0	0	0	0	0	0	603	903	0
487	2	0	0	0	0	0	0	200	300	0	0	0	0	0	0	0	200	903	0	0	0	0	0	0	0	603	903	0
487	3	0	0	0	0	0	0	200	300	0	0	0	0	0	0	0	200	903	0	0	0	0	0	0	0	603	903	0
487	4	0	0	0	0	0	0	200	300	0	0	0	0	0	0	0	200	903	0	0	0	0	0	0	0	603	903	0
487	5	0	0	0	0	0	0	200	300	0	0	0	0	0	0	0	200	903	0	0	0	0	0	0	0	603	903	0
487	6	0	0	0	0	0	0	200	300	0	0	0	0	0	0	0	200	903	0	0	0	0	0	0	0	603	903	0
487	7	0	0	0	0	0	0	200	300	0	0	0	0	0	0	0	200	903	0	0	0	0	0	0	0	603	903	0
487	8	0	0	0	0	0	0	200	300	0	0	0	0	0	0	0	200	903	0	0	0	0	0	0	0	603	903	0
487	9	0	0	0	0	0	0	200	300	0	0	0	0	0	0	0	200	903	0	0	0	0	0	0	0	603	903	0
488	0	0	0	0	0	0	0	200	300	0	0	0	0	0	0	0	200	903	0	0	0	0	0	0	0	603	903	0
488	1	0	0	0	0	0	0	200	300	0	0	0	0	0	0	0	200	903	0	0	0	0	0	0	0	603	903	0
488	2	0	0	0	0	0	0	200	300	0	0	0	0	0	0	0	200	903	0	0	0	0	0	0	0	603	903	0
488	3	0	0	0	0	0	0	200	300	0	0	0	0	0	0	0	200	903	0	0	0	0	0	0	0	603	903	0
488	4	0	0	0	0	0	0	200	300	0	0	0	0	0	0	0	200	903	0	0	0	0	0	0	0	603	903	0
488	5	0	0	0	0	0	0	200	300	0	0	0	0	0	0	0	200	903	0	0	0	0	0	0	0	603	903	0
488	6	0	0	0	0	0	0	200	300	0	0	0	0	0	0	0	200	903	0	0	0	0	0	0	0	603	903	0
488	7	0	0	0	0	0	0	200	300	0	0	0	0	0	0	0	200	903	0	0	0	0	0	0	0	603	903	0
488	8	0	0	0	0	0	0	200	300	0	0	0	0	0	0	0	200	903	0	0	0	0	0	0	0	603	903	0
488	9	0	0	0	0	0	0	200	300	0	0	0	0	0	0	0	200	903	0	0	0	0	0	0	0	603	903	0
489	0	0	0	0	0	0	0	200	300	0	0	0	0	0	0	0	200	903	0	0	0	0	0	0	0	603	903	0
489	1	0	0	0	0	0	0	200	300	0	0	0	0	0	0	0	200	903	0	0	0	0	0	0	0	603	903	0
489	2	0	0	0	0	0	0	200	300	0	0	0	0	0	0	0	200	903	0	0	0	0	0	0	0	603	903	0
489	3	0	0	0	0	0	0	200	300	0	0	0	0	0	0	0	200	903	0	0	0	0	0	0	0	603	903	0
489	4	0	0	0	0	0	0	200	300	0	0	0	0	0	0	0	200	903	0	0	0	0	0	0	0	603	903	0
489	5	0	0	0	0	0	0	200	300	0	0	0	0	0	0	0	200	903	0	0	0	0	0	0	0	603	903	0
489	6	0	0	0	0	0	0	200	300	0	0	0	0	0	0	0	200	903	0	0	0	0	0	0	0	603	903	0
489	7	0	0	0	0	0	0	200	300	0	0	0	0	0	0	0	200	903	0	0	0	0	0	0	0	603	903	0
489	8	0	0	0	0	0	0	200	300	0	0	0	0	0	0	0	200	903	0	0	0	0	0	0	0	603	903	0
489	9	0	0	0	0	0	0	200	300	0	0	0	0	0	0	0	200	903	0	0	0	0	0	0	0	603	903	0
490	0	0	0	0	0	0	0	200	300	0	0	0	0	0	0	0	200	903	0	0	0	0	0	0	0	603	903	0
490	1	0	0	0	0	0	0	200	300	0	0	0	0	0	0	0	200	903	0	0	0	0	0	0	0	603	903	0
490	2	0	0	0	0	0	0	200	300	0	0	0	0	0	0	0	200	903	0	0	0	0	0	0	0	603	903	0
490	3	0	0	0	0	0	0	200	300	0	0	0	0	0	0	0	200	903	0	0	0	0	0	0	0	603	903	0
490	4	0	0	0	0	0	0	200	300	0	0	0	0	0	0	0	200	903	0	0	0	0	0	0	0	603	903	0
490	5	0	0	0	0	0	0	200	300	0	0	0	0	0	0	0	200	903	0	0	0	0	0	0	0	603	903	0
490	6	0	0	0	0	0	0	200	300	0	0	0	0	0	0	0	200	903	0	0	0	0	0	0	0	603	903	0
490	7	0	0	0	0	0	0	200	300	0	0	0	0	0	0	0	200	903	0	0	0	0	0	0	0	603	903	0
490	8	0	0	0	0	0	0	200	300	0	0	0	0	0	0	0	200	903	0	0	0	0	0	0	0	603	903	0
490	9	0	0	0	0	0	0	200	300	0	0	0	0	0	0	0	200	903	0	0	0	0	0	0	0	603	903	0
491	0	0	0	0	0	0	0	200	300	0	0	0	0	0	0	0	200	903	0	0	0	0	0	0	0	603	903	0
491	1	0	0	0	0	0	0	200	300	0	0	0	0	0	0	0	200	903	0	0	0	0	0	0	0	603	903	0
491	2	0	0	0	0	0	0	200	300	0	0	0	0	0	0	0	200	903	0	0	0	0	0	0	0	603	903	0
491	3	0	0	0	0	0	0	200	300	0	0	0	0	0	0	0	200	903	0	0	0	0	0	0	0	603	903	0
491	4	0	0	0	0	0	0	200	300	0	0	0	0	0	0	0	200	903	0	0	0	0	0	0	0	603	903	0
491	5	0	0	0	0	0	0	200	300	0	0	0	0	0	0	0	200	903	0	0	0	0	0	0	0	603	903	0
491	6	0	0	0	0	0	0	200	300	0	0	0	0	0	0	0	200	903	0	0	0	0	0	0	0	603	903	0
491	7	0	0	0	0	0	0	200	300	0	0	0	0	0	0	0	200	903	0	0	0	0	0	0	0	603	903	0
491	8	0	0	0	0	0	0	200	300	0	0	0	0	0	0	0	200	903	0	0	0	0	0	0	0	603	903	0
491	9	0	0	0	0	0	0	200	300	0	0	0	0	0	0	0	200	903	0	0	0	0	0	0	0	603	903	0
492	0	0	0	0	0	0	0	200	300	0	0	0	0	0	0	0	200	903	0	0	0	0	0	0	0	603	903	0
492	1	0	0	0	0	0	0	200	300	0	0	0	0	0	0	0	200	903	0	0	0	0	0	0	0	603	903	0
492	2	0	0	0	0	0	0	200	300	0	0	0	0	0	0	0	200	903	0	0	0	0	0	0	0	603	903	0
492	3	0	0	0	0	0	0	200	300	0	0	0	0	0	0	0	200	903	0	0	0	0	0	0	0	603	903	0
492	4	0	0	0	0	0	0	200	300	0	0	0	0	0	0	0	200	903	0	0	0	0	0	0	0	603	903	0
492	5	0	0	0	0	0	0	200	300	0	0	0	0	0	0	0	200	903	0	0	0	0	0	0	0	603	903	0
492	6	0	0	0	0	0	0	200	300	0	0	0	0	0	0	0	200	903	0	0	0	0	0	0	0	603	903	0
492	7	0	0	0	0	0	0	200	300	0	0	0	0	0	0	0	200	903	0	0	0	0	0	0	0	603	903	0
492	8	0	0	0	0	0	0	200	300	0	0	0	0	0	0	0	200	903	0	0	0	0	0	0	0	603	903	0
492	9	0	0	0	0	0	0	200	300	0	0	0	0	0	0	0	200	903	0	0	0	0	0	0	0	603	903	0
493	0	0	0	0	0	0	0	200	300	0	0	0	0	0	0	0	200	903	0	0	0	0	0	0	0	603	903	0
493	1	0	0	0	0	0	0	200	300	0	0	0	0	0	0	0	200	903	0	0	0	0	0	0	0	603	903	0
493	2	0	0	0	0	0	0	200	300	0	0	0	0	0	0	0	200	903	0	0	0	0	0	0	0	603	903	0
493	3	0	0	0	0	0	0	200	300	0	0	0	0	0	0	0	200	903	0	0	0	0	0	0	0	603	903	0
493	4	0	0	0	0	0	0	200	300	0	0	0	0	0	0	0	200	903	0	0	0	0	0	0	0	603	903	0
493	5	0	0	0	0	0	0	200	300	0	0	0	0	0	0	0	200	903	0	0	0	0	0	0	0	603	903	0
493	6	0	0	0	0	0	0	200	300	0	0	0	0	0	0	0	200	903	0	0	0	0	0	0	0	603	903	0
493	7	0	0	0	0	0	0	200	300	0	0	0	0	0	0	0	200	903	0	0	0	0	0	0	0	603	903	0
493	8	0	0	0	0	0	0	200	300	0	0	0	0	0	0	0	200	903	0	0	0	0	0	0	0	603	903	0
493	9	0	0	0	0	0	0	200	300	0	0	0	0	0	0	0	200	903	0	0	0	0	0	0	0	603	903	0
494	0	0	0	0	0	0	0	200	300	0	0	0	0	0	0	0	200	903	0	0	0	0	0	0	0	603	903	0
494	1	0	0	0	0	0	0	200	300	0	0	0	0	0	0	0	200	903	0	0	0	0	0	0	0	603	903	0
494	2	0	0	0	0	0	0	200	300	0	0	0	0	0	0	0	200	903	0	0	0	0	0	0	0	603	903	0
494	3	0	0	0	0	0	0	200	300	0	0	0	0	0	0	0	200	903	0	0	0	0	0	0	0	603	903	0
494	4	0	0	0	0	0	0	200	300	0	0	0	0	0	0	0	200	903	0	0	0	0	0	0	0	603	903	0
494	5	0	0	0	0	0	0	200	300	0	0	0	0	0	0	0	200	903	0	0	0	0	0	0	0	603	903	0
494	6	0	0	0	0	0	0	200	300	0	0	0	0	0	0	0	200	903	0	0	0	0	0	0	0	603	903	0
494	7	0	0	0	0	0	0	200	300	0	0	0	0	0	0	0	200	903	0	0	0	0	0	0	0	603	903	0
494	8	0	0	0	0	0	0	200	300	0	0	0	0	0	0	0	200	903	0	0	0	0	0	0	0	603	903	0
494	9	0	0	0	0	0	0	200	300	0	0	0	0	0	0	0	200	903	0	0	0	0	0	0	0	603	903	0
495	0	0	0	0	0	0	0	200	300	0	0	0	0	0	0	0	200	903	0	0	0	0	0	0	0	603	903	0
495	1	0	0	0	0	0	0	200	300	0	0	0	0	0	0	0	200	903	0	0	0	0	0	0	0	603	903	0
495	2	0	0	0	0	0	0	200	300	0	0	0	0	0	0	0	200	903	0	0	0	0	0	0	0	603	903	0
495	3	0	0	0	0	0	0	200	300	0	0	0	0	0	0	0	200	903	0	0	0	0	0	0	0	603	903	0
495	4	0	0	0	0	0	0	200	300	0	0	0	0	0	0	0	200	903	0	0	0	0	0	0	0	603	903	0
495	5	0	0	0	0	0	0	200	300	0	0	0	0	0	0	0	200	903	0	0	0	0	0	0	0	603	903	0
495	6	0	0	0	0	0	0	200	300	0	0	0	0	0	0	0	200	903	0	0	0	0	0	0	0	603	903	0
495	7	0	0	0	0	0	0	200	300	0	0	0	0	0	0	0	200	903	0	0	0	0	0	0	0	603	903	0
495	8	0	0	0	0	0	0	200	300	0	0	0	0	0	0	0	200	903	0	0	0	0	0	0	0	603	903	0
495	9	0	0	0	0	0	0	200	300	0	0	0	0	0	0	0	200	903	0	0	0	0	0	0	0	603	903	0
496	0	0	0	0	0	0	0	200	300	0	0	0	0	0	0	0	200	903	0	0	0	0	0	0	0	603	903	0
496	1	0	0	0	0	0	0	200	300	0	0	0	0	0	0	0	200	903	0	0	0	0	0	0	0	603	903	0
496	2	0	0	0	0	0	0	200	300	0	0	0	0	0	0	0	200	903	0	0	0	0	0	0	0	603	903	0
496	3	0	0	0	0	0	0	200	300	0	0	0	0	0	0	0	200	903	0	0	0	0	0	0	0	603	903	0
496	4	0	0	0	0	0	0	200	300	0	0	0	0	0	0	0	200	903	0	0	0	0	0	0	0	603	903	0
496	5	0	0	0	0	0	0	200	300	0	0	0	0	0	0	0	200	903	0	0	0	0	0	0	0	603	903	0
496	6	0	0	0	0	0	0	200	300	0	0	0	0	0	0	0	200	903	0	0	0	0	0	0	0	603	903	0
496	7	0	0	0	0	0	0	200	300	0	0	0	0	0	0	0	200	903	0	0	0	0	0	0	0	603	903	0
496	8	0	0	0	0	0	0	200	300	0	0	0	0	0	0	0	200	903	0	0	0	0	0	0	0	603	903	0
496	9	0	0	0	0	0	0	200	300	0	0	0	0	0	0	0	200	903	0	0	0	0	0	0	0	603	903	0
497	0	0	0	0	0	0	0	200	300	0	0	0	0	0	0	0	200	903	0	0	0	0	0	0	0	603	903	0
497	1	0	0	0	0	0	0	200	300	0	0	0	0	0	0	0	200	903	0	0	0	0	0	0	0	603	903	0
497	2	0	0	0	0	0	0	200	300	0	0	0	0	0	0	0	200	903	0	0	0	0	0	0	0	603	903	0
497	3	0	0	0	0	0	0	200	300	0	0	0	0	0	0	0	200	903	0	0	0	0	0	0	0	603	903	0
497	4	0	0	0	0	0	0	200	300	0	0	0	0	0	0	0	200	903	0	0	0	0	0	0	0	603	903	0
497	5	0	0	0	0	0	0	200	300	0	0	0	0	0	0	0	200	903	0	0	0	0	0	0	0	603	903	0
497	6	0	0	0	0	0	0	200	300	0	0	0	0	0	0	0	200	903	0	0	0	0	0	0	0	603	903	0
497	7	0	0	0	0	0	0	200	300	0	0	0	0	0	0	0	200	903	0	0	0	0	0	0	0	603	903	0
497	8	0	0	0	0	0	0	200	300	0	0	0	0	0	0	0	200	903	0	0	0	0	0	0	0	603	903	0
497	9	0	0	0	0	0	0	200	300	0	0	0	0	0	0	0	200	903	0	0	0	0	0	0	0	603	903	0
498	0	0	0	0	0	0	0	200	300	0	0	0	0	0	0	0	200	903	0	0	0	0	0	0	0	603	903	0
498	1	0	0	0	0	0	0	200	300	0	0	0	0	0	0	0	200	903	0	0	0	0	0	0	0	603	903	0
498	2	0	0	0	0	0	0	200	300	0	0	0	0	0	0	0	200	903	0	0	0	0	0	0	0	603	903	0
498	3	0	0	0	0	0	0	200	300	0	0	0	0	0	0	0	200	903	0	0	0	0	0	0	0	603	903	0
498	4	0	0	0	0	0	0	200	300	0	0	0	0	0	0	0	200	903	0	0	0	0	0	0	0	603	903	0
498	5	0	0	0	0	0	0	200	300	0	0	0	0	0	0	0	200	903	0	0	0	0	0	0	0	603	903	0
498	6	0	0	0	0	0	0	200	300	0	0	0	0	0	0	0	200	903	0	0	0	0	0	0	0	603	903	0
498	7	0	0	0	0	0	0	200	300	0	0	0	0	0	0	0	200	903	0	0	0	0	0	0	0	603	903	0
498	8	0	0	0	0	0	0	200	300	0	0	0	0	0	0	0	200	903	0	0	0	0	0	0	0	603	903	0
498	9	0	0	0	0	0	0	200	300	0	0	0	0	0	0	0	200	903	0	0	0	0	0	0	0	603	903	0
499	0	0	0	0	0	0	0	200	300	0	0	0	0	0	0	0	200	903	0	0	0	0	0	0	0	603	903	0
499	1	0	0	0	0	0	0	200	300	0	0	0	0	0	0	0	200	903	0	0	0	0	0	0	0	603	903	0
499	2	0	0	0	0	0	0	200	300	0	0	0	0	0	0	0	200	903	0	0	0	0	0	0	0	603	903	0
499	3	0	0	0	0	0	0	200	300	0	0	0	0	0	0	0	200	903	0	0	0	0	0	0	0	603	903	0
499	4	0	0	0	0	0	0	200	300	0	0	0	0	0	0	0	200	903	0	0	0	0	0	0	0	603	903	0
499	5	0	0	0	0	0	0	200	300	0	0	0	0	0	0	0	200	903	0	0	0	0	0	0	0	603	903	0
499	6	0	0	0	0	0	0	200	300	0	0	0	0	0	0	0	200	903	0	0	0	0	0	0	0	603	903	0
499	7	0	0	0	0	0	0	200	300	0	0	0	0	0	0	0	200	903	0	0	0	0	0	0	0	603	903	0
499	8	0	0	0	0	0	0	200	300	0	0	0	0	0	0	0	200	903	0	0	0	0	0	0	0	603	903	0
499	9	0	0	0	0	0	0	200	300	0	0	0	0	0	0	0	200	903	0	0	0	0	0	0	0	603	903	0
500	0	0	0	0	0	0	0	200	300	0	0	0	0	0	0	0	200	903	0	0	0	0	0	0	0	603	903	0
500	1	0	0	0	0	0	0	200	300	0	0	0	0	0	0	0	200	903	0	0	0	0	0	0	0	603	903	0
500	2	0	0	0	0	0	0	200	300	0	0	0	0	0	0	0	200	903	0	0	0	0	0	0	0	603	903	0
500	3	0	0	0	0	0	0	200	300	0	0	0	0	0	0	0	200	903	0	0	0	0	0	0	0	603	903	0
500	4	0	0	0	0	0	0	200	300	0	0	0	0	0	0	0	200	903	0	0	0	0	0	0	0	603	903	0
500	5	0	0	0	0	0	0	200	300	0	0	0	0	0	0	0	200	903	0	0	0	0	0	0	0	603	903	0
500	6	0	0	0	0	0	0	200	300	0	0	0	0	0	0	0	200	903	0	0	0	0	0	0	0	603	903	0
500	7	0	0	0	0	0	0	200	300	0	0	0	0	0	0	0	200	903	0	0	0	0	0	0	0	603	903	0
500	8	0	0	0	0	0	0	200	300	0	0	0	0	0	0	0	200	903	0	0	0	0	0	0	0	603	903	0
500	9	0	0	0	0	0	0	200	300	0	0	0	0	0	0	0	200	903	0	0	0	0	0	0	0	603	903	0
501	0	0	0	0	0	0	0	200	300	0	0	0	0	0	0	0	200	903	0	0	0	0	0	0	0	603	903	0
501	1	0	0	0	0	0	0	200	300	0	0	0	0	0	0	0	200	903	0	0	0	0	0	0	0	603	903	0
501	2	0	0	0	0	0	0	200	300	0	0	0	0	0	0	0	200	903	0	0	0	0	0	0	0	603	903	0
501	3	0	0	0	0	0	0	200	300	0	0	0	0	0	0	0	200	903	0	0	0	0	0	0	0	603	903	0
501	4	0	0	0	0	0	0	200	300	0	0	0	0	0	0	0	200	903	0	0	0	0	0	0	0	603	903	0
501	5	0	0	0	0	0	0	200	300	0	0	0	0	0	0	0	200	903	0	0	0	0	0	0	0	603	903	0
501	6	0	0	0	0	0	0	200	300	0	0	0	0	0	0	0	200	903	0	0	0	0	0	0	0	603	903	0
501	7	0	0	0	0	0	0	200	300	0	0	0	0	0	0	0	200	903	0	0	0	0	0	0	0	603	903	0
501	8	0	0	0	0	0	0	200	300	0	0	0	0	0	0	0	200	903	0	0	0	0	0	0	0	603	903	0
501	9	0	0	0	0	0	0	200	300	0	0	0	0	0	0	0	200	903	0	0	0	0	0	0	0	603	903	0
502	0	0	0	0	0	0	0	200	300	0	0	0	0	0	0	0	200	903	0	0	0	0	0	0	0	603	903	0
502	1	0	0	0	0	0	0	200	300	0	0	0	0	0	0	0	200	903	0	0	0	0	0	0	0	603	903	0
502	2	0	0	0	0	0	0	200	300	0	0	0	0	0	0	0	200	903	0	0	0	0	0	0	0	603	903	0
502	3	0	0	0	0	0	0	200	300	0	0	0	0	0	0	0	200	903	0	0	0	0	0	0	0	603	903	0
502	4	0	0	0	0	0	0	200	300	0	0	0	0	0	0	0	200	903	0	0	0	0	0	0	0	603	903	0
502	5	0	0	0	0	0	0	200	300	0	0	0	0	0	0	0	200	903	0	0	0	0	0	0	0	603	903	0
502	6	0	0	0	0	0	0	200	300	0	0	0	0	0	0	0	200	903	0	0	0	0	0	0	0	603	903	0
502	7	0	0	0	0	0	0	200	300	0	0	0	0	0	0	0	200	903	0	0	0	0	0	0	0	603	903	0
502	8	0	0	0	0	0	0	200	300	0	0	0	0	0	0	0	200	903	0	0	0	0	0	0	0	603	903	0
502	9	0	0	0	0	0	0	200	300	0	0	0	0	0	0	0	200	903	0	0	0	0	0	0	0	603	903	0
503	0	0	0	0	0	0	0	200	300	0	0	0	0	0	0	0	200	903	0	0	0	0	0	0	0	603	903	0
503	1	0	0	0	0	0	0	200	300	0	0	0	0	0	0	0	200	903	0	0	0	0	0	0	0	603	903	0
503	2	0	0	0	0	0	0	200	300	0	0	0	0	0	0	0	200	903	0	0	0	0	0	0	0	603	903	0
503	3	0	0	0	0	0	0	200	300	0	0	0	0	0	0	0	200	903	0	0	0	0	0	0	0	603	903	0
503	4	0	0	0	0	0	0	200	300	0	0	0	0	0	0	0	200	903	0	0	0	0	0	0	0	603	903	0
503	5	0	0	0	0	0	0	200	300	0	0	0	0	0	0	0	200	903	0	0	0	0	0	0	0	603	903	0
503	6	0	0	0	0	0	0	200	300	0	0	0	0	0	0	0	200	903	0	0	0	0	0	0	0	603	903	0
503	7	0	0	0	0	0	0	200	300	0	0	0	0	0	0	0	200	903	0	0	0	0	0	0	0	603	903	0
503	8	0	0	0	0	0	0	200	300	0	0	0	0	0	0	0	200	903	0	0	0	0	0	0	0	603	903	0
503	9	0	0	0	0	0	0	200	300	0	0	0	0	0	0	0	200	903	0	0	0	0	0	0	0	603	903	0
504	0	0	0	0	0	0	0	200	300	0	0	0	0	0	0	0	200	903	0	0	0	0	0	0	0	603	903	0
504	1	0	0	0	0	0	0	200	300	0	0	0	0	0	0	0	200	903	0	0	0	0	0	0	0	603	903	0
504	2	0	0	0	0	0	0	200	300	0	0	0	0	0	0	0	200	903	0	0	0	0	0	0	0	603	903	0
504	3	0	0	0	0	0	0	200	300	0	0	0	0	0	0	0	200	903	0	0	0	0	0	0	0	603	903	0
504	4	0	0	0	0	0	0	200	300	0	0	0	0	0	0	0	200	903	0	0	0	0	0	0	0	603	903	0
504	5	0	0	0	0	0	0	200	300	0	0	0	0	0	0	0	200	903	0	0	0	0	0	0	0	603	903	0
504	6	0	0	0	0	0	0	200	300	0	0	0	0	0	0	0	200	903	0	0	0	0	0	0	0	603	903	0
504	7	0	0	0	0	0	0	200	300	0	0	0	0	0	0	0	200	903	0	0	0	0	0	0	0	603	903	0
504	8	0	0	0	0	0	0	200	300	0	0	0	0	0	0	0	200	903	0	0	0	0	0	0	0	603	903	0
504	9	0	0	0	0	0	0	200	300	0	0	0	0	0	0	0	200	903	0	0	0	0	0	0	0	603	903	0
505	0	0	0	0	0	0	0	200	300	0	0	0	0	0	0	0	200	903	0	0	0	0	0	0	0	603	903	0
505	1	0	0	0	0	0	0	200	300	0	0	0	0	0	0	0	200	903	0	0	0	0	0	0	0	603	903	0
505	2	0	0	0	0	0	0	200	300	0	0	0	0	0	0	0	200	903	0	0	0	0	0	0	0	603	903	0
505	3	0	0	0	0	0	0	200	300	0	0	0	0	0	0	0	200	903	0	0	0	0	0	0	0	603	903	0
505	4	0	0	0	0	0	0	200	300	0	0	0	0	0	0	0	200	903	0	0	0	0	0	0	0	603	903	0
505	5	0	0	0	0	0	0	200	300	0	0	0	0	0	0	0	200	903	0	0	0	0	0	0	0	603	903	0
505	6	0	0	0	0	0	0	200	300	0	0	0	0	0	0	0	200	903	0	0	0	0	0	0	0	603	903	0
505	7	0	0	0	0	0	0	200	300	0	0	0	0	0	0	0	200	903	0	0	0	0	0	0	0	603	903	0
505	8	0	0	0	0	0	0	200	300	0	0	0	0	0	0	0	200	903	0	0	0	0	0	0	0	603	903	0
505	9	0	0	0	0	0	0	200	300	0	0	0	0	0	0	0	200	903	0	0	0	0	0	0	0	603	903	0
506	0	0	0	0	0	0	0	200	300	0	0	0	0	0	0	0	200	903	0	0	0	0	0	0	0	603	903	0
506	1	0	0	0	0	0	0	200	300	0	0	0	0	0	0	0	200	903	0	0	0	0	0	0	0	603	903	0
506	2	0	0	0	0	0	0	200	300	0	0	0	0	0	0	0	200	903	0	0	0	0	0	0	0	603	903	0
506	3	0	0	0	0	0	0	200	300	0	0	0	0	0	0	0	200	903	0	0	0	0	0	0	0	603	903	0
506	4	0	0	0	0	0	0	200	300	0	0	0	0	0	0	0	200	903	0	0	0	0	0	0	0	603	903	0
506	5	0	0	0	0	0	0	200	300	0	0	0	0	0	0	0	200	903	0	0	0	0	0	0	0	603	903	0
506	6	0	0	0	0	0	0	200	300	0	0	0	0	0	0	0	200	903	0	0	0	0	0	0	0	603	903	0
506	7	0	0	0	0	0	0	200	300	0	0	0	0	0	0	0	200	903	0	0	0	0	0	0	0	603	903	0
506	8	0	0	0	0	0	0	200	300	0	0	0	0	0	0	0	200	903	0	0	0	0	0	0	0	603	903	0
506	9	0	0	0	0	0	0	200	300	0	0	0	0	0	0	0	200	903	0	0	0	0	0	0	0	603	903	0
507	0	0	0	0	0	0	0	200	300	0	0	0	0	0	0	0	200	903	0	0	0	0	0	0	0	603	903	0
507	1	0	0	0	0	0	0	200	300	0	0	0	0	0	0	0	200	903	0	0	0	0	0	0	0	603	903	0
507	2	0	0	0	0	0	0	200	300	0	0	0	0	0	0	0	200	903	0	0	0	0	0	0	0	603	903	0
507	3	0	0	0	0	0	0	200	300	0	0	0	0	0	0	0	200	903	0	0	0	0	0	0	0	603	903	0
507	4	0	0	0	0	0	0	200	300	0	0	0	0	0	0	0	200	903	0	0	0	0	0	0	0	603	903	0
507	5	0	0	0	0	0	0	200	300	0	0	0	0	0	0	0	200	903	0	0	0	0	0	0	0	603	903	0
507	6	0	0	0	0	0	0	200	300	0	0	0	0	0	0	0	200	903	0	0	0	0	0	0	0	603	903	0
507	7	0	0	0	0	0	0	200	300	0	0	0	0	0	0	0	200	903	0	0	0	0	0	0	0	603	903	0
507	8	0	0	0	0	0	0	200	300	0	0	0	0	0	0	0	200	903	0	0	0	0	0	0	0	603	903	0
507	9	0	0	0	0	0	0	200	300	0	0	0	0	0	0	0	200	903	0	0	0	0	0	0	0	603	903	0
508	0	0	0	0	0	0	0	200	300	0	0	0	0	0	0	0	200	903	0	0	0	0	0	0	0	603	903	0
508	1	0	0	0	0	0	0	200	300	0	0	0	0	0	0	0	200	903	0	0	0	0	0	0	0	603	903	0
508	2	0	0	0	0	0	0	200	300	0	0	0	0	0	0	0	200	903	0	0	0	0	0	0	0	603	903	0
508	3	0	0	0	0	0	0	200	300	0	0	0	0	0	0	0	200	903	0	0	0	0	0	0	0	603	903	0
508	4	0	0	0	0	0	0	200	300	0	0	0	0	0	0	0	200	903	0	0	0	0	0	0	0	603	903	0
508	5	0	0	0	0	0	0	200	300	0	0	0	0	0	0	0	200	903	0	0	0	0	0	0	0	603	903	0
508	6	0	0	0	0	0	0	200	300	0	0	0	0	0	0	0	200	903	0	0	0	0	0	0	0	603	903	0
508	7	0	0	0	0	0	0	200	300	0	0	0	0	0	0	0	200	903	0	0	0	0	0	0	0	603	903	0
508	8	0	0	0	0	0	0	200	300	0	0	0	0	0	0	0	200	903	0	0	0	0	0	0	0	603	903	0
508	9	0	0	0	0	0	0	200	300	0	0	0	0	0	0	0	200	903	0	0	0	0	0	0	0	603	903	0
509	0	0	0	0	0	0	0	200	300	0	0	0	0	0	0	0	200	903	0	0	0	0	0	0	0	603	903	0
509	1	0	0	0	0	0	0	200	300	0	0	0	0	0	0	0	200	903	0	0	0	0	0	0	0	603	903	0
509	2	0	0	0	0	0	0	200	300	0	0	0	0	0	0	0	200	903	0	0	0	0	0	0	0	603	903	0
509	3	0	0	0	0	0	0	200	300	0	0	0	0	0	0	0	200	903	0	0	0	0	0	0	0	603	903	0
509	4	0	0	0	0	0	0	200	300	0	0	0	0	0	0	0	200	903	0	0	0	0	0	0	0	603	903	0
509	5	0	0	0	0	0	0	200	300	0	0	0	0	0	0	0	200	903	0	0	0	0	0	0	0	603	903	0
509	6	0	0	0	0	0	0	200	300	0	0	0	0	0	0	0	200	903	0	0	0	0	0	0	0	603	903	0
509	7	0	0	0	0	0	0	200	300	0	0	0	0	0	0	0	200	903	0	0	0	0	0	0	0	603	903	0
509	8	0	0	0	0	0	0	200	300	0	0	0	0	0	0	0	200	903	0	0	0	0	0	0	0	603	903	0
509	9	0	0	0	0	0	0	200	300	0	0	0	0	0	0	0	200	903	0	0	0	0	0	0	0	603	903	0
510	0	0	0	0	0	0	0	200	300	0	0	0	0	0	0	0	200	903	0	0	0	0	0	0	0	603	903	0
510	1	0	0	0	0	0	0	200	300	0	0	0	0	0	0	0	200	903	0	0	0	0	0	0	0	603	903	0
510	2	0	0	0	0	0	0	200	300	0	0	0	0	0	0	0	200	903	0	0	0	0	0	0	0	603	903	0
510	3	0	0	0	0	0	0	200	300	0	0	0	0	0	0	0	200	903	0	0	0	0	0	0	0	603	903	0
510	4	0	0	0	0	0	0	200	300	0	0	0	0	0	0	0	200	903	0	0	0	0	0	0	0	603	903	0
510	5	0	0	0	0	0	0	200	300	0	0	0	0	0	0	0	200	903	0	0	0	0	0	0	0	603	903	0
510	6	0	0	0	0	0	0	200	300	0	0	0	0	0	0	0	200	903	0	0	0	0	0	0	0	603	903	0
510	7	0	0	0	0	0	0	200	300	0	0	0	0	0	0	0	200	903	0	0	0	0	0	0	0	603	903	0
510	8	0	0	0	0	0	0	200	300	0	0	0	0	0	0	0	200	903	0	0	0	0	0	0	0	603	903	0
510	9	0	0	0	0	0	0	200	300	0	0	0	0	0	0	0	200	903	0	0	0	0	0	0	0	603	903	0
511	0	0	0	0	0	0	0	200	300	0	0	0	0	0	0	0	200	903	0	0	0	0	0	0	0	603	903	0
511	1	0	0	0	0	0	0	200	300	0	0	0	0	0	0	0	200	903	0	0	0	0	0	0	0	603	903	0
511	2	0	0	0	0	0	0	200	300	0	0	0	0	0	0	0	200	903	0	0	0	0	0	0	0	603	903	0
511	3	0	0	0	0	0	0	200	300	0	0	0	0	0	0	0	200	903	0	0	0	0	0	0	0	603	903	0
511	4	0	0	0	0	0	0	200	300	0	0	0	0	0	0	0	200	903	0	0	0	0	0	0	0	603	903	0
511	5	0	0	0	0	0	0	200	300	0	0	0	0	0	0	0	200	903	0	0	0	0	0	0	0	603	903	0
511	6	0	0	0	0	0	0	200	300	0	0	0	0	0	0	0	200	903	0	0	0	0	0	0	0	603	903	0
511	7	0	0	0	0	0	0	200	300	0	0	0	0	0	0	0	200	903	0	0	0	0	0	0	0	603	903	0
511	8	0	0	0	0	0	0	200	300	0	0	0	0	0	0	0	200	903	0	0	0	0	0	0	0	603	903	0
511	9	0	0	0	0	0	0	200	300	0	0	0	0	0	0	0	200	903	0	0	0	0	0	0	0	603	903	0
512	0	0	0	0	0	0	0	200	300	0	0	0	0	0	0	0	200	903	0	0	0	0	0	0	0	603	903	0
512	1	0	0	0	0	0	0	200	300	0	0	0	0	0	0	0	200	903	0	0	0	0	0	0	0	603	903	0
512	2	0	0	0	0	0	0	200	300	0	0	0	0	0	0	0	200	903	0	0	0	0	0	0	0	603	903	0
512	3	0	0	0	0	0	0	200	300	0	0	0	0	0	0	0	200	903	0	0	0	0	0	0	0	603	903	0
512	4	0	0	0	0	0	0	200	300	0	0	0	0	0	0	0	200	903	0	0	0	0	0	0	0	603	903	0
512	5	0	0	0	0	0	0	200	300	0	0	0	0	0	0	0	200	903	0	0	0	0	0	0	0	603	903	0
512	6	0	0	0	0	0	0	200	300	0	0	0	0	0	0	0	200	903	0	0	0	0	0	0	0	603	903	0
512	7	0	0	0	0	0	0	200	300	0	0	0	0	0	0	0	200	903	0	0	0	0	0	0	0	603	903	0
512	8	0	0	0	0	0	0	200	300	0	0	0	0	0	0	0	200	903	0	0	0	0	0	0	0	603	903	0
512	9	0	0	0	0	0	0	200	300	0	0	0	0	0	0	0	200	903	0	0	0	0	0	0	0	603	903	0
513	0	0	0	0	0	0	0	200	300	0	0	0	0	0	0	0	200	903	0	0	0	0	0	0	0	603	903	0
513	1	0	0	0	0	0	0	200	300	0	0	0	0	0	0	0	200	903	0	0	0	0	0	0	0	603	903	0
513	2	0	0	0	0	0	0	200	300	0	0	0	0	0	0	0	200	903	0	0	0	0	0	0	0	603	903	0
513	3	0	0	0	0	0	0	200	300	0	0	0	0	0	0	0	200	903	0	0	0	0	0	0	0	603	903	0
513	4	0	0	0	0	0	0	200	300	0	0	0	0	0	0	0	200	903	0	0	0	0	0	0	0	603	903	0
513	5	0	0	0	0	0	0	200	300	0	0	0	0	0	0	0	200	903	0	0	0	0	0	0	0	603	903	0
513	6	0	0	0	0	0	0	200	300	0	0	0	0	0	0	0	200	903	0	0	0	0	0	0	0	603	903	0
513	7	0	0	0	0	0	0	200	300	0	0	0	0	0	0	0	200	903	0	0	0	0	0	0	0	603	903	0
513	8	0	0	0	0	0	0	200	300	0	0	0	0	0	0	0	200	903	0	0	0	0	0	0	0	603	903	0
513	9	0	0	0	0	0	0	200	300	0	0	0	0	0	0	0	200	903	0	0	0	0	0	0	0	603	903	0
514	0	0	0	0	0	0	0	200	300	0	0	0	0	0	0	0	200	903	0	0	0	0	0	0	0	603	903	0
514	1	0	0	0	0	0	0	200	300	0	0	0	0	0	0	0	200	903	0	0	0	0	0	0	0	603	903	0
514	2	-9.26808	9.99619	-15.8749	3080.66	2296.14	114.213	344.639	105.942	0	0	0	0	0	0	0	200	903	0	0	0	0	0	0	0	603	903	0
514	3	-8.81032	11.9798	-23.5043	3355.32	2479.24	480.424	305.48	157.247	0	0	0	0	0	0	0	200	903	0	0	0	0	0	0	0	603	903	0
514	4	-1.02833	3.12973	-15.2646	2165.13	1685.79	-297.775	310.438	158.16	0	0	0	0	0	0	0	200	903	0	0	0	0	0	0	0	603	903	0
514	5	0	0	0	0	0	0	200	300	0	0	0	0	0	0	0	200	903	0	0	0	0	0	0	0	603	903	0
514	6	-7.7422	5.11337	-5.19378	1341.16	1197.51	-343.551	430.566	41.7759	0	0	0	0	0	0	0	200	903	0	0	0	0	0	0	0	603	903	0
514	7	-4.38527	3.12973	-14.3491	1249.61	1380.61	-23.1163	296.216	212.914	0	0	0	0	0	0	0	200	903	0	0	0	0	0	0	0	603	903	0
514	8	-3.46974	4.04526	-16.1801	2165.13	1441.65	571.977	289.1	166.185	0	0	0	0	0	0	0	200	903	0	0	0	0	0	0	0	603	903	0
514	9	-7.7422	5.11337	-13.7387	3080.66	2418.21	-160.445	376.014	75.7676	0	0	0	0	0	0	0	200	903	0	0	0	0	0	0	0	603	903	0
515	0	-4.69044	6.18149	-12.8232	1707.37	1807.86	-389.327	340.984	166.853	0	0	0	0	0	0	0	200	903	0	0	0	0	0	0	0	603	903	0
515	1	-4.69044	6.94443	-14.9594	2256.69	1685.79	159.989	312.691	149.146	0	0	0	0	0	0	0	200	903	0	0	0	0	0	0	0	603	903	0
515	2	-11.2517	6.33408	-18.6215	2439.79	1929.93	343.095	303.64	168.98	0	0	0	0	0	0	0	200	903	0	0	0	0	0	0	0	603	903	0
515	3	-8.04738	6.33408	-19.537	3080.66	2113.03	-114.669	308.155	142.317	0	0	0	0	0	0	0	200	903	0	0	0	0	0	0	0	603	903	0
515	4	-6.21632	9.08066	-20.7577	3172.21	2357.17	205.766	313.556	147.179	0	0	0	0	0	0	0	200	903	0	0	0	0	0	0	0	603	903	0
515	5	-10.3362	13.2005	-22.2836	3721.53	3394.77	114.213	352.344	132.993	0	0	0	0	0	0	0	200	903	0	0	0	0	0	0	0	603	903	0
515	6	-10.031	11.6747	-26.8613	4270.85	2967.53	-23.1163	310.476	141.004	0	0	0	0	0	0	0	200	903	0	0	0	0	0	0	0	603	903	0
515	7	-8.35255	13.8109	-32.3544	5003.27	3150.63	251.542	297.379	145.361	0	0	0	0	0	0	0	200	903	0	0	0	0	0	0	0	603	903	0
515	8	-11.7095	20.8299	-35.101	6376.56	4188.23	709.306	319.319	118.337	0	0	0	0	0	0	0	200	903	0	0	0	0	0	0	0	603	903	0
515	9	-10.4888	22.2032	-38.7631	6285.01	4066.16	846.635	304.898	137.861	0	0	0	0	0	0	0	200	903	0	0	0	0	0	0	0	603	903	0
516	0	-10.031	22.661	-44.8666	7383.64	4798.58	800.859	306.952	135.431	0	0	0	0	0	0	0	200	903	0	0	0	0	0	0	0	603	903	0
516	1	-12.9302	28.0016	-48.2236	7841.4	5042.72	1899.49	304.57	137.395	0	0	0	0	0	0	0	200	903	0	0	0	0	0	0	0	603	903	0
516	2	-11.7095	34.1051	-52.1908	8940.04	5531	1899.49	305.976	128.705	0	0	0	0	0	0	0	200	903	0	0	0	0	0	0	0	603	903	0
516	3	-8.9629	34.868	-57.3788	9489.36	5775.14	1716.39	300.649	134.619	0	0	0	0	0	0	0	200	903	0	0	0	0	0	0	0	603	903	0
516	4	-7.7422	38.8353	-66.5341	10862.6	6507.56	2998.12	297.808	136.736	0	0	0	0	0	0	0	200	903	0	0	0	0	0	0	0	603	903	0
516	5	-10.031	43.1078	-75.3842	12235.9	7178.95	3089.68	295.232	137.686	0	0	0	0	0	0	0	200	903	0	0	0	0	0	0	0	603	903	0
516	6	-5.60597	46.3121	-82.0981	13609.2	7423.09	2952.35	290.417	134.232	0	0	0	0	0	0	0	200	903	0	0	0	0	0	0	0	603	903	0
516	7	-11.2517	44.0233	-90.0326	15348.7	8460.69	3318.56	293.974	129.52	0	0	0	0	0	0	0	200	903	0	0	0	0	0	0	0	603	903	0
516	8	-11.7095	41.2767	-99.7983	17088.2	9254.15	2906.57	292.729	128.772	0	0	0	0	0	0	0	200	903	0	0	0	0	0	0	0	603	903	0
516	9	-11.2517	40.056	-108.648	18003.8	10474.8	2128.37	296.411	134.293	0	0	0	0	0	0	0	200	903	0	0	0	0	0	0	0	603	903	0
517	0	-10.4888	39.7508	-119.94	20475.7	11024.2	2448.81	291.914	129.284	0	0	0	0	0	0	0	200	903	0	0	0	0	0	0	0	603	903	0
517	1	-13.0828	37.462	-128.18	21940.5	12305.9	2265.7	296.005	128.83	0	0	0	0	0	0	0	200	903	0	0	0	0	0	0	0	603	903	0
517	2	-13.5405	34.5628	-141.607	24320.9	13038.3	1441.73	292.074	128.251	0	0	0	0	0	0	0	200	903	0	0	0	0	0	0	0	603	903	0
517	3	-15.5242	36.6991	-154.12	25511.1	13831.8	1258.62	289.747	134.472	0	0	0	0	0	0	0	200	903	0	0	0	0	0	0	0	603	903	0
517	4	-18.7285	38.0724	-164.19	27250.6	15113.5	1212.85	292.049	134.03	0	0	0	0	0	0	0	200	903	0	0	0	0	0	0	0	603	903	0
517	5	-21.1699	36.0887	-175.177	29814.1	15418.7	983.964	288.018	129.806	0	0	0	0	0	0	0	200	903	0	0	0	0	0	0	0	603	903	0
517	6	-25.1372	34.1051	-187.689	31462	16761.5	-160.445	289.305	132.371	0	0	0	0	0	0	0	200	903	0	0	0	0	0	0	0	603	903	0
517	7	-28.0364	29.0697	-202.032	34574.8	18348.4	-663.985	290.819	128.865	0	0	0	0	0	0	0	200	903	0	0	0	0	0	0	0	603	903	0
517	8	-28.4942	26.4757	-221.563	36680.5	19630.1	-1350.63	288.598	134.447	0	0	0	0	0	0	0	200	903	0	0	0	0	0	0	0	603	903	0
517	9	-30.6304	22.2032	-234.686	39518.6	20911.9	-1854.17	289.106	131.611	0	0	0	0	0	0	0	200	903	0	0	0	0	0	0	0	603	903	0
518	0	-31.8511	19.9144	-255.438	41990.6	23048.1	-1854.17	290.23	135.613	0	0	0	0	0	0	0	200	903	0	0	0	0	0	0	0	603	903	0
518	1	-31.0881	16.8626	-267.645	45194.9	24024.7	-2220.38	289.763	131.139	0	0	0	0	0	0	0	200	903	0	0	0	0	0	0	0	603	903	0
518	2	-34.9028	16.0997	-288.092	47483.8	25855.7	-2266.16	289.748	135.178	0	0	0	0	0	0	0	200	903	0	0	0	0	0	0	0	603	903	0
518	3	-33.5296	19.4566	-306.402	49497.9	27930.9	-1625.29	291.158	138.454	0	0	0	0	0	0	0	200	903	0	0	0	0	0	0	0	603	903	0
518	4	-31.8511	19.7618	-322.271	51329	29151.6	-709.762	290.457	140.728	0	0	0	0	0	0	0	200	903	0	0	0	0	0	0	0	603	903	0
518	5	-29.5623	23.5765	-336.92	54624.9	31165.8	-618.209	292.502	137.87	0	0	0	0	0	0	0	200	903	0	0	0	0	0	0	0	603	903	0
518	6	-32.1563	26.4757	-352.484	56547.5	32325.4	114.213	291.708	139.574	0	0	0	0	0	0	0	200	903	0	0	0	0	0	0	0	603	903	0
518	7	-30.1726	30.7481	-368.048	57646.1	33363	1167.07	290.649	143.373	0	0	0	0	0	0	0	200	903	0	0	0	0	0	0	0	603	903	0
518	8	-29.8674	35.4784	-379.644	59202.5	35072	1167.07	292.381	144.058	0	0	0	0	0	0	0	200	903	0	0	0	0	0	0	0	603	903	0
518	9	-31.0881	41.4293	-391.241	60392.7	35865.5	2174.15	291.671	145.638	0	0	0	0	0	0	0	200	903	0	0	0	0	0	0	0	603	903	0
519	0	-30.9356	46.7699	-401.312	62406.8	36781	3227.01	291.652	144.493	0	0	0	0	0	0	0	200	903	0	0	0	0	0	0	0	603	903	0
519	1	-30.3252	52.5682	-408.636	63047.7	37513.4	3227.01	291.802	145.712	0	0	0	0	0	0	0	200	903	0	0	0	0	0	0	0	603	903	0
519	2	-32.3088	58.5191	-412.603	63688.6	38367.9	3684.77	292.99	145.642	0	0	0	0	0	0	0	200	903	0	0	0	0	0	0	0	603	903	0
519	3	-31.2407	64.7752	-422.979	64329.4	38917.2	4417.19	292.007	147.914	0	0	0	0	0	0	0	200	903	0	0	0	0	0	0	0	603	903	0
519	4	-29.2571	70.421	-429.693	64970.3	39771.7	5012.28	292.558	148.798	0	0	0	0	0	0	0	200	903	0	0	0	0	0	0	0	603	903	0
519	5	-32.1563	75.9142	-436.712	66526.7	39283.4	5058.06	289.953	147.665	0	0	0	0	0	0	0	200	903	0	0	0	0	0	0	0	603	903	0
519	6	-32.3088	81.1021	-440.985	66709.8	40870.4	5515.82	292.68	148.725	0	0	0	0	0	0	0	200	903	0	0	0	0	0	0	0	603	903	0
519	7	-32.614	84.9168	-446.173	66068.9	40076.9	5882.04	289.824	151.921	0	0	0	0	0	0	0	200	903	0	0	0	0	0	0	0	603	903	0
519	8	-32.9192	88.5789	-448.614	66618.3	41541.8	6614.46	292.6	151.502	0	0	0	0	0	0	0	200	903	0	0	0	0	0	0	0	603	903	0
519	9	-32.1563	92.0885	-451.056	67350.7	42030	6339.8	293.182	150.682	0	0	0	0	0	0	0	200	903	0	0	0	0	0	0	0	603	903	0
520	0	-28.9519	93.1566	-456.854	67716.9	42396.2	7346.88	292.8	151.776	0	0	0	0	0	0	0	200	903	0	0	0	0	0	0	0	603	903	0
520	1	-28.7993	95.7506	-462.347	68632.4	42884.5	7026.44	292.754	151.557	0	0	0	0	0	0	0	200	903	0	0	0	0	0	0	0	603	903	0
520	2	-28.0364	98.192	-468.756	68724	43678	7438.43	293.179	153.391	0	0	0	0	0	0	0	200	903	0	0	0	0	0	0	0	603	903	0
520	3	-28.6467	98.0394	-477.606	69090.2	44288.3	7758.87	292.73	155.341	0	0	0	0	0	0	0	200	903	0	0	0	0	0	0	0	603	903	0
520	4	-26.9683	99.7179	-492.56	71012.8	45692.1	8262.41	292.765	155.829	0	0	0	0	0	0	0	200	903	0	0	0	0	0	0	0	603	903	0
520	5	-23.7639	100.023	-498.663	71470.5	46973.9	8033.52	294.2	156.676	0	0	0	0	0	0	0	200	903	0	0	0	0	0	0	0	603	903	0
520	6	-20.2544	101.854	-506.598	73026.9	47828.4	8811.72	294.411	155.848	0	0	0	0	0	0	0	200	903	0	0	0	0	0	0	0	603	903	0
520	7	-17.6604	101.549	-518.805	73026.9	49598.4	9223.71	295.601	159.24	0	0	0	0	0	0	0	200	903	0	0	0	0	0	0	0	603	903	0
520	8	-12.4724	103.533	-532.232	73576.3	50391.8	9452.59	294.68	161.759	0	0	0	0	0	0	0	200	903	0	0	0	0	0	0	0	603	903	0
520	9	-9.72584	103.838	-542.303	75041.1	51124.3	10139.2	294.273	161.625	0	0	0	0	0	0	0	200	903	0	0	0	0	0	0	0	603	903	0
521	0	-8.04738	105.516	-548.407	76048.2	52406	10276.6	295.561	161.329	0	0	0	0	0	0	0	200	903	0	0	0	0	0	0	0	603	903	0
521	1	-6.21632	106.584	-556.341	75773.6	53077.4	10734.3	295.404	163.8	0	0	0	0	0	0	0	200	903	0	0	0	0	0	0	0	603	903	0
521	2	-2.24904	109.178	-561.834	76322.8	54054	11146.3	296.21	164.154	0	0	0	0	0	0	0	200	903	0	0	0	0	0	0	0	603	903	0
521	3	0.0397824	110.399	-566.412	76780.6	54725.3	11604.1	296.618	164.444	0	0	0	0	0	0	0	200	903	0	0	0	0	0	0	0	603	903	0
521	4	3.09154	113.909	-574.041	77146.9	55640.9	12016.1	296.928	165.608	0	0	0	0	0	0	0	200	903	0	0	0	0	0	0	0	603	903	0
521	5	7.05883	115.129	-579.84	78153.9	55518.8	12245	295.749	165.215	0	0	0	0	0	0	0	200	903	0	0	0	0	0	0	0	603	903	0
521	6	7.51659	116.503	-583.197	77238.4	56556.4	12519.6	296.977	167.56	0	0	0	0	0	0	0	200	903	0	0	0	0	0	0	0	603	903	0
521	7	9.65282	120.012	-587.469	77604.6	56800.5	13023.2	296.687	167.9	0	0	0	0	0	0	0	200	903	0	0	0	0	0	0	0	603	903	0
521	8	10.2632	120.622	-589.911	77604.6	57410.9	13023.2	297.321	168.447	0	0	0	0	0	0	0	200	903	0	0	0	0	0	0	0	603	903	0
521	9	12.2468	123.522	-590.216	77513.1	57838.1	13480.9	297.995	168.67	0	0	0	0	0	0	0	200	903	0	0	0	0	0	0	0	603	903	0
522	0	13.0098	123.674	-592.962	77696.1	57716.1	13664	297.335	168.97	0	0	0	0	0	0	0	200	903	0	0	0	0	0	0	0	603	903	0
522	1	15.9089	127.031	-595.404	76872.2	58509.5	13801.4	298.269	170.891	0	0	0	0	0	0	0	200	903	0	0	0	0	0	0	0	603	903	0
522	2	16.6719	128.862	-596.319	77329.9	58265.4	14259.1	297.708	170.321	0	0	0	0	0	0	0	200	903	0	0	0	0	0	0	0	603	903	0
522	3	18.5029	130.235	-600.287	77421.5	58570.6	14579.5	297.571	171.026	0	0	0	0	0	0	0	200	903	0	0	0	0	0	0	0	603	903	0
522	4	18.6555	130.388	-597.845	77513.1	58814.7	14533.8	298.378	170.346	0	0	0	0	0	0	0	200	903	0	0	0	0	0	0	0	603	903	0
522	5	19.2659	130.846	-603.033	76506	58631.6	14762.7	297.228	173.131	0	0	0	0	0	0	0	200	903	0	0	0	0	0	0	0	603	903	0
522	6	21.8598	133.287	-601.202	76689.1	59180.9	15174.6	298.438	172.44	0	0	0	0	0	0	0	200	903	0	0	0	0	0	0	0	603	903	0
522	7	20.6391	133.287	-602.118	76322.8	59180.9	14991.5	298.288	173.243	0	0	0	0	0	0	0	200	903	0	0	0	0	0	0	0	603	903	0
522	8	22.3176	132.524	-603.338	76597.5	59364	15037.3	298.393	173.044	0	0	0	0	0	0	0	200	903	0	0	0	0	0	0	0	603	903	0
522	9	22.4702	131.914	-604.254	76780.6	59486.1	15037.3	298.446	172.933	0	0	0	0	0	0	0	200	903	0	0	0	0	0	0	0	603	903	0
523	0	22.928	132.982	-608.221	75865.1	59730.2	14991.5	298.205	175.267	0	0	0	0	0	0	0	200	903	0	0	0	0	0	0	0	603	903	0
523	1	22.7754	134.203	-609.442	75865.1	59547.1	15083.1	297.708	175.517	0	0	0	0	0	0	0	200	903	0	0	0	0	0	0	0	603	903	0
523	2	23.0806	132.982	-611.578	76231.3	60218.5	15403.5	298.464	175.353	0	0	0	0	0	0	0	200	903	0	0	0	0	0	0	0	603	903	0
523	3	22.0124	133.898	-611.883	76322.8	60218.5	15540.9	298.415	175.266	0	0	0	0	0	0	0	200	903	0	0	0	0	0	0	0	603	903	0
523	4	22.165	133.745	-613.409	75773.6	60462.6	15495.1	298.568	176.471	0	0	0	0	0	0	0	200	903	0	0	0	0	0	0	0	603	903	0
523	5	22.165	134.508	-611.883	75590.4	60889.9	15449.3	299.512	176.463	0	0	0	0	0	0	0	200	903	0	0	0	0	0	0	0	603	903	0
523	6	22.928	132.524	-616.766	75865.1	60889.9	15678.2	298.724	176.995	0	0	0	0	0	0	0	200	903	0	0	0	0	0	0	0	603	903	0
523	7	23.9961	134.966	-620.733	76139.8	61683.4	15724	299.372	177.339	0	0	0	0	0	0	0	200	903	0	0	0	0	0	0	0	603	903	0
523	8	22.7754	136.034	-632.33	76780.6	63026.1	15907.1	299.673	178.575	0	0	0	0	0	0	0	200	903	0	0	0	0	0	0	0	603	903	0
523	9	26.7427	138.78	-641.18	75865.1	63392.3	16685.3	298.868	181.679	0	0	0	0	0	0	0	200	903	0	0	0	0	0	0	0	603	903	0
524	0	32.2358	142.748	-644.842	76414.4	64368.9	17188.8	299.821	181.499	0	0	0	0	0	0	0	200	903	0	0	0	0	0	0	0	603	903	0
524	1	30.5574	143.358	-646.978	76231.3	65040.3	17326.1	300.529	182.173	0	0	0	0	0	0	0	200	903	0	0	0	0	0	0	0	603	903	0
524	2	32.8462	145.189	-652.166	76780.6	65284.4	17921.2	300.104	182.268	0	0	0	0	0	0	0	200	903	0	0	0	0	0	0	0	603	903	0
524	3	37.8816	144.884	-659.796	76872.2	65162.4	18424.8	298.761	183.491	0	0	0	0	0	0	0	200	903	0	0	0	0	0	0	0	603	903	0
524	4	39.4075	149.156	-663.763	76322.8	66566.2	18195.9	300.286	185.015	0	0	0	0	0	0	0	200	903	0	0	0	0	0	0	0	603	903	0
524	5	38.0342	152.208	-668.646	76506	66871.3	18791	300.01	185.581	0	0	0	0	0	0	0	200	903	0	0	0	0	0	0	0	603	903	0
524	6	40.0178	152.971	-673.834	76506	67664.8	18653.6	300.418	186.462	0	0	0	0	0	0	0	200	903	0	0	0	0	0	0	0	603	903	0
524	7	38.6445	154.344	-681.158	77879.3	67909	18699.4	299.696	185.666	0	0	0	0	0	0	0	200	903	0	0	0	0	0	0	0	603	903	0
524	8	37.2712	155.718	-682.989	77146.9	68336.2	18653.6	300.055	187.045	0	0	0	0	0	0	0	200	903	0	0	0	0	0	0	0	603	903	0
524	9	36.3557	155.565	-684.21	77421.5	68519.3	18333.2	300.144	186.845	0	0	0	0	0	0	0	200	903	0	0	0	0	0	0	0	603	903	0
525	0	36.5083	155.26	-689.398	76963.7	68702.4	18287.4	299.656	188.361	0	0	0	0	0	0	0	200	903	0	0	0	0	0	0	0	603	903	0
525	1	37.2712	155.718	-689.093	76780.6	69495.9	18150.1	300.851	188.577	0	0	0	0	0	0	0	200	903	0	0	0	0	0	0	0	603	903	0
525	2	38.1868	154.192	-696.417	77787.7	69068.6	18012.8	299.177	188.303	0	0	0	0	0	0	0	200	903	0	0	0	0	0	0	0	603	903	0
525	3	35.135	154.039	-697.638	77787.7	69556.9	18150.1	299.703	188.498	0	0	0	0	0	0	0	200	903	0	0	0	0	0	0	0	603	903	0
525	4	36.3557	152.666	-700.995	77696.1	69678.9	17738.1	299.4	189.163	0	0	0	0	0	0	0	200	903	0	0	0	0	0	0	0	603	903	0
525	5	39.7126	152.666	-703.436	77055.3	70167.2	17738.1	299.749	190.459	0	0	0	0	0	0	0	200	903	0	0	0	0	0	0	0	603	903	0
525	6	37.5764	151.598	-705.572	77329.9	70533.4	17875.4	299.966	190.401	0	0	0	0	0	0	0	200	903	0	0	0	0	0	0	0	603	903	0
525	7	38.6445	148.546	-708.014	78245.5	70533.4	18104.3	299.622	189.486	0	0	0	0	0	0	0	200	903	0	0	0	0	0	0	0	603	903	0
525	8	38.6445	148.241	-711.676	78245.5	71082.8	17463.5	299.881	190.055	0	0	0	0	0	0	0	200	903	0	0	0	0	0	0	0	603	903	0
525	9	39.56	147.478	-717.169	77970.8	71265.9	17783.9	299.371	191.28	0	0	0	0	0	0	0	200	903	0	0	0	0	0	0	0	603	903	0
526	0	39.8652	147.173	-716.559	77696.1	71571.1	17600.8	299.882	191.57	0	0	0	0	0	0	0	200	903	0	0	0	0	0	0	0	603	903	0
526	1	40.7808	146.41	-720.831	77146.9	71998.3	17326.1	299.882	192.975	0	0	0	0	0	0	0	200	903	0	0	0	0	0	0	0	603	903	0
526	2	40.6282	144.274	-722.357	78245.5	72059.4	17463.5	299.756	191.68	0	0	0	0	0	0	0	200	903	0	0	0	0	0	0	0	603	903	0
526	3	41.5437	145.799	-725.409	78428.6	72364.5	17143	299.757	191.884	0	0	0	0	0	0	0	200	903	0	0	0	0	0	0	0	603	903	0
526	4	41.0859	145.494	-723.578	77604.6	72669.7	17371.9	300.431	192.749	0	0	0	0	0	0	0	200	903	0	0	0	0	0	0	0	603	903	0
526	5	43.0696	146.257	-729.681	77513.1	73035.9	17463.5	300.093	193.771	0	0	0	0	0	0	0	200	903	0	0	0	0	0	0	0	603	903	0
526	6	44.748	145.189	-732.122	78245.5	73280.1	17555	300.093	193.125	0	0	0	0	0	0	0	200	903	0	0	0	0	0	0	0	603	903	0
526	7	43.9851	144.579	-735.174	77146.9	72913.9	17509.2	299.179	195.063	0	0	0	0	0	0	0	200	903	0	0	0	0	0	0	0	603	903	0
526	8	43.3747	143.205	-738.531	78062.3	74012.5	17555	300.216	194.301	0	0	0	0	0	0	0	200	903	0	0	0	0	0	0	0	603	903	0
526	9	43.8325	143.968	-739.142	77421.5	73829.3	16959.9	299.885	195.255	0	0	0	0	0	0	0	200	903	0	0	0	0	0	0	0	603	903	0
527	0	44.9006	143.663	-740.362	77787.7	74012.5	17417.7	299.968	194.933	0	0	0	0	0	0	0	200	903	0	0	0	0	0	0	0	603	903	0
527	1	44.2903	143.358	-742.193	77970.8	73768.3	17326.1	299.392	194.945	0	0	0	0	0	0	0	200	903	0	0	0	0	0	0	0	603	903	0
527	2	45.511	141.222	-744.024	77787.7	74378.7	16914.1	299.968	195.45	0	0	0	0	0	0	0	200	903	0	0	0	0	0	0	0	603	903	0
527	3	45.2058	140.917	-745.55	78611.7	74439.7	17188.8	299.845	194.559	0	0	0	0	0	0	0	200	903	0	0	0	0	0	0	0	603	903	0
527	4	45.9687	140.917	-749.518	78611.7	75172.1	17143	300.294	195.117	0	0	0	0	0	0	0	200	903	0	0	0	0	0	0	0	603	903	0
527	5	46.1213	137.865	-751.043	77787.7	74989	16639.5	299.846	196.427	0	0	0	0	0	0	0	200	903	0	0	0	0	0	0	0	603	903	0
527	6	45.511	138.017	-751.349	78428.6	75355.3	16914.1	300.293	195.616	0	0	0	0	0	0	0	200	903	0	0	0	0	0	0	0	603	903	0
527	7	45.511	135.576	-752.874	78428.6	75050	16868.4	299.685	195.828	0	0	0	0	0	0	0	200	903	0	0	0	0	0	0	0	603	903	0
527	8	46.8843	134.966	-752.264	77787.7	75355.3	16685.3	300.171	196.595	0	0	0	0	0	0	0	200	903	0	0	0	0	0	0	0	603	903	0
527	9	45.6636	133.745	-750.433	77604.6	75538.3	16502.2	300.66	196.587	0	0	0	0	0	0	0	200	903	0	0	0	0	0	0	0	603	903	0
528	0	47.6472	132.829	-754.706	77421.5	75233.2	16456.4	299.686	197.415	0	0	0	0	0	0	0	200	903	0	0	0	0	0	0	0	603	903	0
528	1	48.2576	132.829	-758.062	78428.6	75660.4	16227.5	299.808	196.541	0	0	0	0	0	0	0	200	903	0	0	0	0	0	0	0	603	903	0
528	2	47.1894	129.93	-757.757	78062.3	75721.5	15907.1	299.928	196.982	0	0	0	0	0	0	0	200	903	0	0	0	0	0	0	0	603	903	0
528	3	47.0369	128.099	-757.757	77970.8	76026.6	15952.8	300.331	197.103	0	0	0	0	0	0	0	200	903	0	0	0	0	0	0	0	603	903	0
528	4	46.8843	126.879	-758.978	77970.8	75782.5	15998.6	299.848	197.269	0	0	0	0	0	0	0	200	903	0	0	0	0	0	0	0	603	903	0
528	5	47.1894	125.81	-757.757	77879.3	76148.7	15907.1	300.492	197.224	0	0	0	0	0	0	0	200	903	0	0	0	0	0	0	0	603	903	0
528	6	47.342	123.674	-756.842	78520.1	75721.5	15769.7	300.049	196.253	0	0	0	0	0	0	0	200	903	0	0	0	0	0	0	0	603	903	0
528	7	47.342	122.301	-758.673	78337	76331.8	15586.6	300.612	196.745	0	0	0	0	0	0	0	200	903	0	0	0	0	0	0	0	603	903	0
528	8	48.7153	121.843	-761.419	77970.8	76270.7	15312	300.169	197.598	0	0	0	0	0	0	0	200	903	0	0	0	0	0	0	0	603	903	0
528	9	48.2576	120.47	-761.419	77604.6	76087.7	15266.2	299.929	198.079	0	0	0	0	0	0	0	200	903	0	0	0	0	0	0	0	603	903	0
529	0	47.6472	119.859	-756.231	77513.1	76514.9	15128.9	301.179	197.501	0	0	0	0	0	0	0	200	903	0	0	0	0	0	0	0	603	903	0
529	1	47.342	117.418	-763.25	78337	76270.7	15403.5	299.929	197.364	0	0	0	0	0	0	0	200	903	0	0	0	0	0	0	0	603	903	0
529	2	47.6472	115.892	-761.419	78153.9	76270.7	14762.7	300.169	197.358	0	0	0	0	0	0	0	200	903	0	0	0	0	0	0	0	603	903	0
529	3	47.1894	114.824	-761.114	77696.1	76576	14854.2	300.61	197.918	0	0	0	0	0	0	0	200	903	0	0	0	0	0	0	0	603	903	0
529	4	48.4101	113.603	-760.504	77055.3	76148.7	14854.2	300.129	198.679	0	0	0	0	0	0	0	200	903	0	0	0	0	0	0	0	603	903	0
529	5	47.6472	112.23	-761.114	77513.1	76270.7	14625.3	300.209	198.158	0	0	0	0	0	0	0	200	903	0	0	0	0	0	0	0	603	903	0
529	6	48.2576	111.315	-761.419	77696.1	76453.9	14304.9	300.41	197.959	0	0	0	0	0	0	0	200	903	0	0	0	0	0	0	0	603	903	0
529	7	47.342	110.399	-761.114	78062.3	75965.6	14488	299.808	197.437	0	0	0	0	0	0	0	200	903	0	0	0	0	0	0	0	603	903	0
529	8	46.8843	107.652	-760.809	76963.7	76209.8	14259.1	300.169	198.84	0	0	0	0	0	0	0	200	903	0	0	0	0	0	0	0	603	903	0
529	9	46.7317	107.347	-760.199	76872.2	76331.8	14121.8	300.41	198.879	0	0	0	0	0	0	0	200	903	0	0	0	0	0	0	0	603	903	0
530	0	46.1213	105.669	-757.452	77146.9	75660.4	14030.2	299.888	198.15	0	0	0	0	0	0	0	200	903	0	0	0	0	0	0	0	603	903	0
530	1	46.4265	103.838	-753.79	77238.4	76148.7	14030.2	301.021	197.533	0	0	0	0	0	0	0	200	903	0	0	0	0	0	0	0	603	903	0
530	2	46.8843	102.007	-754.706	76963.7	75843.5	13709.8	300.494	198.022	0	0	0	0	0	0	0	200	903	0	0	0	0	0	0	0	603	903	0
530	3	47.342	99.8705	-754.4	76139.8	75782.5	13618.2	300.454	199.072	0	0	0	0	0	0	0	200	903	0	0	0	0	0	0	0	603	903	0
530	4	46.7317	99.7179	-754.706	75865.1	75721.5	13206.3	300.332	199.477	0	0	0	0	0	0	0	200	903	0	0	0	0	0	0	0	603	903	0
530	5	45.6636	97.8868	-753.485	75865.1	75538.3	13389.4	300.252	199.314	0	0	0	0	0	0	0	200	903	0	0	0	0	0	0	0	603	903	0
530	6	45.9687	96.3609	-751.959	76414.4	75172.1	13297.8	299.968	198.38	0	0	0	0	0	0	0	200	903	0	0	0	0	0	0	0	603	903	0
530	7	46.7317	95.2928	-747.076	75224.2	74928	13023.2	300.295	199.309	0	0	0	0	0	0	0	200	903	0	0	0	0	0	0	0	603	903	0
530	8	45.6636	94.5299	-746.771	74858	75111.1	13160.5	300.581	199.758	0	0	0	0	0	0	0	200	903	0	0	0	0	0	0	0	603	903	0
530	9	45.9687	92.5462	-745.245	75041.1	74989	12794.3	300.623	199.307	0	0	0	0	0	0	0	200	903	0	0	0	0	0	0	0	603	903	0
531	0	46.4265	91.6307	-743.719	74491.8	74867	12519.6	300.666	199.839	0	0	0	0	0	0	0	200	903	0	0	0	0	0	0	0	603	903	0
531	1	44.5954	88.1212	-742.804	74766.4	73890.4	12656.9	299.475	199.346	0	0	0	0	0	0	0	200	903	0	0	0	0	0	0	0	603	903	0
531	2	45.6636	89.3419	-742.804	73759.4	74500.8	12519.6	300.297	200.701	0	0	0	0	0	0	0	200	903	0	0	0	0	0	0	0	603	903	0
531	3	44.4429	88.2738	-739.447	73301.6	73768.3	12153.4	299.762	200.87	0	0	0	0	0	0	0	200	903	0	0	0	0	0	0	0	603	903	0
531	4	44.4429	87.5108	-735.785	73667.8	73829.3	12656.9	300.341	199.879	0	0	0	0	0	0	0	200	903	0	0	0	0	0	0	0	603	903	0
531	5	43.5273	85.6798	-734.564	72935.4	73890.4	12016.1	300.591	200.709	0	0	0	0	0	0	0	200	903	0	0	0	0	0	0	0	603	903	0
531	6	43.8325	84.9168	-733.038	73026.9	73463.1	11970.3	300.217	200.378	0	0	0	0	0	0	0	200	903	0	0	0	0	0	0	0	603	903	0
531	7	44.2903	83.2384	-728.766	72294.5	73341.1	12107.6	300.637	200.799	0	0	0	0	0	0	0	200	903	0	0	0	0	0	0	0	603	903	0
531	8	44.5954	83.2384	-727.85	72019.9	73341.1	11833	300.764	201.051	0	0	0	0	0	0	0	200	903	0	0	0	0	0	0	0	603	903	0
531	9	43.0696	81.8651	-726.324	72019.9	72913.9	11741.4	300.388	200.843	0	0	0	0	0	0	0	200	903	0	0	0	0	0	0	0	603	903	0
532	0	43.0696	81.1021	-723.883	71745.2	72669.7	11695.6	300.389	200.888	0	0	0	0	0	0	0	200	903	0	0	0	0	0	0	0	603	903	0
532	1	42.6118	80.6444	-721.747	70921.2	72730.7	11466.8	300.77	201.737	0	0	0	0	0	0	0	200	903	0	0	0	0	0	0	0	603	903	0
532	2	41.5437	80.034	-716.864	69731	72303.5	11283.6	300.861	202.728	0	0	0	0	0	0	0	200	903	0	0	0	0	0	0	0	603	903	0
532	3	41.5437	77.5926	-715.033	70005.7	72181.4	11375.2	300.948	202.094	0	0	0	0	0	0	0	200	903	0	0	0	0	0	0	0	603	903	0
532	4	41.3911	77.8978	-711.065	70005.7	71387.9	11100.5	300.396	201.548	0	0	0	0	0	0	0	200	903	0	0	0	0	0	0	0	603	903	0
532	5	41.0859	76.3719	-710.455	69731	71571.1	11146.3	300.74	201.85	0	0	0	0	0	0	0	200	903	0	0	0	0	0	0	0	603	903	0
532	6	41.2385	75.609	-707.098	68449.4	70899.6	10825.9	300.268	203.197	0	0	0	0	0	0	0	200	903	0	0	0	0	0	0	0	603	903	0
532	7	41.8489	74.6935	-703.741	67991.5	70716.6	10734.3	300.487	203.386	0	0	0	0	0	0	0	200	903	0	0	0	0	0	0	0	603	903	0
532	8	40.323	74.0831	-702.215	67442.2	70777.6	10688.6	300.792	203.958	0	0	0	0	0	0	0	200	903	0	0	0	0	0	0	0	603	903	0
532	9	39.8652	72.7098	-698.248	67900	70350.4	10551.2	300.753	202.757	0	0	0	0	0	0	0	200	903	0	0	0	0	0	0	0	603	903	0
533	0	39.56	71.4891	-694.891	67076	69862.1	10597	300.537	203.473	0	0	0	0	0	0	0	200	903	0	0	0	0	0	0	0	603	903	0
533	1	39.8652	70.8788	-692.144	66618.3	70167.2	10368.1	301.377	203.751	0	0	0	0	0	0	0	200	903	0	0	0	0	0	0	0	603	903	0
533	2	39.8652	69.6581	-688.482	65611.2	69740	10368.1	301.295	204.702	0	0	0	0	0	0	0	200	903	0	0	0	0	0	0	0	603	903	0
533	3	39.8652	69.5055	-687.567	65977.4	69129.7	10276.6	300.543	204.042	0	0	0	0	0	0	0	200	903	0	0	0	0	0	0	0	603	903	0
533	4	38.4919	67.5218	-681.768	65336.5	68824.5	10093.5	300.95	204.166	0	0	0	0	0	0	0	200	903	0	0	0	0	0	0	0	603	903	0
533	5	39.1023	66.9115	-681.768	65428.1	68702.4	9818.8	300.771	204.032	0	0	0	0	0	0	0	200	903	0	0	0	0	0	0	0	603	903	0
533	6	37.5764	66.4537	-676.581	64695.6	68153.1	9773.03	300.732	204.378	0	0	0	0	0	0	0	200	903	0	0	0	0	0	0	0	603	903	0
533	7	38.6445	64.7752	-674.139	63413.9	68214.1	9773.03	301.187	205.933	0	0	0	0	0	0	0	200	903	0	0	0	0	0	0	0	603	903	0
533	8	37.5764	64.4701	-670.782	63688.6	67786.9	9818.8	301.057	205.053	0	0	0	0	0	0	0	200	903	0	0	0	0	0	0	0	603	903	0
533	9	37.729	62.639	-667.12	63139.3	67786.9	9727.25	301.611	205.355	0	0	0	0	0	0	0	200	903	0	0	0	0	0	0	0	603	903	0
534	0	38.9497	62.1812	-665.289	62498.4	67664.8	9635.7	301.707	206.058	0	0	0	0	0	0	0	200	903	0	0	0	0	0	0	0	603	903	0
534	1	37.4238	62.1812	-663.153	61949.1	66627.2	9361.04	300.47	206.584	0	0	0	0	0	0	0	200	903	0	0	0	0	0	0	0	603	903	0
534	2	36.6609	61.1131	-660.406	61766	67054.5	9361.04	301.535	206.473	0	0	0	0	0	0	0	200	903	0	0	0	0	0	0	0	603	903	0
534	3	36.5083	60.045	-657.354	61399.8	66566.2	9269.49	301.264	206.596	0	0	0	0	0	0	0	200	903	0	0	0	0	0	0	0	603	903	0
534	4	36.6609	57.7562	-653.387	60850.5	66200	9177.93	301.318	206.869	0	0	0	0	0	0	0	200	903	0	0	0	0	0	0	0	603	903	0
534	5	36.0505	57.9088	-649.725	60026.5	66261	8949.05	301.983	207.613	0	0	0	0	0	0	0	200	903	0	0	0	0	0	0	0	603	903	0
534	6	37.2712	57.2984	-647.284	59751.8	65589.6	9177.93	301.331	207.688	0	0	0	0	0	0	0	200	903	0	0	0	0	0	0	0	603	903	0
534	7	37.4238	57.2984	-645.453	59751.8	65467.5	8811.72	301.429	207.426	0	0	0	0	0	0	0	200	903	0	0	0	0	0	0	0	603	903	0
534	8	36.6609	55.62	-643.316	59110.9	65589.6	8949.05	301.956	208.115	0	0	0	0	0	0	0	200	903	0	0	0	0	0	0	0	603	903	0
534	9	38.1868	54.857	-639.044	58378.5	64796.1	8674.39	301.395	208.647	0	0	0	0	0	0	0	200	903	0	0	0	0	0	0	0	603	903	0
535	0	36.0505	54.857	-638.739	57646.1	64674.1	8903.28	301.253	209.75	0	0	0	0	0	0	0	200	903	0	0	0	0	0	0	0	603	903	0
535	1	36.8135	54.2467	-632.635	57463	64613	8674.39	302.133	209.169	0	0	0	0	0	0	0	200	903	0	0	0	0	0	0	0	603	903	0
535	2	35.8979	52.5682	-629.889	57371.5	64124.8	8445.51	301.803	208.918	0	0	0	0	0	0	0	200	903	0	0	0	0	0	0	0	603	903	0
535	3	37.2712	51.9579	-626.837	57005.2	64124.8	8582.84	302.299	209.059	0	0	0	0	0	0	0	200	903	0	0	0	0	0	0	0	603	903	0
535	4	36.5083	51.8053	-625.006	56364.4	63819.6	8491.29	302.11	209.818	0	0	0	0	0	0	0	200	903	0	0	0	0	0	0	0	603	903	0
535	5	36.3557	51.1949	-624.09	55448.8	63270.3	8445.51	301.38	211.153	0	0	0	0	0	0	0	200	903	0	0	0	0	0	0	0	603	903	0
535	6	36.2031	50.432	-620.428	55631.9	63392.3	8537.06	302.175	210.333	0	0	0	0	0	0	0	200	903	0	0	0	0	0	0	0	603	903	0
535	7	35.4402	49.3639	-617.987	54991.1	62782	8308.18	301.591	211.016	0	0	0	0	0	0	0	200	903	0	0	0	0	0	0	0	603	903	0
535	8	35.7453	49.2113	-615.545	53984	62843	8353.96	302.093	212.299	0	0	0	0	0	0	0	200	903	0	0	0	0	0	0	0	603	903	0
535	9	35.135	48.1432	-610.357	53709.3	62720.9	8033.52	302.761	212.003	0	0	0	0	0	0	0	200	903	0	0	0	0	0	0	0	603	903	0
536	0	36.5083	47.6854	-606.39	52793.8	62415.8	8216.63	302.93	212.938	0	0	0	0	0	0	0	200	903	0	0	0	0	0	0	0	603	903	0
536	1	36.2031	46.7699	-606.695	53526.2	62354.7	8079.3	302.778	211.774	0	0	0	0	0	0	0	200	903	0	0	0	0	0	0	0	603	903	0
536	2	36.6609	45.8543	-605.78	52610.7	61988.5	7987.75	302.328	213.152	0	0	0	0	0	0	0	200	903	0	0	0	0	0	0	0	603	903	0
536	3	35.7453	45.3966	-600.897	51969.8	60889.9	7896.2	301.332	213.513	0	0	0	0	0	0	0	200	903	0	0	0	0	0	0	0	603	903	0
536	4	35.7453	45.244	-596.014	51237.4	61378.2	8033.52	302.981	214.033	0	0	0	0	0	0	0	200	903	0	0	0	0	0	0	0	603	903	0
536	5	34.9824	45.244	-595.709	51329	61378.2	7621.54	303.034	213.835	0	0	0	0	0	0	0	200	903	0	0	0	0	0	0	0	603	903	0
536	6	35.5928	43.7181	-592.352	50871.2	60828.9	7758.87	302.69	214.12	0	0	0	0	0	0	0	200	903	0	0	0	0	0	0	0	603	903	0
536	7	34.9824	43.1078	-589.605	50047.2	61012	7758.87	303.479	215.117	0	0	0	0	0	0	0	200	903	0	0	0	0	0	0	0	603	903	0
536	8	35.135	43.1078	-586.248	49406.3	60401.6	7255.33	303.031	215.725	0	0	0	0	0	0	0	200	903	0	0	0	0	0	0	0	603	903	0
536	9	36.2031	42.4974	-585.028	48948.6	60279.5	7255.33	303.037	216.331	0	0	0	0	0	0	0	200	903	0	0	0	0	0	0	0	603	903	0
537	0	35.135	40.6664	-583.502	49131.7	60340.6	7392.66	303.411	215.799	0	0	0	0	0	0	0	200	903	0	0	0	0	0	0	0	603	903	0
537	1	35.8979	40.5138	-580.145	48582.4	59913.3	7621.54	303.273	216.258	0	0	0	0	0	0	0	200	903	0	0	0	0	0	0	0	603	903	0
537	2	33.9143	39.7508	-578.924	47850	59852.3	7209.55	303.385	217.347	0	0	0	0	0	0	0	200	903	0	0	0	0	0	0	0	603	903	0
537	3	35.7453	39.7508	-576.178	47483.8	59730.2	7163.78	303.666	217.588	0	0	0	0	0	0	0	200	903	0	0	0	0	0	0	0	603	903	0
537	4	34.8298	38.9879	-572.21	47483.8	59364	7026.44	303.745	217.017	0	0	0	0	0	0	0	200	903	0	0	0	0	0	0	0	603	903	0
537	5	34.5246	37.6146	-570.379	47209.1	59303	7026.44	303.971	217.232	0	0	0	0	0	0	0	200	903	0	0	0	0	0	0	0	603	903	0
537	6	35.7453	37.1568	-568.548	46110.4	59241.9	6843.34	304.199	218.898	0	0	0	0	0	0	0	200	903	0	0	0	0	0	0	0	603	903	0
537	7	37.2712	37.3094	-568.243	46202	58753.7	6751.79	303.395	218.693	0	0	0	0	0	0	0	200	903	0	0	0	0	0	0	0	603	903	0
537	8	35.7453	36.2413	-567.328	45561.1	58387.5	6751.79	302.917	219.692	0	0	0	0	0	0	0	200	903	0	0	0	0	0	0	0	603	903	0
537	9	35.8979	35.9361	-564.581	46110.4	58631.6	6477.13	303.85	218.328	0	0	0	0	0	0	0	200	903	0	0	0	0	0	0	0	603	903	0
538	0	35.4402	33.3421	-563.665	45561.1	58326.4	6751.79	303.477	219.17	0	0	0	0	0	0	0	200	903	0	0	0	0	0	0	0	603	903	0
538	1	36.2031	34.5628	-559.088	44554.1	58509.5	6477.13	304.652	220.309	0	0	0	0	0	0	0	200	903	0	0	0	0	0	0	0	603	903	0
538	2	35.2876	34.868	-558.477	44187.9	58082.3	6339.8	304.001	220.878	0	0	0	0	0	0	0	200	903	0	0	0	0	0	0	0	603	903	0
538	3	36.6609	33.6473	-556.646	44371	58204.3	6431.35	304.562	220.289	0	0	0	0	0	0	0	200	903	0	0	0	0	0	0	0	603	903	0
538	4	36.2031	32.7318	-555.731	44187.9	58326.4	6522.9	304.954	220.487	0	0	0	0	0	0	0	200	903	0	0	0	0	0	0	0	603	903	0
538	5	37.4238	32.4266	-554.815	42539.9	57410.9	6110.92	303.478	223.326	0	0	0	0	0	0	0	200	903	0	0	0	0	0	0	0	603	903	0
538	6	36.5083	31.9688	-553.9	42997.7	57899.2	6294.02	304.53	222.373	0	0	0	0	0	0	0	200	903	0	0	0	0	0	0	0	603	903	0
538	7	35.8979	31.3585	-552.069	42814.5	57471.9	6339.8	304.103	222.447	0	0	0	0	0	0	0	200	903	0	0	0	0	0	0	0	603	903	0
538	8	36.2031	30.1378	-550.238	42723	57533	6156.69	304.56	222.355	0	0	0	0	0	0	0	200	903	0	0	0	0	0	0	0	603	903	0
538	9	35.7453	29.9852	-547.491	41075.1	57471.9	6110.92	304.973	224.976	0	0	0	0	0	0	0	200	903	0	0	0	0	0	0	0	603	903	0
539	0	36.6609	29.9852	-545.355	41990.6	57349.9	6019.36	305.161	223.003	0	0	0	0	0	0	0	200	903	0	0	0	0	0	0	0	603	903	0
539	1	35.8979	28.6119	-543.829	41441.3	56983.6	5836.26	304.782	223.797	0	0	0	0	0	0	0	200	903	0	0	0	0	0	0	0	603	903	0
539	2	36.8135	29.0697	-542.303	41441.3	56495.4	5607.38	304.177	223.583	0	0	0	0	0	0	0	200	903	0	0	0	0	0	0	0	603	903	0
539	3	35.8979	27.6964	-541.998	41075.1	56861.6	5744.71	304.911	224.215	0	0	0	0	0	0	0	200	903	0	0	0	0	0	0	0	603	903	0
539	4	36.8135	26.4757	-541.693	40159.5	56983.6	5790.48	305.195	225.863	0	0	0	0	0	0	0	200	903	0	0	0	0	0	0	0	603	903	0
539	5	36.0505	26.9334	-540.167	39701.8	57044.7	5241.17	305.606	226.501	0	0	0	0	0	0	0	200	903	0	0	0	0	0	0	0	603	903	0
539	6	36.2031	26.3231	-537.726	39244	56312.3	5332.72	304.723	227.019	0	0	0	0	0	0	0	200	903	0	0	0	0	0	0	0	603	903	0
539	7	36.0505	24.6446	-535.894	39976.4	56861.6	5378.5	306.106	225.402	0	0	0	0	0	0	0	200	903	0	0	0	0	0	0	0	603	903	0
539	8	36.3557	23.1187	-532.232	39427.1	56373.3	5332.72	305.919	225.921	0	0	0	0	0	0	0	200	903	0	0	0	0	0	0	0	603	903	0
539	9	37.1186	24.1869	-534.063	38420	56556.4	5103.84	305.898	228.061	0	0	0	0	0	0	0	200	903	0	0	0	0	0	0	0	603	903	0
540	0	38.1868	22.3558	-532.843	38420	56129.1	5149.61	305.339	227.896	0	0	0	0	0	0	0	200	903	0	0	0	0	0	0	0	603	903	0
540	1	36.6609	23.8817	-532.232	38511.6	56373.3	5241.17	305.919	227.641	0	0	0	0	0	0	0	200	903	0	0	0	0	0	0	0	603	903	0
540	2	36.0505	23.7291	-531.012	38053.8	56190.2	4874.96	305.817	228.337	0	0	0	0	0	0	0	200	903	0	0	0	0	0	0	0	603	903	0
540	3	36.8135	22.8136	-531.622	37321.4	56190.2	5012.28	305.696	229.797	0	0	0	0	0	0	0	200	903	0	0	0	0	0	0	0	603	903	0
540	4	37.1186	23.2713	-527.35	36863.6	55518.8	4600.3	305.279	230.096	0	0	0	0	0	0	0	200	903	0	0	0	0	0	0	0	603	903	0
540	5	36.6609	22.5084	-526.739	37413	55946	4874.96	306.212	228.973	0	0	0	0	0	0	0	200	903	0	0	0	0	0	0	0	603	903	0
540	6	36.8135	21.5929	-525.213	36680.5	56251.2	4691.85	307.102	230.161	0	0	0	0	0	0	0	200	903	0	0	0	0	0	0	0	603	903	0
540	7	37.4238	21.2877	-524.908	36497.4	55396.7	4646.07	305.536	230.469	0	0	0	0	0	0	0	200	903	0	0	0	0	0	0	0	603	903	0
540	8	36.8135	21.2877	-524.908	35765	55640.9	4508.74	306.001	231.864	0	0	0	0	0	0	0	200	903	0	0	0	0	0	0	0	603	903	0
540	9	36.5083	21.2877	-524.298	36497.4	55335.7	4554.52	305.543	230.388	0	0	0	0	0	0	0	200	903	0	0	0	0	0	0	0	603	903	0
541	0	36.3557	19.9144	-522.162	35490.3	55335.7	4325.64	305.974	232.032	0	0	0	0	0	0	0	200	903	0	0	0	0	0	0	0	603	903	0
541	1	35.8979	20.2196	-520.941	35307.2	55518.8	4325.64	306.574	232.224	0	0	0	0	0	0	0	200	903	0	0	0	0	0	0	0	603	903	0
541	2	35.5928	19.6092	-518.805	34666.4	54908.4	4279.86	305.836	233.18	0	0	0	0	0	0	0	200	903	0	0	0	0	0	0	0	603	903	0
541	3	36.6609	19.7618	-517.889	34208.6	55213.6	4142.53	306.613	233.946	0	0	0	0	0	0	0	200	903	0	0	0	0	0	0	0	603	903	0
541	4	35.2876	18.3885	-516.058	34483.3	54847.4	4005.2	306.281	233.179	0	0	0	0	0	0	0	200	903	0	0	0	0	0	0	0	603	903	0
541	5	35.7453	18.5411	-515.753	34483.3	54786.4	3822.1	306.226	233.14	0	0	0	0	0	0	0	200	903	0	0	0	0	0	0	0	603	903	0
541	6	35.135	17.1678	-516.363	33567.7	54847.4	4005.2	306.219	234.992	0	0	0	0	0	0	0	200	903	0	0	0	0	0	0	0	603	903	0
541	7	35.8979	17.6256	-512.701	33567.7	54908.4	3776.32	307.096	234.528	0	0	0	0	0	0	0	200	903	0	0	0	0	0	0	0	603	903	0
541	8	34.9824	17.3204	-515.753	33659.3	54115	3913.65	304.924	234.738	0	0	0	0	0	0	0	200	903	0	0	0	0	0	0	0	603	903	0
541	9	35.5928	15.9471	-512.701	33293.1	54725.3	3501.66	306.739	235.063	0	0	0	0	0	0	0	200	903	0	0	0	0	0	0	0	603	903	0
542	0	34.2195	14.7264	-510.87	33293.1	54481.2	3410.11	306.644	234.831	0	0	0	0	0	0	0	200	903	0	0	0	0	0	0	0	603	903	0
542	1	34.6772	15.9471	-506.598	32286	53931.9	3684.77	306.459	236.269	0	0	0	0	0	0	0	200	903	0	0	0	0	0	0	0	603	903	0
542	2	35.4402	15.6419	-510.26	32102.9	54481.2	3135.45	306.772	237.085	0	0	0	0	0	0	0	200	903	0	0	0	0	0	0	0	603	903	0
542	3	36.0505	14.5738	-510.87	32377.5	53687.7	3135.45	305.091	236.623	0	0	0	0	0	0	0	200	903	0	0	0	0	0	0	0	603	903	0
542	4	34.6772	13.6583	-510.565	31919.8	53931.9	3227.01	305.632	237.481	0	0	0	0	0	0	0	200	903	0	0	0	0	0	0	0	603	903	0
542	5	33.6091	13.2005	-509.649	31370.5	53809.8	2815.02	305.582	238.447	0	0	0	0	0	0	0	200	903	0	0	0	0	0	0	0	603	903	0
542	6	34.5246	13.8109	-508.429	31187.4	53809.8	2860.79	305.836	238.659	0	0	0	0	0	0	0	200	903	0	0	0	0	0	0	0	603	903	0
542	7	34.5246	11.8272	-506.292	30729.6	53748.8	2998.12	306.162	239.305	0	0	0	0	0	0	0	200	903	0	0	0	0	0	0	0	603	903	0
542	8	34.2195	12.4376	-505.682	30912.7	53809.8	2906.57	306.41	238.869	0	0	0	0	0	0	0	200	903	0	0	0	0	0	0	0	603	903	0
542	9	34.0669	12.285	-504.461	30729.6	53260.5	2769.24	305.579	239.084	0	0	0	0	0	0	0	200	903	0	0	0	0	0	0	0	603	903	0
543	0	34.5246	11.6747	-505.072	30638	53626.7	2723.47	306.176	239.339	0	0	0	0	0	0	0	200	903	0	0	0	0	0	0	0	603	903	0
543	1	34.8298	10.7591	-504.156	29356.3	53504.6	2311.48	306.127	241.771	0	0	0	0	0	0	0	200	903	0	0	0	0	0	0	0	603	903	0
543	2	34.3721	11.3695	-504.461	29539.4	53504.6	2586.14	306.063	241.444	0	0	0	0	0	0	0	200	903	0	0	0	0	0	0	0	603	903	0
543	3	34.0669	10.6065	-504.461	29356.3	53382.6	2769.24	305.821	241.807	0	0	0	0	0	0	0	200	903	0	0	0	0	0	0	0	603	903	0
543	4	33.3039	10.4539	-502.935	29539.4	53199.5	2494.58	305.778	241.266	0	0	0	0	0	0	0	200	903	0	0	0	0	0	0	0	603	903	0
543	5	33.6091	9.99619	-501.104	28440.8	53138.4	2494.58	306.043	243.244	0	0	0	0	0	0	0	200	903	0	0	0	0	0	0	0	603	903	0
543	6	33.1514	10.6065	-499.884	28715.4	52833.2	2311.48	305.691	242.556	0	0	0	0	0	0	0	200	903	0	0	0	0	0	0	0	603	903	0
543	7	33.7617	7.85995	-499.884	28257.7	52650.1	2311.48	305.325	243.472	0	0	0	0	0	0	0	200	903	0	0	0	0	0	0	0	603	903	0
543	8	33.7617	9.69101	-499.273	28166.1	52955.3	2448.81	306.065	243.586	0	0	0	0	0	0	0	200	903	0	0	0	0	0	0	0	603	903	0
543	9	33.4565	9.08066	-500.494	28166.1	52955.3	1899.49	305.806	243.723	0	0	0	0	0	0	0	200	903	0	0	0	0	0	0	0	603	903	0
544	0	34.6772	8.31772	-495.001	26975.9	52711.2	1945.27	306.487	245.503	0	0	0	0	0	0	0	200	903	0	0	0	0	0	0	0	603	903	0
544	1	32.9988	8.77548	-499.884	27342.1	52833.2	1853.72	305.691	245.303	0	0	0	0	0	0	0	200	903	0	0	0	0	0	0	0	603	903	0
544	2	32.8462	8.31772	-498.968	26701.3	52833.2	1899.49	305.885	246.487	0	0	0	0	0	0	0	200	903	0	0	0	0	0	0	0	603	903	0
544	3	33.4565	7.85995	-495.611	27525.2	52589.1	1807.94	306.11	244.462	0	0	0	0	0	0	0	200	903	0	0	0	0	0	0	0	603	903	0
544	4	33.3039	7.55478	-493.78	26609.7	52711.2	1807.94	306.75	246.11	0	0	0	0	0	0	0	200	903	0	0	0	0	0	0	0	603	903	0
544	5	33.4565	7.40219	-495.001	26426.6	52528.1	1899.49	306.117	246.613	0	0	0	0	0	0	0	200	903	0	0	0	0	0	0	0	603	903	0
544	6	33.4565	6.79184	-495.001	25877.3	52345	1670.61	305.747	247.723	0	0	0	0	0	0	0	200	903	0	0	0	0	0	0	0	603	903	0
544	7	33.4565	7.2496	-496.222	25602.6	52406	1670.61	305.61	248.405	0	0	0	0	0	0	0	200	903	0	0	0	0	0	0	0	603	903	0
544	8	32.541	7.09702	-496.527	25785.7	51917.7	1350.18	304.562	248.068	0	0	0	0	0	0	0	200	903	0	0	0	0	0	0	0	603	903	0
544	9	32.541	5.57114	-496.222	25785.7	52345	1212.85	305.487	248.036	0	0	0	0	0	0	0	200	903	0	0	0	0	0	0	0	603	903	0
545	0	32.2358	5.41855	-495.306	25053.3	52283.9	1121.29	305.559	249.419	0	0	0	0	0	0	0	200	903	0	0	0	0	0	0	0	603	903	0
545	1	33.1514	5.57114	-494.391	24870.2	51856.7	1395.95	304.89	249.695	0	0	0	0	0	0	0	200	903	0	0	0	0	0	0	0	603	903	0
545	2	31.7781	5.87631	-493.17	24961.8	52161.9	1167.07	305.769	249.385	0	0	0	0	0	0	0	200	903	0	0	0	0	0	0	0	603	903	0
545	3	32.0832	4.50302	-494.391	24595.6	52100.8	938.188	305.384	250.251	0	0	0	0	0	0	0	200	903	0	0	0	0	0	0	0	603	903	0
545	4	32.2358	4.65561	-492.56	24320.9	51734.6	892.411	305.032	250.623	0	0	0	0	0	0	0	200	903	0	0	0	0	0	0	0	603	903	0
545	5	32.541	4.65561	-493.78	23588.5	52039.8	1121.29	305.391	252.229	0	0	0	0	0	0	0	200	903	0	0	0	0	0	0	0	603	903	0
545	6	31.9307	3.58749	-493.17	23588.5	51673.6	663.53	304.778	252.17	0	0	0	0	0	0	0	200	903	0	0	0	0	0	0	0	603	903	0
545	7	31.1677	4.35043	-493.475	24137.8	51490.5	709.306	304.343	251.086	0	0	0	0	0	0	0	200	903	0	0	0	0	0	0	0	603	903	0
545	8	31.3203	3.43491	-493.17	23680	51795.7	755.082	305.026	251.984	0	0	0	0	0	0	0	200	903	0	0	0	0	0	0	0	603	903	0
545	9	30.8625	3.74008	-491.644	23039.2	51673.6	343.095	305.104	253.139	0	0	0	0	0	0	0	200	903	0	0	0	0	0	0	0	603	903	0
546	0	31.0151	2.67197	-491.644	23039.2	51734.6	663.53	305.228	253.139	0	0	0	0	0	0	0	200	903	0	0	0	0	0	0	0	603	903	0
546	1	31.1677	1.90903	-490.728	22856.1	51307.4	526.2	304.553	253.424	0	0	0	0	0	0	0	200	903	0	0	0	0	0	0	0	603	903	0
546	2	30.8625	2.51938	-492.254	22764.5	51307.4	434.647	304.229	253.755	0	0	0	0	0	0	0	200	903	0	0	0	0	0	0	0	603	903	0
546	3	31.4729	1.90903	-491.034	22673	51551.5	205.766	304.986	253.826	0	0	0	0	0	0	0	200	903	0	0	0	0	0	0	0	603	903	0
546	4	30.4048	0.688324	-489.203	21940.5	51429.4	68.4365	305.129	255.15	0	0	0	0	0	0	0	200	903	0	0	0	0	0	0	0	603	903	0
546	5	30.7099	1.60385	-491.034	21574.3	51185.3	-23.1163	304.24	256.063	0	0	0	0	0	0	0	200	903	0	0	0	0	0	0	0	603	903	0
546	6	29.947	0.9935	-491.949	21574.3	51429.4	68.4365	304.542	256.145	0	0	0	0	0	0	0	200	903	0	0	0	0	0	0	0	603	903	0
546	7	30.4048	0.535736	-490.118	21574.3	51002.2	-114.669	304.061	255.981	0	0	0	0	0	0	0	200	903	0	0	0	0	0	0	0	603	903	0
546	8	29.947	0.0779722	-490.118	21849	51368.4	-251.998	304.808	255.421	0	0	0	0	0	0	0	200	903	0	0	0	0	0	0	0	603	903	0
546	9	30.2522	-0.0746157	-489.508	20933.5	51063.2	-160.445	304.316	257.236	0	0	0	0	0	0	0	200	903	0	0	0	0	0	0	0	603	903	0
547	0	30.4048	0.23056	-489.508	20475.7	51124.3	-480.88	304.44	258.171	0	0	0	0	0	0	0	200	903	0	0	0	0	0	0	0	603	903	0
547	1	29.6418	0.0779722	-492.254	20933.5	50697	-801.315	302.99	257.474	0	0	0	0	0	0	0	200	903	0	0	0	0	0	0	0	603	903	0
547	2	30.5574	-0.837555	-491.034	20475.7	51185.3	-526.656	304.24	258.301	0	0	0	0	0	0	0	200	903	0	0	0	0	0	0	0	603	903	0
547	3	29.4892	-1.29532	-491.339	20384.1	50819.1	-709.762	303.43	258.513	0	0	0	0	0	0	0	200	903	0	0	0	0	0	0	0	603	903	0
547	4	30.4048	-2.05826	-490.728	19834.8	51063.2	-343.551	304.056	259.581	0	0	0	0	0	0	0	200	903	0	0	0	0	0	0	0	603	903	0
547	5	29.4892	-2.21085	-491.644	19468.6	50880.1	-755.538	303.49	260.401	0	0	0	0	0	0	0	200	903	0	0	0	0	0	0	0	603	903	0
547	6	29.3367	-1.75308	-491.339	19926.4	51002.2	-709.762	303.802	259.445	0	0	0	0	0	0	0	200	903	0	0	0	0	0	0	0	603	903	0
547	7	30.4048	-2.51602	-489.813	19926.4	51063.2	-755.538	304.251	259.318	0	0	0	0	0	0	0	200	903	0	0	0	0	0	0	0	603	903	0
547	8	29.7944	-2.97379	-490.423	18736.2	51063.2	-938.644	304.121	261.796	0	0	0	0	0	0	0	200	903	0	0	0	0	0	0	0	603	903	0
547	9	30.5574	-2.66861	-493.17	18644.6	51002.2	-984.42	303.417	262.194	0	0	0	0	0	0	0	200	903	0	0	0	0	0	0	0	603	903	0
548	0	29.1841	-3.27896	-492.865	18827.7	50575	-663.985	302.614	261.799	0	0	0	0	0	0	0	200	903	0	0	0	0	0	0	0	603	903	0
548	1	29.6418	-3.58414	-493.475	18644.6	50941.2	-1121.75	303.229	262.218	0	0	0	0	0	0	0	200	903	0	0	0	0	0	0	0	603	903	0
548	2	28.7263	-3.73673	-494.085	18095.3	50697	-1304.85	302.608	263.376	0	0	0	0	0	0	0	200	903	0	0	0	0	0	0	0	603	903	0
548	3	29.7944	-3.73673	-492.56	17912.2	50880.1	-1167.53	303.297	263.634	0	0	0	0	0	0	0	200	903	0	0	0	0	0	0	0	603	903	0
548	4	29.0315	-4.0419	-492.56	18003.8	50941.2	-1487.96	303.421	263.449	0	0	0	0	0	0	0	200	903	0	0	0	0	0	0	0	603	903	0
548	5	30.2522	-5.2626	-493.78	18003.8	51002.2	-1167.53	303.289	263.539	0	0	0	0	0	0	0	200	903	0	0	0	0	0	0	0	603	903	0
548	6	29.6418	-5.56778	-493.475	17546	50697	-1487.96	302.735	264.444	0	0	0	0	0	0	0	200	903	0	0	0	0	0	0	0	603	903	0
548	7	30.7099	-5.87296	-495.611	17271.3	50941.2	-1487.96	302.785	265.151	0	0	0	0	0	0	0	200	903	0	0	0	0	0	0	0	603	903	0
548	8	29.4892	-7.24625	-495.611	16172.7	51368.4	-1442.18	303.647	267.368	0	0	0	0	0	0	0	200	903	0	0	0	0	0	0	0	603	903	0
548	9	29.3367	-5.41519	-497.442	17088.2	50758.1	-1762.62	302.038	265.648	0	0	0	0	0	0	0	200	903	0	0	0	0	0	0	0	603	903	0
549	0	29.1841	-6.33072	-497.137	16722	50697	-1808.4	301.978	266.363	0	0	0	0	0	0	0	200	903	0	0	0	0	0	0	0	603	903	0
549	1	29.947	-6.33072	-496.222	16538.9	50941.2	-1716.84	302.658	266.67	0	0	0	0	0	0	0	200	903	0	0	0	0	0	0	0	603	903	0
549	2	29.3367	-7.09366	-496.222	15898	50819.1	-1991.5	302.412	267.962	0	0	0	0	0	0	0	200	903	0	0	0	0	0	0	0	603	903	0
549	3	30.0996	-6.33072	-497.442	16264.3	51063.2	-1899.95	302.652	267.304	0	0	0	0	0	0	0	200	903	0	0	0	0	0	0	0	603	903	0
549	4	29.1841	-7.8566	-497.442	16355.8	51002.2	-1991.5	302.529	267.12	0	0	0	0	0	0	0	200	903	0	0	0	0	0	0	0	603	903	0
549	5	30.0996	-7.8566	-498.358	15623.4	51429.4	-1991.5	303.198	268.65	0	0	0	0	0	0	0	200	903	0	0	0	0	0	0	0	603	903	0
549	6	29.3367	-7.39883	-499.884	14891	50941.2	-2311.94	301.906	270.211	0	0	0	0	0	0	0	200	903	0	0	0	0	0	0	0	603	903	0
549	7	29.7944	-10.4506	-501.41	15165.6	51368.4	-2174.61	302.448	269.754	0	0	0	0	0	0	0	200	903	0	0	0	0	0	0	0	603	903	0
549	8	29.0315	-8.61954	-502.02	15257.2	51124.3	-2586.59	301.837	269.608	0	0	0	0	0	0	0	200	903	0	0	0	0	0	0	0	603	903	0
549	9	29.7944	-9.53506	-500.494	14707.9	51246.3	-2495.04	302.392	270.613	0	0	0	0	0	0	0	200	903	0	0	0	0	0	0	0	603	903	0
550	0	28.8789	-9.68765	-499.884	14524.8	51185.3	-2678.15	302.394	270.944	0	0	0	0	0	0	0	200	903	0	0	0	0	0	0	0	603	903	0
550	1	29.4892	-9.68765	-501.715	13792.3	51124.3	-2403.49	301.899	272.51	0	0	0	0	0	0	0	200	903	0	0	0	0	0	0	0	603	903	0
550	2	29.1841	-9.68765	-503.546	13975.4	51551.5	-2632.37	302.377	272.246	0	0	0	0	0	0	0	200	903	0	0	0	0	0	0	0	603	903	0
550	3	29.3367	-10.9084	-505.682	13975.4	51185.3	-2998.58	301.22	272.363	0	0	0	0	0	0	0	200	903	0	0	0	0	0	0	0	603	903	0
550	4	28.8789	-11.5187	-506.598	14433.2	51673.6	-2907.03	302.001	271.51	0	0	0	0	0	0	0	200	903	0	0	0	0	0	0	0	603	903	0
550	5	28.5737	-10.4506	-507.208	13609.2	51612.5	-2815.48	301.758	273.168	0	0	0	0	0	0	0	200	903	0	0	0	0	0	0	0	603	903	0
550	6	28.8789	-11.3661	-509.344	12785.3	51490.5	-2769.7	301.092	274.899	0	0	0	0	0	0	0	200	903	0	0	0	0	0	0	0	603	903	0
550	7	28.4211	-13.1972	-507.208	13334.6	51490.5	-3181.69	301.517	273.71	0	0	0	0	0	0	0	200	903	0	0	0	0	0	0	0	603	903	0
550	8	28.4211	-13.0446	-507.208	13151.5	51856.7	-2815.48	302.24	274.071	0	0	0	0	0	0	0	200	903	0	0	0	0	0	0	0	603	903	0
550	9	29.3367	-12.5868	-509.039	12510.6	51612.5	-3456.34	301.392	275.423	0	0	0	0	0	0	0	200	903	0	0	0	0	0	0	0	603	903	0
551	0	30.4048	-12.892	-512.091	12693.7	52039.8	-3273.24	301.622	275.212	0	0	0	0	0	0	0	200	903	0	0	0	0	0	0	0	603	903	0
551	1	29.1841	-12.892	-513.617	12327.5	51917.7	-3593.67	301.083	275.999	0	0	0	0	0	0	0	200	903	0	0	0	0	0	0	0	603	903	0
551	2	28.116	-14.1127	-515.448	12602.2	52039.8	-3593.67	300.96	275.551	0	0	0	0	0	0	0	200	903	0	0	0	0	0	0	0	603	903	0
551	3	28.5737	-15.0282	-515.448	11412	51917.7	-3547.9	300.724	277.86	0	0	0	0	0	0	0	200	903	0	0	0	0	0	0	0	603	903	0
551	4	28.5737	-14.5705	-515.448	11686.6	52833.2	-3822.56	302.5	277.327	0	0	0	0	0	0	0	200	903	0	0	0	0	0	0	0	603	903	0
551	5	28.7263	-14.7231	-516.363	11503.5	52406	-3685.23	301.491	277.722	0	0	0	0	0	0	0	200	903	0	0	0	0	0	0	0	603	903	0
551	6	29.1841	-15.486	-518.499	11595.1	51673.6	-3776.78	299.66	277.637	0	0	0	0	0	0	0	200	903	0	0	0	0	0	0	0	603	903	0
551	7	28.5737	-17.317	-519.415	11412	52345	-4097.22	300.777	278.029	0	0	0	0	0	0	0	200	903	0	0	0	0	0	0	0	603	903	0
551	8	29.1841	-15.486	-523.077	10679.5	52711.2	-4326.1	300.771	279.583	0	0	0	0	0	0	0	200	903	0	0	0	0	0	0	0	603	903	0
551	9	29.1841	-16.2489	-520.941	10404.9	52589.1	-4463.43	300.95	280.027	0	0	0	0	0	0	0	200	903	0	0	0	0	0	0	0	603	903	0
552	0	29.3367	-15.7912	-524.908	10313.3	52894.3	-4234.54	300.769	280.352	0	0	0	0	0	0	0	200	903	0	0	0	0	0	0	0	603	903	0
552	1	28.7263	-17.1645	-524.908	10588	52772.2	-4326.1	300.536	279.829	0	0	0	0	0	0	0	200	903	0	0	0	0	0	0	0	603	903	0
552	2	28.5737	-17.6222	-526.129	9580.91	52955.3	-4417.65	300.651	281.79	0	0	0	0	0	0	0	200	903	0	0	0	0	0	0	0	603	903	0
552	3	28.2685	-17.0119	-527.044	10679.5	52955.3	-4692.31	300.476	279.737	0	0	0	0	0	0	0	200	903	0	0	0	0	0	0	0	603	903	0
552	4	28.7263	-18.8429	-528.57	9580.91	53260.5	-4509.2	300.763	281.874	0	0	0	0	0	0	0	200	903	0	0	0	0	0	0	0	603	903	0
552	5	28.8789	-18.08	-528.875	9397.8	53016.4	-4829.64	300.244	282.231	0	0	0	0	0	0	0	200	903	0	0	0	0	0	0	0	603	903	0
552	6	28.7263	-19.6059	-533.148	9397.8	53260.5	-4921.19	299.898	282.373	0	0	0	0	0	0	0	200	903	0	0	0	0	0	0	0	603	903	0
552	7	29.3367	-19.6059	-532.843	8756.94	53931.9	-4738.08	301.215	283.566	0	0	0	0	0	0	0	200	903	0	0	0	0	0	0	0	603	903	0
552	8	27.0478	-18.8429	-535.894	8207.62	53809.8	-5287.4	300.411	284.684	0	0	0	0	0	0	0	200	903	0	0	0	0	0	0	0	603	903	0
552	9	29.1841	-19.911	-536.81	8848.49	54115	-5058.52	300.809	283.517	0	0	0	0	0	0	0	200	903	0	0	0	0	0	0	0	603	903	0
553	0	27.5056	-20.5214	-538.641	8756.94	54298.1	-4966.97	300.806	283.743	0	0	0	0	0	0	0	200	903	0	0	0	0	0	0	0	603	903	0
553	1	28.5737	-20.9792	-541.693	8756.94	54298.1	-5195.85	300.238	283.834	0	0	0	0	0	0	0	200	903	0	0	0	0	0	0	0	603	903	0
553	2	28.7263	-20.674	-541.693	7841.4	54298.1	-5653.61	300.238	285.524	0	0	0	0	0	0	0	200	903	0	0	0	0	0	0	0	603	903	0
553	3	29.1841	-22.9628	-545.965	7749.85	54298.1	-5333.18	299.453	285.805	0	0	0	0	0	0	0	200	903	0	0	0	0	0	0	0	603	903	0
553	4	29.0315	-21.8947	-546.27	7200.53	54237.1	-5241.62	299.286	286.819	0	0	0	0	0	0	0	200	903	0	0	0	0	0	0	0	603	903	0
553	5	28.4211	-22.6576	-549.627	7292.09	54298.1	-5607.84	298.791	286.733	0	0	0	0	0	0	0	200	903	0	0	0	0	0	0	0	603	903	0
[truncated: 2,234 more rows]
