# Supplementary material for: The Effects of an Extemporaneous Speech Dual-task on Older Adult Gait Control
Source: Research Square preprint supplement (doi:10.21203/rs.3.rs-7674245/v1), 2025-11-18
Supplement: Supplementary file 137 [file Over1ground07.xlsx]

## Sheet: Sheet1
Trajectories
		01:LFHD			01:RFHD			01:LBHD			01:RBHD			01:C7			01:T10			01:CLAV			01:STRN			01:RBAK			01:LSHO			01:LUPA			01:LELB			01:LFRM			01:LWRA			01:LWRB			01:LFIN
Frame	Sub Frame	X	Y	Z	X	Y	Z	X	Y	Z	X	Y	Z	X	Y	Z	X	Y	Z	X	Y	Z	X	Y	Z	X	Y	Z	X	Y	Z	X	Y	Z	X	Y	Z	X	Y	Z	X	Y	Z	X	Y	Z	X	Y	Z
		mm	mm	mm	mm	mm	mm	mm	mm	mm	mm	mm	mm	mm	mm	mm	mm	mm	mm	mm	mm	mm	mm	mm	mm	mm	mm	mm	mm	mm	mm	mm	mm	mm	mm	mm	mm	mm	mm	mm	mm	mm	mm	mm	mm	mm	mm	mm	mm
368	0	93.6319	-2077.53	1571.56	188.772	-2062.42	1556.53	88.9615	-2250.86	1564.9	215.908	-2219.82	1578.17	164.144	-2279.27	1444.41	194.324	-2384.69	1200.97	163.222	-2137.3	1337.48	155.016	-2094.8	1154.4	234.51	-2377.53	1279.4	-2.41291	-2225.79	1369.85	-59.0837	-2328.63	1159.75	-58.1601	-2343.76	1081.71	-97.1687	-2341.97	959.487	-69.9547	-2280.35	847.873	-113.343	-2335.67	852.729	-110.392	-2303.87	767.121
369	0	92.5211	-2063.45	1574.8	187.761	-2048.66	1559.87	87.7593	-2236.89	1567.88	214.872	-2206.19	1581.35	162.961	-2265.14	1447.74	193.065	-2370.71	1204.22	162.584	-2123.33	1340.47	154.719	-2081.36	1156.87	233.567	-2363.75	1282.93	-3.29648	-2211.35	1372.42	-60.4839	-2312.73	1161.75	-59.531	-2327.93	1083.62	-98.2138	-2324.43	961.198	-70.4248	-2261.38	850.315	-114.64	-2315.89	854.651	-110.84	-2283.49	769.062
370	0	91.5409	-2049.41	1577.88	186.884	-2034.92	1563.03	86.6756	-2222.94	1570.75	213.944	-2192.57	1584.38	161.859	-2251.07	1450.93	191.834	-2356.82	1207.35	162.05	-2109.44	1343.35	154.568	-2067.98	1159.3	232.627	-2350.03	1286.31	-4.08701	-2196.94	1374.92	-61.8477	-2296.78	1163.72	-60.8985	-2312	1085.48	-99.2521	-2306.73	962.899	-70.8567	-2242.28	852.81	-115.841	-2296.03	856.556	-111.276	-2262.88	771.122
371	0	90.6911	-2035.4	1580.8	186.142	-2021.21	1566.01	85.7102	-2209.02	1573.5	213.124	-2178.97	1587.27	160.837	-2237.05	1453.96	190.63	-2343.01	1210.36	161.619	-2095.61	1346.14	154.562	-2054.64	1161.69	231.693	-2336.37	1289.53	-4.78471	-2182.56	1377.35	-63.1752	-2280.78	1165.65	-62.2626	-2295.98	1087.28	-100.284	-2288.87	964.589	-71.2503	-2223.03	855.359	-116.946	-2276.09	858.444	-111.7	-2242.02	773.3
372	0	89.971	-2021.42	1583.56	185.532	-2007.53	1568.82	84.8625	-2195.1	1576.15	212.41	-2165.38	1590.01	159.897	-2223.08	1456.84	189.454	-2329.28	1213.26	161.291	-2081.86	1348.81	154.7	-2041.36	1164.04	230.763	-2322.78	1292.59	-5.39013	-2168.21	1379.7	-64.4663	-2264.73	1167.56	-63.6232	-2279.87	1089.03	-101.308	-2270.85	966.267	-71.606	-2203.64	857.961	-117.956	-2256.06	860.316	-112.11	-2220.92	775.595
373	0	89.3792	-2007.47	1586.17	185.055	-1993.88	1571.45	84.1311	-2181.21	1578.67	211.803	-2151.8	1592.61	159.037	-2209.16	1459.57	188.304	-2315.63	1216.03	161.064	-2068.17	1351.38	154.975	-2028.12	1166.35	229.839	-2309.24	1295.5	-5.90431	-2153.89	1381.98	-65.7212	-2248.64	1169.43	-64.9802	-2263.67	1090.72	-102.326	-2252.67	967.931	-71.9243	-2184.1	860.614	-118.873	-2235.94	862.169	-112.505	-2199.59	778.004
374	0	88.9136	-1993.55	1588.6	184.706	-1980.26	1573.9	83.514	-2167.34	1581.08	211.299	-2138.23	1595.05	158.257	-2195.3	1462.14	187.182	-2302.05	1218.68	160.934	-2054.56	1353.84	155.38	-2014.93	1168.6	228.923	-2295.77	1298.25	-6.329	-2139.6	1384.18	-66.9401	-2232.5	1171.26	-66.3337	-2247.39	1092.35	-103.337	-2234.33	969.579	-72.206	-2164.43	863.315	-119.698	-2215.74	864.003	-112.885	-2178.02	780.523
375	0	88.571	-1979.67	1590.87	184.483	-1966.66	1576.16	83.0081	-2153.48	1583.37	210.896	-2124.67	1597.34	157.556	-2181.49	1464.56	186.086	-2288.56	1221.19	160.898	-2041.01	1356.18	155.903	-2001.79	1170.8	228.016	-2282.35	1300.84	-6.66679	-2125.33	1386.3	-68.1231	-2216.33	1173.04	-67.6835	-2231.01	1093.92	-104.341	-2215.83	971.207	-72.4527	-2144.61	866.057	-120.435	-2195.45	865.817	-113.245	-2156.24	783.145
376	0	88.3471	-1965.81	1592.96	184.379	-1953.09	1578.23	82.6096	-2139.63	1585.52	210.591	-2111.11	1599.46	156.933	-2167.72	1466.81	185.02	-2275.12	1223.57	160.95	-2027.52	1358.4	156.527	-1988.68	1172.93	227.122	-2268.99	1303.25	-6.92124	-2111.1	1388.32	-69.2708	-2200.12	1174.77	-69.0297	-2214.54	1095.41	-105.339	-2197.18	972.809	-72.666	-2124.66	868.836	-121.09	-2175.06	867.61	-113.582	-2134.24	785.859
377	0	88.237	-1951.98	1594.87	184.389	-1939.54	1580.1	82.3136	-2125.8	1587.53	210.379	-2097.57	1601.42	156.387	-2154.01	1468.88	183.986	-2261.75	1225.78	161.083	-2014.09	1360.48	157.235	-1975.61	1174.97	226.246	-2255.68	1305.48	-7.09698	-2096.89	1390.25	-70.3838	-2183.89	1176.43	-70.3722	-2197.99	1096.83	-106.329	-2178.39	974.376	-72.8481	-2104.58	871.641	-121.671	-2154.57	869.378	-113.892	-2112.06	788.654
378	0	88.2345	-1938.17	1596.59	184.505	-1926.01	1581.77	82.1146	-2111.99	1589.39	210.256	-2084.03	1603.19	155.917	-2140.34	1470.77	182.986	-2248.44	1227.83	161.288	-2000.72	1362.41	158.005	-1962.57	1176.91	225.393	-2242.41	1307.53	-7.1995	-2082.71	1392.06	-71.463	-2167.64	1178.01	-71.711	-2181.35	1098.16	-107.311	-2159.45	975.899	-73.0015	-2084.36	874.46	-122.184	-2133.98	871.118	-114.171	-2089.69	791.512
379	0	88.3333	-1924.39	1598.11	184.72	-1912.5	1583.22	82.0065	-2098.18	1591.08	210.216	-2070.49	1604.78	155.522	-2126.72	1472.47	182.027	-2235.17	1229.7	161.556	-1987.39	1364.17	158.813	-1949.55	1178.73	224.569	-2229.17	1309.37	-7.23497	-2068.56	1393.74	-72.5097	-2151.39	1179.48	-73.0459	-2164.62	1099.38	-108.285	-2140.37	977.367	-73.1287	-2064.03	877.28	-122.639	-2113.28	872.825	-114.412	-2067.17	794.416
380	0	88.5265	-1910.62	1599.41	185.025	-1898.99	1584.45	81.983	-2084.38	1592.6	210.254	-2056.96	1606.17	155.198	-2113.13	1473.96	181.114	-2221.94	1231.38	161.877	-1974.1	1365.75	159.636	-1936.55	1180.4	223.782	-2215.98	1311	-7.20991	-2054.43	1395.29	-73.5255	-2135.13	1180.84	-74.3765	-2147.81	1100.48	-109.251	-2121.16	978.765	-73.2322	-2043.57	880.085	-123.044	-2092.47	874.492	-114.613	-2044.51	797.343
381	0	88.8072	-1896.88	1600.49	185.413	-1885.5	1585.44	82.0377	-2070.59	1593.92	210.365	-2043.43	1607.35	154.946	-2099.58	1475.24	180.256	-2208.75	1232.84	162.241	-1960.84	1367.14	160.45	-1923.55	1181.88	223.042	-2202.8	1312.41	-7.13089	-2040.33	1396.68	-74.5116	-2118.88	1182.06	-75.7018	-2130.92	1101.45	-110.206	-2101.84	980.081	-73.3141	-2023.01	882.854	-123.407	-2071.55	876.11	-114.768	-2021.73	800.272
382	0	89.1689	-1883.14	1601.34	185.875	-1872.01	1586.2	82.1641	-2056.8	1595.02	210.543	-2029.9	1608.31	154.764	-2086.05	1476.3	179.46	-2195.58	1234.08	162.636	-1947.61	1368.29	161.232	-1910.56	1183.17	222.355	-2189.64	1313.58	-7.00407	-2026.26	1397.89	-75.4685	-2102.63	1183.11	-77.0204	-2113.94	1102.27	-111.148	-2082.4	981.3	-73.3762	-2002.35	885.57	-123.737	-2050.51	877.67	-114.875	-1998.86	803.178
383	0	89.6052	-1869.42	1601.95	186.406	-1858.52	1586.71	82.3565	-2043.02	1595.9	210.785	-2016.36	1609.02	154.652	-2072.56	1477.11	178.736	-2182.42	1235.08	163.054	-1934.39	1369.21	161.962	-1897.57	1184.21	221.734	-2176.49	1314.51	-6.83486	-2012.21	1398.91	-76.3962	-2086.4	1183.98	-78.33	-2096.89	1102.92	-112.077	-2062.87	982.407	-73.4195	-1981.6	888.211	-124.039	-2029.38	879.161	-114.93	-1975.93	806.038
384	0	90.111	-1855.7	1602.31	186.999	-1845.04	1586.96	82.6099	-2029.24	1596.55	211.085	-2002.82	1609.5	154.607	-2059.08	1477.68	178.095	-2169.28	1235.83	163.485	-1921.17	1369.87	162.621	-1884.56	1184.99	221.187	-2163.34	1315.19	-6.62766	-1998.2	1399.71	-77.2933	-2070.18	1184.65	-79.6269	-2079.76	1103.4	-112.988	-2043.26	983.389	-73.4443	-1960.78	890.756	-124.317	-2008.14	880.569	-114.933	-1952.94	808.829
385	0	90.6818	-1841.98	1602.41	187.65	-1831.54	1586.95	82.9199	-2015.45	1596.94	211.442	-1989.28	1609.71	154.631	-2045.61	1478	177.546	-2156.13	1236.33	163.924	-1907.95	1370.25	163.194	-1871.53	1185.48	220.725	-2150.18	1315.61	-6.38564	-1984.22	1400.3	-78.1569	-2053.97	1185.1	-80.9063	-2062.56	1103.67	-113.878	-2023.57	984.233	-73.4502	-1939.9	893.183	-124.576	-1986.82	881.883	-114.883	-1929.94	811.53
386	0	91.3141	-1828.26	1602.25	188.353	-1818.04	1586.67	83.2836	-2001.67	1597.08	211.854	-1975.73	1609.66	154.725	-2032.16	1478.07	177.102	-2142.98	1236.55	164.364	-1894.72	1370.34	163.673	-1858.49	1185.66	220.358	-2137	1315.76	-6.11064	-1970.28	1400.64	-78.9832	-2037.78	1185.31	-82.1621	-2045.3	1103.74	-114.743	-2003.83	984.929	-73.4361	-1918.98	895.475	-124.817	-1965.44	883.091	-114.783	-1906.94	814.122
387	0	92.0057	-1814.54	1601.84	189.108	-1804.53	1586.14	83.6995	-1987.89	1596.95	212.319	-1962.17	1609.35	154.889	-2018.7	1477.87	176.771	-2129.82	1236.51	164.803	-1881.47	1370.13	164.052	-1845.41	1185.52	220.095	-2123.8	1315.64	-5.803	-1956.36	1400.73	-79.7665	-2021.59	1185.28	-83.3863	-2027.98	1103.6	-115.577	-1984.04	985.467	-73.4002	-1898.05	897.613	-125.04	-1944	884.183	-114.634	-1883.97	816.588
388	0	92.7556	-1800.82	1601.16	189.912	-1791.01	1585.34	84.1674	-1974.1	1596.55	212.839	-1948.61	1608.76	155.127	-2005.24	1477.41	176.562	-2116.63	1236.19	165.242	-1868.19	1369.62	164.33	-1832.3	1185.04	219.945	-2110.58	1315.26	-5.46155	-1942.47	1400.56	-80.4995	-2005.41	1184.99	-84.5692	-2010.61	1103.23	-116.375	-1964.24	985.844	-73.3401	-1877.11	899.583	-125.243	-1922.54	885.149	-114.439	-1861.05	818.917
389	0	93.564	-1787.09	1600.24	190.765	-1777.47	1584.29	84.6889	-1960.31	1595.89	213.416	-1935.03	1607.92	155.441	-1991.78	1476.69	176.484	-2103.42	1235.61	165.684	-1854.88	1368.81	164.512	-1819.14	1184.23	219.917	-2097.31	1314.62	-5.08345	-1928.62	1400.14	-81.1735	-1989.24	1184.46	-85.6998	-1993.21	1102.65	-117.129	-1944.43	986.055	-73.253	-1856.21	901.373	-125.425	-1901.08	885.983	-114.204	-1838.2	821.097
390	0	94.4323	-1773.35	1599.07	191.668	-1763.9	1582.99	85.2673	-1946.51	1594.97	214.054	-1921.44	1606.81	155.835	-1978.3	1475.73	176.543	-2090.17	1234.75	166.133	-1841.52	1367.69	164.608	-1805.93	1183.09	220.015	-2084.01	1313.71	-4.66413	-1914.79	1399.46	-81.7781	-1973.07	1183.67	-86.7652	-1975.78	1101.84	-117.832	-1924.64	986.101	-73.1358	-1835.35	902.976	-125.582	-1879.65	886.682	-113.932	-1815.46	823.124
391	0	95.3635	-1759.6	1597.68	192.625	-1750.32	1581.47	85.9073	-1932.72	1593.8	214.757	-1907.85	1605.46	156.315	-1964.81	1474.52	176.742	-2076.88	1233.64	166.6	-1828.13	1366.3	164.632	-1792.66	1181.63	220.246	-2070.67	1312.55	-4.1973	-1900.98	1398.53	-82.3017	-1956.9	1182.64	-87.7513	-1958.35	1100.83	-118.475	-1904.89	985.986	-72.9854	-1814.56	904.388	-125.708	-1858.27	887.244	-113.629	-1792.85	824.994
392	0	96.3615	-1745.84	1596.08	193.638	-1736.72	1579.72	86.6154	-1918.92	1592.4	215.532	-1894.24	1603.88	156.884	-1951.3	1473.09	177.083	-2063.54	1232.28	167.095	-1814.69	1364.63	164.603	-1779.32	1179.88	220.612	-2057.28	1311.15	-3.67508	-1887.2	1397.36	-82.7318	-1940.75	1181.39	-88.643	-1940.92	1099.62	-119.048	-1885.21	985.717	-72.798	-1793.88	905.609	-125.8	-1836.98	887.672	-113.3	-1770.41	826.708
393	0	97.4313	-1732.07	1594.28	194.713	-1723.09	1577.79	87.3992	-1905.12	1590.78	216.386	-1880.61	1602.09	157.55	-1937.78	1471.45	177.566	-2050.15	1230.69	167.631	-1801.2	1362.72	164.543	-1765.9	1177.87	221.112	-2043.83	1309.52	-3.08822	-1873.43	1395.97	-83.0546	-1924.6	1179.93	-89.4243	-1923.51	1098.23	-119.541	-1865.61	985.302	-72.5702	-1773.33	906.642	-125.85	-1815.82	887.97	-112.949	-1748.15	828.268
394	0	98.5788	-1718.3	1592.32	195.857	-1709.43	1575.68	88.2677	-1891.32	1588.97	217.329	-1866.98	1600.12	158.318	-1924.23	1469.61	178.187	-2036.69	1228.87	168.222	-1787.66	1360.6	164.48	-1752.4	1175.63	221.747	-2030.33	1307.68	-2.42641	-1859.67	1394.38	-83.2559	-1908.49	1178.28	-90.0789	-1906.15	1096.67	-119.943	-1846.14	984.754	-72.2981	-1752.93	907.495	-125.85	-1794.82	888.147	-112.582	-1726.12	829.68
395	0	99.8107	-1704.51	1590.23	197.074	-1695.75	1573.44	89.2303	-1877.52	1587	218.368	-1853.33	1597.98	159.193	-1910.66	1467.61	178.94	-2023.16	1226.86	168.886	-1774.06	1358.3	164.442	-1738.8	1173.2	222.511	-2016.78	1305.64	-1.67865	-1845.9	1392.62	-83.3211	-1892.4	1176.47	-90.5907	-1888.85	1094.97	-120.244	-1826.81	984.088	-71.9782	-1732.71	908.178	-125.792	-1774.01	888.211	-112.2	-1704.35	830.952
396	0	101.134	-1690.72	1588.03	198.374	-1682.03	1571.08	90.2972	-1863.72	1584.9	219.512	-1839.66	1595.72	160.182	-1897.06	1465.47	179.816	-2009.55	1224.67	169.637	-1760.41	1355.85	164.458	-1725.09	1170.62	223.399	-2003.17	1303.43	-0.83366	-1832.13	1390.71	-83.2361	-1876.37	1174.53	-90.9441	-1871.64	1093.16	-120.432	-1807.66	983.319	-71.6063	-1712.71	908.707	-125.668	-1753.43	888.175	-111.805	-1682.86	832.091
397	0	102.556	-1676.93	1585.75	199.764	-1668.3	1568.65	91.4785	-1849.93	1582.69	220.772	-1825.99	1593.35	161.289	-1883.44	1463.22	180.805	-1995.85	1222.34	170.494	-1746.7	1353.31	164.562	-1711.27	1167.96	224.402	-1989.5	1301.08	0.119621	-1818.35	1388.69	-82.9874	-1860.41	1172.49	-91.1245	-1854.54	1091.27	-120.495	-1788.71	982.467	-71.1785	-1692.94	909.095	-125.467	-1733.12	888.052	-111.399	-1661.7	833.107
398	0	104.082	-1663.13	1583.45	201.251	-1654.53	1566.17	92.7838	-1836.14	1580.43	222.155	-1812.29	1590.93	162.518	-1869.8	1460.88	181.893	-1982.05	1219.87	171.471	-1732.94	1350.71	164.784	-1697.33	1165.25	225.511	-1975.76	1298.6	1.19149	-1804.54	1386.59	-82.5626	-1844.53	1170.38	-91.1189	-1837.57	1089.32	-120.422	-1770	981.551	-70.6903	-1673.43	909.362	-125.181	-1713.11	887.856	-110.978	-1640.9	834.01
399	0	105.72	-1649.32	1581.14	202.842	-1640.74	1563.7	94.2219	-1822.35	1578.14	223.67	-1798.59	1588.49	163.872	-1856.13	1458.5	183.067	-1968.15	1217.32	172.582	-1719.13	1348.09	165.155	-1683.26	1162.55	226.715	-1961.97	1296.03	2.39091	-1790.71	1384.45	-81.9513	-1828.75	1168.24	-90.9165	-1820.76	1087.35	-120.203	-1751.56	980.592	-70.1372	-1654.22	909.524	-124.798	-1693.45	887.604	-110.541	-1620.49	834.81
400	0	107.474	-1635.51	1578.88	204.544	-1626.93	1561.26	95.8002	-1808.57	1575.86	225.322	-1784.87	1586.06	165.351	-1842.43	1456.1	184.311	-1954.15	1214.71	173.84	-1705.26	1345.52	165.702	-1669.05	1159.91	228.001	-1948.11	1293.4	3.72497	-1776.83	1382.31	-81.1451	-1813.1	1166.11	-90.5085	-1804.11	1085.4	-119.827	-1733.41	979.611	-69.514	-1635.32	909.603	-124.31	-1674.16	887.31	-110.082	-1600.51	835.514
401	0	109.347	-1621.7	1576.7	206.361	-1613.09	1558.9	97.5245	-1794.79	1573.64	227.116	-1771.13	1583.69	166.957	-1828.7	1453.72	185.609	-1940.03	1212.08	175.255	-1691.33	1343.03	166.451	-1654.72	1157.39	229.356	-1934.18	1290.74	5.19843	-1762.9	1380.21	-80.1385	-1797.58	1164.02	-89.8891	-1787.67	1083.49	-119.287	-1715.59	978.63	-68.8156	-1616.76	909.617	-123.707	-1655.27	886.991	-109.592	-1580.99	836.133
402	0	111.342	-1607.89	1574.63	208.297	-1599.23	1556.66	99.3984	-1781.01	1571.52	229.055	-1757.38	1581.41	168.687	-1814.94	1451.41	186.945	-1925.81	1209.46	176.833	-1677.36	1340.66	167.421	-1640.25	1155.03	230.767	-1920.19	1288.08	6.81344	-1748.92	1378.18	-78.9292	-1782.22	1162.01	-89.0553	-1771.43	1081.67	-118.574	-1698.1	977.671	-68.0361	-1598.57	909.585	-122.981	-1636.81	886.664	-109.062	-1561.97	836.674
403	0	113.457	-1594.07	1572.72	210.353	-1585.35	1554.56	101.423	-1767.23	1569.52	231.139	-1743.61	1579.26	170.538	-1801.15	1449.18	188.303	-1911.47	1206.89	178.578	-1663.33	1338.46	168.627	-1625.64	1152.88	232.22	-1906.14	1285.47	8.56928	-1734.87	1376.28	-77.5183	-1767.02	1160.12	-88.0073	-1755.42	1079.97	-117.685	-1680.99	976.756	-67.1698	-1580.77	909.526	-122.124	-1618.82	886.345	-108.479	-1543.46	837.144
404	0	115.689	-1580.25	1570.99	212.527	-1571.45	1552.66	103.596	-1753.45	1567.7	233.366	-1729.81	1577.27	172.503	-1787.33	1447.09	189.669	-1897.02	1204.42	180.489	-1649.26	1336.47	170.076	-1610.91	1150.98	233.701	-1892.03	1282.94	10.4623	-1720.76	1374.54	-75.9102	-1751.99	1158.38	-86.7485	-1739.65	1078.41	-116.615	-1664.26	975.906	-66.2107	-1563.38	909.455	-121.131	-1601.31	886.048	-107.832	-1525.51	837.548
405	0	118.034	-1566.41	1569.48	214.816	-1557.54	1550.97	105.914	-1739.66	1566.07	235.73	-1715.98	1575.49	174.575	-1773.48	1445.15	191.028	-1882.47	1202.07	182.562	-1635.14	1334.72	171.771	-1596.06	1149.35	235.197	-1877.86	1280.53	12.4858	-1706.58	1372.98	-74.1133	-1737.15	1156.82	-85.2854	-1724.14	1077.04	-115.364	-1647.94	975.143	-65.1527	-1546.42	909.39	-119.996	-1584.31	885.789	-107.105	-1508.12	837.893
406	0	120.483	-1552.57	1568.21	217.214	-1543.6	1549.53	108.37	-1725.86	1564.68	238.223	-1702.13	1573.94	176.744	-1759.59	1443.41	192.369	-1867.83	1199.89	184.788	-1620.99	1333.24	173.703	-1581.1	1148.04	236.697	-1863.64	1278.28	14.63	-1692.33	1371.66	-72.1392	-1722.48	1155.48	-83.6279	-1708.89	1075.88	-113.934	-1632.03	974.486	-63.9904	-1529.91	909.344	-118.717	-1567.83	885.582	-106.283	-1491.34	838.183
407	0	123.025	-1538.72	1567.2	219.71	-1529.64	1548.35	110.952	-1712.06	1563.55	240.835	-1688.25	1572.64	178.999	-1745.68	1441.9	193.681	-1853.1	1197.91	187.155	-1606.8	1332.05	175.858	-1566.06	1147.06	238.188	-1849.37	1276.21	16.8823	-1678	1370.6	-70.0031	-1707.99	1154.4	-81.7887	-1693.91	1074.95	-112.331	-1616.55	973.956	-62.7188	-1513.87	909.329	-117.294	-1551.88	885.44	-105.351	-1475.16	838.422
408	0	125.649	-1524.85	1566.47	222.292	-1515.67	1547.47	113.648	-1698.23	1562.71	243.553	-1674.33	1571.62	181.327	-1731.73	1440.63	194.953	-1838.31	1196.17	189.645	-1592.59	1331.17	178.215	-1550.94	1146.44	239.661	-1835.07	1274.36	19.2268	-1663.62	1369.82	-67.7237	-1693.68	1153.58	-79.7837	-1679.21	1074.29	-110.563	-1601.5	973.57	-61.334	-1498.3	909.357	-115.728	-1536.47	885.375	-104.296	-1459.61	838.615
409	0	128.34	-1510.96	1566.03	224.947	-1501.67	1546.87	116.442	-1684.4	1562.16	246.361	-1660.37	1570.9	183.711	-1717.76	1439.63	196.179	-1823.47	1194.69	192.237	-1578.37	1330.62	180.743	-1535.79	1146.17	241.105	-1820.73	1272.76	21.6453	-1649.17	1369.35	-65.323	-1679.53	1153.07	-77.6313	-1664.78	1073.91	-108.642	-1586.87	973.345	-59.8336	-1483.23	909.437	-114.023	-1521.61	885.397	-103.106	-1444.69	838.766
410	0	131.08	-1497.06	1565.89	227.659	-1487.66	1546.58	119.316	-1670.54	1561.93	249.241	-1646.38	1570.48	186.135	-1703.77	1438.91	197.351	-1808.59	1193.51	194.908	-1564.13	1330.4	183.407	-1520.61	1146.26	242.511	-1806.38	1271.43	24.117	-1634.68	1369.2	-62.8255	-1665.55	1152.87	-75.3525	-1650.63	1073.82	-106.581	-1572.67	973.294	-58.2171	-1468.65	909.577	-112.186	-1507.3	885.515	-101.769	-1430.41	838.878
411	0	133.854	-1483.14	1566.04	230.408	-1473.63	1546.59	122.251	-1656.66	1562.02	252.173	-1632.34	1570.38	188.58	-1689.75	1438.49	198.465	-1793.7	1192.63	197.629	-1549.9	1330.51	186.164	-1505.46	1146.71	243.873	-1792.02	1270.41	26.6194	-1620.15	1369.39	-60.2587	-1651.71	1153	-72.9702	-1636.75	1074.04	-104.398	-1558.89	973.428	-56.4867	-1454.57	909.78	-110.228	-1493.54	885.737	-100.28	-1416.78	838.954
412	0	136.64	-1469.2	1566.48	233.177	-1459.58	1546.9	125.223	-1642.76	1562.43	255.136	-1618.27	1570.58	191.029	-1675.72	1438.37	199.519	-1778.82	1192.08	200.371	-1535.68	1330.95	188.97	-1490.35	1147.5	245.183	-1777.66	1269.69	29.1286	-1605.59	1369.91	-57.6517	-1638.01	1153.48	-70.5094	-1623.14	1074.56	-102.112	-1545.53	973.753	-54.6471	-1441	910.052	-108.159	-1480.31	886.066	-98.635	-1403.78	838.999
413	0	139.421	-1455.24	1567.19	235.945	-1445.52	1547.48	128.209	-1628.83	1563.16	258.106	-1604.16	1571.1	193.461	-1661.69	1438.55	200.51	-1763.97	1191.85	203.102	-1521.48	1331.69	191.778	-1475.33	1148.6	246.437	-1763.32	1269.29	31.6199	-1591.02	1370.77	-55.0351	-1624.44	1154.29	-67.9962	-1609.8	1075.4	-99.7435	-1532.56	974.273	-52.7063	-1427.93	910.391	-105.996	-1467.61	886.506	-96.8352	-1391.42	839.014
414	0	142.176	-1441.26	1568.17	238.693	-1431.44	1548.34	131.185	-1614.89	1564.19	261.061	-1590.02	1571.91	195.856	-1647.65	1439.03	201.441	-1749.16	1191.96	205.791	-1507.32	1332.73	194.537	-1460.43	1150	247.632	-1749.01	1269.2	34.0686	-1576.45	1371.96	-52.4398	-1610.99	1155.43	-65.4573	-1596.72	1076.53	-97.3164	-1519.98	974.986	-50.6754	-1415.36	910.797	-103.755	-1455.43	887.055	-94.8862	-1379.67	839.001
415	0	144.886	-1427.26	1569.39	241.399	-1417.36	1549.44	134.126	-1600.92	1565.51	263.976	-1575.86	1572.99	198.198	-1633.61	1439.79	202.314	-1734.42	1192.38	208.407	-1493.19	1334.04	197.202	-1445.67	1151.65	248.766	-1734.74	1269.44	36.4506	-1561.91	1373.45	-49.8965	-1597.65	1156.89	-62.9198	-1583.89	1077.96	-94.8546	-1507.78	975.886	-48.5691	-1403.27	911.265	-101.457	-1443.73	887.71	-92.7988	-1368.52	838.961
416	0	147.531	-1413.24	1570.83	244.043	-1403.26	1550.77	137.007	-1586.94	1567.08	266.829	-1561.67	1574.33	200.467	-1619.58	1440.83	203.133	-1719.76	1193.12	210.919	-1479.12	1335.58	199.727	-1431.08	1153.52	249.839	-1720.52	1269.98	38.7434	-1547.4	1375.23	-47.4346	-1584.42	1158.64	-60.4102	-1571.3	1079.65	-92.3831	-1495.93	976.963	-46.4052	-1391.64	911.788	-99.1248	-1432.51	888.464	-90.5888	-1357.94	838.894
417	0	150.093	-1399.22	1572.46	246.608	-1389.17	1552.29	139.804	-1572.94	1568.9	269.596	-1547.46	1575.89	202.649	-1605.57	1442.11	203.904	-1705.2	1194.15	213.299	-1465.1	1337.34	202.072	-1416.67	1155.56	250.854	-1706.35	1270.82	40.926	-1532.95	1377.26	-45.081	-1571.28	1160.67	-57.9538	-1558.94	1081.58	-89.9271	-1484.42	978.202	-44.2047	-1380.47	912.357	-96.7812	-1421.74	889.308	-88.2774	-1347.91	838.797
418	0	152.555	-1385.19	1574.25	249.074	-1375.08	1553.97	142.495	-1558.93	1570.92	272.257	-1533.25	1577.66	204.729	-1591.58	1443.61	204.634	-1690.75	1195.45	215.524	-1451.14	1339.27	204.202	-1402.45	1157.72	251.815	-1692.25	1271.92	42.9803	-1518.57	1379.51	-42.8595	-1558.25	1162.93	-55.5741	-1546.8	1083.73	-87.5115	-1473.23	979.586	-41.9912	-1369.73	912.96	-94.4514	-1411.4	890.229	-85.8906	-1338.4	838.671
419	0	154.901	-1371.15	1576.18	251.425	-1360.99	1555.8	145.059	-1544.9	1573.1	274.792	-1519.04	1579.59	206.696	-1577.62	1445.32	205.332	-1676.42	1196.99	217.574	-1437.25	1341.34	206.089	-1388.43	1159.97	252.725	-1678.21	1273.28	44.891	-1504.28	1381.94	-40.7897	-1545.32	1165.39	-53.2921	-1534.86	1086.06	-85.1602	-1462.35	981.094	-39.7903	-1359.39	913.584	-92.1608	-1401.45	891.213	-83.4591	-1329.37	838.513
420	0	157.116	-1357.11	1578.21	253.646	-1346.91	1557.73	147.478	-1530.87	1575.43	277.184	-1504.83	1581.66	208.54	-1563.68	1447.2	206.005	-1662.21	1198.75	219.432	-1423.41	1343.51	207.713	-1374.59	1162.26	253.591	-1664.24	1274.85	46.6462	-1490.08	1384.52	-38.8861	-1532.48	1168.01	-51.1261	-1523.11	1088.55	-82.8958	-1451.74	982.702	-37.6292	-1349.44	914.215	-89.935	-1391.88	892.245	-81.0172	-1320.8	838.321
421	0	159.188	-1343.07	1580.31	255.724	-1332.84	1559.74	149.738	-1516.84	1577.85	279.419	-1490.63	1583.83	210.255	-1549.76	1449.21	206.661	-1648.13	1200.68	221.087	-1409.64	1345.75	209.063	-1360.93	1164.56	254.419	-1650.35	1276.62	48.2375	-1475.98	1387.19	-37.1581	-1519.76	1170.75	-49.0906	-1511.53	1091.14	-80.7385	-1441.4	984.386	-35.5356	-1339.84	914.836	-87.7987	-1382.65	893.306	-78.6023	-1312.64	838.093
422	0	161.108	-1329.04	1582.46	257.648	-1318.77	1561.8	151.828	-1502.81	1580.34	281.486	-1476.45	1586.07	211.835	-1535.88	1451.32	207.309	-1634.17	1202.76	222.534	-1395.92	1348.02	210.135	-1347.43	1166.83	255.216	-1636.53	1278.54	49.6603	-1461.99	1389.93	-35.6093	-1507.15	1173.57	-47.1968	-1500.12	1093.82	-78.7066	-1431.31	986.12	-33.5371	-1330.58	915.431	-85.7754	-1373.73	894.379	-76.2533	-1304.86	837.826
423	0	162.867	-1315.01	1584.61	259.409	-1304.73	1563.88	153.738	-1488.78	1582.85	283.377	-1462.28	1588.34	213.28	-1522.02	1453.51	207.955	-1620.35	1204.94	223.773	-1382.26	1350.29	210.935	-1334.06	1169.05	255.987	-1622.77	1280.59	50.9136	-1448.11	1392.68	-34.238	-1494.66	1176.43	-45.4518	-1488.86	1096.53	-76.8154	-1421.44	987.877	-31.6605	-1321.61	915.983	-83.8868	-1365.11	895.446	-74.0096	-1297.42	837.518
424	0	164.459	-1301	1586.75	261.001	-1290.69	1565.94	155.463	-1474.76	1585.35	285.087	-1448.14	1590.61	214.588	-1508.19	1455.74	208.604	-1606.65	1207.2	224.807	-1368.65	1352.53	211.475	-1320.8	1171.19	256.738	-1609.08	1282.72	51.9997	-1434.35	1395.42	-33.0377	-1482.3	1179.28	-43.8589	-1477.73	1099.25	-75.0771	-1411.78	989.632	-29.9306	-1312.92	916.475	-82.1525	-1356.76	896.488	-71.9096	-1290.29	837.166
425	0	165.881	-1287	1588.85	262.422	-1276.67	1567.97	157.004	-1460.75	1587.8	286.614	-1434.01	1592.85	215.764	-1494.38	1457.97	209.26	-1593.06	1209.5	225.643	-1355.08	1354.71	211.776	-1307.62	1173.24	257.475	-1595.45	1284.91	52.924	-1420.69	1398.09	-31.9977	-1470.07	1182.09	-42.4178	-1466.73	1101.94	-73.5012	-1402.31	991.359	-28.3697	-1304.48	916.892	-80.5894	-1348.64	897.487	-69.9893	-1283.44	836.768
426	0	167.132	-1273.02	1590.86	263.669	-1262.66	1569.93	158.36	-1446.75	1590.18	287.959	-1419.91	1595.02	216.81	-1480.59	1460.16	209.926	-1579.57	1211.79	226.295	-1341.54	1356.81	211.861	-1294.51	1175.19	258.2	-1581.87	1287.12	53.6945	-1407.14	1400.66	-31.1037	-1458	1184.83	-41.1248	-1455.83	1104.57	-72.0936	-1393.01	993.032	-26.9972	-1296.25	917.217	-79.2111	-1340.74	898.426	-68.2814	-1276.83	836.32
427	0	168.213	-1259.05	1592.78	264.743	-1248.66	1571.79	159.536	-1432.76	1592.44	289.125	-1405.84	1597.1	217.731	-1466.82	1462.3	210.601	-1566.17	1214.05	226.775	-1328.04	1358.8	211.759	-1281.43	1177.01	258.916	-1568.33	1289.3	54.3213	-1393.67	1403.11	-30.3397	-1446.07	1187.46	-39.9733	-1445.04	1107.11	-70.8574	-1383.87	994.629	-25.8285	-1288.23	917.435	-78.0285	-1333.04	899.287	-66.8136	-1270.42	835.818
428	0	169.127	-1245.09	1594.58	265.647	-1234.67	1573.54	160.538	-1418.78	1594.57	290.119	-1391.78	1599.06	218.536	-1453.07	1464.34	211.286	-1552.85	1216.23	227.1	-1314.55	1360.66	211.503	-1268.37	1178.69	259.624	-1554.83	1291.42	54.8161	-1380.29	1405.39	-29.6882	-1434.29	1189.95	-38.9544	-1434.32	1109.52	-69.7927	-1374.87	996.125	-24.8754	-1280.37	917.53	-77.0485	-1325.5	900.055	-65.6083	-1264.19	835.255
429	0	169.877	-1231.16	1596.22	266.387	-1220.69	1575.15	161.374	-1404.82	1596.53	290.946	-1377.74	1600.88	219.23	-1439.32	1466.25	211.976	-1539.59	1218.31	227.287	-1301.08	1362.36	211.123	-1255.32	1180.23	260.324	-1541.35	1293.46	55.1914	-1366.98	1407.48	-29.1314	-1422.67	1192.28	-38.0577	-1423.68	1111.79	-68.8972	-1365.99	997.5	-24.1451	-1272.66	917.487	-76.2751	-1318.11	900.712	-64.6817	-1258.11	834.624
430	0	170.469	-1217.23	1597.69	266.967	-1206.72	1576.6	162.052	-1390.87	1598.29	291.616	-1363.72	1602.52	219.822	-1425.57	1468	212.67	-1526.38	1220.24	227.355	-1287.62	1363.89	210.654	-1242.25	1181.6	261.013	-1527.89	1295.37	55.4602	-1353.72	1409.36	-28.6523	-1411.18	1194.41	-37.2716	-1413.09	1113.87	-68.1661	-1357.21	998.733	-23.6405	-1265.07	917.293	-75.7084	-1310.85	901.243	-64.0433	-1252.15	833.917
431	0	170.911	-1203.33	1598.97	267.394	-1192.75	1577.87	162.583	-1376.94	1599.83	292.136	-1349.71	1603.96	220.319	-1411.83	1469.57	213.361	-1513.19	1222.01	227.319	-1274.15	1365.23	210.124	-1229.17	1182.8	261.689	-1514.44	1297.13	55.6355	-1340.5	1411	-28.2353	-1399.83	1196.33	-36.5841	-1402.55	1115.76	-67.5923	-1348.52	999.804	-23.3605	-1257.58	916.932	-75.3454	-1303.69	901.634	-63.6959	-1246.29	833.122
432	0	171.208	-1189.43	1600.04	267.677	-1178.78	1578.94	162.974	-1363.02	1601.14	292.515	-1335.71	1605.19	220.728	-1398.07	1470.94	214.044	-1500.02	1223.58	227.198	-1260.68	1366.35	209.564	-1216.06	1183.8	262.347	-1500.99	1298.7	55.7296	-1327.3	1412.37	-27.8668	-1388.59	1198.01	-35.9836	-1392.03	1117.43	-67.1676	-1339.9	1000.7	-23.2995	-1250.17	916.391	-75.1798	-1296.61	901.869	-63.6361	-1240.49	832.229
433	0	171.369	-1175.55	1600.88	267.824	-1164.81	1579.8	163.237	-1349.11	1602.18	292.764	-1321.72	1606.18	221.058	-1384.3	1472.08	214.712	-1486.86	1224.92	227.008	-1247.18	1367.24	208.998	-1202.92	1184.58	262.982	-1487.53	1300.07	55.7536	-1314.11	1413.46	-27.5356	-1377.44	1199.44	-35.4588	-1381.52	1118.86	-66.882	-1331.33	1001.39	-23.4484	-1242.82	915.659	-75.2025	-1289.59	901.935	-63.854	-1234.73	831.225
434	0	171.401	-1161.68	1601.48	267.842	-1150.84	1580.43	163.38	-1335.21	1602.94	292.89	-1307.73	1606.93	221.312	-1370.51	1472.96	215.358	-1473.67	1226.03	226.762	-1233.66	1367.88	208.449	-1189.76	1185.13	263.588	-1474.05	1301.2	55.7177	-1300.91	1414.26	-27.2331	-1366.35	1200.6	-34.9999	-1371.01	1120.04	-66.7248	-1322.79	1001.88	-23.7945	-1235.5	914.723	-75.4019	-1282.61	901.818	-64.3344	-1228.99	830.097
435	0	171.31	-1147.81	1601.83	267.738	-1136.87	1580.82	163.411	-1321.32	1603.41	292.901	-1293.75	1607.41	221.497	-1356.7	1473.59	215.974	-1460.46	1226.87	226.475	-1220.11	1368.25	207.934	-1176.56	1185.43	264.157	-1460.56	1302.09	55.6302	-1287.68	1414.74	-26.9534	-1355.3	1201.47	-34.5979	-1360.48	1120.95	-66.6844	-1314.27	1002.14	-24.3225	-1228.2	913.574	-75.7641	-1275.66	901.508	-65.0571	-1223.25	828.833
436	0	171.102	-1133.95	1601.91	267.521	-1122.89	1580.97	163.338	-1307.44	1603.58	292.804	-1279.77	1607.61	221.615	-1342.85	1473.94	216.553	-1447.21	1227.44	226.155	-1206.51	1368.35	207.467	-1163.34	1185.46	264.682	-1447.03	1302.71	55.4977	-1274.42	1414.91	-26.6933	-1344.24	1202.05	-34.2456	-1349.91	1121.58	-66.7492	-1305.73	1002.18	-25.0147	-1220.91	912.203	-76.2737	-1268.7	900.994	-65.9983	-1217.49	827.421
437	0	170.785	-1120.09	1601.73	267.196	-1108.9	1580.86	163.167	-1293.57	1603.43	292.605	-1265.79	1607.54	221.668	-1328.97	1474	217.086	-1433.91	1227.72	225.813	-1192.86	1368.16	207.058	-1150.08	1185.21	265.155	-1433.47	1303.06	55.3248	-1261.1	1414.75	-26.4518	-1333.15	1202.32	-33.9371	-1339.29	1121.91	-66.9073	-1297.17	1001.97	-25.8516	-1213.59	910.605	-76.9139	-1261.72	900.269	-67.1309	-1211.68	825.85
438	0	170.361	-1106.23	1601.28	266.768	-1094.9	1580.5	162.902	-1279.7	1602.97	292.309	-1251.8	1607.18	221.657	-1315.05	1473.77	217.567	-1420.56	1227.71	225.454	-1179.16	1367.66	206.711	-1136.78	1184.66	265.568	-1419.87	1303.12	55.1141	-1247.73	1414.27	-26.2303	-1322	1202.28	-33.6682	-1328.6	1121.96	-67.1474	-1288.56	1001.52	-26.8129	-1206.24	908.776	-77.667	-1254.71	899.326	-68.4257	-1205.81	824.11
439	0	169.835	-1092.37	1600.56	266.243	-1080.89	1579.89	162.548	-1265.83	1602.19	291.92	-1237.81	1606.54	221.581	-1301.08	1473.25	217.988	-1407.13	1227.4	225.083	-1165.4	1366.87	206.429	-1123.44	1183.8	265.913	-1406.22	1302.89	54.866	-1234.27	1413.45	-26.0323	-1310.76	1201.93	-33.436	-1317.82	1121.7	-67.4582	-1279.89	1000.82	-27.8778	-1198.84	906.714	-78.515	-1247.64	898.161	-69.8526	-1199.85	822.195
440	0	169.209	-1078.51	1599.58	265.622	-1066.87	1579.02	162.107	-1251.96	1601.09	291.439	-1223.81	1605.61	221.437	-1287.06	1472.44	218.34	-1393.63	1226.79	224.699	-1151.57	1365.77	206.21	-1110.06	1182.64	266.18	-1392.51	1302.38	54.5788	-1220.73	1412.31	-25.8626	-1299.4	1201.26	-33.2388	-1306.95	1121.15	-67.8295	-1271.14	999.865	-29.0259	-1191.36	904.422	-79.4398	-1240.48	896.775	-71.3812	-1193.8	820.098
441	0	168.485	-1064.64	1598.35	264.909	-1052.84	1577.92	161.579	-1238.09	1599.69	290.868	-1209.8	1604.41	221.221	-1272.99	1471.35	218.619	-1380.04	1225.88	224.302	-1137.67	1364.37	206.048	-1096.62	1181.18	266.363	-1378.75	1301.57	54.249	-1207.1	1410.85	-25.7276	-1287.9	1200.29	-33.076	-1295.96	1120.3	-68.2516	-1262.28	998.668	-30.2371	-1183.8	901.904	-80.4238	-1233.23	895.167	-72.9815	-1187.62	817.819
442	0	167.662	-1050.77	1596.87	264.104	-1038.8	1576.59	160.964	-1224.22	1598	290.206	-1195.79	1602.94	220.927	-1258.87	1469.98	218.817	-1366.37	1224.69	223.887	-1123.7	1362.68	205.937	-1083.12	1179.42	266.454	-1364.92	1300.48	53.871	-1193.37	1409.09	-25.6344	-1276.24	1199	-32.9478	-1284.85	1119.16	-68.7157	-1253.31	997.23	-31.4929	-1176.12	899.167	-81.4499	-1225.87	893.342	-74.6249	-1181.3	815.357
443	0	166.741	-1036.88	1595.17	263.207	-1024.74	1575.05	160.26	-1210.34	1596.03	289.453	-1181.76	1601.23	220.549	-1244.68	1468.35	218.928	-1352.59	1223.23	223.449	-1109.65	1360.72	205.866	-1069.54	1177.39	266.445	-1351.01	1299.13	53.4381	-1179.54	1407.05	-25.5903	-1264.41	1197.43	-32.8551	-1273.59	1117.75	-69.2137	-1244.19	995.56	-32.776	-1168.32	896.224	-82.5022	-1218.37	891.308	-76.2846	-1174.83	812.715
444	0	165.721	-1022.99	1593.26	262.216	-1010.67	1573.31	159.465	-1196.46	1593.8	288.604	-1167.72	1599.29	220.081	-1230.45	1466.47	218.949	-1338.72	1221.5	222.979	-1095.53	1358.5	205.824	-1055.87	1175.09	266.332	-1337.03	1297.51	52.9419	-1165.61	1404.73	-25.603	-1252.4	1195.57	-32.7995	-1262.19	1116.06	-69.7386	-1234.92	993.669	-34.0709	-1160.37	893.086	-83.566	-1210.71	889.075	-77.9359	-1168.19	809.901
445	0	164.599	-1009.09	1591.17	261.132	-996.583	1571.41	158.576	-1182.56	1591.34	287.658	-1153.67	1597.13	219.513	-1216.15	1464.38	218.876	-1324.74	1219.53	222.467	-1081.32	1356.06	205.796	-1042.11	1172.57	266.11	-1322.96	1295.66	52.3736	-1151.57	1402.17	-25.6795	-1240.2	1193.45	-32.7827	-1250.62	1114.12	-70.2841	-1225.48	991.571	-35.3639	-1152.25	889.771	-84.628	-1202.88	886.656	-79.5569	-1161.35	806.923
446	0	163.373	-995.167	1588.94	259.949	-982.481	1569.36	157.586	-1168.65	1588.68	286.61	-1139.61	1594.8	218.84	-1201.79	1462.09	218.705	-1310.65	1217.34	221.901	-1067.02	1353.42	205.768	-1028.23	1169.85	265.774	-1308.8	1293.59	51.7236	-1137.44	1399.39	-25.8262	-1227.81	1191.08	-32.8065	-1238.88	1111.94	-70.8446	-1215.84	989.284	-36.6432	-1143.95	886.299	-85.6762	-1194.86	884.066	-81.1284	-1154.31	803.795
447	0	162.042	-981.229	1586.59	258.668	-968.359	1567.2	156.492	-1154.72	1585.85	285.456	-1125.53	1592.32	218.053	-1187.37	1459.64	218.435	-1296.43	1214.95	221.269	-1052.64	1350.62	205.722	-1014.22	1166.98	265.324	-1294.54	1291.33	50.9824	-1123.2	1396.42	-26.0487	-1215.22	1188.49	-32.873	-1226.96	1109.56	-71.4155	-1206	986.826	-37.899	-1135.43	882.692	-86.7006	-1186.62	881.325	-82.634	-1147.04	800.532
448	0	160.602	-967.27	1584.16	257.284	-954.217	1564.97	155.289	-1140.77	1582.89	284.192	-1111.43	1589.73	217.146	-1172.9	1457.06	218.065	-1282.09	1212.4	220.557	-1038.17	1347.69	205.64	-1000.08	1163.98	264.758	-1280.18	1288.92	50.1411	-1108.87	1393.3	-26.3508	-1202.43	1185.7	-32.9836	-1214.84	1106.99	-71.9927	-1195.93	984.222	-39.1231	-1126.69	878.975	-87.6926	-1178.14	878.454	-84.0601	-1139.53	797.153
449	0	159.053	-953.285	1581.68	255.795	-940.051	1562.69	153.971	-1126.78	1579.84	282.813	-1097.31	1587.05	216.113	-1158.36	1454.38	217.597	-1267.62	1209.72	219.753	-1023.6	1344.69	205.505	-985.793	1160.92	264.078	-1265.7	1286.38	49.1913	-1094.44	1390.06	-26.7353	-1189.45	1182.75	-33.14	-1202.51	1104.26	-72.573	-1185.62	981.495	-40.3089	-1117.7	875.176	-88.6452	-1169.41	875.478	-85.3961	-1131.75	793.682
450	0	157.392	-939.269	1579.21	254.199	-925.858	1560.42	152.534	-1112.77	1576.73	281.317	-1083.17	1584.34	214.95	-1143.75	1451.64	217.031	-1253.02	1206.95	218.844	-1008.93	1341.66	205.298	-971.348	1157.83	263.285	-1251.1	1283.75	48.1263	-1079.93	1386.75	-27.2031	-1176.28	1179.67	-33.3429	-1189.97	1101.41	-73.1535	-1175.06	978.675	-41.4513	-1108.43	871.328	-89.553	-1160.39	872.423	-86.6339	-1123.68	790.144
451	0	155.62	-925.217	1576.77	252.495	-911.633	1558.18	150.974	-1098.72	1573.61	279.7	-1069	1581.62	213.653	-1129.09	1448.89	216.373	-1238.27	1204.13	217.82	-994.163	1338.65	205	-956.737	1154.77	262.385	-1236.38	1281.07	46.9407	-1065.34	1383.4	-27.7537	-1162.91	1176.5	-33.593	-1177.2	1098.46	-73.732	-1164.22	975.791	-42.5462	-1098.86	867.461	-90.4123	-1151.07	869.319	-87.768	-1115.3	786.569
452	0	153.737	-911.123	1574.42	250.681	-897.373	1556.03	149.289	-1084.62	1570.53	277.96	-1054.8	1578.95	212.223	-1114.35	1446.16	215.626	-1223.39	1201.3	216.671	-979.293	1335.7	204.593	-941.952	1151.78	261.382	-1221.54	1278.4	45.6318	-1050.67	1380.06	-28.3847	-1149.35	1173.28	-33.8902	-1164.2	1095.47	-74.307	-1153.08	972.874	-43.5905	-1088.97	863.612	-91.2207	-1141.42	866.195	-88.7954	-1106.58	782.986
453	0	151.745	-896.983	1572.18	248.759	-883.074	1553.99	147.478	-1070.47	1567.53	276.099	-1040.57	1576.35	210.661	-1099.55	1443.5	214.797	-1208.36	1198.51	215.391	-964.318	1332.86	204.064	-926.989	1148.92	260.285	-1206.56	1275.76	44.1991	-1035.93	1376.77	-29.0928	-1135.6	1170.04	-34.2341	-1150.96	1092.45	-74.8772	-1141.65	969.957	-44.5818	-1078.74	859.816	-91.9771	-1131.42	863.086	-89.7151	-1097.49	779.431
454	0	149.648	-882.79	1570.11	246.73	-868.731	1552.11	145.54	-1056.26	1564.65	274.116	-1026.3	1573.87	208.97	-1084.67	1440.95	213.892	-1193.19	1195.8	213.976	-949.239	1330.18	203.399	-911.842	1146.22	259.101	-1191.46	1273.21	42.6452	-1021.12	1373.57	-29.8729	-1121.66	1166.83	-34.624	-1137.48	1089.46	-75.4417	-1129.89	967.074	-45.5186	-1068.13	856.112	-92.6818	-1121.03	860.021	-90.5281	-1088	775.937
455	0	147.449	-868.54	1568.23	244.598	-854.34	1550.42	143.479	-1041.99	1561.93	272.016	-1011.98	1571.55	207.157	-1069.73	1438.55	212.92	-1177.9	1193.23	212.427	-934.058	1327.7	202.588	-896.511	1143.74	257.841	-1176.23	1270.78	40.9756	-1006.24	1370.51	-30.7195	-1107.53	1163.69	-35.0586	-1123.75	1086.53	-76.0004	-1117.79	964.257	-46.3997	-1057.13	852.536	-93.336	-1110.24	857.036	-91.2371	-1078.08	772.54
456	0	145.156	-854.229	1566.58	242.367	-839.899	1548.95	141.3	-1027.65	1559.41	269.803	-997.626	1569.43	205.232	-1054.73	1436.33	211.889	-1162.48	1190.82	210.748	-918.778	1325.45	201.627	-880.998	1141.5	256.516	-1160.89	1268.53	39.1992	-991.312	1367.62	-31.6261	-1093.22	1160.67	-35.5364	-1109.77	1083.7	-76.5533	-1105.34	961.541	-47.2245	-1045.71	849.127	-93.9421	-1099.02	854.162	-91.8466	-1067.69	769.276
457	0	142.776	-839.854	1565.18	240.043	-825.404	1547.73	139.008	-1013.24	1557.13	267.486	-983.219	1567.53	203.206	-1039.66	1434.33	210.809	-1146.95	1188.63	208.948	-903.407	1323.48	200.515	-865.309	1139.56	255.139	-1145.43	1266.5	37.328	-976.326	1364.96	-32.5861	-1078.72	1157.8	-36.0556	-1095.54	1081.01	-77.1009	-1092.53	958.956	-47.9928	-1033.85	845.919	-94.5029	-1087.34	851.43	-92.3623	-1056.81	766.179
458	0	140.32	-825.414	1564.07	237.637	-810.853	1546.79	136.615	-998.766	1555.12	265.073	-968.76	1565.89	201.094	-1024.53	1432.59	209.691	-1131.32	1186.69	207.039	-887.954	1321.81	199.256	-849.456	1137.93	253.723	-1129.87	1264.71	35.377	-961.294	1362.54	-33.5924	-1064.04	1155.13	-36.6144	-1081.06	1078.49	-77.644	-1079.34	956.532	-48.705	-1021.52	842.948	-95.0224	-1075.19	848.87	-92.7909	-1045.39	763.281
459	0	137.797	-810.908	1563.24	235.156	-796.248	1546.14	134.132	-984.217	1553.4	262.578	-954.251	1564.54	198.912	-1009.35	1431.13	208.546	-1115.62	1185.04	205.036	-872.433	1320.46	197.86	-833.457	1136.64	252.282	-1114.24	1263.21	33.3642	-946.223	1360.4	-34.6383	-1049.17	1152.68	-37.2107	-1066.34	1076.17	-78.1839	-1065.77	954.296	-49.3619	-1008.71	840.245	-95.5048	-1062.52	846.509	-93.1405	-1033.41	760.615
460	0	135.223	-796.337	1562.72	232.615	-781.59	1545.78	131.574	-969.6	1551.99	260.015	-939.689	1563.48	196.681	-994.134	1429.97	207.385	-1099.87	1183.71	202.961	-856.86	1319.46	196.342	-817.338	1135.71	250.833	-1098.54	1262.02	31.3098	-931.123	1358.57	-35.717	-1034.12	1150.49	-37.8423	-1051.38	1074.09	-78.7222	-1051.8	952.274	-49.9647	-995.395	837.838	-95.9547	-1049.34	844.37	-93.4195	-1020.83	758.208
461	0	132.612	-781.707	1562.5	230.026	-766.88	1545.73	128.96	-954.918	1550.92	257.4	-925.078	1562.75	194.421	-978.887	1429.14	206.219	-1084.09	1182.72	200.837	-841.254	1318.8	194.719	-801.132	1135.15	249.39	-1082.79	1261.17	29.236	-916.005	1357.07	-36.8219	-1018.89	1148.58	-38.5074	-1036.19	1072.26	-79.2606	-1037.44	950.485	-50.5151	-981.559	835.752	-96.3774	-1035.61	842.476	-93.6371	-1007.62	756.085
462	0	129.98	-767.022	1562.59	227.407	-752.126	1545.98	126.308	-940.18	1550.19	254.753	-910.42	1562.34	192.154	-963.625	1428.63	205.062	-1068.3	1182.09	198.688	-825.637	1318.5	193.013	-784.876	1134.94	247.97	-1067.03	1260.66	27.1659	-900.88	1355.92	-37.9466	-1003.48	1146.98	-39.2039	-1020.77	1070.71	-79.8013	-1022.67	948.948	-51.0149	-967.187	834.008	-96.778	-1021.33	840.842	-93.8024	-993.749	754.266
463	0	127.345	-752.29	1562.97	224.776	-737.333	1546.53	123.643	-925.394	1549.8	252.095	-895.72	1562.27	189.904	-948.363	1428.47	203.925	-1052.54	1181.82	196.542	-810.034	1318.54	191.248	-768.615	1135.1	246.587	-1051.28	1260.52	25.1233	-885.761	1355.12	-39.0851	-987.899	1145.7	-39.9304	-1005.14	1069.44	-80.3464	-1007.49	947.674	-51.4664	-952.272	832.622	-97.162	-1006.47	839.482	-93.9248	-979.201	752.77
464	0	124.726	-737.522	1563.64	222.152	-722.511	1547.35	120.987	-910.571	1549.75	249.448	-880.985	1562.53	187.694	-933.119	1428.63	202.82	-1036.84	1181.93	194.426	-794.468	1318.92	189.452	-752.397	1135.59	245.255	-1035.56	1260.73	23.1315	-870.663	1354.68	-40.2313	-972.152	1144.74	-40.6853	-989.315	1068.47	-80.8984	-991.912	946.672	-51.8718	-936.806	831.605	-97.5343	-991.041	838.405	-94.0132	-963.95	751.607
465	0	122.145	-722.728	1564.56	219.557	-707.67	1548.44	118.367	-895.725	1550.04	246.838	-866.223	1563.12	185.545	-917.909	1429.13	201.756	-1021.21	1182.4	192.369	-778.967	1319.63	187.653	-736.271	1136.4	243.987	-1019.89	1261.3	21.2128	-855.599	1354.6	-41.3794	-956.253	1144.11	-41.4675	-973.301	1067.8	-81.4596	-975.931	945.948	-52.2335	-920.786	830.963	-97.8997	-975.028	837.616	-94.0761	-947.982	750.788
466	0	119.622	-707.922	1565.72	217.013	-692.822	1549.76	115.808	-880.869	1550.66	244.288	-851.444	1564.03	183.479	-902.753	1429.94	200.741	-1005.69	1183.21	190.396	-763.554	1320.64	185.881	-720.285	1137.51	242.791	-1004.32	1262.2	19.3875	-840.583	1354.86	-42.5239	-940.216	1143.81	-42.2763	-957.118	1067.43	-82.032	-959.556	945.499	-52.5535	-904.216	830.697	-98.2622	-958.434	837.115	-94.1211	-931.284	750.317
467	0	117.18	-693.117	1567.1	214.545	-677.981	1551.3	113.339	-866.019	1551.58	241.824	-836.66	1565.22	181.515	-887.666	1431.05	199.782	-990.295	1184.36	188.533	-748.253	1321.92	184.165	-704.483	1138.87	241.675	-988.85	1263.42	17.6737	-825.628	1355.45	-43.6594	-924.058	1143.82	-43.1111	-940.784	1067.33	-82.6174	-942.797	945.321	-52.8336	-887.104	830.806	-98.6249	-941.263	836.9	-94.1547	-913.853	750.194
468	0	114.84	-678.327	1568.67	212.175	-663.161	1553.02	110.983	-851.19	1552.78	239.47	-821.883	1566.7	179.668	-872.664	1432.42	198.881	-975.046	1185.8	186.802	-733.085	1323.46	182.535	-688.902	1140.45	240.641	-973.513	1264.92	16.0864	-810.744	1356.35	-44.7809	-907.802	1144.12	-43.9718	-924.317	1067.52	-83.2172	-925.667	945.407	-53.0751	-869.461	831.281	-98.9898	-923.526	836.963	-94.1825	-895.689	750.416
469	0	112.623	-663.568	1570.4	209.926	-648.377	1554.91	108.765	-836.399	1554.24	237.248	-807.126	1568.41	177.951	-857.762	1434.05	198.037	-959.96	1187.51	185.222	-718.065	1325.21	181.024	-673.573	1142.23	239.688	-958.325	1266.69	14.6377	-795.941	1357.54	-45.8838	-891.469	1144.7	-44.8584	-907.735	1067.95	-83.8322	-908.182	945.746	-53.2787	-851.306	832.111	-99.3574	-905.239	837.294	-94.2082	-876.799	750.981
470	0	110.549	-648.853	1572.27	207.82	-633.641	1556.92	106.706	-821.658	1555.93	235.18	-792.403	1570.35	176.376	-842.969	1435.89	197.248	-945.046	1189.45	183.808	-703.207	1327.16	179.657	-658.516	1144.16	238.814	-943.3	1268.68	13.3363	-781.225	1358.98	-46.9639	-875.084	1145.53	-45.771	-891.055	1068.62	-84.4622	-890.36	946.322	-53.4445	-832.661	833.283	-99.727	-886.422	837.884	-94.2343	-857.2	751.88
471	0	108.637	-634.194	1574.25	205.876	-618.968	1559.04	104.824	-806.982	1557.83	233.283	-777.727	1572.47	174.947	-828.294	1437.92	196.505	-930.313	1191.6	182.573	-688.519	1329.26	178.464	-643.742	1146.21	238.01	-928.449	1270.86	12.1877	-766.598	1360.65	-48.0176	-858.671	1146.59	-46.71	-874.295	1069.51	-85.1067	-872.223	947.122	-53.572	-813.554	834.781	-100.096	-867.102	838.718	-94.2613	-836.912	753.106
472	0	106.902	-619.602	1576.32	204.111	-604.369	1561.24	103.135	-792.381	1559.9	231.573	-763.11	1574.74	173.67	-813.741	1440.1	195.802	-915.764	1193.91	181.524	-674.005	1331.5	177.465	-629.251	1148.36	237.271	-913.78	1273.19	11.1943	-752.061	1362.51	-49.0417	-842.253	1147.86	-47.6754	-857.47	1070.58	-85.7641	-853.792	948.129	-53.6603	-794.015	836.589	-100.461	-847.308	839.782	-94.2882	-815.964	754.652
473	0	105.358	-605.088	1578.46	202.54	-589.853	1563.49	101.648	-777.864	1562.1	230.06	-748.565	1577.12	172.545	-799.313	1442.4	195.129	-901.398	1196.34	180.665	-659.666	1333.83	176.68	-615.034	1150.57	236.584	-899.293	1275.64	10.3555	-737.614	1364.53	-50.0336	-825.849	1149.31	-48.6669	-840.594	1071.82	-86.4321	-835.09	949.325	-53.7084	-774.08	838.688	-100.818	-827.073	841.064	-94.3122	-794.394	756.511
474	0	104.013	-590.658	1580.64	201.172	-575.43	1565.77	100.369	-763.439	1564.41	228.752	-734.099	1579.59	171.569	-785.011	1444.79	194.475	-887.209	1198.87	179.995	-645.498	1336.23	176.121	-601.077	1152.83	235.941	-884.99	1278.17	9.66817	-723.252	1366.68	-50.9914	-809.478	1150.9	-49.6842	-823.68	1073.2	-87.1079	-816.143	950.695	-53.7148	-753.785	841.062	-101.161	-806.435	842.548	-94.329	-772.243	758.673
475	0	102.874	-576.317	1582.85	200.013	-561.104	1568.06	99.2998	-749.109	1566.8	227.651	-719.722	1582.1	170.738	-770.831	1447.24	193.83	-873.189	1201.45	179.51	-631.495	1338.67	175.793	-587.357	1155.11	235.332	-870.863	1280.75	9.12669	-708.97	1368.92	-51.9134	-793.154	1152.63	-50.7261	-806.737	1074.7	-87.7881	-796.975	952.221	-53.6786	-733.167	843.693	-101.483	-785.432	844.223	-94.3329	-749.56	761.133
476	0	101.944	-562.067	1585.06	199.067	-546.878	1570.33	98.4377	-734.875	1569.23	226.757	-705.438	1584.62	170.045	-756.769	1449.72	193.188	-859.328	1204.06	179.201	-617.647	1341.12	175.693	-573.849	1157.4	234.746	-856.905	1283.34	8.7234	-694.763	1371.24	-52.7989	-776.889	1154.45	-51.7911	-789.775	1076.29	-88.4689	-777.611	953.885	-53.5988	-712.266	846.563	-101.78	-764.103	846.075	-94.3172	-726.399	763.88
477	0	101.221	-547.91	1587.25	198.332	-532.754	1572.57	97.7761	-720.738	1571.67	226.064	-691.251	1587.12	169.483	-742.819	1452.19	192.539	-845.612	1206.66	179.059	-603.943	1343.56	175.813	-560.523	1159.68	234.178	-843.106	1285.91	8.44906	-680.624	1373.59	-53.6478	-760.688	1156.36	-52.877	-772.801	1077.96	-89.1462	-758.076	955.673	-53.475	-691.118	849.655	-102.045	-742.489	848.092	-94.2745	-702.816	766.906
478	0	100.7	-533.844	1589.4	197.802	-518.731	1574.74	97.3055	-706.695	1574.1	225.565	-677.163	1589.57	169.043	-728.976	1454.62	191.881	-832.026	1209.22	179.069	-590.37	1345.97	176.136	-547.352	1161.94	233.62	-829.452	1288.43	8.2932	-666.546	1375.95	-54.4606	-744.556	1158.32	-53.9811	-755.819	1079.67	-89.8159	-738.393	957.565	-53.3074	-669.76	852.952	-102.271	-720.628	850.259	-94.1967	-678.872	770.198
479	0	100.374	-519.865	1591.49	197.47	-504.804	1576.83	97.0136	-692.741	1576.48	225.249	-663.174	1591.95	168.715	-715.231	1457	191.21	-818.553	1211.71	179.215	-576.916	1348.33	176.639	-534.308	1164.16	233.068	-815.928	1290.88	8.24457	-652.523	1378.31	-55.2387	-728.494	1160.32	-55.1002	-738.832	1081.41	-90.4739	-718.585	959.545	-53.0964	-648.227	856.435	-102.456	-698.561	852.565	-94.0759	-654.627	773.742
480	0	100.233	-505.969	1593.5	197.326	-490.97	1578.83	96.8864	-678.871	1578.79	225.103	-649.279	1594.21	168.488	-701.576	1459.28	190.527	-805.178	1214.11	179.482	-563.564	1350.6	177.294	-521.362	1166.32	232.519	-802.52	1293.22	8.29152	-638.548	1380.62	-55.9843	-712.499	1162.32	-56.2306	-721.844	1083.16	-91.1161	-698.675	961.594	-52.8432	-626.553	860.084	-102.593	-676.323	854.994	-93.9043	-630.145	777.52
481	0	100.266	-492.151	1595.42	197.356	-477.222	1580.7	96.9085	-665.077	1581	225.115	-635.476	1596.34	168.352	-688.003	1461.45	189.834	-791.884	1216.38	179.851	-550.302	1352.76	178.07	-508.491	1168.42	231.975	-789.211	1295.43	8.42238	-624.616	1382.87	-56.7	-696.566	1164.31	-57.3682	-704.854	1084.9	-91.7387	-678.682	963.693	-52.5492	-604.769	863.879	-102.679	-653.95	857.532	-93.6745	-605.486	781.511
482	0	100.458	-478.402	1597.21	197.547	-463.554	1582.43	97.0642	-651.354	1583.09	225.268	-621.759	1598.32	168.298	-674.503	1463.48	189.137	-778.656	1218.5	180.305	-537.114	1354.8	178.934	-495.674	1170.41	231.435	-775.984	1297.48	8.62581	-610.722	1385.04	-57.3892	-680.688	1166.26	-58.5086	-687.862	1086.59	-92.3382	-658.627	965.823	-52.2162	-582.903	867.797	-102.712	-631.475	860.161	-93.3802	-580.708	785.69
483	0	100.795	-464.718	1598.86	197.884	-449.958	1584	97.3378	-637.692	1585.03	225.549	-608.122	1600.12	168.316	-661.067	1465.34	188.441	-765.479	1220.45	180.824	-523.987	1356.69	179.854	-482.89	1172.29	230.902	-762.824	1299.36	8.89106	-596.861	1387.1	-58.0552	-664.855	1168.14	-59.6472	-670.866	1088.23	-92.9112	-638.526	967.962	-51.846	-560.982	871.814	-102.69	-608.929	862.862	-93.0155	-555.867	790.029
484	0	101.264	-451.09	1600.35	198.353	-436.426	1585.39	97.7141	-624.085	1586.81	225.941	-594.558	1601.72	168.397	-647.685	1467.02	187.755	-752.339	1222.21	181.394	-510.906	1358.41	180.795	-470.125	1174.03	230.382	-749.717	1301.04	9.20826	-583.03	1389.02	-58.7016	-649.056	1169.93	-60.7792	-653.862	1089.78	-93.4548	-618.395	970.089	-51.4402	-539.033	875.902	-102.61	-586.34	865.615	-92.576	-531.015	794.496
485	0	101.85	-437.51	1601.67	198.938	-422.95	1586.58	98.1788	-610.524	1588.39	226.433	-581.06	1603.11	168.535	-634.35	1468.5	187.088	-739.224	1223.76	181.998	-497.859	1359.93	181.727	-457.364	1175.6	229.881	-736.647	1302.51	9.56857	-569.226	1390.79	-59.3314	-633.28	1171.61	-61.8997	-636.847	1091.23	-93.9661	-598.248	972.182	-50.9999	-517.078	880.032	-102.473	-563.734	868.398	-92.058	-506.199	799.056
486	0	102.538	-423.973	1602.79	199.625	-409.523	1587.57	98.7189	-597.002	1589.77	227.01	-567.619	1604.26	168.723	-621.052	1469.76	186.452	-726.124	1225.08	182.622	-484.833	1361.24	182.624	-444.597	1176.97	229.405	-723.602	1303.75	9.96438	-555.446	1392.38	-59.9471	-617.513	1173.15	-63.0037	-619.817	1092.56	-94.4423	-578.099	974.219	-50.5257	-495.141	884.173	-102.279	-541.135	871.188	-91.4591	-481.461	803.674
487	0	103.317	-410.47	1603.71	200.401	-396.137	1588.33	99.3227	-583.512	1590.92	227.66	-554.228	1605.18	168.957	-607.783	1470.79	185.858	-713.03	1226.16	183.253	-471.816	1362.32	183.461	-431.815	1178.12	228.963	-710.571	1304.74	10.3894	-541.688	1393.77	-60.5501	-601.744	1174.52	-64.0857	-602.767	1093.74	-94.8807	-557.96	976.179	-50.0177	-473.244	888.294	-102.027	-518.566	873.961	-90.7781	-456.841	808.311
488	0	104.174	-396.996	1604.4	201.253	-382.786	1588.87	99.9803	-570.048	1591.83	228.373	-540.88	1605.84	169.231	-594.535	1471.57	185.318	-699.933	1226.99	183.883	-458.8	1363.14	184.219	-419.01	1179.02	228.563	-697.542	1305.49	10.8387	-527.951	1394.95	-61.1403	-585.959	1175.71	-65.1399	-585.693	1094.75	-95.2785	-537.841	978.04	-49.4749	-451.407	892.361	-101.719	-496.047	876.692	-90.0148	-432.37	812.931
489	0	105.098	-383.544	1604.87	202.17	-369.462	1589.16	100.683	-556.604	1592.5	229.139	-527.568	1606.24	169.545	-581.301	1472.1	184.843	-686.827	1227.56	184.503	-445.773	1363.7	184.884	-406.175	1179.66	228.217	-684.507	1305.99	11.3089	-514.234	1395.89	-61.7162	-570.148	1176.69	-66.16	-568.593	1095.58	-95.6326	-517.753	979.784	-48.8961	-429.652	896.34	-101.354	-473.599	879.358	-89.1702	-408.078	817.497
490	0	106.081	-370.108	1605.1	203.143	-356.161	1589.2	101.425	-543.173	1592.9	229.953	-514.283	1606.37	169.898	-568.075	1472.37	184.447	-673.706	1227.87	185.109	-432.73	1363.99	185.446	-393.304	1180	227.932	-671.457	1306.22	11.7983	-500.535	1396.58	-62.274	-554.302	1177.45	-67.1391	-551.464	1096.22	-95.9397	-497.707	981.392	-48.2793	-407.999	900.201	-100.936	-451.24	881.935	-88.2463	-383.991	821.973
491	0	107.113	-356.684	1605.08	204.163	-342.877	1589	102.201	-529.752	1593.04	230.806	-501.02	1606.23	170.291	-554.85	1472.38	184.139	-660.565	1227.91	185.699	-419.661	1363.98	185.902	-380.391	1180.05	227.72	-658.385	1306.18	12.3066	-486.854	1397.02	-62.8084	-538.412	1177.97	-68.0694	-534.307	1096.65	-96.1961	-477.713	982.849	-47.6223	-386.468	903.911	-100.465	-428.99	884.4	-87.2464	-360.131	826.326
492	0	108.19	-343.268	1604.82	205.224	-329.604	1588.54	103.008	-516.337	1592.92	231.697	-487.772	1605.83	170.725	-541.621	1472.13	183.931	-647.399	1227.68	186.274	-406.561	1363.69	186.253	-367.428	1179.8	227.589	-645.286	1305.89	12.8351	-473.188	1397.19	-63.3118	-522.475	1178.26	-68.9423	-517.123	1096.86	-96.3975	-457.783	984.141	-46.9227	-365.078	907.442	-99.9423	-406.868	886.734	-86.1748	-336.518	830.525
493	0	109.306	-329.854	1604.32	206.32	-316.34	1587.84	103.844	-502.924	1592.54	232.621	-474.533	1605.16	171.205	-528.383	1471.62	183.831	-634.204	1227.18	186.836	-393.425	1363.11	186.503	-354.408	1179.24	227.548	-632.153	1305.34	13.3864	-459.538	1397.09	-63.7747	-506.49	1178.29	-69.7485	-499.916	1096.85	-96.5391	-437.93	985.258	-46.1781	-343.85	910.767	-99.3702	-384.893	888.917	-85.0366	-313.17	834.544
494	0	110.457	-316.44	1603.58	207.448	-303.08	1586.9	104.711	-489.509	1591.89	233.578	-461.299	1604.24	171.734	-515.132	1470.85	183.847	-620.973	1226.42	187.393	-380.248	1362.25	186.665	-341.324	1178.38	227.605	-618.981	1304.53	13.9644	-445.9	1396.73	-64.1858	-490.459	1178.08	-70.4777	-482.694	1096.63	-96.6157	-418.168	986.191	-45.3866	-322.803	913.864	-98.7499	-363.087	890.934	-83.8382	-290.104	838.357
495	0	111.644	-303.024	1602.6	208.607	-289.819	1585.73	105.611	-476.092	1591	234.57	-448.063	1603.09	172.318	-501.865	1469.84	183.985	-607.703	1225.41	187.95	-367.027	1361.13	186.75	-328.167	1177.23	227.767	-605.766	1303.47	14.5742	-432.271	1396.1	-64.5325	-474.387	1177.62	-71.119	-465.467	1096.18	-96.6215	-398.514	986.935	-44.5465	-301.956	916.713	-98.0828	-341.47	892.77	-82.5864	-267.336	841.943
496	0	112.865	-289.601	1601.41	209.797	-276.556	1584.34	106.546	-462.669	1589.88	235.6	-434.822	1601.7	172.961	-488.578	1468.6	184.249	-594.386	1224.15	188.518	-353.759	1359.74	186.778	-314.928	1175.81	228.036	-592.503	1302.17	15.2216	-418.649	1395.23	-64.8009	-458.286	1176.92	-71.6609	-448.246	1095.52	-96.5504	-378.986	987.487	-43.6568	-281.328	919.298	-97.3699	-320.066	894.414	-81.2892	-244.884	845.286
497	0	114.123	-276.172	1600.02	211.02	-263.286	1582.76	107.522	-449.239	1588.53	236.67	-421.572	1600.11	173.671	-475.269	1467.15	184.639	-581.017	1222.66	189.108	-340.44	1358.12	186.768	-301.599	1174.15	228.417	-579.189	1300.64	15.9134	-405.028	1394.12	-64.9764	-442.167	1175.99	-72.0917	-431.048	1094.66	-96.396	-359.604	987.847	-42.7172	-260.938	921.608	-96.6115	-298.899	895.859	-79.9546	-222.765	848.369
498	0	115.422	-262.733	1598.44	212.279	-250.006	1581.01	108.546	-435.801	1586.99	237.786	-408.308	1598.34	174.454	-461.935	1465.49	185.155	-567.588	1220.95	189.731	-327.069	1356.29	186.743	-288.171	1172.28	228.911	-565.819	1298.9	16.6567	-391.403	1392.8	-65.0444	-426.049	1174.85	-72.3992	-413.891	1093.61	-96.1517	-340.389	988.018	-41.7279	-240.804	923.637	-95.8077	-277.995	897.098	-78.5913	-200.997	851.182
499	0	116.764	-249.283	1596.71	213.58	-236.714	1579.1	109.625	-422.353	1585.27	238.956	-395.028	1596.4	175.314	-448.574	1463.66	185.793	-554.092	1219.04	190.4	-313.643	1354.29	186.727	-274.636	1170.23	229.515	-552.39	1296.96	17.459	-377.769	1391.29	-64.9903	-409.949	1173.51	-72.5717	-396.794	1092.39	-95.8111	-321.367	988.005	-40.6897	-220.947	925.38	-94.9579	-257.381	898.128	-77.2079	-179.599	853.716
500	0	118.157	-235.821	1594.84	214.928	-223.406	1577.06	110.767	-408.895	1583.41	240.187	-381.728	1594.33	176.257	-435.183	1461.67	186.549	-540.522	1216.94	191.129	-300.159	1352.13	186.746	-260.987	1168.04	230.228	-538.898	1294.85	18.3279	-364.118	1389.61	-64.8002	-393.889	1172.01	-72.598	-379.779	1091.02	-95.3681	-302.561	987.816	-39.6043	-201.385	926.838	-94.0607	-237.087	898.948	-75.8127	-158.594	855.965
501	0	119.606	-222.346	1592.87	216.331	-210.079	1574.93	111.981	-395.425	1581.43	241.487	-368.405	1592.15	177.289	-421.759	1459.55	187.414	-526.87	1214.7	191.93	-286.616	1349.86	186.826	-247.216	1165.75	231.044	-525.34	1292.58	19.2708	-350.443	1387.8	-64.4616	-377.891	1170.36	-72.4676	-362.871	1089.53	-94.8169	-284	987.46	-38.4736	-182.137	928.015	-93.1145	-217.141	899.559	-74.4138	-138.003	857.925
502	0	121.117	-208.856	1590.83	217.796	-196.73	1572.74	113.277	-381.943	1579.36	242.864	-355.055	1589.9	178.413	-408.3	1457.34	188.378	-513.128	1212.32	192.817	-273.012	1347.52	186.992	-233.319	1163.39	231.956	-511.714	1290.19	20.2948	-336.735	1385.88	-63.9636	-361.977	1168.58	-72.1714	-346.091	1087.93	-94.1527	-265.709	986.95	-37.3	-163.223	928.918	-92.117	-197.574	899.965	-73.0185	-117.85	859.594
503	0	122.697	-195.35	1588.75	219.33	-183.356	1570.51	114.664	-368.446	1577.24	244.327	-341.676	1587.6	179.631	-394.802	1455.05	189.43	-499.291	1209.84	193.802	-259.344	1345.15	187.271	-219.292	1161.03	232.957	-498.017	1287.69	21.406	-322.987	1383.89	-63.297	-346.171	1166.72	-71.7018	-329.466	1086.26	-93.3712	-247.718	986.3	-36.0859	-144.663	929.555	-91.0657	-178.417	900.172	-71.6331	-98.1598	860.973
504	0	124.354	-181.828	1586.67	220.94	-169.953	1568.29	116.149	-354.933	1575.1	245.884	-328.265	1585.29	180.947	-381.263	1452.73	190.557	-485.353	1207.29	194.895	-245.611	1342.77	187.685	-205.131	1158.69	234.038	-484.247	1285.12	22.6103	-309.19	1381.87	-62.4555	-330.494	1164.8	-71.053	-313.019	1084.54	-92.4694	-230.051	985.526	-34.834	-126.478	929.94	-89.958	-159.699	900.188	-70.2626	-78.9576	862.065
505	0	126.092	-168.286	1584.63	222.632	-156.519	1566.11	117.741	-341.403	1572.98	247.543	-314.82	1583.01	182.36	-367.68	1450.41	191.745	-471.311	1204.7	196.107	-231.813	1340.44	188.257	-190.837	1156.42	235.188	-470.404	1282.51	23.9119	-295.337	1379.86	-61.4352	-314.964	1162.86	-70.2214	-296.774	1082.81	-91.4455	-212.737	984.648	-33.5466	-108.688	930.085	-88.7913	-141.452	900.022	-68.9108	-60.2696	862.872
506	0	127.917	-154.724	1582.66	224.413	-143.049	1564	119.447	-327.853	1570.91	249.308	-301.336	1580.78	183.869	-354.051	1448.12	192.979	-457.163	1202.11	197.446	-217.949	1338.19	189.005	-176.411	1154.25	236.395	-456.489	1279.9	25.3139	-281.42	1377.89	-60.2351	-299.599	1160.93	-69.2057	-280.751	1081.09	-90.2992	-195.799	983.684	-32.2261	-91.3141	930.008	-87.5637	-123.703	899.688	-67.58	-42.1216	863.402
507	0	129.833	-141.14	1580.79	226.287	-129.541	1561.99	121.27	-314.281	1568.93	251.185	-287.813	1578.64	185.473	-340.373	1445.89	194.245	-442.911	1199.57	198.917	-204.021	1336.05	189.945	-161.856	1152.23	237.65	-442.504	1277.32	26.8179	-267.433	1376	-58.8574	-284.413	1159.04	-68.0074	-264.973	1079.43	-89.0318	-179.26	982.655	-30.8742	-74.3757	929.724	-86.2738	-106.479	899.198	-66.2707	-24.5395	863.662
508	0	131.843	-127.531	1579.05	228.255	-115.991	1560.12	123.214	-300.686	1567.07	253.175	-274.248	1576.63	187.166	-326.647	1443.76	195.527	-428.558	1197.09	200.522	-190.032	1334.07	191.087	-147.181	1150.39	238.938	-428.452	1274.81	28.4232	-253.374	1374.22	-57.3073	-269.417	1157.24	-66.6305	-249.456	1077.84	-87.646	-163.141	981.586	-29.4927	-57.8934	929.253	-84.9209	-89.8059	898.569	-64.9823	-7.54803	863.661
509	0	133.946	-113.897	1577.49	230.319	-102.398	1558.43	125.278	-287.064	1565.37	255.279	-260.64	1574.77	188.944	-312.873	1441.77	196.81	-414.111	1194.74	202.262	-175.984	1332.28	192.437	-132.395	1148.77	240.249	-414.339	1272.41	30.1272	-239.239	1372.59	-55.5934	-254.617	1155.55	-65.0815	-234.216	1076.37	-86.1465	-147.46	980.498	-28.0826	-41.8867	928.612	-83.5057	-73.7045	897.819	-63.7127	8.82884	863.409
510	0	136.141	-100.234	1576.12	232.478	-88.7602	1556.93	127.461	-273.414	1563.85	257.493	-246.986	1573.09	190.798	-299.051	1439.95	198.082	-399.579	1192.53	204.132	-161.886	1330.69	193.995	-117.514	1147.38	241.57	-400.171	1270.14	31.9244	-225.03	1371.15	-53.7277	-240.018	1154.01	-63.37	-219.267	1075.05	-84.5397	-132.229	979.418	-26.6454	-26.3741	927.822	-82.0301	-58.1939	896.967	-62.4587	24.5688	862.92
511	0	138.426	-86.5419	1574.98	234.727	-75.0759	1555.64	129.757	-259.733	1562.55	259.812	-233.287	1571.63	192.719	-285.184	1438.31	199.327	-384.975	1190.51	206.124	-147.743	1329.35	195.756	-102.554	1146.25	242.89	-385.956	1268.06	33.807	-210.75	1369.92	-51.725	-225.62	1152.66	-61.5081	-204.618	1073.89	-82.8339	-117.462	978.369	-25.1821	-11.3726	926.903	-80.4975	-43.2894	896.035	-61.2163	39.6513	862.205
512	0	140.793	-72.819	1574.07	237.06	-61.3457	1554.6	132.158	-246.02	1561.5	262.228	-219.543	1570.4	194.696	-271.277	1436.91	200.535	-370.312	1188.71	208.226	-133.566	1328.27	197.707	-87.5403	1145.41	244.196	-371.705	1266.18	35.7643	-196.405	1368.93	-49.6035	-211.42	1151.53	-59.5107	-190.277	1072.93	-81.0393	-103.166	977.377	-23.6943	3.10232	925.875	-78.9129	-29.0023	895.043	-59.981	54.0583	861.282
513	0	143.234	-59.0647	1573.42	239.47	-47.5709	1553.82	134.653	-232.275	1560.71	264.73	-205.756	1569.42	196.717	-257.335	1435.75	201.694	-355.608	1187.17	210.422	-119.365	1327.46	199.827	-72.4978	1144.87	245.479	-357.428	1264.55	37.7831	-182.005	1368.21	-47.3841	-197.414	1150.64	-57.3952	-176.249	1072.2	-79.1677	-89.3442	976.467	-22.184	17.0374	924.76	-77.2832	-15.3399	894.017	-58.7482	67.7747	860.165
514	0	145.739	-45.2791	1573.05	241.944	-33.754	1553.3	137.229	-218.497	1560.19	267.305	-191.927	1568.71	198.768	-243.364	1434.85	202.798	-340.882	1185.9	212.691	-105.153	1326.95	202.091	-57.4568	1144.64	246.728	-343.137	1263.17	39.8477	-167.562	1367.78	-45.0904	-183.594	1150.02	-55.1812	-162.536	1071.71	-77.2332	-75.9988	975.661	-20.6542	30.4219	923.578	-75.6173	-2.3051	892.979	-57.5138	80.7887	858.874
515	0	148.293	-31.4631	1572.95	244.47	-19.8985	1553.05	139.868	-204.688	1559.97	269.936	-178.06	1568.29	200.834	-229.373	1434.24	203.838	-326.153	1184.93	215.01	-90.9434	1326.74	204.465	-42.4496	1144.72	247.937	-328.844	1262.09	41.9402	-153.091	1367.65	-42.7479	-169.952	1149.7	-52.8908	-149.139	1071.48	-75.2512	-63.1272	974.984	-19.1091	43.2483	922.35	-73.9258	10.1038	891.954	-56.2744	93.0925	857.428
516	0	150.881	-17.6187	1573.13	247.032	-6.00883	1553.08	142.551	-190.849	1560.06	272.604	-164.158	1568.15	202.9	-215.369	1433.91	204.811	-311.44	1184.28	217.352	-76.7486	1326.84	206.911	-27.5097	1145.11	249.097	-314.562	1261.31	44.0411	-138.609	1367.83	-40.3838	-156.479	1149.69	-50.5477	-136.055	1071.53	-73.2388	-50.7242	974.453	-17.5544	55.5124	921.098	-72.2216	21.8929	890.967	-55.0283	104.683	855.848
517	0	153.484	-3.74847	1573.59	249.611	7.90963	1553.38	145.258	-176.983	1560.44	275.289	-150.227	1568.29	204.951	-201.362	1433.88	205.716	-296.764	1183.95	219.688	-62.5819	1327.24	209.386	-12.6708	1145.81	250.206	-300.304	1260.84	46.1298	-124.135	1368.34	-38.0264	-143.168	1150	-48.1772	-123.282	1071.86	-71.2144	-38.7818	974.087	-15.9977	67.2139	919.841	-70.5188	33.073	890.039	-53.7755	115.561	854.154
518	0	156.084	10.1439	1574.31	252.187	21.851	1553.94	147.966	-163.095	1561.12	277.968	-136.272	1568.72	206.971	-187.36	1434.15	206.554	-282.145	1183.94	221.988	-48.4554	1327.94	211.842	2.03561	1146.8	251.261	-286.081	1260.69	48.1849	-109.689	1369.16	-35.704	-130.01	1150.64	-45.8055	-110.813	1072.48	-69.1974	-27.2894	973.898	-14.4485	78.3568	918.599	-68.8338	43.6591	889.192	-52.5184	125.735	852.37
519	0	158.658	24.0542	1575.29	254.74	35.8091	1554.75	150.65	-149.188	1562.09	280.619	-122.299	1569.42	208.946	-173.371	1434.71	207.33	-267.6	1184.27	224.222	-34.3796	1328.91	214.231	16.5812	1148.05	252.261	-271.905	1260.86	50.1851	-95.2912	1370.29	-33.4447	-117.002	1151.61	-43.4593	-98.6429	1073.38	-67.2081	-16.2341	973.898	-12.9186	88.9492	917.39	-67.1838	53.6706	888.445	-51.2623	135.216	850.518
520	0	161.185	37.9776	1576.52	257.247	49.7776	1555.79	153.286	-135.268	1563.33	283.218	-108.314	1570.38	210.863	-159.403	1435.55	208.051	-253.146	1184.91	226.359	-20.3633	1330.16	216.503	30.9428	1149.55	253.209	-257.785	1261.35	52.1094	-80.9614	1371.73	-31.2752	-104.141	1152.89	-41.165	-86.7635	1074.57	-65.2669	-5.60144	974.092	-11.4218	99.0036	916.229	-65.5876	63.13	887.815	-50.0157	144.023	848.621
521	0	163.642	51.9087	1577.96	259.685	63.7501	1557.05	155.849	-121.34	1564.82	285.741	-94.3235	1571.57	212.71	-145.462	1436.65	208.724	-238.799	1185.86	228.371	-6.41273	1331.64	218.612	45.1033	1151.25	254.109	-243.729	1262.13	53.9383	-66.7182	1373.44	-29.2202	-91.4295	1154.49	-38.9483	-75.1669	1076.02	-63.3945	4.62477	974.481	-9.97413	108.537	915.133	-64.0645	72.0635	887.316	-48.7903	152.178	846.702
522	0	166.007	65.8426	1579.59	262.032	77.7206	1558.5	158.316	-107.41	1566.53	288.166	-80.3328	1572.99	214.475	-131.553	1438	209.361	-224.573	1187.1	230.234	7.46793	1333.34	220.513	59.053	1153.12	254.966	-229.745	1263.21	55.6539	-52.5777	1375.4	-27.3014	-78.872	1156.36	-36.833	-63.8441	1077.72	-61.6109	14.4618	975.063	-8.59362	117.569	914.114	-62.6342	80.4993	886.958	-47.6013	159.71	844.784
523	0	168.259	79.774	1581.4	264.267	91.6835	1560.13	160.664	-93.4833	1568.44	290.472	-66.3479	1574.6	216.149	-117.679	1439.58	209.973	-210.478	1188.61	231.924	21.2768	1335.23	222.169	72.7893	1155.13	255.787	-215.839	1264.56	57.2406	-38.5541	1377.59	-25.537	-66.4773	1158.5	-34.841	-52.7859	1079.66	-59.9352	23.9276	975.832	-7.29985	126.125	913.18	-61.3159	88.4677	886.747	-46.4673	166.651	842.889
524	0	170.378	93.6982	1583.35	266.371	105.634	1561.9	162.874	-79.5646	1570.51	292.64	-52.3736	1576.38	217.724	-103.843	1441.35	210.571	-196.522	1190.36	233.424	35.0139	1337.26	223.55	86.3172	1157.24	256.578	-202.012	1266.15	58.6855	-24.6584	1379.98	-23.941	-54.2567	1160.86	-32.991	-41.9825	1081.8	-58.3852	33.041	976.777	-6.11374	134.232	912.34	-60.1285	96.0001	886.687	-45.4098	173.037	841.036
525	0	172.347	107.611	1585.42	268.326	119.567	1563.79	164.926	-65.6585	1572.71	294.653	-38.4145	1578.29	219.194	-90.0455	1443.3	211.166	-182.71	1192.32	234.721	48.6811	1339.42	224.632	99.6483	1159.41	257.347	-188.267	1267.96	59.9788	-10.8984	1382.52	-22.5229	-42.2236	1163.42	-31.2984	-31.4238	1084.13	-56.9771	41.821	977.885	-5.05702	141.92	911.598	-59.0894	103.128	886.775	-44.4526	178.908	839.245
526	0	174.152	121.509	1587.57	270.117	133.479	1565.77	166.805	-51.7688	1575.02	296.497	-24.474	1580.31	220.553	-76.2872	1445.39	211.768	-169.045	1194.46	235.808	62.2814	1341.66	225.406	112.8	1161.61	258.1	-174.604	1269.96	61.1137	2.72148	1385.18	-21.2872	-30.3923	1166.13	-29.775	-21.0992	1086.61	-55.7247	50.2866	979.139	-4.15166	149.221	910.954	-58.2147	109.885	887.006	-43.6216	184.304	837.53
527	0	175.781	135.389	1589.78	271.734	147.369	1567.81	168.501	-37.8986	1577.38	298.161	-10.5551	1582.41	221.797	-62.5674	1447.6	212.386	-155.525	1196.76	236.68	75.8188	1343.95	225.866	125.793	1163.81	258.844	-161.021	1272.13	62.0867	16.2	1387.91	-20.2338	-18.7771	1168.97	-28.4281	-10.9974	1089.21	-54.6399	58.4572	980.519	-3.41928	156.169	910.407	-57.5183	116.301	887.373	-42.9436	189.27	835.904
528	0	177.223	149.248	1592.01	273.167	161.233	1569.89	170.004	-24.0504	1579.77	299.639	3.34003	1584.55	222.926	-48.8847	1449.88	213.025	-142.146	1199.17	237.34	89.2977	1346.26	226.021	138.654	1165.98	259.585	-147.515	1274.42	62.8974	29.5391	1390.69	-19.358	-7.39041	1171.88	-27.2611	-1.10648	1091.9	-53.7316	66.3522	982.003	-2.88039	162.798	909.951	-57.0118	122.407	887.862	-42.4455	193.849	834.379
529	0	178.474	163.085	1594.23	274.409	175.07	1571.96	171.308	-10.2259	1582.15	300.924	17.2099	1586.71	223.937	-35.2372	1452.21	213.69	-128.903	1201.66	237.794	102.723	1348.56	225.887	151.408	1168.1	260.325	-134.081	1276.8	63.5481	42.744	1393.46	-18.6507	3.75787	1174.83	-26.2732	8.58651	1094.65	-53.0063	73.991	983.569	-2.55372	169.143	909.578	-56.7043	128.234	888.459	-42.1534	198.085	832.958
530	0	179.53	176.899	1596.42	275.459	188.881	1574.02	172.412	3.5734	1584.49	302.016	31.0537	1588.85	224.832	-21.6228	1454.55	214.383	-115.786	1204.19	238.053	116.1	1350.81	225.485	164.081	1170.14	261.068	-120.715	1279.23	64.0438	55.8224	1396.19	-18.0997	14.662	1177.79	-25.4597	18.0958	1097.41	-52.4675	81.3937	985.192	-2.45547	175.238	909.278	-56.6021	133.809	889.146	-42.0913	202.021	831.646
531	0	180.39	190.688	1598.54	276.316	202.666	1576.02	173.316	17.3469	1586.76	302.915	44.8711	1590.94	225.612	-8.03886	1456.87	215.102	-102.785	1206.73	238.131	129.435	1352.98	224.848	176.698	1172.09	261.813	-107.41	1281.68	64.3918	68.7848	1398.84	-17.6899	25.3214	1180.7	-24.8126	27.4369	1100.17	-52.1161	88.5809	986.845	-2.59859	181.118	909.035	-56.7084	139.162	889.902	-42.2803	205.698	830.44
532	0	181.057	204.452	1600.57	276.983	216.425	1577.94	174.026	31.0942	1588.93	303.625	58.6625	1592.96	226.279	5.51767	1459.14	215.844	-89.889	1209.23	238.044	142.731	1355.06	224.008	189.28	1173.93	262.561	-94.1615	1284.12	64.6011	81.6436	1401.37	-17.4042	35.7414	1183.55	-24.321	36.6273	1102.89	-51.9502	95.5739	988.503	-2.99219	186.816	908.832	-57.0233	144.317	890.706	-42.7376	209.159	829.336
533	0	181.535	218.19	1602.47	277.463	230.16	1579.76	174.545	44.8154	1590.96	304.151	72.4283	1594.88	226.836	19.05	1461.33	216.603	-77.0843	1211.67	237.809	155.995	1357.01	223.003	201.847	1175.64	263.307	-80.9622	1286.51	64.6819	94.4134	1403.76	-17.2248	45.9342	1186.28	-23.972	45.6861	1105.53	-51.9653	102.395	990.141	-3.64096	192.363	908.651	-57.5439	149.301	891.534	-43.4754	212.441	828.322
534	0	181.829	231.904	1604.23	277.763	243.871	1581.45	174.884	58.5107	1592.83	304.501	86.1696	1596.67	227.287	32.5615	1463.4	217.37	-64.3577	1214.01	237.446	169.232	1358.81	221.873	214.411	1177.21	264.048	-67.8064	1288.81	64.6457	107.11	1405.96	-17.1339	55.9187	1188.88	-23.7514	54.6346	1108.06	-52.1544	109.068	991.732	-4.54488	197.789	908.47	-58.2642	154.139	892.362	-44.5002	215.581	827.388
535	0	181.949	245.591	1605.81	277.891	257.561	1582.99	175.051	72.1806	1594.51	304.682	99.8875	1598.31	227.635	46.056	1465.32	218.136	-51.6957	1216.21	236.973	182.447	1360.44	220.656	226.982	1178.62	264.776	-54.6886	1290.99	64.504	119.75	1407.96	-17.1148	65.7204	1191.31	-23.6443	63.4957	1110.46	-52.5085	115.618	993.251	-5.69897	203.122	908.264	-59.1757	158.855	893.165	-45.8123	218.613	826.517
536	0	181.903	259.254	1607.21	277.856	271.231	1584.36	175.058	85.8257	1595.99	304.705	113.583	1599.77	227.885	59.5371	1467.08	218.889	-39.0845	1218.26	236.409	195.646	1361.88	219.389	239.566	1179.86	265.484	-41.6033	1293.03	64.2685	132.351	1409.72	-17.1524	75.3711	1193.55	-23.6358	72.2942	1112.71	-53.0168	122.071	994.675	-7.09333	208.389	908.011	-60.2669	163.475	893.918	-47.4054	221.571	825.689
537	0	181.7	272.892	1608.39	277.668	284.882	1585.54	174.915	99.4468	1597.23	304.579	127.259	1601.04	228.039	73.0086	1468.64	219.614	-26.5108	1220.12	235.772	208.833	1363.1	218.106	252.165	1180.91	266.164	-28.5457	1294.89	63.9504	144.93	1411.22	-17.2341	84.9073	1195.58	-23.7119	81.0562	1114.77	-53.6669	128.454	995.981	-8.71341	213.614	907.684	-61.5244	168.023	894.599	-49.2667	224.484	824.886
538	0	181.349	286.506	1609.34	277.335	298.518	1586.52	174.635	113.045	1598.22	304.314	140.916	1602.09	228.101	86.4743	1469.98	220.3	-13.9613	1221.76	235.076	222.015	1364.09	216.836	264.779	1181.74	266.803	-15.511	1296.56	63.5599	157.504	1412.44	-17.3504	94.3697	1197.36	-23.8595	89.8087	1116.63	-54.4457	134.796	997.148	-10.5404	218.818	907.261	-62.933	172.526	895.186	-51.377	227.381	824.085
539	0	180.861	300.096	1610.05	276.868	312.139	1587.28	174.229	126.62	1598.94	303.92	154.555	1602.91	228.075	99.9374	1471.09	220.93	-1.42355	1223.18	234.337	235.195	1364.84	215.606	277.405	1182.35	267.392	-2.4949	1298.02	63.106	170.09	1413.37	-17.4946	103.801	1198.9	-24.0673	98.5793	1118.25	-55.3394	141.127	998.156	-12.5519	224.025	906.717	-64.4761	177.009	895.657	-53.7117	230.289	823.264
540	0	180.244	313.662	1610.5	276.274	325.747	1587.8	173.707	140.173	1599.38	303.406	168.18	1603.49	227.96	113.401	1471.94	221.491	11.1145	1224.34	233.565	248.38	1365.33	214.435	290.042	1182.71	267.919	10.5071	1299.23	62.5964	182.704	1413.99	-17.6638	113.246	1200.16	-24.3259	107.395	1119.64	-56.3341	147.477	998.99	-14.7227	229.253	906.032	-66.1362	181.502	895.994	-56.2411	233.232	822.401
541	0	179.505	327.204	1610.69	275.561	339.344	1588.09	173.079	153.705	1599.54	302.78	181.79	1603.81	227.76	126.869	1472.53	221.97	23.6643	1225.24	232.771	261.573	1365.54	213.34	302.688	1182.81	268.373	23.4996	1300.19	62.0368	195.358	1414.3	-17.8578	122.746	1201.15	-24.6278	116.283	1120.77	-57.416	153.878	999.633	-17.0257	234.524	905.187	-67.8956	186.031	896.181	-58.9318	236.235	821.474
542	0	178.652	340.723	1610.6	274.736	352.93	1588.12	172.352	167.216	1599.4	302.05	195.389	1603.86	227.474	140.342	1472.83	222.354	36.2364	1225.86	231.961	274.778	1365.47	212.329	315.342	1182.64	268.741	36.4874	1300.89	61.4312	208.065	1414.29	-18.0795	132.343	1201.84	-24.9675	125.269	1121.63	-58.5715	160.359	1000.07	-19.4327	239.855	904.165	-69.7364	190.626	896.204	-61.7479	239.321	820.464
543	0	177.688	354.219	1610.23	273.803	366.506	1587.9	171.535	180.707	1598.96	301.22	208.976	1603.64	227.102	153.822	1472.86	222.633	48.8408	1226.19	231.138	288	1365.11	211.411	328.005	1182.18	269.013	49.4759	1301.31	60.7815	220.836	1413.96	-18.3341	142.075	1202.24	-25.3416	134.375	1122.2	-59.7883	166.95	1000.3	-21.9155	245.266	902.952	-71.6412	195.316	896.05	-64.6522	242.512	819.351
544	0	176.618	367.693	1609.59	272.764	380.073	1587.42	170.631	194.176	1598.22	300.295	222.554	1603.14	226.641	167.311	1472.59	222.796	61.4865	1226.23	230.305	301.241	1364.45	210.587	340.68	1181.43	269.178	62.4711	1301.45	60.0877	233.677	1413.31	-18.6288	151.974	1202.34	-25.7485	143.624	1122.49	-61.0543	173.68	1000.3	-24.4465	250.777	901.539	-73.5932	200.132	895.711	-67.6077	245.832	818.119
545	0	175.444	381.144	1608.67	271.623	393.63	1586.69	169.642	207.625	1597.19	299.277	236.122	1602.37	226.088	180.81	1472.03	222.838	74.1821	1225.97	229.461	314.504	1363.51	209.855	353.372	1180.39	269.229	75.4798	1301.31	59.3479	246.594	1412.34	-18.9723	162.068	1202.13	-26.188	153.035	1122.49	-62.359	180.576	1000.08	-26.9999	256.408	899.918	-75.5768	205.103	895.179	-70.5786	249.304	816.753
546	0	174.166	394.573	1607.49	270.379	407.179	1585.71	168.57	221.054	1595.87	298.167	249.682	1601.33	225.441	194.319	1471.19	222.754	86.9352	1225.42	228.6	327.792	1362.28	209.21	366.086	1179.06	269.156	88.5096	1300.88	58.5581	259.59	1411.06	-19.3739	172.379	1201.61	-26.6613	162.625	1122.19	-63.6926	187.664	999.621	-29.552	262.18	898.086	-77.5772	210.258	894.45	-73.5318	252.95	815.241
547	0	172.784	407.98	1606.05	269.032	420.718	1584.49	167.414	234.463	1594.27	296.965	263.233	1600.04	224.694	207.839	1470.07	222.541	99.7531	1224.57	227.718	341.108	1360.77	208.645	378.833	1177.45	268.955	101.569	1300.16	57.713	272.665	1409.49	-19.8432	182.922	1200.8	-27.1704	172.406	1121.59	-65.0466	194.966	998.928	-32.0817	268.113	896.043	-79.5811	215.627	893.52	-76.4374	256.795	813.574
548	0	171.295	421.367	1604.37	267.579	434.247	1583.03	166.171	247.852	1592.41	295.666	276.776	1598.49	223.843	221.37	1468.69	222.2	112.643	1223.44	226.807	354.455	1359	208.148	391.621	1175.58	268.622	114.666	1299.16	56.8057	285.817	1407.63	-20.3893	193.707	1199.68	-27.7178	182.39	1120.7	-66.4136	202.505	998.001	-34.5711	274.231	893.791	-81.5766	221.236	892.39	-79.2698	260.865	811.745
549	0	169.695	434.734	1602.46	266.016	447.766	1581.37	164.835	261.223	1590.3	294.269	290.312	1596.72	222.882	234.913	1467.05	221.734	125.611	1222.03	225.855	367.834	1356.98	207.706	404.46	1173.47	268.155	127.812	1297.89	55.8279	299.042	1405.5	-21.0201	204.739	1198.27	-28.3063	192.586	1119.53	-67.787	210.298	996.844	-37.0053	280.558	891.338	-83.5528	227.114	891.06	-82.0079	265.186	809.752
550	0	167.982	448.082	1600.36	264.341	461.276	1579.52	163.402	274.577	1587.98	292.767	303.839	1594.74	221.805	248.468	1465.18	221.146	138.663	1220.36	224.851	381.249	1354.74	207.303	417.361	1171.15	267.556	141.015	1296.36	54.7708	312.334	1403.14	-21.742	216.016	1196.58	-28.9385	202.999	1118.09	-69.1613	218.363	995.46	-39.3727	287.117	888.694	-85.5004	233.284	889.536	-84.6352	269.786	807.595
551	0	166.151	461.415	1598.09	262.548	474.776	1577.5	161.865	287.916	1585.46	291.156	317.359	1592.57	220.608	262.036	1463.11	220.446	151.808	1218.45	223.781	394.704	1352.31	206.919	430.335	1168.63	266.826	154.287	1294.6	53.625	325.685	1400.55	-22.5593	227.532	1194.62	-29.6164	213.634	1116.38	-70.5313	226.714	993.86	-41.6647	293.933	885.87	-87.4109	239.773	887.822	-87.1401	274.694	805.276
552	0	164.197	474.735	1595.69	260.633	488.269	1575.34	160.215	301.243	1582.78	289.43	330.873	1590.25	219.286	275.62	1460.85	219.639	165.053	1216.33	222.632	408.202	1349.72	206.533	443.394	1165.96	265.971	167.636	1292.62	52.3811	339.087	1397.76	-23.474	239.279	1192.42	-30.3415	224.493	1114.42	-71.8929	235.362	992.053	-43.8755	301.034	882.885	-89.2768	246.601	885.929	-89.5155	279.942	802.805
553	0	162.116	488.045	1593.18	258.591	501.757	1573.09	158.447	314.561	1579.97	287.582	344.382	1587.8	217.835	289.223	1458.45	218.737	178.404	1214.01	221.389	421.748	1347.01	206.122	456.549	1163.17	264.997	181.074	1290.46	51.0302	352.531	1394.82	-24.4854	251.242	1189.98	-31.1143	235.576	1112.24	-73.2418	244.319	990.055	-46.0016	308.444	879.758	-91.0917	253.792	883.868	-91.7579	285.562	800.192
554	0	159.904	501.349	1590.6	256.418	515.241	1570.77	156.552	327.876	1577.07	285.608	357.887	1585.26	216.251	302.847	1455.93	217.751	191.869	1211.53	220.038	435.349	1344.21	205.66	469.812	1160.31	263.912	194.608	1288.14	49.5639	366.008	1391.74	-25.5903	263.407	1187.34	-31.9342	246.883	1109.86	-74.5744	253.593	987.883	-48.0417	316.192	876.512	-92.8495	261.365	881.653	-93.8673	291.587	797.451
555	0	157.56	514.651	1588	254.112	528.726	1568.42	154.525	341.192	1574.11	283.501	371.393	1582.68	214.534	316.497	1453.33	216.692	205.455	1208.93	218.565	449.009	1341.36	205.121	483.196	1157.42	262.727	208.25	1285.7	47.9753	379.509	1388.57	-26.7827	275.756	1184.52	-32.7996	258.41	1107.3	-75.8872	263.192	985.558	-49.9959	324.302	873.173	-94.5448	269.339	879.302	-95.846	298.053	794.603
556	0	155.081	527.957	1585.42	251.671	542.215	1566.09	152.36	354.516	1571.13	281.259	384.901	1580.08	212.682	330.178	1450.7	215.573	219.169	1206.25	216.957	462.736	1338.52	204.477	496.713	1154.54	261.451	222.005	1283.18	46.2591	393.026	1385.34	-28.0543	288.271	1181.56	-33.7081	270.157	1104.6	-77.1767	273.121	983.104	-51.8653	332.802	869.772	-96.1728	277.732	876.835	-97.6982	304.992	791.669
557	0	152.468	541.273	1582.91	249.096	555.713	1563.82	150.053	367.853	1568.19	278.877	398.414	1577.5	210.699	343.895	1448.06	214.406	233.017	1203.53	215.205	476.536	1335.72	203.702	510.376	1151.71	260.095	235.882	1280.63	44.4121	406.554	1382.1	-29.3946	300.934	1178.5	-34.6562	282.119	1101.79	-78.4396	283.387	980.548	-53.6517	341.717	866.34	-97.7291	286.562	874.276	-99.4293	312.442	788.674
558	0	149.723	554.604	1580.5	246.387	569.225	1561.65	147.601	381.211	1565.3	276.356	411.937	1574.99	208.586	357.654	1445.47	213.203	247.001	1200.81	213.301	490.415	1333.02	202.773	524.2	1148.99	258.671	249.885	1278.08	42.4332	420.086	1378.89	-30.7916	313.728	1175.37	-35.6398	294.293	1098.91	-79.6726	293.994	977.917	-55.357	351.071	862.912	-99.2094	295.843	871.648	-101.045	320.435	785.648
559	0	146.85	567.957	1578.23	243.549	582.755	1559.62	145.005	394.597	1562.53	273.696	425.473	1572.59	206.349	371.459	1442.97	211.974	261.124	1198.14	211.239	504.38	1330.45	201.667	538.194	1146.42	257.191	264.016	1275.59	40.3243	433.621	1375.74	-32.2324	326.639	1172.23	-36.6542	306.677	1095.99	-80.8728	304.947	975.244	-56.9828	360.887	859.523	-100.61	305.592	868.98	-102.55	329.004	782.62
560	0	143.855	581.336	1576.16	240.588	596.308	1557.77	142.267	408.017	1559.9	270.9	439.026	1570.32	203.996	385.315	1440.59	210.73	275.383	1195.57	209.02	518.433	1328.06	200.368	552.369	1144.04	255.666	278.276	1273.2	38.0898	447.156	1372.7	-33.7037	339.653	1169.1	-37.6945	319.267	1093.08	-82.0374	316.25	972.56	-58.5306	371.187	856.212	-101.928	315.821	866.301	-103.95	338.182	779.622
561	0	140.746	594.749	1574.3	237.512	609.89	1556.14	139.391	421.479	1557.45	267.973	452.6	1568.24	201.535	399.225	1438.38	209.479	289.775	1193.14	206.647	532.577	1325.88	198.862	566.733	1141.89	254.106	292.662	1270.95	35.7374	460.692	1369.82	-35.1928	352.76	1166.05	-38.7558	332.061	1090.22	-83.1642	327.907	969.899	-60.0013	381.989	853.015	-103.161	326.543	863.639	-105.249	347.995	776.686
562	0	137.535	608.201	1572.7	234.333	623.502	1554.75	136.384	434.987	1555.22	264.924	466.198	1566.36	198.978	413.19	1436.37	208.227	304.291	1190.9	204.126	546.812	1323.96	197.144	581.287	1140.01	252.521	307.168	1268.9	33.2774	474.229	1367.13	-36.688	365.954	1163.11	-39.8333	345.058	1087.44	-84.2513	339.921	967.295	-61.3952	393.312	849.97	-104.306	337.77	861.027	-106.45	358.471	773.846
563	0	134.233	621.694	1571.38	231.061	637.149	1553.64	133.255	448.546	1553.24	261.761	479.822	1564.72	196.337	427.209	1434.6	206.979	318.92	1188.89	201.469	561.133	1322.32	195.214	596.028	1138.42	250.92	321.784	1267.08	30.7234	487.769	1364.67	-38.1794	379.234	1160.32	-40.923	358.254	1084.79	-85.2977	352.297	964.779	-62.7126	405.17	847.114	-105.363	349.51	858.493	-107.554	369.631	771.134
564	0	130.856	635.233	1570.37	227.712	650.833	1552.82	130.018	462.159	1551.53	258.498	493.475	1563.35	193.628	441.28	1433.1	205.738	333.646	1187.14	198.691	575.533	1320.99	193.079	610.946	1137.16	249.313	336.496	1265.52	28.0914	501.314	1362.46	-39.6591	392.599	1157.73	-42.0211	371.652	1082.3	-86.303	365.038	962.383	-63.9532	417.574	844.481	-106.331	361.774	856.068	-108.563	381.492	768.58
565	0	127.418	648.819	1569.67	224.301	664.554	1552.32	126.687	475.826	1550.12	255.15	507.157	1562.26	190.866	455.396	1431.89	204.508	348.451	1185.7	195.814	590.001	1319.98	190.753	626.022	1136.25	247.708	351.287	1264.27	25.4	514.866	1360.55	-41.1215	406.056	1155.38	-43.1252	385.248	1080	-87.268	378.148	960.138	-65.117	430.532	842.102	-107.212	374.567	853.779	-109.478	394.069	766.213
566	0	123.937	662.453	1569.3	220.846	678.311	1552.12	123.28	489.548	1549.03	251.733	520.869	1561.48	188.069	469.551	1430.99	203.289	363.311	1184.6	192.859	604.524	1319.31	188.257	641.231	1135.69	246.112	366.137	1263.34	22.6698	528.426	1358.95	-42.5633	419.614	1153.29	-44.2334	399.044	1077.92	-88.1944	391.63	958.069	-66.204	444.052	840.006	-108.008	387.897	851.652	-110.298	407.372	764.061
567	0	120.432	676.131	1569.25	217.364	692.103	1552.25	119.817	503.321	1548.25	248.267	534.608	1561.01	185.255	483.733	1430.41	202.082	378.202	1183.84	189.852	619.083	1319	185.616	656.538	1135.48	244.532	381.023	1262.75	19.9227	541.993	1357.68	-43.9837	433.281	1151.49	-45.3451	413.038	1076.1	-89.0847	405.487	956.201	-67.2143	458.136	838.217	-108.724	401.767	849.711	-111.024	421.406	762.147
568	0	116.923	689.852	1569.52	213.874	705.924	1552.7	116.321	517.14	1547.81	244.773	548.372	1560.87	182.444	497.93	1430.17	200.888	393.098	1183.45	186.823	633.659	1319.02	182.861	671.904	1135.64	242.975	395.919	1262.53	17.1816	555.567	1356.75	-45.3835	447.07	1149.99	-46.4608	427.229	1074.54	-89.9429	419.721	954.554	-68.1485	472.783	836.757	-109.365	416.18	847.976	-111.657	436.172	760.492
569	0	113.429	703.607	1570.1	210.397	719.769	1553.44	112.815	530.996	1547.7	241.273	562.156	1561.04	179.655	512.126	1430.27	199.708	407.97	1183.43	183.799	648.228	1319.39	180.027	687.281	1136.14	241.448	410.799	1262.67	14.4693	569.144	1356.18	-46.7656	460.993	1148.82	-47.5819	441.614	1073.25	-90.7737	434.333	953.143	-69.0075	487.989	835.64	-109.939	431.138	846.464	-112.199	451.669	759.112
570	0	109.972	717.39	1570.98	206.953	733.631	1554.48	109.326	544.88	1547.92	237.792	575.953	1561.53	176.907	526.307	1430.69	198.541	422.791	1183.78	180.811	662.766	1320.08	177.152	702.62	1136.96	239.955	425.636	1263.16	11.808	582.72	1355.95	-48.1338	475.057	1147.97	-48.7111	456.189	1072.25	-91.5827	449.323	951.979	-69.7924	503.748	834.878	-110.452	446.64	845.19	-112.652	467.889	758.022
571	0	106.573	731.191	1572.12	203.564	747.499	1555.78	105.878	558.78	1548.45	234.355	589.757	1562.33	174.218	540.455	1431.43	197.387	437.531	1184.49	177.888	677.25	1321.08	174.274	717.871	1138.09	238.5	440.402	1264.01	9.21874	596.291	1356.07	-49.4928	489.271	1147.44	-49.8516	470.947	1071.54	-92.3763	464.687	951.07	-70.5046	520.048	834.475	-110.916	462.683	844.163	-113.021	484.823	757.233
572	0	103.253	744.997	1573.5	200.249	761.365	1557.32	102.499	572.682	1549.29	230.985	603.558	1563.43	171.606	554.555	1432.48	196.244	452.166	1185.55	175.057	691.656	1322.37	171.433	732.985	1139.48	237.085	455.072	1265.18	6.72048	609.85	1356.52	-50.8477	503.639	1147.23	-51.008	485.883	1071.12	-93.1612	480.423	950.419	-71.1454	536.876	834.434	-111.338	479.261	843.389	-113.31	502.459	756.75
573	0	100.032	758.798	1575.11	197.031	775.215	1559.07	99.2139	586.573	1550.4	227.707	617.346	1564.79	169.084	568.589	1433.81	195.11	466.669	1186.92	172.344	705.961	1323.92	168.669	747.918	1141.12	235.709	469.622	1266.66	4.32993	623.393	1357.28	-52.2035	518.159	1147.31	-52.1849	500.987	1070.96	-93.9443	496.523	950.023	-71.7162	554.213	834.75	-111.73	496.366	842.872	-113.526	520.781	756.578
574	0	96.9303	772.578	1576.89	193.929	789.038	1561.01	96.0476	600.437	1551.78	224.544	631.11	1566.41	166.665	582.544	1435.39	193.98	481.021	1188.59	169.77	720.148	1325.71	166.02	762.633	1142.97	234.373	484.03	1268.42	2.06095	636.913	1358.33	-53.5648	532.829	1147.66	-53.3877	516.249	1071.06	-94.7326	512.979	949.878	-72.2184	572.038	835.416	-112.1	513.985	842.611	-113.676	539.768	756.72
575	0	93.9666	786.326	1578.84	190.962	802.821	1563.11	93.0222	614.26	1553.38	221.519	644.838	1568.25	164.361	596.409	1437.21	192.851	495.202	1190.51	167.356	734.198	1327.69	163.523	777.101	1144.98	233.071	498.278	1270.43	-0.075679	650.405	1359.65	-54.9355	547.64	1148.28	-54.6218	531.658	1071.41	-95.5323	529.781	949.975	-72.6531	590.325	836.421	-112.457	532.105	842.602	-113.767	559.397	757.175
576	0	91.1574	800.027	1580.92	188.147	816.551	1565.34	90.1574	628.028	1555.18	218.648	658.518	1570.28	162.178	610.172	1439.22	191.717	509.199	1192.66	165.116	748.101	1329.84	161.208	791.303	1147.13	231.799	512.354	1272.64	-2.07238	663.866	1361.2	-56.319	562.583	1149.12	-55.8926	547.201	1071.98	-96.3494	546.913	950.303	-73.0214	609.046	837.751	-112.81	550.705	842.842	-113.809	579.642	757.941
577	0	88.5174	813.669	1583.1	185.499	830.217	1567.66	87.4696	641.727	1557.16	215.95	672.14	1572.47	160.123	623.827	1441.4	190.572	523.002	1195	163.062	761.847	1332.14	159.104	805.228	1149.38	230.552	526.246	1275.03	-3.92485	677.29	1362.95	-57.7173	577.645	1150.16	-57.205	562.868	1072.74	-97.1887	564.362	950.85	-73.3246	628.169	839.391	-113.165	569.765	843.323	-113.808	600.473	759.019
578	0	86.0587	827.241	1585.35	183.031	843.809	1570.05	84.9716	655.346	1559.27	213.436	685.693	1574.78	158.197	637.368	1443.72	189.408	536.605	1197.49	161.199	775.431	1334.54	157.233	818.876	1151.71	229.322	539.95	1277.56	-5.63192	690.677	1364.87	-59.132	592.81	1151.38	-58.5631	578.644	1073.68	-98.054	582.108	951.603	-73.564	647.661	841.326	-113.526	589.258	844.038	-113.775	621.854	760.405
579	0	83.7901	840.732	1587.66	180.752	857.316	1572.49	82.672	668.877	1561.49	211.116	699.167	1577.19	156.401	650.794	1446.14	188.22	550.008	1200.1	159.532	788.852	1337.02	155.61	832.255	1154.08	228.103	553.464	1280.19	-7.19536	704.025	1366.94	-60.5634	608.064	1152.75	-59.9706	594.519	1074.78	-98.9483	600.132	952.547	-73.7413	667.484	843.537	-113.898	609.156	844.978	-113.715	643.749	762.096
580	0	81.7176	854.136	1590	178.67	870.732	1574.95	80.5755	682.311	1563.79	208.994	712.555	1579.66	154.734	664.104	1448.63	187.002	563.215	1202.78	158.057	802.113	1339.54	154.244	845.379	1156.48	226.887	566.79	1282.89	-8.61955	717.334	1369.11	-62.0109	623.39	1154.25	-61.4296	610.48	1076	-99.8729	618.414	953.667	-73.8589	687.603	846.006	-114.283	629.428	846.134	-113.636	666.113	764.092
581	0	79.8437	867.447	1592.34	176.785	884.051	1577.4	78.6825	695.644	1566.14	207.073	725.852	1582.16	153.191	677.3	1451.16	185.748	576.232	1205.51	156.77	815.217	1342.09	153.135	858.269	1158.88	225.669	579.934	1285.61	-9.91114	730.603	1371.36	-63.4736	638.772	1155.84	-62.9414	626.516	1077.33	-100.828	636.931	954.947	-73.9197	707.98	848.718	-114.682	650.04	847.495	-113.543	688.903	766.387
582	0	78.1678	880.662	1594.66	175.1	897.268	1579.82	76.9897	708.873	1568.51	205.351	739.051	1584.65	151.767	690.385	1453.7	184.456	589.07	1208.25	155.662	828.172	1344.64	152.278	870.949	1161.27	224.442	592.905	1288.33	-11.0786	743.833	1373.67	-64.9496	654.196	1157.51	-64.506	642.618	1078.75	-101.814	655.659	956.371	-73.9276	728.576	851.652	-115.094	670.957	849.053	-113.44	712.069	768.975
583	0	76.6858	893.779	1596.95	173.608	910.383	1582.19	75.4901	721.999	1570.87	203.821	752.153	1587.11	150.455	703.364	1456.22	183.124	601.742	1210.97	154.721	840.987	1347.16	151.658	883.444	1163.63	223.204	605.716	1291.02	-12.1319	757.025	1376	-66.4369	669.646	1159.24	-66.1222	658.776	1080.23	-102.829	674.574	957.924	-73.8873	749.355	854.791	-115.518	692.144	850.794	-113.331	735.56	771.85
584	0	75.3912	906.799	1599.19	172.304	923.395	1584.48	74.1739	735.022	1573.19	202.476	765.154	1589.5	149.247	716.242	1458.7	181.753	614.266	1213.64	153.931	853.674	1349.62	151.254	895.782	1165.95	221.952	618.379	1293.65	-13.0818	770.179	1378.33	-67.9332	685.11	1161	-67.7876	674.982	1081.75	-103.869	693.653	959.589	-73.8044	770.281	858.115	-115.952	713.562	852.706	-113.216	759.322	775
585	0	74.2744	919.725	1601.35	171.179	936.306	1586.68	73.0288	747.947	1575.45	201.303	778.058	1591.81	148.135	729.027	1461.09	180.344	626.656	1216.22	153.277	866.245	1352.01	151.04	907.989	1168.21	220.684	630.911	1296.18	-13.94	783.297	1380.63	-69.4365	700.576	1162.78	-69.4988	691.23	1083.3	-104.932	712.872	961.349	-73.6853	791.321	861.606	-116.394	735.176	854.777	-113.095	783.3	778.412
586	0	73.324	932.561	1603.42	170.221	949.119	1588.77	72.0405	760.779	1577.63	200.291	790.867	1594	147.11	741.724	1463.39	178.902	638.932	1218.7	152.741	878.712	1354.3	150.984	920.091	1170.4	219.403	643.326	1298.59	-14.7179	796.378	1382.89	-70.9446	716.035	1164.55	-71.2513	707.515	1084.84	-106.015	732.207	963.186	-73.5368	812.442	865.242	-116.84	756.948	856.991	-112.969	807.44	782.068
587	0	72.5267	945.313	1605.37	169.416	961.84	1590.73	71.1934	773.523	1579.71	199.424	803.585	1596.06	146.163	754.342	1465.57	177.434	651.11	1221.04	152.303	891.09	1356.48	151.051	932.111	1172.49	218.109	655.641	1300.87	-15.4271	809.422	1385.08	-72.4558	731.479	1166.29	-73.0397	723.833	1086.37	-107.112	751.636	965.082	-73.3661	833.615	869.002	-117.287	778.843	859.331	-112.834	831.687	785.947
588	0	71.8681	957.987	1607.2	168.75	974.474	1592.54	70.4714	786.187	1581.65	198.688	816.217	1597.97	145.286	766.888	1467.6	175.949	663.208	1223.23	151.945	903.392	1358.52	151.206	944.071	1174.48	216.809	667.874	1302.98	-16.0786	822.43	1387.17	-73.9684	746.904	1167.98	-74.8579	740.18	1087.86	-108.22	771.136	967.017	-73.1804	854.811	872.863	-117.732	800.826	861.779	-112.688	855.986	790.023
589	0	71.3334	970.589	1608.88	168.209	987.027	1594.19	69.8581	798.779	1583.45	198.067	828.77	1599.7	144.471	779.371	1469.46	174.458	675.244	1225.24	151.648	915.631	1360.41	151.409	955.99	1176.33	215.507	680.039	1304.91	-16.6825	835.402	1389.16	-75.4813	762.305	1169.6	-76.6993	756.555	1089.29	-109.334	790.686	968.972	-72.9863	876.006	876.799	-118.171	822.865	864.315	-112.529	880.289	794.268
590	0	70.9074	983.128	1610.4	167.776	999.507	1595.65	69.3374	811.306	1585.08	197.544	841.249	1601.23	143.711	791.798	1471.14	172.973	687.232	1227.06	151.394	927.823	1362.12	151.626	967.882	1178.04	214.21	692.153	1306.64	-17.248	848.337	1391.01	-76.9928	777.681	1171.13	-78.5564	772.957	1090.64	-110.448	810.267	970.927	-72.79	897.175	880.786	-118.601	844.927	866.919	-112.352	904.545	798.65
591	0	70.5753	995.61	1611.74	167.437	1011.92	1596.93	68.894	823.778	1586.53	197.106	853.662	1602.57	142.999	804.179	1472.63	171.506	699.188	1228.67	151.167	939.98	1363.63	151.821	979.76	1179.58	212.928	704.228	1308.17	-17.7832	861.235	1392.71	-78.5017	793.034	1172.55	-80.4214	789.384	1091.9	-111.558	829.86	972.862	-72.5964	918.298	884.795	-119.02	866.982	869.567	-112.157	928.711	803.134
592	0	70.3233	1008.04	1612.9	167.178	1024.28	1598	68.5138	836.201	1587.79	196.738	866.017	1603.69	142.33	816.52	1473.91	170.072	711.125	1230.06	150.95	952.114	1364.94	151.964	991.635	1180.92	211.668	716.278	1309.47	-18.2947	874.097	1394.24	-80.0059	808.364	1173.85	-82.2859	805.837	1093.04	-112.66	849.446	974.757	-72.4096	939.354	888.799	-119.424	889.003	872.237	-111.938	952.746	807.684
593	0	70.1383	1020.44	1613.86	166.987	1036.58	1598.86	68.1839	848.584	1588.83	196.427	878.32	1604.58	141.7	828.831	1474.96	168.686	723.054	1231.21	150.731	964.238	1366.03	152.027	1003.51	1182.04	210.441	728.316	1310.54	-18.7882	886.923	1395.58	-81.5029	823.676	1174.99	-84.1414	822.315	1094.06	-113.748	869.01	976.593	-72.2325	960.323	892.769	-119.812	910.961	874.904	-111.696	976.612	812.263
594	0	70.0089	1032.79	1614.61	166.85	1048.84	1599.5	67.8931	860.935	1589.65	196.162	890.577	1605.23	141.105	841.118	1475.8	167.361	734.985	1232.14	150.5	976.362	1366.88	151.988	1015.4	1182.93	209.256	740.35	1311.38	-19.2675	899.712	1396.73	-82.9894	838.973	1175.98	-85.9786	838.816	1094.93	-114.817	888.534	978.35	-72.0668	981.189	896.677	-120.181	932.831	877.545	-111.428	1000.28	816.834
595	0	69.9252	1045.12	1615.15	166.759	1061.06	1599.92	67.6322	873.26	1590.25	195.934	902.796	1605.65	140.543	853.389	1476.39	166.111	746.928	1232.82	150.247	988.496	1367.48	151.831	1027.31	1183.57	208.124	752.389	1311.99	-19.7353	912.466	1397.66	-84.4607	854.258	1176.78	-87.7881	855.34	1095.65	-115.863	908.005	980.012	-71.9127	1001.93	900.495	-120.53	954.589	880.137	-111.134	1023.71	821.361
596	0	69.8791	1057.43	1615.48	166.705	1073.26	1600.11	67.3939	885.567	1590.61	195.736	914.983	1605.83	140.014	865.651	1476.76	164.948	758.889	1233.26	149.967	1000.65	1367.84	151.544	1039.24	1183.95	207.055	764.442	1312.35	-20.1928	925.186	1398.37	-85.9112	869.536	1177.4	-89.5601	871.882	1096.2	-116.88	927.405	981.562	-71.7695	1022.54	904.197	-120.857	976.213	882.658	-110.814	1046.89	825.808
597	0	69.8642	1069.73	1615.58	166.681	1085.43	1600.08	67.1728	897.86	1590.73	195.56	927.144	1605.77	139.519	877.909	1476.89	163.883	770.874	1233.46	149.658	1012.83	1367.93	151.122	1051.19	1184.05	206.058	776.515	1312.48	-20.6399	937.874	1398.85	-87.3336	884.809	1177.82	-91.2846	888.439	1096.58	-117.865	946.72	982.987	-71.6355	1043	907.756	-121.162	997.678	885.085	-110.469	1069.79	830.144
598	0	69.8763	1082.01	1615.47	166.684	1097.58	1599.83	66.9659	910.145	1590.61	195.404	939.284	1605.48	139.058	890.169	1476.78	162.923	782.89	1233.42	149.32	1025.04	1367.77	150.565	1063.18	1183.87	205.141	788.613	1312.38	-21.0748	950.534	1399.09	-88.7193	900.077	1178.04	-92.9514	905.003	1096.77	-118.812	965.935	984.274	-71.5078	1063.28	911.148	-121.442	1018.97	887.4	-110.101	1092.4	834.338
599	0	69.9128	1094.28	1615.13	166.712	1109.71	1599.36	66.7721	922.426	1590.25	195.267	951.407	1604.95	138.634	902.435	1476.45	162.076	794.939	1233.14	148.956	1037.28	1367.35	149.88	1075.22	1183.42	204.312	800.741	1312.05	-21.4948	963.167	1399.11	-90.0586	915.341	1178.04	-94.5503	921.568	1096.79	-119.715	985.033	985.413	-71.3832	1083.38	914.353	-121.697	1040.05	889.583	-109.714	1114.69	838.363
600	0	69.9733	1106.55	1614.59	166.762	1121.84	1598.69	66.5923	934.708	1589.67	195.148	963.519	1604.2	138.252	914.712	1475.9	161.344	807.027	1232.64	148.571	1049.56	1366.69	149.077	1087.3	1182.7	203.576	812.903	1311.5	-21.8959	975.779	1398.89	-91.3404	930.596	1177.84	-96.0711	938.121	1096.62	-120.569	1004	986.395	-71.2577	1103.27	917.349	-121.926	1060.92	891.618	-109.309	1136.65	842.195
601	0	70.059	1118.82	1613.85	166.838	1133.97	1597.82	66.4296	946.992	1588.86	195.051	975.624	1603.24	137.916	927.001	1475.13	160.73	819.158	1231.93	148.173	1061.89	1365.79	148.172	1099.44	1181.73	202.938	825.101	1310.74	-22.2731	988.374	1398.45	-92.5531	945.838	1177.44	-97.5039	954.651	1096.28	-121.37	1022.82	987.215	-71.1273	1122.95	920.12	-122.126	1081.55	893.49	-108.892	1158.26	845.813
602	0	70.173	1131.1	1612.92	166.942	1146.09	1596.77	66.2887	959.282	1587.84	194.978	987.724	1602.08	137.629	939.307	1474.17	160.23	831.337	1231	147.772	1074.25	1364.67	147.184	1111.65	1180.52	202.399	837.339	1309.78	-22.6204	1000.96	1397.79	-93.6846	961.059	1176.84	-98.8389	971.143	1095.76	-122.111	1041.46	987.867	-70.9876	1142.4	922.651	-122.296	1101.91	895.188	-108.466	1179.53	849.199
603	0	70.3197	1143.37	1611.82	167.079	1158.22	1595.54	66.1762	971.578	1586.63	194.936	999.824	1600.73	137.399	951.63	1473.01	159.841	843.569	1229.87	147.381	1086.67	1363.34	146.137	1123.93	1179.1	201.96	849.62	1308.61	-22.9313	1013.54	1396.93	-94.723	976.248	1176.04	-100.067	987.581	1095.07	-122.788	1059.93	988.35	-70.8347	1161.59	924.931	-122.435	1121.99	896.699	-108.036	1200.42	852.338
604	0	70.5049	1155.65	1610.55	167.256	1170.36	1594.17	66.0998	983.882	1585.24	194.932	1011.93	1599.22	137.229	963.973	1471.68	159.556	855.858	1228.56	147.011	1099.12	1361.84	145.055	1136.29	1177.49	201.618	861.946	1307.27	-23.1987	1026.12	1395.89	-95.6569	991.393	1175.07	-101.18	1003.95	1094.23	-123.395	1078.18	988.663	-70.6648	1180.51	926.951	-122.539	1141.77	898.017	-107.606	1220.92	855.217
605	0	70.7356	1167.94	1609.15	167.478	1182.5	1592.66	66.0686	996.193	1583.68	194.974	1024.03	1597.56	137.125	976.337	1470.19	159.365	868.211	1227.07	146.677	1111.62	1360.17	143.964	1148.74	1175.71	201.371	874.32	1305.75	-23.4151	1038.71	1394.68	-96.4755	1006.48	1173.94	-102.169	1020.22	1093.25	-123.927	1096.21	988.809	-70.4746	1199.15	928.705	-122.607	1161.23	899.134	-107.18	1241.03	857.827
606	0	71.0195	1180.22	1607.63	167.756	1194.65	1591.05	66.0924	1008.51	1581.99	195.071	1036.14	1595.77	137.093	988.724	1468.56	159.259	880.635	1225.42	146.393	1124.17	1358.38	142.894	1161.27	1173.81	201.211	886.743	1304.07	-23.573	1051.32	1393.32	-97.1699	1021.5	1172.66	-103.029	1036.38	1092.13	-124.38	1114	988.79	-70.2612	1217.48	930.188	-122.636	1180.33	900.046	-106.762	1260.72	860.16
607	0	71.3649	1192.52	1606.02	168.096	1206.81	1589.35	66.1815	1020.84	1580.18	195.232	1048.27	1593.87	137.136	1001.14	1466.81	159.224	893.134	1223.63	146.173	1136.77	1356.48	141.872	1173.9	1171.8	201.131	899.22	1302.25	-23.665	1063.96	1391.84	-97.7322	1036.43	1171.25	-103.753	1052.42	1090.9	-124.749	1131.51	988.611	-70.0224	1235.5	931.401	-122.622	1199.07	900.749	-106.355	1279.99	862.209
608	0	71.7803	1204.81	1604.34	168.508	1218.99	1587.58	66.3463	1033.18	1578.28	195.467	1060.4	1591.88	137.259	1013.57	1464.96	159.247	905.717	1221.7	146.033	1149.41	1354.51	140.925	1186.63	1169.74	201.123	911.752	1300.3	-23.6841	1076.64	1390.27	-98.1571	1051.26	1169.74	-104.338	1068.3	1089.58	-125.03	1148.74	988.28	-69.7567	1253.18	932.344	-122.563	1217.41	901.243	-105.96	1298.82	863.97
609	0	72.2738	1217.11	1602.62	169	1231.17	1585.78	66.5969	1045.52	1576.31	195.785	1072.54	1589.84	137.464	1026.04	1463.03	159.314	918.39	1219.67	145.984	1162.1	1352.5	140.082	1199.46	1167.64	201.176	924.342	1298.23	-23.6238	1089.37	1388.63	-98.441	1065.97	1168.15	-104.782	1084	1088.18	-125.22	1165.66	987.804	-69.463	1270.51	933.02	-122.457	1235.34	901.528	-105.581	1317.19	865.44
610	0	72.8535	1229.42	1600.88	169.579	1243.38	1583.96	66.9427	1057.87	1574.29	196.195	1084.69	1587.75	137.754	1038.54	1461.04	159.41	931.161	1217.54	146.039	1174.85	1350.47	139.366	1212.39	1165.55	201.278	936.994	1296.07	-23.4784	1102.16	1386.95	-98.5827	1080.57	1166.49	-105.082	1099.52	1086.72	-125.317	1182.25	987.192	-69.1409	1287.46	933.436	-122.3	1252.83	901.606	-105.216	1335.08	866.617
611	0	73.526	1241.72	1599.16	170.252	1255.59	1582.17	67.3919	1070.22	1572.26	196.705	1096.86	1585.65	138.13	1051.07	1459.01	159.521	944.034	1215.34	146.209	1187.65	1348.47	138.802	1225.44	1163.5	201.418	949.709	1293.84	-23.2431	1115.01	1385.25	-98.5834	1095.02	1164.81	-105.24	1114.83	1085.22	-125.319	1198.49	986.458	-68.7902	1304.04	933.599	-122.091	1269.87	901.482	-104.865	1352.48	867.5
612	0	74.2972	1254.02	1597.49	171.025	1267.82	1580.41	67.9516	1082.58	1570.24	197.322	1109.05	1583.56	138.591	1063.63	1456.98	159.634	957.017	1213.1	146.503	1200.51	1346.51	138.408	1238.6	1161.53	201.584	962.49	1291.55	-22.9141	1127.94	1383.57	-98.4463	1109.34	1163.12	-105.258	1129.91	1083.71	-125.226	1214.36	985.612	-68.4116	1320.21	933.518	-121.827	1286.43	901.162	-104.528	1369.37	868.092
613	0	75.1714	1266.32	1595.88	171.902	1280.06	1578.72	68.627	1094.95	1568.26	198.05	1121.25	1581.5	139.137	1076.24	1454.95	159.734	970.112	1210.82	146.927	1213.43	1344.64	138.201	1251.89	1159.66	201.764	975.338	1289.23	-22.489	1140.96	1381.92	-98.1768	1123.51	1161.45	-105.139	1144.75	1082.21	-125.039	1229.86	984.669	-68.0058	1335.96	933.203	-121.508	1302.49	900.654	-104.202	1385.73	868.394
614	0	76.1511	1278.63	1594.36	172.884	1292.31	1577.13	69.4216	1107.33	1566.33	198.892	1133.46	1579.49	139.764	1088.88	1452.96	159.813	983.322	1208.54	147.488	1226.4	1342.86	138.192	1265.31	1157.92	201.948	988.255	1286.9	-21.9664	1154.06	1380.35	-97.7821	1137.53	1159.83	-104.89	1159.34	1080.74	-124.759	1244.96	983.645	-67.5741	1351.29	932.667	-121.134	1318.04	899.969	-103.885	1401.56	868.41
615	0	77.2371	1290.93	1592.97	173.973	1304.58	1575.65	70.3368	1119.71	1564.49	199.85	1145.69	1577.56	140.47	1101.56	1451.02	159.859	996.648	1206.29	148.185	1239.44	1341.22	138.391	1278.85	1156.35	202.125	1001.24	1284.58	-21.3466	1167.27	1378.87	-97.2711	1151.4	1158.28	-104.516	1173.66	1079.32	-124.389	1259.65	982.555	-67.1178	1366.17	931.923	-120.704	1333.07	899.117	-103.573	1416.83	868.145
616	0	78.4278	1303.23	1591.72	175.166	1316.86	1574.32	71.3719	1132.09	1562.74	200.924	1157.94	1575.74	141.249	1114.29	1449.17	159.865	1010.09	1204.08	149.02	1252.53	1339.73	138.799	1292.54	1154.96	202.286	1014.29	1282.3	-20.6313	1180.57	1377.51	-96.6542	1165.12	1156.84	-104.026	1187.72	1077.98	-123.933	1273.92	981.418	-66.6385	1380.59	930.986	-120.222	1347.55	898.113	-103.263	1431.53	867.606
617	0	79.72	1315.52	1590.63	176.46	1329.15	1573.14	72.5244	1144.48	1561.12	202.109	1170.21	1574.03	142.096	1127.06	1447.41	159.825	1023.64	1201.94	149.988	1265.69	1338.4	139.413	1306.36	1153.77	202.424	1027.4	1280.09	-19.8241	1193.96	1376.29	-95.943	1178.7	1155.53	-103.43	1201.51	1076.73	-123.397	1287.77	980.254	-66.1384	1394.55	929.87	-119.69	1361.49	896.974	-102.95	1445.64	866.802
618	0	81.1081	1327.82	1589.71	177.849	1341.46	1572.14	73.7893	1156.88	1559.64	203.403	1182.5	1572.46	143.005	1139.87	1445.78	159.734	1037.29	1199.9	151.084	1278.89	1337.27	140.225	1320.31	1152.82	202.533	1040.58	1277.96	-18.9303	1207.46	1375.23	-95.15	1192.15	1154.36	-102.737	1215.02	1075.61	-122.788	1301.2	979.081	-65.6193	1408.03	928.594	-119.112	1374.86	895.718	-102.633	1459.17	865.745
619	0	82.5847	1340.11	1589	179.326	1353.78	1571.34	75.1599	1169.29	1558.32	204.797	1194.81	1571.04	143.966	1152.72	1444.3	159.589	1051.03	1197.98	152.298	1292.15	1336.33	141.222	1334.37	1152.09	202.605	1053.8	1275.95	-17.9573	1221.05	1374.36	-94.2886	1205.46	1153.37	-101.959	1228.25	1074.62	-122.114	1314.2	977.921	-65.0838	1421.03	927.176	-118.493	1387.68	894.365	-102.307	1472.09	864.449
620	0	84.1409	1352.41	1588.48	180.881	1366.11	1570.74	76.6272	1181.7	1557.17	206.283	1207.14	1569.8	144.972	1165.61	1442.97	159.388	1064.84	1196.21	153.617	1305.45	1335.61	142.383	1348.55	1151.62	202.637	1067.07	1274.07	-16.9144	1234.72	1373.68	-93.3729	1218.65	1152.58	-101.108	1241.21	1073.8	-121.384	1326.77	976.796	-64.5343	1433.53	925.636	-117.842	1399.94	892.939	-101.97	1484.41	862.931
621	0	85.7661	1364.7	1588.19	182.503	1378.45	1570.37	78.1804	1194.11	1556.21	207.85	1219.48	1568.73	146.01	1178.54	1441.82	159.129	1078.72	1194.6	155.025	1318.79	1335.11	143.683	1362.81	1151.39	202.624	1080.38	1272.35	-15.8129	1248.47	1373.22	-92.4175	1231.71	1152	-100.198	1253.91	1073.16	-120.608	1338.91	975.726	-63.9737	1445.54	923.993	-117.164	1411.63	891.462	-101.619	1496.12	861.208
622	0	87.4483	1376.98	1588.11	184.182	1390.8	1570.21	79.8068	1206.53	1555.43	209.485	1231.84	1567.86	147.071	1191.5	1440.87	158.812	1092.64	1193.19	156.505	1332.15	1334.82	145.095	1377.12	1151.42	202.564	1093.71	1270.81	-14.6658	1262.29	1372.99	-91.4377	1244.66	1151.65	-99.2426	1266.34	1072.71	-119.799	1350.65	974.734	-63.405	1457.05	922.27	-116.471	1422.78	889.961	-101.254	1507.21	859.304
623	0	89.1747	1389.27	1588.26	185.903	1403.16	1570.28	81.4916	1218.96	1554.86	211.175	1244.22	1567.19	148.141	1204.49	1440.12	158.435	1106.59	1191.99	158.035	1345.53	1334.76	146.586	1391.47	1151.68	202.453	1107.05	1269.48	-13.4877	1276.16	1372.98	-90.4491	1257.5	1151.54	-98.2565	1278.52	1072.47	-118.967	1361.98	973.84	-62.8315	1468.07	920.489	-115.772	1433.38	888.461	-100.874	1517.68	857.24
624	0	90.9315	1401.56	1588.63	187.654	1415.54	1570.57	83.2188	1231.39	1554.49	212.903	1256.62	1566.72	149.208	1217.5	1439.58	158.001	1120.53	1191.02	159.593	1358.91	1334.92	148.119	1405.81	1152.18	202.288	1120.4	1268.37	-12.2947	1290.07	1373.22	-89.468	1270.22	1151.68	-97.2553	1290.46	1072.46	-118.126	1372.92	973.063	-62.257	1478.59	918.672	-115.077	1443.46	886.988	-100.479	1527.56	855.043
625	0	92.7042	1413.85	1589.22	189.419	1427.92	1571.08	84.9705	1243.83	1554.33	214.653	1269.03	1566.46	150.259	1230.52	1439.27	157.509	1134.45	1190.29	161.153	1372.28	1335.28	149.66	1420.1	1152.89	202.07	1133.73	1267.49	-11.1036	1304.01	1373.71	-88.5109	1282.84	1152.08	-96.2549	1302.16	1072.67	-117.29	1383.48	972.421	-61.6857	1488.63	916.843	-114.399	1453.02	885.569	-100.071	1536.83	852.739
626	0	94.478	1426.14	1590.02	191.184	1440.31	1571.81	86.7277	1256.27	1554.38	216.406	1281.45	1566.4	151.28	1243.56	1439.18	156.962	1148.33	1189.82	162.691	1385.64	1335.85	151.171	1434.33	1153.79	201.798	1147.03	1266.86	-9.93213	1317.96	1374.43	-87.595	1295.35	1152.74	-95.2718	1313.64	1073.12	-116.472	1393.68	971.931	-61.1223	1498.19	915.023	-113.751	1462.1	884.23	-99.6515	1545.51	850.356
627	0	96.2376	1438.43	1591.02	192.933	1452.7	1572.73	88.4706	1268.72	1554.63	218.144	1293.88	1566.53	152.259	1256.59	1439.32	156.365	1162.14	1189.6	164.18	1398.95	1336.6	152.614	1448.44	1154.86	201.472	1160.3	1266.48	-8.7984	1331.89	1375.39	-86.7374	1307.75	1153.65	-94.3224	1324.91	1073.81	-115.687	1403.54	971.606	-60.5725	1507.3	913.235	-113.146	1470.72	882.993	-99.2234	1553.63	847.92
628	0	97.9674	1450.74	1592.2	194.652	1465.1	1573.83	90.1788	1281.18	1555.09	219.847	1306.32	1566.86	153.184	1269.61	1439.67	155.722	1175.87	1189.65	165.594	1412.23	1337.53	153.955	1462.4	1156.08	201.097	1173.51	1266.36	-7.7204	1345.79	1376.57	-85.9552	1320.03	1154.81	-93.4232	1335.99	1074.74	-114.95	1413.09	971.456	-60.0426	1515.95	911.499	-112.596	1478.9	881.881	-98.7908	1561.2	845.461
629	0	99.6519	1463.05	1593.56	196.325	1477.5	1575.09	91.8319	1293.65	1555.74	221.495	1318.76	1567.38	154.044	1282.62	1440.25	155.04	1189.5	1189.95	166.908	1425.44	1338.61	155.161	1476.2	1157.42	200.676	1186.66	1266.49	-6.71572	1359.64	1377.97	-85.265	1332.2	1156.21	-92.5902	1346.87	1075.89	-114.274	1422.34	971.488	-59.5401	1524.19	909.837	-112.117	1486.69	880.914	-98.3591	1568.25	843.004
630	0	101.276	1475.38	1595.07	197.938	1489.9	1576.51	93.4098	1306.12	1556.57	223.069	1331.21	1568.06	154.828	1295.6	1441.03	154.327	1203.01	1190.51	168.098	1438.59	1339.83	156.201	1489.8	1158.85	200.215	1199.75	1266.88	-5.80106	1373.41	1379.57	-84.6826	1344.26	1157.83	-91.8386	1357.59	1077.27	-113.674	1431.32	971.707	-59.0734	1532.02	908.265	-111.722	1494.11	880.107	-97.9349	1574.8	840.576
631	0	102.824	1487.72	1596.71	199.475	1502.3	1578.05	94.8932	1318.6	1557.58	224.552	1343.66	1568.91	155.529	1308.54	1442.01	153.595	1216.39	1191.3	169.145	1451.66	1341.17	157.051	1503.18	1160.35	199.722	1212.75	1267.5	-4.99179	1387.09	1381.34	-84.2221	1356.19	1159.65	-91.1823	1368.14	1078.85	-113.162	1440.05	972.113	-58.6523	1539.49	906.802	-111.423	1501.2	879.474	-97.5264	1580.9	838.201
632	0	104.283	1500.07	1598.46	200.922	1514.7	1579.69	96.2646	1331.09	1558.75	225.927	1356.1	1569.9	156.139	1321.44	1443.18	152.852	1229.62	1192.32	170.029	1464.64	1342.62	157.689	1516.35	1161.91	199.204	1225.67	1268.35	-4.30149	1400.65	1383.28	-83.8955	1367.99	1161.66	-90.6341	1378.53	1080.63	-112.75	1448.55	972.703	-58.2875	1546.62	905.463	-111.234	1508.01	879.024	-97.1436	1586.58	835.902
633	0	105.638	1512.44	1600.31	202.267	1527.09	1581.42	97.5078	1343.59	1560.07	227.177	1368.54	1571.03	156.653	1334.29	1444.5	152.112	1242.71	1193.55	170.736	1477.53	1344.16	158.101	1529.3	1163.5	198.671	1238.51	1269.42	-3.74154	1414.07	1385.34	-83.7123	1379.67	1163.82	-90.2045	1388.78	1082.57	-112.45	1456.86	973.474	-57.9908	1553.44	904.259	-111.167	1514.57	878.765	-96.7985	1591.88	833.7
634	0	106.878	1524.83	1602.23	203.497	1539.49	1583.21	98.6092	1356.1	1561.53	228.29	1380.98	1572.28	157.066	1347.08	1445.98	151.385	1255.65	1194.96	171.257	1490.34	1345.77	158.276	1542.03	1165.11	198.131	1251.25	1270.68	-3.32077	1427.35	1387.52	-83.6787	1391.2	1166.12	-89.9024	1398.89	1084.67	-112.272	1464.98	974.415	-57.7748	1560	903.201	-111.231	1520.91	878.699	-96.5052	1596.83	831.616
635	0	107.991	1537.24	1604.21	204.602	1551.88	1585.05	99.5575	1368.62	1563.1	229.255	1393.42	1573.63	157.377	1359.81	1447.58	150.681	1268.43	1196.54	171.586	1503.05	1347.45	158.212	1554.56	1166.73	197.593	1263.9	1272.12	-3.04525	1440.47	1389.78	-83.7971	1402.59	1168.53	-89.7339	1408.86	1086.91	-112.223	1472.95	975.516	-57.6529	1566.32	902.298	-111.437	1527.08	878.826	-96.2797	1601.5	829.666
636	0	108.968	1549.67	1606.21	205.571	1564.27	1586.92	100.344	1381.14	1564.76	230.063	1405.84	1575.07	157.583	1372.47	1449.29	150.011	1281.06	1198.26	171.721	1515.66	1349.17	157.913	1566.9	1168.36	197.065	1276.45	1273.71	-2.91808	1453.42	1392.1	-84.0659	1413.82	1171.02	-89.703	1418.71	1089.24	-112.31	1480.79	976.764	-57.6388	1572.45	901.554	-111.791	1533.1	879.139	-96.1399	1605.91	827.866
637	0	109.801	1562.11	1608.23	206.398	1576.66	1588.79	100.964	1393.67	1566.51	230.708	1418.26	1576.58	157.685	1385.08	1451.09	149.382	1293.55	1200.09	171.665	1528.19	1350.92	157.388	1579.08	1170	196.554	1288.93	1275.42	-2.93946	1466.2	1394.46	-84.4797	1424.89	1173.57	-89.8107	1428.43	1091.67	-112.538	1488.5	978.142	-57.7462	1578.42	900.97	-112.298	1539.01	879.632	-96.1052	1610.12	826.228
638	0	110.485	1574.57	1610.25	207.077	1589.04	1590.65	101.414	1406.2	1568.31	231.187	1430.67	1578.14	157.685	1397.61	1452.95	148.799	1305.89	1202.01	171.426	1540.63	1352.7	156.652	1591.13	1171.63	196.067	1301.32	1277.24	-3.10676	1478.82	1396.83	-85.029	1435.79	1176.16	-90.0557	1438.03	1094.15	-112.907	1496.11	979.633	-57.9888	1584.27	900.546	-112.963	1544.84	880.291	-96.1963	1614.17	824.762
639	0	111.016	1587.05	1612.23	207.603	1601.43	1592.48	101.693	1418.74	1570.15	231.498	1443.08	1579.74	157.584	1410.09	1454.85	148.266	1318.11	1203.99	171.013	1552.98	1354.49	155.725	1603.05	1173.26	195.605	1313.63	1279.13	-3.41473	1491.27	1399.17	-85.701	1446.5	1178.75	-90.434	1447.52	1096.66	-113.421	1503.63	981.216	-58.3792	1590.04	900.274	-113.786	1550.6	881.101	-96.4338	1618.11	823.471
640	0	111.391	1599.53	1614.16	207.976	1613.81	1594.26	101.805	1431.27	1572	231.645	1455.47	1581.35	157.387	1422.5	1456.76	147.783	1330.21	1206	170.44	1565.27	1356.28	154.632	1614.89	1174.89	195.173	1325.88	1281.07	-3.85582	1503.57	1401.48	-86.4803	1457.04	1181.32	-90.9396	1456.89	1099.18	-114.075	1511.07	982.869	-58.9294	1595.75	900.146	-114.766	1556.33	882.042	-96.8385	1621.97	822.356
641	0	111.611	1612.03	1616.03	208.195	1626.19	1595.99	101.753	1443.81	1573.83	231.629	1467.86	1582.95	157.098	1434.86	1458.66	147.348	1342.21	1208.02	169.722	1577.49	1358.05	153.401	1626.66	1176.49	194.768	1338.06	1283.02	-4.4205	1515.73	1403.71	-87.35	1467.39	1183.84	-91.5642	1466.15	1101.69	-114.869	1518.46	984.568	-59.6494	1601.45	900.147	-115.9	1562.05	883.092	-97.4298	1625.8	821.415
642	0	111.678	1624.53	1617.81	208.262	1638.57	1597.63	101.545	1456.34	1575.62	231.456	1480.24	1584.52	156.722	1447.17	1460.51	146.955	1354.13	1210.01	168.876	1589.65	1359.78	152.062	1638.38	1178.07	194.388	1350.2	1284.96	-5.09776	1527.77	1405.86	-88.2922	1477.55	1186.3	-92.298	1475.3	1104.15	-115.795	1525.79	986.289	-60.5475	1607.16	900.259	-117.184	1567.75	884.224	-98.2248	1629.63	820.637
643	0	111.593	1637.04	1619.48	208.18	1650.95	1599.18	101.188	1468.87	1577.34	231.135	1492.62	1586.04	156.263	1459.44	1462.3	146.597	1365.98	1211.94	167.922	1601.76	1361.46	150.645	1650.08	1179.61	194.03	1362.29	1286.85	-5.87546	1539.7	1407.88	-89.2893	1487.54	1188.67	-93.13	1484.37	1106.54	-116.849	1533.08	988.005	-61.6298	1612.9	900.46	-118.61	1573.47	885.41	-99.2381	1633.5	820.011
644	0	111.362	1649.55	1621.02	207.953	1663.32	1600.62	100.692	1481.39	1578.97	230.671	1505	1587.48	155.727	1471.69	1464	146.266	1377.77	1213.79	166.876	1613.84	1363.07	149.182	1661.75	1181.09	193.688	1374.35	1288.68	-6.74084	1551.55	1409.76	-90.3246	1497.35	1190.92	-94.0485	1493.34	1108.84	-118.022	1540.34	989.688	-62.8995	1618.7	900.724	-120.17	1579.2	886.621	-100.48	1637.44	819.516
645	0	110.99	1662.06	1622.42	207.588	1675.7	1601.92	100.065	1493.91	1580.47	230.076	1517.37	1588.82	155.12	1483.91	1465.57	145.951	1389.53	1215.52	165.758	1625.9	1364.58	147.702	1673.43	1182.49	193.354	1386.39	1290.4	-7.68088	1563.34	1411.46	-91.3833	1507.01	1193.03	-95.0413	1502.25	1111.02	-119.305	1547.58	991.312	-64.3572	1624.59	901.023	-121.855	1584.97	887.824	-101.958	1641.48	819.13
646	0	110.481	1674.57	1623.65	207.09	1688.09	1603.07	99.3196	1506.42	1581.81	229.358	1529.74	1590.03	154.448	1496.12	1467.01	145.639	1401.26	1217.12	164.586	1637.95	1365.98	146.233	1685.11	1183.79	193.02	1398.41	1292	-8.68275	1575.09	1412.98	-92.4526	1516.55	1194.99	-96.0965	1511.1	1113.06	-120.689	1554.81	992.849	-66.0005	1630.57	901.326	-123.655	1590.77	888.987	-103.672	1645.64	818.825
647	0	109.843	1687.08	1624.69	206.465	1700.48	1604.06	98.4651	1518.93	1582.98	228.527	1542.12	1591.1	153.714	1508.33	1468.27	145.319	1412.99	1218.56	163.375	1650	1367.23	144.799	1696.81	1184.96	192.678	1410.43	1293.45	-9.73419	1586.83	1414.28	-93.5226	1525.98	1196.76	-97.2026	1519.92	1114.94	-122.164	1562.06	994.271	-67.8242	1636.67	901.598	-125.557	1596.62	890.078	-105.62	1649.94	818.571
648	0	109.082	1699.6	1625.52	205.721	1712.88	1604.87	97.5117	1531.44	1583.94	227.593	1554.51	1591.99	152.925	1520.54	1469.34	144.979	1424.73	1219.81	162.141	1662.06	1368.31	143.421	1708.53	1185.96	192.318	1422.45	1294.71	-10.8239	1598.57	1415.35	-94.5856	1535.34	1198.33	-98.3491	1528.72	1116.63	-123.719	1569.32	995.551	-69.8197	1642.9	901.807	-127.551	1602.52	891.065	-107.792	1654.41	818.334
649	0	108.203	1712.11	1626.13	204.865	1725.29	1605.48	96.4693	1543.95	1584.67	226.564	1566.92	1592.69	152.084	1532.78	1470.2	144.606	1436.48	1220.85	160.897	1674.14	1369.19	142.116	1720.28	1186.78	191.93	1434.48	1295.78	-11.9419	1610.34	1416.16	-95.6372	1544.66	1199.68	-99.5267	1537.53	1118.11	-125.345	1576.62	996.664	-71.9762	1649.26	901.918	-129.624	1608.5	891.917	-110.176	1659.04	818.079
650	0	107.213	1724.64	1626.5	203.9	1737.72	1605.87	95.3464	1556.46	1585.14	225.45	1579.34	1593.17	151.193	1545.05	1470.83	144.19	1448.27	1221.67	159.654	1686.25	1369.86	140.896	1732.06	1187.38	191.506	1446.53	1296.63	-13.0797	1622.16	1416.71	-96.675	1553.98	1200.8	-100.727	1546.38	1119.37	-127.031	1583.98	997.587	-74.28	1655.77	901.898	-131.767	1614.55	892.607	-112.753	1663.84	817.772
651	0	106.116	1737.16	1626.62	202.835	1750.17	1606.04	94.1508	1568.98	1585.35	224.256	1591.78	1593.42	150.255	1557.36	1471.21	143.72	1460.09	1222.25	158.42	1698.41	1370.28	139.769	1743.87	1187.74	191.034	1458.6	1297.25	-14.2308	1634.04	1416.96	-97.6996	1563.34	1201.66	-101.945	1555.28	1120.38	-128.769	1591.41	998.297	-76.7154	1662.44	901.715	-133.966	1620.69	893.109	-115.501	1668.84	817.377
652	0	104.917	1749.7	1626.47	201.671	1762.65	1605.96	92.8888	1581.51	1585.27	222.991	1604.26	1593.43	149.271	1569.7	1471.33	143.188	1471.96	1222.57	157.203	1710.61	1370.44	138.738	1755.73	1187.83	190.509	1470.7	1297.62	-15.3904	1646.01	1416.92	-98.7134	1572.78	1202.26	-103.173	1564.28	1121.13	-130.548	1598.94	998.776	-79.2648	1669.27	901.341	-136.214	1626.95	893.399	-118.395	1674.02	816.86
653	0	103.62	1762.26	1626.03	200.414	1775.15	1605.62	91.565	1594.06	1584.9	221.657	1616.77	1593.19	148.24	1582.1	1471.18	142.586	1483.89	1222.62	156.005	1722.87	1370.31	137.804	1767.63	1187.64	189.92	1482.83	1297.72	-16.556	1658.07	1416.58	-99.7206	1582.33	1202.58	-104.41	1573.39	1121.6	-132.361	1606.59	999.006	-81.9091	1676.26	900.748	-138.498	1633.32	893.459	-121.408	1679.39	816.191
654	0	102.228	1774.84	1625.32	199.066	1787.69	1605.03	90.1826	1606.63	1584.23	220.258	1629.32	1592.68	147.162	1594.56	1470.75	141.908	1495.87	1222.4	154.829	1735.18	1369.89	136.963	1779.57	1187.14	189.262	1495	1297.56	-17.7272	1670.24	1415.92	-100.727	1592.03	1202.61	-105.653	1582.64	1121.79	-134.2	1614.38	998.974	-84.6284	1683.43	899.915	-140.812	1639.85	893.271	-124.51	1684.95	815.339
655	0	100.742	1787.44	1624.31	197.629	1800.28	1604.16	88.7429	1619.22	1583.26	218.796	1641.91	1591.9	146.033	1607.07	1470.04	141.152	1507.92	1221.9	153.671	1747.57	1369.17	136.209	1791.57	1186.33	188.529	1507.22	1297.13	-18.9055	1682.52	1414.95	-101.739	1601.92	1202.34	-106.9	1592.07	1121.68	-136.057	1622.33	998.67	-87.4025	1690.78	898.822	-143.146	1646.53	892.824	-127.673	1690.71	814.281
656	0	99.1629	1800.08	1623.01	196.102	1812.91	1603.02	87.2454	1631.84	1582	217.271	1654.56	1590.87	144.851	1619.65	1469.05	140.315	1520.05	1221.12	152.528	1760.02	1368.13	135.53	1803.63	1185.21	187.717	1519.48	1296.42	-20.0948	1694.91	1413.67	-102.764	1612.01	1201.77	-108.151	1601.68	1121.28	-137.928	1630.46	998.088	-90.2109	1698.31	897.456	-145.494	1653.41	892.109	-130.869	1696.67	812.996
657	0	97.4916	1812.76	1621.42	194.486	1825.59	1601.62	85.6883	1644.49	1580.45	215.681	1667.27	1589.58	143.611	1632.29	1467.79	139.398	1532.24	1220.06	151.392	1772.55	1366.79	134.917	1815.76	1183.77	186.823	1531.8	1295.44	-21.3008	1707.42	1412.09	-103.81	1622.34	1200.89	-109.407	1611.51	1120.56	-139.805	1638.8	997.223	-93.0339	1706.03	895.808	-147.849	1660.49	891.123	-134.069	1702.83	811.469
658	0	95.7267	1825.48	1619.56	192.779	1838.33	1599.96	84.0678	1657.19	1578.64	214.022	1680.03	1588.05	142.308	1644.99	1466.27	138.402	1544.52	1218.73	150.255	1785.14	1365.15	134.353	1827.96	1182.04	185.845	1544.18	1294.2	-22.5309	1720.04	1410.22	-104.885	1632.92	1199.7	-110.668	1621.57	1119.55	-141.684	1647.37	996.078	-95.8526	1713.95	893.875	-150.207	1667.8	889.865	-137.251	1709.21	809.692
659	0	93.8664	1838.26	1617.44	190.978	1851.12	1598.05	82.3793	1669.93	1576.57	212.29	1692.86	1586.29	140.936	1657.76	1464.51	137.331	1556.88	1217.14	149.105	1797.82	1363.22	133.822	1840.24	1180.01	184.784	1556.63	1292.71	-23.794	1732.77	1408.07	-105.995	1643.78	1198.21	-111.936	1631.88	1118.23	-143.559	1656.18	994.657	-98.6496	1722.08	891.658	-152.561	1675.36	888.34	-140.393	1715.81	807.66
660	0	91.9081	1851.09	1615.08	189.079	1863.99	1595.91	80.6169	1682.73	1574.29	210.481	1705.76	1584.34	139.491	1670.59	1462.51	136.191	1569.32	1215.31	147.929	1810.57	1361.03	133.305	1852.6	1177.73	183.642	1569.14	1290.98	-25.1001	1745.61	1405.67	-107.146	1654.92	1196.42	-113.21	1642.45	1116.62	-145.427	1665.26	992.968	-101.409	1730.42	889.165	-154.908	1683.2	886.555	-143.476	1722.65	805.378
661	0	89.8488	1864	1612.5	187.08	1876.93	1593.56	78.774	1695.58	1571.81	208.589	1718.73	1582.2	137.967	1683.48	1460.32	134.988	1581.86	1213.26	146.712	1823.4	1358.61	132.783	1865.06	1175.21	182.422	1581.74	1289.05	-26.4601	1758.53	1403.03	-108.343	1666.34	1194.34	-114.49	1653.29	1114.74	-147.284	1674.61	991.027	-104.117	1738.99	886.41	-157.243	1691.33	884.525	-146.487	1729.74	802.853
662	0	87.6853	1876.97	1609.74	184.975	1889.94	1591.04	76.8441	1708.5	1569.17	206.606	1731.78	1579.93	136.359	1696.44	1457.95	133.729	1594.5	1211.01	145.437	1836.31	1355.99	132.234	1877.61	1172.49	181.128	1594.41	1286.92	-27.8851	1771.53	1400.19	-109.589	1678.05	1192	-115.778	1664.4	1112.59	-149.124	1684.25	988.85	-106.762	1747.8	883.412	-159.561	1699.76	882.266	-149.415	1737.11	800.102
663	0	85.414	1890.02	1606.83	182.761	1903.03	1588.38	74.8203	1721.49	1566.42	204.527	1744.91	1577.54	134.661	1709.47	1455.45	132.425	1607.24	1208.59	144.09	1849.3	1353.2	131.636	1890.28	1169.61	179.766	1607.19	1284.65	-29.3861	1784.6	1397.18	-110.885	1690.04	1189.4	-117.071	1675.79	1110.21	-150.945	1694.19	986.46	-109.334	1756.86	880.196	-161.859	1708.52	879.799	-152.254	1744.78	797.146
664	0	83.0319	1903.15	1603.81	180.432	1916.21	1585.61	72.6963	1734.54	1563.58	202.345	1758.12	1575.09	132.87	1722.56	1452.85	131.084	1620.09	1206.04	142.653	1862.38	1350.29	130.965	1903.06	1166.61	178.344	1620.06	1282.25	-30.9735	1797.73	1394.04	-112.231	1702.3	1186.58	-118.368	1687.44	1107.61	-152.742	1704.43	983.882	-111.827	1766.17	876.791	-164.13	1717.62	877.151	-154.999	1752.77	794.014
665	0	80.5362	1916.37	1600.72	177.986	1929.47	1582.77	70.4668	1747.68	1560.72	200.057	1771.41	1572.61	130.984	1735.71	1450.18	129.716	1633.06	1203.41	141.112	1875.54	1347.31	130.197	1915.96	1163.55	176.87	1633.03	1279.77	-32.6568	1810.9	1390.8	-113.624	1714.81	1183.56	-119.668	1699.37	1104.83	-154.511	1714.98	981.148	-114.235	1775.76	873.235	-166.371	1727.06	874.351	-157.65	1761.13	790.739
666	0	77.9251	1929.68	1597.62	175.42	1942.82	1579.92	68.1275	1760.9	1557.87	197.658	1784.79	1570.14	129	1748.94	1447.5	128.332	1646.14	1200.72	139.453	1888.8	1344.31	129.311	1928.99	1160.46	175.353	1646.12	1277.26	-34.4436	1824.09	1387.51	-115.06	1727.55	1180.39	-120.967	1711.55	1101.9	-156.249	1725.84	978.29	-116.555	1785.65	869.568	-168.573	1736.87	871.431	-160.208	1769.87	787.358
667	0	75.1979	1943.08	1594.54	172.73	1956.27	1577.09	65.6755	1774.2	1555.09	195.145	1798.26	1567.73	126.918	1762.23	1444.85	126.943	1659.35	1198.04	137.665	1902.14	1341.35	128.285	1942.16	1157.42	173.801	1659.33	1274.76	-36.34	1837.31	1384.22	-116.533	1740.51	1177.1	-122.262	1723.98	1098.87	-157.952	1737.01	975.347	-118.786	1795.83	865.837	-170.732	1747.05	868.43	-162.674	1779.03	783.916
668	0	72.355	1956.57	1591.54	169.919	1969.81	1574.34	63.1097	1787.59	1552.42	192.517	1811.83	1565.42	124.739	1775.59	1442.27	125.558	1672.69	1195.4	135.737	1915.58	1338.46	127.102	1955.48	1154.46	172.224	1672.66	1272.32	-38.3491	1850.54	1380.96	-118.036	1753.64	1173.75	-123.551	1736.65	1095.77	-159.615	1748.49	972.357	-120.927	1806.35	862.091	-172.84	1757.6	865.384	-165.051	1788.63	780.458
669	0	69.3988	1970.15	1588.67	166.985	1983.45	1571.71	60.4308	1801.07	1549.9	189.776	1825.48	1563.27	122.466	1789.02	1439.81	124.187	1686.15	1192.87	133.666	1929.12	1335.72	125.747	1968.94	1151.64	170.632	1686.12	1269.98	-40.4716	1863.77	1377.79	-119.561	1766.94	1170.37	-124.83	1749.53	1092.65	-161.236	1760.26	969.362	-122.98	1817.2	858.382	-174.888	1768.53	862.334	-167.339	1798.72	777.033
670	0	66.3333	1983.83	1585.97	163.934	1997.18	1569.25	57.6416	1814.64	1547.59	186.925	1839.23	1561.3	120.104	1802.51	1437.51	122.838	1699.74	1190.48	131.449	1942.74	1333.16	124.21	1982.56	1149.02	169.034	1699.7	1267.79	-42.7049	1876.99	1374.75	-121.099	1780.37	1167.03	-126.096	1762.62	1089.56	-162.81	1772.33	966.404	-124.947	1828.42	854.764	-176.869	1779.84	859.323	-169.541	1809.3	773.69
671	0	63.1647	1997.6	1583.47	160.771	2011.01	1566.99	54.7472	1828.29	1545.52	183.968	1853.06	1559.57	117.659	1816.07	1435.42	121.517	1713.45	1188.28	129.09	1956.46	1330.84	122.488	1996.34	1146.64	167.437	1713.41	1265.8	-45.0433	1890.2	1371.89	-122.642	1793.89	1163.78	-127.347	1775.89	1086.54	-164.336	1784.7	963.526	-126.83	1840.01	851.29	-178.775	1791.55	856.391	-171.654	1820.41	770.478
672	0	59.9012	2011.46	1581.23	157.502	2024.93	1564.97	51.7552	1842.04	1543.75	180.915	1866.99	1558.1	115.14	1829.68	1433.58	120.23	1727.27	1186.32	126.594	1970.25	1328.81	120.583	2010.29	1144.55	165.849	1727.23	1264.05	-47.4775	1903.4	1369.24	-124.183	1807.5	1160.67	-128.581	1789.33	1083.65	-165.81	1797.34	960.767	-128.631	1852	848.013	-180.598	1803.64	853.579	-173.677	1832.07	767.445
673	0	56.5532	2025.4	1579.27	154.14	2038.93	1563.22	48.6753	1855.86	1542.28	177.774	1880.99	1556.93	112.556	1843.35	1432	118.981	1741.19	1184.64	123.975	1984.13	1327.09	118.503	2024.38	1142.8	164.277	1741.15	1262.58	-49.9955	1916.58	1366.86	-125.715	1821.16	1157.75	-129.798	1802.92	1080.92	-167.231	1810.26	958.168	-130.353	1864.4	844.984	-182.33	1816.12	850.927	-175.606	1844.3	764.637
674	0	53.1332	2039.42	1577.62	150.696	2053.02	1561.78	45.5201	1869.76	1541.17	174.559	1895.08	1556.1	109.921	1857.06	1430.74	117.773	1755.19	1183.28	121.247	1998.07	1325.72	116.263	2038.63	1141.41	162.727	1755.18	1261.43	-52.582	1929.74	1364.76	-127.232	1834.86	1155.07	-130.998	1816.65	1078.39	-168.598	1823.44	955.765	-131.998	1877.22	842.249	-183.964	1828.99	848.469	-177.436	1857.09	762.095
675	0	49.656	2053.51	1576.29	147.185	2067.19	1560.65	42.3044	1883.73	1540.43	171.285	1909.23	1555.61	107.247	1870.81	1429.8	116.606	1769.27	1182.26	118.431	2012.06	1324.72	113.884	2053.01	1140.42	161.204	1769.27	1260.61	-55.2194	1942.87	1362.98	-128.73	1848.58	1152.67	-132.181	1830.5	1076.11	-169.911	1836.89	953.589	-133.569	1890.47	839.85	-185.495	1842.26	846.24	-179.16	1870.48	759.857
676	0	46.1383	2067.66	1575.31	143.624	2081.41	1559.86	39.0455	1897.76	1540.06	167.969	1923.45	1555.48	104.55	1884.58	1429.2	115.48	1783.4	1181.6	115.55	2026.08	1324.12	111.39	2067.49	1139.84	159.712	1783.43	1260.15	-57.8879	1955.99	1361.55	-130.206	1862.31	1150.59	-133.35	1844.46	1074.1	-171.17	1850.6	951.669	-135.066	1904.16	837.822	-186.917	1855.93	844.267	-180.772	1884.45	757.954
677	0	42.5986	2081.86	1574.66	140.032	2095.69	1559.4	35.7629	1911.83	1540.09	164.63	1937.72	1555.72	101.846	1898.36	1428.96	114.393	1797.56	1181.31	112.629	2040.13	1323.91	108.812	2082.06	1139.68	158.254	1797.63	1260.05	-60.5665	1969.07	1360.47	-131.659	1876.04	1148.86	-134.508	1858.52	1072.39	-172.377	1864.56	950.028	-136.491	1918.31	836.196	-188.228	1869.99	842.575	-182.264	1899	756.412
678	0	39.0572	2096.1	1574.35	136.43	2110.01	1559.27	32.4777	1925.94	1540.51	161.291	1952.03	1556.34	99.1513	1912.14	1429.06	113.342	1811.73	1181.4	109.696	2054.17	1324.1	106.182	2096.68	1139.94	156.832	1811.85	1260.33	-63.2334	1982.14	1359.76	-133.087	1889.77	1147.5	-135.658	1872.66	1071.01	-173.534	1878.76	948.681	-137.845	1932.9	834.991	-189.427	1884.44	841.181	-183.63	1914.14	755.249
679	0	35.5356	2110.35	1574.37	132.841	2124.35	1559.46	29.2127	1940.07	1541.3	157.973	1966.37	1557.31	96.4838	1925.91	1429.51	112.321	1825.88	1181.87	106.779	2068.19	1324.68	103.535	2111.3	1140.61	155.447	1826.06	1260.97	-65.8665	1995.17	1359.41	-134.492	1903.5	1146.51	-136.804	1886.87	1069.95	-174.644	1893.22	947.641	-139.127	1947.93	834.223	-190.513	1899.3	840.098	-184.864	1929.85	754.478
680	0	32.0564	2124.61	1574.71	129.289	2138.7	1559.95	25.9914	1954.19	1542.46	154.7	1980.71	1558.63	93.8599	1939.65	1430.3	111.327	1839.99	1182.69	103.908	2082.16	1325.62	100.907	2125.88	1141.66	154.098	1840.23	1261.95	-68.4445	2008.18	1359.43	-135.874	1917.24	1145.9	-137.952	1901.16	1069.22	-175.711	1907.91	946.912	-140.337	1963.41	833.897	-191.489	1914.55	839.333	-185.96	1946.11	754.102
681	0	28.6423	2138.85	1575.33	125.796	2153.04	1560.73	22.8376	1968.3	1543.95	151.495	1995.06	1560.27	91.2957	1953.35	1431.39	110.351	1854.04	1183.86	101.11	2096.07	1326.9	98.3334	2140.39	1143.07	152.783	1854.35	1263.27	-70.9472	2021.17	1359.79	-137.237	1930.98	1145.66	-139.107	1915.51	1068.83	-176.738	1922.85	946.492	-141.474	1979.32	834.011	-192.358	1930.19	838.887	-186.914	1962.91	754.122
682	0	25.316	2153.07	1576.21	122.389	2167.36	1561.76	19.7746	1982.39	1545.76	148.381	2009.38	1562.21	88.8062	1966.99	1432.78	109.386	1868.01	1185.33	98.4109	2109.9	1328.49	95.8484	2154.78	1144.78	151.501	1868.4	1264.89	-73.3559	2034.13	1360.48	-138.582	1944.73	1145.78	-140.272	1929.91	1068.75	-177.73	1938.02	946.376	-142.535	1995.64	834.555	-193.124	1946.22	838.756	-187.724	1980.23	754.528
683	0	22.0994	2167.24	1577.33	119.089	2181.63	1563.01	16.8245	1996.42	1547.84	145.381	2023.66	1564.4	86.4054	1980.56	1434.42	108.425	1881.87	1187.09	95.8363	2123.63	1330.36	93.4839	2169.01	1146.76	150.246	1882.34	1266.77	-75.6542	2047.07	1361.47	-139.913	1958.5	1146.23	-141.453	1944.37	1068.98	-178.69	1953.43	946.552	-143.517	2012.36	835.514	-193.794	1962.64	838.932	-188.389	1998.05	755.309
684	0	19.013	2181.36	1578.65	115.919	2195.85	1564.46	14.0077	2010.39	1550.16	142.514	2037.9	1566.81	84.1053	1994.07	1436.29	107.458	1895.6	1189.1	93.4072	2137.25	1332.44	91.2684	2183.05	1148.95	149.014	1896.16	1268.9	-77.828	2059.99	1362.73	-141.233	1972.3	1146.98	-142.654	1958.89	1069.48	-179.622	1969.07	947.003	-144.417	2029.46	836.868	-194.374	1979.43	839.401	-188.91	2016.34	756.449
685	0	16.0752	2195.39	1580.14	112.899	2209.99	1566.07	11.3423	2024.29	1552.68	139.798	2052.06	1569.41	81.9165	2007.49	1438.35	106.478	1909.2	1191.31	91.1417	2150.74	1334.71	89.2263	2196.87	1151.3	147.802	1909.85	1271.22	-79.8661	2072.89	1364.23	-142.543	1986.14	1148	-143.877	1973.45	1070.25	-180.531	1984.93	947.712	-145.232	2046.91	838.589	-194.869	1996.58	840.148	-189.288	2035.07	757.929
686	0	13.3021	2209.34	1581.76	110.046	2224.04	1567.8	8.8434	2038.1	1555.35	137.249	2066.15	1572.14	79.8474	2020.82	1440.58	105.478	1922.65	1193.7	89.0543	2164.11	1337.11	87.3775	2210.46	1153.75	146.604	1923.39	1273.7	-81.7599	2085.78	1365.93	-143.846	2000.02	1149.26	-145.126	1988.07	1071.24	-181.418	2001.01	948.656	-145.957	2064.67	840.649	-195.289	2014.09	841.154	-189.527	2054.21	759.727
687	0	10.7071	2223.19	1583.49	107.375	2238	1569.63	6.52307	2051.81	1558.13	134.879	2080.15	1574.96	77.9043	2034.07	1442.92	104.451	1935.94	1196.22	87.1553	2177.34	1339.61	85.7364	2223.79	1156.25	145.416	1936.78	1276.3	-83.5041	2098.65	1367.81	-145.144	2013.95	1150.72	-146.401	2002.74	1072.42	-182.288	2017.3	949.813	-146.589	2082.73	843.015	-195.638	2031.92	842.4	-189.631	2073.74	761.822
688	0	8.30053	2236.94	1585.29	104.898	2251.84	1571.51	4.38976	2065.42	1560.97	132.695	2094.05	1577.84	76.0913	2047.22	1445.35	103.393	1949.06	1198.84	85.4509	2190.43	1342.14	84.3117	2236.87	1158.76	144.233	1950	1278.98	-85.0959	2111.52	1369.81	-146.437	2027.94	1152.34	-147.705	2017.47	1073.77	-183.142	2033.8	951.159	-147.124	2101.05	845.656	-195.925	2050.07	843.865	-189.608	2093.62	764.19
689	0	6.08951	2250.57	1587.13	102.621	2265.58	1573.43	2.44839	2078.93	1563.85	130.704	2107.85	1580.74	74.4104	2060.29	1447.83	102.299	1962.02	1201.51	83.9428	2203.38	1344.69	83.1065	2249.71	1161.24	143.053	1963.05	1281.71	-86.536	2124.39	1371.91	-147.727	2042	1154.09	-149.035	2032.25	1075.25	-183.981	2050.49	952.668	-147.559	2119.59	848.536	-196.155	2068.51	845.527	-189.463	2113.81	766.809
690	0	4.07805	2264.1	1588.98	100.55	2279.2	1575.34	0.700291	2092.34	1566.73	128.906	2121.53	1583.61	72.8614	2073.26	1450.33	101.167	1974.81	1204.21	82.6288	2216.21	1347.2	82.1179	2262.31	1163.65	141.871	1975.95	1284.46	-87.8273	2137.25	1374.07	-149.011	2056.12	1155.93	-150.391	2047.1	1076.83	-184.807	2067.37	954.318	-147.893	2138.31	851.624	-196.336	2087.21	847.366	-189.205	2134.28	769.657
691	0	2.26706	2277.51	1590.82	98.6859	2292.7	1577.22	-0.856585	2105.64	1569.56	127.299	2135.11	1586.42	71.4418	2086.15	1452.83	99.9957	1987.45	1206.91	81.5028	2228.9	1349.64	81.3376	2274.68	1165.96	140.686	1988.68	1287.18	-88.9753	2150.1	1376.27	-150.29	2070.32	1157.83	-151.77	2062	1078.49	-185.619	2084.43	956.085	-148.125	2157.2	854.887	-196.471	2106.16	849.361	-188.841	2155	772.712
692	0	0.654526	2290.81	1592.61	97.026	2306.09	1579.05	-2.22738	2118.84	1572.32	125.881	2148.58	1589.15	70.1476	2098.97	1455.28	98.7855	1999.94	1209.56	80.555	2241.48	1352	80.7526	2286.85	1168.16	139.497	2001.26	1289.86	-89.9877	2162.96	1378.47	-151.561	2084.59	1159.76	-153.169	2076.96	1080.19	-186.418	2101.64	957.947	-148.255	2176.21	858.295	-196.567	2125.33	851.493	-188.379	2175.93	775.951
693	0	-0.764227	2304.01	1594.35	95.5658	2319.37	1580.81	-3.41994	2131.95	1574.99	124.642	2161.94	1591.77	68.9731	2111.7	1457.67	97.5383	2012.29	1212.15	79.773	2253.95	1354.24	80.3452	2298.85	1170.22	138.301	2013.69	1292.45	-90.8735	2175.81	1380.65	-152.824	2098.94	1161.7	-154.584	2091.99	1081.91	-187.203	2119	959.881	-148.285	2195.31	861.818	-196.628	2144.68	853.742	-187.829	2197.02	779.354
694	0	-1.99619	2317.11	1596	94.2979	2332.54	1582.46	-4.4443	2144.96	1577.54	123.574	2175.19	1594.25	67.9114	2124.36	1459.97	96.2575	2024.51	1214.65	79.142	2266.32	1356.35	80.0943	2310.69	1172.15	137.101	2026	1294.95	-91.6434	2188.66	1382.79	-154.077	2113.35	1163.62	-156.011	2107.08	1083.63	-187.973	2136.5	961.867	-148.218	2214.48	865.428	-196.659	2164.19	856.089	-187.198	2218.25	782.898
695	0	-3.05034	2330.12	1597.55	93.2128	2345.62	1584.01	-5.31221	2157.9	1579.95	122.665	2188.35	1596.58	66.9548	2136.96	1462.16	94.9479	2036.62	1217.04	78.6455	2278.59	1358.31	79.9763	2322.41	1173.94	135.896	2038.18	1297.32	-92.3085	2201.51	1384.87	-155.317	2127.84	1165.49	-157.446	2122.24	1085.32	-188.726	2154.11	963.885	-148.061	2233.69	869.098	-196.661	2183.84	858.515	-186.494	2239.57	786.561
696	0	-3.93723	2343.05	1598.99	92.2992	2358.61	1585.42	-6.03657	2170.77	1582.21	121.903	2201.41	1598.74	66.0947	2149.5	1464.22	93.616	2048.63	1219.29	78.266	2290.78	1360.11	79.9657	2334.02	1175.59	134.69	2050.27	1299.56	-92.8805	2214.34	1386.86	-156.543	2142.38	1167.3	-158.883	2137.46	1086.96	-189.462	2171.83	965.915	-147.818	2252.91	872.802	-196.639	2203.59	861.001	-185.725	2260.95	790.318
697	0	-4.66865	2355.91	1600.3	91.5448	2371.51	1586.7	-6.63094	2183.57	1584.3	121.276	2214.4	1600.71	65.3228	2161.98	1466.13	92.2697	2060.56	1221.39	77.9856	2302.9	1361.74	80.0361	2345.57	1177.08	133.486	2062.26	1301.63	-93.3707	2227.16	1388.75	-157.755	2156.99	1169.04	-160.317	2152.75	1088.54	-190.179	2189.64	967.937	-147.496	2272.13	876.514	-196.595	2223.41	863.527	-184.899	2282.36	794.145
698	0	-5.25717	2368.7	1601.46	90.9361	2384.34	1587.81	-7.10902	2196.31	1586.22	120.769	2227.3	1602.49	64.6304	2174.41	1467.88	90.9181	2072.43	1223.33	77.7866	2314.95	1363.2	80.1614	2357.06	1178.43	132.289	2074.18	1303.53	-93.7905	2239.97	1390.52	-158.95	2171.64	1170.67	-161.743	2168.09	1090.04	-190.875	2207.51	969.934	-147.105	2291.32	880.212	-196.531	2243.29	866.074	-184.023	2303.75	798.016
699	0	-5.71581	2381.43	1602.47	90.4595	2397.11	1588.76	-7.48431	2209.01	1587.94	120.371	2240.14	1604.06	64.0096	2186.8	1469.46	89.5718	2084.24	1225.09	77.6518	2326.96	1364.47	80.3161	2368.53	1179.63	131.105	2086.03	1305.25	-94.1503	2252.76	1392.16	-160.127	2186.34	1172.2	-163.157	2183.49	1091.43	-191.549	2225.44	971.888	-146.652	2310.47	883.869	-196.448	2263.19	868.622	-183.105	2325.1	801.904
700	0	-6.05759	2394.12	1603.32	90.1013	2409.82	1589.54	-7.76975	2221.67	1589.48	120.068	2252.92	1605.43	63.4529	2199.15	1470.86	88.2422	2096.01	1226.66	77.5652	2338.91	1365.56	80.4763	2379.98	1180.67	129.94	2097.84	1306.77	-94.4597	2265.52	1393.66	-161.286	2201.07	1173.59	-164.552	2198.94	1092.71	-192.198	2243.4	973.78	-146.146	2329.56	887.463	-196.348	2283.09	871.152	-182.152	2346.37	805.785
701	0	-6.29518	2406.77	1604	89.8482	2422.48	1590.14	-7.97741	2234.29	1590.81	119.848	2265.65	1606.58	62.9534	2211.47	1472.06	86.9415	2107.76	1228.03	77.5122	2350.84	1366.46	80.6202	2391.44	1181.54	128.803	2109.62	1308.09	-94.727	2278.26	1394.99	-162.424	2215.83	1174.85	-165.925	2214.45	1093.86	-192.822	2261.39	975.595	-145.596	2348.58	890.971	-196.231	2302.97	873.642	-181.173	2367.55	809.63
702	0	-6.44054	2419.39	1604.51	89.6879	2435.11	1590.55	-8.11836	2246.88	1591.93	119.701	2278.33	1607.52	62.5057	2223.76	1473.07	85.6823	2119.49	1229.2	77.4801	2362.74	1367.16	80.7288	2402.9	1182.25	127.701	2121.38	1309.21	-94.9596	2290.96	1396.16	-163.539	2230.61	1175.95	-167.27	2230	1094.87	-193.418	2279.37	977.316	-145.011	2367.52	894.371	-196.098	2322.8	876.074	-180.175	2388.6	813.412
703	0	-6.50466	2431.99	1604.83	89.6093	2447.7	1590.78	-8.20246	2259.45	1592.85	119.617	2290.98	1608.23	62.105	2236.03	1473.88	84.4771	2131.21	1230.17	77.4579	2374.63	1367.66	80.7865	2414.39	1182.77	126.644	2133.13	1310.12	-95.1633	2303.64	1397.14	-164.629	2245.41	1176.89	-168.581	2245.58	1095.72	-193.984	2297.34	978.929	-144.399	2386.35	897.642	-195.95	2342.56	878.427	-179.165	2409.5	817.108
704	0	-6.49727	2444.56	1604.98	89.6024	2460.26	1590.82	-8.23823	2272	1593.55	119.586	2303.59	1608.74	61.7479	2248.28	1474.48	83.3382	2142.94	1230.93	77.4371	2386.5	1367.96	80.7809	2425.91	1183.1	125.64	2144.89	1310.82	-95.3423	2316.29	1397.94	-165.69	2260.21	1177.66	-169.854	2261.2	1096.42	-194.519	2315.29	980.42	-143.767	2405.08	900.765	-195.785	2362.22	880.683	-178.152	2430.24	820.693
705	0	-6.42667	2457.12	1604.94	89.6592	2472.8	1590.68	-8.23278	2284.54	1594.05	119.603	2316.18	1609.03	61.432	2260.53	1474.88	82.2771	2154.67	1231.47	77.4114	2398.38	1368.05	80.7036	2437.45	1183.22	124.697	2156.65	1311.31	-95.4995	2328.9	1398.53	-166.717	2275.01	1178.24	-171.082	2276.84	1096.96	-195.02	2333.19	981.778	-143.121	2423.69	903.72	-195.604	2381.78	882.823	-177.143	2450.79	824.143
706	0	-6.29956	2469.68	1604.72	89.7731	2485.32	1590.35	-8.19163	2297.07	1594.34	119.661	2328.74	1609.11	61.1564	2272.76	1475.08	81.3043	2166.42	1231.82	77.3771	2410.27	1367.93	80.5496	2449.04	1183.14	123.823	2168.43	1311.6	-95.6363	2341.48	1398.93	-167.704	2289.81	1178.64	-172.26	2292.5	1097.32	-195.485	2351.02	982.991	-142.469	2442.17	906.493	-195.407	2401.21	884.833	-176.145	2471.15	827.439
707	0	-6.12095	2482.23	1604.32	89.9397	2497.83	1589.84	-8.11871	2309.59	1594.42	119.755	2341.28	1608.98	60.9209	2284.99	1475.08	80.4288	2178.19	1231.95	77.3329	2422.17	1367.61	80.3181	2460.66	1182.84	123.027	2180.23	1311.68	-95.7524	2354.02	1399.13	-168.645	2304.59	1178.86	-173.38	2308.16	1097.51	-195.91	2368.78	984.052	-141.814	2460.52	909.068	-195.194	2420.49	886.696	-175.164	2491.29	830.562
708	0	-5.89408	2494.77	1603.75	90.156	2510.32	1589.16	-8.01625	2322.11	1594.29	119.884	2353.8	1608.66	60.7266	2297.22	1474.88	79.6581	2189.98	1231.89	77.28	2434.09	1367.09	80.0117	2472.33	1182.33	122.314	2192.07	1311.56	-95.8463	2366.54	1399.12	-169.532	2319.35	1178.88	-174.436	2323.82	1097.53	-196.294	2386.44	984.953	-141.16	2478.71	911.434	-194.963	2439.6	888.401	-174.207	2511.21	833.496
709	0	-5.62043	2507.32	1603	90.4211	2522.8	1588.31	-7.8848	2334.62	1593.97	120.047	2366.3	1608.14	60.5757	2309.45	1474.49	78.9976	2201.79	1231.62	77.2221	2446.03	1366.36	79.6366	2484.05	1181.61	121.689	2203.93	1311.25	-95.9149	2379.03	1398.91	-170.358	2334.08	1178.71	-175.422	2339.46	1097.38	-196.633	2404	985.689	-140.511	2496.75	913.58	-194.716	2458.52	889.936	-173.279	2530.89	836.227
710	0	-5.29978	2519.86	1602.08	90.7358	2535.27	1587.29	-7.72315	2347.13	1593.47	120.244	2378.79	1607.44	60.4712	2321.67	1473.91	78.4506	2213.64	1231.16	77.1652	2458	1365.45	79.2024	2495.84	1180.68	121.158	2215.83	1310.75	-95.9542	2391.49	1398.51	-171.112	2348.78	1178.35	-176.33	2355.07	1097.05	-196.924	2421.43	986.258	-139.869	2514.61	915.499	-194.449	2477.25	891.292	-172.385	2550.32	838.744
711	0	-4.93026	2532.42	1601.01	91.1022	2547.73	1586.11	-7.52846	2359.63	1592.78	120.478	2391.26	1606.58	60.4166	2333.89	1473.15	78.0184	2225.52	1230.52	77.1173	2470	1364.36	78.7218	2507.68	1179.56	120.722	2227.76	1310.06	-95.9589	2403.93	1397.92	-171.787	2363.43	1177.82	-177.152	2370.64	1096.57	-197.163	2438.72	986.657	-139.235	2532.31	917.186	-194.164	2495.75	892.462	-171.529	2569.49	841.036
712	0	-4.50853	2544.97	1599.78	91.524	2560.18	1584.79	-7.29631	2372.14	1591.92	120.753	2403.71	1605.55	60.4164	2346.1	1472.22	77.7001	2237.43	1229.69	77.0883	2482.02	1363.1	78.2104	2519.59	1178.26	120.384	2239.73	1309.19	-95.923	2416.35	1397.15	-172.374	2378.03	1177.11	-177.882	2386.16	1095.92	-197.348	2455.85	986.888	-138.61	2549.81	918.637	-193.86	2514.02	893.442	-170.713	2588.38	843.095
713	0	-4.02988	2557.52	1598.42	92.0058	2572.61	1583.33	-7.02085	2384.64	1590.91	121.075	2416.14	1604.37	60.4753	2358.31	1471.14	77.4926	2249.39	1228.68	77.0896	2494.07	1361.68	77.6865	2531.58	1176.8	120.142	2251.74	1308.14	-95.8396	2428.76	1396.22	-172.864	2392.56	1176.25	-178.512	2401.6	1095.13	-197.475	2472.81	986.952	-137.994	2567.11	919.851	-193.535	2532.04	894.227	-169.94	2606.98	844.917
714	0	-3.48846	2570.08	1596.92	92.5534	2585.03	1581.75	-6.69498	2397.13	1589.76	121.449	2428.55	1603.07	60.5987	2370.51	1469.9	77.391	2261.39	1227.5	77.1337	2506.15	1360.14	77.1703	2543.65	1175.19	119.995	2263.78	1306.93	-95.7014	2441.15	1395.13	-173.25	2407.02	1175.23	-179.034	2416.96	1094.2	-197.54	2489.59	986.854	-137.389	2584.2	920.829	-193.188	2549.8	894.818	-169.21	2625.28	846.495
715	0	-2.87743	2582.63	1595.32	93.1734	2597.44	1580.06	-6.31062	2409.61	1588.48	121.884	2440.94	1601.64	60.7917	2382.69	1468.52	77.3886	2273.44	1226.16	77.2341	2518.25	1358.48	76.6841	2555.8	1173.48	119.941	2275.85	1305.55	-95.5007	2453.55	1393.91	-173.523	2421.4	1174.07	-179.444	2432.23	1093.15	-197.54	2506.16	986.599	-136.791	2601.07	921.575	-192.819	2567.27	895.214	-168.524	2643.26	847.826
716	0	-2.18928	2595.18	1593.62	93.8726	2609.83	1578.28	-5.85893	2422.09	1587.1	122.387	2453.31	1600.11	61.0601	2394.86	1467.01	77.4773	2285.55	1224.66	77.4045	2530.38	1356.72	76.251	2568.04	1171.67	119.975	2287.96	1304.02	-95.2297	2465.94	1392.58	-173.679	2435.69	1172.8	-179.734	2447.38	1091.99	-197.472	2522.52	986.194	-136.201	2617.71	922.091	-192.428	2584.45	895.42	-167.878	2660.91	848.908
717	0	-1.41609	2607.71	1591.83	94.6583	2622.19	1576.41	-5.33061	2434.55	1585.63	122.969	2465.65	1598.5	61.4093	2407.02	1465.39	77.648	2297.71	1223.01	77.6588	2542.52	1354.9	75.8954	2580.37	1169.81	120.091	2300.1	1302.34	-94.8805	2478.34	1391.14	-173.711	2449.88	1171.42	-179.899	2462.4	1090.73	-197.332	2538.64	985.648	-135.617	2634.1	922.384	-192.013	2601.33	895.438	-167.272	2678.2	849.74
718	0	-0.549863	2620.24	1589.99	95.5377	2634.54	1574.49	-4.71627	2447	1584.09	123.638	2477.97	1596.83	61.8444	2419.15	1463.68	77.8905	2309.95	1221.22	78.0108	2554.69	1353.03	75.6417	2592.78	1167.91	120.284	2312.27	1300.53	-94.4456	2490.76	1389.63	-173.617	2463.95	1169.96	-179.935	2477.29	1089.38	-197.119	2554.52	984.97	-135.037	2650.24	922.461	-191.574	2617.87	895.275	-166.702	2695.13	850.32
719	0	0.417152	2632.75	1588.1	96.5177	2646.87	1572.52	-4.00667	2459.43	1582.5	124.403	2490.26	1595.1	62.3703	2431.27	1461.88	78.1942	2322.26	1219.32	78.4733	2566.87	1351.15	75.5137	2605.29	1166.02	120.546	2324.47	1298.59	-93.918	2503.19	1388.07	-173.391	2477.92	1168.43	-179.837	2492.04	1087.98	-196.828	2570.14	984.173	-134.458	2666.11	922.329	-191.11	2634.09	894.94	-166.162	2711.68	850.651
720	0	1.49209	2645.23	1586.2	97.6046	2659.17	1570.53	-3.19313	2471.84	1580.89	125.273	2502.52	1593.35	62.9912	2443.36	1460.02	78.5483	2334.64	1217.3	79.0583	2579.07	1349.26	75.5347	2617.89	1164.15	120.87	2336.7	1296.53	-93.2914	2515.66	1386.46	-173.033	2491.77	1166.85	-179.604	2506.62	1086.53	-196.459	2585.49	983.269	-133.878	2681.69	921.998	-190.622	2649.95	894.44	-165.649	2727.83	850.734
721	0	2.68115	2657.7	1584.3	98.8039	2671.45	1568.54	-2.26784	2484.23	1579.27	126.254	2514.75	1591.59	63.7107	2455.45	1458.11	78.9422	2347.11	1215.19	79.7764	2591.29	1347.41	75.7258	2630.58	1162.34	121.247	2348.96	1294.39	-92.56	2528.15	1384.85	-172.542	2505.49	1165.25	-179.233	2521.03	1085.05	-196.01	2600.55	982.273	-133.292	2696.98	921.477	-190.107	2665.45	893.787	-165.155	2743.56	850.572
722	0	3.98924	2670.13	1582.43	100.12	2683.7	1566.58	-1.2241	2496.59	1577.67	127.355	2526.96	1589.84	64.5314	2467.51	1456.17	79.3658	2359.67	1213	80.6363	2603.52	1345.61	76.1057	2643.37	1160.61	121.67	2361.26	1292.16	-91.7195	2540.69	1383.24	-171.918	2519.1	1163.64	-178.725	2535.27	1083.56	-195.478	2615.33	981.199	-132.698	2711.95	920.779	-189.567	2680.58	892.994	-164.674	2758.87	850.172
723	0	5.41969	2682.54	1580.6	101.555	2695.93	1564.65	-0.056615	2508.94	1576.1	128.579	2539.14	1588.11	65.4548	2479.56	1454.23	79.8094	2372.32	1210.75	81.6449	2615.77	1343.89	76.6902	2656.24	1158.98	122.131	2373.58	1289.87	-90.7662	2553.28	1381.66	-171.162	2532.59	1162.06	-178.08	2549.33	1082.09	-194.865	2629.81	980.064	-132.091	2726.61	919.914	-188.999	2695.33	892.075	-164.2	2773.74	849.541
724	0	6.9741	2694.92	1578.83	103.112	2708.15	1562.79	1.23837	2521.27	1574.58	129.93	2551.3	1586.43	66.4813	2491.61	1452.3	80.2646	2385.06	1208.47	82.8068	2628.03	1342.26	77.491	2669.21	1157.48	122.621	2385.93	1287.54	-89.6983	2565.91	1380.14	-170.277	2545.95	1160.51	-177.302	2563.2	1080.65	-194.169	2643.97	978.886	-131.466	2740.93	918.896	-188.403	2709.68	891.045	-163.726	2788.16	848.689
725	0	8.65214	2707.28	1577.16	104.789	2720.34	1561.01	2.66293	2533.57	1573.14	131.411	2563.44	1584.82	67.6099	2503.64	1450.41	80.7236	2397.89	1206.18	84.1237	2640.31	1340.74	78.5153	2682.26	1156.13	123.134	2398.31	1285.19	-88.5152	2578.6	1378.7	-169.267	2559.21	1159.03	-176.392	2576.88	1079.26	-193.391	2657.83	977.684	-130.818	2754.9	917.738	-187.778	2723.64	889.92	-163.244	2802.11	847.628
726	0	10.4515	2719.6	1575.59	106.584	2732.51	1559.33	4.21733	2545.86	1571.79	133.021	2575.56	1583.3	68.8383	2515.68	1448.57	81.1796	2410.81	1203.9	85.5945	2652.61	1339.35	79.7652	2695.39	1154.95	123.662	2410.72	1282.85	-87.2181	2591.34	1377.35	-168.136	2572.36	1157.63	-175.358	2590.36	1077.95	-192.534	2671.36	976.476	-130.144	2768.52	916.455	-187.124	2737.18	888.719	-162.749	2815.6	846.372
727	0	12.3679	2731.9	1574.15	108.494	2744.67	1557.78	5.90003	2558.13	1570.55	134.758	2587.67	1581.87	70.1624	2527.72	1446.81	81.6269	2423.8	1201.66	87.2149	2664.91	1338.11	81.2373	2708.6	1153.94	124.199	2423.16	1280.54	-85.8103	2604.14	1376.11	-166.891	2585.4	1156.34	-174.205	2603.64	1076.74	-191.599	2684.58	975.283	-129.437	2781.76	915.064	-186.438	2750.31	887.461	-162.234	2828.6	844.939
728	0	14.3951	2744.18	1572.85	110.511	2756.83	1556.35	7.70757	2570.39	1569.43	136.618	2599.77	1580.57	71.5766	2539.76	1445.15	82.06	2436.87	1199.49	88.9768	2677.23	1337.02	82.9218	2721.88	1153.12	124.738	2435.61	1278.28	-84.2972	2616.99	1375.02	-165.54	2598.35	1155.17	-172.942	2616.72	1075.64	-190.59	2697.47	974.124	-128.693	2794.61	913.582	-185.721	2763.03	886.167	-161.694	2841.13	843.348
729	0	16.5253	2756.43	1571.71	112.628	2768.97	1555.08	9.63461	2582.63	1568.46	138.595	2611.86	1579.39	73.0735	2551.81	1443.61	82.474	2449.99	1197.4	90.8689	2689.56	1336.09	84.8033	2735.2	1152.5	125.273	2448.08	1276.11	-82.6867	2629.9	1374.08	-164.093	2611.2	1154.16	-171.578	2629.6	1074.67	-189.511	2710.03	973.021	-127.909	2807.08	912.028	-184.971	2775.32	884.858	-161.124	2853.17	841.622
730	0	18.7487	2768.66	1570.74	114.836	2781.11	1553.98	11.6739	2594.86	1567.65	140.682	2623.96	1578.37	74.644	2563.88	1442.21	82.864	2463.16	1195.44	92.8762	2701.89	1335.34	86.8597	2748.57	1152.09	125.798	2460.56	1274.05	-80.9888	2642.84	1373.32	-162.56	2623.97	1153.31	-170.124	2642.29	1073.86	-188.368	2722.28	971.994	-127.08	2819.15	910.423	-184.189	2787.19	883.557	-160.519	2864.72	839.785
731	0	21.0545	2780.89	1569.95	117.123	2793.25	1553.06	13.8161	2607.09	1567.01	142.868	2636.05	1577.51	76.277	2575.96	1440.97	83.2253	2476.35	1193.64	94.98	2714.22	1334.78	89.0632	2761.95	1151.88	126.306	2473.05	1272.13	-79.2162	2655.82	1372.75	-160.956	2636.64	1152.64	-168.593	2654.77	1073.23	-187.168	2734.2	971.063	-126.205	2830.81	908.789	-183.375	2798.64	882.287	-159.878	2875.78	837.866
732	0	23.4303	2793.09	1569.36	119.477	2805.39	1552.32	16.0502	2619.31	1566.56	145.142	2648.16	1576.82	77.9601	2588.05	1439.91	83.5534	2489.55	1192.01	97.1589	2726.56	1334.4	91.3807	2775.33	1151.87	126.792	2485.53	1270.37	-77.3833	2668.83	1372.38	-159.294	2649.24	1152.18	-166.999	2667.05	1072.78	-185.916	2745.8	970.247	-125.282	2842.06	907.149	-182.53	2809.68	881.071	-159.197	2886.36	835.891
733	0	25.8627	2805.29	1568.98	121.885	2817.53	1551.78	18.3631	2631.53	1566.3	147.491	2660.27	1576.32	79.6794	2600.17	1439.04	83.8438	2502.74	1190.59	99.3883	2738.89	1334.2	93.774	2788.67	1152.06	127.25	2498.01	1268.81	-75.507	2681.86	1372.24	-157.593	2661.74	1151.94	-165.357	2679.13	1072.54	-184.624	2757.09	969.566	-124.31	2852.9	905.529	-181.656	2820.3	879.934	-158.474	2896.46	833.89
734	0	28.3374	2817.48	1568.8	124.331	2829.68	1551.45	20.7401	2643.74	1566.24	149.9	2672.4	1576	81.42	2612.31	1438.38	84.0929	2515.9	1189.39	101.642	2751.21	1334.2	96.2012	2801.96	1152.44	127.676	2510.46	1267.47	-73.6058	2694.9	1372.32	-155.87	2674.16	1151.92	-163.684	2691.01	1072.52	-183.3	2768.07	969.036	-123.291	2863.34	903.953	-180.756	2830.53	878.896	-157.707	2906.08	831.892
735	0	30.8391	2829.67	1568.84	126.802	2841.83	1551.32	23.1645	2655.95	1566.39	152.352	2684.54	1575.88	83.1664	2624.47	1437.95	84.298	2529.01	1188.46	103.891	2763.52	1334.38	98.6173	2815.16	1152.99	128.065	2522.89	1266.37	-71.6994	2707.94	1372.65	-154.146	2686.48	1152.15	-161.998	2702.69	1072.72	-181.955	2778.75	968.673	-122.227	2873.37	902.447	-179.833	2840.37	877.981	-156.897	2915.24	829.927
736	0	33.3518	2841.85	1569.09	129.28	2853.99	1551.4	25.6184	2668.16	1566.76	154.83	2696.69	1575.94	84.9029	2636.65	1437.75	84.4583	2542.05	1187.79	106.107	2775.81	1334.74	100.976	2828.25	1153.7	128.417	2535.28	1265.54	-69.8087	2720.96	1373.22	-152.443	2698.69	1152.63	-160.318	2714.18	1073.16	-180.603	2789.14	968.489	-121.124	2883.01	901.035	-178.892	2849.84	877.207	-156.043	2923.95	828.024
737	0	35.8587	2854.03	1569.56	131.75	2866.15	1551.68	28.0827	2680.37	1567.33	157.315	2708.85	1576.21	86.6141	2648.84	1437.79	84.5747	2555	1187.41	108.261	2788.09	1335.27	103.231	2841.2	1154.56	128.729	2547.64	1264.98	-67.9546	2733.95	1374.04	-150.784	2710.81	1153.37	-158.663	2725.46	1073.85	-179.254	2799.25	968.495	-119.986	2892.27	899.743	-177.94	2858.95	876.593	-155.146	2932.21	826.208
738	0	38.3426	2866.21	1570.24	134.193	2878.32	1552.17	30.5373	2692.57	1568.11	159.787	2721.03	1576.66	88.2855	2661.06	1438.06	84.6503	2567.85	1187.33	110.325	2800.33	1335.97	105.336	2853.99	1155.54	129.005	2559.94	1264.7	-66.1577	2746.89	1375.1	-149.191	2722.8	1154.36	-157.053	2736.55	1074.77	-177.924	2809.08	968.699	-118.822	2901.16	898.592	-176.984	2867.72	876.153	-154.209	2940.06	824.505
739	0	40.7859	2878.39	1571.11	136.592	2890.48	1552.84	32.9615	2704.77	1569.1	162.227	2733.21	1577.3	89.9035	2673.27	1438.57	84.6909	2580.58	1187.54	112.274	2812.55	1336.84	107.251	2866.61	1156.64	129.247	2572.19	1264.72	-64.438	2759.78	1376.4	-147.689	2734.68	1155.61	-155.507	2747.45	1075.93	-176.626	2818.66	969.103	-117.641	2909.71	897.603	-176.032	2876.18	875.899	-153.235	2947.52	822.937
740	0	43.171	2890.56	1572.18	138.93	2902.65	1553.7	35.3345	2716.96	1570.28	164.615	2745.4	1578.12	91.456	2685.5	1439.32	84.704	2593.19	1188.04	114.083	2824.72	1337.85	108.939	2879.05	1157.83	129.462	2584.38	1265.03	-62.8134	2772.6	1377.92	-146.298	2746.42	1157.1	-154.044	2758.15	1077.32	-175.374	2827.99	969.71	-116.455	2917.93	896.793	-175.094	2884.35	875.84	-152.231	2954.61	821.523
741	0	45.4806	2902.73	1573.43	141.189	2914.8	1554.74	37.6359	2729.14	1571.65	166.932	2757.59	1579.12	92.9327	2697.71	1440.29	84.6993	2605.66	1188.83	115.734	2836.86	1339	110.37	2891.3	1159.11	129.655	2596.51	1265.61	-61.3001	2785.33	1379.66	-145.039	2758.02	1158.83	-152.682	2768.66	1078.94	-174.183	2837.09	970.516	-115.277	2925.86	896.178	-174.18	2892.26	875.982	-151.203	2961.36	820.281
742	0	47.6979	2914.9	1574.83	143.353	2926.96	1555.92	39.846	2741.31	1573.19	169.16	2769.78	1580.27	94.3248	2709.91	1441.46	84.6875	2617.98	1189.88	117.211	2848.95	1340.28	111.522	2903.37	1160.46	129.835	2608.57	1266.48	-59.9114	2797.96	1381.59	-143.929	2769.48	1160.79	-151.435	2778.98	1080.76	-173.066	2845.98	971.514	-114.12	2933.51	895.767	-173.302	2899.93	876.323	-150.164	2967.8	819.223
743	0	49.8073	2927.06	1576.38	145.405	2939.1	1557.25	41.9467	2753.48	1574.89	171.281	2781.97	1581.57	95.6255	2722.09	1442.83	84.6803	2630.17	1191.19	118.504	2860.99	1341.68	112.384	2915.26	1161.88	130.011	2620.57	1267.59	-58.6574	2810.47	1383.7	-142.982	2780.77	1162.95	-150.317	2789.11	1082.77	-172.036	2854.66	972.695	-113.002	2940.93	895.565	-172.471	2907.38	876.862	-149.125	2973.98	818.359
744	0	51.7944	2939.2	1578.04	147.332	2951.22	1558.7	43.9216	2765.62	1576.72	173.28	2794.15	1583	96.8299	2734.24	1444.36	84.6892	2642.21	1192.73	119.607	2872.98	1343.19	112.954	2927.01	1163.36	130.19	2632.5	1268.94	-57.5451	2822.86	1385.95	-142.207	2791.9	1165.29	-149.339	2799.06	1084.95	-171.105	2863.16	974.044	-111.937	2948.14	895.575	-171.699	2914.65	877.59	-148.103	2979.92	817.695
745	0	53.6467	2951.33	1579.81	149.121	2963.34	1560.25	45.7565	2777.75	1578.66	175.144	2806.32	1584.54	97.9351	2746.36	1446.05	84.7253	2654.12	1194.46	120.52	2884.92	1344.79	113.24	2938.62	1164.89	130.381	2644.37	1270.5	-56.5777	2835.13	1388.33	-141.609	2802.86	1167.79	-148.508	2808.82	1087.28	-170.282	2871.48	975.544	-110.944	2955.17	895.792	-170.999	2921.76	878.495	-147.115	2985.68	817.233
746	0	55.3538	2963.44	1581.65	150.762	2975.43	1561.89	47.44	2789.85	1580.69	176.863	2818.48	1586.18	98.9397	2758.43	1447.86	84.7981	2665.9	1196.35	121.248	2896.8	1346.47	113.261	2950.12	1166.48	130.592	2656.18	1272.23	-55.7551	2847.25	1390.78	-141.185	2813.63	1170.41	-147.828	2818.41	1089.71	-169.577	2879.65	977.175	-110.039	2962.06	896.206	-170.381	2928.74	879.561	-146.182	2991.29	816.969
747	0	56.9075	2975.53	1583.54	152.247	2987.5	1563.58	48.9633	2801.93	1582.78	178.429	2830.63	1587.89	99.8442	2770.46	1449.76	84.916	2677.56	1198.38	121.801	2908.62	1348.21	113.043	2961.53	1168.1	130.829	2667.93	1274.1	-55.074	2859.25	1393.29	-140.928	2824.22	1173.13	-147.298	2827.83	1092.24	-168.996	2887.68	978.912	-109.241	2968.85	896.803	-169.857	2935.61	880.767	-145.325	2996.8	816.898
748	0	58.3025	2987.6	1585.45	153.572	2999.54	1565.32	50.3207	2813.98	1584.9	179.835	2842.75	1589.65	100.651	2782.44	1451.72	85.0845	2689.13	1200.5	122.191	2920.38	1349.99	112.62	2972.87	1169.77	131.095	2679.63	1276.09	-54.528	2871.11	1395.82	-140.828	2834.6	1175.9	-146.916	2837.07	1094.81	-168.544	2895.58	980.73	-108.566	2975.55	897.562	-169.436	2942.4	882.088	-144.565	3002.24	817.006
749	0	59.5358	2999.63	1587.35	154.733	3011.56	1567.07	51.5097	2826.01	1587.02	181.08	2854.85	1591.44	101.362	2794.37	1453.71	85.3073	2700.6	1202.66	122.434	2932.09	1351.79	112.032	2984.17	1171.46	131.395	2691.28	1278.14	-54.1083	2882.84	1398.32	-140.867	2844.79	1178.7	-146.676	2846.17	1097.41	-168.224	2903.38	982.601	-108.028	2982.21	898.459	-169.127	2949.11	883.498	-143.925	3007.67	817.278
750	0	60.6071	3011.64	1589.23	155.73	3023.55	1568.8	52.5305	2838	1589.1	182.162	2866.92	1593.22	101.984	2806.24	1455.7	85.585	2712	1204.85	122.548	2943.75	1353.59	111.321	2995.44	1173.15	131.728	2702.88	1280.22	-53.8042	2894.46	1400.77	-141.023	2854.78	1181.47	-146.567	2855.11	1100	-168.035	2911.07	984.495	-107.641	2988.84	899.464	-168.937	2955.78	884.964	-143.424	3013.11	817.691
751	0	61.5183	3023.61	1591.04	156.568	3035.51	1570.5	53.3864	2849.95	1591.12	183.085	2878.96	1594.97	102.521	2818.07	1457.65	85.916	2723.34	1207	122.554	2955.36	1355.36	110.531	3006.68	1174.83	132.096	2714.46	1282.3	-53.6035	2905.96	1403.12	-141.275	2864.56	1184.18	-146.579	2863.91	1102.53	-167.975	2918.68	986.379	-107.417	2995.48	900.544	-168.871	2962.41	886.453	-143.082	3018.61	818.22
752	0	62.2736	3035.55	1592.76	157.25	3047.44	1572.13	54.0832	2861.88	1593.05	183.853	2890.97	1596.67	102.979	2829.85	1459.53	86.296	2734.63	1209.09	122.47	2966.92	1357.08	109.702	3017.92	1176.48	132.495	2726	1284.33	-53.4933	2917.37	1405.35	-141.597	2874.16	1186.8	-146.696	2872.6	1104.99	-168.04	2926.23	988.223	-107.363	3002.15	901.662	-168.931	2969.02	887.932	-142.913	3024.19	818.833
753	0	62.8791	3047.46	1594.37	157.784	3059.34	1573.68	54.6292	2873.77	1594.85	184.472	2902.94	1598.28	103.366	2841.59	1461.31	86.7187	2745.9	1211.07	122.317	2978.45	1358.72	108.874	3029.15	1178.06	132.922	2737.51	1286.28	-53.4604	2928.69	1407.4	-141.964	2883.56	1189.28	-146.903	2881.18	1107.33	-168.224	2933.72	989.995	-107.485	3008.87	902.779	-169.119	2975.63	889.364	-142.929	3029.88	819.498
754	0	63.342	3059.34	1595.83	158.177	3071.22	1575.11	55.0342	2885.63	1596.49	184.95	2914.88	1599.78	103.687	2853.29	1462.96	87.176	2757.15	1212.92	122.112	2989.94	1360.25	108.082	3040.38	1179.55	133.372	2749.01	1288.11	-53.4921	2939.94	1409.26	-142.352	2892.8	1191.58	-147.184	2889.68	1109.52	-168.519	2941.18	991.664	-107.785	3015.64	903.855	-169.433	2982.25	890.714	-143.139	3035.7	820.177
755	0	63.6708	3071.19	1597.13	158.439	3083.07	1576.4	55.3098	2897.47	1597.95	185.296	2926.8	1601.14	103.95	2864.96	1464.45	87.6585	2768.4	1214.6	121.872	3001.41	1361.63	107.352	3051.6	1180.91	133.839	2760.5	1289.8	-53.5761	2951.13	1410.9	-142.741	2901.89	1193.68	-147.522	2898.12	1111.53	-168.916	2948.62	993.2	-108.26	3022.5	904.85	-169.871	2988.88	891.948	-143.546	3041.67	820.834
756	0	63.8745	3083.01	1598.24	158.578	3094.91	1577.53	55.4682	2909.28	1599.21	185.522	2938.68	1602.34	104.16	2876.61	1465.76	88.1557	2779.64	1216.09	121.611	3012.86	1362.86	106.708	3062.81	1182.11	134.317	2771.98	1291.3	-53.7014	2962.29	1412.29	-143.111	2910.85	1195.54	-147.901	2906.52	1113.35	-169.403	2956.06	994.575	-108.905	3029.45	905.725	-170.427	2995.54	893.034	-144.149	3047.8	821.428
757	0	63.9625	3094.82	1599.15	158.606	3106.74	1578.47	55.5222	2921.07	1600.25	185.637	2950.54	1603.36	104.325	2888.24	1466.87	88.6571	2790.9	1217.36	121.342	3024.3	1363.89	106.164	3074.02	1183.12	134.798	2783.46	1292.61	-53.8582	2973.43	1413.42	-143.449	2919.73	1197.14	-148.304	2914.9	1114.93	-169.971	2963.5	995.765	-109.713	3036.49	906.444	-171.093	3002.23	893.942	-144.944	3054.1	821.923
758	0	63.944	3106.61	1599.83	158.531	3118.56	1579.2	55.4845	2932.85	1601.04	185.653	2962.39	1604.17	104.447	2899.87	1467.76	89.152	2802.16	1218.39	121.074	3035.74	1364.71	105.728	3085.22	1183.92	135.275	2794.93	1293.7	-54.0383	2984.56	1414.26	-143.743	2928.55	1198.46	-148.717	2923.3	1116.27	-170.608	2970.98	996.747	-110.67	3043.64	906.971	-171.862	3008.97	894.645	-145.919	3060.56	822.281
759	0	63.8279	3118.4	1600.27	158.362	3130.38	1579.72	55.367	2944.61	1601.58	185.581	2974.22	1604.76	104.533	2911.49	1468.41	89.6301	2813.44	1219.17	120.814	3047.19	1365.29	105.403	3096.41	1184.47	135.74	2806.42	1294.55	-54.235	2995.7	1414.81	-143.987	2937.35	1199.49	-149.129	2931.73	1117.35	-171.3	2978.49	997.502	-111.764	3050.9	907.277	-172.724	3015.77	895.122	-147.063	3067.19	822.468
760	0	63.6226	3130.18	1600.47	158.107	3142.22	1579.99	55.181	2956.38	1601.86	185.431	2986.06	1605.13	104.585	2923.11	1468.81	90.082	2824.73	1219.69	120.567	3058.65	1365.63	105.186	3107.6	1184.76	136.185	2817.92	1295.15	-54.4436	3006.86	1415.07	-144.176	2946.16	1200.21	-149.527	2940.23	1118.16	-172.038	2986.07	998.017	-112.976	3058.27	907.336	-173.667	3022.62	895.356	-148.359	3073.98	822.456
761	0	63.3355	3141.96	1600.41	157.772	3154.07	1580.03	54.9361	2968.15	1601.87	185.213	2997.9	1605.25	104.604	2934.75	1468.96	90.4992	2836.05	1219.95	120.334	3070.13	1365.7	105.071	3118.78	1184.77	136.603	2829.43	1295.5	-54.6609	3018.06	1415.03	-144.312	2955.02	1200.62	-149.903	2948.81	1118.68	-172.809	2993.73	998.28	-114.29	3065.75	907.129	-174.681	3029.55	895.332	-149.787	3080.91	822.217
762	0	62.9731	3153.75	1600.09	157.363	3165.95	1579.82	54.6402	2979.93	1601.62	184.933	3009.76	1605.14	104.593	2946.41	1468.86	90.8744	2847.39	1219.94	120.116	3081.64	1365.51	105.045	3129.96	1184.49	136.988	2840.96	1295.59	-54.8855	3029.29	1414.69	-144.399	2963.97	1200.72	-150.251	2957.51	1118.93	-173.602	3001.48	998.285	-115.686	3073.36	906.64	-175.754	3036.57	895.045	-151.325	3087.99	821.731
763	0	62.5407	3165.56	1599.51	156.884	3177.85	1579.36	54.2996	2991.72	1601.1	184.599	3021.64	1604.77	104.551	2958.1	1468.51	91.2017	2858.76	1219.67	119.911	3093.18	1365.05	105.096	3141.15	1183.92	137.333	2852.51	1295.41	-55.1175	3040.58	1414.07	-144.441	2973.05	1200.51	-150.566	2966.33	1118.88	-174.408	3009.33	998.029	-117.144	3081.08	905.861	-176.875	3043.68	894.49	-152.952	3095.2	820.983
764	0	62.0424	3177.38	1598.68	156.339	3189.79	1578.65	53.9181	3003.54	1600.33	184.215	3033.55	1604.17	104.477	2969.81	1467.91	91.4768	2870.17	1219.14	119.713	3104.75	1364.32	105.21	3152.36	1183.07	137.634	2864.1	1294.98	-55.3585	3051.93	1413.17	-144.448	2982.27	1200.01	-150.846	2975.31	1118.56	-175.218	3017.31	997.512	-118.645	3088.91	904.79	-178.031	3050.89	893.669	-154.643	3102.53	819.964
765	0	61.481	3189.22	1597.61	155.731	3201.77	1577.7	53.498	3015.38	1599.31	183.784	3045.49	1603.33	104.368	2981.56	1467.07	91.6969	2881.61	1218.36	119.517	3116.38	1363.33	105.37	3163.6	1181.94	137.886	2875.72	1294.3	-55.6114	3063.34	1412.02	-144.429	2991.67	1199.22	-151.092	2984.45	1117.97	-176.025	3025.43	996.739	-120.17	3096.87	903.428	-179.213	3058.23	892.587	-156.376	3109.97	818.669
766	0	60.858	3201.09	1596.3	155.059	3213.79	1576.53	53.0395	3027.26	1598.06	183.306	3057.47	1602.27	104.222	2993.34	1465.99	91.8606	2893.11	1217.35	119.317	3128.04	1362.09	105.561	3174.88	1180.56	138.087	2887.39	1293.37	-55.8801	3074.81	1410.62	-144.396	3001.26	1198.16	-151.303	2993.77	1117.12	-176.822	3033.7	995.718	-121.702	3104.94	901.784	-180.41	3065.69	891.254	-158.128	3117.51	817.1
767	0	60.1736	3212.99	1594.78	154.326	3225.86	1575.14	52.5408	3039.16	1596.59	182.781	3069.49	1601	104.035	3005.16	1464.71	91.9683	2904.65	1216.1	119.103	3139.76	1360.61	105.766	3186.22	1178.94	138.233	2899.1	1292.22	-56.1694	3086.36	1408.99	-144.359	3011.07	1196.85	-151.484	3003.28	1116.02	-177.603	3042.13	994.458	-123.224	3113.14	899.869	-181.613	3073.3	889.683	-159.878	3125.15	815.263
768	0	59.4271	3224.92	1593.06	153.53	3237.96	1573.57	51.999	3051.1	1594.93	182.208	3081.56	1599.53	103.804	3017.03	1463.22	92.0215	2916.26	1214.65	118.867	3151.53	1358.93	105.97	3197.62	1177.11	138.325	2910.86	1290.86	-56.4847	3097.97	1407.16	-144.33	3021.1	1195.3	-151.638	3012.99	1114.68	-178.365	3050.73	992.972	-124.722	3121.46	897.698	-182.813	3081.06	887.887	-161.607	3132.89	813.17
769	0	58.617	3236.88	1591.16	152.671	3250.11	1571.82	51.4095	3063.07	1593.08	181.582	3093.66	1597.88	103.523	3028.94	1461.55	92.0229	2927.93	1213.01	118.6	3163.36	1357.05	106.157	3209.09	1175.1	138.363	2922.68	1289.3	-56.8319	3109.65	1405.14	-144.32	3031.37	1193.54	-151.77	3022.9	1113.12	-179.104	3059.51	991.273	-126.184	3129.91	895.291	-184.005	3088.99	885.884	-163.297	3140.73	810.835
770	0	57.7407	3248.87	1589.1	151.746	3262.29	1569.93	50.7673	3075.08	1591.07	180.901	3105.82	1596.07	103.19	3040.9	1459.71	91.9764	2939.68	1211.19	118.293	3175.25	1355	106.314	3220.65	1172.93	138.348	2934.57	1287.55	-57.2172	3121.39	1402.95	-144.339	3041.87	1191.57	-151.885	3033.02	1111.35	-179.818	3068.48	989.376	-127.599	3138.49	892.666	-185.18	3097.1	883.69	-164.933	3148.66	808.276
771	0	56.7956	3260.89	1586.9	150.753	3274.51	1567.91	50.0666	3087.13	1588.92	180.16	3118.01	1594.12	102.799	3052.9	1457.73	91.8868	2951.5	1209.21	117.935	3187.21	1352.8	106.426	3232.3	1170.64	138.283	2946.53	1285.65	-57.6466	3133.2	1400.63	-144.396	3052.61	1189.43	-151.989	3043.34	1109.4	-180.505	3077.64	987.294	-128.959	3147.21	889.845	-186.333	3105.39	881.324	-166.505	3156.69	805.511
772	0	55.7785	3272.95	1584.59	149.692	3286.77	1565.8	49.3012	3099.21	1586.65	179.354	3130.26	1592.05	102.348	3064.95	1455.61	91.7594	2963.41	1207.1	117.518	3199.22	1350.48	106.479	3244.06	1168.25	138.171	2958.56	1283.59	-58.1262	3145.07	1398.17	-144.5	3063.58	1187.13	-152.088	3053.86	1107.27	-181.165	3087	985.043	-130.256	3156.07	886.85	-187.461	3113.88	878.802	-168.002	3164.82	802.561
773	0	54.6861	3285.04	1582.18	148.561	3299.05	1563.61	48.4654	3111.33	1584.28	178.48	3142.54	1589.88	101.833	3077.06	1453.38	91.6	2975.4	1204.86	117.032	3211.31	1348.07	106.461	3255.92	1165.79	138.018	2970.67	1281.41	-58.6617	3156.99	1395.61	-144.655	3074.78	1184.69	-152.186	3064.59	1104.98	-181.797	3096.57	982.637	-131.487	3165.07	883.701	-188.558	3122.57	876.142	-169.417	3173.06	799.447
774	0	53.5153	3297.16	1579.71	147.357	3311.37	1561.37	47.5535	3123.48	1581.82	177.531	3154.88	1587.63	101.252	3089.22	1451.06	91.4149	2987.48	1202.52	116.471	3223.48	1345.57	106.359	3267.89	1163.29	137.826	2982.87	1279.12	-59.2583	3168.95	1392.96	-144.868	3086.2	1182.13	-152.288	3075.52	1102.55	-182.399	3106.34	980.088	-132.649	3174.22	880.418	-189.623	3131.47	873.359	-170.745	3181.42	796.19
775	0	52.2633	3309.31	1577.17	146.08	3323.71	1559.1	46.5606	3135.67	1579.3	176.506	3167.25	1585.31	100.602	3101.44	1448.65	91.2099	2999.66	1200.1	115.827	3235.71	1343.03	106.163	3279.97	1160.76	137.602	2995.16	1276.74	-59.9206	3180.97	1390.23	-145.141	3097.83	1179.45	-152.398	3086.65	1099.99	-182.973	3116.32	977.409	-133.739	3183.53	877.018	-190.651	3140.58	870.466	-171.983	3189.9	792.808
776	0	50.9274	3321.49	1574.6	144.728	3336.07	1556.81	45.4822	3147.9	1576.72	175.4	3179.68	1582.94	99.8822	3113.71	1446.18	90.9907	3011.93	1197.61	115.093	3248.03	1340.44	105.862	3292.17	1158.22	137.349	3007.53	1274.27	-60.6526	3193.03	1387.44	-145.478	3109.67	1176.68	-152.519	3097.97	1097.3	-183.517	3126.5	974.609	-134.756	3192.99	873.518	-191.642	3149.91	867.476	-173.13	3198.52	789.319
777	0	49.5055	3333.71	1572.01	143.3	3348.46	1554.51	44.3148	3160.16	1574.09	174.21	3192.14	1580.53	99.0917	3126.03	1443.65	90.7624	3024.3	1195.05	114.265	3260.42	1337.83	105.45	3304.47	1155.69	137.072	3020	1271.74	-61.4574	3205.12	1384.59	-145.879	3121.7	1173.82	-152.653	3109.48	1094.51	-184.033	3136.9	971.697	-135.701	3202.62	869.93	-192.594	3159.47	864.399	-174.185	3207.26	785.737
778	0	47.996	3345.96	1569.39	141.795	3360.87	1552.22	43.0558	3172.45	1571.44	172.935	3204.66	1578.09	98.2298	3138.42	1441.07	90.5291	3036.76	1192.45	113.339	3272.9	1335.21	104.918	3316.89	1153.18	136.773	3032.57	1269.15	-62.3377	3217.25	1381.7	-146.345	3133.93	1170.89	-152.803	3121.18	1091.6	-184.52	3147.5	968.68	-136.573	3212.41	866.264	-193.505	3169.24	861.241	-175.148	3216.15	782.074
779	0	46.3976	3358.24	1566.77	140.212	3373.31	1549.94	41.7031	3184.77	1568.75	171.573	3217.22	1575.63	97.2963	3150.86	1438.45	90.2941	3049.32	1189.8	112.313	3285.46	1332.58	104.261	3329.42	1150.7	136.455	3045.23	1266.51	-63.295	3229.42	1378.77	-146.876	3146.34	1167.88	-152.97	3133.07	1088.6	-184.978	3158.31	965.562	-137.373	3222.37	862.529	-194.376	3179.24	858.011	-176.02	3225.18	778.339
780	0	44.7094	3370.55	1564.15	138.549	3385.77	1547.67	40.2555	3197.13	1566.04	170.123	3229.83	1573.15	96.2912	3163.37	1435.79	90.0596	3061.98	1187.12	111.184	3298.11	1329.96	103.478	3342.07	1148.26	136.121	3057.99	1263.82	-64.3308	3241.62	1375.8	-147.473	3158.94	1164.81	-153.154	3145.15	1085.51	-185.407	3169.32	962.346	-138.102	3232.5	858.73	-195.206	3189.46	854.71	-176.8	3234.35	774.538
781	0	42.9312	3382.89	1561.52	136.808	3398.25	1545.43	38.7122	3209.52	1563.31	168.585	3242.49	1570.66	95.2145	3175.93	1433.1	89.827	3074.74	1184.4	109.951	3310.84	1327.34	102.564	3354.82	1145.85	135.771	3070.85	1261.09	-65.4455	3253.85	1372.81	-148.135	3171.72	1161.67	-153.356	3157.4	1082.32	-185.808	3180.55	959.036	-138.758	3242.81	854.869	-195.994	3199.91	851.341	-177.489	3243.68	770.675
782	0	41.0626	3395.26	1558.9	134.987	3410.76	1543.2	37.0729	3221.95	1560.56	166.959	3255.2	1568.15	94.0662	3188.56	1430.37	89.5969	3087.6	1181.65	108.613	3323.66	1324.73	101.52	3367.69	1143.49	135.405	3083.81	1258.31	-66.6397	3266.11	1369.78	-148.861	3184.67	1158.47	-153.576	3169.84	1079.03	-186.179	3191.98	955.631	-139.343	3253.28	850.948	-196.741	3210.59	847.906	-178.088	3253.15	766.75
783	0	39.1035	3407.67	1556.28	133.086	3423.3	1541	35.3375	3234.41	1557.79	165.244	3267.95	1565.63	92.8464	3201.24	1427.61	89.3696	3100.55	1178.86	107.172	3336.57	1322.12	100.345	3380.68	1141.16	135.025	3096.87	1255.5	-67.9133	3278.41	1366.71	-149.653	3197.8	1155.21	-153.814	3182.47	1075.65	-186.522	3203.62	952.133	-139.857	3263.93	846.968	-197.446	3221.49	844.405	-178.597	3262.77	762.766
[truncated: 69 more columns]

## Sheet: Sheet2
Devices
		025370 - Force			025370 - Moment			025370 - CoP			027571 - Force			027571 - Moment			027571 - CoP			037720 - Force			037720 - Moment			037720 - CoP
Frame	Sub Frame	Fx	Fy	Fz	Mx	My	Mz	Cx	Cy	Cz	Fx	Fy	Fz	Mx	My	Mz	Cx	Cy	Cz	Fx	Fy	Fz	Mx	My	Mz	Cx	Cy	Cz
		N	N	N	N.mm	N.mm	N.mm	mm	mm	mm	N	N	N	N.mm	N.mm	N.mm	mm	mm	mm	N	N	N	N.mm	N.mm	N.mm	mm	mm	mm
368	0	0	0	0	0	0	0	200	300	0	0	0	0	0	0	0	200	903	0	0	0	0	0	0	0	603	903	0
368	1	0	0	0	0	0	0	200	300	0	0	0	0	0	0	0	200	903	0	0	0	0	0	0	0	603	903	0
368	2	0	0	0	0	0	0	200	300	0	0	0	0	0	0	0	200	903	0	0	0	0	0	0	0	603	903	0
368	3	0	0	0	0	0	0	200	300	0	0	0	0	0	0	0	200	903	0	0	0	0	0	0	0	603	903	0
368	4	0	0	0	0	0	0	200	300	0	0	0	0	0	0	0	200	903	0	0	0	0	0	0	0	603	903	0
368	5	0	0	0	0	0	0	200	300	0	0	0	0	0	0	0	200	903	0	0	0	0	0	0	0	603	903	0
368	6	0	0	0	0	0	0	200	300	0	0	0	0	0	0	0	200	903	0	0	0	0	0	0	0	603	903	0
368	7	0	0	0	0	0	0	200	300	0	0	0	0	0	0	0	200	903	0	0	0	0	0	0	0	603	903	0
368	8	0	0	0	0	0	0	200	300	0	0	0	0	0	0	0	200	903	0	0	0	0	0	0	0	603	903	0
368	9	0	0	0	0	0	0	200	300	0	0	0	0	0	0	0	200	903	0	0	0	0	0	0	0	603	903	0
369	0	0	0	0	0	0	0	200	300	0	0	0	0	0	0	0	200	903	0	0	0	0	0	0	0	603	903	0
369	1	0	0	0	0	0	0	200	300	0	0	0	0	0	0	0	200	903	0	0	0	0	0	0	0	603	903	0
369	2	0	0	0	0	0	0	200	300	0	0	0	0	0	0	0	200	903	0	0	0	0	0	0	0	603	903	0
369	3	0	0	0	0	0	0	200	300	0	0	0	0	0	0	0	200	903	0	0	0	0	0	0	0	603	903	0
369	4	0	0	0	0	0	0	200	300	0	0	0	0	0	0	0	200	903	0	0	0	0	0	0	0	603	903	0
369	5	0	0	0	0	0	0	200	300	0	0	0	0	0	0	0	200	903	0	0	0	0	0	0	0	603	903	0
369	6	0	0	0	0	0	0	200	300	0	0	0	0	0	0	0	200	903	0	0	0	0	0	0	0	603	903	0
369	7	0	0	0	0	0	0	200	300	0	0	0	0	0	0	0	200	903	0	0	0	0	0	0	0	603	903	0
369	8	0	0	0	0	0	0	200	300	0	0	0	0	0	0	0	200	903	0	0	0	0	0	0	0	603	903	0
369	9	0	0	0	0	0	0	200	300	0	0	0	0	0	0	0	200	903	0	0	0	0	0	0	0	603	903	0
370	0	0	0	0	0	0	0	200	300	0	0	0	0	0	0	0	200	903	0	0	0	0	0	0	0	603	903	0
370	1	0	0	0	0	0	0	200	300	0	0	0	0	0	0	0	200	903	0	0	0	0	0	0	0	603	903	0
370	2	0	0	0	0	0	0	200	300	0	0	0	0	0	0	0	200	903	0	0	0	0	0	0	0	603	903	0
370	3	0	0	0	0	0	0	200	300	0	0	0	0	0	0	0	200	903	0	0	0	0	0	0	0	603	903	0
370	4	0	0	0	0	0	0	200	300	0	0	0	0	0	0	0	200	903	0	0	0	0	0	0	0	603	903	0
370	5	0	0	0	0	0	0	200	300	0	0	0	0	0	0	0	200	903	0	0	0	0	0	0	0	603	903	0
370	6	0	0	0	0	0	0	200	300	0	0	0	0	0	0	0	200	903	0	0	0	0	0	0	0	603	903	0
370	7	0	0	0	0	0	0	200	300	0	0	0	0	0	0	0	200	903	0	0	0	0	0	0	0	603	903	0
370	8	0	0	0	0	0	0	200	300	0	0	0	0	0	0	0	200	903	0	0	0	0	0	0	0	603	903	0
370	9	0	0	0	0	0	0	200	300	0	0	0	0	0	0	0	200	903	0	0	0	0	0	0	0	603	903	0
371	0	0	0	0	0	0	0	200	300	0	0	0	0	0	0	0	200	903	0	0	0	0	0	0	0	603	903	0
371	1	0	0	0	0	0	0	200	300	0	0	0	0	0	0	0	200	903	0	0	0	0	0	0	0	603	903	0
371	2	0	0	0	0	0	0	200	300	0	0	0	0	0	0	0	200	903	0	0	0	0	0	0	0	603	903	0
371	3	0	0	0	0	0	0	200	300	0	0	0	0	0	0	0	200	903	0	0	0	0	0	0	0	603	903	0
371	4	0	0	0	0	0	0	200	300	0	0	0	0	0	0	0	200	903	0	0	0	0	0	0	0	603	903	0
371	5	0	0	0	0	0	0	200	300	0	0	0	0	0	0	0	200	903	0	0	0	0	0	0	0	603	903	0
371	6	0	0	0	0	0	0	200	300	0	0	0	0	0	0	0	200	903	0	0	0	0	0	0	0	603	903	0
371	7	0	0	0	0	0	0	200	300	0	0	0	0	0	0	0	200	903	0	0	0	0	0	0	0	603	903	0
371	8	0	0	0	0	0	0	200	300	0	0	0	0	0	0	0	200	903	0	0	0	0	0	0	0	603	903	0
371	9	0	0	0	0	0	0	200	300	0	0	0	0	0	0	0	200	903	0	0	0	0	0	0	0	603	903	0
372	0	0	0	0	0	0	0	200	300	0	0	0	0	0	0	0	200	903	0	0	0	0	0	0	0	603	903	0
372	1	0	0	0	0	0	0	200	300	0	0	0	0	0	0	0	200	903	0	0	0	0	0	0	0	603	903	0
372	2	0	0	0	0	0	0	200	300	0	0	0	0	0	0	0	200	903	0	0	0	0	0	0	0	603	903	0
372	3	0	0	0	0	0	0	200	300	0	0	0	0	0	0	0	200	903	0	0	0	0	0	0	0	603	903	0
372	4	0	0	0	0	0	0	200	300	0	0	0	0	0	0	0	200	903	0	0	0	0	0	0	0	603	903	0
372	5	0	0	0	0	0	0	200	300	0	0	0	0	0	0	0	200	903	0	0	0	0	0	0	0	603	903	0
372	6	0	0	0	0	0	0	200	300	0	0	0	0	0	0	0	200	903	0	0	0	0	0	0	0	603	903	0
372	7	0	0	0	0	0	0	200	300	0	0	0	0	0	0	0	200	903	0	0	0	0	0	0	0	603	903	0
372	8	0	0	0	0	0	0	200	300	0	0	0	0	0	0	0	200	903	0	0	0	0	0	0	0	603	903	0
372	9	0	0	0	0	0	0	200	300	0	0	0	0	0	0	0	200	903	0	0	0	0	0	0	0	603	903	0
373	0	0	0	0	0	0	0	200	300	0	0	0	0	0	0	0	200	903	0	0	0	0	0	0	0	603	903	0
373	1	0	0	0	0	0	0	200	300	0	0	0	0	0	0	0	200	903	0	0	0	0	0	0	0	603	903	0
373	2	0	0	0	0	0	0	200	300	0	0	0	0	0	0	0	200	903	0	0	0	0	0	0	0	603	903	0
373	3	0	0	0	0	0	0	200	300	0	0	0	0	0	0	0	200	903	0	0	0	0	0	0	0	603	903	0
373	4	0	0	0	0	0	0	200	300	0	0	0	0	0	0	0	200	903	0	0	0	0	0	0	0	603	903	0
373	5	0	0	0	0	0	0	200	300	0	0	0	0	0	0	0	200	903	0	0	0	0	0	0	0	603	903	0
373	6	0	0	0	0	0	0	200	300	0	0	0	0	0	0	0	200	903	0	0	0	0	0	0	0	603	903	0
373	7	0	0	0	0	0	0	200	300	0	0	0	0	0	0	0	200	903	0	0	0	0	0	0	0	603	903	0
373	8	0	0	0	0	0	0	200	300	0	0	0	0	0	0	0	200	903	0	0	0	0	0	0	0	603	903	0
373	9	0	0	0	0	0	0	200	300	0	0	0	0	0	0	0	200	903	0	0	0	0	0	0	0	603	903	0
374	0	0	0	0	0	0	0	200	300	0	0	0	0	0	0	0	200	903	0	0	0	0	0	0	0	603	903	0
374	1	0	0	0	0	0	0	200	300	0	0	0	0	0	0	0	200	903	0	0	0	0	0	0	0	603	903	0
374	2	0	0	0	0	0	0	200	300	0	0	0	0	0	0	0	200	903	0	0	0	0	0	0	0	603	903	0
374	3	0	0	0	0	0	0	200	300	0	0	0	0	0	0	0	200	903	0	0	0	0	0	0	0	603	903	0
374	4	0	0	0	0	0	0	200	300	0	0	0	0	0	0	0	200	903	0	0	0	0	0	0	0	603	903	0
374	5	0	0	0	0	0	0	200	300	0	0	0	0	0	0	0	200	903	0	0	0	0	0	0	0	603	903	0
374	6	0	0	0	0	0	0	200	300	0	0	0	0	0	0	0	200	903	0	0	0	0	0	0	0	603	903	0
374	7	0	0	0	0	0	0	200	300	0	0	0	0	0	0	0	200	903	0	0	0	0	0	0	0	603	903	0
374	8	0	0	0	0	0	0	200	300	0	0	0	0	0	0	0	200	903	0	0	0	0	0	0	0	603	903	0
374	9	0	0	0	0	0	0	200	300	0	0	0	0	0	0	0	200	903	0	0	0	0	0	0	0	603	903	0
375	0	0	0	0	0	0	0	200	300	0	0	0	0	0	0	0	200	903	0	0	0	0	0	0	0	603	903	0
375	1	0	0	0	0	0	0	200	300	0	0	0	0	0	0	0	200	903	0	0	0	0	0	0	0	603	903	0
375	2	0	0	0	0	0	0	200	300	0	0	0	0	0	0	0	200	903	0	0	0	0	0	0	0	603	903	0
375	3	0	0	0	0	0	0	200	300	0	0	0	0	0	0	0	200	903	0	0	0	0	0	0	0	603	903	0
375	4	0	0	0	0	0	0	200	300	0	0	0	0	0	0	0	200	903	0	0	0	0	0	0	0	603	903	0
375	5	0	0	0	0	0	0	200	300	0	0	0	0	0	0	0	200	903	0	0	0	0	0	0	0	603	903	0
375	6	0	0	0	0	0	0	200	300	0	0	0	0	0	0	0	200	903	0	0	0	0	0	0	0	603	903	0
375	7	0	0	0	0	0	0	200	300	0	0	0	0	0	0	0	200	903	0	0	0	0	0	0	0	603	903	0
375	8	0	0	0	0	0	0	200	300	0	0	0	0	0	0	0	200	903	0	0	0	0	0	0	0	603	903	0
375	9	0	0	0	0	0	0	200	300	0	0	0	0	0	0	0	200	903	0	0	0	0	0	0	0	603	903	0
376	0	0	0	0	0	0	0	200	300	0	0	0	0	0	0	0	200	903	0	0	0	0	0	0	0	603	903	0
376	1	0	0	0	0	0	0	200	300	0	0	0	0	0	0	0	200	903	0	0	0	0	0	0	0	603	903	0
376	2	0	0	0	0	0	0	200	300	0	0	0	0	0	0	0	200	903	0	0	0	0	0	0	0	603	903	0
376	3	0	0	0	0	0	0	200	300	0	0	0	0	0	0	0	200	903	0	0	0	0	0	0	0	603	903	0
376	4	0	0	0	0	0	0	200	300	0	0	0	0	0	0	0	200	903	0	0	0	0	0	0	0	603	903	0
376	5	0	0	0	0	0	0	200	300	0	0	0	0	0	0	0	200	903	0	0	0	0	0	0	0	603	903	0
376	6	0	0	0	0	0	0	200	300	0	0	0	0	0	0	0	200	903	0	0	0	0	0	0	0	603	903	0
376	7	0	0	0	0	0	0	200	300	0	0	0	0	0	0	0	200	903	0	0	0	0	0	0	0	603	903	0
376	8	0	0	0	0	0	0	200	300	0	0	0	0	0	0	0	200	903	0	0	0	0	0	0	0	603	903	0
376	9	0	0	0	0	0	0	200	300	0	0	0	0	0	0	0	200	903	0	0	0	0	0	0	0	603	903	0
377	0	0	0	0	0	0	0	200	300	0	0	0	0	0	0	0	200	903	0	0	0	0	0	0	0	603	903	0
377	1	0	0	0	0	0	0	200	300	0	0	0	0	0	0	0	200	903	0	0	0	0	0	0	0	603	903	0
377	2	0	0	0	0	0	0	200	300	0	0	0	0	0	0	0	200	903	0	0	0	0	0	0	0	603	903	0
377	3	0	0	0	0	0	0	200	300	0	0	0	0	0	0	0	200	903	0	0	0	0	0	0	0	603	903	0
377	4	0	0	0	0	0	0	200	300	0	0	0	0	0	0	0	200	903	0	0	0	0	0	0	0	603	903	0
377	5	0	0	0	0	0	0	200	300	0	0	0	0	0	0	0	200	903	0	0	0	0	0	0	0	603	903	0
377	6	0	0	0	0	0	0	200	300	0	0	0	0	0	0	0	200	903	0	0	0	0	0	0	0	603	903	0
377	7	0	0	0	0	0	0	200	300	0	0	0	0	0	0	0	200	903	0	0	0	0	0	0	0	603	903	0
377	8	0	0	0	0	0	0	200	300	0	0	0	0	0	0	0	200	903	0	0	0	0	0	0	0	603	903	0
377	9	0	0	0	0	0	0	200	300	0	0	0	0	0	0	0	200	903	0	0	0	0	0	0	0	603	903	0
378	0	0	0	0	0	0	0	200	300	0	0	0	0	0	0	0	200	903	0	0	0	0	0	0	0	603	903	0
378	1	0	0	0	0	0	0	200	300	0	0	0	0	0	0	0	200	903	0	0	0	0	0	0	0	603	903	0
378	2	0	0	0	0	0	0	200	300	0	0	0	0	0	0	0	200	903	0	0	0	0	0	0	0	603	903	0
378	3	0	0	0	0	0	0	200	300	0	0	0	0	0	0	0	200	903	0	0	0	0	0	0	0	603	903	0
378	4	0	0	0	0	0	0	200	300	0	0	0	0	0	0	0	200	903	0	0	0	0	0	0	0	603	903	0
378	5	0	0	0	0	0	0	200	300	0	0	0	0	0	0	0	200	903	0	0	0	0	0	0	0	603	903	0
378	6	0	0	0	0	0	0	200	300	0	0	0	0	0	0	0	200	903	0	0	0	0	0	0	0	603	903	0
378	7	0	0	0	0	0	0	200	300	0	0	0	0	0	0	0	200	903	0	0	0	0	0	0	0	603	903	0
378	8	0	0	0	0	0	0	200	300	0	0	0	0	0	0	0	200	903	0	0	0	0	0	0	0	603	903	0
378	9	0	0	0	0	0	0	200	300	0	0	0	0	0	0	0	200	903	0	0	0	0	0	0	0	603	903	0
379	0	0	0	0	0	0	0	200	300	0	0	0	0	0	0	0	200	903	0	0	0	0	0	0	0	603	903	0
379	1	0	0	0	0	0	0	200	300	0	0	0	0	0	0	0	200	903	0	0	0	0	0	0	0	603	903	0
379	2	0	0	0	0	0	0	200	300	0	0	0	0	0	0	0	200	903	0	0	0	0	0	0	0	603	903	0
379	3	0	0	0	0	0	0	200	300	0	0	0	0	0	0	0	200	903	0	0	0	0	0	0	0	603	903	0
379	4	0	0	0	0	0	0	200	300	0	0	0	0	0	0	0	200	903	0	0	0	0	0	0	0	603	903	0
379	5	0	0	0	0	0	0	200	300	0	0	0	0	0	0	0	200	903	0	0	0	0	0	0	0	603	903	0
379	6	0	0	0	0	0	0	200	300	0	0	0	0	0	0	0	200	903	0	0	0	0	0	0	0	603	903	0
379	7	0	0	0	0	0	0	200	300	0	0	0	0	0	0	0	200	903	0	0	0	0	0	0	0	603	903	0
379	8	0	0	0	0	0	0	200	300	0	0	0	0	0	0	0	200	903	0	0	0	0	0	0	0	603	903	0
379	9	0	0	0	0	0	0	200	300	0	0	0	0	0	0	0	200	903	0	0	0	0	0	0	0	603	903	0
380	0	0	0	0	0	0	0	200	300	0	0	0	0	0	0	0	200	903	0	0	0	0	0	0	0	603	903	0
380	1	0	0	0	0	0	0	200	300	0	0	0	0	0	0	0	200	903	0	0	0	0	0	0	0	603	903	0
380	2	0	0	0	0	0	0	200	300	0	0	0	0	0	0	0	200	903	0	0	0	0	0	0	0	603	903	0
380	3	0	0	0	0	0	0	200	300	0	0	0	0	0	0	0	200	903	0	0	0	0	0	0	0	603	903	0
380	4	0	0	0	0	0	0	200	300	0	0	0	0	0	0	0	200	903	0	0	0	0	0	0	0	603	903	0
380	5	0	0	0	0	0	0	200	300	0	0	0	0	0	0	0	200	903	0	0	0	0	0	0	0	603	903	0
380	6	0	0	0	0	0	0	200	300	0	0	0	0	0	0	0	200	903	0	0	0	0	0	0	0	603	903	0
380	7	0	0	0	0	0	0	200	300	0	0	0	0	0	0	0	200	903	0	0	0	0	0	0	0	603	903	0
380	8	0	0	0	0	0	0	200	300	0	0	0	0	0	0	0	200	903	0	0	0	0	0	0	0	603	903	0
380	9	0	0	0	0	0	0	200	300	0	0	0	0	0	0	0	200	903	0	0	0	0	0	0	0	603	903	0
381	0	0	0	0	0	0	0	200	300	0	0	0	0	0	0	0	200	903	0	0	0	0	0	0	0	603	903	0
381	1	0	0	0	0	0	0	200	300	0	0	0	0	0	0	0	200	903	0	0	0	0	0	0	0	603	903	0
381	2	0	0	0	0	0	0	200	300	0	0	0	0	0	0	0	200	903	0	0	0	0	0	0	0	603	903	0
381	3	0	0	0	0	0	0	200	300	0	0	0	0	0	0	0	200	903	0	0	0	0	0	0	0	603	903	0
381	4	0	0	0	0	0	0	200	300	0	0	0	0	0	0	0	200	903	0	0	0	0	0	0	0	603	903	0
381	5	0	0	0	0	0	0	200	300	0	0	0	0	0	0	0	200	903	0	0	0	0	0	0	0	603	903	0
381	6	0	0	0	0	0	0	200	300	0	0	0	0	0	0	0	200	903	0	0	0	0	0	0	0	603	903	0
381	7	0	0	0	0	0	0	200	300	0	0	0	0	0	0	0	200	903	0	0	0	0	0	0	0	603	903	0
381	8	0	0	0	0	0	0	200	300	0	0	0	0	0	0	0	200	903	0	0	0	0	0	0	0	603	903	0
381	9	0	0	0	0	0	0	200	300	0	0	0	0	0	0	0	200	903	0	0	0	0	0	0	0	603	903	0
382	0	0	0	0	0	0	0	200	300	0	0	0	0	0	0	0	200	903	0	0	0	0	0	0	0	603	903	0
382	1	0	0	0	0	0	0	200	300	0	0	0	0	0	0	0	200	903	0	0	0	0	0	0	0	603	903	0
382	2	0	0	0	0	0	0	200	300	0	0	0	0	0	0	0	200	903	0	0	0	0	0	0	0	603	903	0
382	3	0	0	0	0	0	0	200	300	0	0	0	0	0	0	0	200	903	0	0	0	0	0	0	0	603	903	0
382	4	0	0	0	0	0	0	200	300	0	0	0	0	0	0	0	200	903	0	0	0	0	0	0	0	603	903	0
382	5	0	0	0	0	0	0	200	300	0	0	0	0	0	0	0	200	903	0	0	0	0	0	0	0	603	903	0
382	6	0	0	0	0	0	0	200	300	0	0	0	0	0	0	0	200	903	0	0	0	0	0	0	0	603	903	0
382	7	0	0	0	0	0	0	200	300	0	0	0	0	0	0	0	200	903	0	0	0	0	0	0	0	603	903	0
382	8	0	0	0	0	0	0	200	300	0	0	0	0	0	0	0	200	903	0	0	0	0	0	0	0	603	903	0
382	9	0	0	0	0	0	0	200	300	0	0	0	0	0	0	0	200	903	0	0	0	0	0	0	0	603	903	0
383	0	0	0	0	0	0	0	200	300	0	0	0	0	0	0	0	200	903	0	0	0	0	0	0	0	603	903	0
383	1	0	0	0	0	0	0	200	300	0	0	0	0	0	0	0	200	903	0	0	0	0	0	0	0	603	903	0
383	2	0	0	0	0	0	0	200	300	0	0	0	0	0	0	0	200	903	0	0	0	0	0	0	0	603	903	0
383	3	0	0	0	0	0	0	200	300	0	0	0	0	0	0	0	200	903	0	0	0	0	0	0	0	603	903	0
383	4	0	0	0	0	0	0	200	300	0	0	0	0	0	0	0	200	903	0	0	0	0	0	0	0	603	903	0
383	5	0	0	0	0	0	0	200	300	0	0	0	0	0	0	0	200	903	0	0	0	0	0	0	0	603	903	0
383	6	0	0	0	0	0	0	200	300	0	0	0	0	0	0	0	200	903	0	0	0	0	0	0	0	603	903	0
383	7	0	0	0	0	0	0	200	300	0	0	0	0	0	0	0	200	903	0	0	0	0	0	0	0	603	903	0
383	8	0	0	0	0	0	0	200	300	0	0	0	0	0	0	0	200	903	0	0	0	0	0	0	0	603	903	0
383	9	0	0	0	0	0	0	200	300	0	0	0	0	0	0	0	200	903	0	0	0	0	0	0	0	603	903	0
384	0	0	0	0	0	0	0	200	300	0	0	0	0	0	0	0	200	903	0	0	0	0	0	0	0	603	903	0
384	1	0	0	0	0	0	0	200	300	0	0	0	0	0	0	0	200	903	0	0	0	0	0	0	0	603	903	0
384	2	0	0	0	0	0	0	200	300	0	0	0	0	0	0	0	200	903	0	0	0	0	0	0	0	603	903	0
384	3	0	0	0	0	0	0	200	300	0	0	0	0	0	0	0	200	903	0	0	0	0	0	0	0	603	903	0
384	4	0	0	0	0	0	0	200	300	0	0	0	0	0	0	0	200	903	0	0	0	0	0	0	0	603	903	0
384	5	0	0	0	0	0	0	200	300	0	0	0	0	0	0	0	200	903	0	0	0	0	0	0	0	603	903	0
384	6	0	0	0	0	0	0	200	300	0	0	0	0	0	0	0	200	903	0	0	0	0	0	0	0	603	903	0
384	7	0	0	0	0	0	0	200	300	0	0	0	0	0	0	0	200	903	0	0	0	0	0	0	0	603	903	0
384	8	0	0	0	0	0	0	200	300	0	0	0	0	0	0	0	200	903	0	0	0	0	0	0	0	603	903	0
384	9	0	0	0	0	0	0	200	300	0	0	0	0	0	0	0	200	903	0	0	0	0	0	0	0	603	903	0
385	0	0	0	0	0	0	0	200	300	0	0	0	0	0	0	0	200	903	0	0	0	0	0	0	0	603	903	0
385	1	0	0	0	0	0	0	200	300	0	0	0	0	0	0	0	200	903	0	0	0	0	0	0	0	603	903	0
385	2	0	0	0	0	0	0	200	300	0	0	0	0	0	0	0	200	903	0	0	0	0	0	0	0	603	903	0
385	3	0	0	0	0	0	0	200	300	0	0	0	0	0	0	0	200	903	0	0	0	0	0	0	0	603	903	0
385	4	0	0	0	0	0	0	200	300	0	0	0	0	0	0	0	200	903	0	0	0	0	0	0	0	603	903	0
385	5	0	0	0	0	0	0	200	300	0	0	0	0	0	0	0	200	903	0	0	0	0	0	0	0	603	903	0
385	6	0	0	0	0	0	0	200	300	0	0	0	0	0	0	0	200	903	0	0	0	0	0	0	0	603	903	0
385	7	0	0	0	0	0	0	200	300	0	0	0	0	0	0	0	200	903	0	0	0	0	0	0	0	603	903	0
385	8	0	0	0	0	0	0	200	300	0	0	0	0	0	0	0	200	903	0	0	0	0	0	0	0	603	903	0
385	9	0	0	0	0	0	0	200	300	0	0	0	0	0	0	0	200	903	0	0	0	0	0	0	0	603	903	0
386	0	0	0	0	0	0	0	200	300	0	0	0	0	0	0	0	200	903	0	0	0	0	0	0	0	603	903	0
386	1	0	0	0	0	0	0	200	300	0	0	0	0	0	0	0	200	903	0	0	0	0	0	0	0	603	903	0
386	2	0	0	0	0	0	0	200	300	0	0	0	0	0	0	0	200	903	0	0	0	0	0	0	0	603	903	0
386	3	0	0	0	0	0	0	200	300	0	0	0	0	0	0	0	200	903	0	0	0	0	0	0	0	603	903	0
386	4	0	0	0	0	0	0	200	300	0	0	0	0	0	0	0	200	903	0	0	0	0	0	0	0	603	903	0
386	5	0	0	0	0	0	0	200	300	0	0	0	0	0	0	0	200	903	0	0	0	0	0	0	0	603	903	0
386	6	0	0	0	0	0	0	200	300	0	0	0	0	0	0	0	200	903	0	0	0	0	0	0	0	603	903	0
386	7	0	0	0	0	0	0	200	300	0	0	0	0	0	0	0	200	903	0	0	0	0	0	0	0	603	903	0
386	8	0	0	0	0	0	0	200	300	0	0	0	0	0	0	0	200	903	0	0	0	0	0	0	0	603	903	0
386	9	0	0	0	0	0	0	200	300	0	0	0	0	0	0	0	200	903	0	0	0	0	0	0	0	603	903	0
387	0	0	0	0	0	0	0	200	300	0	0	0	0	0	0	0	200	903	0	0	0	0	0	0	0	603	903	0
387	1	0	0	0	0	0	0	200	300	0	0	0	0	0	0	0	200	903	0	0	0	0	0	0	0	603	903	0
387	2	0	0	0	0	0	0	200	300	0	0	0	0	0	0	0	200	903	0	0	0	0	0	0	0	603	903	0
387	3	0	0	0	0	0	0	200	300	0	0	0	0	0	0	0	200	903	0	0	0	0	0	0	0	603	903	0
387	4	0	0	0	0	0	0	200	300	0	0	0	0	0	0	0	200	903	0	0	0	0	0	0	0	603	903	0
387	5	0	0	0	0	0	0	200	300	0	0	0	0	0	0	0	200	903	0	0	0	0	0	0	0	603	903	0
387	6	0	0	0	0	0	0	200	300	0	0	0	0	0	0	0	200	903	0	0	0	0	0	0	0	603	903	0
387	7	0	0	0	0	0	0	200	300	0	0	0	0	0	0	0	200	903	0	0	0	0	0	0	0	603	903	0
387	8	0	0	0	0	0	0	200	300	0	0	0	0	0	0	0	200	903	0	0	0	0	0	0	0	603	903	0
387	9	0	0	0	0	0	0	200	300	0	0	0	0	0	0	0	200	903	0	0	0	0	0	0	0	603	903	0
388	0	0	0	0	0	0	0	200	300	0	0	0	0	0	0	0	200	903	0	0	0	0	0	0	0	603	903	0
388	1	0	0	0	0	0	0	200	300	0	0	0	0	0	0	0	200	903	0	0	0	0	0	0	0	603	903	0
388	2	0	0	0	0	0	0	200	300	0	0	0	0	0	0	0	200	903	0	0	0	0	0	0	0	603	903	0
388	3	0	0	0	0	0	0	200	300	0	0	0	0	0	0	0	200	903	0	0	0	0	0	0	0	603	903	0
388	4	0	0	0	0	0	0	200	300	0	0	0	0	0	0	0	200	903	0	0	0	0	0	0	0	603	903	0
388	5	0	0	0	0	0	0	200	300	0	0	0	0	0	0	0	200	903	0	0	0	0	0	0	0	603	903	0
388	6	0	0	0	0	0	0	200	300	0	0	0	0	0	0	0	200	903	0	0	0	0	0	0	0	603	903	0
388	7	0	0	0	0	0	0	200	300	0	0	0	0	0	0	0	200	903	0	0	0	0	0	0	0	603	903	0
388	8	0	0	0	0	0	0	200	300	0	0	0	0	0	0	0	200	903	0	0	0	0	0	0	0	603	903	0
388	9	0	0	0	0	0	0	200	300	0	0	0	0	0	0	0	200	903	0	0	0	0	0	0	0	603	903	0
389	0	0	0	0	0	0	0	200	300	0	0	0	0	0	0	0	200	903	0	0	0	0	0	0	0	603	903	0
389	1	0	0	0	0	0	0	200	300	0	0	0	0	0	0	0	200	903	0	0	0	0	0	0	0	603	903	0
389	2	0	0	0	0	0	0	200	300	0	0	0	0	0	0	0	200	903	0	0	0	0	0	0	0	603	903	0
389	3	0	0	0	0	0	0	200	300	0	0	0	0	0	0	0	200	903	0	0	0	0	0	0	0	603	903	0
389	4	0	0	0	0	0	0	200	300	0	0	0	0	0	0	0	200	903	0	0	0	0	0	0	0	603	903	0
389	5	0	0	0	0	0	0	200	300	0	0	0	0	0	0	0	200	903	0	0	0	0	0	0	0	603	903	0
389	6	0	0	0	0	0	0	200	300	0	0	0	0	0	0	0	200	903	0	0	0	0	0	0	0	603	903	0
389	7	0	0	0	0	0	0	200	300	0	0	0	0	0	0	0	200	903	0	0	0	0	0	0	0	603	903	0
389	8	0	0	0	0	0	0	200	300	0	0	0	0	0	0	0	200	903	0	0	0	0	0	0	0	603	903	0
389	9	0	0	0	0	0	0	200	300	0	0	0	0	0	0	0	200	903	0	0	0	0	0	0	0	603	903	0
390	0	0	0	0	0	0	0	200	300	0	0	0	0	0	0	0	200	903	0	0	0	0	0	0	0	603	903	0
390	1	0	0	0	0	0	0	200	300	0	0	0	0	0	0	0	200	903	0	0	0	0	0	0	0	603	903	0
390	2	0	0	0	0	0	0	200	300	0	0	0	0	0	0	0	200	903	0	0	0	0	0	0	0	603	903	0
390	3	0	0	0	0	0	0	200	300	0	0	0	0	0	0	0	200	903	0	0	0	0	0	0	0	603	903	0
390	4	0	0	0	0	0	0	200	300	0	0	0	0	0	0	0	200	903	0	0	0	0	0	0	0	603	903	0
390	5	0	0	0	0	0	0	200	300	0	0	0	0	0	0	0	200	903	0	0	0	0	0	0	0	603	903	0
390	6	0	0	0	0	0	0	200	300	0	0	0	0	0	0	0	200	903	0	0	0	0	0	0	0	603	903	0
390	7	0	0	0	0	0	0	200	300	0	0	0	0	0	0	0	200	903	0	0	0	0	0	0	0	603	903	0
390	8	0	0	0	0	0	0	200	300	0	0	0	0	0	0	0	200	903	0	0	0	0	0	0	0	603	903	0
390	9	0	0	0	0	0	0	200	300	0	0	0	0	0	0	0	200	903	0	0	0	0	0	0	0	603	903	0
391	0	0	0	0	0	0	0	200	300	0	0	0	0	0	0	0	200	903	0	0	0	0	0	0	0	603	903	0
391	1	0	0	0	0	0	0	200	300	0	0	0	0	0	0	0	200	903	0	0	0	0	0	0	0	603	903	0
391	2	0	0	0	0	0	0	200	300	0	0	0	0	0	0	0	200	903	0	0	0	0	0	0	0	603	903	0
391	3	0	0	0	0	0	0	200	300	0	0	0	0	0	0	0	200	903	0	0	0	0	0	0	0	603	903	0
391	4	0	0	0	0	0	0	200	300	0	0	0	0	0	0	0	200	903	0	0	0	0	0	0	0	603	903	0
391	5	0	0	0	0	0	0	200	300	0	0	0	0	0	0	0	200	903	0	0	0	0	0	0	0	603	903	0
391	6	0	0	0	0	0	0	200	300	0	0	0	0	0	0	0	200	903	0	0	0	0	0	0	0	603	903	0
391	7	0	0	0	0	0	0	200	300	0	0	0	0	0	0	0	200	903	0	0	0	0	0	0	0	603	903	0
391	8	0	0	0	0	0	0	200	300	0	0	0	0	0	0	0	200	903	0	0	0	0	0	0	0	603	903	0
391	9	0	0	0	0	0	0	200	300	0	0	0	0	0	0	0	200	903	0	0	0	0	0	0	0	603	903	0
392	0	0	0	0	0	0	0	200	300	0	0	0	0	0	0	0	200	903	0	0	0	0	0	0	0	603	903	0
392	1	0	0	0	0	0	0	200	300	0	0	0	0	0	0	0	200	903	0	0	0	0	0	0	0	603	903	0
392	2	0	0	0	0	0	0	200	300	0	0	0	0	0	0	0	200	903	0	0	0	0	0	0	0	603	903	0
392	3	0	0	0	0	0	0	200	300	0	0	0	0	0	0	0	200	903	0	0	0	0	0	0	0	603	903	0
392	4	0	0	0	0	0	0	200	300	0	0	0	0	0	0	0	200	903	0	0	0	0	0	0	0	603	903	0
392	5	0	0	0	0	0	0	200	300	0	0	0	0	0	0	0	200	903	0	0	0	0	0	0	0	603	903	0
392	6	0	0	0	0	0	0	200	300	0	0	0	0	0	0	0	200	903	0	0	0	0	0	0	0	603	903	0
392	7	0	0	0	0	0	0	200	300	0	0	0	0	0	0	0	200	903	0	0	0	0	0	0	0	603	903	0
392	8	0	0	0	0	0	0	200	300	0	0	0	0	0	0	0	200	903	0	0	0	0	0	0	0	603	903	0
392	9	0	0	0	0	0	0	200	300	0	0	0	0	0	0	0	200	903	0	0	0	0	0	0	0	603	903	0
393	0	0	0	0	0	0	0	200	300	0	0	0	0	0	0	0	200	903	0	0	0	0	0	0	0	603	903	0
393	1	0	0	0	0	0	0	200	300	0	0	0	0	0	0	0	200	903	0	0	0	0	0	0	0	603	903	0
393	2	0	0	0	0	0	0	200	300	0	0	0	0	0	0	0	200	903	0	0	0	0	0	0	0	603	903	0
393	3	0	0	0	0	0	0	200	300	0	0	0	0	0	0	0	200	903	0	0	0	0	0	0	0	603	903	0
393	4	0	0	0	0	0	0	200	300	0	0	0	0	0	0	0	200	903	0	0	0	0	0	0	0	603	903	0
393	5	0	0	0	0	0	0	200	300	0	0	0	0	0	0	0	200	903	0	0	0	0	0	0	0	603	903	0
393	6	0	0	0	0	0	0	200	300	0	0	0	0	0	0	0	200	903	0	0	0	0	0	0	0	603	903	0
393	7	0	0	0	0	0	0	200	300	0	0	0	0	0	0	0	200	903	0	0	0	0	0	0	0	603	903	0
393	8	0	0	0	0	0	0	200	300	0	0	0	0	0	0	0	200	903	0	0	0	0	0	0	0	603	903	0
393	9	0	0	0	0	0	0	200	300	0	0	0	0	0	0	0	200	903	0	0	0	0	0	0	0	603	903	0
394	0	0	0	0	0	0	0	200	300	0	0	0	0	0	0	0	200	903	0	0	0	0	0	0	0	603	903	0
394	1	0	0	0	0	0	0	200	300	0	0	0	0	0	0	0	200	903	0	0	0	0	0	0	0	603	903	0
394	2	0	0	0	0	0	0	200	300	0	0	0	0	0	0	0	200	903	0	0	0	0	0	0	0	603	903	0
394	3	0	0	0	0	0	0	200	300	0	0	0	0	0	0	0	200	903	0	0	0	0	0	0	0	603	903	0
394	4	0	0	0	0	0	0	200	300	0	0	0	0	0	0	0	200	903	0	0	0	0	0	0	0	603	903	0
394	5	0	0	0	0	0	0	200	300	0	0	0	0	0	0	0	200	903	0	0	0	0	0	0	0	603	903	0
394	6	0	0	0	0	0	0	200	300	0	0	0	0	0	0	0	200	903	0	0	0	0	0	0	0	603	903	0
394	7	0	0	0	0	0	0	200	300	0	0	0	0	0	0	0	200	903	0	0	0	0	0	0	0	603	903	0
394	8	0	0	0	0	0	0	200	300	0	0	0	0	0	0	0	200	903	0	0	0	0	0	0	0	603	903	0
394	9	0	0	0	0	0	0	200	300	0	0	0	0	0	0	0	200	903	0	0	0	0	0	0	0	603	903	0
395	0	0	0	0	0	0	0	200	300	0	0	0	0	0	0	0	200	903	0	0	0	0	0	0	0	603	903	0
395	1	0	0	0	0	0	0	200	300	0	0	0	0	0	0	0	200	903	0	0	0	0	0	0	0	603	903	0
395	2	0	0	0	0	0	0	200	300	0	0	0	0	0	0	0	200	903	0	0	0	0	0	0	0	603	903	0
395	3	0	0	0	0	0	0	200	300	0	0	0	0	0	0	0	200	903	0	0	0	0	0	0	0	603	903	0
395	4	0	0	0	0	0	0	200	300	0	0	0	0	0	0	0	200	903	0	0	0	0	0	0	0	603	903	0
395	5	0	0	0	0	0	0	200	300	0	0	0	0	0	0	0	200	903	0	0	0	0	0	0	0	603	903	0
395	6	0	0	0	0	0	0	200	300	0	0	0	0	0	0	0	200	903	0	0	0	0	0	0	0	603	903	0
395	7	0	0	0	0	0	0	200	300	0	0	0	0	0	0	0	200	903	0	0	0	0	0	0	0	603	903	0
395	8	0	0	0	0	0	0	200	300	0	0	0	0	0	0	0	200	903	0	0	0	0	0	0	0	603	903	0
395	9	0	0	0	0	0	0	200	300	0	0	0	0	0	0	0	200	903	0	0	0	0	0	0	0	603	903	0
396	0	0	0	0	0	0	0	200	300	0	0	0	0	0	0	0	200	903	0	0	0	0	0	0	0	603	903	0
396	1	0	0	0	0	0	0	200	300	0	0	0	0	0	0	0	200	903	0	0	0	0	0	0	0	603	903	0
396	2	0	0	0	0	0	0	200	300	0	0	0	0	0	0	0	200	903	0	0	0	0	0	0	0	603	903	0
396	3	0	0	0	0	0	0	200	300	0	0	0	0	0	0	0	200	903	0	0	0	0	0	0	0	603	903	0
396	4	0	0	0	0	0	0	200	300	0	0	0	0	0	0	0	200	903	0	0	0	0	0	0	0	603	903	0
396	5	0	0	0	0	0	0	200	300	0	0	0	0	0	0	0	200	903	0	0	0	0	0	0	0	603	903	0
396	6	0	0	0	0	0	0	200	300	0	0	0	0	0	0	0	200	903	0	0	0	0	0	0	0	603	903	0
396	7	0	0	0	0	0	0	200	300	0	0	0	0	0	0	0	200	903	0	0	0	0	0	0	0	603	903	0
396	8	0	0	0	0	0	0	200	300	0	0	0	0	0	0	0	200	903	0	0	0	0	0	0	0	603	903	0
396	9	0	0	0	0	0	0	200	300	0	0	0	0	0	0	0	200	903	0	0	0	0	0	0	0	603	903	0
397	0	0	0	0	0	0	0	200	300	0	0	0	0	0	0	0	200	903	0	0	0	0	0	0	0	603	903	0
397	1	0	0	0	0	0	0	200	300	0	0	0	0	0	0	0	200	903	0	0	0	0	0	0	0	603	903	0
397	2	0	0	0	0	0	0	200	300	0	0	0	0	0	0	0	200	903	0	0	0	0	0	0	0	603	903	0
397	3	0	0	0	0	0	0	200	300	0	0	0	0	0	0	0	200	903	0	0	0	0	0	0	0	603	903	0
397	4	0	0	0	0	0	0	200	300	0	0	0	0	0	0	0	200	903	0	0	0	0	0	0	0	603	903	0
397	5	0	0	0	0	0	0	200	300	0	0	0	0	0	0	0	200	903	0	0	0	0	0	0	0	603	903	0
397	6	0	0	0	0	0	0	200	300	0	0	0	0	0	0	0	200	903	0	0	0	0	0	0	0	603	903	0
397	7	0	0	0	0	0	0	200	300	0	0	0	0	0	0	0	200	903	0	0	0	0	0	0	0	603	903	0
397	8	0	0	0	0	0	0	200	300	0	0	0	0	0	0	0	200	903	0	0	0	0	0	0	0	603	903	0
397	9	0	0	0	0	0	0	200	300	0	0	0	0	0	0	0	200	903	0	0	0	0	0	0	0	603	903	0
398	0	0	0	0	0	0	0	200	300	0	0	0	0	0	0	0	200	903	0	0	0	0	0	0	0	603	903	0
398	1	0	0	0	0	0	0	200	300	0	0	0	0	0	0	0	200	903	0	0	0	0	0	0	0	603	903	0
398	2	0	0	0	0	0	0	200	300	0	0	0	0	0	0	0	200	903	0	0	0	0	0	0	0	603	903	0
398	3	0	0	0	0	0	0	200	300	0	0	0	0	0	0	0	200	903	0	0	0	0	0	0	0	603	903	0
398	4	0	0	0	0	0	0	200	300	0	0	0	0	0	0	0	200	903	0	0	0	0	0	0	0	603	903	0
398	5	0	0	0	0	0	0	200	300	0	0	0	0	0	0	0	200	903	0	0	0	0	0	0	0	603	903	0
398	6	0	0	0	0	0	0	200	300	0	0	0	0	0	0	0	200	903	0	0	0	0	0	0	0	603	903	0
398	7	0	0	0	0	0	0	200	300	0	0	0	0	0	0	0	200	903	0	0	0	0	0	0	0	603	903	0
398	8	0	0	0	0	0	0	200	300	0	0	0	0	0	0	0	200	903	0	0	0	0	0	0	0	603	903	0
398	9	0	0	0	0	0	0	200	300	0	0	0	0	0	0	0	200	903	0	0	0	0	0	0	0	603	903	0
399	0	0	0	0	0	0	0	200	300	0	0	0	0	0	0	0	200	903	0	0	0	0	0	0	0	603	903	0
399	1	0	0	0	0	0	0	200	300	0	0	0	0	0	0	0	200	903	0	0	0	0	0	0	0	603	903	0
399	2	0	0	0	0	0	0	200	300	0	0	0	0	0	0	0	200	903	0	0	0	0	0	0	0	603	903	0
399	3	0	0	0	0	0	0	200	300	0	0	0	0	0	0	0	200	903	0	0	0	0	0	0	0	603	903	0
399	4	0	0	0	0	0	0	200	300	0	0	0	0	0	0	0	200	903	0	0	0	0	0	0	0	603	903	0
399	5	0	0	0	0	0	0	200	300	0	0	0	0	0	0	0	200	903	0	0	0	0	0	0	0	603	903	0
399	6	0	0	0	0	0	0	200	300	0	0	0	0	0	0	0	200	903	0	0	0	0	0	0	0	603	903	0
399	7	0	0	0	0	0	0	200	300	0	0	0	0	0	0	0	200	903	0	0	0	0	0	0	0	603	903	0
399	8	0	0	0	0	0	0	200	300	0	0	0	0	0	0	0	200	903	0	0	0	0	0	0	0	603	903	0
399	9	0	0	0	0	0	0	200	300	0	0	0	0	0	0	0	200	903	0	0	0	0	0	0	0	603	903	0
400	0	0	0	0	0	0	0	200	300	0	0	0	0	0	0	0	200	903	0	0	0	0	0	0	0	603	903	0
400	1	0	0	0	0	0	0	200	300	0	0	0	0	0	0	0	200	903	0	0	0	0	0	0	0	603	903	0
400	2	0	0	0	0	0	0	200	300	0	0	0	0	0	0	0	200	903	0	0	0	0	0	0	0	603	903	0
400	3	0	0	0	0	0	0	200	300	0	0	0	0	0	0	0	200	903	0	0	0	0	0	0	0	603	903	0
400	4	0	0	0	0	0	0	200	300	0	0	0	0	0	0	0	200	903	0	0	0	0	0	0	0	603	903	0
400	5	0	0	0	0	0	0	200	300	0	0	0	0	0	0	0	200	903	0	0	0	0	0	0	0	603	903	0
400	6	0	0	0	0	0	0	200	300	0	0	0	0	0	0	0	200	903	0	0	0	0	0	0	0	603	903	0
400	7	0	0	0	0	0	0	200	300	0	0	0	0	0	0	0	200	903	0	0	0	0	0	0	0	603	903	0
400	8	0	0	0	0	0	0	200	300	0	0	0	0	0	0	0	200	903	0	0	0	0	0	0	0	603	903	0
400	9	0	0	0	0	0	0	200	300	0	0	0	0	0	0	0	200	903	0	0	0	0	0	0	0	603	903	0
401	0	0	0	0	0	0	0	200	300	0	0	0	0	0	0	0	200	903	0	0	0	0	0	0	0	603	903	0
401	1	0	0	0	0	0	0	200	300	0	0	0	0	0	0	0	200	903	0	0	0	0	0	0	0	603	903	0
401	2	0	0	0	0	0	0	200	300	0	0	0	0	0	0	0	200	903	0	0	0	0	0	0	0	603	903	0
401	3	0	0	0	0	0	0	200	300	0	0	0	0	0	0	0	200	903	0	0	0	0	0	0	0	603	903	0
401	4	0	0	0	0	0	0	200	300	0	0	0	0	0	0	0	200	903	0	0	0	0	0	0	0	603	903	0
401	5	0	0	0	0	0	0	200	300	0	0	0	0	0	0	0	200	903	0	0	0	0	0	0	0	603	903	0
401	6	0	0	0	0	0	0	200	300	0	0	0	0	0	0	0	200	903	0	0	0	0	0	0	0	603	903	0
401	7	0	0	0	0	0	0	200	300	0	0	0	0	0	0	0	200	903	0	0	0	0	0	0	0	603	903	0
401	8	0	0	0	0	0	0	200	300	0	0	0	0	0	0	0	200	903	0	0	0	0	0	0	0	603	903	0
401	9	0	0	0	0	0	0	200	300	0	0	0	0	0	0	0	200	903	0	0	0	0	0	0	0	603	903	0
402	0	0	0	0	0	0	0	200	300	0	0	0	0	0	0	0	200	903	0	0	0	0	0	0	0	603	903	0
402	1	0	0	0	0	0	0	200	300	0	0	0	0	0	0	0	200	903	0	0	0	0	0	0	0	603	903	0
402	2	0	0	0	0	0	0	200	300	0	0	0	0	0	0	0	200	903	0	0	0	0	0	0	0	603	903	0
402	3	0	0	0	0	0	0	200	300	0	0	0	0	0	0	0	200	903	0	0	0	0	0	0	0	603	903	0
402	4	0	0	0	0	0	0	200	300	0	0	0	0	0	0	0	200	903	0	0	0	0	0	0	0	603	903	0
402	5	0	0	0	0	0	0	200	300	0	0	0	0	0	0	0	200	903	0	0	0	0	0	0	0	603	903	0
402	6	0	0	0	0	0	0	200	300	0	0	0	0	0	0	0	200	903	0	0	0	0	0	0	0	603	903	0
402	7	0	0	0	0	0	0	200	300	0	0	0	0	0	0	0	200	903	0	0	0	0	0	0	0	603	903	0
402	8	0	0	0	0	0	0	200	300	0	0	0	0	0	0	0	200	903	0	0	0	0	0	0	0	603	903	0
402	9	0	0	0	0	0	0	200	300	0	0	0	0	0	0	0	200	903	0	0	0	0	0	0	0	603	903	0
403	0	0	0	0	0	0	0	200	300	0	0	0	0	0	0	0	200	903	0	0	0	0	0	0	0	603	903	0
403	1	0	0	0	0	0	0	200	300	0	0	0	0	0	0	0	200	903	0	0	0	0	0	0	0	603	903	0
403	2	0	0	0	0	0	0	200	300	0	0	0	0	0	0	0	200	903	0	0	0	0	0	0	0	603	903	0
403	3	0	0	0	0	0	0	200	300	0	0	0	0	0	0	0	200	903	0	0	0	0	0	0	0	603	903	0
403	4	0	0	0	0	0	0	200	300	0	0	0	0	0	0	0	200	903	0	0	0	0	0	0	0	603	903	0
403	5	0	0	0	0	0	0	200	300	0	0	0	0	0	0	0	200	903	0	0	0	0	0	0	0	603	903	0
403	6	0	0	0	0	0	0	200	300	0	0	0	0	0	0	0	200	903	0	0	0	0	0	0	0	603	903	0
403	7	0	0	0	0	0	0	200	300	0	0	0	0	0	0	0	200	903	0	0	0	0	0	0	0	603	903	0
403	8	0	0	0	0	0	0	200	300	0	0	0	0	0	0	0	200	903	0	0	0	0	0	0	0	603	903	0
403	9	0	0	0	0	0	0	200	300	0	0	0	0	0	0	0	200	903	0	0	0	0	0	0	0	603	903	0
404	0	0	0	0	0	0	0	200	300	0	0	0	0	0	0	0	200	903	0	0	0	0	0	0	0	603	903	0
404	1	0	0	0	0	0	0	200	300	0	0	0	0	0	0	0	200	903	0	0	0	0	0	0	0	603	903	0
404	2	0	0	0	0	0	0	200	300	0	0	0	0	0	0	0	200	903	0	0	0	0	0	0	0	603	903	0
404	3	0	0	0	0	0	0	200	300	0	0	0	0	0	0	0	200	903	0	0	0	0	0	0	0	603	903	0
404	4	0	0	0	0	0	0	200	300	0	0	0	0	0	0	0	200	903	0	0	0	0	0	0	0	603	903	0
404	5	0	0	0	0	0	0	200	300	0	0	0	0	0	0	0	200	903	0	0	0	0	0	0	0	603	903	0
404	6	0	0	0	0	0	0	200	300	0	0	0	0	0	0	0	200	903	0	0	0	0	0	0	0	603	903	0
404	7	0	0	0	0	0	0	200	300	0	0	0	0	0	0	0	200	903	0	0	0	0	0	0	0	603	903	0
404	8	0	0	0	0	0	0	200	300	0	0	0	0	0	0	0	200	903	0	0	0	0	0	0	0	603	903	0
404	9	0	0	0	0	0	0	200	300	0	0	0	0	0	0	0	200	903	0	0	0	0	0	0	0	603	903	0
405	0	0	0	0	0	0	0	200	300	0	0	0	0	0	0	0	200	903	0	0	0	0	0	0	0	603	903	0
405	1	0	0	0	0	0	0	200	300	0	0	0	0	0	0	0	200	903	0	0	0	0	0	0	0	603	903	0
405	2	0	0	0	0	0	0	200	300	0	0	0	0	0	0	0	200	903	0	0	0	0	0	0	0	603	903	0
405	3	0	0	0	0	0	0	200	300	0	0	0	0	0	0	0	200	903	0	0	0	0	0	0	0	603	903	0
405	4	0	0	0	0	0	0	200	300	0	0	0	0	0	0	0	200	903	0	0	0	0	0	0	0	603	903	0
405	5	0	0	0	0	0	0	200	300	0	0	0	0	0	0	0	200	903	0	0	0	0	0	0	0	603	903	0
405	6	0	0	0	0	0	0	200	300	0	0	0	0	0	0	0	200	903	0	0	0	0	0	0	0	603	903	0
405	7	0	0	0	0	0	0	200	300	0	0	0	0	0	0	0	200	903	0	0	0	0	0	0	0	603	903	0
405	8	0	0	0	0	0	0	200	300	0	0	0	0	0	0	0	200	903	0	0	0	0	0	0	0	603	903	0
405	9	0	0	0	0	0	0	200	300	0	0	0	0	0	0	0	200	903	0	0	0	0	0	0	0	603	903	0
406	0	0	0	0	0	0	0	200	300	0	0	0	0	0	0	0	200	903	0	0	0	0	0	0	0	603	903	0
406	1	0	0	0	0	0	0	200	300	0	0	0	0	0	0	0	200	903	0	0	0	0	0	0	0	603	903	0
406	2	0	0	0	0	0	0	200	300	0	0	0	0	0	0	0	200	903	0	0	0	0	0	0	0	603	903	0
406	3	0	0	0	0	0	0	200	300	0	0	0	0	0	0	0	200	903	0	0	0	0	0	0	0	603	903	0
406	4	0	0	0	0	0	0	200	300	0	0	0	0	0	0	0	200	903	0	0	0	0	0	0	0	603	903	0
406	5	0	0	0	0	0	0	200	300	0	0	0	0	0	0	0	200	903	0	0	0	0	0	0	0	603	903	0
406	6	0	0	0	0	0	0	200	300	0	0	0	0	0	0	0	200	903	0	0	0	0	0	0	0	603	903	0
406	7	0	0	0	0	0	0	200	300	0	0	0	0	0	0	0	200	903	0	0	0	0	0	0	0	603	903	0
406	8	0	0	0	0	0	0	200	300	0	0	0	0	0	0	0	200	903	0	0	0	0	0	0	0	603	903	0
406	9	0	0	0	0	0	0	200	300	0	0	0	0	0	0	0	200	903	0	0	0	0	0	0	0	603	903	0
407	0	0	0	0	0	0	0	200	300	0	0	0	0	0	0	0	200	903	0	0	0	0	0	0	0	603	903	0
407	1	0	0	0	0	0	0	200	300	0	0	0	0	0	0	0	200	903	0	0	0	0	0	0	0	603	903	0
407	2	0	0	0	0	0	0	200	300	0	0	0	0	0	0	0	200	903	0	0	0	0	0	0	0	603	903	0
407	3	0	0	0	0	0	0	200	300	0	0	0	0	0	0	0	200	903	0	0	0	0	0	0	0	603	903	0
407	4	0	0	0	0	0	0	200	300	0	0	0	0	0	0	0	200	903	0	0	0	0	0	0	0	603	903	0
407	5	0	0	0	0	0	0	200	300	0	0	0	0	0	0	0	200	903	0	0	0	0	0	0	0	603	903	0
407	6	0	0	0	0	0	0	200	300	0	0	0	0	0	0	0	200	903	0	0	0	0	0	0	0	603	903	0
407	7	0	0	0	0	0	0	200	300	0	0	0	0	0	0	0	200	903	0	0	0	0	0	0	0	603	903	0
407	8	0	0	0	0	0	0	200	300	0	0	0	0	0	0	0	200	903	0	0	0	0	0	0	0	603	903	0
407	9	0	0	0	0	0	0	200	300	0	0	0	0	0	0	0	200	903	0	0	0	0	0	0	0	603	903	0
408	0	0	0	0	0	0	0	200	300	0	0	0	0	0	0	0	200	903	0	0	0	0	0	0	0	603	903	0
408	1	0	0	0	0	0	0	200	300	0	0	0	0	0	0	0	200	903	0	0	0	0	0	0	0	603	903	0
408	2	0	0	0	0	0	0	200	300	0	0	0	0	0	0	0	200	903	0	0	0	0	0	0	0	603	903	0
408	3	0	0	0	0	0	0	200	300	0	0	0	0	0	0	0	200	903	0	0	0	0	0	0	0	603	903	0
408	4	0	0	0	0	0	0	200	300	0	0	0	0	0	0	0	200	903	0	0	0	0	0	0	0	603	903	0
408	5	0	0	0	0	0	0	200	300	0	0	0	0	0	0	0	200	903	0	0	0	0	0	0	0	603	903	0
408	6	0	0	0	0	0	0	200	300	0	0	0	0	0	0	0	200	903	0	0	0	0	0	0	0	603	903	0
408	7	0	0	0	0	0	0	200	300	0	0	0	0	0	0	0	200	903	0	0	0	0	0	0	0	603	903	0
408	8	0	0	0	0	0	0	200	300	0	0	0	0	0	0	0	200	903	0	0	0	0	0	0	0	603	903	0
408	9	0	0	0	0	0	0	200	300	0	0	0	0	0	0	0	200	903	0	0	0	0	0	0	0	603	903	0
409	0	0	0	0	0	0	0	200	300	0	0	0	0	0	0	0	200	903	0	0	0	0	0	0	0	603	903	0
409	1	0	0	0	0	0	0	200	300	0	0	0	0	0	0	0	200	903	0	0	0	0	0	0	0	603	903	0
409	2	0	0	0	0	0	0	200	300	0	0	0	0	0	0	0	200	903	0	0	0	0	0	0	0	603	903	0
409	3	0	0	0	0	0	0	200	300	0	0	0	0	0	0	0	200	903	0	0	0	0	0	0	0	603	903	0
409	4	0	0	0	0	0	0	200	300	0	0	0	0	0	0	0	200	903	0	0	0	0	0	0	0	603	903	0
409	5	0	0	0	0	0	0	200	300	0	0	0	0	0	0	0	200	903	0	0	0	0	0	0	0	603	903	0
409	6	0	0	0	0	0	0	200	300	0	0	0	0	0	0	0	200	903	0	0	0	0	0	0	0	603	903	0
409	7	0	0	0	0	0	0	200	300	0	0	0	0	0	0	0	200	903	0	0	0	0	0	0	0	603	903	0
409	8	0	0	0	0	0	0	200	300	0	0	0	0	0	0	0	200	903	0	0	0	0	0	0	0	603	903	0
409	9	0	0	0	0	0	0	200	300	0	0	0	0	0	0	0	200	903	0	0	0	0	0	0	0	603	903	0
410	0	0	0	0	0	0	0	200	300	0	0	0	0	0	0	0	200	903	0	0	0	0	0	0	0	603	903	0
410	1	0	0	0	0	0	0	200	300	0	0	0	0	0	0	0	200	903	0	0	0	0	0	0	0	603	903	0
410	2	0	0	0	0	0	0	200	300	0	0	0	0	0	0	0	200	903	0	0	0	0	0	0	0	603	903	0
410	3	0	0	0	0	0	0	200	300	0	0	0	0	0	0	0	200	903	0	0	0	0	0	0	0	603	903	0
410	4	0	0	0	0	0	0	200	300	0	0	0	0	0	0	0	200	903	0	0	0	0	0	0	0	603	903	0
410	5	0	0	0	0	0	0	200	300	0	0	0	0	0	0	0	200	903	0	0	0	0	0	0	0	603	903	0
410	6	0	0	0	0	0	0	200	300	0	0	0	0	0	0	0	200	903	0	0	0	0	0	0	0	603	903	0
410	7	0	0	0	0	0	0	200	300	0	0	0	0	0	0	0	200	903	0	0	0	0	0	0	0	603	903	0
410	8	0	0	0	0	0	0	200	300	0	0	0	0	0	0	0	200	903	0	0	0	0	0	0	0	603	903	0
410	9	0	0	0	0	0	0	200	300	0	0	0	0	0	0	0	200	903	0	0	0	0	0	0	0	603	903	0
411	0	0	0	0	0	0	0	200	300	0	0	0	0	0	0	0	200	903	0	0	0	0	0	0	0	603	903	0
411	1	0	0	0	0	0	0	200	300	0	0	0	0	0	0	0	200	903	0	0	0	0	0	0	0	603	903	0
411	2	0	0	0	0	0	0	200	300	0	0	0	0	0	0	0	200	903	0	0	0	0	0	0	0	603	903	0
411	3	0	0	0	0	0	0	200	300	0	0	0	0	0	0	0	200	903	0	0	0	0	0	0	0	603	903	0
411	4	0	0	0	0	0	0	200	300	0	0	0	0	0	0	0	200	903	0	0	0	0	0	0	0	603	903	0
411	5	0	0	0	0	0	0	200	300	0	0	0	0	0	0	0	200	903	0	0	0	0	0	0	0	603	903	0
411	6	0	0	0	0	0	0	200	300	0	0	0	0	0	0	0	200	903	0	0	0	0	0	0	0	603	903	0
411	7	0	0	0	0	0	0	200	300	0	0	0	0	0	0	0	200	903	0	0	0	0	0	0	0	603	903	0
411	8	0	0	0	0	0	0	200	300	0	0	0	0	0	0	0	200	903	0	0	0	0	0	0	0	603	903	0
411	9	0	0	0	0	0	0	200	300	0	0	0	0	0	0	0	200	903	0	0	0	0	0	0	0	603	903	0
412	0	0	0	0	0	0	0	200	300	0	0	0	0	0	0	0	200	903	0	0	0	0	0	0	0	603	903	0
412	1	0	0	0	0	0	0	200	300	0	0	0	0	0	0	0	200	903	0	0	0	0	0	0	0	603	903	0
412	2	0	0	0	0	0	0	200	300	0	0	0	0	0	0	0	200	903	0	0	0	0	0	0	0	603	903	0
412	3	0	0	0	0	0	0	200	300	0	0	0	0	0	0	0	200	903	0	0	0	0	0	0	0	603	903	0
412	4	0	0	0	0	0	0	200	300	0	0	0	0	0	0	0	200	903	0	0	0	0	0	0	0	603	903	0
412	5	0	0	0	0	0	0	200	300	0	0	0	0	0	0	0	200	903	0	0	0	0	0	0	0	603	903	0
412	6	0	0	0	0	0	0	200	300	0	0	0	0	0	0	0	200	903	0	0	0	0	0	0	0	603	903	0
412	7	0	0	0	0	0	0	200	300	0	0	0	0	0	0	0	200	903	0	0	0	0	0	0	0	603	903	0
412	8	0	0	0	0	0	0	200	300	0	0	0	0	0	0	0	200	903	0	0	0	0	0	0	0	603	903	0
412	9	0	0	0	0	0	0	200	300	0	0	0	0	0	0	0	200	903	0	0	0	0	0	0	0	603	903	0
413	0	0	0	0	0	0	0	200	300	0	0	0	0	0	0	0	200	903	0	0	0	0	0	0	0	603	903	0
413	1	0	0	0	0	0	0	200	300	0	0	0	0	0	0	0	200	903	0	0	0	0	0	0	0	603	903	0
413	2	0	0	0	0	0	0	200	300	0	0	0	0	0	0	0	200	903	0	0	0	0	0	0	0	603	903	0
413	3	0	0	0	0	0	0	200	300	0	0	0	0	0	0	0	200	903	0	0	0	0	0	0	0	603	903	0
413	4	0	0	0	0	0	0	200	300	0	0	0	0	0	0	0	200	903	0	0	0	0	0	0	0	603	903	0
413	5	0	0	0	0	0	0	200	300	0	0	0	0	0	0	0	200	903	0	0	0	0	0	0	0	603	903	0
413	6	0	0	0	0	0	0	200	300	0	0	0	0	0	0	0	200	903	0	0	0	0	0	0	0	603	903	0
413	7	0	0	0	0	0	0	200	300	0	0	0	0	0	0	0	200	903	0	0	0	0	0	0	0	603	903	0
413	8	0	0	0	0	0	0	200	300	0	0	0	0	0	0	0	200	903	0	0	0	0	0	0	0	603	903	0
413	9	0	0	0	0	0	0	200	300	0	0	0	0	0	0	0	200	903	0	0	0	0	0	0	0	603	903	0
414	0	0	0	0	0	0	0	200	300	0	0	0	0	0	0	0	200	903	0	0	0	0	0	0	0	603	903	0
414	1	0	0	0	0	0	0	200	300	0	0	0	0	0	0	0	200	903	0	0	0	0	0	0	0	603	903	0
414	2	0	0	0	0	0	0	200	300	0	0	0	0	0	0	0	200	903	0	0	0	0	0	0	0	603	903	0
414	3	0	0	0	0	0	0	200	300	0	0	0	0	0	0	0	200	903	0	0	0	0	0	0	0	603	903	0
414	4	0	0	0	0	0	0	200	300	0	0	0	0	0	0	0	200	903	0	0	0	0	0	0	0	603	903	0
414	5	0	0	0	0	0	0	200	300	0	0	0	0	0	0	0	200	903	0	0	0	0	0	0	0	603	903	0
414	6	0	0	0	0	0	0	200	300	0	0	0	0	0	0	0	200	903	0	0	0	0	0	0	0	603	903	0
414	7	0	0	0	0	0	0	200	300	0	0	0	0	0	0	0	200	903	0	0	0	0	0	0	0	603	903	0
414	8	0	0	0	0	0	0	200	300	0	0	0	0	0	0	0	200	903	0	0	0	0	0	0	0	603	903	0
414	9	0	0	0	0	0	0	200	300	0	0	0	0	0	0	0	200	903	0	0	0	0	0	0	0	603	903	0
415	0	0	0	0	0	0	0	200	300	0	0	0	0	0	0	0	200	903	0	0	0	0	0	0	0	603	903	0
415	1	0	0	0	0	0	0	200	300	0	0	0	0	0	0	0	200	903	0	0	0	0	0	0	0	603	903	0
415	2	0	0	0	0	0	0	200	300	0	0	0	0	0	0	0	200	903	0	0	0	0	0	0	0	603	903	0
415	3	0	0	0	0	0	0	200	300	0	0	0	0	0	0	0	200	903	0	0	0	0	0	0	0	603	903	0
415	4	0	0	0	0	0	0	200	300	0	0	0	0	0	0	0	200	903	0	0	0	0	0	0	0	603	903	0
415	5	0	0	0	0	0	0	200	300	0	0	0	0	0	0	0	200	903	0	0	0	0	0	0	0	603	903	0
415	6	0	0	0	0	0	0	200	300	0	0	0	0	0	0	0	200	903	0	0	0	0	0	0	0	603	903	0
415	7	0	0	0	0	0	0	200	300	0	0	0	0	0	0	0	200	903	0	0	0	0	0	0	0	603	903	0
415	8	0	0	0	0	0	0	200	300	0	0	0	0	0	0	0	200	903	0	0	0	0	0	0	0	603	903	0
415	9	0	0	0	0	0	0	200	300	0	0	0	0	0	0	0	200	903	0	0	0	0	0	0	0	603	903	0
416	0	0	0	0	0	0	0	200	300	0	0	0	0	0	0	0	200	903	0	0	0	0	0	0	0	603	903	0
416	1	0	0	0	0	0	0	200	300	0	0	0	0	0	0	0	200	903	0	0	0	0	0	0	0	603	903	0
416	2	0	0	0	0	0	0	200	300	0	0	0	0	0	0	0	200	903	0	0	0	0	0	0	0	603	903	0
416	3	0	0	0	0	0	0	200	300	0	0	0	0	0	0	0	200	903	0	0	0	0	0	0	0	603	903	0
416	4	0	0	0	0	0	0	200	300	0	0	0	0	0	0	0	200	903	0	0	0	0	0	0	0	603	903	0
416	5	0	0	0	0	0	0	200	300	0	0	0	0	0	0	0	200	903	0	0	0	0	0	0	0	603	903	0
416	6	0	0	0	0	0	0	200	300	0	0	0	0	0	0	0	200	903	0	0	0	0	0	0	0	603	903	0
416	7	0	0	0	0	0	0	200	300	0	0	0	0	0	0	0	200	903	0	0	0	0	0	0	0	603	903	0
416	8	0	0	0	0	0	0	200	300	0	0	0	0	0	0	0	200	903	0	0	0	0	0	0	0	603	903	0
416	9	0	0	0	0	0	0	200	300	0	0	0	0	0	0	0	200	903	0	0	0	0	0	0	0	603	903	0
417	0	0	0	0	0	0	0	200	300	0	0	0	0	0	0	0	200	903	0	0	0	0	0	0	0	603	903	0
417	1	0	0	0	0	0	0	200	300	0	0	0	0	0	0	0	200	903	0	0	0	0	0	0	0	603	903	0
417	2	0	0	0	0	0	0	200	300	0	0	0	0	0	0	0	200	903	0	0	0	0	0	0	0	603	903	0
417	3	0	0	0	0	0	0	200	300	0	0	0	0	0	0	0	200	903	0	0	0	0	0	0	0	603	903	0
417	4	0	0	0	0	0	0	200	300	0	0	0	0	0	0	0	200	903	0	0	0	0	0	0	0	603	903	0
417	5	0	0	0	0	0	0	200	300	0	0	0	0	0	0	0	200	903	0	0	0	0	0	0	0	603	903	0
417	6	0	0	0	0	0	0	200	300	0	0	0	0	0	0	0	200	903	0	0	0	0	0	0	0	603	903	0
417	7	0	0	0	0	0	0	200	300	0	0	0	0	0	0	0	200	903	0	0	0	0	0	0	0	603	903	0
417	8	0	0	0	0	0	0	200	300	0	0	0	0	0	0	0	200	903	0	0	0	0	0	0	0	603	903	0
417	9	0	0	0	0	0	0	200	300	0	0	0	0	0	0	0	200	903	0	0	0	0	0	0	0	603	903	0
418	0	0	0	0	0	0	0	200	300	0	0	0	0	0	0	0	200	903	0	0	0	0	0	0	0	603	903	0
418	1	0	0	0	0	0	0	200	300	0	0	0	0	0	0	0	200	903	0	0	0	0	0	0	0	603	903	0
418	2	0	0	0	0	0	0	200	300	0	0	0	0	0	0	0	200	903	0	0	0	0	0	0	0	603	903	0
418	3	0	0	0	0	0	0	200	300	0	0	0	0	0	0	0	200	903	0	0	0	0	0	0	0	603	903	0
418	4	0	0	0	0	0	0	200	300	0	0	0	0	0	0	0	200	903	0	0	0	0	0	0	0	603	903	0
418	5	0	0	0	0	0	0	200	300	0	0	0	0	0	0	0	200	903	0	0	0	0	0	0	0	603	903	0
418	6	0	0	0	0	0	0	200	300	0	0	0	0	0	0	0	200	903	0	0	0	0	0	0	0	603	903	0
418	7	0	0	0	0	0	0	200	300	0	0	0	0	0	0	0	200	903	0	0	0	0	0	0	0	603	903	0
418	8	0	0	0	0	0	0	200	300	0	0	0	0	0	0	0	200	903	0	0	0	0	0	0	0	603	903	0
418	9	0	0	0	0	0	0	200	300	0	0	0	0	0	0	0	200	903	0	0	0	0	0	0	0	603	903	0
419	0	0	0	0	0	0	0	200	300	0	0	0	0	0	0	0	200	903	0	0	0	0	0	0	0	603	903	0
419	1	0	0	0	0	0	0	200	300	0	0	0	0	0	0	0	200	903	0	0	0	0	0	0	0	603	903	0
419	2	0	0	0	0	0	0	200	300	0	0	0	0	0	0	0	200	903	0	0	0	0	0	0	0	603	903	0
419	3	0	0	0	0	0	0	200	300	0	0	0	0	0	0	0	200	903	0	0	0	0	0	0	0	603	903	0
419	4	0	0	0	0	0	0	200	300	0	0	0	0	0	0	0	200	903	0	0	0	0	0	0	0	603	903	0
419	5	0	0	0	0	0	0	200	300	0	0	0	0	0	0	0	200	903	0	0	0	0	0	0	0	603	903	0
419	6	0	0	0	0	0	0	200	300	0	0	0	0	0	0	0	200	903	0	0	0	0	0	0	0	603	903	0
419	7	0	0	0	0	0	0	200	300	0	0	0	0	0	0	0	200	903	0	0	0	0	0	0	0	603	903	0
419	8	0	0	0	0	0	0	200	300	0	0	0	0	0	0	0	200	903	0	0	0	0	0	0	0	603	903	0
419	9	0	0	0	0	0	0	200	300	0	0	0	0	0	0	0	200	903	0	0	0	0	0	0	0	603	903	0
420	0	0	0	0	0	0	0	200	300	0	0	0	0	0	0	0	200	903	0	0	0	0	0	0	0	603	903	0
420	1	0	0	0	0	0	0	200	300	0	0	0	0	0	0	0	200	903	0	0	0	0	0	0	0	603	903	0
420	2	0	0	0	0	0	0	200	300	0	0	0	0	0	0	0	200	903	0	0	0	0	0	0	0	603	903	0
420	3	0	0	0	0	0	0	200	300	0	0	0	0	0	0	0	200	903	0	0	0	0	0	0	0	603	903	0
420	4	0	0	0	0	0	0	200	300	0	0	0	0	0	0	0	200	903	0	0	0	0	0	0	0	603	903	0
420	5	0	0	0	0	0	0	200	300	0	0	0	0	0	0	0	200	903	0	0	0	0	0	0	0	603	903	0
420	6	0	0	0	0	0	0	200	300	0	0	0	0	0	0	0	200	903	0	0	0	0	0	0	0	603	903	0
420	7	0	0	0	0	0	0	200	300	0	0	0	0	0	0	0	200	903	0	0	0	0	0	0	0	603	903	0
420	8	0	0	0	0	0	0	200	300	0	0	0	0	0	0	0	200	903	0	0	0	0	0	0	0	603	903	0
420	9	0	0	0	0	0	0	200	300	0	0	0	0	0	0	0	200	903	0	0	0	0	0	0	0	603	903	0
421	0	0	0	0	0	0	0	200	300	0	0	0	0	0	0	0	200	903	0	0	0	0	0	0	0	603	903	0
421	1	0	0	0	0	0	0	200	300	0	0	0	0	0	0	0	200	903	0	0	0	0	0	0	0	603	903	0
421	2	0	0	0	0	0	0	200	300	0	0	0	0	0	0	0	200	903	0	0	0	0	0	0	0	603	903	0
421	3	0	0	0	0	0	0	200	300	0	0	0	0	0	0	0	200	903	0	0	0	0	0	0	0	603	903	0
421	4	0	0	0	0	0	0	200	300	0	0	0	0	0	0	0	200	903	0	0	0	0	0	0	0	603	903	0
421	5	0	0	0	0	0	0	200	300	0	0	0	0	0	0	0	200	903	0	0	0	0	0	0	0	603	903	0
421	6	0	0	0	0	0	0	200	300	0	0	0	0	0	0	0	200	903	0	0	0	0	0	0	0	603	903	0
421	7	0	0	0	0	0	0	200	300	0	0	0	0	0	0	0	200	903	0	0	0	0	0	0	0	603	903	0
421	8	0	0	0	0	0	0	200	300	0	0	0	0	0	0	0	200	903	0	0	0	0	0	0	0	603	903	0
421	9	0	0	0	0	0	0	200	300	0	0	0	0	0	0	0	200	903	0	0	0	0	0	0	0	603	903	0
422	0	0	0	0	0	0	0	200	300	0	0	0	0	0	0	0	200	903	0	0	0	0	0	0	0	603	903	0
422	1	0	0	0	0	0	0	200	300	0	0	0	0	0	0	0	200	903	0	0	0	0	0	0	0	603	903	0
422	2	0	0	0	0	0	0	200	300	0	0	0	0	0	0	0	200	903	0	0	0	0	0	0	0	603	903	0
422	3	0	0	0	0	0	0	200	300	0	0	0	0	0	0	0	200	903	0	0	0	0	0	0	0	603	903	0
422	4	0	0	0	0	0	0	200	300	0	0	0	0	0	0	0	200	903	0	0	0	0	0	0	0	603	903	0
422	5	0	0	0	0	0	0	200	300	0	0	0	0	0	0	0	200	903	0	0	0	0	0	0	0	603	903	0
422	6	0	0	0	0	0	0	200	300	0	0	0	0	0	0	0	200	903	0	0	0	0	0	0	0	603	903	0
422	7	0	0	0	0	0	0	200	300	0	0	0	0	0	0	0	200	903	0	0	0	0	0	0	0	603	903	0
422	8	0	0	0	0	0	0	200	300	0	0	0	0	0	0	0	200	903	0	0	0	0	0	0	0	603	903	0
422	9	0	0	0	0	0	0	200	300	0	0	0	0	0	0	0	200	903	0	0	0	0	0	0	0	603	903	0
423	0	0	0	0	0	0	0	200	300	0	0	0	0	0	0	0	200	903	0	0	0	0	0	0	0	603	903	0
423	1	0	0	0	0	0	0	200	300	0	0	0	0	0	0	0	200	903	0	0	0	0	0	0	0	603	903	0
423	2	0	0	0	0	0	0	200	300	0	0	0	0	0	0	0	200	903	0	0	0	0	0	0	0	603	903	0
423	3	0	0	0	0	0	0	200	300	0	0	0	0	0	0	0	200	903	0	0	0	0	0	0	0	603	903	0
423	4	0	0	0	0	0	0	200	300	0	0	0	0	0	0	0	200	903	0	0	0	0	0	0	0	603	903	0
423	5	0	0	0	0	0	0	200	300	0	0	0	0	0	0	0	200	903	0	0	0	0	0	0	0	603	903	0
423	6	0	0	0	0	0	0	200	300	0	0	0	0	0	0	0	200	903	0	0	0	0	0	0	0	603	903	0
423	7	0	0	0	0	0	0	200	300	0	0	0	0	0	0	0	200	903	0	0	0	0	0	0	0	603	903	0
423	8	0	0	0	0	0	0	200	300	0	0	0	0	0	0	0	200	903	0	0	0	0	0	0	0	603	903	0
423	9	0	0	0	0	0	0	200	300	0	0	0	0	0	0	0	200	903	0	0	0	0	0	0	0	603	903	0
424	0	0	0	0	0	0	0	200	300	0	0	0	0	0	0	0	200	903	0	0	0	0	0	0	0	603	903	0
424	1	0	0	0	0	0	0	200	300	0	0	0	0	0	0	0	200	903	0	0	0	0	0	0	0	603	903	0
424	2	0	0	0	0	0	0	200	300	0	0	0	0	0	0	0	200	903	0	0	0	0	0	0	0	603	903	0
424	3	0	0	0	0	0	0	200	300	0	0	0	0	0	0	0	200	903	0	0	0	0	0	0	0	603	903	0
424	4	0	0	0	0	0	0	200	300	0	0	0	0	0	0	0	200	903	0	0	0	0	0	0	0	603	903	0
424	5	0	0	0	0	0	0	200	300	0	0	0	0	0	0	0	200	903	0	0	0	0	0	0	0	603	903	0
424	6	0	0	0	0	0	0	200	300	0	0	0	0	0	0	0	200	903	0	0	0	0	0	0	0	603	903	0
424	7	0	0	0	0	0	0	200	300	0	0	0	0	0	0	0	200	903	0	0	0	0	0	0	0	603	903	0
424	8	0	0	0	0	0	0	200	300	0	0	0	0	0	0	0	200	903	0	0	0	0	0	0	0	603	903	0
424	9	0	0	0	0	0	0	200	300	0	0	0	0	0	0	0	200	903	0	0	0	0	0	0	0	603	903	0
425	0	0	0	0	0	0	0	200	300	0	0	0	0	0	0	0	200	903	0	0	0	0	0	0	0	603	903	0
425	1	0	0	0	0	0	0	200	300	0	0	0	0	0	0	0	200	903	0	0	0	0	0	0	0	603	903	0
425	2	0	0	0	0	0	0	200	300	0	0	0	0	0	0	0	200	903	0	0	0	0	0	0	0	603	903	0
425	3	0	0	0	0	0	0	200	300	0	0	0	0	0	0	0	200	903	0	0	0	0	0	0	0	603	903	0
425	4	0	0	0	0	0	0	200	300	0	0	0	0	0	0	0	200	903	0	0	0	0	0	0	0	603	903	0
425	5	0	0	0	0	0	0	200	300	0	0	0	0	0	0	0	200	903	0	0	0	0	0	0	0	603	903	0
425	6	0	0	0	0	0	0	200	300	0	0	0	0	0	0	0	200	903	0	0	0	0	0	0	0	603	903	0
425	7	0	0	0	0	0	0	200	300	0	0	0	0	0	0	0	200	903	0	0	0	0	0	0	0	603	903	0
425	8	0	0	0	0	0	0	200	300	0	0	0	0	0	0	0	200	903	0	0	0	0	0	0	0	603	903	0
425	9	0	0	0	0	0	0	200	300	0	0	0	0	0	0	0	200	903	0	0	0	0	0	0	0	603	903	0
426	0	0	0	0	0	0	0	200	300	0	0	0	0	0	0	0	200	903	0	0	0	0	0	0	0	603	903	0
426	1	0	0	0	0	0	0	200	300	0	0	0	0	0	0	0	200	903	0	0	0	0	0	0	0	603	903	0
426	2	0	0	0	0	0	0	200	300	0	0	0	0	0	0	0	200	903	0	0	0	0	0	0	0	603	903	0
426	3	0	0	0	0	0	0	200	300	0	0	0	0	0	0	0	200	903	0	0	0	0	0	0	0	603	903	0
426	4	0	0	0	0	0	0	200	300	0	0	0	0	0	0	0	200	903	0	0	0	0	0	0	0	603	903	0
426	5	0	0	0	0	0	0	200	300	0	0	0	0	0	0	0	200	903	0	0	0	0	0	0	0	603	903	0
426	6	0	0	0	0	0	0	200	300	0	0	0	0	0	0	0	200	903	0	0	0	0	0	0	0	603	903	0
426	7	0	0	0	0	0	0	200	300	0	0	0	0	0	0	0	200	903	0	0	0	0	0	0	0	603	903	0
426	8	0	0	0	0	0	0	200	300	0	0	0	0	0	0	0	200	903	0	0	0	0	0	0	0	603	903	0
426	9	0	0	0	0	0	0	200	300	0	0	0	0	0	0	0	200	903	0	0	0	0	0	0	0	603	903	0
427	0	0	0	0	0	0	0	200	300	0	0	0	0	0	0	0	200	903	0	0	0	0	0	0	0	603	903	0
427	1	0	0	0	0	0	0	200	300	0	0	0	0	0	0	0	200	903	0	0	0	0	0	0	0	603	903	0
427	2	0	0	0	0	0	0	200	300	0	0	0	0	0	0	0	200	903	0	0	0	0	0	0	0	603	903	0
427	3	0	0	0	0	0	0	200	300	0	0	0	0	0	0	0	200	903	0	0	0	0	0	0	0	603	903	0
427	4	0	0	0	0	0	0	200	300	0	0	0	0	0	0	0	200	903	0	0	0	0	0	0	0	603	903	0
427	5	0	0	0	0	0	0	200	300	0	0	0	0	0	0	0	200	903	0	0	0	0	0	0	0	603	903	0
427	6	0	0	0	0	0	0	200	300	0	0	0	0	0	0	0	200	903	0	0	0	0	0	0	0	603	903	0
427	7	0	0	0	0	0	0	200	300	0	0	0	0	0	0	0	200	903	0	0	0	0	0	0	0	603	903	0
427	8	0	0	0	0	0	0	200	300	0	0	0	0	0	0	0	200	903	0	0	0	0	0	0	0	603	903	0
427	9	0	0	0	0	0	0	200	300	0	0	0	0	0	0	0	200	903	0	0	0	0	0	0	0	603	903	0
428	0	0	0	0	0	0	0	200	300	0	0	0	0	0	0	0	200	903	0	0	0	0	0	0	0	603	903	0
428	1	0	0	0	0	0	0	200	300	0	0	0	0	0	0	0	200	903	0	0	0	0	0	0	0	603	903	0
428	2	0	0	0	0	0	0	200	300	0	0	0	0	0	0	0	200	903	0	0	0	0	0	0	0	603	903	0
428	3	0	0	0	0	0	0	200	300	0	0	0	0	0	0	0	200	903	0	0	0	0	0	0	0	603	903	0
428	4	0	0	0	0	0	0	200	300	0	0	0	0	0	0	0	200	903	0	0	0	0	0	0	0	603	903	0
428	5	0	0	0	0	0	0	200	300	0	0	0	0	0	0	0	200	903	0	0	0	0	0	0	0	603	903	0
428	6	0	0	0	0	0	0	200	300	0	0	0	0	0	0	0	200	903	0	0	0	0	0	0	0	603	903	0
428	7	0	0	0	0	0	0	200	300	0	0	0	0	0	0	0	200	903	0	0	0	0	0	0	0	603	903	0
428	8	0	0	0	0	0	0	200	300	0	0	0	0	0	0	0	200	903	0	0	0	0	0	0	0	603	903	0
428	9	0	0	0	0	0	0	200	300	0	0	0	0	0	0	0	200	903	0	0	0	0	0	0	0	603	903	0
429	0	0	0	0	0	0	0	200	300	0	0	0	0	0	0	0	200	903	0	0	0	0	0	0	0	603	903	0
429	1	0	0	0	0	0	0	200	300	0	0	0	0	0	0	0	200	903	0	0	0	0	0	0	0	603	903	0
429	2	0	0	0	0	0	0	200	300	0	0	0	0	0	0	0	200	903	0	0	0	0	0	0	0	603	903	0
429	3	0	0	0	0	0	0	200	300	0	0	0	0	0	0	0	200	903	0	0	0	0	0	0	0	603	903	0
429	4	0	0	0	0	0	0	200	300	0	0	0	0	0	0	0	200	903	0	0	0	0	0	0	0	603	903	0
429	5	0	0	0	0	0	0	200	300	0	0	0	0	0	0	0	200	903	0	0	0	0	0	0	0	603	903	0
429	6	0	0	0	0	0	0	200	300	0	0	0	0	0	0	0	200	903	0	0	0	0	0	0	0	603	903	0
429	7	0	0	0	0	0	0	200	300	0	0	0	0	0	0	0	200	903	0	0	0	0	0	0	0	603	903	0
429	8	0	0	0	0	0	0	200	300	0	0	0	0	0	0	0	200	903	0	0	0	0	0	0	0	603	903	0
429	9	0	0	0	0	0	0	200	300	0	0	0	0	0	0	0	200	903	0	0	0	0	0	0	0	603	903	0
430	0	0	0	0	0	0	0	200	300	0	0	0	0	0	0	0	200	903	0	0	0	0	0	0	0	603	903	0
430	1	0	0	0	0	0	0	200	300	0	0	0	0	0	0	0	200	903	0	0	0	0	0	0	0	603	903	0
430	2	0	0	0	0	0	0	200	300	0	0	0	0	0	0	0	200	903	0	0	0	0	0	0	0	603	903	0
430	3	0	0	0	0	0	0	200	300	0	0	0	0	0	0	0	200	903	0	0	0	0	0	0	0	603	903	0
430	4	0	0	0	0	0	0	200	300	0	0	0	0	0	0	0	200	903	0	0	0	0	0	0	0	603	903	0
430	5	0	0	0	0	0	0	200	300	0	0	0	0	0	0	0	200	903	0	0	0	0	0	0	0	603	903	0
430	6	0	0	0	0	0	0	200	300	0	0	0	0	0	0	0	200	903	0	0	0	0	0	0	0	603	903	0
430	7	0	0	0	0	0	0	200	300	0	0	0	0	0	0	0	200	903	0	0	0	0	0	0	0	603	903	0
430	8	0	0	0	0	0	0	200	300	0	0	0	0	0	0	0	200	903	0	0	0	0	0	0	0	603	903	0
430	9	0	0	0	0	0	0	200	300	0	0	0	0	0	0	0	200	903	0	0	0	0	0	0	0	603	903	0
431	0	0	0	0	0	0	0	200	300	0	0	0	0	0	0	0	200	903	0	0	0	0	0	0	0	603	903	0
431	1	0	0	0	0	0	0	200	300	0	0	0	0	0	0	0	200	903	0	0	0	0	0	0	0	603	903	0
431	2	0	0	0	0	0	0	200	300	0	0	0	0	0	0	0	200	903	0	0	0	0	0	0	0	603	903	0
431	3	0	0	0	0	0	0	200	300	0	0	0	0	0	0	0	200	903	0	0	0	0	0	0	0	603	903	0
431	4	0	0	0	0	0	0	200	300	0	0	0	0	0	0	0	200	903	0	0	0	0	0	0	0	603	903	0
431	5	0	0	0	0	0	0	200	300	0	0	0	0	0	0	0	200	903	0	0	0	0	0	0	0	603	903	0
431	6	0	0	0	0	0	0	200	300	0	0	0	0	0	0	0	200	903	0	0	0	0	0	0	0	603	903	0
431	7	0	0	0	0	0	0	200	300	0	0	0	0	0	0	0	200	903	0	0	0	0	0	0	0	603	903	0
431	8	0	0	0	0	0	0	200	300	0	0	0	0	0	0	0	200	903	0	0	0	0	0	0	0	603	903	0
431	9	0	0	0	0	0	0	200	300	0	0	0	0	0	0	0	200	903	0	0	0	0	0	0	0	603	903	0
432	0	0	0	0	0	0	0	200	300	0	0	0	0	0	0	0	200	903	0	0	0	0	0	0	0	603	903	0
432	1	0	0	0	0	0	0	200	300	0	0	0	0	0	0	0	200	903	0	0	0	0	0	0	0	603	903	0
432	2	0	0	0	0	0	0	200	300	0	0	0	0	0	0	0	200	903	0	0	0	0	0	0	0	603	903	0
432	3	0	0	0	0	0	0	200	300	0	0	0	0	0	0	0	200	903	0	0	0	0	0	0	0	603	903	0
432	4	0	0	0	0	0	0	200	300	0	0	0	0	0	0	0	200	903	0	0	0	0	0	0	0	603	903	0
432	5	0	0	0	0	0	0	200	300	0	0	0	0	0	0	0	200	903	0	0	0	0	0	0	0	603	903	0
432	6	0	0	0	0	0	0	200	300	0	0	0	0	0	0	0	200	903	0	0	0	0	0	0	0	603	903	0
432	7	0	0	0	0	0	0	200	300	0	0	0	0	0	0	0	200	903	0	0	0	0	0	0	0	603	903	0
432	8	0	0	0	0	0	0	200	300	0	0	0	0	0	0	0	200	903	0	0	0	0	0	0	0	603	903	0
432	9	0	0	0	0	0	0	200	300	0	0	0	0	0	0	0	200	903	0	0	0	0	0	0	0	603	903	0
433	0	0	0	0	0	0	0	200	300	0	0	0	0	0	0	0	200	903	0	0	0	0	0	0	0	603	903	0
433	1	0	0	0	0	0	0	200	300	0	0	0	0	0	0	0	200	903	0	0	0	0	0	0	0	603	903	0
433	2	0	0	0	0	0	0	200	300	0	0	0	0	0	0	0	200	903	0	0	0	0	0	0	0	603	903	0
433	3	0	0	0	0	0	0	200	300	0	0	0	0	0	0	0	200	903	0	0	0	0	0	0	0	603	903	0
433	4	0	0	0	0	0	0	200	300	0	0	0	0	0	0	0	200	903	0	0	0	0	0	0	0	603	903	0
433	5	0	0	0	0	0	0	200	300	0	0	0	0	0	0	0	200	903	0	0	0	0	0	0	0	603	903	0
433	6	0	0	0	0	0	0	200	300	0	0	0	0	0	0	0	200	903	0	0	0	0	0	0	0	603	903	0
433	7	0	0	0	0	0	0	200	300	0	0	0	0	0	0	0	200	903	0	0	0	0	0	0	0	603	903	0
433	8	0	0	0	0	0	0	200	300	0	0	0	0	0	0	0	200	903	0	0	0	0	0	0	0	603	903	0
433	9	0	0	0	0	0	0	200	300	0	0	0	0	0	0	0	200	903	0	0	0	0	0	0	0	603	903	0
434	0	0	0	0	0	0	0	200	300	0	0	0	0	0	0	0	200	903	0	0	0	0	0	0	0	603	903	0
434	1	0	0	0	0	0	0	200	300	0	0	0	0	0	0	0	200	903	0	0	0	0	0	0	0	603	903	0
434	2	0	0	0	0	0	0	200	300	0	0	0	0	0	0	0	200	903	0	0	0	0	0	0	0	603	903	0
434	3	0	0	0	0	0	0	200	300	0	0	0	0	0	0	0	200	903	0	0	0	0	0	0	0	603	903	0
434	4	0	0	0	0	0	0	200	300	0	0	0	0	0	0	0	200	903	0	0	0	0	0	0	0	603	903	0
434	5	0	0	0	0	0	0	200	300	0	0	0	0	0	0	0	200	903	0	0	0	0	0	0	0	603	903	0
434	6	0	0	0	0	0	0	200	300	0	0	0	0	0	0	0	200	903	0	0	0	0	0	0	0	603	903	0
434	7	0	0	0	0	0	0	200	300	0	0	0	0	0	0	0	200	903	0	0	0	0	0	0	0	603	903	0
434	8	0	0	0	0	0	0	200	300	0	0	0	0	0	0	0	200	903	0	0	0	0	0	0	0	603	903	0
434	9	0	0	0	0	0	0	200	300	0	0	0	0	0	0	0	200	903	0	0	0	0	0	0	0	603	903	0
435	0	0	0	0	0	0	0	200	300	0	0	0	0	0	0	0	200	903	0	0	0	0	0	0	0	603	903	0
435	1	0	0	0	0	0	0	200	300	0	0	0	0	0	0	0	200	903	0	0	0	0	0	0	0	603	903	0
435	2	0	0	0	0	0	0	200	300	0	0	0	0	0	0	0	200	903	0	0	0	0	0	0	0	603	903	0
435	3	0	0	0	0	0	0	200	300	0	0	0	0	0	0	0	200	903	0	0	0	0	0	0	0	603	903	0
435	4	0	0	0	0	0	0	200	300	0	0	0	0	0	0	0	200	903	0	0	0	0	0	0	0	603	903	0
435	5	0	0	0	0	0	0	200	300	0	0	0	0	0	0	0	200	903	0	0	0	0	0	0	0	603	903	0
435	6	0	0	0	0	0	0	200	300	0	0	0	0	0	0	0	200	903	0	0	0	0	0	0	0	603	903	0
435	7	0	0	0	0	0	0	200	300	0	0	0	0	0	0	0	200	903	0	0	0	0	0	0	0	603	903	0
435	8	0	0	0	0	0	0	200	300	0	0	0	0	0	0	0	200	903	0	0	0	0	0	0	0	603	903	0
435	9	0	0	0	0	0	0	200	300	0	0	0	0	0	0	0	200	903	0	0	0	0	0	0	0	603	903	0
436	0	0	0	0	0	0	0	200	300	0	0	0	0	0	0	0	200	903	0	0	0	0	0	0	0	603	903	0
436	1	0	0	0	0	0	0	200	300	0	0	0	0	0	0	0	200	903	0	0	0	0	0	0	0	603	903	0
436	2	0	0	0	0	0	0	200	300	0	0	0	0	0	0	0	200	903	0	0	0	0	0	0	0	603	903	0
436	3	0	0	0	0	0	0	200	300	0	0	0	0	0	0	0	200	903	0	0	0	0	0	0	0	603	903	0
436	4	0	0	0	0	0	0	200	300	0	0	0	0	0	0	0	200	903	0	0	0	0	0	0	0	603	903	0
436	5	0	0	0	0	0	0	200	300	0	0	0	0	0	0	0	200	903	0	0	0	0	0	0	0	603	903	0
436	6	0	0	0	0	0	0	200	300	0	0	0	0	0	0	0	200	903	0	0	0	0	0	0	0	603	903	0
436	7	0	0	0	0	0	0	200	300	0	0	0	0	0	0	0	200	903	0	0	0	0	0	0	0	603	903	0
436	8	0	0	0	0	0	0	200	300	0	0	0	0	0	0	0	200	903	0	0	0	0	0	0	0	603	903	0
436	9	0	0	0	0	0	0	200	300	0	0	0	0	0	0	0	200	903	0	0	0	0	0	0	0	603	903	0
437	0	0	0	0	0	0	0	200	300	0	0	0	0	0	0	0	200	903	0	0	0	0	0	0	0	603	903	0
437	1	0	0	0	0	0	0	200	300	0	0	0	0	0	0	0	200	903	0	0	0	0	0	0	0	603	903	0
437	2	0	0	0	0	0	0	200	300	0	0	0	0	0	0	0	200	903	0	0	0	0	0	0	0	603	903	0
437	3	0	0	0	0	0	0	200	300	0	0	0	0	0	0	0	200	903	0	0	0	0	0	0	0	603	903	0
437	4	0	0	0	0	0	0	200	300	0	0	0	0	0	0	0	200	903	0	0	0	0	0	0	0	603	903	0
437	5	0	0	0	0	0	0	200	300	0	0	0	0	0	0	0	200	903	0	0	0	0	0	0	0	603	903	0
437	6	0	0	0	0	0	0	200	300	0	0	0	0	0	0	0	200	903	0	0	0	0	0	0	0	603	903	0
437	7	0	0	0	0	0	0	200	300	0	0	0	0	0	0	0	200	903	0	0	0	0	0	0	0	603	903	0
437	8	0	0	0	0	0	0	200	300	0	0	0	0	0	0	0	200	903	0	0	0	0	0	0	0	603	903	0
437	9	0	0	0	0	0	0	200	300	0	0	0	0	0	0	0	200	903	0	0	0	0	0	0	0	603	903	0
438	0	0	0	0	0	0	0	200	300	0	0	0	0	0	0	0	200	903	0	0	0	0	0	0	0	603	903	0
438	1	0	0	0	0	0	0	200	300	0	0	0	0	0	0	0	200	903	0	0	0	0	0	0	0	603	903	0
438	2	0	0	0	0	0	0	200	300	0	0	0	0	0	0	0	200	903	0	0	0	0	0	0	0	603	903	0
438	3	0	0	0	0	0	0	200	300	0	0	0	0	0	0	0	200	903	0	0	0	0	0	0	0	603	903	0
438	4	0	0	0	0	0	0	200	300	0	0	0	0	0	0	0	200	903	0	0	0	0	0	0	0	603	903	0
438	5	0	0	0	0	0	0	200	300	0	0	0	0	0	0	0	200	903	0	0	0	0	0	0	0	603	903	0
438	6	0	0	0	0	0	0	200	300	0	0	0	0	0	0	0	200	903	0	0	0	0	0	0	0	603	903	0
438	7	0	0	0	0	0	0	200	300	0	0	0	0	0	0	0	200	903	0	0	0	0	0	0	0	603	903	0
438	8	0	0	0	0	0	0	200	300	0	0	0	0	0	0	0	200	903	0	0	0	0	0	0	0	603	903	0
438	9	0	0	0	0	0	0	200	300	0	0	0	0	0	0	0	200	903	0	0	0	0	0	0	0	603	903	0
439	0	0	0	0	0	0	0	200	300	0	0	0	0	0	0	0	200	903	0	0	0	0	0	0	0	603	903	0
439	1	0	0	0	0	0	0	200	300	0	0	0	0	0	0	0	200	903	0	0	0	0	0	0	0	603	903	0
439	2	0	0	0	0	0	0	200	300	0	0	0	0	0	0	0	200	903	0	0	0	0	0	0	0	603	903	0
439	3	0	0	0	0	0	0	200	300	0	0	0	0	0	0	0	200	903	0	0	0	0	0	0	0	603	903	0
439	4	0	0	0	0	0	0	200	300	0	0	0	0	0	0	0	200	903	0	0	0	0	0	0	0	603	903	0
439	5	0	0	0	0	0	0	200	300	0	0	0	0	0	0	0	200	903	0	0	0	0	0	0	0	603	903	0
439	6	0	0	0	0	0	0	200	300	0	0	0	0	0	0	0	200	903	0	0	0	0	0	0	0	603	903	0
439	7	0	0	0	0	0	0	200	300	0	0	0	0	0	0	0	200	903	0	0	0	0	0	0	0	603	903	0
439	8	0	0	0	0	0	0	200	300	0	0	0	0	0	0	0	200	903	0	0	0	0	0	0	0	603	903	0
439	9	0	0	0	0	0	0	200	300	0	0	0	0	0	0	0	200	903	0	0	0	0	0	0	0	603	903	0
440	0	0	0	0	0	0	0	200	300	0	0	0	0	0	0	0	200	903	0	0	0	0	0	0	0	603	903	0
440	1	0	0	0	0	0	0	200	300	0	0	0	0	0	0	0	200	903	0	0	0	0	0	0	0	603	903	0
440	2	0	0	0	0	0	0	200	300	0	0	0	0	0	0	0	200	903	0	0	0	0	0	0	0	603	903	0
440	3	0	0	0	0	0	0	200	300	0	0	0	0	0	0	0	200	903	0	0	0	0	0	0	0	603	903	0
440	4	0	0	0	0	0	0	200	300	0	0	0	0	0	0	0	200	903	0	0	0	0	0	0	0	603	903	0
440	5	0	0	0	0	0	0	200	300	0	0	0	0	0	0	0	200	903	0	0	0	0	0	0	0	603	903	0
440	6	0	0	0	0	0	0	200	300	0	0	0	0	0	0	0	200	903	0	0	0	0	0	0	0	603	903	0
440	7	0	0	0	0	0	0	200	300	0	0	0	0	0	0	0	200	903	0	0	0	0	0	0	0	603	903	0
440	8	0	0	0	0	0	0	200	300	0	0	0	0	0	0	0	200	903	0	0	0	0	0	0	0	603	903	0
440	9	0	0	0	0	0	0	200	300	0	0	0	0	0	0	0	200	903	0	0	0	0	0	0	0	603	903	0
441	0	0	0	0	0	0	0	200	300	0	0	0	0	0	0	0	200	903	0	0	0	0	0	0	0	603	903	0
441	1	0	0	0	0	0	0	200	300	0	0	0	0	0	0	0	200	903	0	0	0	0	0	0	0	603	903	0
441	2	0	0	0	0	0	0	200	300	0	0	0	0	0	0	0	200	903	0	0	0	0	0	0	0	603	903	0
441	3	0	0	0	0	0	0	200	300	0	0	0	0	0	0	0	200	903	0	0	0	0	0	0	0	603	903	0
441	4	0	0	0	0	0	0	200	300	0	0	0	0	0	0	0	200	903	0	0	0	0	0	0	0	603	903	0
441	5	0	0	0	0	0	0	200	300	0	0	0	0	0	0	0	200	903	0	0	0	0	0	0	0	603	903	0
441	6	0	0	0	0	0	0	200	300	0	0	0	0	0	0	0	200	903	0	0	0	0	0	0	0	603	903	0
441	7	0	0	0	0	0	0	200	300	0	0	0	0	0	0	0	200	903	0	0	0	0	0	0	0	603	903	0
441	8	0	0	0	0	0	0	200	300	0	0	0	0	0	0	0	200	903	0	0	0	0	0	0	0	603	903	0
441	9	0	0	0	0	0	0	200	300	0	0	0	0	0	0	0	200	903	0	0	0	0	0	0	0	603	903	0
442	0	0	0	0	0	0	0	200	300	0	0	0	0	0	0	0	200	903	0	0	0	0	0	0	0	603	903	0
442	1	0	0	0	0	0	0	200	300	0	0	0	0	0	0	0	200	903	0	0	0	0	0	0	0	603	903	0
442	2	0	0	0	0	0	0	200	300	0	0	0	0	0	0	0	200	903	0	0	0	0	0	0	0	603	903	0
442	3	0	0	0	0	0	0	200	300	0	0	0	0	0	0	0	200	903	0	0	0	0	0	0	0	603	903	0
442	4	0	0	0	0	0	0	200	300	0	0	0	0	0	0	0	200	903	0	0	0	0	0	0	0	603	903	0
442	5	0	0	0	0	0	0	200	300	0	0	0	0	0	0	0	200	903	0	0	0	0	0	0	0	603	903	0
442	6	0	0	0	0	0	0	200	300	0	0	0	0	0	0	0	200	903	0	0	0	0	0	0	0	603	903	0
442	7	0	0	0	0	0	0	200	300	0	0	0	0	0	0	0	200	903	0	0	0	0	0	0	0	603	903	0
442	8	0	0	0	0	0	0	200	300	0	0	0	0	0	0	0	200	903	0	0	0	0	0	0	0	603	903	0
442	9	0	0	0	0	0	0	200	300	0	0	0	0	0	0	0	200	903	0	0	0	0	0	0	0	603	903	0
443	0	0	0	0	0	0	0	200	300	0	0	0	0	0	0	0	200	903	0	0	0	0	0	0	0	603	903	0
443	1	0	0	0	0	0	0	200	300	0	0	0	0	0	0	0	200	903	0	0	0	0	0	0	0	603	903	0
443	2	0	0	0	0	0	0	200	300	0	0	0	0	0	0	0	200	903	0	0	0	0	0	0	0	603	903	0
443	3	0	0	0	0	0	0	200	300	0	0	0	0	0	0	0	200	903	0	0	0	0	0	0	0	603	903	0
443	4	0	0	0	0	0	0	200	300	0	0	0	0	0	0	0	200	903	0	0	0	0	0	0	0	603	903	0
443	5	0	0	0	0	0	0	200	300	0	0	0	0	0	0	0	200	903	0	0	0	0	0	0	0	603	903	0
443	6	0	0	0	0	0	0	200	300	0	0	0	0	0	0	0	200	903	0	0	0	0	0	0	0	603	903	0
443	7	0	0	0	0	0	0	200	300	0	0	0	0	0	0	0	200	903	0	0	0	0	0	0	0	603	903	0
443	8	0	0	0	0	0	0	200	300	0	0	0	0	0	0	0	200	903	0	0	0	0	0	0	0	603	903	0
443	9	0	0	0	0	0	0	200	300	0	0	0	0	0	0	0	200	903	0	0	0	0	0	0	0	603	903	0
444	0	0	0	0	0	0	0	200	300	0	0	0	0	0	0	0	200	903	0	0	0	0	0	0	0	603	903	0
444	1	0	0	0	0	0	0	200	300	0	0	0	0	0	0	0	200	903	0	0	0	0	0	0	0	603	903	0
444	2	0	0	0	0	0	0	200	300	0	0	0	0	0	0	0	200	903	0	0	0	0	0	0	0	603	903	0
444	3	0	0	0	0	0	0	200	300	0	0	0	0	0	0	0	200	903	0	0	0	0	0	0	0	603	903	0
444	4	0	0	0	0	0	0	200	300	0	0	0	0	0	0	0	200	903	0	0	0	0	0	0	0	603	903	0
444	5	0	0	0	0	0	0	200	300	0	0	0	0	0	0	0	200	903	0	0	0	0	0	0	0	603	903	0
444	6	0	0	0	0	0	0	200	300	0	0	0	0	0	0	0	200	903	0	0	0	0	0	0	0	603	903	0
444	7	0	0	0	0	0	0	200	300	0	0	0	0	0	0	0	200	903	0	0	0	0	0	0	0	603	903	0
444	8	0	0	0	0	0	0	200	300	0	0	0	0	0	0	0	200	903	0	0	0	0	0	0	0	603	903	0
444	9	0	0	0	0	0	0	200	300	0	0	0	0	0	0	0	200	903	0	0	0	0	0	0	0	603	903	0
445	0	0	0	0	0	0	0	200	300	0	0	0	0	0	0	0	200	903	0	0	0	0	0	0	0	603	903	0
445	1	0	0	0	0	0	0	200	300	0	0	0	0	0	0	0	200	903	0	0	0	0	0	0	0	603	903	0
445	2	0	0	0	0	0	0	200	300	0	0	0	0	0	0	0	200	903	0	0	0	0	0	0	0	603	903	0
445	3	0	0	0	0	0	0	200	300	0	0	0	0	0	0	0	200	903	0	0	0	0	0	0	0	603	903	0
445	4	0	0	0	0	0	0	200	300	0	0	0	0	0	0	0	200	903	0	0	0	0	0	0	0	603	903	0
445	5	0	0	0	0	0	0	200	300	0	0	0	0	0	0	0	200	903	0	0	0	0	0	0	0	603	903	0
445	6	0	0	0	0	0	0	200	300	0	0	0	0	0	0	0	200	903	0	0	0	0	0	0	0	603	903	0
445	7	0	0	0	0	0	0	200	300	0	0	0	0	0	0	0	200	903	0	0	0	0	0	0	0	603	903	0
445	8	0	0	0	0	0	0	200	300	0	0	0	0	0	0	0	200	903	0	0	0	0	0	0	0	603	903	0
445	9	0	0	0	0	0	0	200	300	0	0	0	0	0	0	0	200	903	0	0	0	0	0	0	0	603	903	0
446	0	0	0	0	0	0	0	200	300	0	0	0	0	0	0	0	200	903	0	0	0	0	0	0	0	603	903	0
446	1	0	0	0	0	0	0	200	300	0	0	0	0	0	0	0	200	903	0	0	0	0	0	0	0	603	903	0
446	2	0	0	0	0	0	0	200	300	0	0	0	0	0	0	0	200	903	0	0	0	0	0	0	0	603	903	0
446	3	0	0	0	0	0	0	200	300	0	0	0	0	0	0	0	200	903	0	0	0	0	0	0	0	603	903	0
446	4	0	0	0	0	0	0	200	300	0	0	0	0	0	0	0	200	903	0	0	0	0	0	0	0	603	903	0
446	5	0	0	0	0	0	0	200	300	0	0	0	0	0	0	0	200	903	0	0	0	0	0	0	0	603	903	0
446	6	0	0	0	0	0	0	200	300	0	0	0	0	0	0	0	200	903	0	0	0	0	0	0	0	603	903	0
446	7	0	0	0	0	0	0	200	300	0	0	0	0	0	0	0	200	903	0	0	0	0	0	0	0	603	903	0
446	8	0	0	0	0	0	0	200	300	0	0	0	0	0	0	0	200	903	0	0	0	0	0	0	0	603	903	0
446	9	0	0	0	0	0	0	200	300	0	0	0	0	0	0	0	200	903	0	0	0	0	0	0	0	603	903	0
447	0	0	0	0	0	0	0	200	300	0	0	0	0	0	0	0	200	903	0	0	0	0	0	0	0	603	903	0
447	1	0	0	0	0	0	0	200	300	0	0	0	0	0	0	0	200	903	0	0	0	0	0	0	0	603	903	0
447	2	0	0	0	0	0	0	200	300	0	0	0	0	0	0	0	200	903	0	0	0	0	0	0	0	603	903	0
447	3	0	0	0	0	0	0	200	300	0	0	0	0	0	0	0	200	903	0	0	0	0	0	0	0	603	903	0
447	4	0	0	0	0	0	0	200	300	0	0	0	0	0	0	0	200	903	0	0	0	0	0	0	0	603	903	0
447	5	0	0	0	0	0	0	200	300	0	0	0	0	0	0	0	200	903	0	0	0	0	0	0	0	603	903	0
447	6	0	0	0	0	0	0	200	300	0	0	0	0	0	0	0	200	903	0	0	0	0	0	0	0	603	903	0
447	7	0	0	0	0	0	0	200	300	0	0	0	0	0	0	0	200	903	0	0	0	0	0	0	0	603	903	0
447	8	0	0	0	0	0	0	200	300	0	0	0	0	0	0	0	200	903	0	0	0	0	0	0	0	603	903	0
447	9	0	0	0	0	0	0	200	300	0	0	0	0	0	0	0	200	903	0	0	0	0	0	0	0	603	903	0
448	0	0	0	0	0	0	0	200	300	0	0	0	0	0	0	0	200	903	0	0	0	0	0	0	0	603	903	0
448	1	0	0	0	0	0	0	200	300	0	0	0	0	0	0	0	200	903	0	0	0	0	0	0	0	603	903	0
448	2	0	0	0	0	0	0	200	300	0	0	0	0	0	0	0	200	903	0	0	0	0	0	0	0	603	903	0
448	3	0	0	0	0	0	0	200	300	0	0	0	0	0	0	0	200	903	0	0	0	0	0	0	0	603	903	0
448	4	0	0	0	0	0	0	200	300	0	0	0	0	0	0	0	200	903	0	0	0	0	0	0	0	603	903	0
448	5	0	0	0	0	0	0	200	300	0	0	0	0	0	0	0	200	903	0	0	0	0	0	0	0	603	903	0
448	6	0	0	0	0	0	0	200	300	0	0	0	0	0	0	0	200	903	0	0	0	0	0	0	0	603	903	0
448	7	0	0	0	0	0	0	200	300	0	0	0	0	0	0	0	200	903	0	0	0	0	0	0	0	603	903	0
448	8	0	0	0	0	0	0	200	300	0	0	0	0	0	0	0	200	903	0	0	0	0	0	0	0	603	903	0
448	9	0	0	0	0	0	0	200	300	0	0	0	0	0	0	0	200	903	0	0	0	0	0	0	0	603	903	0
449	0	0	0	0	0	0	0	200	300	0	0	0	0	0	0	0	200	903	0	0	0	0	0	0	0	603	903	0
449	1	0	0	0	0	0	0	200	300	0	0	0	0	0	0	0	200	903	0	0	0	0	0	0	0	603	903	0
449	2	0	0	0	0	0	0	200	300	0	0	0	0	0	0	0	200	903	0	0	0	0	0	0	0	603	903	0
449	3	0	0	0	0	0	0	200	300	0	0	0	0	0	0	0	200	903	0	0	0	0	0	0	0	603	903	0
449	4	0	0	0	0	0	0	200	300	0	0	0	0	0	0	0	200	903	0	0	0	0	0	0	0	603	903	0
449	5	0	0	0	0	0	0	200	300	0	0	0	0	0	0	0	200	903	0	0	0	0	0	0	0	603	903	0
449	6	0	0	0	0	0	0	200	300	0	0	0	0	0	0	0	200	903	0	0	0	0	0	0	0	603	903	0
449	7	0	0	0	0	0	0	200	300	0	0	0	0	0	0	0	200	903	0	0	0	0	0	0	0	603	903	0
449	8	0	0	0	0	0	0	200	300	0	0	0	0	0	0	0	200	903	0	0	0	0	0	0	0	603	903	0
449	9	0	0	0	0	0	0	200	300	0	0	0	0	0	0	0	200	903	0	0	0	0	0	0	0	603	903	0
450	0	0	0	0	0	0	0	200	300	0	0	0	0	0	0	0	200	903	0	0	0	0	0	0	0	603	903	0
450	1	0	0	0	0	0	0	200	300	0	0	0	0	0	0	0	200	903	0	0	0	0	0	0	0	603	903	0
450	2	0	0	0	0	0	0	200	300	0	0	0	0	0	0	0	200	903	0	0	0	0	0	0	0	603	903	0
450	3	0	0	0	0	0	0	200	300	0	0	0	0	0	0	0	200	903	0	0	0	0	0	0	0	603	903	0
450	4	0	0	0	0	0	0	200	300	0	0	0	0	0	0	0	200	903	0	0	0	0	0	0	0	603	903	0
450	5	0	0	0	0	0	0	200	300	0	0	0	0	0	0	0	200	903	0	0	0	0	0	0	0	603	903	0
450	6	0	0	0	0	0	0	200	300	0	0	0	0	0	0	0	200	903	0	0	0	0	0	0	0	603	903	0
450	7	0	0	0	0	0	0	200	300	0	0	0	0	0	0	0	200	903	0	0	0	0	0	0	0	603	903	0
450	8	0	0	0	0	0	0	200	300	0	0	0	0	0	0	0	200	903	0	0	0	0	0	0	0	603	903	0
450	9	0	0	0	0	0	0	200	300	0	0	0	0	0	0	0	200	903	0	0	0	0	0	0	0	603	903	0
451	0	0	0	0	0	0	0	200	300	0	0	0	0	0	0	0	200	903	0	0	0	0	0	0	0	603	903	0
451	1	0	0	0	0	0	0	200	300	0	0	0	0	0	0	0	200	903	0	0	0	0	0	0	0	603	903	0
451	2	0	0	0	0	0	0	200	300	0	0	0	0	0	0	0	200	903	0	0	0	0	0	0	0	603	903	0
451	3	0	0	0	0	0	0	200	300	0	0	0	0	0	0	0	200	903	0	0	0	0	0	0	0	603	903	0
451	4	0	0	0	0	0	0	200	300	0	0	0	0	0	0	0	200	903	0	0	0	0	0	0	0	603	903	0
451	5	0	0	0	0	0	0	200	300	0	0	0	0	0	0	0	200	903	0	0	0	0	0	0	0	603	903	0
451	6	0	0	0	0	0	0	200	300	0	0	0	0	0	0	0	200	903	0	0	0	0	0	0	0	603	903	0
451	7	0	0	0	0	0	0	200	300	0	0	0	0	0	0	0	200	903	0	0	0	0	0	0	0	603	903	0
451	8	0	0	0	0	0	0	200	300	0	0	0	0	0	0	0	200	903	0	0	0	0	0	0	0	603	903	0
451	9	0	0	0	0	0	0	200	300	0	0	0	0	0	0	0	200	903	0	0	0	0	0	0	0	603	903	0
452	0	0	0	0	0	0	0	200	300	0	0	0	0	0	0	0	200	903	0	0	0	0	0	0	0	603	903	0
452	1	0	0	0	0	0	0	200	300	0	0	0	0	0	0	0	200	903	0	0	0	0	0	0	0	603	903	0
452	2	0	0	0	0	0	0	200	300	0	0	0	0	0	0	0	200	903	0	0	0	0	0	0	0	603	903	0
452	3	0	0	0	0	0	0	200	300	0	0	0	0	0	0	0	200	903	0	0	0	0	0	0	0	603	903	0
452	4	0	0	0	0	0	0	200	300	0	0	0	0	0	0	0	200	903	0	0	0	0	0	0	0	603	903	0
452	5	0	0	0	0	0	0	200	300	0	0	0	0	0	0	0	200	903	0	0	0	0	0	0	0	603	903	0
452	6	0	0	0	0	0	0	200	300	0	0	0	0	0	0	0	200	903	0	0	0	0	0	0	0	603	903	0
452	7	0	0	0	0	0	0	200	300	0	0	0	0	0	0	0	200	903	0	0	0	0	0	0	0	603	903	0
452	8	0	0	0	0	0	0	200	300	0	0	0	0	0	0	0	200	903	0	0	0	0	0	0	0	603	903	0
452	9	0	0	0	0	0	0	200	300	0	0	0	0	0	0	0	200	903	0	0	0	0	0	0	0	603	903	0
453	0	0	0	0	0	0	0	200	300	0	0	0	0	0	0	0	200	903	0	0	0	0	0	0	0	603	903	0
453	1	0	0	0	0	0	0	200	300	0	0	0	0	0	0	0	200	903	0	0	0	0	0	0	0	603	903	0
453	2	0	0	0	0	0	0	200	300	0	0	0	0	0	0	0	200	903	0	0	0	0	0	0	0	603	903	0
453	3	0	0	0	0	0	0	200	300	0	0	0	0	0	0	0	200	903	0	0	0	0	0	0	0	603	903	0
453	4	0	0	0	0	0	0	200	300	0	0	0	0	0	0	0	200	903	0	0	0	0	0	0	0	603	903	0
453	5	0	0	0	0	0	0	200	300	0	0	0	0	0	0	0	200	903	0	0	0	0	0	0	0	603	903	0
453	6	0	0	0	0	0	0	200	300	0	0	0	0	0	0	0	200	903	0	0	0	0	0	0	0	603	903	0
453	7	0	0	0	0	0	0	200	300	0	0	0	0	0	0	0	200	903	0	0	0	0	0	0	0	603	903	0
453	8	0	0	0	0	0	0	200	300	0	0	0	0	0	0	0	200	903	0	0	0	0	0	0	0	603	903	0
453	9	0	0	0	0	0	0	200	300	0	0	0	0	0	0	0	200	903	0	0	0	0	0	0	0	603	903	0
454	0	0	0	0	0	0	0	200	300	0	0	0	0	0	0	0	200	903	0	0	0	0	0	0	0	603	903	0
454	1	0	0	0	0	0	0	200	300	0	0	0	0	0	0	0	200	903	0	0	0	0	0	0	0	603	903	0
454	2	0	0	0	0	0	0	200	300	0	0	0	0	0	0	0	200	903	0	0	0	0	0	0	0	603	903	0
454	3	0	0	0	0	0	0	200	300	0	0	0	0	0	0	0	200	903	0	0	0	0	0	0	0	603	903	0
454	4	0	0	0	0	0	0	200	300	0	0	0	0	0	0	0	200	903	0	0	0	0	0	0	0	603	903	0
454	5	0	0	0	0	0	0	200	300	0	0	0	0	0	0	0	200	903	0	0	0	0	0	0	0	603	903	0
454	6	0	0	0	0	0	0	200	300	0	0	0	0	0	0	0	200	903	0	0	0	0	0	0	0	603	903	0
454	7	0	0	0	0	0	0	200	300	0	0	0	0	0	0	0	200	903	0	0	0	0	0	0	0	603	903	0
454	8	0	0	0	0	0	0	200	300	0	0	0	0	0	0	0	200	903	0	0	0	0	0	0	0	603	903	0
454	9	0	0	0	0	0	0	200	300	0	0	0	0	0	0	0	200	903	0	0	0	0	0	0	0	603	903	0
455	0	0	0	0	0	0	0	200	300	0	0	0	0	0	0	0	200	903	0	0	0	0	0	0	0	603	903	0
455	1	0	0	0	0	0	0	200	300	0	0	0	0	0	0	0	200	903	0	0	0	0	0	0	0	603	903	0
455	2	0	0	0	0	0	0	200	300	0	0	0	0	0	0	0	200	903	0	0	0	0	0	0	0	603	903	0
455	3	0	0	0	0	0	0	200	300	0	0	0	0	0	0	0	200	903	0	0	0	0	0	0	0	603	903	0
455	4	0	0	0	0	0	0	200	300	0	0	0	0	0	0	0	200	903	0	0	0	0	0	0	0	603	903	0
455	5	0	0	0	0	0	0	200	300	0	0	0	0	0	0	0	200	903	0	0	0	0	0	0	0	603	903	0
455	6	0	0	0	0	0	0	200	300	0	0	0	0	0	0	0	200	903	0	0	0	0	0	0	0	603	903	0
455	7	0	0	0	0	0	0	200	300	0	0	0	0	0	0	0	200	903	0	0	0	0	0	0	0	603	903	0
455	8	0	0	0	0	0	0	200	300	0	0	0	0	0	0	0	200	903	0	0	0	0	0	0	0	603	903	0
455	9	0	0	0	0	0	0	200	300	0	0	0	0	0	0	0	200	903	0	0	0	0	0	0	0	603	903	0
456	0	0	0	0	0	0	0	200	300	0	0	0	0	0	0	0	200	903	0	0	0	0	0	0	0	603	903	0
456	1	0	0	0	0	0	0	200	300	0	0	0	0	0	0	0	200	903	0	0	0	0	0	0	0	603	903	0
456	2	0	0	0	0	0	0	200	300	0	0	0	0	0	0	0	200	903	0	0	0	0	0	0	0	603	903	0
456	3	0	0	0	0	0	0	200	300	0	0	0	0	0	0	0	200	903	0	0	0	0	0	0	0	603	903	0
456	4	0	0	0	0	0	0	200	300	0	0	0	0	0	0	0	200	903	0	0	0	0	0	0	0	603	903	0
456	5	0	0	0	0	0	0	200	300	0	0	0	0	0	0	0	200	903	0	0	0	0	0	0	0	603	903	0
456	6	0	0	0	0	0	0	200	300	0	0	0	0	0	0	0	200	903	0	0	0	0	0	0	0	603	903	0
456	7	0	0	0	0	0	0	200	300	0	0	0	0	0	0	0	200	903	0	0	0	0	0	0	0	603	903	0
456	8	0	0	0	0	0	0	200	300	0	0	0	0	0	0	0	200	903	0	0	0	0	0	0	0	603	903	0
456	9	0	0	0	0	0	0	200	300	0	0	0	0	0	0	0	200	903	0	0	0	0	0	0	0	603	903	0
457	0	0	0	0	0	0	0	200	300	0	0	0	0	0	0	0	200	903	0	0	0	0	0	0	0	603	903	0
457	1	0	0	0	0	0	0	200	300	0	0	0	0	0	0	0	200	903	0	0	0	0	0	0	0	603	903	0
457	2	0	0	0	0	0	0	200	300	0	0	0	0	0	0	0	200	903	0	0	0	0	0	0	0	603	903	0
457	3	0	0	0	0	0	0	200	300	0	0	0	0	0	0	0	200	903	0	0	0	0	0	0	0	603	903	0
457	4	0	0	0	0	0	0	200	300	0	0	0	0	0	0	0	200	903	0	0	0	0	0	0	0	603	903	0
457	5	0	0	0	0	0	0	200	300	0	0	0	0	0	0	0	200	903	0	0	0	0	0	0	0	603	903	0
457	6	0	0	0	0	0	0	200	300	0	0	0	0	0	0	0	200	903	0	0	0	0	0	0	0	603	903	0
457	7	0	0	0	0	0	0	200	300	0	0	0	0	0	0	0	200	903	0	0	0	0	0	0	0	603	903	0
457	8	0	0	0	0	0	0	200	300	0	0	0	0	0	0	0	200	903	0	0	0	0	0	0	0	603	903	0
457	9	0	0	0	0	0	0	200	300	0	0	0	0	0	0	0	200	903	0	0	0	0	0	0	0	603	903	0
458	0	0	0	0	0	0	0	200	300	0	0	0	0	0	0	0	200	903	0	0	0	0	0	0	0	603	903	0
458	1	0	0	0	0	0	0	200	300	0	0	0	0	0	0	0	200	903	0	0	0	0	0	0	0	603	903	0
458	2	0	0	0	0	0	0	200	300	0	0	0	0	0	0	0	200	903	0	0	0	0	0	0	0	603	903	0
458	3	0	0	0	0	0	0	200	300	0	0	0	0	0	0	0	200	903	0	0	0	0	0	0	0	603	903	0
458	4	0	0	0	0	0	0	200	300	0	0	0	0	0	0	0	200	903	0	0	0	0	0	0	0	603	903	0
458	5	0	0	0	0	0	0	200	300	0	0	0	0	0	0	0	200	903	0	0	0	0	0	0	0	603	903	0
458	6	0	0	0	0	0	0	200	300	0	0	0	0	0	0	0	200	903	0	0	0	0	0	0	0	603	903	0
458	7	0	0	0	0	0	0	200	300	0	0	0	0	0	0	0	200	903	0	0	0	0	0	0	0	603	903	0
458	8	0	0	0	0	0	0	200	300	0	0	0	0	0	0	0	200	903	0	0	0	0	0	0	0	603	903	0
458	9	0	0	0	0	0	0	200	300	0	0	0	0	0	0	0	200	903	0	0	0	0	0	0	0	603	903	0
459	0	0	0	0	0	0	0	200	300	0	0	0	0	0	0	0	200	903	0	0	0	0	0	0	0	603	903	0
459	1	0	0	0	0	0	0	200	300	0	0	0	0	0	0	0	200	903	0	0	0	0	0	0	0	603	903	0
459	2	0	0	0	0	0	0	200	300	0	0	0	0	0	0	0	200	903	0	0	0	0	0	0	0	603	903	0
459	3	0	0	0	0	0	0	200	300	0	0	0	0	0	0	0	200	903	0	0	0	0	0	0	0	603	903	0
459	4	0	0	0	0	0	0	200	300	0	0	0	0	0	0	0	200	903	0	0	0	0	0	0	0	603	903	0
459	5	0	0	0	0	0	0	200	300	0	0	0	0	0	0	0	200	903	0	0	0	0	0	0	0	603	903	0
459	6	0	0	0	0	0	0	200	300	0	0	0	0	0	0	0	200	903	0	0	0	0	0	0	0	603	903	0
459	7	0	0	0	0	0	0	200	300	0	0	0	0	0	0	0	200	903	0	0	0	0	0	0	0	603	903	0
459	8	0	0	0	0	0	0	200	300	0	0	0	0	0	0	0	200	903	0	0	0	0	0	0	0	603	903	0
459	9	0	0	0	0	0	0	200	300	0	0	0	0	0	0	0	200	903	0	0	0	0	0	0	0	603	903	0
460	0	0	0	0	0	0	0	200	300	0	0	0	0	0	0	0	200	903	0	0	0	0	0	0	0	603	903	0
460	1	0	0	0	0	0	0	200	300	0	0	0	0	0	0	0	200	903	0	0	0	0	0	0	0	603	903	0
460	2	0	0	0	0	0	0	200	300	0	0	0	0	0	0	0	200	903	0	0	0	0	0	0	0	603	903	0
460	3	0	0	0	0	0	0	200	300	0	0	0	0	0	0	0	200	903	0	0	0	0	0	0	0	603	903	0
460	4	0	0	0	0	0	0	200	300	0	0	0	0	0	0	0	200	903	0	0	0	0	0	0	0	603	903	0
460	5	0	0	0	0	0	0	200	300	0	0	0	0	0	0	0	200	903	0	0	0	0	0	0	0	603	903	0
460	6	0	0	0	0	0	0	200	300	0	0	0	0	0	0	0	200	903	0	0	0	0	0	0	0	603	903	0
460	7	0	0	0	0	0	0	200	300	0	0	0	0	0	0	0	200	903	0	0	0	0	0	0	0	603	903	0
460	8	0	0	0	0	0	0	200	300	0	0	0	0	0	0	0	200	903	0	0	0	0	0	0	0	603	903	0
460	9	0	0	0	0	0	0	200	300	0	0	0	0	0	0	0	200	903	0	0	0	0	0	0	0	603	903	0
461	0	0	0	0	0	0	0	200	300	0	0	0	0	0	0	0	200	903	0	0	0	0	0	0	0	603	903	0
461	1	0	0	0	0	0	0	200	300	0	0	0	0	0	0	0	200	903	0	0	0	0	0	0	0	603	903	0
461	2	0	0	0	0	0	0	200	300	0	0	0	0	0	0	0	200	903	0	0	0	0	0	0	0	603	903	0
461	3	0	0	0	0	0	0	200	300	0	0	0	0	0	0	0	200	903	0	0	0	0	0	0	0	603	903	0
461	4	0	0	0	0	0	0	200	300	0	0	0	0	0	0	0	200	903	0	0	0	0	0	0	0	603	903	0
461	5	0	0	0	0	0	0	200	300	0	0	0	0	0	0	0	200	903	0	0	0	0	0	0	0	603	903	0
461	6	0	0	0	0	0	0	200	300	0	0	0	0	0	0	0	200	903	0	0	0	0	0	0	0	603	903	0
461	7	0	0	0	0	0	0	200	300	0	0	0	0	0	0	0	200	903	0	0	0	0	0	0	0	603	903	0
461	8	0	0	0	0	0	0	200	300	0	0	0	0	0	0	0	200	903	0	0	0	0	0	0	0	603	903	0
461	9	0	0	0	0	0	0	200	300	0	0	0	0	0	0	0	200	903	0	0	0	0	0	0	0	603	903	0
462	0	0	0	0	0	0	0	200	300	0	0	0	0	0	0	0	200	903	0	0	0	0	0	0	0	603	903	0
462	1	0	0	0	0	0	0	200	300	0	0	0	0	0	0	0	200	903	0	0	0	0	0	0	0	603	903	0
462	2	0	0	0	0	0	0	200	300	0	0	0	0	0	0	0	200	903	0	0	0	0	0	0	0	603	903	0
462	3	0	0	0	0	0	0	200	300	0	0	0	0	0	0	0	200	903	0	0	0	0	0	0	0	603	903	0
462	4	0	0	0	0	0	0	200	300	0	0	0	0	0	0	0	200	903	0	0	0	0	0	0	0	603	903	0
462	5	0	0	0	0	0	0	200	300	0	0	0	0	0	0	0	200	903	0	0	0	0	0	0	0	603	903	0
462	6	0	0	0	0	0	0	200	300	0	0	0	0	0	0	0	200	903	0	0	0	0	0	0	0	603	903	0
462	7	0	0	0	0	0	0	200	300	0	0	0	0	0	0	0	200	903	0	0	0	0	0	0	0	603	903	0
462	8	0	0	0	0	0	0	200	300	0	0	0	0	0	0	0	200	903	0	0	0	0	0	0	0	603	903	0
462	9	0	0	0	0	0	0	200	300	0	0	0	0	0	0	0	200	903	0	0	0	0	0	0	0	603	903	0
463	0	0	0	0	0	0	0	200	300	0	0	0	0	0	0	0	200	903	0	0	0	0	0	0	0	603	903	0
463	1	0	0	0	0	0	0	200	300	0	0	0	0	0	0	0	200	903	0	0	0	0	0	0	0	603	903	0
463	2	0	0	0	0	0	0	200	300	0	0	0	0	0	0	0	200	903	0	0	0	0	0	0	0	603	903	0
463	3	0	0	0	0	0	0	200	300	0	0	0	0	0	0	0	200	903	0	0	0	0	0	0	0	603	903	0
463	4	0	0	0	0	0	0	200	300	0	0	0	0	0	0	0	200	903	0	0	0	0	0	0	0	603	903	0
463	5	0	0	0	0	0	0	200	300	0	0	0	0	0	0	0	200	903	0	0	0	0	0	0	0	603	903	0
463	6	0	0	0	0	0	0	200	300	0	0	0	0	0	0	0	200	903	0	0	0	0	0	0	0	603	903	0
463	7	0	0	0	0	0	0	200	300	0	0	0	0	0	0	0	200	903	0	0	0	0	0	0	0	603	903	0
463	8	0	0	0	0	0	0	200	300	0	0	0	0	0	0	0	200	903	0	0	0	0	0	0	0	603	903	0
463	9	0	0	0	0	0	0	200	300	0	0	0	0	0	0	0	200	903	0	0	0	0	0	0	0	603	903	0
464	0	0	0	0	0	0	0	200	300	0	0	0	0	0	0	0	200	903	0	0	0	0	0	0	0	603	903	0
464	1	0	0	0	0	0	0	200	300	0	0	0	0	0	0	0	200	903	0	0	0	0	0	0	0	603	903	0
464	2	0	0	0	0	0	0	200	300	0	0	0	0	0	0	0	200	903	0	0	0	0	0	0	0	603	903	0
464	3	0	0	0	0	0	0	200	300	0	0	0	0	0	0	0	200	903	0	0	0	0	0	0	0	603	903	0
464	4	0	0	0	0	0	0	200	300	0	0	0	0	0	0	0	200	903	0	0	0	0	0	0	0	603	903	0
464	5	0	0	0	0	0	0	200	300	0	0	0	0	0	0	0	200	903	0	0	0	0	0	0	0	603	903	0
464	6	0	0	0	0	0	0	200	300	0	0	0	0	0	0	0	200	903	0	0	0	0	0	0	0	603	903	0
464	7	0	0	0	0	0	0	200	300	0	0	0	0	0	0	0	200	903	0	0	0	0	0	0	0	603	903	0
464	8	0	0	0	0	0	0	200	300	0	0	0	0	0	0	0	200	903	0	0	0	0	0	0	0	603	903	0
464	9	0	0	0	0	0	0	200	300	0	0	0	0	0	0	0	200	903	0	0	0	0	0	0	0	603	903	0
465	0	0	0	0	0	0	0	200	300	0	0	0	0	0	0	0	200	903	0	0	0	0	0	0	0	603	903	0
465	1	0	0	0	0	0	0	200	300	0	0	0	0	0	0	0	200	903	0	0	0	0	0	0	0	603	903	0
465	2	0	0	0	0	0	0	200	300	0	0	0	0	0	0	0	200	903	0	0	0	0	0	0	0	603	903	0
465	3	0	0	0	0	0	0	200	300	0	0	0	0	0	0	0	200	903	0	0	0	0	0	0	0	603	903	0
465	4	0	0	0	0	0	0	200	300	0	0	0	0	0	0	0	200	903	0	0	0	0	0	0	0	603	903	0
465	5	0	0	0	0	0	0	200	300	0	0	0	0	0	0	0	200	903	0	0	0	0	0	0	0	603	903	0
465	6	0	0	0	0	0	0	200	300	0	0	0	0	0	0	0	200	903	0	0	0	0	0	0	0	603	903	0
465	7	0	0	0	0	0	0	200	300	0	0	0	0	0	0	0	200	903	0	0	0	0	0	0	0	603	903	0
465	8	0	0	0	0	0	0	200	300	0	0	0	0	0	0	0	200	903	0	0	0	0	0	0	0	603	903	0
465	9	0	0	0	0	0	0	200	300	0	0	0	0	0	0	0	200	903	0	0	0	0	0	0	0	603	903	0
466	0	0	0	0	0	0	0	200	300	0	0	0	0	0	0	0	200	903	0	0	0	0	0	0	0	603	903	0
466	1	0	0	0	0	0	0	200	300	0	0	0	0	0	0	0	200	903	0	0	0	0	0	0	0	603	903	0
466	2	0	0	0	0	0	0	200	300	0	0	0	0	0	0	0	200	903	0	0	0	0	0	0	0	603	903	0
466	3	0	0	0	0	0	0	200	300	0	0	0	0	0	0	0	200	903	0	0	0	0	0	0	0	603	903	0
466	4	0	0	0	0	0	0	200	300	0	0	0	0	0	0	0	200	903	0	0	0	0	0	0	0	603	903	0
466	5	0	0	0	0	0	0	200	300	0	0	0	0	0	0	0	200	903	0	0	0	0	0	0	0	603	903	0
466	6	0	0	0	0	0	0	200	300	0	0	0	0	0	0	0	200	903	0	0	0	0	0	0	0	603	903	0
466	7	0	0	0	0	0	0	200	300	0	0	0	0	0	0	0	200	903	0	0	0	0	0	0	0	603	903	0
466	8	0	0	0	0	0	0	200	300	0	0	0	0	0	0	0	200	903	0	0	0	0	0	0	0	603	903	0
466	9	0	0	0	0	0	0	200	300	0	0	0	0	0	0	0	200	903	0	0	0	0	0	0	0	603	903	0
467	0	0	0	0	0	0	0	200	300	0	0	0	0	0	0	0	200	903	0	0	0	0	0	0	0	603	903	0
467	1	0	0	0	0	0	0	200	300	0	0	0	0	0	0	0	200	903	0	0	0	0	0	0	0	603	903	0
467	2	0	0	0	0	0	0	200	300	0	0	0	0	0	0	0	200	903	0	0	0	0	0	0	0	603	903	0
467	3	0	0	0	0	0	0	200	300	0	0	0	0	0	0	0	200	903	0	0	0	0	0	0	0	603	903	0
467	4	0	0	0	0	0	0	200	300	0	0	0	0	0	0	0	200	903	0	0	0	0	0	0	0	603	903	0
467	5	0	0	0	0	0	0	200	300	0	0	0	0	0	0	0	200	903	0	0	0	0	0	0	0	603	903	0
467	6	0	0	0	0	0	0	200	300	0	0	0	0	0	0	0	200	903	0	0	0	0	0	0	0	603	903	0
467	7	0	0	0	0	0	0	200	300	0	0	0	0	0	0	0	200	903	0	0	0	0	0	0	0	603	903	0
467	8	0	0	0	0	0	0	200	300	0	0	0	0	0	0	0	200	903	0	0	0	0	0	0	0	603	903	0
467	9	0	0	0	0	0	0	200	300	0	0	0	0	0	0	0	200	903	0	0	0	0	0	0	0	603	903	0
468	0	0	0	0	0	0	0	200	300	0	0	0	0	0	0	0	200	903	0	0	0	0	0	0	0	603	903	0
468	1	0	0	0	0	0	0	200	300	0	0	0	0	0	0	0	200	903	0	0	0	0	0	0	0	603	903	0
468	2	0	0	0	0	0	0	200	300	0	0	0	0	0	0	0	200	903	0	0	0	0	0	0	0	603	903	0
468	3	0	0	0	0	0	0	200	300	0	0	0	0	0	0	0	200	903	0	0	0	0	0	0	0	603	903	0
468	4	0	0	0	0	0	0	200	300	0	0	0	0	0	0	0	200	903	0	0	0	0	0	0	0	603	903	0
468	5	0	0	0	0	0	0	200	300	0	0	0	0	0	0	0	200	903	0	0	0	0	0	0	0	603	903	0
468	6	0	0	0	0	0	0	200	300	0	0	0	0	0	0	0	200	903	0	0	0	0	0	0	0	603	903	0
468	7	0	0	0	0	0	0	200	300	0	0	0	0	0	0	0	200	903	0	0	0	0	0	0	0	603	903	0
468	8	0	0	0	0	0	0	200	300	0	0	0	0	0	0	0	200	903	0	0	0	0	0	0	0	603	903	0
468	9	0	0	0	0	0	0	200	300	0	0	0	0	0	0	0	200	903	0	0	0	0	0	0	0	603	903	0
469	0	0	0	0	0	0	0	200	300	0	0	0	0	0	0	0	200	903	0	0	0	0	0	0	0	603	903	0
469	1	0	0	0	0	0	0	200	300	0	0	0	0	0	0	0	200	903	0	0	0	0	0	0	0	603	903	0
469	2	0	0	0	0	0	0	200	300	0	0	0	0	0	0	0	200	903	0	0	0	0	0	0	0	603	903	0
469	3	0	0	0	0	0	0	200	300	0	0	0	0	0	0	0	200	903	0	0	0	0	0	0	0	603	903	0
469	4	0	0	0	0	0	0	200	300	0	0	0	0	0	0	0	200	903	0	0	0	0	0	0	0	603	903	0
469	5	0	0	0	0	0	0	200	300	0	0	0	0	0	0	0	200	903	0	0	0	0	0	0	0	603	903	0
469	6	0	0	0	0	0	0	200	300	0	0	0	0	0	0	0	200	903	0	0	0	0	0	0	0	603	903	0
469	7	0	0	0	0	0	0	200	300	0	0	0	0	0	0	0	200	903	0	0	0	0	0	0	0	603	903	0
469	8	0	0	0	0	0	0	200	300	0	0	0	0	0	0	0	200	903	0	0	0	0	0	0	0	603	903	0
469	9	0	0	0	0	0	0	200	300	0	0	0	0	0	0	0	200	903	0	0	0	0	0	0	0	603	903	0
470	0	0	0	0	0	0	0	200	300	0	0	0	0	0	0	0	200	903	0	0	0	0	0	0	0	603	903	0
470	1	0	0	0	0	0	0	200	300	0	0	0	0	0	0	0	200	903	0	0	0	0	0	0	0	603	903	0
470	2	0	0	0	0	0	0	200	300	0	0	0	0	0	0	0	200	903	0	0	0	0	0	0	0	603	903	0
470	3	0	0	0	0	0	0	200	300	0	0	0	0	0	0	0	200	903	0	0	0	0	0	0	0	603	903	0
470	4	0	0	0	0	0	0	200	300	0	0	0	0	0	0	0	200	903	0	0	0	0	0	0	0	603	903	0
470	5	0	0	0	0	0	0	200	300	0	0	0	0	0	0	0	200	903	0	0	0	0	0	0	0	603	903	0
470	6	0	0	0	0	0	0	200	300	0	0	0	0	0	0	0	200	903	0	0	0	0	0	0	0	603	903	0
470	7	0	0	0	0	0	0	200	300	0	0	0	0	0	0	0	200	903	0	0	0	0	0	0	0	603	903	0
470	8	0	0	0	0	0	0	200	300	0	0	0	0	0	0	0	200	903	0	0	0	0	0	0	0	603	903	0
470	9	0	0	0	0	0	0	200	300	0	0	0	0	0	0	0	200	903	0	0	0	0	0	0	0	603	903	0
471	0	0	0	0	0	0	0	200	300	0	0	0	0	0	0	0	200	903	0	0	0	0	0	0	0	603	903	0
471	1	0	0	0	0	0	0	200	300	0	0	0	0	0	0	0	200	903	0	0	0	0	0	0	0	603	903	0
471	2	0	0	0	0	0	0	200	300	0	0	0	0	0	0	0	200	903	0	0	0	0	0	0	0	603	903	0
471	3	0	0	0	0	0	0	200	300	0	0	0	0	0	0	0	200	903	0	0	0	0	0	0	0	603	903	0
471	4	0	0	0	0	0	0	200	300	0	0	0	0	0	0	0	200	903	0	0	0	0	0	0	0	603	903	0
471	5	0	0	0	0	0	0	200	300	0	0	0	0	0	0	0	200	903	0	0	0	0	0	0	0	603	903	0
471	6	0	0	0	0	0	0	200	300	0	0	0	0	0	0	0	200	903	0	0	0	0	0	0	0	603	903	0
471	7	0	0	0	0	0	0	200	300	0	0	0	0	0	0	0	200	903	0	0	0	0	0	0	0	603	903	0
471	8	0	0	0	0	0	0	200	300	0	0	0	0	0	0	0	200	903	0	0	0	0	0	0	0	603	903	0
471	9	0	0	0	0	0	0	200	300	0	0	0	0	0	0	0	200	903	0	0	0	0	0	0	0	603	903	0
472	0	0	0	0	0	0	0	200	300	0	0	0	0	0	0	0	200	903	0	0	0	0	0	0	0	603	903	0
472	1	0	0	0	0	0	0	200	300	0	0	0	0	0	0	0	200	903	0	0	0	0	0	0	0	603	903	0
472	2	0	0	0	0	0	0	200	300	0	0	0	0	0	0	0	200	903	0	0	0	0	0	0	0	603	903	0
472	3	0	0	0	0	0	0	200	300	0	0	0	0	0	0	0	200	903	0	0	0	0	0	0	0	603	903	0
472	4	0	0	0	0	0	0	200	300	0	0	0	0	0	0	0	200	903	0	0	0	0	0	0	0	603	903	0
472	5	0	0	0	0	0	0	200	300	0	0	0	0	0	0	0	200	903	0	0	0	0	0	0	0	603	903	0
472	6	0	0	0	0	0	0	200	300	0	0	0	0	0	0	0	200	903	0	0	0	0	0	0	0	603	903	0
472	7	0	0	0	0	0	0	200	300	0	0	0	0	0	0	0	200	903	0	0	0	0	0	0	0	603	903	0
472	8	0	0	0	0	0	0	200	300	0	0	0	0	0	0	0	200	903	0	0	0	0	0	0	0	603	903	0
472	9	0	0	0	0	0	0	200	300	0	0	0	0	0	0	0	200	903	0	0	0	0	0	0	0	603	903	0
473	0	0	0	0	0	0	0	200	300	0	0	0	0	0	0	0	200	903	0	0	0	0	0	0	0	603	903	0
473	1	0	0	0	0	0	0	200	300	0	0	0	0	0	0	0	200	903	0	0	0	0	0	0	0	603	903	0
473	2	0	0	0	0	0	0	200	300	0	0	0	0	0	0	0	200	903	0	0	0	0	0	0	0	603	903	0
473	3	0	0	0	0	0	0	200	300	0	0	0	0	0	0	0	200	903	0	0	0	0	0	0	0	603	903	0
473	4	0	0	0	0	0	0	200	300	0	0	0	0	0	0	0	200	903	0	0	0	0	0	0	0	603	903	0
473	5	0	0	0	0	0	0	200	300	0	0	0	0	0	0	0	200	903	0	0	0	0	0	0	0	603	903	0
473	6	0	0	0	0	0	0	200	300	0	0	0	0	0	0	0	200	903	0	0	0	0	0	0	0	603	903	0
473	7	0	0	0	0	0	0	200	300	0	0	0	0	0	0	0	200	903	0	0	0	0	0	0	0	603	903	0
473	8	0	0	0	0	0	0	200	300	0	0	0	0	0	0	0	200	903	0	0	0	0	0	0	0	603	903	0
473	9	0	0	0	0	0	0	200	300	0	0	0	0	0	0	0	200	903	0	0	0	0	0	0	0	603	903	0
474	0	0	0	0	0	0	0	200	300	0	0	0	0	0	0	0	200	903	0	0	0	0	0	0	0	603	903	0
474	1	0	0	0	0	0	0	200	300	0	0	0	0	0	0	0	200	903	0	0	0	0	0	0	0	603	903	0
474	2	0	0	0	0	0	0	200	300	0	0	0	0	0	0	0	200	903	0	0	0	0	0	0	0	603	903	0
474	3	0	0	0	0	0	0	200	300	0	0	0	0	0	0	0	200	903	0	0	0	0	0	0	0	603	903	0
474	4	0	0	0	0	0	0	200	300	0	0	0	0	0	0	0	200	903	0	0	0	0	0	0	0	603	903	0
474	5	0	0	0	0	0	0	200	300	0	0	0	0	0	0	0	200	903	0	0	0	0	0	0	0	603	903	0
474	6	0	0	0	0	0	0	200	300	0	0	0	0	0	0	0	200	903	0	0	0	0	0	0	0	603	903	0
474	7	0	0	0	0	0	0	200	300	0	0	0	0	0	0	0	200	903	0	0	0	0	0	0	0	603	903	0
474	8	0	0	0	0	0	0	200	300	0	0	0	0	0	0	0	200	903	0	0	0	0	0	0	0	603	903	0
474	9	0	0	0	0	0	0	200	300	0	0	0	0	0	0	0	200	903	0	0	0	0	0	0	0	603	903	0
475	0	0	0	0	0	0	0	200	300	0	0	0	0	0	0	0	200	903	0	0	0	0	0	0	0	603	903	0
475	1	0	0	0	0	0	0	200	300	0	0	0	0	0	0	0	200	903	0	0	0	0	0	0	0	603	903	0
475	2	0	0	0	0	0	0	200	300	0	0	0	0	0	0	0	200	903	0	0	0	0	0	0	0	603	903	0
475	3	0	0	0	0	0	0	200	300	0	0	0	0	0	0	0	200	903	0	0	0	0	0	0	0	603	903	0
475	4	0	0	0	0	0	0	200	300	0	0	0	0	0	0	0	200	903	0	0	0	0	0	0	0	603	903	0
475	5	0	0	0	0	0	0	200	300	0	0	0	0	0	0	0	200	903	0	0	0	0	0	0	0	603	903	0
475	6	0	0	0	0	0	0	200	300	0	0	0	0	0	0	0	200	903	0	0	0	0	0	0	0	603	903	0
475	7	0	0	0	0	0	0	200	300	0	0	0	0	0	0	0	200	903	0	0	0	0	0	0	0	603	903	0
475	8	0	0	0	0	0	0	200	300	0	0	0	0	0	0	0	200	903	0	0	0	0	0	0	0	603	903	0
475	9	0	0	0	0	0	0	200	300	0	0	0	0	0	0	0	200	903	0	0	0	0	0	0	0	603	903	0
476	0	0	0	0	0	0	0	200	300	0	0	0	0	0	0	0	200	903	0	0	0	0	0	0	0	603	903	0
476	1	0	0	0	0	0	0	200	300	0	0	0	0	0	0	0	200	903	0	0	0	0	0	0	0	603	903	0
476	2	0	0	0	0	0	0	200	300	0	0	0	0	0	0	0	200	903	0	0	0	0	0	0	0	603	903	0
476	3	0	0	0	0	0	0	200	300	0	0	0	0	0	0	0	200	903	0	0	0	0	0	0	0	603	903	0
476	4	0	0	0	0	0	0	200	300	0	0	0	0	0	0	0	200	903	0	0	0	0	0	0	0	603	903	0
476	5	0	0	0	0	0	0	200	300	0	0	0	0	0	0	0	200	903	0	0	0	0	0	0	0	603	903	0
476	6	0	0	0	0	0	0	200	300	0	0	0	0	0	0	0	200	903	0	0	0	0	0	0	0	603	903	0
476	7	0	0	0	0	0	0	200	300	0	0	0	0	0	0	0	200	903	0	0	0	0	0	0	0	603	903	0
476	8	0	0	0	0	0	0	200	300	0	0	0	0	0	0	0	200	903	0	0	0	0	0	0	0	603	903	0
476	9	0	0	0	0	0	0	200	300	0	0	0	0	0	0	0	200	903	0	0	0	0	0	0	0	603	903	0
477	0	0	0	0	0	0	0	200	300	0	0	0	0	0	0	0	200	903	0	0	0	0	0	0	0	603	903	0
477	1	0	0	0	0	0	0	200	300	0	0	0	0	0	0	0	200	903	0	0	0	0	0	0	0	603	903	0
477	2	0	0	0	0	0	0	200	300	0	0	0	0	0	0	0	200	903	0	0	0	0	0	0	0	603	903	0
477	3	0	0	0	0	0	0	200	300	0	0	0	0	0	0	0	200	903	0	0	0	0	0	0	0	603	903	0
477	4	0	0	0	0	0	0	200	300	0	0	0	0	0	0	0	200	903	0	0	0	0	0	0	0	603	903	0
477	5	0	0	0	0	0	0	200	300	0	0	0	0	0	0	0	200	903	0	0	0	0	0	0	0	603	903	0
477	6	0	0	0	0	0	0	200	300	0	0	0	0	0	0	0	200	903	0	0	0	0	0	0	0	603	903	0
477	7	0	0	0	0	0	0	200	300	0	0	0	0	0	0	0	200	903	0	0	0	0	0	0	0	603	903	0
477	8	0	0	0	0	0	0	200	300	0	0	0	0	0	0	0	200	903	0	0	0	0	0	0	0	603	903	0
477	9	0	0	0	0	0	0	200	300	0	0	0	0	0	0	0	200	903	0	0	0	0	0	0	0	603	903	0
478	0	0	0	0	0	0	0	200	300	0	0	0	0	0	0	0	200	903	0	0	0	0	0	0	0	603	903	0
478	1	0	0	0	0	0	0	200	300	0	0	0	0	0	0	0	200	903	0	0	0	0	0	0	0	603	903	0
478	2	0	0	0	0	0	0	200	300	0	0	0	0	0	0	0	200	903	0	0	0	0	0	0	0	603	903	0
478	3	0	0	0	0	0	0	200	300	0	0	0	0	0	0	0	200	903	0	0	0	0	0	0	0	603	903	0
478	4	0	0	0	0	0	0	200	300	0	0	0	0	0	0	0	200	903	0	0	0	0	0	0	0	603	903	0
478	5	0	0	0	0	0	0	200	300	0	0	0	0	0	0	0	200	903	0	0	0	0	0	0	0	603	903	0
478	6	0	0	0	0	0	0	200	300	0	0	0	0	0	0	0	200	903	0	0	0	0	0	0	0	603	903	0
478	7	0	0	0	0	0	0	200	300	0	0	0	0	0	0	0	200	903	0	0	0	0	0	0	0	603	903	0
478	8	0	0	0	0	0	0	200	300	0	0	0	0	0	0	0	200	903	0	0	0	0	0	0	0	603	903	0
478	9	0	0	0	0	0	0	200	300	0	0	0	0	0	0	0	200	903	0	0	0	0	0	0	0	603	903	0
479	0	0	0	0	0	0	0	200	300	0	0	0	0	0	0	0	200	903	0	0	0	0	0	0	0	603	903	0
479	1	0	0	0	0	0	0	200	300	0	0	0	0	0	0	0	200	903	0	0	0	0	0	0	0	603	903	0
479	2	0	0	0	0	0	0	200	300	0	0	0	0	0	0	0	200	903	0	0	0	0	0	0	0	603	903	0
479	3	0	0	0	0	0	0	200	300	0	0	0	0	0	0	0	200	903	0	0	0	0	0	0	0	603	903	0
479	4	0	0	0	0	0	0	200	300	0	0	0	0	0	0	0	200	903	0	0	0	0	0	0	0	603	903	0
479	5	0	0	0	0	0	0	200	300	0	0	0	0	0	0	0	200	903	0	0	0	0	0	0	0	603	903	0
479	6	0	0	0	0	0	0	200	300	0	0	0	0	0	0	0	200	903	0	0	0	0	0	0	0	603	903	0
479	7	0	0	0	0	0	0	200	300	0	0	0	0	0	0	0	200	903	0	0	0	0	0	0	0	603	903	0
479	8	0	0	0	0	0	0	200	300	0	0	0	0	0	0	0	200	903	0	0	0	0	0	0	0	603	903	0
479	9	0	0	0	0	0	0	200	300	0	0	0	0	0	0	0	200	903	0	0	0	0	0	0	0	603	903	0
480	0	0	0	0	0	0	0	200	300	0	0	0	0	0	0	0	200	903	0	0	0	0	0	0	0	603	903	0
480	1	0	0	0	0	0	0	200	300	0	0	0	0	0	0	0	200	903	0	0	0	0	0	0	0	603	903	0
480	2	0	0	0	0	0	0	200	300	0	0	0	0	0	0	0	200	903	0	0	0	0	0	0	0	603	903	0
480	3	0	0	0	0	0	0	200	300	0	0	0	0	0	0	0	200	903	0	0	0	0	0	0	0	603	903	0
480	4	0	0	0	0	0	0	200	300	0	0	0	0	0	0	0	200	903	0	0	0	0	0	0	0	603	903	0
480	5	0	0	0	0	0	0	200	300	0	0	0	0	0	0	0	200	903	0	0	0	0	0	0	0	603	903	0
480	6	0	0	0	0	0	0	200	300	0	0	0	0	0	0	0	200	903	0	0	0	0	0	0	0	603	903	0
480	7	0	0	0	0	0	0	200	300	0	0	0	0	0	0	0	200	903	0	0	0	0	0	0	0	603	903	0
480	8	0	0	0	0	0	0	200	300	0	0	0	0	0	0	0	200	903	0	0	0	0	0	0	0	603	903	0
480	9	0	0	0	0	0	0	200	300	0	0	0	0	0	0	0	200	903	0	0	0	0	0	0	0	603	903	0
481	0	0	0	0	0	0	0	200	300	0	0	0	0	0	0	0	200	903	0	0	0	0	0	0	0	603	903	0
481	1	0	0	0	0	0	0	200	300	0	0	0	0	0	0	0	200	903	0	0	0	0	0	0	0	603	903	0
481	2	0	0	0	0	0	0	200	300	0	0	0	0	0	0	0	200	903	0	0	0	0	0	0	0	603	903	0
481	3	0	0	0	0	0	0	200	300	0	0	0	0	0	0	0	200	903	0	0	0	0	0	0	0	603	903	0
481	4	0	0	0	0	0	0	200	300	0	0	0	0	0	0	0	200	903	0	0	0	0	0	0	0	603	903	0
481	5	0	0	0	0	0	0	200	300	0	0	0	0	0	0	0	200	903	0	0	0	0	0	0	0	603	903	0
481	6	0	0	0	0	0	0	200	300	0	0	0	0	0	0	0	200	903	0	0	0	0	0	0	0	603	903	0
481	7	0	0	0	0	0	0	200	300	0	0	0	0	0	0	0	200	903	0	0	0	0	0	0	0	603	903	0
481	8	0	0	0	0	0	0	200	300	0	0	0	0	0	0	0	200	903	0	0	0	0	0	0	0	603	903	0
481	9	0	0	0	0	0	0	200	300	0	0	0	0	0	0	0	200	903	0	0	0	0	0	0	0	603	903	0
482	0	0	0	0	0	0	0	200	300	0	0	0	0	0	0	0	200	903	0	0	0	0	0	0	0	603	903	0
482	1	0	0	0	0	0	0	200	300	0	0	0	0	0	0	0	200	903	0	0	0	0	0	0	0	603	903	0
482	2	0	0	0	0	0	0	200	300	0	0	0	0	0	0	0	200	903	0	0	0	0	0	0	0	603	903	0
482	3	0	0	0	0	0	0	200	300	0	0	0	0	0	0	0	200	903	0	0	0	0	0	0	0	603	903	0
482	4	0	0	0	0	0	0	200	300	0	0	0	0	0	0	0	200	903	0	0	0	0	0	0	0	603	903	0
482	5	0	0	0	0	0	0	200	300	0	0	0	0	0	0	0	200	903	0	0	0	0	0	0	0	603	903	0
482	6	0	0	0	0	0	0	200	300	0	0	0	0	0	0	0	200	903	0	0	0	0	0	0	0	603	903	0
482	7	0	0	0	0	0	0	200	300	0	0	0	0	0	0	0	200	903	0	0	0	0	0	0	0	603	903	0
482	8	0	0	0	0	0	0	200	300	0	0	0	0	0	0	0	200	903	0	0	0	0	0	0	0	603	903	0
482	9	0	0	0	0	0	0	200	300	0	0	0	0	0	0	0	200	903	0	0	0	0	0	0	0	603	903	0
483	0	0	0	0	0	0	0	200	300	0	0	0	0	0	0	0	200	903	0	0	0	0	0	0	0	603	903	0
483	1	0	0	0	0	0	0	200	300	0	0	0	0	0	0	0	200	903	0	0	0	0	0	0	0	603	903	0
483	2	0	0	0	0	0	0	200	300	0	0	0	0	0	0	0	200	903	0	0	0	0	0	0	0	603	903	0
483	3	0	0	0	0	0	0	200	300	0	0	0	0	0	0	0	200	903	0	0	0	0	0	0	0	603	903	0
483	4	0	0	0	0	0	0	200	300	0	0	0	0	0	0	0	200	903	0	0	0	0	0	0	0	603	903	0
483	5	0	0	0	0	0	0	200	300	0	0	0	0	0	0	0	200	903	0	0	0	0	0	0	0	603	903	0
483	6	0	0	0	0	0	0	200	300	0	0	0	0	0	0	0	200	903	0	0	0	0	0	0	0	603	903	0
483	7	0	0	0	0	0	0	200	300	0	0	0	0	0	0	0	200	903	0	0	0	0	0	0	0	603	903	0
483	8	0	0	0	0	0	0	200	300	0	0	0	0	0	0	0	200	903	0	0	0	0	0	0	0	603	903	0
483	9	0	0	0	0	0	0	200	300	0	0	0	0	0	0	0	200	903	0	0	0	0	0	0	0	603	903	0
484	0	0	0	0	0	0	0	200	300	0	0	0	0	0	0	0	200	903	0	0	0	0	0	0	0	603	903	0
484	1	0	0	0	0	0	0	200	300	0	0	0	0	0	0	0	200	903	0	0	0	0	0	0	0	603	903	0
484	2	0	0	0	0	0	0	200	300	0	0	0	0	0	0	0	200	903	0	0	0	0	0	0	0	603	903	0
484	3	0	0	0	0	0	0	200	300	0	0	0	0	0	0	0	200	903	0	0	0	0	0	0	0	603	903	0
484	4	0	0	0	0	0	0	200	300	0	0	0	0	0	0	0	200	903	0	0	0	0	0	0	0	603	903	0
484	5	0	0	0	0	0	0	200	300	0	0	0	0	0	0	0	200	903	0	0	0	0	0	0	0	603	903	0
484	6	0	0	0	0	0	0	200	300	0	0	0	0	0	0	0	200	903	0	0	0	0	0	0	0	603	903	0
484	7	0	0	0	0	0	0	200	300	0	0	0	0	0	0	0	200	903	0	0	0	0	0	0	0	603	903	0
484	8	0	0	0	0	0	0	200	300	0	0	0	0	0	0	0	200	903	0	0	0	0	0	0	0	603	903	0
484	9	0	0	0	0	0	0	200	300	0	0	0	0	0	0	0	200	903	0	0	0	0	0	0	0	603	903	0
485	0	0	0	0	0	0	0	200	300	0	0	0	0	0	0	0	200	903	0	0	0	0	0	0	0	603	903	0
485	1	0	0	0	0	0	0	200	300	0	0	0	0	0	0	0	200	903	0	0	0	0	0	0	0	603	903	0
485	2	0	0	0	0	0	0	200	300	0	0	0	0	0	0	0	200	903	0	0	0	0	0	0	0	603	903	0
485	3	0	0	0	0	0	0	200	300	0	0	0	0	0	0	0	200	903	0	0	0	0	0	0	0	603	903	0
485	4	0	0	0	0	0	0	200	300	0	0	0	0	0	0	0	200	903	0	0	0	0	0	0	0	603	903	0
485	5	0	0	0	0	0	0	200	300	0	0	0	0	0	0	0	200	903	0	0	0	0	0	0	0	603	903	0
485	6	0	0	0	0	0	0	200	300	0	0	0	0	0	0	0	200	903	0	0	0	0	0	0	0	603	903	0
485	7	0	0	0	0	0	0	200	300	0	0	0	0	0	0	0	200	903	0	0	0	0	0	0	0	603	903	0
485	8	0	0	0	0	0	0	200	300	0	0	0	0	0	0	0	200	903	0	0	0	0	0	0	0	603	903	0
485	9	0	0	0	0	0	0	200	300	0	0	0	0	0	0	0	200	903	0	0	0	0	0	0	0	603	903	0
486	0	0	0	0	0	0	0	200	300	0	0	0	0	0	0	0	200	903	0	0	0	0	0	0	0	603	903	0
486	1	0	0	0	0	0	0	200	300	0	0	0	0	0	0	0	200	903	0	0	0	0	0	0	0	603	903	0
486	2	0	0	0	0	0	0	200	300	0	0	0	0	0	0	0	200	903	0	0	0	0	0	0	0	603	903	0
486	3	0	0	0	0	0	0	200	300	0	0	0	0	0	0	0	200	903	0	0	0	0	0	0	0	603	903	0
486	4	0	0	0	0	0	0	200	300	0	0	0	0	0	0	0	200	903	0	0	0	0	0	0	0	603	903	0
486	5	0	0	0	0	0	0	200	300	0	0	0	0	0	0	0	200	903	0	0	0	0	0	0	0	603	903	0
486	6	0	0	0	0	0	0	200	300	0	0	0	0	0	0	0	200	903	0	0	0	0	0	0	0	603	903	0
486	7	0	0	0	0	0	0	200	300	0	0	0	0	0	0	0	200	903	0	0	0	0	0	0	0	603	903	0
486	8	0	0	0	0	0	0	200	300	0	0	0	0	0	0	0	200	903	0	0	0	0	0	0	0	603	903	0
486	9	0	0	0	0	0	0	200	300	0	0	0	0	0	0	0	200	903	0	0	0	0	0	0	0	603	903	0
487	0	0	0	0	0	0	0	200	300	0	0	0	0	0	0	0	200	903	0	0	0	0	0	0	0	603	903	0
487	1	0	0	0	0	0	0	200	300	0	0	0	0	0	0	0	200	903	0	0	0	0	0	0	0	603	903	0
487	2	0	0	0	0	0	0	200	300	0	0	0	0	0	0	0	200	903	0	0	0	0	0	0	0	603	903	0
487	3	0	0	0	0	0	0	200	300	0	0	0	0	0	0	0	200	903	0	0	0	0	0	0	0	603	903	0
487	4	0	0	0	0	0	0	200	300	0	0	0	0	0	0	0	200	903	0	0	0	0	0	0	0	603	903	0
487	5	0	0	0	0	0	0	200	300	0	0	0	0	0	0	0	200	903	0	0	0	0	0	0	0	603	903	0
487	6	0	0	0	0	0	0	200	300	0	0	0	0	0	0	0	200	903	0	0	0	0	0	0	0	603	903	0
487	7	0	0	0	0	0	0	200	300	0	0	0	0	0	0	0	200	903	0	0	0	0	0	0	0	603	903	0
487	8	0	0	0	0	0	0	200	300	0	0	0	0	0	0	0	200	903	0	0	0	0	0	0	0	603	903	0
487	9	0	0	0	0	0	0	200	300	0	0	0	0	0	0	0	200	903	0	0	0	0	0	0	0	603	903	0
488	0	0	0	0	0	0	0	200	300	0	0	0	0	0	0	0	200	903	0	0	0	0	0	0	0	603	903	0
488	1	0	0	0	0	0	0	200	300	0	0	0	0	0	0	0	200	903	0	0	0	0	0	0	0	603	903	0
488	2	0	0	0	0	0	0	200	300	0	0	0	0	0	0	0	200	903	0	0	0	0	0	0	0	603	903	0
488	3	0	0	0	0	0	0	200	300	0	0	0	0	0	0	0	200	903	0	0	0	0	0	0	0	603	903	0
488	4	0	0	0	0	0	0	200	300	0	0	0	0	0	0	0	200	903	0	0	0	0	0	0	0	603	903	0
488	5	0	0	0	0	0	0	200	300	0	0	0	0	0	0	0	200	903	0	0	0	0	0	0	0	603	903	0
488	6	0	0	0	0	0	0	200	300	0	0	0	0	0	0	0	200	903	0	0	0	0	0	0	0	603	903	0
488	7	0	0	0	0	0	0	200	300	0	0	0	0	0	0	0	200	903	0	0	0	0	0	0	0	603	903	0
488	8	0	0	0	0	0	0	200	300	0	0	0	0	0	0	0	200	903	0	0	0	0	0	0	0	603	903	0
488	9	0	0	0	0	0	0	200	300	0	0	0	0	0	0	0	200	903	0	0	0	0	0	0	0	603	903	0
489	0	0	0	0	0	0	0	200	300	0	0	0	0	0	0	0	200	903	0	0	0	0	0	0	0	603	903	0
489	1	0	0	0	0	0	0	200	300	0	0	0	0	0	0	0	200	903	0	0	0	0	0	0	0	603	903	0
489	2	0	0	0	0	0	0	200	300	0	0	0	0	0	0	0	200	903	0	0	0	0	0	0	0	603	903	0
489	3	0	0	0	0	0	0	200	300	0	0	0	0	0	0	0	200	903	0	0	0	0	0	0	0	603	903	0
489	4	0	0	0	0	0	0	200	300	0	0	0	0	0	0	0	200	903	0	0	0	0	0	0	0	603	903	0
489	5	0	0	0	0	0	0	200	300	0	0	0	0	0	0	0	200	903	0	0	0	0	0	0	0	603	903	0
489	6	0	0	0	0	0	0	200	300	0	0	0	0	0	0	0	200	903	0	0	0	0	0	0	0	603	903	0
489	7	0	0	0	0	0	0	200	300	0	0	0	0	0	0	0	200	903	0	0	0	0	0	0	0	603	903	0
489	8	0	0	0	0	0	0	200	300	0	0	0	0	0	0	0	200	903	0	0	0	0	0	0	0	603	903	0
489	9	0	0	0	0	0	0	200	300	0	0	0	0	0	0	0	200	903	0	0	0	0	0	0	0	603	903	0
490	0	0	0	0	0	0	0	200	300	0	0	0	0	0	0	0	200	903	0	0	0	0	0	0	0	603	903	0
490	1	0	0	0	0	0	0	200	300	0	0	0	0	0	0	0	200	903	0	0	0	0	0	0	0	603	903	0
490	2	0	0	0	0	0	0	200	300	0	0	0	0	0	0	0	200	903	0	0	0	0	0	0	0	603	903	0
490	3	0	0	0	0	0	0	200	300	0	0	0	0	0	0	0	200	903	0	0	0	0	0	0	0	603	903	0
490	4	0	0	0	0	0	0	200	300	0	0	0	0	0	0	0	200	903	0	0	0	0	0	0	0	603	903	0
490	5	0	0	0	0	0	0	200	300	0	0	0	0	0	0	0	200	903	0	0	0	0	0	0	0	603	903	0
490	6	0	0	0	0	0	0	200	300	0	0	0	0	0	0	0	200	903	0	0	0	0	0	0	0	603	903	0
490	7	0	0	0	0	0	0	200	300	0	0	0	0	0	0	0	200	903	0	0	0	0	0	0	0	603	903	0
490	8	0	0	0	0	0	0	200	300	0	0	0	0	0	0	0	200	903	0	0	0	0	0	0	0	603	903	0
490	9	0	0	0	0	0	0	200	300	0	0	0	0	0	0	0	200	903	0	0	0	0	0	0	0	603	903	0
491	0	0	0	0	0	0	0	200	300	0	0	0	0	0	0	0	200	903	0	0	0	0	0	0	0	603	903	0
491	1	0	0	0	0	0	0	200	300	0	0	0	0	0	0	0	200	903	0	0	0	0	0	0	0	603	903	0
491	2	0	0	0	0	0	0	200	300	0	0	0	0	0	0	0	200	903	0	0	0	0	0	0	0	603	903	0
491	3	0	0	0	0	0	0	200	300	0	0	0	0	0	0	0	200	903	0	0	0	0	0	0	0	603	903	0
491	4	0	0	0	0	0	0	200	300	0	0	0	0	0	0	0	200	903	0	0	0	0	0	0	0	603	903	0
491	5	0	0	0	0	0	0	200	300	0	0	0	0	0	0	0	200	903	0	0	0	0	0	0	0	603	903	0
491	6	0	0	0	0	0	0	200	300	0	0	0	0	0	0	0	200	903	0	0	0	0	0	0	0	603	903	0
491	7	0	0	0	0	0	0	200	300	0	0	0	0	0	0	0	200	903	0	0	0	0	0	0	0	603	903	0
491	8	0	0	0	0	0	0	200	300	0	0	0	0	0	0	0	200	903	0	0	0	0	0	0	0	603	903	0
491	9	0	0	0	0	0	0	200	300	0	0	0	0	0	0	0	200	903	0	0	0	0	0	0	0	603	903	0
492	0	0	0	0	0	0	0	200	300	0	0	0	0	0	0	0	200	903	0	0	0	0	0	0	0	603	903	0
492	1	0	0	0	0	0	0	200	300	0	0	0	0	0	0	0	200	903	0	0	0	0	0	0	0	603	903	0
492	2	0	0	0	0	0	0	200	300	0	0	0	0	0	0	0	200	903	0	0	0	0	0	0	0	603	903	0
492	3	0	0	0	0	0	0	200	300	0	0	0	0	0	0	0	200	903	0	0	0	0	0	0	0	603	903	0
492	4	0	0	0	0	0	0	200	300	0	0	0	0	0	0	0	200	903	0	0	0	0	0	0	0	603	903	0
492	5	0	0	0	0	0	0	200	300	0	0	0	0	0	0	0	200	903	0	0	0	0	0	0	0	603	903	0
492	6	0	0	0	0	0	0	200	300	0	0	0	0	0	0	0	200	903	0	0	0	0	0	0	0	603	903	0
492	7	0	0	0	0	0	0	200	300	0	0	0	0	0	0	0	200	903	0	0	0	0	0	0	0	603	903	0
492	8	0	0	0	0	0	0	200	300	0	0	0	0	0	0	0	200	903	0	0	0	0	0	0	0	603	903	0
492	9	0	0	0	0	0	0	200	300	0	0	0	0	0	0	0	200	903	0	0	0	0	0	0	0	603	903	0
493	0	0	0	0	0	0	0	200	300	0	0	0	0	0	0	0	200	903	0	0	0	0	0	0	0	603	903	0
493	1	0	0	0	0	0	0	200	300	0	0	0	0	0	0	0	200	903	0	0	0	0	0	0	0	603	903	0
493	2	0	0	0	0	0	0	200	300	0	0	0	0	0	0	0	200	903	0	0	0	0	0	0	0	603	903	0
493	3	0	0	0	0	0	0	200	300	0	0	0	0	0	0	0	200	903	0	0	0	0	0	0	0	603	903	0
493	4	0	0	0	0	0	0	200	300	0	0	0	0	0	0	0	200	903	0	0	0	0	0	0	0	603	903	0
493	5	0	0	0	0	0	0	200	300	0	0	0	0	0	0	0	200	903	0	0	0	0	0	0	0	603	903	0
493	6	0	0	0	0	0	0	200	300	0	0	0	0	0	0	0	200	903	0	0	0	0	0	0	0	603	903	0
493	7	0	0	0	0	0	0	200	300	0	0	0	0	0	0	0	200	903	0	0	0	0	0	0	0	603	903	0
493	8	0	0	0	0	0	0	200	300	0	0	0	0	0	0	0	200	903	0	0	0	0	0	0	0	603	903	0
493	9	0	0	0	0	0	0	200	300	0	0	0	0	0	0	0	200	903	0	0	0	0	0	0	0	603	903	0
494	0	0	0	0	0	0	0	200	300	0	0	0	0	0	0	0	200	903	0	0	0	0	0	0	0	603	903	0
494	1	0	0	0	0	0	0	200	300	0	0	0	0	0	0	0	200	903	0	0	0	0	0	0	0	603	903	0
494	2	0	0	0	0	0	0	200	300	0	0	0	0	0	0	0	200	903	0	0	0	0	0	0	0	603	903	0
494	3	0	0	0	0	0	0	200	300	0	0	0	0	0	0	0	200	903	0	0	0	0	0	0	0	603	903	0
494	4	0	0	0	0	0	0	200	300	0	0	0	0	0	0	0	200	903	0	0	0	0	0	0	0	603	903	0
494	5	0	0	0	0	0	0	200	300	0	0	0	0	0	0	0	200	903	0	0	0	0	0	0	0	603	903	0
494	6	0	0	0	0	0	0	200	300	0	0	0	0	0	0	0	200	903	0	0	0	0	0	0	0	603	903	0
494	7	0	0	0	0	0	0	200	300	0	0	0	0	0	0	0	200	903	0	0	0	0	0	0	0	603	903	0
494	8	0	0	0	0	0	0	200	300	0	0	0	0	0	0	0	200	903	0	0	0	0	0	0	0	603	903	0
494	9	0	0	0	0	0	0	200	300	0	0	0	0	0	0	0	200	903	0	0	0	0	0	0	0	603	903	0
495	0	0	0	0	0	0	0	200	300	0	0	0	0	0	0	0	200	903	0	0	0	0	0	0	0	603	903	0
495	1	0	0	0	0	0	0	200	300	0	0	0	0	0	0	0	200	903	0	0	0	0	0	0	0	603	903	0
495	2	0	0	0	0	0	0	200	300	0	0	0	0	0	0	0	200	903	0	0	0	0	0	0	0	603	903	0
495	3	0	0	0	0	0	0	200	300	0	0	0	0	0	0	0	200	903	0	0	0	0	0	0	0	603	903	0
495	4	0	0	0	0	0	0	200	300	0	0	0	0	0	0	0	200	903	0	0	0	0	0	0	0	603	903	0
495	5	0	0	0	0	0	0	200	300	0	0	0	0	0	0	0	200	903	0	0	0	0	0	0	0	603	903	0
495	6	0	0	0	0	0	0	200	300	0	0	0	0	0	0	0	200	903	0	0	0	0	0	0	0	603	903	0
495	7	0	0	0	0	0	0	200	300	0	0	0	0	0	0	0	200	903	0	0	0	0	0	0	0	603	903	0
495	8	0	0	0	0	0	0	200	300	0	0	0	0	0	0	0	200	903	0	0	0	0	0	0	0	603	903	0
495	9	0	0	0	0	0	0	200	300	0	0	0	0	0	0	0	200	903	0	0	0	0	0	0	0	603	903	0
496	0	0	0	0	0	0	0	200	300	0	0	0	0	0	0	0	200	903	0	0	0	0	0	0	0	603	903	0
496	1	0	0	0	0	0	0	200	300	0	0	0	0	0	0	0	200	903	0	0	0	0	0	0	0	603	903	0
496	2	0	0	0	0	0	0	200	300	0	0	0	0	0	0	0	200	903	0	0	0	0	0	0	0	603	903	0
496	3	0	0	0	0	0	0	200	300	0	0	0	0	0	0	0	200	903	0	0	0	0	0	0	0	603	903	0
496	4	0	0	0	0	0	0	200	300	0	0	0	0	0	0	0	200	903	0	0	0	0	0	0	0	603	903	0
496	5	0	0	0	0	0	0	200	300	0	0	0	0	0	0	0	200	903	0	0	0	0	0	0	0	603	903	0
496	6	0	0	0	0	0	0	200	300	0	0	0	0	0	0	0	200	903	0	0	0	0	0	0	0	603	903	0
496	7	0	0	0	0	0	0	200	300	0	0	0	0	0	0	0	200	903	0	0	0	0	0	0	0	603	903	0
496	8	0	0	0	0	0	0	200	300	0	0	0	0	0	0	0	200	903	0	0	0	0	0	0	0	603	903	0
496	9	0	0	0	0	0	0	200	300	0	0	0	0	0	0	0	200	903	0	0	0	0	0	0	0	603	903	0
497	0	0	0	0	0	0	0	200	300	0	0	0	0	0	0	0	200	903	0	0	0	0	0	0	0	603	903	0
497	1	0	0	0	0	0	0	200	300	0	0	0	0	0	0	0	200	903	0	0	0	0	0	0	0	603	903	0
497	2	0	0	0	0	0	0	200	300	0	0	0	0	0	0	0	200	903	0	0	0	0	0	0	0	603	903	0
497	3	0	0	0	0	0	0	200	300	0	0	0	0	0	0	0	200	903	0	0	0	0	0	0	0	603	903	0
497	4	0	0	0	0	0	0	200	300	0	0	0	0	0	0	0	200	903	0	0	0	0	0	0	0	603	903	0
497	5	0	0	0	0	0	0	200	300	0	0	0	0	0	0	0	200	903	0	0	0	0	0	0	0	603	903	0
497	6	0	0	0	0	0	0	200	300	0	0	0	0	0	0	0	200	903	0	0	0	0	0	0	0	603	903	0
497	7	0	0	0	0	0	0	200	300	0	0	0	0	0	0	0	200	903	0	0	0	0	0	0	0	603	903	0
497	8	0	0	0	0	0	0	200	300	0	0	0	0	0	0	0	200	903	0	0	0	0	0	0	0	603	903	0
497	9	0	0	0	0	0	0	200	300	0	0	0	0	0	0	0	200	903	0	0	0	0	0	0	0	603	903	0
498	0	0	0	0	0	0	0	200	300	0	0	0	0	0	0	0	200	903	0	0	0	0	0	0	0	603	903	0
498	1	0	0	0	0	0	0	200	300	0	0	0	0	0	0	0	200	903	0	0	0	0	0	0	0	603	903	0
498	2	0	0	0	0	0	0	200	300	0	0	0	0	0	0	0	200	903	0	0	0	0	0	0	0	603	903	0
498	3	0	0	0	0	0	0	200	300	0	0	0	0	0	0	0	200	903	0	0	0	0	0	0	0	603	903	0
498	4	0	0	0	0	0	0	200	300	0	0	0	0	0	0	0	200	903	0	0	0	0	0	0	0	603	903	0
498	5	0	0	0	0	0	0	200	300	0	0	0	0	0	0	0	200	903	0	0	0	0	0	0	0	603	903	0
498	6	0	0	0	0	0	0	200	300	0	0	0	0	0	0	0	200	903	0	0	0	0	0	0	0	603	903	0
498	7	0	0	0	0	0	0	200	300	0	0	0	0	0	0	0	200	903	0	0	0	0	0	0	0	603	903	0
498	8	0	0	0	0	0	0	200	300	0	0	0	0	0	0	0	200	903	0	0	0	0	0	0	0	603	903	0
498	9	0	0	0	0	0	0	200	300	0	0	0	0	0	0	0	200	903	0	0	0	0	0	0	0	603	903	0
499	0	0	0	0	0	0	0	200	300	0	0	0	0	0	0	0	200	903	0	0	0	0	0	0	0	603	903	0
499	1	0	0	0	0	0	0	200	300	0	0	0	0	0	0	0	200	903	0	0	0	0	0	0	0	603	903	0
499	2	0	0	0	0	0	0	200	300	0	0	0	0	0	0	0	200	903	0	0	0	0	0	0	0	603	903	0
499	3	0	0	0	0	0	0	200	300	0	0	0	0	0	0	0	200	903	0	0	0	0	0	0	0	603	903	0
499	4	0	0	0	0	0	0	200	300	0	0	0	0	0	0	0	200	903	0	0	0	0	0	0	0	603	903	0
499	5	0	0	0	0	0	0	200	300	0	0	0	0	0	0	0	200	903	0	0	0	0	0	0	0	603	903	0
499	6	0	0	0	0	0	0	200	300	0	0	0	0	0	0	0	200	903	0	0	0	0	0	0	0	603	903	0
499	7	0	0	0	0	0	0	200	300	0	0	0	0	0	0	0	200	903	0	0	0	0	0	0	0	603	903	0
499	8	0	0	0	0	0	0	200	300	0	0	0	0	0	0	0	200	903	0	0	0	0	0	0	0	603	903	0
499	9	0	0	0	0	0	0	200	300	0	0	0	0	0	0	0	200	903	0	0	0	0	0	0	0	603	903	0
500	0	0	0	0	0	0	0	200	300	0	0	0	0	0	0	0	200	903	0	0	0	0	0	0	0	603	903	0
500	1	0	0	0	0	0	0	200	300	0	0	0	0	0	0	0	200	903	0	0	0	0	0	0	0	603	903	0
500	2	0	0	0	0	0	0	200	300	0	0	0	0	0	0	0	200	903	0	0	0	0	0	0	0	603	903	0
500	3	0	0	0	0	0	0	200	300	0	0	0	0	0	0	0	200	903	0	0	0	0	0	0	0	603	903	0
500	4	0	0	0	0	0	0	200	300	0	0	0	0	0	0	0	200	903	0	0	0	0	0	0	0	603	903	0
500	5	0	0	0	0	0	0	200	300	0	0	0	0	0	0	0	200	903	0	0	0	0	0	0	0	603	903	0
500	6	0	0	0	0	0	0	200	300	0	0	0	0	0	0	0	200	903	0	0	0	0	0	0	0	603	903	0
500	7	0	0	0	0	0	0	200	300	0	0	0	0	0	0	0	200	903	0	0	0	0	0	0	0	603	903	0
500	8	0	0	0	0	0	0	200	300	0	0	0	0	0	0	0	200	903	0	0	0	0	0	0	0	603	903	0
500	9	0	0	0	0	0	0	200	300	0	0	0	0	0	0	0	200	903	0	0	0	0	0	0	0	603	903	0
501	0	0	0	0	0	0	0	200	300	0	0	0	0	0	0	0	200	903	0	0	0	0	0	0	0	603	903	0
501	1	0	0	0	0	0	0	200	300	0	0	0	0	0	0	0	200	903	0	0	0	0	0	0	0	603	903	0
501	2	0	0	0	0	0	0	200	300	0	0	0	0	0	0	0	200	903	0	0	0	0	0	0	0	603	903	0
501	3	0	0	0	0	0	0	200	300	0	0	0	0	0	0	0	200	903	0	0	0	0	0	0	0	603	903	0
501	4	0	0	0	0	0	0	200	300	0	0	0	0	0	0	0	200	903	0	0	0	0	0	0	0	603	903	0
501	5	0	0	0	0	0	0	200	300	0	0	0	0	0	0	0	200	903	0	0	0	0	0	0	0	603	903	0
501	6	0	0	0	0	0	0	200	300	0	0	0	0	0	0	0	200	903	0	0	0	0	0	0	0	603	903	0
501	7	0	0	0	0	0	0	200	300	0	0	0	0	0	0	0	200	903	0	0	0	0	0	0	0	603	903	0
501	8	0	0	0	0	0	0	200	300	0	0	0	0	0	0	0	200	903	0	0	0	0	0	0	0	603	903	0
501	9	0	0	0	0	0	0	200	300	0	0	0	0	0	0	0	200	903	0	0	0	0	0	0	0	603	903	0
502	0	0	0	0	0	0	0	200	300	0	0	0	0	0	0	0	200	903	0	0	0	0	0	0	0	603	903	0
502	1	0	0	0	0	0	0	200	300	0	0	0	0	0	0	0	200	903	0	0	0	0	0	0	0	603	903	0
502	2	0	0	0	0	0	0	200	300	0	0	0	0	0	0	0	200	903	0	0	0	0	0	0	0	603	903	0
502	3	0	0	0	0	0	0	200	300	0	0	0	0	0	0	0	200	903	0	0	0	0	0	0	0	603	903	0
502	4	0	0	0	0	0	0	200	300	0	0	0	0	0	0	0	200	903	0	0	0	0	0	0	0	603	903	0
502	5	0	0	0	0	0	0	200	300	0	0	0	0	0	0	0	200	903	0	0	0	0	0	0	0	603	903	0
502	6	0	0	0	0	0	0	200	300	0	0	0	0	0	0	0	200	903	0	0	0	0	0	0	0	603	903	0
502	7	0	0	0	0	0	0	200	300	0	0	0	0	0	0	0	200	903	0	0	0	0	0	0	0	603	903	0
502	8	0	0	0	0	0	0	200	300	0	0	0	0	0	0	0	200	903	0	0	0	0	0	0	0	603	903	0
502	9	0	0	0	0	0	0	200	300	0	0	0	0	0	0	0	200	903	0	0	0	0	0	0	0	603	903	0
503	0	0	0	0	0	0	0	200	300	0	0	0	0	0	0	0	200	903	0	0	0	0	0	0	0	603	903	0
503	1	0	0	0	0	0	0	200	300	0	0	0	0	0	0	0	200	903	0	0	0	0	0	0	0	603	903	0
503	2	0	0	0	0	0	0	200	300	0	0	0	0	0	0	0	200	903	0	0	0	0	0	0	0	603	903	0
503	3	0	0	0	0	0	0	200	300	0	0	0	0	0	0	0	200	903	0	0	0	0	0	0	0	603	903	0
503	4	0	0	0	0	0	0	200	300	0	0	0	0	0	0	0	200	903	0	0	0	0	0	0	0	603	903	0
503	5	0	0	0	0	0	0	200	300	0	0	0	0	0	0	0	200	903	0	0	0	0	0	0	0	603	903	0
503	6	0	0	0	0	0	0	200	300	0	0	0	0	0	0	0	200	903	0	0	0	0	0	0	0	603	903	0
503	7	0	0	0	0	0	0	200	300	0	0	0	0	0	0	0	200	903	0	0	0	0	0	0	0	603	903	0
503	8	0	0	0	0	0	0	200	300	0	0	0	0	0	0	0	200	903	0	0	0	0	0	0	0	603	903	0
503	9	0	0	0	0	0	0	200	300	0	0	0	0	0	0	0	200	903	0	0	0	0	0	0	0	603	903	0
504	0	0	0	0	0	0	0	200	300	0	0	0	0	0	0	0	200	903	0	0	0	0	0	0	0	603	903	0
504	1	0	0	0	0	0	0	200	300	0	0	0	0	0	0	0	200	903	0	0	0	0	0	0	0	603	903	0
504	2	0	0	0	0	0	0	200	300	0	0	0	0	0	0	0	200	903	0	0	0	0	0	0	0	603	903	0
504	3	0	0	0	0	0	0	200	300	0	0	0	0	0	0	0	200	903	0	0	0	0	0	0	0	603	903	0
504	4	0	0	0	0	0	0	200	300	0	0	0	0	0	0	0	200	903	0	0	0	0	0	0	0	603	903	0
504	5	0	0	0	0	0	0	200	300	0	0	0	0	0	0	0	200	903	0	0	0	0	0	0	0	603	903	0
504	6	0	0	0	0	0	0	200	300	0	0	0	0	0	0	0	200	903	0	0	0	0	0	0	0	603	903	0
504	7	0	0	0	0	0	0	200	300	0	0	0	0	0	0	0	200	903	0	0	0	0	0	0	0	603	903	0
504	8	0	0	0	0	0	0	200	300	0	0	0	0	0	0	0	200	903	0	0	0	0	0	0	0	603	903	0
504	9	0	0	0	0	0	0	200	300	0	0	0	0	0	0	0	200	903	0	0	0	0	0	0	0	603	903	0
505	0	0	0	0	0	0	0	200	300	0	0	0	0	0	0	0	200	903	0	0	0	0	0	0	0	603	903	0
505	1	0	0	0	0	0	0	200	300	0	0	0	0	0	0	0	200	903	0	0	0	0	0	0	0	603	903	0
505	2	0	0	0	0	0	0	200	300	0	0	0	0	0	0	0	200	903	0	0	0	0	0	0	0	603	903	0
505	3	0	0	0	0	0	0	200	300	0	0	0	0	0	0	0	200	903	0	0	0	0	0	0	0	603	903	0
505	4	0	0	0	0	0	0	200	300	0	0	0	0	0	0	0	200	903	0	0	0	0	0	0	0	603	903	0
505	5	0	0	0	0	0	0	200	300	0	0	0	0	0	0	0	200	903	0	0	0	0	0	0	0	603	903	0
505	6	0	0	0	0	0	0	200	300	0	0	0	0	0	0	0	200	903	0	0	0	0	0	0	0	603	903	0
505	7	0	0	0	0	0	0	200	300	0	0	0	0	0	0	0	200	903	0	0	0	0	0	0	0	603	903	0
505	8	0	0	0	0	0	0	200	300	0	0	0	0	0	0	0	200	903	0	0	0	0	0	0	0	603	903	0
505	9	0	0	0	0	0	0	200	300	0	0	0	0	0	0	0	200	903	0	0	0	0	0	0	0	603	903	0
506	0	0	0	0	0	0	0	200	300	0	0	0	0	0	0	0	200	903	0	0	0	0	0	0	0	603	903	0
506	1	0	0	0	0	0	0	200	300	0	0	0	0	0	0	0	200	903	0	0	0	0	0	0	0	603	903	0
506	2	0	0	0	0	0	0	200	300	0	0	0	0	0	0	0	200	903	0	0	0	0	0	0	0	603	903	0
506	3	0	0	0	0	0	0	200	300	0	0	0	0	0	0	0	200	903	0	0	0	0	0	0	0	603	903	0
506	4	0	0	0	0	0	0	200	300	0	0	0	0	0	0	0	200	903	0	0	0	0	0	0	0	603	903	0
506	5	0	0	0	0	0	0	200	300	0	0	0	0	0	0	0	200	903	0	0	0	0	0	0	0	603	903	0
506	6	0	0	0	0	0	0	200	300	0	0	0	0	0	0	0	200	903	0	0	0	0	0	0	0	603	903	0
506	7	0	0	0	0	0	0	200	300	0	0	0	0	0	0	0	200	903	0	0	0	0	0	0	0	603	903	0
506	8	0	0	0	0	0	0	200	300	0	0	0	0	0	0	0	200	903	0	0	0	0	0	0	0	603	903	0
506	9	0	0	0	0	0	0	200	300	0	0	0	0	0	0	0	200	903	0	0	0	0	0	0	0	603	903	0
507	0	0	0	0	0	0	0	200	300	0	0	0	0	0	0	0	200	903	0	0	0	0	0	0	0	603	903	0
507	1	0	0	0	0	0	0	200	300	0	0	0	0	0	0	0	200	903	0	0	0	0	0	0	0	603	903	0
507	2	0	0	0	0	0	0	200	300	0	0	0	0	0	0	0	200	903	0	0	0	0	0	0	0	603	903	0
507	3	0	0	0	0	0	0	200	300	0	0	0	0	0	0	0	200	903	0	0	0	0	0	0	0	603	903	0
507	4	0	0	0	0	0	0	200	300	0	0	0	0	0	0	0	200	903	0	0	0	0	0	0	0	603	903	0
507	5	0	0	0	0	0	0	200	300	0	0	0	0	0	0	0	200	903	0	0	0	0	0	0	0	603	903	0
507	6	0	0	0	0	0	0	200	300	0	0	0	0	0	0	0	200	903	0	0	0	0	0	0	0	603	903	0
507	7	0	0	0	0	0	0	200	300	0	0	0	0	0	0	0	200	903	0	0	0	0	0	0	0	603	903	0
507	8	0	0	0	0	0	0	200	300	0	0	0	0	0	0	0	200	903	0	0	0	0	0	0	0	603	903	0
507	9	0	0	0	0	0	0	200	300	0	0	0	0	0	0	0	200	903	0	0	0	0	0	0	0	603	903	0
508	0	0	0	0	0	0	0	200	300	0	0	0	0	0	0	0	200	903	0	0	0	0	0	0	0	603	903	0
508	1	0	0	0	0	0	0	200	300	0	0	0	0	0	0	0	200	903	0	0	0	0	0	0	0	603	903	0
508	2	0	0	0	0	0	0	200	300	0	0	0	0	0	0	0	200	903	0	0	0	0	0	0	0	603	903	0
508	3	0	0	0	0	0	0	200	300	0	0	0	0	0	0	0	200	903	0	0	0	0	0	0	0	603	903	0
508	4	0	0	0	0	0	0	200	300	0	0	0	0	0	0	0	200	903	0	0	0	0	0	0	0	603	903	0
508	5	0	0	0	0	0	0	200	300	0	0	0	0	0	0	0	200	903	0	0	0	0	0	0	0	603	903	0
508	6	0	0	0	0	0	0	200	300	0	0	0	0	0	0	0	200	903	0	0	0	0	0	0	0	603	903	0
508	7	0	0	0	0	0	0	200	300	0	0	0	0	0	0	0	200	903	0	0	0	0	0	0	0	603	903	0
508	8	0	0	0	0	0	0	200	300	0	0	0	0	0	0	0	200	903	0	0	0	0	0	0	0	603	903	0
508	9	0	0	0	0	0	0	200	300	0	0	0	0	0	0	0	200	903	0	0	0	0	0	0	0	603	903	0
509	0	0	0	0	0	0	0	200	300	0	0	0	0	0	0	0	200	903	0	0	0	0	0	0	0	603	903	0
509	1	0	0	0	0	0	0	200	300	0	0	0	0	0	0	0	200	903	0	0	0	0	0	0	0	603	903	0
509	2	0	0	0	0	0	0	200	300	0	0	0	0	0	0	0	200	903	0	0	0	0	0	0	0	603	903	0
509	3	0	0	0	0	0	0	200	300	0	0	0	0	0	0	0	200	903	0	0	0	0	0	0	0	603	903	0
509	4	0	0	0	0	0	0	200	300	0	0	0	0	0	0	0	200	903	0	0	0	0	0	0	0	603	903	0
509	5	0	0	0	0	0	0	200	300	0	0	0	0	0	0	0	200	903	0	0	0	0	0	0	0	603	903	0
509	6	0	0	0	0	0	0	200	300	0	0	0	0	0	0	0	200	903	0	0	0	0	0	0	0	603	903	0
509	7	-8.65773	6.0289	-14.3491	3721.53	1868.89	-984.42	330.245	40.6427	0	0	0	0	0	0	0	200	903	0	0	0	0	0	0	0	603	903	0
509	8	-14.7612	12.7428	-24.1147	5735.69	2601.31	-1350.63	307.873	62.1494	0	0	0	0	0	0	0	200	903	0	0	0	0	0	0	0	603	903	0
509	9	-6.21632	6.63925	-21.3681	3813.08	2540.28	-1030.2	318.882	121.552	0	0	0	0	0	0	0	200	903	0	0	0	0	0	0	0	603	903	0
510	0	-0.723157	2.06161	-12.8232	2714.45	1258.54	-251.998	298.146	88.3168	0	0	0	0	0	0	0	200	903	0	0	0	0	0	0	0	603	903	0
510	1	-13.388	5.72372	-7.02483	1615.82	1563.72	-526.656	422.599	69.985	0	0	0	0	0	0	0	200	903	0	0	0	0	0	0	0	603	903	0
510	2	-10.4888	6.33408	-7.63518	1890.48	1075.44	-1030.2	340.853	52.3996	0	0	0	0	0	0	0	200	903	0	0	0	0	0	0	0	603	903	0
510	3	-3.16456	0.840912	-15.2646	2897.56	1319.58	-160.445	286.447	110.178	0	0	0	0	0	0	0	200	903	0	0	0	0	0	0	0	603	903	0
510	4	-8.81032	5.41855	-14.9594	3904.64	2235.1	-709.762	349.411	38.9845	0	0	0	0	0	0	0	200	903	0	0	0	0	0	0	0	603	903	0
510	5	-7.58961	8.16513	-12.2128	3629.98	1868.89	-1259.08	353.027	2.77316	0	0	0	0	0	0	0	200	903	0	0	0	0	0	0	0	603	903	0
510	6	-4.53785	6.33408	-13.4335	2989.11	1502.68	-709.762	311.861	77.4888	0	0	0	0	0	0	0	200	903	0	0	0	0	0	0	0	603	903	0
510	7	-11.7095	6.94443	-19.537	3629.98	1929.93	22.6601	298.783	114.2	0	0	0	0	0	0	0	200	903	0	0	0	0	0	0	0	603	903	0
510	8	-12.9302	8.92807	-18.6215	4545.5	1929.93	-1213.3	303.64	55.9004	0	0	0	0	0	0	0	200	903	0	0	0	0	0	0	0	603	903	0
510	9	-5.75856	9.08066	-19.537	4362.4	2479.24	-892.867	326.9	76.7114	0	0	0	0	0	0	0	200	903	0	0	0	0	0	0	0	603	903	0
511	0	-9.42067	13.3531	-20.4526	5827.24	2967.53	-206.222	345.093	15.085	0	0	0	0	0	0	0	200	903	0	0	0	0	0	0	0	603	903	0
511	1	-13.5405	14.879	-25.9457	6559.66	3089.6	-343.551	319.079	47.1775	0	0	0	0	0	0	0	200	903	0	0	0	0	0	0	0	603	903	0
511	2	-8.50514	15.1842	-31.4389	6101.9	2784.42	-480.88	288.566	105.912	0	0	0	0	0	0	0	200	903	0	0	0	0	0	0	0	603	903	0
511	3	-8.04738	20.6773	-35.4062	8665.38	3272.7	983.964	292.433	55.2579	0	0	0	0	0	0	0	200	903	0	0	0	0	0	0	0	603	903	0
511	4	-9.42067	24.1869	-36.9321	8940.04	4310.3	938.188	316.709	57.9328	0	0	0	0	0	0	0	200	903	0	0	0	0	0	0	0	603	903	0
511	5	-3.01198	24.6446	-40.8993	9764.02	4310.3	800.859	305.388	61.2672	0	0	0	0	0	0	0	200	903	0	0	0	0	0	0	0	603	903	0
511	6	-4.69044	26.9334	-47.6132	11686.6	4798.58	2769.24	300.783	54.5508	0	0	0	0	0	0	0	200	903	0	0	0	0	0	0	0	603	903	0
511	7	-9.26808	32.1214	-52.1908	12968.4	5408.93	2677.69	303.638	51.5204	0	0	0	0	0	0	0	200	903	0	0	0	0	0	0	0	603	903	0
511	8	-3.46974	31.8163	-57.0737	13883.9	5531	1762.16	296.91	56.7374	0	0	0	0	0	0	0	200	903	0	0	0	0	0	0	0	603	903	0
511	9	-3.9275	29.3748	-64.0927	16264.3	6446.53	2631.91	300.581	46.2385	0	0	0	0	0	0	0	200	903	0	0	0	0	0	0	0	603	903	0
512	0	-7.89479	28.7645	-76.6049	19377.1	7423.09	2036.82	296.901	47.052	0	0	0	0	0	0	0	200	903	0	0	0	0	0	0	0	603	903	0
512	1	-6.06373	25.4076	-85.1498	20384.1	7728.27	159.989	290.761	60.6086	0	0	0	0	0	0	0	200	903	0	0	0	0	0	0	0	603	903	0
512	2	-9.57325	21.898	-95.5258	23588.5	8521.72	205.766	289.209	53.0669	0	0	0	0	0	0	0	200	903	0	0	0	0	0	0	0	603	903	0
512	3	-14.6087	22.0506	-102.545	26609.7	9315.18	343.095	290.84	40.5065	0	0	0	0	0	0	0	200	903	0	0	0	0	0	0	0	603	903	0
512	4	-14.3035	21.2877	-112.616	28166.1	9864.5	-1442.18	287.594	49.8916	0	0	0	0	0	0	0	200	903	0	0	0	0	0	0	0	603	903	0
512	5	-11.4043	22.3558	-119.024	29814.1	10169.7	-1167.53	285.442	49.5129	0	0	0	0	0	0	0	200	903	0	0	0	0	0	0	0	603	903	0
512	6	-15.8294	25.1024	-127.569	32652.2	11085.2	-709.762	286.896	44.0434	0	0	0	0	0	0	0	200	903	0	0	0	0	0	0	0	603	903	0
512	7	-17.2027	24.492	-136.725	34757.9	11573.5	-1671.07	284.648	45.7815	0	0	0	0	0	0	0	200	903	0	0	0	0	0	0	0	603	903	0
512	8	-16.8975	25.255	-141.607	35856.5	11939.7	-2220.38	284.315	46.789	0	0	0	0	0	0	0	200	903	0	0	0	0	0	0	0	603	903	0
512	9	-23.1536	26.7809	-157.782	39060.9	12916.3	-1899.95	281.862	52.437	0	0	0	0	0	0	0	200	903	0	0	0	0	0	0	0	603	903	0
513	0	-23.3062	22.9662	-167.242	42356.8	14075.9	-3502.12	284.165	46.7336	0	0	0	0	0	0	0	200	903	0	0	0	0	0	0	0	603	903	0
513	1	-27.1209	16.4049	-178.228	44737.2	15052.5	-4646.53	284.456	48.9897	0	0	0	0	0	0	0	200	903	0	0	0	0	0	0	0	603	903	0
513	2	-29.2571	14.7264	-190.13	47392.2	15845.9	-5287.4	283.343	50.7384	0	0	0	0	0	0	0	200	903	0	0	0	0	0	0	0	603	903	0
513	3	-32.7666	14.5738	-203.863	51969.8	16639.4	-5790.94	281.62	45.075	0	0	0	0	0	0	0	200	903	0	0	0	0	0	0	0	603	903	0
513	4	-34.1399	11.0643	-218.817	53526.2	17249.8	-7164.23	278.832	55.3834	0	0	0	0	0	0	0	200	903	0	0	0	0	0	0	0	603	903	0
513	5	-37.4968	11.0643	-230.719	56547.5	18470.5	-7026.9	280.056	54.9073	0	0	0	0	0	0	0	200	903	0	0	0	0	0	0	0	603	903	0
513	6	-39.4805	12.7428	-240.179	59660.2	19386	-6523.36	280.715	51.601	0	0	0	0	0	0	0	200	903	0	0	0	0	0	0	0	603	903	0
513	7	-38.8701	15.4893	-250.25	62406.8	20850.8	-7072.68	283.32	50.622	0	0	0	0	0	0	0	200	903	0	0	0	0	0	0	0	603	903	0
513	8	-41.3115	17.9308	-260.321	63871.7	21461.2	-6706.47	282.441	54.6424	0	0	0	0	0	0	0	200	903	0	0	0	0	0	0	0	603	903	0
513	9	-41.1589	19.9144	-275.885	67991.5	22437.8	-5790.94	281.33	53.5509	0	0	0	0	0	0	0	200	903	0	0	0	0	0	0	0	603	903	0
514	0	-39.4805	22.8136	-287.787	70280.4	23475.3	-6065.6	281.572	55.7898	0	0	0	0	0	0	0	200	903	0	0	0	0	0	0	0	603	903	0
514	1	-40.7012	27.2386	-298.468	72019.9	24329.8	-5928.27	281.516	58.7013	0	0	0	0	0	0	0	200	903	0	0	0	0	0	0	0	603	903	0
514	2	-43.7529	29.5274	-308.539	74217.1	24818.1	-4463.43	280.438	59.4559	0	0	0	0	0	0	0	200	903	0	0	0	0	0	0	0	603	903	0
514	3	-43.4478	33.1895	-318.609	75773.6	25733.6	-4005.66	280.769	62.174	0	0	0	0	0	0	0	200	903	0	0	0	0	0	0	0	603	903	0
514	4	-43.1426	39.1405	-326.239	78245.5	26832.3	-4371.87	282.247	60.1588	0	0	0	0	0	0	0	200	903	0	0	0	0	0	0	0	603	903	0
514	5	-42.99	45.3966	-329.901	79161	27625.7	-3181.69	283.74	60.0461	0	0	0	0	0	0	0	200	903	0	0	0	0	0	0	0	603	903	0
514	6	-42.0745	49.0587	-339.056	81724.5	28114	-2632.37	282.919	58.9648	0	0	0	0	0	0	0	200	903	0	0	0	0	0	0	0	603	903	0
514	7	-41.9219	50.432	-347.296	82182.2	28724.4	-2861.25	282.709	63.3654	0	0	0	0	0	0	0	200	903	0	0	0	0	0	0	0	603	903	0
514	8	-42.3797	60.045	-354.315	83372.4	28968.5	-1945.72	281.759	64.6939	0	0	0	0	0	0	0	200	903	0	0	0	0	0	0	0	603	903	0
514	9	-44.0581	63.2494	-358.893	84471.1	29151.6	-1487.96	281.227	64.6341	0	0	0	0	0	0	0	200	903	0	0	0	0	0	0	0	603	903	0
515	0	-43.7529	65.9959	-359.198	85478.1	29884	-1579.51	283.197	62.0304	0	0	0	0	0	0	0	200	903	0	0	0	0	0	0	0	603	903	0
515	1	-44.2107	70.2684	-367.743	85661.3	30616.5	-1030.2	283.255	67.0619	0	0	0	0	0	0	0	200	903	0	0	0	0	0	0	0	603	903	0
515	2	-42.6848	73.9305	-367.437	86485.2	30738.5	-389.327	283.656	64.6261	0	0	0	0	0	0	0	200	903	0	0	0	0	0	0	0	603	903	0
515	3	-42.2271	77.5926	-376.593	87950	30616.5	-343.551	281.299	66.4585	0	0	0	0	0	0	0	200	903	0	0	0	0	0	0	0	603	903	0
515	4	-42.6848	79.7289	-383.001	87492.3	31837.2	159.989	283.125	71.5614	0	0	0	0	0	0	0	200	903	0	0	0	0	0	0	0	603	903	0
515	5	-40.8538	82.7806	-385.748	88865.6	32203.4	709.306	283.483	69.6278	0	0	0	0	0	0	0	200	903	0	0	0	0	0	0	0	603	903	0
515	6	-41.4641	84.1539	-390.631	89781.1	32264.4	388.871	282.596	70.1638	0	0	0	0	0	0	0	200	903	0	0	0	0	0	0	0	603	903	0
515	7	-41.3115	84.3065	-394.293	90879.7	32813.7	1075.52	283.222	69.5121	0	0	0	0	0	0	0	200	903	0	0	0	0	0	0	0	603	903	0
515	8	-40.0908	86.1375	-396.124	90147.3	32874.8	1624.83	282.991	72.4265	0	0	0	0	0	0	0	200	903	0	0	0	0	0	0	0	603	903	0
515	9	-37.802	87.0531	-399.176	91703.7	33363	1807.94	283.58	70.2673	0	0	0	0	0	0	0	200	903	0	0	0	0	0	0	0	603	903	0
516	0	-36.7339	87.0531	-404.974	92527.7	33607.2	2082.6	282.986	71.5219	0	0	0	0	0	0	0	200	903	0	0	0	0	0	0	0	603	903	0
516	1	-34.2925	87.816	-412.603	93901	34766.8	2677.69	284.262	72.4184	0	0	0	0	0	0	0	200	903	0	0	0	0	0	0	0	603	903	0
516	2	-32.7666	87.0531	-421.148	95365.8	36048.6	2906.57	285.596	73.5577	0	0	0	0	0	0	0	200	903	0	0	0	0	0	0	0	603	903	0
516	3	-29.8674	86.5953	-430.914	96464.4	36353.8	3364.33	284.364	76.1399	0	0	0	0	0	0	0	200	903	0	0	0	0	0	0	0	603	903	0
516	4	-26.9683	87.6634	-438.238	97288.5	37391.4	4005.2	285.322	78.001	0	0	0	0	0	0	0	200	903	0	0	0	0	0	0	0	603	903	0
516	5	-25.4424	89.1893	-444.342	98203.9	38429	4462.97	286.485	78.9901	0	0	0	0	0	0	0	200	903	0	0	0	0	0	0	0	603	903	0
516	6	-24.0691	87.9686	-449.835	101225	38795.2	4966.51	286.243	74.9726	0	0	0	0	0	0	0	200	903	0	0	0	0	0	0	0	603	903	0
516	7	-19.3389	88.1212	-458.075	101042	39954.8	5653.15	287.223	79.42	0	0	0	0	0	0	0	200	903	0	0	0	0	0	0	0	603	903	0
516	8	-14.9138	89.3419	-466.925	102141	40931.4	6065.14	287.662	81.2479	0	0	0	0	0	0	0	200	903	0	0	0	0	0	0	0	603	903	0
516	9	-14.6087	91.1729	-471.808	102782	41419.7	6339.8	287.789	82.1535	0	0	0	0	0	0	0	200	903	0	0	0	0	0	0	0	603	903	0
517	0	-11.5569	91.6307	-476.08	103697	41785.9	7209.55	287.771	82.1856	0	0	0	0	0	0	0	200	903	0	0	0	0	0	0	0	603	903	0
517	1	-11.0991	94.2247	-482.184	104246	42091.1	7575.76	287.293	83.8033	0	0	0	0	0	0	0	200	903	0	0	0	0	0	0	0	603	903	0
517	2	-9.26808	98.192	-484.625	105528	43189.7	7529.99	289.12	82.2478	0	0	0	0	0	0	0	200	903	0	0	0	0	0	0	0	603	903	0
517	3	-7.13185	98.8023	-484.625	105345	43128.7	8262.41	288.994	82.6255	0	0	0	0	0	0	0	200	903	0	0	0	0	0	0	0	603	903	0
517	4	-3.46974	100.481	-491.949	105711	43433.8	9040.6	288.289	85.1174	0	0	0	0	0	0	0	200	903	0	0	0	0	0	0	0	603	903	0
517	5	-1.79127	103.38	-496.832	106810	44105.2	9269.49	288.773	85.018	0	0	0	0	0	0	0	200	903	0	0	0	0	0	0	0	603	903	0
517	6	-0.112806	103.99	-501.104	106261	44471.4	9635.7	288.747	87.9472	0	0	0	0	0	0	0	200	903	0	0	0	0	0	0	0	603	903	0
517	7	0.344958	108.11	-503.851	107451	44898.7	10139.2	289.111	86.741	0	0	0	0	0	0	0	200	903	0	0	0	0	0	0	0	603	903	0
517	8	2.3286	108.568	-506.598	107085	45020.8	10597	288.869	88.6201	0	0	0	0	0	0	0	200	903	0	0	0	0	0	0	0	603	903	0
517	9	3.85448	111.315	-507.208	107268	45814.2	10780.1	290.326	88.5134	0	0	0	0	0	0	0	200	903	0	0	0	0	0	0	0	603	903	0
518	0	5.53295	112.383	-505.377	107176	45448	11375.2	289.929	87.9283	0	0	0	0	0	0	0	200	903	0	0	0	0	0	0	0	603	903	0
518	1	7.05883	114.671	-512.701	107725	45936.3	11741.4	289.597	89.8865	0	0	0	0	0	0	0	200	903	0	0	0	0	0	0	0	603	903	0
518	2	9.34764	115.282	-516.363	108458	46119.4	11924.5	289.316	89.9582	0	0	0	0	0	0	0	200	903	0	0	0	0	0	0	0	603	903	0
518	3	10.2632	116.503	-519.72	108366	46546.6	12107.6	289.561	91.491	0	0	0	0	0	0	0	200	903	0	0	0	0	0	0	0	603	903	0
518	4	10.2632	117.723	-520.636	108275	46851.8	12611.2	289.99	92.0335	0	0	0	0	0	0	0	200	903	0	0	0	0	0	0	0	603	903	0
518	5	12.0942	116.503	-522.772	108183	47645.3	13023.2	291.14	93.0585	0	0	0	0	0	0	0	200	903	0	0	0	0	0	0	0	603	903	0
518	6	11.9416	118.486	-524.908	108733	47767.3	13160.5	291.001	92.8541	0	0	0	0	0	0	0	200	903	0	0	0	0	0	0	0	603	903	0
518	7	12.7046	120.012	-527.044	108641	47767.3	13572.5	290.632	93.8675	0	0	0	0	0	0	0	200	903	0	0	0	0	0	0	0	603	903	0
518	8	14.0779	120.622	-530.401	109373	47950.4	13526.7	290.404	93.7912	0	0	0	0	0	0	0	200	903	0	0	0	0	0	0	0	603	903	0
518	9	15.9089	119.554	-536.505	110014	48255.6	13664	289.944	94.9427	0	0	0	0	0	0	0	200	903	0	0	0	0	0	0	0	603	903	0
519	0	15.2986	120.622	-536.81	110655	48866	14030.2	291.03	93.8654	0	0	0	0	0	0	0	200	903	0	0	0	0	0	0	0	603	903	0
519	1	15.6037	119.707	-537.42	109923	48499.8	14030.2	290.246	95.4623	0	0	0	0	0	0	0	200	903	0	0	0	0	0	0	0	603	903	0
519	2	14.8408	120.775	-549.933	111571	50819.1	13892.9	292.41	97.1193	0	0	0	0	0	0	0	200	903	0	0	0	0	0	0	0	603	903	0
519	3	15.6037	123.522	-561.834	112120	52100.8	15220.4	292.733	100.44	0	0	0	0	0	0	0	200	903	0	0	0	0	0	0	0	603	903	0
519	4	23.5383	127.489	-568.548	113127	52467	16044.4	292.283	101.025	0	0	0	0	0	0	0	200	903	0	0	0	0	0	0	0	603	903	0
519	5	26.4375	131.609	-571.905	113768	53077.4	16044.4	292.808	101.072	0	0	0	0	0	0	0	200	903	0	0	0	0	0	0	0	603	903	0
519	6	23.2331	133.287	-576.788	115324	54237.1	17097.2	294.033	100.058	0	0	0	0	0	0	0	200	903	0	0	0	0	0	0	0	603	903	0
519	7	26.7427	132.372	-589.911	116148	54725.3	18104.3	292.769	103.109	0	0	0	0	0	0	0	200	903	0	0	0	0	0	0	0	603	903	0
519	8	32.9988	136.797	-596.319	115599	54542.2	18104.3	291.465	106.146	0	0	0	0	0	0	0	200	903	0	0	0	0	0	0	0	603	903	0
519	9	30.5574	142.595	-602.728	118254	56556.4	18699.4	293.834	103.802	0	0	0	0	0	0	0	200	903	0	0	0	0	0	0	0	603	903	0
520	0	31.3203	142.748	-606.695	118712	56617.4	19523.4	293.321	104.331	0	0	0	0	0	0	0	200	903	0	0	0	0	0	0	0	603	903	0
520	1	30.5574	145.036	-614.935	118712	57044.7	19569.2	292.765	106.952	0	0	0	0	0	0	0	200	903	0	0	0	0	0	0	0	603	903	0
520	2	28.4211	150.53	-622.564	119353	57533	19248.7	292.413	108.289	0	0	0	0	0	0	0	200	903	0	0	0	0	0	0	0	603	903	0
520	3	27.8108	151.75	-626.837	120543	58448.5	19477.6	293.244	107.697	0	0	0	0	0	0	0	200	903	0	0	0	0	0	0	0	603	903	0
520	4	26.4375	149.156	-633.856	120818	58448.5	18653.6	292.211	109.393	0	0	0	0	0	0	0	200	903	0	0	0	0	0	0	0	603	903	0
520	5	25.522	152.208	-638.128	121550	59119.9	18607.9	292.646	109.521	0	0	0	0	0	0	0	200	903	0	0	0	0	0	0	0	603	903	0
520	6	24.3013	153.734	-643.011	122282	58875.7	18516.3	291.563	109.829	0	0	0	0	0	0	0	200	903	0	0	0	0	0	0	0	603	903	0
520	7	23.6909	152.971	-645.758	122191	59303	18516.3	291.835	110.779	0	0	0	0	0	0	0	200	903	0	0	0	0	0	0	0	603	903	0
520	8	21.0969	150.072	-648.199	122740	59730.2	18333.2	292.148	110.644	0	0	0	0	0	0	0	200	903	0	0	0	0	0	0	0	603	903	0
520	9	25.0642	150.835	-651.251	123106	59913.3	17875.4	291.997	110.969	0	0	0	0	0	0	0	200	903	0	0	0	0	0	0	0	603	903	0
521	0	25.6745	149.462	-655.218	124022	60584.7	18104.3	292.465	110.717	0	0	0	0	0	0	0	200	903	0	0	0	0	0	0	0	603	903	0
521	1	23.5383	149.309	-659.185	123747	60828.9	18104.3	292.279	112.273	0	0	0	0	0	0	0	200	903	0	0	0	0	0	0	0	603	903	0
521	2	24.3013	147.63	-662.848	124846	60950.9	18150.1	291.953	111.652	0	0	0	0	0	0	0	200	903	0	0	0	0	0	0	0	603	903	0
521	3	25.2168	146.715	-666.815	124663	60950.9	17829.7	291.406	113.047	0	0	0	0	0	0	0	200	903	0	0	0	0	0	0	0	603	903	0
521	4	26.1323	147.173	-667.73	124937	61744.4	18195.9	292.469	112.893	0	0	0	0	0	0	0	200	903	0	0	0	0	0	0	0	603	903	0
521	5	27.353	143.968	-672.308	125395	61744.4	17783.9	291.839	113.486	0	0	0	0	0	0	0	200	903	0	0	0	0	0	0	0	603	903	0
521	6	29.7944	143.968	-675.055	125944	62476.8	17875.4	292.551	113.431	0	0	0	0	0	0	0	200	903	0	0	0	0	0	0	0	603	903	0
521	7	31.3203	144.121	-679.632	126585	63087.2	18195.9	292.825	113.744	0	0	0	0	0	0	0	200	903	0	0	0	0	0	0	0	603	903	0
521	8	34.5246	144.121	-686.041	125761	63453.4	18562.1	292.492	116.685	0	0	0	0	0	0	0	200	903	0	0	0	0	0	0	0	603	903	0
521	9	33.7617	143.511	-690.313	127226	63453.4	18379	291.92	115.698	0	0	0	0	0	0	0	200	903	0	0	0	0	0	0	0	603	903	0
522	0	35.135	144.426	-693.67	127135	64246.8	18974.1	292.619	116.722	0	0	0	0	0	0	0	200	903	0	0	0	0	0	0	0	603	903	0
522	1	37.1186	145.799	-697.332	127592	64185.8	18745.2	292.045	117.028	0	0	0	0	0	0	0	200	903	0	0	0	0	0	0	0	603	903	0
522	2	36.9661	146.257	-700.689	127226	64918.2	19203	292.649	118.427	0	0	0	0	0	0	0	200	903	0	0	0	0	0	0	0	603	903	0
522	3	36.5083	146.41	-698.553	128966	65162.4	19523.4	293.282	115.382	0	0	0	0	0	0	0	200	903	0	0	0	0	0	0	0	603	903	0
522	4	38.1868	147.478	-706.488	127226	65650.6	18974.1	292.925	119.917	0	0	0	0	0	0	0	200	903	0	0	0	0	0	0	0	603	903	0
522	5	40.6282	149.462	-709.845	128325	66383	19431.8	293.518	119.221	0	0	0	0	0	0	0	200	903	0	0	0	0	0	0	0	603	903	0
522	6	39.4075	149.004	-713.812	129057	65894.8	19706.5	292.314	119.2	0	0	0	0	0	0	0	200	903	0	0	0	0	0	0	0	603	903	0
522	7	38.6445	147.783	-717.779	129332	66444.1	19843.8	292.569	119.817	0	0	0	0	0	0	0	200	903	0	0	0	0	0	0	0	603	903	0
522	8	38.3393	149.614	-719.61	129332	67054.5	19294.5	293.182	120.275	0	0	0	0	0	0	0	200	903	0	0	0	0	0	0	0	603	903	0
522	9	39.56	149.309	-719.915	128508	67115.5	19981.2	293.227	121.496	0	0	0	0	0	0	0	200	903	0	0	0	0	0	0	0	603	903	0
523	0	39.2549	147.02	-723.272	129881	66383	19431.8	291.782	120.426	0	0	0	0	0	0	0	200	903	0	0	0	0	0	0	0	603	903	0
523	1	39.2549	146.868	-724.798	129423	67542.8	19294.5	293.188	121.435	0	0	0	0	0	0	0	200	903	0	0	0	0	0	0	0	603	903	0
523	2	40.323	147.173	-724.798	129607	67664.8	19157.2	293.357	121.183	0	0	0	0	0	0	0	200	903	0	0	0	0	0	0	0	603	903	0
523	3	40.9333	145.036	-728.766	130156	67359.6	19111.4	292.43	121.402	0	0	0	0	0	0	0	200	903	0	0	0	0	0	0	0	603	903	0
523	4	40.4756	143.358	-728.46	129515	67847.9	18974.1	293.139	122.207	0	0	0	0	0	0	0	200	903	0	0	0	0	0	0	0	603	903	0
523	5	40.1704	142.595	-731.817	129698	67847.9	19248.7	292.712	122.773	0	0	0	0	0	0	0	200	903	0	0	0	0	0	0	0	603	903	0
523	6	42.0015	142.748	-731.207	130247	68214.1	19019.9	293.29	121.873	0	0	0	0	0	0	0	200	903	0	0	0	0	0	0	0	603	903	0
523	7	40.323	138.78	-734.564	130156	68214.1	18745.2	292.863	122.812	0	0	0	0	0	0	0	200	903	0	0	0	0	0	0	0	603	903	0
523	8	42.6118	140.306	-735.174	129515	68946.5	18928.3	293.783	123.831	0	0	0	0	0	0	0	200	903	0	0	0	0	0	0	0	603	903	0
523	9	42.6118	139.543	-737.616	130797	68580.3	18699.4	292.976	122.676	0	0	0	0	0	0	0	200	903	0	0	0	0	0	0	0	603	903	0
524	0	43.5273	138.017	-740.973	130614	68702.4	18653.6	292.719	123.727	0	0	0	0	0	0	0	200	903	0	0	0	0	0	0	0	603	903	0
524	1	43.2222	136.797	-744.024	130064	68580.3	18882.5	292.175	125.188	0	0	0	0	0	0	0	200	903	0	0	0	0	0	0	0	603	903	0
524	2	43.5273	136.492	-745.855	129790	69190.7	18562.1	292.767	125.986	0	0	0	0	0	0	0	200	903	0	0	0	0	0	0	0	603	903	0
524	3	43.8325	135.729	-746.161	130705	69190.7	18516.3	292.729	124.83	0	0	0	0	0	0	0	200	903	0	0	0	0	0	0	0	603	903	0
524	4	43.9851	134.966	-748.297	130522	69312.7	18424.8	292.627	125.574	0	0	0	0	0	0	0	200	903	0	0	0	0	0	0	0	603	903	0
524	5	43.9851	134.355	-746.771	130888	69862.1	18333.2	293.552	124.728	0	0	0	0	0	0	0	200	903	0	0	0	0	0	0	0	603	903	0
524	6	44.4429	134.508	-751.654	131529	69618	18195.9	292.62	125.014	0	0	0	0	0	0	0	200	903	0	0	0	0	0	0	0	603	903	0
524	7	45.3584	132.982	-758.062	131987	69740	17967	291.998	125.889	0	0	0	0	0	0	0	200	903	0	0	0	0	0	0	0	603	903	0
524	8	44.4429	132.524	-756.842	131346	69618	18012.8	291.985	126.455	0	0	0	0	0	0	0	200	903	0	0	0	0	0	0	0	603	903	0
524	9	44.2903	131.456	-758.368	131712	70533.4	18012.8	293.007	126.321	0	0	0	0	0	0	0	200	903	0	0	0	0	0	0	0	603	903	0
525	0	43.8325	130.235	-760.504	131712	70594.5	17326.1	292.826	126.809	0	0	0	0	0	0	0	200	903	0	0	0	0	0	0	0	603	903	0
525	1	44.2903	129.625	-760.504	131346	69678.9	17875.4	291.622	127.291	0	0	0	0	0	0	0	200	903	0	0	0	0	0	0	0	603	903	0
525	2	43.5273	127.336	-760.809	131529	70472.4	17555	292.628	127.119	0	0	0	0	0	0	0	200	903	0	0	0	0	0	0	0	603	903	0
525	3	44.4429	126.116	-762.03	131895	70472.4	17417.7	292.48	126.916	0	0	0	0	0	0	0	200	903	0	0	0	0	0	0	0	603	903	0
525	4	44.4429	125.81	-763.556	131346	70289.3	17280.3	292.055	127.981	0	0	0	0	0	0	0	200	903	0	0	0	0	0	0	0	603	903	0
525	5	44.5954	125.505	-765.997	131346	70106.2	17417.7	291.523	128.529	0	0	0	0	0	0	0	200	903	0	0	0	0	0	0	0	603	903	0
525	6	45.0532	123.522	-761.419	132078	70533.4	17234.6	292.634	126.537	0	0	0	0	0	0	0	200	903	0	0	0	0	0	0	0	603	903	0
525	7	44.4429	121.233	-766.302	132078	70411.4	16731	291.885	127.642	0	0	0	0	0	0	0	200	903	0	0	0	0	0	0	0	603	903	0
525	8	45.6636	120.622	-764.776	130980	69984.2	17051.5	291.509	128.734	0	0	0	0	0	0	0	200	903	0	0	0	0	0	0	0	603	903	0
525	9	44.748	119.097	-765.387	131346	70350.4	16639.5	291.915	128.393	0	0	0	0	0	0	0	200	903	0	0	0	0	0	0	0	603	903	0
526	0	46.7317	119.097	-766.302	131895	70472.4	16685.3	291.964	127.881	0	0	0	0	0	0	0	200	903	0	0	0	0	0	0	0	603	903	0
526	1	45.9687	115.892	-765.692	131804	70228.3	16776.8	291.719	127.863	0	0	0	0	0	0	0	200	903	0	0	0	0	0	0	0	603	903	0
526	2	46.1213	116.96	-769.049	131346	70228.3	16776.8	291.318	129.21	0	0	0	0	0	0	0	200	903	0	0	0	0	0	0	0	603	903	0
526	3	45.6636	115.434	-762.64	130247	70228.3	15952.8	292.086	129.215	0	0	0	0	0	0	0	200	903	0	0	0	0	0	0	0	603	903	0
526	4	45.0532	113.756	-768.744	130614	70045.2	16364.8	291.116	130.095	0	0	0	0	0	0	0	200	903	0	0	0	0	0	0	0	603	903	0
526	5	45.6636	113.146	-764.471	130431	69556.9	16227.5	290.987	129.385	0	0	0	0	0	0	0	200	903	0	0	0	0	0	0	0	603	903	0
526	6	44.5954	112.688	-765.081	130156	69984.2	15907.1	291.473	129.88	0	0	0	0	0	0	0	200	903	0	0	0	0	0	0	0	603	903	0
526	7	45.0532	111.009	-764.471	130247	70167.2	16135.9	291.785	129.624	0	0	0	0	0	0	0	200	903	0	0	0	0	0	0	0	603	903	0
526	8	44.748	109.789	-764.166	130614	69495.9	15449.3	290.943	129.077	0	0	0	0	0	0	0	200	903	0	0	0	0	0	0	0	603	903	0
526	9	44.4429	109.331	-765.387	129423	69373.8	15449.3	290.639	130.905	0	0	0	0	0	0	0	200	903	0	0	0	0	0	0	0	603	903	0
527	0	44.1377	108.263	-762.945	129332	69373.8	15220.4	290.929	130.483	0	0	0	0	0	0	0	200	903	0	0	0	0	0	0	0	603	903	0
527	1	43.6799	106.737	-763.556	129515	69373.8	14945.8	290.856	130.379	0	0	0	0	0	0	0	200	903	0	0	0	0	0	0	0	603	903	0
527	2	43.3747	105.516	-759.588	129149	69007.6	14945.8	290.849	129.975	0	0	0	0	0	0	0	200	903	0	0	0	0	0	0	0	603	903	0
527	3	42.6118	104.753	-759.893	128142	68824.5	14991.5	290.571	131.369	0	0	0	0	0	0	0	200	903	0	0	0	0	0	0	0	603	903	0
527	4	43.0696	103.99	-758.062	128325	68946.5	14671.1	290.951	130.72	0	0	0	0	0	0	0	200	903	0	0	0	0	0	0	0	603	903	0
527	5	42.0015	102.617	-757.757	128508	68275.2	14350.7	290.102	130.41	0	0	0	0	0	0	0	200	903	0	0	0	0	0	0	0	603	903	0
527	6	42.0015	101.091	-758.062	127959	68397.2	14030.2	290.226	131.203	0	0	0	0	0	0	0	200	903	0	0	0	0	0	0	0	603	903	0
527	7	40.1704	100.633	-756.537	127043	68275.2	14304.9	290.247	132.073	0	0	0	0	0	0	0	200	903	0	0	0	0	0	0	0	603	903	0
527	8	40.0178	99.4127	-755.011	126768	68153.1	13709.8	290.268	132.097	0	0	0	0	0	0	0	200	903	0	0	0	0	0	0	0	603	903	0
527	9	38.6445	98.3446	-752.264	127043	67359.6	13847.1	289.543	131.119	0	0	0	0	0	0	0	200	903	0	0	0	0	0	0	0	603	903	0
528	0	38.7971	97.7342	-749.823	126677	67481.7	13435.1	289.997	131.058	0	0	0	0	0	0	0	200	903	0	0	0	0	0	0	0	603	903	0
528	1	37.729	96.0558	-747.992	125670	67603.8	12977.4	290.38	131.99	0	0	0	0	0	0	0	200	903	0	0	0	0	0	0	0	603	903	0
528	2	38.6445	93.3092	-746.161	125395	67298.6	13252	290.193	131.946	0	0	0	0	0	0	0	200	903	0	0	0	0	0	0	0	603	903	0
528	3	37.8816	94.2247	-743.109	125487	66383	12748.5	289.332	131.133	0	0	0	0	0	0	0	200	903	0	0	0	0	0	0	0	603	903	0
528	4	38.0342	93.4618	-745.245	124937	66322.1	13206.3	288.994	132.354	0	0	0	0	0	0	0	200	903	0	0	0	0	0	0	0	603	903	0
528	5	37.8816	92.6988	-739.752	123564	66138.9	12656.9	289.407	132.965	0	0	0	0	0	0	0	200	903	0	0	0	0	0	0	0	603	903	0
528	6	36.8135	91.0204	-739.142	124388	65589.6	12519.6	288.738	131.713	0	0	0	0	0	0	0	200	903	0	0	0	0	0	0	0	603	903	0
528	7	38.3393	90.2574	-735.174	123289	65406.5	12428.1	288.967	132.299	0	0	0	0	0	0	0	200	903	0	0	0	0	0	0	0	603	903	0
528	8	36.0505	88.7315	-733.648	122374	65406.5	12199.2	289.152	133.198	0	0	0	0	0	0	0	200	903	0	0	0	0	0	0	0	603	903	0
528	9	36.8135	88.1212	-730.597	121825	65223.4	11924.5	289.274	133.253	0	0	0	0	0	0	0	200	903	0	0	0	0	0	0	0	603	903	0
529	0	36.9661	87.5108	-727.85	122282	64613	11970.3	288.772	131.995	0	0	0	0	0	0	0	200	903	0	0	0	0	0	0	0	603	903	0
529	1	36.2031	86.1375	-727.545	121825	64552	12107.6	288.726	132.554	0	0	0	0	0	0	0	200	903	0	0	0	0	0	0	0	603	903	0
529	2	36.2031	84.9168	-724.188	120451	64307.9	11604.1	288.8	133.674	0	0	0	0	0	0	0	200	903	0	0	0	0	0	0	0	603	903	0
529	3	35.5928	82.628	-722.357	119994	64491	11741.4	289.279	133.886	0	0	0	0	0	0	0	200	903	0	0	0	0	0	0	0	603	903	0
529	4	34.6772	82.9332	-719.915	119170	62965.1	11466.8	287.462	134.467	0	0	0	0	0	0	0	200	903	0	0	0	0	0	0	0	603	903	0
529	5	34.5246	81.5599	-716.559	118895	63758.5	11283.6	288.979	134.075	0	0	0	0	0	0	0	200	903	0	0	0	0	0	0	0	603	903	0
529	6	33.7617	80.797	-710.455	117979	63392.3	11054.8	289.228	133.938	0	0	0	0	0	0	0	200	903	0	0	0	0	0	0	0	603	903	0
529	7	34.8298	80.4918	-710.455	118437	63087.2	11146.3	288.798	133.294	0	0	0	0	0	0	0	200	903	0	0	0	0	0	0	0	603	903	0
529	8	36.2031	78.5081	-709.845	117247	62537.8	10871.7	288.101	134.827	0	0	0	0	0	0	0	200	903	0	0	0	0	0	0	0	603	903	0
529	9	34.5246	77.44	-707.403	116514	62476.8	10963.2	288.319	135.293	0	0	0	0	0	0	0	200	903	0	0	0	0	0	0	0	603	903	0
530	0	32.8462	75.9142	-703.741	115965	62110.6	10780.1	288.258	135.216	0	0	0	0	0	0	0	200	903	0	0	0	0	0	0	0	603	903	0
530	1	33.4565	76.8297	-700.384	115965	61683.4	10276.6	288.071	134.426	0	0	0	0	0	0	0	200	903	0	0	0	0	0	0	0	603	903	0
530	2	34.5246	74.846	-696.112	114409	61561.3	10551.2	288.436	135.646	0	0	0	0	0	0	0	200	903	0	0	0	0	0	0	0	603	903	0
530	3	33.3039	74.6935	-693.67	113951	61012	10368.1	287.955	135.727	0	0	0	0	0	0	0	200	903	0	0	0	0	0	0	0	603	903	0
530	4	33.7617	73.4727	-690.924	114043	60584.7	10322.3	287.687	134.942	0	0	0	0	0	0	0	200	903	0	0	0	0	0	0	0	603	903	0
530	5	32.6936	72.0995	-688.177	113219	60523.7	10230.8	287.948	135.48	0	0	0	0	0	0	0	200	903	0	0	0	0	0	0	0	603	903	0
530	6	33.1514	72.0995	-687.262	112852	60462.6	10185	287.976	135.794	0	0	0	0	0	0	0	200	903	0	0	0	0	0	0	0	603	903	0
530	7	33.1514	70.7262	-681.158	111571	60157.5	9910.36	288.316	136.204	0	0	0	0	0	0	0	200	903	0	0	0	0	0	0	0	603	903	0
530	8	31.7781	69.6581	-680.548	111479	59486.1	10047.7	287.409	136.192	0	0	0	0	0	0	0	200	903	0	0	0	0	0	0	0	603	903	0
530	9	33.7617	68.7425	-676.275	110106	59364	10001.9	287.781	137.188	0	0	0	0	0	0	0	200	903	0	0	0	0	0	0	0	603	903	0
531	0	31.7781	68.5899	-673.529	110197	59180.9	9773.03	287.867	136.388	0	0	0	0	0	0	0	200	903	0	0	0	0	0	0	0	603	903	0
531	1	32.541	66.9115	-670.172	109556	58936.8	9681.47	287.943	136.525	0	0	0	0	0	0	0	200	903	0	0	0	0	0	0	0	603	903	0
531	2	32.3884	66.6063	-668.036	109465	58326.4	9635.7	287.31	136.139	0	0	0	0	0	0	0	200	903	0	0	0	0	0	0	0	603	903	0
531	3	32.541	65.0804	-666.815	107817	58204.3	9269.49	287.287	138.31	0	0	0	0	0	0	0	200	903	0	0	0	0	0	0	0	603	903	0
531	4	32.2358	63.5545	-660.711	107085	58021.2	9452.59	287.816	137.925	0	0	0	0	0	0	0	200	903	0	0	0	0	0	0	0	603	903	0
531	5	30.5574	62.1812	-661.322	106902	57410.9	9406.82	286.812	138.352	0	0	0	0	0	0	0	200	903	0	0	0	0	0	0	0	603	903	0
531	6	32.2358	62.0287	-654.303	105894	56983.6	8949.05	287.091	138.157	0	0	0	0	0	0	0	200	903	0	0	0	0	0	0	0	603	903	0
531	7	30.7099	61.8761	-653.082	105345	57227.8	9177.93	287.627	138.695	0	0	0	0	0	0	0	200	903	0	0	0	0	0	0	0	603	903	0
531	8	31.6255	60.6554	-650.641	105528	57044.7	8903.28	287.675	137.809	0	0	0	0	0	0	0	200	903	0	0	0	0	0	0	0	603	903	0
531	9	31.1677	58.5191	-649.115	104979	56434.3	8720.17	286.94	138.274	0	0	0	0	0	0	0	200	903	0	0	0	0	0	0	0	603	903	0
532	0	31.7781	58.9769	-646.673	103606	56312.3	8903.28	287.08	139.787	0	0	0	0	0	0	0	200	903	0	0	0	0	0	0	0	603	903	0
532	1	31.1677	58.214	-643.316	103239	56129.1	8674.39	287.25	139.52	0	0	0	0	0	0	0	200	903	0	0	0	0	0	0	0	603	903	0
532	2	30.5574	56.5355	-640.57	102141	55579.8	8353.96	286.766	140.547	0	0	0	0	0	0	0	200	903	0	0	0	0	0	0	0	603	903	0
532	3	29.7944	56.2303	-638.739	102141	55762.9	8582.84	287.302	140.09	0	0	0	0	0	0	0	200	903	0	0	0	0	0	0	0	603	903	0
532	4	29.947	54.857	-634.771	101042	55396.7	8399.74	287.27	140.821	0	0	0	0	0	0	0	200	903	0	0	0	0	0	0	0	603	903	0
532	5	30.0996	54.2467	-630.499	101408	55274.7	7896.2	287.668	139.162	0	0	0	0	0	0	0	200	903	0	0	0	0	0	0	0	603	903	0
532	6	30.2522	52.4156	-628.973	100767	54664.3	8308.18	286.91	139.791	0	0	0	0	0	0	0	200	903	0	0	0	0	0	0	0	603	903	0
532	7	29.4892	53.1786	-625.616	99485.7	54847.4	8079.3	287.669	140.98	0	0	0	0	0	0	0	200	903	0	0	0	0	0	0	0	603	903	0
532	8	29.947	51.1949	-625.921	98936.4	54420.2	7667.32	286.944	141.935	0	0	0	0	0	0	0	200	903	0	0	0	0	0	0	0	603	903	0
532	9	30.8625	51.1949	-619.513	98112.4	53992.9	7941.97	287.154	141.63	0	0	0	0	0	0	0	200	903	0	0	0	0	0	0	0	603	903	0
533	0	29.4892	50.432	-621.344	98112.4	53626.7	7758.87	286.308	142.096	0	0	0	0	0	0	0	200	903	0	0	0	0	0	0	0	603	903	0
533	1	30.5574	50.1268	-618.292	97013.8	53870.9	7667.32	287.129	143.094	0	0	0	0	0	0	0	200	903	0	0	0	0	0	0	0	603	903	0
533	2	28.4211	49.8216	-616.156	97380	53504.6	7804.65	286.836	141.956	0	0	0	0	0	0	0	200	903	0	0	0	0	0	0	0	603	903	0
533	3	29.4892	48.9061	-613.714	96556	52833.2	7621.54	286.088	142.669	0	0	0	0	0	0	0	200	903	0	0	0	0	0	0	0	603	903	0
533	4	29.1841	47.838	-611.273	95823.6	53077.4	7392.66	286.831	143.239	0	0	0	0	0	0	0	200	903	0	0	0	0	0	0	0	603	903	0
533	5	29.3367	47.075	-610.357	94725	52711.2	7621.54	286.361	144.804	0	0	0	0	0	0	0	200	903	0	0	0	0	0	0	0	603	903	0
533	6	29.1841	46.3121	-608.526	94725	52345	7758.87	286.019	144.337	0	0	0	0	0	0	0	200	903	0	0	0	0	0	0	0	603	903	0
533	7	27.6582	46.0069	-606.085	94175.6	51978.8	7301.1	285.762	144.616	0	0	0	0	0	0	0	200	903	0	0	0	0	0	0	0	603	903	0
533	8	28.5737	46.0069	-601.202	93534.8	52222.9	7346.88	286.864	144.42	0	0	0	0	0	0	0	200	903	0	0	0	0	0	0	0	603	903	0
533	9	28.4211	44.9388	-600.287	93351.7	51978.8	7163.78	286.59	144.488	0	0	0	0	0	0	0	200	903	0	0	0	0	0	0	0	603	903	0
534	0	31.4729	44.0233	-598.761	92893.9	51429.4	7346.88	285.893	144.856	0	0	0	0	0	0	0	200	903	0	0	0	0	0	0	0	603	903	0
534	1	29.0315	44.0233	-595.404	91886.9	51429.4	7392.66	286.377	145.673	0	0	0	0	0	0	0	200	903	0	0	0	0	0	0	0	603	903	0
534	2	29.4892	43.1078	-595.404	90788.2	51673.6	6934.89	286.787	147.518	0	0	0	0	0	0	0	200	903	0	0	0	0	0	0	0	603	903	0
534	3	29.1841	42.3448	-592.352	90696.7	51429.4	7072.22	286.822	146.887	0	0	0	0	0	0	0	200	903	0	0	0	0	0	0	0	603	903	0
534	4	28.4211	41.2767	-592.047	90788.2	50697	6706.01	285.63	146.654	0	0	0	0	0	0	0	200	903	0	0	0	0	0	0	0	603	903	0
534	5	28.4211	41.5819	-589.605	89689.6	51185.3	6614.46	286.813	147.882	0	0	0	0	0	0	0	200	903	0	0	0	0	0	0	0	603	903	0
534	6	28.4211	40.8189	-587.164	89506.4	50697	6706.01	286.342	147.561	0	0	0	0	0	0	0	200	903	0	0	0	0	0	0	0	603	903	0
534	7	30.0996	40.056	-584.112	89323.4	50391.8	6980.67	286.271	147.078	0	0	0	0	0	0	0	200	903	0	0	0	0	0	0	0	603	903	0
534	8	27.6582	38.5301	-584.112	88133.2	50147.7	6522.9	285.853	149.116	0	0	0	0	0	0	0	200	903	0	0	0	0	0	0	0	603	903	0
534	9	28.2685	37.462	-581.976	87858.5	50147.7	6751.79	286.168	149.034	0	0	0	0	0	0	0	200	903	0	0	0	0	0	0	0	603	903	0
535	0	28.2685	37.9198	-578.009	87309.2	49903.6	6660.23	286.337	148.948	0	0	0	0	0	0	0	200	903	0	0	0	0	0	0	0	603	903	0
535	1	28.8789	37.462	-579.229	86576.8	49659.4	6477.13	285.734	150.531	0	0	0	0	0	0	0	200	903	0	0	0	0	0	0	0	603	903	0
535	2	29.4892	38.0724	-576.178	86393.7	49903.6	6431.35	286.611	150.057	0	0	0	0	0	0	0	200	903	0	0	0	0	0	0	0	603	903	0
535	3	28.2685	36.6991	-574.347	86302.1	49598.4	6660.23	286.356	149.739	0	0	0	0	0	0	0	200	903	0	0	0	0	0	0	0	603	903	0
535	4	29.1841	35.9361	-571.905	85935.9	49232.2	6339.8	286.085	149.737	0	0	0	0	0	0	0	200	903	0	0	0	0	0	0	0	603	903	0
535	5	29.4892	35.0206	-574.041	84654.1	49171.1	6248.25	285.658	152.53	0	0	0	0	0	0	0	200	903	0	0	0	0	0	0	0	603	903	0
535	6	29.4892	35.1732	-570.685	83921.7	48988	6339.8	285.841	152.946	0	0	0	0	0	0	0	200	903	0	0	0	0	0	0	0	603	903	0
535	7	28.4211	35.1732	-569.159	84562.6	48621.8	6110.92	285.428	151.425	0	0	0	0	0	0	0	200	903	0	0	0	0	0	0	0	603	903	0
535	8	28.7263	32.4266	-567.328	84379.5	48866	6110.92	286.134	151.268	0	0	0	0	0	0	0	200	903	0	0	0	0	0	0	0	603	903	0
535	9	28.2685	34.2577	-564.581	82914.6	48621.8	6156.69	286.12	153.14	0	0	0	0	0	0	0	200	903	0	0	0	0	0	0	0	603	903	0
536	0	28.8789	33.7999	-562.14	82731.6	48804.9	5927.81	286.82	152.827	0	0	0	0	0	0	0	200	903	0	0	0	0	0	0	0	603	903	0
536	1	28.8789	31.6637	-560.919	82365.4	47950.4	5882.04	285.486	153.16	0	0	0	0	0	0	0	200	903	0	0	0	0	0	0	0	603	903	0
536	2	29.0315	32.1214	-558.477	81449.8	48316.6	6202.47	286.515	154.157	0	0	0	0	0	0	0	200	903	0	0	0	0	0	0	0	603	903	0
536	3	29.0315	32.1214	-560.003	80900.5	48011.5	5744.71	285.734	155.536	0	0	0	0	0	0	0	200	903	0	0	0	0	0	0	0	603	903	0
536	4	28.4211	31.5111	-558.783	81266.7	47706.3	5744.71	285.375	154.565	0	0	0	0	0	0	0	200	903	0	0	0	0	0	0	0	603	903	0
536	5	27.9634	30.9007	-556.036	80900.5	47767.3	5836.26	285.907	154.505	0	0	0	0	0	0	0	200	903	0	0	0	0	0	0	0	603	903	0
536	6	28.4211	31.2059	-554.205	79435.7	47767.3	5561.6	286.191	156.667	0	0	0	0	0	0	0	200	903	0	0	0	0	0	0	0	603	903	0
536	7	28.116	30.443	-549.933	79710.3	47706.3	5378.5	286.749	155.054	0	0	0	0	0	0	0	200	903	0	0	0	0	0	0	0	603	903	0
536	8	28.8789	29.9852	-551.153	79252.5	47034.9	5653.15	285.339	156.206	0	0	0	0	0	0	0	200	903	0	0	0	0	0	0	0	603	903	0
536	9	30.4048	29.0697	-550.543	78428.6	47218	5698.93	285.766	157.543	0	0	0	0	0	0	0	200	903	0	0	0	0	0	0	0	603	903	0
537	0	28.4211	27.5438	-549.627	77696.1	47279.1	5332.72	286.02	158.639	0	0	0	0	0	0	0	200	903	0	0	0	0	0	0	0	603	903	0
537	1	27.9634	28.3067	-549.017	78062.3	46851.8	5698.93	285.338	157.814	0	0	0	0	0	0	0	200	903	0	0	0	0	0	0	0	603	903	0
537	2	27.9634	28.0016	-546.881	76780.6	46729.7	5195.39	285.448	159.603	0	0	0	0	0	0	0	200	903	0	0	0	0	0	0	0	603	903	0
537	3	27.0478	28.3067	-545.05	76689.1	46729.7	5607.38	285.735	159.299	0	0	0	0	0	0	0	200	903	0	0	0	0	0	0	0	603	903	0
537	4	27.5056	28.0016	-538.641	76872.2	46729.7	4966.51	286.755	157.285	0	0	0	0	0	0	0	200	903	0	0	0	0	0	0	0	603	903	0
537	5	27.5056	26.7809	-541.693	76322.8	45997.3	5195.39	284.914	159.103	0	0	0	0	0	0	0	200	903	0	0	0	0	0	0	0	603	903	0
537	6	27.8108	26.7809	-541.082	74858	45997.3	5058.06	285.01	161.651	0	0	0	0	0	0	0	200	903	0	0	0	0	0	0	0	603	903	0
537	7	27.9634	24.492	-541.082	74949.6	46302.5	5058.06	285.574	161.482	0	0	0	0	0	0	0	200	903	0	0	0	0	0	0	0	603	903	0
537	8	27.353	25.7127	-539.557	74766.4	45936.3	5195.39	285.137	161.43	0	0	0	0	0	0	0	200	903	0	0	0	0	0	0	0	603	903	0
537	9	26.5901	26.1705	-535.284	73942.5	45997.3	4874.96	285.931	161.863	0	0	0	0	0	0	0	200	903	0	0	0	0	0	0	0	603	903	0
538	0	26.1323	26.1705	-534.979	73850.9	45997.3	4874.96	285.98	161.955	0	0	0	0	0	0	0	200	903	0	0	0	0	0	0	0	603	903	0
538	1	27.5056	26.1705	-535.894	73576.3	45631.1	4783.4	285.149	162.704	0	0	0	0	0	0	0	200	903	0	0	0	0	0	0	0	603	903	0
538	2	26.7427	24.6446	-533.148	73484.7	45387	4874.96	285.13	162.168	0	0	0	0	0	0	0	200	903	0	0	0	0	0	0	0	603	903	0
538	3	26.1323	24.6446	-534.063	72386.1	45814.2	4646.07	285.784	164.462	0	0	0	0	0	0	0	200	903	0	0	0	0	0	0	0	603	903	0
538	4	26.1323	24.7972	-530.706	71928.3	45509	4554.52	285.752	164.467	0	0	0	0	0	0	0	200	903	0	0	0	0	0	0	0	603	903	0
538	5	25.9797	23.4239	-531.012	71836.8	45081.8	4462.97	284.898	164.717	0	0	0	0	0	0	0	200	903	0	0	0	0	0	0	0	603	903	0
538	6	26.5901	23.4239	-527.96	71287.4	45325.9	4462.97	285.851	164.976	0	0	0	0	0	0	0	200	903	0	0	0	0	0	0	0	603	903	0
538	7	25.3694	22.661	-528.57	70371.9	45387	4417.19	285.867	166.864	0	0	0	0	0	0	0	200	903	0	0	0	0	0	0	0	603	903	0
538	8	25.9797	22.8136	-528.57	71470.5	44837.6	4417.19	284.828	164.785	0	0	0	0	0	0	0	200	903	0	0	0	0	0	0	0	603	903	0
538	9	25.522	22.8136	-526.434	70188.8	44715.6	4279.86	284.941	166.671	0	0	0	0	0	0	0	200	903	0	0	0	0	0	0	0	603	903	0
539	0	25.0642	23.1187	-527.35	70005.7	45264.9	4005.2	285.835	167.25	0	0	0	0	0	0	0	200	903	0	0	0	0	0	0	0	603	903	0
539	1	25.6745	22.0506	-523.687	70005.7	45081.8	4096.76	286.085	166.322	0	0	0	0	0	0	0	200	903	0	0	0	0	0	0	0	603	903	0
539	2	24.9116	21.2877	-526.434	69731	44288.3	4142.53	284.129	167.541	0	0	0	0	0	0	0	200	903	0	0	0	0	0	0	0	603	903	0
539	3	25.2168	20.8299	-523.687	69364.8	44715.6	4005.2	285.386	167.545	0	0	0	0	0	0	0	200	903	0	0	0	0	0	0	0	603	903	0
539	4	23.9961	21.7455	-521.551	69273.3	44715.6	3867.87	285.736	167.178	0	0	0	0	0	0	0	200	903	0	0	0	0	0	0	0	603	903	0
539	5	24.1487	20.067	-521.551	68540.9	44227.3	3638.99	284.8	168.583	0	0	0	0	0	0	0	200	903	0	0	0	0	0	0	0	603	903	0
539	6	24.9116	19.7618	-520.941	67625.3	44471.4	3730.55	285.368	170.186	0	0	0	0	0	0	0	200	903	0	0	0	0	0	0	0	603	903	0
539	7	24.1487	19.9144	-521.551	67442.2	43800	3822.1	283.98	170.689	0	0	0	0	0	0	0	200	903	0	0	0	0	0	0	0	603	903	0
539	8	23.3857	18.9989	-520.941	67259.1	44227.3	3593.22	284.899	170.889	0	0	0	0	0	0	0	200	903	0	0	0	0	0	0	0	603	903	0
539	9	23.8435	18.8463	-519.11	66801.4	44105.2	3593.22	284.963	171.316	0	0	0	0	0	0	0	200	903	0	0	0	0	0	0	0	603	903	0
540	0	23.6909	19.4566	-517.279	66343.6	44044.2	3547.44	285.146	171.745	0	0	0	0	0	0	0	200	903	0	0	0	0	0	0	0	603	903	0
540	1	23.0806	19.304	-516.668	66618.3	44471.4	3501.66	286.073	171.062	0	0	0	0	0	0	0	200	903	0	0	0	0	0	0	0	603	903	0
540	2	23.8435	16.0997	-516.058	66068.9	43861.1	3410.11	284.993	171.974	0	0	0	0	0	0	0	200	903	0	0	0	0	0	0	0	603	903	0
540	3	25.8271	18.6937	-516.668	65428.1	44044.2	3272.78	285.247	173.365	0	0	0	0	0	0	0	200	903	0	0	0	0	0	0	0	603	903	0
540	4	23.2331	17.6256	-516.668	65885.9	43739	3364.33	284.656	172.479	0	0	0	0	0	0	0	200	903	0	0	0	0	0	0	0	603	903	0
540	5	23.2331	17.473	-516.058	65245	43494.9	3272.78	284.283	173.57	0	0	0	0	0	0	0	200	903	0	0	0	0	0	0	0	603	903	0
540	6	22.6228	17.0152	-515.143	64146.3	43616.9	3089.68	284.67	175.478	0	0	0	0	0	0	0	200	903	0	0	0	0	0	0	0	603	903	0
540	7	23.5383	16.7101	-513.617	64329.4	43861.1	3043.9	285.397	174.752	0	0	0	0	0	0	0	200	903	0	0	0	0	0	0	0	603	903	0
540	8	22.928	16.0997	-509.955	64604.1	43678	3089.68	285.651	173.314	0	0	0	0	0	0	0	200	903	0	0	0	0	0	0	0	603	903	0
540	9	23.6909	16.0997	-511.786	63047.7	43250.7	3181.23	284.51	176.808	0	0	0	0	0	0	0	200	903	0	0	0	0	0	0	0	603	903	0
541	0	25.2168	15.1842	-511.48	63413.9	43616.9	3043.9	285.276	176.019	0	0	0	0	0	0	0	200	903	0	0	0	0	0	0	0	603	903	0
541	1	23.3857	15.6419	-511.786	62589.9	43433.8	2906.57	284.867	177.703	0	0	0	0	0	0	0	200	903	0	0	0	0	0	0	0	603	903	0
541	2	22.7754	15.6419	-512.091	62864.6	43678	2952.35	285.293	177.239	0	0	0	0	0	0	0	200	903	0	0	0	0	0	0	0	603	903	0
541	3	22.7754	12.8954	-510.26	62132.2	43128.7	3272.78	284.523	178.234	0	0	0	0	0	0	0	200	903	0	0	0	0	0	0	0	603	903	0
541	4	23.6909	15.1842	-509.039	62406.8	43739	2815.02	285.925	177.403	0	0	0	0	0	0	0	200	903	0	0	0	0	0	0	0	603	903	0
541	5	22.0124	14.2686	-508.734	61766	43311.8	2677.69	285.136	178.589	0	0	0	0	0	0	0	200	903	0	0	0	0	0	0	0	603	903	0
541	6	23.2331	15.0316	-508.123	61216.7	43372.8	2815.02	285.359	179.524	0	0	0	0	0	0	0	200	903	0	0	0	0	0	0	0	603	903	0
541	7	22.3176	14.879	-505.072	61399.8	43372.8	2860.79	285.875	178.434	0	0	0	0	0	0	0	200	903	0	0	0	0	0	0	0	603	903	0
541	8	23.9961	13.9635	-508.734	61399.8	43311.8	2769.24	285.136	179.309	0	0	0	0	0	0	0	200	903	0	0	0	0	0	0	0	603	903	0
541	9	22.4702	13.6583	-508.734	60850.5	43189.7	2631.91	284.896	180.388	0	0	0	0	0	0	0	200	903	0	0	0	0	0	0	0	603	903	0
542	0	22.165	13.5057	-508.734	60575.8	43189.7	2586.14	284.896	180.928	0	0	0	0	0	0	0	200	903	0	0	0	0	0	0	0	603	903	0
542	1	22.0124	11.5221	-505.377	60850.5	42762.5	2631.91	284.615	179.594	0	0	0	0	0	0	0	200	903	0	0	0	0	0	0	0	603	903	0
542	2	22.165	13.0479	-504.767	59294	42823.5	2357.25	284.838	182.532	0	0	0	0	0	0	0	200	903	0	0	0	0	0	0	0	603	903	0
542	3	23.0806	12.8954	-507.208	59751.8	43067.6	2494.58	284.911	182.195	0	0	0	0	0	0	0	200	903	0	0	0	0	0	0	0	603	903	0
542	4	23.0806	11.5221	-508.123	59202.5	43189.7	2265.7	284.998	183.488	0	0	0	0	0	0	0	200	903	0	0	0	0	0	0	0	603	903	0
542	5	22.6228	12.7428	-505.377	59019.4	43616.9	2311.48	286.306	183.217	0	0	0	0	0	0	0	200	903	0	0	0	0	0	0	0	603	903	0
542	6	22.6228	11.8272	-504.156	58744.7	42884.5	2174.15	285.062	183.479	0	0	0	0	0	0	0	200	903	0	0	0	0	0	0	0	603	903	0
542	7	22.4702	11.2169	-505.072	58653.2	43739	2265.7	286.6	183.872	0	0	0	0	0	0	0	200	903	0	0	0	0	0	0	0	603	903	0
542	8	21.5547	10.4539	-503.546	57737.7	43189.7	2219.93	285.771	185.338	0	0	0	0	0	0	0	200	903	0	0	0	0	0	0	0	603	903	0
542	9	22.0124	11.5221	-504.156	57463	43128.7	2265.7	285.546	186.021	0	0	0	0	0	0	0	200	903	0	0	0	0	0	0	0	603	903	0
543	0	21.7073	10.4539	-502.325	57829.2	42945.6	2174.15	285.494	184.877	0	0	0	0	0	0	0	200	903	0	0	0	0	0	0	0	603	903	0
543	1	23.6909	10.1488	-505.377	57005.2	43128.7	1762.16	285.34	187.203	0	0	0	0	0	0	0	200	903	0	0	0	0	0	0	0	603	903	0
543	2	21.5547	9.69101	-502.02	56822.1	43128.7	2082.6	285.91	186.813	0	0	0	0	0	0	0	200	903	0	0	0	0	0	0	0	603	903	0
543	3	21.7073	9.8436	-503.546	56181.2	42945.6	2036.82	285.286	188.429	0	0	0	0	0	0	0	200	903	0	0	0	0	0	0	0	603	903	0
543	4	21.2495	9.23325	-503.546	55998.1	43433.8	1945.27	286.256	188.792	0	0	0	0	0	0	0	200	903	0	0	0	0	0	0	0	603	903	0
543	5	21.5547	9.99619	-502.325	56181.2	42945.6	2128.37	285.494	188.158	0	0	0	0	0	0	0	200	903	0	0	0	0	0	0	0	603	903	0
543	6	22.0124	10.1488	-501.715	56272.8	43128.7	1991.04	285.963	187.839	0	0	0	0	0	0	0	200	903	0	0	0	0	0	0	0	603	903	0
543	7	22.165	9.23325	-500.189	55723.5	43372.8	1716.39	286.713	188.595	0	0	0	0	0	0	0	200	903	0	0	0	0	0	0	0	603	903	0
543	8	22.7754	8.92807	-500.799	55174.2	43555.9	1945.27	286.973	189.828	0	0	0	0	0	0	0	200	903	0	0	0	0	0	0	0	603	903	0
543	9	22.0124	9.08066	-502.63	55357.3	43006.6	1624.83	285.563	189.865	0	0	0	0	0	0	0	200	903	0	0	0	0	0	0	0	603	903	0
544	0	23.6909	8.92807	-502.325	54899.5	42945.6	2174.15	285.494	190.709	0	0	0	0	0	0	0	200	903	0	0	0	0	0	0	0	603	903	0
544	1	21.8598	8.47031	-502.935	54899.5	43189.7	1670.61	285.875	190.842	0	0	0	0	0	0	0	200	903	0	0	0	0	0	0	0	603	903	0
544	2	21.8598	7.70737	-501.715	54441.8	43006.6	1716.39	285.719	191.489	0	0	0	0	0	0	0	200	903	0	0	0	0	0	0	0	603	903	0
544	3	21.8598	7.55478	-500.494	53984	43067.6	1670.61	286.05	192.139	0	0	0	0	0	0	0	200	903	0	0	0	0	0	0	0	603	903	0
544	4	23.0806	7.55478	-501.41	53434.7	43189.7	1624.83	286.137	193.431	0	0	0	0	0	0	0	200	903	0	0	0	0	0	0	0	603	903	0
544	5	22.6228	6.18149	-501.104	53160	43311.8	1487.5	286.433	193.914	0	0	0	0	0	0	0	200	903	0	0	0	0	0	0	0	603	903	0
544	6	23.0806	6.94443	-502.935	54075.6	43067.6	1441.73	285.633	192.48	0	0	0	0	0	0	0	200	903	0	0	0	0	0	0	0	603	903	0
544	7	22.7754	6.79184	-503.241	52702.2	43372.8	1624.83	286.187	195.274	0	0	0	0	0	0	0	200	903	0	0	0	0	0	0	0	603	903	0
544	8	22.6228	7.2496	-502.02	52610.7	43494.9	1395.95	286.64	195.202	0	0	0	0	0	0	0	200	903	0	0	0	0	0	0	0	603	903	0
544	9	22.3176	5.87631	-503.546	53068.5	43189.7	1716.39	285.771	194.61	0	0	0	0	0	0	0	200	903	0	0	0	0	0	0	0	603	903	0
545	0	22.4702	4.50302	-501.104	52885.3	43372.8	1350.18	286.554	194.462	0	0	0	0	0	0	0	200	903	0	0	0	0	0	0	0	603	903	0
545	1	22.4702	6.63925	-501.715	52610.7	43494.9	1487.5	286.692	195.138	0	0	0	0	0	0	0	200	903	0	0	0	0	0	0	0	603	903	0
545	2	23.2331	6.18149	-500.799	51786.7	43250.7	1350.18	286.363	196.592	0	0	0	0	0	0	0	200	903	0	0	0	0	0	0	0	603	903	0
545	3	25.0642	5.11337	-502.935	51512.1	43311.8	1395.95	286.118	197.577	0	0	0	0	0	0	0	200	903	0	0	0	0	0	0	0	603	903	0
545	4	23.5383	4.8082	-503.546	51145.9	43616.9	1212.85	286.62	198.429	0	0	0	0	0	0	0	200	903	0	0	0	0	0	0	0	603	903	0
545	5	22.928	4.96078	-505.377	51512.1	43678	1533.28	286.427	198.072	0	0	0	0	0	0	0	200	903	0	0	0	0	0	0	0	603	903	0
545	6	22.928	4.50302	-503.851	51420.5	43372.8	1258.62	286.083	197.945	0	0	0	0	0	0	0	200	903	0	0	0	0	0	0	0	603	903	0
545	7	23.2331	4.8082	-502.935	51969.8	43800	1075.52	287.089	196.667	0	0	0	0	0	0	0	200	903	0	0	0	0	0	0	0	603	903	0
545	8	22.928	3.89267	-504.767	50413.4	43739	1167.07	286.652	200.125	0	0	0	0	0	0	0	200	903	0	0	0	0	0	0	0	603	903	0
545	9	23.6909	4.50302	-505.377	50413.4	43616.9	1029.74	286.306	200.246	0	0	0	0	0	0	0	200	903	0	0	0	0	0	0	0	603	903	0
546	0	23.6909	3.43491	-505.072	51145.9	43372.8	1121.29	285.875	198.735	0	0	0	0	0	0	0	200	903	0	0	0	0	0	0	0	603	903	0
546	1	23.5383	2.97714	-507.513	50779.7	43800	1075.52	286.303	199.944	0	0	0	0	0	0	0	200	903	0	0	0	0	0	0	0	603	903	0
546	2	23.2331	2.36679	-505.682	50321.9	43861.1	800.859	286.737	200.487	0	0	0	0	0	0	0	200	903	0	0	0	0	0	0	0	603	903	0
546	3	23.3857	1.75644	-507.513	49864.1	43739	938.188	286.183	201.748	0	0	0	0	0	0	0	200	903	0	0	0	0	0	0	0	603	903	0
546	4	24.3013	1.90903	-507.208	50230.3	43922.1	800.859	286.596	200.967	0	0	0	0	0	0	0	200	903	0	0	0	0	0	0	0	603	903	0
546	5	22.7754	2.06161	-508.123	49040.1	44227.3	755.082	287.04	203.488	0	0	0	0	0	0	0	200	903	0	0	0	0	0	0	0	603	903	0
546	6	23.3857	2.51938	-508.429	49681	43861.1	938.188	286.268	202.285	0	0	0	0	0	0	0	200	903	0	0	0	0	0	0	0	603	903	0
546	7	23.9961	2.06161	-507.818	49681	44044.2	571.977	286.732	202.168	0	0	0	0	0	0	0	200	903	0	0	0	0	0	0	0	603	903	0
546	8	23.9961	1.75644	-511.175	50138.8	44044.2	892.411	286.163	201.915	0	0	0	0	0	0	0	200	903	0	0	0	0	0	0	0	603	903	0
546	9	23.6909	1.75644	-511.786	49040.1	43922.1	617.753	285.821	204.178	0	0	0	0	0	0	0	200	903	0	0	0	0	0	0	0	603	903	0
547	0	23.3857	1.60385	-513.006	48948.6	44105.2	480.424	285.974	204.585	0	0	0	0	0	0	0	200	903	0	0	0	0	0	0	0	603	903	0
547	1	22.7754	-0.227204	-513.617	49040.1	44166.3	526.2	285.991	204.52	0	0	0	0	0	0	0	200	903	0	0	0	0	0	0	0	603	903	0
547	2	22.928	-0.0746157	-513.922	48582.4	44471.4	297.318	286.534	205.467	0	0	0	0	0	0	0	200	903	0	0	0	0	0	0	0	603	903	0
547	3	22.928	-0.837555	-513.006	48582.4	44593.5	343.095	286.926	205.299	0	0	0	0	0	0	0	200	903	0	0	0	0	0	0	0	603	903	0
547	4	24.759	-0.227204	-514.837	49223.2	44044.2	480.424	285.55	204.391	0	0	0	0	0	0	0	200	903	0	0	0	0	0	0	0	603	903	0
547	5	25.9797	-1.60049	-519.415	48857	44715.6	251.542	286.088	205.938	0	0	0	0	0	0	0	200	903	0	0	0	0	0	0	0	603	903	0
547	6	24.1487	-1.60049	-518.499	48307.7	44471.4	343.095	285.77	206.832	0	0	0	0	0	0	0	200	903	0	0	0	0	0	0	0	603	903	0
547	7	24.3013	-1.29532	-517.889	48307.7	44715.6	159.989	286.342	206.722	0	0	0	0	0	0	0	200	903	0	0	0	0	0	0	0	603	903	0
547	8	23.8435	-2.36343	-519.72	48582.4	44837.6	159.989	286.273	206.522	0	0	0	0	0	0	0	200	903	0	0	0	0	0	0	0	603	903	0
547	9	23.3857	-2.36343	-519.11	47941.5	45264.9	22.6601	287.197	207.647	0	0	0	0	0	0	0	200	903	0	0	0	0	0	0	0	603	903	0
548	0	23.2331	-2.8212	-517.584	47758.4	44471.4	-23.1163	285.921	207.728	0	0	0	0	0	0	0	200	903	0	0	0	0	0	0	0	603	903	0
548	1	24.9116	-2.51602	-520.941	48490.8	45509	22.6601	287.359	206.917	0	0	0	0	0	0	0	200	903	0	0	0	0	0	0	0	603	903	0
548	2	25.522	-4.0419	-523.687	48216.2	45203.9	-251.998	286.318	207.929	0	0	0	0	0	0	0	200	903	0	0	0	0	0	0	0	603	903	0
548	3	24.4538	-4.34708	-523.687	47300.7	45325.9	-251.998	286.552	209.678	0	0	0	0	0	0	0	200	903	0	0	0	0	0	0	0	603	903	0
548	4	23.5383	-3.73673	-524.298	47483.8	45264.9	-480.88	286.334	209.434	0	0	0	0	0	0	0	200	903	0	0	0	0	0	0	0	603	903	0
548	5	24.759	-4.80484	-526.129	48216.2	45814.2	-114.669	287.078	208.357	0	0	0	0	0	0	0	200	903	0	0	0	0	0	0	0	603	903	0
548	6	24.4538	-5.72037	-525.824	47758.4	45814.2	-114.669	287.128	209.174	0	0	0	0	0	0	0	200	903	0	0	0	0	0	0	0	603	903	0
548	7	25.0642	-5.87296	-526.129	47666.9	45387	-572.433	286.266	209.401	0	0	0	0	0	0	0	200	903	0	0	0	0	0	0	0	603	903	0
548	8	25.3694	-6.02554	-527.655	47850	46058.4	-343.551	287.289	209.316	0	0	0	0	0	0	0	200	903	0	0	0	0	0	0	0	603	903	0
548	9	25.3694	-7.70401	-531.317	47758.4	46302.5	-663.985	287.147	210.113	0	0	0	0	0	0	0	200	903	0	0	0	0	0	0	0	603	903	0
549	0	25.3694	-7.55142	-529.791	47026	46241.5	-755.538	287.283	211.237	0	0	0	0	0	0	0	200	903	0	0	0	0	0	0	0	603	903	0
549	1	24.1487	-7.8566	-534.369	46751.3	46058.4	-572.433	286.192	212.511	0	0	0	0	0	0	0	200	903	0	0	0	0	0	0	0	603	903	0
549	2	26.2849	-7.8566	-533.453	47483.8	45997.3	-709.762	286.226	210.988	0	0	0	0	0	0	0	200	903	0	0	0	0	0	0	0	603	903	0
549	3	24.1487	-9.0773	-534.369	47483.8	46485.6	-892.867	286.992	211.14	0	0	0	0	0	0	0	200	903	0	0	0	0	0	0	0	603	903	0
549	4	25.522	-9.22989	-535.894	46842.9	46790.8	-1075.97	287.313	212.589	0	0	0	0	0	0	0	200	903	0	0	0	0	0	0	0	603	903	0
549	5	25.3694	-9.0773	-538.031	46659.8	47095.9	-847.091	287.534	213.277	0	0	0	0	0	0	0	200	903	0	0	0	0	0	0	0	603	903	0
549	6	26.2849	-9.99283	-542.608	46934.4	46973.9	-892.867	286.571	213.502	0	0	0	0	0	0	0	200	903	0	0	0	0	0	0	0	603	903	0
549	7	24.4538	-10.6032	-541.693	46659.8	46302.5	-1304.85	285.477	213.863	0	0	0	0	0	0	0	200	903	0	0	0	0	0	0	0	603	903	0
549	8	25.2168	-10.4506	-544.134	46476.7	47401.1	-1167.53	287.113	214.586	0	0	0	0	0	0	0	200	903	0	0	0	0	0	0	0	603	903	0
549	9	25.2168	-10.298	-542.608	47026	47523.2	-938.644	287.583	213.333	0	0	0	0	0	0	0	200	903	0	0	0	0	0	0	0	603	903	0
550	0	25.2168	-12.7394	-541.388	46842.9	47279.1	-1259.08	287.329	213.476	0	0	0	0	0	0	0	200	903	0	0	0	0	0	0	0	603	903	0
550	1	26.1323	-12.7394	-546.27	46110.4	47767.3	-1350.63	287.443	215.59	0	0	0	0	0	0	0	200	903	0	0	0	0	0	0	0	603	903	0
550	2	27.6582	-12.5868	-550.238	46385.1	47645.3	-1487.96	286.59	215.7	0	0	0	0	0	0	0	200	903	0	0	0	0	0	0	0	603	903	0
550	3	26.4375	-13.3498	-550.848	46110.4	47706.3	-1396.41	286.605	216.292	0	0	0	0	0	0	0	200	903	0	0	0	0	0	0	0	603	903	0
550	4	24.9116	-13.3498	-552.679	46018.9	47767.3	-1808.4	286.429	216.735	0	0	0	0	0	0	0	200	903	0	0	0	0	0	0	0	603	903	0
550	5	26.1323	-13.3498	-554.815	46110.4	48499.8	-1716.84	287.416	216.89	0	0	0	0	0	0	0	200	903	0	0	0	0	0	0	0	603	903	0
550	6	25.6745	-13.9601	-553.9	46385.1	47950.4	-1716.84	286.569	216.257	0	0	0	0	0	0	0	200	903	0	0	0	0	0	0	0	603	903	0
550	7	27.353	-15.486	-555.426	46568.2	48133.5	-1716.84	286.661	216.158	0	0	0	0	0	0	0	200	903	0	0	0	0	0	0	0	603	903	0
550	8	26.2849	-14.7231	-557.257	46293.6	48560.8	-2037.28	287.143	216.926	0	0	0	0	0	0	0	200	903	0	0	0	0	0	0	0	603	903	0
550	9	27.2004	-15.7912	-560.309	45835.8	48621.8	-2037.28	286.777	218.195	0	0	0	0	0	0	0	200	903	0	0	0	0	0	0	0	603	903	0
551	0	27.0478	-16.5541	-560.309	46202	48316.6	-1899.95	286.232	217.542	0	0	0	0	0	0	0	200	903	0	0	0	0	0	0	0	603	903	0
551	1	26.5901	-17.1645	-563.665	45286.5	49110.1	-2128.83	287.126	219.657	0	0	0	0	0	0	0	200	903	0	0	0	0	0	0	0	603	903	0
551	2	26.5901	-16.8593	-564.276	45378	49232.2	-2174.61	287.248	219.582	0	0	0	0	0	0	0	200	903	0	0	0	0	0	0	0	603	903	0
551	3	26.4375	-16.8593	-564.276	46202	48682.9	-2357.71	286.275	218.122	0	0	0	0	0	0	0	200	903	0	0	0	0	0	0	0	603	903	0
551	4	25.9797	-17.317	-563.665	46018.9	49293.2	-2220.38	287.451	218.358	0	0	0	0	0	0	0	200	903	0	0	0	0	0	0	0	603	903	0
551	5	26.2849	-18.2326	-568.243	45744.2	49476.3	-2861.25	287.069	219.499	0	0	0	0	0	0	0	200	903	0	0	0	0	0	0	0	603	903	0
551	6	28.5737	-18.9955	-571.6	46018.9	49720.5	-2403.49	286.985	219.491	0	0	0	0	0	0	0	200	903	0	0	0	0	0	0	0	603	903	0
551	7	26.7427	-20.0636	-572.821	45744.2	48927	-2723.92	285.414	220.142	0	0	0	0	0	0	0	200	903	0	0	0	0	0	0	0	603	903	0
551	8	27.0478	-19.911	-575.262	45286.5	49842.5	-2632.37	286.643	221.277	0	0	0	0	0	0	0	200	903	0	0	0	0	0	0	0	603	903	0
551	9	25.522	-21.1317	-576.178	45286.5	49903.6	-2723.92	286.611	221.402	0	0	0	0	0	0	0	200	903	0	0	0	0	0	0	0	603	903	0
552	0	26.4375	-22.505	-577.398	46568.2	50147.7	-2861.25	286.851	219.348	0	0	0	0	0	0	0	200	903	0	0	0	0	0	0	0	603	903	0
552	1	26.1323	-21.5895	-578.314	46476.7	50025.6	-3181.69	286.503	219.634	0	0	0	0	0	0	0	200	903	0	0	0	0	0	0	0	603	903	0
552	2	26.5901	-22.1999	-581.06	45103.4	50452.9	-2952.8	286.829	222.377	0	0	0	0	0	0	0	200	903	0	0	0	0	0	0	0	603	903	0
552	3	25.8271	-23.1154	-583.197	45652.7	49903.6	-3685.23	285.569	221.72	0	0	0	0	0	0	0	200	903	0	0	0	0	0	0	0	603	903	0
552	4	26.1323	-24.1835	-586.859	46202	50513.9	-3685.23	286.075	221.272	0	0	0	0	0	0	0	200	903	0	0	0	0	0	0	0	603	903	0
552	5	26.2849	-24.9464	-585.638	45286.5	51246.3	-3227.46	287.505	222.672	0	0	0	0	0	0	0	200	903	0	0	0	0	0	0	0	603	903	0
552	6	25.2168	-25.4042	-591.742	45835.8	51185.3	-4097.22	286.499	222.541	0	0	0	0	0	0	0	200	903	0	0	0	0	0	0	0	603	903	0
552	7	25.3694	-26.3197	-592.047	46202	51185.3	-3822.56	286.455	221.962	0	0	0	0	0	0	0	200	903	0	0	0	0	0	0	0	603	903	0
552	8	25.8271	-27.5404	-593.268	45561.1	51551.5	-4051.44	286.894	223.203	0	0	0	0	0	0	0	200	903	0	0	0	0	0	0	0	603	903	0
552	9	26.2849	-27.3878	-596.624	45286.5	51673.6	-4142.99	286.61	224.095	0	0	0	0	0	0	0	200	903	0	0	0	0	0	0	0	603	903	0
553	0	25.6745	-28.7611	-596.93	46385.1	51673.6	-4234.54	286.566	222.294	0	0	0	0	0	0	0	200	903	0	0	0	0	0	0	0	603	903	0
553	1	27.2004	-29.8293	-602.118	46659.8	51917.7	-4417.65	286.225	222.507	0	0	0	0	0	0	0	200	903	0	0	0	0	0	0	0	603	903	0
553	2	25.8271	-31.05	-603.338	45561.1	52345	-4600.76	286.759	224.485	0	0	0	0	0	0	0	200	903	0	0	0	0	0	0	0	603	903	0
553	3	25.9797	-31.8129	-605.475	45927.3	52528.1	-4463.43	286.755	224.147	0	0	0	0	0	0	0	200	903	0	0	0	0	0	0	0	603	903	0
553	4	25.522	-32.1181	-608.831	46293.6	51856.7	-4600.76	285.174	223.963	0	0	0	0	0	0	0	200	903	0	0	0	0	0	0	0	603	903	0
553	5	25.8271	-32.7284	-607.611	47209.1	52650.1	-5058.52	286.651	222.304	0	0	0	0	0	0	0	200	903	0	0	0	0	0	0	0	603	903	0
553	6	25.9797	-32.2707	-611.273	45744.2	52955.3	-4646.53	286.631	225.166	0	0	0	0	0	0	0	200	903	0	0	0	0	0	0	0	603	903	0
553	7	26.1323	-32.4232	-611.578	46385.1	52772.2	-5150.07	286.289	224.155	0	0	0	0	0	0	0	200	903	0	0	0	0	0	0	0	603	903	0
553	8	27.0478	-35.0172	-614.019	46385.1	53138.4	-5058.52	286.542	224.457	0	0	0	0	0	0	0	200	903	0	0	0	0	0	0	0	603	903	0
553	9	26.2849	-35.3224	-617.682	45652.7	53504.6	-5195.85	286.622	226.09	0	0	0	0	0	0	0	200	903	0	0	0	0	0	0	0	603	903	0
554	0	26.5901	-35.475	-618.902	45652.7	53077.4	-5150.07	285.761	226.236	0	0	0	0	0	0	0	200	903	0	0	0	0	0	0	0	603	903	0
554	1	25.0642	-36.3905	-620.733	46018.9	53382.6	-5607.84	285.999	225.864	0	0	0	0	0	0	0	200	903	0	0	0	0	0	0	0	603	903	0
554	2	25.3694	-39.2897	-624.09	46568.2	53809.8	-5516.28	286.221	225.382	0	0	0	0	0	0	0	200	903	0	0	0	0	0	0	0	603	903	0
554	3	24.759	-37.3061	-622.259	45927.3	54054	-5653.61	286.867	226.193	0	0	0	0	0	0	0	200	903	0	0	0	0	0	0	0	603	903	0
554	4	25.0642	-38.5268	-625.006	45378	53687.7	-5928.27	285.9	227.396	0	0	0	0	0	0	0	200	903	0	0	0	0	0	0	0	603	903	0
554	5	25.8271	-40.2052	-627.142	45927.3	54359.1	-5974.05	286.678	226.767	0	0	0	0	0	0	0	200	903	0	0	0	0	0	0	0	603	903	0
554	6	25.522	-40.5104	-628.058	46110.4	54237.1	-6019.82	286.357	226.582	0	0	0	0	0	0	0	200	903	0	0	0	0	0	0	0	603	903	0
554	7	25.9797	-40.2052	-632.025	45286.5	54298.1	-6157.15	285.911	228.347	0	0	0	0	0	0	0	200	903	0	0	0	0	0	0	0	603	903	0
554	8	25.8271	-40.9682	-629.278	46110.4	54664.3	-6294.48	286.868	226.725	0	0	0	0	0	0	0	200	903	0	0	0	0	0	0	0	603	903	0
554	9	25.2168	-43.1044	-636.908	46018.9	54481.2	-6157.15	285.54	227.746	0	0	0	0	0	0	0	200	903	0	0	0	0	0	0	0	603	903	0
555	0	26.4375	-42.494	-636.297	45652.7	54786.4	-6431.81	286.102	228.253	0	0	0	0	0	0	0	200	903	0	0	0	0	0	0	0	603	903	0
555	1	25.2168	-43.257	-639.959	45286.5	54908.4	-6477.59	285.8	229.235	0	0	0	0	0	0	0	200	903	0	0	0	0	0	0	0	603	903	0
555	2	25.0642	-44.9355	-641.18	46110.4	55335.7	-6706.47	286.303	228.085	0	0	0	0	0	0	0	200	903	0	0	0	0	0	0	0	603	903	0
555	3	26.2849	-46.0036	-642.401	45561.1	55640.9	-6523.36	286.614	229.077	0	0	0	0	0	0	0	200	903	0	0	0	0	0	0	0	603	903	0
555	4	27.5056	-46.0036	-645.758	45103.4	55396.7	-6798.02	285.786	230.154	0	0	0	0	0	0	0	200	903	0	0	0	0	0	0	0	603	903	0
555	5	26.2849	-46.1562	-649.115	45835.8	56007.1	-6843.8	286.282	229.387	0	0	0	0	0	0	0	200	903	0	0	0	0	0	0	0	603	903	0
555	6	25.9797	-47.682	-649.42	45378	55762.9	-6798.02	285.866	230.125	0	0	0	0	0	0	0	200	903	0	0	0	0	0	0	0	603	903	0
555	7	26.1323	-47.5294	-651.251	45011.8	55885	-7026.9	285.812	230.884	0	0	0	0	0	0	0	200	903	0	0	0	0	0	0	0	603	903	0
555	8	27.6582	-48.2924	-652.166	45194.9	56129.1	-6798.02	286.066	230.7	0	0	0	0	0	0	0	200	903	0	0	0	0	0	0	0	603	903	0
555	9	25.9797	-49.0553	-653.692	45469.6	56617.4	-7210.01	286.612	230.442	0	0	0	0	0	0	0	200	903	0	0	0	0	0	0	0	603	903	0
556	0	27.0478	-52.5648	-655.218	45286.5	56556.4	-7210.01	286.317	230.883	0	0	0	0	0	0	0	200	903	0	0	0	0	0	0	0	603	903	0
556	1	27.0478	-50.276	-656.439	44828.7	56007.1	-7393.11	285.32	231.709	0	0	0	0	0	0	0	200	903	0	0	0	0	0	0	0	603	903	0
556	2	26.5901	-51.039	-661.017	45469.6	56800.5	-6889.57	285.929	231.213	0	0	0	0	0	0	0	200	903	0	0	0	0	0	0	0	603	903	0
556	3	27.9634	-52.4123	-661.322	45378	57044.7	-7484.67	286.259	231.383	0	0	0	0	0	0	0	200	903	0	0	0	0	0	0	0	603	903	0
556	4	27.2004	-53.9381	-665.594	45011.8	56983.6	-7072.68	285.613	232.374	0	0	0	0	0	0	0	200	903	0	0	0	0	0	0	0	603	903	0
556	5	27.2004	-53.9381	-665.594	44462.5	57044.7	-7301.56	285.705	233.199	0	0	0	0	0	0	0	200	903	0	0	0	0	0	0	0	603	903	0
556	6	27.5056	-54.8537	-667.12	45469.6	57288.8	-7484.67	285.875	231.842	0	0	0	0	0	0	0	200	903	0	0	0	0	0	0	0	603	903	0
556	7	26.8953	-55.3114	-666.51	44462.5	57655	-7347.34	286.503	233.291	0	0	0	0	0	0	0	200	903	0	0	0	0	0	0	0	603	903	0
556	8	27.8108	-54.8537	-668.646	45103.4	57471.9	-7622	285.953	232.545	0	0	0	0	0	0	0	200	903	0	0	0	0	0	0	0	603	903	0
556	9	28.116	-56.227	-670.782	45011.8	58021.2	-7759.32	286.498	232.897	0	0	0	0	0	0	0	200	903	0	0	0	0	0	0	0	603	903	0
557	0	28.4211	-56.3795	-674.749	45194.9	58021.2	-7667.77	285.989	233.02	0	0	0	0	0	0	0	200	903	0	0	0	0	0	0	0	603	903	0
557	1	27.6582	-59.1261	-672.613	44187.9	57716.1	-7622	285.809	234.304	0	0	0	0	0	0	0	200	903	0	0	0	0	0	0	0	603	903	0
557	2	26.2849	-59.7365	-677.801	44737.2	57899.2	-7850.88	285.422	233.997	0	0	0	0	0	0	0	200	903	0	0	0	0	0	0	0	603	903	0
557	3	27.5056	-59.5839	-680.243	45011.8	57716.1	-8033.99	284.846	233.83	0	0	0	0	0	0	0	200	903	0	0	0	0	0	0	0	603	903	0
557	4	26.8953	-59.5839	-680.853	44187.9	58082.3	-7942.43	285.308	235.099	0	0	0	0	0	0	0	200	903	0	0	0	0	0	0	0	603	903	0
557	5	28.4211	-60.9572	-682.989	44554.1	58326.4	-8354.42	285.399	234.766	0	0	0	0	0	0	0	200	903	0	0	0	0	0	0	0	603	903	0
557	6	27.9634	-61.2624	-684.21	44279.4	58692.6	-8125.54	285.782	235.284	0	0	0	0	0	0	0	200	903	0	0	0	0	0	0	0	603	903	0
557	7	28.4211	-62.7882	-687.567	44828.7	58997.8	-8400.2	285.807	234.801	0	0	0	0	0	0	0	200	903	0	0	0	0	0	0	0	603	903	0
557	8	27.2004	-64.0089	-689.398	44096.3	58753.7	-8445.97	285.225	236.037	0	0	0	0	0	0	0	200	903	0	0	0	0	0	0	0	603	903	0
557	9	26.8953	-63.7038	-691.534	44737.2	58997.8	-8171.31	285.314	235.307	0	0	0	0	0	0	0	200	903	0	0	0	0	0	0	0	603	903	0
558	0	25.9797	-64.6193	-693.365	44737.2	59669.2	-8629.08	286.057	235.478	0	0	0	0	0	0	0	200	903	0	0	0	0	0	0	0	603	903	0
558	1	26.2849	-65.84	-694.281	44554.1	59425	-8674.85	285.592	235.827	0	0	0	0	0	0	0	200	903	0	0	0	0	0	0	0	603	903	0
558	2	26.2849	-67.5185	-695.196	44187.9	59486.1	-8537.53	285.567	236.438	0	0	0	0	0	0	0	200	903	0	0	0	0	0	0	0	603	903	0
558	3	26.8953	-67.0607	-697.943	44462.5	59791.3	-8857.96	285.668	236.295	0	0	0	0	0	0	0	200	903	0	0	0	0	0	0	0	603	903	0
558	4	27.353	-68.2814	-701.3	44920.3	59669.2	-8720.63	285.084	235.947	0	0	0	0	0	0	0	200	903	0	0	0	0	0	0	0	603	903	0
558	5	26.1323	-71.028	-702.52	44462.5	59974.4	-8857.96	285.37	236.71	0	0	0	0	0	0	0	200	903	0	0	0	0	0	0	0	603	903	0
558	6	25.522	-70.1125	-705.267	44187.9	60279.5	-9086.84	285.471	237.346	0	0	0	0	0	0	0	200	903	0	0	0	0	0	0	0	603	903	0
558	7	25.3694	-70.4176	-706.488	44187.9	60340.6	-8995.29	285.409	237.454	0	0	0	0	0	0	0	200	903	0	0	0	0	0	0	0	603	903	0
558	8	25.522	-72.7065	-708.014	44462.5	60096.4	-9361.5	284.88	237.201	0	0	0	0	0	0	0	200	903	0	0	0	0	0	0	0	603	903	0
558	9	24.6064	-73.7746	-709.845	44096.3	60279.5	-9407.28	284.919	237.879	0	0	0	0	0	0	0	200	903	0	0	0	0	0	0	0	603	903	0
559	0	25.2168	-73.3168	-711.371	44462.5	60828.9	-9178.39	285.509	237.497	0	0	0	0	0	0	0	200	903	0	0	0	0	0	0	0	603	903	0
559	1	25.6745	-74.3849	-713.202	44920.3	61256.1	-9636.16	285.889	237.016	0	0	0	0	0	0	0	200	903	0	0	0	0	0	0	0	603	903	0
559	2	25.6745	-75.453	-715.643	44645.6	61073	-9498.83	285.34	237.615	0	0	0	0	0	0	0	200	903	0	0	0	0	0	0	0	603	903	0
559	3	25.6745	-76.5211	-715.338	43821.6	61073	-9407.28	285.376	238.74	0	0	0	0	0	0	0	200	903	0	0	0	0	0	0	0	603	903	0
559	4	24.6064	-78.1996	-719.915	43913.2	61195.1	-9224.17	285.003	239.002	0	0	0	0	0	0	0	200	903	0	0	0	0	0	0	0	603	903	0
559	5	26.4375	-78.3522	-721.441	44096.3	61073	-9727.71	284.654	238.878	0	0	0	0	0	0	0	200	903	0	0	0	0	0	0	0	603	903	0
559	6	25.0642	-79.1151	-721.747	43455.4	61500.2	-10002.4	285.21	239.791	0	0	0	0	0	0	0	200	903	0	0	0	0	0	0	0	603	903	0
559	7	26.4375	-79.4203	-723.578	44096.3	61500.2	-10002.4	284.995	239.058	0	0	0	0	0	0	0	200	903	0	0	0	0	0	0	0	603	903	0
559	8	26.1323	-80.0307	-725.714	44096.3	61439.2	-9865.04	284.66	239.237	0	0	0	0	0	0	0	200	903	0	0	0	0	0	0	0	603	903	0
559	9	26.1323	-81.8617	-728.766	44737.2	61500.2	-10002.4	284.39	238.612	0	0	0	0	0	0	0	200	903	0	0	0	0	0	0	0	603	903	0
560	0	25.8271	-83.235	-727.545	43638.5	61988.5	-9681.93	285.202	240.019	0	0	0	0	0	0	0	200	903	0	0	0	0	0	0	0	603	903	0
560	1	25.522	-83.998	-729.986	44096.3	61866.5	-9910.82	284.75	239.593	0	0	0	0	0	0	0	200	903	0	0	0	0	0	0	0	603	903	0
560	2	27.2004	-85.3712	-730.597	44462.5	61927.5	-10002.4	284.763	239.142	0	0	0	0	0	0	0	200	903	0	0	0	0	0	0	0	603	903	0
560	3	25.6745	-84.6083	-733.343	44462.5	62354.7	-9773.49	285.028	239.37	0	0	0	0	0	0	0	200	903	0	0	0	0	0	0	0	603	903	0
560	4	27.0478	-86.2868	-733.954	44187.9	62171.6	-10002.4	284.708	239.795	0	0	0	0	0	0	0	200	903	0	0	0	0	0	0	0	603	903	0
560	5	27.2004	-86.4394	-735.479	44187.9	62171.6	-10139.7	284.532	239.92	0	0	0	0	0	0	0	200	903	0	0	0	0	0	0	0	603	903	0
560	6	28.7263	-87.9652	-738.531	44004.8	62904.1	-9865.04	285.175	240.416	0	0	0	0	0	0	0	200	903	0	0	0	0	0	0	0	603	903	0
560	7	27.353	-88.7282	-738.836	43547	63087.2	-10048.1	285.387	241.06	0	0	0	0	0	0	0	200	903	0	0	0	0	0	0	0	603	903	0
560	8	27.6582	-89.4911	-740.973	43455.4	62782	-9910.82	284.729	241.354	0	0	0	0	0	0	0	200	903	0	0	0	0	0	0	0	603	903	0
560	9	27.6582	-90.5592	-740.973	43730.1	63026.1	-10048.1	285.059	240.983	0	0	0	0	0	0	0	200	903	0	0	0	0	0	0	0	603	903	0
561	0	28.5737	-91.6273	-742.498	44645.6	63331.3	-10139.7	285.295	239.871	0	0	0	0	0	0	0	200	903	0	0	0	0	0	0	0	603	903	0
561	1	28.116	-92.2377	-741.278	42906.1	63209.2	-9498.83	285.271	242.119	0	0	0	0	0	0	0	200	903	0	0	0	0	0	0	0	603	903	0
561	2	29.4892	-92.8481	-743.109	44096.3	63331.3	-10139.7	285.225	240.66	0	0	0	0	0	0	0	200	903	0	0	0	0	0	0	0	603	903	0
561	3	29.7944	-94.5265	-744.33	43547	63697.5	-9681.93	285.577	241.495	0	0	0	0	0	0	0	200	903	0	0	0	0	0	0	0	603	903	0
561	4	29.947	-94.6791	-746.771	42906.1	63697.5	-10048.1	285.297	242.544	0	0	0	0	0	0	0	200	903	0	0	0	0	0	0	0	603	903	0
561	5	30.7099	-96.0524	-744.94	42631.4	63758.5	-9544.61	285.589	242.772	0	0	0	0	0	0	0	200	903	0	0	0	0	0	0	0	603	903	0
561	6	30.0996	-97.5783	-747.686	42631.4	63514.4	-10002.4	284.948	242.982	0	0	0	0	0	0	0	200	903	0	0	0	0	0	0	0	603	903	0
561	7	32.8462	-98.3412	-747.076	42723	63880.6	-10139.7	285.508	242.813	0	0	0	0	0	0	0	200	903	0	0	0	0	0	0	0	603	903	0
561	8	30.8625	-98.799	-746.771	42631.4	63575.4	-10231.3	285.134	242.912	0	0	0	0	0	0	0	200	903	0	0	0	0	0	0	0	603	903	0
561	9	31.6255	-100.935	-747.992	43363.9	63331.3	-9819.26	284.668	242.026	0	0	0	0	0	0	0	200	903	0	0	0	0	0	0	0	603	903	0
562	0	32.6936	-101.698	-747.992	42814.5	64185.8	-10277	285.811	242.761	0	0	0	0	0	0	0	200	903	0	0	0	0	0	0	0	603	903	0
562	1	32.9988	-101.851	-750.433	42173.7	63880.6	-9956.59	285.125	243.801	0	0	0	0	0	0	0	200	903	0	0	0	0	0	0	0	603	903	0
562	2	33.1514	-103.377	-750.433	42265.2	63331.3	-10048.1	284.393	243.679	0	0	0	0	0	0	0	200	903	0	0	0	0	0	0	0	603	903	0
562	3	32.6936	-104.75	-751.654	42906.1	64002.7	-9956.59	285.149	242.918	0	0	0	0	0	0	0	200	903	0	0	0	0	0	0	0	603	903	0
562	4	33.9143	-105.055	-748.602	42448.3	64124.8	-9956.59	285.659	243.297	0	0	0	0	0	0	0	200	903	0	0	0	0	0	0	0	603	903	0
562	5	34.9824	-105.971	-748.907	42173.7	63636.5	-10185.5	284.972	243.686	0	0	0	0	0	0	0	200	903	0	0	0	0	0	0	0	603	903	0
562	6	34.5246	-108.107	-748.907	42265.2	63819.6	-10093.9	285.217	243.564	0	0	0	0	0	0	0	200	903	0	0	0	0	0	0	0	603	903	0
562	7	34.5246	-108.87	-749.518	41349.7	63758.5	-10048.1	285.066	244.832	0	0	0	0	0	0	0	200	903	0	0	0	0	0	0	0	603	903	0
562	8	34.8298	-110.548	-751.043	41075.1	63941.6	-10002.4	285.137	245.309	0	0	0	0	0	0	0	200	903	0	0	0	0	0	0	0	603	903	0
562	9	34.8298	-111.006	-750.433	41807.5	63880.6	-10322.8	285.125	244.289	0	0	0	0	0	0	0	200	903	0	0	0	0	0	0	0	603	903	0
563	0	35.8979	-112.074	-748.602	41990.6	64063.7	-10002.4	285.578	243.908	0	0	0	0	0	0	0	200	903	0	0	0	0	0	0	0	603	903	0
563	1	35.2876	-113.142	-747.076	40617.3	64002.7	-10048.1	285.671	245.632	0	0	0	0	0	0	0	200	903	0	0	0	0	0	0	0	603	903	0
563	2	35.8979	-114.058	-747.076	40617.3	63575.4	-10048.1	285.099	245.632	0	0	0	0	0	0	0	200	903	0	0	0	0	0	0	0	603	903	0
563	3	35.8979	-115.278	-749.518	40617.3	64307.9	-10093.9	285.799	245.809	0	0	0	0	0	0	0	200	903	0	0	0	0	0	0	0	603	903	0
563	4	35.8979	-116.041	-748.602	40525.8	63697.5	-10368.6	285.089	245.865	0	0	0	0	0	0	0	200	903	0	0	0	0	0	0	0	603	903	0
563	5	36.2031	-117.415	-744.635	40159.5	63636.5	-9498.83	285.46	246.068	0	0	0	0	0	0	0	200	903	0	0	0	0	0	0	0	603	903	0
563	6	35.8979	-118.483	-747.076	40617.3	63941.6	-10414.4	285.589	245.632	0	0	0	0	0	0	0	200	903	0	0	0	0	0	0	0	603	903	0
563	7	37.1186	-119.093	-745.55	39610.2	63880.6	-10139.7	285.683	246.871	0	0	0	0	0	0	0	200	903	0	0	0	0	0	0	0	603	903	0
563	8	35.4402	-120.009	-743.719	39518.6	63331.3	-10368.6	285.155	246.863	0	6.11755	7.36664	-21.5504	2512.03	-1006.48	1581.3	153.296	786.435	0	0	0	0	0	0	0	603	903	0
563	9	36.5083	-121.229	-743.719	39976.4	63392.3	-10414.4	285.237	246.248	0	10.2374	10.8762	-40.7764	4068.43	-2471.32	1123.53	139.393	803.226	0	0	0	0	0	0	0	603	903	0
564	0	36.6609	-122.755	-742.498	39518.6	63270.3	-10643.2	285.213	246.776	0	2.30285	-0.567928	-43.523	3610.66	-1860.97	1215.09	157.242	820.04	0	0	0	0	0	0	0	603	903	0
564	1	35.8979	-122.755	-744.024	39152.4	63087.2	-10551.7	284.792	247.377	0	-0.291141	-10.4861	-29.4849	2145.82	-1616.83	1352.42	145.164	830.223	0	0	0	0	0	0	0	603	903	0
564	2	35.4402	-123.671	-739.142	39518.6	63087.2	-10505.9	285.352	246.534	0	8.25378	-5.45074	-20.0245	2512.03	-1433.72	1718.63	128.401	777.552	0	0	0	0	0	0	0	603	903	0
564	3	35.5928	-125.044	-740.057	39152.4	63087.2	-10505.9	285.246	247.095	0	3.06579	-7.89215	-30.7056	2054.26	-1006.48	1260.86	167.222	836.098	0	0	0	0	0	0	0	603	903	0
564	4	36.8135	-126.875	-736.7	38236.9	62537.8	-10689	284.889	248.097	0	-3.64807	-18.8785	-41.0816	3610.66	-1433.72	1627.08	165.101	815.11	0	0	0	0	0	0	0	603	903	0
564	5	35.7453	-127.486	-737.31	38236.9	62598.9	-10551.7	284.902	248.14	0	-2.73255	-20.5569	-43.2178	4434.64	-2532.36	1718.63	141.405	800.389	0	0	0	0	0	0	0	603	903	0
564	6	36.0505	-126.57	-735.479	38511.6	62965.1	-10551.7	285.611	247.637	0	-1.51184	-17.5052	-43.8282	4709.29	-1860.97	1718.63	157.539	795.551	0	0	0	0	0	0	0	603	903	0
564	7	35.2876	-128.706	-732.428	38694.7	62476.8	-11009.4	285.301	247.169	0	2.60803	-21.6251	-50.8472	4709.29	-2410.29	2176.39	152.598	810.383	0	0	0	0	0	0	0	603	903	0
564	8	36.2031	-130.079	-732.122	37504.5	62293.7	-10643.2	285.086	248.773	0	0.319211	-27.4234	-60.0025	7089.67	-3569.96	2039.06	140.503	784.844	0	0	0	0	0	0	0	603	903	0
564	9	35.5928	-131.148	-731.207	37596.1	62354.7	-11055.2	285.276	248.584	0	-8.53089	-27.576	-74.0406	7822.09	-4058.24	1581.3	145.189	797.354	0	0	0	0	0	0	0	603	903	0
565	0	35.2876	-132.063	-731.817	37321.4	62354.7	-10689	285.205	249.002	0	-7.61536	-25.4398	-80.1441	8554.51	-3569.96	1581.3	155.456	796.261	0	0	0	0	0	0	0	603	903	0
565	1	32.6936	-132.521	-726.019	36680.5	61866.5	-10734.8	285.213	249.477	0	2.76062	-25.8975	-87.4683	9561.59	-4485.48	1581.3	148.719	793.685	0	0	0	0	0	0	0	603	903	0
565	2	34.0669	-133.284	-723.272	36405.9	61622.3	-10963.7	285.199	249.665	0	-3.80066	-26.0501	-96.6236	10568.7	-4912.73	940.43	149.156	793.62	0	0	0	0	0	0	0	603	903	0
565	3	35.135	-134.505	-721.136	36405.9	61378.2	-10963.7	285.113	249.516	0	-11.4301	-22.9983	-109.441	12125.1	-5278.94	1306.64	151.764	792.209	0	0	0	0	0	0	0	603	903	0
565	4	36.0505	-134.962	-721.441	35948.1	61134	-11146.8	284.739	250.172	0	-5.93689	-21.6251	-118.901	13315.2	-5950.33	1398.19	149.956	791.014	0	0	0	0	0	0	0	603	903	0
565	5	33.4565	-135.115	-719.61	35856.5	61134	-11375.7	284.954	250.172	0	-0.443728	-21.7776	-122.869	14047.7	-5584.12	1031.98	154.552	788.669	0	0	0	0	0	0	0	603	903	0
565	6	32.6936	-136.183	-718.39	35765	60828.9	-10917.9	284.674	250.215	0	-0.138553	-18.4207	-134.16	14963.2	-5767.22	1947.51	157.012	791.468	0	0	0	0	0	0	0	603	903	0
565	7	32.6936	-137.251	-712.896	35765	60767.8	-11146.8	285.241	249.831	0	-2.27478	-18.4207	-145.452	16428	-6804.82	2039.06	153.216	790.055	0	0	0	0	0	0	0	603	903	0
565	8	32.6936	-138.014	-710.76	35032.6	60157.5	-10963.7	284.638	250.711	0	1.53991	-21.4725	-156.743	17252	-7048.96	2313.72	155.029	792.935	0	0	0	0	0	0	0	603	903	0
565	9	33.9143	-138.93	-707.708	35307.2	60340.6	-11375.7	285.262	250.111	0	7.03308	-16.7422	-160.711	17618.2	-6377.57	2679.93	160.316	793.373	0	0	0	0	0	0	0	603	903	0
566	0	32.2358	-139.998	-705.572	34757.9	60279.5	-11329.9	285.434	250.738	0	8.55896	-10.181	-165.898	18259.1	-6926.89	2771.49	158.246	792.938	0	0	0	0	0	0	0	603	903	0
566	1	32.0832	-141.524	-705.572	33750.8	59486.1	-11375.7	284.309	252.165	0	5.5072	-11.4017	-171.086	18991.5	-6987.93	2405.27	159.156	791.995	0	0	0	0	0	0	0	603	903	0
566	2	31.9307	-140.761	-701.91	33934	59241.9	-11375.7	284.401	251.655	0	8.71154	-10.6387	-182.988	20090.2	-6926.89	2451.05	162.146	793.211	0	0	0	0	0	0	0	603	903	0
566	3	32.541	-142.592	-698.553	33659.3	59425	-11513	285.069	251.816	0	11.3055	-1.17828	-186.04	20364.8	-6987.93	2679.93	162.439	793.535	0	0	0	0	0	0	0	603	903	0
566	4	32.6936	-142.744	-692.144	33659.3	58997.8	-11650.3	285.239	251.37	0	10.8478	1.5683	-194.28	20731	-7293.1	1993.29	162.461	796.293	0	0	0	0	0	0	0	603	903	0
566	5	30.4048	-144.118	-689.703	32835.3	58326.4	-11696.1	284.567	252.392	0	12.8314	1.26313	-200.078	21463.4	-7293.1	2679.93	163.549	795.725	0	0	0	0	0	0	0	603	903	0
566	6	29.7944	-144.728	-686.651	33476.2	58753.7	-11925	285.565	251.247	0	16.4935	6.6037	-210.149	23019.8	-7293.1	2771.49	165.296	793.46	0	0	0	0	0	0	0	603	903	0
566	7	31.3203	-145.643	-684.21	32926.9	57777.1	-11741.9	284.444	251.876	0	18.6298	12.2495	-215.947	22470.5	-7293.1	2542.6	166.227	798.944	0	0	0	0	0	0	0	603	903	0
566	8	31.6255	-144.728	-680.548	32560.6	57594	-11192.6	284.629	252.155	0	21.3763	14.996	-218.389	23111.4	-7537.24	2634.16	165.487	797.173	0	0	0	0	0	0	0	603	903	0
566	9	29.0315	-146.254	-675.97	32286	56739.5	-12016.5	283.938	252.238	0	23.36	18.0478	-226.018	24118.5	-7598.28	3137.7	166.382	796.29	0	0	0	0	0	0	0	603	903	0
567	0	28.7263	-146.559	-673.529	32011.3	57227.8	-11741.9	284.967	252.472	0	24.7333	22.778	-236.089	25034	-7537.24	2313.72	168.075	796.964	0	0	0	0	0	0	0	603	903	0
567	1	28.7263	-145.796	-668.646	31187.4	56556.4	-11925	284.583	253.357	0	26.7169	27.2031	-245.244	25125.6	-7720.35	2817.26	168.52	800.549	0	0	0	0	0	0	0	603	903	0
567	2	29.3367	-146.406	-664.679	30546.5	56129.1	-11375.7	284.446	254.043	0	29.7687	29.6445	-249.517	25858	-8269.67	2588.38	166.857	799.368	0	0	0	0	0	0	0	603	903	0
567	3	28.4211	-148.237	-658.575	30729.6	55701.9	-11696.1	284.579	253.339	0	31.9049	32.8488	-257.451	26498.8	-7842.42	2039.06	169.538	800.072	0	0	0	0	0	0	0	603	903	0
567	4	27.9634	-148.085	-655.218	29997.2	55274.7	-11513	284.361	254.218	0	33.2782	37.4265	-268.132	26681.9	-8208.63	2634.16	169.386	803.49	0	0	0	0	0	0	0	603	903	0
567	5	28.8789	-147.322	-651.861	30088.7	54786.4	-11925	284.046	253.842	0	36.4825	41.3937	-275.457	27597.5	-8391.74	2313.72	169.535	802.812	0	0	0	0	0	0	0	603	903	0
[truncated: 2,164 more rows]
