# Supplementary material for: The Effects of an Extemporaneous Speech Dual-task on Older Adult Gait Control
Source: Research Square preprint supplement (doi:10.21203/rs.3.rs-7674245/v1), 2025-11-18
Supplement: Supplementary file 139 [file Over1ground09.xlsx]

## Sheet: Sheet1
Trajectories
		01:LFHD			01:RFHD			01:LBHD			01:RBHD			01:C7			01:T10			01:CLAV			01:STRN			01:RBAK			01:LSHO			01:LUPA			01:LELB			01:LFRM			01:LWRA			01:LWRB			01:LFIN
Frame	Sub Frame	X	Y	Z	X	Y	Z	X	Y	Z	X	Y	Z	X	Y	Z	X	Y	Z	X	Y	Z	X	Y	Z	X	Y	Z	X	Y	Z	X	Y	Z	X	Y	Z	X	Y	Z	X	Y	Z	X	Y	Z	X	Y	Z
		mm	mm	mm	mm	mm	mm	mm	mm	mm	mm	mm	mm	mm	mm	mm	mm	mm	mm	mm	mm	mm	mm	mm	mm	mm	mm	mm	mm	mm	mm	mm	mm	mm	mm	mm	mm	mm	mm	mm	mm	mm	mm	mm	mm	mm	mm	mm	mm
314	0	142.193	-2341.16	1584.08	243.493	-2336.63	1582.99	134.591	-2514.97	1604.53	261.4	-2483.55	1605.02	195.349	-2568.25	1471.4	190.512	-2677.43	1227.46	198.577	-2433.47	1361.34	182.579	-2397.49	1177.69	237.246	-2675.01	1303.56	29.7184	-2501.81	1406.22	-52.8056	-2587.67	1200.14	-57.7422	-2610.18	1119.31	-93.5194	-2586.88	997.226	-54.1301	-2515.18	893.77	-105.511	-2565.1	891.018	-97.6866	-2520.65	810.93
315	0	141.823	-2327.81	1580.79	242.985	-2322.5	1579.93	134.784	-2501.16	1601.33	261.299	-2469.29	1602.08	195.385	-2554	1468.58	190.921	-2664.03	1225.01	198.768	-2419.89	1358.22	183.077	-2384.31	1174.72	237.481	-2661.7	1301.27	29.6012	-2488.14	1403.13	-51.7715	-2578.36	1197.88	-56.631	-2599.53	1117.13	-93.631	-2578.95	995.21	-55.6624	-2509.29	890.386	-106.393	-2559.41	888.967	-99.8198	-2516.13	808.418
316	0	141.318	-2314.35	1577.59	242.366	-2308.34	1576.94	134.819	-2487.3	1598.14	261.074	-2455.02	1599.16	195.303	-2539.68	1465.77	191.261	-2650.47	1222.51	198.854	-2406.18	1355.09	183.532	-2370.96	1171.7	237.641	-2648.22	1298.93	29.3858	-2474.32	1400.01	-50.894	-2568.53	1195.51	-55.6438	-2588.58	1114.88	-93.7524	-2570.61	993.118	-57.1108	-2502.94	886.976	-107.215	-2553.3	886.82	-101.813	-2511.14	805.819
317	0	140.676	-2300.77	1574.46	241.638	-2294.14	1574.04	134.695	-2473.39	1594.96	260.727	-2440.73	1596.28	195.103	-2525.28	1462.95	191.534	-2636.76	1219.97	198.836	-2392.33	1351.94	183.944	-2357.43	1168.64	237.726	-2634.57	1296.54	29.0721	-2460.35	1396.87	-50.1729	-2558.17	1193.03	-54.7802	-2577.33	1112.57	-93.8836	-2561.88	990.951	-58.4752	-2496.12	883.541	-107.977	-2546.75	884.58	-103.665	-2505.69	803.134
318	0	139.899	-2287.07	1571.42	240.798	-2279.92	1571.22	134.413	-2459.43	1591.78	260.256	-2426.42	1593.42	194.785	-2510.8	1460.13	191.74	-2622.89	1217.37	198.713	-2378.35	1348.78	184.311	-2343.71	1165.53	237.738	-2620.76	1294.09	28.6596	-2446.25	1393.7	-49.607	-2547.29	1190.44	-54.0391	-2565.77	1110.19	-94.0243	-2552.75	988.709	-59.7556	-2488.85	880.083	-108.679	-2539.76	882.247	-105.377	-2499.79	800.366
319	0	138.987	-2273.27	1568.47	239.848	-2265.66	1568.49	133.973	-2445.43	1588.62	259.661	-2412.1	1590.59	194.349	-2496.24	1457.32	191.878	-2608.86	1214.73	198.484	-2364.22	1345.62	184.633	-2329.81	1162.4	237.675	-2606.78	1291.59	28.1476	-2432	1390.51	-49.1938	-2535.89	1187.75	-53.4183	-2553.91	1107.74	-94.1737	-2543.22	986.397	-60.952	-2481.11	876.604	-109.322	-2532.33	879.826	-106.949	-2493.41	797.517
320	0	137.942	-2259.36	1565.61	238.787	-2251.37	1565.85	133.375	-2431.38	1585.48	258.942	-2397.76	1587.81	193.794	-2481.59	1454.52	191.951	-2594.67	1212.06	198.148	-2349.96	1342.46	184.905	-2315.73	1159.24	237.54	-2592.64	1289.05	27.5345	-2417.6	1387.3	-48.9284	-2524	1184.96	-52.9145	-2541.75	1105.23	-94.3307	-2533.29	984.017	-62.0645	-2472.9	873.111	-109.911	-2524.45	877.324	-108.381	-2486.57	794.595
321	0	136.765	-2245.33	1562.85	237.615	-2237.04	1563.31	132.619	-2417.27	1582.37	258.099	-2383.4	1585.07	193.121	-2466.87	1451.75	191.958	-2580.32	1209.36	197.701	-2335.55	1339.32	185.121	-2301.46	1156.09	237.335	-2578.32	1286.48	26.8185	-2403.06	1384.1	-48.8041	-2511.61	1182.08	-52.5231	-2529.29	1102.67	-94.4939	-2522.97	981.576	-63.0931	-2464.21	869.612	-110.447	-2516.11	874.752	-109.674	-2479.23	791.609
322	0	135.459	-2231.2	1560.21	236.332	-2222.67	1560.89	131.707	-2403.11	1579.3	257.129	-2369.01	1582.4	192.331	-2452.05	1449.02	191.904	-2565.81	1206.65	197.142	-2321	1336.23	185.273	-2287	1152.96	237.062	-2563.84	1283.91	25.9974	-2388.38	1380.91	-48.8118	-2498.77	1179.12	-52.2385	-2516.55	1100.06	-94.6613	-2512.24	979.085	-64.0381	-2455.04	866.12	-110.937	-2507.29	872.125	-110.83	-2471.41	788.573
323	0	134.026	-2216.96	1557.7	234.938	-2208.26	1558.6	130.639	-2388.89	1576.3	256.034	-2354.6	1579.81	191.423	-2437.16	1446.34	191.791	-2551.12	1203.96	196.468	-2306.29	1333.21	185.349	-2272.35	1149.89	236.726	-2549.18	1281.34	25.0694	-2373.57	1377.76	-48.9408	-2485.49	1176.1	-52.0536	-2503.51	1097.41	-94.8305	-2501.1	976.555	-64.9	-2445.38	862.649	-111.384	-2497.97	869.46	-111.849	-2463.06	785.504
324	0	132.471	-2202.61	1555.33	233.435	-2193.8	1556.46	129.417	-2374.61	1573.39	254.814	-2340.15	1577.32	190.4	-2422.17	1443.74	191.625	-2536.26	1201.3	195.674	-2291.44	1330.28	185.337	-2257.5	1146.91	236.33	-2534.34	1278.8	24.0337	-2358.63	1374.66	-49.1783	-2471.81	1173.05	-51.9607	-2490.2	1094.75	-94.9989	-2489.57	974.002	-65.6793	-2435.21	859.219	-111.794	-2488.14	866.778	-112.736	-2454.18	782.423
325	0	130.797	-2188.16	1553.14	231.824	-2179.29	1554.49	128.044	-2360.25	1570.6	253.468	-2325.67	1574.96	189.265	-2407.09	1441.24	191.412	-2521.23	1198.71	194.76	-2276.42	1327.48	185.221	-2242.46	1144.06	235.881	-2519.33	1276.33	22.8909	-2343.57	1371.66	-49.5102	-2457.77	1169.99	-51.9511	-2476.6	1092.09	-95.1638	-2477.62	971.443	-66.3768	-2424.53	855.853	-112.17	-2477.78	864.102	-113.493	-2444.73	779.354
326	0	129.01	-2173.6	1551.13	230.107	-2164.71	1552.71	126.525	-2345.82	1567.94	252	-2311.15	1572.75	188.021	-2391.92	1438.87	191.159	-2506.02	1196.21	193.724	-2261.25	1324.85	184.986	-2227.21	1141.38	235.386	-2504.14	1273.95	21.6436	-2328.41	1368.77	-49.9214	-2443.41	1166.95	-52.0154	-2462.73	1089.45	-95.3222	-2465.26	968.899	-66.9938	-2413.31	852.576	-112.516	-2466.85	861.456	-114.124	-2434.7	776.325
327	0	127.116	-2158.94	1549.34	228.287	-2150.07	1551.14	124.864	-2331.31	1565.46	250.413	-2296.58	1570.71	186.676	-2376.66	1436.66	190.873	-2490.64	1193.85	192.565	-2245.92	1322.42	184.618	-2211.77	1138.91	234.852	-2488.76	1271.71	20.2969	-2313.15	1366.02	-50.3965	-2428.77	1163.96	-52.144	-2448.59	1086.86	-95.4713	-2452.49	966.392	-67.5316	-2401.55	849.414	-112.835	-2455.35	858.865	-114.635	-2424.05	773.363
328	0	125.122	-2144.17	1547.79	226.368	-2135.36	1549.81	123.068	-2316.72	1563.18	248.71	-2281.96	1568.89	185.236	-2361.3	1434.64	190.564	-2475.09	1191.65	191.288	-2230.44	1320.24	184.104	-2196.12	1136.7	234.287	-2473.22	1269.63	18.858	-2297.82	1363.46	-50.9203	-2413.88	1161.06	-52.3272	-2434.17	1084.34	-95.6081	-2439.3	963.946	-67.9921	-2389.23	846.397	-113.127	-2443.25	856.356	-115.029	-2412.76	770.5
329	0	123.036	-2129.31	1546.48	224.357	-2120.57	1548.73	121.146	-2302.03	1561.13	246.899	-2267.29	1567.3	183.712	-2345.85	1432.83	190.24	-2459.38	1189.64	189.896	-2214.81	1318.33	183.437	-2180.27	1134.77	233.7	-2457.51	1267.75	17.3365	-2282.41	1361.09	-51.478	-2398.8	1158.3	-52.5555	-2419.5	1081.93	-95.7302	-2425.69	961.585	-68.3771	-2376.33	843.553	-113.392	-2430.55	853.953	-115.312	-2400.79	767.766
330	0	120.869	-2114.35	1545.45	222.26	-2105.7	1547.92	119.11	-2287.26	1559.34	244.989	-2252.55	1565.96	182.115	-2330.32	1431.27	189.909	-2443.52	1187.88	188.399	-2199.05	1316.71	182.613	-2164.23	1133.15	233.101	-2441.64	1266.1	15.7446	-2266.96	1358.97	-52.0566	-2383.53	1155.69	-52.82	-2404.57	1079.64	-95.8353	-2411.66	959.334	-68.6892	-2362.84	840.913	-113.628	-2417.22	851.682	-115.491	-2388.12	765.19
331	0	118.631	-2099.29	1544.7	220.087	-2090.75	1547.4	116.974	-2272.39	1557.83	242.989	-2237.76	1564.91	180.461	-2314.71	1429.97	189.579	-2427.53	1186.37	186.809	-2183.15	1315.43	181.635	-2148	1131.89	232.499	-2425.62	1264.73	14.0973	-2251.47	1357.1	-52.6447	-2368.13	1153.3	-53.1122	-2389.38	1077.52	-95.9218	-2397.2	957.218	-68.9307	-2348.75	838.503	-113.834	-2403.26	849.564	-115.572	-2374.73	762.801
332	0	116.335	-2084.16	1544.24	217.849	-2075.72	1547.17	114.753	-2257.44	1556.62	240.914	-2222.91	1564.15	178.765	-2299.02	1428.97	189.258	-2411.42	1185.16	185.142	-2167.16	1314.5	180.51	-2131.6	1130.99	231.904	-2409.47	1263.64	12.4124	-2235.95	1355.52	-53.2332	-2352.59	1151.14	-53.4247	-2373.94	1075.58	-95.9887	-2382.32	955.258	-69.1044	-2334.07	836.351	-114.005	-2388.66	847.621	-115.56	-2360.6	760.627
333	0	113.996	-2068.95	1544.08	215.558	-2060.61	1547.25	112.466	-2242.4	1555.73	238.778	-2207.99	1563.71	177.046	-2283.28	1428.27	188.951	-2395.22	1184.27	183.416	-2151.07	1313.92	179.25	-2115.05	1130.47	231.327	-2393.22	1262.88	10.7103	-2220.43	1354.24	-53.8148	-2336.93	1149.24	-53.7506	-2358.26	1073.85	-96.0355	-2367.01	953.477	-69.2128	-2318.77	834.481	-114.137	-2373.42	845.87	-115.463	-2345.71	758.692
334	0	111.629	-2053.67	1544.21	213.23	-2045.43	1547.62	110.136	-2227.29	1555.17	236.6	-2193.01	1563.58	175.323	-2267.49	1427.9	188.666	-2378.95	1183.72	181.654	-2134.92	1313.71	177.875	-2098.39	1130.33	230.778	-2376.88	1262.46	9.01378	-2204.91	1353.28	-54.3839	-2321.15	1147.63	-54.0846	-2342.34	1072.35	-96.0627	-2351.28	951.894	-69.2587	-2302.86	832.914	-114.226	-2357.54	844.325	-115.286	-2330.06	757.018
335	0	109.25	-2038.34	1544.64	210.882	-2030.18	1548.29	107.786	-2212.1	1554.94	234.4	-2177.98	1563.79	173.618	-2251.66	1427.85	188.406	-2362.64	1183.52	179.879	-2118.74	1313.86	176.406	-2081.65	1130.57	230.266	-2360.49	1262.38	7.34679	-2189.42	1352.65	-54.9363	-2305.24	1146.33	-54.4218	-2326.2	1071.1	-96.0709	-2335.13	950.526	-69.2443	-2286.34	831.668	-114.267	-2341.04	842.999	-115.038	-2313.63	755.622
336	0	106.88	-2022.97	1545.35	208.532	-2014.86	1549.24	105.442	-2196.87	1555.05	232.2	-2162.89	1564.32	171.951	-2235.82	1428.13	188.178	-2346.31	1183.67	178.117	-2102.55	1314.36	174.869	-2064.87	1131.16	229.802	-2344.07	1262.66	5.73385	-2173.96	1352.35	-55.4689	-2289.21	1145.35	-54.7591	-2309.83	1070.1	-96.0618	-2318.56	949.386	-69.1716	-2269.22	830.758	-114.254	-2323.92	841.899	-114.723	-2296.43	754.521
337	0	104.537	-2007.58	1546.32	206.201	-1999.5	1550.46	103.133	-2181.58	1555.48	230.023	-2147.75	1565.17	170.344	-2219.98	1428.73	187.984	-2330	1184.18	176.396	-2086.37	1315.2	173.292	-2048.1	1132.09	229.391	-2327.65	1263.3	4.19896	-2158.56	1352.39	-55.9791	-2273.05	1144.69	-55.094	-2293.25	1069.37	-96.037	-2301.57	948.484	-69.0419	-2251.51	830.195	-114.184	-2306.2	841.03	-114.347	-2278.46	753.726
338	0	102.242	-1992.18	1547.55	203.91	-1984.1	1551.93	100.887	-2166.27	1556.24	227.896	-2132.56	1566.33	168.816	-2204.15	1429.65	187.825	-2313.73	1185.05	174.742	-2070.24	1316.36	171.708	-2031.39	1133.33	229.041	-2311.27	1264.28	2.76469	-2143.22	1352.76	-56.4652	-2256.76	1144.35	-55.4256	-2276.47	1068.91	-95.9989	-2284.18	947.829	-68.856	-2233.23	829.987	-114.053	-2287.9	840.394	-113.916	-2259.74	753.246
339	0	100.019	-1976.79	1549	201.683	-1968.67	1553.62	98.7324	-2150.94	1557.29	225.843	-2117.34	1567.77	167.386	-2188.36	1430.86	187.703	-2297.54	1186.25	173.183	-2054.18	1317.81	170.147	-2014.79	1134.84	228.753	-2294.95	1265.59	1.45148	-2127.95	1353.44	-56.9255	-2240.35	1144.33	-55.7541	-2259.51	1068.72	-95.9502	-2266.39	947.425	-68.6139	-2214.39	830.136	-113.858	-2269.05	839.993	-113.433	-2240.28	753.086
340	0	97.8875	-1961.42	1550.65	199.542	-1953.23	1555.52	96.6986	-2135.61	1558.63	223.89	-2102.1	1569.48	166.069	-2172.62	1432.36	187.616	-2281.45	1187.77	171.743	-2038.22	1319.52	168.645	-1998.34	1136.59	228.53	-2278.71	1267.21	0.277055	-2112.76	1354.43	-57.3587	-2223.81	1144.61	-56.0808	-2242.37	1068.79	-95.8937	-2248.21	947.271	-68.3149	-2195.01	830.643	-113.599	-2249.66	839.826	-112.902	-2220.11	753.251
341	0	95.8707	-1946.08	1552.49	197.511	-1937.79	1557.59	94.8122	-2120.29	1560.24	222.063	-2086.83	1571.43	164.879	-2156.94	1434.12	187.56	-2265.47	1189.58	170.445	-2022.37	1321.47	167.235	-1982.09	1138.55	228.368	-2262.6	1269.11	-0.743956	-2097.65	1355.7	-57.7637	-2207.15	1145.18	-56.4081	-2225.07	1069.11	-95.8323	-2229.67	947.365	-67.9575	-2175.12	831.506	-113.275	-2229.77	839.892	-112.325	-2199.24	753.743
342	0	93.9892	-1930.78	1554.47	195.611	-1922.36	1559.8	93.0977	-2105	1562.07	220.383	-2071.55	1573.6	163.827	-2141.34	1436.1	187.529	-2249.64	1191.66	169.31	-2006.66	1323.62	165.952	-1966.05	1140.66	228.262	-2246.61	1271.27	-1.60031	-2082.6	1357.23	-58.14	-2190.38	1146.01	-56.7395	-2207.63	1069.68	-95.7685	-2210.76	947.704	-67.5395	-2154.75	832.716	-112.891	-2209.38	840.189	-111.702	-2177.71	754.561
343	0	92.2626	-1915.55	1556.59	193.864	-1906.96	1562.14	91.5766	-2089.74	1564.11	218.874	-2056.28	1575.94	162.919	-2125.82	1438.29	187.516	-2233.96	1193.97	168.354	-1991.08	1325.93	164.828	-1950.27	1142.91	228.204	-2230.77	1273.65	-2.28431	-2067.63	1358.99	-58.4872	-2173.52	1147.08	-57.079	-2190.06	1070.47	-95.7049	-2191.52	948.278	-67.0581	-2133.94	834.267	-112.449	-2188.53	840.717	-111.034	-2155.54	755.707
344	0	90.7086	-1900.38	1558.81	192.287	-1891.6	1564.56	90.2663	-2074.53	1566.32	217.551	-2041	1578.43	162.159	-2110.39	1440.64	187.512	-2218.45	1196.48	167.591	-1975.65	1328.38	163.896	-1934.74	1145.25	228.184	-2215.1	1276.21	-2.79179	-2052.72	1360.95	-58.8056	-2156.56	1148.38	-57.4316	-2172.38	1071.47	-95.6437	-2171.96	949.078	-66.5098	-2112.71	836.146	-111.952	-2167.25	841.474	-110.318	-2132.78	757.18
345	0	89.3426	-1885.27	1561.11	190.898	-1876.28	1567.05	89.1798	-2059.37	1568.68	216.43	-2025.75	1581.02	161.548	-2095.05	1443.12	187.506	-2203.12	1199.15	167.029	-1960.38	1330.94	163.182	-1919.48	1147.67	228.191	-2199.6	1278.92	-3.12211	-2037.85	1363.09	-59.0963	-2139.53	1149.86	-57.8026	-2154.6	1072.65	-95.5865	-2152.11	950.093	-65.8913	-2091.11	838.342	-111.405	-2145.55	842.455	-109.55	-2109.46	758.978
346	0	88.1769	-1870.24	1563.46	189.709	-1861.01	1569.56	88.3249	-2044.27	1571.14	215.521	-2010.52	1583.69	161.085	-2079.81	1445.71	187.488	-2187.96	1201.95	166.674	-1945.25	1333.57	162.709	-1904.47	1150.12	228.214	-2184.27	1281.75	-3.27794	-2023.02	1365.37	-59.3611	-2122.44	1151.51	-58.1976	-2136.74	1074	-95.5348	-2131.98	951.31	-65.1993	-2069.17	840.839	-110.811	-2123.47	843.657	-108.728	-2085.62	761.1
347	0	87.2212	-1855.27	1565.85	188.731	-1845.8	1572.09	87.7046	-2029.23	1573.67	214.83	-1995.32	1586.39	160.764	-2064.65	1448.37	187.448	-2172.98	1204.84	166.525	-1930.27	1336.24	162.495	-1889.71	1152.6	228.24	-2169.12	1284.64	-3.26503	-2008.21	1367.76	-59.6028	-2105.29	1153.31	-58.6221	-2118.81	1075.5	-95.4896	-2111.6	952.714	-64.4306	-2046.93	843.621	-110.174	-2101.04	845.076	-107.843	-2061.3	763.542
348	0	86.4816	-1840.38	1568.23	187.971	-1830.65	1574.59	87.3165	-2014.25	1576.23	214.357	-1980.16	1589.09	160.58	-2049.59	1451.05	187.375	-2158.16	1207.78	166.579	-1915.43	1338.92	162.55	-1875.17	1155.08	228.258	-2154.14	1287.58	-3.09186	-1993.4	1370.23	-59.825	-2088.1	1155.22	-59.0816	-2100.83	1077.12	-95.4513	-2091	954.288	-63.5828	-2024.43	846.67	-109.495	-2078.29	846.704	-106.891	-2036.56	766.297
349	0	85.9612	-1825.54	1570.59	187.432	-1815.56	1577.05	87.1536	-1999.33	1578.8	214.101	-1965.03	1591.75	160.523	-2034.6	1453.74	187.261	-2143.5	1210.73	166.831	-1900.71	1341.58	162.876	-1860.83	1157.55	228.258	-2139.32	1290.51	-2.76917	-1978.59	1372.74	-60.0325	-2070.88	1157.23	-59.5812	-2082.8	1078.83	-95.4202	-2070.2	956.016	-62.6543	-2001.71	849.968	-108.778	-2055.25	848.534	-105.864	-2011.45	769.358
350	0	85.66	-1810.76	1572.9	187.115	-1800.54	1579.42	87.2049	-1984.46	1581.34	214.055	-1949.96	1594.34	160.586	-2019.69	1456.39	187.1	-2128.99	1213.66	167.268	-1886.12	1344.2	163.468	-1846.66	1159.98	228.232	-2124.65	1293.41	-2.30952	-1963.76	1375.27	-60.2312	-2053.63	1159.3	-60.1255	-2064.73	1080.62	-95.3959	-2049.23	957.877	-61.6446	-1978.81	853.493	-108.022	-2031.96	850.554	-104.755	-1986.01	772.713
351	0	85.575	-1796.03	1575.14	187.018	-1785.59	1581.7	87.4555	-1969.64	1583.81	214.209	-1934.93	1596.82	160.757	-2004.85	1458.97	186.889	-2114.6	1216.52	167.878	-1871.62	1346.74	164.311	-1832.64	1162.35	228.175	-2110.11	1296.23	-1.7267	-1948.89	1377.78	-60.4279	-2036.37	1161.42	-60.718	-2046.64	1082.45	-95.3777	-2028.1	959.852	-60.5543	-1955.75	857.221	-107.229	-2008.45	852.753	-103.557	-1960.3	776.345
352	0	85.7006	-1781.34	1577.28	187.135	-1770.69	1583.85	87.8883	-1954.86	1586.19	214.55	-1919.95	1599.18	161.027	-1990.07	1461.46	186.626	-2100.32	1219.29	168.646	-1857.22	1349.17	165.386	-1818.73	1164.65	228.083	-2095.7	1298.95	-1.03526	-1933.99	1380.24	-60.6299	-2019.09	1163.55	-61.3614	-2028.52	1084.3	-95.3642	-2006.84	961.918	-59.3851	-1932.58	861.129	-106.399	-1984.76	855.113	-102.263	-1934.37	780.236
353	0	86.0292	-1766.68	1579.29	187.459	-1755.86	1585.84	88.4846	-1940.11	1588.44	215.064	-1905.03	1601.36	161.386	-1975.34	1463.81	186.314	-2086.13	1221.93	169.555	-1842.89	1351.48	166.664	-1804.91	1166.84	227.956	-2081.4	1301.52	-0.249943	-1919.04	1382.63	-60.8453	-2001.81	1165.66	-62.0572	-2010.38	1086.14	-95.3538	-1985.47	964.052	-58.1398	-1909.33	865.188	-105.53	-1960.91	857.617	-100.867	-1908.29	784.361
354	0	86.5513	-1752.04	1581.16	187.982	-1741.08	1587.66	89.2247	-1925.39	1590.54	215.735	-1890.16	1603.36	161.824	-1960.67	1466.01	185.957	-2072.03	1224.41	170.586	-1828.62	1353.63	168.115	-1791.15	1168.91	227.795	-2067.19	1303.93	0.614932	-1904.03	1384.92	-61.0817	-1984.53	1167.75	-62.8055	-1992.23	1087.95	-95.3442	-1964.01	966.229	-56.822	-1886.03	869.372	-104.623	-1936.93	860.245	-99.3658	-1882.09	788.693
355	0	87.2562	-1737.41	1582.85	188.692	-1726.36	1589.28	90.0894	-1910.69	1592.46	216.548	-1875.34	1605.15	162.333	-1946.03	1468.02	185.563	-2057.98	1226.7	171.722	-1814.4	1355.59	169.703	-1777.43	1170.83	227.605	-2053.06	1306.14	1.54597	-1888.97	1387.08	-61.346	-1967.24	1169.76	-63.6049	-1974.05	1089.7	-95.3328	-1942.48	968.425	-55.436	-1862.71	873.648	-103.676	-1912.87	862.973	-97.7552	-1855.83	793.2
356	0	88.1325	-1722.79	1584.35	189.578	-1711.68	1590.69	91.0603	-1896.01	1594.18	217.486	-1860.57	1606.7	162.906	-1931.44	1469.82	185.143	-2043.98	1228.77	172.944	-1800.22	1357.34	171.391	-1763.74	1172.57	227.393	-2038.99	1308.13	2.53112	-1873.86	1389.07	-61.6437	-1949.95	1171.68	-64.4524	-1955.86	1091.36	-95.3161	-1920.9	970.615	-53.9865	-1839.39	877.986	-102.689	-1888.73	865.779	-96.0337	-1829.56	797.847
357	0	89.1686	-1708.17	1585.63	190.63	-1697.04	1591.86	92.1205	-1881.33	1595.67	218.535	-1845.85	1608.01	163.535	-1916.87	1471.4	184.708	-2030	1230.61	174.234	-1786.07	1358.85	173.142	-1750.05	1174.1	227.168	-2024.96	1309.87	3.55988	-1858.7	1390.89	-61.9786	-1932.65	1173.48	-65.3432	-1937.64	1092.9	-95.2905	-1899.28	972.773	-52.4783	-1816.09	882.353	-101.66	-1864.56	868.635	-94.2011	-1803.32	802.596
358	0	90.353	-1693.55	1586.69	191.835	-1682.45	1592.79	93.2551	-1866.66	1596.93	219.681	-1831.19	1609.05	164.217	-1902.34	1472.73	184.273	-2016.05	1232.18	175.578	-1771.93	1360.11	174.919	-1736.36	1175.39	226.94	-2010.97	1311.35	4.62361	-1843.49	1392.51	-62.3518	-1915.32	1175.13	-66.2707	-1919.39	1094.31	-95.2515	-1877.63	974.876	-50.9162	-1792.84	886.715	-100.59	-1840.37	871.517	-92.2588	-1777.15	807.409
359	0	91.6745	-1678.91	1587.5	193.182	-1667.9	1593.45	94.4519	-1851.99	1597.93	220.912	-1816.58	1609.82	164.947	-1887.83	1473.8	183.854	-2002.11	1233.48	176.96	-1757.79	1361.1	176.689	-1722.66	1176.41	226.721	-1997.01	1312.56	5.7157	-1828.24	1393.9	-62.7619	-1897.98	1176.6	-67.2263	-1901.11	1095.56	-95.1942	-1855.98	976.9	-49.3046	-1769.67	891.039	-99.4771	-1816.19	874.396	-90.2097	-1751.1	812.247
360	0	93.1228	-1664.27	1588.05	194.662	-1653.38	1593.84	95.7009	-1837.32	1598.66	222.217	-1802.01	1610.31	165.723	-1873.34	1474.59	183.467	-1988.17	1234.5	178.369	-1743.66	1361.79	178.421	-1708.93	1177.15	226.525	-1983.06	1313.47	6.83164	-1812.97	1395.05	-63.2045	-1880.59	1177.88	-68.1999	-1882.8	1096.62	-95.113	-1834.33	978.825	-47.6477	-1746.58	895.292	-98.3224	-1792.05	877.249	-88.0586	-1725.19	817.071
361	0	94.6884	-1649.62	1588.34	196.263	-1638.9	1593.96	96.9953	-1822.65	1599.12	223.59	-1787.5	1610.51	166.544	-1858.88	1475.11	183.129	-1974.22	1235.21	179.795	-1729.51	1362.19	180.09	-1695.17	1177.59	226.364	-1969.12	1314.09	7.96908	-1797.67	1395.94	-63.6717	-1863.17	1178.95	-69.179	-1864.44	1097.49	-95.0017	-1812.7	980.631	-45.9489	-1723.6	899.441	-97.1257	-1767.96	880.047	-85.8117	-1699.46	821.843
362	0	96.3629	-1634.97	1588.36	197.977	-1624.45	1593.8	98.3306	-1807.97	1599.3	225.023	-1773.03	1610.43	167.411	-1844.44	1475.33	182.856	-1960.26	1235.62	181.232	-1715.36	1362.28	181.678	-1681.38	1177.71	226.254	-1955.17	1314.41	9.12773	-1782.36	1396.58	-64.1528	-1845.69	1179.78	-70.1495	-1846.04	1098.16	-94.8534	-1791.09	982.3	-44.2115	-1700.75	903.456	-95.8874	-1743.96	882.769	-83.4766	-1673.94	826.526
363	0	98.1389	-1620.31	1588.11	199.796	-1610.04	1593.37	99.7052	-1793.3	1599.21	226.515	-1758.62	1610.06	168.325	-1830.03	1475.28	182.663	-1946.29	1235.73	182.676	-1701.19	1362.06	183.169	-1667.54	1177.51	226.207	-1941.23	1314.42	10.3093	-1767.06	1396.94	-64.6336	-1828.17	1180.37	-71.0954	-1827.59	1098.6	-94.6607	-1769.53	983.82	-42.4378	-1678.04	907.308	-94.6081	-1720.07	885.392	-81.0623	-1648.65	831.089
364	0	100.01	-1605.66	1587.59	201.714	-1595.65	1592.66	101.12	-1778.64	1598.84	228.062	-1744.25	1609.42	169.29	-1815.65	1474.94	182.564	-1932.29	1235.52	184.126	-1687.01	1361.53	184.56	-1653.64	1176.99	226.237	-1927.28	1314.13	11.5173	-1751.76	1397.04	-65.097	-1810.59	1180.72	-71.9991	-1809.11	1098.82	-94.4158	-1748.03	985.177	-40.63	-1655.49	910.972	-93.2886	-1696.3	887.895	-78.5792	-1623.62	835.499
365	0	101.971	-1591.01	1586.82	203.723	-1581.3	1591.69	102.578	-1763.99	1598.2	229.666	-1729.92	1608.51	170.31	-1801.29	1474.31	182.574	-1918.27	1235.01	185.584	-1672.81	1360.72	185.848	-1639.68	1176.16	226.357	-1913.32	1313.54	12.757	-1736.48	1396.86	-65.5235	-1792.95	1180.81	-72.8417	-1790.58	1098.81	-94.1102	-1726.6	986.363	-38.7898	-1633.11	914.425	-91.9296	-1672.68	890.261	-76.0387	-1598.86	839.731
366	0	104.018	-1576.37	1585.79	205.82	-1566.98	1590.46	104.084	-1749.35	1597.32	231.329	-1715.64	1607.35	171.39	-1786.98	1473.42	182.702	-1904.21	1234.2	187.056	-1658.6	1359.63	187.04	-1625.65	1175.04	226.578	-1899.35	1312.66	14.0348	-1721.24	1396.42	-65.8912	-1775.27	1180.65	-73.6027	-1772.03	1098.58	-93.735	-1705.26	987.372	-36.9187	-1610.93	917.646	-90.5317	-1649.23	892.475	-73.4532	-1574.4	843.762
367	0	106.148	-1561.76	1584.52	208	-1552.7	1589	105.645	-1734.73	1596.19	233.055	-1701.4	1605.95	172.536	-1772.7	1472.27	182.958	-1890.13	1233.1	188.549	-1644.37	1358.28	188.15	-1611.53	1173.65	226.91	-1885.37	1311.49	15.3582	-1706.03	1395.73	-66.1772	-1757.56	1180.24	-74.2613	-1753.45	1098.12	-93.2812	-1684.03	988.202	-35.0177	-1588.95	920.62	-89.0954	-1625.99	894.524	-70.8359	-1550.25	847.571
368	0	108.357	-1547.17	1583.03	210.26	-1538.45	1587.32	107.268	-1720.14	1594.84	234.848	-1687.21	1604.33	173.754	-1758.46	1470.87	183.348	-1876	1231.72	190.072	-1630.14	1356.7	189.194	-1597.31	1172.02	227.361	-1871.37	1310.04	16.7357	-1690.87	1394.81	-66.3577	-1739.82	1179.61	-74.7962	-1734.88	1097.46	-92.7395	-1662.93	988.851	-33.088	-1567.19	923.336	-87.6206	-1602.97	896.399	-68.2005	-1526.43	851.143
369	0	110.646	-1532.61	1581.34	212.598	-1524.24	1585.44	108.963	-1705.59	1593.3	236.714	-1673.05	1602.52	175.052	-1744.27	1469.25	183.875	-1861.83	1230.07	191.637	-1615.89	1354.93	190.196	-1582.99	1170.2	227.936	-1857.36	1308.34	18.176	-1675.75	1393.67	-66.4088	-1722.08	1178.75	-75.1859	-1716.32	1096.6	-92.101	-1641.99	989.322	-31.1305	-1545.68	925.784	-86.1067	-1580.2	898.092	-65.5611	-1502.96	854.467
370	0	113.013	-1518.1	1579.47	215.013	-1510.07	1583.38	110.739	-1691.07	1591.58	238.66	-1658.94	1600.54	176.436	-1730.13	1467.42	184.542	-1847.61	1228.17	193.255	-1601.64	1352.98	191.183	-1568.55	1168.21	228.639	-1843.32	1306.38	19.688	-1660.7	1392.33	-66.3077	-1704.36	1177.68	-75.4102	-1697.8	1095.55	-91.3566	-1621.23	989.619	-29.1461	-1524.42	927.96	-84.5528	-1557.71	899.598	-62.9315	-1479.86	857.532
371	0	115.457	-1503.62	1577.46	217.504	-1495.92	1581.19	112.603	-1676.6	1589.71	240.693	-1644.86	1598.42	177.913	-1716.05	1465.41	185.346	-1833.33	1226.04	194.94	-1587.37	1350.91	192.185	-1553.99	1166.11	229.472	-1829.27	1304.2	21.2805	-1645.7	1390.81	-66.0331	-1686.69	1176.43	-75.4497	-1679.35	1094.34	-90.498	-1600.68	989.749	-27.1355	-1503.43	929.865	-82.9569	-1535.54	900.917	-60.3251	-1457.14	860.334
372	0	117.981	-1489.19	1575.33	220.072	-1481.82	1578.87	114.566	-1662.17	1587.73	242.818	-1630.82	1596.19	179.488	-1702.01	1463.24	186.284	-1818.99	1223.69	196.706	-1573.11	1348.74	193.232	-1539.3	1163.93	230.433	-1815.19	1301.82	22.9618	-1630.75	1389.16	-65.5658	-1669.08	1175.02	-75.287	-1660.99	1092.98	-89.5175	-1580.37	989.721	-25.0994	-1482.74	931.501	-81.3168	-1513.7	902.047	-57.7545	-1434.84	862.87
373	0	120.583	-1474.82	1573.12	222.717	-1467.75	1576.48	116.636	-1647.79	1585.65	245.042	-1616.81	1593.87	181.166	-1688.02	1460.94	187.351	-1804.58	1221.16	198.564	-1558.83	1346.52	194.358	-1524.48	1161.73	231.52	-1801.09	1299.25	24.7393	-1615.86	1387.38	-64.8896	-1651.59	1173.46	-74.9071	-1642.75	1091.5	-88.4082	-1560.33	989.544	-23.0384	-1462.37	932.875	-79.6292	-1492.24	902.992	-55.231	-1412.97	865.139
374	0	123.266	-1460.49	1570.85	225.439	-1453.71	1574.04	118.818	-1633.46	1583.52	247.371	-1602.83	1591.49	182.952	-1674.08	1458.54	188.539	-1790.08	1218.47	200.527	-1544.55	1344.28	195.596	-1509.53	1159.54	232.728	-1786.95	1296.53	26.6192	-1601.02	1385.52	-63.9914	-1634.23	1171.79	-74.2983	-1624.68	1089.93	-87.1647	-1540.59	989.232	-20.9529	-1442.32	933.996	-77.8905	-1471.19	903.755	-52.7639	-1391.54	867.145
375	0	126.029	-1446.21	1568.57	228.239	-1439.7	1571.58	121.118	-1619.19	1581.36	249.808	-1588.87	1589.1	184.848	-1660.17	1456.08	189.839	-1775.51	1215.65	202.605	-1530.26	1342.05	196.977	-1494.45	1157.4	234.05	-1772.78	1293.68	28.6065	-1586.23	1383.6	-62.862	-1617.05	1170.02	-73.4519	-1606.8	1088.27	-85.7825	-1521.2	988.799	-18.8433	-1422.64	934.878	-76.0966	-1450.58	904.343	-50.3607	-1370.6	868.891
376	0	128.873	-1431.99	1566.32	231.117	-1425.72	1569.14	123.54	-1604.96	1579.21	252.355	-1574.94	1586.71	186.855	-1646.3	1453.58	191.238	-1760.85	1212.75	204.806	-1515.96	1339.88	198.528	-1479.24	1155.36	235.478	-1758.57	1290.74	30.7041	-1571.48	1381.66	-61.4962	-1600.07	1168.2	-72.3634	-1589.15	1086.58	-84.2593	-1502.16	988.259	-16.7095	-1403.33	935.534	-74.2434	-1430.44	904.763	-48.0261	-1350.16	870.382
377	0	131.797	-1417.8	1564.12	234.074	-1411.75	1566.77	126.086	-1590.78	1577.1	255.015	-1561.02	1584.37	188.973	-1632.46	1451.09	192.727	-1746.1	1209.79	207.136	-1501.64	1337.79	200.274	-1463.92	1153.44	237.004	-1744.32	1287.76	32.9128	-1556.76	1379.73	-59.8932	-1583.32	1166.34	-71.0324	-1571.75	1084.87	-82.5943	-1483.53	987.63	-14.5517	-1384.42	935.982	-72.3268	-1410.81	905.025	-45.7623	-1330.24	871.626
378	0	134.801	-1403.66	1562.01	237.107	-1397.81	1564.49	128.754	-1576.64	1575.06	257.786	-1547.12	1582.1	191.2	-1618.63	1448.63	194.291	-1731.27	1206.82	209.596	-1487.31	1335.82	202.232	-1448.5	1151.68	238.616	-1730.03	1284.76	35.2311	-1542.07	1377.84	-58.0566	-1566.85	1164.49	-69.4628	-1554.66	1083.17	-80.7886	-1465.33	986.93	-12.3698	-1365.93	936.238	-70.3435	-1391.71	905.139	-43.5685	-1310.88	872.63
379	0	137.881	-1389.55	1560.03	240.215	-1383.87	1562.34	131.542	-1562.53	1573.12	260.665	-1533.22	1579.94	193.532	-1604.8	1446.25	195.917	-1716.35	1203.89	212.185	-1472.97	1334	204.415	-1432.99	1150.11	240.305	-1715.69	1281.8	37.6546	-1527.39	1376.03	-55.9946	-1550.66	1162.67	-67.6628	-1537.89	1081.52	-78.8457	-1447.59	986.178	-10.1638	-1347.9	936.323	-68.2908	-1373.19	905.118	-41.4412	-1292.11	873.401
380	0	141.034	-1375.47	1558.22	243.394	-1369.94	1560.34	134.445	-1548.46	1571.31	263.647	-1519.33	1577.91	195.961	-1590.97	1443.98	197.592	-1701.37	1201.04	214.898	-1458.61	1332.34	206.825	-1417.41	1148.73	242.057	-1701.31	1278.91	40.1759	-1512.73	1374.33	-53.72	-1534.79	1160.92	-65.6448	-1521.46	1079.95	-76.7713	-1430.33	985.396	-7.93401	-1330.35	936.256	-66.1673	-1355.26	904.975	-39.3742	-1273.94	873.948
381	0	144.256	-1361.4	1556.59	246.639	-1356.01	1558.54	137.454	-1534.4	1569.66	266.724	-1505.43	1576.05	198.479	-1577.12	1441.87	199.3	-1686.32	1198.32	217.725	-1444.23	1330.88	209.456	-1401.79	1147.58	243.859	-1686.88	1276.14	42.7843	-1498.06	1372.77	-51.25	-1519.25	1159.27	-63.4252	-1505.42	1078.48	-74.5734	-1413.58	984.604	-5.68124	-1313.29	936.056	-63.9733	-1337.96	904.725	-37.3589	-1256.42	874.28
382	0	147.539	-1347.35	1555.18	249.944	-1342.07	1556.95	140.558	-1520.36	1568.21	269.888	-1491.52	1574.38	201.075	-1563.24	1439.93	201.027	-1671.23	1195.77	220.651	-1429.83	1329.63	212.292	-1386.16	1146.66	245.699	-1672.43	1273.54	45.4661	-1483.4	1371.38	-48.6062	-1504.06	1157.75	-61.024	-1489.76	1077.16	-72.2624	-1397.36	983.825	-3.40697	-1296.76	935.743	-61.7111	-1321.3	904.383	-35.3852	-1239.56	874.404
383	0	150.875	-1333.29	1554.02	253.301	-1328.12	1555.6	143.746	-1506.32	1566.97	273.124	-1477.6	1572.93	203.735	-1549.33	1438.22	202.757	-1656.1	1193.45	223.656	-1415.42	1328.6	215.307	-1370.54	1145.99	247.56	-1657.94	1271.16	48.2042	-1468.74	1370.2	-45.814	-1489.22	1156.42	-58.4647	-1474.52	1076.01	-69.851	-1381.67	983.081	-1.11362	-1280.78	935.336	-59.3852	-1305.31	903.967	-33.4414	-1223.39	874.33
384	0	154.255	-1319.23	1553.11	256.7	-1314.15	1554.51	147.001	-1492.27	1565.98	276.42	-1463.65	1571.71	206.442	-1535.38	1436.75	204.476	-1640.97	1191.39	226.717	-1401	1327.81	218.465	-1354.98	1145.56	249.428	-1643.43	1269.03	50.9785	-1454.07	1369.26	-42.9029	-1474.72	1155.29	-55.7735	-1459.68	1075.06	-67.3542	-1366.54	982.394	1.19513	-1265.37	934.855	-57.003	-1290.01	903.492	-31.5159	-1207.93	874.065
385	0	157.667	-1305.14	1552.49	260.129	-1300.16	1553.68	150.305	-1478.2	1565.24	279.759	-1449.68	1570.75	209.178	-1521.38	1435.57	206.17	-1625.86	1189.64	229.805	-1386.57	1327.27	221.721	-1339.5	1145.38	251.288	-1628.91	1267.2	53.7665	-1439.39	1368.58	-39.9054	-1460.57	1154.4	-52.979	-1445.27	1074.34	-64.7893	-1351.97	981.788	3.51408	-1250.55	934.315	-54.5747	-1275.4	902.978	-29.5971	-1193.21	873.618
386	0	161.096	-1291.04	1552.15	263.574	-1286.14	1553.14	153.637	-1464.11	1564.79	283.12	-1435.68	1570.07	211.922	-1507.33	1434.68	207.824	-1610.77	1188.23	232.89	-1372.15	1326.99	225.023	-1324.15	1145.45	253.124	-1614.39	1265.71	56.5435	-1424.71	1368.19	-36.8568	-1446.74	1153.79	-50.1119	-1431.27	1073.88	-62.1757	-1337.97	981.283	5.83624	-1236.32	933.734	-52.1134	-1261.49	902.442	-27.6747	-1179.24	872.997
387	0	164.528	-1276.9	1552.1	267.021	-1272.09	1552.87	156.976	-1449.98	1564.64	286.483	-1421.65	1569.66	214.653	-1493.23	1434.12	209.426	-1595.75	1187.19	235.937	-1357.73	1326.98	228.313	-1308.94	1145.75	254.921	-1599.89	1264.57	59.2835	-1410.04	1368.11	-33.7942	-1433.22	1153.48	-47.2039	-1417.68	1073.7	-59.5346	-1324.52	980.898	8.1526	-1222.72	933.126	-49.6353	-1248.28	901.901	-25.7404	-1166.04	872.208
388	0	167.945	-1262.72	1552.34	270.452	-1258.01	1552.88	160.296	-1435.82	1564.79	289.825	-1407.59	1569.54	217.349	-1479.09	1433.89	210.967	-1580.8	1186.55	238.91	-1343.33	1327.23	231.529	-1293.92	1146.29	256.667	-1585.41	1263.83	61.9599	-1395.39	1368.35	-30.756	-1419.98	1153.5	-44.2876	-1404.49	1073.81	-56.8889	-1311.63	980.651	10.4519	-1209.74	932.504	-47.16	-1235.78	901.373	-23.789	-1153.61	871.26
389	0	171.326	-1248.5	1552.87	273.846	-1243.9	1553.17	163.57	-1421.6	1565.26	293.121	-1393.49	1569.71	219.986	-1464.91	1434.01	212.441	-1565.96	1186.32	241.774	-1328.95	1327.74	234.609	-1279.11	1147.05	258.35	-1570.98	1263.48	64.5459	-1380.77	1368.93	-27.7807	-1406.98	1153.86	-41.3952	-1391.68	1074.24	-54.263	-1299.28	980.557	12.7204	-1197.38	931.878	-44.7097	-1223.96	900.875	-21.8189	-1141.97	870.162
390	0	174.651	-1234.24	1553.68	277.182	-1229.76	1553.72	166.772	-1407.35	1566.05	296.345	-1379.37	1570.18	222.544	-1450.7	1434.47	213.842	-1551.22	1186.5	244.492	-1314.62	1328.51	237.493	-1264.52	1148.02	259.964	-1556.59	1263.55	67.0158	-1366.19	1369.84	-24.9056	-1394.19	1154.58	-38.5582	-1379.24	1074.98	-51.6821	-1287.47	980.629	14.9418	-1185.64	931.259	-42.3095	-1212.81	900.422	-19.8332	-1131.1	868.922
391	0	177.895	-1219.94	1554.74	280.436	-1215.6	1554.51	169.874	-1393.04	1567.15	299.47	-1365.21	1570.93	225.003	-1436.47	1435.26	215.173	-1536.62	1187.09	247.031	-1300.32	1329.55	240.124	-1250.17	1149.19	261.504	-1542.26	1264.01	69.3457	-1351.68	1371.1	-22.1661	-1381.58	1155.65	-35.8062	-1367.13	1076.05	-49.172	-1276.16	980.874	17.0975	-1174.52	930.655	-39.9866	-1202.31	900.029	-17.8403	-1120.99	867.552
392	0	181.034	-1205.6	1556.06	283.584	-1201.41	1555.54	172.848	-1378.69	1568.55	302.469	-1351.04	1571.96	227.343	-1422.25	1436.39	216.436	-1522.16	1188.09	249.361	-1286.08	1330.82	242.454	-1236.06	1150.54	262.967	-1528.01	1264.88	71.5142	-1337.25	1372.68	-19.5939	-1369.11	1157.08	-33.1665	-1355.35	1077.43	-46.7583	-1265.35	981.298	19.1662	-1164.01	930.071	-37.77	-1192.44	899.708	-15.8546	-1111.64	866.063
393	0	184.043	-1191.24	1557.59	286.6	-1187.22	1556.78	175.668	-1364.31	1570.23	305.318	-1336.84	1573.25	229.551	-1408.03	1437.83	217.637	-1507.85	1189.46	251.459	-1271.91	1332.34	244.442	-1222.18	1152.07	264.358	-1513.84	1266.12	73.503	-1322.92	1374.57	-17.2162	-1356.75	1158.85	-30.6631	-1343.87	1079.11	-44.4662	-1255.01	981.902	21.1244	-1154.07	929.514	-35.6896	-1183.16	899.469	-13.8968	-1103.01	864.47
394	0	186.897	-1176.85	1559.32	289.459	-1173.01	1558.22	178.31	-1349.89	1572.19	307.992	-1322.62	1574.79	231.612	-1393.83	1439.55	218.787	-1493.7	1191.18	253.303	-1257.8	1334.08	246.059	-1208.51	1153.77	265.679	-1499.74	1267.71	75.298	-1308.72	1376.76	-15.0547	-1344.48	1160.95	-28.3163	-1332.66	1081.09	-42.3198	-1245.12	982.684	22.9466	-1144.7	928.986	-33.7755	-1174.45	899.321	-11.994	-1095.08	862.79
395	0	189.572	-1162.44	1561.22	292.137	-1158.8	1559.82	180.753	-1335.45	1574.38	310.469	-1308.4	1576.56	233.519	-1379.66	1441.54	219.895	-1479.7	1193.22	254.881	-1243.76	1336.03	247.287	-1195.03	1155.63	266.939	-1485.74	1269.63	76.889	-1294.64	1379.21	-13.1244	-1332.29	1163.33	-26.1419	-1321.71	1083.33	-40.3415	-1235.64	983.636	24.6059	-1135.86	928.49	-32.0571	-1166.27	899.27	-10.1792	-1087.81	861.041
396	0	192.045	-1148.03	1563.27	294.61	-1144.59	1561.58	182.979	-1321	1576.78	312.732	-1294.18	1578.54	235.265	-1365.54	1443.76	220.974	-1465.85	1195.54	256.186	-1229.8	1338.17	248.122	-1181.71	1157.63	268.145	-1471.82	1271.83	78.2708	-1280.72	1381.88	-11.4334	-1320.17	1165.98	-24.1515	-1311	1085.82	-38.5514	-1226.56	984.75	26.0747	-1127.52	928.027	-30.5622	-1158.58	899.32	-8.49086	-1081.17	859.244
397	0	194.296	-1133.64	1565.43	296.86	-1130.4	1563.46	184.975	-1306.55	1579.36	314.767	-1279.96	1580.69	236.847	-1351.47	1446.17	222.034	-1452.15	1198.1	257.22	-1215.92	1340.47	248.573	-1168.51	1159.77	269.309	-1457.98	1274.28	79.4422	-1266.95	1384.75	-9.98297	-1308.13	1168.86	-22.3517	-1300.5	1088.52	-36.967	-1217.85	986.011	27.3252	-1119.65	927.596	-29.3165	-1151.34	899.47	-6.97144	-1075.11	857.418
398	0	196.311	-1119.26	1567.67	298.869	-1116.22	1565.44	186.732	-1292.11	1582.06	316.564	-1265.75	1583	238.266	-1337.46	1448.74	223.085	-1438.58	1200.84	257.989	-1202.11	1342.91	248.659	-1155.41	1162.03	270.439	-1444.21	1276.92	80.407	-1253.35	1387.77	-8.76731	-1296.19	1171.92	-20.7448	-1290.21	1091.39	-35.6027	-1209.47	987.403	28.3304	-1112.2	927.196	-28.3421	-1144.52	899.717	-5.66615	-1069.58	855.587
399	0	198.076	-1104.91	1569.96	300.626	-1102.06	1567.49	188.247	-1277.7	1584.87	318.118	-1251.56	1585.42	239.526	-1323.51	1451.42	224.137	-1425.14	1203.73	258.506	-1188.38	1345.46	248.413	-1142.37	1164.38	271.545	-1430.52	1279.71	81.1727	-1239.9	1390.88	-7.77468	-1284.37	1175.11	-19.3287	-1280.11	1094.39	-34.4694	-1201.42	988.906	29.0651	-1105.15	926.821	-27.6574	-1138.08	900.055	-4.62104	-1064.52	853.768
400	0	199.585	-1090.61	1572.27	302.124	-1087.94	1569.59	189.521	-1263.33	1587.71	319.429	-1237.4	1587.91	240.632	-1309.62	1454.18	225.195	-1411.81	1206.71	258.79	-1174.72	1348.08	247.874	-1129.35	1166.82	272.634	-1416.9	1282.6	81.7505	-1226.61	1394.05	-6.98817	-1272.7	1178.4	-18.0973	-1270.18	1097.5	-33.5744	-1193.66	990.496	29.5067	-1098.44	926.464	-27.276	-1131.98	900.473	-3.88106	-1059.89	851.981
401	0	200.835	-1076.36	1574.56	303.361	-1073.84	1571.7	190.559	-1249.01	1590.56	320.5	-1223.25	1590.45	241.592	-1295.79	1456.95	226.262	-1398.57	1209.73	258.863	-1161.12	1350.74	247.088	-1116.33	1169.31	273.713	-1403.32	1285.53	82.1545	-1213.47	1397.21	-6.38679	-1261.21	1181.72	-17.0413	-1260.42	1100.65	-32.9213	-1186.16	992.148	29.6363	-1092.04	926.117	-27.2066	-1126.2	900.959	-3.48803	-1055.62	850.241
402	0	201.827	-1062.18	1576.79	304.338	-1059.78	1573.8	191.371	-1234.76	1593.37	321.34	-1209.14	1592.98	242.415	-1282.02	1459.71	227.339	-1385.42	1212.73	258.75	-1147.57	1353.41	246.105	-1103.28	1171.82	274.784	-1389.79	1288.47	82.4012	-1200.46	1400.33	-5.94671	-1249.93	1185.04	-16.1489	-1250.81	1103.82	-32.51	-1178.9	993.836	29.4393	-1085.9	925.766	-27.4523	-1120.69	901.493	-3.47871	-1051.67	848.558
403	0	202.569	-1048.05	1578.95	305.063	-1045.75	1575.85	191.97	-1220.57	1596.08	321.961	-1195.06	1595.47	243.113	-1268.3	1462.39	228.422	-1372.33	1215.67	258.478	-1134.07	1356.02	244.976	-1090.19	1174.31	275.849	-1376.3	1291.35	82.5085	-1187.58	1403.34	-5.6425	-1238.9	1188.3	-15.4062	-1241.34	1106.94	-32.3366	-1171.85	995.53	28.9062	-1080	925.396	-28.0109	-1115.43	902.057	-3.88305	-1047.97	846.94
404	0	203.071	-1034	1580.98	305.546	-1031.76	1577.82	192.372	-1206.45	1598.65	322.377	-1181.01	1597.87	243.694	-1254.63	1464.97	229.505	-1359.29	1218.49	258.075	-1120.61	1358.56	243.752	-1077.06	1176.75	276.907	-1362.84	1294.13	82.4952	-1174.79	1406.19	-5.44832	-1228.12	1191.44	-14.7981	-1232	1109.99	-32.394	-1165	997.2	28.0326	-1074.29	924.991	-28.8748	-1110.39	902.627	-4.72275	-1044.47	845.389
405	0	203.347	-1020.01	1582.86	305.803	-1017.81	1579.68	192.595	-1192.4	1601.04	322.605	-1167	1600.14	244.172	-1240.99	1467.39	230.581	-1346.28	1221.16	257.568	-1107.17	1360.96	242.481	-1063.87	1179.08	277.953	-1349.39	1296.77	82.3803	-1162.09	1408.85	-5.339	-1217.61	1194.44	-14.309	-1222.77	1112.92	-32.6721	-1158.31	998.815	26.8204	-1068.73	924.53	-30.0314	-1105.53	903.177	-6.0102	-1041.13	843.902
406	0	203.413	-1006.09	1584.56	305.849	-1003.88	1581.39	192.657	-1178.43	1603.2	322.663	-1153.02	1602.24	244.555	-1227.38	1469.61	231.639	-1333.29	1223.63	256.983	-1093.75	1363.18	241.204	-1050.64	1181.26	278.981	-1335.95	1299.21	82.1821	-1149.44	1411.26	-5.29099	-1207.36	1197.24	-13.9238	-1213.63	1115.69	-33.1582	-1151.76	1000.35	25.2768	-1063.3	923.992	-31.4633	-1100.84	903.683	-7.74791	-1037.89	842.47
407	0	203.286	-992.225	1586.03	305.703	-989.986	1582.91	192.576	-1164.52	1605.11	322.57	-1139.06	1604.13	244.855	-1213.78	1471.61	232.666	-1320.31	1225.87	256.344	-1080.34	1365.19	239.959	-1037.37	1183.24	279.981	-1322.52	1301.43	81.9178	-1136.82	1413.38	-5.28315	-1197.34	1199.81	-13.6282	-1204.56	1118.27	-33.8378	-1145.33	1001.77	23.4147	-1057.97	923.355	-33.1497	-1096.29	904.115	-9.92826	-1034.71	841.083
408	0	202.984	-978.421	1587.26	305.383	-976.112	1584.22	192.371	-1150.68	1606.72	322.342	-1125.12	1605.78	245.08	-1200.19	1473.33	233.649	-1307.33	1227.83	255.672	-1066.92	1366.94	238.777	-1024.06	1184.97	280.944	-1309.08	1303.39	81.6029	-1124.22	1415.19	-5.29754	-1187.54	1202.12	-13.4092	-1195.53	1120.61	-34.6945	-1138.98	1003.04	21.2522	-1052.7	922.595	-35.0665	-1091.85	904.45	-12.5338	-1031.55	839.724
409	0	202.526	-964.665	1588.21	304.908	-962.254	1585.29	192.058	-1136.9	1608	321.998	-1111.2	1607.14	245.237	-1186.59	1474.76	234.573	-1294.34	1229.49	254.985	-1053.5	1368.39	237.68	-1010.74	1186.41	281.856	-1295.64	1305.05	81.2508	-1111.6	1416.64	-5.32004	-1177.9	1204.12	-13.256	-1186.53	1122.7	-35.7113	-1132.69	1004.15	18.8117	-1047.48	921.692	-37.1873	-1087.5	904.66	-15.5382	-1028.38	838.374
410	0	201.929	-950.948	1588.87	304.295	-948.405	1586.08	191.652	-1123.16	1608.94	321.552	-1097.29	1608.21	245.331	-1172.98	1475.87	235.423	-1281.32	1230.82	254.298	-1040.05	1369.51	236.687	-997.42	1187.52	282.705	-1282.18	1306.4	80.872	-1098.95	1417.71	-5.34089	-1168.38	1205.81	-13.1602	-1177.53	1124.5	-36.8708	-1126.42	1005.08	16.1197	-1042.28	920.624	-39.4847	-1083.22	904.723	-18.9067	-1025.18	837.012
411	0	201.209	-937.262	1589.2	303.56	-934.559	1586.58	191.165	-1109.46	1609.52	321.017	-1083.38	1608.95	245.364	-1159.35	1476.64	236.184	-1268.28	1231.82	253.623	-1026.57	1370.27	235.808	-984.103	1188.27	283.476	-1268.71	1307.42	80.4743	-1086.24	1418.39	-5.35512	-1158.92	1207.17	-13.1156	-1168.49	1125.99	-38.1557	-1120.16	1005.79	13.2056	-1037.08	919.374	-41.9307	-1078.98	904.619	-22.5981	-1021.91	835.615
412	0	200.379	-923.597	1589.2	302.716	-920.708	1586.76	190.608	-1095.79	1609.71	320.404	-1069.47	1609.34	245.339	-1145.68	1477.05	236.842	-1255.2	1232.45	252.966	-1013.06	1370.64	235.048	-970.802	1188.61	284.154	-1255.22	1308.08	80.0624	-1073.45	1418.67	-5.36273	-1149.45	1208.17	-13.119	-1159.38	1127.17	-39.5493	-1113.87	1006.28	10.1008	-1031.86	917.924	-44.4982	-1074.74	904.331	-26.5658	-1018.57	834.16
413	0	199.45	-909.943	1588.85	301.776	-906.845	1586.62	189.988	-1082.13	1609.52	319.72	-1055.54	1609.38	245.252	-1131.98	1477.1	237.383	-1242.08	1232.73	252.331	-999.504	1370.62	234.407	-957.525	1188.54	284.723	-1241.7	1308.39	79.6373	-1060.56	1418.54	-5.36866	-1139.91	1208.82	-13.1693	-1150.18	1128	-41.0362	-1107.51	1006.53	6.83812	-1026.6	916.262	-47.1608	-1070.49	903.846	-30.7596	-1015.14	832.624
414	0	198.431	-896.291	1588.14	300.747	-892.965	1586.14	189.307	-1068.48	1608.93	318.97	-1041.6	1609.05	245.1	-1118.23	1476.78	237.796	-1228.91	1232.63	251.719	-985.9	1370.18	233.879	-944.275	1188.03	285.171	-1228.16	1308.33	79.1969	-1047.57	1417.99	-5.38237	-1130.25	1209.1	-13.2681	-1140.86	1128.5	-42.602	-1101.06	1006.53	3.45041	-1021.27	914.38	-49.8945	-1066.2	903.154	-35.1275	-1011.6	830.985
415	0	197.328	-882.632	1587.09	299.636	-879.062	1585.32	188.566	-1054.83	1607.97	318.155	-1027.64	1608.36	244.875	-1104.43	1476.08	238.07	-1215.69	1232.17	251.123	-972.244	1369.32	233.458	-931.049	1187.09	285.483	-1214.59	1307.91	78.7354	-1034.45	1417.04	-5.41732	-1120.41	1209.02	-13.4189	-1131.38	1128.65	-44.2339	-1094.48	1006.28	-0.029867	-1015.87	912.272	-52.6774	-1061.82	902.249	-39.6168	-1007.95	829.222
416	0	196.144	-868.957	1585.7	298.446	-865.133	1584.17	187.764	-1041.17	1606.63	317.273	-1013.65	1607.32	244.57	-1090.58	1475.03	238.196	-1202.4	1231.35	250.537	-958.529	1368.05	233.13	-917.843	1185.72	285.649	-1200.98	1307.14	78.244	-1021.19	1415.69	-5.49015	-1110.33	1208.58	-13.6271	-1121.72	1128.46	-45.9209	-1087.74	1005.77	-3.57152	-1010.36	909.937	-55.4904	-1057.32	901.131	-44.176	-1004.17	827.318
417	0	194.88	-855.26	1583.97	297.176	-851.174	1582.69	186.893	-1027.49	1604.93	316.321	-999.64	1605.93	244.172	-1076.66	1473.64	238.17	-1189.06	1230.18	249.947	-944.752	1366.37	232.881	-904.645	1183.93	285.659	-1187.32	1306.02	77.7109	-1007.8	1413.97	-5.61975	-1099.98	1207.78	-13.8992	-1111.85	1127.92	-47.6536	-1080.8	1005.01	-7.14522	-1004.72	907.377	-58.3176	-1052.68	899.803	-48.756	-1000.26	825.259
418	0	193.533	-841.534	1581.94	295.827	-837.182	1580.91	185.947	-1013.79	1602.89	315.291	-985.597	1604.21	243.67	-1062.69	1471.91	237.987	-1175.64	1228.68	249.34	-930.909	1364.32	232.693	-891.442	1181.74	285.506	-1173.62	1304.57	77.1218	-994.262	1411.89	-5.82631	-1089.32	1206.64	-14.2429	-1101.75	1127.05	-49.4241	-1073.64	1004	-10.7239	-998.927	904.6	-61.1458	-1047.84	898.27	-53.3112	-996.198	823.034
419	0	192.099	-827.773	1579.63	294.392	-823.156	1578.84	184.913	-1000.05	1600.55	314.173	-971.523	1602.19	243.052	-1048.65	1469.89	237.646	-1162.14	1226.86	248.696	-916.993	1361.91	232.544	-878.216	1179.19	285.186	-1159.85	1302.82	76.4604	-980.584	1409.47	-6.13011	-1078.32	1205.16	-14.6662	-1091.4	1125.86	-51.2261	-1066.23	1002.74	-14.2832	-992.957	901.616	-63.9648	-1042.77	896.542	-57.8002	-991.978	820.636
420	0	190.573	-813.971	1577.08	292.867	-809.095	1576.53	183.78	-986.283	1597.93	312.957	-957.42	1599.9	242.302	-1034.55	1467.59	237.148	-1148.56	1224.77	247.996	-903.003	1359.18	232.409	-864.948	1176.31	284.697	-1146.02	1300.78	75.7091	-966.769	1406.76	-6.55046	-1066.97	1203.37	-15.1769	-1080.78	1124.36	-53.0544	-1058.53	1001.26	-17.8014	-986.781	898.44	-66.7669	-1037.43	894.631	-62.1866	-987.576	818.062
421	0	188.946	-800.124	1574.32	291.244	-794.998	1574.01	182.534	-972.47	1595.07	311.63	-943.287	1597.37	241.408	-1020.38	1465.05	236.499	-1134.87	1222.42	247.217	-888.933	1356.17	232.262	-851.615	1173.15	284.041	-1132.1	1298.49	74.8495	-952.824	1403.79	-7.1046	-1055.27	1201.28	-15.7822	-1069.88	1122.57	-54.9049	-1050.52	999.557	-21.2598	-980.369	895.09	-69.5465	-1031.78	892.555	-66.4396	-982.97	815.317
422	0	187.212	-786.226	1571.4	289.515	-780.864	1571.32	181.16	-958.612	1592.02	310.179	-929.126	1594.64	240.356	-1006.14	1462.31	235.705	-1121.08	1219.85	246.336	-874.778	1352.94	232.073	-838.194	1169.77	283.222	-1118.1	1295.99	73.8634	-938.76	1400.58	-7.80664	-1043.21	1198.9	-16.488	-1058.7	1120.52	-56.7738	-1042.17	997.656	-24.6423	-973.691	891.589	-72.2996	-1025.77	890.33	-70.534	-978.131	812.409
423	0	185.359	-772.275	1568.38	287.67	-766.694	1568.51	179.642	-944.703	1588.82	308.591	-914.937	1591.76	239.135	-991.841	1459.42	234.775	-1107.18	1217.1	245.329	-860.535	1349.52	231.808	-824.663	1166.22	282.246	-1104	1293.32	72.7333	-924.587	1397.2	-8.66676	-1030.8	1196.28	-17.2989	-1047.21	1118.24	-58.6579	-1033.46	995.575	-27.9355	-966.715	887.962	-75.0233	-1019.37	887.977	-74.4505	-973.026	809.35
424	0	183.38	-758.266	1565.3	285.701	-752.486	1565.64	177.966	-930.741	1585.52	306.85	-900.72	1588.78	237.735	-977.467	1456.42	233.721	-1093.14	1214.22	244.174	-846.198	1345.99	231.437	-810.999	1162.56	281.122	-1089.8	1290.52	71.4434	-910.321	1393.67	-9.69051	-1018.06	1193.43	-18.2173	-1035.43	1115.74	-60.5539	-1024.37	993.336	-31.1283	-959.41	884.237	-77.7149	-1012.54	885.519	-78.1752	-967.619	806.163
425	0	181.265	-744.195	1562.22	283.597	-738.241	1562.76	176.118	-916.721	1582.17	304.946	-886.477	1585.74	236.147	-963.023	1453.37	232.558	-1078.97	1211.24	242.85	-831.762	1342.4	230.925	-797.18	1158.85	279.861	-1075.47	1287.63	69.9803	-895.976	1390.05	-10.8784	-1005.01	1190.4	-19.2435	-1023.35	1113.07	-62.4582	-1014.89	990.967	-34.212	-951.743	880.446	-80.3716	-1005.25	882.98	-81.6997	-961.867	802.87
426	0	179.006	-730.061	1559.2	281.351	-723.957	1559.93	174.087	-902.64	1578.83	302.866	-872.208	1582.71	234.366	-948.506	1450.31	231.3	-1064.66	1208.24	241.339	-817.225	1338.83	230.241	-783.187	1155.17	278.475	-1061.02	1284.72	68.3335	-881.566	1386.4	-12.2258	-991.685	1187.22	-20.3752	-1010.97	1110.26	-64.3667	-1005	988.494	-37.1798	-943.683	876.623	-82.9896	-997.457	880.386	-85.0204	-955.725	799.504
427	0	176.595	-715.86	1556.3	278.956	-709.634	1557.21	171.862	-888.496	1575.55	300.602	-857.911	1579.73	232.391	-933.916	1447.3	229.963	-1050.19	1205.24	239.626	-802.583	1335.32	229.357	-769.002	1151.57	276.977	-1046.44	1281.84	66.4965	-867.106	1382.76	-13.7232	-978.105	1183.93	-21.6079	-998.306	1107.36	-66.2748	-994.686	985.947	-40.0266	-935.197	872.806	-85.5644	-989.146	877.765	-88.1378	-949.144	796.097
428	0	174.029	-701.592	1553.57	276.406	-695.271	1554.65	169.436	-874.286	1572.38	298.146	-843.587	1576.87	230.222	-919.252	1444.38	228.563	-1035.57	1202.31	237.702	-787.833	1331.96	228.248	-754.608	1148.13	275.382	-1031.71	1279.03	64.4668	-852.609	1379.17	-15.3563	-964.305	1180.59	-22.9346	-985.359	1104.39	-68.1771	-983.946	983.359	-42.7489	-926.253	869.03	-88.0897	-980.289	875.144	-91.0558	-942.074	792.689
429	0	171.303	-687.254	1551.06	273.697	-680.866	1552.31	166.805	-860.008	1569.37	295.494	-829.235	1574.17	227.866	-904.514	1441.62	227.117	-1020.79	1199.51	235.561	-772.977	1328.8	226.896	-739.993	1144.91	273.703	-1016.86	1276.36	62.2467	-838.088	1375.7	-17.1074	-950.319	1177.24	-24.346	-972.142	1101.41	-70.0674	-972.774	980.76	-45.3445	-916.824	865.337	-90.5579	-970.864	872.551	-93.7811	-934.465	789.318
430	0	168.418	-672.847	1548.81	270.83	-666.421	1550.23	163.969	-845.662	1566.57	292.646	-814.854	1571.69	225.33	-889.703	1439.06	225.639	-1005.86	1196.87	233.207	-758.015	1325.89	225.29	-725.148	1141.96	271.954	-1001.86	1273.87	59.8434	-823.551	1372.4	-18.9555	-936.178	1173.93	-25.8312	-958.666	1098.46	-71.9392	-961.17	978.186	-47.8121	-906.879	861.765	-92.96	-960.858	870.015	-96.322	-926.268	786.027
431	0	165.376	-658.373	1546.88	267.805	-651.934	1548.47	160.932	-831.248	1564.02	289.606	-800.444	1569.46	222.628	-874.823	1436.74	224.142	-990.787	1194.46	230.645	-742.953	1323.29	223.426	-710.069	1139.33	270.15	-986.735	1271.62	57.2692	-809.009	1369.29	-20.878	-921.913	1170.71	-27.3777	-944.945	1095.59	-73.7853	-949.133	975.668	-50.1516	-896.393	858.354	-95.2855	-950.257	867.562	-98.6878	-917.433	782.856
432	0	162.182	-643.833	1545.28	264.629	-637.407	1547.05	157.702	-816.769	1561.76	286.379	-786.005	1567.54	219.775	-859.877	1434.7	222.639	-975.574	1192.32	227.891	-727.797	1321.04	221.311	-694.76	1137.08	268.304	-971.486	1269.64	54.541	-794.466	1366.44	-22.8515	-907.547	1167.65	-28.9722	-930.991	1092.83	-75.5983	-936.667	973.239	-52.3635	-885.341	855.14	-97.5235	-939.055	865.219	-100.888	-907.917	779.845
433	0	158.848	-629.233	1544.05	261.311	-622.842	1546.01	154.291	-802.226	1559.82	282.979	-771.536	1565.95	216.791	-844.872	1432.99	221.139	-960.238	1190.48	224.965	-712.558	1319.18	218.959	-679.232	1135.23	266.43	-956.126	1267.98	51.6805	-779.929	1363.88	-24.8529	-893.103	1164.79	-30.6013	-916.816	1090.23	-77.3709	-923.776	970.929	-54.4489	-873.702	852.161	-99.6622	-927.248	863.01	-102.932	-897.678	777.032
434	0	155.385	-614.578	1543.21	257.863	-608.24	1545.37	150.717	-787.626	1558.22	279.421	-757.039	1564.73	213.699	-829.816	1431.62	219.651	-944.8	1188.99	221.893	-697.249	1317.73	216.392	-663.504	1133.8	264.539	-940.671	1266.68	48.7133	-765.401	1361.64	-26.8606	-878.595	1162.17	-32.2517	-902.432	1087.82	-79.0962	-910.466	968.767	-56.4093	-861.458	849.447	-101.69	-914.833	860.956	-104.828	-886.68	774.449
435	0	151.811	-599.873	1542.75	254.302	-593.605	1545.14	147	-772.974	1556.99	275.725	-742.516	1563.89	210.523	-814.722	1430.62	218.183	-929.282	1187.88	218.706	-681.889	1316.71	213.643	-647.606	1132.82	262.646	-925.143	1265.76	45.6683	-750.887	1359.74	-28.8552	-864.031	1159.84	-33.9107	-887.851	1085.64	-80.7677	-896.743	966.779	-58.2463	-848.595	847.028	-103.597	-901.813	859.076	-106.582	-874.894	772.125
436	0	148.146	-585.129	1542.69	250.647	-578.942	1545.32	143.167	-758.277	1556.13	271.916	-727.969	1563.45	207.292	-799.602	1430	216.742	-913.711	1187.16	215.437	-666.496	1316.12	210.747	-631.575	1132.28	260.761	-909.562	1265.25	42.5765	-736.388	1358.21	-30.8203	-849.414	1157.82	-35.5671	-873.081	1083.71	-82.3798	-882.613	964.987	-59.9615	-835.1	844.928	-105.374	-888.19	857.387	-108.199	-862.296	770.082
437	0	144.412	-570.354	1543.01	246.921	-564.257	1545.9	139.247	-743.544	1555.66	268.022	-713.401	1563.41	204.033	-784.472	1429.78	215.331	-898.114	1186.85	212.126	-651.093	1315.97	207.748	-615.459	1132.19	258.898	-893.956	1265.14	39.4705	-721.91	1357.06	-32.743	-834.741	1156.15	-37.211	-858.132	1082.06	-83.9279	-868.083	963.409	-61.5568	-820.968	843.166	-107.012	-873.97	855.9	-109.684	-848.869	768.337
438	0	140.638	-555.561	1543.7	243.15	-549.558	1546.87	135.273	-728.787	1555.56	264.075	-698.818	1563.78	200.777	-769.349	1429.95	213.956	-882.522	1186.96	208.809	-635.705	1316.24	204.69	-599.309	1132.52	257.066	-878.351	1265.45	36.3828	-707.455	1356.29	-34.6141	-820.005	1154.82	-38.8341	-843.011	1080.7	-85.4088	-853.159	962.059	-63.0334	-806.195	841.756	-108.508	-859.159	854.625	-111.038	-834.602	766.903
439	0	136.851	-540.76	1544.73	239.363	-534.853	1548.21	131.28	-714.018	1555.84	260.108	-684.225	1564.54	197.551	-754.252	1430.5	212.619	-866.966	1187.48	205.527	-620.357	1316.92	201.621	-583.184	1133.25	255.277	-862.774	1266.17	33.345	-693.029	1355.91	-36.4278	-805.195	1153.86	-40.4301	-827.726	1079.64	-86.8203	-837.849	960.947	-64.3925	-790.784	840.708	-109.859	-843.764	853.566	-112.262	-819.494	765.783
440	0	133.081	-525.966	1546.08	235.59	-520.151	1549.87	127.305	-699.249	1556.48	256.156	-669.63	1565.67	194.384	-739.199	1431.42	211.321	-851.476	1188.39	202.314	-605.076	1317.98	198.588	-567.142	1134.35	253.537	-847.254	1267.27	30.3868	-678.636	1355.9	-38.1816	-790.301	1153.25	-41.9946	-812.283	1078.88	-88.1614	-822.158	960.077	-65.6349	-774.74	840.024	-111.063	-827.792	852.727	-113.355	-803.545	764.978
441	0	129.358	-511.192	1547.71	231.861	-505.463	1551.83	123.385	-684.494	1557.46	252.256	-655.04	1567.15	191.301	-724.209	1432.69	210.063	-836.079	1189.68	199.208	-589.885	1319.4	195.637	-551.24	1135.79	251.853	-831.817	1268.75	27.5349	-664.283	1356.26	-39.8756	-775.309	1152.99	-43.5248	-796.689	1078.41	-89.4322	-806.094	959.449	-66.7605	-758.075	839.703	-112.124	-811.252	852.105	-114.318	-786.767	764.485
442	0	125.715	-496.452	1549.58	228.208	-490.8	1554.05	119.557	-669.767	1558.76	248.444	-640.466	1568.95	188.326	-709.298	1434.28	208.844	-820.802	1191.32	196.238	-574.808	1321.13	192.812	-535.53	1137.52	250.23	-816.487	1270.56	24.8127	-649.974	1356.96	-41.5119	-760.211	1153.05	-45.0199	-780.95	1078.23	-90.6339	-789.664	959.06	-67.7687	-740.804	839.738	-113.046	-794.154	851.697	-115.149	-769.174	764.294
443	0	122.18	-481.758	1551.67	224.661	-476.171	1556.49	115.856	-655.082	1560.35	244.755	-625.915	1571.04	185.48	-694.481	1436.15	207.659	-805.667	1193.27	193.43	-559.864	1323.15	190.153	-520.056	1139.51	248.669	-801.287	1272.68	22.2394	-635.715	1357.97	-43.0941	-744.997	1153.41	-46.4802	-765.074	1078.31	-91.7683	-772.874	958.903	-68.6585	-722.948	840.121	-113.834	-776.507	851.497	-115.846	-750.786	764.398
444	0	118.782	-467.124	1553.94	221.249	-461.59	1559.1	112.314	-640.452	1562.2	241.219	-611.4	1573.38	182.778	-679.77	1438.28	206.504	-790.69	1195.5	190.807	-545.069	1325.41	187.694	-504.853	1141.72	247.169	-786.234	1275.06	19.8296	-621.51	1359.28	-44.6264	-729.664	1154.05	-47.9074	-749.066	1078.64	-92.8378	-755.734	958.967	-69.4278	-704.53	840.839	-114.495	-758.324	851.498	-116.408	-731.628	764.785
445	0	115.546	-452.56	1556.35	217.998	-447.065	1561.86	108.959	-625.891	1564.28	237.866	-596.929	1575.93	180.235	-665.174	1440.63	205.373	-775.886	1197.96	188.384	-530.435	1327.87	185.465	-489.943	1144.09	245.73	-771.341	1277.67	17.5934	-607.364	1360.84	-46.1133	-714.21	1154.91	-49.3043	-732.934	1079.2	-93.8451	-738.254	959.239	-70.0743	-685.579	841.875	-115.037	-739.619	851.693	-116.835	-711.731	765.445
446	0	112.493	-438.078	1558.87	214.93	-432.608	1564.7	105.816	-611.408	1566.55	234.72	-582.513	1578.64	177.858	-650.699	1443.15	204.261	-761.264	1200.62	186.172	-515.967	1330.49	183.487	-475.337	1146.6	244.346	-756.619	1280.45	15.5365	-593.277	1362.63	-47.5588	-698.638	1155.99	-50.6742	-716.684	1079.96	-94.7934	-720.442	959.704	-70.5953	-666.128	843.214	-115.468	-720.408	852.073	-117.126	-691.127	766.368
447	0	109.643	-423.685	1561.47	212.065	-418.227	1567.61	102.903	-597.014	1568.98	231.799	-568.161	1581.48	175.654	-636.347	1445.82	203.16	-746.826	1203.44	184.176	-501.669	1333.24	181.774	-461.036	1149.21	243.012	-742.072	1283.37	13.6601	-579.25	1364.6	-48.9665	-682.953	1157.23	-52.0212	-700.326	1080.88	-95.6855	-702.312	960.348	-70.9882	-646.212	844.838	-115.796	-700.707	852.631	-117.28	-669.853	767.547
448	0	107.008	-409.388	1564.13	209.415	-403.93	1570.54	100.234	-582.715	1571.53	229.119	-553.882	1584.39	173.625	-622.116	1448.58	202.063	-732.573	1206.36	182.395	-487.539	1336.07	180.332	-447.027	1151.89	241.724	-727.7	1286.38	11.9615	-565.282	1366.73	-50.3394	-667.166	1158.62	-53.3493	-683.866	1081.96	-96.5244	-683.876	961.153	-71.2506	-625.867	846.729	-116.028	-680.538	853.359	-117.298	-647.949	768.976
449	0	104.597	-395.191	1566.8	206.992	-389.723	1573.47	97.8145	-568.518	1574.16	226.686	-539.682	1587.34	171.767	-608.003	1451.4	200.964	-718.5	1209.36	180.825	-473.57	1338.94	179.159	-433.291	1154.6	240.474	-713.5	1289.44	10.4342	-551.371	1368.97	-51.6794	-651.289	1160.12	-54.663	-667.312	1083.15	-97.3132	-665.148	962.103	-71.3811	-605.132	848.871	-116.172	-659.923	854.251	-117.182	-625.459	770.65
450	0	102.414	-381.097	1569.47	204.798	-375.609	1576.36	95.6467	-554.424	1576.84	224.503	-525.568	1590.29	170.076	-594.003	1454.25	199.859	-704.598	1212.38	179.456	-459.753	1341.82	178.246	-419.801	1157.31	239.256	-699.465	1292.51	9.06935	-537.512	1371.3	-52.9881	-635.336	1161.7	-55.9667	-650.672	1084.43	-98.0547	-646.145	963.18	-71.3791	-584.048	851.244	-116.234	-638.888	855.299	-116.933	-602.428	772.566
451	0	100.458	-367.106	1572.11	202.836	-361.593	1579.18	93.7263	-540.434	1579.52	222.567	-511.544	1593.2	168.544	-580.107	1457.09	198.744	-690.856	1215.4	178.276	-446.077	1344.68	177.574	-406.526	1160	238.066	-685.587	1295.55	7.85546	-523.701	1373.68	-54.2665	-619.326	1163.34	-57.2647	-633.954	1085.77	-98.7517	-626.884	964.369	-71.2454	-562.655	853.833	-116.219	-617.461	856.498	-116.551	-578.904	774.721
452	0	98.726	-353.216	1574.7	201.099	-347.675	1581.91	92.044	-526.547	1582.18	220.869	-497.611	1596.03	167.161	-566.307	1459.88	197.617	-677.26	1218.37	177.27	-432.527	1347.47	177.119	-393.433	1162.64	236.898	-671.852	1298.54	6.77971	-509.932	1376.07	-55.5158	-603.273	1165.02	-58.5613	-617.166	1087.15	-99.4068	-607.382	965.652	-70.9827	-540.992	856.62	-116.134	-595.671	857.839	-116.041	-554.938	777.113
453	0	97.2083	-339.423	1577.21	199.579	-333.853	1584.53	90.5864	-512.759	1584.78	219.397	-483.772	1598.76	165.917	-552.594	1462.59	196.478	-663.796	1221.26	176.42	-419.089	1350.18	176.853	-380.488	1165.22	235.748	-658.248	1301.43	5.82833	-496.199	1378.45	-56.737	-587.197	1166.7	-59.8603	-600.315	1088.54	-100.023	-587.66	967.011	-70.5953	-519.098	859.587	-115.981	-573.551	859.317	-115.403	-530.582	779.736
454	0	95.8937	-325.723	1579.62	198.266	-320.125	1587.02	89.3364	-499.065	1587.29	218.135	-470.024	1601.34	164.8	-538.958	1465.19	195.329	-650.448	1224.04	175.708	-405.747	1352.77	176.741	-367.658	1167.7	234.615	-644.761	1304.2	4.98723	-482.496	1380.79	-57.9319	-571.112	1168.38	-61.1653	-583.408	1089.92	-100.602	-567.739	968.43	-70.0893	-497.009	862.718	-115.767	-551.136	860.92	-114.643	-505.89	782.586
455	0	94.7682	-312.107	1581.9	197.145	-306.488	1589.35	88.2748	-485.458	1589.67	217.064	-456.366	1603.76	163.795	-525.389	1467.65	194.174	-637.199	1226.68	175.115	-392.487	1355.21	176.75	-354.914	1170.06	233.499	-631.375	1306.81	4.24259	-468.818	1383.05	-59.1028	-555.033	1170.01	-62.4795	-566.449	1091.26	-101.148	-547.641	969.892	-69.4724	-474.763	865.993	-115.493	-528.461	862.64	-113.763	-480.917	785.651
456	0	93.816	-298.569	1584.04	196.2	-292.935	1591.5	87.3806	-471.929	1591.89	216.163	-442.793	1605.99	162.892	-511.878	1469.95	193.02	-624.035	1229.15	174.623	-379.292	1357.48	176.843	-342.228	1172.27	232.399	-618.076	1309.25	3.58121	-455.159	1385.21	-60.2524	-538.97	1171.59	-63.8051	-549.445	1092.54	-101.662	-527.387	971.378	-68.754	-452.394	869.394	-115.163	-505.564	864.464	-112.77	-455.717	788.92
457	0	93.02	-285.1	1586.02	195.414	-279.46	1593.46	86.6325	-458.469	1593.94	215.412	-429.3	1608	162.078	-498.417	1472.06	191.874	-610.94	1231.44	174.212	-366.15	1359.56	176.985	-329.579	1174.32	231.319	-604.849	1311.49	2.99099	-441.514	1387.25	-61.3841	-522.932	1173.09	-65.1437	-532.4	1093.75	-102.146	-507.001	972.872	-67.9446	-429.934	872.899	-114.781	-482.483	866.379	-111.667	-430.346	792.377
458	0	92.3629	-271.689	1587.81	194.769	-266.055	1595.21	86.0092	-445.07	1595.78	214.79	-415.88	1609.79	161.342	-484.996	1473.97	190.746	-597.902	1233.51	173.866	-353.046	1361.42	177.145	-316.949	1176.17	230.263	-591.682	1313.51	2.46111	-427.881	1389.13	-62.5016	-506.922	1174.48	-66.4959	-515.315	1094.85	-102.604	-486.506	974.356	-67.0557	-407.414	876.488	-114.349	-459.256	868.37	-110.463	-404.859	796.002
459	0	91.8275	-258.328	1589.39	194.247	-252.71	1596.74	85.4907	-431.72	1597.4	214.276	-402.524	1611.33	160.674	-471.608	1475.65	189.647	-584.907	1235.36	173.57	-339.97	1363.04	177.291	-304.325	1177.8	229.237	-578.561	1315.31	1.98233	-414.258	1390.84	-63.6084	-490.942	1175.75	-67.8608	-498.194	1095.83	-103.036	-465.925	975.812	-66.0994	-384.863	880.137	-113.872	-435.922	870.419	-109.166	-379.308	799.773
460	0	91.3971	-245.007	1590.76	193.831	-239.418	1598.03	85.0586	-418.409	1598.77	213.853	-389.224	1612.62	160.067	-458.246	1477.09	188.59	-571.946	1236.96	173.308	-326.911	1364.41	177.399	-291.695	1179.18	228.248	-565.476	1316.86	1.54708	-400.642	1392.35	-64.7077	-474.987	1176.87	-69.2363	-481.038	1096.68	-103.445	-445.283	977.225	-65.0882	-362.311	883.822	-113.351	-412.519	872.509	-107.784	-353.747	803.665
461	0	91.0564	-231.716	1591.89	193.506	-226.168	1599.08	84.6966	-405.129	1599.89	213.504	-375.971	1613.63	159.514	-444.904	1478.28	187.587	-559.01	1238.31	173.07	-313.86	1365.5	177.447	-279.054	1180.3	227.305	-552.416	1318.16	1.14962	-387.033	1393.65	-65.8017	-459.052	1177.82	-70.619	-463.847	1097.37	-103.832	-424.602	978.578	-64.0343	-339.784	887.52	-112.792	-389.085	874.623	-106.328	-328.223	807.649
462	0	90.7917	-218.446	1592.77	193.257	-212.95	1599.87	84.391	-391.868	1600.74	213.215	-362.755	1614.38	159.009	-431.576	1479.21	186.653	-546.09	1239.41	172.846	-300.809	1366.32	177.419	-266.396	1181.13	226.419	-539.372	1319.21	0.786093	-373.432	1394.71	-66.8916	-443.128	1178.59	-72.0037	-446.624	1097.89	-104.196	-403.905	979.856	-62.9499	-317.307	891.206	-112.198	-365.656	876.742	-104.809	-302.785	811.698
463	0	90.5911	-205.189	1593.4	193.072	-199.755	1600.4	84.131	-378.62	1601.32	212.976	-349.567	1614.86	158.552	-418.258	1479.88	185.8	-533.181	1240.24	172.629	-287.751	1366.85	177.304	-253.719	1181.67	225.598	-526.336	1320	0.454573	-359.84	1395.53	-67.9764	-427.204	1179.15	-73.3836	-429.369	1098.24	-104.538	-383.216	981.048	-61.8463	-294.906	894.855	-111.572	-342.269	878.848	-103.241	-277.475	815.783
464	0	90.4451	-191.937	1593.76	192.941	-186.575	1600.67	83.9083	-365.376	1601.63	212.777	-336.396	1615.06	158.14	-404.946	1480.29	185.043	-520.275	1240.82	172.415	-274.681	1367.08	177.096	-241.021	1181.89	224.854	-513.301	1320.53	0.155074	-346.258	1396.1	-69.0535	-411.27	1179.51	-74.7506	-412.085	1098.4	-104.857	-362.555	982.141	-60.734	-272.605	898.445	-110.919	-318.956	880.924	-101.635	-252.336	819.873
465	0	90.3466	-178.685	1593.86	192.857	-173.4	1600.67	83.7181	-352.13	1601.66	212.614	-323.235	1614.98	157.776	-391.636	1480.43	184.393	-507.367	1241.13	172.202	-261.595	1367.01	176.795	-228.297	1181.8	224.199	-500.261	1320.8	-0.110492	-332.688	1396.42	-70.1176	-395.315	1179.66	-76.0948	-394.776	1098.38	-105.151	-341.945	983.125	-59.6225	-250.426	901.951	-110.243	-295.751	882.955	-100.006	-227.406	823.94
466	0	90.291	-165.426	1593.69	192.816	-160.225	1600.4	83.5581	-338.877	1601.42	212.484	-310.075	1614.65	157.463	-378.327	1480.32	183.861	-494.453	1241.18	171.993	-248.489	1366.65	176.406	-215.547	1181.39	223.643	-487.211	1320.83	-0.338378	-319.131	1396.47	-71.1612	-379.329	1179.58	-77.405	-377.446	1098.17	-105.418	-321.407	983.992	-58.52	-228.393	905.354	-109.548	-272.684	884.924	-98.368	-202.719	827.957
467	0	90.2765	-152.157	1593.26	192.814	-147.042	1599.87	83.4291	-325.612	1600.92	212.387	-296.911	1614.05	157.205	-365.018	1479.94	183.458	-481.528	1240.98	171.792	-235.361	1366.01	175.939	-202.764	1180.67	223.197	-474.145	1320.6	-0.523125	-305.59	1396.27	-72.1741	-363.307	1179.29	-78.669	-360.104	1097.77	-105.655	-300.963	984.738	-57.4336	-206.526	908.631	-108.841	-249.786	886.82	-96.7345	-178.307	831.899
468	0	90.3037	-138.876	1592.57	192.853	-133.849	1599.09	83.3346	-312.333	1600.16	212.327	-283.737	1613.21	157.01	-351.709	1479.32	183.191	-468.584	1240.53	171.607	-222.209	1365.09	175.409	-189.944	1179.67	222.87	-461.061	1320.14	-0.657719	-292.066	1395.81	-73.1438	-347.247	1178.78	-79.8732	-342.758	1097.18	-105.859	-280.634	985.357	-56.3689	-184.848	911.765	-108.124	-227.083	888.629	-95.1194	-154.2	835.74
469	0	90.3756	-125.581	1591.62	192.935	-120.641	1598.07	83.2803	-299.039	1599.17	212.31	-270.548	1612.14	156.886	-338.4	1478.47	183.064	-455.618	1239.85	171.447	-209.032	1363.92	174.834	-177.08	1178.39	222.671	-447.953	1319.44	-0.73379	-278.56	1395.11	-74.0557	-331.149	1178.07	-81.0036	-325.421	1096.42	-106.024	-260.441	985.846	-55.3306	-163.38	914.738	-107.402	-204.604	890.341	-93.5362	-130.425	839.461
470	0	90.4977	-112.271	1590.44	193.067	-107.417	1596.81	83.2746	-285.73	1597.94	212.342	-257.343	1610.84	156.841	-325.094	1477.38	183.083	-442.622	1238.92	171.325	-195.83	1362.5	174.236	-164.165	1176.86	222.607	-434.819	1318.51	-0.741853	-265.071	1394.18	-74.8936	-315.021	1177.17	-82.0453	-308.107	1095.49	-106.147	-240.408	986.206	-54.3218	-142.142	917.536	-106.68	-182.375	891.946	-91.9973	-107.004	843.039
471	0	90.6774	-98.9495	1589.04	193.255	-94.1771	1595.34	83.3273	-272.407	1596.52	212.434	-244.121	1609.35	156.886	-311.792	1476.09	183.247	-429.589	1237.78	171.255	-182.602	1360.86	173.641	-151.188	1175.11	222.683	-421.655	1317.37	-0.671574	-251.602	1393.03	-75.64	-298.874	1176.08	-82.9835	-290.832	1094.39	-106.221	-220.556	986.435	-53.345	-121.155	920.146	-105.962	-160.422	893.436	-90.5146	-83.9623	846.458
472	0	90.9241	-85.6168	1587.43	193.51	-80.9217	1593.66	83.4503	-259.072	1594.9	212.596	-230.883	1607.68	157.032	-298.498	1474.59	183.555	-416.511	1236.41	171.252	-169.349	1359.04	173.075	-138.141	1173.17	222.902	-408.461	1316.01	-0.512059	-238.15	1391.68	-76.2768	-282.726	1174.82	-83.803	-273.616	1093.16	-106.24	-200.907	986.535	-52.4012	-100.44	922.554	-105.25	-138.771	894.803	-89.0985	-61.3194	849.702
473	0	91.2485	-72.2765	1585.63	193.843	-67.653	1591.82	83.6564	-245.73	1593.12	212.842	-217.629	1605.86	157.289	-285.215	1472.91	184.004	-403.381	1234.84	171.334	-156.072	1357.05	172.567	-125.012	1171.08	223.265	-395.232	1314.44	-0.252185	-224.714	1390.15	-76.7858	-266.597	1173.41	-84.4894	-256.478	1091.79	-106.199	-181.486	986.51	-51.4908	-80.0173	924.752	-104.546	-117.449	896.04	-87.7585	-39.0955	852.755
474	0	91.6622	-58.932	1583.68	194.265	-54.3739	1589.81	83.9595	-232.383	1591.2	213.185	-204.362	1603.9	157.668	-271.945	1471.07	184.587	-390.191	1233.07	171.517	-142.77	1354.92	172.147	-111.791	1168.86	223.771	-381.969	1312.68	0.119075	-211.293	1388.47	-77.1496	-250.513	1171.86	-85.0286	-239.441	1090.3	-106.091	-162.315	986.362	-50.6133	-59.9071	926.73	-103.852	-96.4821	897.139	-86.5022	-17.3099	855.604
475	0	92.1777	-45.5871	1581.59	194.789	-41.0878	1587.69	84.3737	-219.035	1589.17	213.639	-191.086	1601.83	158.179	-258.691	1469.08	185.297	-376.932	1231.11	171.819	-129.444	1352.69	171.844	-98.466	1166.57	224.416	-368.668	1310.73	0.612302	-197.884	1386.65	-77.3517	-234.5	1170.19	-85.4076	-222.528	1088.72	-105.91	-143.421	986.096	-49.7671	-40.1302	928.483	-103.167	-75.8983	898.095	-85.3359	4.01825	858.236
476	0	92.8075	-32.2459	1579.4	195.429	-27.7979	1585.46	84.9133	-205.691	1587.05	214.218	-177.804	1599.68	158.832	-245.455	1466.98	186.125	-363.597	1228.98	172.255	-116.095	1350.4	171.684	-85.0279	1164.23	225.196	-355.33	1308.62	1.23729	-184.485	1384.73	-77.3772	-218.588	1168.42	-85.6145	-205.763	1087.05	-105.649	-124.826	985.719	-48.9504	-20.7076	930.004	-102.488	-55.7253	898.901	-84.264	24.8696	860.642
477	0	93.5637	-18.9119	1577.14	196.197	-14.5076	1583.16	85.5924	-192.356	1584.87	214.935	-164.519	1597.47	159.635	-232.24	1464.77	187.058	-350.179	1226.69	172.843	-102.722	1348.07	171.694	-71.4675	1161.88	226.104	-341.953	1306.34	2.00271	-171.09	1382.73	-77.2135	-202.806	1166.56	-85.6388	-189.169	1085.32	-105.303	-106.557	985.237	-48.1602	-1.66044	931.292	-101.813	-35.9917	899.553	-83.2892	45.2244	862.809
478	0	94.4575	-5.58823	1574.84	197.104	-1.21926	1580.83	86.4241	-179.031	1582.67	215.802	-151.232	1595.24	160.595	-219.044	1462.48	188.085	-336.673	1224.27	173.594	-89.3266	1345.73	171.896	-57.7777	1159.56	227.13	-328.537	1303.92	2.91578	-157.695	1380.68	-76.8501	-187.181	1164.65	-85.4719	-172.771	1083.55	-104.867	-88.6386	984.659	-47.3933	16.9899	932.343	-101.137	-16.7267	900.047	-82.4123	65.0622	864.731
479	0	95.499	7.72288	1572.53	198.161	12.0653	1578.5	87.4202	-165.72	1580.46	216.832	-137.947	1593.02	161.718	-205.867	1460.16	189.192	-323.074	1221.73	174.521	-75.9074	1343.43	172.31	-43.9532	1157.3	228.265	-315.082	1301.39	3.98198	-144.296	1378.62	-76.2792	-171.741	1162.7	-85.1071	-156.591	1081.76	-104.334	-71.096	983.995	-46.6453	35.2217	933.158	-100.454	2.04054	900.38	-81.6321	84.3616	866.398
480	0	96.6962	21.0202	1570.26	199.375	25.3455	1576.2	88.5908	-152.424	1578.29	218.033	-124.662	1590.83	163.006	-192.707	1457.81	190.365	-309.38	1219.11	175.633	-62.4644	1341.2	172.951	-29.991	1155.14	229.498	-301.59	1298.77	5.20477	-130.887	1376.56	-75.4957	-156.507	1160.74	-84.5398	-140.653	1079.97	-103.7	-53.9537	983.255	-45.9116	53.0129	933.741	-99.7574	20.2807	900.55	-80.9454	103.1	867.805
481	0	98.0548	34.3036	1568.05	200.752	38.6223	1573.96	89.9438	-139.143	1576.19	219.412	-111.379	1588.71	164.461	-179.56	1455.48	191.589	-295.592	1216.42	176.937	-48.9972	1339.05	173.829	-15.891	1153.11	230.814	-288.061	1296.08	6.58533	-117.462	1374.56	-74.4974	-141.5	1158.8	-83.768	-124.978	1078.22	-102.962	-37.2356	982.455	-45.1867	70.3412	934.096	-99.039	37.9651	900.56	-80.3467	121.254	868.948
482	0	99.5783	47.5744	1565.93	202.295	51.8981	1571.82	91.4848	-125.875	1574.18	220.975	-98.0928	1586.68	166.08	-166.421	1453.2	192.85	-281.712	1213.72	178.433	-35.5056	1337.04	174.95	-1.65652	1151.23	232.203	-274.498	1293.36	8.12231	-104.015	1372.64	-73.285	-126.736	1156.9	-82.7923	-109.585	1076.52	-102.117	-20.9643	981.607	-44.4645	87.1843	934.229	-98.291	55.0663	900.412	-79.8282	138.8	869.823
483	0	101.267	60.8351	1563.95	204.006	65.1765	1569.81	93.2164	-112.619	1572.29	222.722	-84.8012	1584.78	167.86	-153.286	1451	194.133	-267.746	1211.04	180.121	-21.9899	1335.18	176.313	12.7053	1149.54	233.649	-260.904	1290.65	9.81156	-90.5404	1370.84	-71.862	-112.225	1155.08	-81.6159	-94.4928	1074.9	-101.163	-5.16057	980.731	-43.7383	103.52	934.152	-97.5053	71.5583	900.115	-79.38	155.713	870.43
484	0	103.119	74.0895	1562.13	205.88	78.4625	1567.96	95.1382	-99.3689	1570.57	224.654	-71.4987	1583.04	169.794	-140.149	1448.91	195.422	-253.702	1208.41	181.994	-8.45084	1333.51	177.912	27.183	1148.06	235.139	-247.282	1287.99	11.646	-77.0336	1369.19	-70.2351	-97.9757	1153.37	-80.2449	-79.7162	1073.4	-100.099	10.1567	979.844	-43.001	119.327	933.875	-96.6743	87.4172	899.677	-78.9897	171.968	870.771
485	0	105.128	87.3424	1560.5	207.913	91.7622	1566.3	97.2464	-86.121	1569.04	226.765	-58.1789	1581.49	171.87	-127.004	1446.97	196.705	-239.591	1205.89	184.042	5.10974	1332.04	179.732	41.7599	1146.81	236.658	-233.638	1285.41	13.6153	-63.4907	1367.73	-68.4143	-83.9913	1151.81	-78.6883	-65.2693	1072.04	-98.9272	24.9714	978.966	-42.2452	134.584	933.413	-95.7909	102.622	899.114	-78.6432	187.541	870.851
486	0	107.286	100.599	1559.09	210.095	105.082	1564.85	99.534	-72.8689	1567.72	229.049	-44.8351	1580.14	174.076	-113.844	1445.22	197.967	-225.428	1203.52	186.249	18.689	1330.8	181.755	56.4143	1145.81	238.191	-219.978	1282.97	15.7061	-49.9091	1366.5	-66.4129	-70.2718	1150.44	-76.9584	-51.1634	1070.86	-97.649	39.2701	978.12	-41.4636	149.272	932.784	-94.8493	117.155	898.44	-78.324	202.408	870.676
487	0	109.582	113.866	1557.92	212.415	118.429	1563.63	101.991	-59.6062	1566.65	231.494	-31.4603	1579.03	176.395	-100.666	1443.68	199.195	-211.228	1201.34	188.596	32.2827	1329.81	183.954	71.1194	1145.09	239.724	-206.309	1280.7	17.9017	-36.2878	1365.51	-64.2479	-56.8137	1149.29	-75.0703	-37.4073	1069.88	-96.2691	53.0429	977.327	-40.6487	163.372	932.006	-93.8452	131.001	897.678	-78.0144	216.547	870.256
488	0	112.003	127.148	1557	214.86	131.808	1562.67	104.602	-46.3266	1565.84	234.086	-18.0483	1578.17	178.808	-87.4653	1442.38	200.377	-197.01	1199.39	191.057	45.8854	1329.09	186.296	85.8437	1144.65	241.241	-192.639	1278.65	20.1825	-22.6275	1364.81	-61.9404	-43.6105	1148.39	-73.0422	-24.0075	1069.14	-94.7938	66.2835	976.611	-39.7938	176.87	931.101	-92.7762	144.153	896.849	-77.6956	229.939	869.605
489	0	114.533	140.452	1556.36	217.413	145.225	1561.97	107.352	-33.0242	1565.33	236.809	-4.59384	1577.57	181.292	-74.24	1441.34	201.501	-182.794	1197.72	193.606	59.4901	1328.64	188.743	100.552	1144.51	242.729	-178.979	1276.86	22.5261	-8.93061	1364.41	-59.5155	-30.6531	1147.79	-70.8954	-10.9677	1068.65	-93.2316	78.9895	975.993	-38.8931	189.753	930.092	-91.6419	156.605	895.978	-77.3478	242.568	868.737
490	0	117.154	153.781	1556	220.056	158.682	1561.53	110.218	-19.6942	1565.11	239.642	8.90624	1577.26	183.824	-60.9896	1440.6	202.557	-168.6	1196.36	196.21	73.0886	1328.48	191.255	115.206	1144.67	244.171	-165.337	1275.36	24.908	4.79806	1364.35	-57.0023	-17.9301	1147.5	-68.6538	1.71076	1068.43	-91.5932	91.1624	975.496	-37.9417	202.013	929.002	-90.4447	168.358	895.091	-76.9518	254.423	867.669
491	0	119.846	167.139	1555.92	222.769	172.18	1561.37	113.179	-6.33313	1565.21	242.563	22.4528	1577.23	186.378	-47.7157	1440.16	203.537	-154.447	1195.34	198.837	86.6716	1328.61	193.786	129.768	1145.13	245.556	-151.725	1274.17	27.3023	18.5516	1364.62	-54.4341	-5.42816	1147.56	-66.3439	14.0296	1068.52	-89.8914	102.808	975.138	-36.9366	213.644	927.855	-89.1895	179.42	894.216	-76.4886	265.499	866.42
492	0	122.59	180.528	1556.13	225.532	185.717	1561.47	116.207	7.0606	1565.62	245.547	36.044	1577.48	188.927	-34.4214	1440.02	204.434	-140.356	1194.66	201.45	100.229	1329.02	196.289	144.2	1145.87	246.87	-138.151	1273.33	29.6822	32.3208	1365.24	-51.8474	6.86769	1147.97	-63.9939	25.9931	1068.91	-88.1411	113.936	974.936	-35.8767	224.647	926.676	-87.8839	189.804	893.378	-75.9414	275.795	865.009
493	0	125.362	193.946	1556.61	228.322	199.289	1561.83	119.274	20.4867	1566.34	248.567	49.6751	1578.02	191.446	-21.112	1440.2	205.245	-126.343	1194.36	204.017	113.752	1329.71	198.719	158.466	1146.88	248.103	-124.627	1272.84	32.021	46.0942	1366.21	-49.2815	18.9735	1148.76	-61.6335	37.6087	1069.62	-86.3592	124.56	974.905	-34.7634	235.026	925.488	-86.5385	199.53	892.602	-75.2955	285.321	863.459
494	0	128.141	207.392	1557.35	231.115	212.888	1562.44	122.351	33.943	1567.37	251.593	63.3389	1578.81	193.908	-7.79402	1440.69	205.968	-112.425	1194.43	206.502	127.229	1330.67	201.03	172.539	1148.15	249.249	-111.16	1272.7	34.2927	59.8584	1367.52	-46.7771	30.9058	1149.9	-59.2929	48.8866	1070.65	-84.5643	134.699	975.054	-33.6006	244.794	924.311	-85.1666	208.622	891.912	-74.54	294.091	861.789
495	0	130.902	220.862	1558.34	233.89	226.506	1563.27	125.405	47.4251	1568.68	254.598	77.0257	1579.86	196.291	5.52522	1441.47	206.605	-98.6147	1194.85	208.874	140.653	1331.88	203.182	186.394	1149.63	250.301	-97.7597	1272.92	36.4731	73.5985	1369.15	-44.3749	42.6813	1151.4	-57.0018	59.8397	1071.98	-82.7762	144.372	975.388	-32.3951	253.965	923.165	-83.7838	217.113	891.325	-73.6684	302.13	860.022
496	0	133.622	234.349	1559.56	236.621	240.132	1564.32	128.406	60.9268	1570.26	257.552	90.7238	1581.14	198.573	18.8379	1442.54	207.161	-84.924	1195.63	211.106	154.016	1333.31	205.137	200.017	1151.3	251.26	-84.4315	1273.49	38.5401	87.2989	1371.07	-42.1141	54.3157	1153.24	-54.7891	70.4837	1073.62	-81.0152	153.604	975.909	-31.1567	262.56	922.066	-82.4077	225.035	890.859	-72.6794	309.466	858.179
497	0	136.277	247.846	1560.99	239.285	253.754	1565.55	131.322	74.4406	1572.08	260.425	104.421	1582.63	200.735	32.1361	1443.87	207.643	-71.3611	1196.74	213.171	167.312	1334.95	206.863	213.4	1153.12	252.126	-71.181	1274.38	40.4749	100.944	1373.27	-40.0304	65.8232	1155.39	-52.681	80.8366	1075.53	-79.3022	162.421	976.615	-29.898	270.606	921.026	-81.0573	232.43	890.523	-71.5779	316.136	856.28
498	0	138.845	261.345	1562.61	241.86	267.36	1566.96	134.126	87.9574	1574.1	263.191	118.103	1584.3	202.764	45.4128	1445.43	208.062	-57.9313	1198.15	215.052	180.538	1336.76	208.338	226.548	1155.07	252.903	-58.0117	1275.58	42.2617	114.519	1375.7	-38.1543	77.2157	1157.82	-50.7011	90.9181	1077.71	-77.6572	170.852	977.499	-28.6343	278.131	920.056	-79.7526	239.337	890.325	-70.375	322.182	854.346
499	0	141.304	274.836	1564.38	244.323	280.939	1568.51	136.791	101.468	1576.29	265.824	131.757	1586.12	204.648	58.6615	1447.19	208.428	-44.6373	1199.82	216.734	193.692	1338.71	209.545	239.472	1157.1	253.599	-44.9253	1277.05	43.8888	128.01	1378.32	-36.5097	88.5023	1160.5	-48.8691	100.75	1080.11	-76.0995	178.926	978.549	-27.3832	285.17	919.161	-78.5134	245.798	890.266	-69.0884	327.649	852.395
500	0	143.635	288.309	1566.28	246.656	294.479	1570.18	139.295	114.961	1578.62	268.302	145.37	1588.07	206.379	71.8767	1449.13	208.752	-31.4789	1201.73	218.21	206.772	1340.77	210.477	252.192	1159.18	254.22	-31.9218	1278.76	45.3486	141.407	1381.09	-35.1121	99.6886	1163.37	-47.2004	110.353	1082.71	-74.6465	186.673	979.753	-26.1643	291.759	918.344	-77.3592	251.857	890.345	-67.7423	332.585	850.447
501	0	145.82	301.754	1568.28	248.839	307.97	1571.95	141.617	128.426	1581.05	270.608	158.932	1590.12	207.952	85.0542	1451.21	209.046	-18.4532	1203.83	219.476	219.782	1342.91	211.136	264.734	1161.28	254.777	-18.9997	1280.67	46.6372	154.701	1383.97	-33.9684	110.777	1166.41	-45.7055	119.751	1085.47	-73.3135	194.124	981.093	-24.9986	297.937	917.606	-76.3083	257.554	890.555	-66.3664	337.04	848.518
502	0	147.843	315.162	1570.36	250.859	321.404	1573.79	143.745	141.854	1583.53	272.726	172.432	1592.23	209.366	98.1909	1453.39	209.322	-5.55461	1206.09	220.536	232.722	1345.1	211.532	277.129	1163.39	255.278	-6.15566	1282.75	47.755	167.888	1386.91	-33.0758	121.765	1169.56	-44.39	128.967	1088.37	-72.1134	201.309	982.551	-23.9077	303.745	916.941	-75.377	262.931	890.886	-64.9952	341.064	846.622
503	0	149.694	328.523	1572.47	252.704	334.772	1575.68	145.668	155.236	1586.03	274.647	185.862	1594.37	210.622	111.284	1455.64	209.587	7.22454	1208.45	221.397	245.597	1347.31	211.685	289.41	1165.48	255.733	6.61472	1284.95	48.7056	180.965	1389.86	-32.4227	132.65	1172.78	-43.2545	138.022	1091.36	-71.0562	208.256	984.104	-22.9133	309.223	916.344	-74.5797	268.024	891.323	-63.6664	344.708	844.774
504	0	151.365	341.83	1574.6	254.366	348.072	1577.59	147.383	168.562	1588.51	276.365	199.217	1596.52	211.725	124.334	1457.93	209.849	19.894	1210.88	222.071	258.41	1349.52	211.619	301.608	1167.52	256.151	19.3171	1287.24	49.4959	193.934	1392.79	-31.9889	143.424	1176.02	-42.2945	146.939	1094.4	-70.1486	214.996	985.73	-22.0366	314.412	915.805	-73.9283	272.869	891.85	-62.4198	348.02	842.984
505	0	152.851	355.077	1576.7	255.841	361.298	1579.5	148.889	181.826	1590.93	277.879	212.492	1598.63	212.68	137.339	1460.2	210.113	32.465	1213.33	222.574	271.168	1351.68	211.365	313.754	1169.51	256.537	31.9579	1289.56	50.1355	206.799	1395.66	-31.7473	154.077	1179.25	-41.5014	155.738	1097.46	-69.3945	221.553	987.405	-21.2974	319.355	915.312	-73.4315	277.5	892.449	-61.2951	351.047	841.258
506	0	154.152	368.258	1578.76	257.129	374.45	1581.38	150.191	195.022	1593.25	279.192	225.686	1600.69	213.496	150.302	1462.43	210.381	44.95	1215.75	222.923	283.875	1353.77	210.956	325.877	1171.42	256.899	44.5441	1291.88	50.6358	219.568	1398.42	-31.6656	164.602	1182.43	-40.8626	164.44	1100.5	-68.7944	227.956	989.102	-20.7134	324.092	914.851	-73.0954	281.945	893.098	-60.3306	353.836	839.602
507	0	155.269	381.37	1580.75	258.233	387.528	1583.21	151.297	208.147	1595.45	280.312	238.798	1602.65	214.181	163.223	1464.59	210.652	57.3622	1218.11	223.135	296.538	1355.78	210.428	337.997	1173.24	257.239	57.0833	1294.15	51.0094	232.248	1401.03	-31.7083	174.99	1185.51	-40.3622	173.065	1103.49	-68.346	234.229	990.795	-20.3	328.661	914.404	-72.9231	286.233	893.775	-59.5614	356.43	838.015
508	0	156.208	394.412	1582.63	259.158	400.534	1584.95	152.216	221.199	1597.5	281.246	251.831	1604.5	214.745	176.107	1466.63	210.925	69.7154	1220.38	223.231	309.164	1357.66	209.817	350.134	1174.96	257.559	69.5831	1296.34	51.2698	244.853	1403.47	-31.8388	185.237	1188.46	-39.9824	181.633	1106.39	-68.0443	240.396	992.459	-20.0694	333.099	913.954	-72.9146	290.389	894.457	-59.0181	358.868	836.495
509	0	156.977	407.384	1584.38	259.914	413.472	1586.59	152.962	234.177	1599.35	282.008	264.788	1606.2	215.198	188.957	1468.53	211.194	82.0235	1222.5	223.229	321.761	1359.4	209.158	362.299	1176.55	257.86	82.0511	1298.41	51.4305	257.395	1405.7	-32.0219	195.341	1191.25	-39.7038	190.165	1109.17	-67.8823	246.48	994.067	-20.0308	337.442	913.481	-73.0672	294.437	895.12	-58.7257	361.19	835.034
510	0	157.586	420.288	1585.98	260.509	426.345	1588.1	153.549	247.084	1601	282.609	277.673	1607.73	215.55	201.78	1470.26	211.454	94.3002	1224.45	223.147	334.336	1360.98	208.481	374.499	1177.99	258.138	94.4948	1300.32	51.5046	269.889	1407.7	-32.2256	205.307	1193.84	-39.5066	198.68	1111.79	-67.8507	252.505	995.594	-20.1893	341.723	912.963	-73.3761	298.4	895.74	-58.7025	363.431	833.622
511	0	158.046	433.127	1587.4	260.957	439.159	1589.45	153.992	259.923	1602.41	283.063	290.492	1609.07	215.809	214.581	1471.79	211.698	106.559	1226.19	223.001	346.897	1362.36	207.814	386.736	1179.27	258.392	106.922	1302.05	51.5041	282.35	1409.44	-32.4224	215.148	1196.21	-39.3716	207.199	1114.23	-67.9393	258.494	997.014	-20.5468	345.972	912.381	-73.8338	302.3	896.296	-58.9599	365.625	832.248
512	0	158.367	445.906	1588.63	261.269	451.92	1590.64	154.304	272.698	1603.57	283.385	303.252	1610.18	215.986	227.367	1473.09	211.917	118.813	1227.71	222.804	359.454	1363.54	207.18	399.008	1180.36	258.616	119.34	1303.56	51.4402	294.794	1410.89	-32.5906	224.88	1198.33	-39.2809	215.745	1116.47	-68.1369	264.469	998.306	-21.1012	350.217	911.713	-74.4316	306.159	896.766	-59.502	367.801	830.895
513	0	158.562	458.632	1589.65	261.456	464.636	1591.63	154.5	285.415	1604.46	283.586	315.96	1611.07	216.086	240.145	1474.15	212.103	131.075	1228.98	222.571	372.015	1364.48	206.595	411.315	1181.23	258.803	131.756	1304.84	51.3222	307.235	1412.06	-32.7149	234.529	1200.18	-39.2188	224.337	1118.48	-68.4322	270.455	999.447	-21.8474	354.486	910.938	-75.1591	310	897.129	-60.3257	369.99	829.546
514	0	158.641	471.31	1590.43	261.529	477.314	1592.41	154.591	298.081	1605.07	283.68	328.624	1611.7	216.118	252.925	1474.95	212.248	143.356	1229.97	222.31	384.59	1365.18	206.072	423.65	1181.87	258.947	144.178	1305.87	51.1579	319.691	1412.91	-32.7866	244.126	1201.75	-39.1724	233	1120.23	-68.8141	276.475	1000.42	-22.7766	358.803	910.038	-76.0054	313.845	897.367	-61.4209	372.216	828.183
515	0	158.613	483.947	1590.97	261.497	489.961	1592.97	154.589	310.703	1605.37	283.675	341.251	1612.06	216.085	265.714	1475.48	212.344	155.668	1230.68	222.028	397.186	1365.6	205.618	436.011	1182.26	259.041	156.614	1306.62	50.953	332.175	1413.44	-32.8032	253.705	1203.02	-39.132	241.755	1121.72	-69.272	282.555	1001.2	-23.8773	363.19	908.995	-76.9589	317.72	897.466	-62.7712	374.504	826.787
516	0	158.486	496.552	1591.27	261.369	502.584	1593.29	154.502	323.288	1605.37	283.581	353.851	1612.15	215.991	278.519	1475.72	212.384	168.021	1231.09	221.732	409.812	1365.74	205.235	448.396	1182.37	259.077	169.071	1307.09	50.7113	344.702	1413.65	-32.768	263.305	1203.99	-39.0914	250.626	1122.92	-69.7965	288.72	1001.78	-25.1358	367.669	907.794	-78.0082	321.651	897.411	-64.3548	376.878	825.34
517	0	158.266	509.13	1591.3	261.149	515.191	1593.37	154.336	335.844	1605.06	283.404	366.429	1611.95	215.839	291.35	1475.66	212.36	180.423	1231.2	221.424	422.477	1365.6	204.922	460.805	1182.19	259.049	181.558	1307.26	50.4344	357.283	1413.53	-32.6896	272.965	1204.64	-39.0478	259.633	1123.83	-70.3792	294.996	1002.15	-26.5362	372.262	906.421	-79.1421	325.665	897.191	-66.1452	379.359	823.823
518	0	157.957	521.691	1591.06	260.842	527.79	1593.2	154.096	348.378	1604.44	283.148	378.996	1611.46	215.627	304.213	1475.31	212.269	192.884	1231	221.104	435.187	1365.15	204.673	473.238	1181.72	258.95	194.083	1307.13	50.122	369.93	1413.08	-32.5808	282.724	1204.97	-39.0021	268.8	1124.44	-71.0134	301.409	1002.3	-28.0613	376.989	904.866	-80.3501	329.791	896.797	-68.1129	381.97	822.221
519	0	157.559	534.239	1590.57	260.449	540.386	1592.79	153.783	360.897	1603.5	282.814	391.556	1610.68	215.354	317.115	1474.66	212.105	205.411	1230.5	220.769	447.949	1364.39	204.481	485.7	1180.93	258.774	206.654	1306.71	49.7714	382.651	1412.31	-32.458	292.619	1204.99	-38.958	278.144	1124.73	-71.6937	307.988	1002.21	-29.6932	381.87	903.122	-81.6228	334.062	896.225	-70.226	384.732	820.519
520	0	157.072	546.783	1589.81	259.968	552.987	1592.12	153.397	373.408	1602.25	282.403	404.119	1609.62	215.018	330.062	1473.72	211.865	218.01	1229.69	220.416	460.769	1363.33	204.336	498.198	1179.84	258.517	219.282	1305.98	49.3784	395.453	1411.22	-32.3399	302.686	1204.69	-38.9221	287.685	1124.71	-72.4159	314.756	1001.89	-31.4134	386.926	901.185	-82.9517	338.51	895.469	-72.4518	387.667	818.704
521	0	156.494	559.327	1588.8	259.397	565.598	1591.22	152.936	385.917	1600.71	281.911	416.689	1608.28	214.614	343.058	1472.49	211.548	230.688	1228.58	220.037	473.653	1361.97	204.225	510.74	1178.45	258.175	231.974	1304.96	48.9369	408.34	1409.82	-32.2467	312.954	1204.07	-38.9031	297.44	1124.39	-73.1776	321.742	1001.32	-33.2038	392.178	899.054	-84.3293	343.17	894.529	-74.7578	390.8	816.766
522	0	155.821	571.877	1587.55	258.731	578.225	1590.08	152.394	398.43	1598.88	281.335	429.274	1606.67	214.135	356.107	1470.98	211.153	243.451	1227.18	219.623	486.606	1360.32	204.135	523.336	1176.77	257.747	244.739	1303.65	48.4393	421.316	1408.13	-32.1993	323.449	1203.15	-38.911	307.422	1123.75	-73.977	328.97	1000.53	-35.0467	397.649	896.73	-85.7495	348.076	893.405	-77.1131	394.157	814.7
523	0	155.045	584.44	1586.07	257.963	590.872	1588.72	151.767	410.954	1596.79	280.668	441.878	1604.81	213.576	369.212	1469.22	210.68	256.303	1225.51	219.165	499.631	1358.4	204.052	535.997	1174.81	257.232	257.585	1302.06	47.8771	434.378	1406.16	-32.2181	334.191	1201.94	-38.9568	317.642	1122.81	-74.8136	336.465	999.497	-36.9257	403.361	894.22	-87.2074	353.263	892.1	-79.4891	397.765	812.5
524	0	154.159	597.019	1584.39	257.086	603.546	1587.16	151.046	423.492	1594.45	279.904	454.508	1602.72	212.929	382.376	1467.22	210.131	269.251	1223.58	218.648	512.734	1356.22	203.959	548.734	1172.6	256.63	270.522	1300.22	47.2409	447.524	1403.93	-32.322	345.195	1200.43	-39.0513	328.111	1121.59	-75.6872	344.249	998.239	-38.8257	409.34	891.53	-88.6988	358.768	890.619	-81.8602	401.656	810.166
525	0	153.156	609.62	1582.52	256.091	616.25	1585.43	150.223	436.052	1591.9	279.033	467.169	1600.42	212.186	395.6	1465	209.509	282.299	1221.41	218.06	525.917	1353.82	203.84	561.561	1170.17	255.945	283.556	1298.14	46.5208	460.75	1401.47	-32.5278	356.469	1198.65	-39.205	338.836	1120.08	-76.5982	352.343	996.762	-40.7331	415.611	888.674	-90.2203	364.625	888.968	-84.205	405.862	807.698
526	0	152.027	622.247	1580.5	254.97	628.99	1583.54	149.288	448.638	1589.15	278.048	479.866	1597.94	211.34	408.885	1462.59	208.82	295.453	1219.03	217.385	539.184	1351.21	203.675	574.489	1167.54	255.18	296.697	1295.84	45.7071	474.047	1398.8	-32.8493	368.017	1196.6	-39.4271	349.82	1118.31	-77.5468	360.768	995.078	-42.6366	422.202	885.664	-91.769	370.867	887.156	-86.506	410.419	805.102
527	0	150.763	634.906	1578.36	253.712	641.769	1581.54	148.233	461.256	1586.25	276.938	492.604	1595.31	210.384	422.233	1460.03	208.068	308.72	1216.47	216.608	552.54	1348.45	203.446	587.531	1164.75	254.342	309.951	1293.36	44.7902	487.407	1395.94	-33.2965	379.838	1194.32	-39.7251	361.065	1116.29	-78.5327	369.539	993.202	-44.5266	429.14	882.519	-93.342	377.527	885.193	-88.7503	415.366	802.387
528	0	149.356	647.603	1576.14	252.31	654.593	1579.45	147.048	473.913	1583.23	275.696	505.388	1592.57	209.312	435.645	1457.34	207.264	322.104	1213.76	215.715	565.987	1345.56	203.132	600.699	1161.84	253.436	323.326	1290.74	43.7616	500.82	1392.95	-33.8752	391.926	1191.8	-40.1045	372.571	1114.05	-79.5552	378.673	991.15	-46.3953	436.456	879.26	-94.9362	384.634	883.093	-90.9292	420.744	799.565
529	0	147.799	660.341	1573.86	250.756	667.466	1577.31	145.725	486.614	1580.13	274.313	518.223	1589.77	208.119	449.122	1454.57	206.415	335.611	1210.93	214.692	579.53	1342.59	202.711	614.006	1158.85	252.471	336.829	1288	42.6139	514.273	1389.84	-34.5866	404.271	1189.09	-40.5682	384.337	1111.62	-80.6125	388.181	988.944	-48.2367	444.178	875.911	-96.5476	392.216	880.871	-93.0378	426.593	796.651
530	0	146.085	673.128	1571.59	249.044	680.393	1575.17	144.256	499.366	1577	272.782	531.115	1586.93	206.802	462.665	1451.77	205.533	349.248	1208.04	213.526	593.171	1339.58	202.162	627.461	1155.83	251.457	350.464	1285.19	41.3416	527.757	1386.65	-35.4273	416.857	1186.21	-41.1166	396.357	1109.01	-81.7017	398.073	986.606	-50.046	452.336	872.5	-98.1714	400.297	878.544	-95.0746	432.958	793.666
531	0	144.21	685.968	1569.35	247.168	693.378	1573.06	142.636	512.175	1573.88	271.098	544.069	1584.11	205.361	476.276	1448.96	204.63	363.016	1205.12	212.206	606.915	1336.59	201.465	641.077	1152.82	250.404	364.239	1282.36	39.941	541.259	1383.44	-36.3891	429.668	1183.18	-41.7477	408.626	1106.28	-82.8189	408.358	984.163	-51.8194	460.959	869.057	-99.8016	408.899	876.135	-97.0408	439.882	790.633
532	0	142.172	698.866	1567.19	245.127	706.427	1571.04	140.86	525.048	1570.82	269.258	557.091	1581.35	203.797	489.958	1446.21	203.716	376.921	1202.22	210.724	620.763	1333.67	200.6	654.861	1149.87	249.323	378.156	1279.55	38.4108	554.77	1380.23	-37.4598	442.683	1180.06	-42.4567	421.138	1103.45	-83.9588	419.04	981.643	-53.5538	470.075	865.614	-101.43	418.041	873.664	-98.939	447.409	787.579
533	0	139.97	711.827	1565.16	242.919	719.544	1569.14	138.928	537.99	1567.86	267.26	570.183	1578.69	202.113	503.71	1443.55	202.805	390.963	1199.39	209.075	634.717	1330.87	199.554	668.823	1147.04	248.225	392.217	1276.81	36.7525	568.279	1377.09	-38.6235	455.881	1176.88	-43.2366	433.882	1100.57	-85.1151	430.124	979.078	-55.2464	479.712	862.208	-103.049	427.739	871.159	-100.773	455.582	784.534
534	0	137.609	724.856	1563.29	240.548	732.732	1567.4	136.842	551.006	1565.05	265.108	583.351	1576.19	200.316	517.534	1441.03	201.908	405.141	1196.68	207.258	648.775	1328.24	198.313	682.967	1144.36	247.12	406.424	1274.2	34.9702	581.778	1374.05	-39.8617	469.239	1173.68	-44.0788	446.851	1097.68	-86.2804	441.61	976.501	-56.8944	489.893	858.877	-104.647	438.003	868.647	-102.546	464.441	781.533
535	0	135.093	737.956	1561.64	238.019	745.994	1565.87	134.605	564.099	1562.44	262.805	596.598	1573.89	198.414	531.43	1438.69	201.037	419.452	1194.14	205.276	662.936	1325.82	196.87	697.296	1141.91	246.02	420.774	1271.76	33.0711	595.26	1371.16	-41.154	482.734	1170.53	-44.9731	460.034	1094.82	-87.4466	453.497	973.947	-58.4947	500.642	855.66	-106.212	448.844	866.159	-104.26	474.025	778.61
536	0	132.431	751.129	1560.23	235.341	759.332	1564.59	132.225	577.274	1560.07	260.359	609.924	1571.82	196.417	545.395	1436.59	200.199	433.889	1191.82	203.136	677.195	1323.66	195.223	711.808	1139.71	244.934	435.261	1269.54	31.0651	608.722	1368.46	-42.4793	496.344	1167.47	-45.9087	473.419	1092.03	-88.6053	465.783	971.451	-60.0439	511.978	852.599	-107.732	460.268	863.724	-105.918	484.365	775.804
537	0	129.636	764.375	1559.09	232.526	772.746	1563.58	129.713	590.53	1557.97	257.781	623.331	1570.03	194.339	559.425	1434.74	199.403	448.444	1189.75	200.848	691.545	1321.81	193.376	726.498	1137.83	243.871	449.877	1267.58	28.9651	622.159	1366	-43.8167	510.048	1164.56	-46.8747	486.998	1089.37	-89.7478	478.466	969.049	-61.5382	523.916	849.732	-109.194	472.279	861.376	-107.517	495.492	773.153
538	0	126.722	777.694	1558.26	229.589	786.234	1562.87	127.083	603.867	1556.17	255.087	636.818	1568.54	192.193	573.514	1433.2	198.655	463.103	1187.99	198.429	705.975	1320.29	191.338	741.353	1136.29	242.837	464.61	1265.93	26.7861	635.569	1363.83	-45.1468	523.83	1161.84	-47.8606	500.758	1086.87	-90.8659	491.54	966.775	-62.9735	536.47	847.101	-110.585	484.878	859.144	-109.055	507.428	770.694
539	0	123.708	791.083	1557.74	226.549	799.792	1562.48	124.352	617.282	1554.72	252.292	650.38	1567.39	189.995	587.655	1431.98	197.956	477.852	1186.55	195.896	720.472	1319.15	189.123	756.355	1135.13	241.839	479.445	1264.61	24.546	648.953	1361.96	-46.4524	537.674	1159.37	-48.8568	514.688	1084.58	-91.9517	505	964.661	-64.3451	549.649	844.744	-111.891	498.063	857.061	-110.527	520.19	768.463
540	0	120.614	804.537	1557.56	223.427	813.417	1562.43	121.54	630.769	1553.63	249.417	664.012	1566.59	187.763	601.838	1431.11	197.308	492.673	1185.48	193.273	735.02	1318.39	186.752	771.479	1134.39	240.881	494.363	1263.65	22.2639	662.31	1360.45	-47.7197	551.57	1157.2	-49.8553	528.779	1082.53	-92.9988	518.84	962.738	-65.6483	563.457	842.695	-113.101	511.833	855.154	-111.924	533.788	766.495
541	0	117.464	818.05	1557.73	220.248	827.099	1562.73	118.67	644.321	1552.91	246.485	677.707	1566.16	185.514	616.049	1430.6	196.709	507.544	1184.78	190.585	749.6	1318.04	184.248	786.695	1134.07	239.964	509.343	1263.07	19.9604	675.643	1359.3	-48.9382	565.511	1155.35	-50.8501	543.019	1080.76	-94.0016	533.052	961.031	-66.8783	577.896	840.987	-114.205	526.181	853.449	-113.237	548.225	764.818
542	0	114.283	831.612	1558.23	217.037	840.829	1563.37	115.766	657.929	1552.57	243.519	691.455	1566.11	183.265	630.276	1430.46	196.156	522.444	1184.48	187.859	764.194	1318.1	181.641	801.967	1134.18	239.091	524.361	1262.88	17.6567	688.953	1358.53	-50.1018	579.493	1153.87	-51.8371	557.398	1079.28	-94.9563	547.63	959.563	-68.0303	592.962	839.646	-115.196	541.102	851.969	-114.455	563.497	763.46
543	0	111.1	845.212	1559.07	213.823	854.596	1564.34	112.855	671.579	1552.61	240.548	705.243	1566.42	181.034	644.503	1430.68	195.643	537.348	1184.56	185.124	778.779	1318.56	178.96	817.256	1134.72	238.259	539.39	1263.08	15.3738	702.244	1358.16	-51.2086	593.515	1152.77	-52.8145	571.906	1078.12	-95.8607	562.566	958.352	-69.0997	608.647	838.694	-116.067	556.588	850.733	-115.566	579.592	762.439
544	0	107.94	858.839	1560.23	210.634	868.387	1565.63	109.963	685.259	1553.02	237.597	719.059	1567.09	178.839	658.716	1431.26	195.163	552.233	1185.03	182.408	793.334	1319.41	176.241	832.518	1135.67	237.467	554.406	1263.66	13.1322	715.518	1358.18	-52.2605	607.578	1152.07	-53.7829	586.533	1077.28	-96.7143	577.85	957.408	-70.0824	624.938	838.148	-116.815	572.628	849.754	-116.558	596.493	761.771
545	0	104.835	872.48	1561.7	207.5	882.186	1567.22	107.118	698.953	1553.8	234.694	732.887	1568.11	176.694	672.899	1432.19	194.705	567.072	1185.86	179.741	807.838	1320.63	173.518	847.714	1137	236.709	569.381	1264.61	10.9511	728.781	1358.58	-53.2632	621.684	1151.76	-54.7448	601.269	1076.78	-97.5183	593.475	956.74	-70.9745	641.82	838.017	-117.44	589.21	849.043	-117.421	614.175	761.467
546	0	101.81	886.12	1563.43	204.45	895.98	1569.09	104.347	712.647	1554.9	231.866	746.713	1569.44	174.614	687.038	1433.43	194.26	581.843	1187.04	177.15	822.273	1322.19	170.827	862.802	1138.69	235.98	584.29	1265.9	8.84801	742.037	1359.35	-54.2255	635.837	1151.84	-55.7047	616.107	1076.59	-98.2754	609.43	956.348	-71.7724	659.269	838.305	-117.943	606.321	848.605	-118.143	632.609	761.529
547	0	98.8926	899.745	1565.42	201.51	909.752	1571.2	101.676	726.325	1556.31	229.14	760.52	1571.07	172.611	701.121	1434.97	193.816	596.522	1188.54	174.661	836.62	1324.05	168.204	877.747	1140.68	235.272	599.11	1267.51	6.83856	755.291	1360.47	-55.1583	650.042	1152.28	-56.6683	631.037	1076.72	-98.9895	625.704	956.229	-72.473	677.261	839.009	-118.329	623.946	848.439	-118.717	651.762	761.957
548	0	96.1081	913.342	1567.63	198.707	923.488	1573.53	99.1269	739.972	1558	226.538	774.292	1572.94	170.698	715.138	1436.77	193.36	611.088	1190.32	172.298	850.865	1326.18	165.684	892.517	1142.93	234.577	613.819	1269.39	4.93603	768.546	1361.89	-56.0743	664.303	1153.06	-57.6428	646.053	1077.15	-99.6658	642.289	956.377	-73.0736	695.765	840.122	-118.603	642.068	848.543	-119.135	671.592	762.746
549	0	93.4784	926.9	1570.03	196.064	937.176	1576.03	96.7222	753.577	1559.91	224.083	788.018	1575.03	168.882	729.081	1438.79	192.881	625.523	1192.36	170.083	864.998	1328.52	163.302	907.088	1145.38	233.888	628.4	1271.51	3.15129	781.81	1363.6	-56.9863	678.624	1154.15	-58.6355	661.149	1077.84	-100.31	659.171	956.778	-73.5717	714.748	841.631	-118.772	660.665	848.912	-119.396	692.06	763.887
550	0	91.0225	940.407	1572.57	193.599	950.804	1578.67	94.4793	767.128	1562.02	221.792	801.684	1577.28	167.172	742.944	1441	192.366	639.81	1194.6	168.031	879.009	1331.04	161.087	921.442	1147.98	233.196	642.837	1273.83	1.49267	795.087	1365.55	-57.9072	693.011	1155.51	-59.6541	676.319	1078.77	-100.927	676.339	957.417	-73.9651	734.173	843.517	-118.847	679.716	849.536	-119.496	713.118	765.37
551	0	88.756	953.856	1575.24	191.329	964.362	1581.42	92.4122	780.616	1564.27	219.679	815.281	1579.67	165.571	756.724	1443.37	191.807	653.938	1197.02	166.158	892.896	1333.68	159.069	935.567	1150.68	232.493	657.12	1276.31	-0.034127	808.381	1367.69	-58.8485	707.469	1157.09	-60.7057	691.561	1079.92	-101.524	693.782	958.279	-74.252	753.999	845.759	-118.835	699.198	850.404	-119.437	734.72	767.182
552	0	86.6905	967.241	1577.99	189.264	977.845	1584.24	90.5313	794.037	1566.63	217.755	828.803	1582.14	164.085	770.422	1445.84	191.196	667.897	1199.57	164.474	906.655	1336.4	157.27	949.459	1153.42	231.773	671.241	1278.91	-1.42593	821.698	1369.99	-59.8198	722.001	1158.86	-61.7968	706.872	1081.25	-102.106	711.486	959.344	-74.4309	774.186	848.334	-118.747	719.085	851.506	-119.223	756.817	769.31
553	0	84.834	980.56	1580.79	187.413	991.249	1587.09	88.8428	807.387	1569.07	216.028	842.245	1584.66	162.714	784.038	1448.4	190.525	681.683	1202.22	162.984	920.288	1339.15	155.709	963.12	1156.15	231.031	685.195	1281.59	-2.68204	835.039	1372.41	-60.8287	736.613	1160.78	-62.9326	722.252	1082.72	-102.677	729.438	960.592	-74.5007	794.691	851.215	-118.593	739.349	852.83	-118.86	779.358	771.741
554	0	83.1906	993.811	1583.61	185.78	1004.57	1589.95	87.349	820.666	1571.53	214.5	855.606	1587.19	161.459	797.575	1451	189.79	695.294	1204.92	161.69	933.797	1341.89	154.398	976.558	1158.84	230.261	698.983	1284.31	-3.80406	848.409	1374.9	-61.8799	751.307	1162.79	-64.1171	737.7	1084.3	-103.242	747.625	962.004	-74.4605	815.469	854.376	-118.382	759.962	854.362	-118.354	802.294	774.461
555	0	81.7608	1007	1586.41	184.363	1017.82	1592.77	86.0487	833.877	1573.98	213.169	868.887	1589.69	160.317	811.037	1453.6	188.99	708.734	1207.65	160.591	947.187	1344.59	153.342	989.787	1161.46	229.461	712.606	1287.04	-4.79558	861.807	1377.43	-62.9753	766.087	1164.87	-65.3524	753.218	1085.97	-103.803	766.034	963.559	-74.3104	836.477	857.788	-118.124	780.895	856.092	-117.714	825.571	777.454
556	0	80.5422	1020.13	1589.17	183.159	1030.99	1595.53	84.9371	847.024	1576.4	212.032	882.091	1592.12	159.285	824.428	1456.18	188.122	722.007	1210.38	159.682	960.465	1347.21	152.541	1002.82	1163.96	228.628	726.07	1289.74	-5.66198	875.234	1379.96	-64.1142	780.953	1166.99	-66.6392	768.808	1087.68	-104.363	784.649	965.237	-74.0508	857.673	861.422	-117.826	802.115	858.005	-116.948	849.141	780.708
557	0	79.5291	1033.2	1591.86	182.163	1044.09	1598.19	84.0067	860.116	1578.75	211.082	895.225	1594.47	158.358	837.754	1458.7	187.19	735.124	1213.06	158.952	973.637	1349.72	151.986	1015.69	1166.35	227.762	739.382	1292.39	-6.41005	888.689	1382.46	-65.2933	795.906	1169.09	-67.9767	784.472	1089.42	-104.923	803.458	967.017	-73.683	879.016	865.249	-117.496	823.594	860.09	-116.066	872.953	784.206
558	0	78.7138	1046.23	1594.44	181.365	1057.13	1600.73	83.2473	873.159	1581.01	210.31	908.294	1596.7	157.531	851.019	1461.15	186.194	748.096	1215.67	158.393	986.711	1352.11	151.664	1028.4	1168.59	226.863	752.552	1294.95	-7.04769	902.17	1384.91	-66.5075	810.945	1171.17	-69.3623	800.214	1091.14	-105.481	822.444	968.881	-73.2089	900.466	869.238	-117.141	845.299	862.332	-115.077	896.956	787.93
559	0	78.0861	1059.22	1596.9	180.754	1070.11	1603.13	82.6472	886.163	1583.16	209.704	921.306	1598.8	156.797	864.228	1463.48	185.141	760.936	1218.19	157.989	999.697	1354.35	151.555	1040.98	1170.68	225.933	765.592	1297.4	-7.58359	915.673	1387.28	-67.75	826.069	1173.19	-70.7921	816.035	1092.84	-106.037	841.593	970.809	-72.6314	921.987	873.361	-116.763	867.198	864.717	-113.99	921.104	791.861
560	0	77.6347	1072.18	1599.22	180.319	1083.06	1605.37	82.1932	899.137	1585.17	209.251	934.269	1600.73	156.149	877.386	1465.69	184.035	773.66	1220.58	157.726	1012.6	1356.42	151.637	1053.46	1172.61	224.973	778.514	1299.71	-8.02686	929.193	1389.54	-69.013	841.273	1175.12	-72.261	831.941	1094.48	-106.588	860.888	972.781	-71.9541	943.543	877.587	-116.368	889.26	867.23	-112.811	945.348	795.979
561	0	77.3468	1085.12	1601.36	180.046	1095.96	1607.41	81.8719	912.089	1587.04	208.938	947.192	1602.5	155.58	890.497	1467.75	182.886	786.285	1222.84	157.587	1025.43	1358.32	151.882	1065.86	1174.38	223.989	791.331	1301.88	-8.38674	942.727	1391.67	-70.2884	856.554	1176.96	-73.7625	847.932	1096.05	-107.13	880.315	974.779	-71.1811	965.105	881.887	-115.956	911.454	869.854	-111.548	969.645	800.258
562	0	77.2087	1098.05	1603.33	179.921	1108.84	1609.26	81.6693	925.027	1588.74	208.753	960.082	1604.08	155.082	903.565	1469.64	181.701	798.826	1224.93	157.558	1038.21	1360.04	152.26	1078.2	1175.98	222.985	804.056	1303.87	-8.6723	956.27	1393.66	-71.5678	871.907	1178.67	-75.2896	864.013	1097.51	-107.661	899.856	976.785	-70.3172	986.644	886.231	-115.528	933.75	872.571	-110.207	993.951	804.674
563	0	77.2067	1110.98	1605.1	179.93	1121.69	1610.89	81.5719	937.958	1590.27	208.68	972.945	1605.46	154.648	916.595	1471.35	180.491	811.3	1226.84	157.62	1050.92	1361.56	152.741	1090.49	1177.41	221.966	816.702	1305.67	-8.89223	969.816	1395.5	-72.8436	887.329	1180.24	-76.8342	880.186	1098.87	-108.176	919.494	978.779	-69.3673	1008.13	890.591	-115.085	956.117	875.362	-108.791	1018.23	809.196
564	0	77.3265	1123.9	1606.66	180.059	1134.53	1612.3	81.5671	950.888	1591.61	208.708	985.788	1606.63	154.273	929.59	1472.87	179.269	823.723	1228.55	157.759	1063.6	1362.87	153.295	1102.75	1178.67	220.941	829.283	1307.26	-9.05464	983.361	1397.16	-74.1082	902.815	1181.66	-78.3879	896.451	1100.1	-108.669	939.212	980.743	-68.3369	1029.55	894.935	-114.623	978.524	878.206	-107.305	1042.43	813.796
565	0	77.5545	1136.83	1608	180.295	1147.36	1613.48	81.6429	963.821	1592.76	208.824	998.615	1607.6	153.949	942.553	1474.18	178.046	836.109	1230.05	157.958	1076.23	1363.98	153.892	1114.98	1179.74	219.918	841.811	1308.65	-9.16688	996.9	1398.64	-75.3553	918.36	1182.92	-79.9419	912.81	1101.18	-109.137	958.994	982.661	-67.2313	1050.88	899.238	-114.141	1000.94	881.081	-105.752	1066.53	818.442
566	0	77.8775	1149.77	1609.11	180.624	1160.19	1614.42	81.7886	976.76	1593.7	209.016	1011.43	1608.35	153.672	955.489	1475.27	176.836	848.471	1231.34	158.204	1088.84	1364.87	154.503	1127.21	1180.61	218.904	854.297	1309.82	-9.23544	1010.43	1399.93	-76.5788	933.961	1184	-81.4869	929.262	1102.11	-109.573	978.82	984.516	-66.0559	1072.1	903.471	-113.636	1023.35	883.966	-104.133	1090.5	823.1
567	0	78.2832	1162.71	1609.99	181.034	1173.01	1615.12	81.9947	989.706	1594.44	209.276	1024.24	1608.88	153.437	968.4	1476.15	175.652	860.822	1232.4	158.484	1101.44	1365.53	155.102	1139.44	1181.28	217.911	866.752	1310.76	-9.26581	1023.95	1401.01	-77.7735	949.614	1184.89	-83.0139	945.806	1102.88	-109.973	998.674	986.291	-64.816	1093.19	907.607	-113.102	1045.71	886.837	-102.451	1114.3	827.739
568	0	78.76	1175.66	1610.64	181.514	1185.83	1615.59	82.2529	1002.66	1594.96	209.593	1037.04	1609.19	153.242	981.289	1476.8	174.51	873.171	1233.23	158.787	1114.02	1365.98	155.666	1151.66	1181.74	216.947	879.185	1311.48	-9.26244	1037.45	1401.89	-78.9345	965.316	1185.6	-84.5132	962.44	1103.48	-110.331	1018.54	987.971	-63.5166	1114.15	911.622	-112.536	1068	889.672	-100.708	1137.92	832.326
569	0	79.2981	1188.61	1611.06	182.054	1198.65	1615.81	82.5559	1015.62	1595.28	209.96	1049.84	1609.28	153.082	994.159	1477.22	173.422	885.527	1233.83	159.103	1126.59	1366.19	156.176	1163.9	1181.98	216.023	891.605	1311.97	-9.2287	1050.94	1402.55	-80.0569	981.064	1186.11	-85.9755	979.16	1103.9	-110.642	1038.39	989.545	-62.1623	1134.95	915.492	-111.933	1090.2	892.449	-98.9039	1161.31	836.831
570	0	79.8886	1201.57	1611.25	182.644	1211.47	1615.81	82.898	1028.58	1595.37	210.371	1062.63	1609.15	152.958	1007.01	1477.43	172.401	897.898	1234.19	159.426	1139.17	1366.17	156.615	1176.14	1181.99	215.149	904.02	1312.23	-9.16683	1064.4	1403	-81.1359	996.855	1186.42	-87.3911	995.96	1104.14	-110.902	1058.23	990.999	-60.7571	1155.6	919.196	-111.288	1112.28	895.147	-97.0412	1184.47	841.223
571	0	80.5242	1214.53	1611.21	183.279	1224.29	1615.58	83.2742	1041.55	1595.26	210.82	1075.41	1608.81	152.868	1019.85	1477.4	171.46	910.29	1234.33	159.75	1151.76	1365.93	156.973	1188.4	1181.77	214.334	916.436	1312.27	-9.07794	1077.85	1403.23	-82.1663	1012.68	1186.53	-88.7501	1012.83	1104.21	-111.105	1078.01	992.324	-59.305	1176.07	922.715	-110.598	1134.23	897.746	-95.1216	1207.38	845.477
572	0	81.1991	1227.49	1610.96	183.952	1237.1	1615.13	83.6812	1054.52	1594.94	211.303	1088.18	1608.26	152.814	1032.67	1477.16	170.608	922.708	1234.23	160.071	1164.35	1365.46	157.243	1200.69	1181.31	213.589	928.859	1312.09	-8.96202	1091.27	1403.25	-83.1419	1028.55	1186.45	-90.0427	1029.77	1104.09	-111.247	1097.74	993.511	-57.8091	1196.36	926.031	-109.857	1156.01	900.228	-93.1473	1230.02	849.567
573	0	81.9092	1240.45	1610.49	184.66	1249.91	1614.47	84.1166	1067.48	1594.41	211.818	1100.94	1607.51	152.796	1045.47	1476.71	169.855	935.156	1233.9	160.39	1176.97	1364.77	157.425	1213.02	1180.62	212.921	941.293	1311.69	-8.81796	1104.67	1403.06	-84.0564	1044.44	1186.16	-91.2587	1046.76	1103.8	-111.323	1117.39	994.553	-56.2722	1216.46	929.129	-109.062	1177.61	902.577	-91.121	1252.38	853.472
574	0	82.6519	1253.4	1609.82	185.4	1262.71	1613.61	84.5793	1080.43	1593.69	212.362	1113.7	1606.57	152.818	1058.25	1476.05	169.209	947.64	1233.36	160.707	1189.59	1363.87	157.523	1225.39	1179.72	212.338	953.744	1311.09	-8.64355	1118.04	1402.66	-84.9022	1060.36	1185.69	-92.388	1063.79	1103.33	-111.329	1136.95	995.446	-54.6968	1236.36	931.999	-108.211	1199.02	904.779	-89.0457	1274.44	857.171
575	0	83.4261	1266.33	1608.96	186.171	1275.49	1612.57	85.0693	1093.37	1592.79	212.936	1126.43	1605.45	152.884	1071.02	1475.19	168.676	960.162	1232.59	161.025	1202.24	1362.77	157.544	1237.81	1178.6	211.846	966.213	1310.27	-8.43557	1131.38	1402.07	-85.6714	1076.3	1185.04	-93.4206	1080.84	1102.7	-111.261	1156.39	996.186	-53.0848	1256.05	934.629	-107.3	1220.2	906.821	-86.9252	1296.2	860.649
576	0	84.2321	1279.25	1607.92	186.975	1288.26	1611.35	85.588	1106.29	1591.71	213.541	1139.15	1604.17	152.997	1083.77	1474.15	168.258	972.727	1231.62	161.352	1214.9	1361.49	157.502	1250.31	1177.29	211.451	978.705	1309.26	-8.18983	1144.7	1401.28	-86.3556	1092.24	1184.22	-94.3464	1097.91	1101.92	-111.115	1175.7	996.772	-51.438	1275.53	937.012	-106.328	1241.16	908.695	-84.7635	1317.64	863.892
577	0	85.0716	1292.15	1606.71	187.813	1301.01	1609.97	86.1381	1119.2	1590.47	214.178	1151.85	1602.73	153.162	1096.49	1472.92	167.958	985.339	1230.44	161.694	1227.59	1360.04	157.414	1262.88	1175.81	211.157	991.222	1308.05	-7.9013	1157.99	1400.33	-86.9457	1108.18	1183.22	-95.1556	1114.97	1100.98	-110.887	1194.86	997.205	-49.758	1294.78	939.144	-105.295	1261.87	910.392	-82.5655	1338.75	866.889
578	0	85.9474	1305.04	1605.35	188.688	1313.73	1608.45	86.7233	1132.09	1589.1	214.85	1164.52	1601.16	153.384	1109.18	1471.53	167.777	998.002	1229.06	162.061	1240.28	1358.45	157.299	1275.54	1174.19	210.964	1003.77	1306.66	-7.56428	1171.25	1399.21	-87.433	1124.1	1182.08	-95.839	1132	1099.91	-110.572	1213.86	997.487	-48.0465	1313.8	941.021	-104.2	1282.31	911.907	-80.3363	1359.52	869.634
579	0	86.8632	1317.89	1603.87	189.606	1326.44	1606.8	87.3485	1144.95	1587.6	215.562	1177.17	1599.47	153.669	1121.85	1469.99	167.711	1010.72	1227.5	162.463	1252.99	1356.75	157.182	1288.31	1172.46	210.875	1016.34	1305.08	-7.17251	1184.48	1397.95	-87.8085	1140	1180.8	-96.3876	1148.99	1098.72	-110.169	1232.67	997.62	-46.3051	1332.58	942.645	-103.044	1302.47	913.237	-78.0819	1379.95	872.12
580	0	87.8236	1330.72	1602.27	190.569	1339.12	1605.05	88.0195	1157.78	1586	216.318	1189.8	1597.69	154.022	1134.48	1468.31	167.757	1023.5	1225.76	162.912	1265.72	1354.95	157.086	1301.18	1170.64	210.888	1028.95	1303.34	-6.71941	1197.69	1396.55	-88.0639	1155.84	1179.4	-96.7932	1165.9	1097.42	-109.673	1251.27	997.61	-44.5357	1351.1	944.016	-101.829	1322.32	914.379	-75.8088	1400.02	874.344
581	0	88.8334	1343.53	1600.57	191.585	1351.77	1603.21	88.7429	1170.59	1584.32	217.124	1202.41	1595.83	154.449	1147.08	1466.51	167.911	1036.35	1223.85	163.421	1278.46	1353.08	157.039	1314.16	1168.77	211.001	1041.59	1301.43	-6.19826	1210.86	1395.06	-88.1913	1171.63	1177.89	-97.0485	1182.73	1096.02	-109.082	1269.65	997.462	-42.7407	1369.36	945.14	-100.556	1341.87	915.334	-73.524	1419.73	876.305
582	0	89.8978	1356.3	1598.81	192.656	1364.4	1601.31	89.5257	1183.36	1582.58	217.985	1214.99	1593.93	154.954	1159.65	1464.61	168.165	1049.28	1221.78	164.001	1291.21	1351.18	157.067	1327.27	1166.89	211.211	1054.27	1299.37	-5.60241	1224.01	1393.47	-88.1835	1187.34	1176.29	-97.1473	1199.44	1094.54	-108.394	1287.78	997.185	-40.9231	1387.34	946.021	-99.2288	1361.08	916.102	-71.2354	1439.06	878.005
583	0	91.0218	1369.05	1596.99	193.789	1377	1599.36	90.3754	1196.11	1580.81	218.908	1227.54	1591.99	155.544	1172.18	1462.62	168.511	1062.28	1219.58	164.665	1303.97	1349.27	157.196	1340.5	1165.02	211.511	1066.99	1297.18	-4.92547	1237.14	1391.81	-88.0343	1202.96	1174.62	-97.0845	1216.02	1093	-107.608	1305.65	996.786	-39.0861	1405.03	946.667	-97.8508	1379.93	916.687	-68.951	1458.01	879.445
584	0	92.2103	1381.77	1595.15	194.989	1389.58	1597.4	91.2993	1208.83	1579.02	219.9	1240.08	1590.06	156.221	1184.68	1460.56	168.94	1075.37	1217.26	165.426	1316.75	1347.39	157.452	1353.86	1163.21	211.898	1079.76	1294.86	-4.16154	1250.26	1390.11	-87.7384	1218.46	1172.91	-96.8565	1232.44	1091.41	-106.723	1323.23	996.275	-37.2339	1422.43	947.089	-96.4258	1398.42	917.091	-66.6796	1476.56	880.63
585	0	93.4675	1394.46	1593.31	196.258	1402.14	1595.44	92.3047	1221.52	1577.24	220.967	1252.6	1588.14	156.991	1197.16	1458.47	169.443	1088.56	1214.84	166.294	1329.54	1345.55	157.858	1367.34	1161.47	212.363	1092.58	1292.45	-3.30545	1263.36	1388.39	-87.2917	1233.83	1171.16	-96.4613	1248.67	1089.8	-105.74	1340.51	995.662	-35.3714	1439.51	947.296	-94.9585	1416.52	917.319	-64.4307	1494.7	881.564
586	0	94.7968	1407.13	1591.49	197.601	1414.68	1593.52	93.3983	1234.18	1575.5	222.115	1265.11	1586.26	157.856	1209.62	1456.36	170.009	1101.84	1212.34	167.278	1342.36	1343.78	158.435	1380.96	1159.84	212.9	1105.45	1289.96	-2.35302	1276.46	1386.68	-86.6913	1249.06	1169.41	-95.8985	1264.7	1088.18	-104.66	1357.47	994.958	-33.5043	1456.28	947.301	-93.4538	1434.21	917.377	-62.2141	1512.42	882.254
587	0	96.2008	1419.78	1589.71	199.019	1427.21	1591.65	94.586	1246.82	1573.81	223.348	1277.61	1584.45	158.818	1222.07	1454.25	170.629	1115.22	1209.79	168.387	1355.19	1342.11	159.2	1394.7	1158.34	213.502	1118.38	1287.41	-1.30132	1289.56	1384.99	-85.9357	1264.12	1167.68	-95.1693	1280.5	1086.58	-103.486	1374.08	994.176	-31.6388	1472.7	947.116	-91.9172	1451.46	917.272	-60.04	1529.69	882.706
588	0	97.6807	1432.42	1588.01	200.513	1439.74	1589.86	95.8727	1259.44	1572.2	224.673	1290.11	1582.73	159.879	1234.51	1452.17	171.29	1128.71	1207.23	169.625	1368.06	1340.57	160.167	1408.57	1156.99	214.161	1131.37	1284.84	-0.148964	1302.67	1383.35	-85.0248	1279.01	1165.98	-94.277	1296.05	1085.01	-102.222	1390.32	993.328	-29.782	1488.78	946.754	-90.3547	1468.27	917.011	-57.9191	1546.52	882.928
589	0	99.2368	1445.04	1586.4	202.083	1452.27	1588.17	97.2622	1272.05	1570.7	226.091	1302.62	1581.12	161.036	1246.96	1450.14	171.984	1142.3	1204.67	170.996	1380.96	1339.16	161.343	1422.55	1155.82	214.869	1144.41	1282.26	1.10359	1315.8	1381.78	-83.9606	1293.71	1164.34	-93.2269	1311.34	1083.5	-100.874	1406.19	992.428	-27.9415	1504.49	946.229	-88.7725	1484.61	916.602	-55.8624	1562.88	882.928
590	0	100.868	1457.65	1584.9	203.727	1464.81	1586.6	98.7568	1284.66	1569.31	227.605	1315.14	1579.64	162.289	1259.43	1448.2	172.701	1155.98	1202.15	172.498	1393.89	1337.91	162.73	1436.64	1154.84	215.618	1157.52	1279.72	2.45374	1328.95	1380.31	-82.7466	1308.2	1162.79	-92.0259	1326.35	1082.06	-99.4476	1421.65	991.489	-26.1254	1519.82	945.557	-87.1775	1500.47	916.054	-53.8808	1578.75	882.714
591	0	102.571	1470.27	1583.53	205.442	1477.36	1585.17	100.357	1297.26	1568.06	229.215	1327.68	1578.31	163.633	1271.92	1446.36	173.43	1169.76	1199.7	174.128	1406.86	1336.82	164.323	1450.82	1154.06	216.399	1170.69	1277.24	3.89647	1342.14	1378.96	-81.3887	1322.49	1161.34	-90.6834	1341.06	1080.72	-97.9522	1436.71	990.526	-24.3422	1534.77	944.752	-85.5769	1515.81	915.378	-51.9852	1594.13	882.297
592	0	104.343	1482.89	1582.32	207.224	1489.95	1583.9	102.062	1309.86	1566.97	230.92	1340.26	1577.14	165.06	1284.45	1444.66	174.162	1183.61	1197.37	175.878	1419.87	1335.92	166.111	1465.08	1153.49	217.203	1183.92	1274.86	5.42423	1355.37	1377.76	-79.8953	1336.56	1160.02	-89.2107	1355.47	1079.5	-96.3967	1451.33	989.554	-22.6005	1549.31	943.829	-83.9783	1530.64	914.585	-50.1861	1608.99	881.686
593	0	106.179	1495.52	1581.27	209.067	1502.56	1582.81	103.868	1322.48	1566.06	232.717	1352.88	1576.16	166.564	1297.02	1443.11	174.887	1197.52	1195.18	177.735	1432.93	1335.21	168.075	1479.4	1153.14	218.02	1197.19	1272.62	7.02682	1368.64	1376.72	-78.2771	1350.4	1158.84	-87.6209	1369.56	1078.41	-94.7919	1465.53	988.589	-20.9091	1563.43	942.803	-82.3898	1544.92	913.687	-48.4932	1623.32	880.891
594	0	108.073	1508.18	1580.41	210.966	1515.22	1581.9	105.769	1335.11	1565.33	234.601	1365.54	1575.36	168.132	1309.65	1441.73	175.595	1211.49	1193.16	179.685	1446.02	1334.69	170.189	1493.75	1153	218.84	1210.51	1270.53	8.69156	1381.96	1375.87	-76.5477	1364.02	1157.83	-85.9295	1383.33	1077.48	-93.1498	1479.27	987.647	-19.2764	1577.13	941.689	-80.8199	1558.66	912.698	-46.9154	1637.11	879.924
595	0	110.018	1520.86	1579.74	212.912	1527.92	1581.18	107.758	1347.77	1564.81	236.564	1378.25	1574.77	169.752	1322.33	1440.56	176.278	1225.48	1191.36	181.709	1459.14	1334.37	172.421	1508.11	1153.07	219.652	1223.86	1268.65	10.4034	1395.33	1375.22	-74.724	1377.4	1157.02	-84.1539	1396.77	1076.73	-91.4835	1492.57	986.743	-17.7108	1590.39	940.5	-79.2773	1571.83	911.632	-45.46	1650.33	878.794
596	0	112.005	1533.58	1579.27	214.899	1540.68	1580.66	109.822	1360.46	1564.5	238.596	1391.02	1574.38	171.409	1335.07	1439.6	176.924	1239.48	1189.8	183.784	1472.3	1334.25	174.736	1522.45	1153.34	220.445	1237.23	1267	12.1455	1408.74	1374.79	-72.8255	1390.56	1156.41	-82.3132	1409.89	1076.17	-89.8073	1505.41	985.893	-16.2201	1603.2	939.253	-77.7715	1584.44	910.504	-44.1328	1662.98	877.514
597	0	114.026	1546.33	1579	216.916	1553.49	1580.35	111.95	1373.19	1564.42	240.685	1403.85	1574.21	173.087	1347.87	1438.87	177.526	1253.47	1188.51	185.884	1485.49	1334.32	177.09	1536.73	1153.81	221.208	1250.61	1265.6	13.8992	1422.2	1374.59	-70.8751	1403.5	1156.02	-80.4285	1422.69	1075.82	-88.1362	1517.8	985.113	-14.8119	1615.55	937.959	-76.3121	1596.48	909.33	-42.9375	1675.05	876.094
598	0	116.069	1559.14	1578.94	218.954	1566.36	1580.23	114.125	1385.96	1564.56	242.817	1416.75	1574.24	174.768	1360.74	1438.39	178.076	1267.43	1187.5	187.985	1498.7	1334.59	179.44	1550.92	1154.44	221.932	1263.99	1264.48	15.645	1435.71	1374.64	-68.8985	1416.22	1155.88	-78.522	1435.18	1075.7	-86.4863	1529.75	984.416	-13.4928	1627.44	936.632	-74.9092	1607.95	908.127	-41.876	1686.53	874.546
599	0	118.122	1571.99	1579.09	221	1579.3	1580.31	116.328	1398.78	1564.93	244.973	1429.7	1574.49	176.435	1373.66	1438.16	178.568	1281.33	1186.8	190.056	1511.92	1335.03	181.742	1564.99	1155.23	222.609	1277.35	1263.65	17.3631	1449.24	1374.94	-66.9239	1428.73	1155.98	-76.6174	1447.37	1075.8	-84.8741	1541.25	983.817	-12.2694	1638.86	935.285	-73.5734	1618.86	906.912	-40.9479	1697.41	872.882
600	0	120.173	1584.89	1579.44	223.043	1592.29	1580.57	118.539	1411.65	1565.53	247.137	1442.72	1574.94	178.07	1386.64	1438.19	178.999	1295.15	1186.42	192.069	1525.14	1335.65	183.948	1578.91	1156.16	223.233	1290.69	1263.14	19.0334	1462.8	1375.49	-64.9814	1441.05	1156.34	-74.7388	1459.26	1076.15	-83.3166	1552.33	983.328	-11.1473	1649.82	933.929	-72.3157	1629.21	905.701	-40.1507	1707.7	871.114
601	0	122.207	1597.85	1579.99	225.067	1605.34	1581.01	120.736	1424.57	1566.36	249.288	1455.79	1575.59	179.658	1399.67	1438.47	179.367	1308.88	1186.36	193.997	1538.36	1336.43	186.017	1592.66	1157.19	223.798	1303.98	1262.93	20.6366	1476.36	1376.29	-63.102	1453.2	1156.97	-72.9106	1470.89	1076.74	-81.8307	1562.99	982.96	-10.132	1660.3	932.574	-71.1475	1639.02	904.512	-39.4808	1717.39	869.253
602	0	124.207	1610.87	1580.71	227.057	1618.45	1581.62	122.897	1437.55	1567.4	251.404	1468.91	1576.42	181.183	1412.73	1439	179.674	1322.51	1186.61	195.813	1551.55	1337.37	187.907	1606.22	1158.32	224.305	1317.22	1263.05	22.1544	1489.92	1377.34	-61.3169	1465.2	1157.85	-71.1567	1482.25	1077.57	-80.4335	1573.24	982.721	-9.22877	1670.32	931.23	-70.0806	1648.31	903.361	-38.9332	1726.48	867.311
603	0	126.158	1623.94	1581.61	228.996	1631.61	1582.37	124.999	1450.58	1568.66	253.464	1482.09	1577.44	182.631	1425.82	1439.77	179.924	1336.02	1187.18	197.492	1564.73	1338.44	189.582	1619.58	1159.53	224.754	1330.4	1263.47	23.5703	1503.45	1378.63	-59.6563	1477.05	1158.99	-69.4998	1493.37	1078.64	-79.1413	1583.12	982.618	-8.44276	1679.88	929.908	-69.1272	1657.1	902.264	-38.503	1735	865.301
604	0	128.041	1637.06	1582.66	230.868	1644.81	1583.27	127.019	1463.66	1570.1	255.448	1495.3	1578.62	183.992	1438.93	1440.77	180.127	1349.39	1188.04	199.013	1577.86	1339.64	191.012	1632.74	1160.81	225.149	1343.51	1264.19	24.8696	1516.93	1380.14	-58.1479	1488.79	1160.38	-67.9609	1504.28	1079.94	-77.9696	1592.65	982.657	-7.77926	1689	928.614	-68.2993	1665.42	901.235	-38.1858	1742.96	863.236
605	0	129.839	1650.23	1583.85	232.656	1658.06	1584.28	128.938	1476.78	1571.73	257.334	1508.55	1579.96	185.256	1452.04	1442	180.29	1362.63	1189.19	200.36	1590.96	1340.97	192.175	1645.69	1162.13	225.495	1356.55	1265.19	26.0404	1530.36	1381.85	-56.8158	1500.42	1162	-66.5586	1514.98	1081.46	-76.9328	1601.83	982.839	-7.2438	1697.69	927.356	-67.6093	1673.3	900.287	-37.9783	1750.37	861.131
606	0	131.536	1663.44	1585.16	234.341	1671.33	1585.4	130.735	1489.95	1573.52	259.105	1521.83	1581.43	186.416	1465.14	1443.41	180.426	1375.72	1190.59	201.519	1604	1342.4	193.056	1658.46	1163.51	225.8	1369.5	1266.46	27.0733	1543.7	1383.75	-55.6791	1511.97	1163.85	-65.3084	1525.49	1083.18	-76.0436	1610.7	983.166	-6.84231	1705.96	926.141	-67.0688	1680.77	899.433	-37.8795	1757.26	859.001
607	0	133.115	1676.69	1586.57	235.909	1684.64	1586.61	132.395	1503.14	1575.46	260.745	1535.14	1583.03	187.467	1478.22	1445.01	180.546	1388.68	1192.22	202.483	1616.98	1343.93	193.646	1671.04	1164.93	226.073	1382.37	1267.96	27.9622	1556.94	1385.81	-54.7514	1523.44	1165.89	-64.2222	1535.83	1085.1	-75.313	1619.28	983.634	-6.58107	1713.83	924.975	-66.689	1687.86	898.68	-37.8908	1763.66	856.861
608	0	134.563	1689.96	1588.06	237.345	1697.96	1587.89	133.904	1516.37	1577.52	262.24	1548.46	1584.74	188.407	1491.27	1446.76	180.663	1401.48	1194.05	203.249	1629.91	1345.54	193.95	1683.48	1166.39	226.322	1395.17	1269.67	28.7042	1570.08	1388.01	-54.0394	1534.84	1168.11	-63.3082	1546.02	1087.18	-74.7498	1627.6	984.237	-6.4667	1721.34	923.862	-66.48	1694.6	898.037	-38.0166	1769.6	854.727
609	0	135.866	1703.25	1589.61	238.637	1711.3	1589.23	135.253	1529.62	1579.67	263.579	1561.78	1586.53	189.235	1504.28	1448.63	180.788	1414.16	1196.05	203.82	1642.76	1347.24	193.976	1695.78	1167.9	226.556	1407.88	1271.55	29.2993	1583.1	1390.31	-53.5434	1546.17	1170.49	-62.5702	1556.05	1089.4	-74.3604	1635.67	984.969	-6.50604	1728.5	922.805	-66.4508	1701.03	897.506	-38.2641	1775.11	852.614
610	0	137.017	1716.56	1591.19	239.775	1724.64	1590.61	136.436	1542.88	1581.89	264.756	1575.12	1588.39	189.953	1517.25	1450.6	180.931	1426.7	1198.18	204.202	1655.55	1348.99	193.743	1707.98	1169.44	226.785	1420.52	1273.58	29.7506	1596	1392.69	-53.2565	1557.43	1172.98	-62.008	1565.96	1091.75	-74.1487	1643.51	985.817	-6.7059	1735.34	921.805	-66.6084	1707.18	897.089	-38.6435	1780.24	850.537
611	0	138.008	1729.86	1592.79	240.752	1737.97	1592	137.449	1556.14	1584.15	265.767	1588.45	1590.3	190.562	1530.17	1452.64	181.099	1439.12	1200.41	204.406	1668.27	1350.79	193.277	1720.1	1171.03	227.014	1433.09	1275.72	30.064	1608.77	1395.11	-53.1658	1568.6	1175.56	-61.617	1575.73	1094.18	-74.1159	1651.16	986.766	-7.07286	1741.9	920.86	-66.9582	1713.08	896.782	-39.1671	1785.02	848.509
612	0	138.837	1743.16	1594.38	241.567	1751.3	1593.4	138.293	1569.4	1586.42	266.611	1601.77	1592.22	191.067	1543.05	1454.71	181.295	1451.43	1202.7	204.446	1680.93	1352.61	192.61	1732.16	1172.65	227.249	1445.6	1277.92	30.2475	1621.42	1397.54	-53.2524	1579.68	1178.2	-61.389	1585.38	1096.67	-74.2607	1658.62	987.8	-7.61289	1748.2	919.967	-67.5028	1718.76	896.577	-39.849	1789.49	846.541
613	0	139.503	1756.44	1595.94	242.219	1764.61	1594.77	138.971	1582.65	1588.67	267.29	1615.07	1594.14	191.472	1555.86	1456.79	181.521	1463.65	1205.01	204.34	1693.53	1354.45	191.776	1744.19	1174.28	227.495	1458.06	1280.16	30.311	1633.96	1399.94	-53.4935	1590.64	1180.86	-61.3123	1594.91	1099.18	-74.579	1665.92	988.898	-8.33108	1754.27	919.117	-68.2428	1724.24	896.465	-40.7038	1793.7	844.639
614	0	140.011	1769.7	1597.43	242.71	1777.89	1596.11	139.489	1595.89	1590.86	267.81	1628.36	1596.02	191.783	1568.63	1458.83	181.775	1475.79	1207.3	204.105	1706.07	1356.27	190.816	1756.22	1175.93	227.751	1470.47	1282.38	30.2661	1646.38	1402.28	-53.8631	1601.47	1183.5	-61.3723	1604.33	1101.69	-75.0645	1673.07	990.036	-9.23125	1760.15	918.301	-69.1757	1729.56	896.428	-41.7461	1797.68	842.807
615	0	140.364	1782.93	1598.85	243.048	1791.15	1597.37	139.856	1609.1	1592.97	268.178	1641.63	1597.84	192.006	1581.36	1460.81	182.052	1487.87	1209.52	203.762	1718.56	1358.05	189.77	1768.24	1177.55	228.018	1482.84	1284.55	30.1249	1658.71	1404.52	-54.3334	1612.16	1186.08	-61.5522	1613.64	1104.15	-75.7085	1680.09	991.188	-10.3157	1765.86	917.504	-70.2965	1734.74	896.449	-42.9895	1801.49	841.043
616	0	140.573	1796.13	1600.16	243.24	1804.38	1598.56	140.08	1622.28	1594.95	268.402	1654.87	1599.56	192.146	1594.04	1462.69	182.345	1499.9	1211.65	203.33	1731.02	1359.77	188.678	1780.29	1179.14	228.291	1495.19	1286.64	29.9002	1670.96	1406.61	-54.8768	1622.69	1188.56	-61.8339	1622.85	1106.53	-76.5003	1687	992.327	-11.5847	1771.45	916.71	-71.5973	1739.79	896.504	-44.4453	1805.16	839.341
617	0	140.645	1809.29	1601.34	243.296	1817.57	1599.63	140.171	1635.43	1596.78	268.492	1668.08	1601.15	192.21	1606.69	1464.44	182.645	1511.89	1213.65	202.83	1743.44	1361.39	187.579	1792.36	1180.66	228.568	1507.51	1288.61	29.6047	1683.15	1408.54	-55.4663	1633.05	1190.91	-62.1982	1631.96	1108.8	-77.4276	1693.8	993.424	-13.0366	1776.93	915.897	-73.0677	1744.74	896.568	-46.122	1808.72	837.691
618	0	140.592	1822.42	1602.36	243.227	1830.72	1600.57	140.141	1648.56	1598.42	268.459	1681.25	1602.59	192.203	1619.31	1466.02	182.94	1523.87	1215.48	202.279	1755.85	1362.88	186.507	1804.46	1182.08	228.84	1519.82	1290.42	29.2506	1695.3	1410.25	-56.0772	1643.24	1193.08	-62.6264	1641	1110.93	-78.4768	1700.52	994.449	-14.6674	1782.34	915.045	-74.6948	1749.6	896.613	-48.0244	1812.22	836.078
619	0	140.424	1835.51	1603.21	243.045	1843.84	1601.36	140.001	1661.65	1599.84	268.314	1694.4	1603.85	192.132	1631.92	1467.41	183.22	1535.85	1217.11	201.696	1768.24	1364.21	185.492	1816.6	1183.35	229.102	1532.12	1292.04	28.8491	1707.42	1411.72	-56.6878	1653.27	1195.04	-63.1002	1649.96	1112.87	-79.6333	1707.18	995.373	-16.4708	1787.7	914.128	-76.4639	1754.4	896.61	-50.1532	1815.69	834.484
620	0	140.154	1848.56	1603.85	242.76	1856.92	1601.97	139.761	1674.72	1601.02	268.067	1707.51	1604.89	191.999	1644.52	1468.58	183.474	1547.84	1218.51	201.094	1780.64	1365.36	184.562	1828.78	1184.46	229.343	1544.43	1293.44	28.4104	1719.53	1412.92	-57.2798	1663.15	1196.76	-63.6027	1658.88	1114.61	-80.882	1713.78	996.166	-18.4379	1793.03	913.121	-78.3584	1759.15	896.53	-52.5045	1819.15	832.887
621	0	139.79	1861.58	1604.28	242.384	1869.96	1602.39	139.432	1687.75	1601.92	267.729	1720.6	1605.7	191.811	1657.12	1469.51	183.688	1559.85	1219.66	200.489	1793.06	1366.28	183.734	1840.98	1185.35	229.555	1556.74	1294.61	27.9433	1731.66	1413.83	-57.8387	1672.91	1198.22	-64.119	1667.75	1116.11	-82.2076	1720.35	996.803	-20.5578	1798.37	911.998	-80.3607	1763.86	896.345	-55.0696	1822.63	831.264
622	0	139.343	1874.57	1604.47	241.926	1882.98	1602.59	139.022	1700.76	1602.53	267.308	1733.65	1606.26	191.57	1669.74	1470.18	183.853	1571.9	1220.53	199.889	1805.49	1366.96	183.024	1853.22	1185.99	229.728	1569.07	1295.51	27.4546	1743.82	1414.42	-58.3542	1682.56	1199.39	-64.6362	1676.62	1117.35	-83.5952	1726.91	997.258	-22.8172	1803.72	910.734	-82.4528	1768.55	896.028	-57.8353	1826.15	829.59
623	0	138.82	1887.53	1604.41	241.394	1895.98	1602.57	138.54	1713.74	1602.82	266.814	1746.69	1606.54	191.277	1682.38	1470.56	183.959	1583.99	1221.12	199.303	1817.96	1367.36	182.437	1865.49	1186.36	229.853	1581.41	1296.14	26.9494	1756.03	1414.68	-58.8204	1692.14	1200.25	-65.1443	1685.5	1118.32	-85.0302	1733.47	997.51	-25.2009	1809.11	909.307	-84.6164	1773.24	895.555	-60.7836	1829.73	827.842
624	0	138.227	1900.47	1604.09	240.793	1908.95	1602.31	137.992	1726.71	1602.79	266.252	1759.7	1606.53	190.936	1695.05	1470.66	183.997	1596.14	1221.41	198.737	1830.48	1367.46	181.977	1877.78	1186.42	229.919	1593.78	1296.47	26.4308	1768.3	1414.59	-59.2353	1701.7	1200.79	-65.6357	1694.42	1118.99	-86.4991	1740.07	997.542	-27.6919	1814.56	907.697	-86.8335	1777.94	894.905	-63.8925	1833.37	825.995
625	0	137.568	1913.4	1603.5	240.127	1921.91	1601.8	137.383	1739.65	1602.43	265.626	1772.69	1606.22	190.544	1707.76	1470.45	183.959	1608.36	1221.38	198.191	1843.04	1367.25	181.638	1890.09	1186.16	229.918	1606.18	1296.51	25.8999	1780.65	1414.16	-59.6008	1711.27	1200.99	-66.1058	1703.41	1119.35	-87.9895	1746.72	997.34	-30.2719	1820.08	905.885	-89.0872	1782.67	894.063	-67.1368	1837.08	824.03
626	0	136.846	1926.31	1602.64	239.399	1934.86	1601.04	136.717	1752.59	1601.73	264.941	1785.68	1605.62	190.102	1720.51	1469.95	183.842	1620.64	1221.05	197.666	1855.66	1366.72	181.413	1902.44	1185.56	229.842	1618.61	1296.25	25.3556	1793.09	1413.38	-59.9225	1720.89	1200.87	-66.5523	1712.5	1119.4	-89.4903	1753.46	996.894	-32.9215	1825.68	903.86	-91.3614	1787.46	893.017	-70.4882	1840.89	821.927
627	0	136.061	1939.22	1601.51	238.609	1947.81	1600.03	135.995	1765.52	1600.71	264.197	1798.66	1604.72	189.606	1733.32	1469.15	183.64	1633	1220.4	197.156	1868.35	1365.87	181.287	1914.81	1184.62	229.685	1631.08	1295.7	24.7948	1805.63	1412.25	-60.209	1730.6	1200.41	-66.9755	1721.71	1119.14	-90.9915	1760.3	996.2	-35.6207	1831.38	901.615	-93.6418	1792.33	891.76	-73.9164	1844.79	819.673
628	0	135.211	1952.12	1600.11	237.753	1960.76	1598.77	135.217	1778.44	1599.36	263.393	1811.65	1603.52	189.055	1746.18	1468.05	183.354	1645.44	1219.46	196.657	1881.1	1364.68	181.246	1927.22	1183.34	229.442	1643.6	1294.85	24.2127	1818.27	1410.8	-60.4718	1740.46	1199.62	-67.378	1731.08	1118.57	-92.4849	1767.27	995.257	-38.3491	1837.21	899.145	-95.9158	1797.31	890.292	-77.3902	1848.8	817.256
629	0	134.294	1965.03	1598.47	236.829	1973.73	1597.28	134.38	1791.37	1597.7	262.527	1824.65	1602.05	188.443	1759.1	1466.68	182.982	1657.96	1218.22	196.158	1893.93	1363.18	181.269	1939.67	1181.73	229.11	1656.18	1293.71	23.6028	1831.01	1409.04	-60.7238	1750.49	1198.51	-67.7637	1740.63	1117.69	-93.9636	1774.41	994.071	-41.0864	1843.16	896.454	-98.1725	1802.42	888.616	-80.8776	1852.92	814.673
630	0	133.303	1977.96	1596.59	235.831	1986.72	1595.56	133.48	1804.3	1595.76	261.594	1837.66	1600.31	187.765	1772.09	1465.04	182.528	1670.57	1216.72	195.647	1906.84	1361.38	181.335	1952.17	1179.81	228.69	1668.82	1292.32	22.957	1843.86	1406.98	-60.9798	1760.74	1197.1	-68.1383	1750.38	1116.52	-95.4219	1781.74	992.649	-43.8126	1849.27	893.549	-100.403	1807.69	886.741	-84.3475	1857.16	811.923
631	0	132.234	1990.89	1594.51	234.752	1999.73	1593.65	132.512	1817.25	1593.55	260.591	1850.7	1598.33	187.018	1785.14	1463.17	181.997	1683.27	1214.96	195.112	1919.83	1359.3	181.419	1964.73	1177.61	228.182	1681.54	1290.67	22.2662	1856.81	1404.66	-61.2546	1771.23	1195.39	-68.5083	1760.36	1115.07	-96.8556	1789.29	991.005	-46.5084	1855.55	890.446	-102.599	1813.17	884.68	-87.7698	1861.55	809.01
632	0	131.077	2003.85	1592.24	233.584	2012.77	1591.56	131.469	1830.22	1591.12	259.509	1863.77	1596.14	186.194	1798.27	1461.08	181.394	1696.07	1212.97	194.535	1932.91	1356.97	181.497	1977.36	1175.15	227.592	1694.34	1288.8	21.5203	1869.86	1402.11	-61.5636	1781.99	1193.42	-68.8806	1770.59	1113.37	-98.2615	1797.08	989.157	-49.1558	1862.02	887.161	-104.757	1818.88	882.452	-91.1166	1866.11	805.947
633	0	129.827	2016.84	1589.82	232.32	2025.85	1589.33	130.343	1843.21	1588.49	258.341	1876.87	1593.77	185.289	1811.46	1458.81	180.729	1708.96	1210.79	193.902	1946.07	1354.43	181.542	1990.07	1172.48	226.925	1707.24	1286.73	20.7091	1882.99	1399.35	-61.9207	1793.04	1191.2	-69.2621	1781.07	1111.43	-99.6371	1805.14	987.124	-51.7383	1868.71	883.718	-106.871	1824.86	880.077	-94.3626	1870.85	802.748
634	0	128.473	2029.86	1587.28	230.951	2038.97	1586.98	129.126	1856.24	1585.7	257.08	1890.01	1591.26	184.297	1824.72	1456.39	180.01	1721.96	1208.44	193.194	1959.33	1351.71	181.528	2002.87	1169.64	226.19	1720.24	1284.51	19.8218	1896.21	1396.43	-62.3387	1804.38	1188.77	-69.6596	1791.82	1109.29	-100.981	1813.5	984.93	-54.2408	1875.63	880.146	-108.938	1831.15	877.581	-97.4859	1875.81	799.434
635	0	127.008	2042.92	1584.67	229.468	2052.13	1584.57	127.807	1869.3	1582.8	255.716	1903.21	1588.65	183.214	1838.06	1453.86	179.25	1735.06	1205.97	192.394	1972.69	1348.87	181.428	2015.77	1166.68	225.395	1733.36	1282.15	18.8483	1909.49	1393.38	-62.8281	1816.03	1186.14	-70.079	1802.84	1106.96	-102.292	1822.17	982.601	-56.6509	1882.8	876.476	-110.957	1837.77	874.989	-100.468	1881.02	796.03
636	0	125.423	2056.02	1582.02	227.863	2065.35	1582.12	126.378	1882.41	1579.82	254.242	1916.45	1585.98	182.035	1851.48	1451.27	178.46	1748.29	1203.41	191.485	1986.14	1345.95	181.216	2028.79	1163.64	224.551	1746.61	1279.71	17.7791	1922.84	1390.25	-63.3963	1827.98	1183.35	-70.5254	1814.13	1104.49	-103.57	1831.16	980.167	-58.9579	1890.27	872.744	-112.924	1844.78	872.331	-103.296	1886.52	792.567
637	0	123.712	2069.18	1579.37	226.129	2078.63	1579.68	124.83	1895.57	1576.83	252.649	1929.76	1583.3	180.758	1864.97	1448.64	177.654	1761.63	1200.81	190.452	1999.7	1343.01	180.868	2041.94	1160.59	223.668	1760	1277.22	16.6061	1936.23	1387.08	-64.0477	1840.22	1180.45	-71.0027	1825.69	1101.9	-104.813	1840.5	977.658	-61.1539	1898.05	868.987	-114.838	1852.18	869.638	-105.958	1892.35	789.077
638	0	121.868	2082.4	1576.78	224.26	2091.97	1577.3	123.154	1908.79	1573.86	250.929	1943.12	1580.65	179.38	1878.55	1446.04	176.844	1775.1	1198.2	189.282	2013.37	1340.09	180.363	2055.23	1157.57	222.759	1773.53	1274.74	15.3228	1949.66	1383.91	-64.7829	1852.72	1177.46	-71.5133	1837.52	1099.24	-106.022	1850.19	975.105	-63.2334	1906.17	865.245	-116.697	1860.03	866.941	-108.45	1898.56	785.596
639	0	119.886	2095.68	1574.29	222.253	2105.37	1575.01	121.344	1922.07	1570.96	249.078	1956.56	1578.09	177.901	1892.21	1443.49	176.044	1788.71	1195.64	187.963	2027.15	1337.26	179.682	2068.68	1154.64	221.833	1787.2	1272.3	13.925	1963.11	1380.79	-65.5991	1865.47	1174.43	-72.0585	1849.59	1096.54	-107.196	1860.24	972.542	-65.1933	1914.66	861.56	-118.498	1868.32	864.27	-110.768	1905.19	782.161
640	0	117.765	2109.02	1571.92	220.104	2118.84	1572.86	119.393	1935.42	1568.17	247.089	1970.06	1575.65	176.322	1905.95	1441.06	175.264	1802.46	1193.17	186.488	2041.03	1334.55	178.81	2082.29	1151.85	220.902	1801.04	1269.95	12.4111	1976.58	1377.75	-66.4899	1878.43	1171.4	-72.6381	1861.89	1093.83	-108.333	1870.65	970.001	-67.0329	1923.54	857.972	-120.236	1877.1	861.657	-112.914	1912.29	778.811
641	0	115.503	2122.44	1569.73	217.814	2132.39	1570.89	117.3	1948.85	1565.55	244.96	1983.63	1573.38	174.646	1919.77	1438.76	174.517	1816.34	1190.83	184.854	2055.03	1332.04	177.74	2096.09	1149.26	219.975	1815.03	1267.74	10.7821	1990.06	1374.84	-67.4461	1891.57	1168.43	-73.2506	1874.42	1091.17	-109.434	1881.43	967.514	-68.7534	1932.85	854.523	-121.907	1886.38	859.132	-114.893	1919.91	775.583
642	0	113.104	2135.94	1567.74	215.386	2146	1569.14	115.063	1962.35	1563.14	242.691	1997.27	1571.33	172.879	1933.67	1436.65	173.811	1830.37	1188.66	183.061	2069.14	1329.74	176.468	2110.08	1146.91	219.059	1829.16	1265.71	9.04213	2003.55	1372.1	-68.4561	1904.86	1165.54	-73.8934	1887.15	1088.59	-110.495	1892.57	965.114	-70.3581	1942.6	851.251	-123.506	1896.15	856.721	-116.709	1928.09	772.514
643	0	110.572	2149.52	1565.99	212.824	2159.68	1567.63	112.683	1975.94	1560.96	240.284	2010.99	1569.52	171.026	1947.66	1434.76	173.151	1844.54	1186.7	181.114	2083.35	1327.72	174.996	2124.26	1144.84	218.162	1843.45	1263.9	7.19844	2017.03	1369.56	-69.5065	1918.25	1162.79	-74.5631	1900.06	1086.13	-111.516	1904.06	962.829	-71.8519	1952.83	848.195	-125.026	1906.44	854.453	-118.372	1936.87	769.639
644	0	107.915	2163.18	1564.5	210.136	2173.44	1566.39	110.165	1989.61	1559.05	237.742	2024.77	1568	169.097	1961.71	1433.12	172.542	1858.83	1184.99	179.023	2097.66	1326.01	173.334	2138.65	1143.11	217.289	1857.87	1262.34	5.26133	2030.5	1367.25	-70.5836	1931.72	1160.23	-75.2555	1913.14	1083.81	-112.496	1915.9	960.69	-73.2406	1963.55	845.388	-126.46	1917.25	852.349	-119.889	1946.29	766.992
645	0	105.144	2176.92	1563.29	207.334	2187.26	1565.44	107.518	2003.36	1557.44	235.076	2038.62	1566.79	167.103	1975.83	1431.77	171.986	1873.24	1183.56	176.802	2112.05	1324.62	171.496	2153.22	1141.72	216.444	1872.42	1261.07	3.24403	2043.96	1365.21	-71.6733	1945.24	1157.88	-75.9662	1926.38	1081.68	-113.432	1928.08	958.72	-74.531	1974.78	842.862	-127.8	1928.57	850.431	-121.271	1956.38	764.6
646	0	102.274	2190.73	1562.37	204.43	2201.14	1564.8	104.753	2017.19	1556.15	232.295	2052.53	1565.91	165.055	1990.01	1430.71	171.481	1887.76	1182.43	174.469	2126.52	1323.59	169.502	2167.98	1140.72	215.63	1887.07	1260.1	1.1624	2057.41	1363.46	-72.7626	1958.79	1155.79	-76.6905	1939.74	1079.76	-114.323	1940.59	956.943	-75.73	1986.53	840.644	-129.04	1940.4	848.717	-122.525	1967.17	762.49
647	0	99.3196	2204.62	1561.75	201.441	2215.09	1564.48	101.885	2031.09	1555.2	229.415	2066.5	1565.37	162.969	2004.24	1429.96	171.027	1902.36	1181.62	172.047	2141.06	1322.93	167.377	2182.89	1140.1	214.849	1901.82	1259.47	-0.965482	2070.84	1362.02	-73.8397	1972.35	1153.98	-77.424	1953.23	1078.08	-115.167	1953.41	955.377	-76.8448	1998.81	838.756	-130.173	1952.73	847.22	-123.66	1978.66	760.679
648	0	96.3012	2218.57	1561.44	198.386	2229.08	1564.47	98.9321	2045.06	1554.59	226.453	2080.51	1565.19	160.859	2018.49	1429.55	170.618	1917.02	1181.16	169.559	2155.63	1322.64	165.148	2197.94	1139.88	214.103	1916.62	1259.18	-3.11988	2084.25	1360.9	-74.8947	1985.9	1152.49	-78.1627	1966.83	1076.65	-115.964	1966.55	954.039	-77.8819	2011.64	837.216	-131.193	1965.56	845.952	-124.681	1990.88	759.185
649	0	93.2398	2232.57	1561.41	195.284	2243.12	1564.76	95.9156	2059.09	1554.33	223.429	2094.57	1565.36	158.743	2032.77	1429.46	170.25	1931.73	1181.03	167.032	2170.22	1322.71	162.843	2213.07	1140.04	213.392	1931.46	1259.23	-5.28001	2097.64	1360.11	-75.9198	1999.45	1151.31	-78.9031	1980.53	1075.5	-116.713	1979.99	952.94	-78.847	2025.02	836.037	-132.095	1978.88	844.92	-125.595	2003.83	758.016
650	0	90.1588	2246.62	1561.67	192.161	2257.19	1565.35	92.8596	2073.16	1554.41	220.367	2108.65	1565.87	156.637	2047.04	1429.69	169.915	1946.44	1181.25	164.495	2184.82	1323.15	160.495	2228.26	1140.58	212.716	1946.32	1259.63	-7.42472	2111.01	1359.66	-76.91	2012.99	1150.47	-79.6426	1994.33	1074.62	-117.414	1993.72	952.086	-79.7447	2038.93	835.226	-132.878	1992.67	844.126	-126.404	2017.5	757.177
651	0	87.0832	2260.7	1562.18	189.039	2271.29	1566.21	89.7902	2087.27	1554.82	217.291	2122.75	1566.73	154.558	2061.29	1430.24	169.607	1961.14	1181.8	161.977	2199.38	1323.93	158.134	2243.45	1141.47	212.073	1961.15	1260.36	-9.53313	2124.36	1359.54	-77.8623	2026.52	1149.97	-80.3796	2008.22	1074.03	-118.068	2007.74	951.481	-80.5781	2053.39	834.784	-133.539	2006.93	843.572	-127.11	2031.9	756.669
652	0	84.0389	2274.8	1562.94	185.946	2285.39	1567.32	86.7346	2101.4	1555.56	214.228	2136.86	1567.9	152.522	2075.5	1431.1	169.316	1975.8	1182.68	159.506	2213.9	1325.03	155.792	2258.59	1142.67	211.462	1975.94	1261.41	-11.5853	2137.68	1359.74	-78.7764	2040.07	1149.79	-81.1132	2022.19	1073.72	-118.675	2022.04	951.124	-81.3486	2068.37	834.71	-134.078	2021.65	843.253	-127.715	2047	756.486
653	0	81.0521	2288.91	1563.92	182.908	2299.5	1568.66	83.7209	2115.54	1556.59	211.204	2150.96	1569.36	150.546	2089.66	1432.24	169.034	1990.38	1183.86	157.109	2228.35	1326.43	153.499	2273.64	1144.15	210.877	1990.65	1262.75	-13.5627	2150.96	1360.25	-79.6539	2053.63	1149.93	-81.8437	2036.24	1073.68	-119.238	2036.61	951.009	-82.0559	2083.87	834.997	-134.5	2036.81	843.164	-128.217	2062.78	756.621
654	0	78.1492	2303	1565.09	179.952	2313.59	1570.19	80.7767	2129.66	1557.9	208.246	2165.05	1571.09	148.642	2103.75	1433.63	168.749	2004.87	1185.31	154.813	2242.7	1328.08	151.285	2288.55	1145.88	210.316	2005.26	1264.37	-15.449	2164.22	1361.06	-80.4979	2067.23	1150.35	-82.5722	2050.37	1073.89	-119.759	2051.45	951.127	-82.698	2099.86	835.632	-134.805	2052.41	843.296	-128.615	2079.24	757.064
655	0	75.3556	2317.08	1566.42	177.103	2327.66	1571.88	77.9283	2143.76	1559.45	205.38	2179.1	1573.06	146.824	2117.75	1435.26	168.453	2019.23	1187.02	152.641	2256.93	1329.96	149.178	2303.27	1147.8	209.771	2019.74	1266.23	-17.2299	2177.45	1362.14	-81.3129	2080.86	1151.04	-83.3008	2064.59	1074.35	-120.24	2066.55	951.468	-83.271	2116.33	836.603	-135	2068.43	843.639	-128.908	2096.34	757.8
656	0	72.6955	2331.11	1567.88	174.387	2341.69	1573.7	75.1999	2157.82	1561.23	202.631	2193.1	1575.23	145.101	2131.65	1437.1	168.134	2033.45	1188.95	150.613	2271.04	1332.03	147.206	2317.78	1149.87	209.238	2034.08	1268.29	-18.894	2190.65	1363.46	-82.104	2094.56	1151.98	-84.032	2078.89	1075.04	-120.683	2081.91	952.018	-83.7697	2133.25	837.892	-135.091	2084.87	844.182	-129.092	2114.05	758.817
657	0	70.1911	2345.1	1569.44	171.826	2355.68	1575.62	72.6128	2171.84	1563.19	200.019	2207.05	1577.56	143.483	2145.44	1439.1	167.782	2047.51	1191.06	148.745	2285	1334.26	145.393	2332.04	1152.07	208.708	2048.25	1270.52	-20.4327	2203.82	1365	-82.8765	2108.32	1153.12	-84.7687	2093.27	1075.92	-121.091	2097.53	952.761	-84.1876	2150.58	839.479	-135.082	2101.71	844.913	-129.165	2132.34	760.101
658	0	67.862	2359.03	1571.09	169.442	2369.6	1577.6	70.1846	2185.79	1565.31	197.564	2220.94	1580.02	141.975	2159.12	1441.25	167.388	2061.39	1193.32	147.049	2298.82	1336.6	143.76	2346.05	1154.34	208.175	2062.24	1272.9	-21.8401	2216.96	1366.74	-83.6356	2122.16	1154.44	-85.514	2107.73	1076.97	-121.467	2113.39	953.682	-84.5174	2168.31	841.345	-134.982	2118.94	845.819	-129.125	2151.18	761.638
659	0	65.7249	2372.9	1572.78	167.251	2383.46	1579.62	67.929	2199.68	1567.56	195.281	2234.75	1582.58	140.58	2172.67	1443.51	166.944	2075.09	1195.71	145.535	2312.47	1339.03	142.323	2359.78	1156.66	207.631	2076.05	1275.38	-23.1137	2230.07	1368.63	-84.386	2136.09	1155.91	-86.271	2122.27	1078.19	-121.813	2129.5	954.762	-84.7518	2186.39	843.469	-134.798	2136.54	846.889	-128.97	2170.53	763.417
660	0	63.7931	2386.7	1574.51	165.268	2397.24	1581.65	65.8553	2213.49	1569.9	193.181	2248.48	1585.2	139.301	2186.09	1445.86	166.442	2088.6	1198.18	144.206	2325.96	1341.52	141.096	2373.25	1159.01	207.069	2089.67	1277.93	-24.2534	2243.16	1370.67	-85.1321	2150.11	1157.5	-87.0425	2136.9	1079.52	-122.131	2145.85	955.986	-84.8835	2204.79	845.83	-134.535	2154.5	848.113	-128.697	2190.36	765.427
661	0	62.0763	2400.43	1576.23	163.503	2410.94	1583.65	63.9682	2227.23	1572.3	191.27	2262.13	1587.84	138.136	2199.39	1448.25	165.877	2101.92	1200.71	143.062	2339.3	1344.03	140.085	2386.45	1161.35	206.484	2103.09	1280.53	-25.2622	2256.23	1372.8	-85.8776	2164.23	1159.19	-87.831	2151.62	1080.97	-122.424	2162.43	957.335	-84.906	2223.48	848.406	-134.201	2172.8	849.479	-128.305	2210.63	767.656
662	0	60.5803	2414.08	1577.94	161.964	2424.56	1585.62	62.2684	2240.9	1574.74	189.552	2275.69	1590.48	137.082	2212.56	1450.67	165.246	2115.05	1203.27	142.097	2352.47	1346.54	139.29	2399.4	1163.67	205.87	2116.32	1283.13	-26.1452	2269.28	1375.02	-86.6255	2178.44	1160.95	-88.6387	2166.42	1082.49	-122.694	2179.23	958.794	-84.8141	2242.42	851.178	-133.803	2191.42	850.979	-127.795	2231.3	770.097
663	0	59.3074	2427.66	1579.6	160.652	2438.08	1587.52	60.7522	2254.49	1577.18	188.025	2289.16	1593.09	136.135	2225.62	1453.08	164.547	2128	1205.83	141.305	2365.5	1349.03	138.706	2412.13	1165.95	205.222	2129.37	1285.72	-26.9097	2282.31	1377.29	-87.3785	2192.75	1162.75	-89.4675	2181.31	1084.07	-122.942	2196.25	960.346	-84.6041	2261.58	854.124	-133.346	2210.34	852.602	-127.166	2252.31	772.74
664	0	58.2561	2441.18	1581.21	159.567	2451.52	1589.34	59.4124	2268.02	1579.6	186.684	2302.54	1595.64	135.288	2238.57	1455.46	163.78	2140.78	1208.35	140.674	2378.38	1351.46	138.322	2424.65	1168.19	204.54	2142.24	1288.26	-27.5645	2295.33	1379.59	-88.1392	2207.16	1164.59	-90.319	2196.28	1085.68	-123.172	2213.47	961.973	-84.2742	2280.92	857.224	-132.835	2229.53	854.34	-126.418	2273.65	775.574
665	0	57.4215	2454.63	1582.74	158.705	2464.88	1591.05	58.2386	2281.48	1581.98	185.521	2315.84	1598.11	134.533	2251.4	1457.79	162.95	2153.4	1210.83	140.189	2391.13	1353.83	138.12	2436.99	1170.38	203.82	2154.94	1290.73	-28.1197	2308.33	1381.9	-88.9101	2221.66	1166.43	-91.1945	2211.34	1087.3	-123.383	2230.88	963.659	-83.8246	2300.42	860.458	-132.277	2248.99	856.182	-125.554	2295.25	778.587
666	0	56.7955	2468.03	1584.17	158.058	2478.14	1592.64	57.2182	2294.89	1584.29	184.524	2329.05	1600.46	133.864	2264.14	1460.04	162.06	2165.87	1213.22	139.836	2403.76	1356.11	138.079	2449.19	1172.5	203.066	2167.5	1293.11	-28.5859	2321.31	1384.18	-89.6936	2236.24	1168.26	-92.095	2226.48	1088.91	-123.579	2248.48	965.387	-83.2577	2320.04	863.805	-131.676	2268.68	858.119	-124.575	2317.08	781.767
667	0	56.3675	2481.38	1585.48	157.616	2491.32	1594.08	56.3366	2308.25	1586.51	183.681	2342.18	1602.69	133.27	2276.79	1462.18	161.118	2178.22	1215.51	139.597	2416.28	1358.29	138.173	2461.26	1174.55	202.278	2179.92	1295.38	-28.9743	2334.27	1386.42	-90.4925	2250.89	1170.06	-93.0215	2241.7	1090.49	-123.761	2266.23	967.142	-82.5781	2339.75	867.243	-131.036	2288.57	860.138	-123.484	2339.09	785.098
668	0	56.1244	2494.68	1586.67	157.365	2504.43	1595.38	55.5784	2321.57	1588.62	182.976	2355.24	1604.78	132.744	2289.35	1464.2	160.133	2190.46	1217.67	139.454	2428.7	1360.35	138.373	2473.25	1176.52	201.462	2192.22	1297.51	-29.2957	2347.21	1388.59	-91.3094	2265.62	1171.81	-93.9745	2257	1092.02	-123.929	2284.14	968.904	-81.7922	2359.53	870.751	-130.362	2308.65	862.227	-122.286	2361.25	788.561
669	0	56.0518	2507.96	1587.7	157.292	2517.45	1596.5	54.9276	2334.87	1590.6	182.393	2368.22	1606.71	132.276	2301.83	1466.07	159.116	2202.6	1219.69	139.39	2441.04	1362.27	138.649	2485.17	1178.39	200.622	2204.41	1299.48	-29.5608	2360.13	1390.67	-92.1468	2280.41	1173.48	-94.9543	2272.38	1093.48	-124.087	2302.19	970.658	-80.9084	2379.36	874.307	-129.658	2328.88	864.371	-120.984	2383.51	792.135
670	0	56.1337	2521.2	1588.58	157.379	2530.4	1597.45	54.3686	2348.13	1592.43	181.917	2381.15	1608.46	131.86	2314.25	1467.79	158.081	2214.67	1221.54	139.386	2453.31	1364.04	138.97	2497.06	1180.16	199.768	2216.52	1301.29	-29.7795	2373.03	1392.65	-93.0069	2295.25	1175.07	-95.9607	2287.83	1094.84	-124.235	2320.35	972.386	-79.9362	2399.2	877.886	-128.927	2349.25	866.555	-119.584	2405.83	795.797
671	0	56.3539	2534.43	1589.29	157.611	2543.29	1598.21	53.8863	2361.39	1594.1	181.532	2394.01	1610.02	131.487	2326.61	1469.33	157.039	2226.67	1223.21	139.427	2465.52	1365.64	139.307	2508.93	1181.79	198.906	2228.56	1302.91	-29.9609	2385.9	1394.48	-93.8911	2310.13	1176.55	-96.993	2303.36	1096.1	-124.374	2338.61	974.071	-78.8866	2419.05	881.466	-128.173	2369.72	868.762	-118.092	2428.17	799.523
672	0	56.6959	2547.64	1589.81	157.971	2556.11	1598.78	53.4673	2374.62	1595.58	181.222	2406.83	1611.38	131.153	2338.93	1470.68	156.006	2238.62	1224.68	139.497	2477.69	1367.06	139.633	2520.8	1183.27	198.046	2240.55	1304.34	-30.113	2398.74	1396.17	-94.7997	2325.06	1177.9	-98.0497	2318.95	1097.23	-124.506	2356.96	975.696	-77.7709	2438.88	885.024	-127.4	2390.27	870.973	-116.517	2450.51	803.285
673	0	57.1436	2560.84	1590.14	158.443	2568.88	1599.14	53.0994	2387.86	1596.87	180.974	2419.59	1612.54	130.85	2351.21	1471.83	154.996	2250.54	1225.95	139.583	2489.83	1368.28	139.92	2532.69	1184.59	197.199	2252.49	1305.55	-30.2427	2411.55	1397.68	-95.7317	2340.02	1179.11	-99.1285	2334.61	1098.21	-124.631	2375.37	977.246	-76.6011	2458.68	888.534	-126.611	2410.88	873.171	-114.867	2472.8	807.056
674	0	57.6821	2574.03	1590.27	159.011	2581.6	1599.29	52.7724	2401.09	1597.95	180.776	2432.32	1613.47	130.577	2363.45	1472.78	154.024	2262.44	1227.01	139.673	2501.95	1369.29	140.148	2544.61	1185.71	196.375	2264.4	1306.56	-30.3557	2424.33	1399	-96.6847	2355.01	1180.15	-100.226	2350.32	1099.04	-124.749	2393.84	978.705	-75.389	2478.42	891.974	-125.809	2431.51	875.337	-113.152	2495.02	810.811
675	0	58.2975	2587.22	1590.19	159.661	2594.27	1599.23	52.4783	2414.31	1598.82	180.618	2445	1614.19	130.33	2375.68	1473.51	153.102	2274.32	1227.84	139.756	2514.06	1370.07	140.297	2556.55	1186.61	195.584	2276.3	1307.35	-30.4564	2437.08	1400.12	-97.6544	2370.03	1181.01	-101.338	2366.1	1099.7	-124.861	2412.33	980.06	-74.1461	2498.1	895.322	-124.999	2452.15	877.452	-111.383	2517.14	814.521
676	0	58.9777	2600.41	1589.91	160.379	2606.9	1598.96	52.211	2427.54	1599.46	180.492	2457.66	1614.68	130.107	2387.89	1474.02	152.244	2286.2	1228.45	139.826	2526.18	1370.62	140.355	2568.52	1187.28	194.836	2288.2	1307.91	-30.5477	2449.79	1401.02	-98.6345	2385.06	1181.68	-102.458	2381.92	1100.18	-124.966	2430.84	981.298	-72.8836	2517.7	898.556	-124.184	2472.76	879.499	-109.571	2539.13	818.163
677	0	59.7122	2613.6	1589.42	161.156	2619.5	1598.48	51.9667	2440.78	1599.88	180.391	2470.28	1614.95	129.91	2400.1	1474.31	151.46	2298.08	1228.84	139.877	2538.3	1370.94	140.313	2580.53	1187.7	194.142	2300.1	1308.26	-30.6314	2462.48	1401.7	-99.6171	2400.11	1182.15	-103.579	2397.79	1100.48	-125.063	2449.35	982.411	-71.612	2537.2	901.656	-123.367	2493.33	881.46	-107.729	2560.98	821.714
678	0	60.4928	2626.79	1588.72	161.982	2632.07	1597.79	51.7437	2454.02	1600.07	180.313	2482.89	1614.99	129.737	2412.31	1474.38	150.761	2309.96	1229.01	139.906	2550.45	1371	140.165	2592.58	1187.85	193.511	2312.01	1308.39	-30.7078	2475.13	1402.15	-100.592	2415.16	1182.41	-104.694	2413.69	1100.59	-125.151	2467.83	983.39	-70.3412	2556.6	904.604	-122.553	2513.82	883.322	-105.87	2582.64	825.151
679	0	61.3134	2639.98	1587.82	162.849	2644.62	1596.89	51.5422	2467.26	1600.03	180.257	2495.47	1614.82	129.593	2424.53	1474.23	150.152	2321.87	1228.96	139.913	2562.62	1370.83	139.912	2604.65	1187.73	192.949	2323.95	1308.3	-30.7759	2487.76	1402.36	-101.549	2430.22	1182.46	-105.794	2429.62	1100.51	-125.228	2486.27	984.229	-69.0803	2575.87	907.385	-121.746	2534.22	885.07	-104.008	2604.12	828.456
680	0	62.1698	2653.17	1586.72	163.753	2657.16	1595.8	51.3639	2480.51	1599.78	180.222	2508.04	1614.43	129.48	2436.76	1473.88	149.64	2333.79	1228.7	139.9	2574.81	1370.41	139.56	2616.76	1187.33	192.464	2335.91	1308.01	-30.8334	2500.36	1402.34	-102.475	2445.28	1182.31	-106.867	2445.57	1100.25	-125.293	2504.66	984.923	-67.8378	2595.01	909.984	-120.949	2554.49	886.693	-102.157	2625.38	831.613
681	0	63.0604	2666.36	1585.44	164.691	2669.68	1594.51	51.2124	2493.76	1599.32	180.211	2520.6	1613.83	129.401	2449	1473.33	149.227	2345.73	1228.23	139.872	2587.04	1369.75	139.116	2628.9	1186.67	192.06	2347.91	1307.51	-30.8767	2512.94	1402.1	-103.358	2460.31	1181.95	-107.902	2461.52	1099.81	-125.342	2522.97	985.471	-66.6214	2614	912.391	-120.167	2574.62	888.181	-100.331	2646.41	834.606
682	0	63.9851	2679.55	1583.97	165.66	2682.2	1593.04	51.0921	2507.03	1598.66	180.229	2533.15	1613.04	129.362	2461.26	1472.59	148.913	2357.71	1227.57	139.834	2599.3	1368.87	138.594	2641.08	1185.74	191.741	2359.94	1306.82	-30.9012	2525.5	1401.64	-104.183	2475.33	1181.39	-108.889	2477.47	1099.19	-125.373	2541.17	985.873	-65.4381	2632.83	914.596	-119.403	2594.58	889.527	-98.5436	2667.2	837.425
683	0	64.9462	2692.73	1582.35	166.663	2694.71	1591.4	51.0086	2520.3	1597.81	180.28	2545.7	1612.07	129.368	2473.54	1471.66	148.697	2369.72	1226.72	139.796	2611.59	1367.78	138.009	2653.3	1184.57	191.509	2372.01	1305.94	-30.9014	2538.04	1400.98	-104.939	2490.31	1180.64	-109.813	2493.4	1098.42	-125.384	2559.27	986.131	-64.2943	2651.49	916.593	-118.661	2614.35	890.724	-96.8089	2687.71	840.058
684	0	65.947	2705.91	1580.57	167.702	2707.23	1589.61	50.968	2533.58	1596.8	180.371	2558.25	1610.94	129.424	2485.83	1470.57	148.575	2381.78	1225.68	139.767	2623.92	1366.5	137.381	2665.56	1183.18	191.362	2384.13	1304.88	-30.8708	2550.57	1400.12	-105.612	2505.25	1179.72	-110.664	2509.3	1097.49	-125.371	2577.22	986.247	-63.1957	2669.95	918.377	-117.944	2633.89	891.77	-95.1403	2707.94	842.497
685	0	66.9927	2719.08	1578.65	168.782	2719.75	1587.68	50.9768	2546.87	1595.64	180.509	2570.8	1609.66	129.536	2498.14	1469.32	148.543	2393.88	1224.48	139.759	2636.28	1365.06	136.729	2677.87	1181.6	191.301	2396.28	1303.66	-30.8023	2563.1	1399.09	-106.191	2520.12	1178.64	-111.429	2525.15	1096.43	-125.332	2595.02	986.227	-62.1476	2688.22	919.946	-117.255	2653.2	892.661	-93.5505	2727.86	844.734
686	0	68.0891	2732.24	1576.62	169.907	2732.27	1585.63	51.042	2560.17	1594.35	180.701	2583.36	1608.26	129.71	2510.47	1467.93	148.592	2406.05	1223.12	139.785	2648.67	1363.47	136.078	2690.25	1179.86	191.32	2408.49	1302.27	-30.6883	2575.62	1397.92	-106.666	2534.93	1177.42	-112.096	2540.93	1095.25	-125.264	2612.64	986.077	-61.1544	2706.27	921.301	-116.596	2672.25	893.398	-92.0512	2747.47	846.763
687	0	69.2428	2745.39	1574.49	171.085	2744.79	1583.49	51.1704	2573.48	1592.96	180.955	2595.92	1606.75	129.951	2522.8	1466.43	148.716	2418.27	1221.62	139.858	2661.09	1361.77	135.45	2702.69	1178.01	191.417	2420.74	1300.73	-30.5209	2588.15	1396.61	-107.029	2549.65	1176.08	-112.655	2556.63	1093.97	-125.165	2630.07	985.806	-60.2199	2724.09	922.442	-115.97	2691	893.98	-90.6532	2766.74	848.58
688	0	70.4605	2758.54	1572.29	172.322	2757.32	1581.26	51.3689	2586.8	1591.48	181.278	2608.49	1605.16	130.264	2535.16	1464.81	148.905	2430.57	1219.98	139.991	2673.54	1359.97	134.872	2715.2	1176.06	191.585	2433.04	1299.06	-30.292	2600.69	1395.19	-107.271	2564.28	1174.64	-113.096	2572.23	1092.6	-125.032	2647.27	985.42	-59.3473	2741.67	923.373	-115.379	2709.45	894.411	-89.3658	2785.65	850.18
689	0	71.749	2771.68	1570.04	173.624	2769.86	1578.98	51.6442	2600.13	1589.95	181.678	2621.07	1603.51	130.655	2547.52	1463.11	149.15	2442.95	1218.22	140.198	2686.02	1358.13	134.369	2727.8	1174.08	191.818	2445.39	1297.27	-29.9939	2613.25	1393.69	-107.388	2578.81	1173.12	-113.413	2587.72	1091.17	-124.864	2664.24	984.931	-58.5392	2758.98	924.099	-114.821	2727.56	894.693	-88.197	2804.18	851.562
690	0	73.1144	2784.81	1567.75	174.999	2782.4	1576.66	52.0031	2613.48	1588.38	182.162	2633.66	1601.83	131.128	2559.88	1461.34	149.441	2455.42	1216.35	140.493	2698.52	1356.25	133.965	2740.49	1172.08	192.108	2457.79	1295.36	-29.6189	2625.82	1392.13	-107.375	2593.22	1171.54	-113.598	2603.07	1089.7	-124.658	2680.94	984.349	-57.7974	2776.03	924.626	-114.3	2745.31	894.831	-87.1531	2822.33	852.722
691	0	74.5617	2797.94	1565.46	176.452	2794.95	1574.34	52.4516	2626.83	1586.79	182.736	2646.26	1600.13	131.686	2572.26	1459.51	149.77	2467.97	1214.39	140.886	2711.05	1354.37	133.686	2753.28	1170.12	192.449	2470.24	1293.36	-29.1601	2638.43	1390.54	-107.231	2607.52	1169.94	-113.649	2618.28	1088.2	-124.416	2697.37	983.685	-57.123	2792.78	924.963	-113.813	2762.69	894.831	-86.2383	2840.07	853.662
692	0	76.095	2811.06	1563.19	177.988	2807.5	1572.03	52.9957	2640.2	1585.22	183.408	2658.87	1598.44	132.331	2584.65	1457.66	150.127	2480.63	1212.36	141.388	2723.6	1352.52	133.552	2766.17	1168.22	192.834	2482.74	1291.28	-28.6111	2651.06	1388.94	-106.957	2621.7	1168.33	-113.563	2633.33	1086.69	-124.134	2713.5	982.952	-56.5163	2809.23	925.118	-113.362	2779.67	894.7	-85.4553	2857.38	854.382
693	0	77.7166	2824.18	1560.95	179.609	2820.06	1569.76	53.6406	2653.57	1583.67	184.181	2671.5	1596.79	133.066	2597.04	1455.79	150.504	2493.38	1210.27	142.01	2736.17	1350.73	133.585	2779.17	1166.42	193.254	2495.3	1289.13	-27.9668	2663.73	1387.36	-106.554	2635.74	1166.73	-113.341	2648.2	1085.2	-123.815	2729.32	982.163	-55.9772	2825.36	925.102	-112.946	2796.23	894.446	-84.8046	2874.25	854.885
694	0	79.4272	2837.3	1558.78	181.317	2832.64	1567.55	54.391	2666.95	1582.17	185.062	2684.16	1595.18	133.891	2609.44	1453.92	150.893	2506.23	1208.15	142.757	2748.76	1349.01	133.799	2792.28	1164.75	193.705	2507.9	1286.94	-27.2231	2676.44	1385.81	-106.026	2649.66	1165.17	-112.985	2662.87	1083.75	-123.457	2744.8	981.331	-55.5047	2841.15	924.925	-112.565	2812.36	894.079	-84.2847	2890.67	855.175
695	0	81.2256	2850.42	1556.69	183.111	2845.23	1565.42	55.2506	2680.34	1580.75	186.052	2696.84	1593.64	134.806	2621.85	1452.08	151.288	2519.19	1206	143.635	2761.38	1347.38	134.209	2805.5	1163.22	194.179	2520.55	1284.73	-26.3774	2689.19	1384.32	-105.379	2663.45	1163.66	-112.501	2677.34	1082.35	-123.063	2759.94	980.47	-55.0975	2856.6	924.598	-112.217	2828.04	893.608	-83.8925	2906.62	855.258
696	0	83.1088	2863.55	1554.7	184.989	2857.83	1563.39	56.2221	2693.72	1579.41	187.155	2709.55	1592.18	135.81	2634.27	1450.29	151.683	2532.24	1203.86	144.647	2774.01	1345.88	134.821	2818.83	1161.86	194.671	2533.25	1282.5	-25.4289	2701.99	1382.91	-104.618	2677.11	1162.24	-111.895	2691.59	1081.03	-122.634	2774.73	979.595	-54.7534	2871.68	924.135	-111.904	2843.27	893.047	-83.6232	2922.08	855.14
697	0	85.072	2876.67	1552.82	186.946	2870.45	1561.48	57.3069	2707.11	1578.17	188.371	2722.3	1590.83	136.902	2646.7	1448.56	152.073	2545.38	1201.75	145.791	2786.66	1344.5	135.64	2832.28	1160.69	195.176	2546	1280.3	-24.3787	2714.82	1381.6	-103.752	2690.63	1160.91	-111.175	2705.6	1079.79	-122.173	2789.14	978.722	-54.47	2886.38	923.549	-111.626	2858.02	892.406	-83.4704	2937.04	854.83
698	0	87.1086	2889.8	1551.08	188.977	2883.1	1559.69	58.505	2720.5	1577.05	189.699	2735.08	1589.59	138.076	2659.15	1446.92	152.454	2558.61	1199.69	147.063	2799.33	1343.27	136.663	2845.82	1159.72	195.689	2558.78	1278.13	-23.2304	2727.7	1380.41	-102.79	2704.03	1159.7	-110.351	2719.39	1078.67	-121.684	2803.17	977.865	-54.2444	2900.69	922.854	-111.381	2872.29	891.702	-83.427	2951.5	854.338
699	0	89.2106	2902.94	1549.49	191.072	2895.78	1558.06	59.8147	2733.88	1576.07	191.136	2747.91	1588.48	139.329	2671.62	1445.37	152.821	2571.9	1197.7	148.458	2812.02	1342.19	137.88	2859.45	1158.96	196.207	2571.6	1276.03	-21.99	2740.61	1379.36	-101.741	2717.28	1158.62	-109.436	2732.92	1077.67	-121.17	2816.82	977.041	-54.0735	2914.6	922.064	-111.172	2886.07	890.948	-83.4847	2965.44	853.678
700	0	91.3689	2916.09	1548.06	193.225	2908.49	1556.58	61.2326	2747.25	1575.22	192.678	2760.78	1587.51	140.653	2684.1	1443.95	153.172	2585.26	1195.81	149.965	2824.71	1341.28	139.278	2873.15	1158.4	196.724	2584.45	1274.02	-20.6659	2753.56	1378.45	-100.617	2730.4	1157.7	-108.442	2746.2	1076.82	-120.637	2830.08	976.265	-53.954	2928.09	921.196	-110.999	2899.36	890.161	-83.6352	2978.86	852.864
701	0	93.573	2929.24	1546.8	195.423	2921.23	1555.26	62.7532	2760.62	1574.54	194.32	2773.7	1586.69	142.04	2696.6	1442.66	153.501	2598.66	1194.05	151.568	2837.42	1340.53	140.835	2886.91	1158.05	197.236	2597.32	1272.13	-19.2696	2766.54	1377.72	-99.4285	2743.37	1156.95	-107.382	2759.21	1076.12	-120.092	2842.95	975.555	-53.8825	2941.15	920.263	-110.863	2912.16	889.359	-83.8697	2991.74	851.911
702	0	95.8122	2942.4	1545.72	197.657	2934.02	1554.11	64.3692	2773.98	1574.01	196.052	2786.67	1586.03	143.48	2709.13	1441.53	153.805	2612.08	1192.43	153.253	2850.13	1339.96	142.523	2900.69	1157.91	197.738	2610.21	1270.37	-17.815	2779.55	1377.17	-98.1897	2756.19	1156.38	-106.273	2771.97	1075.6	-119.54	2855.43	974.925	-53.8556	2953.78	919.285	-110.765	2924.47	888.559	-84.1795	3004.08	850.839
703	0	98.0747	2955.57	1544.82	199.914	2946.85	1553.15	66.071	2787.33	1573.66	197.865	2799.69	1585.52	144.96	2721.68	1440.58	154.08	2625.51	1191	154.997	2862.84	1339.56	144.311	2914.46	1157.96	198.222	2623.1	1268.79	-16.3182	2792.58	1376.81	-96.9146	2768.86	1156.02	-105.13	2784.46	1075.27	-118.989	2867.52	974.391	-53.87	2965.97	918.275	-110.707	2936.28	887.779	-84.5564	3015.88	849.664
704	0	100.349	2968.75	1544.11	202.183	2959.72	1552.35	67.8473	2800.68	1573.49	199.747	2812.75	1585.18	146.465	2734.25	1439.8	154.321	2638.93	1189.76	156.778	2875.55	1339.33	146.16	2928.21	1158.2	198.683	2635.99	1267.4	-14.7973	2805.62	1376.65	-95.6194	2781.36	1155.87	-103.971	2796.68	1075.14	-118.448	2879.22	973.967	-53.9226	2977.72	917.252	-110.691	2947.6	887.038	-84.992	3027.13	848.409
705	0	102.621	2981.93	1543.59	204.451	2972.63	1551.73	69.6842	2814.02	1573.5	201.685	2825.86	1585	147.981	2746.84	1439.23	154.524	2652.31	1188.75	158.571	2888.25	1339.27	148.032	2941.89	1158.61	199.115	2648.87	1266.22	-13.2717	2818.68	1376.71	-94.3221	2793.69	1155.94	-102.813	2808.65	1075.21	-117.925	2890.54	973.667	-54.0107	2989.01	916.23	-110.719	2958.44	886.353	-85.4787	3037.83	847.092
706	0	104.88	2995.12	1543.25	206.705	2985.58	1551.28	71.5664	2827.35	1573.7	203.661	2839.01	1584.99	149.489	2759.46	1438.86	154.685	2665.65	1187.98	160.349	2900.94	1339.38	149.884	2955.47	1159.18	199.51	2661.72	1265.28	-11.7621	2831.74	1376.99	-93.0421	2805.85	1156.24	-101.674	2820.35	1075.51	-117.429	2901.49	973.501	-54.1322	2999.85	915.226	-110.794	2968.82	885.739	-86.0089	3048	845.734
707	0	107.111	3008.3	1543.09	208.931	2998.56	1550.99	73.4765	2840.68	1574.09	205.66	2852.19	1585.13	150.972	2772.09	1438.7	154.801	2678.92	1187.46	162.084	2913.61	1339.65	151.672	2968.93	1159.87	199.864	2674.54	1264.6	-10.2891	2844.79	1377.48	-91.8006	2817.84	1156.78	-100.573	2831.8	1076.02	-116.969	2912.07	973.478	-54.2858	3010.25	914.253	-110.918	2978.73	885.212	-86.576	3057.62	844.353
708	0	109.3	3021.49	1543.11	211.116	3011.58	1550.86	75.3956	2854	1574.66	207.663	2865.39	1585.44	152.412	2784.74	1438.76	154.871	2692.11	1187.2	163.749	2926.25	1340.07	153.357	2982.24	1160.68	200.17	2687.32	1264.17	-8.87359	2857.83	1378.2	-90.6197	2829.65	1157.56	-99.5278	2843	1076.76	-116.555	2922.31	973.604	-54.4707	3020.2	913.324	-111.095	2988.2	884.784	-87.174	3066.72	842.966
709	0	111.434	3034.67	1543.29	213.246	3024.61	1550.86	77.3039	2867.31	1575.42	209.65	2878.62	1585.89	153.791	2797.4	1439.04	154.894	2705.21	1187.21	165.315	2938.85	1340.63	154.897	2995.37	1161.59	200.427	2700.05	1264.02	-7.53582	2870.84	1379.13	-89.5219	2841.3	1158.57	-98.5552	2853.97	1077.72	-116.197	2932.21	973.885	-54.6876	3029.72	912.45	-111.328	2997.24	884.466	-87.7979	3075.31	841.591
710	0	113.496	3047.85	1543.62	215.305	3037.67	1551	79.1806	2880.62	1576.36	211.6	2891.86	1586.48	155.092	2810.05	1439.52	154.872	2718.2	1187.48	166.759	2951.41	1341.33	156.259	3008.32	1162.57	200.63	2712.72	1264.14	-6.29484	2883.81	1380.26	-88.5293	2852.78	1159.8	-97.6711	2864.71	1078.88	-115.904	2941.8	974.321	-54.9382	3038.81	911.64	-111.623	3005.88	884.265	-88.4447	3083.4	840.241
711	0	115.473	3061.01	1544.1	217.28	3050.73	1551.25	81.0049	2893.92	1577.48	213.494	2905.1	1587.21	156.3	2822.7	1440.22	154.809	2731.07	1188.02	168.056	2963.93	1342.15	157.409	3021.07	1163.61	200.781	2725.33	1264.52	-5.16805	2896.72	1381.58	-87.6628	2864.11	1161.25	-96.8899	2875.24	1080.26	-115.685	2951.08	974.91	-55.2256	3047.51	910.902	-111.983	3014.13	884.186	-89.113	3091.02	838.93
712	0	117.348	3074.15	1544.71	219.156	3063.79	1551.61	82.7562	2907.2	1578.75	215.311	2918.33	1588.06	157.401	2835.33	1441.11	154.71	2743.83	1188.8	169.188	2976.38	1343.09	158.325	3033.63	1164.7	200.879	2737.86	1265.17	-4.17067	2909.56	1383.08	-86.9408	2875.3	1162.9	-96.2236	2885.56	1081.82	-115.549	2960.07	975.648	-55.5543	3055.81	910.24	-112.413	3022.02	884.231	-89.8038	3098.19	837.667
713	0	119.107	3087.27	1545.43	220.919	3076.84	1552.06	84.4146	2920.47	1580.18	217.031	2931.55	1589.04	158.383	2847.94	1442.19	154.58	2756.46	1189.82	170.138	2988.78	1344.14	158.989	3045.99	1165.83	200.928	2750.33	1266.07	-3.31532	2922.31	1384.74	-86.3786	2886.35	1164.73	-95.6818	2895.69	1083.56	-115.502	2968.8	976.528	-55.9302	3063.76	909.659	-112.919	3029.58	884.4	-90.5211	3104.95	836.462
714	0	120.735	3100.35	1546.25	222.554	3089.87	1552.6	85.9617	2933.72	1581.73	218.636	2944.75	1590.12	159.239	2860.51	1443.44	154.427	2768.95	1191.06	170.896	3001.12	1345.28	159.392	3058.16	1166.99	200.931	2762.72	1267.19	-2.61159	2934.97	1386.53	-85.987	2897.28	1166.71	-95.2714	2905.64	1085.46	-115.552	2977.28	977.54	-56.3602	3071.36	909.158	-113.506	3036.83	884.689	-91.2714	3111.32	835.324
715	0	122.219	3113.39	1547.16	224.049	3102.87	1553.21	87.3809	2946.94	1583.41	220.11	2957.92	1591.29	159.96	2873.04	1444.83	154.258	2781.32	1192.49	171.456	3013.39	1346.52	159.531	3070.16	1168.19	200.893	2775.03	1268.53	-2.06593	2947.52	1388.43	-85.7721	2908.09	1168.84	-94.9961	2915.41	1087.49	-115.704	2985.53	978.672	-56.8528	3078.64	908.738	-114.179	3043.8	885.092	-92.0645	3117.33	834.257
716	0	123.546	3126.4	1548.14	225.393	3115.85	1553.87	88.6575	2960.12	1585.18	221.439	2971.05	1592.54	160.544	2885.52	1446.36	154.082	2793.56	1194.09	171.816	3025.58	1347.83	159.414	3082.01	1169.43	200.819	2787.27	1270.05	-1.68147	2959.95	1390.43	-85.734	2918.8	1171.07	-94.8568	2925.04	1089.64	-115.961	2993.57	979.91	-57.417	3085.65	908.394	-114.943	3050.5	885.6	-92.9124	3123.03	833.268
717	0	124.706	3139.34	1549.17	226.578	3128.78	1554.59	89.7799	2973.26	1587.03	222.61	2984.13	1593.87	160.988	2897.95	1448	153.904	2805.67	1195.83	171.98	3037.7	1349.22	159.054	3093.73	1170.7	200.714	2799.43	1271.73	-1.45813	2972.25	1392.48	-85.8675	2929.39	1173.39	-94.851	2934.51	1091.87	-116.325	3001.42	981.238	-58.0625	3092.39	908.122	-115.801	3056.98	886.203	-93.8295	3128.44	832.359
718	0	125.691	3152.24	1550.24	227.594	3141.67	1555.34	90.7391	2986.36	1588.92	223.615	2997.17	1595.24	161.293	2910.31	1449.73	153.73	2817.66	1197.69	171.955	3049.75	1350.65	158.472	3105.33	1172	200.584	2811.52	1273.53	-1.39277	2984.43	1394.57	-86.1615	2939.89	1175.76	-94.9735	2943.85	1094.17	-116.798	3009.1	982.636	-58.799	3098.91	907.914	-116.757	3063.25	886.887	-94.8318	3133.61	831.529
719	0	126.495	3165.06	1551.32	228.438	3154.51	1556.12	91.529	2999.39	1590.84	224.447	3010.14	1596.65	161.463	2922.61	1451.51	153.565	2829.54	1199.63	171.753	3061.72	1352.14	157.693	3116.84	1173.34	200.434	2823.53	1275.43	-1.47946	2996.49	1396.67	-86.6	2950.27	1178.17	-95.2164	2953.07	1096.5	-117.377	3016.62	984.085	-59.636	3105.23	907.76	-117.814	3069.34	887.636	-95.9357	3138.56	830.777
720	0	127.114	3177.83	1552.41	229.107	3167.29	1556.91	92.1465	3012.37	1592.76	225.103	3023.05	1598.07	161.502	2934.85	1453.32	153.412	2841.3	1201.61	171.387	3073.62	1353.65	156.749	3128.27	1174.7	200.267	2835.47	1277.39	-1.70983	3008.41	1398.74	-87.1631	2960.55	1180.56	-95.5694	2962.16	1098.84	-118.061	3024	985.563	-60.5824	3111.39	907.649	-118.971	3075.26	888.433	-97.1575	3143.34	830.097
721	0	127.547	3190.51	1553.47	229.599	3180	1557.7	92.5916	3025.27	1594.66	225.584	3035.89	1599.49	161.417	2947.02	1455.13	153.271	2852.96	1203.61	170.874	3085.45	1355.16	155.671	3139.65	1176.08	200.088	2847.35	1279.38	-2.07355	3020.22	1400.76	-87.8282	2970.7	1182.92	-96.0202	2971.16	1101.15	-118.845	3031.27	987.044	-61.6454	3117.41	907.564	-120.23	3081.05	889.257	-98.512	3147.97	829.48
722	0	127.796	3203.13	1554.5	229.917	3192.66	1558.46	92.8665	3038.1	1596.49	225.891	3048.67	1600.88	161.213	2959.12	1456.92	153.141	2864.53	1205.59	170.233	3097.21	1356.67	154.495	3150.98	1177.46	199.899	2859.17	1281.35	-2.55871	3031.92	1402.7	-88.5713	2980.73	1185.22	-96.5552	2980.06	1103.41	-119.723	3038.42	988.506	-62.8308	3123.33	907.488	-121.587	3086.72	890.086	-100.012	3152.5	828.914
723	0	127.863	3215.66	1555.46	230.064	3205.24	1559.19	92.9759	3050.85	1598.24	226.029	3061.37	1602.22	160.901	2971.16	1458.64	153.02	2876.02	1207.52	169.482	3108.92	1358.13	153.256	3162.28	1178.83	199.701	2870.92	1283.27	-3.15241	3043.52	1404.52	-89.3688	2990.63	1187.41	-97.1599	2988.87	1105.59	-120.689	3045.49	989.922	-64.1423	3129.17	907.402	-123.04	3092.29	890.897	-101.667	3156.94	828.382
724	0	127.755	3228.12	1556.35	230.045	3217.76	1559.86	92.9263	3063.52	1599.88	226.004	3074	1603.49	160.488	2983.14	1460.28	152.903	2887.43	1209.36	168.641	3120.57	1359.54	151.985	3173.55	1180.14	199.495	2882.63	1285.12	-3.84123	3055.03	1406.2	-90.1981	3000.4	1189.47	-97.8196	2997.62	1107.66	-121.735	3052.49	991.264	-65.5811	3134.97	907.284	-124.582	3097.79	891.664	-103.482	3161.33	827.864
725	0	127.479	3240.5	1557.13	229.865	3230.22	1560.46	92.7254	3076.1	1601.38	225.825	3086.56	1604.66	159.983	2995.07	1461.81	152.783	2898.78	1211.08	167.729	3132.17	1360.86	150.713	3184.8	1181.39	199.278	2894.29	1286.84	-4.61168	3066.47	1407.71	-91.0393	3010.03	1191.37	-98.5196	3006.31	1109.58	-122.852	3059.43	992.509	-67.1461	3140.74	907.11	-126.208	3103.23	892.362	-105.461	3165.69	827.34
726	0	127.04	3252.81	1557.79	229.532	3242.61	1560.96	92.3818	3088.6	1602.72	225.5	3099.06	1605.71	159.396	3006.94	1463.2	152.653	2910.08	1212.66	166.762	3143.74	1362.06	149.468	3196.04	1182.54	199.049	2905.9	1288.43	-5.4507	3077.84	1409.02	-91.8754	3019.55	1193.07	-99.2462	3014.95	1111.33	-124.032	3066.34	993.628	-68.8336	3146.51	906.856	-127.909	3108.63	892.966	-107.6	3170.05	826.785
727	0	126.449	3265.04	1558.3	229.052	3254.93	1561.35	91.9048	3101.02	1603.88	225.038	3111.49	1606.62	158.734	3018.77	1464.41	152.506	2921.34	1214.06	165.757	3155.28	1363.12	148.273	3207.27	1183.55	198.803	2917.48	1289.84	-6.34595	3089.17	1410.11	-92.6928	3028.95	1194.56	-99.987	3023.58	1112.89	-125.264	3073.22	994.598	-70.6374	3152.31	906.497	-129.675	3114.01	893.448	-109.893	3174.42	826.173
728	0	125.713	3277.21	1558.66	228.43	3267.2	1561.62	91.3038	3113.35	1604.83	224.449	3123.86	1607.38	158.006	3030.57	1465.44	152.332	2932.57	1215.26	164.729	3166.8	1364.01	147.145	3218.49	1184.4	198.538	2929.03	1291.05	-7.28622	3100.47	1410.96	-93.4818	3038.25	1195.81	-100.731	3032.2	1114.23	-126.538	3080.1	995.395	-72.5489	3158.16	906.01	-131.495	3119.39	893.785	-112.328	3178.83	825.478
729	0	124.841	3289.31	1558.85	227.672	3279.42	1561.74	90.5876	3125.6	1605.56	223.743	3136.19	1607.95	157.219	3042.35	1466.26	152.123	2943.79	1216.24	163.688	3178.3	1364.71	146.099	3229.7	1185.06	198.247	2940.56	1292.05	-8.26167	3111.76	1411.55	-94.236	3047.49	1196.81	-101.469	3040.83	1115.33	-127.846	3087	995.998	-74.5574	3164.06	905.371	-133.358	3124.79	893.954	-114.892	3183.29	824.675
730	0	123.839	3301.35	1558.85	226.781	3291.58	1561.7	89.765	3137.78	1606.05	222.929	3148.47	1608.33	156.379	3054.1	1466.85	151.871	2955.01	1216.98	162.644	3189.81	1365.2	145.144	3240.92	1185.49	197.924	2952.07	1292.8	-9.26412	3123.05	1411.86	-94.9523	3056.67	1197.52	-102.195	3049.5	1116.17	-129.177	3093.93	996.39	-76.6504	3170.04	904.559	-135.251	3130.22	893.935	-117.565	3187.81	823.739
731	0	122.714	3313.33	1558.64	225.761	3303.71	1561.5	88.8437	3149.88	1606.3	222.013	3160.71	1608.5	155.49	3065.84	1467.2	151.568	2966.23	1217.47	161.605	3201.33	1365.45	144.284	3252.14	1185.69	197.565	2963.57	1293.31	-10.2873	3134.35	1411.88	-95.6309	3065.85	1197.95	-102.902	3058.23	1116.74	-130.524	3100.91	996.555	-78.8138	3176.12	903.556	-137.164	3135.71	893.711	-120.327	3192.41	822.649
732	0	121.471	3325.26	1558.23	224.615	3315.8	1561.11	87.8305	3161.91	1606.28	221.005	3172.91	1608.45	154.556	3077.58	1467.3	151.206	2977.46	1217.7	160.574	3212.86	1365.46	143.52	3263.38	1185.62	197.161	2975.08	1293.56	-11.3267	3145.67	1411.62	-96.2744	3075.04	1198.09	-103.589	3067.03	1117.03	-131.876	3107.97	996.481	-81.0323	3182.31	902.346	-139.084	3141.28	893.266	-123.154	3197.09	821.384
733	0	120.116	3337.14	1557.62	223.344	3327.86	1560.54	86.7312	3173.88	1606	219.908	3185.09	1608.18	153.578	3089.32	1467.14	150.78	2988.73	1217.66	159.552	3224.42	1365.2	142.848	3274.63	1185.29	196.708	2986.58	1293.55	-12.3802	3157.04	1411.06	-96.8877	3084.28	1197.92	-104.254	3075.93	1117.04	-133.228	3115.11	996.16	-83.2903	3188.62	900.92	-141	3146.93	892.593	-126.023	3201.88	819.929
734	0	118.651	3348.98	1556.79	221.947	3339.9	1559.78	85.5503	3185.79	1605.46	218.728	3197.24	1607.68	152.558	3101.08	1466.72	150.286	3000.02	1217.35	158.54	3236.01	1364.68	142.261	3285.91	1184.67	196.2	2998.11	1293.27	-13.4473	3168.45	1410.21	-97.4776	3093.6	1197.46	-104.897	3084.94	1116.76	-134.573	3122.37	995.589	-85.5716	3195.05	899.268	-142.902	3152.7	891.684	-128.907	3206.77	818.272
735	0	117.078	3360.79	1555.76	220.425	3351.92	1558.84	84.2909	3197.63	1604.66	217.467	3209.38	1606.95	151.494	3112.85	1466.05	149.721	3011.37	1216.77	157.533	3247.64	1363.89	141.75	3297.22	1183.78	195.631	3009.65	1292.72	-14.5296	3179.91	1409.07	-98.0525	3103.04	1196.7	-105.521	3094.08	1116.18	-135.904	3129.76	994.765	-87.8601	3201.64	897.39	-144.78	3158.6	890.538	-131.782	3211.79	816.406
736	0	115.4	3372.56	1554.52	218.777	3363.93	1557.71	82.9549	3209.42	1603.6	216.128	3221.5	1606	150.386	3124.64	1465.13	149.084	3022.76	1215.92	156.526	3259.32	1362.84	141.302	3308.57	1182.62	194.997	3021.22	1291.93	-15.6304	3191.44	1407.67	-98.6218	3112.61	1195.65	-106.13	3103.37	1115.33	-137.216	3137.29	993.693	-90.1406	3208.38	895.285	-146.625	3164.65	889.157	-134.623	3216.94	814.328
737	0	113.616	3384.31	1553.11	217.003	3375.94	1556.41	81.5429	3221.17	1602.3	214.709	3233.61	1604.83	149.228	3136.46	1463.96	148.376	3034.22	1214.82	155.512	3271.04	1361.53	140.902	3319.97	1181.2	194.296	3032.83	1290.89	-16.7544	3203.03	1406	-99.1961	3122.36	1194.32	-106.726	3112.82	1114.21	-138.507	3144.99	992.377	-92.3983	3215.28	892.96	-148.432	3170.88	887.545	-137.408	3222.24	812.039
738	0	111.727	3396.03	1551.51	215.103	3387.94	1554.96	80.0544	3232.86	1600.77	213.21	3245.71	1603.46	148.019	3148.3	1462.57	147.598	3045.74	1213.48	154.481	3282.82	1359.99	140.534	3331.43	1179.54	193.525	3044.48	1289.62	-17.9078	3214.69	1404.09	-99.786	3132.28	1192.71	-107.315	3122.44	1112.82	-139.773	3152.86	990.827	-94.6199	3222.37	890.423	-150.193	3177.3	885.712	-140.116	3227.71	809.545
739	0	109.731	3407.72	1549.77	213.076	3399.94	1553.36	78.4878	3244.51	1599.03	211.629	3257.8	1601.9	146.753	3160.18	1460.96	146.757	3057.33	1211.92	153.423	3294.66	1358.22	140.18	3342.97	1177.66	192.686	3056.18	1288.13	-19.0975	3226.41	1401.96	-100.402	3142.41	1190.86	-107.903	3132.23	1111.18	-141.012	3160.93	989.054	-96.7932	3229.65	887.688	-151.905	3183.94	883.67	-142.729	3233.36	806.856
740	0	107.628	3419.4	1547.89	210.925	3411.93	1551.64	76.8405	3256.12	1597.09	209.964	3269.88	1600.17	145.425	3172.1	1459.17	145.857	3069.01	1210.14	152.325	3306.55	1356.25	139.819	3354.58	1175.58	191.78	3067.94	1286.45	-20.3312	3238.19	1399.63	-101.056	3152.74	1188.76	-108.494	3142.21	1109.31	-142.222	3169.2	987.072	-98.9078	3237.12	884.772	-153.564	3190.8	881.434	-145.231	3239.22	803.986
741	0	105.415	3431.06	1545.91	208.651	3423.93	1549.82	75.1092	3267.69	1594.99	208.209	3281.95	1598.3	144.031	3184.05	1457.2	144.906	3080.78	1208.19	151.176	3318.5	1354.11	139.432	3366.27	1173.34	190.81	3079.77	1284.6	-21.6169	3250.03	1397.12	-101.755	3163.29	1186.45	-109.095	3152.36	1107.22	-143.404	3177.68	984.897	-100.955	3244.82	881.693	-155.168	3197.92	879.019	-147.611	3245.3	800.951
742	0	103.091	3442.72	1543.84	206.255	3435.92	1547.92	73.2902	3279.22	1592.75	206.361	3294.01	1596.3	142.566	3196.04	1455.09	143.912	3092.63	1206.08	149.964	3330.52	1351.82	138.997	3378.06	1170.97	189.781	3091.67	1282.61	-22.9625	3261.92	1394.46	-102.508	3174.06	1183.95	-109.709	3162.71	1104.94	-144.556	3186.4	982.546	-102.927	3252.74	878.471	-156.714	3205.31	876.444	-149.86	3251.64	797.772
743	0	100.655	3454.36	1541.71	203.74	3447.92	1545.97	71.3792	3290.73	1590.38	204.417	3306.06	1594.2	141.025	3208.07	1452.87	142.886	3104.59	1203.83	148.675	3342.6	1349.41	138.493	3389.93	1168.5	188.7	3103.65	1280.49	-24.376	3273.86	1391.67	-103.321	3185.04	1181.27	-110.343	3173.24	1102.48	-145.68	3195.34	980.036	-104.818	3260.9	875.13	-158.202	3212.98	873.728	-151.971	3258.24	794.47
744	0	98.103	3465.99	1539.55	201.109	3459.93	1544.01	69.3721	3302.22	1587.93	202.371	3318.1	1592.03	139.404	3220.13	1450.55	141.835	3116.65	1201.48	147.297	3354.74	1346.92	137.899	3401.9	1165.95	187.573	3115.72	1278.27	-25.8648	3285.83	1388.79	-104.198	3196.22	1178.45	-111.001	3183.94	1099.88	-146.775	3204.53	977.385	-106.625	3269.32	871.693	-159.631	3220.95	870.891	-153.941	3265.14	791.07
745	0	95.435	3477.63	1537.39	198.363	3471.94	1542.04	67.2645	3313.68	1585.42	200.219	3330.13	1589.81	137.7	3232.24	1448.17	140.771	3128.82	1199.06	145.819	3366.94	1344.38	137.194	3413.97	1163.36	186.408	3127.89	1275.99	-27.4357	3297.83	1385.83	-105.141	3207.59	1175.51	-111.686	3194.83	1097.14	-147.844	3213.96	974.612	-108.345	3277.99	868.183	-161.003	3229.23	867.953	-155.769	3272.35	787.596
746	0	92.649	3489.26	1535.26	195.505	3483.98	1540.11	65.0526	3325.13	1582.87	197.958	3342.16	1587.58	135.909	3244.39	1445.74	139.704	3141.09	1196.59	144.23	3379.21	1341.82	136.359	3426.14	1160.77	185.213	3140.17	1273.66	-29.0948	3309.85	1382.82	-106.149	3219.14	1172.47	-112.401	3205.89	1094.29	-148.886	3223.64	971.736	-109.976	3286.95	864.623	-162.317	3237.84	864.933	-157.456	3279.91	784.072
747	0	89.7439	3500.9	1533.17	192.539	3496.03	1538.23	62.7328	3336.57	1580.31	195.585	3354.17	1585.36	134.03	3256.59	1443.31	138.643	3153.48	1194.11	142.521	3391.55	1339.26	135.378	3438.4	1158.19	183.996	3152.55	1271.32	-30.8471	3321.89	1379.79	-107.221	3230.85	1169.35	-113.148	3217.12	1091.35	-149.902	3233.57	968.771	-111.518	3296.19	861.035	-163.574	3246.78	861.85	-159.005	3287.82	780.524
748	0	86.7185	3512.55	1531.15	189.467	3508.12	1536.44	60.3023	3348	1577.76	193.097	3366.18	1583.17	132.059	3268.83	1440.89	137.598	3165.98	1191.63	140.684	3403.96	1336.75	134.233	3450.76	1155.67	182.765	3165.05	1268.99	-32.6972	3333.93	1376.76	-108.353	3242.7	1166.19	-113.93	3228.51	1088.34	-150.893	3243.76	965.735	-112.972	3305.73	857.441	-164.775	3256.07	858.722	-160.419	3296.11	776.975
749	0	83.5721	3524.2	1529.23	186.292	3520.23	1534.74	57.7585	3359.42	1575.25	190.492	3378.19	1581.03	129.997	3281.11	1438.49	136.577	3178.61	1189.18	138.712	3416.44	1334.29	132.914	3463.23	1153.23	181.525	3177.66	1266.69	-34.6483	3345.97	1373.74	-109.539	3254.68	1163	-114.746	3240.05	1085.27	-151.859	3254.21	962.642	-114.336	3315.57	853.86	-165.922	3265.7	855.564	-161.703	3304.8	773.446
750	0	80.3043	3535.87	1527.41	183.015	3532.38	1533.17	55.0999	3370.85	1572.8	187.768	3390.19	1578.96	127.841	3293.45	1436.15	135.587	3191.35	1186.78	136.6	3428.99	1331.92	131.409	3475.8	1150.88	180.284	3190.4	1264.44	-36.7033	3358	1370.76	-110.776	3266.77	1159.81	-115.599	3251.75	1082.17	-152.801	3264.91	959.503	-115.614	3325.72	850.307	-167.016	3275.69	852.39	-162.86	3313.89	769.957
751	0	76.9148	3547.55	1525.72	179.64	3544.58	1531.73	52.3251	3382.28	1570.41	184.924	3402.19	1576.98	125.593	3305.83	1433.87	134.634	3204.23	1184.44	134.343	3441.62	1329.66	129.711	3488.48	1148.66	179.044	3203.27	1262.26	-38.864	3370.02	1367.83	-112.057	3278.96	1156.62	-116.487	3263.59	1079.04	-153.718	3275.87	956.328	-116.806	3336.19	846.797	-168.057	3286.04	849.213	-163.895	3323.41	766.523
752	0	73.4035	3559.24	1524.16	176.169	3556.82	1530.44	49.4334	3393.71	1568.1	181.96	3414.19	1575.1	123.25	3318.26	1431.67	133.722	3217.23	1182.18	131.938	3454.32	1327.51	127.815	3501.26	1146.56	177.809	3216.26	1260.16	-41.1317	3382.03	1364.95	-113.379	3291.23	1153.46	-117.411	3275.58	1075.89	-154.612	3287.08	953.125	-117.913	3346.99	843.339	-169.046	3296.75	846.039	-164.81	3333.36	763.158
753	0	69.7706	3570.96	1522.75	172.602	3569.11	1529.31	46.4245	3405.15	1565.88	178.875	3426.19	1573.33	120.814	3330.75	1429.54	132.856	3230.36	1180.01	129.385	3467.1	1325.48	125.717	3514.16	1144.62	176.581	3229.39	1258.14	-43.5072	3394.02	1362.14	-114.736	3303.57	1150.33	-118.37	3287.7	1072.73	-155.481	3298.55	949.899	-118.935	3358.1	839.942	-169.985	3307.83	842.877	-165.608	3343.75	759.87
754	0	66.0162	3582.69	1521.48	168.941	3581.45	1528.33	43.298	3416.6	1563.75	175.669	3438.18	1571.66	118.285	3343.28	1427.51	132.037	3243.62	1177.94	126.682	3479.96	1323.59	123.415	3527.18	1142.83	175.361	3242.65	1256.22	-45.9911	3406	1359.39	-116.127	3315.98	1147.24	-119.365	3299.96	1069.56	-156.326	3310.28	946.655	-119.875	3369.54	836.612	-170.873	3319.27	839.731	-166.292	3354.58	756.666
755	0	62.1405	3594.44	1520.37	165.187	3593.84	1527.52	40.0541	3428.06	1561.72	172.342	3450.18	1570.12	115.661	3355.87	1425.57	131.265	3257.01	1175.96	123.827	3492.89	1321.84	120.91	3540.31	1141.2	174.15	3256.03	1254.4	-48.5835	3417.95	1356.73	-117.549	3328.45	1144.18	-120.396	3312.36	1066.4	-157.146	3322.26	943.395	-120.731	3381.32	833.35	-171.71	3331.07	836.603	-166.862	3365.85	753.549
756	0	58.1435	3606.21	1519.42	161.341	3606.29	1526.87	36.6925	3439.53	1559.79	168.894	3462.17	1568.69	112.944	3368.5	1423.72	130.542	3270.54	1174.08	120.822	3505.91	1320.23	118.2	3553.56	1139.74	172.948	3269.56	1252.67	-51.2845	3429.89	1354.13	-119.002	3340.98	1141.18	-121.461	3324.89	1063.23	-157.942	3334.49	940.119	-121.505	3393.41	830.158	-172.497	3343.25	833.495	-167.318	3377.58	750.522
757	0	54.0253	3618	1518.62	157.403	3618.79	1526.39	33.2135	3451	1557.96	165.325	3474.16	1567.38	110.132	3381.19	1421.96	129.867	3284.21	1172.3	117.666	3519	1318.76	115.286	3566.93	1138.44	171.756	3283.21	1251.05	-54.0941	3441.81	1351.61	-120.485	3353.58	1138.22	-122.562	3337.55	1060.07	-158.714	3346.99	936.829	-122.196	3405.84	827.038	-173.234	3355.78	830.407	-167.662	3389.75	747.586
[truncated: 69 more columns]

## Sheet: Sheet2
Devices
		025370 - Force			025370 - Moment			025370 - CoP			027571 - Force			027571 - Moment			027571 - CoP			037720 - Force			037720 - Moment			037720 - CoP
Frame	Sub Frame	Fx	Fy	Fz	Mx	My	Mz	Cx	Cy	Cz	Fx	Fy	Fz	Mx	My	Mz	Cx	Cy	Cz	Fx	Fy	Fz	Mx	My	Mz	Cx	Cy	Cz
		N	N	N	N.mm	N.mm	N.mm	mm	mm	mm	N	N	N	N.mm	N.mm	N.mm	mm	mm	mm	N	N	N	N.mm	N.mm	N.mm	mm	mm	mm
314	0	0	0	0	0	0	0	200	300	0	0	0	0	0	0	0	200	903	0	0	0	0	0	0	0	603	903	0
314	1	0	0	0	0	0	0	200	300	0	0	0	0	0	0	0	200	903	0	0	0	0	0	0	0	603	903	0
314	2	0	0	0	0	0	0	200	300	0	0	0	0	0	0	0	200	903	0	0	0	0	0	0	0	603	903	0
314	3	0	0	0	0	0	0	200	300	0	0	0	0	0	0	0	200	903	0	0	0	0	0	0	0	603	903	0
314	4	0	0	0	0	0	0	200	300	0	0	0	0	0	0	0	200	903	0	0	0	0	0	0	0	603	903	0
314	5	0	0	0	0	0	0	200	300	0	0	0	0	0	0	0	200	903	0	0	0	0	0	0	0	603	903	0
314	6	0	0	0	0	0	0	200	300	0	0	0	0	0	0	0	200	903	0	0	0	0	0	0	0	603	903	0
314	7	0	0	0	0	0	0	200	300	0	0	0	0	0	0	0	200	903	0	0	0	0	0	0	0	603	903	0
314	8	0	0	0	0	0	0	200	300	0	0	0	0	0	0	0	200	903	0	0	0	0	0	0	0	603	903	0
314	9	0	0	0	0	0	0	200	300	0	0	0	0	0	0	0	200	903	0	0	0	0	0	0	0	603	903	0
315	0	0	0	0	0	0	0	200	300	0	0	0	0	0	0	0	200	903	0	0	0	0	0	0	0	603	903	0
315	1	0	0	0	0	0	0	200	300	0	0	0	0	0	0	0	200	903	0	0	0	0	0	0	0	603	903	0
315	2	0	0	0	0	0	0	200	300	0	0	0	0	0	0	0	200	903	0	0	0	0	0	0	0	603	903	0
315	3	0	0	0	0	0	0	200	300	0	0	0	0	0	0	0	200	903	0	0	0	0	0	0	0	603	903	0
315	4	0	0	0	0	0	0	200	300	0	0	0	0	0	0	0	200	903	0	0	0	0	0	0	0	603	903	0
315	5	0	0	0	0	0	0	200	300	0	0	0	0	0	0	0	200	903	0	0	0	0	0	0	0	603	903	0
315	6	0	0	0	0	0	0	200	300	0	0	0	0	0	0	0	200	903	0	0	0	0	0	0	0	603	903	0
315	7	0	0	0	0	0	0	200	300	0	0	0	0	0	0	0	200	903	0	0	0	0	0	0	0	603	903	0
315	8	0	0	0	0	0	0	200	300	0	0	0	0	0	0	0	200	903	0	0	0	0	0	0	0	603	903	0
315	9	0	0	0	0	0	0	200	300	0	0	0	0	0	0	0	200	903	0	0	0	0	0	0	0	603	903	0
316	0	0	0	0	0	0	0	200	300	0	0	0	0	0	0	0	200	903	0	0	0	0	0	0	0	603	903	0
316	1	0	0	0	0	0	0	200	300	0	0	0	0	0	0	0	200	903	0	0	0	0	0	0	0	603	903	0
316	2	0	0	0	0	0	0	200	300	0	0	0	0	0	0	0	200	903	0	0	0	0	0	0	0	603	903	0
316	3	0	0	0	0	0	0	200	300	0	0	0	0	0	0	0	200	903	0	0	0	0	0	0	0	603	903	0
316	4	0	0	0	0	0	0	200	300	0	0	0	0	0	0	0	200	903	0	0	0	0	0	0	0	603	903	0
316	5	0	0	0	0	0	0	200	300	0	0	0	0	0	0	0	200	903	0	0	0	0	0	0	0	603	903	0
316	6	0	0	0	0	0	0	200	300	0	0	0	0	0	0	0	200	903	0	0	0	0	0	0	0	603	903	0
316	7	0	0	0	0	0	0	200	300	0	0	0	0	0	0	0	200	903	0	0	0	0	0	0	0	603	903	0
316	8	0	0	0	0	0	0	200	300	0	0	0	0	0	0	0	200	903	0	0	0	0	0	0	0	603	903	0
316	9	0	0	0	0	0	0	200	300	0	0	0	0	0	0	0	200	903	0	0	0	0	0	0	0	603	903	0
317	0	0	0	0	0	0	0	200	300	0	0	0	0	0	0	0	200	903	0	0	0	0	0	0	0	603	903	0
317	1	0	0	0	0	0	0	200	300	0	0	0	0	0	0	0	200	903	0	0	0	0	0	0	0	603	903	0
317	2	0	0	0	0	0	0	200	300	0	0	0	0	0	0	0	200	903	0	0	0	0	0	0	0	603	903	0
317	3	0	0	0	0	0	0	200	300	0	0	0	0	0	0	0	200	903	0	0	0	0	0	0	0	603	903	0
317	4	0	0	0	0	0	0	200	300	0	0	0	0	0	0	0	200	903	0	0	0	0	0	0	0	603	903	0
317	5	0	0	0	0	0	0	200	300	0	0	0	0	0	0	0	200	903	0	0	0	0	0	0	0	603	903	0
317	6	0	0	0	0	0	0	200	300	0	0	0	0	0	0	0	200	903	0	0	0	0	0	0	0	603	903	0
317	7	0	0	0	0	0	0	200	300	0	0	0	0	0	0	0	200	903	0	0	0	0	0	0	0	603	903	0
317	8	0	0	0	0	0	0	200	300	0	0	0	0	0	0	0	200	903	0	0	0	0	0	0	0	603	903	0
317	9	0	0	0	0	0	0	200	300	0	0	0	0	0	0	0	200	903	0	0	0	0	0	0	0	603	903	0
318	0	0	0	0	0	0	0	200	300	0	0	0	0	0	0	0	200	903	0	0	0	0	0	0	0	603	903	0
318	1	0	0	0	0	0	0	200	300	0	0	0	0	0	0	0	200	903	0	0	0	0	0	0	0	603	903	0
318	2	0	0	0	0	0	0	200	300	0	0	0	0	0	0	0	200	903	0	0	0	0	0	0	0	603	903	0
318	3	0	0	0	0	0	0	200	300	0	0	0	0	0	0	0	200	903	0	0	0	0	0	0	0	603	903	0
318	4	0	0	0	0	0	0	200	300	0	0	0	0	0	0	0	200	903	0	0	0	0	0	0	0	603	903	0
318	5	0	0	0	0	0	0	200	300	0	0	0	0	0	0	0	200	903	0	0	0	0	0	0	0	603	903	0
318	6	0	0	0	0	0	0	200	300	0	0	0	0	0	0	0	200	903	0	0	0	0	0	0	0	603	903	0
318	7	0	0	0	0	0	0	200	300	0	0	0	0	0	0	0	200	903	0	0	0	0	0	0	0	603	903	0
318	8	0	0	0	0	0	0	200	300	0	0	0	0	0	0	0	200	903	0	0	0	0	0	0	0	603	903	0
318	9	0	0	0	0	0	0	200	300	0	0	0	0	0	0	0	200	903	0	0	0	0	0	0	0	603	903	0
319	0	0	0	0	0	0	0	200	300	0	0	0	0	0	0	0	200	903	0	0	0	0	0	0	0	603	903	0
319	1	0	0	0	0	0	0	200	300	0	0	0	0	0	0	0	200	903	0	0	0	0	0	0	0	603	903	0
319	2	0	0	0	0	0	0	200	300	0	0	0	0	0	0	0	200	903	0	0	0	0	0	0	0	603	903	0
319	3	0	0	0	0	0	0	200	300	0	0	0	0	0	0	0	200	903	0	0	0	0	0	0	0	603	903	0
319	4	0	0	0	0	0	0	200	300	0	0	0	0	0	0	0	200	903	0	0	0	0	0	0	0	603	903	0
319	5	0	0	0	0	0	0	200	300	0	0	0	0	0	0	0	200	903	0	0	0	0	0	0	0	603	903	0
319	6	0	0	0	0	0	0	200	300	0	0	0	0	0	0	0	200	903	0	0	0	0	0	0	0	603	903	0
319	7	0	0	0	0	0	0	200	300	0	0	0	0	0	0	0	200	903	0	0	0	0	0	0	0	603	903	0
319	8	0	0	0	0	0	0	200	300	0	0	0	0	0	0	0	200	903	0	0	0	0	0	0	0	603	903	0
319	9	0	0	0	0	0	0	200	300	0	0	0	0	0	0	0	200	903	0	0	0	0	0	0	0	603	903	0
320	0	0	0	0	0	0	0	200	300	0	0	0	0	0	0	0	200	903	0	0	0	0	0	0	0	603	903	0
320	1	0	0	0	0	0	0	200	300	0	0	0	0	0	0	0	200	903	0	0	0	0	0	0	0	603	903	0
320	2	0	0	0	0	0	0	200	300	0	0	0	0	0	0	0	200	903	0	0	0	0	0	0	0	603	903	0
320	3	0	0	0	0	0	0	200	300	0	0	0	0	0	0	0	200	903	0	0	0	0	0	0	0	603	903	0
320	4	0	0	0	0	0	0	200	300	0	0	0	0	0	0	0	200	903	0	0	0	0	0	0	0	603	903	0
320	5	0	0	0	0	0	0	200	300	0	0	0	0	0	0	0	200	903	0	0	0	0	0	0	0	603	903	0
320	6	0	0	0	0	0	0	200	300	0	0	0	0	0	0	0	200	903	0	0	0	0	0	0	0	603	903	0
320	7	0	0	0	0	0	0	200	300	0	0	0	0	0	0	0	200	903	0	0	0	0	0	0	0	603	903	0
320	8	0	0	0	0	0	0	200	300	0	0	0	0	0	0	0	200	903	0	0	0	0	0	0	0	603	903	0
320	9	0	0	0	0	0	0	200	300	0	0	0	0	0	0	0	200	903	0	0	0	0	0	0	0	603	903	0
321	0	0	0	0	0	0	0	200	300	0	0	0	0	0	0	0	200	903	0	0	0	0	0	0	0	603	903	0
321	1	0	0	0	0	0	0	200	300	0	0	0	0	0	0	0	200	903	0	0	0	0	0	0	0	603	903	0
321	2	0	0	0	0	0	0	200	300	0	0	0	0	0	0	0	200	903	0	0	0	0	0	0	0	603	903	0
321	3	0	0	0	0	0	0	200	300	0	0	0	0	0	0	0	200	903	0	0	0	0	0	0	0	603	903	0
321	4	0	0	0	0	0	0	200	300	0	0	0	0	0	0	0	200	903	0	0	0	0	0	0	0	603	903	0
321	5	0	0	0	0	0	0	200	300	0	0	0	0	0	0	0	200	903	0	0	0	0	0	0	0	603	903	0
321	6	0	0	0	0	0	0	200	300	0	0	0	0	0	0	0	200	903	0	0	0	0	0	0	0	603	903	0
321	7	0	0	0	0	0	0	200	300	0	0	0	0	0	0	0	200	903	0	0	0	0	0	0	0	603	903	0
321	8	0	0	0	0	0	0	200	300	0	0	0	0	0	0	0	200	903	0	0	0	0	0	0	0	603	903	0
321	9	0	0	0	0	0	0	200	300	0	0	0	0	0	0	0	200	903	0	0	0	0	0	0	0	603	903	0
322	0	0	0	0	0	0	0	200	300	0	0	0	0	0	0	0	200	903	0	0	0	0	0	0	0	603	903	0
322	1	0	0	0	0	0	0	200	300	0	0	0	0	0	0	0	200	903	0	0	0	0	0	0	0	603	903	0
322	2	0	0	0	0	0	0	200	300	0	0	0	0	0	0	0	200	903	0	0	0	0	0	0	0	603	903	0
322	3	0	0	0	0	0	0	200	300	0	0	0	0	0	0	0	200	903	0	0	0	0	0	0	0	603	903	0
322	4	0	0	0	0	0	0	200	300	0	0	0	0	0	0	0	200	903	0	0	0	0	0	0	0	603	903	0
322	5	0	0	0	0	0	0	200	300	0	0	0	0	0	0	0	200	903	0	0	0	0	0	0	0	603	903	0
322	6	0	0	0	0	0	0	200	300	0	0	0	0	0	0	0	200	903	0	0	0	0	0	0	0	603	903	0
322	7	0	0	0	0	0	0	200	300	0	0	0	0	0	0	0	200	903	0	0	0	0	0	0	0	603	903	0
322	8	0	0	0	0	0	0	200	300	0	0	0	0	0	0	0	200	903	0	0	0	0	0	0	0	603	903	0
322	9	0	0	0	0	0	0	200	300	0	0	0	0	0	0	0	200	903	0	0	0	0	0	0	0	603	903	0
323	0	0	0	0	0	0	0	200	300	0	0	0	0	0	0	0	200	903	0	0	0	0	0	0	0	603	903	0
323	1	0	0	0	0	0	0	200	300	0	0	0	0	0	0	0	200	903	0	0	0	0	0	0	0	603	903	0
323	2	0	0	0	0	0	0	200	300	0	0	0	0	0	0	0	200	903	0	0	0	0	0	0	0	603	903	0
323	3	0	0	0	0	0	0	200	300	0	0	0	0	0	0	0	200	903	0	0	0	0	0	0	0	603	903	0
323	4	0	0	0	0	0	0	200	300	0	0	0	0	0	0	0	200	903	0	0	0	0	0	0	0	603	903	0
323	5	0	0	0	0	0	0	200	300	0	0	0	0	0	0	0	200	903	0	0	0	0	0	0	0	603	903	0
323	6	0	0	0	0	0	0	200	300	0	0	0	0	0	0	0	200	903	0	0	0	0	0	0	0	603	903	0
323	7	0	0	0	0	0	0	200	300	0	0	0	0	0	0	0	200	903	0	0	0	0	0	0	0	603	903	0
323	8	0	0	0	0	0	0	200	300	0	0	0	0	0	0	0	200	903	0	0	0	0	0	0	0	603	903	0
323	9	0	0	0	0	0	0	200	300	0	0	0	0	0	0	0	200	903	0	0	0	0	0	0	0	603	903	0
324	0	0	0	0	0	0	0	200	300	0	0	0	0	0	0	0	200	903	0	0	0	0	0	0	0	603	903	0
324	1	0	0	0	0	0	0	200	300	0	0	0	0	0	0	0	200	903	0	0	0	0	0	0	0	603	903	0
324	2	0	0	0	0	0	0	200	300	0	0	0	0	0	0	0	200	903	0	0	0	0	0	0	0	603	903	0
324	3	0	0	0	0	0	0	200	300	0	0	0	0	0	0	0	200	903	0	0	0	0	0	0	0	603	903	0
324	4	0	0	0	0	0	0	200	300	0	0	0	0	0	0	0	200	903	0	0	0	0	0	0	0	603	903	0
324	5	0	0	0	0	0	0	200	300	0	0	0	0	0	0	0	200	903	0	0	0	0	0	0	0	603	903	0
324	6	0	0	0	0	0	0	200	300	0	0	0	0	0	0	0	200	903	0	0	0	0	0	0	0	603	903	0
324	7	0	0	0	0	0	0	200	300	0	0	0	0	0	0	0	200	903	0	0	0	0	0	0	0	603	903	0
324	8	0	0	0	0	0	0	200	300	0	0	0	0	0	0	0	200	903	0	0	0	0	0	0	0	603	903	0
324	9	0	0	0	0	0	0	200	300	0	0	0	0	0	0	0	200	903	0	0	0	0	0	0	0	603	903	0
325	0	0	0	0	0	0	0	200	300	0	0	0	0	0	0	0	200	903	0	0	0	0	0	0	0	603	903	0
325	1	0	0	0	0	0	0	200	300	0	0	0	0	0	0	0	200	903	0	0	0	0	0	0	0	603	903	0
325	2	0	0	0	0	0	0	200	300	0	0	0	0	0	0	0	200	903	0	0	0	0	0	0	0	603	903	0
325	3	0	0	0	0	0	0	200	300	0	0	0	0	0	0	0	200	903	0	0	0	0	0	0	0	603	903	0
325	4	0	0	0	0	0	0	200	300	0	0	0	0	0	0	0	200	903	0	0	0	0	0	0	0	603	903	0
325	5	0	0	0	0	0	0	200	300	0	0	0	0	0	0	0	200	903	0	0	0	0	0	0	0	603	903	0
325	6	0	0	0	0	0	0	200	300	0	0	0	0	0	0	0	200	903	0	0	0	0	0	0	0	603	903	0
325	7	0	0	0	0	0	0	200	300	0	0	0	0	0	0	0	200	903	0	0	0	0	0	0	0	603	903	0
325	8	0	0	0	0	0	0	200	300	0	0	0	0	0	0	0	200	903	0	0	0	0	0	0	0	603	903	0
325	9	0	0	0	0	0	0	200	300	0	0	0	0	0	0	0	200	903	0	0	0	0	0	0	0	603	903	0
326	0	0	0	0	0	0	0	200	300	0	0	0	0	0	0	0	200	903	0	0	0	0	0	0	0	603	903	0
326	1	0	0	0	0	0	0	200	300	0	0	0	0	0	0	0	200	903	0	0	0	0	0	0	0	603	903	0
326	2	0	0	0	0	0	0	200	300	0	0	0	0	0	0	0	200	903	0	0	0	0	0	0	0	603	903	0
326	3	0	0	0	0	0	0	200	300	0	0	0	0	0	0	0	200	903	0	0	0	0	0	0	0	603	903	0
326	4	0	0	0	0	0	0	200	300	0	0	0	0	0	0	0	200	903	0	0	0	0	0	0	0	603	903	0
326	5	0	0	0	0	0	0	200	300	0	0	0	0	0	0	0	200	903	0	0	0	0	0	0	0	603	903	0
326	6	0	0	0	0	0	0	200	300	0	0	0	0	0	0	0	200	903	0	0	0	0	0	0	0	603	903	0
326	7	0	0	0	0	0	0	200	300	0	0	0	0	0	0	0	200	903	0	0	0	0	0	0	0	603	903	0
326	8	0	0	0	0	0	0	200	300	0	0	0	0	0	0	0	200	903	0	0	0	0	0	0	0	603	903	0
326	9	0	0	0	0	0	0	200	300	0	0	0	0	0	0	0	200	903	0	0	0	0	0	0	0	603	903	0
327	0	0	0	0	0	0	0	200	300	0	0	0	0	0	0	0	200	903	0	0	0	0	0	0	0	603	903	0
327	1	0	0	0	0	0	0	200	300	0	0	0	0	0	0	0	200	903	0	0	0	0	0	0	0	603	903	0
327	2	0	0	0	0	0	0	200	300	0	0	0	0	0	0	0	200	903	0	0	0	0	0	0	0	603	903	0
327	3	0	0	0	0	0	0	200	300	0	0	0	0	0	0	0	200	903	0	0	0	0	0	0	0	603	903	0
327	4	0	0	0	0	0	0	200	300	0	0	0	0	0	0	0	200	903	0	0	0	0	0	0	0	603	903	0
327	5	0	0	0	0	0	0	200	300	0	0	0	0	0	0	0	200	903	0	0	0	0	0	0	0	603	903	0
327	6	0	0	0	0	0	0	200	300	0	0	0	0	0	0	0	200	903	0	0	0	0	0	0	0	603	903	0
327	7	0	0	0	0	0	0	200	300	0	0	0	0	0	0	0	200	903	0	0	0	0	0	0	0	603	903	0
327	8	0	0	0	0	0	0	200	300	0	0	0	0	0	0	0	200	903	0	0	0	0	0	0	0	603	903	0
327	9	0	0	0	0	0	0	200	300	0	0	0	0	0	0	0	200	903	0	0	0	0	0	0	0	603	903	0
328	0	0	0	0	0	0	0	200	300	0	0	0	0	0	0	0	200	903	0	0	0	0	0	0	0	603	903	0
328	1	0	0	0	0	0	0	200	300	0	0	0	0	0	0	0	200	903	0	0	0	0	0	0	0	603	903	0
328	2	0	0	0	0	0	0	200	300	0	0	0	0	0	0	0	200	903	0	0	0	0	0	0	0	603	903	0
328	3	0	0	0	0	0	0	200	300	0	0	0	0	0	0	0	200	903	0	0	0	0	0	0	0	603	903	0
328	4	0	0	0	0	0	0	200	300	0	0	0	0	0	0	0	200	903	0	0	0	0	0	0	0	603	903	0
328	5	0	0	0	0	0	0	200	300	0	0	0	0	0	0	0	200	903	0	0	0	0	0	0	0	603	903	0
328	6	0	0	0	0	0	0	200	300	0	0	0	0	0	0	0	200	903	0	0	0	0	0	0	0	603	903	0
328	7	0	0	0	0	0	0	200	300	0	0	0	0	0	0	0	200	903	0	0	0	0	0	0	0	603	903	0
328	8	0	0	0	0	0	0	200	300	0	0	0	0	0	0	0	200	903	0	0	0	0	0	0	0	603	903	0
328	9	0	0	0	0	0	0	200	300	0	0	0	0	0	0	0	200	903	0	0	0	0	0	0	0	603	903	0
329	0	0	0	0	0	0	0	200	300	0	0	0	0	0	0	0	200	903	0	0	0	0	0	0	0	603	903	0
329	1	0	0	0	0	0	0	200	300	0	0	0	0	0	0	0	200	903	0	0	0	0	0	0	0	603	903	0
329	2	0	0	0	0	0	0	200	300	0	0	0	0	0	0	0	200	903	0	0	0	0	0	0	0	603	903	0
329	3	0	0	0	0	0	0	200	300	0	0	0	0	0	0	0	200	903	0	0	0	0	0	0	0	603	903	0
329	4	0	0	0	0	0	0	200	300	0	0	0	0	0	0	0	200	903	0	0	0	0	0	0	0	603	903	0
329	5	0	0	0	0	0	0	200	300	0	0	0	0	0	0	0	200	903	0	0	0	0	0	0	0	603	903	0
329	6	0	0	0	0	0	0	200	300	0	0	0	0	0	0	0	200	903	0	0	0	0	0	0	0	603	903	0
329	7	0	0	0	0	0	0	200	300	0	0	0	0	0	0	0	200	903	0	0	0	0	0	0	0	603	903	0
329	8	0	0	0	0	0	0	200	300	0	0	0	0	0	0	0	200	903	0	0	0	0	0	0	0	603	903	0
329	9	0	0	0	0	0	0	200	300	0	0	0	0	0	0	0	200	903	0	0	0	0	0	0	0	603	903	0
330	0	0	0	0	0	0	0	200	300	0	0	0	0	0	0	0	200	903	0	0	0	0	0	0	0	603	903	0
330	1	0	0	0	0	0	0	200	300	0	0	0	0	0	0	0	200	903	0	0	0	0	0	0	0	603	903	0
330	2	0	0	0	0	0	0	200	300	0	0	0	0	0	0	0	200	903	0	0	0	0	0	0	0	603	903	0
330	3	0	0	0	0	0	0	200	300	0	0	0	0	0	0	0	200	903	0	0	0	0	0	0	0	603	903	0
330	4	0	0	0	0	0	0	200	300	0	0	0	0	0	0	0	200	903	0	0	0	0	0	0	0	603	903	0
330	5	0	0	0	0	0	0	200	300	0	0	0	0	0	0	0	200	903	0	0	0	0	0	0	0	603	903	0
330	6	0	0	0	0	0	0	200	300	0	0	0	0	0	0	0	200	903	0	0	0	0	0	0	0	603	903	0
330	7	0	0	0	0	0	0	200	300	0	0	0	0	0	0	0	200	903	0	0	0	0	0	0	0	603	903	0
330	8	0	0	0	0	0	0	200	300	0	0	0	0	0	0	0	200	903	0	0	0	0	0	0	0	603	903	0
330	9	0	0	0	0	0	0	200	300	0	0	0	0	0	0	0	200	903	0	0	0	0	0	0	0	603	903	0
331	0	0	0	0	0	0	0	200	300	0	0	0	0	0	0	0	200	903	0	0	0	0	0	0	0	603	903	0
331	1	0	0	0	0	0	0	200	300	0	0	0	0	0	0	0	200	903	0	0	0	0	0	0	0	603	903	0
331	2	0	0	0	0	0	0	200	300	0	0	0	0	0	0	0	200	903	0	0	0	0	0	0	0	603	903	0
331	3	0	0	0	0	0	0	200	300	0	0	0	0	0	0	0	200	903	0	0	0	0	0	0	0	603	903	0
331	4	0	0	0	0	0	0	200	300	0	0	0	0	0	0	0	200	903	0	0	0	0	0	0	0	603	903	0
331	5	0	0	0	0	0	0	200	300	0	0	0	0	0	0	0	200	903	0	0	0	0	0	0	0	603	903	0
331	6	0	0	0	0	0	0	200	300	0	0	0	0	0	0	0	200	903	0	0	0	0	0	0	0	603	903	0
331	7	0	0	0	0	0	0	200	300	0	0	0	0	0	0	0	200	903	0	0	0	0	0	0	0	603	903	0
331	8	0	0	0	0	0	0	200	300	0	0	0	0	0	0	0	200	903	0	0	0	0	0	0	0	603	903	0
331	9	0	0	0	0	0	0	200	300	0	0	0	0	0	0	0	200	903	0	0	0	0	0	0	0	603	903	0
332	0	0	0	0	0	0	0	200	300	0	0	0	0	0	0	0	200	903	0	0	0	0	0	0	0	603	903	0
332	1	0	0	0	0	0	0	200	300	0	0	0	0	0	0	0	200	903	0	0	0	0	0	0	0	603	903	0
332	2	0	0	0	0	0	0	200	300	0	0	0	0	0	0	0	200	903	0	0	0	0	0	0	0	603	903	0
332	3	0	0	0	0	0	0	200	300	0	0	0	0	0	0	0	200	903	0	0	0	0	0	0	0	603	903	0
332	4	0	0	0	0	0	0	200	300	0	0	0	0	0	0	0	200	903	0	0	0	0	0	0	0	603	903	0
332	5	0	0	0	0	0	0	200	300	0	0	0	0	0	0	0	200	903	0	0	0	0	0	0	0	603	903	0
332	6	0	0	0	0	0	0	200	300	0	0	0	0	0	0	0	200	903	0	0	0	0	0	0	0	603	903	0
332	7	0	0	0	0	0	0	200	300	0	0	0	0	0	0	0	200	903	0	0	0	0	0	0	0	603	903	0
332	8	0	0	0	0	0	0	200	300	0	0	0	0	0	0	0	200	903	0	0	0	0	0	0	0	603	903	0
332	9	0	0	0	0	0	0	200	300	0	0	0	0	0	0	0	200	903	0	0	0	0	0	0	0	603	903	0
333	0	0	0	0	0	0	0	200	300	0	0	0	0	0	0	0	200	903	0	0	0	0	0	0	0	603	903	0
333	1	0	0	0	0	0	0	200	300	0	0	0	0	0	0	0	200	903	0	0	0	0	0	0	0	603	903	0
333	2	0	0	0	0	0	0	200	300	0	0	0	0	0	0	0	200	903	0	0	0	0	0	0	0	603	903	0
333	3	0	0	0	0	0	0	200	300	0	0	0	0	0	0	0	200	903	0	0	0	0	0	0	0	603	903	0
333	4	0	0	0	0	0	0	200	300	0	0	0	0	0	0	0	200	903	0	0	0	0	0	0	0	603	903	0
333	5	0	0	0	0	0	0	200	300	0	0	0	0	0	0	0	200	903	0	0	0	0	0	0	0	603	903	0
333	6	0	0	0	0	0	0	200	300	0	0	0	0	0	0	0	200	903	0	0	0	0	0	0	0	603	903	0
333	7	0	0	0	0	0	0	200	300	0	0	0	0	0	0	0	200	903	0	0	0	0	0	0	0	603	903	0
333	8	0	0	0	0	0	0	200	300	0	0	0	0	0	0	0	200	903	0	0	0	0	0	0	0	603	903	0
333	9	0	0	0	0	0	0	200	300	0	0	0	0	0	0	0	200	903	0	0	0	0	0	0	0	603	903	0
334	0	0	0	0	0	0	0	200	300	0	0	0	0	0	0	0	200	903	0	0	0	0	0	0	0	603	903	0
334	1	0	0	0	0	0	0	200	300	0	0	0	0	0	0	0	200	903	0	0	0	0	0	0	0	603	903	0
334	2	0	0	0	0	0	0	200	300	0	0	0	0	0	0	0	200	903	0	0	0	0	0	0	0	603	903	0
334	3	0	0	0	0	0	0	200	300	0	0	0	0	0	0	0	200	903	0	0	0	0	0	0	0	603	903	0
334	4	0	0	0	0	0	0	200	300	0	0	0	0	0	0	0	200	903	0	0	0	0	0	0	0	603	903	0
334	5	0	0	0	0	0	0	200	300	0	0	0	0	0	0	0	200	903	0	0	0	0	0	0	0	603	903	0
334	6	0	0	0	0	0	0	200	300	0	0	0	0	0	0	0	200	903	0	0	0	0	0	0	0	603	903	0
334	7	0	0	0	0	0	0	200	300	0	0	0	0	0	0	0	200	903	0	0	0	0	0	0	0	603	903	0
334	8	0	0	0	0	0	0	200	300	0	0	0	0	0	0	0	200	903	0	0	0	0	0	0	0	603	903	0
334	9	0	0	0	0	0	0	200	300	0	0	0	0	0	0	0	200	903	0	0	0	0	0	0	0	603	903	0
335	0	0	0	0	0	0	0	200	300	0	0	0	0	0	0	0	200	903	0	0	0	0	0	0	0	603	903	0
335	1	0	0	0	0	0	0	200	300	0	0	0	0	0	0	0	200	903	0	0	0	0	0	0	0	603	903	0
335	2	0	0	0	0	0	0	200	300	0	0	0	0	0	0	0	200	903	0	0	0	0	0	0	0	603	903	0
335	3	0	0	0	0	0	0	200	300	0	0	0	0	0	0	0	200	903	0	0	0	0	0	0	0	603	903	0
335	4	0	0	0	0	0	0	200	300	0	0	0	0	0	0	0	200	903	0	0	0	0	0	0	0	603	903	0
335	5	0	0	0	0	0	0	200	300	0	0	0	0	0	0	0	200	903	0	0	0	0	0	0	0	603	903	0
335	6	0	0	0	0	0	0	200	300	0	0	0	0	0	0	0	200	903	0	0	0	0	0	0	0	603	903	0
335	7	0	0	0	0	0	0	200	300	0	0	0	0	0	0	0	200	903	0	0	0	0	0	0	0	603	903	0
335	8	0	0	0	0	0	0	200	300	0	0	0	0	0	0	0	200	903	0	0	0	0	0	0	0	603	903	0
335	9	0	0	0	0	0	0	200	300	0	0	0	0	0	0	0	200	903	0	0	0	0	0	0	0	603	903	0
336	0	0	0	0	0	0	0	200	300	0	0	0	0	0	0	0	200	903	0	0	0	0	0	0	0	603	903	0
336	1	0	0	0	0	0	0	200	300	0	0	0	0	0	0	0	200	903	0	0	0	0	0	0	0	603	903	0
336	2	0	0	0	0	0	0	200	300	0	0	0	0	0	0	0	200	903	0	0	0	0	0	0	0	603	903	0
336	3	0	0	0	0	0	0	200	300	0	0	0	0	0	0	0	200	903	0	0	0	0	0	0	0	603	903	0
336	4	0	0	0	0	0	0	200	300	0	0	0	0	0	0	0	200	903	0	0	0	0	0	0	0	603	903	0
336	5	0	0	0	0	0	0	200	300	0	0	0	0	0	0	0	200	903	0	0	0	0	0	0	0	603	903	0
336	6	0	0	0	0	0	0	200	300	0	0	0	0	0	0	0	200	903	0	0	0	0	0	0	0	603	903	0
336	7	0	0	0	0	0	0	200	300	0	0	0	0	0	0	0	200	903	0	0	0	0	0	0	0	603	903	0
336	8	0	0	0	0	0	0	200	300	0	0	0	0	0	0	0	200	903	0	0	0	0	0	0	0	603	903	0
336	9	0	0	0	0	0	0	200	300	0	0	0	0	0	0	0	200	903	0	0	0	0	0	0	0	603	903	0
337	0	0	0	0	0	0	0	200	300	0	0	0	0	0	0	0	200	903	0	0	0	0	0	0	0	603	903	0
337	1	0	0	0	0	0	0	200	300	0	0	0	0	0	0	0	200	903	0	0	0	0	0	0	0	603	903	0
337	2	0	0	0	0	0	0	200	300	0	0	0	0	0	0	0	200	903	0	0	0	0	0	0	0	603	903	0
337	3	0	0	0	0	0	0	200	300	0	0	0	0	0	0	0	200	903	0	0	0	0	0	0	0	603	903	0
337	4	0	0	0	0	0	0	200	300	0	0	0	0	0	0	0	200	903	0	0	0	0	0	0	0	603	903	0
337	5	0	0	0	0	0	0	200	300	0	0	0	0	0	0	0	200	903	0	0	0	0	0	0	0	603	903	0
337	6	0	0	0	0	0	0	200	300	0	0	0	0	0	0	0	200	903	0	0	0	0	0	0	0	603	903	0
337	7	0	0	0	0	0	0	200	300	0	0	0	0	0	0	0	200	903	0	0	0	0	0	0	0	603	903	0
337	8	0	0	0	0	0	0	200	300	0	0	0	0	0	0	0	200	903	0	0	0	0	0	0	0	603	903	0
337	9	0	0	0	0	0	0	200	300	0	0	0	0	0	0	0	200	903	0	0	0	0	0	0	0	603	903	0
338	0	0	0	0	0	0	0	200	300	0	0	0	0	0	0	0	200	903	0	0	0	0	0	0	0	603	903	0
338	1	0	0	0	0	0	0	200	300	0	0	0	0	0	0	0	200	903	0	0	0	0	0	0	0	603	903	0
338	2	0	0	0	0	0	0	200	300	0	0	0	0	0	0	0	200	903	0	0	0	0	0	0	0	603	903	0
338	3	0	0	0	0	0	0	200	300	0	0	0	0	0	0	0	200	903	0	0	0	0	0	0	0	603	903	0
338	4	0	0	0	0	0	0	200	300	0	0	0	0	0	0	0	200	903	0	0	0	0	0	0	0	603	903	0
338	5	0	0	0	0	0	0	200	300	0	0	0	0	0	0	0	200	903	0	0	0	0	0	0	0	603	903	0
338	6	0	0	0	0	0	0	200	300	0	0	0	0	0	0	0	200	903	0	0	0	0	0	0	0	603	903	0
338	7	0	0	0	0	0	0	200	300	0	0	0	0	0	0	0	200	903	0	0	0	0	0	0	0	603	903	0
338	8	0	0	0	0	0	0	200	300	0	0	0	0	0	0	0	200	903	0	0	0	0	0	0	0	603	903	0
338	9	0	0	0	0	0	0	200	300	0	0	0	0	0	0	0	200	903	0	0	0	0	0	0	0	603	903	0
339	0	0	0	0	0	0	0	200	300	0	0	0	0	0	0	0	200	903	0	0	0	0	0	0	0	603	903	0
339	1	0	0	0	0	0	0	200	300	0	0	0	0	0	0	0	200	903	0	0	0	0	0	0	0	603	903	0
339	2	0	0	0	0	0	0	200	300	0	0	0	0	0	0	0	200	903	0	0	0	0	0	0	0	603	903	0
339	3	0	0	0	0	0	0	200	300	0	0	0	0	0	0	0	200	903	0	0	0	0	0	0	0	603	903	0
339	4	0	0	0	0	0	0	200	300	0	0	0	0	0	0	0	200	903	0	0	0	0	0	0	0	603	903	0
339	5	0	0	0	0	0	0	200	300	0	0	0	0	0	0	0	200	903	0	0	0	0	0	0	0	603	903	0
339	6	0	0	0	0	0	0	200	300	0	0	0	0	0	0	0	200	903	0	0	0	0	0	0	0	603	903	0
339	7	0	0	0	0	0	0	200	300	0	0	0	0	0	0	0	200	903	0	0	0	0	0	0	0	603	903	0
339	8	0	0	0	0	0	0	200	300	0	0	0	0	0	0	0	200	903	0	0	0	0	0	0	0	603	903	0
339	9	0	0	0	0	0	0	200	300	0	0	0	0	0	0	0	200	903	0	0	0	0	0	0	0	603	903	0
340	0	0	0	0	0	0	0	200	300	0	0	0	0	0	0	0	200	903	0	0	0	0	0	0	0	603	903	0
340	1	0	0	0	0	0	0	200	300	0	0	0	0	0	0	0	200	903	0	0	0	0	0	0	0	603	903	0
340	2	0	0	0	0	0	0	200	300	0	0	0	0	0	0	0	200	903	0	0	0	0	0	0	0	603	903	0
340	3	0	0	0	0	0	0	200	300	0	0	0	0	0	0	0	200	903	0	0	0	0	0	0	0	603	903	0
340	4	0	0	0	0	0	0	200	300	0	0	0	0	0	0	0	200	903	0	0	0	0	0	0	0	603	903	0
340	5	0	0	0	0	0	0	200	300	0	0	0	0	0	0	0	200	903	0	0	0	0	0	0	0	603	903	0
340	6	0	0	0	0	0	0	200	300	0	0	0	0	0	0	0	200	903	0	0	0	0	0	0	0	603	903	0
340	7	0	0	0	0	0	0	200	300	0	0	0	0	0	0	0	200	903	0	0	0	0	0	0	0	603	903	0
340	8	0	0	0	0	0	0	200	300	0	0	0	0	0	0	0	200	903	0	0	0	0	0	0	0	603	903	0
340	9	0	0	0	0	0	0	200	300	0	0	0	0	0	0	0	200	903	0	0	0	0	0	0	0	603	903	0
341	0	0	0	0	0	0	0	200	300	0	0	0	0	0	0	0	200	903	0	0	0	0	0	0	0	603	903	0
341	1	0	0	0	0	0	0	200	300	0	0	0	0	0	0	0	200	903	0	0	0	0	0	0	0	603	903	0
341	2	0	0	0	0	0	0	200	300	0	0	0	0	0	0	0	200	903	0	0	0	0	0	0	0	603	903	0
341	3	0	0	0	0	0	0	200	300	0	0	0	0	0	0	0	200	903	0	0	0	0	0	0	0	603	903	0
341	4	0	0	0	0	0	0	200	300	0	0	0	0	0	0	0	200	903	0	0	0	0	0	0	0	603	903	0
341	5	0	0	0	0	0	0	200	300	0	0	0	0	0	0	0	200	903	0	0	0	0	0	0	0	603	903	0
341	6	0	0	0	0	0	0	200	300	0	0	0	0	0	0	0	200	903	0	0	0	0	0	0	0	603	903	0
341	7	0	0	0	0	0	0	200	300	0	0	0	0	0	0	0	200	903	0	0	0	0	0	0	0	603	903	0
341	8	0	0	0	0	0	0	200	300	0	0	0	0	0	0	0	200	903	0	0	0	0	0	0	0	603	903	0
341	9	0	0	0	0	0	0	200	300	0	0	0	0	0	0	0	200	903	0	0	0	0	0	0	0	603	903	0
342	0	0	0	0	0	0	0	200	300	0	0	0	0	0	0	0	200	903	0	0	0	0	0	0	0	603	903	0
342	1	0	0	0	0	0	0	200	300	0	0	0	0	0	0	0	200	903	0	0	0	0	0	0	0	603	903	0
342	2	0	0	0	0	0	0	200	300	0	0	0	0	0	0	0	200	903	0	0	0	0	0	0	0	603	903	0
342	3	0	0	0	0	0	0	200	300	0	0	0	0	0	0	0	200	903	0	0	0	0	0	0	0	603	903	0
342	4	0	0	0	0	0	0	200	300	0	0	0	0	0	0	0	200	903	0	0	0	0	0	0	0	603	903	0
342	5	0	0	0	0	0	0	200	300	0	0	0	0	0	0	0	200	903	0	0	0	0	0	0	0	603	903	0
342	6	0	0	0	0	0	0	200	300	0	0	0	0	0	0	0	200	903	0	0	0	0	0	0	0	603	903	0
342	7	0	0	0	0	0	0	200	300	0	0	0	0	0	0	0	200	903	0	0	0	0	0	0	0	603	903	0
342	8	0	0	0	0	0	0	200	300	0	0	0	0	0	0	0	200	903	0	0	0	0	0	0	0	603	903	0
342	9	0	0	0	0	0	0	200	300	0	0	0	0	0	0	0	200	903	0	0	0	0	0	0	0	603	903	0
343	0	0	0	0	0	0	0	200	300	0	0	0	0	0	0	0	200	903	0	0	0	0	0	0	0	603	903	0
343	1	0	0	0	0	0	0	200	300	0	0	0	0	0	0	0	200	903	0	0	0	0	0	0	0	603	903	0
343	2	0	0	0	0	0	0	200	300	0	0	0	0	0	0	0	200	903	0	0	0	0	0	0	0	603	903	0
343	3	0	0	0	0	0	0	200	300	0	0	0	0	0	0	0	200	903	0	0	0	0	0	0	0	603	903	0
343	4	0	0	0	0	0	0	200	300	0	0	0	0	0	0	0	200	903	0	0	0	0	0	0	0	603	903	0
343	5	0	0	0	0	0	0	200	300	0	0	0	0	0	0	0	200	903	0	0	0	0	0	0	0	603	903	0
343	6	0	0	0	0	0	0	200	300	0	0	0	0	0	0	0	200	903	0	0	0	0	0	0	0	603	903	0
343	7	0	0	0	0	0	0	200	300	0	0	0	0	0	0	0	200	903	0	0	0	0	0	0	0	603	903	0
343	8	0	0	0	0	0	0	200	300	0	0	0	0	0	0	0	200	903	0	0	0	0	0	0	0	603	903	0
343	9	0	0	0	0	0	0	200	300	0	0	0	0	0	0	0	200	903	0	0	0	0	0	0	0	603	903	0
344	0	0	0	0	0	0	0	200	300	0	0	0	0	0	0	0	200	903	0	0	0	0	0	0	0	603	903	0
344	1	0	0	0	0	0	0	200	300	0	0	0	0	0	0	0	200	903	0	0	0	0	0	0	0	603	903	0
344	2	0	0	0	0	0	0	200	300	0	0	0	0	0	0	0	200	903	0	0	0	0	0	0	0	603	903	0
344	3	0	0	0	0	0	0	200	300	0	0	0	0	0	0	0	200	903	0	0	0	0	0	0	0	603	903	0
344	4	0	0	0	0	0	0	200	300	0	0	0	0	0	0	0	200	903	0	0	0	0	0	0	0	603	903	0
344	5	0	0	0	0	0	0	200	300	0	0	0	0	0	0	0	200	903	0	0	0	0	0	0	0	603	903	0
344	6	0	0	0	0	0	0	200	300	0	0	0	0	0	0	0	200	903	0	0	0	0	0	0	0	603	903	0
344	7	0	0	0	0	0	0	200	300	0	0	0	0	0	0	0	200	903	0	0	0	0	0	0	0	603	903	0
344	8	0	0	0	0	0	0	200	300	0	0	0	0	0	0	0	200	903	0	0	0	0	0	0	0	603	903	0
344	9	0	0	0	0	0	0	200	300	0	0	0	0	0	0	0	200	903	0	0	0	0	0	0	0	603	903	0
345	0	0	0	0	0	0	0	200	300	0	0	0	0	0	0	0	200	903	0	0	0	0	0	0	0	603	903	0
345	1	0	0	0	0	0	0	200	300	0	0	0	0	0	0	0	200	903	0	0	0	0	0	0	0	603	903	0
345	2	0	0	0	0	0	0	200	300	0	0	0	0	0	0	0	200	903	0	0	0	0	0	0	0	603	903	0
345	3	0	0	0	0	0	0	200	300	0	0	0	0	0	0	0	200	903	0	0	0	0	0	0	0	603	903	0
345	4	0	0	0	0	0	0	200	300	0	0	0	0	0	0	0	200	903	0	0	0	0	0	0	0	603	903	0
345	5	0	0	0	0	0	0	200	300	0	0	0	0	0	0	0	200	903	0	0	0	0	0	0	0	603	903	0
345	6	0	0	0	0	0	0	200	300	0	0	0	0	0	0	0	200	903	0	0	0	0	0	0	0	603	903	0
345	7	0	0	0	0	0	0	200	300	0	0	0	0	0	0	0	200	903	0	0	0	0	0	0	0	603	903	0
345	8	0	0	0	0	0	0	200	300	0	0	0	0	0	0	0	200	903	0	0	0	0	0	0	0	603	903	0
345	9	0	0	0	0	0	0	200	300	0	0	0	0	0	0	0	200	903	0	0	0	0	0	0	0	603	903	0
346	0	0	0	0	0	0	0	200	300	0	0	0	0	0	0	0	200	903	0	0	0	0	0	0	0	603	903	0
346	1	0	0	0	0	0	0	200	300	0	0	0	0	0	0	0	200	903	0	0	0	0	0	0	0	603	903	0
346	2	0	0	0	0	0	0	200	300	0	0	0	0	0	0	0	200	903	0	0	0	0	0	0	0	603	903	0
346	3	0	0	0	0	0	0	200	300	0	0	0	0	0	0	0	200	903	0	0	0	0	0	0	0	603	903	0
346	4	0	0	0	0	0	0	200	300	0	0	0	0	0	0	0	200	903	0	0	0	0	0	0	0	603	903	0
346	5	0	0	0	0	0	0	200	300	0	0	0	0	0	0	0	200	903	0	0	0	0	0	0	0	603	903	0
346	6	0	0	0	0	0	0	200	300	0	0	0	0	0	0	0	200	903	0	0	0	0	0	0	0	603	903	0
346	7	0	0	0	0	0	0	200	300	0	0	0	0	0	0	0	200	903	0	0	0	0	0	0	0	603	903	0
346	8	0	0	0	0	0	0	200	300	0	0	0	0	0	0	0	200	903	0	0	0	0	0	0	0	603	903	0
346	9	0	0	0	0	0	0	200	300	0	0	0	0	0	0	0	200	903	0	0	0	0	0	0	0	603	903	0
347	0	0	0	0	0	0	0	200	300	0	0	0	0	0	0	0	200	903	0	0	0	0	0	0	0	603	903	0
347	1	0	0	0	0	0	0	200	300	0	0	0	0	0	0	0	200	903	0	0	0	0	0	0	0	603	903	0
347	2	0	0	0	0	0	0	200	300	0	0	0	0	0	0	0	200	903	0	0	0	0	0	0	0	603	903	0
347	3	0	0	0	0	0	0	200	300	0	0	0	0	0	0	0	200	903	0	0	0	0	0	0	0	603	903	0
347	4	0	0	0	0	0	0	200	300	0	0	0	0	0	0	0	200	903	0	0	0	0	0	0	0	603	903	0
347	5	0	0	0	0	0	0	200	300	0	0	0	0	0	0	0	200	903	0	0	0	0	0	0	0	603	903	0
347	6	0	0	0	0	0	0	200	300	0	0	0	0	0	0	0	200	903	0	0	0	0	0	0	0	603	903	0
347	7	0	0	0	0	0	0	200	300	0	0	0	0	0	0	0	200	903	0	0	0	0	0	0	0	603	903	0
347	8	0	0	0	0	0	0	200	300	0	0	0	0	0	0	0	200	903	0	0	0	0	0	0	0	603	903	0
347	9	0	0	0	0	0	0	200	300	0	0	0	0	0	0	0	200	903	0	0	0	0	0	0	0	603	903	0
348	0	0	0	0	0	0	0	200	300	0	0	0	0	0	0	0	200	903	0	0	0	0	0	0	0	603	903	0
348	1	0	0	0	0	0	0	200	300	0	0	0	0	0	0	0	200	903	0	0	0	0	0	0	0	603	903	0
348	2	0	0	0	0	0	0	200	300	0	0	0	0	0	0	0	200	903	0	0	0	0	0	0	0	603	903	0
348	3	0	0	0	0	0	0	200	300	0	0	0	0	0	0	0	200	903	0	0	0	0	0	0	0	603	903	0
348	4	0	0	0	0	0	0	200	300	0	0	0	0	0	0	0	200	903	0	0	0	0	0	0	0	603	903	0
348	5	0	0	0	0	0	0	200	300	0	0	0	0	0	0	0	200	903	0	0	0	0	0	0	0	603	903	0
348	6	0	0	0	0	0	0	200	300	0	0	0	0	0	0	0	200	903	0	0	0	0	0	0	0	603	903	0
348	7	0	0	0	0	0	0	200	300	0	0	0	0	0	0	0	200	903	0	0	0	0	0	0	0	603	903	0
348	8	0	0	0	0	0	0	200	300	0	0	0	0	0	0	0	200	903	0	0	0	0	0	0	0	603	903	0
348	9	0	0	0	0	0	0	200	300	0	0	0	0	0	0	0	200	903	0	0	0	0	0	0	0	603	903	0
349	0	0	0	0	0	0	0	200	300	0	0	0	0	0	0	0	200	903	0	0	0	0	0	0	0	603	903	0
349	1	0	0	0	0	0	0	200	300	0	0	0	0	0	0	0	200	903	0	0	0	0	0	0	0	603	903	0
349	2	0	0	0	0	0	0	200	300	0	0	0	0	0	0	0	200	903	0	0	0	0	0	0	0	603	903	0
349	3	0	0	0	0	0	0	200	300	0	0	0	0	0	0	0	200	903	0	0	0	0	0	0	0	603	903	0
349	4	0	0	0	0	0	0	200	300	0	0	0	0	0	0	0	200	903	0	0	0	0	0	0	0	603	903	0
349	5	0	0	0	0	0	0	200	300	0	0	0	0	0	0	0	200	903	0	0	0	0	0	0	0	603	903	0
349	6	0	0	0	0	0	0	200	300	0	0	0	0	0	0	0	200	903	0	0	0	0	0	0	0	603	903	0
349	7	0	0	0	0	0	0	200	300	0	0	0	0	0	0	0	200	903	0	0	0	0	0	0	0	603	903	0
349	8	0	0	0	0	0	0	200	300	0	0	0	0	0	0	0	200	903	0	0	0	0	0	0	0	603	903	0
349	9	0	0	0	0	0	0	200	300	0	0	0	0	0	0	0	200	903	0	0	0	0	0	0	0	603	903	0
350	0	0	0	0	0	0	0	200	300	0	0	0	0	0	0	0	200	903	0	0	0	0	0	0	0	603	903	0
350	1	0	0	0	0	0	0	200	300	0	0	0	0	0	0	0	200	903	0	0	0	0	0	0	0	603	903	0
350	2	0	0	0	0	0	0	200	300	0	0	0	0	0	0	0	200	903	0	0	0	0	0	0	0	603	903	0
350	3	0	0	0	0	0	0	200	300	0	0	0	0	0	0	0	200	903	0	0	0	0	0	0	0	603	903	0
350	4	0	0	0	0	0	0	200	300	0	0	0	0	0	0	0	200	903	0	0	0	0	0	0	0	603	903	0
350	5	0	0	0	0	0	0	200	300	0	0	0	0	0	0	0	200	903	0	0	0	0	0	0	0	603	903	0
350	6	0	0	0	0	0	0	200	300	0	0	0	0	0	0	0	200	903	0	0	0	0	0	0	0	603	903	0
350	7	0	0	0	0	0	0	200	300	0	0	0	0	0	0	0	200	903	0	0	0	0	0	0	0	603	903	0
350	8	0	0	0	0	0	0	200	300	0	0	0	0	0	0	0	200	903	0	0	0	0	0	0	0	603	903	0
350	9	0	0	0	0	0	0	200	300	0	0	0	0	0	0	0	200	903	0	0	0	0	0	0	0	603	903	0
351	0	0	0	0	0	0	0	200	300	0	0	0	0	0	0	0	200	903	0	0	0	0	0	0	0	603	903	0
351	1	0	0	0	0	0	0	200	300	0	0	0	0	0	0	0	200	903	0	0	0	0	0	0	0	603	903	0
351	2	0	0	0	0	0	0	200	300	0	0	0	0	0	0	0	200	903	0	0	0	0	0	0	0	603	903	0
351	3	0	0	0	0	0	0	200	300	0	0	0	0	0	0	0	200	903	0	0	0	0	0	0	0	603	903	0
351	4	0	0	0	0	0	0	200	300	0	0	0	0	0	0	0	200	903	0	0	0	0	0	0	0	603	903	0
351	5	0	0	0	0	0	0	200	300	0	0	0	0	0	0	0	200	903	0	0	0	0	0	0	0	603	903	0
351	6	0	0	0	0	0	0	200	300	0	0	0	0	0	0	0	200	903	0	0	0	0	0	0	0	603	903	0
351	7	0	0	0	0	0	0	200	300	0	0	0	0	0	0	0	200	903	0	0	0	0	0	0	0	603	903	0
351	8	0	0	0	0	0	0	200	300	0	0	0	0	0	0	0	200	903	0	0	0	0	0	0	0	603	903	0
351	9	0	0	0	0	0	0	200	300	0	0	0	0	0	0	0	200	903	0	0	0	0	0	0	0	603	903	0
352	0	0	0	0	0	0	0	200	300	0	0	0	0	0	0	0	200	903	0	0	0	0	0	0	0	603	903	0
352	1	0	0	0	0	0	0	200	300	0	0	0	0	0	0	0	200	903	0	0	0	0	0	0	0	603	903	0
352	2	0	0	0	0	0	0	200	300	0	0	0	0	0	0	0	200	903	0	0	0	0	0	0	0	603	903	0
352	3	0	0	0	0	0	0	200	300	0	0	0	0	0	0	0	200	903	0	0	0	0	0	0	0	603	903	0
352	4	0	0	0	0	0	0	200	300	0	0	0	0	0	0	0	200	903	0	0	0	0	0	0	0	603	903	0
352	5	0	0	0	0	0	0	200	300	0	0	0	0	0	0	0	200	903	0	0	0	0	0	0	0	603	903	0
352	6	0	0	0	0	0	0	200	300	0	0	0	0	0	0	0	200	903	0	0	0	0	0	0	0	603	903	0
352	7	0	0	0	0	0	0	200	300	0	0	0	0	0	0	0	200	903	0	0	0	0	0	0	0	603	903	0
352	8	0	0	0	0	0	0	200	300	0	0	0	0	0	0	0	200	903	0	0	0	0	0	0	0	603	903	0
352	9	0	0	0	0	0	0	200	300	0	0	0	0	0	0	0	200	903	0	0	0	0	0	0	0	603	903	0
353	0	0	0	0	0	0	0	200	300	0	0	0	0	0	0	0	200	903	0	0	0	0	0	0	0	603	903	0
353	1	0	0	0	0	0	0	200	300	0	0	0	0	0	0	0	200	903	0	0	0	0	0	0	0	603	903	0
353	2	0	0	0	0	0	0	200	300	0	0	0	0	0	0	0	200	903	0	0	0	0	0	0	0	603	903	0
353	3	0	0	0	0	0	0	200	300	0	0	0	0	0	0	0	200	903	0	0	0	0	0	0	0	603	903	0
353	4	0	0	0	0	0	0	200	300	0	0	0	0	0	0	0	200	903	0	0	0	0	0	0	0	603	903	0
353	5	0	0	0	0	0	0	200	300	0	0	0	0	0	0	0	200	903	0	0	0	0	0	0	0	603	903	0
353	6	0	0	0	0	0	0	200	300	0	0	0	0	0	0	0	200	903	0	0	0	0	0	0	0	603	903	0
353	7	0	0	0	0	0	0	200	300	0	0	0	0	0	0	0	200	903	0	0	0	0	0	0	0	603	903	0
353	8	0	0	0	0	0	0	200	300	0	0	0	0	0	0	0	200	903	0	0	0	0	0	0	0	603	903	0
353	9	0	0	0	0	0	0	200	300	0	0	0	0	0	0	0	200	903	0	0	0	0	0	0	0	603	903	0
354	0	0	0	0	0	0	0	200	300	0	0	0	0	0	0	0	200	903	0	0	0	0	0	0	0	603	903	0
354	1	0	0	0	0	0	0	200	300	0	0	0	0	0	0	0	200	903	0	0	0	0	0	0	0	603	903	0
354	2	0	0	0	0	0	0	200	300	0	0	0	0	0	0	0	200	903	0	0	0	0	0	0	0	603	903	0
354	3	0	0	0	0	0	0	200	300	0	0	0	0	0	0	0	200	903	0	0	0	0	0	0	0	603	903	0
354	4	0	0	0	0	0	0	200	300	0	0	0	0	0	0	0	200	903	0	0	0	0	0	0	0	603	903	0
354	5	0	0	0	0	0	0	200	300	0	0	0	0	0	0	0	200	903	0	0	0	0	0	0	0	603	903	0
354	6	0	0	0	0	0	0	200	300	0	0	0	0	0	0	0	200	903	0	0	0	0	0	0	0	603	903	0
354	7	0	0	0	0	0	0	200	300	0	0	0	0	0	0	0	200	903	0	0	0	0	0	0	0	603	903	0
354	8	0	0	0	0	0	0	200	300	0	0	0	0	0	0	0	200	903	0	0	0	0	0	0	0	603	903	0
354	9	0	0	0	0	0	0	200	300	0	0	0	0	0	0	0	200	903	0	0	0	0	0	0	0	603	903	0
355	0	0	0	0	0	0	0	200	300	0	0	0	0	0	0	0	200	903	0	0	0	0	0	0	0	603	903	0
355	1	0	0	0	0	0	0	200	300	0	0	0	0	0	0	0	200	903	0	0	0	0	0	0	0	603	903	0
355	2	0	0	0	0	0	0	200	300	0	0	0	0	0	0	0	200	903	0	0	0	0	0	0	0	603	903	0
355	3	0	0	0	0	0	0	200	300	0	0	0	0	0	0	0	200	903	0	0	0	0	0	0	0	603	903	0
355	4	0	0	0	0	0	0	200	300	0	0	0	0	0	0	0	200	903	0	0	0	0	0	0	0	603	903	0
355	5	0	0	0	0	0	0	200	300	0	0	0	0	0	0	0	200	903	0	0	0	0	0	0	0	603	903	0
355	6	0	0	0	0	0	0	200	300	0	0	0	0	0	0	0	200	903	0	0	0	0	0	0	0	603	903	0
355	7	0	0	0	0	0	0	200	300	0	0	0	0	0	0	0	200	903	0	0	0	0	0	0	0	603	903	0
355	8	0	0	0	0	0	0	200	300	0	0	0	0	0	0	0	200	903	0	0	0	0	0	0	0	603	903	0
355	9	0	0	0	0	0	0	200	300	0	0	0	0	0	0	0	200	903	0	0	0	0	0	0	0	603	903	0
356	0	0	0	0	0	0	0	200	300	0	0	0	0	0	0	0	200	903	0	0	0	0	0	0	0	603	903	0
356	1	0	0	0	0	0	0	200	300	0	0	0	0	0	0	0	200	903	0	0	0	0	0	0	0	603	903	0
356	2	0	0	0	0	0	0	200	300	0	0	0	0	0	0	0	200	903	0	0	0	0	0	0	0	603	903	0
356	3	0	0	0	0	0	0	200	300	0	0	0	0	0	0	0	200	903	0	0	0	0	0	0	0	603	903	0
356	4	0	0	0	0	0	0	200	300	0	0	0	0	0	0	0	200	903	0	0	0	0	0	0	0	603	903	0
356	5	0	0	0	0	0	0	200	300	0	0	0	0	0	0	0	200	903	0	0	0	0	0	0	0	603	903	0
356	6	0	0	0	0	0	0	200	300	0	0	0	0	0	0	0	200	903	0	0	0	0	0	0	0	603	903	0
356	7	0	0	0	0	0	0	200	300	0	0	0	0	0	0	0	200	903	0	0	0	0	0	0	0	603	903	0
356	8	0	0	0	0	0	0	200	300	0	0	0	0	0	0	0	200	903	0	0	0	0	0	0	0	603	903	0
356	9	0	0	0	0	0	0	200	300	0	0	0	0	0	0	0	200	903	0	0	0	0	0	0	0	603	903	0
357	0	0	0	0	0	0	0	200	300	0	0	0	0	0	0	0	200	903	0	0	0	0	0	0	0	603	903	0
357	1	0	0	0	0	0	0	200	300	0	0	0	0	0	0	0	200	903	0	0	0	0	0	0	0	603	903	0
357	2	0	0	0	0	0	0	200	300	0	0	0	0	0	0	0	200	903	0	0	0	0	0	0	0	603	903	0
357	3	0	0	0	0	0	0	200	300	0	0	0	0	0	0	0	200	903	0	0	0	0	0	0	0	603	903	0
357	4	0	0	0	0	0	0	200	300	0	0	0	0	0	0	0	200	903	0	0	0	0	0	0	0	603	903	0
357	5	0	0	0	0	0	0	200	300	0	0	0	0	0	0	0	200	903	0	0	0	0	0	0	0	603	903	0
357	6	0	0	0	0	0	0	200	300	0	0	0	0	0	0	0	200	903	0	0	0	0	0	0	0	603	903	0
357	7	0	0	0	0	0	0	200	300	0	0	0	0	0	0	0	200	903	0	0	0	0	0	0	0	603	903	0
357	8	0	0	0	0	0	0	200	300	0	0	0	0	0	0	0	200	903	0	0	0	0	0	0	0	603	903	0
357	9	0	0	0	0	0	0	200	300	0	0	0	0	0	0	0	200	903	0	0	0	0	0	0	0	603	903	0
358	0	0	0	0	0	0	0	200	300	0	0	0	0	0	0	0	200	903	0	0	0	0	0	0	0	603	903	0
358	1	0	0	0	0	0	0	200	300	0	0	0	0	0	0	0	200	903	0	0	0	0	0	0	0	603	903	0
358	2	0	0	0	0	0	0	200	300	0	0	0	0	0	0	0	200	903	0	0	0	0	0	0	0	603	903	0
358	3	0	0	0	0	0	0	200	300	0	0	0	0	0	0	0	200	903	0	0	0	0	0	0	0	603	903	0
358	4	0	0	0	0	0	0	200	300	0	0	0	0	0	0	0	200	903	0	0	0	0	0	0	0	603	903	0
358	5	0	0	0	0	0	0	200	300	0	0	0	0	0	0	0	200	903	0	0	0	0	0	0	0	603	903	0
358	6	0	0	0	0	0	0	200	300	0	0	0	0	0	0	0	200	903	0	0	0	0	0	0	0	603	903	0
358	7	0	0	0	0	0	0	200	300	0	0	0	0	0	0	0	200	903	0	0	0	0	0	0	0	603	903	0
358	8	0	0	0	0	0	0	200	300	0	0	0	0	0	0	0	200	903	0	0	0	0	0	0	0	603	903	0
358	9	0	0	0	0	0	0	200	300	0	0	0	0	0	0	0	200	903	0	0	0	0	0	0	0	603	903	0
359	0	0	0	0	0	0	0	200	300	0	0	0	0	0	0	0	200	903	0	0	0	0	0	0	0	603	903	0
359	1	0	0	0	0	0	0	200	300	0	0	0	0	0	0	0	200	903	0	0	0	0	0	0	0	603	903	0
359	2	0	0	0	0	0	0	200	300	0	0	0	0	0	0	0	200	903	0	0	0	0	0	0	0	603	903	0
359	3	0	0	0	0	0	0	200	300	0	0	0	0	0	0	0	200	903	0	0	0	0	0	0	0	603	903	0
359	4	0	0	0	0	0	0	200	300	0	0	0	0	0	0	0	200	903	0	0	0	0	0	0	0	603	903	0
359	5	0	0	0	0	0	0	200	300	0	0	0	0	0	0	0	200	903	0	0	0	0	0	0	0	603	903	0
359	6	0	0	0	0	0	0	200	300	0	0	0	0	0	0	0	200	903	0	0	0	0	0	0	0	603	903	0
359	7	0	0	0	0	0	0	200	300	0	0	0	0	0	0	0	200	903	0	0	0	0	0	0	0	603	903	0
359	8	0	0	0	0	0	0	200	300	0	0	0	0	0	0	0	200	903	0	0	0	0	0	0	0	603	903	0
359	9	0	0	0	0	0	0	200	300	0	0	0	0	0	0	0	200	903	0	0	0	0	0	0	0	603	903	0
360	0	0	0	0	0	0	0	200	300	0	0	0	0	0	0	0	200	903	0	0	0	0	0	0	0	603	903	0
360	1	0	0	0	0	0	0	200	300	0	0	0	0	0	0	0	200	903	0	0	0	0	0	0	0	603	903	0
360	2	0	0	0	0	0	0	200	300	0	0	0	0	0	0	0	200	903	0	0	0	0	0	0	0	603	903	0
360	3	0	0	0	0	0	0	200	300	0	0	0	0	0	0	0	200	903	0	0	0	0	0	0	0	603	903	0
360	4	0	0	0	0	0	0	200	300	0	0	0	0	0	0	0	200	903	0	0	0	0	0	0	0	603	903	0
360	5	0	0	0	0	0	0	200	300	0	0	0	0	0	0	0	200	903	0	0	0	0	0	0	0	603	903	0
360	6	0	0	0	0	0	0	200	300	0	0	0	0	0	0	0	200	903	0	0	0	0	0	0	0	603	903	0
360	7	0	0	0	0	0	0	200	300	0	0	0	0	0	0	0	200	903	0	0	0	0	0	0	0	603	903	0
360	8	0	0	0	0	0	0	200	300	0	0	0	0	0	0	0	200	903	0	0	0	0	0	0	0	603	903	0
360	9	0	0	0	0	0	0	200	300	0	0	0	0	0	0	0	200	903	0	0	0	0	0	0	0	603	903	0
361	0	0	0	0	0	0	0	200	300	0	0	0	0	0	0	0	200	903	0	0	0	0	0	0	0	603	903	0
361	1	0	0	0	0	0	0	200	300	0	0	0	0	0	0	0	200	903	0	0	0	0	0	0	0	603	903	0
361	2	0	0	0	0	0	0	200	300	0	0	0	0	0	0	0	200	903	0	0	0	0	0	0	0	603	903	0
361	3	0	0	0	0	0	0	200	300	0	0	0	0	0	0	0	200	903	0	0	0	0	0	0	0	603	903	0
361	4	0	0	0	0	0	0	200	300	0	0	0	0	0	0	0	200	903	0	0	0	0	0	0	0	603	903	0
361	5	0	0	0	0	0	0	200	300	0	0	0	0	0	0	0	200	903	0	0	0	0	0	0	0	603	903	0
361	6	0	0	0	0	0	0	200	300	0	0	0	0	0	0	0	200	903	0	0	0	0	0	0	0	603	903	0
361	7	0	0	0	0	0	0	200	300	0	0	0	0	0	0	0	200	903	0	0	0	0	0	0	0	603	903	0
361	8	0	0	0	0	0	0	200	300	0	0	0	0	0	0	0	200	903	0	0	0	0	0	0	0	603	903	0
361	9	0	0	0	0	0	0	200	300	0	0	0	0	0	0	0	200	903	0	0	0	0	0	0	0	603	903	0
362	0	0	0	0	0	0	0	200	300	0	0	0	0	0	0	0	200	903	0	0	0	0	0	0	0	603	903	0
362	1	0	0	0	0	0	0	200	300	0	0	0	0	0	0	0	200	903	0	0	0	0	0	0	0	603	903	0
362	2	0	0	0	0	0	0	200	300	0	0	0	0	0	0	0	200	903	0	0	0	0	0	0	0	603	903	0
362	3	0	0	0	0	0	0	200	300	0	0	0	0	0	0	0	200	903	0	0	0	0	0	0	0	603	903	0
362	4	0	0	0	0	0	0	200	300	0	0	0	0	0	0	0	200	903	0	0	0	0	0	0	0	603	903	0
362	5	0	0	0	0	0	0	200	300	0	0	0	0	0	0	0	200	903	0	0	0	0	0	0	0	603	903	0
362	6	0	0	0	0	0	0	200	300	0	0	0	0	0	0	0	200	903	0	0	0	0	0	0	0	603	903	0
362	7	0	0	0	0	0	0	200	300	0	0	0	0	0	0	0	200	903	0	0	0	0	0	0	0	603	903	0
362	8	0	0	0	0	0	0	200	300	0	0	0	0	0	0	0	200	903	0	0	0	0	0	0	0	603	903	0
362	9	0	0	0	0	0	0	200	300	0	0	0	0	0	0	0	200	903	0	0	0	0	0	0	0	603	903	0
363	0	0	0	0	0	0	0	200	300	0	0	0	0	0	0	0	200	903	0	0	0	0	0	0	0	603	903	0
363	1	0	0	0	0	0	0	200	300	0	0	0	0	0	0	0	200	903	0	0	0	0	0	0	0	603	903	0
363	2	0	0	0	0	0	0	200	300	0	0	0	0	0	0	0	200	903	0	0	0	0	0	0	0	603	903	0
363	3	0	0	0	0	0	0	200	300	0	0	0	0	0	0	0	200	903	0	0	0	0	0	0	0	603	903	0
363	4	0	0	0	0	0	0	200	300	0	0	0	0	0	0	0	200	903	0	0	0	0	0	0	0	603	903	0
363	5	0	0	0	0	0	0	200	300	0	0	0	0	0	0	0	200	903	0	0	0	0	0	0	0	603	903	0
363	6	0	0	0	0	0	0	200	300	0	0	0	0	0	0	0	200	903	0	0	0	0	0	0	0	603	903	0
363	7	0	0	0	0	0	0	200	300	0	0	0	0	0	0	0	200	903	0	0	0	0	0	0	0	603	903	0
363	8	0	0	0	0	0	0	200	300	0	0	0	0	0	0	0	200	903	0	0	0	0	0	0	0	603	903	0
363	9	0	0	0	0	0	0	200	300	0	0	0	0	0	0	0	200	903	0	0	0	0	0	0	0	603	903	0
364	0	0	0	0	0	0	0	200	300	0	0	0	0	0	0	0	200	903	0	0	0	0	0	0	0	603	903	0
364	1	0	0	0	0	0	0	200	300	0	0	0	0	0	0	0	200	903	0	0	0	0	0	0	0	603	903	0
364	2	0	0	0	0	0	0	200	300	0	0	0	0	0	0	0	200	903	0	0	0	0	0	0	0	603	903	0
364	3	0	0	0	0	0	0	200	300	0	0	0	0	0	0	0	200	903	0	0	0	0	0	0	0	603	903	0
364	4	0	0	0	0	0	0	200	300	0	0	0	0	0	0	0	200	903	0	0	0	0	0	0	0	603	903	0
364	5	0	0	0	0	0	0	200	300	0	0	0	0	0	0	0	200	903	0	0	0	0	0	0	0	603	903	0
364	6	0	0	0	0	0	0	200	300	0	0	0	0	0	0	0	200	903	0	0	0	0	0	0	0	603	903	0
364	7	0	0	0	0	0	0	200	300	0	0	0	0	0	0	0	200	903	0	0	0	0	0	0	0	603	903	0
364	8	0	0	0	0	0	0	200	300	0	0	0	0	0	0	0	200	903	0	0	0	0	0	0	0	603	903	0
364	9	0	0	0	0	0	0	200	300	0	0	0	0	0	0	0	200	903	0	0	0	0	0	0	0	603	903	0
365	0	0	0	0	0	0	0	200	300	0	0	0	0	0	0	0	200	903	0	0	0	0	0	0	0	603	903	0
365	1	0	0	0	0	0	0	200	300	0	0	0	0	0	0	0	200	903	0	0	0	0	0	0	0	603	903	0
365	2	0	0	0	0	0	0	200	300	0	0	0	0	0	0	0	200	903	0	0	0	0	0	0	0	603	903	0
365	3	0	0	0	0	0	0	200	300	0	0	0	0	0	0	0	200	903	0	0	0	0	0	0	0	603	903	0
365	4	0	0	0	0	0	0	200	300	0	0	0	0	0	0	0	200	903	0	0	0	0	0	0	0	603	903	0
365	5	0	0	0	0	0	0	200	300	0	0	0	0	0	0	0	200	903	0	0	0	0	0	0	0	603	903	0
365	6	0	0	0	0	0	0	200	300	0	0	0	0	0	0	0	200	903	0	0	0	0	0	0	0	603	903	0
365	7	0	0	0	0	0	0	200	300	0	0	0	0	0	0	0	200	903	0	0	0	0	0	0	0	603	903	0
365	8	0	0	0	0	0	0	200	300	0	0	0	0	0	0	0	200	903	0	0	0	0	0	0	0	603	903	0
365	9	0	0	0	0	0	0	200	300	0	0	0	0	0	0	0	200	903	0	0	0	0	0	0	0	603	903	0
366	0	0	0	0	0	0	0	200	300	0	0	0	0	0	0	0	200	903	0	0	0	0	0	0	0	603	903	0
366	1	0	0	0	0	0	0	200	300	0	0	0	0	0	0	0	200	903	0	0	0	0	0	0	0	603	903	0
366	2	0	0	0	0	0	0	200	300	0	0	0	0	0	0	0	200	903	0	0	0	0	0	0	0	603	903	0
366	3	0	0	0	0	0	0	200	300	0	0	0	0	0	0	0	200	903	0	0	0	0	0	0	0	603	903	0
366	4	0	0	0	0	0	0	200	300	0	0	0	0	0	0	0	200	903	0	0	0	0	0	0	0	603	903	0
366	5	0	0	0	0	0	0	200	300	0	0	0	0	0	0	0	200	903	0	0	0	0	0	0	0	603	903	0
366	6	0	0	0	0	0	0	200	300	0	0	0	0	0	0	0	200	903	0	0	0	0	0	0	0	603	903	0
366	7	0	0	0	0	0	0	200	300	0	0	0	0	0	0	0	200	903	0	0	0	0	0	0	0	603	903	0
366	8	0	0	0	0	0	0	200	300	0	0	0	0	0	0	0	200	903	0	0	0	0	0	0	0	603	903	0
366	9	0	0	0	0	0	0	200	300	0	0	0	0	0	0	0	200	903	0	0	0	0	0	0	0	603	903	0
367	0	0	0	0	0	0	0	200	300	0	0	0	0	0	0	0	200	903	0	0	0	0	0	0	0	603	903	0
367	1	0	0	0	0	0	0	200	300	0	0	0	0	0	0	0	200	903	0	0	0	0	0	0	0	603	903	0
367	2	0	0	0	0	0	0	200	300	0	0	0	0	0	0	0	200	903	0	0	0	0	0	0	0	603	903	0
367	3	0	0	0	0	0	0	200	300	0	0	0	0	0	0	0	200	903	0	0	0	0	0	0	0	603	903	0
367	4	0	0	0	0	0	0	200	300	0	0	0	0	0	0	0	200	903	0	0	0	0	0	0	0	603	903	0
367	5	0	0	0	0	0	0	200	300	0	0	0	0	0	0	0	200	903	0	0	0	0	0	0	0	603	903	0
367	6	0	0	0	0	0	0	200	300	0	0	0	0	0	0	0	200	903	0	0	0	0	0	0	0	603	903	0
367	7	0	0	0	0	0	0	200	300	0	0	0	0	0	0	0	200	903	0	0	0	0	0	0	0	603	903	0
367	8	0	0	0	0	0	0	200	300	0	0	0	0	0	0	0	200	903	0	0	0	0	0	0	0	603	903	0
367	9	0	0	0	0	0	0	200	300	0	0	0	0	0	0	0	200	903	0	0	0	0	0	0	0	603	903	0
368	0	0	0	0	0	0	0	200	300	0	0	0	0	0	0	0	200	903	0	0	0	0	0	0	0	603	903	0
368	1	0	0	0	0	0	0	200	300	0	0	0	0	0	0	0	200	903	0	0	0	0	0	0	0	603	903	0
368	2	0	0	0	0	0	0	200	300	0	0	0	0	0	0	0	200	903	0	0	0	0	0	0	0	603	903	0
368	3	0	0	0	0	0	0	200	300	0	0	0	0	0	0	0	200	903	0	0	0	0	0	0	0	603	903	0
368	4	0	0	0	0	0	0	200	300	0	0	0	0	0	0	0	200	903	0	0	0	0	0	0	0	603	903	0
368	5	0	0	0	0	0	0	200	300	0	0	0	0	0	0	0	200	903	0	0	0	0	0	0	0	603	903	0
368	6	0	0	0	0	0	0	200	300	0	0	0	0	0	0	0	200	903	0	0	0	0	0	0	0	603	903	0
368	7	0	0	0	0	0	0	200	300	0	0	0	0	0	0	0	200	903	0	0	0	0	0	0	0	603	903	0
368	8	0	0	0	0	0	0	200	300	0	0	0	0	0	0	0	200	903	0	0	0	0	0	0	0	603	903	0
368	9	0	0	0	0	0	0	200	300	0	0	0	0	0	0	0	200	903	0	0	0	0	0	0	0	603	903	0
369	0	0	0	0	0	0	0	200	300	0	0	0	0	0	0	0	200	903	0	0	0	0	0	0	0	603	903	0
369	1	0	0	0	0	0	0	200	300	0	0	0	0	0	0	0	200	903	0	0	0	0	0	0	0	603	903	0
369	2	0	0	0	0	0	0	200	300	0	0	0	0	0	0	0	200	903	0	0	0	0	0	0	0	603	903	0
369	3	0	0	0	0	0	0	200	300	0	0	0	0	0	0	0	200	903	0	0	0	0	0	0	0	603	903	0
369	4	0	0	0	0	0	0	200	300	0	0	0	0	0	0	0	200	903	0	0	0	0	0	0	0	603	903	0
369	5	0	0	0	0	0	0	200	300	0	0	0	0	0	0	0	200	903	0	0	0	0	0	0	0	603	903	0
369	6	0	0	0	0	0	0	200	300	0	0	0	0	0	0	0	200	903	0	0	0	0	0	0	0	603	903	0
369	7	0	0	0	0	0	0	200	300	0	0	0	0	0	0	0	200	903	0	0	0	0	0	0	0	603	903	0
369	8	0	0	0	0	0	0	200	300	0	0	0	0	0	0	0	200	903	0	0	0	0	0	0	0	603	903	0
369	9	0	0	0	0	0	0	200	300	0	0	0	0	0	0	0	200	903	0	0	0	0	0	0	0	603	903	0
370	0	0	0	0	0	0	0	200	300	0	0	0	0	0	0	0	200	903	0	0	0	0	0	0	0	603	903	0
370	1	0	0	0	0	0	0	200	300	0	0	0	0	0	0	0	200	903	0	0	0	0	0	0	0	603	903	0
370	2	0	0	0	0	0	0	200	300	0	0	0	0	0	0	0	200	903	0	0	0	0	0	0	0	603	903	0
370	3	0	0	0	0	0	0	200	300	0	0	0	0	0	0	0	200	903	0	0	0	0	0	0	0	603	903	0
370	4	0	0	0	0	0	0	200	300	0	0	0	0	0	0	0	200	903	0	0	0	0	0	0	0	603	903	0
370	5	0	0	0	0	0	0	200	300	0	0	0	0	0	0	0	200	903	0	0	0	0	0	0	0	603	903	0
370	6	0	0	0	0	0	0	200	300	0	0	0	0	0	0	0	200	903	0	0	0	0	0	0	0	603	903	0
370	7	0	0	0	0	0	0	200	300	0	0	0	0	0	0	0	200	903	0	0	0	0	0	0	0	603	903	0
370	8	0	0	0	0	0	0	200	300	0	0	0	0	0	0	0	200	903	0	0	0	0	0	0	0	603	903	0
370	9	0	0	0	0	0	0	200	300	0	0	0	0	0	0	0	200	903	0	0	0	0	0	0	0	603	903	0
371	0	0	0	0	0	0	0	200	300	0	0	0	0	0	0	0	200	903	0	0	0	0	0	0	0	603	903	0
371	1	0	0	0	0	0	0	200	300	0	0	0	0	0	0	0	200	903	0	0	0	0	0	0	0	603	903	0
371	2	0	0	0	0	0	0	200	300	0	0	0	0	0	0	0	200	903	0	0	0	0	0	0	0	603	903	0
371	3	0	0	0	0	0	0	200	300	0	0	0	0	0	0	0	200	903	0	0	0	0	0	0	0	603	903	0
371	4	0	0	0	0	0	0	200	300	0	0	0	0	0	0	0	200	903	0	0	0	0	0	0	0	603	903	0
371	5	0	0	0	0	0	0	200	300	0	0	0	0	0	0	0	200	903	0	0	0	0	0	0	0	603	903	0
371	6	0	0	0	0	0	0	200	300	0	0	0	0	0	0	0	200	903	0	0	0	0	0	0	0	603	903	0
371	7	0	0	0	0	0	0	200	300	0	0	0	0	0	0	0	200	903	0	0	0	0	0	0	0	603	903	0
371	8	0	0	0	0	0	0	200	300	0	0	0	0	0	0	0	200	903	0	0	0	0	0	0	0	603	903	0
371	9	0	0	0	0	0	0	200	300	0	0	0	0	0	0	0	200	903	0	0	0	0	0	0	0	603	903	0
372	0	0	0	0	0	0	0	200	300	0	0	0	0	0	0	0	200	903	0	0	0	0	0	0	0	603	903	0
372	1	0	0	0	0	0	0	200	300	0	0	0	0	0	0	0	200	903	0	0	0	0	0	0	0	603	903	0
372	2	0	0	0	0	0	0	200	300	0	0	0	0	0	0	0	200	903	0	0	0	0	0	0	0	603	903	0
372	3	0	0	0	0	0	0	200	300	0	0	0	0	0	0	0	200	903	0	0	0	0	0	0	0	603	903	0
372	4	0	0	0	0	0	0	200	300	0	0	0	0	0	0	0	200	903	0	0	0	0	0	0	0	603	903	0
372	5	0	0	0	0	0	0	200	300	0	0	0	0	0	0	0	200	903	0	0	0	0	0	0	0	603	903	0
372	6	0	0	0	0	0	0	200	300	0	0	0	0	0	0	0	200	903	0	0	0	0	0	0	0	603	903	0
372	7	0	0	0	0	0	0	200	300	0	0	0	0	0	0	0	200	903	0	0	0	0	0	0	0	603	903	0
372	8	0	0	0	0	0	0	200	300	0	0	0	0	0	0	0	200	903	0	0	0	0	0	0	0	603	903	0
372	9	0	0	0	0	0	0	200	300	0	0	0	0	0	0	0	200	903	0	0	0	0	0	0	0	603	903	0
373	0	0	0	0	0	0	0	200	300	0	0	0	0	0	0	0	200	903	0	0	0	0	0	0	0	603	903	0
373	1	0	0	0	0	0	0	200	300	0	0	0	0	0	0	0	200	903	0	0	0	0	0	0	0	603	903	0
373	2	0	0	0	0	0	0	200	300	0	0	0	0	0	0	0	200	903	0	0	0	0	0	0	0	603	903	0
373	3	0	0	0	0	0	0	200	300	0	0	0	0	0	0	0	200	903	0	0	0	0	0	0	0	603	903	0
373	4	0	0	0	0	0	0	200	300	0	0	0	0	0	0	0	200	903	0	0	0	0	0	0	0	603	903	0
373	5	0	0	0	0	0	0	200	300	0	0	0	0	0	0	0	200	903	0	0	0	0	0	0	0	603	903	0
373	6	0	0	0	0	0	0	200	300	0	0	0	0	0	0	0	200	903	0	0	0	0	0	0	0	603	903	0
373	7	0	0	0	0	0	0	200	300	0	0	0	0	0	0	0	200	903	0	0	0	0	0	0	0	603	903	0
373	8	0	0	0	0	0	0	200	300	0	0	0	0	0	0	0	200	903	0	0	0	0	0	0	0	603	903	0
373	9	0	0	0	0	0	0	200	300	0	0	0	0	0	0	0	200	903	0	0	0	0	0	0	0	603	903	0
374	0	0	0	0	0	0	0	200	300	0	0	0	0	0	0	0	200	903	0	0	0	0	0	0	0	603	903	0
374	1	0	0	0	0	0	0	200	300	0	0	0	0	0	0	0	200	903	0	0	0	0	0	0	0	603	903	0
374	2	0	0	0	0	0	0	200	300	0	0	0	0	0	0	0	200	903	0	0	0	0	0	0	0	603	903	0
374	3	0	0	0	0	0	0	200	300	0	0	0	0	0	0	0	200	903	0	0	0	0	0	0	0	603	903	0
374	4	0	0	0	0	0	0	200	300	0	0	0	0	0	0	0	200	903	0	0	0	0	0	0	0	603	903	0
374	5	0	0	0	0	0	0	200	300	0	0	0	0	0	0	0	200	903	0	0	0	0	0	0	0	603	903	0
374	6	0	0	0	0	0	0	200	300	0	0	0	0	0	0	0	200	903	0	0	0	0	0	0	0	603	903	0
374	7	0	0	0	0	0	0	200	300	0	0	0	0	0	0	0	200	903	0	0	0	0	0	0	0	603	903	0
374	8	0	0	0	0	0	0	200	300	0	0	0	0	0	0	0	200	903	0	0	0	0	0	0	0	603	903	0
374	9	0	0	0	0	0	0	200	300	0	0	0	0	0	0	0	200	903	0	0	0	0	0	0	0	603	903	0
375	0	0	0	0	0	0	0	200	300	0	0	0	0	0	0	0	200	903	0	0	0	0	0	0	0	603	903	0
375	1	0	0	0	0	0	0	200	300	0	0	0	0	0	0	0	200	903	0	0	0	0	0	0	0	603	903	0
375	2	0	0	0	0	0	0	200	300	0	0	0	0	0	0	0	200	903	0	0	0	0	0	0	0	603	903	0
375	3	0	0	0	0	0	0	200	300	0	0	0	0	0	0	0	200	903	0	0	0	0	0	0	0	603	903	0
375	4	0	0	0	0	0	0	200	300	0	0	0	0	0	0	0	200	903	0	0	0	0	0	0	0	603	903	0
375	5	0	0	0	0	0	0	200	300	0	0	0	0	0	0	0	200	903	0	0	0	0	0	0	0	603	903	0
375	6	0	0	0	0	0	0	200	300	0	0	0	0	0	0	0	200	903	0	0	0	0	0	0	0	603	903	0
375	7	0	0	0	0	0	0	200	300	0	0	0	0	0	0	0	200	903	0	0	0	0	0	0	0	603	903	0
375	8	0	0	0	0	0	0	200	300	0	0	0	0	0	0	0	200	903	0	0	0	0	0	0	0	603	903	0
375	9	0	0	0	0	0	0	200	300	0	0	0	0	0	0	0	200	903	0	0	0	0	0	0	0	603	903	0
376	0	0	0	0	0	0	0	200	300	0	0	0	0	0	0	0	200	903	0	0	0	0	0	0	0	603	903	0
376	1	0	0	0	0	0	0	200	300	0	0	0	0	0	0	0	200	903	0	0	0	0	0	0	0	603	903	0
376	2	0	0	0	0	0	0	200	300	0	0	0	0	0	0	0	200	903	0	0	0	0	0	0	0	603	903	0
376	3	0	0	0	0	0	0	200	300	0	0	0	0	0	0	0	200	903	0	0	0	0	0	0	0	603	903	0
376	4	0	0	0	0	0	0	200	300	0	0	0	0	0	0	0	200	903	0	0	0	0	0	0	0	603	903	0
376	5	0	0	0	0	0	0	200	300	0	0	0	0	0	0	0	200	903	0	0	0	0	0	0	0	603	903	0
376	6	0	0	0	0	0	0	200	300	0	0	0	0	0	0	0	200	903	0	0	0	0	0	0	0	603	903	0
376	7	0	0	0	0	0	0	200	300	0	0	0	0	0	0	0	200	903	0	0	0	0	0	0	0	603	903	0
376	8	0	0	0	0	0	0	200	300	0	0	0	0	0	0	0	200	903	0	0	0	0	0	0	0	603	903	0
376	9	0	0	0	0	0	0	200	300	0	0	0	0	0	0	0	200	903	0	0	0	0	0	0	0	603	903	0
377	0	0	0	0	0	0	0	200	300	0	0	0	0	0	0	0	200	903	0	0	0	0	0	0	0	603	903	0
377	1	0	0	0	0	0	0	200	300	0	0	0	0	0	0	0	200	903	0	0	0	0	0	0	0	603	903	0
377	2	0	0	0	0	0	0	200	300	0	0	0	0	0	0	0	200	903	0	0	0	0	0	0	0	603	903	0
377	3	0	0	0	0	0	0	200	300	0	0	0	0	0	0	0	200	903	0	0	0	0	0	0	0	603	903	0
377	4	0	0	0	0	0	0	200	300	0	0	0	0	0	0	0	200	903	0	0	0	0	0	0	0	603	903	0
377	5	0	0	0	0	0	0	200	300	0	0	0	0	0	0	0	200	903	0	0	0	0	0	0	0	603	903	0
377	6	0	0	0	0	0	0	200	300	0	0	0	0	0	0	0	200	903	0	0	0	0	0	0	0	603	903	0
377	7	0	0	0	0	0	0	200	300	0	0	0	0	0	0	0	200	903	0	0	0	0	0	0	0	603	903	0
377	8	0	0	0	0	0	0	200	300	0	0	0	0	0	0	0	200	903	0	0	0	0	0	0	0	603	903	0
377	9	0	0	0	0	0	0	200	300	0	0	0	0	0	0	0	200	903	0	0	0	0	0	0	0	603	903	0
378	0	0	0	0	0	0	0	200	300	0	0	0	0	0	0	0	200	903	0	0	0	0	0	0	0	603	903	0
378	1	0	0	0	0	0	0	200	300	0	0	0	0	0	0	0	200	903	0	0	0	0	0	0	0	603	903	0
378	2	0	0	0	0	0	0	200	300	0	0	0	0	0	0	0	200	903	0	0	0	0	0	0	0	603	903	0
378	3	0	0	0	0	0	0	200	300	0	0	0	0	0	0	0	200	903	0	0	0	0	0	0	0	603	903	0
378	4	0	0	0	0	0	0	200	300	0	0	0	0	0	0	0	200	903	0	0	0	0	0	0	0	603	903	0
378	5	0	0	0	0	0	0	200	300	0	0	0	0	0	0	0	200	903	0	0	0	0	0	0	0	603	903	0
378	6	0	0	0	0	0	0	200	300	0	0	0	0	0	0	0	200	903	0	0	0	0	0	0	0	603	903	0
378	7	0	0	0	0	0	0	200	300	0	0	0	0	0	0	0	200	903	0	0	0	0	0	0	0	603	903	0
378	8	0	0	0	0	0	0	200	300	0	0	0	0	0	0	0	200	903	0	0	0	0	0	0	0	603	903	0
378	9	0	0	0	0	0	0	200	300	0	0	0	0	0	0	0	200	903	0	0	0	0	0	0	0	603	903	0
379	0	0	0	0	0	0	0	200	300	0	0	0	0	0	0	0	200	903	0	0	0	0	0	0	0	603	903	0
379	1	0	0	0	0	0	0	200	300	0	0	0	0	0	0	0	200	903	0	0	0	0	0	0	0	603	903	0
379	2	0	0	0	0	0	0	200	300	0	0	0	0	0	0	0	200	903	0	0	0	0	0	0	0	603	903	0
379	3	0	0	0	0	0	0	200	300	0	0	0	0	0	0	0	200	903	0	0	0	0	0	0	0	603	903	0
379	4	0	0	0	0	0	0	200	300	0	0	0	0	0	0	0	200	903	0	0	0	0	0	0	0	603	903	0
379	5	0	0	0	0	0	0	200	300	0	0	0	0	0	0	0	200	903	0	0	0	0	0	0	0	603	903	0
379	6	0	0	0	0	0	0	200	300	0	0	0	0	0	0	0	200	903	0	0	0	0	0	0	0	603	903	0
379	7	0	0	0	0	0	0	200	300	0	0	0	0	0	0	0	200	903	0	0	0	0	0	0	0	603	903	0
379	8	0	0	0	0	0	0	200	300	0	0	0	0	0	0	0	200	903	0	0	0	0	0	0	0	603	903	0
379	9	0	0	0	0	0	0	200	300	0	0	0	0	0	0	0	200	903	0	0	0	0	0	0	0	603	903	0
380	0	0	0	0	0	0	0	200	300	0	0	0	0	0	0	0	200	903	0	0	0	0	0	0	0	603	903	0
380	1	0	0	0	0	0	0	200	300	0	0	0	0	0	0	0	200	903	0	0	0	0	0	0	0	603	903	0
380	2	0	0	0	0	0	0	200	300	0	0	0	0	0	0	0	200	903	0	0	0	0	0	0	0	603	903	0
380	3	0	0	0	0	0	0	200	300	0	0	0	0	0	0	0	200	903	0	0	0	0	0	0	0	603	903	0
380	4	0	0	0	0	0	0	200	300	0	0	0	0	0	0	0	200	903	0	0	0	0	0	0	0	603	903	0
380	5	0	0	0	0	0	0	200	300	0	0	0	0	0	0	0	200	903	0	0	0	0	0	0	0	603	903	0
380	6	0	0	0	0	0	0	200	300	0	0	0	0	0	0	0	200	903	0	0	0	0	0	0	0	603	903	0
380	7	0	0	0	0	0	0	200	300	0	0	0	0	0	0	0	200	903	0	0	0	0	0	0	0	603	903	0
380	8	0	0	0	0	0	0	200	300	0	0	0	0	0	0	0	200	903	0	0	0	0	0	0	0	603	903	0
380	9	0	0	0	0	0	0	200	300	0	0	0	0	0	0	0	200	903	0	0	0	0	0	0	0	603	903	0
381	0	0	0	0	0	0	0	200	300	0	0	0	0	0	0	0	200	903	0	0	0	0	0	0	0	603	903	0
381	1	0	0	0	0	0	0	200	300	0	0	0	0	0	0	0	200	903	0	0	0	0	0	0	0	603	903	0
381	2	0	0	0	0	0	0	200	300	0	0	0	0	0	0	0	200	903	0	0	0	0	0	0	0	603	903	0
381	3	0	0	0	0	0	0	200	300	0	0	0	0	0	0	0	200	903	0	0	0	0	0	0	0	603	903	0
381	4	0	0	0	0	0	0	200	300	0	0	0	0	0	0	0	200	903	0	0	0	0	0	0	0	603	903	0
381	5	0	0	0	0	0	0	200	300	0	0	0	0	0	0	0	200	903	0	0	0	0	0	0	0	603	903	0
381	6	0	0	0	0	0	0	200	300	0	0	0	0	0	0	0	200	903	0	0	0	0	0	0	0	603	903	0
381	7	0	0	0	0	0	0	200	300	0	0	0	0	0	0	0	200	903	0	0	0	0	0	0	0	603	903	0
381	8	0	0	0	0	0	0	200	300	0	0	0	0	0	0	0	200	903	0	0	0	0	0	0	0	603	903	0
381	9	0	0	0	0	0	0	200	300	0	0	0	0	0	0	0	200	903	0	0	0	0	0	0	0	603	903	0
382	0	0	0	0	0	0	0	200	300	0	0	0	0	0	0	0	200	903	0	0	0	0	0	0	0	603	903	0
382	1	0	0	0	0	0	0	200	300	0	0	0	0	0	0	0	200	903	0	0	0	0	0	0	0	603	903	0
382	2	0	0	0	0	0	0	200	300	0	0	0	0	0	0	0	200	903	0	0	0	0	0	0	0	603	903	0
382	3	0	0	0	0	0	0	200	300	0	0	0	0	0	0	0	200	903	0	0	0	0	0	0	0	603	903	0
382	4	0	0	0	0	0	0	200	300	0	0	0	0	0	0	0	200	903	0	0	0	0	0	0	0	603	903	0
382	5	0	0	0	0	0	0	200	300	0	0	0	0	0	0	0	200	903	0	0	0	0	0	0	0	603	903	0
382	6	0	0	0	0	0	0	200	300	0	0	0	0	0	0	0	200	903	0	0	0	0	0	0	0	603	903	0
382	7	0	0	0	0	0	0	200	300	0	0	0	0	0	0	0	200	903	0	0	0	0	0	0	0	603	903	0
382	8	0	0	0	0	0	0	200	300	0	0	0	0	0	0	0	200	903	0	0	0	0	0	0	0	603	903	0
382	9	0	0	0	0	0	0	200	300	0	0	0	0	0	0	0	200	903	0	0	0	0	0	0	0	603	903	0
383	0	0	0	0	0	0	0	200	300	0	0	0	0	0	0	0	200	903	0	0	0	0	0	0	0	603	903	0
383	1	0	0	0	0	0	0	200	300	0	0	0	0	0	0	0	200	903	0	0	0	0	0	0	0	603	903	0
383	2	0	0	0	0	0	0	200	300	0	0	0	0	0	0	0	200	903	0	0	0	0	0	0	0	603	903	0
383	3	0	0	0	0	0	0	200	300	0	0	0	0	0	0	0	200	903	0	0	0	0	0	0	0	603	903	0
383	4	0	0	0	0	0	0	200	300	0	0	0	0	0	0	0	200	903	0	0	0	0	0	0	0	603	903	0
383	5	0	0	0	0	0	0	200	300	0	0	0	0	0	0	0	200	903	0	0	0	0	0	0	0	603	903	0
383	6	0	0	0	0	0	0	200	300	0	0	0	0	0	0	0	200	903	0	0	0	0	0	0	0	603	903	0
383	7	0	0	0	0	0	0	200	300	0	0	0	0	0	0	0	200	903	0	0	0	0	0	0	0	603	903	0
383	8	0	0	0	0	0	0	200	300	0	0	0	0	0	0	0	200	903	0	0	0	0	0	0	0	603	903	0
383	9	0	0	0	0	0	0	200	300	0	0	0	0	0	0	0	200	903	0	0	0	0	0	0	0	603	903	0
384	0	0	0	0	0	0	0	200	300	0	0	0	0	0	0	0	200	903	0	0	0	0	0	0	0	603	903	0
384	1	0	0	0	0	0	0	200	300	0	0	0	0	0	0	0	200	903	0	0	0	0	0	0	0	603	903	0
384	2	0	0	0	0	0	0	200	300	0	0	0	0	0	0	0	200	903	0	0	0	0	0	0	0	603	903	0
384	3	0	0	0	0	0	0	200	300	0	0	0	0	0	0	0	200	903	0	0	0	0	0	0	0	603	903	0
384	4	0	0	0	0	0	0	200	300	0	0	0	0	0	0	0	200	903	0	0	0	0	0	0	0	603	903	0
384	5	0	0	0	0	0	0	200	300	0	0	0	0	0	0	0	200	903	0	0	0	0	0	0	0	603	903	0
384	6	0	0	0	0	0	0	200	300	0	0	0	0	0	0	0	200	903	0	0	0	0	0	0	0	603	903	0
384	7	0	0	0	0	0	0	200	300	0	0	0	0	0	0	0	200	903	0	0	0	0	0	0	0	603	903	0
384	8	0	0	0	0	0	0	200	300	0	0	0	0	0	0	0	200	903	0	0	0	0	0	0	0	603	903	0
384	9	0	0	0	0	0	0	200	300	0	0	0	0	0	0	0	200	903	0	0	0	0	0	0	0	603	903	0
385	0	0	0	0	0	0	0	200	300	0	0	0	0	0	0	0	200	903	0	0	0	0	0	0	0	603	903	0
385	1	0	0	0	0	0	0	200	300	0	0	0	0	0	0	0	200	903	0	0	0	0	0	0	0	603	903	0
385	2	0	0	0	0	0	0	200	300	0	0	0	0	0	0	0	200	903	0	0	0	0	0	0	0	603	903	0
385	3	0	0	0	0	0	0	200	300	0	0	0	0	0	0	0	200	903	0	0	0	0	0	0	0	603	903	0
385	4	0	0	0	0	0	0	200	300	0	0	0	0	0	0	0	200	903	0	0	0	0	0	0	0	603	903	0
385	5	0	0	0	0	0	0	200	300	0	0	0	0	0	0	0	200	903	0	0	0	0	0	0	0	603	903	0
385	6	0	0	0	0	0	0	200	300	0	0	0	0	0	0	0	200	903	0	0	0	0	0	0	0	603	903	0
385	7	0	0	0	0	0	0	200	300	0	0	0	0	0	0	0	200	903	0	0	0	0	0	0	0	603	903	0
385	8	0	0	0	0	0	0	200	300	0	0	0	0	0	0	0	200	903	0	0	0	0	0	0	0	603	903	0
385	9	0	0	0	0	0	0	200	300	0	0	0	0	0	0	0	200	903	0	0	0	0	0	0	0	603	903	0
386	0	0	0	0	0	0	0	200	300	0	0	0	0	0	0	0	200	903	0	0	0	0	0	0	0	603	903	0
386	1	0	0	0	0	0	0	200	300	0	0	0	0	0	0	0	200	903	0	0	0	0	0	0	0	603	903	0
386	2	0	0	0	0	0	0	200	300	0	0	0	0	0	0	0	200	903	0	0	0	0	0	0	0	603	903	0
386	3	0	0	0	0	0	0	200	300	0	0	0	0	0	0	0	200	903	0	0	0	0	0	0	0	603	903	0
386	4	0	0	0	0	0	0	200	300	0	0	0	0	0	0	0	200	903	0	0	0	0	0	0	0	603	903	0
386	5	0	0	0	0	0	0	200	300	0	0	0	0	0	0	0	200	903	0	0	0	0	0	0	0	603	903	0
386	6	0	0	0	0	0	0	200	300	0	0	0	0	0	0	0	200	903	0	0	0	0	0	0	0	603	903	0
386	7	0	0	0	0	0	0	200	300	0	0	0	0	0	0	0	200	903	0	0	0	0	0	0	0	603	903	0
386	8	0	0	0	0	0	0	200	300	0	0	0	0	0	0	0	200	903	0	0	0	0	0	0	0	603	903	0
386	9	0	0	0	0	0	0	200	300	0	0	0	0	0	0	0	200	903	0	0	0	0	0	0	0	603	903	0
387	0	0	0	0	0	0	0	200	300	0	0	0	0	0	0	0	200	903	0	0	0	0	0	0	0	603	903	0
387	1	0	0	0	0	0	0	200	300	0	0	0	0	0	0	0	200	903	0	0	0	0	0	0	0	603	903	0
387	2	0	0	0	0	0	0	200	300	0	0	0	0	0	0	0	200	903	0	0	0	0	0	0	0	603	903	0
387	3	0	0	0	0	0	0	200	300	0	0	0	0	0	0	0	200	903	0	0	0	0	0	0	0	603	903	0
387	4	0	0	0	0	0	0	200	300	0	0	0	0	0	0	0	200	903	0	0	0	0	0	0	0	603	903	0
387	5	0	0	0	0	0	0	200	300	0	0	0	0	0	0	0	200	903	0	0	0	0	0	0	0	603	903	0
387	6	0	0	0	0	0	0	200	300	0	0	0	0	0	0	0	200	903	0	0	0	0	0	0	0	603	903	0
387	7	0	0	0	0	0	0	200	300	0	0	0	0	0	0	0	200	903	0	0	0	0	0	0	0	603	903	0
387	8	0	0	0	0	0	0	200	300	0	0	0	0	0	0	0	200	903	0	0	0	0	0	0	0	603	903	0
387	9	0	0	0	0	0	0	200	300	0	0	0	0	0	0	0	200	903	0	0	0	0	0	0	0	603	903	0
388	0	0	0	0	0	0	0	200	300	0	0	0	0	0	0	0	200	903	0	0	0	0	0	0	0	603	903	0
388	1	0	0	0	0	0	0	200	300	0	0	0	0	0	0	0	200	903	0	0	0	0	0	0	0	603	903	0
388	2	0	0	0	0	0	0	200	300	0	0	0	0	0	0	0	200	903	0	0	0	0	0	0	0	603	903	0
388	3	0	0	0	0	0	0	200	300	0	0	0	0	0	0	0	200	903	0	0	0	0	0	0	0	603	903	0
388	4	0	0	0	0	0	0	200	300	0	0	0	0	0	0	0	200	903	0	0	0	0	0	0	0	603	903	0
388	5	0	0	0	0	0	0	200	300	0	0	0	0	0	0	0	200	903	0	0	0	0	0	0	0	603	903	0
388	6	0	0	0	0	0	0	200	300	0	0	0	0	0	0	0	200	903	0	0	0	0	0	0	0	603	903	0
388	7	0	0	0	0	0	0	200	300	0	0	0	0	0	0	0	200	903	0	0	0	0	0	0	0	603	903	0
388	8	0	0	0	0	0	0	200	300	0	0	0	0	0	0	0	200	903	0	0	0	0	0	0	0	603	903	0
388	9	0	0	0	0	0	0	200	300	0	0	0	0	0	0	0	200	903	0	0	0	0	0	0	0	603	903	0
389	0	0	0	0	0	0	0	200	300	0	0	0	0	0	0	0	200	903	0	0	0	0	0	0	0	603	903	0
389	1	0	0	0	0	0	0	200	300	0	0	0	0	0	0	0	200	903	0	0	0	0	0	0	0	603	903	0
389	2	0	0	0	0	0	0	200	300	0	0	0	0	0	0	0	200	903	0	0	0	0	0	0	0	603	903	0
389	3	0	0	0	0	0	0	200	300	0	0	0	0	0	0	0	200	903	0	0	0	0	0	0	0	603	903	0
389	4	0	0	0	0	0	0	200	300	0	0	0	0	0	0	0	200	903	0	0	0	0	0	0	0	603	903	0
389	5	0	0	0	0	0	0	200	300	0	0	0	0	0	0	0	200	903	0	0	0	0	0	0	0	603	903	0
389	6	0	0	0	0	0	0	200	300	0	0	0	0	0	0	0	200	903	0	0	0	0	0	0	0	603	903	0
389	7	0	0	0	0	0	0	200	300	0	0	0	0	0	0	0	200	903	0	0	0	0	0	0	0	603	903	0
389	8	0	0	0	0	0	0	200	300	0	0	0	0	0	0	0	200	903	0	0	0	0	0	0	0	603	903	0
389	9	0	0	0	0	0	0	200	300	0	0	0	0	0	0	0	200	903	0	0	0	0	0	0	0	603	903	0
390	0	0	0	0	0	0	0	200	300	0	0	0	0	0	0	0	200	903	0	0	0	0	0	0	0	603	903	0
390	1	0	0	0	0	0	0	200	300	0	0	0	0	0	0	0	200	903	0	0	0	0	0	0	0	603	903	0
390	2	0	0	0	0	0	0	200	300	0	0	0	0	0	0	0	200	903	0	0	0	0	0	0	0	603	903	0
390	3	0	0	0	0	0	0	200	300	0	0	0	0	0	0	0	200	903	0	0	0	0	0	0	0	603	903	0
390	4	0	0	0	0	0	0	200	300	0	0	0	0	0	0	0	200	903	0	0	0	0	0	0	0	603	903	0
390	5	0	0	0	0	0	0	200	300	0	0	0	0	0	0	0	200	903	0	0	0	0	0	0	0	603	903	0
390	6	0	0	0	0	0	0	200	300	0	0	0	0	0	0	0	200	903	0	0	0	0	0	0	0	603	903	0
390	7	0	0	0	0	0	0	200	300	0	0	0	0	0	0	0	200	903	0	0	0	0	0	0	0	603	903	0
390	8	0	0	0	0	0	0	200	300	0	0	0	0	0	0	0	200	903	0	0	0	0	0	0	0	603	903	0
390	9	0	0	0	0	0	0	200	300	0	0	0	0	0	0	0	200	903	0	0	0	0	0	0	0	603	903	0
391	0	0	0	0	0	0	0	200	300	0	0	0	0	0	0	0	200	903	0	0	0	0	0	0	0	603	903	0
391	1	0	0	0	0	0	0	200	300	0	0	0	0	0	0	0	200	903	0	0	0	0	0	0	0	603	903	0
391	2	0	0	0	0	0	0	200	300	0	0	0	0	0	0	0	200	903	0	0	0	0	0	0	0	603	903	0
391	3	0	0	0	0	0	0	200	300	0	0	0	0	0	0	0	200	903	0	0	0	0	0	0	0	603	903	0
391	4	0	0	0	0	0	0	200	300	0	0	0	0	0	0	0	200	903	0	0	0	0	0	0	0	603	903	0
391	5	0	0	0	0	0	0	200	300	0	0	0	0	0	0	0	200	903	0	0	0	0	0	0	0	603	903	0
391	6	0	0	0	0	0	0	200	300	0	0	0	0	0	0	0	200	903	0	0	0	0	0	0	0	603	903	0
391	7	0	0	0	0	0	0	200	300	0	0	0	0	0	0	0	200	903	0	0	0	0	0	0	0	603	903	0
391	8	0	0	0	0	0	0	200	300	0	0	0	0	0	0	0	200	903	0	0	0	0	0	0	0	603	903	0
391	9	0	0	0	0	0	0	200	300	0	0	0	0	0	0	0	200	903	0	0	0	0	0	0	0	603	903	0
392	0	0	0	0	0	0	0	200	300	0	0	0	0	0	0	0	200	903	0	0	0	0	0	0	0	603	903	0
392	1	0	0	0	0	0	0	200	300	0	0	0	0	0	0	0	200	903	0	0	0	0	0	0	0	603	903	0
392	2	0	0	0	0	0	0	200	300	0	0	0	0	0	0	0	200	903	0	0	0	0	0	0	0	603	903	0
392	3	0	0	0	0	0	0	200	300	0	0	0	0	0	0	0	200	903	0	0	0	0	0	0	0	603	903	0
392	4	0	0	0	0	0	0	200	300	0	0	0	0	0	0	0	200	903	0	0	0	0	0	0	0	603	903	0
392	5	0	0	0	0	0	0	200	300	0	0	0	0	0	0	0	200	903	0	0	0	0	0	0	0	603	903	0
392	6	0	0	0	0	0	0	200	300	0	0	0	0	0	0	0	200	903	0	0	0	0	0	0	0	603	903	0
392	7	0	0	0	0	0	0	200	300	0	0	0	0	0	0	0	200	903	0	0	0	0	0	0	0	603	903	0
392	8	0	0	0	0	0	0	200	300	0	0	0	0	0	0	0	200	903	0	0	0	0	0	0	0	603	903	0
392	9	0	0	0	0	0	0	200	300	0	0	0	0	0	0	0	200	903	0	0	0	0	0	0	0	603	903	0
393	0	0	0	0	0	0	0	200	300	0	0	0	0	0	0	0	200	903	0	0	0	0	0	0	0	603	903	0
393	1	0	0	0	0	0	0	200	300	0	0	0	0	0	0	0	200	903	0	0	0	0	0	0	0	603	903	0
393	2	0	0	0	0	0	0	200	300	0	0	0	0	0	0	0	200	903	0	0	0	0	0	0	0	603	903	0
393	3	0	0	0	0	0	0	200	300	0	0	0	0	0	0	0	200	903	0	0	0	0	0	0	0	603	903	0
393	4	0	0	0	0	0	0	200	300	0	0	0	0	0	0	0	200	903	0	0	0	0	0	0	0	603	903	0
393	5	0	0	0	0	0	0	200	300	0	0	0	0	0	0	0	200	903	0	0	0	0	0	0	0	603	903	0
393	6	0	0	0	0	0	0	200	300	0	0	0	0	0	0	0	200	903	0	0	0	0	0	0	0	603	903	0
393	7	0	0	0	0	0	0	200	300	0	0	0	0	0	0	0	200	903	0	0	0	0	0	0	0	603	903	0
393	8	0	0	0	0	0	0	200	300	0	0	0	0	0	0	0	200	903	0	0	0	0	0	0	0	603	903	0
393	9	0	0	0	0	0	0	200	300	0	0	0	0	0	0	0	200	903	0	0	0	0	0	0	0	603	903	0
394	0	0	0	0	0	0	0	200	300	0	0	0	0	0	0	0	200	903	0	0	0	0	0	0	0	603	903	0
394	1	0	0	0	0	0	0	200	300	0	0	0	0	0	0	0	200	903	0	0	0	0	0	0	0	603	903	0
394	2	0	0	0	0	0	0	200	300	0	0	0	0	0	0	0	200	903	0	0	0	0	0	0	0	603	903	0
394	3	0	0	0	0	0	0	200	300	0	0	0	0	0	0	0	200	903	0	0	0	0	0	0	0	603	903	0
394	4	0	0	0	0	0	0	200	300	0	0	0	0	0	0	0	200	903	0	0	0	0	0	0	0	603	903	0
394	5	0	0	0	0	0	0	200	300	0	0	0	0	0	0	0	200	903	0	0	0	0	0	0	0	603	903	0
394	6	0	0	0	0	0	0	200	300	0	0	0	0	0	0	0	200	903	0	0	0	0	0	0	0	603	903	0
394	7	0	0	0	0	0	0	200	300	0	0	0	0	0	0	0	200	903	0	0	0	0	0	0	0	603	903	0
394	8	0	0	0	0	0	0	200	300	0	0	0	0	0	0	0	200	903	0	0	0	0	0	0	0	603	903	0
394	9	0	0	0	0	0	0	200	300	0	0	0	0	0	0	0	200	903	0	0	0	0	0	0	0	603	903	0
395	0	0	0	0	0	0	0	200	300	0	0	0	0	0	0	0	200	903	0	0	0	0	0	0	0	603	903	0
395	1	0	0	0	0	0	0	200	300	0	0	0	0	0	0	0	200	903	0	0	0	0	0	0	0	603	903	0
395	2	0	0	0	0	0	0	200	300	0	0	0	0	0	0	0	200	903	0	0	0	0	0	0	0	603	903	0
395	3	0	0	0	0	0	0	200	300	0	0	0	0	0	0	0	200	903	0	0	0	0	0	0	0	603	903	0
395	4	0	0	0	0	0	0	200	300	0	0	0	0	0	0	0	200	903	0	0	0	0	0	0	0	603	903	0
395	5	0	0	0	0	0	0	200	300	0	0	0	0	0	0	0	200	903	0	0	0	0	0	0	0	603	903	0
395	6	0	0	0	0	0	0	200	300	0	0	0	0	0	0	0	200	903	0	0	0	0	0	0	0	603	903	0
395	7	0	0	0	0	0	0	200	300	0	0	0	0	0	0	0	200	903	0	0	0	0	0	0	0	603	903	0
395	8	0	0	0	0	0	0	200	300	0	0	0	0	0	0	0	200	903	0	0	0	0	0	0	0	603	903	0
395	9	0	0	0	0	0	0	200	300	0	0	0	0	0	0	0	200	903	0	0	0	0	0	0	0	603	903	0
396	0	0	0	0	0	0	0	200	300	0	0	0	0	0	0	0	200	903	0	0	0	0	0	0	0	603	903	0
396	1	0	0	0	0	0	0	200	300	0	0	0	0	0	0	0	200	903	0	0	0	0	0	0	0	603	903	0
396	2	0	0	0	0	0	0	200	300	0	0	0	0	0	0	0	200	903	0	0	0	0	0	0	0	603	903	0
396	3	0	0	0	0	0	0	200	300	0	0	0	0	0	0	0	200	903	0	0	0	0	0	0	0	603	903	0
396	4	0	0	0	0	0	0	200	300	0	0	0	0	0	0	0	200	903	0	0	0	0	0	0	0	603	903	0
396	5	0	0	0	0	0	0	200	300	0	0	0	0	0	0	0	200	903	0	0	0	0	0	0	0	603	903	0
396	6	0	0	0	0	0	0	200	300	0	0	0	0	0	0	0	200	903	0	0	0	0	0	0	0	603	903	0
396	7	0	0	0	0	0	0	200	300	0	0	0	0	0	0	0	200	903	0	0	0	0	0	0	0	603	903	0
396	8	0	0	0	0	0	0	200	300	0	0	0	0	0	0	0	200	903	0	0	0	0	0	0	0	603	903	0
396	9	0	0	0	0	0	0	200	300	0	0	0	0	0	0	0	200	903	0	0	0	0	0	0	0	603	903	0
397	0	0	0	0	0	0	0	200	300	0	0	0	0	0	0	0	200	903	0	0	0	0	0	0	0	603	903	0
397	1	0	0	0	0	0	0	200	300	0	0	0	0	0	0	0	200	903	0	0	0	0	0	0	0	603	903	0
397	2	0	0	0	0	0	0	200	300	0	0	0	0	0	0	0	200	903	0	0	0	0	0	0	0	603	903	0
397	3	0	0	0	0	0	0	200	300	0	0	0	0	0	0	0	200	903	0	0	0	0	0	0	0	603	903	0
397	4	0	0	0	0	0	0	200	300	0	0	0	0	0	0	0	200	903	0	0	0	0	0	0	0	603	903	0
397	5	0	0	0	0	0	0	200	300	0	0	0	0	0	0	0	200	903	0	0	0	0	0	0	0	603	903	0
397	6	0	0	0	0	0	0	200	300	0	0	0	0	0	0	0	200	903	0	0	0	0	0	0	0	603	903	0
397	7	0	0	0	0	0	0	200	300	0	0	0	0	0	0	0	200	903	0	0	0	0	0	0	0	603	903	0
397	8	0	0	0	0	0	0	200	300	0	0	0	0	0	0	0	200	903	0	0	0	0	0	0	0	603	903	0
397	9	0	0	0	0	0	0	200	300	0	0	0	0	0	0	0	200	903	0	0	0	0	0	0	0	603	903	0
398	0	0	0	0	0	0	0	200	300	0	0	0	0	0	0	0	200	903	0	0	0	0	0	0	0	603	903	0
398	1	0	0	0	0	0	0	200	300	0	0	0	0	0	0	0	200	903	0	0	0	0	0	0	0	603	903	0
398	2	0	0	0	0	0	0	200	300	0	0	0	0	0	0	0	200	903	0	0	0	0	0	0	0	603	903	0
398	3	0	0	0	0	0	0	200	300	0	0	0	0	0	0	0	200	903	0	0	0	0	0	0	0	603	903	0
398	4	0	0	0	0	0	0	200	300	0	0	0	0	0	0	0	200	903	0	0	0	0	0	0	0	603	903	0
398	5	0	0	0	0	0	0	200	300	0	0	0	0	0	0	0	200	903	0	0	0	0	0	0	0	603	903	0
398	6	0	0	0	0	0	0	200	300	0	0	0	0	0	0	0	200	903	0	0	0	0	0	0	0	603	903	0
398	7	0	0	0	0	0	0	200	300	0	0	0	0	0	0	0	200	903	0	0	0	0	0	0	0	603	903	0
398	8	0	0	0	0	0	0	200	300	0	0	0	0	0	0	0	200	903	0	0	0	0	0	0	0	603	903	0
398	9	0	0	0	0	0	0	200	300	0	0	0	0	0	0	0	200	903	0	0	0	0	0	0	0	603	903	0
399	0	0	0	0	0	0	0	200	300	0	0	0	0	0	0	0	200	903	0	0	0	0	0	0	0	603	903	0
399	1	0	0	0	0	0	0	200	300	0	0	0	0	0	0	0	200	903	0	0	0	0	0	0	0	603	903	0
399	2	0	0	0	0	0	0	200	300	0	0	0	0	0	0	0	200	903	0	0	0	0	0	0	0	603	903	0
399	3	0	0	0	0	0	0	200	300	0	0	0	0	0	0	0	200	903	0	0	0	0	0	0	0	603	903	0
399	4	0	0	0	0	0	0	200	300	0	0	0	0	0	0	0	200	903	0	0	0	0	0	0	0	603	903	0
399	5	0	0	0	0	0	0	200	300	0	0	0	0	0	0	0	200	903	0	0	0	0	0	0	0	603	903	0
399	6	0	0	0	0	0	0	200	300	0	0	0	0	0	0	0	200	903	0	0	0	0	0	0	0	603	903	0
399	7	0	0	0	0	0	0	200	300	0	0	0	0	0	0	0	200	903	0	0	0	0	0	0	0	603	903	0
399	8	0	0	0	0	0	0	200	300	0	0	0	0	0	0	0	200	903	0	0	0	0	0	0	0	603	903	0
399	9	0	0	0	0	0	0	200	300	0	0	0	0	0	0	0	200	903	0	0	0	0	0	0	0	603	903	0
400	0	0	0	0	0	0	0	200	300	0	0	0	0	0	0	0	200	903	0	0	0	0	0	0	0	603	903	0
400	1	0	0	0	0	0	0	200	300	0	0	0	0	0	0	0	200	903	0	0	0	0	0	0	0	603	903	0
400	2	0	0	0	0	0	0	200	300	0	0	0	0	0	0	0	200	903	0	0	0	0	0	0	0	603	903	0
400	3	0	0	0	0	0	0	200	300	0	0	0	0	0	0	0	200	903	0	0	0	0	0	0	0	603	903	0
400	4	0	0	0	0	0	0	200	300	0	0	0	0	0	0	0	200	903	0	0	0	0	0	0	0	603	903	0
400	5	0	0	0	0	0	0	200	300	0	0	0	0	0	0	0	200	903	0	0	0	0	0	0	0	603	903	0
400	6	0	0	0	0	0	0	200	300	0	0	0	0	0	0	0	200	903	0	0	0	0	0	0	0	603	903	0
400	7	0	0	0	0	0	0	200	300	0	0	0	0	0	0	0	200	903	0	0	0	0	0	0	0	603	903	0
400	8	0	0	0	0	0	0	200	300	0	0	0	0	0	0	0	200	903	0	0	0	0	0	0	0	603	903	0
400	9	0	0	0	0	0	0	200	300	0	0	0	0	0	0	0	200	903	0	0	0	0	0	0	0	603	903	0
401	0	0	0	0	0	0	0	200	300	0	0	0	0	0	0	0	200	903	0	0	0	0	0	0	0	603	903	0
401	1	0	0	0	0	0	0	200	300	0	0	0	0	0	0	0	200	903	0	0	0	0	0	0	0	603	903	0
401	2	0	0	0	0	0	0	200	300	0	0	0	0	0	0	0	200	903	0	0	0	0	0	0	0	603	903	0
401	3	0	0	0	0	0	0	200	300	0	0	0	0	0	0	0	200	903	0	0	0	0	0	0	0	603	903	0
401	4	0	0	0	0	0	0	200	300	0	0	0	0	0	0	0	200	903	0	0	0	0	0	0	0	603	903	0
401	5	0	0	0	0	0	0	200	300	0	0	0	0	0	0	0	200	903	0	0	0	0	0	0	0	603	903	0
401	6	0	0	0	0	0	0	200	300	0	0	0	0	0	0	0	200	903	0	0	0	0	0	0	0	603	903	0
401	7	0	0	0	0	0	0	200	300	0	0	0	0	0	0	0	200	903	0	0	0	0	0	0	0	603	903	0
401	8	0	0	0	0	0	0	200	300	0	0	0	0	0	0	0	200	903	0	0	0	0	0	0	0	603	903	0
401	9	0	0	0	0	0	0	200	300	0	0	0	0	0	0	0	200	903	0	0	0	0	0	0	0	603	903	0
402	0	0	0	0	0	0	0	200	300	0	0	0	0	0	0	0	200	903	0	0	0	0	0	0	0	603	903	0
402	1	0	0	0	0	0	0	200	300	0	0	0	0	0	0	0	200	903	0	0	0	0	0	0	0	603	903	0
402	2	0	0	0	0	0	0	200	300	0	0	0	0	0	0	0	200	903	0	0	0	0	0	0	0	603	903	0
402	3	0	0	0	0	0	0	200	300	0	0	0	0	0	0	0	200	903	0	0	0	0	0	0	0	603	903	0
402	4	0	0	0	0	0	0	200	300	0	0	0	0	0	0	0	200	903	0	0	0	0	0	0	0	603	903	0
402	5	0	0	0	0	0	0	200	300	0	0	0	0	0	0	0	200	903	0	0	0	0	0	0	0	603	903	0
402	6	0	0	0	0	0	0	200	300	0	0	0	0	0	0	0	200	903	0	0	0	0	0	0	0	603	903	0
402	7	0	0	0	0	0	0	200	300	0	0	0	0	0	0	0	200	903	0	0	0	0	0	0	0	603	903	0
402	8	0	0	0	0	0	0	200	300	0	0	0	0	0	0	0	200	903	0	0	0	0	0	0	0	603	903	0
402	9	0	0	0	0	0	0	200	300	0	0	0	0	0	0	0	200	903	0	0	0	0	0	0	0	603	903	0
403	0	0	0	0	0	0	0	200	300	0	0	0	0	0	0	0	200	903	0	0	0	0	0	0	0	603	903	0
403	1	0	0	0	0	0	0	200	300	0	0	0	0	0	0	0	200	903	0	0	0	0	0	0	0	603	903	0
403	2	0	0	0	0	0	0	200	300	0	0	0	0	0	0	0	200	903	0	0	0	0	0	0	0	603	903	0
403	3	0	0	0	0	0	0	200	300	0	0	0	0	0	0	0	200	903	0	0	0	0	0	0	0	603	903	0
403	4	0	0	0	0	0	0	200	300	0	0	0	0	0	0	0	200	903	0	0	0	0	0	0	0	603	903	0
403	5	0	0	0	0	0	0	200	300	0	0	0	0	0	0	0	200	903	0	0	0	0	0	0	0	603	903	0
403	6	0	0	0	0	0	0	200	300	0	0	0	0	0	0	0	200	903	0	0	0	0	0	0	0	603	903	0
403	7	0	0	0	0	0	0	200	300	0	0	0	0	0	0	0	200	903	0	0	0	0	0	0	0	603	903	0
403	8	0	0	0	0	0	0	200	300	0	0	0	0	0	0	0	200	903	0	0	0	0	0	0	0	603	903	0
403	9	0	0	0	0	0	0	200	300	0	0	0	0	0	0	0	200	903	0	0	0	0	0	0	0	603	903	0
404	0	0	0	0	0	0	0	200	300	0	0	0	0	0	0	0	200	903	0	0	0	0	0	0	0	603	903	0
404	1	0	0	0	0	0	0	200	300	0	0	0	0	0	0	0	200	903	0	0	0	0	0	0	0	603	903	0
404	2	0	0	0	0	0	0	200	300	0	0	0	0	0	0	0	200	903	0	0	0	0	0	0	0	603	903	0
404	3	0	0	0	0	0	0	200	300	0	0	0	0	0	0	0	200	903	0	0	0	0	0	0	0	603	903	0
404	4	0	0	0	0	0	0	200	300	0	0	0	0	0	0	0	200	903	0	0	0	0	0	0	0	603	903	0
404	5	0	0	0	0	0	0	200	300	0	0	0	0	0	0	0	200	903	0	0	0	0	0	0	0	603	903	0
404	6	0	0	0	0	0	0	200	300	0	0	0	0	0	0	0	200	903	0	0	0	0	0	0	0	603	903	0
404	7	0	0	0	0	0	0	200	300	0	0	0	0	0	0	0	200	903	0	0	0	0	0	0	0	603	903	0
404	8	0	0	0	0	0	0	200	300	0	0	0	0	0	0	0	200	903	0	0	0	0	0	0	0	603	903	0
404	9	0	0	0	0	0	0	200	300	0	0	0	0	0	0	0	200	903	0	0	0	0	0	0	0	603	903	0
405	0	0	0	0	0	0	0	200	300	0	0	0	0	0	0	0	200	903	0	0	0	0	0	0	0	603	903	0
405	1	0	0	0	0	0	0	200	300	0	0	0	0	0	0	0	200	903	0	0	0	0	0	0	0	603	903	0
405	2	0	0	0	0	0	0	200	300	0	0	0	0	0	0	0	200	903	0	0	0	0	0	0	0	603	903	0
405	3	0	0	0	0	0	0	200	300	0	0	0	0	0	0	0	200	903	0	0	0	0	0	0	0	603	903	0
405	4	0	0	0	0	0	0	200	300	0	0	0	0	0	0	0	200	903	0	0	0	0	0	0	0	603	903	0
405	5	0	0	0	0	0	0	200	300	0	0	0	0	0	0	0	200	903	0	0	0	0	0	0	0	603	903	0
405	6	0	0	0	0	0	0	200	300	0	0	0	0	0	0	0	200	903	0	0	0	0	0	0	0	603	903	0
405	7	0	0	0	0	0	0	200	300	0	0	0	0	0	0	0	200	903	0	0	0	0	0	0	0	603	903	0
405	8	0	0	0	0	0	0	200	300	0	0	0	0	0	0	0	200	903	0	0	0	0	0	0	0	603	903	0
405	9	0	0	0	0	0	0	200	300	0	0	0	0	0	0	0	200	903	0	0	0	0	0	0	0	603	903	0
406	0	0	0	0	0	0	0	200	300	0	0	0	0	0	0	0	200	903	0	0	0	0	0	0	0	603	903	0
406	1	0	0	0	0	0	0	200	300	0	0	0	0	0	0	0	200	903	0	0	0	0	0	0	0	603	903	0
406	2	0	0	0	0	0	0	200	300	0	0	0	0	0	0	0	200	903	0	0	0	0	0	0	0	603	903	0
406	3	0	0	0	0	0	0	200	300	0	0	0	0	0	0	0	200	903	0	0	0	0	0	0	0	603	903	0
406	4	0	0	0	0	0	0	200	300	0	0	0	0	0	0	0	200	903	0	0	0	0	0	0	0	603	903	0
406	5	0	0	0	0	0	0	200	300	0	0	0	0	0	0	0	200	903	0	0	0	0	0	0	0	603	903	0
406	6	0	0	0	0	0	0	200	300	0	0	0	0	0	0	0	200	903	0	0	0	0	0	0	0	603	903	0
406	7	0	0	0	0	0	0	200	300	0	0	0	0	0	0	0	200	903	0	0	0	0	0	0	0	603	903	0
406	8	0	0	0	0	0	0	200	300	0	0	0	0	0	0	0	200	903	0	0	0	0	0	0	0	603	903	0
406	9	0	0	0	0	0	0	200	300	0	0	0	0	0	0	0	200	903	0	0	0	0	0	0	0	603	903	0
407	0	0	0	0	0	0	0	200	300	0	0	0	0	0	0	0	200	903	0	0	0	0	0	0	0	603	903	0
407	1	0	0	0	0	0	0	200	300	0	0	0	0	0	0	0	200	903	0	0	0	0	0	0	0	603	903	0
407	2	0	0	0	0	0	0	200	300	0	0	0	0	0	0	0	200	903	0	0	0	0	0	0	0	603	903	0
407	3	0	0	0	0	0	0	200	300	0	0	0	0	0	0	0	200	903	0	0	0	0	0	0	0	603	903	0
407	4	0	0	0	0	0	0	200	300	0	0	0	0	0	0	0	200	903	0	0	0	0	0	0	0	603	903	0
407	5	0	0	0	0	0	0	200	300	0	0	0	0	0	0	0	200	903	0	0	0	0	0	0	0	603	903	0
407	6	0	0	0	0	0	0	200	300	0	0	0	0	0	0	0	200	903	0	0	0	0	0	0	0	603	903	0
407	7	0	0	0	0	0	0	200	300	0	0	0	0	0	0	0	200	903	0	0	0	0	0	0	0	603	903	0
407	8	0	0	0	0	0	0	200	300	0	0	0	0	0	0	0	200	903	0	0	0	0	0	0	0	603	903	0
407	9	0	0	0	0	0	0	200	300	0	0	0	0	0	0	0	200	903	0	0	0	0	0	0	0	603	903	0
408	0	0	0	0	0	0	0	200	300	0	0	0	0	0	0	0	200	903	0	0	0	0	0	0	0	603	903	0
408	1	0	0	0	0	0	0	200	300	0	0	0	0	0	0	0	200	903	0	0	0	0	0	0	0	603	903	0
408	2	0	0	0	0	0	0	200	300	0	0	0	0	0	0	0	200	903	0	0	0	0	0	0	0	603	903	0
408	3	0	0	0	0	0	0	200	300	0	0	0	0	0	0	0	200	903	0	0	0	0	0	0	0	603	903	0
408	4	0	0	0	0	0	0	200	300	0	0	0	0	0	0	0	200	903	0	0	0	0	0	0	0	603	903	0
408	5	0	0	0	0	0	0	200	300	0	0	0	0	0	0	0	200	903	0	0	0	0	0	0	0	603	903	0
408	6	0	0	0	0	0	0	200	300	0	0	0	0	0	0	0	200	903	0	0	0	0	0	0	0	603	903	0
408	7	0	0	0	0	0	0	200	300	0	0	0	0	0	0	0	200	903	0	0	0	0	0	0	0	603	903	0
408	8	0	0	0	0	0	0	200	300	0	0	0	0	0	0	0	200	903	0	0	0	0	0	0	0	603	903	0
408	9	0	0	0	0	0	0	200	300	0	0	0	0	0	0	0	200	903	0	0	0	0	0	0	0	603	903	0
409	0	0	0	0	0	0	0	200	300	0	0	0	0	0	0	0	200	903	0	0	0	0	0	0	0	603	903	0
409	1	0	0	0	0	0	0	200	300	0	0	0	0	0	0	0	200	903	0	0	0	0	0	0	0	603	903	0
409	2	0	0	0	0	0	0	200	300	0	0	0	0	0	0	0	200	903	0	0	0	0	0	0	0	603	903	0
409	3	0	0	0	0	0	0	200	300	0	0	0	0	0	0	0	200	903	0	0	0	0	0	0	0	603	903	0
409	4	0	0	0	0	0	0	200	300	0	0	0	0	0	0	0	200	903	0	0	0	0	0	0	0	603	903	0
409	5	0	0	0	0	0	0	200	300	0	0	0	0	0	0	0	200	903	0	0	0	0	0	0	0	603	903	0
409	6	0	0	0	0	0	0	200	300	0	0	0	0	0	0	0	200	903	0	0	0	0	0	0	0	603	903	0
409	7	0	0	0	0	0	0	200	300	0	0	0	0	0	0	0	200	903	0	0	0	0	0	0	0	603	903	0
409	8	0	0	0	0	0	0	200	300	0	0	0	0	0	0	0	200	903	0	0	0	0	0	0	0	603	903	0
409	9	0	0	0	0	0	0	200	300	0	0	0	0	0	0	0	200	903	0	0	0	0	0	0	0	603	903	0
410	0	0	0	0	0	0	0	200	300	0	0	0	0	0	0	0	200	903	0	0	0	0	0	0	0	603	903	0
410	1	0	0	0	0	0	0	200	300	0	0	0	0	0	0	0	200	903	0	0	0	0	0	0	0	603	903	0
410	2	0	0	0	0	0	0	200	300	0	0	0	0	0	0	0	200	903	0	0	0	0	0	0	0	603	903	0
410	3	0	0	0	0	0	0	200	300	0	0	0	0	0	0	0	200	903	0	0	0	0	0	0	0	603	903	0
410	4	0	0	0	0	0	0	200	300	0	0	0	0	0	0	0	200	903	0	0	0	0	0	0	0	603	903	0
410	5	0	0	0	0	0	0	200	300	0	0	0	0	0	0	0	200	903	0	0	0	0	0	0	0	603	903	0
410	6	0	0	0	0	0	0	200	300	0	0	0	0	0	0	0	200	903	0	0	0	0	0	0	0	603	903	0
410	7	0	0	0	0	0	0	200	300	0	0	0	0	0	0	0	200	903	0	0	0	0	0	0	0	603	903	0
410	8	0	0	0	0	0	0	200	300	0	0	0	0	0	0	0	200	903	0	0	0	0	0	0	0	603	903	0
410	9	0	0	0	0	0	0	200	300	0	0	0	0	0	0	0	200	903	0	0	0	0	0	0	0	603	903	0
411	0	0	0	0	0	0	0	200	300	0	0	0	0	0	0	0	200	903	0	0	0	0	0	0	0	603	903	0
411	1	0	0	0	0	0	0	200	300	0	0	0	0	0	0	0	200	903	0	0	0	0	0	0	0	603	903	0
411	2	0	0	0	0	0	0	200	300	0	0	0	0	0	0	0	200	903	0	0	0	0	0	0	0	603	903	0
411	3	0	0	0	0	0	0	200	300	0	0	0	0	0	0	0	200	903	0	0	0	0	0	0	0	603	903	0
411	4	0	0	0	0	0	0	200	300	0	0	0	0	0	0	0	200	903	0	0	0	0	0	0	0	603	903	0
411	5	0	0	0	0	0	0	200	300	0	0	0	0	0	0	0	200	903	0	0	0	0	0	0	0	603	903	0
411	6	0	0	0	0	0	0	200	300	0	0	0	0	0	0	0	200	903	0	0	0	0	0	0	0	603	903	0
411	7	0	0	0	0	0	0	200	300	0	0	0	0	0	0	0	200	903	0	0	0	0	0	0	0	603	903	0
411	8	0	0	0	0	0	0	200	300	0	0	0	0	0	0	0	200	903	0	0	0	0	0	0	0	603	903	0
411	9	0	0	0	0	0	0	200	300	0	0	0	0	0	0	0	200	903	0	0	0	0	0	0	0	603	903	0
412	0	0	0	0	0	0	0	200	300	0	0	0	0	0	0	0	200	903	0	0	0	0	0	0	0	603	903	0
412	1	0	0	0	0	0	0	200	300	0	0	0	0	0	0	0	200	903	0	0	0	0	0	0	0	603	903	0
412	2	0	0	0	0	0	0	200	300	0	0	0	0	0	0	0	200	903	0	0	0	0	0	0	0	603	903	0
412	3	0	0	0	0	0	0	200	300	0	0	0	0	0	0	0	200	903	0	0	0	0	0	0	0	603	903	0
412	4	0	0	0	0	0	0	200	300	0	0	0	0	0	0	0	200	903	0	0	0	0	0	0	0	603	903	0
412	5	0	0	0	0	0	0	200	300	0	0	0	0	0	0	0	200	903	0	0	0	0	0	0	0	603	903	0
412	6	0	0	0	0	0	0	200	300	0	0	0	0	0	0	0	200	903	0	0	0	0	0	0	0	603	903	0
412	7	0	0	0	0	0	0	200	300	0	0	0	0	0	0	0	200	903	0	0	0	0	0	0	0	603	903	0
412	8	0	0	0	0	0	0	200	300	0	0	0	0	0	0	0	200	903	0	0	0	0	0	0	0	603	903	0
412	9	0	0	0	0	0	0	200	300	0	0	0	0	0	0	0	200	903	0	0	0	0	0	0	0	603	903	0
413	0	0	0	0	0	0	0	200	300	0	0	0	0	0	0	0	200	903	0	0	0	0	0	0	0	603	903	0
413	1	0	0	0	0	0	0	200	300	0	0	0	0	0	0	0	200	903	0	0	0	0	0	0	0	603	903	0
413	2	0	0	0	0	0	0	200	300	0	0	0	0	0	0	0	200	903	0	0	0	0	0	0	0	603	903	0
413	3	0	0	0	0	0	0	200	300	0	0	0	0	0	0	0	200	903	0	0	0	0	0	0	0	603	903	0
413	4	0	0	0	0	0	0	200	300	0	0	0	0	0	0	0	200	903	0	0	0	0	0	0	0	603	903	0
413	5	0	0	0	0	0	0	200	300	0	0	0	0	0	0	0	200	903	0	0	0	0	0	0	0	603	903	0
413	6	0	0	0	0	0	0	200	300	0	0	0	0	0	0	0	200	903	0	0	0	0	0	0	0	603	903	0
413	7	0	0	0	0	0	0	200	300	0	0	0	0	0	0	0	200	903	0	0	0	0	0	0	0	603	903	0
413	8	0	0	0	0	0	0	200	300	0	0	0	0	0	0	0	200	903	0	0	0	0	0	0	0	603	903	0
413	9	0	0	0	0	0	0	200	300	0	0	0	0	0	0	0	200	903	0	0	0	0	0	0	0	603	903	0
414	0	0	0	0	0	0	0	200	300	0	0	0	0	0	0	0	200	903	0	0	0	0	0	0	0	603	903	0
414	1	0	0	0	0	0	0	200	300	0	0	0	0	0	0	0	200	903	0	0	0	0	0	0	0	603	903	0
414	2	0	0	0	0	0	0	200	300	0	0	0	0	0	0	0	200	903	0	0	0	0	0	0	0	603	903	0
414	3	0	0	0	0	0	0	200	300	0	0	0	0	0	0	0	200	903	0	0	0	0	0	0	0	603	903	0
414	4	0	0	0	0	0	0	200	300	0	0	0	0	0	0	0	200	903	0	0	0	0	0	0	0	603	903	0
414	5	0	0	0	0	0	0	200	300	0	0	0	0	0	0	0	200	903	0	0	0	0	0	0	0	603	903	0
414	6	0	0	0	0	0	0	200	300	0	0	0	0	0	0	0	200	903	0	0	0	0	0	0	0	603	903	0
414	7	0	0	0	0	0	0	200	300	0	0	0	0	0	0	0	200	903	0	0	0	0	0	0	0	603	903	0
414	8	0	0	0	0	0	0	200	300	0	0	0	0	0	0	0	200	903	0	0	0	0	0	0	0	603	903	0
414	9	0	0	0	0	0	0	200	300	0	0	0	0	0	0	0	200	903	0	0	0	0	0	0	0	603	903	0
415	0	0	0	0	0	0	0	200	300	0	0	0	0	0	0	0	200	903	0	0	0	0	0	0	0	603	903	0
415	1	0	0	0	0	0	0	200	300	0	0	0	0	0	0	0	200	903	0	0	0	0	0	0	0	603	903	0
415	2	0	0	0	0	0	0	200	300	0	0	0	0	0	0	0	200	903	0	0	0	0	0	0	0	603	903	0
415	3	0	0	0	0	0	0	200	300	0	0	0	0	0	0	0	200	903	0	0	0	0	0	0	0	603	903	0
415	4	0	0	0	0	0	0	200	300	0	0	0	0	0	0	0	200	903	0	0	0	0	0	0	0	603	903	0
415	5	0	0	0	0	0	0	200	300	0	0	0	0	0	0	0	200	903	0	0	0	0	0	0	0	603	903	0
415	6	0	0	0	0	0	0	200	300	0	0	0	0	0	0	0	200	903	0	0	0	0	0	0	0	603	903	0
415	7	0	0	0	0	0	0	200	300	0	0	0	0	0	0	0	200	903	0	0	0	0	0	0	0	603	903	0
415	8	0	0	0	0	0	0	200	300	0	0	0	0	0	0	0	200	903	0	0	0	0	0	0	0	603	903	0
415	9	0	0	0	0	0	0	200	300	0	0	0	0	0	0	0	200	903	0	0	0	0	0	0	0	603	903	0
416	0	0	0	0	0	0	0	200	300	0	0	0	0	0	0	0	200	903	0	0	0	0	0	0	0	603	903	0
416	1	0	0	0	0	0	0	200	300	0	0	0	0	0	0	0	200	903	0	0	0	0	0	0	0	603	903	0
416	2	0	0	0	0	0	0	200	300	0	0	0	0	0	0	0	200	903	0	0	0	0	0	0	0	603	903	0
416	3	0	0	0	0	0	0	200	300	0	0	0	0	0	0	0	200	903	0	0	0	0	0	0	0	603	903	0
416	4	0	0	0	0	0	0	200	300	0	0	0	0	0	0	0	200	903	0	0	0	0	0	0	0	603	903	0
416	5	0	0	0	0	0	0	200	300	0	0	0	0	0	0	0	200	903	0	0	0	0	0	0	0	603	903	0
416	6	0	0	0	0	0	0	200	300	0	0	0	0	0	0	0	200	903	0	0	0	0	0	0	0	603	903	0
416	7	0	0	0	0	0	0	200	300	0	0	0	0	0	0	0	200	903	0	0	0	0	0	0	0	603	903	0
416	8	0	0	0	0	0	0	200	300	0	0	0	0	0	0	0	200	903	0	0	0	0	0	0	0	603	903	0
416	9	0	0	0	0	0	0	200	300	0	0	0	0	0	0	0	200	903	0	0	0	0	0	0	0	603	903	0
417	0	0	0	0	0	0	0	200	300	0	0	0	0	0	0	0	200	903	0	0	0	0	0	0	0	603	903	0
417	1	0	0	0	0	0	0	200	300	0	0	0	0	0	0	0	200	903	0	0	0	0	0	0	0	603	903	0
417	2	0	0	0	0	0	0	200	300	0	0	0	0	0	0	0	200	903	0	0	0	0	0	0	0	603	903	0
417	3	0	0	0	0	0	0	200	300	0	0	0	0	0	0	0	200	903	0	0	0	0	0	0	0	603	903	0
417	4	0	0	0	0	0	0	200	300	0	0	0	0	0	0	0	200	903	0	0	0	0	0	0	0	603	903	0
417	5	0	0	0	0	0	0	200	300	0	0	0	0	0	0	0	200	903	0	0	0	0	0	0	0	603	903	0
417	6	0	0	0	0	0	0	200	300	0	0	0	0	0	0	0	200	903	0	0	0	0	0	0	0	603	903	0
417	7	0	0	0	0	0	0	200	300	0	0	0	0	0	0	0	200	903	0	0	0	0	0	0	0	603	903	0
417	8	0	0	0	0	0	0	200	300	0	0	0	0	0	0	0	200	903	0	0	0	0	0	0	0	603	903	0
417	9	0	0	0	0	0	0	200	300	0	0	0	0	0	0	0	200	903	0	0	0	0	0	0	0	603	903	0
418	0	0	0	0	0	0	0	200	300	0	0	0	0	0	0	0	200	903	0	0	0	0	0	0	0	603	903	0
418	1	0	0	0	0	0	0	200	300	0	0	0	0	0	0	0	200	903	0	0	0	0	0	0	0	603	903	0
418	2	0	0	0	0	0	0	200	300	0	0	0	0	0	0	0	200	903	0	0	0	0	0	0	0	603	903	0
418	3	0	0	0	0	0	0	200	300	0	0	0	0	0	0	0	200	903	0	0	0	0	0	0	0	603	903	0
418	4	0	0	0	0	0	0	200	300	0	0	0	0	0	0	0	200	903	0	0	0	0	0	0	0	603	903	0
418	5	0	0	0	0	0	0	200	300	0	0	0	0	0	0	0	200	903	0	0	0	0	0	0	0	603	903	0
418	6	0	0	0	0	0	0	200	300	0	0	0	0	0	0	0	200	903	0	0	0	0	0	0	0	603	903	0
418	7	0	0	0	0	0	0	200	300	0	0	0	0	0	0	0	200	903	0	0	0	0	0	0	0	603	903	0
418	8	0	0	0	0	0	0	200	300	0	0	0	0	0	0	0	200	903	0	0	0	0	0	0	0	603	903	0
418	9	0	0	0	0	0	0	200	300	0	0	0	0	0	0	0	200	903	0	0	0	0	0	0	0	603	903	0
419	0	0	0	0	0	0	0	200	300	0	0	0	0	0	0	0	200	903	0	0	0	0	0	0	0	603	903	0
419	1	0	0	0	0	0	0	200	300	0	0	0	0	0	0	0	200	903	0	0	0	0	0	0	0	603	903	0
419	2	0	0	0	0	0	0	200	300	0	0	0	0	0	0	0	200	903	0	0	0	0	0	0	0	603	903	0
419	3	0	0	0	0	0	0	200	300	0	0	0	0	0	0	0	200	903	0	0	0	0	0	0	0	603	903	0
419	4	0	0	0	0	0	0	200	300	0	0	0	0	0	0	0	200	903	0	0	0	0	0	0	0	603	903	0
419	5	0	0	0	0	0	0	200	300	0	0	0	0	0	0	0	200	903	0	0	0	0	0	0	0	603	903	0
419	6	0	0	0	0	0	0	200	300	0	0	0	0	0	0	0	200	903	0	0	0	0	0	0	0	603	903	0
419	7	0	0	0	0	0	0	200	300	0	0	0	0	0	0	0	200	903	0	0	0	0	0	0	0	603	903	0
419	8	0	0	0	0	0	0	200	300	0	0	0	0	0	0	0	200	903	0	0	0	0	0	0	0	603	903	0
419	9	0	0	0	0	0	0	200	300	0	0	0	0	0	0	0	200	903	0	0	0	0	0	0	0	603	903	0
420	0	0	0	0	0	0	0	200	300	0	0	0	0	0	0	0	200	903	0	0	0	0	0	0	0	603	903	0
420	1	0	0	0	0	0	0	200	300	0	0	0	0	0	0	0	200	903	0	0	0	0	0	0	0	603	903	0
420	2	0	0	0	0	0	0	200	300	0	0	0	0	0	0	0	200	903	0	0	0	0	0	0	0	603	903	0
420	3	0	0	0	0	0	0	200	300	0	0	0	0	0	0	0	200	903	0	0	0	0	0	0	0	603	903	0
420	4	0	0	0	0	0	0	200	300	0	0	0	0	0	0	0	200	903	0	0	0	0	0	0	0	603	903	0
420	5	0	0	0	0	0	0	200	300	0	0	0	0	0	0	0	200	903	0	0	0	0	0	0	0	603	903	0
420	6	0	0	0	0	0	0	200	300	0	0	0	0	0	0	0	200	903	0	0	0	0	0	0	0	603	903	0
420	7	0	0	0	0	0	0	200	300	0	0	0	0	0	0	0	200	903	0	0	0	0	0	0	0	603	903	0
420	8	0	0	0	0	0	0	200	300	0	0	0	0	0	0	0	200	903	0	0	0	0	0	0	0	603	903	0
420	9	0	0	0	0	0	0	200	300	0	0	0	0	0	0	0	200	903	0	0	0	0	0	0	0	603	903	0
421	0	0	0	0	0	0	0	200	300	0	0	0	0	0	0	0	200	903	0	0	0	0	0	0	0	603	903	0
421	1	0	0	0	0	0	0	200	300	0	0	0	0	0	0	0	200	903	0	0	0	0	0	0	0	603	903	0
421	2	0	0	0	0	0	0	200	300	0	0	0	0	0	0	0	200	903	0	0	0	0	0	0	0	603	903	0
421	3	0	0	0	0	0	0	200	300	0	0	0	0	0	0	0	200	903	0	0	0	0	0	0	0	603	903	0
421	4	0	0	0	0	0	0	200	300	0	0	0	0	0	0	0	200	903	0	0	0	0	0	0	0	603	903	0
421	5	0	0	0	0	0	0	200	300	0	0	0	0	0	0	0	200	903	0	0	0	0	0	0	0	603	903	0
421	6	0	0	0	0	0	0	200	300	0	0	0	0	0	0	0	200	903	0	0	0	0	0	0	0	603	903	0
421	7	0	0	0	0	0	0	200	300	0	0	0	0	0	0	0	200	903	0	0	0	0	0	0	0	603	903	0
421	8	0	0	0	0	0	0	200	300	0	0	0	0	0	0	0	200	903	0	0	0	0	0	0	0	603	903	0
421	9	0	0	0	0	0	0	200	300	0	0	0	0	0	0	0	200	903	0	0	0	0	0	0	0	603	903	0
422	0	0	0	0	0	0	0	200	300	0	0	0	0	0	0	0	200	903	0	0	0	0	0	0	0	603	903	0
422	1	0	0	0	0	0	0	200	300	0	0	0	0	0	0	0	200	903	0	0	0	0	0	0	0	603	903	0
422	2	0	0	0	0	0	0	200	300	0	0	0	0	0	0	0	200	903	0	0	0	0	0	0	0	603	903	0
422	3	0	0	0	0	0	0	200	300	0	0	0	0	0	0	0	200	903	0	0	0	0	0	0	0	603	903	0
422	4	0	0	0	0	0	0	200	300	0	0	0	0	0	0	0	200	903	0	0	0	0	0	0	0	603	903	0
422	5	0	0	0	0	0	0	200	300	0	0	0	0	0	0	0	200	903	0	0	0	0	0	0	0	603	903	0
422	6	0	0	0	0	0	0	200	300	0	0	0	0	0	0	0	200	903	0	0	0	0	0	0	0	603	903	0
422	7	0	0	0	0	0	0	200	300	0	0	0	0	0	0	0	200	903	0	0	0	0	0	0	0	603	903	0
422	8	0	0	0	0	0	0	200	300	0	0	0	0	0	0	0	200	903	0	0	0	0	0	0	0	603	903	0
422	9	0	0	0	0	0	0	200	300	0	0	0	0	0	0	0	200	903	0	0	0	0	0	0	0	603	903	0
423	0	0	0	0	0	0	0	200	300	0	0	0	0	0	0	0	200	903	0	0	0	0	0	0	0	603	903	0
423	1	0	0	0	0	0	0	200	300	0	0	0	0	0	0	0	200	903	0	0	0	0	0	0	0	603	903	0
423	2	0	0	0	0	0	0	200	300	0	0	0	0	0	0	0	200	903	0	0	0	0	0	0	0	603	903	0
423	3	0	0	0	0	0	0	200	300	0	0	0	0	0	0	0	200	903	0	0	0	0	0	0	0	603	903	0
423	4	0	0	0	0	0	0	200	300	0	0	0	0	0	0	0	200	903	0	0	0	0	0	0	0	603	903	0
423	5	0	0	0	0	0	0	200	300	0	0	0	0	0	0	0	200	903	0	0	0	0	0	0	0	603	903	0
423	6	0	0	0	0	0	0	200	300	0	0	0	0	0	0	0	200	903	0	0	0	0	0	0	0	603	903	0
423	7	0	0	0	0	0	0	200	300	0	0	0	0	0	0	0	200	903	0	0	0	0	0	0	0	603	903	0
423	8	0	0	0	0	0	0	200	300	0	0	0	0	0	0	0	200	903	0	0	0	0	0	0	0	603	903	0
423	9	0	0	0	0	0	0	200	300	0	0	0	0	0	0	0	200	903	0	0	0	0	0	0	0	603	903	0
424	0	0	0	0	0	0	0	200	300	0	0	0	0	0	0	0	200	903	0	0	0	0	0	0	0	603	903	0
424	1	0	0	0	0	0	0	200	300	0	0	0	0	0	0	0	200	903	0	0	0	0	0	0	0	603	903	0
424	2	0	0	0	0	0	0	200	300	0	0	0	0	0	0	0	200	903	0	0	0	0	0	0	0	603	903	0
424	3	0	0	0	0	0	0	200	300	0	0	0	0	0	0	0	200	903	0	0	0	0	0	0	0	603	903	0
424	4	0	0	0	0	0	0	200	300	0	0	0	0	0	0	0	200	903	0	0	0	0	0	0	0	603	903	0
424	5	0	0	0	0	0	0	200	300	0	0	0	0	0	0	0	200	903	0	0	0	0	0	0	0	603	903	0
424	6	0	0	0	0	0	0	200	300	0	0	0	0	0	0	0	200	903	0	0	0	0	0	0	0	603	903	0
424	7	0	0	0	0	0	0	200	300	0	0	0	0	0	0	0	200	903	0	0	0	0	0	0	0	603	903	0
424	8	0	0	0	0	0	0	200	300	0	0	0	0	0	0	0	200	903	0	0	0	0	0	0	0	603	903	0
424	9	0	0	0	0	0	0	200	300	0	0	0	0	0	0	0	200	903	0	0	0	0	0	0	0	603	903	0
425	0	0	0	0	0	0	0	200	300	0	0	0	0	0	0	0	200	903	0	0	0	0	0	0	0	603	903	0
425	1	0	0	0	0	0	0	200	300	0	0	0	0	0	0	0	200	903	0	0	0	0	0	0	0	603	903	0
425	2	0	0	0	0	0	0	200	300	0	0	0	0	0	0	0	200	903	0	0	0	0	0	0	0	603	903	0
425	3	0	0	0	0	0	0	200	300	0	0	0	0	0	0	0	200	903	0	0	0	0	0	0	0	603	903	0
425	4	0	0	0	0	0	0	200	300	0	0	0	0	0	0	0	200	903	0	0	0	0	0	0	0	603	903	0
425	5	0	0	0	0	0	0	200	300	0	0	0	0	0	0	0	200	903	0	0	0	0	0	0	0	603	903	0
425	6	0	0	0	0	0	0	200	300	0	0	0	0	0	0	0	200	903	0	0	0	0	0	0	0	603	903	0
425	7	0	0	0	0	0	0	200	300	0	0	0	0	0	0	0	200	903	0	0	0	0	0	0	0	603	903	0
425	8	0	0	0	0	0	0	200	300	0	0	0	0	0	0	0	200	903	0	0	0	0	0	0	0	603	903	0
425	9	0	0	0	0	0	0	200	300	0	0	0	0	0	0	0	200	903	0	0	0	0	0	0	0	603	903	0
426	0	0	0	0	0	0	0	200	300	0	0	0	0	0	0	0	200	903	0	0	0	0	0	0	0	603	903	0
426	1	0	0	0	0	0	0	200	300	0	0	0	0	0	0	0	200	903	0	0	0	0	0	0	0	603	903	0
426	2	0	0	0	0	0	0	200	300	0	0	0	0	0	0	0	200	903	0	0	0	0	0	0	0	603	903	0
426	3	0	0	0	0	0	0	200	300	0	0	0	0	0	0	0	200	903	0	0	0	0	0	0	0	603	903	0
426	4	0	0	0	0	0	0	200	300	0	0	0	0	0	0	0	200	903	0	0	0	0	0	0	0	603	903	0
426	5	0	0	0	0	0	0	200	300	0	0	0	0	0	0	0	200	903	0	0	0	0	0	0	0	603	903	0
426	6	0	0	0	0	0	0	200	300	0	0	0	0	0	0	0	200	903	0	0	0	0	0	0	0	603	903	0
426	7	0	0	0	0	0	0	200	300	0	0	0	0	0	0	0	200	903	0	0	0	0	0	0	0	603	903	0
426	8	0	0	0	0	0	0	200	300	0	0	0	0	0	0	0	200	903	0	0	0	0	0	0	0	603	903	0
426	9	0	0	0	0	0	0	200	300	0	0	0	0	0	0	0	200	903	0	0	0	0	0	0	0	603	903	0
427	0	0	0	0	0	0	0	200	300	0	0	0	0	0	0	0	200	903	0	0	0	0	0	0	0	603	903	0
427	1	0	0	0	0	0	0	200	300	0	0	0	0	0	0	0	200	903	0	0	0	0	0	0	0	603	903	0
427	2	0	0	0	0	0	0	200	300	0	0	0	0	0	0	0	200	903	0	0	0	0	0	0	0	603	903	0
427	3	0	0	0	0	0	0	200	300	0	0	0	0	0	0	0	200	903	0	0	0	0	0	0	0	603	903	0
427	4	0	0	0	0	0	0	200	300	0	0	0	0	0	0	0	200	903	0	0	0	0	0	0	0	603	903	0
427	5	0	0	0	0	0	0	200	300	0	0	0	0	0	0	0	200	903	0	0	0	0	0	0	0	603	903	0
427	6	0	0	0	0	0	0	200	300	0	0	0	0	0	0	0	200	903	0	0	0	0	0	0	0	603	903	0
427	7	0	0	0	0	0	0	200	300	0	0	0	0	0	0	0	200	903	0	0	0	0	0	0	0	603	903	0
427	8	0	0	0	0	0	0	200	300	0	0	0	0	0	0	0	200	903	0	0	0	0	0	0	0	603	903	0
427	9	0	0	0	0	0	0	200	300	0	0	0	0	0	0	0	200	903	0	0	0	0	0	0	0	603	903	0
428	0	0	0	0	0	0	0	200	300	0	0	0	0	0	0	0	200	903	0	0	0	0	0	0	0	603	903	0
428	1	0	0	0	0	0	0	200	300	0	0	0	0	0	0	0	200	903	0	0	0	0	0	0	0	603	903	0
428	2	0	0	0	0	0	0	200	300	0	0	0	0	0	0	0	200	903	0	0	0	0	0	0	0	603	903	0
428	3	0	0	0	0	0	0	200	300	0	0	0	0	0	0	0	200	903	0	0	0	0	0	0	0	603	903	0
428	4	0	0	0	0	0	0	200	300	0	0	0	0	0	0	0	200	903	0	0	0	0	0	0	0	603	903	0
428	5	0	0	0	0	0	0	200	300	0	0	0	0	0	0	0	200	903	0	0	0	0	0	0	0	603	903	0
428	6	0	0	0	0	0	0	200	300	0	0	0	0	0	0	0	200	903	0	0	0	0	0	0	0	603	903	0
428	7	0	0	0	0	0	0	200	300	0	0	0	0	0	0	0	200	903	0	0	0	0	0	0	0	603	903	0
428	8	0	0	0	0	0	0	200	300	0	0	0	0	0	0	0	200	903	0	0	0	0	0	0	0	603	903	0
428	9	0	0	0	0	0	0	200	300	0	0	0	0	0	0	0	200	903	0	0	0	0	0	0	0	603	903	0
429	0	0	0	0	0	0	0	200	300	0	0	0	0	0	0	0	200	903	0	0	0	0	0	0	0	603	903	0
429	1	0	0	0	0	0	0	200	300	0	0	0	0	0	0	0	200	903	0	0	0	0	0	0	0	603	903	0
429	2	0	0	0	0	0	0	200	300	0	0	0	0	0	0	0	200	903	0	0	0	0	0	0	0	603	903	0
429	3	0	0	0	0	0	0	200	300	0	0	0	0	0	0	0	200	903	0	0	0	0	0	0	0	603	903	0
429	4	0	0	0	0	0	0	200	300	0	0	0	0	0	0	0	200	903	0	0	0	0	0	0	0	603	903	0
429	5	0	0	0	0	0	0	200	300	0	0	0	0	0	0	0	200	903	0	0	0	0	0	0	0	603	903	0
429	6	0	0	0	0	0	0	200	300	0	0	0	0	0	0	0	200	903	0	0	0	0	0	0	0	603	903	0
429	7	0	0	0	0	0	0	200	300	0	0	0	0	0	0	0	200	903	0	0	0	0	0	0	0	603	903	0
429	8	0	0	0	0	0	0	200	300	0	0	0	0	0	0	0	200	903	0	0	0	0	0	0	0	603	903	0
429	9	0	0	0	0	0	0	200	300	0	0	0	0	0	0	0	200	903	0	0	0	0	0	0	0	603	903	0
430	0	0	0	0	0	0	0	200	300	0	0	0	0	0	0	0	200	903	0	0	0	0	0	0	0	603	903	0
430	1	0	0	0	0	0	0	200	300	0	0	0	0	0	0	0	200	903	0	0	0	0	0	0	0	603	903	0
430	2	0	0	0	0	0	0	200	300	0	0	0	0	0	0	0	200	903	0	0	0	0	0	0	0	603	903	0
430	3	0	0	0	0	0	0	200	300	0	0	0	0	0	0	0	200	903	0	0	0	0	0	0	0	603	903	0
430	4	0	0	0	0	0	0	200	300	0	0	0	0	0	0	0	200	903	0	0	0	0	0	0	0	603	903	0
430	5	0	0	0	0	0	0	200	300	0	0	0	0	0	0	0	200	903	0	0	0	0	0	0	0	603	903	0
430	6	0	0	0	0	0	0	200	300	0	0	0	0	0	0	0	200	903	0	0	0	0	0	0	0	603	903	0
430	7	0	0	0	0	0	0	200	300	0	0	0	0	0	0	0	200	903	0	0	0	0	0	0	0	603	903	0
430	8	0	0	0	0	0	0	200	300	0	0	0	0	0	0	0	200	903	0	0	0	0	0	0	0	603	903	0
430	9	0	0	0	0	0	0	200	300	0	0	0	0	0	0	0	200	903	0	0	0	0	0	0	0	603	903	0
431	0	0	0	0	0	0	0	200	300	0	0	0	0	0	0	0	200	903	0	0	0	0	0	0	0	603	903	0
431	1	0	0	0	0	0	0	200	300	0	0	0	0	0	0	0	200	903	0	0	0	0	0	0	0	603	903	0
431	2	0	0	0	0	0	0	200	300	0	0	0	0	0	0	0	200	903	0	0	0	0	0	0	0	603	903	0
431	3	0	0	0	0	0	0	200	300	0	0	0	0	0	0	0	200	903	0	0	0	0	0	0	0	603	903	0
431	4	0	0	0	0	0	0	200	300	0	0	0	0	0	0	0	200	903	0	0	0	0	0	0	0	603	903	0
431	5	0	0	0	0	0	0	200	300	0	0	0	0	0	0	0	200	903	0	0	0	0	0	0	0	603	903	0
431	6	0	0	0	0	0	0	200	300	0	0	0	0	0	0	0	200	903	0	0	0	0	0	0	0	603	903	0
431	7	0	0	0	0	0	0	200	300	0	0	0	0	0	0	0	200	903	0	0	0	0	0	0	0	603	903	0
431	8	0	0	0	0	0	0	200	300	0	0	0	0	0	0	0	200	903	0	0	0	0	0	0	0	603	903	0
431	9	0	0	0	0	0	0	200	300	0	0	0	0	0	0	0	200	903	0	0	0	0	0	0	0	603	903	0
432	0	0	0	0	0	0	0	200	300	0	0	0	0	0	0	0	200	903	0	0	0	0	0	0	0	603	903	0
432	1	0	0	0	0	0	0	200	300	0	0	0	0	0	0	0	200	903	0	0	0	0	0	0	0	603	903	0
432	2	0	0	0	0	0	0	200	300	0	0	0	0	0	0	0	200	903	0	0	0	0	0	0	0	603	903	0
432	3	0	0	0	0	0	0	200	300	0	0	0	0	0	0	0	200	903	0	0	0	0	0	0	0	603	903	0
432	4	0	0	0	0	0	0	200	300	0	0	0	0	0	0	0	200	903	0	0	0	0	0	0	0	603	903	0
432	5	0	0	0	0	0	0	200	300	0	0	0	0	0	0	0	200	903	0	0	0	0	0	0	0	603	903	0
432	6	0	0	0	0	0	0	200	300	0	0	0	0	0	0	0	200	903	0	0	0	0	0	0	0	603	903	0
432	7	0	0	0	0	0	0	200	300	0	0	0	0	0	0	0	200	903	0	0	0	0	0	0	0	603	903	0
432	8	0	0	0	0	0	0	200	300	0	0	0	0	0	0	0	200	903	0	0	0	0	0	0	0	603	903	0
432	9	0	0	0	0	0	0	200	300	0	0	0	0	0	0	0	200	903	0	0	0	0	0	0	0	603	903	0
433	0	0	0	0	0	0	0	200	300	0	0	0	0	0	0	0	200	903	0	0	0	0	0	0	0	603	903	0
433	1	0	0	0	0	0	0	200	300	0	0	0	0	0	0	0	200	903	0	0	0	0	0	0	0	603	903	0
433	2	0	0	0	0	0	0	200	300	0	0	0	0	0	0	0	200	903	0	0	0	0	0	0	0	603	903	0
433	3	0	0	0	0	0	0	200	300	0	0	0	0	0	0	0	200	903	0	0	0	0	0	0	0	603	903	0
433	4	0	0	0	0	0	0	200	300	0	0	0	0	0	0	0	200	903	0	0	0	0	0	0	0	603	903	0
433	5	0	0	0	0	0	0	200	300	0	0	0	0	0	0	0	200	903	0	0	0	0	0	0	0	603	903	0
433	6	0	0	0	0	0	0	200	300	0	0	0	0	0	0	0	200	903	0	0	0	0	0	0	0	603	903	0
433	7	0	0	0	0	0	0	200	300	0	0	0	0	0	0	0	200	903	0	0	0	0	0	0	0	603	903	0
433	8	0	0	0	0	0	0	200	300	0	0	0	0	0	0	0	200	903	0	0	0	0	0	0	0	603	903	0
433	9	0	0	0	0	0	0	200	300	0	0	0	0	0	0	0	200	903	0	0	0	0	0	0	0	603	903	0
434	0	0	0	0	0	0	0	200	300	0	0	0	0	0	0	0	200	903	0	0	0	0	0	0	0	603	903	0
434	1	0	0	0	0	0	0	200	300	0	0	0	0	0	0	0	200	903	0	0	0	0	0	0	0	603	903	0
434	2	0	0	0	0	0	0	200	300	0	0	0	0	0	0	0	200	903	0	0	0	0	0	0	0	603	903	0
434	3	0	0	0	0	0	0	200	300	0	0	0	0	0	0	0	200	903	0	0	0	0	0	0	0	603	903	0
434	4	0	0	0	0	0	0	200	300	0	0	0	0	0	0	0	200	903	0	0	0	0	0	0	0	603	903	0
434	5	0	0	0	0	0	0	200	300	0	0	0	0	0	0	0	200	903	0	0	0	0	0	0	0	603	903	0
434	6	0	0	0	0	0	0	200	300	0	0	0	0	0	0	0	200	903	0	0	0	0	0	0	0	603	903	0
434	7	0	0	0	0	0	0	200	300	0	0	0	0	0	0	0	200	903	0	0	0	0	0	0	0	603	903	0
434	8	0	0	0	0	0	0	200	300	0	0	0	0	0	0	0	200	903	0	0	0	0	0	0	0	603	903	0
434	9	0	0	0	0	0	0	200	300	0	0	0	0	0	0	0	200	903	0	0	0	0	0	0	0	603	903	0
435	0	0	0	0	0	0	0	200	300	0	0	0	0	0	0	0	200	903	0	0	0	0	0	0	0	603	903	0
435	1	0	0	0	0	0	0	200	300	0	0	0	0	0	0	0	200	903	0	0	0	0	0	0	0	603	903	0
435	2	0	0	0	0	0	0	200	300	0	0	0	0	0	0	0	200	903	0	0	0	0	0	0	0	603	903	0
435	3	0	0	0	0	0	0	200	300	0	0	0	0	0	0	0	200	903	0	0	0	0	0	0	0	603	903	0
435	4	0	0	0	0	0	0	200	300	0	0	0	0	0	0	0	200	903	0	0	0	0	0	0	0	603	903	0
435	5	0	0	0	0	0	0	200	300	0	0	0	0	0	0	0	200	903	0	0	0	0	0	0	0	603	903	0
435	6	0	0	0	0	0	0	200	300	0	0	0	0	0	0	0	200	903	0	0	0	0	0	0	0	603	903	0
435	7	0	0	0	0	0	0	200	300	0	0	0	0	0	0	0	200	903	0	0	0	0	0	0	0	603	903	0
435	8	0	0	0	0	0	0	200	300	0	0	0	0	0	0	0	200	903	0	0	0	0	0	0	0	603	903	0
435	9	0	0	0	0	0	0	200	300	0	0	0	0	0	0	0	200	903	0	0	0	0	0	0	0	603	903	0
436	0	0	0	0	0	0	0	200	300	0	0	0	0	0	0	0	200	903	0	0	0	0	0	0	0	603	903	0
436	1	0	0	0	0	0	0	200	300	0	0	0	0	0	0	0	200	903	0	0	0	0	0	0	0	603	903	0
436	2	0	0	0	0	0	0	200	300	0	0	0	0	0	0	0	200	903	0	0	0	0	0	0	0	603	903	0
436	3	0	0	0	0	0	0	200	300	0	0	0	0	0	0	0	200	903	0	0	0	0	0	0	0	603	903	0
436	4	0	0	0	0	0	0	200	300	0	0	0	0	0	0	0	200	903	0	0	0	0	0	0	0	603	903	0
436	5	0	0	0	0	0	0	200	300	0	0	0	0	0	0	0	200	903	0	0	0	0	0	0	0	603	903	0
436	6	0	0	0	0	0	0	200	300	0	0	0	0	0	0	0	200	903	0	0	0	0	0	0	0	603	903	0
436	7	0	0	0	0	0	0	200	300	0	0	0	0	0	0	0	200	903	0	0	0	0	0	0	0	603	903	0
436	8	0	0	0	0	0	0	200	300	0	0	0	0	0	0	0	200	903	0	0	0	0	0	0	0	603	903	0
436	9	0	0	0	0	0	0	200	300	0	0	0	0	0	0	0	200	903	0	0	0	0	0	0	0	603	903	0
437	0	0	0	0	0	0	0	200	300	0	0	0	0	0	0	0	200	903	0	0	0	0	0	0	0	603	903	0
437	1	0	0	0	0	0	0	200	300	0	0	0	0	0	0	0	200	903	0	0	0	0	0	0	0	603	903	0
437	2	0	0	0	0	0	0	200	300	0	0	0	0	0	0	0	200	903	0	0	0	0	0	0	0	603	903	0
437	3	0	0	0	0	0	0	200	300	0	0	0	0	0	0	0	200	903	0	0	0	0	0	0	0	603	903	0
437	4	0	0	0	0	0	0	200	300	0	0	0	0	0	0	0	200	903	0	0	0	0	0	0	0	603	903	0
437	5	0	0	0	0	0	0	200	300	0	0	0	0	0	0	0	200	903	0	0	0	0	0	0	0	603	903	0
437	6	0	0	0	0	0	0	200	300	0	0	0	0	0	0	0	200	903	0	0	0	0	0	0	0	603	903	0
437	7	0	0	0	0	0	0	200	300	0	0	0	0	0	0	0	200	903	0	0	0	0	0	0	0	603	903	0
437	8	0	0	0	0	0	0	200	300	0	0	0	0	0	0	0	200	903	0	0	0	0	0	0	0	603	903	0
437	9	0	0	0	0	0	0	200	300	0	0	0	0	0	0	0	200	903	0	0	0	0	0	0	0	603	903	0
438	0	0	0	0	0	0	0	200	300	0	0	0	0	0	0	0	200	903	0	0	0	0	0	0	0	603	903	0
438	1	0	0	0	0	0	0	200	300	0	0	0	0	0	0	0	200	903	0	0	0	0	0	0	0	603	903	0
438	2	0	0	0	0	0	0	200	300	0	0	0	0	0	0	0	200	903	0	0	0	0	0	0	0	603	903	0
438	3	0	0	0	0	0	0	200	300	0	0	0	0	0	0	0	200	903	0	0	0	0	0	0	0	603	903	0
438	4	0	0	0	0	0	0	200	300	0	0	0	0	0	0	0	200	903	0	0	0	0	0	0	0	603	903	0
438	5	0	0	0	0	0	0	200	300	0	0	0	0	0	0	0	200	903	0	0	0	0	0	0	0	603	903	0
438	6	0	0	0	0	0	0	200	300	0	0	0	0	0	0	0	200	903	0	0	0	0	0	0	0	603	903	0
438	7	0	0	0	0	0	0	200	300	0	0	0	0	0	0	0	200	903	0	0	0	0	0	0	0	603	903	0
438	8	0	0	0	0	0	0	200	300	0	0	0	0	0	0	0	200	903	0	0	0	0	0	0	0	603	903	0
438	9	0	0	0	0	0	0	200	300	0	0	0	0	0	0	0	200	903	0	0	0	0	0	0	0	603	903	0
439	0	0	0	0	0	0	0	200	300	0	0	0	0	0	0	0	200	903	0	0	0	0	0	0	0	603	903	0
439	1	0	0	0	0	0	0	200	300	0	0	0	0	0	0	0	200	903	0	0	0	0	0	0	0	603	903	0
439	2	0	0	0	0	0	0	200	300	0	0	0	0	0	0	0	200	903	0	0	0	0	0	0	0	603	903	0
439	3	0	0	0	0	0	0	200	300	0	0	0	0	0	0	0	200	903	0	0	0	0	0	0	0	603	903	0
439	4	0	0	0	0	0	0	200	300	0	0	0	0	0	0	0	200	903	0	0	0	0	0	0	0	603	903	0
439	5	0	0	0	0	0	0	200	300	0	0	0	0	0	0	0	200	903	0	0	0	0	0	0	0	603	903	0
439	6	0	0	0	0	0	0	200	300	0	0	0	0	0	0	0	200	903	0	0	0	0	0	0	0	603	903	0
439	7	0	0	0	0	0	0	200	300	0	0	0	0	0	0	0	200	903	0	0	0	0	0	0	0	603	903	0
439	8	0	0	0	0	0	0	200	300	0	0	0	0	0	0	0	200	903	0	0	0	0	0	0	0	603	903	0
439	9	0	0	0	0	0	0	200	300	0	0	0	0	0	0	0	200	903	0	0	0	0	0	0	0	603	903	0
440	0	0	0	0	0	0	0	200	300	0	0	0	0	0	0	0	200	903	0	0	0	0	0	0	0	603	903	0
440	1	0	0	0	0	0	0	200	300	0	0	0	0	0	0	0	200	903	0	0	0	0	0	0	0	603	903	0
440	2	0	0	0	0	0	0	200	300	0	0	0	0	0	0	0	200	903	0	0	0	0	0	0	0	603	903	0
440	3	0	0	0	0	0	0	200	300	0	0	0	0	0	0	0	200	903	0	0	0	0	0	0	0	603	903	0
440	4	0	0	0	0	0	0	200	300	0	0	0	0	0	0	0	200	903	0	0	0	0	0	0	0	603	903	0
440	5	0	0	0	0	0	0	200	300	0	0	0	0	0	0	0	200	903	0	0	0	0	0	0	0	603	903	0
440	6	0	0	0	0	0	0	200	300	0	0	0	0	0	0	0	200	903	0	0	0	0	0	0	0	603	903	0
440	7	0	0	0	0	0	0	200	300	0	0	0	0	0	0	0	200	903	0	0	0	0	0	0	0	603	903	0
440	8	0	0	0	0	0	0	200	300	0	0	0	0	0	0	0	200	903	0	0	0	0	0	0	0	603	903	0
440	9	0	0	0	0	0	0	200	300	0	0	0	0	0	0	0	200	903	0	0	0	0	0	0	0	603	903	0
441	0	0	0	0	0	0	0	200	300	0	0	0	0	0	0	0	200	903	0	0	0	0	0	0	0	603	903	0
441	1	0	0	0	0	0	0	200	300	0	0	0	0	0	0	0	200	903	0	0	0	0	0	0	0	603	903	0
441	2	0	0	0	0	0	0	200	300	0	0	0	0	0	0	0	200	903	0	0	0	0	0	0	0	603	903	0
441	3	0	0	0	0	0	0	200	300	0	0	0	0	0	0	0	200	903	0	0	0	0	0	0	0	603	903	0
441	4	0	0	0	0	0	0	200	300	0	0	0	0	0	0	0	200	903	0	0	0	0	0	0	0	603	903	0
441	5	0	0	0	0	0	0	200	300	0	0	0	0	0	0	0	200	903	0	0	0	0	0	0	0	603	903	0
441	6	0	0	0	0	0	0	200	300	0	0	0	0	0	0	0	200	903	0	0	0	0	0	0	0	603	903	0
441	7	0	0	0	0	0	0	200	300	0	0	0	0	0	0	0	200	903	0	0	0	0	0	0	0	603	903	0
441	8	0	0	0	0	0	0	200	300	0	0	0	0	0	0	0	200	903	0	0	0	0	0	0	0	603	903	0
441	9	0	0	0	0	0	0	200	300	0	0	0	0	0	0	0	200	903	0	0	0	0	0	0	0	603	903	0
442	0	0	0	0	0	0	0	200	300	0	0	0	0	0	0	0	200	903	0	0	0	0	0	0	0	603	903	0
442	1	0	0	0	0	0	0	200	300	0	0	0	0	0	0	0	200	903	0	0	0	0	0	0	0	603	903	0
442	2	0	0	0	0	0	0	200	300	0	0	0	0	0	0	0	200	903	0	0	0	0	0	0	0	603	903	0
442	3	0	0	0	0	0	0	200	300	0	0	0	0	0	0	0	200	903	0	0	0	0	0	0	0	603	903	0
442	4	0	0	0	0	0	0	200	300	0	0	0	0	0	0	0	200	903	0	0	0	0	0	0	0	603	903	0
442	5	0	0	0	0	0	0	200	300	0	0	0	0	0	0	0	200	903	0	0	0	0	0	0	0	603	903	0
442	6	0	0	0	0	0	0	200	300	0	0	0	0	0	0	0	200	903	0	0	0	0	0	0	0	603	903	0
442	7	0	0	0	0	0	0	200	300	0	0	0	0	0	0	0	200	903	0	0	0	0	0	0	0	603	903	0
442	8	0	0	0	0	0	0	200	300	0	0	0	0	0	0	0	200	903	0	0	0	0	0	0	0	603	903	0
442	9	0	0	0	0	0	0	200	300	0	0	0	0	0	0	0	200	903	0	0	0	0	0	0	0	603	903	0
443	0	0	0	0	0	0	0	200	300	0	0	0	0	0	0	0	200	903	0	0	0	0	0	0	0	603	903	0
443	1	0	0	0	0	0	0	200	300	0	0	0	0	0	0	0	200	903	0	0	0	0	0	0	0	603	903	0
443	2	0	0	0	0	0	0	200	300	0	0	0	0	0	0	0	200	903	0	0	0	0	0	0	0	603	903	0
443	3	0	0	0	0	0	0	200	300	0	0	0	0	0	0	0	200	903	0	0	0	0	0	0	0	603	903	0
443	4	0	0	0	0	0	0	200	300	0	0	0	0	0	0	0	200	903	0	0	0	0	0	0	0	603	903	0
443	5	0	0	0	0	0	0	200	300	0	0	0	0	0	0	0	200	903	0	0	0	0	0	0	0	603	903	0
443	6	0	0	0	0	0	0	200	300	0	0	0	0	0	0	0	200	903	0	0	0	0	0	0	0	603	903	0
443	7	0	0	0	0	0	0	200	300	0	0	0	0	0	0	0	200	903	0	0	0	0	0	0	0	603	903	0
443	8	0	0	0	0	0	0	200	300	0	0	0	0	0	0	0	200	903	0	0	0	0	0	0	0	603	903	0
443	9	0	0	0	0	0	0	200	300	0	0	0	0	0	0	0	200	903	0	0	0	0	0	0	0	603	903	0
444	0	0	0	0	0	0	0	200	300	0	0	0	0	0	0	0	200	903	0	0	0	0	0	0	0	603	903	0
444	1	0	0	0	0	0	0	200	300	0	0	0	0	0	0	0	200	903	0	0	0	0	0	0	0	603	903	0
444	2	0	0	0	0	0	0	200	300	0	0	0	0	0	0	0	200	903	0	0	0	0	0	0	0	603	903	0
444	3	0	0	0	0	0	0	200	300	0	0	0	0	0	0	0	200	903	0	0	0	0	0	0	0	603	903	0
444	4	0	0	0	0	0	0	200	300	0	0	0	0	0	0	0	200	903	0	0	0	0	0	0	0	603	903	0
444	5	0	0	0	0	0	0	200	300	0	0	0	0	0	0	0	200	903	0	0	0	0	0	0	0	603	903	0
444	6	0	0	0	0	0	0	200	300	0	0	0	0	0	0	0	200	903	0	0	0	0	0	0	0	603	903	0
444	7	0	0	0	0	0	0	200	300	0	0	0	0	0	0	0	200	903	0	0	0	0	0	0	0	603	903	0
444	8	0	0	0	0	0	0	200	300	0	0	0	0	0	0	0	200	903	0	0	0	0	0	0	0	603	903	0
444	9	0	0	0	0	0	0	200	300	0	0	0	0	0	0	0	200	903	0	0	0	0	0	0	0	603	903	0
445	0	0	0	0	0	0	0	200	300	0	0	0	0	0	0	0	200	903	0	0	0	0	0	0	0	603	903	0
445	1	0	0	0	0	0	0	200	300	0	0	0	0	0	0	0	200	903	0	0	0	0	0	0	0	603	903	0
445	2	0	0	0	0	0	0	200	300	0	0	0	0	0	0	0	200	903	0	0	0	0	0	0	0	603	903	0
445	3	0	0	0	0	0	0	200	300	0	0	0	0	0	0	0	200	903	0	0	0	0	0	0	0	603	903	0
445	4	0	0	0	0	0	0	200	300	0	0	0	0	0	0	0	200	903	0	0	0	0	0	0	0	603	903	0
445	5	0	0	0	0	0	0	200	300	0	0	0	0	0	0	0	200	903	0	0	0	0	0	0	0	603	903	0
445	6	0	0	0	0	0	0	200	300	0	0	0	0	0	0	0	200	903	0	0	0	0	0	0	0	603	903	0
445	7	0	0	0	0	0	0	200	300	0	0	0	0	0	0	0	200	903	0	0	0	0	0	0	0	603	903	0
445	8	0	0	0	0	0	0	200	300	0	0	0	0	0	0	0	200	903	0	0	0	0	0	0	0	603	903	0
445	9	0	0	0	0	0	0	200	300	0	0	0	0	0	0	0	200	903	0	0	0	0	0	0	0	603	903	0
446	0	0	0	0	0	0	0	200	300	0	0	0	0	0	0	0	200	903	0	0	0	0	0	0	0	603	903	0
446	1	0	0	0	0	0	0	200	300	0	0	0	0	0	0	0	200	903	0	0	0	0	0	0	0	603	903	0
446	2	0	0	0	0	0	0	200	300	0	0	0	0	0	0	0	200	903	0	0	0	0	0	0	0	603	903	0
446	3	0	0	0	0	0	0	200	300	0	0	0	0	0	0	0	200	903	0	0	0	0	0	0	0	603	903	0
446	4	0	0	0	0	0	0	200	300	0	0	0	0	0	0	0	200	903	0	0	0	0	0	0	0	603	903	0
446	5	0	0	0	0	0	0	200	300	0	0	0	0	0	0	0	200	903	0	0	0	0	0	0	0	603	903	0
446	6	0	0	0	0	0	0	200	300	0	0	0	0	0	0	0	200	903	0	0	0	0	0	0	0	603	903	0
446	7	0	0	0	0	0	0	200	300	0	0	0	0	0	0	0	200	903	0	0	0	0	0	0	0	603	903	0
446	8	0	0	0	0	0	0	200	300	0	0	0	0	0	0	0	200	903	0	0	0	0	0	0	0	603	903	0
446	9	0	0	0	0	0	0	200	300	0	0	0	0	0	0	0	200	903	0	0	0	0	0	0	0	603	903	0
447	0	0	0	0	0	0	0	200	300	0	0	0	0	0	0	0	200	903	0	0	0	0	0	0	0	603	903	0
447	1	0	0	0	0	0	0	200	300	0	0	0	0	0	0	0	200	903	0	0	0	0	0	0	0	603	903	0
447	2	0	0	0	0	0	0	200	300	0	0	0	0	0	0	0	200	903	0	0	0	0	0	0	0	603	903	0
447	3	0	0	0	0	0	0	200	300	0	0	0	0	0	0	0	200	903	0	0	0	0	0	0	0	603	903	0
447	4	0	0	0	0	0	0	200	300	0	0	0	0	0	0	0	200	903	0	0	0	0	0	0	0	603	903	0
447	5	0	0	0	0	0	0	200	300	0	0	0	0	0	0	0	200	903	0	0	0	0	0	0	0	603	903	0
447	6	0	0	0	0	0	0	200	300	0	0	0	0	0	0	0	200	903	0	0	0	0	0	0	0	603	903	0
447	7	0	0	0	0	0	0	200	300	0	0	0	0	0	0	0	200	903	0	0	0	0	0	0	0	603	903	0
447	8	0	0	0	0	0	0	200	300	0	0	0	0	0	0	0	200	903	0	0	0	0	0	0	0	603	903	0
447	9	0	0	0	0	0	0	200	300	0	0	0	0	0	0	0	200	903	0	0	0	0	0	0	0	603	903	0
448	0	0	0	0	0	0	0	200	300	0	0	0	0	0	0	0	200	903	0	0	0	0	0	0	0	603	903	0
448	1	0	0	0	0	0	0	200	300	0	0	0	0	0	0	0	200	903	0	0	0	0	0	0	0	603	903	0
448	2	0	0	0	0	0	0	200	300	0	0	0	0	0	0	0	200	903	0	0	0	0	0	0	0	603	903	0
448	3	0	0	0	0	0	0	200	300	0	0	0	0	0	0	0	200	903	0	0	0	0	0	0	0	603	903	0
448	4	0	0	0	0	0	0	200	300	0	0	0	0	0	0	0	200	903	0	0	0	0	0	0	0	603	903	0
448	5	0	0	0	0	0	0	200	300	0	0	0	0	0	0	0	200	903	0	0	0	0	0	0	0	603	903	0
448	6	0	0	0	0	0	0	200	300	0	0	0	0	0	0	0	200	903	0	0	0	0	0	0	0	603	903	0
448	7	0	0	0	0	0	0	200	300	0	0	0	0	0	0	0	200	903	0	0	0	0	0	0	0	603	903	0
448	8	0	0	0	0	0	0	200	300	0	0	0	0	0	0	0	200	903	0	0	0	0	0	0	0	603	903	0
448	9	0	0	0	0	0	0	200	300	0	0	0	0	0	0	0	200	903	0	0	0	0	0	0	0	603	903	0
449	0	0	0	0	0	0	0	200	300	0	0	0	0	0	0	0	200	903	0	0	0	0	0	0	0	603	903	0
449	1	0	0	0	0	0	0	200	300	0	0	0	0	0	0	0	200	903	0	0	0	0	0	0	0	603	903	0
449	2	0	0	0	0	0	0	200	300	0	0	0	0	0	0	0	200	903	0	0	0	0	0	0	0	603	903	0
449	3	0	0	0	0	0	0	200	300	0	0	0	0	0	0	0	200	903	0	0	0	0	0	0	0	603	903	0
449	4	0	0	0	0	0	0	200	300	0	0	0	0	0	0	0	200	903	0	0	0	0	0	0	0	603	903	0
449	5	0	0	0	0	0	0	200	300	0	0	0	0	0	0	0	200	903	0	0	0	0	0	0	0	603	903	0
449	6	0	0	0	0	0	0	200	300	0	0	0	0	0	0	0	200	903	0	0	0	0	0	0	0	603	903	0
449	7	0	0	0	0	0	0	200	300	0	0	0	0	0	0	0	200	903	0	0	0	0	0	0	0	603	903	0
449	8	0	0	0	0	0	0	200	300	0	0	0	0	0	0	0	200	903	0	0	0	0	0	0	0	603	903	0
449	9	0	0	0	0	0	0	200	300	0	0	0	0	0	0	0	200	903	0	0	0	0	0	0	0	603	903	0
450	0	0	0	0	0	0	0	200	300	0	0	0	0	0	0	0	200	903	0	0	0	0	0	0	0	603	903	0
450	1	0	0	0	0	0	0	200	300	0	0	0	0	0	0	0	200	903	0	0	0	0	0	0	0	603	903	0
450	2	0	0	0	0	0	0	200	300	0	0	0	0	0	0	0	200	903	0	0	0	0	0	0	0	603	903	0
450	3	0	0	0	0	0	0	200	300	0	0	0	0	0	0	0	200	903	0	0	0	0	0	0	0	603	903	0
450	4	0	0	0	0	0	0	200	300	0	0	0	0	0	0	0	200	903	0	0	0	0	0	0	0	603	903	0
450	5	0	0	0	0	0	0	200	300	0	0	0	0	0	0	0	200	903	0	0	0	0	0	0	0	603	903	0
450	6	0	0	0	0	0	0	200	300	0	0	0	0	0	0	0	200	903	0	0	0	0	0	0	0	603	903	0
450	7	0	0	0	0	0	0	200	300	0	0	0	0	0	0	0	200	903	0	0	0	0	0	0	0	603	903	0
450	8	0	0	0	0	0	0	200	300	0	0	0	0	0	0	0	200	903	0	0	0	0	0	0	0	603	903	0
450	9	0	0	0	0	0	0	200	300	0	0	0	0	0	0	0	200	903	0	0	0	0	0	0	0	603	903	0
451	0	0	0	0	0	0	0	200	300	0	0	0	0	0	0	0	200	903	0	0	0	0	0	0	0	603	903	0
451	1	0	0	0	0	0	0	200	300	0	0	0	0	0	0	0	200	903	0	0	0	0	0	0	0	603	903	0
451	2	0	0	0	0	0	0	200	300	0	0	0	0	0	0	0	200	903	0	0	0	0	0	0	0	603	903	0
451	3	0	0	0	0	0	0	200	300	0	0	0	0	0	0	0	200	903	0	0	0	0	0	0	0	603	903	0
451	4	0	0	0	0	0	0	200	300	0	0	0	0	0	0	0	200	903	0	0	0	0	0	0	0	603	903	0
451	5	0	0	0	0	0	0	200	300	0	0	0	0	0	0	0	200	903	0	0	0	0	0	0	0	603	903	0
451	6	0	0	0	0	0	0	200	300	0	0	0	0	0	0	0	200	903	0	0	0	0	0	0	0	603	903	0
451	7	0	0	0	0	0	0	200	300	0	0	0	0	0	0	0	200	903	0	0	0	0	0	0	0	603	903	0
451	8	0	0	0	0	0	0	200	300	0	0	0	0	0	0	0	200	903	0	0	0	0	0	0	0	603	903	0
451	9	0	0	0	0	0	0	200	300	0	0	0	0	0	0	0	200	903	0	0	0	0	0	0	0	603	903	0
452	0	0	0	0	0	0	0	200	300	0	0	0	0	0	0	0	200	903	0	0	0	0	0	0	0	603	903	0
452	1	0	0	0	0	0	0	200	300	0	0	0	0	0	0	0	200	903	0	0	0	0	0	0	0	603	903	0
452	2	0	0	0	0	0	0	200	300	0	0	0	0	0	0	0	200	903	0	0	0	0	0	0	0	603	903	0
452	3	0	0	0	0	0	0	200	300	0	0	0	0	0	0	0	200	903	0	0	0	0	0	0	0	603	903	0
452	4	0	0	0	0	0	0	200	300	0	0	0	0	0	0	0	200	903	0	0	0	0	0	0	0	603	903	0
452	5	0	0	0	0	0	0	200	300	0	0	0	0	0	0	0	200	903	0	0	0	0	0	0	0	603	903	0
452	6	0	0	0	0	0	0	200	300	0	0	0	0	0	0	0	200	903	0	0	0	0	0	0	0	603	903	0
452	7	0	0	0	0	0	0	200	300	0	0	0	0	0	0	0	200	903	0	0	0	0	0	0	0	603	903	0
452	8	0	0	0	0	0	0	200	300	0	0	0	0	0	0	0	200	903	0	0	0	0	0	0	0	603	903	0
452	9	0	0	0	0	0	0	200	300	0	0	0	0	0	0	0	200	903	0	0	0	0	0	0	0	603	903	0
453	0	0	0	0	0	0	0	200	300	0	0	0	0	0	0	0	200	903	0	0	0	0	0	0	0	603	903	0
453	1	0	0	0	0	0	0	200	300	0	0	0	0	0	0	0	200	903	0	0	0	0	0	0	0	603	903	0
453	2	0	0	0	0	0	0	200	300	0	0	0	0	0	0	0	200	903	0	0	0	0	0	0	0	603	903	0
453	3	0	0	0	0	0	0	200	300	0	0	0	0	0	0	0	200	903	0	0	0	0	0	0	0	603	903	0
453	4	0	0	0	0	0	0	200	300	0	0	0	0	0	0	0	200	903	0	0	0	0	0	0	0	603	903	0
453	5	0	0	0	0	0	0	200	300	0	0	0	0	0	0	0	200	903	0	0	0	0	0	0	0	603	903	0
453	6	0	0	0	0	0	0	200	300	0	0	0	0	0	0	0	200	903	0	0	0	0	0	0	0	603	903	0
453	7	0	0	0	0	0	0	200	300	0	0	0	0	0	0	0	200	903	0	0	0	0	0	0	0	603	903	0
453	8	0	0	0	0	0	0	200	300	0	0	0	0	0	0	0	200	903	0	0	0	0	0	0	0	603	903	0
453	9	0	0	0	0	0	0	200	300	0	0	0	0	0	0	0	200	903	0	0	0	0	0	0	0	603	903	0
454	0	0	0	0	0	0	0	200	300	0	0	0	0	0	0	0	200	903	0	0	0	0	0	0	0	603	903	0
454	1	0	0	0	0	0	0	200	300	0	0	0	0	0	0	0	200	903	0	0	0	0	0	0	0	603	903	0
454	2	0	0	0	0	0	0	200	300	0	0	0	0	0	0	0	200	903	0	0	0	0	0	0	0	603	903	0
454	3	0	0	0	0	0	0	200	300	0	0	0	0	0	0	0	200	903	0	0	0	0	0	0	0	603	903	0
454	4	0	0	0	0	0	0	200	300	0	0	0	0	0	0	0	200	903	0	0	0	0	0	0	0	603	903	0
454	5	0	0	0	0	0	0	200	300	0	0	0	0	0	0	0	200	903	0	0	0	0	0	0	0	603	903	0
454	6	0	0	0	0	0	0	200	300	0	0	0	0	0	0	0	200	903	0	0	0	0	0	0	0	603	903	0
454	7	0	0	0	0	0	0	200	300	0	0	0	0	0	0	0	200	903	0	0	0	0	0	0	0	603	903	0
454	8	0	0	0	0	0	0	200	300	0	0	0	0	0	0	0	200	903	0	0	0	0	0	0	0	603	903	0
454	9	0	0	0	0	0	0	200	300	0	0	0	0	0	0	0	200	903	0	0	0	0	0	0	0	603	903	0
455	0	0	0	0	0	0	0	200	300	0	0	0	0	0	0	0	200	903	0	0	0	0	0	0	0	603	903	0
455	1	0	0	0	0	0	0	200	300	0	0	0	0	0	0	0	200	903	0	0	0	0	0	0	0	603	903	0
455	2	0	0	0	0	0	0	200	300	0	0	0	0	0	0	0	200	903	0	0	0	0	0	0	0	603	903	0
455	3	0	0	0	0	0	0	200	300	0	0	0	0	0	0	0	200	903	0	0	0	0	0	0	0	603	903	0
455	4	0	0	0	0	0	0	200	300	0	0	0	0	0	0	0	200	903	0	0	0	0	0	0	0	603	903	0
455	5	0	0	0	0	0	0	200	300	0	0	0	0	0	0	0	200	903	0	0	0	0	0	0	0	603	903	0
455	6	0	0	0	0	0	0	200	300	0	0	0	0	0	0	0	200	903	0	0	0	0	0	0	0	603	903	0
455	7	0	0	0	0	0	0	200	300	0	0	0	0	0	0	0	200	903	0	0	0	0	0	0	0	603	903	0
455	8	0	0	0	0	0	0	200	300	0	0	0	0	0	0	0	200	903	0	0	0	0	0	0	0	603	903	0
455	9	0	0	0	0	0	0	200	300	0	0	0	0	0	0	0	200	903	0	0	0	0	0	0	0	603	903	0
456	0	0	0	0	0	0	0	200	300	0	0	0	0	0	0	0	200	903	0	0	0	0	0	0	0	603	903	0
456	1	0	0	0	0	0	0	200	300	0	0	0	0	0	0	0	200	903	0	0	0	0	0	0	0	603	903	0
456	2	0	0	0	0	0	0	200	300	0	0	0	0	0	0	0	200	903	0	0	0	0	0	0	0	603	903	0
456	3	0	0	0	0	0	0	200	300	0	0	0	0	0	0	0	200	903	0	0	0	0	0	0	0	603	903	0
456	4	0	0	0	0	0	0	200	300	0	0	0	0	0	0	0	200	903	0	0	0	0	0	0	0	603	903	0
456	5	0	0	0	0	0	0	200	300	0	0	0	0	0	0	0	200	903	0	0	0	0	0	0	0	603	903	0
456	6	0	0	0	0	0	0	200	300	0	0	0	0	0	0	0	200	903	0	0	0	0	0	0	0	603	903	0
456	7	0	0	0	0	0	0	200	300	0	0	0	0	0	0	0	200	903	0	0	0	0	0	0	0	603	903	0
456	8	0	0	0	0	0	0	200	300	0	0	0	0	0	0	0	200	903	0	0	0	0	0	0	0	603	903	0
456	9	0	0	0	0	0	0	200	300	0	0	0	0	0	0	0	200	903	0	0	0	0	0	0	0	603	903	0
457	0	0	0	0	0	0	0	200	300	0	0	0	0	0	0	0	200	903	0	0	0	0	0	0	0	603	903	0
457	1	0	0	0	0	0	0	200	300	0	0	0	0	0	0	0	200	903	0	0	0	0	0	0	0	603	903	0
457	2	0	0	0	0	0	0	200	300	0	0	0	0	0	0	0	200	903	0	0	0	0	0	0	0	603	903	0
457	3	0	0	0	0	0	0	200	300	0	0	0	0	0	0	0	200	903	0	0	0	0	0	0	0	603	903	0
457	4	0	0	0	0	0	0	200	300	0	0	0	0	0	0	0	200	903	0	0	0	0	0	0	0	603	903	0
457	5	0	0	0	0	0	0	200	300	0	0	0	0	0	0	0	200	903	0	0	0	0	0	0	0	603	903	0
457	6	0	0	0	0	0	0	200	300	0	0	0	0	0	0	0	200	903	0	0	0	0	0	0	0	603	903	0
457	7	0	0	0	0	0	0	200	300	0	0	0	0	0	0	0	200	903	0	0	0	0	0	0	0	603	903	0
457	8	0	0	0	0	0	0	200	300	0	0	0	0	0	0	0	200	903	0	0	0	0	0	0	0	603	903	0
457	9	0	0	0	0	0	0	200	300	0	0	0	0	0	0	0	200	903	0	0	0	0	0	0	0	603	903	0
458	0	0	0	0	0	0	0	200	300	0	0	0	0	0	0	0	200	903	0	0	0	0	0	0	0	603	903	0
458	1	0	0	0	0	0	0	200	300	0	0	0	0	0	0	0	200	903	0	0	0	0	0	0	0	603	903	0
458	2	0	0	0	0	0	0	200	300	0	0	0	0	0	0	0	200	903	0	0	0	0	0	0	0	603	903	0
458	3	0	0	0	0	0	0	200	300	0	0	0	0	0	0	0	200	903	0	0	0	0	0	0	0	603	903	0
458	4	0	0	0	0	0	0	200	300	0	0	0	0	0	0	0	200	903	0	0	0	0	0	0	0	603	903	0
458	5	0	0	0	0	0	0	200	300	0	0	0	0	0	0	0	200	903	0	0	0	0	0	0	0	603	903	0
458	6	0	0	0	0	0	0	200	300	0	0	0	0	0	0	0	200	903	0	0	0	0	0	0	0	603	903	0
458	7	0	0	0	0	0	0	200	300	0	0	0	0	0	0	0	200	903	0	0	0	0	0	0	0	603	903	0
458	8	0	0	0	0	0	0	200	300	0	0	0	0	0	0	0	200	903	0	0	0	0	0	0	0	603	903	0
458	9	0	0	0	0	0	0	200	300	0	0	0	0	0	0	0	200	903	0	0	0	0	0	0	0	603	903	0
459	0	0	0	0	0	0	0	200	300	0	0	0	0	0	0	0	200	903	0	0	0	0	0	0	0	603	903	0
459	1	0	0	0	0	0	0	200	300	0	0	0	0	0	0	0	200	903	0	0	0	0	0	0	0	603	903	0
459	2	0	0	0	0	0	0	200	300	0	0	0	0	0	0	0	200	903	0	0	0	0	0	0	0	603	903	0
459	3	0	0	0	0	0	0	200	300	0	0	0	0	0	0	0	200	903	0	0	0	0	0	0	0	603	903	0
459	4	0	0	0	0	0	0	200	300	0	0	0	0	0	0	0	200	903	0	0	0	0	0	0	0	603	903	0
459	5	0	0	0	0	0	0	200	300	0	0	0	0	0	0	0	200	903	0	0	0	0	0	0	0	603	903	0
459	6	0	0	0	0	0	0	200	300	0	0	0	0	0	0	0	200	903	0	0	0	0	0	0	0	603	903	0
459	7	0	0	0	0	0	0	200	300	0	0	0	0	0	0	0	200	903	0	0	0	0	0	0	0	603	903	0
459	8	0	0	0	0	0	0	200	300	0	0	0	0	0	0	0	200	903	0	0	0	0	0	0	0	603	903	0
459	9	0	0	0	0	0	0	200	300	0	0	0	0	0	0	0	200	903	0	0	0	0	0	0	0	603	903	0
460	0	0	0	0	0	0	0	200	300	0	0	0	0	0	0	0	200	903	0	0	0	0	0	0	0	603	903	0
460	1	0	0	0	0	0	0	200	300	0	0	0	0	0	0	0	200	903	0	0	0	0	0	0	0	603	903	0
460	2	0	0	0	0	0	0	200	300	0	0	0	0	0	0	0	200	903	0	0	0	0	0	0	0	603	903	0
460	3	0	0	0	0	0	0	200	300	0	0	0	0	0	0	0	200	903	0	0	0	0	0	0	0	603	903	0
460	4	0	0	0	0	0	0	200	300	0	0	0	0	0	0	0	200	903	0	0	0	0	0	0	0	603	903	0
460	5	0	0	0	0	0	0	200	300	0	0	0	0	0	0	0	200	903	0	0	0	0	0	0	0	603	903	0
460	6	0	0	0	0	0	0	200	300	0	0	0	0	0	0	0	200	903	0	0	0	0	0	0	0	603	903	0
460	7	0	0	0	0	0	0	200	300	0	0	0	0	0	0	0	200	903	0	0	0	0	0	0	0	603	903	0
460	8	0	0	0	0	0	0	200	300	0	0	0	0	0	0	0	200	903	0	0	0	0	0	0	0	603	903	0
460	9	0	0	0	0	0	0	200	300	0	0	0	0	0	0	0	200	903	0	0	0	0	0	0	0	603	903	0
461	0	0	0	0	0	0	0	200	300	0	0	0	0	0	0	0	200	903	0	0	0	0	0	0	0	603	903	0
461	1	0	0	0	0	0	0	200	300	0	0	0	0	0	0	0	200	903	0	0	0	0	0	0	0	603	903	0
461	2	0	0	0	0	0	0	200	300	0	0	0	0	0	0	0	200	903	0	0	0	0	0	0	0	603	903	0
461	3	0	0	0	0	0	0	200	300	0	0	0	0	0	0	0	200	903	0	0	0	0	0	0	0	603	903	0
461	4	0	0	0	0	0	0	200	300	0	0	0	0	0	0	0	200	903	0	0	0	0	0	0	0	603	903	0
461	5	0	0	0	0	0	0	200	300	0	0	0	0	0	0	0	200	903	0	0	0	0	0	0	0	603	903	0
461	6	0	0	0	0	0	0	200	300	0	0	0	0	0	0	0	200	903	0	0	0	0	0	0	0	603	903	0
461	7	0	0	0	0	0	0	200	300	0	0	0	0	0	0	0	200	903	0	0	0	0	0	0	0	603	903	0
461	8	0	0	0	0	0	0	200	300	0	0	0	0	0	0	0	200	903	0	0	0	0	0	0	0	603	903	0
461	9	0	0	0	0	0	0	200	300	0	0	0	0	0	0	0	200	903	0	0	0	0	0	0	0	603	903	0
462	0	0	0	0	0	0	0	200	300	0	0	0	0	0	0	0	200	903	0	0	0	0	0	0	0	603	903	0
462	1	0	0	0	0	0	0	200	300	0	0	0	0	0	0	0	200	903	0	0	0	0	0	0	0	603	903	0
462	2	0	0	0	0	0	0	200	300	0	0	0	0	0	0	0	200	903	0	0	0	0	0	0	0	603	903	0
462	3	0	0	0	0	0	0	200	300	0	0	0	0	0	0	0	200	903	0	0	0	0	0	0	0	603	903	0
462	4	0	0	0	0	0	0	200	300	0	0	0	0	0	0	0	200	903	0	0	0	0	0	0	0	603	903	0
462	5	0	0	0	0	0	0	200	300	0	0	0	0	0	0	0	200	903	0	0	0	0	0	0	0	603	903	0
462	6	0	0	0	0	0	0	200	300	0	0	0	0	0	0	0	200	903	0	0	0	0	0	0	0	603	903	0
462	7	0	0	0	0	0	0	200	300	0	0	0	0	0	0	0	200	903	0	0	0	0	0	0	0	603	903	0
462	8	0	0	0	0	0	0	200	300	0	0	0	0	0	0	0	200	903	0	0	0	0	0	0	0	603	903	0
462	9	0	0	0	0	0	0	200	300	0	0	0	0	0	0	0	200	903	0	0	0	0	0	0	0	603	903	0
463	0	0	0	0	0	0	0	200	300	0	0	0	0	0	0	0	200	903	0	0	0	0	0	0	0	603	903	0
463	1	0	0	0	0	0	0	200	300	0	0	0	0	0	0	0	200	903	0	0	0	0	0	0	0	603	903	0
463	2	0	0	0	0	0	0	200	300	0	0	0	0	0	0	0	200	903	0	0	0	0	0	0	0	603	903	0
463	3	0	0	0	0	0	0	200	300	0	0	0	0	0	0	0	200	903	0	0	0	0	0	0	0	603	903	0
463	4	0	0	0	0	0	0	200	300	0	0	0	0	0	0	0	200	903	0	0	0	0	0	0	0	603	903	0
463	5	0	0	0	0	0	0	200	300	0	0	0	0	0	0	0	200	903	0	0	0	0	0	0	0	603	903	0
463	6	0	0	0	0	0	0	200	300	0	0	0	0	0	0	0	200	903	0	0	0	0	0	0	0	603	903	0
463	7	0	0	0	0	0	0	200	300	0	0	0	0	0	0	0	200	903	0	0	0	0	0	0	0	603	903	0
463	8	0	0	0	0	0	0	200	300	0	0	0	0	0	0	0	200	903	0	0	0	0	0	0	0	603	903	0
463	9	0	0	0	0	0	0	200	300	0	0	0	0	0	0	0	200	903	0	0	0	0	0	0	0	603	903	0
464	0	0	0	0	0	0	0	200	300	0	0	0	0	0	0	0	200	903	0	0	0	0	0	0	0	603	903	0
464	1	0	0	0	0	0	0	200	300	0	0	0	0	0	0	0	200	903	0	0	0	0	0	0	0	603	903	0
464	2	0	0	0	0	0	0	200	300	0	0	0	0	0	0	0	200	903	0	0	0	0	0	0	0	603	903	0
464	3	0	0	0	0	0	0	200	300	0	0	0	0	0	0	0	200	903	0	0	0	0	0	0	0	603	903	0
464	4	0	0	0	0	0	0	200	300	0	0	0	0	0	0	0	200	903	0	0	0	0	0	0	0	603	903	0
464	5	0	0	0	0	0	0	200	300	0	0	0	0	0	0	0	200	903	0	0	0	0	0	0	0	603	903	0
464	6	0	0	0	0	0	0	200	300	0	0	0	0	0	0	0	200	903	0	0	0	0	0	0	0	603	903	0
464	7	0	0	0	0	0	0	200	300	0	0	0	0	0	0	0	200	903	0	0	0	0	0	0	0	603	903	0
464	8	0	0	0	0	0	0	200	300	0	0	0	0	0	0	0	200	903	0	0	0	0	0	0	0	603	903	0
464	9	0	0	0	0	0	0	200	300	0	0	0	0	0	0	0	200	903	0	0	0	0	0	0	0	603	903	0
465	0	0	0	0	0	0	0	200	300	0	0	0	0	0	0	0	200	903	0	0	0	0	0	0	0	603	903	0
465	1	0	0	0	0	0	0	200	300	0	0	0	0	0	0	0	200	903	0	0	0	0	0	0	0	603	903	0
465	2	0	0	0	0	0	0	200	300	0	0	0	0	0	0	0	200	903	0	0	0	0	0	0	0	603	903	0
465	3	0	0	0	0	0	0	200	300	0	0	0	0	0	0	0	200	903	0	0	0	0	0	0	0	603	903	0
465	4	0	0	0	0	0	0	200	300	0	0	0	0	0	0	0	200	903	0	0	0	0	0	0	0	603	903	0
465	5	0	0	0	0	0	0	200	300	0	0	0	0	0	0	0	200	903	0	0	0	0	0	0	0	603	903	0
465	6	0	0	0	0	0	0	200	300	0	0	0	0	0	0	0	200	903	0	0	0	0	0	0	0	603	903	0
465	7	0	0	0	0	0	0	200	300	0	0	0	0	0	0	0	200	903	0	0	0	0	0	0	0	603	903	0
465	8	0	0	0	0	0	0	200	300	0	0	0	0	0	0	0	200	903	0	0	0	0	0	0	0	603	903	0
465	9	0	0	0	0	0	0	200	300	0	0	0	0	0	0	0	200	903	0	0	0	0	0	0	0	603	903	0
466	0	0	0	0	0	0	0	200	300	0	0	0	0	0	0	0	200	903	0	0	0	0	0	0	0	603	903	0
466	1	0	0	0	0	0	0	200	300	0	0	0	0	0	0	0	200	903	0	0	0	0	0	0	0	603	903	0
466	2	0	0	0	0	0	0	200	300	0	0	0	0	0	0	0	200	903	0	0	0	0	0	0	0	603	903	0
466	3	0	0	0	0	0	0	200	300	0	0	0	0	0	0	0	200	903	0	0	0	0	0	0	0	603	903	0
466	4	0	0	0	0	0	0	200	300	0	0	0	0	0	0	0	200	903	0	0	0	0	0	0	0	603	903	0
466	5	0	0	0	0	0	0	200	300	0	0	0	0	0	0	0	200	903	0	0	0	0	0	0	0	603	903	0
466	6	0	0	0	0	0	0	200	300	0	0	0	0	0	0	0	200	903	0	0	0	0	0	0	0	603	903	0
466	7	0	0	0	0	0	0	200	300	0	0	0	0	0	0	0	200	903	0	0	0	0	0	0	0	603	903	0
466	8	0	0	0	0	0	0	200	300	0	0	0	0	0	0	0	200	903	0	0	0	0	0	0	0	603	903	0
466	9	0	0	0	0	0	0	200	300	0	0	0	0	0	0	0	200	903	0	0	0	0	0	0	0	603	903	0
467	0	0	0	0	0	0	0	200	300	0	0	0	0	0	0	0	200	903	0	0	0	0	0	0	0	603	903	0
467	1	0	0	0	0	0	0	200	300	0	0	0	0	0	0	0	200	903	0	0	0	0	0	0	0	603	903	0
467	2	0	0	0	0	0	0	200	300	0	0	0	0	0	0	0	200	903	0	0	0	0	0	0	0	603	903	0
467	3	0	0	0	0	0	0	200	300	0	0	0	0	0	0	0	200	903	0	0	0	0	0	0	0	603	903	0
467	4	0	0	0	0	0	0	200	300	0	0	0	0	0	0	0	200	903	0	0	0	0	0	0	0	603	903	0
467	5	0	0	0	0	0	0	200	300	0	0	0	0	0	0	0	200	903	0	0	0	0	0	0	0	603	903	0
467	6	0	0	0	0	0	0	200	300	0	0	0	0	0	0	0	200	903	0	0	0	0	0	0	0	603	903	0
467	7	0	0	0	0	0	0	200	300	0	0	0	0	0	0	0	200	903	0	0	0	0	0	0	0	603	903	0
467	8	0	0	0	0	0	0	200	300	0	0	0	0	0	0	0	200	903	0	0	0	0	0	0	0	603	903	0
467	9	0	0	0	0	0	0	200	300	0	0	0	0	0	0	0	200	903	0	0	0	0	0	0	0	603	903	0
468	0	0	0	0	0	0	0	200	300	0	0	0	0	0	0	0	200	903	0	0	0	0	0	0	0	603	903	0
468	1	0	0	0	0	0	0	200	300	0	0	0	0	0	0	0	200	903	0	0	0	0	0	0	0	603	903	0
468	2	0	0	0	0	0	0	200	300	0	0	0	0	0	0	0	200	903	0	0	0	0	0	0	0	603	903	0
468	3	0	0	0	0	0	0	200	300	0	0	0	0	0	0	0	200	903	0	0	0	0	0	0	0	603	903	0
468	4	0	0	0	0	0	0	200	300	0	0	0	0	0	0	0	200	903	0	0	0	0	0	0	0	603	903	0
468	5	0	0	0	0	0	0	200	300	0	0	0	0	0	0	0	200	903	0	0	0	0	0	0	0	603	903	0
468	6	0	0	0	0	0	0	200	300	0	0	0	0	0	0	0	200	903	0	0	0	0	0	0	0	603	903	0
468	7	0	0	0	0	0	0	200	300	0	0	0	0	0	0	0	200	903	0	0	0	0	0	0	0	603	903	0
468	8	0	0	0	0	0	0	200	300	0	0	0	0	0	0	0	200	903	0	0	0	0	0	0	0	603	903	0
468	9	0	0	0	0	0	0	200	300	0	0	0	0	0	0	0	200	903	0	0	0	0	0	0	0	603	903	0
469	0	0	0	0	0	0	0	200	300	0	0	0	0	0	0	0	200	903	0	0	0	0	0	0	0	603	903	0
469	1	0	0	0	0	0	0	200	300	0	0	0	0	0	0	0	200	903	0	0	0	0	0	0	0	603	903	0
469	2	0	0	0	0	0	0	200	300	0	0	0	0	0	0	0	200	903	0	0	0	0	0	0	0	603	903	0
469	3	0	0	0	0	0	0	200	300	0	0	0	0	0	0	0	200	903	0	0	0	0	0	0	0	603	903	0
469	4	0	0	0	0	0	0	200	300	0	0	0	0	0	0	0	200	903	0	0	0	0	0	0	0	603	903	0
469	5	0	0	0	0	0	0	200	300	0	0	0	0	0	0	0	200	903	0	0	0	0	0	0	0	603	903	0
469	6	0	0	0	0	0	0	200	300	0	0	0	0	0	0	0	200	903	0	0	0	0	0	0	0	603	903	0
469	7	0	0	0	0	0	0	200	300	0	0	0	0	0	0	0	200	903	0	0	0	0	0	0	0	603	903	0
469	8	0	0	0	0	0	0	200	300	0	0	0	0	0	0	0	200	903	0	0	0	0	0	0	0	603	903	0
469	9	0	0	0	0	0	0	200	300	0	0	0	0	0	0	0	200	903	0	0	0	0	0	0	0	603	903	0
470	0	0	0	0	0	0	0	200	300	0	0	0	0	0	0	0	200	903	0	0	0	0	0	0	0	603	903	0
470	1	0	0	0	0	0	0	200	300	0	0	0	0	0	0	0	200	903	0	0	0	0	0	0	0	603	903	0
470	2	0	0	0	0	0	0	200	300	0	0	0	0	0	0	0	200	903	0	0	0	0	0	0	0	603	903	0
470	3	0	0	0	0	0	0	200	300	0	0	0	0	0	0	0	200	903	0	0	0	0	0	0	0	603	903	0
470	4	0	0	0	0	0	0	200	300	0	0	0	0	0	0	0	200	903	0	0	0	0	0	0	0	603	903	0
470	5	0	0	0	0	0	0	200	300	0	0	0	0	0	0	0	200	903	0	0	0	0	0	0	0	603	903	0
470	6	0	0	0	0	0	0	200	300	0	0	0	0	0	0	0	200	903	0	0	0	0	0	0	0	603	903	0
470	7	0	0	0	0	0	0	200	300	0	0	0	0	0	0	0	200	903	0	0	0	0	0	0	0	603	903	0
470	8	0	0	0	0	0	0	200	300	0	0	0	0	0	0	0	200	903	0	0	0	0	0	0	0	603	903	0
470	9	0	0	0	0	0	0	200	300	0	0	0	0	0	0	0	200	903	0	0	0	0	0	0	0	603	903	0
471	0	0	0	0	0	0	0	200	300	0	0	0	0	0	0	0	200	903	0	0	0	0	0	0	0	603	903	0
471	1	0	0	0	0	0	0	200	300	0	0	0	0	0	0	0	200	903	0	0	0	0	0	0	0	603	903	0
471	2	0	0	0	0	0	0	200	300	0	0	0	0	0	0	0	200	903	0	0	0	0	0	0	0	603	903	0
471	3	0	0	0	0	0	0	200	300	0	0	0	0	0	0	0	200	903	0	0	0	0	0	0	0	603	903	0
471	4	0	0	0	0	0	0	200	300	0	0	0	0	0	0	0	200	903	0	0	0	0	0	0	0	603	903	0
471	5	0	0	0	0	0	0	200	300	0	0	0	0	0	0	0	200	903	0	0	0	0	0	0	0	603	903	0
471	6	0	0	0	0	0	0	200	300	0	0	0	0	0	0	0	200	903	0	0	0	0	0	0	0	603	903	0
471	7	0	0	0	0	0	0	200	300	0	0	0	0	0	0	0	200	903	0	0	0	0	0	0	0	603	903	0
471	8	0	0	0	0	0	0	200	300	0	0	0	0	0	0	0	200	903	0	0	0	0	0	0	0	603	903	0
471	9	0	0	0	0	0	0	200	300	0	0	0	0	0	0	0	200	903	0	0	0	0	0	0	0	603	903	0
472	0	0	0	0	0	0	0	200	300	0	0	0	0	0	0	0	200	903	0	0	0	0	0	0	0	603	903	0
472	1	0	0	0	0	0	0	200	300	0	0	0	0	0	0	0	200	903	0	0	0	0	0	0	0	603	903	0
472	2	0	0	0	0	0	0	200	300	0	0	0	0	0	0	0	200	903	0	0	0	0	0	0	0	603	903	0
472	3	0	0	0	0	0	0	200	300	0	0	0	0	0	0	0	200	903	0	0	0	0	0	0	0	603	903	0
472	4	0	0	0	0	0	0	200	300	0	0	0	0	0	0	0	200	903	0	0	0	0	0	0	0	603	903	0
472	5	0	0	0	0	0	0	200	300	0	0	0	0	0	0	0	200	903	0	0	0	0	0	0	0	603	903	0
472	6	0	0	0	0	0	0	200	300	0	0	0	0	0	0	0	200	903	0	0	0	0	0	0	0	603	903	0
472	7	0	0	0	0	0	0	200	300	0	0	0	0	0	0	0	200	903	0	0	0	0	0	0	0	603	903	0
472	8	0	0	0	0	0	0	200	300	0	0	0	0	0	0	0	200	903	0	0	0	0	0	0	0	603	903	0
472	9	0	0	0	0	0	0	200	300	0	0	0	0	0	0	0	200	903	0	0	0	0	0	0	0	603	903	0
473	0	0	0	0	0	0	0	200	300	0	0	0	0	0	0	0	200	903	0	0	0	0	0	0	0	603	903	0
473	1	0	0	0	0	0	0	200	300	0	0	0	0	0	0	0	200	903	0	0	0	0	0	0	0	603	903	0
473	2	0	0	0	0	0	0	200	300	0	0	0	0	0	0	0	200	903	0	0	0	0	0	0	0	603	903	0
473	3	0	0	0	0	0	0	200	300	0	0	0	0	0	0	0	200	903	0	0	0	0	0	0	0	603	903	0
473	4	0	0	0	0	0	0	200	300	0	0	0	0	0	0	0	200	903	0	0	0	0	0	0	0	603	903	0
473	5	0	0	0	0	0	0	200	300	0	0	0	0	0	0	0	200	903	0	0	0	0	0	0	0	603	903	0
473	6	0	0	0	0	0	0	200	300	0	0	0	0	0	0	0	200	903	0	0	0	0	0	0	0	603	903	0
473	7	0	0	0	0	0	0	200	300	0	0	0	0	0	0	0	200	903	0	0	0	0	0	0	0	603	903	0
473	8	0	0	0	0	0	0	200	300	0	0	0	0	0	0	0	200	903	0	0	0	0	0	0	0	603	903	0
473	9	0	0	0	0	0	0	200	300	0	0	0	0	0	0	0	200	903	0	0	0	0	0	0	0	603	903	0
474	0	0	0	0	0	0	0	200	300	0	0	0	0	0	0	0	200	903	0	0	0	0	0	0	0	603	903	0
474	1	0	0	0	0	0	0	200	300	0	0	0	0	0	0	0	200	903	0	0	0	0	0	0	0	603	903	0
474	2	0	0	0	0	0	0	200	300	0	0	0	0	0	0	0	200	903	0	0	0	0	0	0	0	603	903	0
474	3	0	0	0	0	0	0	200	300	0	0	0	0	0	0	0	200	903	0	0	0	0	0	0	0	603	903	0
474	4	0	0	0	0	0	0	200	300	0	0	0	0	0	0	0	200	903	0	0	0	0	0	0	0	603	903	0
474	5	0	0	0	0	0	0	200	300	0	0	0	0	0	0	0	200	903	0	0	0	0	0	0	0	603	903	0
474	6	0	0	0	0	0	0	200	300	0	0	0	0	0	0	0	200	903	0	0	0	0	0	0	0	603	903	0
474	7	0	0	0	0	0	0	200	300	0	0	0	0	0	0	0	200	903	0	0	0	0	0	0	0	603	903	0
474	8	0	0	0	0	0	0	200	300	0	0	0	0	0	0	0	200	903	0	0	0	0	0	0	0	603	903	0
474	9	0	0	0	0	0	0	200	300	0	0	0	0	0	0	0	200	903	0	0	0	0	0	0	0	603	903	0
475	0	0	0	0	0	0	0	200	300	0	0	0	0	0	0	0	200	903	0	0	0	0	0	0	0	603	903	0
475	1	0	0	0	0	0	0	200	300	0	0	0	0	0	0	0	200	903	0	0	0	0	0	0	0	603	903	0
475	2	0	0	0	0	0	0	200	300	0	0	0	0	0	0	0	200	903	0	0	0	0	0	0	0	603	903	0
475	3	0	0	0	0	0	0	200	300	0	0	0	0	0	0	0	200	903	0	0	0	0	0	0	0	603	903	0
475	4	0	0	0	0	0	0	200	300	0	0	0	0	0	0	0	200	903	0	0	0	0	0	0	0	603	903	0
475	5	0	0	0	0	0	0	200	300	0	0	0	0	0	0	0	200	903	0	0	0	0	0	0	0	603	903	0
475	6	0	0	0	0	0	0	200	300	0	0	0	0	0	0	0	200	903	0	0	0	0	0	0	0	603	903	0
475	7	0	0	0	0	0	0	200	300	0	0	0	0	0	0	0	200	903	0	0	0	0	0	0	0	603	903	0
475	8	0	0	0	0	0	0	200	300	0	0	0	0	0	0	0	200	903	0	0	0	0	0	0	0	603	903	0
475	9	0	0	0	0	0	0	200	300	0	0	0	0	0	0	0	200	903	0	0	0	0	0	0	0	603	903	0
476	0	0	0	0	0	0	0	200	300	0	0	0	0	0	0	0	200	903	0	0	0	0	0	0	0	603	903	0
476	1	0	0	0	0	0	0	200	300	0	0	0	0	0	0	0	200	903	0	0	0	0	0	0	0	603	903	0
476	2	0	0	0	0	0	0	200	300	0	0	0	0	0	0	0	200	903	0	0	0	0	0	0	0	603	903	0
476	3	0	0	0	0	0	0	200	300	0	0	0	0	0	0	0	200	903	0	0	0	0	0	0	0	603	903	0
476	4	0	0	0	0	0	0	200	300	0	0	0	0	0	0	0	200	903	0	0	0	0	0	0	0	603	903	0
476	5	0	0	0	0	0	0	200	300	0	0	0	0	0	0	0	200	903	0	0	0	0	0	0	0	603	903	0
476	6	0	0	0	0	0	0	200	300	0	0	0	0	0	0	0	200	903	0	0	0	0	0	0	0	603	903	0
476	7	0	0	0	0	0	0	200	300	0	0	0	0	0	0	0	200	903	0	0	0	0	0	0	0	603	903	0
476	8	0	0	0	0	0	0	200	300	0	0	0	0	0	0	0	200	903	0	0	0	0	0	0	0	603	903	0
476	9	0	0	0	0	0	0	200	300	0	0	0	0	0	0	0	200	903	0	0	0	0	0	0	0	603	903	0
477	0	0	0	0	0	0	0	200	300	0	0	0	0	0	0	0	200	903	0	0	0	0	0	0	0	603	903	0
477	1	0	0	0	0	0	0	200	300	0	0	0	0	0	0	0	200	903	0	0	0	0	0	0	0	603	903	0
477	2	0	0	0	0	0	0	200	300	0	0	0	0	0	0	0	200	903	0	0	0	0	0	0	0	603	903	0
477	3	0	0	0	0	0	0	200	300	0	0	0	0	0	0	0	200	903	0	0	0	0	0	0	0	603	903	0
477	4	0	0	0	0	0	0	200	300	0	0	0	0	0	0	0	200	903	0	0	0	0	0	0	0	603	903	0
477	5	0	0	0	0	0	0	200	300	0	0	0	0	0	0	0	200	903	0	0	0	0	0	0	0	603	903	0
477	6	0	0	0	0	0	0	200	300	0	0	0	0	0	0	0	200	903	0	0	0	0	0	0	0	603	903	0
477	7	0	0	0	0	0	0	200	300	0	0	0	0	0	0	0	200	903	0	0	0	0	0	0	0	603	903	0
477	8	0	0	0	0	0	0	200	300	0	0	0	0	0	0	0	200	903	0	0	0	0	0	0	0	603	903	0
477	9	0	0	0	0	0	0	200	300	0	0	0	0	0	0	0	200	903	0	0	0	0	0	0	0	603	903	0
478	0	0	0	0	0	0	0	200	300	0	0	0	0	0	0	0	200	903	0	0	0	0	0	0	0	603	903	0
478	1	0	0	0	0	0	0	200	300	0	0	0	0	0	0	0	200	903	0	0	0	0	0	0	0	603	903	0
478	2	0	0	0	0	0	0	200	300	0	0	0	0	0	0	0	200	903	0	0	0	0	0	0	0	603	903	0
478	3	0	0	0	0	0	0	200	300	0	0	0	0	0	0	0	200	903	0	0	0	0	0	0	0	603	903	0
478	4	0	0	0	0	0	0	200	300	0	0	0	0	0	0	0	200	903	0	0	0	0	0	0	0	603	903	0
478	5	0	0	0	0	0	0	200	300	0	0	0	0	0	0	0	200	903	0	0	0	0	0	0	0	603	903	0
478	6	0	0	0	0	0	0	200	300	0	0	0	0	0	0	0	200	903	0	0	0	0	0	0	0	603	903	0
478	7	0	0	0	0	0	0	200	300	0	0	0	0	0	0	0	200	903	0	0	0	0	0	0	0	603	903	0
478	8	0	0	0	0	0	0	200	300	0	0	0	0	0	0	0	200	903	0	0	0	0	0	0	0	603	903	0
478	9	0	0	0	0	0	0	200	300	0	0	0	0	0	0	0	200	903	0	0	0	0	0	0	0	603	903	0
479	0	0	0	0	0	0	0	200	300	0	0	0	0	0	0	0	200	903	0	0	0	0	0	0	0	603	903	0
479	1	0	0	0	0	0	0	200	300	0	0	0	0	0	0	0	200	903	0	0	0	0	0	0	0	603	903	0
479	2	0	0	0	0	0	0	200	300	0	0	0	0	0	0	0	200	903	0	0	0	0	0	0	0	603	903	0
479	3	0	0	0	0	0	0	200	300	0	0	0	0	0	0	0	200	903	0	0	0	0	0	0	0	603	903	0
479	4	0	0	0	0	0	0	200	300	0	0	0	0	0	0	0	200	903	0	0	0	0	0	0	0	603	903	0
479	5	0	0	0	0	0	0	200	300	0	0	0	0	0	0	0	200	903	0	0	0	0	0	0	0	603	903	0
479	6	0	0	0	0	0	0	200	300	0	0	0	0	0	0	0	200	903	0	0	0	0	0	0	0	603	903	0
479	7	0	0	0	0	0	0	200	300	0	0	0	0	0	0	0	200	903	0	0	0	0	0	0	0	603	903	0
479	8	0	0	0	0	0	0	200	300	0	0	0	0	0	0	0	200	903	0	0	0	0	0	0	0	603	903	0
479	9	0	0	0	0	0	0	200	300	0	0	0	0	0	0	0	200	903	0	0	0	0	0	0	0	603	903	0
480	0	0	0	0	0	0	0	200	300	0	0	0	0	0	0	0	200	903	0	0	0	0	0	0	0	603	903	0
480	1	0	0	0	0	0	0	200	300	0	0	0	0	0	0	0	200	903	0	0	0	0	0	0	0	603	903	0
480	2	0	0	0	0	0	0	200	300	0	0	0	0	0	0	0	200	903	0	0	0	0	0	0	0	603	903	0
480	3	0	0	0	0	0	0	200	300	0	0	0	0	0	0	0	200	903	0	0	0	0	0	0	0	603	903	0
480	4	0	0	0	0	0	0	200	300	0	0	0	0	0	0	0	200	903	0	0	0	0	0	0	0	603	903	0
480	5	0	0	0	0	0	0	200	300	0	0	0	0	0	0	0	200	903	0	0	0	0	0	0	0	603	903	0
480	6	0	0	0	0	0	0	200	300	0	0	0	0	0	0	0	200	903	0	0	0	0	0	0	0	603	903	0
480	7	0	0	0	0	0	0	200	300	0	0	0	0	0	0	0	200	903	0	0	0	0	0	0	0	603	903	0
480	8	0	0	0	0	0	0	200	300	0	0	0	0	0	0	0	200	903	0	0	0	0	0	0	0	603	903	0
480	9	0	0	0	0	0	0	200	300	0	0	0	0	0	0	0	200	903	0	0	0	0	0	0	0	603	903	0
481	0	0	0	0	0	0	0	200	300	0	0	0	0	0	0	0	200	903	0	0	0	0	0	0	0	603	903	0
481	1	0	0	0	0	0	0	200	300	0	0	0	0	0	0	0	200	903	0	0	0	0	0	0	0	603	903	0
481	2	0	0	0	0	0	0	200	300	0	0	0	0	0	0	0	200	903	0	0	0	0	0	0	0	603	903	0
481	3	0	0	0	0	0	0	200	300	0	0	0	0	0	0	0	200	903	0	0	0	0	0	0	0	603	903	0
481	4	0	0	0	0	0	0	200	300	0	0	0	0	0	0	0	200	903	0	0	0	0	0	0	0	603	903	0
481	5	0	0	0	0	0	0	200	300	0	0	0	0	0	0	0	200	903	0	0	0	0	0	0	0	603	903	0
481	6	0	0	0	0	0	0	200	300	0	0	0	0	0	0	0	200	903	0	0	0	0	0	0	0	603	903	0
481	7	0	0	0	0	0	0	200	300	0	0	0	0	0	0	0	200	903	0	0	0	0	0	0	0	603	903	0
481	8	0	0	0	0	0	0	200	300	0	0	0	0	0	0	0	200	903	0	0	0	0	0	0	0	603	903	0
481	9	0	0	0	0	0	0	200	300	0	0	0	0	0	0	0	200	903	0	0	0	0	0	0	0	603	903	0
482	0	0	0	0	0	0	0	200	300	0	0	0	0	0	0	0	200	903	0	0	0	0	0	0	0	603	903	0
482	1	0	0	0	0	0	0	200	300	0	0	0	0	0	0	0	200	903	0	0	0	0	0	0	0	603	903	0
482	2	0	0	0	0	0	0	200	300	0	0	0	0	0	0	0	200	903	0	0	0	0	0	0	0	603	903	0
482	3	0	0	0	0	0	0	200	300	0	0	0	0	0	0	0	200	903	0	0	0	0	0	0	0	603	903	0
482	4	0	0	0	0	0	0	200	300	0	0	0	0	0	0	0	200	903	0	0	0	0	0	0	0	603	903	0
482	5	0	0	0	0	0	0	200	300	0	0	0	0	0	0	0	200	903	0	0	0	0	0	0	0	603	903	0
482	6	0	0	0	0	0	0	200	300	0	0	0	0	0	0	0	200	903	0	0	0	0	0	0	0	603	903	0
482	7	0	0	0	0	0	0	200	300	0	0	0	0	0	0	0	200	903	0	0	0	0	0	0	0	603	903	0
482	8	0	0	0	0	0	0	200	300	0	0	0	0	0	0	0	200	903	0	0	0	0	0	0	0	603	903	0
482	9	0	0	0	0	0	0	200	300	0	0	0	0	0	0	0	200	903	0	0	0	0	0	0	0	603	903	0
483	0	0	0	0	0	0	0	200	300	0	0	0	0	0	0	0	200	903	0	0	0	0	0	0	0	603	903	0
483	1	0	0	0	0	0	0	200	300	0	0	0	0	0	0	0	200	903	0	0	0	0	0	0	0	603	903	0
483	2	0	0	0	0	0	0	200	300	0	0	0	0	0	0	0	200	903	0	0	0	0	0	0	0	603	903	0
483	3	0	0	0	0	0	0	200	300	0	0	0	0	0	0	0	200	903	0	0	0	0	0	0	0	603	903	0
483	4	0	0	0	0	0	0	200	300	0	0	0	0	0	0	0	200	903	0	0	0	0	0	0	0	603	903	0
483	5	0	0	0	0	0	0	200	300	0	0	0	0	0	0	0	200	903	0	0	0	0	0	0	0	603	903	0
483	6	0	0	0	0	0	0	200	300	0	0	0	0	0	0	0	200	903	0	0	0	0	0	0	0	603	903	0
483	7	0	0	0	0	0	0	200	300	0	0	0	0	0	0	0	200	903	0	0	0	0	0	0	0	603	903	0
483	8	0	0	0	0	0	0	200	300	0	0	0	0	0	0	0	200	903	0	0	0	0	0	0	0	603	903	0
483	9	0	0	0	0	0	0	200	300	0	0	0	0	0	0	0	200	903	0	0	0	0	0	0	0	603	903	0
484	0	0	0	0	0	0	0	200	300	0	0	0	0	0	0	0	200	903	0	0	0	0	0	0	0	603	903	0
484	1	0	0	0	0	0	0	200	300	0	0	0	0	0	0	0	200	903	0	0	0	0	0	0	0	603	903	0
484	2	0	0	0	0	0	0	200	300	0	0	0	0	0	0	0	200	903	0	0	0	0	0	0	0	603	903	0
484	3	0	0	0	0	0	0	200	300	0	0	0	0	0	0	0	200	903	0	0	0	0	0	0	0	603	903	0
484	4	0	0	0	0	0	0	200	300	0	0	0	0	0	0	0	200	903	0	0	0	0	0	0	0	603	903	0
484	5	0	0	0	0	0	0	200	300	0	0	0	0	0	0	0	200	903	0	0	0	0	0	0	0	603	903	0
484	6	0	0	0	0	0	0	200	300	0	0	0	0	0	0	0	200	903	0	0	0	0	0	0	0	603	903	0
484	7	0	0	0	0	0	0	200	300	0	0	0	0	0	0	0	200	903	0	0	0	0	0	0	0	603	903	0
484	8	0	0	0	0	0	0	200	300	0	0	0	0	0	0	0	200	903	0	0	0	0	0	0	0	603	903	0
484	9	0	0	0	0	0	0	200	300	0	0	0	0	0	0	0	200	903	0	0	0	0	0	0	0	603	903	0
485	0	0	0	0	0	0	0	200	300	0	0	0	0	0	0	0	200	903	0	0	0	0	0	0	0	603	903	0
485	1	0	0	0	0	0	0	200	300	0	0	0	0	0	0	0	200	903	0	0	0	0	0	0	0	603	903	0
485	2	0	0	0	0	0	0	200	300	0	0	0	0	0	0	0	200	903	0	0	0	0	0	0	0	603	903	0
485	3	0	0	0	0	0	0	200	300	0	0	0	0	0	0	0	200	903	0	0	0	0	0	0	0	603	903	0
485	4	0	0	0	0	0	0	200	300	0	0	0	0	0	0	0	200	903	0	0	0	0	0	0	0	603	903	0
485	5	0	0	0	0	0	0	200	300	0	0	0	0	0	0	0	200	903	0	0	0	0	0	0	0	603	903	0
485	6	0	0	0	0	0	0	200	300	0	0	0	0	0	0	0	200	903	0	0	0	0	0	0	0	603	903	0
485	7	0	0	0	0	0	0	200	300	0	0	0	0	0	0	0	200	903	0	0	0	0	0	0	0	603	903	0
485	8	0	0	0	0	0	0	200	300	0	0	0	0	0	0	0	200	903	0	0	0	0	0	0	0	603	903	0
485	9	0	0	0	0	0	0	200	300	0	0	0	0	0	0	0	200	903	0	0	0	0	0	0	0	603	903	0
486	0	0	0	0	0	0	0	200	300	0	0	0	0	0	0	0	200	903	0	0	0	0	0	0	0	603	903	0
486	1	-5.60597	3.89267	-12.8232	1524.26	1380.61	68.4365	307.665	181.132	0	0	0	0	0	0	0	200	903	0	0	0	0	0	0	0	603	903	0
486	2	-13.9983	10.9117	-23.8095	2806	2601.31	68.4365	309.255	182.148	0	0	0	0	0	0	0	200	903	0	0	0	0	0	0	0	603	903	0
486	3	-9.87843	9.99619	-28.082	2256.69	2357.17	-251.998	283.939	219.639	0	0	0	0	0	0	0	200	903	0	0	0	0	0	0	0	603	903	0
486	4	-6.06373	5.26596	-17.0956	1798.92	1563.72	114.213	291.469	194.773	0	0	0	0	0	0	0	200	903	0	0	0	0	0	0	0	603	903	0
486	5	-10.9465	5.11337	-10.9921	974.948	1685.79	-23.1163	353.363	211.305	0	0	0	0	0	0	0	200	903	0	0	0	0	0	0	0	603	903	0
486	6	-8.9629	6.63925	-13.1283	1158.05	1746.82	-160.445	333.057	211.79	0	0	0	0	0	0	0	200	903	0	0	0	0	0	0	0	603	903	0
486	7	-4.08009	6.0289	-18.3163	1432.71	1380.61	388.871	275.376	221.78	0	0	0	0	0	0	0	200	903	0	0	0	0	0	0	0	603	903	0
486	8	-8.81032	5.87631	-20.1474	1982.03	2052	434.647	301.849	201.624	0	0	0	0	0	0	0	200	903	0	0	0	0	0	0	0	603	903	0
486	9	-10.031	9.69101	-18.6215	1707.37	1990.96	-114.669	306.917	208.312	0	0	0	0	0	0	0	200	903	0	0	0	0	0	0	0	603	903	0
487	0	-4.53785	11.8272	-21.0629	2073.58	1807.86	388.871	285.831	201.553	0	0	0	0	0	0	0	200	903	0	0	0	0	0	0	0	603	903	0
487	1	-7.13185	12.4376	-25.0302	2622.9	2296.14	755.082	291.735	195.211	0	0	0	0	0	0	0	200	903	0	0	0	0	0	0	0	603	903	0
487	2	-7.13185	13.3531	-29.3027	2989.11	2601.31	983.964	288.774	197.992	0	0	0	0	0	0	0	200	903	0	0	0	0	0	0	0	603	903	0
487	3	-4.08009	17.1678	-35.4062	3446.87	3089.6	1167.07	287.261	202.648	0	0	0	0	0	0	0	200	903	0	0	0	0	0	0	0	603	903	0
487	4	-1.18092	22.661	-41.5097	3996.19	3516.84	1991.04	284.723	203.729	0	0	0	0	0	0	0	200	903	0	0	0	0	0	0	0	603	903	0
487	5	-2.55421	21.7455	-50.0546	6101.9	4005.12	2174.15	280.015	178.095	0	0	0	0	0	0	0	200	903	0	0	0	0	0	0	0	603	903	0
487	6	3.5493	18.2359	-59.2099	6193.45	4615.47	2128.37	277.951	195.398	0	0	0	0	0	0	0	200	903	0	0	0	0	0	0	0	603	903	0
487	7	3.39672	18.5411	-67.7548	7383.64	5347.9	2357.25	278.93	191.024	0	0	0	0	0	0	0	200	903	0	0	0	0	0	0	0	603	903	0
487	8	0.497546	20.6773	-79.9618	8573.83	5897.21	1807.94	273.75	192.776	0	0	0	0	0	0	0	200	903	0	0	0	0	0	0	0	603	903	0
487	9	-0.417981	17.1678	-92.1689	10313.3	6812.74	1304.4	273.916	188.104	0	0	0	0	0	0	0	200	903	0	0	0	0	0	0	0	603	903	0
488	0	-4.69044	14.879	-106.207	11320.4	6873.78	1716.39	264.721	193.412	0	0	0	0	0	0	0	200	903	0	0	0	0	0	0	0	603	903	0
488	1	-7.43702	17.0152	-119.33	12693.7	8155.51	1212.85	268.344	193.625	0	0	0	0	0	0	0	200	903	0	0	0	0	0	0	0	603	903	0
488	2	-6.97926	17.3204	-129.4	14158.5	8704.83	251.542	267.271	190.583	0	0	0	0	0	0	0	200	903	0	0	0	0	0	0	0	603	903	0
488	3	-8.81032	16.4049	-137.64	15714.9	9071.04	800.859	265.904	185.826	0	0	0	0	0	0	0	200	903	0	0	0	0	0	0	0	603	903	0
488	4	-14.4561	18.5411	-155.645	17362.9	9681.39	571.977	262.202	188.446	0	0	0	0	0	0	0	200	903	0	0	0	0	0	0	0	603	903	0
488	5	-14.7612	20.8299	-170.599	18644.6	10780	22.6601	263.189	190.711	0	0	0	0	0	0	0	200	903	0	0	0	0	0	0	0	603	903	0
488	6	-17.2027	20.3722	-183.111	20109.5	11146.2	-251.998	260.871	190.179	0	0	0	0	0	0	0	200	903	0	0	0	0	0	0	0	603	903	0
488	7	-22.0855	20.6773	-197.455	21208.1	12061.8	205.766	261.086	192.592	0	0	0	0	0	0	0	200	903	0	0	0	0	0	0	0	603	903	0
488	8	-23.3062	21.898	-213.324	23313.8	13404.5	-755.538	262.837	190.712	0	0	0	0	0	0	0	200	903	0	0	0	0	0	0	0	603	903	0
488	9	-21.6277	19.7618	-229.498	24504	13465.6	-801.315	258.674	193.228	0	0	0	0	0	0	0	200	903	0	0	0	0	0	0	0	603	903	0
489	0	-28.3416	17.9308	-246.588	26243.5	14991.5	-251.998	260.796	193.573	0	0	0	0	0	0	0	200	903	0	0	0	0	0	0	0	603	903	0
489	1	-32.7666	16.2523	-263.372	28074.6	15052.5	-1213.3	257.153	193.404	0	0	0	0	0	0	0	200	903	0	0	0	0	0	0	0	603	903	0
489	2	-32.3088	18.5411	-279.852	29905.6	16029	-1625.29	257.277	193.138	0	0	0	0	0	0	0	200	903	0	0	0	0	0	0	0	603	903	0
489	3	-35.3606	21.898	-297.247	31462	16944.6	-801.315	257.005	194.155	0	0	0	0	0	0	0	200	903	0	0	0	0	0	0	0	603	903	0
489	4	-35.8184	25.255	-311.895	32102.9	17677	-526.656	256.676	197.072	0	0	0	0	0	0	0	200	903	0	0	0	0	0	0	0	603	903	0
489	5	-37.6494	28.4593	-327.459	33750.8	18409.4	-1030.2	256.219	196.931	0	0	0	0	0	0	0	200	903	0	0	0	0	0	0	0	603	903	0
489	6	-40.8538	32.4266	-343.329	34849.5	19752.2	-160.445	257.531	198.495	0	0	0	0	0	0	0	200	903	0	0	0	0	0	0	0	603	903	0
489	7	-42.8374	35.9361	-358.282	36314.3	20179.4	159.989	256.323	198.643	0	0	0	0	0	0	0	200	903	0	0	0	0	0	0	0	603	903	0
489	8	-42.99	38.8353	-372.32	37596.1	20850.8	-114.669	256.002	199.022	0	0	0	0	0	0	0	200	903	0	0	0	0	0	0	0	603	903	0
489	9	-47.2625	44.481	-385.443	38145.4	21888.4	434.647	256.788	201.035	0	0	0	0	0	0	0	200	903	0	0	0	0	0	0	0	603	903	0
490	0	-48.4832	50.5846	-401.007	38420	22071.5	983.964	255.04	204.191	0	0	0	0	0	0	0	200	903	0	0	0	0	0	0	0	603	903	0
490	1	-48.0254	56.6881	-414.129	39884.9	22865	1121.29	255.212	203.69	0	0	0	0	0	0	0	200	903	0	0	0	0	0	0	0	603	903	0
490	2	-51.9927	61.4183	-424.81	40800.4	23109.1	1212.85	254.399	203.956	0	0	0	0	0	0	0	200	903	0	0	0	0	0	0	0	603	903	0
490	3	-53.5186	69.2003	-431.219	40892	23292.2	1853.72	254.015	205.171	0	0	0	0	0	0	0	200	903	0	0	0	0	0	0	0	603	903	0
490	4	-54.1289	75.3038	-441.9	41075.1	24146.7	1716.39	254.643	207.049	0	0	0	0	0	0	0	200	903	0	0	0	0	0	0	0	603	903	0
490	5	-53.8237	80.1866	-451.666	42082.1	24390.9	1807.94	254.002	206.829	0	0	0	0	0	0	0	200	903	0	0	0	0	0	0	0	603	903	0
490	6	-55.3496	84.1539	-461.737	42356.8	25001.2	2494.58	254.146	208.266	0	0	0	0	0	0	0	200	903	0	0	0	0	0	0	0	603	903	0
490	7	-54.8919	88.8841	-470.587	41990.6	25367.4	2631.91	253.906	210.77	0	0	0	0	0	0	0	200	903	0	0	0	0	0	0	0	603	903	0
490	8	-55.5022	94.2247	-478.521	44187.9	25794.7	2860.79	253.905	207.658	0	0	0	0	0	0	0	200	903	0	0	0	0	0	0	0	603	903	0
490	9	-58.2488	96.6661	-489.203	42997.7	26649.2	2998.12	254.475	212.107	0	0	0	0	0	0	0	200	903	0	0	0	0	0	0	0	603	903	0
491	0	-56.8755	99.8705	-493.475	44828.7	27137.5	3410.11	254.993	209.157	0	0	0	0	0	0	0	200	903	0	0	0	0	0	0	0	603	903	0
491	1	-58.8591	101.854	-504.156	44554.1	27015.4	2952.35	253.585	211.626	0	0	0	0	0	0	0	200	903	0	0	0	0	0	0	0	603	903	0
491	2	-58.8591	104.906	-512.091	44554.1	28114	3364.33	254.9	212.996	0	0	0	0	0	0	0	200	903	0	0	0	0	0	0	0	603	903	0
491	3	-56.8755	105.974	-520.331	44645.6	28358.2	3730.55	254.5	214.198	0	0	0	0	0	0	0	200	903	0	0	0	0	0	0	0	603	903	0
491	4	-56.8755	107.5	-527.96	45927.3	28358.2	3272.78	253.713	213.01	0	0	0	0	0	0	0	200	903	0	0	0	0	0	0	0	603	903	0
491	5	-57.0281	108.415	-536.505	46018.9	29456.8	3638.99	254.905	214.225	0	0	0	0	0	0	0	200	903	0	0	0	0	0	0	0	603	903	0
491	6	-56.5703	108.11	-542.608	45652.7	29395.8	3501.66	254.175	215.864	0	0	0	0	0	0	0	200	903	0	0	0	0	0	0	0	603	903	0
491	7	-55.3496	107.652	-549.322	46293.6	30311.3	3638.99	255.179	215.726	0	0	0	0	0	0	0	200	903	0	0	0	0	0	0	0	603	903	0
491	8	-54.1289	107.958	-562.445	46934.4	31532	3638.99	256.062	216.553	0	0	0	0	0	0	0	200	903	0	0	0	0	0	0	0	603	903	0
491	9	-49.7039	107.652	-575.262	47758.4	31898.2	3776.32	255.45	216.98	0	0	0	0	0	0	0	200	903	0	0	0	0	0	0	0	603	903	0
492	0	-47.7202	106.889	-588.385	48124.6	33179.9	3867.87	256.392	218.209	0	0	0	0	0	0	0	200	903	0	0	0	0	0	0	0	603	903	0
492	1	-47.8728	109.483	-599.676	48124.6	33668.2	3776.32	256.144	219.749	0	0	0	0	0	0	0	200	903	0	0	0	0	0	0	0	603	903	0
492	2	-44.5159	110.704	-610.052	47758.4	33790.3	4279.86	255.389	221.714	0	0	0	0	0	0	0	200	903	0	0	0	0	0	0	0	603	903	0
492	3	-43.6004	111.62	-621.344	48399.3	35255.1	3822.1	256.74	222.105	0	0	0	0	0	0	0	200	903	0	0	0	0	0	0	0	603	903	0
492	4	-40.5486	111.162	-628.363	48399.3	35438.2	3867.87	256.398	222.976	0	0	0	0	0	0	0	200	903	0	0	0	0	0	0	0	603	903	0
492	5	-38.4124	113.298	-632.635	47941.5	36048.6	4188.31	256.982	224.219	0	0	0	0	0	0	0	200	903	0	0	0	0	0	0	0	603	903	0
492	6	-35.971	116.808	-639.654	47850	36414.8	4554.52	256.929	225.194	0	0	0	0	0	0	0	200	903	0	0	0	0	0	0	0	603	903	0
492	7	-35.3606	118.639	-644.537	47941.5	36964.1	4325.64	257.35	225.619	0	0	0	0	0	0	0	200	903	0	0	0	0	0	0	0	603	903	0
492	8	-32.4614	119.402	-649.115	48033.1	37330.3	4691.85	257.51	226.002	0	0	0	0	0	0	0	200	903	0	0	0	0	0	0	0	603	903	0
492	9	-29.5623	121.691	-652.777	47117.5	37940.7	4737.63	258.122	227.82	0	0	0	0	0	0	0	200	903	0	0	0	0	0	0	0	603	903	0
493	0	-28.6467	124.895	-652.472	46751.3	37757.6	4646.07	257.869	228.347	0	0	0	0	0	0	0	200	903	0	0	0	0	0	0	0	603	903	0
493	1	-28.189	126.879	-657.965	46751.3	38367.9	5195.39	258.313	228.946	0	0	0	0	0	0	0	200	903	0	0	0	0	0	0	0	603	903	0
493	2	-25.4424	127.489	-657.965	46568.2	38673.1	5241.17	258.777	229.224	0	0	0	0	0	0	0	200	903	0	0	0	0	0	0	0	603	903	0
493	3	-24.6795	129.778	-659.185	46202	38184.8	5332.72	257.927	229.91	0	0	0	0	0	0	0	200	903	0	0	0	0	0	0	0	603	903	0
493	4	-21.6277	131.456	-659.796	44920.3	39039.3	5378.5	259.169	231.918	0	0	0	0	0	0	0	200	903	0	0	0	0	0	0	0	603	903	0
493	5	-19.1863	132.524	-660.406	45652.7	39527.6	5973.59	259.853	230.872	0	0	0	0	0	0	0	200	903	0	0	0	0	0	0	0	603	903	0
493	6	-18.2708	133.44	-664.373	44462.5	39283.4	5607.38	259.129	233.076	0	0	0	0	0	0	0	200	903	0	0	0	0	0	0	0	603	903	0
493	7	-15.5242	134.508	-665.594	44645.6	39649.7	6065.14	259.57	232.924	0	0	0	0	0	0	0	200	903	0	0	0	0	0	0	0	603	903	0
493	8	-15.6768	135.576	-665.289	44737.2	39649.7	6294.02	259.598	232.755	0	0	0	0	0	0	0	200	903	0	0	0	0	0	0	0	603	903	0
493	9	-14.6087	135.576	-665.289	43089.2	39832.8	6202.47	259.873	235.232	0	0	0	0	0	0	0	200	903	0	0	0	0	0	0	0	603	903	0
494	0	-12.9302	134.66	-664.984	44004.8	40015.9	6797.56	260.176	233.826	0	0	0	0	0	0	0	200	903	0	0	0	0	0	0	0	603	903	0
494	1	-12.1672	133.898	-666.205	42814.5	40076.9	6522.9	260.157	235.734	0	0	0	0	0	0	0	200	903	0	0	0	0	0	0	0	603	903	0
494	2	-10.6414	136.186	-665.899	41990.6	40809.3	6889.12	261.285	236.942	0	0	0	0	0	0	0	200	903	0	0	0	0	0	0	0	603	903	0
494	3	-9.72584	134.813	-666.51	41624.4	40565.2	6431.35	260.862	237.549	0	0	0	0	0	0	0	200	903	0	0	0	0	0	0	0	603	903	0
494	4	-8.35255	135.423	-668.341	42082.1	40321	6797.56	260.33	237.035	0	0	0	0	0	0	0	200	903	0	0	0	0	0	0	0	603	903	0
494	5	-8.65773	135.423	-668.646	41532.8	40687.3	6980.67	260.85	237.885	0	0	0	0	0	0	0	200	903	0	0	0	0	0	0	0	603	903	0
494	6	-7.89479	135.576	-668.646	40708.9	41053.5	6751.79	261.398	239.117	0	0	0	0	0	0	0	200	903	0	0	0	0	0	0	0	603	903	0
494	7	-8.19996	135.729	-669.561	40342.6	40870.4	6751.79	261.04	239.748	0	0	0	0	0	0	0	200	903	0	0	0	0	0	0	0	603	903	0
494	8	-7.28444	135.271	-672.613	40525.8	41297.6	7301.1	261.399	239.749	0	0	0	0	0	0	0	200	903	0	0	0	0	0	0	0	603	903	0
494	9	-5.60597	136.186	-682.989	39610.2	42701.4	7072.22	262.521	242.005	0	0	0	0	0	0	0	200	903	0	0	0	0	0	0	0	603	903	0
495	0	2.63378	139.391	-689.703	38145.4	43433.8	7575.76	262.975	244.693	0	0	0	0	0	0	0	200	903	0	0	0	0	0	0	0	603	903	0
495	1	5.99071	143.358	-690.619	38053.8	44044.2	8262.41	263.775	244.899	0	0	0	0	0	0	0	200	903	0	0	0	0	0	0	0	603	903	0
495	2	6.60106	143.205	-693.06	37504.5	44105.2	8216.63	263.638	245.886	0	0	0	0	0	0	0	200	903	0	0	0	0	0	0	0	603	903	0
495	3	11.0261	147.173	-699.469	37962.3	44959.7	8216.63	264.277	245.727	0	0	0	0	0	0	0	200	903	0	0	0	0	0	0	0	603	903	0
495	4	15.146	147.325	-704.046	36772.1	45081.8	8628.62	264.032	247.77	0	0	0	0	0	0	0	200	903	0	0	0	0	0	0	0	603	903	0
495	5	16.977	150.377	-705.877	36405.9	45509	8720.17	264.472	248.425	0	0	0	0	0	0	0	200	903	0	0	0	0	0	0	0	603	903	0
495	6	17.5874	152.666	-707.403	35765	45753.2	8628.62	264.678	249.442	0	0	0	0	0	0	0	200	903	0	0	0	0	0	0	0	603	903	0
495	7	18.8081	155.87	-710.15	35765	46119.4	9132.16	264.943	249.637	0	0	0	0	0	0	0	200	903	0	0	0	0	0	0	0	603	903	0
495	8	18.3503	157.091	-719.305	35215.7	46485.6	8857.5	264.626	251.042	0	0	0	0	0	0	0	200	903	0	0	0	0	0	0	0	603	903	0
495	9	19.571	157.701	-722.357	34208.6	46851.8	8720.17	264.86	252.643	0	0	0	0	0	0	0	200	903	0	0	0	0	0	0	0	603	903	0
496	0	19.1133	158.922	-720.526	34208.6	46668.7	9361.04	264.77	252.523	0	0	0	0	0	0	0	200	903	0	0	0	0	0	0	0	603	903	0
496	1	17.5874	160.448	-720.526	33659.3	47279.1	9223.71	265.617	253.285	0	0	0	0	0	0	0	200	903	0	0	0	0	0	0	0	603	903	0
496	2	18.1977	159.685	-725.103	33476.2	47095.9	8994.83	264.951	253.833	0	0	0	0	0	0	0	200	903	0	0	0	0	0	0	0	603	903	0
496	3	17.8926	158.159	-722.662	33201.5	46973.9	9315.26	265.001	254.057	0	0	0	0	0	0	0	200	903	0	0	0	0	0	0	0	603	903	0
496	4	16.2141	158.922	-722.662	32835.3	47279.1	9361.04	265.423	254.563	0	0	0	0	0	0	0	200	903	0	0	0	0	0	0	0	603	903	0
496	5	18.6555	157.701	-723.883	31919.8	47095.9	9086.38	265.06	255.905	0	0	0	0	0	0	0	200	903	0	0	0	0	0	0	0	603	903	0
496	6	18.0452	155.87	-724.798	32377.5	47523.2	9269.49	265.567	255.329	0	0	0	0	0	0	0	200	903	0	0	0	0	0	0	0	603	903	0
496	7	16.2141	152.971	-726.935	32194.4	47401.1	9773.03	265.207	255.712	0	0	0	0	0	0	0	200	903	0	0	0	0	0	0	0	603	903	0
496	8	16.2141	151.75	-725.714	31187.4	47218	8811.72	265.064	257.025	0	0	0	0	0	0	0	200	903	0	0	0	0	0	0	0	603	903	0
496	9	17.1296	151.293	-727.85	31004.3	47706.3	9132.16	265.544	257.403	0	0	0	0	0	0	0	200	903	0	0	0	0	0	0	0	603	903	0
497	0	18.6555	149.156	-725.714	30729.6	47645.3	9040.6	265.653	257.656	0	0	0	0	0	0	0	200	903	0	0	0	0	0	0	0	603	903	0
497	1	17.74	147.173	-726.935	30729.6	47462.2	8628.62	265.291	257.727	0	0	0	0	0	0	0	200	903	0	0	0	0	0	0	0	603	903	0
497	2	17.74	147.02	-725.103	29814.1	47889.4	8857.5	266.045	258.883	0	0	0	0	0	0	0	200	903	0	0	0	0	0	0	0	603	903	0
497	3	18.8081	145.799	-729.376	29264.8	47889.4	8949.05	265.658	259.877	0	0	0	0	0	0	0	200	903	0	0	0	0	0	0	0	603	903	0
497	4	21.4021	144.426	-731.207	28898.5	47950.4	8628.62	265.577	260.478	0	0	0	0	0	0	0	200	903	0	0	0	0	0	0	0	603	903	0
497	5	20.4866	144.579	-733.038	29722.5	48438.7	8308.18	266.079	259.453	0	0	0	0	0	0	0	200	903	0	0	0	0	0	0	0	603	903	0
497	6	21.2495	144.731	-735.174	29447.9	48682.9	8857.5	266.219	259.944	0	0	0	0	0	0	0	200	903	0	0	0	0	0	0	0	603	903	0
497	7	22.6228	144.121	-736.7	28715.4	49049.1	8308.18	266.579	261.022	0	0	0	0	0	0	0	200	903	0	0	0	0	0	0	0	603	903	0
497	8	23.2331	142.442	-736.7	27799.9	49232.2	8537.06	266.828	262.264	0	0	0	0	0	0	0	200	903	0	0	0	0	0	0	0	603	903	0
497	9	24.3013	145.342	-738.531	27708.4	48682.9	8857.5	265.918	262.482	0	0	0	0	0	0	0	200	903	0	0	0	0	0	0	0	603	903	0
498	0	26.4375	144.884	-741.278	27708.4	49537.4	8857.5	266.827	262.621	0	0	0	0	0	0	0	200	903	0	0	0	0	0	0	0	603	903	0
498	1	26.4375	144.274	-742.193	27708.4	49964.6	8445.51	267.32	262.667	0	0	0	0	0	0	0	200	903	0	0	0	0	0	0	0	603	903	0
498	2	27.353	143.511	-745.855	27250.6	49842.5	9086.38	266.826	263.464	0	0	0	0	0	0	0	200	903	0	0	0	0	0	0	0	603	903	0
498	3	29.1841	144.274	-742.804	26518.2	49720.5	8674.39	266.936	264.3	0	0	0	0	0	0	0	200	903	0	0	0	0	0	0	0	603	903	0
498	4	29.0315	143.968	-747.992	26426.6	50330.8	8765.95	267.288	264.67	0	0	0	0	0	0	0	200	903	0	0	0	0	0	0	0	603	903	0
498	5	30.5574	143.663	-746.771	26518.2	50208.7	8582.84	267.234	264.49	0	0	0	0	0	0	0	200	903	0	0	0	0	0	0	0	603	903	0
498	6	30.5574	141.527	-748.602	26518.2	50636	8811.72	267.641	264.576	0	0	0	0	0	0	0	200	903	0	0	0	0	0	0	0	603	903	0
498	7	31.0151	141.68	-749.212	25419.5	50147.7	8628.62	266.934	266.072	0	0	0	0	0	0	0	200	903	0	0	0	0	0	0	0	603	903	0
498	8	31.9307	140.611	-750.128	25694.2	51124.3	8399.74	268.154	265.747	0	0	0	0	0	0	0	200	903	0	0	0	0	0	0	0	603	903	0
498	9	33.6091	138.475	-751.654	25236.4	51185.3	8811.72	268.097	266.425	0	0	0	0	0	0	0	200	903	0	0	0	0	0	0	0	603	903	0
499	0	33.1514	136.949	-752.264	25419.5	51002.2	8491.29	267.798	266.209	0	0	0	0	0	0	0	200	903	0	0	0	0	0	0	0	603	903	0
499	1	33.4565	134.05	-753.79	25328	51246.3	8582.84	267.985	266.399	0	0	0	0	0	0	0	200	903	0	0	0	0	0	0	0	603	903	0
499	2	33.4565	135.118	-753.79	24412.5	51124.3	8720.17	267.823	267.614	0	0	0	0	0	0	0	200	903	0	0	0	0	0	0	0	603	903	0
499	3	33.6091	134.355	-753.485	24961.8	51429.4	8628.62	268.255	266.872	0	0	0	0	0	0	0	200	903	0	0	0	0	0	0	0	603	903	0
499	4	33.7617	133.44	-751.654	24595.6	51856.7	8399.74	268.99	267.278	0	0	0	0	0	0	0	200	903	0	0	0	0	0	0	0	603	903	0
499	5	34.6772	131.914	-753.485	24320.9	51368.4	8537.06	268.174	267.722	0	0	0	0	0	0	0	200	903	0	0	0	0	0	0	0	603	903	0
499	6	34.5246	130.541	-754.706	24320.9	52039.8	8399.74	268.954	267.774	0	0	0	0	0	0	0	200	903	0	0	0	0	0	0	0	603	903	0
499	7	34.6772	129.93	-757.452	23588.5	51673.6	8262.41	268.22	268.858	0	0	0	0	0	0	0	200	903	0	0	0	0	0	0	0	603	903	0
499	8	35.135	129.778	-754.4	23313.8	51490.5	8445.51	268.254	269.096	0	0	0	0	0	0	0	200	903	0	0	0	0	0	0	0	603	903	0
499	9	34.6772	128.557	-757.757	23680	51795.7	8216.63	268.354	268.75	0	0	0	0	0	0	0	200	903	0	0	0	0	0	0	0	603	903	0
500	0	34.6772	126.879	-756.842	23588.5	52283.9	8079.3	269.082	268.833	0	0	0	0	0	0	0	200	903	0	0	0	0	0	0	0	603	903	0
500	1	34.5246	126.421	-756.231	22947.6	52039.8	7987.75	268.815	269.655	0	0	0	0	0	0	0	200	903	0	0	0	0	0	0	0	603	903	0
500	2	35.4402	126.726	-756.231	22581.4	52345	8308.18	269.218	270.14	0	0	0	0	0	0	0	200	903	0	0	0	0	0	0	0	603	903	0
500	3	35.4402	124.895	-756.842	23130.7	52161.9	7941.97	268.92	269.438	0	0	0	0	0	0	0	200	903	0	0	0	0	0	0	0	603	903	0
500	4	36.5083	123.979	-762.945	22673	52222.9	7987.75	268.449	270.282	0	0	0	0	0	0	0	200	903	0	0	0	0	0	0	0	603	903	0
500	5	36.3557	122.759	-760.809	22398.3	52467	8033.52	268.962	270.56	0	0	0	0	0	0	0	200	903	0	0	0	0	0	0	0	603	903	0
500	6	36.6609	122.453	-761.114	21940.5	52161.9	8033.52	268.534	271.173	0	0	0	0	0	0	0	200	903	0	0	0	0	0	0	0	603	903	0
500	7	35.7453	122.301	-761.419	22215.2	52467	7850.42	268.907	270.824	0	0	0	0	0	0	0	200	903	0	0	0	0	0	0	0	603	903	0
500	8	36.6609	119.859	-761.114	21757.4	52528.1	7850.42	269.015	271.414	0	0	0	0	0	0	0	200	903	0	0	0	0	0	0	0	603	903	0
500	9	36.2031	120.012	-760.504	22489.8	52650.1	7758.87	269.231	270.428	0	0	0	0	0	0	0	200	903	0	0	0	0	0	0	0	603	903	0
501	0	35.5928	119.554	-760.809	21757.4	52589.1	7758.87	269.123	271.402	0	0	0	0	0	0	0	200	903	0	0	0	0	0	0	0	603	903	0
501	1	36.2031	116.503	-759.283	21025	52711.2	7484.21	269.422	272.309	0	0	0	0	0	0	0	200	903	0	0	0	0	0	0	0	603	903	0
501	2	36.6609	117.265	-762.64	21116.6	52345	7621.54	268.637	272.311	0	0	0	0	0	0	0	200	903	0	0	0	0	0	0	0	603	903	0
501	3	36.3557	115.892	-762.03	20841.9	52711.2	7667.32	269.172	272.65	0	0	0	0	0	0	0	200	903	0	0	0	0	0	0	0	603	903	0
501	4	35.135	114.977	-761.419	20658.8	52406	7713.09	268.827	272.868	0	0	0	0	0	0	0	200	903	0	0	0	0	0	0	0	603	903	0
501	5	35.135	114.671	-761.114	20109.5	52589.1	7575.76	269.095	273.579	0	0	0	0	0	0	0	200	903	0	0	0	0	0	0	0	603	903	0
501	6	34.9824	113.146	-759.283	20750.3	52528.1	7346.88	269.181	272.671	0	0	0	0	0	0	0	200	903	0	0	0	0	0	0	0	603	903	0
501	7	34.3721	111.467	-755.316	20201	52222.9	7346.88	269.14	273.255	0	0	0	0	0	0	0	200	903	0	0	0	0	0	0	0	603	903	0
501	8	34.3721	108.721	-756.231	20292.6	52589.1	7255.33	269.541	273.166	0	0	0	0	0	0	0	200	903	0	0	0	0	0	0	0	603	903	0
501	9	34.3721	108.11	-755.926	19651.7	52528.1	7118	269.488	274.003	0	0	0	0	0	0	0	200	903	0	0	0	0	0	0	0	603	903	0
502	0	34.0669	107.5	-756.842	19743.3	52283.9	7118	269.082	273.914	0	0	0	0	0	0	0	200	903	0	0	0	0	0	0	0	603	903	0
502	1	33.7617	106.584	-753.18	19743.3	52039.8	7529.99	269.093	273.787	0	0	0	0	0	0	0	200	903	0	0	0	0	0	0	0	603	903	0
502	2	32.0832	105.364	-753.79	19834.8	52222.9	6751.79	269.28	273.687	0	0	0	0	0	0	0	200	903	0	0	0	0	0	0	0	603	903	0
502	3	31.7781	104.296	-753.79	19010.8	51856.7	6797.56	268.795	274.78	0	0	0	0	0	0	0	200	903	0	0	0	0	0	0	0	603	903	0
502	4	31.7781	103.685	-749.212	19010.8	52039.8	6751.79	269.459	274.626	0	0	0	0	0	0	0	200	903	0	0	0	0	0	0	0	603	903	0
502	5	30.8625	103.075	-744.635	19377.1	51795.7	6614.46	269.559	273.978	0	0	0	0	0	0	0	200	903	0	0	0	0	0	0	0	603	903	0
502	6	31.6255	100.939	-747.076	19010.8	51734.6	6385.58	269.249	274.553	0	0	0	0	0	0	0	200	903	0	0	0	0	0	0	0	603	903	0
502	7	31.1677	100.176	-744.94	19010.8	51917.7	6477.13	269.694	274.48	0	0	0	0	0	0	0	200	903	0	0	0	0	0	0	0	603	903	0
502	8	30.8625	98.3446	-746.466	18186.9	51307.4	6294.02	268.734	275.636	0	0	0	0	0	0	0	200	903	0	0	0	0	0	0	0	603	903	0
502	9	30.2522	96.8187	-739.752	18736.2	51246.3	6202.47	269.275	274.672	0	0	0	0	0	0	0	200	903	0	0	0	0	0	0	0	603	903	0
503	0	29.6418	97.1239	-743.719	18461.5	51368.4	6431.35	269.07	275.177	0	0	0	0	0	0	0	200	903	0	0	0	0	0	0	0	603	903	0
503	1	29.7944	96.0558	-740.667	18278.4	51246.3	6110.92	269.189	275.322	0	0	0	0	0	0	0	200	903	0	0	0	0	0	0	0	603	903	0
503	2	28.5737	94.9876	-738.226	17637.6	51307.4	6477.13	269.501	276.108	0	0	0	0	0	0	0	200	903	0	0	0	0	0	0	0	603	903	0
503	3	28.5737	94.2247	-735.785	17546	51124.3	5882.04	269.483	276.153	0	0	0	0	0	0	0	200	903	0	0	0	0	0	0	0	603	903	0
503	4	27.9634	93.1566	-735.174	17912.2	50513.9	6339.8	268.71	275.635	0	0	0	0	0	0	0	200	903	0	0	0	0	0	0	0	603	903	0
503	5	28.116	92.0885	-734.869	17729.1	50758.1	5744.71	269.071	275.874	0	0	0	0	0	0	0	200	903	0	0	0	0	0	0	0	603	903	0
503	6	28.116	90.5626	-733.343	17271.3	50513.9	5836.26	268.882	276.448	0	0	0	0	0	0	0	200	903	0	0	0	0	0	0	0	603	903	0
503	7	27.2004	90.41	-729.986	16996.7	50513.9	5836.26	269.198	276.716	0	0	0	0	0	0	0	200	903	0	0	0	0	0	0	0	603	903	0
503	8	26.8953	89.0367	-729.071	16905.1	50575	5698.93	269.369	276.813	0	0	0	0	0	0	0	200	903	0	0	0	0	0	0	0	603	903	0
503	9	26.5901	88.1212	-725.103	16905.1	50208.7	5698.93	269.244	276.686	0	0	0	0	0	0	0	200	903	0	0	0	0	0	0	0	603	903	0
504	0	26.2849	86.5953	-719.915	17179.8	49903.6	5607.38	269.319	276.136	0	0	0	0	0	0	0	200	903	0	0	0	0	0	0	0	603	903	0
504	1	26.7427	85.985	-720.526	16355.8	49598.4	5286.94	268.836	277.3	0	0	0	0	0	0	0	200	903	0	0	0	0	0	0	0	603	903	0
504	2	27.6582	85.0694	-720.221	16355.8	49720.5	5332.72	269.035	277.291	0	0	0	0	0	0	0	200	903	0	0	0	0	0	0	0	603	903	0
504	3	26.8953	83.391	-719	16538.9	49842.5	5744.71	269.322	276.997	0	0	0	0	0	0	0	200	903	0	0	0	0	0	0	0	603	903	0
504	4	25.522	82.628	-715.338	16081.2	49537.4	5103.84	269.25	277.52	0	0	0	0	0	0	0	200	903	0	0	0	0	0	0	0	603	903	0
504	5	25.8271	81.4073	-714.117	15714.9	49110.1	5378.5	268.77	277.994	0	0	0	0	0	0	0	200	903	0	0	0	0	0	0	0	603	903	0
504	6	24.6064	81.1021	-707.708	15440.3	48866	5378.5	269.048	278.183	0	0	0	0	0	0	0	200	903	0	0	0	0	0	0	0	603	903	0
504	7	24.9116	79.8814	-704.962	15806.5	49293.2	5012.28	269.923	277.578	0	0	0	0	0	0	0	200	903	0	0	0	0	0	0	0	603	903	0
504	8	25.522	78.6607	-701.3	15623.4	48804.9	4966.51	269.592	277.722	0	0	0	0	0	0	0	200	903	0	0	0	0	0	0	0	603	903	0
504	9	25.2168	77.8978	-699.469	14707.9	48804.9	4920.73	269.774	278.973	0	0	0	0	0	0	0	200	903	0	0	0	0	0	0	0	603	903	0
505	0	24.9116	76.9823	-698.248	14982.5	48682.9	4737.63	269.721	278.543	0	0	0	0	0	0	0	200	903	0	0	0	0	0	0	0	603	903	0
505	1	24.9116	76.3719	-690.008	14982.5	47950.4	5149.61	269.493	278.286	0	0	0	0	0	0	0	200	903	0	0	0	0	0	0	0	603	903	0
505	2	24.4538	73.3202	-692.45	14982.5	48316.6	4737.63	269.776	278.363	0	0	0	0	0	0	0	200	903	0	0	0	0	0	0	0	603	903	0
505	3	24.4538	72.7098	-687.567	14891	48011.5	4371.42	269.828	278.343	0	0	0	0	0	0	0	200	903	0	0	0	0	0	0	0	603	903	0
505	4	24.3013	72.5572	-684.21	14250.1	47218	4646.07	269.011	279.173	0	0	0	0	0	0	0	200	903	0	0	0	0	0	0	0	603	903	0
505	5	24.1487	71.3365	-680.243	14067	47706.3	4646.07	270.131	279.321	0	0	0	0	0	0	0	200	903	0	0	0	0	0	0	0	603	903	0
505	6	24.759	70.8788	-679.022	14433.2	47401.1	4737.63	269.808	278.744	0	0	0	0	0	0	0	200	903	0	0	0	0	0	0	0	603	903	0
505	7	23.6909	69.5055	-675.665	14616.3	46912.8	4371.42	269.432	278.368	0	0	0	0	0	0	0	200	903	0	0	0	0	0	0	0	603	903	0
505	8	23.8435	68.5899	-674.444	13426.1	47279.1	4417.19	270.101	280.093	0	0	0	0	0	0	0	200	903	0	0	0	0	0	0	0	603	903	0
505	9	23.2331	67.827	-670.172	14524.8	46729.7	4279.86	269.728	278.327	0	0	0	0	0	0	0	200	903	0	0	0	0	0	0	0	603	903	0
506	0	23.5383	66.1485	-667.425	13334.6	46363.5	4829.18	269.466	280.021	0	0	0	0	0	0	0	200	903	0	0	0	0	0	0	0	603	903	0
506	1	23.5383	66.9115	-662.237	13609.2	45997.3	4142.53	269.457	279.45	0	0	0	0	0	0	0	200	903	0	0	0	0	0	0	0	603	903	0
506	2	22.7754	65.0804	-659.185	13243	45936.3	4325.64	269.686	279.91	0	0	0	0	0	0	0	200	903	0	0	0	0	0	0	0	603	903	0
506	3	23.8435	64.1649	-655.829	13059.9	46424.6	4050.98	270.788	280.086	0	0	0	0	0	0	0	200	903	0	0	0	0	0	0	0	603	903	0
506	4	23.0806	64.0123	-652.777	12785.3	45936.3	3822.1	270.371	280.414	0	0	0	0	0	0	0	200	903	0	0	0	0	0	0	0	603	903	0
506	5	23.8435	62.9442	-651.556	12968.4	45692.1	4005.2	270.128	280.096	0	0	0	0	0	0	0	200	903	0	0	0	0	0	0	0	603	903	0
506	6	23.3857	61.1131	-647.284	12785.3	45631.1	3684.77	270.496	280.248	0	0	0	0	0	0	0	200	903	0	0	0	0	0	0	0	603	903	0
506	7	23.2331	60.5028	-645.147	12419	45692.1	4096.76	270.824	280.75	0	0	0	0	0	0	0	200	903	0	0	0	0	0	0	0	603	903	0
506	8	22.4702	59.8924	-642.401	12510.6	45325.9	3776.32	270.557	280.525	0	0	0	0	0	0	0	200	903	0	0	0	0	0	0	0	603	903	0
506	9	22.3176	59.4347	-638.128	12052.8	45387	3638.99	271.125	281.112	0	0	0	0	0	0	0	200	903	0	0	0	0	0	0	0	603	903	0
507	0	21.8598	56.9933	-632.635	12693.7	45020.8	4096.76	271.164	279.935	0	0	0	0	0	0	0	200	903	0	0	0	0	0	0	0	603	903	0
507	1	22.6228	56.9933	-632.33	11961.3	44471.4	3547.44	270.329	281.084	0	0	0	0	0	0	0	200	903	0	0	0	0	0	0	0	603	903	0
507	2	22.4702	56.5355	-628.668	11778.2	44837.6	3364.33	271.322	281.265	0	0	0	0	0	0	0	200	903	0	0	0	0	0	0	0	603	903	0
507	3	22.928	55.3148	-627.752	11412	44044.2	3410.11	270.162	281.821	0	0	0	0	0	0	0	200	903	0	0	0	0	0	0	0	603	903	0
507	4	23.0806	54.857	-624.09	11686.6	44044.2	3593.22	270.573	281.274	0	0	0	0	0	0	0	200	903	0	0	0	0	0	0	0	603	903	0
507	5	21.5547	53.1786	-620.428	11503.5	43861.1	3364.33	270.695	281.459	0	0	0	0	0	0	0	200	903	0	0	0	0	0	0	0	603	903	0
507	6	21.7073	52.4156	-618.902	11228.9	43739	2860.79	270.672	281.857	0	0	0	0	0	0	0	200	903	0	0	0	0	0	0	0	603	903	0
507	7	22.6228	52.1104	-614.019	11137.3	43616.9	3135.45	271.035	281.862	0	0	0	0	0	0	0	200	903	0	0	0	0	0	0	0	603	903	0
507	8	22.0124	51.8053	-611.883	11595.1	43494.9	3089.68	271.084	281.05	0	0	0	0	0	0	0	200	903	0	0	0	0	0	0	0	603	903	0
507	9	22.7754	50.2794	-610.663	11412	43250.7	2952.35	270.826	281.312	0	0	0	0	0	0	0	200	903	0	0	0	0	0	0	0	603	903	0
508	0	22.0124	47.6854	-607.306	10954.2	43189.7	2998.12	271.117	281.963	0	0	0	0	0	0	0	200	903	0	0	0	0	0	0	0	603	903	0
508	1	22.3176	47.838	-605.169	10954.2	42884.5	3089.68	270.864	281.899	0	0	0	0	0	0	0	200	903	0	0	0	0	0	0	0	603	903	0
508	2	22.6228	47.6854	-601.812	10404.9	42640.4	2723.47	270.853	282.711	0	0	0	0	0	0	0	200	903	0	0	0	0	0	0	0	603	903	0
508	3	21.7073	47.5328	-600.592	10862.6	42640.4	2815.02	270.997	281.913	0	0	0	0	0	0	0	200	903	0	0	0	0	0	0	0	603	903	0
508	4	21.8598	45.8543	-597.845	10221.8	42274.2	2677.69	270.711	282.902	0	0	0	0	0	0	0	200	903	0	0	0	0	0	0	0	603	903	0
508	5	21.7073	45.244	-594.183	10404.9	42457.3	2677.69	271.455	282.489	0	0	0	0	0	0	0	200	903	0	0	0	0	0	0	0	603	903	0
508	6	21.4021	44.0233	-590.826	10038.7	42030	2494.58	271.138	283.009	0	0	0	0	0	0	0	200	903	0	0	0	0	0	0	0	603	903	0
508	7	22.4702	43.5655	-588.69	10313.3	41969	2723.47	271.292	282.481	0	0	0	0	0	0	0	200	903	0	0	0	0	0	0	0	603	903	0
508	8	22.7754	42.0396	-587.164	10404.9	42274.2	2631.91	271.997	282.279	0	0	0	0	0	0	0	200	903	0	0	0	0	0	0	0	603	903	0
508	9	23.3857	41.4293	-585.028	10130.2	41969	2403.03	271.738	282.684	0	0	0	0	0	0	0	200	903	0	0	0	0	0	0	0	603	903	0
509	0	23.0806	41.4293	-581.06	10130.2	41236.6	2265.7	270.968	282.566	0	0	0	0	0	0	0	200	903	0	0	0	0	0	0	0	603	903	0
509	1	22.6228	39.9034	-581.366	9397.8	42030	2311.48	272.295	283.835	0	0	0	0	0	0	0	200	903	0	0	0	0	0	0	0	603	903	0
509	2	23.9961	40.5138	-577.704	9764.02	41602.8	2311.48	272.014	283.099	0	0	0	0	0	0	0	200	903	0	0	0	0	0	0	0	603	903	0
509	3	23.2331	37.462	-574.957	9489.36	41358.6	2357.25	271.934	283.496	0	0	0	0	0	0	0	200	903	0	0	0	0	0	0	0	603	903	0
509	4	23.2331	37.6146	-573.431	9580.91	41541.8	2174.15	272.444	283.292	0	0	0	0	0	0	0	200	903	0	0	0	0	0	0	0	603	903	0
509	5	23.6909	37.6146	-570.379	9123.15	41297.6	2128.37	272.404	284.005	0	0	0	0	0	0	0	200	903	0	0	0	0	0	0	0	603	903	0
509	6	24.9116	37.1568	-570.074	8756.94	41053.5	2036.82	272.014	284.639	0	0	0	0	0	0	0	200	903	0	0	0	0	0	0	0	603	903	0
509	7	23.9961	35.1732	-568.243	9031.59	40382.1	2311.48	271.065	284.106	0	0	0	0	0	0	0	200	903	0	0	0	0	0	0	0	603	903	0
509	8	23.3857	34.4102	-566.412	8299.17	40565.2	1807.94	271.618	285.348	0	0	0	0	0	0	0	200	903	0	0	0	0	0	0	0	603	903	0
509	9	23.2331	34.2577	-564.581	9214.7	40565.2	1899.49	271.85	283.679	0	0	0	0	0	0	0	200	903	0	0	0	0	0	0	0	603	903	0
510	0	24.759	32.274	-559.088	8482.28	40687.3	1624.83	272.774	284.828	0	0	0	0	0	0	0	200	903	0	0	0	0	0	0	0	603	903	0
510	1	23.8435	33.1895	-559.088	8848.49	40626.2	2357.25	272.665	284.173	0	0	0	0	0	0	0	200	903	0	0	0	0	0	0	0	603	903	0
510	2	24.4538	32.274	-555.426	8299.17	40565.2	1579.06	273.034	285.058	0	0	0	0	0	0	0	200	903	0	0	0	0	0	0	0	603	903	0
510	3	24.759	31.0533	-553.595	8116.06	40443.1	1991.04	273.055	285.339	0	0	0	0	0	0	0	200	903	0	0	0	0	0	0	0	603	903	0
510	4	25.522	30.9007	-552.374	7932.96	40076.9	1533.28	272.554	285.638	0	0	0	0	0	0	0	200	903	0	0	0	0	0	0	0	603	903	0
510	5	25.2168	30.443	-552.069	8665.38	40260	1441.73	272.926	284.304	0	0	0	0	0	0	0	200	903	0	0	0	0	0	0	0	603	903	0
510	6	24.3013	28.7645	-549.627	8024.51	40015.9	1487.5	272.805	285.4	0	0	0	0	0	0	0	200	903	0	0	0	0	0	0	0	603	903	0
510	7	24.6064	28.6119	-546.576	7749.85	40137.9	1579.06	273.435	285.821	0	0	0	0	0	0	0	200	903	0	0	0	0	0	0	0	603	903	0
510	8	25.0642	27.6964	-544.439	7566.74	39893.8	1579.06	273.275	286.102	0	0	0	0	0	0	0	200	903	0	0	0	0	0	0	0	603	903	0
510	9	24.3013	27.5438	-542.914	7658.3	39527.6	1212.85	272.806	285.894	0	0	0	0	0	0	0	200	903	0	0	0	0	0	0	0	603	903	0
511	0	25.522	26.3231	-541.693	7658.3	39710.7	1167.07	273.309	285.862	0	0	0	0	0	0	0	200	903	0	0	0	0	0	0	0	603	903	0
511	1	25.6745	25.7127	-537.726	7292.09	39832.8	938.188	274.076	286.439	0	0	0	0	0	0	0	200	903	0	0	0	0	0	0	0	603	903	0
511	2	25.6745	24.9498	-539.862	7200.53	39466.6	983.964	273.105	286.662	0	0	0	0	0	0	0	200	903	0	0	0	0	0	0	0	603	903	0
511	3	25.9797	25.4076	-535.894	6834.32	39649.7	1533.28	273.988	287.247	0	0	0	0	0	0	0	200	903	0	0	0	0	0	0	0	603	903	0
511	4	25.0642	24.492	-537.115	7108.98	39405.5	846.635	273.365	286.765	0	0	0	0	0	0	0	200	903	0	0	0	0	0	0	0	603	903	0
511	5	26.5901	23.2713	-532.232	6834.32	39527.6	617.753	274.268	287.159	0	0	0	0	0	0	0	200	903	0	0	0	0	0	0	0	603	903	0
511	6	25.522	22.5084	-530.706	7292.09	39344.5	892.411	274.136	286.26	0	0	0	0	0	0	0	200	903	0	0	0	0	0	0	0	603	903	0
511	7	25.9797	22.9662	-529.181	6834.32	38856.2	755.082	273.427	287.085	0	0	0	0	0	0	0	200	903	0	0	0	0	0	0	0	603	903	0
511	8	25.9797	21.2877	-527.96	6285.01	38917.2	388.871	273.713	288.096	0	0	0	0	0	0	0	200	903	0	0	0	0	0	0	0	603	903	0
511	9	26.5901	21.2877	-529.181	6651.22	39039.3	709.306	273.773	287.431	0	0	0	0	0	0	0	200	903	0	0	0	0	0	0	0	603	903	0
512	0	26.7427	20.6773	-526.739	6376.56	38795.2	571.977	273.652	287.894	0	0	0	0	0	0	0	200	903	0	0	0	0	0	0	0	603	903	0
512	1	25.522	20.3722	-525.824	5827.24	38795.2	617.753	273.78	288.918	0	0	0	0	0	0	0	200	903	0	0	0	0	0	0	0	603	903	0
512	2	25.0642	20.067	-523.687	5827.24	38490	480.424	273.498	288.873	0	0	0	0	0	0	0	200	903	0	0	0	0	0	0	0	603	903	0
512	3	25.3694	20.067	-520.636	6285.01	38367.9	388.871	273.694	287.928	0	0	0	0	0	0	0	200	903	0	0	0	0	0	0	0	603	903	0
512	4	25.9797	18.8463	-517.584	5644.14	38612.1	343.095	274.601	289.095	0	0	0	0	0	0	0	200	903	0	0	0	0	0	0	0	603	903	0
512	5	25.9797	18.0833	-517.889	5186.37	38184.8	480.424	273.732	289.986	0	0	0	0	0	0	0	200	903	0	0	0	0	0	0	0	603	903	0
512	6	26.4375	18.0833	-518.499	6010.35	38367.9	251.542	273.998	288.408	0	0	0	0	0	0	0	200	903	0	0	0	0	0	0	0	603	903	0
512	7	25.522	18.3885	-516.363	5003.27	37940.7	343.095	273.477	290.311	0	0	0	0	0	0	0	200	903	0	0	0	0	0	0	0	603	903	0
512	8	24.6064	17.1678	-514.532	5094.82	38184.8	114.213	274.213	290.098	0	0	0	0	0	0	0	200	903	0	0	0	0	0	0	0	603	903	0
512	9	24.4538	15.6419	-514.227	5186.37	37879.6	526.2	273.663	289.914	0	0	0	0	0	0	0	200	903	0	0	0	0	0	0	0	603	903	0
513	0	25.0642	16.7101	-511.48	5094.82	38001.7	114.213	274.298	290.039	0	0	0	0	0	0	0	200	903	0	0	0	0	0	0	0	603	903	0
513	1	24.4538	14.7264	-510.26	4820.16	37940.7	22.6601	274.356	290.553	0	0	0	0	0	0	0	200	903	0	0	0	0	0	0	0	603	903	0
513	2	25.2168	15.3368	-509.344	5094.82	37574.5	-68.8927	273.77	289.997	0	0	0	0	0	0	0	200	903	0	0	0	0	0	0	0	603	903	0
513	3	24.1487	14.5738	-504.156	5003.27	37452.4	68.4365	274.287	290.076	0	0	0	0	0	0	0	200	903	0	0	0	0	0	0	0	603	903	0
513	4	24.6064	14.1161	-508.429	4820.16	37818.6	-114.669	274.383	290.52	0	0	0	0	0	0	0	200	903	0	0	0	0	0	0	0	603	903	0
513	5	23.9961	14.879	-503.851	3904.64	37391.4	-114.669	274.211	292.25	0	0	0	0	0	0	0	200	903	0	0	0	0	0	0	0	603	903	0
[truncated: 2,444 more rows]
