# Supplementary material for: The Effects of an Extemporaneous Speech Dual-task on Older Adult Gait Control
Source: Research Square preprint supplement (doi:10.21203/rs.3.rs-7674245/v1), 2025-11-18
Supplement: Supplementary file 141 [file Over2ground03.xlsx]

## Sheet: Sheet1
Trajectories
		02:LFHD			02:RFHD			02:LBHD			02:RBHD			02:C7			02:T10			02:CLAV			02:STRN			02:RBAK			02:LSHO			02:LUPA			02:LELB			02:LFRM			02:LWRA			02:LWRB			02:LFIN
Frame	Sub Frame	X	Y	Z	X	Y	Z	X	Y	Z	X	Y	Z	X	Y	Z	X	Y	Z	X	Y	Z	X	Y	Z	X	Y	Z	X	Y	Z	X	Y	Z	X	Y	Z	X	Y	Z	X	Y	Z	X	Y	Z	X	Y	Z
		mm	mm	mm	mm	mm	mm	mm	mm	mm	mm	mm	mm	mm	mm	mm	mm	mm	mm	mm	mm	mm	mm	mm	mm	mm	mm	mm	mm	mm	mm	mm	mm	mm	mm	mm	mm	mm	mm	mm	mm	mm	mm	mm	mm	mm	mm	mm	mm
459	0	346.912	2777.79	1579.54	246.759	2774.09	1575.28	354.283	2950.45	1599.23	241.636	2954.71	1595.77	294.54	2990.49	1417.57	307.937	3042.56	1202.93	301.185	2857.38	1351.13	295.701	2798.93	1218.53	213.015	3054.42	1251.78	472.493	2929.24	1371.05	516.929	2968.84	1142.77	514.583	2990.47	1079.11	524.864	2924.52	972.492	497.984	2920.88	869.631	546.855	2972.06	861.45	547.319	2942.26	768.902
460	0	346.102	2765.79	1581.75	245.987	2762.29	1577.36	353.829	2938.32	1601.77	241.178	2942.84	1598.22	294.88	2978.73	1420.17	309.129	3031.21	1205.5	300.479	2845.82	1353.57	294.598	2788.11	1220.59	214.401	3043.86	1254.4	472.289	2916.13	1373.95	517.455	2953.87	1145.39	515.693	2975.53	1081.6	524.633	2908.07	975.555	497.585	2903.55	872.661	546.977	2954.16	863.575	547.332	2921.87	771.857
461	0	345.255	2753.8	1583.76	245.17	2750.49	1579.24	353.323	2926.23	1604.1	240.669	2930.99	1600.45	295.166	2966.98	1422.56	310.261	3019.87	1207.9	299.752	2834.27	1355.79	293.495	2777.24	1222.49	215.717	3033.28	1256.82	472.034	2903.06	1376.66	517.953	2938.9	1147.85	516.747	2960.51	1083.91	524.369	2891.53	978.511	497.135	2886.07	875.627	547.053	2936.04	865.661	547.245	2901.34	774.798
462	0	344.369	2741.83	1585.57	244.31	2738.71	1580.92	352.765	2914.15	1606.22	240.108	2919.16	1602.46	295.399	2955.23	1424.74	311.336	3008.53	1210.12	299.003	2822.72	1357.81	292.393	2766.32	1224.21	216.962	3022.65	1259.05	471.728	2890.03	1379.17	518.423	2923.92	1150.14	517.746	2945.43	1086.05	524.071	2874.89	981.362	496.635	2868.44	878.531	547.082	2917.7	867.705	547.056	2880.68	777.726
463	0	343.446	2729.86	1587.19	243.407	2726.94	1582.39	352.154	2902.09	1608.13	239.497	2907.35	1604.24	295.577	2943.49	1426.72	312.353	2997.19	1212.17	298.232	2811.17	1359.61	291.291	2755.35	1225.77	218.136	3011.99	1261.09	471.372	2877.03	1381.49	518.865	2908.93	1152.28	518.689	2930.27	1088.01	523.74	2858.15	984.105	496.085	2850.65	881.37	547.064	2899.14	869.709	546.766	2859.89	780.639
464	0	342.486	2717.91	1588.62	242.46	2715.17	1583.67	351.492	2890.06	1609.83	238.835	2895.56	1605.81	295.702	2931.77	1428.48	313.312	2985.86	1214.04	297.44	2799.63	1361.19	290.19	2744.34	1227.15	219.237	3001.29	1262.92	470.966	2864.08	1383.61	519.277	2893.94	1154.25	519.577	2915.04	1089.8	523.376	2841.32	986.74	495.485	2832.71	884.143	546.999	2880.37	871.667	546.374	2838.97	783.533
465	0	341.49	2705.97	1589.84	241.471	2703.42	1584.74	350.778	2878.05	1611.31	238.122	2883.78	1607.15	295.771	2920.04	1430.03	314.215	2974.53	1215.73	296.627	2788.08	1362.56	289.089	2733.27	1228.36	220.263	2990.55	1264.56	470.51	2851.17	1385.53	519.66	2878.95	1156.06	520.408	2899.73	1091.4	522.979	2824.4	989.264	494.837	2814.62	886.846	546.886	2861.39	873.577	545.88	2817.92	786.406
466	0	340.459	2694.05	1590.87	240.441	2691.67	1585.6	350.013	2866.06	1612.57	237.36	2872.01	1608.27	295.785	2908.32	1431.37	315.062	2963.21	1217.24	295.793	2776.54	1363.72	287.989	2722.15	1229.38	221.211	2979.77	1265.99	470.004	2838.31	1387.25	520.012	2863.96	1157.7	521.182	2884.36	1092.82	522.551	2807.4	991.672	494.142	2796.39	889.476	546.726	2842.21	875.433	545.286	2796.76	789.25
467	0	339.394	2682.13	1591.7	239.373	2679.94	1586.27	349.199	2854.09	1613.61	236.548	2860.26	1609.16	295.74	2896.61	1432.48	315.856	2951.89	1218.55	294.939	2765	1364.64	286.891	2710.99	1230.21	222.078	2968.95	1267.21	469.449	2825.48	1388.75	520.331	2848.96	1159.16	521.897	2868.93	1094.05	522.092	2790.31	993.96	493.4	2778.01	892.025	546.516	2822.85	877.226	544.592	2775.49	792.057
468	0	338.298	2670.23	1592.33	238.269	2668.2	1586.72	348.335	2842.14	1614.43	235.688	2848.52	1609.81	295.637	2884.89	1433.38	316.597	2940.58	1219.67	294.065	2753.45	1365.34	285.796	2699.79	1230.83	222.857	2958.08	1268.22	468.846	2812.7	1390.04	520.614	2833.97	1160.44	522.551	2853.43	1095.09	521.603	2773.14	996.122	492.614	2759.51	894.488	546.257	2803.32	878.947	543.8	2754.13	794.819
469	0	337.172	2658.34	1592.75	237.13	2656.47	1586.97	347.423	2830.22	1615.02	234.78	2836.79	1610.24	295.471	2873.18	1434.06	317.283	2929.27	1220.58	293.171	2741.9	1365.81	284.705	2688.56	1231.23	223.542	2947.17	1269	468.195	2799.97	1391.09	520.857	2818.99	1161.52	523.141	2837.86	1095.93	521.083	2755.91	998.149	491.784	2740.9	896.856	545.946	2783.64	880.586	542.911	2732.68	797.526
470	0	336.018	2646.45	1592.97	235.961	2644.75	1587.02	346.465	2818.31	1615.37	233.826	2825.07	1610.42	295.239	2861.46	1434.5	317.91	2917.98	1221.29	292.26	2730.34	1366.04	283.623	2677.29	1231.41	224.126	2936.2	1269.57	467.497	2787.28	1391.91	521.055	2804.01	1162.41	523.664	2822.25	1096.56	520.532	2738.62	1000.04	490.913	2722.18	899.118	545.581	2763.84	882.133	541.93	2711.18	800.166
471	0	334.839	2634.58	1592.98	234.763	2633.01	1586.85	345.461	2806.42	1615.49	232.825	2813.35	1610.36	294.938	2849.73	1434.72	318.473	2906.7	1221.77	291.329	2718.78	1366.04	282.551	2666.01	1231.34	224.601	2925.18	1269.9	466.751	2774.66	1392.49	521.203	2789.04	1163.09	524.115	2806.58	1096.98	519.948	2721.29	1001.77	490.002	2703.37	901.267	545.162	2743.94	883.576	540.861	2689.63	802.73
472	0	333.638	2622.71	1592.79	233.542	2621.28	1586.48	344.411	2794.54	1615.37	231.779	2801.63	1610.06	294.563	2837.99	1434.7	318.963	2895.43	1222.04	290.381	2707.19	1365.79	281.494	2654.71	1231.03	224.956	2914.11	1270.01	465.958	2762.08	1392.82	521.292	2774.09	1163.57	524.489	2790.87	1097.19	519.33	2703.92	1003.35	489.052	2684.5	903.293	544.686	2723.97	884.907	539.71	2668.06	805.208
473	0	332.415	2610.85	1592.39	232.298	2609.53	1585.91	343.318	2782.68	1615.02	230.688	2789.91	1609.53	294.11	2826.23	1434.45	319.365	2884.18	1222.08	289.414	2695.59	1365.31	280.453	2643.4	1230.46	225.183	2902.97	1269.88	465.117	2749.57	1392.9	521.317	2759.16	1163.82	524.781	2775.13	1097.18	518.675	2686.54	1004.77	488.065	2665.58	905.186	544.152	2703.97	886.116	538.484	2646.5	807.591
474	0	331.174	2598.99	1591.78	231.036	2597.78	1585.13	342.18	2770.83	1614.42	229.552	2778.17	1608.75	293.573	2814.46	1433.97	319.665	2872.96	1221.89	288.428	2683.97	1364.58	279.431	2632.08	1229.65	225.271	2891.78	1269.52	464.226	2737.12	1392.72	521.269	2744.26	1163.85	524.986	2759.36	1096.96	517.98	2669.16	1006.02	487.041	2646.63	906.938	543.558	2683.96	887.196	537.191	2624.96	809.874
475	0	329.915	2587.14	1590.97	229.756	2586.01	1584.16	340.999	2758.99	1613.59	228.371	2766.43	1607.74	292.947	2802.66	1433.24	319.845	2861.75	1221.47	287.419	2672.31	1363.62	278.427	2620.73	1228.59	225.209	2880.51	1268.92	463.285	2724.74	1392.28	521.14	2729.39	1163.66	525.096	2743.59	1096.51	517.241	2651.79	1007.09	485.981	2627.68	908.543	542.902	2663.96	888.143	535.84	2603.49	812.05
476	0	328.641	2575.29	1589.97	228.462	2574.22	1583	339.775	2747.15	1612.52	227.144	2754.67	1606.51	292.227	2790.84	1432.29	319.885	2850.57	1220.83	286.385	2660.63	1362.43	277.439	2609.36	1227.3	224.988	2869.17	1268.09	462.29	2712.43	1391.58	520.92	2714.56	1163.24	525.105	2727.82	1095.85	516.454	2634.46	1007.98	484.886	2608.75	909.995	542.184	2644.03	888.953	534.44	2582.09	814.115
477	0	327.351	2563.44	1588.77	227.153	2562.41	1581.65	338.506	2735.33	1611.24	225.872	2742.9	1605.06	291.407	2779	1431.11	319.765	2839.41	1219.96	285.321	2648.9	1361.03	276.462	2597.94	1225.78	224.599	2857.74	1267.04	461.239	2700.18	1390.63	520.603	2699.77	1162.6	525.007	2712.08	1094.98	515.617	2617.17	1008.7	483.755	2589.87	911.29	541.401	2624.17	889.623	533	2560.81	816.068
478	0	326.045	2551.59	1587.4	225.83	2550.57	1580.14	337.193	2723.5	1609.73	224.552	2731.1	1603.4	290.484	2767.12	1429.72	319.468	2828.26	1218.86	284.222	2637.13	1359.41	275.488	2586.46	1224.05	224.036	2846.24	1265.75	460.128	2687.99	1389.43	520.181	2685.05	1161.74	524.795	2696.37	1093.9	514.724	2599.96	1009.23	482.588	2571.05	912.425	540.552	2604.43	890.154	531.531	2539.67	817.907
479	0	324.723	2539.74	1585.85	224.494	2538.71	1578.47	335.833	2711.68	1608.03	223.184	2719.28	1601.55	289.453	2755.21	1428.1	318.974	2817.11	1217.53	283.082	2625.32	1357.61	274.506	2574.91	1222.14	223.292	2834.64	1264.25	458.953	2675.86	1388	519.647	2670.39	1160.67	524.463	2680.72	1092.62	513.772	2582.84	1009.59	481.385	2552.33	913.399	539.636	2584.84	890.547	530.04	2518.7	819.632
480	0	323.384	2527.88	1584.14	223.141	2526.82	1576.66	334.425	2699.86	1606.13	221.766	2707.43	1599.53	288.31	2743.26	1426.29	318.273	2805.96	1215.99	281.891	2613.44	1355.62	273.503	2563.28	1220.07	222.367	2822.94	1262.54	457.71	2663.78	1386.35	518.995	2655.82	1159.39	524.005	2665.14	1091.15	512.76	2565.84	1009.77	480.145	2533.74	914.212	538.652	2565.41	890.805	528.536	2497.93	821.244
481	0	322.025	2516.01	1582.29	221.77	2514.9	1574.73	332.968	2688.03	1604.07	220.295	2695.55	1597.36	287.053	2731.27	1424.3	317.352	2794.78	1214.24	280.642	2601.51	1353.49	272.463	2551.54	1217.85	221.26	2811.13	1260.62	456.394	2651.74	1384.48	518.222	2641.34	1157.92	523.416	2649.66	1089.51	511.685	2548.97	1009.78	478.868	2515.29	914.868	537.599	2546.19	890.929	527.027	2477.39	822.744
482	0	320.644	2504.13	1580.33	220.378	2502.94	1572.7	331.46	2676.2	1601.86	218.771	2683.64	1595.06	285.68	2719.24	1422.13	316.21	2783.55	1212.29	279.326	2589.5	1351.23	271.369	2539.68	1215.52	219.976	2799.22	1258.52	455.002	2639.73	1382.44	517.323	2626.97	1156.28	522.693	2634.29	1087.71	510.545	2532.25	1009.63	477.553	2497.01	915.368	536.474	2527.19	890.923	525.519	2457.11	824.133
483	0	319.238	2492.24	1578.26	218.962	2490.95	1570.59	329.897	2664.36	1599.51	217.191	2671.69	1592.65	284.191	2707.16	1419.82	314.846	2772.24	1210.15	277.932	2577.42	1348.86	270.202	2527.7	1213.1	218.521	2787.2	1256.25	453.528	2627.73	1380.23	516.295	2612.71	1154.48	521.83	2619.05	1085.77	509.34	2515.7	1009.32	476.199	2478.93	915.718	535.276	2508.45	890.792	524.017	2437.11	825.413
484	0	317.803	2480.34	1576.11	217.517	2478.91	1568.42	328.279	2652.5	1597.07	215.553	2659.71	1590.16	282.586	2695.04	1417.39	313.268	2760.81	1207.83	276.451	2565.27	1346.42	268.943	2515.59	1210.63	216.904	2775.05	1253.84	451.969	2615.72	1377.88	515.138	2598.57	1152.54	520.827	2603.96	1083.71	508.069	2499.35	1008.86	474.807	2461.07	915.924	534.004	2490	890.538	522.526	2417.44	826.584
485	0	316.335	2468.41	1573.92	216.04	2466.84	1566.23	326.602	2640.63	1594.56	213.854	2647.69	1587.63	280.866	2682.85	1414.86	311.489	2749.25	1205.36	274.875	2553.03	1343.93	267.574	2503.33	1208.14	215.138	2762.79	1251.29	450.321	2603.69	1375.42	513.851	2584.57	1150.49	519.681	2589.04	1081.55	506.733	2483.21	1008.27	473.375	2443.47	915.991	532.655	2471.87	890.166	521.049	2398.11	827.645
486	0	314.829	2456.46	1571.7	214.526	2454.71	1564.04	324.866	2628.74	1592	212.093	2635.62	1585.08	279.036	2670.61	1412.26	309.526	2737.5	1202.77	273.196	2540.7	1341.43	266.078	2490.94	1205.64	213.237	2750.4	1248.64	448.582	2591.62	1372.89	512.433	2570.71	1148.35	518.392	2574.29	1079.32	505.332	2467.3	1007.56	471.903	2426.13	915.93	531.229	2454.07	889.681	519.587	2379.16	828.597
487	0	313.283	2444.48	1569.5	212.971	2442.55	1561.89	323.067	2616.82	1589.43	210.269	2623.51	1582.56	277.098	2658.31	1409.64	307.399	2725.54	1200.06	271.407	2528.28	1338.95	264.439	2478.4	1203.19	211.216	2737.89	1245.92	446.75	2579.5	1370.32	510.888	2556.99	1146.15	516.962	2559.74	1077.04	503.868	2451.64	1006.74	470.393	2409.1	915.747	529.723	2436.66	889.088	518.14	2360.62	829.439
488	0	311.691	2432.46	1567.33	211.37	2430.33	1559.8	321.206	2604.86	1586.89	208.381	2611.35	1580.08	275.057	2645.94	1407.01	305.132	2713.34	1197.29	269.506	2515.77	1336.52	262.645	2465.72	1200.81	209.091	2725.26	1243.16	444.823	2567.3	1367.75	509.215	2543.42	1143.93	515.392	2545.38	1074.75	502.34	2436.25	1005.83	468.843	2392.4	915.454	528.137	2419.64	888.393	516.707	2342.52	830.167
489	0	310.051	2420.41	1565.24	209.722	2418.06	1557.81	319.282	2592.88	1584.41	206.429	2599.14	1577.7	272.919	2633.5	1404.42	302.748	2700.86	1194.47	267.491	2503.16	1334.19	260.69	2452.89	1198.54	206.877	2712.5	1240.39	442.803	2555.01	1365.21	507.418	2529.99	1141.72	513.686	2531.24	1072.48	500.75	2421.14	1004.85	467.255	2376.04	915.062	526.47	2403.06	887.605	515.287	2324.9	830.783
490	0	308.361	2408.32	1563.26	208.024	2405.74	1555.95	317.296	2580.85	1582.03	204.414	2586.88	1575.43	270.689	2621	1401.92	300.269	2688.08	1191.66	265.362	2490.46	1331.98	258.569	2439.92	1196.41	204.59	2699.62	1237.65	440.691	2542.63	1362.76	505.501	2516.71	1139.55	511.848	2517.32	1070.26	499.099	2406.32	1003.82	465.628	2360.06	914.584	524.723	2386.93	886.735	513.876	2307.77	831.283
491	0	306.619	2396.18	1561.41	206.273	2393.37	1554.25	315.248	2568.77	1579.79	202.337	2574.56	1573.33	268.376	2608.42	1399.53	297.714	2675	1188.89	263.126	2477.67	1329.94	256.288	2426.81	1194.46	202.241	2686.62	1234.99	438.491	2530.14	1360.42	503.467	2503.57	1137.47	509.884	2503.61	1068.13	497.387	2391.81	1002.76	463.965	2344.47	914.033	522.897	2371.29	885.796	512.471	2291.17	831.668
492	0	304.824	2384	1559.74	204.471	2380.94	1552.73	313.143	2556.64	1577.71	200.203	2562.18	1571.43	265.986	2595.78	1397.3	295.1	2661.6	1186.21	260.79	2464.8	1328.09	253.856	2413.56	1192.72	199.842	2673.51	1232.44	436.208	2517.55	1358.25	501.32	2490.57	1135.52	507.799	2490.13	1066.14	495.615	2377.61	1001.7	462.264	2329.31	913.425	520.996	2356.15	884.806	511.065	2275.14	831.937
493	0	302.979	2371.76	1558.27	202.617	2368.45	1551.43	310.983	2544.46	1575.85	198.016	2549.75	1569.75	263.526	2583.08	1395.27	292.438	2647.91	1183.68	258.365	2451.85	1326.47	251.289	2400.19	1191.22	197.399	2660.3	1230.05	433.851	2504.87	1356.28	499.068	2477.7	1133.73	505.601	2476.87	1064.31	493.785	2363.74	1000.66	460.529	2314.58	912.778	519.024	2341.53	883.785	509.655	2259.69	832.092
494	0	301.084	2359.47	1557.02	200.715	2355.92	1550.38	308.774	2532.22	1574.23	195.78	2537.25	1568.34	261.005	2570.31	1393.48	289.738	2633.94	1181.35	255.866	2438.83	1325.11	248.613	2386.69	1190.01	194.919	2646.98	1227.85	431.428	2492.09	1354.56	496.716	2464.95	1132.14	503.298	2463.84	1062.69	491.897	2350.2	999.662	458.761	2300.31	912.108	516.989	2327.46	882.757	508.234	2244.86	832.138
495	0	299.144	2347.13	1556.04	198.768	2343.33	1549.59	306.523	2519.92	1572.88	193.504	2524.71	1567.21	258.431	2557.48	1391.96	287.003	2619.72	1179.27	253.311	2425.76	1324.04	245.857	2373.1	1189.09	192.403	2633.58	1225.9	428.95	2479.24	1353.12	494.273	2452.33	1130.79	500.899	2451.04	1061.31	489.954	2337	998.742	456.962	2286.52	911.437	514.897	2313.95	881.75	506.797	2230.66	832.078
496	0	297.164	2334.74	1555.33	196.782	2330.69	1549.09	304.236	2507.57	1571.84	191.194	2512.11	1566.4	255.814	2544.61	1390.74	284.235	2605.29	1177.5	250.72	2412.64	1323.27	243.056	2359.42	1188.5	189.854	2620.11	1224.24	426.43	2466.33	1352	491.747	2439.83	1129.71	498.414	2438.47	1060.21	487.959	2324.15	997.922	455.135	2273.21	910.784	512.76	2300.99	880.794	505.339	2217.13	831.922
497	0	295.151	2322.31	1554.92	194.764	2318.01	1548.89	301.924	2495.16	1571.11	188.861	2499.46	1565.91	253.162	2531.71	1389.86	281.434	2590.72	1176.09	248.114	2399.49	1322.83	240.248	2345.68	1188.24	187.271	2606.58	1222.9	423.882	2453.39	1351.23	489.15	2427.46	1128.93	495.853	2426.12	1059.41	485.914	2311.64	997.229	453.282	2260.4	910.171	510.588	2288.6	879.921	503.855	2204.26	831.678
498	0	293.112	2309.82	1554.82	192.721	2305.29	1549.01	299.596	2482.7	1570.74	186.513	2486.77	1565.77	250.485	2518.77	1389.34	278.601	2576.06	1175.09	245.516	2386.33	1322.72	237.474	2331.91	1188.32	184.655	2593.03	1221.93	421.322	2440.44	1350.84	486.494	2415.22	1128.48	493.229	2414.01	1058.95	483.826	2299.49	996.686	451.409	2248.11	909.618	508.394	2276.78	879.163	502.34	2192.09	831.359
499	0	291.056	2297.3	1555.05	190.662	2292.55	1549.44	297.262	2470.19	1570.71	184.161	2474.04	1565.98	247.795	2505.82	1389.2	275.738	2561.38	1174.53	242.949	2373.18	1322.96	234.773	2318.15	1188.75	182.006	2579.46	1221.35	418.765	2427.52	1350.84	483.793	2403.11	1128.37	490.554	2402.13	1058.84	481.7	2287.69	996.315	449.519	2236.32	909.147	506.192	2265.51	878.553	500.792	2180.61	830.979
500	0	288.994	2284.75	1555.59	188.597	2279.77	1550.18	294.933	2457.64	1571.05	181.817	2461.28	1566.55	245.102	2492.88	1389.44	272.851	2546.75	1174.44	240.436	2360.05	1323.55	232.185	2304.42	1189.51	179.326	2565.91	1221.19	416.227	2414.64	1351.23	481.062	2391.16	1128.62	487.843	2390.49	1059.09	479.544	2276.25	996.135	447.619	2225.05	908.776	503.997	2254.8	878.121	499.208	2169.83	830.553
501	0	286.935	2272.17	1556.46	186.537	2266.98	1551.24	292.62	2445.05	1571.76	179.49	2448.5	1567.47	242.417	2479.94	1390.07	269.947	2532.25	1174.84	237.999	2346.96	1324.48	229.741	2290.76	1190.6	176.619	2552.4	1221.47	413.724	2401.85	1352.03	478.318	2379.36	1129.23	485.111	2379.1	1059.72	477.369	2265.17	996.16	445.715	2214.29	908.524	501.824	2244.62	877.893	497.588	2159.74	830.099
502	0	284.891	2259.57	1557.65	184.492	2254.19	1552.59	290.334	2432.44	1572.82	177.192	2435.71	1568.74	239.752	2467.04	1391.09	267.038	2517.94	1175.72	235.655	2333.94	1325.73	227.471	2277.21	1192	173.888	2538.95	1222.18	411.271	2389.17	1353.23	475.579	2367.75	1130.19	482.371	2367.97	1060.71	475.185	2254.44	996.4	443.815	2204.04	908.406	499.686	2234.95	877.891	495.932	2150.32	829.632
503	0	282.871	2246.97	1559.13	182.472	2241.4	1554.23	288.085	2419.82	1574.23	174.932	2422.92	1570.33	237.118	2454.18	1392.49	264.141	2503.88	1177.08	233.423	2321	1327.31	225.397	2263.81	1193.69	171.14	2525.59	1223.32	408.882	2376.62	1354.81	472.862	2356.34	1131.5	479.64	2357.11	1062.07	473.005	2244.07	996.859	441.926	2194.28	908.433	497.599	2225.78	878.13	494.242	2141.57	829.171
504	0	280.888	2234.37	1560.9	180.49	2228.63	1556.14	285.883	2407.19	1575.96	172.72	2410.14	1572.23	234.525	2441.38	1394.23	261.272	2490.13	1178.89	231.316	2308.15	1329.17	223.533	2250.58	1195.65	168.381	2512.33	1224.88	406.57	2364.24	1356.74	470.187	2345.15	1133.13	476.933	2346.52	1063.76	470.844	2234.06	997.536	440.058	2185	908.616	495.576	2217.09	878.62	492.522	2133.46	828.733
505	0	278.951	2221.79	1562.92	178.554	2215.88	1558.27	283.735	2394.58	1578	170.565	2397.38	1574.4	231.984	2428.65	1396.31	258.447	2476.71	1181.11	229.343	2295.42	1331.31	221.886	2237.55	1197.84	165.617	2499.19	1226.84	404.342	2352.04	1359	467.57	2334.2	1135.07	474.265	2336.23	1065.77	468.715	2224.42	998.425	438.22	2176.2	908.957	493.63	2208.84	879.361	490.777	2125.97	828.331
506	0	277.069	2209.24	1565.17	176.675	2203.17	1560.62	281.651	2381.98	1580.32	168.475	2384.65	1576.83	229.502	2416.01	1398.69	255.682	2463.66	1183.69	227.511	2282.81	1333.69	220.455	2224.73	1200.25	162.856	2486.18	1229.16	402.208	2340.05	1361.54	465.028	2323.52	1137.27	471.649	2326.23	1068.07	466.634	2215.12	999.513	436.425	2167.84	909.458	491.77	2201.02	880.347	489.014	2119.05	827.981
507	0	275.252	2196.72	1567.62	174.861	2190.5	1563.14	279.636	2369.42	1582.88	166.454	2371.96	1579.47	227.087	2403.47	1401.32	252.989	2450.97	1186.57	225.819	2270.34	1336.27	219.232	2212.14	1202.84	160.103	2473.32	1231.8	400.172	2328.28	1364.32	462.575	2313.13	1139.71	469.099	2316.54	1070.62	464.615	2206.19	1000.78	434.681	2159.92	910.113	490.006	2193.59	881.562	487.244	2112.66	827.691
508	0	273.507	2184.26	1570.23	173.12	2177.89	1565.81	277.694	2356.91	1585.63	164.508	2359.33	1582.29	224.744	2391.03	1404.17	250.377	2438.65	1189.69	224.267	2258.01	1339.02	218.201	2199.77	1205.58	157.365	2460.61	1234.72	398.235	2316.72	1367.29	460.222	2303.04	1142.33	466.623	2307.18	1073.38	462.674	2197.61	1002.21	433.002	2152.4	910.913	488.344	2186.54	882.985	485.477	2106.78	827.471
509	0	271.841	2171.86	1572.97	171.459	2165.35	1568.58	275.83	2344.46	1588.55	162.64	2346.75	1585.25	222.475	2378.7	1407.2	247.85	2426.67	1193	222.847	2245.82	1341.91	217.339	2187.64	1208.43	154.646	2448.05	1237.87	396.396	2305.39	1370.4	457.976	2293.27	1145.11	464.232	2298.14	1076.3	460.822	2189.38	1003.78	431.396	2145.27	911.844	486.787	2179.85	884.587	483.726	2101.36	827.325
510	0	270.258	2159.53	1575.8	169.883	2152.89	1571.42	274.044	2332.07	1591.58	160.851	2334.25	1588.3	220.283	2366.48	1410.35	245.407	2415	1196.43	221.551	2233.77	1344.88	216.62	2175.71	1211.37	151.952	2435.64	1241.19	394.65	2294.28	1373.6	455.843	2283.83	1147.99	461.931	2289.43	1079.34	459.073	2181.5	1005.44	429.874	2138.5	912.886	485.337	2173.49	886.332	482.006	2096.35	827.251
511	0	268.762	2147.28	1578.68	168.395	2140.5	1574.3	272.336	2319.77	1594.67	159.141	2321.82	1591.4	218.166	2354.37	1413.57	243.04	2403.6	1199.93	220.365	2221.87	1347.91	216.013	2163.99	1214.35	149.286	2423.37	1244.62	392.992	2283.37	1376.82	453.824	2274.72	1150.92	459.723	2281.06	1082.46	457.433	2173.97	1007.17	428.447	2132.06	914.016	483.992	2167.46	888.182	480.333	2091.72	827.249
512	0	267.354	2135.12	1581.57	166.998	2128.2	1577.17	270.706	2307.56	1597.78	157.509	2309.48	1594.5	216.122	2342.37	1416.82	240.74	2392.43	1203.43	219.275	2210.1	1350.94	215.487	2152.44	1217.34	146.651	2411.22	1248.11	391.413	2272.66	1380.03	451.915	2265.93	1153.87	457.607	2273.02	1085.6	455.911	2166.76	1008.94	427.121	2125.94	915.208	482.747	2161.73	890.091	478.724	2087.42	827.308
513	0	266.035	2123.05	1584.42	165.692	2115.99	1580.01	269.149	2295.44	1600.85	155.952	2297.23	1597.56	214.147	2330.47	1420.04	238.495	2381.44	1206.88	218.266	2198.45	1353.93	215.011	2141.04	1220.29	144.048	2399.18	1251.59	389.903	2262.13	1383.16	450.111	2257.48	1156.79	455.582	2265.3	1088.73	454.51	2159.89	1010.71	425.903	2120.11	916.432	481.596	2156.29	892.016	477.197	2083.41	827.417
514	0	264.803	2111.08	1587.21	164.476	2103.88	1582.78	267.662	2283.43	1603.83	154.466	2285.07	1600.54	212.234	2318.67	1423.19	236.289	2370.57	1210.23	217.321	2186.91	1356.84	214.555	2129.76	1223.18	141.48	2387.24	1255	388.45	2251.75	1386.17	448.4	2249.33	1159.64	453.641	2257.89	1091.79	453.231	2153.33	1012.44	424.8	2114.55	917.655	480.529	2151.15	893.91	475.768	2079.66	827.561
515	0	263.655	2099.22	1589.89	163.347	2091.85	1585.44	266.239	2271.53	1606.69	153.044	2273.01	1603.39	210.377	2306.96	1426.22	234.108	2359.79	1213.43	216.427	2175.47	1359.63	214.097	2118.57	1225.96	138.946	2375.39	1258.3	387.044	2241.51	1389.01	446.771	2241.48	1162.37	451.777	2250.79	1094.76	452.072	2147.07	1014.09	423.813	2109.23	918.842	479.536	2146.29	895.727	474.455	2076.13	827.72
516	0	262.587	2087.46	1592.43	162.301	2079.92	1587.97	264.873	2259.74	1609.37	151.681	2261.03	1606.07	208.568	2295.33	1429.08	231.939	2349.06	1216.43	215.567	2164.12	1362.25	213.617	2107.45	1228.59	136.446	2363.6	1261.43	385.675	2231.38	1391.66	445.21	2233.91	1164.97	449.978	2243.96	1097.59	451.031	2141.11	1015.63	422.945	2104.15	919.96	478.606	2141.7	897.424	473.273	2072.81	827.871
517	0	261.593	2075.8	1594.8	161.334	2068.08	1590.32	263.558	2248.05	1611.83	150.371	2249.15	1608.55	206.801	2283.76	1431.75	229.77	2338.35	1219.21	214.729	2152.84	1364.68	213.104	2096.36	1231.03	133.982	2351.85	1264.34	384.333	2221.33	1394.06	443.7	2226.58	1167.38	448.233	2237.39	1100.24	450.101	2135.41	1017.03	422.196	2099.27	920.975	477.726	2137.37	898.962	472.236	2069.66	827.991
518	0	260.666	2064.23	1596.96	160.437	2056.32	1592.49	262.286	2236.47	1614.05	149.104	2237.35	1610.79	205.069	2272.26	1434.17	227.593	2327.63	1221.72	213.904	2141.63	1366.87	212.549	2085.31	1233.24	131.554	2340.15	1266.98	383.011	2211.35	1396.2	442.227	2219.48	1169.59	446.529	2231.05	1102.7	449.273	2129.97	1018.27	421.564	2094.59	921.854	476.882	2133.31	900.304	471.355	2066.67	828.055
519	0	259.799	2052.75	1598.9	159.605	2044.63	1594.43	261.05	2224.99	1615.99	147.876	2225.63	1612.78	203.366	2260.8	1436.33	225.404	2316.89	1223.93	213.082	2130.46	1368.8	211.954	2074.26	1235.18	129.166	2328.47	1269.33	381.703	2201.4	1398.06	440.776	2212.55	1171.58	444.851	2224.91	1104.94	448.54	2124.75	1019.3	421.045	2090.08	922.566	476.061	2129.5	901.422	470.638	2063.82	828.037
520	0	258.983	2041.35	1600.58	158.828	2033.02	1596.13	259.841	2213.59	1617.63	146.677	2213.98	1614.47	201.686	2249.38	1438.2	223.203	2306.13	1225.83	212.258	2119.32	1370.44	211.323	2063.22	1236.83	126.821	2316.82	1271.36	380.406	2191.48	1399.61	439.332	2205.78	1173.32	443.187	2218.93	1106.94	447.891	2119.74	1020.12	420.634	2085.73	923.085	475.252	2125.94	902.292	470.092	2061.11	827.912
521	0	258.211	2030.02	1601.99	158.099	2021.46	1597.57	258.654	2202.27	1618.95	145.501	2202.39	1615.86	200.028	2237.99	1439.77	220.996	2295.34	1227.41	211.428	2108.21	1371.78	210.665	2052.2	1238.15	124.525	2305.17	1273.05	379.118	2181.56	1400.86	437.885	2199.13	1174.82	441.525	2213.08	1108.69	447.315	2114.91	1020.7	420.325	2081.53	923.386	474.443	2122.61	902.899	469.717	2058.53	827.659
522	0	257.473	2018.75	1603.11	157.408	2009.94	1598.74	257.483	2191.01	1619.94	144.343	2190.84	1616.94	198.389	2226.62	1441.02	218.79	2284.54	1228.65	210.592	2097.11	1372.79	209.991	2041.19	1239.13	122.285	2293.55	1274.39	377.84	2171.63	1401.79	436.426	2192.55	1176.05	439.854	2207.32	1110.17	446.802	2110.24	1021.04	420.111	2077.45	923.453	473.624	2119.5	903.234	469.512	2056.08	827.259
523	0	256.764	2007.52	1603.94	156.747	1998.46	1599.61	256.322	2179.8	1620.6	143.198	2179.34	1617.69	196.771	2215.25	1441.94	216.601	2273.73	1229.56	209.751	2086.02	1373.48	209.315	2030.21	1239.75	120.113	2281.94	1275.38	376.575	2161.66	1402.41	434.949	2186	1177.03	438.166	2201.6	1111.39	446.342	2105.68	1021.13	419.984	2073.49	923.269	472.787	2116.59	903.297	469.473	2053.76	826.694
524	0	256.075	1996.32	1604.47	156.109	1987	1600.19	255.169	2168.62	1620.93	142.063	2167.85	1618.12	195.176	2203.89	1442.54	214.445	2262.93	1230.15	208.907	2074.93	1373.84	208.651	2019.26	1240	118.019	2270.34	1276.01	375.327	2151.65	1402.73	433.452	2179.46	1177.74	436.456	2195.88	1112.35	445.927	2101.21	1020.96	419.935	2069.63	922.826	471.928	2113.86	903.093	469.589	2051.57	825.954
525	0	255.401	1985.14	1604.7	155.487	1975.56	1600.46	254.022	2157.45	1620.94	140.934	2156.38	1618.22	193.611	2192.53	1442.82	212.344	2252.15	1230.43	208.064	2063.83	1373.87	208.01	2008.36	1239.89	116.016	2258.77	1276.3	374.103	2141.57	1402.77	431.937	2172.89	1178.21	434.722	2190.13	1113.04	445.547	2096.81	1020.53	419.956	2065.85	922.122	471.043	2111.29	902.635	469.85	2049.52	825.029
526	0	254.736	1973.96	1604.63	154.874	1964.11	1600.44	252.881	2146.29	1620.64	139.813	2144.92	1618.01	192.081	2181.15	1442.8	210.322	2241.42	1230.41	207.229	2052.72	1373.58	207.405	1997.51	1239.42	114.117	2247.23	1276.27	372.909	2131.43	1402.52	430.406	2166.23	1178.43	432.965	2184.3	1113.48	445.197	2092.42	1019.86	420.038	2062.14	921.155	470.133	2108.85	901.942	470.24	2047.61	823.917
527	0	254.077	1962.77	1604.27	154.268	1952.65	1600.12	251.748	2135.12	1620.05	138.701	2133.44	1617.5	190.595	2169.75	1442.48	208.403	2230.73	1230.13	206.408	2041.58	1372.99	206.845	1986.72	1238.62	112.336	2235.71	1275.93	371.755	2121.2	1402.02	428.869	2159.47	1178.41	431.19	2178.36	1113.68	444.872	2088.03	1018.94	420.173	2058.49	919.934	469.202	2106.51	901.035	470.741	2045.84	822.617
528	0	253.423	1951.55	1603.63	153.664	1941.17	1599.52	250.627	2123.91	1619.17	137.601	2121.94	1616.69	189.163	2158.33	1441.88	206.614	2220.1	1229.6	205.609	2030.42	1372.1	206.338	1975.97	1237.5	110.685	2224.23	1275.3	370.649	2110.88	1401.27	427.334	2152.57	1178.18	429.406	2172.25	1113.64	444.57	2083.58	1017.8	420.353	2054.87	918.467	468.257	2104.24	899.941	471.333	2044.2	821.135
529	0	252.772	1940.3	1602.73	153.061	1929.66	1598.65	249.524	2112.67	1618.04	136.518	2110.42	1615.62	187.797	2146.89	1441.02	204.98	2209.53	1228.85	204.839	2019.23	1370.94	205.888	1965.25	1236.09	109.174	2212.78	1274.42	369.601	2100.46	1400.3	425.815	2145.5	1177.74	427.622	2165.96	1113.39	444.288	2079.06	1016.45	420.571	2051.26	916.768	467.309	2101.98	898.688	471.996	2042.71	819.477
530	0	252.126	1929	1601.6	152.459	1918.11	1597.52	248.445	2101.39	1616.68	135.459	2098.86	1614.29	186.508	2135.41	1439.92	203.522	2199.01	1227.91	204.106	2007.99	1369.54	205.5	1954.56	1234.43	107.812	2201.37	1273.31	368.619	2089.92	1399.13	424.326	2138.22	1177.11	425.854	2159.43	1112.94	444.027	2074.43	1014.9	420.822	2047.65	914.855	466.37	2099.72	897.305	472.708	2041.33	817.657
531	0	251.488	1917.65	1600.24	151.861	1906.53	1596.16	247.401	2090.04	1615.1	134.434	2087.27	1612.73	185.308	2123.9	1438.61	202.26	2188.55	1226.8	203.42	1996.72	1367.91	205.174	1943.87	1232.54	106.606	2189.98	1271.98	367.713	2079.26	1397.78	422.883	2130.71	1176.3	424.118	2152.65	1112.3	443.79	2069.65	1013.18	421.101	2044	912.747	465.456	2097.39	895.821	473.447	2040.06	815.686
532	0	250.861	1906.24	1598.69	151.269	1894.9	1594.59	246.401	2078.64	1613.34	133.452	2075.64	1610.96	184.208	2112.36	1437.09	201.205	2178.11	1225.54	202.789	1985.39	1366.08	204.911	1933.16	1230.46	105.561	2178.61	1270.48	366.893	2068.48	1396.27	421.502	2122.95	1175.32	422.432	2145.6	1111.49	443.579	2064.68	1011.29	421.403	2040.3	910.465	464.585	2094.96	894.265	474.192	2038.87	813.582
533	0	250.25	1894.76	1596.98	150.689	1883.24	1592.84	245.457	2067.16	1611.41	132.524	2063.98	1609	183.22	2100.77	1435.41	200.364	2167.68	1224.16	202.22	1974	1364.08	204.712	1922.39	1228.23	104.677	2167.26	1268.82	366.165	2057.56	1394.6	420.2	2114.91	1174.19	420.814	2138.23	1110.53	443.399	2059.5	1009.27	421.725	2036.51	908.033	463.772	2092.38	892.662	474.924	2037.73	811.362
534	0	249.662	1883.22	1595.13	150.125	1871.52	1590.94	244.582	2055.63	1609.34	131.663	2052.28	1606.87	182.355	2089.13	1433.57	199.736	2157.22	1222.66	201.723	1962.55	1361.94	204.575	1911.55	1225.88	103.955	2155.9	1267.02	365.539	2046.51	1392.81	418.994	2106.58	1172.91	419.284	2130.55	1109.42	443.255	2054.08	1007.12	422.065	2032.61	905.473	463.037	2089.6	891.036	475.626	2036.61	809.046
535	0	249.103	1871.6	1593.19	149.583	1859.78	1588.92	243.789	2044.03	1607.15	130.882	2040.56	1604.6	181.621	2077.45	1431.6	199.314	2146.7	1221.06	201.305	1951.03	1359.69	204.5	1900.6	1223.44	103.391	2144.52	1265.11	365.02	2035.31	1390.9	417.899	2097.94	1171.51	417.861	2122.52	1108.18	443.151	2048.39	1004.88	422.421	2028.56	902.811	462.396	2086.57	889.407	476.284	2035.45	806.655
536	0	248.579	1859.93	1591.17	149.071	1847.99	1586.82	243.092	2032.36	1604.86	130.194	2028.81	1602.22	181.026	2065.71	1429.53	199.086	2136.08	1219.36	200.973	1939.43	1357.34	204.487	1889.52	1220.95	102.981	2133.11	1263.1	364.616	2023.98	1388.89	416.928	2088.98	1169.99	416.563	2114.15	1106.83	443.092	2042.39	1002.55	422.791	2024.32	900.069	461.865	2083.26	887.791	476.886	2034.21	804.209
537	0	248.097	1848.18	1589.13	148.594	1836.18	1584.68	242.503	2020.63	1602.49	129.614	2017.04	1599.73	180.577	2053.91	1427.37	199.033	2125.33	1217.58	200.735	1927.74	1354.94	204.536	1878.29	1218.43	102.721	2121.63	1261.01	364.33	2012.5	1386.79	416.093	2079.69	1168.36	415.404	2105.43	1105.38	443.082	2036.08	1000.16	423.174	2019.86	897.273	461.455	2079.61	886.202	477.424	2032.83	801.731
538	0	247.665	1836.37	1587.09	148.16	1824.34	1582.53	242.037	2008.85	1600.08	129.153	2005.27	1597.17	180.277	2042.05	1425.14	199.133	2114.39	1215.71	200.597	1915.95	1352.51	204.65	1866.89	1215.92	102.602	2110.08	1258.85	364.168	2000.89	1384.63	415.403	2070.06	1166.63	414.397	2096.34	1103.83	443.123	2029.41	997.717	423.57	2015.15	894.446	461.177	2075.58	884.652	477.895	2031.25	799.241
539	0	247.287	1824.51	1585.09	147.774	1812.49	1580.4	241.705	1997.02	1597.62	128.824	1993.49	1594.56	180.131	2030.11	1422.87	199.361	2103.24	1213.76	200.564	1904.05	1350.08	204.831	1855.3	1213.44	102.616	2098.43	1256.65	364.131	1989.13	1382.42	414.864	2060.09	1164.82	413.552	2086.9	1102.21	443.219	2022.38	995.251	423.977	2010.14	891.61	461.035	2071.14	883.147	478.297	2029.4	796.762
540	0	246.97	1812.59	1583.16	147.441	1800.63	1578.35	241.519	1985.14	1595.16	128.639	1981.72	1591.92	180.137	2018.1	1420.58	199.696	2091.85	1211.73	200.641	1892.03	1347.68	205.081	1843.51	1211.02	102.758	2086.66	1254.42	364.223	1977.24	1380.17	414.478	2049.8	1162.94	412.873	2077.1	1100.54	443.368	2014.96	992.774	424.393	2004.81	888.789	461.031	2066.25	881.695	478.634	2027.22	794.316
541	0	246.716	1800.61	1581.34	147.167	1788.77	1576.39	241.488	1973.21	1592.7	128.607	1969.96	1589.29	180.296	2006.01	1418.29	200.114	2080.19	1209.62	200.832	1879.9	1345.33	205.405	1831.52	1208.68	103.017	2074.75	1252.17	364.443	1965.22	1377.9	414.246	2039.17	1161.01	412.361	2066.95	1098.81	443.572	2007.14	990.307	424.817	1999.1	886.005	461.162	2060.88	880.298	478.911	2024.65	791.922
542	0	246.531	1788.59	1579.66	146.955	1776.92	1574.57	241.618	1961.25	1590.28	128.736	1958.22	1586.67	180.605	1993.82	1416.02	200.598	2068.25	1207.46	201.138	1867.63	1343.07	205.807	1819.31	1206.45	103.387	2062.67	1249.92	364.791	1953.06	1375.63	414.165	2028.22	1159.05	412.016	2056.46	1097.06	443.828	1998.9	987.867	425.247	1993	883.279	461.419	2054.99	878.96	479.137	2021.6	789.602
543	0	246.415	1776.53	1578.14	146.806	1765.08	1572.91	241.916	1949.24	1587.9	129.032	1946.51	1584.1	181.061	1981.54	1413.79	201.133	2056	1205.25	201.559	1855.22	1340.91	206.289	1806.89	1204.35	103.861	2050.42	1247.69	365.264	1940.77	1373.39	414.227	2016.95	1157.07	411.829	2045.63	1095.3	444.132	1990.24	985.474	425.68	1986.46	880.632	461.79	2048.57	877.683	479.321	2018.02	787.374
544	0	246.369	1764.42	1576.82	146.723	1753.25	1571.45	242.384	1937.21	1585.6	129.497	1934.81	1581.6	181.657	1969.15	1411.63	201.712	2043.45	1203.01	202.093	1842.68	1338.89	206.854	1794.26	1202.4	104.432	2037.97	1245.51	365.859	1928.34	1371.2	414.425	2005.38	1155.1	411.793	2034.47	1093.54	444.482	1981.14	983.148	426.115	1979.44	878.086	462.26	2041.59	876.468	479.474	2013.83	785.255
545	0	246.394	1752.28	1575.71	146.705	1741.45	1570.21	243.021	1925.14	1583.4	130.132	1923.15	1579.2	182.387	1956.66	1409.57	202.331	2030.59	1200.76	202.737	1829.99	1337.03	207.503	1781.41	1200.62	105.095	2025.33	1243.39	366.572	1915.77	1369.07	414.748	1993.53	1153.17	411.894	2022.99	1091.82	444.872	1971.59	980.906	426.547	1971.92	875.661	462.81	2034.03	875.318	479.606	2008.99	783.261
546	0	246.486	1740.11	1574.84	146.752	1729.67	1569.22	243.825	1913.03	1581.32	130.936	1911.51	1576.92	183.242	1944.06	1407.62	202.991	2017.43	1198.53	203.485	1817.15	1335.36	208.231	1768.35	1199.04	105.844	2012.49	1241.36	367.395	1903.07	1367.04	415.183	1981.39	1151.28	412.12	2011.21	1090.14	445.297	1961.6	978.77	426.974	1963.87	873.376	463.418	2025.86	874.234	479.73	2003.43	781.406
547	0	246.642	1727.9	1574.23	146.861	1717.91	1568.48	244.79	1900.89	1579.38	131.902	1899.88	1574.78	184.214	1931.35	1405.82	203.696	2003.98	1196.36	204.328	1804.17	1333.88	209.035	1755.09	1197.66	106.675	1999.45	1239.45	368.32	1890.22	1365.13	415.717	1968.98	1149.48	412.455	1999.13	1088.53	445.751	1951.14	976.759	427.393	1955.24	871.248	464.063	2017.09	873.218	479.852	1997.1	779.699
548	0	246.86	1715.66	1573.88	147.028	1706.17	1568.02	245.907	1888.71	1577.6	133.022	1888.28	1572.81	185.293	1918.52	1404.18	204.453	1990.25	1194.28	205.257	1791.06	1332.62	209.906	1741.64	1196.52	107.584	1986.23	1237.69	369.338	1877.23	1363.36	416.337	1956.31	1147.78	412.884	1986.75	1087.02	446.228	1940.23	974.89	427.801	1946.02	869.294	464.722	2007.69	872.272	479.982	1989.95	778.151
549	0	247.131	1703.38	1573.81	147.25	1694.46	1567.84	247.166	1876.48	1576.01	134.287	1876.67	1571.02	186.466	1905.58	1402.73	205.269	1976.26	1192.33	206.258	1777.81	1331.6	210.831	1728	1195.61	108.563	1972.82	1236.11	370.436	1864.1	1361.76	417.029	1943.39	1146.21	413.391	1974.09	1085.61	446.721	1928.85	973.183	428.194	1936.18	867.531	465.376	1997.66	871.4	480.125	1981.96	776.768
550	0	247.452	1691.07	1574.02	147.52	1682.75	1567.95	248.554	1864.21	1574.62	135.684	1865.07	1569.44	187.721	1892.53	1401.49	206.149	1962.03	1190.56	207.319	1764.44	1330.82	211.797	1714.21	1194.94	109.608	1959.26	1234.73	371.603	1850.82	1360.35	417.78	1930.23	1144.79	413.963	1961.14	1084.34	447.224	1917	971.653	428.571	1925.69	865.972	466.006	1986.98	870.607	480.283	1973.07	775.552
551	0	247.813	1678.71	1574.51	147.833	1671.05	1568.35	250.054	1851.89	1573.45	137.198	1853.46	1568.09	189.045	1879.38	1400.49	207.097	1947.58	1189.01	208.423	1750.97	1330.3	212.785	1700.28	1194.54	110.711	1945.57	1233.59	372.823	1837.39	1359.16	418.577	1916.83	1143.55	414.587	1947.92	1083.22	447.731	1904.67	970.315	428.928	1914.55	864.628	466.598	1975.65	869.895	480.459	1963.28	774.507
552	0	248.206	1666.32	1575.28	148.18	1659.35	1569.04	251.65	1839.5	1572.52	138.812	1841.82	1566.98	190.423	1866.14	1399.74	208.11	1932.96	1187.71	209.555	1737.4	1330.04	213.779	1686.22	1194.38	111.862	1931.77	1232.72	374.082	1823.82	1358.2	419.408	1903.19	1142.49	415.251	1934.42	1082.26	448.234	1891.87	969.184	429.263	1902.72	863.509	467.141	1963.66	869.271	480.651	1952.55	773.631
553	0	248.624	1653.88	1576.31	148.555	1647.64	1570	253.323	1827.05	1571.83	140.509	1830.15	1566.11	191.842	1852.82	1399.26	209.182	1918.2	1186.72	210.696	1723.76	1330.04	214.758	1672.09	1194.48	113.05	1917.9	1232.14	375.363	1810.11	1357.48	420.265	1889.32	1141.64	415.948	1920.65	1081.48	448.728	1878.6	968.269	429.571	1890.21	862.623	467.629	1951	868.737	480.856	1940.87	772.922
554	0	249.057	1641.4	1577.6	148.95	1635.91	1571.23	255.056	1814.53	1571.39	142.27	1818.44	1565.51	193.285	1839.42	1399.05	210.301	1903.34	1186.07	211.829	1710.06	1330.3	215.703	1657.9	1194.83	114.264	1903.99	1231.87	376.65	1796.28	1357.03	421.137	1875.22	1141	416.671	1906.6	1080.88	449.206	1864.84	967.578	429.851	1877.01	861.974	468.06	1937.67	868.299	481.068	1928.24	772.377
555	0	249.497	1628.86	1579.13	149.356	1624.16	1572.71	256.829	1801.94	1571.2	144.076	1806.67	1565.18	194.738	1825.97	1399.13	211.45	1888.42	1185.77	212.937	1696.33	1330.82	216.595	1643.69	1195.42	115.491	1890.08	1231.94	377.927	1782.34	1356.85	422.017	1860.88	1140.58	417.414	1892.29	1080.47	449.661	1850.61	967.119	430.098	1863.11	861.566	468.434	1923.67	867.96	481.283	1914.65	771.991
556	0	249.933	1616.28	1580.88	149.763	1612.37	1574.42	258.622	1789.28	1571.28	145.909	1794.85	1565.11	196.187	1812.47	1399.5	212.611	1873.51	1185.86	214.004	1682.59	1331.57	217.416	1629.49	1196.23	116.718	1876.2	1232.34	379.178	1768.29	1356.95	422.9	1846.33	1140.39	418.175	1877.7	1080.26	450.087	1835.9	966.891	430.306	1848.52	861.399	468.757	1909	867.722	481.491	1900.1	771.758
557	0	250.357	1603.64	1582.82	150.165	1600.54	1576.34	260.417	1776.54	1571.6	147.75	1782.96	1565.31	197.618	1798.96	1400.15	213.766	1858.63	1186.32	215.012	1668.86	1332.56	218.151	1615.36	1197.24	117.936	1862.39	1233.08	380.389	1754.15	1357.32	423.78	1831.55	1140.41	418.953	1862.85	1080.23	450.477	1820.71	966.897	430.472	1833.25	861.471	469.035	1893.66	867.587	481.685	1884.6	771.673
558	0	250.76	1590.95	1584.92	150.551	1588.67	1578.44	262.196	1763.73	1572.17	149.58	1771.01	1565.78	199.019	1785.44	1401.08	214.897	1843.86	1187.17	215.949	1655.17	1333.77	218.784	1601.31	1198.45	119.138	1848.68	1234.14	381.547	1739.95	1357.96	424.655	1816.55	1140.66	419.75	1847.73	1080.4	450.824	1805.07	967.132	430.589	1817.31	861.776	469.277	1877.65	867.553	481.856	1868.17	771.73
559	0	251.134	1578.2	1587.17	150.914	1576.75	1580.69	263.943	1750.84	1572.98	151.384	1758.98	1566.5	200.38	1771.94	1402.27	215.995	1829.24	1188.37	216.801	1641.52	1335.17	219.304	1587.38	1199.82	120.319	1835.09	1235.52	382.641	1725.69	1358.87	425.521	1801.34	1141.12	420.565	1832.36	1080.74	451.122	1788.96	967.591	430.651	1800.72	862.308	469.491	1860.97	867.621	481.995	1850.82	771.923
560	0	251.47	1565.41	1589.52	151.246	1564.77	1583.06	265.641	1737.89	1574.01	153.145	1746.89	1567.47	201.691	1758.47	1403.7	217.055	1814.81	1189.9	217.559	1627.95	1336.75	219.699	1573.6	1201.33	121.479	1821.66	1237.18	383.662	1711.41	1360.02	426.377	1785.94	1141.77	421.402	1816.74	1081.25	451.365	1772.41	968.265	430.652	1783.51	863.059	469.687	1843.65	867.787	482.094	1832.57	772.248
561	0	251.763	1552.58	1591.94	151.54	1552.75	1585.52	267.279	1724.87	1575.24	154.851	1734.73	1568.67	202.947	1745.06	1405.36	218.079	1800.62	1191.72	218.214	1614.47	1338.48	219.961	1559.99	1202.98	122.624	1808.4	1239.09	384.603	1697.11	1361.41	427.223	1770.34	1142.6	422.263	1800.87	1081.91	451.549	1755.43	969.143	430.583	1765.7	864.017	469.871	1825.69	868.05	482.143	1813.45	772.702
562	0	252.005	1539.7	1594.42	151.788	1540.67	1588.05	268.845	1711.81	1576.66	156.49	1722.52	1570.08	204.143	1731.72	1407.2	219.078	1786.69	1193.79	218.762	1601.09	1340.34	220.085	1546.56	1204.73	123.759	1795.33	1241.22	385.46	1682.82	1363.01	428.058	1754.56	1143.6	423.149	1784.78	1082.7	451.667	1738.04	970.213	430.439	1747.32	865.17	470.048	1807.12	868.405	482.136	1793.5	773.284
563	0	252.192	1526.79	1596.91	151.986	1528.55	1590.61	270.328	1698.69	1578.24	158.053	1710.25	1571.68	205.274	1718.46	1409.21	220.069	1773.05	1196.06	219.202	1587.83	1342.31	220.071	1533.32	1206.57	124.893	1782.46	1243.52	386.231	1668.56	1364.8	428.883	1738.62	1144.75	424.063	1768.46	1083.62	451.715	1720.25	971.461	430.214	1728.42	866.505	470.222	1787.96	868.85	482.065	1772.74	773.993
564	0	252.318	1513.85	1599.39	152.128	1516.38	1593.17	271.723	1685.55	1579.97	159.53	1697.93	1573.46	206.341	1705.29	1411.35	221.069	1759.7	1198.48	219.533	1574.69	1344.37	219.921	1520.28	1208.47	126.036	1769.78	1245.95	386.916	1654.34	1366.75	429.698	1722.51	1146.02	425.006	1751.92	1084.63	451.69	1702.08	972.872	429.9	1709.02	868.007	470.393	1768.24	869.38	481.923	1751.23	774.83
565	0	252.381	1500.89	1601.82	152.211	1504.17	1595.7	273.024	1672.37	1581.82	160.919	1685.58	1575.37	207.342	1692.23	1413.59	222.097	1746.65	1201	219.761	1561.67	1346.48	219.644	1507.42	1210.43	127.196	1757.3	1248.48	387.517	1640.17	1368.84	430.502	1706.26	1147.38	425.976	1735.19	1085.72	451.589	1683.57	974.43	429.495	1689.17	869.662	470.56	1748	869.995	481.705	1729	775.8
566	0	252.38	1487.91	1604.19	152.232	1491.94	1598.17	274.227	1659.19	1583.75	162.214	1673.2	1577.4	208.278	1679.28	1415.9	223.171	1733.88	1203.57	219.893	1548.79	1348.63	219.254	1494.74	1212.42	128.379	1745.01	1251.04	388.038	1626.09	1371.03	431.295	1689.86	1148.83	426.973	1718.26	1086.86	451.41	1664.74	976.116	428.994	1668.91	871.454	470.718	1727.25	870.689	481.405	1706.12	776.905
567	0	252.312	1474.93	1606.48	152.192	1479.68	1600.57	275.332	1645.99	1585.75	163.415	1660.8	1579.51	209.153	1666.45	1418.24	224.299	1721.36	1206.16	219.939	1536.03	1350.78	218.768	1482.23	1214.42	129.587	1732.9	1253.62	388.484	1612.09	1373.3	432.076	1673.34	1150.33	427.993	1701.15	1088.05	451.152	1645.61	977.914	428.396	1648.28	873.367	470.862	1706.05	871.461	481.021	1682.63	778.149
568	0	252.181	1461.95	1608.65	152.09	1467.4	1602.85	276.339	1632.81	1587.78	164.522	1648.4	1581.66	209.968	1653.72	1420.57	225.486	1709.07	1208.72	219.909	1523.39	1352.92	218.208	1469.86	1216.41	130.821	1720.94	1256.15	388.863	1598.18	1375.61	432.843	1656.7	1151.85	429.034	1683.88	1089.24	450.814	1626.2	979.806	427.7	1627.33	875.385	470.985	1684.43	872.307	480.549	1658.59	779.534
569	0	251.987	1448.98	1610.68	151.927	1455.11	1605.01	277.25	1619.63	1589.81	165.537	1635.99	1583.83	210.728	1641.1	1422.86	226.727	1696.98	1211.21	219.818	1510.87	1355.01	217.599	1457.62	1218.38	132.076	1709.12	1258.62	389.182	1584.39	1377.94	433.594	1639.95	1153.37	430.089	1666.44	1090.43	450.398	1606.56	981.771	426.909	1606.08	877.492	471.078	1662.44	873.221	479.985	1634.08	781.062
570	0	251.735	1436.02	1612.57	151.708	1442.82	1607.01	278.069	1606.49	1591.81	166.463	1623.59	1585.97	211.436	1628.58	1425.07	228.012	1685.03	1213.6	219.68	1498.45	1357.02	216.965	1445.49	1220.29	133.346	1697.42	1260.99	389.449	1570.7	1380.23	434.327	1623.1	1154.87	431.153	1648.86	1091.59	449.906	1586.7	983.792	426.026	1584.58	879.672	471.133	1640.1	874.198	479.328	1609.13	782.732
571	0	251.428	1423.09	1614.29	151.437	1430.53	1608.84	278.8	1593.37	1593.75	167.304	1611.2	1588.05	212.096	1616.16	1427.18	229.324	1673.18	1215.86	219.508	1486.12	1358.93	216.33	1433.45	1222.12	134.623	1685.81	1263.22	389.671	1557.13	1382.47	435.04	1606.17	1156.32	432.219	1631.16	1092.69	449.341	1566.66	985.848	425.055	1562.87	881.908	471.141	1617.46	875.228	478.576	1583.83	784.54
572	0	251.074	1410.19	1615.82	151.12	1418.24	1610.48	279.449	1580.28	1595.58	168.065	1598.83	1590.03	212.713	1603.81	1429.15	230.642	1661.41	1217.96	219.316	1473.88	1360.71	215.715	1421.47	1223.85	135.896	1674.27	1265.3	389.855	1543.68	1384.61	435.729	1589.17	1157.7	433.281	1613.33	1093.72	448.708	1546.47	987.919	424.004	1540.98	884.184	471.093	1594.56	876.302	477.728	1558.24	786.478
573	0	250.679	1397.32	1617.15	150.762	1405.97	1611.91	280.022	1567.24	1597.29	168.751	1586.48	1591.87	213.289	1591.53	1430.96	231.943	1649.66	1219.87	219.116	1461.7	1362.33	215.139	1409.53	1225.44	137.152	1662.79	1267.18	390.009	1530.34	1386.62	436.393	1572.12	1158.98	434.331	1595.41	1094.66	448.014	1526.14	989.986	422.879	1518.93	886.483	470.979	1571.44	877.408	476.781	1532.41	788.538
574	0	250.251	1384.48	1618.27	150.371	1393.7	1613.12	280.525	1554.25	1598.83	169.367	1574.15	1593.54	213.829	1579.31	1432.57	233.203	1637.91	1221.58	218.919	1449.59	1363.77	214.616	1397.63	1226.86	138.38	1651.33	1268.87	390.137	1517.1	1388.47	437.029	1555.02	1160.13	435.363	1577.4	1095.48	447.264	1505.72	992.028	421.688	1496.77	888.789	470.794	1548.13	878.532	475.735	1506.4	790.707
575	0	249.797	1371.68	1619.17	149.955	1381.45	1614.1	280.965	1541.29	1600.19	169.919	1561.84	1595.01	214.334	1567.13	1433.96	234.402	1626.14	1223.05	218.735	1437.51	1365	214.155	1385.74	1228.08	139.568	1639.89	1270.33	390.246	1503.97	1390.12	437.635	1537.9	1161.15	436.369	1559.32	1096.16	446.466	1485.24	994.027	420.439	1474.52	891.087	470.53	1524.68	879.659	474.589	1480.28	792.971
576	0	249.326	1358.92	1619.83	149.523	1369.2	1614.83	281.347	1528.39	1601.33	170.411	1549.55	1596.26	214.806	1554.98	1435.12	235.521	1614.32	1224.29	218.569	1425.46	1365.99	213.76	1373.85	1229.07	140.702	1628.43	1271.56	390.337	1490.94	1391.55	438.208	1520.77	1162	437.343	1541.19	1096.68	445.627	1464.71	995.965	419.139	1452.21	893.362	470.182	1501.12	880.777	473.344	1454.09	795.314
577	0	248.846	1346.2	1620.24	149.081	1356.96	1615.31	281.678	1515.52	1602.23	170.847	1537.27	1597.25	215.245	1542.84	1436.02	236.546	1602.46	1225.26	218.425	1413.43	1366.73	213.434	1361.98	1229.81	141.772	1616.96	1272.53	390.412	1477.99	1392.72	438.747	1503.64	1162.67	438.278	1523.02	1097.04	444.753	1444.17	997.824	417.797	1429.86	895.599	469.746	1477.5	881.869	471.999	1427.89	797.72
578	0	248.367	1333.51	1620.41	148.638	1344.72	1615.52	281.962	1502.7	1602.87	171.231	1525	1597.97	215.65	1530.71	1436.66	237.466	1590.55	1225.97	218.306	1401.41	1367.2	213.172	1350.09	1230.27	142.765	1605.45	1273.25	390.473	1465.11	1393.61	439.251	1486.55	1163.15	439.169	1504.83	1097.21	443.852	1423.64	999.589	416.42	1407.5	897.786	469.22	1453.83	882.924	470.556	1401.73	800.173
579	0	247.895	1320.85	1620.33	148.202	1332.47	1615.48	282.202	1489.92	1603.23	171.565	1512.74	1598.41	216.019	1518.57	1437.01	238.274	1578.59	1226.4	218.21	1389.39	1367.39	212.969	1338.21	1230.43	143.671	1593.9	1273.7	390.518	1452.3	1394.21	439.716	1469.49	1163.43	440.01	1486.64	1097.19	442.93	1403.16	1001.25	415.013	1385.16	899.911	468.605	1430.17	883.93	469.017	1375.64	802.656
580	0	247.439	1308.21	1619.98	147.779	1320.21	1615.16	282.401	1477.17	1603.32	171.85	1500.46	1598.55	216.349	1506.41	1437.09	238.967	1566.61	1226.55	218.135	1377.34	1367.29	212.817	1326.31	1230.29	144.48	1582.29	1273.88	390.544	1439.55	1394.5	440.141	1452.49	1163.49	440.796	1468.47	1096.96	441.991	1382.73	1002.79	413.582	1362.87	901.965	467.902	1406.54	884.878	467.385	1349.68	805.157
581	0	247.005	1295.6	1619.38	147.375	1307.93	1614.59	282.56	1464.45	1603.11	172.085	1488.17	1598.4	216.636	1494.22	1436.87	239.543	1554.61	1226.42	218.076	1365.28	1366.9	212.705	1314.4	1229.84	145.183	1570.61	1273.79	390.55	1426.84	1394.46	440.523	1435.56	1163.33	441.522	1450.33	1096.53	441.04	1362.4	1004.2	412.133	1340.65	903.94	467.113	1382.98	885.761	465.664	1323.87	807.661
582	0	246.597	1282.99	1618.51	146.995	1295.62	1613.74	282.678	1451.75	1602.62	172.268	1475.86	1597.94	216.875	1482	1436.36	240.002	1542.59	1226.01	218.026	1353.18	1366.21	212.623	1302.48	1229.07	145.77	1558.85	1273.42	390.529	1414.18	1394.11	440.861	1418.72	1162.95	442.184	1432.25	1095.89	440.08	1342.18	1005.47	410.668	1318.53	905.828	466.243	1359.53	886.575	463.86	1298.26	810.158
583	0	246.221	1270.4	1617.39	146.641	1283.27	1612.65	282.753	1439.07	1601.83	172.396	1463.51	1597.2	217.061	1469.74	1435.57	240.343	1530.58	1225.32	217.978	1341.04	1365.24	212.558	1290.52	1228.01	146.236	1547.01	1272.78	390.477	1401.54	1393.44	441.149	1401.98	1162.35	442.777	1414.24	1095.04	439.114	1322.09	1006.6	409.192	1296.53	907.626	465.296	1336.2	887.318	461.98	1272.87	812.639
584	0	245.879	1257.8	1616.02	146.318	1270.88	1611.3	282.782	1426.41	1600.76	172.464	1451.12	1596.18	217.186	1457.44	1434.5	240.567	1518.57	1224.36	217.923	1328.86	1363.99	212.499	1278.53	1226.65	146.574	1535.08	1271.87	390.389	1388.92	1392.45	441.386	1385.36	1161.54	443.298	1396.33	1093.99	438.144	1302.17	1007.59	407.709	1274.68	909.329	464.279	1313.04	887.988	460.032	1247.74	815.097
585	0	245.573	1245.2	1614.41	146.024	1258.42	1609.71	282.759	1413.76	1599.43	172.467	1438.68	1594.88	217.245	1445.08	1433.16	240.673	1506.56	1223.13	217.849	1316.62	1362.47	212.433	1266.49	1225.03	146.779	1523.04	1270.7	390.258	1376.32	1391.16	441.567	1368.87	1160.51	443.743	1378.53	1092.75	437.17	1282.42	1008.43	406.219	1253.01	910.935	463.199	1290.08	888.588	458.025	1222.9	817.527
586	0	245.302	1232.59	1612.57	145.76	1245.9	1607.9	282.68	1401.11	1597.84	172.399	1426.19	1593.35	217.231	1432.68	1431.56	240.66	1494.56	1221.65	217.747	1304.31	1360.71	212.347	1254.38	1223.16	146.851	1510.9	1269.28	390.078	1363.73	1389.58	441.69	1352.53	1159.27	444.109	1360.87	1091.31	436.194	1262.87	1009.12	404.728	1231.54	912.442	462.061	1267.34	889.12	455.972	1198.38	819.922
587	0	245.064	1219.96	1610.52	145.524	1233.31	1605.88	282.538	1388.47	1596.01	172.252	1413.63	1591.58	217.138	1420.22	1429.72	240.528	1482.53	1219.92	217.606	1291.93	1358.73	212.228	1242.18	1221.08	146.79	1498.65	1267.6	389.843	1351.14	1387.74	441.75	1336.33	1157.84	444.393	1343.35	1089.7	435.217	1243.55	1009.67	403.236	1210.31	913.849	460.874	1244.86	889.586	453.883	1174.2	822.28
588	0	244.857	1207.31	1608.27	145.312	1220.63	1603.67	282.326	1375.82	1593.97	172.02	1400.99	1589.61	216.959	1407.7	1427.66	240.278	1470.48	1217.94	217.414	1279.48	1356.55	212.064	1229.89	1218.81	146.597	1486.27	1265.68	389.547	1338.54	1385.65	441.744	1320.31	1156.23	444.593	1326.02	1087.93	434.238	1224.46	1010.07	401.746	1189.33	915.156	459.643	1222.67	889.991	451.772	1150.39	824.594
589	0	244.676	1194.64	1605.84	145.119	1207.88	1601.3	282.036	1363.18	1591.75	171.696	1388.28	1587.46	216.69	1395.12	1425.39	239.911	1458.38	1215.75	217.161	1266.95	1354.19	211.842	1217.48	1216.4	146.277	1473.77	1263.54	389.184	1325.93	1383.35	441.669	1304.46	1154.46	444.707	1308.87	1086.02	433.26	1205.64	1010.34	400.262	1168.63	916.36	458.377	1200.79	890.335	449.652	1126.98	826.861
590	0	244.514	1181.93	1603.26	144.94	1195.03	1598.78	281.663	1350.52	1589.36	171.274	1375.49	1585.16	216.325	1382.48	1422.94	239.43	1446.22	1213.35	216.837	1254.32	1351.7	211.55	1204.94	1213.86	145.837	1461.14	1261.19	388.75	1313.29	1380.87	441.524	1288.8	1152.54	444.732	1291.94	1083.97	432.283	1187.1	1010.46	398.786	1148.24	917.462	457.079	1179.26	890.619	447.538	1104	829.073
591	0	244.365	1169.19	1600.56	144.767	1182.09	1596.15	281.2	1337.85	1586.83	170.748	1362.62	1582.74	215.861	1369.76	1420.32	238.838	1433.96	1210.75	216.432	1241.6	1349.09	211.178	1192.26	1211.24	145.286	1448.38	1258.65	388.24	1300.61	1378.24	441.305	1273.32	1150.48	444.669	1275.23	1081.81	431.306	1168.86	1010.46	397.321	1128.18	918.46	455.757	1158.11	890.842	445.442	1081.47	831.222
592	0	244.222	1156.41	1597.75	144.594	1169.06	1593.43	280.642	1325.17	1584.21	170.114	1349.66	1580.23	215.296	1356.98	1417.58	238.143	1421.58	1207.99	215.938	1228.77	1346.39	210.716	1179.41	1208.58	144.634	1435.48	1255.94	387.652	1287.89	1375.49	441.012	1258.05	1148.32	444.515	1258.77	1079.57	430.332	1150.93	1010.32	395.87	1108.48	919.351	454.413	1137.37	891.002	443.378	1059.42	833.299
593	0	244.075	1143.59	1594.88	144.413	1155.93	1590.65	279.985	1312.47	1581.51	169.37	1336.62	1577.65	214.628	1344.12	1414.74	237.351	1409.06	1205.08	215.35	1215.84	1343.66	210.155	1166.41	1205.9	143.892	1422.43	1253.08	386.981	1275.11	1372.65	440.642	1242.97	1146.07	444.271	1242.56	1077.25	429.361	1133.33	1010.07	394.436	1089.15	920.134	453.052	1117.06	891.093	441.361	1037.87	835.293
594	0	243.917	1130.73	1591.98	144.216	1142.71	1587.86	279.227	1299.75	1578.78	168.514	1323.5	1575.05	213.858	1331.18	1411.83	236.472	1396.38	1202.05	214.662	1202.79	1340.9	209.491	1153.23	1203.24	143.071	1409.25	1250.1	386.228	1262.26	1369.78	440.196	1228.1	1143.76	443.938	1226.62	1074.88	428.393	1116.07	1009.69	393.024	1070.23	920.806	451.676	1097.22	891.11	439.401	1016.85	837.188
595	0	243.74	1117.82	1589.08	143.996	1129.4	1585.07	278.366	1287	1576.04	167.548	1310.29	1572.46	212.988	1318.16	1408.88	235.516	1383.52	1198.93	213.874	1189.63	1338.17	208.718	1139.88	1200.63	142.184	1395.91	1247.03	385.392	1249.33	1366.9	439.674	1213.43	1141.41	443.515	1210.96	1072.5	427.428	1099.16	1009.21	391.635	1051.72	921.362	450.288	1077.88	891.046	437.51	996.394	838.97
596	0	243.536	1104.86	1586.22	143.746	1116.01	1582.33	277.404	1274.22	1573.32	166.474	1296.99	1569.9	212.02	1305.05	1405.94	234.493	1370.45	1195.76	212.985	1176.35	1335.49	207.837	1126.35	1198.1	141.241	1382.44	1243.9	384.474	1236.31	1364.05	439.076	1198.96	1139.06	443.004	1195.58	1070.11	426.468	1082.62	1008.63	390.273	1033.66	921.8	448.891	1059.05	890.894	435.697	976.517	840.621
597	0	243.299	1091.86	1583.43	143.459	1102.53	1579.67	276.344	1261.4	1570.68	165.296	1283.62	1567.41	210.961	1291.86	1403.03	233.416	1357.17	1192.57	211.999	1162.96	1332.89	206.849	1112.64	1195.67	140.251	1368.82	1240.76	383.479	1223.19	1361.28	438.402	1184.69	1136.73	442.408	1180.49	1067.76	425.511	1066.45	1007.96	388.941	1016.06	922.117	447.486	1040.78	890.646	433.971	957.246	842.123
598	0	243.024	1078.81	1580.75	143.133	1088.97	1577.13	275.191	1248.55	1568.13	164.022	1270.17	1565.03	209.818	1278.57	1400.21	232.294	1343.66	1189.4	210.922	1149.45	1330.41	205.76	1098.76	1193.39	139.222	1355.06	1237.64	382.411	1209.97	1358.62	437.656	1170.6	1134.46	441.727	1165.69	1065.47	424.558	1050.65	1007.2	387.642	998.936	922.309	446.076	1023.09	890.296	432.339	938.605	843.457
599	0	242.707	1065.71	1578.22	142.764	1075.34	1574.73	273.951	1235.65	1565.71	162.66	1256.65	1562.78	208.598	1265.2	1397.49	231.137	1329.92	1186.31	209.765	1135.84	1328.09	204.58	1084.71	1191.27	138.162	1341.17	1234.58	381.278	1196.64	1356.1	436.839	1156.69	1132.27	440.966	1151.18	1063.26	423.609	1035.24	1006.38	386.379	982.31	922.373	444.666	1005.99	889.841	430.805	920.619	844.604
600	0	242.347	1052.56	1575.86	142.35	1061.65	1572.52	272.634	1222.7	1563.47	161.221	1243.06	1560.7	207.312	1251.74	1394.94	229.956	1315.94	1183.34	208.538	1122.12	1325.95	203.324	1070.51	1189.34	137.075	1327.16	1231.63	380.089	1183.21	1353.77	435.953	1142.95	1130.2	440.127	1136.95	1061.18	422.662	1020.22	1005.5	385.154	966.196	922.31	443.259	989.508	889.279	429.372	903.309	845.546
601	0	241.943	1039.36	1573.72	141.894	1047.89	1570.51	271.25	1209.7	1561.43	159.717	1229.41	1558.83	205.972	1238.21	1392.58	228.756	1301.75	1180.53	207.259	1108.32	1324.02	202.008	1056.17	1187.63	135.964	1313.03	1228.84	378.854	1169.68	1351.67	435.003	1129.38	1128.28	439.215	1123	1059.24	421.717	1005.59	1004.58	383.971	950.607	922.119	441.861	973.666	888.612	428.044	886.698	846.264
602	0	241.5	1026.11	1571.81	141.397	1034.07	1568.73	269.812	1196.65	1559.62	158.162	1215.7	1557.19	204.591	1224.61	1390.46	227.544	1287.35	1177.96	205.944	1094.44	1322.33	200.655	1041.72	1186.16	134.833	1298.81	1226.24	377.587	1156.07	1349.82	433.992	1115.95	1126.55	438.232	1109.33	1057.49	420.772	991.338	1003.64	382.83	935.557	921.802	440.477	958.478	887.847	426.82	870.805	846.746
603	0	241.021	1012.81	1570.17	140.866	1020.21	1567.22	268.334	1183.54	1558.09	156.571	1201.93	1555.8	203.183	1210.95	1388.6	226.324	1272.77	1175.67	204.614	1080.51	1320.91	199.292	1027.18	1184.94	133.682	1284.51	1223.9	376.302	1142.39	1348.26	432.924	1102.67	1125.04	437.185	1095.92	1055.94	419.828	977.479	1002.69	381.736	921.056	921.366	439.116	943.953	886.993	425.701	855.65	846.978
604	0	240.513	999.474	1568.81	140.305	1006.31	1565.98	266.832	1170.38	1556.85	154.96	1188.12	1554.71	201.764	1197.24	1387.05	225.098	1258.03	1173.7	203.29	1066.54	1319.77	197.944	1012.58	1184	132.513	1270.17	1221.84	375.013	1128.66	1347.01	431.807	1089.52	1123.77	436.079	1082.76	1054.64	418.883	964.004	1001.76	380.69	907.111	920.816	437.787	930.1	886.066	424.684	841.248	846.952
605	0	239.984	986.094	1567.76	139.726	992.385	1565.03	265.32	1157.17	1555.93	153.346	1174.27	1553.93	200.349	1183.51	1385.83	223.87	1243.18	1172.11	201.996	1052.56	1318.94	196.642	997.965	1183.35	131.328	1255.79	1220.12	373.738	1114.91	1346.09	430.647	1076.5	1122.77	434.92	1069.86	1053.6	417.939	950.91	1000.86	379.696	893.729	920.164	436.501	916.921	885.083	423.767	827.613	846.665
606	0	239.445	972.682	1567.02	139.136	978.435	1564.39	263.817	1143.91	1555.36	151.747	1160.4	1553.47	198.954	1169.78	1384.96	222.641	1228.26	1170.94	200.753	1038.59	1318.43	195.414	983.363	1183.01	130.129	1241.41	1218.77	372.493	1101.17	1345.53	429.451	1063.61	1122.07	433.716	1057.19	1052.85	416.996	938.195	1000.01	378.756	880.913	919.421	435.269	904.412	884.069	422.949	814.757	846.115
607	0	238.907	959.242	1566.61	138.549	964.473	1564.06	262.339	1130.62	1555.15	150.18	1146.51	1553.37	197.595	1156.05	1384.47	221.414	1213.33	1170.21	199.583	1024.65	1318.26	194.288	968.818	1182.97	128.92	1227.06	1217.82	371.295	1087.47	1345.34	428.229	1050.85	1121.67	432.474	1044.76	1052.4	416.058	925.854	999.242	377.876	868.662	918.603	434.104	892.567	883.049	422.225	802.685	845.308
608	0	238.382	945.784	1566.53	137.976	950.512	1564.03	260.902	1117.29	1555.32	148.662	1132.61	1553.62	196.288	1142.36	1384.36	220.194	1198.44	1169.96	198.506	1010.78	1318.42	193.288	954.372	1183.25	127.705	1212.76	1217.3	370.16	1073.84	1345.51	426.992	1038.22	1121.6	431.202	1032.55	1052.27	415.129	913.883	998.564	377.058	856.976	917.728	433.019	881.372	882.051	421.593	791.401	844.255
609	0	237.884	932.318	1566.77	137.431	936.561	1564.31	259.525	1103.94	1555.88	147.21	1118.72	1554.24	195.045	1128.73	1384.65	218.984	1183.66	1170.17	197.541	996.99	1318.94	192.436	940.063	1183.84	126.49	1198.56	1217.21	369.102	1060.31	1346.06	425.75	1025.72	1121.84	429.911	1020.58	1052.46	414.215	902.278	997.996	376.308	845.847	916.815	432.028	870.81	881.104	421.049	780.902	842.971
610	0	237.426	918.852	1567.34	136.927	922.632	1564.9	258.22	1090.58	1556.83	145.838	1104.84	1555.23	193.88	1115.18	1385.33	217.791	1169.03	1170.86	196.701	983.314	1319.79	191.75	925.929	1184.74	125.278	1184.46	1217.57	368.135	1046.92	1346.97	424.517	1013.39	1122.41	428.609	1008.83	1052.98	413.323	891.036	997.551	375.633	835.267	915.883	431.145	860.859	880.237	420.592	771.181	841.476
611	0	237.021	905.398	1568.21	136.478	908.737	1565.77	257.003	1077.21	1558.15	144.561	1090.99	1556.58	192.803	1101.72	1386.39	216.622	1154.62	1172	195.997	969.772	1320.98	191.239	911.999	1185.96	124.076	1170.5	1218.38	367.269	1033.71	1348.22	423.304	1001.22	1123.3	427.305	997.316	1053.81	412.463	880.153	997.243	375.038	825.224	914.953	430.383	851.494	879.478	420.22	762.224	839.794
612	0	236.681	891.969	1569.37	136.097	894.886	1566.9	255.885	1063.87	1559.85	143.389	1077.18	1558.29	191.82	1088.39	1387.82	215.482	1140.48	1173.57	195.437	956.381	1322.5	190.911	898.298	1187.48	122.888	1156.7	1219.61	366.512	1020.69	1349.81	422.124	989.234	1124.48	426.011	986.038	1054.95	411.646	869.627	997.078	374.531	815.705	914.046	429.754	842.686	878.853	419.932	754.015	837.955
613	0	236.419	878.575	1570.8	135.795	881.09	1568.29	254.877	1050.55	1561.91	142.333	1063.42	1560.34	190.938	1075.2	1389.61	214.378	1126.64	1175.52	195.024	943.158	1324.33	190.764	884.843	1189.29	121.718	1143.07	1221.26	365.871	1007.9	1351.7	420.99	977.462	1125.95	424.734	975.006	1056.37	410.884	859.457	997.06	374.12	806.691	913.181	429.27	834.405	878.382	419.73	746.529	835.99
614	0	236.244	865.229	1572.47	135.583	867.359	1569.91	253.986	1037.27	1564.3	141.4	1049.72	1562.71	190.159	1062.15	1391.72	213.314	1113.14	1177.82	194.756	930.114	1326.46	190.794	871.643	1191.38	120.568	1129.61	1223.29	365.347	995.345	1353.86	419.912	965.923	1127.67	423.484	964.229	1058.06	410.189	849.64	997.191	373.813	798.165	912.374	428.939	826.623	878.082	419.617	739.74	833.935
615	0	236.165	851.941	1574.35	135.47	853.703	1571.73	253.218	1024.04	1566.98	140.593	1036.09	1565.37	189.482	1049.26	1394.12	212.296	1099.99	1180.41	194.628	917.256	1328.85	190.986	858.698	1193.73	119.438	1116.35	1225.67	364.939	983.046	1356.26	418.9	954.637	1129.61	422.269	953.719	1059.98	409.576	840.177	997.465	373.617	790.105	911.64	428.768	819.308	877.965	419.596	733.615	831.823
616	0	236.19	838.721	1576.41	135.462	840.129	1573.73	252.574	1010.87	1569.93	139.915	1022.54	1568.29	188.904	1036.54	1396.77	211.326	1087.19	1183.23	194.631	904.587	1331.48	191.324	846.001	1196.34	118.33	1103.26	1228.36	364.642	971.006	1358.86	417.961	943.629	1131.75	421.097	943.488	1062.11	409.057	831.068	997.874	373.542	782.49	910.99	428.76	812.433	878.035	419.675	728.117	829.69
617	0	236.321	825.579	1578.62	135.566	826.644	1575.86	252.057	997.783	1573.1	139.365	1009.08	1571.44	188.419	1023.98	1399.64	210.403	1074.72	1186.25	194.751	892.104	1334.32	191.783	833.538	1199.16	117.242	1090.36	1231.31	364.449	959.224	1361.61	417.1	932.917	1134.05	419.973	933.55	1064.41	408.645	822.31	998.403	373.593	775.296	910.43	428.914	805.973	878.288	419.861	723.207	827.57
618	0	236.563	812.523	1580.94	135.783	813.253	1578.11	251.662	984.776	1576.44	138.941	995.7	1574.76	188.021	1011.58	1402.68	209.526	1062.55	1189.4	194.975	879.802	1337.33	192.338	821.289	1202.18	116.174	1077.62	1234.48	364.349	947.689	1364.48	416.32	922.519	1136.45	418.902	923.916	1066.84	408.35	813.905	999.036	373.779	768.5	909.961	429.228	799.902	878.716	420.163	718.843	825.492
619	0	236.913	799.558	1583.32	136.113	799.959	1580.43	251.386	971.859	1579.9	138.636	982.416	1578.21	187.699	999.338	1405.84	208.689	1050.66	1192.65	195.284	867.669	1340.46	192.958	809.229	1205.35	115.123	1065.04	1237.8	364.329	936.389	1367.42	415.621	912.447	1138.94	417.889	914.597	1069.36	408.181	805.852	999.751	374.103	762.076	909.58	429.695	794.2	879.3	420.589	714.98	823.482
620	0	237.369	786.688	1585.74	136.553	786.764	1582.79	251.223	959.035	1583.43	138.444	969.227	1581.74	187.442	987.241	1409.06	207.884	1038.99	1195.93	195.661	855.693	1343.67	193.614	797.329	1208.63	114.085	1052.59	1241.21	364.374	925.302	1370.37	415	902.711	1141.45	416.934	905.601	1071.93	408.146	798.147	1000.52	374.57	756.001	909.279	430.304	788.848	880.016	421.149	711.571	821.559
621	0	237.927	773.916	1588.14	137.098	773.669	1585.14	251.162	946.308	1586.96	138.355	956.131	1585.3	187.238	975.276	1412.31	207.1	1027.5	1199.19	196.086	843.855	1346.91	194.277	785.558	1211.99	113.057	1040.26	1244.67	364.469	914.406	1373.3	414.453	893.315	1143.96	416.037	896.934	1074.51	408.25	790.789	1001.32	375.182	750.251	909.041	431.041	783.83	880.831	421.851	708.569	819.736
622	0	238.578	761.241	1590.48	137.742	760.672	1587.46	251.195	933.677	1590.45	138.358	943.127	1588.83	187.074	963.425	1415.52	206.325	1016.13	1202.4	196.543	832.139	1350.12	194.923	773.885	1215.36	112.035	1028.01	1248.1	364.597	903.673	1376.15	413.972	884.257	1146.41	415.198	888.595	1077.05	408.494	783.77	1002.11	375.939	744.8	908.849	431.89	779.13	881.709	422.702	705.926	818.018
623	0	239.314	748.661	1592.73	138.475	747.768	1589.71	251.309	921.141	1593.82	138.442	930.211	1592.28	186.937	951.671	1418.64	205.545	1004.86	1205.5	197.013	820.522	1353.27	195.531	762.281	1218.68	111.014	1015.84	1251.46	364.744	893.074	1378.88	413.55	875.53	1148.77	414.412	880.581	1079.53	408.878	777.085	1002.86	376.839	739.625	908.677	432.831	774.737	882.606	423.707	703.595	816.402
624	0	240.124	736.171	1594.84	139.287	734.953	1591.83	251.494	908.696	1597.04	138.595	917.377	1595.59	186.815	939.995	1421.63	204.746	993.617	1208.45	197.482	808.985	1356.28	196.085	750.719	1221.91	109.99	1003.72	1254.67	364.894	882.58	1381.45	413.176	867.122	1151	413.675	872.883	1081.88	409.398	770.721	1003.54	377.877	734.703	908.5	433.845	770.636	883.478	424.868	701.529	814.879
625	0	240.996	723.768	1596.78	140.164	722.221	1593.81	251.735	896.335	1600.04	138.803	904.62	1598.71	186.695	928.377	1424.43	203.917	982.384	1211.19	197.937	797.507	1359.11	196.578	739.177	1224.98	108.959	991.631	1257.7	365.035	872.163	1383.81	412.84	859.016	1153.06	412.98	865.486	1084.09	410.048	764.666	1004.12	379.046	730.013	908.285	434.907	766.817	884.279	426.183	699.685	813.433
626	0	241.918	711.441	1598.5	141.095	709.563	1595.59	252.022	884.049	1602.78	139.055	891.93	1601.59	186.568	916.796	1427.01	203.047	971.131	1213.69	198.369	786.067	1361.71	197.006	727.639	1227.82	107.919	979.558	1260.48	365.159	861.793	1385.92	412.531	851.187	1154.92	412.32	858.37	1086.11	410.818	758.904	1004.55	380.337	725.532	908.001	435.995	763.267	884.962	427.651	698.024	812.041
627	0	242.876	699.183	1599.99	142.067	696.969	1597.16	252.341	871.831	1605.22	139.338	879.301	1604.2	186.426	905.234	1429.32	202.132	959.838	1215.91	198.77	774.647	1364.04	197.372	716.094	1230.39	106.87	967.49	1262.98	365.256	851.446	1387.74	412.238	843.609	1156.54	411.686	851.508	1087.91	411.697	753.415	1004.82	381.739	721.242	907.618	437.085	759.974	885.485	429.262	696.509	810.68
628	0	243.858	686.982	1601.2	143.065	684.431	1598.48	252.681	859.669	1607.33	139.642	866.72	1606.48	186.263	893.673	1431.33	201.17	948.494	1217.82	199.137	763.228	1366.05	197.684	704.54	1232.63	105.816	955.418	1265.16	365.324	841.097	1389.27	411.951	836.25	1157.91	411.071	844.871	1089.47	412.67	748.177	1004.9	383.237	717.124	907.105	438.153	756.923	885.81	431.007	695.108	809.323
629	0	244.853	674.829	1602.12	144.079	671.938	1599.52	253.032	847.551	1609.07	139.956	854.18	1608.42	186.076	882.095	1433.01	200.165	937.098	1219.4	199.467	751.795	1367.72	197.953	692.975	1234.49	104.761	943.337	1266.99	365.362	830.724	1390.46	411.662	829.074	1159.01	410.465	838.424	1090.77	413.723	743.164	1004.75	384.818	713.159	906.434	439.176	754.101	885.906	432.873	693.796	807.941
630	0	245.849	662.71	1602.74	145.096	659.478	1600.27	253.386	835.464	1610.42	140.274	841.669	1609.99	185.866	870.487	1434.35	199.125	925.653	1220.61	199.763	740.335	1369.01	198.192	681.405	1235.93	103.714	931.245	1268.46	365.37	820.309	1391.3	411.362	822.043	1159.83	409.862	832.127	1091.8	414.837	738.349	1004.37	386.463	709.331	905.581	440.134	751.489	885.751	434.844	692.551	806.51
631	0	246.837	650.614	1603.03	146.106	647.04	1600.7	253.735	823.397	1611.38	140.588	829.177	1611.16	185.636	858.834	1435.33	198.064	914.168	1221.46	200.029	728.836	1369.91	198.416	669.837	1236.92	102.688	919.144	1269.54	365.354	809.833	1391.79	411.046	815.115	1160.34	409.253	825.94	1092.54	415.997	733.699	1003.75	388.157	705.623	904.527	441.006	749.068	885.328	436.901	691.359	805.007
632	0	247.809	638.528	1602.99	147.1	634.615	1600.82	254.076	811.336	1611.94	140.895	816.694	1611.94	185.391	847.128	1435.95	197.001	902.657	1221.95	200.271	717.287	1370.4	198.641	658.278	1237.45	101.698	907.038	1270.24	365.322	799.283	1391.92	410.711	808.247	1160.57	408.633	819.82	1092.99	417.184	729.184	1002.87	389.882	702.017	903.259	441.778	746.815	884.635	439.024	690.208	803.413
633	0	248.759	626.442	1602.62	148.072	622.192	1600.6	254.406	799.269	1612.1	141.192	804.211	1612.31	185.14	835.359	1436.19	195.957	891.136	1222.07	200.498	705.683	1370.48	198.88	646.735	1237.51	100.762	894.931	1270.56	365.282	788.644	1391.71	410.353	801.398	1160.5	407.999	813.721	1093.16	418.382	724.767	1001.73	391.62	698.496	901.769	442.436	744.705	883.675	441.193	689.091	801.714
634	0	249.683	614.344	1601.93	149.016	609.762	1600.05	254.724	787.184	1611.88	141.479	791.72	1612.29	184.893	823.521	1436.08	194.958	879.619	1221.85	200.718	694.017	1370.16	199.149	635.212	1237.11	99.8988	882.829	1270.51	365.246	777.905	1391.15	409.976	794.523	1160.15	407.348	807.599	1093.06	419.576	720.413	1000.35	393.356	695.041	900.054	442.972	742.708	882.462	443.385	688.004	799.902
635	0	250.578	602.223	1600.92	149.93	597.318	1599.18	255.032	775.072	1611.28	141.76	779.213	1611.88	184.663	811.613	1435.61	194.031	868.122	1221.3	200.943	682.285	1369.45	199.459	623.708	1236.25	99.129	870.738	1270.1	365.227	767.057	1390.27	409.581	787.579	1159.53	406.681	801.411	1092.68	420.753	716.083	998.735	395.075	691.63	898.12	443.381	740.792	881.017	445.577	686.946	797.975
636	0	251.445	590.072	1599.61	150.812	584.853	1598	255.336	762.923	1610.33	142.037	766.685	1611.11	184.464	799.631	1434.81	193.204	856.657	1220.44	201.185	670.484	1368.37	199.822	612.221	1234.97	98.4727	858.661	1269.36	365.238	756.091	1389.08	409.174	780.525	1158.66	406.001	795.112	1092.07	421.902	711.738	996.893	396.765	688.242	895.976	443.664	738.92	879.369	447.747	685.916	795.935
637	0	252.284	577.881	1598.02	151.663	572.363	1596.52	255.64	750.728	1609.07	142.318	754.131	1609.99	184.312	787.577	1433.7	192.503	845.229	1219.32	201.456	658.612	1366.95	200.248	600.742	1233.31	97.9489	846.601	1268.3	365.293	745.001	1387.63	408.764	773.322	1157.56	405.313	788.664	1091.22	423.015	707.338	994.846	398.413	684.852	893.639	443.826	737.05	877.551	449.872	684.909	793.79
638	0	253.099	565.646	1596.17	152.487	559.842	1594.76	255.953	738.483	1607.51	142.61	741.549	1608.55	184.221	775.453	1432.3	191.956	833.841	1217.95	201.769	646.669	1365.22	200.744	589.256	1231.3	97.5748	834.555	1266.96	365.405	733.781	1385.92	408.361	765.932	1156.25	404.625	782.027	1090.16	424.086	702.844	992.618	400.011	681.432	891.126	443.877	735.14	875.601	451.931	683.921	791.552
639	0	253.894	553.36	1594.09	153.287	547.291	1592.75	256.283	726.182	1605.7	142.921	728.937	1606.83	184.207	763.261	1430.64	191.583	822.489	1216.36	202.136	634.653	1363.21	201.319	577.747	1229.01	97.3646	822.521	1265.36	365.589	722.429	1384	407.979	758.322	1154.75	403.947	775.166	1088.93	425.115	698.214	990.231	401.554	677.953	888.462	443.833	733.142	873.557	453.903	682.943	789.238
640	0	254.676	541.022	1591.8	154.07	534.708	1590.51	256.642	713.822	1603.67	143.263	716.296	1604.87	184.286	751.007	1428.75	191.404	811.16	1214.59	202.57	622.564	1360.96	201.977	566.192	1226.47	97.3295	810.49	1263.53	365.857	710.941	1381.89	407.63	750.46	1153.09	403.292	768.05	1087.53	426.101	693.411	987.713	403.037	674.382	885.671	443.711	731.007	871.458	455.77	681.96	786.864
641	0	255.45	528.628	1589.35	154.842	522.094	1588.07	257.041	701.403	1601.46	143.646	703.627	1602.69	184.47	738.695	1426.65	191.435	799.838	1212.66	203.083	610.401	1358.52	202.726	554.57	1223.76	97.4769	798.45	1261.5	366.22	699.319	1379.62	407.332	742.32	1151.29	402.673	760.651	1086	427.049	688.393	985.089	404.458	670.686	882.781	443.535	728.683	869.34	457.515	680.95	784.45
642	0	256.224	516.179	1586.76	155.611	509.452	1585.48	257.491	688.925	1599.11	144.082	690.932	1600.33	184.774	726.328	1424.37	191.683	788.499	1210.6	203.685	598.165	1355.94	203.568	542.855	1220.92	97.8106	786.388	1259.3	366.69	687.562	1377.23	407.1	733.879	1149.37	402.106	752.944	1084.35	427.965	683.125	982.388	405.819	666.827	879.819	443.33	726.118	867.238	459.124	679.885	782.015
643	0	257.007	503.675	1584.08	156.385	496.784	1582.76	258.003	676.388	1596.65	144.581	678.217	1597.84	185.208	713.913	1421.96	192.153	777.113	1208.42	204.387	585.852	1353.24	204.509	531.024	1218.01	98.3306	774.286	1256.95	367.276	675.673	1374.75	406.951	725.12	1147.36	401.607	744.911	1082.62	428.858	677.569	979.635	407.123	662.767	876.814	443.122	723.258	865.18	460.585	678.729	779.578
644	0	257.805	491.117	1581.33	157.172	484.094	1579.95	258.589	663.796	1594.14	145.156	665.485	1595.26	185.781	701.452	1419.43	192.841	765.648	1206.14	205.198	573.463	1350.48	205.551	519.054	1215.09	99.0336	762.124	1254.47	367.985	663.656	1372.19	406.902	716.029	1145.28	401.193	736.537	1080.82	429.738	671.692	976.857	408.374	658.466	873.792	442.94	720.051	863.192	461.89	677.436	777.157
645	0	258.626	478.508	1578.57	157.981	471.387	1577.09	259.259	651.152	1591.6	145.817	652.741	1592.61	186.502	688.948	1416.82	193.74	754.067	1203.77	206.127	560.994	1347.71	206.699	506.926	1212.21	99.9136	749.882	1251.89	368.824	651.516	1369.6	406.966	706.597	1143.14	400.878	727.81	1078.96	430.616	665.462	974.078	409.579	653.884	870.782	442.811	716.445	861.291	463.036	675.956	774.771
646	0	259.479	465.849	1575.82	158.82	458.666	1574.22	260.023	638.46	1589.07	146.574	639.99	1589.95	187.374	676.401	1414.17	194.836	742.336	1201.33	207.18	548.443	1344.95	207.955	494.626	1209.41	100.962	737.537	1249.24	369.797	639.259	1366.99	407.159	696.82	1140.97	400.679	718.723	1077.08	431.505	658.851	971.322	410.746	648.976	867.808	442.761	712.391	859.493	464.022	674.229	772.433
647	0	260.368	453.145	1573.13	159.695	445.934	1571.39	260.889	625.723	1586.59	147.434	627.237	1587.3	188.401	663.813	1411.5	196.11	730.42	1198.83	208.361	535.807	1342.26	209.322	482.141	1206.72	102.169	725.071	1246.54	370.907	626.89	1364.4	407.49	686.7	1138.79	400.608	709.273	1075.19	432.415	651.832	968.611	411.885	643.703	864.896	442.816	707.843	857.806	464.854	672.188	770.158
648	0	261.301	440.396	1570.53	160.614	433.196	1568.62	261.864	612.946	1584.2	148.405	614.486	1584.71	189.584	651.181	1408.83	197.541	718.286	1196.28	209.673	523.083	1339.67	210.801	469.466	1204.2	103.523	712.463	1243.81	372.153	614.415	1361.83	407.968	676.24	1136.63	400.677	699.461	1073.3	433.359	644.382	965.968	413.002	638.022	862.069	442.994	702.759	856.235	465.539	669.762	767.961
649	0	262.281	427.606	1568.06	161.58	420.453	1565.96	262.952	600.131	1581.91	149.492	601.741	1582.2	190.92	638.502	1406.22	199.109	705.909	1193.7	211.117	510.267	1337.2	212.394	456.599	1201.86	105.011	699.697	1241.1	373.536	601.838	1359.33	408.599	665.447	1134.49	400.894	689.289	1071.44	434.346	636.481	963.414	414.109	631.892	859.349	443.312	697.099	854.784	466.092	666.878	765.853
650	0	263.313	414.777	1565.76	162.6	407.708	1563.45	264.157	587.282	1579.77	150.698	589.002	1579.8	192.406	625.774	1403.68	200.79	693.263	1191.11	212.69	497.356	1334.91	214.099	443.541	1199.74	106.622	686.761	1238.41	375.052	589.162	1356.91	409.385	654.332	1132.4	401.266	678.762	1069.62	435.385	628.112	960.968	415.213	625.274	856.758	443.781	690.83	853.45	466.529	663.458	763.847
651	0	264.398	401.908	1563.65	163.676	394.959	1561.11	265.48	574.401	1577.79	152.025	576.272	1577.55	194.034	612.99	1401.24	202.565	680.334	1188.54	214.389	484.35	1332.8	215.914	430.298	1197.85	108.343	673.646	1235.8	376.695	576.39	1354.59	410.325	642.906	1130.39	401.797	667.887	1067.86	436.482	619.26	958.652	416.321	618.131	854.317	444.407	683.922	852.234	466.872	659.425	761.954
652	0	265.539	389.002	1561.77	164.809	382.208	1558.99	266.92	561.487	1576.01	153.472	563.548	1575.48	195.798	600.148	1398.95	204.418	667.111	1186.01	216.205	471.245	1330.92	217.832	416.878	1196.2	110.161	660.349	1233.28	378.459	563.522	1352.41	411.416	631.182	1128.48	402.486	656.669	1066.19	437.644	609.914	956.485	417.442	610.427	852.045	445.19	676.352	851.134	467.145	654.705	760.185
653	0	266.735	376.057	1560.15	165.999	369.451	1557.11	268.473	548.542	1574.44	155.035	550.829	1573.6	197.686	587.244	1396.82	206.336	653.588	1183.57	218.128	458.044	1329.27	219.844	403.292	1194.82	112.065	646.873	1230.9	380.334	550.556	1350.38	412.651	619.171	1126.69	403.333	645.118	1064.62	438.873	600.064	954.487	418.581	602.132	849.961	446.125	668.101	850.147	467.374	649.226	758.552
654	0	267.985	363.075	1558.79	167.247	356.685	1555.5	270.135	535.564	1573.1	156.71	538.111	1571.95	199.686	574.273	1394.88	208.309	639.767	1181.24	220.146	444.748	1327.89	221.938	389.551	1193.72	114.044	633.227	1228.7	382.308	537.491	1348.54	414.022	606.884	1125.04	404.332	633.239	1063.18	440.17	589.704	952.676	419.742	593.216	848.084	447.204	659.154	849.274	467.586	642.921	757.064
655	0	269.285	350.053	1557.72	168.548	343.907	1554.17	271.898	522.552	1572.02	158.49	525.388	1570.54	201.786	561.234	1393.18	210.33	625.658	1179.06	222.241	431.361	1326.77	224.098	375.671	1192.89	116.086	619.426	1226.69	384.371	524.322	1346.91	415.518	594.332	1123.57	405.477	621.039	1061.88	441.533	578.828	951.07	420.93	583.654	846.429	448.414	649.5	848.516	467.811	635.73	755.733
656	0	270.633	336.99	1556.95	169.9	331.113	1553.14	273.753	509.503	1571.19	160.364	512.656	1569.4	203.971	548.126	1391.72	212.395	611.275	1177.09	224.397	417.889	1325.95	226.303	361.668	1192.35	118.182	605.493	1224.93	386.506	511.046	1345.51	417.128	581.52	1122.29	406.76	608.523	1060.75	442.96	567.432	949.688	422.146	573.425	845.013	449.741	639.135	847.874	468.076	627.602	754.567
657	0	272.022	323.887	1556.49	171.298	318.296	1552.43	275.688	496.413	1570.65	162.321	499.906	1568.53	206.225	534.952	1390.54	214.5	596.643	1175.37	226.592	404.343	1325.41	228.532	347.563	1192.1	120.322	591.453	1223.45	388.7	497.66	1344.37	418.838	568.453	1121.23	408.171	595.694	1059.81	444.446	555.514	948.544	423.394	562.514	843.851	451.168	628.054	847.352	468.408	618.493	753.577
658	0	273.447	310.74	1556.34	172.734	305.452	1552.03	277.691	483.281	1570.39	164.349	487.131	1567.97	208.532	521.716	1389.66	216.64	581.79	1173.93	228.805	390.733	1325.18	230.76	333.377	1192.12	122.496	577.338	1222.27	390.935	484.161	1343.5	420.635	555.136	1120.4	409.701	582.556	1059.07	445.984	543.074	947.654	424.673	550.906	842.953	452.679	616.26	846.957	468.834	608.37	752.77
659	0	274.902	297.551	1556.49	174.203	292.577	1551.96	279.748	470.103	1570.42	166.432	474.325	1567.72	210.875	508.422	1389.09	218.809	566.757	1172.82	231.013	377.072	1325.25	232.959	319.137	1192.43	124.695	563.185	1221.43	393.193	470.548	1342.93	422.506	541.566	1119.83	411.338	569.11	1058.56	447.568	530.11	947.029	425.983	538.593	842.33	454.26	603.753	846.694	469.375	597.206	752.154
660	0	276.378	284.318	1556.94	175.695	279.665	1552.2	281.843	456.877	1570.74	168.554	461.479	1567.78	213.238	495.079	1388.85	221	551.587	1172.08	233.194	363.375	1325.61	235.103	304.872	1193	126.911	549.032	1220.94	395.459	456.821	1342.68	424.438	527.745	1119.52	413.074	555.358	1058.27	449.188	516.624	946.681	427.322	525.573	841.991	455.895	590.538	846.568	470.051	584.988	751.737
661	0	277.867	271.044	1557.67	177.203	266.714	1552.75	283.96	443.602	1571.35	170.7	448.589	1568.16	215.605	481.699	1388.95	223.205	536.333	1171.73	235.324	349.66	1326.27	237.165	290.614	1193.83	129.137	534.917	1220.83	397.714	442.982	1342.75	426.42	513.669	1119.48	414.899	541.3	1058.23	450.835	502.618	946.615	428.686	511.846	841.94	457.575	576.62	846.588	470.877	571.709	751.524
662	0	279.362	257.729	1558.67	178.717	253.721	1553.6	286.083	430.278	1572.25	172.851	435.65	1568.85	217.961	468.292	1389.4	225.415	521.053	1171.8	237.383	335.944	1327.21	239.117	276.396	1194.9	131.367	520.881	1221.11	399.942	429.036	1343.15	428.439	499.337	1119.73	416.804	526.939	1058.44	452.498	488.094	946.835	430.072	497.416	842.179	459.292	562.007	846.757	471.864	557.371	751.519
663	0	280.852	244.377	1559.92	180.227	240.685	1554.72	288.196	416.906	1573.43	174.991	422.658	1569.86	220.291	454.873	1390.18	227.622	505.808	1172.29	239.352	322.247	1328.42	240.937	262.25	1196.21	133.598	506.961	1221.76	402.128	414.991	1343.89	430.487	484.747	1120.25	418.782	512.275	1058.9	454.168	473.058	947.344	431.475	482.294	842.708	461.038	546.706	847.081	473.018	541.985	751.726
664	0	282.329	230.992	1561.39	181.725	227.608	1556.09	290.281	403.49	1574.87	177.103	409.613	1571.18	222.583	441.459	1391.29	229.821	490.661	1173.2	241.213	308.587	1329.88	242.602	248.207	1197.72	135.828	493.192	1222.8	404.257	400.855	1344.96	432.554	469.898	1121.04	420.827	497.31	1059.61	455.834	457.515	948.139	432.887	466.493	843.523	462.813	530.726	847.562	474.338	525.569	752.147
665	0	283.784	217.581	1563.05	183.201	214.493	1557.69	292.323	390.034	1576.56	179.171	396.516	1572.78	224.827	428.064	1392.71	232.012	475.675	1174.52	242.951	294.983	1331.57	244.093	234.296	1199.43	138.061	479.604	1224.2	406.316	386.642	1346.34	434.634	454.791	1122.11	422.934	482.049	1060.55	457.486	441.473	949.213	434.302	450.031	844.618	464.615	514.077	848.202	475.822	508.148	752.783
666	0	285.209	204.15	1564.88	184.646	201.343	1559.49	294.309	376.545	1578.48	181.18	383.369	1574.65	227.013	414.705	1394.44	234.197	460.908	1176.22	244.557	281.452	1333.48	245.396	220.539	1201.31	140.298	466.222	1225.93	408.296	372.363	1348.04	436.72	439.43	1123.42	425.099	466.496	1061.73	459.114	424.944	950.559	435.713	432.929	845.983	466.447	496.77	849.001	477.46	489.752	753.633
667	0	286.596	190.706	1566.86	186.051	188.165	1561.45	296.225	363.03	1580.61	183.118	370.179	1576.77	229.135	401.398	1396.44	236.384	446.411	1178.28	246.023	268.01	1335.58	246.501	206.951	1203.35	142.547	453.064	1227.97	410.186	358.037	1350.03	438.808	423.819	1124.98	427.32	450.657	1063.12	460.711	407.939	952.166	437.111	415.213	847.608	468.31	478.821	849.957	479.239	470.418	754.696
668	0	287.936	177.259	1568.94	187.409	174.967	1563.55	298.06	349.5	1582.93	184.972	356.952	1579.12	231.186	388.157	1398.68	238.583	432.226	1180.64	247.345	254.671	1337.85	247.404	193.544	1205.53	144.812	440.142	1230.29	411.982	343.679	1352.28	440.895	407.966	1126.76	429.595	434.54	1064.7	462.269	390.473	954.019	438.488	396.911	849.479	470.209	460.243	851.067	481.14	450.188	755.972
669	0	289.224	163.818	1571.1	188.712	161.758	1565.76	299.804	335.964	1585.41	186.734	343.699	1581.65	233.164	374.995	1401.14	240.806	418.382	1183.27	248.526	241.447	1340.26	248.11	180.323	1207.84	147.099	427.461	1232.83	413.68	329.311	1354.77	442.979	391.879	1128.73	431.921	418.154	1066.47	463.781	372.565	956.104	439.839	378.052	851.581	472.148	441.056	852.328	483.143	429.106	757.457
670	0	290.453	150.392	1573.32	189.955	148.549	1568.03	301.45	322.434	1588.02	188.397	330.43	1584.34	235.065	361.923	1403.77	243.062	404.894	1186.12	249.569	228.346	1342.77	248.628	167.287	1210.25	149.411	415.018	1235.56	415.276	314.952	1357.47	445.059	375.57	1130.87	434.297	401.512	1068.38	465.243	354.235	958.401	441.155	358.67	853.898	474.13	421.279	853.736	485.226	407.223	759.149
671	0	291.619	136.992	1575.56	191.134	135.35	1570.35	302.994	308.921	1590.72	189.957	317.158	1587.15	236.888	348.949	1406.55	245.357	391.762	1189.13	250.484	215.374	1345.37	248.976	154.432	1212.74	151.747	402.804	1238.43	416.772	300.624	1360.35	447.133	359.055	1133.17	436.721	384.625	1070.43	466.651	335.505	960.892	442.433	338.8	856.412	476.156	400.937	855.284	487.362	384.59	761.046
672	0	292.718	123.627	1577.8	192.244	122.171	1572.67	304.433	295.437	1593.5	191.409	303.894	1590.04	238.634	336.079	1409.41	247.695	378.972	1192.24	251.283	202.535	1348.02	249.178	141.748	1215.3	154.106	390.804	1241.39	418.17	286.348	1363.36	449.203	342.349	1135.57	439.191	367.51	1072.58	468.003	316.403	963.557	443.667	318.478	859.105	478.229	380.054	856.967	489.528	361.261	763.141
673	0	293.748	110.306	1580.01	193.284	109.025	1574.96	305.766	281.993	1596.3	192.756	290.652	1592.97	240.304	323.316	1412.34	250.071	366.497	1195.41	251.98	189.827	1350.69	249.266	129.222	1217.9	156.48	378.999	1244.41	419.473	272.145	1366.47	451.269	325.472	1138.07	441.703	350.182	1074.8	469.299	296.956	966.372	444.855	297.738	861.958	480.346	358.659	858.776	491.698	337.296	765.432
674	0	294.708	97.037	1582.17	194.253	95.9207	1577.2	306.996	268.6	1599.1	193.997	277.445	1595.89	241.901	310.661	1415.27	252.475	354.302	1198.58	252.593	177.249	1353.34	249.271	116.841	1220.5	158.861	367.364	1247.42	420.689	258.032	1369.64	453.331	308.447	1140.62	444.256	332.662	1077.06	470.541	277.196	969.316	445.995	276.619	864.95	482.506	336.783	860.703	493.846	312.751	767.91
675	0	295.599	83.8272	1584.24	195.152	82.8676	1579.34	308.124	255.267	1601.85	195.138	264.283	1598.76	243.427	298.112	1418.17	254.892	342.341	1201.7	253.14	164.794	1355.94	249.229	104.587	1223.09	161.239	355.874	1250.39	421.822	244.027	1372.83	455.39	291.298	1143.2	446.845	314.969	1079.33	471.732	257.155	972.363	447.089	255.157	868.062	484.702	314.46	862.735	495.952	287.687	770.57
676	0	296.421	70.6823	1586.21	195.983	69.8732	1581.38	309.158	242.003	1604.52	196.184	251.177	1601.54	244.887	285.664	1421	257.305	330.567	1204.72	253.637	152.457	1358.46	249.174	92.4435	1225.62	163.6	344.503	1253.27	422.883	230.145	1375.98	457.448	274.051	1145.76	449.465	297.125	1081.59	472.876	236.869	975.49	448.137	233.387	871.272	486.928	291.727	864.86	497.995	262.164	773.4
677	0	297.178	57.6066	1588.05	196.749	56.9434	1583.27	310.102	228.814	1607.08	197.141	238.135	1604.19	246.285	273.313	1423.7	259.694	318.931	1207.61	254.104	140.228	1360.86	249.137	80.3935	1228.06	165.931	333.225	1256.02	423.879	216.394	1379.06	459.504	256.733	1148.29	452.111	279.154	1083.8	473.978	216.375	978.671	449.142	211.347	874.559	489.174	268.623	867.063	499.956	236.243	776.389
678	0	297.874	44.6026	1589.74	197.455	44.0822	1584.99	310.966	215.704	1609.47	198.017	225.164	1606.66	247.627	261.05	1426.25	262.039	307.386	1210.31	254.556	128.096	1363.1	249.146	68.4227	1230.37	168.221	322.014	1258.61	424.819	202.783	1382.01	461.56	239.374	1150.74	454.778	261.079	1085.93	475.046	195.71	981.878	450.108	189.071	877.903	491.428	245.192	869.326	501.82	209.985	779.524
679	0	298.514	31.6713	1591.26	198.105	31.2916	1586.52	311.758	202.675	1611.68	198.822	212.267	1608.92	248.916	248.868	1428.61	264.322	295.889	1212.8	255.007	116.05	1365.16	249.223	56.5196	1232.5	170.455	310.848	1260.99	425.713	189.317	1384.8	463.615	222.001	1153.08	457.46	242.923	1087.95	476.087	174.912	985.087	451.039	166.596	881.281	493.679	221.476	871.631	503.574	183.45	782.79
680	0	299.103	18.8119	1592.59	198.706	18.5715	1587.85	312.487	189.727	1613.68	199.565	199.446	1610.94	250.159	236.755	1430.73	266.528	284.405	1215.04	255.469	104.08	1367	249.383	44.6759	1234.41	172.624	299.707	1263.13	426.568	175.996	1387.38	465.67	204.642	1155.28	460.148	224.71	1089.82	477.107	154.021	988.272	451.94	143.956	884.674	495.911	197.524	873.957	505.211	156.696	786.171
681	0	299.647	6.02192	1593.7	199.263	5.91993	1588.94	313.163	176.859	1615.42	200.255	186.699	1612.68	251.358	224.702	1432.6	268.644	272.906	1217	255.953	92.1729	1368.59	249.637	32.8869	1236.07	174.715	288.573	1265.02	427.392	162.819	1389.72	467.721	187.322	1157.32	462.837	206.465	1091.53	478.114	133.073	991.407	452.815	121.186	888.063	498.11	173.383	876.284	506.723	129.783	789.651
682	0	300.152	-6.7027	1594.58	199.783	-6.66683	1589.78	313.795	164.065	1616.89	200.901	174.025	1614.13	252.518	212.698	1434.19	270.66	261.375	1218.67	256.465	80.3177	1369.92	249.987	21.1506	1237.44	176.72	277.431	1266.62	428.192	149.783	1391.77	469.768	170.067	1159.17	465.516	188.208	1093.05	479.114	112.107	994.469	453.667	98.3216	891.429	500.261	149.103	878.593	508.107	102.765	793.215
683	0	300.625	-19.3673	1595.22	200.272	-19.1941	1590.36	314.392	151.339	1618.08	201.513	161.417	1615.27	253.641	200.733	1435.47	272.569	249.801	1220.02	257.009	68.5029	1370.95	250.431	9.46651	1238.49	178.631	266.27	1267.92	428.973	136.882	1393.51	471.804	152.897	1160.8	468.178	169.962	1094.36	480.113	91.1573	997.436	454.501	75.3983	894.756	502.35	124.733	880.865	509.362	75.6977	796.848
684	0	301.071	-31.9785	1595.6	200.735	-31.6686	1590.67	314.963	138.674	1618.96	202.098	148.868	1616.09	254.729	188.795	1436.44	274.365	238.181	1221.03	257.587	56.7175	1371.68	250.964	-2.16585	1239.2	180.441	255.078	1268.91	429.739	124.11	1394.9	473.826	135.833	1162.19	470.81	151.747	1095.44	481.113	70.259	1000.29	455.318	52.4511	898.03	504.364	100.324	883.083	510.491	48.6351	800.536
685	0	301.495	-44.5437	1595.7	201.18	-44.0978	1590.69	315.515	126.061	1619.53	202.665	136.371	1616.57	255.782	176.876	1437.09	276.043	226.521	1221.71	258.198	44.9513	1372.08	251.576	-13.7482	1239.55	182.142	243.847	1269.57	430.492	111.459	1395.94	475.826	118.891	1163.33	473.403	133.583	1096.27	482.116	49.4446	1003.01	456.119	29.5157	901.24	506.289	75.9254	885.234	511.498	21.6287	804.267
686	0	301.903	-57.0708	1595.54	201.609	-56.4901	1590.43	316.054	113.489	1619.78	203.218	123.917	1616.73	256.801	164.964	1437.4	277.603	214.829	1222.06	258.84	33.1943	1372.17	252.253	-25.2852	1239.53	183.731	232.57	1269.92	431.233	98.9194	1396.61	477.796	102.085	1164.2	475.944	115.488	1096.86	483.124	28.7447	1005.59	456.905	6.62755	904.374	508.115	51.5852	887.307	512.389	-5.27073	808.031
687	0	302.298	-69.5681	1595.08	202.027	-68.8542	1589.88	316.586	100.95	1619.71	203.763	111.494	1616.55	257.783	153.051	1437.38	279.041	203.118	1222.06	259.507	21.437	1371.93	252.983	-36.7851	1239.15	185.201	221.24	1269.95	431.962	86.4824	1396.91	479.726	85.4278	1164.8	478.421	97.4823	1097.18	484.135	8.1886	1008.01	457.676	-16.1776	907.426	509.833	27.3508	889.293	513.173	-32.0137	811.819
688	0	302.684	-82.0439	1594.35	202.436	-81.1989	1589.05	317.114	88.4321	1619.33	204.303	99.0935	1616.06	258.727	141.13	1437.04	280.357	191.4	1221.74	260.192	9.67051	1371.37	253.749	-48.2603	1238.41	186.549	209.851	1269.67	432.676	74.1375	1396.82	481.605	68.9297	1165.12	480.82	79.5825	1097.25	485.145	-12.1965	1010.26	458.43	-38.8646	910.389	511.436	3.26753	891.189	513.857	-58.5519	815.625
689	0	303.061	-94.5064	1593.33	202.838	-93.533	1587.93	317.641	75.9259	1618.65	204.84	86.705	1615.26	259.629	129.192	1436.38	281.552	179.688	1221.09	260.889	-2.11386	1370.5	254.537	-59.7273	1237.33	187.773	198.397	1269.08	433.373	61.8738	1396.36	483.424	52.5992	1165.17	483.13	61.807	1097.06	486.15	-32.3847	1012.34	459.164	-61.3983	913.259	512.918	-20.6212	892.992	514.453	-84.8382	819.442
690	0	303.432	-106.963	1592.04	203.233	-105.865	1586.54	318.166	63.4222	1617.67	205.374	74.3187	1614.17	260.485	117.232	1435.41	282.624	167.993	1220.14	261.587	-13.9244	1369.33	255.332	-71.2065	1235.94	188.869	186.872	1268.2	434.048	49.6795	1395.55	485.169	36.4439	1164.93	485.336	44.1739	1096.62	487.145	-52.3518	1014.25	459.877	-83.7446	916.035	514.276	-44.2742	894.702	514.969	-110.827	823.263
691	0	303.795	-119.422	1590.48	203.621	-118.202	1584.88	318.689	50.9126	1616.42	205.905	61.9258	1612.81	261.29	105.243	1434.15	283.575	156.32	1218.9	262.277	-25.7694	1367.89	256.116	-82.7201	1234.27	189.837	175.268	1267.03	434.696	37.5423	1394.39	486.829	20.4704	1164.43	487.427	26.7012	1095.93	488.124	-72.075	1015.98	460.564	-105.87	918.714	515.507	-67.6527	896.321	515.417	-136.473	827.084
692	0	304.149	-131.889	1588.66	204	-130.552	1582.98	319.207	38.3899	1614.91	206.429	49.5182	1611.21	262.04	93.2196	1432.62	284.406	144.672	1217.38	262.947	-37.6567	1366.19	256.876	-94.2917	1232.34	190.677	163.58	1265.61	435.31	25.4491	1392.91	488.394	4.68483	1163.67	489.391	9.40725	1095.01	489.08	-91.5329	1017.53	461.222	-127.742	921.296	516.611	-90.7205	897.853	515.805	-161.734	830.896
693	0	304.493	-144.371	1586.62	204.368	-142.922	1580.86	319.716	25.8481	1613.17	206.943	37.0885	1609.37	262.73	81.1578	1430.84	285.118	133.046	1215.62	263.586	-49.5945	1364.25	257.597	-105.945	1230.21	191.392	151.801	1263.94	435.884	13.3861	1391.14	489.853	-10.9068	1162.67	491.219	-7.68954	1093.88	490.006	-110.705	1018.9	461.849	-149.33	923.779	517.589	-113.444	899.3	516.142	-186.569	834.69
694	0	304.822	-156.873	1584.35	204.72	-155.318	1578.53	320.211	13.2822	1611.21	207.442	24.6305	1607.35	263.354	69.0523	1428.83	285.716	121.436	1213.62	264.183	-61.5908	1362.12	258.263	-117.7	1227.9	191.986	139.922	1262.04	436.411	1.33875	1389.11	491.197	-26.2989	1161.43	492.9	-24.5709	1092.53	490.898	-129.573	1020.11	462.44	-170.604	926.163	518.442	-135.79	900.664	516.438	-210.94	838.458
695	0	305.134	-169.399	1581.9	205.054	-167.746	1576.02	320.686	0.688583	1609.07	207.919	12.139	1605.15	263.907	56.8982	1426.61	286.201	109.828	1211.43	264.725	-73.6537	1359.81	258.861	-129.577	1225.46	192.465	127.937	1259.93	436.883	-10.7082	1386.84	492.417	-41.486	1159.98	494.427	-41.2188	1091	491.749	-148.119	1021.14	462.994	-191.536	928.446	519.173	-157.731	901.946	516.698	-234.81	842.184
696	0	305.423	-181.953	1579.28	205.364	-180.21	1573.37	321.134	-11.9355	1606.77	208.368	-0.39044	1602.8	264.383	44.6902	1424.21	286.58	98.2086	1209.05	265.203	-85.7916	1357.36	259.38	-141.591	1222.92	192.836	115.838	1257.63	437.293	-22.7704	1384.37	493.508	-56.4628	1158.33	495.796	-57.616	1089.29	492.556	-166.326	1022	463.508	-212.099	930.625	519.785	-179.239	903.147	516.928	-258.145	845.854
697	0	305.685	-194.54	1576.53	205.645	-192.715	1570.6	321.548	-24.5917	1604.33	208.781	-12.9615	1600.35	264.778	32.4228	1421.65	286.859	86.5562	1206.52	265.605	-98.0129	1354.8	259.806	-153.754	1220.31	193.108	103.618	1255.16	437.635	-34.8639	1381.74	494.464	-71.2248	1156.5	497.002	-73.7461	1087.43	493.313	-184.179	1022.69	463.981	-232.267	932.694	520.283	-200.287	904.262	517.134	-280.915	849.45
698	0	305.915	-207.162	1573.68	205.893	-205.267	1567.75	321.919	-37.2811	1601.79	209.15	-25.5771	1597.8	265.087	20.0898	1418.96	287.044	74.848	1203.85	265.922	-110.326	1352.15	260.131	-166.076	1217.69	193.291	91.2685	1252.54	437.902	-47.0048	1378.99	495.283	-85.7684	1154.52	498.044	-89.5941	1085.43	494.019	-201.666	1023.23	464.412	-252.018	934.648	520.67	-220.853	905.287	517.318	-303.092	852.949
699	0	306.108	-219.821	1570.76	206.102	-217.868	1564.85	322.239	-50.0041	1599.16	209.468	-38.2396	1595.19	265.305	7.68473	1416.18	287.144	63.058	1201.08	266.147	-122.74	1349.47	260.348	-178.564	1215.06	193.397	78.7833	1249.79	438.09	-59.2089	1376.14	495.964	-100.091	1152.41	498.922	-105.147	1083.31	494.672	-218.774	1023.6	464.801	-271.329	936.477	520.953	-240.912	906.213	517.484	-324.652	856.327
700	0	306.26	-232.522	1567.81	206.268	-230.523	1561.94	322.5	-62.7609	1596.48	209.726	-50.9511	1592.56	265.43	-4.79923	1413.32	287.166	51.1576	1198.22	266.273	-135.262	1346.76	260.45	-191.224	1212.48	193.433	66.1551	1246.94	438.194	-71.4913	1373.23	496.507	-114.192	1150.18	499.639	-120.394	1081.1	495.269	-235.493	1023.81	465.149	-290.181	938.173	521.136	-260.445	907.029	517.633	-345.574	859.557
701	0	306.368	-245.265	1564.87	206.388	-243.235	1559.05	322.697	-75.5514	1593.78	209.918	-63.7133	1589.92	265.458	-17.369	1410.43	287.12	39.1173	1195.3	266.297	-147.9	1344.07	260.436	-204.059	1209.95	193.411	53.3775	1244.01	438.21	-83.8659	1370.31	496.914	-128.073	1147.87	500.198	-135.327	1078.8	495.811	-251.815	1023.87	465.455	-308.556	939.723	521.226	-279.432	907.723	517.768	-365.839	862.61
702	0	306.427	-258.053	1561.97	206.459	-256.009	1556.22	322.821	-88.3755	1591.09	210.037	-76.5278	1587.3	265.389	-30.0315	1407.52	287.014	26.907	1192.35	266.217	-160.661	1341.43	260.306	-217.073	1207.51	193.339	40.4445	1241.02	438.139	-96.3449	1367.41	497.19	-141.736	1145.5	500.605	-149.941	1076.46	496.298	-267.735	1023.77	465.724	-326.436	941.112	521.228	-297.855	908.28	517.887	-385.433	865.454
703	0	306.436	-270.888	1559.15	206.477	-268.846	1553.48	322.869	-101.233	1588.42	210.078	-89.3962	1584.72	265.22	-42.793	1404.64	286.856	14.4975	1189.38	266.034	-173.551	1338.86	260.065	-230.269	1205.18	193.221	27.3511	1238	437.979	-108.938	1364.56	497.339	-155.188	1143.1	500.869	-164.233	1074.08	496.73	-283.248	1023.52	465.955	-343.806	942.327	521.15	-315.697	908.686	517.992	-404.341	868.058
704	0	306.393	-283.772	1556.45	206.443	-281.75	1550.87	322.836	-114.125	1585.82	210.036	-102.32	1582.22	264.954	-55.659	1401.8	286.654	1.86175	1186.42	265.752	-186.573	1336.39	259.72	-243.648	1202.98	193.063	14.0936	1234.98	437.732	-121.653	1361.79	497.368	-168.435	1140.7	500.996	-178.205	1071.7	497.107	-298.353	1023.13	466.152	-360.654	943.351	521	-332.943	908.925	518.083	-422.554	870.389
705	0	306.3	-296.707	1553.89	206.356	-294.723	1548.42	322.721	-127.052	1583.3	209.911	-115.301	1579.82	264.591	-68.6339	1399.05	286.412	-11.0236	1183.51	265.377	-199.729	1334.05	259.283	-257.211	1200.92	192.866	0.669655	1231.98	437.401	-134.493	1359.15	497.285	-181.489	1138.33	500.997	-191.862	1069.35	497.43	-313.051	1022.59	466.318	-376.967	944.169	520.784	-349.578	908.984	518.162	-440.063	872.415
706	0	306.155	-309.693	1551.51	206.217	-307.768	1546.16	322.522	-140.014	1580.89	209.701	-128.339	1577.54	264.135	-81.7205	1396.41	286.133	-24.1773	1180.68	264.92	-213.019	1331.85	258.769	-270.953	1199.03	192.628	-12.9204	1229.05	436.993	-147.459	1356.65	497.096	-194.361	1136.01	500.882	-205.211	1067.05	497.7	-327.344	1021.91	466.456	-392.735	944.765	520.511	-365.591	908.851	518.228	-456.859	874.107
707	0	305.964	-322.733	1549.34	206.031	-320.886	1544.12	322.243	-153.013	1578.62	209.408	-141.437	1575.4	263.59	-94.9197	1393.92	285.819	-37.6116	1177.95	264.391	-226.44	1329.83	258.197	-284.868	1197.32	192.347	-26.6737	1226.21	436.514	-160.548	1354.34	496.812	-207.063	1133.8	500.66	-218.262	1064.83	497.916	-341.237	1021.11	466.567	-407.95	945.126	520.191	-380.968	908.515	518.283	-472.935	875.434
708	0	305.729	-335.826	1547.41	205.8	-334.077	1542.32	321.886	-166.049	1576.51	209.037	-154.595	1573.43	262.965	-108.23	1391.6	285.467	-51.3317	1175.35	263.806	-239.985	1328	257.589	-298.945	1195.8	192.019	-40.5836	1223.51	435.973	-173.751	1352.24	496.44	-219.612	1131.7	500.343	-231.029	1062.73	498.079	-354.734	1020.19	466.655	-422.603	945.238	519.833	-395.701	907.971	518.329	-488.286	876.372
709	0	305.455	-348.973	1545.74	205.531	-347.34	1540.78	321.457	-179.125	1574.6	208.593	-167.813	1571.65	262.266	-121.648	1389.49	285.072	-65.3342	1172.94	263.182	-253.645	1326.38	256.971	-313.167	1194.48	191.637	-54.6395	1220.97	435.381	-187.058	1350.38	495.991	-232.022	1129.77	499.938	-243.527	1060.78	498.19	-367.844	1019.15	466.723	-436.689	945.094	519.446	-409.78	907.219	518.368	-502.904	876.897
710	0	305.15	-362.173	1544.34	205.23	-360.674	1539.52	320.965	-192.24	1572.9	208.084	-181.09	1570.07	261.504	-135.166	1387.62	284.627	-79.6069	1170.75	262.536	-267.406	1324.99	256.368	-327.511	1193.37	191.197	-68.8266	1218.64	434.751	-200.455	1348.78	495.474	-244.308	1128.03	499.457	-255.77	1058.99	498.248	-380.574	1018.03	466.772	-450.203	944.686	519.04	-423.199	906.259	518.402	-516.781	876.992
711	0	304.821	-375.425	1543.25	204.905	-374.076	1538.55	320.418	-205.397	1571.44	207.52	-194.426	1568.73	260.692	-148.777	1386.01	284.127	-94.1279	1168.81	261.889	-281.254	1323.84	255.806	-341.95	1192.47	190.693	-83.125	1216.55	434.096	-213.924	1347.48	494.898	-256.484	1126.5	498.907	-267.778	1057.42	498.254	-392.933	1016.82	466.805	-463.14	944.012	518.626	-435.951	905.102	518.435	-529.91	876.645
712	0	304.476	-388.726	1542.46	204.565	-387.541	1537.87	319.828	-218.594	1570.24	206.913	-207.817	1567.64	259.844	-162.467	1384.68	283.563	-108.866	1167.16	261.259	-295.17	1322.94	255.31	-356.449	1191.79	190.125	-97.5107	1214.74	433.433	-227.445	1346.47	494.273	-268.563	1125.21	498.297	-279.565	1056.07	498.208	-404.929	1015.55	466.825	-475.5	943.073	518.213	-448.034	903.758	518.469	-542.282	875.848
713	0	304.124	-402.074	1541.98	204.219	-401.064	1537.51	319.208	-231.832	1569.32	206.276	-221.261	1566.81	258.975	-176.222	1383.68	282.934	-123.779	1165.85	260.667	-309.132	1322.31	254.903	-370.972	1191.34	189.493	-111.956	1213.26	432.775	-240.998	1345.79	493.608	-280.557	1124.19	497.633	-291.149	1054.98	498.111	-416.572	1014.23	466.833	-487.28	941.877	517.809	-459.445	902.247	518.509	-553.888	874.599
714	0	303.776	-415.463	1541.83	203.877	-414.638	1537.44	318.573	-245.11	1568.69	205.624	-234.753	1566.25	258.102	-190.025	1383	282.24	-138.82	1164.91	260.132	-323.117	1321.96	254.604	-385.478	1191.1	188.801	-126.428	1212.12	432.14	-254.558	1345.44	492.913	-292.472	1123.46	496.921	-302.545	1054.16	497.966	-427.869	1012.89	466.833	-498.481	940.433	517.424	-470.185	900.59	518.557	-564.72	872.906
715	0	303.441	-428.889	1541.99	203.549	-428.252	1537.68	317.936	-258.424	1568.37	204.972	-248.286	1565.98	257.242	-203.856	1382.67	281.487	-153.93	1164.37	259.671	-337.1	1321.88	254.427	-399.927	1191.09	188.058	-140.895	1211.37	431.542	-268.102	1345.43	492.196	-304.316	1123.02	496.168	-313.767	1053.63	497.776	-438.828	1011.53	466.826	-509.105	938.758	517.066	-480.258	898.814	518.618	-574.767	870.779
716	0	303.128	-442.345	1542.47	203.245	-441.898	1538.21	317.314	-271.772	1568.37	204.334	-261.854	1566.01	256.414	-217.695	1382.69	280.687	-169.047	1164.24	259.297	-351.056	1322.08	254.381	-414.278	1191.31	187.273	-155.323	1211.02	430.997	-281.606	1345.76	491.465	-316.088	1122.88	495.378	-324.826	1053.4	497.545	-449.454	1010.19	466.816	-519.156	936.871	516.741	-489.669	896.947	518.692	-584.024	868.239
717	0	302.849	-455.822	1543.24	202.975	-455.564	1539.02	316.722	-285.149	1568.69	203.729	-275.447	1566.33	255.633	-231.518	1383.08	279.856	-184.107	1164.55	259.024	-364.959	1322.57	254.472	-428.495	1191.75	186.463	-169.676	1211.09	430.516	-295.046	1346.43	490.73	-327.789	1123.05	494.556	-335.731	1053.48	497.277	-459.753	1008.87	466.805	-528.638	934.796	516.456	-498.427	895.023	518.784	-592.482	865.313
718	0	302.612	-469.312	1544.29	202.748	-469.238	1540.09	316.175	-298.549	1569.33	203.169	-289.056	1566.96	254.917	-245.302	1383.83	279.013	-199.042	1165.3	258.861	-378.783	1323.34	254.7	-442.549	1192.43	185.64	-183.923	1211.57	430.112	-308.399	1347.42	489.996	-339.412	1123.52	493.704	-346.489	1053.86	496.979	-469.729	1007.59	466.798	-537.558	932.561	516.217	-506.545	893.073	518.896	-600.14	862.034
719	0	302.426	-482.805	1545.61	202.573	-482.906	1541.4	315.688	-311.965	1570.3	202.671	-302.67	1567.88	254.279	-259.024	1384.92	278.18	-213.789	1166.47	258.812	-392.504	1324.38	255.061	-456.413	1193.34	184.819	-198.035	1212.47	429.792	-321.641	1348.72	489.27	-350.95	1124.28	492.827	-357.103	1054.53	496.659	-479.383	1006.37	466.797	-545.924	930.194	516.027	-514.037	891.133	519.028	-606.996	858.441
720	0	302.299	-496.29	1547.16	202.458	-496.556	1542.93	315.273	-325.389	1571.57	202.246	-316.277	1569.1	253.73	-272.663	1386.36	277.377	-228.291	1168.05	258.879	-406.103	1325.69	255.546	-470.071	1194.48	184.016	-211.987	1213.78	429.563	-334.753	1350.3	488.558	-362.39	1125.31	491.926	-367.573	1055.48	496.323	-488.719	1005.22	466.809	-553.748	927.727	515.891	-520.923	889.235	519.184	-613.055	854.58
721	0	302.239	-509.755	1548.93	202.411	-510.173	1544.66	314.941	-338.811	1573.13	201.906	-329.867	1570.59	253.278	-286.198	1388.11	276.62	-242.498	1170	259.059	-419.558	1327.25	256.143	-483.512	1195.86	183.242	-225.759	1215.48	429.429	-347.716	1352.15	487.863	-373.719	1126.59	491.003	-377.895	1056.7	495.982	-497.736	1004.15	466.837	-561.041	925.193	515.81	-527.223	887.411	519.363	-618.326	850.502
722	0	302.251	-523.189	1550.88	202.437	-523.745	1546.56	314.703	-352.221	1574.98	201.661	-343.427	1572.35	252.93	-299.611	1390.15	275.924	-256.374	1172.28	259.349	-432.857	1329.05	256.837	-496.73	1197.47	182.505	-239.337	1217.53	429.389	-360.517	1354.23	487.188	-384.92	1128.1	490.061	-388.066	1058.16	495.643	-506.433	1003.17	466.888	-567.818	922.625	515.787	-532.962	885.691	519.569	-622.823	846.26
723	0	302.342	-536.579	1552.97	202.542	-537.26	1548.59	314.565	-365.606	1577.07	201.518	-356.946	1574.35	252.686	-312.889	1392.46	275.298	-269.897	1174.85	259.737	-445.989	1331.06	257.607	-509.726	1199.31	181.813	-252.712	1219.9	429.44	-373.144	1356.5	486.534	-395.973	1129.8	489.1	-398.075	1059.84	495.317	-514.809	1002.27	466.966	-574.097	920.053	515.822	-538.166	884.101	519.802	-626.567	841.91
724	0	302.515	-549.914	1555.18	202.729	-550.706	1550.74	314.532	-378.955	1579.37	201.479	-370.411	1576.57	252.545	-326.021	1394.99	274.75	-283.057	1177.66	260.214	-458.946	1333.28	258.434	-522.506	1201.37	181.17	-265.883	1222.55	429.577	-385.593	1358.93	485.901	-406.861	1131.66	488.121	-407.913	1061.69	495.011	-522.864	1001.47	467.077	-579.897	917.507	515.912	-542.864	882.661	520.063	-629.584	837.509
725	0	302.773	-563.182	1557.47	203	-564.073	1552.97	314.604	-392.255	1581.86	201.547	-383.814	1578.98	252.501	-339.001	1397.71	274.282	-295.859	1180.65	260.763	-471.728	1335.66	259.292	-535.079	1203.63	180.574	-278.855	1225.44	429.792	-397.862	1361.48	485.289	-417.563	1133.64	487.127	-417.566	1063.69	494.734	-530.596	1000.75	467.225	-585.239	915.014	516.053	-547.085	881.387	520.355	-631.906	833.113
726	0	303.118	-576.373	1559.8	203.357	-577.353	1555.25	314.781	-405.493	1584.5	201.721	-397.143	1581.55	252.547	-351.827	1400.57	273.894	-308.321	1183.77	261.37	-484.338	1338.18	260.158	-547.46	1206.07	180.026	-291.636	1228.51	430.074	-409.955	1364.09	484.694	-428.059	1135.72	486.116	-427.024	1065.8	494.494	-538.005	1000.12	467.416	-590.147	912.595	516.242	-550.861	880.29	520.68	-633.572	828.775
727	0	303.548	-589.477	1562.14	203.799	-590.54	1557.55	315.059	-418.658	1587.22	201.996	-410.391	1584.23	252.672	-364.5	1403.52	273.581	-320.472	1186.97	262.017	-496.782	1340.79	261.005	-559.667	1208.65	179.52	-304.242	1231.71	430.411	-421.881	1366.74	484.113	-438.332	1137.84	485.093	-436.271	1067.98	494.295	-545.092	999.565	467.652	-594.647	910.267	516.469	-554.223	879.373	521.039	-634.627	824.545
728	0	304.063	-602.485	1564.46	204.324	-603.628	1559.84	315.432	-431.737	1590	202.367	-423.551	1586.99	252.862	-377.029	1406.53	273.336	-332.349	1190.18	262.687	-509.072	1343.47	261.813	-571.722	1211.34	179.051	-316.693	1234.98	430.788	-433.651	1369.37	483.543	-448.367	1139.96	484.057	-445.296	1070.2	494.144	-551.859	999.069	467.935	-598.766	908.045	516.725	-557.205	878.632	521.433	-635.122	820.464
729	0	304.659	-615.393	1566.72	204.928	-616.616	1562.1	315.892	-444.723	1592.78	202.823	-436.619	1589.78	253.105	-389.421	1409.53	273.145	-343.993	1193.37	263.364	-521.222	1346.17	262.56	-583.649	1214.1	178.612	-329.008	1238.27	431.191	-445.28	1371.94	482.979	-458.149	1142.06	483.01	-454.088	1072.41	494.043	-558.31	998.619	468.267	-602.535	905.932	516.999	-559.841	878.058	521.863	-635.112	816.57
730	0	305.331	-628.196	1568.88	205.606	-629.503	1564.28	316.427	-457.607	1595.51	203.357	-449.591	1592.55	253.385	-401.69	1412.48	272.995	-355.451	1196.47	264.031	-533.25	1348.84	263.231	-595.476	1216.87	178.193	-341.213	1241.53	431.607	-456.787	1374.42	482.418	-467.671	1144.09	481.955	-462.638	1074.58	493.995	-564.453	998.198	468.647	-605.983	903.932	517.279	-562.165	877.633	522.328	-634.658	812.889
731	0	306.074	-640.892	1570.92	206.353	-642.291	1566.37	317.027	-470.384	1598.13	203.954	-462.467	1595.26	253.686	-413.85	1415.34	272.866	-366.768	1199.44	264.677	-545.173	1351.44	263.816	-607.229	1219.61	177.785	-353.331	1244.68	432.022	-468.19	1376.75	481.856	-476.927	1146.01	480.894	-470.943	1076.68	493.999	-570.296	997.785	469.074	-609.145	902.038	517.552	-564.211	877.334	522.827	-633.824	809.439
732	0	306.879	-653.481	1572.81	207.162	-654.984	1568.33	317.679	-483.052	1600.62	204.604	-475.248	1597.86	253.994	-425.919	1418.05	272.739	-377.99	1202.24	265.29	-557.012	1353.92	264.311	-618.934	1222.26	177.38	-365.384	1247.68	432.424	-479.509	1378.89	481.289	-485.917	1147.8	479.83	-479.001	1078.66	494.056	-575.852	997.36	469.545	-612.053	900.242	517.805	-566.015	877.135	523.357	-632.679	806.23
733	0	307.74	-665.968	1574.51	208.023	-667.589	1570.14	318.371	-495.61	1602.9	205.293	-487.938	1600.29	254.296	-437.916	1420.56	272.595	-389.157	1204.81	265.861	-568.787	1356.24	264.716	-630.615	1224.77	176.969	-377.394	1250.48	432.804	-490.763	1380.82	480.716	-494.646	1149.42	478.765	-486.816	1080.5	494.164	-581.137	996.901	470.056	-614.743	898.528	518.025	-567.613	877.003	523.913	-631.29	803.261
734	0	308.648	-678.358	1576.01	208.93	-680.113	1571.77	319.088	-508.062	1604.96	206.008	-500.543	1602.53	254.581	-449.857	1422.85	272.417	-400.306	1207.12	266.387	-580.518	1358.35	265.038	-642.292	1227.08	176.545	-389.38	1253.04	433.155	-501.969	1382.49	480.134	-503.124	1150.84	477.701	-494.398	1082.17	494.32	-586.17	996.386	470.603	-617.25	896.88	518.2	-569.039	876.906	524.489	-629.728	800.524
735	0	309.593	-690.658	1577.27	209.872	-692.565	1573.19	319.82	-520.415	1606.75	206.738	-513.07	1604.52	254.839	-461.763	1424.88	272.188	-411.467	1209.14	266.864	-592.223	1360.21	265.288	-653.98	1229.13	176.104	-401.357	1255.31	433.472	-513.146	1383.88	479.545	-511.367	1152.05	476.643	-501.76	1083.64	494.521	-590.974	995.792	471.181	-619.609	895.276	518.32	-570.33	876.81	525.078	-628.06	798.004
736	0	310.567	-702.878	1578.29	210.842	-704.957	1574.39	320.555	-532.678	1608.23	207.471	-525.53	1606.24	255.064	-473.65	1426.61	271.9	-422.666	1210.84	267.295	-603.92	1361.79	265.482	-665.688	1230.9	175.644	-413.34	1257.27	433.754	-524.31	1384.97	478.948	-519.395	1153.02	475.593	-508.922	1084.89	494.764	-595.575	995.102	471.783	-621.856	893.697	518.374	-571.521	876.682	525.673	-626.351	795.681
737	0	311.56	-715.031	1579.04	211.831	-717.299	1575.33	321.284	-544.861	1609.4	208.199	-537.932	1607.66	255.254	-485.537	1428.02	271.545	-433.919	1212.2	267.682	-615.626	1363.05	265.637	-677.422	1232.32	175.166	-425.336	1258.89	434.002	-535.473	1385.73	478.348	-527.235	1153.74	474.557	-515.91	1085.9	495.043	-600.003	994.298	472.402	-624.026	892.12	518.357	-572.648	876.493	526.264	-624.665	793.53
738	0	312.564	-727.129	1579.51	212.831	-729.603	1576.01	321.998	-556.979	1610.22	208.913	-550.289	1608.74	255.407	-497.439	1429.09	271.122	-445.236	1213.21	268.033	-627.354	1363.98	265.772	-689.182	1233.37	174.672	-437.353	1260.16	434.22	-546.65	1386.16	477.746	-534.916	1154.2	473.537	-522.754	1086.66	495.354	-604.293	993.364	473.034	-626.156	890.524	518.263	-573.747	876.216	526.844	-623.06	791.524
739	0	313.572	-739.186	1579.69	213.834	-741.881	1576.41	322.693	-569.046	1610.69	209.607	-562.613	1609.48	255.526	-509.37	1429.81	270.637	-456.624	1213.87	268.356	-639.116	1364.54	265.906	-700.967	1234.03	174.171	-449.394	1261.05	434.414	-557.852	1386.25	477.149	-542.473	1154.4	472.539	-529.488	1087.17	495.693	-608.48	992.29	473.672	-628.281	888.893	518.09	-574.857	875.831	527.402	-621.588	789.634
740	0	314.578	-751.216	1579.57	214.836	-754.146	1576.51	323.363	-581.078	1610.8	210.279	-574.916	1609.86	255.617	-521.342	1430.18	270.097	-468.08	1214.16	268.66	-650.924	1364.74	266.06	-712.771	1234.27	173.672	-461.461	1261.58	434.592	-569.09	1386	476.562	-549.944	1154.33	471.57	-536.149	1087.42	496.054	-612.605	991.068	474.309	-630.438	887.208	517.838	-576.014	875.323	527.93	-620.297	787.833
741	0	315.576	-763.234	1579.16	215.83	-766.407	1576.33	324.009	-593.091	1610.56	210.927	-587.21	1609.88	255.688	-533.365	1430.2	269.517	-479.6	1214.11	268.958	-662.785	1364.56	266.249	-724.59	1234.09	173.188	-473.556	1261.75	434.764	-580.373	1385.42	475.991	-557.371	1154	470.635	-542.778	1087.41	496.435	-616.711	989.694	474.943	-632.663	885.458	517.512	-577.26	874.683	528.423	-619.231	786.097
742	0	316.561	-775.253	1578.47	216.813	-778.677	1575.84	324.631	-605.1	1609.97	211.551	-599.507	1609.54	255.749	-545.448	1429.87	268.915	-491.174	1213.72	269.261	-674.708	1364.02	266.492	-736.42	1233.5	172.732	-485.677	1261.55	434.941	-591.711	1384.51	475.445	-564.796	1153.41	469.741	-549.418	1087.16	496.831	-620.842	988.169	475.568	-634.994	883.634	517.118	-578.635	873.908	528.871	-618.427	784.403
743	0	317.533	-787.288	1577.49	217.783	-790.963	1575.06	325.232	-617.12	1609.05	212.155	-611.817	1608.85	255.812	-557.596	1429.2	268.313	-502.792	1213.02	269.583	-686.696	1363.11	266.8	-748.26	1232.5	172.322	-497.825	1261.02	435.134	-603.112	1383.29	474.931	-572.263	1152.59	468.895	-556.113	1086.67	497.239	-625.045	986.494	476.182	-637.469	881.729	516.665	-580.181	873.001	529.272	-617.918	782.732
744	0	318.49	-799.35	1576.24	218.738	-803.274	1574	325.817	-629.166	1607.81	212.743	-624.148	1607.83	255.891	-569.814	1428.22	267.735	-514.441	1212.02	269.935	-698.757	1361.87	267.186	-760.111	1231.12	171.973	-510.002	1260.17	435.356	-614.585	1381.8	474.46	-579.818	1151.54	468.106	-562.905	1085.95	497.658	-629.368	984.677	476.783	-640.127	879.743	516.166	-581.945	871.971	529.621	-617.737	781.07
745	0	319.432	-811.449	1574.74	219.679	-815.617	1572.66	326.391	-641.247	1606.29	213.319	-636.508	1606.49	255.999	-582.104	1426.93	267.205	-526.11	1210.76	270.331	-710.891	1360.3	267.659	-771.978	1229.39	171.701	-522.209	1259.01	435.618	-626.137	1380.04	474.041	-587.503	1150.28	467.381	-569.839	1085.03	498.088	-633.86	982.728	477.372	-643.008	877.675	515.637	-583.971	870.828	529.917	-617.909	779.405
746	0	320.36	-823.594	1573.01	220.608	-827.995	1571.07	326.961	-653.375	1604.51	213.892	-648.902	1604.86	256.15	-594.467	1425.36	266.751	-537.791	1209.25	270.781	-723.104	1358.45	268.227	-783.871	1227.34	171.522	-534.451	1257.58	435.932	-637.776	1378.05	473.683	-595.362	1148.83	466.729	-576.955	1083.91	498.527	-638.568	980.656	477.949	-646.152	875.53	515.095	-586.307	869.588	530.16	-618.463	777.73
747	0	321.279	-835.793	1571.06	221.527	-840.413	1569.24	327.537	-665.558	1602.49	214.469	-661.335	1602.97	256.358	-606.902	1423.54	266.398	-549.479	1207.53	271.297	-735.396	1356.33	268.893	-795.801	1225.03	171.45	-546.735	1255.89	436.308	-649.508	1375.85	473.397	-603.433	1147.2	466.158	-584.293	1082.62	498.979	-643.54	978.477	478.518	-649.6	873.314	514.559	-589	868.264	530.353	-619.423	776.04
748	0	322.192	-848.05	1568.94	222.44	-852.872	1567.21	328.126	-677.8	1600.27	215.058	-673.808	1600.85	256.636	-619.408	1421.5	266.171	-561.175	1205.62	271.889	-747.771	1354	269.663	-807.784	1222.49	171.496	-559.071	1253.98	436.755	-661.337	1373.48	473.192	-611.756	1145.43	465.677	-591.89	1081.17	499.447	-648.821	976.204	479.08	-653.392	871.036	514.05	-592.097	866.873	530.498	-620.816	774.334
749	0	323.103	-860.368	1566.67	223.351	-865.374	1565	328.738	-690.105	1597.89	215.668	-686.322	1598.53	256.995	-631.981	1419.26	266.09	-572.887	1203.55	272.565	-760.231	1351.48	270.538	-819.84	1219.78	171.671	-571.469	1251.86	437.284	-673.269	1370.97	473.078	-620.36	1143.52	465.292	-599.779	1079.59	499.934	-654.456	973.855	479.642	-657.571	868.706	513.587	-595.645	865.429	530.602	-622.67	772.61
750	0	324.018	-872.75	1564.27	224.264	-877.917	1562.64	329.38	-702.475	1595.39	216.306	-698.875	1596.05	257.447	-644.621	1416.85	266.173	-584.629	1201.33	273.332	-772.777	1348.82	271.518	-831.986	1216.94	171.98	-583.942	1249.57	437.9	-685.306	1368.34	473.064	-629.276	1141.5	465.012	-607.99	1077.9	500.445	-660.485	971.444	480.207	-662.175	866.334	513.192	-599.689	863.946	530.673	-625.015	770.87
751	0	324.941	-885.195	1561.8	225.186	-890.5	1560.17	330.062	-714.909	1592.79	216.983	-711.466	1593.44	257.999	-657.324	1414.32	266.433	-596.424	1198.98	274.196	-785.413	1346.06	272.604	-844.244	1214.03	172.428	-596.506	1247.12	438.609	-697.451	1365.64	473.158	-638.527	1139.39	464.844	-616.547	1076.1	500.986	-666.947	968.991	480.783	-667.244	863.934	512.883	-604.269	862.435	530.72	-627.882	769.117
752	0	325.879	-897.703	1559.27	226.122	-903.12	1557.63	330.79	-727.405	1590.15	217.704	-724.092	1590.76	258.659	-670.087	1411.68	266.877	-608.299	1196.53	275.162	-798.139	1343.24	273.794	-856.631	1211.1	173.016	-609.174	1244.55	439.416	-709.704	1362.88	473.365	-648.13	1137.21	464.792	-625.472	1074.23	501.565	-673.873	966.513	481.376	-672.815	861.517	512.677	-609.427	860.905	530.753	-631.306	767.353
753	0	326.836	-910.271	1556.74	227.076	-915.776	1555.05	331.572	-739.961	1587.5	218.477	-736.749	1588.04	259.431	-682.91	1408.97	267.506	-620.287	1193.99	276.234	-810.959	1340.42	275.087	-869.165	1208.2	173.741	-621.963	1241.87	440.324	-722.064	1360.1	473.692	-658.098	1134.97	464.863	-634.783	1072.29	502.186	-681.295	964.027	481.994	-678.925	859.099	512.59	-615.195	859.362	530.785	-635.323	765.58
754	0	327.818	-922.896	1554.24	228.055	-928.464	1552.47	332.413	-752.571	1584.88	219.307	-749.432	1585.31	260.318	-695.792	1406.23	268.315	-632.424	1191.36	277.411	-823.875	1337.62	276.481	-881.86	1205.37	174.598	-634.887	1239.13	441.333	-734.531	1357.32	474.141	-668.44	1132.71	465.058	-644.494	1070.32	502.858	-689.239	961.553	482.643	-685.608	856.694	512.634	-621.605	857.813	530.829	-639.973	763.803
755	0	328.829	-935.575	1551.81	229.062	-941.181	1549.94	333.318	-765.233	1582.32	220.201	-762.139	1582.63	261.32	-708.732	1403.49	269.292	-644.746	1188.69	278.695	-836.889	1334.9	277.973	-894.725	1202.66	175.581	-647.96	1236.34	442.443	-747.101	1354.58	474.714	-679.158	1130.45	465.382	-654.613	1068.32	503.586	-697.724	959.112	483.332	-692.895	854.318	512.816	-628.684	856.262	530.899	-645.296	762.027
756	0	329.873	-948.305	1549.48	230.102	-953.925	1547.5	334.291	-777.941	1579.87	221.161	-774.866	1580.02	262.434	-721.73	1400.79	270.422	-657.288	1185.97	280.083	-850.002	1332.29	279.561	-907.768	1200.09	176.679	-661.192	1233.55	443.652	-759.772	1351.91	475.411	-690.252	1128.2	465.833	-665.147	1066.32	504.376	-706.769	956.722	484.067	-700.815	851.99	513.142	-636.453	854.716	531.011	-651.333	760.257
757	0	330.951	-961.083	1547.3	231.177	-966.694	1545.18	335.335	-790.693	1577.55	222.19	-787.609	1577.53	263.655	-734.788	1398.16	271.682	-670.08	1183.24	281.572	-863.215	1329.83	281.241	-920.991	1197.72	177.882	-674.591	1230.79	444.954	-772.542	1349.33	476.228	-701.716	1126	466.412	-676.099	1064.34	505.233	-716.387	954.407	484.855	-709.392	849.727	513.614	-644.929	853.179	531.178	-658.125	758.503
758	0	332.067	-973.906	1545.29	232.289	-979.486	1543.03	336.449	-803.485	1575.41	223.29	-800.367	1575.19	264.976	-747.906	1395.65	273.049	-683.146	1180.54	283.156	-876.528	1327.56	283.009	-934.393	1195.57	179.175	-688.162	1228.09	446.345	-785.406	1346.88	477.162	-713.545	1123.86	467.115	-687.468	1062.41	506.16	-726.586	952.189	485.702	-718.651	847.552	514.231	-654.127	851.66	531.418	-665.713	756.774
759	0	333.22	-986.772	1543.51	233.438	-992.301	1541.08	337.634	-816.314	1573.47	224.461	-813.138	1573.05	266.39	-761.087	1393.28	274.499	-696.503	1177.89	284.827	-889.939	1325.51	284.857	-947.969	1193.66	180.546	-701.903	1225.5	447.818	-798.361	1344.58	478.207	-725.727	1121.82	467.939	-699.253	1060.54	507.159	-737.371	950.091	486.613	-728.61	845.486	514.987	-664.056	850.169	531.745	-674.136	755.084
760	0	334.409	-999.68	1541.96	234.625	-1005.14	1539.36	338.887	-829.18	1571.77	225.701	-825.922	1571.12	267.886	-774.329	1391.1	276.007	-710.162	1175.35	286.575	-903.444	1323.7	286.778	-961.708	1192.02	181.979	-715.81	1223.07	449.362	-811.404	1342.48	479.354	-738.251	1119.9	468.88	-711.449	1058.77	508.233	-748.747	948.14	487.59	-739.284	843.553	515.876	-674.723	848.719	532.173	-683.431	753.449
761	0	335.632	-1012.63	1540.69	235.846	-1018	1537.91	340.207	-842.082	1570.32	227.008	-838.721	1569.44	269.454	-787.633	1389.13	277.55	-724.125	1172.96	288.388	-917.037	1322.17	288.762	-975.6	1190.68	183.46	-729.871	1220.82	450.97	-824.535	1340.59	480.595	-751.105	1118.13	469.93	-724.049	1057.11	509.378	-760.711	946.36	488.636	-750.685	841.778	516.889	-686.131	847.325	532.716	-693.631	751.887
762	0	336.886	-1025.61	1539.7	237.098	-1030.88	1536.75	341.587	-855.019	1569.15	228.376	-851.535	1568.04	271.08	-800.997	1387.42	279.111	-738.383	1170.76	290.253	-930.713	1320.94	290.794	-989.628	1189.64	184.976	-744.068	1218.81	452.629	-837.75	1338.96	481.921	-764.278	1116.55	471.084	-737.046	1055.6	510.594	-773.261	944.777	489.751	-762.823	840.187	518.016	-698.281	846.007	533.386	-704.765	750.421
763	0	338.167	-1038.64	1539.03	238.377	-1043.79	1535.9	343.022	-867.994	1568.28	229.801	-864.368	1566.94	272.753	-814.419	1385.99	280.672	-752.922	1168.81	292.153	-944.461	1320.02	292.859	-1003.77	1188.92	186.515	-758.38	1217.08	454.329	-851.051	1337.6	483.322	-777.754	1115.18	472.334	-750.429	1054.27	511.875	-786.392	943.415	490.934	-775.7	838.805	519.245	-711.172	844.785	534.192	-716.857	749.073
764	0	339.467	-1051.7	1538.67	239.677	-1056.73	1535.37	344.504	-881.007	1567.72	231.275	-877.223	1566.16	274.46	-827.894	1384.87	282.224	-767.719	1167.16	294.072	-958.271	1319.44	294.936	-1018.01	1188.53	188.064	-772.778	1215.67	456.057	-864.435	1336.55	484.788	-791.523	1114.04	473.672	-764.187	1053.13	513.216	-800.094	942.297	492.181	-789.318	837.656	520.565	-724.8	843.679	535.141	-729.926	747.868
765	0	340.781	-1064.81	1538.64	240.991	-1069.69	1535.18	346.024	-894.059	1567.49	232.789	-890.102	1565.71	276.189	-841.415	1384.07	283.758	-782.742	1165.86	295.991	-972.129	1319.18	297.004	-1032.32	1188.48	189.617	-787.23	1214.6	457.8	-877.905	1335.82	486.311	-805.573	1113.16	475.094	-778.31	1052.21	514.61	-814.36	941.446	493.486	-803.671	836.765	521.965	-739.16	842.713	536.238	-743.984	746.833
766	0	342.099	-1077.95	1538.93	242.31	-1082.69	1535.32	347.572	-907.153	1567.58	234.333	-903.009	1565.6	277.928	-854.976	1383.63	285.273	-797.951	1164.94	297.89	-986.021	1319.27	299.038	-1046.66	1188.75	191.168	-801.701	1213.91	459.546	-891.461	1335.44	487.882	-819.893	1112.56	476.591	-792.784	1051.53	516.049	-829.177	940.88	494.844	-818.75	836.152	523.433	-754.242	841.906	537.483	-759.038	745.992
767	0	343.414	-1091.13	1539.55	243.626	-1095.71	1535.8	349.137	-920.289	1567.99	235.896	-915.946	1565.83	279.666	-868.568	1383.54	286.768	-813.301	1164.43	299.75	-999.932	1319.69	301.011	-1061.02	1189.36	192.712	-816.154	1213.61	461.283	-905.104	1335.41	489.493	-834.473	1112.25	478.161	-807.596	1051.11	517.523	-844.531	940.614	496.244	-834.544	835.834	524.962	-770.038	841.28	538.875	-775.086	745.369
768	0	344.714	-1104.35	1540.48	244.929	-1108.77	1536.6	350.708	-933.466	1568.73	237.467	-928.916	1566.39	281.394	-882.18	1383.81	288.245	-828.738	1164.37	301.551	-1013.84	1320.44	302.898	-1075.36	1190.27	194.248	-830.548	1213.71	462.999	-918.833	1335.75	491.138	-849.303	1112.25	479.797	-822.73	1050.96	519.021	-860.408	940.659	497.678	-851.033	835.827	526.543	-786.534	840.85	540.407	-792.122	744.986
769	0	345.991	-1117.6	1541.7	246.209	-1121.85	1537.72	352.271	-946.684	1569.77	239.033	-941.918	1567.29	283.102	-895.8	1384.45	289.711	-844.204	1164.75	303.277	-1027.74	1321.51	304.673	-1089.65	1191.48	195.78	-844.847	1214.23	464.684	-932.65	1336.44	492.813	-864.374	1112.56	481.499	-838.172	1051.09	520.534	-876.79	941.023	499.134	-868.197	836.14	528.17	-803.714	840.631	542.072	-810.131	744.864
770	0	347.235	-1130.88	1543.2	247.456	-1134.96	1539.12	353.814	-959.942	1571.11	240.582	-954.953	1568.5	284.784	-909.417	1385.43	291.172	-859.635	1165.59	304.909	-1041.61	1322.86	306.313	-1103.87	1192.95	197.312	-859.013	1215.15	466.328	-946.552	1337.5	494.514	-879.68	1113.17	483.264	-853.906	1051.5	522.051	-893.66	941.708	500.6	-886.009	836.78	529.836	-821.561	840.634	543.856	-829.09	745.017
771	0	348.435	-1144.19	1544.94	248.66	-1148.09	1540.79	355.327	-973.235	1572.72	242.102	-968.018	1570.01	286.435	-923.018	1386.76	292.639	-874.966	1166.85	306.434	-1055.43	1324.49	307.796	-1117.99	1194.68	198.851	-873.013	1216.45	467.923	-960.539	1338.9	496.239	-895.211	1114.09	485.091	-869.916	1052.18	523.56	-910.995	942.712	502.063	-904.439	837.748	531.537	-840.052	840.864	545.745	-848.97	745.458
772	0	349.583	-1157.52	1546.91	249.812	-1161.24	1542.7	356.796	-986.56	1574.58	243.581	-981.112	1571.8	288.05	-936.59	1388.4	294.123	-890.135	1168.52	307.838	-1069.19	1326.37	309.104	-1131.99	1196.61	200.407	-886.818	1218.12	469.462	-974.605	1340.63	497.986	-910.96	1115.31	486.981	-886.187	1053.12	525.052	-928.775	944.028	503.512	-923.453	839.04	533.269	-859.162	841.324	547.72	-869.736	746.196
773	0	350.669	-1170.86	1549.07	250.903	-1174.41	1544.82	358.213	-999.912	1576.66	245.009	-994.228	1573.82	289.626	-950.121	1390.33	295.639	-905.082	1170.56	309.114	-1082.88	1328.46	310.224	-1145.85	1198.74	201.992	-900.405	1220.11	470.94	-988.748	1342.66	499.755	-926.921	1116.79	488.935	-902.701	1054.32	526.517	-946.975	945.644	504.933	-943.015	840.65	535.03	-878.865	842.013	549.762	-891.345	747.234
774	0	351.685	-1184.22	1551.39	251.925	-1187.58	1547.11	359.567	-1013.28	1578.94	246.377	-1007.36	1576.07	291.164	-963.599	1392.52	297.202	-919.753	1172.92	310.255	-1096.47	1330.73	311.147	-1159.55	1201.02	203.618	-913.754	1222.39	472.353	-1002.96	1344.97	501.547	-943.086	1118.53	490.953	-919.445	1055.76	527.946	-965.571	947.547	506.315	-963.084	842.564	536.815	-899.129	842.927	551.847	-913.749	748.576
775	0	352.625	-1197.58	1553.84	252.872	-1200.75	1549.53	360.851	-1026.67	1581.39	247.676	-1020.51	1578.49	292.661	-977.014	1394.93	298.826	-934.107	1175.56	311.259	-1109.97	1333.16	311.868	-1173.1	1203.42	205.294	-926.856	1224.93	473.699	-1017.23	1347.51	503.361	-959.448	1120.49	493.036	-936.402	1057.4	529.332	-984.535	949.716	507.647	-983.621	844.769	538.622	-919.922	844.059	553.952	-936.894	750.217
776	0	353.484	-1210.93	1556.37	253.737	-1213.91	1552.05	362.059	-1040.06	1583.97	248.901	-1033.66	1581.05	294.119	-990.358	1397.53	300.525	-948.116	1178.41	312.127	-1123.36	1335.69	312.392	-1186.48	1205.91	207.03	-939.707	1227.66	474.977	-1031.54	1350.26	505.199	-976.001	1122.66	495.184	-953.558	1059.24	530.667	-1003.84	952.132	508.92	-1004.58	847.247	540.447	-941.208	845.399	556.055	-960.722	752.152
777	0	354.257	-1224.28	1558.97	254.517	-1227.05	1554.63	363.188	-1053.45	1586.65	250.047	-1046.8	1583.73	295.54	-1003.62	1400.28	302.308	-961.765	1181.43	312.864	-1136.64	1338.31	312.726	-1199.69	1208.46	208.831	-952.309	1230.55	476.187	-1045.9	1353.17	507.061	-992.736	1124.99	497.395	-970.9	1061.23	531.948	-1023.46	954.77	510.127	-1025.93	849.976	542.286	-962.953	846.938	558.13	-985.171	754.374
778	0	354.942	-1237.6	1561.58	255.209	-1240.16	1557.23	364.234	-1066.83	1589.4	251.114	-1059.93	1586.47	296.923	-1016.8	1403.14	304.179	-975.055	1184.56	313.477	-1149.8	1340.97	312.887	-1212.75	1211.05	210.699	-964.672	1233.55	477.33	-1060.27	1356.21	508.945	-1009.64	1127.46	499.668	-988.413	1063.35	533.169	-1043.37	957.606	511.261	-1047.61	852.934	544.138	-985.118	848.662	560.156	-1010.18	756.872
779	0	355.539	-1250.9	1564.19	255.812	-1253.24	1559.82	365.197	-1080.19	1592.17	252.099	-1073.03	1589.25	298.27	-1029.89	1406.06	306.137	-988.004	1187.75	313.979	-1162.85	1343.65	312.894	-1225.65	1213.64	212.63	-976.812	1236.61	478.407	-1074.64	1359.34	510.85	-1026.71	1130.03	501.997	-1006.08	1065.57	534.33	-1063.53	960.613	512.318	-1069.59	856.098	545.996	-1007.67	850.56	562.11	-1035.67	759.631
780	0	356.048	-1264.16	1566.76	256.327	-1266.28	1562.36	366.078	-1093.53	1594.95	253.004	-1086.1	1592.01	299.582	-1042.9	1409	308.174	-1000.64	1190.95	314.382	-1175.77	1346.3	312.775	-1238.4	1216.22	214.619	-988.749	1239.69	479.422	-1088.99	1362.5	512.774	-1043.93	1132.66	504.378	-1023.9	1067.86	535.427	-1083.91	963.764	513.296	-1091.83	859.442	547.857	-1030.56	852.618	563.974	-1061.6	762.637
781	0	356.472	-1277.39	1569.25	256.758	-1279.26	1564.82	366.879	-1106.83	1597.69	253.833	-1099.13	1594.74	300.86	-1055.81	1411.92	310.274	-1013	1194.1	314.701	-1188.58	1348.89	312.557	-1251.02	1218.75	216.654	-1000.51	1242.75	480.377	-1103.31	1365.66	514.713	-1061.29	1135.33	506.803	-1041.85	1070.18	536.462	-1104.49	967.032	514.195	-1114.28	862.94	549.715	-1053.76	854.819	565.729	-1087.87	765.871
782	0	356.815	-1290.56	1571.65	257.108	-1292.19	1567.17	367.606	-1120.08	1600.37	254.588	-1112.11	1597.38	302.106	-1068.64	1414.78	312.419	-1025.12	1197.17	314.953	-1201.29	1351.4	312.271	-1263.52	1221.2	218.721	-1012.11	1245.74	481.276	-1117.57	1368.78	516.662	-1078.76	1137.99	509.263	-1059.91	1072.5	537.436	-1125.24	970.387	515.015	-1136.92	866.565	551.565	-1077.24	857.147	567.363	-1114.44	769.313
783	0	357.084	-1303.69	1573.92	257.383	-1305.06	1569.38	368.261	-1133.29	1602.93	255.276	-1125.04	1599.91	303.32	-1081.38	1417.54	314.584	-1037.07	1200.12	315.153	-1213.89	1353.79	311.945	-1275.92	1223.56	220.804	-1023.6	1248.62	482.123	-1131.76	1371.81	518.616	-1096.33	1140.62	511.748	-1078.08	1074.79	538.351	-1146.13	973.801	515.76	-1159.71	870.29	553.398	-1100.95	859.585	568.862	-1141.24	772.939
784	0	357.286	-1316.76	1576.04	257.589	-1317.87	1571.43	368.852	-1146.44	1605.37	255.901	-1137.9	1602.28	304.502	-1094.04	1420.16	316.744	-1048.88	1202.91	315.318	-1226.39	1356.03	311.608	-1288.23	1225.79	222.887	-1034.98	1251.37	482.922	-1145.87	1374.72	520.569	-1113.97	1143.17	514.248	-1096.34	1077.02	539.211	-1167.12	977.247	516.432	-1182.61	874.088	555.207	-1124.85	862.112	570.218	-1168.2	776.726
785	0	357.427	-1329.76	1577.99	257.736	-1330.61	1573.29	369.384	-1159.53	1607.63	256.47	-1150.7	1604.48	305.652	-1106.63	1422.61	318.873	-1060.6	1205.52	315.463	-1238.81	1358.09	311.283	-1300.45	1227.85	224.952	-1046.29	1253.94	483.677	-1159.88	1377.45	522.513	-1131.67	1145.62	516.751	-1114.68	1079.15	540.02	-1188.19	980.696	517.036	-1205.59	877.932	556.984	-1148.92	864.709	571.426	-1195.26	780.648
786	0	357.518	-1342.71	1579.74	257.831	-1343.29	1574.94	369.865	-1172.56	1609.71	256.99	-1163.43	1606.46	306.769	-1119.15	1424.85	320.946	-1072.27	1207.9	315.599	-1251.15	1359.95	310.991	-1312.61	1229.73	226.981	-1057.56	1256.3	484.391	-1173.77	1379.99	524.442	-1149.39	1147.94	519.245	-1133.08	1081.16	540.781	-1209.31	984.122	517.574	-1228.63	881.795	558.718	-1173.12	867.353	572.482	-1222.37	784.679
787	0	357.567	-1355.59	1581.28	257.884	-1355.9	1576.37	370.301	-1185.52	1611.56	257.467	-1176.09	1608.21	307.853	-1131.62	1426.87	322.941	-1083.92	1210.04	315.738	-1263.43	1361.58	310.744	-1324.71	1231.39	228.956	-1068.8	1258.44	485.068	-1187.56	1382.29	526.346	-1167.12	1150.1	521.716	-1151.52	1083.03	541.498	-1230.45	987.499	518.052	-1251.69	885.651	560.399	-1197.4	870.023	573.386	-1249.48	788.791
788	0	357.584	-1368.41	1582.58	257.904	-1368.44	1577.56	370.698	-1198.41	1613.16	257.906	-1188.69	1609.7	308.9	-1144.04	1428.62	324.84	-1095.58	1211.91	315.888	-1275.66	1362.97	310.554	-1336.76	1232.8	230.862	-1080.04	1260.33	485.709	-1201.23	1384.32	528.22	-1184.82	1152.08	524.152	-1169.99	1084.72	542.175	-1251.58	990.801	518.473	-1274.75	889.477	562.018	-1221.74	872.696	574.139	-1276.53	792.959
789	0	357.577	-1381.16	1583.65	257.9	-1380.93	1578.49	371.061	-1211.23	1614.51	258.312	-1201.22	1610.92	309.908	-1156.41	1430.11	326.626	-1107.26	1213.5	316.052	-1287.84	1364.08	310.424	-1348.74	1233.93	232.683	-1091.29	1261.95	486.316	-1214.77	1386.06	530.053	-1202.48	1153.85	526.54	-1188.48	1086.22	542.815	-1272.68	994.006	518.84	-1297.78	893.25	563.563	-1246.1	875.352	574.745	-1303.49	797.159
790	0	357.556	-1393.86	1584.46	257.88	-1393.37	1579.17	371.398	-1223.98	1615.57	258.691	-1213.69	1611.84	310.874	-1168.75	1431.3	328.287	-1118.98	1214.79	316.234	-1299.99	1364.92	310.353	-1360.68	1234.76	234.404	-1102.57	1263.29	486.889	-1228.2	1387.48	531.837	-1220.06	1155.39	528.869	-1206.97	1087.51	543.42	-1293.71	997.093	519.154	-1320.75	896.95	565.024	-1270.43	877.969	575.21	-1330.3	801.366
791	0	357.527	-1406.5	1585.01	257.852	-1405.76	1579.58	371.71	-1236.67	1616.33	259.044	-1226.11	1612.47	311.793	-1181.07	1432.18	329.814	-1130.73	1215.77	316.434	-1312.12	1365.46	310.339	-1372.56	1235.27	236.013	-1113.88	1264.33	487.428	-1241.51	1388.56	533.563	-1237.56	1156.69	531.124	-1225.44	1088.58	543.99	-1314.66	1000.04	519.418	-1343.64	900.557	566.394	-1294.71	880.531	575.539	-1356.93	805.56
792	0	357.498	-1419.08	1585.28	257.823	-1418.11	1579.72	372.001	-1249.29	1616.8	259.375	-1238.48	1612.79	312.659	-1193.37	1432.75	331.198	-1142.51	1216.43	316.647	-1324.23	1365.69	310.372	-1384.4	1235.46	237.495	-1125.24	1265.08	487.928	-1254.71	1389.3	535.222	-1254.93	1157.73	533.295	-1243.87	1089.41	544.525	-1335.49	1002.84	519.631	-1366.42	904.055	567.663	-1318.9	883.02	575.74	-1383.35	809.722
793	0	357.472	-1431.61	1585.29	257.797	-1430.43	1579.59	372.272	-1261.86	1616.95	259.684	-1250.82	1612.81	313.466	-1205.67	1433.01	332.434	-1154.3	1216.79	316.87	-1336.34	1365.63	310.444	-1396.18	1235.3	238.841	-1136.66	1265.52	488.387	-1267.8	1389.68	536.805	-1272.18	1158.52	535.371	-1262.24	1090.01	545.023	-1356.18	1005.48	519.795	-1389.06	907.432	568.825	-1342.96	885.423	575.822	-1409.51	813.838
794	0	357.455	-1444.1	1585.02	257.779	-1442.72	1579.2	372.524	-1274.37	1616.8	259.969	-1263.12	1612.52	314.207	-1217.96	1432.95	333.518	-1166.11	1216.82	317.094	-1348.46	1365.26	310.541	-1407.93	1234.8	240.04	-1148.14	1265.65	488.801	-1280.8	1389.71	538.301	-1289.28	1159.04	537.339	-1280.55	1090.36	545.482	-1376.71	1007.93	519.909	-1411.53	910.676	569.875	-1366.85	887.73	575.792	-1435.4	817.894
795	0	357.447	-1456.54	1584.48	257.77	-1455	1578.55	372.754	-1286.84	1616.34	260.23	-1275.4	1611.93	314.875	-1230.26	1432.59	334.447	-1177.92	1216.55	317.311	-1360.58	1364.59	310.652	-1419.64	1233.97	241.083	-1159.7	1265.49	489.162	-1293.71	1389.39	539.702	-1306.21	1159.3	539.19	-1298.76	1090.48	545.897	-1397.05	1010.21	519.972	-1433.81	913.777	570.809	-1390.54	889.933	575.661	-1460.97	821.879
796	0	357.45	-1468.96	1583.69	257.771	-1467.27	1577.65	372.961	-1299.26	1615.58	260.462	-1287.66	1611.06	315.461	-1242.56	1431.91	335.219	-1189.72	1215.98	317.51	-1372.73	1363.63	310.761	-1431.34	1232.83	241.963	-1171.33	1265.03	489.465	-1306.54	1388.73	540.998	-1322.98	1159.29	540.914	-1316.85	1090.35	546.266	-1417.18	1012.29	519.983	-1455.87	916.73	571.625	-1414	892.026	575.438	-1486.2	825.786
797	0	357.46	-1481.34	1582.63	257.78	-1479.55	1576.51	373.139	-1311.64	1614.53	260.661	-1299.92	1609.91	315.958	-1254.88	1430.95	335.832	-1201.51	1215.11	317.679	-1384.91	1362.4	310.855	-1443.04	1231.38	242.676	-1183.05	1264.28	489.703	-1319.3	1387.75	542.18	-1339.55	1159.03	542.503	-1334.8	1090	546.583	-1437.08	1014.18	519.942	-1477.68	919.53	572.322	-1437.19	894.006	575.131	-1511.07	829.606
798	0	357.476	-1493.69	1581.34	257.794	-1491.82	1575.15	373.284	-1324	1613.21	260.821	-1312.18	1608.51	316.357	-1267.22	1429.71	336.288	-1213.28	1213.97	317.807	-1397.13	1360.91	310.919	-1454.76	1229.66	243.22	-1194.85	1263.25	489.867	-1332	1386.46	543.238	-1355.93	1158.53	543.949	-1352.6	1089.43	546.844	-1456.73	1015.88	519.848	-1499.21	922.172	572.9	-1460.07	895.87	574.751	-1535.53	833.334
799	0	357.491	-1506.02	1579.82	257.808	-1504.11	1573.58	373.388	-1336.32	1611.64	260.935	-1324.44	1606.87	316.65	-1279.59	1428.2	336.588	-1225.05	1212.57	317.881	-1409.39	1359.19	310.938	-1466.53	1227.7	243.594	-1206.75	1261.96	489.95	-1344.66	1384.88	544.167	-1372.11	1157.79	545.244	-1370.21	1088.65	547.045	-1476.1	1017.38	519.702	-1520.44	924.656	573.361	-1482.61	897.618	574.306	-1559.57	836.963
800	0	357.498	-1518.33	1578.1	257.816	-1516.42	1571.83	373.444	-1348.63	1609.83	260.995	-1336.72	1605.02	316.83	-1291.97	1426.45	336.734	-1236.82	1210.92	317.887	-1421.69	1357.25	310.897	-1478.36	1225.53	243.8	-1218.75	1260.4	489.945	-1357.27	1383.05	544.958	-1388.07	1156.83	546.384	-1387.61	1087.68	547.183	-1495.17	1018.7	519.503	-1541.35	926.978	573.707	-1504.78	899.248	573.805	-1583.16	840.487
801	0	357.492	-1530.63	1576.19	257.811	-1528.74	1569.92	373.444	-1360.91	1607.8	260.993	-1349.01	1602.98	316.89	-1304.39	1424.47	336.73	-1248.6	1209.05	317.814	-1434.06	1355.12	310.783	-1490.29	1223.19	243.844	-1230.86	1258.61	489.845	-1369.86	1380.99	545.607	-1403.81	1155.67	547.364	-1404.78	1086.53	547.255	-1513.93	1019.82	519.252	-1561.9	929.139	573.941	-1526.56	900.758	573.257	-1606.27	843.899
802	0	357.461	-1542.91	1574.12	257.782	-1541.09	1567.87	373.378	-1373.18	1605.59	260.921	-1361.33	1600.77	316.823	-1316.85	1422.3	336.583	-1260.41	1206.97	317.65	-1446.48	1352.84	310.583	-1502.32	1220.72	243.731	-1243.08	1256.59	489.641	-1382.44	1378.72	546.108	-1419.33	1154.32	548.178	-1421.71	1085.21	547.259	-1532.36	1020.75	518.951	-1582.08	931.136	574.064	-1547.91	902.147	572.671	-1628.88	847.189
803	0	357.397	-1555.19	1571.93	257.721	-1553.46	1565.72	373.238	-1385.44	1603.22	260.768	-1373.66	1598.43	316.624	-1329.34	1419.94	336.3	-1272.28	1204.7	317.385	-1458.98	1350.43	310.284	-1514.49	1218.14	243.47	-1255.41	1254.37	489.329	-1395.01	1376.3	546.458	-1434.62	1152.8	548.826	-1438.36	1083.74	547.196	-1550.43	1021.5	518.602	-1601.86	932.967	574.081	-1568.8	903.408	572.053	-1650.96	850.346
804	0	357.29	-1567.46	1569.63	257.618	-1565.86	1563.48	373.014	-1397.68	1600.72	260.528	-1386.02	1595.97	316.288	-1341.87	1417.44	335.888	-1284.23	1202.27	317.009	-1471.55	1347.92	309.875	-1526.79	1215.51	243.069	-1267.87	1251.96	488.904	-1407.59	1373.74	546.655	-1449.68	1151.13	549.306	-1454.72	1082.13	547.064	-1568.14	1022.07	518.208	-1621.23	934.631	573.993	-1589.2	904.538	571.413	-1672.49	853.358
805	0	357.131	-1579.72	1567.26	257.463	-1578.29	1561.2	372.698	-1409.92	1598.12	260.191	-1398.39	1593.44	315.812	-1354.44	1414.81	335.356	-1296.28	1199.7	316.516	-1484.2	1345.35	309.35	-1539.26	1212.85	242.537	-1280.46	1249.38	488.361	-1420.19	1371.08	546.699	-1464.49	1149.33	549.617	-1470.77	1080.41	546.864	-1585.47	1022.46	517.771	-1640.16	936.124	573.805	-1609.1	905.527	570.756	-1693.45	856.21
806	0	356.908	-1591.99	1564.86	257.245	-1590.75	1558.9	372.283	-1422.15	1595.45	259.751	-1410.79	1590.86	315.194	-1367.07	1412.1	334.711	-1308.47	1197.01	315.898	-1496.93	1342.75	308.7	-1551.88	1210.21	241.883	-1293.19	1246.67	487.699	-1432.81	1368.36	546.591	-1479.07	1147.42	549.761	-1486.51	1078.6	546.598	-1602.41	1022.68	517.294	-1658.65	937.441	573.517	-1628.47	906.366	570.09	-1713.81	858.883
807	0	356.614	-1604.25	1562.45	256.957	-1603.23	1556.62	371.76	-1434.37	1592.74	259.201	-1423.22	1588.26	314.433	-1379.75	1409.32	333.959	-1320.83	1194.22	315.154	-1509.75	1340.16	307.924	-1564.68	1207.61	241.115	-1306.06	1243.84	486.915	-1445.47	1365.61	546.331	-1493.41	1145.42	549.74	-1501.91	1076.7	546.268	-1618.94	1022.73	516.781	-1676.66	938.578	573.135	-1647.29	907.046	569.418	-1733.57	861.358
808	0	356.241	-1616.52	1560.08	256.589	-1615.74	1554.39	371.126	-1446.59	1590.03	258.537	-1435.66	1585.67	313.529	-1392.49	1406.51	333.106	-1333.37	1191.36	314.282	-1522.67	1337.59	307.02	-1577.64	1205.08	240.241	-1319.07	1240.93	486.01	-1458.18	1362.86	545.922	-1507.5	1143.37	549.557	-1516.98	1074.74	545.875	-1635.06	1022.61	516.234	-1694.2	939.528	572.661	-1665.54	907.554	568.746	-1752.7	863.615
809	0	355.782	-1628.8	1557.77	256.135	-1628.27	1552.24	370.377	-1458.81	1587.33	257.756	-1448.12	1583.11	312.483	-1405.28	1403.7	332.156	-1346.13	1188.45	313.286	-1535.68	1335.09	305.991	-1590.78	1202.66	239.264	-1332.24	1237.96	484.986	-1470.93	1360.15	545.369	-1521.36	1141.28	549.216	-1531.7	1072.74	545.422	-1650.77	1022.34	515.657	-1711.24	940.285	572.098	-1683.2	907.88	568.077	-1771.18	865.631
810	0	355.232	-1641.08	1555.57	255.591	-1640.82	1550.21	369.509	-1471.03	1584.7	256.856	-1460.59	1580.62	311.3	-1418.15	1400.93	331.109	-1359.12	1185.53	312.169	-1548.79	1332.69	304.846	-1604.08	1200.37	238.19	-1345.57	1234.98	483.847	-1483.73	1357.51	544.676	-1534.99	1139.18	548.722	-1546.09	1070.72	544.909	-1666.06	1021.91	515.053	-1727.77	940.843	571.451	-1700.25	908.016	567.414	-1789.01	867.385
811	0	354.588	-1653.38	1553.5	254.953	-1653.4	1548.32	368.525	-1483.24	1582.15	255.839	-1473.09	1578.23	309.984	-1431.07	1398.23	329.967	-1372.37	1182.63	310.94	-1561.99	1330.42	303.595	-1617.56	1198.25	237.019	-1359.05	1232	482.6	-1496.58	1354.97	543.848	-1548.4	1137.09	548.081	-1560.13	1068.71	544.338	-1680.92	1021.33	514.423	-1743.79	941.196	570.725	-1716.68	907.951	566.758	-1806.16	868.854
812	0	353.849	-1665.68	1551.6	254.219	-1665.99	1546.6	367.426	-1495.46	1579.72	254.708	-1485.59	1575.96	308.541	-1444.07	1395.63	328.729	-1385.88	1179.77	309.611	-1575.28	1328.3	302.252	-1631.2	1196.3	235.752	-1372.69	1229.07	481.251	-1509.48	1352.58	542.89	-1561.58	1135.06	547.298	-1573.83	1066.74	543.71	-1695.37	1020.63	513.771	-1759.28	941.338	569.925	-1732.49	907.683	566.109	-1822.63	870.017
813	0	353.016	-1678	1549.89	253.392	-1678.61	1545.08	366.217	-1507.68	1577.43	253.467	-1498.11	1573.85	306.98	-1457.12	1393.17	327.391	-1399.65	1177	308.193	-1588.65	1326.35	300.837	-1645	1194.56	234.389	-1386.48	1226.23	479.81	-1522.42	1350.35	541.809	-1574.56	1133.1	546.381	-1587.21	1064.82	543.026	-1709.39	1019.79	513.098	-1774.23	941.265	569.058	-1747.65	907.209	565.469	-1838.41	870.856
814	0	352.093	-1690.34	1548.41	252.473	-1691.24	1543.79	364.904	-1519.91	1575.32	252.124	-1510.64	1571.9	305.31	-1470.25	1390.88	325.952	-1413.68	1174.36	306.704	-1602.1	1324.61	299.373	-1658.95	1193.05	232.927	-1400.42	1223.51	478.288	-1535.4	1348.32	540.612	-1587.33	1131.24	545.335	-1600.26	1062.99	542.285	-1722.99	1018.85	512.405	-1788.64	940.978	568.129	-1762.16	906.532	564.837	-1853.48	871.354
815	0	351.084	-1702.69	1547.17	251.469	-1703.89	1542.73	363.498	-1532.14	1573.4	250.689	-1523.18	1570.16	303.543	-1483.43	1388.78	324.406	-1427.95	1171.89	305.161	-1615.63	1323.09	297.884	-1673.02	1191.78	231.367	-1414.49	1220.95	476.699	-1548.41	1346.51	539.306	-1599.92	1129.52	544.167	-1613	1061.28	541.489	-1736.18	1017.81	511.694	-1802.5	940.475	567.146	-1776.02	905.659	564.211	-1867.83	871.499
816	0	349.996	-1715.06	1546.19	250.386	-1716.55	1541.94	362.008	-1544.39	1571.71	249.172	-1535.74	1568.63	301.691	-1496.66	1386.92	322.753	-1442.43	1169.64	303.584	-1629.2	1321.82	296.397	-1687.21	1190.75	229.709	-1428.68	1218.6	475.057	-1561.43	1344.96	537.9	-1612.32	1127.97	542.884	-1625.44	1059.71	540.638	-1748.96	1016.69	510.966	-1815.8	939.761	566.117	-1789.21	904.602	563.59	-1881.45	871.281
817	0	348.838	-1727.45	1545.49	249.234	-1729.23	1541.42	360.448	-1556.65	1570.27	247.587	-1548.3	1567.34	299.771	-1509.94	1385.32	320.991	-1457.1	1167.65	301.994	-1642.81	1320.79	294.939	-1701.47	1189.99	227.955	-1442.96	1216.49	473.378	-1574.46	1343.69	536.401	-1624.55	1126.6	541.494	-1637.59	1058.31	539.732	-1761.33	1015.51	510.221	-1828.54	938.842	565.049	-1801.73	903.376	562.974	-1894.33	870.695
818	0	347.622	-1739.85	1545.09	248.022	-1741.91	1541.18	358.83	-1568.92	1569.09	245.948	-1560.87	1566.31	297.799	-1523.25	1384	319.124	-1471.9	1165.96	300.411	-1656.45	1320.03	293.536	-1715.79	1189.49	226.11	-1457.31	1214.66	471.678	-1587.47	1342.72	534.82	-1636.6	1125.45	540.003	-1649.45	1057.1	538.772	-1773.3	1014.28	509.462	-1840.71	937.729	563.951	-1813.59	902.003	562.36	-1906.45	869.742
819	0	346.357	-1752.28	1544.98	246.764	-1754.61	1541.22	357.171	-1581.22	1568.19	244.27	-1573.46	1565.54	295.794	-1536.59	1382.99	317.161	-1486.79	1164.62	298.856	-1670.09	1319.55	292.213	-1730.12	1189.24	224.184	-1471.7	1213.15	469.975	-1600.45	1342.06	533.166	-1648.5	1124.52	538.42	-1661.04	1056.11	537.761	-1784.86	1013.03	508.687	-1852.3	936.433	562.829	-1824.77	900.505	561.747	-1917.81	868.428
820	0	345.058	-1764.72	1545.17	245.471	-1767.3	1541.55	355.487	-1593.52	1567.59	242.569	-1586.05	1565.06	293.775	-1549.94	1382.3	315.117	-1501.7	1163.66	297.349	-1683.71	1319.35	290.992	-1744.43	1189.26	222.189	-1486.1	1211.98	468.285	-1613.4	1341.73	531.452	-1660.22	1123.85	536.753	-1672.36	1055.35	536.701	-1796.04	1011.77	507.898	-1863.33	934.972	561.69	-1835.28	898.909	561.133	-1928.4	866.763
821	0	343.736	-1777.18	1545.67	244.156	-1780	1542.17	353.793	-1605.85	1567.3	240.861	-1598.64	1564.86	291.762	-1563.27	1381.94	313.012	-1516.57	1163.12	295.908	-1697.29	1319.42	289.889	-1758.67	1189.52	220.141	-1500.47	1211.18	466.626	-1626.28	1341.74	529.687	-1671.78	1123.44	535.011	-1683.42	1054.84	535.597	-1806.82	1010.52	507.096	-1873.78	933.362	560.541	-1845.14	897.241	560.518	-1938.21	864.763
822	0	342.406	-1789.66	1546.45	242.834	-1792.7	1543.05	352.106	-1618.2	1567.32	239.163	-1611.24	1564.95	289.775	-1576.59	1381.93	310.872	-1531.33	1163	294.548	-1710.81	1319.77	288.918	-1772.8	1190.03	218.06	-1514.77	1210.76	465.014	-1639.09	1342.08	527.885	-1683.18	1123.29	533.202	-1694.23	1054.58	534.452	-1817.21	1009.3	506.281	-1883.65	931.624	559.387	-1854.33	895.532	559.898	-1947.23	862.448
823	0	341.081	-1802.14	1547.51	241.517	-1805.39	1544.19	350.443	-1630.56	1567.65	237.492	-1623.85	1565.34	287.834	-1589.86	1382.27	308.729	-1545.93	1163.32	293.285	-1724.25	1320.4	288.087	-1786.79	1190.77	215.966	-1528.97	1210.74	463.464	-1651.81	1342.75	526.059	-1694.4	1123.41	531.335	-1704.78	1054.59	533.274	-1827.22	1008.13	505.456	-1892.96	929.781	558.234	-1862.88	893.808	559.272	-1955.48	859.844
824	0	339.772	-1814.63	1548.84	240.219	-1818.07	1545.58	348.818	-1642.94	1568.3	235.862	-1636.44	1566.02	285.956	-1603.07	1382.95	306.613	-1560.3	1164.07	292.128	-1737.58	1321.3	287.402	-1800.6	1191.73	213.881	-1543.04	1211.12	461.989	-1664.42	1343.74	524.221	-1705.44	1123.8	529.421	-1715.09	1054.87	532.07	-1836.84	1007.01	504.621	-1901.71	927.854	557.085	-1870.79	892.098	558.638	-1962.93	856.98
825	0	338.494	-1827.11	1550.42	238.951	-1830.73	1547.18	347.247	-1655.34	1569.26	234.287	-1649.03	1566.98	284.159	-1616.2	1383.96	304.557	-1574.39	1165.24	291.085	-1750.79	1322.45	286.863	-1814.19	1192.9	211.824	-1556.94	1211.89	460.601	-1676.91	1345.04	522.383	-1716.29	1124.44	527.47	-1725.15	1055.4	530.846	-1846.08	1005.96	503.779	-1909.9	925.867	555.945	-1878.08	890.427	557.995	-1969.62	853.888
826	0	337.256	-1839.59	1552.21	237.726	-1843.36	1548.99	345.742	-1667.74	1570.52	232.781	-1661.61	1568.22	282.456	-1629.23	1385.29	302.588	-1588.15	1166.79	290.161	-1763.85	1323.85	286.466	-1827.55	1194.28	209.815	-1570.65	1213.04	459.308	-1689.25	1346.62	520.558	-1726.95	1125.32	525.489	-1734.96	1056.17	529.612	-1854.94	1004.98	502.933	-1917.54	923.842	554.817	-1884.78	888.819	557.34	-1975.54	850.604
827	0	336.07	-1852.06	1554.21	236.553	-1855.96	1550.97	344.315	-1680.14	1572.06	231.356	-1674.17	1569.72	280.858	-1642.15	1386.92	300.726	-1601.55	1168.68	289.356	-1776.77	1325.48	286.204	-1840.66	1195.85	207.867	-1584.16	1214.55	458.117	-1701.45	1348.46	518.757	-1737.4	1126.43	523.49	-1744.53	1057.18	528.375	-1863.43	1004.08	502.083	-1924.65	921.801	553.704	-1890.9	887.294	556.672	-1980.71	847.167
828	0	334.945	-1864.51	1556.37	235.442	-1868.53	1553.09	342.975	-1692.54	1573.88	230.019	-1686.7	1571.46	279.374	-1654.95	1388.82	298.987	-1614.57	1170.88	288.667	-1789.51	1327.33	286.067	-1853.5	1197.61	205.993	-1597.45	1216.39	457.032	-1713.48	1350.53	516.987	-1747.64	1127.74	521.48	-1753.85	1058.41	527.143	-1871.54	1003.27	501.235	-1931.25	919.765	552.607	-1896.46	885.87	555.989	-1985.17	843.617
829	0	333.888	-1876.92	1558.68	234.4	-1881.05	1555.35	341.731	-1704.93	1575.95	228.779	-1699.2	1573.44	278.007	-1667.61	1390.97	297.378	-1627.2	1173.33	288.089	-1802.08	1329.37	286.038	-1866.08	1199.55	204.2	-1610.5	1218.53	456.052	-1725.34	1352.79	515.258	-1757.66	1129.23	519.469	-1762.93	1059.83	525.924	-1879.28	1002.54	500.388	-1937.33	917.751	551.529	-1901.49	884.559	555.292	-1988.92	839.993
830	0	332.906	-1889.3	1561.1	233.435	-1893.52	1557.7	340.586	-1717.3	1578.23	227.64	-1711.66	1575.62	276.76	-1680.13	1393.34	295.899	-1639.44	1175.98	287.61	-1814.48	1331.59	286.098	-1878.4	1201.65	202.494	-1623.33	1220.93	455.177	-1737.04	1355.2	513.575	-1767.45	1130.87	517.464	-1771.75	1061.41	524.723	-1886.66	1001.89	499.547	-1942.94	915.776	550.468	-1906.02	883.373	554.579	-1992	836.337
831	0	332.003	-1901.64	1563.6	232.55	-1905.93	1560.12	339.544	-1729.64	1580.71	226.605	-1724.08	1577.98	275.632	-1692.51	1395.89	294.546	-1651.33	1178.79	287.219	-1826.7	1333.96	286.223	-1890.46	1203.9	200.878	-1635.93	1223.55	454.4	-1748.57	1357.74	511.941	-1777	1132.63	515.471	-1780.32	1063.14	523.548	-1893.68	1001.32	498.713	-1948.08	913.854	549.424	-1910.07	882.317	553.852	-1994.45	832.687
832	0	331.184	-1913.92	1566.15	231.75	-1918.28	1562.58	338.606	-1741.94	1583.33	225.673	-1736.45	1580.48	274.618	-1704.74	1398.58	293.31	-1662.88	1181.72	286.901	-1838.76	1336.45	286.385	-1902.3	1206.28	199.351	-1648.32	1226.36	453.714	-1759.95	1360.36	510.359	-1786.31	1134.49	513.496	-1788.64	1064.98	522.401	-1900.34	1000.81	497.888	-1952.77	911.994	548.392	-1913.68	881.393	553.109	-1996.31	829.081
833	0	330.45	-1926.15	1568.73	231.034	-1930.56	1565.07	337.768	-1754.2	1586.08	224.843	-1748.75	1583.1	273.712	-1716.83	1401.38	292.178	-1674.13	1184.71	286.64	-1850.65	1339.04	286.556	-1913.92	1208.77	197.912	-1660.51	1229.31	453.109	-1771.18	1363.01	508.828	-1795.39	1136.41	511.544	-1796.71	1066.91	521.285	-1906.66	1000.35	497.073	-1957.05	910.203	547.37	-1916.87	880.6	552.353	-1997.62	825.551
834	0	329.801	-1938.31	1571.3	230.405	-1942.77	1567.56	337.027	-1766.4	1588.89	224.11	-1761	1585.8	272.904	-1728.79	1404.24	291.138	-1685.15	1187.72	286.419	-1862.41	1341.68	286.707	-1925.36	1211.35	196.558	-1672.52	1232.35	452.573	-1782.29	1365.67	507.345	-1804.22	1138.35	509.618	-1804.53	1068.9	520.202	-1912.64	999.948	496.267	-1960.93	908.485	546.35	-1919.66	879.931	551.585	-1998.42	822.127
835	0	329.234	-1950.41	1573.84	229.858	-1954.91	1570.02	336.378	-1778.53	1591.72	223.468	-1773.18	1588.53	272.185	-1740.63	1407.11	290.171	-1695.97	1190.73	286.22	-1874.03	1344.35	286.808	-1936.64	1213.97	195.286	-1684.37	1235.43	452.094	-1793.31	1368.3	505.908	-1812.81	1140.3	507.72	-1812.1	1070.92	519.153	-1918.29	999.571	495.472	-1964.43	906.841	545.327	-1922.1	879.377	550.804	-1998.76	818.832
836	0	328.748	-1962.43	1576.32	229.391	-1966.98	1572.42	335.812	-1790.6	1594.54	222.909	-1785.29	1591.26	271.542	-1752.36	1409.97	289.264	-1706.65	1193.68	286.027	-1885.55	1347	286.836	-1947.82	1216.62	194.089	-1696.08	1238.5	451.658	-1804.24	1370.84	504.512	-1821.17	1142.23	505.852	-1819.42	1072.93	518.136	-1923.63	999.21	494.687	-1967.6	905.265	544.293	-1924.2	878.925	550.012	-1998.69	815.685
837	0	328.336	-1974.38	1578.7	229	-1978.98	1574.76	335.321	-1802.59	1597.28	222.425	-1797.33	1593.93	270.963	-1764	1412.76	288.398	-1717.24	1196.55	285.825	-1896.97	1349.59	286.769	-1958.9	1219.24	192.962	-1707.68	1241.52	451.252	-1815.13	1373.28	503.15	-1829.31	1144.09	504.012	-1826.51	1074.91	517.149	-1928.67	998.847	493.91	-1970.45	903.753	543.239	-1926	878.558	549.21	-1998.26	812.695
838	0	327.994	-1986.26	1580.97	228.677	-1990.91	1577	334.894	-1814.5	1599.9	222.005	-1809.3	1596.51	270.434	-1775.58	1415.45	287.56	-1727.8	1199.3	285.6	-1908.32	1352.09	286.596	-1969.94	1221.79	191.897	-1719.19	1244.44	450.864	-1825.99	1375.58	501.816	-1837.25	1145.87	502.199	-1833.38	1076.84	516.19	-1933.43	998.466	493.14	-1973.01	902.294	542.157	-1927.53	878.256	548.395	-1997.52	809.87
839	0	327.713	-1998.07	1583.11	228.416	-2002.78	1579.12	334.521	-1826.34	1602.35	221.638	-1821.2	1598.94	269.943	-1787.09	1417.99	286.736	-1738.36	1201.88	285.343	-1919.63	1354.45	286.308	-1980.97	1224.23	190.888	-1730.63	1247.21	450.482	-1836.84	1377.69	500.503	-1844.99	1147.54	500.411	-1840.05	1078.68	515.256	-1937.94	998.049	492.375	-1975.32	900.876	541.039	-1928.81	877.998	547.568	-1996.51	807.207
840	0	327.486	-2009.81	1585.08	228.208	-2014.58	1581.11	334.192	-1838.09	1604.59	221.315	-1833.03	1601.2	269.478	-1798.57	1420.35	285.918	-1748.95	1204.28	285.046	-1930.9	1356.64	285.906	-1991.99	1226.51	189.929	-1742.03	1249.8	450.099	-1847.72	1379.6	499.206	-1852.56	1149.08	498.646	-1846.52	1080.42	514.344	-1942.21	997.579	491.613	-1977.4	899.487	539.877	-1929.88	877.763	546.727	-1995.29	804.7
841	0	327.303	-2021.49	1586.87	228.044	-2026.32	1582.93	333.897	-1849.77	1606.59	221.025	-1844.79	1603.23	269.028	-1810.03	1422.49	285.098	-1759.62	1206.45	284.703	-1942.17	1358.6	285.396	-2003.04	1228.58	189.014	-1753.4	1252.15	449.706	-1858.64	1381.27	497.919	-1859.99	1150.46	496.898	-1852.84	1082.02	513.448	-1946.27	997.04	490.853	-1979.28	898.112	538.662	-1930.77	877.528	545.868	-1993.9	802.339
842	0	327.156	-2033.11	1588.45	227.916	-2038.02	1584.58	333.624	-1861.37	1608.29	220.757	-1856.5	1605	268.585	-1821.49	1424.39	284.274	-1770.37	1208.38	284.315	-1953.44	1360.32	284.791	-2014.14	1230.39	188.14	-1764.75	1254.26	449.3	-1869.62	1382.68	496.637	-1867.3	1151.67	495.166	-1859.02	1083.47	512.566	-1950.15	996.416	490.091	-1981.01	896.736	537.39	-1931.5	877.273	544.99	-1992.39	800.11
843	0	327.037	-2044.69	1589.83	227.814	-2049.67	1586.03	333.365	-1872.92	1609.69	220.503	-1868.16	1606.48	268.142	-1832.97	1426.02	283.447	-1781.22	1210.03	283.881	-1964.73	1361.75	284.108	-2025.27	1231.91	187.305	-1776.1	1256.08	448.879	-1880.67	1383.82	495.357	-1874.52	1152.68	493.445	-1865.09	1084.75	511.692	-1953.89	995.695	489.326	-1982.6	895.346	536.053	-1932.12	876.98	544.089	-1990.79	797.997
844	0	326.936	-2056.22	1590.97	227.73	-2061.29	1587.27	333.113	-1884.41	1610.74	220.256	-1879.78	1607.64	267.694	-1844.47	1427.36	282.623	-1792.18	1211.4	283.407	-1976.05	1362.88	283.368	-2036.46	1233.1	186.509	-1787.45	1257.59	448.443	-1891.81	1384.67	494.076	-1881.69	1153.5	491.734	-1871.09	1085.86	510.825	-1957.51	994.866	488.555	-1984.1	893.927	534.649	-1932.65	876.634	543.16	-1989.15	795.983
845	0	326.846	-2067.73	1591.88	227.656	-2072.89	1588.29	332.86	-1895.86	1611.44	220.009	-1891.36	1608.46	267.24	-1856.02	1428.4	281.81	-1803.22	1212.47	282.899	-1987.42	1363.68	282.594	-2047.69	1233.93	185.754	-1798.81	1258.79	447.996	-1903.03	1385.22	492.794	-1888.82	1154.1	490.031	-1877.05	1086.77	509.959	-1961.05	993.921	487.776	-1985.54	892.47	533.175	-1933.13	876.225	542.2	-1987.51	794.052
846	0	326.76	-2079.22	1592.54	227.585	-2084.47	1589.08	332.602	-1907.28	1611.78	219.756	-1902.91	1608.93	266.779	-1867.62	1429.13	281.02	-1814.36	1213.24	282.364	-1998.85	1364.14	281.809	-2058.95	1234.37	185.045	-1810.17	1259.67	447.542	-1914.36	1385.48	491.512	-1895.97	1154.49	488.334	-1883.02	1087.49	509.093	-1964.55	992.856	486.987	-1986.96	890.965	531.632	-1933.59	875.747	541.205	-1985.88	792.189
847	0	326.672	-2090.7	1592.95	227.511	-2096.04	1589.62	332.336	-1918.68	1611.75	219.495	-1914.46	1609.04	266.313	-1879.29	1429.54	280.265	-1825.56	1213.7	281.813	-2010.33	1364.26	281.038	-2070.25	1234.42	184.388	-1821.55	1260.23	447.087	-1925.78	1385.43	490.232	-1903.16	1154.66	486.645	-1889.03	1088	508.225	-1968.06	991.669	486.186	-1988.38	889.406	530.022	-1934.08	875.198	540.17	-1984.3	790.383
848	0	326.579	-2102.19	1593.11	227.429	-2107.62	1589.92	332.059	-1930.07	1611.36	219.224	-1925.99	1608.79	265.848	-1891.02	1429.65	279.561	-1836.83	1213.87	281.258	-2021.88	1364.03	280.3	-2081.56	1234.07	183.79	-1832.93	1260.47	446.639	-1937.31	1385.1	488.957	-1910.43	1154.62	484.965	-1895.12	1088.33	507.353	-1971.6	990.362	485.372	-1989.85	887.79	528.351	-1934.64	874.582	539.093	-1982.81	788.623
849	0	326.476	-2113.68	1593.04	227.337	-2119.21	1589.98	331.772	-1941.48	1610.62	218.944	-1937.53	1608.19	265.388	-1902.83	1429.45	278.922	-1848.13	1213.76	280.709	-2033.49	1363.46	279.617	-2092.89	1233.33	183.259	-1844.33	1260.4	446.206	-1948.94	1384.49	487.695	-1917.8	1154.36	483.299	-1901.33	1088.45	506.477	-1975.23	988.938	484.543	-1991.41	886.117	526.627	-1935.29	873.906	537.969	-1981.43	786.904
850	0	326.364	-2125.2	1592.72	227.234	-2130.82	1589.8	331.476	-1952.9	1609.54	218.656	-1949.09	1607.24	264.941	-1914.71	1428.97	278.365	-1859.46	1213.38	280.179	-2045.18	1362.56	279.005	-2104.22	1232.21	182.801	-1855.73	1260.05	445.797	-1960.67	1383.61	486.451	-1925.32	1153.91	481.652	-1907.69	1088.4	505.6	-1978.99	987.406	483.7	-1993.09	884.387	524.861	-1936.11	873.179	536.796	-1980.19	785.223
851	0	326.243	-2136.75	1592.18	227.12	-2142.46	1589.38	331.176	-1964.35	1608.15	218.364	-1960.67	1605.97	264.515	-1926.67	1428.21	277.905	-1870.8	1212.76	279.68	-2056.94	1361.36	278.477	-2115.56	1230.74	182.424	-1867.14	1259.43	445.421	-1972.5	1382.5	485.233	-1933	1153.26	480.03	-1914.24	1088.17	504.722	-1982.91	985.775	482.843	-1994.94	882.606	523.066	-1937.12	872.415	535.573	-1979.12	783.58
852	0	326.115	-2148.33	1591.44	226.998	-2154.13	1588.74	330.875	-1975.85	1606.48	218.073	-1972.28	1604.39	264.119	-1938.71	1427.19	277.553	-1882.13	1211.93	279.223	-2068.78	1359.88	278.045	-2126.91	1228.94	182.133	-1878.57	1258.55	445.086	-1984.42	1381.16	484.051	-1940.89	1152.44	478.443	-1921.01	1087.77	503.849	-1987.04	984.055	481.973	-1996.99	880.781	521.259	-1938.38	871.627	534.299	-1978.25	781.977
853	0	325.983	-2159.95	1590.49	226.869	-2165.84	1587.9	330.581	-1987.39	1604.56	217.788	-1983.93	1602.54	263.764	-1950.82	1425.94	277.321	-1893.45	1210.89	278.82	-2080.68	1358.15	277.714	-2138.26	1226.86	181.933	-1890.01	1257.46	444.801	-1996.43	1379.63	482.913	-1948.99	1151.46	476.9	-1928.03	1087.22	502.986	-1991.42	982.26	481.094	-1999.3	878.918	519.458	-1939.94	870.828	532.975	-1977.62	780.417
854	0	325.852	-2171.62	1589.37	226.74	-2177.6	1586.85	330.299	-1998.99	1602.42	217.518	-1995.63	1600.44	263.458	-1963.01	1424.49	277.216	-1904.76	1209.68	278.481	-2092.66	1356.19	277.491	-2149.64	1224.54	181.825	-1901.49	1256.16	444.574	-2008.52	1377.93	481.83	-1957.33	1150.34	475.411	-1935.32	1086.54	502.139	-1996.08	980.403	480.209	-2001.89	877.026	517.682	-1941.85	870.029	531.605	-1977.27	778.904
855	0	325.727	-2183.34	1588.1	226.616	-2189.41	1585.64	330.038	-2010.65	1600.1	217.269	-2007.37	1598.14	263.21	-1975.26	1422.84	277.241	-1916.07	1208.32	278.215	-2104.72	1354.05	277.375	-2161.05	1222.02	181.811	-1913	1254.69	444.41	-2020.69	1376.08	480.812	-1965.93	1149.08	473.988	-1942.9	1085.73	501.316	-2001.07	978.497	479.324	-2004.82	875.115	515.954	-1944.16	869.241	530.193	-1977.24	777.441
856	0	325.616	-2195.12	1586.69	226.504	-2201.27	1584.27	329.806	-2022.37	1597.63	217.05	-2019.17	1595.66	263.03	-1987.57	1421.04	277.394	-1927.38	1206.83	278.032	-2116.84	1351.75	277.367	-2172.51	1219.36	181.888	-1924.56	1253.05	444.317	-2032.93	1374.12	479.87	-1974.8	1147.71	472.643	-1950.79	1084.81	500.525	-2006.41	976.556	478.447	-2008.12	873.194	514.292	-1946.92	868.467	528.745	-1977.59	776.03
857	0	325.526	-2206.95	1585.18	226.41	-2213.19	1582.77	329.612	-2034.16	1595.06	216.87	-2031.02	1593.05	262.925	-1999.94	1419.1	277.672	-1938.72	1205.22	277.938	-2129.05	1349.35	277.465	-2184.05	1216.6	182.055	-1936.19	1251.29	444.299	-2045.24	1372.05	479.014	-1983.95	1146.24	471.388	-1958.99	1083.79	499.776	-2012.13	974.593	477.586	-2011.84	871.272	512.72	-1950.18	867.712	527.27	-1978.36	774.672
858	0	325.464	-2218.84	1583.59	226.344	-2225.16	1581.16	329.464	-2046.02	1592.42	216.737	-2042.92	1590.33	262.904	-2012.37	1417.05	278.066	-1950.11	1203.5	277.939	-2141.32	1346.87	277.665	-2195.68	1213.8	182.306	-1947.9	1249.41	444.362	-2057.6	1369.92	478.252	-1993.38	1144.69	470.234	-1967.52	1082.69	499.078	-2018.26	972.619	476.752	-2016.02	869.358	511.256	-1953.97	866.971	525.778	-1979.6	773.364
859	0	325.437	-2230.79	1581.94	226.311	-2237.18	1579.49	329.372	-2057.94	1589.74	216.66	-2054.88	1587.56	262.972	-2024.85	1414.93	278.562	-1961.58	1201.69	278.041	-2153.67	1344.36	277.965	-2207.42	1211	182.638	-1959.72	1247.44	444.507	-2070.02	1367.73	477.593	-2003.09	1143.08	469.191	-1976.38	1081.51	498.441	-2024.82	970.645	475.956	-2020.69	867.458	509.917	-1958.34	866.242	524.283	-1981.37	772.102
860	0	325.454	-2242.8	1580.27	226.32	-2249.26	1577.76	329.341	-2069.93	1587.07	216.646	-2066.89	1584.75	263.133	-2037.38	1412.74	279.145	-1973.17	1199.8	278.246	-2166.11	1341.85	278.359	-2219.3	1208.23	183.044	-1971.65	1245.4	444.739	-2082.48	1365.52	477.046	-2013.09	1141.41	468.271	-1985.57	1080.26	497.875	-2031.84	968.683	475.21	-2025.89	865.581	508.719	-1963.31	865.514	522.798	-1983.73	770.878
861	0	325.52	-2254.87	1578.6	226.378	-2261.4	1576.02	329.379	-2081.98	1584.43	216.702	-2078.95	1581.96	263.391	-2049.95	1410.53	279.797	-1984.91	1197.83	278.559	-2178.62	1339.37	278.846	-2231.32	1205.55	183.519	-1983.71	1243.31	445.058	-2094.99	1363.29	476.615	-2023.36	1139.7	467.481	-1995.09	1078.96	497.387	-2039.32	966.743	474.524	-2031.65	863.733	507.673	-1968.92	864.778	521.339	-1986.74	769.686
862	0	325.643	-2267	1576.96	226.492	-2273.59	1574.28	329.492	-2094.09	1581.86	216.835	-2091.06	1579.21	263.748	-2062.58	1408.31	280.498	-1996.84	1195.8	278.979	-2191.22	1336.95	279.422	-2243.52	1202.99	184.055	-1995.93	1241.19	445.465	-2107.54	1361.08	476.305	-2033.92	1137.98	466.829	-2004.95	1077.62	496.986	-2047.28	964.833	473.91	-2038	861.921	506.788	-1975.19	864.024	519.923	-1990.45	768.515
863	0	325.827	-2279.18	1575.39	226.668	-2285.83	1572.59	329.685	-2106.26	1579.39	217.049	-2103.23	1576.54	264.204	-2075.26	1406.12	281.229	-2008.98	1193.72	279.505	-2203.9	1334.64	280.086	-2255.89	1200.58	184.648	-2008.31	1239.07	445.958	-2120.13	1358.89	476.119	-2044.75	1136.24	466.318	-2015.14	1076.24	496.679	-2055.74	962.965	473.378	-2044.97	860.151	506.067	-1982.13	863.241	518.568	-1994.9	767.359
864	0	326.077	-2291.42	1573.89	226.911	-2298.12	1570.97	329.961	-2118.48	1577.04	217.347	-2115.43	1573.97	264.757	-2088	1403.97	281.974	-2021.36	1191.61	280.137	-2216.68	1332.45	280.835	-2268.46	1198.34	185.292	-2020.86	1236.96	446.538	-2132.76	1356.76	476.059	-2055.84	1134.52	465.952	-2025.66	1074.84	496.469	-2064.7	961.148	472.937	-2052.57	858.431	505.51	-1989.76	862.422	517.293	-2000.17	766.208
865	0	326.396	-2303.71	1572.51	227.226	-2310.46	1569.45	330.321	-2130.75	1574.83	217.733	-2127.68	1571.53	265.405	-2100.79	1401.9	282.715	-2034.01	1189.49	280.869	-2229.55	1330.42	281.667	-2281.22	1196.31	185.981	-2033.6	1234.9	447.2	-2145.43	1354.7	476.122	-2067.21	1132.82	465.731	-2036.51	1073.44	496.36	-2074.17	959.394	472.594	-2060.84	856.77	505.115	-1998.08	861.562	516.118	-2006.27	765.06
866	0	326.788	-2316.06	1571.27	227.615	-2322.85	1568.06	330.768	-2143.07	1572.79	218.207	-2139.98	1569.25	266.143	-2113.64	1399.93	283.443	-2046.92	1187.38	281.697	-2242.51	1328.56	282.58	-2294.17	1194.49	186.713	-2046.52	1232.9	447.941	-2158.15	1352.74	476.308	-2078.83	1131.18	465.654	-2047.69	1072.05	496.353	-2084.16	957.715	472.353	-2069.77	855.178	504.875	-2007.1	860.659	515.061	-2013.27	763.913
867	0	327.252	-2328.46	1570.18	228.081	-2335.28	1566.82	331.3	-2155.43	1570.93	218.769	-2152.31	1567.15	266.966	-2126.55	1398.08	284.151	-2060.1	1185.32	282.614	-2255.57	1326.89	283.569	-2307.31	1192.91	187.483	-2059.63	1231	448.756	-2170.92	1350.89	476.612	-2090.72	1129.59	465.719	-2059.21	1070.68	496.448	-2094.66	956.125	472.217	-2079.39	853.666	504.782	-2016.82	859.718	514.142	-2021.19	762.767
868	0	327.789	-2340.92	1569.28	228.625	-2347.77	1565.76	331.916	-2167.84	1569.28	219.418	-2164.68	1565.24	267.867	-2139.53	1396.38	284.838	-2073.54	1183.34	283.611	-2268.72	1325.44	284.628	-2320.64	1191.58	188.29	-2072.91	1229.22	449.641	-2183.76	1349.18	477.03	-2102.87	1128.1	465.922	-2071.06	1069.36	496.642	-2105.69	954.638	472.189	-2089.69	852.246	504.824	-2027.23	858.745	513.376	-2030.06	761.631
869	0	328.396	-2353.43	1568.57	229.248	-2360.3	1564.89	332.612	-2180.29	1567.84	220.15	-2177.09	1563.55	268.841	-2152.57	1394.85	285.508	-2087.23	1181.47	284.679	-2281.96	1324.21	285.75	-2334.15	1190.51	189.133	-2086.36	1227.59	450.589	-2196.66	1347.64	477.554	-2115.28	1126.71	466.256	-2083.25	1068.1	496.933	-2117.25	953.268	472.266	-2100.7	850.933	504.99	-2038.34	857.754	512.78	-2039.89	760.512
870	0	329.072	-2365.99	1568.08	229.946	-2372.87	1564.24	333.385	-2192.78	1566.62	220.961	-2189.54	1562.08	269.879	-2165.67	1393.51	286.17	-2101.14	1179.75	285.804	-2295.3	1323.23	286.923	-2347.81	1189.69	190.011	-2099.96	1226.14	451.592	-2209.63	1346.27	478.179	-2127.97	1125.44	466.715	-2095.78	1066.93	497.315	-2129.33	952.032	472.446	-2112.4	849.74	505.267	-2050.15	856.758	512.366	-2050.72	759.424
871	0	329.813	-2378.61	1567.82	230.719	-2385.49	1563.83	334.229	-2205.32	1565.64	221.848	-2202.02	1560.86	270.973	-2178.84	1392.38	286.836	-2115.25	1178.23	286.976	-2308.71	1322.49	288.135	-2361.62	1189.15	190.924	-2113.7	1224.88	452.643	-2222.7	1345.12	478.897	-2140.94	1124.33	467.294	-2108.66	1065.87	497.782	-2141.95	950.945	472.725	-2124.81	848.685	505.645	-2062.64	855.776	512.143	-2062.54	758.385
872	0	330.613	-2391.28	1567.79	231.562	-2398.15	1563.65	335.14	-2217.9	1564.9	222.804	-2214.54	1559.89	272.116	-2192.07	1391.48	287.522	-2129.52	1176.92	288.181	-2322.21	1322.01	289.369	-2375.55	1188.87	191.873	-2127.55	1223.85	453.734	-2235.85	1344.19	479.701	-2154.19	1123.37	467.985	-2121.89	1064.92	498.327	-2155.1	950.023	473.098	-2137.91	847.781	506.113	-2075.82	854.829	512.12	-2075.36	757.41
873	0	331.468	-2404	1568.02	232.47	-2410.86	1563.74	336.11	-2230.52	1564.41	223.823	-2227.09	1559.18	273.299	-2205.36	1390.83	288.242	-2143.93	1175.88	289.405	-2335.78	1321.8	290.611	-2389.57	1188.85	192.856	-2141.49	1223.06	454.858	-2249.12	1343.51	480.583	-2167.74	1122.6	468.783	-2135.47	1064.12	498.944	-2168.79	949.28	473.558	-2151.71	847.044	506.663	-2089.68	853.938	512.3	-2089.18	756.521
874	0	332.372	-2416.77	1568.5	233.437	-2423.61	1564.09	337.134	-2243.19	1564.17	224.901	-2239.68	1558.73	274.514	-2218.7	1390.42	289.009	-2158.43	1175.12	290.634	-2349.41	1321.84	291.843	-2403.67	1189.09	193.871	-2155.49	1222.53	456.005	-2262.49	1343.09	481.537	-2181.58	1122.02	469.681	-2149.42	1063.48	499.625	-2183.02	948.731	474.099	-2166.21	846.488	507.29	-2104.22	853.124	512.684	-2103.98	755.737
875	0	333.319	-2429.6	1569.23	234.457	-2436.41	1564.71	338.206	-2255.9	1564.18	226.029	-2252.3	1558.55	275.753	-2232.08	1390.29	289.836	-2173.01	1174.68	291.857	-2363.09	1322.15	293.047	-2417.81	1189.59	194.917	-2169.52	1222.28	457.167	-2275.97	1342.94	482.557	-2195.73	1121.66	470.675	-2163.72	1063.01	500.362	-2197.79	948.388	474.714	-2181.4	846.127	507.991	-2119.45	852.406	513.27	-2119.77	755.076
876	0	334.303	-2442.47	1570.22	235.524	-2449.25	1565.6	339.318	-2268.66	1564.44	227.203	-2264.95	1558.64	277.01	-2245.51	1390.42	290.728	-2187.63	1174.57	293.06	-2376.82	1322.72	294.21	-2431.97	1190.32	195.988	-2183.57	1222.33	458.337	-2289.57	1343.08	483.636	-2210.2	1121.51	471.759	-2178.39	1062.72	501.15	-2213.11	948.261	475.397	-2197.27	845.972	508.764	-2135.36	851.803	514.055	-2136.53	754.558
877	0	335.317	-2455.38	1571.47	236.629	-2462.13	1566.77	340.465	-2281.46	1564.96	228.416	-2277.64	1559.01	278.276	-2258.96	1390.84	291.688	-2202.26	1174.81	294.232	-2390.58	1323.55	295.316	-2446.11	1191.29	197.081	-2197.6	1222.67	459.507	-2303.3	1343.52	484.771	-2224.99	1121.58	472.931	-2193.43	1062.63	501.982	-2228.98	948.36	476.141	-2213.82	846.033	509.61	-2151.96	851.332	515.035	-2154.25	754.197
878	0	336.357	-2468.34	1572.97	237.766	-2475.06	1568.21	341.642	-2294.31	1565.72	229.663	-2290.35	1559.64	279.546	-2272.44	1391.53	292.715	-2216.88	1175.4	295.364	-2404.38	1324.64	296.354	-2460.22	1192.47	198.189	-2211.59	1223.34	460.671	-2317.14	1344.25	485.957	-2240.1	1121.89	474.187	-2208.83	1062.75	502.853	-2245.39	948.693	476.941	-2231.06	846.318	510.533	-2169.24	851.004	516.203	-2172.92	754.007
879	0	337.418	-2481.34	1574.72	238.929	-2488.03	1569.93	342.843	-2307.2	1566.72	230.94	-2303.1	1560.54	280.816	-2285.94	1392.51	293.803	-2231.47	1176.36	296.448	-2418.19	1325.97	297.316	-2474.26	1193.86	199.309	-2225.53	1224.32	461.822	-2331.11	1345.29	487.191	-2255.54	1122.44	475.526	-2224.6	1063.07	503.759	-2262.35	949.264	477.793	-2248.96	846.834	511.536	-2187.21	850.831	517.553	-2192.52	754
880	0	338.497	-2494.38	1576.72	240.11	-2501.04	1571.92	344.065	-2320.15	1567.97	232.243	-2315.87	1561.71	282.08	-2299.45	1393.78	294.945	-2246.01	1177.69	297.477	-2432.01	1327.56	298.194	-2488.21	1195.44	200.434	-2239.39	1225.62	462.957	-2345.2	1346.63	488.471	-2271.3	1123.22	476.945	-2240.73	1063.6	504.696	-2279.87	950.077	478.692	-2267.54	847.586	512.622	-2205.88	850.82	519.08	-2213.05	754.182
881	0	339.59	-2507.46	1578.97	241.304	-2514.09	1574.18	345.304	-2333.14	1569.46	233.568	-2328.67	1563.14	283.336	-2312.97	1395.33	296.133	-2260.49	1179.37	298.446	-2445.85	1329.38	298.984	-2502.07	1197.21	201.561	-2253.17	1227.24	464.072	-2359.41	1348.28	489.794	-2287.4	1124.25	478.445	-2257.23	1064.34	505.661	-2297.93	951.136	479.636	-2286.78	848.575	513.796	-2225.23	850.976	520.777	-2234.49	754.559
882	0	340.694	-2520.57	1581.47	242.507	-2527.19	1576.71	346.558	-2346.18	1571.19	234.914	-2341.51	1564.84	284.583	-2326.48	1397.16	297.362	-2274.9	1181.4	299.352	-2459.69	1331.45	299.681	-2515.82	1199.17	202.688	-2266.85	1229.19	465.163	-2373.73	1350.24	491.16	-2303.82	1125.51	480.023	-2274.1	1065.3	506.654	-2316.55	952.443	480.624	-2306.68	849.806	515.06	-2245.27	851.302	522.641	-2256.84	755.137
883	0	341.81	-2533.72	1584.2	243.714	-2540.32	1579.5	347.826	-2359.27	1573.15	236.278	-2354.36	1566.8	285.818	-2340	1399.27	298.625	-2289.23	1183.79	300.192	-2473.53	1333.75	300.284	-2529.44	1201.29	203.811	-2280.43	1231.45	466.229	-2388.18	1352.51	492.567	-2320.58	1127.01	481.679	-2291.32	1066.47	507.672	-2335.72	953.997	481.652	-2327.25	851.278	516.417	-2266.01	851.8	524.67	-2280.09	755.915
884	0	342.935	-2546.91	1587.18	244.925	-2553.49	1582.56	349.105	-2372.4	1575.35	237.66	-2367.25	1569.01	287.042	-2353.52	1401.66	299.919	-2303.47	1186.53	300.965	-2487.37	1336.28	300.792	-2542.94	1203.59	204.93	-2293.91	1234.04	467.269	-2402.74	1355.08	494.015	-2337.66	1128.76	483.414	-2308.91	1067.86	508.716	-2355.44	955.8	482.723	-2348.48	852.992	517.867	-2287.44	852.471	526.86	-2304.25	756.897
885	0	344.07	-2560.14	1590.39	246.137	-2566.71	1585.89	350.395	-2385.58	1577.78	239.06	-2380.17	1571.49	288.254	-2367.03	1404.34	301.242	-2317.64	1189.61	301.67	-2501.21	1339.05	301.204	-2556.32	1206.05	206.045	-2307.27	1236.95	468.282	-2417.42	1357.96	495.504	-2355.07	1130.74	485.228	-2326.86	1069.46	509.785	-2375.71	957.851	483.833	-2370.37	854.949	519.412	-2309.56	853.315	529.21	-2329.3	758.081
886	0	345.214	-2573.4	1593.85	247.35	-2579.96	1589.48	351.698	-2398.81	1580.44	240.477	-2393.11	1574.22	289.454	-2380.54	1407.29	302.593	-2331.72	1193.04	302.308	-2515.05	1342.06	301.519	-2569.57	1208.69	207.156	-2320.53	1240.18	469.269	-2432.22	1361.14	497.034	-2372.81	1132.96	487.12	-2345.18	1071.27	510.879	-2396.53	960.151	484.985	-2392.92	857.149	521.051	-2332.37	854.332	531.722	-2355.26	759.468
[truncated: 69 more columns]

## Sheet: Sheet2
Devices
		025370 - Force			025370 - Moment			025370 - CoP			027571 - Force			027571 - Moment			027571 - CoP			037720 - Force			037720 - Moment			037720 - CoP
Frame	Sub Frame	Fx	Fy	Fz	Mx	My	Mz	Cx	Cy	Cz	Fx	Fy	Fz	Mx	My	Mz	Cx	Cy	Cz	Fx	Fy	Fz	Mx	My	Mz	Cx	Cy	Cz
		N	N	N	N.mm	N.mm	N.mm	mm	mm	mm	N	N	N	N.mm	N.mm	N.mm	mm	mm	mm	N	N	N	N.mm	N.mm	N.mm	mm	mm	mm
459	0	0	0	0	0	0	0	200	300	0	0	0	0	0	0	0	200	903	0	0	0	0	0	0	0	603	903	0
459	1	0	0	0	0	0	0	200	300	0	0	0	0	0	0	0	200	903	0	0	0	0	0	0	0	603	903	0
459	2	0	0	0	0	0	0	200	300	0	0	0	0	0	0	0	200	903	0	0	0	0	0	0	0	603	903	0
459	3	0	0	0	0	0	0	200	300	0	0	0	0	0	0	0	200	903	0	0	0	0	0	0	0	603	903	0
459	4	0	0	0	0	0	0	200	300	0	0	0	0	0	0	0	200	903	0	0	0	0	0	0	0	603	903	0
459	5	0	0	0	0	0	0	200	300	0	0	0	0	0	0	0	200	903	0	0	0	0	0	0	0	603	903	0
459	6	0	0	0	0	0	0	200	300	0	0	0	0	0	0	0	200	903	0	0	0	0	0	0	0	603	903	0
459	7	0	0	0	0	0	0	200	300	0	0	0	0	0	0	0	200	903	0	0	0	0	0	0	0	603	903	0
459	8	0	0	0	0	0	0	200	300	0	0	0	0	0	0	0	200	903	0	0	0	0	0	0	0	603	903	0
459	9	0	0	0	0	0	0	200	300	0	0	0	0	0	0	0	200	903	0	0	0	0	0	0	0	603	903	0
460	0	0	0	0	0	0	0	200	300	0	0	0	0	0	0	0	200	903	0	0	0	0	0	0	0	603	903	0
460	1	0	0	0	0	0	0	200	300	0	0	0	0	0	0	0	200	903	0	0	0	0	0	0	0	603	903	0
460	2	0	0	0	0	0	0	200	300	0	0	0	0	0	0	0	200	903	0	0	0	0	0	0	0	603	903	0
460	3	0	0	0	0	0	0	200	300	0	0	0	0	0	0	0	200	903	0	0	0	0	0	0	0	603	903	0
460	4	0	0	0	0	0	0	200	300	0	0	0	0	0	0	0	200	903	0	0	0	0	0	0	0	603	903	0
460	5	0	0	0	0	0	0	200	300	0	0	0	0	0	0	0	200	903	0	0	0	0	0	0	0	603	903	0
460	6	0	0	0	0	0	0	200	300	0	0	0	0	0	0	0	200	903	0	0	0	0	0	0	0	603	903	0
460	7	0	0	0	0	0	0	200	300	0	0	0	0	0	0	0	200	903	0	0	0	0	0	0	0	603	903	0
460	8	0	0	0	0	0	0	200	300	0	0	0	0	0	0	0	200	903	0	0	0	0	0	0	0	603	903	0
460	9	0	0	0	0	0	0	200	300	0	0	0	0	0	0	0	200	903	0	0	0	0	0	0	0	603	903	0
461	0	0	0	0	0	0	0	200	300	0	0	0	0	0	0	0	200	903	0	0	0	0	0	0	0	603	903	0
461	1	0	0	0	0	0	0	200	300	0	0	0	0	0	0	0	200	903	0	0	0	0	0	0	0	603	903	0
461	2	0	0	0	0	0	0	200	300	0	0	0	0	0	0	0	200	903	0	0	0	0	0	0	0	603	903	0
461	3	0	0	0	0	0	0	200	300	0	0	0	0	0	0	0	200	903	0	0	0	0	0	0	0	603	903	0
461	4	0	0	0	0	0	0	200	300	0	0	0	0	0	0	0	200	903	0	0	0	0	0	0	0	603	903	0
461	5	0	0	0	0	0	0	200	300	0	0	0	0	0	0	0	200	903	0	0	0	0	0	0	0	603	903	0
461	6	0	0	0	0	0	0	200	300	0	0	0	0	0	0	0	200	903	0	0	0	0	0	0	0	603	903	0
461	7	0	0	0	0	0	0	200	300	0	0	0	0	0	0	0	200	903	0	0	0	0	0	0	0	603	903	0
461	8	0	0	0	0	0	0	200	300	0	0	0	0	0	0	0	200	903	0	0	0	0	0	0	0	603	903	0
461	9	0	0	0	0	0	0	200	300	0	0	0	0	0	0	0	200	903	0	0	0	0	0	0	0	603	903	0
462	0	0	0	0	0	0	0	200	300	0	0	0	0	0	0	0	200	903	0	0	0	0	0	0	0	603	903	0
462	1	0	0	0	0	0	0	200	300	0	0	0	0	0	0	0	200	903	0	0	0	0	0	0	0	603	903	0
462	2	0	0	0	0	0	0	200	300	0	0	0	0	0	0	0	200	903	0	0	0	0	0	0	0	603	903	0
462	3	0	0	0	0	0	0	200	300	0	0	0	0	0	0	0	200	903	0	0	0	0	0	0	0	603	903	0
462	4	0	0	0	0	0	0	200	300	0	0	0	0	0	0	0	200	903	0	0	0	0	0	0	0	603	903	0
462	5	0	0	0	0	0	0	200	300	0	0	0	0	0	0	0	200	903	0	0	0	0	0	0	0	603	903	0
462	6	0	0	0	0	0	0	200	300	0	0	0	0	0	0	0	200	903	0	0	0	0	0	0	0	603	903	0
462	7	0	0	0	0	0	0	200	300	0	0	0	0	0	0	0	200	903	0	0	0	0	0	0	0	603	903	0
462	8	0	0	0	0	0	0	200	300	0	0	0	0	0	0	0	200	903	0	0	0	0	0	0	0	603	903	0
462	9	0	0	0	0	0	0	200	300	0	0	0	0	0	0	0	200	903	0	0	0	0	0	0	0	603	903	0
463	0	0	0	0	0	0	0	200	300	0	0	0	0	0	0	0	200	903	0	0	0	0	0	0	0	603	903	0
463	1	0	0	0	0	0	0	200	300	0	0	0	0	0	0	0	200	903	0	0	0	0	0	0	0	603	903	0
463	2	0	0	0	0	0	0	200	300	0	0	0	0	0	0	0	200	903	0	0	0	0	0	0	0	603	903	0
463	3	0	0	0	0	0	0	200	300	0	0	0	0	0	0	0	200	903	0	0	0	0	0	0	0	603	903	0
463	4	0	0	0	0	0	0	200	300	0	0	0	0	0	0	0	200	903	0	0	0	0	0	0	0	603	903	0
463	5	0	0	0	0	0	0	200	300	0	0	0	0	0	0	0	200	903	0	0	0	0	0	0	0	603	903	0
463	6	0	0	0	0	0	0	200	300	0	0	0	0	0	0	0	200	903	0	0	0	0	0	0	0	603	903	0
463	7	0	0	0	0	0	0	200	300	0	0	0	0	0	0	0	200	903	0	0	0	0	0	0	0	603	903	0
463	8	0	0	0	0	0	0	200	300	0	0	0	0	0	0	0	200	903	0	0	0	0	0	0	0	603	903	0
463	9	0	0	0	0	0	0	200	300	0	0	0	0	0	0	0	200	903	0	0	0	0	0	0	0	603	903	0
464	0	0	0	0	0	0	0	200	300	0	0	0	0	0	0	0	200	903	0	0	0	0	0	0	0	603	903	0
464	1	0	0	0	0	0	0	200	300	0	0	0	0	0	0	0	200	903	0	0	0	0	0	0	0	603	903	0
464	2	0	0	0	0	0	0	200	300	0	0	0	0	0	0	0	200	903	0	0	0	0	0	0	0	603	903	0
464	3	0	0	0	0	0	0	200	300	0	0	0	0	0	0	0	200	903	0	0	0	0	0	0	0	603	903	0
464	4	0	0	0	0	0	0	200	300	0	0	0	0	0	0	0	200	903	0	0	0	0	0	0	0	603	903	0
464	5	0	0	0	0	0	0	200	300	0	0	0	0	0	0	0	200	903	0	0	0	0	0	0	0	603	903	0
464	6	0	0	0	0	0	0	200	300	0	0	0	0	0	0	0	200	903	0	0	0	0	0	0	0	603	903	0
464	7	0	0	0	0	0	0	200	300	0	0	0	0	0	0	0	200	903	0	0	0	0	0	0	0	603	903	0
464	8	0	0	0	0	0	0	200	300	0	0	0	0	0	0	0	200	903	0	0	0	0	0	0	0	603	903	0
464	9	0	0	0	0	0	0	200	300	0	0	0	0	0	0	0	200	903	0	0	0	0	0	0	0	603	903	0
465	0	0	0	0	0	0	0	200	300	0	0	0	0	0	0	0	200	903	0	0	0	0	0	0	0	603	903	0
465	1	0	0	0	0	0	0	200	300	0	0	0	0	0	0	0	200	903	0	0	0	0	0	0	0	603	903	0
465	2	0	0	0	0	0	0	200	300	0	0	0	0	0	0	0	200	903	0	0	0	0	0	0	0	603	903	0
465	3	0	0	0	0	0	0	200	300	0	0	0	0	0	0	0	200	903	0	0	0	0	0	0	0	603	903	0
465	4	0	0	0	0	0	0	200	300	0	0	0	0	0	0	0	200	903	0	0	0	0	0	0	0	603	903	0
465	5	0	0	0	0	0	0	200	300	0	0	0	0	0	0	0	200	903	0	0	0	0	0	0	0	603	903	0
465	6	0	0	0	0	0	0	200	300	0	0	0	0	0	0	0	200	903	0	0	0	0	0	0	0	603	903	0
465	7	0	0	0	0	0	0	200	300	0	0	0	0	0	0	0	200	903	0	0	0	0	0	0	0	603	903	0
465	8	0	0	0	0	0	0	200	300	0	0	0	0	0	0	0	200	903	0	0	0	0	0	0	0	603	903	0
465	9	0	0	0	0	0	0	200	300	0	0	0	0	0	0	0	200	903	0	0	0	0	0	0	0	603	903	0
466	0	0	0	0	0	0	0	200	300	0	0	0	0	0	0	0	200	903	0	0	0	0	0	0	0	603	903	0
466	1	0	0	0	0	0	0	200	300	0	0	0	0	0	0	0	200	903	0	0	0	0	0	0	0	603	903	0
466	2	0	0	0	0	0	0	200	300	0	0	0	0	0	0	0	200	903	0	0	0	0	0	0	0	603	903	0
466	3	0	0	0	0	0	0	200	300	0	0	0	0	0	0	0	200	903	0	0	0	0	0	0	0	603	903	0
466	4	0	0	0	0	0	0	200	300	0	0	0	0	0	0	0	200	903	0	0	0	0	0	0	0	603	903	0
466	5	0	0	0	0	0	0	200	300	0	0	0	0	0	0	0	200	903	0	0	0	0	0	0	0	603	903	0
466	6	0	0	0	0	0	0	200	300	0	0	0	0	0	0	0	200	903	0	0	0	0	0	0	0	603	903	0
466	7	0	0	0	0	0	0	200	300	0	0	0	0	0	0	0	200	903	0	0	0	0	0	0	0	603	903	0
466	8	0	0	0	0	0	0	200	300	0	0	0	0	0	0	0	200	903	0	0	0	0	0	0	0	603	903	0
466	9	0	0	0	0	0	0	200	300	0	0	0	0	0	0	0	200	903	0	0	0	0	0	0	0	603	903	0
467	0	0	0	0	0	0	0	200	300	0	0	0	0	0	0	0	200	903	0	0	0	0	0	0	0	603	903	0
467	1	0	0	0	0	0	0	200	300	0	0	0	0	0	0	0	200	903	0	0	0	0	0	0	0	603	903	0
467	2	0	0	0	0	0	0	200	300	0	0	0	0	0	0	0	200	903	0	0	0	0	0	0	0	603	903	0
467	3	0	0	0	0	0	0	200	300	0	0	0	0	0	0	0	200	903	0	0	0	0	0	0	0	603	903	0
467	4	0	0	0	0	0	0	200	300	0	0	0	0	0	0	0	200	903	0	0	0	0	0	0	0	603	903	0
467	5	0	0	0	0	0	0	200	300	0	0	0	0	0	0	0	200	903	0	0	0	0	0	0	0	603	903	0
467	6	0	0	0	0	0	0	200	300	0	0	0	0	0	0	0	200	903	0	0	0	0	0	0	0	603	903	0
467	7	0	0	0	0	0	0	200	300	0	0	0	0	0	0	0	200	903	0	0	0	0	0	0	0	603	903	0
467	8	0	0	0	0	0	0	200	300	0	0	0	0	0	0	0	200	903	0	0	0	0	0	0	0	603	903	0
467	9	0	0	0	0	0	0	200	300	0	0	0	0	0	0	0	200	903	0	0	0	0	0	0	0	603	903	0
468	0	0	0	0	0	0	0	200	300	0	0	0	0	0	0	0	200	903	0	0	0	0	0	0	0	603	903	0
468	1	0	0	0	0	0	0	200	300	0	0	0	0	0	0	0	200	903	0	0	0	0	0	0	0	603	903	0
468	2	0	0	0	0	0	0	200	300	0	0	0	0	0	0	0	200	903	0	0	0	0	0	0	0	603	903	0
468	3	0	0	0	0	0	0	200	300	0	0	0	0	0	0	0	200	903	0	0	0	0	0	0	0	603	903	0
468	4	0	0	0	0	0	0	200	300	0	0	0	0	0	0	0	200	903	0	0	0	0	0	0	0	603	903	0
468	5	0	0	0	0	0	0	200	300	0	0	0	0	0	0	0	200	903	0	0	0	0	0	0	0	603	903	0
468	6	0	0	0	0	0	0	200	300	0	0	0	0	0	0	0	200	903	0	0	0	0	0	0	0	603	903	0
468	7	0	0	0	0	0	0	200	300	0	0	0	0	0	0	0	200	903	0	0	0	0	0	0	0	603	903	0
468	8	0	0	0	0	0	0	200	300	0	0	0	0	0	0	0	200	903	0	0	0	0	0	0	0	603	903	0
468	9	0	0	0	0	0	0	200	300	0	0	0	0	0	0	0	200	903	0	0	0	0	0	0	0	603	903	0
469	0	0	0	0	0	0	0	200	300	0	0	0	0	0	0	0	200	903	0	0	0	0	0	0	0	603	903	0
469	1	0	0	0	0	0	0	200	300	0	0	0	0	0	0	0	200	903	0	0	0	0	0	0	0	603	903	0
469	2	0	0	0	0	0	0	200	300	0	0	0	0	0	0	0	200	903	0	0	0	0	0	0	0	603	903	0
469	3	0	0	0	0	0	0	200	300	0	0	0	0	0	0	0	200	903	0	0	0	0	0	0	0	603	903	0
469	4	0	0	0	0	0	0	200	300	0	0	0	0	0	0	0	200	903	0	0	0	0	0	0	0	603	903	0
469	5	0	0	0	0	0	0	200	300	0	0	0	0	0	0	0	200	903	0	0	0	0	0	0	0	603	903	0
469	6	0	0	0	0	0	0	200	300	0	0	0	0	0	0	0	200	903	0	0	0	0	0	0	0	603	903	0
469	7	0	0	0	0	0	0	200	300	0	0	0	0	0	0	0	200	903	0	0	0	0	0	0	0	603	903	0
469	8	0	0	0	0	0	0	200	300	0	0	0	0	0	0	0	200	903	0	0	0	0	0	0	0	603	903	0
469	9	0	0	0	0	0	0	200	300	0	0	0	0	0	0	0	200	903	0	0	0	0	0	0	0	603	903	0
470	0	0	0	0	0	0	0	200	300	0	0	0	0	0	0	0	200	903	0	0	0	0	0	0	0	603	903	0
470	1	0	0	0	0	0	0	200	300	0	0	0	0	0	0	0	200	903	0	0	0	0	0	0	0	603	903	0
470	2	0	0	0	0	0	0	200	300	0	0	0	0	0	0	0	200	903	0	0	0	0	0	0	0	603	903	0
470	3	0	0	0	0	0	0	200	300	0	0	0	0	0	0	0	200	903	0	0	0	0	0	0	0	603	903	0
470	4	0	0	0	0	0	0	200	300	0	0	0	0	0	0	0	200	903	0	0	0	0	0	0	0	603	903	0
470	5	0	0	0	0	0	0	200	300	0	0	0	0	0	0	0	200	903	0	0	0	0	0	0	0	603	903	0
470	6	0	0	0	0	0	0	200	300	0	0	0	0	0	0	0	200	903	0	0	0	0	0	0	0	603	903	0
470	7	0	0	0	0	0	0	200	300	0	0	0	0	0	0	0	200	903	0	0	0	0	0	0	0	603	903	0
470	8	0	0	0	0	0	0	200	300	0	0	0	0	0	0	0	200	903	0	0	0	0	0	0	0	603	903	0
470	9	0	0	0	0	0	0	200	300	0	0	0	0	0	0	0	200	903	0	0	0	0	0	0	0	603	903	0
471	0	0	0	0	0	0	0	200	300	0	0	0	0	0	0	0	200	903	0	0	0	0	0	0	0	603	903	0
471	1	0	0	0	0	0	0	200	300	0	0	0	0	0	0	0	200	903	0	0	0	0	0	0	0	603	903	0
471	2	0	0	0	0	0	0	200	300	0	0	0	0	0	0	0	200	903	0	0	0	0	0	0	0	603	903	0
471	3	0	0	0	0	0	0	200	300	0	0	0	0	0	0	0	200	903	0	0	0	0	0	0	0	603	903	0
471	4	0	0	0	0	0	0	200	300	0	0	0	0	0	0	0	200	903	0	0	0	0	0	0	0	603	903	0
471	5	0	0	0	0	0	0	200	300	0	0	0	0	0	0	0	200	903	0	0	0	0	0	0	0	603	903	0
471	6	0	0	0	0	0	0	200	300	0	0	0	0	0	0	0	200	903	0	0	0	0	0	0	0	603	903	0
471	7	0	0	0	0	0	0	200	300	0	0	0	0	0	0	0	200	903	0	0	0	0	0	0	0	603	903	0
471	8	0	0	0	0	0	0	200	300	0	0	0	0	0	0	0	200	903	0	0	0	0	0	0	0	603	903	0
471	9	0	0	0	0	0	0	200	300	0	0	0	0	0	0	0	200	903	0	0	0	0	0	0	0	603	903	0
472	0	0	0	0	0	0	0	200	300	0	0	0	0	0	0	0	200	903	0	0	0	0	0	0	0	603	903	0
472	1	0	0	0	0	0	0	200	300	0	0	0	0	0	0	0	200	903	0	0	0	0	0	0	0	603	903	0
472	2	0	0	0	0	0	0	200	300	0	0	0	0	0	0	0	200	903	0	0	0	0	0	0	0	603	903	0
472	3	0	0	0	0	0	0	200	300	0	0	0	0	0	0	0	200	903	0	0	0	0	0	0	0	603	903	0
472	4	0	0	0	0	0	0	200	300	0	0	0	0	0	0	0	200	903	0	0	0	0	0	0	0	603	903	0
472	5	0	0	0	0	0	0	200	300	0	0	0	0	0	0	0	200	903	0	0	0	0	0	0	0	603	903	0
472	6	0	0	0	0	0	0	200	300	0	0	0	0	0	0	0	200	903	0	0	0	0	0	0	0	603	903	0
472	7	0	0	0	0	0	0	200	300	0	0	0	0	0	0	0	200	903	0	0	0	0	0	0	0	603	903	0
472	8	0	0	0	0	0	0	200	300	0	0	0	0	0	0	0	200	903	0	0	0	0	0	0	0	603	903	0
472	9	0	0	0	0	0	0	200	300	0	0	0	0	0	0	0	200	903	0	0	0	0	0	0	0	603	903	0
473	0	0	0	0	0	0	0	200	300	0	0	0	0	0	0	0	200	903	0	0	0	0	0	0	0	603	903	0
473	1	0	0	0	0	0	0	200	300	0	0	0	0	0	0	0	200	903	0	0	0	0	0	0	0	603	903	0
473	2	0	0	0	0	0	0	200	300	0	0	0	0	0	0	0	200	903	0	0	0	0	0	0	0	603	903	0
473	3	0	0	0	0	0	0	200	300	0	0	0	0	0	0	0	200	903	0	0	0	0	0	0	0	603	903	0
473	4	0	0	0	0	0	0	200	300	0	0	0	0	0	0	0	200	903	0	0	0	0	0	0	0	603	903	0
473	5	0	0	0	0	0	0	200	300	0	0	0	0	0	0	0	200	903	0	0	0	0	0	0	0	603	903	0
473	6	0	0	0	0	0	0	200	300	0	0	0	0	0	0	0	200	903	0	0	0	0	0	0	0	603	903	0
473	7	0	0	0	0	0	0	200	300	0	0	0	0	0	0	0	200	903	0	0	0	0	0	0	0	603	903	0
473	8	0	0	0	0	0	0	200	300	0	0	0	0	0	0	0	200	903	0	0	0	0	0	0	0	603	903	0
473	9	0	0	0	0	0	0	200	300	0	0	0	0	0	0	0	200	903	0	0	0	0	0	0	0	603	903	0
474	0	0	0	0	0	0	0	200	300	0	0	0	0	0	0	0	200	903	0	0	0	0	0	0	0	603	903	0
474	1	0	0	0	0	0	0	200	300	0	0	0	0	0	0	0	200	903	0	0	0	0	0	0	0	603	903	0
474	2	0	0	0	0	0	0	200	300	0	0	0	0	0	0	0	200	903	0	0	0	0	0	0	0	603	903	0
474	3	0	0	0	0	0	0	200	300	0	0	0	0	0	0	0	200	903	0	0	0	0	0	0	0	603	903	0
474	4	0	0	0	0	0	0	200	300	0	0	0	0	0	0	0	200	903	0	0	0	0	0	0	0	603	903	0
474	5	0	0	0	0	0	0	200	300	0	0	0	0	0	0	0	200	903	0	0	0	0	0	0	0	603	903	0
474	6	0	0	0	0	0	0	200	300	0	0	0	0	0	0	0	200	903	0	0	0	0	0	0	0	603	903	0
474	7	0	0	0	0	0	0	200	300	0	0	0	0	0	0	0	200	903	0	0	0	0	0	0	0	603	903	0
474	8	0	0	0	0	0	0	200	300	0	0	0	0	0	0	0	200	903	0	0	0	0	0	0	0	603	903	0
474	9	0	0	0	0	0	0	200	300	0	0	0	0	0	0	0	200	903	0	0	0	0	0	0	0	603	903	0
475	0	0	0	0	0	0	0	200	300	0	0	0	0	0	0	0	200	903	0	0	0	0	0	0	0	603	903	0
475	1	0	0	0	0	0	0	200	300	0	0	0	0	0	0	0	200	903	0	0	0	0	0	0	0	603	903	0
475	2	0	0	0	0	0	0	200	300	0	0	0	0	0	0	0	200	903	0	0	0	0	0	0	0	603	903	0
475	3	0	0	0	0	0	0	200	300	0	0	0	0	0	0	0	200	903	0	0	0	0	0	0	0	603	903	0
475	4	0	0	0	0	0	0	200	300	0	0	0	0	0	0	0	200	903	0	0	0	0	0	0	0	603	903	0
475	5	0	0	0	0	0	0	200	300	0	0	0	0	0	0	0	200	903	0	0	0	0	0	0	0	603	903	0
475	6	0	0	0	0	0	0	200	300	0	0	0	0	0	0	0	200	903	0	0	0	0	0	0	0	603	903	0
475	7	0	0	0	0	0	0	200	300	0	0	0	0	0	0	0	200	903	0	0	0	0	0	0	0	603	903	0
475	8	0	0	0	0	0	0	200	300	0	0	0	0	0	0	0	200	903	0	0	0	0	0	0	0	603	903	0
475	9	0	0	0	0	0	0	200	300	0	0	0	0	0	0	0	200	903	0	0	0	0	0	0	0	603	903	0
476	0	0	0	0	0	0	0	200	300	0	0	0	0	0	0	0	200	903	0	0	0	0	0	0	0	603	903	0
476	1	0	0	0	0	0	0	200	300	0	0	0	0	0	0	0	200	903	0	0	0	0	0	0	0	603	903	0
476	2	0	0	0	0	0	0	200	300	0	0	0	0	0	0	0	200	903	0	0	0	0	0	0	0	603	903	0
476	3	0	0	0	0	0	0	200	300	0	0	0	0	0	0	0	200	903	0	0	0	0	0	0	0	603	903	0
476	4	0	0	0	0	0	0	200	300	0	0	0	0	0	0	0	200	903	0	0	0	0	0	0	0	603	903	0
476	5	0	0	0	0	0	0	200	300	0	0	0	0	0	0	0	200	903	0	0	0	0	0	0	0	603	903	0
476	6	0	0	0	0	0	0	200	300	0	0	0	0	0	0	0	200	903	0	0	0	0	0	0	0	603	903	0
476	7	0	0	0	0	0	0	200	300	0	0	0	0	0	0	0	200	903	0	0	0	0	0	0	0	603	903	0
476	8	0	0	0	0	0	0	200	300	0	0	0	0	0	0	0	200	903	0	0	0	0	0	0	0	603	903	0
476	9	0	0	0	0	0	0	200	300	0	0	0	0	0	0	0	200	903	0	0	0	0	0	0	0	603	903	0
477	0	0	0	0	0	0	0	200	300	0	0	0	0	0	0	0	200	903	0	0	0	0	0	0	0	603	903	0
477	1	0	0	0	0	0	0	200	300	0	0	0	0	0	0	0	200	903	0	0	0	0	0	0	0	603	903	0
477	2	0	0	0	0	0	0	200	300	0	0	0	0	0	0	0	200	903	0	0	0	0	0	0	0	603	903	0
477	3	0	0	0	0	0	0	200	300	0	0	0	0	0	0	0	200	903	0	0	0	0	0	0	0	603	903	0
477	4	0	0	0	0	0	0	200	300	0	0	0	0	0	0	0	200	903	0	0	0	0	0	0	0	603	903	0
477	5	0	0	0	0	0	0	200	300	0	0	0	0	0	0	0	200	903	0	0	0	0	0	0	0	603	903	0
477	6	0	0	0	0	0	0	200	300	0	0	0	0	0	0	0	200	903	0	0	0	0	0	0	0	603	903	0
477	7	0	0	0	0	0	0	200	300	0	0	0	0	0	0	0	200	903	0	0	0	0	0	0	0	603	903	0
477	8	0	0	0	0	0	0	200	300	0	0	0	0	0	0	0	200	903	0	0	0	0	0	0	0	603	903	0
477	9	0	0	0	0	0	0	200	300	0	0	0	0	0	0	0	200	903	0	0	0	0	0	0	0	603	903	0
478	0	0	0	0	0	0	0	200	300	0	0	0	0	0	0	0	200	903	0	0	0	0	0	0	0	603	903	0
478	1	0	0	0	0	0	0	200	300	0	0	0	0	0	0	0	200	903	0	0	0	0	0	0	0	603	903	0
478	2	0	0	0	0	0	0	200	300	0	0	0	0	0	0	0	200	903	0	0	0	0	0	0	0	603	903	0
478	3	0	0	0	0	0	0	200	300	0	0	0	0	0	0	0	200	903	0	0	0	0	0	0	0	603	903	0
478	4	0	0	0	0	0	0	200	300	0	0	0	0	0	0	0	200	903	0	0	0	0	0	0	0	603	903	0
478	5	0	0	0	0	0	0	200	300	0	0	0	0	0	0	0	200	903	0	0	0	0	0	0	0	603	903	0
478	6	0	0	0	0	0	0	200	300	0	0	0	0	0	0	0	200	903	0	0	0	0	0	0	0	603	903	0
478	7	0	0	0	0	0	0	200	300	0	0	0	0	0	0	0	200	903	0	0	0	0	0	0	0	603	903	0
478	8	0	0	0	0	0	0	200	300	0	0	0	0	0	0	0	200	903	0	0	0	0	0	0	0	603	903	0
478	9	0	0	0	0	0	0	200	300	0	0	0	0	0	0	0	200	903	0	0	0	0	0	0	0	603	903	0
479	0	0	0	0	0	0	0	200	300	0	0	0	0	0	0	0	200	903	0	0	0	0	0	0	0	603	903	0
479	1	0	0	0	0	0	0	200	300	0	0	0	0	0	0	0	200	903	0	0	0	0	0	0	0	603	903	0
479	2	0	0	0	0	0	0	200	300	0	0	0	0	0	0	0	200	903	0	0	0	0	0	0	0	603	903	0
479	3	0	0	0	0	0	0	200	300	0	0	0	0	0	0	0	200	903	0	0	0	0	0	0	0	603	903	0
479	4	0	0	0	0	0	0	200	300	0	0	0	0	0	0	0	200	903	0	0	0	0	0	0	0	603	903	0
479	5	0	0	0	0	0	0	200	300	0	0	0	0	0	0	0	200	903	0	0	0	0	0	0	0	603	903	0
479	6	0	0	0	0	0	0	200	300	0	0	0	0	0	0	0	200	903	0	0	0	0	0	0	0	603	903	0
479	7	0	0	0	0	0	0	200	300	0	0	0	0	0	0	0	200	903	0	0	0	0	0	0	0	603	903	0
479	8	0	0	0	0	0	0	200	300	0	0	0	0	0	0	0	200	903	0	0	0	0	0	0	0	603	903	0
479	9	0	0	0	0	0	0	200	300	0	0	0	0	0	0	0	200	903	0	0	0	0	0	0	0	603	903	0
480	0	0	0	0	0	0	0	200	300	0	0	0	0	0	0	0	200	903	0	0	0	0	0	0	0	603	903	0
480	1	0	0	0	0	0	0	200	300	0	0	0	0	0	0	0	200	903	0	0	0	0	0	0	0	603	903	0
480	2	0	0	0	0	0	0	200	300	0	0	0	0	0	0	0	200	903	0	0	0	0	0	0	0	603	903	0
480	3	0	0	0	0	0	0	200	300	0	0	0	0	0	0	0	200	903	0	0	0	0	0	0	0	603	903	0
480	4	0	0	0	0	0	0	200	300	0	0	0	0	0	0	0	200	903	0	0	0	0	0	0	0	603	903	0
480	5	0	0	0	0	0	0	200	300	0	0	0	0	0	0	0	200	903	0	0	0	0	0	0	0	603	903	0
480	6	0	0	0	0	0	0	200	300	0	0	0	0	0	0	0	200	903	0	0	0	0	0	0	0	603	903	0
480	7	0	0	0	0	0	0	200	300	0	0	0	0	0	0	0	200	903	0	0	0	0	0	0	0	603	903	0
480	8	0	0	0	0	0	0	200	300	0	0	0	0	0	0	0	200	903	0	0	0	0	0	0	0	603	903	0
480	9	0	0	0	0	0	0	200	300	0	0	0	0	0	0	0	200	903	0	0	0	0	0	0	0	603	903	0
481	0	0	0	0	0	0	0	200	300	0	0	0	0	0	0	0	200	903	0	0	0	0	0	0	0	603	903	0
481	1	0	0	0	0	0	0	200	300	0	0	0	0	0	0	0	200	903	0	0	0	0	0	0	0	603	903	0
481	2	0	0	0	0	0	0	200	300	0	0	0	0	0	0	0	200	903	0	0	0	0	0	0	0	603	903	0
481	3	0	0	0	0	0	0	200	300	0	0	0	0	0	0	0	200	903	0	0	0	0	0	0	0	603	903	0
481	4	0	0	0	0	0	0	200	300	0	0	0	0	0	0	0	200	903	0	0	0	0	0	0	0	603	903	0
481	5	0	0	0	0	0	0	200	300	0	0	0	0	0	0	0	200	903	0	0	0	0	0	0	0	603	903	0
481	6	0	0	0	0	0	0	200	300	0	0	0	0	0	0	0	200	903	0	0	0	0	0	0	0	603	903	0
481	7	0	0	0	0	0	0	200	300	0	0	0	0	0	0	0	200	903	0	0	0	0	0	0	0	603	903	0
481	8	0	0	0	0	0	0	200	300	0	0	0	0	0	0	0	200	903	0	0	0	0	0	0	0	603	903	0
481	9	0	0	0	0	0	0	200	300	0	0	0	0	0	0	0	200	903	0	0	0	0	0	0	0	603	903	0
482	0	0	0	0	0	0	0	200	300	0	0	0	0	0	0	0	200	903	0	0	0	0	0	0	0	603	903	0
482	1	0	0	0	0	0	0	200	300	0	0	0	0	0	0	0	200	903	0	0	0	0	0	0	0	603	903	0
482	2	0	0	0	0	0	0	200	300	0	0	0	0	0	0	0	200	903	0	0	0	0	0	0	0	603	903	0
482	3	0	0	0	0	0	0	200	300	0	0	0	0	0	0	0	200	903	0	0	0	0	0	0	0	603	903	0
482	4	0	0	0	0	0	0	200	300	0	0	0	0	0	0	0	200	903	0	0	0	0	0	0	0	603	903	0
482	5	0	0	0	0	0	0	200	300	0	0	0	0	0	0	0	200	903	0	0	0	0	0	0	0	603	903	0
482	6	0	0	0	0	0	0	200	300	0	0	0	0	0	0	0	200	903	0	0	0	0	0	0	0	603	903	0
482	7	0	0	0	0	0	0	200	300	0	0	0	0	0	0	0	200	903	0	0	0	0	0	0	0	603	903	0
482	8	0	0	0	0	0	0	200	300	0	0	0	0	0	0	0	200	903	0	0	0	0	0	0	0	603	903	0
482	9	0	0	0	0	0	0	200	300	0	0	0	0	0	0	0	200	903	0	0	0	0	0	0	0	603	903	0
483	0	0	0	0	0	0	0	200	300	0	0	0	0	0	0	0	200	903	0	0	0	0	0	0	0	603	903	0
483	1	0	0	0	0	0	0	200	300	0	0	0	0	0	0	0	200	903	0	0	0	0	0	0	0	603	903	0
483	2	0	0	0	0	0	0	200	300	0	0	0	0	0	0	0	200	903	0	0	0	0	0	0	0	603	903	0
483	3	0	0	0	0	0	0	200	300	0	0	0	0	0	0	0	200	903	0	0	0	0	0	0	0	603	903	0
483	4	0	0	0	0	0	0	200	300	0	0	0	0	0	0	0	200	903	0	0	0	0	0	0	0	603	903	0
483	5	0	0	0	0	0	0	200	300	0	0	0	0	0	0	0	200	903	0	0	0	0	0	0	0	603	903	0
483	6	0	0	0	0	0	0	200	300	0	0	0	0	0	0	0	200	903	0	0	0	0	0	0	0	603	903	0
483	7	0	0	0	0	0	0	200	300	0	0	0	0	0	0	0	200	903	0	0	0	0	0	0	0	603	903	0
483	8	0	0	0	0	0	0	200	300	0	0	0	0	0	0	0	200	903	0	0	0	0	0	0	0	603	903	0
483	9	0	0	0	0	0	0	200	300	0	0	0	0	0	0	0	200	903	0	0	0	0	0	0	0	603	903	0
484	0	0	0	0	0	0	0	200	300	0	0	0	0	0	0	0	200	903	0	0	0	0	0	0	0	603	903	0
484	1	0	0	0	0	0	0	200	300	0	0	0	0	0	0	0	200	903	0	0	0	0	0	0	0	603	903	0
484	2	0	0	0	0	0	0	200	300	0	0	0	0	0	0	0	200	903	0	0	0	0	0	0	0	603	903	0
484	3	0	0	0	0	0	0	200	300	0	0	0	0	0	0	0	200	903	0	0	0	0	0	0	0	603	903	0
484	4	0	0	0	0	0	0	200	300	0	0	0	0	0	0	0	200	903	0	0	0	0	0	0	0	603	903	0
484	5	0	0	0	0	0	0	200	300	0	0	0	0	0	0	0	200	903	0	0	0	0	0	0	0	603	903	0
484	6	0	0	0	0	0	0	200	300	0	0	0	0	0	0	0	200	903	0	0	0	0	0	0	0	603	903	0
484	7	0	0	0	0	0	0	200	300	0	0	0	0	0	0	0	200	903	0	0	0	0	0	0	0	603	903	0
484	8	0	0	0	0	0	0	200	300	0	0	0	0	0	0	0	200	903	0	0	0	0	0	0	0	603	903	0
484	9	0	0	0	0	0	0	200	300	0	0	0	0	0	0	0	200	903	0	0	0	0	0	0	0	603	903	0
485	0	0	0	0	0	0	0	200	300	0	0	0	0	0	0	0	200	903	0	0	0	0	0	0	0	603	903	0
485	1	0	0	0	0	0	0	200	300	0	0	0	0	0	0	0	200	903	0	0	0	0	0	0	0	603	903	0
485	2	0	0	0	0	0	0	200	300	0	0	0	0	0	0	0	200	903	0	0	0	0	0	0	0	603	903	0
485	3	0	0	0	0	0	0	200	300	0	0	0	0	0	0	0	200	903	0	0	0	0	0	0	0	603	903	0
485	4	0	0	0	0	0	0	200	300	0	0	0	0	0	0	0	200	903	0	0	0	0	0	0	0	603	903	0
485	5	0	0	0	0	0	0	200	300	0	0	0	0	0	0	0	200	903	0	0	0	0	0	0	0	603	903	0
485	6	0	0	0	0	0	0	200	300	0	0	0	0	0	0	0	200	903	0	0	0	0	0	0	0	603	903	0
485	7	0	0	0	0	0	0	200	300	0	0	0	0	0	0	0	200	903	0	0	0	0	0	0	0	603	903	0
485	8	0	0	0	0	0	0	200	300	0	0	0	0	0	0	0	200	903	0	0	0	0	0	0	0	603	903	0
485	9	0	0	0	0	0	0	200	300	0	0	0	0	0	0	0	200	903	0	0	0	0	0	0	0	603	903	0
486	0	0	0	0	0	0	0	200	300	0	0	0	0	0	0	0	200	903	0	0	0	0	0	0	0	603	903	0
486	1	0	0	0	0	0	0	200	300	0	0	0	0	0	0	0	200	903	0	0	0	0	0	0	0	603	903	0
486	2	0	0	0	0	0	0	200	300	0	0	0	0	0	0	0	200	903	0	0	0	0	0	0	0	603	903	0
486	3	0	0	0	0	0	0	200	300	0	0	0	0	0	0	0	200	903	0	0	0	0	0	0	0	603	903	0
486	4	0	0	0	0	0	0	200	300	0	0	0	0	0	0	0	200	903	0	0	0	0	0	0	0	603	903	0
486	5	0	0	0	0	0	0	200	300	0	0	0	0	0	0	0	200	903	0	0	0	0	0	0	0	603	903	0
486	6	0	0	0	0	0	0	200	300	0	0	0	0	0	0	0	200	903	0	0	0	0	0	0	0	603	903	0
486	7	0	0	0	0	0	0	200	300	0	0	0	0	0	0	0	200	903	0	0	0	0	0	0	0	603	903	0
486	8	0	0	0	0	0	0	200	300	0	0	0	0	0	0	0	200	903	0	0	0	0	0	0	0	603	903	0
486	9	0	0	0	0	0	0	200	300	0	0	0	0	0	0	0	200	903	0	0	0	0	0	0	0	603	903	0
487	0	0	0	0	0	0	0	200	300	0	0	0	0	0	0	0	200	903	0	0	0	0	0	0	0	603	903	0
487	1	0	0	0	0	0	0	200	300	0	0	0	0	0	0	0	200	903	0	0	0	0	0	0	0	603	903	0
487	2	0	0	0	0	0	0	200	300	0	0	0	0	0	0	0	200	903	0	0	0	0	0	0	0	603	903	0
487	3	0	0	0	0	0	0	200	300	0	0	0	0	0	0	0	200	903	0	0	0	0	0	0	0	603	903	0
487	4	0	0	0	0	0	0	200	300	0	0	0	0	0	0	0	200	903	0	0	0	0	0	0	0	603	903	0
487	5	0	0	0	0	0	0	200	300	0	0	0	0	0	0	0	200	903	0	0	0	0	0	0	0	603	903	0
487	6	0	0	0	0	0	0	200	300	0	0	0	0	0	0	0	200	903	0	0	0	0	0	0	0	603	903	0
487	7	0	0	0	0	0	0	200	300	0	0	0	0	0	0	0	200	903	0	0	0	0	0	0	0	603	903	0
487	8	0	0	0	0	0	0	200	300	0	0	0	0	0	0	0	200	903	0	0	0	0	0	0	0	603	903	0
487	9	0	0	0	0	0	0	200	300	0	0	0	0	0	0	0	200	903	0	0	0	0	0	0	0	603	903	0
488	0	0	0	0	0	0	0	200	300	0	0	0	0	0	0	0	200	903	0	0	0	0	0	0	0	603	903	0
488	1	0	0	0	0	0	0	200	300	0	0	0	0	0	0	0	200	903	0	0	0	0	0	0	0	603	903	0
488	2	0	0	0	0	0	0	200	300	0	0	0	0	0	0	0	200	903	0	0	0	0	0	0	0	603	903	0
488	3	0	0	0	0	0	0	200	300	0	0	0	0	0	0	0	200	903	0	0	0	0	0	0	0	603	903	0
488	4	0	0	0	0	0	0	200	300	0	0	0	0	0	0	0	200	903	0	0	0	0	0	0	0	603	903	0
488	5	0	0	0	0	0	0	200	300	0	0	0	0	0	0	0	200	903	0	0	0	0	0	0	0	603	903	0
488	6	0	0	0	0	0	0	200	300	0	0	0	0	0	0	0	200	903	0	0	0	0	0	0	0	603	903	0
488	7	0	0	0	0	0	0	200	300	0	0	0	0	0	0	0	200	903	0	0	0	0	0	0	0	603	903	0
488	8	0	0	0	0	0	0	200	300	0	0	0	0	0	0	0	200	903	0	0	0	0	0	0	0	603	903	0
488	9	0	0	0	0	0	0	200	300	0	0	0	0	0	0	0	200	903	0	0	0	0	0	0	0	603	903	0
489	0	0	0	0	0	0	0	200	300	0	0	0	0	0	0	0	200	903	0	0	0	0	0	0	0	603	903	0
489	1	0	0	0	0	0	0	200	300	0	0	0	0	0	0	0	200	903	0	0	0	0	0	0	0	603	903	0
489	2	0	0	0	0	0	0	200	300	0	0	0	0	0	0	0	200	903	0	0	0	0	0	0	0	603	903	0
489	3	0	0	0	0	0	0	200	300	0	0	0	0	0	0	0	200	903	0	0	0	0	0	0	0	603	903	0
489	4	0	0	0	0	0	0	200	300	0	0	0	0	0	0	0	200	903	0	0	0	0	0	0	0	603	903	0
489	5	0	0	0	0	0	0	200	300	0	0	0	0	0	0	0	200	903	0	0	0	0	0	0	0	603	903	0
489	6	0	0	0	0	0	0	200	300	0	0	0	0	0	0	0	200	903	0	0	0	0	0	0	0	603	903	0
489	7	0	0	0	0	0	0	200	300	0	0	0	0	0	0	0	200	903	0	0	0	0	0	0	0	603	903	0
489	8	0	0	0	0	0	0	200	300	0	0	0	0	0	0	0	200	903	0	0	0	0	0	0	0	603	903	0
489	9	0	0	0	0	0	0	200	300	0	0	0	0	0	0	0	200	903	0	0	0	0	0	0	0	603	903	0
490	0	0	0	0	0	0	0	200	300	0	0	0	0	0	0	0	200	903	0	0	0	0	0	0	0	603	903	0
490	1	0	0	0	0	0	0	200	300	0	0	0	0	0	0	0	200	903	0	0	0	0	0	0	0	603	903	0
490	2	0	0	0	0	0	0	200	300	0	0	0	0	0	0	0	200	903	0	0	0	0	0	0	0	603	903	0
490	3	0	0	0	0	0	0	200	300	0	0	0	0	0	0	0	200	903	0	0	0	0	0	0	0	603	903	0
490	4	0	0	0	0	0	0	200	300	0	0	0	0	0	0	0	200	903	0	0	0	0	0	0	0	603	903	0
490	5	0	0	0	0	0	0	200	300	0	0	0	0	0	0	0	200	903	0	0	0	0	0	0	0	603	903	0
490	6	0	0	0	0	0	0	200	300	0	0	0	0	0	0	0	200	903	0	0	0	0	0	0	0	603	903	0
490	7	0	0	0	0	0	0	200	300	0	0	0	0	0	0	0	200	903	0	0	0	0	0	0	0	603	903	0
490	8	0	0	0	0	0	0	200	300	0	0	0	0	0	0	0	200	903	0	0	0	0	0	0	0	603	903	0
490	9	0	0	0	0	0	0	200	300	0	0	0	0	0	0	0	200	903	0	0	0	0	0	0	0	603	903	0
491	0	0	0	0	0	0	0	200	300	0	0	0	0	0	0	0	200	903	0	0	0	0	0	0	0	603	903	0
491	1	0	0	0	0	0	0	200	300	0	0	0	0	0	0	0	200	903	0	0	0	0	0	0	0	603	903	0
491	2	0	0	0	0	0	0	200	300	0	0	0	0	0	0	0	200	903	0	0	0	0	0	0	0	603	903	0
491	3	0	0	0	0	0	0	200	300	0	0	0	0	0	0	0	200	903	0	0	0	0	0	0	0	603	903	0
491	4	0	0	0	0	0	0	200	300	0	0	0	0	0	0	0	200	903	0	0	0	0	0	0	0	603	903	0
491	5	0	0	0	0	0	0	200	300	0	0	0	0	0	0	0	200	903	0	0	0	0	0	0	0	603	903	0
491	6	0	0	0	0	0	0	200	300	0	0	0	0	0	0	0	200	903	0	0	0	0	0	0	0	603	903	0
491	7	0	0	0	0	0	0	200	300	0	0	0	0	0	0	0	200	903	0	0	0	0	0	0	0	603	903	0
491	8	0	0	0	0	0	0	200	300	0	0	0	0	0	0	0	200	903	0	0	0	0	0	0	0	603	903	0
491	9	0	0	0	0	0	0	200	300	0	0	0	0	0	0	0	200	903	0	0	0	0	0	0	0	603	903	0
492	0	0	0	0	0	0	0	200	300	0	0	0	0	0	0	0	200	903	0	0	0	0	0	0	0	603	903	0
492	1	0	0	0	0	0	0	200	300	0	0	0	0	0	0	0	200	903	0	0	0	0	0	0	0	603	903	0
492	2	0	0	0	0	0	0	200	300	0	0	0	0	0	0	0	200	903	0	0	0	0	0	0	0	603	903	0
492	3	0	0	0	0	0	0	200	300	0	0	0	0	0	0	0	200	903	0	0	0	0	0	0	0	603	903	0
492	4	0	0	0	0	0	0	200	300	0	0	0	0	0	0	0	200	903	0	0	0	0	0	0	0	603	903	0
492	5	0	0	0	0	0	0	200	300	0	0	0	0	0	0	0	200	903	0	0	0	0	0	0	0	603	903	0
492	6	0	0	0	0	0	0	200	300	0	0	0	0	0	0	0	200	903	0	0	0	0	0	0	0	603	903	0
492	7	0	0	0	0	0	0	200	300	0	0	0	0	0	0	0	200	903	0	0	0	0	0	0	0	603	903	0
492	8	0	0	0	0	0	0	200	300	0	0	0	0	0	0	0	200	903	0	0	0	0	0	0	0	603	903	0
492	9	0	0	0	0	0	0	200	300	0	0	0	0	0	0	0	200	903	0	0	0	0	0	0	0	603	903	0
493	0	0	0	0	0	0	0	200	300	0	0	0	0	0	0	0	200	903	0	0	0	0	0	0	0	603	903	0
493	1	0	0	0	0	0	0	200	300	0	0	0	0	0	0	0	200	903	0	0	0	0	0	0	0	603	903	0
493	2	0	0	0	0	0	0	200	300	0	0	0	0	0	0	0	200	903	0	0	0	0	0	0	0	603	903	0
493	3	0	0	0	0	0	0	200	300	0	0	0	0	0	0	0	200	903	0	0	0	0	0	0	0	603	903	0
493	4	0	0	0	0	0	0	200	300	0	0	0	0	0	0	0	200	903	0	0	0	0	0	0	0	603	903	0
493	5	0	0	0	0	0	0	200	300	0	0	0	0	0	0	0	200	903	0	0	0	0	0	0	0	603	903	0
493	6	0	0	0	0	0	0	200	300	0	0	0	0	0	0	0	200	903	0	0	0	0	0	0	0	603	903	0
493	7	0	0	0	0	0	0	200	300	0	0	0	0	0	0	0	200	903	0	0	0	0	0	0	0	603	903	0
493	8	0	0	0	0	0	0	200	300	0	0	0	0	0	0	0	200	903	0	0	0	0	0	0	0	603	903	0
493	9	0	0	0	0	0	0	200	300	0	0	0	0	0	0	0	200	903	0	0	0	0	0	0	0	603	903	0
494	0	0	0	0	0	0	0	200	300	0	0	0	0	0	0	0	200	903	0	0	0	0	0	0	0	603	903	0
494	1	0	0	0	0	0	0	200	300	0	0	0	0	0	0	0	200	903	0	0	0	0	0	0	0	603	903	0
494	2	0	0	0	0	0	0	200	300	0	0	0	0	0	0	0	200	903	0	0	0	0	0	0	0	603	903	0
494	3	0	0	0	0	0	0	200	300	0	0	0	0	0	0	0	200	903	0	0	0	0	0	0	0	603	903	0
494	4	0	0	0	0	0	0	200	300	0	0	0	0	0	0	0	200	903	0	0	0	0	0	0	0	603	903	0
494	5	0	0	0	0	0	0	200	300	0	0	0	0	0	0	0	200	903	0	0	0	0	0	0	0	603	903	0
494	6	0	0	0	0	0	0	200	300	0	0	0	0	0	0	0	200	903	0	0	0	0	0	0	0	603	903	0
494	7	0	0	0	0	0	0	200	300	0	0	0	0	0	0	0	200	903	0	0	0	0	0	0	0	603	903	0
494	8	0	0	0	0	0	0	200	300	0	0	0	0	0	0	0	200	903	0	0	0	0	0	0	0	603	903	0
494	9	0	0	0	0	0	0	200	300	0	0	0	0	0	0	0	200	903	0	0	0	0	0	0	0	603	903	0
495	0	0	0	0	0	0	0	200	300	0	0	0	0	0	0	0	200	903	0	0	0	0	0	0	0	603	903	0
495	1	0	0	0	0	0	0	200	300	0	0	0	0	0	0	0	200	903	0	0	0	0	0	0	0	603	903	0
495	2	0	0	0	0	0	0	200	300	0	0	0	0	0	0	0	200	903	0	0	0	0	0	0	0	603	903	0
495	3	0	0	0	0	0	0	200	300	0	0	0	0	0	0	0	200	903	0	0	0	0	0	0	0	603	903	0
495	4	0	0	0	0	0	0	200	300	0	0	0	0	0	0	0	200	903	0	0	0	0	0	0	0	603	903	0
495	5	0	0	0	0	0	0	200	300	0	0	0	0	0	0	0	200	903	0	0	0	0	0	0	0	603	903	0
495	6	0	0	0	0	0	0	200	300	0	0	0	0	0	0	0	200	903	0	0	0	0	0	0	0	603	903	0
495	7	0	0	0	0	0	0	200	300	0	0	0	0	0	0	0	200	903	0	0	0	0	0	0	0	603	903	0
495	8	0	0	0	0	0	0	200	300	0	0	0	0	0	0	0	200	903	0	0	0	0	0	0	0	603	903	0
495	9	0	0	0	0	0	0	200	300	0	0	0	0	0	0	0	200	903	0	0	0	0	0	0	0	603	903	0
496	0	0	0	0	0	0	0	200	300	0	0	0	0	0	0	0	200	903	0	0	0	0	0	0	0	603	903	0
496	1	0	0	0	0	0	0	200	300	0	0	0	0	0	0	0	200	903	0	0	0	0	0	0	0	603	903	0
496	2	0	0	0	0	0	0	200	300	0	0	0	0	0	0	0	200	903	0	0	0	0	0	0	0	603	903	0
496	3	0	0	0	0	0	0	200	300	0	0	0	0	0	0	0	200	903	0	0	0	0	0	0	0	603	903	0
496	4	0	0	0	0	0	0	200	300	0	0	0	0	0	0	0	200	903	0	0	0	0	0	0	0	603	903	0
496	5	0	0	0	0	0	0	200	300	0	0	0	0	0	0	0	200	903	0	0	0	0	0	0	0	603	903	0
496	6	0	0	0	0	0	0	200	300	0	0	0	0	0	0	0	200	903	0	0	0	0	0	0	0	603	903	0
496	7	0	0	0	0	0	0	200	300	0	0	0	0	0	0	0	200	903	0	0	0	0	0	0	0	603	903	0
496	8	0	0	0	0	0	0	200	300	0	0	0	0	0	0	0	200	903	0	0	0	0	0	0	0	603	903	0
496	9	0	0	0	0	0	0	200	300	0	0	0	0	0	0	0	200	903	0	0	0	0	0	0	0	603	903	0
497	0	0	0	0	0	0	0	200	300	0	0	0	0	0	0	0	200	903	0	0	0	0	0	0	0	603	903	0
497	1	0	0	0	0	0	0	200	300	0	0	0	0	0	0	0	200	903	0	0	0	0	0	0	0	603	903	0
497	2	0	0	0	0	0	0	200	300	0	0	0	0	0	0	0	200	903	0	0	0	0	0	0	0	603	903	0
497	3	0	0	0	0	0	0	200	300	0	0	0	0	0	0	0	200	903	0	0	0	0	0	0	0	603	903	0
497	4	0	0	0	0	0	0	200	300	0	0	0	0	0	0	0	200	903	0	0	0	0	0	0	0	603	903	0
497	5	0	0	0	0	0	0	200	300	0	0	0	0	0	0	0	200	903	0	0	0	0	0	0	0	603	903	0
497	6	0	0	0	0	0	0	200	300	0	0	0	0	0	0	0	200	903	0	0	0	0	0	0	0	603	903	0
497	7	0	0	0	0	0	0	200	300	0	0	0	0	0	0	0	200	903	0	0	0	0	0	0	0	603	903	0
497	8	0	0	0	0	0	0	200	300	0	0	0	0	0	0	0	200	903	0	0	0	0	0	0	0	603	903	0
497	9	0	0	0	0	0	0	200	300	0	0	0	0	0	0	0	200	903	0	0	0	0	0	0	0	603	903	0
498	0	0	0	0	0	0	0	200	300	0	0	0	0	0	0	0	200	903	0	0	0	0	0	0	0	603	903	0
498	1	0	0	0	0	0	0	200	300	0	0	0	0	0	0	0	200	903	0	0	0	0	0	0	0	603	903	0
498	2	0	0	0	0	0	0	200	300	0	0	0	0	0	0	0	200	903	0	0	0	0	0	0	0	603	903	0
498	3	0	0	0	0	0	0	200	300	0	0	0	0	0	0	0	200	903	0	0	0	0	0	0	0	603	903	0
498	4	0	0	0	0	0	0	200	300	0	0	0	0	0	0	0	200	903	0	0	0	0	0	0	0	603	903	0
498	5	0	0	0	0	0	0	200	300	0	0	0	0	0	0	0	200	903	0	0	0	0	0	0	0	603	903	0
498	6	0	0	0	0	0	0	200	300	0	0	0	0	0	0	0	200	903	0	0	0	0	0	0	0	603	903	0
498	7	0	0	0	0	0	0	200	300	0	0	0	0	0	0	0	200	903	0	0	0	0	0	0	0	603	903	0
498	8	0	0	0	0	0	0	200	300	0	0	0	0	0	0	0	200	903	0	0	0	0	0	0	0	603	903	0
498	9	0	0	0	0	0	0	200	300	0	0	0	0	0	0	0	200	903	0	0	0	0	0	0	0	603	903	0
499	0	0	0	0	0	0	0	200	300	0	0	0	0	0	0	0	200	903	0	0	0	0	0	0	0	603	903	0
499	1	0	0	0	0	0	0	200	300	0	0	0	0	0	0	0	200	903	0	0	0	0	0	0	0	603	903	0
499	2	0	0	0	0	0	0	200	300	0	0	0	0	0	0	0	200	903	0	0	0	0	0	0	0	603	903	0
499	3	0	0	0	0	0	0	200	300	0	0	0	0	0	0	0	200	903	0	0	0	0	0	0	0	603	903	0
499	4	0	0	0	0	0	0	200	300	0	0	0	0	0	0	0	200	903	0	0	0	0	0	0	0	603	903	0
499	5	0	0	0	0	0	0	200	300	0	0	0	0	0	0	0	200	903	0	0	0	0	0	0	0	603	903	0
499	6	0	0	0	0	0	0	200	300	0	0	0	0	0	0	0	200	903	0	0	0	0	0	0	0	603	903	0
499	7	0	0	0	0	0	0	200	300	0	0	0	0	0	0	0	200	903	0	0	0	0	0	0	0	603	903	0
499	8	0	0	0	0	0	0	200	300	0	0	0	0	0	0	0	200	903	0	0	0	0	0	0	0	603	903	0
499	9	0	0	0	0	0	0	200	300	0	0	0	0	0	0	0	200	903	0	0	0	0	0	0	0	603	903	0
500	0	0	0	0	0	0	0	200	300	0	0	0	0	0	0	0	200	903	0	0	0	0	0	0	0	603	903	0
500	1	0	0	0	0	0	0	200	300	0	0	0	0	0	0	0	200	903	0	0	0	0	0	0	0	603	903	0
500	2	0	0	0	0	0	0	200	300	0	0	0	0	0	0	0	200	903	0	0	0	0	0	0	0	603	903	0
500	3	0	0	0	0	0	0	200	300	0	0	0	0	0	0	0	200	903	0	0	0	0	0	0	0	603	903	0
500	4	0	0	0	0	0	0	200	300	0	0	0	0	0	0	0	200	903	0	0	0	0	0	0	0	603	903	0
500	5	0	0	0	0	0	0	200	300	0	0	0	0	0	0	0	200	903	0	0	0	0	0	0	0	603	903	0
500	6	0	0	0	0	0	0	200	300	0	0	0	0	0	0	0	200	903	0	0	0	0	0	0	0	603	903	0
500	7	0	0	0	0	0	0	200	300	0	0	0	0	0	0	0	200	903	0	0	0	0	0	0	0	603	903	0
500	8	0	0	0	0	0	0	200	300	0	0	0	0	0	0	0	200	903	0	0	0	0	0	0	0	603	903	0
500	9	0	0	0	0	0	0	200	300	0	0	0	0	0	0	0	200	903	0	0	0	0	0	0	0	603	903	0
501	0	0	0	0	0	0	0	200	300	0	0	0	0	0	0	0	200	903	0	0	0	0	0	0	0	603	903	0
501	1	0	0	0	0	0	0	200	300	0	0	0	0	0	0	0	200	903	0	0	0	0	0	0	0	603	903	0
501	2	0	0	0	0	0	0	200	300	0	0	0	0	0	0	0	200	903	0	0	0	0	0	0	0	603	903	0
501	3	0	0	0	0	0	0	200	300	0	0	0	0	0	0	0	200	903	0	0	0	0	0	0	0	603	903	0
501	4	0	0	0	0	0	0	200	300	0	0	0	0	0	0	0	200	903	0	0	0	0	0	0	0	603	903	0
501	5	0	0	0	0	0	0	200	300	0	0	0	0	0	0	0	200	903	0	0	0	0	0	0	0	603	903	0
501	6	0	0	0	0	0	0	200	300	0	0	0	0	0	0	0	200	903	0	0	0	0	0	0	0	603	903	0
501	7	0	0	0	0	0	0	200	300	0	0	0	0	0	0	0	200	903	0	0	0	0	0	0	0	603	903	0
501	8	0	0	0	0	0	0	200	300	0	0	0	0	0	0	0	200	903	0	0	0	0	0	0	0	603	903	0
501	9	0	0	0	0	0	0	200	300	0	0	0	0	0	0	0	200	903	0	0	0	0	0	0	0	603	903	0
502	0	0	0	0	0	0	0	200	300	0	0	0	0	0	0	0	200	903	0	0	0	0	0	0	0	603	903	0
502	1	0	0	0	0	0	0	200	300	0	0	0	0	0	0	0	200	903	0	0	0	0	0	0	0	603	903	0
502	2	0	0	0	0	0	0	200	300	0	0	0	0	0	0	0	200	903	0	0	0	0	0	0	0	603	903	0
502	3	0	0	0	0	0	0	200	300	0	0	0	0	0	0	0	200	903	0	0	0	0	0	0	0	603	903	0
502	4	0	0	0	0	0	0	200	300	0	0	0	0	0	0	0	200	903	0	0	0	0	0	0	0	603	903	0
502	5	0	0	0	0	0	0	200	300	0	0	0	0	0	0	0	200	903	0	0	0	0	0	0	0	603	903	0
502	6	0	0	0	0	0	0	200	300	0	0	0	0	0	0	0	200	903	0	0	0	0	0	0	0	603	903	0
502	7	0	0	0	0	0	0	200	300	0	0	0	0	0	0	0	200	903	0	0	0	0	0	0	0	603	903	0
502	8	0	0	0	0	0	0	200	300	0	0	0	0	0	0	0	200	903	0	0	0	0	0	0	0	603	903	0
502	9	0	0	0	0	0	0	200	300	0	0	0	0	0	0	0	200	903	0	0	0	0	0	0	0	603	903	0
503	0	0	0	0	0	0	0	200	300	0	0	0	0	0	0	0	200	903	0	0	0	0	0	0	0	603	903	0
503	1	0	0	0	0	0	0	200	300	0	0	0	0	0	0	0	200	903	0	0	0	0	0	0	0	603	903	0
503	2	0	0	0	0	0	0	200	300	0	0	0	0	0	0	0	200	903	0	0	0	0	0	0	0	603	903	0
503	3	0	0	0	0	0	0	200	300	0	0	0	0	0	0	0	200	903	0	0	0	0	0	0	0	603	903	0
503	4	0	0	0	0	0	0	200	300	0	0	0	0	0	0	0	200	903	0	0	0	0	0	0	0	603	903	0
503	5	0	0	0	0	0	0	200	300	0	0	0	0	0	0	0	200	903	0	0	0	0	0	0	0	603	903	0
503	6	0	0	0	0	0	0	200	300	0	0	0	0	0	0	0	200	903	0	0	0	0	0	0	0	603	903	0
503	7	0	0	0	0	0	0	200	300	0	0	0	0	0	0	0	200	903	0	0	0	0	0	0	0	603	903	0
503	8	0	0	0	0	0	0	200	300	0	0	0	0	0	0	0	200	903	0	0	0	0	0	0	0	603	903	0
503	9	0	0	0	0	0	0	200	300	0	0	0	0	0	0	0	200	903	0	0	0	0	0	0	0	603	903	0
504	0	0	0	0	0	0	0	200	300	0	0	0	0	0	0	0	200	903	0	0	0	0	0	0	0	603	903	0
504	1	0	0	0	0	0	0	200	300	0	0	0	0	0	0	0	200	903	0	0	0	0	0	0	0	603	903	0
504	2	0	0	0	0	0	0	200	300	0	0	0	0	0	0	0	200	903	0	0	0	0	0	0	0	603	903	0
504	3	0	0	0	0	0	0	200	300	0	0	0	0	0	0	0	200	903	0	0	0	0	0	0	0	603	903	0
504	4	0	0	0	0	0	0	200	300	0	0	0	0	0	0	0	200	903	0	0	0	0	0	0	0	603	903	0
504	5	0	0	0	0	0	0	200	300	0	0	0	0	0	0	0	200	903	0	0	0	0	0	0	0	603	903	0
504	6	0	0	0	0	0	0	200	300	0	0	0	0	0	0	0	200	903	0	0	0	0	0	0	0	603	903	0
504	7	0	0	0	0	0	0	200	300	0	0	0	0	0	0	0	200	903	0	0	0	0	0	0	0	603	903	0
504	8	0	0	0	0	0	0	200	300	0	0	0	0	0	0	0	200	903	0	0	0	0	0	0	0	603	903	0
504	9	0	0	0	0	0	0	200	300	0	0	0	0	0	0	0	200	903	0	0	0	0	0	0	0	603	903	0
505	0	0	0	0	0	0	0	200	300	0	0	0	0	0	0	0	200	903	0	0	0	0	0	0	0	603	903	0
505	1	0	0	0	0	0	0	200	300	0	0	0	0	0	0	0	200	903	0	0	0	0	0	0	0	603	903	0
505	2	0	0	0	0	0	0	200	300	0	0	0	0	0	0	0	200	903	0	0	0	0	0	0	0	603	903	0
505	3	0	0	0	0	0	0	200	300	0	0	0	0	0	0	0	200	903	0	0	0	0	0	0	0	603	903	0
505	4	0	0	0	0	0	0	200	300	0	0	0	0	0	0	0	200	903	0	0	0	0	0	0	0	603	903	0
505	5	0	0	0	0	0	0	200	300	0	0	0	0	0	0	0	200	903	0	0	0	0	0	0	0	603	903	0
505	6	0	0	0	0	0	0	200	300	0	0	0	0	0	0	0	200	903	0	0	0	0	0	0	0	603	903	0
505	7	0	0	0	0	0	0	200	300	0	0	0	0	0	0	0	200	903	0	0	0	0	0	0	0	603	903	0
505	8	0	0	0	0	0	0	200	300	0	0	0	0	0	0	0	200	903	0	0	0	0	0	0	0	603	903	0
505	9	0	0	0	0	0	0	200	300	0	0	0	0	0	0	0	200	903	0	0	0	0	0	0	0	603	903	0
506	0	0	0	0	0	0	0	200	300	0	0	0	0	0	0	0	200	903	0	0	0	0	0	0	0	603	903	0
506	1	0	0	0	0	0	0	200	300	0	0	0	0	0	0	0	200	903	0	0	0	0	0	0	0	603	903	0
506	2	0	0	0	0	0	0	200	300	0	0	0	0	0	0	0	200	903	0	0	0	0	0	0	0	603	903	0
506	3	0	0	0	0	0	0	200	300	0	0	0	0	0	0	0	200	903	0	0	0	0	0	0	0	603	903	0
506	4	0	0	0	0	0	0	200	300	0	0	0	0	0	0	0	200	903	0	0	0	0	0	0	0	603	903	0
506	5	0	0	0	0	0	0	200	300	0	0	0	0	0	0	0	200	903	0	0	0	0	0	0	0	603	903	0
506	6	0	0	0	0	0	0	200	300	0	0	0	0	0	0	0	200	903	0	0	0	0	0	0	0	603	903	0
506	7	0	0	0	0	0	0	200	300	0	0	0	0	0	0	0	200	903	0	0	0	0	0	0	0	603	903	0
506	8	0	0	0	0	0	0	200	300	0	0	0	0	0	0	0	200	903	0	0	0	0	0	0	0	603	903	0
506	9	0	0	0	0	0	0	200	300	0	0	0	0	0	0	0	200	903	0	0	0	0	0	0	0	603	903	0
507	0	0	0	0	0	0	0	200	300	0	0	0	0	0	0	0	200	903	0	0	0	0	0	0	0	603	903	0
507	1	0	0	0	0	0	0	200	300	0	0	0	0	0	0	0	200	903	0	0	0	0	0	0	0	603	903	0
507	2	0	0	0	0	0	0	200	300	0	0	0	0	0	0	0	200	903	0	0	0	0	0	0	0	603	903	0
507	3	0	0	0	0	0	0	200	300	0	0	0	0	0	0	0	200	903	0	0	0	0	0	0	0	603	903	0
507	4	0	0	0	0	0	0	200	300	0	0	0	0	0	0	0	200	903	0	0	0	0	0	0	0	603	903	0
507	5	0	0	0	0	0	0	200	300	0	0	0	0	0	0	0	200	903	0	0	0	0	0	0	0	603	903	0
507	6	0	0	0	0	0	0	200	300	0	0	0	0	0	0	0	200	903	0	0	0	0	0	0	0	603	903	0
507	7	0	0	0	0	0	0	200	300	0	0	0	0	0	0	0	200	903	0	0	0	0	0	0	0	603	903	0
507	8	0	0	0	0	0	0	200	300	0	0	0	0	0	0	0	200	903	0	0	0	0	0	0	0	603	903	0
507	9	0	0	0	0	0	0	200	300	0	0	0	0	0	0	0	200	903	0	0	0	0	0	0	0	603	903	0
508	0	0	0	0	0	0	0	200	300	0	0	0	0	0	0	0	200	903	0	0	0	0	0	0	0	603	903	0
508	1	0	0	0	0	0	0	200	300	0	0	0	0	0	0	0	200	903	0	0	0	0	0	0	0	603	903	0
508	2	0	0	0	0	0	0	200	300	0	0	0	0	0	0	0	200	903	0	0	0	0	0	0	0	603	903	0
508	3	0	0	0	0	0	0	200	300	0	0	0	0	0	0	0	200	903	0	0	0	0	0	0	0	603	903	0
508	4	0	0	0	0	0	0	200	300	0	0	0	0	0	0	0	200	903	0	0	0	0	0	0	0	603	903	0
508	5	0	0	0	0	0	0	200	300	0	0	0	0	0	0	0	200	903	0	0	0	0	0	0	0	603	903	0
508	6	0	0	0	0	0	0	200	300	0	0	0	0	0	0	0	200	903	0	0	0	0	0	0	0	603	903	0
508	7	0	0	0	0	0	0	200	300	0	0	0	0	0	0	0	200	903	0	0	0	0	0	0	0	603	903	0
508	8	0	0	0	0	0	0	200	300	0	0	0	0	0	0	0	200	903	0	0	0	0	0	0	0	603	903	0
508	9	0	0	0	0	0	0	200	300	0	0	0	0	0	0	0	200	903	0	0	0	0	0	0	0	603	903	0
509	0	0	0	0	0	0	0	200	300	0	0	0	0	0	0	0	200	903	0	0	0	0	0	0	0	603	903	0
509	1	0	0	0	0	0	0	200	300	0	0	0	0	0	0	0	200	903	0	0	0	0	0	0	0	603	903	0
509	2	0	0	0	0	0	0	200	300	0	0	0	0	0	0	0	200	903	0	0	0	0	0	0	0	603	903	0
509	3	0	0	0	0	0	0	200	300	0	0	0	0	0	0	0	200	903	0	0	0	0	0	0	0	603	903	0
509	4	0	0	0	0	0	0	200	300	0	0	0	0	0	0	0	200	903	0	0	0	0	0	0	0	603	903	0
509	5	0	0	0	0	0	0	200	300	0	0	0	0	0	0	0	200	903	0	0	0	0	0	0	0	603	903	0
509	6	0	0	0	0	0	0	200	300	0	0	0	0	0	0	0	200	903	0	0	0	0	0	0	0	603	903	0
509	7	0	0	0	0	0	0	200	300	0	0	0	0	0	0	0	200	903	0	0	0	0	0	0	0	603	903	0
509	8	0	0	0	0	0	0	200	300	0	0	0	0	0	0	0	200	903	0	0	0	0	0	0	0	603	903	0
509	9	0	0	0	0	0	0	200	300	0	0	0	0	0	0	0	200	903	0	0	0	0	0	0	0	603	903	0
510	0	0	0	0	0	0	0	200	300	0	0	0	0	0	0	0	200	903	0	0	0	0	0	0	0	603	903	0
510	1	0	0	0	0	0	0	200	300	0	0	0	0	0	0	0	200	903	0	0	0	0	0	0	0	603	903	0
510	2	0	0	0	0	0	0	200	300	0	0	0	0	0	0	0	200	903	0	0	0	0	0	0	0	603	903	0
510	3	0	0	0	0	0	0	200	300	0	0	0	0	0	0	0	200	903	0	0	0	0	0	0	0	603	903	0
510	4	0	0	0	0	0	0	200	300	0	0	0	0	0	0	0	200	903	0	0	0	0	0	0	0	603	903	0
510	5	0	0	0	0	0	0	200	300	0	0	0	0	0	0	0	200	903	0	0	0	0	0	0	0	603	903	0
510	6	0	0	0	0	0	0	200	300	0	0	0	0	0	0	0	200	903	0	0	0	0	0	0	0	603	903	0
510	7	0	0	0	0	0	0	200	300	0	0	0	0	0	0	0	200	903	0	0	0	0	0	0	0	603	903	0
510	8	0	0	0	0	0	0	200	300	0	0	0	0	0	0	0	200	903	0	0	0	0	0	0	0	603	903	0
510	9	0	0	0	0	0	0	200	300	0	0	0	0	0	0	0	200	903	0	0	0	0	0	0	0	603	903	0
511	0	0	0	0	0	0	0	200	300	0	0	0	0	0	0	0	200	903	0	0	0	0	0	0	0	603	903	0
511	1	0	0	0	0	0	0	200	300	0	0	0	0	0	0	0	200	903	0	0	0	0	0	0	0	603	903	0
511	2	0	0	0	0	0	0	200	300	0	0	0	0	0	0	0	200	903	0	0	0	0	0	0	0	603	903	0
511	3	0	0	0	0	0	0	200	300	0	0	0	0	0	0	0	200	903	0	0	0	0	0	0	0	603	903	0
511	4	0	0	0	0	0	0	200	300	0	0	0	0	0	0	0	200	903	0	0	0	0	0	0	0	603	903	0
511	5	0	0	0	0	0	0	200	300	0	0	0	0	0	0	0	200	903	0	0	0	0	0	0	0	603	903	0
511	6	0	0	0	0	0	0	200	300	0	0	0	0	0	0	0	200	903	0	0	0	0	0	0	0	603	903	0
511	7	0	0	0	0	0	0	200	300	0	0	0	0	0	0	0	200	903	0	0	0	0	0	0	0	603	903	0
511	8	0	0	0	0	0	0	200	300	0	0	0	0	0	0	0	200	903	0	0	0	0	0	0	0	603	903	0
511	9	0	0	0	0	0	0	200	300	0	0	0	0	0	0	0	200	903	0	0	0	0	0	0	0	603	903	0
512	0	0	0	0	0	0	0	200	300	0	0	0	0	0	0	0	200	903	0	0	0	0	0	0	0	603	903	0
512	1	0	0	0	0	0	0	200	300	0	0	0	0	0	0	0	200	903	0	0	0	0	0	0	0	603	903	0
512	2	0	0	0	0	0	0	200	300	0	0	0	0	0	0	0	200	903	0	0	0	0	0	0	0	603	903	0
512	3	0	0	0	0	0	0	200	300	0	0	0	0	0	0	0	200	903	0	0	0	0	0	0	0	603	903	0
512	4	0	0	0	0	0	0	200	300	0	0	0	0	0	0	0	200	903	0	0	0	0	0	0	0	603	903	0
512	5	0	0	0	0	0	0	200	300	0	0	0	0	0	0	0	200	903	0	0	0	0	0	0	0	603	903	0
512	6	0	0	0	0	0	0	200	300	0	0	0	0	0	0	0	200	903	0	0	0	0	0	0	0	603	903	0
512	7	0	0	0	0	0	0	200	300	0	0	0	0	0	0	0	200	903	0	0	0	0	0	0	0	603	903	0
512	8	0	0	0	0	0	0	200	300	0	0	0	0	0	0	0	200	903	0	0	0	0	0	0	0	603	903	0
512	9	0	0	0	0	0	0	200	300	0	0	0	0	0	0	0	200	903	0	0	0	0	0	0	0	603	903	0
513	0	0	0	0	0	0	0	200	300	0	0	0	0	0	0	0	200	903	0	0	0	0	0	0	0	603	903	0
513	1	0	0	0	0	0	0	200	300	0	0	0	0	0	0	0	200	903	0	0	0	0	0	0	0	603	903	0
513	2	0	0	0	0	0	0	200	300	0	0	0	0	0	0	0	200	903	0	0	0	0	0	0	0	603	903	0
513	3	0	0	0	0	0	0	200	300	0	0	0	0	0	0	0	200	903	0	0	0	0	0	0	0	603	903	0
513	4	0	0	0	0	0	0	200	300	0	0	0	0	0	0	0	200	903	0	0	0	0	0	0	0	603	903	0
513	5	0	0	0	0	0	0	200	300	0	0	0	0	0	0	0	200	903	0	0	0	0	0	0	0	603	903	0
513	6	0	0	0	0	0	0	200	300	0	0	0	0	0	0	0	200	903	0	0	0	0	0	0	0	603	903	0
513	7	0	0	0	0	0	0	200	300	0	0	0	0	0	0	0	200	903	0	0	0	0	0	0	0	603	903	0
513	8	0	0	0	0	0	0	200	300	0	0	0	0	0	0	0	200	903	0	0	0	0	0	0	0	603	903	0
513	9	0	0	0	0	0	0	200	300	0	0	0	0	0	0	0	200	903	0	0	0	0	0	0	0	603	903	0
514	0	0	0	0	0	0	0	200	300	0	0	0	0	0	0	0	200	903	0	0	0	0	0	0	0	603	903	0
514	1	0	0	0	0	0	0	200	300	0	0	0	0	0	0	0	200	903	0	0	0	0	0	0	0	603	903	0
514	2	0	0	0	0	0	0	200	300	0	0	0	0	0	0	0	200	903	0	0	0	0	0	0	0	603	903	0
514	3	0	0	0	0	0	0	200	300	0	0	0	0	0	0	0	200	903	0	0	0	0	0	0	0	603	903	0
514	4	0	0	0	0	0	0	200	300	0	0	0	0	0	0	0	200	903	0	0	0	0	0	0	0	603	903	0
514	5	0	0	0	0	0	0	200	300	0	0	0	0	0	0	0	200	903	0	0	0	0	0	0	0	603	903	0
514	6	0	0	0	0	0	0	200	300	0	0	0	0	0	0	0	200	903	0	0	0	0	0	0	0	603	903	0
514	7	0	0	0	0	0	0	200	300	0	0	0	0	0	0	0	200	903	0	0	0	0	0	0	0	603	903	0
514	8	0	0	0	0	0	0	200	300	0	0	0	0	0	0	0	200	903	0	0	0	0	0	0	0	603	903	0
514	9	0	0	0	0	0	0	200	300	0	0	0	0	0	0	0	200	903	0	0	0	0	0	0	0	603	903	0
515	0	0	0	0	0	0	0	200	300	0	0	0	0	0	0	0	200	903	0	0	0	0	0	0	0	603	903	0
515	1	0	0	0	0	0	0	200	300	0	0	0	0	0	0	0	200	903	0	0	0	0	0	0	0	603	903	0
515	2	0	0	0	0	0	0	200	300	0	0	0	0	0	0	0	200	903	0	0	0	0	0	0	0	603	903	0
515	3	0	0	0	0	0	0	200	300	0	0	0	0	0	0	0	200	903	0	0	0	0	0	0	0	603	903	0
515	4	0	0	0	0	0	0	200	300	0	0	0	0	0	0	0	200	903	0	0	0	0	0	0	0	603	903	0
515	5	0	0	0	0	0	0	200	300	0	0	0	0	0	0	0	200	903	0	0	0	0	0	0	0	603	903	0
515	6	0	0	0	0	0	0	200	300	0	0	0	0	0	0	0	200	903	0	0	0	0	0	0	0	603	903	0
515	7	0	0	0	0	0	0	200	300	0	0	0	0	0	0	0	200	903	0	0	0	0	0	0	0	603	903	0
515	8	0	0	0	0	0	0	200	300	0	0	0	0	0	0	0	200	903	0	0	0	0	0	0	0	603	903	0
515	9	0	0	0	0	0	0	200	300	0	0	0	0	0	0	0	200	903	0	0	0	0	0	0	0	603	903	0
516	0	0	0	0	0	0	0	200	300	0	0	0	0	0	0	0	200	903	0	0	0	0	0	0	0	603	903	0
516	1	0	0	0	0	0	0	200	300	0	0	0	0	0	0	0	200	903	0	0	0	0	0	0	0	603	903	0
516	2	0	0	0	0	0	0	200	300	0	0	0	0	0	0	0	200	903	0	0	0	0	0	0	0	603	903	0
516	3	0	0	0	0	0	0	200	300	0	0	0	0	0	0	0	200	903	0	0	0	0	0	0	0	603	903	0
516	4	0	0	0	0	0	0	200	300	0	0	0	0	0	0	0	200	903	0	0	0	0	0	0	0	603	903	0
516	5	0	0	0	0	0	0	200	300	0	0	0	0	0	0	0	200	903	0	0	0	0	0	0	0	603	903	0
516	6	0	0	0	0	0	0	200	300	0	0	0	0	0	0	0	200	903	0	0	0	0	0	0	0	603	903	0
516	7	0	0	0	0	0	0	200	300	0	0	0	0	0	0	0	200	903	0	0	0	0	0	0	0	603	903	0
516	8	0	0	0	0	0	0	200	300	0	0	0	0	0	0	0	200	903	0	0	0	0	0	0	0	603	903	0
516	9	0	0	0	0	0	0	200	300	0	0	0	0	0	0	0	200	903	0	0	0	0	0	0	0	603	903	0
517	0	0	0	0	0	0	0	200	300	0	0	0	0	0	0	0	200	903	0	0	0	0	0	0	0	603	903	0
517	1	0	0	0	0	0	0	200	300	0	0	0	0	0	0	0	200	903	0	0	0	0	0	0	0	603	903	0
517	2	0	0	0	0	0	0	200	300	0	0	0	0	0	0	0	200	903	0	0	0	0	0	0	0	603	903	0
517	3	0	0	0	0	0	0	200	300	0	0	0	0	0	0	0	200	903	0	0	0	0	0	0	0	603	903	0
517	4	0	0	0	0	0	0	200	300	0	0	0	0	0	0	0	200	903	0	0	0	0	0	0	0	603	903	0
517	5	0	0	0	0	0	0	200	300	0	0	0	0	0	0	0	200	903	0	0	0	0	0	0	0	603	903	0
517	6	0	0	0	0	0	0	200	300	0	0	0	0	0	0	0	200	903	0	0	0	0	0	0	0	603	903	0
517	7	0	0	0	0	0	0	200	300	0	0	0	0	0	0	0	200	903	0	0	0	0	0	0	0	603	903	0
517	8	0	0	0	0	0	0	200	300	0	0	0	0	0	0	0	200	903	0	0	0	0	0	0	0	603	903	0
517	9	0	0	0	0	0	0	200	300	0	0	0	0	0	0	0	200	903	0	0	0	0	0	0	0	603	903	0
518	0	0	0	0	0	0	0	200	300	0	0	0	0	0	0	0	200	903	0	0	0	0	0	0	0	603	903	0
518	1	0	0	0	0	0	0	200	300	0	0	0	0	0	0	0	200	903	0	0	0	0	0	0	0	603	903	0
518	2	0	0	0	0	0	0	200	300	0	0	0	0	0	0	0	200	903	0	0	0	0	0	0	0	603	903	0
518	3	0	0	0	0	0	0	200	300	0	0	0	0	0	0	0	200	903	0	0	0	0	0	0	0	603	903	0
518	4	0	0	0	0	0	0	200	300	0	0	0	0	0	0	0	200	903	0	0	0	0	0	0	0	603	903	0
518	5	0	0	0	0	0	0	200	300	0	0	0	0	0	0	0	200	903	0	0	0	0	0	0	0	603	903	0
518	6	0	0	0	0	0	0	200	300	0	0	0	0	0	0	0	200	903	0	0	0	0	0	0	0	603	903	0
518	7	0	0	0	0	0	0	200	300	0	0	0	0	0	0	0	200	903	0	0	0	0	0	0	0	603	903	0
518	8	0	0	0	0	0	0	200	300	0	0	0	0	0	0	0	200	903	0	0	0	0	0	0	0	603	903	0
518	9	0	0	0	0	0	0	200	300	0	0	0	0	0	0	0	200	903	0	0	0	0	0	0	0	603	903	0
519	0	0	0	0	0	0	0	200	300	0	0	0	0	0	0	0	200	903	0	0	0	0	0	0	0	603	903	0
519	1	0	0	0	0	0	0	200	300	0	0	0	0	0	0	0	200	903	0	0	0	0	0	0	0	603	903	0
519	2	0	0	0	0	0	0	200	300	0	0	0	0	0	0	0	200	903	0	0	0	0	0	0	0	603	903	0
519	3	0	0	0	0	0	0	200	300	0	0	0	0	0	0	0	200	903	0	0	0	0	0	0	0	603	903	0
519	4	0	0	0	0	0	0	200	300	0	0	0	0	0	0	0	200	903	0	0	0	0	0	0	0	603	903	0
519	5	0	0	0	0	0	0	200	300	0	0	0	0	0	0	0	200	903	0	0	0	0	0	0	0	603	903	0
519	6	0	0	0	0	0	0	200	300	0	0	0	0	0	0	0	200	903	0	0	0	0	0	0	0	603	903	0
519	7	0	0	0	0	0	0	200	300	0	0	0	0	0	0	0	200	903	0	0	0	0	0	0	0	603	903	0
519	8	0	0	0	0	0	0	200	300	0	0	0	0	0	0	0	200	903	0	0	0	0	0	0	0	603	903	0
519	9	0	0	0	0	0	0	200	300	0	0	0	0	0	0	0	200	903	0	0	0	0	0	0	0	603	903	0
520	0	0	0	0	0	0	0	200	300	0	0	0	0	0	0	0	200	903	0	0	0	0	0	0	0	603	903	0
520	1	0	0	0	0	0	0	200	300	0	0	0	0	0	0	0	200	903	0	0	0	0	0	0	0	603	903	0
520	2	0	0	0	0	0	0	200	300	0	0	0	0	0	0	0	200	903	0	0	0	0	0	0	0	603	903	0
520	3	0	0	0	0	0	0	200	300	0	0	0	0	0	0	0	200	903	0	0	0	0	0	0	0	603	903	0
520	4	0	0	0	0	0	0	200	300	0	0	0	0	0	0	0	200	903	0	0	0	0	0	0	0	603	903	0
520	5	0	0	0	0	0	0	200	300	0	0	0	0	0	0	0	200	903	0	0	0	0	0	0	0	603	903	0
520	6	0	0	0	0	0	0	200	300	0	0	0	0	0	0	0	200	903	0	0	0	0	0	0	0	603	903	0
520	7	0	0	0	0	0	0	200	300	0	0	0	0	0	0	0	200	903	0	0	0	0	0	0	0	603	903	0
520	8	0	0	0	0	0	0	200	300	0	0	0	0	0	0	0	200	903	0	0	0	0	0	0	0	603	903	0
520	9	0	0	0	0	0	0	200	300	0	0	0	0	0	0	0	200	903	0	0	0	0	0	0	0	603	903	0
521	0	0	0	0	0	0	0	200	300	0	0	0	0	0	0	0	200	903	0	0	0	0	0	0	0	603	903	0
521	1	0	0	0	0	0	0	200	300	0	0	0	0	0	0	0	200	903	0	0	0	0	0	0	0	603	903	0
521	2	0	0	0	0	0	0	200	300	0	0	0	0	0	0	0	200	903	0	0	0	0	0	0	0	603	903	0
521	3	0	0	0	0	0	0	200	300	0	0	0	0	0	0	0	200	903	0	0	0	0	0	0	0	603	903	0
521	4	0	0	0	0	0	0	200	300	0	0	0	0	0	0	0	200	903	0	0	0	0	0	0	0	603	903	0
521	5	0	0	0	0	0	0	200	300	0	0	0	0	0	0	0	200	903	0	0	0	0	0	0	0	603	903	0
521	6	0	0	0	0	0	0	200	300	0	0	0	0	0	0	0	200	903	0	0	0	0	0	0	0	603	903	0
521	7	0	0	0	0	0	0	200	300	0	0	0	0	0	0	0	200	903	0	0	0	0	0	0	0	603	903	0
521	8	0	0	0	0	0	0	200	300	0	0	0	0	0	0	0	200	903	0	0	0	0	0	0	0	603	903	0
521	9	0	0	0	0	0	0	200	300	0	0	0	0	0	0	0	200	903	0	0	0	0	0	0	0	603	903	0
522	0	0	0	0	0	0	0	200	300	0	0	0	0	0	0	0	200	903	0	0	0	0	0	0	0	603	903	0
522	1	0	0	0	0	0	0	200	300	0	0	0	0	0	0	0	200	903	0	0	0	0	0	0	0	603	903	0
522	2	0	0	0	0	0	0	200	300	0	0	0	0	0	0	0	200	903	0	0	0	0	0	0	0	603	903	0
522	3	0	0	0	0	0	0	200	300	0	0	0	0	0	0	0	200	903	0	0	0	0	0	0	0	603	903	0
522	4	0	0	0	0	0	0	200	300	0	0	0	0	0	0	0	200	903	0	0	0	0	0	0	0	603	903	0
522	5	0	0	0	0	0	0	200	300	0	0	0	0	0	0	0	200	903	0	0	0	0	0	0	0	603	903	0
522	6	0	0	0	0	0	0	200	300	0	0	0	0	0	0	0	200	903	0	0	0	0	0	0	0	603	903	0
522	7	0	0	0	0	0	0	200	300	0	0	0	0	0	0	0	200	903	0	0	0	0	0	0	0	603	903	0
522	8	0	0	0	0	0	0	200	300	0	0	0	0	0	0	0	200	903	0	0	0	0	0	0	0	603	903	0
522	9	0	0	0	0	0	0	200	300	0	0	0	0	0	0	0	200	903	0	0	0	0	0	0	0	603	903	0
523	0	0	0	0	0	0	0	200	300	0	0	0	0	0	0	0	200	903	0	0	0	0	0	0	0	603	903	0
523	1	0	0	0	0	0	0	200	300	0	0	0	0	0	0	0	200	903	0	0	0	0	0	0	0	603	903	0
523	2	0	0	0	0	0	0	200	300	0	0	0	0	0	0	0	200	903	0	0	0	0	0	0	0	603	903	0
523	3	0	0	0	0	0	0	200	300	0	0	0	0	0	0	0	200	903	0	0	0	0	0	0	0	603	903	0
523	4	0	0	0	0	0	0	200	300	0	0	0	0	0	0	0	200	903	0	0	0	0	0	0	0	603	903	0
523	5	0	0	0	0	0	0	200	300	0	0	0	0	0	0	0	200	903	0	0	0	0	0	0	0	603	903	0
523	6	0	0	0	0	0	0	200	300	0	0	0	0	0	0	0	200	903	0	0	0	0	0	0	0	603	903	0
523	7	0	0	0	0	0	0	200	300	0	0	0	0	0	0	0	200	903	0	0	0	0	0	0	0	603	903	0
523	8	0	0	0	0	0	0	200	300	0	0	0	0	0	0	0	200	903	0	0	0	0	0	0	0	603	903	0
523	9	0	0	0	0	0	0	200	300	0	0	0	0	0	0	0	200	903	0	0	0	0	0	0	0	603	903	0
524	0	0	0	0	0	0	0	200	300	0	0	0	0	0	0	0	200	903	0	0	0	0	0	0	0	603	903	0
524	1	0	0	0	0	0	0	200	300	0	0	0	0	0	0	0	200	903	0	0	0	0	0	0	0	603	903	0
524	2	0	0	0	0	0	0	200	300	0	0	0	0	0	0	0	200	903	0	0	0	0	0	0	0	603	903	0
524	3	0	0	0	0	0	0	200	300	0	0	0	0	0	0	0	200	903	0	0	0	0	0	0	0	603	903	0
524	4	0	0	0	0	0	0	200	300	0	0	0	0	0	0	0	200	903	0	0	0	0	0	0	0	603	903	0
524	5	0	0	0	0	0	0	200	300	0	0	0	0	0	0	0	200	903	0	0	0	0	0	0	0	603	903	0
524	6	0	0	0	0	0	0	200	300	0	0	0	0	0	0	0	200	903	0	0	0	0	0	0	0	603	903	0
524	7	0	0	0	0	0	0	200	300	0	0	0	0	0	0	0	200	903	0	0	0	0	0	0	0	603	903	0
524	8	0	0	0	0	0	0	200	300	0	0	0	0	0	0	0	200	903	0	0	0	0	0	0	0	603	903	0
524	9	0	0	0	0	0	0	200	300	0	0	0	0	0	0	0	200	903	0	0	0	0	0	0	0	603	903	0
525	0	0	0	0	0	0	0	200	300	0	0	0	0	0	0	0	200	903	0	0	0	0	0	0	0	603	903	0
525	1	0	0	0	0	0	0	200	300	0	0	0	0	0	0	0	200	903	0	0	0	0	0	0	0	603	903	0
525	2	0	0	0	0	0	0	200	300	0	0	0	0	0	0	0	200	903	0	0	0	0	0	0	0	603	903	0
525	3	0	0	0	0	0	0	200	300	0	0	0	0	0	0	0	200	903	0	0	0	0	0	0	0	603	903	0
525	4	0	0	0	0	0	0	200	300	0	0	0	0	0	0	0	200	903	0	0	0	0	0	0	0	603	903	0
525	5	0	0	0	0	0	0	200	300	0	0	0	0	0	0	0	200	903	0	0	0	0	0	0	0	603	903	0
525	6	0	0	0	0	0	0	200	300	0	0	0	0	0	0	0	200	903	0	0	0	0	0	0	0	603	903	0
525	7	0	0	0	0	0	0	200	300	0	0	0	0	0	0	0	200	903	0	0	0	0	0	0	0	603	903	0
525	8	0	0	0	0	0	0	200	300	0	0	0	0	0	0	0	200	903	0	0	0	0	0	0	0	603	903	0
525	9	0	0	0	0	0	0	200	300	0	0	0	0	0	0	0	200	903	0	0	0	0	0	0	0	603	903	0
526	0	0	0	0	0	0	0	200	300	0	0	0	0	0	0	0	200	903	0	0	0	0	0	0	0	603	903	0
526	1	0	0	0	0	0	0	200	300	0	0	0	0	0	0	0	200	903	0	0	0	0	0	0	0	603	903	0
526	2	0	0	0	0	0	0	200	300	0	0	0	0	0	0	0	200	903	0	0	0	0	0	0	0	603	903	0
526	3	0	0	0	0	0	0	200	300	0	0	0	0	0	0	0	200	903	0	0	0	0	0	0	0	603	903	0
526	4	0	0	0	0	0	0	200	300	0	0	0	0	0	0	0	200	903	0	0	0	0	0	0	0	603	903	0
526	5	0	0	0	0	0	0	200	300	0	0	0	0	0	0	0	200	903	0	0	0	0	0	0	0	603	903	0
526	6	0	0	0	0	0	0	200	300	0	0	0	0	0	0	0	200	903	0	0	0	0	0	0	0	603	903	0
526	7	0	0	0	0	0	0	200	300	0	0	0	0	0	0	0	200	903	0	0	0	0	0	0	0	603	903	0
526	8	0	0	0	0	0	0	200	300	0	0	0	0	0	0	0	200	903	0	0	0	0	0	0	0	603	903	0
526	9	0	0	0	0	0	0	200	300	0	0	0	0	0	0	0	200	903	0	0	0	0	0	0	0	603	903	0
527	0	0	0	0	0	0	0	200	300	0	0	0	0	0	0	0	200	903	0	0	0	0	0	0	0	603	903	0
527	1	0	0	0	0	0	0	200	300	0	0	0	0	0	0	0	200	903	0	0	0	0	0	0	0	603	903	0
527	2	0	0	0	0	0	0	200	300	0	0	0	0	0	0	0	200	903	0	0	0	0	0	0	0	603	903	0
527	3	0	0	0	0	0	0	200	300	0	0	0	0	0	0	0	200	903	0	0	0	0	0	0	0	603	903	0
527	4	0	0	0	0	0	0	200	300	0	0	0	0	0	0	0	200	903	0	0	0	0	0	0	0	603	903	0
527	5	0	0	0	0	0	0	200	300	0	0	0	0	0	0	0	200	903	0	0	0	0	0	0	0	603	903	0
527	6	0	0	0	0	0	0	200	300	0	0	0	0	0	0	0	200	903	0	0	0	0	0	0	0	603	903	0
527	7	0	0	0	0	0	0	200	300	0	0	0	0	0	0	0	200	903	0	0	0	0	0	0	0	603	903	0
527	8	0	0	0	0	0	0	200	300	0	0	0	0	0	0	0	200	903	0	0	0	0	0	0	0	603	903	0
527	9	0	0	0	0	0	0	200	300	0	0	0	0	0	0	0	200	903	0	0	0	0	0	0	0	603	903	0
528	0	0	0	0	0	0	0	200	300	0	0	0	0	0	0	0	200	903	0	0	0	0	0	0	0	603	903	0
528	1	0	0	0	0	0	0	200	300	0	0	0	0	0	0	0	200	903	0	0	0	0	0	0	0	603	903	0
528	2	0	0	0	0	0	0	200	300	0	0	0	0	0	0	0	200	903	0	0	0	0	0	0	0	603	903	0
528	3	0	0	0	0	0	0	200	300	0	0	0	0	0	0	0	200	903	0	0	0	0	0	0	0	603	903	0
528	4	0	0	0	0	0	0	200	300	0	0	0	0	0	0	0	200	903	0	0	0	0	0	0	0	603	903	0
528	5	0	0	0	0	0	0	200	300	0	0	0	0	0	0	0	200	903	0	0	0	0	0	0	0	603	903	0
528	6	0	0	0	0	0	0	200	300	0	0	0	0	0	0	0	200	903	0	0	0	0	0	0	0	603	903	0
528	7	0	0	0	0	0	0	200	300	0	0	0	0	0	0	0	200	903	0	0	0	0	0	0	0	603	903	0
528	8	0	0	0	0	0	0	200	300	0	0	0	0	0	0	0	200	903	0	0	0	0	0	0	0	603	903	0
528	9	0	0	0	0	0	0	200	300	0	0	0	0	0	0	0	200	903	0	0	0	0	0	0	0	603	903	0
529	0	0	0	0	0	0	0	200	300	0	0	0	0	0	0	0	200	903	0	0	0	0	0	0	0	603	903	0
529	1	0	0	0	0	0	0	200	300	0	0	0	0	0	0	0	200	903	0	0	0	0	0	0	0	603	903	0
529	2	0	0	0	0	0	0	200	300	0	0	0	0	0	0	0	200	903	0	0	0	0	0	0	0	603	903	0
529	3	0	0	0	0	0	0	200	300	0	0	0	0	0	0	0	200	903	0	0	0	0	0	0	0	603	903	0
529	4	0	0	0	0	0	0	200	300	0	0	0	0	0	0	0	200	903	0	0	0	0	0	0	0	603	903	0
529	5	0	0	0	0	0	0	200	300	0	0	0	0	0	0	0	200	903	0	0	0	0	0	0	0	603	903	0
529	6	0	0	0	0	0	0	200	300	0	0	0	0	0	0	0	200	903	0	0	0	0	0	0	0	603	903	0
529	7	0	0	0	0	0	0	200	300	0	0	0	0	0	0	0	200	903	0	0	0	0	0	0	0	603	903	0
529	8	0	0	0	0	0	0	200	300	0	0	0	0	0	0	0	200	903	0	0	0	0	0	0	0	603	903	0
529	9	0	0	0	0	0	0	200	300	0	0	0	0	0	0	0	200	903	0	0	0	0	0	0	0	603	903	0
530	0	0	0	0	0	0	0	200	300	0	0	0	0	0	0	0	200	903	0	0	0	0	0	0	0	603	903	0
530	1	0	0	0	0	0	0	200	300	0	0	0	0	0	0	0	200	903	0	0	0	0	0	0	0	603	903	0
530	2	0	0	0	0	0	0	200	300	0	0	0	0	0	0	0	200	903	0	0	0	0	0	0	0	603	903	0
530	3	0	0	0	0	0	0	200	300	0	0	0	0	0	0	0	200	903	0	0	0	0	0	0	0	603	903	0
530	4	0	0	0	0	0	0	200	300	0	0	0	0	0	0	0	200	903	0	0	0	0	0	0	0	603	903	0
530	5	0	0	0	0	0	0	200	300	0	0	0	0	0	0	0	200	903	0	0	0	0	0	0	0	603	903	0
530	6	0	0	0	0	0	0	200	300	0	0	0	0	0	0	0	200	903	0	0	0	0	0	0	0	603	903	0
530	7	0	0	0	0	0	0	200	300	0	0	0	0	0	0	0	200	903	0	0	0	0	0	0	0	603	903	0
530	8	0	0	0	0	0	0	200	300	0	0	0	0	0	0	0	200	903	0	0	0	0	0	0	0	603	903	0
530	9	0	0	0	0	0	0	200	300	0	0	0	0	0	0	0	200	903	0	0	0	0	0	0	0	603	903	0
531	0	0	0	0	0	0	0	200	300	0	0	0	0	0	0	0	200	903	0	0	0	0	0	0	0	603	903	0
531	1	0	0	0	0	0	0	200	300	0	0	0	0	0	0	0	200	903	0	0	0	0	0	0	0	603	903	0
531	2	0	0	0	0	0	0	200	300	0	0	0	0	0	0	0	200	903	0	0	0	0	0	0	0	603	903	0
531	3	0	0	0	0	0	0	200	300	0	0	0	0	0	0	0	200	903	0	0	0	0	0	0	0	603	903	0
531	4	0	0	0	0	0	0	200	300	0	0	0	0	0	0	0	200	903	0	0	0	0	0	0	0	603	903	0
531	5	0	0	0	0	0	0	200	300	0	0	0	0	0	0	0	200	903	0	0	0	0	0	0	0	603	903	0
531	6	0	0	0	0	0	0	200	300	0	0	0	0	0	0	0	200	903	0	0	0	0	0	0	0	603	903	0
531	7	0	0	0	0	0	0	200	300	0	0	0	0	0	0	0	200	903	0	0	0	0	0	0	0	603	903	0
531	8	0	0	0	0	0	0	200	300	0	0	0	0	0	0	0	200	903	0	0	0	0	0	0	0	603	903	0
531	9	0	0	0	0	0	0	200	300	0	0	0	0	0	0	0	200	903	0	0	0	0	0	0	0	603	903	0
532	0	0	0	0	0	0	0	200	300	0	0	0	0	0	0	0	200	903	0	0	0	0	0	0	0	603	903	0
532	1	0	0	0	0	0	0	200	300	0	0	0	0	0	0	0	200	903	0	0	0	0	0	0	0	603	903	0
532	2	0	0	0	0	0	0	200	300	0	0	0	0	0	0	0	200	903	0	0	0	0	0	0	0	603	903	0
532	3	0	0	0	0	0	0	200	300	0	0	0	0	0	0	0	200	903	0	0	0	0	0	0	0	603	903	0
532	4	0	0	0	0	0	0	200	300	0	0	0	0	0	0	0	200	903	0	0	0	0	0	0	0	603	903	0
532	5	0	0	0	0	0	0	200	300	0	0	0	0	0	0	0	200	903	0	0	0	0	0	0	0	603	903	0
532	6	0	0	0	0	0	0	200	300	0	0	0	0	0	0	0	200	903	0	0	0	0	0	0	0	603	903	0
532	7	0	0	0	0	0	0	200	300	0	0	0	0	0	0	0	200	903	0	0	0	0	0	0	0	603	903	0
532	8	0	0	0	0	0	0	200	300	0	0	0	0	0	0	0	200	903	0	0	0	0	0	0	0	603	903	0
532	9	0	0	0	0	0	0	200	300	0	0	0	0	0	0	0	200	903	0	0	0	0	0	0	0	603	903	0
533	0	0	0	0	0	0	0	200	300	0	0	0	0	0	0	0	200	903	0	0	0	0	0	0	0	603	903	0
533	1	0	0	0	0	0	0	200	300	0	0	0	0	0	0	0	200	903	0	0	0	0	0	0	0	603	903	0
533	2	0	0	0	0	0	0	200	300	0	0	0	0	0	0	0	200	903	0	0	0	0	0	0	0	603	903	0
533	3	0	0	0	0	0	0	200	300	0	0	0	0	0	0	0	200	903	0	0	0	0	0	0	0	603	903	0
533	4	0	0	0	0	0	0	200	300	0	0	0	0	0	0	0	200	903	0	0	0	0	0	0	0	603	903	0
533	5	0	0	0	0	0	0	200	300	0	0	0	0	0	0	0	200	903	0	0	0	0	0	0	0	603	903	0
533	6	0	0	0	0	0	0	200	300	0	0	0	0	0	0	0	200	903	0	0	0	0	0	0	0	603	903	0
533	7	0	0	0	0	0	0	200	300	0	0	0	0	0	0	0	200	903	0	0	0	0	0	0	0	603	903	0
533	8	0	0	0	0	0	0	200	300	0	0	0	0	0	0	0	200	903	0	0	0	0	0	0	0	603	903	0
533	9	0	0	0	0	0	0	200	300	0	0	0	0	0	0	0	200	903	0	0	0	0	0	0	0	603	903	0
534	0	0	0	0	0	0	0	200	300	0	0	0	0	0	0	0	200	903	0	0	0	0	0	0	0	603	903	0
534	1	0	0	0	0	0	0	200	300	0	0	0	0	0	0	0	200	903	0	0	0	0	0	0	0	603	903	0
534	2	0	0	0	0	0	0	200	300	0	0	0	0	0	0	0	200	903	0	0	0	0	0	0	0	603	903	0
534	3	0	0	0	0	0	0	200	300	0	0	0	0	0	0	0	200	903	0	0	0	0	0	0	0	603	903	0
534	4	0	0	0	0	0	0	200	300	0	0	0	0	0	0	0	200	903	0	0	0	0	0	0	0	603	903	0
534	5	0	0	0	0	0	0	200	300	0	0	0	0	0	0	0	200	903	0	0	0	0	0	0	0	603	903	0
534	6	0	0	0	0	0	0	200	300	0	0	0	0	0	0	0	200	903	0	0	0	0	0	0	0	603	903	0
534	7	0	0	0	0	0	0	200	300	0	0	0	0	0	0	0	200	903	0	0	0	0	0	0	0	603	903	0
534	8	0	0	0	0	0	0	200	300	0	0	0	0	0	0	0	200	903	0	0	0	0	0	0	0	603	903	0
534	9	0	0	0	0	0	0	200	300	0	0	0	0	0	0	0	200	903	0	0	0	0	0	0	0	603	903	0
535	0	0	0	0	0	0	0	200	300	0	0	0	0	0	0	0	200	903	0	0	0	0	0	0	0	603	903	0
535	1	0	0	0	0	0	0	200	300	0	0	0	0	0	0	0	200	903	0	0	0	0	0	0	0	603	903	0
535	2	0	0	0	0	0	0	200	300	0	0	0	0	0	0	0	200	903	0	0	0	0	0	0	0	603	903	0
535	3	0	0	0	0	0	0	200	300	0	0	0	0	0	0	0	200	903	0	0	0	0	0	0	0	603	903	0
535	4	0	0	0	0	0	0	200	300	0	0	0	0	0	0	0	200	903	0	0	0	0	0	0	0	603	903	0
535	5	0	0	0	0	0	0	200	300	0	0	0	0	0	0	0	200	903	0	0	0	0	0	0	0	603	903	0
535	6	0	0	0	0	0	0	200	300	0	0	0	0	0	0	0	200	903	0	0	0	0	0	0	0	603	903	0
535	7	0	0	0	0	0	0	200	300	0	0	0	0	0	0	0	200	903	0	0	0	0	0	0	0	603	903	0
535	8	0	0	0	0	0	0	200	300	0	0	0	0	0	0	0	200	903	0	0	0	0	0	0	0	603	903	0
535	9	0	0	0	0	0	0	200	300	0	0	0	0	0	0	0	200	903	0	0	0	0	0	0	0	603	903	0
536	0	0	0	0	0	0	0	200	300	0	0	0	0	0	0	0	200	903	0	0	0	0	0	0	0	603	903	0
536	1	0	0	0	0	0	0	200	300	0	0	0	0	0	0	0	200	903	0	0	0	0	0	0	0	603	903	0
536	2	0	0	0	0	0	0	200	300	0	0	0	0	0	0	0	200	903	0	0	0	0	0	0	0	603	903	0
536	3	0	0	0	0	0	0	200	300	0	0	0	0	0	0	0	200	903	0	0	0	0	0	0	0	603	903	0
536	4	0	0	0	0	0	0	200	300	0	0	0	0	0	0	0	200	903	0	0	0	0	0	0	0	603	903	0
536	5	0	0	0	0	0	0	200	300	0	0	0	0	0	0	0	200	903	0	0	0	0	0	0	0	603	903	0
536	6	0	0	0	0	0	0	200	300	0	0	0	0	0	0	0	200	903	0	0	0	0	0	0	0	603	903	0
536	7	0	0	0	0	0	0	200	300	0	0	0	0	0	0	0	200	903	0	0	0	0	0	0	0	603	903	0
536	8	0	0	0	0	0	0	200	300	0	0	0	0	0	0	0	200	903	0	0	0	0	0	0	0	603	903	0
536	9	0	0	0	0	0	0	200	300	0	0	0	0	0	0	0	200	903	0	0	0	0	0	0	0	603	903	0
537	0	0	0	0	0	0	0	200	300	0	0	0	0	0	0	0	200	903	0	0	0	0	0	0	0	603	903	0
537	1	0	0	0	0	0	0	200	300	0	0	0	0	0	0	0	200	903	0	0	0	0	0	0	0	603	903	0
537	2	0	0	0	0	0	0	200	300	0	0	0	0	0	0	0	200	903	0	0	0	0	0	0	0	603	903	0
537	3	0	0	0	0	0	0	200	300	0	0	0	0	0	0	0	200	903	0	0	0	0	0	0	0	603	903	0
537	4	0	0	0	0	0	0	200	300	0	0	0	0	0	0	0	200	903	0	0	0	0	0	0	0	603	903	0
537	5	0	0	0	0	0	0	200	300	0	0	0	0	0	0	0	200	903	0	0	0	0	0	0	0	603	903	0
537	6	0	0	0	0	0	0	200	300	0	0	0	0	0	0	0	200	903	0	0	0	0	0	0	0	603	903	0
537	7	0	0	0	0	0	0	200	300	0	0	0	0	0	0	0	200	903	0	0	0	0	0	0	0	603	903	0
537	8	0	0	0	0	0	0	200	300	0	0	0	0	0	0	0	200	903	0	0	0	0	0	0	0	603	903	0
537	9	0	0	0	0	0	0	200	300	0	0	0	0	0	0	0	200	903	0	0	0	0	0	0	0	603	903	0
538	0	0	0	0	0	0	0	200	300	0	0	0	0	0	0	0	200	903	0	0	0	0	0	0	0	603	903	0
538	1	0	0	0	0	0	0	200	300	0	0	0	0	0	0	0	200	903	0	0	0	0	0	0	0	603	903	0
538	2	0	0	0	0	0	0	200	300	0	0	0	0	0	0	0	200	903	0	0	0	0	0	0	0	603	903	0
538	3	0	0	0	0	0	0	200	300	0	0	0	0	0	0	0	200	903	0	0	0	0	0	0	0	603	903	0
538	4	0	0	0	0	0	0	200	300	0	0	0	0	0	0	0	200	903	0	0	0	0	0	0	0	603	903	0
538	5	0	0	0	0	0	0	200	300	0	0	0	0	0	0	0	200	903	0	0	0	0	0	0	0	603	903	0
538	6	0	0	0	0	0	0	200	300	0	0	0	0	0	0	0	200	903	0	0	0	0	0	0	0	603	903	0
538	7	0	0	0	0	0	0	200	300	0	0	0	0	0	0	0	200	903	0	0	0	0	0	0	0	603	903	0
538	8	0	0	0	0	0	0	200	300	0	0	0	0	0	0	0	200	903	0	0	0	0	0	0	0	603	903	0
538	9	0	0	0	0	0	0	200	300	0	0	0	0	0	0	0	200	903	0	0	0	0	0	0	0	603	903	0
539	0	0	0	0	0	0	0	200	300	0	0	0	0	0	0	0	200	903	0	0	0	0	0	0	0	603	903	0
539	1	0	0	0	0	0	0	200	300	0	0	0	0	0	0	0	200	903	0	0	0	0	0	0	0	603	903	0
539	2	0	0	0	0	0	0	200	300	0	0	0	0	0	0	0	200	903	0	0	0	0	0	0	0	603	903	0
539	3	0	0	0	0	0	0	200	300	0	0	0	0	0	0	0	200	903	0	0	0	0	0	0	0	603	903	0
539	4	0	0	0	0	0	0	200	300	0	0	0	0	0	0	0	200	903	0	0	0	0	0	0	0	603	903	0
539	5	0	0	0	0	0	0	200	300	0	0	0	0	0	0	0	200	903	0	0	0	0	0	0	0	603	903	0
539	6	0	0	0	0	0	0	200	300	0	0	0	0	0	0	0	200	903	0	0	0	0	0	0	0	603	903	0
539	7	0	0	0	0	0	0	200	300	0	0	0	0	0	0	0	200	903	0	0	0	0	0	0	0	603	903	0
539	8	0	0	0	0	0	0	200	300	0	0	0	0	0	0	0	200	903	0	0	0	0	0	0	0	603	903	0
539	9	0	0	0	0	0	0	200	300	0	0	0	0	0	0	0	200	903	0	0	0	0	0	0	0	603	903	0
540	0	0	0	0	0	0	0	200	300	0	0	0	0	0	0	0	200	903	0	0	0	0	0	0	0	603	903	0
540	1	0	0	0	0	0	0	200	300	0	0	0	0	0	0	0	200	903	0	0	0	0	0	0	0	603	903	0
540	2	0	0	0	0	0	0	200	300	0	0	0	0	0	0	0	200	903	0	0	0	0	0	0	0	603	903	0
540	3	0	0	0	0	0	0	200	300	0	0	0	0	0	0	0	200	903	0	0	0	0	0	0	0	603	903	0
540	4	0	0	0	0	0	0	200	300	0	0	0	0	0	0	0	200	903	0	0	0	0	0	0	0	603	903	0
540	5	0	0	0	0	0	0	200	300	0	0	0	0	0	0	0	200	903	0	0	0	0	0	0	0	603	903	0
540	6	0	0	0	0	0	0	200	300	0	0	0	0	0	0	0	200	903	0	0	0	0	0	0	0	603	903	0
540	7	0	0	0	0	0	0	200	300	0	0	0	0	0	0	0	200	903	0	0	0	0	0	0	0	603	903	0
540	8	0	0	0	0	0	0	200	300	0	0	0	0	0	0	0	200	903	0	0	0	0	0	0	0	603	903	0
540	9	0	0	0	0	0	0	200	300	0	0	0	0	0	0	0	200	903	0	0	0	0	0	0	0	603	903	0
541	0	0	0	0	0	0	0	200	300	0	0	0	0	0	0	0	200	903	0	0	0	0	0	0	0	603	903	0
541	1	0	0	0	0	0	0	200	300	0	0	0	0	0	0	0	200	903	0	0	0	0	0	0	0	603	903	0
541	2	0	0	0	0	0	0	200	300	0	0	0	0	0	0	0	200	903	0	0	0	0	0	0	0	603	903	0
541	3	0	0	0	0	0	0	200	300	0	0	0	0	0	0	0	200	903	0	0	0	0	0	0	0	603	903	0
541	4	0	0	0	0	0	0	200	300	0	0	0	0	0	0	0	200	903	0	0	0	0	0	0	0	603	903	0
541	5	0	0	0	0	0	0	200	300	0	0	0	0	0	0	0	200	903	0	0	0	0	0	0	0	603	903	0
541	6	0	0	0	0	0	0	200	300	0	0	0	0	0	0	0	200	903	0	0	0	0	0	0	0	603	903	0
541	7	0	0	0	0	0	0	200	300	0	0	0	0	0	0	0	200	903	0	0	0	0	0	0	0	603	903	0
541	8	0	0	0	0	0	0	200	300	0	0	0	0	0	0	0	200	903	0	0	0	0	0	0	0	603	903	0
541	9	0	0	0	0	0	0	200	300	0	0	0	0	0	0	0	200	903	0	0	0	0	0	0	0	603	903	0
542	0	0	0	0	0	0	0	200	300	0	0	0	0	0	0	0	200	903	0	0	0	0	0	0	0	603	903	0
542	1	0	0	0	0	0	0	200	300	0	0	0	0	0	0	0	200	903	0	0	0	0	0	0	0	603	903	0
542	2	0	0	0	0	0	0	200	300	0	0	0	0	0	0	0	200	903	0	0	0	0	0	0	0	603	903	0
542	3	0	0	0	0	0	0	200	300	0	0	0	0	0	0	0	200	903	0	0	0	0	0	0	0	603	903	0
542	4	0	0	0	0	0	0	200	300	0	0	0	0	0	0	0	200	903	0	0	0	0	0	0	0	603	903	0
542	5	0	0	0	0	0	0	200	300	0	0	0	0	0	0	0	200	903	0	0	0	0	0	0	0	603	903	0
542	6	0	0	0	0	0	0	200	300	0	0	0	0	0	0	0	200	903	0	0	0	0	0	0	0	603	903	0
542	7	0	0	0	0	0	0	200	300	0	0	0	0	0	0	0	200	903	0	0	0	0	0	0	0	603	903	0
542	8	0	0	0	0	0	0	200	300	0	0	0	0	0	0	0	200	903	0	0	0	0	0	0	0	603	903	0
542	9	0	0	0	0	0	0	200	300	0	0	0	0	0	0	0	200	903	0	0	0	0	0	0	0	603	903	0
543	0	0	0	0	0	0	0	200	300	0	0	0	0	0	0	0	200	903	0	0	0	0	0	0	0	603	903	0
543	1	0	0	0	0	0	0	200	300	0	0	0	0	0	0	0	200	903	0	0	0	0	0	0	0	603	903	0
543	2	0	0	0	0	0	0	200	300	0	0	0	0	0	0	0	200	903	0	0	0	0	0	0	0	603	903	0
543	3	0	0	0	0	0	0	200	300	0	0	0	0	0	0	0	200	903	0	0	0	0	0	0	0	603	903	0
543	4	0	0	0	0	0	0	200	300	0	0	0	0	0	0	0	200	903	0	0	0	0	0	0	0	603	903	0
543	5	0	0	0	0	0	0	200	300	0	0	0	0	0	0	0	200	903	0	0	0	0	0	0	0	603	903	0
543	6	0	0	0	0	0	0	200	300	0	0	0	0	0	0	0	200	903	0	0	0	0	0	0	0	603	903	0
543	7	0	0	0	0	0	0	200	300	0	0	0	0	0	0	0	200	903	0	0	0	0	0	0	0	603	903	0
543	8	0	0	0	0	0	0	200	300	0	0	0	0	0	0	0	200	903	0	0	0	0	0	0	0	603	903	0
543	9	0	0	0	0	0	0	200	300	0	0	0	0	0	0	0	200	903	0	0	0	0	0	0	0	603	903	0
544	0	0	0	0	0	0	0	200	300	0	0	0	0	0	0	0	200	903	0	0	0	0	0	0	0	603	903	0
544	1	0	0	0	0	0	0	200	300	0	0	0	0	0	0	0	200	903	0	0	0	0	0	0	0	603	903	0
544	2	0	0	0	0	0	0	200	300	0	0	0	0	0	0	0	200	903	0	0	0	0	0	0	0	603	903	0
544	3	0	0	0	0	0	0	200	300	0	0	0	0	0	0	0	200	903	0	0	0	0	0	0	0	603	903	0
544	4	0	0	0	0	0	0	200	300	0	0	0	0	0	0	0	200	903	0	0	0	0	0	0	0	603	903	0
544	5	0	0	0	0	0	0	200	300	0	0	0	0	0	0	0	200	903	0	0	0	0	0	0	0	603	903	0
544	6	0	0	0	0	0	0	200	300	0	0	0	0	0	0	0	200	903	0	0	0	0	0	0	0	603	903	0
544	7	0	0	0	0	0	0	200	300	0	0	0	0	0	0	0	200	903	0	0	0	0	0	0	0	603	903	0
544	8	0	0	0	0	0	0	200	300	0	0	0	0	0	0	0	200	903	0	0	0	0	0	0	0	603	903	0
544	9	0	0	0	0	0	0	200	300	0	0	0	0	0	0	0	200	903	0	0	0	0	0	0	0	603	903	0
545	0	0	0	0	0	0	0	200	300	0	0	0	0	0	0	0	200	903	0	0	0	0	0	0	0	603	903	0
545	1	0	0	0	0	0	0	200	300	0	0	0	0	0	0	0	200	903	0	0	0	0	0	0	0	603	903	0
545	2	0	0	0	0	0	0	200	300	0	0	0	0	0	0	0	200	903	0	0	0	0	0	0	0	603	903	0
545	3	0	0	0	0	0	0	200	300	0	0	0	0	0	0	0	200	903	0	0	0	0	0	0	0	603	903	0
545	4	0	0	0	0	0	0	200	300	0	0	0	0	0	0	0	200	903	0	0	0	0	0	0	0	603	903	0
545	5	0	0	0	0	0	0	200	300	0	0	0	0	0	0	0	200	903	0	0	0	0	0	0	0	603	903	0
545	6	0	0	0	0	0	0	200	300	0	0	0	0	0	0	0	200	903	0	0	0	0	0	0	0	603	903	0
545	7	0	0	0	0	0	0	200	300	0	0	0	0	0	0	0	200	903	0	0	0	0	0	0	0	603	903	0
545	8	0	0	0	0	0	0	200	300	0	0	0	0	0	0	0	200	903	0	0	0	0	0	0	0	603	903	0
545	9	0	0	0	0	0	0	200	300	0	0	0	0	0	0	0	200	903	0	0	0	0	0	0	0	603	903	0
546	0	0	0	0	0	0	0	200	300	0	0	0	0	0	0	0	200	903	0	0	0	0	0	0	0	603	903	0
546	1	0	0	0	0	0	0	200	300	0	0	0	0	0	0	0	200	903	0	0	0	0	0	0	0	603	903	0
546	2	0	0	0	0	0	0	200	300	0	0	0	0	0	0	0	200	903	0	0	0	0	0	0	0	603	903	0
546	3	0	0	0	0	0	0	200	300	0	0	0	0	0	0	0	200	903	0	0	0	0	0	0	0	603	903	0
546	4	0	0	0	0	0	0	200	300	0	0	0	0	0	0	0	200	903	0	0	0	0	0	0	0	603	903	0
546	5	0	0	0	0	0	0	200	300	0	0	0	0	0	0	0	200	903	0	0	0	0	0	0	0	603	903	0
546	6	0	0	0	0	0	0	200	300	0	0	0	0	0	0	0	200	903	0	0	0	0	0	0	0	603	903	0
546	7	0	0	0	0	0	0	200	300	0	0	0	0	0	0	0	200	903	0	0	0	0	0	0	0	603	903	0
546	8	0	0	0	0	0	0	200	300	0	0	0	0	0	0	0	200	903	0	0	0	0	0	0	0	603	903	0
546	9	0	0	0	0	0	0	200	300	0	0	0	0	0	0	0	200	903	0	0	0	0	0	0	0	603	903	0
547	0	0	0	0	0	0	0	200	300	0	0	0	0	0	0	0	200	903	0	0	0	0	0	0	0	603	903	0
547	1	0	0	0	0	0	0	200	300	0	0	0	0	0	0	0	200	903	0	0	0	0	0	0	0	603	903	0
547	2	0	0	0	0	0	0	200	300	0	0	0	0	0	0	0	200	903	0	0	0	0	0	0	0	603	903	0
547	3	0	0	0	0	0	0	200	300	0	0	0	0	0	0	0	200	903	0	0	0	0	0	0	0	603	903	0
547	4	0	0	0	0	0	0	200	300	0	0	0	0	0	0	0	200	903	0	0	0	0	0	0	0	603	903	0
547	5	0	0	0	0	0	0	200	300	0	0	0	0	0	0	0	200	903	0	0	0	0	0	0	0	603	903	0
547	6	0	0	0	0	0	0	200	300	0	0	0	0	0	0	0	200	903	0	0	0	0	0	0	0	603	903	0
547	7	0	0	0	0	0	0	200	300	0	0	0	0	0	0	0	200	903	0	0	0	0	0	0	0	603	903	0
547	8	0	0	0	0	0	0	200	300	0	0	0	0	0	0	0	200	903	0	0	0	0	0	0	0	603	903	0
547	9	0	0	0	0	0	0	200	300	0	0	0	0	0	0	0	200	903	0	0	0	0	0	0	0	603	903	0
548	0	0	0	0	0	0	0	200	300	0	0	0	0	0	0	0	200	903	0	0	0	0	0	0	0	603	903	0
548	1	0	0	0	0	0	0	200	300	0	0	0	0	0	0	0	200	903	0	0	0	0	0	0	0	603	903	0
548	2	0	0	0	0	0	0	200	300	0	0	0	0	0	0	0	200	903	0	0	0	0	0	0	0	603	903	0
548	3	0	0	0	0	0	0	200	300	0	0	0	0	0	0	0	200	903	0	0	0	0	0	0	0	603	903	0
548	4	0	0	0	0	0	0	200	300	0	0	0	0	0	0	0	200	903	0	0	0	0	0	0	0	603	903	0
548	5	0	0	0	0	0	0	200	300	0	0	0	0	0	0	0	200	903	0	0	0	0	0	0	0	603	903	0
548	6	0	0	0	0	0	0	200	300	0	0	0	0	0	0	0	200	903	0	0	0	0	0	0	0	603	903	0
548	7	0	0	0	0	0	0	200	300	0	0	0	0	0	0	0	200	903	0	0	0	0	0	0	0	603	903	0
548	8	0	0	0	0	0	0	200	300	0	0	0	0	0	0	0	200	903	0	0	0	0	0	0	0	603	903	0
548	9	0	0	0	0	0	0	200	300	0	0	0	0	0	0	0	200	903	0	0	0	0	0	0	0	603	903	0
549	0	0	0	0	0	0	0	200	300	0	0	0	0	0	0	0	200	903	0	0	0	0	0	0	0	603	903	0
549	1	0	0	0	0	0	0	200	300	0	0	0	0	0	0	0	200	903	0	0	0	0	0	0	0	603	903	0
549	2	0	0	0	0	0	0	200	300	0	0	0	0	0	0	0	200	903	0	0	0	0	0	0	0	603	903	0
549	3	0	0	0	0	0	0	200	300	0	0	0	0	0	0	0	200	903	0	0	0	0	0	0	0	603	903	0
549	4	0	0	0	0	0	0	200	300	0	0	0	0	0	0	0	200	903	0	0	0	0	0	0	0	603	903	0
549	5	0	0	0	0	0	0	200	300	0	0	0	0	0	0	0	200	903	0	0	0	0	0	0	0	603	903	0
549	6	0	0	0	0	0	0	200	300	0	0	0	0	0	0	0	200	903	0	0	0	0	0	0	0	603	903	0
549	7	0	0	0	0	0	0	200	300	0	0	0	0	0	0	0	200	903	0	0	0	0	0	0	0	603	903	0
549	8	0	0	0	0	0	0	200	300	0	0	0	0	0	0	0	200	903	0	0	0	0	0	0	0	603	903	0
549	9	0	0	0	0	0	0	200	300	0	0	0	0	0	0	0	200	903	0	0	0	0	0	0	0	603	903	0
550	0	0	0	0	0	0	0	200	300	0	0	0	0	0	0	0	200	903	0	0	0	0	0	0	0	603	903	0
550	1	0	0	0	0	0	0	200	300	0	0	0	0	0	0	0	200	903	0	0	0	0	0	0	0	603	903	0
550	2	0	0	0	0	0	0	200	300	0	0	0	0	0	0	0	200	903	0	0	0	0	0	0	0	603	903	0
550	3	0	0	0	0	0	0	200	300	0	0	0	0	0	0	0	200	903	0	0	0	0	0	0	0	603	903	0
550	4	0	0	0	0	0	0	200	300	0	0	0	0	0	0	0	200	903	0	0	0	0	0	0	0	603	903	0
550	5	0	0	0	0	0	0	200	300	0	0	0	0	0	0	0	200	903	0	0	0	0	0	0	0	603	903	0
550	6	0	0	0	0	0	0	200	300	0	0	0	0	0	0	0	200	903	0	0	0	0	0	0	0	603	903	0
550	7	0	0	0	0	0	0	200	300	0	0	0	0	0	0	0	200	903	0	0	0	0	0	0	0	603	903	0
550	8	0	0	0	0	0	0	200	300	0	0	0	0	0	0	0	200	903	0	0	0	0	0	0	0	603	903	0
550	9	0	0	0	0	0	0	200	300	0	0	0	0	0	0	0	200	903	0	0	0	0	0	0	0	603	903	0
551	0	0	0	0	0	0	0	200	300	0	0	0	0	0	0	0	200	903	0	0	0	0	0	0	0	603	903	0
551	1	0	0	0	0	0	0	200	300	0	0	0	0	0	0	0	200	903	0	0	0	0	0	0	0	603	903	0
551	2	0	0	0	0	0	0	200	300	0	0	0	0	0	0	0	200	903	0	0	0	0	0	0	0	603	903	0
551	3	0	0	0	0	0	0	200	300	0	0	0	0	0	0	0	200	903	0	0	0	0	0	0	0	603	903	0
551	4	0	0	0	0	0	0	200	300	0	0	0	0	0	0	0	200	903	0	0	0	0	0	0	0	603	903	0
551	5	0	0	0	0	0	0	200	300	0	0	0	0	0	0	0	200	903	0	0	0	0	0	0	0	603	903	0
551	6	0	0	0	0	0	0	200	300	0	0	0	0	0	0	0	200	903	0	0	0	0	0	0	0	603	903	0
551	7	0	0	0	0	0	0	200	300	0	0	0	0	0	0	0	200	903	0	0	0	0	0	0	0	603	903	0
551	8	0	0	0	0	0	0	200	300	0	0	0	0	0	0	0	200	903	0	0	0	0	0	0	0	603	903	0
551	9	0	0	0	0	0	0	200	300	0	0	0	0	0	0	0	200	903	0	0	0	0	0	0	0	603	903	0
552	0	0	0	0	0	0	0	200	300	0	0	0	0	0	0	0	200	903	0	0	0	0	0	0	0	603	903	0
552	1	0	0	0	0	0	0	200	300	0	0	0	0	0	0	0	200	903	0	0	0	0	0	0	0	603	903	0
552	2	0	0	0	0	0	0	200	300	0	0	0	0	0	0	0	200	903	0	0	0	0	0	0	0	603	903	0
552	3	0	0	0	0	0	0	200	300	0	0	0	0	0	0	0	200	903	0	0	0	0	0	0	0	603	903	0
552	4	0	0	0	0	0	0	200	300	0	0	0	0	0	0	0	200	903	0	0	0	0	0	0	0	603	903	0
552	5	0	0	0	0	0	0	200	300	0	0	0	0	0	0	0	200	903	0	0	0	0	0	0	0	603	903	0
552	6	0	0	0	0	0	0	200	300	0	0	0	0	0	0	0	200	903	0	0	0	0	0	0	0	603	903	0
552	7	0	0	0	0	0	0	200	300	0	0	0	0	0	0	0	200	903	0	0	0	0	0	0	0	603	903	0
552	8	0	0	0	0	0	0	200	300	0	0	0	0	0	0	0	200	903	0	0	0	0	0	0	0	603	903	0
552	9	0	0	0	0	0	0	200	300	0	0	0	0	0	0	0	200	903	0	0	0	0	0	0	0	603	903	0
553	0	0	0	0	0	0	0	200	300	0	0	0	0	0	0	0	200	903	0	0	0	0	0	0	0	603	903	0
553	1	0	0	0	0	0	0	200	300	0	0	0	0	0	0	0	200	903	0	0	0	0	0	0	0	603	903	0
553	2	0	0	0	0	0	0	200	300	0	0	0	0	0	0	0	200	903	0	0	0	0	0	0	0	603	903	0
553	3	0	0	0	0	0	0	200	300	0	0	0	0	0	0	0	200	903	0	0	0	0	0	0	0	603	903	0
553	4	0	0	0	0	0	0	200	300	0	0	0	0	0	0	0	200	903	0	0	0	0	0	0	0	603	903	0
553	5	0	0	0	0	0	0	200	300	0	0	0	0	0	0	0	200	903	0	0	0	0	0	0	0	603	903	0
553	6	0	0	0	0	0	0	200	300	0	0	0	0	0	0	0	200	903	0	0	0	0	0	0	0	603	903	0
553	7	0	0	0	0	0	0	200	300	0	0	0	0	0	0	0	200	903	0	0	0	0	0	0	0	603	903	0
553	8	0	0	0	0	0	0	200	300	0	0	0	0	0	0	0	200	903	0	0	0	0	0	0	0	603	903	0
553	9	0	0	0	0	0	0	200	300	0	0	0	0	0	0	0	200	903	0	0	0	0	0	0	0	603	903	0
554	0	0	0	0	0	0	0	200	300	0	0	0	0	0	0	0	200	903	0	0	0	0	0	0	0	603	903	0
554	1	0	0	0	0	0	0	200	300	0	0	0	0	0	0	0	200	903	0	0	0	0	0	0	0	603	903	0
554	2	0	0	0	0	0	0	200	300	0	0	0	0	0	0	0	200	903	0	0	0	0	0	0	0	603	903	0
554	3	0	0	0	0	0	0	200	300	0	0	0	0	0	0	0	200	903	0	0	0	0	0	0	0	603	903	0
554	4	0	0	0	0	0	0	200	300	0	0	0	0	0	0	0	200	903	0	0	0	0	0	0	0	603	903	0
554	5	0	0	0	0	0	0	200	300	0	0	0	0	0	0	0	200	903	0	0	0	0	0	0	0	603	903	0
554	6	0	0	0	0	0	0	200	300	0	0	0	0	0	0	0	200	903	0	0	0	0	0	0	0	603	903	0
554	7	0	0	0	0	0	0	200	300	0	0	0	0	0	0	0	200	903	0	0	0	0	0	0	0	603	903	0
554	8	0	0	0	0	0	0	200	300	0	0	0	0	0	0	0	200	903	0	0	0	0	0	0	0	603	903	0
554	9	0	0	0	0	0	0	200	300	0	0	0	0	0	0	0	200	903	0	0	0	0	0	0	0	603	903	0
555	0	0	0	0	0	0	0	200	300	0	0	0	0	0	0	0	200	903	0	0	0	0	0	0	0	603	903	0
555	1	0	0	0	0	0	0	200	300	0	0	0	0	0	0	0	200	903	0	0	0	0	0	0	0	603	903	0
555	2	0	0	0	0	0	0	200	300	0	0	0	0	0	0	0	200	903	0	0	0	0	0	0	0	603	903	0
555	3	0	0	0	0	0	0	200	300	0	0	0	0	0	0	0	200	903	0	0	0	0	0	0	0	603	903	0
555	4	0	0	0	0	0	0	200	300	0	0	0	0	0	0	0	200	903	0	0	0	0	0	0	0	603	903	0
555	5	0	0	0	0	0	0	200	300	0	0	0	0	0	0	0	200	903	0	0	0	0	0	0	0	603	903	0
555	6	0	0	0	0	0	0	200	300	0	0	0	0	0	0	0	200	903	0	0	0	0	0	0	0	603	903	0
555	7	0	0	0	0	0	0	200	300	0	0	0	0	0	0	0	200	903	0	0	0	0	0	0	0	603	903	0
555	8	0	0	0	0	0	0	200	300	0	0	0	0	0	0	0	200	903	0	0	0	0	0	0	0	603	903	0
555	9	0	0	0	0	0	0	200	300	0	0	0	0	0	0	0	200	903	0	0	0	0	0	0	0	603	903	0
556	0	0	0	0	0	0	0	200	300	0	0	0	0	0	0	0	200	903	0	0	0	0	0	0	0	603	903	0
556	1	0	0	0	0	0	0	200	300	0	0	0	0	0	0	0	200	903	0	0	0	0	0	0	0	603	903	0
556	2	0	0	0	0	0	0	200	300	0	0	0	0	0	0	0	200	903	0	0	0	0	0	0	0	603	903	0
556	3	0	0	0	0	0	0	200	300	0	0	0	0	0	0	0	200	903	0	0	0	0	0	0	0	603	903	0
556	4	0	0	0	0	0	0	200	300	0	0	0	0	0	0	0	200	903	0	0	0	0	0	0	0	603	903	0
556	5	0	0	0	0	0	0	200	300	0	0	0	0	0	0	0	200	903	0	0	0	0	0	0	0	603	903	0
556	6	0	0	0	0	0	0	200	300	0	0	0	0	0	0	0	200	903	0	0	0	0	0	0	0	603	903	0
556	7	0	0	0	0	0	0	200	300	0	0	0	0	0	0	0	200	903	0	0	0	0	0	0	0	603	903	0
556	8	0	0	0	0	0	0	200	300	0	0	0	0	0	0	0	200	903	0	0	0	0	0	0	0	603	903	0
556	9	0	0	0	0	0	0	200	300	0	0	0	0	0	0	0	200	903	0	0	0	0	0	0	0	603	903	0
557	0	0	0	0	0	0	0	200	300	0	0	0	0	0	0	0	200	903	0	0	0	0	0	0	0	603	903	0
557	1	0	0	0	0	0	0	200	300	0	0	0	0	0	0	0	200	903	0	0	0	0	0	0	0	603	903	0
557	2	0	0	0	0	0	0	200	300	0	0	0	0	0	0	0	200	903	0	0	0	0	0	0	0	603	903	0
557	3	0	0	0	0	0	0	200	300	0	0	0	0	0	0	0	200	903	0	0	0	0	0	0	0	603	903	0
557	4	0	0	0	0	0	0	200	300	0	0	0	0	0	0	0	200	903	0	0	0	0	0	0	0	603	903	0
557	5	0	0	0	0	0	0	200	300	0	0	0	0	0	0	0	200	903	0	0	0	0	0	0	0	603	903	0
557	6	0	0	0	0	0	0	200	300	0	0	0	0	0	0	0	200	903	0	0	0	0	0	0	0	603	903	0
557	7	0	0	0	0	0	0	200	300	0	0	0	0	0	0	0	200	903	0	0	0	0	0	0	0	603	903	0
557	8	0	0	0	0	0	0	200	300	0	0	0	0	0	0	0	200	903	0	0	0	0	0	0	0	603	903	0
557	9	0	0	0	0	0	0	200	300	0	0	0	0	0	0	0	200	903	0	0	0	0	0	0	0	603	903	0
558	0	0	0	0	0	0	0	200	300	0	0	0	0	0	0	0	200	903	0	0	0	0	0	0	0	603	903	0
558	1	0	0	0	0	0	0	200	300	0	0	0	0	0	0	0	200	903	0	0	0	0	0	0	0	603	903	0
558	2	0	0	0	0	0	0	200	300	0	0	0	0	0	0	0	200	903	0	0	0	0	0	0	0	603	903	0
558	3	0	0	0	0	0	0	200	300	0	0	0	0	0	0	0	200	903	0	0	0	0	0	0	0	603	903	0
558	4	0	0	0	0	0	0	200	300	0	0	0	0	0	0	0	200	903	0	0	0	0	0	0	0	603	903	0
558	5	0	0	0	0	0	0	200	300	0	0	0	0	0	0	0	200	903	0	0	0	0	0	0	0	603	903	0
558	6	0	0	0	0	0	0	200	300	0	0	0	0	0	0	0	200	903	0	0	0	0	0	0	0	603	903	0
558	7	0	0	0	0	0	0	200	300	0	0	0	0	0	0	0	200	903	0	0	0	0	0	0	0	603	903	0
558	8	0	0	0	0	0	0	200	300	0	0	0	0	0	0	0	200	903	0	0	0	0	0	0	0	603	903	0
558	9	0	0	0	0	0	0	200	300	0	0	0	0	0	0	0	200	903	0	0	0	0	0	0	0	603	903	0
559	0	0	0	0	0	0	0	200	300	0	0	0	0	0	0	0	200	903	0	0	0	0	0	0	0	603	903	0
559	1	0	0	0	0	0	0	200	300	0	0	0	0	0	0	0	200	903	0	0	0	0	0	0	0	603	903	0
559	2	0	0	0	0	0	0	200	300	0	0	0	0	0	0	0	200	903	0	0	0	0	0	0	0	603	903	0
559	3	0	0	0	0	0	0	200	300	0	0	0	0	0	0	0	200	903	0	0	0	0	0	0	0	603	903	0
559	4	0	0	0	0	0	0	200	300	0	0	0	0	0	0	0	200	903	0	0	0	0	0	0	0	603	903	0
559	5	0	0	0	0	0	0	200	300	0	0	0	0	0	0	0	200	903	0	0	0	0	0	0	0	603	903	0
559	6	0	0	0	0	0	0	200	300	0	0	0	0	0	0	0	200	903	0	0	0	0	0	0	0	603	903	0
559	7	0	0	0	0	0	0	200	300	0	0	0	0	0	0	0	200	903	0	0	0	0	0	0	0	603	903	0
559	8	0	0	0	0	0	0	200	300	0	0	0	0	0	0	0	200	903	0	0	0	0	0	0	0	603	903	0
559	9	0	0	0	0	0	0	200	300	0	0	0	0	0	0	0	200	903	0	0	0	0	0	0	0	603	903	0
560	0	0	0	0	0	0	0	200	300	0	0	0	0	0	0	0	200	903	0	0	0	0	0	0	0	603	903	0
560	1	0	0	0	0	0	0	200	300	0	0	0	0	0	0	0	200	903	0	0	0	0	0	0	0	603	903	0
560	2	0	0	0	0	0	0	200	300	0	0	0	0	0	0	0	200	903	0	0	0	0	0	0	0	603	903	0
560	3	0	0	0	0	0	0	200	300	0	0	0	0	0	0	0	200	903	0	0	0	0	0	0	0	603	903	0
560	4	0	0	0	0	0	0	200	300	0	0	0	0	0	0	0	200	903	0	0	0	0	0	0	0	603	903	0
560	5	0	0	0	0	0	0	200	300	0	0	0	0	0	0	0	200	903	0	0	0	0	0	0	0	603	903	0
560	6	0	0	0	0	0	0	200	300	0	0	0	0	0	0	0	200	903	0	0	0	0	0	0	0	603	903	0
560	7	0	0	0	0	0	0	200	300	0	0	0	0	0	0	0	200	903	0	0	0	0	0	0	0	603	903	0
560	8	0	0	0	0	0	0	200	300	0	0	0	0	0	0	0	200	903	0	0	0	0	0	0	0	603	903	0
560	9	0	0	0	0	0	0	200	300	0	0	0	0	0	0	0	200	903	0	0	0	0	0	0	0	603	903	0
561	0	0	0	0	0	0	0	200	300	0	0	0	0	0	0	0	200	903	0	0	0	0	0	0	0	603	903	0
561	1	0	0	0	0	0	0	200	300	0	0	0	0	0	0	0	200	903	0	0	0	0	0	0	0	603	903	0
561	2	0	0	0	0	0	0	200	300	0	0	0	0	0	0	0	200	903	0	0	0	0	0	0	0	603	903	0
561	3	0	0	0	0	0	0	200	300	0	0	0	0	0	0	0	200	903	0	0	0	0	0	0	0	603	903	0
561	4	0	0	0	0	0	0	200	300	0	0	0	0	0	0	0	200	903	0	0	0	0	0	0	0	603	903	0
561	5	0	0	0	0	0	0	200	300	0	0	0	0	0	0	0	200	903	0	0	0	0	0	0	0	603	903	0
561	6	0	0	0	0	0	0	200	300	0	0	0	0	0	0	0	200	903	0	0	0	0	0	0	0	603	903	0
561	7	0	0	0	0	0	0	200	300	0	0	0	0	0	0	0	200	903	0	0	0	0	0	0	0	603	903	0
561	8	0	0	0	0	0	0	200	300	0	0	0	0	0	0	0	200	903	0	0	0	0	0	0	0	603	903	0
561	9	0	0	0	0	0	0	200	300	0	0	0	0	0	0	0	200	903	0	0	0	0	0	0	0	603	903	0
562	0	0	0	0	0	0	0	200	300	0	0	0	0	0	0	0	200	903	0	0	0	0	0	0	0	603	903	0
562	1	0	0	0	0	0	0	200	300	0	0	0	0	0	0	0	200	903	0	0	0	0	0	0	0	603	903	0
562	2	0	0	0	0	0	0	200	300	0	0	0	0	0	0	0	200	903	0	0	0	0	0	0	0	603	903	0
562	3	0	0	0	0	0	0	200	300	0	0	0	0	0	0	0	200	903	0	0	0	0	0	0	0	603	903	0
562	4	0	0	0	0	0	0	200	300	0	0	0	0	0	0	0	200	903	0	0	0	0	0	0	0	603	903	0
562	5	0	0	0	0	0	0	200	300	0	0	0	0	0	0	0	200	903	0	0	0	0	0	0	0	603	903	0
562	6	0	0	0	0	0	0	200	300	0	0	0	0	0	0	0	200	903	0	0	0	0	0	0	0	603	903	0
562	7	0	0	0	0	0	0	200	300	0	0	0	0	0	0	0	200	903	0	0	0	0	0	0	0	603	903	0
562	8	0	0	0	0	0	0	200	300	0	0	0	0	0	0	0	200	903	0	0	0	0	0	0	0	603	903	0
562	9	0	0	0	0	0	0	200	300	0	0	0	0	0	0	0	200	903	0	0	0	0	0	0	0	603	903	0
563	0	0	0	0	0	0	0	200	300	0	0	0	0	0	0	0	200	903	0	0	0	0	0	0	0	603	903	0
563	1	0	0	0	0	0	0	200	300	0	0	0	0	0	0	0	200	903	0	0	0	0	0	0	0	603	903	0
563	2	0	0	0	0	0	0	200	300	0	0	0	0	0	0	0	200	903	0	0	0	0	0	0	0	603	903	0
563	3	0	0	0	0	0	0	200	300	0	0	0	0	0	0	0	200	903	0	0	0	0	0	0	0	603	903	0
563	4	0	0	0	0	0	0	200	300	0	0	0	0	0	0	0	200	903	0	0	0	0	0	0	0	603	903	0
563	5	0	0	0	0	0	0	200	300	0	0	0	0	0	0	0	200	903	0	0	0	0	0	0	0	603	903	0
563	6	0	0	0	0	0	0	200	300	0	0	0	0	0	0	0	200	903	0	0	0	0	0	0	0	603	903	0
563	7	0	0	0	0	0	0	200	300	0	0	0	0	0	0	0	200	903	0	0	0	0	0	0	0	603	903	0
563	8	0	0	0	0	0	0	200	300	0	0	0	0	0	0	0	200	903	0	0	0	0	0	0	0	603	903	0
563	9	0	0	0	0	0	0	200	300	0	0	0	0	0	0	0	200	903	0	0	0	0	0	0	0	603	903	0
564	0	0	0	0	0	0	0	200	300	0	0	0	0	0	0	0	200	903	0	0	0	0	0	0	0	603	903	0
564	1	0	0	0	0	0	0	200	300	0	0	0	0	0	0	0	200	903	0	0	0	0	0	0	0	603	903	0
564	2	0	0	0	0	0	0	200	300	0	0	0	0	0	0	0	200	903	0	0	0	0	0	0	0	603	903	0
564	3	0	0	0	0	0	0	200	300	0	0	0	0	0	0	0	200	903	0	0	0	0	0	0	0	603	903	0
564	4	0	0	0	0	0	0	200	300	0	0	0	0	0	0	0	200	903	0	0	0	0	0	0	0	603	903	0
564	5	0	0	0	0	0	0	200	300	0	0	0	0	0	0	0	200	903	0	0	0	0	0	0	0	603	903	0
564	6	0	0	0	0	0	0	200	300	0	0	0	0	0	0	0	200	903	0	0	0	0	0	0	0	603	903	0
564	7	0	0	0	0	0	0	200	300	0	0	0	0	0	0	0	200	903	0	0	0	0	0	0	0	603	903	0
564	8	0	0	0	0	0	0	200	300	0	0	0	0	0	0	0	200	903	0	0	0	0	0	0	0	603	903	0
564	9	0	0	0	0	0	0	200	300	0	0	0	0	0	0	0	200	903	0	0	0	0	0	0	0	603	903	0
565	0	0	0	0	0	0	0	200	300	0	0	0	0	0	0	0	200	903	0	0	0	0	0	0	0	603	903	0
565	1	0	0	0	0	0	0	200	300	0	0	0	0	0	0	0	200	903	0	0	0	0	0	0	0	603	903	0
565	2	0	0	0	0	0	0	200	300	0	0	0	0	0	0	0	200	903	0	0	0	0	0	0	0	603	903	0
565	3	0	0	0	0	0	0	200	300	0	0	0	0	0	0	0	200	903	0	0	0	0	0	0	0	603	903	0
565	4	0	0	0	0	0	0	200	300	0	0	0	0	0	0	0	200	903	0	0	0	0	0	0	0	603	903	0
565	5	0	0	0	0	0	0	200	300	0	0	0	0	0	0	0	200	903	0	0	0	0	0	0	0	603	903	0
565	6	0	0	0	0	0	0	200	300	0	0	0	0	0	0	0	200	903	0	0	0	0	0	0	0	603	903	0
565	7	0	0	0	0	0	0	200	300	0	0	0	0	0	0	0	200	903	0	0	0	0	0	0	0	603	903	0
565	8	0	0	0	0	0	0	200	300	0	0	0	0	0	0	0	200	903	0	0	0	0	0	0	0	603	903	0
565	9	0	0	0	0	0	0	200	300	0	0	0	0	0	0	0	200	903	0	0	0	0	0	0	0	603	903	0
566	0	0	0	0	0	0	0	200	300	0	0	0	0	0	0	0	200	903	0	0	0	0	0	0	0	603	903	0
566	1	0	0	0	0	0	0	200	300	0	0	0	0	0	0	0	200	903	0	0	0	0	0	0	0	603	903	0
566	2	0	0	0	0	0	0	200	300	0	0	0	0	0	0	0	200	903	0	0	0	0	0	0	0	603	903	0
566	3	0	0	0	0	0	0	200	300	0	0	0	0	0	0	0	200	903	0	0	0	0	0	0	0	603	903	0
566	4	0	0	0	0	0	0	200	300	0	0	0	0	0	0	0	200	903	0	0	0	0	0	0	0	603	903	0
566	5	0	0	0	0	0	0	200	300	0	0	0	0	0	0	0	200	903	0	0	0	0	0	0	0	603	903	0
566	6	0	0	0	0	0	0	200	300	0	0	0	0	0	0	0	200	903	0	0	0	0	0	0	0	603	903	0
566	7	0	0	0	0	0	0	200	300	0	0	0	0	0	0	0	200	903	0	0	0	0	0	0	0	603	903	0
566	8	0	0	0	0	0	0	200	300	0	0	0	0	0	0	0	200	903	0	0	0	0	0	0	0	603	903	0
566	9	0	0	0	0	0	0	200	300	0	0	0	0	0	0	0	200	903	0	0	0	0	0	0	0	603	903	0
567	0	0	0	0	0	0	0	200	300	0	0	0	0	0	0	0	200	903	0	0	0	0	0	0	0	603	903	0
567	1	0	0	0	0	0	0	200	300	0	0	0	0	0	0	0	200	903	0	0	0	0	0	0	0	603	903	0
567	2	0	0	0	0	0	0	200	300	0	0	0	0	0	0	0	200	903	0	0	0	0	0	0	0	603	903	0
567	3	0	0	0	0	0	0	200	300	0	0	0	0	0	0	0	200	903	0	0	0	0	0	0	0	603	903	0
567	4	0	0	0	0	0	0	200	300	0	0	0	0	0	0	0	200	903	0	0	0	0	0	0	0	603	903	0
567	5	0	0	0	0	0	0	200	300	0	0	0	0	0	0	0	200	903	0	0	0	0	0	0	0	603	903	0
567	6	0	0	0	0	0	0	200	300	0	0	0	0	0	0	0	200	903	0	0	0	0	0	0	0	603	903	0
567	7	0	0	0	0	0	0	200	300	0	0	0	0	0	0	0	200	903	0	0	0	0	0	0	0	603	903	0
567	8	0	0	0	0	0	0	200	300	0	0	0	0	0	0	0	200	903	0	0	0	0	0	0	0	603	903	0
567	9	0	0	0	0	0	0	200	300	0	0	0	0	0	0	0	200	903	0	0	0	0	0	0	0	603	903	0
568	0	0	0	0	0	0	0	200	300	0	0	0	0	0	0	0	200	903	0	0	0	0	0	0	0	603	903	0
568	1	0	0	0	0	0	0	200	300	0	0	0	0	0	0	0	200	903	0	0	0	0	0	0	0	603	903	0
568	2	0	0	0	0	0	0	200	300	0	0	0	0	0	0	0	200	903	0	0	0	0	0	0	0	603	903	0
568	3	0	0	0	0	0	0	200	300	0	0	0	0	0	0	0	200	903	0	0	0	0	0	0	0	603	903	0
568	4	0	0	0	0	0	0	200	300	0	0	0	0	0	0	0	200	903	0	0	0	0	0	0	0	603	903	0
568	5	0	0	0	0	0	0	200	300	0	0	0	0	0	0	0	200	903	0	0	0	0	0	0	0	603	903	0
568	6	0	0	0	0	0	0	200	300	0	0	0	0	0	0	0	200	903	0	0	0	0	0	0	0	603	903	0
568	7	0	0	0	0	0	0	200	300	0	0	0	0	0	0	0	200	903	0	0	0	0	0	0	0	603	903	0
568	8	0	0	0	0	0	0	200	300	0	0	0	0	0	0	0	200	903	0	0	0	0	0	0	0	603	903	0
568	9	0	0	0	0	0	0	200	300	0	0	0	0	0	0	0	200	903	0	0	0	0	0	0	0	603	903	0
569	0	0	0	0	0	0	0	200	300	0	0	0	0	0	0	0	200	903	0	0	0	0	0	0	0	603	903	0
569	1	0	0	0	0	0	0	200	300	0	0	0	0	0	0	0	200	903	0	0	0	0	0	0	0	603	903	0
569	2	0	0	0	0	0	0	200	300	0	0	0	0	0	0	0	200	903	0	0	0	0	0	0	0	603	903	0
569	3	0	0	0	0	0	0	200	300	0	0	0	0	0	0	0	200	903	0	0	0	0	0	0	0	603	903	0
569	4	0	0	0	0	0	0	200	300	0	0	0	0	0	0	0	200	903	0	0	0	0	0	0	0	603	903	0
569	5	0	0	0	0	0	0	200	300	0	0	0	0	0	0	0	200	903	0	0	0	0	0	0	0	603	903	0
569	6	0	0	0	0	0	0	200	300	0	0	0	0	0	0	0	200	903	0	0	0	0	0	0	0	603	903	0
569	7	0	0	0	0	0	0	200	300	0	0	0	0	0	0	0	200	903	0	0	0	0	0	0	0	603	903	0
569	8	0	0	0	0	0	0	200	300	0	0	0	0	0	0	0	200	903	0	0	0	0	0	0	0	603	903	0
569	9	0	0	0	0	0	0	200	300	0	0	0	0	0	0	0	200	903	0	0	0	0	0	0	0	603	903	0
570	0	0	0	0	0	0	0	200	300	0	0	0	0	0	0	0	200	903	0	0	0	0	0	0	0	603	903	0
570	1	0	0	0	0	0	0	200	300	0	0	0	0	0	0	0	200	903	0	0	0	0	0	0	0	603	903	0
570	2	0	0	0	0	0	0	200	300	0	0	0	0	0	0	0	200	903	0	0	0	0	0	0	0	603	903	0
570	3	0	0	0	0	0	0	200	300	0	0	0	0	0	0	0	200	903	0	0	0	0	0	0	0	603	903	0
570	4	0	0	0	0	0	0	200	300	0	0	0	0	0	0	0	200	903	0	0	0	0	0	0	0	603	903	0
570	5	0	0	0	0	0	0	200	300	0	0	0	0	0	0	0	200	903	0	0	0	0	0	0	0	603	903	0
570	6	0	0	0	0	0	0	200	300	0	0	0	0	0	0	0	200	903	0	0	0	0	0	0	0	603	903	0
570	7	0	0	0	0	0	0	200	300	0	0	0	0	0	0	0	200	903	0	0	0	0	0	0	0	603	903	0
570	8	0	0	0	0	0	0	200	300	0	0	0	0	0	0	0	200	903	0	0	0	0	0	0	0	603	903	0
570	9	0	0	0	0	0	0	200	300	0	0	0	0	0	0	0	200	903	0	0	0	0	0	0	0	603	903	0
571	0	0	0	0	0	0	0	200	300	0	0	0	0	0	0	0	200	903	0	0	0	0	0	0	0	603	903	0
571	1	0	0	0	0	0	0	200	300	0	0	0	0	0	0	0	200	903	0	0	0	0	0	0	0	603	903	0
571	2	0	0	0	0	0	0	200	300	0	0	0	0	0	0	0	200	903	0	0	0	0	0	0	0	603	903	0
571	3	0	0	0	0	0	0	200	300	0	0	0	0	0	0	0	200	903	0	0	0	0	0	0	0	603	903	0
571	4	0	0	0	0	0	0	200	300	0	0	0	0	0	0	0	200	903	0	0	0	0	0	0	0	603	903	0
571	5	0	0	0	0	0	0	200	300	0	0	0	0	0	0	0	200	903	0	0	0	0	0	0	0	603	903	0
571	6	0	0	0	0	0	0	200	300	0	0	0	0	0	0	0	200	903	0	0	0	0	0	0	0	603	903	0
571	7	0	0	0	0	0	0	200	300	0	0	0	0	0	0	0	200	903	0	0	0	0	0	0	0	603	903	0
571	8	0	0	0	0	0	0	200	300	0	0	0	0	0	0	0	200	903	0	0	0	0	0	0	0	603	903	0
571	9	0	0	0	0	0	0	200	300	0	0	0	0	0	0	0	200	903	0	0	0	0	0	0	0	603	903	0
572	0	0	0	0	0	0	0	200	300	0	0	0	0	0	0	0	200	903	0	0	0	0	0	0	0	603	903	0
572	1	0	0	0	0	0	0	200	300	0	0	0	0	0	0	0	200	903	0	0	0	0	0	0	0	603	903	0
572	2	0	0	0	0	0	0	200	300	0	0	0	0	0	0	0	200	903	0	0	0	0	0	0	0	603	903	0
572	3	0	0	0	0	0	0	200	300	0	0	0	0	0	0	0	200	903	0	0	0	0	0	0	0	603	903	0
572	4	0	0	0	0	0	0	200	300	0	0	0	0	0	0	0	200	903	0	0	0	0	0	0	0	603	903	0
572	5	0	0	0	0	0	0	200	300	0	0	0	0	0	0	0	200	903	0	0	0	0	0	0	0	603	903	0
572	6	0	0	0	0	0	0	200	300	0	0	0	0	0	0	0	200	903	0	0	0	0	0	0	0	603	903	0
572	7	0	0	0	0	0	0	200	300	0	0	0	0	0	0	0	200	903	0	0	0	0	0	0	0	603	903	0
572	8	0	0	0	0	0	0	200	300	0	0	0	0	0	0	0	200	903	0	0	0	0	0	0	0	603	903	0
572	9	0	0	0	0	0	0	200	300	0	0	0	0	0	0	0	200	903	0	0	0	0	0	0	0	603	903	0
573	0	0	0	0	0	0	0	200	300	0	0	0	0	0	0	0	200	903	0	0	0	0	0	0	0	603	903	0
573	1	0	0	0	0	0	0	200	300	0	0	0	0	0	0	0	200	903	0	0	0	0	0	0	0	603	903	0
573	2	0	0	0	0	0	0	200	300	0	0	0	0	0	0	0	200	903	0	0	0	0	0	0	0	603	903	0
573	3	0	0	0	0	0	0	200	300	0	0	0	0	0	0	0	200	903	0	0	0	0	0	0	0	603	903	0
573	4	0	0	0	0	0	0	200	300	0	0	0	0	0	0	0	200	903	0	0	0	0	0	0	0	603	903	0
573	5	0	0	0	0	0	0	200	300	0	0	0	0	0	0	0	200	903	0	0	0	0	0	0	0	603	903	0
573	6	0	0	0	0	0	0	200	300	0	0	0	0	0	0	0	200	903	0	0	0	0	0	0	0	603	903	0
573	7	0	0	0	0	0	0	200	300	0	0	0	0	0	0	0	200	903	0	0	0	0	0	0	0	603	903	0
573	8	0	0	0	0	0	0	200	300	0	0	0	0	0	0	0	200	903	0	0	0	0	0	0	0	603	903	0
573	9	0	0	0	0	0	0	200	300	0	0	0	0	0	0	0	200	903	0	0	0	0	0	0	0	603	903	0
574	0	0	0	0	0	0	0	200	300	0	0	0	0	0	0	0	200	903	0	0	0	0	0	0	0	603	903	0
574	1	0	0	0	0	0	0	200	300	0	0	0	0	0	0	0	200	903	0	0	0	0	0	0	0	603	903	0
574	2	0	0	0	0	0	0	200	300	0	0	0	0	0	0	0	200	903	0	0	0	0	0	0	0	603	903	0
574	3	0	0	0	0	0	0	200	300	0	0	0	0	0	0	0	200	903	0	0	0	0	0	0	0	603	903	0
574	4	0	0	0	0	0	0	200	300	0	0	0	0	0	0	0	200	903	0	0	0	0	0	0	0	603	903	0
574	5	0	0	0	0	0	0	200	300	0	0	0	0	0	0	0	200	903	0	0	0	0	0	0	0	603	903	0
574	6	0	0	0	0	0	0	200	300	0	0	0	0	0	0	0	200	903	0	0	0	0	0	0	0	603	903	0
574	7	0	0	0	0	0	0	200	300	0	0	0	0	0	0	0	200	903	0	0	0	0	0	0	0	603	903	0
574	8	0	0	0	0	0	0	200	300	0	0	0	0	0	0	0	200	903	0	0	0	0	0	0	0	603	903	0
574	9	0	0	0	0	0	0	200	300	0	0	0	0	0	0	0	200	903	0	0	0	0	0	0	0	603	903	0
575	0	0	0	0	0	0	0	200	300	0	0	0	0	0	0	0	200	903	0	0	0	0	0	0	0	603	903	0
575	1	0	0	0	0	0	0	200	300	0	0	0	0	0	0	0	200	903	0	0	0	0	0	0	0	603	903	0
575	2	0	0	0	0	0	0	200	300	0	0	0	0	0	0	0	200	903	0	0	0	0	0	0	0	603	903	0
575	3	0	0	0	0	0	0	200	300	0	0	0	0	0	0	0	200	903	0	0	0	0	0	0	0	603	903	0
575	4	0	0	0	0	0	0	200	300	0	0	0	0	0	0	0	200	903	0	0	0	0	0	0	0	603	903	0
575	5	0	0	0	0	0	0	200	300	0	0	0	0	0	0	0	200	903	0	0	0	0	0	0	0	603	903	0
575	6	0	0	0	0	0	0	200	300	0	0	0	0	0	0	0	200	903	0	0	0	0	0	0	0	603	903	0
575	7	0	0	0	0	0	0	200	300	0	0	0	0	0	0	0	200	903	0	0	0	0	0	0	0	603	903	0
575	8	0	0	0	0	0	0	200	300	0	0	0	0	0	0	0	200	903	0	0	0	0	0	0	0	603	903	0
575	9	0	0	0	0	0	0	200	300	0	0	0	0	0	0	0	200	903	0	0	0	0	0	0	0	603	903	0
576	0	0	0	0	0	0	0	200	300	0	0	0	0	0	0	0	200	903	0	0	0	0	0	0	0	603	903	0
576	1	0	0	0	0	0	0	200	300	0	0	0	0	0	0	0	200	903	0	0	0	0	0	0	0	603	903	0
576	2	0	0	0	0	0	0	200	300	0	0	0	0	0	0	0	200	903	0	0	0	0	0	0	0	603	903	0
576	3	0	0	0	0	0	0	200	300	0	0	0	0	0	0	0	200	903	0	0	0	0	0	0	0	603	903	0
576	4	0	0	0	0	0	0	200	300	0	0	0	0	0	0	0	200	903	0	0	0	0	0	0	0	603	903	0
576	5	0	0	0	0	0	0	200	300	0	0	0	0	0	0	0	200	903	0	0	0	0	0	0	0	603	903	0
576	6	0	0	0	0	0	0	200	300	0	0	0	0	0	0	0	200	903	0	0	0	0	0	0	0	603	903	0
576	7	0	0	0	0	0	0	200	300	0	0	0	0	0	0	0	200	903	0	0	0	0	0	0	0	603	903	0
576	8	0	0	0	0	0	0	200	300	0	0	0	0	0	0	0	200	903	0	0	0	0	0	0	0	603	903	0
576	9	0	0	0	0	0	0	200	300	0	0	0	0	0	0	0	200	903	0	0	0	0	0	0	0	603	903	0
577	0	0	0	0	0	0	0	200	300	0	0	0	0	0	0	0	200	903	0	0	0	0	0	0	0	603	903	0
577	1	0	0	0	0	0	0	200	300	0	0	0	0	0	0	0	200	903	0	0	0	0	0	0	0	603	903	0
577	2	0	0	0	0	0	0	200	300	0	0	0	0	0	0	0	200	903	0	0	0	0	0	0	0	603	903	0
577	3	0	0	0	0	0	0	200	300	0	0	0	0	0	0	0	200	903	0	0	0	0	0	0	0	603	903	0
577	4	0	0	0	0	0	0	200	300	0	0	0	0	0	0	0	200	903	0	0	0	0	0	0	0	603	903	0
577	5	0	0	0	0	0	0	200	300	0	0	0	0	0	0	0	200	903	0	0	0	0	0	0	0	603	903	0
577	6	0	0	0	0	0	0	200	300	0	0	0	0	0	0	0	200	903	0	0	0	0	0	0	0	603	903	0
577	7	0	0	0	0	0	0	200	300	0	0	0	0	0	0	0	200	903	0	0	0	0	0	0	0	603	903	0
577	8	0	0	0	0	0	0	200	300	0	0	0	0	0	0	0	200	903	0	0	0	0	0	0	0	603	903	0
577	9	0	0	0	0	0	0	200	300	0	0	0	0	0	0	0	200	903	0	0	0	0	0	0	0	603	903	0
578	0	0	0	0	0	0	0	200	300	0	0	0	0	0	0	0	200	903	0	0	0	0	0	0	0	603	903	0
578	1	0	0	0	0	0	0	200	300	0	0	0	0	0	0	0	200	903	0	0	0	0	0	0	0	603	903	0
578	2	0	0	0	0	0	0	200	300	0	0	0	0	0	0	0	200	903	0	0	0	0	0	0	0	603	903	0
578	3	0	0	0	0	0	0	200	300	0	0	0	0	0	0	0	200	903	0	0	0	0	0	0	0	603	903	0
578	4	0	0	0	0	0	0	200	300	0	0	0	0	0	0	0	200	903	0	0	0	0	0	0	0	603	903	0
578	5	0	0	0	0	0	0	200	300	0	0	0	0	0	0	0	200	903	0	0	0	0	0	0	0	603	903	0
578	6	0	0	0	0	0	0	200	300	0	0	0	0	0	0	0	200	903	0	0	0	0	0	0	0	603	903	0
578	7	0	0	0	0	0	0	200	300	0	0	0	0	0	0	0	200	903	0	0	0	0	0	0	0	603	903	0
578	8	0	0	0	0	0	0	200	300	0	0	0	0	0	0	0	200	903	0	0	0	0	0	0	0	603	903	0
578	9	0	0	0	0	0	0	200	300	0	0	0	0	0	0	0	200	903	0	0	0	0	0	0	0	603	903	0
579	0	0	0	0	0	0	0	200	300	0	0	0	0	0	0	0	200	903	0	0	0	0	0	0	0	603	903	0
579	1	0	0	0	0	0	0	200	300	0	0	0	0	0	0	0	200	903	0	0	0	0	0	0	0	603	903	0
579	2	0	0	0	0	0	0	200	300	0	0	0	0	0	0	0	200	903	0	0	0	0	0	0	0	603	903	0
579	3	0	0	0	0	0	0	200	300	0	0	0	0	0	0	0	200	903	0	0	0	0	0	0	0	603	903	0
579	4	0	0	0	0	0	0	200	300	0	0	0	0	0	0	0	200	903	0	0	0	0	0	0	0	603	903	0
579	5	0	0	0	0	0	0	200	300	0	0	0	0	0	0	0	200	903	0	0	0	0	0	0	0	603	903	0
579	6	0	0	0	0	0	0	200	300	0	0	0	0	0	0	0	200	903	0	0	0	0	0	0	0	603	903	0
579	7	0	0	0	0	0	0	200	300	0	0	0	0	0	0	0	200	903	0	0	0	0	0	0	0	603	903	0
579	8	0	0	0	0	0	0	200	300	0	0	0	0	0	0	0	200	903	0	0	0	0	0	0	0	603	903	0
579	9	0	0	0	0	0	0	200	300	0	0	0	0	0	0	0	200	903	0	0	0	0	0	0	0	603	903	0
580	0	0	0	0	0	0	0	200	300	0	0	0	0	0	0	0	200	903	0	0	0	0	0	0	0	603	903	0
580	1	0	0	0	0	0	0	200	300	0	0	0	0	0	0	0	200	903	0	0	0	0	0	0	0	603	903	0
580	2	0	0	0	0	0	0	200	300	0	0	0	0	0	0	0	200	903	0	0	0	0	0	0	0	603	903	0
580	3	0	0	0	0	0	0	200	300	0	0	0	0	0	0	0	200	903	0	0	0	0	0	0	0	603	903	0
580	4	0	0	0	0	0	0	200	300	0	0	0	0	0	0	0	200	903	0	0	0	0	0	0	0	603	903	0
580	5	0	0	0	0	0	0	200	300	0	0	0	0	0	0	0	200	903	0	0	0	0	0	0	0	603	903	0
580	6	0	0	0	0	0	0	200	300	0	0	0	0	0	0	0	200	903	0	0	0	0	0	0	0	603	903	0
580	7	0	0	0	0	0	0	200	300	0	0	0	0	0	0	0	200	903	0	0	0	0	0	0	0	603	903	0
580	8	0	0	0	0	0	0	200	300	0	0	0	0	0	0	0	200	903	0	0	0	0	0	0	0	603	903	0
580	9	0	0	0	0	0	0	200	300	0	0	0	0	0	0	0	200	903	0	0	0	0	0	0	0	603	903	0
581	0	0	0	0	0	0	0	200	300	0	0	0	0	0	0	0	200	903	0	0	0	0	0	0	0	603	903	0
581	1	0	0	0	0	0	0	200	300	0	0	0	0	0	0	0	200	903	0	0	0	0	0	0	0	603	903	0
581	2	0	0	0	0	0	0	200	300	0	0	0	0	0	0	0	200	903	0	0	0	0	0	0	0	603	903	0
581	3	0	0	0	0	0	0	200	300	0	0	0	0	0	0	0	200	903	0	0	0	0	0	0	0	603	903	0
581	4	0	0	0	0	0	0	200	300	0	0	0	0	0	0	0	200	903	0	0	0	0	0	0	0	603	903	0
581	5	0	0	0	0	0	0	200	300	0	0	0	0	0	0	0	200	903	0	0	0	0	0	0	0	603	903	0
581	6	0	0	0	0	0	0	200	300	0	0	0	0	0	0	0	200	903	0	0	0	0	0	0	0	603	903	0
581	7	0	0	0	0	0	0	200	300	0	0	0	0	0	0	0	200	903	0	0	0	0	0	0	0	603	903	0
581	8	0	0	0	0	0	0	200	300	0	0	0	0	0	0	0	200	903	0	0	0	0	0	0	0	603	903	0
581	9	0	0	0	0	0	0	200	300	0	0	0	0	0	0	0	200	903	0	0	0	0	0	0	0	603	903	0
582	0	0	0	0	0	0	0	200	300	0	0	0	0	0	0	0	200	903	0	0	0	0	0	0	0	603	903	0
582	1	0	0	0	0	0	0	200	300	0	0	0	0	0	0	0	200	903	0	0	0	0	0	0	0	603	903	0
582	2	0	0	0	0	0	0	200	300	0	0	0	0	0	0	0	200	903	0	0	0	0	0	0	0	603	903	0
582	3	0	0	0	0	0	0	200	300	0	0	0	0	0	0	0	200	903	0	0	0	0	0	0	0	603	903	0
582	4	0	0	0	0	0	0	200	300	0	0	0	0	0	0	0	200	903	0	0	0	0	0	0	0	603	903	0
582	5	0	0	0	0	0	0	200	300	0	0	0	0	0	0	0	200	903	0	0	0	0	0	0	0	603	903	0
582	6	0	0	0	0	0	0	200	300	0	0	0	0	0	0	0	200	903	0	0	0	0	0	0	0	603	903	0
582	7	0	0	0	0	0	0	200	300	0	0	0	0	0	0	0	200	903	0	0	0	0	0	0	0	603	903	0
582	8	0	0	0	0	0	0	200	300	0	0	0	0	0	0	0	200	903	0	0	0	0	0	0	0	603	903	0
582	9	0	0	0	0	0	0	200	300	0	0	0	0	0	0	0	200	903	0	0	0	0	0	0	0	603	903	0
583	0	0	0	0	0	0	0	200	300	0	0	0	0	0	0	0	200	903	0	0	0	0	0	0	0	603	903	0
583	1	0	0	0	0	0	0	200	300	0	0	0	0	0	0	0	200	903	0	0	0	0	0	0	0	603	903	0
583	2	0	0	0	0	0	0	200	300	0	0	0	0	0	0	0	200	903	0	0	0	0	0	0	0	603	903	0
583	3	0	0	0	0	0	0	200	300	0	0	0	0	0	0	0	200	903	0	0	0	0	0	0	0	603	903	0
583	4	0	0	0	0	0	0	200	300	0	0	0	0	0	0	0	200	903	0	0	0	0	0	0	0	603	903	0
583	5	0	0	0	0	0	0	200	300	0	0	0	0	0	0	0	200	903	0	0	0	0	0	0	0	603	903	0
583	6	0	0	0	0	0	0	200	300	0	0	0	0	0	0	0	200	903	0	0	0	0	0	0	0	603	903	0
583	7	0	0	0	0	0	0	200	300	0	0	0	0	0	0	0	200	903	0	0	0	0	0	0	0	603	903	0
583	8	0	0	0	0	0	0	200	300	0	0	0	0	0	0	0	200	903	0	0	0	0	0	0	0	603	903	0
583	9	0	0	0	0	0	0	200	300	0	0	0	0	0	0	0	200	903	0	0	0	0	0	0	0	603	903	0
584	0	0	0	0	0	0	0	200	300	0	0	0	0	0	0	0	200	903	0	0	0	0	0	0	0	603	903	0
584	1	0	0	0	0	0	0	200	300	0	0	0	0	0	0	0	200	903	0	0	0	0	0	0	0	603	903	0
584	2	0	0	0	0	0	0	200	300	0	0	0	0	0	0	0	200	903	0	0	0	0	0	0	0	603	903	0
584	3	0	0	0	0	0	0	200	300	0	0	0	0	0	0	0	200	903	0	0	0	0	0	0	0	603	903	0
584	4	0	0	0	0	0	0	200	300	0	0	0	0	0	0	0	200	903	0	0	0	0	0	0	0	603	903	0
584	5	0	0	0	0	0	0	200	300	0	0	0	0	0	0	0	200	903	0	0	0	0	0	0	0	603	903	0
584	6	0	0	0	0	0	0	200	300	0	0	0	0	0	0	0	200	903	0	0	0	0	0	0	0	603	903	0
584	7	0	0	0	0	0	0	200	300	0	0	0	0	0	0	0	200	903	0	0	0	0	0	0	0	603	903	0
584	8	0	0	0	0	0	0	200	300	0	0	0	0	0	0	0	200	903	0	0	0	0	0	0	0	603	903	0
584	9	0	0	0	0	0	0	200	300	0	0	0	0	0	0	0	200	903	0	0	0	0	0	0	0	603	903	0
585	0	0	0	0	0	0	0	200	300	0	0	0	0	0	0	0	200	903	0	0	0	0	0	0	0	603	903	0
585	1	0	0	0	0	0	0	200	300	0	0	0	0	0	0	0	200	903	0	0	0	0	0	0	0	603	903	0
585	2	0	0	0	0	0	0	200	300	0	0	0	0	0	0	0	200	903	0	0	0	0	0	0	0	603	903	0
585	3	0	0	0	0	0	0	200	300	0	0	0	0	0	0	0	200	903	0	0	0	0	0	0	0	603	903	0
585	4	0	0	0	0	0	0	200	300	0	0	0	0	0	0	0	200	903	0	0	0	0	0	0	0	603	903	0
585	5	0	0	0	0	0	0	200	300	0	0	0	0	0	0	0	200	903	0	0	0	0	0	0	0	603	903	0
585	6	0	0	0	0	0	0	200	300	0	0	0	0	0	0	0	200	903	0	0	0	0	0	0	0	603	903	0
585	7	0	0	0	0	0	0	200	300	0	0	0	0	0	0	0	200	903	0	0	0	0	0	0	0	603	903	0
585	8	0	0	0	0	0	0	200	300	0	0	0	0	0	0	0	200	903	0	0	0	0	0	0	0	603	903	0
585	9	0	0	0	0	0	0	200	300	0	0	0	0	0	0	0	200	903	0	0	0	0	0	0	0	603	903	0
586	0	0	0	0	0	0	0	200	300	0	0	0	0	0	0	0	200	903	0	0	0	0	0	0	0	603	903	0
586	1	0	0	0	0	0	0	200	300	0	0	0	0	0	0	0	200	903	0	0	0	0	0	0	0	603	903	0
586	2	0	0	0	0	0	0	200	300	0	0	0	0	0	0	0	200	903	0	0	0	0	0	0	0	603	903	0
586	3	0	0	0	0	0	0	200	300	0	0	0	0	0	0	0	200	903	0	0	0	0	0	0	0	603	903	0
586	4	0	0	0	0	0	0	200	300	0	0	0	0	0	0	0	200	903	0	0	0	0	0	0	0	603	903	0
586	5	0	0	0	0	0	0	200	300	0	0	0	0	0	0	0	200	903	0	0	0	0	0	0	0	603	903	0
586	6	0	0	0	0	0	0	200	300	0	0	0	0	0	0	0	200	903	0	0	0	0	0	0	0	603	903	0
586	7	0	0	0	0	0	0	200	300	0	0	0	0	0	0	0	200	903	0	0	0	0	0	0	0	603	903	0
586	8	0	0	0	0	0	0	200	300	0	0	0	0	0	0	0	200	903	0	0	0	0	0	0	0	603	903	0
586	9	0	0	0	0	0	0	200	300	0	0	0	0	0	0	0	200	903	0	0	0	0	0	0	0	603	903	0
587	0	0	0	0	0	0	0	200	300	0	0	0	0	0	0	0	200	903	0	0	0	0	0	0	0	603	903	0
587	1	0	0	0	0	0	0	200	300	0	0	0	0	0	0	0	200	903	0	0	0	0	0	0	0	603	903	0
587	2	0	0	0	0	0	0	200	300	0	0	0	0	0	0	0	200	903	0	0	0	0	0	0	0	603	903	0
587	3	0	0	0	0	0	0	200	300	0	0	0	0	0	0	0	200	903	0	0	0	0	0	0	0	603	903	0
587	4	0	0	0	0	0	0	200	300	0	0	0	0	0	0	0	200	903	0	0	0	0	0	0	0	603	903	0
587	5	0	0	0	0	0	0	200	300	0	0	0	0	0	0	0	200	903	0	0	0	0	0	0	0	603	903	0
587	6	0	0	0	0	0	0	200	300	0	0	0	0	0	0	0	200	903	0	0	0	0	0	0	0	603	903	0
587	7	0	0	0	0	0	0	200	300	0	0	0	0	0	0	0	200	903	0	0	0	0	0	0	0	603	903	0
587	8	0	0	0	0	0	0	200	300	0	0	0	0	0	0	0	200	903	0	0	0	0	0	0	0	603	903	0
587	9	0	0	0	0	0	0	200	300	0	0	0	0	0	0	0	200	903	0	0	0	0	0	0	0	603	903	0
588	0	0	0	0	0	0	0	200	300	0	0	0	0	0	0	0	200	903	0	0	0	0	0	0	0	603	903	0
588	1	0	0	0	0	0	0	200	300	0	0	0	0	0	0	0	200	903	0	0	0	0	0	0	0	603	903	0
588	2	0	0	0	0	0	0	200	300	0	0	0	0	0	0	0	200	903	0	0	0	0	0	0	0	603	903	0
588	3	0	0	0	0	0	0	200	300	0	0	0	0	0	0	0	200	903	0	0	0	0	0	0	0	603	903	0
588	4	0	0	0	0	0	0	200	300	0	0	0	0	0	0	0	200	903	0	0	0	0	0	0	0	603	903	0
588	5	0	0	0	0	0	0	200	300	0	0	0	0	0	0	0	200	903	0	0	0	0	0	0	0	603	903	0
588	6	0	0	0	0	0	0	200	300	0	0	0	0	0	0	0	200	903	0	0	0	0	0	0	0	603	903	0
588	7	0	0	0	0	0	0	200	300	0	0	0	0	0	0	0	200	903	0	0	0	0	0	0	0	603	903	0
588	8	0	0	0	0	0	0	200	300	0	0	0	0	0	0	0	200	903	0	0	0	0	0	0	0	603	903	0
588	9	0	0	0	0	0	0	200	300	0	0	0	0	0	0	0	200	903	0	0	0	0	0	0	0	603	903	0
589	0	0	0	0	0	0	0	200	300	0	0	0	0	0	0	0	200	903	0	0	0	0	0	0	0	603	903	0
589	1	0	0	0	0	0	0	200	300	0	0	0	0	0	0	0	200	903	0	0	0	0	0	0	0	603	903	0
589	2	0	0	0	0	0	0	200	300	0	0	0	0	0	0	0	200	903	0	0	0	0	0	0	0	603	903	0
589	3	0	0	0	0	0	0	200	300	0	0	0	0	0	0	0	200	903	0	0	0	0	0	0	0	603	903	0
589	4	0	0	0	0	0	0	200	300	0	0	0	0	0	0	0	200	903	0	0	0	0	0	0	0	603	903	0
589	5	0	0	0	0	0	0	200	300	0	0	0	0	0	0	0	200	903	0	0	0	0	0	0	0	603	903	0
589	6	0	0	0	0	0	0	200	300	0	0	0	0	0	0	0	200	903	0	0	0	0	0	0	0	603	903	0
589	7	0	0	0	0	0	0	200	300	0	0	0	0	0	0	0	200	903	0	0	0	0	0	0	0	603	903	0
589	8	0	0	0	0	0	0	200	300	0	0	0	0	0	0	0	200	903	0	0	0	0	0	0	0	603	903	0
589	9	0	0	0	0	0	0	200	300	0	0	0	0	0	0	0	200	903	0	0	0	0	0	0	0	603	903	0
590	0	0	0	0	0	0	0	200	300	0	0	0	0	0	0	0	200	903	0	0	0	0	0	0	0	603	903	0
590	1	0	0	0	0	0	0	200	300	0	0	0	0	0	0	0	200	903	0	0	0	0	0	0	0	603	903	0
590	2	0	0	0	0	0	0	200	300	0	0	0	0	0	0	0	200	903	0	0	0	0	0	0	0	603	903	0
590	3	0	0	0	0	0	0	200	300	0	0	0	0	0	0	0	200	903	0	0	0	0	0	0	0	603	903	0
590	4	0	0	0	0	0	0	200	300	0	0	0	0	0	0	0	200	903	0	0	0	0	0	0	0	603	903	0
590	5	0	0	0	0	0	0	200	300	0	0	0	0	0	0	0	200	903	0	0	0	0	0	0	0	603	903	0
590	6	0	0	0	0	0	0	200	300	0	0	0	0	0	0	0	200	903	0	0	0	0	0	0	0	603	903	0
590	7	0	0	0	0	0	0	200	300	0	0	0	0	0	0	0	200	903	0	0	0	0	0	0	0	603	903	0
590	8	0	0	0	0	0	0	200	300	0	0	0	0	0	0	0	200	903	0	0	0	0	0	0	0	603	903	0
590	9	0	0	0	0	0	0	200	300	0	0	0	0	0	0	0	200	903	0	0	0	0	0	0	0	603	903	0
591	0	0	0	0	0	0	0	200	300	0	0	0	0	0	0	0	200	903	0	0	0	0	0	0	0	603	903	0
591	1	0	0	0	0	0	0	200	300	0	0	0	0	0	0	0	200	903	0	0	0	0	0	0	0	603	903	0
591	2	0	0	0	0	0	0	200	300	0	0	0	0	0	0	0	200	903	0	0	0	0	0	0	0	603	903	0
591	3	0	0	0	0	0	0	200	300	0	0	0	0	0	0	0	200	903	0	0	0	0	0	0	0	603	903	0
591	4	0	0	0	0	0	0	200	300	0	0	0	0	0	0	0	200	903	0	0	0	0	0	0	0	603	903	0
591	5	0	0	0	0	0	0	200	300	0	0	0	0	0	0	0	200	903	0	0	0	0	0	0	0	603	903	0
591	6	0	0	0	0	0	0	200	300	0	0	0	0	0	0	0	200	903	0	0	0	0	0	0	0	603	903	0
591	7	0	0	0	0	0	0	200	300	0	0	0	0	0	0	0	200	903	0	0	0	0	0	0	0	603	903	0
591	8	0	0	0	0	0	0	200	300	0	0	0	0	0	0	0	200	903	0	0	0	0	0	0	0	603	903	0
591	9	0	0	0	0	0	0	200	300	0	0	0	0	0	0	0	200	903	0	0	0	0	0	0	0	603	903	0
592	0	0	0	0	0	0	0	200	300	0	0	0	0	0	0	0	200	903	0	0	0	0	0	0	0	603	903	0
592	1	0	0	0	0	0	0	200	300	0	0	0	0	0	0	0	200	903	0	0	0	0	0	0	0	603	903	0
592	2	0	0	0	0	0	0	200	300	0	0	0	0	0	0	0	200	903	0	0	0	0	0	0	0	603	903	0
592	3	0	0	0	0	0	0	200	300	0	0	0	0	0	0	0	200	903	0	0	0	0	0	0	0	603	903	0
592	4	0	0	0	0	0	0	200	300	0	0	0	0	0	0	0	200	903	0	0	0	0	0	0	0	603	903	0
592	5	0	0	0	0	0	0	200	300	0	0	0	0	0	0	0	200	903	0	0	0	0	0	0	0	603	903	0
592	6	0	0	0	0	0	0	200	300	0	0	0	0	0	0	0	200	903	0	0	0	0	0	0	0	603	903	0
592	7	0	0	0	0	0	0	200	300	0	0	0	0	0	0	0	200	903	0	0	0	0	0	0	0	603	903	0
592	8	0	0	0	0	0	0	200	300	0	0	0	0	0	0	0	200	903	0	0	0	0	0	0	0	603	903	0
592	9	0	0	0	0	0	0	200	300	0	0	0	0	0	0	0	200	903	0	0	0	0	0	0	0	603	903	0
593	0	0	0	0	0	0	0	200	300	0	0	0	0	0	0	0	200	903	0	0	0	0	0	0	0	603	903	0
593	1	0	0	0	0	0	0	200	300	0	0	0	0	0	0	0	200	903	0	0	0	0	0	0	0	603	903	0
593	2	0	0	0	0	0	0	200	300	0	0	0	0	0	0	0	200	903	0	0	0	0	0	0	0	603	903	0
593	3	0	0	0	0	0	0	200	300	0	0	0	0	0	0	0	200	903	0	0	0	0	0	0	0	603	903	0
593	4	0	0	0	0	0	0	200	300	0	0	0	0	0	0	0	200	903	0	0	0	0	0	0	0	603	903	0
593	5	0	0	0	0	0	0	200	300	0	0	0	0	0	0	0	200	903	0	0	0	0	0	0	0	603	903	0
593	6	0	0	0	0	0	0	200	300	0	0	0	0	0	0	0	200	903	0	0	0	0	0	0	0	603	903	0
593	7	0	0	0	0	0	0	200	300	0	0	0	0	0	0	0	200	903	0	0	0	0	0	0	0	603	903	0
593	8	0	0	0	0	0	0	200	300	0	0	0	0	0	0	0	200	903	0	0	0	0	0	0	0	603	903	0
593	9	0	0	0	0	0	0	200	300	0	0	0	0	0	0	0	200	903	0	0	0	0	0	0	0	603	903	0
594	0	0	0	0	0	0	0	200	300	0	0	0	0	0	0	0	200	903	0	0	0	0	0	0	0	603	903	0
594	1	0	0	0	0	0	0	200	300	0	0	0	0	0	0	0	200	903	0	0	0	0	0	0	0	603	903	0
594	2	0	0	0	0	0	0	200	300	0	0	0	0	0	0	0	200	903	0	0	0	0	0	0	0	603	903	0
594	3	0	0	0	0	0	0	200	300	0	0	0	0	0	0	0	200	903	0	0	0	0	0	0	0	603	903	0
594	4	0	0	0	0	0	0	200	300	0	0	0	0	0	0	0	200	903	0	0	0	0	0	0	0	603	903	0
594	5	0	0	0	0	0	0	200	300	0	0	0	0	0	0	0	200	903	0	0	0	0	0	0	0	603	903	0
594	6	0	0	0	0	0	0	200	300	0	0	0	0	0	0	0	200	903	0	0	0	0	0	0	0	603	903	0
594	7	0	0	0	0	0	0	200	300	0	0	0	0	0	0	0	200	903	0	0	0	0	0	0	0	603	903	0
594	8	0	0	0	0	0	0	200	300	0	0	0	0	0	0	0	200	903	0	0	0	0	0	0	0	603	903	0
594	9	0	0	0	0	0	0	200	300	0	0	0	0	0	0	0	200	903	0	0	0	0	0	0	0	603	903	0
595	0	0	0	0	0	0	0	200	300	0	0	0	0	0	0	0	200	903	0	0	0	0	0	0	0	603	903	0
595	1	0	0	0	0	0	0	200	300	0	0	0	0	0	0	0	200	903	0	0	0	0	0	0	0	603	903	0
595	2	0	0	0	0	0	0	200	300	0	0	0	0	0	0	0	200	903	0	0	0	0	0	0	0	603	903	0
595	3	0	0	0	0	0	0	200	300	0	0	0	0	0	0	0	200	903	0	0	0	0	0	0	0	603	903	0
595	4	0	0	0	0	0	0	200	300	0	0	0	0	0	0	0	200	903	0	0	0	0	0	0	0	603	903	0
595	5	0	0	0	0	0	0	200	300	0	0	0	0	0	0	0	200	903	0	0	0	0	0	0	0	603	903	0
595	6	0	0	0	0	0	0	200	300	0	0	0	0	0	0	0	200	903	0	0	0	0	0	0	0	603	903	0
595	7	0	0	0	0	0	0	200	300	0	0	0	0	0	0	0	200	903	0	0	0	0	0	0	0	603	903	0
595	8	0	0	0	0	0	0	200	300	0	0	0	0	0	0	0	200	903	0	0	0	0	0	0	0	603	903	0
595	9	0	0	0	0	0	0	200	300	0	0	0	0	0	0	0	200	903	0	0	0	0	0	0	0	603	903	0
596	0	0	0	0	0	0	0	200	300	0	0	0	0	0	0	0	200	903	0	0	0	0	0	0	0	603	903	0
596	1	0	0	0	0	0	0	200	300	0	0	0	0	0	0	0	200	903	0	0	0	0	0	0	0	603	903	0
596	2	0	0	0	0	0	0	200	300	0	0	0	0	0	0	0	200	903	0	0	0	0	0	0	0	603	903	0
596	3	0	0	0	0	0	0	200	300	0	0	0	0	0	0	0	200	903	0	0	0	0	0	0	0	603	903	0
596	4	0	0	0	0	0	0	200	300	0	0	0	0	0	0	0	200	903	0	0	0	0	0	0	0	603	903	0
596	5	0	0	0	0	0	0	200	300	0	0	0	0	0	0	0	200	903	0	0	0	0	0	0	0	603	903	0
596	6	0	0	0	0	0	0	200	300	0	0	0	0	0	0	0	200	903	0	0	0	0	0	0	0	603	903	0
596	7	0	0	0	0	0	0	200	300	0	0	0	0	0	0	0	200	903	0	0	0	0	0	0	0	603	903	0
596	8	0	0	0	0	0	0	200	300	0	0	0	0	0	0	0	200	903	0	0	0	0	0	0	0	603	903	0
596	9	0	0	0	0	0	0	200	300	0	0	0	0	0	0	0	200	903	0	0	0	0	0	0	0	603	903	0
597	0	0	0	0	0	0	0	200	300	0	0	0	0	0	0	0	200	903	0	0	0	0	0	0	0	603	903	0
597	1	0	0	0	0	0	0	200	300	0	0	0	0	0	0	0	200	903	0	0	0	0	0	0	0	603	903	0
597	2	0	0	0	0	0	0	200	300	0	0	0	0	0	0	0	200	903	0	0	0	0	0	0	0	603	903	0
597	3	0	0	0	0	0	0	200	300	0	0	0	0	0	0	0	200	903	0	0	0	0	0	0	0	603	903	0
597	4	0	0	0	0	0	0	200	300	0	0	0	0	0	0	0	200	903	0	0	0	0	0	0	0	603	903	0
597	5	0	0	0	0	0	0	200	300	0	0	0	0	0	0	0	200	903	0	0	0	0	0	0	0	603	903	0
597	6	0	0	0	0	0	0	200	300	0	0	0	0	0	0	0	200	903	0	0	0	0	0	0	0	603	903	0
597	7	0	0	0	0	0	0	200	300	0	0	0	0	0	0	0	200	903	0	0	0	0	0	0	0	603	903	0
597	8	0	0	0	0	0	0	200	300	0	0	0	0	0	0	0	200	903	0	0	0	0	0	0	0	603	903	0
597	9	0	0	0	0	0	0	200	300	0	0	0	0	0	0	0	200	903	0	0	0	0	0	0	0	603	903	0
598	0	0	0	0	0	0	0	200	300	0	0	0	0	0	0	0	200	903	0	0	0	0	0	0	0	603	903	0
598	1	0	0	0	0	0	0	200	300	0	0	0	0	0	0	0	200	903	0	0	0	0	0	0	0	603	903	0
598	2	0	0	0	0	0	0	200	300	0	0	0	0	0	0	0	200	903	0	0	0	0	0	0	0	603	903	0
598	3	0	0	0	0	0	0	200	300	0	0	0	0	0	0	0	200	903	0	0	0	0	0	0	0	603	903	0
598	4	0	0	0	0	0	0	200	300	0	0	0	0	0	0	0	200	903	0	0	0	0	0	0	0	603	903	0
598	5	0	0	0	0	0	0	200	300	0	0	0	0	0	0	0	200	903	0	0	0	0	0	0	0	603	903	0
598	6	0	0	0	0	0	0	200	300	0	0	0	0	0	0	0	200	903	0	0	0	0	0	0	0	603	903	0
598	7	0	0	0	0	0	0	200	300	0	0	0	0	0	0	0	200	903	0	0	0	0	0	0	0	603	903	0
598	8	0	0	0	0	0	0	200	300	0	0	0	0	0	0	0	200	903	0	0	0	0	0	0	0	603	903	0
598	9	0	0	0	0	0	0	200	300	0	0	0	0	0	0	0	200	903	0	0	0	0	0	0	0	603	903	0
599	0	0	0	0	0	0	0	200	300	0	0	0	0	0	0	0	200	903	0	0	0	0	0	0	0	603	903	0
599	1	0	0	0	0	0	0	200	300	0	0	0	0	0	0	0	200	903	0	0	0	0	0	0	0	603	903	0
599	2	0	0	0	0	0	0	200	300	0	0	0	0	0	0	0	200	903	0	0	0	0	0	0	0	603	903	0
599	3	0	0	0	0	0	0	200	300	0	0	0	0	0	0	0	200	903	0	0	0	0	0	0	0	603	903	0
599	4	0	0	0	0	0	0	200	300	0	0	0	0	0	0	0	200	903	0	0	0	0	0	0	0	603	903	0
599	5	0	0	0	0	0	0	200	300	0	0	0	0	0	0	0	200	903	0	0	0	0	0	0	0	603	903	0
599	6	0	0	0	0	0	0	200	300	0	0	0	0	0	0	0	200	903	0	0	0	0	0	0	0	603	903	0
599	7	0	0	0	0	0	0	200	300	0	0	0	0	0	0	0	200	903	0	0	0	0	0	0	0	603	903	0
599	8	0	0	0	0	0	0	200	300	0	0	0	0	0	0	0	200	903	0	0	0	0	0	0	0	603	903	0
599	9	0	0	0	0	0	0	200	300	0	0	0	0	0	0	0	200	903	0	0	0	0	0	0	0	603	903	0
600	0	0	0	0	0	0	0	200	300	0	0	0	0	0	0	0	200	903	0	0	0	0	0	0	0	603	903	0
600	1	0	0	0	0	0	0	200	300	0	0	0	0	0	0	0	200	903	0	0	0	0	0	0	0	603	903	0
600	2	0	0	0	0	0	0	200	300	0	0	0	0	0	0	0	200	903	0	0	0	0	0	0	0	603	903	0
600	3	0	0	0	0	0	0	200	300	0	0	0	0	0	0	0	200	903	0	0	0	0	0	0	0	603	903	0
600	4	0	0	0	0	0	0	200	300	0	0	0	0	0	0	0	200	903	0	0	0	0	0	0	0	603	903	0
600	5	0	0	0	0	0	0	200	300	0	0	0	0	0	0	0	200	903	0	0	0	0	0	0	0	603	903	0
600	6	0	0	0	0	0	0	200	300	0	0	0	0	0	0	0	200	903	0	0	0	0	0	0	0	603	903	0
600	7	0	0	0	0	0	0	200	300	0	0	0	0	0	0	0	200	903	0	0	0	0	0	0	0	603	903	0
600	8	0	0	0	0	0	0	200	300	0	0	0	0	0	0	0	200	903	0	0	0	0	0	0	0	603	903	0
600	9	0	0	0	0	0	0	200	300	0	0	0	0	0	0	0	200	903	0	0	0	0	0	0	0	603	903	0
601	0	0	0	0	0	0	0	200	300	0	0	0	0	0	0	0	200	903	0	0	0	0	0	0	0	603	903	0
601	1	0	0	0	0	0	0	200	300	0	0	0	0	0	0	0	200	903	0	0	0	0	0	0	0	603	903	0
601	2	0	0	0	0	0	0	200	300	0	0	0	0	0	0	0	200	903	0	0	0	0	0	0	0	603	903	0
601	3	0	0	0	0	0	0	200	300	0	-3.68805	-9.09408	-20.2613	-479.647	-888.413	663.986	156.152	926.673	0	0	0	0	0	0	0	603	903	0
601	4	0	0	0	0	0	0	200	300	0	-2.16217	-6.19491	-22.3975	-662.752	-1193.59	847.092	146.709	932.59	0	0	0	0	0	0	0	603	903	0
601	5	0	0	0	0	0	0	200	300	0	-3.53546	-5.27938	-23.0079	-662.752	-1559.8	526.657	132.206	931.805	0	0	0	0	0	0	0	603	903	0
601	6	0	0	0	0	0	0	200	300	0	-2.77252	-3.90609	-26.3648	-662.752	-1681.87	389.328	136.208	928.138	0	0	0	0	0	0	0	603	903	0
601	7	0	0	0	0	0	0	200	300	0	-4.90875	-1.3121	-32.1632	-479.647	-1926.01	389.328	140.118	917.913	0	0	0	0	0	0	0	603	903	0
601	8	0	0	0	0	0	0	200	300	0	-7.19757	-0.549159	-36.7408	-662.752	-2536.36	160.446	130.966	921.039	0	0	0	0	0	0	0	603	903	0
601	9	0	0	0	0	0	0	200	300	0	-7.65533	-0.701747	-39.1822	-388.094	-2414.29	251.999	138.383	912.905	0	0	0	0	0	0	0	603	903	0
602	0	0	0	0	0	0	0	200	300	0	-7.50275	-2.07504	-46.8116	-479.647	-3146.71	618.209	132.779	913.246	0	0	0	0	0	0	0	603	903	0
602	1	0	0	0	0	0	0	200	300	0	-10.0967	-2.07504	-50.1685	893.645	-3634.99	206.222	127.544	885.187	0	0	0	0	0	0	0	603	903	0
602	2	0	0	0	0	0	0	200	300	0	-9.94415	-2.5328	-55.0514	252.775	-3329.82	251.999	139.514	898.408	0	0	0	0	0	0	0	603	903	0
602	3	0	0	0	0	0	0	200	300	0	-7.19757	-2.5328	-61.1549	69.6699	-4001.21	526.657	134.573	901.861	0	0	0	0	0	0	0	603	903	0
602	4	0	0	0	0	0	0	200	300	0	-9.79156	-1.92245	-63.2911	252.775	-4428.45	68.8931	130.03	899.006	0	0	0	0	0	0	0	603	903	0
602	5	0	0	0	0	0	0	200	300	0	-9.63898	-2.83798	-69.6998	435.881	-4489.49	-68.436	135.588	896.746	0	0	0	0	0	0	0	603	903	0
602	6	0	0	0	0	0	0	200	300	0	-9.48639	-1.46469	-74.5826	435.881	-4550.52	206.222	138.987	897.156	0	0	0	0	0	0	0	603	903	0
602	7	0	0	0	0	0	0	200	300	0	-9.94415	-0.243984	-79.4654	-21.8829	-5282.95	-205.765	133.519	903.275	0	0	0	0	0	0	0	603	903	0
602	8	0	0	0	0	0	0	200	300	0	-10.7071	1.43448	-84.9586	802.092	-5099.84	-68.436	139.973	893.559	0	0	0	0	0	0	0	603	903	0
602	9	0	0	0	0	0	0	200	300	0	-10.0967	1.43448	-89.8414	893.645	-5160.88	-480.423	142.556	893.053	0	0	0	0	0	0	0	603	903	0
603	0	0	0	0	0	0	0	200	300	0	-9.3338	-0.396572	-93.5035	527.434	-6015.37	-68.436	135.667	897.359	0	0	0	0	0	0	0	603	903	0
603	1	0	0	0	0	0	0	200	300	0	-10.5545	2.19742	-96.5553	802.092	-6137.44	-388.871	136.436	894.693	0	0	0	0	0	0	0	603	903	0
603	2	0	0	0	0	0	0	200	300	0	-11.1649	2.5026	-102.354	893.645	-6259.51	-434.647	138.844	894.269	0	0	0	0	0	0	0	603	903	0
603	3	0	0	0	0	0	0	200	300	0	-9.63898	2.19742	-109.373	1259.86	-6564.69	-526.2	139.979	891.481	0	0	0	0	0	0	0	603	903	0
603	4	0	0	0	0	0	0	200	300	0	-9.48639	1.73966	-114.255	1900.72	-6320.54	-343.094	144.681	886.364	0	0	0	0	0	0	0	603	903	0
603	5	0	0	0	0	0	0	200	300	0	-11.3174	0.21378	-117.918	985.198	-6564.69	-526.2	144.328	894.645	0	0	0	0	0	0	0	603	903	0
603	6	0	0	0	0	0	0	200	300	0	-9.3338	-0.0913958	-121.274	1442.96	-7052.97	-571.976	141.843	891.102	0	0	0	0	0	0	0	603	903	0
603	7	0	0	0	0	0	0	200	300	0	-11.1649	-0.854335	-124.326	1534.51	-6869.86	-663.529	144.743	890.657	0	0	0	0	0	0	0	603	903	0
603	8	0	0	0	0	0	0	200	300	0	-11.1649	-1.76986	-129.514	1534.51	-7175.04	-526.2	144.6	891.152	0	0	0	0	0	0	0	603	903	0
603	9	0	0	0	0	0	0	200	300	0	-9.94415	-2.83798	-131.956	2266.94	-7480.21	-434.647	143.313	885.82	0	0	0	0	0	0	0	603	903	0
604	0	0	0	0	0	0	0	200	300	0	-11.3174	-5.73715	-134.397	1259.86	-7480.21	-388.871	144.342	893.626	0	0	0	0	0	0	0	603	903	0
604	1	0	0	0	0	0	0	200	300	0	-8.41827	-6.50009	-136.533	1626.07	-7541.25	-114.212	144.766	891.09	0	0	0	0	0	0	0	603	903	0
604	2	0	0	0	0	0	0	200	300	0	-10.7071	-7.5682	-137.754	2450.04	-7541.25	-251.541	145.256	885.214	0	0	0	0	0	0	0	603	903	0
604	3	0	0	0	0	0	0	200	300	0	-9.48639	-10.3148	-143.858	2083.83	-7358.14	-297.318	148.851	888.515	0	0	0	0	0	0	0	603	903	0
604	4	0	0	0	0	0	0	200	300	0	-9.02863	-12.7562	-147.214	1992.28	-7663.32	-68.436	147.945	889.467	0	0	0	0	0	0	0	603	903	0
604	5	0	0	0	0	0	0	200	300	0	-8.87604	-15.9605	-154.539	2541.59	-7663.32	114.67	150.412	886.554	0	0	0	0	0	0	0	603	903	0
604	6	0	0	0	0	0	0	200	300	0	-5.5191	-17.1812	-158.506	2083.83	-7602.28	114.67	152.038	889.853	0	0	0	0	0	0	0	603	903	0
604	7	0	0	0	0	0	0	200	300	0	-1.39923	-19.0123	-163.084	2816.25	-7236.07	251.999	155.63	885.731	0	0	0	0	0	0	0	603	903	0
604	8	0	0	0	0	0	0	200	300	0	1.19476	-21.4537	-171.323	3090.91	-7114	389.328	158.476	884.959	0	0	0	0	0	0	0	603	903	0
604	9	0	0	0	0	0	0	200	300	0	2.72064	-23.8951	-178.648	3457.12	-7724.35	755.539	156.762	883.648	0	0	0	0	0	0	0	603	903	0
605	0	0	0	0	0	0	0	200	300	0	6.84052	-27.4046	-186.582	4464.2	-7052.97	801.315	162.199	879.074	0	0	0	0	0	0	0	603	903	0
605	1	0	0	0	0	0	0	200	300	0	7.60346	-29.846	-192.991	4189.54	-7480.21	1304.85	161.241	881.292	0	0	0	0	0	0	0	603	903	0
605	2	0	0	0	0	0	0	200	300	0	10.1974	-32.2874	-200.315	4738.86	-8029.53	1304.85	159.915	879.343	0	0	0	0	0	0	0	603	903	0
605	3	0	0	0	0	0	0	200	300	0	12.4863	-35.4918	-209.47	4921.97	-7724.35	1487.96	163.124	879.503	0	0	0	0	0	0	0	603	903	0
605	4	0	0	0	0	0	0	200	300	0	14.3173	-37.9332	-217.71	5196.62	-7907.46	1991.5	163.679	879.131	0	0	0	0	0	0	0	603	903	0
605	5	0	0	0	0	0	0	200	300	0	15.6906	-39.6117	-228.086	5745.94	-8395.74	2128.83	163.19	877.808	0	0	0	0	0	0	0	603	903	0
605	6	0	0	0	0	0	0	200	300	0	18.5898	-41.9005	-238.462	6386.81	-8761.95	2769.7	163.256	876.217	0	0	0	0	0	0	0	603	903	0
605	7	0	0	0	0	0	0	200	300	0	22.0993	-44.3419	-250.059	7027.68	-8517.81	2907.03	165.937	874.896	0	0	0	0	0	0	0	603	903	0
605	8	0	0	0	0	0	0	200	300	0	23.0148	-47.6988	-260.435	7485.44	-8822.98	3044.36	166.122	874.258	0	0	0	0	0	0	0	603	903	0
605	9	0	0	0	0	0	0	200	300	0	23.9304	-48.7669	-272.031	7851.65	-9250.23	3685.23	165.996	874.137	0	0	0	0	0	0	0	603	903	0
606	0	0	0	0	0	0	0	200	300	0	26.6769	-50.598	-283.628	9041.84	-9067.12	3593.67	168.032	871.121	0	0	0	0	0	0	0	603	903	0
606	1	0	0	0	0	0	0	200	300	0	29.4235	-53.6497	-293.088	9499.61	-9677.47	4142.99	166.981	870.588	0	0	0	0	0	0	0	603	903	0
606	2	0	0	0	0	0	0	200	300	0	30.3391	-54.7179	-303.77	10140.5	-10348.9	4554.98	165.932	869.618	0	0	0	0	0	0	0	603	903	0
606	3	0	0	0	0	0	0	200	300	0	30.1865	-55.786	-315.366	11330.7	-10348.9	4966.97	167.185	867.071	0	0	0	0	0	0	0	603	903	0
606	4	0	0	0	0	0	0	200	300	0	32.3227	-58.5326	-327.879	11971.5	-10715.1	5333.18	167.32	866.488	0	0	0	0	0	0	0	603	903	0
606	5	0	0	0	0	0	0	200	300	0	35.0693	-61.8895	-340.696	12429.3	-11386.5	5928.27	166.579	866.518	0	0	0	0	0	0	0	603	903	0
606	6	0	0	0	0	0	0	200	300	0	35.2219	-62.9576	-348.936	14260.3	-11630.6	6065.6	166.668	862.132	0	0	0	0	0	0	0	603	903	0
606	7	0	0	0	0	0	0	200	300	0	34.9167	-64.7887	-359.922	14443.5	-12241	6111.38	165.99	862.871	0	0	0	0	0	0	0	603	903	0
606	8	0	0	0	0	0	0	200	300	0	38.5788	-66.9249	-370.908	15084.3	-12363	6386.03	166.668	862.331	0	0	0	0	0	0	0	603	903	0
606	9	0	0	0	0	0	0	200	300	0	37.8159	-70.4344	-384.641	15999.9	-12607.2	6752.25	167.224	861.403	0	0	0	0	0	0	0	603	903	0
607	0	0	0	0	0	0	0	200	300	0	37.6633	-72.5706	-394.712	17281.6	-13217.5	7164.23	166.514	859.217	0	0	0	0	0	0	0	603	903	0
607	1	0	0	0	0	0	0	200	300	0	37.3581	-75.4698	-403.562	18197.1	-13522.7	7118.46	166.492	857.909	0	0	0	0	0	0	0	603	903	0
607	2	0	0	0	0	0	0	200	300	0	37.5107	-78.2164	-414.243	18746.4	-13827.9	7393.11	166.619	857.745	0	0	0	0	0	0	0	603	903	0
607	3	0	0	0	0	0	0	200	300	0	36.29	-79.7423	-423.399	20028.2	-14682.4	7301.56	165.323	855.697	0	0	0	0	0	0	0	603	903	0
607	4	0	0	0	0	0	0	200	300	0	35.8322	-83.4044	-434.08	20852.2	-14987.5	7347.34	165.473	854.962	0	0	0	0	0	0	0	603	903	0
607	5	0	0	0	0	0	0	200	300	0	37.3581	-86.4561	-442.93	21309.9	-15170.6	7576.22	165.749	854.889	0	0	0	0	0	0	0	603	903	0
607	6	0	0	0	0	0	0	200	300	0	34.7641	-88.5924	-451.17	22500.1	-15536.8	7622	165.563	853.129	0	0	0	0	0	0	0	603	903	0
607	7	0	0	0	0	0	0	200	300	0	32.1701	-91.339	-460.02	23324.1	-16269.3	7713.55	164.634	852.298	0	0	0	0	0	0	0	603	903	0
607	8	0	0	0	0	0	0	200	300	0	30.6442	-92.7122	-469.175	24788.9	-16696.5	7759.33	164.413	850.165	0	0	0	0	0	0	0	603	903	0
607	9	0	0	0	0	0	0	200	300	0	28.9658	-95.4588	-479.551	25796	-17001.7	7438.89	164.547	849.208	0	0	0	0	0	0	0	603	903	0
608	0	0	0	0	0	0	0	200	300	0	27.4399	-98.358	-489.316	26436.9	-17917.2	7164.23	163.383	848.972	0	0	0	0	0	0	0	603	903	0
608	1	0	0	0	0	0	0	200	300	0	24.5407	-101.257	-497.861	27535.5	-18222.4	6889.57	163.399	847.693	0	0	0	0	0	0	0	603	903	0
608	2	0	0	0	0	0	0	200	300	0	21.7941	-103.699	-505.186	28451	-18527.6	6843.8	163.325	846.682	0	0	0	0	0	0	0	603	903	0
608	3	0	0	0	0	0	0	200	300	0	20.2682	-104.309	-511.9	29915.9	-19504.1	6843.8	161.899	844.559	0	0	0	0	0	0	0	603	903	0
608	4	0	0	0	0	0	0	200	300	0	18.4372	-109.039	-520.75	31197.6	-19626.2	6935.35	162.312	843.091	0	0	0	0	0	0	0	603	903	0
608	5	0	0	0	0	0	0	200	300	0	17.0639	-111.481	-528.684	31380.7	-20175.5	6477.59	161.838	843.644	0	0	0	0	0	0	0	603	903	0
608	6	0	0	0	0	0	0	200	300	0	14.9277	-112.701	-533.567	32662.4	-21030	6431.81	160.586	841.785	0	0	0	0	0	0	0	603	903	0
608	7	0	0	0	0	0	0	200	300	0	10.35	-114.685	-538.145	33852.6	-21091	6386.03	160.808	840.094	0	0	0	0	0	0	0	603	903	0
608	8	0	0	0	0	0	0	200	300	0	10.35	-116.821	-543.638	34401.9	-21396.2	6111.38	160.643	839.719	0	0	0	0	0	0	0	603	903	0
608	9	0	0	0	0	0	0	200	300	0	8.21381	-118.194	-551.267	34951.3	-22189.7	5974.05	159.748	839.598	0	0	0	0	0	0	0	603	903	0
609	0	0	0	0	0	0	0	200	300	0	5.00946	-120.636	-555.54	35225.9	-22311.8	6157.15	159.838	839.591	0	0	0	0	0	0	0	603	903	0
609	1	0	0	0	0	0	0	200	300	0	4.39911	-121.704	-557.371	36324.6	-22311.8	5882.49	159.97	837.829	0	0	0	0	0	0	0	603	903	0
609	2	0	0	0	0	0	0	200	300	0	3.78876	-124.603	-561.338	38155.6	-22739	5928.27	159.491	835.027	0	0	0	0	0	0	0	603	903	0
609	3	0	0	0	0	0	0	200	300	0	4.39911	-123.688	-564.39	38155.6	-23288.3	6386.03	158.737	835.395	0	0	0	0	0	0	0	603	903	0
609	4	0	0	0	0	0	0	200	300	0	0.889588	-124.298	-565.61	38796.5	-23044.2	5653.61	159.258	834.408	0	0	0	0	0	0	0	603	903	0
609	5	0	0	0	0	0	0	200	300	0	0.737	-126.129	-566.526	38704.9	-23532.5	5699.39	158.462	834.68	0	0	0	0	0	0	0	603	903	0
609	6	0	0	0	0	0	0	200	300	0	0.889588	-124.603	-569.273	39345.8	-23837.6	6065.6	158.126	833.884	0	0	0	0	0	0	0	603	903	0
609	7	0	0	0	0	0	0	200	300	0	1.65253	-125.824	-569.883	39620.5	-23471.4	6065.6	158.814	833.476	0	0	0	0	0	0	0	603	903	0
609	8	0	0	0	0	0	0	200	300	0	2.41547	-126.282	-569.883	39620.5	-24081.8	6248.71	157.743	833.476	0	0	0	0	0	0	0	603	903	0
609	9	0	0	0	0	0	0	200	300	0	1.49994	-126.129	-572.629	40261.3	-23959.7	6569.14	158.158	832.69	0	0	0	0	0	0	0	603	903	0
610	0	0	0	0	0	0	0	200	300	0	1.65253	-126.434	-571.714	40902.2	-23593.5	6706.47	158.732	831.457	0	0	0	0	0	0	0	603	903	0
610	1	0	0	0	0	0	0	200	300	0	3.17841	-126.434	-573.545	41634.6	-23776.6	6981.13	158.544	830.408	0	0	0	0	0	0	0	603	903	0
610	2	0	0	0	0	0	0	200	300	0	3.17841	-127.197	-573.545	42458.6	-23837.6	6798.02	158.438	828.972	0	0	0	0	0	0	0	603	903	0
610	3	0	0	0	0	0	0	200	300	0	3.02582	-125.824	-573.545	41451.5	-23715.6	7210.01	158.651	830.728	0	0	0	0	0	0	0	603	903	0
610	4	0	0	0	0	0	0	200	300	0	3.94135	-125.824	-574.155	42458.6	-24448	7210.01	157.419	829.05	0	0	0	0	0	0	0	603	903	0
610	5	0	0	0	0	0	0	200	300	0	4.5517	-127.197	-574.766	43740.3	-24509	7347.34	157.358	826.899	0	0	0	0	0	0	0	603	903	0
610	6	0	0	0	0	0	0	200	300	0	7.14569	-127.35	-577.207	43648.8	-24448	7484.67	157.644	827.379	0	0	0	0	0	0	0	603	903	0
610	7	0	0	0	0	0	0	200	300	0	5.46722	-128.113	-575.986	43831.9	-24081.8	7667.77	158.19	826.901	0	0	0	0	0	0	0	603	903	0
610	8	0	0	0	0	0	0	200	300	0	3.94135	-127.807	-575.986	44381.2	-24631.1	7622	157.237	825.947	0	0	0	0	0	0	0	603	903	0
610	9	0	0	0	0	0	0	200	300	0	3.63617	-128.57	-577.207	44747.4	-24814.2	7530.44	157.01	825.476	0	0	0	0	0	0	0	603	903	0
611	0	0	0	0	0	0	0	200	300	0	4.09393	-129.791	-577.512	45296.7	-24753.2	7301.56	157.138	824.566	0	0	0	0	0	0	0	603	903	0
611	1	0	0	0	0	0	0	200	300	0	3.78876	-130.401	-578.123	45571.4	-25058.3	7667.77	156.656	824.174	0	0	0	0	0	0	0	603	903	0
611	2	0	0	0	0	0	0	200	300	0	1.49994	-130.249	-575.681	45937.6	-25180.4	7484.67	156.26	823.203	0	0	0	0	0	0	0	603	903	0
611	3	0	0	0	0	0	0	200	300	0	2.41547	-131.47	-580.869	46029.2	-24692.1	7393.11	157.491	823.758	0	0	0	0	0	0	0	603	903	0
611	4	0	0	0	0	0	0	200	300	0	-1.24664	-131.775	-583.005	46853.1	-25119.4	7438.89	156.914	822.635	0	0	0	0	0	0	0	603	903	0
611	5	0	0	0	0	0	0	200	300	0	-2.31476	-133.758	-584.531	48043.3	-25546.6	7072.68	156.296	820.809	0	0	0	0	0	0	0	603	903	0
611	6	0	0	0	0	0	0	200	300	0	-3.23029	-135.284	-584.531	47585.5	-25607.7	6843.8	156.191	821.592	0	0	0	0	0	0	0	603	903	0
611	7	0	0	0	0	0	0	200	300	0	-5.67169	-134.369	-586.973	48318	-26218	6660.69	155.334	820.683	0	0	0	0	0	0	0	603	903	0
611	8	0	0	0	0	0	0	200	300	0	-7.35016	-134.216	-585.142	48867.3	-26767.3	6569.14	154.255	819.486	0	0	0	0	0	0	0	603	903	0
611	9	0	0	0	0	0	0	200	300	0	-9.02863	-136.2	-593.076	49965.9	-26279	6248.71	155.69	818.751	0	0	0	0	0	0	0	603	903	0
612	0	0	0	0	0	0	0	200	300	0	-10.4019	-137.726	-595.212	50423.7	-26645.2	6111.38	155.234	818.285	0	0	0	0	0	0	0	603	903	0
612	1	0	0	0	0	0	0	200	300	0	-13.6063	-139.252	-595.518	50698.3	-27194.6	6019.82	154.335	817.867	0	0	0	0	0	0	0	603	903	0
612	2	0	0	0	0	0	0	200	300	0	-16.658	-139.557	-598.875	51156.1	-27682.8	5790.94	153.775	817.58	0	0	0	0	0	0	0	603	903	0
612	3	0	0	0	0	0	0	200	300	0	-18.0313	-140.472	-602.537	52071.6	-27438.7	5836.72	154.461	816.579	0	0	0	0	0	0	0	603	903	0
612	4	0	0	0	0	0	0	200	300	0	-18.4891	-141.693	-603.147	52437.9	-27804.9	5653.61	153.9	816.06	0	0	0	0	0	0	0	603	903	0
612	5	0	0	0	0	0	0	200	300	0	-20.1675	-141.846	-607.419	52804.1	-28781.5	5378.95	152.617	816.068	0	0	0	0	0	0	0	603	903	0
612	6	0	0	0	0	0	0	200	300	0	-22.6089	-142.914	-609.251	53261.8	-28415.3	5424.73	153.36	815.578	0	0	0	0	0	0	0	603	903	0
612	7	0	0	0	0	0	0	200	300	0	-22.6089	-142.914	-611.387	54177.3	-28964.6	5287.4	152.625	814.386	0	0	0	0	0	0	0	603	903	0
612	8	0	0	0	0	0	0	200	300	0	-23.5245	-142.914	-615.049	55001.3	-29208.7	5150.07	152.51	813.574	0	0	0	0	0	0	0	603	903	0
612	9	0	0	0	0	0	0	200	300	0	-24.2874	-143.982	-618.101	55459.1	-29330.8	5333.18	152.547	813.275	0	0	0	0	0	0	0	603	903	0
613	0	0	0	0	0	0	0	200	300	0	-25.6607	-144.592	-620.237	55001.3	-29147.7	5287.4	153.006	814.322	0	0	0	0	0	0	0	603	903	0
613	1	0	0	0	0	0	0	200	300	0	-25.0504	-144.745	-620.847	55825.3	-29880.1	5058.52	151.872	813.082	0	0	0	0	0	0	0	603	903	0
613	2	0	0	0	0	0	0	200	300	0	-26.5762	-143.829	-623.594	56557.7	-30124.3	5241.62	151.693	812.304	0	0	0	0	0	0	0	603	903	0
613	3	0	0	0	0	0	0	200	300	0	-25.2029	-143.066	-626.951	56832.4	-29819.1	5378.95	152.438	812.351	0	0	0	0	0	0	0	603	903	0
613	4	0	0	0	0	0	0	200	300	0	-25.8133	-144.287	-630.308	56923.9	-29758.1	5287.4	152.788	812.689	0	0	0	0	0	0	0	603	903	0
613	5	0	0	0	0	0	0	200	300	0	-27.3392	-143.982	-631.834	57290.1	-30673.6	5516.28	151.453	812.327	0	0	0	0	0	0	0	603	903	0
613	6	0	0	0	0	0	0	200	300	0	-27.7969	-142.761	-633.359	57747.9	-30368.4	5333.18	152.052	811.823	0	0	0	0	0	0	0	603	903	0
613	7	0	0	0	0	0	0	200	300	0	-26.7288	-142.608	-637.022	58938.1	-30734.6	5470.51	151.753	810.479	0	0	0	0	0	0	0	603	903	0
613	8	0	0	0	0	0	0	200	300	0	-27.034	-142.608	-641.294	59121.2	-31589.1	5241.62	150.742	810.81	0	0	0	0	0	0	0	603	903	0
613	9	0	0	0	0	0	0	200	300	0	-28.2547	-142.303	-644.651	59029.7	-31161.9	4829.64	151.661	811.432	0	0	0	0	0	0	0	603	903	0
614	0	0	0	0	0	0	0	200	300	0	-25.2029	-142.761	-646.482	59487.4	-31161.9	4966.97	151.798	810.983	0	0	0	0	0	0	0	603	903	0
614	1	0	0	0	0	0	0	200	300	0	-28.7125	-141.083	-650.449	60677.6	-31772.2	4829.64	151.153	809.714	0	0	0	0	0	0	0	603	903	0
614	2	0	0	0	0	0	0	200	300	0	-28.2547	-140.625	-652.891	60677.6	-31955.3	4875.41	151.056	810.063	0	0	0	0	0	0	0	603	903	0
614	3	0	0	0	0	0	0	200	300	0	-28.2547	-140.472	-656.248	60677.6	-31650.1	4783.86	151.771	810.539	0	0	0	0	0	0	0	603	903	0
614	4	0	0	0	0	0	0	200	300	0	-29.3228	-140.472	-658.994	61043.8	-32199.4	4783.86	151.139	810.368	0	0	0	0	0	0	0	603	903	0
614	5	0	0	0	0	0	0	200	300	0	-29.7806	-139.557	-662.046	61318.4	-32443.6	4692.31	150.995	810.38	0	0	0	0	0	0	0	603	903	0
614	6	0	0	0	0	0	0	200	300	0	-28.5599	-137.421	-665.098	62142.4	-32565.7	4371.87	151.036	809.567	0	0	0	0	0	0	0	603	903	0
614	7	0	0	0	0	0	0	200	300	0	-29.4754	-136.352	-666.318	62508.7	-32321.5	4692.31	151.492	809.188	0	0	0	0	0	0	0	603	903	0
614	8	0	0	0	0	0	0	200	300	0	-28.8651	-135.742	-671.812	62600.2	-32931.9	4738.08	150.98	809.819	0	0	0	0	0	0	0	603	903	0
614	9	0	0	0	0	0	0	200	300	0	-30.8487	-136.2	-671.812	62874.9	-32687.7	4509.2	151.344	809.41	0	0	0	0	0	0	0	603	903	0
615	0	0	0	0	0	0	0	200	300	0	-30.8487	-136.2	-674.253	63332.6	-32687.7	4417.65	151.52	809.07	0	0	0	0	0	0	0	603	903	0
615	1	0	0	0	0	0	0	200	300	0	-32.0694	-133.453	-674.558	63790.4	-33420.2	4417.65	150.456	808.434	0	0	0	0	0	0	0	603	903	0
615	2	0	0	0	0	0	0	200	300	0	-29.7806	-132.843	-677.915	64431.2	-33725.3	4463.43	150.251	807.957	0	0	0	0	0	0	0	603	903	0
615	3	0	0	0	0	0	0	200	300	0	-30.0858	-131.164	-679.746	64156.6	-33298.1	4234.54	151.014	808.617	0	0	0	0	0	0	0	603	903	0
615	4	0	0	0	0	0	0	200	300	0	-31.7642	-130.859	-681.272	63881.9	-33481.2	4097.22	150.855	809.231	0	0	0	0	0	0	0	603	903	0
615	5	0	0	0	0	0	0	200	300	0	-31.3065	-129.028	-682.188	64614.3	-33725.3	4142.99	150.563	808.284	0	0	0	0	0	0	0	603	903	0
615	6	0	0	0	0	0	0	200	300	0	-31.1539	-128.723	-683.713	65255.2	-33603.3	4051.44	150.852	807.558	0	0	0	0	0	0	0	603	903	0
615	7	0	0	0	0	0	0	200	300	0	-31.6116	-127.045	-684.629	65621.4	-33298.1	3959.88	151.363	807.15	0	0	0	0	0	0	0	603	903	0
615	8	0	0	0	0	0	0	200	300	0	-31.3065	-125.976	-686.46	65163.7	-33847.4	3959.88	150.693	808.073	0	0	0	0	0	0	0	603	903	0
615	9	0	0	0	0	0	0	200	300	0	-32.8323	-124.603	-686.46	65255.2	-34213.6	3685.23	150.159	807.94	0	0	0	0	0	0	0	603	903	0
616	0	0	0	0	0	0	0	200	300	0	-32.8323	-122.772	-684.629	65529.9	-34030.5	3547.9	150.294	807.284	0	0	0	0	0	0	0	603	903	0
616	1	0	0	0	0	0	0	200	300	0	-30.0858	-122.772	-686.765	65804.5	-34518.8	3822.56	149.737	807.182	0	0	0	0	0	0	0	603	903	0
616	2	0	0	0	0	0	0	200	300	0	-32.8323	-120.788	-687.07	66262.3	-34640.9	3410.57	149.582	806.558	0	0	0	0	0	0	0	603	903	0
616	3	0	0	0	0	0	0	200	300	0	-32.3746	-119.72	-688.596	65987.6	-34091.6	3502.12	150.491	807.171	0	0	0	0	0	0	0	603	903	0
616	4	0	0	0	0	0	0	200	300	0	-33.7479	-119.263	-689.207	66353.9	-34213.6	3273.24	150.358	806.724	0	0	0	0	0	0	0	603	903	0
616	5	0	0	0	0	0	0	200	300	0	-33.9005	-118.194	-689.207	66628.5	-34335.7	3135.91	150.181	806.326	0	0	0	0	0	0	0	603	903	0
616	6	0	0	0	0	0	0	200	300	0	-33.1375	-117.889	-688.901	66537	-34640.9	3181.69	149.716	806.416	0	0	0	0	0	0	0	603	903	0
616	7	0	0	0	0	0	0	200	300	0	-33.5953	-115.906	-688.901	67177.9	-34701.9	2861.25	149.627	805.486	0	0	0	0	0	0	0	603	903	0
616	8	0	0	0	0	0	0	200	300	0	-33.9005	-115.906	-688.596	66445.4	-35007.1	2632.37	149.162	806.506	0	0	0	0	0	0	0	603	903	0
616	9	0	0	0	0	0	0	200	300	0	-33.2901	-115.295	-690.122	67269.4	-35434.3	3044.36	148.655	805.525	0	0	0	0	0	0	0	603	903	0
617	0	0	0	0	0	0	0	200	300	0	-34.9686	-113.159	-688.291	67910.3	-35068.1	3044.36	149.05	804.335	0	0	0	0	0	0	0	603	903	0
617	1	0	0	0	0	0	0	200	300	0	-32.9849	-113.617	-687.986	67544.1	-35190.2	2952.8	148.85	804.824	0	0	0	0	0	0	0	603	903	0
617	2	0	0	0	0	0	0	200	300	0	-33.5953	-112.091	-687.07	67910.3	-35312.3	2952.8	148.605	804.16	0	0	0	0	0	0	0	603	903	0
617	3	0	0	0	0	0	0	200	300	0	-34.816	-111.023	-687.681	68001.8	-35068.1	2861.25	149.005	804.114	0	0	0	0	0	0	0	603	903	0
617	4	0	0	0	0	0	0	200	300	0	-34.5108	-111.633	-687.07	67818.7	-35251.2	2815.48	148.693	804.293	0	0	0	0	0	0	0	603	903	0
617	5	0	0	0	0	0	0	200	300	0	-33.7479	-110.718	-684.934	68276.5	-35495.4	2586.59	148.177	803.317	0	0	0	0	0	0	0	603	903	0
617	6	0	0	0	0	0	0	200	300	0	-33.4427	-109.039	-684.019	68184.9	-34946	2586.59	148.911	803.317	0	0	0	0	0	0	0	603	903	0
617	7	0	0	0	0	0	0	200	300	0	-33.2901	-107.818	-684.019	68001.8	-35251.2	2678.15	148.465	803.585	0	0	0	0	0	0	0	603	903	0
617	8	0	0	0	0	0	0	200	300	0	-34.6634	-107.513	-682.493	67727.1	-35190.2	2586.59	148.439	803.765	0	0	0	0	0	0	0	603	903	0
617	9	0	0	0	0	0	0	200	300	0	-34.2056	-107.361	-682.493	68184.9	-35678.5	2678.15	147.723	803.094	0	0	0	0	0	0	0	603	903	0
618	0	0	0	0	0	0	0	200	300	0	-32.9849	-105.987	-678.831	69192	-35190.2	2449.26	148.161	801.072	0	0	0	0	0	0	0	603	903	0
618	1	0	0	0	0	0	0	200	300	0	-32.8323	-104.919	-677	68642.7	-35861.6	2266.16	147.029	801.607	0	0	0	0	0	0	0	603	903	0
618	2	0	0	0	0	0	0	200	300	0	-31.9168	-104.004	-677.915	68093.4	-35800.5	2357.71	147.19	802.555	0	0	0	0	0	0	0	603	903	0
618	3	0	0	0	0	0	0	200	300	0	-33.4427	-102.783	-675.169	67910.3	-35251.2	2311.94	147.789	802.417	0	0	0	0	0	0	0	603	903	0
618	4	0	0	0	0	0	0	200	300	0	-33.5953	-101.715	-674.863	68642.7	-35007.1	2449.26	148.127	801.286	0	0	0	0	0	0	0	603	903	0
618	5	0	0	0	0	0	0	200	300	0	-32.6797	-102.173	-673.643	68917.3	-35678.5	2266.16	147.037	800.695	0	0	0	0	0	0	0	603	903	0
618	6	0	0	0	0	0	0	200	300	0	-32.0694	-100.342	-670.286	68825.8	-35739.5	2449.26	146.68	800.319	0	0	0	0	0	0	0	603	903	0
618	7	0	0	0	0	0	0	200	300	0	-31.6116	-99.4261	-669.981	68459.6	-35251.2	2495.04	147.385	800.819	0	0	0	0	0	0	0	603	903	0
618	8	0	0	0	0	0	0	200	300	0	-32.6797	-99.2735	-669.065	68459.6	-35678.5	1945.72	146.674	800.679	0	0	0	0	0	0	0	603	903	0
618	9	0	0	0	0	0	0	200	300	0	-30.5435	-97.9002	-665.403	68184.9	-35312.3	2037.28	146.931	800.528	0	0	0	0	0	0	0	603	903	0
619	0	0	0	0	0	0	0	200	300	0	-32.222	-95.0011	-661.741	68642.7	-35373.3	2128.83	146.545	799.269	0	0	0	0	0	0	0	603	903	0
619	1	0	0	0	0	0	0	200	300	0	-31.459	-95.764	-661.741	69008.9	-35129.1	1899.95	146.914	798.716	0	0	0	0	0	0	0	603	903	0
619	2	0	0	0	0	0	0	200	300	0	-30.8487	-95.1536	-661.741	68642.7	-34946	1899.95	147.191	799.269	0	0	0	0	0	0	0	603	903	0
619	3	0	0	0	0	0	0	200	300	0	-33.1375	-94.0855	-659.605	68459.6	-34885	1899.95	147.112	799.211	0	0	0	0	0	0	0	603	903	0
619	4	0	0	0	0	0	0	200	300	0	-30.8487	-92.8648	-656.858	68368	-35007.1	1671.07	146.705	798.917	0	0	0	0	0	0	0	603	903	0
619	5	0	0	0	0	0	0	200	300	0	-32.0694	-91.339	-651.67	68551.1	-35556.4	1625.29	145.438	797.807	0	0	0	0	0	0	0	603	903	0
619	6	0	0	0	0	0	0	200	300	0	-31.1539	-89.8131	-652.28	68642.7	-35190.2	1533.74	146.051	797.765	0	0	0	0	0	0	0	603	903	0
619	7	0	0	0	0	0	0	200	300	0	-31.3065	-89.3553	-650.754	67910.3	-34824	1625.29	146.487	798.644	0	0	0	0	0	0	0	603	903	0
619	8	0	0	0	0	0	0	200	300	0	-32.8323	-88.745	-648.923	68368	-34701.9	1625.29	146.524	797.644	0	0	0	0	0	0	0	603	903	0
619	9	0	0	0	0	0	0	200	300	0	-30.0858	-87.6768	-644.346	68276.5	-34824	1533.74	145.955	797.038	0	0	0	0	0	0	0	603	903	0
620	0	0	0	0	0	0	0	200	300	0	-32.3746	-85.9984	-642.82	68184.9	-34762.9	1625.29	145.921	796.929	0	0	0	0	0	0	0	603	903	0
620	1	0	0	0	0	0	0	200	300	0	-31.9168	-83.8621	-641.294	68551.1	-34579.8	1259.08	146.078	796.105	0	0	0	0	0	0	0	603	903	0
620	2	0	0	0	0	0	0	200	300	0	-30.5435	-83.557	-638.853	67544.1	-34824	1167.53	145.49	797.273	0	0	0	0	0	0	0	603	903	0
620	3	0	0	0	0	0	0	200	300	0	-31.6116	-82.6414	-636.411	67360.9	-34885	1259.08	145.185	797.155	0	0	0	0	0	0	0	603	903	0
620	4	0	0	0	0	0	0	200	300	0	-32.222	-81.4207	-632.444	67818.7	-34640.9	1075.97	145.227	795.767	0	0	0	0	0	0	0	603	903	0
620	5	0	0	0	0	0	0	200	300	0	-30.3909	-80.6578	-628.782	67086.3	-33969.5	1213.3	145.976	796.308	0	0	0	0	0	0	0	603	903	0
620	6	0	0	0	0	0	0	200	300	0	-30.5435	-78.0638	-622.983	67818.7	-34518.8	847.092	144.591	794.139	0	0	0	0	0	0	0	603	903	0
620	7	0	0	0	0	0	0	200	300	0	-30.5435	-77.606	-625.425	66628.5	-33908.4	709.762	145.783	796.467	0	0	0	0	0	0	0	603	903	0
620	8	0	0	0	0	0	0	200	300	0	-30.2383	-77.606	-623.289	66720.1	-34030.5	847.092	145.402	795.955	0	0	0	0	0	0	0	603	903	0
620	9	0	0	0	0	0	0	200	300	0	-31.459	-76.2327	-619.627	66811.7	-34518.8	618.209	144.291	795.174	0	0	0	0	0	0	0	603	903	0
621	0	0	0	0	0	0	0	200	300	0	-29.9332	-74.8595	-615.354	66445.4	-33237.1	755.539	145.987	795.021	0	0	0	0	0	0	0	603	903	0
621	1	0	0	0	0	0	0	200	300	0	-29.3228	-72.7232	-612.302	66170.7	-33847.4	663.986	144.721	794.931	0	0	0	0	0	0	0	603	903	0
621	2	0	0	0	0	0	0	200	300	0	-30.5435	-72.8758	-609.556	66079.2	-33969.5	984.421	144.272	794.594	0	0	0	0	0	0	0	603	903	0
621	3	0	0	0	0	0	0	200	300	0	-30.5435	-73.6388	-607.114	66537	-33786.4	663.986	144.349	793.405	0	0	0	0	0	0	0	603	903	0
621	4	0	0	0	0	0	0	200	300	0	-29.0176	-71.5025	-604.063	65896.1	-33359.1	572.433	144.775	793.912	0	0	0	0	0	0	0	603	903	0
621	5	0	0	0	0	0	0	200	300	0	-29.0176	-69.6715	-596.738	65621.4	-33359.1	526.657	144.098	793.033	0	0	0	0	0	0	0	603	903	0
621	6	0	0	0	0	0	0	200	300	0	-29.1702	-69.2137	-596.738	65163.7	-33237.1	389.328	144.302	793.8	0	0	0	0	0	0	0	603	903	0
621	7	0	0	0	0	0	0	200	300	0	-29.1702	-68.1456	-593.992	64980.6	-32992.9	343.551	144.456	793.604	0	0	0	0	0	0	0	603	903	0
621	8	0	0	0	0	0	0	200	300	0	-28.5599	-67.8404	-590.33	64889	-32870.9	297.775	144.318	793.08	0	0	0	0	0	0	0	603	903	0
621	9	0	0	0	0	0	0	200	300	0	-28.2547	-66.9249	-587.583	64980.6	-33420.2	160.446	143.123	792.41	0	0	0	0	0	0	0	603	903	0
622	0	0	0	0	0	0	0	200	300	0	-28.2547	-66.7723	-582.7	64248.1	-32382.6	160.446	144.427	792.741	0	0	0	0	0	0	0	603	903	0
622	1	0	0	0	0	0	0	200	300	0	-29.1702	-65.399	-580.259	64339.7	-32199.4	480.881	144.508	792.119	0	0	0	0	0	0	0	603	903	0
622	2	0	0	0	0	0	0	200	300	0	-27.1866	-64.1783	-576.597	64248.1	-32809.8	343.551	143.097	791.574	0	0	0	0	0	0	0	603	903	0
622	3	0	0	0	0	0	0	200	300	0	-28.7125	-64.3309	-570.493	63698.8	-32565.7	114.67	142.917	791.344	0	0	0	0	0	0	0	603	903	0
622	4	0	0	0	0	0	0	200	300	0	-27.034	-63.4154	-568.357	63241.1	-31955.3	160.446	143.776	791.73	0	0	0	0	0	0	0	603	903	0
622	5	0	0	0	0	0	0	200	300	0	-27.3392	-61.8895	-564.085	62966.4	-32382.6	114.67	142.593	791.374	0	0	0	0	0	0	0	603	903	0
622	6	0	0	0	0	0	0	200	300	0	-28.4073	-61.2791	-559.812	62966.4	-32016.3	114.67	142.809	790.522	0	0	0	0	0	0	0	603	903	0
622	7	0	0	0	0	0	0	200	300	0	-27.9495	-60.8214	-556.76	62325.6	-31711.2	-68.436	143.043	791.057	0	0	0	0	0	0	0	603	903	0
622	8	0	0	0	0	0	0	200	300	0	-27.1866	-59.7533	-553.709	62325.6	-31589.1	-68.436	142.95	790.44	0	0	0	0	0	0	0	603	903	0
622	9	0	0	0	0	0	0	200	300	0	-25.8133	-59.2955	-550.046	62142.4	-31711.2	-159.989	142.348	790.023	0	0	0	0	0	0	0	603	903	0
623	0	0	0	0	0	0	0	200	300	0	-27.034	-58.0748	-542.112	61318.4	-31161.9	-343.094	142.518	789.89	0	0	0	0	0	0	0	603	903	0
623	1	0	0	0	0	0	0	200	300	0	-27.3392	-58.2274	-541.196	60769.1	-30856.7	-114.212	142.984	790.713	0	0	0	0	0	0	0	603	903	0
623	2	0	0	0	0	0	0	200	300	0	-27.3392	-56.2437	-536.619	61226.9	-30917.7	-159.989	142.384	788.902	0	0	0	0	0	0	0	603	903	0
623	3	0	0	0	0	0	0	200	300	0	-25.9659	-55.4808	-534.177	61501.6	-30551.5	-388.871	142.806	787.867	0	0	0	0	0	0	0	603	903	0
623	4	0	0	0	0	0	0	200	300	0	-25.8133	-55.786	-529.905	60586	-30429.4	-709.305	142.576	788.666	0	0	0	0	0	0	0	603	903	0
623	5	0	0	0	0	0	0	200	300	0	-27.9495	-54.4127	-525.938	60128.3	-30917.7	-388.871	141.214	788.674	0	0	0	0	0	0	0	603	903	0
623	6	0	0	0	0	0	0	200	300	0	-26.5762	-53.3446	-521.055	59853.6	-30917.7	-571.976	140.663	788.13	0	0	0	0	0	0	0	603	903	0
623	7	0	0	0	0	0	0	200	300	0	-27.7969	-52.5816	-516.477	59853.6	-30063.2	-343.094	141.792	787.112	0	0	0	0	0	0	0	603	903	0
623	8	0	0	0	0	0	0	200	300	0	-26.5762	-51.6661	-513.425	59670.5	-30368.4	-709.305	140.851	786.78	0	0	0	0	0	0	0	603	903	0
623	9	0	0	0	0	0	0	200	300	0	-25.5081	-51.3609	-508.848	58755	-29941.2	-526.2	141.159	787.533	0	0	0	0	0	0	0	603	903	0
624	0	0	0	0	0	0	0	200	300	0	-27.1866	-50.4454	-505.186	58297.2	-29697	-709.305	141.216	787.602	0	0	0	0	0	0	0	603	903	0
624	1	0	0	0	0	0	0	200	300	0	-27.7969	-49.0721	-501.524	58663.4	-29391.8	-663.529	141.395	786.03	0	0	0	0	0	0	0	603	903	0
624	2	0	0	0	0	0	0	200	300	0	-26.2711	-48.7669	-497.556	57198.6	-29574.9	-617.753	140.56	788.041	0	0	0	0	0	0	0	603	903	0
624	3	0	0	0	0	0	0	200	300	0	-26.8814	-47.2411	-493.894	57931	-29208.7	-755.082	140.86	785.706	0	0	0	0	0	0	0	603	903	0
624	4	0	0	0	0	0	0	200	300	0	-26.1185	-48.3092	-489.316	57290.1	-28903.6	-1075.52	140.931	785.918	0	0	0	0	0	0	0	603	903	0
624	5	0	0	0	0	0	0	200	300	0	-27.034	-47.0885	-485.044	56557.7	-29330.8	-1029.74	139.53	786.397	0	0	0	0	0	0	0	603	903	0
624	6	0	0	0	0	0	0	200	300	0	-27.3392	-44.7996	-481.992	57015.5	-28537.3	-1075.52	140.793	784.709	0	0	0	0	0	0	0	603	903	0
624	7	0	0	0	0	0	0	200	300	0	-26.1185	-44.9522	-479.856	56283.1	-28293.2	-938.187	141.038	785.708	0	0	0	0	0	0	0	603	903	0
624	8	0	0	0	0	0	0	200	300	0	-25.6607	-45.2574	-473.142	55092.9	-28537.3	-938.187	139.685	786.56	0	0	0	0	0	0	0	603	903	0
624	9	0	0	0	0	0	0	200	300	0	-27.1866	-44.4945	-470.09	55642.2	-28171.1	-1029.74	140.073	784.635	0	0	0	0	0	0	0	603	903	0
625	0	0	0	0	0	0	0	200	300	0	-25.3555	-42.816	-465.818	55001.3	-28049.1	-938.187	139.785	784.925	0	0	0	0	0	0	0	603	903	0
625	1	0	0	0	0	0	0	200	300	0	-27.4918	-41.7479	-461.24	55092.9	-28293.2	-1258.62	138.658	783.555	0	0	0	0	0	0	0	603	903	0
625	2	0	0	0	0	0	0	200	300	0	-25.6607	-41.4427	-458.494	54543.5	-28110.1	-1304.4	138.69	784.038	0	0	0	0	0	0	0	603	903	0
625	3	0	0	0	0	0	0	200	300	0	-25.0504	-40.0694	-456.052	53444.9	-27682.8	-1121.29	139.299	785.81	0	0	0	0	0	0	0	603	903	0
625	4	0	0	0	0	0	0	200	300	0	-27.1866	-39.3065	-449.949	54085.8	-27255.6	-1304.4	139.425	782.796	0	0	0	0	0	0	0	603	903	0
625	5	0	0	0	0	0	0	200	300	0	-26.4236	-39.1539	-446.592	53536.5	-26950.4	-1304.4	139.653	783.122	0	0	0	0	0	0	0	603	903	0
625	6	0	0	0	0	0	0	200	300	0	-26.2711	-37.628	-444.456	53261.8	-26828.4	-1212.85	139.638	783.164	0	0	0	0	0	0	0	603	903	0
625	7	0	0	0	0	0	0	200	300	0	-25.6607	-37.1703	-439.878	52895.6	-26767.3	-1487.5	139.148	782.749	0	0	0	0	0	0	0	603	903	0
625	8	0	0	0	0	0	0	200	300	0	-25.2029	-36.7125	-436.216	52254.8	-27255.6	-1350.17	137.518	783.209	0	0	0	0	0	0	0	603	903	0
625	9	0	0	0	0	0	0	200	300	0	-26.5762	-35.9496	-431.638	51797	-26767.3	-1624.83	137.987	782.999	0	0	0	0	0	0	0	603	903	0
626	0	0	0	0	0	0	0	200	300	0	-25.9659	-34.1185	-425.23	50881.4	-26706.3	-1533.28	137.196	783.344	0	0	0	0	0	0	0	603	903	0
626	1	0	0	0	0	0	0	200	300	0	-25.0504	-34.4237	-425.84	51705.4	-26584.2	-1533.28	137.572	781.58	0	0	0	0	0	0	0	603	903	0
626	2	0	0	0	0	0	0	200	300	0	-23.8297	-33.3556	-422.483	51339.2	-26218	-1579.06	137.943	781.482	0	0	0	0	0	0	0	603	903	0
626	3	0	0	0	0	0	0	200	300	0	-25.0504	-32.7452	-419.431	50606.8	-25790.8	-1258.62	138.51	782.344	0	0	0	0	0	0	0	603	903	0
626	4	0	0	0	0	0	0	200	300	0	-26.7288	-32.2874	-415.464	50515.2	-25607.7	-1487.5	138.364	781.413	0	0	0	0	0	0	0	603	903	0
626	5	0	0	0	0	0	0	200	300	0	-26.1185	-31.0667	-411.191	49691.3	-25851.8	-1624.83	137.13	782.153	0	0	0	0	0	0	0	603	903	0
626	6	0	0	0	0	0	0	200	300	0	-24.44	-30.4564	-409.36	50240.6	-25363.5	-1579.06	138.041	780.271	0	0	0	0	0	0	0	603	903	0
626	7	0	0	0	0	0	0	200	300	0	-23.8297	-29.6934	-405.088	49965.9	-24997.3	-1899.49	138.292	779.654	0	0	0	0	0	0	0	603	903	0
626	8	0	0	0	0	0	0	200	300	0	-24.5926	-29.3883	-402.952	48958.9	-25363.5	-1807.94	137.056	781.5	0	0	0	0	0	0	0	603	903	0
626	9	0	0	0	0	0	0	200	300	0	-25.5081	-28.6253	-399.595	49142	-25302.5	-1945.27	136.68	780.021	0	0	0	0	0	0	0	603	903	0
627	0	0	0	0	0	0	0	200	300	0	-25.8133	-28.015	-396.238	48592.6	-24509	-1716.39	138.146	780.365	0	0	0	0	0	0	0	603	903	0
627	1	0	0	0	0	0	0	200	300	0	-24.2874	-26.9469	-394.407	48775.7	-24997.3	-2036.82	136.621	779.331	0	0	0	0	0	0	0	603	903	0
627	2	0	0	0	0	0	0	200	300	0	-25.3555	-26.1839	-388.303	48684.2	-24997.3	-1991.04	135.624	777.623	0	0	0	0	0	0	0	603	903	0
627	3	0	0	0	0	0	0	200	300	0	-23.6771	-26.4891	-388.608	47494	-24325.9	-1991.04	137.403	780.784	0	0	0	0	0	0	0	603	903	0
627	4	0	0	0	0	0	0	200	300	0	-25.2029	-24.8106	-385.252	47219.3	-24386.9	-2082.6	136.699	780.432	0	0	0	0	0	0	0	603	903	0
627	5	0	0	0	0	0	0	200	300	0	-23.2193	-24.3529	-380.979	47402.4	-24325.9	-1945.27	136.149	778.577	0	0	0	0	0	0	0	603	903	0
627	6	0	0	0	0	0	0	200	300	0	-25.0504	-24.0477	-380.674	47310.9	-23715.6	-1945.27	137.701	778.718	0	0	0	0	0	0	0	603	903	0
627	7	0	0	0	0	0	0	200	300	0	-23.8297	-23.4373	-375.791	47127.8	-23837.6	-1807.94	136.567	777.591	0	0	0	0	0	0	0	603	903	0
627	8	0	0	0	0	0	0	200	300	0	-24.2874	-22.6744	-375.486	46761.6	-24325.9	-2311.48	135.215	778.464	0	0	0	0	0	0	0	603	903	0
627	9	0	0	0	0	0	0	200	300	0	-25.0504	-21.9115	-372.434	46853.1	-23959.7	-2082.6	135.667	777.198	0	0	0	0	0	0	0	603	903	0
628	0	0	0	0	0	0	0	200	300	0	-23.0667	-21.3011	-369.688	46029.2	-23532.5	-2174.15	136.345	778.492	0	0	0	0	0	0	0	603	903	0
628	1	0	0	0	0	0	0	200	300	0	-24.5926	-20.6908	-368.162	46120.7	-24081.8	-1991.04	134.589	777.727	0	0	0	0	0	0	0	603	903	0
628	2	0	0	0	0	0	0	200	300	0	-23.6771	-20.233	-366.636	46029.2	-23837.6	-2403.03	134.983	777.455	0	0	0	0	0	0	0	603	903	0
628	3	0	0	0	0	0	0	200	300	0	-23.2193	-19.6226	-363.584	45663	-22983.1	-2082.6	136.787	777.409	0	0	0	0	0	0	0	603	903	0
628	4	0	0	0	0	0	0	200	300	0	-24.44	-19.1649	-357.481	45296.7	-23105.2	-2174.15	135.367	776.289	0	0	0	0	0	0	0	603	903	0
628	5	0	0	0	0	0	0	200	300	0	-24.5926	-19.4701	-358.396	45846.1	-23288.3	-2403.03	135.021	775.08	0	0	0	0	0	0	0	603	903	0
628	6	0	0	0	0	0	0	200	300	0	-22.1512	-18.8597	-357.175	45663	-22800	-2357.25	136.166	775.155	0	0	0	0	0	0	0	603	903	0
628	7	0	0	0	0	0	0	200	300	0	-20.3201	-18.2494	-355.65	45022.1	-23044.2	-2265.7	135.205	776.409	0	0	0	0	0	0	0	603	903	0
628	8	0	0	0	0	0	0	200	300	0	-22.1512	-17.1812	-352.293	44839	-23105.2	-2265.7	134.415	775.722	0	0	0	0	0	0	0	603	903	0
628	9	0	0	0	0	0	0	200	300	0	-23.2193	-17.0287	-350.462	44472.7	-23288.3	-2128.37	133.55	776.102	0	0	0	0	0	0	0	603	903	0
629	0	0	0	0	0	0	0	200	300	0	-22.4564	-16.1131	-350.767	45022.1	-22494.9	-2128.37	135.869	774.647	0	0	0	0	0	0	0	603	903	0
629	1	0	0	0	0	0	0	200	300	0	-21.846	-16.2657	-346.799	44289.6	-22616.9	-2357.25	134.784	775.29	0	0	0	0	0	0	0	603	903	0
629	2	0	0	0	0	0	0	200	300	0	-21.9986	-16.5709	-346.799	44472.7	-22678	-2357.25	134.608	774.762	0	0	0	0	0	0	0	603	903	0
629	3	0	0	0	0	0	0	200	300	0	-21.2357	-14.8924	-344.358	43923.4	-22433.8	-2403.03	134.853	775.448	0	0	0	0	0	0	0	603	903	0
629	4	0	0	0	0	0	0	200	300	0	-22.1512	-14.7398	-340.391	43282.6	-21884.5	-2494.58	135.708	775.844	0	0	0	0	0	0	0	603	903	0
629	5	0	0	0	0	0	0	200	300	0	-21.2357	-13.8243	-342.222	43923.4	-22739	-2403.03	133.555	774.652	0	0	0	0	0	0	0	603	903	0
629	6	0	0	0	0	0	0	200	300	0	-20.4727	-13.3665	-339.17	43557.2	-22067.6	-2219.93	134.936	774.577	0	0	0	0	0	0	0	603	903	0
629	7	0	0	0	0	0	0	200	300	0	-18.7943	-13.5191	-336.423	43557.2	-21701.4	-2311.48	135.494	773.529	0	0	0	0	0	0	0	603	903	0
629	8	0	0	0	0	0	0	200	300	0	-19.4046	-13.5191	-335.203	43099.5	-21701.4	-2357.25	135.259	774.423	0	0	0	0	0	0	0	603	903	0
629	9	0	0	0	0	0	0	200	300	0	-21.5408	-13.214	-333.677	43282.6	-21396.2	-2540.36	135.877	773.286	0	0	0	0	0	0	0	603	903	0
630	0	0	0	0	0	0	0	200	300	0	-20.9305	-12.2984	-333.066	43282.6	-21396.2	-2311.48	135.76	773.048	0	0	0	0	0	0	0	603	903	0
630	1	0	0	0	0	0	0	200	300	0	-19.252	-11.9933	-331.541	43465.7	-21823.5	-2494.58	134.176	771.898	0	0	0	0	0	0	0	603	903	0
630	2	0	0	0	0	0	0	200	300	0	-17.2684	-12.1458	-329.099	42824.8	-22006.6	-2311.48	133.131	772.873	0	0	0	0	0	0	0	603	903	0
630	3	0	0	0	0	0	0	200	300	0	-19.7098	-11.0777	-326.963	42641.7	-21396.2	-2036.82	134.561	772.583	0	0	0	0	0	0	0	603	903	0
630	4	0	0	0	0	0	0	200	300	0	-19.8624	-11.2303	-328.184	43007.9	-21335.2	-2540.36	134.99	771.952	0	0	0	0	0	0	0	603	903	0
630	5	0	0	0	0	0	0	200	300	0	-18.9468	-11.2303	-328.184	43099.5	-21701.4	-2265.7	133.874	771.673	0	0	0	0	0	0	0	603	903	0
630	6	0	0	0	0	0	0	200	300	0	-18.1839	-10.9251	-326.658	43191	-21213.1	-2677.69	135.06	770.779	0	0	0	0	0	0	0	603	903	0
630	7	0	0	0	0	0	0	200	300	0	-18.1839	-10.1622	-323.911	42916.4	-21518.3	-2723.47	133.567	770.506	0	0	0	0	0	0	0	603	903	0
630	8	0	0	0	0	0	0	200	300	0	-18.0313	-9.70443	-324.522	42367.1	-21457.3	-2494.58	133.88	772.448	0	0	0	0	0	0	0	603	903	0
630	9	0	0	0	0	0	0	200	300	0	-16.5054	-9.55184	-324.522	42550.2	-21152.1	-2448.81	134.821	771.883	0	0	0	0	0	0	0	603	903	0
631	0	0	0	0	0	0	0	200	300	0	-17.8787	-10.0096	-321.47	42733.3	-20907.9	-2448.81	134.961	770.069	0	0	0	0	0	0	0	603	903	0
631	1	0	0	0	0	0	0	200	300	0	-17.1158	-10.1622	-321.47	42733.3	-21213.1	-2586.14	134.012	770.069	0	0	0	0	0	0	0	603	903	0
631	2	0	0	0	0	0	0	200	300	0	-17.421	-9.70443	-320.859	42367.1	-20785.9	-2448.81	135.218	770.958	0	0	0	0	0	0	0	603	903	0
631	3	0	0	0	0	0	0	200	300	0	-18.1839	-8.63632	-319.639	41726.2	-20663.8	-2448.81	135.353	772.458	0	0	0	0	0	0	0	603	903	0
631	4	0	0	0	0	0	0	200	300	0	-18.1839	-8.17855	-319.944	42000.8	-20907.9	-2631.91	134.651	771.724	0	0	0	0	0	0	0	603	903	0
631	5	0	0	0	0	0	0	200	300	0	-17.1158	-8.94149	-319.944	42367.1	-20846.9	-2631.91	134.842	770.58	0	0	0	0	0	0	0	603	903	0
631	6	0	0	0	0	0	0	200	300	0	-16.0477	-9.70443	-321.47	42733.3	-21213.1	-2357.25	134.012	770.069	0	0	0	0	0	0	0	603	903	0
631	7	0	0	0	0	0	0	200	300	0	-16.5054	-8.78891	-317.808	43191	-21274.2	-2265.7	133.06	767.097	0	0	0	0	0	0	0	603	903	0
631	8	0	0	0	0	0	0	200	300	0	-15.7425	-8.02597	-317.808	42550.2	-21030	-2631.91	133.828	769.114	0	0	0	0	0	0	0	603	903	0
631	9	0	0	0	0	0	0	200	300	0	-16.5054	-7.41561	-318.113	42641.7	-20846.9	-2677.69	134.467	768.954	0	0	0	0	0	0	0	603	903	0
632	0	0	0	0	0	0	0	200	300	0	-16.658	-6.95785	-317.503	43465.7	-21274.2	-2631.91	132.995	766.101	0	0	0	0	0	0	0	603	903	0
632	1	0	0	0	0	0	0	200	300	0	-15.5899	-8.33114	-319.334	42824.8	-21213.1	-2494.58	133.571	768.893	0	0	0	0	0	0	0	603	903	0
632	2	0	0	0	0	0	0	200	300	0	-15.2847	-7.26303	-315.671	43007.9	-20846.9	-2860.79	133.96	766.757	0	0	0	0	0	0	0	603	903	0
632	3	0	0	0	0	0	0	200	300	0	-14.9796	-6.3475	-316.892	42641.7	-21030	-2723.47	133.637	768.438	0	0	0	0	0	0	0	603	903	0
632	4	0	0	0	0	0	0	200	300	0	-16.658	-6.19491	-317.197	42733.3	-21030	-2723.47	133.701	768.279	0	0	0	0	0	0	0	603	903	0
632	5	0	0	0	0	0	0	200	300	0	-17.421	-6.65268	-317.197	43374.1	-20541.7	-2631.91	135.24	766.258	0	0	0	0	0	0	0	603	903	0
632	6	0	0	0	0	0	0	200	300	0	-15.7425	-7.41561	-317.503	43465.7	-20907.9	-2494.58	134.149	766.101	0	0	0	0	0	0	0	603	903	0
632	7	0	0	0	0	0	0	200	300	0	-14.827	-5.73715	-317.197	43557.2	-21701.4	-2586.14	131.584	765.681	0	0	0	0	0	0	0	603	903	0
632	8	0	0	0	0	0	0	200	300	0	-15.4373	-5.1268	-315.671	43374.1	-21396.2	-2860.79	132.22	765.597	0	0	0	0	0	0	0	603	903	0
632	9	0	0	0	0	0	0	200	300	0	-15.8951	-4.51644	-318.723	43648.8	-20846.9	-2723.47	134.592	766.051	0	0	0	0	0	0	0	603	903	0
633	0	0	0	0	0	0	0	200	300	0	-14.2166	-4.82162	-319.334	43557.2	-21213.1	-2815.02	133.571	766.6	0	0	0	0	0	0	0	603	903	0
633	1	0	0	0	0	0	0	200	300	0	-16.5054	-5.1268	-319.639	43831.9	-21152.1	-3135.45	133.825	765.87	0	0	0	0	0	0	0	603	903	0
633	2	0	0	0	0	0	0	200	300	0	-15.5899	-4.82162	-319.028	43740.3	-21274.2	-2860.79	133.316	765.895	0	0	0	0	0	0	0	603	903	0
633	3	0	0	0	0	0	0	200	300	0	-15.7425	-3.29574	-319.944	44472.7	-21274.2	-2998.12	133.507	763.998	0	0	0	0	0	0	0	603	903	0
633	4	0	0	0	0	0	0	200	300	0	-15.2847	-2.99057	-321.47	43740.3	-21640.4	-2723.47	132.683	766.936	0	0	0	0	0	0	0	603	903	0
633	5	0	0	0	0	0	0	200	300	0	-16.2003	-2.68539	-321.165	43740.3	-21213.1	-3455.89	133.949	766.807	0	0	0	0	0	0	0	603	903	0
633	6	0	0	0	0	0	0	200	300	0	-16.3528	-2.5328	-320.859	44289.6	-21152.1	-3227.01	134.077	764.966	0	0	0	0	0	0	0	603	903	0
633	7	0	0	0	0	0	0	200	300	0	-14.9796	-1.15951	-320.249	44655.9	-21579.3	-3043.9	132.617	763.559	0	0	0	0	0	0	0	603	903	0
633	8	0	0	0	0	0	0	200	300	0	-13.7589	-2.22763	-321.775	45388.3	-21213.1	-3135.45	134.075	761.944	0	0	0	0	0	0	0	603	903	0
633	9	0	0	0	0	0	0	200	300	0	-14.9796	-1.61727	-324.216	44747.4	-21152.1	-3227.01	134.759	764.983	0	0	0	0	0	0	0	603	903	0
634	0	0	0	0	0	0	0	200	300	0	-16.0477	-0.854335	-325.437	45113.6	-21701.4	-3043.9	133.316	764.375	0	0	0	0	0	0	0	603	903	0
634	1	0	0	0	0	0	0	200	300	0	-16.8106	-0.0913958	-325.132	45388.3	-22128.6	-3410.11	131.939	763.401	0	0	0	0	0	0	0	603	903	0
634	2	0	0	0	0	0	0	200	300	0	-14.9796	0.671544	-321.775	45205.2	-21457.3	-3410.11	133.316	762.513	0	0	0	0	0	0	0	603	903	0
634	3	0	0	0	0	0	0	200	300	0	-15.2847	1.43448	-325.742	45937.6	-21762.4	-3364.33	133.191	761.976	0	0	0	0	0	0	0	603	903	0
634	4	0	0	0	0	0	0	200	300	0	-15.7425	1.2819	-328.489	45479.8	-22067.6	-3455.89	132.821	764.548	0	0	0	0	0	0	0	603	903	0
634	5	0	0	0	0	0	0	200	300	0	-14.827	1.58707	-330.625	46029.2	-21823.5	-3547.44	133.993	763.781	0	0	0	0	0	0	0	603	903	0
634	6	0	0	0	0	0	0	200	300	0	-16.9632	2.5026	-328.489	46395.4	-21945.5	-3410.11	133.192	761.761	0	0	0	0	0	0	0	603	903	0
634	7	0	0	0	0	0	0	200	300	0	-15.4373	2.80777	-328.184	46395.4	-22189.7	-3501.66	132.386	761.63	0	0	0	0	0	0	0	603	903	0
634	8	0	0	0	0	0	0	200	300	0	-15.4373	3.11295	-331.846	46853.1	-22311.8	-3822.1	132.765	761.811	0	0	0	0	0	0	0	603	903	0
634	9	0	0	0	0	0	0	200	300	0	-16.658	4.48624	-333.066	46761.6	-22128.6	-4005.2	133.561	762.603	0	0	0	0	0	0	0	603	903	0
635	0	0	0	0	0	0	0	200	300	0	-14.064	4.79142	-334.898	46670	-22678	-3776.32	132.284	763.644	0	0	0	0	0	0	0	603	903	0
635	1	0	0	0	0	0	0	200	300	0	-17.2684	5.55436	-334.592	47402.4	-22189.7	-3776.32	133.681	761.328	0	0	0	0	0	0	0	603	903	0
635	2	0	0	0	0	0	0	200	300	0	-15.5899	6.16471	-336.423	47860.2	-22433.8	-3959.43	133.317	760.738	0	0	0	0	0	0	0	603	903	0
635	3	0	0	0	0	0	0	200	300	0	-16.0477	6.3173	-338.865	48134.9	-22861.1	-3867.87	132.536	760.953	0	0	0	0	0	0	0	603	903	0
635	4	0	0	0	0	0	0	200	300	0	-16.9632	8.14835	-338.865	47494	-22433.8	-4096.76	133.797	762.844	0	0	0	0	0	0	0	603	903	0
635	5	0	0	0	0	0	0	200	300	0	-17.7261	7.23282	-342.832	47951.8	-22739	-4188.31	133.673	763.131	0	0	0	0	0	0	0	603	903	0
635	6	0	0	0	0	0	0	200	300	0	-17.7261	8.30094	-342.527	48501.1	-23166.2	-4325.64	132.367	761.402	0	0	0	0	0	0	0	603	903	0
635	7	0	0	0	0	0	0	200	300	0	-16.3528	9.21647	-343.137	48958.9	-23166.2	-4462.97	132.487	760.32	0	0	0	0	0	0	0	603	903	0
635	8	0	0	0	0	0	0	200	300	0	-15.2847	9.67423	-347.105	49233.5	-22983.1	-4371.41	133.786	761.16	0	0	0	0	0	0	0	603	903	0
635	9	0	0	0	0	0	0	200	300	0	-16.658	9.36905	-345.884	49782.8	-23471.4	-4417.19	132.141	759.071	0	0	0	0	0	0	0	603	903	0
636	0	0	0	0	0	0	0	200	300	0	-17.5735	8.7587	-348.63	49416.6	-23166.2	-4600.3	133.551	761.255	0	0	0	0	0	0	0	603	903	0
636	1	0	0	0	0	0	0	200	300	0	-17.8787	10.8949	-350.767	50149	-23654.5	-4646.07	132.563	760.03	0	0	0	0	0	0	0	603	903	0
636	2	0	0	0	0	0	0	200	300	0	-17.1158	12.726	-352.903	49691.3	-23776.6	-4783.4	132.626	762.193	0	0	0	0	0	0	0	603	903	0
636	3	0	0	0	0	0	0	200	300	0	-16.8106	12.5734	-354.429	50423.7	-24142.8	-4783.4	131.883	760.733	0	0	0	0	0	0	0	603	903	0
636	4	0	0	0	0	0	0	200	300	0	-16.5054	12.5734	-356.87	50698.3	-23654.5	-4829.18	133.717	760.936	0	0	0	0	0	0	0	603	903	0
636	5	0	0	0	0	0	0	200	300	0	-17.7261	12.2682	-354.124	50973	-23898.7	-4829.18	132.513	759.059	0	0	0	0	0	0	0	603	903	0
636	6	0	0	0	0	0	0	200	300	0	-17.8787	13.6415	-359.617	51797	-24020.7	-4920.73	133.205	758.966	0	0	0	0	0	0	0	603	903	0
636	7	0	0	0	0	0	0	200	300	0	-17.421	14.7096	-360.532	52071.6	-23898.7	-4646.07	133.713	758.57	0	0	0	0	0	0	0	603	903	0
636	8	0	0	0	0	0	0	200	300	0	-16.658	15.0148	-364.194	52621	-24386.9	-4829.18	133.039	758.514	0	0	0	0	0	0	0	603	903	0
636	9	0	0	0	0	0	0	200	300	0	-18.4891	15.32	-365.11	53170.3	-24936.3	-5103.84	131.702	757.372	0	0	0	0	0	0	0	603	903	0
637	0	0	0	0	0	0	0	200	300	0	-18.3365	14.8622	-365.72	52895.6	-24875.2	-4829.18	131.983	758.366	0	0	0	0	0	0	0	603	903	0
637	1	0	0	0	0	0	0	200	300	0	-16.5054	16.3881	-368.772	53353.4	-24631.1	-5332.72	133.208	758.322	0	0	0	0	0	0	0	603	903	0
637	2	0	0	0	0	0	0	200	300	0	-15.4373	17.4562	-371.519	53811.1	-25119.4	-5378.49	132.387	758.159	0	0	0	0	0	0	0	603	903	0
637	3	0	0	0	0	0	0	200	300	0	-17.1158	17.914	-374.57	53994.2	-25058.3	-5058.06	133.101	758.85	0	0	0	0	0	0	0	603	903	0
637	4	0	0	0	0	0	0	200	300	0	-18.1839	17.7614	-378.538	54635.1	-25424.5	-5515.82	132.835	758.668	0	0	0	0	0	0	0	603	903	0
637	5	0	0	0	0	0	0	200	300	0	-18.4891	17.7614	-377.622	55184.4	-25241.4	-5607.38	133.157	756.863	0	0	0	0	0	0	0	603	903	0
637	6	0	0	0	0	0	0	200	300	0	-17.421	18.6769	-380.064	55916.9	-25729.7	-5653.15	132.302	755.875	0	0	0	0	0	0	0	603	903	0
637	7	0	0	0	0	0	0	200	300	0	-15.2847	19.8976	-382.505	56100	-25668.7	-5653.15	132.893	756.335	0	0	0	0	0	0	0	603	903	0
637	8	0	0	0	0	0	0	200	300	0	-17.5735	20.3554	-384.946	55825.3	-25851.8	-5653.15	132.843	757.979	0	0	0	0	0	0	0	603	903	0
637	9	0	0	0	0	0	0	200	300	0	-17.5735	19.4399	-387.388	56649.3	-26462.1	-5378.49	131.691	756.766	0	0	0	0	0	0	0	603	903	0
638	0	0	0	0	0	0	0	200	300	0	-17.5735	20.3554	-389.524	58022.6	-26157	-5470.05	132.849	754.042	0	0	0	0	0	0	0	603	903	0
638	1	0	0	0	0	0	0	200	300	0	-16.9632	19.745	-391.66	57198.6	-26034.9	-5515.82	133.527	756.959	0	0	0	0	0	0	0	603	903	0
638	2	0	0	0	0	0	0	200	300	0	-16.9632	21.7287	-394.102	58663.4	-26584.2	-5653.15	132.545	754.146	0	0	0	0	0	0	0	603	903	0
638	3	0	0	0	0	0	0	200	300	0	-17.8787	21.2709	-396.848	58571.9	-26767.3	-5882.03	132.55	755.407	0	0	0	0	0	0	0	603	903	0
638	4	0	0	0	0	0	0	200	300	0	-15.8951	21.7287	-399.9	58663.4	-26706.3	-5882.03	133.218	756.305	0	0	0	0	0	0	0	603	903	0
638	5	0	0	0	0	0	0	200	300	0	-18.0313	21.8813	-402.647	59762.1	-27072.5	-5836.26	132.764	754.577	0	0	0	0	0	0	0	603	903	0
638	6	0	0	0	0	0	0	200	300	0	-16.3528	22.4916	-403.867	60128.3	-27316.6	-6019.36	132.362	754.119	0	0	0	0	0	0	0	603	903	0
638	7	0	0	0	0	0	0	200	300	0	-16.2003	22.9494	-407.224	60494.5	-27377.7	-5882.03	132.77	754.447	0	0	0	0	0	0	0	603	903	0
638	8	0	0	0	0	0	0	200	300	0	-17.5735	20.8131	-410.276	60769.1	-27743.9	-6202.47	132.378	754.882	0	0	0	0	0	0	0	603	903	0
638	9	0	0	0	0	0	0	200	300	0	-17.5735	22.7968	-413.633	61226.9	-27866	-5744.71	132.631	754.978	0	0	0	0	0	0	0	603	903	0
639	0	0	0	0	0	0	0	200	300	0	-17.1158	22.9494	-416.379	63058	-27866	-5973.59	133.076	751.557	0	0	0	0	0	0	0	603	903	0
639	1	0	0	0	0	0	0	200	300	0	-15.2847	23.102	-418.516	62783.3	-28049.1	-5973.59	132.98	752.986	0	0	0	0	0	0	0	603	903	0
639	2	0	0	0	0	0	0	200	300	0	-15.5899	23.5597	-419.431	62691.8	-28720.5	-5744.71	131.525	753.531	0	0	0	0	0	0	0	603	903	0
639	3	0	0	0	0	0	0	200	300	0	-18.1839	23.2546	-422.178	63241.1	-28293.2	-5882.03	132.983	753.203	0	0	0	0	0	0	0	603	903	0
639	4	0	0	0	0	0	0	200	300	0	-17.7261	23.8649	-426.755	64156.6	-28293.2	-5882.03	133.702	752.664	0	0	0	0	0	0	0	603	903	0
639	5	0	0	0	0	0	0	200	300	0	-16.5054	23.4071	-430.723	64980.6	-28842.5	-6202.47	133.037	752.136	0	0	0	0	0	0	0	603	903	0
639	6	0	0	0	0	0	0	200	300	0	-15.8951	24.0175	-431.028	65529.9	-29086.7	-6156.69	132.518	750.968	0	0	0	0	0	0	0	603	903	0
639	7	0	0	0	0	0	0	200	300	0	-16.0477	24.0175	-433.469	65346.8	-29269.8	-6294.02	132.476	752.247	0	0	0	0	0	0	0	603	903	0
639	8	0	0	0	0	0	0	200	300	0	-17.5735	24.1701	-437.742	65896.1	-29819.1	-6522.9	131.88	752.464	0	0	0	0	0	0	0	603	903	0
639	9	0	0	0	0	0	0	200	300	0	-17.5735	24.7804	-440.794	65987.6	-29513.9	-6248.25	133.044	753.298	0	0	0	0	0	0	0	603	903	0
640	0	0	0	0	0	0	0	200	300	0	-15.7425	24.1701	-443.845	67635.6	-29452.9	-5653.15	133.642	750.615	0	0	0	0	0	0	0	603	903	0
640	1	0	0	0	0	0	0	200	300	0	-15.8951	24.4753	-444.761	68459.6	-29636	-6431.35	133.367	749.076	0	0	0	0	0	0	0	603	903	0
640	2	0	0	0	0	0	0	200	300	0	-16.0477	25.2382	-448.118	68368	-29636	-6522.9	133.866	750.433	0	0	0	0	0	0	0	603	903	0
640	3	0	0	0	0	0	0	200	300	0	-16.9632	23.8649	-452.085	68825.8	-29941.2	-6339.8	133.771	750.759	0	0	0	0	0	0	0	603	903	0
640	4	0	0	0	0	0	0	200	300	0	-16.9632	25.0856	-454.221	69832.9	-30185.3	-6522.9	133.545	749.258	0	0	0	0	0	0	0	603	903	0
640	5	0	0	0	0	0	0	200	300	0	-15.5899	25.2382	-455.747	69832.9	-30978.8	-6522.9	132.026	749.773	0	0	0	0	0	0	0	603	903	0
640	6	0	0	0	0	0	0	200	300	0	-15.8951	25.2382	-457.578	70931.5	-30429.4	-6202.47	133.499	747.985	0	0	0	0	0	0	0	603	903	0
640	7	0	0	0	0	0	0	200	300	0	-16.0477	24.1701	-461.851	70931.5	-30429.4	-6660.23	134.114	749.419	0	0	0	0	0	0	0	603	903	0
640	8	0	0	0	0	0	0	200	300	0	-17.421	25.696	-465.513	71572.4	-31467	-6477.13	132.404	749.25	0	0	0	0	0	0	0	603	903	0
640	9	0	0	0	0	0	0	200	300	0	-18.0313	26.1537	-467.344	72213.2	-31283.9	-6339.8	133.06	748.482	0	0	0	0	0	0	0	603	903	0
641	0	0	0	0	0	0	0	200	300	0	-15.8951	25.5434	-469.175	73220.3	-31100.8	-6843.34	133.712	746.938	0	0	0	0	0	0	0	603	903	0
641	1	0	0	0	0	0	0	200	300	0	-16.0477	25.696	-471.921	73311.9	-31894.3	-6889.11	132.416	747.652	0	0	0	0	0	0	0	603	903	0
641	2	0	0	0	0	0	0	200	300	0	-16.3528	24.933	-473.142	73220.3	-31955.3	-6751.79	132.461	748.247	0	0	0	0	0	0	0	603	903	0
641	3	0	0	0	0	0	0	200	300	0	-17.2684	26.6115	-476.194	74318.9	-31345	-6934.89	134.176	746.931	0	0	0	0	0	0	0	603	903	0
641	4	0	0	0	0	0	0	200	300	0	-17.1158	27.2218	-480.772	75051.4	-31711.2	-6889.11	134.041	746.894	0	0	0	0	0	0	0	603	903	0
641	5	0	0	0	0	0	0	200	300	0	-17.7261	27.0692	-481.992	75966.9	-32382.6	-7118	132.815	745.39	0	0	0	0	0	0	0	603	903	0
641	6	0	0	0	0	0	0	200	300	0	-16.5054	26.4589	-483.213	76241.6	-32321.5	-6980.67	133.111	745.22	0	0	0	0	0	0	0	603	903	0
641	7	0	0	0	0	0	0	200	300	0	-14.9796	27.2218	-485.349	77065.6	-32504.6	-7072.22	133.028	744.216	0	0	0	0	0	0	0	603	903	0
641	8	0	0	0	0	0	0	200	300	0	-16.3528	27.9848	-489.927	76974	-33115	-7209.55	132.408	745.887	0	0	0	0	0	0	0	603	903	0
641	9	0	0	0	0	0	0	200	300	0	-18.1839	29.2055	-493.284	77706.4	-32809.8	-7255.33	133.487	745.471	0	0	0	0	0	0	0	603	903	0
642	0	0	0	0	0	0	0	200	300	0	-17.8787	28.1374	-494.199	78347.3	-32992.9	-7118	133.24	744.466	0	0	0	0	0	0	0	603	903	0
642	1	0	0	0	0	0	0	200	300	0	-16.3528	27.0692	-498.472	79079.7	-33603.3	-7026.44	132.587	744.356	0	0	0	0	0	0	0	603	903	0
642	2	0	0	0	0	0	0	200	300	0	-16.3528	28.9003	-499.692	80178.3	-33786.4	-7255.33	132.386	742.545	0	0	0	0	0	0	0	603	903	0
642	3	0	0	0	0	0	0	200	300	0	-16.9632	29.8158	-501.829	79812.1	-33481.2	-7484.21	133.282	743.958	0	0	0	0	0	0	0	603	903	0
642	4	0	0	0	0	0	0	200	300	0	-18.1839	30.121	-506.406	80636.1	-34640.9	-7621.54	131.595	743.768	0	0	0	0	0	0	0	603	903	0
642	5	0	0	0	0	0	0	200	300	0	-18.6417	30.5788	-506.101	81551.6	-34274.7	-7713.09	132.277	741.863	0	0	0	0	0	0	0	603	903	0
642	6	0	0	0	0	0	0	200	300	0	-17.1158	29.6632	-509.763	81093.9	-34091.6	-7713.09	133.123	743.919	0	0	0	0	0	0	0	603	903	0
642	7	0	0	0	0	0	0	200	300	0	-15.7425	30.4262	-512.815	82741.8	-34274.7	-7667.32	133.164	741.652	0	0	0	0	0	0	0	603	903	0
642	8	0	0	0	0	0	0	200	300	0	-17.421	31.4943	-514.646	82558.7	-34640.9	-7896.2	132.69	742.582	0	0	0	0	0	0	0	603	903	0
642	9	0	0	0	0	0	0	200	300	0	-19.252	32.1046	-519.529	83199.6	-35251.2	-7850.42	132.148	742.856	0	0	0	0	0	0	0	603	903	0
643	0	0	0	0	0	0	0	200	300	0	-20.015	31.9521	-520.139	84481.3	-34824	-7987.75	133.049	740.579	0	0	0	0	0	0	0	603	903	0
643	1	0	0	0	0	0	0	200	300	0	-18.6417	31.0365	-523.496	84298.2	-35495.4	-7987.75	132.196	741.971	0	0	0	0	0	0	0	603	903	0
643	2	0	0	0	0	0	0	200	300	0	-18.6417	31.6469	-524.107	85488.4	-35922.6	-8033.52	131.459	739.887	0	0	0	0	0	0	0	603	903	0
643	3	0	0	0	0	0	0	200	300	0	-19.5572	31.9521	-525.938	85671.5	-35739.5	-7941.97	132.046	740.107	0	0	0	0	0	0	0	603	903	0
643	4	0	0	0	0	0	0	200	300	0	-19.7098	31.7995	-528.379	86037.7	-35922.6	-8170.85	132.014	740.167	0	0	0	0	0	0	0	603	903	0
643	5	0	0	0	0	0	0	200	300	0	-20.7779	33.4779	-532.041	86770.1	-36166.8	-8308.18	132.023	739.911	0	0	0	0	0	0	0	603	903	0
643	6	0	0	0	0	0	0	200	300	0	-19.0994	32.5624	-533.262	87685.7	-35922.6	-8445.51	132.636	738.567	0	0	0	0	0	0	0	603	903	0
643	7	0	0	0	0	0	0	200	300	0	-19.8624	33.6305	-536.314	88601.2	-36227.8	-8628.62	132.45	737.796	0	0	0	0	0	0	0	603	903	0
643	8	0	0	0	0	0	0	200	300	0	-20.1675	34.6986	-536.924	88509.6	-36349.9	-8811.72	132.3	738.154	0	0	0	0	0	0	0	603	903	0
643	9	0	0	0	0	0	0	200	300	0	-20.7779	35.0038	-540.586	88692.8	-36471.9	-8537.06	132.533	738.932	0	0	0	0	0	0	0	603	903	0
644	0	0	0	0	0	0	0	200	300	0	-21.2357	34.8512	-540.586	89791.4	-36777.1	-9040.6	131.968	736.9	0	0	0	0	0	0	0	603	903	0
644	1	0	0	0	0	0	0	200	300	0	-20.015	34.6986	-543.943	90432.2	-37204.3	-8903.27	131.602	736.747	0	0	0	0	0	0	0	603	903	0
644	2	0	0	0	0	0	0	200	300	0	-19.8624	36.8349	-545.164	90890	-37814.7	-8674.39	130.636	736.279	0	0	0	0	0	0	0	603	903	0
644	3	0	0	0	0	0	0	200	300	0	-21.3882	37.2926	-546.384	91256.2	-37021.2	-9040.6	132.243	735.982	0	0	0	0	0	0	0	603	903	0
644	4	0	0	0	0	0	0	200	300	0	-21.6934	37.4452	-550.046	91714	-37448.5	-8903.27	131.918	736.261	0	0	0	0	0	0	0	603	903	0
644	5	0	0	0	0	0	0	200	300	0	-21.846	38.5133	-551.878	92446.4	-38058.8	-9223.71	131.038	735.487	0	0	0	0	0	0	0	603	903	0
644	6	0	0	0	0	0	0	200	300	0	-21.6934	38.0556	-549.436	92537.9	-37692.6	-9315.26	131.398	734.577	0	0	0	0	0	0	0	603	903	0
644	7	0	0	0	0	0	0	200	300	0	-21.3882	38.3608	-551.878	92995.7	-37814.7	-9315.26	131.48	734.492	0	0	0	0	0	0	0	603	903	0
644	8	0	0	0	0	0	0	200	300	0	-22.1512	39.8866	-554.929	93453.5	-38608.2	-9361.04	130.427	734.594	0	0	0	0	0	0	0	603	903	0
644	9	0	0	0	0	0	0	200	300	0	-22.6089	40.8022	-557.371	93911.3	-38119.9	-9589.92	131.608	734.51	0	0	0	0	0	0	0	603	903	0
645	0	0	0	0	0	0	0	200	300	0	-23.0667	40.6496	-559.812	94643.7	-38303	-9589.92	131.579	733.937	0	0	0	0	0	0	0	603	903	0
645	1	0	0	0	0	0	0	200	300	0	-23.0667	41.5651	-559.812	95009.9	-38791.3	-9773.03	130.707	733.283	0	0	0	0	0	0	0	603	903	0
645	2	0	0	0	0	0	0	200	300	0	-20.7779	42.1754	-561.033	95833.8	-38486.1	-9818.8	131.401	732.183	0	0	0	0	0	0	0	603	903	0
645	3	0	0	0	0	0	0	200	300	0	-22.9141	41.2599	-563.169	96017	-38852.3	-10047.7	131.011	732.506	0	0	0	0	0	0	0	603	903	0
645	4	0	0	0	0	0	0	200	300	0	-23.6771	43.8539	-564.085	96383.2	-39401.6	-10185	130.149	732.133	0	0	0	0	0	0	0	603	903	0
645	5	0	0	0	0	0	0	200	300	0	-23.9822	43.7013	-567.441	96749.4	-39340.6	-9910.35	130.67	732.499	0	0	0	0	0	0	0	603	903	0
645	6	0	0	0	0	0	0	200	300	0	-23.6771	44.3117	-568.357	97207.2	-39523.7	-10139.2	130.46	731.968	0	0	0	0	0	0	0	603	903	0
645	7	0	0	0	0	0	0	200	300	0	-23.8297	45.5324	-568.967	97939.6	-39584.7	-9864.58	130.427	730.864	0	0	0	0	0	0	0	603	903	0
645	8	0	0	0	0	0	0	200	300	0	-24.5926	44.3117	-568.357	98214.2	-39889.9	-10322.3	129.815	730.196	0	0	0	0	0	0	0	603	903	0
645	9	0	0	0	0	0	0	200	300	0	-25.8133	46.4479	-573.24	98763.5	-39340.6	-10368.1	131.372	730.71	0	0	0	0	0	0	0	603	903	0
646	0	0	0	0	0	0	0	200	300	0	-25.8133	46.4479	-574.461	99495.9	-39523.7	-10368.1	131.199	729.801	0	0	0	0	0	0	0	603	903	0
646	1	0	0	0	0	0	0	200	300	0	-24.1348	47.2108	-574.766	100137	-40195.1	-10963.2	130.067	728.778	0	0	0	0	0	0	0	603	903	0
646	2	0	0	0	0	0	0	200	300	0	-25.6607	48.279	-575.986	100228	-40012	-10963.2	130.533	728.988	0	0	0	0	0	0	0	603	903	0
646	3	0	0	0	0	0	0	200	300	0	-25.2029	49.0419	-577.817	100412	-40195.1	-10780.1	130.436	729.223	0	0	0	0	0	0	0	603	903	0
646	4	0	0	0	0	0	0	200	300	0	-27.034	48.7367	-578.733	101327	-40805.4	-11054.8	129.492	727.916	0	0	0	0	0	0	0	603	903	0
646	5	0	0	0	0	0	0	200	300	0	-25.3555	48.8893	-581.785	101510	-40073	-11192.1	131.121	728.519	0	0	0	0	0	0	0	603	903	0
646	6	0	0	0	0	0	0	200	300	0	-27.7969	49.6523	-581.174	102426	-40744.4	-11146.3	129.893	726.761	0	0	0	0	0	0	0	603	903	0
646	7	0	0	0	0	0	0	200	300	0	-26.5762	51.1781	-581.785	102334	-41171.6	-11146.3	129.232	727.103	0	0	0	0	0	0	0	603	903	0
646	8	0	0	0	0	0	0	200	300	0	-26.7288	52.0937	-584.531	103341	-41537.8	-11329.4	128.938	726.207	0	0	0	0	0	0	0	603	903	0
646	9	0	0	0	0	0	0	200	300	0	-27.6443	50.11	-582.395	103158	-40805.4	-11329.4	129.935	725.873	0	0	0	0	0	0	0	603	903	0
647	0	0	0	0	0	0	0	200	300	0	-28.1021	52.0937	-587.278	103616	-41415.8	-11512.5	129.478	726.566	0	0	0	0	0	0	0	603	903	0
647	1	0	0	0	0	0	0	200	300	0	-28.8651	52.8566	-588.499	104440	-41598.9	-11329.4	129.314	725.532	0	0	0	0	0	0	0	603	903	0
647	2	0	0	0	0	0	0	200	300	0	-27.6443	54.2299	-589.414	105172	-40927.5	-11512.5	130.562	724.565	0	0	0	0	0	0	0	603	903	0
647	3	0	0	0	0	0	0	200	300	0	-27.7969	54.3825	-592.466	105538	-41415.8	-11558.3	130.096	724.866	0	0	0	0	0	0	0	603	903	0
647	4	0	0	0	0	0	0	200	300	0	-28.2547	55.298	-592.161	105813	-42026.1	-12016.1	129.029	724.31	0	0	0	0	0	0	0	603	903	0
647	5	0	0	0	0	0	0	200	300	0	-29.628	55.1454	-592.771	106179	-41782	-11970.3	129.514	723.876	0	0	0	0	0	0	0	603	903	0
647	6	0	0	0	0	0	0	200	300	0	-29.628	54.9928	-593.992	106271	-41720.9	-12153.4	129.762	724.09	0	0	0	0	0	0	0	603	903	0
647	7	0	0	0	0	0	0	200	300	0	-28.7125	56.9765	-596.738	107370	-42392.3	-12153.4	128.96	723.073	0	0	0	0	0	0	0	603	903	0
647	8	0	0	0	0	0	0	200	300	0	-29.7806	56.0609	-595.212	107736	-42636.5	-12153.4	128.368	721.996	0	0	0	0	0	0	0	603	903	0
647	9	0	0	0	0	0	0	200	300	0	-29.1702	57.1291	-598.875	107736	-42026.1	-12244.9	129.825	723.103	0	0	0	0	0	0	0	603	903	0
648	0	0	0	0	0	0	0	200	300	0	-31.3065	57.1291	-600.095	108743	-42575.4	-12244.9	129.052	721.791	0	0	0	0	0	0	0	603	903	0
648	1	0	0	0	0	0	0	200	300	0	-28.5599	57.4342	-599.485	108377	-42697.5	-12061.8	128.776	722.217	0	0	0	0	0	0	0	603	903	0
648	2	0	0	0	0	0	0	200	300	0	-31.6116	59.1127	-598.875	109658	-42514.4	-12656.9	129.01	719.893	0	0	0	0	0	0	0	603	903	0
648	3	0	0	0	0	0	0	200	300	0	-30.5435	58.8075	-602.537	109750	-42392.3	-12428.1	129.644	720.854	0	0	0	0	0	0	0	603	903	0
648	4	0	0	0	0	0	0	200	300	0	-30.2383	59.4179	-605.283	111215	-42636.5	-12336.5	129.559	719.26	0	0	0	0	0	0	0	603	903	0
648	5	0	0	0	0	0	0	200	300	0	-31.7642	59.8756	-606.504	111032	-42819.6	-12748.5	129.399	719.932	0	0	0	0	0	0	0	603	903	0
648	6	0	0	0	0	0	0	200	300	0	-31.9168	59.8756	-606.809	111123	-42636.5	-12885.8	129.737	719.873	0	0	0	0	0	0	0	603	903	0
648	7	0	0	0	0	0	0	200	300	0	-32.3746	60.6386	-607.725	111764	-43613	-12885.8	128.236	719.094	0	0	0	0	0	0	0	603	903	0
648	8	0	0	0	0	0	0	200	300	0	-32.0694	62.9274	-608.03	111489	-43368.9	-12840	128.673	719.638	0	0	0	0	0	0	0	603	903	0
648	9	0	0	0	0	0	0	200	300	0	-31.7642	62.6222	-610.776	112313	-43002.7	-13160.5	129.593	719.114	0	0	0	0	0	0	0	603	903	0
649	0	0	0	0	0	0	0	200	300	0	-33.1375	62.7748	-610.166	112771	-43552	-13206.3	128.623	718.18	0	0	0	0	0	0	0	603	903	0
649	1	0	0	0	0	0	0	200	300	0	-32.9849	62.4696	-611.692	112954	-43613	-13252	128.701	718.341	0	0	0	0	0	0	0	603	903	0
649	2	0	0	0	0	0	0	200	300	0	-33.5953	63.6903	-612.607	113961	-43796.1	-13023.2	128.509	716.973	0	0	0	0	0	0	0	603	903	0
649	3	0	0	0	0	0	0	200	300	0	-33.4427	64.7585	-614.133	113961	-43979.2	-13206.3	128.388	717.436	0	0	0	0	0	0	0	603	903	0
649	4	0	0	0	0	0	0	200	300	0	-32.9849	64.3007	-615.659	114968	-44101.3	-13252	128.367	716.26	0	0	0	0	0	0	0	603	903	0
649	5	0	0	0	0	0	0	200	300	0	-32.6797	64.7585	-616.88	115060	-43979.2	-13618.2	128.707	716.481	0	0	0	0	0	0	0	603	903	0
649	6	0	0	0	0	0	0	200	300	0	-34.9686	63.8429	-618.711	115518	-44162.4	-13664	128.622	716.293	0	0	0	0	0	0	0	603	903	0
649	7	0	0	0	0	0	0	200	300	0	-34.9686	66.5895	-617.49	116067	-43979.2	-13709.8	128.777	715.034	0	0	0	0	0	0	0	603	903	0
649	8	0	0	0	0	0	0	200	300	0	-34.6634	66.8947	-620.237	115884	-43979.2	-13847.1	129.093	716.162	0	0	0	0	0	0	0	603	903	0
649	9	0	0	0	0	0	0	200	300	0	-33.5953	67.3525	-620.237	117074	-43979.2	-13984.5	129.093	714.243	0	0	0	0	0	0	0	603	903	0
650	0	0	0	0	0	0	0	200	300	0	-35.1212	66.8947	-622.983	116799	-44894.8	-13801.4	127.936	715.516	0	0	0	0	0	0	0	603	903	0
650	1	0	0	0	0	0	0	200	300	0	-37.2574	65.9792	-622.068	117166	-44467.5	-14259.1	128.517	714.651	0	0	0	0	0	0	0	603	903	0
650	2	0	0	0	0	0	0	200	300	0	-36.4944	67.6576	-622.068	117440	-44345.5	-14167.6	128.713	714.21	0	0	0	0	0	0	0	603	903	0
650	3	0	0	0	0	0	0	200	300	0	-35.7315	69.7939	-623.289	117990	-45077.9	-14121.8	127.677	713.698	0	0	0	0	0	0	0	603	903	0
650	4	0	0	0	0	0	0	200	300	0	-35.7315	69.4887	-623.594	118630	-44772.7	-14121.8	128.202	712.763	0	0	0	0	0	0	0	603	903	0
650	5	0	0	0	0	0	0	200	300	0	-35.7315	68.8783	-624.815	118722	-44711.7	-14030.2	128.44	712.988	0	0	0	0	0	0	0	603	903	0
650	6	0	0	0	0	0	0	200	300	0	-37.7151	68.5732	-623.899	119546	-45016.8	-14076	127.846	711.389	0	0	0	0	0	0	0	603	903	0
650	7	0	0	0	0	0	0	200	300	0	-38.1729	69.6413	-625.425	119912	-44772.7	-14488	128.412	711.271	0	0	0	0	0	0	0	603	903	0
650	8	0	0	0	0	0	0	200	300	0	-37.1048	70.862	-625.425	119363	-44589.6	-14442.2	128.705	712.149	0	0	0	0	0	0	0	603	903	0
650	9	0	0	0	0	0	0	200	300	0	-37.41	71.9301	-625.425	120736	-44528.6	-14533.8	128.803	709.953	0	0	0	0	0	0	0	603	903	0
651	0	0	0	0	0	0	0	200	300	0	-38.1729	71.0146	-625.73	119821	-45505.1	-14854.2	127.277	711.511	0	0	0	0	0	0	0	603	903	0
651	1	0	0	0	0	0	0	200	300	0	-36.9522	71.3197	-626.34	120736	-44711.7	-14900	128.614	710.236	0	0	0	0	0	0	0	603	903	0
651	2	0	0	0	0	0	0	200	300	0	-38.7833	72.3879	-626.951	121102	-44711.7	-14396.4	128.684	709.839	0	0	0	0	0	0	0	603	903	0
651	3	0	0	0	0	0	0	200	300	0	-38.1729	73.6086	-627.561	121377	-45261	-14991.5	127.878	709.589	0	0	0	0	0	0	0	603	903	0
651	4	0	0	0	0	0	0	200	300	0	-39.0884	73.6086	-627.866	121835	-44711.7	-15037.3	128.788	708.954	0	0	0	0	0	0	0	603	903	0
651	5	0	0	0	0	0	0	200	300	0	-39.6988	72.9982	-623.289	121469	-44772.7	-14579.5	128.167	708.117	0	0	0	0	0	0	0	603	903	0
651	6	0	0	0	0	0	0	200	300	0	-39.8514	74.3715	-627.561	121560	-44955.8	-14991.5	128.364	709.298	0	0	0	0	0	0	0	603	903	0
651	7	0	0	0	0	0	0	200	300	0	-39.241	74.6767	-626.035	123025	-44955.8	-15083.1	128.19	706.486	0	0	0	0	0	0	0	603	903	0
651	8	0	0	0	0	0	0	200	300	0	-36.9522	75.7448	-626.646	122384	-45077.9	-14762.7	128.065	707.7	0	0	0	0	0	0	0	603	903	0
651	9	0	0	0	0	0	0	200	300	0	-39.241	75.8974	-629.087	122750	-45383.1	-15083.1	127.859	707.875	0	0	0	0	0	0	0	603	903	0
652	0	0	0	0	0	0	0	200	300	0	-40.7669	76.2026	-628.171	122933	-44894.8	-15220.4	128.531	707.3	0	0	0	0	0	0	0	603	903	0
652	1	0	0	0	0	0	0	200	300	0	-40.6143	76.2026	-628.171	123117	-44955.8	-15540.9	128.434	707.008	0	0	0	0	0	0	0	603	903	0
652	2	0	0	0	0	0	0	200	300	0	-40.3091	77.1181	-626.646	123391	-45505.1	-15632.4	127.383	706.092	0	0	0	0	0	0	0	603	903	0
652	3	0	0	0	0	0	0	200	300	0	-40.3091	78.0336	-626.951	123666	-45261	-15540.9	127.808	705.75	0	0	0	0	0	0	0	603	903	0
652	4	0	0	0	0	0	0	200	300	0	-41.2247	77.1181	-627.866	123666	-44772.7	-15907.1	128.691	706.038	0	0	0	0	0	0	0	603	903	0
652	5	0	0	0	0	0	0	200	300	0	-40.1566	79.1017	-626.035	123574	-45505.1	-15678.2	127.312	705.608	0	0	0	0	0	0	0	603	903	0
652	6	0	0	0	0	0	0	200	300	0	-41.2247	78.644	-626.646	124398	-45261	-15540.9	127.773	704.485	0	0	0	0	0	0	0	603	903	0
652	7	0	0	0	0	0	0	200	300	0	-40.7669	79.7121	-624.815	124764	-45138.9	-15678.2	127.756	703.318	0	0	0	0	0	0	0	603	903	0
652	8	0	0	0	0	0	0	200	300	0	-41.3773	80.6276	-622.373	124124	-45261	-15769.7	127.277	703.564	0	0	0	0	0	0	0	603	903	0
652	9	0	0	0	0	0	0	200	300	0	-42.2928	79.5595	-623.594	123941	-45200	-15907.1	127.517	704.248	0	0	0	0	0	0	0	603	903	0
653	0	0	0	0	0	0	0	200	300	0	-42.598	82.3061	-623.594	124398	-44650.6	-15678.2	128.398	703.514	0	0	0	0	0	0	0	603	903	0
653	1	0	0	0	0	0	0	200	300	0	-40.1566	81.3905	-622.983	124673	-45138.9	-15861.3	127.544	702.878	0	0	0	0	0	0	0	603	903	0
653	2	0	0	0	0	0	0	200	300	0	-41.5298	82.4587	-621.763	124764	-45077.9	-16227.5	127.5	702.338	0	0	0	0	0	0	0	603	903	0
653	3	0	0	0	0	0	0	200	300	0	-41.835	82.6112	-619.932	124307	-44467.5	-16273.3	128.27	702.483	0	0	0	0	0	0	0	603	903	0
653	4	0	0	0	0	0	0	200	300	0	-43.6661	83.9845	-619.932	124032	-44650.6	-16273.3	127.975	702.926	0	0	0	0	0	0	0	603	903	0
653	5	0	0	0	0	0	0	200	300	0	-43.8187	84.4423	-619.016	124398	-44711.7	-16547.9	127.77	702.039	0	0	0	0	0	0	0	603	903	0
653	6	0	0	0	0	0	0	200	300	0	-41.9876	84.1371	-618.406	125222	-44528.6	-16410.6	127.995	700.508	0	0	0	0	0	0	0	603	903	0
653	7	0	0	0	0	0	0	200	300	0	-42.1402	85.5104	-616.88	124948	-44650.6	-16273.3	127.619	700.452	0	0	0	0	0	0	0	603	903	0
653	8	0	0	0	0	0	0	200	300	0	-41.5298	84.9001	-611.997	124673	-45077.9	-16914.1	126.343	699.285	0	0	0	0	0	0	0	603	903	0
653	9	0	0	0	0	0	0	200	300	0	-42.4454	88.4096	-614.133	124307	-44650.6	-16685.3	127.295	700.59	0	0	0	0	0	0	0	603	903	0
654	0	0	0	0	0	0	0	200	300	0	-42.598	88.4096	-614.744	124764	-43857.2	-16731	128.658	700.046	0	0	0	0	0	0	0	603	903	0
654	1	0	0	0	0	0	0	200	300	0	-42.9031	88.1044	-612.607	124581	-44345.5	-16593.7	127.612	699.637	0	0	0	0	0	0	0	603	903	0
654	2	0	0	0	0	0	0	200	300	0	-43.0557	89.3251	-610.471	124215	-44467.5	-16776.8	127.159	699.526	0	0	0	0	0	0	0	603	903	0
654	3	0	0	0	0	0	0	200	300	0	-44.1238	89.1725	-606.809	124398	-43979.2	-16502.2	127.524	697.996	0	0	0	0	0	0	0	603	903	0
654	4	0	0	0	0	0	0	200	300	0	-43.8187	91.4613	-606.504	123941	-43796.1	-16914.1	127.789	698.648	0	0	0	0	0	0	0	603	903	0
654	5	0	0	0	0	0	0	200	300	0	-43.2083	92.2243	-605.894	124581	-44345.5	-17051.5	126.81	697.384	0	0	0	0	0	0	0	603	903	0
654	6	0	0	0	0	0	0	200	300	0	-41.5298	91.4613	-603.147	124124	-43307.9	-17051.5	128.197	697.207	0	0	0	0	0	0	0	603	903	0
654	7	0	0	0	0	0	0	200	300	0	-42.4454	92.2243	-601.316	123300	-43307.9	-17005.7	127.978	697.95	0	0	0	0	0	0	0	603	903	0
654	8	0	0	0	0	0	0	200	300	0	-44.2764	93.5976	-598.875	123849	-43613	-17326.1	127.175	696.197	0	0	0	0	0	0	0	603	903	0
654	9	0	0	0	0	0	0	200	300	0	-43.9713	94.3605	-597.959	123757	-42880.6	-17463.5	128.288	696.034	0	0	0	0	0	0	0	603	903	0
655	0	0	0	0	0	0	0	200	300	0	-42.598	95.5812	-596.738	123483	-43124.8	-17143	127.733	696.07	0	0	0	0	0	0	0	603	903	0
655	1	0	0	0	0	0	0	200	300	0	-42.2928	94.9709	-594.907	123117	-42880.6	-17417.7	127.921	696.049	0	0	0	0	0	0	0	603	903	0
655	2	0	0	0	0	0	0	200	300	0	-42.1402	93.9027	-593.687	122384	-42880.6	-17555	127.772	696.857	0	0	0	0	0	0	0	603	903	0
655	3	0	0	0	0	0	0	200	300	0	-43.3609	96.6493	-589.414	122476	-42697.5	-17417.7	127.559	695.208	0	0	0	0	0	0	0	603	903	0
655	4	0	0	0	0	0	0	200	300	0	-44.1238	98.1752	-586.668	122384	-42392.3	-17509.2	127.74	694.391	0	0	0	0	0	0	0	603	903	0
655	5	0	0	0	0	0	0	200	300	0	-42.9031	98.3278	-587.278	121652	-42514.4	-17097.2	127.608	695.855	0	0	0	0	0	0	0	603	903	0
655	6	0	0	0	0	0	0	200	300	0	-43.2083	97.7174	-583.311	121560	-42026.1	-17646.6	127.952	694.603	0	0	0	0	0	0	0	603	903	0
655	7	-1.84263	-1.48148	-11.1203	526.151	926.277	821.593	283.296	252.686	0	-43.6661	96.8019	-580.564	120645	-41598.9	-17646.6	128.347	695.194	0	0	0	0	0	0	0	603	903	0
655	8	-2.30039	5.69015	-23.3273	1899.44	2208.02	1599.79	294.654	218.574	0	-43.0557	98.3278	-577.817	120553	-41965.1	-17738.1	127.373	694.365	0	0	0	0	0	0	0	603	903	0
655	9	4.1083	11.6411	-31.2619	2814.97	2940.44	2332.21	294.058	209.955	0	-41.835	100.006	-575.376	121377	-41049.6	-17875.4	128.656	692.047	0	0	0	0	0	0	0	603	903	0
656	0	7.00747	14.0825	-37.9758	3364.29	3245.61	2469.54	285.465	211.41	0	-40.3091	99.5485	-573.85	120736	-40988.5	-17188.8	128.573	692.603	0	0	0	0	0	0	0	603	903	0
656	1	3.04019	18.0498	-39.8068	4279.82	3672.86	3064.64	292.267	192.485	0	-41.835	99.5485	-568.662	120370	-41110.6	-17967	127.706	691.328	0	0	0	0	0	0	0	603	903	0
656	2	3.19278	21.5593	-44.9948	3913.6	3855.97	3064.64	285.698	213.021	0	-42.7505	99.8537	-568.357	119454	-40256.1	-17967	129.171	692.825	0	0	0	0	0	0	0	603	903	0
656	3	1.6669	21.4067	-53.8449	4188.26	4100.11	2973.08	276.147	222.216	0	-42.4454	100.006	-565.305	119912	-40500.2	-17829.7	128.357	690.881	0	0	0	0	0	0	0	603	903	0
656	4	3.49795	22.6274	-55.3708	5012.24	4954.6	3293.52	289.48	209.479	0	-41.0721	100.922	-562.559	119180	-40683.4	-17783.9	127.682	691.147	0	0	0	0	0	0	0	603	903	0
656	5	4.56607	22.6274	-63.9157	5378.45	5870.13	3522.4	291.842	215.851	0	-41.2247	101.38	-558.591	118539	-40317.1	-17829.7	127.824	690.79	0	0	0	0	0	0	0	603	903	0
656	6	8.83853	24.9162	-69.7141	5927.76	6114.27	3568.18	287.705	214.97	0	-40.9195	102.905	-556.455	118173	-39889.9	-17829.7	128.314	690.633	0	0	0	0	0	0	0	603	903	0
656	7	8.22818	25.6792	-75.8176	5927.76	6724.62	3980.16	288.695	221.815	0	-40.6143	101.685	-551.878	117715	-39950.9	-17829.7	127.609	689.701	0	0	0	0	0	0	0	603	903	0
656	8	7.16006	24.7636	-84.3625	7667.27	7212.9	4209.04	285.499	209.115	0	-40.6143	101.532	-550.046	117898	-39096.4	-17692.3	128.922	688.658	0	0	0	0	0	0	0	603	903	0
656	9	10.517	24.6111	-89.8557	8125.03	7823.25	4300.6	287.065	209.577	0	-39.3936	102.753	-546.69	117623	-38669.2	-17967	129.267	687.844	0	0	0	0	0	0	0	603	903	0
657	0	11.8903	22.9326	-97.7902	9223.66	8433.61	4575.25	286.242	205.679	0	-39.241	101.837	-542.417	116433	-38425	-17921.2	129.16	688.344	0	0	0	0	0	0	0	603	903	0
657	1	11.1273	23.3903	-106.335	10230.7	8921.89	3842.83	283.903	203.788	0	-39.0884	103.211	-541.196	116250	-38303	-17463.5	129.225	688.198	0	0	0	0	0	0	0	603	903	0
657	2	11.2799	19.5757	-112.744	10505.4	9166.03	3842.83	281.3	206.821	0	-39.0884	103.668	-536.619	115152	-37936.8	-17921.2	129.304	688.413	0	0	0	0	0	0	0	603	903	0
657	3	9.1437	17.592	-118.237	10047.6	9532.24	3293.52	280.62	215.021	0	-37.7151	103.058	-531.736	115152	-37631.6	-17921.2	129.229	686.442	0	0	0	0	0	0	0	603	903	0
657	4	9.1437	16.9817	-124.341	11237.8	10020.5	2973.08	280.589	209.621	0	-35.7315	103.516	-528.379	114511	-37753.7	-17509.2	128.548	686.279	0	0	0	0	0	0	0	603	903	0
657	5	13.2636	11.4885	-128.308	11695.6	10630.9	3110.41	282.854	208.847	0	-35.8841	103.974	-525.022	113778	-37021.2	-17555	129.486	686.289	0	0	0	0	0	0	0	603	903	0
657	6	12.6532	8.28415	-133.191	12702.7	10630.9	2744.2	279.817	204.628	0	-37.41	104.279	-523.496	112680	-36349.9	-17417.7	130.563	687.756	0	0	0	0	0	0	0	603	903	0
657	7	12.0429	5.84274	-135.937	13343.5	11912.6	2652.65	287.633	201.84	0	-36.9522	103.821	-518.613	113046	-37021.2	-17463.5	128.615	685.023	0	0	0	0	0	0	0	603	903	0
657	8	13.5688	4.46945	-141.736	13618.2	11668.5	2744.2	282.326	203.918	0	-34.6634	101.685	-514.646	112130	-36716.1	-17463.5	128.658	685.122	0	0	0	0	0	0	0	603	903	0
657	9	12.6532	1.87546	-146.313	14899.9	11485.4	2561.09	278.499	198.164	0	-33.7479	104.431	-509.153	110848	-35739.5	-17463.5	129.806	685.289	0	0	0	0	0	0	0	603	903	0
658	0	12.5006	-1.1763	-153.332	14625.3	12461.9	2515.32	281.274	204.617	0	-35.2737	105.347	-504.575	110299	-35312.3	-17463.5	130.016	684.402	0	0	0	0	0	0	0	603	903	0
658	1	14.6369	-5.14359	-156.994	14442.2	12523	2240.66	279.767	208.008	0	-34.6634	104.736	-500.913	109567	-35312.3	-17234.6	129.504	684.266	0	0	0	0	0	0	0	603	903	0
658	2	14.7895	-4.83841	-160.046	15266.1	12339.9	1966	277.102	204.614	0	-32.8323	103.668	-497.251	109841	-34762.9	-16914.1	130.09	682.103	0	0	0	0	0	0	0	603	903	0
658	3	13.4162	-7.58499	-165.844	15907	13560.6	1828.67	281.767	204.085	0	-32.0694	104.126	-492.673	108285	-34152.6	-17234.6	130.679	683.209	0	0	0	0	0	0	0	603	903	0
658	4	12.348	-10.3316	-170.117	17188.8	13316.4	1874.45	278.278	198.959	0	-32.5272	104.126	-487.485	107186	-34274.7	-16959.9	129.691	683.124	0	0	0	0	0	0	0	603	903	0
658	5	13.111	-10.9419	-174.389	17280.3	13682.6	1691.34	278.46	200.91	0	-29.628	105.499	-482.603	106912	-33969.5	-16914.1	129.612	681.469	0	0	0	0	0	0	0	603	903	0
[truncated: 2,284 more rows]
