# Supplementary material for: The Effects of an Extemporaneous Speech Dual-task on Older Adult Gait Control
Source: Research Square preprint supplement (doi:10.21203/rs.3.rs-7674245/v1), 2025-11-18
Supplement: Supplementary file 143 [file Over2ground06.xlsx]

## Sheet: Sheet1
Trajectories
		02:LFHD			02:RFHD			02:LBHD			02:RBHD			02:C7			02:T10			02:CLAV			02:STRN			02:RBAK			02:LSHO			02:LUPA			02:LELB			02:LFRM			02:LWRA			02:LWRB			02:LFIN
Frame	Sub Frame	X	Y	Z	X	Y	Z	X	Y	Z	X	Y	Z	X	Y	Z	X	Y	Z	X	Y	Z	X	Y	Z	X	Y	Z	X	Y	Z	X	Y	Z	X	Y	Z	X	Y	Z	X	Y	Z	X	Y	Z	X	Y	Z
		mm	mm	mm	mm	mm	mm	mm	mm	mm	mm	mm	mm	mm	mm	mm	mm	mm	mm	mm	mm	mm	mm	mm	mm	mm	mm	mm	mm	mm	mm	mm	mm	mm	mm	mm	mm	mm	mm	mm	mm	mm	mm	mm	mm	mm	mm	mm	mm
537	0	184.603	-2484.19	1536.93	283.399	-2472.37	1534.07	190.954	-2656.94	1565.59	299.543	-2652.91	1564.55	249.658	-2696.2	1378.29	225.061	-2734.34	1162.07	238.667	-2561.3	1315.21	240.152	-2494.59	1189.57	324.039	-2756.91	1206.9	72.5733	-2637.38	1344.74	8.98164	-2615.73	1121.96	2.93259	-2613.17	1053.11	-3.2754	-2493.79	994.612	21.8419	-2430.78	913.089	-26.4853	-2471.2	878.026	-38.1464	-2376.84	841.616
538	0	185.369	-2470.62	1539.92	284.116	-2458.77	1536.99	191.668	-2643.28	1569.3	300.366	-2639.32	1568.18	250.675	-2683.38	1382.01	226.625	-2722.02	1165.24	238.969	-2548.45	1318.59	239.828	-2482.12	1192.2	325.29	-2743.09	1210.09	73.1954	-2625.54	1348.24	10.6892	-2603.63	1124.73	5.10598	-2602.01	1055.7	-0.83073	-2483.62	995.759	24.495	-2422.46	912.97	-24.2542	-2462.76	878.454	-34.4038	-2370.2	838.995
539	0	186.053	-2457.17	1542.88	284.753	-2445.31	1539.88	192.311	-2629.75	1572.93	301.118	-2625.85	1571.76	251.656	-2670.66	1385.69	228.17	-2709.86	1168.46	239.261	-2535.72	1321.96	239.528	-2469.77	1194.89	326.549	-2729.46	1213.33	73.7974	-2613.82	1351.67	12.3698	-2591.92	1127.45	7.26028	-2591.22	1058.26	1.48957	-2473.85	996.858	27.0055	-2414.49	912.86	-22.1198	-2454.73	878.926	-30.8156	-2364	836.474
540	0	186.656	-2443.84	1545.79	285.31	-2431.98	1542.75	192.884	-2616.34	1576.5	301.8	-2612.49	1575.28	252.6	-2658.03	1389.32	229.698	-2697.83	1171.73	239.543	-2523.09	1325.29	239.252	-2457.56	1197.65	327.816	-2716.01	1216.63	74.3794	-2602.2	1355	14.0238	-2580.62	1130.11	9.39546	-2580.81	1060.8	3.68558	-2464.48	997.909	29.3736	-2406.87	912.76	-20.0818	-2447.13	879.44	-27.3822	-2358.26	834.053
541	0	187.178	-2430.64	1548.65	285.788	-2418.78	1545.59	193.387	-2603.07	1579.99	302.413	-2599.24	1578.76	253.508	-2645.49	1392.9	231.207	-2685.95	1175.05	239.815	-2510.57	1328.61	239.002	-2445.47	1200.48	329.09	-2702.75	1219.97	74.9421	-2590.68	1358.25	15.6513	-2569.71	1132.72	11.5114	-2570.77	1063.32	5.75757	-2455.51	998.912	31.5992	-2399.59	912.668	-18.1389	-2439.94	879.996	-24.1052	-2352.97	831.732
542	0	187.621	-2417.57	1551.46	286.187	-2405.71	1548.41	193.822	-2589.92	1583.4	302.956	-2586.11	1582.18	254.381	-2633.05	1396.43	232.695	-2674.21	1178.41	240.078	-2498.15	1331.89	238.781	-2433.5	1203.36	330.371	-2689.67	1223.35	75.4867	-2579.27	1361.4	17.2528	-2559.2	1135.28	13.608	-2561.1	1065.8	7.70616	-2446.93	999.864	33.6829	-2392.67	912.583	-16.2889	-2433.17	880.588	-20.9875	-2348.13	829.511
543	0	187.986	-2404.62	1554.23	286.51	-2392.77	1551.19	194.189	-2576.9	1586.72	303.433	-2573.09	1585.53	255.22	-2620.69	1399.89	234.162	-2662.59	1181.8	240.335	-2485.84	1335.13	238.594	-2421.64	1206.28	331.66	-2676.77	1226.77	76.0156	-2567.95	1364.45	18.8292	-2549.09	1137.77	15.6847	-2551.79	1068.25	9.53248	-2438.75	1000.76	35.6251	-2386.09	912.499	-14.5276	-2426.82	881.209	-18.0334	-2343.73	827.389
544	0	188.275	-2391.79	1556.93	286.759	-2379.96	1553.94	194.49	-2564.01	1589.95	303.845	-2560.19	1588.81	256.026	-2608.41	1403.29	235.604	-2651.07	1185.2	240.586	-2473.63	1338.33	238.446	-2409.89	1209.24	332.955	-2664.03	1230.2	76.5315	-2556.72	1367.4	20.3821	-2539.36	1140.19	17.7413	-2542.85	1070.67	11.2383	-2430.96	1001.6	37.4272	-2379.85	912.41	-12.8492	-2420.89	881.849	-15.2487	-2339.76	825.366
545	0	188.493	-2379.09	1559.57	286.937	-2367.27	1556.64	194.731	-2551.25	1593.07	304.197	-2547.4	1592.01	256.803	-2596.22	1406.6	237.02	-2639.65	1188.6	240.834	-2461.51	1341.46	238.342	-2398.23	1212.21	334.256	-2651.46	1233.63	77.0381	-2545.57	1370.24	21.913	-2530	1142.54	19.7773	-2534.27	1073.03	12.8264	-2423.55	1002.36	39.091	-2373.94	912.308	-11.2457	-2415.37	882.493	-12.6404	-2336.21	823.436
546	0	188.644	-2366.52	1562.14	287.049	-2354.71	1559.29	194.913	-2538.61	1596.06	304.492	-2534.73	1595.09	257.553	-2584.1	1409.81	238.407	-2628.3	1191.95	241.082	-2449.48	1344.5	238.287	-2386.64	1215.17	335.561	-2639.02	1237.03	77.5394	-2534.48	1372.94	23.4242	-2521	1144.79	21.7926	-2526.02	1075.33	14.3002	-2416.51	1003.05	40.619	-2368.37	912.179	-9.70724	-2410.25	883.123	-10.2158	-2333.07	821.594
547	0	188.732	-2354.06	1564.62	287.1	-2342.27	1561.86	195.043	-2526.1	1598.91	304.736	-2522.16	1598.06	258.28	-2572.05	1412.91	239.765	-2616.99	1195.23	241.332	-2437.53	1347.45	238.285	-2375.11	1218.08	336.87	-2626.72	1240.37	78.0395	-2523.46	1375.51	24.9183	-2512.33	1146.95	23.7871	-2518.1	1077.56	15.6646	-2409.84	1003.64	42.0148	-2363.12	912.01	-8.22232	-2405.54	883.716	-7.98236	-2330.31	819.831
548	0	188.765	-2341.72	1566.99	287.097	-2329.94	1564.35	195.126	-2513.7	1601.59	304.935	-2509.71	1600.87	258.987	-2560.05	1415.86	241.097	-2605.7	1198.4	241.585	-2425.65	1350.26	238.338	-2363.62	1220.91	338.182	-2614.52	1243.62	78.5425	-2512.48	1377.9	26.3978	-2503.98	1148.99	25.7611	-2510.49	1079.7	16.9252	-2403.53	1004.13	43.2829	-2358.18	911.783	-6.77834	-2401.23	884.247	-5.94632	-2327.9	818.134
549	0	188.749	-2329.5	1569.25	287.048	-2317.71	1566.74	195.169	-2501.43	1604.08	305.095	-2497.36	1603.51	259.678	-2548.1	1418.64	242.406	-2594.42	1201.42	241.844	-2413.84	1352.92	238.444	-2352.15	1223.63	339.495	-2602.4	1246.73	79.0515	-2501.54	1380.12	27.8656	-2495.91	1150.89	27.7154	-2503.15	1081.72	18.0891	-2397.54	1004.5	44.4289	-2353.53	911.479	-5.36193	-2397.29	884.691	-4.1124	-2325.83	816.488
550	0	188.692	-2317.39	1571.37	286.959	-2305.59	1568.99	195.177	-2489.26	1606.36	305.224	-2485.11	1605.94	260.358	-2536.19	1421.24	243.698	-2583.12	1204.25	242.11	-2402.08	1355.38	238.6	-2340.7	1226.18	340.808	-2590.35	1249.67	79.5691	-2490.63	1382.14	29.3242	-2488.09	1152.64	29.6508	-2496.06	1083.62	19.1642	-2391.87	1004.73	45.4595	-2349.17	911.079	-3.95947	-2393.73	885.022	-2.48291	-2324.06	814.877
551	0	188.601	-2305.38	1573.33	286.839	-2293.55	1571.1	195.159	-2477.19	1608.4	305.327	-2472.95	1608.15	261.028	-2524.31	1423.62	244.98	-2571.8	1206.85	242.381	-2390.37	1357.63	238.798	-2329.24	1228.54	342.117	-2578.35	1252.41	80.0964	-2479.73	1383.94	30.7762	-2480.47	1154.21	31.5687	-2489.18	1085.38	20.1596	-2386.48	1004.8	46.3825	-2345.07	910.561	-2.55758	-2390.51	885.214	-1.05726	-2322.57	813.279
552	0	188.485	-2293.47	1575.11	286.697	-2281.6	1573.04	195.121	-2465.21	1610.18	305.413	-2460.88	1610.11	261.691	-2512.45	1425.75	246.258	-2560.46	1209.18	242.658	-2378.7	1359.64	239.03	-2317.78	1230.66	343.419	-2566.39	1254.9	80.6332	-2468.84	1385.51	32.2233	-2473.02	1155.6	33.4703	-2482.48	1086.96	21.0848	-2381.35	1004.7	47.2067	-2341.21	909.906	-1.14364	-2387.62	885.245	0.168463	-2321.32	811.674
553	0	188.351	-2281.64	1576.69	286.538	-2269.71	1574.77	195.07	-2453.31	1611.68	305.487	-2448.89	1611.8	262.348	-2500.6	1427.63	247.537	-2549.08	1211.23	242.939	-2367.05	1361.38	239.285	-2306.32	1232.49	344.708	-2554.44	1257.12	81.1774	-2457.94	1386.82	33.6669	-2465.69	1156.79	35.3569	-2475.91	1088.37	21.9501	-2376.45	1004.42	47.9417	-2337.59	909.094	0.293769	-2385.03	885.095	1.20172	-2320.28	810.043
554	0	188.206	-2269.89	1578.05	286.372	-2257.89	1576.29	195.012	-2441.49	1612.88	305.554	-2436.96	1613.19	262.998	-2488.75	1429.22	248.82	-2537.68	1212.96	243.221	-2355.43	1362.82	239.549	-2294.85	1234.02	345.976	-2542.51	1259.04	81.7255	-2447.03	1387.87	35.1072	-2458.43	1157.75	37.2295	-2469.43	1089.58	22.7656	-2371.74	1003.95	48.5979	-2334.16	908.109	1.76436	-2382.72	884.753	2.05353	-2319.44	808.364
555	0	188.057	-2258.21	1579.17	286.205	-2246.1	1577.57	194.952	-2429.71	1613.78	305.619	-2425.09	1614.27	263.639	-2476.9	1430.51	250.105	-2526.26	1214.36	243.5	-2343.82	1363.94	239.811	-2283.38	1235.2	347.214	-2530.58	1260.64	82.272	-2436.11	1388.63	36.5433	-2451.21	1158.49	39.0888	-2463	1090.57	23.5411	-2367.19	1003.27	49.1857	-2330.91	906.939	3.27571	-2380.64	884.209	2.73841	-2318.76	806.621
556	0	187.907	-2246.57	1580.04	286.041	-2234.35	1578.59	194.896	-2417.98	1614.36	305.686	-2413.26	1615.03	264.267	-2465.03	1431.5	251.389	-2514.82	1215.42	243.772	-2332.21	1364.74	240.056	-2271.92	1236.03	348.409	-2518.65	1261.9	82.8103	-2425.16	1389.12	37.9731	-2443.97	1158.98	40.9342	-2456.57	1091.34	24.2857	-2362.76	1002.38	49.7159	-2327.82	905.572	4.83289	-2378.77	883.461	3.27411	-2318.22	804.798
557	0	187.762	-2234.96	1580.64	285.886	-2222.63	1579.33	194.847	-2406.28	1614.62	305.756	-2401.47	1615.46	264.878	-2453.14	1432.16	252.661	-2503.39	1216.13	244.033	-2320.61	1365.2	240.273	-2260.46	1236.47	349.55	-2506.72	1262.82	83.3321	-2414.17	1389.31	39.3928	-2436.68	1159.23	42.7643	-2450.1	1091.88	25.0073	-2358.41	1001.28	50.1991	-2324.85	904.004	6.43804	-2377.06	882.515	3.68125	-2317.8	802.887
558	0	187.622	-2223.37	1580.96	285.742	-2210.91	1579.78	194.807	-2394.6	1614.56	305.831	-2389.7	1615.55	265.462	-2441.23	1432.5	253.907	-2491.97	1216.5	244.275	-2309	1365.32	240.451	-2249.02	1236.53	350.62	-2494.8	1263.38	83.8284	-2403.15	1389.22	40.7971	-2429.31	1159.24	44.5767	-2443.56	1092.19	25.7122	-2354.1	999.973	50.6452	-2321.98	902.233	8.09019	-2375.48	881.381	3.98282	-2317.49	800.88
559	0	187.49	-2211.79	1581.01	285.611	-2199.2	1579.93	194.776	-2382.92	1614.18	305.909	-2377.94	1615.31	266.013	-2429.29	1432.52	255.109	-2480.57	1216.54	244.492	-2297.38	1365.1	240.58	-2237.59	1236.2	351.606	-2482.88	1263.6	84.2893	-2392.07	1388.85	42.1791	-2421.8	1158.99	46.3672	-2436.91	1092.26	26.4049	-2349.79	998.459	51.0635	-2319.17	900.264	9.78512	-2373.96	880.074	4.20367	-2317.26	798.776
560	0	187.366	-2200.2	1580.77	285.492	-2187.48	1579.78	194.753	-2371.23	1613.49	305.989	-2366.18	1614.74	266.52	-2417.32	1432.22	256.248	-2469.2	1216.27	244.678	-2285.74	1364.54	240.653	-2226.17	1235.49	352.491	-2470.98	1263.48	84.7042	-2380.93	1388.19	43.5304	-2414.15	1158.51	48.1303	-2430.11	1092.1	27.0878	-2345.45	996.75	51.4622	-2316.39	898.104	11.5154	-2372.48	878.617	4.3698	-2317.09	796.578
561	0	187.246	-2188.58	1580.25	285.386	-2175.74	1579.33	194.736	-2359.52	1612.51	306.066	-2354.41	1613.86	266.973	-2405.31	1431.62	257.298	-2457.88	1215.7	244.825	-2274.08	1363.65	240.664	-2214.76	1234.43	353.26	-2459.08	1263.03	85.0628	-2369.72	1387.27	44.8409	-2406.32	1157.8	49.8587	-2423.13	1091.72	27.7611	-2341.03	994.857	51.8484	-2313.61	895.767	13.2707	-2370.97	877.032	4.50763	-2316.96	794.292
562	0	187.13	-2176.93	1579.46	285.288	-2163.97	1578.59	194.72	-2347.78	1611.25	306.135	-2342.63	1612.69	267.361	-2393.28	1430.72	258.237	-2446.61	1214.85	244.927	-2262.38	1362.46	240.608	-2203.35	1233.03	353.9	-2447.2	1262.27	85.3543	-2358.44	1386.09	46.0992	-2398.29	1156.86	51.5438	-2415.96	1091.13	28.423	-2336.5	992.795	52.2278	-2310.8	893.268	15.0378	-2369.38	875.346	4.64308	-2316.85	791.93
563	0	187.013	-2165.24	1578.4	285.196	-2152.17	1577.56	194.698	-2336	1609.74	306.191	-2330.82	1611.23	267.672	-2381.21	1429.55	259.04	-2435.4	1213.75	244.975	-2250.65	1360.99	240.483	-2191.92	1231.32	354.398	-2435.33	1261.22	85.5689	-2347.07	1384.68	47.2929	-2390.06	1155.72	53.175	-2408.57	1090.33	29.0695	-2331.82	990.582	52.6045	-2307.91	890.627	16.801	-2367.67	873.587	4.80075	-2316.73	789.506
564	0	186.891	-2153.5	1577.11	285.104	-2140.33	1576.27	194.662	-2324.17	1608.01	306.224	-2318.98	1609.53	267.896	-2369.11	1428.11	259.685	-2424.23	1212.42	244.962	-2238.87	1359.26	240.286	-2180.47	1229.34	354.744	-2423.47	1259.91	85.697	-2335.6	1383.04	48.4087	-2381.59	1154.39	54.7403	-2400.94	1089.35	29.6949	-2326.95	988.237	52.9811	-2304.9	887.865	18.5428	-2365.79	871.781	5.00302	-2316.58	787.037
565	0	186.759	-2141.69	1575.58	285.008	-2128.46	1574.73	194.604	-2312.3	1606.06	306.227	-2307.11	1607.6	268.021	-2356.97	1426.44	260.152	-2413.12	1210.89	244.882	-2227.05	1357.3	240.018	-2168.98	1227.12	354.93	-2411.62	1258.34	85.73	-2324.04	1381.2	49.433	-2372.9	1152.88	56.2266	-2393.06	1088.19	30.2918	-2321.87	985.781	53.3579	-2301.74	885.006	20.2437	-2363.67	869.954	5.26923	-2316.35	784.539
566	0	186.611	-2129.83	1573.85	284.9	-2116.54	1572.96	194.513	-2300.37	1603.95	306.189	-2295.2	1605.47	268.04	-2344.81	1424.56	260.424	-2402.05	1209.17	244.728	-2215.17	1355.14	239.677	-2157.43	1224.71	354.951	-2399.77	1256.56	85.6605	-2312.37	1379.19	50.3521	-2363.96	1151.23	57.6193	-2384.92	1086.88	30.8516	-2316.54	983.235	53.7336	-2298.4	882.076	21.8831	-2361.27	868.129	5.61495	-2316	782.032
567	0	186.44	-2117.89	1571.95	284.773	-2104.58	1571	194.379	-2288.38	1601.7	306.103	-2283.25	1603.18	267.942	-2332.62	1422.49	260.491	-2390.99	1207.29	244.493	-2203.23	1352.83	239.264	-2145.8	1222.16	354.807	-2387.91	1254.58	85.4825	-2300.6	1377.02	51.1531	-2354.77	1149.44	58.9039	-2376.5	1085.44	31.3647	-2310.94	980.621	54.1044	-2294.82	879.098	23.4394	-2358.54	866.327	6.05138	-2315.49	779.534
568	0	186.24	-2105.89	1569.89	284.621	-2092.58	1568.87	194.192	-2276.33	1599.33	305.957	-2271.26	1600.77	267.724	-2320.4	1420.26	260.346	-2379.94	1205.27	244.171	-2191.22	1350.39	238.779	-2134.09	1219.5	354.497	-2376.03	1252.43	85.1913	-2288.72	1374.71	51.8237	-2345.33	1147.53	60.0652	-2367.81	1083.88	31.8211	-2305.03	977.961	54.4648	-2290.97	876.1	24.8903	-2355.44	864.564	6.58479	-2314.77	777.063
569	0	186.006	-2093.82	1567.72	284.437	-2080.53	1566.61	193.941	-2264.22	1596.9	305.742	-2259.23	1598.26	267.378	-2308.15	1417.91	259.989	-2368.84	1203.11	243.758	-2179.14	1347.88	238.22	-2122.27	1216.78	354.027	-2364.11	1250.14	84.7839	-2276.74	1372.3	52.3535	-2335.64	1145.54	61.0891	-2358.83	1082.23	32.2103	-2298.78	975.278	54.8076	-2286.81	873.104	26.2136	-2351.91	862.853	7.21619	-2313.78	774.634
570	0	185.731	-2081.68	1565.47	284.214	-2068.45	1564.25	193.615	-2252.06	1594.42	305.45	-2247.16	1595.69	266.903	-2295.87	1415.46	259.425	-2357.68	1200.85	243.249	-2166.98	1345.31	237.587	-2110.33	1214.05	353.401	-2352.13	1247.73	84.259	-2264.65	1369.81	52.7334	-2325.7	1143.47	61.9623	-2349.57	1080.5	32.5222	-2292.18	972.592	55.1239	-2282.3	870.136	27.3879	-2347.93	861.204	7.94104	-2312.44	772.26
571	0	185.409	-2069.47	1563.17	283.944	-2056.32	1561.84	193.206	-2239.83	1591.94	305.073	-2235.06	1593.1	266.297	-2283.55	1412.93	258.669	-2346.41	1198.49	242.641	-2154.73	1342.74	236.879	-2098.25	1211.35	352.63	-2340.07	1245.23	83.6167	-2252.45	1367.27	52.9569	-2315.5	1141.36	62.6732	-2340.02	1078.71	32.7471	-2285.2	969.925	55.4041	-2277.41	867.218	28.3932	-2343.45	859.622	8.74925	-2310.71	769.955
572	0	185.036	-2057.19	1560.87	283.622	-2044.15	1559.4	192.707	-2227.55	1589.49	304.603	-2222.91	1590.52	265.562	-2271.2	1410.38	257.737	-2334.97	1196.05	241.932	-2142.39	1340.21	236.094	-2086.03	1208.72	351.724	-2327.92	1242.66	82.859	-2240.17	1364.7	53.0196	-2305.05	1139.21	63.2125	-2330.19	1076.89	32.8758	-2277.81	967.298	55.6378	-2272.08	864.372	29.2119	-2338.44	858.112	9.62534	-2308.5	767.728
573	0	184.605	-2044.85	1558.59	283.243	-2031.94	1556.99	192.111	-2215.21	1587.1	304.036	-2210.73	1588	264.701	-2258.81	1407.81	256.652	-2323.34	1193.55	241.12	-2129.96	1337.74	235.229	-2073.65	1206.21	350.695	-2315.65	1240.06	81.9889	-2227.78	1362.14	52.9198	-2294.34	1137.06	63.5735	-2320.06	1075.04	32.9006	-2270.01	964.73	55.8144	-2266.3	861.618	29.8297	-2332.86	856.674	10.5489	-2305.75	765.587
574	0	184.114	-2032.45	1556.38	282.802	-2019.7	1554.64	191.413	-2202.82	1584.8	303.367	-2198.51	1585.55	263.719	-2246.37	1405.28	255.441	-2311.46	1191.01	240.205	-2117.43	1335.38	234.283	-2061.1	1203.84	349.556	-2303.25	1237.45	81.0112	-2215.31	1359.6	52.658	-2283.38	1134.93	63.7522	-2309.65	1073.2	32.8147	-2261.76	962.242	55.9235	-2260.01	858.976	30.2365	-2326.69	855.308	11.4951	-2302.39	763.539
575	0	183.559	-2019.98	1554.27	282.296	-2007.41	1552.39	190.611	-2190.38	1582.63	302.595	-2186.26	1583.22	262.623	-2233.88	1402.81	254.131	-2299.3	1188.45	239.191	-2104.8	1333.15	233.254	-2048.38	1201.67	348.323	-2290.7	1234.87	79.9316	-2202.75	1357.13	52.2376	-2272.17	1132.83	63.7475	-2298.95	1071.39	32.6131	-2253.07	959.853	55.9553	-2253.19	856.465	30.4265	-2319.9	854.013	12.4355	-2298.34	761.59
576	0	182.939	-2007.46	1552.31	281.722	-1995.09	1550.27	189.704	-2177.88	1580.6	301.719	-2173.98	1581.03	261.42	-2221.33	1400.43	252.749	-2286.83	1185.89	238.08	-2092.06	1331.1	232.141	-2035.47	1199.71	347.01	-2277.98	1232.34	78.7572	-2190.1	1354.74	51.6638	-2260.72	1130.8	63.5612	-2287.96	1069.61	32.2923	-2243.9	957.582	55.9008	-2245.8	854.101	30.3989	-2312.46	852.789	13.3392	-2293.55	759.747
577	0	182.252	-1994.87	1550.51	281.079	-1982.73	1548.33	188.695	-2165.33	1578.76	300.741	-2161.66	1579.02	260.12	-2208.71	1398.17	251.32	-2274.02	1183.38	236.879	-2079.21	1329.24	230.945	-2022.37	1198	345.632	-2265.09	1229.91	77.4959	-2177.37	1352.48	50.944	-2249.01	1128.86	63.1977	-2276.68	1067.91	31.8506	-2234.25	955.449	55.7522	-2237.82	851.902	30.158	-2304.37	851.636	14.1734	-2287.96	758.015
578	0	181.498	-1982.23	1548.92	280.367	-1970.33	1546.59	187.585	-2152.73	1577.12	299.665	-2149.3	1577.2	258.734	-2196.03	1396.07	249.866	-2260.85	1180.93	235.593	-2066.26	1327.59	229.669	-2009.08	1196.55	344.201	-2252.01	1227.6	76.1565	-2164.55	1350.36	50.0874	-2237.06	1127.02	62.6636	-2265.11	1066.29	31.2881	-2224.11	953.472	55.503	-2229.21	849.883	29.7122	-2295.6	850.557	14.9052	-2281.51	756.402
579	0	180.679	-1969.54	1547.56	279.588	-1957.88	1545.09	186.381	-2140.08	1575.7	298.495	-2136.91	1575.61	257.273	-2183.27	1394.15	248.401	-2247.33	1178.59	234.234	-2053.2	1326.2	228.319	-1995.61	1195.38	342.732	-2238.75	1225.45	74.7487	-2151.65	1348.43	49.1043	-2224.86	1125.33	61.9675	-2253.23	1064.78	30.6067	-2213.46	951.67	55.1482	-2219.95	848.059	29.0741	-2286.14	849.553	15.5018	-2274.15	754.916
580	0	179.797	-1956.78	1546.45	278.745	-1945.39	1543.84	185.089	-2127.38	1574.51	297.24	-2124.47	1574.25	255.749	-2170.43	1392.45	246.937	-2233.46	1176.41	232.812	-2040.04	1325.06	226.903	-1981.96	1194.51	341.235	-2225.32	1223.49	73.2826	-2138.66	1346.7	48.0058	-2212.41	1123.8	61.1191	-2241.05	1063.41	29.8101	-2202.31	950.06	54.6847	-2210.02	846.445	28.259	-2275.98	848.632	15.9325	-2265.84	753.566
581	0	178.856	-1943.97	1545.62	277.841	-1932.84	1542.87	183.72	-2114.63	1573.59	295.908	-2111.99	1573.16	254.174	-2157.51	1390.98	245.477	-2219.26	1174.42	231.341	-2026.78	1324.19	225.434	-1968.16	1193.94	339.72	-2211.73	1221.76	71.7689	-2125.57	1345.21	46.8036	-2199.71	1122.45	60.1293	-2228.56	1062.18	28.9033	-2190.62	948.66	54.1107	-2199.4	845.053	27.2841	-2265.12	847.802	16.1691	-2256.56	752.362
582	0	177.862	-1931.1	1545.06	276.882	-1920.24	1542.19	182.282	-2101.82	1572.93	294.508	-2099.46	1572.33	252.56	-2144.51	1389.78	244.023	-2204.75	1172.67	229.835	-2013.43	1323.6	223.927	-1954.21	1193.67	338.195	-2198	1220.28	70.2186	-2112.39	1343.98	45.5092	-2186.74	1121.31	59.0088	-2215.76	1061.14	27.8928	-2178.42	947.485	53.4259	-2188.06	843.896	26.1671	-2253.53	847.071	16.1871	-2246.28	751.315
583	0	176.819	-1918.18	1544.8	275.874	-1907.58	1541.82	180.788	-2088.96	1572.54	293.052	-2086.87	1571.79	250.92	-2131.43	1388.86	242.571	-2189.97	1171.21	228.311	-2000.01	1323.3	222.402	-1940.16	1193.69	336.664	-2184.14	1219.09	68.643	-2099.11	1343.03	44.1337	-2173.52	1120.39	57.7685	-2202.63	1060.28	26.7862	-2165.67	946.549	52.6317	-2176	842.984	24.9252	-2241.23	846.45	15.9666	-2234.98	750.437
584	0	175.737	-1905.19	1544.83	274.825	-1894.86	1541.75	179.251	-2076.04	1572.43	291.553	-2074.22	1571.55	249.265	-2118.28	1388.23	241.113	-2174.95	1170.06	226.785	-1986.52	1323.29	220.879	-1926.01	1194.01	335.133	-2170.2	1218.22	67.0538	-2085.73	1342.38	42.6878	-2160.02	1119.72	56.4181	-2189.18	1059.63	25.592	-2152.39	945.864	51.7307	-2163.22	842.326	23.5738	-2228.21	845.95	15.493	-2222.65	749.738
585	0	174.623	-1892.15	1545.15	273.743	-1882.08	1541.98	177.685	-2063.06	1572.6	290.024	-2061.51	1571.59	247.607	-2105.06	1387.91	239.645	-2159.76	1169.27	225.275	-1972.97	1323.57	219.381	-1911.82	1194.6	333.604	-2156.2	1217.67	65.4623	-2072.24	1342.05	41.1807	-2146.25	1119.3	54.9668	-2175.39	1059.21	24.3193	-2138.57	945.44	50.7266	-2149.7	841.929	22.1258	-2214.47	845.582	14.7573	-2209.3	749.228
586	0	173.485	-1879.05	1545.75	272.636	-1869.23	1542.51	176.103	-2050.02	1573.05	288.48	-2048.74	1571.93	245.957	-2091.78	1387.9	238.158	-2144.45	1168.85	223.799	-1959.38	1324.12	217.93	-1897.61	1195.44	332.078	-2142.18	1217.46	63.88	-2058.64	1342.05	39.6208	-2132.2	1119.14	53.422	-2161.26	1059.01	22.9775	-2124.21	945.284	49.6245	-2135.45	841.797	20.5909	-2200	845.356	13.7564	-2194.91	748.916
587	0	172.333	-1865.89	1546.61	271.514	-1856.31	1543.32	174.521	-2036.92	1573.76	286.933	-2035.89	1572.56	244.325	-2078.46	1388.21	236.648	-2129.07	1168.83	222.374	-1945.76	1324.94	216.551	-1883.42	1196.52	330.555	-2128.18	1217.61	62.3177	-2044.93	1342.37	38.0154	-2117.87	1119.25	51.7898	-2146.8	1059.04	21.5763	-2109.31	945.4	48.4301	-2120.47	841.933	18.9757	-2184.82	845.279	12.4933	-2179.51	748.809
588	0	171.178	-1852.69	1547.71	270.386	-1843.33	1544.39	172.952	-2023.77	1574.72	285.399	-2022.97	1573.47	242.721	-2065.1	1388.84	235.112	-2113.7	1169.22	221.015	-1932.14	1326.02	215.262	-1869.27	1197.81	329.034	-2114.24	1218.1	60.7859	-2031.12	1343.02	36.3704	-2103.25	1119.62	50.0748	-2132	1059.31	20.1251	-2093.88	945.79	47.1503	-2104.78	842.336	17.2835	-2168.94	845.358	10.9766	-2163.11	748.911
589	0	170.028	-1839.43	1549.04	269.263	-1830.28	1545.7	171.412	-2010.56	1575.93	283.892	-2009.98	1574.64	241.151	-2051.72	1389.76	233.549	-2098.39	1169.99	219.736	-1918.52	1327.32	214.085	-1855.21	1199.29	327.513	-2100.39	1218.93	59.2942	-2017.22	1343.99	34.6904	-2088.34	1120.25	48.2798	-2116.86	1059.8	18.6331	-2077.92	946.451	45.7924	-2088.39	843.005	15.515	-2152.35	845.597	9.22022	-2145.74	749.226
590	0	168.894	-1826.12	1550.56	268.154	-1817.16	1547.23	169.913	-1997.29	1577.36	282.424	-1996.92	1576.06	239.623	-2038.33	1390.98	231.959	-2083.21	1171.15	218.55	-1904.93	1328.84	213.035	-1841.26	1200.93	325.986	-2086.67	1220.1	57.8512	-2003.23	1345.27	32.9792	-2073.16	1121.14	46.4067	-2101.39	1060.52	17.1089	-2061.44	947.379	44.3645	-2071.31	843.933	13.6687	-2135.07	845.997	7.24287	-2127.41	749.753
591	0	167.786	-1812.78	1552.25	267.069	-1803.98	1548.93	168.468	-1983.97	1579	281.008	-1983.79	1577.72	238.143	-2024.95	1392.46	230.342	-2068.22	1172.67	217.466	-1891.38	1330.55	212.127	-1827.44	1202.7	324.45	-2073.12	1221.56	56.4645	-1989.16	1346.85	31.2393	-2057.69	1122.26	44.4556	-2085.6	1061.45	15.5606	-2044.46	948.566	42.875	-2053.58	845.113	11.742	-2117.13	846.558	5.06708	-2108.17	750.492
592	0	166.712	-1799.4	1554.07	266.016	-1790.75	1550.8	167.087	-1970.61	1580.82	279.655	-1970.59	1579.58	236.715	-2011.58	1394.2	228.7	-2053.48	1174.51	216.491	-1877.88	1332.42	211.37	-1813.77	1204.58	322.897	-2059.74	1223.31	55.1402	-1975.03	1348.69	29.4725	-2041.96	1123.61	42.4264	-2069.5	1062.57	13.9957	-2026.99	950.004	41.3323	-2035.22	846.537	9.73154	-2098.52	847.279	2.71844	-2088.04	751.441
593	0	165.681	-1785.98	1556	265.004	-1777.47	1552.78	165.781	-1957.2	1582.81	278.375	-1957.32	1581.63	235.341	-1998.25	1396.16	227.032	-2039.03	1176.63	215.63	-1864.45	1334.43	210.769	-1800.27	1206.54	321.324	-2046.57	1225.31	53.8831	-1960.85	1350.79	27.6801	-2025.96	1125.16	40.3182	-2053.1	1063.88	12.4209	-2009.06	951.679	39.7453	-2016.27	848.195	7.6341	-2079.29	848.156	0.224536	-2067.07	752.598
594	0	164.701	-1772.55	1558	264.041	-1764.14	1554.84	164.556	-1943.75	1584.93	277.175	-1944	1583.84	234.024	-1984.96	1398.32	225.339	-2024.91	1179.01	214.884	-1851.1	1336.55	210.327	-1786.94	1208.58	319.724	-2033.61	1227.53	52.6968	-1946.63	1353.1	25.8625	-2009.72	1126.89	38.1302	-2036.41	1065.34	10.8421	-1990.68	953.58	38.1228	-1996.75	850.073	5.44716	-2059.45	849.186	-2.38599	-2045.31	753.961
595	0	163.778	-1759.09	1560.04	263.134	-1750.78	1556.95	163.419	-1930.27	1587.16	276.062	-1930.63	1586.17	232.765	-1971.72	1400.64	223.619	-2011.15	1181.58	214.249	-1837.85	1338.77	210.037	-1773.8	1210.66	318.093	-2020.88	1229.92	51.5831	-1932.4	1355.61	24.0203	-1993.24	1128.78	35.862	-2019.45	1066.95	9.26483	-1971.89	955.691	36.4733	-1976.72	852.161	3.16929	-2039.04	850.367	-5.0844	-2022.8	755.526
596	0	162.919	-1745.63	1562.09	262.288	-1737.39	1559.08	162.374	-1916.77	1589.48	275.04	-1917.21	1588.6	231.563	-1958.55	1403.1	221.873	-1997.75	1184.3	213.721	-1824.69	1341.04	209.89	-1760.83	1212.77	316.432	-2008.37	1232.45	50.5425	-1918.18	1358.27	22.1538	-1976.54	1130.82	33.5142	-2002.24	1068.68	7.69381	-1952.7	957.997	34.8053	-1956.2	854.444	0.800543	-2018.07	851.695	-7.84269	-1999.6	757.294
597	0	162.127	-1732.16	1564.13	261.508	-1723.99	1561.19	161.423	-1903.24	1591.86	274.11	-1903.76	1591.11	230.417	-1945.44	1405.65	220.102	-1984.71	1187.13	213.29	-1811.64	1343.34	209.868	-1748.04	1214.89	314.739	-1996.07	1235.09	49.5743	-1903.97	1361.06	20.2632	-1959.64	1132.97	31.0884	-1984.79	1070.51	6.13323	-1933.15	960.481	33.1271	-1935.25	856.909	-1.65723	-1996.59	853.168	-10.6343	-1975.74	759.263
598	0	161.405	-1718.69	1566.11	260.797	-1710.57	1563.25	160.566	-1889.7	1594.27	273.273	-1890.28	1593.64	229.326	-1932.41	1408.27	218.308	-1972.02	1190.02	212.947	-1798.69	1345.65	209.952	-1735.41	1217.01	313.02	-1983.97	1237.8	48.6761	-1889.81	1363.94	18.349	-1942.56	1135.21	28.5874	-1967.12	1072.42	4.5866	-1913.27	963.128	31.4463	-1913.89	859.543	-4.20016	-1974.63	854.782	-13.4347	-1951.31	761.433
599	0	160.757	-1705.22	1568.03	260.159	-1697.15	1565.23	159.801	-1876.15	1596.68	272.527	-1876.79	1596.18	228.286	-1919.45	1410.92	216.498	-1959.65	1192.93	212.678	-1785.85	1347.94	210.115	-1722.93	1219.11	311.281	-1972.05	1240.53	47.8445	-1875.7	1366.87	16.4119	-1925.32	1137.53	26.0156	-1949.26	1074.38	3.05677	-1893.09	965.917	29.7701	-1892.19	862.33	-6.82217	-1952.22	856.535	-16.2217	-1926.33	763.804
600	0	160.181	-1691.77	1569.85	259.593	-1683.74	1567.1	159.125	-1862.6	1599.08	271.87	-1863.29	1598.68	227.295	-1906.57	1413.55	214.68	-1947.56	1195.82	212.468	-1773.11	1350.17	210.331	-1710.59	1221.17	309.528	-1960.29	1243.26	47.075	-1861.66	1369.82	14.4527	-1907.94	1139.88	23.3788	-1931.22	1076.39	1.54585	-1872.65	968.832	28.1053	-1870.17	865.256	-9.51484	-1929.4	858.422	-18.9756	-1900.89	766.374
601	0	159.678	-1678.34	1571.54	259.099	-1670.35	1568.84	158.534	-1849.06	1601.42	271.296	-1849.79	1601.12	226.348	-1893.77	1416.15	212.863	-1935.71	1198.64	212.303	-1760.48	1352.33	210.572	-1698.37	1223.17	307.771	-1948.66	1245.93	46.362	-1847.71	1372.76	12.4726	-1890.45	1142.26	20.6838	-1913.04	1078.4	0.055161	-1851.98	971.853	26.4576	-1847.87	868.306	-12.2674	-1906.22	860.437	-21.6792	-1875.03	769.142
602	0	159.246	-1664.93	1573.1	258.675	-1656.98	1570.41	158.02	-1835.53	1603.68	270.799	-1836.3	1603.46	225.441	-1881.04	1418.66	211.058	-1924.04	1201.36	212.167	-1747.94	1354.38	210.813	-1686.25	1225.08	306.021	-1937.14	1248.53	45.6995	-1833.86	1375.64	10.473	-1872.88	1144.63	17.9388	-1894.72	1080.41	-1.41477	-1831.12	974.96	24.8323	-1825.35	871.464	-15.0669	-1882.7	862.573	-24.3178	-1848.81	772.103
603	0	158.88	-1651.55	1574.5	258.319	-1643.64	1571.81	157.577	-1822.01	1605.83	270.372	-1822.83	1605.67	224.568	-1868.38	1421.05	209.274	-1912.51	1203.96	212.045	-1735.48	1356.3	211.029	-1674.21	1226.88	304.286	-1925.71	1251	45.0806	-1820.11	1378.43	8.45565	-1855.24	1146.98	15.1525	-1876.3	1082.39	-2.86419	-1810.11	978.131	23.234	-1802.63	874.711	-17.8981	-1858.9	864.82	-26.8789	-1822.3	775.251
604	0	158.577	-1638.19	1575.72	258.025	-1630.34	1573	157.197	-1808.52	1607.84	270.006	-1809.39	1607.71	223.724	-1855.78	1423.3	207.523	-1901.07	1206.38	211.925	-1723.11	1358.07	211.201	-1662.23	1228.54	302.578	-1914.33	1253.33	44.4987	-1806.47	1381.09	6.42266	-1837.58	1149.27	12.3346	-1857.8	1084.31	-4.29405	-1788.98	981.344	21.6664	-1779.76	878.033	-20.7441	-1834.86	867.163	-29.3518	-1795.55	778.577
605	0	158.331	-1624.87	1576.75	257.79	-1617.09	1573.98	156.871	-1795.05	1609.69	269.694	-1795.98	1609.57	222.904	-1843.23	1425.36	205.811	-1889.67	1208.62	211.795	-1710.79	1359.65	211.314	-1650.31	1230.04	300.903	-1902.99	1255.47	43.9472	-1792.93	1383.59	4.37657	-1819.91	1151.47	9.49521	-1839.25	1086.16	-5.70581	-1767.77	984.578	20.1324	-1756.77	881.41	-23.5866	-1810.61	869.587	-31.7279	-1768.61	782.07
606	0	158.136	-1611.59	1577.57	257.606	-1603.88	1574.73	156.59	-1781.61	1611.35	269.427	-1782.62	1611.21	222.104	-1830.73	1427.23	204.146	-1878.28	1210.64	211.645	-1698.54	1361.02	211.358	-1638.42	1231.34	299.271	-1891.67	1257.41	43.4201	-1779.5	1385.9	2.32047	-1802.25	1153.57	6.64473	-1820.66	1087.9	-7.10122	-1746.52	987.809	18.6345	-1733.7	884.825	-26.4065	-1786.21	872.075	-33.9998	-1741.56	785.715
607	0	157.986	-1598.34	1578.18	257.468	-1590.72	1575.25	156.345	-1768.21	1612.79	269.195	-1769.3	1612.61	221.32	-1818.27	1428.86	202.532	-1866.86	1212.42	211.469	-1686.33	1362.16	211.329	-1626.56	1232.41	297.687	-1880.35	1259.13	42.9118	-1766.16	1387.97	0.258081	-1784.65	1155.54	3.7939	-1802.06	1089.53	-8.48207	-1725.26	991.014	17.1743	-1710.57	888.261	-29.184	-1761.7	874.607	-36.1615	-1714.43	789.497
608	0	157.875	-1585.13	1578.56	257.369	-1577.61	1575.52	156.128	-1754.85	1614.01	268.99	-1756.03	1613.76	220.548	-1805.84	1430.24	200.973	-1855.39	1213.94	211.261	-1674.15	1363.06	211.225	-1614.72	1233.23	296.157	-1869.01	1260.6	42.4181	-1752.92	1389.8	-1.80599	-1767.12	1157.36	0.953723	-1783.48	1091.02	-9.84986	-1704.03	994.172	15.7533	-1687.43	891.7	-31.9	-1737.13	877.162	-38.2084	-1687.28	793.399
609	0	157.795	-1571.96	1578.71	257.302	-1564.55	1575.54	155.931	-1741.52	1614.98	268.805	-1742.81	1614.64	219.788	-1793.44	1431.36	199.47	-1843.86	1215.2	211.02	-1661.99	1363.7	211.05	-1602.9	1233.78	294.686	-1857.65	1261.81	41.9358	-1739.75	1391.34	-3.86616	-1749.67	1159.01	-1.86451	-1764.92	1092.35	-11.2055	-1682.85	997.261	14.3729	-1664.3	895.126	-34.536	-1712.55	879.721	-40.1366	-1660.17	797.404
610	0	157.739	-1558.83	1578.63	257.259	-1551.54	1575.31	155.746	-1728.23	1615.69	268.632	-1729.64	1615.23	219.039	-1781.05	1432.2	198.026	-1832.25	1216.18	210.746	-1649.84	1364.08	210.812	-1591.09	1234.04	293.277	-1846.25	1262.75	41.463	-1726.67	1392.59	-5.91567	-1732.33	1160.46	-4.64926	-1746.42	1093.5	-12.5492	-1661.77	1000.26	13.0343	-1641.22	898.523	-37.0749	-1688	882.264	-41.9438	-1633.14	801.492
611	0	157.701	-1545.73	1578.31	257.234	-1538.57	1574.83	155.568	-1714.99	1616.12	268.465	-1716.52	1615.53	218.3	-1768.67	1432.75	196.641	-1820.56	1216.87	210.442	-1637.69	1364.17	210.519	-1579.29	1234	291.934	-1834.81	1263.41	40.9993	-1713.64	1393.52	-7.94657	-1715.12	1161.7	-7.38878	-1727.98	1094.46	-13.8799	-1640.8	1003.16	11.7392	-1618.22	901.877	-39.5016	-1663.53	884.772	-43.6283	-1606.24	805.646
612	0	157.676	-1532.67	1577.75	257.222	-1525.65	1574.1	155.391	-1701.78	1616.28	268.299	-1703.45	1615.55	217.576	-1756.29	1433.02	195.317	-1808.81	1217.28	210.113	-1625.54	1363.99	210.183	-1567.49	1233.66	290.659	-1823.32	1263.79	40.5457	-1700.67	1394.13	-9.94967	-1698.04	1162.73	-10.0712	-1709.64	1095.23	-15.1957	-1619.98	1005.93	10.4892	-1595.33	905.174	-41.8034	-1639.19	887.228	-45.1893	-1579.51	809.849
613	0	157.659	-1519.64	1576.95	257.217	-1512.78	1573.14	155.212	-1688.61	1616.16	268.13	-1690.43	1615.28	216.868	-1743.91	1432.99	194.055	-1797.01	1217.41	209.766	-1613.37	1363.54	209.818	-1555.68	1233.02	289.455	-1811.78	1263.88	40.1047	-1687.75	1394.41	-11.9147	-1681.11	1163.53	-12.6844	-1691.39	1095.79	-16.4932	-1599.34	1008.56	9.28663	-1572.58	908.402	-43.97	-1615	889.618	-46.6272	-1553	814.082
614	0	157.645	-1506.65	1575.93	257.216	-1499.94	1571.95	155.029	-1675.48	1615.76	267.957	-1677.44	1614.73	216.182	-1731.51	1432.67	192.859	-1785.17	1217.26	209.408	-1601.18	1362.81	209.436	-1543.87	1232.1	288.324	-1800.17	1263.7	39.68	-1674.86	1394.37	-13.8304	-1664.33	1164.09	-15.2167	-1673.27	1096.14	-17.7681	-1578.89	1011.04	8.13365	-1550	911.55	-45.9937	-1591.02	891.931	-47.9433	-1526.75	818.329
615	0	157.631	-1493.69	1574.68	257.214	-1487.13	1570.54	154.84	-1662.39	1615.08	267.779	-1664.5	1613.9	215.524	-1719.11	1432.07	191.731	-1773.3	1216.83	209.049	-1588.96	1361.82	209.053	-1532.03	1230.9	287.267	-1788.5	1263.25	39.2765	-1662.01	1394.01	-15.685	-1647.72	1164.42	-17.6564	-1655.28	1096.28	-19.0153	-1558.66	1013.37	7.03288	-1527.62	914.609	-47.8692	-1567.29	894.157	-49.1395	-1500.8	822.575
616	0	157.615	-1480.75	1573.22	257.211	-1474.35	1568.93	154.647	-1649.34	1614.14	267.597	-1651.6	1612.82	214.899	-1706.69	1431.2	190.674	-1761.43	1216.14	208.7	-1576.7	1360.59	208.684	-1520.15	1229.44	286.287	-1776.76	1262.52	38.9	-1649.17	1393.34	-17.4663	-1631.27	1164.51	-19.9922	-1637.43	1096.21	-20.2286	-1538.68	1015.53	5.98697	-1505.46	917.57	-49.5938	-1543.83	896.289	-50.2189	-1475.2	826.802
617	0	157.598	-1467.84	1571.56	257.205	-1461.59	1567.14	154.451	-1636.32	1612.95	267.412	-1638.72	1611.5	214.314	-1694.25	1430.06	189.692	-1749.56	1215.19	208.371	-1564.4	1359.13	208.342	-1508.22	1227.77	285.386	-1764.94	1261.54	38.5573	-1636.35	1392.37	-19.1623	-1615	1164.37	-22.2136	-1619.76	1095.94	-21.4019	-1518.95	1017.52	4.99865	-1483.57	920.426	-51.1663	-1520.69	898.322	-51.185	-1449.97	830.995
618	0	157.579	-1454.96	1569.71	257.197	-1448.86	1565.17	154.257	-1623.34	1611.52	267.229	-1625.88	1609.95	213.779	-1681.79	1428.68	188.792	-1737.72	1213.99	208.075	-1552.06	1357.46	208.042	-1496.23	1225.89	284.563	-1753.04	1260.3	38.2555	-1623.54	1391.13	-20.7614	-1598.9	1164	-24.3108	-1602.27	1095.47	-22.5287	-1499.49	1019.33	4.07052	-1461.95	923.17	-52.5877	-1497.88	900.251	-52.0423	-1425.15	835.137
619	0	157.559	-1442.11	1567.7	257.19	-1436.14	1563.04	154.069	-1610.39	1609.86	267.052	-1613.05	1608.2	213.299	-1669.3	1427.06	187.977	-1725.89	1212.56	207.821	-1539.67	1355.59	207.797	-1484.16	1223.85	283.821	-1741.05	1258.82	38.002	-1610.74	1389.63	-22.2527	-1582.97	1163.42	-26.2751	-1584.97	1094.81	-23.6027	-1480.33	1020.96	3.20498	-1440.64	925.796	-53.8603	-1475.44	902.073	-52.7957	-1400.79	839.211
620	0	157.543	-1429.28	1565.53	257.185	-1423.43	1560.79	153.893	-1597.47	1608.01	266.887	-1600.26	1606.27	212.884	-1656.78	1425.22	187.253	-1714.08	1210.9	207.622	-1527.23	1353.56	207.62	-1471.98	1221.67	283.159	-1728.95	1257.11	37.804	-1597.92	1387.89	-23.6267	-1567.24	1162.64	-28.099	-1567.89	1093.96	-24.6183	-1461.48	1022.42	2.40411	-1419.67	928.299	-54.9876	-1453.4	903.785	-53.4505	-1376.9	843.201
621	0	157.533	-1416.47	1563.23	257.188	-1410.74	1558.44	153.737	-1584.59	1605.98	266.741	-1587.47	1604.19	212.541	-1644.23	1423.2	186.625	-1702.29	1209.04	207.486	-1514.72	1351.39	207.522	-1459.7	1219.39	282.579	-1716.75	1255.18	37.6685	-1585.1	1385.96	-24.8749	-1551.69	1161.66	-29.7761	-1551.05	1092.95	-25.5705	-1442.95	1023.69	1.66958	-1399.05	930.672	-55.9742	-1431.78	905.384	-54.0123	-1353.54	847.086
622	0	157.535	-1403.68	1560.83	257.203	-1398.05	1556	153.607	-1571.74	1603.8	266.623	-1574.71	1601.98	212.276	-1631.65	1420.99	186.1	-1690.5	1206.98	207.423	-1502.16	1349.11	207.512	-1447.3	1217.04	282.08	-1704.44	1253.05	37.6018	-1572.26	1383.84	-25.9908	-1536.34	1160.5	-31.3016	-1534.45	1091.77	-26.4551	-1424.76	1024.79	1.00254	-1378.8	932.91	-56.8254	-1410.59	906.867	-54.4872	-1330.71	850.849
623	0	157.553	-1390.91	1558.35	257.234	-1385.36	1553.5	153.512	-1558.91	1601.48	266.538	-1561.96	1599.67	212.096	-1619.02	1418.64	185.681	-1678.68	1204.74	207.441	-1489.52	1346.73	207.596	-1434.76	1214.64	281.663	-1692	1250.74	37.6091	-1559.39	1381.58	-26.9696	-1521.19	1159.18	-32.6722	-1518.11	1090.45	-27.2688	-1406.91	1025.7	0.403584	-1358.95	935.007	-57.5468	-1389.86	908.229	-54.8809	-1308.45	854.469
624	0	157.594	-1378.16	1555.82	257.289	-1372.67	1550.97	153.46	-1546.12	1599.07	266.497	-1549.22	1597.28	212.007	-1606.35	1416.16	185.373	-1666.8	1202.35	207.545	-1476.8	1344.3	207.779	-1422.08	1212.23	281.326	-1679.44	1248.26	37.6948	-1546.49	1379.2	-27.8083	-1506.24	1157.72	-33.8858	-1502.06	1089	-28.0094	-1389.42	1026.44	-0.127272	-1339.52	936.954	-58.1448	-1369.62	909.464	-55.1995	-1286.77	857.925
625	0	157.662	-1365.42	1553.26	257.371	-1359.98	1548.45	153.46	-1533.35	1596.58	266.506	-1536.48	1594.84	212.013	-1593.63	1413.58	185.177	-1654.84	1199.81	207.741	-1464.01	1341.84	208.064	-1409.25	1209.83	281.07	-1666.74	1245.64	37.8617	-1533.56	1376.73	-28.5055	-1491.51	1156.12	-34.942	-1486.29	1087.43	-28.6753	-1372.3	1027.01	-0.590596	-1320.52	938.744	-58.6255	-1349.87	910.564	-55.449	-1265.7	861.196
626	0	157.765	-1352.69	1550.71	257.488	-1347.28	1545.95	153.519	-1520.61	1594.05	266.573	-1523.75	1592.38	212.117	-1580.86	1410.93	185.094	-1642.75	1197.16	208.029	-1451.13	1339.37	208.452	-1396.27	1207.46	280.892	-1653.91	1242.91	38.1112	-1520.58	1374.21	-29.0618	-1477	1154.41	-35.8413	-1470.83	1085.76	-29.2659	-1355.57	1027.4	-0.987514	-1301.97	940.37	-58.9956	-1330.63	911.523	-55.6351	-1245.26	864.259
627	0	157.906	-1339.97	1548.2	257.645	-1334.57	1543.5	153.643	-1507.88	1591.51	266.705	-1511.01	1589.93	212.321	-1568.02	1408.24	185.121	-1630.49	1194.42	208.411	-1438.16	1336.93	208.941	-1383.13	1205.16	280.791	-1640.93	1240.09	38.4433	-1507.55	1371.67	-29.4792	-1462.71	1152.61	-36.5856	-1455.69	1084.01	-29.7812	-1339.21	1027.63	-1.31967	-1283.89	941.821	-59.2613	-1311.93	912.33	-55.7636	-1225.45	867.094
628	0	158.09	-1327.26	1545.75	257.844	-1321.84	1541.15	153.839	-1495.18	1588.98	266.908	-1498.28	1587.51	212.623	-1555.13	1405.54	185.254	-1618.03	1191.62	208.884	-1425.1	1334.54	209.526	-1369.83	1202.95	280.767	-1627.81	1237.2	38.856	-1494.47	1369.14	-29.761	-1448.64	1150.75	-37.1774	-1440.87	1082.19	-30.2217	-1323.26	1027.69	-1.58916	-1266.3	943.09	-59.4291	-1293.77	912.976	-55.8402	-1206.3	869.677
629	0	158.322	-1314.54	1543.4	258.091	-1309.09	1538.9	154.109	-1482.48	1586.5	267.185	-1485.53	1585.16	213.023	-1542.16	1402.86	185.485	-1605.32	1188.79	209.444	-1411.95	1332.23	210.201	-1356.37	1200.84	280.817	-1614.54	1234.29	39.3458	-1481.33	1366.65	-29.9115	-1434.81	1148.84	-37.6201	-1426.38	1080.33	-30.5883	-1307.7	1027.59	-1.79849	-1249.2	944.165	-59.505	-1276.19	913.451	-55.8704	-1187.8	871.987
630	0	158.604	-1301.82	1541.17	258.387	-1296.31	1536.8	154.457	-1469.79	1584.1	267.538	-1472.77	1582.89	213.515	-1529.12	1400.24	185.808	-1592.34	1185.95	210.082	-1398.69	1330.03	210.955	-1342.76	1198.85	280.943	-1601.13	1231.39	39.9072	-1468.13	1364.24	-29.9359	-1421.19	1146.92	-37.9172	-1412.21	1078.44	-30.8819	-1292.55	1027.34	-1.95045	-1232.61	945.038	-59.4952	-1259.18	913.746	-55.8597	-1169.98	874.003
631	0	158.936	-1289.09	1539.11	258.733	-1283.51	1534.87	154.883	-1457.1	1581.81	267.969	-1459.99	1580.75	214.096	-1516	1397.71	186.214	-1579.07	1183.15	210.789	-1385.35	1327.96	211.777	-1329	1197.02	281.142	-1587.56	1228.52	40.5329	-1454.87	1361.93	-29.8397	-1407.81	1145	-38.0724	-1398.38	1076.57	-31.1038	-1277.81	1026.93	-2.04812	-1216.55	945.701	-59.4053	-1242.77	913.852	-55.8135	-1152.84	875.706
632	0	159.319	-1276.33	1537.22	259.129	-1270.66	1533.12	155.385	-1444.4	1579.65	268.475	-1447.19	1578.75	214.756	-1502.81	1395.3	186.695	-1565.48	1180.42	211.552	-1371.91	1326.05	212.649	-1315.1	1195.35	281.415	-1573.87	1225.74	41.2139	-1441.55	1359.77	-29.6291	-1394.64	1143.12	-38.0895	-1384.88	1074.72	-31.255	-1263.47	1026.4	-2.09472	-1201.03	946.145	-59.2412	-1226.97	913.762	-55.7369	-1136.39	877.075
633	0	159.75	-1263.56	1535.55	259.572	-1257.78	1531.59	155.96	-1431.7	1577.67	269.053	-1434.36	1576.92	215.487	-1489.55	1393.05	187.244	-1551.59	1177.81	212.358	-1358.39	1324.32	213.552	-1301.06	1193.87	281.762	-1560.04	1223.07	41.9395	-1428.18	1357.78	-29.3101	-1381.68	1141.31	-37.9718	-1371.69	1072.93	-31.3364	-1249.55	1025.73	-2.09367	-1186.05	946.365	-59.0081	-1211.8	913.474	-55.6354	-1120.65	878.095
634	0	160.226	-1250.76	1534.11	260.058	-1244.86	1530.3	156.6	-1418.97	1575.88	269.696	-1421.49	1575.28	216.278	-1476.21	1391	187.853	-1537.4	1175.36	213.189	-1344.79	1322.79	214.464	-1286.92	1192.59	282.182	-1546.09	1220.57	42.6973	-1414.77	1356	-28.8891	-1368.93	1139.6	-37.7227	-1358.82	1071.22	-31.349	-1236.03	1024.94	-2.04845	-1171.62	946.356	-58.7115	-1197.28	912.986	-55.514	-1105.61	878.75
635	0	160.741	-1237.92	1532.93	260.581	-1231.89	1529.25	157.298	-1406.21	1574.32	270.397	-1408.59	1573.86	217.115	-1462.81	1389.17	188.518	-1522.93	1173.11	214.027	-1331.12	1321.48	215.36	-1272.67	1191.53	282.675	-1532.04	1218.27	43.4738	-1401.32	1354.45	-28.3723	-1356.37	1138.02	-37.3455	-1346.26	1069.64	-31.2939	-1222.92	1024.06	-1.9627	-1157.76	946.118	-58.3564	-1183.4	912.3	-55.3778	-1091.31	879.028
636	0	161.29	-1225.05	1532.01	261.136	-1218.88	1528.47	158.045	-1393.42	1573.02	271.146	-1395.65	1572.68	217.985	-1449.35	1387.59	189.232	-1508.22	1171.11	214.853	-1317.4	1320.41	216.215	-1258.36	1190.69	283.237	-1517.91	1216.21	44.2543	-1387.84	1353.16	-27.7663	-1344	1136.59	-36.8433	-1333.98	1068.2	-31.1722	-1210.22	1023.08	-1.84015	-1144.47	945.65	-57.9479	-1170.2	911.424	-55.2317	-1077.73	878.92
637	0	161.863	-1212.14	1531.38	261.712	-1205.81	1527.95	158.827	-1380.59	1571.98	271.93	-1382.67	1571.75	218.872	-1435.84	1386.3	189.99	-1493.31	1169.39	215.649	-1303.65	1319.59	217.004	-1244.01	1190.09	283.864	-1503.71	1214.43	45.0238	-1374.35	1352.16	-27.0776	-1331.8	1135.35	-36.2194	-1321.98	1066.92	-30.9855	-1197.92	1022.03	-1.68466	-1131.75	944.958	-57.4908	-1157.67	910.367	-55.0804	-1064.91	878.419
638	0	162.451	-1199.18	1531.05	262.302	-1192.7	1527.72	159.632	-1367.72	1571.24	272.738	-1369.64	1571.1	219.76	-1422.29	1385.32	190.783	-1478.26	1168.01	216.396	-1289.87	1319.05	217.704	-1229.65	1189.74	284.55	-1489.48	1212.98	45.7669	-1360.86	1351.46	-26.3133	-1319.76	1134.32	-35.4774	-1310.25	1065.85	-30.7362	-1186.01	1020.92	-1.50022	-1119.61	944.048	-56.9898	-1145.83	909.145	-54.928	-1052.85	877.525
639	0	163.044	-1186.18	1531.02	262.894	-1179.55	1527.77	160.446	-1354.81	1570.8	273.555	-1356.57	1570.73	220.631	-1408.71	1384.67	191.601	-1463.11	1167	217.076	-1276.09	1318.78	218.294	-1215.32	1189.64	285.285	-1475.24	1211.88	46.4687	-1347.38	1351.08	-25.481	-1307.88	1133.52	-34.6218	-1298.78	1064.99	-30.4273	-1174.49	1019.78	-1.291	-1108.05	942.931	-56.4497	-1134.67	907.774	-54.7783	-1041.56	876.239
640	0	163.632	-1173.13	1531.3	263.478	-1166.36	1528.1	161.253	-1341.84	1570.69	274.365	-1343.46	1570.66	221.47	-1395.13	1384.36	192.434	-1447.95	1166.39	217.673	-1262.33	1318.79	218.758	-1201.04	1189.78	286.058	-1461.03	1211.16	47.1151	-1333.94	1351.02	-24.5888	-1296.14	1132.97	-33.6575	-1287.54	1064.38	-30.0627	-1163.36	1018.61	-1.06129	-1097.06	941.62	-55.8754	-1124.2	906.276	-54.6346	-1031.05	874.57
641	0	164.202	-1160.05	1531.87	264.042	-1153.13	1528.71	162.038	-1328.83	1570.91	275.153	-1330.3	1570.88	222.259	-1381.54	1384.41	193.266	-1432.83	1166.21	218.174	-1248.6	1319.08	219.084	-1186.86	1190.18	286.855	-1446.86	1210.85	47.6936	-1320.54	1351.3	-23.6454	-1284.54	1132.68	-32.5907	-1276.53	1064.01	-29.6475	-1152.61	1017.43	-0.815538	-1086.64	940.131	-55.272	-1114.41	904.676	-54.499	-1021.34	872.53
642	0	164.743	-1146.93	1532.74	264.575	-1139.88	1529.58	162.785	-1315.77	1571.45	275.904	-1317.11	1571.41	222.985	-1367.98	1384.82	194.082	-1417.82	1166.46	218.569	-1234.93	1319.67	219.265	-1172.8	1190.82	287.662	-1432.77	1210.96	48.1933	-1307.21	1351.91	-22.6601	-1273.06	1132.66	-31.4285	-1265.74	1063.9	-29.1878	-1142.23	1016.27	-0.558349	-1076.8	938.482	-54.6449	-1105.3	902.998	-54.3734	-1012.43	870.137
643	0	165.243	-1133.78	1533.88	265.066	-1126.6	1530.69	163.479	-1302.67	1572.33	276.603	-1303.9	1572.23	223.634	-1354.45	1385.59	194.868	-1402.98	1167.16	218.85	-1221.34	1320.53	219.3	-1158.9	1191.72	288.467	-1418.79	1211.49	48.6053	-1293.96	1352.84	-21.6426	-1261.72	1132.91	-30.1791	-1255.15	1064.06	-28.6905	-1132.22	1015.12	-0.2945	-1067.52	936.693	-53.9999	-1096.85	901.27	-54.2584	-1004.32	867.416
644	0	165.693	-1120.6	1535.29	265.505	-1113.32	1532.05	164.107	-1289.53	1573.53	277.236	-1290.66	1573.35	224.196	-1340.98	1386.72	195.61	-1388.38	1168.3	219.014	-1207.84	1321.68	219.192	-1145.17	1192.85	289.255	-1404.94	1212.44	48.9237	-1280.81	1354.07	-20.6026	-1250.5	1133.42	-28.8517	-1244.76	1064.48	-28.1634	-1122.57	1014.02	-0.028923	-1058.79	934.786	-53.3434	-1089.06	899.521	-54.154	-997.015	864.394
645	0	166.081	-1107.42	1536.94	265.883	-1100.04	1533.61	164.655	-1276.36	1575.04	277.792	-1277.4	1574.75	224.662	-1327.58	1388.18	196.299	-1374.05	1169.84	219.06	-1194.45	1323.09	218.949	-1131.64	1194.23	290.017	-1391.23	1213.81	49.1447	-1267.77	1355.59	-19.5499	-1239.41	1134.18	-27.4561	-1234.55	1065.16	-27.6151	-1113.27	1012.96	0.23333	-1050.6	932.783	-52.6819	-1081.89	897.777	-54.0595	-990.499	861.105
646	0	166.399	-1094.23	1538.8	266.189	-1086.78	1535.37	165.114	-1263.17	1576.84	278.258	-1264.14	1576.42	225.028	-1314.26	1389.95	196.928	-1360.04	1171.77	218.991	-1181.18	1324.75	218.582	-1118.31	1195.83	290.745	-1377.69	1215.56	49.2677	-1254.86	1357.37	-18.4939	-1228.44	1135.19	-26.0028	-1224.52	1066.08	-27.0541	-1104.32	1011.95	0.487142	-1042.94	930.706	-52.0226	-1075.33	896.066	-53.9739	-984.764	857.586
647	0	166.639	-1081.04	1540.85	266.417	-1073.53	1537.29	165.474	-1249.97	1578.91	278.626	-1250.89	1578.33	225.292	-1301.04	1392.02	197.496	-1346.37	1174.05	218.814	-1168.04	1326.64	218.11	-1105.2	1197.65	291.434	-1364.31	1217.67	49.2945	-1242.08	1359.38	-17.4432	-1217.61	1136.4	-24.5028	-1214.66	1067.22	-26.4894	-1095.7	1011	0.727424	-1035.79	928.577	-51.3725	-1069.34	894.411	-53.8956	-979.794	853.878
648	0	166.794	-1067.88	1543.06	266.561	-1060.33	1539.35	165.731	-1236.77	1581.22	278.89	-1237.65	1580.47	225.454	-1287.92	1394.34	198.003	-1333.04	1176.63	218.539	-1155.03	1328.75	217.552	-1092.29	1199.68	292.08	-1351.11	1220.1	49.2297	-1229.44	1361.57	-16.4056	-1206.92	1137.81	-22.9669	-1204.97	1068.56	-25.9293	-1087.42	1010.12	0.949225	-1029.14	926.418	-50.7386	-1063.91	892.837	-53.8235	-975.564	850.025
649	0	166.86	-1054.75	1545.38	266.615	-1047.16	1541.52	165.879	-1223.58	1583.72	279.047	-1224.44	1582.8	225.519	-1274.92	1396.88	198.454	-1320.04	1179.45	218.178	-1142.17	1331.04	216.932	-1079.6	1201.9	292.683	-1338.09	1222.81	49.0805	-1216.94	1363.93	-15.3876	-1196.37	1139.38	-21.4057	-1195.44	1070.08	-25.3821	-1079.47	1009.29	1.14787	-1022.97	924.247	-50.1272	-1058.98	891.361	-53.7564	-972.046	846.072
650	0	166.833	-1041.66	1547.8	266.579	-1034.06	1543.78	165.919	-1210.41	1586.4	279.094	-1211.26	1585.3	225.493	-1262.03	1399.6	198.853	-1307.36	1182.47	217.744	-1129.44	1333.49	216.275	-1067.1	1204.28	293.246	-1325.23	1225.76	48.8561	-1204.59	1366.4	-14.3943	-1185.98	1141.08	-19.8295	-1186.08	1071.75	-24.8548	-1071.82	1008.53	1.31912	-1017.25	922.082	-49.5439	-1054.54	889.999	-53.6936	-969.207	842.063
651	0	166.713	-1028.63	1550.27	266.449	-1021.01	1546.1	165.852	-1197.29	1589.19	279.034	-1198.13	1587.92	225.385	-1249.26	1402.46	199.206	-1294.98	1185.63	217.253	-1116.85	1336.06	215.609	-1054.77	1206.79	293.77	-1312.53	1228.88	48.5678	-1192.38	1368.93	-13.4294	-1175.74	1142.88	-18.2475	-1176.88	1073.53	-24.354	-1064.49	1007.82	1.45929	-1011.96	919.937	-48.9929	-1050.55	888.762	-53.635	-967.007	838.041
652	0	166.499	-1015.67	1552.76	266.228	-1008.04	1548.45	165.683	-1184.22	1592.05	278.87	-1185.06	1590.63	225.207	-1236.6	1405.4	199.522	-1282.86	1188.86	216.721	-1104.39	1338.71	214.96	-1042.61	1209.41	294.26	-1299.97	1232.13	48.2283	-1180.29	1371.49	-12.4947	-1165.67	1144.73	-16.6683	-1167.85	1075.4	-23.8847	-1057.45	1007.15	1.56545	-1007.09	917.824	-48.4767	-1046.96	887.654	-53.5809	-965.402	834.049
653	0	166.195	-1002.77	1555.23	265.917	-995.139	1550.79	165.418	-1171.21	1594.93	278.608	-1172.06	1593.38	224.971	-1224.04	1408.37	199.807	-1270.95	1192.12	216.165	-1092.04	1341.4	214.352	-1030.59	1212.09	294.723	-1287.54	1235.45	47.851	-1168.32	1374.04	-11.5908	-1155.78	1146.6	-15.0991	-1158.98	1077.3	-23.4511	-1050.7	1006.52	1.63552	-1002.59	915.75	-47.9963	-1043.75	886.674	-53.5322	-964.344	830.121
654	0	165.803	-989.96	1557.66	265.521	-982.315	1553.11	165.065	-1158.28	1597.79	278.257	-1159.12	1596.12	224.689	-1211.59	1411.34	200.071	-1259.23	1195.34	215.6	-1079.79	1344.09	213.805	-1018.67	1214.79	295.163	-1275.22	1238.77	47.4495	-1156.45	1376.52	-10.7165	-1146.06	1148.45	-13.546	-1150.28	1079.22	-23.0562	-1044.23	1005.9	1.66841	-998.439	913.72	-47.5506	-1040.87	885.818	-53.4898	-963.779	826.291
655	0	165.331	-977.231	1560	265.046	-969.568	1555.37	164.636	-1145.42	1600.56	277.826	-1146.26	1598.82	224.378	-1199.22	1414.24	200.324	-1247.65	1198.47	215.04	-1067.63	1346.73	213.334	-1006.85	1217.47	295.59	-1262.98	1242.05	47.0373	-1144.67	1378.89	-9.86969	-1136.52	1150.25	-12.0138	-1141.75	1081.11	-22.7016	-1038.02	1005.29	1.66408	-994.612	911.733	-47.1364	-1038.29	885.074	-53.4552	-963.652	822.583
656	0	164.784	-964.587	1562.23	264.497	-956.895	1557.53	164.142	-1132.66	1603.21	277.328	-1133.48	1601.41	224.049	-1186.92	1417.02	200.576	-1236.17	1201.46	214.495	-1055.55	1349.27	212.947	-995.079	1220.06	296.01	-1250.8	1245.21	46.6263	-1132.97	1381.12	-9.04738	-1127.16	1151.95	-10.5063	-1133.38	1082.93	-22.3882	-1032.06	1004.67	1.62362	-991.073	909.787	-46.7487	-1035.96	884.425	-53.4294	-963.904	819.018
657	0	164.171	-952.028	1564.3	263.883	-944.292	1559.58	163.596	-1119.98	1605.68	276.773	-1120.77	1603.86	223.716	-1174.69	1419.65	200.837	-1224.76	1204.25	213.977	-1043.52	1351.66	212.648	-983.348	1222.53	296.43	-1238.67	1248.21	46.2273	-1121.32	1383.16	-8.24602	-1117.98	1153.53	-9.0259	-1125.19	1084.65	-22.1155	-1026.34	1004.01	1.54921	-987.79	907.875	-46.3809	-1033.86	883.852	-53.4133	-964.475	815.608
658	0	163.5	-939.549	1566.21	263.212	-931.752	1561.49	163.009	-1107.4	1607.93	276.175	-1108.14	1606.12	223.392	-1162.5	1422.08	201.119	-1213.4	1206.81	213.49	-1031.53	1353.87	212.43	-971.632	1224.81	296.857	-1226.57	1251	45.8486	-1109.71	1384.98	-7.46188	-1108.98	1154.95	-7.57436	-1117.16	1086.24	-21.8822	-1020.83	1003.3	1.44408	-984.729	905.99	-46.0242	-1031.95	883.333	-53.4071	-965.304	812.361
659	0	162.782	-927.144	1567.9	262.494	-919.268	1563.22	162.395	-1094.9	1609.92	275.546	-1095.57	1608.16	223.086	-1150.35	1424.27	201.43	-1202.06	1209.08	213.04	-1019.58	1355.86	212.283	-959.917	1226.86	297.295	-1214.48	1253.54	45.4964	-1098.12	1386.55	-6.69134	-1100.14	1156.19	-6.15264	-1109.28	1087.67	-21.6861	-1015.52	1002.53	1.31236	-981.855	904.122	-45.669	-1030.2	882.842	-53.4106	-966.33	809.279
660	0	162.024	-914.805	1569.37	261.736	-906.83	1564.74	161.764	-1082.48	1611.61	274.898	-1083.07	1609.93	222.806	-1138.21	1426.19	201.776	-1190.72	1211.06	212.627	-1007.63	1357.57	212.192	-948.189	1228.63	297.748	-1202.39	1255.79	45.1741	-1086.56	1387.84	-5.93115	-1091.46	1157.22	-4.7613	-1101.56	1088.92	-21.5245	-1010.39	1001.67	1.15892	-979.136	902.258	-45.3046	-1028.56	882.355	-53.4223	-967.494	806.356
661	0	161.237	-902.519	1570.59	260.948	-894.425	1566.05	161.128	-1070.13	1612.98	274.242	-1070.62	1611.4	222.557	-1126.08	1427.81	202.161	-1179.38	1212.7	212.248	-995.681	1359	212.135	-936.442	1230.08	298.217	-1190.3	1257.72	44.8824	-1075	1388.84	-5.17875	-1082.93	1158.02	-3.40076	-1093.97	1089.97	-21.3939	-1005.42	1000.71	0.98913	-976.536	900.388	-44.9198	-1027.02	881.849	-53.4402	-968.736	803.588
662	0	160.428	-890.275	1571.53	260.137	-882.043	1567.1	160.494	-1057.84	1614.02	273.587	-1058.2	1612.56	222.343	-1113.93	1429.11	202.586	-1168.02	1214	211.901	-983.723	1360.09	212.09	-924.671	1231.18	298.699	-1178.19	1259.3	44.6195	-1063.44	1389.52	-4.43247	-1074.53	1158.58	-2.07155	-1086.51	1090.8	-21.2909	-1000.57	999.648	0.808582	-974.021	898.5	-44.5039	-1025.53	881.3	-53.461	-970.002	800.962
663	0	159.606	-878.058	1572.19	259.313	-869.67	1567.89	159.871	-1045.59	1614.7	272.94	-1045.81	1613.39	222.162	-1101.77	1430.08	203.047	-1156.65	1214.95	211.577	-971.744	1360.85	212.035	-912.878	1231.9	299.189	-1166.07	1260.53	44.381	-1051.87	1389.89	-3.69175	-1066.25	1158.89	-0.774516	-1079.16	1091.4	-21.212	-995.834	998.465	0.622788	-971.557	896.585	-44.047	-1024.06	880.691	-53.4808	-971.239	798.466
664	0	158.778	-865.854	1572.54	258.48	-857.295	1568.38	159.262	-1033.37	1615.02	272.306	-1033.44	1613.86	222.012	-1089.58	1430.7	203.535	-1145.25	1215.55	211.269	-959.737	1361.25	211.947	-901.064	1232.22	299.68	-1153.93	1261.41	44.1604	-1040.28	1389.93	-2.95737	-1058.06	1158.96	0.48895	-1071.89	1091.76	-21.154	-991.176	997.157	0.436801	-969.112	894.635	-43.5405	-1022.58	880.007	-53.4948	-972.396	796.089
665	0	157.949	-853.646	1572.59	257.645	-844.906	1568.59	158.669	-1021.17	1614.98	271.69	-1021.06	1613.99	221.887	-1077.34	1430.99	204.041	-1133.83	1215.82	210.966	-947.696	1361.3	211.805	-889.232	1232.15	300.159	-1141.78	1261.92	43.9492	-1028.68	1389.66	-2.23157	-1049.94	1158.78	1.71677	-1064.69	1091.89	-21.1144	-986.568	995.724	0.254849	-966.651	892.643	-42.978	-1021.06	879.238	-53.4976	-973.428	793.816
666	0	157.124	-841.42	1572.33	256.812	-832.491	1568.48	158.094	-1008.95	1614.6	271.093	-1008.67	1613.76	221.777	-1065.07	1430.93	204.549	-1122.39	1215.75	210.658	-935.616	1360.98	211.592	-877.386	1231.67	300.615	-1129.61	1262.08	43.7373	-1017.05	1389.08	-1.5182	-1041.87	1158.35	2.90601	-1057.53	1091.79	-21.0916	-981.981	994.165	0.079988	-964.142	890.607	-42.3554	-1019.46	878.38	-53.4834	-974.293	791.636
667	0	156.305	-829.162	1571.76	255.983	-820.04	1568.07	157.533	-996.716	1613.87	270.513	-996.243	1613.2	221.673	-1052.74	1430.55	205.041	-1110.91	1215.38	210.332	-923.492	1360.32	211.292	-865.527	1230.8	301.033	-1117.42	1261.91	43.5139	-1005.4	1388.21	-0.822715	-1033.83	1157.7	4.05278	-1050.39	1091.48	-21.0853	-977.383	992.486	-0.086216	-961.55	888.525	-41.6717	-1017.76	877.431	-53.4464	-974.951	789.536
668	0	155.492	-816.858	1570.89	255.16	-807.547	1567.34	156.983	-984.442	1612.83	269.946	-983.781	1612.31	221.563	-1040.36	1429.85	205.5	-1099.41	1214.72	209.976	-911.322	1359.32	210.895	-853.656	1229.57	301.396	-1105.22	1261.41	43.2671	-993.71	1387.05	-0.152252	-1025.79	1156.83	5.15215	-1043.24	1090.95	-21.0964	-972.742	990.692	-0.243952	-958.844	886.398	-40.9293	-1015.91	876.395	-53.3809	-975.368	787.507
669	0	154.687	-804.499	1569.73	254.342	-795.004	1566.32	156.437	-972.117	1611.5	269.388	-971.27	1611.11	221.432	-1027.93	1428.86	205.903	-1087.88	1213.81	209.577	-899.103	1358.01	210.393	-841.769	1227.99	301.689	-1093	1260.62	42.9848	-981.987	1385.64	0.484505	-1017.71	1155.77	6.19811	-1036.04	1090.24	-21.1275	-968.026	988.794	-0.395345	-955.989	884.229	-40.1338	-1013.89	875.278	-53.282	-975.51	785.54
670	0	153.886	-792.076	1568.3	253.528	-782.408	1565.01	155.887	-959.729	1609.9	268.831	-958.703	1609.63	221.267	-1015.44	1427.59	206.231	-1076.31	1212.65	209.123	-886.833	1356.41	209.779	-829.862	1226.11	301.897	-1080.77	1259.54	42.6551	-970.224	1383.99	1.07748	-1009.58	1154.53	7.18357	-1028.77	1089.34	-21.1827	-963.199	986.802	-0.544566	-952.951	882.024	-39.2944	-1011.65	874.091	-53.1455	-975.349	783.626
671	0	153.086	-779.582	1566.61	252.715	-769.756	1563.42	155.324	-947.271	1608.07	268.266	-946.078	1607.89	221.053	-1002.9	1426.07	206.465	-1064.69	1211.28	208.603	-874.508	1354.55	209.053	-817.924	1223.96	302.006	-1068.5	1258.22	42.2665	-958.416	1382.14	1.61544	-1001.37	1153.13	8.10049	-1021.4	1088.29	-21.2678	-958.228	984.73	-0.697825	-949.698	879.789	-38.4238	-1009.16	872.845	-52.969	-974.855	781.761
672	0	152.283	-767.013	1564.69	251.899	-757.049	1561.59	154.738	-934.735	1606.03	267.682	-933.392	1605.93	220.775	-990.306	1424.32	206.587	-1053.01	1209.71	208.004	-862.127	1352.46	208.212	-805.944	1221.59	302.004	-1056.21	1256.66	41.808	-946.56	1380.1	2.08634	-993.04	1151.59	8.94001	-1013.89	1087.1	-21.3898	-953.077	982.59	-0.863271	-946.194	877.531	-37.5378	-1006.38	871.55	-52.7515	-974.004	779.937
673	0	151.47	-754.369	1562.58	251.075	-744.289	1559.53	154.117	-922.12	1603.83	267.069	-920.647	1603.78	220.42	-977.66	1422.38	206.583	-1041.25	1207.97	207.317	-849.685	1350.19	207.259	-793.905	1219.05	301.883	-1043.86	1254.9	41.2697	-934.649	1377.9	2.47771	-984.569	1149.94	9.69265	-1006.22	1085.8	-21.5571	-947.711	980.397	-1.05078	-942.406	875.259	-36.655	-1003.28	870.22	-52.4947	-972.769	778.149
674	0	150.643	-741.649	1560.31	250.238	-731.48	1557.29	153.45	-909.424	1601.5	266.414	-907.847	1601.46	219.975	-964.964	1420.26	206.44	-1029.41	1206.07	206.532	-837.179	1347.78	206.193	-781.79	1216.38	301.635	-1031.46	1252.96	40.6428	-922.682	1375.58	2.77709	-975.926	1148.18	10.3486	-998.359	1084.38	-21.7792	-942.094	978.166	-1.27168	-938.297	872.981	-35.7961	-999.82	868.864	-52.2026	-971.125	776.394
675	0	149.795	-728.856	1557.91	249.382	-718.627	1554.9	152.725	-896.65	1599.07	265.705	-894.997	1599.03	219.429	-952.22	1418.01	206.152	-1017.46	1204.04	205.64	-824.604	1345.25	205.018	-769.579	1213.64	301.257	-1018.98	1250.86	39.92	-910.653	1373.15	2.97253	-967.085	1146.34	10.898	-990.269	1082.88	-22.066	-936.193	975.91	-1.53835	-933.834	870.706	-34.9833	-995.961	867.492	-51.8825	-969.047	774.666
676	0	148.918	-715.995	1555.43	248.501	-705.737	1552.39	151.931	-883.803	1596.59	264.93	-882.107	1596.5	218.774	-939.428	1415.64	205.715	-1005.38	1201.88	204.636	-811.955	1342.66	203.735	-757.253	1210.87	300.749	-1006.4	1248.63	39.0953	-898.56	1370.65	3.05309	-958.019	1144.44	11.3314	-981.924	1081.31	-22.4276	-929.971	973.644	-1.86381	-928.98	868.442	-34.2396	-991.67	866.112	-51.5444	-966.51	772.964
677	0	148.008	-703.071	1552.9	247.59	-692.816	1549.82	151.058	-870.889	1594.08	264.078	-869.184	1593.93	218.002	-926.588	1413.19	205.131	-993.159	1199.61	203.513	-799.226	1340.04	202.346	-744.793	1208.12	300.112	-993.716	1246.29	38.1647	-886.4	1368.09	3.0093	-948.705	1142.5	11.6401	-973.297	1079.68	-22.8738	-923.397	971.382	-2.26123	-923.703	866.2	-33.5878	-986.913	864.731	-51.2018	-963.484	771.283
678	0	147.058	-690.089	1550.38	246.643	-679.872	1547.22	150.096	-857.915	1591.59	263.139	-856.238	1591.34	217.109	-913.699	1410.7	204.403	-980.78	1197.24	202.268	-786.411	1337.44	200.852	-732.179	1205.44	299.352	-980.898	1243.87	37.1257	-874.169	1365.51	2.83362	-939.119	1140.52	11.8164	-964.361	1078.01	-23.414	-916.437	969.138	-2.74333	-917.967	863.987	-33.0496	-981.656	863.355	-50.871	-959.941	769.624
679	0	146.063	-677.057	1547.9	245.655	-666.913	1544.65	149.036	-844.89	1589.14	262.102	-843.281	1588.77	216.094	-900.759	1408.18	203.539	-968.23	1194.8	200.9	-773.504	1334.89	199.254	-719.397	1202.87	298.475	-967.929	1241.39	35.9779	-861.866	1362.94	2.52077	-929.242	1138.52	11.8542	-955.093	1076.3	-24.056	-909.06	966.924	-3.32187	-911.739	861.812	-32.6452	-975.866	861.987	-50.5714	-955.849	767.986
680	0	145.02	-663.98	1545.52	244.623	-653.944	1542.15	147.872	-831.821	1586.76	260.962	-830.322	1586.25	214.957	-887.763	1405.68	202.552	-955.496	1192.31	199.41	-760.498	1332.44	197.555	-706.433	1200.44	297.49	-954.793	1238.88	34.7226	-849.489	1360.39	2.06803	-919.058	1136.52	11.7492	-945.47	1074.58	-24.8064	-901.236	964.756	-4.00718	-904.985	859.687	-32.392	-969.514	860.631	-50.3242	-951.175	766.372
681	0	143.926	-650.863	1543.28	243.543	-640.972	1539.77	146.599	-818.718	1584.49	259.711	-817.37	1583.82	213.702	-874.707	1403.22	201.454	-942.569	1189.79	197.799	-747.387	1330.12	195.754	-693.277	1198.19	296.409	-941.475	1236.38	33.363	-837.036	1357.89	1.47536	-908.551	1134.53	11.499	-935.475	1072.86	-25.6699	-892.94	962.649	-4.80772	-897.675	857.621	-32.3045	-962.569	859.293	-50.1527	-945.883	764.786
682	0	142.779	-637.711	1541.21	242.416	-628.001	1537.55	145.214	-805.587	1582.36	258.346	-804.432	1581.5	212.336	-861.587	1400.83	200.262	-929.442	1187.27	196.072	-734.166	1327.95	193.854	-679.924	1196.16	295.243	-927.962	1233.9	31.9044	-824.504	1355.48	0.745352	-897.712	1132.57	11.1035	-925.091	1071.14	-26.649	-884.144	960.616	-5.72983	-889.779	855.626	-32.3934	-955.003	857.978	-50.0811	-939.935	763.237
683	0	141.58	-624.529	1539.36	241.239	-615.033	1535.53	143.718	-792.436	1580.38	256.868	-791.514	1579.33	210.866	-848.396	1398.55	198.993	-916.109	1184.78	194.237	-720.832	1325.98	191.859	-666.371	1194.36	294.006	-914.248	1231.5	30.3535	-811.891	1353.18	-0.116862	-886.532	1130.67	10.5646	-914.306	1069.46	-27.7441	-874.827	958.675	-6.77738	-881.267	853.716	-32.6661	-946.792	856.691	-50.1339	-933.292	761.734
684	0	140.33	-611.319	1537.76	240.015	-602.071	1533.76	142.113	-779.27	1578.58	255.277	-778.621	1577.33	209.304	-835.13	1396.41	197.666	-902.569	1182.36	192.303	-707.382	1324.22	189.773	-652.62	1192.81	292.712	-900.328	1229.2	28.719	-799.193	1351.01	-1.10395	-875.007	1128.84	9.88626	-903.109	1067.82	-28.9536	-864.969	956.842	-7.95174	-872.113	851.903	-33.1259	-937.911	855.442	-50.3349	-925.914	760.287
685	0	139.031	-598.082	1536.45	238.746	-589.114	1532.27	140.402	-766.092	1576.99	253.577	-765.753	1575.52	207.66	-821.783	1394.43	196.3	-888.819	1180.04	190.281	-693.816	1322.7	187.604	-638.679	1191.53	291.375	-886.205	1227.04	27.011	-786.406	1349.01	-2.20674	-863.135	1127.1	9.07391	-891.495	1066.25	-30.2734	-854.551	955.134	-9.25159	-862.295	850.205	-33.7725	-928.34	854.239	-50.7064	-917.761	758.912
686	0	137.689	-584.819	1535.44	237.437	-576.16	1531.08	138.594	-752.905	1575.61	251.777	-752.911	1573.93	205.95	-808.353	1392.64	194.912	-874.86	1177.88	188.187	-680.136	1321.43	185.361	-624.558	1190.54	290.009	-871.887	1225.05	25.2409	-773.527	1347.2	-3.41473	-850.918	1125.48	8.13446	-879.46	1064.77	-31.6979	-843.561	953.569	-10.673	-851.791	848.637	-34.6024	-918.059	853.094	-51.2685	-908.792	757.622
687	0	136.309	-571.531	1534.75	236.092	-563.206	1530.22	136.697	-739.71	1574.46	249.886	-740.091	1572.58	204.187	-794.838	1391.08	193.519	-860.695	1175.9	186.036	-666.347	1320.43	183.059	-610.273	1189.83	288.626	-857.388	1223.28	23.4212	-760.549	1345.6	-4.71661	-838.357	1124	7.07562	-867.003	1063.39	-33.2193	-831.987	952.166	-12.2096	-840.585	847.216	-35.6091	-907.054	852.018	-52.0379	-898.973	756.435
688	0	134.898	-558.217	1534.4	234.718	-550.249	1529.71	134.725	-726.505	1573.55	247.915	-727.289	1571.47	202.385	-781.237	1389.75	192.133	-846.329	1174.14	183.847	-652.455	1319.71	180.714	-595.844	1189.4	287.237	-842.728	1221.75	21.5651	-747.469	1344.25	-6.10077	-825.458	1122.69	5.90552	-854.129	1062.15	-34.8288	-819.823	950.942	-13.8529	-828.664	845.961	-36.784	-895.313	851.026	-53.0276	-888.267	755.365
689	0	133.465	-544.875	1534.4	233.324	-537.283	1529.56	132.691	-713.291	1572.89	245.88	-714.499	1570.63	200.56	-767.553	1388.7	190.766	-831.771	1172.65	181.639	-638.469	1319.27	178.345	-581.294	1189.26	285.851	-827.934	1220.49	19.6864	-734.281	1343.16	-7.55588	-812.226	1121.57	4.63225	-840.842	1061.06	-36.516	-807.065	949.916	-15.5926	-816.018	844.89	-38.117	-882.83	850.13	-54.2462	-876.646	754.431
690	0	132.02	-531.505	1534.73	231.918	-524.304	1529.77	130.61	-700.063	1572.5	243.796	-701.714	1570.06	198.725	-753.791	1387.92	189.424	-817.031	1171.46	179.433	-624.401	1319.11	175.978	-566.651	1189.4	284.476	-813.036	1219.53	17.7993	-720.981	1342.36	-9.07134	-798.669	1120.66	3.26342	-827.152	1060.14	-38.27	-793.713	949.103	-17.4168	-802.645	844.02	-39.597	-869.599	849.346	-55.6973	-864.084	753.647
691	0	130.574	-518.105	1535.4	230.511	-511.306	1530.32	128.5	-686.818	1572.35	241.681	-688.925	1569.77	196.896	-739.957	1387.44	188.111	-802.127	1170.59	177.252	-610.264	1319.24	173.636	-551.946	1189.81	283.117	-798.071	1218.88	15.9178	-707.563	1341.85	-10.6376	-784.794	1119.98	1.80579	-813.07	1059.41	-40.0792	-779.771	948.521	-19.3127	-788.544	843.37	-41.2128	-855.623	848.688	-57.3794	-850.562	753.029
692	0	129.136	-504.674	1536.39	229.113	-498.285	1531.23	126.38	-673.554	1572.47	239.553	-676.125	1569.76	195.083	-726.061	1387.26	186.827	-787.079	1170.06	175.117	-596.074	1319.65	171.347	-537.211	1190.46	281.776	-783.077	1218.58	14.0553	-694.026	1341.66	-12.2467	-770.611	1119.54	0.264991	-798.61	1058.9	-41.9319	-765.246	948.181	-21.2669	-773.721	842.953	-42.9535	-840.904	848.168	-59.286	-836.067	752.59
693	0	127.718	-491.212	1537.69	227.735	-485.235	1532.46	124.267	-660.266	1572.85	237.432	-663.305	1570.04	193.3	-712.113	1387.39	185.57	-771.912	1169.9	173.049	-581.847	1320.32	169.14	-522.48	1191.35	280.453	-768.097	1218.62	12.225	-680.365	1341.78	-13.892	-756.128	1119.36	-1.35465	-783.787	1058.6	-43.8161	-750.149	948.096	-23.2653	-758.185	842.786	-44.8087	-825.453	847.799	-61.4057	-820.595	752.341
694	0	126.333	-477.72	1539.27	226.389	-472.153	1534	122.18	-646.951	1573.48	235.336	-650.458	1570.59	191.555	-698.126	1387.84	184.334	-756.657	1170.1	171.07	-567.601	1321.25	167.041	-507.785	1192.46	279.147	-753.17	1219.01	10.4387	-666.581	1342.23	-15.5689	-741.357	1119.45	-3.05021	-768.621	1058.54	-45.7206	-734.495	948.274	-25.2941	-741.952	842.88	-46.7689	-809.281	847.591	-63.7224	-804.145	752.293
695	0	124.991	-464.198	1541.1	225.084	-459.037	1535.82	120.138	-633.608	1574.34	233.283	-637.578	1571.41	189.856	-684.114	1388.58	183.112	-741.35	1170.68	169.197	-553.354	1322.43	165.077	-493.158	1193.76	277.855	-738.339	1219.75	8.70705	-652.674	1343	-17.2743	-726.308	1119.81	-4.82021	-753.132	1058.72	-47.6342	-718.301	948.722	-27.3394	-725.042	843.244	-48.8256	-792.407	847.555	-66.2158	-786.728	752.456
696	0	123.704	-450.649	1543.15	223.833	-445.887	1537.89	118.157	-620.234	1575.44	231.291	-624.659	1572.49	188.211	-670.092	1389.62	181.895	-726.032	1171.61	167.447	-539.124	1323.83	163.272	-478.627	1195.24	276.568	-723.641	1220.82	7.03947	-638.646	1344.07	-19.0069	-710.993	1120.45	-6.66442	-737.341	1059.14	-49.5467	-701.588	949.443	-29.3877	-707.479	843.885	-50.9713	-774.85	847.697	-68.8627	-768.359	752.837
697	0	122.482	-437.077	1545.41	222.645	-432.703	1540.18	116.254	-606.829	1576.76	229.375	-611.7	1573.81	186.623	-656.076	1390.95	180.672	-710.745	1172.9	165.834	-524.927	1325.44	161.648	-464.215	1196.87	275.28	-709.111	1222.21	5.44367	-624.5	1345.45	-20.7669	-695.426	1121.35	-8.58372	-721.272	1059.81	-51.4488	-684.38	950.437	-31.4261	-689.291	844.808	-53.199	-756.633	848.023	-71.6367	-749.062	753.443
698	0	121.335	-423.485	1547.83	221.531	-419.487	1542.66	114.441	-593.394	1578.28	227.55	-598.698	1575.36	185.095	-642.079	1392.54	179.43	-695.536	1174.51	164.37	-510.78	1327.23	160.221	-449.942	1198.64	273.981	-694.778	1223.91	3.92582	-610.241	1347.12	-22.5558	-679.62	1122.52	-10.5798	-704.947	1060.71	-53.332	-666.704	951.701	-33.4424	-670.51	846.014	-55.5022	-737.785	848.537	-74.51	-728.866	754.279
699	0	120.272	-409.878	1550.38	220.498	-406.243	1545.28	112.731	-579.931	1579.99	225.827	-585.656	1577.12	183.628	-628.117	1394.37	178.157	-680.45	1176.42	163.061	-496.698	1329.19	159.005	-435.821	1200.52	272.66	-680.666	1225.87	2.49049	-595.877	1349.05	-24.3759	-663.589	1123.94	-12.6549	-688.391	1061.84	-55.1889	-648.588	953.229	-35.4254	-651.172	847.501	-57.8746	-718.334	849.241	-77.4533	-707.809	755.351
700	0	119.301	-396.261	1553.03	219.554	-392.977	1548.02	111.134	-566.443	1581.86	224.216	-572.575	1579.06	182.222	-614.202	1396.42	176.841	-665.533	1178.6	161.912	-482.692	1331.28	158.008	-421.858	1202.49	271.308	-666.792	1228.08	1.14074	-581.415	1351.22	-26.2303	-647.348	1125.59	-14.8114	-671.626	1063.18	-57.0132	-630.063	955.014	-37.3649	-631.315	849.266	-60.3102	-698.313	850.135	-80.4373	-685.933	756.664
701	0	118.429	-382.641	1555.75	218.707	-379.695	1550.84	109.656	-552.933	1583.88	222.724	-559.46	1581.17	180.875	-600.347	1398.65	175.47	-650.824	1181.01	160.925	-468.774	1333.5	157.234	-408.057	1204.55	269.915	-653.166	1230.49	-0.121763	-566.867	1353.61	-28.1221	-630.915	1127.45	-17.0512	-654.676	1064.73	-58.7996	-611.161	957.043	-39.2519	-610.979	851.3	-62.8025	-677.754	851.219	-83.4331	-663.286	758.221
702	0	117.659	-369.024	1558.51	217.96	-366.405	1553.7	108.301	-539.409	1586.02	221.355	-546.318	1583.4	179.585	-586.561	1401.05	174.037	-636.357	1183.61	160.096	-454.951	1335.8	156.68	-394.415	1206.68	268.474	-639.789	1233.08	-1.2966	-552.244	1356.18	-30.0545	-614.304	1129.51	-19.3759	-637.562	1066.46	-60.5441	-591.916	959.301	-41.0789	-590.207	853.593	-65.3446	-656.694	852.49	-86.413	-639.92	760.024
703	0	116.997	-355.418	1561.29	217.317	-353.114	1556.57	107.073	-525.876	1588.25	220.111	-533.157	1585.74	178.349	-572.852	1403.57	172.537	-622.158	1186.36	159.42	-441.228	1338.17	156.336	-380.926	1208.86	266.98	-626.657	1235.8	-2.38442	-537.56	1358.9	-32.0297	-597.533	1131.75	-21.7858	-620.305	1068.35	-62.2436	-572.361	961.773	-42.8397	-569.042	856.134	-67.9294	-635.168	853.945	-89.3508	-615.893	762.076
704	0	116.444	-341.829	1564.05	216.781	-339.833	1559.43	105.97	-512.342	1590.56	218.993	-519.985	1588.14	177.165	-559.224	1406.18	170.967	-608.242	1189.22	158.887	-427.609	1340.59	156.189	-367.58	1211.07	265.431	-613.759	1238.62	-3.38678	-522.829	1361.73	-34.049	-580.618	1134.12	-24.2799	-602.923	1070.38	-63.8962	-552.529	964.438	-44.53	-547.526	858.907	-70.5489	-613.213	855.577	-92.2226	-591.264	764.376
705	0	116	-328.265	1566.76	216.351	-326.569	1562.24	104.991	-498.814	1592.91	217.997	-506.813	1590.59	176.031	-545.682	1408.85	169.33	-594.613	1192.14	158.488	-414.093	1343.02	156.219	-354.365	1213.31	263.83	-601.077	1241.49	-4.30598	-508.069	1364.65	-36.1127	-563.578	1136.61	-26.8556	-585.434	1072.52	-65.5011	-532.456	967.276	-46.1469	-525.703	861.894	-73.1945	-590.867	857.379	-95.007	-566.097	766.922
706	0	115.664	-314.732	1569.42	216.026	-313.333	1564.97	104.133	-485.301	1595.26	217.12	-493.649	1593.04	174.943	-532.225	1411.53	167.635	-581.262	1195.1	158.208	-400.678	1345.43	156.403	-341.267	1215.55	262.182	-588.589	1244.39	-5.14492	-493.296	1367.61	-38.219	-546.43	1139.18	-29.5087	-567.852	1074.74	-67.0584	-512.174	970.263	-47.6893	-503.615	865.075	-75.8571	-568.168	859.339	-97.6855	-540.456	769.708
707	0	115.433	-301.237	1571.98	215.804	-300.131	1567.6	103.388	-471.811	1597.6	216.357	-480.505	1595.46	173.9	-518.851	1414.19	165.892	-568.169	1198.03	158.032	-387.359	1347.81	156.714	-328.271	1217.77	260.495	-576.271	1247.26	-5.90696	-478.525	1370.57	-40.3648	-529.193	1141.79	-32.2331	-550.191	1077.01	-68.5691	-491.716	973.372	-49.1574	-481.301	868.428	-78.5266	-545.154	861.446	-100.243	-514.408	772.725
708	0	115.302	-287.786	1574.44	215.679	-286.97	1570.1	102.753	-458.351	1599.88	215.7	-467.388	1597.81	172.9	-505.558	1416.79	164.114	-555.304	1200.91	157.946	-374.13	1350.11	157.126	-315.361	1219.96	258.782	-564.093	1250.07	-6.59579	-463.775	1373.5	-42.5448	-511.884	1144.42	-35.0211	-532.462	1079.3	-70.035	-471.114	976.578	-50.553	-458.802	871.926	-81.1924	-521.863	863.683	-102.665	-488.02	775.959
709	0	115.267	-274.383	1576.76	215.647	-273.858	1572.45	102.218	-444.93	1602.07	215.143	-454.307	1600.05	171.944	-492.339	1419.3	162.319	-542.629	1203.69	157.934	-360.982	1352.31	157.611	-302.522	1222.07	257.054	-552.026	1252.79	-7.2153	-449.061	1376.36	-44.7522	-494.521	1147.03	-37.8632	-514.677	1081.57	-71.4587	-450.397	979.849	-51.8788	-436.155	875.543	-83.8435	-498.335	866.031	-104.945	-461.357	779.392
710	0	115.319	-261.033	1578.93	215.701	-260.796	1574.64	101.776	-431.553	1604.14	214.678	-441.268	1602.15	171.031	-479.188	1421.67	160.523	-530.104	1206.33	157.98	-347.906	1354.39	158.141	-289.738	1224.08	255.327	-540.043	1255.37	-7.76941	-434.397	1379.1	-46.9783	-477.122	1149.57	-40.7485	-496.842	1083.8	-72.8429	-429.595	983.157	-53.1383	-413.393	879.25	-86.468	-474.606	868.468	-107.075	-434.485	783.003
711	0	115.452	-247.737	1580.92	215.832	-247.789	1576.63	101.42	-418.225	1606.06	214.295	-428.277	1604.08	170.162	-466.095	1423.87	158.746	-517.685	1208.79	158.07	-334.891	1356.3	158.693	-276.997	1225.96	253.618	-528.115	1257.78	-8.26191	-419.796	1381.69	-49.2132	-459.704	1152.02	-43.6643	-478.965	1085.93	-74.1907	-408.737	986.469	-54.3357	-390.551	883.016	-89.0542	-450.717	870.971	-109.052	-407.469	786.766
712	0	115.656	-234.496	1582.73	216.033	-234.836	1578.42	101.14	-404.951	1607.78	213.989	-415.336	1605.81	169.339	-453.051	1425.87	157.008	-505.333	1211.05	158.191	-321.925	1358.02	159.244	-264.287	1227.67	251.942	-516.215	1259.99	-8.69628	-405.269	1384.09	-51.4455	-442.284	1154.34	-46.5969	-461.053	1087.95	-75.5048	-387.847	989.756	-55.4751	-367.659	886.811	-91.5897	-426.704	873.513	-110.875	-380.37	790.652
713	0	115.922	-221.311	1584.33	216.295	-221.937	1579.98	100.93	-391.733	1609.28	213.75	-402.446	1607.29	168.565	-440.047	1427.63	155.328	-493.012	1213.07	158.331	-308.999	1359.52	159.776	-251.6	1229.17	250.317	-504.32	1261.97	-9.07554	-390.824	1386.27	-53.6627	-424.874	1156.49	-49.5312	-443.111	1089.82	-76.7878	-366.951	992.986	-56.5606	-344.745	890.603	-94.0626	-402.606	876.068	-112.545	-353.247	794.63
714	0	116.241	-208.178	1585.7	216.609	-209.086	1581.31	100.782	-378.57	1610.54	213.572	-389.606	1608.51	167.844	-427.071	1429.14	153.724	-480.691	1214.82	158.481	-296.099	1360.78	160.273	-238.929	1230.43	248.759	-492.407	1263.7	-9.40214	-376.469	1388.2	-55.8516	-407.49	1158.45	-52.4511	-425.143	1091.51	-78.0412	-346.071	996.13	-57.5958	-321.836	894.362	-96.4608	-378.461	878.607	-114.068	-326.157	798.669
715	0	116.603	-195.095	1586.82	216.967	-196.28	1582.38	100.689	-365.461	1611.53	213.448	-376.813	1609.45	167.18	-414.113	1430.37	152.213	-468.347	1216.28	158.634	-283.216	1361.77	160.724	-226.27	1231.41	247.287	-480.459	1265.15	-9.6778	-362.208	1389.84	-57.9984	-390.143	1160.19	-55.3398	-407.154	1093	-79.2655	-325.23	999.159	-58.5837	-298.958	898.058	-98.773	-354.305	881.105	-115.448	-299.152	802.736
716	0	117	-182.056	1587.7	217.36	-183.511	1583.19	100.646	-352.404	1612.22	213.373	-364.061	1610.07	166.577	-401.164	1431.29	150.811	-455.962	1217.45	158.785	-270.338	1362.47	161.121	-213.621	1232.09	245.915	-468.458	1266.3	-9.90344	-348.045	1391.18	-60.0888	-372.843	1161.68	-58.1795	-389.15	1094.25	-80.4599	-304.448	1002.05	-59.5264	-276.135	901.663	-100.989	-330.174	883.536	-116.693	-272.282	806.8
717	0	117.424	-169.056	1588.31	217.781	-170.772	1583.72	100.647	-339.392	1612.62	213.343	-351.344	1610.39	166.042	-388.214	1431.91	149.531	-443.526	1218.29	158.931	-257.456	1362.87	161.458	-200.98	1232.44	244.66	-456.39	1267.15	-10.0791	-333.979	1392.2	-62.1087	-355.6	1162.91	-60.952	-371.135	1095.26	-81.6223	-283.743	1004.77	-60.425	-253.39	905.151	-103.099	-306.104	885.878	-117.81	-245.593	810.83
718	0	117.866	-156.088	1588.64	218.223	-158.054	1583.98	100.689	-326.421	1612.69	213.353	-338.652	1610.37	165.579	-375.254	1432.19	148.386	-431.038	1218.82	159.071	-244.56	1362.95	161.734	-188.344	1232.45	243.536	-444.243	1267.67	-10.2039	-320.011	1392.88	-64.0438	-338.421	1163.86	-63.6386	-353.117	1096	-82.7488	-263.133	1007.31	-61.2797	-230.745	908.498	-105.094	-282.131	888.11	-118.809	-219.127	814.798
719	0	118.322	-143.144	1588.69	218.681	-145.346	1583.95	100.768	-313.482	1612.44	213.401	-325.978	1610.03	165.196	-362.277	1432.16	147.387	-418.498	1219.01	159.206	-231.644	1362.71	161.95	-175.711	1232.1	242.556	-432.008	1267.88	-10.2761	-306.137	1393.22	-65.8801	-321.315	1164.52	-66.2208	-335.104	1096.47	-83.8344	-242.636	1009.65	-62.0897	-208.224	911.684	-106.969	-258.286	890.216	-119.697	-192.923	818.68
720	0	118.787	-130.216	1588.45	219.152	-132.64	1583.64	100.883	-300.568	1611.86	213.486	-313.309	1609.35	164.898	-349.276	1431.79	146.543	-405.914	1218.89	159.341	-218.699	1362.15	162.109	-163.074	1231.4	241.733	-419.677	1267.76	-10.2932	-292.353	1393.21	-67.6043	-304.288	1164.89	-68.6798	-317.106	1096.67	-84.8723	-222.267	1011.78	-62.8532	-185.848	914.691	-108.717	-234.603	892.181	-120.485	-167.016	822.452
721	0	119.256	-117.296	1587.92	219.63	-119.924	1583.05	101.032	-287.669	1610.97	213.607	-300.637	1608.36	164.691	-336.246	1431.1	145.861	-393.295	1218.44	159.481	-205.719	1361.28	162.22	-150.427	1230.34	241.077	-407.243	1267.32	-10.2519	-278.655	1392.86	-69.2034	-287.347	1164.96	-70.9975	-299.135	1096.59	-85.8551	-202.045	1013.68	-63.5677	-163.639	917.504	-110.334	-211.111	893.996	-121.18	-141.437	826.096
722	0	119.728	-104.376	1587.11	220.116	-107.19	1582.18	101.217	-274.777	1609.76	213.766	-287.95	1607.07	164.58	-323.184	1430.09	145.346	-380.65	1217.69	159.633	-192.697	1360.09	162.29	-137.759	1228.96	240.595	-394.701	1266.56	-10.1483	-265.034	1392.17	-70.6655	-270.499	1164.75	-73.1567	-281.205	1096.24	-86.7745	-181.984	1015.34	-64.23	-141.619	920.112	-111.819	-187.842	895.651	-121.792	-116.218	829.595
723	0	120.203	-91.447	1586.02	220.608	-94.427	1581.04	101.437	-261.883	1608.26	213.962	-275.238	1605.48	164.571	-310.084	1428.78	145.002	-367.991	1216.64	159.807	-179.629	1358.62	162.335	-125.058	1227.26	240.293	-382.046	1265.51	-9.97831	-251.483	1391.16	-71.9794	-253.753	1164.25	-75.1413	-263.334	1095.62	-87.6215	-162.102	1016.77	-64.8364	-119.811	922.506	-113.169	-164.824	897.144	-122.326	-91.3825	832.935
724	0	120.68	-78.5026	1584.66	221.106	-81.6274	1579.64	101.695	-248.978	1606.48	214.199	-262.49	1603.63	164.667	-296.946	1427.18	144.829	-355.325	1215.3	160.011	-166.51	1356.87	162.369	-112.309	1225.29	240.173	-369.276	1264.15	-9.73739	-237.991	1389.84	-73.135	-237.117	1163.48	-76.9366	-245.539	1094.74	-88.3875	-142.416	1017.96	-65.3829	-98.2356	924.679	-114.384	-142.084	898.469	-122.79	-66.9563	836.105
725	0	121.162	-65.5357	1583.04	221.613	-68.7831	1578.01	101.994	-236.054	1604.43	214.481	-249.699	1601.54	164.872	-283.766	1425.31	144.827	-342.655	1213.69	160.259	-153.334	1354.87	162.411	-99.4953	1223.06	240.234	-356.389	1262.52	-9.42107	-224.546	1388.24	-74.1237	-220.599	1162.45	-78.5301	-227.842	1093.62	-89.0638	-122.942	1018.92	-65.8654	-76.917	926.627	-115.464	-119.649	899.626	-123.19	-42.9613	839.094
726	0	121.652	-52.5399	1581.19	222.131	-55.8869	1576.16	102.337	-223.104	1602.16	214.81	-236.855	1599.24	165.188	-270.543	1423.19	144.991	-329.983	1211.83	160.56	-140.098	1352.66	162.482	-86.6016	1220.63	240.472	-343.384	1260.63	-9.02508	-211.135	1386.38	-74.9379	-204.21	1161.18	-79.9111	-210.265	1092.27	-89.6428	-103.699	1019.64	-66.2796	-55.8776	928.348	-116.408	-97.5473	900.614	-123.529	-19.4185	841.895
727	0	122.152	-39.5097	1579.11	222.663	-42.9329	1574.11	102.728	-210.122	1599.68	215.191	-223.952	1596.75	165.616	-257.275	1420.85	145.316	-317.302	1209.73	160.928	-126.796	1350.25	162.604	-73.6118	1218.02	240.879	-330.26	1258.5	-8.54549	-197.744	1384.28	-75.5718	-187.961	1159.69	-81.0714	-192.83	1090.71	-90.1175	-84.7052	1020.13	-66.6214	-35.1406	929.841	-117.217	-75.8037	901.431	-123.811	3.65209	844.499
728	0	122.668	-26.4403	1576.85	223.212	-29.9158	1571.89	103.172	-197.102	1597.04	215.628	-210.984	1594.13	166.157	-243.962	1418.33	145.796	-304.602	1207.42	161.374	-113.425	1347.69	162.8	-60.5118	1215.29	241.446	-317.017	1256.15	-7.97893	-184.357	1381.98	-76.0212	-171.861	1158	-82.0048	-175.561	1088.97	-90.4819	-65.9788	1020.41	-66.887	-14.7293	931.108	-117.89	-54.4454	902.078	-124.039	26.2311	846.901
729	0	123.205	-13.3273	1574.43	223.784	-16.8313	1569.53	103.672	-184.039	1594.25	216.126	-197.945	1591.39	166.809	-230.6	1415.64	146.421	-291.865	1204.92	161.909	-99.9813	1345.01	163.092	-47.2896	1212.47	242.161	-303.656	1253.6	-7.32281	-170.956	1379.5	-76.2834	-155.923	1156.13	-82.7077	-158.482	1087.05	-90.7314	-47.5387	1020.47	-67.0726	5.33267	932.15	-118.427	-33.4991	902.554	-124.214	48.2993	849.093
730	0	123.767	-0.167175	1571.88	224.382	-3.67608	1567.08	104.233	-170.929	1591.36	216.689	-184.831	1588.58	167.57	-217.187	1412.82	147.182	-279.072	1202.25	162.545	-86.4605	1342.26	163.502	-33.9361	1209.6	243.008	-290.18	1250.9	-6.57541	-157.525	1376.9	-76.3576	-140.155	1154.1	-83.1791	-141.614	1084.99	-90.8624	-29.4031	1020.33	-67.1747	25.0217	932.972	-118.825	-12.992	902.857	-124.337	69.8371	851.071
731	0	124.359	13.043	1569.23	225.011	9.55246	1564.55	104.858	-157.769	1588.42	217.321	-171.641	1585.74	168.436	-203.723	1409.92	148.067	-266.195	1199.44	163.288	-72.8601	1339.46	164.049	-20.4447	1206.72	243.972	-276.59	1248.06	-5.73613	-144.046	1374.19	-76.2448	-124.567	1151.95	-83.4198	-124.978	1082.82	-90.8726	-11.59	1020	-67.19	44.3141	933.576	-119.081	7.04811	902.986	-124.407	90.8244	852.829
732	0	124.987	26.3055	1566.54	225.675	22.856	1562	105.55	-144.557	1585.44	218.024	-158.372	1582.91	169.403	-190.204	1406.97	149.065	-253.207	1196.53	164.147	-59.1778	1336.67	164.75	-6.81225	1203.87	245.036	-262.89	1245.12	-4.80555	-130.502	1371.43	-75.9476	-109.167	1149.7	-83.4332	-108.593	1080.55	-90.7605	5.88374	1019.49	-67.1151	63.1866	933.967	-119.193	26.5933	902.94	-124.423	111.241	854.359
733	0	125.654	39.6222	1563.84	226.377	36.2355	1559.47	106.312	-131.29	1582.49	218.8	-145.023	1580.12	170.465	-176.629	1404.02	150.164	-240.076	1193.55	165.124	-45.4126	1333.92	165.616	6.96205	1201.1	246.184	-249.083	1242.13	-3.78557	-116.88	1368.66	-75.4702	-93.9599	1147.39	-83.2247	-92.4721	1078.24	-90.5253	23.0027	1018.83	-66.9469	81.6162	934.152	-119.156	45.6154	902.718	-124.384	131.064	855.656
734	0	126.364	52.9942	1561.16	227.12	49.691	1556.99	107.145	-117.968	1579.6	219.652	-131.594	1577.43	171.615	-162.997	1401.11	151.351	-226.772	1190.55	166.221	-31.5647	1331.26	166.656	20.8761	1198.43	247.399	-235.174	1239.13	-2.67952	-103.167	1365.91	-74.8181	-78.9481	1145.05	-82.8011	-76.6288	1075.9	-90.1669	39.7529	1018.01	-66.6823	99.5802	934.137	-118.966	64.0865	902.321	-124.284	150.272	856.713
735	0	127.12	66.4218	1558.57	227.907	63.2215	1554.61	108.049	-104.59	1576.81	220.577	-118.087	1574.86	172.845	-149.307	1398.28	152.612	-213.267	1187.57	167.436	-17.6363	1328.72	167.87	34.9251	1195.91	248.665	-221.168	1236.15	-1.49216	-89.3526	1363.23	-73.9985	-64.132	1142.73	-82.1713	-61.071	1073.58	-89.6856	56.1227	1017.07	-66.3182	117.057	933.929	-118.618	81.9794	901.75	-124.12	168.841	857.524
736	0	127.923	79.9047	1556.09	228.738	76.8251	1552.37	109.023	-91.1557	1574.17	221.575	-104.504	1572.47	174.147	-135.56	1395.57	153.933	-199.538	1184.66	168.764	-3.63113	1326.35	169.255	49.1022	1193.57	249.968	-207.072	1233.26	-0.229777	-75.4331	1360.67	-73.0194	-49.5084	1140.46	-81.3451	-45.8031	1071.31	-89.0818	72.1026	1016.03	-65.8514	134.027	933.537	-118.108	99.2681	901.011	-123.885	186.747	858.082
737	0	128.772	93.4416	1553.78	229.613	90.4988	1550.31	110.063	-77.6672	1571.71	222.643	-90.8479	1570.27	175.512	-121.759	1393.05	155.301	-185.567	1181.87	170.197	10.4445	1324.18	170.801	63.3975	1191.45	251.296	-192.894	1230.49	1.09988	-61.4077	1358.28	-71.89	-35.0715	1138.28	-80.3336	-30.826	1069.13	-88.3563	87.6856	1014.89	-65.2792	150.47	932.972	-117.434	115.929	900.112	-123.572	203.967	858.382
738	0	129.667	107.03	1551.67	230.529	104.238	1548.46	111.167	-64.1262	1569.47	223.775	-77.1232	1568.32	176.928	-107.906	1390.73	156.701	-171.347	1179.27	171.72	24.5821	1322.25	172.491	77.7989	1189.58	252.638	-178.643	1227.9	2.48762	-47.2814	1356.09	-70.6203	-20.8128	1136.23	-79.1487	-16.1373	1067.09	-87.5098	102.867	1013.7	-64.599	166.369	932.244	-116.594	131.941	899.066	-123.174	220.475	858.419
739	0	130.603	120.667	1549.8	231.483	118.038	1546.87	112.328	-50.536	1567.5	224.967	-63.3356	1566.64	178.386	-94.009	1388.68	158.12	-156.881	1176.9	173.32	38.7707	1320.6	174.302	92.2915	1187.99	253.986	-164.329	1225.53	3.92288	-33.0647	1354.14	-69.2213	-6.72171	1134.36	-77.8032	-1.73169	1065.23	-86.5434	117.645	1012.46	-63.8087	181.711	931.369	-115.588	147.287	897.891	-122.679	236.251	858.19
740	0	131.576	134.347	1548.2	232.471	131.891	1545.54	113.539	-36.9011	1565.82	226.21	-49.4922	1565.27	179.875	-80.0751	1386.92	159.547	-142.184	1174.81	174.978	52.997	1319.24	176.207	106.857	1186.71	255.333	-149.967	1223.43	5.3939	-18.774	1352.48	-67.7046	7.2132	1132.71	-76.3105	12.3985	1063.58	-85.4588	132.02	1011.21	-62.9069	196.481	930.361	-114.42	161.954	896.608	-122.078	251.272	857.695
741	0	132.58	148.064	1546.9	233.486	145.789	1544.52	114.793	-23.2273	1564.47	227.495	-35.6012	1564.22	181.383	-66.1148	1385.48	160.971	-127.284	1173.07	176.672	67.2456	1318.21	178.172	121.475	1185.76	256.676	-135.571	1221.65	6.88783	-4.43092	1351.14	-66.0829	21.0035	1131.32	-74.6843	26.2622	1062.18	-84.258	145.995	1009.98	-61.8933	210.672	929.239	-113.095	175.934	895.244	-121.361	265.521	856.935
742	0	133.606	161.811	1545.93	234.52	159.722	1543.81	116.078	-9.52181	1563.47	228.813	-21.6723	1563.51	182.9	-52.1401	1384.41	162.386	-112.221	1171.7	178.379	81.4991	1317.52	180.159	136.121	1185.17	258.012	-121.159	1220.22	8.39098	9.93777	1350.15	-64.3698	34.6597	1130.21	-72.9391	39.8692	1061.07	-82.9444	159.573	1008.79	-60.7686	224.278	928.023	-111.624	189.228	893.83	-120.518	278.984	855.916
743	0	134.647	175.577	1545.3	235.566	173.68	1543.44	117.386	4.20667	1562.84	230.152	-7.71612	1563.17	184.414	-38.1651	1383.71	163.786	-97.0463	1170.76	180.075	95.7387	1317.19	182.131	150.768	1184.95	259.343	-106.747	1219.18	9.88914	24.3012	1349.54	-62.5794	48.1897	1129.42	-71.0894	53.2289	1060.26	-81.5223	172.76	1007.66	-59.5349	237.297	926.736	-110.02	201.839	892.399	-119.537	291.652	854.645
744	0	135.69	189.354	1545.02	236.612	187.65	1543.4	118.703	17.9482	1562.59	231.501	6.25542	1563.19	185.914	-24.2051	1383.41	165.17	-81.8198	1170.26	181.735	109.944	1317.23	184.047	165.385	1185.1	260.669	-92.3559	1218.54	11.3678	38.6252	1349.32	-60.7267	61.5979	1128.97	-69.15	66.35	1059.79	-79.9977	185.564	1006.63	-58.196	249.731	925.399	-108.297	213.78	890.988	-118.412	303.521	853.137
745	0	136.727	203.13	1545.1	237.648	201.619	1543.71	120.019	31.6917	1562.74	232.847	20.2297	1563.59	187.39	-10.2764	1383.5	166.537	-66.6071	1170.21	183.336	124.096	1317.63	185.869	179.939	1185.62	261.993	-78.0048	1218.34	12.8128	52.8738	1349.49	-58.8273	74.8842	1128.87	-67.1359	79.2389	1059.66	-78.3784	197.991	1005.71	-56.7572	261.586	924.037	-106.476	225.069	889.635	-117.135	314.595	851.406
746	0	137.744	216.891	1545.54	238.662	215.574	1544.34	121.32	45.425	1563.29	234.177	34.1934	1564.35	188.833	3.60418	1384	167.891	-51.4761	1170.63	184.854	138.174	1318.4	187.56	194.399	1186.51	263.32	-63.7129	1218.57	14.2103	67.0104	1350.06	-56.897	88.0433	1129.12	-65.062	91.8999	1059.89	-76.6742	210.048	1004.92	-55.2259	272.872	922.676	-104.578	235.731	888.376	-115.701	324.883	849.475
747	0	138.73	230.625	1546.34	239.643	229.5	1545.3	122.595	59.1354	1564.22	235.48	48.1332	1565.48	190.235	17.42	1384.89	169.233	-36.493	1171.49	186.267	152.159	1319.53	189.089	208.731	1187.74	264.654	-49.4983	1219.23	15.5474	80.9995	1351.02	-54.9518	101.064	1129.72	-62.9428	104.334	1060.46	-74.8966	221.743	1004.29	-53.6112	283.603	921.339	-102.626	245.794	887.246	-114.108	334.403	847.367
748	0	139.672	244.319	1547.46	240.578	243.385	1546.56	123.831	72.81	1565.53	236.743	62.0357	1566.95	191.587	31.1551	1386.17	170.568	-21.7188	1172.79	187.559	166.033	1320.99	190.429	222.905	1189.3	265.999	-35.3778	1220.33	16.8129	94.8076	1352.36	-53.0073	113.932	1130.66	-60.7925	116.54	1061.37	-73.0592	233.081	1003.82	-51.9239	293.796	920.051	-100.644	255.294	886.276	-112.357	343.178	845.114
749	0	140.558	257.961	1548.91	241.456	257.214	1548.12	125.016	86.4357	1567.19	237.953	75.8881	1568.75	192.883	44.7948	1387.81	171.898	-7.2052	1174.48	188.715	179.78	1322.77	191.561	236.895	1191.16	267.36	-21.3654	1221.83	17.9969	108.405	1354.05	-51.0783	126.624	1131.92	-58.6243	128.511	1062.59	-71.1772	244.069	1003.53	-50.1765	303.47	918.834	-98.6552	264.266	885.493	-110.455	351.236	842.748
750	0	141.376	271.537	1550.65	242.264	270.976	1549.93	126.139	100	1569.19	239.101	89.6783	1570.85	194.119	58.3261	1389.78	173.227	7.0079	1176.55	189.723	193.387	1324.85	192.473	250.678	1193.3	268.739	-7.47263	1223.72	19.0918	121.767	1356.05	-49.1786	139.117	1133.47	-56.4507	140.24	1064.11	-69.2668	254.709	1003.41	-48.3829	312.649	917.708	-96.682	272.748	884.918	-108.408	358.614	840.305
751	0	142.116	285.037	1552.66	242.994	284.66	1551.99	127.191	113.492	1571.49	240.176	103.396	1573.22	195.291	71.7382	1392.07	174.556	20.8946	1178.94	190.578	206.843	1327.19	193.159	264.24	1195.68	270.138	6.29208	1225.97	20.0923	134.875	1358.35	-47.3201	151.383	1135.29	-54.2827	151.715	1065.89	-67.3449	265.004	1003.47	-46.5577	321.356	916.692	-94.7445	280.777	884.565	-106.23	365.349	837.823
752	0	142.767	298.45	1554.9	243.635	298.256	1554.25	128.163	126.901	1574.06	241.17	117.031	1575.83	196.396	85.0228	1394.62	175.886	34.4437	1181.61	191.277	220.141	1329.77	193.623	277.572	1198.28	271.558	19.9237	1228.54	20.9954	147.715	1360.89	-45.5126	163.396	1137.32	-52.1303	162.922	1067.9	-65.4289	274.955	1003.7	-44.7164	329.616	915.798	-92.8592	288.388	884.44	-103.938	371.485	835.343
753	0	143.322	311.768	1557.33	244.181	311.757	1556.68	129.048	140.217	1576.85	242.076	130.575	1578.65	197.434	98.1741	1397.42	177.218	47.6582	1184.52	191.823	233.276	1332.56	193.875	290.674	1201.05	272.997	33.4203	1231.38	21.801	160.284	1363.64	-43.7637	175.126	1139.55	-50.0018	173.846	1070.11	-63.5352	284.563	1004.09	-42.8747	337.455	915.037	-91.0388	295.613	884.544	-101.552	377.066	832.904
754	0	143.774	324.984	1559.92	244.623	325.156	1559.26	129.84	153.434	1579.82	242.889	144.024	1581.64	198.405	111.189	1400.4	178.551	60.5536	1187.62	192.22	246.247	1335.5	193.933	303.55	1203.98	274.453	46.7837	1234.47	22.5111	172.58	1366.54	-42.0782	186.549	1141.92	-47.9039	184.471	1072.47	-61.6797	293.826	1004.62	-41.0478	344.898	914.414	-89.2917	302.481	884.866	-99.0967	382.138	830.542
755	0	144.118	338.092	1562.63	244.96	338.45	1561.94	130.536	166.546	1582.94	243.605	157.372	1584.75	199.311	124.068	1403.54	179.884	73.1558	1190.87	192.478	259.055	1338.58	193.82	316.215	1207.02	275.921	60.0181	1237.74	23.1305	184.611	1369.56	-40.4584	197.643	1144.4	-45.8418	194.782	1074.94	-59.8765	302.745	1005.28	-39.2507	351.971	913.93	-87.6213	309.017	885.393	-96.5981	386.75	828.292
756	0	144.351	351.09	1565.42	245.187	351.636	1564.68	131.135	179.549	1586.15	244.224	170.617	1587.96	200.154	136.811	1406.77	181.217	85.498	1194.23	192.61	271.705	1341.74	193.563	328.686	1210.14	277.395	73.1308	1241.16	23.6659	196.389	1372.65	-38.904	208.391	1146.94	-43.8187	204.764	1077.49	-58.1379	311.318	1006.05	-37.4972	358.699	913.58	-86.0269	315.241	886.099	-94.0849	390.95	826.182
757	0	144.473	363.976	1568.23	245.306	364.714	1567.46	131.637	192.442	1589.4	244.747	183.758	1591.21	200.939	149.425	1410.07	182.549	97.6183	1197.64	192.629	284.203	1344.94	193.191	340.988	1213.32	278.87	86.1309	1244.66	24.1254	207.932	1375.75	-37.4123	218.779	1149.5	-41.8362	214.406	1080.07	-56.4741	319.546	1006.89	-35.7997	365.106	913.354	-84.5034	321.168	886.954	-91.5865	394.786	824.234
758	0	144.487	376.75	1571.04	245.318	377.686	1570.23	132.044	205.224	1592.65	245.175	196.798	1594.46	201.67	161.915	1413.38	183.878	109.556	1201.06	192.55	296.559	1348.15	192.733	353.147	1216.5	280.34	99.0293	1248.2	24.5187	219.259	1378.83	-35.9788	228.802	1152.04	-39.8944	223.7	1082.64	-54.8931	327.429	1007.78	-34.1693	371.216	913.235	-83.0423	326.813	887.922	-89.1325	398.306	822.461
759	0	144.394	389.415	1573.79	245.226	390.556	1572.96	132.362	217.899	1595.85	245.513	209.738	1597.66	202.353	174.291	1416.66	185.203	121.349	1204.45	192.39	308.783	1351.31	192.219	365.192	1219.67	281.798	111.838	1251.72	24.8559	230.395	1381.83	-34.5973	238.459	1154.53	-37.9915	232.644	1085.17	-53.4001	334.972	1008.69	-32.615	377.052	913.205	-81.6321	332.187	888.963	-86.751	401.558	820.868
760	0	144.202	401.974	1576.45	245.035	403.328	1575.6	132.596	230.468	1598.95	245.768	222.584	1600.78	202.994	186.561	1419.85	186.525	133.034	1207.76	192.165	320.888	1354.39	191.674	377.149	1222.78	283.24	124.568	1255.18	25.1472	241.365	1384.72	-33.2605	247.756	1156.92	-36.1245	241.239	1087.62	-51.9984	342.181	1009.58	-31.1442	382.636	913.238	-80.2594	337.297	890.031	-84.468	404.585	819.453
761	0	143.916	414.433	1578.97	244.753	416.009	1578.11	132.753	242.938	1601.9	245.948	235.341	1603.78	203.598	198.737	1422.92	187.841	144.639	1210.93	191.889	332.888	1357.35	191.119	389.042	1225.79	284.661	137.232	1258.51	25.4027	252.194	1387.45	-31.9604	256.705	1159.18	-34.2896	249.494	1089.95	-50.6887	349.064	1010.43	-29.7619	387.989	913.305	-78.9091	342.153	891.081	-82.3065	407.431	818.201
762	0	143.547	426.799	1581.32	244.388	428.607	1580.47	132.843	255.315	1604.67	246.06	248.017	1606.6	204.172	210.831	1425.82	189.152	156.19	1213.94	191.578	344.797	1360.14	190.572	400.891	1228.67	286.057	149.841	1261.68	25.6313	262.91	1389.98	-30.6892	265.324	1161.28	-32.4819	257.422	1092.14	-49.4697	355.633	1011.19	-28.4714	393.131	913.375	-77.5656	346.762	892.065	-80.2855	410.135	817.092
763	0	143.102	439.078	1583.46	243.946	441.13	1582.63	132.875	267.607	1607.21	246.115	260.619	1609.22	204.72	222.858	1428.51	190.456	167.703	1216.73	191.244	356.629	1362.72	190.045	412.709	1231.36	287.423	162.406	1264.63	25.8411	273.538	1392.28	-29.4392	273.635	1163.19	-30.6963	265.044	1094.15	-48.3384	361.904	1011.84	-27.2737	398.081	913.416	-76.2132	351.134	892.939	-78.4196	412.732	816.099
764	0	142.593	451.281	1585.36	243.439	453.589	1584.57	132.86	279.823	1609.5	246.123	273.158	1611.6	205.249	234.829	1430.97	191.75	179.191	1219.28	190.897	368.4	1365.06	189.544	424.504	1233.83	288.757	174.934	1267.33	26.0384	284.104	1394.33	-28.2034	281.667	1164.89	-28.9278	272.387	1095.96	-47.2901	367.896	1012.34	-26.1681	402.86	913.393	-74.8367	355.279	893.661	-76.7187	415.253	815.189
765	0	142.029	463.416	1586.99	242.874	465.993	1586.26	132.806	291.972	1611.5	246.093	285.643	1613.7	205.759	246.759	1433.14	193.032	190.659	1221.54	190.546	380.124	1367.13	189.074	436.279	1236.03	290.054	187.432	1269.74	26.2278	294.633	1396.08	-26.9759	289.452	1166.35	-27.1717	279.482	1097.55	-46.3191	373.631	1012.67	-25.1524	407.483	913.274	-73.4224	359.208	894.193	-75.1875	417.724	814.325
766	0	141.421	475.494	1588.34	242.261	478.353	1587.67	132.723	304.065	1613.18	246.034	298.085	1615.51	206.255	258.661	1435.02	194.297	202.109	1223.49	190.198	391.816	1368.9	188.633	448.031	1237.92	291.31	199.906	1271.83	26.412	305.147	1397.53	-25.7524	297.027	1167.56	-25.4244	286.366	1098.9	-45.4189	379.134	1012.8	-24.2229	411.971	913.028	-71.9581	362.937	894.505	-73.8263	420.165	813.471
767	0	140.778	487.526	1589.37	241.608	490.681	1588.78	132.622	316.113	1614.53	245.956	310.493	1617	206.737	270.547	1436.58	195.539	213.539	1225.11	189.858	403.489	1370.33	188.216	459.753	1239.47	292.52	212.356	1273.59	26.5918	315.669	1398.65	-24.5301	304.432	1168.51	-23.6836	293.08	1099.99	-44.5828	384.436	1012.72	-23.3751	416.339	912.627	-70.4343	366.483	894.572	-72.6305	422.589	812.589
768	0	140.11	499.524	1590.07	240.925	502.986	1589.57	132.508	328.128	1615.54	245.866	322.879	1618.15	207.203	282.431	1437.8	196.751	224.943	1226.39	189.527	415.157	1371.43	187.818	471.44	1240.64	293.678	224.786	1274.98	26.7661	326.219	1399.43	-23.3083	311.709	1169.18	-21.9488	299.667	1100.83	-43.8041	389.568	1012.41	-22.6039	420.607	912.045	-68.8441	369.864	894.38	-71.5915	425.008	811.645
769	0	139.424	511.497	1590.45	240.217	515.28	1590.04	132.388	340.121	1616.18	245.769	335.252	1618.95	207.652	294.323	1438.67	197.921	236.317	1227.32	189.206	426.832	1372.16	187.431	483.083	1241.42	294.776	237.194	1276.01	26.9319	336.817	1399.88	-22.0881	318.903	1169.59	-20.221	306.173	1101.4	-43.077	394.564	1011.85	-21.9039	424.792	911.263	-67.1842	373.105	893.919	-70.697	427.424	810.607
770	0	138.726	523.457	1590.48	239.491	527.572	1590.17	132.268	352.102	1616.47	245.67	347.622	1619.39	208.078	306.234	1439.18	199.041	247.653	1227.9	188.895	438.524	1372.52	187.045	494.679	1241.77	295.805	249.578	1276.67	27.0844	347.481	1399.99	-20.8732	326.058	1169.71	-18.5039	312.645	1101.71	-42.3964	399.463	1011.05	-21.2704	428.914	910.266	-65.4546	376.23	893.191	-69.9321	429.838	809.45
771	0	138.022	535.415	1590.18	238.753	539.87	1589.96	132.149	364.083	1616.41	245.572	359.997	1619.47	208.475	318.173	1439.34	200.095	258.948	1228.13	188.59	450.244	1372.5	186.652	506.226	1241.71	296.755	261.937	1276.95	27.2173	358.228	1399.77	-19.6694	333.221	1169.57	-16.8031	319.131	1101.76	-41.7589	404.303	1010	-20.6992	432.994	909.042	-63.6595	379.27	892.204	-69.2791	432.247	808.151
772	0	137.315	547.379	1589.55	238.006	552.183	1589.41	132.032	376.073	1615.99	245.475	372.385	1619.2	208.836	330.147	1439.16	201.071	270.198	1228.03	188.287	462.002	1372.13	186.244	517.726	1241.22	297.613	274.268	1276.88	27.3231	369.074	1399.22	-18.4852	340.438	1169.17	-15.1272	325.678	1101.57	-41.1626	409.125	1008.71	-20.1872	437.053	907.589	-61.8071	382.256	890.972	-68.7194	434.648	806.696
773	0	136.608	559.36	1588.61	237.253	564.517	1588.54	131.917	388.082	1615.24	245.377	384.793	1618.58	209.152	342.162	1438.63	201.952	281.406	1227.62	187.979	473.804	1371.39	185.812	529.187	1240.32	298.367	286.569	1276.45	27.3928	380.033	1398.37	-17.3312	347.755	1168.52	-13.487	332.331	1101.13	-40.6078	413.972	1007.17	-19.7327	441.117	905.906	-59.9099	385.223	889.516	-68.2331	437.035	805.076
774	0	135.902	571.365	1587.35	236.495	576.877	1587.35	131.8	400.117	1614.17	245.275	397.224	1617.63	209.412	354.223	1437.77	202.722	292.575	1226.9	187.662	485.657	1370.3	185.35	540.623	1239.03	299.003	298.839	1275.69	27.4168	391.117	1397.22	-16.2205	355.215	1167.63	-11.8957	339.135	1100.48	-40.0965	418.886	1005.41	-19.3356	445.21	903.998	-57.9844	388.21	887.861	-67.8009	439.406	803.286
775	0	135.194	583.402	1585.81	235.731	589.266	1585.86	131.677	412.184	1612.8	245.165	409.684	1616.36	209.604	366.333	1436.6	203.364	303.716	1225.9	187.326	497.568	1368.9	184.852	552.051	1237.38	299.508	311.078	1274.61	27.385	402.337	1395.8	-15.1681	362.859	1166.52	-10.369	346.13	1099.61	-39.6331	423.912	1003.45	-18.9972	449.362	901.876	-56.0512	391.258	886.035	-67.4041	441.76	801.33
776	0	134.484	595.475	1584.01	234.961	601.688	1584.1	131.54	424.29	1611.16	245.038	422.173	1614.8	209.718	378.493	1435.14	203.863	314.845	1224.64	186.964	509.542	1367.19	184.313	563.492	1235.39	299.866	323.289	1273.24	27.2868	413.704	1394.13	-14.1908	370.728	1165.2	-8.9242	353.357	1098.54	-39.2237	429.093	1001.29	-18.7206	453.604	899.554	-54.1345	394.408	884.069	-67.0257	444.102	799.214
777	0	133.767	607.589	1581.97	234.183	614.143	1582.08	131.383	436.438	1609.27	244.889	434.693	1612.97	209.74	390.703	1433.42	204.2	325.984	1223.14	186.567	521.582	1365.22	183.729	574.971	1233.12	300.067	335.475	1271.61	27.1116	425.223	1392.23	-13.3067	378.859	1163.69	-7.58013	360.85	1097.3	-38.8761	434.471	998.951	-18.5098	457.968	897.048	-52.2616	397.706	881.992	-66.6515	446.443	796.95
778	0	133.038	619.747	1579.72	233.391	626.629	1579.84	131.196	448.63	1607.16	244.706	447.242	1610.91	209.659	402.965	1431.45	204.363	337.159	1221.43	186.125	533.693	1363.01	183.096	586.515	1230.6	300.098	347.644	1269.72	26.8494	436.899	1390.14	-12.5348	387.283	1162.02	-6.35661	368.644	1095.9	-38.5992	440.091	996.466	-18.3703	462.49	894.381	-50.4625	401.199	879.836	-66.2702	448.802	794.551
779	0	132.293	631.95	1577.3	232.584	639.146	1577.41	130.968	460.867	1604.87	244.482	459.818	1608.63	209.464	415.275	1429.27	204.336	348.399	1219.51	185.63	545.877	1360.6	182.412	598.151	1227.89	299.949	359.805	1267.62	26.4907	448.735	1387.87	-11.894	396.032	1160.18	-5.27371	376.766	1094.36	-38.4029	445.992	993.853	-18.3079	467.207	891.574	-48.7691	404.934	877.628	-65.8743	451.204	792.037
780	0	131.525	644.2	1574.75	231.755	651.69	1574.82	130.69	473.149	1602.44	244.205	472.416	1606.19	209.145	427.633	1426.9	204.109	359.741	1217.42	185.072	558.138	1358.03	181.675	609.904	1225.04	299.615	371.97	1265.32	26.027	460.729	1385.45	-11.4026	405.129	1158.21	-4.35115	385.242	1092.69	-38.2973	452.215	991.135	-18.3287	472.159	888.653	-47.2143	408.96	875.396	-65.461	453.686	789.428
781	0	130.728	656.495	1572.09	230.9	664.257	1572.11	130.351	485.474	1599.89	243.865	485.034	1603.61	208.694	440.037	1424.38	203.673	371.218	1215.16	184.443	570.477	1355.34	180.881	621.798	1222.1	299.09	384.154	1262.85	25.4511	472.879	1382.92	-11.0776	414.595	1156.13	-3.60751	394.093	1090.91	-38.2921	458.796	988.336	-18.4388	477.384	885.643	-45.8313	413.324	873.163	-65.0321	456.294	786.745
782	0	129.896	668.834	1569.38	230.013	676.843	1569.33	129.94	497.839	1597.26	243.452	497.664	1600.93	208.104	452.485	1421.74	203.023	382.867	1212.75	183.733	582.898	1352.58	180.029	633.855	1219.13	298.374	396.375	1260.24	24.7575	485.178	1380.29	-10.9338	424.446	1153.94	-3.05947	403.334	1089.03	-38.3964	465.772	985.48	-18.6436	482.923	882.574	-44.6523	418.075	870.951	-64.5945	459.081	784.011
783	0	129.021	681.214	1566.64	229.089	689.442	1566.5	129.447	510.242	1594.6	242.956	510.301	1598.19	207.37	464.975	1419.01	202.156	394.721	1210.21	182.937	595.401	1349.78	179.116	646.091	1216.18	297.469	408.65	1257.51	23.9423	497.62	1377.6	-10.9831	434.691	1151.67	-2.72109	412.979	1087.08	-38.6181	473.175	982.594	-18.9475	488.817	879.471	-43.7074	423.259	868.777	-64.1599	462.112	781.252
784	0	128.098	693.632	1563.93	228.122	702.05	1563.69	128.863	522.677	1591.94	242.369	522.94	1595.43	206.492	477.508	1416.23	201.076	406.812	1207.55	182.046	607.989	1347	178.138	658.518	1213.29	296.382	421	1254.69	23.0036	510.195	1374.88	-11.2338	445.334	1149.33	-2.60317	423.034	1085.07	-38.9635	481.034	979.701	-19.3536	495.106	876.363	-43.0234	428.924	866.657	-63.7448	465.456	778.492
785	0	127.121	706.084	1561.28	227.107	714.661	1560.92	128.179	535.14	1589.31	241.682	535.575	1592.69	205.47	490.083	1413.43	199.793	419.165	1204.81	181.057	620.663	1344.26	177.092	671.146	1210.52	295.124	433.443	1251.81	21.9416	522.892	1372.16	-11.6905	456.375	1146.97	-2.71269	433.502	1083.01	-39.437	489.375	976.828	-19.8637	501.829	873.28	-42.6226	435.113	864.605	-63.3694	469.19	775.757
786	0	126.085	718.569	1558.73	226.04	727.272	1558.25	127.39	547.628	1586.76	240.89	548.2	1590.01	204.307	502.701	1410.64	198.321	431.802	1201.99	179.966	633.424	1341.63	175.975	683.978	1207.9	293.707	445.998	1248.92	20.7586	535.7	1369.47	-12.3532	467.807	1144.58	-3.05247	444.382	1080.94	-40.0413	498.219	974.001	-20.4779	509.026	870.251	-42.5216	441.87	862.632	-63.0576	473.397	773.072
787	0	124.987	731.081	1556.33	224.917	739.88	1555.72	126.49	560.136	1584.33	239.988	560.811	1587.42	203.009	515.364	1407.92	196.681	444.736	1199.13	178.772	646.272	1339.13	174.781	697.012	1205.48	292.149	458.682	1246.03	19.4592	548.608	1366.84	-13.2177	479.618	1142.21	-3.62098	455.667	1078.86	-40.7767	507.584	971.248	-21.195	516.731	867.305	-42.7307	449.233	860.748	-62.8353	478.16	770.463
788	0	123.825	743.62	1554.12	223.737	752.481	1553.37	125.476	572.66	1582.03	238.973	573.405	1584.98	201.586	528.074	1405.29	194.899	457.973	1196.27	177.475	659.206	1336.8	173.51	710.243	1203.28	290.469	471.508	1243.2	18.0498	561.602	1364.3	-14.2757	491.792	1139.88	-4.41239	467.35	1076.81	-41.6418	517.485	968.597	-22.0121	524.982	864.472	-43.2533	457.238	858.964	-62.7299	483.563	767.956
789	0	122.597	756.183	1552.13	222.498	765.075	1551.23	124.347	585.199	1579.92	237.845	585.981	1582.7	200.048	540.832	1402.79	193.006	471.511	1193.45	176.079	672.224	1334.69	172.158	723.663	1201.34	288.69	484.485	1240.47	16.5391	574.671	1361.88	-15.5147	504.31	1137.61	-5.41682	479.418	1074.81	-42.6331	527.93	966.075	-22.9254	533.808	861.782	-44.0856	465.918	857.29	-62.7687	489.688	765.577
790	0	121.305	768.768	1550.39	221.201	777.661	1549.36	123.106	597.749	1578.01	236.605	598.537	1580.62	198.409	553.641	1400.47	191.034	485.341	1190.72	174.589	685.324	1332.81	170.726	737.258	1199.69	286.833	497.618	1237.88	14.9375	587.806	1359.63	-16.9194	517.15	1135.45	-6.62075	491.855	1072.89	-43.7455	538.923	963.712	-23.9304	543.241	859.265	-45.2165	475.3	855.736	-62.9779	496.611	763.35
791	0	119.95	781.375	1548.94	219.847	790.241	1547.77	121.755	610.312	1576.34	235.257	611.074	1578.79	196.682	566.501	1398.35	189.015	499.446	1188.12	173.014	698.499	1331.21	169.218	751.013	1198.35	284.923	510.906	1235.47	13.2571	600.996	1357.57	-18.4715	530.286	1133.43	-8.0076	504.645	1071.07	-44.9725	550.467	961.537	-25.0219	553.304	856.949	-46.6282	485.406	854.313	-63.3816	504.404	761.3
792	0	118.538	794.005	1547.8	218.442	802.815	1546.5	120.3	622.887	1574.93	233.807	623.595	1577.21	194.882	579.413	1396.48	186.981	513.804	1185.71	171.365	711.744	1329.89	167.638	764.908	1197.32	282.982	524.341	1233.3	11.5114	614.232	1355.73	-20.151	543.694	1131.58	-9.55842	517.768	1069.39	-46.3065	562.556	959.577	-26.195	564.021	854.864	-48.2973	496.252	853.034	-64.0004	513.13	759.451
793	0	117.075	806.659	1546.98	216.99	815.387	1545.56	118.749	635.476	1573.8	232.262	636.102	1575.93	193.027	592.374	1394.88	184.959	528.384	1183.54	169.655	725.051	1328.89	165.997	778.92	1196.64	281.032	537.91	1231.41	9.71476	627.509	1354.15	-21.937	557.347	1129.93	-11.2527	531.205	1067.88	-47.739	575.184	957.86	-27.445	575.408	853.036	-50.1952	507.848	851.912	-64.8509	522.842	757.825
794	0	115.57	819.337	1546.5	215.501	827.959	1544.98	117.111	648.082	1572.97	230.631	648.599	1574.96	191.132	605.382	1393.58	182.972	543.151	1181.66	167.9	738.407	1328.21	164.308	793.025	1196.29	279.09	551.592	1229.82	7.88246	640.819	1352.85	-23.8082	571.221	1128.52	-13.0692	544.937	1066.56	-49.2609	588.339	956.412	-28.7679	587.478	851.492	-52.2899	520.198	850.96	-65.9447	533.581	756.443
795	0	114.034	832.043	1546.36	213.985	840.534	1544.76	115.399	660.709	1572.45	228.925	661.091	1574.31	189.211	618.431	1392.61	181.04	558.065	1180.11	166.118	751.803	1327.86	162.589	807.195	1196.29	277.172	565.362	1228.59	6.02986	654.159	1351.86	-25.7441	585.292	1127.37	-14.987	558.942	1065.47	-50.8629	602.008	955.256	-30.1606	600.24	850.252	-54.5473	533.298	850.19	-67.2882	545.375	755.325
796	0	112.48	844.778	1546.56	212.454	853.116	1544.9	113.624	673.36	1572.24	227.157	673.582	1574	187.281	631.514	1391.98	179.175	573.081	1178.94	164.328	765.224	1327.85	160.859	821.399	1196.63	275.29	579.19	1227.73	4.17223	667.526	1351.2	-27.7253	599.54	1126.51	-16.9859	573.202	1064.61	-52.5358	616.174	954.412	-31.6206	613.697	849.336	-56.9326	547.14	849.615	-68.8819	558.243	754.486
797	0	110.92	857.545	1547.09	210.922	865.707	1545.39	111.8	686.04	1572.36	225.339	686.077	1574.03	185.353	644.622	1391.7	177.384	588.151	1178.18	162.548	778.657	1328.17	159.142	835.606	1197.31	273.451	593.043	1227.26	2.32424	680.918	1350.87	-29.7345	613.944	1125.95	-19.0476	587.698	1064.02	-54.2702	630.816	953.895	-33.1463	627.846	848.761	-59.4117	561.707	849.243	-70.721	572.188	753.94
798	0	109.372	870.345	1547.95	209.402	878.309	1546.23	109.941	698.754	1572.79	223.486	698.58	1574.41	183.441	657.746	1391.79	175.669	603.223	1177.83	160.8	792.086	1328.82	157.463	849.783	1198.29	271.66	606.882	1227.19	0.49962	694.334	1350.9	-31.7567	628.488	1125.72	-21.1561	602.413	1063.7	-56.0571	645.914	953.718	-34.7363	642.679	848.538	-61.9525	576.978	849.084	-72.795	587.202	753.698
799	0	107.852	883.18	1549.11	207.913	890.922	1547.4	108.063	711.506	1573.53	221.611	711.094	1575.12	181.553	670.874	1392.23	174.025	618.246	1177.92	159.103	805.496	1329.78	155.847	863.895	1199.56	269.913	620.67	1227.53	-1.28924	707.776	1351.28	-33.7796	643.16	1125.81	-23.2983	617.329	1063.67	-57.8876	661.445	953.886	-36.3886	658.184	848.673	-64.5258	592.927	849.141	-75.0885	603.265	753.765
800	0	106.376	896.051	1550.54	206.469	903.546	1548.86	106.178	724.3	1574.57	219.728	723.62	1576.15	179.699	683.992	1393.01	172.442	633.168	1178.44	157.474	818.87	1331.03	154.32	877.912	1201.1	268.207	634.37	1228.26	-3.03153	721.242	1352	-35.7939	657.95	1126.22	-25.4642	632.433	1063.92	-59.7528	677.385	954.401	-38.1007	674.341	849.168	-67.1064	609.522	849.418	-77.5814	620.345	754.147
801	0	104.962	908.957	1552.21	205.087	916.18	1550.58	104.302	737.139	1575.89	217.85	736.161	1577.49	177.883	697.089	1394.13	170.908	647.937	1179.37	155.929	832.195	1332.55	152.905	891.803	1202.86	266.533	647.945	1229.37	-4.71826	734.735	1353.06	-37.7932	672.849	1126.95	-27.6466	647.713	1064.46	-61.6442	693.712	955.26	-39.8685	691.125	850.02	-69.6732	626.732	849.912	-80.2501	638.402	754.843
802	0	103.626	921.899	1554.11	203.782	928.822	1552.55	102.448	750.025	1577.47	215.99	748.717	1579.12	176.112	710.15	1395.56	169.405	662.507	1180.68	154.484	845.456	1334.32	151.624	905.542	1204.83	264.879	661.363	1230.83	-6.34234	748.254	1354.44	-39.7741	687.856	1127.99	-29.8417	663.157	1065.26	-63.5533	710.401	956.455	-41.6863	708.509	851.223	-72.2099	644.518	850.621	-83.0677	657.388	755.852
803	0	102.382	934.874	1556.18	202.57	941.468	1554.7	100.626	762.959	1579.29	214.159	761.285	1581.01	174.386	723.164	1397.28	167.911	676.837	1182.35	153.149	858.64	1336.3	150.494	919.106	1206.96	263.231	674.596	1232.6	-7.89855	761.799	1356.12	-41.7354	702.968	1129.31	-32.0481	678.757	1066.33	-65.4714	727.429	957.971	-43.5464	726.457	852.764	-74.7049	662.844	851.539	-86.0051	677.246	757.169
804	0	101.245	947.879	1558.39	201.464	954.114	1557.02	98.8497	775.941	1581.32	212.368	773.865	1583.14	172.708	736.117	1399.26	166.404	690.892	1184.32	151.931	871.735	1338.47	149.527	932.482	1209.22	261.573	687.62	1234.65	-9.38344	775.368	1358.08	-43.6782	718.188	1130.9	-34.2667	694.507	1067.64	-67.3898	744.776	959.793	-45.4394	744.934	854.628	-77.151	681.673	852.658	-89.0317	697.916	758.787
805	0	100.227	960.912	1560.71	200.473	966.755	1559.46	97.1269	788.97	1583.53	210.625	786.452	1585.46	171.078	749.001	1401.45	164.862	704.649	1186.55	150.837	884.732	1340.8	148.731	945.66	1211.59	259.893	700.42	1236.93	-10.7952	788.959	1360.28	-45.6053	733.518	1132.72	-36.5	710.4	1069.16	-69.2996	762.419	961.898	-47.3539	763.9	856.797	-79.5451	700.967	853.969	-92.1161	719.334	760.699
806	0	99.3361	973.967	1563.1	199.608	979.385	1561.97	95.466	802.043	1585.9	208.938	799.043	1587.95	169.495	761.807	1403.84	163.263	718.093	1189	149.866	897.623	1343.24	148.107	958.639	1214.02	258.177	712.985	1239.41	-12.1334	802.566	1362.69	-47.5204	748.965	1134.76	-38.7515	726.436	1070.88	-71.192	780.341	964.265	-49.2774	783.312	859.25	-81.8879	720.691	855.464	-95.2267	741.431	762.896
807	0	98.58	987.04	1565.53	198.875	992	1564.52	93.8735	815.156	1588.38	207.313	811.633	1590.58	167.959	774.528	1406.38	161.592	731.222	1191.62	149.016	910.403	1345.77	147.649	971.421	1216.51	256.415	725.314	1242.03	-13.3989	816.182	1365.28	-49.4277	764.534	1136.97	-41.025	742.61	1072.77	-73.0582	798.522	966.868	-51.196	803.13	861.963	-84.1829	740.812	857.134	-98.3325	764.141	765.366
808	0	97.9626	1000.12	1567.96	198.276	1004.59	1567.07	92.3543	828.304	1590.95	205.755	824.217	1593.29	166.467	787.159	1409.02	159.835	744.044	1194.35	148.281	923.069	1348.35	147.346	984.017	1219.01	254.601	737.413	1244.75	-14.5933	829.799	1368.01	-51.3315	780.229	1139.32	-43.324	758.921	1074.79	-74.8894	816.946	969.679	-53.0956	823.31	864.913	-86.4359	761.298	858.968	-101.404	787.394	768.097
809	0	97.485	1013.21	1570.36	197.813	1017.16	1569.59	90.9119	841.482	1593.58	204.266	836.79	1596.07	165.02	799.697	1411.74	157.991	756.577	1197.17	147.654	935.619	1350.96	147.179	996.441	1221.52	252.733	749.291	1247.52	-15.7195	843.406	1370.85	-53.2356	796.054	1141.78	-45.6513	775.369	1076.93	-76.6774	835.596	972.671	-54.9618	843.81	868.073	-88.6539	782.121	860.959	-104.412	811.124	771.076
810	0	97.1457	1026.3	1572.69	197.483	1029.69	1572.04	89.5482	854.682	1596.22	202.85	849.346	1598.86	163.615	812.144	1414.5	156.061	768.849	1200.01	147.122	948.054	1353.55	147.126	1008.71	1224.01	250.813	760.968	1250.31	-16.7806	856.991	1373.75	-55.143	812.011	1144.32	-48.0086	791.951	1079.14	-78.4144	854.456	975.814	-56.7809	864.591	871.416	-90.8444	803.254	863.095	-107.332	835.264	774.287
811	0	96.9404	1039.38	1574.94	197.283	1042.18	1574.39	88.2642	867.897	1598.85	201.507	861.881	1601.63	162.253	824.499	1417.24	154.056	780.894	1202.85	146.673	960.378	1356.1	147.162	1020.85	1226.46	248.848	772.464	1253.07	-17.7804	870.541	1376.69	-57.0558	828.099	1146.9	-50.396	808.664	1081.41	-80.0939	873.51	979.079	-58.5398	885.612	874.915	-93.0143	824.674	865.366	-110.14	859.752	777.712
812	0	96.8625	1052.44	1577.07	197.205	1054.62	1576.61	87.0592	881.119	1601.43	200.236	874.388	1604.35	160.931	836.767	1419.94	151.992	792.748	1205.63	146.292	972.595	1358.57	147.259	1032.87	1228.85	246.848	783.804	1255.76	-18.723	884.043	1379.61	-58.9747	844.312	1149.5	-52.812	825.505	1083.69	-81.71	892.741	982.437	-60.2267	906.836	878.542	-95.1692	846.356	867.761	-112.816	884.525	781.332
813	0	96.9033	1065.48	1579.05	197.241	1067.03	1578.68	85.9317	894.338	1603.93	199.037	886.864	1606.97	159.649	848.952	1422.55	149.89	804.451	1208.33	145.965	984.712	1360.94	147.391	1044.8	1231.16	244.825	795.016	1258.35	-19.6129	897.486	1382.49	-60.8994	860.644	1152.07	-55.2534	842.468	1085.96	-83.2583	912.132	985.858	-61.8315	928.23	882.267	-97.3131	868.279	870.263	-115.341	909.527	785.122
814	0	97.0525	1078.49	1580.87	197.381	1079.38	1580.56	84.8793	907.548	1606.31	197.908	899.304	1609.47	158.408	861.06	1425.04	147.772	816.041	1210.91	145.677	996.738	1363.18	147.531	1056.66	1233.36	242.793	806.127	1260.8	-20.4543	910.857	1385.27	-62.8284	877.08	1154.59	-57.7154	859.547	1088.19	-84.7356	931.663	989.313	-63.3459	949.758	886.063	-99.4473	890.419	872.858	-117.701	934.701	789.058
815	0	97.2982	1091.46	1582.51	197.612	1091.68	1582.25	83.8986	920.738	1608.55	196.846	911.706	1611.81	157.206	873.1	1427.38	145.663	827.554	1213.33	145.415	1008.68	1365.25	147.656	1068.47	1235.43	240.77	817.164	1263.08	-21.2516	924.147	1387.94	-64.7588	893.607	1157.02	-60.1918	876.732	1090.34	-86.14	951.316	992.772	-64.7634	971.391	889.9	-101.571	912.754	875.526	-119.885	959.995	793.11
816	0	97.6279	1104.39	1583.95	197.923	1103.93	1583.71	82.9854	933.903	1610.61	195.847	924.067	1613.95	156.046	885.08	1429.53	143.584	839.019	1215.55	145.164	1020.55	1367.13	147.746	1080.23	1237.33	238.772	828.153	1265.17	-22.0088	937.346	1390.44	-66.6871	910.205	1159.34	-62.6748	894.015	1092.4	-87.4707	971.068	996.207	-66.0794	993.098	893.75	-103.679	935.258	878.246	-121.883	985.362	797.249
817	0	98.0283	1117.28	1585.16	198.301	1116.12	1584.94	82.1352	947.036	1612.47	194.907	936.386	1615.88	154.926	897.009	1431.47	141.559	850.464	1217.56	144.915	1032.36	1368.8	147.787	1091.95	1239.04	236.815	839.116	1267.03	-22.7297	950.448	1392.74	-68.6086	926.855	1161.52	-65.1555	911.384	1094.33	-88.7277	990.896	999.591	-67.2912	1014.85	897.585	-105.766	957.906	880.996	-123.691	1010.75	801.443
818	0	98.4863	1130.12	1586.14	198.731	1128.27	1585.93	81.3429	960.13	1614.11	194.023	948.662	1617.57	153.85	908.897	1433.16	139.607	861.907	1219.33	144.658	1044.12	1370.23	147.766	1103.65	1240.52	234.916	850.075	1268.64	-23.4172	963.449	1394.81	-70.5175	943.534	1163.53	-67.6238	928.826	1096.11	-89.9117	1010.78	1002.9	-68.3974	1036.62	901.378	-107.822	980.667	883.751	-125.305	1036.13	805.661
819	0	98.9886	1142.92	1586.88	199.203	1140.37	1586.66	80.6035	973.181	1615.49	193.189	960.897	1618.99	152.818	920.754	1434.6	137.747	873.362	1220.82	144.387	1055.84	1371.4	147.676	1115.32	1241.75	233.092	861.048	1270	-24.0739	976.345	1396.63	-72.4074	960.219	1165.35	-70.069	946.328	1097.71	-91.0237	1030.68	1006.1	-69.3982	1058.38	905.103	-109.837	1003.51	886.486	-126.725	1061.45	809.874
820	0	99.5227	1155.66	1587.37	199.704	1152.42	1587.12	79.9119	986.185	1616.61	192.401	973.093	1620.13	151.833	932.589	1435.76	135.993	884.838	1222.04	144.095	1067.53	1372.29	147.515	1126.96	1242.7	231.357	872.052	1271.08	-24.7015	989.134	1398.15	-74.2707	976.89	1166.96	-72.4798	963.874	1099.11	-92.0646	1050.59	1009.17	-70.2945	1080.1	908.736	-111.797	1026.4	889.177	-127.954	1086.68	814.051
821	0	100.077	1168.36	1587.6	200.222	1164.44	1587.32	79.2629	999.141	1617.45	191.655	985.251	1620.98	150.899	944.412	1436.62	134.361	896.339	1222.95	143.781	1079.21	1372.9	147.282	1138.58	1243.35	229.727	883.099	1271.88	-25.3006	1001.82	1399.37	-76.0993	993.523	1168.33	-74.8444	981.447	1100.3	-93.035	1070.47	1012.1	-71.088	1101.76	912.256	-113.69	1049.31	891.8	-128.996	1111.77	818.168
822	0	100.641	1181.01	1587.56	200.747	1176.42	1587.25	78.6523	1012.05	1617.99	190.948	997.376	1621.52	150.019	956.232	1437.19	132.862	907.865	1223.56	143.444	1090.87	1373.21	146.98	1150.18	1243.68	228.214	894.201	1272.39	-25.8712	1014.4	1400.26	-77.8838	1010.1	1169.47	-77.151	999.031	1101.27	-93.935	1090.3	1014.86	-71.7811	1123.33	915.641	-115.501	1072.19	894.333	-129.859	1136.71	822.201
823	0	101.205	1193.62	1587.27	201.271	1188.37	1586.92	78.0759	1024.9	1618.24	190.274	1009.47	1621.75	149.197	968.056	1437.44	131.506	919.415	1223.86	143.087	1102.54	1373.22	146.615	1161.76	1243.68	226.832	905.368	1272.61	-26.4122	1026.88	1400.81	-79.6145	1026.6	1170.34	-79.3876	1016.61	1101.99	-94.764	1110.04	1017.44	-72.3761	1144.78	918.875	-117.217	1095.01	896.755	-130.55	1161.45	826.13
824	0	101.761	1206.19	1586.72	201.787	1200.3	1586.32	77.5307	1037.71	1618.17	189.633	1021.54	1621.68	148.436	979.892	1437.39	130.302	930.987	1223.85	142.712	1114.22	1372.93	146.195	1173.33	1243.35	225.59	916.609	1272.53	-26.9215	1039.26	1401.01	-81.2808	1043	1170.95	-81.5422	1034.15	1102.46	-95.5208	1129.68	1019.81	-72.8753	1166.1	921.942	-118.827	1117.73	899.052	-131.078	1185.96	829.939
825	0	102.303	1218.73	1585.9	202.288	1212.21	1585.47	77.0143	1050.46	1617.8	189.021	1033.6	1621.29	147.742	991.746	1437.03	129.256	942.58	1223.52	142.326	1125.91	1372.34	145.727	1184.9	1242.7	224.498	927.932	1272.17	-27.3964	1051.56	1400.86	-82.8719	1059.3	1171.29	-83.603	1051.65	1102.68	-96.2036	1149.18	1021.98	-73.2812	1187.24	924.829	-120.317	1140.31	901.207	-131.454	1210.22	833.616
826	0	102.827	1231.23	1584.84	202.77	1224.12	1584.38	76.5255	1063.18	1617.13	188.439	1045.64	1620.61	147.118	1003.62	1436.36	128.373	954.192	1222.9	141.935	1137.64	1371.45	145.225	1196.47	1241.73	223.563	939.343	1271.52	-27.8331	1063.77	1400.36	-84.3768	1075.47	1171.36	-85.5583	1069.07	1102.65	-96.8101	1168.52	1023.93	-73.5957	1208.2	927.527	-121.678	1162.71	903.21	-131.689	1234.19	837.151
827	0	103.328	1243.7	1583.54	203.23	1236.02	1583.05	76.064	1075.85	1616.17	187.887	1057.67	1619.63	146.569	1015.53	1435.41	127.656	965.826	1221.98	141.547	1149.4	1370.28	144.701	1208.08	1240.46	222.791	950.85	1270.59	-28.2276	1075.91	1399.52	-85.7844	1091.5	1171.15	-87.3968	1086.4	1102.37	-97.3378	1187.67	1025.65	-73.8206	1228.94	930.029	-122.903	1184.89	905.053	-131.793	1257.86	840.537
828	0	103.806	1256.15	1582.01	203.668	1247.93	1581.51	75.6307	1088.48	1614.92	187.365	1069.69	1618.37	146.099	1027.47	1434.16	127.106	977.485	1220.78	141.173	1161.2	1368.84	144.169	1219.72	1238.91	222.183	962.459	1269.4	-28.5751	1087.99	1398.36	-87.0842	1107.39	1170.68	-89.1076	1103.6	1101.84	-97.7845	1206.61	1027.15	-73.9577	1249.44	932.327	-123.983	1206.82	906.73	-131.775	1281.18	843.77
829	0	104.259	1268.58	1580.26	204.083	1259.85	1579.76	75.2276	1101.07	1613.4	186.877	1081.73	1616.86	145.71	1039.44	1432.65	126.723	989.178	1219.31	140.823	1173.05	1367.16	143.645	1231.42	1237.11	221.741	974.174	1267.95	-28.8706	1100.01	1396.88	-88.2663	1123.1	1169.95	-90.6807	1120.65	1101.07	-98.148	1225.31	1028.41	-74.0083	1269.68	934.421	-124.914	1228.46	908.235	-131.647	1304.14	846.846
830	0	104.69	1280.99	1578.32	204.476	1271.79	1577.83	74.8576	1113.63	1611.64	186.426	1093.77	1615.1	145.407	1051.45	1430.88	126.502	1000.91	1217.58	140.508	1184.95	1365.25	143.146	1243.18	1235.09	221.46	986.002	1266.26	-29.1093	1112	1395.11	-89.3219	1138.64	1168.96	-92.1068	1137.53	1100.06	-98.4267	1243.75	1029.43	-73.9739	1289.63	936.306	-125.691	1249.79	909.567	-131.417	1326.7	849.761
831	0	105.1	1293.38	1576.19	204.852	1283.75	1575.73	74.5247	1126.16	1609.64	186.016	1105.82	1613.13	145.19	1063.5	1428.88	126.439	1012.71	1215.62	140.237	1196.92	1363.13	142.69	1255.04	1232.89	221.335	997.947	1264.34	-29.2863	1123.96	1393.08	-90.243	1153.98	1167.73	-93.3777	1154.2	1098.82	-98.6197	1261.91	1030.22	-73.8558	1309.27	937.983	-126.311	1270.75	910.72	-131.093	1348.85	852.512
832	0	105.494	1305.77	1573.91	205.213	1295.74	1573.49	74.2334	1138.66	1607.43	185.652	1117.89	1610.96	145.062	1075.6	1426.66	126.526	1024.57	1213.43	140.024	1208.95	1360.84	142.294	1266.99	1230.52	221.356	1010.01	1262.2	-29.3973	1135.92	1390.8	-91.0236	1169.13	1166.26	-94.4865	1170.65	1097.37	-98.7269	1279.75	1030.78	-73.6555	1328.58	939.452	-126.773	1291.34	911.693	-130.682	1370.55	855.096
833	0	105.875	1318.16	1571.49	205.564	1307.76	1571.12	73.9892	1151.15	1605.05	185.34	1129.99	1608.63	145.021	1087.75	1424.25	126.752	1036.52	1211.03	139.877	1221.06	1358.41	141.977	1279.06	1228.04	221.511	1022.2	1259.86	-29.4384	1147.88	1388.32	-91.6592	1184.06	1164.58	-95.4277	1186.84	1095.71	-98.7489	1297.27	1031.1	-73.3745	1347.55	940.712	-127.075	1311.52	912.482	-130.192	1391.78	857.506
834	0	106.25	1330.54	1568.96	205.911	1319.81	1568.67	73.7976	1163.61	1602.51	185.087	1142.11	1606.15	145.068	1099.95	1421.68	127.105	1048.57	1208.44	139.808	1233.25	1355.86	141.754	1291.24	1225.47	221.785	1034.51	1257.33	-29.4066	1159.87	1385.66	-92.1468	1198.76	1162.69	-96.1973	1202.75	1093.85	-98.6871	1314.44	1031.2	-73.0144	1366.14	941.764	-127.216	1331.25	913.081	-129.626	1412.53	859.735
835	0	106.624	1342.92	1566.35	206.26	1331.91	1566.15	73.6646	1176.06	1599.86	184.897	1154.26	1603.57	145.201	1112.2	1418.96	127.568	1060.75	1205.69	139.824	1245.53	1353.23	141.641	1303.57	1222.85	222.161	1046.95	1254.65	-29.2999	1171.9	1382.85	-92.4857	1213.22	1160.62	-96.7929	1218.35	1091.82	-98.5436	1331.25	1031.07	-72.577	1384.35	942.609	-127.195	1350.52	913.484	-128.991	1432.76	861.773
836	0	107.003	1355.31	1563.69	206.616	1344.05	1563.6	73.5959	1188.51	1597.11	184.778	1166.45	1600.92	145.418	1124.52	1416.14	128.124	1073.08	1202.79	139.933	1257.9	1350.54	141.652	1316.03	1220.21	222.621	1059.52	1251.82	-29.1173	1184	1379.94	-92.6765	1227.44	1158.38	-97.2135	1233.64	1089.62	-98.3211	1347.67	1030.71	-72.0642	1402.14	943.246	-127.014	1369.3	913.684	-128.289	1452.45	863.608
837	0	107.394	1367.72	1561.02	206.988	1356.24	1561.04	73.5969	1200.94	1594.31	184.734	1178.67	1598.22	145.713	1136.91	1413.24	128.755	1085.55	1199.77	140.14	1270.36	1347.84	141.796	1328.64	1217.59	223.144	1072.21	1248.87	-28.8592	1196.18	1376.95	-92.7217	1241.42	1155.99	-97.4599	1248.59	1087.28	-98.0223	1363.7	1030.15	-71.4781	1419.51	943.674	-126.671	1387.57	913.672	-127.523	1471.58	865.228
838	0	107.804	1380.14	1558.37	207.381	1368.49	1558.51	73.6723	1213.38	1591.5	184.771	1190.94	1595.51	146.084	1149.37	1410.29	129.439	1098.2	1196.66	140.449	1282.93	1345.16	142.08	1341.41	1215.01	223.71	1085.02	1245.83	-28.5271	1208.46	1373.93	-92.6251	1255.13	1153.49	-97.5343	1263.19	1084.82	-97.6501	1379.32	1029.37	-70.8209	1436.43	943.892	-126.169	1405.29	913.442	-126.695	1490.14	866.615
839	0	108.239	1392.58	1555.77	207.801	1380.78	1556.04	73.8258	1225.83	1588.7	184.891	1203.25	1592.82	146.523	1161.91	1407.34	130.156	1111.03	1193.48	140.86	1295.61	1342.52	142.509	1354.33	1212.52	224.301	1097.95	1242.73	-28.1241	1220.86	1370.91	-92.3914	1268.6	1150.89	-97.4403	1277.43	1082.25	-97.2074	1394.53	1028.39	-70.0948	1452.89	943.899	-125.508	1422.46	912.983	-125.808	1508.1	867.754
840	0	108.704	1405.06	1553.27	208.254	1393.14	1553.66	74.06	1238.29	1585.96	185.098	1215.6	1590.19	147.026	1174.53	1404.41	130.884	1124.05	1190.28	141.371	1308.39	1339.97	143.08	1367.42	1210.14	224.899	1111.01	1239.6	-27.6545	1233.38	1367.93	-92.0267	1281.82	1148.22	-97.183	1291.3	1079.62	-96.6966	1409.32	1027.23	-69.3022	1468.87	943.694	-124.693	1439.04	912.291	-124.861	1525.44	868.627
841	0	109.205	1417.56	1550.88	208.745	1405.55	1551.41	74.3759	1250.77	1583.31	185.391	1228.01	1587.65	147.584	1187.23	1401.55	131.603	1137.27	1187.1	141.979	1321.28	1337.53	143.79	1380.68	1207.9	225.487	1124.18	1236.47	-27.1243	1246.05	1365.04	-91.5374	1294.79	1145.53	-96.7682	1304.82	1076.94	-96.1196	1423.67	1025.88	-68.4453	1484.35	943.276	-123.726	1455.01	911.361	-123.855	1542.14	869.215
842	0	109.747	1430.11	1548.66	209.278	1418.03	1549.3	74.7729	1263.28	1580.79	185.77	1240.46	1585.23	148.19	1200.02	1398.8	132.295	1150.68	1183.96	142.674	1334.27	1335.24	144.627	1394.1	1205.84	226.052	1137.46	1233.39	-26.5404	1258.85	1362.27	-90.9306	1307.53	1142.85	-96.203	1317.98	1074.27	-95.4779	1437.6	1024.38	-67.5266	1499.32	942.646	-122.613	1470.36	910.194	-122.791	1558.18	869.503
843	0	110.332	1442.7	1546.63	209.855	1430.57	1547.39	75.2485	1275.82	1578.44	186.231	1252.97	1582.97	148.835	1212.9	1396.2	132.944	1164.28	1180.93	143.446	1347.37	1333.12	145.576	1407.69	1203.98	226.586	1150.84	1230.4	-25.9115	1271.8	1359.66	-90.214	1320.06	1140.22	-95.4949	1330.8	1071.62	-94.7726	1451.11	1022.73	-66.5487	1513.76	941.806	-121.361	1485.06	908.793	-121.668	1573.54	869.474
844	0	110.962	1455.33	1544.82	210.478	1443.17	1545.68	75.7983	1288.4	1576.29	186.77	1265.53	1580.9	149.51	1225.86	1393.77	133.539	1178.06	1178.05	144.282	1360.56	1331.22	146.618	1421.42	1202.34	227.079	1164.33	1227.54	-25.247	1284.89	1357.26	-89.3951	1332.39	1137.68	-94.6524	1343.28	1069.06	-94.004	1464.19	1020.96	-65.5141	1527.66	940.759	-119.98	1499.1	907.169	-120.486	1588.21	869.114
845	0	111.638	1468.03	1543.26	211.147	1455.83	1544.21	76.416	1301.03	1574.37	187.378	1278.15	1579.05	150.206	1238.9	1391.57	134.072	1192	1175.37	145.164	1373.83	1329.54	147.727	1435.3	1200.95	227.531	1177.9	1224.85	-24.5577	1298.11	1355.09	-88.4822	1344.53	1135.27	-93.6843	1355.44	1066.61	-93.1725	1476.85	1019.09	-64.4259	1541.01	939.51	-118.48	1512.46	905.336	-119.247	1602.15	868.413
846	0	112.358	1480.77	1541.98	211.859	1468.56	1542.99	77.0933	1313.71	1572.73	188.048	1290.83	1577.44	150.913	1252.02	1389.63	134.542	1206.1	1172.94	146.075	1387.18	1328.12	148.875	1449.3	1199.84	227.94	1191.56	1222.38	-23.8551	1311.44	1353.19	-87.4834	1356.52	1133.04	-92.5996	1367.31	1064.32	-92.2783	1489.09	1017.14	-63.2872	1553.79	938.07	-116.875	1525.13	903.316	-117.95	1615.35	867.362
847	0	113.119	1493.58	1540.99	212.611	1481.34	1542.04	77.8201	1326.44	1571.38	188.768	1303.56	1576.1	151.622	1265.2	1387.97	134.951	1220.31	1170.81	146.994	1400.59	1326.98	150.031	1463.41	1199.01	228.311	1205.28	1220.18	-23.1512	1324.87	1351.6	-86.4075	1368.36	1131.02	-91.4081	1378.89	1062.23	-91.3217	1500.94	1015.14	-62.1018	1566.01	936.449	-115.18	1537.11	901.135	-116.597	1627.79	865.959
848	0	113.915	1506.44	1540.31	213.396	1494.18	1541.38	78.5849	1339.24	1570.34	189.525	1316.34	1575.05	152.324	1278.44	1386.63	135.306	1234.62	1169.02	147.901	1414.05	1326.13	151.162	1477.58	1198.47	228.65	1219.05	1218.28	-22.4587	1338.37	1350.34	-85.2637	1380.09	1129.26	-90.1199	1390.22	1060.38	-90.3038	1512.39	1013.13	-60.8738	1577.64	934.661	-113.413	1548.38	898.824	-115.189	1639.45	864.203
849	0	114.741	1519.36	1539.95	214.209	1507.07	1541	79.3747	1352.09	1569.64	190.305	1329.17	1574.31	153.008	1291.72	1385.64	135.618	1248.97	1167.62	148.773	1427.52	1325.59	152.234	1491.78	1198.23	228.964	1232.84	1216.72	-21.7899	1351.91	1349.42	-84.0618	1391.71	1127.78	-88.7454	1401.31	1058.81	-89.2264	1523.45	1011.12	-59.608	1588.69	932.722	-111.594	1558.95	896.422	-113.731	1650.32	862.102
850	0	115.587	1532.33	1539.91	215.039	1520	1540.92	80.1753	1365.01	1569.3	191.095	1342.05	1573.9	153.666	1305.03	1385	135.899	1263.34	1166.64	149.59	1441.01	1325.36	153.218	1505.98	1198.29	229.262	1246.65	1215.55	-21.1571	1365.46	1348.88	-82.8121	1403.24	1126.62	-87.2959	1412.19	1057.54	-88.0925	1534.15	1009.15	-58.31	1599.16	930.654	-109.741	1568.84	893.966	-112.225	1660.38	859.666
851	0	116.443	1545.35	1540.2	215.876	1532.97	1541.13	80.9723	1377.98	1569.31	191.878	1354.97	1573.81	154.29	1318.35	1384.74	136.163	1277.66	1166.11	150.331	1454.47	1325.44	154.083	1520.13	1198.65	229.555	1260.45	1214.78	-20.5717	1378.99	1348.71	-81.5258	1414.69	1125.79	-85.7828	1422.87	1056.6	-86.9063	1544.48	1007.24	-56.9861	1609.05	928.478	-107.878	1578.04	891.498	-110.676	1669.62	856.913
852	0	117.297	1558.4	1540.8	216.708	1545.97	1541.63	81.7505	1391.01	1569.69	192.64	1367.93	1574.06	154.872	1331.66	1384.87	136.421	1291.9	1166.04	150.979	1467.9	1325.85	154.806	1534.19	1199.29	229.85	1274.2	1214.44	-20.0444	1392.47	1348.91	-80.2149	1426.06	1125.3	-84.2183	1433.37	1056.01	-85.6738	1554.46	1005.42	-55.6434	1618.37	926.217	-106.024	1586.57	889.062	-109.091	1678.04	853.866
853	0	118.136	1571.5	1541.7	217.522	1558.99	1542.4	82.4952	1404.09	1570.43	193.365	1380.92	1574.64	155.404	1344.94	1385.37	136.684	1306	1166.45	151.518	1481.27	1326.56	155.366	1548.12	1200.21	230.156	1287.9	1214.55	-19.5841	1405.85	1349.49	-78.8918	1437.37	1125.17	-82.615	1443.71	1055.77	-84.4025	1564.1	1003.71	-54.2902	1627.12	923.896	-104.202	1594.46	886.696	-107.477	1685.64	850.553
854	0	118.945	1584.61	1542.88	218.305	1572.02	1543.43	83.1921	1417.21	1571.51	194.039	1393.93	1575.54	155.881	1358.18	1386.25	136.961	1319.93	1167.32	151.936	1494.56	1327.58	155.747	1561.89	1201.38	230.481	1301.52	1215.09	-19.1985	1419.1	1350.42	-77.569	1448.59	1125.38	-80.9859	1453.9	1055.89	-83.1014	1573.42	1002.12	-52.9352	1635.32	921.543	-102.432	1601.74	884.442	-105.842	1692.42	847.007
855	0	119.71	1597.74	1544.32	219.042	1585.05	1544.7	83.8277	1430.35	1572.93	194.649	1406.96	1576.76	156.298	1371.36	1387.5	137.259	1333.64	1168.63	152.223	1507.75	1328.88	155.941	1575.45	1202.8	230.831	1315.04	1216.07	-18.8931	1432.2	1351.68	-76.2595	1459.73	1125.93	-79.3438	1463.94	1056.35	-81.7812	1582.42	1000.68	-51.5885	1642.98	919.181	-100.734	1608.44	882.333	-104.195	1698.4	843.268
856	0	120.416	1610.86	1545.99	219.72	1598.08	1546.18	84.3899	1443.52	1574.66	195.183	1419.99	1578.28	156.652	1384.46	1389.08	137.582	1347.09	1170.35	152.373	1520.83	1330.45	155.943	1588.79	1204.43	231.212	1328.43	1217.46	-18.6716	1445.12	1353.25	-74.9755	1470.77	1126.78	-77.7017	1473.84	1057.13	-80.4539	1591.11	999.391	-50.2604	1650.12	916.837	-99.1266	1614.59	880.401	-102.546	1703.6	839.377
857	0	121.049	1623.98	1547.87	220.324	1611.08	1547.86	84.8681	1456.69	1576.67	195.63	1433.02	1580.07	156.94	1397.46	1390.98	137.932	1360.27	1172.45	152.385	1533.78	1332.27	155.756	1601.89	1206.27	231.627	1341.69	1219.25	-18.5355	1457.82	1355.09	-73.7286	1481.69	1127.93	-76.072	1483.6	1058.22	-79.1325	1599.49	998.262	-48.9622	1656.76	914.534	-97.6256	1620.24	878.671	-100.907	1708.03	835.382
858	0	121.594	1637.07	1549.92	220.841	1624.07	1549.7	85.2534	1469.86	1578.94	195.984	1446.04	1582.12	157.162	1410.36	1393.16	138.31	1373.16	1174.87	152.262	1546.59	1334.31	155.389	1614.75	1208.29	232.08	1354.81	1221.4	-18.4841	1470.31	1357.16	-72.5291	1492.47	1129.32	-74.4664	1493.21	1059.58	-77.8306	1607.59	997.293	-47.7053	1662.92	912.294	-96.2446	1625.41	877.161	-99.29	1711.75	831.331
859	0	122.038	1650.12	1552.1	221.259	1637.02	1551.67	85.539	1483	1581.43	196.238	1459.03	1584.38	157.319	1423.14	1395.59	138.717	1385.75	1177.56	152.009	1559.25	1336.54	154.857	1627.36	1210.48	232.572	1367.77	1223.88	-18.5145	1482.56	1359.42	-71.3857	1503.09	1130.93	-72.8956	1502.67	1061.18	-76.5619	1615.39	996.482	-46.5013	1668.63	910.136	-94.9944	1630.16	875.883	-97.7076	1714.78	827.273
860	0	122.369	1663.12	1554.39	221.568	1649.94	1553.75	85.7204	1496.1	1584.09	196.389	1472	1586.84	157.414	1435.8	1398.24	139.15	1398.04	1180.47	151.634	1571.76	1338.93	154.179	1639.73	1212.81	233.103	1380.57	1226.63	-18.6218	1494.56	1361.83	-70.3052	1513.52	1132.72	-71.3689	1511.97	1062.98	-75.34	1622.9	995.821	-45.3618	1673.91	908.076	-93.8821	1634.51	874.843	-96.1737	1717.17	823.258
861	0	122.577	1676.06	1556.74	221.758	1662.81	1555.91	85.7954	1509.16	1586.89	196.435	1484.93	1589.44	157.451	1448.33	1401.04	139.606	1410.06	1183.54	151.151	1584.12	1341.46	153.382	1651.88	1215.26	233.672	1393.22	1229.61	-18.7987	1506.33	1364.34	-69.2917	1523.74	1134.63	-69.8941	1521.08	1064.94	-74.1777	1630.14	995.3	-44.2975	1678.79	906.127	-92.9114	1638.51	874.038	-94.7024	1718.98	819.334
862	0	122.653	1688.94	1559.12	221.821	1675.63	1558.12	85.7638	1522.15	1589.78	196.378	1497.81	1592.16	157.435	1460.74	1403.97	140.085	1421.82	1186.72	150.574	1596.33	1344.07	152.492	1663.83	1217.79	234.276	1405.72	1232.76	-19.0364	1517.86	1366.9	-68.3473	1533.73	1136.64	-68.4773	1530	1067.01	-73.0868	1637.09	994.904	-43.3186	1683.3	904.297	-92.0821	1642.2	873.46	-93.3079	1720.25	815.543
863	0	122.591	1701.73	1561.5	221.754	1688.4	1560.35	85.6279	1535.07	1592.71	196.222	1510.65	1594.95	157.372	1473.02	1406.97	140.583	1433.36	1189.94	149.918	1608.4	1346.74	151.54	1675.6	1220.39	234.911	1418.08	1236.04	-19.3246	1529.17	1369.46	-67.4713	1543.46	1138.69	-67.1226	1538.72	1069.16	-72.0777	1643.76	994.614	-42.4342	1687.46	902.589	-91.3902	1645.6	873.093	-92.0046	1721.05	811.925
864	0	122.387	1714.44	1563.84	221.551	1701.12	1562.57	85.3921	1547.9	1595.63	195.972	1523.43	1597.76	157.271	1485.18	1410	141.099	1444.69	1193.16	149.201	1620.33	1349.42	150.554	1687.21	1223.02	235.573	1430.31	1239.38	-19.6519	1540.28	1371.99	-66.6609	1552.93	1140.75	-65.8324	1547.21	1071.34	-71.1592	1650.16	994.41	-41.6518	1691.3	901.003	-90.8281	1648.74	872.916	-90.8059	1721.44	808.511
865	0	122.039	1727.06	1566.11	221.213	1713.78	1564.75	85.0628	1560.63	1598.51	195.636	1536.15	1600.57	157.139	1497.23	1413.01	141.632	1455.87	1196.33	148.439	1632.14	1352.08	149.563	1698.71	1225.65	236.259	1442.43	1242.74	-20.0065	1551.21	1374.45	-65.911	1562.11	1142.78	-64.6067	1555.46	1073.52	-70.3381	1656.29	994.27	-40.9773	1694.86	899.533	-90.3844	1651.64	872.903	-89.7245	1721.49	805.325
866	0	121.549	1739.59	1568.27	220.741	1726.39	1566.86	84.6478	1573.26	1601.29	195.222	1548.81	1603.31	156.985	1509.18	1415.96	142.183	1466.92	1199.4	147.649	1643.85	1354.67	148.591	1710.1	1228.24	236.965	1454.46	1246.04	-20.3768	1561.99	1376.78	-65.2154	1571.01	1144.74	-63.444	1563.46	1075.65	-69.6195	1662.14	994.169	-40.4149	1698.16	898.172	-90.045	1654.33	873.021	-88.7715	1721.25	802.382
867	0	120.92	1752.01	1570.31	220.137	1738.95	1568.88	84.1566	1585.78	1603.93	194.741	1561.41	1605.96	156.818	1521.04	1418.79	142.755	1477.88	1202.33	146.846	1655.46	1357.15	147.656	1721.43	1230.75	237.687	1466.41	1249.25	-20.7518	1572.63	1378.96	-64.5665	1579.61	1146.59	-62.3408	1571.21	1077.7	-69.0067	1667.74	994.082	-39.9668	1701.24	896.906	-89.793	1656.83	873.237	-87.9564	1720.79	799.689
868	0	120.156	1764.35	1572.18	219.406	1751.46	1570.77	83.5996	1598.2	1606.38	194.205	1573.96	1608.47	156.645	1532.83	1421.47	143.35	1488.79	1205.07	146.043	1667	1359.49	146.773	1732.71	1233.13	238.421	1478.3	1252.31	-21.122	1583.17	1380.95	-63.9562	1587.93	1148.31	-61.2921	1578.7	1079.64	-68.501	1673.08	993.984	-39.6332	1704.11	895.72	-89.6096	1659.15	873.514	-87.2861	1720.17	797.243
869	0	119.266	1776.59	1573.87	218.556	1763.92	1572.52	82.9877	1610.5	1608.63	193.625	1586.45	1610.8	156.474	1544.55	1423.96	143.971	1499.68	1207.59	145.251	1678.47	1361.65	145.948	1743.97	1235.34	239.165	1490.15	1255.17	-21.4793	1593.63	1382.72	-63.3765	1595.98	1149.86	-60.2918	1585.93	1081.44	-68.1019	1678.18	993.851	-39.4124	1706.81	894.594	-89.4746	1661.31	873.816	-86.7652	1719.46	795.033
870	0	118.258	1788.74	1575.34	217.595	1776.34	1574.09	82.332	1622.7	1610.62	193.012	1598.89	1612.92	156.311	1556.23	1426.23	144.62	1510.58	1209.86	144.479	1689.9	1363.59	145.185	1755.2	1237.34	239.914	1501.97	1257.79	-21.8182	1604.03	1384.26	-62.8199	1603.76	1151.24	-59.3329	1592.93	1083.07	-67.8074	1683.05	993.658	-39.3009	1709.38	893.511	-89.367	1663.32	874.104	-86.3952	1718.7	793.043
871	0	117.143	1800.81	1576.59	216.532	1788.73	1575.46	81.6434	1634.8	1612.34	192.378	1611.3	1614.8	156.158	1567.88	1428.24	145.297	1521.49	1211.85	143.731	1701.29	1365.28	144.478	1766.42	1239.08	240.664	1513.78	1260.13	-22.1355	1614.4	1385.53	-62.2798	1611.3	1152.42	-58.4082	1599.69	1084.52	-67.6138	1687.7	993.386	-39.2935	1711.83	892.45	-89.2659	1665.2	874.346	-86.175	1717.94	791.249
872	0	115.932	1812.81	1577.59	215.377	1801.08	1576.61	80.932	1646.8	1613.76	191.733	1623.66	1616.42	156.018	1579.5	1429.98	146	1532.45	1213.54	143.01	1712.67	1366.7	143.822	1777.63	1240.53	241.407	1525.57	1262.18	-22.4305	1624.75	1386.53	-61.7508	1618.62	1153.38	-57.5104	1606.24	1085.77	-67.5161	1692.17	993.015	-39.3836	1714.2	891.39	-89.1513	1666.96	874.51	-86.1005	1717.24	789.624
873	0	114.637	1824.73	1578.33	214.141	1813.42	1577.53	80.2069	1658.72	1614.87	191.086	1636	1617.74	155.89	1591.12	1431.42	146.722	1543.46	1214.91	142.316	1724.04	1367.82	143.204	1788.83	1241.66	242.136	1537.36	1263.91	-22.7052	1635.11	1387.23	-61.2289	1625.76	1154.13	-56.633	1612.62	1086.81	-67.5082	1696.46	992.529	-39.5637	1716.53	890.314	-89.0045	1668.62	874.571	-86.1646	1716.61	788.141
874	0	113.27	1836.61	1578.8	212.835	1825.74	1578.18	79.4757	1670.58	1615.67	190.445	1648.32	1618.77	155.772	1602.74	1432.56	147.456	1554.52	1215.95	141.646	1735.41	1368.64	142.61	1800.01	1242.43	242.841	1549.14	1265.31	-22.964	1645.5	1387.65	-60.7118	1632.75	1154.64	-55.7702	1618.84	1087.63	-67.5833	1700.61	991.918	-39.825	1718.83	889.204	-88.8092	1670.2	874.511	-86.358	1716.11	786.77
875	0	111.845	1848.44	1578.99	211.471	1838.06	1578.57	78.7445	1682.37	1616.14	189.814	1660.63	1619.49	155.659	1614.37	1433.38	148.189	1565.63	1216.67	140.995	1746.79	1369.13	142.028	1811.17	1242.84	243.51	1560.92	1266.36	-23.2136	1655.92	1387.78	-60.1987	1639.62	1154.94	-54.9178	1624.95	1088.23	-67.7338	1704.65	991.173	-40.1585	1721.14	888.046	-88.552	1671.72	874.317	-86.6689	1715.75	785.484
876	0	110.372	1860.23	1578.9	210.058	1850.38	1578.68	78.0174	1694.12	1616.29	189.198	1672.94	1619.89	155.542	1626.03	1433.89	148.903	1576.79	1217.08	140.357	1758.2	1369.3	141.44	1822.3	1242.87	244.129	1572.7	1267.09	-23.4624	1666.4	1387.62	-59.6906	1646.42	1155.01	-54.0734	1630.99	1088.61	-67.9519	1708.61	990.289	-40.5547	1723.48	886.828	-88.2229	1673.2	873.982	-87.0835	1715.56	784.26
877	0	108.862	1872.01	1578.53	208.607	1862.7	1578.51	77.2967	1705.85	1616.13	188.598	1685.26	1619.98	155.415	1637.71	1434.08	149.58	1587.98	1217.18	139.724	1769.63	1369.15	140.833	1833.41	1242.52	244.682	1584.47	1267.49	-23.7204	1676.94	1387.19	-59.1904	1653.19	1154.87	-53.2365	1637	1088.79	-68.2296	1712.52	989.267	-41.0043	1725.88	885.542	-87.8162	1674.68	873.509	-87.5868	1715.54	783.074
878	0	107.326	1883.78	1577.88	207.125	1875.03	1578.05	76.5827	1717.56	1615.68	188.012	1697.59	1619.76	155.265	1649.43	1433.98	150.198	1599.19	1217	139.086	1781.1	1368.68	140.194	1844.48	1241.81	245.154	1596.22	1267.57	-23.9987	1687.55	1386.5	-58.7027	1659.96	1154.52	-52.4087	1643.02	1088.76	-68.5596	1716.43	988.108	-41.4984	1728.38	884.181	-87.3304	1676.19	872.903	-88.1623	1715.72	781.912
879	0	105.771	1895.55	1576.95	205.62	1887.39	1577.31	75.874	1729.27	1614.94	187.438	1709.94	1619.25	155.082	1661.19	1433.58	150.735	1610.4	1216.56	138.433	1792.59	1367.91	139.508	1855.54	1240.75	245.529	1607.95	1267.36	-24.309	1698.24	1385.56	-58.2343	1666.79	1153.99	-51.5942	1649.1	1088.54	-68.9349	1720.38	986.819	-42.0287	1731	882.744	-86.7687	1677.77	872.177	-88.7935	1716.11	780.758
880	0	104.204	1907.34	1575.77	204.098	1899.76	1576.29	75.1673	1740.99	1613.94	186.871	1722.32	1618.45	154.853	1672.99	1432.91	151.168	1621.61	1215.89	137.755	1804.13	1366.85	138.766	1866.58	1239.37	245.788	1619.66	1266.88	-24.6634	1709.02	1384.39	-57.7934	1673.72	1153.28	-50.7995	1655.28	1088.14	-69.3496	1724.41	985.407	-42.5881	1733.76	881.232	-86.1392	1679.46	871.347	-89.4633	1716.71	779.606
881	0	102.632	1919.14	1574.34	202.564	1912.15	1575	74.4578	1752.74	1612.69	186.304	1734.72	1617.38	154.566	1684.83	1431.99	151.475	1632.8	1215.01	137.041	1815.71	1365.52	137.957	1877.62	1237.7	245.918	1631.35	1266.14	-25.0737	1719.9	1383.02	-57.3904	1680.78	1152.41	-50.0333	1661.6	1087.59	-69.7994	1728.56	983.884	-43.1709	1736.7	879.646	-85.4544	1681.3	870.431	-90.1553	1717.54	778.449
882	0	101.056	1930.98	1572.68	201.02	1924.57	1573.46	73.7393	1764.53	1611.23	185.728	1747.16	1616.07	154.207	1696.71	1430.83	151.636	1643.94	1213.95	136.28	1827.33	1363.95	137.075	1888.68	1235.77	245.904	1643.01	1265.17	-25.5514	1730.87	1381.47	-57.037	1688.01	1151.4	-49.3069	1668.11	1086.89	-70.2814	1732.87	982.26	-43.7729	1739.86	877.992	-84.7317	1683.35	869.45	-90.8539	1718.6	777.284
883	0	99.4789	1942.86	1570.81	199.469	1937	1571.67	73.0046	1776.36	1609.58	185.136	1759.63	1614.55	153.766	1708.63	1429.45	151.634	1655.04	1212.74	135.463	1838.98	1362.16	136.111	1899.77	1233.64	245.736	1654.65	1264	-26.107	1741.95	1379.76	-56.746	1695.46	1150.26	-48.6334	1674.83	1086.07	-70.7945	1737.4	980.548	-44.3922	1743.25	876.276	-83.9923	1685.65	868.423	-91.5448	1719.92	776.111
884	0	97.9016	1954.77	1568.74	197.911	1949.46	1569.67	72.2457	1788.24	1607.76	184.516	1772.13	1612.82	153.232	1720.58	1427.88	151.455	1666.08	1211.39	134.58	1850.69	1360.19	135.061	1910.9	1231.34	245.403	1666.27	1262.63	-26.7504	1753.12	1377.91	-56.5316	1703.14	1149.01	-48.0278	1681.81	1085.13	-71.3398	1742.18	978.76	-45.0286	1746.91	874.505	-83.2607	1688.25	867.366	-92.2154	1721.5	774.928
885	0	96.3229	1966.73	1566.51	196.345	1961.94	1567.46	71.4542	1800.17	1605.81	183.86	1784.66	1610.93	152.594	1732.56	1426.14	151.09	1677.07	1209.93	133.62	1862.43	1358.06	133.921	1922.1	1228.92	244.901	1677.88	1261.09	-27.4899	1764.4	1375.95	-56.4081	1711.09	1147.65	-47.5062	1689.07	1084.08	-71.9198	1747.25	976.907	-45.684	1750.87	872.686	-82.5645	1691.21	866.293	-92.8557	1723.37	773.734
886	0	94.741	1978.72	1564.13	194.77	1974.42	1565.08	70.6213	1812.16	1603.75	183.156	1797.21	1608.89	151.845	1744.58	1424.25	150.533	1688	1208.36	132.577	1874.22	1355.8	132.686	1933.38	1226.41	244.226	1689.5	1259.4	-28.3328	1775.78	1373.9	-56.3901	1719.33	1146.21	-47.0854	1696.64	1082.95	-72.5395	1752.65	975	-46.3618	1755.17	870.827	-81.9326	1694.56	865.216	-93.4581	1725.56	772.526
887	0	93.1529	1990.77	1561.64	193.183	1986.92	1562.56	69.7383	1824.2	1601.6	182.394	1809.78	1606.74	150.977	1756.61	1422.23	149.783	1698.91	1206.69	131.443	1886.05	1353.45	131.354	1944.76	1223.85	243.379	1701.13	1257.56	-29.2848	1787.25	1371.77	-56.492	1727.88	1144.69	-46.7824	1704.53	1081.73	-73.2052	1758.43	973.049	-47.0675	1759.83	868.935	-81.3952	1698.35	864.141	-94.0188	1728.08	771.301
888	0	91.5554	2002.85	1559.06	191.583	1999.42	1559.92	68.7972	1836.3	1599.4	181.566	1822.36	1604.51	149.987	1768.67	1420.11	148.843	1709.8	1204.92	130.21	1897.93	1351.04	129.922	1956.25	1221.29	242.361	1712.8	1255.6	-30.3503	1798.82	1369.59	-56.7271	1736.76	1143.09	-46.6137	1712.78	1080.44	-73.9248	1764.6	971.065	-47.8078	1764.88	867.015	-80.9818	1702.63	863.068	-94.5371	1730.99	770.054
889	0	89.9448	2014.96	1556.42	189.966	2011.92	1557.2	67.79	1848.44	1597.18	180.662	1834.95	1602.22	148.87	1780.74	1417.91	147.722	1720.7	1203.06	128.874	1909.86	1348.6	128.388	1967.87	1218.75	241.178	1724.52	1253.51	-31.5322	1810.46	1367.37	-57.1074	1745.97	1141.43	-46.5949	1721.38	1079.07	-74.7072	1771.21	969.056	-48.5906	1770.35	865.076	-80.7208	1707.44	861.998	-95.0166	1734.3	768.78
890	0	88.3171	2027.12	1553.75	188.329	2024.41	1554.42	66.7096	1860.64	1594.96	179.674	1847.54	1599.9	147.625	1792.84	1415.64	146.431	1731.65	1201.1	127.432	1921.84	1346.16	126.752	1979.63	1216.27	239.838	1736.32	1251.32	-32.8318	1822.19	1365.13	-57.6431	1755.52	1139.71	-46.7398	1730.36	1077.65	-75.5623	1778.28	967.031	-49.4248	1776.27	863.123	-80.638	1712.8	860.924	-95.4646	1738.07	767.471
891	0	86.6686	2039.3	1551.09	186.671	2036.89	1551.63	65.5501	1872.88	1592.76	178.597	1860.12	1597.58	146.252	1804.95	1413.34	144.982	1742.7	1199.04	125.879	1933.88	1343.75	125.012	1991.53	1213.88	238.349	1748.2	1249.04	-34.2489	1833.99	1362.88	-58.342	1765.41	1137.94	-47.0604	1739.7	1076.16	-76.5	1785.82	965	-50.3204	1782.67	861.164	-80.7556	1718.74	859.84	-95.8926	1742.34	766.124
892	0	84.9961	2051.51	1548.47	184.989	2049.35	1548.86	64.3063	1885.15	1590.62	177.424	1872.69	1595.3	144.754	1817.08	1411.03	143.393	1753.88	1196.89	124.216	1945.97	1341.4	123.169	2003.58	1211.6	236.723	1760.18	1246.69	-35.7818	1845.86	1360.64	-59.2094	1775.63	1136.14	-47.566	1749.43	1074.62	-77.5301	1793.86	962.972	-51.2871	1789.57	859.207	-81.0918	1725.3	858.741	-96.3157	1747.14	764.733
893	0	83.2967	2063.75	1545.92	183.28	2061.79	1546.14	62.9743	1897.46	1588.55	176.151	1885.24	1593.07	143.135	1829.23	1408.73	141.678	1765.24	1194.65	122.443	1958.13	1339.14	121.222	2015.78	1209.45	234.971	1772.29	1244.29	-37.427	1857.79	1358.44	-60.248	1786.2	1134.3	-48.2632	1759.53	1073.03	-78.6617	1802.41	960.962	-52.3352	1797	857.262	-81.66	1732.48	857.619	-96.7525	1752.53	763.299
894	0	81.5684	2076	1543.47	181.543	2074.2	1543.52	61.5517	1909.8	1586.59	174.776	1897.77	1590.93	141.4	1841.4	1406.47	139.854	1776.83	1192.34	120.563	1970.34	1337	119.175	2028.13	1207.46	233.107	1784.53	1241.87	-39.1797	1869.78	1356.28	-61.4572	1797.08	1132.45	-49.1555	1770.01	1071.42	-79.9027	1811.47	958.981	-53.4746	1804.98	855.342	-82.4685	1740.31	856.472	-97.2249	1758.55	761.823
895	0	79.8099	2088.29	1541.17	179.777	2086.6	1541.02	60.0375	1922.16	1584.76	173.299	1910.27	1588.89	139.557	1853.61	1404.28	137.935	1788.68	1189.98	118.582	1982.62	1335.01	117.03	2040.62	1205.65	231.146	1796.91	1239.45	-41.0334	1881.83	1354.19	-62.834	1808.29	1130.61	-50.2435	1780.86	1069.78	-81.2599	1821.07	957.047	-54.7144	1813.54	853.459	-83.5207	1748.8	855.3	-97.7571	1765.25	760.311
896	0	78.0208	2100.59	1539.04	177.983	2098.97	1538.68	58.4322	1934.55	1583.08	171.72	1922.75	1587	137.615	1865.84	1402.19	135.935	1800.82	1187.6	116.506	1994.97	1333.17	114.795	2053.25	1204.02	229.101	1809.45	1237.06	-42.9802	1893.93	1352.2	-64.3724	1819.8	1128.8	-51.5246	1792.07	1068.15	-82.7381	1831.2	955.177	-56.0632	1822.68	851.632	-84.815	1757.95	854.106	-98.3755	1772.66	758.776
897	0	76.2019	2112.91	1537.1	176.16	2111.32	1536.54	56.7383	1946.96	1581.56	170.042	1935.2	1585.27	135.584	1878.1	1400.22	133.864	1813.28	1185.24	114.345	2007.38	1331.53	112.477	2066.02	1202.6	226.989	1822.12	1234.75	-45.011	1906.08	1350.32	-66.0644	1831.6	1127.04	-52.9938	1803.63	1066.54	-84.3405	1841.85	953.394	-57.5284	1832.44	849.879	-86.3455	1767.78	852.899	-99.1071	1780.83	757.233
898	0	74.3549	2125.26	1535.39	174.311	2123.65	1534.62	54.9596	1959.4	1580.24	168.27	1947.63	1583.72	133.477	1890.41	1398.41	131.733	1826.08	1182.94	112.11	2019.86	1330.1	110.087	2078.91	1201.41	224.822	1834.95	1232.56	-47.115	1918.3	1348.59	-67.8998	1843.69	1125.36	-54.6435	1815.54	1064.97	-86.0685	1853.04	951.719	-59.1164	1842.82	848.222	-88.1026	1778.29	851.692	-99.9795	1789.81	755.701
899	0	72.4827	2137.63	1533.92	172.438	2135.97	1532.95	53.1021	1971.85	1579.13	166.41	1960.04	1582.39	131.304	1902.75	1396.78	129.55	1839.2	1180.75	109.817	2032.41	1328.9	107.64	2091.9	1200.44	222.617	1847.9	1230.51	-49.2805	1930.57	1347.03	-69.867	1856.04	1123.78	-56.4642	1827.78	1063.48	-87.9212	1864.75	950.178	-60.8317	1853.84	846.684	-90.0738	1789.47	850.501	-101.019	1799.61	754.206
900	0	70.5894	2150.02	1532.72	170.545	2148.29	1531.55	51.1734	1984.33	1578.24	164.47	1972.44	1581.28	129.08	1915.13	1395.37	127.326	1852.64	1178.72	107.479	2045.01	1327.94	105.153	2104.99	1199.73	220.385	1860.96	1228.66	-51.4947	1942.9	1345.67	-71.9536	1868.66	1122.35	-58.445	1840.35	1062.09	-89.8963	1876.98	948.797	-62.6775	1865.51	845.29	-92.2444	1801.33	849.349	-102.251	1810.29	752.775
901	0	68.68	2162.44	1531.8	168.635	2160.6	1530.44	49.1826	1996.83	1577.59	162.462	1984.82	1580.42	126.819	1927.55	1394.19	125.071	1866.38	1176.91	105.117	2057.66	1327.24	102.646	2118.16	1199.26	218.14	1874.12	1227.04	-53.7439	1955.3	1344.53	-74.1461	1881.52	1121.1	-60.574	1853.22	1060.84	-91.9895	1889.72	947.6	-64.6553	1877.84	844.066	-94.5984	1813.87	848.258	-103.698	1821.85	751.437
902	0	66.7606	2174.89	1531.16	166.716	2172.91	1529.63	47.1406	2009.36	1577.19	160.395	1997.2	1579.83	124.534	1940	1393.28	122.795	1880.38	1175.35	102.747	2070.35	1326.8	100.141	2131.38	1199.05	215.895	1887.35	1225.69	-56.0136	1967.77	1343.65	-76.4314	1894.61	1120.04	-62.839	1866.39	1059.75	-94.1949	1902.95	946.614	-66.7645	1890.82	843.036	-97.1196	1827.07	847.254	-105.378	1834.33	750.223
903	0	64.8383	2187.37	1530.81	164.793	2185.23	1529.13	45.0595	2021.92	1577.05	158.285	2009.58	1579.51	122.241	1952.49	1392.64	120.512	1894.6	1174.09	100.391	2083.07	1326.63	97.6627	2144.64	1199.11	213.66	1900.61	1224.65	-58.2891	1980.3	1343.03	-78.7965	1907.92	1119.21	-65.2278	1879.84	1058.85	-96.5054	1916.67	945.862	-69.003	1904.46	842.226	-99.7915	1840.93	846.362	-107.307	1847.73	749.165
904	0	62.9211	2199.87	1530.76	162.875	2197.56	1528.95	42.9527	2034.5	1577.17	156.143	2021.97	1579.47	119.951	1965.01	1392.31	118.234	1908.98	1173.19	98.0687	2095.81	1326.73	95.2356	2157.9	1199.42	211.445	1913.87	1223.94	-60.5558	1992.91	1342.71	-81.2289	1921.44	1118.64	-67.7288	1893.55	1058.16	-98.9126	1930.85	945.368	-71.3666	1918.75	841.658	-102.599	1855.43	845.609	-109.495	1862.07	748.295
905	0	61.0179	2212.4	1530.98	160.97	2209.9	1529.06	40.8347	2047.1	1577.55	153.987	2034.37	1579.71	117.68	1977.55	1392.28	115.976	1923.47	1172.66	95.7996	2108.57	1327.11	92.8851	2171.13	1199.97	209.258	1927.11	1223.59	-62.7993	2005.6	1342.69	-83.7175	1935.15	1118.34	-70.3314	1907.52	1057.7	-101.407	1945.49	945.148	-73.8496	1933.68	841.353	-105.527	1870.58	845.018	-111.947	1877.34	747.641
906	0	59.1379	2224.95	1531.48	159.087	2222.26	1529.48	38.7203	2059.74	1578.19	151.832	2046.79	1580.25	115.44	1990.1	1392.56	113.749	1937.98	1172.52	93.603	2121.31	1327.75	90.6356	2184.32	1200.77	207.107	1940.27	1223.6	-65.0059	2018.35	1342.98	-86.2521	1949.05	1118.33	-73.0262	1921.72	1057.5	-103.979	1960.56	945.221	-76.4444	1949.23	841.328	-108.563	1886.34	844.61	-114.663	1893.54	747.232
907	0	57.2913	2237.52	1532.23	157.237	2234.64	1530.18	36.6252	2072.39	1579.07	149.694	2059.23	1581.06	113.24	2002.65	1393.15	111.565	1952.47	1172.8	91.4968	2134.03	1328.64	88.51	2197.43	1201.78	204.994	1953.34	1223.99	-67.1631	2031.17	1343.59	-88.8242	1963.12	1118.61	-75.8049	1936.13	1057.56	-106.617	1976.03	945.595	-79.1422	1965.39	841.599	-111.695	1902.7	844.403	-117.638	1910.66	747.091
908	0	55.4881	2250.1	1533.22	155.43	2247.03	1531.14	34.5647	2085.06	1580.21	147.59	2071.68	1582.14	111.092	2015.2	1394.05	109.431	1966.84	1173.49	89.4968	2146.72	1329.77	86.5292	2210.43	1203	202.921	1966.27	1224.75	-69.2597	2044.06	1344.52	-91.4266	1977.35	1119.2	-78.6609	1950.75	1057.88	-109.311	1991.9	946.28	-81.9326	1982.12	842.174	-114.912	1919.65	844.41	-120.861	1928.67	747.24
909	0	53.7388	2262.69	1534.43	153.676	2259.43	1532.34	32.5541	2097.74	1581.56	145.535	2084.16	1583.48	109.003	2027.72	1395.25	107.351	1981.04	1174.57	87.6166	2159.37	1331.12	84.7115	2223.31	1204.41	200.885	1979.03	1225.86	-71.2861	2057.01	1345.75	-94.0539	1991.72	1120.08	-81.5889	1965.54	1058.48	-112.05	2008.14	947.276	-84.8045	1999.4	843.059	-118.204	1937.15	844.642	-124.317	1947.54	747.697
910	0	52.0536	2275.28	1535.82	151.987	2271.84	1533.75	30.6081	2110.44	1583.13	143.545	2096.65	1585.05	106.978	2040.21	1396.72	105.322	1995	1176.02	85.867	2171.94	1332.68	83.072	2236.04	1205.97	198.882	1991.61	1227.31	-73.2344	2070.01	1347.27	-96.7018	2006.23	1121.25	-84.5847	1980.5	1059.34	-114.824	2024.71	948.583	-87.7457	2017.2	844.257	-121.562	1955.19	845.105	-127.985	1967.23	748.474
911	0	50.4424	2287.85	1537.37	150.372	2284.25	1535.34	28.7402	2123.13	1584.89	141.634	2109.15	1586.85	105.024	2052.65	1398.45	103.338	2008.66	1177.81	84.2558	2184.45	1334.42	81.6215	2248.61	1207.68	196.904	2003.98	1229.06	-75.0985	2083.04	1349.07	-99.3675	2020.86	1122.69	-87.645	1995.61	1060.45	-117.622	2041.61	950.194	-90.7435	2035.47	845.766	-124.977	1973.72	845.8	-131.841	1987.7	749.582
912	0	48.9147	2300.41	1539.06	148.84	2296.65	1537.09	26.963	2135.82	1586.82	139.815	2121.65	1588.83	103.142	2065.04	1400.4	101.386	2021.99	1179.9	82.7875	2196.86	1336.32	80.3663	2261.01	1209.51	194.941	2016.12	1231.08	-76.874	2096.11	1351.12	-102.049	2035.61	1124.39	-90.7673	2010.85	1061.8	-120.434	2058.79	952.099	-93.7849	2054.19	847.581	-128.44	1992.72	846.729	-135.856	2008.89	751.028
913	0	47.479	2312.95	1540.85	147.401	2309.03	1538.95	25.2871	2148.49	1588.9	138.099	2134.15	1590.98	101.336	2077.35	1402.56	99.4527	2034.96	1182.24	81.4631	2209.18	1338.36	79.307	2273.24	1211.44	192.985	2028.03	1233.34	-78.5583	2109.19	1353.4	-104.745	2050.46	1126.33	-93.9489	2026.21	1063.37	-123.251	2076.24	954.284	-96.8569	2073.32	849.693	-131.943	2012.16	847.888	-140.002	2030.75	752.814
914	0	46.1428	2325.44	1542.72	146.063	2321.38	1540.89	23.7219	2161.14	1591.1	136.495	2146.64	1593.27	99.605	2089.58	1404.89	97.5236	2047.55	1184.79	80.2803	2221.39	1340.5	78.4381	2285.3	1213.45	191.028	2039.7	1235.78	-80.15	2122.27	1355.87	-107.455	2065.4	1128.47	-97.1868	2041.68	1065.13	-126.064	2093.93	956.732	-99.9468	2092.8	852.091	-135.478	2031.99	849.272	-144.246	2053.22	754.941
915	0	44.9123	2337.89	1544.64	144.831	2333.68	1542.89	22.2744	2173.75	1593.41	135.012	2159.1	1595.67	97.9503	2101.72	1407.36	95.5855	2059.76	1187.48	79.2335	2233.48	1342.73	77.7482	2297.19	1215.54	189.061	2051.13	1238.38	-81.649	2135.33	1358.52	-110.176	2080.44	1130.79	-100.477	2057.25	1067.08	-128.866	2111.83	959.426	-103.042	2112.6	854.761	-139.039	2052.18	850.875	-148.555	2076.23	757.407
916	0	43.792	2350.28	1546.59	143.709	2345.94	1544.91	20.9502	2186.32	1595.79	133.654	2171.53	1598.13	96.371	2113.77	1409.93	93.6299	2071.62	1190.29	78.3142	2245.46	1345.03	77.2199	2308.92	1217.68	187.083	2062.34	1241.07	-83.0563	2148.35	1361.3	-112.908	2095.55	1133.26	-103.815	2072.9	1069.17	-131.65	2129.92	962.344	-106.132	2132.68	857.689	-142.619	2072.69	852.692	-152.898	2099.71	760.205
917	0	42.7849	2362.6	1548.54	142.702	2358.14	1546.92	19.7522	2198.84	1598.22	132.425	2183.91	1600.65	94.8664	2125.71	1412.57	91.6535	2083.16	1193.15	77.5115	2257.31	1347.35	76.8309	2320.5	1219.85	185.091	2073.33	1243.83	-84.3738	2161.32	1364.18	-115.647	2110.74	1135.85	-107.195	2088.63	1071.39	-134.408	2148.18	965.463	-109.206	2153	860.858	-146.21	2093.49	854.712	-157.242	2123.59	763.325
918	0	41.892	2374.85	1550.47	141.809	2370.26	1548.9	18.6819	2211.29	1600.67	131.326	2196.23	1603.16	93.4352	2137.56	1415.24	89.6589	2094.4	1196.03	76.8125	2269.04	1349.68	76.5552	2331.94	1222.05	183.089	2084.14	1246.61	-85.6043	2174.21	1367.13	-118.39	2125.99	1138.52	-110.607	2104.43	1073.69	-137.136	2166.57	968.759	-112.254	2173.52	864.247	-149.806	2114.54	856.928	-161.557	2147.79	766.756
919	0	41.1125	2387.02	1552.37	141.03	2382.31	1550.81	17.7385	2223.66	1603.12	130.356	2208.48	1605.66	92.0759	2149.3	1417.91	87.6536	2105.4	1198.87	76.2032	2280.66	1352	76.3646	2343.25	1224.24	181.084	2094.78	1249.38	-86.7511	2187.02	1370.12	-121.132	2141.29	1141.26	-114.043	2120.29	1076.07	-139.829	2185.07	972.209	-115.268	2194.2	867.839	-153.401	2135.8	859.329	-165.816	2172.26	770.481
920	0	40.4438	2399.1	1554.2	140.362	2394.26	1552.65	16.9195	2235.96	1605.54	129.512	2220.65	1608.09	90.787	2160.94	1420.53	85.6491	2116.2	1201.65	75.6692	2292.15	1354.26	76.2307	2354.46	1226.42	179.083	2105.28	1252.08	-87.8178	2199.72	1373.11	-123.867	2156.63	1144.02	-117.491	2136.2	1078.48	-142.484	2203.66	975.786	-118.241	2215	871.611	-156.987	2157.24	861.902	-169.993	2196.91	774.479
921	0	39.8817	2411.09	1555.97	139.801	2406.13	1554.38	16.2207	2248.16	1607.9	128.791	2232.73	1610.44	89.567	2172.48	1423.08	83.659	2126.85	1204.33	75.1961	2303.54	1356.45	76.1264	2365.56	1228.55	177.098	2115.67	1254.7	-88.8084	2212.31	1376.07	-126.588	2171.99	1146.77	-120.939	2152.15	1080.89	-145.097	2222.31	979.464	-121.167	2235.9	875.541	-160.557	2178.82	864.633	-174.067	2221.69	778.727
922	0	39.4203	2422.98	1557.64	139.341	2417.9	1555.99	15.6364	2260.26	1610.16	128.186	2244.72	1612.66	88.4147	2183.93	1425.52	81.6975	2137.39	1206.87	74.7705	2314.83	1358.55	76.0274	2376.59	1230.61	175.142	2125.97	1257.19	-89.7269	2224.78	1378.96	-129.288	2187.36	1149.49	-124.374	2168.13	1083.29	-147.667	2241.01	983.216	-124.04	2256.86	879.607	-164.101	2200.52	867.506	-178.018	2246.52	783.199
923	0	39.0525	2434.79	1559.2	138.974	2429.57	1557.47	15.1597	2272.27	1612.31	127.69	2256.6	1614.74	87.3291	2195.3	1427.82	79.7788	2147.87	1209.25	74.3805	2326.03	1360.51	75.9136	2387.55	1232.57	173.226	2136.2	1259.54	-90.5769	2237.11	1381.76	-131.958	2202.72	1152.15	-127.781	2184.13	1085.64	-150.192	2259.71	987.016	-126.856	2277.85	883.783	-167.609	2222.29	870.502	-181.83	2271.36	787.865
924	0	38.7701	2446.49	1560.64	138.692	2441.15	1558.79	14.7825	2284.17	1614.31	127.296	2268.38	1616.63	86.3097	2206.59	1429.96	77.9157	2158.31	1211.45	74.0158	2337.14	1362.31	75.7692	2398.45	1234.4	171.365	2146.38	1261.7	-91.3617	2249.32	1384.42	-134.589	2218.04	1154.72	-131.146	2200.13	1087.9	-152.672	2278.41	990.835	-129.611	2298.84	888.046	-171.071	2244.11	873.599	-185.489	2296.14	792.692
925	0	38.5642	2458.11	1561.94	138.486	2452.64	1559.95	14.4962	2295.96	1616.15	126.994	2280.05	1618.33	85.3563	2217.81	1431.9	76.12	2168.74	1213.44	73.6684	2348.19	1363.94	75.584	2409.3	1236.05	169.57	2156.55	1263.67	-92.0842	2261.4	1386.92	-137.174	2233.32	1157.17	-134.455	2216.14	1090.07	-155.104	2297.07	994.647	-132.3	2319.81	892.369	-174.475	2265.95	876.776	-188.986	2320.82	797.646
926	0	38.4252	2469.63	1563.09	138.345	2464.05	1560.93	14.2917	2307.65	1617.79	126.776	2291.62	1619.8	84.4696	2228.97	1433.63	74.4024	2179.19	1215.21	73.3325	2359.17	1365.37	75.3527	2420.1	1237.51	167.855	2166.7	1265.42	-92.7464	2273.35	1389.22	-139.701	2248.53	1159.47	-137.692	2232.12	1092.11	-157.488	2315.68	998.425	-134.922	2340.73	896.726	-177.807	2287.76	880.007	-192.314	2345.35	802.693
927	0	38.343	2481.07	1564.07	138.26	2475.37	1561.72	14.1599	2319.24	1619.22	126.632	2303.1	1621.03	83.6507	2240.08	1435.12	72.7729	2189.67	1216.74	73.0046	2370.1	1366.57	75.0745	2430.87	1238.75	166.232	2176.87	1266.93	-93.3498	2285.19	1391.31	-142.163	2263.65	1161.61	-140.845	2248.08	1093.99	-159.822	2334.2	1002.14	-137.47	2361.58	901.092	-181.056	2309.51	883.266	-195.467	2369.68	807.797
928	0	38.3079	2492.44	1564.88	138.22	2486.63	1562.31	14.0919	2330.73	1620.41	126.554	2314.48	1622.01	82.9012	2251.14	1436.36	71.2412	2200.18	1218.02	72.6835	2380.99	1367.54	74.753	2441.6	1239.73	164.712	2187.06	1268.2	-93.8949	2296.91	1393.16	-144.549	2278.67	1163.57	-143.899	2263.99	1095.71	-162.102	2352.62	1005.77	-139.941	2382.32	905.44	-184.206	2331.18	886.526	-198.443	2393.79	812.926
929	0	38.3103	2503.73	1565.48	138.216	2497.82	1562.7	14.0794	2342.13	1621.36	126.534	2325.79	1622.72	82.2236	2262.17	1437.34	69.8164	2210.74	1219.05	72.3698	2391.84	1368.25	74.3948	2452.29	1240.45	163.306	2197.27	1269.2	-94.3816	2308.52	1394.74	-146.849	2293.57	1165.32	-146.843	2279.85	1097.24	-164.324	2370.92	1009.29	-142.33	2402.94	909.743	-187.246	2352.74	889.761	-201.244	2417.65	818.046
930	0	38.3409	2514.95	1565.88	138.239	2508.96	1562.87	14.1148	2353.45	1622.05	126.564	2337.03	1623.17	81.6205	2273.17	1438.05	68.508	2221.33	1219.83	72.0661	2402.67	1368.7	74.009	2462.95	1240.87	162.025	2207.52	1269.95	-94.8091	2320.03	1396.05	-149.053	2308.34	1166.86	-149.665	2295.64	1098.56	-166.483	2389.07	1012.67	-144.63	2423.41	913.976	-190.163	2374.13	892.945	-203.87	2441.21	823.127
931	0	38.3918	2526.13	1566.07	138.281	2520.07	1562.83	14.1917	2364.7	1622.48	126.637	2348.21	1623.34	81.095	2284.16	1438.49	67.325	2231.94	1220.35	71.7766	2413.49	1368.89	73.606	2473.59	1241.01	160.878	2217.81	1270.43	-95.1758	2331.46	1397.07	-151.152	2322.98	1168.16	-152.353	2311.35	1099.67	-168.571	2407.07	1015.9	-146.837	2443.7	918.114	-192.946	2395.35	896.052	-206.325	2464.46	828.139
932	0	38.4556	2537.25	1566.02	138.335	2531.15	1562.56	14.3047	2375.88	1622.63	126.749	2359.34	1623.25	80.6502	2295.12	1438.66	66.2764	2242.58	1220.61	71.5067	2424.29	1368.8	73.1972	2484.19	1240.84	159.873	2228.15	1270.65	-95.4798	2342.8	1397.78	-153.135	2337.47	1169.22	-154.898	2326.97	1100.55	-170.581	2424.88	1018.96	-148.943	2463.79	922.133	-195.585	2416.35	899.059	-208.613	2487.36	833.056
933	0	38.5266	2548.34	1565.75	138.394	2542.21	1562.06	14.4496	2387.01	1622.52	126.895	2370.45	1622.89	80.289	2306.08	1438.56	65.3699	2253.22	1220.63	71.263	2435.1	1368.45	72.7945	2494.78	1240.39	159.019	2238.54	1270.6	-95.7188	2354.06	1398.2	-154.991	2351.81	1170.03	-157.289	2342.49	1101.2	-172.503	2442.49	1021.82	-150.941	2483.66	926.009	-198.07	2437.1	901.944	-210.74	2509.91	837.854
934	0	38.6005	2559.39	1565.24	138.455	2553.27	1561.35	14.6237	2398.1	1622.14	127.073	2381.53	1622.28	80.0143	2317.03	1438.19	64.6125	2263.86	1220.39	71.0527	2445.9	1367.84	72.4101	2505.36	1239.65	158.32	2248.99	1270.3	-95.8901	2365.26	1398.31	-156.712	2366	1170.59	-159.519	2357.9	1101.62	-174.327	2459.89	1024.47	-152.826	2503.27	929.722	-200.395	2457.58	904.689	-212.71	2532.07	842.51
935	0	38.6744	2570.43	1564.5	138.516	2564.33	1560.41	14.8255	2409.15	1621.5	127.282	2392.62	1621.42	79.828	2327.99	1437.57	64.0086	2274.49	1219.93	70.8838	2456.71	1366.98	72.0561	2515.93	1238.64	157.781	2259.49	1269.75	-95.9912	2376.4	1398.12	-158.288	2380.04	1170.89	-161.58	2373.19	1101.8	-176.041	2477.07	1026.9	-154.589	2522.61	933.249	-202.555	2477.76	907.275	-214.529	2553.84	847.004
936	0	38.7473	2581.44	1563.52	138.575	2575.4	1559.26	15.0547	2420.18	1620.61	127.52	2403.7	1620.34	79.7318	2338.94	1436.7	63.5609	2285.1	1219.23	70.7644	2467.53	1365.88	71.7447	2526.5	1237.37	157.402	2270.06	1268.96	-96.0196	2387.5	1397.64	-159.709	2393.93	1170.94	-163.464	2388.33	1101.75	-177.637	2494	1029.1	-156.226	2541.65	936.573	-204.542	2497.61	909.689	-216.202	2575.18	851.319
937	0	38.8197	2592.44	1562.32	138.634	2586.49	1557.91	15.3121	2431.19	1619.49	127.79	2414.8	1619.05	79.7264	2349.9	1435.61	63.2688	2295.7	1218.31	70.7028	2478.36	1364.56	71.4882	2537.09	1235.89	157.182	2280.68	1267.93	-95.973	2398.55	1396.88	-160.97	2407.66	1170.75	-165.167	2403.32	1101.47	-179.103	2510.69	1031.06	-157.729	2560.38	939.675	-206.355	2517.12	911.917	-217.733	2596.08	855.436
938	0	38.8938	2603.44	1560.9	138.695	2597.6	1556.36	15.5997	2442.19	1618.15	128.093	2425.92	1617.57	79.8117	2360.87	1434.3	63.1295	2306.27	1217.17	70.7075	2489.22	1363.04	71.2992	2547.71	1234.2	157.117	2291.38	1266.68	-95.8494	2409.57	1395.84	-162.063	2421.24	1170.31	-166.682	2418.15	1100.97	-180.431	2527.1	1032.77	-159.094	2578.78	942.54	-207.989	2536.26	913.947	-219.125	2616.52	859.34
939	0	38.9732	2614.43	1559.27	138.762	2608.73	1554.64	15.9202	2453.19	1616.61	128.432	2437.07	1615.91	79.987	2371.85	1432.79	63.1376	2316.84	1215.84	70.7865	2500.1	1361.34	71.1902	2558.36	1232.34	157.2	2302.14	1265.22	-95.6476	2420.57	1394.56	-162.984	2434.67	1169.64	-168.006	2432.81	1100.25	-181.612	2543.25	1034.22	-160.316	2596.81	945.154	-209.442	2555.01	915.768	-220.383	2636.49	863.013
940	0	39.0631	2625.42	1557.47	138.84	2619.9	1552.75	16.2772	2464.19	1614.9	128.809	2448.25	1614.11	80.2504	2382.85	1431.1	63.2852	2327.42	1214.31	70.9473	2511.02	1359.48	71.1738	2569.06	1230.33	157.422	2312.97	1263.57	-95.3665	2431.57	1393.04	-163.729	2447.95	1168.74	-169.136	2447.27	1099.33	-182.64	2559.11	1035.41	-161.392	2614.48	947.503	-210.711	2573.36	917.371	-221.508	2655.98	866.441
941	0	39.1698	2636.42	1555.49	138.936	2631.08	1550.73	16.6745	2475.2	1613.03	129.229	2459.46	1612.18	80.5993	2393.86	1429.24	63.5629	2338	1212.6	71.1972	2521.97	1357.5	71.2622	2579.81	1228.22	157.769	2323.88	1261.73	-95.0059	2442.57	1391.31	-164.296	2461.08	1167.63	-170.071	2461.53	1098.2	-183.51	2574.67	1036.35	-162.317	2631.77	949.575	-211.795	2591.28	918.743	-222.501	2674.95	869.605
942	0	39.3006	2647.43	1553.38	139.058	2642.3	1548.59	17.1166	2486.21	1611.03	129.695	2470.7	1610.15	81.0305	2404.9	1427.25	63.9594	2348.62	1210.73	71.5425	2532.97	1355.4	71.4674	2590.64	1226.03	158.228	2334.85	1259.73	-94.5662	2453.59	1389.39	-164.686	2474.05	1166.31	-170.811	2475.58	1096.89	-184.219	2589.94	1037.01	-163.089	2648.66	951.358	-212.692	2608.77	919.876	-223.363	2693.42	872.486
943	0	39.4637	2658.44	1551.15	139.214	2653.54	1546.36	17.6078	2497.23	1608.93	130.211	2481.96	1608.03	81.54	2415.96	1425.13	64.4626	2359.3	1208.7	71.9885	2544.01	1353.23	71.8001	2601.54	1223.78	158.783	2345.91	1257.57	-94.0483	2464.64	1387.3	-164.9	2486.88	1164.81	-171.356	2489.41	1095.41	-184.765	2604.89	1037.41	-163.708	2665.15	952.843	-213.401	2625.81	920.758	-224.092	2711.36	875.064
944	0	39.6676	2669.46	1548.84	139.411	2664.8	1544.07	18.1524	2508.26	1606.74	130.781	2493.26	1605.86	82.1232	2427.04	1422.92	65.0595	2370.04	1206.53	72.5396	2555.11	1351.01	72.2701	2612.54	1221.51	159.418	2357.04	1255.28	-93.4536	2475.74	1385.08	-164.942	2499.55	1163.14	-171.709	2503.02	1093.77	-185.147	2619.54	1037.55	-164.171	2681.21	954.02	-213.921	2642.39	921.378	-224.687	2728.76	877.32
945	0	39.9209	2680.49	1546.47	139.659	2676.08	1541.74	18.7544	2519.3	1604.51	131.409	2504.57	1603.66	82.7754	2438.17	1420.62	65.7371	2380.89	1204.23	73.1989	2566.27	1348.76	72.8857	2623.65	1219.24	160.117	2368.26	1252.88	-92.7844	2486.89	1382.73	-164.816	2512.07	1161.31	-171.874	2516.39	1091.98	-185.368	2633.87	1037.42	-164.478	2696.86	954.881	-214.253	2658.5	921.728	-225.145	2745.61	879.231
946	0	40.2318	2691.54	1544.09	139.965	2687.38	1539.41	19.4169	2530.34	1602.24	132.097	2515.91	1601.45	83.4912	2449.33	1418.28	66.4822	2391.86	1201.83	73.9681	2577.49	1346.51	73.6531	2634.87	1217	160.863	2379.56	1250.39	-92.0432	2498.13	1380.31	-164.527	2524.45	1159.35	-171.854	2529.54	1090.07	-185.428	2647.88	1037.04	-164.631	2712.07	955.42	-214.398	2674.14	921.798	-225.462	2761.92	880.777
947	0	40.6083	2702.6	1541.71	140.336	2698.7	1537.11	20.1426	2541.4	1599.98	132.847	2527.25	1599.25	84.2656	2460.53	1415.9	67.2825	2402.98	1199.34	74.8472	2588.79	1344.28	74.5764	2646.21	1214.82	161.642	2390.95	1247.82	-91.2333	2509.44	1377.82	-164.083	2536.69	1157.28	-171.656	2542.46	1088.04	-185.332	2661.58	1036.4	-164.629	2726.86	955.631	-214.359	2689.29	921.58	-225.635	2777.67	881.935
948	0	41.0568	2713.68	1539.37	140.779	2710.03	1534.86	20.9331	2552.47	1597.73	133.66	2538.61	1597.08	85.0934	2471.78	1413.52	68.1262	2414.26	1196.79	75.8345	2600.17	1342.11	75.6567	2657.69	1212.71	162.44	2402.42	1245.21	-90.3586	2520.86	1375.31	-163.491	2548.79	1155.12	-171.285	2555.15	1085.93	-185.083	2674.96	1035.51	-164.474	2741.2	955.512	-214.137	2703.94	921.069	-225.66	2792.86	882.687
949	0	41.5829	2724.77	1537.12	141.298	2721.38	1532.7	21.789	2563.54	1595.54	134.536	2549.97	1594.98	85.9697	2483.08	1411.15	69.0028	2425.72	1194.19	76.9266	2611.63	1340.01	76.8921	2669.3	1210.71	163.247	2413.99	1242.57	-89.4231	2532.38	1372.79	-162.757	2560.77	1152.89	-170.748	2567.62	1083.75	-184.685	2688.03	1034.39	-164.168	2755.11	955.06	-213.738	2718.1	920.264	-225.531	2807.48	883.014
950	0	42.19	2735.88	1534.97	141.897	2732.74	1530.65	22.7096	2574.63	1593.42	135.475	2561.33	1592.95	86.8896	2494.44	1408.83	69.9029	2437.38	1191.58	78.1179	2623.17	1338.01	78.2769	2681.06	1208.83	164.055	2425.65	1239.94	-88.4316	2544.01	1370.31	-161.891	2572.64	1150.64	-170.05	2579.9	1081.54	-184.142	2700.8	1033.05	-163.714	2768.57	954.279	-213.167	2731.75	919.167	-225.245	2821.53	882.902
951	0	42.8802	2747.01	1532.96	142.578	2744.1	1528.74	23.693	2585.73	1591.41	136.473	2572.68	1591.03	87.8489	2505.85	1406.59	70.8189	2449.25	1188.99	79.4012	2634.79	1336.13	79.8015	2692.95	1207.09	164.858	2437.4	1237.34	-87.389	2555.76	1367.88	-160.899	2584.42	1148.37	-169.198	2591.97	1079.31	-183.458	2713.26	1031.49	-163.113	2781.58	953.174	-212.429	2744.89	917.783	-224.799	2835	882.34
952	0	43.6529	2758.17	1531.11	143.339	2755.48	1527	24.7362	2596.84	1589.51	137.529	2584.04	1589.23	88.8435	2517.32	1404.44	71.7455	2461.33	1186.44	80.7672	2646.5	1334.39	81.4522	2704.99	1205.52	165.655	2449.25	1234.8	-86.3006	2567.62	1365.55	-159.79	2596.1	1146.14	-168.199	2603.86	1077.11	-182.636	2725.43	1029.75	-162.368	2794.15	951.753	-211.533	2757.52	916.126	-224.188	2847.89	881.324
953	0	44.506	2769.36	1529.45	144.178	2766.87	1525.45	25.835	2607.96	1587.75	138.638	2595.39	1587.57	89.8697	2528.84	1402.42	72.6798	2473.63	1183.97	82.2049	2658.29	1332.81	83.2114	2717.16	1204.13	166.446	2461.19	1232.36	-85.172	2579.58	1363.34	-158.57	2607.72	1143.96	-167.059	2615.59	1074.95	-181.68	2737.3	1027.84	-161.483	2806.28	950.028	-210.486	2769.63	914.212	-223.41	2860.18	879.853
954	0	45.4349	2780.57	1528	145.091	2778.28	1524.1	26.9839	2619.1	1586.16	139.794	2606.73	1586.07	90.9242	2540.42	1400.54	73.6217	2486.13	1181.63	83.7018	2670.15	1331.41	85.0579	2729.45	1202.93	167.235	2473.22	1230.04	-84.009	2591.64	1361.28	-157.247	2619.27	1141.88	-165.784	2627.15	1072.87	-180.593	2748.9	1025.79	-160.461	2817.95	948.016	-209.296	2781.22	912.066	-222.465	2871.89	877.934
955	0	46.4331	2791.81	1526.77	146.072	2789.69	1522.97	28.1767	2630.25	1584.74	140.991	2618.08	1584.74	92.0036	2552.06	1398.84	74.5739	2498.81	1179.44	85.2437	2682.08	1330.21	86.9675	2741.85	1201.96	168.028	2485.33	1227.89	-82.8178	2603.79	1359.4	-155.828	2630.78	1139.92	-164.38	2638.58	1070.91	-179.378	2760.22	1023.61	-159.304	2829.18	945.738	-207.973	2792.28	909.717	-221.353	2882.98	875.581
956	0	47.4924	2803.07	1525.78	147.112	2801.12	1522.08	29.4063	2641.42	1583.53	142.223	2629.42	1583.61	93.1048	2563.74	1397.34	75.5415	2511.66	1177.45	86.8157	2694.06	1329.21	88.914	2754.34	1201.2	168.834	2497.51	1225.92	-81.6049	2616.01	1357.72	-154.318	2642.25	1138.11	-162.853	2649.86	1069.09	-178.038	2771.27	1021.35	-158.018	2839.96	943.22	-206.528	2802.83	907.199	-220.074	2893.47	872.814
957	0	48.6026	2814.37	1525.04	148.202	2812.56	1521.44	30.6649	2652.61	1582.53	143.481	2640.76	1582.69	94.2244	2575.46	1396.05	76.531	2524.64	1175.69	88.4019	2706.09	1328.44	90.8704	2766.91	1200.68	169.661	2509.76	1224.18	-80.3772	2628.27	1356.27	-152.724	2653.69	1136.49	-161.209	2661.03	1067.44	-176.576	2782.06	1019.03	-156.606	2850.3	940.49	-204.969	2812.85	904.549	-218.631	2903.34	869.662
958	0	49.7527	2825.69	1524.55	149.33	2824.01	1521.03	31.9442	2663.82	1581.74	144.758	2652.11	1581.98	95.3588	2587.21	1394.99	77.5495	2537.71	1174.21	89.9861	2718.15	1327.89	92.8094	2779.53	1200.39	170.517	2522.05	1222.69	-79.1419	2640.57	1355.06	-151.052	2665.1	1135.07	-159.452	2672.07	1065.98	-174.996	2792.59	1016.67	-155.073	2860.19	937.58	-203.309	2822.37	901.809	-217.028	2912.58	866.159
959	0	50.9304	2837.04	1524.32	150.486	2835.47	1520.87	33.2359	2675.04	1581.2	146.045	2663.46	1581.49	96.504	2598.99	1394.18	78.6028	2550.84	1173.04	91.5522	2730.23	1327.56	94.7052	2792.17	1200.34	171.41	2534.36	1221.48	-77.9066	2652.87	1354.12	-149.309	2676.48	1133.88	-157.591	2682.99	1064.74	-173.302	2802.86	1014.32	-153.425	2869.63	934.526	-201.556	2831.38	899.023	-215.271	2921.19	862.345
960	0	52.123	2848.41	1524.33	151.657	2846.95	1520.95	34.5311	2686.29	1580.88	147.334	2674.82	1581.22	97.6554	2610.78	1393.62	79.6951	2563.98	1172.19	93.0845	2742.3	1327.47	96.5338	2804.81	1200.52	172.346	2546.69	1220.57	-76.679	2665.15	1353.44	-147.501	2687.82	1132.92	-155.632	2693.8	1063.74	-171.499	2812.88	1011.99	-151.667	2878.65	931.365	-199.721	2839.89	896.235	-213.367	2929.18	858.266
961	0	53.3176	2859.8	1524.58	152.831	2858.43	1521.26	35.821	2697.55	1580.81	148.617	2686.18	1581.19	98.8081	2622.57	1393.33	80.8277	2577.08	1171.7	94.5679	2754.36	1327.6	98.2736	2817.42	1200.92	173.329	2559.01	1219.97	-75.4668	2677.4	1353.04	-145.636	2699.12	1132.21	-153.581	2704.49	1062.97	-169.593	2822.65	1009.72	-149.806	2887.23	928.135	-197.815	2847.93	893.489	-211.322	2936.54	853.971
962	0	54.5015	2871.2	1525.06	153.994	2869.91	1521.79	37.0971	2708.83	1580.98	149.885	2697.55	1581.38	99.9565	2634.34	1393.31	81.9986	2590.08	1171.57	95.9883	2766.37	1327.95	99.9064	2829.96	1201.53	174.361	2571.28	1219.69	-74.2778	2689.57	1352.92	-143.721	2710.34	1131.75	-151.447	2715.04	1062.45	-167.593	2832.16	1007.54	-147.849	2895.39	924.875	-195.847	2855.51	890.825	-209.146	2943.29	849.515
963	0	55.6627	2882.61	1525.76	155.135	2881.4	1522.52	38.3508	2720.12	1581.38	151.131	2708.94	1581.79	101.095	2646.09	1393.56	83.2034	2602.93	1171.8	97.3331	2778.32	1328.51	101.417	2842.42	1202.34	175.443	2583.5	1219.75	-73.1194	2701.65	1353.07	-141.764	2721.48	1131.53	-149.238	2725.46	1062.19	-165.506	2841.42	1005.46	-145.804	2903.13	921.625	-193.826	2862.65	888.282	-206.848	2949.43	844.951
964	0	56.7896	2894.01	1526.66	156.243	2892.89	1523.43	39.5739	2731.42	1582.01	152.345	2720.32	1582.42	102.218	2657.8	1394.07	84.4352	2615.6	1172.39	98.5908	2790.2	1329.27	102.794	2854.75	1203.32	176.572	2595.65	1220.13	-71.9989	2713.62	1353.49	-139.775	2732.52	1131.56	-146.964	2735.73	1062.16	-163.342	2850.43	1003.51	-143.677	2910.47	918.42	-191.76	2869.37	885.893	-204.438	2954.98	840.334
965	0	57.872	2905.41	1527.73	157.307	2904.36	1524.51	40.7587	2742.72	1582.86	153.521	2731.72	1583.25	103.319	2669.45	1394.84	85.6859	2628.04	1173.31	99.7516	2801.97	1330.22	104.027	2866.94	1204.46	177.749	2607.69	1220.83	-70.9231	2725.45	1354.16	-137.763	2743.42	1131.81	-144.634	2745.83	1062.37	-161.112	2859.18	1001.7	-141.478	2917.42	915.298	-189.657	2875.69	883.689	-201.924	2959.96	835.718
966	0	58.9005	2916.8	1528.96	158.316	2915.82	1525.73	41.898	2754.03	1583.93	154.652	2743.12	1584.29	104.394	2681.03	1395.86	86.9475	2640.22	1174.54	100.807	2813.64	1331.34	105.111	2878.95	1205.75	178.968	2619.61	1221.84	-69.8985	2737.12	1355.07	-135.737	2754.16	1132.28	-142.257	2755.76	1062.8	-158.826	2867.68	1000.06	-139.214	2923.98	912.289	-187.525	2881.64	881.692	-199.318	2964.39	831.155
967	0	59.8669	2928.16	1530.34	159.263	2927.27	1527.07	42.9853	2765.34	1585.2	155.731	2754.52	1585.52	105.436	2692.53	1397.12	88.2122	2652.1	1176.05	101.752	2825.18	1332.63	106.042	2890.78	1207.16	180.228	2631.39	1223.13	-68.9309	2748.6	1356.19	-133.706	2764.72	1132.94	-139.844	2765.49	1063.44	-156.495	2875.91	998.584	-136.895	2930.18	909.423	-185.368	2887.24	879.921	-196.628	2968.31	826.693
968	0	60.7642	2939.49	1531.83	160.14	2938.68	1528.52	44.0146	2776.65	1586.67	156.753	2765.92	1586.93	106.442	2703.93	1398.6	89.4736	2663.69	1177.8	102.579	2836.57	1334.08	106.819	2902.41	1208.69	181.526	2643.02	1224.7	-68.0252	2759.88	1357.52	-131.679	2775.07	1133.78	-137.403	2775.01	1064.27	-154.13	2883.88	997.29	-134.527	2936.02	906.725	-183.193	2892.52	878.389	-193.864	2971.74	822.375
969	0	61.5865	2950.79	1533.42	160.939	2950.07	1530.06	44.9811	2787.95	1588.32	157.712	2777.32	1588.52	107.408	2715.23	1400.3	90.7263	2674.96	1179.77	103.287	2847.81	1335.66	107.441	2913.81	1210.31	182.858	2654.49	1226.52	-67.1861	2770.95	1359.03	-129.663	2785.18	1134.78	-134.943	2784.32	1065.28	-151.742	2891.59	996.183	-132.12	2941.51	904.218	-181.002	2897.49	877.106	-191.034	2974.71	818.243
970	0	62.329	2962.04	1535.1	161.656	2961.42	1531.67	45.8805	2799.23	1590.15	158.606	2788.72	1590.28	108.33	2726.42	1402.2	91.9665	2685.91	1181.92	103.873	2858.9	1337.37	107.912	2924.99	1212.03	184.221	2665.79	1228.58	-66.4171	2781.79	1360.71	-127.666	2795.05	1135.93	-132.472	2793.38	1066.44	-149.34	2899.03	995.266	-129.679	2946.67	901.92	-178.8	2902.18	876.077	-188.147	2977.24	814.328
971	0	62.9876	2973.24	1536.86	162.286	2972.73	1533.34	46.7093	2810.51	1592.14	159.429	2800.11	1592.2	109.205	2737.49	1404.3	93.1911	2696.54	1184.22	104.335	2869.81	1339.21	108.234	2935.93	1213.83	185.611	2676.9	1230.86	-65.7211	2792.39	1362.55	-125.694	2804.64	1137.2	-129.996	2802.2	1067.75	-146.932	2906.2	994.543	-127.211	2951.51	899.844	-176.589	2906.6	875.305	-185.209	2979.36	810.661
972	0	63.5595	2984.39	1538.67	162.825	2984	1535.06	47.4651	2821.76	1594.29	160.18	2811.49	1594.27	110.031	2748.43	1406.59	94.3978	2706.86	1186.66	104.675	2880.55	1341.17	108.412	2946.63	1215.7	187.025	2687.83	1233.35	-65.1002	2802.74	1364.52	-123.752	2813.95	1138.58	-127.52	2810.77	1069.19	-144.524	2913.1	994.016	-124.721	2956.04	898.002	-174.369	2910.76	874.792	-182.226	2981.1	807.264
973	0	64.0423	2995.48	1540.54	163.27	2995.22	1536.82	48.1457	2833	1596.6	160.857	2822.85	1596.5	110.807	2759.25	1409.06	95.585	2716.87	1189.2	104.891	2891.11	1343.24	108.449	2957.08	1217.64	188.46	2698.56	1236.03	-64.5562	2812.85	1366.63	-121.842	2822.96	1140.07	-125.048	2819.07	1070.76	-142.122	2919.72	993.685	-122.212	2960.25	896.403	-172.141	2914.67	874.536	-179.203	2982.46	804.153
974	0	64.4344	3006.51	1542.47	163.621	3006.4	1538.63	48.7499	2844.22	1599.05	161.458	2834.21	1598.88	111.532	2769.93	1411.71	96.7511	2726.58	1191.84	104.985	2901.5	1345.43	108.351	2967.28	1219.66	189.913	2709.1	1238.9	-64.0897	2822.7	1368.87	-119.967	2831.67	1141.66	-122.584	2827.11	1072.44	-139.73	2926.07	993.551	-119.688	2964.16	895.051	-169.906	2918.34	874.536	-176.144	2983.47	801.343
975	0	64.7349	3017.48	1544.43	163.875	3017.52	1540.47	49.2768	2855.42	1601.65	161.982	2845.55	1601.41	112.204	2780.49	1414.53	97.8952	2735.99	1194.57	104.957	2911.7	1347.71	108.12	2977.23	1221.74	191.382	2719.44	1241.96	-63.7016	2832.3	1371.23	-118.13	2840.06	1143.34	-120.128	2834.88	1074.24	-137.349	2932.15	993.614	-117.149	2967.78	893.951	-167.664	2921.77	874.793	-173.051	2984.13	798.84
976	0	64.943	3028.39	1546.44	164.032	3028.6	1542.35	49.726	2866.6	1604.4	162.428	2856.88	1604.08	112.823	2790.91	1417.52	99.0165	2745.1	1197.39	104.807	2921.72	1350.11	107.758	2986.93	1223.89	192.866	2729.59	1245.2	-63.3919	2841.65	1373.7	-116.33	2848.15	1145.11	-117.683	2842.37	1076.14	-134.981	2937.95	993.873	-114.598	2971.09	893.103	-165.415	2924.97	875.303	-169.926	2984.44	796.65
977	0	65.0585	3039.24	1548.5	164.092	3039.62	1544.26	50.0973	2877.75	1607.29	162.798	2868.19	1606.9	113.389	2801.19	1420.69	100.115	2753.92	1200.29	104.535	2931.56	1352.61	107.267	2996.38	1226.11	194.365	2739.54	1248.61	-63.1609	2850.74	1376.3	-114.568	2855.92	1146.97	-115.248	2849.59	1078.16	-132.628	2943.47	994.329	-112.035	2974.11	892.51	-163.158	2927.94	876.068	-166.768	2984.42	794.775
978	0	65.0814	3050.02	1550.59	164.054	3050.6	1546.2	50.3905	2888.89	1610.32	163.089	2879.49	1609.86	113.902	2811.35	1424.03	101.19	2762.44	1203.27	104.143	2941.22	1355.22	106.646	3005.58	1228.39	195.878	2749.29	1252.21	-63.0086	2859.57	1379.01	-112.844	2863.38	1148.91	-112.824	2856.54	1080.28	-130.288	2948.72	994.982	-109.46	2976.83	892.171	-160.894	2930.67	877.087	-163.58	2984.05	793.215
[truncated: 69 more columns]

## Sheet: Sheet2
Devices
		025370 - Force			025370 - Moment			025370 - CoP			027571 - Force			027571 - Moment			027571 - CoP			037720 - Force			037720 - Moment			037720 - CoP
Frame	Sub Frame	Fx	Fy	Fz	Mx	My	Mz	Cx	Cy	Cz	Fx	Fy	Fz	Mx	My	Mz	Cx	Cy	Cz	Fx	Fy	Fz	Mx	My	Mz	Cx	Cy	Cz
		N	N	N	N.mm	N.mm	N.mm	mm	mm	mm	N	N	N	N.mm	N.mm	N.mm	mm	mm	mm	N	N	N	N.mm	N.mm	N.mm	mm	mm	mm
537	0	0	0	0	0	0	0	200	300	0	0	0	0	0	0	0	200	903	0	0	0	0	0	0	0	603	903	0
537	1	0	0	0	0	0	0	200	300	0	0	0	0	0	0	0	200	903	0	0	0	0	0	0	0	603	903	0
537	2	0	0	0	0	0	0	200	300	0	0	0	0	0	0	0	200	903	0	0	0	0	0	0	0	603	903	0
537	3	0	0	0	0	0	0	200	300	0	0	0	0	0	0	0	200	903	0	0	0	0	0	0	0	603	903	0
537	4	0	0	0	0	0	0	200	300	0	0	0	0	0	0	0	200	903	0	0	0	0	0	0	0	603	903	0
537	5	0	0	0	0	0	0	200	300	0	0	0	0	0	0	0	200	903	0	0	0	0	0	0	0	603	903	0
537	6	0	0	0	0	0	0	200	300	0	0	0	0	0	0	0	200	903	0	0	0	0	0	0	0	603	903	0
537	7	0	0	0	0	0	0	200	300	0	0	0	0	0	0	0	200	903	0	0	0	0	0	0	0	603	903	0
537	8	0	0	0	0	0	0	200	300	0	0	0	0	0	0	0	200	903	0	0	0	0	0	0	0	603	903	0
537	9	0	0	0	0	0	0	200	300	0	0	0	0	0	0	0	200	903	0	0	0	0	0	0	0	603	903	0
538	0	0	0	0	0	0	0	200	300	0	0	0	0	0	0	0	200	903	0	0	0	0	0	0	0	603	903	0
538	1	0	0	0	0	0	0	200	300	0	0	0	0	0	0	0	200	903	0	0	0	0	0	0	0	603	903	0
538	2	0	0	0	0	0	0	200	300	0	0	0	0	0	0	0	200	903	0	0	0	0	0	0	0	603	903	0
538	3	0	0	0	0	0	0	200	300	0	0	0	0	0	0	0	200	903	0	0	0	0	0	0	0	603	903	0
538	4	0	0	0	0	0	0	200	300	0	0	0	0	0	0	0	200	903	0	0	0	0	0	0	0	603	903	0
538	5	0	0	0	0	0	0	200	300	0	0	0	0	0	0	0	200	903	0	0	0	0	0	0	0	603	903	0
538	6	0	0	0	0	0	0	200	300	0	0	0	0	0	0	0	200	903	0	0	0	0	0	0	0	603	903	0
538	7	0	0	0	0	0	0	200	300	0	0	0	0	0	0	0	200	903	0	0	0	0	0	0	0	603	903	0
538	8	0	0	0	0	0	0	200	300	0	0	0	0	0	0	0	200	903	0	0	0	0	0	0	0	603	903	0
538	9	0	0	0	0	0	0	200	300	0	0	0	0	0	0	0	200	903	0	0	0	0	0	0	0	603	903	0
539	0	0	0	0	0	0	0	200	300	0	0	0	0	0	0	0	200	903	0	0	0	0	0	0	0	603	903	0
539	1	0	0	0	0	0	0	200	300	0	0	0	0	0	0	0	200	903	0	0	0	0	0	0	0	603	903	0
539	2	0	0	0	0	0	0	200	300	0	0	0	0	0	0	0	200	903	0	0	0	0	0	0	0	603	903	0
539	3	0	0	0	0	0	0	200	300	0	0	0	0	0	0	0	200	903	0	0	0	0	0	0	0	603	903	0
539	4	0	0	0	0	0	0	200	300	0	0	0	0	0	0	0	200	903	0	0	0	0	0	0	0	603	903	0
539	5	0	0	0	0	0	0	200	300	0	0	0	0	0	0	0	200	903	0	0	0	0	0	0	0	603	903	0
539	6	0	0	0	0	0	0	200	300	0	0	0	0	0	0	0	200	903	0	0	0	0	0	0	0	603	903	0
539	7	0	0	0	0	0	0	200	300	0	0	0	0	0	0	0	200	903	0	0	0	0	0	0	0	603	903	0
539	8	0	0	0	0	0	0	200	300	0	0	0	0	0	0	0	200	903	0	0	0	0	0	0	0	603	903	0
539	9	0	0	0	0	0	0	200	300	0	0	0	0	0	0	0	200	903	0	0	0	0	0	0	0	603	903	0
540	0	0	0	0	0	0	0	200	300	0	0	0	0	0	0	0	200	903	0	0	0	0	0	0	0	603	903	0
540	1	0	0	0	0	0	0	200	300	0	0	0	0	0	0	0	200	903	0	0	0	0	0	0	0	603	903	0
540	2	0	0	0	0	0	0	200	300	0	0	0	0	0	0	0	200	903	0	0	0	0	0	0	0	603	903	0
540	3	0	0	0	0	0	0	200	300	0	0	0	0	0	0	0	200	903	0	0	0	0	0	0	0	603	903	0
540	4	0	0	0	0	0	0	200	300	0	0	0	0	0	0	0	200	903	0	0	0	0	0	0	0	603	903	0
540	5	0	0	0	0	0	0	200	300	0	0	0	0	0	0	0	200	903	0	0	0	0	0	0	0	603	903	0
540	6	0	0	0	0	0	0	200	300	0	0	0	0	0	0	0	200	903	0	0	0	0	0	0	0	603	903	0
540	7	0	0	0	0	0	0	200	300	0	0	0	0	0	0	0	200	903	0	0	0	0	0	0	0	603	903	0
540	8	0	0	0	0	0	0	200	300	0	0	0	0	0	0	0	200	903	0	0	0	0	0	0	0	603	903	0
540	9	0	0	0	0	0	0	200	300	0	0	0	0	0	0	0	200	903	0	0	0	0	0	0	0	603	903	0
541	0	0	0	0	0	0	0	200	300	0	0	0	0	0	0	0	200	903	0	0	0	0	0	0	0	603	903	0
541	1	0	0	0	0	0	0	200	300	0	0	0	0	0	0	0	200	903	0	0	0	0	0	0	0	603	903	0
541	2	0	0	0	0	0	0	200	300	0	0	0	0	0	0	0	200	903	0	0	0	0	0	0	0	603	903	0
541	3	0	0	0	0	0	0	200	300	0	0	0	0	0	0	0	200	903	0	0	0	0	0	0	0	603	903	0
541	4	0	0	0	0	0	0	200	300	0	0	0	0	0	0	0	200	903	0	0	0	0	0	0	0	603	903	0
541	5	0	0	0	0	0	0	200	300	0	0	0	0	0	0	0	200	903	0	0	0	0	0	0	0	603	903	0
541	6	0	0	0	0	0	0	200	300	0	0	0	0	0	0	0	200	903	0	0	0	0	0	0	0	603	903	0
541	7	0	0	0	0	0	0	200	300	0	0	0	0	0	0	0	200	903	0	0	0	0	0	0	0	603	903	0
541	8	0	0	0	0	0	0	200	300	0	0	0	0	0	0	0	200	903	0	0	0	0	0	0	0	603	903	0
541	9	0	0	0	0	0	0	200	300	0	0	0	0	0	0	0	200	903	0	0	0	0	0	0	0	603	903	0
542	0	0	0	0	0	0	0	200	300	0	0	0	0	0	0	0	200	903	0	0	0	0	0	0	0	603	903	0
542	1	0	0	0	0	0	0	200	300	0	0	0	0	0	0	0	200	903	0	0	0	0	0	0	0	603	903	0
542	2	0	0	0	0	0	0	200	300	0	0	0	0	0	0	0	200	903	0	0	0	0	0	0	0	603	903	0
542	3	0	0	0	0	0	0	200	300	0	0	0	0	0	0	0	200	903	0	0	0	0	0	0	0	603	903	0
542	4	0	0	0	0	0	0	200	300	0	0	0	0	0	0	0	200	903	0	0	0	0	0	0	0	603	903	0
542	5	0	0	0	0	0	0	200	300	0	0	0	0	0	0	0	200	903	0	0	0	0	0	0	0	603	903	0
542	6	0	0	0	0	0	0	200	300	0	0	0	0	0	0	0	200	903	0	0	0	0	0	0	0	603	903	0
542	7	0	0	0	0	0	0	200	300	0	0	0	0	0	0	0	200	903	0	0	0	0	0	0	0	603	903	0
542	8	0	0	0	0	0	0	200	300	0	0	0	0	0	0	0	200	903	0	0	0	0	0	0	0	603	903	0
542	9	0	0	0	0	0	0	200	300	0	0	0	0	0	0	0	200	903	0	0	0	0	0	0	0	603	903	0
543	0	0	0	0	0	0	0	200	300	0	0	0	0	0	0	0	200	903	0	0	0	0	0	0	0	603	903	0
543	1	0	0	0	0	0	0	200	300	0	0	0	0	0	0	0	200	903	0	0	0	0	0	0	0	603	903	0
543	2	0	0	0	0	0	0	200	300	0	0	0	0	0	0	0	200	903	0	0	0	0	0	0	0	603	903	0
543	3	0	0	0	0	0	0	200	300	0	0	0	0	0	0	0	200	903	0	0	0	0	0	0	0	603	903	0
543	4	0	0	0	0	0	0	200	300	0	0	0	0	0	0	0	200	903	0	0	0	0	0	0	0	603	903	0
543	5	0	0	0	0	0	0	200	300	0	0	0	0	0	0	0	200	903	0	0	0	0	0	0	0	603	903	0
543	6	0	0	0	0	0	0	200	300	0	0	0	0	0	0	0	200	903	0	0	0	0	0	0	0	603	903	0
543	7	0	0	0	0	0	0	200	300	0	0	0	0	0	0	0	200	903	0	0	0	0	0	0	0	603	903	0
543	8	0	0	0	0	0	0	200	300	0	0	0	0	0	0	0	200	903	0	0	0	0	0	0	0	603	903	0
543	9	0	0	0	0	0	0	200	300	0	0	0	0	0	0	0	200	903	0	0	0	0	0	0	0	603	903	0
544	0	0	0	0	0	0	0	200	300	0	0	0	0	0	0	0	200	903	0	0	0	0	0	0	0	603	903	0
544	1	0	0	0	0	0	0	200	300	0	0	0	0	0	0	0	200	903	0	0	0	0	0	0	0	603	903	0
544	2	0	0	0	0	0	0	200	300	0	0	0	0	0	0	0	200	903	0	0	0	0	0	0	0	603	903	0
544	3	0	0	0	0	0	0	200	300	0	0	0	0	0	0	0	200	903	0	0	0	0	0	0	0	603	903	0
544	4	0	0	0	0	0	0	200	300	0	0	0	0	0	0	0	200	903	0	0	0	0	0	0	0	603	903	0
544	5	0	0	0	0	0	0	200	300	0	0	0	0	0	0	0	200	903	0	0	0	0	0	0	0	603	903	0
544	6	0	0	0	0	0	0	200	300	0	0	0	0	0	0	0	200	903	0	0	0	0	0	0	0	603	903	0
544	7	0	0	0	0	0	0	200	300	0	0	0	0	0	0	0	200	903	0	0	0	0	0	0	0	603	903	0
544	8	0	0	0	0	0	0	200	300	0	0	0	0	0	0	0	200	903	0	0	0	0	0	0	0	603	903	0
544	9	0	0	0	0	0	0	200	300	0	0	0	0	0	0	0	200	903	0	0	0	0	0	0	0	603	903	0
545	0	0	0	0	0	0	0	200	300	0	0	0	0	0	0	0	200	903	0	0	0	0	0	0	0	603	903	0
545	1	0	0	0	0	0	0	200	300	0	0	0	0	0	0	0	200	903	0	0	0	0	0	0	0	603	903	0
545	2	0	0	0	0	0	0	200	300	0	0	0	0	0	0	0	200	903	0	0	0	0	0	0	0	603	903	0
545	3	0	0	0	0	0	0	200	300	0	0	0	0	0	0	0	200	903	0	0	0	0	0	0	0	603	903	0
545	4	0	0	0	0	0	0	200	300	0	0	0	0	0	0	0	200	903	0	0	0	0	0	0	0	603	903	0
545	5	0	0	0	0	0	0	200	300	0	0	0	0	0	0	0	200	903	0	0	0	0	0	0	0	603	903	0
545	6	0	0	0	0	0	0	200	300	0	0	0	0	0	0	0	200	903	0	0	0	0	0	0	0	603	903	0
545	7	0	0	0	0	0	0	200	300	0	0	0	0	0	0	0	200	903	0	0	0	0	0	0	0	603	903	0
545	8	0	0	0	0	0	0	200	300	0	0	0	0	0	0	0	200	903	0	0	0	0	0	0	0	603	903	0
545	9	0	0	0	0	0	0	200	300	0	0	0	0	0	0	0	200	903	0	0	0	0	0	0	0	603	903	0
546	0	0	0	0	0	0	0	200	300	0	0	0	0	0	0	0	200	903	0	0	0	0	0	0	0	603	903	0
546	1	0	0	0	0	0	0	200	300	0	0	0	0	0	0	0	200	903	0	0	0	0	0	0	0	603	903	0
546	2	0	0	0	0	0	0	200	300	0	0	0	0	0	0	0	200	903	0	0	0	0	0	0	0	603	903	0
546	3	0	0	0	0	0	0	200	300	0	0	0	0	0	0	0	200	903	0	0	0	0	0	0	0	603	903	0
546	4	0	0	0	0	0	0	200	300	0	0	0	0	0	0	0	200	903	0	0	0	0	0	0	0	603	903	0
546	5	0	0	0	0	0	0	200	300	0	0	0	0	0	0	0	200	903	0	0	0	0	0	0	0	603	903	0
546	6	0	0	0	0	0	0	200	300	0	0	0	0	0	0	0	200	903	0	0	0	0	0	0	0	603	903	0
546	7	0	0	0	0	0	0	200	300	0	0	0	0	0	0	0	200	903	0	0	0	0	0	0	0	603	903	0
546	8	0	0	0	0	0	0	200	300	0	0	0	0	0	0	0	200	903	0	0	0	0	0	0	0	603	903	0
546	9	0	0	0	0	0	0	200	300	0	0	0	0	0	0	0	200	903	0	0	0	0	0	0	0	603	903	0
547	0	0	0	0	0	0	0	200	300	0	0	0	0	0	0	0	200	903	0	0	0	0	0	0	0	603	903	0
547	1	0	0	0	0	0	0	200	300	0	0	0	0	0	0	0	200	903	0	0	0	0	0	0	0	603	903	0
547	2	0	0	0	0	0	0	200	300	0	0	0	0	0	0	0	200	903	0	0	0	0	0	0	0	603	903	0
547	3	0	0	0	0	0	0	200	300	0	0	0	0	0	0	0	200	903	0	0	0	0	0	0	0	603	903	0
547	4	0	0	0	0	0	0	200	300	0	0	0	0	0	0	0	200	903	0	0	0	0	0	0	0	603	903	0
547	5	0	0	0	0	0	0	200	300	0	0	0	0	0	0	0	200	903	0	0	0	0	0	0	0	603	903	0
547	6	0	0	0	0	0	0	200	300	0	0	0	0	0	0	0	200	903	0	0	0	0	0	0	0	603	903	0
547	7	0	0	0	0	0	0	200	300	0	0	0	0	0	0	0	200	903	0	0	0	0	0	0	0	603	903	0
547	8	0	0	0	0	0	0	200	300	0	0	0	0	0	0	0	200	903	0	0	0	0	0	0	0	603	903	0
547	9	0	0	0	0	0	0	200	300	0	0	0	0	0	0	0	200	903	0	0	0	0	0	0	0	603	903	0
548	0	0	0	0	0	0	0	200	300	0	0	0	0	0	0	0	200	903	0	0	0	0	0	0	0	603	903	0
548	1	0	0	0	0	0	0	200	300	0	0	0	0	0	0	0	200	903	0	0	0	0	0	0	0	603	903	0
548	2	0	0	0	0	0	0	200	300	0	0	0	0	0	0	0	200	903	0	0	0	0	0	0	0	603	903	0
548	3	0	0	0	0	0	0	200	300	0	0	0	0	0	0	0	200	903	0	0	0	0	0	0	0	603	903	0
548	4	0	0	0	0	0	0	200	300	0	0	0	0	0	0	0	200	903	0	0	0	0	0	0	0	603	903	0
548	5	0	0	0	0	0	0	200	300	0	0	0	0	0	0	0	200	903	0	0	0	0	0	0	0	603	903	0
548	6	0	0	0	0	0	0	200	300	0	0	0	0	0	0	0	200	903	0	0	0	0	0	0	0	603	903	0
548	7	0	0	0	0	0	0	200	300	0	0	0	0	0	0	0	200	903	0	0	0	0	0	0	0	603	903	0
548	8	0	0	0	0	0	0	200	300	0	0	0	0	0	0	0	200	903	0	0	0	0	0	0	0	603	903	0
548	9	0	0	0	0	0	0	200	300	0	0	0	0	0	0	0	200	903	0	0	0	0	0	0	0	603	903	0
549	0	0	0	0	0	0	0	200	300	0	0	0	0	0	0	0	200	903	0	0	0	0	0	0	0	603	903	0
549	1	0	0	0	0	0	0	200	300	0	0	0	0	0	0	0	200	903	0	0	0	0	0	0	0	603	903	0
549	2	0	0	0	0	0	0	200	300	0	0	0	0	0	0	0	200	903	0	0	0	0	0	0	0	603	903	0
549	3	0	0	0	0	0	0	200	300	0	0	0	0	0	0	0	200	903	0	0	0	0	0	0	0	603	903	0
549	4	0	0	0	0	0	0	200	300	0	0	0	0	0	0	0	200	903	0	0	0	0	0	0	0	603	903	0
549	5	0	0	0	0	0	0	200	300	0	0	0	0	0	0	0	200	903	0	0	0	0	0	0	0	603	903	0
549	6	0	0	0	0	0	0	200	300	0	0	0	0	0	0	0	200	903	0	0	0	0	0	0	0	603	903	0
549	7	0	0	0	0	0	0	200	300	0	0	0	0	0	0	0	200	903	0	0	0	0	0	0	0	603	903	0
549	8	0	0	0	0	0	0	200	300	0	0	0	0	0	0	0	200	903	0	0	0	0	0	0	0	603	903	0
549	9	0	0	0	0	0	0	200	300	0	0	0	0	0	0	0	200	903	0	0	0	0	0	0	0	603	903	0
550	0	0	0	0	0	0	0	200	300	0	0	0	0	0	0	0	200	903	0	0	0	0	0	0	0	603	903	0
550	1	0	0	0	0	0	0	200	300	0	0	0	0	0	0	0	200	903	0	0	0	0	0	0	0	603	903	0
550	2	0	0	0	0	0	0	200	300	0	0	0	0	0	0	0	200	903	0	0	0	0	0	0	0	603	903	0
550	3	0	0	0	0	0	0	200	300	0	0	0	0	0	0	0	200	903	0	0	0	0	0	0	0	603	903	0
550	4	0	0	0	0	0	0	200	300	0	0	0	0	0	0	0	200	903	0	0	0	0	0	0	0	603	903	0
550	5	0	0	0	0	0	0	200	300	0	0	0	0	0	0	0	200	903	0	0	0	0	0	0	0	603	903	0
550	6	0	0	0	0	0	0	200	300	0	0	0	0	0	0	0	200	903	0	0	0	0	0	0	0	603	903	0
550	7	0	0	0	0	0	0	200	300	0	0	0	0	0	0	0	200	903	0	0	0	0	0	0	0	603	903	0
550	8	0	0	0	0	0	0	200	300	0	0	0	0	0	0	0	200	903	0	0	0	0	0	0	0	603	903	0
550	9	0	0	0	0	0	0	200	300	0	0	0	0	0	0	0	200	903	0	0	0	0	0	0	0	603	903	0
551	0	0	0	0	0	0	0	200	300	0	0	0	0	0	0	0	200	903	0	0	0	0	0	0	0	603	903	0
551	1	0	0	0	0	0	0	200	300	0	0	0	0	0	0	0	200	903	0	0	0	0	0	0	0	603	903	0
551	2	0	0	0	0	0	0	200	300	0	0	0	0	0	0	0	200	903	0	0	0	0	0	0	0	603	903	0
551	3	0	0	0	0	0	0	200	300	0	0	0	0	0	0	0	200	903	0	0	0	0	0	0	0	603	903	0
551	4	0	0	0	0	0	0	200	300	0	0	0	0	0	0	0	200	903	0	0	0	0	0	0	0	603	903	0
551	5	0	0	0	0	0	0	200	300	0	0	0	0	0	0	0	200	903	0	0	0	0	0	0	0	603	903	0
551	6	0	0	0	0	0	0	200	300	0	0	0	0	0	0	0	200	903	0	0	0	0	0	0	0	603	903	0
551	7	0	0	0	0	0	0	200	300	0	0	0	0	0	0	0	200	903	0	0	0	0	0	0	0	603	903	0
551	8	0	0	0	0	0	0	200	300	0	0	0	0	0	0	0	200	903	0	0	0	0	0	0	0	603	903	0
551	9	0	0	0	0	0	0	200	300	0	0	0	0	0	0	0	200	903	0	0	0	0	0	0	0	603	903	0
552	0	0	0	0	0	0	0	200	300	0	0	0	0	0	0	0	200	903	0	0	0	0	0	0	0	603	903	0
552	1	0	0	0	0	0	0	200	300	0	0	0	0	0	0	0	200	903	0	0	0	0	0	0	0	603	903	0
552	2	0	0	0	0	0	0	200	300	0	0	0	0	0	0	0	200	903	0	0	0	0	0	0	0	603	903	0
552	3	0	0	0	0	0	0	200	300	0	0	0	0	0	0	0	200	903	0	0	0	0	0	0	0	603	903	0
552	4	0	0	0	0	0	0	200	300	0	0	0	0	0	0	0	200	903	0	0	0	0	0	0	0	603	903	0
552	5	0	0	0	0	0	0	200	300	0	0	0	0	0	0	0	200	903	0	0	0	0	0	0	0	603	903	0
552	6	0	0	0	0	0	0	200	300	0	0	0	0	0	0	0	200	903	0	0	0	0	0	0	0	603	903	0
552	7	0	0	0	0	0	0	200	300	0	0	0	0	0	0	0	200	903	0	0	0	0	0	0	0	603	903	0
552	8	0	0	0	0	0	0	200	300	0	0	0	0	0	0	0	200	903	0	0	0	0	0	0	0	603	903	0
552	9	0	0	0	0	0	0	200	300	0	0	0	0	0	0	0	200	903	0	0	0	0	0	0	0	603	903	0
553	0	0	0	0	0	0	0	200	300	0	0	0	0	0	0	0	200	903	0	0	0	0	0	0	0	603	903	0
553	1	0	0	0	0	0	0	200	300	0	0	0	0	0	0	0	200	903	0	0	0	0	0	0	0	603	903	0
553	2	0	0	0	0	0	0	200	300	0	0	0	0	0	0	0	200	903	0	0	0	0	0	0	0	603	903	0
553	3	0	0	0	0	0	0	200	300	0	0	0	0	0	0	0	200	903	0	0	0	0	0	0	0	603	903	0
553	4	0	0	0	0	0	0	200	300	0	0	0	0	0	0	0	200	903	0	0	0	0	0	0	0	603	903	0
553	5	0	0	0	0	0	0	200	300	0	0	0	0	0	0	0	200	903	0	0	0	0	0	0	0	603	903	0
553	6	0	0	0	0	0	0	200	300	0	0	0	0	0	0	0	200	903	0	0	0	0	0	0	0	603	903	0
553	7	0	0	0	0	0	0	200	300	0	0	0	0	0	0	0	200	903	0	0	0	0	0	0	0	603	903	0
553	8	0	0	0	0	0	0	200	300	0	0	0	0	0	0	0	200	903	0	0	0	0	0	0	0	603	903	0
553	9	0	0	0	0	0	0	200	300	0	0	0	0	0	0	0	200	903	0	0	0	0	0	0	0	603	903	0
554	0	0	0	0	0	0	0	200	300	0	0	0	0	0	0	0	200	903	0	0	0	0	0	0	0	603	903	0
554	1	0	0	0	0	0	0	200	300	0	0	0	0	0	0	0	200	903	0	0	0	0	0	0	0	603	903	0
554	2	0	0	0	0	0	0	200	300	0	0	0	0	0	0	0	200	903	0	0	0	0	0	0	0	603	903	0
554	3	0	0	0	0	0	0	200	300	0	0	0	0	0	0	0	200	903	0	0	0	0	0	0	0	603	903	0
554	4	0	0	0	0	0	0	200	300	0	0	0	0	0	0	0	200	903	0	0	0	0	0	0	0	603	903	0
554	5	0	0	0	0	0	0	200	300	0	0	0	0	0	0	0	200	903	0	0	0	0	0	0	0	603	903	0
554	6	0	0	0	0	0	0	200	300	0	0	0	0	0	0	0	200	903	0	0	0	0	0	0	0	603	903	0
554	7	0	0	0	0	0	0	200	300	0	0	0	0	0	0	0	200	903	0	0	0	0	0	0	0	603	903	0
554	8	0	0	0	0	0	0	200	300	0	0	0	0	0	0	0	200	903	0	0	0	0	0	0	0	603	903	0
554	9	0	0	0	0	0	0	200	300	0	0	0	0	0	0	0	200	903	0	0	0	0	0	0	0	603	903	0
555	0	0	0	0	0	0	0	200	300	0	0	0	0	0	0	0	200	903	0	0	0	0	0	0	0	603	903	0
555	1	0	0	0	0	0	0	200	300	0	0	0	0	0	0	0	200	903	0	0	0	0	0	0	0	603	903	0
555	2	0	0	0	0	0	0	200	300	0	0	0	0	0	0	0	200	903	0	0	0	0	0	0	0	603	903	0
555	3	0	0	0	0	0	0	200	300	0	0	0	0	0	0	0	200	903	0	0	0	0	0	0	0	603	903	0
555	4	0	0	0	0	0	0	200	300	0	0	0	0	0	0	0	200	903	0	0	0	0	0	0	0	603	903	0
555	5	0	0	0	0	0	0	200	300	0	0	0	0	0	0	0	200	903	0	0	0	0	0	0	0	603	903	0
555	6	0	0	0	0	0	0	200	300	0	0	0	0	0	0	0	200	903	0	0	0	0	0	0	0	603	903	0
555	7	0	0	0	0	0	0	200	300	0	0	0	0	0	0	0	200	903	0	0	0	0	0	0	0	603	903	0
555	8	0	0	0	0	0	0	200	300	0	0	0	0	0	0	0	200	903	0	0	0	0	0	0	0	603	903	0
555	9	0	0	0	0	0	0	200	300	0	0	0	0	0	0	0	200	903	0	0	0	0	0	0	0	603	903	0
556	0	0	0	0	0	0	0	200	300	0	0	0	0	0	0	0	200	903	0	0	0	0	0	0	0	603	903	0
556	1	0	0	0	0	0	0	200	300	0	0	0	0	0	0	0	200	903	0	0	0	0	0	0	0	603	903	0
556	2	0	0	0	0	0	0	200	300	0	0	0	0	0	0	0	200	903	0	0	0	0	0	0	0	603	903	0
556	3	0	0	0	0	0	0	200	300	0	0	0	0	0	0	0	200	903	0	0	0	0	0	0	0	603	903	0
556	4	0	0	0	0	0	0	200	300	0	0	0	0	0	0	0	200	903	0	0	0	0	0	0	0	603	903	0
556	5	0	0	0	0	0	0	200	300	0	0	0	0	0	0	0	200	903	0	0	0	0	0	0	0	603	903	0
556	6	0	0	0	0	0	0	200	300	0	0	0	0	0	0	0	200	903	0	0	0	0	0	0	0	603	903	0
556	7	0	0	0	0	0	0	200	300	0	0	0	0	0	0	0	200	903	0	0	0	0	0	0	0	603	903	0
556	8	0	0	0	0	0	0	200	300	0	0	0	0	0	0	0	200	903	0	0	0	0	0	0	0	603	903	0
556	9	0	0	0	0	0	0	200	300	0	0	0	0	0	0	0	200	903	0	0	0	0	0	0	0	603	903	0
557	0	0	0	0	0	0	0	200	300	0	0	0	0	0	0	0	200	903	0	0	0	0	0	0	0	603	903	0
557	1	0	0	0	0	0	0	200	300	0	0	0	0	0	0	0	200	903	0	0	0	0	0	0	0	603	903	0
557	2	0	0	0	0	0	0	200	300	0	0	0	0	0	0	0	200	903	0	0	0	0	0	0	0	603	903	0
557	3	0	0	0	0	0	0	200	300	0	0	0	0	0	0	0	200	903	0	0	0	0	0	0	0	603	903	0
557	4	0	0	0	0	0	0	200	300	0	0	0	0	0	0	0	200	903	0	0	0	0	0	0	0	603	903	0
557	5	0	0	0	0	0	0	200	300	0	0	0	0	0	0	0	200	903	0	0	0	0	0	0	0	603	903	0
557	6	0	0	0	0	0	0	200	300	0	0	0	0	0	0	0	200	903	0	0	0	0	0	0	0	603	903	0
557	7	0	0	0	0	0	0	200	300	0	0	0	0	0	0	0	200	903	0	0	0	0	0	0	0	603	903	0
557	8	0	0	0	0	0	0	200	300	0	0	0	0	0	0	0	200	903	0	0	0	0	0	0	0	603	903	0
557	9	0	0	0	0	0	0	200	300	0	0	0	0	0	0	0	200	903	0	0	0	0	0	0	0	603	903	0
558	0	0	0	0	0	0	0	200	300	0	0	0	0	0	0	0	200	903	0	0	0	0	0	0	0	603	903	0
558	1	0	0	0	0	0	0	200	300	0	0	0	0	0	0	0	200	903	0	0	0	0	0	0	0	603	903	0
558	2	0	0	0	0	0	0	200	300	0	0	0	0	0	0	0	200	903	0	0	0	0	0	0	0	603	903	0
558	3	0	0	0	0	0	0	200	300	0	0	0	0	0	0	0	200	903	0	0	0	0	0	0	0	603	903	0
558	4	0	0	0	0	0	0	200	300	0	0	0	0	0	0	0	200	903	0	0	0	0	0	0	0	603	903	0
558	5	0	0	0	0	0	0	200	300	0	0	0	0	0	0	0	200	903	0	0	0	0	0	0	0	603	903	0
558	6	0	0	0	0	0	0	200	300	0	0	0	0	0	0	0	200	903	0	0	0	0	0	0	0	603	903	0
558	7	0	0	0	0	0	0	200	300	0	0	0	0	0	0	0	200	903	0	0	0	0	0	0	0	603	903	0
558	8	0	0	0	0	0	0	200	300	0	0	0	0	0	0	0	200	903	0	0	0	0	0	0	0	603	903	0
558	9	0	0	0	0	0	0	200	300	0	0	0	0	0	0	0	200	903	0	0	0	0	0	0	0	603	903	0
559	0	0	0	0	0	0	0	200	300	0	0	0	0	0	0	0	200	903	0	0	0	0	0	0	0	603	903	0
559	1	0	0	0	0	0	0	200	300	0	0	0	0	0	0	0	200	903	0	0	0	0	0	0	0	603	903	0
559	2	0	0	0	0	0	0	200	300	0	0	0	0	0	0	0	200	903	0	0	0	0	0	0	0	603	903	0
559	3	0	0	0	0	0	0	200	300	0	0	0	0	0	0	0	200	903	0	0	0	0	0	0	0	603	903	0
559	4	0	0	0	0	0	0	200	300	0	0	0	0	0	0	0	200	903	0	0	0	0	0	0	0	603	903	0
559	5	0	0	0	0	0	0	200	300	0	0	0	0	0	0	0	200	903	0	0	0	0	0	0	0	603	903	0
559	6	0	0	0	0	0	0	200	300	0	0	0	0	0	0	0	200	903	0	0	0	0	0	0	0	603	903	0
559	7	0	0	0	0	0	0	200	300	0	0	0	0	0	0	0	200	903	0	0	0	0	0	0	0	603	903	0
559	8	0	0	0	0	0	0	200	300	0	0	0	0	0	0	0	200	903	0	0	0	0	0	0	0	603	903	0
559	9	0	0	0	0	0	0	200	300	0	0	0	0	0	0	0	200	903	0	0	0	0	0	0	0	603	903	0
560	0	0	0	0	0	0	0	200	300	0	0	0	0	0	0	0	200	903	0	0	0	0	0	0	0	603	903	0
560	1	0	0	0	0	0	0	200	300	0	0	0	0	0	0	0	200	903	0	0	0	0	0	0	0	603	903	0
560	2	0	0	0	0	0	0	200	300	0	0	0	0	0	0	0	200	903	0	0	0	0	0	0	0	603	903	0
560	3	0	0	0	0	0	0	200	300	0	0	0	0	0	0	0	200	903	0	0	0	0	0	0	0	603	903	0
560	4	0	0	0	0	0	0	200	300	0	0	0	0	0	0	0	200	903	0	0	0	0	0	0	0	603	903	0
560	5	0	0	0	0	0	0	200	300	0	0	0	0	0	0	0	200	903	0	0	0	0	0	0	0	603	903	0
560	6	0	0	0	0	0	0	200	300	0	0	0	0	0	0	0	200	903	0	0	0	0	0	0	0	603	903	0
560	7	0	0	0	0	0	0	200	300	0	0	0	0	0	0	0	200	903	0	0	0	0	0	0	0	603	903	0
560	8	0	0	0	0	0	0	200	300	0	0	0	0	0	0	0	200	903	0	0	0	0	0	0	0	603	903	0
560	9	0	0	0	0	0	0	200	300	0	0	0	0	0	0	0	200	903	0	0	0	0	0	0	0	603	903	0
561	0	0	0	0	0	0	0	200	300	0	0	0	0	0	0	0	200	903	0	0	0	0	0	0	0	603	903	0
561	1	0	0	0	0	0	0	200	300	0	0	0	0	0	0	0	200	903	0	0	0	0	0	0	0	603	903	0
561	2	0	0	0	0	0	0	200	300	0	0	0	0	0	0	0	200	903	0	0	0	0	0	0	0	603	903	0
561	3	0	0	0	0	0	0	200	300	0	0	0	0	0	0	0	200	903	0	0	0	0	0	0	0	603	903	0
561	4	0	0	0	0	0	0	200	300	0	0	0	0	0	0	0	200	903	0	0	0	0	0	0	0	603	903	0
561	5	0	0	0	0	0	0	200	300	0	0	0	0	0	0	0	200	903	0	0	0	0	0	0	0	603	903	0
561	6	0	0	0	0	0	0	200	300	0	0	0	0	0	0	0	200	903	0	0	0	0	0	0	0	603	903	0
561	7	0	0	0	0	0	0	200	300	0	0	0	0	0	0	0	200	903	0	0	0	0	0	0	0	603	903	0
561	8	0	0	0	0	0	0	200	300	0	0	0	0	0	0	0	200	903	0	0	0	0	0	0	0	603	903	0
561	9	0	0	0	0	0	0	200	300	0	0	0	0	0	0	0	200	903	0	0	0	0	0	0	0	603	903	0
562	0	0	0	0	0	0	0	200	300	0	0	0	0	0	0	0	200	903	0	0	0	0	0	0	0	603	903	0
562	1	0	0	0	0	0	0	200	300	0	0	0	0	0	0	0	200	903	0	0	0	0	0	0	0	603	903	0
562	2	0	0	0	0	0	0	200	300	0	0	0	0	0	0	0	200	903	0	0	0	0	0	0	0	603	903	0
562	3	0	0	0	0	0	0	200	300	0	0	0	0	0	0	0	200	903	0	0	0	0	0	0	0	603	903	0
562	4	0	0	0	0	0	0	200	300	0	0	0	0	0	0	0	200	903	0	0	0	0	0	0	0	603	903	0
562	5	0	0	0	0	0	0	200	300	0	0	0	0	0	0	0	200	903	0	0	0	0	0	0	0	603	903	0
562	6	0	0	0	0	0	0	200	300	0	0	0	0	0	0	0	200	903	0	0	0	0	0	0	0	603	903	0
562	7	0	0	0	0	0	0	200	300	0	0	0	0	0	0	0	200	903	0	0	0	0	0	0	0	603	903	0
562	8	0	0	0	0	0	0	200	300	0	0	0	0	0	0	0	200	903	0	0	0	0	0	0	0	603	903	0
562	9	0	0	0	0	0	0	200	300	0	0	0	0	0	0	0	200	903	0	0	0	0	0	0	0	603	903	0
563	0	0	0	0	0	0	0	200	300	0	0	0	0	0	0	0	200	903	0	0	0	0	0	0	0	603	903	0
563	1	0	0	0	0	0	0	200	300	0	0	0	0	0	0	0	200	903	0	0	0	0	0	0	0	603	903	0
563	2	0	0	0	0	0	0	200	300	0	0	0	0	0	0	0	200	903	0	0	0	0	0	0	0	603	903	0
563	3	0	0	0	0	0	0	200	300	0	0	0	0	0	0	0	200	903	0	0	0	0	0	0	0	603	903	0
563	4	0	0	0	0	0	0	200	300	0	0	0	0	0	0	0	200	903	0	0	0	0	0	0	0	603	903	0
563	5	0	0	0	0	0	0	200	300	0	0	0	0	0	0	0	200	903	0	0	0	0	0	0	0	603	903	0
563	6	0	0	0	0	0	0	200	300	0	0	0	0	0	0	0	200	903	0	0	0	0	0	0	0	603	903	0
563	7	0	0	0	0	0	0	200	300	0	0	0	0	0	0	0	200	903	0	0	0	0	0	0	0	603	903	0
563	8	0	0	0	0	0	0	200	300	0	0	0	0	0	0	0	200	903	0	0	0	0	0	0	0	603	903	0
563	9	0	0	0	0	0	0	200	300	0	0	0	0	0	0	0	200	903	0	0	0	0	0	0	0	603	903	0
564	0	0	0	0	0	0	0	200	300	0	0	0	0	0	0	0	200	903	0	0	0	0	0	0	0	603	903	0
564	1	0	0	0	0	0	0	200	300	0	0	0	0	0	0	0	200	903	0	0	0	0	0	0	0	603	903	0
564	2	0	0	0	0	0	0	200	300	0	0	0	0	0	0	0	200	903	0	0	0	0	0	0	0	603	903	0
564	3	0	0	0	0	0	0	200	300	0	0	0	0	0	0	0	200	903	0	0	0	0	0	0	0	603	903	0
564	4	0	0	0	0	0	0	200	300	0	0	0	0	0	0	0	200	903	0	0	0	0	0	0	0	603	903	0
564	5	0	0	0	0	0	0	200	300	0	0	0	0	0	0	0	200	903	0	0	0	0	0	0	0	603	903	0
564	6	0	0	0	0	0	0	200	300	0	0	0	0	0	0	0	200	903	0	0	0	0	0	0	0	603	903	0
564	7	0	0	0	0	0	0	200	300	0	0	0	0	0	0	0	200	903	0	0	0	0	0	0	0	603	903	0
564	8	0	0	0	0	0	0	200	300	0	0	0	0	0	0	0	200	903	0	0	0	0	0	0	0	603	903	0
564	9	0	0	0	0	0	0	200	300	0	0	0	0	0	0	0	200	903	0	0	0	0	0	0	0	603	903	0
565	0	0	0	0	0	0	0	200	300	0	0	0	0	0	0	0	200	903	0	0	0	0	0	0	0	603	903	0
565	1	0	0	0	0	0	0	200	300	0	0	0	0	0	0	0	200	903	0	0	0	0	0	0	0	603	903	0
565	2	0	0	0	0	0	0	200	300	0	0	0	0	0	0	0	200	903	0	0	0	0	0	0	0	603	903	0
565	3	0	0	0	0	0	0	200	300	0	0	0	0	0	0	0	200	903	0	0	0	0	0	0	0	603	903	0
565	4	0	0	0	0	0	0	200	300	0	0	0	0	0	0	0	200	903	0	0	0	0	0	0	0	603	903	0
565	5	0	0	0	0	0	0	200	300	0	0	0	0	0	0	0	200	903	0	0	0	0	0	0	0	603	903	0
565	6	0	0	0	0	0	0	200	300	0	0	0	0	0	0	0	200	903	0	0	0	0	0	0	0	603	903	0
565	7	0	0	0	0	0	0	200	300	0	0	0	0	0	0	0	200	903	0	0	0	0	0	0	0	603	903	0
565	8	0	0	0	0	0	0	200	300	0	0	0	0	0	0	0	200	903	0	0	0	0	0	0	0	603	903	0
565	9	0	0	0	0	0	0	200	300	0	0	0	0	0	0	0	200	903	0	0	0	0	0	0	0	603	903	0
566	0	0	0	0	0	0	0	200	300	0	0	0	0	0	0	0	200	903	0	0	0	0	0	0	0	603	903	0
566	1	0	0	0	0	0	0	200	300	0	0	0	0	0	0	0	200	903	0	0	0	0	0	0	0	603	903	0
566	2	0	0	0	0	0	0	200	300	0	0	0	0	0	0	0	200	903	0	0	0	0	0	0	0	603	903	0
566	3	0	0	0	0	0	0	200	300	0	0	0	0	0	0	0	200	903	0	0	0	0	0	0	0	603	903	0
566	4	0	0	0	0	0	0	200	300	0	0	0	0	0	0	0	200	903	0	0	0	0	0	0	0	603	903	0
566	5	0	0	0	0	0	0	200	300	0	0	0	0	0	0	0	200	903	0	0	0	0	0	0	0	603	903	0
566	6	0	0	0	0	0	0	200	300	0	0	0	0	0	0	0	200	903	0	0	0	0	0	0	0	603	903	0
566	7	0	0	0	0	0	0	200	300	0	0	0	0	0	0	0	200	903	0	0	0	0	0	0	0	603	903	0
566	8	0	0	0	0	0	0	200	300	0	0	0	0	0	0	0	200	903	0	0	0	0	0	0	0	603	903	0
566	9	0	0	0	0	0	0	200	300	0	0	0	0	0	0	0	200	903	0	0	0	0	0	0	0	603	903	0
567	0	0	0	0	0	0	0	200	300	0	0	0	0	0	0	0	200	903	0	0	0	0	0	0	0	603	903	0
567	1	0	0	0	0	0	0	200	300	0	0	0	0	0	0	0	200	903	0	0	0	0	0	0	0	603	903	0
567	2	0	0	0	0	0	0	200	300	0	0	0	0	0	0	0	200	903	0	0	0	0	0	0	0	603	903	0
567	3	0	0	0	0	0	0	200	300	0	0	0	0	0	0	0	200	903	0	0	0	0	0	0	0	603	903	0
567	4	0	0	0	0	0	0	200	300	0	0	0	0	0	0	0	200	903	0	0	0	0	0	0	0	603	903	0
567	5	0	0	0	0	0	0	200	300	0	0	0	0	0	0	0	200	903	0	0	0	0	0	0	0	603	903	0
567	6	0	0	0	0	0	0	200	300	0	0	0	0	0	0	0	200	903	0	0	0	0	0	0	0	603	903	0
567	7	0	0	0	0	0	0	200	300	0	0	0	0	0	0	0	200	903	0	0	0	0	0	0	0	603	903	0
567	8	0	0	0	0	0	0	200	300	0	0	0	0	0	0	0	200	903	0	0	0	0	0	0	0	603	903	0
567	9	0	0	0	0	0	0	200	300	0	0	0	0	0	0	0	200	903	0	0	0	0	0	0	0	603	903	0
568	0	0	0	0	0	0	0	200	300	0	0	0	0	0	0	0	200	903	0	0	0	0	0	0	0	603	903	0
568	1	0	0	0	0	0	0	200	300	0	0	0	0	0	0	0	200	903	0	0	0	0	0	0	0	603	903	0
568	2	0	0	0	0	0	0	200	300	0	0	0	0	0	0	0	200	903	0	0	0	0	0	0	0	603	903	0
568	3	0	0	0	0	0	0	200	300	0	0	0	0	0	0	0	200	903	0	0	0	0	0	0	0	603	903	0
568	4	0	0	0	0	0	0	200	300	0	0	0	0	0	0	0	200	903	0	0	0	0	0	0	0	603	903	0
568	5	0	0	0	0	0	0	200	300	0	0	0	0	0	0	0	200	903	0	0	0	0	0	0	0	603	903	0
568	6	0	0	0	0	0	0	200	300	0	0	0	0	0	0	0	200	903	0	0	0	0	0	0	0	603	903	0
568	7	0	0	0	0	0	0	200	300	0	0	0	0	0	0	0	200	903	0	0	0	0	0	0	0	603	903	0
568	8	0	0	0	0	0	0	200	300	0	0	0	0	0	0	0	200	903	0	0	0	0	0	0	0	603	903	0
568	9	0	0	0	0	0	0	200	300	0	0	0	0	0	0	0	200	903	0	0	0	0	0	0	0	603	903	0
569	0	0	0	0	0	0	0	200	300	0	0	0	0	0	0	0	200	903	0	0	0	0	0	0	0	603	903	0
569	1	0	0	0	0	0	0	200	300	0	0	0	0	0	0	0	200	903	0	0	0	0	0	0	0	603	903	0
569	2	0	0	0	0	0	0	200	300	0	0	0	0	0	0	0	200	903	0	0	0	0	0	0	0	603	903	0
569	3	0	0	0	0	0	0	200	300	0	0	0	0	0	0	0	200	903	0	0	0	0	0	0	0	603	903	0
569	4	0	0	0	0	0	0	200	300	0	0	0	0	0	0	0	200	903	0	0	0	0	0	0	0	603	903	0
569	5	0	0	0	0	0	0	200	300	0	0	0	0	0	0	0	200	903	0	0	0	0	0	0	0	603	903	0
569	6	0	0	0	0	0	0	200	300	0	0	0	0	0	0	0	200	903	0	0	0	0	0	0	0	603	903	0
569	7	0	0	0	0	0	0	200	300	0	0	0	0	0	0	0	200	903	0	0	0	0	0	0	0	603	903	0
569	8	0	0	0	0	0	0	200	300	0	0	0	0	0	0	0	200	903	0	0	0	0	0	0	0	603	903	0
569	9	0	0	0	0	0	0	200	300	0	0	0	0	0	0	0	200	903	0	0	0	0	0	0	0	603	903	0
570	0	0	0	0	0	0	0	200	300	0	0	0	0	0	0	0	200	903	0	0	0	0	0	0	0	603	903	0
570	1	0	0	0	0	0	0	200	300	0	0	0	0	0	0	0	200	903	0	0	0	0	0	0	0	603	903	0
570	2	0	0	0	0	0	0	200	300	0	0	0	0	0	0	0	200	903	0	0	0	0	0	0	0	603	903	0
570	3	0	0	0	0	0	0	200	300	0	0	0	0	0	0	0	200	903	0	0	0	0	0	0	0	603	903	0
570	4	0	0	0	0	0	0	200	300	0	0	0	0	0	0	0	200	903	0	0	0	0	0	0	0	603	903	0
570	5	0	0	0	0	0	0	200	300	0	0	0	0	0	0	0	200	903	0	0	0	0	0	0	0	603	903	0
570	6	0	0	0	0	0	0	200	300	0	0	0	0	0	0	0	200	903	0	0	0	0	0	0	0	603	903	0
570	7	0	0	0	0	0	0	200	300	0	0	0	0	0	0	0	200	903	0	0	0	0	0	0	0	603	903	0
570	8	0	0	0	0	0	0	200	300	0	0	0	0	0	0	0	200	903	0	0	0	0	0	0	0	603	903	0
570	9	0	0	0	0	0	0	200	300	0	0	0	0	0	0	0	200	903	0	0	0	0	0	0	0	603	903	0
571	0	0	0	0	0	0	0	200	300	0	0	0	0	0	0	0	200	903	0	0	0	0	0	0	0	603	903	0
571	1	0	0	0	0	0	0	200	300	0	0	0	0	0	0	0	200	903	0	0	0	0	0	0	0	603	903	0
571	2	0	0	0	0	0	0	200	300	0	0	0	0	0	0	0	200	903	0	0	0	0	0	0	0	603	903	0
571	3	0	0	0	0	0	0	200	300	0	0	0	0	0	0	0	200	903	0	0	0	0	0	0	0	603	903	0
571	4	0	0	0	0	0	0	200	300	0	0	0	0	0	0	0	200	903	0	0	0	0	0	0	0	603	903	0
571	5	0	0	0	0	0	0	200	300	0	0	0	0	0	0	0	200	903	0	0	0	0	0	0	0	603	903	0
571	6	0	0	0	0	0	0	200	300	0	0	0	0	0	0	0	200	903	0	0	0	0	0	0	0	603	903	0
571	7	0	0	0	0	0	0	200	300	0	0	0	0	0	0	0	200	903	0	0	0	0	0	0	0	603	903	0
571	8	0	0	0	0	0	0	200	300	0	0	0	0	0	0	0	200	903	0	0	0	0	0	0	0	603	903	0
571	9	0	0	0	0	0	0	200	300	0	0	0	0	0	0	0	200	903	0	0	0	0	0	0	0	603	903	0
572	0	0	0	0	0	0	0	200	300	0	0	0	0	0	0	0	200	903	0	0	0	0	0	0	0	603	903	0
572	1	0	0	0	0	0	0	200	300	0	0	0	0	0	0	0	200	903	0	0	0	0	0	0	0	603	903	0
572	2	0	0	0	0	0	0	200	300	0	0	0	0	0	0	0	200	903	0	0	0	0	0	0	0	603	903	0
572	3	0	0	0	0	0	0	200	300	0	0	0	0	0	0	0	200	903	0	0	0	0	0	0	0	603	903	0
572	4	0	0	0	0	0	0	200	300	0	0	0	0	0	0	0	200	903	0	0	0	0	0	0	0	603	903	0
572	5	0	0	0	0	0	0	200	300	0	0	0	0	0	0	0	200	903	0	0	0	0	0	0	0	603	903	0
572	6	0	0	0	0	0	0	200	300	0	0	0	0	0	0	0	200	903	0	0	0	0	0	0	0	603	903	0
572	7	0	0	0	0	0	0	200	300	0	0	0	0	0	0	0	200	903	0	0	0	0	0	0	0	603	903	0
572	8	0	0	0	0	0	0	200	300	0	0	0	0	0	0	0	200	903	0	0	0	0	0	0	0	603	903	0
572	9	0	0	0	0	0	0	200	300	0	0	0	0	0	0	0	200	903	0	0	0	0	0	0	0	603	903	0
573	0	0	0	0	0	0	0	200	300	0	0	0	0	0	0	0	200	903	0	0	0	0	0	0	0	603	903	0
573	1	0	0	0	0	0	0	200	300	0	0	0	0	0	0	0	200	903	0	0	0	0	0	0	0	603	903	0
573	2	0	0	0	0	0	0	200	300	0	0	0	0	0	0	0	200	903	0	0	0	0	0	0	0	603	903	0
573	3	0	0	0	0	0	0	200	300	0	0	0	0	0	0	0	200	903	0	0	0	0	0	0	0	603	903	0
573	4	0	0	0	0	0	0	200	300	0	0	0	0	0	0	0	200	903	0	0	0	0	0	0	0	603	903	0
573	5	0	0	0	0	0	0	200	300	0	0	0	0	0	0	0	200	903	0	0	0	0	0	0	0	603	903	0
573	6	0	0	0	0	0	0	200	300	0	0	0	0	0	0	0	200	903	0	0	0	0	0	0	0	603	903	0
573	7	0	0	0	0	0	0	200	300	0	0	0	0	0	0	0	200	903	0	0	0	0	0	0	0	603	903	0
573	8	0	0	0	0	0	0	200	300	0	0	0	0	0	0	0	200	903	0	0	0	0	0	0	0	603	903	0
573	9	0	0	0	0	0	0	200	300	0	0	0	0	0	0	0	200	903	0	0	0	0	0	0	0	603	903	0
574	0	0	0	0	0	0	0	200	300	0	0	0	0	0	0	0	200	903	0	0	0	0	0	0	0	603	903	0
574	1	0	0	0	0	0	0	200	300	0	0	0	0	0	0	0	200	903	0	0	0	0	0	0	0	603	903	0
574	2	0	0	0	0	0	0	200	300	0	0	0	0	0	0	0	200	903	0	0	0	0	0	0	0	603	903	0
574	3	0	0	0	0	0	0	200	300	0	0	0	0	0	0	0	200	903	0	0	0	0	0	0	0	603	903	0
574	4	0	0	0	0	0	0	200	300	0	0	0	0	0	0	0	200	903	0	0	0	0	0	0	0	603	903	0
574	5	0	0	0	0	0	0	200	300	0	0	0	0	0	0	0	200	903	0	0	0	0	0	0	0	603	903	0
574	6	0	0	0	0	0	0	200	300	0	0	0	0	0	0	0	200	903	0	0	0	0	0	0	0	603	903	0
574	7	0	0	0	0	0	0	200	300	0	0	0	0	0	0	0	200	903	0	0	0	0	0	0	0	603	903	0
574	8	0	0	0	0	0	0	200	300	0	0	0	0	0	0	0	200	903	0	0	0	0	0	0	0	603	903	0
574	9	0	0	0	0	0	0	200	300	0	0	0	0	0	0	0	200	903	0	0	0	0	0	0	0	603	903	0
575	0	0	0	0	0	0	0	200	300	0	0	0	0	0	0	0	200	903	0	0	0	0	0	0	0	603	903	0
575	1	0	0	0	0	0	0	200	300	0	0	0	0	0	0	0	200	903	0	0	0	0	0	0	0	603	903	0
575	2	0	0	0	0	0	0	200	300	0	0	0	0	0	0	0	200	903	0	0	0	0	0	0	0	603	903	0
575	3	0	0	0	0	0	0	200	300	0	0	0	0	0	0	0	200	903	0	0	0	0	0	0	0	603	903	0
575	4	0	0	0	0	0	0	200	300	0	0	0	0	0	0	0	200	903	0	0	0	0	0	0	0	603	903	0
575	5	0	0	0	0	0	0	200	300	0	0	0	0	0	0	0	200	903	0	0	0	0	0	0	0	603	903	0
575	6	0	0	0	0	0	0	200	300	0	0	0	0	0	0	0	200	903	0	0	0	0	0	0	0	603	903	0
575	7	0	0	0	0	0	0	200	300	0	0	0	0	0	0	0	200	903	0	0	0	0	0	0	0	603	903	0
575	8	0	0	0	0	0	0	200	300	0	0	0	0	0	0	0	200	903	0	0	0	0	0	0	0	603	903	0
575	9	0	0	0	0	0	0	200	300	0	0	0	0	0	0	0	200	903	0	0	0	0	0	0	0	603	903	0
576	0	0	0	0	0	0	0	200	300	0	0	0	0	0	0	0	200	903	0	0	0	0	0	0	0	603	903	0
576	1	0	0	0	0	0	0	200	300	0	0	0	0	0	0	0	200	903	0	0	0	0	0	0	0	603	903	0
576	2	0	0	0	0	0	0	200	300	0	0	0	0	0	0	0	200	903	0	0	0	0	0	0	0	603	903	0
576	3	0	0	0	0	0	0	200	300	0	0	0	0	0	0	0	200	903	0	0	0	0	0	0	0	603	903	0
576	4	0	0	0	0	0	0	200	300	0	0	0	0	0	0	0	200	903	0	0	0	0	0	0	0	603	903	0
576	5	0	0	0	0	0	0	200	300	0	0	0	0	0	0	0	200	903	0	0	0	0	0	0	0	603	903	0
576	6	0	0	0	0	0	0	200	300	0	0	0	0	0	0	0	200	903	0	0	0	0	0	0	0	603	903	0
576	7	0	0	0	0	0	0	200	300	0	0	0	0	0	0	0	200	903	0	0	0	0	0	0	0	603	903	0
576	8	0	0	0	0	0	0	200	300	0	0	0	0	0	0	0	200	903	0	0	0	0	0	0	0	603	903	0
576	9	0	0	0	0	0	0	200	300	0	0	0	0	0	0	0	200	903	0	0	0	0	0	0	0	603	903	0
577	0	0	0	0	0	0	0	200	300	0	0	0	0	0	0	0	200	903	0	0	0	0	0	0	0	603	903	0
577	1	0	0	0	0	0	0	200	300	0	0	0	0	0	0	0	200	903	0	0	0	0	0	0	0	603	903	0
577	2	0	0	0	0	0	0	200	300	0	0	0	0	0	0	0	200	903	0	0	0	0	0	0	0	603	903	0
577	3	0	0	0	0	0	0	200	300	0	0	0	0	0	0	0	200	903	0	0	0	0	0	0	0	603	903	0
577	4	0	0	0	0	0	0	200	300	0	0	0	0	0	0	0	200	903	0	0	0	0	0	0	0	603	903	0
577	5	0	0	0	0	0	0	200	300	0	0	0	0	0	0	0	200	903	0	0	0	0	0	0	0	603	903	0
577	6	0	0	0	0	0	0	200	300	0	0	0	0	0	0	0	200	903	0	0	0	0	0	0	0	603	903	0
577	7	0	0	0	0	0	0	200	300	0	0	0	0	0	0	0	200	903	0	0	0	0	0	0	0	603	903	0
577	8	0	0	0	0	0	0	200	300	0	0	0	0	0	0	0	200	903	0	0	0	0	0	0	0	603	903	0
577	9	0	0	0	0	0	0	200	300	0	0	0	0	0	0	0	200	903	0	0	0	0	0	0	0	603	903	0
578	0	0	0	0	0	0	0	200	300	0	0	0	0	0	0	0	200	903	0	0	0	0	0	0	0	603	903	0
578	1	0	0	0	0	0	0	200	300	0	0	0	0	0	0	0	200	903	0	0	0	0	0	0	0	603	903	0
578	2	0	0	0	0	0	0	200	300	0	0	0	0	0	0	0	200	903	0	0	0	0	0	0	0	603	903	0
578	3	0	0	0	0	0	0	200	300	0	0	0	0	0	0	0	200	903	0	0	0	0	0	0	0	603	903	0
578	4	0	0	0	0	0	0	200	300	0	0	0	0	0	0	0	200	903	0	0	0	0	0	0	0	603	903	0
578	5	0	0	0	0	0	0	200	300	0	0	0	0	0	0	0	200	903	0	0	0	0	0	0	0	603	903	0
578	6	0	0	0	0	0	0	200	300	0	0	0	0	0	0	0	200	903	0	0	0	0	0	0	0	603	903	0
578	7	0	0	0	0	0	0	200	300	0	0	0	0	0	0	0	200	903	0	0	0	0	0	0	0	603	903	0
578	8	0	0	0	0	0	0	200	300	0	0	0	0	0	0	0	200	903	0	0	0	0	0	0	0	603	903	0
578	9	0	0	0	0	0	0	200	300	0	0	0	0	0	0	0	200	903	0	0	0	0	0	0	0	603	903	0
579	0	0	0	0	0	0	0	200	300	0	0	0	0	0	0	0	200	903	0	0	0	0	0	0	0	603	903	0
579	1	0	0	0	0	0	0	200	300	0	0	0	0	0	0	0	200	903	0	0	0	0	0	0	0	603	903	0
579	2	0	0	0	0	0	0	200	300	0	0	0	0	0	0	0	200	903	0	0	0	0	0	0	0	603	903	0
579	3	0	0	0	0	0	0	200	300	0	0	0	0	0	0	0	200	903	0	0	0	0	0	0	0	603	903	0
579	4	0	0	0	0	0	0	200	300	0	0	0	0	0	0	0	200	903	0	0	0	0	0	0	0	603	903	0
579	5	0	0	0	0	0	0	200	300	0	0	0	0	0	0	0	200	903	0	0	0	0	0	0	0	603	903	0
579	6	0	0	0	0	0	0	200	300	0	0	0	0	0	0	0	200	903	0	0	0	0	0	0	0	603	903	0
579	7	0	0	0	0	0	0	200	300	0	0	0	0	0	0	0	200	903	0	0	0	0	0	0	0	603	903	0
579	8	0	0	0	0	0	0	200	300	0	0	0	0	0	0	0	200	903	0	0	0	0	0	0	0	603	903	0
579	9	0	0	0	0	0	0	200	300	0	0	0	0	0	0	0	200	903	0	0	0	0	0	0	0	603	903	0
580	0	0	0	0	0	0	0	200	300	0	0	0	0	0	0	0	200	903	0	0	0	0	0	0	0	603	903	0
580	1	0	0	0	0	0	0	200	300	0	0	0	0	0	0	0	200	903	0	0	0	0	0	0	0	603	903	0
580	2	0	0	0	0	0	0	200	300	0	0	0	0	0	0	0	200	903	0	0	0	0	0	0	0	603	903	0
580	3	0	0	0	0	0	0	200	300	0	0	0	0	0	0	0	200	903	0	0	0	0	0	0	0	603	903	0
580	4	0	0	0	0	0	0	200	300	0	0	0	0	0	0	0	200	903	0	0	0	0	0	0	0	603	903	0
580	5	0	0	0	0	0	0	200	300	0	0	0	0	0	0	0	200	903	0	0	0	0	0	0	0	603	903	0
580	6	0	0	0	0	0	0	200	300	0	0	0	0	0	0	0	200	903	0	0	0	0	0	0	0	603	903	0
580	7	0	0	0	0	0	0	200	300	0	0	0	0	0	0	0	200	903	0	0	0	0	0	0	0	603	903	0
580	8	0	0	0	0	0	0	200	300	0	0	0	0	0	0	0	200	903	0	0	0	0	0	0	0	603	903	0
580	9	0	0	0	0	0	0	200	300	0	0	0	0	0	0	0	200	903	0	0	0	0	0	0	0	603	903	0
581	0	0	0	0	0	0	0	200	300	0	0	0	0	0	0	0	200	903	0	0	0	0	0	0	0	603	903	0
581	1	0	0	0	0	0	0	200	300	0	0	0	0	0	0	0	200	903	0	0	0	0	0	0	0	603	903	0
581	2	0	0	0	0	0	0	200	300	0	0	0	0	0	0	0	200	903	0	0	0	0	0	0	0	603	903	0
581	3	0	0	0	0	0	0	200	300	0	0	0	0	0	0	0	200	903	0	0	0	0	0	0	0	603	903	0
581	4	0	0	0	0	0	0	200	300	0	0	0	0	0	0	0	200	903	0	0	0	0	0	0	0	603	903	0
581	5	0	0	0	0	0	0	200	300	0	0	0	0	0	0	0	200	903	0	0	0	0	0	0	0	603	903	0
581	6	0	0	0	0	0	0	200	300	0	0	0	0	0	0	0	200	903	0	0	0	0	0	0	0	603	903	0
581	7	0	0	0	0	0	0	200	300	0	0	0	0	0	0	0	200	903	0	0	0	0	0	0	0	603	903	0
581	8	0	0	0	0	0	0	200	300	0	0	0	0	0	0	0	200	903	0	0	0	0	0	0	0	603	903	0
581	9	0	0	0	0	0	0	200	300	0	0	0	0	0	0	0	200	903	0	0	0	0	0	0	0	603	903	0
582	0	0	0	0	0	0	0	200	300	0	0	0	0	0	0	0	200	903	0	0	0	0	0	0	0	603	903	0
582	1	0	0	0	0	0	0	200	300	0	0	0	0	0	0	0	200	903	0	0	0	0	0	0	0	603	903	0
582	2	0	0	0	0	0	0	200	300	0	0	0	0	0	0	0	200	903	0	0	0	0	0	0	0	603	903	0
582	3	0	0	0	0	0	0	200	300	0	0	0	0	0	0	0	200	903	0	0	0	0	0	0	0	603	903	0
582	4	0	0	0	0	0	0	200	300	0	0	0	0	0	0	0	200	903	0	0	0	0	0	0	0	603	903	0
582	5	0	0	0	0	0	0	200	300	0	0	0	0	0	0	0	200	903	0	0	0	0	0	0	0	603	903	0
582	6	0	0	0	0	0	0	200	300	0	0	0	0	0	0	0	200	903	0	0	0	0	0	0	0	603	903	0
582	7	0	0	0	0	0	0	200	300	0	0	0	0	0	0	0	200	903	0	0	0	0	0	0	0	603	903	0
582	8	0	0	0	0	0	0	200	300	0	0	0	0	0	0	0	200	903	0	0	0	0	0	0	0	603	903	0
582	9	0	0	0	0	0	0	200	300	0	0	0	0	0	0	0	200	903	0	0	0	0	0	0	0	603	903	0
583	0	0	0	0	0	0	0	200	300	0	0	0	0	0	0	0	200	903	0	0	0	0	0	0	0	603	903	0
583	1	0	0	0	0	0	0	200	300	0	0	0	0	0	0	0	200	903	0	0	0	0	0	0	0	603	903	0
583	2	0	0	0	0	0	0	200	300	0	0	0	0	0	0	0	200	903	0	0	0	0	0	0	0	603	903	0
583	3	0	0	0	0	0	0	200	300	0	0	0	0	0	0	0	200	903	0	0	0	0	0	0	0	603	903	0
583	4	0	0	0	0	0	0	200	300	0	0	0	0	0	0	0	200	903	0	0	0	0	0	0	0	603	903	0
583	5	0	0	0	0	0	0	200	300	0	0	0	0	0	0	0	200	903	0	0	0	0	0	0	0	603	903	0
583	6	0	0	0	0	0	0	200	300	0	0	0	0	0	0	0	200	903	0	0	0	0	0	0	0	603	903	0
583	7	0	0	0	0	0	0	200	300	0	0	0	0	0	0	0	200	903	0	0	0	0	0	0	0	603	903	0
583	8	0	0	0	0	0	0	200	300	0	0	0	0	0	0	0	200	903	0	0	0	0	0	0	0	603	903	0
583	9	0	0	0	0	0	0	200	300	0	0	0	0	0	0	0	200	903	0	0	0	0	0	0	0	603	903	0
584	0	0	0	0	0	0	0	200	300	0	0	0	0	0	0	0	200	903	0	0	0	0	0	0	0	603	903	0
584	1	0	0	0	0	0	0	200	300	0	0	0	0	0	0	0	200	903	0	0	0	0	0	0	0	603	903	0
584	2	0	0	0	0	0	0	200	300	0	0	0	0	0	0	0	200	903	0	0	0	0	0	0	0	603	903	0
584	3	0	0	0	0	0	0	200	300	0	0	0	0	0	0	0	200	903	0	0	0	0	0	0	0	603	903	0
584	4	0	0	0	0	0	0	200	300	0	0	0	0	0	0	0	200	903	0	0	0	0	0	0	0	603	903	0
584	5	0	0	0	0	0	0	200	300	0	0	0	0	0	0	0	200	903	0	0	0	0	0	0	0	603	903	0
584	6	0	0	0	0	0	0	200	300	0	0	0	0	0	0	0	200	903	0	0	0	0	0	0	0	603	903	0
584	7	0	0	0	0	0	0	200	300	0	0	0	0	0	0	0	200	903	0	0	0	0	0	0	0	603	903	0
584	8	0	0	0	0	0	0	200	300	0	0	0	0	0	0	0	200	903	0	0	0	0	0	0	0	603	903	0
584	9	0	0	0	0	0	0	200	300	0	0	0	0	0	0	0	200	903	0	0	0	0	0	0	0	603	903	0
585	0	0	0	0	0	0	0	200	300	0	0	0	0	0	0	0	200	903	0	0	0	0	0	0	0	603	903	0
585	1	0	0	0	0	0	0	200	300	0	0	0	0	0	0	0	200	903	0	0	0	0	0	0	0	603	903	0
585	2	0	0	0	0	0	0	200	300	0	0	0	0	0	0	0	200	903	0	0	0	0	0	0	0	603	903	0
585	3	0	0	0	0	0	0	200	300	0	0	0	0	0	0	0	200	903	0	0	0	0	0	0	0	603	903	0
585	4	0	0	0	0	0	0	200	300	0	0	0	0	0	0	0	200	903	0	0	0	0	0	0	0	603	903	0
585	5	0	0	0	0	0	0	200	300	0	0	0	0	0	0	0	200	903	0	0	0	0	0	0	0	603	903	0
585	6	0	0	0	0	0	0	200	300	0	0	0	0	0	0	0	200	903	0	0	0	0	0	0	0	603	903	0
585	7	0	0	0	0	0	0	200	300	0	0	0	0	0	0	0	200	903	0	0	0	0	0	0	0	603	903	0
585	8	0	0	0	0	0	0	200	300	0	0	0	0	0	0	0	200	903	0	0	0	0	0	0	0	603	903	0
585	9	0	0	0	0	0	0	200	300	0	0	0	0	0	0	0	200	903	0	0	0	0	0	0	0	603	903	0
586	0	0	0	0	0	0	0	200	300	0	0	0	0	0	0	0	200	903	0	0	0	0	0	0	0	603	903	0
586	1	0	0	0	0	0	0	200	300	0	0	0	0	0	0	0	200	903	0	0	0	0	0	0	0	603	903	0
586	2	0	0	0	0	0	0	200	300	0	0	0	0	0	0	0	200	903	0	0	0	0	0	0	0	603	903	0
586	3	0	0	0	0	0	0	200	300	0	0	0	0	0	0	0	200	903	0	0	0	0	0	0	0	603	903	0
586	4	0	0	0	0	0	0	200	300	0	0	0	0	0	0	0	200	903	0	0	0	0	0	0	0	603	903	0
586	5	0	0	0	0	0	0	200	300	0	0	0	0	0	0	0	200	903	0	0	0	0	0	0	0	603	903	0
586	6	0	0	0	0	0	0	200	300	0	0	0	0	0	0	0	200	903	0	0	0	0	0	0	0	603	903	0
586	7	0	0	0	0	0	0	200	300	0	0	0	0	0	0	0	200	903	0	0	0	0	0	0	0	603	903	0
586	8	0	0	0	0	0	0	200	300	0	0	0	0	0	0	0	200	903	0	0	0	0	0	0	0	603	903	0
586	9	0	0	0	0	0	0	200	300	0	0	0	0	0	0	0	200	903	0	0	0	0	0	0	0	603	903	0
587	0	0	0	0	0	0	0	200	300	0	0	0	0	0	0	0	200	903	0	0	0	0	0	0	0	603	903	0
587	1	0	0	0	0	0	0	200	300	0	0	0	0	0	0	0	200	903	0	0	0	0	0	0	0	603	903	0
587	2	0	0	0	0	0	0	200	300	0	0	0	0	0	0	0	200	903	0	0	0	0	0	0	0	603	903	0
587	3	0	0	0	0	0	0	200	300	0	0	0	0	0	0	0	200	903	0	0	0	0	0	0	0	603	903	0
587	4	0	0	0	0	0	0	200	300	0	0	0	0	0	0	0	200	903	0	0	0	0	0	0	0	603	903	0
587	5	0	0	0	0	0	0	200	300	0	0	0	0	0	0	0	200	903	0	0	0	0	0	0	0	603	903	0
587	6	0	0	0	0	0	0	200	300	0	0	0	0	0	0	0	200	903	0	0	0	0	0	0	0	603	903	0
587	7	0	0	0	0	0	0	200	300	0	0	0	0	0	0	0	200	903	0	0	0	0	0	0	0	603	903	0
587	8	0	0	0	0	0	0	200	300	0	0	0	0	0	0	0	200	903	0	0	0	0	0	0	0	603	903	0
587	9	0	0	0	0	0	0	200	300	0	0	0	0	0	0	0	200	903	0	0	0	0	0	0	0	603	903	0
588	0	0	0	0	0	0	0	200	300	0	0	0	0	0	0	0	200	903	0	0	0	0	0	0	0	603	903	0
588	1	0	0	0	0	0	0	200	300	0	0	0	0	0	0	0	200	903	0	0	0	0	0	0	0	603	903	0
588	2	0	0	0	0	0	0	200	300	0	0	0	0	0	0	0	200	903	0	0	0	0	0	0	0	603	903	0
588	3	0	0	0	0	0	0	200	300	0	0	0	0	0	0	0	200	903	0	0	0	0	0	0	0	603	903	0
588	4	0	0	0	0	0	0	200	300	0	0	0	0	0	0	0	200	903	0	0	0	0	0	0	0	603	903	0
588	5	0	0	0	0	0	0	200	300	0	0	0	0	0	0	0	200	903	0	0	0	0	0	0	0	603	903	0
588	6	0	0	0	0	0	0	200	300	0	0	0	0	0	0	0	200	903	0	0	0	0	0	0	0	603	903	0
588	7	0	0	0	0	0	0	200	300	0	0	0	0	0	0	0	200	903	0	0	0	0	0	0	0	603	903	0
588	8	0	0	0	0	0	0	200	300	0	0	0	0	0	0	0	200	903	0	0	0	0	0	0	0	603	903	0
588	9	0	0	0	0	0	0	200	300	0	0	0	0	0	0	0	200	903	0	0	0	0	0	0	0	603	903	0
589	0	0	0	0	0	0	0	200	300	0	0	0	0	0	0	0	200	903	0	0	0	0	0	0	0	603	903	0
589	1	0	0	0	0	0	0	200	300	0	0	0	0	0	0	0	200	903	0	0	0	0	0	0	0	603	903	0
589	2	0	0	0	0	0	0	200	300	0	0	0	0	0	0	0	200	903	0	0	0	0	0	0	0	603	903	0
589	3	0	0	0	0	0	0	200	300	0	0	0	0	0	0	0	200	903	0	0	0	0	0	0	0	603	903	0
589	4	0	0	0	0	0	0	200	300	0	0	0	0	0	0	0	200	903	0	0	0	0	0	0	0	603	903	0
589	5	0	0	0	0	0	0	200	300	0	0	0	0	0	0	0	200	903	0	0	0	0	0	0	0	603	903	0
589	6	0	0	0	0	0	0	200	300	0	0	0	0	0	0	0	200	903	0	0	0	0	0	0	0	603	903	0
589	7	0	0	0	0	0	0	200	300	0	0	0	0	0	0	0	200	903	0	0	0	0	0	0	0	603	903	0
589	8	0	0	0	0	0	0	200	300	0	0	0	0	0	0	0	200	903	0	0	0	0	0	0	0	603	903	0
589	9	0	0	0	0	0	0	200	300	0	0	0	0	0	0	0	200	903	0	0	0	0	0	0	0	603	903	0
590	0	0	0	0	0	0	0	200	300	0	0	0	0	0	0	0	200	903	0	0	0	0	0	0	0	603	903	0
590	1	0	0	0	0	0	0	200	300	0	0	0	0	0	0	0	200	903	0	0	0	0	0	0	0	603	903	0
590	2	0	0	0	0	0	0	200	300	0	0	0	0	0	0	0	200	903	0	0	0	0	0	0	0	603	903	0
590	3	0	0	0	0	0	0	200	300	0	0	0	0	0	0	0	200	903	0	0	0	0	0	0	0	603	903	0
590	4	0	0	0	0	0	0	200	300	0	0	0	0	0	0	0	200	903	0	0	0	0	0	0	0	603	903	0
590	5	0	0	0	0	0	0	200	300	0	0	0	0	0	0	0	200	903	0	0	0	0	0	0	0	603	903	0
590	6	0	0	0	0	0	0	200	300	0	0	0	0	0	0	0	200	903	0	0	0	0	0	0	0	603	903	0
590	7	0	0	0	0	0	0	200	300	0	0	0	0	0	0	0	200	903	0	0	0	0	0	0	0	603	903	0
590	8	0	0	0	0	0	0	200	300	0	0	0	0	0	0	0	200	903	0	0	0	0	0	0	0	603	903	0
590	9	0	0	0	0	0	0	200	300	0	0	0	0	0	0	0	200	903	0	0	0	0	0	0	0	603	903	0
591	0	0	0	0	0	0	0	200	300	0	0	0	0	0	0	0	200	903	0	0	0	0	0	0	0	603	903	0
591	1	0	0	0	0	0	0	200	300	0	0	0	0	0	0	0	200	903	0	0	0	0	0	0	0	603	903	0
591	2	0	0	0	0	0	0	200	300	0	0	0	0	0	0	0	200	903	0	0	0	0	0	0	0	603	903	0
591	3	0	0	0	0	0	0	200	300	0	0	0	0	0	0	0	200	903	0	0	0	0	0	0	0	603	903	0
591	4	0	0	0	0	0	0	200	300	0	0	0	0	0	0	0	200	903	0	0	0	0	0	0	0	603	903	0
591	5	0	0	0	0	0	0	200	300	0	0	0	0	0	0	0	200	903	0	0	0	0	0	0	0	603	903	0
591	6	0	0	0	0	0	0	200	300	0	0	0	0	0	0	0	200	903	0	0	0	0	0	0	0	603	903	0
591	7	0	0	0	0	0	0	200	300	0	0	0	0	0	0	0	200	903	0	0	0	0	0	0	0	603	903	0
591	8	0	0	0	0	0	0	200	300	0	0	0	0	0	0	0	200	903	0	0	0	0	0	0	0	603	903	0
591	9	0	0	0	0	0	0	200	300	0	0	0	0	0	0	0	200	903	0	0	0	0	0	0	0	603	903	0
592	0	0	0	0	0	0	0	200	300	0	0	0	0	0	0	0	200	903	0	0	0	0	0	0	0	603	903	0
592	1	0	0	0	0	0	0	200	300	0	0	0	0	0	0	0	200	903	0	0	0	0	0	0	0	603	903	0
592	2	0	0	0	0	0	0	200	300	0	0	0	0	0	0	0	200	903	0	0	0	0	0	0	0	603	903	0
592	3	0	0	0	0	0	0	200	300	0	0	0	0	0	0	0	200	903	0	0	0	0	0	0	0	603	903	0
592	4	0	0	0	0	0	0	200	300	0	0	0	0	0	0	0	200	903	0	0	0	0	0	0	0	603	903	0
592	5	0	0	0	0	0	0	200	300	0	0	0	0	0	0	0	200	903	0	0	0	0	0	0	0	603	903	0
592	6	0	0	0	0	0	0	200	300	0	0	0	0	0	0	0	200	903	0	0	0	0	0	0	0	603	903	0
592	7	0	0	0	0	0	0	200	300	0	0	0	0	0	0	0	200	903	0	0	0	0	0	0	0	603	903	0
592	8	0	0	0	0	0	0	200	300	0	0	0	0	0	0	0	200	903	0	0	0	0	0	0	0	603	903	0
592	9	0	0	0	0	0	0	200	300	0	0	0	0	0	0	0	200	903	0	0	0	0	0	0	0	603	903	0
593	0	0	0	0	0	0	0	200	300	0	0	0	0	0	0	0	200	903	0	0	0	0	0	0	0	603	903	0
593	1	0	0	0	0	0	0	200	300	0	0	0	0	0	0	0	200	903	0	0	0	0	0	0	0	603	903	0
593	2	0	0	0	0	0	0	200	300	0	0	0	0	0	0	0	200	903	0	0	0	0	0	0	0	603	903	0
593	3	0	0	0	0	0	0	200	300	0	0	0	0	0	0	0	200	903	0	0	0	0	0	0	0	603	903	0
593	4	0	0	0	0	0	0	200	300	0	0	0	0	0	0	0	200	903	0	0	0	0	0	0	0	603	903	0
593	5	0	0	0	0	0	0	200	300	0	0	0	0	0	0	0	200	903	0	0	0	0	0	0	0	603	903	0
593	6	0	0	0	0	0	0	200	300	0	0	0	0	0	0	0	200	903	0	0	0	0	0	0	0	603	903	0
593	7	0	0	0	0	0	0	200	300	0	0	0	0	0	0	0	200	903	0	0	0	0	0	0	0	603	903	0
593	8	0	0	0	0	0	0	200	300	0	0	0	0	0	0	0	200	903	0	0	0	0	0	0	0	603	903	0
593	9	0	0	0	0	0	0	200	300	0	0	0	0	0	0	0	200	903	0	0	0	0	0	0	0	603	903	0
594	0	0	0	0	0	0	0	200	300	0	0	0	0	0	0	0	200	903	0	0	0	0	0	0	0	603	903	0
594	1	0	0	0	0	0	0	200	300	0	0	0	0	0	0	0	200	903	0	0	0	0	0	0	0	603	903	0
594	2	0	0	0	0	0	0	200	300	0	0	0	0	0	0	0	200	903	0	0	0	0	0	0	0	603	903	0
594	3	0	0	0	0	0	0	200	300	0	0	0	0	0	0	0	200	903	0	0	0	0	0	0	0	603	903	0
594	4	0	0	0	0	0	0	200	300	0	0	0	0	0	0	0	200	903	0	0	0	0	0	0	0	603	903	0
594	5	0	0	0	0	0	0	200	300	0	0	0	0	0	0	0	200	903	0	0	0	0	0	0	0	603	903	0
594	6	0	0	0	0	0	0	200	300	0	0	0	0	0	0	0	200	903	0	0	0	0	0	0	0	603	903	0
594	7	0	0	0	0	0	0	200	300	0	0	0	0	0	0	0	200	903	0	0	0	0	0	0	0	603	903	0
594	8	0	0	0	0	0	0	200	300	0	0	0	0	0	0	0	200	903	0	0	0	0	0	0	0	603	903	0
594	9	0	0	0	0	0	0	200	300	0	0	0	0	0	0	0	200	903	0	0	0	0	0	0	0	603	903	0
595	0	0	0	0	0	0	0	200	300	0	0	0	0	0	0	0	200	903	0	0	0	0	0	0	0	603	903	0
595	1	0	0	0	0	0	0	200	300	0	0	0	0	0	0	0	200	903	0	0	0	0	0	0	0	603	903	0
595	2	0	0	0	0	0	0	200	300	0	0	0	0	0	0	0	200	903	0	0	0	0	0	0	0	603	903	0
595	3	0	0	0	0	0	0	200	300	0	0	0	0	0	0	0	200	903	0	0	0	0	0	0	0	603	903	0
595	4	0	0	0	0	0	0	200	300	0	0	0	0	0	0	0	200	903	0	0	0	0	0	0	0	603	903	0
595	5	0	0	0	0	0	0	200	300	0	0	0	0	0	0	0	200	903	0	0	0	0	0	0	0	603	903	0
595	6	0	0	0	0	0	0	200	300	0	0	0	0	0	0	0	200	903	0	0	0	0	0	0	0	603	903	0
595	7	0	0	0	0	0	0	200	300	0	0	0	0	0	0	0	200	903	0	0	0	0	0	0	0	603	903	0
595	8	0	0	0	0	0	0	200	300	0	0	0	0	0	0	0	200	903	0	0	0	0	0	0	0	603	903	0
595	9	0	0	0	0	0	0	200	300	0	0	0	0	0	0	0	200	903	0	0	0	0	0	0	0	603	903	0
596	0	0	0	0	0	0	0	200	300	0	0	0	0	0	0	0	200	903	0	0	0	0	0	0	0	603	903	0
596	1	0	0	0	0	0	0	200	300	0	0	0	0	0	0	0	200	903	0	0	0	0	0	0	0	603	903	0
596	2	0	0	0	0	0	0	200	300	0	0	0	0	0	0	0	200	903	0	0	0	0	0	0	0	603	903	0
596	3	0	0	0	0	0	0	200	300	0	0	0	0	0	0	0	200	903	0	0	0	0	0	0	0	603	903	0
596	4	0	0	0	0	0	0	200	300	0	0	0	0	0	0	0	200	903	0	0	0	0	0	0	0	603	903	0
596	5	0	0	0	0	0	0	200	300	0	0	0	0	0	0	0	200	903	0	0	0	0	0	0	0	603	903	0
596	6	0	0	0	0	0	0	200	300	0	0	0	0	0	0	0	200	903	0	0	0	0	0	0	0	603	903	0
596	7	0	0	0	0	0	0	200	300	0	0	0	0	0	0	0	200	903	0	0	0	0	0	0	0	603	903	0
596	8	0	0	0	0	0	0	200	300	0	0	0	0	0	0	0	200	903	0	0	0	0	0	0	0	603	903	0
596	9	0	0	0	0	0	0	200	300	0	0	0	0	0	0	0	200	903	0	0	0	0	0	0	0	603	903	0
597	0	0	0	0	0	0	0	200	300	0	0	0	0	0	0	0	200	903	0	0	0	0	0	0	0	603	903	0
597	1	0	0	0	0	0	0	200	300	0	0	0	0	0	0	0	200	903	0	0	0	0	0	0	0	603	903	0
597	2	0	0	0	0	0	0	200	300	0	0	0	0	0	0	0	200	903	0	0	0	0	0	0	0	603	903	0
597	3	0	0	0	0	0	0	200	300	0	0	0	0	0	0	0	200	903	0	0	0	0	0	0	0	603	903	0
597	4	0	0	0	0	0	0	200	300	0	0	0	0	0	0	0	200	903	0	0	0	0	0	0	0	603	903	0
597	5	0	0	0	0	0	0	200	300	0	0	0	0	0	0	0	200	903	0	0	0	0	0	0	0	603	903	0
597	6	0	0	0	0	0	0	200	300	0	0	0	0	0	0	0	200	903	0	0	0	0	0	0	0	603	903	0
597	7	0	0	0	0	0	0	200	300	0	0	0	0	0	0	0	200	903	0	0	0	0	0	0	0	603	903	0
597	8	0	0	0	0	0	0	200	300	0	0	0	0	0	0	0	200	903	0	0	0	0	0	0	0	603	903	0
597	9	0	0	0	0	0	0	200	300	0	0	0	0	0	0	0	200	903	0	0	0	0	0	0	0	603	903	0
598	0	0	0	0	0	0	0	200	300	0	0	0	0	0	0	0	200	903	0	0	0	0	0	0	0	603	903	0
598	1	0	0	0	0	0	0	200	300	0	0	0	0	0	0	0	200	903	0	0	0	0	0	0	0	603	903	0
598	2	0	0	0	0	0	0	200	300	0	0	0	0	0	0	0	200	903	0	0	0	0	0	0	0	603	903	0
598	3	0	0	0	0	0	0	200	300	0	0	0	0	0	0	0	200	903	0	0	0	0	0	0	0	603	903	0
598	4	0	0	0	0	0	0	200	300	0	0	0	0	0	0	0	200	903	0	0	0	0	0	0	0	603	903	0
598	5	0	0	0	0	0	0	200	300	0	0	0	0	0	0	0	200	903	0	0	0	0	0	0	0	603	903	0
598	6	0	0	0	0	0	0	200	300	0	0	0	0	0	0	0	200	903	0	0	0	0	0	0	0	603	903	0
598	7	0	0	0	0	0	0	200	300	0	0	0	0	0	0	0	200	903	0	0	0	0	0	0	0	603	903	0
598	8	0	0	0	0	0	0	200	300	0	0	0	0	0	0	0	200	903	0	0	0	0	0	0	0	603	903	0
598	9	0	0	0	0	0	0	200	300	0	0	0	0	0	0	0	200	903	0	0	0	0	0	0	0	603	903	0
599	0	0	0	0	0	0	0	200	300	0	0	0	0	0	0	0	200	903	0	0	0	0	0	0	0	603	903	0
599	1	0	0	0	0	0	0	200	300	0	0	0	0	0	0	0	200	903	0	0	0	0	0	0	0	603	903	0
599	2	0	0	0	0	0	0	200	300	0	0	0	0	0	0	0	200	903	0	0	0	0	0	0	0	603	903	0
599	3	0	0	0	0	0	0	200	300	0	0	0	0	0	0	0	200	903	0	0	0	0	0	0	0	603	903	0
599	4	0	0	0	0	0	0	200	300	0	0	0	0	0	0	0	200	903	0	0	0	0	0	0	0	603	903	0
599	5	0	0	0	0	0	0	200	300	0	0	0	0	0	0	0	200	903	0	0	0	0	0	0	0	603	903	0
599	6	0	0	0	0	0	0	200	300	0	0	0	0	0	0	0	200	903	0	0	0	0	0	0	0	603	903	0
599	7	0	0	0	0	0	0	200	300	0	0	0	0	0	0	0	200	903	0	0	0	0	0	0	0	603	903	0
599	8	0	0	0	0	0	0	200	300	0	0	0	0	0	0	0	200	903	0	0	0	0	0	0	0	603	903	0
599	9	0	0	0	0	0	0	200	300	0	0	0	0	0	0	0	200	903	0	0	0	0	0	0	0	603	903	0
600	0	0	0	0	0	0	0	200	300	0	0	0	0	0	0	0	200	903	0	0	0	0	0	0	0	603	903	0
600	1	0	0	0	0	0	0	200	300	0	0	0	0	0	0	0	200	903	0	0	0	0	0	0	0	603	903	0
600	2	0	0	0	0	0	0	200	300	0	0	0	0	0	0	0	200	903	0	0	0	0	0	0	0	603	903	0
600	3	0	0	0	0	0	0	200	300	0	0	0	0	0	0	0	200	903	0	0	0	0	0	0	0	603	903	0
600	4	0	0	0	0	0	0	200	300	0	0	0	0	0	0	0	200	903	0	0	0	0	0	0	0	603	903	0
600	5	0	0	0	0	0	0	200	300	0	0	0	0	0	0	0	200	903	0	0	0	0	0	0	0	603	903	0
600	6	0	0	0	0	0	0	200	300	0	0	0	0	0	0	0	200	903	0	0	0	0	0	0	0	603	903	0
600	7	0	0	0	0	0	0	200	300	0	0	0	0	0	0	0	200	903	0	0	0	0	0	0	0	603	903	0
600	8	0	0	0	0	0	0	200	300	0	0	0	0	0	0	0	200	903	0	0	0	0	0	0	0	603	903	0
600	9	0	0	0	0	0	0	200	300	0	0	0	0	0	0	0	200	903	0	0	0	0	0	0	0	603	903	0
601	0	0	0	0	0	0	0	200	300	0	0	0	0	0	0	0	200	903	0	0	0	0	0	0	0	603	903	0
601	1	0	0	0	0	0	0	200	300	0	0	0	0	0	0	0	200	903	0	0	0	0	0	0	0	603	903	0
601	2	0	0	0	0	0	0	200	300	0	0	0	0	0	0	0	200	903	0	0	0	0	0	0	0	603	903	0
601	3	0	0	0	0	0	0	200	300	0	0	0	0	0	0	0	200	903	0	0	0	0	0	0	0	603	903	0
601	4	0	0	0	0	0	0	200	300	0	0	0	0	0	0	0	200	903	0	0	0	0	0	0	0	603	903	0
601	5	0	0	0	0	0	0	200	300	0	0	0	0	0	0	0	200	903	0	0	0	0	0	0	0	603	903	0
601	6	0	0	0	0	0	0	200	300	0	0	0	0	0	0	0	200	903	0	0	0	0	0	0	0	603	903	0
601	7	0	0	0	0	0	0	200	300	0	0	0	0	0	0	0	200	903	0	0	0	0	0	0	0	603	903	0
601	8	0	0	0	0	0	0	200	300	0	0	0	0	0	0	0	200	903	0	0	0	0	0	0	0	603	903	0
601	9	0	0	0	0	0	0	200	300	0	0	0	0	0	0	0	200	903	0	0	0	0	0	0	0	603	903	0
602	0	0	0	0	0	0	0	200	300	0	0	0	0	0	0	0	200	903	0	0	0	0	0	0	0	603	903	0
602	1	0	0	0	0	0	0	200	300	0	0	0	0	0	0	0	200	903	0	0	0	0	0	0	0	603	903	0
602	2	0	0	0	0	0	0	200	300	0	0	0	0	0	0	0	200	903	0	0	0	0	0	0	0	603	903	0
602	3	0	0	0	0	0	0	200	300	0	0	0	0	0	0	0	200	903	0	0	0	0	0	0	0	603	903	0
602	4	0	0	0	0	0	0	200	300	0	0	0	0	0	0	0	200	903	0	0	0	0	0	0	0	603	903	0
602	5	0	0	0	0	0	0	200	300	0	0	0	0	0	0	0	200	903	0	0	0	0	0	0	0	603	903	0
602	6	0	0	0	0	0	0	200	300	0	0	0	0	0	0	0	200	903	0	0	0	0	0	0	0	603	903	0
602	7	0	0	0	0	0	0	200	300	0	0	0	0	0	0	0	200	903	0	0	0	0	0	0	0	603	903	0
602	8	0	0	0	0	0	0	200	300	0	0	0	0	0	0	0	200	903	0	0	0	0	0	0	0	603	903	0
602	9	0	0	0	0	0	0	200	300	0	0	0	0	0	0	0	200	903	0	0	0	0	0	0	0	603	903	0
603	0	0	0	0	0	0	0	200	300	0	0	0	0	0	0	0	200	903	0	0	0	0	0	0	0	603	903	0
603	1	0	0	0	0	0	0	200	300	0	0	0	0	0	0	0	200	903	0	0	0	0	0	0	0	603	903	0
603	2	0	0	0	0	0	0	200	300	0	0	0	0	0	0	0	200	903	0	0	0	0	0	0	0	603	903	0
603	3	0	0	0	0	0	0	200	300	0	0	0	0	0	0	0	200	903	0	0	0	0	0	0	0	603	903	0
603	4	0	0	0	0	0	0	200	300	0	0	0	0	0	0	0	200	903	0	0	0	0	0	0	0	603	903	0
603	5	0	0	0	0	0	0	200	300	0	0	0	0	0	0	0	200	903	0	0	0	0	0	0	0	603	903	0
603	6	0	0	0	0	0	0	200	300	0	0	0	0	0	0	0	200	903	0	0	0	0	0	0	0	603	903	0
603	7	0	0	0	0	0	0	200	300	0	0	0	0	0	0	0	200	903	0	0	0	0	0	0	0	603	903	0
603	8	0	0	0	0	0	0	200	300	0	0	0	0	0	0	0	200	903	0	0	0	0	0	0	0	603	903	0
603	9	0	0	0	0	0	0	200	300	0	0	0	0	0	0	0	200	903	0	0	0	0	0	0	0	603	903	0
604	0	0	0	0	0	0	0	200	300	0	0	0	0	0	0	0	200	903	0	0	0	0	0	0	0	603	903	0
604	1	0	0	0	0	0	0	200	300	0	0	0	0	0	0	0	200	903	0	0	0	0	0	0	0	603	903	0
604	2	0	0	0	0	0	0	200	300	0	0	0	0	0	0	0	200	903	0	0	0	0	0	0	0	603	903	0
604	3	0	0	0	0	0	0	200	300	0	0	0	0	0	0	0	200	903	0	0	0	0	0	0	0	603	903	0
604	4	0	0	0	0	0	0	200	300	0	0	0	0	0	0	0	200	903	0	0	0	0	0	0	0	603	903	0
604	5	0	0	0	0	0	0	200	300	0	0	0	0	0	0	0	200	903	0	0	0	0	0	0	0	603	903	0
604	6	0	0	0	0	0	0	200	300	0	0	0	0	0	0	0	200	903	0	0	0	0	0	0	0	603	903	0
604	7	0	0	0	0	0	0	200	300	0	0	0	0	0	0	0	200	903	0	0	0	0	0	0	0	603	903	0
604	8	0	0	0	0	0	0	200	300	0	0	0	0	0	0	0	200	903	0	0	0	0	0	0	0	603	903	0
604	9	0	0	0	0	0	0	200	300	0	0	0	0	0	0	0	200	903	0	0	0	0	0	0	0	603	903	0
605	0	0	0	0	0	0	0	200	300	0	0	0	0	0	0	0	200	903	0	0	0	0	0	0	0	603	903	0
605	1	0	0	0	0	0	0	200	300	0	0	0	0	0	0	0	200	903	0	0	0	0	0	0	0	603	903	0
605	2	0	0	0	0	0	0	200	300	0	0	0	0	0	0	0	200	903	0	0	0	0	0	0	0	603	903	0
605	3	0	0	0	0	0	0	200	300	0	0	0	0	0	0	0	200	903	0	0	0	0	0	0	0	603	903	0
605	4	0	0	0	0	0	0	200	300	0	0	0	0	0	0	0	200	903	0	0	0	0	0	0	0	603	903	0
605	5	0	0	0	0	0	0	200	300	0	0	0	0	0	0	0	200	903	0	0	0	0	0	0	0	603	903	0
605	6	0	0	0	0	0	0	200	300	0	0	0	0	0	0	0	200	903	0	0	0	0	0	0	0	603	903	0
605	7	0	0	0	0	0	0	200	300	0	0	0	0	0	0	0	200	903	0	0	0	0	0	0	0	603	903	0
605	8	0	0	0	0	0	0	200	300	0	0	0	0	0	0	0	200	903	0	0	0	0	0	0	0	603	903	0
605	9	0	0	0	0	0	0	200	300	0	0	0	0	0	0	0	200	903	0	0	0	0	0	0	0	603	903	0
606	0	0	0	0	0	0	0	200	300	0	0	0	0	0	0	0	200	903	0	0	0	0	0	0	0	603	903	0
606	1	0	0	0	0	0	0	200	300	0	0	0	0	0	0	0	200	903	0	0	0	0	0	0	0	603	903	0
606	2	0	0	0	0	0	0	200	300	0	0	0	0	0	0	0	200	903	0	0	0	0	0	0	0	603	903	0
606	3	0	0	0	0	0	0	200	300	0	0	0	0	0	0	0	200	903	0	0	0	0	0	0	0	603	903	0
606	4	0	0	0	0	0	0	200	300	0	0	0	0	0	0	0	200	903	0	0	0	0	0	0	0	603	903	0
606	5	0	0	0	0	0	0	200	300	0	0	0	0	0	0	0	200	903	0	0	0	0	0	0	0	603	903	0
606	6	0	0	0	0	0	0	200	300	0	0	0	0	0	0	0	200	903	0	0	0	0	0	0	0	603	903	0
606	7	0	0	0	0	0	0	200	300	0	0	0	0	0	0	0	200	903	0	0	0	0	0	0	0	603	903	0
606	8	0	0	0	0	0	0	200	300	0	0	0	0	0	0	0	200	903	0	0	0	0	0	0	0	603	903	0
606	9	0	0	0	0	0	0	200	300	0	0	0	0	0	0	0	200	903	0	0	0	0	0	0	0	603	903	0
607	0	0	0	0	0	0	0	200	300	0	0	0	0	0	0	0	200	903	0	0	0	0	0	0	0	603	903	0
607	1	0	0	0	0	0	0	200	300	0	0	0	0	0	0	0	200	903	0	0	0	0	0	0	0	603	903	0
607	2	0	0	0	0	0	0	200	300	0	0	0	0	0	0	0	200	903	0	0	0	0	0	0	0	603	903	0
607	3	0	0	0	0	0	0	200	300	0	0	0	0	0	0	0	200	903	0	0	0	0	0	0	0	603	903	0
607	4	0	0	0	0	0	0	200	300	0	0	0	0	0	0	0	200	903	0	0	0	0	0	0	0	603	903	0
607	5	0	0	0	0	0	0	200	300	0	0	0	0	0	0	0	200	903	0	0	0	0	0	0	0	603	903	0
607	6	0	0	0	0	0	0	200	300	0	0	0	0	0	0	0	200	903	0	0	0	0	0	0	0	603	903	0
607	7	0	0	0	0	0	0	200	300	0	0	0	0	0	0	0	200	903	0	0	0	0	0	0	0	603	903	0
607	8	0	0	0	0	0	0	200	300	0	0	0	0	0	0	0	200	903	0	0	0	0	0	0	0	603	903	0
607	9	0	0	0	0	0	0	200	300	0	0	0	0	0	0	0	200	903	0	0	0	0	0	0	0	603	903	0
608	0	0	0	0	0	0	0	200	300	0	0	0	0	0	0	0	200	903	0	0	0	0	0	0	0	603	903	0
608	1	0	0	0	0	0	0	200	300	0	0	0	0	0	0	0	200	903	0	0	0	0	0	0	0	603	903	0
608	2	0	0	0	0	0	0	200	300	0	0	0	0	0	0	0	200	903	0	0	0	0	0	0	0	603	903	0
608	3	0	0	0	0	0	0	200	300	0	0	0	0	0	0	0	200	903	0	0	0	0	0	0	0	603	903	0
608	4	0	0	0	0	0	0	200	300	0	0	0	0	0	0	0	200	903	0	0	0	0	0	0	0	603	903	0
608	5	0	0	0	0	0	0	200	300	0	0	0	0	0	0	0	200	903	0	0	0	0	0	0	0	603	903	0
608	6	0	0	0	0	0	0	200	300	0	0	0	0	0	0	0	200	903	0	0	0	0	0	0	0	603	903	0
608	7	0	0	0	0	0	0	200	300	0	0	0	0	0	0	0	200	903	0	0	0	0	0	0	0	603	903	0
608	8	0	0	0	0	0	0	200	300	0	0	0	0	0	0	0	200	903	0	0	0	0	0	0	0	603	903	0
608	9	0	0	0	0	0	0	200	300	0	0	0	0	0	0	0	200	903	0	0	0	0	0	0	0	603	903	0
609	0	0	0	0	0	0	0	200	300	0	0	0	0	0	0	0	200	903	0	0	0	0	0	0	0	603	903	0
609	1	0	0	0	0	0	0	200	300	0	0	0	0	0	0	0	200	903	0	0	0	0	0	0	0	603	903	0
609	2	0	0	0	0	0	0	200	300	0	0	0	0	0	0	0	200	903	0	0	0	0	0	0	0	603	903	0
609	3	0	0	0	0	0	0	200	300	0	0	0	0	0	0	0	200	903	0	0	0	0	0	0	0	603	903	0
609	4	0	0	0	0	0	0	200	300	0	0	0	0	0	0	0	200	903	0	0	0	0	0	0	0	603	903	0
609	5	0	0	0	0	0	0	200	300	0	0	0	0	0	0	0	200	903	0	0	0	0	0	0	0	603	903	0
609	6	0	0	0	0	0	0	200	300	0	0	0	0	0	0	0	200	903	0	0	0	0	0	0	0	603	903	0
609	7	0	0	0	0	0	0	200	300	0	0	0	0	0	0	0	200	903	0	0	0	0	0	0	0	603	903	0
609	8	0	0	0	0	0	0	200	300	0	0	0	0	0	0	0	200	903	0	0	0	0	0	0	0	603	903	0
609	9	0	0	0	0	0	0	200	300	0	0	0	0	0	0	0	200	903	0	0	0	0	0	0	0	603	903	0
610	0	0	0	0	0	0	0	200	300	0	0	0	0	0	0	0	200	903	0	0	0	0	0	0	0	603	903	0
610	1	0	0	0	0	0	0	200	300	0	0	0	0	0	0	0	200	903	0	0	0	0	0	0	0	603	903	0
610	2	0	0	0	0	0	0	200	300	0	0	0	0	0	0	0	200	903	0	0	0	0	0	0	0	603	903	0
610	3	0	0	0	0	0	0	200	300	0	0	0	0	0	0	0	200	903	0	0	0	0	0	0	0	603	903	0
610	4	0	0	0	0	0	0	200	300	0	0	0	0	0	0	0	200	903	0	0	0	0	0	0	0	603	903	0
610	5	0	0	0	0	0	0	200	300	0	0	0	0	0	0	0	200	903	0	0	0	0	0	0	0	603	903	0
610	6	0	0	0	0	0	0	200	300	0	0	0	0	0	0	0	200	903	0	0	0	0	0	0	0	603	903	0
610	7	0	0	0	0	0	0	200	300	0	0	0	0	0	0	0	200	903	0	0	0	0	0	0	0	603	903	0
610	8	0	0	0	0	0	0	200	300	0	0	0	0	0	0	0	200	903	0	0	0	0	0	0	0	603	903	0
610	9	0	0	0	0	0	0	200	300	0	0	0	0	0	0	0	200	903	0	0	0	0	0	0	0	603	903	0
611	0	0	0	0	0	0	0	200	300	0	0	0	0	0	0	0	200	903	0	0	0	0	0	0	0	603	903	0
611	1	0	0	0	0	0	0	200	300	0	0	0	0	0	0	0	200	903	0	0	0	0	0	0	0	603	903	0
611	2	0	0	0	0	0	0	200	300	0	0	0	0	0	0	0	200	903	0	0	0	0	0	0	0	603	903	0
611	3	0	0	0	0	0	0	200	300	0	0	0	0	0	0	0	200	903	0	0	0	0	0	0	0	603	903	0
611	4	0	0	0	0	0	0	200	300	0	0	0	0	0	0	0	200	903	0	0	0	0	0	0	0	603	903	0
611	5	0	0	0	0	0	0	200	300	0	0	0	0	0	0	0	200	903	0	0	0	0	0	0	0	603	903	0
611	6	0	0	0	0	0	0	200	300	0	0	0	0	0	0	0	200	903	0	0	0	0	0	0	0	603	903	0
611	7	0	0	0	0	0	0	200	300	0	0	0	0	0	0	0	200	903	0	0	0	0	0	0	0	603	903	0
611	8	0	0	0	0	0	0	200	300	0	0	0	0	0	0	0	200	903	0	0	0	0	0	0	0	603	903	0
611	9	0	0	0	0	0	0	200	300	0	0	0	0	0	0	0	200	903	0	0	0	0	0	0	0	603	903	0
612	0	0	0	0	0	0	0	200	300	0	0	0	0	0	0	0	200	903	0	0	0	0	0	0	0	603	903	0
612	1	0	0	0	0	0	0	200	300	0	0	0	0	0	0	0	200	903	0	0	0	0	0	0	0	603	903	0
612	2	0	0	0	0	0	0	200	300	0	0	0	0	0	0	0	200	903	0	0	0	0	0	0	0	603	903	0
612	3	0	0	0	0	0	0	200	300	0	0	0	0	0	0	0	200	903	0	0	0	0	0	0	0	603	903	0
612	4	0	0	0	0	0	0	200	300	0	0	0	0	0	0	0	200	903	0	0	0	0	0	0	0	603	903	0
612	5	0	0	0	0	0	0	200	300	0	0	0	0	0	0	0	200	903	0	0	0	0	0	0	0	603	903	0
612	6	0	0	0	0	0	0	200	300	0	0	0	0	0	0	0	200	903	0	0	0	0	0	0	0	603	903	0
612	7	0	0	0	0	0	0	200	300	0	0	0	0	0	0	0	200	903	0	0	0	0	0	0	0	603	903	0
612	8	0	0	0	0	0	0	200	300	0	0	0	0	0	0	0	200	903	0	0	0	0	0	0	0	603	903	0
612	9	0	0	0	0	0	0	200	300	0	0	0	0	0	0	0	200	903	0	0	0	0	0	0	0	603	903	0
613	0	0	0	0	0	0	0	200	300	0	0	0	0	0	0	0	200	903	0	0	0	0	0	0	0	603	903	0
613	1	0	0	0	0	0	0	200	300	0	0	0	0	0	0	0	200	903	0	0	0	0	0	0	0	603	903	0
613	2	0	0	0	0	0	0	200	300	0	0	0	0	0	0	0	200	903	0	0	0	0	0	0	0	603	903	0
613	3	0	0	0	0	0	0	200	300	0	0	0	0	0	0	0	200	903	0	0	0	0	0	0	0	603	903	0
613	4	0	0	0	0	0	0	200	300	0	0	0	0	0	0	0	200	903	0	0	0	0	0	0	0	603	903	0
613	5	0	0	0	0	0	0	200	300	0	0	0	0	0	0	0	200	903	0	0	0	0	0	0	0	603	903	0
613	6	0	0	0	0	0	0	200	300	0	0	0	0	0	0	0	200	903	0	0	0	0	0	0	0	603	903	0
613	7	0	0	0	0	0	0	200	300	0	0	0	0	0	0	0	200	903	0	0	0	0	0	0	0	603	903	0
613	8	0	0	0	0	0	0	200	300	0	0	0	0	0	0	0	200	903	0	0	0	0	0	0	0	603	903	0
613	9	0	0	0	0	0	0	200	300	0	0	0	0	0	0	0	200	903	0	0	0	0	0	0	0	603	903	0
614	0	0	0	0	0	0	0	200	300	0	0	0	0	0	0	0	200	903	0	0	0	0	0	0	0	603	903	0
614	1	0	0	0	0	0	0	200	300	0	0	0	0	0	0	0	200	903	0	0	0	0	0	0	0	603	903	0
614	2	0	0	0	0	0	0	200	300	0	0	0	0	0	0	0	200	903	0	0	0	0	0	0	0	603	903	0
614	3	0	0	0	0	0	0	200	300	0	0	0	0	0	0	0	200	903	0	0	0	0	0	0	0	603	903	0
614	4	0	0	0	0	0	0	200	300	0	0	0	0	0	0	0	200	903	0	0	0	0	0	0	0	603	903	0
614	5	0	0	0	0	0	0	200	300	0	0	0	0	0	0	0	200	903	0	0	0	0	0	0	0	603	903	0
614	6	0	0	0	0	0	0	200	300	0	0	0	0	0	0	0	200	903	0	0	0	0	0	0	0	603	903	0
614	7	0	0	0	0	0	0	200	300	0	0	0	0	0	0	0	200	903	0	0	0	0	0	0	0	603	903	0
614	8	0	0	0	0	0	0	200	300	0	0	0	0	0	0	0	200	903	0	0	0	0	0	0	0	603	903	0
614	9	0	0	0	0	0	0	200	300	0	0	0	0	0	0	0	200	903	0	0	0	0	0	0	0	603	903	0
615	0	0	0	0	0	0	0	200	300	0	0	0	0	0	0	0	200	903	0	0	0	0	0	0	0	603	903	0
615	1	0	0	0	0	0	0	200	300	0	0	0	0	0	0	0	200	903	0	0	0	0	0	0	0	603	903	0
615	2	0	0	0	0	0	0	200	300	0	0	0	0	0	0	0	200	903	0	0	0	0	0	0	0	603	903	0
615	3	0	0	0	0	0	0	200	300	0	0	0	0	0	0	0	200	903	0	0	0	0	0	0	0	603	903	0
615	4	0	0	0	0	0	0	200	300	0	0	0	0	0	0	0	200	903	0	0	0	0	0	0	0	603	903	0
615	5	0	0	0	0	0	0	200	300	0	0	0	0	0	0	0	200	903	0	0	0	0	0	0	0	603	903	0
615	6	0	0	0	0	0	0	200	300	0	0	0	0	0	0	0	200	903	0	0	0	0	0	0	0	603	903	0
615	7	0	0	0	0	0	0	200	300	0	0	0	0	0	0	0	200	903	0	0	0	0	0	0	0	603	903	0
615	8	0	0	0	0	0	0	200	300	0	0	0	0	0	0	0	200	903	0	0	0	0	0	0	0	603	903	0
615	9	0	0	0	0	0	0	200	300	0	0	0	0	0	0	0	200	903	0	0	0	0	0	0	0	603	903	0
616	0	0	0	0	0	0	0	200	300	0	0	0	0	0	0	0	200	903	0	0	0	0	0	0	0	603	903	0
616	1	0	0	0	0	0	0	200	300	0	0	0	0	0	0	0	200	903	0	0	0	0	0	0	0	603	903	0
616	2	0	0	0	0	0	0	200	300	0	0	0	0	0	0	0	200	903	0	0	0	0	0	0	0	603	903	0
616	3	0	0	0	0	0	0	200	300	0	0	0	0	0	0	0	200	903	0	0	0	0	0	0	0	603	903	0
616	4	0	0	0	0	0	0	200	300	0	0	0	0	0	0	0	200	903	0	0	0	0	0	0	0	603	903	0
616	5	0	0	0	0	0	0	200	300	0	0	0	0	0	0	0	200	903	0	0	0	0	0	0	0	603	903	0
616	6	0	0	0	0	0	0	200	300	0	0	0	0	0	0	0	200	903	0	0	0	0	0	0	0	603	903	0
616	7	0	0	0	0	0	0	200	300	0	0	0	0	0	0	0	200	903	0	0	0	0	0	0	0	603	903	0
616	8	0	0	0	0	0	0	200	300	0	0	0	0	0	0	0	200	903	0	0	0	0	0	0	0	603	903	0
616	9	0	0	0	0	0	0	200	300	0	0	0	0	0	0	0	200	903	0	0	0	0	0	0	0	603	903	0
617	0	0	0	0	0	0	0	200	300	0	0	0	0	0	0	0	200	903	0	0	0	0	0	0	0	603	903	0
617	1	0	0	0	0	0	0	200	300	0	0	0	0	0	0	0	200	903	0	0	0	0	0	0	0	603	903	0
617	2	0	0	0	0	0	0	200	300	0	0	0	0	0	0	0	200	903	0	0	0	0	0	0	0	603	903	0
617	3	0	0	0	0	0	0	200	300	0	0	0	0	0	0	0	200	903	0	0	0	0	0	0	0	603	903	0
617	4	0	0	0	0	0	0	200	300	0	0	0	0	0	0	0	200	903	0	0	0	0	0	0	0	603	903	0
617	5	0	0	0	0	0	0	200	300	0	0	0	0	0	0	0	200	903	0	0	0	0	0	0	0	603	903	0
617	6	0	0	0	0	0	0	200	300	0	0	0	0	0	0	0	200	903	0	0	0	0	0	0	0	603	903	0
617	7	0	0	0	0	0	0	200	300	0	0	0	0	0	0	0	200	903	0	0	0	0	0	0	0	603	903	0
617	8	0	0	0	0	0	0	200	300	0	0	0	0	0	0	0	200	903	0	0	0	0	0	0	0	603	903	0
617	9	0	0	0	0	0	0	200	300	0	0	0	0	0	0	0	200	903	0	0	0	0	0	0	0	603	903	0
618	0	0	0	0	0	0	0	200	300	0	0	0	0	0	0	0	200	903	0	0	0	0	0	0	0	603	903	0
618	1	0	0	0	0	0	0	200	300	0	0	0	0	0	0	0	200	903	0	0	0	0	0	0	0	603	903	0
618	2	0	0	0	0	0	0	200	300	0	0	0	0	0	0	0	200	903	0	0	0	0	0	0	0	603	903	0
618	3	0	0	0	0	0	0	200	300	0	0	0	0	0	0	0	200	903	0	0	0	0	0	0	0	603	903	0
618	4	0	0	0	0	0	0	200	300	0	0	0	0	0	0	0	200	903	0	0	0	0	0	0	0	603	903	0
618	5	0	0	0	0	0	0	200	300	0	0	0	0	0	0	0	200	903	0	0	0	0	0	0	0	603	903	0
618	6	0	0	0	0	0	0	200	300	0	0	0	0	0	0	0	200	903	0	0	0	0	0	0	0	603	903	0
618	7	0	0	0	0	0	0	200	300	0	0	0	0	0	0	0	200	903	0	0	0	0	0	0	0	603	903	0
618	8	0	0	0	0	0	0	200	300	0	0	0	0	0	0	0	200	903	0	0	0	0	0	0	0	603	903	0
618	9	0	0	0	0	0	0	200	300	0	0	0	0	0	0	0	200	903	0	0	0	0	0	0	0	603	903	0
619	0	0	0	0	0	0	0	200	300	0	0	0	0	0	0	0	200	903	0	0	0	0	0	0	0	603	903	0
619	1	0	0	0	0	0	0	200	300	0	0	0	0	0	0	0	200	903	0	0	0	0	0	0	0	603	903	0
619	2	0	0	0	0	0	0	200	300	0	0	0	0	0	0	0	200	903	0	0	0	0	0	0	0	603	903	0
619	3	0	0	0	0	0	0	200	300	0	0	0	0	0	0	0	200	903	0	0	0	0	0	0	0	603	903	0
619	4	0	0	0	0	0	0	200	300	0	0	0	0	0	0	0	200	903	0	0	0	0	0	0	0	603	903	0
619	5	0	0	0	0	0	0	200	300	0	0	0	0	0	0	0	200	903	0	0	0	0	0	0	0	603	903	0
619	6	0	0	0	0	0	0	200	300	0	0	0	0	0	0	0	200	903	0	0	0	0	0	0	0	603	903	0
619	7	0	0	0	0	0	0	200	300	0	0	0	0	0	0	0	200	903	0	0	0	0	0	0	0	603	903	0
619	8	0	0	0	0	0	0	200	300	0	0	0	0	0	0	0	200	903	0	0	0	0	0	0	0	603	903	0
619	9	0	0	0	0	0	0	200	300	0	0	0	0	0	0	0	200	903	0	0	0	0	0	0	0	603	903	0
620	0	0	0	0	0	0	0	200	300	0	0	0	0	0	0	0	200	903	0	0	0	0	0	0	0	603	903	0
620	1	0	0	0	0	0	0	200	300	0	0	0	0	0	0	0	200	903	0	0	0	0	0	0	0	603	903	0
620	2	0	0	0	0	0	0	200	300	0	0	0	0	0	0	0	200	903	0	0	0	0	0	0	0	603	903	0
620	3	0	0	0	0	0	0	200	300	0	0	0	0	0	0	0	200	903	0	0	0	0	0	0	0	603	903	0
620	4	0	0	0	0	0	0	200	300	0	0	0	0	0	0	0	200	903	0	0	0	0	0	0	0	603	903	0
620	5	0	0	0	0	0	0	200	300	0	0	0	0	0	0	0	200	903	0	0	0	0	0	0	0	603	903	0
620	6	0	0	0	0	0	0	200	300	0	0	0	0	0	0	0	200	903	0	0	0	0	0	0	0	603	903	0
620	7	0	0	0	0	0	0	200	300	0	0	0	0	0	0	0	200	903	0	0	0	0	0	0	0	603	903	0
620	8	0	0	0	0	0	0	200	300	0	0	0	0	0	0	0	200	903	0	0	0	0	0	0	0	603	903	0
620	9	0	0	0	0	0	0	200	300	0	0	0	0	0	0	0	200	903	0	0	0	0	0	0	0	603	903	0
621	0	0	0	0	0	0	0	200	300	0	0	0	0	0	0	0	200	903	0	0	0	0	0	0	0	603	903	0
621	1	0	0	0	0	0	0	200	300	0	0	0	0	0	0	0	200	903	0	0	0	0	0	0	0	603	903	0
621	2	0	0	0	0	0	0	200	300	0	0	0	0	0	0	0	200	903	0	0	0	0	0	0	0	603	903	0
621	3	0	0	0	0	0	0	200	300	0	0	0	0	0	0	0	200	903	0	0	0	0	0	0	0	603	903	0
621	4	0	0	0	0	0	0	200	300	0	0	0	0	0	0	0	200	903	0	0	0	0	0	0	0	603	903	0
621	5	0	0	0	0	0	0	200	300	0	0	0	0	0	0	0	200	903	0	0	0	0	0	0	0	603	903	0
621	6	0	0	0	0	0	0	200	300	0	0	0	0	0	0	0	200	903	0	0	0	0	0	0	0	603	903	0
621	7	0	0	0	0	0	0	200	300	0	0	0	0	0	0	0	200	903	0	0	0	0	0	0	0	603	903	0
621	8	0	0	0	0	0	0	200	300	0	0	0	0	0	0	0	200	903	0	0	0	0	0	0	0	603	903	0
621	9	0	0	0	0	0	0	200	300	0	0	0	0	0	0	0	200	903	0	0	0	0	0	0	0	603	903	0
622	0	0	0	0	0	0	0	200	300	0	0	0	0	0	0	0	200	903	0	0	0	0	0	0	0	603	903	0
622	1	0	0	0	0	0	0	200	300	0	0	0	0	0	0	0	200	903	0	0	0	0	0	0	0	603	903	0
622	2	0	0	0	0	0	0	200	300	0	0	0	0	0	0	0	200	903	0	0	0	0	0	0	0	603	903	0
622	3	0	0	0	0	0	0	200	300	0	0	0	0	0	0	0	200	903	0	0	0	0	0	0	0	603	903	0
622	4	0	0	0	0	0	0	200	300	0	0	0	0	0	0	0	200	903	0	0	0	0	0	0	0	603	903	0
622	5	0	0	0	0	0	0	200	300	0	0	0	0	0	0	0	200	903	0	0	0	0	0	0	0	603	903	0
622	6	0	0	0	0	0	0	200	300	0	0	0	0	0	0	0	200	903	0	0	0	0	0	0	0	603	903	0
622	7	0	0	0	0	0	0	200	300	0	0	0	0	0	0	0	200	903	0	0	0	0	0	0	0	603	903	0
622	8	0	0	0	0	0	0	200	300	0	0	0	0	0	0	0	200	903	0	0	0	0	0	0	0	603	903	0
622	9	0	0	0	0	0	0	200	300	0	0	0	0	0	0	0	200	903	0	0	0	0	0	0	0	603	903	0
623	0	0	0	0	0	0	0	200	300	0	0	0	0	0	0	0	200	903	0	0	0	0	0	0	0	603	903	0
623	1	0	0	0	0	0	0	200	300	0	0	0	0	0	0	0	200	903	0	0	0	0	0	0	0	603	903	0
623	2	0	0	0	0	0	0	200	300	0	0	0	0	0	0	0	200	903	0	0	0	0	0	0	0	603	903	0
623	3	0	0	0	0	0	0	200	300	0	0	0	0	0	0	0	200	903	0	0	0	0	0	0	0	603	903	0
623	4	0	0	0	0	0	0	200	300	0	0	0	0	0	0	0	200	903	0	0	0	0	0	0	0	603	903	0
623	5	0	0	0	0	0	0	200	300	0	0	0	0	0	0	0	200	903	0	0	0	0	0	0	0	603	903	0
623	6	0	0	0	0	0	0	200	300	0	0	0	0	0	0	0	200	903	0	0	0	0	0	0	0	603	903	0
623	7	0	0	0	0	0	0	200	300	0	0	0	0	0	0	0	200	903	0	0	0	0	0	0	0	603	903	0
623	8	0	0	0	0	0	0	200	300	0	0	0	0	0	0	0	200	903	0	0	0	0	0	0	0	603	903	0
623	9	0	0	0	0	0	0	200	300	0	0	0	0	0	0	0	200	903	0	0	0	0	0	0	0	603	903	0
624	0	0	0	0	0	0	0	200	300	0	0	0	0	0	0	0	200	903	0	0	0	0	0	0	0	603	903	0
624	1	0	0	0	0	0	0	200	300	0	0	0	0	0	0	0	200	903	0	0	0	0	0	0	0	603	903	0
624	2	0	0	0	0	0	0	200	300	0	0	0	0	0	0	0	200	903	0	0	0	0	0	0	0	603	903	0
624	3	0	0	0	0	0	0	200	300	0	0	0	0	0	0	0	200	903	0	0	0	0	0	0	0	603	903	0
624	4	0	0	0	0	0	0	200	300	0	0	0	0	0	0	0	200	903	0	0	0	0	0	0	0	603	903	0
624	5	0	0	0	0	0	0	200	300	0	0	0	0	0	0	0	200	903	0	0	0	0	0	0	0	603	903	0
624	6	0	0	0	0	0	0	200	300	0	0	0	0	0	0	0	200	903	0	0	0	0	0	0	0	603	903	0
624	7	0	0	0	0	0	0	200	300	0	0	0	0	0	0	0	200	903	0	0	0	0	0	0	0	603	903	0
624	8	0	0	0	0	0	0	200	300	0	0	0	0	0	0	0	200	903	0	0	0	0	0	0	0	603	903	0
624	9	0	0	0	0	0	0	200	300	0	0	0	0	0	0	0	200	903	0	0	0	0	0	0	0	603	903	0
625	0	0	0	0	0	0	0	200	300	0	0	0	0	0	0	0	200	903	0	0	0	0	0	0	0	603	903	0
625	1	0	0	0	0	0	0	200	300	0	0	0	0	0	0	0	200	903	0	0	0	0	0	0	0	603	903	0
625	2	0	0	0	0	0	0	200	300	0	0	0	0	0	0	0	200	903	0	0	0	0	0	0	0	603	903	0
625	3	0	0	0	0	0	0	200	300	0	0	0	0	0	0	0	200	903	0	0	0	0	0	0	0	603	903	0
625	4	0	0	0	0	0	0	200	300	0	0	0	0	0	0	0	200	903	0	0	0	0	0	0	0	603	903	0
625	5	0	0	0	0	0	0	200	300	0	0	0	0	0	0	0	200	903	0	0	0	0	0	0	0	603	903	0
625	6	0	0	0	0	0	0	200	300	0	0	0	0	0	0	0	200	903	0	0	0	0	0	0	0	603	903	0
625	7	0	0	0	0	0	0	200	300	0	0	0	0	0	0	0	200	903	0	0	0	0	0	0	0	603	903	0
625	8	0	0	0	0	0	0	200	300	0	0	0	0	0	0	0	200	903	0	0	0	0	0	0	0	603	903	0
625	9	0	0	0	0	0	0	200	300	0	0	0	0	0	0	0	200	903	0	0	0	0	0	0	0	603	903	0
626	0	0	0	0	0	0	0	200	300	0	0	0	0	0	0	0	200	903	0	0	0	0	0	0	0	603	903	0
626	1	0	0	0	0	0	0	200	300	0	0	0	0	0	0	0	200	903	0	0	0	0	0	0	0	603	903	0
626	2	0	0	0	0	0	0	200	300	0	0	0	0	0	0	0	200	903	0	0	0	0	0	0	0	603	903	0
626	3	0	0	0	0	0	0	200	300	0	0	0	0	0	0	0	200	903	0	0	0	0	0	0	0	603	903	0
626	4	0	0	0	0	0	0	200	300	0	0	0	0	0	0	0	200	903	0	0	0	0	0	0	0	603	903	0
626	5	0	0	0	0	0	0	200	300	0	0	0	0	0	0	0	200	903	0	0	0	0	0	0	0	603	903	0
626	6	0	0	0	0	0	0	200	300	0	0	0	0	0	0	0	200	903	0	0	0	0	0	0	0	603	903	0
626	7	0	0	0	0	0	0	200	300	0	0	0	0	0	0	0	200	903	0	0	0	0	0	0	0	603	903	0
626	8	0	0	0	0	0	0	200	300	0	0	0	0	0	0	0	200	903	0	0	0	0	0	0	0	603	903	0
626	9	0	0	0	0	0	0	200	300	0	0	0	0	0	0	0	200	903	0	0	0	0	0	0	0	603	903	0
627	0	0	0	0	0	0	0	200	300	0	0	0	0	0	0	0	200	903	0	0	0	0	0	0	0	603	903	0
627	1	0	0	0	0	0	0	200	300	0	0	0	0	0	0	0	200	903	0	0	0	0	0	0	0	603	903	0
627	2	0	0	0	0	0	0	200	300	0	0	0	0	0	0	0	200	903	0	0	0	0	0	0	0	603	903	0
627	3	0	0	0	0	0	0	200	300	0	0	0	0	0	0	0	200	903	0	0	0	0	0	0	0	603	903	0
627	4	0	0	0	0	0	0	200	300	0	0	0	0	0	0	0	200	903	0	0	0	0	0	0	0	603	903	0
627	5	0	0	0	0	0	0	200	300	0	0	0	0	0	0	0	200	903	0	0	0	0	0	0	0	603	903	0
627	6	0	0	0	0	0	0	200	300	0	0	0	0	0	0	0	200	903	0	0	0	0	0	0	0	603	903	0
627	7	0	0	0	0	0	0	200	300	0	0	0	0	0	0	0	200	903	0	0	0	0	0	0	0	603	903	0
627	8	0	0	0	0	0	0	200	300	0	0	0	0	0	0	0	200	903	0	0	0	0	0	0	0	603	903	0
627	9	0	0	0	0	0	0	200	300	0	0	0	0	0	0	0	200	903	0	0	0	0	0	0	0	603	903	0
628	0	0	0	0	0	0	0	200	300	0	0	0	0	0	0	0	200	903	0	0	0	0	0	0	0	603	903	0
628	1	0	0	0	0	0	0	200	300	0	0	0	0	0	0	0	200	903	0	0	0	0	0	0	0	603	903	0
628	2	0	0	0	0	0	0	200	300	0	0	0	0	0	0	0	200	903	0	0	0	0	0	0	0	603	903	0
628	3	0	0	0	0	0	0	200	300	0	0	0	0	0	0	0	200	903	0	0	0	0	0	0	0	603	903	0
628	4	0	0	0	0	0	0	200	300	0	0	0	0	0	0	0	200	903	0	0	0	0	0	0	0	603	903	0
628	5	0	0	0	0	0	0	200	300	0	0	0	0	0	0	0	200	903	0	0	0	0	0	0	0	603	903	0
628	6	0	0	0	0	0	0	200	300	0	0	0	0	0	0	0	200	903	0	0	0	0	0	0	0	603	903	0
628	7	0	0	0	0	0	0	200	300	0	0	0	0	0	0	0	200	903	0	0	0	0	0	0	0	603	903	0
628	8	0	0	0	0	0	0	200	300	0	0	0	0	0	0	0	200	903	0	0	0	0	0	0	0	603	903	0
628	9	0	0	0	0	0	0	200	300	0	0	0	0	0	0	0	200	903	0	0	0	0	0	0	0	603	903	0
629	0	0	0	0	0	0	0	200	300	0	0	0	0	0	0	0	200	903	0	0	0	0	0	0	0	603	903	0
629	1	0	0	0	0	0	0	200	300	0	0	0	0	0	0	0	200	903	0	0	0	0	0	0	0	603	903	0
629	2	0	0	0	0	0	0	200	300	0	0	0	0	0	0	0	200	903	0	0	0	0	0	0	0	603	903	0
629	3	0	0	0	0	0	0	200	300	0	0	0	0	0	0	0	200	903	0	0	0	0	0	0	0	603	903	0
629	4	0	0	0	0	0	0	200	300	0	0	0	0	0	0	0	200	903	0	0	0	0	0	0	0	603	903	0
629	5	0	0	0	0	0	0	200	300	0	0	0	0	0	0	0	200	903	0	0	0	0	0	0	0	603	903	0
629	6	0	0	0	0	0	0	200	300	0	0	0	0	0	0	0	200	903	0	0	0	0	0	0	0	603	903	0
629	7	0	0	0	0	0	0	200	300	0	0	0	0	0	0	0	200	903	0	0	0	0	0	0	0	603	903	0
629	8	0	0	0	0	0	0	200	300	0	0	0	0	0	0	0	200	903	0	0	0	0	0	0	0	603	903	0
629	9	0	0	0	0	0	0	200	300	0	0	0	0	0	0	0	200	903	0	0	0	0	0	0	0	603	903	0
630	0	0	0	0	0	0	0	200	300	0	0	0	0	0	0	0	200	903	0	0	0	0	0	0	0	603	903	0
630	1	0	0	0	0	0	0	200	300	0	0	0	0	0	0	0	200	903	0	0	0	0	0	0	0	603	903	0
630	2	0	0	0	0	0	0	200	300	0	0	0	0	0	0	0	200	903	0	0	0	0	0	0	0	603	903	0
630	3	0	0	0	0	0	0	200	300	0	0	0	0	0	0	0	200	903	0	0	0	0	0	0	0	603	903	0
630	4	0	0	0	0	0	0	200	300	0	0	0	0	0	0	0	200	903	0	0	0	0	0	0	0	603	903	0
630	5	0	0	0	0	0	0	200	300	0	0	0	0	0	0	0	200	903	0	0	0	0	0	0	0	603	903	0
630	6	0	0	0	0	0	0	200	300	0	0	0	0	0	0	0	200	903	0	0	0	0	0	0	0	603	903	0
630	7	0	0	0	0	0	0	200	300	0	0	0	0	0	0	0	200	903	0	0	0	0	0	0	0	603	903	0
630	8	0	0	0	0	0	0	200	300	0	0	0	0	0	0	0	200	903	0	0	0	0	0	0	0	603	903	0
630	9	0	0	0	0	0	0	200	300	0	0	0	0	0	0	0	200	903	0	0	0	0	0	0	0	603	903	0
631	0	0	0	0	0	0	0	200	300	0	0	0	0	0	0	0	200	903	0	0	0	0	0	0	0	603	903	0
631	1	0	0	0	0	0	0	200	300	0	0	0	0	0	0	0	200	903	0	0	0	0	0	0	0	603	903	0
631	2	0	0	0	0	0	0	200	300	0	0	0	0	0	0	0	200	903	0	0	0	0	0	0	0	603	903	0
631	3	0	0	0	0	0	0	200	300	0	0	0	0	0	0	0	200	903	0	0	0	0	0	0	0	603	903	0
631	4	0	0	0	0	0	0	200	300	0	0	0	0	0	0	0	200	903	0	0	0	0	0	0	0	603	903	0
631	5	0	0	0	0	0	0	200	300	0	0	0	0	0	0	0	200	903	0	0	0	0	0	0	0	603	903	0
631	6	0	0	0	0	0	0	200	300	0	0	0	0	0	0	0	200	903	0	0	0	0	0	0	0	603	903	0
631	7	0	0	0	0	0	0	200	300	0	0	0	0	0	0	0	200	903	0	0	0	0	0	0	0	603	903	0
631	8	0	0	0	0	0	0	200	300	0	0	0	0	0	0	0	200	903	0	0	0	0	0	0	0	603	903	0
631	9	0	0	0	0	0	0	200	300	0	0	0	0	0	0	0	200	903	0	0	0	0	0	0	0	603	903	0
632	0	0	0	0	0	0	0	200	300	0	0	0	0	0	0	0	200	903	0	0	0	0	0	0	0	603	903	0
632	1	0	0	0	0	0	0	200	300	0	0	0	0	0	0	0	200	903	0	0	0	0	0	0	0	603	903	0
632	2	0	0	0	0	0	0	200	300	0	0	0	0	0	0	0	200	903	0	0	0	0	0	0	0	603	903	0
632	3	0	0	0	0	0	0	200	300	0	0	0	0	0	0	0	200	903	0	0	0	0	0	0	0	603	903	0
632	4	0	0	0	0	0	0	200	300	0	0	0	0	0	0	0	200	903	0	0	0	0	0	0	0	603	903	0
632	5	0	0	0	0	0	0	200	300	0	0	0	0	0	0	0	200	903	0	0	0	0	0	0	0	603	903	0
632	6	0	0	0	0	0	0	200	300	0	0	0	0	0	0	0	200	903	0	0	0	0	0	0	0	603	903	0
632	7	0	0	0	0	0	0	200	300	0	0	0	0	0	0	0	200	903	0	0	0	0	0	0	0	603	903	0
632	8	0	0	0	0	0	0	200	300	0	0	0	0	0	0	0	200	903	0	0	0	0	0	0	0	603	903	0
632	9	0	0	0	0	0	0	200	300	0	0	0	0	0	0	0	200	903	0	0	0	0	0	0	0	603	903	0
633	0	0	0	0	0	0	0	200	300	0	0	0	0	0	0	0	200	903	0	0	0	0	0	0	0	603	903	0
633	1	0	0	0	0	0	0	200	300	0	0	0	0	0	0	0	200	903	0	0	0	0	0	0	0	603	903	0
633	2	0	0	0	0	0	0	200	300	0	0	0	0	0	0	0	200	903	0	0	0	0	0	0	0	603	903	0
633	3	0	0	0	0	0	0	200	300	0	0	0	0	0	0	0	200	903	0	0	0	0	0	0	0	603	903	0
633	4	0	0	0	0	0	0	200	300	0	0	0	0	0	0	0	200	903	0	0	0	0	0	0	0	603	903	0
633	5	0	0	0	0	0	0	200	300	0	0	0	0	0	0	0	200	903	0	0	0	0	0	0	0	603	903	0
633	6	0	0	0	0	0	0	200	300	0	0	0	0	0	0	0	200	903	0	0	0	0	0	0	0	603	903	0
633	7	0	0	0	0	0	0	200	300	0	0	0	0	0	0	0	200	903	0	0	0	0	0	0	0	603	903	0
633	8	0	0	0	0	0	0	200	300	0	0	0	0	0	0	0	200	903	0	0	0	0	0	0	0	603	903	0
633	9	0	0	0	0	0	0	200	300	0	0	0	0	0	0	0	200	903	0	0	0	0	0	0	0	603	903	0
634	0	0	0	0	0	0	0	200	300	0	0	0	0	0	0	0	200	903	0	0	0	0	0	0	0	603	903	0
634	1	0	0	0	0	0	0	200	300	0	0	0	0	0	0	0	200	903	0	0	0	0	0	0	0	603	903	0
634	2	0	0	0	0	0	0	200	300	0	0	0	0	0	0	0	200	903	0	0	0	0	0	0	0	603	903	0
634	3	0	0	0	0	0	0	200	300	0	0	0	0	0	0	0	200	903	0	0	0	0	0	0	0	603	903	0
634	4	0	0	0	0	0	0	200	300	0	0	0	0	0	0	0	200	903	0	0	0	0	0	0	0	603	903	0
634	5	0	0	0	0	0	0	200	300	0	0	0	0	0	0	0	200	903	0	0	0	0	0	0	0	603	903	0
634	6	0	0	0	0	0	0	200	300	0	0	0	0	0	0	0	200	903	0	0	0	0	0	0	0	603	903	0
634	7	0	0	0	0	0	0	200	300	0	0	0	0	0	0	0	200	903	0	0	0	0	0	0	0	603	903	0
634	8	0	0	0	0	0	0	200	300	0	0	0	0	0	0	0	200	903	0	0	0	0	0	0	0	603	903	0
634	9	0	0	0	0	0	0	200	300	0	0	0	0	0	0	0	200	903	0	0	0	0	0	0	0	603	903	0
635	0	0	0	0	0	0	0	200	300	0	0	0	0	0	0	0	200	903	0	0	0	0	0	0	0	603	903	0
635	1	0	0	0	0	0	0	200	300	0	0	0	0	0	0	0	200	903	0	0	0	0	0	0	0	603	903	0
635	2	0	0	0	0	0	0	200	300	0	0	0	0	0	0	0	200	903	0	0	0	0	0	0	0	603	903	0
635	3	0	0	0	0	0	0	200	300	0	0	0	0	0	0	0	200	903	0	0	0	0	0	0	0	603	903	0
635	4	0	0	0	0	0	0	200	300	0	0	0	0	0	0	0	200	903	0	0	0	0	0	0	0	603	903	0
635	5	0	0	0	0	0	0	200	300	0	0	0	0	0	0	0	200	903	0	0	0	0	0	0	0	603	903	0
635	6	0	0	0	0	0	0	200	300	0	0	0	0	0	0	0	200	903	0	0	0	0	0	0	0	603	903	0
635	7	0	0	0	0	0	0	200	300	0	0	0	0	0	0	0	200	903	0	0	0	0	0	0	0	603	903	0
635	8	0	0	0	0	0	0	200	300	0	0	0	0	0	0	0	200	903	0	0	0	0	0	0	0	603	903	0
635	9	0	0	0	0	0	0	200	300	0	0	0	0	0	0	0	200	903	0	0	0	0	0	0	0	603	903	0
636	0	0	0	0	0	0	0	200	300	0	0	0	0	0	0	0	200	903	0	0	0	0	0	0	0	603	903	0
636	1	0	0	0	0	0	0	200	300	0	0	0	0	0	0	0	200	903	0	0	0	0	0	0	0	603	903	0
636	2	0	0	0	0	0	0	200	300	0	0	0	0	0	0	0	200	903	0	0	0	0	0	0	0	603	903	0
636	3	0	0	0	0	0	0	200	300	0	0	0	0	0	0	0	200	903	0	0	0	0	0	0	0	603	903	0
636	4	0	0	0	0	0	0	200	300	0	0	0	0	0	0	0	200	903	0	0	0	0	0	0	0	603	903	0
636	5	0	0	0	0	0	0	200	300	0	0	0	0	0	0	0	200	903	0	0	0	0	0	0	0	603	903	0
636	6	0	0	0	0	0	0	200	300	0	0	0	0	0	0	0	200	903	0	0	0	0	0	0	0	603	903	0
636	7	0	0	0	0	0	0	200	300	0	0	0	0	0	0	0	200	903	0	0	0	0	0	0	0	603	903	0
636	8	0	0	0	0	0	0	200	300	0	0	0	0	0	0	0	200	903	0	0	0	0	0	0	0	603	903	0
636	9	0	0	0	0	0	0	200	300	0	0	0	0	0	0	0	200	903	0	0	0	0	0	0	0	603	903	0
637	0	0	0	0	0	0	0	200	300	0	0	0	0	0	0	0	200	903	0	0	0	0	0	0	0	603	903	0
637	1	0	0	0	0	0	0	200	300	0	0	0	0	0	0	0	200	903	0	0	0	0	0	0	0	603	903	0
637	2	0	0	0	0	0	0	200	300	0	0	0	0	0	0	0	200	903	0	0	0	0	0	0	0	603	903	0
637	3	0	0	0	0	0	0	200	300	0	0	0	0	0	0	0	200	903	0	0	0	0	0	0	0	603	903	0
637	4	0	0	0	0	0	0	200	300	0	0	0	0	0	0	0	200	903	0	0	0	0	0	0	0	603	903	0
637	5	0	0	0	0	0	0	200	300	0	0	0	0	0	0	0	200	903	0	0	0	0	0	0	0	603	903	0
637	6	0	0	0	0	0	0	200	300	0	0	0	0	0	0	0	200	903	0	0	0	0	0	0	0	603	903	0
637	7	0	0	0	0	0	0	200	300	0	0	0	0	0	0	0	200	903	0	0	0	0	0	0	0	603	903	0
637	8	0	0	0	0	0	0	200	300	0	0	0	0	0	0	0	200	903	0	0	0	0	0	0	0	603	903	0
637	9	0	0	0	0	0	0	200	300	0	0	0	0	0	0	0	200	903	0	0	0	0	0	0	0	603	903	0
638	0	0	0	0	0	0	0	200	300	0	0	0	0	0	0	0	200	903	0	0	0	0	0	0	0	603	903	0
638	1	0	0	0	0	0	0	200	300	0	0	0	0	0	0	0	200	903	0	0	0	0	0	0	0	603	903	0
638	2	0	0	0	0	0	0	200	300	0	0	0	0	0	0	0	200	903	0	0	0	0	0	0	0	603	903	0
638	3	0	0	0	0	0	0	200	300	0	0	0	0	0	0	0	200	903	0	0	0	0	0	0	0	603	903	0
638	4	0	0	0	0	0	0	200	300	0	0	0	0	0	0	0	200	903	0	0	0	0	0	0	0	603	903	0
638	5	0	0	0	0	0	0	200	300	0	0	0	0	0	0	0	200	903	0	0	0	0	0	0	0	603	903	0
638	6	0	0	0	0	0	0	200	300	0	0	0	0	0	0	0	200	903	0	0	0	0	0	0	0	603	903	0
638	7	0	0	0	0	0	0	200	300	0	0	0	0	0	0	0	200	903	0	0	0	0	0	0	0	603	903	0
638	8	0	0	0	0	0	0	200	300	0	0	0	0	0	0	0	200	903	0	0	0	0	0	0	0	603	903	0
638	9	0	0	0	0	0	0	200	300	0	0	0	0	0	0	0	200	903	0	0	0	0	0	0	0	603	903	0
639	0	0	0	0	0	0	0	200	300	0	0	0	0	0	0	0	200	903	0	0	0	0	0	0	0	603	903	0
639	1	0	0	0	0	0	0	200	300	0	0	0	0	0	0	0	200	903	0	0	0	0	0	0	0	603	903	0
639	2	0	0	0	0	0	0	200	300	0	0	0	0	0	0	0	200	903	0	0	0	0	0	0	0	603	903	0
639	3	0	0	0	0	0	0	200	300	0	0	0	0	0	0	0	200	903	0	0	0	0	0	0	0	603	903	0
639	4	0	0	0	0	0	0	200	300	0	0	0	0	0	0	0	200	903	0	0	0	0	0	0	0	603	903	0
639	5	0	0	0	0	0	0	200	300	0	0	0	0	0	0	0	200	903	0	0	0	0	0	0	0	603	903	0
639	6	0	0	0	0	0	0	200	300	0	0	0	0	0	0	0	200	903	0	0	0	0	0	0	0	603	903	0
639	7	0	0	0	0	0	0	200	300	0	0	0	0	0	0	0	200	903	0	0	0	0	0	0	0	603	903	0
639	8	0	0	0	0	0	0	200	300	0	0	0	0	0	0	0	200	903	0	0	0	0	0	0	0	603	903	0
639	9	0	0	0	0	0	0	200	300	0	0	0	0	0	0	0	200	903	0	0	0	0	0	0	0	603	903	0
640	0	0	0	0	0	0	0	200	300	0	0	0	0	0	0	0	200	903	0	0	0	0	0	0	0	603	903	0
640	1	0	0	0	0	0	0	200	300	0	0	0	0	0	0	0	200	903	0	0	0	0	0	0	0	603	903	0
640	2	0	0	0	0	0	0	200	300	0	0	0	0	0	0	0	200	903	0	0	0	0	0	0	0	603	903	0
640	3	0	0	0	0	0	0	200	300	0	0	0	0	0	0	0	200	903	0	0	0	0	0	0	0	603	903	0
640	4	0	0	0	0	0	0	200	300	0	0	0	0	0	0	0	200	903	0	0	0	0	0	0	0	603	903	0
640	5	0	0	0	0	0	0	200	300	0	0	0	0	0	0	0	200	903	0	0	0	0	0	0	0	603	903	0
640	6	0	0	0	0	0	0	200	300	0	0	0	0	0	0	0	200	903	0	0	0	0	0	0	0	603	903	0
640	7	0	0	0	0	0	0	200	300	0	0	0	0	0	0	0	200	903	0	0	0	0	0	0	0	603	903	0
640	8	0	0	0	0	0	0	200	300	0	0	0	0	0	0	0	200	903	0	0	0	0	0	0	0	603	903	0
640	9	0	0	0	0	0	0	200	300	0	0	0	0	0	0	0	200	903	0	0	0	0	0	0	0	603	903	0
641	0	0	0	0	0	0	0	200	300	0	0	0	0	0	0	0	200	903	0	0	0	0	0	0	0	603	903	0
641	1	0	0	0	0	0	0	200	300	0	0	0	0	0	0	0	200	903	0	0	0	0	0	0	0	603	903	0
641	2	0	0	0	0	0	0	200	300	0	0	0	0	0	0	0	200	903	0	0	0	0	0	0	0	603	903	0
641	3	0	0	0	0	0	0	200	300	0	0	0	0	0	0	0	200	903	0	0	0	0	0	0	0	603	903	0
641	4	0	0	0	0	0	0	200	300	0	0	0	0	0	0	0	200	903	0	0	0	0	0	0	0	603	903	0
641	5	0	0	0	0	0	0	200	300	0	0	0	0	0	0	0	200	903	0	0	0	0	0	0	0	603	903	0
641	6	0	0	0	0	0	0	200	300	0	0	0	0	0	0	0	200	903	0	0	0	0	0	0	0	603	903	0
641	7	0	0	0	0	0	0	200	300	0	0	0	0	0	0	0	200	903	0	0	0	0	0	0	0	603	903	0
641	8	0	0	0	0	0	0	200	300	0	0	0	0	0	0	0	200	903	0	0	0	0	0	0	0	603	903	0
641	9	0	0	0	0	0	0	200	300	0	0	0	0	0	0	0	200	903	0	0	0	0	0	0	0	603	903	0
642	0	0	0	0	0	0	0	200	300	0	0	0	0	0	0	0	200	903	0	0	0	0	0	0	0	603	903	0
642	1	0	0	0	0	0	0	200	300	0	0	0	0	0	0	0	200	903	0	0	0	0	0	0	0	603	903	0
642	2	0	0	0	0	0	0	200	300	0	0	0	0	0	0	0	200	903	0	0	0	0	0	0	0	603	903	0
642	3	0	0	0	0	0	0	200	300	0	0	0	0	0	0	0	200	903	0	0	0	0	0	0	0	603	903	0
642	4	0	0	0	0	0	0	200	300	0	0	0	0	0	0	0	200	903	0	0	0	0	0	0	0	603	903	0
642	5	0	0	0	0	0	0	200	300	0	0	0	0	0	0	0	200	903	0	0	0	0	0	0	0	603	903	0
642	6	0	0	0	0	0	0	200	300	0	0	0	0	0	0	0	200	903	0	0	0	0	0	0	0	603	903	0
642	7	0	0	0	0	0	0	200	300	0	0	0	0	0	0	0	200	903	0	0	0	0	0	0	0	603	903	0
642	8	0	0	0	0	0	0	200	300	0	0	0	0	0	0	0	200	903	0	0	0	0	0	0	0	603	903	0
642	9	0	0	0	0	0	0	200	300	0	0	0	0	0	0	0	200	903	0	0	0	0	0	0	0	603	903	0
643	0	0	0	0	0	0	0	200	300	0	0	0	0	0	0	0	200	903	0	0	0	0	0	0	0	603	903	0
643	1	0	0	0	0	0	0	200	300	0	0	0	0	0	0	0	200	903	0	0	0	0	0	0	0	603	903	0
643	2	0	0	0	0	0	0	200	300	0	0	0	0	0	0	0	200	903	0	0	0	0	0	0	0	603	903	0
643	3	0	0	0	0	0	0	200	300	0	0	0	0	0	0	0	200	903	0	0	0	0	0	0	0	603	903	0
643	4	0	0	0	0	0	0	200	300	0	0	0	0	0	0	0	200	903	0	0	0	0	0	0	0	603	903	0
643	5	0	0	0	0	0	0	200	300	0	0	0	0	0	0	0	200	903	0	0	0	0	0	0	0	603	903	0
643	6	0	0	0	0	0	0	200	300	0	0	0	0	0	0	0	200	903	0	0	0	0	0	0	0	603	903	0
643	7	0	0	0	0	0	0	200	300	0	0	0	0	0	0	0	200	903	0	0	0	0	0	0	0	603	903	0
643	8	0	0	0	0	0	0	200	300	0	0	0	0	0	0	0	200	903	0	0	0	0	0	0	0	603	903	0
643	9	0	0	0	0	0	0	200	300	0	0	0	0	0	0	0	200	903	0	0	0	0	0	0	0	603	903	0
644	0	0	0	0	0	0	0	200	300	0	0	0	0	0	0	0	200	903	0	0	0	0	0	0	0	603	903	0
644	1	0	0	0	0	0	0	200	300	0	0	0	0	0	0	0	200	903	0	0	0	0	0	0	0	603	903	0
644	2	0	0	0	0	0	0	200	300	0	0	0	0	0	0	0	200	903	0	0	0	0	0	0	0	603	903	0
644	3	0	0	0	0	0	0	200	300	0	0	0	0	0	0	0	200	903	0	0	0	0	0	0	0	603	903	0
644	4	0	0	0	0	0	0	200	300	0	0	0	0	0	0	0	200	903	0	0	0	0	0	0	0	603	903	0
644	5	0	0	0	0	0	0	200	300	0	0	0	0	0	0	0	200	903	0	0	0	0	0	0	0	603	903	0
644	6	0	0	0	0	0	0	200	300	0	0	0	0	0	0	0	200	903	0	0	0	0	0	0	0	603	903	0
644	7	0	0	0	0	0	0	200	300	0	0	0	0	0	0	0	200	903	0	0	0	0	0	0	0	603	903	0
644	8	0	0	0	0	0	0	200	300	0	0	0	0	0	0	0	200	903	0	0	0	0	0	0	0	603	903	0
644	9	0	0	0	0	0	0	200	300	0	0	0	0	0	0	0	200	903	0	0	0	0	0	0	0	603	903	0
645	0	0	0	0	0	0	0	200	300	0	0	0	0	0	0	0	200	903	0	0	0	0	0	0	0	603	903	0
645	1	0	0	0	0	0	0	200	300	0	0	0	0	0	0	0	200	903	0	0	0	0	0	0	0	603	903	0
645	2	0	0	0	0	0	0	200	300	0	0	0	0	0	0	0	200	903	0	0	0	0	0	0	0	603	903	0
645	3	0	0	0	0	0	0	200	300	0	0	0	0	0	0	0	200	903	0	0	0	0	0	0	0	603	903	0
645	4	0	0	0	0	0	0	200	300	0	0	0	0	0	0	0	200	903	0	0	0	0	0	0	0	603	903	0
645	5	0	0	0	0	0	0	200	300	0	0	0	0	0	0	0	200	903	0	0	0	0	0	0	0	603	903	0
645	6	0	0	0	0	0	0	200	300	0	0	0	0	0	0	0	200	903	0	0	0	0	0	0	0	603	903	0
645	7	0	0	0	0	0	0	200	300	0	0	0	0	0	0	0	200	903	0	0	0	0	0	0	0	603	903	0
645	8	0	0	0	0	0	0	200	300	0	0	0	0	0	0	0	200	903	0	0	0	0	0	0	0	603	903	0
645	9	0	0	0	0	0	0	200	300	0	0	0	0	0	0	0	200	903	0	0	0	0	0	0	0	603	903	0
646	0	0	0	0	0	0	0	200	300	0	0	0	0	0	0	0	200	903	0	0	0	0	0	0	0	603	903	0
646	1	0	0	0	0	0	0	200	300	0	0	0	0	0	0	0	200	903	0	0	0	0	0	0	0	603	903	0
646	2	0	0	0	0	0	0	200	300	0	0	0	0	0	0	0	200	903	0	0	0	0	0	0	0	603	903	0
646	3	0	0	0	0	0	0	200	300	0	0	0	0	0	0	0	200	903	0	0	0	0	0	0	0	603	903	0
646	4	0	0	0	0	0	0	200	300	0	0	0	0	0	0	0	200	903	0	0	0	0	0	0	0	603	903	0
646	5	0	0	0	0	0	0	200	300	0	0	0	0	0	0	0	200	903	0	0	0	0	0	0	0	603	903	0
646	6	0	0	0	0	0	0	200	300	0	0	0	0	0	0	0	200	903	0	0	0	0	0	0	0	603	903	0
646	7	0	0	0	0	0	0	200	300	0	0	0	0	0	0	0	200	903	0	0	0	0	0	0	0	603	903	0
646	8	0	0	0	0	0	0	200	300	0	0	0	0	0	0	0	200	903	0	0	0	0	0	0	0	603	903	0
646	9	0	0	0	0	0	0	200	300	0	0	0	0	0	0	0	200	903	0	0	0	0	0	0	0	603	903	0
647	0	0	0	0	0	0	0	200	300	0	0	0	0	0	0	0	200	903	0	0	0	0	0	0	0	603	903	0
647	1	0	0	0	0	0	0	200	300	0	0	0	0	0	0	0	200	903	0	0	0	0	0	0	0	603	903	0
647	2	0	0	0	0	0	0	200	300	0	0	0	0	0	0	0	200	903	0	0	0	0	0	0	0	603	903	0
647	3	0	0	0	0	0	0	200	300	0	0	0	0	0	0	0	200	903	0	0	0	0	0	0	0	603	903	0
647	4	0	0	0	0	0	0	200	300	0	0	0	0	0	0	0	200	903	0	0	0	0	0	0	0	603	903	0
647	5	0	0	0	0	0	0	200	300	0	0	0	0	0	0	0	200	903	0	0	0	0	0	0	0	603	903	0
647	6	0	0	0	0	0	0	200	300	0	0	0	0	0	0	0	200	903	0	0	0	0	0	0	0	603	903	0
647	7	0	0	0	0	0	0	200	300	0	0	0	0	0	0	0	200	903	0	0	0	0	0	0	0	603	903	0
647	8	0	0	0	0	0	0	200	300	0	0	0	0	0	0	0	200	903	0	0	0	0	0	0	0	603	903	0
647	9	0	0	0	0	0	0	200	300	0	0	0	0	0	0	0	200	903	0	0	0	0	0	0	0	603	903	0
648	0	0	0	0	0	0	0	200	300	0	0	0	0	0	0	0	200	903	0	0	0	0	0	0	0	603	903	0
648	1	0	0	0	0	0	0	200	300	0	0	0	0	0	0	0	200	903	0	0	0	0	0	0	0	603	903	0
648	2	0	0	0	0	0	0	200	300	0	0	0	0	0	0	0	200	903	0	0	0	0	0	0	0	603	903	0
648	3	0	0	0	0	0	0	200	300	0	0	0	0	0	0	0	200	903	0	0	0	0	0	0	0	603	903	0
648	4	0	0	0	0	0	0	200	300	0	0	0	0	0	0	0	200	903	0	0	0	0	0	0	0	603	903	0
648	5	0	0	0	0	0	0	200	300	0	0	0	0	0	0	0	200	903	0	0	0	0	0	0	0	603	903	0
648	6	0	0	0	0	0	0	200	300	0	0	0	0	0	0	0	200	903	0	0	0	0	0	0	0	603	903	0
648	7	0	0	0	0	0	0	200	300	0	0	0	0	0	0	0	200	903	0	0	0	0	0	0	0	603	903	0
648	8	0	0	0	0	0	0	200	300	0	0	0	0	0	0	0	200	903	0	0	0	0	0	0	0	603	903	0
648	9	0	0	0	0	0	0	200	300	0	0	0	0	0	0	0	200	903	0	0	0	0	0	0	0	603	903	0
649	0	0	0	0	0	0	0	200	300	0	0	0	0	0	0	0	200	903	0	0	0	0	0	0	0	603	903	0
649	1	0	0	0	0	0	0	200	300	0	0	0	0	0	0	0	200	903	0	0	0	0	0	0	0	603	903	0
649	2	0	0	0	0	0	0	200	300	0	0	0	0	0	0	0	200	903	0	0	0	0	0	0	0	603	903	0
649	3	0	0	0	0	0	0	200	300	0	0	0	0	0	0	0	200	903	0	0	0	0	0	0	0	603	903	0
649	4	0	0	0	0	0	0	200	300	0	0	0	0	0	0	0	200	903	0	0	0	0	0	0	0	603	903	0
649	5	0	0	0	0	0	0	200	300	0	0	0	0	0	0	0	200	903	0	0	0	0	0	0	0	603	903	0
649	6	0	0	0	0	0	0	200	300	0	0	0	0	0	0	0	200	903	0	0	0	0	0	0	0	603	903	0
649	7	0	0	0	0	0	0	200	300	0	0	0	0	0	0	0	200	903	0	0	0	0	0	0	0	603	903	0
649	8	0	0	0	0	0	0	200	300	0	0	0	0	0	0	0	200	903	0	0	0	0	0	0	0	603	903	0
649	9	0	0	0	0	0	0	200	300	0	0	0	0	0	0	0	200	903	0	0	0	0	0	0	0	603	903	0
650	0	0	0	0	0	0	0	200	300	0	0	0	0	0	0	0	200	903	0	0	0	0	0	0	0	603	903	0
650	1	0	0	0	0	0	0	200	300	0	0	0	0	0	0	0	200	903	0	0	0	0	0	0	0	603	903	0
650	2	0	0	0	0	0	0	200	300	0	0	0	0	0	0	0	200	903	0	0	0	0	0	0	0	603	903	0
650	3	0	0	0	0	0	0	200	300	0	0	0	0	0	0	0	200	903	0	0	0	0	0	0	0	603	903	0
650	4	0	0	0	0	0	0	200	300	0	0	0	0	0	0	0	200	903	0	0	0	0	0	0	0	603	903	0
650	5	0	0	0	0	0	0	200	300	0	0	0	0	0	0	0	200	903	0	0	0	0	0	0	0	603	903	0
650	6	0	0	0	0	0	0	200	300	0	0	0	0	0	0	0	200	903	0	0	0	0	0	0	0	603	903	0
650	7	0	0	0	0	0	0	200	300	0	0	0	0	0	0	0	200	903	0	0	0	0	0	0	0	603	903	0
650	8	0	0	0	0	0	0	200	300	0	0	0	0	0	0	0	200	903	0	0	0	0	0	0	0	603	903	0
650	9	0	0	0	0	0	0	200	300	0	0	0	0	0	0	0	200	903	0	0	0	0	0	0	0	603	903	0
651	0	0	0	0	0	0	0	200	300	0	0	0	0	0	0	0	200	903	0	0	0	0	0	0	0	603	903	0
651	1	0	0	0	0	0	0	200	300	0	0	0	0	0	0	0	200	903	0	0	0	0	0	0	0	603	903	0
651	2	0	0	0	0	0	0	200	300	0	0	0	0	0	0	0	200	903	0	0	0	0	0	0	0	603	903	0
651	3	0	0	0	0	0	0	200	300	0	0	0	0	0	0	0	200	903	0	0	0	0	0	0	0	603	903	0
651	4	0	0	0	0	0	0	200	300	0	0	0	0	0	0	0	200	903	0	0	0	0	0	0	0	603	903	0
651	5	0	0	0	0	0	0	200	300	0	0	0	0	0	0	0	200	903	0	0	0	0	0	0	0	603	903	0
651	6	0	0	0	0	0	0	200	300	0	0	0	0	0	0	0	200	903	0	0	0	0	0	0	0	603	903	0
651	7	0	0	0	0	0	0	200	300	0	0	0	0	0	0	0	200	903	0	0	0	0	0	0	0	603	903	0
651	8	0	0	0	0	0	0	200	300	0	0	0	0	0	0	0	200	903	0	0	0	0	0	0	0	603	903	0
651	9	0	0	0	0	0	0	200	300	0	0	0	0	0	0	0	200	903	0	0	0	0	0	0	0	603	903	0
652	0	0	0	0	0	0	0	200	300	0	0	0	0	0	0	0	200	903	0	0	0	0	0	0	0	603	903	0
652	1	0	0	0	0	0	0	200	300	0	0	0	0	0	0	0	200	903	0	0	0	0	0	0	0	603	903	0
652	2	0	0	0	0	0	0	200	300	0	0	0	0	0	0	0	200	903	0	0	0	0	0	0	0	603	903	0
652	3	0	0	0	0	0	0	200	300	0	0	0	0	0	0	0	200	903	0	0	0	0	0	0	0	603	903	0
652	4	0	0	0	0	0	0	200	300	0	0	0	0	0	0	0	200	903	0	0	0	0	0	0	0	603	903	0
652	5	0	0	0	0	0	0	200	300	0	0	0	0	0	0	0	200	903	0	0	0	0	0	0	0	603	903	0
652	6	0	0	0	0	0	0	200	300	0	0	0	0	0	0	0	200	903	0	0	0	0	0	0	0	603	903	0
652	7	0	0	0	0	0	0	200	300	0	0	0	0	0	0	0	200	903	0	0	0	0	0	0	0	603	903	0
652	8	0	0	0	0	0	0	200	300	0	0	0	0	0	0	0	200	903	0	0	0	0	0	0	0	603	903	0
652	9	0	0	0	0	0	0	200	300	0	0	0	0	0	0	0	200	903	0	0	0	0	0	0	0	603	903	0
653	0	0	0	0	0	0	0	200	300	0	0	0	0	0	0	0	200	903	0	0	0	0	0	0	0	603	903	0
653	1	0	0	0	0	0	0	200	300	0	0	0	0	0	0	0	200	903	0	0	0	0	0	0	0	603	903	0
653	2	0	0	0	0	0	0	200	300	0	0	0	0	0	0	0	200	903	0	0	0	0	0	0	0	603	903	0
653	3	0	0	0	0	0	0	200	300	0	0	0	0	0	0	0	200	903	0	0	0	0	0	0	0	603	903	0
653	4	0	0	0	0	0	0	200	300	0	0	0	0	0	0	0	200	903	0	0	0	0	0	0	0	603	903	0
653	5	0	0	0	0	0	0	200	300	0	0	0	0	0	0	0	200	903	0	0	0	0	0	0	0	603	903	0
653	6	0	0	0	0	0	0	200	300	0	0	0	0	0	0	0	200	903	0	0	0	0	0	0	0	603	903	0
653	7	0	0	0	0	0	0	200	300	0	0	0	0	0	0	0	200	903	0	0	0	0	0	0	0	603	903	0
653	8	0	0	0	0	0	0	200	300	0	0	0	0	0	0	0	200	903	0	0	0	0	0	0	0	603	903	0
653	9	0	0	0	0	0	0	200	300	0	0	0	0	0	0	0	200	903	0	0	0	0	0	0	0	603	903	0
654	0	0	0	0	0	0	0	200	300	0	0	0	0	0	0	0	200	903	0	0	0	0	0	0	0	603	903	0
654	1	0	0	0	0	0	0	200	300	0	0	0	0	0	0	0	200	903	0	0	0	0	0	0	0	603	903	0
654	2	0	0	0	0	0	0	200	300	0	0	0	0	0	0	0	200	903	0	0	0	0	0	0	0	603	903	0
654	3	0	0	0	0	0	0	200	300	0	0	0	0	0	0	0	200	903	0	0	0	0	0	0	0	603	903	0
654	4	0	0	0	0	0	0	200	300	0	0	0	0	0	0	0	200	903	0	0	0	0	0	0	0	603	903	0
654	5	0	0	0	0	0	0	200	300	0	0	0	0	0	0	0	200	903	0	0	0	0	0	0	0	603	903	0
654	6	0	0	0	0	0	0	200	300	0	0	0	0	0	0	0	200	903	0	0	0	0	0	0	0	603	903	0
654	7	0	0	0	0	0	0	200	300	0	0	0	0	0	0	0	200	903	0	0	0	0	0	0	0	603	903	0
654	8	0	0	0	0	0	0	200	300	0	0	0	0	0	0	0	200	903	0	0	0	0	0	0	0	603	903	0
654	9	0	0	0	0	0	0	200	300	0	0	0	0	0	0	0	200	903	0	0	0	0	0	0	0	603	903	0
655	0	0	0	0	0	0	0	200	300	0	0	0	0	0	0	0	200	903	0	0	0	0	0	0	0	603	903	0
655	1	0	0	0	0	0	0	200	300	0	0	0	0	0	0	0	200	903	0	0	0	0	0	0	0	603	903	0
655	2	0	0	0	0	0	0	200	300	0	0	0	0	0	0	0	200	903	0	0	0	0	0	0	0	603	903	0
655	3	0	0	0	0	0	0	200	300	0	0	0	0	0	0	0	200	903	0	0	0	0	0	0	0	603	903	0
655	4	0	0	0	0	0	0	200	300	0	0	0	0	0	0	0	200	903	0	0	0	0	0	0	0	603	903	0
655	5	0	0	0	0	0	0	200	300	0	0	0	0	0	0	0	200	903	0	0	0	0	0	0	0	603	903	0
655	6	0	0	0	0	0	0	200	300	0	0	0	0	0	0	0	200	903	0	0	0	0	0	0	0	603	903	0
655	7	0	0	0	0	0	0	200	300	0	0	0	0	0	0	0	200	903	0	0	0	0	0	0	0	603	903	0
655	8	0	0	0	0	0	0	200	300	0	0	0	0	0	0	0	200	903	0	0	0	0	0	0	0	603	903	0
655	9	0	0	0	0	0	0	200	300	0	0	0	0	0	0	0	200	903	0	0	0	0	0	0	0	603	903	0
656	0	0	0	0	0	0	0	200	300	0	0	0	0	0	0	0	200	903	0	0	0	0	0	0	0	603	903	0
656	1	0	0	0	0	0	0	200	300	0	0	0	0	0	0	0	200	903	0	0	0	0	0	0	0	603	903	0
656	2	0	0	0	0	0	0	200	300	0	0	0	0	0	0	0	200	903	0	0	0	0	0	0	0	603	903	0
656	3	0	0	0	0	0	0	200	300	0	0	0	0	0	0	0	200	903	0	0	0	0	0	0	0	603	903	0
656	4	0	0	0	0	0	0	200	300	0	0	0	0	0	0	0	200	903	0	0	0	0	0	0	0	603	903	0
656	5	0	0	0	0	0	0	200	300	0	0	0	0	0	0	0	200	903	0	0	0	0	0	0	0	603	903	0
656	6	0	0	0	0	0	0	200	300	0	0	0	0	0	0	0	200	903	0	0	0	0	0	0	0	603	903	0
656	7	0	0	0	0	0	0	200	300	0	0	0	0	0	0	0	200	903	0	0	0	0	0	0	0	603	903	0
656	8	0	0	0	0	0	0	200	300	0	0	0	0	0	0	0	200	903	0	0	0	0	0	0	0	603	903	0
656	9	0	0	0	0	0	0	200	300	0	0	0	0	0	0	0	200	903	0	0	0	0	0	0	0	603	903	0
657	0	0	0	0	0	0	0	200	300	0	0	0	0	0	0	0	200	903	0	0	0	0	0	0	0	603	903	0
657	1	0	0	0	0	0	0	200	300	0	0	0	0	0	0	0	200	903	0	0	0	0	0	0	0	603	903	0
657	2	0	0	0	0	0	0	200	300	0	0	0	0	0	0	0	200	903	0	0	0	0	0	0	0	603	903	0
657	3	0	0	0	0	0	0	200	300	0	0	0	0	0	0	0	200	903	0	0	0	0	0	0	0	603	903	0
657	4	0	0	0	0	0	0	200	300	0	0	0	0	0	0	0	200	903	0	0	0	0	0	0	0	603	903	0
657	5	0	0	0	0	0	0	200	300	0	0	0	0	0	0	0	200	903	0	0	0	0	0	0	0	603	903	0
657	6	0	0	0	0	0	0	200	300	0	0	0	0	0	0	0	200	903	0	0	0	0	0	0	0	603	903	0
657	7	0	0	0	0	0	0	200	300	0	0	0	0	0	0	0	200	903	0	0	0	0	0	0	0	603	903	0
657	8	0	0	0	0	0	0	200	300	0	0	0	0	0	0	0	200	903	0	0	0	0	0	0	0	603	903	0
657	9	0	0	0	0	0	0	200	300	0	0	0	0	0	0	0	200	903	0	0	0	0	0	0	0	603	903	0
658	0	0	0	0	0	0	0	200	300	0	0	0	0	0	0	0	200	903	0	0	0	0	0	0	0	603	903	0
658	1	0	0	0	0	0	0	200	300	0	0	0	0	0	0	0	200	903	0	0	0	0	0	0	0	603	903	0
658	2	0	0	0	0	0	0	200	300	0	0	0	0	0	0	0	200	903	0	0	0	0	0	0	0	603	903	0
658	3	0	0	0	0	0	0	200	300	0	0	0	0	0	0	0	200	903	0	0	0	0	0	0	0	603	903	0
658	4	0	0	0	0	0	0	200	300	0	0	0	0	0	0	0	200	903	0	0	0	0	0	0	0	603	903	0
658	5	0	0	0	0	0	0	200	300	0	0	0	0	0	0	0	200	903	0	0	0	0	0	0	0	603	903	0
658	6	0	0	0	0	0	0	200	300	0	0	0	0	0	0	0	200	903	0	0	0	0	0	0	0	603	903	0
658	7	0	0	0	0	0	0	200	300	0	0	0	0	0	0	0	200	903	0	0	0	0	0	0	0	603	903	0
658	8	0	0	0	0	0	0	200	300	0	0	0	0	0	0	0	200	903	0	0	0	0	0	0	0	603	903	0
658	9	0	0	0	0	0	0	200	300	0	0	0	0	0	0	0	200	903	0	0	0	0	0	0	0	603	903	0
659	0	0	0	0	0	0	0	200	300	0	0	0	0	0	0	0	200	903	0	0	0	0	0	0	0	603	903	0
659	1	0	0	0	0	0	0	200	300	0	0	0	0	0	0	0	200	903	0	0	0	0	0	0	0	603	903	0
659	2	0	0	0	0	0	0	200	300	0	0	0	0	0	0	0	200	903	0	0	0	0	0	0	0	603	903	0
659	3	0	0	0	0	0	0	200	300	0	0	0	0	0	0	0	200	903	0	0	0	0	0	0	0	603	903	0
659	4	0	0	0	0	0	0	200	300	0	0	0	0	0	0	0	200	903	0	0	0	0	0	0	0	603	903	0
659	5	0	0	0	0	0	0	200	300	0	0	0	0	0	0	0	200	903	0	0	0	0	0	0	0	603	903	0
659	6	0	0	0	0	0	0	200	300	0	0	0	0	0	0	0	200	903	0	0	0	0	0	0	0	603	903	0
659	7	0	0	0	0	0	0	200	300	0	0	0	0	0	0	0	200	903	0	0	0	0	0	0	0	603	903	0
659	8	0	0	0	0	0	0	200	300	0	0	0	0	0	0	0	200	903	0	0	0	0	0	0	0	603	903	0
659	9	0	0	0	0	0	0	200	300	0	0	0	0	0	0	0	200	903	0	0	0	0	0	0	0	603	903	0
660	0	0	0	0	0	0	0	200	300	0	0	0	0	0	0	0	200	903	0	0	0	0	0	0	0	603	903	0
660	1	0	0	0	0	0	0	200	300	0	0	0	0	0	0	0	200	903	0	0	0	0	0	0	0	603	903	0
660	2	0	0	0	0	0	0	200	300	0	0	0	0	0	0	0	200	903	0	0	0	0	0	0	0	603	903	0
660	3	0	0	0	0	0	0	200	300	0	0	0	0	0	0	0	200	903	0	0	0	0	0	0	0	603	903	0
660	4	0	0	0	0	0	0	200	300	0	0	0	0	0	0	0	200	903	0	0	0	0	0	0	0	603	903	0
660	5	0	0	0	0	0	0	200	300	0	0	0	0	0	0	0	200	903	0	0	0	0	0	0	0	603	903	0
660	6	0	0	0	0	0	0	200	300	0	0	0	0	0	0	0	200	903	0	0	0	0	0	0	0	603	903	0
660	7	0	0	0	0	0	0	200	300	0	0	0	0	0	0	0	200	903	0	0	0	0	0	0	0	603	903	0
660	8	0	0	0	0	0	0	200	300	0	0	0	0	0	0	0	200	903	0	0	0	0	0	0	0	603	903	0
660	9	0	0	0	0	0	0	200	300	0	0	0	0	0	0	0	200	903	0	0	0	0	0	0	0	603	903	0
661	0	0	0	0	0	0	0	200	300	0	0	0	0	0	0	0	200	903	0	0	0	0	0	0	0	603	903	0
661	1	0	0	0	0	0	0	200	300	0	0	0	0	0	0	0	200	903	0	0	0	0	0	0	0	603	903	0
661	2	0	0	0	0	0	0	200	300	0	0	0	0	0	0	0	200	903	0	0	0	0	0	0	0	603	903	0
661	3	0	0	0	0	0	0	200	300	0	0	0	0	0	0	0	200	903	0	0	0	0	0	0	0	603	903	0
661	4	0	0	0	0	0	0	200	300	0	0	0	0	0	0	0	200	903	0	0	0	0	0	0	0	603	903	0
661	5	0	0	0	0	0	0	200	300	0	0	0	0	0	0	0	200	903	0	0	0	0	0	0	0	603	903	0
661	6	0	0	0	0	0	0	200	300	0	0	0	0	0	0	0	200	903	0	0	0	0	0	0	0	603	903	0
661	7	0	0	0	0	0	0	200	300	0	0	0	0	0	0	0	200	903	0	0	0	0	0	0	0	603	903	0
661	8	0	0	0	0	0	0	200	300	0	0	0	0	0	0	0	200	903	0	0	0	0	0	0	0	603	903	0
661	9	0	0	0	0	0	0	200	300	0	0	0	0	0	0	0	200	903	0	0	0	0	0	0	0	603	903	0
662	0	0	0	0	0	0	0	200	300	0	0	0	0	0	0	0	200	903	0	0	0	0	0	0	0	603	903	0
662	1	0	0	0	0	0	0	200	300	0	0	0	0	0	0	0	200	903	0	0	0	0	0	0	0	603	903	0
662	2	0	0	0	0	0	0	200	300	0	0	0	0	0	0	0	200	903	0	0	0	0	0	0	0	603	903	0
662	3	0	0	0	0	0	0	200	300	0	0	0	0	0	0	0	200	903	0	0	0	0	0	0	0	603	903	0
662	4	0	0	0	0	0	0	200	300	0	0	0	0	0	0	0	200	903	0	0	0	0	0	0	0	603	903	0
662	5	0	0	0	0	0	0	200	300	0	0	0	0	0	0	0	200	903	0	0	0	0	0	0	0	603	903	0
662	6	0	0	0	0	0	0	200	300	0	0	0	0	0	0	0	200	903	0	0	0	0	0	0	0	603	903	0
662	7	0	0	0	0	0	0	200	300	0	0	0	0	0	0	0	200	903	0	0	0	0	0	0	0	603	903	0
662	8	0	0	0	0	0	0	200	300	0	0	0	0	0	0	0	200	903	0	0	0	0	0	0	0	603	903	0
662	9	0	0	0	0	0	0	200	300	0	0	0	0	0	0	0	200	903	0	0	0	0	0	0	0	603	903	0
663	0	0	0	0	0	0	0	200	300	0	0	0	0	0	0	0	200	903	0	0	0	0	0	0	0	603	903	0
663	1	0	0	0	0	0	0	200	300	0	0	0	0	0	0	0	200	903	0	0	0	0	0	0	0	603	903	0
663	2	0	0	0	0	0	0	200	300	0	0	0	0	0	0	0	200	903	0	0	0	0	0	0	0	603	903	0
663	3	0	0	0	0	0	0	200	300	0	0	0	0	0	0	0	200	903	0	0	0	0	0	0	0	603	903	0
663	4	0	0	0	0	0	0	200	300	0	0	0	0	0	0	0	200	903	0	0	0	0	0	0	0	603	903	0
663	5	0	0	0	0	0	0	200	300	0	0	0	0	0	0	0	200	903	0	0	0	0	0	0	0	603	903	0
663	6	0	0	0	0	0	0	200	300	0	0	0	0	0	0	0	200	903	0	0	0	0	0	0	0	603	903	0
663	7	0	0	0	0	0	0	200	300	0	0	0	0	0	0	0	200	903	0	0	0	0	0	0	0	603	903	0
663	8	0	0	0	0	0	0	200	300	0	0	0	0	0	0	0	200	903	0	0	0	0	0	0	0	603	903	0
663	9	0	0	0	0	0	0	200	300	0	0	0	0	0	0	0	200	903	0	0	0	0	0	0	0	603	903	0
664	0	0	0	0	0	0	0	200	300	0	0	0	0	0	0	0	200	903	0	0	0	0	0	0	0	603	903	0
664	1	0	0	0	0	0	0	200	300	0	0	0	0	0	0	0	200	903	0	0	0	0	0	0	0	603	903	0
664	2	0	0	0	0	0	0	200	300	0	0	0	0	0	0	0	200	903	0	0	0	0	0	0	0	603	903	0
664	3	0	0	0	0	0	0	200	300	0	0	0	0	0	0	0	200	903	0	0	0	0	0	0	0	603	903	0
664	4	0	0	0	0	0	0	200	300	0	0	0	0	0	0	0	200	903	0	0	0	0	0	0	0	603	903	0
664	5	0	0	0	0	0	0	200	300	0	0	0	0	0	0	0	200	903	0	0	0	0	0	0	0	603	903	0
664	6	0	0	0	0	0	0	200	300	0	0	0	0	0	0	0	200	903	0	0	0	0	0	0	0	603	903	0
664	7	0	0	0	0	0	0	200	300	0	0	0	0	0	0	0	200	903	0	0	0	0	0	0	0	603	903	0
664	8	0	0	0	0	0	0	200	300	0	0	0	0	0	0	0	200	903	0	0	0	0	0	0	0	603	903	0
664	9	0	0	0	0	0	0	200	300	0	0	0	0	0	0	0	200	903	0	0	0	0	0	0	0	603	903	0
665	0	0	0	0	0	0	0	200	300	0	0	0	0	0	0	0	200	903	0	0	0	0	0	0	0	603	903	0
665	1	0	0	0	0	0	0	200	300	0	0	0	0	0	0	0	200	903	0	0	0	0	0	0	0	603	903	0
665	2	0	0	0	0	0	0	200	300	0	0	0	0	0	0	0	200	903	0	0	0	0	0	0	0	603	903	0
665	3	0	0	0	0	0	0	200	300	0	0	0	0	0	0	0	200	903	0	0	0	0	0	0	0	603	903	0
665	4	0	0	0	0	0	0	200	300	0	0	0	0	0	0	0	200	903	0	0	0	0	0	0	0	603	903	0
665	5	0	0	0	0	0	0	200	300	0	0	0	0	0	0	0	200	903	0	0	0	0	0	0	0	603	903	0
665	6	0	0	0	0	0	0	200	300	0	0	0	0	0	0	0	200	903	0	0	0	0	0	0	0	603	903	0
665	7	0	0	0	0	0	0	200	300	0	0	0	0	0	0	0	200	903	0	0	0	0	0	0	0	603	903	0
665	8	0	0	0	0	0	0	200	300	0	0	0	0	0	0	0	200	903	0	0	0	0	0	0	0	603	903	0
665	9	0	0	0	0	0	0	200	300	0	0	0	0	0	0	0	200	903	0	0	0	0	0	0	0	603	903	0
666	0	0	0	0	0	0	0	200	300	0	0	0	0	0	0	0	200	903	0	0	0	0	0	0	0	603	903	0
666	1	0	0	0	0	0	0	200	300	0	0	0	0	0	0	0	200	903	0	0	0	0	0	0	0	603	903	0
666	2	0	0	0	0	0	0	200	300	0	0	0	0	0	0	0	200	903	0	0	0	0	0	0	0	603	903	0
666	3	0	0	0	0	0	0	200	300	0	0	0	0	0	0	0	200	903	0	0	0	0	0	0	0	603	903	0
666	4	0	0	0	0	0	0	200	300	0	0	0	0	0	0	0	200	903	0	0	0	0	0	0	0	603	903	0
666	5	0	0	0	0	0	0	200	300	0	0	0	0	0	0	0	200	903	0	0	0	0	0	0	0	603	903	0
666	6	0	0	0	0	0	0	200	300	0	0	0	0	0	0	0	200	903	0	0	0	0	0	0	0	603	903	0
666	7	0	0	0	0	0	0	200	300	0	0	0	0	0	0	0	200	903	0	0	0	0	0	0	0	603	903	0
666	8	0	0	0	0	0	0	200	300	0	0	0	0	0	0	0	200	903	0	0	0	0	0	0	0	603	903	0
666	9	0	0	0	0	0	0	200	300	0	0	0	0	0	0	0	200	903	0	0	0	0	0	0	0	603	903	0
667	0	0	0	0	0	0	0	200	300	0	0	0	0	0	0	0	200	903	0	0	0	0	0	0	0	603	903	0
667	1	0	0	0	0	0	0	200	300	0	0	0	0	0	0	0	200	903	0	0	0	0	0	0	0	603	903	0
667	2	0	0	0	0	0	0	200	300	0	0	0	0	0	0	0	200	903	0	0	0	0	0	0	0	603	903	0
667	3	0	0	0	0	0	0	200	300	0	0	0	0	0	0	0	200	903	0	0	0	0	0	0	0	603	903	0
667	4	0	0	0	0	0	0	200	300	0	0	0	0	0	0	0	200	903	0	0	0	0	0	0	0	603	903	0
667	5	0	0	0	0	0	0	200	300	0	0	0	0	0	0	0	200	903	0	0	0	0	0	0	0	603	903	0
667	6	0	0	0	0	0	0	200	300	0	0	0	0	0	0	0	200	903	0	0	0	0	0	0	0	603	903	0
667	7	0	0	0	0	0	0	200	300	0	0	0	0	0	0	0	200	903	0	0	0	0	0	0	0	603	903	0
667	8	0	0	0	0	0	0	200	300	0	0	0	0	0	0	0	200	903	0	0	0	0	0	0	0	603	903	0
667	9	0	0	0	0	0	0	200	300	0	0	0	0	0	0	0	200	903	0	0	0	0	0	0	0	603	903	0
668	0	0	0	0	0	0	0	200	300	0	0	0	0	0	0	0	200	903	0	0	0	0	0	0	0	603	903	0
668	1	0	0	0	0	0	0	200	300	0	0	0	0	0	0	0	200	903	0	0	0	0	0	0	0	603	903	0
668	2	0	0	0	0	0	0	200	300	0	0	0	0	0	0	0	200	903	0	0	0	0	0	0	0	603	903	0
668	3	0	0	0	0	0	0	200	300	0	0	0	0	0	0	0	200	903	0	0	0	0	0	0	0	603	903	0
668	4	0	0	0	0	0	0	200	300	0	0	0	0	0	0	0	200	903	0	0	0	0	0	0	0	603	903	0
668	5	0	0	0	0	0	0	200	300	0	0	0	0	0	0	0	200	903	0	0	0	0	0	0	0	603	903	0
668	6	0	0	0	0	0	0	200	300	0	0	0	0	0	0	0	200	903	0	0	0	0	0	0	0	603	903	0
668	7	0	0	0	0	0	0	200	300	0	0	0	0	0	0	0	200	903	0	0	0	0	0	0	0	603	903	0
668	8	0	0	0	0	0	0	200	300	0	0	0	0	0	0	0	200	903	0	0	0	0	0	0	0	603	903	0
668	9	0	0	0	0	0	0	200	300	0	0	0	0	0	0	0	200	903	0	0	0	0	0	0	0	603	903	0
669	0	0	0	0	0	0	0	200	300	0	0	0	0	0	0	0	200	903	0	0	0	0	0	0	0	603	903	0
669	1	0	0	0	0	0	0	200	300	0	0	0	0	0	0	0	200	903	0	0	0	0	0	0	0	603	903	0
669	2	0	0	0	0	0	0	200	300	0	0	0	0	0	0	0	200	903	0	0	0	0	0	0	0	603	903	0
669	3	0	0	0	0	0	0	200	300	0	0	0	0	0	0	0	200	903	0	0	0	0	0	0	0	603	903	0
669	4	0	0	0	0	0	0	200	300	0	0	0	0	0	0	0	200	903	0	0	0	0	0	0	0	603	903	0
669	5	0	0	0	0	0	0	200	300	0	0	0	0	0	0	0	200	903	0	0	0	0	0	0	0	603	903	0
669	6	0	0	0	0	0	0	200	300	0	0	0	0	0	0	0	200	903	0	0	0	0	0	0	0	603	903	0
669	7	0	0	0	0	0	0	200	300	0	0	0	0	0	0	0	200	903	0	0	0	0	0	0	0	603	903	0
669	8	0	0	0	0	0	0	200	300	0	0	0	0	0	0	0	200	903	0	0	0	0	0	0	0	603	903	0
669	9	0	0	0	0	0	0	200	300	0	0	0	0	0	0	0	200	903	0	0	0	0	0	0	0	603	903	0
670	0	0	0	0	0	0	0	200	300	0	0	0	0	0	0	0	200	903	0	0	0	0	0	0	0	603	903	0
670	1	0	0	0	0	0	0	200	300	0	0	0	0	0	0	0	200	903	0	0	0	0	0	0	0	603	903	0
670	2	0	0	0	0	0	0	200	300	0	0	0	0	0	0	0	200	903	0	0	0	0	0	0	0	603	903	0
670	3	0	0	0	0	0	0	200	300	0	0	0	0	0	0	0	200	903	0	0	0	0	0	0	0	603	903	0
670	4	0	0	0	0	0	0	200	300	0	0	0	0	0	0	0	200	903	0	0	0	0	0	0	0	603	903	0
670	5	0	0	0	0	0	0	200	300	0	0	0	0	0	0	0	200	903	0	0	0	0	0	0	0	603	903	0
670	6	0	0	0	0	0	0	200	300	0	0	0	0	0	0	0	200	903	0	0	0	0	0	0	0	603	903	0
670	7	0	0	0	0	0	0	200	300	0	0	0	0	0	0	0	200	903	0	0	0	0	0	0	0	603	903	0
670	8	0	0	0	0	0	0	200	300	0	0	0	0	0	0	0	200	903	0	0	0	0	0	0	0	603	903	0
670	9	0	0	0	0	0	0	200	300	0	0	0	0	0	0	0	200	903	0	0	0	0	0	0	0	603	903	0
671	0	0	0	0	0	0	0	200	300	0	0	0	0	0	0	0	200	903	0	0	0	0	0	0	0	603	903	0
671	1	0	0	0	0	0	0	200	300	0	0	0	0	0	0	0	200	903	0	0	0	0	0	0	0	603	903	0
671	2	0	0	0	0	0	0	200	300	0	0	0	0	0	0	0	200	903	0	0	0	0	0	0	0	603	903	0
671	3	0	0	0	0	0	0	200	300	0	0	0	0	0	0	0	200	903	0	0	0	0	0	0	0	603	903	0
671	4	0	0	0	0	0	0	200	300	0	0	0	0	0	0	0	200	903	0	0	0	0	0	0	0	603	903	0
671	5	0	0	0	0	0	0	200	300	0	0	0	0	0	0	0	200	903	0	0	0	0	0	0	0	603	903	0
671	6	0	0	0	0	0	0	200	300	0	0	0	0	0	0	0	200	903	0	0	0	0	0	0	0	603	903	0
671	7	0	0	0	0	0	0	200	300	0	0	0	0	0	0	0	200	903	0	0	0	0	0	0	0	603	903	0
671	8	0	0	0	0	0	0	200	300	0	0	0	0	0	0	0	200	903	0	0	0	0	0	0	0	603	903	0
671	9	0	0	0	0	0	0	200	300	0	0	0	0	0	0	0	200	903	0	0	0	0	0	0	0	603	903	0
672	0	0	0	0	0	0	0	200	300	0	0	0	0	0	0	0	200	903	0	0	0	0	0	0	0	603	903	0
672	1	0	0	0	0	0	0	200	300	0	0	0	0	0	0	0	200	903	0	0	0	0	0	0	0	603	903	0
672	2	0	0	0	0	0	0	200	300	0	0	0	0	0	0	0	200	903	0	0	0	0	0	0	0	603	903	0
672	3	0	0	0	0	0	0	200	300	0	0	0	0	0	0	0	200	903	0	0	0	0	0	0	0	603	903	0
672	4	0	0	0	0	0	0	200	300	0	0	0	0	0	0	0	200	903	0	0	0	0	0	0	0	603	903	0
672	5	0	0	0	0	0	0	200	300	0	0	0	0	0	0	0	200	903	0	0	0	0	0	0	0	603	903	0
672	6	0	0	0	0	0	0	200	300	0	0	0	0	0	0	0	200	903	0	0	0	0	0	0	0	603	903	0
672	7	0	0	0	0	0	0	200	300	0	0	0	0	0	0	0	200	903	0	0	0	0	0	0	0	603	903	0
672	8	0	0	0	0	0	0	200	300	0	0	0	0	0	0	0	200	903	0	0	0	0	0	0	0	603	903	0
672	9	0	0	0	0	0	0	200	300	0	0	0	0	0	0	0	200	903	0	0	0	0	0	0	0	603	903	0
673	0	0	0	0	0	0	0	200	300	0	0	0	0	0	0	0	200	903	0	0	0	0	0	0	0	603	903	0
673	1	0	0	0	0	0	0	200	300	0	0	0	0	0	0	0	200	903	0	0	0	0	0	0	0	603	903	0
673	2	0	0	0	0	0	0	200	300	0	0	0	0	0	0	0	200	903	0	0	0	0	0	0	0	603	903	0
673	3	0	0	0	0	0	0	200	300	0	0	0	0	0	0	0	200	903	0	0	0	0	0	0	0	603	903	0
673	4	0	0	0	0	0	0	200	300	0	0	0	0	0	0	0	200	903	0	0	0	0	0	0	0	603	903	0
673	5	0	0	0	0	0	0	200	300	0	0	0	0	0	0	0	200	903	0	0	0	0	0	0	0	603	903	0
673	6	0	0	0	0	0	0	200	300	0	0	0	0	0	0	0	200	903	0	0	0	0	0	0	0	603	903	0
673	7	0	0	0	0	0	0	200	300	0	0	0	0	0	0	0	200	903	0	0	0	0	0	0	0	603	903	0
673	8	0	0	0	0	0	0	200	300	0	0	0	0	0	0	0	200	903	0	0	0	0	0	0	0	603	903	0
673	9	0	0	0	0	0	0	200	300	0	0	0	0	0	0	0	200	903	0	0	0	0	0	0	0	603	903	0
674	0	0	0	0	0	0	0	200	300	0	0	0	0	0	0	0	200	903	0	0	0	0	0	0	0	603	903	0
674	1	0	0	0	0	0	0	200	300	0	0	0	0	0	0	0	200	903	0	0	0	0	0	0	0	603	903	0
674	2	0	0	0	0	0	0	200	300	0	0	0	0	0	0	0	200	903	0	0	0	0	0	0	0	603	903	0
674	3	0	0	0	0	0	0	200	300	0	0	0	0	0	0	0	200	903	0	0	0	0	0	0	0	603	903	0
674	4	0	0	0	0	0	0	200	300	0	0	0	0	0	0	0	200	903	0	0	0	0	0	0	0	603	903	0
674	5	0	0	0	0	0	0	200	300	0	0	0	0	0	0	0	200	903	0	0	0	0	0	0	0	603	903	0
674	6	0	0	0	0	0	0	200	300	0	0	0	0	0	0	0	200	903	0	0	0	0	0	0	0	603	903	0
674	7	0	0	0	0	0	0	200	300	0	0	0	0	0	0	0	200	903	0	0	0	0	0	0	0	603	903	0
674	8	0	0	0	0	0	0	200	300	0	0	0	0	0	0	0	200	903	0	0	0	0	0	0	0	603	903	0
674	9	0	0	0	0	0	0	200	300	0	0	0	0	0	0	0	200	903	0	0	0	0	0	0	0	603	903	0
675	0	0	0	0	0	0	0	200	300	0	0	0	0	0	0	0	200	903	0	0	0	0	0	0	0	603	903	0
675	1	0	0	0	0	0	0	200	300	0	0	0	0	0	0	0	200	903	0	0	0	0	0	0	0	603	903	0
675	2	0	0	0	0	0	0	200	300	0	0	0	0	0	0	0	200	903	0	0	0	0	0	0	0	603	903	0
675	3	0	0	0	0	0	0	200	300	0	0	0	0	0	0	0	200	903	0	0	0	0	0	0	0	603	903	0
675	4	0	0	0	0	0	0	200	300	0	0	0	0	0	0	0	200	903	0	0	0	0	0	0	0	603	903	0
675	5	0	0	0	0	0	0	200	300	0	0	0	0	0	0	0	200	903	0	0	0	0	0	0	0	603	903	0
675	6	0	0	0	0	0	0	200	300	0	0	0	0	0	0	0	200	903	0	0	0	0	0	0	0	603	903	0
675	7	0	0	0	0	0	0	200	300	0	0	0	0	0	0	0	200	903	0	0	0	0	0	0	0	603	903	0
675	8	0	0	0	0	0	0	200	300	0	0	0	0	0	0	0	200	903	0	0	0	0	0	0	0	603	903	0
675	9	0	0	0	0	0	0	200	300	0	0	0	0	0	0	0	200	903	0	0	0	0	0	0	0	603	903	0
676	0	0	0	0	0	0	0	200	300	0	0	0	0	0	0	0	200	903	0	0	0	0	0	0	0	603	903	0
676	1	0	0	0	0	0	0	200	300	0	0	0	0	0	0	0	200	903	0	0	0	0	0	0	0	603	903	0
676	2	0	0	0	0	0	0	200	300	0	0	0	0	0	0	0	200	903	0	0	0	0	0	0	0	603	903	0
676	3	0	0	0	0	0	0	200	300	0	0	0	0	0	0	0	200	903	0	0	0	0	0	0	0	603	903	0
676	4	0	0	0	0	0	0	200	300	0	0	0	0	0	0	0	200	903	0	0	0	0	0	0	0	603	903	0
676	5	0	0	0	0	0	0	200	300	0	0	0	0	0	0	0	200	903	0	0	0	0	0	0	0	603	903	0
676	6	0	0	0	0	0	0	200	300	0	0	0	0	0	0	0	200	903	0	0	0	0	0	0	0	603	903	0
676	7	0	0	0	0	0	0	200	300	0	0	0	0	0	0	0	200	903	0	0	0	0	0	0	0	603	903	0
676	8	0	0	0	0	0	0	200	300	0	0	0	0	0	0	0	200	903	0	0	0	0	0	0	0	603	903	0
676	9	0	0	0	0	0	0	200	300	0	0	0	0	0	0	0	200	903	0	0	0	0	0	0	0	603	903	0
677	0	0	0	0	0	0	0	200	300	0	0	0	0	0	0	0	200	903	0	0	0	0	0	0	0	603	903	0
677	1	0	0	0	0	0	0	200	300	0	0	0	0	0	0	0	200	903	0	0	0	0	0	0	0	603	903	0
677	2	0	0	0	0	0	0	200	300	0	0	0	0	0	0	0	200	903	0	0	0	0	0	0	0	603	903	0
677	3	0	0	0	0	0	0	200	300	0	0	0	0	0	0	0	200	903	0	0	0	0	0	0	0	603	903	0
677	4	0	0	0	0	0	0	200	300	0	0	0	0	0	0	0	200	903	0	0	0	0	0	0	0	603	903	0
677	5	0	0	0	0	0	0	200	300	0	0	0	0	0	0	0	200	903	0	0	0	0	0	0	0	603	903	0
677	6	0	0	0	0	0	0	200	300	0	0	0	0	0	0	0	200	903	0	0	0	0	0	0	0	603	903	0
677	7	0	0	0	0	0	0	200	300	0	0	0	0	0	0	0	200	903	0	0	0	0	0	0	0	603	903	0
677	8	0	0	0	0	0	0	200	300	0	0	0	0	0	0	0	200	903	0	0	0	0	0	0	0	603	903	0
677	9	0	0	0	0	0	0	200	300	0	0	0	0	0	0	0	200	903	0	0	0	0	0	0	0	603	903	0
678	0	0	0	0	0	0	0	200	300	0	0	0	0	0	0	0	200	903	0	0	0	0	0	0	0	603	903	0
678	1	0	0	0	0	0	0	200	300	0	0	0	0	0	0	0	200	903	0	0	0	0	0	0	0	603	903	0
678	2	0	0	0	0	0	0	200	300	0	0	0	0	0	0	0	200	903	0	0	0	0	0	0	0	603	903	0
678	3	0	0	0	0	0	0	200	300	0	0	0	0	0	0	0	200	903	0	0	0	0	0	0	0	603	903	0
678	4	0	0	0	0	0	0	200	300	0	0	0	0	0	0	0	200	903	0	0	0	0	0	0	0	603	903	0
678	5	0	0	0	0	0	0	200	300	0	0	0	0	0	0	0	200	903	0	0	0	0	0	0	0	603	903	0
678	6	0	0	0	0	0	0	200	300	0	0	0	0	0	0	0	200	903	0	0	0	0	0	0	0	603	903	0
678	7	0	0	0	0	0	0	200	300	0	0	0	0	0	0	0	200	903	0	0	0	0	0	0	0	603	903	0
678	8	0	0	0	0	0	0	200	300	0	0	0	0	0	0	0	200	903	0	0	0	0	0	0	0	603	903	0
678	9	0	0	0	0	0	0	200	300	0	0	0	0	0	0	0	200	903	0	0	0	0	0	0	0	603	903	0
679	0	0	0	0	0	0	0	200	300	0	0	0	0	0	0	0	200	903	0	0	0	0	0	0	0	603	903	0
679	1	0	0	0	0	0	0	200	300	0	0	0	0	0	0	0	200	903	0	0	0	0	0	0	0	603	903	0
679	2	0	0	0	0	0	0	200	300	0	0	0	0	0	0	0	200	903	0	0	0	0	0	0	0	603	903	0
679	3	0	0	0	0	0	0	200	300	0	0	0	0	0	0	0	200	903	0	0	0	0	0	0	0	603	903	0
679	4	0	0	0	0	0	0	200	300	0	0	0	0	0	0	0	200	903	0	0	0	0	0	0	0	603	903	0
679	5	0	0	0	0	0	0	200	300	0	0	0	0	0	0	0	200	903	0	0	0	0	0	0	0	603	903	0
679	6	0	0	0	0	0	0	200	300	0	0	0	0	0	0	0	200	903	0	0	0	0	0	0	0	603	903	0
679	7	0	0	0	0	0	0	200	300	0	0	0	0	0	0	0	200	903	0	0	0	0	0	0	0	603	903	0
679	8	0	0	0	0	0	0	200	300	0	0	0	0	0	0	0	200	903	0	0	0	0	0	0	0	603	903	0
679	9	0	0	0	0	0	0	200	300	0	0	0	0	0	0	0	200	903	0	0	0	0	0	0	0	603	903	0
680	0	0	0	0	0	0	0	200	300	0	0	0	0	0	0	0	200	903	0	0	0	0	0	0	0	603	903	0
680	1	0	0	0	0	0	0	200	300	0	0	0	0	0	0	0	200	903	0	0	0	0	0	0	0	603	903	0
680	2	0	0	0	0	0	0	200	300	0	0	0	0	0	0	0	200	903	0	0	0	0	0	0	0	603	903	0
680	3	0	0	0	0	0	0	200	300	0	0	0	0	0	0	0	200	903	0	0	0	0	0	0	0	603	903	0
680	4	0	0	0	0	0	0	200	300	0	0	0	0	0	0	0	200	903	0	0	0	0	0	0	0	603	903	0
680	5	0	0	0	0	0	0	200	300	0	0	0	0	0	0	0	200	903	0	0	0	0	0	0	0	603	903	0
680	6	0	0	0	0	0	0	200	300	0	0	0	0	0	0	0	200	903	0	0	0	0	0	0	0	603	903	0
680	7	0	0	0	0	0	0	200	300	0	0	0	0	0	0	0	200	903	0	0	0	0	0	0	0	603	903	0
680	8	0	0	0	0	0	0	200	300	0	0	0	0	0	0	0	200	903	0	0	0	0	0	0	0	603	903	0
680	9	0	0	0	0	0	0	200	300	0	0	0	0	0	0	0	200	903	0	0	0	0	0	0	0	603	903	0
681	0	0	0	0	0	0	0	200	300	0	0	0	0	0	0	0	200	903	0	0	0	0	0	0	0	603	903	0
681	1	0	0	0	0	0	0	200	300	0	0	0	0	0	0	0	200	903	0	0	0	0	0	0	0	603	903	0
681	2	0	0	0	0	0	0	200	300	0	0	0	0	0	0	0	200	903	0	0	0	0	0	0	0	603	903	0
681	3	0	0	0	0	0	0	200	300	0	0	0	0	0	0	0	200	903	0	0	0	0	0	0	0	603	903	0
681	4	0	0	0	0	0	0	200	300	0	0	0	0	0	0	0	200	903	0	0	0	0	0	0	0	603	903	0
681	5	0	0	0	0	0	0	200	300	0	0	0	0	0	0	0	200	903	0	0	0	0	0	0	0	603	903	0
681	6	0	0	0	0	0	0	200	300	0	0	0	0	0	0	0	200	903	0	0	0	0	0	0	0	603	903	0
681	7	0	0	0	0	0	0	200	300	0	0	0	0	0	0	0	200	903	0	0	0	0	0	0	0	603	903	0
681	8	0	0	0	0	0	0	200	300	0	0	0	0	0	0	0	200	903	0	0	0	0	0	0	0	603	903	0
681	9	0	0	0	0	0	0	200	300	0	0	0	0	0	0	0	200	903	0	0	0	0	0	0	0	603	903	0
682	0	0	0	0	0	0	0	200	300	0	0	0	0	0	0	0	200	903	0	0	0	0	0	0	0	603	903	0
682	1	0	0	0	0	0	0	200	300	0	0	0	0	0	0	0	200	903	0	0	0	0	0	0	0	603	903	0
682	2	0	0	0	0	0	0	200	300	0	0	0	0	0	0	0	200	903	0	0	0	0	0	0	0	603	903	0
682	3	0	0	0	0	0	0	200	300	0	0	0	0	0	0	0	200	903	0	0	0	0	0	0	0	603	903	0
682	4	0	0	0	0	0	0	200	300	0	0	0	0	0	0	0	200	903	0	0	0	0	0	0	0	603	903	0
682	5	0	0	0	0	0	0	200	300	0	0	0	0	0	0	0	200	903	0	0	0	0	0	0	0	603	903	0
682	6	0	0	0	0	0	0	200	300	0	0	0	0	0	0	0	200	903	0	0	0	0	0	0	0	603	903	0
682	7	0	0	0	0	0	0	200	300	0	0	0	0	0	0	0	200	903	0	0	0	0	0	0	0	603	903	0
682	8	0	0	0	0	0	0	200	300	0	0	0	0	0	0	0	200	903	0	0	0	0	0	0	0	603	903	0
682	9	0	0	0	0	0	0	200	300	0	0	0	0	0	0	0	200	903	0	0	0	0	0	0	0	603	903	0
683	0	0	0	0	0	0	0	200	300	0	0	0	0	0	0	0	200	903	0	0	0	0	0	0	0	603	903	0
683	1	0	0	0	0	0	0	200	300	0	0	0	0	0	0	0	200	903	0	0	0	0	0	0	0	603	903	0
683	2	0	0	0	0	0	0	200	300	0	0	0	0	0	0	0	200	903	0	0	0	0	0	0	0	603	903	0
683	3	0	0	0	0	0	0	200	300	0	0	0	0	0	0	0	200	903	0	0	0	0	0	0	0	603	903	0
683	4	0	0	0	0	0	0	200	300	0	0	0	0	0	0	0	200	903	0	0	0	0	0	0	0	603	903	0
683	5	0	0	0	0	0	0	200	300	0	0	0	0	0	0	0	200	903	0	0	0	0	0	0	0	603	903	0
683	6	0	0	0	0	0	0	200	300	0	0	0	0	0	0	0	200	903	0	0	0	0	0	0	0	603	903	0
683	7	0	0	0	0	0	0	200	300	0	0	0	0	0	0	0	200	903	0	0	0	0	0	0	0	603	903	0
683	8	0	0	0	0	0	0	200	300	0	0	0	0	0	0	0	200	903	0	0	0	0	0	0	0	603	903	0
683	9	0	0	0	0	0	0	200	300	0	0	0	0	0	0	0	200	903	0	0	0	0	0	0	0	603	903	0
684	0	0	0	0	0	0	0	200	300	0	0	0	0	0	0	0	200	903	0	0	0	0	0	0	0	603	903	0
684	1	0	0	0	0	0	0	200	300	0	0	0	0	0	0	0	200	903	0	0	0	0	0	0	0	603	903	0
684	2	0	0	0	0	0	0	200	300	0	0	0	0	0	0	0	200	903	0	0	0	0	0	0	0	603	903	0
684	3	0	0	0	0	0	0	200	300	0	0	0	0	0	0	0	200	903	0	0	0	0	0	0	0	603	903	0
684	4	0	0	0	0	0	0	200	300	0	0	0	0	0	0	0	200	903	0	0	0	0	0	0	0	603	903	0
684	5	0	0	0	0	0	0	200	300	0	0	0	0	0	0	0	200	903	0	0	0	0	0	0	0	603	903	0
684	6	0	0	0	0	0	0	200	300	0	0	0	0	0	0	0	200	903	0	0	0	0	0	0	0	603	903	0
684	7	0	0	0	0	0	0	200	300	0	0	0	0	0	0	0	200	903	0	0	0	0	0	0	0	603	903	0
684	8	0	0	0	0	0	0	200	300	0	0	0	0	0	0	0	200	903	0	0	0	0	0	0	0	603	903	0
684	9	0	0	0	0	0	0	200	300	0	0	0	0	0	0	0	200	903	0	0	0	0	0	0	0	603	903	0
685	0	0	0	0	0	0	0	200	300	0	0	0	0	0	0	0	200	903	0	0	0	0	0	0	0	603	903	0
685	1	0	0	0	0	0	0	200	300	0	0	0	0	0	0	0	200	903	0	0	0	0	0	0	0	603	903	0
685	2	0	0	0	0	0	0	200	300	0	0	0	0	0	0	0	200	903	0	0	0	0	0	0	0	603	903	0
685	3	0	0	0	0	0	0	200	300	0	0	0	0	0	0	0	200	903	0	0	0	0	0	0	0	603	903	0
685	4	0	0	0	0	0	0	200	300	0	0	0	0	0	0	0	200	903	0	0	0	0	0	0	0	603	903	0
685	5	0	0	0	0	0	0	200	300	0	0	0	0	0	0	0	200	903	0	0	0	0	0	0	0	603	903	0
685	6	0	0	0	0	0	0	200	300	0	0	0	0	0	0	0	200	903	0	0	0	0	0	0	0	603	903	0
685	7	0	0	0	0	0	0	200	300	0	0	0	0	0	0	0	200	903	0	0	0	0	0	0	0	603	903	0
685	8	0	0	0	0	0	0	200	300	0	0	0	0	0	0	0	200	903	0	0	0	0	0	0	0	603	903	0
685	9	0	0	0	0	0	0	200	300	0	0	0	0	0	0	0	200	903	0	0	0	0	0	0	0	603	903	0
686	0	0	0	0	0	0	0	200	300	0	0	0	0	0	0	0	200	903	0	0	0	0	0	0	0	603	903	0
686	1	0	0	0	0	0	0	200	300	0	0	0	0	0	0	0	200	903	0	0	0	0	0	0	0	603	903	0
686	2	0	0	0	0	0	0	200	300	0	0	0	0	0	0	0	200	903	0	0	0	0	0	0	0	603	903	0
686	3	0	0	0	0	0	0	200	300	0	0	0	0	0	0	0	200	903	0	0	0	0	0	0	0	603	903	0
686	4	0	0	0	0	0	0	200	300	0	0	0	0	0	0	0	200	903	0	0	0	0	0	0	0	603	903	0
686	5	0	0	0	0	0	0	200	300	0	0	0	0	0	0	0	200	903	0	0	0	0	0	0	0	603	903	0
686	6	0	0	0	0	0	0	200	300	0	0	0	0	0	0	0	200	903	0	0	0	0	0	0	0	603	903	0
686	7	0	0	0	0	0	0	200	300	0	0	0	0	0	0	0	200	903	0	0	0	0	0	0	0	603	903	0
686	8	0	0	0	0	0	0	200	300	0	0	0	0	0	0	0	200	903	0	0	0	0	0	0	0	603	903	0
686	9	0	0	0	0	0	0	200	300	0	0	0	0	0	0	0	200	903	0	0	0	0	0	0	0	603	903	0
687	0	0	0	0	0	0	0	200	300	0	0	0	0	0	0	0	200	903	0	0	0	0	0	0	0	603	903	0
687	1	0	0	0	0	0	0	200	300	0	0	0	0	0	0	0	200	903	0	0	0	0	0	0	0	603	903	0
687	2	0	0	0	0	0	0	200	300	0	0	0	0	0	0	0	200	903	0	0	0	0	0	0	0	603	903	0
687	3	0	0	0	0	0	0	200	300	0	0	0	0	0	0	0	200	903	0	0	0	0	0	0	0	603	903	0
687	4	0	0	0	0	0	0	200	300	0	0	0	0	0	0	0	200	903	0	0	0	0	0	0	0	603	903	0
687	5	0	0	0	0	0	0	200	300	0	0	0	0	0	0	0	200	903	0	0	0	0	0	0	0	603	903	0
687	6	0	0	0	0	0	0	200	300	0	0	0	0	0	0	0	200	903	0	0	0	0	0	0	0	603	903	0
687	7	0	0	0	0	0	0	200	300	0	0	0	0	0	0	0	200	903	0	0	0	0	0	0	0	603	903	0
687	8	0	0	0	0	0	0	200	300	0	0	0	0	0	0	0	200	903	0	0	0	0	0	0	0	603	903	0
687	9	0	0	0	0	0	0	200	300	0	0	0	0	0	0	0	200	903	0	0	0	0	0	0	0	603	903	0
688	0	0	0	0	0	0	0	200	300	0	0	0	0	0	0	0	200	903	0	0	0	0	0	0	0	603	903	0
688	1	0	0	0	0	0	0	200	300	0	0	0	0	0	0	0	200	903	0	0	0	0	0	0	0	603	903	0
688	2	0	0	0	0	0	0	200	300	0	0	0	0	0	0	0	200	903	0	0	0	0	0	0	0	603	903	0
688	3	0	0	0	0	0	0	200	300	0	0	0	0	0	0	0	200	903	0	0	0	0	0	0	0	603	903	0
688	4	0	0	0	0	0	0	200	300	0	0	0	0	0	0	0	200	903	0	0	0	0	0	0	0	603	903	0
688	5	0	0	0	0	0	0	200	300	0	0	0	0	0	0	0	200	903	0	0	0	0	0	0	0	603	903	0
688	6	0	0	0	0	0	0	200	300	0	0	0	0	0	0	0	200	903	0	0	0	0	0	0	0	603	903	0
688	7	0	0	0	0	0	0	200	300	0	0	0	0	0	0	0	200	903	0	0	0	0	0	0	0	603	903	0
688	8	0	0	0	0	0	0	200	300	0	0	0	0	0	0	0	200	903	0	0	0	0	0	0	0	603	903	0
688	9	0	0	0	0	0	0	200	300	0	0	0	0	0	0	0	200	903	0	0	0	0	0	0	0	603	903	0
689	0	0	0	0	0	0	0	200	300	0	0	0	0	0	0	0	200	903	0	0	0	0	0	0	0	603	903	0
689	1	0	0	0	0	0	0	200	300	0	0	0	0	0	0	0	200	903	0	0	0	0	0	0	0	603	903	0
689	2	0	0	0	0	0	0	200	300	0	0	0	0	0	0	0	200	903	0	0	0	0	0	0	0	603	903	0
689	3	0	0	0	0	0	0	200	300	0	0	0	0	0	0	0	200	903	0	0	0	0	0	0	0	603	903	0
689	4	0	0	0	0	0	0	200	300	0	0	0	0	0	0	0	200	903	0	0	0	0	0	0	0	603	903	0
689	5	0	0	0	0	0	0	200	300	0	0	0	0	0	0	0	200	903	0	0	0	0	0	0	0	603	903	0
689	6	0	0	0	0	0	0	200	300	0	0	0	0	0	0	0	200	903	0	0	0	0	0	0	0	603	903	0
689	7	0	0	0	0	0	0	200	300	0	0	0	0	0	0	0	200	903	0	0	0	0	0	0	0	603	903	0
689	8	0	0	0	0	0	0	200	300	0	0	0	0	0	0	0	200	903	0	0	0	0	0	0	0	603	903	0
689	9	0	0	0	0	0	0	200	300	0	0	0	0	0	0	0	200	903	0	0	0	0	0	0	0	603	903	0
690	0	0	0	0	0	0	0	200	300	0	0	0	0	0	0	0	200	903	0	0	0	0	0	0	0	603	903	0
690	1	0	0	0	0	0	0	200	300	0	0	0	0	0	0	0	200	903	0	0	0	0	0	0	0	603	903	0
690	2	0	0	0	0	0	0	200	300	0	0	0	0	0	0	0	200	903	0	0	0	0	0	0	0	603	903	0
690	3	0	0	0	0	0	0	200	300	0	0	0	0	0	0	0	200	903	0	0	0	0	0	0	0	603	903	0
690	4	0	0	0	0	0	0	200	300	0	0	0	0	0	0	0	200	903	0	0	0	0	0	0	0	603	903	0
690	5	0	0	0	0	0	0	200	300	0	0	0	0	0	0	0	200	903	0	0	0	0	0	0	0	603	903	0
690	6	0	0	0	0	0	0	200	300	0	0	0	0	0	0	0	200	903	0	0	0	0	0	0	0	603	903	0
690	7	0	0	0	0	0	0	200	300	0	0	0	0	0	0	0	200	903	0	0	0	0	0	0	0	603	903	0
690	8	0	0	0	0	0	0	200	300	0	0	0	0	0	0	0	200	903	0	0	0	0	0	0	0	603	903	0
690	9	0	0	0	0	0	0	200	300	0	0	0	0	0	0	0	200	903	0	0	0	0	0	0	0	603	903	0
691	0	0	0	0	0	0	0	200	300	0	0	0	0	0	0	0	200	903	0	0	0	0	0	0	0	603	903	0
691	1	0	0	0	0	0	0	200	300	0	0	0	0	0	0	0	200	903	0	0	0	0	0	0	0	603	903	0
691	2	0	0	0	0	0	0	200	300	0	0	0	0	0	0	0	200	903	0	0	0	0	0	0	0	603	903	0
691	3	0	0	0	0	0	0	200	300	0	0	0	0	0	0	0	200	903	0	0	0	0	0	0	0	603	903	0
691	4	0	0	0	0	0	0	200	300	0	0	0	0	0	0	0	200	903	0	0	0	0	0	0	0	603	903	0
691	5	0	0	0	0	0	0	200	300	0	0	0	0	0	0	0	200	903	0	0	0	0	0	0	0	603	903	0
691	6	0	0	0	0	0	0	200	300	0	0	0	0	0	0	0	200	903	0	0	0	0	0	0	0	603	903	0
691	7	0	0	0	0	0	0	200	300	0	0	0	0	0	0	0	200	903	0	0	0	0	0	0	0	603	903	0
691	8	0	0	0	0	0	0	200	300	0	0	0	0	0	0	0	200	903	0	0	0	0	0	0	0	603	903	0
691	9	0	0	0	0	0	0	200	300	0	0	0	0	0	0	0	200	903	0	0	0	0	0	0	0	603	903	0
692	0	0	0	0	0	0	0	200	300	0	0	0	0	0	0	0	200	903	0	0	0	0	0	0	0	603	903	0
692	1	0	0	0	0	0	0	200	300	0	0	0	0	0	0	0	200	903	0	0	0	0	0	0	0	603	903	0
692	2	0	0	0	0	0	0	200	300	0	0	0	0	0	0	0	200	903	0	0	0	0	0	0	0	603	903	0
692	3	0	0	0	0	0	0	200	300	0	0	0	0	0	0	0	200	903	0	0	0	0	0	0	0	603	903	0
692	4	0	0	0	0	0	0	200	300	0	0	0	0	0	0	0	200	903	0	0	0	0	0	0	0	603	903	0
692	5	0	0	0	0	0	0	200	300	0	0	0	0	0	0	0	200	903	0	0	0	0	0	0	0	603	903	0
692	6	0	0	0	0	0	0	200	300	0	0	0	0	0	0	0	200	903	0	0	0	0	0	0	0	603	903	0
692	7	0	0	0	0	0	0	200	300	0	0	0	0	0	0	0	200	903	0	0	0	0	0	0	0	603	903	0
692	8	0	0	0	0	0	0	200	300	0	0	0	0	0	0	0	200	903	0	0	0	0	0	0	0	603	903	0
692	9	0	0	0	0	0	0	200	300	0	0	0	0	0	0	0	200	903	0	0	0	0	0	0	0	603	903	0
693	0	0	0	0	0	0	0	200	300	0	0	0	0	0	0	0	200	903	0	0	0	0	0	0	0	603	903	0
693	1	0	0	0	0	0	0	200	300	0	0	0	0	0	0	0	200	903	0	0	0	0	0	0	0	603	903	0
693	2	0	0	0	0	0	0	200	300	0	0	0	0	0	0	0	200	903	0	0	0	0	0	0	0	603	903	0
693	3	0	0	0	0	0	0	200	300	0	0	0	0	0	0	0	200	903	0	0	0	0	0	0	0	603	903	0
693	4	0	0	0	0	0	0	200	300	0	0	0	0	0	0	0	200	903	0	0	0	0	0	0	0	603	903	0
693	5	0	0	0	0	0	0	200	300	0	0	0	0	0	0	0	200	903	0	0	0	0	0	0	0	603	903	0
693	6	0	0	0	0	0	0	200	300	0	0	0	0	0	0	0	200	903	0	0	0	0	0	0	0	603	903	0
693	7	0	0	0	0	0	0	200	300	0	0	0	0	0	0	0	200	903	0	0	0	0	0	0	0	603	903	0
693	8	0	0	0	0	0	0	200	300	0	0	0	0	0	0	0	200	903	0	0	0	0	0	0	0	603	903	0
693	9	0	0	0	0	0	0	200	300	0	0	0	0	0	0	0	200	903	0	0	0	0	0	0	0	603	903	0
694	0	0	0	0	0	0	0	200	300	0	0	0	0	0	0	0	200	903	0	0	0	0	0	0	0	603	903	0
694	1	0	0	0	0	0	0	200	300	0	0	0	0	0	0	0	200	903	0	0	0	0	0	0	0	603	903	0
694	2	0	0	0	0	0	0	200	300	0	0	0	0	0	0	0	200	903	0	0	0	0	0	0	0	603	903	0
694	3	0	0	0	0	0	0	200	300	0	0	0	0	0	0	0	200	903	0	0	0	0	0	0	0	603	903	0
694	4	0	0	0	0	0	0	200	300	0	0	0	0	0	0	0	200	903	0	0	0	0	0	0	0	603	903	0
694	5	0	0	0	0	0	0	200	300	0	0	0	0	0	0	0	200	903	0	0	0	0	0	0	0	603	903	0
694	6	0	0	0	0	0	0	200	300	0	0	0	0	0	0	0	200	903	0	0	0	0	0	0	0	603	903	0
694	7	0	0	0	0	0	0	200	300	0	0	0	0	0	0	0	200	903	0	0	0	0	0	0	0	603	903	0
694	8	0	0	0	0	0	0	200	300	0	0	0	0	0	0	0	200	903	0	0	0	0	0	0	0	603	903	0
694	9	0	0	0	0	0	0	200	300	0	0	0	0	0	0	0	200	903	0	0	0	0	0	0	0	603	903	0
695	0	0	0	0	0	0	0	200	300	0	0	0	0	0	0	0	200	903	0	0	0	0	0	0	0	603	903	0
695	1	0	0	0	0	0	0	200	300	0	0	0	0	0	0	0	200	903	0	0	0	0	0	0	0	603	903	0
695	2	0	0	0	0	0	0	200	300	0	0	0	0	0	0	0	200	903	0	0	0	0	0	0	0	603	903	0
695	3	0	0	0	0	0	0	200	300	0	0	0	0	0	0	0	200	903	0	0	0	0	0	0	0	603	903	0
695	4	0	0	0	0	0	0	200	300	0	0	0	0	0	0	0	200	903	0	0	0	0	0	0	0	603	903	0
695	5	0	0	0	0	0	0	200	300	0	0	0	0	0	0	0	200	903	0	0	0	0	0	0	0	603	903	0
695	6	0	0	0	0	0	0	200	300	0	0	0	0	0	0	0	200	903	0	0	0	0	0	0	0	603	903	0
695	7	0	0	0	0	0	0	200	300	0	0	0	0	0	0	0	200	903	0	0	0	0	0	0	0	603	903	0
695	8	0	0	0	0	0	0	200	300	0	0	0	0	0	0	0	200	903	0	0	0	0	0	0	0	603	903	0
695	9	0	0	0	0	0	0	200	300	0	0	0	0	0	0	0	200	903	0	0	0	0	0	0	0	603	903	0
696	0	0	0	0	0	0	0	200	300	0	0	0	0	0	0	0	200	903	0	0	0	0	0	0	0	603	903	0
696	1	0	0	0	0	0	0	200	300	0	0	0	0	0	0	0	200	903	0	0	0	0	0	0	0	603	903	0
696	2	0	0	0	0	0	0	200	300	0	0	0	0	0	0	0	200	903	0	0	0	0	0	0	0	603	903	0
696	3	0	0	0	0	0	0	200	300	0	0	0	0	0	0	0	200	903	0	0	0	0	0	0	0	603	903	0
696	4	0	0	0	0	0	0	200	300	0	0	0	0	0	0	0	200	903	0	0	0	0	0	0	0	603	903	0
696	5	0	0	0	0	0	0	200	300	0	0	0	0	0	0	0	200	903	0	0	0	0	0	0	0	603	903	0
696	6	0	0	0	0	0	0	200	300	0	0	0	0	0	0	0	200	903	0	0	0	0	0	0	0	603	903	0
696	7	0	0	0	0	0	0	200	300	0	0	0	0	0	0	0	200	903	0	0	0	0	0	0	0	603	903	0
696	8	0	0	0	0	0	0	200	300	0	0	0	0	0	0	0	200	903	0	0	0	0	0	0	0	603	903	0
696	9	0	0	0	0	0	0	200	300	0	0	0	0	0	0	0	200	903	0	0	0	0	0	0	0	603	903	0
697	0	0	0	0	0	0	0	200	300	0	0	0	0	0	0	0	200	903	0	0	0	0	0	0	0	603	903	0
697	1	0	0	0	0	0	0	200	300	0	0	0	0	0	0	0	200	903	0	0	0	0	0	0	0	603	903	0
697	2	0	0	0	0	0	0	200	300	0	0	0	0	0	0	0	200	903	0	0	0	0	0	0	0	603	903	0
697	3	0	0	0	0	0	0	200	300	0	0	0	0	0	0	0	200	903	0	0	0	0	0	0	0	603	903	0
697	4	0	0	0	0	0	0	200	300	0	0	0	0	0	0	0	200	903	0	0	0	0	0	0	0	603	903	0
697	5	0	0	0	0	0	0	200	300	0	0	0	0	0	0	0	200	903	0	0	0	0	0	0	0	603	903	0
697	6	0	0	0	0	0	0	200	300	0	0	0	0	0	0	0	200	903	0	0	0	0	0	0	0	603	903	0
697	7	0	0	0	0	0	0	200	300	0	0	0	0	0	0	0	200	903	0	0	0	0	0	0	0	603	903	0
697	8	0	0	0	0	0	0	200	300	0	0	0	0	0	0	0	200	903	0	0	0	0	0	0	0	603	903	0
697	9	0	0	0	0	0	0	200	300	0	0	0	0	0	0	0	200	903	0	0	0	0	0	0	0	603	903	0
698	0	0	0	0	0	0	0	200	300	0	0	0	0	0	0	0	200	903	0	0	0	0	0	0	0	603	903	0
698	1	0	0	0	0	0	0	200	300	0	0	0	0	0	0	0	200	903	0	0	0	0	0	0	0	603	903	0
698	2	0	0	0	0	0	0	200	300	0	0	0	0	0	0	0	200	903	0	0	0	0	0	0	0	603	903	0
698	3	0	0	0	0	0	0	200	300	0	0	0	0	0	0	0	200	903	0	0	0	0	0	0	0	603	903	0
698	4	0	0	0	0	0	0	200	300	0	0	0	0	0	0	0	200	903	0	0	0	0	0	0	0	603	903	0
698	5	0	0	0	0	0	0	200	300	0	0	0	0	0	0	0	200	903	0	0	0	0	0	0	0	603	903	0
698	6	0	0	0	0	0	0	200	300	0	0	0	0	0	0	0	200	903	0	0	0	0	0	0	0	603	903	0
698	7	0	0	0	0	0	0	200	300	0	0	0	0	0	0	0	200	903	0	0	0	0	0	0	0	603	903	0
698	8	0	0	0	0	0	0	200	300	0	0	0	0	0	0	0	200	903	0	0	0	0	0	0	0	603	903	0
698	9	0	0	0	0	0	0	200	300	0	0	0	0	0	0	0	200	903	0	0	0	0	0	0	0	603	903	0
699	0	0	0	0	0	0	0	200	300	0	0	0	0	0	0	0	200	903	0	0	0	0	0	0	0	603	903	0
699	1	0	0	0	0	0	0	200	300	0	0	0	0	0	0	0	200	903	0	0	0	0	0	0	0	603	903	0
699	2	0	0	0	0	0	0	200	300	0	0	0	0	0	0	0	200	903	0	0	0	0	0	0	0	603	903	0
699	3	0	0	0	0	0	0	200	300	0	0	0	0	0	0	0	200	903	0	0	0	0	0	0	0	603	903	0
699	4	0	0	0	0	0	0	200	300	0	0	0	0	0	0	0	200	903	0	0	0	0	0	0	0	603	903	0
699	5	0	0	0	0	0	0	200	300	0	0	0	0	0	0	0	200	903	0	0	0	0	0	0	0	603	903	0
699	6	0	0	0	0	0	0	200	300	0	0	0	0	0	0	0	200	903	0	0	0	0	0	0	0	603	903	0
699	7	0	0	0	0	0	0	200	300	0	0	0	0	0	0	0	200	903	0	0	0	0	0	0	0	603	903	0
699	8	0	0	0	0	0	0	200	300	0	0	0	0	0	0	0	200	903	0	0	0	0	0	0	0	603	903	0
699	9	0	0	0	0	0	0	200	300	0	0	0	0	0	0	0	200	903	0	0	0	0	0	0	0	603	903	0
700	0	0	0	0	0	0	0	200	300	0	0	0	0	0	0	0	200	903	0	0	0	0	0	0	0	603	903	0
700	1	0	0	0	0	0	0	200	300	0	0	0	0	0	0	0	200	903	0	0	0	0	0	0	0	603	903	0
700	2	0	0	0	0	0	0	200	300	0	0	0	0	0	0	0	200	903	0	0	0	0	0	0	0	603	903	0
700	3	0	0	0	0	0	0	200	300	0	0	0	0	0	0	0	200	903	0	0	0	0	0	0	0	603	903	0
700	4	0	0	0	0	0	0	200	300	0	0	0	0	0	0	0	200	903	0	0	0	0	0	0	0	603	903	0
700	5	0	0	0	0	0	0	200	300	0	0	0	0	0	0	0	200	903	0	0	0	0	0	0	0	603	903	0
700	6	0	0	0	0	0	0	200	300	0	0	0	0	0	0	0	200	903	0	0	0	0	0	0	0	603	903	0
700	7	0	0	0	0	0	0	200	300	0	0	0	0	0	0	0	200	903	0	0	0	0	0	0	0	603	903	0
700	8	0	0	0	0	0	0	200	300	0	0	0	0	0	0	0	200	903	0	0	0	0	0	0	0	603	903	0
700	9	0	0	0	0	0	0	200	300	0	0	0	0	0	0	0	200	903	0	0	0	0	0	0	0	603	903	0
701	0	0	0	0	0	0	0	200	300	0	0	0	0	0	0	0	200	903	0	0	0	0	0	0	0	603	903	0
701	1	0	0	0	0	0	0	200	300	0	0	0	0	0	0	0	200	903	0	0	0	0	0	0	0	603	903	0
701	2	0	0	0	0	0	0	200	300	0	0	0	0	0	0	0	200	903	0	0	0	0	0	0	0	603	903	0
701	3	0	0	0	0	0	0	200	300	0	0	0	0	0	0	0	200	903	0	0	0	0	0	0	0	603	903	0
701	4	0	0	0	0	0	0	200	300	0	0	0	0	0	0	0	200	903	0	0	0	0	0	0	0	603	903	0
701	5	0	0	0	0	0	0	200	300	0	0	0	0	0	0	0	200	903	0	0	0	0	0	0	0	603	903	0
701	6	0	0	0	0	0	0	200	300	0	0	0	0	0	0	0	200	903	0	0	0	0	0	0	0	603	903	0
701	7	0	0	0	0	0	0	200	300	0	0	0	0	0	0	0	200	903	0	0	0	0	0	0	0	603	903	0
701	8	0	0	0	0	0	0	200	300	0	0	0	0	0	0	0	200	903	0	0	0	0	0	0	0	603	903	0
701	9	0	0	0	0	0	0	200	300	0	0	0	0	0	0	0	200	903	0	0	0	0	0	0	0	603	903	0
702	0	0	0	0	0	0	0	200	300	0	0	0	0	0	0	0	200	903	0	0	0	0	0	0	0	603	903	0
702	1	0	0	0	0	0	0	200	300	0	0	0	0	0	0	0	200	903	0	0	0	0	0	0	0	603	903	0
702	2	0	0	0	0	0	0	200	300	0	0	0	0	0	0	0	200	903	0	0	0	0	0	0	0	603	903	0
702	3	0	0	0	0	0	0	200	300	0	0	0	0	0	0	0	200	903	0	0	0	0	0	0	0	603	903	0
702	4	0	0	0	0	0	0	200	300	0	0	0	0	0	0	0	200	903	0	0	0	0	0	0	0	603	903	0
702	5	0	0	0	0	0	0	200	300	0	0	0	0	0	0	0	200	903	0	0	0	0	0	0	0	603	903	0
702	6	0	0	0	0	0	0	200	300	0	0	0	0	0	0	0	200	903	0	0	0	0	0	0	0	603	903	0
702	7	0	0	0	0	0	0	200	300	0	0	0	0	0	0	0	200	903	0	0	0	0	0	0	0	603	903	0
702	8	0	0	0	0	0	0	200	300	0	0	0	0	0	0	0	200	903	0	0	0	0	0	0	0	603	903	0
702	9	0	0	0	0	0	0	200	300	0	0	0	0	0	0	0	200	903	0	0	0	0	0	0	0	603	903	0
703	0	0	0	0	0	0	0	200	300	0	0	0	0	0	0	0	200	903	0	0	0	0	0	0	0	603	903	0
703	1	0	0	0	0	0	0	200	300	0	0	0	0	0	0	0	200	903	0	0	0	0	0	0	0	603	903	0
703	2	0	0	0	0	0	0	200	300	0	0	0	0	0	0	0	200	903	0	0	0	0	0	0	0	603	903	0
703	3	0	0	0	0	0	0	200	300	0	0	0	0	0	0	0	200	903	0	0	0	0	0	0	0	603	903	0
703	4	0	0	0	0	0	0	200	300	0	0	0	0	0	0	0	200	903	0	0	0	0	0	0	0	603	903	0
703	5	0	0	0	0	0	0	200	300	0	0	0	0	0	0	0	200	903	0	0	0	0	0	0	0	603	903	0
703	6	0	0	0	0	0	0	200	300	0	0	0	0	0	0	0	200	903	0	0	0	0	0	0	0	603	903	0
703	7	0	0	0	0	0	0	200	300	0	0	0	0	0	0	0	200	903	0	0	0	0	0	0	0	603	903	0
703	8	0	0	0	0	0	0	200	300	0	0	0	0	0	0	0	200	903	0	0	0	0	0	0	0	603	903	0
703	9	0	0	0	0	0	0	200	300	0	0	0	0	0	0	0	200	903	0	0	0	0	0	0	0	603	903	0
704	0	0	0	0	0	0	0	200	300	0	0	0	0	0	0	0	200	903	0	0	0	0	0	0	0	603	903	0
704	1	0	0	0	0	0	0	200	300	0	0	0	0	0	0	0	200	903	0	0	0	0	0	0	0	603	903	0
704	2	0	0	0	0	0	0	200	300	0	0	0	0	0	0	0	200	903	0	0	0	0	0	0	0	603	903	0
704	3	0	0	0	0	0	0	200	300	0	0	0	0	0	0	0	200	903	0	0	0	0	0	0	0	603	903	0
704	4	0	0	0	0	0	0	200	300	0	0	0	0	0	0	0	200	903	0	0	0	0	0	0	0	603	903	0
704	5	0	0	0	0	0	0	200	300	0	0	0	0	0	0	0	200	903	0	0	0	0	0	0	0	603	903	0
704	6	0	0	0	0	0	0	200	300	0	0	0	0	0	0	0	200	903	0	0	0	0	0	0	0	603	903	0
704	7	0	0	0	0	0	0	200	300	0	0	0	0	0	0	0	200	903	0	0	0	0	0	0	0	603	903	0
704	8	0	0	0	0	0	0	200	300	0	0	0	0	0	0	0	200	903	0	0	0	0	0	0	0	603	903	0
704	9	0	0	0	0	0	0	200	300	0	0	0	0	0	0	0	200	903	0	0	0	0	0	0	0	603	903	0
705	0	0	0	0	0	0	0	200	300	0	0	0	0	0	0	0	200	903	0	0	0	0	0	0	0	603	903	0
705	1	0	0	0	0	0	0	200	300	0	0	0	0	0	0	0	200	903	0	0	0	0	0	0	0	603	903	0
705	2	0	0	0	0	0	0	200	300	0	0	0	0	0	0	0	200	903	0	0	0	0	0	0	0	603	903	0
705	3	0	0	0	0	0	0	200	300	0	0	0	0	0	0	0	200	903	0	0	0	0	0	0	0	603	903	0
705	4	0	0	0	0	0	0	200	300	0	0	0	0	0	0	0	200	903	0	0	0	0	0	0	0	603	903	0
705	5	0	0	0	0	0	0	200	300	0	0	0	0	0	0	0	200	903	0	0	0	0	0	0	0	603	903	0
705	6	0	0	0	0	0	0	200	300	0	0	0	0	0	0	0	200	903	0	0	0	0	0	0	0	603	903	0
705	7	0	0	0	0	0	0	200	300	0	0	0	0	0	0	0	200	903	0	0	0	0	0	0	0	603	903	0
705	8	0	0	0	0	0	0	200	300	0	0	0	0	0	0	0	200	903	0	0	0	0	0	0	0	603	903	0
705	9	0	0	0	0	0	0	200	300	0	0	0	0	0	0	0	200	903	0	0	0	0	0	0	0	603	903	0
706	0	0	0	0	0	0	0	200	300	0	0	0	0	0	0	0	200	903	0	0	0	0	0	0	0	603	903	0
706	1	0	0	0	0	0	0	200	300	0	0	0	0	0	0	0	200	903	0	0	0	0	0	0	0	603	903	0
706	2	0	0	0	0	0	0	200	300	0	0	0	0	0	0	0	200	903	0	0	0	0	0	0	0	603	903	0
706	3	0	0	0	0	0	0	200	300	0	0	0	0	0	0	0	200	903	0	0	0	0	0	0	0	603	903	0
706	4	0	0	0	0	0	0	200	300	0	0	0	0	0	0	0	200	903	0	0	0	0	0	0	0	603	903	0
706	5	0	0	0	0	0	0	200	300	0	0	0	0	0	0	0	200	903	0	0	0	0	0	0	0	603	903	0
706	6	0	0	0	0	0	0	200	300	0	0	0	0	0	0	0	200	903	0	0	0	0	0	0	0	603	903	0
706	7	0	0	0	0	0	0	200	300	0	0	0	0	0	0	0	200	903	0	0	0	0	0	0	0	603	903	0
706	8	0	0	0	0	0	0	200	300	0	0	0	0	0	0	0	200	903	0	0	0	0	0	0	0	603	903	0
706	9	0	0	0	0	0	0	200	300	0	0	0	0	0	0	0	200	903	0	0	0	0	0	0	0	603	903	0
707	0	0	0	0	0	0	0	200	300	0	0	0	0	0	0	0	200	903	0	0	0	0	0	0	0	603	903	0
707	1	0	0	0	0	0	0	200	300	0	0	0	0	0	0	0	200	903	0	0	0	0	0	0	0	603	903	0
707	2	0	0	0	0	0	0	200	300	0	0	0	0	0	0	0	200	903	0	0	0	0	0	0	0	603	903	0
707	3	0	0	0	0	0	0	200	300	0	0	0	0	0	0	0	200	903	0	0	0	0	0	0	0	603	903	0
707	4	0	0	0	0	0	0	200	300	0	0	0	0	0	0	0	200	903	0	0	0	0	0	0	0	603	903	0
707	5	0	0	0	0	0	0	200	300	0	0	0	0	0	0	0	200	903	0	0	0	0	0	0	0	603	903	0
707	6	0	0	0	0	0	0	200	300	0	0	0	0	0	0	0	200	903	0	0	0	0	0	0	0	603	903	0
707	7	0	0	0	0	0	0	200	300	0	0	0	0	0	0	0	200	903	0	0	0	0	0	0	0	603	903	0
707	8	0	0	0	0	0	0	200	300	0	0	0	0	0	0	0	200	903	0	0	0	0	0	0	0	603	903	0
707	9	0	0	0	0	0	0	200	300	0	0	0	0	0	0	0	200	903	0	0	0	0	0	0	0	603	903	0
708	0	0	0	0	0	0	0	200	300	0	0	0	0	0	0	0	200	903	0	0	0	0	0	0	0	603	903	0
708	1	0	0	0	0	0	0	200	300	0	0	0	0	0	0	0	200	903	0	0	0	0	0	0	0	603	903	0
708	2	0	0	0	0	0	0	200	300	0	0	0	0	0	0	0	200	903	0	0	0	0	0	0	0	603	903	0
708	3	0	0	0	0	0	0	200	300	0	0	0	0	0	0	0	200	903	0	0	0	0	0	0	0	603	903	0
708	4	0	0	0	0	0	0	200	300	0	0	0	0	0	0	0	200	903	0	0	0	0	0	0	0	603	903	0
708	5	0	0	0	0	0	0	200	300	0	0	0	0	0	0	0	200	903	0	0	0	0	0	0	0	603	903	0
708	6	0	0	0	0	0	0	200	300	0	0	0	0	0	0	0	200	903	0	0	0	0	0	0	0	603	903	0
708	7	0	0	0	0	0	0	200	300	0	0	0	0	0	0	0	200	903	0	0	0	0	0	0	0	603	903	0
708	8	0	0	0	0	0	0	200	300	0	0	0	0	0	0	0	200	903	0	0	0	0	0	0	0	603	903	0
708	9	0	0	0	0	0	0	200	300	0	0	0	0	0	0	0	200	903	0	0	0	0	0	0	0	603	903	0
709	0	0	0	0	0	0	0	200	300	0	0	0	0	0	0	0	200	903	0	0	0	0	0	0	0	603	903	0
709	1	0	0	0	0	0	0	200	300	0	0	0	0	0	0	0	200	903	0	0	0	0	0	0	0	603	903	0
709	2	0	0	0	0	0	0	200	300	0	0	0	0	0	0	0	200	903	0	0	0	0	0	0	0	603	903	0
709	3	0	0	0	0	0	0	200	300	0	0	0	0	0	0	0	200	903	0	0	0	0	0	0	0	603	903	0
709	4	0	0	0	0	0	0	200	300	0	0	0	0	0	0	0	200	903	0	0	0	0	0	0	0	603	903	0
709	5	0	0	0	0	0	0	200	300	0	0	0	0	0	0	0	200	903	0	0	0	0	0	0	0	603	903	0
709	6	0	0	0	0	0	0	200	300	0	0	0	0	0	0	0	200	903	0	0	0	0	0	0	0	603	903	0
709	7	0	0	0	0	0	0	200	300	0	0	0	0	0	0	0	200	903	0	0	0	0	0	0	0	603	903	0
709	8	0	0	0	0	0	0	200	300	0	0	0	0	0	0	0	200	903	0	0	0	0	0	0	0	603	903	0
709	9	0	0	0	0	0	0	200	300	0	0	0	0	0	0	0	200	903	0	0	0	0	0	0	0	603	903	0
710	0	0	0	0	0	0	0	200	300	0	0	0	0	0	0	0	200	903	0	0	0	0	0	0	0	603	903	0
710	1	0	0	0	0	0	0	200	300	0	0	0	0	0	0	0	200	903	0	0	0	0	0	0	0	603	903	0
710	2	0	0	0	0	0	0	200	300	0	0	0	0	0	0	0	200	903	0	0	0	0	0	0	0	603	903	0
710	3	0	0	0	0	0	0	200	300	0	0	0	0	0	0	0	200	903	0	0	0	0	0	0	0	603	903	0
710	4	0	0	0	0	0	0	200	300	0	0	0	0	0	0	0	200	903	0	0	0	0	0	0	0	603	903	0
710	5	0	0	0	0	0	0	200	300	0	0	0	0	0	0	0	200	903	0	0	0	0	0	0	0	603	903	0
710	6	0	0	0	0	0	0	200	300	0	0	0	0	0	0	0	200	903	0	0	0	0	0	0	0	603	903	0
710	7	0	0	0	0	0	0	200	300	0	0	0	0	0	0	0	200	903	0	0	0	0	0	0	0	603	903	0
710	8	0	0	0	0	0	0	200	300	0	0	0	0	0	0	0	200	903	0	0	0	0	0	0	0	603	903	0
710	9	0	0	0	0	0	0	200	300	0	0	0	0	0	0	0	200	903	0	0	0	0	0	0	0	603	903	0
711	0	0	0	0	0	0	0	200	300	0	0	0	0	0	0	0	200	903	0	0	0	0	0	0	0	603	903	0
711	1	0	0	0	0	0	0	200	300	0	0	0	0	0	0	0	200	903	0	0	0	0	0	0	0	603	903	0
711	2	0	0	0	0	0	0	200	300	0	0	0	0	0	0	0	200	903	0	0	0	0	0	0	0	603	903	0
711	3	0	0	0	0	0	0	200	300	0	0	0	0	0	0	0	200	903	0	0	0	0	0	0	0	603	903	0
711	4	0	0	0	0	0	0	200	300	0	0	0	0	0	0	0	200	903	0	0	0	0	0	0	0	603	903	0
711	5	0	0	0	0	0	0	200	300	0	0	0	0	0	0	0	200	903	0	0	0	0	0	0	0	603	903	0
711	6	0	0	0	0	0	0	200	300	0	0	0	0	0	0	0	200	903	0	0	0	0	0	0	0	603	903	0
711	7	0	0	0	0	0	0	200	300	0	0	0	0	0	0	0	200	903	0	0	0	0	0	0	0	603	903	0
711	8	0	0	0	0	0	0	200	300	0	0	0	0	0	0	0	200	903	0	0	0	0	0	0	0	603	903	0
711	9	0	0	0	0	0	0	200	300	0	0	0	0	0	0	0	200	903	0	0	0	0	0	0	0	603	903	0
712	0	0	0	0	0	0	0	200	300	0	0	0	0	0	0	0	200	903	0	0	0	0	0	0	0	603	903	0
712	1	0	0	0	0	0	0	200	300	0	0	0	0	0	0	0	200	903	0	0	0	0	0	0	0	603	903	0
712	2	0	0	0	0	0	0	200	300	0	0	0	0	0	0	0	200	903	0	0	0	0	0	0	0	603	903	0
712	3	0	0	0	0	0	0	200	300	0	0	0	0	0	0	0	200	903	0	0	0	0	0	0	0	603	903	0
712	4	0	0	0	0	0	0	200	300	0	0	0	0	0	0	0	200	903	0	0	0	0	0	0	0	603	903	0
712	5	0	0	0	0	0	0	200	300	0	0	0	0	0	0	0	200	903	0	0	0	0	0	0	0	603	903	0
712	6	0	0	0	0	0	0	200	300	0	0	0	0	0	0	0	200	903	0	0	0	0	0	0	0	603	903	0
712	7	0	0	0	0	0	0	200	300	0	0	0	0	0	0	0	200	903	0	0	0	0	0	0	0	603	903	0
712	8	0	0	0	0	0	0	200	300	0	0	0	0	0	0	0	200	903	0	0	0	0	0	0	0	603	903	0
712	9	0	0	0	0	0	0	200	300	0	0	0	0	0	0	0	200	903	0	0	0	0	0	0	0	603	903	0
713	0	0	0	0	0	0	0	200	300	0	0	0	0	0	0	0	200	903	0	0	0	0	0	0	0	603	903	0
713	1	0	0	0	0	0	0	200	300	0	0	0	0	0	0	0	200	903	0	0	0	0	0	0	0	603	903	0
713	2	0	0	0	0	0	0	200	300	0	0	0	0	0	0	0	200	903	0	0	0	0	0	0	0	603	903	0
713	3	0	0	0	0	0	0	200	300	0	0	0	0	0	0	0	200	903	0	0	0	0	0	0	0	603	903	0
713	4	0	0	0	0	0	0	200	300	0	0	0	0	0	0	0	200	903	0	0	0	0	0	0	0	603	903	0
713	5	0	0	0	0	0	0	200	300	0	0	0	0	0	0	0	200	903	0	0	0	0	0	0	0	603	903	0
713	6	0	0	0	0	0	0	200	300	0	0	0	0	0	0	0	200	903	0	0	0	0	0	0	0	603	903	0
713	7	0	0	0	0	0	0	200	300	0	0	0	0	0	0	0	200	903	0	0	0	0	0	0	0	603	903	0
713	8	0	0	0	0	0	0	200	300	0	0	0	0	0	0	0	200	903	0	0	0	0	0	0	0	603	903	0
713	9	0	0	0	0	0	0	200	300	0	0	0	0	0	0	0	200	903	0	0	0	0	0	0	0	603	903	0
714	0	0	0	0	0	0	0	200	300	0	0	0	0	0	0	0	200	903	0	0	0	0	0	0	0	603	903	0
714	1	0	0	0	0	0	0	200	300	0	0	0	0	0	0	0	200	903	0	0	0	0	0	0	0	603	903	0
714	2	0	0	0	0	0	0	200	300	0	0	0	0	0	0	0	200	903	0	0	0	0	0	0	0	603	903	0
714	3	0	0	0	0	0	0	200	300	0	0	0	0	0	0	0	200	903	0	0	0	0	0	0	0	603	903	0
714	4	0	0	0	0	0	0	200	300	0	0	0	0	0	0	0	200	903	0	0	0	0	0	0	0	603	903	0
714	5	0	0	0	0	0	0	200	300	0	0	0	0	0	0	0	200	903	0	0	0	0	0	0	0	603	903	0
714	6	0	0	0	0	0	0	200	300	0	0	0	0	0	0	0	200	903	0	0	0	0	0	0	0	603	903	0
714	7	0	0	0	0	0	0	200	300	0	0	0	0	0	0	0	200	903	0	0	0	0	0	0	0	603	903	0
714	8	0	0	0	0	0	0	200	300	0	0	0	0	0	0	0	200	903	0	0	0	0	0	0	0	603	903	0
714	9	0	0	0	0	0	0	200	300	0	0	0	0	0	0	0	200	903	0	0	0	0	0	0	0	603	903	0
715	0	0	0	0	0	0	0	200	300	0	0	0	0	0	0	0	200	903	0	0	0	0	0	0	0	603	903	0
715	1	0	0	0	0	0	0	200	300	0	0	0	0	0	0	0	200	903	0	0	0	0	0	0	0	603	903	0
715	2	0	0	0	0	0	0	200	300	0	0	0	0	0	0	0	200	903	0	0	0	0	0	0	0	603	903	0
715	3	0	0	0	0	0	0	200	300	0	0	0	0	0	0	0	200	903	0	0	0	0	0	0	0	603	903	0
715	4	0	0	0	0	0	0	200	300	0	0	0	0	0	0	0	200	903	0	0	0	0	0	0	0	603	903	0
715	5	0	0	0	0	0	0	200	300	0	0	0	0	0	0	0	200	903	0	0	0	0	0	0	0	603	903	0
715	6	0	0	0	0	0	0	200	300	0	0	0	0	0	0	0	200	903	0	0	0	0	0	0	0	603	903	0
715	7	0	0	0	0	0	0	200	300	0	0	0	0	0	0	0	200	903	0	0	0	0	0	0	0	603	903	0
715	8	0	0	0	0	0	0	200	300	0	0	0	0	0	0	0	200	903	0	0	0	0	0	0	0	603	903	0
715	9	0	0	0	0	0	0	200	300	0	0	0	0	0	0	0	200	903	0	0	0	0	0	0	0	603	903	0
716	0	0	0	0	0	0	0	200	300	0	0	0	0	0	0	0	200	903	0	0	0	0	0	0	0	603	903	0
716	1	0	0	0	0	0	0	200	300	0	0	0	0	0	0	0	200	903	0	0	0	0	0	0	0	603	903	0
716	2	0	0	0	0	0	0	200	300	0	0	0	0	0	0	0	200	903	0	0	0	0	0	0	0	603	903	0
716	3	0	0	0	0	0	0	200	300	0	0	0	0	0	0	0	200	903	0	0	0	0	0	0	0	603	903	0
716	4	0	0	0	0	0	0	200	300	0	0	0	0	0	0	0	200	903	0	0	0	0	0	0	0	603	903	0
716	5	0	0	0	0	0	0	200	300	0	0	0	0	0	0	0	200	903	0	0	0	0	0	0	0	603	903	0
716	6	0	0	0	0	0	0	200	300	0	0	0	0	0	0	0	200	903	0	0	0	0	0	0	0	603	903	0
716	7	0	0	0	0	0	0	200	300	0	0	0	0	0	0	0	200	903	0	0	0	0	0	0	0	603	903	0
716	8	0	0	0	0	0	0	200	300	0	0	0	0	0	0	0	200	903	0	0	0	0	0	0	0	603	903	0
716	9	0	0	0	0	0	0	200	300	0	0	0	0	0	0	0	200	903	0	0	0	0	0	0	0	603	903	0
717	0	0	0	0	0	0	0	200	300	0	0	0	0	0	0	0	200	903	0	0	0	0	0	0	0	603	903	0
717	1	0	0	0	0	0	0	200	300	0	0	0	0	0	0	0	200	903	0	0	0	0	0	0	0	603	903	0
717	2	0	0	0	0	0	0	200	300	0	0	0	0	0	0	0	200	903	0	0	0	0	0	0	0	603	903	0
717	3	0	0	0	0	0	0	200	300	0	0	0	0	0	0	0	200	903	0	0	0	0	0	0	0	603	903	0
717	4	0	0	0	0	0	0	200	300	0	0	0	0	0	0	0	200	903	0	0	0	0	0	0	0	603	903	0
717	5	0	0	0	0	0	0	200	300	0	0	0	0	0	0	0	200	903	0	0	0	0	0	0	0	603	903	0
717	6	0	0	0	0	0	0	200	300	0	0	0	0	0	0	0	200	903	0	0	0	0	0	0	0	603	903	0
717	7	0	0	0	0	0	0	200	300	0	0	0	0	0	0	0	200	903	0	0	0	0	0	0	0	603	903	0
717	8	0	0	0	0	0	0	200	300	0	0	0	0	0	0	0	200	903	0	0	0	0	0	0	0	603	903	0
717	9	0	0	0	0	0	0	200	300	0	0	0	0	0	0	0	200	903	0	0	0	0	0	0	0	603	903	0
718	0	0	0	0	0	0	0	200	300	0	0	0	0	0	0	0	200	903	0	0	0	0	0	0	0	603	903	0
718	1	0	0	0	0	0	0	200	300	0	0	0	0	0	0	0	200	903	0	0	0	0	0	0	0	603	903	0
718	2	0	0	0	0	0	0	200	300	0	0	0	0	0	0	0	200	903	0	0	0	0	0	0	0	603	903	0
718	3	0	0	0	0	0	0	200	300	0	0	0	0	0	0	0	200	903	0	0	0	0	0	0	0	603	903	0
718	4	0	0	0	0	0	0	200	300	0	0	0	0	0	0	0	200	903	0	0	0	0	0	0	0	603	903	0
718	5	0	0	0	0	0	0	200	300	0	0	0	0	0	0	0	200	903	0	0	0	0	0	0	0	603	903	0
718	6	0	0	0	0	0	0	200	300	0	0	0	0	0	0	0	200	903	0	0	0	0	0	0	0	603	903	0
718	7	0	0	0	0	0	0	200	300	0	0	0	0	0	0	0	200	903	0	0	0	0	0	0	0	603	903	0
718	8	0	0	0	0	0	0	200	300	0	0	0	0	0	0	0	200	903	0	0	0	0	0	0	0	603	903	0
718	9	0	0	0	0	0	0	200	300	0	0	0	0	0	0	0	200	903	0	0	0	0	0	0	0	603	903	0
719	0	0	0	0	0	0	0	200	300	0	0	0	0	0	0	0	200	903	0	0	0	0	0	0	0	603	903	0
719	1	0	0	0	0	0	0	200	300	0	0	0	0	0	0	0	200	903	0	0	0	0	0	0	0	603	903	0
719	2	0	0	0	0	0	0	200	300	0	0	0	0	0	0	0	200	903	0	0	0	0	0	0	0	603	903	0
719	3	0	0	0	0	0	0	200	300	0	0	0	0	0	0	0	200	903	0	0	0	0	0	0	0	603	903	0
719	4	0	0	0	0	0	0	200	300	0	0	0	0	0	0	0	200	903	0	0	0	0	0	0	0	603	903	0
719	5	0	0	0	0	0	0	200	300	0	0	0	0	0	0	0	200	903	0	0	0	0	0	0	0	603	903	0
719	6	0	0	0	0	0	0	200	300	0	0	0	0	0	0	0	200	903	0	0	0	0	0	0	0	603	903	0
719	7	0	0	0	0	0	0	200	300	0	0	0	0	0	0	0	200	903	0	0	0	0	0	0	0	603	903	0
719	8	0	0	0	0	0	0	200	300	0	0	0	0	0	0	0	200	903	0	0	0	0	0	0	0	603	903	0
719	9	0	0	0	0	0	0	200	300	0	0	0	0	0	0	0	200	903	0	0	0	0	0	0	0	603	903	0
720	0	0	0	0	0	0	0	200	300	0	0	0	0	0	0	0	200	903	0	0	0	0	0	0	0	603	903	0
720	1	0	0	0	0	0	0	200	300	0	0	0	0	0	0	0	200	903	0	0	0	0	0	0	0	603	903	0
720	2	0	0	0	0	0	0	200	300	0	0	0	0	0	0	0	200	903	0	0	0	0	0	0	0	603	903	0
720	3	0	0	0	0	0	0	200	300	0	0	0	0	0	0	0	200	903	0	0	0	0	0	0	0	603	903	0
720	4	0	0	0	0	0	0	200	300	0	0	0	0	0	0	0	200	903	0	0	0	0	0	0	0	603	903	0
720	5	0	0	0	0	0	0	200	300	0	0	0	0	0	0	0	200	903	0	0	0	0	0	0	0	603	903	0
720	6	0	0	0	0	0	0	200	300	0	0	0	0	0	0	0	200	903	0	0	0	0	0	0	0	603	903	0
720	7	0	0	0	0	0	0	200	300	0	0	0	0	0	0	0	200	903	0	0	0	0	0	0	0	603	903	0
720	8	0	0	0	0	0	0	200	300	0	0	0	0	0	0	0	200	903	0	0	0	0	0	0	0	603	903	0
720	9	0	0	0	0	0	0	200	300	0	0	0	0	0	0	0	200	903	0	0	0	0	0	0	0	603	903	0
721	0	0	0	0	0	0	0	200	300	0	0	0	0	0	0	0	200	903	0	0	0	0	0	0	0	603	903	0
721	1	0	0	0	0	0	0	200	300	0	0	0	0	0	0	0	200	903	0	0	0	0	0	0	0	603	903	0
721	2	0	0	0	0	0	0	200	300	0	0	0	0	0	0	0	200	903	0	0	0	0	0	0	0	603	903	0
721	3	0	0	0	0	0	0	200	300	0	0	0	0	0	0	0	200	903	0	0	0	0	0	0	0	603	903	0
721	4	0	0	0	0	0	0	200	300	0	0	0	0	0	0	0	200	903	0	0	0	0	0	0	0	603	903	0
721	5	0	0	0	0	0	0	200	300	0	0	0	0	0	0	0	200	903	0	0	0	0	0	0	0	603	903	0
721	6	0	0	0	0	0	0	200	300	0	0	0	0	0	0	0	200	903	0	0	0	0	0	0	0	603	903	0
721	7	0	0	0	0	0	0	200	300	0	0	0	0	0	0	0	200	903	0	0	0	0	0	0	0	603	903	0
721	8	0	0	0	0	0	0	200	300	0	0	0	0	0	0	0	200	903	0	0	0	0	0	0	0	603	903	0
721	9	0	0	0	0	0	0	200	300	0	0	0	0	0	0	0	200	903	0	0	0	0	0	0	0	603	903	0
722	0	0	0	0	0	0	0	200	300	0	0	0	0	0	0	0	200	903	0	0	0	0	0	0	0	603	903	0
722	1	0	0	0	0	0	0	200	300	0	0	0	0	0	0	0	200	903	0	0	0	0	0	0	0	603	903	0
722	2	0	0	0	0	0	0	200	300	0	0	0	0	0	0	0	200	903	0	0	0	0	0	0	0	603	903	0
722	3	0	0	0	0	0	0	200	300	0	0	0	0	0	0	0	200	903	0	0	0	0	0	0	0	603	903	0
722	4	0	0	0	0	0	0	200	300	0	0	0	0	0	0	0	200	903	0	0	0	0	0	0	0	603	903	0
722	5	0	0	0	0	0	0	200	300	0	0	0	0	0	0	0	200	903	0	0	0	0	0	0	0	603	903	0
722	6	0	0	0	0	0	0	200	300	0	0	0	0	0	0	0	200	903	0	0	0	0	0	0	0	603	903	0
722	7	0	0	0	0	0	0	200	300	0	0	0	0	0	0	0	200	903	0	0	0	0	0	0	0	603	903	0
722	8	0	0	0	0	0	0	200	300	0	0	0	0	0	0	0	200	903	0	0	0	0	0	0	0	603	903	0
722	9	0	0	0	0	0	0	200	300	0	0	0	0	0	0	0	200	903	0	0	0	0	0	0	0	603	903	0
723	0	0	0	0	0	0	0	200	300	0	0	0	0	0	0	0	200	903	0	0	0	0	0	0	0	603	903	0
723	1	0	0	0	0	0	0	200	300	0	0	0	0	0	0	0	200	903	0	0	0	0	0	0	0	603	903	0
723	2	0	0	0	0	0	0	200	300	0	0	0	0	0	0	0	200	903	0	0	0	0	0	0	0	603	903	0
723	3	0	0	0	0	0	0	200	300	0	0	0	0	0	0	0	200	903	0	0	0	0	0	0	0	603	903	0
723	4	0	0	0	0	0	0	200	300	0	0	0	0	0	0	0	200	903	0	0	0	0	0	0	0	603	903	0
723	5	0	0	0	0	0	0	200	300	0	0	0	0	0	0	0	200	903	0	0	0	0	0	0	0	603	903	0
723	6	0	0	0	0	0	0	200	300	0	0	0	0	0	0	0	200	903	0	0	0	0	0	0	0	603	903	0
723	7	0	0	0	0	0	0	200	300	0	0	0	0	0	0	0	200	903	0	0	0	0	0	0	0	603	903	0
723	8	0	0	0	0	0	0	200	300	0	0	0	0	0	0	0	200	903	0	0	0	0	0	0	0	603	903	0
723	9	0	0	0	0	0	0	200	300	0	0	0	0	0	0	0	200	903	0	0	0	0	0	0	0	603	903	0
724	0	0	0	0	0	0	0	200	300	0	0	0	0	0	0	0	200	903	0	0	0	0	0	0	0	603	903	0
724	1	0	0	0	0	0	0	200	300	0	0	0	0	0	0	0	200	903	0	0	0	0	0	0	0	603	903	0
724	2	0	0	0	0	0	0	200	300	0	0	0	0	0	0	0	200	903	0	0	0	0	0	0	0	603	903	0
724	3	0	0	0	0	0	0	200	300	0	0	0	0	0	0	0	200	903	0	0	0	0	0	0	0	603	903	0
724	4	0	0	0	0	0	0	200	300	0	0	0	0	0	0	0	200	903	0	0	0	0	0	0	0	603	903	0
724	5	0	0	0	0	0	0	200	300	0	0	0	0	0	0	0	200	903	0	0	0	0	0	0	0	603	903	0
724	6	0	0	0	0	0	0	200	300	0	0	0	0	0	0	0	200	903	0	0	0	0	0	0	0	603	903	0
724	7	0	0	0	0	0	0	200	300	0	0	0	0	0	0	0	200	903	0	0	0	0	0	0	0	603	903	0
724	8	0	0	0	0	0	0	200	300	0	0	0	0	0	0	0	200	903	0	0	0	0	0	0	0	603	903	0
724	9	0	0	0	0	0	0	200	300	0	0	0	0	0	0	0	200	903	0	0	0	0	0	0	0	603	903	0
725	0	0	0	0	0	0	0	200	300	0	0	0	0	0	0	0	200	903	0	0	0	0	0	0	0	603	903	0
725	1	0	0	0	0	0	0	200	300	0	0	0	0	0	0	0	200	903	0	0	0	0	0	0	0	603	903	0
725	2	0	0	0	0	0	0	200	300	0	0	0	0	0	0	0	200	903	0	0	0	0	0	0	0	603	903	0
725	3	0	0	0	0	0	0	200	300	0	0	0	0	0	0	0	200	903	0	0	0	0	0	0	0	603	903	0
725	4	0	0	0	0	0	0	200	300	0	0	0	0	0	0	0	200	903	0	0	0	0	0	0	0	603	903	0
725	5	0	0	0	0	0	0	200	300	0	0	0	0	0	0	0	200	903	0	0	0	0	0	0	0	603	903	0
725	6	0	0	0	0	0	0	200	300	0	0	0	0	0	0	0	200	903	0	0	0	0	0	0	0	603	903	0
725	7	0	0	0	0	0	0	200	300	0	0	0	0	0	0	0	200	903	0	0	0	0	0	0	0	603	903	0
725	8	0	0	0	0	0	0	200	300	0	0	0	0	0	0	0	200	903	0	0	0	0	0	0	0	603	903	0
725	9	0	0	0	0	0	0	200	300	0	0	0	0	0	0	0	200	903	0	0	0	0	0	0	0	603	903	0
726	0	0	0	0	0	0	0	200	300	0	0	0	0	0	0	0	200	903	0	0	0	0	0	0	0	603	903	0
726	1	0	0	0	0	0	0	200	300	0	0	0	0	0	0	0	200	903	0	0	0	0	0	0	0	603	903	0
726	2	0	0	0	0	0	0	200	300	0	0	0	0	0	0	0	200	903	0	0	0	0	0	0	0	603	903	0
726	3	0	0	0	0	0	0	200	300	0	0	0	0	0	0	0	200	903	0	0	0	0	0	0	0	603	903	0
726	4	0	0	0	0	0	0	200	300	0	0	0	0	0	0	0	200	903	0	0	0	0	0	0	0	603	903	0
726	5	0	0	0	0	0	0	200	300	0	0	0	0	0	0	0	200	903	0	0	0	0	0	0	0	603	903	0
726	6	0	0	0	0	0	0	200	300	0	0	0	0	0	0	0	200	903	0	0	0	0	0	0	0	603	903	0
726	7	0	0	0	0	0	0	200	300	0	0	0	0	0	0	0	200	903	0	0	0	0	0	0	0	603	903	0
726	8	0	0	0	0	0	0	200	300	0	0	0	0	0	0	0	200	903	0	0	0	0	0	0	0	603	903	0
726	9	0	0	0	0	0	0	200	300	0	0	0	0	0	0	0	200	903	0	0	0	0	0	0	0	603	903	0
727	0	0	0	0	0	0	0	200	300	0	0	0	0	0	0	0	200	903	0	0	0	0	0	0	0	603	903	0
727	1	0	0	0	0	0	0	200	300	0	0	0	0	0	0	0	200	903	0	0	0	0	0	0	0	603	903	0
727	2	0	0	0	0	0	0	200	300	0	0	0	0	0	0	0	200	903	0	0	0	0	0	0	0	603	903	0
727	3	0	0	0	0	0	0	200	300	0	0	0	0	0	0	0	200	903	0	0	0	0	0	0	0	603	903	0
727	4	0	0	0	0	0	0	200	300	0	0	0	0	0	0	0	200	903	0	0	0	0	0	0	0	603	903	0
727	5	0	0	0	0	0	0	200	300	0	0	0	0	0	0	0	200	903	0	0	0	0	0	0	0	603	903	0
727	6	0	0	0	0	0	0	200	300	0	0	0	0	0	0	0	200	903	0	0	0	0	0	0	0	603	903	0
727	7	0	0	0	0	0	0	200	300	0	0	0	0	0	0	0	200	903	0	0	0	0	0	0	0	603	903	0
727	8	0	0	0	0	0	0	200	300	0	0	0	0	0	0	0	200	903	0	0	0	0	0	0	0	603	903	0
727	9	0	0	0	0	0	0	200	300	0	0	0	0	0	0	0	200	903	0	0	0	0	0	0	0	603	903	0
728	0	0	0	0	0	0	0	200	300	0	0	0	0	0	0	0	200	903	0	0	0	0	0	0	0	603	903	0
728	1	0	0	0	0	0	0	200	300	0	0	0	0	0	0	0	200	903	0	0	0	0	0	0	0	603	903	0
728	2	0	0	0	0	0	0	200	300	0	0	0	0	0	0	0	200	903	0	0	0	0	0	0	0	603	903	0
728	3	0	0	0	0	0	0	200	300	0	0	0	0	0	0	0	200	903	0	0	0	0	0	0	0	603	903	0
728	4	0	0	0	0	0	0	200	300	0	0	0	0	0	0	0	200	903	0	0	0	0	0	0	0	603	903	0
728	5	0	0	0	0	0	0	200	300	0	0	0	0	0	0	0	200	903	0	0	0	0	0	0	0	603	903	0
728	6	0	0	0	0	0	0	200	300	0	0	0	0	0	0	0	200	903	0	0	0	0	0	0	0	603	903	0
728	7	0	0	0	0	0	0	200	300	0	0	0	0	0	0	0	200	903	0	0	0	0	0	0	0	603	903	0
728	8	0	0	0	0	0	0	200	300	0	0	0	0	0	0	0	200	903	0	0	0	0	0	0	0	603	903	0
728	9	0	0	0	0	0	0	200	300	0	0	0	0	0	0	0	200	903	0	0	0	0	0	0	0	603	903	0
729	0	0	0	0	0	0	0	200	300	0	0	0	0	0	0	0	200	903	0	0	0	0	0	0	0	603	903	0
729	1	0	0	0	0	0	0	200	300	0	0	0	0	0	0	0	200	903	0	0	0	0	0	0	0	603	903	0
729	2	0	0	0	0	0	0	200	300	0	0	0	0	0	0	0	200	903	0	0	0	0	0	0	0	603	903	0
729	3	0	0	0	0	0	0	200	300	0	0	0	0	0	0	0	200	903	0	0	0	0	0	0	0	603	903	0
729	4	0	0	0	0	0	0	200	300	0	0	0	0	0	0	0	200	903	0	0	0	0	0	0	0	603	903	0
729	5	0	0	0	0	0	0	200	300	0	0	0	0	0	0	0	200	903	0	0	0	0	0	0	0	603	903	0
729	6	0	0	0	0	0	0	200	300	0	0	0	0	0	0	0	200	903	0	0	0	0	0	0	0	603	903	0
729	7	0	0	0	0	0	0	200	300	0	0	0	0	0	0	0	200	903	0	0	0	0	0	0	0	603	903	0
729	8	0	0	0	0	0	0	200	300	0	0	0	0	0	0	0	200	903	0	0	0	0	0	0	0	603	903	0
729	9	0	0	0	0	0	0	200	300	0	0	0	0	0	0	0	200	903	0	0	0	0	0	0	0	603	903	0
730	0	0	0	0	0	0	0	200	300	0	0	0	0	0	0	0	200	903	0	0	0	0	0	0	0	603	903	0
730	1	0	0	0	0	0	0	200	300	0	0	0	0	0	0	0	200	903	0	0	0	0	0	0	0	603	903	0
730	2	0	0	0	0	0	0	200	300	0	0	0	0	0	0	0	200	903	0	0	0	0	0	0	0	603	903	0
730	3	0	0	0	0	0	0	200	300	0	0	0	0	0	0	0	200	903	0	0	0	0	0	0	0	603	903	0
730	4	0	0	0	0	0	0	200	300	0	0	0	0	0	0	0	200	903	0	0	0	0	0	0	0	603	903	0
730	5	0	0	0	0	0	0	200	300	0	0	0	0	0	0	0	200	903	0	0	0	0	0	0	0	603	903	0
730	6	0	0	0	0	0	0	200	300	0	0	0	0	0	0	0	200	903	0	0	0	0	0	0	0	603	903	0
730	7	0	0	0	0	0	0	200	300	0	0	0	0	0	0	0	200	903	0	0	0	0	0	0	0	603	903	0
730	8	0	0	0	0	0	0	200	300	0	0	0	0	0	0	0	200	903	0	0	0	0	0	0	0	603	903	0
730	9	0	0	0	0	0	0	200	300	0	0	0	0	0	0	0	200	903	0	0	0	0	0	0	0	603	903	0
731	0	0	0	0	0	0	0	200	300	0	0	0	0	0	0	0	200	903	0	0	0	0	0	0	0	603	903	0
731	1	0	0	0	0	0	0	200	300	0	0	0	0	0	0	0	200	903	0	0	0	0	0	0	0	603	903	0
731	2	0	0	0	0	0	0	200	300	0	0	0	0	0	0	0	200	903	0	0	0	0	0	0	0	603	903	0
731	3	0	0	0	0	0	0	200	300	0	0	0	0	0	0	0	200	903	0	0	0	0	0	0	0	603	903	0
731	4	0	0	0	0	0	0	200	300	0	0	0	0	0	0	0	200	903	0	0	0	0	0	0	0	603	903	0
731	5	0	0	0	0	0	0	200	300	0	0	0	0	0	0	0	200	903	0	0	0	0	0	0	0	603	903	0
731	6	0	0	0	0	0	0	200	300	0	0	0	0	0	0	0	200	903	0	0	0	0	0	0	0	603	903	0
731	7	0	0	0	0	0	0	200	300	0	0	0	0	0	0	0	200	903	0	0	0	0	0	0	0	603	903	0
731	8	0	0	0	0	0	0	200	300	0	0	0	0	0	0	0	200	903	0	0	0	0	0	0	0	603	903	0
731	9	0	0	0	0	0	0	200	300	0	0	0	0	0	0	0	200	903	0	0	0	0	0	0	0	603	903	0
732	0	0	0	0	0	0	0	200	300	0	0	0	0	0	0	0	200	903	0	0	0	0	0	0	0	603	903	0
732	1	0	0	0	0	0	0	200	300	0	0	0	0	0	0	0	200	903	0	0	0	0	0	0	0	603	903	0
732	2	0	0	0	0	0	0	200	300	0	0	0	0	0	0	0	200	903	0	0	0	0	0	0	0	603	903	0
732	3	0	0	0	0	0	0	200	300	0	0	0	0	0	0	0	200	903	0	0	0	0	0	0	0	603	903	0
732	4	0	0	0	0	0	0	200	300	0	0	0	0	0	0	0	200	903	0	0	0	0	0	0	0	603	903	0
732	5	0	0	0	0	0	0	200	300	0	0	0	0	0	0	0	200	903	0	0	0	0	0	0	0	603	903	0
732	6	0	0	0	0	0	0	200	300	0	0	0	0	0	0	0	200	903	0	0	0	0	0	0	0	603	903	0
732	7	0	0	0	0	0	0	200	300	0	0	0	0	0	0	0	200	903	0	0	0	0	0	0	0	603	903	0
732	8	0	0	0	0	0	0	200	300	0	0	0	0	0	0	0	200	903	0	0	0	0	0	0	0	603	903	0
732	9	0	0	0	0	0	0	200	300	0	0	0	0	0	0	0	200	903	0	0	0	0	0	0	0	603	903	0
733	0	0	0	0	0	0	0	200	300	0	0	0	0	0	0	0	200	903	0	0	0	0	0	0	0	603	903	0
733	1	0	0	0	0	0	0	200	300	0	0	0	0	0	0	0	200	903	0	0	0	0	0	0	0	603	903	0
733	2	0	0	0	0	0	0	200	300	0	0	0	0	0	0	0	200	903	0	0	0	0	0	0	0	603	903	0
733	3	0	0	0	0	0	0	200	300	0	0	0	0	0	0	0	200	903	0	0	0	0	0	0	0	603	903	0
733	4	0	0	0	0	0	0	200	300	0	0	0	0	0	0	0	200	903	0	0	0	0	0	0	0	603	903	0
733	5	0	0	0	0	0	0	200	300	0	0	0	0	0	0	0	200	903	0	0	0	0	0	0	0	603	903	0
733	6	0	0	0	0	0	0	200	300	0	0	0	0	0	0	0	200	903	0	0	0	0	0	0	0	603	903	0
733	7	0	0	0	0	0	0	200	300	0	0	0	0	0	0	0	200	903	0	0	0	0	0	0	0	603	903	0
733	8	0	0	0	0	0	0	200	300	0	0	0	0	0	0	0	200	903	0	0	0	0	0	0	0	603	903	0
733	9	0	0	0	0	0	0	200	300	0	0	0	0	0	0	0	200	903	0	0	0	0	0	0	0	603	903	0
734	0	0	0	0	0	0	0	200	300	0	0	0	0	0	0	0	200	903	0	0	0	0	0	0	0	603	903	0
734	1	0	0	0	0	0	0	200	300	0	0	0	0	0	0	0	200	903	0	0	0	0	0	0	0	603	903	0
734	2	0	0	0	0	0	0	200	300	0	0	0	0	0	0	0	200	903	0	0	0	0	0	0	0	603	903	0
734	3	0	0	0	0	0	0	200	300	0	0	0	0	0	0	0	200	903	0	0	0	0	0	0	0	603	903	0
734	4	0	0	0	0	0	0	200	300	0	0	0	0	0	0	0	200	903	0	0	0	0	0	0	0	603	903	0
734	5	0	0	0	0	0	0	200	300	0	0	0	0	0	0	0	200	903	0	0	0	0	0	0	0	603	903	0
734	6	0	0	0	0	0	0	200	300	0	0	0	0	0	0	0	200	903	0	0	0	0	0	0	0	603	903	0
734	7	0	0	0	0	0	0	200	300	0	0	0	0	0	0	0	200	903	0	0	0	0	0	0	0	603	903	0
734	8	0	0	0	0	0	0	200	300	0	0	0	0	0	0	0	200	903	0	0	0	0	0	0	0	603	903	0
734	9	0	0	0	0	0	0	200	300	0	0	0	0	0	0	0	200	903	0	0	0	0	0	0	0	603	903	0
735	0	0	0	0	0	0	0	200	300	0	0	0	0	0	0	0	200	903	0	0	0	0	0	0	0	603	903	0
735	1	0	0	0	0	0	0	200	300	0	0	0	0	0	0	0	200	903	0	0	0	0	0	0	0	603	903	0
735	2	0	0	0	0	0	0	200	300	0	0	0	0	0	0	0	200	903	0	0	0	0	0	0	0	603	903	0
735	3	0	0	0	0	0	0	200	300	0	0	0	0	0	0	0	200	903	0	0	0	0	0	0	0	603	903	0
735	4	0	0	0	0	0	0	200	300	0	0	0	0	0	0	0	200	903	0	0	0	0	0	0	0	603	903	0
735	5	0	0	0	0	0	0	200	300	0	0	0	0	0	0	0	200	903	0	0	0	0	0	0	0	603	903	0
735	6	0	0	0	0	0	0	200	300	0	0	0	0	0	0	0	200	903	0	0	0	0	0	0	0	603	903	0
735	7	0	0	0	0	0	0	200	300	0	0	0	0	0	0	0	200	903	0	0	0	0	0	0	0	603	903	0
735	8	0	0	0	0	0	0	200	300	0	0	0	0	0	0	0	200	903	0	0	0	0	0	0	0	603	903	0
735	9	0	0	0	0	0	0	200	300	0	0	0	0	0	0	0	200	903	0	0	0	0	0	0	0	603	903	0
736	0	0	0	0	0	0	0	200	300	0	0	0	0	0	0	0	200	903	0	0	0	0	0	0	0	603	903	0
736	1	0	0	0	0	0	0	200	300	0	0	0	0	0	0	0	200	903	0	0	0	0	0	0	0	603	903	0
736	2	0	0	0	0	0	0	200	300	0	0	0	0	0	0	0	200	903	0	0	0	0	0	0	0	603	903	0
736	3	0	0	0	0	0	0	200	300	0	0	0	0	0	0	0	200	903	0	0	0	0	0	0	0	603	903	0
736	4	0	0	0	0	0	0	200	300	0	0	0	0	0	0	0	200	903	0	0	0	0	0	0	0	603	903	0
736	5	0	0	0	0	0	0	200	300	0	0	0	0	0	0	0	200	903	0	0	0	0	0	0	0	603	903	0
[truncated: 2,424 more rows]
