# Supplementary material for: The Effects of an Extemporaneous Speech Dual-task on Older Adult Gait Control
Source: Research Square preprint supplement (doi:10.21203/rs.3.rs-7674245/v1), 2025-11-18
Supplement: Supplementary file 145 [file Over2ground07.xlsx]

## Sheet: Sheet1
Trajectories
		02:LFHD			02:RFHD			02:LBHD			02:RBHD			02:C7			02:T10			02:CLAV			02:STRN			02:RBAK			02:LSHO			02:LUPA			02:LELB			02:LFRM			02:LWRA			02:LWRB			02:LFIN
Frame	Sub Frame	X	Y	Z	X	Y	Z	X	Y	Z	X	Y	Z	X	Y	Z	X	Y	Z	X	Y	Z	X	Y	Z	X	Y	Z	X	Y	Z	X	Y	Z	X	Y	Z	X	Y	Z	X	Y	Z	X	Y	Z	X	Y	Z
		mm	mm	mm	mm	mm	mm	mm	mm	mm	mm	mm	mm	mm	mm	mm	mm	mm	mm	mm	mm	mm	mm	mm	mm	mm	mm	mm	mm	mm	mm	mm	mm	mm	mm	mm	mm	mm	mm	mm	mm	mm	mm	mm	mm	mm	mm	mm	mm
718	0	276.393	2372.52	1581.3	176.414	2366.91	1576.13	280.336	2540.07	1626.14	167.207	2542.5	1623.95	216.201	2598.5	1441.85	230.612	2656.94	1227.34	231.28	2469.54	1372.47	230.722	2410.59	1240.37	133.903	2661.78	1274.92	396.378	2552.27	1399.64	448.55	2578.77	1170.85	447.823	2595.42	1104.19	463.336	2509.06	1010.1	438.675	2485.86	908.936	488.319	2535.18	892.772	487.58	2484.71	808.236
719	0	276.171	2360.24	1580.34	176.265	2354.42	1575.38	279.75	2527.7	1625.52	166.589	2529.85	1623.55	214.74	2586.38	1441.62	228.482	2645.31	1227.16	230.718	2457.84	1371.82	230.604	2399.62	1239.53	131.908	2649.58	1274.89	395.293	2541.77	1399.1	446.532	2572.01	1170.77	445.446	2589.47	1104.33	462.223	2504.57	1009.17	437.966	2481.47	907.902	486.22	2531.92	891.862	487.51	2480.99	807.531
720	0	275.957	2347.9	1579.21	176.114	2341.88	1574.43	279.192	2515.27	1624.73	166.001	2517.15	1622.95	213.4	2574.22	1441.21	226.548	2633.77	1226.84	230.201	2446.08	1370.99	230.511	2388.6	1238.49	130.108	2637.41	1274.68	394.303	2531.09	1398.4	444.602	2564.98	1170.55	443.149	2583.22	1104.32	461.152	2499.84	1008.1	437.274	2476.95	906.729	484.137	2528.51	890.87	487.385	2477.3	806.688
721	0	275.75	2335.48	1577.91	175.961	2329.29	1573.28	278.662	2502.76	1623.76	165.442	2504.39	1622.15	212.181	2562.02	1440.6	224.81	2622.34	1226.36	229.73	2434.26	1369.96	230.445	2377.54	1237.25	128.503	2625.27	1274.26	393.41	2520.24	1397.56	442.761	2557.68	1170.17	440.932	2576.68	1104.17	460.126	2494.87	1006.9	436.598	2472.28	905.417	482.072	2524.95	889.797	487.205	2473.64	805.706
722	0	275.551	2323	1576.43	175.808	2316.63	1571.92	278.16	2490.18	1622.63	164.914	2491.59	1621.15	211.084	2549.76	1439.82	223.271	2611.01	1225.74	229.304	2422.37	1368.75	230.404	2366.43	1235.82	127.093	2613.16	1273.66	392.612	2509.22	1396.55	441.008	2550.11	1169.64	438.797	2569.84	1103.87	459.143	2489.65	1005.57	435.94	2467.48	903.968	480.025	2521.23	888.645	486.97	2470.02	804.586
723	0	275.361	2310.44	1574.79	175.656	2303.93	1570.38	277.686	2477.52	1621.33	164.418	2478.74	1619.96	210.108	2537.46	1438.85	221.93	2599.77	1224.98	228.924	2410.41	1367.35	230.389	2355.28	1234.19	125.878	2601.08	1272.87	391.912	2498.02	1395.39	439.346	2542.27	1168.96	436.745	2562.71	1103.43	458.205	2484.19	1004.11	435.299	2462.54	902.382	478.001	2517.35	887.413	486.677	2466.42	803.328
724	0	275.18	2297.82	1572.98	175.506	2291.17	1568.64	277.244	2464.79	1619.87	163.955	2465.83	1618.58	209.255	2525.11	1437.69	220.79	2588.62	1224.07	228.591	2398.39	1365.77	230.4	2344.07	1232.38	124.856	2589.03	1271.89	391.309	2486.65	1394.09	437.779	2534.15	1168.14	434.781	2555.27	1102.84	457.312	2478.47	1002.52	434.675	2457.44	900.662	476.003	2513.3	886.105	486.325	2462.84	801.933
725	0	275.013	2285.13	1571.01	175.361	2278.35	1566.71	276.835	2452	1618.25	163.527	2452.88	1617.02	208.525	2512.72	1436.36	219.851	2577.53	1223.01	228.306	2386.29	1364.01	230.435	2332.78	1230.4	124.027	2576.99	1270.73	390.803	2475.09	1392.63	436.31	2525.75	1167.17	432.911	2547.53	1102.11	456.467	2472.49	1000.8	434.071	2452.2	898.81	474.04	2509.07	884.723	485.91	2459.27	800.404
726	0	274.86	2272.37	1568.88	175.226	2265.49	1564.61	276.462	2439.13	1616.47	163.139	2439.88	1615.27	207.921	2500.27	1434.86	219.114	2566.5	1221.82	228.071	2374.13	1362.08	230.496	2321.41	1228.26	123.387	2564.96	1269.38	390.397	2463.36	1391.03	434.947	2517.05	1166.05	431.141	2539.47	1101.24	455.672	2466.25	998.954	433.486	2446.79	896.833	472.122	2504.65	883.272	485.429	2455.7	798.742
727	0	274.726	2259.55	1566.61	175.104	2252.57	1562.33	276.131	2426.19	1614.56	162.794	2426.83	1613.36	207.443	2487.78	1433.19	218.578	2555.49	1220.49	227.889	2361.89	1360	230.584	2309.93	1225.97	122.933	2552.94	1267.86	390.091	2451.45	1389.28	433.696	2508.06	1164.79	429.482	2531.1	1100.23	454.93	2459.72	996.992	432.924	2441.21	894.735	470.263	2500.01	881.757	484.879	2452.1	796.953
728	0	274.617	2246.66	1564.22	175.001	2239.61	1559.91	275.846	2413.19	1612.51	162.497	2413.74	1611.3	207.093	2475.24	1431.37	218.239	2544.48	1219.03	227.763	2349.56	1357.78	230.699	2298.32	1223.57	122.66	2540.89	1266.17	389.886	2439.37	1387.4	432.566	2498.75	1163.4	427.945	2522.41	1099.09	454.244	2452.91	994.917	432.385	2435.44	892.524	468.481	2495.12	880.182	484.256	2448.45	795.039
729	0	274.536	2233.71	1561.71	174.924	2226.6	1557.36	275.614	2400.13	1610.35	162.254	2400.62	1609.1	206.873	2462.64	1429.39	218.09	2533.41	1217.43	227.696	2337.16	1355.44	230.844	2286.57	1221.06	122.561	2528.82	1264.32	389.785	2427.11	1385.4	431.568	2489.11	1161.87	426.542	2513.38	1097.82	453.619	2445.78	992.737	431.873	2429.45	890.209	466.795	2489.97	878.555	483.56	2444.71	793.007
730	0	274.491	2220.71	1559.11	174.879	2213.56	1554.69	275.44	2387.01	1608.09	162.071	2387.45	1606.78	206.783	2449.99	1427.29	218.124	2522.26	1215.7	227.694	2324.66	1352.99	231.021	2274.66	1218.47	122.63	2516.69	1262.31	389.789	2414.67	1383.28	430.71	2479.15	1160.21	425.286	2504	1096.42	453.059	2438.32	990.46	431.391	2423.24	887.8	465.225	2484.52	876.881	482.793	2440.84	790.866
731	0	274.487	2207.64	1556.44	174.874	2200.47	1551.94	275.332	2373.84	1605.75	161.954	2374.25	1604.36	206.825	2437.28	1425.07	218.331	2510.96	1213.84	227.76	2312.07	1350.46	231.233	2262.57	1215.83	122.856	2504.5	1260.17	389.898	2402.07	1381.05	430.002	2468.84	1158.43	424.19	2494.28	1094.92	452.569	2430.52	988.099	430.943	2416.77	885.31	463.794	2478.74	875.169	481.958	2436.79	788.623
732	0	274.532	2194.52	1553.72	174.915	2187.35	1549.12	275.297	2360.61	1603.36	161.911	2361.03	1601.88	206.998	2424.52	1422.75	218.7	2499.48	1211.84	227.9	2299.38	1347.88	231.484	2250.28	1213.16	123.23	2492.23	1257.91	390.114	2389.31	1378.73	429.451	2458.18	1156.54	423.264	2484.21	1093.3	452.152	2422.34	985.665	430.531	2410.01	882.752	462.524	2472.58	873.425	481.064	2432.51	786.29
733	0	274.63	2181.36	1550.99	175.008	2174.2	1546.28	275.34	2347.34	1600.94	161.946	2347.77	1599.35	207.3	2411.69	1420.35	219.22	2487.76	1209.72	228.118	2286.59	1345.27	231.777	2237.81	1210.5	123.741	2479.85	1255.54	390.436	2376.38	1376.34	429.064	2447.17	1154.55	422.52	2473.77	1091.59	451.813	2413.78	983.174	430.16	2402.94	880.142	461.434	2466.01	871.657	480.121	2427.93	783.882
734	0	274.787	2168.13	1548.27	175.16	2161.01	1543.44	275.468	2334.02	1598.52	162.067	2334.5	1596.81	207.728	2398.8	1417.91	219.88	2475.77	1207.48	228.42	2273.68	1342.66	232.117	2225.12	1207.86	124.378	2467.34	1253.09	390.864	2363.31	1373.89	428.845	2435.8	1152.47	421.963	2462.97	1089.79	451.555	2404.81	980.642	429.832	2395.53	877.498	460.541	2459	869.874	479.144	2423.01	781.414
735	0	275.01	2154.86	1545.6	175.376	2147.79	1540.64	275.685	2320.66	1596.12	162.277	2321.19	1594.28	208.278	2385.83	1415.44	220.666	2463.46	1205.13	228.807	2260.66	1340.09	232.508	2212.24	1205.28	125.127	2454.69	1250.57	391.396	2350.11	1371.4	428.794	2424.08	1150.33	421.599	2451.8	1087.93	451.38	2395.42	978.091	429.553	2387.74	874.841	459.858	2451.51	868.086	478.15	2417.67	778.907
736	0	275.301	2141.54	1543.01	175.659	2134.54	1537.91	275.997	2307.25	1593.78	162.581	2307.87	1591.81	208.943	2372.79	1412.97	221.566	2450.81	1202.69	229.284	2247.52	1337.59	232.956	2199.15	1202.79	125.976	2441.89	1248.02	392.027	2336.77	1368.92	428.908	2412	1148.14	421.426	2440.27	1086.02	451.289	2385.59	975.542	429.323	2379.55	872.193	459.395	2443.51	866.306	477.161	2411.86	776.382
737	0	275.663	2128.17	1540.54	176.012	2121.25	1535.29	276.405	2293.81	1591.53	162.981	2294.52	1589.42	209.714	2359.67	1410.54	222.566	2437.79	1200.19	229.851	2234.26	1335.19	233.465	2185.85	1200.42	126.908	2428.91	1245.48	392.752	2323.32	1366.45	429.182	2399.59	1145.93	421.443	2428.37	1084.08	451.284	2375.3	973.021	429.148	2370.91	869.579	459.154	2434.97	864.545	476.199	2405.5	773.865
738	0	276.099	2114.75	1538.21	176.437	2107.93	1532.82	276.91	2280.32	1589.41	163.477	2281.15	1587.16	210.582	2346.46	1408.19	223.648	2424.39	1197.65	230.507	2220.88	1332.92	234.04	2172.36	1198.2	127.909	2415.75	1242.97	393.565	2309.77	1364.04	429.605	2386.84	1143.73	421.64	2416.11	1082.13	451.363	2364.55	970.556	429.03	2361.8	867.027	459.134	2425.86	862.822	475.289	2398.54	771.386
739	0	276.606	2101.28	1536.07	176.933	2094.57	1530.53	277.511	2266.79	1587.43	164.067	2267.76	1585.04	211.535	2333.17	1405.94	224.796	2410.62	1195.11	231.25	2207.37	1330.83	234.684	2158.67	1196.17	128.961	2402.4	1240.53	394.458	2296.12	1361.73	430.164	2373.78	1141.57	422.007	2403.5	1080.21	451.524	2353.33	968.178	428.971	2352.19	864.567	459.328	2416.16	861.153	474.457	2390.92	768.975
740	0	277.185	2087.76	1534.15	177.498	2081.17	1528.46	278.204	2253.21	1585.64	164.75	2254.33	1583.11	212.558	2319.78	1403.84	225.986	2396.49	1192.63	232.073	2193.74	1328.94	235.4	2144.79	1194.35	130.047	2388.86	1238.21	395.42	2282.39	1359.54	430.845	2360.43	1139.49	422.529	2390.54	1078.35	451.765	2341.62	965.919	428.975	2342.05	862.231	459.721	2405.84	859.56	473.728	2382.58	766.666
741	0	277.83	2074.18	1532.46	178.127	2067.73	1526.64	278.985	2239.6	1584.06	165.52	2240.88	1581.4	213.637	2306.31	1401.91	227.198	2382.02	1190.25	232.971	2180	1327.27	236.188	2130.74	1192.78	131.148	2375.12	1236.05	396.439	2268.58	1357.51	431.63	2346.8	1137.52	423.186	2377.27	1076.58	452.083	2329.45	963.812	429.046	2331.34	860.053	460.298	2394.9	858.063	473.127	2373.49	764.493
742	0	278.537	2060.56	1531.05	178.815	2054.23	1525.1	279.847	2225.94	1582.71	166.369	2227.4	1579.93	214.758	2292.74	1400.2	228.406	2367.24	1188.02	233.933	2166.15	1325.87	237.045	2116.52	1191.49	132.248	2361.21	1234.08	397.504	2254.71	1355.69	432.498	2332.92	1135.71	423.96	2363.68	1074.93	452.474	2316.8	961.892	429.186	2320.05	858.065	461.037	2383.31	856.687	472.676	2363.6	762.492
743	0	279.298	2046.87	1529.93	179.555	2040.69	1523.86	280.779	2212.23	1581.63	167.288	2213.88	1578.74	215.903	2279.08	1398.74	229.589	2352.18	1185.99	234.946	2152.2	1324.74	237.964	2102.16	1190.49	133.33	2347.12	1232.36	398.598	2240.79	1354.11	433.431	2318.81	1134.08	424.829	2349.79	1073.43	452.934	2303.68	960.192	429.399	2308.16	856.302	461.916	2371.08	855.454	472.395	2352.87	760.697
744	0	280.104	2033.14	1529.11	180.337	2027.1	1522.94	281.771	2198.49	1580.82	168.265	2200.32	1577.84	217.057	2265.33	1397.56	230.723	2336.89	1184.23	235.997	2138.16	1323.92	238.936	2087.65	1189.81	134.378	2332.88	1230.92	399.708	2226.82	1352.8	434.41	2304.49	1132.69	425.771	2335.63	1072.13	453.458	2290.1	958.743	429.688	2295.64	854.796	462.908	2358.2	854.387	472.3	2341.28	759.142
745	0	280.945	2019.35	1528.62	181.151	2013.45	1522.36	282.809	2184.69	1580.31	169.288	2186.72	1577.24	218.206	2251.5	1396.67	231.792	2321.41	1182.78	237.069	2124.04	1323.41	239.945	2073.04	1189.47	135.38	2318.5	1229.79	400.82	2212.8	1351.79	435.415	2289.99	1131.55	426.766	2321.22	1071.04	454.042	2276.08	957.574	430.056	2282.49	853.576	463.988	2344.68	853.508	472.401	2328.81	757.856
746	0	281.809	2005.52	1528.45	181.985	1999.75	1522.12	283.879	2170.86	1580.11	170.342	2173.08	1576.97	219.336	2237.6	1396.11	232.78	2305.8	1181.68	238.145	2109.85	1323.23	240.973	2058.33	1189.46	136.325	2304.02	1229.01	401.917	2198.75	1351.11	436.429	2275.33	1130.69	427.795	2306.58	1070.2	454.681	2261.63	956.711	430.505	2268.7	852.668	465.131	2330.51	852.836	472.708	2315.44	756.866
747	0	282.683	1991.63	1528.61	182.825	1986	1522.22	284.965	2156.98	1580.21	171.413	2159.4	1577.02	220.434	2223.63	1395.88	233.677	2290.11	1180.98	239.206	2095.62	1323.36	241.999	2043.56	1189.8	137.207	2289.46	1228.59	402.986	2184.66	1350.76	437.439	2260.54	1130.15	428.841	2291.72	1069.63	455.371	2246.77	956.175	431.036	2254.27	852.094	466.314	2315.73	852.387	473.22	2301.18	756.195
748	0	283.551	1977.71	1529.09	183.658	1972.2	1522.67	286.051	2143.06	1580.62	172.483	2145.67	1577.4	221.489	2209.61	1395.99	234.479	2274.38	1180.69	240.234	2081.35	1323.83	242.998	2028.76	1190.47	138.023	2274.86	1228.55	404.014	2170.54	1350.78	438.431	2245.62	1129.94	429.889	2276.68	1069.34	456.107	2231.52	955.981	431.648	2239.2	851.87	467.514	2300.33	852.173	473.935	2286.03	755.86
749	0	284.401	1963.75	1529.88	184.468	1958.36	1523.44	287.12	2129.11	1581.33	173.538	2131.91	1578.1	222.493	2195.54	1396.45	235.185	2258.67	1180.83	241.21	2067.07	1324.6	243.945	2013.95	1191.46	138.774	2260.26	1228.9	404.989	2156.38	1351.15	439.398	2230.61	1130.06	430.93	2261.47	1069.34	456.885	2215.91	956.138	432.338	2223.51	852.008	468.712	2284.35	852.202	474.846	2270	755.871
750	0	285.216	1949.76	1530.97	185.241	1944.48	1524.53	288.156	2115.13	1582.34	174.56	2118.11	1579.11	223.44	2181.45	1397.24	235.803	2243.04	1181.4	242.119	2052.79	1325.67	244.815	1999.17	1192.74	139.466	2245.68	1229.63	405.901	2142.19	1351.87	440.334	2215.51	1130.51	431.957	2246.12	1069.64	457.701	2199.94	956.649	433.103	2207.21	852.51	469.894	2267.81	852.477	475.938	2253.11	756.235
751	0	285.981	1935.75	1532.32	185.961	1930.57	1525.9	289.144	2101.13	1583.62	175.536	2104.28	1580.41	224.326	2167.34	1398.36	236.344	2227.52	1182.39	242.943	2038.53	1327.02	245.584	1984.45	1194.28	140.11	2231.16	1230.74	406.743	2127.95	1352.94	441.237	2200.33	1131.3	432.967	2230.63	1070.24	458.549	2183.65	957.51	433.935	2190.32	853.377	471.047	2250.73	852.995	477.196	2235.38	756.951
752	0	286.683	1921.71	1533.93	186.616	1916.64	1527.53	290.068	2087.1	1585.15	176.45	2090.43	1581.98	225.149	2153.23	1399.79	236.825	2212.17	1183.77	243.67	2024.3	1328.62	246.229	1969.82	1196.06	140.718	2216.74	1232.2	407.508	2113.68	1354.34	442.108	2185.09	1132.4	433.961	2215.02	1071.12	459.424	2167.06	958.712	434.827	2172.88	854.598	472.163	2233.15	853.751	478.598	2216.86	758.011
753	0	287.307	1907.67	1535.76	187.19	1902.7	1529.4	290.917	2073.06	1586.92	177.292	2076.56	1583.8	225.91	2139.13	1401.5	237.27	2197.02	1185.51	244.288	2010.12	1330.44	246.732	1955.3	1198.03	141.307	2202.46	1233.98	408.193	2099.38	1356.04	442.951	2169.78	1133.8	434.944	2199.31	1072.26	460.322	2150.19	960.237	435.766	2154.92	856.159	473.236	2215.09	854.733	480.121	2197.58	759.406
754	0	287.841	1893.63	1537.77	187.674	1888.75	1531.45	291.678	2059.02	1588.89	178.05	2062.68	1585.82	226.61	2125.07	1403.47	237.703	2182.1	1187.56	244.789	1996	1332.46	247.077	1940.92	1200.16	141.896	2188.33	1236.05	408.797	2085.03	1358.01	443.771	2154.41	1135.47	435.921	2183.49	1073.66	461.236	2133.05	962.064	436.741	2136.47	858.041	474.265	2196.59	855.927	481.741	2177.58	761.118
755	0	288.275	1879.58	1539.94	188.055	1874.81	1533.66	292.344	2044.97	1591.05	178.716	2048.8	1588.03	227.253	2111.04	1405.65	238.152	2167.44	1189.89	245.169	1981.95	1334.64	247.254	1926.7	1202.41	142.502	2174.39	1238.38	409.318	2070.65	1360.23	444.577	2138.98	1137.37	436.902	2167.59	1075.27	462.159	2115.67	964.167	437.736	2117.57	860.218	475.251	2177.69	857.316	483.429	2156.92	763.128
756	0	288.599	1865.55	1542.21	188.327	1860.89	1535.98	292.906	2030.92	1593.34	179.284	2034.93	1590.38	227.843	2097.07	1408.03	238.643	2153.06	1192.43	245.424	1967.99	1336.96	247.258	1912.65	1204.75	143.145	2160.64	1240.92	409.759	2056.24	1362.66	445.375	2123.47	1139.48	437.895	2151.59	1077.07	463.085	2098.06	966.516	438.736	2098.27	862.661	476.199	2158.41	858.882	485.159	2135.65	765.413
757	0	288.808	1851.53	1544.57	188.484	1847	1538.38	293.362	2016.87	1595.76	179.749	2021.06	1592.85	228.384	2083.17	1410.55	239.2	2138.95	1195.15	245.557	1954.12	1339.36	247.089	1898.77	1207.16	143.839	2147.1	1243.62	410.123	2041.8	1365.25	446.177	2107.88	1141.76	438.911	2135.49	1079.02	464.007	2080.23	969.077	439.726	2078.61	865.34	477.116	2138.78	860.604	486.903	2113.82	767.947
758	0	288.897	1837.54	1546.97	188.521	1833.15	1540.81	293.709	2002.84	1598.25	180.111	2007.22	1595.39	228.881	2069.33	1413.19	239.841	2125.11	1197.98	245.572	1940.35	1341.83	246.755	1885.06	1209.59	144.596	2133.77	1246.44	410.411	2027.35	1367.98	446.988	2092.2	1144.16	439.959	2119.3	1081.1	464.917	2062.2	971.816	440.691	2058.63	868.219	478.008	2118.83	862.461	488.637	2091.49	770.702
759	0	288.865	1823.57	1549.38	188.44	1819.33	1543.24	293.946	1988.83	1600.79	180.368	1993.4	1597.96	229.337	2055.58	1415.89	240.575	2111.54	1200.88	245.475	1926.68	1344.33	246.269	1871.53	1212.03	145.42	2120.64	1249.34	410.63	2012.89	1370.8	447.816	2076.43	1146.64	441.047	2103	1083.26	465.807	2043.98	974.697	441.617	2038.38	871.264	478.886	2098.59	864.431	490.334	2068.72	773.65
760	0	288.713	1809.63	1551.76	188.24	1805.57	1545.63	294.077	1974.84	1603.35	180.524	1979.62	1600.54	229.756	2041.91	1418.63	241.407	2098.21	1203.81	245.276	1913.11	1346.81	245.651	1858.15	1214.44	146.315	2107.72	1252.27	410.783	1998.44	1373.66	448.668	2060.54	1149.17	442.182	2086.59	1085.47	466.67	2025.57	977.682	442.492	2017.89	874.439	479.757	2078.08	866.492	491.974	2045.56	776.76
761	0	288.444	1795.73	1554.07	187.926	1791.87	1547.94	294.103	1960.88	1605.89	180.58	1965.88	1603.08	230.14	2028.32	1421.35	242.331	2085.09	1206.72	244.987	1899.64	1349.26	244.922	1844.92	1216.81	147.274	2094.97	1255.18	410.875	1984.01	1376.55	449.546	2044.54	1151.7	443.368	2070.06	1087.68	467.5	2006.99	980.734	443.305	1997.2	877.708	480.63	2057.32	868.623	493.535	2022.07	779.999
762	0	288.064	1781.87	1556.3	187.506	1778.23	1550.14	294.03	1946.95	1608.37	180.543	1952.18	1605.56	230.492	2014.81	1424.02	243.333	2072.16	1209.57	244.62	1886.27	1351.64	244.111	1831.81	1219.11	148.29	2082.38	1258.04	410.911	1969.6	1379.4	450.453	2028.42	1154.2	444.607	2053.41	1089.87	468.289	1988.24	983.818	444.05	1976.35	881.035	481.513	2036.34	870.8	495.001	1998.31	783.337
763	0	287.58	1768.06	1558.4	186.986	1764.65	1552.21	293.865	1933.06	1610.76	180.417	1938.53	1607.92	230.811	2001.38	1426.61	244.396	2059.37	1212.32	244.189	1872.99	1353.92	243.243	1818.81	1221.32	149.348	2069.94	1260.8	410.894	1955.24	1382.19	451.387	2012.18	1156.63	445.898	2036.63	1092	469.032	1969.32	986.899	444.72	1955.37	884.386	482.41	2015.14	873.001	496.357	1974.33	786.739
764	0	287.003	1754.3	1560.36	186.377	1751.14	1554.11	293.614	1919.21	1613.04	180.209	1924.94	1610.15	231.099	1988.03	1429.07	245.495	2046.69	1214.94	243.707	1859.8	1356.06	242.346	1805.9	1223.41	150.432	2057.6	1263.43	410.83	1940.93	1384.88	452.348	1995.82	1158.95	447.239	2019.73	1094.03	469.725	1950.26	989.942	445.31	1934.28	887.725	483.325	1993.75	875.203	497.591	1950.18	790.174
765	0	286.342	1740.59	1562.14	185.691	1737.69	1555.83	293.284	1905.41	1615.16	179.927	1911.41	1612.21	231.355	1974.76	1431.37	246.607	2034.09	1217.39	243.187	1846.68	1358.04	241.446	1793.06	1225.36	151.524	2045.35	1265.88	410.722	1926.69	1387.42	453.329	1979.34	1161.13	448.624	2002.69	1095.94	470.363	1931.06	992.915	445.82	1913.11	891.021	484.259	1972.18	877.382	498.694	1925.9	793.607
766	0	285.608	1726.94	1563.74	184.938	1724.32	1557.34	292.884	1891.68	1617.1	179.577	1897.95	1614.07	231.578	1961.55	1433.47	247.704	2021.53	1219.64	242.641	1833.63	1359.84	240.563	1780.26	1227.15	152.602	2033.16	1268.14	410.572	1912.52	1389.8	454.326	1962.75	1163.15	450.045	1985.51	1097.69	470.944	1911.73	995.789	446.248	1891.88	894.241	485.21	1950.45	879.514	499.659	1901.55	797.005
767	0	284.814	1713.35	1565.14	184.13	1711.01	1558.63	292.421	1878	1618.83	179.166	1884.55	1615.71	231.765	1948.39	1435.35	248.762	2008.98	1221.66	242.078	1820.64	1361.42	239.714	1767.5	1228.73	153.648	2021.01	1270.16	410.384	1898.42	1391.98	455.331	1946.06	1164.97	451.494	1968.21	1099.25	471.466	1892.28	998.535	446.596	1870.61	897.356	486.174	1928.58	881.578	500.484	1877.16	800.339
768	0	283.972	1699.82	1566.32	183.28	1697.77	1559.69	291.903	1864.39	1620.33	178.702	1871.21	1617.09	231.914	1935.29	1436.99	249.759	1996.43	1223.41	241.507	1807.69	1362.77	238.913	1754.76	1230.09	154.642	2008.87	1271.92	410.158	1884.4	1393.92	456.335	1929.28	1166.57	452.958	1950.79	1100.61	471.928	1872.72	1001.13	446.866	1849.32	900.339	487.146	1906.59	883.55	501.167	1852.76	803.578
769	0	283.091	1686.35	1567.27	182.399	1684.58	1560.52	291.338	1850.84	1621.58	178.191	1857.95	1618.21	232.023	1922.22	1438.35	250.674	1983.84	1224.89	240.934	1794.77	1363.87	238.167	1742.04	1231.2	155.565	1996.72	1273.41	409.896	1870.46	1395.6	457.328	1912.43	1167.94	454.427	1933.25	1101.74	472.328	1853.09	1003.54	447.061	1828.03	903.165	488.117	1884.49	885.41	501.711	1828.4	806.695
770	0	282.184	1672.94	1567.99	181.497	1671.46	1561.11	290.731	1837.38	1622.55	177.639	1844.76	1619.05	232.087	1909.19	1439.43	251.489	1971.22	1226.08	240.363	1781.88	1364.69	237.477	1729.32	1232.04	156.402	1984.56	1274.6	409.596	1856.59	1397	458.3	1895.52	1169.06	455.887	1915.61	1102.63	472.666	1833.38	1005.76	447.184	1806.75	905.812	489.078	1862.32	887.139	502.117	1804.1	809.667
771	0	281.26	1659.59	1568.47	180.584	1658.38	1561.45	290.09	1823.99	1623.23	177.052	1831.63	1619.59	232.103	1896.17	1440.2	252.191	1958.55	1226.95	239.794	1769	1365.23	236.842	1716.61	1232.58	157.137	1972.35	1275.48	409.258	1842.8	1398.09	459.237	1878.56	1169.91	457.322	1897.87	1103.25	472.942	1813.63	1007.77	447.24	1785.51	908.262	490.019	1840.1	888.72	502.392	1779.89	812.475
772	0	280.327	1646.31	1568.71	179.668	1645.36	1561.56	289.421	1810.68	1623.6	176.433	1818.58	1619.83	232.065	1883.18	1440.65	252.769	1945.84	1227.51	239.227	1756.12	1365.48	236.255	1703.92	1232.81	157.759	1960.09	1276.04	408.879	1829.08	1398.87	460.129	1861.57	1170.49	458.72	1880.06	1103.62	473.155	1793.85	1009.55	447.23	1764.31	910.5	490.929	1817.86	890.139	502.543	1755.79	815.102
773	0	279.391	1633.09	1568.73	178.756	1632.38	1561.44	288.726	1797.45	1623.66	175.788	1805.59	1619.75	231.97	1870.18	1440.79	253.213	1933.09	1227.74	238.659	1743.24	1365.43	235.706	1691.22	1232.72	158.258	1947.76	1276.29	408.456	1815.42	1399.32	460.962	1844.57	1170.79	460.065	1862.19	1103.71	473.304	1774.07	1011.09	447.161	1743.17	912.514	491.797	1795.62	891.385	502.578	1731.84	817.537
774	0	278.458	1619.92	1568.52	177.852	1619.43	1561.1	288.011	1784.31	1623.41	175.117	1792.67	1619.36	231.812	1857.19	1440.61	253.52	1920.29	1227.65	238.083	1730.34	1365.09	235.182	1678.53	1232.31	158.624	1935.37	1276.21	407.985	1801.81	1399.44	461.724	1827.58	1170.81	461.342	1844.28	1103.53	473.389	1754.32	1012.4	447.033	1722.11	914.297	492.613	1773.41	892.45	502.505	1708.05	819.772
775	0	277.533	1606.82	1568.09	176.96	1606.52	1560.55	287.277	1771.25	1622.84	174.424	1779.82	1618.67	231.585	1844.18	1440.1	253.684	1907.47	1227.25	237.493	1717.42	1364.44	234.67	1665.84	1231.58	158.853	1922.89	1275.81	407.462	1788.25	1399.22	462.402	1810.6	1170.56	462.537	1826.36	1103.09	473.406	1734.6	1013.45	446.852	1701.15	915.844	493.367	1751.27	893.329	502.335	1684.44	821.806
776	0	276.618	1593.77	1567.46	176.082	1593.64	1559.81	286.526	1758.28	1621.96	173.708	1767.03	1617.67	231.285	1831.16	1439.29	253.705	1894.62	1226.53	236.88	1704.46	1363.52	234.153	1653.13	1230.54	158.94	1910.33	1275.1	406.881	1774.72	1398.67	462.984	1793.67	1170.03	463.635	1808.44	1102.38	473.357	1714.96	1014.27	446.619	1680.31	917.155	494.048	1729.23	894.02	502.078	1661.04	823.638
777	0	275.712	1580.78	1566.64	175.218	1580.79	1558.89	285.758	1745.39	1620.77	172.97	1754.3	1616.37	230.904	1818.11	1438.16	253.585	1881.75	1225.51	236.234	1691.46	1362.31	233.614	1640.39	1229.21	158.882	1897.68	1274.08	406.236	1761.22	1397.8	463.459	1776.79	1169.25	464.624	1790.56	1101.41	473.238	1695.42	1014.84	446.336	1659.6	918.232	494.649	1707.32	894.524	501.745	1637.87	825.273
778	0	274.818	1567.85	1565.64	174.367	1567.96	1557.82	284.971	1732.59	1619.28	172.206	1741.63	1614.8	230.439	1805.05	1436.75	253.323	1868.87	1224.2	235.545	1678.42	1360.84	233.036	1627.61	1227.6	158.679	1884.94	1272.77	405.524	1747.73	1396.62	463.815	1759.98	1168.21	465.489	1772.73	1100.2	473.05	1676	1015.17	446.007	1639.05	919.08	495.161	1685.58	894.844	501.345	1614.94	826.717
779	0	273.931	1554.97	1564.49	173.526	1555.15	1556.61	284.164	1719.88	1617.51	171.416	1729.02	1612.97	229.883	1791.95	1435.06	252.925	1855.96	1222.61	234.8	1665.33	1359.13	232.402	1614.77	1225.74	158.332	1872.09	1271.17	404.737	1734.26	1395.14	464.044	1743.27	1166.93	466.22	1754.99	1098.77	472.791	1656.73	1015.27	445.631	1618.67	919.708	495.58	1664.02	894.985	500.889	1592.28	827.98
780	0	273.05	1542.14	1563.2	172.691	1542.36	1555.29	283.333	1707.25	1615.47	170.594	1716.46	1610.9	229.23	1778.82	1433.11	252.393	1843.03	1220.77	233.99	1652.18	1357.2	231.694	1601.84	1223.67	157.843	1859.14	1269.31	403.87	1720.79	1393.39	464.138	1726.66	1165.43	466.806	1737.37	1097.12	472.46	1637.64	1015.16	445.212	1598.49	920.126	495.897	1642.69	894.953	500.385	1569.9	829.072
781	0	272.172	1529.37	1561.79	171.857	1529.59	1553.89	282.473	1694.7	1613.19	169.736	1703.95	1608.61	228.476	1765.66	1430.92	251.731	1830.07	1218.68	233.102	1638.97	1355.06	230.897	1588.81	1221.42	157.216	1846.09	1267.2	402.919	1707.31	1391.39	464.09	1710.18	1163.72	467.237	1719.89	1095.27	472.058	1618.76	1014.84	444.748	1578.52	920.344	496.11	1621.63	894.757	499.843	1547.84	830.003
782	0	271.29	1516.65	1560.29	171.019	1516.83	1552.41	281.578	1682.23	1610.7	168.838	1691.49	1606.13	227.616	1752.45	1428.52	250.943	1817.07	1216.36	232.127	1625.7	1352.76	229.995	1575.65	1219.01	156.454	1832.92	1264.86	401.879	1693.81	1389.16	463.895	1693.84	1161.83	467.504	1702.57	1093.24	471.584	1600.1	1014.33	444.242	1558.79	920.376	496.212	1600.84	894.404	499.269	1526.11	830.784
783	0	270.401	1503.98	1558.72	170.171	1504.09	1550.9	280.643	1669.85	1608.01	167.892	1679.07	1603.49	226.646	1739.21	1425.92	250.032	1804	1213.84	231.054	1612.36	1350.32	228.975	1562.36	1216.5	155.563	1819.64	1262.3	400.746	1680.3	1386.73	463.551	1677.66	1159.77	467.602	1685.45	1091.06	471.038	1581.69	1013.64	443.693	1539.32	920.235	496.201	1580.38	893.903	498.67	1504.74	831.425
784	0	269.497	1491.36	1557.11	169.306	1491.36	1549.37	279.661	1657.54	1605.17	166.894	1666.7	1600.71	225.564	1725.93	1423.17	249.001	1790.85	1211.13	229.878	1598.95	1347.78	227.827	1548.92	1213.91	154.548	1806.24	1259.55	399.518	1666.76	1384.14	463.056	1661.66	1157.56	467.525	1668.54	1088.74	470.422	1563.56	1012.78	443.101	1520.13	919.935	496.073	1560.27	893.262	498.05	1483.75	831.934
785	0	268.573	1478.79	1555.48	168.417	1478.65	1547.85	278.626	1645.3	1602.19	165.837	1654.36	1597.84	224.366	1712.6	1420.28	247.851	1777.59	1208.25	228.591	1585.46	1345.15	226.541	1535.32	1211.28	153.417	1792.73	1256.63	398.193	1653.19	1381.41	462.408	1645.84	1155.23	467.268	1651.87	1086.31	469.735	1545.73	1011.78	442.465	1501.23	919.489	495.826	1540.53	892.49	497.414	1463.17	832.32
786	0	267.622	1466.26	1553.85	167.498	1465.95	1546.37	277.531	1633.12	1599.12	164.715	1642.04	1594.89	223.052	1699.23	1417.29	246.585	1764.21	1205.23	227.191	1571.91	1342.48	225.111	1521.57	1208.64	152.174	1779.09	1253.57	396.771	1639.58	1378.58	461.609	1630.23	1152.81	466.831	1635.44	1083.79	468.979	1528.21	1010.64	441.783	1482.66	918.912	495.456	1521.2	891.594	496.764	1443.01	832.587
787	0	266.639	1453.78	1552.26	166.543	1453.26	1544.95	276.37	1621.01	1595.99	163.523	1629.76	1591.91	221.622	1685.82	1414.24	245.203	1750.67	1202.08	225.676	1558.27	1339.81	223.537	1507.66	1206.03	150.826	1765.32	1250.39	395.252	1625.94	1375.69	460.66	1614.82	1150.32	466.211	1619.29	1081.22	468.152	1511.02	1009.39	441.055	1464.44	918.216	494.962	1502.3	890.585	496.099	1423.32	832.742
788	0	265.618	1441.33	1550.72	165.546	1440.58	1543.61	275.138	1608.94	1592.84	162.257	1617.49	1588.93	220.077	1672.35	1411.15	243.708	1736.96	1198.84	224.048	1544.56	1337.16	221.821	1493.6	1203.49	149.378	1751.43	1247.11	393.64	1612.26	1372.78	459.563	1599.63	1147.8	465.411	1603.41	1078.61	467.255	1494.18	1008.05	440.278	1446.57	917.414	494.342	1483.87	889.471	495.419	1404.1	832.786
789	0	264.554	1428.92	1549.28	164.504	1427.9	1542.39	273.831	1596.92	1589.71	160.914	1605.23	1585.99	218.421	1658.85	1408.08	242.102	1723.05	1195.53	222.313	1530.77	1334.58	219.969	1479.4	1201.04	147.836	1737.41	1243.79	391.938	1598.54	1369.88	458.321	1584.65	1145.26	464.432	1587.82	1076	466.287	1477.7	1006.63	439.449	1429.1	916.521	493.594	1465.92	888.264	494.722	1385.41	832.722
790	0	263.443	1416.54	1547.94	163.412	1415.23	1541.29	272.447	1584.92	1586.64	159.492	1592.97	1583.13	216.657	1645.29	1405.04	240.387	1708.94	1192.19	220.477	1516.91	1332.09	217.994	1465.06	1198.71	146.204	1723.26	1240.44	390.153	1584.79	1367.03	456.938	1569.9	1142.75	463.277	1572.52	1073.43	465.245	1461.6	1005.15	438.564	1412.03	915.55	492.718	1448.48	886.977	494.003	1367.25	832.553
791	0	262.283	1404.17	1546.74	162.269	1402.57	1540.35	270.985	1572.95	1583.66	157.991	1580.71	1580.38	214.792	1631.69	1402.09	238.568	1694.6	1188.87	218.552	1502.98	1329.74	215.912	1450.59	1196.54	144.486	1708.98	1237.11	388.292	1571.01	1364.29	455.419	1555.37	1140.3	461.952	1557.51	1070.92	464.129	1445.87	1003.64	437.619	1395.39	914.514	491.711	1431.57	885.622	493.258	1349.65	832.28
792	0	261.072	1391.83	1545.71	161.072	1389.9	1539.59	269.446	1560.99	1580.82	156.412	1568.44	1577.78	212.834	1618.04	1399.27	236.648	1680.05	1185.6	216.552	1488.99	1327.56	213.746	1436.01	1194.55	142.686	1694.58	1233.85	386.367	1557.21	1361.68	453.771	1541.06	1137.95	460.462	1542.8	1068.51	462.935	1430.53	1002.12	436.611	1379.2	913.427	490.575	1415.22	884.218	492.481	1332.65	831.905
793	0	259.81	1379.49	1544.86	159.824	1377.23	1539.02	267.833	1549.02	1578.16	154.76	1556.14	1575.35	210.793	1604.35	1396.62	234.636	1665.29	1182.44	214.495	1474.94	1325.57	211.523	1421.33	1192.78	140.808	1680.07	1230.69	384.388	1543.38	1359.26	451.999	1526.96	1135.72	458.816	1528.39	1066.24	461.662	1415.59	1000.61	435.536	1363.48	912.305	489.309	1399.43	882.782	491.664	1316.28	831.431
794	0	258.499	1367.15	1544.23	158.525	1364.55	1538.67	266.15	1537.05	1575.71	153.039	1543.83	1573.15	208.681	1590.62	1394.17	232.537	1650.34	1179.45	212.398	1460.85	1323.81	209.272	1406.55	1191.25	138.856	1665.46	1227.69	382.37	1529.55	1357.06	450.113	1513.08	1133.67	457.021	1514.26	1064.15	460.306	1401.03	999.142	434.387	1348.24	911.163	487.914	1384.23	881.337	490.799	1300.55	830.861
795	0	257.142	1354.8	1543.82	157.178	1351.85	1538.55	264.405	1525.05	1573.51	151.257	1531.48	1571.19	206.512	1576.87	1391.98	230.363	1635.23	1176.69	210.283	1446.72	1322.31	207.027	1391.71	1189.98	136.835	1650.76	1224.9	380.326	1515.72	1355.12	448.121	1499.4	1131.82	455.087	1500.43	1062.27	458.867	1386.88	997.731	433.163	1333.5	910.017	486.393	1369.63	879.905	489.876	1285.48	830.202
796	0	255.743	1342.44	1543.66	155.79	1339.15	1538.68	262.607	1513.02	1571.59	149.424	1519.09	1569.5	204.301	1563.08	1390.06	228.124	1619.99	1174.23	208.173	1432.57	1321.09	204.821	1376.82	1189	134.753	1635.99	1222.37	378.273	1501.9	1353.48	446.036	1485.91	1130.21	453.027	1486.87	1060.63	457.344	1373.12	996.406	431.858	1319.27	908.886	484.749	1355.63	878.513	488.886	1271.11	829.459
797	0	254.308	1330.07	1543.77	154.365	1326.43	1539.06	260.766	1500.95	1569.98	147.552	1506.67	1568.11	202.066	1549.28	1388.47	225.835	1604.68	1172.11	206.089	1418.41	1320.17	202.686	1361.91	1188.31	132.618	1621.18	1220.15	376.227	1488.11	1352.17	443.87	1472.62	1128.88	450.853	1473.6	1059.27	455.736	1359.76	995.191	430.47	1305.57	907.785	482.988	1342.25	877.188	487.819	1257.44	828.64
798	0	252.843	1317.67	1544.16	152.911	1313.7	1539.7	258.895	1488.84	1568.71	145.652	1494.2	1567.03	199.825	1535.48	1387.22	223.515	1589.34	1170.42	204.054	1404.26	1319.56	200.655	1347.01	1187.93	130.441	1606.36	1218.29	374.206	1474.36	1351.22	441.637	1459.52	1127.84	448.581	1460.6	1058.21	454.046	1346.79	994.109	428.997	1292.4	906.734	481.117	1329.47	875.956	486.664	1244.49	827.755
799	0	251.359	1305.24	1544.83	151.436	1300.95	1540.61	257.009	1476.67	1567.79	143.739	1481.69	1566.29	197.597	1521.68	1386.35	221.184	1574.03	1169.19	202.089	1390.15	1319.29	198.752	1332.16	1187.86	128.236	1591.55	1216.83	372.225	1460.66	1350.64	439.354	1446.61	1127.12	446.226	1447.87	1057.47	452.279	1334.21	993.178	427.44	1279.77	905.75	479.143	1317.3	874.844	485.411	1232.27	826.815
800	0	249.863	1292.79	1545.79	149.949	1288.19	1541.78	255.121	1464.45	1567.24	141.828	1469.14	1565.89	195.399	1507.9	1385.87	218.865	1558.82	1168.46	200.212	1376.08	1319.35	197	1317.39	1188.1	126.017	1576.79	1215.81	370.301	1447.02	1350.45	437.038	1433.88	1126.73	443.805	1435.41	1057.07	450.44	1322.01	992.419	425.8	1267.67	904.851	477.08	1305.73	873.878	484.051	1220.77	825.829
801	0	248.366	1280.31	1547.05	148.462	1275.42	1543.22	253.248	1452.17	1567.06	139.935	1456.56	1565.84	193.25	1494.15	1385.78	216.584	1543.77	1168.26	198.441	1362.07	1319.74	195.415	1302.74	1188.64	123.801	1562.11	1215.26	368.447	1433.48	1350.65	434.707	1421.35	1126.69	441.337	1423.21	1057.03	448.538	1310.2	991.844	424.08	1256.11	904.052	474.94	1294.74	873.079	482.574	1209.99	824.809
802	0	246.879	1267.8	1548.59	146.984	1262.65	1544.92	251.405	1439.85	1567.27	138.074	1443.96	1566.14	191.167	1480.45	1386.1	214.362	1528.92	1168.58	196.789	1348.16	1320.47	194.006	1288.24	1189.49	121.601	1547.53	1215.18	366.675	1420.04	1351.25	432.381	1409	1127	438.841	1411.29	1057.34	446.583	1298.77	991.466	422.287	1245.08	903.369	472.738	1284.31	872.468	480.975	1199.92	823.767
803	0	245.413	1255.27	1550.41	145.527	1249.88	1546.86	249.606	1427.47	1567.86	136.262	1431.33	1566.78	189.162	1466.81	1386.82	212.22	1514.33	1169.42	195.266	1334.34	1321.53	192.779	1273.92	1190.62	119.431	1533.09	1215.57	364.995	1406.71	1352.22	430.077	1396.84	1127.65	436.336	1399.62	1057.99	444.587	1287.7	991.291	420.429	1234.56	902.812	470.491	1274.43	872.059	479.247	1190.54	822.714
804	0	243.98	1242.73	1552.49	144.103	1237.13	1549.03	247.866	1415.06	1568.81	134.51	1418.69	1567.76	187.247	1453.26	1387.93	210.173	1500.04	1170.74	193.879	1320.65	1322.9	191.733	1259.82	1192.04	117.303	1518.81	1216.43	363.415	1393.53	1353.55	427.814	1384.89	1128.63	433.84	1388.22	1058.98	442.564	1276.99	991.321	418.516	1224.55	902.393	468.22	1265.05	871.862	477.388	1181.81	821.662
805	0	242.592	1230.19	1554.81	142.723	1224.39	1551.42	246.197	1402.63	1570.12	132.832	1406.05	1569.06	185.43	1439.8	1389.41	208.229	1486.06	1172.51	192.63	1307.1	1324.57	190.865	1245.94	1193.71	115.224	1504.7	1217.75	361.939	1380.5	1355.22	425.608	1373.15	1129.92	431.371	1377.09	1060.29	440.53	1266.64	991.556	416.56	1215.03	902.117	465.942	1256.17	871.882	475.4	1173.72	820.623
806	0	241.259	1217.65	1557.37	141.398	1211.69	1554	244.609	1390.18	1571.76	131.237	1393.42	1570.67	183.716	1426.44	1391.23	206.391	1472.41	1174.67	191.518	1293.69	1326.52	190.164	1232.3	1195.63	113.199	1490.78	1219.48	360.569	1367.65	1357.19	423.474	1361.63	1131.5	428.943	1366.22	1061.89	438.498	1256.62	991.989	414.576	1205.97	901.988	463.68	1247.74	872.12	473.286	1166.22	819.608
807	0	239.991	1205.13	1560.12	140.139	1199.02	1556.76	243.109	1377.72	1573.71	129.731	1380.81	1572.57	182.105	1413.21	1393.37	204.654	1459.1	1177.15	190.539	1280.44	1328.72	189.618	1218.92	1197.79	111.228	1477.05	1221.6	359.303	1354.98	1359.42	421.421	1350.34	1133.35	426.571	1355.61	1063.77	436.485	1246.95	992.612	412.577	1197.36	902.009	461.45	1239.73	872.571	471.058	1159.27	818.63
808	0	238.799	1192.63	1563.04	138.955	1186.39	1559.67	241.703	1365.28	1575.94	128.321	1368.22	1574.72	180.598	1400.1	1395.79	203.009	1446.11	1179.91	189.684	1267.36	1331.15	189.209	1205.78	1200.15	109.312	1463.52	1224.06	358.138	1342.5	1361.88	419.458	1339.29	1135.43	424.264	1345.27	1065.88	434.505	1237.6	993.411	410.581	1189.17	902.175	459.271	1232.11	873.227	468.727	1152.84	817.702
809	0	237.689	1180.18	1566.1	137.854	1173.82	1562.7	240.394	1352.86	1578.42	127.007	1355.68	1577.11	179.188	1387.12	1398.46	201.445	1433.42	1182.88	188.941	1254.44	1333.79	188.916	1192.88	1202.71	107.446	1450.18	1226.82	357.067	1330.22	1364.53	417.588	1328.48	1137.7	422.029	1335.19	1068.2	432.569	1228.57	994.372	408.601	1181.39	902.482	457.158	1224.87	874.075	466.312	1146.87	816.834
810	0	236.668	1167.77	1569.28	136.843	1161.32	1565.83	239.181	1340.48	1581.1	125.789	1343.19	1579.69	177.868	1374.28	1401.33	199.95	1420.99	1186	188.297	1241.69	1336.6	188.714	1180.22	1205.43	105.628	1437.02	1229.83	356.081	1318.13	1367.32	415.81	1317.92	1140.14	419.87	1325.37	1070.69	430.689	1219.85	995.475	406.654	1173.97	902.921	455.122	1217.96	875.098	463.836	1141.32	816.04
811	0	235.74	1155.43	1572.53	135.927	1148.87	1569.02	238.06	1328.16	1583.95	124.664	1330.75	1582.44	176.631	1361.57	1404.35	198.512	1408.8	1189.23	187.737	1229.11	1339.55	188.576	1167.78	1208.3	103.852	1424.04	1233.03	355.17	1306.24	1370.21	414.122	1307.62	1142.7	417.786	1315.81	1073.32	428.874	1211.43	996.699	404.754	1166.91	903.48	453.172	1211.37	876.276	461.323	1136.17	815.328
812	0	234.906	1143.16	1575.82	135.106	1136.5	1572.26	237.027	1315.9	1586.91	123.625	1318.37	1585.3	175.465	1348.99	1407.49	197.117	1396.8	1192.52	187.243	1216.67	1342.59	188.476	1155.54	1211.27	102.113	1411.21	1236.38	354.319	1294.52	1373.16	412.514	1297.57	1145.36	415.773	1306.5	1076.05	427.13	1203.3	998.021	402.912	1160.16	904.144	451.311	1205.07	877.588	458.801	1131.36	814.707
813	0	234.166	1130.97	1579.12	134.383	1124.2	1575.5	236.074	1303.71	1589.95	122.666	1306.06	1588.25	174.36	1336.54	1410.69	195.754	1384.94	1195.83	186.8	1204.39	1345.69	188.387	1143.47	1214.33	100.407	1398.51	1239.8	353.517	1282.98	1376.13	410.977	1287.78	1148.07	413.828	1297.45	1078.85	425.461	1195.44	999.414	401.142	1153.72	904.895	449.54	1199.06	879.006	456.301	1126.86	814.182
814	0	233.519	1118.87	1582.38	133.753	1111.97	1578.72	235.192	1291.6	1593	121.776	1293.81	1591.23	173.302	1324.21	1413.9	194.412	1373.2	1199.12	186.39	1192.23	1348.82	188.286	1131.54	1217.42	98.727	1385.92	1243.25	352.75	1271.58	1379.08	409.498	1278.23	1150.8	411.939	1288.64	1081.69	423.871	1187.86	1000.85	399.452	1147.55	905.711	447.855	1193.3	880.502	453.853	1122.63	813.753
815	0	232.959	1106.85	1585.58	133.214	1099.81	1581.88	234.37	1279.58	1596.04	120.946	1281.63	1594.2	172.28	1311.98	1417.08	193.081	1361.53	1202.35	185.999	1180.19	1351.91	188.156	1119.72	1220.51	97.0687	1373.43	1246.68	352.005	1260.31	1381.96	408.063	1268.92	1153.51	410.099	1280.06	1084.52	422.361	1180.53	1002.3	397.852	1141.63	906.568	446.25	1187.78	882.046	451.485	1118.66	813.417
816	0	232.48	1094.92	1588.67	132.758	1087.72	1584.94	233.597	1267.65	1599	120.166	1269.52	1597.11	171.283	1299.84	1420.19	191.749	1349.9	1205.48	185.614	1168.25	1354.93	187.981	1107.99	1223.55	95.4274	1361.02	1250.03	351.271	1249.15	1384.75	406.659	1259.83	1156.17	408.294	1271.71	1087.31	420.93	1173.44	1003.74	396.346	1135.93	907.438	444.714	1182.5	883.603	449.225	1114.9	813.164
817	0	232.074	1083.07	1591.61	132.378	1075.7	1587.87	232.862	1255.8	1601.83	119.423	1257.46	1599.92	170.301	1287.78	1423.16	190.41	1338.27	1208.49	185.222	1156.39	1357.84	187.754	1096.31	1226.5	93.7993	1348.66	1253.24	350.536	1238.07	1387.4	405.273	1250.96	1158.74	406.515	1263.57	1090.03	419.576	1166.58	1005.12	394.94	1130.43	908.294	443.238	1177.43	885.141	447.098	1111.33	812.979
818	0	231.732	1071.3	1594.37	132.063	1063.73	1590.64	232.153	1244.04	1604.5	118.707	1245.46	1602.58	169.324	1275.79	1425.97	189.054	1326.64	1211.33	184.814	1144.6	1360.59	187.471	1084.66	1229.31	92.182	1336.34	1256.27	349.794	1227.06	1389.88	403.891	1242.27	1161.19	404.749	1255.62	1092.64	418.299	1159.93	1006.43	393.638	1125.11	909.104	441.808	1172.57	886.624	445.124	1107.94	812.845
819	0	231.443	1059.6	1596.92	131.804	1051.81	1593.21	231.461	1232.34	1606.95	118.009	1233.5	1605.04	168.346	1263.85	1428.57	187.677	1314.99	1213.96	184.385	1132.87	1363.14	187.136	1073.02	1231.93	90.5749	1324.05	1259.08	349.039	1216.09	1392.15	402.504	1233.75	1163.48	402.988	1247.84	1095.12	417.095	1153.47	1007.63	392.441	1119.93	909.836	440.412	1167.89	888.017	443.318	1104.68	812.737
820	0	231.198	1047.96	1599.23	131.589	1039.93	1595.55	230.775	1220.71	1609.16	117.32	1221.58	1607.27	167.361	1251.95	1430.92	186.278	1303.3	1216.36	183.931	1121.17	1365.45	186.752	1061.39	1234.31	88.9796	1311.78	1261.63	348.266	1205.14	1394.19	401.103	1225.38	1165.6	401.222	1240.21	1097.42	415.963	1147.19	1008.68	391.35	1114.88	910.46	439.038	1163.39	889.286	441.691	1101.56	812.627
821	0	230.986	1036.37	1601.26	131.406	1028.08	1597.62	230.089	1209.13	1611.08	116.633	1209.7	1609.23	166.369	1240.08	1432.99	184.857	1291.58	1218.49	183.449	1109.49	1367.49	186.33	1049.74	1236.42	87.4	1299.53	1263.88	347.476	1194.2	1395.97	399.685	1217.12	1167.5	399.448	1232.7	1099.53	414.899	1141.05	1009.57	390.366	1109.94	910.945	437.675	1159.04	890.4	440.25	1098.54	812.486
822	0	230.795	1024.82	1602.99	131.244	1016.25	1599.4	229.396	1197.59	1612.7	115.941	1197.82	1610.89	165.367	1228.22	1434.76	183.42	1279.82	1220.31	182.941	1097.83	1369.21	185.879	1038.1	1238.21	85.8424	1287.28	1265.8	346.67	1183.25	1397.46	398.247	1208.96	1169.16	397.661	1225.27	1101.41	413.902	1135.04	1010.26	389.487	1105.07	911.262	436.315	1154.83	891.329	438.995	1095.62	812.282
823	0	230.615	1013.28	1604.4	131.092	1004.43	1600.87	228.693	1186.07	1613.97	115.242	1185.96	1612.21	164.359	1216.37	1436.2	181.976	1268.03	1221.8	182.41	1086.17	1370.6	185.413	1026.45	1239.64	84.3156	1275.05	1267.37	345.852	1172.27	1398.65	396.791	1200.85	1170.57	395.862	1217.91	1103.05	412.97	1129.13	1010.73	388.712	1100.26	911.383	434.951	1150.73	892.049	437.922	1092.77	811.984
824	0	230.438	1001.76	1605.47	130.941	992.608	1602	227.976	1174.56	1614.9	114.533	1174.1	1613.19	163.348	1204.51	1437.29	180.536	1256.23	1222.95	181.86	1074.5	1371.63	184.941	1014.8	1240.69	82.8305	1262.84	1268.58	345.028	1161.26	1399.52	395.322	1192.78	1171.7	394.055	1210.56	1104.41	412.101	1123.28	1010.96	388.039	1095.48	911.287	433.581	1146.72	892.539	437.023	1089.98	811.562
825	0	230.255	990.216	1606.18	130.782	980.773	1602.77	227.248	1163.04	1615.46	113.815	1162.21	1613.81	162.342	1192.63	1438.03	179.116	1244.41	1223.74	181.298	1062.81	1372.29	184.477	1003.16	1241.34	81.3998	1250.65	1269.4	344.206	1150.2	1400.06	393.846	1184.7	1172.54	392.246	1203.2	1105.5	411.296	1117.48	1010.93	387.465	1090.71	910.954	432.205	1142.77	892.784	436.286	1087.23	810.99
826	0	230.061	978.652	1606.54	130.609	968.916	1603.18	226.509	1151.49	1615.65	113.091	1150.31	1614.05	161.347	1180.73	1438.4	177.731	1232.6	1224.16	180.731	1051.09	1372.57	184.031	991.537	1241.56	80.0375	1238.48	1269.85	343.393	1139.09	1400.27	392.375	1176.59	1173.09	390.446	1195.78	1106.29	410.555	1111.68	1010.64	386.987	1085.93	910.369	430.827	1138.86	892.775	435.698	1084.51	810.245
827	0	229.851	967.048	1606.52	130.416	957.026	1603.21	225.764	1139.89	1615.48	112.363	1138.37	1613.92	160.375	1168.81	1438.41	176.398	1220.81	1224.22	180.168	1039.35	1372.46	183.613	979.936	1241.36	78.7581	1226.34	1269.92	342.602	1127.9	1400.14	390.921	1168.42	1173.33	388.666	1188.29	1106.79	409.878	1105.85	1010.08	386.604	1081.11	909.522	429.454	1134.95	892.509	435.243	1081.8	809.309
828	0	229.621	955.391	1606.15	130.201	945.096	1602.88	225.02	1128.25	1614.94	111.639	1126.4	1613.42	159.435	1156.85	1438.06	175.132	1209.07	1223.91	179.619	1027.56	1371.97	183.232	968.359	1240.73	77.576	1214.24	1269.61	341.841	1116.64	1399.68	389.497	1160.15	1173.28	386.922	1180.67	1106.98	409.267	1099.96	1009.24	386.312	1076.22	908.411	428.097	1131.01	891.986	434.905	1079.07	808.17
829	0	229.372	943.671	1605.43	129.964	933.117	1602.17	224.284	1116.53	1614.06	110.924	1114.37	1612.56	158.539	1144.85	1437.37	173.95	1197.38	1223.25	179.092	1015.74	1371.12	182.896	956.805	1239.69	76.5049	1202.17	1268.96	341.122	1105.3	1398.89	388.12	1151.76	1172.92	385.228	1172.91	1106.87	408.724	1093.98	1008.13	386.107	1071.26	907.035	426.77	1127	891.215	434.668	1076.31	806.821
830	0	229.104	931.877	1604.36	129.705	921.085	1601.12	223.565	1104.74	1612.85	110.228	1102.29	1611.36	157.7	1132.81	1436.34	172.865	1185.75	1222.27	178.598	1003.87	1369.9	182.612	945.268	1238.27	75.5572	1190.14	1267.96	340.456	1093.87	1397.8	386.806	1143.2	1172.27	383.603	1164.96	1106.47	408.252	1087.86	1006.76	385.988	1066.17	905.401	425.487	1122.89	890.209	434.516	1073.49	805.263
831	0	228.822	920.002	1602.97	129.429	908.993	1599.72	222.872	1092.87	1611.34	109.559	1090.15	1609.83	156.93	1120.74	1434.99	171.892	1174.21	1220.98	178.147	991.949	1368.36	182.387	933.74	1236.47	74.7434	1178.15	1266.65	339.854	1082.34	1396.41	385.571	1134.47	1171.34	382.065	1156.8	1105.78	407.853	1081.59	1005.13	385.95	1060.96	903.52	424.265	1118.63	888.982	434.435	1070.57	803.501
832	0	228.529	908.04	1601.29	129.141	896.841	1598.01	222.216	1080.9	1609.55	108.927	1077.96	1608.01	156.241	1108.62	1433.35	171.042	1162.76	1219.41	177.748	979.976	1366.51	182.224	922.209	1234.35	74.0722	1166.18	1265.04	339.326	1070.72	1394.74	384.432	1125.52	1170.14	380.629	1148.4	1104.83	407.531	1075.12	1003.27	385.99	1055.57	901.409	423.124	1114.19	887.556	434.413	1067.53	801.548
833	0	228.233	895.988	1599.33	128.847	884.626	1596	221.608	1068.84	1607.51	108.342	1065.7	1605.92	155.646	1096.46	1431.45	170.328	1151.4	1217.6	177.41	967.945	1364.39	182.129	910.656	1231.94	73.5499	1154.23	1263.17	338.883	1058.98	1392.83	383.404	1116.34	1168.7	379.314	1139.75	1103.63	407.288	1068.42	1001.2	386.105	1050	899.086	422.08	1109.53	885.954	434.441	1064.32	799.418
834	0	227.941	883.844	1597.14	128.554	872.347	1593.74	221.057	1056.69	1605.27	107.814	1053.39	1603.6	155.154	1084.26	1429.3	169.76	1140.12	1215.57	177.143	955.851	1362.03	182.105	899.064	1229.29	73.181	1142.29	1261.07	338.534	1047.14	1390.69	382.503	1106.91	1167.04	378.134	1130.82	1102.2	407.126	1061.46	998.929	386.293	1044.21	896.575	421.152	1104.6	884.2	434.512	1060.91	797.132
835	0	227.661	871.611	1594.75	128.273	860.008	1591.26	220.575	1044.44	1602.85	107.352	1041.01	1601.08	154.778	1072.02	1426.95	169.349	1128.91	1213.35	176.954	943.691	1359.49	182.154	887.408	1226.45	72.9677	1130.34	1258.75	338.287	1035.19	1388.35	381.739	1097.19	1165.16	377.104	1121.59	1100.56	407.049	1054.21	996.49	386.55	1038.16	893.903	420.357	1099.37	882.32	434.62	1057.25	794.714
836	0	227.404	859.289	1592.19	128.012	847.61	1588.6	220.169	1032.11	1600.29	106.965	1028.59	1598.42	154.525	1059.73	1424.43	169.103	1117.75	1210.97	176.851	931.46	1356.79	182.277	875.667	1223.47	72.9107	1118.37	1256.26	338.149	1023.12	1385.86	381.125	1087.19	1163.12	376.233	1112.05	1098.74	407.058	1046.65	993.911	386.872	1031.85	891.098	419.71	1093.8	880.341	434.765	1053.3	792.189
837	0	227.179	846.884	1589.52	127.781	835.156	1585.8	219.85	1019.69	1597.65	106.662	1016.11	1595.63	154.403	1047.39	1421.76	169.031	1106.59	1208.46	176.841	919.151	1354	182.478	863.813	1220.41	73.0088	1106.34	1253.62	338.126	1010.94	1383.23	380.668	1076.88	1160.92	375.531	1102.19	1096.77	407.155	1038.73	991.219	387.259	1025.22	888.19	419.223	1087.86	878.289	434.947	1049.01	789.584
838	0	226.994	834.399	1586.77	127.589	822.652	1582.91	219.624	1007.19	1594.95	106.449	1003.59	1592.78	154.418	1035.01	1418.99	169.138	1095.41	1205.85	176.929	906.759	1351.14	182.757	851.824	1217.33	73.2593	1094.25	1250.86	338.224	998.639	1380.51	380.374	1066.25	1158.59	375.004	1092	1094.66	407.341	1030.45	988.445	387.708	1018.26	885.211	418.905	1081.5	876.19	435.17	1044.34	786.927
839	0	226.859	821.842	1583.99	127.445	810.101	1579.97	219.498	994.62	1592.24	106.333	991.028	1589.9	154.574	1022.58	1416.16	169.426	1084.16	1203.15	177.12	894.278	1348.28	183.115	839.673	1214.27	73.6582	1082.06	1248.01	338.444	986.219	1377.72	380.244	1055.29	1156.18	374.654	1081.47	1092.46	407.615	1021.78	985.619	388.216	1010.93	882.193	418.762	1074.7	874.069	435.437	1039.23	784.245
840	0	226.781	809.218	1581.24	127.357	797.509	1577.04	219.477	981.985	1589.56	106.32	978.431	1587.03	154.874	1010.09	1413.3	169.895	1072.77	1200.39	177.418	881.702	1345.45	183.554	827.339	1211.31	74.1996	1069.76	1245.1	338.788	973.679	1374.91	380.28	1044.01	1153.7	374.481	1070.59	1090.19	407.978	1012.69	982.774	388.783	1003.2	879.169	418.797	1067.43	871.948	435.757	1033.65	781.568
841	0	226.769	796.534	1578.56	127.332	784.88	1574.17	219.564	969.294	1586.95	106.411	965.805	1584.21	155.316	997.546	1410.44	170.539	1061.18	1197.59	177.823	869.025	1342.71	184.074	814.802	1208.48	74.8762	1057.32	1242.18	339.257	961.02	1372.11	380.477	1032.4	1151.18	374.482	1059.36	1087.88	408.429	1003.17	979.942	389.408	995.042	876.171	419.009	1059.65	869.851	436.137	1027.54	778.923
842	0	226.828	783.796	1575.99	127.376	772.219	1571.4	219.761	956.554	1584.44	106.61	953.153	1581.48	155.899	984.933	1407.64	171.349	1049.35	1194.77	178.336	856.24	1340.09	184.678	802.045	1205.83	75.6787	1044.73	1239.26	339.847	948.242	1369.36	380.83	1020.46	1148.67	374.652	1047.77	1085.57	408.967	993.197	977.154	390.088	986.428	873.232	419.393	1051.34	867.799	436.585	1020.87	776.338
843	0	226.962	771.01	1573.58	127.493	759.53	1568.78	220.07	943.77	1582.08	106.917	940.48	1578.88	156.616	972.247	1404.93	172.309	1037.21	1191.96	178.955	843.344	1337.64	185.364	789.056	1203.41	76.5962	1031.96	1236.4	340.555	935.344	1366.69	381.331	1008.2	1146.19	374.981	1035.83	1083.27	409.589	982.764	974.444	390.824	977.327	870.383	419.939	1042.47	865.813	437.109	1013.6	773.84
844	0	227.174	758.181	1571.37	127.687	746.815	1566.36	220.488	930.949	1579.89	107.332	927.789	1576.45	157.462	959.481	1402.33	173.401	1024.71	1189.18	179.677	830.331	1335.39	186.134	775.828	1201.25	77.616	1019.01	1233.62	341.376	922.325	1364.13	381.969	995.609	1143.78	375.461	1023.54	1081.03	410.293	971.854	971.844	391.615	967.71	867.657	420.639	1033.03	863.912	437.718	1005.67	771.455
845	0	227.465	745.313	1569.41	127.959	734.077	1564.18	221.014	918.095	1577.9	107.851	915.08	1574.21	158.428	946.63	1399.91	174.6	1011.82	1186.47	180.495	817.2	1333.37	186.983	762.363	1199.39	78.7243	1005.86	1230.98	342.301	909.185	1361.74	382.732	982.705	1141.47	376.079	1010.89	1078.87	411.074	960.458	969.385	392.457	957.55	865.084	421.478	1022.99	862.118	438.417	997.07	769.209
846	0	227.835	732.409	1567.73	128.307	721.316	1562.27	221.643	905.211	1576.14	108.471	902.357	1572.19	159.501	933.687	1397.68	175.881	998.514	1183.88	181.402	803.949	1331.62	187.907	748.665	1197.84	79.9062	992.521	1228.51	343.32	895.922	1359.54	383.607	969.492	1139.29	376.823	997.884	1076.83	411.929	948.568	967.098	393.349	946.823	862.693	422.441	1012.33	860.449	439.212	987.751	767.128
847	0	228.282	719.471	1566.36	128.731	708.533	1560.68	222.37	892.298	1574.62	109.187	889.617	1570.41	160.669	920.647	1395.68	177.218	984.775	1181.43	182.388	790.579	1330.17	188.898	734.749	1196.62	81.1464	978.984	1226.25	344.424	882.535	1357.56	384.581	955.977	1137.29	377.68	984.528	1074.94	412.852	936.178	965.014	394.289	935.505	860.514	423.514	1001.03	858.926	440.105	977.687	765.236
848	0	228.802	706.501	1565.33	129.227	695.728	1559.43	223.189	879.358	1573.37	109.992	876.859	1568.9	161.919	907.507	1393.95	178.588	970.611	1179.19	183.438	777.094	1329.02	189.945	720.635	1195.75	82.4302	965.264	1224.24	345.599	869.022	1355.83	385.638	942.166	1135.48	378.637	970.824	1073.23	413.835	923.284	963.159	395.27	923.575	858.574	424.68	989.088	857.565	441.097	966.847	763.555
849	0	229.389	693.497	1564.65	129.789	682.898	1558.55	224.091	866.39	1572.4	110.879	864.083	1567.67	163.234	894.266	1392.51	179.969	956.043	1177.2	184.539	763.499	1328.19	191.035	706.35	1195.22	83.7433	951.379	1222.53	346.832	855.382	1354.39	386.766	928.069	1133.91	379.682	956.778	1071.72	414.873	909.882	961.559	396.29	911.017	856.896	425.924	976.483	856.386	442.186	955.208	762.106
850	0	230.037	680.46	1564.33	130.41	670.041	1558.03	225.068	853.391	1571.71	111.838	851.284	1566.74	164.601	880.924	1391.38	181.343	941.107	1175.52	185.675	749.803	1327.69	192.148	691.928	1195.02	85.0726	937.35	1221.14	348.106	841.614	1353.25	387.952	913.693	1132.59	380.803	942.398	1070.44	415.957	895.974	960.236	397.341	897.817	855.503	427.234	963.208	855.402	443.366	942.746	760.906
851	0	230.736	667.388	1564.38	131.083	657.155	1557.91	226.109	840.36	1571.31	112.861	838.46	1566.1	166.001	867.485	1390.58	182.696	925.852	1174.19	186.828	736.015	1327.52	193.264	677.405	1195.15	86.4065	923.206	1220.1	349.408	827.719	1352.44	389.183	899.047	1131.54	381.99	927.69	1069.41	417.077	881.561	959.21	398.418	883.965	854.415	428.596	949.257	854.628	444.631	929.442	759.971
852	0	231.478	654.28	1564.8	131.797	644.239	1558.17	227.205	827.294	1571.19	113.936	825.608	1565.77	167.421	853.954	1390.12	184.017	910.34	1173.25	187.979	722.148	1327.67	194.363	662.822	1195.59	87.7351	908.979	1219.44	350.721	813.698	1351.97	390.45	884.142	1130.8	383.236	912.664	1068.64	418.224	866.649	958.494	399.511	869.457	853.645	430	934.624	854.075	445.97	915.28	759.313
853	0	232.253	641.133	1565.57	132.543	631.289	1558.8	228.343	814.191	1571.34	115.055	812.724	1565.73	168.844	840.339	1390.01	185.299	894.643	1172.74	189.109	708.217	1328.14	195.42	648.218	1196.32	89.0503	894.705	1219.17	352.028	799.555	1351.85	391.743	868.987	1130.36	384.533	897.334	1068.16	419.389	851.243	958.099	400.613	854.294	853.204	431.438	919.311	853.749	447.373	900.249	758.938
854	0	233.048	627.947	1566.69	133.308	618.303	1559.81	229.513	801.046	1571.77	116.204	799.806	1565.99	170.256	826.649	1390.24	186.537	878.838	1172.66	190.201	694.238	1328.92	196.415	633.635	1197.3	90.346	880.422	1219.3	353.316	785.294	1352.07	393.057	853.594	1130.23	385.877	881.712	1067.95	420.56	835.354	958.031	401.714	838.481	853.099	432.902	903.319	853.654	448.825	884.341	758.851
855	0	233.852	614.72	1568.12	134.082	605.282	1561.15	230.703	787.86	1572.44	117.374	786.853	1566.53	171.645	812.897	1390.81	187.728	863.01	1173.03	191.237	680.227	1329.97	197.325	619.107	1198.52	91.6189	866.167	1219.82	354.57	770.922	1352.64	394.384	837.974	1130.42	387.266	865.812	1068.03	421.728	818.995	958.289	402.805	822.03	853.331	434.387	886.657	853.788	450.312	867.556	759.05
856	0	234.654	601.453	1569.83	134.852	592.225	1562.82	231.901	774.629	1573.35	118.553	773.864	1567.33	173	799.095	1391.71	188.874	847.241	1173.84	192.201	666.203	1331.28	198.132	604.67	1199.93	92.8683	851.977	1220.72	355.777	756.447	1353.54	395.723	822.139	1130.91	388.696	849.651	1068.39	422.884	802.18	958.87	403.876	804.958	853.896	435.888	869.338	854.149	451.819	849.898	759.532
857	0	235.442	588.144	1571.81	135.606	579.132	1564.77	233.097	761.353	1574.47	119.731	760.838	1568.38	174.311	785.259	1392.92	189.979	831.611	1175.07	193.08	652.182	1332.82	198.82	590.35	1201.5	94.0965	837.886	1221.98	356.926	741.88	1354.76	397.069	806.104	1131.7	390.169	833.245	1069.02	424.016	784.928	959.763	404.915	787.288	854.785	437.403	851.377	854.728	453.328	831.378	760.289
858	0	236.203	574.797	1574.01	136.332	566.006	1566.98	234.279	748.032	1575.79	120.898	747.777	1569.66	175.573	771.404	1394.41	191.054	816.192	1176.67	193.863	638.184	1334.56	199.374	576.17	1203.21	95.3086	823.925	1223.58	358.009	727.232	1356.28	398.422	789.881	1132.76	391.685	816.61	1069.91	425.116	767.259	960.956	405.913	769.047	855.986	438.926	832.797	855.515	454.824	812.016	761.311
859	0	236.928	561.411	1576.39	137.019	552.849	1569.41	235.439	734.669	1577.26	122.043	734.684	1571.14	176.779	757.545	1396.16	192.112	801.046	1178.62	194.542	624.224	1336.47	199.785	562.147	1205.03	96.5123	810.119	1225.47	359.019	712.515	1358.06	399.78	773.482	1134.07	393.244	799.763	1071.02	426.175	749.195	962.43	406.861	750.267	857.482	440.453	813.624	856.495	456.292	791.837	762.586
860	0	237.605	547.991	1578.93	137.656	539.666	1572.01	236.567	721.264	1578.88	123.16	721.561	1572.79	177.927	743.697	1398.13	193.173	786.219	1180.85	195.11	610.317	1338.52	200.045	548.289	1206.92	97.7168	796.49	1227.62	359.951	697.743	1360.08	401.143	756.921	1135.62	394.847	782.719	1072.35	427.184	730.763	964.166	407.747	730.985	859.252	441.979	793.889	857.654	457.717	770.875	764.102
861	0	238.225	534.54	1581.57	138.235	526.461	1574.75	237.656	707.822	1580.6	124.24	708.413	1574.59	179.017	729.874	1400.3	194.255	771.742	1183.32	195.568	596.477	1340.67	200.154	534.602	1208.86	98.9323	783.053	1229.99	360.803	682.931	1362.31	402.511	740.209	1137.36	396.493	765.492	1073.86	428.137	711.988	966.139	408.564	711.238	861.274	443.498	773.627	858.977	459.085	749.171	765.846
862	0	238.781	521.062	1584.28	138.746	513.24	1577.58	238.699	694.346	1582.42	125.279	695.246	1576.51	180.047	716.089	1402.62	195.382	757.628	1185.96	195.915	582.714	1342.89	200.114	521.087	1210.83	100.168	769.815	1232.53	361.574	668.095	1364.7	403.882	723.354	1139.28	398.181	748.096	1075.53	429.026	692.896	968.325	409.303	691.069	863.523	445.003	752.873	860.449	460.383	726.773	767.805
863	0	239.267	507.562	1587.03	139.185	500.009	1580.47	239.691	680.841	1584.3	126.27	682.065	1578.51	181.021	702.352	1405.06	196.57	743.875	1188.73	196.156	569.04	1345.16	199.931	507.738	1212.81	101.432	756.779	1235.2	362.265	653.251	1367.23	405.256	706.368	1141.33	399.907	730.541	1077.32	429.845	673.517	970.698	409.957	670.52	865.974	446.486	731.667	862.053	461.602	703.735	769.966
864	0	239.677	494.046	1589.77	139.544	486.774	1583.37	240.628	667.312	1586.22	127.211	668.875	1580.57	181.94	688.674	1407.59	197.832	730.463	1191.57	196.298	555.458	1347.44	199.62	494.549	1214.78	102.729	743.941	1237.96	362.878	638.415	1369.85	406.628	689.258	1143.48	401.667	712.841	1079.22	430.587	653.877	973.229	410.519	649.632	868.6	447.939	710.049	863.775	462.73	680.114	772.317
865	0	240.008	480.518	1592.48	139.823	473.541	1586.25	241.51	653.766	1588.15	128.1	655.684	1582.66	182.807	675.062	1410.16	199.174	717.363	1194.44	196.352	541.974	1349.7	199.196	481.509	1216.72	104.062	731.29	1240.76	363.419	623.604	1372.54	407.997	672.032	1145.71	403.454	695.004	1081.18	431.249	634.005	975.892	410.986	628.448	871.373	449.353	688.061	865.601	463.758	655.974	774.847
866	0	240.26	466.985	1595.12	140.02	460.318	1589.06	242.333	640.209	1590.06	128.935	642.498	1584.75	183.625	661.519	1412.74	200.593	704.535	1197.31	196.328	528.588	1351.92	198.682	468.603	1218.62	105.428	718.81	1243.57	363.89	608.834	1375.24	409.358	654.7	1147.97	405.262	677.041	1083.18	431.825	613.928	978.659	411.353	607.008	874.266	450.719	665.74	867.516	464.68	631.378	777.541
867	0	240.433	453.454	1597.66	140.136	447.109	1591.78	243.099	626.648	1591.94	129.717	629.323	1586.81	184.399	648.049	1415.29	202.077	691.932	1200.12	196.24	515.298	1354.06	198.099	455.816	1220.46	106.824	706.484	1246.34	364.299	594.12	1377.94	410.706	637.27	1150.24	407.081	658.962	1085.18	432.314	593.672	981.501	411.618	585.349	877.253	452.027	643.128	869.507	465.487	606.394	780.386
868	0	240.53	439.931	1600.08	140.173	433.921	1594.37	243.809	613.089	1593.76	130.447	616.164	1588.8	185.132	634.654	1417.78	203.607	679.503	1202.86	196.102	502.102	1356.11	197.472	443.129	1222.23	108.241	694.29	1249.05	364.651	579.475	1380.58	412.036	619.753	1152.49	408.902	640.777	1087.16	432.713	573.266	984.391	411.779	563.508	880.308	453.27	620.263	871.56	466.172	581.088	783.367
869	0	240.554	426.422	1602.35	140.136	420.758	1596.81	244.465	599.538	1595.48	131.126	603.026	1590.69	185.828	621.33	1420.18	205.16	667.199	1205.49	195.927	488.993	1358.04	196.825	430.523	1223.92	109.67	682.202	1251.65	364.953	564.91	1383.14	413.342	602.161	1154.68	410.714	622.496	1089.09	433.023	552.735	987.304	411.839	541.518	883.405	454.437	597.181	873.659	466.73	555.523	786.466
870	0	240.512	412.932	1604.44	140.031	407.625	1599.06	245.069	586.004	1597.09	131.757	589.915	1592.47	186.488	608.075	1422.44	206.71	654.971	1207.97	195.729	475.963	1359.83	196.18	417.978	1225.49	111.097	670.199	1254.12	365.21	550.437	1385.57	414.619	584.508	1156.79	412.507	604.131	1090.94	433.243	532.104	990.212	411.798	519.407	886.522	455.521	573.918	875.79	467.155	529.763	789.665
871	0	240.409	399.468	1606.34	139.867	394.524	1601.1	245.625	572.491	1598.56	132.342	576.832	1594.09	187.117	594.884	1424.55	208.23	642.775	1210.28	195.52	463.004	1361.45	195.554	405.477	1226.93	112.511	658.255	1256.43	365.429	536.06	1387.86	415.859	566.809	1158.78	414.271	585.695	1092.68	433.375	511.398	993.089	411.659	497.202	889.635	456.513	550.509	877.935	467.441	503.866	792.941
872	0	240.254	386.034	1608.03	139.649	381.457	1602.92	246.135	559.004	1599.88	132.884	563.779	1595.54	187.715	581.75	1426.47	209.697	630.576	1212.4	195.311	450.105	1362.87	194.964	393.004	1228.23	113.897	646.348	1258.55	365.614	521.786	1389.96	417.059	549.08	1160.65	415.994	567.2	1094.3	433.424	490.644	995.913	411.426	474.93	892.722	457.405	526.986	880.077	467.583	477.89	796.272
873	0	240.054	372.635	1609.49	139.389	368.424	1604.5	246.605	545.55	1601	133.386	550.759	1596.78	188.282	568.664	1428.17	211.089	618.346	1214.31	195.113	437.254	1364.09	194.421	380.547	1229.34	115.24	634.457	1260.46	365.771	507.618	1391.85	418.211	531.34	1162.35	417.668	548.661	1095.76	433.393	469.863	998.658	411.102	452.612	895.764	458.192	503.381	882.197	467.578	451.884	799.636
874	0	239.818	359.273	1610.7	139.095	355.426	1605.81	247.036	532.13	1601.93	133.85	537.769	1597.81	188.82	555.619	1429.64	212.388	606.067	1215.97	194.932	424.441	1365.08	193.935	368.097	1230.26	116.527	622.561	1262.14	365.903	493.554	1393.49	419.311	513.605	1163.86	419.282	530.091	1097.04	433.286	449.08	1001.3	410.692	430.271	898.742	458.867	479.725	884.278	467.423	425.897	803.008
875	0	239.554	345.951	1611.66	138.776	342.461	1606.86	247.431	518.748	1602.63	134.28	524.81	1598.59	189.327	542.603	1430.85	213.581	593.728	1217.37	194.773	411.654	1365.82	193.51	355.646	1230.95	117.743	610.644	1263.58	366.014	479.594	1394.88	420.352	495.896	1165.18	420.827	511.506	1098.13	433.108	428.318	1003.83	410.2	407.928	901.639	459.424	456.049	886.302	467.117	399.971	806.365
876	0	239.271	332.669	1612.36	138.441	329.525	1607.63	247.793	505.405	1603.08	134.676	511.878	1599.1	189.801	529.607	1431.8	214.658	581.328	1218.5	194.64	398.88	1366.31	193.148	343.191	1231.39	118.876	598.689	1264.76	366.104	465.735	1395.97	421.331	478.231	1166.28	422.295	492.922	1099.01	432.865	407.6	1006.22	409.63	385.605	904.439	459.861	432.384	888.251	466.658	374.145	809.685
877	0	238.975	319.427	1612.79	138.098	316.614	1608.12	248.124	492.1	1603.28	135.04	498.969	1599.35	190.238	516.621	1432.45	215.612	568.873	1219.35	194.534	386.108	1366.52	192.849	330.728	1231.57	119.912	586.682	1265.67	366.175	451.972	1396.77	422.241	460.628	1167.14	423.677	474.357	1099.66	432.561	386.946	1008.45	408.986	363.322	907.128	460.173	408.759	890.11	466.049	348.454	812.949
878	0	238.675	306.224	1612.95	137.754	303.725	1608.32	248.424	478.834	1603.22	135.374	486.078	1599.31	190.635	503.634	1432.82	216.439	556.374	1219.91	194.454	373.327	1366.45	192.612	318.255	1231.46	120.841	574.61	1266.3	366.227	438.3	1397.25	423.078	443.106	1167.75	424.967	455.827	1100.08	432.201	366.38	1010.51	408.272	341.102	909.695	460.359	385.205	891.866	465.292	322.931	816.137
879	0	238.374	293.057	1612.83	137.416	290.85	1608.24	248.695	465.604	1602.88	135.675	473.2	1598.98	190.987	490.639	1432.89	217.136	543.845	1220.17	194.398	360.527	1366.1	192.434	305.765	1231.05	121.652	562.463	1266.65	366.258	424.711	1397.41	423.838	425.682	1168.11	426.156	437.35	1100.26	431.787	345.923	1012.4	407.49	318.967	912.128	460.419	361.75	893.505	464.393	297.603	819.236
880	0	238.079	279.923	1612.45	137.087	277.984	1607.88	248.934	452.407	1602.25	135.944	460.329	1598.36	191.29	477.626	1432.66	217.703	531.304	1220.13	194.36	347.697	1365.46	192.308	293.254	1230.35	122.335	550.23	1266.71	366.267	411.198	1397.24	424.514	408.372	1168.21	427.238	418.946	1100.18	431.324	325.595	1014.09	406.645	296.942	914.42	460.352	338.425	895.017	463.358	272.499	822.233
881	0	237.792	266.817	1611.8	136.772	265.12	1607.26	249.142	439.239	1601.35	136.179	447.458	1597.44	191.538	464.587	1432.13	218.14	518.766	1219.8	194.336	334.829	1364.53	192.23	280.714	1229.34	122.885	537.902	1266.48	366.249	397.754	1396.75	425.105	391.192	1168.05	428.208	400.635	1099.86	430.812	305.419	1015.59	405.738	275.049	916.564	460.16	315.259	896.395	462.194	247.644	825.117
882	0	237.515	253.734	1610.89	136.472	252.251	1606.36	249.316	426.096	1600.16	136.378	434.581	1596.24	191.726	451.516	1431.3	218.449	506.245	1219.19	194.316	321.914	1363.32	192.191	268.133	1228.03	123.294	525.47	1265.96	366.202	384.367	1395.94	425.604	374.156	1167.62	429.06	382.435	1099.28	430.256	285.414	1016.88	404.772	253.312	918.554	459.843	292.28	897.631	460.912	223.062	827.883
883	0	237.249	240.668	1609.73	136.188	239.369	1605.22	249.453	412.972	1598.71	136.536	421.689	1594.77	191.849	438.407	1430.19	218.633	493.754	1218.29	194.294	308.947	1361.84	192.183	255.503	1226.44	123.56	512.928	1265.15	366.122	371.03	1394.82	426.01	357.278	1166.93	429.789	364.367	1098.46	429.655	265.6	1017.96	403.75	231.757	920.386	459.405	269.518	898.721	459.522	198.776	830.523
884	0	236.994	227.613	1608.32	135.918	226.468	1603.84	249.55	399.861	1596.99	136.651	408.777	1593.04	191.901	425.254	1428.8	218.695	481.298	1217.13	194.258	295.918	1360.11	192.194	242.809	1224.58	123.681	500.269	1264.07	366.003	357.73	1393.4	426.319	340.571	1165.99	430.389	346.453	1097.4	429.01	245.999	1018.83	402.674	210.407	922.057	458.847	247.001	899.662	458.036	174.809	833.036
885	0	236.746	214.561	1606.7	135.661	213.541	1602.25	249.603	386.758	1595.02	136.719	395.838	1591.06	191.878	412.056	1427.15	218.637	468.878	1215.72	194.199	282.824	1358.13	192.212	230.04	1222.48	123.659	487.488	1262.71	365.841	344.457	1391.7	426.529	324.046	1164.79	430.859	328.712	1096.1	428.324	226.63	1019.5	401.548	189.287	923.566	458.174	224.758	900.449	456.466	151.184	835.417
886	0	236.503	201.508	1604.86	135.411	200.583	1600.45	249.608	373.657	1592.82	136.735	382.866	1588.86	191.776	398.806	1425.26	218.465	456.49	1214.06	194.104	269.658	1355.94	192.221	217.183	1220.16	123.498	474.581	1261.08	365.631	331.198	1389.73	426.638	307.712	1163.36	431.195	311.163	1094.58	427.595	207.511	1019.95	400.373	168.421	924.911	457.387	202.817	901.082	454.824	127.923	837.664
887	0	236.261	188.445	1602.84	135.166	187.586	1598.48	249.562	360.551	1590.41	136.695	369.857	1586.46	191.592	385.503	1423.14	218.183	444.122	1212.18	193.964	256.416	1353.56	192.206	204.226	1217.65	123.205	461.545	1259.21	365.367	317.941	1387.54	426.645	291.58	1161.71	431.395	293.827	1092.85	426.827	188.662	1020.2	399.153	147.834	926.091	456.49	181.206	901.557	453.123	105.05	839.776
888	0	236.014	175.366	1600.66	134.918	174.548	1596.35	249.46	347.435	1587.81	136.596	356.804	1583.9	191.324	372.144	1420.82	217.798	431.757	1210.1	193.765	243.092	1351.02	192.148	191.159	1214.99	122.789	448.379	1257.1	365.045	304.672	1385.13	426.548	275.655	1159.84	431.458	276.72	1090.92	426.018	170.099	1020.25	397.891	127.549	927.106	455.487	159.953	901.874	451.375	82.5864	841.747
889	0	235.757	162.267	1598.33	134.661	161.464	1594.11	249.298	334.302	1585.05	136.433	343.706	1581.19	190.968	358.727	1418.32	217.316	419.369	1207.83	193.499	229.683	1348.34	192.027	177.972	1212.21	122.262	435.08	1254.78	364.661	291.377	1382.54	426.348	259.943	1157.78	431.383	259.86	1088.81	425.17	151.839	1020.09	396.589	107.59	927.954	454.381	139.086	902.03	449.592	60.5561	843.574
890	0	235.481	149.14	1595.9	134.387	148.331	1591.76	249.075	321.148	1582.17	136.203	330.559	1578.37	190.526	345.247	1415.68	216.746	406.929	1205.39	193.153	216.185	1345.56	191.824	164.654	1209.35	121.637	421.647	1252.27	364.208	278.043	1379.81	426.043	244.448	1155.55	431.171	243.261	1086.54	424.284	133.898	1019.75	395.251	87.9794	928.635	453.176	118.631	902.021	447.783	38.9826	845.25
891	0	235.181	135.982	1593.39	134.089	135.15	1589.36	248.787	307.966	1579.18	135.906	317.362	1575.47	189.995	331.704	1412.91	216.095	394.401	1202.8	192.721	202.593	1342.72	191.522	151.199	1206.44	120.929	408.081	1249.58	363.685	264.656	1376.95	425.634	229.17	1153.18	430.825	226.935	1084.13	423.361	116.289	1019.22	393.88	68.7399	929.148	451.875	98.6157	901.848	445.959	17.8894	846.769
892	0	234.847	122.787	1590.84	133.758	121.919	1586.93	248.433	294.75	1576.13	135.54	304.114	1572.53	189.376	318.094	1410.06	215.374	381.746	1200.08	192.193	188.906	1339.84	191.101	137.597	1203.53	120.152	394.381	1246.76	363.088	251.202	1374.02	425.121	214.108	1150.68	430.345	210.893	1081.61	422.401	99.0262	1018.51	392.48	49.8935	929.493	450.483	79.0658	901.506	444.128	-2.69926	848.121
893	0	234.472	109.552	1588.28	133.386	108.641	1584.51	248.015	281.496	1573.04	135.106	290.815	1569.57	188.671	304.414	1407.15	214.595	368.923	1197.26	191.564	175.12	1336.98	190.549	123.843	1200.66	119.321	380.548	1243.82	362.414	237.671	1371.05	424.505	199.259	1148.09	429.737	195.142	1078.99	421.404	82.1195	1017.64	391.054	31.4618	929.668	449.004	60.0069	900.997	442.297	-22.7591	849.296
894	0	234.048	96.2726	1585.75	132.964	95.3173	1582.14	247.533	268.199	1569.96	134.607	277.469	1566.63	187.88	290.662	1404.23	213.767	355.892	1194.36	190.832	161.234	1334.16	189.854	109.928	1197.87	118.447	366.579	1240.81	361.663	224.052	1368.07	423.786	184.618	1145.43	429.004	179.688	1076.32	420.372	65.5791	1016.61	389.606	13.4656	929.675	447.445	41.4639	900.319	440.473	-42.2656	850.282
895	0	233.566	82.9471	1583.29	132.484	81.9537	1579.85	246.993	254.854	1566.91	134.048	264.077	1563.75	187.005	276.836	1401.33	212.9	342.613	1191.41	189.996	147.248	1331.43	189.009	95.85	1195.2	117.541	352.477	1237.75	360.834	210.339	1365.12	422.966	170.176	1142.75	428.151	164.533	1073.63	419.304	49.4128	1015.44	388.139	-4.07509	929.513	445.812	23.4603	899.477	438.661	-61.1939	851.07
896	0	233.019	69.5731	1580.94	131.937	68.5555	1577.68	246.398	241.455	1563.94	133.436	250.645	1560.96	186.049	262.934	1398.49	212.003	329.054	1188.44	189.059	133.162	1328.82	188.016	81.6047	1192.67	116.61	338.24	1234.7	359.928	196.528	1362.26	422.046	155.926	1140.08	427.184	149.678	1070.94	418.201	33.6272	1014.15	386.657	-21.1408	929.186	444.112	6.0184	898.476	436.866	-79.519	851.646
897	0	232.399	56.1492	1578.74	131.317	55.13	1575.67	245.756	227.998	1561.06	132.778	237.176	1558.28	185.016	248.956	1395.75	211.081	315.188	1185.51	188.026	118.98	1326.36	186.88	67.1926	1190.34	115.657	323.87	1231.68	358.948	182.619	1359.5	421.029	141.857	1137.46	426.11	135.12	1068.3	417.062	18.227	1012.76	385.165	-37.7132	928.696	442.355	-10.841	897.324	435.092	-97.2161	852.001
898	0	231.698	42.6747	1576.72	130.617	41.6855	1573.87	245.078	214.478	1558.33	132.087	223.677	1555.76	183.908	234.903	1393.16	210.134	300.999	1182.63	186.907	104.706	1324.09	185.614	52.6174	1188.22	114.681	309.368	1228.75	357.898	168.615	1356.91	419.917	127.958	1134.93	424.935	120.857	1065.74	415.888	3.2157	1011.28	383.667	-53.7752	928.05	440.551	-27.0991	896.033	433.342	-114.261	852.123
899	0	230.912	29.1494	1574.93	129.831	28.2313	1572.29	244.373	200.892	1555.76	131.374	210.154	1553.41	182.73	220.777	1390.74	209.159	286.482	1179.86	185.714	90.3472	1322.05	184.238	37.8873	1186.35	113.678	294.74	1225.95	356.784	154.527	1354.51	418.715	114.219	1132.53	423.666	106.882	1063.31	414.68	-11.4047	1009.75	382.168	-69.311	927.254	438.712	-42.7395	894.618	431.619	-130.628	852.005
900	0	230.034	15.5738	1573.38	128.954	14.7778	1570.98	243.655	187.236	1553.4	130.654	196.617	1551.27	181.489	206.584	1388.53	208.145	271.644	1177.25	184.462	75.9144	1320.25	182.779	23.0159	1184.75	112.64	279.993	1223.32	355.615	140.366	1352.35	417.426	100.63	1130.29	422.312	93.1904	1061.04	413.439	-25.6334	1008.18	380.674	-84.3067	926.318	436.851	-57.7486	893.1	429.928	-146.296	851.641
901	0	229.062	1.94929	1572.13	127.985	1.33588	1569.95	242.936	173.507	1551.26	129.942	183.072	1549.36	180.192	192.33	1386.58	207.081	256.505	1174.84	183.17	61.4194	1318.73	181.271	8.02222	1183.44	111.557	265.137	1220.91	354.4	126.15	1350.45	416.057	87.1834	1128.27	420.879	79.7746	1058.98	412.167	-39.4704	1006.59	379.189	-98.7503	925.254	434.983	-72.1156	891.501	428.273	-161.243	851.027
902	0	227.992	-11.7224	1571.18	126.922	-12.0832	1569.24	242.233	159.702	1549.38	129.256	169.529	1547.7	178.846	178.024	1384.91	205.95	241.098	1172.7	181.857	46.8776	1317.51	179.749	-7.06802	1182.44	110.417	250.187	1218.77	353.15	111.9	1348.86	414.615	73.8738	1126.49	419.377	66.6281	1057.15	410.866	-52.9168	1005.03	377.722	-112.632	924.076	433.124	-85.8333	889.848	426.657	-175.448	850.165
903	0	226.823	-25.4386	1570.56	125.764	-25.4681	1568.86	241.559	145.822	1547.77	128.613	155.996	1546.31	177.461	163.677	1383.55	204.736	225.471	1170.86	180.544	32.3065	1316.6	178.253	-22.2231	1181.74	109.212	235.162	1216.93	351.88	97.6396	1347.59	413.111	60.6984	1124.99	417.814	53.7446	1055.59	409.541	-65.974	1003.5	376.278	-125.945	922.802	431.29	-98.8978	888.168	425.086	-188.896	849.057
904	0	225.557	-39.1961	1570.29	124.516	-38.8077	1568.82	240.93	131.864	1546.47	128.03	142.483	1545.22	176.048	149.304	1382.53	203.426	209.681	1169.38	179.255	17.7261	1316.02	176.821	-37.4056	1181.36	107.931	220.085	1215.45	350.602	83.3949	1346.68	411.553	47.6581	1123.79	416.2	41.1184	1054.33	408.197	-78.6438	1002.04	374.865	-138.684	921.449	429.497	-111.309	886.493	423.566	-201.572	847.713
905	0	224.196	-52.9905	1570.37	123.179	-52.0912	1569.14	240.361	117.832	1545.49	127.525	128.997	1544.43	174.62	134.921	1381.86	202.011	193.797	1168.3	178.009	3.15816	1315.77	175.488	-52.5736	1181.29	106.57	204.982	1214.34	349.333	69.1941	1346.13	409.956	34.7576	1122.91	414.544	28.7452	1053.38	406.843	-90.9284	1000.68	373.491	-150.847	920.036	427.764	-123.07	884.853	422.103	-213.466	846.143
906	0	222.744	-66.817	1570.81	121.761	-65.3088	1569.8	239.865	103.727	1544.84	127.113	115.548	1543.96	173.189	120.546	1381.57	200.489	177.892	1167.66	176.827	-11.3741	1315.87	174.288	-67.6827	1181.52	105.127	189.882	1213.65	348.087	55.066	1345.95	408.331	22.0052	1122.37	412.857	16.6219	1052.77	405.487	-102.83	999.426	372.165	-162.436	918.587	426.105	-134.189	883.279	420.705	-224.572	844.364
907	0	221.207	-80.6695	1571.6	120.269	-78.4515	1570.8	239.456	89.5552	1544.53	126.808	102.144	1543.81	171.769	106.199	1381.65	198.867	162.046	1167.48	175.727	-25.8467	1316.3	173.247	-82.6884	1182.04	103.603	174.817	1213.39	346.88	41.0401	1346.16	406.695	9.41288	1122.17	411.147	4.74712	1052.51	404.139	-114.35	998.307	370.896	-173.455	917.122	424.539	-144.676	881.799	419.378	-234.89	842.397
908	0	219.591	-94.5413	1572.75	118.713	-91.5113	1572.13	239.143	75.3216	1544.58	126.625	88.7918	1543.99	170.373	91.9006	1382.11	197.159	146.336	1167.77	174.725	-40.2358	1317.06	172.383	-97.5482	1182.85	102.007	159.818	1213.58	345.725	27.1454	1346.74	405.062	-3.00442	1122.32	409.426	-6.87917	1052.59	402.811	-125.49	997.336	369.693	-183.911	915.663	423.077	-154.544	880.441	418.131	-244.422	840.265
909	0	217.908	-108.425	1574.22	117.102	-104.482	1573.77	238.934	61.0348	1544.98	126.572	75.4987	1544.5	169.014	77.6735	1382.95	195.384	130.836	1168.53	173.834	-54.5183	1318.15	171.709	-112.225	1183.94	100.346	144.915	1214.2	344.634	13.4099	1347.69	403.447	-15.2294	1122.81	407.702	-18.2553	1053.02	401.516	-136.253	996.527	368.566	-193.813	914.231	421.735	-163.81	879.228	416.973	-253.178	837.994
910	0	216.166	-122.311	1576.01	115.449	-117.358	1575.71	238.836	46.7044	1545.73	126.656	62.2711	1545.33	167.706	63.5392	1384.15	193.567	115.611	1169.73	173.061	-68.6725	1319.55	171.229	-126.687	1185.28	98.6346	130.136	1215.26	343.617	-0.14041	1348.98	401.864	-27.2433	1123.63	405.985	-29.378	1053.78	400.268	-146.639	995.887	367.525	-203.175	912.846	420.522	-172.494	878.179	415.912	-261.174	835.614
911	0	214.376	-136.191	1578.08	113.766	-130.135	1577.9	238.851	32.3419	1546.83	126.883	49.1144	1546.48	166.457	49.5181	1385.69	191.732	100.716	1171.36	172.413	-82.6793	1321.24	170.941	-140.911	1186.88	96.8847	115.508	1216.73	342.684	-13.4825	1350.59	400.326	-39.0265	1124.75	404.283	-40.2431	1054.85	399.08	-156.65	995.42	366.579	-212.011	911.527	419.448	-180.616	877.309	414.957	-268.429	833.156
912	0	212.552	-150.054	1580.4	112.066	-142.81	1580.33	238.98	17.9601	1548.26	127.253	36.0334	1547.93	165.278	35.629	1387.56	189.905	86.1899	1173.36	171.89	-96.5224	1323.2	170.837	-154.884	1188.72	95.1101	101.049	1218.59	341.838	-26.5973	1352.5	398.845	-50.5595	1126.16	402.604	-50.845	1056.22	397.966	-166.288	995.125	365.738	-220.339	910.29	418.52	-188.199	876.629	414.117	-274.969	830.654
913	0	210.705	-163.89	1582.95	110.363	-155.383	1582.96	239.219	3.57261	1549.99	127.763	23.0321	1549.67	164.173	21.888	1389.72	188.105	72.0561	1175.69	171.489	-110.189	1325.42	170.9	-168.599	1190.78	93.3241	86.7765	1220.81	341.082	-39.4707	1354.66	397.429	-61.8242	1127.81	400.953	-61.1779	1057.85	396.938	-175.552	994.998	365.011	-228.176	909.147	417.74	-195.265	876.142	413.401	-280.824	828.142
914	0	208.847	-177.688	1585.69	108.668	-167.851	1585.76	239.564	-10.806	1552.02	128.409	10.1134	1551.68	163.147	8.30804	1392.13	186.351	58.3212	1178.3	171.203	-123.671	1327.85	171.111	-182.057	1193.07	91.5385	72.7008	1223.34	340.416	-52.0945	1357.05	396.082	-72.8043	1129.69	399.336	-71.2356	1059.72	396.008	-184.445	995.031	364.406	-235.545	908.108	417.11	-201.838	875.85	412.818	-286.027	825.651
915	0	206.991	-191.437	1588.58	106.993	-180.217	1588.69	240.006	-25.1609	1554.3	129.182	-2.72055	1553.92	162.201	-5.10192	1394.78	184.657	44.9753	1181.13	171.023	-136.964	1330.49	171.443	-195.266	1195.55	89.7641	58.8267	1226.15	339.835	-64.4665	1359.61	394.809	-83.4862	1131.75	397.755	-81.0126	1061.78	395.186	-192.969	995.211	363.929	-242.465	907.179	416.627	-207.941	875.747	412.377	-290.616	823.214
916	0	205.148	-205.127	1591.58	105.351	-192.48	1591.71	240.535	-39.4775	1556.81	130.069	-15.4685	1556.38	161.334	-18.3368	1397.6	183.03	31.9937	1184.14	170.936	-150.069	1333.29	171.867	-208.239	1198.21	88.0101	45.1535	1229.19	339.334	-76.591	1362.31	393.609	-93.8597	1133.97	396.213	-90.5039	1064.02	394.479	-201.126	995.523	363.588	-248.959	906.364	416.286	-213.596	875.823	412.084	-294.63	820.86
917	0	203.328	-218.747	1594.65	103.749	-204.644	1594.79	241.139	-53.7417	1559.5	131.058	-28.1304	1559.01	160.541	-31.3958	1400.57	181.474	19.3391	1187.27	170.926	-162.988	1336.22	172.352	-220.996	1201.03	86.2841	31.6754	1232.41	338.903	-88.4786	1365.1	392.479	-103.919	1136.29	394.71	-99.7065	1066.38	393.893	-208.921	995.947	363.385	-255.05	905.66	416.076	-218.826	876.064	411.948	-298.112	818.615
918	0	201.541	-232.288	1597.75	102.196	-216.712	1597.9	241.804	-67.9402	1562.34	132.132	-40.7069	1561.78	159.817	-44.282	1403.64	179.99	6.96497	1190.48	170.978	-175.732	1339.24	172.865	-233.556	1203.98	84.5917	18.3814	1235.75	338.53	-100.145	1367.93	391.412	-113.661	1138.68	393.244	-108.619	1068.83	393.431	-216.358	996.465	363.322	-260.762	905.062	415.986	-223.65	876.451	411.974	-301.103	816.499
919	0	199.793	-245.743	1600.85	100.699	-228.689	1600.99	242.514	-82.061	1565.26	133.273	-53.2001	1564.64	159.154	-57.0023	1406.76	178.572	-5.18124	1193.72	171.073	-188.311	1342.31	173.373	-245.947	1207.02	82.9372	5.25662	1239.17	338.203	-111.612	1370.78	390.402	-123.089	1141.11	391.813	-117.244	1071.34	393.093	-223.445	997.051	363.399	-266.119	904.56	416	-228.091	876.962	412.166	-303.647	814.528
920	0	198.092	-259.105	1603.9	99.2601	-240.58	1604.03	243.254	-96.0936	1568.23	134.461	-65.6129	1567.55	158.541	-69.5671	1409.89	177.212	-17.1542	1196.96	171.196	-200.74	1345.4	173.849	-258.192	1210.12	81.3227	-7.71712	1242.61	337.909	-122.904	1373.59	389.439	-132.21	1143.54	390.413	-125.587	1073.87	392.876	-230.191	997.682	363.614	-271.144	904.141	416.102	-232.168	877.572	412.525	-305.788	812.712
921	0	196.443	-272.369	1606.86	97.8838	-252.392	1606.99	244.006	-110.029	1571.19	135.678	-77.9498	1570.46	157.969	-81.9895	1412.97	175.899	-29.0073	1200.14	171.329	-213.036	1348.45	174.268	-270.321	1213.23	79.7489	-20.5602	1246.02	337.632	-134.047	1376.32	388.512	-141.037	1145.94	389.041	-133.655	1076.38	392.778	-236.608	998.332	363.963	-275.863	903.789	416.271	-235.904	878.251	413.049	-307.567	811.053
922	0	194.85	-285.533	1609.69	96.5707	-264.135	1609.83	244.755	-123.86	1574.08	136.9	-90.216	1573.32	157.426	-94.2854	1415.97	174.62	-40.7891	1203.22	171.456	-225.217	1351.43	174.613	-282.358	1216.31	78.2151	-33.2943	1249.34	337.359	-145.071	1378.93	387.61	-149.585	1148.26	387.692	-141.462	1078.84	392.791	-242.711	998.974	364.441	-280.301	903.484	416.487	-239.319	878.972	413.734	-309.027	809.547
923	0	193.316	-298.597	1612.36	95.3206	-275.818	1612.51	245.484	-137.581	1576.87	138.107	-102.418	1576.08	156.901	-106.472	1418.84	173.361	-52.5415	1206.16	171.565	-237.301	1354.29	174.871	-294.33	1219.31	76.7196	-45.9408	1252.53	337.078	-156.004	1381.39	386.724	-157.877	1150.49	386.359	-149.026	1081.22	392.908	-248.519	999.582	365.04	-284.484	903.203	416.731	-242.437	879.704	414.571	-310.207	808.186
924	0	191.843	-311.56	1614.83	94.1325	-287.453	1615.01	246.177	-151.188	1579.49	139.279	-114.565	1578.69	156.381	-118.569	1421.53	172.112	-64.2975	1208.92	171.645	-249.309	1357	175.039	-306.258	1222.18	75.2603	-58.52	1255.53	336.778	-166.874	1383.66	385.843	-165.937	1152.59	385.039	-156.368	1083.49	393.121	-254.051	1000.13	365.753	-288.439	902.925	416.982	-245.283	880.417	415.551	-311.144	806.952
925	0	190.434	-324.428	1617.08	93.0045	-299.054	1617.28	246.82	-164.68	1581.9	140.393	-126.664	1581.11	155.858	-130.594	1424.01	170.861	-76.0812	1211.47	171.686	-261.259	1359.5	175.118	-318.16	1224.86	73.8354	-71.0505	1258.3	336.45	-177.709	1385.71	384.959	-173.793	1154.53	383.726	-163.514	1085.62	393.419	-259.333	1000.6	366.57	-292.193	902.624	417.222	-247.882	881.082	416.657	-311.876	805.825
926	0	189.089	-337.205	1619.06	91.9344	-310.634	1619.31	247.398	-178.056	1584.07	141.432	-138.726	1583.3	155.321	-142.568	1426.25	169.601	-87.9069	1213.75	171.682	-273.168	1361.76	175.114	-330.049	1227.31	72.4435	-83.5479	1260.8	336.087	-188.534	1387.52	384.065	-181.479	1156.29	382.417	-170.494	1087.59	393.794	-264.392	1000.96	367.482	-295.774	902.277	417.434	-250.265	881.672	417.874	-312.436	804.783
927	0	187.812	-349.897	1620.76	90.9201	-322.21	1621.07	247.899	-191.316	1585.95	142.375	-150.762	1585.23	154.764	-154.51	1428.21	168.327	-99.7805	1215.76	171.63	-285.054	1363.75	175.04	-341.934	1229.49	71.0844	-96.0246	1263	335.686	-199.372	1389.06	383.157	-189.027	1157.85	381.11	-177.342	1089.38	394.236	-269.259	1001.19	368.48	-299.211	901.862	417.604	-252.461	882.166	419.183	-312.854	803.8
928	0	186.603	-362.514	1622.16	89.9596	-333.8	1622.53	248.313	-204.463	1587.51	143.206	-162.783	1586.85	154.181	-166.438	1429.86	167.04	-111.7	1217.44	171.529	-296.933	1365.43	174.91	-353.82	1231.34	69.7593	-108.49	1264.86	335.246	-210.243	1390.32	382.233	-196.475	1159.2	379.805	-184.092	1090.96	394.735	-273.966	1001.28	369.554	-302.533	901.359	417.721	-254.504	882.543	420.562	-313.161	802.85
929	0	185.467	-375.065	1623.22	89.0515	-345.419	1623.67	248.631	-217.5	1588.73	143.91	-174.802	1588.14	153.57	-178.369	1431.18	165.743	-123.657	1218.79	171.379	-308.819	1366.77	174.738	-365.707	1232.83	68.4712	-120.949	1266.36	334.767	-221.168	1391.28	381.294	-203.861	1160.32	378.503	-190.784	1092.32	395.284	-278.55	1001.22	370.696	-305.77	900.748	417.776	-256.429	882.788	421.992	-313.384	801.908
930	0	184.404	-387.56	1623.95	88.1952	-357.088	1624.48	248.844	-230.431	1589.59	144.474	-186.829	1589.08	152.93	-190.319	1432.17	164.443	-135.638	1219.79	171.184	-320.724	1367.76	174.543	-377.594	1233.94	67.2247	-133.407	1267.49	334.254	-232.164	1391.93	380.342	-211.223	1161.21	377.208	-197.456	1093.46	395.874	-283.048	1000.99	371.897	-308.953	900.016	417.765	-258.275	882.892	423.449	-313.551	800.952
931	0	183.42	-400.01	1624.34	87.3909	-368.822	1624.94	248.948	-243.261	1590.09	144.887	-198.877	1589.66	152.262	-202.302	1432.8	163.154	-147.624	1220.43	170.948	-332.66	1368.38	174.34	-389.478	1234.63	66.0268	-145.861	1268.23	333.712	-243.245	1392.27	379.384	-218.601	1161.86	375.926	-204.147	1094.37	396.501	-287.5	1000.59	373.149	-312.114	899.151	417.689	-260.083	882.849	424.914	-313.689	799.962
932	0	182.517	-412.426	1624.36	86.6398	-380.64	1625.05	248.94	-255.994	1590.21	145.142	-210.959	1589.87	151.571	-214.329	1433.07	161.889	-159.596	1220.71	170.677	-344.636	1368.63	174.142	-401.357	1234.9	64.8859	-158.313	1268.59	333.149	-254.426	1392.3	378.426	-226.034	1162.27	374.666	-210.898	1095.05	397.157	-291.947	1000.01	374.446	-315.286	898.146	417.55	-261.894	882.659	426.366	-313.824	798.922
933	0	181.701	-424.819	1624.04	85.944	-392.559	1624.8	248.819	-268.638	1589.96	145.234	-223.084	1589.71	150.863	-226.411	1432.98	160.667	-171.533	1220.63	170.38	-356.662	1368.49	173.964	-413.228	1234.74	63.8121	-170.76	1268.56	332.576	-265.719	1392.02	377.48	-233.559	1162.44	373.438	-217.745	1095.49	397.841	-296.432	999.262	375.781	-318.502	896.999	417.355	-263.755	882.328	427.788	-313.988	797.822
934	0	180.977	-437.2	1623.36	85.3069	-404.593	1624.2	248.586	-281.197	1589.35	145.16	-235.264	1589.19	150.148	-238.554	1432.54	159.508	-183.416	1220.22	170.065	-368.744	1367.97	173.816	-425.092	1234.15	62.8167	-183.198	1268.16	332.002	-277.136	1391.45	376.557	-241.216	1162.38	372.255	-224.726	1095.71	398.55	-300.998	998.342	377.149	-321.798	895.71	417.118	-265.711	881.862	429.166	-314.212	796.656
935	0	180.35	-449.578	1622.35	84.7324	-416.755	1623.25	248.244	-293.679	1588.39	144.922	-247.508	1588.31	149.437	-250.764	1431.75	158.433	-195.227	1219.49	169.742	-380.888	1367.09	173.706	-436.952	1233.16	61.9118	-195.627	1267.39	331.439	-288.687	1390.59	375.67	-249.038	1162.1	371.13	-231.874	1095.72	399.282	-305.687	997.259	378.546	-325.208	894.283	416.852	-267.812	881.273	430.487	-314.531	795.42
936	0	179.825	-461.963	1621.01	84.2255	-429.057	1621.95	247.799	-306.091	1587.1	144.524	-259.825	1587.1	148.742	-263.046	1430.64	157.463	-206.953	1218.45	169.42	-393.101	1365.85	173.641	-448.815	1231.77	61.1097	-208.046	1266.28	330.901	-300.381	1389.47	374.833	-257.059	1161.6	370.079	-239.221	1095.51	400.038	-310.544	996.022	379.968	-328.77	892.725	416.574	-270.107	880.576	431.743	-314.985	794.116
937	0	179.407	-474.363	1619.36	83.7917	-441.508	1620.34	247.26	-318.44	1585.52	143.974	-272.221	1585.57	148.077	-275.4	1429.21	156.62	-218.588	1217.15	169.109	-405.387	1364.28	173.625	-460.691	1230.02	60.4225	-220.454	1264.85	330.4	-312.226	1388.1	374.063	-265.312	1160.9	369.115	-246.798	1095.11	400.819	-315.611	994.643	381.411	-332.522	891.047	416.306	-272.645	879.783	432.929	-315.618	792.75
938	0	179.103	-486.785	1617.43	83.4371	-454.114	1618.42	246.634	-330.733	1583.66	143.281	-284.703	1583.76	147.457	-287.828	1427.5	155.924	-230.131	1215.6	168.821	-417.75	1362.42	173.662	-472.594	1227.95	59.8615	-232.855	1263.11	329.95	-324.227	1386.5	373.375	-273.824	1160.02	368.255	-254.632	1094.52	401.627	-320.93	993.132	382.874	-336.503	889.258	416.068	-275.477	878.91	434.047	-316.478	791.329
939	0	178.916	-499.237	1615.23	83.1679	-466.879	1616.21	245.934	-342.98	1581.57	142.459	-297.275	1581.69	146.898	-300.327	1425.52	155.392	-241.591	1213.83	168.567	-430.195	1360.27	173.752	-484.54	1225.59	59.4371	-245.254	1261.11	329.562	-336.39	1384.69	372.784	-282.621	1158.96	367.513	-262.747	1093.76	402.465	-326.542	991.504	384.354	-340.751	887.374	415.882	-278.652	877.971	435.098	-317.617	789.86
940	0	178.852	-511.725	1612.8	82.9905	-479.803	1613.76	245.174	-355.188	1579.28	141.524	-309.942	1579.41	146.414	-312.898	1423.3	155.04	-252.985	1211.87	168.356	-442.724	1357.9	173.896	-496.548	1222.99	59.1579	-257.659	1258.85	329.25	-348.717	1382.7	372.304	-291.727	1157.74	366.902	-271.166	1092.85	403.335	-332.488	989.773	385.85	-345.307	885.406	415.77	-282.218	876.979	436.092	-319.09	788.355
941	0	178.913	-524.252	1610.17	82.9113	-492.887	1611.08	244.366	-367.367	1576.83	140.494	-322.704	1576.94	146.021	-325.536	1420.87	154.877	-264.343	1209.75	168.2	-455.342	1355.33	174.093	-508.64	1220.2	59.031	-270.082	1256.39	329.025	-361.208	1380.54	371.95	-301.161	1156.37	366.435	-279.908	1091.8	404.241	-338.805	987.953	387.361	-350.212	883.37	415.754	-286.223	875.945	437.038	-320.957	786.821
942	0	179.103	-536.824	1607.37	82.9362	-506.126	1608.21	243.528	-379.525	1574.26	139.388	-335.563	1574.34	145.733	-338.24	1418.27	154.911	-275.702	1207.48	168.108	-468.051	1352.6	174.342	-520.838	1217.27	59.0611	-282.534	1253.74	328.897	-373.863	1378.26	371.733	-310.939	1154.88	366.121	-288.991	1090.61	405.186	-345.528	986.059	388.886	-355.507	881.28	415.852	-290.71	874.878	437.952	-323.279	785.268
943	0	179.424	-549.444	1604.45	83.0709	-519.513	1605.18	242.674	-391.673	1571.62	138.228	-348.52	1571.64	145.56	-351.006	1415.52	155.145	-287.11	1205.09	168.09	-480.855	1349.76	174.644	-533.164	1214.26	59.251	-295.032	1250.93	328.875	-386.678	1375.87	371.662	-321.075	1153.27	365.97	-298.43	1089.32	406.173	-352.691	984.106	390.424	-361.232	879.151	416.08	-295.723	873.784	438.849	-326.117	783.705
944	0	179.876	-562.114	1601.43	83.32	-533.043	1602.05	241.823	-403.82	1568.95	137.035	-361.573	1568.88	145.515	-363.832	1412.67	155.577	-298.622	1202.58	168.155	-493.756	1346.86	174.996	-545.64	1211.2	59.6008	-307.593	1248	328.966	-399.647	1373.4	371.746	-331.578	1151.57	365.985	-308.238	1087.92	407.205	-360.324	982.11	391.976	-367.427	876.996	416.453	-301.302	872.669	439.748	-329.534	782.138
945	0	180.461	-574.838	1598.36	83.6876	-546.706	1598.84	240.989	-415.976	1566.29	135.833	-374.72	1566.12	145.602	-376.717	1409.74	156.202	-310.3	1199.98	168.309	-506.758	1343.94	175.399	-558.288	1208.17	60.1079	-320.236	1244.98	329.175	-412.762	1370.87	371.987	-342.454	1149.78	366.168	-318.425	1086.44	408.283	-368.454	980.087	393.54	-374.132	874.832	416.978	-307.483	871.535	440.668	-333.59	780.575
946	0	181.178	-587.617	1595.28	84.1767	-560.493	1595.6	240.19	-428.15	1563.69	134.643	-387.96	1563.39	145.828	-389.66	1406.78	157.008	-322.205	1197.29	168.56	-519.861	1341.06	175.854	-571.125	1205.2	60.7666	-332.98	1241.91	329.504	-426.014	1368.33	372.386	-353.705	1147.94	366.52	-329	1084.9	409.409	-377.105	978.054	395.117	-381.384	872.673	417.662	-314.3	870.388	441.626	-338.345	779.022
947	0	182.024	-600.453	1592.24	84.7891	-574.392	1592.37	239.439	-440.354	1561.19	133.486	-401.29	1560.74	146.194	-402.659	1403.83	157.981	-334.398	1194.54	168.912	-533.069	1338.24	176.361	-584.168	1202.36	61.5682	-345.845	1238.82	329.955	-439.391	1365.79	372.94	-365.33	1146.05	367.034	-339.97	1083.3	410.582	-386.299	976.029	396.705	-389.221	870.537	418.507	-321.785	869.23	442.641	-343.855	777.486
948	0	182.997	-613.348	1589.28	85.5251	-588.394	1589.21	238.753	-452.595	1558.83	132.382	-414.707	1558.21	146.697	-415.717	1400.91	159.103	-346.933	1191.74	169.368	-546.38	1335.55	176.924	-597.428	1199.68	62.5007	-358.847	1235.75	330.523	-452.88	1363.3	373.641	-377.324	1144.15	367.704	-351.337	1081.67	411.802	-396.052	974.034	398.303	-397.676	868.441	419.507	-329.964	868.064	443.73	-350.171	775.976
949	0	184.092	-626.303	1586.43	86.3839	-602.487	1586.14	238.141	-464.885	1556.65	131.35	-428.209	1555.84	147.331	-428.833	1398.08	160.351	-359.857	1188.92	169.928	-559.795	1333.02	177.545	-610.912	1197.21	63.5489	-372.003	1232.73	331.206	-466.469	1360.88	374.481	-389.679	1142.26	368.518	-363.105	1080.03	413.066	-406.377	972.089	399.911	-406.78	866.405	420.657	-338.86	866.898	444.905	-357.34	774.5
950	0	185.304	-639.318	1583.74	87.3629	-616.661	1583.22	237.615	-477.23	1554.69	130.404	-441.792	1553.68	148.088	-442.011	1395.38	161.701	-373.2	1186.11	170.59	-573.313	1330.7	178.227	-624.621	1194.99	64.6948	-385.325	1229.81	331.995	-480.144	1358.57	375.445	-402.385	1140.41	369.464	-375.272	1078.4	414.37	-417.285	970.218	401.526	-416.562	864.449	421.946	-348.494	865.739	446.177	-365.403	773.07
951	0	186.626	-652.397	1581.25	88.4578	-630.907	1580.49	237.182	-489.64	1552.98	129.557	-455.453	1551.74	148.957	-455.251	1392.84	163.126	-386.98	1183.34	171.351	-586.931	1328.62	178.972	-638.552	1193.06	65.918	-398.821	1227.03	332.88	-493.891	1356.4	376.518	-415.428	1138.62	370.523	-387.837	1076.81	415.711	-428.781	968.445	403.146	-427.046	862.597	423.358	-358.882	864.597	447.554	-374.398	771.7
952	0	188.051	-665.538	1579	89.6629	-645.215	1577.99	236.848	-502.122	1551.55	128.818	-469.19	1550.07	149.922	-468.556	1390.51	164.597	-401.199	1180.67	172.204	-600.643	1326.81	179.782	-652.693	1191.45	67.1963	-412.494	1224.44	333.85	-507.698	1354.42	377.68	-428.793	1136.92	371.68	-400.794	1075.28	417.081	-440.867	966.796	404.766	-438.254	860.873	424.878	-370.036	863.486	449.038	-384.351	770.405
953	0	189.569	-678.744	1577.02	90.9706	-659.577	1575.75	236.615	-514.682	1550.42	128.195	-482.999	1548.7	150.968	-481.926	1388.41	166.086	-415.841	1178.15	173.139	-614.444	1325.3	180.657	-667.029	1190.18	68.5063	-426.343	1222.08	334.89	-521.553	1352.65	378.913	-442.461	1135.36	372.914	-414.136	1073.84	418.475	-453.542	965.298	406.383	-450.201	859.3	426.484	-381.963	862.421	450.629	-395.286	769.204
954	0	191.169	-692.015	1575.33	92.3719	-673.985	1573.8	236.483	-527.325	1549.61	127.69	-496.877	1547.64	152.078	-495.363	1386.6	167.566	-430.876	1175.83	174.144	-628.326	1324.12	181.592	-681.536	1189.26	69.8249	-440.359	1219.99	335.986	-535.445	1351.13	380.195	-456.415	1133.95	374.205	-427.853	1072.52	419.885	-466.801	963.976	407.991	-462.898	857.906	428.158	-394.668	861.419	452.322	-407.219	768.117
955	0	192.84	-705.349	1573.96	93.8563	-688.433	1572.17	236.45	-540.055	1549.15	127.303	-510.821	1546.93	153.232	-508.866	1385.09	169.008	-446.259	1173.77	175.206	-642.278	1323.28	182.581	-696.187	1188.72	71.1298	-454.528	1218.22	337.121	-549.366	1349.88	381.506	-470.634	1132.73	375.535	-441.935	1071.35	421.3	-480.635	962.857	409.583	-476.353	856.716	429.876	-408.149	860.499	454.107	-420.157	767.166
956	0	194.57	-718.748	1572.92	95.4119	-702.914	1570.89	236.511	-552.876	1549.03	127.03	-524.827	1546.56	154.413	-522.431	1383.92	170.388	-461.931	1172.03	176.307	-656.29	1322.8	183.611	-710.95	1188.55	72.4004	-468.831	1216.8	338.279	-563.31	1348.94	382.827	-485.099	1131.73	376.885	-456.368	1070.34	422.713	-495.034	961.964	411.152	-490.565	855.754	431.617	-422.402	859.682	455.973	-434.103	766.372
957	0	196.345	-732.209	1572.24	97.0257	-717.422	1569.96	236.657	-565.787	1549.27	126.864	-538.892	1546.56	155.603	-536.056	1383.11	171.682	-477.825	1170.67	177.431	-670.35	1322.67	184.669	-725.791	1188.76	73.6194	-483.242	1215.77	339.442	-577.271	1348.32	384.139	-499.791	1130.96	378.239	-471.135	1069.54	424.112	-509.981	961.32	412.689	-505.53	855.044	433.36	-437.418	858.987	457.903	-449.053	765.758
958	0	198.152	-745.731	1571.9	98.6838	-731.953	1569.4	236.878	-578.789	1549.85	126.796	-553.011	1546.92	156.786	-549.734	1382.67	172.871	-493.866	1169.71	178.556	-684.443	1322.91	185.736	-740.674	1189.33	74.7729	-497.732	1215.14	340.595	-591.248	1348.05	385.427	-514.691	1130.46	379.58	-486.22	1068.94	425.487	-525.46	960.943	414.185	-521.236	854.607	435.085	-453.183	858.433	459.88	-464.994	765.344
959	0	199.974	-759.309	1571.91	100.372	-746.499	1569.2	237.164	-591.88	1550.78	126.814	-567.179	1547.65	157.947	-563.46	1382.61	173.941	-509.973	1169.21	179.665	-698.556	1323.49	186.79	-755.564	1190.26	75.8515	-512.266	1214.93	341.722	-605.24	1348.13	386.677	-529.783	1130.24	380.898	-501.604	1068.58	426.826	-541.45	960.849	415.628	-537.666	854.461	436.772	-469.678	858.037	461.882	-481.911	765.151
960	0	201.798	-772.941	1572.27	102.074	-761.057	1569.38	237.5	-605.054	1552.04	126.904	-581.39	1548.72	159.074	-577.224	1382.93	174.883	-526.063	1169.17	180.738	-712.674	1324.42	187.809	-770.428	1191.51	76.8508	-526.809	1215.15	342.811	-619.248	1348.56	387.88	-545.051	1130.3	382.185	-517.267	1068.46	428.12	-557.93	961.047	417.007	-554.799	854.62	438.406	-486.882	857.814	463.887	-499.78	765.196
961	0	203.609	-786.619	1572.95	103.776	-775.621	1569.9	237.872	-618.308	1553.6	127.052	-595.639	1550.14	160.158	-591.017	1383.63	175.697	-542.056	1169.6	181.756	-726.781	1325.66	188.768	-785.235	1193.06	77.7717	-541.323	1215.8	343.85	-633.276	1349.35	389.028	-560.483	1130.65	383.433	-533.189	1068.59	429.356	-574.875	961.544	418.309	-572.606	855.092	439.971	-504.768	857.776	465.87	-518.573	765.491
962	0	205.393	-800.339	1573.93	105.462	-790.184	1570.75	238.265	-631.634	1555.46	127.241	-609.919	1551.87	161.191	-604.828	1384.7	176.39	-557.874	1170.49	182.703	-740.865	1327.2	189.644	-799.958	1194.89	78.6206	-555.772	1216.86	344.83	-647.328	1350.48	390.12	-576.068	1131.28	384.64	-549.349	1068.97	430.523	-592.261	962.339	419.521	-591.055	855.885	441.456	-523.305	857.93	467.809	-538.256	766.048
963	0	207.135	-814.092	1575.2	107.119	-804.742	1571.92	238.665	-645.023	1557.57	127.454	-624.221	1553.88	162.17	-618.646	1386.11	176.98	-573.449	1171.81	183.562	-754.912	1329	190.414	-814.575	1196.95	79.4093	-570.12	1218.3	345.743	-661.409	1351.93	391.154	-591.798	1132.19	385.808	-565.728	1069.59	431.613	-610.06	963.43	420.63	-610.107	856.996	442.85	-542.462	858.283	469.677	-558.79	766.872
964	0	208.822	-827.871	1576.72	108.732	-819.287	1573.36	239.055	-658.466	1559.91	127.676	-638.537	1556.16	163.093	-632.458	1387.83	177.494	-588.725	1173.53	184.322	-768.909	1331.03	191.058	-829.07	1199.21	80.1541	-584.334	1220.1	346.586	-675.523	1353.68	392.135	-607.667	1133.37	386.94	-582.306	1070.46	432.615	-628.245	964.805	421.622	-629.721	858.42	444.148	-562.202	858.833	471.452	-580.131	767.967
965	0	210.442	-841.666	1578.46	110.29	-833.813	1575.05	239.423	-671.952	1562.44	127.891	-652.86	1558.67	163.963	-646.254	1389.84	177.966	-603.659	1175.59	184.973	-782.846	1333.26	191.558	-843.428	1201.63	80.8745	-598.386	1222.22	347.357	-689.677	1355.71	393.068	-623.672	1134.78	388.042	-599.067	1071.54	433.521	-646.79	966.45	422.486	-649.854	860.149	445.342	-582.487	859.58	473.11	-602.233	769.332
966	0	211.985	-855.468	1580.39	111.78	-848.314	1576.94	239.755	-685.471	1565.14	128.084	-667.179	1561.36	164.781	-660.023	1392.1	178.435	-618.224	1177.96	185.509	-796.714	1335.66	191.899	-857.641	1204.18	81.5922	-612.254	1224.61	348.055	-703.873	1357.98	393.961	-639.813	1136.42	389.121	-615.994	1072.83	434.324	-665.666	968.348	423.208	-670.458	862.168	446.432	-603.277	860.518	474.628	-625.042	770.96
967	0	213.441	-869.268	1582.46	113.192	-862.782	1579	240.04	-699.011	1567.96	128.243	-681.487	1564.2	165.552	-673.755	1394.57	178.942	-632.41	1180.57	185.927	-810.505	1338.17	192.073	-871.705	1206.81	82.3286	-625.921	1227.22	348.682	-718.114	1360.45	394.823	-656.092	1138.24	390.186	-633.075	1074.3	435.016	-684.847	970.476	423.778	-691.485	864.457	447.416	-624.531	861.638	475.987	-648.503	772.845
968	0	214.802	-883.056	1584.64	114.52	-877.211	1581.18	240.267	-712.562	1570.88	128.355	-695.774	1567.15	166.28	-687.442	1397.2	179.522	-646.221	1183.36	186.227	-824.214	1340.77	192.075	-885.616	1209.5	83.1034	-639.379	1230	349.242	-732.398	1363.09	395.664	-672.511	1140.23	391.246	-650.297	1075.93	435.595	-704.307	972.808	424.187	-712.888	866.996	448.295	-646.209	862.931	477.167	-672.56	774.974
969	0	216.062	-896.825	1586.9	115.755	-891.594	1583.45	240.431	-726.112	1573.85	128.414	-710.032	1570.16	166.971	-701.078	1399.96	180.205	-659.675	1186.29	186.415	-837.837	1343.41	191.911	-899.376	1212.19	83.9329	-652.625	1232.9	349.738	-746.724	1365.85	396.493	-689.073	1142.34	392.309	-667.651	1077.68	436.054	-724.02	975.318	424.428	-734.617	869.76	449.072	-668.27	864.384	478.152	-697.15	777.333
970	0	217.218	-910.565	1589.2	116.893	-905.925	1585.75	240.525	-739.653	1576.84	128.412	-724.252	1573.2	167.629	-714.657	1402.79	181.01	-672.804	1189.29	186.498	-851.371	1346.07	191.589	-912.988	1214.87	84.8283	-665.664	1235.87	350.176	-761.083	1368.7	397.319	-705.782	1144.54	393.385	-685.131	1079.52	436.393	-743.962	977.976	424.496	-756.626	872.721	449.75	-690.675	865.983	478.927	-722.213	779.905
971	0	218.266	-924.268	1591.49	117.932	-920.198	1588.05	240.546	-753.174	1579.81	128.345	-738.428	1576.21	168.258	-728.177	1405.65	181.944	-685.648	1192.31	186.486	-864.818	1348.69	191.127	-926.458	1217.51	85.7953	-678.509	1238.86	350.56	-775.467	1371.58	398.15	-722.639	1146.79	394.478	-702.728	1081.42	436.61	-764.11	980.752	424.388	-778.87	875.851	450.335	-713.386	867.713	479.483	-747.686	782.67
972	0	219.206	-937.93	1593.75	118.87	-934.409	1590.3	240.494	-766.67	1582.73	128.212	-752.552	1579.16	168.862	-741.637	1408.49	183.002	-698.253	1195.32	186.393	-878.179	1351.24	190.549	-939.794	1220.06	86.8335	-691.175	1241.82	350.896	-789.865	1374.46	398.992	-739.646	1149.06	395.596	-720.439	1083.36	436.705	-784.439	983.614	424.105	-801.305	879.118	450.833	-736.366	869.557	479.809	-773.505	785.606
973	0	220.039	-951.544	1595.94	119.707	-948.553	1592.47	240.37	-780.133	1585.56	128.014	-766.619	1582.01	169.442	-755.037	1411.28	184.169	-710.669	1198.25	186.231	-891.457	1353.7	189.882	-953.007	1222.5	87.9371	-703.686	1244.7	351.189	-804.261	1377.3	399.848	-756.798	1151.32	396.739	-738.259	1085.28	436.681	-804.929	986.531	423.648	-823.892	882.492	451.247	-759.579	871.498	479.9	-799.609	788.688
974	0	220.769	-965.107	1598.03	120.446	-962.626	1594.52	240.178	-793.558	1588.27	127.753	-780.625	1584.71	169.999	-768.382	1413.96	185.422	-722.951	1201.07	186.018	-904.658	1356.01	189.157	-966.111	1224.81	89.0947	-716.065	1247.47	351.444	-818.642	1380.05	400.721	-774.09	1153.52	397.909	-756.183	1087.17	436.541	-825.555	989.473	423.024	-846.593	885.939	451.585	-782.995	873.515	479.754	-825.936	791.89
975	0	221.398	-978.616	1599.99	121.09	-976.627	1596.41	239.921	-806.942	1590.81	127.433	-794.567	1587.23	170.533	-781.673	1416.5	186.732	-735.148	1203.73	185.767	-917.789	1358.17	188.408	-979.12	1226.95	90.2909	-728.339	1250.09	351.665	-832.991	1382.67	401.611	-791.511	1155.63	399.105	-774.205	1088.98	436.288	-846.297	992.408	422.238	-869.374	889.428	451.848	-806.579	875.589	479.37	-852.427	795.185
976	0	221.933	-992.07	1601.78	121.644	-990.555	1598.13	239.608	-820.283	1593.17	127.061	-808.442	1589.54	171.044	-794.918	1418.86	188.068	-747.311	1206.2	185.496	-930.856	1360.12	187.663	-992.049	1228.91	91.5072	-740.534	1252.51	351.857	-847.294	1385.13	402.514	-809.047	1157.63	400.321	-792.32	1090.68	435.929	-867.132	995.308	421.3	-892.204	892.927	452.042	-830.304	877.697	478.751	-879.025	798.542
977	0	222.38	-1005.47	1603.39	122.112	-1004.41	1599.64	239.244	-833.581	1595.31	126.644	-822.251	1591.6	171.529	-808.122	1421	189.396	-759.485	1208.44	185.216	-943.869	1361.85	186.953	-1004.91	1230.64	92.7231	-752.677	1254.72	352.022	-861.537	1387.39	403.427	-826.681	1159.47	401.554	-810.521	1092.24	435.47	-888.036	998.143	420.22	-915.052	896.404	452.167	-854.138	879.817	477.902	-905.677	801.934
978	0	222.746	-1018.82	1604.79	122.502	-1018.19	1600.92	238.837	-846.836	1597.21	126.188	-835.994	1593.39	171.986	-821.293	1422.9	190.687	-771.708	1210.42	184.941	-956.837	1363.32	186.3	-1017.73	1232.12	93.9171	-764.79	1256.68	352.164	-875.709	1389.42	404.343	-844.39	1161.13	402.795	-828.799	1093.64	434.917	-908.987	1000.89	419.009	-937.893	899.828	452.224	-878.054	881.927	476.832	-932.331	805.332
979	0	223.039	-1032.12	1605.95	122.82	-1031.91	1601.94	238.395	-860.051	1598.84	125.702	-849.674	1594.89	172.413	-834.439	1424.52	191.913	-784.011	1212.12	184.68	-969.771	1364.53	185.723	-1030.5	1233.33	95.0681	-776.897	1258.37	352.284	-889.802	1391.18	405.255	-862.152	1162.59	404.036	-847.144	1094.85	434.277	-929.961	1003.52	417.678	-960.7	903.172	452.212	-902.022	884.003	475.55	-958.94	808.709
980	0	223.266	-1045.37	1606.87	123.074	-1045.56	1602.71	237.926	-873.229	1600.18	125.193	-863.296	1596.07	172.804	-847.569	1425.85	193.048	-796.416	1213.51	184.44	-982.681	1365.44	185.235	-1043.24	1234.25	96.156	-789.016	1259.79	352.383	-903.809	1392.66	406.154	-879.941	1163.82	405.267	-865.545	1095.84	433.557	-950.933	1006	416.238	-983.45	906.41	452.128	-926.014	886.024	474.069	-985.46	812.041
981	0	223.437	-1058.59	1607.52	123.27	-1059.15	1603.2	237.436	-886.375	1601.21	124.667	-876.864	1596.94	173.156	-860.69	1426.88	194.074	-808.938	1214.58	184.225	-995.577	1366.05	184.842	-1055.97	1234.84	97.1623	-801.163	1260.91	352.46	-917.729	1393.82	407.03	-897.731	1164.8	406.477	-883.989	1096.61	432.764	-971.881	1008.33	414.702	-1006.12	909.516	451.969	-950	887.97	472.403	-1011.85	815.306
982	0	223.558	-1071.77	1607.91	123.416	-1072.7	1603.41	236.931	-899.495	1601.92	124.129	-890.386	1597.47	173.465	-873.812	1427.59	194.974	-821.582	1215.33	184.038	-1008.47	1366.34	184.542	-1068.67	1235.09	98.071	-813.353	1261.73	352.516	-931.561	1394.65	407.875	-915.496	1165.52	407.654	-902.46	1097.12	431.903	-992.779	1010.49	413.08	-1028.69	912.471	451.73	-973.95	889.821	470.568	-1038.07	818.484
983	0	223.637	-1084.92	1608.01	123.518	-1086.2	1603.33	236.417	-912.592	1602.32	123.585	-903.868	1597.67	173.726	-886.942	1427.98	195.738	-834.344	1215.75	183.875	-1021.37	1366.32	184.331	-1081.36	1235	98.8681	-825.597	1262.25	352.547	-945.308	1395.14	408.676	-933.212	1165.98	408.786	-920.943	1097.39	430.98	-1013.6	1012.45	411.382	-1051.13	915.257	451.406	-997.833	891.562	468.578	-1064.09	821.561
984	0	223.68	-1098.06	1607.83	123.583	-1099.66	1602.97	235.896	-925.675	1602.38	123.037	-917.318	1597.54	173.935	-900.085	1428.04	196.357	-847.217	1215.85	183.734	-1034.28	1365.97	184.197	-1094.05	1234.56	99.5425	-837.906	1262.46	352.55	-958.977	1395.29	409.423	-950.854	1166.15	409.861	-939.42	1097.39	429.998	-1034.33	1014.21	409.616	-1073.43	917.857	450.993	-1021.62	893.177	466.454	-1089.88	824.523
985	0	223.694	-1111.19	1607.37	123.616	-1113.1	1602.33	235.37	-938.75	1602.12	122.487	-930.746	1597.08	174.086	-913.249	1427.77	196.828	-860.186	1215.64	183.607	-1047.22	1365.3	184.124	-1106.74	1233.77	100.086	-850.288	1262.38	352.52	-972.575	1395.08	410.105	-968.401	1166.05	410.866	-957.872	1097.12	428.962	-1054.94	1015.75	407.791	-1095.56	920.26	450.486	-1045.27	894.654	464.211	-1115.4	827.362
986	0	223.682	-1124.31	1606.62	123.62	-1126.52	1601.42	234.841	-951.822	1601.55	121.935	-944.159	1596.31	174.175	-926.437	1427.2	197.148	-873.233	1215.13	183.484	-1060.19	1364.33	184.094	-1119.44	1232.65	100.491	-862.75	1262	352.453	-986.112	1394.53	410.712	-985.834	1165.67	411.791	-976.281	1096.6	427.873	-1075.4	1017.07	405.915	-1117.51	922.457	449.882	-1068.76	895.985	461.868	-1140.62	830.07
987	0	223.647	-1137.43	1605.6	123.6	-1139.93	1600.24	234.307	-964.898	1600.66	121.38	-957.567	1595.24	174.197	-939.654	1426.31	197.318	-886.34	1214.33	183.356	-1073.19	1363.06	184.086	-1132.16	1231.22	100.755	-875.299	1261.34	352.342	-999.598	1393.64	411.232	-1003.14	1165.02	412.622	-994.625	1095.82	426.735	-1095.69	1018.17	403.996	-1139.24	924.441	449.178	-1092.05	897.161	459.443	-1165.53	832.642
988	0	223.591	-1150.57	1604.32	123.556	-1153.34	1598.81	233.766	-977.984	1599.47	120.819	-970.977	1593.88	174.148	-952.902	1425.14	197.341	-899.491	1213.26	183.209	-1086.24	1361.51	184.074	-1144.91	1229.5	100.876	-887.94	1260.39	352.182	-1013.05	1392.42	411.656	-1020.3	1164.1	413.349	-1012.88	1094.79	425.549	-1115.8	1019.05	402.041	-1160.74	926.206	448.375	-1115.12	898.177	456.953	-1190.09	835.072
989	0	223.514	-1163.71	1602.79	123.49	-1166.75	1597.15	233.215	-991.085	1598.01	120.249	-984.396	1592.27	174.024	-966.183	1423.68	197.219	-912.669	1211.94	183.03	-1099.34	1359.71	184.036	-1157.71	1227.51	100.854	-900.681	1259.18	351.965	-1026.47	1390.89	411.975	-1037.3	1162.93	413.961	-1031.03	1093.53	424.317	-1135.7	1019.69	400.057	-1182	927.751	447.474	-1137.93	899.029	454.416	-1214.28	837.356
990	0	223.413	-1176.88	1601.02	123.399	-1180.18	1595.27	232.651	-1004.21	1596.29	119.665	-997.832	1590.43	173.821	-979.499	1421.97	196.958	-925.863	1210.38	182.805	-1112.5	1357.68	183.945	-1170.58	1225.31	100.693	-913.524	1257.72	351.686	-1039.88	1389.08	412.179	-1054.14	1161.52	414.451	-1049.06	1092.04	423.041	-1155.36	1020.12	398.05	-1202.98	929.075	446.476	-1160.44	899.715	451.849	-1238.08	839.49
991	0	223.288	-1190.07	1599.03	123.283	-1193.63	1593.2	232.067	-1017.35	1594.34	119.062	-1011.29	1588.37	173.537	-992.851	1420.02	196.565	-939.068	1208.59	182.522	-1125.71	1355.44	183.778	-1183.52	1222.92	100.397	-926.476	1256.01	351.337	-1053.29	1387	412.263	-1070.81	1159.88	414.809	-1066.93	1090.35	421.723	-1174.78	1020.32	396.029	-1223.67	930.178	445.386	-1182.63	900.231	449.266	-1261.47	841.468
992	0	223.133	-1203.29	1596.85	123.138	-1207.1	1590.95	231.46	-1030.52	1592.18	118.435	-1024.77	1586.14	173.17	-1006.24	1417.85	196.048	-952.282	1206.59	182.165	-1139	1353.03	183.512	-1196.57	1220.37	99.9734	-939.54	1254.07	350.913	-1066.72	1384.68	412.219	-1087.3	1158.03	415.029	-1084.64	1088.46	420.365	-1193.94	1020.3	393.999	-1244.06	931.061	444.208	-1204.47	900.576	446.684	-1284.42	843.283
993	0	222.943	-1216.54	1594.5	122.959	-1220.6	1588.56	230.824	-1043.72	1589.83	117.779	-1038.28	1583.75	172.717	-1019.67	1415.48	195.416	-965.514	1204.39	181.724	-1152.35	1350.48	183.127	-1209.72	1217.71	99.4296	-952.718	1251.92	350.41	-1080.18	1382.15	412.044	-1103.62	1156	415.106	-1102.15	1086.39	418.971	-1212.81	1020.08	391.969	-1264.12	931.725	442.949	-1225.92	900.748	444.115	-1306.91	844.928
994	0	222.714	-1229.83	1592.01	122.743	-1234.13	1586.05	230.153	-1056.96	1587.34	117.087	-1051.83	1581.24	172.18	-1033.14	1412.95	194.678	-978.773	1202.01	181.187	-1165.77	1347.82	182.602	-1222.98	1214.98	98.7756	-966.014	1249.57	349.822	-1093.68	1379.44	411.736	-1119.76	1153.79	415.036	-1119.46	1084.17	417.545	-1231.39	1019.65	389.945	-1283.84	932.173	441.613	-1246.98	900.746	441.575	-1328.93	846.392
995	0	222.439	-1243.14	1589.4	122.483	-1247.68	1583.45	229.442	-1070.23	1584.73	116.355	-1065.4	1578.64	171.556	-1046.64	1410.28	193.845	-992.076	1199.46	180.545	-1179.27	1345.07	181.925	-1236.38	1212.2	98.0223	-979.428	1247.05	349.147	-1107.23	1376.58	411.293	-1135.72	1151.44	414.818	-1136.55	1081.82	416.088	-1249.66	1019.02	387.934	-1303.2	932.408	440.208	-1267.59	900.566	439.076	-1350.45	847.667
996	0	222.113	-1256.49	1586.71	122.173	-1261.27	1580.8	228.687	-1083.53	1582.03	115.579	-1079.01	1575.98	170.848	-1060.2	1407.5	192.925	-1005.44	1196.77	179.791	-1192.85	1342.29	181.084	-1249.9	1209.41	97.1811	-992.96	1244.38	348.383	-1120.85	1373.62	410.716	-1151.51	1148.97	414.45	-1153.4	1079.35	414.607	-1267.6	1018.21	385.941	-1322.2	932.432	438.74	-1287.75	900.207	436.628	-1371.46	848.739
997	0	221.729	-1269.87	1583.97	121.81	-1274.89	1578.12	227.882	-1096.87	1579.28	114.753	-1092.65	1573.29	170.057	-1073.8	1404.65	191.929	-1018.9	1193.94	178.92	-1206.51	1339.5	180.07	-1263.55	1206.65	96.2634	-1006.61	1241.58	347.53	-1134.55	1370.57	410.007	-1167.11	1146.4	413.932	-1170	1076.79	413.103	-1285.21	1017.22	383.973	-1340.81	932.248	437.216	-1307.43	899.668	434.243	-1391.94	849.597
998	0	221.282	-1283.29	1581.22	121.387	-1288.54	1575.45	227.026	-1110.25	1576.51	113.875	-1106.33	1570.62	169.184	-1087.44	1401.76	190.864	-1032.47	1191	177.93	-1220.26	1336.73	178.883	-1277.33	1203.93	95.2808	-1020.38	1238.69	346.589	-1148.33	1367.5	409.171	-1182.55	1143.75	413.266	-1186.35	1074.17	411.582	-1302.48	1016.07	382.033	-1359.02	931.861	435.641	-1326.61	898.947	431.93	-1411.86	850.23
999	0	220.769	-1296.74	1578.5	120.901	-1302.22	1572.83	226.116	-1123.67	1573.77	112.942	-1120.03	1567.99	168.234	-1101.14	1398.86	189.739	-1046.16	1187.99	176.822	-1234.09	1334.02	177.522	-1291.24	1201.29	94.2439	-1034.26	1235.74	345.562	-1162.21	1364.42	408.211	-1197.81	1141.07	412.454	-1202.44	1071.52	410.045	-1319.41	1014.76	380.126	-1376.82	931.276	434.02	-1345.26	898.047	429.696	-1431.22	850.624
1000	0	220.187	-1310.22	1575.84	120.349	-1315.94	1570.3	225.15	-1137.12	1571.08	111.955	-1133.77	1565.44	167.208	-1114.89	1396	188.562	-1060.01	1184.94	175.601	-1248	1331.4	175.996	-1305.28	1198.77	93.1623	-1048.26	1232.76	344.454	-1176.17	1361.38	407.133	-1212.91	1138.38	411.499	-1218.26	1068.85	408.496	-1335.97	1013.32	378.255	-1394.19	930.498	432.36	-1363.37	896.97	427.548	-1449.98	850.77
1001	0	219.534	-1323.74	1573.28	119.73	-1329.68	1567.88	224.131	-1150.62	1568.49	110.913	-1147.54	1563	166.113	-1128.69	1393.21	187.339	-1074.03	1181.87	174.272	-1261.99	1328.92	174.315	-1319.45	1196.4	92.0439	-1062.36	1229.79	343.27	-1190.23	1358.43	405.942	-1227.84	1135.72	410.405	-1233.83	1066.21	406.936	-1352.18	1011.76	376.423	-1411.12	929.536	430.666	-1380.91	895.723	425.49	-1468.13	850.66
1002	0	218.81	-1337.29	1570.86	119.042	-1343.45	1565.62	223.058	-1164.15	1566.03	109.819	-1161.33	1560.7	164.952	-1142.55	1390.53	186.077	-1088.22	1178.85	172.847	-1276.05	1326.59	172.498	-1333.73	1194.19	90.8952	-1076.56	1226.88	342.017	-1204.37	1355.6	404.644	-1242.62	1133.13	409.177	-1249.12	1063.64	405.367	-1368.03	1010.11	374.63	-1427.59	928.4	428.943	-1397.88	894.316	423.528	-1485.65	850.287
1003	0	218.018	-1350.87	1568.61	118.288	-1357.24	1563.54	221.937	-1177.72	1563.74	108.676	-1175.15	1558.58	163.732	-1156.46	1388.02	184.78	-1102.59	1175.9	171.34	-1290.18	1324.46	170.566	-1348.13	1192.19	89.7206	-1090.86	1224.07	340.705	-1218.59	1352.95	403.245	-1257.25	1130.63	407.819	-1264.16	1061.16	403.79	-1383.51	1008.39	372.877	-1443.6	927.103	427.197	-1414.25	892.765	421.661	-1502.52	849.649
1004	0	217.162	-1364.48	1566.57	117.471	-1371.06	1561.68	220.773	-1191.33	1561.65	107.491	-1188.99	1556.68	162.458	-1170.41	1385.7	183.454	-1117.13	1173.1	169.766	-1304.37	1322.56	168.547	-1362.64	1190.43	88.5228	-1105.24	1221.41	339.342	-1232.88	1350.5	401.752	-1271.73	1128.28	406.337	-1278.95	1058.82	402.203	-1398.63	1006.62	371.164	-1459.14	925.662	425.432	-1430.01	891.089	419.891	-1518.72	848.749
1005	0	216.247	-1378.12	1564.77	116.596	-1384.91	1560.07	219.572	-1204.98	1559.8	106.269	-1202.85	1555.02	161.138	-1184.4	1383.61	182.101	-1131.85	1170.5	168.145	-1318.6	1320.9	166.474	-1377.24	1188.93	87.3026	-1119.7	1218.94	337.941	-1247.2	1348.29	400.17	-1286.08	1126.11	404.739	-1293.48	1056.65	400.607	-1413.37	1004.84	369.492	-1474.18	924.095	423.655	-1445.15	889.314	418.217	-1534.22	847.593
1006	0	215.281	-1391.79	1563.23	115.67	-1398.77	1558.73	218.342	-1218.65	1558.23	105.02	-1216.73	1553.63	159.781	-1198.43	1381.8	180.723	-1146.71	1168.15	166.499	-1332.86	1319.52	164.382	-1391.93	1187.72	86.06	-1134.21	1216.71	336.514	-1261.56	1346.38	398.507	-1300.28	1124.16	403.032	-1307.76	1054.7	399.002	-1427.75	1003.07	367.859	-1488.72	922.425	421.874	-1459.65	887.469	416.634	-1549.01	846.192
1007	0	214.275	-1405.48	1562	114.7	-1412.65	1557.69	217.094	-1232.36	1556.95	103.754	-1230.63	1552.53	158.395	-1212.47	1380.29	179.321	-1161.69	1166.11	164.85	-1347.13	1318.44	162.31	-1406.67	1186.81	84.7937	-1148.77	1214.77	335.075	-1275.91	1344.79	396.772	-1314.35	1122.47	401.226	-1321.8	1052.99	397.386	-1441.76	1001.34	366.264	-1502.75	920.678	420.094	-1473.53	885.59	415.139	-1563.07	844.562
1008	0	213.237	-1419.2	1561.07	113.698	-1426.54	1556.95	215.837	-1246.1	1556	102.481	-1244.52	1551.75	156.99	-1226.52	1379.12	177.896	-1176.76	1164.43	163.223	-1361.4	1317.68	160.298	-1421.45	1186.23	83.5025	-1163.36	1213.15	333.638	-1290.23	1343.54	394.973	-1328.27	1121.07	399.331	-1335.59	1051.56	395.763	-1455.4	999.69	364.707	-1516.26	918.883	418.326	-1486.77	883.713	413.726	-1576.38	842.726
1009	0	212.18	-1432.93	1560.47	112.672	-1440.43	1556.52	214.584	-1259.86	1555.4	101.213	-1258.43	1551.31	155.578	-1240.57	1378.3	176.447	-1191.87	1163.17	161.64	-1375.64	1317.24	158.384	-1436.23	1185.99	82.1853	-1177.94	1211.91	332.218	-1304.5	1342.68	393.122	-1342.04	1119.98	397.359	-1349.12	1050.43	394.133	-1468.66	998.148	363.189	-1529.25	917.069	416.578	-1499.38	881.879	412.388	-1588.93	840.709
1010	0	211.117	-1446.68	1560.21	111.636	-1454.32	1556.43	213.345	-1273.63	1555.16	99.9627	-1272.32	1551.21	154.169	-1254.6	1377.87	174.977	-1206.97	1162.36	160.125	-1389.84	1317.15	156.604	-1450.98	1186.07	80.8416	-1192.51	1211.06	330.829	-1318.68	1342.2	391.231	-1355.66	1119.23	395.324	-1362.41	1049.64	392.5	-1481.55	996.742	361.709	-1541.71	915.27	414.861	-1511.36	880.128	411.115	-1600.73	838.542
1011	0	210.06	-1460.43	1560.3	110.603	-1468.21	1556.66	212.134	-1287.41	1555.3	98.742	-1286.2	1551.47	152.776	-1268.59	1377.83	173.488	-1222.02	1162.02	158.7	-1403.97	1317.39	154.99	-1465.64	1186.48	79.4722	-1207.03	1210.63	329.485	-1332.74	1342.13	389.313	-1369.09	1118.84	393.24	-1375.42	1049.19	390.871	-1494.06	995.499	360.269	-1553.64	913.517	413.184	-1522.73	878.502	409.901	-1611.76	836.257
1012	0	209.022	-1474.18	1560.72	109.584	-1482.07	1557.2	210.962	-1301.19	1555.81	97.5632	-1300.07	1552.08	151.408	-1282.52	1378.18	171.984	-1236.94	1162.18	157.383	-1418.01	1317.98	153.567	-1480.17	1187.21	78.0787	-1221.48	1210.64	328.2	-1346.66	1342.47	387.385	-1382.34	1118.8	391.122	-1388.17	1049.1	389.254	-1506.19	994.442	358.871	-1565.04	911.843	411.559	-1533.5	877.036	408.736	-1622.03	833.893
1013	0	208.016	-1487.91	1561.48	108.592	-1495.91	1558.06	209.84	-1314.96	1556.71	96.4378	-1313.9	1553.06	150.078	-1296.37	1378.93	170.473	-1251.7	1162.83	156.19	-1431.94	1318.9	152.356	-1494.54	1188.25	76.6641	-1235.84	1211.1	326.985	-1360.4	1343.2	385.463	-1395.36	1119.12	388.989	-1400.62	1049.36	387.657	-1517.93	993.59	357.519	-1575.93	910.277	409.995	-1543.7	875.764	407.612	-1631.56	831.487
1014	0	207.055	-1501.63	1562.56	107.642	-1509.72	1559.22	208.779	-1328.71	1557.97	95.3765	-1327.69	1554.38	148.795	-1310.14	1380.06	168.961	-1266.24	1163.96	155.134	-1445.75	1320.15	151.369	-1508.7	1189.57	75.232	-1250.09	1211.99	325.85	-1373.95	1344.31	383.564	-1408.14	1119.79	386.855	-1412.78	1049.97	386.091	-1529.28	992.954	356.217	-1586.3	908.847	408.504	-1553.34	874.714	406.521	-1640.38	829.077
1015	0	206.149	-1515.31	1563.94	106.744	-1523.48	1560.65	207.788	-1342.42	1559.59	94.3884	-1341.44	1556.03	147.568	-1323.8	1381.56	167.458	-1280.52	1165.54	154.224	-1459.41	1321.71	150.611	-1522.62	1191.16	73.7866	-1264.2	1213.32	324.804	-1387.27	1345.79	381.704	-1420.64	1120.79	384.739	-1424.61	1050.91	384.57	-1540.25	992.543	354.97	-1596.18	907.577	407.094	-1562.45	873.906	405.457	-1648.5	826.701
1016	0	205.31	-1528.95	1565.6	105.91	-1537.19	1562.34	206.875	-1356.09	1561.55	93.4813	-1355.13	1557.99	146.404	-1337.34	1383.41	165.974	-1294.51	1167.54	153.463	-1472.91	1323.55	150.08	-1536.27	1193.01	72.3327	-1278.16	1215.06	323.85	-1400.35	1347.6	379.901	-1432.85	1122.1	382.658	-1436.12	1052.16	383.106	-1550.81	992.358	353.784	-1605.56	906.485	405.773	-1571.07	873.355	404.416	-1655.97	824.396
1017	0	204.546	-1542.54	1567.51	105.149	-1550.83	1564.26	206.047	-1369.71	1563.81	92.6613	-1368.76	1560.25	145.309	-1350.74	1385.57	164.519	-1308.18	1169.9	152.851	-1486.25	1325.67	149.768	-1549.65	1195.07	70.875	-1291.96	1217.18	322.993	-1413.18	1349.71	378.169	-1444.73	1123.68	380.626	-1447.28	1053.71	381.712	-1560.98	992.394	352.665	-1614.48	905.585	404.548	-1579.21	873.065	403.395	-1662.82	822.195
1018	0	203.864	-1556.06	1569.65	104.47	-1564.4	1566.38	205.306	-1383.25	1566.35	91.9322	-1382.31	1562.77	144.286	-1364.01	1388.03	163.1	-1321.53	1172.58	152.385	-1499.41	1328.02	149.659	-1562.75	1197.35	69.4185	-1305.59	1219.65	322.232	-1425.75	1352.08	376.521	-1456.26	1125.51	378.658	-1458.08	1055.51	380.4	-1570.75	992.642	351.62	-1622.94	904.884	403.422	-1586.9	873.033	402.396	-1669.09	820.128
1019	0	203.272	-1569.51	1571.99	103.879	-1577.89	1568.68	204.656	-1396.72	1569.14	91.296	-1395.78	1565.52	143.337	-1377.13	1390.73	161.727	-1334.56	1175.51	152.056	-1512.39	1330.58	149.729	-1575.58	1199.81	67.9681	-1319.05	1222.42	321.563	-1438.06	1354.66	374.966	-1467.41	1127.55	376.766	-1468.5	1057.54	379.181	-1580.11	993.084	350.656	-1630.97	904.384	402.398	-1594.17	873.248	401.421	-1674.85	818.22
1020	0	202.772	-1582.87	1574.47	103.382	-1591.29	1571.12	204.097	-1410.1	1572.12	90.7525	-1409.16	1568.45	142.46	-1390.11	1393.63	160.406	-1347.28	1178.65	151.853	-1525.2	1333.32	149.953	-1588.15	1202.44	66.5282	-1332.34	1225.46	320.982	-1450.12	1357.41	373.511	-1478.17	1129.76	374.96	-1478.54	1059.75	378.065	-1589.07	993.7	349.777	-1638.59	904.079	401.473	-1601.05	873.69	400.475	-1680.12	816.491
1021	0	202.366	-1596.14	1577.08	102.982	-1604.6	1573.67	203.627	-1423.39	1575.25	90.2995	-1422.45	1571.54	141.652	-1402.95	1396.7	159.139	-1359.71	1181.94	151.761	-1537.83	1336.19	150.298	-1600.51	1205.21	65.1029	-1345.46	1228.7	320.479	-1461.93	1360.29	372.16	-1488.54	1132.09	373.248	-1488.19	1062.11	377.06	-1597.64	994.464	348.991	-1645.82	903.958	400.645	-1607.55	874.334	399.566	-1684.97	814.953
1022	0	202.056	-1609.32	1579.77	102.679	-1617.82	1576.3	203.242	-1436.57	1578.49	89.9328	-1435.65	1574.73	140.909	-1415.64	1399.88	157.925	-1371.9	1185.31	151.763	-1550.3	1339.17	150.732	-1612.67	1208.09	63.6952	-1358.43	1232.09	320.045	-1473.52	1363.23	370.912	-1498.5	1134.51	371.634	-1497.45	1064.57	376.169	-1605.81	995.347	348.3	-1652.68	904.002	399.908	-1613.69	875.146	398.705	-1689.45	813.612
1023	0	201.84	-1622.38	1582.49	102.472	-1630.93	1578.97	202.936	-1449.64	1581.78	89.6465	-1448.75	1577.98	140.224	-1428.2	1403.13	156.762	-1383.87	1188.73	151.842	-1562.61	1342.2	151.221	-1624.68	1211.06	62.3072	-1371.25	1235.59	319.667	-1484.9	1366.2	369.764	-1508.07	1136.97	370.119	-1506.31	1067.11	375.395	-1613.59	996.315	347.707	-1659.19	904.188	399.251	-1619.5	876.09	397.902	-1693.59	812.467
1024	0	201.714	-1635.34	1585.22	102.359	-1643.95	1581.65	202.703	-1462.61	1585.07	89.433	-1461.76	1581.24	139.589	-1440.64	1406.4	155.639	-1395.67	1192.14	151.98	-1574.79	1345.24	151.733	-1636.58	1214.08	60.9395	-1383.96	1239.12	319.332	-1496.09	1369.15	368.709	-1517.24	1139.44	368.702	-1514.8	1069.67	374.737	-1621	997.333	347.214	-1665.38	904.487	398.665	-1624.98	877.122	397.168	-1697.46	811.507
1025	0	201.674	-1648.18	1587.9	102.335	-1656.87	1584.31	202.534	-1475.45	1588.3	89.2836	-1474.67	1584.47	138.994	-1452.97	1409.63	154.547	-1407.34	1195.49	152.157	-1586.85	1348.25	152.24	-1648.41	1217.12	59.5919	-1396.56	1242.64	319.028	-1507.13	1372.02	367.739	-1526.04	1141.87	367.376	-1522.91	1072.22	374.192	-1628.04	998.365	346.82	-1671.26	904.865	398.136	-1630.16	878.2	396.516	-1701.08	810.716
1026	0	201.714	-1660.92	1590.51	102.394	-1669.69	1586.9	202.419	-1488.19	1591.43	89.1885	-1487.48	1587.61	138.432	-1465.21	1412.77	153.472	-1418.92	1198.73	152.356	-1598.8	1351.18	152.719	-1660.19	1220.13	58.2632	-1409.07	1246.08	318.741	-1518.04	1374.78	366.843	-1534.48	1144.23	366.136	-1530.68	1074.72	373.754	-1634.74	999.373	346.523	-1676.86	905.285	397.652	-1635.04	879.277	395.954	-1704.51	810.069
1027	0	201.826	-1673.54	1593	102.529	-1682.41	1589.39	202.35	-1500.81	1594.41	89.1374	-1500.21	1590.62	137.891	-1477.36	1415.79	152.4	-1430.45	1201.81	152.563	-1610.66	1353.99	153.152	-1671.97	1223.06	56.9518	-1421.51	1249.39	318.461	-1528.84	1377.39	366.007	-1542.61	1146.48	364.97	-1538.11	1077.13	373.416	-1641.1	1000.32	346.32	-1682.2	905.709	397.196	-1639.64	880.308	395.493	-1707.76	809.536
1028	0	202.001	-1686.06	1595.33	102.73	-1695.05	1591.75	202.314	-1513.33	1597.18	89.12	-1512.85	1593.45	137.365	-1489.44	1418.63	151.32	-1441.96	1204.7	152.764	-1622.46	1356.63	153.527	-1683.75	1225.87	55.6567	-1433.91	1252.51	318.178	-1539.58	1379.8	365.217	-1550.44	1148.59	363.868	-1545.25	1079.42	373.167	-1647.15	1001.17	346.205	-1687.3	906.097	396.754	-1643.98	881.249	395.139	-1710.87	809.081
1029	0	202.232	-1698.47	1597.48	102.988	-1707.6	1593.94	202.302	-1525.74	1599.71	89.1261	-1525.41	1596.06	136.847	-1501.48	1421.26	150.222	-1453.48	1207.35	152.949	-1634.2	1359.07	153.839	-1695.56	1228.5	54.3775	-1446.26	1255.41	317.884	-1550.27	1381.98	364.462	-1558.02	1150.53	362.815	-1552.12	1081.55	372.996	-1652.92	1001.88	346.171	-1692.18	906.407	396.309	-1648.07	882.059	394.895	-1713.85	808.664
1030	0	202.509	-1710.8	1599.41	103.294	-1720.08	1595.94	202.306	-1538.06	1601.96	89.1463	-1537.9	1598.42	136.331	-1513.48	1423.64	149.1	-1465.03	1209.72	153.109	-1645.92	1361.27	154.087	-1707.39	1230.91	53.1159	-1458.6	1258.03	317.575	-1560.93	1383.9	363.726	-1565.39	1152.28	361.797	-1558.76	1083.5	372.891	-1658.44	1002.44	346.211	-1696.86	906.601	395.847	-1651.91	882.7	394.763	-1716.74	808.246
1031	0	202.822	-1723.03	1601.09	103.637	-1732.49	1597.72	202.315	-1550.29	1603.9	89.1719	-1550.32	1600.48	135.814	-1525.46	1425.74	147.953	-1476.61	1211.79	153.239	-1657.62	1363.18	154.278	-1719.24	1233.04	51.8755	-1470.92	1260.35	317.249	-1571.61	1385.54	362.998	-1572.59	1153.8	360.803	-1565.21	1085.24	372.839	-1663.73	1002.8	346.317	-1701.37	906.642	395.353	-1655.54	883.142	394.74	-1719.52	807.784
1032	0	203.162	-1735.19	1602.51	104.009	-1744.84	1599.25	202.323	-1562.45	1605.5	89.1959	-1562.69	1602.23	135.295	-1537.44	1427.53	146.786	-1488.23	1213.54	153.338	-1669.32	1364.79	154.418	-1731.1	1234.84	50.6625	-1483.24	1262.34	316.906	-1582.3	1386.87	362.267	-1579.67	1155.08	359.817	-1571.51	1086.75	372.828	-1668.82	1002.95	346.478	-1705.72	906.497	394.814	-1658.96	883.358	394.821	-1722.22	807.237
1033	0	203.521	-1747.29	1603.65	104.399	-1757.14	1600.51	202.325	-1574.54	1606.75	89.2126	-1575.02	1603.63	134.777	-1549.42	1429	145.607	-1499.89	1214.94	153.406	-1681.03	1366.06	154.519	-1742.96	1236.28	49.4861	-1495.54	1263.96	316.551	-1593.05	1387.88	361.524	-1586.67	1156.12	358.829	-1577.72	1088.01	372.846	-1673.76	1002.86	346.687	-1709.93	906.139	394.22	-1662.2	883.329	394.997	-1724.82	806.57
1034	0	203.89	-1759.34	1604.48	104.801	-1769.41	1601.49	202.316	-1586.58	1607.62	89.2183	-1587.31	1604.68	134.263	-1561.42	1430.12	144.432	-1511.57	1215.98	153.445	-1692.76	1366.99	154.594	-1754.79	1237.33	48.3576	-1507.84	1265.22	316.188	-1603.86	1388.55	360.763	-1593.63	1156.89	357.83	-1583.87	1089.02	372.88	-1678.57	1002.52	346.933	-1714.03	905.544	393.561	-1665.28	883.045	395.258	-1727.34	805.749
1035	0	204.263	-1771.35	1605.02	105.205	-1781.65	1602.17	202.295	-1598.58	1608.13	89.2109	-1599.57	1605.36	133.759	-1573.44	1430.9	143.278	-1523.26	1216.67	153.461	-1704.53	1367.55	154.654	-1766.59	1237.95	47.2911	-1520.13	1266.11	315.827	-1614.76	1388.89	359.98	-1600.61	1157.39	356.812	-1590.02	1089.77	372.921	-1683.3	1001.92	347.208	-1718.02	904.695	392.83	-1668.21	882.501	395.589	-1729.75	804.747
1036	0	204.634	-1783.33	1605.24	105.608	-1793.86	1602.54	202.261	-1610.56	1608.27	89.1905	-1611.81	1605.67	133.273	-1585.5	1431.33	142.166	-1534.95	1217.02	153.459	-1716.34	1367.75	154.712	-1778.33	1238.14	46.3021	-1532.41	1266.63	315.476	-1625.76	1388.91	359.174	-1607.65	1157.62	355.771	-1596.21	1090.25	372.961	-1687.97	1001.06	347.504	-1721.94	903.583	392.025	-1671.03	881.701	395.973	-1732.06	803.544
1037	0	205	-1795.3	1605.16	106.003	-1806.07	1602.61	202.216	-1622.53	1608.04	89.1592	-1624.05	1605.61	132.817	-1597.61	1431.41	141.119	-1546.62	1217.02	153.449	-1728.2	1367.59	154.78	-1790.01	1237.9	45.4075	-1544.66	1266.78	315.147	-1636.86	1388.59	358.349	-1614.79	1157.58	354.706	-1602.48	1090.46	372.992	-1692.64	999.946	347.814	-1725.81	902.202	391.144	-1673.75	880.655	396.394	-1734.25	802.126
1038	0	205.359	-1807.27	1604.77	106.39	-1818.28	1602.37	202.164	-1634.49	1607.47	89.1208	-1636.28	1605.19	132.401	-1609.76	1431.16	140.162	-1558.25	1216.7	153.437	-1740.12	1367.07	154.868	-1801.64	1237.23	44.6244	-1556.89	1266.59	314.852	-1648.09	1387.97	357.51	-1622.06	1157.29	353.621	-1608.89	1090.42	373.01	-1697.33	998.573	348.132	-1729.65	900.555	390.19	-1676.43	879.378	396.832	-1736.33	800.485
1039	0	205.708	-1819.25	1604.09	106.765	-1830.49	1601.82	202.111	-1646.47	1606.56	89.0811	-1648.52	1604.43	132.037	-1621.96	1430.58	139.319	-1569.84	1216.09	153.435	-1752.09	1366.2	154.984	-1813.2	1236.15	43.9696	-1569.09	1266.06	314.604	-1659.45	1387.04	356.665	-1629.52	1156.75	352.52	-1615.47	1090.14	373.013	-1702.09	996.956	348.452	-1733.48	898.651	389.171	-1679.07	877.894	397.268	-1738.28	798.624
1040	0	206.05	-1831.25	1603.13	107.131	-1842.72	1600.99	202.064	-1658.47	1605.35	89.0472	-1660.78	1603.35	131.738	-1634.21	1429.7	138.613	-1581.36	1215.21	153.452	-1764.12	1365.02	155.136	-1824.72	1234.69	43.4584	-1581.26	1265.23	314.413	-1670.95	1385.85	355.826	-1637.19	1155.97	351.413	-1622.27	1089.62	373.001	-1706.95	995.109	348.772	-1737.33	896.504	388.096	-1681.73	876.228	397.682	-1740.12	796.549
1041	0	206.385	-1843.29	1601.91	107.488	-1854.97	1599.88	202.032	-1670.51	1603.86	89.0276	-1673.06	1601.96	131.518	-1646.5	1428.54	138.065	-1592.81	1214.09	153.499	-1776.22	1363.54	155.331	-1836.22	1232.89	43.1041	-1593.39	1264.11	314.294	-1682.6	1384.39	355.006	-1645.11	1154.96	350.312	-1629.32	1088.88	372.975	-1711.96	993.052	349.087	-1741.22	894.131	386.978	-1684.43	874.41	398.056	-1741.85	794.274
1042	0	206.719	-1855.37	1600.45	107.841	-1867.25	1598.51	202.023	-1682.59	1602.13	89.032	-1685.36	1600.3	131.388	-1658.85	1427.11	137.694	-1604.19	1212.76	153.586	-1788.38	1361.79	155.573	-1847.72	1230.79	42.9174	-1605.5	1262.74	314.256	-1694.39	1382.71	354.22	-1653.31	1153.76	349.232	-1636.66	1087.95	372.941	-1717.15	990.805	349.399	-1745.18	891.557	385.836	-1687.22	872.472	398.375	-1743.48	791.819
1043	0	207.054	-1867.5	1598.78	108.193	-1879.56	1596.9	202.049	-1694.72	1600.18	89.0706	-1697.68	1598.41	131.361	-1671.24	1425.45	137.513	-1615.49	1211.25	153.724	-1800.61	1359.81	155.867	-1859.24	1228.44	42.9058	-1617.58	1261.14	314.31	-1706.34	1380.83	353.486	-1661.81	1152.36	348.187	-1644.3	1086.83	372.903	-1722.55	988.392	349.705	-1749.25	888.807	384.689	-1690.14	870.445	398.622	-1745.05	789.207
1044	0	207.396	-1879.69	1596.91	108.55	-1891.9	1595.08	202.12	-1706.91	1598.04	89.1542	-1710.04	1596.3	131.446	-1683.68	1423.59	137.534	-1626.73	1209.58	153.923	-1812.9	1357.63	156.216	-1870.82	1225.89	43.0735	-1629.64	1259.33	314.466	-1718.42	1378.77	352.819	-1670.64	1150.8	347.196	-1652.29	1085.55	372.87	-1728.21	985.836	350.008	-1753.45	885.91	383.56	-1693.24	868.362	398.788	-1746.58	786.467
1045	0	207.752	-1891.93	1594.88	108.918	-1904.27	1593.07	202.248	-1719.16	1595.77	89.2935	-1722.43	1594.03	131.652	-1696.15	1421.54	137.76	-1637.93	1207.78	154.192	-1825.25	1355.29	156.624	-1882.48	1223.2	43.4212	-1641.69	1257.35	314.73	-1730.66	1376.57	352.236	-1679.81	1149.09	346.277	-1660.63	1084.14	372.851	-1734.14	983.164	350.309	-1757.82	882.896	382.474	-1696.56	866.253	398.865	-1748.11	783.627
1046	0	208.128	-1904.24	1592.72	109.304	-1916.68	1590.91	202.443	-1731.47	1593.39	89.4993	-1734.85	1591.62	131.988	-1708.66	1419.34	138.192	-1649.1	1205.86	154.54	-1837.68	1352.83	157.094	-1894.26	1220.41	43.9464	-1653.76	1255.21	315.11	-1743.03	1374.25	351.755	-1689.33	1147.24	345.446	-1669.33	1082.6	372.854	-1740.39	980.403	350.613	-1762.38	879.795	381.456	-1700.14	864.146	398.85	-1749.71	780.718
1047	0	208.531	-1916.62	1590.46	109.714	-1929.12	1588.62	202.714	-1743.85	1590.94	89.7814	-1747.3	1589.11	132.459	-1721.2	1417.02	138.823	-1660.28	1203.84	154.976	-1850.16	1350.29	157.63	-1906.17	1217.58	44.6436	-1665.84	1252.95	315.609	-1755.53	1371.83	351.389	-1699.22	1145.28	344.722	-1678.42	1080.96	372.891	-1746.99	977.579	350.923	-1767.19	876.641	380.533	-1704.04	862.068	398.743	-1751.41	777.774
1048	0	208.967	-1929.05	1588.12	110.155	-1941.6	1586.24	203.072	-1756.29	1588.45	90.1491	-1759.77	1586.55	133.068	-1733.77	1414.6	139.643	-1671.52	1201.74	155.506	-1862.72	1347.7	158.237	-1918.24	1214.76	45.5049	-1677.98	1250.58	316.23	-1768.15	1369.35	351.153	-1709.48	1143.23	344.12	-1687.89	1079.24	372.971	-1753.95	974.72	351.243	-1772.27	873.462	379.728	-1708.29	860.037	398.553	-1753.3	774.823
1049	0	209.443	-1941.56	1585.76	110.634	-1954.1	1583.8	203.524	-1768.79	1585.97	90.6104	-1772.28	1583.96	133.817	-1746.37	1412.12	140.636	-1682.87	1199.55	156.137	-1875.34	1345.11	158.92	-1930.48	1211.99	46.5202	-1690.18	1248.14	316.976	-1780.88	1366.82	351.056	-1720.09	1141.11	343.653	-1697.74	1077.45	373.106	-1761.3	971.851	351.58	-1777.66	870.29	379.065	-1712.96	858.074	398.288	-1755.44	771.898
1050	0	209.965	-1954.12	1583.39	111.158	-1966.63	1581.34	204.077	-1781.35	1583.52	91.1719	-1784.8	1581.39	134.704	-1759	1409.61	141.783	-1694.38	1197.29	156.874	-1888.04	1342.56	159.684	-1942.91	1209.31	47.6777	-1702.46	1245.63	317.845	-1793.71	1364.29	351.109	-1731.07	1138.94	343.334	-1707.96	1075.61	373.306	-1769.06	968.998	351.939	-1783.41	867.154	378.563	-1718.07	856.191	397.965	-1757.91	769.025
1051	0	210.539	-1966.75	1581.06	111.733	-1979.19	1578.89	204.736	-1793.96	1581.14	91.8387	-1797.35	1578.87	135.728	-1771.65	1407.09	143.067	-1706.11	1194.97	157.72	-1900.81	1340.08	160.535	-1955.53	1206.78	48.9644	-1714.85	1243.08	318.835	-1806.63	1361.76	351.315	-1742.38	1136.73	343.17	-1718.56	1073.75	373.579	-1777.25	966.188	352.327	-1789.56	864.083	378.238	-1723.68	854.399	397.603	-1760.79	766.231
1052	0	211.169	-1979.43	1578.79	112.363	-1991.76	1576.49	205.504	-1806.64	1578.86	92.6141	-1809.92	1576.43	136.883	-1784.35	1404.59	144.465	-1718.1	1192.58	158.677	-1913.66	1337.7	161.478	-1968.35	1204.42	50.3664	-1727.37	1240.53	319.942	-1819.64	1359.27	351.677	-1754.02	1134.52	343.169	-1729.51	1071.88	373.934	-1785.89	963.445	352.75	-1796.13	861.102	378.102	-1729.83	852.707	397.223	-1764.17	763.541
1053	0	211.86	-1992.16	1576.63	113.054	-2004.36	1574.18	206.382	-1819.35	1576.7	93.4997	-1822.5	1574.1	138.162	-1797.07	1402.15	145.96	-1730.41	1190.15	159.744	-1926.58	1335.47	162.518	-1981.38	1202.27	51.8695	-1740.03	1237.98	321.163	-1832.71	1356.85	352.195	-1765.96	1132.33	343.333	-1740.81	1070.02	374.379	-1794.98	960.795	353.216	-1803.18	858.24	378.162	-1736.54	851.119	396.851	-1768.11	760.976
1054	0	212.614	-2004.95	1574.6	113.808	-2016.98	1572	207.371	-1832.12	1574.7	94.4949	-1835.1	1571.9	139.556	-1809.84	1399.79	147.534	-1743.07	1187.69	160.918	-1939.59	1333.4	163.659	-1994.61	1200.35	53.4592	-1752.84	1235.47	322.488	-1845.85	1354.52	352.866	-1778.19	1130.18	343.663	-1752.45	1068.19	374.919	-1804.54	958.262	353.732	-1810.75	855.52	378.42	-1743.86	849.64	396.512	-1772.71	758.557
1055	0	213.435	-2017.77	1572.75	114.628	-2029.61	1569.97	208.467	-1844.92	1572.87	95.5974	-1847.72	1569.88	141.056	-1822.66	1397.54	149.172	-1756.12	1185.23	162.196	-1952.68	1331.52	164.901	-2008.05	1198.68	55.1215	-1765.83	1233.04	323.911	-1859.05	1352.3	353.683	-1790.69	1128.1	344.157	-1764.39	1066.43	375.558	-1814.58	955.872	354.304	-1818.86	852.968	378.872	-1751.82	848.272	396.235	-1778.03	756.301
1056	0	214.322	-2030.65	1571.09	115.515	-2042.27	1568.12	209.666	-1857.76	1571.23	96.8028	-1860.35	1568.04	142.65	-1835.53	1395.44	150.859	-1769.56	1182.81	163.57	-1965.85	1329.87	166.244	-2021.67	1197.28	56.843	-1778.98	1230.7	325.422	-1872.3	1350.23	354.639	-1803.43	1126.12	344.811	-1776.64	1064.74	376.299	-1825.1	953.646	354.938	-1827.56	850.606	379.514	-1760.44	847.02	396.045	-1784.15	754.225
1057	0	215.276	-2043.56	1569.65	116.47	-2054.94	1566.5	210.962	-1870.64	1569.81	98.1052	-1873	1566.41	144.325	-1848.46	1393.5	152.587	-1783.39	1180.45	165.032	-1979.11	1328.45	167.683	-2035.48	1196.17	58.611	-1792.31	1228.5	327.01	-1885.61	1348.33	355.725	-1816.4	1124.28	345.619	-1789.18	1063.15	377.143	-1836.1	951.609	355.639	-1836.87	848.456	380.333	-1769.75	845.886	395.968	-1791.13	752.343
1058	0	216.295	-2056.51	1568.45	117.492	-2067.63	1565.12	212.346	-1883.55	1568.61	99.4967	-1885.67	1565.01	146.068	-1861.45	1391.76	154.347	-1797.62	1178.21	166.569	-1992.45	1327.28	169.21	-2049.45	1195.35	60.4138	-1805.81	1226.46	328.664	-1898.97	1346.64	356.928	-1829.58	1122.59	346.572	-1801.99	1061.7	378.088	-1847.59	949.782	356.413	-1846.83	846.538	381.317	-1779.76	844.874	396.028	-1799.02	750.666
1059	0	217.377	-2069.5	1567.52	118.576	-2080.35	1564	213.81	-1896.5	1567.65	100.968	-1898.36	1563.85	147.864	-1874.5	1390.24	156.133	-1812.2	1176.13	168.168	-2005.87	1326.38	170.811	-2063.57	1194.81	62.2407	-1819.46	1224.63	330.37	-1912.4	1345.16	358.238	-1842.96	1121.1	347.663	-1815.07	1060.4	379.132	-1859.56	948.185	357.262	-1857.45	844.871	382.451	-1790.47	843.988	396.246	-1807.86	749.205
1060	0	218.517	-2082.52	1566.86	119.72	-2093.1	1563.17	215.343	-1909.47	1566.94	102.508	-1911.08	1562.95	149.7	-1887.63	1388.96	157.942	-1827.11	1174.25	169.814	-2019.37	1325.75	172.471	-2077.81	1194.56	64.0821	-1833.25	1223.03	332.115	-1925.89	1343.93	359.643	-1856.52	1119.82	348.882	-1828.41	1059.27	380.271	-1872.03	946.836	358.188	-1868.76	843.471	383.72	-1801.91	843.233	396.64	-1817.71	747.97
1061	0	219.712	-2095.58	1566.49	120.919	-2105.88	1562.64	216.932	-1922.48	1566.49	104.104	-1923.83	1562.32	151.56	-1900.82	1387.95	159.77	-1842.3	1172.63	171.489	-2032.94	1325.4	174.17	-2092.15	1194.6	65.929	-1847.15	1221.69	333.884	-1939.44	1342.98	361.133	-1870.26	1118.77	350.22	-1842	1058.34	381.499	-1884.98	945.753	359.194	-1880.76	842.351	385.108	-1814.08	842.617	397.222	-1828.57	746.967
1062	0	220.953	-2108.68	1566.41	122.166	-2118.7	1562.41	218.564	-1935.52	1566.29	105.745	-1936.62	1561.96	153.432	-1914.07	1387.23	161.614	-1857.7	1171.3	173.174	-2046.56	1325.33	175.886	-2106.55	1194.9	67.7734	-1861.14	1220.64	335.664	-1953.06	1342.31	362.695	-1884.17	1117.98	351.668	-1855.84	1057.62	382.808	-1898.42	944.949	360.277	-1893.46	841.525	386.6	-1826.96	842.145	398.004	-1840.47	746.202
1063	0	222.234	-2121.81	1566.62	123.453	-2131.56	1562.48	220.226	-1948.59	1566.36	107.416	-1949.46	1561.88	155.3	-1927.39	1386.8	163.469	-1873.27	1170.31	174.852	-2060.23	1325.53	177.592	-2120.99	1195.46	69.6082	-1875.18	1219.91	337.44	-1966.76	1341.94	364.32	-1898.27	1117.47	353.219	-1869.93	1057.13	384.19	-1912.35	944.434	361.438	-1906.88	841	388.185	-1840.57	841.824	398.991	-1853.41	745.679
1064	0	223.548	-2134.98	1567.11	124.772	-2144.47	1562.86	221.903	-1961.7	1566.69	109.103	-1962.34	1562.09	157.151	-1940.76	1386.68	165.329	-1888.92	1169.69	176.503	-2073.94	1326.01	179.264	-2135.43	1196.25	71.4265	-1889.24	1219.52	339.198	-1980.53	1341.88	365.999	-1912.55	1117.24	354.864	-1884.27	1056.88	385.637	-1926.75	944.217	362.671	-1921	840.782	389.852	-1854.89	841.661	400.183	-1867.4	745.403
1065	0	224.884	-2148.19	1567.86	126.114	-2157.44	1563.53	223.583	-1974.84	1567.27	110.793	-1975.27	1562.58	158.973	-1954.18	1386.88	167.186	-1904.58	1169.47	178.109	-2087.67	1326.75	180.875	-2149.82	1197.26	73.2227	-1903.29	1219.48	340.923	-1994.37	1342.15	367.723	-1927.01	1117.3	356.597	-1898.86	1056.88	387.137	-1941.63	944.301	363.973	-1935.81	840.875	391.594	-1869.91	841.664	401.577	-1882.41	745.375
1066	0	226.235	-2161.43	1568.87	127.467	-2170.46	1564.48	225.25	-1988.02	1568.11	112.471	-1988.26	1563.34	160.754	-1967.63	1387.39	169.028	-1920.18	1169.65	179.651	-2101.4	1327.74	182.403	-2164.15	1198.46	74.9921	-1917.28	1219.8	342.603	-2008.29	1342.73	369.485	-1941.67	1117.65	358.412	-1913.7	1057.12	388.68	-1956.98	944.69	365.338	-1951.31	841.278	393.406	-1885.62	841.837	403.166	-1898.44	745.596
1067	0	227.59	-2174.72	1570.11	128.822	-2183.55	1565.69	226.891	-2001.24	1569.19	114.124	-2001.31	1564.38	162.485	-1981.1	1388.2	170.846	-1935.65	1170.24	181.115	-2115.12	1328.96	183.824	-2178.37	1199.83	76.7314	-1931.19	1220.48	344.226	-2022.27	1343.64	371.278	-1956.53	1118.28	360.305	-1928.79	1057.62	390.256	-1972.79	945.38	366.758	-1967.47	841.989	395.284	-1902.01	842.186	404.939	-1915.45	746.068
1068	0	228.94	-2188.04	1571.56	130.168	-2196.69	1567.13	228.494	-2014.49	1570.49	115.741	-2014.42	1565.67	164.156	-1994.59	1389.32	172.631	-1950.9	1171.24	182.487	-2128.81	1330.39	185.121	-2192.46	1201.35	78.4395	-1944.97	1221.5	345.783	-2036.31	1344.85	373.096	-1971.59	1119.2	362.272	-1944.14	1058.36	391.853	-1989.06	946.368	368.225	-1984.28	843.003	397.228	-1919.05	842.714	406.881	-1933.41	746.791
1069	0	230.274	-2201.4	1573.2	131.493	-2209.9	1568.79	230.048	-2027.78	1572.01	117.308	-2027.58	1567.21	165.762	-2008.06	1390.72	174.377	-1965.89	1172.62	183.755	-2142.46	1332.02	186.277	-2206.38	1203	80.1173	-1958.61	1222.86	347.265	-2050.4	1346.36	374.936	-1986.86	1120.38	364.308	-1959.73	1059.32	393.461	-2005.76	947.646	369.729	-2001.7	844.312	399.237	-1936.73	843.425	408.973	-1952.29	747.763
1070	0	231.583	-2214.78	1574.98	132.788	-2223.17	1570.62	231.542	-2041.1	1573.73	118.817	-2040.8	1568.98	167.297	-2021.52	1392.39	176.085	-1980.56	1174.35	184.912	-2156.04	1333.83	187.282	-2220.11	1204.75	81.7681	-1972.07	1224.52	348.665	-2064.52	1348.15	376.794	-2002.34	1121.82	366.412	-1975.56	1060.52	395.072	-2022.89	949.204	371.261	-2019.71	845.906	401.311	-1955.02	844.319	411.196	-1972.03	748.984
1071	0	232.858	-2228.2	1576.89	134.042	-2236.5	1572.61	232.968	-2054.46	1575.64	120.259	-2054.07	1570.96	168.759	-2034.94	1394.29	177.759	-1994.88	1176.4	185.953	-2169.55	1335.78	188.128	-2233.66	1206.59	83.3968	-1985.33	1226.46	349.979	-2078.67	1350.2	378.667	-2018.01	1123.49	368.58	-1991.63	1061.91	396.676	-2040.43	951.03	372.81	-2038.26	847.774	403.451	-1973.91	845.399	413.527	-1992.58	750.453
1072	0	234.088	-2241.64	1578.89	135.245	-2249.88	1574.7	234.319	-2067.84	1577.7	121.627	-2067.38	1573.12	170.146	-2048.31	1396.42	179.407	-2008.81	1178.73	186.877	-2182.96	1337.86	188.815	-2246.99	1208.51	85.0094	-1998.39	1228.65	351.206	-2092.82	1352.49	380.552	-2033.89	1125.37	370.81	-2007.93	1063.5	398.267	-2058.36	953.11	374.366	-2057.34	849.901	405.656	-1993.36	846.662	415.943	-2013.9	752.169
1073	0	235.267	-2255.1	1580.96	136.39	-2263.3	1576.88	235.588	-2081.24	1579.9	122.916	-2080.72	1575.44	171.458	-2061.61	1398.72	181.042	-2022.36	1181.28	187.684	-2196.27	1340.05	189.346	-2260.13	1210.5	86.612	-2011.24	1231.05	352.343	-2106.96	1354.98	382.447	-2049.95	1127.44	373.099	-2024.45	1065.25	399.837	-2076.66	955.427	375.92	-2076.89	852.274	407.923	-2013.35	848.107	418.418	-2035.93	754.129
1074	0	236.385	-2268.57	1583.05	137.469	-2276.75	1579.1	236.774	-2094.65	1582.22	124.122	-2094.09	1577.89	172.697	-2074.84	1401.18	182.675	-2035.54	1184.02	188.381	-2209.47	1342.32	189.733	-2273.06	1212.53	88.2101	-2023.87	1233.61	353.394	-2121.07	1357.66	384.352	-2066.19	1129.68	375.442	-2041.17	1067.15	401.383	-2095.29	957.964	377.461	-2096.88	854.876	410.251	-2033.83	849.732	420.93	-2058.61	756.332
1075	0	237.437	-2282.05	1585.15	138.476	-2290.23	1581.33	237.872	-2108.07	1584.64	125.243	-2107.47	1580.44	173.866	-2087.98	1403.76	184.316	-2048.37	1186.88	188.975	-2222.56	1344.64	189.993	-2285.81	1214.61	89.8077	-2036.29	1236.3	354.361	-2135.13	1360.48	386.266	-2082.59	1132.06	377.837	-2058.07	1069.17	402.9	-2114.24	960.701	378.982	-2117.26	857.69	412.632	-2054.79	851.531	423.453	-2081.87	758.774
1076	0	238.418	-2295.52	1587.23	139.408	-2303.71	1583.54	238.884	-2121.5	1587.11	126.281	-2120.86	1583.06	174.969	-2101.03	1406.41	185.971	-2060.88	1189.83	189.478	-2235.52	1346.99	190.146	-2298.39	1216.72	91.4067	-2048.52	1239.07	355.249	-2149.12	1363.41	388.186	-2099.12	1134.54	380.278	-2075.15	1071.29	404.387	-2133.47	963.618	380.475	-2137.99	860.698	415.062	-2076.17	853.499	425.967	-2105.66	761.449
1077	0	239.323	-2308.99	1589.26	140.262	-2317.2	1585.7	239.811	-2134.91	1589.62	127.236	-2134.23	1585.71	176.009	-2113.99	1409.1	187.638	-2073.12	1192.81	189.901	-2248.35	1349.33	190.218	-2310.81	1218.85	93.0069	-2060.55	1241.89	356.064	-2163.03	1366.42	390.112	-2115.77	1137.11	382.759	-2092.38	1073.49	405.843	-2152.95	966.691	381.934	-2159.04	863.881	417.531	-2097.95	855.627	428.449	-2129.92	764.352
1078	0	240.15	-2322.43	1591.21	141.038	-2330.67	1587.77	240.653	-2148.31	1592.14	128.111	-2147.59	1588.35	176.993	-2126.84	1411.8	189.313	-2085.13	1195.79	190.261	-2261.07	1351.65	190.237	-2323.11	1220.98	94.6063	-2072.43	1244.7	356.814	-2176.84	1369.46	392.044	-2132.52	1139.73	385.274	-2109.74	1075.73	407.269	-2172.64	969.898	383.356	-2180.36	867.218	420.03	-2120.08	857.903	430.882	-2154.58	767.473
1079	0	240.898	-2335.85	1593.07	141.736	-2344.12	1589.73	241.416	-2161.68	1594.62	128.91	-2160.91	1590.94	177.927	-2139.6	1414.46	190.986	-2096.96	1198.71	190.571	-2273.67	1353.91	190.229	-2335.29	1223.08	96.2008	-2084.16	1247.47	357.507	-2190.55	1372.5	393.981	-2149.34	1142.38	387.817	-2127.21	1077.98	408.666	-2192.52	973.211	384.738	-2201.91	870.688	422.546	-2142.52	860.312	433.248	-2179.59	770.8
1080	0	241.567	-2349.24	1594.82	142.36	-2357.53	1591.56	242.104	-2175.02	1597.05	129.638	-2174.18	1593.45	178.816	-2152.25	1417.04	192.647	-2108.67	1201.55	190.846	-2286.16	1356.09	190.22	-2347.39	1225.15	97.785	-2095.77	1250.16	358.15	-2204.14	1375.49	395.921	-2166.2	1145	390.38	-2144.77	1080.22	410.037	-2212.54	976.603	386.079	-2223.65	874.267	425.067	-2165.23	862.839	435.534	-2204.87	774.318
1081	0	242.16	-2362.59	1596.43	142.914	-2370.9	1593.24	242.721	-2188.32	1599.37	130.301	-2187.4	1595.85	179.667	-2164.82	1419.51	194.284	-2120.28	1204.25	191.102	-2298.55	1358.15	190.233	-2359.42	1227.13	99.3527	-2107.28	1252.73	358.752	-2217.6	1378.4	397.863	-2183.08	1147.59	392.954	-2162.4	1082.42	411.386	-2232.67	980.047	387.379	-2245.54	877.932	427.58	-2188.16	865.462	437.728	-2230.39	778.01
1082	0	242.679	-2375.88	1597.89	143.403	-2384.21	1594.74	243.273	-2201.57	1601.57	130.905	-2200.56	1598.08	180.485	-2177.3	1421.84	195.884	-2131.84	1206.79	191.351	-2310.86	1360.07	190.286	-2371.4	1229.01	100.897	-2118.71	1255.16	359.32	-2230.94	1381.18	399.804	-2199.95	1150.09	395.533	-2180.08	1084.55	412.716	-2252.88	983.514	388.641	-2267.56	881.658	430.068	-2211.28	868.158	439.82	-2256.06	781.854
1083	0	243.129	-2389.13	1599.19	143.837	-2397.46	1596.06	243.767	-2214.77	1603.6	131.455	-2213.65	1600.13	181.275	-2189.71	1423.98	197.437	-2143.39	1209.14	191.604	-2323.09	1361.81	190.39	-2383.35	1230.75	102.41	-2130.09	1257.41	359.863	-2244.17	1383.78	401.744	-2216.79	1152.49	398.108	-2197.78	1086.57	414.033	-2273.12	986.972	389.866	-2289.66	885.42	432.518	-2234.54	870.903	441.806	-2281.86	785.828
1084	0	243.517	-2402.31	1600.31	144.221	-2410.65	1597.17	244.209	-2227.92	1605.44	131.958	-2226.67	1601.95	182.041	-2202.04	1425.92	198.935	-2154.94	1211.27	191.87	-2335.26	1363.36	190.554	-2395.27	1232.31	103.884	-2141.43	1259.46	360.385	-2257.27	1386.19	403.677	-2233.58	1154.74	400.67	-2215.48	1088.46	415.339	-2293.38	990.394	391.057	-2311.8	889.192	434.915	-2257.89	873.668	443.679	-2307.71	789.908
1085	0	243.848	-2415.43	1601.24	144.566	-2423.77	1598.07	244.604	-2241	1607.06	132.421	-2239.61	1603.53	182.786	-2214.32	1427.63	200.369	-2166.51	1213.16	192.156	-2347.38	1364.69	190.779	-2407.17	1233.65	105.312	-2152.75	1261.28	360.892	-2270.27	1388.35	405.599	-2250.3	1156.82	403.209	-2233.17	1090.19	416.638	-2313.6	993.75	392.218	-2333.97	892.95	437.246	-2281.29	876.429	445.439	-2333.57	794.066
1086	0	244.13	-2428.48	1601.97	144.881	-2436.82	1598.76	244.959	-2254.03	1608.44	132.847	-2252.48	1604.84	183.511	-2226.55	1429.09	201.732	-2178.11	1214.78	192.465	-2359.46	1365.78	191.064	-2419.06	1234.75	106.685	-2164.08	1262.86	361.385	-2283.17	1390.24	407.506	-2266.92	1158.71	405.718	-2250.84	1091.74	417.931	-2333.77	997.012	393.352	-2356.13	896.669	439.497	-2304.7	879.157	447.083	-2359.4	798.278
1087	0	244.369	-2441.47	1602.49	145.174	-2449.8	1599.22	245.279	-2266.99	1609.55	133.242	-2265.28	1605.86	184.218	-2238.73	1430.28	203.018	-2189.74	1216.13	192.799	-2371.52	1366.61	191.401	-2430.93	1235.58	107.997	-2175.41	1264.17	361.866	-2295.98	1391.84	409.391	-2283.45	1160.37	408.185	-2268.45	1093.08	419.219	-2353.85	1000.16	394.462	-2378.25	900.328	441.659	-2328.07	881.829	448.614	-2385.15	802.516
1088	0	244.574	-2454.39	1602.8	145.456	-2462.71	1599.45	245.569	-2279.89	1610.39	133.61	-2278.01	1606.58	184.904	-2250.88	1431.19	204.221	-2201.4	1217.19	193.156	-2383.57	1367.18	191.783	-2442.79	1236.11	109.238	-2186.78	1265.22	362.336	-2308.71	1393.12	411.245	-2299.85	1161.79	410.602	-2286	1094.2	420.502	-2373.82	1003.16	395.55	-2400.3	903.906	443.722	-2351.38	884.421	450.033	-2410.78	806.757
1089	0	244.752	-2467.25	1602.9	145.732	-2475.56	1599.46	245.833	-2292.73	1610.93	133.954	-2290.69	1607.01	185.567	-2263.01	1431.81	205.334	-2213.08	1217.95	193.534	-2395.62	1367.47	192.198	-2454.64	1236.33	110.401	-2198.18	1265.98	362.792	-2321.37	1394.07	413.06	-2316.14	1162.96	412.958	-2303.47	1095.09	421.775	-2393.65	1006	396.618	-2422.26	907.385	445.678	-2374.57	886.913	451.344	-2436.24	810.976
1090	0	244.908	-2480.04	1602.78	146.011	-2488.35	1599.24	246.076	-2305.51	1611.18	134.276	-2303.3	1607.12	186.204	-2275.13	1432.13	206.351	-2224.77	1218.4	193.928	-2407.68	1367.48	192.635	-2466.49	1236.24	111.478	-2209.64	1266.45	363.231	-2333.97	1394.68	414.826	-2332.3	1163.86	415.242	-2320.86	1095.73	423.036	-2413.33	1008.66	397.667	-2444.09	910.747	447.524	-2397.61	889.288	452.552	-2461.49	815.152
1091	0	245.049	-2492.77	1602.44	146.296	-2501.09	1598.81	246.299	-2318.23	1611.13	134.576	-2315.87	1606.93	186.81	-2287.23	1432.16	207.268	-2236.47	1218.54	194.331	-2419.76	1367.22	193.081	-2478.34	1235.82	112.462	-2221.16	1266.64	363.649	-2346.52	1394.94	416.533	-2348.32	1164.5	417.445	-2338.13	1096.13	424.279	-2432.83	1011.13	398.7	-2465.76	913.979	449.255	-2420.47	891.534	453.661	-2486.51	819.265
1092	0	245.18	-2505.44	1601.88	146.593	-2513.78	1598.16	246.505	-2330.91	1610.78	134.856	-2328.4	1606.44	187.378	-2299.34	1431.89	208.08	-2248.17	1218.38	194.736	-2431.86	1366.67	193.525	-2490.2	1235.1	113.344	-2232.75	1266.54	364.041	-2359.02	1394.87	418.171	-2364.21	1164.86	419.557	-2355.29	1096.27	425.497	-2452.13	1013.4	399.716	-2487.27	917.069	450.871	-2443.12	893.639	454.679	-2511.24	823.296
1093	0	245.306	-2518.05	1601.1	146.902	-2526.42	1597.3	246.695	-2343.53	1610.14	135.114	-2340.89	1605.67	187.903	-2311.44	1431.34	208.784	-2259.86	1217.92	195.134	-2443.99	1365.86	193.957	-2502.09	1234.07	114.119	-2244.42	1266.14	364.4	-2371.49	1394.47	419.728	-2379.96	1164.95	421.567	-2372.32	1096.17	426.682	-2471.23	1015.45	400.716	-2508.57	920.009	452.371	-2465.52	895.597	455.612	-2535.67	827.231
1094	0	245.428	-2530.62	1600.12	147.223	-2539.02	1596.24	246.869	-2356.12	1609.22	135.348	-2353.36	1604.63	188.377	-2323.56	1430.51	209.379	-2271.55	1217.16	195.517	-2456.16	1364.8	194.369	-2514.03	1232.77	114.78	-2256.18	1265.47	364.722	-2383.93	1393.74	421.194	-2395.56	1164.78	423.466	-2389.21	1095.83	427.828	-2490.1	1017.3	401.699	-2529.64	922.79	453.756	-2487.64	897.403	456.466	-2559.75	831.054
1095	0	245.549	-2543.13	1598.93	147.554	-2551.59	1594.99	247.028	-2368.66	1608.02	135.558	-2365.82	1603.33	188.794	-2335.69	1429.42	209.861	-2283.24	1216.12	195.876	-2468.37	1363.49	194.754	-2526.01	1231.21	115.322	-2268.03	1264.51	364.999	-2396.35	1392.72	422.558	-2411.02	1164.36	425.246	-2405.95	1095.25	428.925	-2508.73	1018.92	402.665	-2550.47	925.407	455.029	-2509.46	899.055	457.25	-2583.45	834.752
1096	0	245.671	-2555.61	1597.55	147.893	-2564.13	1593.56	247.171	-2381.16	1606.57	135.741	-2378.26	1601.79	189.148	-2347.83	1428.07	210.233	-2294.93	1214.81	196.203	-2480.63	1361.95	195.107	-2538.06	1229.43	115.743	-2279.99	1263.29	365.227	-2408.75	1391.41	423.813	-2426.34	1163.69	426.897	-2422.51	1094.45	429.966	-2527.12	1020.33	403.614	-2571.03	927.856	456.192	-2530.95	900.553	457.969	-2606.75	838.314
1097	0	245.793	-2568.04	1595.97	148.235	-2576.64	1591.96	247.296	-2393.63	1604.88	135.895	-2390.7	1600.03	189.431	-2360	1426.47	210.493	-2306.62	1213.24	196.489	-2492.92	1360.2	195.424	-2550.2	1227.45	116.038	-2292.06	1261.81	365.398	-2421.13	1389.83	424.949	-2441.51	1162.78	428.414	-2438.91	1093.44	430.945	-2545.24	1021.53	404.543	-2591.31	930.133	457.248	-2552.1	901.896	458.632	-2629.62	841.729
1098	0	245.915	-2580.43	1594.22	148.574	-2589.12	1590.19	247.402	-2406.07	1602.96	136.016	-2403.13	1598.07	189.638	-2372.19	1424.65	210.643	-2318.34	1211.44	196.726	-2505.26	1358.26	195.704	-2562.43	1225.31	116.207	-2304.23	1260.08	365.51	-2433.5	1388.01	425.959	-2456.52	1161.66	429.788	-2455.12	1092.24	431.855	-2563.1	1022.51	405.452	-2611.28	932.236	458.198	-2572.87	903.086	459.243	-2652.03	844.986
1099	0	246.036	-2592.78	1592.29	148.904	-2601.58	1588.28	247.488	-2418.48	1600.84	136.104	-2415.56	1595.93	189.765	-2384.41	1422.61	210.686	-2330.1	1209.41	196.908	-2517.65	1356.14	195.945	-2574.76	1223.03	116.251	-2316.52	1258.11	365.557	-2445.86	1385.96	426.838	-2471.38	1160.32	431.014	-2471.13	1090.84	432.691	-2580.69	1023.29	406.337	-2630.94	934.164	459.047	-2593.25	904.124	459.808	-2673.95	848.078
1100	0	246.155	-2605.11	1590.2	149.219	-2614.02	1586.23	247.55	-2430.87	1598.52	136.155	-2428	1593.61	189.807	-2396.66	1420.37	210.621	-2341.9	1207.18	197.027	-2530.09	1353.86	196.15	-2587.21	1220.64	116.168	-2328.91	1255.92	365.536	-2458.2	1383.7	427.58	-2486.08	1158.79	432.087	-2486.95	1089.27	433.449	-2597.99	1023.86	407.197	-2650.25	935.915	459.796	-2613.23	905.013	460.332	-2695.38	850.996
1101	0	246.269	-2617.4	1587.96	149.511	-2626.44	1584.04	247.588	-2443.23	1596.03	136.168	-2440.44	1591.15	189.761	-2408.94	1417.93	210.452	-2353.76	1204.77	197.078	-2542.57	1351.44	196.321	-2599.76	1218.18	115.961	-2341.41	1253.51	365.444	-2470.54	1381.26	428.183	-2500.61	1157.07	433.004	-2502.55	1087.53	434.125	-2615	1024.23	408.029	-2669.23	937.488	460.448	-2632.79	905.755	460.819	-2716.29	853.733
1102	0	246.378	-2629.66	1585.57	149.775	-2638.84	1581.73	247.599	-2455.58	1593.38	136.14	-2452.89	1588.55	189.624	-2421.26	1415.31	210.179	-2365.69	1202.19	197.058	-2555.1	1348.89	196.458	-2612.44	1215.66	115.632	-2354.02	1250.9	365.281	-2482.88	1378.64	428.642	-2514.98	1155.17	433.761	-2517.93	1085.64	434.717	-2631.72	1024.4	408.831	-2687.84	938.882	461.005	-2651.91	906.349	461.273	-2736.68	856.282
1103	0	246.48	-2641.9	1583.04	150.006	-2651.21	1579.3	247.583	-2467.91	1590.58	136.071	-2465.34	1585.82	189.396	-2433.61	1412.52	209.804	-2377.7	1199.46	196.961	-2567.67	1346.22	196.566	-2625.23	1213.11	115.184	-2366.73	1248.1	365.043	-2495.2	1375.86	428.957	-2529.18	1153.1	434.355	-2533.1	1083.6	435.223	-2648.15	1024.38	409.598	-2706.1	940.097	461.467	-2670.6	906.799	461.695	-2756.52	858.638
1104	0	246.573	-2654.11	1580.37	150.2	-2663.57	1576.76	247.537	-2480.22	1587.64	135.958	-2477.8	1582.97	189.074	-2445.99	1409.57	209.328	-2389.79	1196.59	196.785	-2580.29	1343.44	196.645	-2638.14	1210.55	114.618	-2379.54	1245.11	364.73	-2507.52	1372.93	429.125	-2543.2	1150.87	434.784	-2548.04	1081.41	435.64	-2664.27	1024.16	410.33	-2723.98	941.131	461.837	-2688.83	907.104	462.088	-2775.81	860.798
1105	0	246.656	-2666.29	1577.57	150.354	-2675.91	1574.11	247.461	-2492.51	1584.56	135.8	-2490.27	1580.01	188.658	-2458.41	1406.45	208.752	-2401.99	1193.59	196.528	-2592.96	1340.55	196.699	-2651.16	1207.98	113.937	-2392.45	1241.94	364.342	-2519.84	1369.85	429.146	-2557.05	1148.48	435.049	-2562.76	1079.09	435.97	-2680.1	1023.76	411.025	-2741.48	941.984	462.115	-2706.61	907.266	462.452	-2794.54	862.757
1106	0	246.728	-2678.45	1574.65	150.466	-2688.23	1571.35	247.355	-2504.79	1581.35	135.598	-2502.74	1576.94	188.148	-2470.87	1403.17	208.076	-2414.28	1190.46	196.189	-2605.67	1337.57	196.727	-2664.31	1205.42	113.142	-2405.45	1238.61	363.879	-2532.15	1366.64	429.02	-2570.72	1145.93	435.147	-2577.24	1076.64	436.21	-2695.62	1023.16	411.681	-2758.61	942.657	462.302	-2723.93	907.284	462.789	-2812.71	864.513
1107	0	246.789	-2690.58	1571.59	150.537	-2700.52	1568.48	247.217	-2517.06	1578.02	135.35	-2515.23	1573.77	187.544	-2483.36	1399.74	207.3	-2426.68	1187.22	195.767	-2618.42	1334.49	196.732	-2677.57	1202.86	112.236	-2418.55	1235.1	363.339	-2544.46	1363.29	428.746	-2584.21	1143.23	435.079	-2591.49	1074.04	436.361	-2710.84	1022.38	412.298	-2775.36	943.148	462.398	-2740.78	907.16	463.099	-2830.32	866.066
1108	0	246.839	-2702.69	1568.41	150.566	-2712.8	1565.51	247.048	-2529.31	1574.56	135.057	-2527.72	1570.49	186.845	-2495.88	1396.16	206.425	-2439.18	1183.86	195.261	-2631.22	1331.32	196.712	-2690.95	1200.32	111.217	-2431.75	1231.42	362.724	-2556.76	1359.81	428.324	-2597.53	1140.38	434.844	-2605.52	1071.32	436.423	-2725.75	1021.4	412.875	-2791.73	943.457	462.402	-2757.18	906.892	463.383	-2847.37	867.414
1109	0	246.878	-2714.77	1565.11	150.553	-2725.07	1562.44	246.848	-2541.54	1570.97	134.718	-2540.21	1567.1	186.052	-2508.45	1392.42	205.45	-2451.78	1180.39	194.671	-2644.07	1328.05	196.669	-2704.44	1197.79	110.087	-2445.04	1227.58	362.032	-2569.06	1356.19	427.755	-2610.67	1137.37	434.443	-2619.31	1068.47	436.395	-2740.36	1020.24	413.412	-2807.71	943.586	462.317	-2773.11	906.482	463.639	-2863.85	868.558
[truncated: 69 more columns]

## Sheet: Sheet2
Devices
		025370 - Force			025370 - Moment			025370 - CoP			027571 - Force			027571 - Moment			027571 - CoP			037720 - Force			037720 - Moment			037720 - CoP
Frame	Sub Frame	Fx	Fy	Fz	Mx	My	Mz	Cx	Cy	Cz	Fx	Fy	Fz	Mx	My	Mz	Cx	Cy	Cz	Fx	Fy	Fz	Mx	My	Mz	Cx	Cy	Cz
		N	N	N	N.mm	N.mm	N.mm	mm	mm	mm	N	N	N	N.mm	N.mm	N.mm	mm	mm	mm	N	N	N	N.mm	N.mm	N.mm	mm	mm	mm
718	0	0	0	0	0	0	0	200	300	0	0	0	0	0	0	0	200	903	0	0	0	0	0	0	0	603	903	0
718	1	0	0	0	0	0	0	200	300	0	0	0	0	0	0	0	200	903	0	0	0	0	0	0	0	603	903	0
718	2	0	0	0	0	0	0	200	300	0	0	0	0	0	0	0	200	903	0	0	0	0	0	0	0	603	903	0
718	3	0	0	0	0	0	0	200	300	0	0	0	0	0	0	0	200	903	0	0	0	0	0	0	0	603	903	0
718	4	0	0	0	0	0	0	200	300	0	0	0	0	0	0	0	200	903	0	0	0	0	0	0	0	603	903	0
718	5	0	0	0	0	0	0	200	300	0	0	0	0	0	0	0	200	903	0	0	0	0	0	0	0	603	903	0
718	6	0	0	0	0	0	0	200	300	0	0	0	0	0	0	0	200	903	0	0	0	0	0	0	0	603	903	0
718	7	0	0	0	0	0	0	200	300	0	0	0	0	0	0	0	200	903	0	0	0	0	0	0	0	603	903	0
718	8	0	0	0	0	0	0	200	300	0	0	0	0	0	0	0	200	903	0	0	0	0	0	0	0	603	903	0
718	9	0	0	0	0	0	0	200	300	0	0	0	0	0	0	0	200	903	0	0	0	0	0	0	0	603	903	0
719	0	0	0	0	0	0	0	200	300	0	0	0	0	0	0	0	200	903	0	0	0	0	0	0	0	603	903	0
719	1	0	0	0	0	0	0	200	300	0	0	0	0	0	0	0	200	903	0	0	0	0	0	0	0	603	903	0
719	2	0	0	0	0	0	0	200	300	0	0	0	0	0	0	0	200	903	0	0	0	0	0	0	0	603	903	0
719	3	0	0	0	0	0	0	200	300	0	0	0	0	0	0	0	200	903	0	0	0	0	0	0	0	603	903	0
719	4	0	0	0	0	0	0	200	300	0	0	0	0	0	0	0	200	903	0	0	0	0	0	0	0	603	903	0
719	5	0	0	0	0	0	0	200	300	0	0	0	0	0	0	0	200	903	0	0	0	0	0	0	0	603	903	0
719	6	0	0	0	0	0	0	200	300	0	0	0	0	0	0	0	200	903	0	0	0	0	0	0	0	603	903	0
719	7	0	0	0	0	0	0	200	300	0	0	0	0	0	0	0	200	903	0	0	0	0	0	0	0	603	903	0
719	8	0	0	0	0	0	0	200	300	0	0	0	0	0	0	0	200	903	0	0	0	0	0	0	0	603	903	0
719	9	0	0	0	0	0	0	200	300	0	0	0	0	0	0	0	200	903	0	0	0	0	0	0	0	603	903	0
720	0	0	0	0	0	0	0	200	300	0	0	0	0	0	0	0	200	903	0	0	0	0	0	0	0	603	903	0
720	1	0	0	0	0	0	0	200	300	0	0	0	0	0	0	0	200	903	0	0	0	0	0	0	0	603	903	0
720	2	0	0	0	0	0	0	200	300	0	0	0	0	0	0	0	200	903	0	0	0	0	0	0	0	603	903	0
720	3	0	0	0	0	0	0	200	300	0	0	0	0	0	0	0	200	903	0	0	0	0	0	0	0	603	903	0
720	4	0	0	0	0	0	0	200	300	0	0	0	0	0	0	0	200	903	0	0	0	0	0	0	0	603	903	0
720	5	0	0	0	0	0	0	200	300	0	0	0	0	0	0	0	200	903	0	0	0	0	0	0	0	603	903	0
720	6	0	0	0	0	0	0	200	300	0	0	0	0	0	0	0	200	903	0	0	0	0	0	0	0	603	903	0
720	7	0	0	0	0	0	0	200	300	0	0	0	0	0	0	0	200	903	0	0	0	0	0	0	0	603	903	0
720	8	0	0	0	0	0	0	200	300	0	0	0	0	0	0	0	200	903	0	0	0	0	0	0	0	603	903	0
720	9	0	0	0	0	0	0	200	300	0	0	0	0	0	0	0	200	903	0	0	0	0	0	0	0	603	903	0
721	0	0	0	0	0	0	0	200	300	0	0	0	0	0	0	0	200	903	0	0	0	0	0	0	0	603	903	0
721	1	0	0	0	0	0	0	200	300	0	0	0	0	0	0	0	200	903	0	0	0	0	0	0	0	603	903	0
721	2	0	0	0	0	0	0	200	300	0	0	0	0	0	0	0	200	903	0	0	0	0	0	0	0	603	903	0
721	3	0	0	0	0	0	0	200	300	0	0	0	0	0	0	0	200	903	0	0	0	0	0	0	0	603	903	0
721	4	0	0	0	0	0	0	200	300	0	0	0	0	0	0	0	200	903	0	0	0	0	0	0	0	603	903	0
721	5	0	0	0	0	0	0	200	300	0	0	0	0	0	0	0	200	903	0	0	0	0	0	0	0	603	903	0
721	6	0	0	0	0	0	0	200	300	0	0	0	0	0	0	0	200	903	0	0	0	0	0	0	0	603	903	0
721	7	0	0	0	0	0	0	200	300	0	0	0	0	0	0	0	200	903	0	0	0	0	0	0	0	603	903	0
721	8	0	0	0	0	0	0	200	300	0	0	0	0	0	0	0	200	903	0	0	0	0	0	0	0	603	903	0
721	9	0	0	0	0	0	0	200	300	0	0	0	0	0	0	0	200	903	0	0	0	0	0	0	0	603	903	0
722	0	0	0	0	0	0	0	200	300	0	0	0	0	0	0	0	200	903	0	0	0	0	0	0	0	603	903	0
722	1	0	0	0	0	0	0	200	300	0	0	0	0	0	0	0	200	903	0	0	0	0	0	0	0	603	903	0
722	2	0	0	0	0	0	0	200	300	0	0	0	0	0	0	0	200	903	0	0	0	0	0	0	0	603	903	0
722	3	0	0	0	0	0	0	200	300	0	0	0	0	0	0	0	200	903	0	0	0	0	0	0	0	603	903	0
722	4	0	0	0	0	0	0	200	300	0	0	0	0	0	0	0	200	903	0	0	0	0	0	0	0	603	903	0
722	5	0	0	0	0	0	0	200	300	0	0	0	0	0	0	0	200	903	0	0	0	0	0	0	0	603	903	0
722	6	0	0	0	0	0	0	200	300	0	0	0	0	0	0	0	200	903	0	0	0	0	0	0	0	603	903	0
722	7	0	0	0	0	0	0	200	300	0	0	0	0	0	0	0	200	903	0	0	0	0	0	0	0	603	903	0
722	8	0	0	0	0	0	0	200	300	0	0	0	0	0	0	0	200	903	0	0	0	0	0	0	0	603	903	0
722	9	0	0	0	0	0	0	200	300	0	0	0	0	0	0	0	200	903	0	0	0	0	0	0	0	603	903	0
723	0	0	0	0	0	0	0	200	300	0	0	0	0	0	0	0	200	903	0	0	0	0	0	0	0	603	903	0
723	1	0	0	0	0	0	0	200	300	0	0	0	0	0	0	0	200	903	0	0	0	0	0	0	0	603	903	0
723	2	0	0	0	0	0	0	200	300	0	0	0	0	0	0	0	200	903	0	0	0	0	0	0	0	603	903	0
723	3	0	0	0	0	0	0	200	300	0	0	0	0	0	0	0	200	903	0	0	0	0	0	0	0	603	903	0
723	4	0	0	0	0	0	0	200	300	0	0	0	0	0	0	0	200	903	0	0	0	0	0	0	0	603	903	0
723	5	0	0	0	0	0	0	200	300	0	0	0	0	0	0	0	200	903	0	0	0	0	0	0	0	603	903	0
723	6	0	0	0	0	0	0	200	300	0	0	0	0	0	0	0	200	903	0	0	0	0	0	0	0	603	903	0
723	7	0	0	0	0	0	0	200	300	0	0	0	0	0	0	0	200	903	0	0	0	0	0	0	0	603	903	0
723	8	0	0	0	0	0	0	200	300	0	0	0	0	0	0	0	200	903	0	0	0	0	0	0	0	603	903	0
723	9	0	0	0	0	0	0	200	300	0	0	0	0	0	0	0	200	903	0	0	0	0	0	0	0	603	903	0
724	0	0	0	0	0	0	0	200	300	0	0	0	0	0	0	0	200	903	0	0	0	0	0	0	0	603	903	0
724	1	0	0	0	0	0	0	200	300	0	0	0	0	0	0	0	200	903	0	0	0	0	0	0	0	603	903	0
724	2	0	0	0	0	0	0	200	300	0	0	0	0	0	0	0	200	903	0	0	0	0	0	0	0	603	903	0
724	3	0	0	0	0	0	0	200	300	0	0	0	0	0	0	0	200	903	0	0	0	0	0	0	0	603	903	0
724	4	0	0	0	0	0	0	200	300	0	0	0	0	0	0	0	200	903	0	0	0	0	0	0	0	603	903	0
724	5	0	0	0	0	0	0	200	300	0	0	0	0	0	0	0	200	903	0	0	0	0	0	0	0	603	903	0
724	6	0	0	0	0	0	0	200	300	0	0	0	0	0	0	0	200	903	0	0	0	0	0	0	0	603	903	0
724	7	0	0	0	0	0	0	200	300	0	0	0	0	0	0	0	200	903	0	0	0	0	0	0	0	603	903	0
724	8	0	0	0	0	0	0	200	300	0	0	0	0	0	0	0	200	903	0	0	0	0	0	0	0	603	903	0
724	9	0	0	0	0	0	0	200	300	0	0	0	0	0	0	0	200	903	0	0	0	0	0	0	0	603	903	0
725	0	0	0	0	0	0	0	200	300	0	0	0	0	0	0	0	200	903	0	0	0	0	0	0	0	603	903	0
725	1	0	0	0	0	0	0	200	300	0	0	0	0	0	0	0	200	903	0	0	0	0	0	0	0	603	903	0
725	2	0	0	0	0	0	0	200	300	0	0	0	0	0	0	0	200	903	0	0	0	0	0	0	0	603	903	0
725	3	0	0	0	0	0	0	200	300	0	0	0	0	0	0	0	200	903	0	0	0	0	0	0	0	603	903	0
725	4	0	0	0	0	0	0	200	300	0	0	0	0	0	0	0	200	903	0	0	0	0	0	0	0	603	903	0
725	5	0	0	0	0	0	0	200	300	0	0	0	0	0	0	0	200	903	0	0	0	0	0	0	0	603	903	0
725	6	0	0	0	0	0	0	200	300	0	0	0	0	0	0	0	200	903	0	0	0	0	0	0	0	603	903	0
725	7	0	0	0	0	0	0	200	300	0	0	0	0	0	0	0	200	903	0	0	0	0	0	0	0	603	903	0
725	8	0	0	0	0	0	0	200	300	0	0	0	0	0	0	0	200	903	0	0	0	0	0	0	0	603	903	0
725	9	0	0	0	0	0	0	200	300	0	0	0	0	0	0	0	200	903	0	0	0	0	0	0	0	603	903	0
726	0	0	0	0	0	0	0	200	300	0	0	0	0	0	0	0	200	903	0	0	0	0	0	0	0	603	903	0
726	1	0	0	0	0	0	0	200	300	0	0	0	0	0	0	0	200	903	0	0	0	0	0	0	0	603	903	0
726	2	0	0	0	0	0	0	200	300	0	0	0	0	0	0	0	200	903	0	0	0	0	0	0	0	603	903	0
726	3	0	0	0	0	0	0	200	300	0	0	0	0	0	0	0	200	903	0	0	0	0	0	0	0	603	903	0
726	4	0	0	0	0	0	0	200	300	0	0	0	0	0	0	0	200	903	0	0	0	0	0	0	0	603	903	0
726	5	0	0	0	0	0	0	200	300	0	0	0	0	0	0	0	200	903	0	0	0	0	0	0	0	603	903	0
726	6	0	0	0	0	0	0	200	300	0	0	0	0	0	0	0	200	903	0	0	0	0	0	0	0	603	903	0
726	7	0	0	0	0	0	0	200	300	0	0	0	0	0	0	0	200	903	0	0	0	0	0	0	0	603	903	0
726	8	0	0	0	0	0	0	200	300	0	0	0	0	0	0	0	200	903	0	0	0	0	0	0	0	603	903	0
726	9	0	0	0	0	0	0	200	300	0	0	0	0	0	0	0	200	903	0	0	0	0	0	0	0	603	903	0
727	0	0	0	0	0	0	0	200	300	0	0	0	0	0	0	0	200	903	0	0	0	0	0	0	0	603	903	0
727	1	0	0	0	0	0	0	200	300	0	0	0	0	0	0	0	200	903	0	0	0	0	0	0	0	603	903	0
727	2	0	0	0	0	0	0	200	300	0	0	0	0	0	0	0	200	903	0	0	0	0	0	0	0	603	903	0
727	3	0	0	0	0	0	0	200	300	0	0	0	0	0	0	0	200	903	0	0	0	0	0	0	0	603	903	0
727	4	0	0	0	0	0	0	200	300	0	0	0	0	0	0	0	200	903	0	0	0	0	0	0	0	603	903	0
727	5	0	0	0	0	0	0	200	300	0	0	0	0	0	0	0	200	903	0	0	0	0	0	0	0	603	903	0
727	6	0	0	0	0	0	0	200	300	0	0	0	0	0	0	0	200	903	0	0	0	0	0	0	0	603	903	0
727	7	0	0	0	0	0	0	200	300	0	0	0	0	0	0	0	200	903	0	0	0	0	0	0	0	603	903	0
727	8	0	0	0	0	0	0	200	300	0	0	0	0	0	0	0	200	903	0	0	0	0	0	0	0	603	903	0
727	9	0	0	0	0	0	0	200	300	0	0	0	0	0	0	0	200	903	0	0	0	0	0	0	0	603	903	0
728	0	0	0	0	0	0	0	200	300	0	0	0	0	0	0	0	200	903	0	0	0	0	0	0	0	603	903	0
728	1	0	0	0	0	0	0	200	300	0	0	0	0	0	0	0	200	903	0	0	0	0	0	0	0	603	903	0
728	2	0	0	0	0	0	0	200	300	0	0	0	0	0	0	0	200	903	0	0	0	0	0	0	0	603	903	0
728	3	0	0	0	0	0	0	200	300	0	0	0	0	0	0	0	200	903	0	0	0	0	0	0	0	603	903	0
728	4	0	0	0	0	0	0	200	300	0	0	0	0	0	0	0	200	903	0	0	0	0	0	0	0	603	903	0
728	5	0	0	0	0	0	0	200	300	0	0	0	0	0	0	0	200	903	0	0	0	0	0	0	0	603	903	0
728	6	0	0	0	0	0	0	200	300	0	0	0	0	0	0	0	200	903	0	0	0	0	0	0	0	603	903	0
728	7	0	0	0	0	0	0	200	300	0	0	0	0	0	0	0	200	903	0	0	0	0	0	0	0	603	903	0
728	8	0	0	0	0	0	0	200	300	0	0	0	0	0	0	0	200	903	0	0	0	0	0	0	0	603	903	0
728	9	0	0	0	0	0	0	200	300	0	0	0	0	0	0	0	200	903	0	0	0	0	0	0	0	603	903	0
729	0	0	0	0	0	0	0	200	300	0	0	0	0	0	0	0	200	903	0	0	0	0	0	0	0	603	903	0
729	1	0	0	0	0	0	0	200	300	0	0	0	0	0	0	0	200	903	0	0	0	0	0	0	0	603	903	0
729	2	0	0	0	0	0	0	200	300	0	0	0	0	0	0	0	200	903	0	0	0	0	0	0	0	603	903	0
729	3	0	0	0	0	0	0	200	300	0	0	0	0	0	0	0	200	903	0	0	0	0	0	0	0	603	903	0
729	4	0	0	0	0	0	0	200	300	0	0	0	0	0	0	0	200	903	0	0	0	0	0	0	0	603	903	0
729	5	0	0	0	0	0	0	200	300	0	0	0	0	0	0	0	200	903	0	0	0	0	0	0	0	603	903	0
729	6	0	0	0	0	0	0	200	300	0	0	0	0	0	0	0	200	903	0	0	0	0	0	0	0	603	903	0
729	7	0	0	0	0	0	0	200	300	0	0	0	0	0	0	0	200	903	0	0	0	0	0	0	0	603	903	0
729	8	0	0	0	0	0	0	200	300	0	0	0	0	0	0	0	200	903	0	0	0	0	0	0	0	603	903	0
729	9	0	0	0	0	0	0	200	300	0	0	0	0	0	0	0	200	903	0	0	0	0	0	0	0	603	903	0
730	0	0	0	0	0	0	0	200	300	0	0	0	0	0	0	0	200	903	0	0	0	0	0	0	0	603	903	0
730	1	0	0	0	0	0	0	200	300	0	0	0	0	0	0	0	200	903	0	0	0	0	0	0	0	603	903	0
730	2	0	0	0	0	0	0	200	300	0	0	0	0	0	0	0	200	903	0	0	0	0	0	0	0	603	903	0
730	3	0	0	0	0	0	0	200	300	0	0	0	0	0	0	0	200	903	0	0	0	0	0	0	0	603	903	0
730	4	0	0	0	0	0	0	200	300	0	0	0	0	0	0	0	200	903	0	0	0	0	0	0	0	603	903	0
730	5	0	0	0	0	0	0	200	300	0	0	0	0	0	0	0	200	903	0	0	0	0	0	0	0	603	903	0
730	6	0	0	0	0	0	0	200	300	0	0	0	0	0	0	0	200	903	0	0	0	0	0	0	0	603	903	0
730	7	0	0	0	0	0	0	200	300	0	0	0	0	0	0	0	200	903	0	0	0	0	0	0	0	603	903	0
730	8	0	0	0	0	0	0	200	300	0	0	0	0	0	0	0	200	903	0	0	0	0	0	0	0	603	903	0
730	9	0	0	0	0	0	0	200	300	0	0	0	0	0	0	0	200	903	0	0	0	0	0	0	0	603	903	0
731	0	0	0	0	0	0	0	200	300	0	0	0	0	0	0	0	200	903	0	0	0	0	0	0	0	603	903	0
731	1	0	0	0	0	0	0	200	300	0	0	0	0	0	0	0	200	903	0	0	0	0	0	0	0	603	903	0
731	2	0	0	0	0	0	0	200	300	0	0	0	0	0	0	0	200	903	0	0	0	0	0	0	0	603	903	0
731	3	0	0	0	0	0	0	200	300	0	0	0	0	0	0	0	200	903	0	0	0	0	0	0	0	603	903	0
731	4	0	0	0	0	0	0	200	300	0	0	0	0	0	0	0	200	903	0	0	0	0	0	0	0	603	903	0
731	5	0	0	0	0	0	0	200	300	0	0	0	0	0	0	0	200	903	0	0	0	0	0	0	0	603	903	0
731	6	0	0	0	0	0	0	200	300	0	0	0	0	0	0	0	200	903	0	0	0	0	0	0	0	603	903	0
731	7	0	0	0	0	0	0	200	300	0	0	0	0	0	0	0	200	903	0	0	0	0	0	0	0	603	903	0
731	8	0	0	0	0	0	0	200	300	0	0	0	0	0	0	0	200	903	0	0	0	0	0	0	0	603	903	0
731	9	0	0	0	0	0	0	200	300	0	0	0	0	0	0	0	200	903	0	0	0	0	0	0	0	603	903	0
732	0	0	0	0	0	0	0	200	300	0	0	0	0	0	0	0	200	903	0	0	0	0	0	0	0	603	903	0
732	1	0	0	0	0	0	0	200	300	0	0	0	0	0	0	0	200	903	0	0	0	0	0	0	0	603	903	0
732	2	0	0	0	0	0	0	200	300	0	0	0	0	0	0	0	200	903	0	0	0	0	0	0	0	603	903	0
732	3	0	0	0	0	0	0	200	300	0	0	0	0	0	0	0	200	903	0	0	0	0	0	0	0	603	903	0
732	4	0	0	0	0	0	0	200	300	0	0	0	0	0	0	0	200	903	0	0	0	0	0	0	0	603	903	0
732	5	0	0	0	0	0	0	200	300	0	0	0	0	0	0	0	200	903	0	0	0	0	0	0	0	603	903	0
732	6	0	0	0	0	0	0	200	300	0	0	0	0	0	0	0	200	903	0	0	0	0	0	0	0	603	903	0
732	7	0	0	0	0	0	0	200	300	0	0	0	0	0	0	0	200	903	0	0	0	0	0	0	0	603	903	0
732	8	0	0	0	0	0	0	200	300	0	0	0	0	0	0	0	200	903	0	0	0	0	0	0	0	603	903	0
732	9	0	0	0	0	0	0	200	300	0	0	0	0	0	0	0	200	903	0	0	0	0	0	0	0	603	903	0
733	0	0	0	0	0	0	0	200	300	0	0	0	0	0	0	0	200	903	0	0	0	0	0	0	0	603	903	0
733	1	0	0	0	0	0	0	200	300	0	0	0	0	0	0	0	200	903	0	0	0	0	0	0	0	603	903	0
733	2	0	0	0	0	0	0	200	300	0	0	0	0	0	0	0	200	903	0	0	0	0	0	0	0	603	903	0
733	3	0	0	0	0	0	0	200	300	0	0	0	0	0	0	0	200	903	0	0	0	0	0	0	0	603	903	0
733	4	0	0	0	0	0	0	200	300	0	0	0	0	0	0	0	200	903	0	0	0	0	0	0	0	603	903	0
733	5	0	0	0	0	0	0	200	300	0	0	0	0	0	0	0	200	903	0	0	0	0	0	0	0	603	903	0
733	6	0	0	0	0	0	0	200	300	0	0	0	0	0	0	0	200	903	0	0	0	0	0	0	0	603	903	0
733	7	0	0	0	0	0	0	200	300	0	0	0	0	0	0	0	200	903	0	0	0	0	0	0	0	603	903	0
733	8	0	0	0	0	0	0	200	300	0	0	0	0	0	0	0	200	903	0	0	0	0	0	0	0	603	903	0
733	9	0	0	0	0	0	0	200	300	0	0	0	0	0	0	0	200	903	0	0	0	0	0	0	0	603	903	0
734	0	0	0	0	0	0	0	200	300	0	0	0	0	0	0	0	200	903	0	0	0	0	0	0	0	603	903	0
734	1	0	0	0	0	0	0	200	300	0	0	0	0	0	0	0	200	903	0	0	0	0	0	0	0	603	903	0
734	2	0	0	0	0	0	0	200	300	0	0	0	0	0	0	0	200	903	0	0	0	0	0	0	0	603	903	0
734	3	0	0	0	0	0	0	200	300	0	0	0	0	0	0	0	200	903	0	0	0	0	0	0	0	603	903	0
734	4	0	0	0	0	0	0	200	300	0	0	0	0	0	0	0	200	903	0	0	0	0	0	0	0	603	903	0
734	5	0	0	0	0	0	0	200	300	0	0	0	0	0	0	0	200	903	0	0	0	0	0	0	0	603	903	0
734	6	0	0	0	0	0	0	200	300	0	0	0	0	0	0	0	200	903	0	0	0	0	0	0	0	603	903	0
734	7	0	0	0	0	0	0	200	300	0	0	0	0	0	0	0	200	903	0	0	0	0	0	0	0	603	903	0
734	8	0	0	0	0	0	0	200	300	0	0	0	0	0	0	0	200	903	0	0	0	0	0	0	0	603	903	0
734	9	0	0	0	0	0	0	200	300	0	0	0	0	0	0	0	200	903	0	0	0	0	0	0	0	603	903	0
735	0	0	0	0	0	0	0	200	300	0	0	0	0	0	0	0	200	903	0	0	0	0	0	0	0	603	903	0
735	1	0	0	0	0	0	0	200	300	0	0	0	0	0	0	0	200	903	0	0	0	0	0	0	0	603	903	0
735	2	0	0	0	0	0	0	200	300	0	0	0	0	0	0	0	200	903	0	0	0	0	0	0	0	603	903	0
735	3	0	0	0	0	0	0	200	300	0	0	0	0	0	0	0	200	903	0	0	0	0	0	0	0	603	903	0
735	4	0	0	0	0	0	0	200	300	0	0	0	0	0	0	0	200	903	0	0	0	0	0	0	0	603	903	0
735	5	0	0	0	0	0	0	200	300	0	0	0	0	0	0	0	200	903	0	0	0	0	0	0	0	603	903	0
735	6	0	0	0	0	0	0	200	300	0	0	0	0	0	0	0	200	903	0	0	0	0	0	0	0	603	903	0
735	7	0	0	0	0	0	0	200	300	0	0	0	0	0	0	0	200	903	0	0	0	0	0	0	0	603	903	0
735	8	0	0	0	0	0	0	200	300	0	0	0	0	0	0	0	200	903	0	0	0	0	0	0	0	603	903	0
735	9	0	0	0	0	0	0	200	300	0	0	0	0	0	0	0	200	903	0	0	0	0	0	0	0	603	903	0
736	0	0	0	0	0	0	0	200	300	0	0	0	0	0	0	0	200	903	0	0	0	0	0	0	0	603	903	0
736	1	0	0	0	0	0	0	200	300	0	0	0	0	0	0	0	200	903	0	0	0	0	0	0	0	603	903	0
736	2	0	0	0	0	0	0	200	300	0	0	0	0	0	0	0	200	903	0	0	0	0	0	0	0	603	903	0
736	3	0	0	0	0	0	0	200	300	0	0	0	0	0	0	0	200	903	0	0	0	0	0	0	0	603	903	0
736	4	0	0	0	0	0	0	200	300	0	0	0	0	0	0	0	200	903	0	0	0	0	0	0	0	603	903	0
736	5	0	0	0	0	0	0	200	300	0	0	0	0	0	0	0	200	903	0	0	0	0	0	0	0	603	903	0
736	6	0	0	0	0	0	0	200	300	0	0	0	0	0	0	0	200	903	0	0	0	0	0	0	0	603	903	0
736	7	0	0	0	0	0	0	200	300	0	0	0	0	0	0	0	200	903	0	0	0	0	0	0	0	603	903	0
736	8	0	0	0	0	0	0	200	300	0	0	0	0	0	0	0	200	903	0	0	0	0	0	0	0	603	903	0
736	9	0	0	0	0	0	0	200	300	0	0	0	0	0	0	0	200	903	0	0	0	0	0	0	0	603	903	0
737	0	0	0	0	0	0	0	200	300	0	0	0	0	0	0	0	200	903	0	0	0	0	0	0	0	603	903	0
737	1	0	0	0	0	0	0	200	300	0	0	0	0	0	0	0	200	903	0	0	0	0	0	0	0	603	903	0
737	2	0	0	0	0	0	0	200	300	0	0	0	0	0	0	0	200	903	0	0	0	0	0	0	0	603	903	0
737	3	0	0	0	0	0	0	200	300	0	0	0	0	0	0	0	200	903	0	0	0	0	0	0	0	603	903	0
737	4	0	0	0	0	0	0	200	300	0	0	0	0	0	0	0	200	903	0	0	0	0	0	0	0	603	903	0
737	5	0	0	0	0	0	0	200	300	0	0	0	0	0	0	0	200	903	0	0	0	0	0	0	0	603	903	0
737	6	0	0	0	0	0	0	200	300	0	0	0	0	0	0	0	200	903	0	0	0	0	0	0	0	603	903	0
737	7	0	0	0	0	0	0	200	300	0	0	0	0	0	0	0	200	903	0	0	0	0	0	0	0	603	903	0
737	8	0	0	0	0	0	0	200	300	0	0	0	0	0	0	0	200	903	0	0	0	0	0	0	0	603	903	0
737	9	0	0	0	0	0	0	200	300	0	0	0	0	0	0	0	200	903	0	0	0	0	0	0	0	603	903	0
738	0	0	0	0	0	0	0	200	300	0	0	0	0	0	0	0	200	903	0	0	0	0	0	0	0	603	903	0
738	1	0	0	0	0	0	0	200	300	0	0	0	0	0	0	0	200	903	0	0	0	0	0	0	0	603	903	0
738	2	0	0	0	0	0	0	200	300	0	0	0	0	0	0	0	200	903	0	0	0	0	0	0	0	603	903	0
738	3	0	0	0	0	0	0	200	300	0	0	0	0	0	0	0	200	903	0	0	0	0	0	0	0	603	903	0
738	4	0	0	0	0	0	0	200	300	0	0	0	0	0	0	0	200	903	0	0	0	0	0	0	0	603	903	0
738	5	0	0	0	0	0	0	200	300	0	0	0	0	0	0	0	200	903	0	0	0	0	0	0	0	603	903	0
738	6	0	0	0	0	0	0	200	300	0	0	0	0	0	0	0	200	903	0	0	0	0	0	0	0	603	903	0
738	7	0	0	0	0	0	0	200	300	0	0	0	0	0	0	0	200	903	0	0	0	0	0	0	0	603	903	0
738	8	0	0	0	0	0	0	200	300	0	0	0	0	0	0	0	200	903	0	0	0	0	0	0	0	603	903	0
738	9	0	0	0	0	0	0	200	300	0	0	0	0	0	0	0	200	903	0	0	0	0	0	0	0	603	903	0
739	0	0	0	0	0	0	0	200	300	0	0	0	0	0	0	0	200	903	0	0	0	0	0	0	0	603	903	0
739	1	0	0	0	0	0	0	200	300	0	0	0	0	0	0	0	200	903	0	0	0	0	0	0	0	603	903	0
739	2	0	0	0	0	0	0	200	300	0	0	0	0	0	0	0	200	903	0	0	0	0	0	0	0	603	903	0
739	3	0	0	0	0	0	0	200	300	0	0	0	0	0	0	0	200	903	0	0	0	0	0	0	0	603	903	0
739	4	0	0	0	0	0	0	200	300	0	0	0	0	0	0	0	200	903	0	0	0	0	0	0	0	603	903	0
739	5	0	0	0	0	0	0	200	300	0	0	0	0	0	0	0	200	903	0	0	0	0	0	0	0	603	903	0
739	6	0	0	0	0	0	0	200	300	0	0	0	0	0	0	0	200	903	0	0	0	0	0	0	0	603	903	0
739	7	0	0	0	0	0	0	200	300	0	0	0	0	0	0	0	200	903	0	0	0	0	0	0	0	603	903	0
739	8	0	0	0	0	0	0	200	300	0	0	0	0	0	0	0	200	903	0	0	0	0	0	0	0	603	903	0
739	9	0	0	0	0	0	0	200	300	0	0	0	0	0	0	0	200	903	0	0	0	0	0	0	0	603	903	0
740	0	0	0	0	0	0	0	200	300	0	0	0	0	0	0	0	200	903	0	0	0	0	0	0	0	603	903	0
740	1	0	0	0	0	0	0	200	300	0	0	0	0	0	0	0	200	903	0	0	0	0	0	0	0	603	903	0
740	2	0	0	0	0	0	0	200	300	0	0	0	0	0	0	0	200	903	0	0	0	0	0	0	0	603	903	0
740	3	0	0	0	0	0	0	200	300	0	0	0	0	0	0	0	200	903	0	0	0	0	0	0	0	603	903	0
740	4	0	0	0	0	0	0	200	300	0	0	0	0	0	0	0	200	903	0	0	0	0	0	0	0	603	903	0
740	5	0	0	0	0	0	0	200	300	0	0	0	0	0	0	0	200	903	0	0	0	0	0	0	0	603	903	0
740	6	0	0	0	0	0	0	200	300	0	0	0	0	0	0	0	200	903	0	0	0	0	0	0	0	603	903	0
740	7	0	0	0	0	0	0	200	300	0	0	0	0	0	0	0	200	903	0	0	0	0	0	0	0	603	903	0
740	8	0	0	0	0	0	0	200	300	0	0	0	0	0	0	0	200	903	0	0	0	0	0	0	0	603	903	0
740	9	0	0	0	0	0	0	200	300	0	0	0	0	0	0	0	200	903	0	0	0	0	0	0	0	603	903	0
741	0	0	0	0	0	0	0	200	300	0	0	0	0	0	0	0	200	903	0	0	0	0	0	0	0	603	903	0
741	1	0	0	0	0	0	0	200	300	0	0	0	0	0	0	0	200	903	0	0	0	0	0	0	0	603	903	0
741	2	0	0	0	0	0	0	200	300	0	0	0	0	0	0	0	200	903	0	0	0	0	0	0	0	603	903	0
741	3	0	0	0	0	0	0	200	300	0	0	0	0	0	0	0	200	903	0	0	0	0	0	0	0	603	903	0
741	4	0	0	0	0	0	0	200	300	0	0	0	0	0	0	0	200	903	0	0	0	0	0	0	0	603	903	0
741	5	0	0	0	0	0	0	200	300	0	0	0	0	0	0	0	200	903	0	0	0	0	0	0	0	603	903	0
741	6	0	0	0	0	0	0	200	300	0	0	0	0	0	0	0	200	903	0	0	0	0	0	0	0	603	903	0
741	7	0	0	0	0	0	0	200	300	0	0	0	0	0	0	0	200	903	0	0	0	0	0	0	0	603	903	0
741	8	0	0	0	0	0	0	200	300	0	0	0	0	0	0	0	200	903	0	0	0	0	0	0	0	603	903	0
741	9	0	0	0	0	0	0	200	300	0	0	0	0	0	0	0	200	903	0	0	0	0	0	0	0	603	903	0
742	0	0	0	0	0	0	0	200	300	0	0	0	0	0	0	0	200	903	0	0	0	0	0	0	0	603	903	0
742	1	0	0	0	0	0	0	200	300	0	0	0	0	0	0	0	200	903	0	0	0	0	0	0	0	603	903	0
742	2	0	0	0	0	0	0	200	300	0	0	0	0	0	0	0	200	903	0	0	0	0	0	0	0	603	903	0
742	3	0	0	0	0	0	0	200	300	0	0	0	0	0	0	0	200	903	0	0	0	0	0	0	0	603	903	0
742	4	0	0	0	0	0	0	200	300	0	0	0	0	0	0	0	200	903	0	0	0	0	0	0	0	603	903	0
742	5	0	0	0	0	0	0	200	300	0	0	0	0	0	0	0	200	903	0	0	0	0	0	0	0	603	903	0
742	6	0	0	0	0	0	0	200	300	0	0	0	0	0	0	0	200	903	0	0	0	0	0	0	0	603	903	0
742	7	0	0	0	0	0	0	200	300	0	0	0	0	0	0	0	200	903	0	0	0	0	0	0	0	603	903	0
742	8	0	0	0	0	0	0	200	300	0	0	0	0	0	0	0	200	903	0	0	0	0	0	0	0	603	903	0
742	9	0	0	0	0	0	0	200	300	0	0	0	0	0	0	0	200	903	0	0	0	0	0	0	0	603	903	0
743	0	0	0	0	0	0	0	200	300	0	0	0	0	0	0	0	200	903	0	0	0	0	0	0	0	603	903	0
743	1	0	0	0	0	0	0	200	300	0	0	0	0	0	0	0	200	903	0	0	0	0	0	0	0	603	903	0
743	2	0	0	0	0	0	0	200	300	0	0	0	0	0	0	0	200	903	0	0	0	0	0	0	0	603	903	0
743	3	0	0	0	0	0	0	200	300	0	0	0	0	0	0	0	200	903	0	0	0	0	0	0	0	603	903	0
743	4	0	0	0	0	0	0	200	300	0	0	0	0	0	0	0	200	903	0	0	0	0	0	0	0	603	903	0
743	5	0	0	0	0	0	0	200	300	0	0	0	0	0	0	0	200	903	0	0	0	0	0	0	0	603	903	0
743	6	0	0	0	0	0	0	200	300	0	0	0	0	0	0	0	200	903	0	0	0	0	0	0	0	603	903	0
743	7	0	0	0	0	0	0	200	300	0	0	0	0	0	0	0	200	903	0	0	0	0	0	0	0	603	903	0
743	8	0	0	0	0	0	0	200	300	0	0	0	0	0	0	0	200	903	0	0	0	0	0	0	0	603	903	0
743	9	0	0	0	0	0	0	200	300	0	0	0	0	0	0	0	200	903	0	0	0	0	0	0	0	603	903	0
744	0	0	0	0	0	0	0	200	300	0	0	0	0	0	0	0	200	903	0	0	0	0	0	0	0	603	903	0
744	1	0	0	0	0	0	0	200	300	0	0	0	0	0	0	0	200	903	0	0	0	0	0	0	0	603	903	0
744	2	0	0	0	0	0	0	200	300	0	0	0	0	0	0	0	200	903	0	0	0	0	0	0	0	603	903	0
744	3	0	0	0	0	0	0	200	300	0	0	0	0	0	0	0	200	903	0	0	0	0	0	0	0	603	903	0
744	4	0	0	0	0	0	0	200	300	0	0	0	0	0	0	0	200	903	0	0	0	0	0	0	0	603	903	0
744	5	0	0	0	0	0	0	200	300	0	0	0	0	0	0	0	200	903	0	0	0	0	0	0	0	603	903	0
744	6	0	0	0	0	0	0	200	300	0	0	0	0	0	0	0	200	903	0	0	0	0	0	0	0	603	903	0
744	7	0	0	0	0	0	0	200	300	0	0	0	0	0	0	0	200	903	0	0	0	0	0	0	0	603	903	0
744	8	0	0	0	0	0	0	200	300	0	0	0	0	0	0	0	200	903	0	0	0	0	0	0	0	603	903	0
744	9	0	0	0	0	0	0	200	300	0	0	0	0	0	0	0	200	903	0	0	0	0	0	0	0	603	903	0
745	0	0	0	0	0	0	0	200	300	0	0	0	0	0	0	0	200	903	0	0	0	0	0	0	0	603	903	0
745	1	0	0	0	0	0	0	200	300	0	0	0	0	0	0	0	200	903	0	0	0	0	0	0	0	603	903	0
745	2	0	0	0	0	0	0	200	300	0	0	0	0	0	0	0	200	903	0	0	0	0	0	0	0	603	903	0
745	3	0	0	0	0	0	0	200	300	0	0	0	0	0	0	0	200	903	0	0	0	0	0	0	0	603	903	0
745	4	0	0	0	0	0	0	200	300	0	0	0	0	0	0	0	200	903	0	0	0	0	0	0	0	603	903	0
745	5	0	0	0	0	0	0	200	300	0	0	0	0	0	0	0	200	903	0	0	0	0	0	0	0	603	903	0
745	6	0	0	0	0	0	0	200	300	0	0	0	0	0	0	0	200	903	0	0	0	0	0	0	0	603	903	0
745	7	0	0	0	0	0	0	200	300	0	0	0	0	0	0	0	200	903	0	0	0	0	0	0	0	603	903	0
745	8	0	0	0	0	0	0	200	300	0	0	0	0	0	0	0	200	903	0	0	0	0	0	0	0	603	903	0
745	9	0	0	0	0	0	0	200	300	0	0	0	0	0	0	0	200	903	0	0	0	0	0	0	0	603	903	0
746	0	0	0	0	0	0	0	200	300	0	0	0	0	0	0	0	200	903	0	0	0	0	0	0	0	603	903	0
746	1	0	0	0	0	0	0	200	300	0	0	0	0	0	0	0	200	903	0	0	0	0	0	0	0	603	903	0
746	2	0	0	0	0	0	0	200	300	0	0	0	0	0	0	0	200	903	0	0	0	0	0	0	0	603	903	0
746	3	0	0	0	0	0	0	200	300	0	0	0	0	0	0	0	200	903	0	0	0	0	0	0	0	603	903	0
746	4	0	0	0	0	0	0	200	300	0	0	0	0	0	0	0	200	903	0	0	0	0	0	0	0	603	903	0
746	5	0	0	0	0	0	0	200	300	0	0	0	0	0	0	0	200	903	0	0	0	0	0	0	0	603	903	0
746	6	0	0	0	0	0	0	200	300	0	0	0	0	0	0	0	200	903	0	0	0	0	0	0	0	603	903	0
746	7	0	0	0	0	0	0	200	300	0	0	0	0	0	0	0	200	903	0	0	0	0	0	0	0	603	903	0
746	8	0	0	0	0	0	0	200	300	0	0	0	0	0	0	0	200	903	0	0	0	0	0	0	0	603	903	0
746	9	0	0	0	0	0	0	200	300	0	0	0	0	0	0	0	200	903	0	0	0	0	0	0	0	603	903	0
747	0	0	0	0	0	0	0	200	300	0	0	0	0	0	0	0	200	903	0	0	0	0	0	0	0	603	903	0
747	1	0	0	0	0	0	0	200	300	0	0	0	0	0	0	0	200	903	0	0	0	0	0	0	0	603	903	0
747	2	0	0	0	0	0	0	200	300	0	0	0	0	0	0	0	200	903	0	0	0	0	0	0	0	603	903	0
747	3	0	0	0	0	0	0	200	300	0	0	0	0	0	0	0	200	903	0	0	0	0	0	0	0	603	903	0
747	4	0	0	0	0	0	0	200	300	0	0	0	0	0	0	0	200	903	0	0	0	0	0	0	0	603	903	0
747	5	0	0	0	0	0	0	200	300	0	0	0	0	0	0	0	200	903	0	0	0	0	0	0	0	603	903	0
747	6	0	0	0	0	0	0	200	300	0	0	0	0	0	0	0	200	903	0	0	0	0	0	0	0	603	903	0
747	7	0	0	0	0	0	0	200	300	0	0	0	0	0	0	0	200	903	0	0	0	0	0	0	0	603	903	0
747	8	0	0	0	0	0	0	200	300	0	0	0	0	0	0	0	200	903	0	0	0	0	0	0	0	603	903	0
747	9	0	0	0	0	0	0	200	300	0	0	0	0	0	0	0	200	903	0	0	0	0	0	0	0	603	903	0
748	0	0	0	0	0	0	0	200	300	0	0	0	0	0	0	0	200	903	0	0	0	0	0	0	0	603	903	0
748	1	0	0	0	0	0	0	200	300	0	0	0	0	0	0	0	200	903	0	0	0	0	0	0	0	603	903	0
748	2	0	0	0	0	0	0	200	300	0	0	0	0	0	0	0	200	903	0	0	0	0	0	0	0	603	903	0
748	3	0	0	0	0	0	0	200	300	0	0	0	0	0	0	0	200	903	0	0	0	0	0	0	0	603	903	0
748	4	0	0	0	0	0	0	200	300	0	0	0	0	0	0	0	200	903	0	0	0	0	0	0	0	603	903	0
748	5	0	0	0	0	0	0	200	300	0	0	0	0	0	0	0	200	903	0	0	0	0	0	0	0	603	903	0
748	6	0	0	0	0	0	0	200	300	0	0	0	0	0	0	0	200	903	0	0	0	0	0	0	0	603	903	0
748	7	0	0	0	0	0	0	200	300	0	0	0	0	0	0	0	200	903	0	0	0	0	0	0	0	603	903	0
748	8	0	0	0	0	0	0	200	300	0	0	0	0	0	0	0	200	903	0	0	0	0	0	0	0	603	903	0
748	9	0	0	0	0	0	0	200	300	0	0	0	0	0	0	0	200	903	0	0	0	0	0	0	0	603	903	0
749	0	0	0	0	0	0	0	200	300	0	0	0	0	0	0	0	200	903	0	0	0	0	0	0	0	603	903	0
749	1	0	0	0	0	0	0	200	300	0	0	0	0	0	0	0	200	903	0	0	0	0	0	0	0	603	903	0
749	2	0	0	0	0	0	0	200	300	0	0	0	0	0	0	0	200	903	0	0	0	0	0	0	0	603	903	0
749	3	0	0	0	0	0	0	200	300	0	0	0	0	0	0	0	200	903	0	0	0	0	0	0	0	603	903	0
749	4	0	0	0	0	0	0	200	300	0	0	0	0	0	0	0	200	903	0	0	0	0	0	0	0	603	903	0
749	5	0	0	0	0	0	0	200	300	0	0	0	0	0	0	0	200	903	0	0	0	0	0	0	0	603	903	0
749	6	0	0	0	0	0	0	200	300	0	0	0	0	0	0	0	200	903	0	0	0	0	0	0	0	603	903	0
749	7	0	0	0	0	0	0	200	300	0	0	0	0	0	0	0	200	903	0	0	0	0	0	0	0	603	903	0
749	8	0	0	0	0	0	0	200	300	0	0	0	0	0	0	0	200	903	0	0	0	0	0	0	0	603	903	0
749	9	0	0	0	0	0	0	200	300	0	0	0	0	0	0	0	200	903	0	0	0	0	0	0	0	603	903	0
750	0	0	0	0	0	0	0	200	300	0	0	0	0	0	0	0	200	903	0	0	0	0	0	0	0	603	903	0
750	1	0	0	0	0	0	0	200	300	0	0	0	0	0	0	0	200	903	0	0	0	0	0	0	0	603	903	0
750	2	0	0	0	0	0	0	200	300	0	0	0	0	0	0	0	200	903	0	0	0	0	0	0	0	603	903	0
750	3	0	0	0	0	0	0	200	300	0	0	0	0	0	0	0	200	903	0	0	0	0	0	0	0	603	903	0
750	4	0	0	0	0	0	0	200	300	0	0	0	0	0	0	0	200	903	0	0	0	0	0	0	0	603	903	0
750	5	0	0	0	0	0	0	200	300	0	0	0	0	0	0	0	200	903	0	0	0	0	0	0	0	603	903	0
750	6	0	0	0	0	0	0	200	300	0	0	0	0	0	0	0	200	903	0	0	0	0	0	0	0	603	903	0
750	7	0	0	0	0	0	0	200	300	0	0	0	0	0	0	0	200	903	0	0	0	0	0	0	0	603	903	0
750	8	0	0	0	0	0	0	200	300	0	0	0	0	0	0	0	200	903	0	0	0	0	0	0	0	603	903	0
750	9	0	0	0	0	0	0	200	300	0	0	0	0	0	0	0	200	903	0	0	0	0	0	0	0	603	903	0
751	0	0	0	0	0	0	0	200	300	0	0	0	0	0	0	0	200	903	0	0	0	0	0	0	0	603	903	0
751	1	0	0	0	0	0	0	200	300	0	0	0	0	0	0	0	200	903	0	0	0	0	0	0	0	603	903	0
751	2	0	0	0	0	0	0	200	300	0	0	0	0	0	0	0	200	903	0	0	0	0	0	0	0	603	903	0
751	3	0	0	0	0	0	0	200	300	0	0	0	0	0	0	0	200	903	0	0	0	0	0	0	0	603	903	0
751	4	0	0	0	0	0	0	200	300	0	0	0	0	0	0	0	200	903	0	0	0	0	0	0	0	603	903	0
751	5	0	0	0	0	0	0	200	300	0	0	0	0	0	0	0	200	903	0	0	0	0	0	0	0	603	903	0
751	6	0	0	0	0	0	0	200	300	0	0	0	0	0	0	0	200	903	0	0	0	0	0	0	0	603	903	0
751	7	0	0	0	0	0	0	200	300	0	0	0	0	0	0	0	200	903	0	0	0	0	0	0	0	603	903	0
751	8	0	0	0	0	0	0	200	300	0	0	0	0	0	0	0	200	903	0	0	0	0	0	0	0	603	903	0
751	9	0	0	0	0	0	0	200	300	0	0	0	0	0	0	0	200	903	0	0	0	0	0	0	0	603	903	0
752	0	0	0	0	0	0	0	200	300	0	0	0	0	0	0	0	200	903	0	0	0	0	0	0	0	603	903	0
752	1	0	0	0	0	0	0	200	300	0	0	0	0	0	0	0	200	903	0	0	0	0	0	0	0	603	903	0
752	2	0	0	0	0	0	0	200	300	0	0	0	0	0	0	0	200	903	0	0	0	0	0	0	0	603	903	0
752	3	0	0	0	0	0	0	200	300	0	0	0	0	0	0	0	200	903	0	0	0	0	0	0	0	603	903	0
752	4	0	0	0	0	0	0	200	300	0	0	0	0	0	0	0	200	903	0	0	0	0	0	0	0	603	903	0
752	5	0	0	0	0	0	0	200	300	0	0	0	0	0	0	0	200	903	0	0	0	0	0	0	0	603	903	0
752	6	0	0	0	0	0	0	200	300	0	0	0	0	0	0	0	200	903	0	0	0	0	0	0	0	603	903	0
752	7	0	0	0	0	0	0	200	300	0	0	0	0	0	0	0	200	903	0	0	0	0	0	0	0	603	903	0
752	8	0	0	0	0	0	0	200	300	0	0	0	0	0	0	0	200	903	0	0	0	0	0	0	0	603	903	0
752	9	0	0	0	0	0	0	200	300	0	0	0	0	0	0	0	200	903	0	0	0	0	0	0	0	603	903	0
753	0	0	0	0	0	0	0	200	300	0	0	0	0	0	0	0	200	903	0	0	0	0	0	0	0	603	903	0
753	1	0	0	0	0	0	0	200	300	0	0	0	0	0	0	0	200	903	0	0	0	0	0	0	0	603	903	0
753	2	0	0	0	0	0	0	200	300	0	0	0	0	0	0	0	200	903	0	0	0	0	0	0	0	603	903	0
753	3	0	0	0	0	0	0	200	300	0	0	0	0	0	0	0	200	903	0	0	0	0	0	0	0	603	903	0
753	4	0	0	0	0	0	0	200	300	0	0	0	0	0	0	0	200	903	0	0	0	0	0	0	0	603	903	0
753	5	0	0	0	0	0	0	200	300	0	0	0	0	0	0	0	200	903	0	0	0	0	0	0	0	603	903	0
753	6	0	0	0	0	0	0	200	300	0	0	0	0	0	0	0	200	903	0	0	0	0	0	0	0	603	903	0
753	7	0	0	0	0	0	0	200	300	0	0	0	0	0	0	0	200	903	0	0	0	0	0	0	0	603	903	0
753	8	0	0	0	0	0	0	200	300	0	0	0	0	0	0	0	200	903	0	0	0	0	0	0	0	603	903	0
753	9	0	0	0	0	0	0	200	300	0	0	0	0	0	0	0	200	903	0	0	0	0	0	0	0	603	903	0
754	0	0	0	0	0	0	0	200	300	0	0	0	0	0	0	0	200	903	0	0	0	0	0	0	0	603	903	0
754	1	0	0	0	0	0	0	200	300	0	0	0	0	0	0	0	200	903	0	0	0	0	0	0	0	603	903	0
754	2	0	0	0	0	0	0	200	300	0	0	0	0	0	0	0	200	903	0	0	0	0	0	0	0	603	903	0
754	3	0	0	0	0	0	0	200	300	0	0	0	0	0	0	0	200	903	0	0	0	0	0	0	0	603	903	0
754	4	0	0	0	0	0	0	200	300	0	0	0	0	0	0	0	200	903	0	0	0	0	0	0	0	603	903	0
754	5	0	0	0	0	0	0	200	300	0	0	0	0	0	0	0	200	903	0	0	0	0	0	0	0	603	903	0
754	6	0	0	0	0	0	0	200	300	0	0	0	0	0	0	0	200	903	0	0	0	0	0	0	0	603	903	0
754	7	0	0	0	0	0	0	200	300	0	0	0	0	0	0	0	200	903	0	0	0	0	0	0	0	603	903	0
754	8	0	0	0	0	0	0	200	300	0	0	0	0	0	0	0	200	903	0	0	0	0	0	0	0	603	903	0
754	9	0	0	0	0	0	0	200	300	0	0	0	0	0	0	0	200	903	0	0	0	0	0	0	0	603	903	0
755	0	0	0	0	0	0	0	200	300	0	0	0	0	0	0	0	200	903	0	0	0	0	0	0	0	603	903	0
755	1	0	0	0	0	0	0	200	300	0	0	0	0	0	0	0	200	903	0	0	0	0	0	0	0	603	903	0
755	2	0	0	0	0	0	0	200	300	0	0	0	0	0	0	0	200	903	0	0	0	0	0	0	0	603	903	0
755	3	0	0	0	0	0	0	200	300	0	0	0	0	0	0	0	200	903	0	0	0	0	0	0	0	603	903	0
755	4	0	0	0	0	0	0	200	300	0	0	0	0	0	0	0	200	903	0	0	0	0	0	0	0	603	903	0
755	5	0	0	0	0	0	0	200	300	0	0	0	0	0	0	0	200	903	0	0	0	0	0	0	0	603	903	0
755	6	0	0	0	0	0	0	200	300	0	0	0	0	0	0	0	200	903	0	0	0	0	0	0	0	603	903	0
755	7	0	0	0	0	0	0	200	300	0	0	0	0	0	0	0	200	903	0	0	0	0	0	0	0	603	903	0
755	8	0	0	0	0	0	0	200	300	0	0	0	0	0	0	0	200	903	0	0	0	0	0	0	0	603	903	0
755	9	0	0	0	0	0	0	200	300	0	0	0	0	0	0	0	200	903	0	0	0	0	0	0	0	603	903	0
756	0	0	0	0	0	0	0	200	300	0	0	0	0	0	0	0	200	903	0	0	0	0	0	0	0	603	903	0
756	1	0	0	0	0	0	0	200	300	0	0	0	0	0	0	0	200	903	0	0	0	0	0	0	0	603	903	0
756	2	0	0	0	0	0	0	200	300	0	0	0	0	0	0	0	200	903	0	0	0	0	0	0	0	603	903	0
756	3	0	0	0	0	0	0	200	300	0	0	0	0	0	0	0	200	903	0	0	0	0	0	0	0	603	903	0
756	4	0	0	0	0	0	0	200	300	0	0	0	0	0	0	0	200	903	0	0	0	0	0	0	0	603	903	0
756	5	0	0	0	0	0	0	200	300	0	0	0	0	0	0	0	200	903	0	0	0	0	0	0	0	603	903	0
756	6	0	0	0	0	0	0	200	300	0	0	0	0	0	0	0	200	903	0	0	0	0	0	0	0	603	903	0
756	7	0	0	0	0	0	0	200	300	0	0	0	0	0	0	0	200	903	0	0	0	0	0	0	0	603	903	0
756	8	0	0	0	0	0	0	200	300	0	0	0	0	0	0	0	200	903	0	0	0	0	0	0	0	603	903	0
756	9	0	0	0	0	0	0	200	300	0	0	0	0	0	0	0	200	903	0	0	0	0	0	0	0	603	903	0
757	0	0	0	0	0	0	0	200	300	0	0	0	0	0	0	0	200	903	0	0	0	0	0	0	0	603	903	0
757	1	0	0	0	0	0	0	200	300	0	0	0	0	0	0	0	200	903	0	0	0	0	0	0	0	603	903	0
757	2	0	0	0	0	0	0	200	300	0	0	0	0	0	0	0	200	903	0	0	0	0	0	0	0	603	903	0
757	3	0	0	0	0	0	0	200	300	0	0	0	0	0	0	0	200	903	0	0	0	0	0	0	0	603	903	0
757	4	0	0	0	0	0	0	200	300	0	0	0	0	0	0	0	200	903	0	0	0	0	0	0	0	603	903	0
757	5	0	0	0	0	0	0	200	300	0	0	0	0	0	0	0	200	903	0	0	0	0	0	0	0	603	903	0
757	6	0	0	0	0	0	0	200	300	0	0	0	0	0	0	0	200	903	0	0	0	0	0	0	0	603	903	0
757	7	0	0	0	0	0	0	200	300	0	0	0	0	0	0	0	200	903	0	0	0	0	0	0	0	603	903	0
757	8	0	0	0	0	0	0	200	300	0	0	0	0	0	0	0	200	903	0	0	0	0	0	0	0	603	903	0
757	9	0	0	0	0	0	0	200	300	0	0	0	0	0	0	0	200	903	0	0	0	0	0	0	0	603	903	0
758	0	0	0	0	0	0	0	200	300	0	0	0	0	0	0	0	200	903	0	0	0	0	0	0	0	603	903	0
758	1	0	0	0	0	0	0	200	300	0	0	0	0	0	0	0	200	903	0	0	0	0	0	0	0	603	903	0
758	2	0	0	0	0	0	0	200	300	0	0	0	0	0	0	0	200	903	0	0	0	0	0	0	0	603	903	0
758	3	0	0	0	0	0	0	200	300	0	0	0	0	0	0	0	200	903	0	0	0	0	0	0	0	603	903	0
758	4	0	0	0	0	0	0	200	300	0	0	0	0	0	0	0	200	903	0	0	0	0	0	0	0	603	903	0
758	5	0	0	0	0	0	0	200	300	0	0	0	0	0	0	0	200	903	0	0	0	0	0	0	0	603	903	0
758	6	0	0	0	0	0	0	200	300	0	0	0	0	0	0	0	200	903	0	0	0	0	0	0	0	603	903	0
758	7	0	0	0	0	0	0	200	300	0	0	0	0	0	0	0	200	903	0	0	0	0	0	0	0	603	903	0
758	8	0	0	0	0	0	0	200	300	0	0	0	0	0	0	0	200	903	0	0	0	0	0	0	0	603	903	0
758	9	0	0	0	0	0	0	200	300	0	0	0	0	0	0	0	200	903	0	0	0	0	0	0	0	603	903	0
759	0	0	0	0	0	0	0	200	300	0	0	0	0	0	0	0	200	903	0	0	0	0	0	0	0	603	903	0
759	1	0	0	0	0	0	0	200	300	0	0	0	0	0	0	0	200	903	0	0	0	0	0	0	0	603	903	0
759	2	0	0	0	0	0	0	200	300	0	0	0	0	0	0	0	200	903	0	0	0	0	0	0	0	603	903	0
759	3	0	0	0	0	0	0	200	300	0	0	0	0	0	0	0	200	903	0	0	0	0	0	0	0	603	903	0
759	4	0	0	0	0	0	0	200	300	0	0	0	0	0	0	0	200	903	0	0	0	0	0	0	0	603	903	0
759	5	0	0	0	0	0	0	200	300	0	0	0	0	0	0	0	200	903	0	0	0	0	0	0	0	603	903	0
759	6	0	0	0	0	0	0	200	300	0	0	0	0	0	0	0	200	903	0	0	0	0	0	0	0	603	903	0
759	7	0	0	0	0	0	0	200	300	0	0	0	0	0	0	0	200	903	0	0	0	0	0	0	0	603	903	0
759	8	0	0	0	0	0	0	200	300	0	0	0	0	0	0	0	200	903	0	0	0	0	0	0	0	603	903	0
759	9	0	0	0	0	0	0	200	300	0	0	0	0	0	0	0	200	903	0	0	0	0	0	0	0	603	903	0
760	0	0	0	0	0	0	0	200	300	0	0	0	0	0	0	0	200	903	0	0	0	0	0	0	0	603	903	0
760	1	0	0	0	0	0	0	200	300	0	0	0	0	0	0	0	200	903	0	0	0	0	0	0	0	603	903	0
760	2	0	0	0	0	0	0	200	300	0	0	0	0	0	0	0	200	903	0	0	0	0	0	0	0	603	903	0
760	3	0	0	0	0	0	0	200	300	0	0	0	0	0	0	0	200	903	0	0	0	0	0	0	0	603	903	0
760	4	0	0	0	0	0	0	200	300	0	0	0	0	0	0	0	200	903	0	0	0	0	0	0	0	603	903	0
760	5	0	0	0	0	0	0	200	300	0	0	0	0	0	0	0	200	903	0	0	0	0	0	0	0	603	903	0
760	6	0	0	0	0	0	0	200	300	0	0	0	0	0	0	0	200	903	0	0	0	0	0	0	0	603	903	0
760	7	0	0	0	0	0	0	200	300	0	0	0	0	0	0	0	200	903	0	0	0	0	0	0	0	603	903	0
760	8	0	0	0	0	0	0	200	300	0	0	0	0	0	0	0	200	903	0	0	0	0	0	0	0	603	903	0
760	9	0	0	0	0	0	0	200	300	0	0	0	0	0	0	0	200	903	0	0	0	0	0	0	0	603	903	0
761	0	0	0	0	0	0	0	200	300	0	0	0	0	0	0	0	200	903	0	0	0	0	0	0	0	603	903	0
761	1	0	0	0	0	0	0	200	300	0	0	0	0	0	0	0	200	903	0	0	0	0	0	0	0	603	903	0
761	2	0	0	0	0	0	0	200	300	0	0	0	0	0	0	0	200	903	0	0	0	0	0	0	0	603	903	0
761	3	0	0	0	0	0	0	200	300	0	0	0	0	0	0	0	200	903	0	0	0	0	0	0	0	603	903	0
761	4	0	0	0	0	0	0	200	300	0	0	0	0	0	0	0	200	903	0	0	0	0	0	0	0	603	903	0
761	5	0	0	0	0	0	0	200	300	0	0	0	0	0	0	0	200	903	0	0	0	0	0	0	0	603	903	0
761	6	0	0	0	0	0	0	200	300	0	0	0	0	0	0	0	200	903	0	0	0	0	0	0	0	603	903	0
761	7	0	0	0	0	0	0	200	300	0	0	0	0	0	0	0	200	903	0	0	0	0	0	0	0	603	903	0
761	8	0	0	0	0	0	0	200	300	0	0	0	0	0	0	0	200	903	0	0	0	0	0	0	0	603	903	0
761	9	0	0	0	0	0	0	200	300	0	0	0	0	0	0	0	200	903	0	0	0	0	0	0	0	603	903	0
762	0	0	0	0	0	0	0	200	300	0	0	0	0	0	0	0	200	903	0	0	0	0	0	0	0	603	903	0
762	1	0	0	0	0	0	0	200	300	0	0	0	0	0	0	0	200	903	0	0	0	0	0	0	0	603	903	0
762	2	0	0	0	0	0	0	200	300	0	0	0	0	0	0	0	200	903	0	0	0	0	0	0	0	603	903	0
762	3	0	0	0	0	0	0	200	300	0	0	0	0	0	0	0	200	903	0	0	0	0	0	0	0	603	903	0
762	4	0	0	0	0	0	0	200	300	0	0	0	0	0	0	0	200	903	0	0	0	0	0	0	0	603	903	0
762	5	0	0	0	0	0	0	200	300	0	0	0	0	0	0	0	200	903	0	0	0	0	0	0	0	603	903	0
762	6	0	0	0	0	0	0	200	300	0	0	0	0	0	0	0	200	903	0	0	0	0	0	0	0	603	903	0
762	7	0	0	0	0	0	0	200	300	0	0	0	0	0	0	0	200	903	0	0	0	0	0	0	0	603	903	0
762	8	0	0	0	0	0	0	200	300	0	0	0	0	0	0	0	200	903	0	0	0	0	0	0	0	603	903	0
762	9	0	0	0	0	0	0	200	300	0	0	0	0	0	0	0	200	903	0	0	0	0	0	0	0	603	903	0
763	0	0	0	0	0	0	0	200	300	0	0	0	0	0	0	0	200	903	0	0	0	0	0	0	0	603	903	0
763	1	0	0	0	0	0	0	200	300	0	0	0	0	0	0	0	200	903	0	0	0	0	0	0	0	603	903	0
763	2	0	0	0	0	0	0	200	300	0	0	0	0	0	0	0	200	903	0	0	0	0	0	0	0	603	903	0
763	3	0	0	0	0	0	0	200	300	0	0	0	0	0	0	0	200	903	0	0	0	0	0	0	0	603	903	0
763	4	0	0	0	0	0	0	200	300	0	0	0	0	0	0	0	200	903	0	0	0	0	0	0	0	603	903	0
763	5	0	0	0	0	0	0	200	300	0	0	0	0	0	0	0	200	903	0	0	0	0	0	0	0	603	903	0
763	6	0	0	0	0	0	0	200	300	0	0	0	0	0	0	0	200	903	0	0	0	0	0	0	0	603	903	0
763	7	0	0	0	0	0	0	200	300	0	0	0	0	0	0	0	200	903	0	0	0	0	0	0	0	603	903	0
763	8	0	0	0	0	0	0	200	300	0	0	0	0	0	0	0	200	903	0	0	0	0	0	0	0	603	903	0
763	9	0	0	0	0	0	0	200	300	0	0	0	0	0	0	0	200	903	0	0	0	0	0	0	0	603	903	0
764	0	0	0	0	0	0	0	200	300	0	0	0	0	0	0	0	200	903	0	0	0	0	0	0	0	603	903	0
764	1	0	0	0	0	0	0	200	300	0	0	0	0	0	0	0	200	903	0	0	0	0	0	0	0	603	903	0
764	2	0	0	0	0	0	0	200	300	0	0	0	0	0	0	0	200	903	0	0	0	0	0	0	0	603	903	0
764	3	0	0	0	0	0	0	200	300	0	0	0	0	0	0	0	200	903	0	0	0	0	0	0	0	603	903	0
764	4	0	0	0	0	0	0	200	300	0	0	0	0	0	0	0	200	903	0	0	0	0	0	0	0	603	903	0
764	5	0	0	0	0	0	0	200	300	0	0	0	0	0	0	0	200	903	0	0	0	0	0	0	0	603	903	0
764	6	0	0	0	0	0	0	200	300	0	0	0	0	0	0	0	200	903	0	0	0	0	0	0	0	603	903	0
764	7	0	0	0	0	0	0	200	300	0	0	0	0	0	0	0	200	903	0	0	0	0	0	0	0	603	903	0
764	8	0	0	0	0	0	0	200	300	0	0	0	0	0	0	0	200	903	0	0	0	0	0	0	0	603	903	0
764	9	0	0	0	0	0	0	200	300	0	0	0	0	0	0	0	200	903	0	0	0	0	0	0	0	603	903	0
765	0	0	0	0	0	0	0	200	300	0	0	0	0	0	0	0	200	903	0	0	0	0	0	0	0	603	903	0
765	1	0	0	0	0	0	0	200	300	0	0	0	0	0	0	0	200	903	0	0	0	0	0	0	0	603	903	0
765	2	0	0	0	0	0	0	200	300	0	0	0	0	0	0	0	200	903	0	0	0	0	0	0	0	603	903	0
765	3	0	0	0	0	0	0	200	300	0	0	0	0	0	0	0	200	903	0	0	0	0	0	0	0	603	903	0
765	4	0	0	0	0	0	0	200	300	0	0	0	0	0	0	0	200	903	0	0	0	0	0	0	0	603	903	0
765	5	0	0	0	0	0	0	200	300	0	0	0	0	0	0	0	200	903	0	0	0	0	0	0	0	603	903	0
765	6	0	0	0	0	0	0	200	300	0	0	0	0	0	0	0	200	903	0	0	0	0	0	0	0	603	903	0
765	7	0	0	0	0	0	0	200	300	0	0	0	0	0	0	0	200	903	0	0	0	0	0	0	0	603	903	0
765	8	0	0	0	0	0	0	200	300	0	0	0	0	0	0	0	200	903	0	0	0	0	0	0	0	603	903	0
765	9	0	0	0	0	0	0	200	300	0	0	0	0	0	0	0	200	903	0	0	0	0	0	0	0	603	903	0
766	0	0	0	0	0	0	0	200	300	0	0	0	0	0	0	0	200	903	0	0	0	0	0	0	0	603	903	0
766	1	0	0	0	0	0	0	200	300	0	0	0	0	0	0	0	200	903	0	0	0	0	0	0	0	603	903	0
766	2	0	0	0	0	0	0	200	300	0	0	0	0	0	0	0	200	903	0	0	0	0	0	0	0	603	903	0
766	3	0	0	0	0	0	0	200	300	0	0	0	0	0	0	0	200	903	0	0	0	0	0	0	0	603	903	0
766	4	0	0	0	0	0	0	200	300	0	0	0	0	0	0	0	200	903	0	0	0	0	0	0	0	603	903	0
766	5	0	0	0	0	0	0	200	300	0	0	0	0	0	0	0	200	903	0	0	0	0	0	0	0	603	903	0
766	6	0	0	0	0	0	0	200	300	0	0	0	0	0	0	0	200	903	0	0	0	0	0	0	0	603	903	0
766	7	0	0	0	0	0	0	200	300	0	0	0	0	0	0	0	200	903	0	0	0	0	0	0	0	603	903	0
766	8	0	0	0	0	0	0	200	300	0	0	0	0	0	0	0	200	903	0	0	0	0	0	0	0	603	903	0
766	9	0	0	0	0	0	0	200	300	0	0	0	0	0	0	0	200	903	0	0	0	0	0	0	0	603	903	0
767	0	0	0	0	0	0	0	200	300	0	0	0	0	0	0	0	200	903	0	0	0	0	0	0	0	603	903	0
767	1	0	0	0	0	0	0	200	300	0	0	0	0	0	0	0	200	903	0	0	0	0	0	0	0	603	903	0
767	2	0	0	0	0	0	0	200	300	0	0	0	0	0	0	0	200	903	0	0	0	0	0	0	0	603	903	0
767	3	0	0	0	0	0	0	200	300	0	0	0	0	0	0	0	200	903	0	0	0	0	0	0	0	603	903	0
767	4	0	0	0	0	0	0	200	300	0	0	0	0	0	0	0	200	903	0	0	0	0	0	0	0	603	903	0
767	5	0	0	0	0	0	0	200	300	0	0	0	0	0	0	0	200	903	0	0	0	0	0	0	0	603	903	0
767	6	0	0	0	0	0	0	200	300	0	0	0	0	0	0	0	200	903	0	0	0	0	0	0	0	603	903	0
767	7	0	0	0	0	0	0	200	300	0	0	0	0	0	0	0	200	903	0	0	0	0	0	0	0	603	903	0
767	8	0	0	0	0	0	0	200	300	0	0	0	0	0	0	0	200	903	0	0	0	0	0	0	0	603	903	0
767	9	0	0	0	0	0	0	200	300	0	0	0	0	0	0	0	200	903	0	0	0	0	0	0	0	603	903	0
768	0	0	0	0	0	0	0	200	300	0	0	0	0	0	0	0	200	903	0	0	0	0	0	0	0	603	903	0
768	1	0	0	0	0	0	0	200	300	0	0	0	0	0	0	0	200	903	0	0	0	0	0	0	0	603	903	0
768	2	0	0	0	0	0	0	200	300	0	0	0	0	0	0	0	200	903	0	0	0	0	0	0	0	603	903	0
768	3	0	0	0	0	0	0	200	300	0	0	0	0	0	0	0	200	903	0	0	0	0	0	0	0	603	903	0
768	4	0	0	0	0	0	0	200	300	0	0	0	0	0	0	0	200	903	0	0	0	0	0	0	0	603	903	0
768	5	0	0	0	0	0	0	200	300	0	0	0	0	0	0	0	200	903	0	0	0	0	0	0	0	603	903	0
768	6	0	0	0	0	0	0	200	300	0	0	0	0	0	0	0	200	903	0	0	0	0	0	0	0	603	903	0
768	7	0	0	0	0	0	0	200	300	0	0	0	0	0	0	0	200	903	0	0	0	0	0	0	0	603	903	0
768	8	0	0	0	0	0	0	200	300	0	0	0	0	0	0	0	200	903	0	0	0	0	0	0	0	603	903	0
768	9	0	0	0	0	0	0	200	300	0	0	0	0	0	0	0	200	903	0	0	0	0	0	0	0	603	903	0
769	0	0	0	0	0	0	0	200	300	0	0	0	0	0	0	0	200	903	0	0	0	0	0	0	0	603	903	0
769	1	0	0	0	0	0	0	200	300	0	0	0	0	0	0	0	200	903	0	0	0	0	0	0	0	603	903	0
769	2	0	0	0	0	0	0	200	300	0	0	0	0	0	0	0	200	903	0	0	0	0	0	0	0	603	903	0
769	3	0	0	0	0	0	0	200	300	0	0	0	0	0	0	0	200	903	0	0	0	0	0	0	0	603	903	0
769	4	0	0	0	0	0	0	200	300	0	0	0	0	0	0	0	200	903	0	0	0	0	0	0	0	603	903	0
769	5	0	0	0	0	0	0	200	300	0	0	0	0	0	0	0	200	903	0	0	0	0	0	0	0	603	903	0
769	6	0	0	0	0	0	0	200	300	0	0	0	0	0	0	0	200	903	0	0	0	0	0	0	0	603	903	0
769	7	0	0	0	0	0	0	200	300	0	0	0	0	0	0	0	200	903	0	0	0	0	0	0	0	603	903	0
769	8	0	0	0	0	0	0	200	300	0	0	0	0	0	0	0	200	903	0	0	0	0	0	0	0	603	903	0
769	9	0	0	0	0	0	0	200	300	0	0	0	0	0	0	0	200	903	0	0	0	0	0	0	0	603	903	0
770	0	0	0	0	0	0	0	200	300	0	0	0	0	0	0	0	200	903	0	0	0	0	0	0	0	603	903	0
770	1	0	0	0	0	0	0	200	300	0	0	0	0	0	0	0	200	903	0	0	0	0	0	0	0	603	903	0
770	2	0	0	0	0	0	0	200	300	0	0	0	0	0	0	0	200	903	0	0	0	0	0	0	0	603	903	0
770	3	0	0	0	0	0	0	200	300	0	0	0	0	0	0	0	200	903	0	0	0	0	0	0	0	603	903	0
770	4	0	0	0	0	0	0	200	300	0	0	0	0	0	0	0	200	903	0	0	0	0	0	0	0	603	903	0
770	5	0	0	0	0	0	0	200	300	0	0	0	0	0	0	0	200	903	0	0	0	0	0	0	0	603	903	0
770	6	0	0	0	0	0	0	200	300	0	0	0	0	0	0	0	200	903	0	0	0	0	0	0	0	603	903	0
770	7	0	0	0	0	0	0	200	300	0	0	0	0	0	0	0	200	903	0	0	0	0	0	0	0	603	903	0
770	8	0	0	0	0	0	0	200	300	0	0	0	0	0	0	0	200	903	0	0	0	0	0	0	0	603	903	0
770	9	0	0	0	0	0	0	200	300	0	0	0	0	0	0	0	200	903	0	0	0	0	0	0	0	603	903	0
771	0	0	0	0	0	0	0	200	300	0	0	0	0	0	0	0	200	903	0	0	0	0	0	0	0	603	903	0
771	1	0	0	0	0	0	0	200	300	0	0	0	0	0	0	0	200	903	0	0	0	0	0	0	0	603	903	0
771	2	0	0	0	0	0	0	200	300	0	0	0	0	0	0	0	200	903	0	0	0	0	0	0	0	603	903	0
771	3	0	0	0	0	0	0	200	300	0	0	0	0	0	0	0	200	903	0	0	0	0	0	0	0	603	903	0
771	4	0	0	0	0	0	0	200	300	0	0	0	0	0	0	0	200	903	0	0	0	0	0	0	0	603	903	0
771	5	0	0	0	0	0	0	200	300	0	0	0	0	0	0	0	200	903	0	0	0	0	0	0	0	603	903	0
771	6	0	0	0	0	0	0	200	300	0	0	0	0	0	0	0	200	903	0	0	0	0	0	0	0	603	903	0
771	7	0	0	0	0	0	0	200	300	0	0	0	0	0	0	0	200	903	0	0	0	0	0	0	0	603	903	0
771	8	0	0	0	0	0	0	200	300	0	0	0	0	0	0	0	200	903	0	0	0	0	0	0	0	603	903	0
771	9	0	0	0	0	0	0	200	300	0	0	0	0	0	0	0	200	903	0	0	0	0	0	0	0	603	903	0
772	0	0	0	0	0	0	0	200	300	0	0	0	0	0	0	0	200	903	0	0	0	0	0	0	0	603	903	0
772	1	0	0	0	0	0	0	200	300	0	0	0	0	0	0	0	200	903	0	0	0	0	0	0	0	603	903	0
772	2	0	0	0	0	0	0	200	300	0	0	0	0	0	0	0	200	903	0	0	0	0	0	0	0	603	903	0
772	3	0	0	0	0	0	0	200	300	0	0	0	0	0	0	0	200	903	0	0	0	0	0	0	0	603	903	0
772	4	0	0	0	0	0	0	200	300	0	0	0	0	0	0	0	200	903	0	0	0	0	0	0	0	603	903	0
772	5	0	0	0	0	0	0	200	300	0	0	0	0	0	0	0	200	903	0	0	0	0	0	0	0	603	903	0
772	6	0	0	0	0	0	0	200	300	0	0	0	0	0	0	0	200	903	0	0	0	0	0	0	0	603	903	0
772	7	0	0	0	0	0	0	200	300	0	0	0	0	0	0	0	200	903	0	0	0	0	0	0	0	603	903	0
772	8	0	0	0	0	0	0	200	300	0	0	0	0	0	0	0	200	903	0	0	0	0	0	0	0	603	903	0
772	9	0	0	0	0	0	0	200	300	0	0	0	0	0	0	0	200	903	0	0	0	0	0	0	0	603	903	0
773	0	0	0	0	0	0	0	200	300	0	0	0	0	0	0	0	200	903	0	0	0	0	0	0	0	603	903	0
773	1	0	0	0	0	0	0	200	300	0	0	0	0	0	0	0	200	903	0	0	0	0	0	0	0	603	903	0
773	2	0	0	0	0	0	0	200	300	0	0	0	0	0	0	0	200	903	0	0	0	0	0	0	0	603	903	0
773	3	0	0	0	0	0	0	200	300	0	0	0	0	0	0	0	200	903	0	0	0	0	0	0	0	603	903	0
773	4	0	0	0	0	0	0	200	300	0	0	0	0	0	0	0	200	903	0	0	0	0	0	0	0	603	903	0
773	5	0	0	0	0	0	0	200	300	0	0	0	0	0	0	0	200	903	0	0	0	0	0	0	0	603	903	0
773	6	0	0	0	0	0	0	200	300	0	0	0	0	0	0	0	200	903	0	0	0	0	0	0	0	603	903	0
773	7	0	0	0	0	0	0	200	300	0	0	0	0	0	0	0	200	903	0	0	0	0	0	0	0	603	903	0
773	8	0	0	0	0	0	0	200	300	0	0	0	0	0	0	0	200	903	0	0	0	0	0	0	0	603	903	0
773	9	0	0	0	0	0	0	200	300	0	0	0	0	0	0	0	200	903	0	0	0	0	0	0	0	603	903	0
774	0	0	0	0	0	0	0	200	300	0	0	0	0	0	0	0	200	903	0	0	0	0	0	0	0	603	903	0
774	1	0	0	0	0	0	0	200	300	0	0	0	0	0	0	0	200	903	0	0	0	0	0	0	0	603	903	0
774	2	0	0	0	0	0	0	200	300	0	0	0	0	0	0	0	200	903	0	0	0	0	0	0	0	603	903	0
774	3	0	0	0	0	0	0	200	300	0	0	0	0	0	0	0	200	903	0	0	0	0	0	0	0	603	903	0
774	4	0	0	0	0	0	0	200	300	0	0	0	0	0	0	0	200	903	0	0	0	0	0	0	0	603	903	0
774	5	0	0	0	0	0	0	200	300	0	0	0	0	0	0	0	200	903	0	0	0	0	0	0	0	603	903	0
774	6	0	0	0	0	0	0	200	300	0	0	0	0	0	0	0	200	903	0	0	0	0	0	0	0	603	903	0
774	7	0	0	0	0	0	0	200	300	0	0	0	0	0	0	0	200	903	0	0	0	0	0	0	0	603	903	0
774	8	0	0	0	0	0	0	200	300	0	0	0	0	0	0	0	200	903	0	0	0	0	0	0	0	603	903	0
774	9	0	0	0	0	0	0	200	300	0	0	0	0	0	0	0	200	903	0	0	0	0	0	0	0	603	903	0
775	0	0	0	0	0	0	0	200	300	0	0	0	0	0	0	0	200	903	0	0	0	0	0	0	0	603	903	0
775	1	0	0	0	0	0	0	200	300	0	0	0	0	0	0	0	200	903	0	0	0	0	0	0	0	603	903	0
775	2	0	0	0	0	0	0	200	300	0	0	0	0	0	0	0	200	903	0	0	0	0	0	0	0	603	903	0
775	3	0	0	0	0	0	0	200	300	0	0	0	0	0	0	0	200	903	0	0	0	0	0	0	0	603	903	0
775	4	0	0	0	0	0	0	200	300	0	0	0	0	0	0	0	200	903	0	0	0	0	0	0	0	603	903	0
775	5	0	0	0	0	0	0	200	300	0	0	0	0	0	0	0	200	903	0	0	0	0	0	0	0	603	903	0
775	6	0	0	0	0	0	0	200	300	0	0	0	0	0	0	0	200	903	0	0	0	0	0	0	0	603	903	0
775	7	0	0	0	0	0	0	200	300	0	0	0	0	0	0	0	200	903	0	0	0	0	0	0	0	603	903	0
775	8	0	0	0	0	0	0	200	300	0	0	0	0	0	0	0	200	903	0	0	0	0	0	0	0	603	903	0
775	9	0	0	0	0	0	0	200	300	0	0	0	0	0	0	0	200	903	0	0	0	0	0	0	0	603	903	0
776	0	0	0	0	0	0	0	200	300	0	0	0	0	0	0	0	200	903	0	0	0	0	0	0	0	603	903	0
776	1	0	0	0	0	0	0	200	300	0	0	0	0	0	0	0	200	903	0	0	0	0	0	0	0	603	903	0
776	2	0	0	0	0	0	0	200	300	0	0	0	0	0	0	0	200	903	0	0	0	0	0	0	0	603	903	0
776	3	0	0	0	0	0	0	200	300	0	0	0	0	0	0	0	200	903	0	0	0	0	0	0	0	603	903	0
776	4	0	0	0	0	0	0	200	300	0	0	0	0	0	0	0	200	903	0	0	0	0	0	0	0	603	903	0
776	5	0	0	0	0	0	0	200	300	0	0	0	0	0	0	0	200	903	0	0	0	0	0	0	0	603	903	0
776	6	0	0	0	0	0	0	200	300	0	0	0	0	0	0	0	200	903	0	0	0	0	0	0	0	603	903	0
776	7	0	0	0	0	0	0	200	300	0	0	0	0	0	0	0	200	903	0	0	0	0	0	0	0	603	903	0
776	8	0	0	0	0	0	0	200	300	0	0	0	0	0	0	0	200	903	0	0	0	0	0	0	0	603	903	0
776	9	0	0	0	0	0	0	200	300	0	0	0	0	0	0	0	200	903	0	0	0	0	0	0	0	603	903	0
777	0	0	0	0	0	0	0	200	300	0	0	0	0	0	0	0	200	903	0	0	0	0	0	0	0	603	903	0
777	1	0	0	0	0	0	0	200	300	0	0	0	0	0	0	0	200	903	0	0	0	0	0	0	0	603	903	0
777	2	0	0	0	0	0	0	200	300	0	0	0	0	0	0	0	200	903	0	0	0	0	0	0	0	603	903	0
777	3	0	0	0	0	0	0	200	300	0	0	0	0	0	0	0	200	903	0	0	0	0	0	0	0	603	903	0
777	4	0	0	0	0	0	0	200	300	0	0	0	0	0	0	0	200	903	0	0	0	0	0	0	0	603	903	0
777	5	0	0	0	0	0	0	200	300	0	0	0	0	0	0	0	200	903	0	0	0	0	0	0	0	603	903	0
777	6	0	0	0	0	0	0	200	300	0	0	0	0	0	0	0	200	903	0	0	0	0	0	0	0	603	903	0
777	7	0	0	0	0	0	0	200	300	0	0	0	0	0	0	0	200	903	0	0	0	0	0	0	0	603	903	0
777	8	0	0	0	0	0	0	200	300	0	0	0	0	0	0	0	200	903	0	0	0	0	0	0	0	603	903	0
777	9	0	0	0	0	0	0	200	300	0	0	0	0	0	0	0	200	903	0	0	0	0	0	0	0	603	903	0
778	0	0	0	0	0	0	0	200	300	0	0	0	0	0	0	0	200	903	0	0	0	0	0	0	0	603	903	0
778	1	0	0	0	0	0	0	200	300	0	0	0	0	0	0	0	200	903	0	0	0	0	0	0	0	603	903	0
778	2	0	0	0	0	0	0	200	300	0	0	0	0	0	0	0	200	903	0	0	0	0	0	0	0	603	903	0
778	3	0	0	0	0	0	0	200	300	0	0	0	0	0	0	0	200	903	0	0	0	0	0	0	0	603	903	0
778	4	0	0	0	0	0	0	200	300	0	0	0	0	0	0	0	200	903	0	0	0	0	0	0	0	603	903	0
778	5	0	0	0	0	0	0	200	300	0	0	0	0	0	0	0	200	903	0	0	0	0	0	0	0	603	903	0
778	6	0	0	0	0	0	0	200	300	0	0	0	0	0	0	0	200	903	0	0	0	0	0	0	0	603	903	0
778	7	0	0	0	0	0	0	200	300	0	0	0	0	0	0	0	200	903	0	0	0	0	0	0	0	603	903	0
778	8	0	0	0	0	0	0	200	300	0	0	0	0	0	0	0	200	903	0	0	0	0	0	0	0	603	903	0
778	9	0	0	0	0	0	0	200	300	0	0	0	0	0	0	0	200	903	0	0	0	0	0	0	0	603	903	0
779	0	0	0	0	0	0	0	200	300	0	0	0	0	0	0	0	200	903	0	0	0	0	0	0	0	603	903	0
779	1	0	0	0	0	0	0	200	300	0	0	0	0	0	0	0	200	903	0	0	0	0	0	0	0	603	903	0
779	2	0	0	0	0	0	0	200	300	0	0	0	0	0	0	0	200	903	0	0	0	0	0	0	0	603	903	0
779	3	0	0	0	0	0	0	200	300	0	0	0	0	0	0	0	200	903	0	0	0	0	0	0	0	603	903	0
779	4	0	0	0	0	0	0	200	300	0	0	0	0	0	0	0	200	903	0	0	0	0	0	0	0	603	903	0
779	5	0	0	0	0	0	0	200	300	0	0	0	0	0	0	0	200	903	0	0	0	0	0	0	0	603	903	0
779	6	0	0	0	0	0	0	200	300	0	0	0	0	0	0	0	200	903	0	0	0	0	0	0	0	603	903	0
779	7	0	0	0	0	0	0	200	300	0	0	0	0	0	0	0	200	903	0	0	0	0	0	0	0	603	903	0
779	8	0	0	0	0	0	0	200	300	0	0	0	0	0	0	0	200	903	0	0	0	0	0	0	0	603	903	0
779	9	0	0	0	0	0	0	200	300	0	0	0	0	0	0	0	200	903	0	0	0	0	0	0	0	603	903	0
780	0	0	0	0	0	0	0	200	300	0	0	0	0	0	0	0	200	903	0	0	0	0	0	0	0	603	903	0
780	1	0	0	0	0	0	0	200	300	0	0	0	0	0	0	0	200	903	0	0	0	0	0	0	0	603	903	0
780	2	0	0	0	0	0	0	200	300	0	0	0	0	0	0	0	200	903	0	0	0	0	0	0	0	603	903	0
780	3	0	0	0	0	0	0	200	300	0	0	0	0	0	0	0	200	903	0	0	0	0	0	0	0	603	903	0
780	4	0	0	0	0	0	0	200	300	0	0	0	0	0	0	0	200	903	0	0	0	0	0	0	0	603	903	0
780	5	0	0	0	0	0	0	200	300	0	0	0	0	0	0	0	200	903	0	0	0	0	0	0	0	603	903	0
780	6	0	0	0	0	0	0	200	300	0	0	0	0	0	0	0	200	903	0	0	0	0	0	0	0	603	903	0
780	7	0	0	0	0	0	0	200	300	0	0	0	0	0	0	0	200	903	0	0	0	0	0	0	0	603	903	0
780	8	0	0	0	0	0	0	200	300	0	0	0	0	0	0	0	200	903	0	0	0	0	0	0	0	603	903	0
780	9	0	0	0	0	0	0	200	300	0	0	0	0	0	0	0	200	903	0	0	0	0	0	0	0	603	903	0
781	0	0	0	0	0	0	0	200	300	0	0	0	0	0	0	0	200	903	0	0	0	0	0	0	0	603	903	0
781	1	0	0	0	0	0	0	200	300	0	0	0	0	0	0	0	200	903	0	0	0	0	0	0	0	603	903	0
781	2	0	0	0	0	0	0	200	300	0	0	0	0	0	0	0	200	903	0	0	0	0	0	0	0	603	903	0
781	3	0	0	0	0	0	0	200	300	0	0	0	0	0	0	0	200	903	0	0	0	0	0	0	0	603	903	0
781	4	0	0	0	0	0	0	200	300	0	0	0	0	0	0	0	200	903	0	0	0	0	0	0	0	603	903	0
781	5	0	0	0	0	0	0	200	300	0	0	0	0	0	0	0	200	903	0	0	0	0	0	0	0	603	903	0
781	6	0	0	0	0	0	0	200	300	0	0	0	0	0	0	0	200	903	0	0	0	0	0	0	0	603	903	0
781	7	0	0	0	0	0	0	200	300	0	0	0	0	0	0	0	200	903	0	0	0	0	0	0	0	603	903	0
781	8	0	0	0	0	0	0	200	300	0	0	0	0	0	0	0	200	903	0	0	0	0	0	0	0	603	903	0
781	9	0	0	0	0	0	0	200	300	0	0	0	0	0	0	0	200	903	0	0	0	0	0	0	0	603	903	0
782	0	0	0	0	0	0	0	200	300	0	0	0	0	0	0	0	200	903	0	0	0	0	0	0	0	603	903	0
782	1	0	0	0	0	0	0	200	300	0	0	0	0	0	0	0	200	903	0	0	0	0	0	0	0	603	903	0
782	2	0	0	0	0	0	0	200	300	0	0	0	0	0	0	0	200	903	0	0	0	0	0	0	0	603	903	0
782	3	0	0	0	0	0	0	200	300	0	0	0	0	0	0	0	200	903	0	0	0	0	0	0	0	603	903	0
782	4	0	0	0	0	0	0	200	300	0	0	0	0	0	0	0	200	903	0	0	0	0	0	0	0	603	903	0
782	5	0	0	0	0	0	0	200	300	0	0	0	0	0	0	0	200	903	0	0	0	0	0	0	0	603	903	0
782	6	0	0	0	0	0	0	200	300	0	0	0	0	0	0	0	200	903	0	0	0	0	0	0	0	603	903	0
782	7	0	0	0	0	0	0	200	300	0	0	0	0	0	0	0	200	903	0	0	0	0	0	0	0	603	903	0
782	8	0	0	0	0	0	0	200	300	0	0	0	0	0	0	0	200	903	0	0	0	0	0	0	0	603	903	0
782	9	0	0	0	0	0	0	200	300	0	0	0	0	0	0	0	200	903	0	0	0	0	0	0	0	603	903	0
783	0	0	0	0	0	0	0	200	300	0	0	0	0	0	0	0	200	903	0	0	0	0	0	0	0	603	903	0
783	1	0	0	0	0	0	0	200	300	0	0	0	0	0	0	0	200	903	0	0	0	0	0	0	0	603	903	0
783	2	0	0	0	0	0	0	200	300	0	0	0	0	0	0	0	200	903	0	0	0	0	0	0	0	603	903	0
783	3	0	0	0	0	0	0	200	300	0	0	0	0	0	0	0	200	903	0	0	0	0	0	0	0	603	903	0
783	4	0	0	0	0	0	0	200	300	0	0	0	0	0	0	0	200	903	0	0	0	0	0	0	0	603	903	0
783	5	0	0	0	0	0	0	200	300	0	0	0	0	0	0	0	200	903	0	0	0	0	0	0	0	603	903	0
783	6	0	0	0	0	0	0	200	300	0	0	0	0	0	0	0	200	903	0	0	0	0	0	0	0	603	903	0
783	7	0	0	0	0	0	0	200	300	0	0	0	0	0	0	0	200	903	0	0	0	0	0	0	0	603	903	0
783	8	0	0	0	0	0	0	200	300	0	0	0	0	0	0	0	200	903	0	0	0	0	0	0	0	603	903	0
783	9	0	0	0	0	0	0	200	300	0	0	0	0	0	0	0	200	903	0	0	0	0	0	0	0	603	903	0
784	0	0	0	0	0	0	0	200	300	0	0	0	0	0	0	0	200	903	0	0	0	0	0	0	0	603	903	0
784	1	0	0	0	0	0	0	200	300	0	0	0	0	0	0	0	200	903	0	0	0	0	0	0	0	603	903	0
784	2	0	0	0	0	0	0	200	300	0	0	0	0	0	0	0	200	903	0	0	0	0	0	0	0	603	903	0
784	3	0	0	0	0	0	0	200	300	0	0	0	0	0	0	0	200	903	0	0	0	0	0	0	0	603	903	0
784	4	0	0	0	0	0	0	200	300	0	0	0	0	0	0	0	200	903	0	0	0	0	0	0	0	603	903	0
784	5	0	0	0	0	0	0	200	300	0	0	0	0	0	0	0	200	903	0	0	0	0	0	0	0	603	903	0
784	6	0	0	0	0	0	0	200	300	0	0	0	0	0	0	0	200	903	0	0	0	0	0	0	0	603	903	0
784	7	0	0	0	0	0	0	200	300	0	0	0	0	0	0	0	200	903	0	0	0	0	0	0	0	603	903	0
784	8	0	0	0	0	0	0	200	300	0	0	0	0	0	0	0	200	903	0	0	0	0	0	0	0	603	903	0
784	9	0	0	0	0	0	0	200	300	0	0	0	0	0	0	0	200	903	0	0	0	0	0	0	0	603	903	0
785	0	0	0	0	0	0	0	200	300	0	0	0	0	0	0	0	200	903	0	0	0	0	0	0	0	603	903	0
785	1	0	0	0	0	0	0	200	300	0	0	0	0	0	0	0	200	903	0	0	0	0	0	0	0	603	903	0
785	2	0	0	0	0	0	0	200	300	0	0	0	0	0	0	0	200	903	0	0	0	0	0	0	0	603	903	0
785	3	0	0	0	0	0	0	200	300	0	0	0	0	0	0	0	200	903	0	0	0	0	0	0	0	603	903	0
785	4	0	0	0	0	0	0	200	300	0	0	0	0	0	0	0	200	903	0	0	0	0	0	0	0	603	903	0
785	5	0	0	0	0	0	0	200	300	0	0	0	0	0	0	0	200	903	0	0	0	0	0	0	0	603	903	0
785	6	0	0	0	0	0	0	200	300	0	0	0	0	0	0	0	200	903	0	0	0	0	0	0	0	603	903	0
785	7	0	0	0	0	0	0	200	300	0	0	0	0	0	0	0	200	903	0	0	0	0	0	0	0	603	903	0
785	8	0	0	0	0	0	0	200	300	0	0	0	0	0	0	0	200	903	0	0	0	0	0	0	0	603	903	0
785	9	0	0	0	0	0	0	200	300	0	0	0	0	0	0	0	200	903	0	0	0	0	0	0	0	603	903	0
786	0	0	0	0	0	0	0	200	300	0	0	0	0	0	0	0	200	903	0	0	0	0	0	0	0	603	903	0
786	1	0	0	0	0	0	0	200	300	0	0	0	0	0	0	0	200	903	0	0	0	0	0	0	0	603	903	0
786	2	0	0	0	0	0	0	200	300	0	0	0	0	0	0	0	200	903	0	0	0	0	0	0	0	603	903	0
786	3	0	0	0	0	0	0	200	300	0	0	0	0	0	0	0	200	903	0	0	0	0	0	0	0	603	903	0
786	4	0	0	0	0	0	0	200	300	0	0	0	0	0	0	0	200	903	0	0	0	0	0	0	0	603	903	0
786	5	0	0	0	0	0	0	200	300	0	0	0	0	0	0	0	200	903	0	0	0	0	0	0	0	603	903	0
786	6	0	0	0	0	0	0	200	300	0	0	0	0	0	0	0	200	903	0	0	0	0	0	0	0	603	903	0
786	7	0	0	0	0	0	0	200	300	0	0	0	0	0	0	0	200	903	0	0	0	0	0	0	0	603	903	0
786	8	0	0	0	0	0	0	200	300	0	0	0	0	0	0	0	200	903	0	0	0	0	0	0	0	603	903	0
786	9	0	0	0	0	0	0	200	300	0	0	0	0	0	0	0	200	903	0	0	0	0	0	0	0	603	903	0
787	0	0	0	0	0	0	0	200	300	0	0	0	0	0	0	0	200	903	0	0	0	0	0	0	0	603	903	0
787	1	0	0	0	0	0	0	200	300	0	0	0	0	0	0	0	200	903	0	0	0	0	0	0	0	603	903	0
787	2	0	0	0	0	0	0	200	300	0	0	0	0	0	0	0	200	903	0	0	0	0	0	0	0	603	903	0
787	3	0	0	0	0	0	0	200	300	0	0	0	0	0	0	0	200	903	0	0	0	0	0	0	0	603	903	0
787	4	0	0	0	0	0	0	200	300	0	0	0	0	0	0	0	200	903	0	0	0	0	0	0	0	603	903	0
787	5	0	0	0	0	0	0	200	300	0	0	0	0	0	0	0	200	903	0	0	0	0	0	0	0	603	903	0
787	6	0	0	0	0	0	0	200	300	0	0	0	0	0	0	0	200	903	0	0	0	0	0	0	0	603	903	0
787	7	0	0	0	0	0	0	200	300	0	0	0	0	0	0	0	200	903	0	0	0	0	0	0	0	603	903	0
787	8	0	0	0	0	0	0	200	300	0	0	0	0	0	0	0	200	903	0	0	0	0	0	0	0	603	903	0
787	9	0	0	0	0	0	0	200	300	0	0	0	0	0	0	0	200	903	0	0	0	0	0	0	0	603	903	0
788	0	0	0	0	0	0	0	200	300	0	0	0	0	0	0	0	200	903	0	0	0	0	0	0	0	603	903	0
788	1	0	0	0	0	0	0	200	300	0	0	0	0	0	0	0	200	903	0	0	0	0	0	0	0	603	903	0
788	2	0	0	0	0	0	0	200	300	0	0	0	0	0	0	0	200	903	0	0	0	0	0	0	0	603	903	0
788	3	0	0	0	0	0	0	200	300	0	0	0	0	0	0	0	200	903	0	0	0	0	0	0	0	603	903	0
788	4	0	0	0	0	0	0	200	300	0	0	0	0	0	0	0	200	903	0	0	0	0	0	0	0	603	903	0
788	5	0	0	0	0	0	0	200	300	0	0	0	0	0	0	0	200	903	0	0	0	0	0	0	0	603	903	0
788	6	0	0	0	0	0	0	200	300	0	0	0	0	0	0	0	200	903	0	0	0	0	0	0	0	603	903	0
788	7	0	0	0	0	0	0	200	300	0	0	0	0	0	0	0	200	903	0	0	0	0	0	0	0	603	903	0
788	8	0	0	0	0	0	0	200	300	0	0	0	0	0	0	0	200	903	0	0	0	0	0	0	0	603	903	0
788	9	0	0	0	0	0	0	200	300	0	0	0	0	0	0	0	200	903	0	0	0	0	0	0	0	603	903	0
789	0	0	0	0	0	0	0	200	300	0	0	0	0	0	0	0	200	903	0	0	0	0	0	0	0	603	903	0
789	1	0	0	0	0	0	0	200	300	0	0	0	0	0	0	0	200	903	0	0	0	0	0	0	0	603	903	0
789	2	0	0	0	0	0	0	200	300	0	0	0	0	0	0	0	200	903	0	0	0	0	0	0	0	603	903	0
789	3	0	0	0	0	0	0	200	300	0	0	0	0	0	0	0	200	903	0	0	0	0	0	0	0	603	903	0
789	4	0	0	0	0	0	0	200	300	0	0	0	0	0	0	0	200	903	0	0	0	0	0	0	0	603	903	0
789	5	0	0	0	0	0	0	200	300	0	0	0	0	0	0	0	200	903	0	0	0	0	0	0	0	603	903	0
789	6	0	0	0	0	0	0	200	300	0	0	0	0	0	0	0	200	903	0	0	0	0	0	0	0	603	903	0
789	7	0	0	0	0	0	0	200	300	0	0	0	0	0	0	0	200	903	0	0	0	0	0	0	0	603	903	0
789	8	0	0	0	0	0	0	200	300	0	0	0	0	0	0	0	200	903	0	0	0	0	0	0	0	603	903	0
789	9	0	0	0	0	0	0	200	300	0	0	0	0	0	0	0	200	903	0	0	0	0	0	0	0	603	903	0
790	0	0	0	0	0	0	0	200	300	0	0	0	0	0	0	0	200	903	0	0	0	0	0	0	0	603	903	0
790	1	0	0	0	0	0	0	200	300	0	0	0	0	0	0	0	200	903	0	0	0	0	0	0	0	603	903	0
790	2	0	0	0	0	0	0	200	300	0	0	0	0	0	0	0	200	903	0	0	0	0	0	0	0	603	903	0
790	3	0	0	0	0	0	0	200	300	0	0	0	0	0	0	0	200	903	0	0	0	0	0	0	0	603	903	0
790	4	0	0	0	0	0	0	200	300	0	0	0	0	0	0	0	200	903	0	0	0	0	0	0	0	603	903	0
790	5	0	0	0	0	0	0	200	300	0	0	0	0	0	0	0	200	903	0	0	0	0	0	0	0	603	903	0
790	6	0	0	0	0	0	0	200	300	0	0	0	0	0	0	0	200	903	0	0	0	0	0	0	0	603	903	0
790	7	0	0	0	0	0	0	200	300	0	0	0	0	0	0	0	200	903	0	0	0	0	0	0	0	603	903	0
790	8	0	0	0	0	0	0	200	300	0	0	0	0	0	0	0	200	903	0	0	0	0	0	0	0	603	903	0
790	9	0	0	0	0	0	0	200	300	0	0	0	0	0	0	0	200	903	0	0	0	0	0	0	0	603	903	0
791	0	0	0	0	0	0	0	200	300	0	0	0	0	0	0	0	200	903	0	0	0	0	0	0	0	603	903	0
791	1	0	0	0	0	0	0	200	300	0	0	0	0	0	0	0	200	903	0	0	0	0	0	0	0	603	903	0
791	2	0	0	0	0	0	0	200	300	0	0	0	0	0	0	0	200	903	0	0	0	0	0	0	0	603	903	0
791	3	0	0	0	0	0	0	200	300	0	0	0	0	0	0	0	200	903	0	0	0	0	0	0	0	603	903	0
791	4	0	0	0	0	0	0	200	300	0	0	0	0	0	0	0	200	903	0	0	0	0	0	0	0	603	903	0
791	5	0	0	0	0	0	0	200	300	0	0	0	0	0	0	0	200	903	0	0	0	0	0	0	0	603	903	0
791	6	0	0	0	0	0	0	200	300	0	0	0	0	0	0	0	200	903	0	0	0	0	0	0	0	603	903	0
791	7	0	0	0	0	0	0	200	300	0	0	0	0	0	0	0	200	903	0	0	0	0	0	0	0	603	903	0
791	8	0	0	0	0	0	0	200	300	0	0	0	0	0	0	0	200	903	0	0	0	0	0	0	0	603	903	0
791	9	0	0	0	0	0	0	200	300	0	0	0	0	0	0	0	200	903	0	0	0	0	0	0	0	603	903	0
792	0	0	0	0	0	0	0	200	300	0	0	0	0	0	0	0	200	903	0	0	0	0	0	0	0	603	903	0
792	1	0	0	0	0	0	0	200	300	0	0	0	0	0	0	0	200	903	0	0	0	0	0	0	0	603	903	0
792	2	0	0	0	0	0	0	200	300	0	0	0	0	0	0	0	200	903	0	0	0	0	0	0	0	603	903	0
792	3	0	0	0	0	0	0	200	300	0	0	0	0	0	0	0	200	903	0	0	0	0	0	0	0	603	903	0
792	4	0	0	0	0	0	0	200	300	0	0	0	0	0	0	0	200	903	0	0	0	0	0	0	0	603	903	0
792	5	0	0	0	0	0	0	200	300	0	0	0	0	0	0	0	200	903	0	0	0	0	0	0	0	603	903	0
792	6	0	0	0	0	0	0	200	300	0	0	0	0	0	0	0	200	903	0	0	0	0	0	0	0	603	903	0
792	7	0	0	0	0	0	0	200	300	0	0	0	0	0	0	0	200	903	0	0	0	0	0	0	0	603	903	0
792	8	0	0	0	0	0	0	200	300	0	0	0	0	0	0	0	200	903	0	0	0	0	0	0	0	603	903	0
792	9	0	0	0	0	0	0	200	300	0	0	0	0	0	0	0	200	903	0	0	0	0	0	0	0	603	903	0
793	0	0	0	0	0	0	0	200	300	0	0	0	0	0	0	0	200	903	0	0	0	0	0	0	0	603	903	0
793	1	0	0	0	0	0	0	200	300	0	0	0	0	0	0	0	200	903	0	0	0	0	0	0	0	603	903	0
793	2	0	0	0	0	0	0	200	300	0	0	0	0	0	0	0	200	903	0	0	0	0	0	0	0	603	903	0
793	3	0	0	0	0	0	0	200	300	0	0	0	0	0	0	0	200	903	0	0	0	0	0	0	0	603	903	0
793	4	0	0	0	0	0	0	200	300	0	0	0	0	0	0	0	200	903	0	0	0	0	0	0	0	603	903	0
793	5	0	0	0	0	0	0	200	300	0	0	0	0	0	0	0	200	903	0	0	0	0	0	0	0	603	903	0
793	6	0	0	0	0	0	0	200	300	0	0	0	0	0	0	0	200	903	0	0	0	0	0	0	0	603	903	0
793	7	0	0	0	0	0	0	200	300	0	0	0	0	0	0	0	200	903	0	0	0	0	0	0	0	603	903	0
793	8	0	0	0	0	0	0	200	300	0	0	0	0	0	0	0	200	903	0	0	0	0	0	0	0	603	903	0
793	9	0	0	0	0	0	0	200	300	0	0	0	0	0	0	0	200	903	0	0	0	0	0	0	0	603	903	0
794	0	0	0	0	0	0	0	200	300	0	0	0	0	0	0	0	200	903	0	0	0	0	0	0	0	603	903	0
794	1	0	0	0	0	0	0	200	300	0	0	0	0	0	0	0	200	903	0	0	0	0	0	0	0	603	903	0
794	2	0	0	0	0	0	0	200	300	0	0	0	0	0	0	0	200	903	0	0	0	0	0	0	0	603	903	0
794	3	0	0	0	0	0	0	200	300	0	0	0	0	0	0	0	200	903	0	0	0	0	0	0	0	603	903	0
794	4	0	0	0	0	0	0	200	300	0	0	0	0	0	0	0	200	903	0	0	0	0	0	0	0	603	903	0
794	5	0	0	0	0	0	0	200	300	0	0	0	0	0	0	0	200	903	0	0	0	0	0	0	0	603	903	0
794	6	0	0	0	0	0	0	200	300	0	0	0	0	0	0	0	200	903	0	0	0	0	0	0	0	603	903	0
794	7	0	0	0	0	0	0	200	300	0	0	0	0	0	0	0	200	903	0	0	0	0	0	0	0	603	903	0
794	8	0	0	0	0	0	0	200	300	0	0	0	0	0	0	0	200	903	0	0	0	0	0	0	0	603	903	0
794	9	0	0	0	0	0	0	200	300	0	0	0	0	0	0	0	200	903	0	0	0	0	0	0	0	603	903	0
795	0	0	0	0	0	0	0	200	300	0	0	0	0	0	0	0	200	903	0	0	0	0	0	0	0	603	903	0
795	1	0	0	0	0	0	0	200	300	0	0	0	0	0	0	0	200	903	0	0	0	0	0	0	0	603	903	0
795	2	0	0	0	0	0	0	200	300	0	0	0	0	0	0	0	200	903	0	0	0	0	0	0	0	603	903	0
795	3	0	0	0	0	0	0	200	300	0	0	0	0	0	0	0	200	903	0	0	0	0	0	0	0	603	903	0
795	4	0	0	0	0	0	0	200	300	0	0	0	0	0	0	0	200	903	0	0	0	0	0	0	0	603	903	0
795	5	0	0	0	0	0	0	200	300	0	0	0	0	0	0	0	200	903	0	0	0	0	0	0	0	603	903	0
795	6	0	0	0	0	0	0	200	300	0	0	0	0	0	0	0	200	903	0	0	0	0	0	0	0	603	903	0
795	7	0	0	0	0	0	0	200	300	0	0	0	0	0	0	0	200	903	0	0	0	0	0	0	0	603	903	0
795	8	0	0	0	0	0	0	200	300	0	0	0	0	0	0	0	200	903	0	0	0	0	0	0	0	603	903	0
795	9	0	0	0	0	0	0	200	300	0	0	0	0	0	0	0	200	903	0	0	0	0	0	0	0	603	903	0
796	0	0	0	0	0	0	0	200	300	0	0	0	0	0	0	0	200	903	0	0	0	0	0	0	0	603	903	0
796	1	0	0	0	0	0	0	200	300	0	0	0	0	0	0	0	200	903	0	0	0	0	0	0	0	603	903	0
796	2	0	0	0	0	0	0	200	300	0	0	0	0	0	0	0	200	903	0	0	0	0	0	0	0	603	903	0
796	3	0	0	0	0	0	0	200	300	0	0	0	0	0	0	0	200	903	0	0	0	0	0	0	0	603	903	0
796	4	0	0	0	0	0	0	200	300	0	0	0	0	0	0	0	200	903	0	0	0	0	0	0	0	603	903	0
796	5	0	0	0	0	0	0	200	300	0	0	0	0	0	0	0	200	903	0	0	0	0	0	0	0	603	903	0
796	6	0	0	0	0	0	0	200	300	0	0	0	0	0	0	0	200	903	0	0	0	0	0	0	0	603	903	0
796	7	0	0	0	0	0	0	200	300	0	0	0	0	0	0	0	200	903	0	0	0	0	0	0	0	603	903	0
796	8	0	0	0	0	0	0	200	300	0	0	0	0	0	0	0	200	903	0	0	0	0	0	0	0	603	903	0
796	9	0	0	0	0	0	0	200	300	0	0	0	0	0	0	0	200	903	0	0	0	0	0	0	0	603	903	0
797	0	0	0	0	0	0	0	200	300	0	-4.14581	-2.07504	-19.0406	-6796.79	-949.448	1533.74	150.136	1259.96	0	0	0	0	0	0	0	603	903	0
797	1	0	0	0	0	0	0	200	300	0	-2.92511	-1.92245	-21.1768	-8170.08	-1437.73	2083.05	132.108	1288.8	0	0	0	0	0	0	0	603	903	0
797	2	0	0	0	0	0	0	200	300	0	-5.67169	-1.3121	-24.839	-9085.6	-1926.01	2037.28	122.46	1268.78	0	0	0	0	0	0	0	603	903	0
797	3	0	0	0	0	0	0	200	300	0	-5.97687	-3.60092	-33.3839	-11923.7	-2048.08	1991.5	138.651	1260.17	0	0	0	0	0	0	0	603	903	0
797	4	0	0	0	0	0	0	200	300	0	-5.06134	-6.80526	-45.5909	-15128.1	-2170.15	2403.49	152.399	1234.82	0	0	0	0	0	0	0	603	903	0
797	5	0	0	0	0	0	0	200	300	0	-5.82428	-9.70443	-55.6617	-17691.6	-2475.33	2266.16	155.529	1220.84	0	0	0	0	0	0	0	603	903	0
797	6	0	0	0	0	0	0	200	300	0	-5.82428	-11.2303	-65.7325	-20529.7	-2841.54	2128.83	156.771	1215.32	0	0	0	0	0	0	0	603	903	0
797	7	0	0	0	0	0	0	200	300	0	-3.53546	-15.045	-78.8551	-24191.8	-3146.71	1671.07	160.095	1209.79	0	0	0	0	0	0	0	603	903	0
797	8	0	0	0	0	0	0	200	300	0	-0.0259395	-18.7071	-93.1983	-28311.7	-3451.89	618.209	162.962	1206.78	0	0	0	0	0	0	0	603	903	0
797	9	0	0	0	0	0	0	200	300	0	0.584412	-23.5899	-106.016	-33072.4	-3940.17	801.315	162.834	1214.96	0	0	0	0	0	0	0	603	903	0
798	0	0	0	0	0	0	0	200	300	0	0.279236	-27.5572	-118.528	-37009.2	-4489.49	892.868	162.123	1215.24	0	0	0	0	0	0	0	603	903	0
798	1	0	0	0	0	0	0	200	300	0	4.85687	-30.3038	-132.871	-40305.1	-4428.45	68.8931	166.671	1206.34	0	0	0	0	0	0	0	603	903	0
798	2	0	0	0	0	0	0	200	300	0	7.75604	-33.5081	-147.825	-44333.4	-4611.56	-159.989	168.804	1202.91	0	0	0	0	0	0	0	603	903	0
798	3	0	0	0	0	0	0	200	300	0	8.21381	-35.4918	-161.253	-49094.2	-5710.19	-343.094	164.589	1207.46	0	0	0	0	0	0	0	603	903	0
798	4	0	0	0	0	0	0	200	300	0	8.67157	-37.3228	-173.765	-52847.8	-5649.16	-1258.62	167.49	1207.13	0	0	0	0	0	0	0	603	903	0
798	5	0	0	0	0	0	0	200	300	0	13.4018	-40.3746	-188.108	-56876.1	-5954.33	-1716.39	168.346	1205.36	0	0	0	0	0	0	0	603	903	0
798	6	0	0	0	0	0	0	200	300	0	15.9958	-43.1212	-205.198	-60812.9	-6808.83	-2311.48	166.818	1199.36	0	0	0	0	0	0	0	603	903	0
798	7	0	0	0	0	0	0	200	300	0	18.132	-46.6307	-221.677	-65848.3	-6808.83	-3181.23	169.285	1200.05	0	0	0	0	0	0	0	603	903	0
798	8	0	0	0	0	0	0	200	300	0	19.8105	-51.2083	-238.767	-70975.2	-7602.28	-3410.11	168.16	1200.26	0	0	0	0	0	0	0	603	903	0
798	9	0	0	0	0	0	0	200	300	0	24.8459	-54.4127	-253.11	-75644.4	-8578.84	-4142.53	166.106	1201.86	0	0	0	0	0	0	0	603	903	0
799	0	0	0	0	0	0	0	200	300	0	26.2192	-56.0912	-270.811	-79306.5	-9250.23	-4920.73	165.842	1195.85	0	0	0	0	0	0	0	603	903	0
799	1	0	0	0	0	0	0	200	300	0	28.3554	-58.5326	-286.375	-83884.2	-9128.16	-5012.28	168.125	1195.92	0	0	0	0	0	0	0	603	903	0
799	2	0	0	0	0	0	0	200	300	0	29.8813	-61.4317	-303.77	-88828	-10043.7	-5561.6	166.937	1195.42	0	0	0	0	0	0	0	603	903	0
799	3	0	0	0	0	0	0	200	300	0	31.102	-63.1102	-317.808	-93222.6	-10470.9	-6110.92	167.053	1196.33	0	0	0	0	0	0	0	603	903	0
799	4	0	0	0	0	0	0	200	300	0	34.9167	-63.1102	-332.761	-97342.5	-10470.9	-6385.57	168.533	1195.53	0	0	0	0	0	0	0	603	903	0
799	5	0	0	0	0	0	0	200	300	0	33.3908	-65.2464	-347.715	-100730	-11752.7	-6751.79	166.2	1192.69	0	0	0	0	0	0	0	603	903	0
799	6	0	0	0	0	0	0	200	300	0	35.527	-67.993	-362.363	-104758	-12118.9	-6843.34	166.556	1192.1	0	0	0	0	0	0	0	603	903	0
799	7	0	0	0	0	0	0	200	300	0	37.2055	-69.8241	-377.012	-108878	-12546.1	-6843.34	166.722	1191.79	0	0	0	0	0	0	0	603	903	0
799	8	0	0	0	0	0	0	200	300	0	35.527	-71.0448	-391.355	-112540	-13278.5	-6706.01	166.07	1190.57	0	0	0	0	0	0	0	603	903	0
799	9	0	0	0	0	0	0	200	300	0	35.2219	-73.7913	-404.478	-116202	-13888.9	-7072.22	165.662	1190.29	0	0	0	0	0	0	0	603	903	0
800	0	0	0	0	0	0	0	200	300	0	36.29	-76.2327	-418.211	-119315	-14438.2	-6614.46	165.476	1188.3	0	0	0	0	0	0	0	603	903	0
800	1	0	0	0	0	0	0	200	300	0	37.8159	-77.4535	-429.197	-122519	-14987.5	-6889.11	165.08	1188.46	0	0	0	0	0	0	0	603	903	0
800	2	0	0	0	0	0	0	200	300	0	37.3581	-79.2845	-442.625	-126090	-15353.7	-6706.01	165.312	1187.87	0	0	0	0	0	0	0	603	903	0
800	3	0	0	0	0	0	0	200	300	0	35.2219	-81.2682	-456.052	-128837	-15781	-6385.57	165.397	1185.5	0	0	0	0	0	0	0	603	903	0
800	4	0	0	0	0	0	0	200	300	0	33.8486	-83.4044	-461.851	-131034	-16330.3	-6477.13	164.642	1186.71	0	0	0	0	0	0	0	603	903	0
800	5	0	0	0	0	0	0	200	300	0	35.8322	-84.9303	-474.668	-133689	-16696.5	-6339.8	164.825	1184.65	0	0	0	0	0	0	0	603	903	0
800	6	0	0	0	0	0	0	200	300	0	36.4426	-88.745	-482.603	-136344	-16879.6	-5973.59	165.024	1185.52	0	0	0	0	0	0	0	603	903	0
800	7	0	0	0	0	0	0	200	300	0	34.0012	-89.0501	-491.148	-138358	-17367.9	-5653.15	164.638	1184.7	0	0	0	0	0	0	0	603	903	0
800	8	0	0	0	0	0	0	200	300	0	32.6279	-90.576	-499.387	-140281	-17734.1	-5378.49	164.488	1183.91	0	0	0	0	0	0	0	603	903	0
800	9	0	0	0	0	0	0	200	300	0	32.7805	-92.8648	-506.406	-141471	-18039.3	-5607.38	164.378	1182.36	0	0	0	0	0	0	0	603	903	0
801	0	0	0	0	0	0	0	200	300	0	33.2382	-95.1536	-511.594	-143302	-18161.4	-5286.94	164.5	1183.11	0	0	0	0	0	0	0	603	903	0
801	1	0	0	0	0	0	0	200	300	0	33.696	-93.9329	-517.393	-144767	-18771.7	-5103.84	163.719	1182.8	0	0	0	0	0	0	0	603	903	0
801	2	0	0	0	0	0	0	200	300	0	30.7968	-93.17	-524.412	-146323	-19076.9	-5103.84	163.622	1182.02	0	0	0	0	0	0	0	603	903	0
801	3	0	0	0	0	0	0	200	300	0	30.1865	-96.0692	-528.074	-147056	-19015.9	-4462.97	163.99	1181.48	0	0	0	0	0	0	0	603	903	0
801	4	0	0	0	0	0	0	200	300	0	30.6442	-95.6114	-531.431	-147605	-19321	-4600.3	163.643	1180.75	0	0	0	0	0	0	0	603	903	0
801	5	0	0	0	0	0	0	200	300	0	29.2709	-94.2381	-535.398	-147422	-19748.3	-4508.74	163.115	1178.35	0	0	0	0	0	0	0	603	903	0
801	6	0	0	0	0	0	0	200	300	0	29.1183	-95.1536	-539.06	-149619	-19809.3	-4554.52	163.252	1180.56	0	0	0	0	0	0	0	603	903	0
801	7	0	0	0	0	0	0	200	300	0	30.9494	-96.2218	-542.722	-150168	-20785.9	-4234.09	161.701	1179.69	0	0	0	0	0	0	0	603	903	0
801	8	0	0	0	0	0	0	200	300	0	28.8132	-95.9166	-544.248	-150626	-20175.5	-4234.09	162.93	1179.76	0	0	0	0	0	0	0	603	903	0
801	9	0	0	0	0	0	0	200	300	0	27.5925	-95.764	-546.995	-150809	-20236.6	-3959.43	163.004	1178.71	0	0	0	0	0	0	0	603	903	0
802	0	0	0	0	0	0	0	200	300	0	28.508	-97.1373	-550.657	-151450	-20846.9	-3822.1	162.142	1178.04	0	0	0	0	0	0	0	603	903	0
802	1	0	0	0	0	0	0	200	300	0	27.8976	-97.9002	-552.488	-151633	-21030	-3913.65	161.936	1177.46	0	0	0	0	0	0	0	603	903	0
802	2	0	0	0	0	0	0	200	300	0	26.9821	-97.4425	-551.267	-150809	-20785.9	-3593.22	162.294	1176.57	0	0	0	0	0	0	0	603	903	0
802	3	0	0	0	0	0	0	200	300	0	27.8976	-98.0528	-554.014	-152366	-21274.2	-3501.66	161.6	1178.02	0	0	0	0	0	0	0	603	903	0
802	4	0	0	0	0	0	0	200	300	0	28.8132	-98.5106	-555.845	-152091	-21274.2	-3593.22	161.726	1176.62	0	0	0	0	0	0	0	603	903	0
802	5	0	0	0	0	0	0	200	300	0	28.0502	-99.4261	-556.76	-152549	-21030	-3547.44	162.228	1176.99	0	0	0	0	0	0	0	603	903	0
802	6	0	0	0	0	0	0	200	300	0	28.0502	-100.342	-557.676	-153006	-21823.5	-3318.56	160.867	1177.36	0	0	0	0	0	0	0	603	903	0
802	7	0	0	0	0	0	0	200	300	0	26.6769	-101.257	-559.812	-151542	-21701.4	-3227.01	161.234	1173.7	0	0	0	0	0	0	0	603	903	0
802	8	0	0	0	0	0	0	200	300	0	26.6769	-102.02	-562.559	-153464	-21823.5	-2860.79	161.207	1175.8	0	0	0	0	0	0	0	603	903	0
802	9	0	0	0	0	0	0	200	300	0	26.9821	-102.783	-563.779	-152915	-22433.8	-2860.79	160.208	1174.23	0	0	0	0	0	0	0	603	903	0
803	0	0	0	0	0	0	0	200	300	0	26.9821	-105.224	-563.474	-153006	-22494.9	-2677.69	160.078	1174.54	0	0	0	0	0	0	0	603	903	0
803	1	0	0	0	0	0	0	200	300	0	26.8295	-106.445	-565.305	-153647	-22311.8	-1991.04	160.532	1174.8	0	0	0	0	0	0	0	603	903	0
803	2	0	0	0	0	0	0	200	300	0	24.0829	-106.293	-567.441	-152274	-22739	-1991.04	159.927	1171.35	0	0	0	0	0	0	0	603	903	0
803	3	0	0	0	0	0	0	200	300	0	22.5571	-108.734	-569.883	-153922	-23105.2	-1670.61	159.456	1173.09	0	0	0	0	0	0	0	603	903	0
803	4	0	0	0	0	0	0	200	300	0	23.0148	-110.26	-570.798	-154105	-22922.1	-1029.74	159.842	1172.98	0	0	0	0	0	0	0	603	903	0
803	5	0	0	0	0	0	0	200	300	0	20.5734	-109.802	-572.629	-154105	-23654.5	-709.305	158.691	1172.12	0	0	0	0	0	0	0	603	903	0
803	6	0	0	0	0	0	0	200	300	0	18.5898	-110.718	-575.376	-154838	-23654.5	-205.765	158.889	1172.11	0	0	0	0	0	0	0	603	903	0
803	7	0	0	0	0	0	0	200	300	0	15.6906	-114.075	-574.461	-154838	-23532.5	801.315	159.036	1172.54	0	0	0	0	0	0	0	603	903	0
803	8	0	0	0	0	0	0	200	300	0	12.0285	-114.227	-577.512	-154746	-24081.8	1487.96	158.301	1170.95	0	0	0	0	0	0	0	603	903	0
803	9	0	0	0	0	0	0	200	300	0	11.7233	-116.363	-577.207	-154471	-24509	1716.84	157.539	1170.62	0	0	0	0	0	0	0	603	903	0
804	0	0	0	0	0	0	0	200	300	0	12.6389	-116.363	-578.428	-154471	-24448	2540.82	157.734	1170.05	0	0	0	0	0	0	0	603	903	0
804	1	0	0	0	0	0	0	200	300	0	7.45087	-117.889	-579.343	-154838	-24814.2	3181.69	157.168	1170.26	0	0	0	0	0	0	0	603	903	0
804	2	0	0	0	0	0	0	200	300	0	3.33099	-119.568	-580.869	-154746	-25119.4	3685.23	156.756	1169.4	0	0	0	0	0	0	0	603	903	0
804	3	0	0	0	0	0	0	200	300	0	1.34735	-120.178	-582.09	-153922	-24997.3	4371.87	157.056	1167.43	0	0	0	0	0	0	0	603	903	0
804	4	0	0	0	0	0	0	200	300	0	0.584412	-121.399	-581.48	-153647	-25241.4	4600.76	156.591	1167.24	0	0	0	0	0	0	0	603	903	0
804	5	0	0	0	0	0	0	200	300	0	-0.788879	-120.178	-581.48	-154655	-25668.7	5516.28	155.856	1168.97	0	0	0	0	0	0	0	603	903	0
804	6	0	0	0	0	0	0	200	300	0	-3.84064	-121.857	-582.395	-154105	-25973.9	6340.26	155.402	1167.61	0	0	0	0	0	0	0	603	903	0
804	7	0	0	0	0	0	0	200	300	0	-4.2984	-122.925	-580.564	-153464	-25912.8	6706.47	155.366	1167.34	0	0	0	0	0	0	0	603	903	0
804	8	0	0	0	0	0	0	200	300	0	-7.96051	-122.619	-581.785	-153830	-26340.1	6981.13	154.725	1167.41	0	0	0	0	0	0	0	603	903	0
804	9	0	0	0	0	0	0	200	300	0	-8.72345	-122.009	-585.447	-153830	-26950.4	7713.55	153.966	1165.76	0	0	0	0	0	0	0	603	903	0
805	0	0	0	0	0	0	0	200	300	0	-10.4019	-123.535	-586.362	-154014	-26828.4	7896.65	154.246	1165.66	0	0	0	0	0	0	0	603	903	0
805	1	0	0	0	0	0	0	200	300	0	-12.8433	-124.603	-586.973	-154563	-27133.5	8445.97	153.774	1166.32	0	0	0	0	0	0	0	603	903	0
805	2	0	0	0	0	0	0	200	300	0	-14.064	-123.993	-586.973	-154380	-27316.6	9041.07	153.462	1166.01	0	0	0	0	0	0	0	603	903	0
805	3	0	0	0	0	0	0	200	300	0	-16.3528	-125.213	-589.109	-154197	-26523.2	9544.61	154.977	1164.75	0	0	0	0	0	0	0	603	903	0
805	4	0	0	0	0	0	0	200	300	0	-16.658	-126.892	-592.161	-154471	-27804.9	9956.59	153.045	1163.86	0	0	0	0	0	0	0	603	903	0
805	5	0	0	0	0	0	0	200	300	0	-16.8106	-127.96	-592.771	-154471	-28293.2	10139.7	152.27	1163.59	0	0	0	0	0	0	0	603	903	0
805	6	0	0	0	0	0	0	200	300	0	-19.4046	-127.197	-592.161	-155112	-27621.8	10322.8	153.354	1164.94	0	0	0	0	0	0	0	603	903	0
805	7	0	0	0	0	0	0	200	300	0	-18.3365	-127.96	-596.738	-155570	-28110.1	11146.8	152.894	1163.7	0	0	0	0	0	0	0	603	903	0
805	8	0	0	0	0	0	0	200	300	0	-21.0831	-129.791	-597.959	-155112	-28659.4	11329.9	152.071	1162.4	0	0	0	0	0	0	0	603	903	0
805	9	0	0	0	0	0	0	200	300	0	-20.6253	-130.401	-598.264	-155295	-28049.1	11329.9	153.116	1162.58	0	0	0	0	0	0	0	603	903	0
806	0	0	0	0	0	0	0	200	300	0	-20.7779	-129.791	-600.095	-155936	-28293.2	11284.1	152.852	1162.85	0	0	0	0	0	0	0	603	903	0
806	1	0	0	0	0	0	0	200	300	0	-22.7615	-129.944	-601.926	-155570	-29086.7	11513	151.677	1161.45	0	0	0	0	0	0	0	603	903	0
806	2	0	0	0	0	0	0	200	300	0	-21.9986	-130.249	-604.063	-156852	-28659.4	11787.6	152.556	1162.66	0	0	0	0	0	0	0	603	903	0
806	3	0	0	0	0	0	0	200	300	0	-21.6934	-130.554	-605.283	-156302	-28964.6	12062.3	152.147	1161.23	0	0	0	0	0	0	0	603	903	0
806	4	0	0	0	0	0	0	200	300	0	-22.4564	-129.333	-605.894	-156119	-29208.7	11970.8	151.792	1160.67	0	0	0	0	0	0	0	603	903	0
806	5	0	0	0	0	0	0	200	300	0	-22.9141	-129.639	-608.335	-156943	-29208.7	11925	151.986	1160.99	0	0	0	0	0	0	0	603	903	0
806	6	0	0	0	0	0	0	200	300	0	-23.9822	-129.639	-609.861	-156669	-29513.9	11925	151.605	1159.89	0	0	0	0	0	0	0	603	903	0
806	7	0	0	0	0	0	0	200	300	0	-24.1348	-128.265	-609.861	-157493	-29758.1	12199.6	151.205	1161.24	0	0	0	0	0	0	0	603	903	0
806	8	0	0	0	0	0	0	200	300	0	-23.2193	-128.265	-611.997	-157493	-29941.2	12062.3	151.076	1160.34	0	0	0	0	0	0	0	603	903	0
806	9	0	0	0	0	0	0	200	300	0	-22.7615	-126.587	-612.607	-157401	-29697	12016.5	151.524	1159.94	0	0	0	0	0	0	0	603	903	0
807	0	0	0	0	0	0	0	200	300	0	-24.8978	-125.366	-610.166	-157676	-29941.2	12062.3	150.93	1161.41	0	0	0	0	0	0	0	603	903	0
807	1	0	0	0	0	0	0	200	300	0	-24.7452	-123.993	-615.049	-158225	-30734.6	12291.2	150.029	1160.26	0	0	0	0	0	0	0	603	903	0
807	2	0	0	0	0	0	0	200	300	0	-25.0504	-125.519	-616.575	-158133	-30429.4	12245.4	150.648	1159.47	0	0	0	0	0	0	0	603	903	0
807	3	0	0	0	0	0	0	200	300	0	-24.44	-123.993	-615.964	-158225	-30551.5	12428.5	150.401	1159.87	0	0	0	0	0	0	0	603	903	0
807	4	0	0	0	0	0	0	200	300	0	-25.2029	-122.619	-618.711	-158866	-30368.4	12428.5	150.917	1159.77	0	0	0	0	0	0	0	603	903	0
807	5	0	0	0	0	0	0	200	300	0	-25.2029	-123.077	-619.932	-157950	-30490.5	12108.1	150.816	1157.79	0	0	0	0	0	0	0	603	903	0
807	6	0	0	0	0	0	0	200	300	0	-25.8133	-121.857	-620.237	-158866	-30673.6	12520.1	150.545	1159.14	0	0	0	0	0	0	0	603	903	0
807	7	0	0	0	0	0	0	200	300	0	-24.7452	-119.11	-619.932	-158866	-31100.8	12016.5	149.832	1159.26	0	0	0	0	0	0	0	603	903	0
807	8	0	0	0	0	0	0	200	300	0	-22.7615	-117.431	-622.373	-159232	-31100.8	11604.5	150.029	1158.85	0	0	0	0	0	0	0	603	903	0
807	9	0	0	0	0	0	0	200	300	0	-24.7452	-118.042	-622.678	-159507	-30856.7	12153.9	150.445	1159.16	0	0	0	0	0	0	0	603	903	0
808	0	0	0	0	0	0	0	200	300	0	-24.8978	-117.279	-623.899	-159690	-31161.9	12016.5	150.053	1158.95	0	0	0	0	0	0	0	603	903	0
808	1	0	0	0	0	0	0	200	300	0	-25.6607	-114.837	-624.815	-159415	-30978.8	11833.4	150.419	1158.14	0	0	0	0	0	0	0	603	903	0
808	2	0	0	0	0	0	0	200	300	0	-25.2029	-113.922	-626.035	-159507	-30917.7	11741.9	150.613	1157.79	0	0	0	0	0	0	0	603	903	0
808	3	0	0	0	0	0	0	200	300	0	-24.5926	-113.617	-626.34	-159873	-31528.1	11787.6	149.663	1158.25	0	0	0	0	0	0	0	603	903	0
808	4	0	0	0	0	0	0	200	300	0	-25.5081	-112.396	-626.951	-160056	-31100.8	11741.9	150.394	1158.29	0	0	0	0	0	0	0	603	903	0
808	5	0	0	0	0	0	0	200	300	0	-25.5081	-110.107	-626.951	-160239	-31100.8	11604.5	150.394	1158.59	0	0	0	0	0	0	0	603	903	0
808	6	0	0	0	0	0	0	200	300	0	-24.44	-109.649	-629.087	-159781	-31711.2	11879.2	149.592	1156.99	0	0	0	0	0	0	0	603	903	0
808	7	0	0	0	0	0	0	200	300	0	-22.6089	-108.276	-625.12	-159141	-31283.9	11696.1	149.955	1157.58	0	0	0	0	0	0	0	603	903	0
808	8	0	0	0	0	0	0	200	300	0	-24.8978	-107.666	-629.087	-159965	-31345	11375.7	150.174	1157.28	0	0	0	0	0	0	0	603	903	0
808	9	0	0	0	0	0	0	200	300	0	-24.8978	-106.903	-629.697	-160239	-31772.2	11467.2	149.544	1157.47	0	0	0	0	0	0	0	603	903	0
809	0	0	0	0	0	0	0	200	300	0	-25.8133	-105.224	-630.918	-159873	-31711.2	11329.9	149.738	1156.4	0	0	0	0	0	0	0	603	903	0
809	1	0	0	0	0	0	0	200	300	0	-24.7452	-104.004	-631.834	-159232	-31833.2	11284.1	149.618	1155.02	0	0	0	0	0	0	0	603	903	0
809	2	0	0	0	0	0	0	200	300	0	-25.0504	-103.851	-632.139	-159965	-31772.2	11421.4	149.739	1156.05	0	0	0	0	0	0	0	603	903	0
809	3	0	0	0	0	0	0	200	300	0	-22.9141	-103.546	-631.223	-160239	-31894.3	11284.1	149.472	1156.86	0	0	0	0	0	0	0	603	903	0
809	4	0	0	0	0	0	0	200	300	0	-25.9659	-100.799	-631.834	-160422	-32077.4	11375.7	149.231	1156.9	0	0	0	0	0	0	0	603	903	0
809	5	0	0	0	0	0	0	200	300	0	-26.2711	-98.9683	-629.697	-159873	-32992.9	11192.6	147.605	1156.89	0	0	0	0	0	0	0	603	903	0
809	6	0	0	0	0	0	0	200	300	0	-25.0504	-100.036	-630.308	-159507	-32199.4	11146.8	148.915	1156.06	0	0	0	0	0	0	0	603	903	0
809	7	0	0	0	0	0	0	200	300	0	-24.5926	-100.342	-633.359	-160239	-32260.5	11329.9	149.064	1156	0	0	0	0	0	0	0	603	903	0
809	8	0	0	0	0	0	0	200	300	0	-25.9659	-98.6632	-632.749	-159965	-32748.8	11284.1	148.244	1155.81	0	0	0	0	0	0	0	603	903	0
809	9	0	0	0	0	0	0	200	300	0	-26.4236	-97.1373	-632.444	-159507	-33237.1	11101	147.447	1155.21	0	0	0	0	0	0	0	603	903	0
810	0	0	0	0	0	0	0	200	300	0	-24.7452	-96.9847	-634.275	-158957	-32809.8	11055.2	148.272	1153.61	0	0	0	0	0	0	0	603	903	0
810	1	0	0	0	0	0	0	200	300	0	-24.8978	-96.6795	-633.054	-158866	-33054	11009.5	147.787	1153.95	0	0	0	0	0	0	0	603	903	0
810	2	0	0	0	0	0	0	200	300	0	-25.9659	-96.2218	-632.139	-158957	-33115	10689	147.614	1154.46	0	0	0	0	0	0	0	603	903	0
810	3	0	0	0	0	0	0	200	300	0	-26.1185	-95.0011	-633.97	-159415	-32687.7	11101	148.44	1154.46	0	0	0	0	0	0	0	603	903	0
810	4	0	0	0	0	0	0	200	300	0	-23.8297	-93.9329	-633.359	-158683	-33237.1	10963.7	147.523	1153.54	0	0	0	0	0	0	0	603	903	0
810	5	0	0	0	0	0	0	200	300	0	-25.6607	-94.6959	-632.749	-158683	-33176	10597.5	147.568	1153.78	0	0	0	0	0	0	0	603	903	0
810	6	0	0	0	0	0	0	200	300	0	-24.1348	-93.7804	-631.834	-159232	-32626.7	11009.5	148.362	1155.02	0	0	0	0	0	0	0	603	903	0
810	7	0	0	0	0	0	0	200	300	0	-25.9659	-92.4071	-632.444	-157950	-33664.3	10826.3	146.771	1152.75	0	0	0	0	0	0	0	603	903	0
810	8	0	0	0	0	0	0	200	300	0	-26.4236	-91.9493	-633.97	-158500	-33298.1	10734.8	147.477	1153.01	0	0	0	0	0	0	0	603	903	0
810	9	0	0	0	0	0	0	200	300	0	-24.5926	-91.9493	-635.19	-158133	-32870.9	10917.9	148.25	1151.95	0	0	0	0	0	0	0	603	903	0
811	0	0	0	0	0	0	0	200	300	0	-24.7452	-91.4915	-632.749	-158408	-33725.3	10597.5	146.7	1153.35	0	0	0	0	0	0	0	603	903	0
811	1	0	0	0	0	0	0	200	300	0	-24.2874	-89.8131	-631.223	-158591	-33847.4	10917.9	146.378	1154.24	0	0	0	0	0	0	0	603	903	0
811	2	0	0	0	0	0	0	200	300	0	-25.9659	-88.8975	-633.665	-157493	-33420.2	10643.2	147.259	1151.54	0	0	0	0	0	0	0	603	903	0
811	3	0	0	0	0	0	0	200	300	0	-23.6771	-89.2027	-630.918	-157126	-33725.3	10734.8	146.546	1152.04	0	0	0	0	0	0	0	603	903	0
811	4	0	0	0	0	0	0	200	300	0	-25.6607	-89.2027	-631.834	-156760	-33847.4	10597.5	146.43	1151.1	0	0	0	0	0	0	0	603	903	0
811	5	0	0	0	0	0	0	200	300	0	-24.8978	-87.3717	-631.834	-156577	-33908.4	10551.7	146.333	1150.81	0	0	0	0	0	0	0	603	903	0
811	6	0	0	0	0	0	0	200	300	0	-25.0504	-86.6087	-632.444	-156852	-34152.6	10460.1	145.999	1151.01	0	0	0	0	0	0	0	603	903	0
811	7	0	0	0	0	0	0	200	300	0	-25.8133	-87.3717	-628.477	-156943	-34457.8	10872.1	145.173	1152.72	0	0	0	0	0	0	0	603	903	0
811	8	0	0	0	0	0	0	200	300	0	-23.0667	-85.5406	-630.308	-156302	-33786.4	10597.5	146.397	1150.98	0	0	0	0	0	0	0	603	903	0
811	9	0	0	0	0	0	0	200	300	0	-25.9659	-86.4561	-628.782	-155478	-34152.6	10643.2	145.685	1150.27	0	0	0	0	0	0	0	603	903	0
812	0	0	0	0	0	0	0	200	300	0	-24.7452	-85.5406	-629.392	-155204	-34152.6	10963.7	145.737	1149.59	0	0	0	0	0	0	0	603	903	0
812	1	0	0	0	0	0	0	200	300	0	-25.2029	-84.4725	-629.392	-154838	-34335.7	10460.1	145.446	1149.01	0	0	0	0	0	0	0	603	903	0
812	2	0	0	0	0	0	0	200	300	0	-26.7288	-84.6251	-627.866	-153281	-34274.7	10643.2	145.411	1147.13	0	0	0	0	0	0	0	603	903	0
812	3	0	0	0	0	0	0	200	300	0	-24.2874	-84.3199	-626.646	-154563	-34396.7	10734.8	145.11	1149.65	0	0	0	0	0	0	0	603	903	0
812	4	0	0	0	0	0	0	200	300	0	-25.8133	-83.2518	-625.425	-153739	-34152.6	10597.5	145.393	1148.82	0	0	0	0	0	0	0	603	903	0
812	5	0	0	0	0	0	0	200	300	0	-25.3555	-82.4889	-625.12	-153006	-34335.7	10643.2	145.073	1147.76	0	0	0	0	0	0	0	603	903	0
812	6	0	0	0	0	0	0	200	300	0	-25.3555	-82.794	-624.509	-153098	-34274.7	10368.6	145.117	1148.15	0	0	0	0	0	0	0	603	903	0
812	7	0	0	0	0	0	0	200	300	0	-26.5762	-82.4889	-622.068	-152732	-34396.7	10185.5	144.706	1148.52	0	0	0	0	0	0	0	603	903	0
812	8	0	0	0	0	0	0	200	300	0	-26.2711	-80.6578	-616.27	-152000	-34091.6	10551.7	144.681	1149.64	0	0	0	0	0	0	0	603	903	0
812	9	0	0	0	0	0	0	200	300	0	-25.0504	-80.6578	-619.627	-150992	-34824	10643.2	143.798	1146.68	0	0	0	0	0	0	0	603	903	0
813	0	0	0	0	0	0	0	200	300	0	-25.3555	-80.0474	-616.88	-150351	-34335.7	10414.4	144.34	1146.73	0	0	0	0	0	0	0	603	903	0
813	1	0	0	0	0	0	0	200	300	0	-26.4236	-81.1156	-616.27	-150443	-34152.6	10689	144.582	1147.12	0	0	0	0	0	0	0	603	903	0
813	2	0	0	0	0	0	0	200	300	0	-24.2874	-80.3526	-613.828	-149894	-34824	10460.1	143.268	1147.19	0	0	0	0	0	0	0	603	903	0
813	3	0	0	0	0	0	0	200	300	0	-26.2711	-78.8267	-610.471	-148520	-34457.8	10414.4	143.555	1146.29	0	0	0	0	0	0	0	603	903	0
813	4	0	0	0	0	0	0	200	300	0	-24.7452	-78.8267	-610.776	-148704	-34457.8	10643.2	143.584	1146.47	0	0	0	0	0	0	0	603	903	0
813	5	0	0	0	0	0	0	200	300	0	-24.8978	-78.5216	-609.251	-148154	-34701.9	10139.7	143.042	1146.17	0	0	0	0	0	0	0	603	903	0
813	6	0	0	0	0	0	0	200	300	0	-25.9659	-78.5216	-606.199	-147605	-33908.4	10277	144.064	1146.49	0	0	0	0	0	0	0	603	903	0
813	7	0	0	0	0	0	0	200	300	0	-25.9659	-78.0638	-604.368	-146598	-34335.7	10551.7	143.187	1145.56	0	0	0	0	0	0	0	603	903	0
813	8	0	0	0	0	0	0	200	300	0	-25.0504	-77.1483	-603.452	-144492	-35007.1	10231.3	141.989	1142.44	0	0	0	0	0	0	0	603	903	0
813	9	0	0	0	0	0	0	200	300	0	-24.7452	-77.1483	-600.095	-144584	-34701.9	9956.59	142.173	1143.93	0	0	0	0	0	0	0	603	903	0
814	0	0	0	0	0	0	0	200	300	0	-25.0504	-77.1483	-598.569	-144950	-34152.6	9956.59	142.943	1145.16	0	0	0	0	0	0	0	603	903	0
814	1	0	0	0	0	0	0	200	300	0	-23.0667	-76.2327	-596.433	-143760	-34579.8	10231.3	142.022	1144.03	0	0	0	0	0	0	0	603	903	0
814	2	0	0	0	0	0	0	200	300	0	-25.9659	-76.0802	-593.992	-142936	-34396.7	9956.59	142.092	1143.64	0	0	0	0	0	0	0	603	903	0
814	3	0	0	0	0	0	0	200	300	0	-24.1348	-75.6224	-592.161	-142386	-34091.6	9910.82	142.429	1143.45	0	0	0	0	0	0	0	603	903	0
814	4	0	0	0	0	0	0	200	300	0	-24.1348	-75.6224	-588.499	-142112	-34457.8	9544.61	141.448	1144.48	0	0	0	0	0	0	0	603	903	0
814	5	0	0	0	0	0	0	200	300	0	-25.3555	-73.7913	-584.531	-141654	-34396.7	9636.16	141.155	1145.34	0	0	0	0	0	0	0	603	903	0
814	6	0	0	0	0	0	0	200	300	0	-24.1348	-73.0284	-585.447	-140098	-34213.6	9865.04	141.56	1142.3	0	0	0	0	0	0	0	603	903	0
814	7	0	0	0	0	0	0	200	300	0	-23.9822	-73.3336	-579.343	-138358	-34152.6	9773.49	141.049	1141.82	0	0	0	0	0	0	0	603	903	0
814	8	0	0	0	0	0	0	200	300	0	-23.5245	-71.9603	-580.564	-138633	-34030.5	9544.61	141.384	1141.79	0	0	0	0	0	0	0	603	903	0
814	9	0	0	0	0	0	0	200	300	0	-24.8978	-71.1973	-575.071	-137351	-33908.4	9315.72	141.036	1141.84	0	0	0	0	0	0	0	603	903	0
815	0	0	0	0	0	0	0	200	300	0	-24.2874	-70.1292	-572.935	-137351	-33786.4	9407.28	141.029	1142.73	0	0	0	0	0	0	0	603	903	0
815	1	0	0	0	0	0	0	200	300	0	-23.0667	-68.9085	-570.188	-136161	-33908.4	9498.83	140.531	1141.8	0	0	0	0	0	0	0	603	903	0
815	2	0	0	0	0	0	0	200	300	0	-21.6934	-68.1456	-568.662	-135428	-33603.3	9361.5	140.908	1141.15	0	0	0	0	0	0	0	603	903	0
815	3	0	0	0	0	0	0	200	300	0	-24.5926	-67.3827	-564.695	-134879	-33298.1	9453.05	141.033	1141.85	0	0	0	0	0	0	0	603	903	0
815	4	0	0	0	0	0	0	200	300	0	-24.8978	-66.4671	-562.559	-134147	-33908.4	9819.26	139.725	1141.46	0	0	0	0	0	0	0	603	903	0
815	5	0	0	0	0	0	0	200	300	0	-24.44	-65.2464	-559.507	-132499	-34396.7	9269.95	138.523	1139.81	0	0	0	0	0	0	0	603	903	0
815	6	0	0	0	0	0	0	200	300	0	-23.5245	-64.9412	-554.929	-132041	-33542.2	9132.62	139.556	1140.94	0	0	0	0	0	0	0	603	903	0
815	7	0	0	0	0	0	0	200	300	0	-22.7615	-64.0257	-551.878	-131125	-33542.2	9269.95	139.222	1140.6	0	0	0	0	0	0	0	603	903	0
815	8	0	0	0	0	0	0	200	300	0	-23.8297	-62.9576	-549.131	-130485	-33481.2	9086.84	139.029	1140.62	0	0	0	0	0	0	0	603	903	0
815	9	0	0	0	0	0	0	200	300	0	-25.5081	-62.9576	-546.69	-129569	-33176	9178.4	139.315	1140.01	0	0	0	0	0	0	0	603	903	0
816	0	0	0	0	0	0	0	200	300	0	-24.7452	-61.5843	-544.248	-128562	-33664.3	8949.51	138.145	1139.22	0	0	0	0	0	0	0	603	903	0
816	1	0	0	0	0	0	0	200	300	0	-24.44	-60.5162	-539.365	-127372	-33420.2	8857.96	138.038	1139.15	0	0	0	0	0	0	0	603	903	0
816	2	0	0	0	0	0	0	200	300	0	-24.2874	-59.6007	-535.093	-126456	-32931.9	9178.4	138.456	1139.33	0	0	0	0	0	0	0	603	903	0
816	3	0	0	0	0	0	0	200	300	0	-24.8978	-57.7696	-529.905	-125815	-33542.2	9315.72	136.701	1140.43	0	0	0	0	0	0	0	603	903	0
816	4	0	0	0	0	0	0	200	300	0	-24.5926	-59.1429	-529.6	-124534	-33115	9269.95	137.472	1138.15	0	0	0	0	0	0	0	603	903	0
816	5	0	0	0	0	0	0	200	300	0	-26.2711	-58.2274	-527.769	-123710	-33176	8766.41	137.139	1137.4	0	0	0	0	0	0	0	603	903	0
816	6	0	0	0	0	0	0	200	300	0	-25.0504	-57.3119	-523.496	-122977	-33237.1	9086.84	136.509	1137.92	0	0	0	0	0	0	0	603	903	0
816	7	0	0	0	0	0	0	200	300	0	-25.5081	-56.3963	-521.055	-121787	-32992.9	8812.18	136.681	1136.73	0	0	0	0	0	0	0	603	903	0
816	8	0	0	0	0	0	0	200	300	0	-25.8133	-55.3282	-518.308	-121604	-32687.7	8903.74	136.934	1137.62	0	0	0	0	0	0	0	603	903	0
816	9	0	0	0	0	0	0	200	300	0	-23.3719	-55.023	-514.951	-120597	-32809.8	8949.51	136.286	1137.19	0	0	0	0	0	0	0	603	903	0
817	0	0	0	0	0	0	0	200	300	0	-26.7288	-53.6497	-510.984	-119040	-32748.8	8812.18	135.91	1135.96	0	0	0	0	0	0	0	603	903	0
817	1	0	0	0	0	0	0	200	300	0	-25.2029	-53.0394	-507.017	-118308	-32504.6	9041.07	135.89	1136.34	0	0	0	0	0	0	0	603	903	0
817	2	0	0	0	0	0	0	200	300	0	-25.0504	-52.2765	-505.186	-117942	-32870.9	8903.74	134.933	1136.46	0	0	0	0	0	0	0	603	903	0
817	3	0	0	0	0	0	0	200	300	0	-27.034	-51.2083	-501.218	-116752	-32626.7	8949.51	134.905	1135.94	0	0	0	0	0	0	0	603	903	0
817	4	0	0	0	0	0	0	200	300	0	-26.8814	-50.7506	-496.946	-115928	-32077.4	9315.72	135.451	1136.28	0	0	0	0	0	0	0	603	903	0
817	5	0	0	0	0	0	0	200	300	0	-25.9659	-49.6825	-494.199	-114371	-31955.3	9132.62	135.339	1134.43	0	0	0	0	0	0	0	603	903	0
817	6	0	0	0	0	0	0	200	300	0	-24.7452	-49.3773	-491.758	-114188	-32199.4	9041.07	134.522	1135.2	0	0	0	0	0	0	0	603	903	0
817	7	0	0	0	0	0	0	200	300	0	-25.9659	-48.3092	-489.011	-114005	-31833.2	9041.07	134.903	1136.13	0	0	0	0	0	0	0	603	903	0
817	8	0	0	0	0	0	0	200	300	0	-27.6443	-47.3936	-484.434	-112449	-32138.4	8674.86	133.658	1135.12	0	0	0	0	0	0	0	603	903	0
817	9	0	0	0	0	0	0	200	300	0	-28.1021	-46.9359	-480.772	-111442	-31528.1	8812.18	134.422	1134.8	0	0	0	0	0	0	0	603	903	0
818	0	0	0	0	0	0	0	200	300	0	-25.8133	-45.5626	-478.635	-110801	-31528.1	9086.84	134.129	1134.49	0	0	0	0	0	0	0	603	903	0
818	1	0	0	0	0	0	0	200	300	0	-25.6607	-44.9522	-475.584	-109702	-31650.1	8995.29	133.45	1133.67	0	0	0	0	0	0	0	603	903	0
818	2	0	0	0	0	0	0	200	300	0	-27.3392	-44.7996	-472.227	-109061	-31528.1	8766.41	133.235	1133.95	0	0	0	0	0	0	0	603	903	0
818	3	0	0	0	0	0	0	200	300	0	-27.1866	-43.4264	-469.175	-108603	-31406	8766.41	133.061	1134.48	0	0	0	0	0	0	0	603	903	0
818	4	0	0	0	0	0	0	200	300	0	-27.1866	-42.816	-467.039	-107139	-31161.9	8629.08	133.278	1132.4	0	0	0	0	0	0	0	603	903	0
818	5	0	0	0	0	0	0	200	300	0	-26.2711	-42.3582	-464.292	-106589	-31589.1	8629.08	131.963	1132.57	0	0	0	0	0	0	0	603	903	0
818	6	0	0	0	0	0	0	200	300	0	-27.4918	-40.8324	-460.63	-105948	-31772.2	8857.96	131.024	1133.01	0	0	0	0	0	0	0	603	903	0
818	7	0	0	0	0	0	0	200	300	0	-28.5599	-40.0694	-457.273	-104667	-31039.8	8400.2	132.12	1131.89	0	0	0	0	0	0	0	603	903	0
818	8	0	0	0	0	0	0	200	300	0	-28.2547	-39.9168	-454.526	-103934	-31345	8537.53	131.038	1131.67	0	0	0	0	0	0	0	603	903	0
818	9	0	0	0	0	0	0	200	300	0	-26.7288	-39.4591	-451.475	-103202	-31467	8445.97	130.302	1131.59	0	0	0	0	0	0	0	603	903	0
819	0	0	0	0	0	0	0	200	300	0	-27.4918	-37.1703	-447.813	-102286	-30673.6	8537.53	131.504	1131.41	0	0	0	0	0	0	0	603	903	0
819	1	0	0	0	0	0	0	200	300	0	-27.4918	-37.628	-445.371	-101920	-30917.7	8629.08	130.58	1131.84	0	0	0	0	0	0	0	603	903	0
819	2	0	0	0	0	0	0	200	300	0	-27.6443	-37.1703	-443.845	-100913	-30917.7	8583.3	130.341	1130.36	0	0	0	0	0	0	0	603	903	0
819	3	0	0	0	0	0	0	200	300	0	-28.4073	-36.4073	-440.183	-100089	-30612.5	8537.53	130.455	1130.38	0	0	0	0	0	0	0	603	903	0
819	4	0	0	0	0	0	0	200	300	0	-26.8814	-35.4918	-436.826	-99722.8	-30795.6	8400.2	129.501	1131.29	0	0	0	0	0	0	0	603	903	0
819	5	0	0	0	0	0	0	200	300	0	-26.5762	-34.4237	-434.385	-98807.3	-30917.7	8217.09	128.824	1130.47	0	0	0	0	0	0	0	603	903	0
819	6	0	0	0	0	0	0	200	300	0	-27.9495	-33.3556	-431.943	-98074.9	-30307.4	8308.64	129.835	1130.05	0	0	0	0	0	0	0	603	903	0
819	7	0	0	0	0	0	0	200	300	0	-26.8814	-33.3556	-430.418	-97800.2	-30185.3	8079.76	129.87	1130.22	0	0	0	0	0	0	0	603	903	0
819	8	0	0	0	0	0	0	200	300	0	-27.9495	-32.5926	-428.281	-96610.1	-30673.6	8125.54	128.38	1128.58	0	0	0	0	0	0	0	603	903	0
819	9	0	0	0	0	0	0	200	300	0	-26.7288	-32.1349	-423.704	-95053.6	-29941.2	8033.99	129.335	1127.34	0	0	0	0	0	0	0	603	903	0
820	0	0	0	0	0	0	0	200	300	0	-27.034	-31.2193	-420.957	-95328.3	-30368.4	8171.32	127.859	1129.46	0	0	0	0	0	0	0	603	903	0
820	1	0	0	0	0	0	0	200	300	0	-26.4236	-31.5245	-420.042	-95053.6	-29880.1	8171.32	128.864	1129.3	0	0	0	0	0	0	0	603	903	0
820	2	0	0	0	0	0	0	200	300	0	-27.3392	-30.3038	-416.99	-94595.9	-29391.8	7759.33	129.514	1129.85	0	0	0	0	0	0	0	603	903	0
820	3	0	0	0	0	0	0	200	300	0	-27.034	-29.6934	-414.243	-93131	-30002.2	8033.99	127.574	1127.82	0	0	0	0	0	0	0	603	903	0
820	4	0	0	0	0	0	0	200	300	0	-26.4236	-29.0831	-413.023	-92490.1	-30612.5	7805.1	125.882	1126.93	0	0	0	0	0	0	0	603	903	0
820	5	0	0	0	0	0	0	200	300	0	-25.9659	-28.1676	-408.75	-90933.8	-29574.9	7530.44	127.645	1125.47	0	0	0	0	0	0	0	603	903	0
820	6	0	0	0	0	0	0	200	300	0	-27.034	-27.8624	-407.529	-91208.4	-29636	7622	127.279	1126.81	0	0	0	0	0	0	0	603	903	0
820	7	0	0	0	0	0	0	200	300	0	-26.8814	-26.7943	-404.783	-90842.2	-29880.1	7576.22	126.182	1127.42	0	0	0	0	0	0	0	603	903	0
820	8	0	0	0	0	0	0	200	300	0	-26.8814	-26.9469	-403.562	-90018.3	-30002.2	7530.44	125.657	1126.06	0	0	0	0	0	0	0	603	903	0
820	9	0	0	0	0	0	0	200	300	0	-25.9659	-26.1839	-402.341	-89468.9	-29269.8	7530.44	127.251	1125.37	0	0	0	0	0	0	0	603	903	0
821	0	0	0	0	0	0	0	200	300	0	-25.2029	-25.5736	-398.069	-89011.2	-29513.9	7255.79	125.857	1126.61	0	0	0	0	0	0	0	603	903	0
821	1	0	0	0	0	0	0	200	300	0	-26.4236	-24.9632	-395.017	-88187.2	-29391.8	7210.01	125.594	1126.25	0	0	0	0	0	0	0	603	903	0
821	2	0	0	0	0	0	0	200	300	0	-25.2029	-24.8106	-395.017	-87729.4	-28842.5	7301.56	126.984	1125.09	0	0	0	0	0	0	0	603	903	0
821	3	0	0	0	0	0	0	200	300	0	-25.5081	-24.5055	-391.66	-86813.9	-29391.8	7026.9	124.956	1124.66	0	0	0	0	0	0	0	603	903	0
821	4	0	0	0	0	0	0	200	300	0	-24.5926	-23.5899	-390.134	-86173	-29147.7	6843.8	125.288	1123.88	0	0	0	0	0	0	0	603	903	0
821	5	0	0	0	0	0	0	200	300	0	-24.5926	-23.1322	-387.693	-86539.2	-28903.6	6798.02	125.447	1126.22	0	0	0	0	0	0	0	603	903	0
821	6	0	0	0	0	0	0	200	300	0	-25.2029	-22.0641	-386.167	-85349.1	-29330.8	6706.47	124.046	1124.02	0	0	0	0	0	0	0	603	903	0
821	7	0	0	0	0	0	0	200	300	0	-21.6934	-22.827	-384.031	-85349.1	-29025.6	6660.69	124.419	1125.25	0	0	0	0	0	0	0	603	903	0
821	8	0	0	0	0	0	0	200	300	0	-25.0504	-21.6063	-382.2	-84067.3	-28659.4	6614.92	125.015	1122.96	0	0	0	0	0	0	0	603	903	0
821	9	0	0	0	0	0	0	200	300	0	-24.2874	-21.1485	-379.453	-82510.9	-28781.5	6431.81	124.15	1120.45	0	0	0	0	0	0	0	603	903	0
822	0	0	0	0	0	0	0	200	300	0	-22.7615	-21.1485	-378.843	-82968.7	-28781.5	6614.92	124.028	1122.01	0	0	0	0	0	0	0	603	903	0
822	1	0	0	0	0	0	0	200	300	0	-23.6771	-20.233	-376.707	-83243.3	-28659.4	6477.59	123.921	1123.98	0	0	0	0	0	0	0	603	903	0
822	2	0	0	0	0	0	0	200	300	0	-24.2874	-19.6226	-374.57	-82510.9	-28476.3	6340.26	123.976	1123.28	0	0	0	0	0	0	0	603	903	0
822	3	0	0	0	0	0	0	200	300	0	-23.5245	-19.0123	-373.655	-81961.6	-28110.1	6340.26	124.77	1122.35	0	0	0	0	0	0	0	603	903	0
822	4	0	0	0	0	0	0	200	300	0	-22.7615	-18.4019	-373.045	-81320.8	-28110.1	6202.93	124.647	1120.99	0	0	0	0	0	0	0	603	903	0
822	5	0	0	0	0	0	0	200	300	0	-21.2357	-17.9442	-371.213	-80771.4	-28049.1	5928.27	124.44	1120.59	0	0	0	0	0	0	0	603	903	0
822	6	0	0	0	0	0	0	200	300	0	-22.3038	-17.7916	-367.857	-81229.2	-28720.5	6202.93	121.925	1123.82	0	0	0	0	0	0	0	603	903	0
822	7	0	0	0	0	0	0	200	300	0	-23.3719	-16.4183	-367.246	-79764.3	-28354.2	5745.17	122.792	1120.2	0	0	0	0	0	0	0	603	903	0
822	8	0	0	0	0	0	0	200	300	0	-23.2193	-16.5709	-366.331	-79947.4	-28110.1	5790.94	123.266	1121.24	0	0	0	0	0	0	0	603	903	0
822	9	0	0	0	0	0	0	200	300	0	-20.9305	-16.8761	-366.331	-79306.5	-28232.2	6248.71	122.933	1119.49	0	0	0	0	0	0	0	603	903	0
823	0	0	0	0	0	0	0	200	300	0	-21.9986	-16.4183	-363.889	-78757.3	-28232.2	5607.84	122.415	1119.43	0	0	0	0	0	0	0	603	903	0
823	1	0	0	0	0	0	0	200	300	0	-21.6934	-15.045	-362.363	-79031.9	-27927	5607.84	122.931	1121.1	0	0	0	0	0	0	0	603	903	0
823	2	0	0	0	0	0	0	200	300	0	-21.9986	-14.5872	-363.279	-78665.7	-28476.3	5470.51	121.613	1119.54	0	0	0	0	0	0	0	603	903	0
823	3	0	0	0	0	0	0	200	300	0	-21.846	-14.4347	-360.837	-77750.2	-28110.1	5607.84	122.098	1118.47	0	0	0	0	0	0	0	603	903	0
823	4	0	0	0	0	0	0	200	300	0	-20.9305	-13.9769	-359.312	-77841.7	-27988	5424.73	122.107	1119.64	0	0	0	0	0	0	0	603	903	0
823	5	0	0	0	0	0	0	200	300	0	-20.7779	-13.6717	-358.701	-77567	-28171.1	5424.73	121.464	1119.24	0	0	0	0	0	0	0	603	903	0
823	6	0	0	0	0	0	0	200	300	0	-21.2357	-12.9088	-355.65	-77017.7	-28232.2	5150.07	120.618	1119.56	0	0	0	0	0	0	0	603	903	0
823	7	0	0	0	0	0	0	200	300	0	-21.3882	-12.7562	-353.208	-77109.3	-27682.8	4921.19	121.625	1121.31	0	0	0	0	0	0	0	603	903	0
823	8	0	0	0	0	0	0	200	300	0	-20.3201	-13.9769	-356.87	-76376.9	-27804.9	5104.3	122.087	1117.02	0	0	0	0	0	0	0	603	903	0
823	9	0	0	0	0	0	0	200	300	0	-19.4046	-13.214	-354.429	-76010.6	-27988	4875.41	121.033	1117.46	0	0	0	0	0	0	0	603	903	0
824	0	0	0	0	0	0	0	200	300	0	-16.9632	-12.2984	-353.208	-75919.1	-27438.7	4921.19	122.316	1117.94	0	0	0	0	0	0	0	603	903	0
824	1	0	0	0	0	0	0	200	300	0	-19.0994	-10.62	-352.903	-76102.2	-27499.7	4783.86	122.076	1118.65	0	0	0	0	0	0	0	603	903	0
824	2	0	0	0	0	0	0	200	300	0	-20.3201	-11.8407	-351.377	-75919.1	-27560.8	4371.87	121.564	1119.06	0	0	0	0	0	0	0	603	903	0
824	3	0	0	0	0	0	0	200	300	0	-19.8624	-10.9251	-350.462	-76010.6	-27438.7	4646.53	121.707	1119.89	0	0	0	0	0	0	0	603	903	0
824	4	0	0	0	0	0	0	200	300	0	-17.8787	-10.7725	-351.377	-75186.7	-27499.7	4692.31	121.737	1116.98	0	0	0	0	0	0	0	603	903	0
824	5	0	0	0	0	0	0	200	300	0	-16.5054	-9.70443	-350.767	-74362.7	-27927	4234.54	120.383	1115	0	0	0	0	0	0	0	603	903	0
824	6	0	0	0	0	0	0	200	300	0	-17.7261	-10.7725	-350.156	-75095.2	-27377.7	4234.54	121.813	1117.46	0	0	0	0	0	0	0	603	903	0
824	7	0	0	0	0	0	0	200	300	0	-18.7943	-9.70443	-349.851	-74912	-27499.7	4188.77	121.396	1117.13	0	0	0	0	0	0	0	603	903	0
824	8	0	0	0	0	0	0	200	300	0	-18.7943	-9.39926	-348.325	-74179.6	-28049.1	4142.99	119.475	1115.96	0	0	0	0	0	0	0	603	903	0
824	9	0	0	0	0	0	0	200	300	0	-16.9632	-8.48373	-348.63	-74362.7	-27866	4005.66	120.07	1116.3	0	0	0	0	0	0	0	603	903	0
825	0	0	0	0	0	0	0	200	300	0	-15.2847	-8.94149	-348.63	-73721.8	-27133.5	3959.88	122.171	1114.46	0	0	0	0	0	0	0	603	903	0
825	1	0	0	0	0	0	0	200	300	0	-17.421	-8.17855	-346.189	-73996.5	-27438.7	3868.33	120.741	1116.75	0	0	0	0	0	0	0	603	903	0
825	2	0	0	0	0	0	0	200	300	0	-18.0313	-8.33114	-347.105	-74271.1	-27682.8	4142.99	120.246	1116.97	0	0	0	0	0	0	0	603	903	0
825	3	0	0	0	0	0	0	200	300	0	-18.3365	-8.33114	-347.715	-73355.6	-27927	3822.56	119.684	1113.96	0	0	0	0	0	0	0	603	903	0
825	4	0	0	0	0	0	0	200	300	0	-16.8106	-7.87338	-346.189	-72989.4	-27927	3776.78	119.33	1113.84	0	0	0	0	0	0	0	603	903	0
825	5	0	0	0	0	0	0	200	300	0	-16.5054	-8.17855	-345.274	-73538.7	-27499.7	3731	120.354	1115.99	0	0	0	0	0	0	0	603	903	0
825	6	0	0	0	0	0	0	200	300	0	-17.5735	-7.11044	-345.884	-73447.2	-27499.7	3776.78	120.494	1115.35	0	0	0	0	0	0	0	603	903	0
825	7	0	0	0	0	0	0	200	300	0	-15.7425	-7.26303	-345.884	-73081	-27804.9	3685.23	119.612	1114.29	0	0	0	0	0	0	0	603	903	0
825	8	0	0	0	0	0	0	200	300	0	-17.1158	-6.80526	-346.494	-72714.8	-27866	3547.9	119.577	1112.86	0	0	0	0	0	0	0	603	903	0
825	9	0	0	0	0	0	0	200	300	0	-16.2003	-6.3475	-344.663	-72623.2	-27438.7	3227.46	120.39	1113.71	0	0	0	0	0	0	0	603	903	0
826	0	0	0	0	0	0	0	200	300	0	-14.9796	-6.04232	-344.663	-73081	-27316.6	3273.24	120.744	1115.04	0	0	0	0	0	0	0	603	903	0
826	1	0	0	0	0	0	0	200	300	0	-16.0477	-6.19491	-344.968	-72073.9	-28049.1	3410.57	118.691	1111.93	0	0	0	0	0	0	0	603	903	0
826	2	0	0	0	0	0	0	200	300	0	-16.8106	-5.73715	-346.189	-72348.5	-27377.7	3273.24	120.917	1111.99	0	0	0	0	0	0	0	603	903	0
826	3	0	0	0	0	0	0	200	300	0	-15.2847	-5.73715	-344.663	-72165.5	-27377.7	3044.36	120.567	1112.38	0	0	0	0	0	0	0	603	903	0
826	4	0	0	0	0	0	0	200	300	0	-13.1485	-5.58456	-344.663	-72348.5	-27621.8	3090.13	119.859	1112.91	0	0	0	0	0	0	0	603	903	0
826	5	0	0	0	0	0	0	200	300	0	-15.8951	-4.97421	-344.358	-72531.7	-27560.8	2907.03	119.965	1113.63	0	0	0	0	0	0	0	603	903	0
826	6	0	0	0	0	0	0	200	300	0	-15.5899	-4.97421	-345.884	-72714.8	-27316.6	3135.91	121.024	1113.23	0	0	0	0	0	0	0	603	903	0
826	7	0	0	0	0	0	0	200	300	0	-16.5054	-4.82162	-345.274	-71982.3	-27743.9	2998.58	119.647	1111.48	0	0	0	0	0	0	0	603	903	0
826	8	0	0	0	0	0	0	200	300	0	-15.8951	-4.36386	-344.663	-70975.2	-27499.7	3181.69	120.213	1108.93	0	0	0	0	0	0	0	603	903	0
826	9	0	0	0	0	0	0	200	300	0	-14.827	-4.36386	-345.579	-72348.5	-27560.8	2952.8	120.247	1112.35	0	0	0	0	0	0	0	603	903	0
827	0	0	0	0	0	0	0	200	300	0	-15.2847	-4.05868	-345.274	-72623.2	-28049.1	3044.36	118.763	1113.34	0	0	0	0	0	0	0	603	903	0
827	1	0	0	0	0	0	0	200	300	0	-13.6063	-3.29574	-345.274	-71982.3	-28049.1	2861.25	118.763	1111.48	0	0	0	0	0	0	0	603	903	0
827	2	0	0	0	0	0	0	200	300	0	-15.4373	-2.99057	-345.274	-71890.8	-27194.6	2907.03	121.238	1111.21	0	0	0	0	0	0	0	603	903	0
827	3	0	0	0	0	0	0	200	300	0	-15.1321	-2.5328	-346.494	-71616.1	-27927	2998.58	119.401	1109.69	0	0	0	0	0	0	0	603	903	0
827	4	0	0	0	0	0	0	200	300	0	-14.9796	-3.14315	-345.884	-72165.5	-27804.9	2769.7	119.612	1111.64	0	0	0	0	0	0	0	603	903	0
827	5	0	0	0	0	0	0	200	300	0	-15.5899	-2.38021	-345.274	-72440.1	-27866	2723.92	119.293	1112.81	0	0	0	0	0	0	0	603	903	0
827	6	0	0	0	0	0	0	200	300	0	-15.7425	-1.15951	-346.494	-72623.2	-28354.2	2403.49	118.168	1112.59	0	0	0	0	0	0	0	603	903	0
827	7	0	0	0	0	0	0	200	300	0	-14.827	-1.76986	-345.274	-72073.9	-28171.1	2495.04	118.409	1111.74	0	0	0	0	0	0	0	603	903	0
827	8	0	0	0	0	0	0	200	300	0	-12.5381	-1.76986	-347.715	-71616.1	-27743.9	2723.92	120.211	1108.96	0	0	0	0	0	0	0	603	903	0
827	9	0	0	0	0	0	0	200	300	0	-15.1321	-2.38021	-349.241	-71982.3	-28415.3	2311.94	118.637	1109.11	0	0	0	0	0	0	0	603	903	0
828	0	0	0	0	0	0	0	200	300	0	-16.5054	-0.396572	-348.63	-72440.1	-28354.2	2357.71	118.67	1110.78	0	0	0	0	0	0	0	603	903	0
828	1	0	0	0	0	0	0	200	300	0	-15.7425	-0.243984	-347.715	-71890.8	-27927	2449.26	119.684	1109.75	0	0	0	0	0	0	0	603	903	0
828	2	0	0	0	0	0	0	200	300	0	-14.827	0.518956	-350.767	-71982.3	-27927	2266.16	120.383	1108.21	0	0	0	0	0	0	0	603	903	0
828	3	0	0	0	0	0	0	200	300	0	-14.827	0.0611921	-350.767	-72440.1	-28110.1	2495.04	119.861	1109.52	0	0	0	0	0	0	0	603	903	0
828	4	0	0	0	0	0	0	200	300	0	-15.7425	0.366368	-349.546	-72440.1	-28110.1	2632.37	119.581	1110.24	0	0	0	0	0	0	0	603	903	0
828	5	0	0	0	0	0	0	200	300	0	-15.8951	1.2819	-350.767	-70883.7	-28232.2	2403.49	119.513	1105.08	0	0	0	0	0	0	0	603	903	0
828	6	0	0	0	0	0	0	200	300	0	-14.3692	1.89225	-351.377	-71890.8	-28781.5	2403.49	118.089	1107.6	0	0	0	0	0	0	0	603	903	0
828	7	0	0	0	0	0	0	200	300	0	-12.9959	1.43448	-353.818	-72348.5	-28293.2	2357.71	120.035	1107.48	0	0	0	0	0	0	0	603	903	0
828	8	0	0	0	0	0	0	200	300	0	-14.3692	2.04483	-353.818	-72440.1	-28354.2	2266.16	119.862	1107.74	0	0	0	0	0	0	0	603	903	0
828	9	0	0	0	0	0	0	200	300	0	-15.8951	2.19742	-354.124	-72714.8	-28659.4	2495.04	119.069	1108.34	0	0	0	0	0	0	0	603	903	0
829	0	0	0	0	0	0	0	200	300	0	-15.5899	3.11295	-356.26	-72257	-28293.2	2266.16	120.583	1105.82	0	0	0	0	0	0	0	603	903	0
829	1	0	0	0	0	0	0	200	300	0	-14.9796	2.96036	-355.955	-72623.2	-28232.2	2266.16	120.686	1107.02	0	0	0	0	0	0	0	603	903	0
829	2	0	0	0	0	0	0	200	300	0	-15.4373	3.11295	-355.344	-72989.4	-28781.5	2952.8	119.004	1108.4	0	0	0	0	0	0	0	603	903	0
829	3	0	0	0	0	0	0	200	300	0	-15.2847	4.48624	-356.87	-73172.5	-29208.7	2403.49	118.153	1108.04	0	0	0	0	0	0	0	603	903	0
829	4	0	0	0	0	0	0	200	300	0	-13.7589	4.33365	-357.481	-72714.8	-28598.4	2128.83	120	1106.41	0	0	0	0	0	0	0	603	903	0
829	5	0	0	0	0	0	0	200	300	0	-16.3528	4.33365	-359.006	-72714.8	-28903.6	1899.95	119.49	1105.54	0	0	0	0	0	0	0	603	903	0
829	6	0	0	0	0	0	0	200	300	0	-14.5218	4.944	-360.227	-72806.3	-29330.8	1945.72	118.577	1105.11	0	0	0	0	0	0	0	603	903	0
829	7	0	0	0	0	0	0	200	300	0	-15.1321	5.85953	-361.143	-73538.7	-29147.7	1854.17	119.29	1106.63	0	0	0	0	0	0	0	603	903	0
829	8	0	0	0	0	0	0	200	300	0	-16.0477	5.09659	-361.143	-73904.9	-29330.8	2311.94	118.783	1107.64	0	0	0	0	0	0	0	603	903	0
829	9	0	0	0	0	0	0	200	300	0	-14.064	6.46988	-359.617	-73630.3	-29330.8	1854.17	118.439	1107.75	0	0	0	0	0	0	0	603	903	0
830	0	0	0	0	0	0	0	200	300	0	-16.5054	5.24918	-364.194	-73355.6	-29025.6	1854.17	120.302	1104.42	0	0	0	0	0	0	0	603	903	0
830	1	0	0	0	0	0	0	200	300	0	-15.4373	7.538	-364.805	-73721.8	-29574.9	2037.28	118.929	1105.09	0	0	0	0	0	0	0	603	903	0
830	2	0	0	0	0	0	0	200	300	0	-15.1321	6.62247	-366.025	-73813.4	-30002.2	1854.17	118.033	1104.66	0	0	0	0	0	0	0	603	903	0
830	3	0	0	0	0	0	0	200	300	0	-16.658	8.30094	-365.72	-73721.8	-29330.8	1671.07	119.8	1104.58	0	0	0	0	0	0	0	603	903	0
830	4	0	0	0	0	0	0	200	300	0	-16.3528	7.08024	-365.72	-74271.1	-29208.7	1945.72	120.134	1106.08	0	0	0	0	0	0	0	603	903	0
830	5	0	0	0	0	0	0	200	300	0	-15.7425	9.06388	-368.162	-74088.1	-29758.1	2037.28	119.171	1104.24	0	0	0	0	0	0	0	603	903	0
830	6	0	0	0	0	0	0	200	300	0	-13.7589	9.82682	-369.993	-74088.1	-29391.8	1762.62	120.561	1103.24	0	0	0	0	0	0	0	603	903	0
830	7	0	0	0	0	0	0	200	300	0	-15.8951	9.82682	-372.739	-75186.7	-29697	1716.84	120.328	1104.71	0	0	0	0	0	0	0	603	903	0
830	8	0	0	0	0	0	0	200	300	0	-17.421	10.4372	-371.519	-75003.6	-29697	1350.63	120.066	1104.88	0	0	0	0	0	0	0	603	903	0
830	9	0	0	0	0	0	0	200	300	0	-17.1158	10.8949	-373.045	-76376.9	-29819.1	1945.72	120.066	1107.74	0	0	0	0	0	0	0	603	903	0
831	0	0	0	0	0	0	0	200	300	0	-15.5899	11.5053	-375.486	-74912	-30063.2	1762.62	119.935	1102.51	0	0	0	0	0	0	0	603	903	0
831	1	0	0	0	0	0	0	200	300	0	-13.4537	12.1156	-377.317	-74912	-30612.5	1487.96	118.868	1101.54	0	0	0	0	0	0	0	603	903	0
831	2	0	0	0	0	0	0	200	300	0	-15.7425	11.8105	-377.317	-75644.4	-29819.1	1533.74	120.971	1103.48	0	0	0	0	0	0	0	603	903	0
831	3	0	0	0	0	0	0	200	300	0	-17.421	12.726	-378.538	-76285.3	-30124.3	1487.96	120.419	1104.53	0	0	0	0	0	0	0	603	903	0
831	4	0	0	0	0	0	0	200	300	0	-16.8106	13.9467	-380.064	-76102.2	-30612.5	1350.63	119.454	1103.24	0	0	0	0	0	0	0	603	903	0
831	5	0	0	0	0	0	0	200	300	0	-15.4373	13.9467	-381.895	-76193.8	-30978.8	1350.63	118.881	1102.52	0	0	0	0	0	0	0	603	903	0
831	6	0	0	0	0	0	0	200	300	0	-15.4373	14.557	-382.505	-76193.8	-30002.2	1213.3	121.564	1102.2	0	0	0	0	0	0	0	603	903	0
831	7	0	0	0	0	0	0	200	300	0	-16.9632	15.32	-384.336	-76468.4	-30795.6	1121.75	119.873	1101.96	0	0	0	0	0	0	0	603	903	0
831	8	0	0	0	0	0	0	200	300	0	-16.9632	15.0148	-386.167	-76926.2	-30978.8	1213.3	119.779	1102.2	0	0	0	0	0	0	0	603	903	0
831	9	0	0	0	0	0	0	200	300	0	-16.2003	15.7777	-388.914	-77109.3	-31039.8	1030.2	120.188	1101.27	0	0	0	0	0	0	0	603	903	0
832	0	0	0	0	0	0	0	200	300	0	-15.8951	16.2355	-388.914	-77109.3	-31100.8	938.644	120.032	1101.27	0	0	0	0	0	0	0	603	903	0
832	1	0	0	0	0	0	0	200	300	0	-15.7425	17.151	-390.134	-77109.3	-31345	847.092	119.656	1100.65	0	0	0	0	0	0	0	603	903	0
832	2	0	0	0	0	0	0	200	300	0	-15.7425	17.914	-393.491	-77658.6	-31222.9	755.539	120.652	1100.36	0	0	0	0	0	0	0	603	903	0
832	3	0	0	0	0	0	0	200	300	0	-17.421	17.7614	-394.102	-78116.4	-31100.8	618.209	121.084	1101.21	0	0	0	0	0	0	0	603	903	0
832	4	0	0	0	0	0	0	200	300	0	-16.8106	18.5243	-396.543	-78116.4	-31650.1	572.433	120.185	1099.99	0	0	0	0	0	0	0	603	903	0
832	5	0	0	0	0	0	0	200	300	0	-16.0477	19.5924	-397.764	-78391.1	-32077.4	618.209	119.356	1100.08	0	0	0	0	0	0	0	603	903	0
832	6	0	0	0	0	0	0	200	300	0	-15.8951	20.2028	-399.29	-78665.7	-31528.1	526.657	121.04	1100.01	0	0	0	0	0	0	0	603	903	0
832	7	0	0	0	0	0	0	200	300	0	-16.658	19.8976	-402.647	-79123.5	-32016.3	618.209	120.485	1099.51	0	0	0	0	0	0	0	603	903	0
832	8	0	0	0	0	0	0	200	300	0	-16.9632	20.6606	-403.562	-79215	-32199.4	389.328	120.212	1099.29	0	0	0	0	0	0	0	603	903	0
832	9	0	0	0	0	0	0	200	300	0	-16.0477	21.7287	-404.783	-79306.5	-32199.4	251.999	120.453	1098.92	0	0	0	0	0	0	0	603	903	0
833	0	0	0	0	0	0	0	200	300	0	-15.5899	22.1864	-406.919	-80039	-32321.5	343.551	120.57	1099.7	0	0	0	0	0	0	0	603	903	0
833	1	0	0	0	0	0	0	200	300	0	-15.4373	22.4916	-409.055	-80496.7	-32748.8	389.328	119.94	1099.79	0	0	0	0	0	0	0	603	903	0
833	2	0	0	0	0	0	0	200	300	0	-16.5054	22.6442	-410.276	-80588.3	-32199.4	114.67	121.518	1099.42	0	0	0	0	0	0	0	603	903	0
833	3	0	0	0	0	0	0	200	300	0	-16.3528	23.4071	-414.243	-80862.9	-32626.7	251.999	121.238	1098.21	0	0	0	0	0	0	0	603	903	0
833	4	0	0	0	0	0	0	200	300	0	-15.5899	24.4753	-416.379	-80405.2	-33420.2	160.446	119.736	1096.11	0	0	0	0	0	0	0	603	903	0
833	5	0	0	0	0	0	0	200	300	0	-15.4373	24.0175	-418.211	-81320.8	-33298.1	-68.436	120.38	1097.45	0	0	0	0	0	0	0	603	903	0
833	6	0	0	0	0	0	0	200	300	0	-15.2847	24.933	-418.211	-81870	-32992.9	-68.436	121.109	1098.76	0	0	0	0	0	0	0	603	903	0
833	7	0	0	0	0	0	0	200	300	0	-16.9632	26.4589	-422.483	-82144.7	-33664.3	114.67	120.318	1097.43	0	0	0	0	0	0	0	603	903	0
833	8	0	0	0	0	0	0	200	300	0	-16.8106	26.1537	-424.619	-82236.2	-33664.3	-114.212	120.719	1096.67	0	0	0	0	0	0	0	603	903	0
833	9	0	0	0	0	0	0	200	300	0	-15.7425	25.8485	-427.671	-81961.6	-33481.2	-297.318	121.713	1094.65	0	0	0	0	0	0	0	603	903	0
834	0	0	0	0	0	0	0	200	300	0	-15.8951	26.4589	-428.281	-83060.2	-33908.4	-205.765	120.827	1096.94	0	0	0	0	0	0	0	603	903	0
834	1	0	0	0	0	0	0	200	300	0	-16.0477	27.6796	-431.028	-83792.6	-34152.6	-343.094	120.765	1097.4	0	0	0	0	0	0	0	603	903	0
834	2	0	0	0	0	0	0	200	300	0	-15.8951	28.4425	-433.775	-83792.6	-34091.6	-343.094	121.407	1096.17	0	0	0	0	0	0	0	603	903	0
834	3	0	0	0	0	0	0	200	300	0	-16.9632	28.29	-435.606	-83334.9	-34091.6	-617.753	121.738	1094.31	0	0	0	0	0	0	0	603	903	0
834	4	0	0	0	0	0	0	200	300	0	-15.2847	28.29	-437.437	-84433.5	-34701.9	-480.423	120.67	1096.02	0	0	0	0	0	0	0	603	903	0
834	5	0	0	0	0	0	0	200	300	0	-12.8433	29.8158	-440.488	-84433.5	-34579.8	-755.082	121.497	1094.68	0	0	0	0	0	0	0	603	903	0
834	6	0	0	0	0	0	0	200	300	0	-14.2166	30.4262	-442.93	-85074.4	-34824	-938.187	121.378	1095.07	0	0	0	0	0	0	0	603	903	0
834	7	0	0	0	0	0	0	200	300	0	-16.3528	30.121	-445.371	-85623.7	-35312.3	-892.411	120.713	1095.25	0	0	0	0	0	0	0	603	903	0
834	8	0	0	0	0	0	0	200	300	0	-17.1158	29.9684	-446.897	-85532.1	-35373.3	-800.858	120.847	1094.39	0	0	0	0	0	0	0	603	903	0
834	9	0	0	0	0	0	0	200	300	0	-15.7425	31.3417	-449.033	-85532.1	-34946	-846.635	122.175	1093.48	0	0	0	0	0	0	0	603	903	0
835	0	0	0	0	0	0	0	200	300	0	-15.2847	31.3417	-452.085	-86813.9	-35617.4	-938.187	121.215	1095.03	0	0	0	0	0	0	0	603	903	0
835	1	0	0	0	0	0	0	200	300	0	-15.4373	31.3417	-455.137	-87088.6	-36044.7	-709.305	120.805	1094.35	0	0	0	0	0	0	0	603	903	0
835	2	0	0	0	0	0	0	200	300	0	-14.5218	32.4098	-456.052	-87454.8	-35861.6	-1075.52	121.365	1094.76	0	0	0	0	0	0	0	603	903	0
835	3	0	0	0	0	0	0	200	300	0	-16.3528	33.1728	-457.578	-87271.6	-36105.7	-1075.52	121.094	1093.73	0	0	0	0	0	0	0	603	903	0
835	4	0	0	0	0	0	0	200	300	0	-14.3692	33.4779	-462.156	-86813.9	-36349.9	-1350.17	121.347	1090.85	0	0	0	0	0	0	0	603	903	0
835	5	0	0	0	0	0	0	200	300	0	-13.6063	33.4779	-463.987	-87912.5	-36105.7	-1533.28	122.184	1092.47	0	0	0	0	0	0	0	603	903	0
835	6	0	0	0	0	0	0	200	300	0	-15.1321	33.9357	-466.733	-88828	-36105.7	-1487.5	122.642	1093.32	0	0	0	0	0	0	0	603	903	0
835	7	0	0	0	0	0	0	200	300	0	-15.8951	35.1564	-467.954	-88919.6	-36899.2	-1716.39	121.148	1093.02	0	0	0	0	0	0	0	603	903	0
835	8	0	0	0	0	0	0	200	300	0	-16.2003	35.0038	-470.701	-89652	-36471.9	-1395.95	122.516	1093.47	0	0	0	0	0	0	0	603	903	0
835	9	0	0	0	0	0	0	200	300	0	-14.5218	34.2409	-472.227	-89377.4	-36777.1	-1487.5	122.12	1092.27	0	0	0	0	0	0	0	603	903	0
836	0	0	0	0	0	0	0	200	300	0	-12.233	35.4616	-476.499	-89652	-37509.5	-1716.39	121.281	1091.15	0	0	0	0	0	0	0	603	903	0
836	1	0	0	0	0	0	0	200	300	0	-14.827	36.2245	-474.973	-90476	-37204.3	-1899.49	121.671	1093.49	0	0	0	0	0	0	0	603	903	0
836	2	0	0	0	0	0	0	200	300	0	-15.5899	36.8349	-481.077	-91025.3	-37326.4	-1853.71	122.411	1092.21	0	0	0	0	0	0	0	603	903	0
836	3	0	0	0	0	0	0	200	300	0	-16.3528	36.5297	-483.823	-90476	-37631.6	-1899.49	122.22	1090	0	0	0	0	0	0	0	603	903	0
836	4	0	0	0	0	0	0	200	300	0	-14.9796	36.6823	-485.654	-90933.8	-37570.6	-1853.71	122.639	1090.24	0	0	0	0	0	0	0	603	903	0
836	5	0	0	0	0	0	0	200	300	0	-14.9796	37.903	-488.096	-91116.9	-37509.5	-1579.06	123.151	1089.68	0	0	0	0	0	0	0	603	903	0
836	6	0	0	0	0	0	0	200	300	0	-16.3528	38.6659	-491.453	-91666.2	-38241.9	-1991.04	122.186	1089.52	0	0	0	0	0	0	0	603	903	0
836	7	0	0	0	0	0	0	200	300	0	-13.9114	38.0556	-493.894	-92398.6	-38425	-2174.15	122.2	1090.08	0	0	0	0	0	0	0	603	903	0
836	8	0	0	0	0	0	0	200	300	0	-15.4373	38.3608	-494.504	-92581.7	-38119.9	-2082.6	122.913	1090.22	0	0	0	0	0	0	0	603	903	0
836	9	0	0	0	0	0	0	200	300	0	-14.064	39.734	-496.946	-92398.6	-38303	-2174.15	122.923	1088.93	0	0	0	0	0	0	0	603	903	0
837	0	0	0	0	0	0	0	200	300	0	-14.9796	40.3444	-501.524	-92490.1	-38852.3	-2174.15	122.531	1087.42	0	0	0	0	0	0	0	603	903	0
837	1	0	0	0	0	0	0	200	300	0	-15.5899	40.0392	-501.218	-93405.7	-38730.2	-2494.58	122.728	1089.36	0	0	0	0	0	0	0	603	903	0
837	2	0	0	0	0	0	0	200	300	0	-14.9796	40.1918	-505.186	-93588.8	-38791.3	-2631.91	123.214	1088.26	0	0	0	0	0	0	0	603	903	0
837	3	0	0	0	0	0	0	200	300	0	-15.1321	41.4125	-505.491	-93863.4	-39523.7	-2265.7	121.811	1088.69	0	0	0	0	0	0	0	603	903	0
837	4	0	0	0	0	0	0	200	300	0	-14.6744	42.328	-510.984	-93039.5	-39096.4	-2494.58	123.488	1085.08	0	0	0	0	0	0	0	603	903	0
837	5	0	0	0	0	0	0	200	300	0	-14.6744	40.9547	-512.205	-93863.4	-39279.5	-2631.91	123.313	1086.25	0	0	0	0	0	0	0	603	903	0
837	6	0	0	0	0	0	0	200	300	0	-14.9796	41.4125	-514.036	-94962.1	-39828.9	-2540.36	122.517	1087.74	0	0	0	0	0	0	0	603	903	0
837	7	0	0	0	0	0	0	200	300	0	-15.7425	42.7858	-513.12	-95145.2	-40256.1	-2723.47	121.546	1088.42	0	0	0	0	0	0	0	603	903	0
837	8	0	0	0	0	0	0	200	300	0	-16.3528	41.4125	-519.224	-94779	-40439.2	-2723.47	122.116	1085.54	0	0	0	0	0	0	0	603	903	0
837	9	0	0	0	0	0	0	200	300	0	-14.9796	43.091	-520.75	-95603	-40378.2	-2769.24	122.461	1086.59	0	0	0	0	0	0	0	603	903	0
838	0	0	0	0	0	0	0	200	300	0	-14.827	43.3962	-523.496	-95603	-40683.4	-2906.57	122.285	1085.62	0	0	0	0	0	0	0	603	903	0
838	1	0	0	0	0	0	0	200	300	0	-15.1321	44.0065	-525.632	-95786	-39950.9	-2586.14	123.995	1085.23	0	0	0	0	0	0	0	603	903	0
838	2	0	0	0	0	0	0	200	300	0	-15.8951	44.922	-528.989	-96610.1	-40256.1	-2631.91	123.9	1085.63	0	0	0	0	0	0	0	603	903	0
838	3	0	0	0	0	0	0	200	300	0	-16.8106	45.685	-531.126	-96426.9	-41171.6	-2860.79	122.482	1084.55	0	0	0	0	0	0	0	603	903	0
838	4	0	0	0	0	0	0	200	300	0	-15.4373	45.3798	-532.346	-96518.5	-40927.5	-3043.9	123.119	1084.31	0	0	0	0	0	0	0	603	903	0
838	5	0	0	0	0	0	0	200	300	0	-15.4373	45.8376	-534.482	-97067.8	-40988.5	-2815.02	123.312	1084.61	0	0	0	0	0	0	0	603	903	0
838	6	0	0	0	0	0	0	200	300	0	-15.8951	47.2108	-537.229	-96243.8	-41354.7	-2998.12	123.022	1082.15	0	0	0	0	0	0	0	603	903	0
838	7	0	0	0	0	0	0	200	300	0	-16.5054	47.516	-540.281	-97708.7	-41232.7	-3089.68	123.683	1083.85	0	0	0	0	0	0	0	603	903	0
838	8	0	0	0	0	0	0	200	300	0	-16.5054	47.2108	-542.417	-98258	-41476.8	-3135.45	123.533	1084.15	0	0	0	0	0	0	0	603	903	0
838	9	0	0	0	0	0	0	200	300	0	-17.1158	48.1264	-543.638	-97708.7	-41843	-3501.66	123.031	1082.73	0	0	0	0	0	0	0	603	903	0
839	0	0	0	0	0	0	0	200	300	0	-16.2003	49.1945	-545.164	-97525.6	-41598.9	-3364.33	123.695	1081.89	0	0	0	0	0	0	0	603	903	0
839	1	0	0	0	0	0	0	200	300	0	-15.4373	49.8048	-549.436	-97983.3	-41965.1	-3181.23	123.622	1081.33	0	0	0	0	0	0	0	603	903	0
839	2	0	0	0	0	0	0	200	300	0	-16.658	49.3471	-552.488	-98990.4	-42514.4	-3318.56	123.049	1082.17	0	0	0	0	0	0	0	603	903	0
839	3	0	0	0	0	0	0	200	300	0	-17.7261	48.4316	-550.657	-99539.7	-42087.2	-3410.11	123.569	1083.77	0	0	0	0	0	0	0	603	903	0
839	4	0	0	0	0	0	0	200	300	0	-17.1158	50.5678	-554.624	-99081.9	-42514.4	-3227.01	123.346	1081.65	0	0	0	0	0	0	0	603	903	0
839	5	0	0	0	0	0	0	200	300	0	-16.9632	51.0255	-556.76	-98441.1	-43002.7	-3272.78	122.763	1079.81	0	0	0	0	0	0	0	603	903	0
839	6	0	0	0	0	0	0	200	300	0	-16.5054	52.704	-558.591	-99906	-42758.5	-3638.99	123.453	1081.85	0	0	0	0	0	0	0	603	903	0
839	7	0	0	0	0	0	0	200	300	0	-18.3365	52.0937	-562.559	-100272	-42819.6	-3410.11	123.884	1081.24	0	0	0	0	0	0	0	603	903	0
839	8	0	0	0	0	0	0	200	300	0	-16.9632	52.704	-563.169	-99906	-43185.8	-3410.11	123.316	1080.4	0	0	0	0	0	0	0	603	903	0
839	9	0	0	0	0	0	0	200	300	0	-17.5735	53.7721	-565	-99997.5	-43796.1	-3776.32	122.485	1079.99	0	0	0	0	0	0	0	603	903	0
840	0	0	0	0	0	0	0	200	300	0	-16.8106	54.8402	-568.357	-100364	-43246.8	-3593.22	123.909	1079.59	0	0	0	0	0	0	0	603	903	0
840	1	0	0	0	0	0	0	200	300	0	-17.421	55.298	-569.578	-101188	-43979.2	-3684.77	122.786	1080.65	0	0	0	0	0	0	0	603	903	0
840	2	0	0	0	0	0	0	200	300	0	-18.3365	54.9928	-570.188	-100547	-44040.3	-3684.77	122.762	1079.34	0	0	0	0	0	0	0	603	903	0
840	3	0	0	0	0	0	0	200	300	0	-16.8106	54.3825	-573.24	-101279	-43735.1	-3638.99	123.705	1079.68	0	0	0	0	0	0	0	603	903	0
840	4	0	0	0	0	0	0	200	300	0	-18.6417	55.7558	-575.986	-101096	-44406.5	-3959.43	122.904	1078.52	0	0	0	0	0	0	0	603	903	0
840	5	0	0	0	0	0	0	200	300	0	-17.8787	57.7394	-578.428	-101737	-44589.6	-3364.33	122.912	1078.89	0	0	0	0	0	0	0	603	903	0
840	6	0	0	0	0	0	0	200	300	0	-17.7261	58.1972	-581.174	-102012	-44345.5	-3684.77	123.697	1078.53	0	0	0	0	0	0	0	603	903	0
840	7	0	0	0	0	0	0	200	300	0	-19.5572	58.3498	-581.48	-102103	-44894.8	-3684.77	122.792	1078.59	0	0	0	0	0	0	0	603	903	0
840	8	0	0	0	0	0	0	200	300	0	-19.0994	58.8075	-583.921	-101920	-44772.7	-3455.89	123.324	1077.54	0	0	0	0	0	0	0	603	903	0
840	9	0	0	0	0	0	0	200	300	0	-18.7943	59.7231	-588.193	-101188	-44711.7	-3730.55	123.985	1075.03	0	0	0	0	0	0	0	603	903	0
841	0	0	0	0	0	0	0	200	300	0	-19.0994	60.0282	-586.057	-102012	-45688.2	-3867.87	122.041	1077.06	0	0	0	0	0	0	0	603	903	0
841	1	0	0	0	0	0	0	200	300	0	-19.252	58.1972	-591.55	-102927	-45688.2	-3684.77	122.765	1077	0	0	0	0	0	0	0	603	903	0
841	2	0	0	0	0	0	0	200	300	0	-18.1839	61.0963	-591.55	-103019	-45627.2	-3867.87	122.868	1077.15	0	0	0	0	0	0	0	603	903	0
841	3	0	0	0	0	0	0	200	300	0	-20.6253	62.1645	-594.602	-102744	-45505.1	-3959.43	123.47	1075.79	0	0	0	0	0	0	0	603	903	0
841	4	0	0	0	0	0	0	200	300	0	-20.015	61.8593	-597.959	-102836	-45749.3	-3684.77	123.491	1074.98	0	0	0	0	0	0	0	603	903	0
841	5	0	0	0	0	0	0	200	300	0	-20.1675	61.8593	-597.959	-103293	-45993.4	-3867.87	123.083	1075.74	0	0	0	0	0	0	0	603	903	0
841	6	0	0	0	0	0	0	200	300	0	-20.7779	62.9274	-598.875	-102927	-46481.7	-3822.1	122.385	1074.87	0	0	0	0	0	0	0	603	903	0
841	7	0	0	0	0	0	0	200	300	0	-21.846	64.3007	-597.654	-103751	-46298.6	-3867.87	122.533	1076.6	0	0	0	0	0	0	0	603	903	0
841	8	0	0	0	0	0	0	200	300	0	-20.9305	62.9274	-603.452	-103293	-46298.6	-3913.65	123.277	1074.17	0	0	0	0	0	0	0	603	903	0
841	9	0	0	0	0	0	0	200	300	0	-20.7779	65.2162	-601.621	-103202	-46359.6	-4005.2	122.942	1074.54	0	0	0	0	0	0	0	603	903	0
842	0	0	0	0	0	0	0	200	300	0	-21.2357	65.0636	-607.419	-104117	-46847.9	-3913.65	122.874	1074.41	0	0	0	0	0	0	0	603	903	0
842	1	0	0	0	0	0	0	200	300	0	-22.7615	65.674	-608.03	-103202	-46847.9	-4005.2	122.951	1072.73	0	0	0	0	0	0	0	603	903	0
842	2	0	0	0	0	0	0	200	300	0	-22.7615	67.0473	-609.861	-104392	-46664.8	-3730.55	123.483	1074.17	0	0	0	0	0	0	0	603	903	0
842	3	0	0	0	0	0	0	200	300	0	-22.4564	67.9628	-612.913	-103660	-47458.2	-3593.22	122.569	1072.13	0	0	0	0	0	0	0	603	903	0
842	4	0	0	0	0	0	0	200	300	0	-22.3038	68.1154	-614.744	-103568	-46908.9	-3501.66	123.694	1071.47	0	0	0	0	0	0	0	603	903	0
842	5	0	0	0	0	0	0	200	300	0	-22.9141	68.4206	-614.133	-103019	-47519.3	-4005.2	122.624	1070.75	0	0	0	0	0	0	0	603	903	0
842	6	0	0	0	0	0	0	200	300	0	-23.5245	69.4887	-617.185	-104575	-47702.4	-3776.32	122.71	1072.44	0	0	0	0	0	0	0	603	903	0
842	7	0	0	0	0	0	0	200	300	0	-23.8297	70.7094	-619.016	-104575	-47458.2	-3959.43	123.333	1071.94	0	0	0	0	0	0	0	603	903	0
842	8	0	0	0	0	0	0	200	300	0	-24.1348	70.099	-621.763	-104209	-47763.4	-3822.1	123.181	1070.6	0	0	0	0	0	0	0	603	903	0
842	9	0	0	0	0	0	0	200	300	0	-23.2193	70.7094	-621.763	-104209	-47946.5	-3638.99	122.886	1070.6	0	0	0	0	0	0	0	603	903	0
843	0	0	0	0	0	0	0	200	300	0	-21.6934	72.2353	-622.983	-103934	-47580.3	-3822.1	123.625	1069.83	0	0	0	0	0	0	0	603	903	0
843	1	0	0	0	0	0	0	200	300	0	-23.9822	72.2353	-623.899	-104758	-48251.7	-3867.87	122.661	1070.91	0	0	0	0	0	0	0	603	903	0
843	2	0	0	0	0	0	0	200	300	0	-24.2874	72.5404	-625.73	-104667	-48373.8	-3547.44	122.692	1070.27	0	0	0	0	0	0	0	603	903	0
843	3	0	0	0	0	0	0	200	300	0	-24.8978	73.3034	-626.035	-105216	-47946.5	-3959.43	123.412	1071.07	0	0	0	0	0	0	0	603	903	0
843	4	0	0	0	0	0	0	200	300	0	-23.8297	73.6086	-626.951	-104392	-48373.8	-3867.87	122.843	1069.51	0	0	0	0	0	0	0	603	903	0
843	5	0	0	0	0	0	0	200	300	0	-22.4564	73.9137	-629.087	-104209	-48617.9	-3867.87	122.717	1068.65	0	0	0	0	0	0	0	603	903	0
843	6	0	0	0	0	0	0	200	300	0	-24.8978	75.4396	-630.308	-104667	-48495.9	-3959.43	123.06	1069.06	0	0	0	0	0	0	0	603	903	0
843	7	0	0	0	0	0	0	200	300	0	-26.2711	75.1344	-631.834	-105216	-48679	-3913.65	122.956	1069.53	0	0	0	0	0	0	0	603	903	0
843	8	0	0	0	0	0	0	200	300	0	-25.9659	76.2026	-632.139	-104300	-49106.2	-3822.1	122.317	1068	0	0	0	0	0	0	0	603	903	0
843	9	0	0	0	0	0	0	200	300	0	-24.8978	77.2707	-630.613	-103202	-48556.9	-3730.55	123	1066.65	0	0	0	0	0	0	0	603	903	0
844	0	0	0	0	0	0	0	200	300	0	-25.0504	77.4233	-633.359	-103843	-48617.9	-3593.22	123.238	1066.96	0	0	0	0	0	0	0	603	903	0
844	1	0	0	0	0	0	0	200	300	0	-25.8133	78.0336	-635.496	-104575	-49167.2	-3547.44	122.632	1067.56	0	0	0	0	0	0	0	603	903	0
844	2	0	0	0	0	0	0	200	300	0	-26.5762	78.644	-633.97	-104392	-48617.9	-3867.87	123.312	1067.66	0	0	0	0	0	0	0	603	903	0
844	3	0	0	0	0	0	0	200	300	0	-26.5762	80.3224	-635.19	-103934	-48617.9	-3776.32	123.459	1066.63	0	0	0	0	0	0	0	603	903	0
844	4	0	0	0	0	0	0	200	300	0	-26.1185	80.475	-636.716	-102836	-49472.4	-3776.32	122.301	1064.51	0	0	0	0	0	0	0	603	903	0
844	5	0	0	0	0	0	0	200	300	0	-25.5081	80.1698	-637.632	-103568	-48801	-3913.65	123.465	1065.43	0	0	0	0	0	0	0	603	903	0
844	6	0	0	0	0	0	0	200	300	0	-26.1185	80.7802	-637.327	-104300	-49045.2	-3730.55	123.045	1066.65	0	0	0	0	0	0	0	603	903	0
844	7	0	0	0	0	0	0	200	300	0	-27.3392	80.9328	-632.444	-103568	-49045.2	-3776.32	122.451	1066.76	0	0	0	0	0	0	0	603	903	0
844	8	0	0	0	0	0	0	200	300	0	-27.1866	81.3905	-636.106	-102744	-48923.1	-3959.43	123.09	1064.52	0	0	0	0	0	0	0	603	903	0
844	9	0	0	0	0	0	0	200	300	0	-25.9659	82.7638	-638.242	-103202	-49106.2	-3867.87	123.06	1064.7	0	0	0	0	0	0	0	603	903	0
845	0	0	0	0	0	0	0	200	300	0	-26.4236	82.6112	-638.547	-102378	-49716.6	-3776.32	122.141	1063.33	0	0	0	0	0	0	0	603	903	0
845	1	0	0	0	0	0	0	200	300	0	-27.9495	83.2216	-637.327	-103202	-48862.1	-3730.55	123.333	1064.93	0	0	0	0	0	0	0	603	903	0
845	2	0	0	0	0	0	0	200	300	0	-27.4918	85.663	-639.158	-102836	-48984.1	-3776.32	123.361	1063.89	0	0	0	0	0	0	0	603	903	0
845	3	0	0	0	0	0	0	200	300	0	-28.4073	86.7311	-639.463	-102561	-49777.6	-4142.53	122.157	1063.39	0	0	0	0	0	0	0	603	903	0
845	4	0	0	0	0	0	0	200	300	0	-27.4918	86.5785	-639.158	-102286	-49655.5	-3867.87	122.311	1063.03	0	0	0	0	0	0	0	603	903	0
845	5	0	0	0	0	0	0	200	300	0	-24.7452	86.7311	-637.937	-101920	-49228.3	-3867.87	122.832	1062.77	0	0	0	0	0	0	0	603	903	0
845	6	0	0	0	0	0	0	200	300	0	-27.034	88.1044	-638.853	-101829	-49655.5	-4142.53	122.274	1062.39	0	0	0	0	0	0	0	603	903	0
845	7	0	0	0	0	0	0	200	300	0	-28.7125	88.8673	-639.463	-102103	-49350.3	-4279.86	122.825	1062.67	0	0	0	0	0	0	0	603	903	0
845	8	0	0	0	0	0	0	200	300	0	-27.9495	89.0199	-639.158	-101920	-49167.2	-4096.76	123.075	1062.46	0	0	0	0	0	0	0	603	903	0
845	9	0	0	0	0	0	0	200	300	0	-27.4918	90.0881	-637.937	-100272	-49167.2	-4096.76	122.928	1060.18	0	0	0	0	0	0	0	603	903	0
846	0	0	0	0	0	0	0	200	300	0	-26.8814	91.3088	-637.937	-101371	-49472.4	-4188.31	122.449	1061.9	0	0	0	0	0	0	0	603	903	0
846	1	0	0	0	0	0	0	200	300	0	-28.7125	92.5295	-639.768	-101096	-48923.1	-4188.31	123.53	1061.02	0	0	0	0	0	0	0	603	903	0
846	2	0	0	0	0	0	0	200	300	0	-27.3392	91.1562	-635.496	-100547	-48862.1	-4279.86	123.112	1061.22	0	0	0	0	0	0	0	603	903	0
846	3	0	0	0	0	0	0	200	300	0	-28.4073	92.3769	-637.937	-100272	-49472.4	-4050.98	122.449	1060.18	0	0	0	0	0	0	0	603	903	0
846	4	0	0	0	0	0	0	200	300	0	-27.3392	93.9027	-636.411	-99814.4	-49228.3	-4279.86	122.647	1059.84	0	0	0	0	0	0	0	603	903	0
846	5	0	0	0	0	0	0	200	300	0	-27.7969	95.276	-635.19	-99356.6	-49045.2	-4050.98	122.787	1059.42	0	0	0	0	0	0	0	603	903	0
846	6	0	0	0	0	0	0	200	300	0	-28.1021	96.039	-634.885	-99631.3	-48923.1	-4188.31	122.942	1059.93	0	0	0	0	0	0	0	603	903	0
846	7	0	0	0	0	0	0	200	300	0	-29.0176	96.039	-635.496	-99173.5	-48801	-4325.64	123.208	1059.06	0	0	0	0	0	0	0	603	903	0
846	8	0	0	0	0	0	0	200	300	0	-29.3228	96.6493	-633.665	-98898.9	-48740	-4417.19	123.082	1059.07	0	0	0	0	0	0	0	603	903	0
846	9	0	0	0	0	0	0	200	300	0	-29.4754	97.87	-631.834	-98349.5	-49228.3	-4417.19	122.087	1058.66	0	0	0	0	0	0	0	603	903	0
847	0	0	0	0	0	0	0	200	300	0	-28.2547	99.5485	-632.749	-98258	-48740	-4462.97	122.971	1058.29	0	0	0	0	0	0	0	603	903	0
847	1	0	0	0	0	0	0	200	300	0	-28.5599	99.0907	-630.308	-98166.5	-48617.9	-4096.76	122.866	1058.74	0	0	0	0	0	0	0	603	903	0
847	2	0	0	0	0	0	0	200	300	0	-29.3228	99.8537	-629.392	-97067.8	-48801	-4234.09	122.463	1057.22	0	0	0	0	0	0	0	603	903	0
847	3	0	0	0	0	0	0	200	300	0	-29.7806	101.38	-628.477	-97342.5	-48984.1	-4554.52	122.059	1057.89	0	0	0	0	0	0	0	603	903	0
847	4	0	0	0	0	0	0	200	300	0	-29.3228	102.142	-627.256	-96793.1	-48312.7	-4462.97	122.978	1057.31	0	0	0	0	0	0	0	603	903	0
847	5	0	0	0	0	0	0	200	300	0	-27.6443	102.448	-624.509	-96793.1	-48617.9	-4234.09	122.15	1057.99	0	0	0	0	0	0	0	603	903	0
847	6	0	0	0	0	0	0	200	300	0	-29.7806	101.99	-626.035	-96335.4	-48495.9	-4508.74	122.535	1056.88	0	0	0	0	0	0	0	603	903	0
847	7	0	0	0	0	0	0	200	300	0	-30.2383	103.211	-621.152	-96060.7	-48068.6	-4462.97	122.614	1057.65	0	0	0	0	0	0	0	603	903	0
847	8	0	0	0	0	0	0	200	300	0	-30.5435	105.042	-621.458	-95053.6	-48251.7	-4096.76	122.357	1055.95	0	0	0	0	0	0	0	603	903	0
847	9	0	0	0	0	0	0	200	300	0	-29.7806	105.652	-620.237	-94779	-48190.7	-4142.53	122.303	1055.81	0	0	0	0	0	0	0	603	903	0
848	0	-4.13144	-9.26346	-12.341	-3593.72	743.172	1279.36	260.22	591.202	0	-27.3392	105.957	-619.321	-94321.2	-47702.4	-4600.3	122.976	1055.3	0	0	0	0	0	0	0	603	903	0
848	1	-4.28403	-10.9419	-18.4445	-4417.7	560.066	1233.58	230.365	539.513	0	-29.7806	105.957	-616.575	-94504.3	-47641.4	-4600.3	122.732	1056.27	0	0	0	0	0	0	0	603	903	0
848	2	-5.04697	-7.58499	-21.8015	-5424.78	743.172	684.264	234.088	548.826	0	-30.0858	107.178	-614.133	-93863.4	-48129.6	-4371.41	121.63	1055.84	0	0	0	0	0	0	0	603	903	0
848	3	-2.30039	-3.15995	-20.2756	-5974.09	1048.35	134.948	251.705	594.645	0	-31.3065	108.093	-613.218	-92490.1	-47031	-4783.4	123.305	1053.83	0	0	0	0	0	0	0	603	903	0
848	4	1.36172	0.654752	-22.717	-5150.12	987.312	89.1712	243.461	526.708	0	-29.7806	108.704	-613.523	-92581.7	-47214.1	-4829.18	123.044	1053.9	0	0	0	0	0	0	0	603	903	0
848	5	2.58242	1.11252	-25.1584	-6431.86	1597.66	89.1712	263.504	555.655	0	-29.7806	107.941	-609.861	-92490.1	-47092	-4920.73	122.782	1054.66	0	0	0	0	0	0	0	603	903	0
848	6	0.141017	2.63839	-31.5671	-7438.94	1536.63	-139.711	248.678	535.655	0	-30.2383	109.314	-604.673	-91391.5	-46847.9	-4554.52	122.524	1054.14	0	0	0	0	0	0	0	603	903	0
848	7	0.293605	7.06344	-33.7033	-8812.23	1048.35	-368.593	231.105	561.465	0	-30.5435	111.45	-604.368	-91483.1	-46786.9	-4737.63	122.585	1054.37	0	0	0	0	0	0	0	603	903	0
848	8	1.36172	7.97897	-36.4499	-9819.31	1414.56	180.724	238.808	569.392	0	-29.628	111.45	-603.452	-90384.5	-46908.9	-4874.95	122.266	1052.78	0	0	0	0	0	0	0	603	903	0
848	9	3.65054	5.69015	-44.3845	-9910.87	1841.8	-551.698	241.497	523.296	0	-30.0858	111.603	-601.621	-89926.7	-46420.7	-5241.17	122.841	1052.47	0	0	0	0	0	0	0	603	903	0
849	0	6.54971	5.84274	-49.8776	-11558.8	2208.02	-734.804	244.269	531.743	0	-30.6961	111.756	-597.959	-90292.9	-46298.6	-5012.28	122.572	1054	0	0	0	0	0	0	0	603	903	0
849	1	6.85488	8.13156	-55.9812	-14122.3	2452.16	-872.133	243.803	552.269	0	-28.7125	111.908	-593.992	-89468.9	-46176.5	-5286.94	122.261	1053.62	0	0	0	0	0	0	0	603	903	0
849	2	5.48159	9.96261	-62.695	-16502.7	2391.12	-1238.34	238.139	563.221	0	-30.0858	113.739	-593.992	-87912.5	-46176.5	-4966.51	122.261	1051	0	0	0	0	0	0	0	603	903	0
849	3	3.95571	9.35226	-66.9675	-17418.2	2391.12	-1238.34	235.706	560.099	0	-29.3228	114.655	-592.161	-87363.2	-45444.1	-5195.39	123.257	1050.53	0	0	0	0	0	0	0	603	903	0
849	4	4.26089	9.50485	-72.7658	-17784.4	2696.3	-414.369	237.054	544.406	0	-29.4754	113.434	-588.804	-87088.6	-45505.1	-5286.94	122.716	1050.91	0	0	0	0	0	0	0	603	903	0
849	5	5.17642	9.04709	-80.3952	-20347.9	2940.44	-734.804	236.575	553.098	0	-29.628	114.197	-585.447	-86539.2	-45444.1	-5195.39	122.377	1050.82	0	0	0	0	0	0	0	603	903	0
849	6	7.16006	9.65744	-85.8884	-22178.9	3672.86	-917.909	242.763	558.23	0	-29.3228	115.418	-582.7	-86539.2	-45016.8	-5470.05	122.744	1051.51	0	0	0	0	0	0	0	603	903	0
849	7	6.24453	9.81003	-95.0436	-23735.3	3367.68	-139.711	235.433	549.731	0	-29.0176	115.57	-580.259	-85074.4	-44711.7	-5653.15	122.945	1049.61	0	0	0	0	0	0	0	603	903	0
849	8	3.65054	9.50485	-100.842	-24834	3001.47	-460.145	229.764	546.266	0	-28.4073	114.197	-574.766	-84616.6	-44772.7	-5378.49	122.103	1050.22	0	0	0	0	0	0	0	603	903	0
849	9	4.26089	9.50485	-105.725	-26115.7	3428.72	-734.804	232.431	547.016	0	-27.6443	112.671	-573.24	-84158.8	-44101.3	-5653.15	123.067	1049.81	0	0	0	0	0	0	0	603	903	0
850	0	4.71865	8.28415	-109.997	-27763.6	3978.04	-551.698	236.165	552.403	0	-29.0176	115.723	-569.883	-83243.3	-43857.2	-5698.93	123.042	1049.07	0	0	0	0	0	0	0	603	903	0
850	1	4.26089	8.28415	-112.744	-27946.8	3733.89	-368.593	233.118	547.878	0	-28.4073	116.638	-567.136	-83243.3	-44284.4	-5836.26	121.916	1049.78	0	0	0	0	0	0	0	603	903	0
850	2	6.09194	7.21603	-120.373	-30327.1	3611.82	-734.804	230.005	551.942	0	-28.1021	116.944	-564.695	-81778.5	-43674.1	-5836.26	122.659	1047.82	0	0	0	0	0	0	0	603	903	0
850	3	6.24453	6.75827	-126.477	-30876.4	3917	-689.027	230.97	544.127	0	-25.5081	116.028	-560.422	-81503.8	-43185.8	-5882.03	122.941	1048.43	0	0	0	0	0	0	0	603	903	0
850	4	5.02383	5.23239	-130.444	-31792	3550.79	-689.027	227.221	543.721	0	-26.2711	116.791	-557.676	-81046.1	-43124.8	-5561.6	122.671	1048.33	0	0	0	0	0	0	0	603	903	0
850	5	5.63418	3.70651	-132.58	-33348.4	4039.07	-917.909	230.465	551.534	0	-27.3392	116.638	-554.624	-79947.4	-43063.7	-5836.26	122.355	1047.15	0	0	0	0	0	0	0	603	903	0
850	6	5.93936	2.63839	-138.379	-34263.9	4222.18	-963.685	230.512	547.61	0	-28.1021	117.249	-549.131	-78848.8	-42270.3	-6202.47	123.023	1046.59	0	0	0	0	0	0	0	603	903	0
850	7	5.93936	0.196989	-140.515	-35179.4	4344.25	-826.356	230.917	550.361	0	-26.2711	117.859	-546.995	-78207.9	-41843	-5973.59	123.504	1045.98	0	0	0	0	0	0	0	603	903	0
850	8	5.02383	-0.108187	-144.177	-36095	4283.21	-1009.46	229.708	550.352	0	-26.1185	117.096	-542.722	-77200.8	-41354.7	-6477.13	123.801	1045.25	0	0	0	0	0	0	0	603	903	0
850	9	6.39712	-2.24442	-150.586	-37742.9	4161.14	-1146.79	227.633	550.641	0	-26.8814	117.554	-537.839	-77658.6	-40988.5	-6477.13	123.79	1047.39	0	0	0	0	0	0	0	603	903	0
851	0	5.32901	-3.7703	-156.994	-39024.7	4161.14	-780.58	226.505	548.574	0	-25.0504	117.096	-533.872	-76376.9	-40866.5	-6065.14	123.453	1046.06	0	0	0	0	0	0	0	603	903	0
851	1	3.65054	-4.53324	-163.708	-39848.6	4405.28	-368.593	226.909	543.412	0	-26.2711	118.164	-528.684	-74820.5	-41110.6	-6706.01	122.24	1044.52	0	0	0	0	0	0	0	603	903	0
851	2	1.97207	-8.34793	-166.15	-41496.6	4405.28	226.5	226.514	549.754	0	-24.44	117.554	-525.632	-74271.1	-40134	-6751.79	123.646	1044.3	0	0	0	0	0	0	0	603	903	0
851	3	-0.469334	-8.34793	-175.305	-42137.4	3855.97	-93.9343	221.996	540.367	0	-23.3719	117.706	-520.444	-74179.6	-40073	-6660.23	123.002	1045.53	0	0	0	0	0	0	0	603	903	0
851	4	-0.469334	-10.6368	-180.188	-43876.9	4039.07	867.369	222.416	543.507	0	-25.0504	117.859	-514.646	-73081	-39828.9	-6843.34	122.609	1045	0	0	0	0	0	0	0	603	903	0
851	5	-4.13144	-14.604	-185.681	-44884	3855.97	867.369	220.767	541.727	0	-24.5926	117.401	-511.9	-71707.7	-39401.6	-6797.56	123.029	1043.08	0	0	0	0	0	0	0	603	903	0
851	6	-5.35215	-16.7403	-191.479	-47172.8	3733.89	1050.47	219.5	546.36	0	-22.6089	117.554	-508.237	-70609	-38608.2	-7026.44	124.035	1041.93	0	0	0	0	0	0	0	603	903	0
851	7	-5.9625	-17.198	-199.414	-49095.5	3917	1691.34	219.643	546.199	0	-23.3719	117.859	-503.355	-69785.1	-38608.2	-7072.22	123.298	1041.64	0	0	0	0	0	0	0	603	903	0
851	8	-7.64097	-19.1817	-209.179	-50011	4100.11	1737.12	219.601	539.082	0	-22.4564	117.554	-499.082	-70517.5	-38119.9	-6843.34	123.62	1044.29	0	0	0	0	0	0	0	603	903	0
851	9	-9.01426	-23.9119	-215.588	-51292.7	4283.21	1737.12	219.868	537.92	0	-20.4727	116.944	-493.284	-68778	-37631.6	-7209.55	123.712	1042.43	0	0	0	0	0	0	0	603	903	0
852	0	-11.9134	-26.5059	-223.828	-53490	3794.93	2469.54	216.955	538.978	0	-21.2357	117.096	-486.265	-67404.7	-37387.5	-7438.43	123.113	1041.62	0	0	0	0	0	0	0	603	903	0
852	1	-12.9815	-27.574	-231.762	-55595.7	3733.89	2377.99	216.111	539.882	0	-20.3201	116.791	-481.687	-66397.6	-36960.2	-7301.1	123.269	1040.84	0	0	0	0	0	0	0	603	903	0
852	2	-13.1341	-29.8628	-237.256	-57518.3	3978.04	2149.11	216.767	542.432	0	-20.015	117.096	-479.246	-65665.2	-36105.7	-7713.09	124.661	1040.02	0	0	0	0	0	0	0	603	903	0
852	3	-13.4393	-33.2198	-244.885	-59715.6	4161.14	2286.44	216.992	543.852	0	-19.8624	114.502	-468.259	-64566.6	-36166.8	-7667.32	122.763	1040.89	0	0	0	0	0	0	0	603	903	0
852	4	-13.8971	-35.2034	-258.313	-60905.8	3672.86	2652.65	214.219	535.783	0	-19.4046	116.028	-465.208	-64200.3	-35800.5	-7621.54	123.044	1041	0	0	0	0	0	0	0	603	903	0
852	5	-15.4229	-36.8819	-266.247	-63103	4222.18	2652.65	215.858	537.009	0	-17.5735	115.57	-460.325	-62735.5	-34640.9	-8170.85	124.747	1039.29	0	0	0	0	0	0	0	603	903	0
852	6	-17.4066	-40.6966	-279.37	-65575	4405.28	2835.75	215.769	534.725	0	-15.7425	115.57	-455.137	-61911.5	-34274.7	-7987.75	124.694	1039.03	0	0	0	0	0	0	0	603	903	0
852	7	-18.4747	-42.8328	-285.779	-67955.3	4344.25	3018.86	215.201	537.79	0	-16.658	115.112	-451.17	-60996	-33969.5	-7941.97	124.708	1038.2	0	0	0	0	0	0	0	603	903	0
852	8	-18.3221	-44.6639	-300.122	-69969.5	4527.35	2881.53	215.085	533.137	0	-16.658	112.671	-440.183	-59714.3	-33420.2	-8079.3	124.077	1038.66	0	0	0	0	0	0	0	603	903	0
852	9	-18.9325	-46.0371	-307.446	-71251.2	4710.46	2881.53	215.321	531.752	0	-15.7425	113.892	-437.742	-58707.2	-32992.9	-8308.18	124.629	1037.11	0	0	0	0	0	0	0	603	903	0
853	0	-19.2376	-49.3941	-317.212	-73173.8	4832.53	3201.97	215.234	530.678	0	-13.1485	113.587	-430.418	-57883.2	-32443.6	-8399.73	124.623	1037.48	0	0	0	0	0	0	0	603	903	0
853	1	-18.1695	-53.2088	-327.588	-76286.6	4771.49	2561.09	214.566	532.874	0	-12.3856	114.35	-425.23	-56967.7	-31833.2	-8628.62	125.139	1036.97	0	0	0	0	0	0	0	603	903	0
853	2	-19.3902	-54.1243	-338.574	-78575.4	5015.64	2515.32	214.814	532.078	0	-13.3011	113.587	-420.042	-56235.3	-31283.9	-8491.29	125.522	1036.88	0	0	0	0	0	0	0	603	903	0
853	3	-20.0006	-55.8028	-351.086	-79674	5076.67	2789.98	214.46	526.936	0	-12.3856	112.824	-413.938	-54862	-30978.8	-8720.17	125.161	1035.54	0	0	0	0	0	0	0	603	903	0
853	4	-17.8644	-59.4649	-362.378	-82054.5	5137.71	2561.09	214.178	526.434	0	-10.4019	110.535	-402.647	-53580.2	-30185.3	-9132.16	125.033	1036.07	0	0	0	0	0	0	0	603	903	0
853	5	-18.7799	-62.5166	-373.059	-83885.5	5564.95	2332.21	214.917	524.859	0	-9.3338	112.213	-401.731	-53030.9	-29758.1	-8949.05	125.925	1035.01	0	0	0	0	0	0	0	603	903	0
853	6	-17.1014	-64.3477	-383.13	-86723.6	5992.2	2286.44	215.64	526.356	0	-8.26569	112.518	-394.407	-52481.6	-29819.1	-8582.84	124.395	1036.06	0	0	0	0	0	0	0	603	903	0
853	7	-19.0851	-67.0943	-392.59	-89287.1	6053.23	2515.32	215.419	527.431	0	-9.48639	111.145	-388.303	-50833.7	-28781.5	-9269.49	125.879	1033.91	0	0	0	0	0	0	0	603	903	0
853	8	-18.7799	-69.5357	-402.05	-90202.6	5931.16	2515.32	214.752	524.357	0	-8.1131	108.704	-383.115	-49643.5	-27927	-9177.93	127.106	1032.58	0	0	0	0	0	0	0	603	903	0
853	9	-17.8644	-71.8245	-411.816	-91301.3	6358.41	2469.54	215.44	521.704	0	-6.58722	106.568	-375.486	-48911.1	-27988	-8949.05	125.462	1033.26	0	0	0	0	0	0	0	603	903	0
854	0	-15.8807	-75.6392	-424.023	-93223.8	6907.73	2423.77	216.291	519.856	0	-5.5191	107.636	-368.162	-47629.3	-27743.9	-9040.6	124.642	1032.37	0	0	0	0	0	0	0	603	903	0
854	1	-15.8807	-78.3858	-429.821	-95604.3	6724.62	2194.88	215.645	522.428	0	-6.12946	106.568	-362.363	-47812.4	-26340.1	-8994.83	127.31	1034.95	0	0	0	0	0	0	0	603	903	0
854	2	-17.8644	-79.3013	-442.944	-96336.7	6968.76	1737.12	215.733	517.492	0	-3.84064	106.262	-357.786	-46256	-26584.2	-9086.38	125.698	1032.28	0	0	0	0	0	0	0	603	903	0
854	3	-13.4393	-81.8953	-453.015	-99174.8	7090.83	1737.12	215.653	518.922	0	-5.36652	104.126	-352.293	-44882.7	-25668.7	-8994.83	127.138	1030.4	0	0	0	0	0	0	0	603	903	0
854	4	-15.2704	-84.1841	-460.339	-100090	7396.01	1462.46	216.066	517.427	0	-3.38287	100.464	-348.02	-44058.7	-25058.3	-8857.5	127.997	1029.6	0	0	0	0	0	0	0	603	903	0
854	5	-13.5919	-87.0833	-467.968	-101189	7823.25	1279.36	216.717	516.23	0	-2.77252	101.532	-338.865	-42685.5	-25546.6	-8811.72	124.611	1028.97	0	0	0	0	0	0	0	603	903	0
854	6	-11.4557	-89.6773	-477.429	-103569	7823.25	1416.69	216.386	516.931	0	-3.68805	100.769	-331.235	-42410.8	-24448	-8857.5	126.192	1031.04	0	0	0	0	0	0	0	603	903	0
854	7	-10.3875	-91.2032	-485.363	-104485	8006.36	821.593	216.496	515.271	0	-2.61993	99.2433	-325.742	-41586.8	-23471.4	-8765.95	127.945	1030.67	0	0	0	0	0	0	0	603	903	0
854	8	-9.62461	-93.0342	-492.993	-105584	8372.57	501.158	216.983	514.169	0	-2.31476	97.5649	-320.249	-39755.8	-23166.2	-8765.95	127.662	1027.14	0	0	0	0	0	0	0	603	903	0
854	9	-9.47202	-95.7808	-500.927	-106316	8494.64	821.593	216.958	512.238	0	-0.941467	95.5812	-312.009	-38474	-23044.2	-8491.29	126.143	1026.31	0	0	0	0	0	0	0	603	903	0
855	0	-6.26767	-98.3748	-504.895	-106957	8616.71	638.488	217.066	511.84	0	-1.09405	94.6657	-306.211	-38199.4	-22250.7	-8491.29	127.335	1027.75	0	0	0	0	0	0	0	603	903	0
855	1	-6.11509	-98.68	-511.914	-108513	9288.1	134.948	218.144	511.976	0	-1.85699	94.2079	-299.192	-37650.1	-21884.5	-8353.96	126.855	1028.84	0	0	0	0	0	0	0	603	903	0
855	2	-4.43662	-100.358	-515.576	-109429	9166.03	-322.816	217.778	512.246	0	0.431824	92.2243	-292.173	-37283.8	-21396.2	-8353.96	126.769	1030.61	0	0	0	0	0	0	0	603	903	0
855	3	-3.67368	-103.41	-522.9	-110253	9166.03	-597.474	217.529	510.849	0	0.126648	90.5458	-286.68	-35269.7	-20785.9	-7987.75	127.494	1026.03	0	0	0	0	0	0	0	603	903	0
855	4	-3.52109	-102.647	-528.393	-110619	9410.17	-597.474	217.809	509.35	0	0.584412	88.7148	-278.135	-33804.8	-20236.6	-7987.75	127.242	1024.54	0	0	0	0	0	0	0	603	903	0
855	5	-3.21592	-104.631	-534.192	-110802	9593.27	-505.922	217.959	507.42	0	0.584412	88.4096	-272.642	-33438.6	-19992.4	-7987.75	126.671	1025.65	0	0	0	0	0	0	0	603	903	0
855	6	-2.60556	-106.004	-537.243	-111168	9654.31	-689.027	217.97	506.923	0	-0.331115	84.4423	-265.012	-32156.9	-19199	-7941.97	127.554	1024.34	0	0	0	0	0	0	0	603	903	0
855	7	-2.30039	-106.615	-538.769	-111992	9654.31	-872.133	217.919	507.867	0	0.279236	85.0527	-258.298	-31332.9	-18710.7	-7346.88	127.562	1024.31	0	0	0	0	0	0	0	603	903	0
855	8	-3.06333	-106.92	-539.074	-112633	9898.45	-872.133	218.362	508.938	0	1.34735	82.1535	-250.974	-30325.8	-18527.6	-7667.32	126.177	1023.83	0	0	0	0	0	0	0	603	903	0
855	9	-1.99521	-107.072	-543.347	-111809	9959.49	-872.133	218.33	505.779	0	2.11029	80.9328	-244.26	-29593.4	-17551	-7301.1	128.146	1024.16	0	0	0	0	0	0	0	603	903	0
856	0	-1.99521	-107.377	-546.704	-111260	9837.42	-1101.02	217.994	503.51	0	1.34735	79.7121	-236.631	-28220.1	-16940.7	-7255.33	128.409	1022.26	0	0	0	0	0	0	0	603	903	0
856	1	-2.45298	-108.598	-547.924	-112084	9959.49	-1146.79	218.177	504.561	0	0.737	76.3551	-231.748	-27945.5	-17001.7	-7072.22	126.637	1023.59	0	0	0	0	0	0	0	603	903	0
856	2	-3.06333	-107.377	-548.535	-112542	10386.7	-1055.24	218.935	505.167	0	1.49994	76.05	-224.424	-26572.2	-16452.4	-6843.34	126.691	1021.4	0	0	0	0	0	0	0	603	903	0
856	3	-3.06333	-107.683	-549.756	-112450	10203.6	-963.685	218.56	504.545	0	2.26288	74.0663	-216.795	-24649.6	-15720	-6339.8	127.489	1016.7	0	0	0	0	0	0	0	603	903	0
856	4	-3.97886	-107.53	-548.84	-111626	9654.31	-1192.57	217.59	503.385	0	2.11029	72.0827	-210.386	-25198.9	-15475.8	-6614.46	126.441	1022.77	0	0	0	0	0	0	0	603	903	0
856	5	-3.82627	-107.377	-547.619	-111443	10020.5	-1329.9	218.298	503.504	0	1.65253	71.4723	-205.198	-23459.4	-15170.6	-6477.13	126.068	1017.33	0	0	0	0	0	0	0	603	903	0
856	6	-2.30039	-107.988	-547.314	-110802	10264.7	-917.909	218.755	502.447	0	1.49994	69.1835	-198.484	-23642.5	-14133	-6477.13	128.795	1022.12	0	0	0	0	0	0	0	603	903	0
856	7	-2.75815	-108.14	-549.145	-111077	10264.7	-1146.79	218.692	502.272	0	1.80512	68.1154	-192.075	-22177.6	-14072	-6156.69	126.737	1018.46	0	0	0	0	0	0	0	603	903	0
856	8	-2.60556	-107.835	-548.535	-111168	10142.6	-1329.9	218.49	502.664	0	3.17841	66.1318	-186.582	-21353.7	-13766.8	-6202.47	126.216	1017.45	0	0	0	0	0	0	0	603	903	0
856	9	-3.21592	-107.072	-548.84	-110619	10325.7	-1467.23	218.814	501.55	0	1.49994	63.2326	-179.258	-20621.2	-12851.3	-5882.03	128.308	1018.04	0	0	0	0	0	0	0	603	903	0
857	0	-2.30039	-107.377	-545.483	-109246	10447.8	-1741.88	219.153	500.273	0	2.26288	62.1645	-174.375	-19980.4	-12546.1	-5515.82	128.051	1017.58	0	0	0	0	0	0	0	603	903	0
857	1	-3.3685	-108.293	-543.042	-109246	10203.6	-1741.88	218.79	501.174	0	1.49994	60.6386	-168.882	-19064.9	-12485.1	-5607.38	126.072	1015.89	0	0	0	0	0	0	0	603	903	0
857	2	-1.38486	-109.209	-543.957	-109154	10203.6	-1696.11	218.758	500.667	0	2.26288	58.3498	-162.778	-18057.8	-11508.5	-5378.49	129.299	1013.93	0	0	0	0	0	0	0	603	903	0
857	3	-1.69004	-108.293	-543.347	-108605	10203.6	-1513	218.779	499.881	0	2.41547	56.2135	-154.844	-17142.2	-11447.5	-4966.51	126.071	1013.71	0	0	0	0	0	0	0	603	903	0
857	4	-0.927098	-108.598	-542.737	-108055	10325.7	-1924.99	219.025	499.094	0	0.431824	54.8402	-148.435	-16684.5	-10959.2	-4829.18	126.168	1015.4	0	0	0	0	0	0	0	603	903	0
857	5	-0.0115708	-109.361	-541.821	-107048	10386.7	-2062.32	219.17	497.571	0	0.126648	53.467	-144.773	-16226.7	-9982.65	-4325.64	131.046	1015.08	0	0	0	0	0	0	0	603	903	0
857	6	-0.621922	-110.277	-541.211	-106499	10447.8	-2245.42	219.304	496.779	0	-0.178527	51.7885	-141.721	-15036.5	-10287.8	-4325.64	127.408	1009.1	0	0	0	0	0	0	0	603	903	0
857	7	1.20913	-110.582	-538.464	-105675	10936	-2199.65	220.31	496.253	0	0.431824	48.8893	-134.397	-14487.2	-10043.7	-4188.31	125.269	1010.79	0	0	0	0	0	0	0	603	903	0
857	8	2.27725	-110.887	-534.192	-106591	10691.9	-2428.53	220.015	499.536	0	0.126648	47.3634	-126.462	-14121	-9311.26	-4050.98	126.371	1014.66	0	0	0	0	0	0	0	603	903	0
857	9	4.41348	-110.887	-535.717	-105400	10569.8	-2657.41	219.73	496.746	0	-0.483703	46.6005	-123.716	-13388.6	-9128.16	-3913.65	126.217	1011.22	0	0	0	0	0	0	0	603	903	0
858	0	5.93936	-111.497	-536.633	-104760	10569.8	-2977.85	219.697	495.216	0	-0.331115	43.7013	-118.528	-12747.7	-8639.88	-3822.1	127.107	1010.55	0	0	0	0	0	0	0	603	903	0
858	1	7.77041	-112.413	-536.633	-103569	10814	-3206.73	220.152	492.999	0	-0.178527	43.091	-113.645	-12198.4	-7968.49	-3593.22	129.883	1010.34	0	0	0	0	0	0	0	603	903	0
858	2	7.31265	-113.023	-536.633	-103936	10875	-3435.61	220.265	493.681	0	2.26288	41.1073	-109.373	-11557.5	-7846.42	-3593.22	128.26	1008.67	0	0	0	0	0	0	0	603	903	0
858	3	10.9748	-111.955	-534.192	-104668	11241.2	-3618.72	221.043	495.937	0	-0.483703	39.8866	-102.354	-11282.9	-7602.28	-3043.9	125.725	1013.23	0	0	0	0	0	0	0	603	903	0
858	4	10.3644	-111.955	-535.107	-103203	11180.2	-3801.82	220.893	492.864	0	-0.941467	38.6659	-95.6397	-11099.8	-7114	-3135.45	125.617	1019.06	0	0	0	0	0	0	0	603	903	0
858	5	12.9584	-111.497	-532.971	-103295	11241.2	-4122.25	221.092	493.809	0	-1.09405	35.9193	-93.1983	-9909.58	-7175.04	-2998.12	123.013	1009.33	0	0	0	0	0	0	0	603	903	0
858	6	14.0265	-112.413	-530.224	-103203	11485.4	-4534.24	221.661	494.641	0	-0.788879	36.0719	-88.0103	-8719.39	-6991.93	-2769.24	120.556	1002.07	0	0	0	0	0	0	0	603	903	0
858	7	15.3998	-112.871	-535.717	-102745	11119.2	-4717.35	220.756	491.79	0	-1.09405	33.4779	-84.6534	-9360.26	-5832.26	-2677.69	131.104	1013.57	0	0	0	0	0	0	0	603	903	0
858	8	17.2309	-112.413	-536.023	-103112	11546.4	-4580.02	221.541	492.364	0	-0.636291	32.1046	-80.3809	-8994.05	-5954.33	-2494.58	125.924	1014.89	0	0	0	0	0	0	0	603	903	0
858	9	18.1464	-112.108	-536.938	-102196	12095.7	-4808.9	222.527	490.331	0	-2.46735	31.6469	-75.8033	-8261.63	-5649.16	-2265.7	125.476	1011.99	0	0	0	0	0	0	0	603	903	0
859	0	19.3671	-113.176	-535.412	-102928	11851.6	-5449.77	222.135	492.242	0	-2.46735	30.121	-73.9723	-7620.76	-5282.95	-2128.37	128.582	1006.02	0	0	0	0	0	0	0	603	903	0
859	1	20.4352	-112.413	-533.276	-102379	11668.5	-5541.32	221.881	491.981	0	-1.70441	28.29	-67.8687	-7346.1	-5038.81	-1762.16	125.757	1011.24	0	0	0	0	0	0	0	603	903	0
859	2	22.724	-113.023	-536.938	-102471	12156.8	-5770.21	222.641	490.843	0	-2.16217	25.3908	-66.3429	-6888.34	-4794.67	-1991.04	127.729	1006.83	0	0	0	0	0	0	0	603	903	0
859	3	23.9447	-113.634	-540.295	-103112	12400.9	-6090.64	222.952	490.843	0	-2.46735	24.1701	-62.3756	-6796.79	-4916.74	-1350.17	121.175	1011.97	0	0	0	0	0	0	0	603	903	0
859	4	23.7921	-112.718	-541.516	-101830	12339.9	-6548.4	222.788	488.046	0	-3.0777	24.3227	-59.629	-6705.23	-4550.52	-1441.73	123.686	1015.45	0	0	0	0	0	0	0	603	903	0
859	5	25.0128	-113.939	-542.431	-103020	12278.8	-6090.64	222.637	489.923	0	-2.16217	22.9494	-55.9669	-6064.36	-4245.35	-1670.61	124.145	1011.36	0	0	0	0	0	0	0	603	903	0
859	6	25.0128	-113.786	-543.652	-101921	11912.6	-6365.3	221.912	487.475	0	-1.39923	21.1183	-52.3048	-5789.71	-3573.96	-800.858	131.671	1013.69	0	0	0	0	0	0	0	603	903	0
859	7	25.9284	-114.549	-541.516	-101372	12584	-6777.29	223.238	487.201	0	-2.46735	19.2873	-49.253	-5423.49	-3879.14	-1121.29	121.241	1013.12	0	0	0	0	0	0	0	603	903	0
859	8	27.6068	-113.786	-543.652	-102745	12523	-6868.84	223.035	488.991	0	-2.77252	18.9821	-45.8961	-5148.84	-3451.89	-1121.29	124.789	1015.18	0	0	0	0	0	0	0	603	903	0
859	9	27.6068	-114.854	-545.483	-103112	12767.1	-6594.18	223.405	489.028	0	-3.38287	18.2192	-43.7599	-4782.62	-3329.82	-892.411	123.907	1012.29	0	0	0	0	0	0	0	603	903	0
860	0	28.3698	-113.939	-548.535	-103112	13072.3	-6914.62	223.831	487.976	0	-2.77252	17.6088	-41.9288	-4141.76	-3146.71	-1075.52	124.951	1001.78	0	0	0	0	0	0	0	603	903	0
860	1	28.0646	-113.939	-549.756	-102654	12706.1	-7006.17	223.112	486.726	0	-1.85699	15.9303	-36.7408	-4599.52	-2902.57	-892.411	120.999	1028.19	0	0	0	0	0	0	0	603	903	0
860	2	26.9965	-113.786	-550.671	-102104	12706.1	-7006.17	223.074	485.418	0	-2.61993	14.8622	-33.6891	-4324.86	-2597.4	-617.753	122.901	1031.38	0	0	0	0	0	0	0	603	903	0
860	3	27.7594	-113.481	-551.892	-103752	13194.3	-6868.84	223.908	487.994	0	-3.38287	13.9467	-28.8062	-3134.68	-2170.15	-480.423	124.664	1011.82	0	0	0	0	0	0	0	603	903	0
860	4	27.4543	-114.091	-551.587	-103844	13011.2	-6960.39	223.589	488.264	0	-2.46735	12.4208	-28.8062	-2860.02	-1987.05	-709.305	131.02	1002.28	0	0	0	0	0	0	0	603	903	0
860	5	27.7594	-113.023	-550.671	-103752	12767.1	-7051.94	223.185	488.411	0	-0.0259395	13.0312	-26.3648	-3409.34	-2048.08	-388.871	122.318	1032.31	0	0	0	0	0	0	0	603	903	0
860	6	28.5224	-112.108	-554.638	-103661	13072.3	-7097.72	223.569	486.898	0	-1.55182	11.6579	-23.3131	-3134.68	-1498.77	-480.423	135.711	1037.46	0	0	0	0	0	0	0	603	903	0
860	7	29.2853	-112.108	-557.385	-104027	13072.3	-7006.17	223.453	486.634	0	-2.61993	10.8949	-19.9561	-3317.78	-1315.66	-343.094	134.072	1069.25	0	0	0	0	0	0	0	603	903	0
860	8	28.3698	-111.803	-559.216	-104576	13194.3	-6960.39	223.594	487.005	0	-3.0777	10.5898	-17.2096	-2768.47	-1254.62	-205.765	127.097	1063.87	0	0	0	0	0	0	0	603	903	0
860	9	28.5224	-110.887	-561.963	-103295	13011.2	-7006.17	223.153	483.811	0	-2.46735	9.67423	-17.2096	-1578.28	-949.448	-251.541	144.83	994.709	0	0	0	0	0	0	0	603	903	0
861	0	27.7594	-110.429	-563.183	-104943	12889.2	-6319.52	222.886	486.338	0	0	0	0	0	0	0	200	903	0	0	0	0	0	0	0	603	903	0
861	1	27.912	-109.056	-562.268	-104119	13194.3	-7051.94	223.466	485.176	0	0	0	0	0	0	0	200	903	0	0	0	0	0	0	0	603	903	0
861	2	28.2172	-109.209	-563.488	-104851	13194.3	-7006.17	223.415	486.075	0	0	0	0	0	0	0	200	903	0	0	0	0	0	0	0	603	903	0
861	3	28.2172	-108.903	-566.235	-105858	12706.1	-6868.84	222.44	486.951	0	0	0	0	0	0	0	200	903	0	0	0	0	0	0	0	603	903	0
861	4	28.2172	-107.683	-568.371	-104668	13499.5	-6914.62	223.751	484.154	0	0	0	0	0	0	0	200	903	0	0	0	0	0	0	0	603	903	0
861	5	29.2853	-106.92	-571.423	-105950	13377.5	-7006.17	223.411	485.414	0	0	0	0	0	0	0	200	903	0	0	0	0	0	0	0	603	903	0
861	6	29.7431	-105.699	-573.254	-105767	13255.4	-7006.17	223.123	484.502	0	0	0	0	0	0	0	200	903	0	0	0	0	0	0	0	603	903	0
861	7	28.8275	-104.783	-575.085	-105950	13560.6	-7006.17	223.58	484.233	0	0	0	0	0	0	0	200	903	0	0	0	0	0	0	0	603	903	0
861	8	28.9801	-104.478	-576.916	-107598	13804.7	-6777.29	223.928	486.505	0	0	0	0	0	0	0	200	903	0	0	0	0	0	0	0	603	903	0
861	9	28.2172	-102.8	-576.916	-106774	13377.5	-7097.72	223.188	485.077	0	0	0	0	0	0	0	200	903	0	0	0	0	0	0	0	603	903	0
862	0	28.9801	-101.884	-575.695	-107415	13560.6	-7097.72	223.555	486.582	0	0	0	0	0	0	0	200	903	0	0	0	0	0	0	0	603	903	0
862	1	29.7431	-101.427	-580.273	-107231	13682.6	-6731.51	223.58	484.795	0	0	0	0	0	0	0	200	903	0	0	0	0	0	0	0	603	903	0
862	2	29.4379	-101.427	-581.189	-107598	13560.6	-6868.84	223.332	485.134	0	0	0	0	0	0	0	200	903	0	0	0	0	0	0	0	603	903	0
862	3	28.675	-99.9007	-584.24	-108605	13926.8	-6365.3	223.837	485.89	0	0	0	0	0	0	0	200	903	0	0	0	0	0	0	0	603	903	0
862	4	29.1327	-98.5274	-585.461	-108788	13377.5	-6823.06	222.849	485.816	0	0	0	0	0	0	0	200	903	0	0	0	0	0	0	0	603	903	0
862	5	28.2172	-97.3067	-586.682	-108696	13682.6	-6868.84	223.322	485.273	0	0	0	0	0	0	0	200	903	0	0	0	0	0	0	0	603	903	0
862	6	29.1327	-96.8489	-588.208	-108513	14293	-6868.84	224.299	484.481	0	0	0	0	0	0	0	200	903	0	0	0	0	0	0	0	603	903	0
862	7	28.5224	-96.3911	-589.123	-109154	13926.8	-6731.51	223.64	485.282	0	0	0	0	0	0	0	200	903	0	0	0	0	0	0	0	603	903	0
862	8	27.6068	-95.4756	-587.292	-109246	13560.6	-6777.29	223.09	486.016	0	0	0	0	0	0	0	200	903	0	0	0	0	0	0	0	603	903	0
862	9	29.2853	-93.492	-588.513	-109154	13560.6	-6731.51	223.042	485.474	0	0	0	0	0	0	0	200	903	0	0	0	0	0	0	0	603	903	0
863	0	30.2008	-93.3394	-592.175	-110344	13804.7	-6319.52	223.312	486.337	0	0	0	0	0	0	0	200	903	0	0	0	0	0	0	0	603	903	0
863	1	28.8275	-91.3557	-595.227	-109246	13682.6	-6777.29	222.987	483.536	0	0	0	0	0	0	0	200	903	0	0	0	0	0	0	0	603	903	0
863	2	27.6068	-90.135	-595.532	-109703	13682.6	-5861.76	222.975	484.211	0	0	0	0	0	0	0	200	903	0	0	0	0	0	0	0	603	903	0
863	3	26.9965	-89.5247	-595.227	-109795	13438.5	-6502.63	222.577	484.459	0	0	0	0	0	0	0	200	903	0	0	0	0	0	0	0	603	903	0
863	4	26.6913	-88.4566	-595.227	-110894	13804.7	-6685.73	223.192	486.305	0	0	0	0	0	0	0	200	903	0	0	0	0	0	0	0	603	903	0
863	5	26.5387	-86.6255	-595.227	-111077	13743.7	-6365.3	223.09	486.612	0	0	0	0	0	0	0	200	903	0	0	0	0	0	0	0	603	903	0
863	6	26.9965	-85.8626	-596.142	-110253	13316.4	-5999.09	222.338	484.944	0	0	0	0	0	0	0	200	903	0	0	0	0	0	0	0	603	903	0
863	7	26.6913	-84.7945	-594.006	-110253	13621.6	-6182.19	222.932	485.609	0	0	0	0	0	0	0	200	903	0	0	0	0	0	0	0	603	903	0
863	8	26.5387	-83.2686	-599.499	-110710	13438.5	-6227.97	222.416	484.672	0	0	0	0	0	0	0	200	903	0	0	0	0	0	0	0	603	903	0
863	9	25.1654	-82.3531	-599.194	-111443	13255.4	-5815.98	222.122	485.988	0	0	0	0	0	0	0	200	903	0	0	0	0	0	0	0	603	903	0
864	0	24.8603	-81.1324	-598.889	-111718	13499.5	-5861.76	222.541	486.541	0	0	0	0	0	0	0	200	903	0	0	0	0	0	0	0	603	903	0
864	1	25.9284	-80.3694	-599.804	-111168	13865.7	-5632.88	223.117	485.341	0	0	0	0	0	0	0	200	903	0	0	0	0	0	0	0	603	903	0
864	2	23.7921	-79.9117	-599.804	-110802	13621.6	-5449.77	222.71	484.73	0	0	0	0	0	0	0	200	903	0	0	0	0	0	0	0	603	903	0
864	3	24.8603	-78.6909	-599.804	-110253	13499.5	-5632.88	222.507	483.814	0	0	0	0	0	0	0	200	903	0	0	0	0	0	0	0	603	903	0
864	4	25.0128	-77.1651	-599.499	-111626	13194.3	-5632.88	222.009	486.199	0	0	0	0	0	0	0	200	903	0	0	0	0	0	0	0	603	903	0
864	5	24.0973	-78.2332	-601.635	-111901	13438.5	-5632.88	222.337	485.994	0	0	0	0	0	0	0	200	903	0	0	0	0	0	0	0	603	903	0
864	6	22.724	-75.4866	-602.551	-111351	13316.4	-5358.22	222.1	484.8	0	0	0	0	0	0	0	200	903	0	0	0	0	0	0	0	603	903	0
864	7	23.1818	-74.7237	-601.635	-111168	13316.4	-5266.67	222.134	484.777	0	0	0	0	0	0	0	200	903	0	0	0	0	0	0	0	603	903	0
864	8	22.8766	-73.9607	-600.11	-111626	13194.3	-4900.46	221.987	486.009	0	0	0	0	0	0	0	200	903	0	0	0	0	0	0	0	603	903	0
864	9	21.9611	-71.8245	-600.11	-110344	13438.5	-4763.13	222.393	483.873	0	0	0	0	0	0	0	200	903	0	0	0	0	0	0	0	603	903	0
865	0	22.5714	-72.2823	-600.11	-111809	13377.5	-5175.11	222.292	486.314	0	0	0	0	0	0	0	200	903	0	0	0	0	0	0	0	603	903	0
865	1	21.1981	-70.2986	-602.551	-110619	12828.1	-5129.34	221.29	483.584	0	0	0	0	0	0	0	200	903	0	0	0	0	0	0	0	603	903	0
865	2	21.8085	-69.8409	-601.025	-110710	13133.3	-5037.78	221.852	484.203	0	0	0	0	0	0	0	200	903	0	0	0	0	0	0	0	603	903	0
865	3	20.7404	-69.3831	-598.889	-111443	13194.3	-4671.57	222.031	486.083	0	0	0	0	0	0	0	200	903	0	0	0	0	0	0	0	603	903	0
865	4	20.4352	-67.3994	-601.635	-111077	12461.9	-4854.68	220.713	484.625	0	0	0	0	0	0	0	200	903	0	0	0	0	0	0	0	603	903	0
865	5	20.13	-67.2469	-597.668	-111077	13133.3	-4763.13	221.974	485.85	0	0	0	0	0	0	0	200	903	0	0	0	0	0	0	0	603	903	0
865	6	18.7567	-65.5684	-597.668	-110619	13072.3	-4488.47	221.872	485.084	0	0	0	0	0	0	0	200	903	0	0	0	0	0	0	0	603	903	0
865	7	18.6042	-64.6529	-597.058	-110436	13316.4	-4580.02	222.303	484.967	0	0	0	0	0	0	0	200	903	0	0	0	0	0	0	0	603	903	0
865	8	19.0619	-63.7373	-596.753	-110527	12950.2	-4259.58	221.701	485.215	0	0	0	0	0	0	0	200	903	0	0	0	0	0	0	0	603	903	0
865	9	19.0619	-62.5166	-599.194	-110436	12828.1	-3710.27	221.409	484.307	0	0	0	0	0	0	0	200	903	0	0	0	0	0	0	0	603	903	0
866	0	18.299	-61.4485	-598.279	-109703	12706.1	-3984.93	221.238	483.365	0	0	0	0	0	0	0	200	903	0	0	0	0	0	0	0	603	903	0
866	1	16.6205	-61.6011	-595.837	-109520	12950.2	-3847.6	221.734	483.809	0	0	0	0	0	0	0	200	903	0	0	0	0	0	0	0	603	903	0
866	2	18.1464	-60.9908	-594.006	-109429	12645	-3939.15	221.288	484.222	0	0	0	0	0	0	0	200	903	0	0	0	0	0	0	0	603	903	0
866	3	16.7731	-60.2278	-593.091	-109795	12523	-3756.04	221.115	485.123	0	0	0	0	0	0	0	200	903	0	0	0	0	0	0	0	603	903	0
866	4	17.2309	-58.5494	-591.87	-109246	12828.1	-3756.04	221.674	484.577	0	0	0	0	0	0	0	200	903	0	0	0	0	0	0	0	603	903	0
866	5	16.9257	-58.0916	-590.649	-108147	12523	-3664.49	221.202	483.099	0	0	0	0	0	0	0	200	903	0	0	0	0	0	0	0	603	903	0
866	6	16.4679	-57.7864	-590.344	-108238	12584	-3801.82	221.316	483.348	0	0	0	0	0	0	0	200	903	0	0	0	0	0	0	0	603	903	0
866	7	16.4679	-58.2442	-589.123	-107964	12889.2	-3572.94	221.879	483.262	0	0	0	0	0	0	0	200	903	0	0	0	0	0	0	0	603	903	0
866	8	14.942	-56.8709	-588.818	-107964	12584	-3023.62	221.372	483.357	0	0	0	0	0	0	0	200	903	0	0	0	0	0	0	0	603	903	0
866	9	14.7895	-55.345	-587.597	-107323	12461.9	-3527.16	221.208	482.647	0	0	0	0	0	0	0	200	903	0	0	0	0	0	0	0	603	903	0
867	0	14.7895	-54.4295	-583.935	-106316	12339.9	-3664.49	221.132	482.068	0	0	0	0	0	0	0	200	903	0	0	0	0	0	0	0	603	903	0
867	1	14.6369	-54.5821	-582.104	-105675	12461.9	-3206.73	221.408	481.54	0	0	0	0	0	0	0	200	903	0	0	0	0	0	0	0	603	903	0
867	2	14.6369	-53.8191	-580.578	-106133	12584	-3206.73	221.675	482.805	0	0	0	0	0	0	0	200	903	0	0	0	0	0	0	0	603	903	0
867	3	14.942	-53.2088	-578.442	-106224	12095.7	-3023.62	220.911	483.639	0	0	0	0	0	0	0	200	903	0	0	0	0	0	0	0	603	903	0
867	4	14.4843	-51.9881	-578.747	-105675	12156.8	-2977.85	221.005	482.593	0	0	0	0	0	0	0	200	903	0	0	0	0	0	0	0	603	903	0
867	5	13.2636	-50.92	-575.695	-104393	12706.1	-2886.29	222.071	481.334	0	0	0	0	0	0	0	200	903	0	0	0	0	0	0	0	603	903	0
867	6	14.0265	-51.3777	-574.475	-104302	12278.8	-2565.86	221.374	481.56	0	0	0	0	0	0	0	200	903	0	0	0	0	0	0	0	603	903	0
867	7	13.2636	-51.3777	-571.728	-104393	12095.7	-2611.64	221.156	482.593	0	0	0	0	0	0	0	200	903	0	0	0	0	0	0	0	603	903	0
867	8	12.8058	-49.3941	-569.897	-103478	12339.9	-2382.75	221.653	481.573	0	0	0	0	0	0	0	200	903	0	0	0	0	0	0	0	603	903	0
867	9	14.6369	-48.6311	-566.845	-103386	12034.7	-2748.96	221.231	482.389	0	0	0	0	0	0	0	200	903	0	0	0	0	0	0	0	603	903	0
868	0	14.1791	-48.0208	-566.235	-102379	12034.7	-2977.85	221.254	480.807	0	0	0	0	0	0	0	200	903	0	0	0	0	0	0	0	603	903	0
868	1	13.8739	-47.7156	-564.404	-101647	12156.8	-2977.85	221.539	480.096	0	0	0	0	0	0	0	200	903	0	0	0	0	0	0	0	603	903	0
868	2	16.1627	-46.6475	-561.352	-101830	12278.8	-2611.64	221.874	481.401	0	0	0	0	0	0	0	200	903	0	0	0	0	0	0	0	603	903	0
868	3	12.1955	-46.1897	-561.047	-101647	11973.6	-2748.96	221.342	481.173	0	0	0	0	0	0	0	200	903	0	0	0	0	0	0	0	603	903	0
868	4	14.942	-44.8164	-556.164	-100823	11607.4	-2794.74	220.871	481.282	0	0	0	0	0	0	0	200	903	0	0	0	0	0	0	0	603	903	0
868	5	13.5688	-44.5113	-554.333	-99907.2	12217.8	-2474.31	222.041	480.23	0	0	0	0	0	0	0	200	903	0	0	0	0	0	0	0	603	903	0
868	6	13.8739	-44.3587	-551.587	-98900.2	11973.6	-2565.86	221.708	479.301	0	0	0	0	0	0	0	200	903	0	0	0	0	0	0	0	603	903	0
868	7	13.4162	-45.2742	-548.23	-98808.6	11912.6	-2657.41	221.729	480.232	0	0	0	0	0	0	0	200	903	0	0	0	0	0	0	0	603	903	0
868	8	14.3317	-43.4431	-548.535	-99174.8	11729.5	-2657.41	221.383	480.799	0	0	0	0	0	0	0	200	903	0	0	0	0	0	0	0	603	903	0
868	9	13.7213	-41.9173	-543.347	-98442.4	12156.8	-2611.64	222.374	481.178	0	0	0	0	0	0	0	200	903	0	0	0	0	0	0	0	603	903	0
869	0	13.111	-41.3069	-544.262	-97160.6	12278.8	-2886.29	222.561	478.518	0	0	0	0	0	0	0	200	903	0	0	0	0	0	0	0	603	903	0
869	1	13.4162	-41.6121	-542.431	-96519.7	11790.5	-2657.41	221.736	477.939	0	0	0	0	0	0	0	200	903	0	0	0	0	0	0	0	603	903	0
869	2	12.6532	-41.1543	-538.159	-95970.5	11668.5	-2199.65	221.682	478.331	0	0	0	0	0	0	0	200	903	0	0	0	0	0	0	0	603	903	0
869	3	12.5006	-40.544	-536.023	-96245.1	12034.7	-2565.86	222.452	479.554	0	0	0	0	0	0	0	200	903	0	0	0	0	0	0	0	603	903	0
869	4	13.7213	-39.4759	-532.361	-96062	11790.5	-2382.75	222.148	480.445	0	0	0	0	0	0	0	200	903	0	0	0	0	0	0	0	603	903	0
869	5	13.5688	-38.4077	-532.361	-95054.9	11668.5	-2382.75	221.918	478.554	0	0	0	0	0	0	0	200	903	0	0	0	0	0	0	0	603	903	0
869	6	13.8739	-38.1026	-530.224	-94047.8	11851.6	-2382.75	222.352	477.374	0	0	0	0	0	0	0	200	903	0	0	0	0	0	0	0	603	903	0
869	7	13.5688	-38.1026	-522.9	-93223.8	11790.5	-2382.75	222.548	478.282	0	0	0	0	0	0	0	200	903	0	0	0	0	0	0	0	603	903	0
869	8	12.9584	-37.95	-525.647	-93498.5	11546.4	-2703.19	221.966	477.873	0	0	0	0	0	0	0	200	903	0	0	0	0	0	0	0	603	903	0
869	9	14.4843	-36.7293	-520.459	-92949.2	11485.4	-2428.53	222.068	478.591	0	0	0	0	0	0	0	200	903	0	0	0	0	0	0	0	603	903	0
870	0	12.0429	-37.0345	-519.848	-92674.6	11546.4	-2199.65	222.211	478.272	0	0	0	0	0	0	0	200	903	0	0	0	0	0	0	0	603	903	0
870	1	12.1955	-36.4241	-518.017	-90660.4	11668.5	-1787.66	222.525	475.014	0	0	0	0	0	0	0	200	903	0	0	0	0	0	0	0	603	903	0
870	2	13.4162	-35.9663	-514.966	-90385.7	11485.4	-2428.53	222.303	475.518	0	0	0	0	0	0	0	200	903	0	0	0	0	0	0	0	603	903	0
870	3	14.0265	-35.6612	-513.745	-90843.5	11241.2	-2245.42	221.881	476.826	0	0	0	0	0	0	0	200	903	0	0	0	0	0	0	0	603	903	0
870	4	13.111	-34.5931	-511.303	-90202.6	11729.5	-2520.08	222.94	476.417	0	0	0	0	0	0	0	200	903	0	0	0	0	0	0	0	603	903	0
870	5	12.1955	-34.4405	-510.083	-89287.1	11668.5	-2565.86	222.876	475.044	0	0	0	0	0	0	0	200	903	0	0	0	0	0	0	0	603	903	0
870	6	11.8903	-33.2198	-507.336	-88096.9	11424.3	-2336.98	222.518	473.646	0	0	0	0	0	0	0	200	903	0	0	0	0	0	0	0	603	903	0
870	7	12.1955	-33.8301	-503.064	-87456	11607.4	-2428.53	223.074	473.847	0	0	0	0	0	0	0	200	903	0	0	0	0	0	0	0	603	903	0
870	8	14.1791	-33.6775	-499.707	-87730.7	11607.4	-2199.65	223.229	475.564	0	0	0	0	0	0	0	200	903	0	0	0	0	0	0	0	603	903	0
870	9	12.9584	-32.6094	-499.096	-87089.8	11424.3	-2245.42	222.89	474.495	0	0	0	0	0	0	0	200	903	0	0	0	0	0	0	0	603	903	0
871	0	13.5688	-31.9991	-496.96	-85808.1	11302.3	-2016.54	222.743	472.666	0	0	0	0	0	0	0	200	903	0	0	0	0	0	0	0	603	903	0
871	1	12.8058	-31.9991	-493.908	-85350.4	11668.5	-2062.32	223.625	472.806	0	0	0	0	0	0	0	200	903	0	0	0	0	0	0	0	603	903	0
871	2	12.0429	-31.9991	-492.993	-84251.7	11363.3	-2016.54	223.05	470.898	0	0	0	0	0	0	0	200	903	0	0	0	0	0	0	0	603	903	0
871	3	12.1955	-32.6094	-489.636	-84709.5	11668.5	-1558.78	223.831	473.005	0	0	0	0	0	0	0	200	903	0	0	0	0	0	0	0	603	903	0
871	4	12.9584	-30.4732	-485.669	-84709.5	11363.3	-2062.32	223.397	474.418	0	0	0	0	0	0	0	200	903	0	0	0	0	0	0	0	603	903	0
871	5	11.4325	-29.8628	-480.175	-83061.5	11546.4	-2428.53	224.046	472.982	0	0	0	0	0	0	0	200	903	0	0	0	0	0	0	0	603	903	0
871	6	12.8058	-30.0154	-480.786	-82329.1	11607.4	-2336.98	224.143	471.239	0	0	0	0	0	0	0	200	903	0	0	0	0	0	0	0	603	903	0
871	7	14.6369	-29.8628	-479.565	-81779.8	11241.2	-1924.99	223.44	470.529	0	0	0	0	0	0	0	200	903	0	0	0	0	0	0	0	603	903	0
871	8	13.4162	-29.8628	-479.26	-82146	11363.3	-2245.42	223.71	471.402	0	0	0	0	0	0	0	200	903	0	0	0	0	0	0	0	603	903	0
871	9	12.6532	-28.0318	-475.903	-81138.9	11485.4	-2382.75	224.134	470.495	0	0	0	0	0	0	0	200	903	0	0	0	0	0	0	0	603	903	0
872	0	12.1955	-28.0318	-475.903	-80498	11424.3	-2336.98	224.006	469.148	0	0	0	0	0	0	0	200	903	0	0	0	0	0	0	0	603	903	0
872	1	13.4162	-28.0318	-471.631	-78941.6	10752.9	-2336.98	222.8	467.38	0	0	0	0	0	0	0	200	903	0	0	0	0	0	0	0	603	903	0
872	2	11.8903	-29.2525	-469.189	-79399.4	11729.5	-2245.42	225	469.227	0	0	0	0	0	0	0	200	903	0	0	0	0	0	0	0	603	903	0
872	3	13.2636	-27.2688	-467.968	-79857.2	11668.5	-2153.87	224.934	470.647	0	0	0	0	0	0	0	200	903	0	0	0	0	0	0	0	603	903	0
872	4	12.9584	-25.4378	-465.222	-78667	11302.3	-2108.1	224.294	469.096	0	0	0	0	0	0	0	200	903	0	0	0	0	0	0	0	603	903	0
872	5	13.5688	-25.2852	-463.391	-78667	11241.2	-2428.53	224.259	469.764	0	0	0	0	0	0	0	200	903	0	0	0	0	0	0	0	603	903	0
872	6	13.2636	-25.4378	-463.391	-77202.1	11607.4	-2245.42	225.049	466.603	0	0	0	0	0	0	0	200	903	0	0	0	0	0	0	0	603	903	0
872	7	11.8903	-25.4378	-459.729	-76652.8	11546.4	-2199.65	225.116	466.735	0	0	0	0	0	0	0	200	903	0	0	0	0	0	0	0	603	903	0
872	8	12.1955	-24.5222	-458.813	-76835.9	11424.3	-2108.1	224.9	467.467	0	0	0	0	0	0	0	200	903	0	0	0	0	0	0	0	603	903	0
872	9	11.8903	-23.4541	-455.456	-75371.1	11302.3	-2245.42	224.815	465.485	0	0	0	0	0	0	0	200	903	0	0	0	0	0	0	0	603	903	0
873	0	12.348	-24.2171	-453.32	-76011.9	11302.3	-2565.86	224.932	467.678	0	0	0	0	0	0	0	200	903	0	0	0	0	0	0	0	603	903	0
873	1	13.111	-22.6912	-450.573	-75004.9	11546.4	-2336.98	225.626	466.465	0	0	0	0	0	0	0	200	903	0	0	0	0	0	0	0	603	903	0
873	2	12.9584	-23.3015	-449.658	-74364	11363.3	-2016.54	225.271	465.379	0	0	0	0	0	0	0	200	903	0	0	0	0	0	0	0	603	903	0
873	3	13.7213	-22.2334	-448.742	-73997.8	11973.6	-2291.2	226.683	464.9	0	0	0	0	0	0	0	200	903	0	0	0	0	0	0	0	603	903	0
873	4	14.1791	-21.4705	-446.911	-73631.6	11912.6	-2108.1	226.655	464.757	0	0	0	0	0	0	0	200	903	0	0	0	0	0	0	0	603	903	0
873	5	12.6532	-21.7757	-444.775	-73723.1	11485.4	-2336.98	225.823	465.754	0	0	0	0	0	0	0	200	903	0	0	0	0	0	0	0	603	903	0
873	6	12.348	-21.0127	-442.944	-72624.5	11607.4	-2153.87	226.205	463.959	0	0	0	0	0	0	0	200	903	0	0	0	0	0	0	0	603	903	0
873	7	12.6532	-21.4705	-438.977	-71800.5	11912.6	-2199.65	227.137	463.563	0	0	0	0	0	0	0	200	903	0	0	0	0	0	0	0	603	903	0
873	8	12.1955	-20.8601	-435.009	-72349.8	11790.5	-2153.87	227.104	466.318	0	0	0	0	0	0	0	200	903	0	0	0	0	0	0	0	603	903	0
873	9	13.111	-19.3343	-435.009	-70793.5	11851.6	-2382.75	227.244	462.74	0	0	0	0	0	0	0	200	903	0	0	0	0	0	0	0	603	903	0
874	0	14.0265	-19.792	-434.704	-71159.7	11546.4	-2108.1	226.562	463.697	0	0	0	0	0	0	0	200	903	0	0	0	0	0	0	0	603	903	0
874	1	13.2636	-19.0291	-433.484	-70427.2	10997.1	-2291.2	225.369	462.468	0	0	0	0	0	0	0	200	903	0	0	0	0	0	0	0	603	903	0
874	2	13.2636	-18.7239	-428.601	-69603.3	11912.6	-2428.53	227.794	462.397	0	0	0	0	0	0	0	200	903	0	0	0	0	0	0	0	603	903	0
874	3	12.8058	-18.2661	-429.211	-69877.9	11241.2	-2016.54	226.19	462.805	0	0	0	0	0	0	0	200	903	0	0	0	0	0	0	0	603	903	0
874	4	14.3317	-17.5032	-426.77	-69328.6	11729.5	-2199.65	227.484	462.45	0	0	0	0	0	0	0	200	903	0	0	0	0	0	0	0	603	903	0
874	5	12.6532	-16.8929	-424.328	-69328.6	11912.6	-2336.98	228.074	463.384	0	0	0	0	0	0	0	200	903	0	0	0	0	0	0	0	603	903	0
874	6	12.6532	-16.5877	-421.887	-68138.4	11607.4	-2336.98	227.513	461.509	0	0	0	0	0	0	0	200	903	0	0	0	0	0	0	0	603	903	0
874	7	12.8058	-16.4351	-422.192	-67589.1	11424.3	-2062.32	227.06	460.091	0	0	0	0	0	0	0	200	903	0	0	0	0	0	0	0	603	903	0
874	8	13.4162	-16.4351	-419.445	-67589.1	12034.7	-2336.98	228.692	461.139	0	0	0	0	0	0	0	200	903	0	0	0	0	0	0	0	603	903	0
874	9	14.0265	-15.6722	-419.751	-67222.9	11912.6	-2245.42	228.38	460.15	0	0	0	0	0	0	0	200	903	0	0	0	0	0	0	0	603	903	0
875	0	13.8739	-14.9092	-419.14	-67314.4	11668.5	-2382.75	227.839	460.601	0	0	0	0	0	0	0	200	903	0	0	0	0	0	0	0	603	903	0
875	1	12.348	-14.604	-416.394	-65849.6	11668.5	-2291.2	228.023	458.143	0	0	0	0	0	0	0	200	903	0	0	0	0	0	0	0	603	903	0
875	2	12.6532	-15.2144	-413.952	-65025.6	11790.5	-1970.77	228.483	457.085	0	0	0	0	0	0	0	200	903	0	0	0	0	0	0	0	603	903	0
875	3	12.1955	-15.9773	-412.121	-65300.3	11973.6	-2199.65	229.054	458.449	0	0	0	0	0	0	0	200	903	0	0	0	0	0	0	0	603	903	0
875	4	12.348	-13.6885	-409.985	-65483.4	12034.7	-2199.65	229.354	459.721	0	0	0	0	0	0	0	200	903	0	0	0	0	0	0	0	603	903	0
875	5	13.7213	-12.9256	-410.29	-64842.5	11912.6	-2062.32	229.035	458.041	0	0	0	0	0	0	0	200	903	0	0	0	0	0	0	0	603	903	0
875	6	13.111	-12.3152	-406.018	-63743.9	11546.4	-2153.87	228.438	456.998	0	0	0	0	0	0	0	200	903	0	0	0	0	0	0	0	603	903	0
875	7	13.4162	-13.2307	-407.238	-63743.9	11912.6	-2199.65	229.252	456.527	0	0	0	0	0	0	0	200	903	0	0	0	0	0	0	0	603	903	0
875	8	12.9584	-12.4678	-404.187	-63652.3	11485.4	-2108.1	228.416	457.483	0	0	0	0	0	0	0	200	903	0	0	0	0	0	0	0	603	903	0
875	9	12.6532	-11.7049	-406.323	-63469.2	11851.6	-2336.98	229.168	456.204	0	0	0	0	0	0	0	200	903	0	0	0	0	0	0	0	603	903	0
876	0	13.8739	-10.9419	-404.187	-62645.3	11973.6	-2291.2	229.624	454.991	0	0	0	0	0	0	0	200	903	0	0	0	0	0	0	0	603	903	0
876	1	12.348	-10.179	-402.356	-62736.8	11729.5	-1924.99	229.152	455.924	0	0	0	0	0	0	0	200	903	0	0	0	0	0	0	0	603	903	0
876	2	12.9584	-9.87381	-401.135	-62095.9	11912.6	-2291.2	229.697	454.801	0	0	0	0	0	0	0	200	903	0	0	0	0	0	0	0	603	903	0
876	3	13.2636	-10.179	-398.083	-62187.5	12034.7	-2428.53	230.232	456.217	0	0	0	0	0	0	0	200	903	0	0	0	0	0	0	0	603	903	0
876	4	12.9584	-10.3316	-400.525	-62095.9	11973.6	-1924.99	229.895	455.037	0	0	0	0	0	0	0	200	903	0	0	0	0	0	0	0	603	903	0
876	5	13.5688	-8.34793	-397.473	-61546.6	11851.6	-2108.1	229.817	454.845	0	0	0	0	0	0	0	200	903	0	0	0	0	0	0	0	603	903	0
876	6	12.348	-8.04276	-397.778	-61272	12095.7	-2291.2	230.408	454.036	0	0	0	0	0	0	0	200	903	0	0	0	0	0	0	0	603	903	0
876	7	12.5006	-9.41605	-396.862	-60539.5	12217.8	-2153.87	230.786	452.545	0	0	0	0	0	0	0	200	903	0	0	0	0	0	0	0	603	903	0
876	8	12.0429	-7.89017	-395.031	-60264.9	12217.8	-2199.65	230.929	452.557	0	0	0	0	0	0	0	200	903	0	0	0	0	0	0	0	603	903	0
876	9	12.8058	-6.97464	-391.369	-60905.8	11851.6	-2153.87	230.282	455.622	0	0	0	0	0	0	0	200	903	0	0	0	0	0	0	0	603	903	0
877	0	13.111	-5.90653	-393.2	-60631.1	11973.6	-1696.11	230.452	454.199	0	0	0	0	0	0	0	200	903	0	0	0	0	0	0	0	603	903	0
877	1	13.111	-4.991	-388.623	-59349.4	12278.8	-2062.32	231.596	452.717	0	0	0	0	0	0	0	200	903	0	0	0	0	0	0	0	603	903	0
877	2	13.7213	-5.44876	-394.116	-59257.8	12400.9	-1970.77	231.465	450.356	0	0	0	0	0	0	0	200	903	0	0	0	0	0	0	0	603	903	0
877	3	14.7895	-6.36429	-391.064	-58891.6	11729.5	-2062.32	229.994	450.593	0	0	0	0	0	0	0	200	903	0	0	0	0	0	0	0	603	903	0
877	4	11.7377	-4.53324	-391.674	-59440.9	12461.9	-2108.1	231.817	451.761	0	0	0	0	0	0	0	200	903	0	0	0	0	0	0	0	603	903	0
877	5	13.7213	-3.61771	-389.233	-59624	12645	-1924.99	232.487	453.183	0	0	0	0	0	0	0	200	903	0	0	0	0	0	0	0	603	903	0
877	6	12.348	-3.15995	-389.538	-59074.7	12156.8	-1558.78	231.208	451.653	0	0	0	0	0	0	0	200	903	0	0	0	0	0	0	0	603	903	0
877	7	13.8739	-2.39701	-388.623	-58067.6	12339.9	-2245.42	231.753	449.419	0	0	0	0	0	0	0	200	903	0	0	0	0	0	0	0	603	903	0
877	8	13.4162	-2.70218	-388.012	-58342.3	12523	-2062.32	232.275	450.362	0	0	0	0	0	0	0	200	903	0	0	0	0	0	0	0	603	903	0
877	9	12.8058	-1.48148	-389.233	-58342.3	12400.9	-2245.42	231.86	449.89	0	0	0	0	0	0	0	200	903	0	0	0	0	0	0	0	603	903	0
878	0	13.4162	-0.718539	-386.487	-57243.6	12339.9	-1650.33	231.928	448.113	0	0	0	0	0	0	0	200	903	0	0	0	0	0	0	0	603	903	0
878	1	13.111	-1.78665	-388.928	-58067.6	12584	-1787.66	232.356	449.302	0	0	0	0	0	0	0	200	903	0	0	0	0	0	0	0	603	903	0
878	2	13.4162	0.502164	-385.876	-57060.5	12767.1	-1879.21	233.086	447.873	0	0	0	0	0	0	0	200	903	0	0	0	0	0	0	0	603	903	0
878	3	12.348	0.80734	-386.792	-56969	12889.2	-1970.77	233.323	447.286	0	0	0	0	0	0	0	200	903	0	0	0	0	0	0	0	603	903	0
878	4	13.7213	0.959928	-387.097	-57609.9	12400.9	-1924.99	232.036	448.825	0	0	0	0	0	0	0	200	903	0	0	0	0	0	0	0	603	903	0
878	5	13.2636	1.11252	-386.487	-57243.6	12523	-1879.21	232.402	448.113	0	0	0	0	0	0	0	200	903	0	0	0	0	0	0	0	603	903	0
878	6	14.0265	2.63839	-388.012	-57426.8	13194.3	-1787.66	234.005	448.002	0	0	0	0	0	0	0	200	903	0	0	0	0	0	0	0	603	903	0
878	7	13.4162	2.94357	-388.623	-56328.1	12828.1	-1833.44	233.009	444.943	0	0	0	0	0	0	0	200	903	0	0	0	0	0	0	0	603	903	0
878	8	12.9584	3.70651	-388.012	-55870.4	12584	-1970.77	232.432	443.991	0	0	0	0	0	0	0	200	903	0	0	0	0	0	0	0	603	903	0
878	9	13.2636	3.55392	-386.487	-55870.4	13133.3	-1879.21	233.981	444.56	0	0	0	0	0	0	0	200	903	0	0	0	0	0	0	0	603	903	0
879	0	13.2636	4.31686	-385.571	-56602.8	12461.9	-2016.54	232.321	446.802	0	0	0	0	0	0	0	200	903	0	0	0	0	0	0	0	603	903	0
879	1	12.348	5.69015	-386.792	-56328.1	12645	-1467.23	232.692	445.629	0	0	0	0	0	0	0	200	903	0	0	0	0	0	0	0	603	903	0
879	2	13.8739	5.99533	-386.487	-56511.2	12889.2	-1787.66	233.35	446.218	0	0	0	0	0	0	0	200	903	0	0	0	0	0	0	0	603	903	0
879	3	13.8739	7.21603	-386.181	-54954.8	13316.4	-2062.32	234.482	442.303	0	0	0	0	0	0	0	200	903	0	0	0	0	0	0	0	603	903	0
879	4	13.7213	6.60568	-387.402	-55229.5	13499.5	-2062.32	234.846	442.564	0	0	0	0	0	0	0	200	903	0	0	0	0	0	0	0	603	903	0
879	5	13.7213	6.75827	-388.012	-56053.5	13194.3	-1833.44	234.005	444.463	0	0	0	0	0	0	0	200	903	0	0	0	0	0	0	0	603	903	0
879	6	12.5006	7.21603	-388.623	-54222.4	12950.2	-1696.11	233.323	439.525	0	0	0	0	0	0	0	200	903	0	0	0	0	0	0	0	603	903	0
879	7	13.2636	6.3005	-387.707	-54680.2	13499.5	-1558.78	234.819	441.035	0	0	0	0	0	0	0	200	903	0	0	0	0	0	0	0	603	903	0
879	8	12.9584	8.43674	-387.402	-54405.5	13560.6	-1879.21	235.004	440.437	0	0	0	0	0	0	0	200	903	0	0	0	0	0	0	0	603	903	0
879	9	13.111	8.43674	-384.655	-54405.5	13316.4	-1833.44	234.619	441.44	0	0	0	0	0	0	0	200	903	0	0	0	0	0	0	0	603	903	0
880	0	14.0265	8.28415	-387.097	-54680.2	13255.4	-2016.54	234.243	441.257	0	0	0	0	0	0	0	200	903	0	0	0	0	0	0	0	603	903	0
880	1	14.6369	9.50485	-386.181	-53673.1	13499.5	-1970.77	234.956	438.984	0	0	0	0	0	0	0	200	903	0	0	0	0	0	0	0	603	903	0
880	2	14.3317	7.36862	-389.843	-54039.3	13682.6	-1879.21	235.098	438.618	0	0	0	0	0	0	0	200	903	0	0	0	0	0	0	0	603	903	0
880	3	14.4843	10.1152	-386.792	-53306.9	13438.5	-1833.44	234.743	437.818	0	0	0	0	0	0	0	200	903	0	0	0	0	0	0	0	603	903	0
880	4	14.3317	10.1152	-391.064	-53490	13316.4	-1833.44	234.052	436.781	0	0	0	0	0	0	0	200	903	0	0	0	0	0	0	0	603	903	0
880	5	13.111	9.50485	-387.707	-54222.4	13560.6	-1833.44	234.976	439.854	0	0	0	0	0	0	0	200	903	0	0	0	0	0	0	0	603	903	0
880	6	13.2636	9.65744	-388.928	-53764.6	13865.7	-1558.78	235.651	438.238	0	0	0	0	0	0	0	200	903	0	0	0	0	0	0	0	603	903	0
880	7	13.5688	8.43674	-386.181	-53764.6	13682.6	-1696.11	235.431	439.221	0	0	0	0	0	0	0	200	903	0	0	0	0	0	0	0	603	903	0
880	8	14.7895	10.2678	-389.538	-52666	13682.6	-2108.1	235.125	435.201	0	0	0	0	0	0	0	200	903	0	0	0	0	0	0	0	603	903	0
880	9	15.705	10.1152	-394.726	-52574.5	14109.9	-1787.66	235.746	433.192	0	0	0	0	0	0	0	200	903	0	0	0	0	0	0	0	603	903	0
881	0	14.4843	9.65744	-393.506	-53306.9	13926.8	-1696.11	235.392	435.467	0	0	0	0	0	0	0	200	903	0	0	0	0	0	0	0	603	903	0
881	1	14.3317	10.2678	-390.149	-53123.8	13560.6	-2062.32	234.757	436.163	0	0	0	0	0	0	0	200	903	0	0	0	0	0	0	0	603	903	0
881	2	13.5688	10.2678	-393.2	-51933.6	13987.8	-1696.11	235.574	432.079	0	0	0	0	0	0	0	200	903	0	0	0	0	0	0	0	603	903	0
881	3	16.3153	9.96261	-394.116	-51842	14293	-1467.23	236.266	431.54	0	0	0	0	0	0	0	200	903	0	0	0	0	0	0	0	603	903	0
881	4	13.4162	10.2678	-394.726	-52391.4	14048.8	-1696.11	235.591	432.728	0	0	0	0	0	0	0	200	903	0	0	0	0	0	0	0	603	903	0
881	5	14.4843	10.573	-393.811	-52208.2	13926.8	-1879.21	235.364	432.572	0	0	0	0	0	0	0	200	903	0	0	0	0	0	0	0	603	903	0
881	6	14.4843	10.1152	-395.337	-51842	14109.9	-1741.88	235.691	431.134	0	0	0	0	0	0	0	200	903	0	0	0	0	0	0	0	603	903	0
881	7	14.1791	9.35226	-397.168	-50651.8	14048.8	-1375.67	235.373	427.533	0	0	0	0	0	0	0	200	903	0	0	0	0	0	0	0	603	903	0
881	8	14.1791	9.04709	-395.337	-52025.1	14170.9	-1787.66	235.845	431.597	0	0	0	0	0	0	0	200	903	0	0	0	0	0	0	0	603	903	0
881	9	13.2636	10.2678	-398.999	-51292.7	13621.6	-1604.56	234.139	428.554	0	0	0	0	0	0	0	200	903	0	0	0	0	0	0	0	603	903	0
882	0	14.0265	8.8945	-398.999	-51292.7	14415.1	-1558.78	236.128	428.554	0	0	0	0	0	0	0	200	903	0	0	0	0	0	0	0	603	903	0
882	1	13.2636	9.81003	-396.862	-50926.5	14170.9	-1329.9	235.707	428.323	0	0	0	0	0	0	0	200	903	0	0	0	0	0	0	0	603	903	0
882	2	13.8739	8.58932	-398.999	-50834.9	14170.9	-1604.56	235.516	427.406	0	0	0	0	0	0	0	200	903	0	0	0	0	0	0	0	603	903	0
882	3	14.0265	9.50485	-401.44	-51201.1	14170.9	-1604.56	235.3	427.544	0	0	0	0	0	0	0	200	903	0	0	0	0	0	0	0	603	903	0
882	4	13.8739	9.50485	-402.05	-51475.8	14598.2	-1558.78	236.309	428.033	0	0	0	0	0	0	0	200	903	0	0	0	0	0	0	0	603	903	0
882	5	14.0265	9.50485	-403.882	-50743.4	14415.1	-1467.23	235.691	425.639	0	0	0	0	0	0	0	200	903	0	0	0	0	0	0	0	603	903	0
882	6	13.4162	9.04709	-404.797	-50468.7	14415.1	-1604.56	235.611	424.677	0	0	0	0	0	0	0	200	903	0	0	0	0	0	0	0	603	903	0
882	7	13.2636	8.8945	-404.492	-51384.2	14170.9	-1238.34	235.034	427.034	0	0	0	0	0	0	0	200	903	0	0	0	0	0	0	0	603	903	0
882	8	12.8058	8.74191	-404.492	-50194.1	14354	-917.909	235.487	424.092	0	0	0	0	0	0	0	200	903	0	0	0	0	0	0	0	603	903	0
882	9	13.4162	9.04709	-402.356	-49827.9	14537.1	-1192.57	236.13	423.84	0	0	0	0	0	0	0	200	903	0	0	0	0	0	0	0	603	903	0
883	0	14.3317	8.28415	-406.628	-50194.1	14415.1	-1329.9	235.45	423.44	0	0	0	0	0	0	0	200	903	0	0	0	0	0	0	0	603	903	0
883	1	14.6369	7.06344	-407.849	-50011	14293	-1238.34	235.045	422.621	0	0	0	0	0	0	0	200	903	0	0	0	0	0	0	0	603	903	0
883	2	13.2636	8.13156	-409.375	-50468.7	14476.1	-1375.67	235.361	423.283	0	0	0	0	0	0	0	200	903	0	0	0	0	0	0	0	603	903	0
883	3	13.4162	6.91086	-409.68	-50743.4	14720.2	-1284.12	235.931	423.861	0	0	0	0	0	0	0	200	903	0	0	0	0	0	0	0	603	903	0
883	4	12.1955	7.97897	-412.426	-49553.2	14048.8	-872.133	234.064	420.15	0	0	0	0	0	0	0	200	903	0	0	0	0	0	0	0	603	903	0
883	5	12.8058	7.97897	-411.206	-48912.3	14720.2	-1146.79	235.798	418.949	0	0	0	0	0	0	0	200	903	0	0	0	0	0	0	0	603	903	0
883	6	13.2636	7.21603	-411.816	-50377.2	14903.3	-1192.57	236.189	422.329	0	0	0	0	0	0	0	200	903	0	0	0	0	0	0	0	603	903	0
883	7	13.111	7.21603	-413.952	-50377.2	14231.9	-872.133	234.381	421.698	0	0	0	0	0	0	0	200	903	0	0	0	0	0	0	0	603	903	0
883	8	12.348	7.36862	-415.173	-49278.6	14598.2	-1055.24	235.162	418.694	0	0	0	0	0	0	0	200	903	0	0	0	0	0	0	0	603	903	0
883	9	13.111	6.91086	-418.225	-49095.5	14659.2	-963.685	235.051	417.39	0	0	0	0	0	0	0	200	903	0	0	0	0	0	0	0	603	903	0
884	0	11.5851	6.60568	-418.53	-49553.2	14537.1	-872.133	234.734	418.398	0	0	0	0	0	0	0	200	903	0	0	0	0	0	0	0	603	903	0
884	1	12.5006	6.91086	-420.666	-48637.7	14842.3	-780.58	235.283	415.621	0	0	0	0	0	0	0	200	903	0	0	0	0	0	0	0	603	903	0
884	2	12.6532	5.99533	-418.53	-50102.5	15025.4	-597.474	235.9	419.711	0	0	0	0	0	0	0	200	903	0	0	0	0	0	0	0	603	903	0
884	3	11.2799	6.75827	-420.666	-49095.5	14598.2	-643.251	234.702	416.709	0	0	0	0	0	0	0	200	903	0	0	0	0	0	0	0	603	903	0
884	4	12.6532	6.14792	-421.887	-49095.5	14231.9	-780.58	233.734	416.371	0	0	0	0	0	0	0	200	903	0	0	0	0	0	0	0	603	903	0
884	5	12.8058	5.38498	-424.023	-49553.2	15147.5	-643.251	235.723	416.864	0	0	0	0	0	0	0	200	903	0	0	0	0	0	0	0	603	903	0
884	6	12.348	6.75827	-427.075	-49644.8	15025.4	-826.356	235.182	416.244	0	0	0	0	0	0	0	200	903	0	0	0	0	0	0	0	603	903	0
884	7	12.0429	6.60568	-427.38	-48912.3	14842.3	-872.133	234.729	414.447	0	0	0	0	0	0	0	200	903	0	0	0	0	0	0	0	603	903	0
884	8	11.2799	5.84274	-429.211	-49187	15025.4	-689.027	235.007	414.599	0	0	0	0	0	0	0	200	903	0	0	0	0	0	0	0	603	903	0
884	9	10.8222	5.99533	-428.906	-49736.3	15147.5	-734.804	235.317	415.961	0	0	0	0	0	0	0	200	903	0	0	0	0	0	0	0	603	903	0
885	0	11.7377	7.06344	-431.042	-49370.1	15696.8	-734.804	236.416	414.537	0	0	0	0	0	0	0	200	903	0	0	0	0	0	0	0	603	903	0
885	1	13.5688	6.60568	-432.873	-48729.2	15086.4	-322.816	234.852	412.572	0	0	0	0	0	0	0	200	903	0	0	0	0	0	0	0	603	903	0
885	2	11.7377	5.69015	-433.484	-48729.2	15330.6	-139.711	235.366	412.413	0	0	0	0	0	0	0	200	903	0	0	0	0	0	0	0	603	903	0
885	3	11.2799	6.14792	-437.451	-49095.5	15635.8	-597.474	235.743	412.231	0	0	0	0	0	0	0	200	903	0	0	0	0	0	0	0	603	903	0
885	4	11.5851	6.60568	-437.756	-49003.9	15513.7	-460.145	235.439	411.943	0	0	0	0	0	0	0	200	903	0	0	0	0	0	0	0	603	903	0
885	5	11.2799	4.46945	-439.892	-49095.5	15452.6	-231.263	235.128	411.608	0	0	0	0	0	0	0	200	903	0	0	0	0	0	0	0	603	903	0
885	6	11.7377	6.14792	-441.723	-48912.3	15879.9	-231.263	235.95	410.731	0	0	0	0	0	0	0	200	903	0	0	0	0	0	0	0	603	903	0
885	7	11.1273	6.14792	-442.334	-48729.2	15391.6	-460.145	234.796	410.164	0	0	0	0	0	0	0	200	903	0	0	0	0	0	0	0	603	903	0
885	8	10.6696	6.14792	-442.639	-49461.7	15391.6	-551.698	234.772	411.743	0	0	0	0	0	0	0	200	903	0	0	0	0	0	0	0	603	903	0
885	9	11.8903	5.84274	-443.86	-49736.3	15879.9	-368.593	235.777	412.054	0	0	0	0	0	0	0	200	903	0	0	0	0	0	0	0	603	903	0
886	0	12.6532	6.60568	-449.963	-48820.8	15635.8	-2.38158	234.749	408.5	0	0	0	0	0	0	0	200	903	0	0	0	0	0	0	0	603	903	0
886	1	11.7377	6.60568	-449.353	-48637.7	15452.6	-139.711	234.389	408.239	0	0	0	0	0	0	0	200	903	0	0	0	0	0	0	0	603	903	0
886	2	12.0429	6.60568	-449.353	-48820.8	15818.9	-185.487	235.204	408.647	0	0	0	0	0	0	0	200	903	0	0	0	0	0	0	0	603	903	0
886	3	10.9748	6.45309	-453.32	-49827.9	15818.9	226.5	234.896	409.918	0	0	0	0	0	0	0	200	903	0	0	0	0	0	0	0	603	903	0
886	4	10.6696	7.06344	-455.151	-48820.8	15757.8	-93.9343	234.621	407.263	0	0	0	0	0	0	0	200	903	0	0	0	0	0	0	0	603	903	0
886	5	11.1273	6.60568	-455.456	-49919.4	16124	-551.698	235.402	409.603	0	0	0	0	0	0	0	200	903	0	0	0	0	0	0	0	603	903	0
886	6	10.517	7.82638	-457.898	-49095.5	16124	43.3948	235.213	407.219	0	0	0	0	0	0	0	200	903	0	0	0	0	0	0	0	603	903	0
886	7	11.7377	7.97897	-458.508	-48637.7	15757.8	-48.1579	234.368	406.078	0	0	0	0	0	0	0	200	903	0	0	0	0	0	0	0	603	903	0
886	8	12.348	7.97897	-458.508	-49919.4	15940.9	89.1712	234.767	408.874	0	0	0	0	0	0	0	200	903	0	0	0	0	0	0	0	603	903	0
886	9	11.4325	8.28415	-463.696	-50102.5	16246.1	89.1712	235.036	408.05	0	0	0	0	0	0	0	200	903	0	0	0	0	0	0	0	603	903	0
887	0	12.5006	9.35226	-464.917	-49553.2	16368.2	226.5	235.207	406.585	0	0	0	0	0	0	0	200	903	0	0	0	0	0	0	0	603	903	0
887	1	10.9748	9.81003	-467.663	-49187	16307.1	363.83	234.869	405.176	0	0	0	0	0	0	0	200	903	0	0	0	0	0	0	0	603	903	0
887	2	12.8058	9.81003	-468.884	-48454.6	16612.3	134.948	235.429	403.34	0	0	0	0	0	0	0	200	903	0	0	0	0	0	0	0	603	903	0
887	3	11.1273	9.35226	-469.494	-49370.1	16551.3	272.277	235.253	405.156	0	0	0	0	0	0	0	200	903	0	0	0	0	0	0	0	603	903	0
887	4	12.8058	10.573	-472.241	-50834.9	16307.1	730.04	234.531	407.646	0	0	0	0	0	0	0	200	903	0	0	0	0	0	0	0	603	903	0
887	5	12.0429	11.7937	-473.462	-50194.1	16185.1	592.711	234.185	406.015	0	0	0	0	0	0	0	200	903	0	0	0	0	0	0	0	603	903	0
887	6	11.7377	12.2514	-476.208	-50377.2	16917.5	546.935	235.525	405.788	0	0	0	0	0	0	0	200	903	0	0	0	0	0	0	0	603	903	0
887	7	12.9584	12.404	-478.955	-49644.8	16917.5	638.488	235.322	403.652	0	0	0	0	0	0	0	200	903	0	0	0	0	0	0	0	603	903	0
887	8	11.8903	12.5566	-481.396	-49736.3	16612.3	684.264	234.509	403.317	0	0	0	0	0	0	0	200	903	0	0	0	0	0	0	0	603	903	0
887	9	11.4325	13.4721	-482.922	-49278.6	16734.4	226.5	234.652	402.043	0	0	0	0	0	0	0	200	903	0	0	0	0	0	0	0	603	903	0
888	0	12.0429	12.5566	-482.617	-51201.1	16612.3	592.711	234.421	406.091	0	0	0	0	0	0	0	200	903	0	0	0	0	0	0	0	603	903	0
888	1	11.7377	15.1506	-483.227	-51018	16856.5	775.817	234.883	405.578	0	0	0	0	0	0	0	200	903	0	0	0	0	0	0	0	603	903	0
888	2	12.8058	15.761	-487.195	-50194.1	16551.3	730.04	233.973	403.027	0	0	0	0	0	0	0	200	903	0	0	0	0	0	0	0	603	903	0
888	3	13.5688	15.761	-495.434	-50102.5	17283.7	958.922	234.886	401.129	0	0	0	0	0	0	0	200	903	0	0	0	0	0	0	0	603	903	0
888	4	13.111	15.6084	-493.908	-50102.5	17222.7	775.817	234.87	401.441	0	0	0	0	0	0	0	200	903	0	0	0	0	0	0	0	603	903	0
888	5	14.942	17.4394	-492.993	-51567.4	17588.9	730.04	235.678	404.601	0	0	0	0	0	0	0	200	903	0	0	0	0	0	0	0	603	903	0
888	6	12.9584	18.5075	-497.57	-51658.9	17283.7	730.04	234.736	403.822	0	0	0	0	0	0	0	200	903	0	0	0	0	0	0	0	603	903	0
888	7	13.7213	19.4231	-498.486	-51018	17711	821.593	235.53	402.346	0	0	0	0	0	0	0	200	903	0	0	0	0	0	0	0	603	903	0
888	8	13.7213	18.9653	-500.927	-51109.6	17649.9	958.922	235.234	402.03	0	0	0	0	0	0	0	200	903	0	0	0	0	0	0	0	603	903	0
888	9	14.0265	19.7282	-503.369	-51018	17527.8	913.146	234.821	401.353	0	0	0	0	0	0	0	200	903	0	0	0	0	0	0	0	603	903	0
889	0	14.0265	20.7964	-503.369	-51842	17649.9	775.817	235.064	402.99	0	0	0	0	0	0	0	200	903	0	0	0	0	0	0	0	603	903	0
889	1	14.4843	21.8645	-508.862	-52208.2	18077.2	1142.03	235.525	402.598	0	0	0	0	0	0	0	200	903	0	0	0	0	0	0	0	603	903	0
889	2	14.3317	22.0171	-505.505	-51567.4	18016.1	1279.36	235.64	402.012	0	0	0	0	0	0	0	200	903	0	0	0	0	0	0	0	603	903	0
889	3	14.0265	23.2378	-512.524	-51109.6	17955.1	1050.47	235.033	399.721	0	0	0	0	0	0	0	200	903	0	0	0	0	0	0	0	603	903	0
889	4	16.7731	23.6955	-514.66	-51658.9	18138.2	913.146	235.243	400.375	0	0	0	0	0	0	0	200	903	0	0	0	0	0	0	0	603	903	0
889	5	14.7895	23.6955	-515.881	-52299.8	18016.1	1554.01	234.923	401.38	0	0	0	0	0	0	0	200	903	0	0	0	0	0	0	0	603	903	0
889	6	16.7731	25.6792	-516.797	-52299.8	18321.3	867.369	235.452	401.2	0	0	0	0	0	0	0	200	903	0	0	0	0	0	0	0	603	903	0
889	7	16.3153	25.8318	-520.154	-52757.6	18077.2	1142.03	234.754	401.427	0	0	0	0	0	0	0	200	903	0	0	0	0	0	0	0	603	903	0
889	8	15.705	27.205	-523.816	-51750.5	18748.6	1187.8	235.792	398.795	0	0	0	0	0	0	0	200	903	0	0	0	0	0	0	0	603	903	0
889	9	16.6205	27.5102	-526.562	-51750.5	18992.7	1050.47	236.069	398.28	0	0	0	0	0	0	0	200	903	0	0	0	0	0	0	0	603	903	0
890	0	16.6205	28.1206	-528.393	-52208.2	18504.4	1233.58	235.02	398.806	0	0	0	0	0	0	0	200	903	0	0	0	0	0	0	0	603	903	0
890	1	15.8576	29.6465	-528.698	-52940.7	18565.4	1370.91	235.115	400.134	0	0	0	0	0	0	0	200	903	0	0	0	0	0	0	0	603	903	0
890	2	16.0102	31.0197	-530.224	-52849.1	19175.8	1279.36	236.165	399.673	0	0	0	0	0	0	0	200	903	0	0	0	0	0	0	0	603	903	0
890	3	16.9257	31.6301	-530.835	-52299.8	19297.9	1416.69	236.354	398.524	0	0	0	0	0	0	0	200	903	0	0	0	0	0	0	0	603	903	0
890	4	17.536	32.393	-534.802	-52208.2	19114.8	1233.58	235.742	397.622	0	0	0	0	0	0	0	200	903	0	0	0	0	0	0	0	603	903	0
890	5	19.0619	32.8508	-538.464	-52482.9	19481	1279.36	236.179	397.468	0	0	0	0	0	0	0	200	903	0	0	0	0	0	0	0	603	903	0
890	6	18.1464	33.7663	-540.295	-53306.9	19419.9	1279.36	235.943	398.663	0	0	0	0	0	0	0	200	903	0	0	0	0	0	0	0	603	903	0
890	7	17.0783	34.6819	-541.211	-53306.9	19236.8	1142.03	235.544	398.496	0	0	0	0	0	0	0	200	903	0	0	0	0	0	0	0	603	903	0
890	8	18.1464	36.5129	-543.957	-52940.7	19419.9	1325.13	235.701	397.325	0	0	0	0	0	0	0	200	903	0	0	0	0	0	0	0	603	903	0
890	9	19.0619	36.3603	-544.568	-52208.2	19664.1	1370.91	236.11	395.871	0	0	0	0	0	0	0	200	903	0	0	0	0	0	0	0	603	903	0
891	0	18.9093	37.1233	-546.704	-52666	19786.2	1508.24	236.192	396.334	0	0	0	0	0	0	0	200	903	0	0	0	0	0	0	0	603	903	0
891	1	19.6723	37.4284	-547.619	-53032.2	20030.3	1554.01	236.577	396.841	0	0	0	0	0	0	0	200	903	0	0	0	0	0	0	0	603	903	0
891	2	20.4352	38.9543	-550.366	-53490	19664.1	1370.91	235.729	397.19	0	0	0	0	0	0	0	200	903	0	0	0	0	0	0	0	603	903	0
891	3	20.2826	40.175	-553.418	-53581.5	19786.2	1187.8	235.753	396.819	0	0	0	0	0	0	0	200	903	0	0	0	0	0	0	0	603	903	0
891	4	21.1981	41.3957	-551.892	-53581.5	20274.4	1187.8	236.736	397.087	0	0	0	0	0	0	0	200	903	0	0	0	0	0	0	0	603	903	0
891	5	21.1981	42.1587	-558.3	-53123.8	20213.4	1416.69	236.205	395.153	0	0	0	0	0	0	0	200	903	0	0	0	0	0	0	0	603	903	0
891	6	20.7404	42.3112	-559.521	-52299.8	19725.1	1508.24	235.254	393.472	0	0	0	0	0	0	0	200	903	0	0	0	0	0	0	0	603	903	0
891	7	20.893	41.8535	-558.3	-53398.4	20091.3	1233.58	235.987	395.645	0	0	0	0	0	0	0	200	903	0	0	0	0	0	0	0	603	903	0
891	8	21.0456	43.9897	-559.216	-54039.3	20640.6	1416.69	236.91	396.634	0	0	0	0	0	0	0	200	903	0	0	0	0	0	0	0	603	903	0
891	9	21.9611	45.8208	-564.404	-53673.1	20457.5	1462.46	236.246	395.097	0	0	0	0	0	0	0	200	903	0	0	0	0	0	0	0	603	903	0
892	0	23.9447	47.0415	-568.371	-53764.6	20030.3	1554.01	235.242	394.594	0	0	0	0	0	0	0	200	903	0	0	0	0	0	0	0	603	903	0
892	1	22.724	47.1941	-568.982	-53398.4	20823.7	1508.24	236.598	393.849	0	0	0	0	0	0	0	200	903	0	0	0	0	0	0	0	603	903	0
892	2	22.2663	48.1096	-566.845	-53398.4	20762.7	1142.03	236.629	394.203	0	0	0	0	0	0	0	200	903	0	0	0	0	0	0	0	603	903	0
892	3	21.9611	49.1777	-570.508	-54039.3	20762.7	1462.46	236.393	394.721	0	0	0	0	0	0	0	200	903	0	0	0	0	0	0	0	603	903	0
892	4	23.1818	48.8725	-570.813	-54130.9	20701.7	1691.34	236.267	394.831	0	0	0	0	0	0	0	200	903	0	0	0	0	0	0	0	603	903	0
892	5	21.8085	51.3139	-573.254	-53856.2	20762.7	1554.01	236.219	393.948	0	0	0	0	0	0	0	200	903	0	0	0	0	0	0	0	603	903	0
892	6	23.6396	52.8398	-575.39	-52391.4	20823.7	1554.01	236.191	391.054	0	0	0	0	0	0	0	200	903	0	0	0	0	0	0	0	603	903	0
892	7	23.487	52.9924	-578.442	-53581.5	20884.8	1645.57	236.105	392.631	0	0	0	0	0	0	0	200	903	0	0	0	0	0	0	0	603	903	0
892	8	25.1654	53.2976	-578.747	-53398.4	21190	1599.79	236.614	392.266	0	0	0	0	0	0	0	200	903	0	0	0	0	0	0	0	603	903	0
892	9	24.2499	54.2131	-582.104	-54405.5	21617.2	1508.24	237.136	393.464	0	0	0	0	0	0	0	200	903	0	0	0	0	0	0	0	603	903	0
893	0	23.9447	55.739	-584.24	-53123.8	20640.6	1828.67	235.329	390.928	0	0	0	0	0	0	0	200	903	0	0	0	0	0	0	0	603	903	0
893	1	23.6396	56.6545	-586.071	-53581.5	21434.1	1782.9	236.573	391.425	0	0	0	0	0	0	0	200	903	0	0	0	0	0	0	0	603	903	0
893	2	26.2335	57.7226	-583.935	-53306.9	21251	1462.46	236.393	391.289	0	0	0	0	0	0	0	200	903	0	0	0	0	0	0	0	603	903	0
893	3	24.2499	57.2649	-586.377	-52849.1	21312	1737.12	236.345	390.128	0	0	0	0	0	0	0	200	903	0	0	0	0	0	0	0	603	903	0
893	4	23.7921	58.7907	-588.818	-53398.4	21434.1	1645.57	236.402	390.687	0	0	0	0	0	0	0	200	903	0	0	0	0	0	0	0	603	903	0
893	5	25.318	59.2485	-589.123	-53764.6	21678.2	2149.11	236.797	391.262	0	0	0	0	0	0	0	200	903	0	0	0	0	0	0	0	603	903	0
893	6	25.7758	61.2321	-592.48	-53764.6	21739.3	2103.33	236.692	390.745	0	0	0	0	0	0	0	200	903	0	0	0	0	0	0	0	603	903	0
893	7	25.0128	62.3003	-593.396	-53398.4	21495.1	1737.12	236.224	389.988	0	0	0	0	0	0	0	200	903	0	0	0	0	0	0	0	603	903	0
893	8	24.8603	62.758	-595.837	-53673.1	21922.4	1828.67	236.793	390.08	0	0	0	0	0	0	0	200	903	0	0	0	0	0	0	0	603	903	0
893	9	24.8603	63.0632	-597.363	-53398.4	21800.3	2011.78	236.494	389.39	0	0	0	0	0	0	0	200	903	0	0	0	0	0	0	0	603	903	0
894	0	24.5551	64.4365	-596.142	-53398.4	21678.2	1920.23	236.364	389.573	0	0	0	0	0	0	0	200	903	0	0	0	0	0	0	0	603	903	0
894	1	25.4706	65.5046	-597.668	-53764.6	22044.5	1828.67	236.884	389.957	0	0	0	0	0	0	0	200	903	0	0	0	0	0	0	0	603	903	0
894	2	25.7758	67.1831	-599.499	-53032.2	21556.2	1966	235.957	388.461	0	0	0	0	0	0	0	200	903	0	0	0	0	0	0	0	603	903	0
894	3	26.5387	66.115	-599.804	-52849.1	21800.3	1874.45	236.346	388.111	0	0	0	0	0	0	0	200	903	0	0	0	0	0	0	0	603	903	0
894	4	26.2335	66.8779	-603.466	-53306.9	22044.5	2149.11	236.53	388.334	0	0	0	0	0	0	0	200	903	0	0	0	0	0	0	0	603	903	0
894	5	25.9284	68.709	-604.382	-53947.7	22410.7	2103.33	237.08	389.261	0	0	0	0	0	0	0	200	903	0	0	0	0	0	0	0	603	903	0
894	6	25.4706	69.9297	-606.823	-53490	22715.8	2332.21	237.434	388.148	0	0	0	0	0	0	0	200	903	0	0	0	0	0	0	0	603	903	0
894	7	26.2335	70.54	-607.739	-53032.2	21922.4	2103.33	236.072	387.261	0	0	0	0	0	0	0	200	903	0	0	0	0	0	0	0	603	903	0
894	8	25.6232	70.8452	-606.823	-52940.7	22532.7	2103.33	237.132	387.242	0	0	0	0	0	0	0	200	903	0	0	0	0	0	0	0	603	903	0
894	9	25.1654	71.3029	-607.434	-51933.6	22593.8	2011.78	237.195	385.497	0	0	0	0	0	0	0	200	903	0	0	0	0	0	0	0	603	903	0
895	0	26.6913	71.9133	-609.265	-53306.9	22593.8	2332.21	237.084	387.494	0	0	0	0	0	0	0	200	903	0	0	0	0	0	0	0	603	903	0
895	1	26.3861	73.2866	-610.18	-52299.8	22471.7	2332.21	236.828	385.712	0	0	0	0	0	0	0	200	903	0	0	0	0	0	0	0	603	903	0
895	2	26.9965	73.4392	-612.011	-53215.3	22898.9	2057.55	237.416	386.952	0	0	0	0	0	0	0	200	903	0	0	0	0	0	0	0	603	903	0
895	3	25.9284	74.6599	-614.453	-52391.4	22776.9	2377.99	237.069	385.265	0	0	0	0	0	0	0	200	903	0	0	0	0	0	0	0	603	903	0
895	4	25.4706	74.9651	-615.368	-52299.8	22410.7	2469.54	236.418	384.989	0	0	0	0	0	0	0	200	903	0	0	0	0	0	0	0	603	903	0
895	5	26.8439	75.5754	-615.674	-52208.2	22715.8	2286.44	236.896	384.799	0	0	0	0	0	0	0	200	903	0	0	0	0	0	0	0	603	903	0
895	6	26.5387	74.5073	-615.063	-52940.7	23021	2377.99	237.429	386.074	0	0	0	0	0	0	0	200	903	0	0	0	0	0	0	0	603	903	0
895	7	26.6913	77.5591	-617.199	-52574.5	22898.9	2286.44	237.101	385.182	0	0	0	0	0	0	0	200	903	0	0	0	0	0	0	0	603	903	0
895	8	27.4543	78.322	-616.894	-51933.6	22532.7	2057.55	236.526	384.186	0	0	0	0	0	0	0	200	903	0	0	0	0	0	0	0	603	903	0
895	9	27.4543	78.1694	-617.505	-51933.6	22715.8	2332.21	236.787	384.102	0	0	0	0	0	0	0	200	903	0	0	0	0	0	0	0	603	903	0
896	0	27.3017	78.6272	-619.641	-52116.7	23021	2194.88	237.152	384.108	0	0	0	0	0	0	0	200	903	0	0	0	0	0	0	0	603	903	0
896	1	27.7594	80.0005	-620.862	-52757.6	23143.1	2194.88	237.276	384.975	0	0	0	0	0	0	0	200	903	0	0	0	0	0	0	0	603	903	0
896	2	27.3017	80.916	-623.303	-52208.2	22288.6	2469.54	235.759	383.761	0	0	0	0	0	0	0	200	903	0	0	0	0	0	0	0	603	903	0
896	3	26.6913	81.8315	-622.693	-51018	22960	2103.33	236.872	381.931	0	0	0	0	0	0	0	200	903	0	0	0	0	0	0	0	603	903	0
896	4	27.4543	81.3737	-621.777	-50834.9	23387.2	2194.88	237.614	381.758	0	0	0	0	0	0	0	200	903	0	0	0	0	0	0	0	603	903	0
896	5	26.9965	81.0686	-622.693	-51292.7	23021	2240.66	236.97	382.372	0	0	0	0	0	0	0	200	903	0	0	0	0	0	0	0	603	903	0
896	6	27.1491	83.0522	-623.608	-51567.4	22960	2515.32	236.818	382.692	0	0	0	0	0	0	0	200	903	0	0	0	0	0	0	0	603	903	0
896	7	28.2172	84.2729	-623.608	-51658.9	23448.3	2286.44	237.601	382.839	0	0	0	0	0	0	0	200	903	0	0	0	0	0	0	0	603	903	0
896	8	28.3698	85.0359	-626.049	-51109.6	23326.2	2377.99	237.259	381.638	0	0	0	0	0	0	0	200	903	0	0	0	0	0	0	0	603	903	0
896	9	28.5224	85.4936	-623.913	-50468.7	22960	2103.33	236.8	380.891	0	0	0	0	0	0	0	200	903	0	0	0	0	0	0	0	603	903	0
897	0	27.7594	86.2566	-626.049	-50743.4	23631.4	2286.44	237.747	381.053	0	0	0	0	0	0	0	200	903	0	0	0	0	0	0	0	603	903	0
897	1	28.2172	85.9514	-625.744	-51292.7	23265.2	2515.32	237.18	381.971	0	0	0	0	0	0	0	200	903	0	0	0	0	0	0	0	603	903	0
897	2	27.912	87.4773	-625.439	-50651.8	23326.2	2240.66	237.296	380.986	0	0	0	0	0	0	0	200	903	0	0	0	0	0	0	0	603	903	0
897	3	28.675	87.935	-627.575	-50743.4	23570.3	2103.33	237.558	380.856	0	0	0	0	0	0	0	200	903	0	0	0	0	0	0	0	603	903	0
897	4	28.8275	88.3928	-626.965	-50285.6	23326.2	2194.88	237.205	380.205	0	0	0	0	0	0	0	200	903	0	0	0	0	0	0	0	603	903	0
897	5	29.2853	88.2402	-627.27	-49736.3	23570.3	2057.55	237.576	379.29	0	0	0	0	0	0	0	200	903	0	0	0	0	0	0	0	603	903	0
897	6	29.7431	89.4609	-629.101	-50560.3	23265.2	2011.78	236.982	380.369	0	0	0	0	0	0	0	200	903	0	0	0	0	0	0	0	603	903	0
897	7	29.2853	90.9868	-629.101	-49187	23814.5	2103.33	237.855	378.186	0	0	0	0	0	0	0	200	903	0	0	0	0	0	0	0	603	903	0
897	8	29.7431	90.8342	-628.491	-50011	23875.5	1966	237.989	379.573	0	0	0	0	0	0	0	200	903	0	0	0	0	0	0	0	603	903	0
897	9	30.3534	92.5127	-626.965	-49370.1	23387.2	2057.55	237.302	378.745	0	0	0	0	0	0	0	200	903	0	0	0	0	0	0	0	603	903	0
898	0	29.8957	92.5127	-626.66	-48912.3	23448.3	1920.23	237.418	378.052	0	0	0	0	0	0	0	200	903	0	0	0	0	0	0	0	603	903	0
898	1	31.1164	93.4282	-625.439	-48912.3	23692.4	1920.23	237.881	378.205	0	0	0	0	0	0	0	200	903	0	0	0	0	0	0	0	603	903	0
898	2	30.6586	92.6653	-624.829	-49278.6	23875.5	1966	238.211	378.867	0	0	0	0	0	0	0	200	903	0	0	0	0	0	0	0	603	903	0
898	3	31.7267	94.8015	-627.27	-49095.5	23570.3	1920.23	237.576	378.268	0	0	0	0	0	0	0	200	903	0	0	0	0	0	0	0	603	903	0
898	4	31.8793	95.8696	-622.693	-48088.4	23631.4	1874.45	237.95	377.227	0	0	0	0	0	0	0	200	903	0	0	0	0	0	0	0	603	903	0
898	5	31.2689	96.4799	-626.965	-48088.4	23692.4	1966	237.789	376.7	0	0	0	0	0	0	0	200	903	0	0	0	0	0	0	0	603	903	0
898	6	30.6586	96.6325	-625.439	-47355.9	23570.3	1645.57	237.686	375.716	0	0	0	0	0	0	0	200	903	0	0	0	0	0	0	0	603	903	0
898	7	31.5741	98.311	-621.777	-48271.5	22898.9	1874.45	236.828	377.635	0	0	0	0	0	0	0	200	903	0	0	0	0	0	0	0	603	903	0
898	8	31.4215	99.3791	-622.082	-47813.7	23509.3	2103.33	237.791	376.861	0	0	0	0	0	0	0	200	903	0	0	0	0	0	0	0	603	903	0
898	9	32.3371	99.9895	-621.472	-47355.9	23143.1	2011.78	237.239	376.2	0	0	0	0	0	0	0	200	903	0	0	0	0	0	0	0	603	903	0
899	0	32.1845	100.905	-619.946	-46898.2	23692.4	1920.23	238.217	375.649	0	0	0	0	0	0	0	200	903	0	0	0	0	0	0	0	603	903	0
899	1	32.7948	100.752	-621.472	-46715.1	23326.2	1874.45	237.534	375.168	0	0	0	0	0	0	0	200	903	0	0	0	0	0	0	0	603	903	0
899	2	31.8793	101.668	-616.894	-47172.8	23387.2	2240.66	237.911	376.468	0	0	0	0	0	0	0	200	903	0	0	0	0	0	0	0	603	903	0
899	3	31.8793	102.736	-618.42	-45891.1	23204.1	1920.23	237.522	374.207	0	0	0	0	0	0	0	200	903	0	0	0	0	0	0	0	603	903	0
899	4	31.2689	102.278	-613.537	-46806.6	23387.2	1920.23	238.119	376.29	0	0	0	0	0	0	0	200	903	0	0	0	0	0	0	0	603	903	0
899	5	31.4215	105.33	-614.148	-45433.3	23509.3	1874.45	238.28	373.978	0	0	0	0	0	0	0	200	903	0	0	0	0	0	0	0	603	903	0
899	6	31.4215	104.567	-612.927	-45616.4	23326.2	1920.23	238.057	374.424	0	0	0	0	0	0	0	200	903	0	0	0	0	0	0	0	603	903	0
899	7	32.3371	104.567	-612.011	-46165.8	23326.2	2011.78	238.114	375.433	0	0	0	0	0	0	0	200	903	0	0	0	0	0	0	0	603	903	0
899	8	33.4052	106.246	-610.486	-44884	23082	2103.33	237.809	373.522	0	0	0	0	0	0	0	200	903	0	0	0	0	0	0	0	603	903	0
899	9	31.8793	105.177	-609.57	-45158.7	23143.1	2286.44	237.966	374.083	0	0	0	0	0	0	0	200	903	0	0	0	0	0	0	0	603	903	0
900	0	30.2008	107.161	-605.908	-44517.8	23204.1	2149.11	238.296	373.473	0	0	0	0	0	0	0	200	903	0	0	0	0	0	0	0	603	903	0
900	1	30.6586	107.161	-605.603	-44243.1	23387.2	1874.45	238.618	373.056	0	0	0	0	0	0	0	200	903	0	0	0	0	0	0	0	603	903	0
900	2	31.8793	107.314	-599.499	-44517.8	22776.9	2194.88	237.993	374.258	0	0	0	0	0	0	0	200	903	0	0	0	0	0	0	0	603	903	0
900	3	30.6586	107.161	-601.025	-44243.1	22654.8	2332.21	237.694	373.613	0	0	0	0	0	0	0	200	903	0	0	0	0	0	0	0	603	903	0
900	4	32.1845	108.84	-597.668	-43419.2	22960	2332.21	238.416	372.648	0	0	0	0	0	0	0	200	903	0	0	0	0	0	0	0	603	903	0
900	5	30.8112	109.755	-596.142	-42778.3	22532.7	2149.11	237.798	371.759	0	0	0	0	0	0	0	200	903	0	0	0	0	0	0	0	603	903	0
900	6	32.3371	109.297	-595.227	-42778.3	22288.6	2377.99	237.446	371.869	0	0	0	0	0	0	0	200	903	0	0	0	0	0	0	0	603	903	0
900	7	30.2008	108.077	-592.48	-41954.3	22532.7	2194.88	238.031	370.811	0	0	0	0	0	0	0	200	903	0	0	0	0	0	0	0	603	903	0
900	8	30.0482	110.06	-589.734	-42869.9	21983.4	2332.21	237.277	372.694	0	0	0	0	0	0	0	200	903	0	0	0	0	0	0	0	603	903	0
900	9	28.675	111.891	-588.513	-42320.6	22105.5	2515.32	237.562	371.911	0	0	0	0	0	0	0	200	903	0	0	0	0	0	0	0	603	903	0
901	0	30.0482	111.739	-584.24	-40855.7	22349.6	2561.09	238.254	369.93	0	0	0	0	0	0	0	200	903	0	0	0	0	0	0	0	603	903	0
901	1	28.675	111.739	-581.494	-41221.9	21983.4	2744.2	237.805	370.89	0	0	0	0	0	0	0	200	903	0	0	0	0	0	0	0	603	903	0
901	2	27.7594	112.349	-577.832	-40306.4	21434.1	2835.75	237.094	369.755	0	0	0	0	0	0	0	200	903	0	0	0	0	0	0	0	603	903	0
901	3	28.0646	112.502	-575.085	-40855.7	21983.4	2927.31	238.226	371.043	0	0	0	0	0	0	0	200	903	0	0	0	0	0	0	0	603	903	0
901	4	29.1327	113.57	-573.864	-39940.2	21861.3	2881.53	238.095	369.599	0	0	0	0	0	0	0	200	903	0	0	0	0	0	0	0	603	903	0
901	5	26.9965	112.044	-570.508	-39390.9	21556.2	2881.53	237.784	369.045	0	0	0	0	0	0	0	200	903	0	0	0	0	0	0	0	603	903	0
901	6	26.8439	114.485	-568.066	-38475.3	21373.1	2881.53	237.624	367.73	0	0	0	0	0	0	0	200	903	0	0	0	0	0	0	0	603	903	0
901	7	26.2335	114.333	-565.014	-38658.4	20762.7	3018.86	236.747	368.42	0	0	0	0	0	0	0	200	903	0	0	0	0	0	0	0	603	903	0
901	8	27.3017	114.18	-561.047	-38566.9	20823.7	2881.53	237.116	368.741	0	0	0	0	0	0	0	200	903	0	0	0	0	0	0	0	603	903	0
901	9	25.7758	115.401	-555.554	-38017.6	20762.7	3156.19	237.373	368.432	0	0	0	0	0	0	0	200	903	0	0	0	0	0	0	0	603	903	0
902	0	26.3861	115.096	-553.112	-37559.8	20945.8	3293.52	237.869	367.906	0	0	0	0	0	0	0	200	903	0	0	0	0	0	0	0	603	903	0
902	1	25.4706	116.011	-550.061	-36827.4	20884.8	3156.19	237.968	366.952	0	0	0	0	0	0	0	200	903	0	0	0	0	0	0	0	603	903	0
902	2	26.6913	116.164	-546.399	-36552.7	20396.5	3110.41	237.329	366.898	0	0	0	0	0	0	0	200	903	0	0	0	0	0	0	0	603	903	0
902	3	24.8603	115.859	-543.652	-36461.2	20152.4	3247.74	237.068	367.067	0	0	0	0	0	0	0	200	903	0	0	0	0	0	0	0	603	903	0
902	4	24.2499	116.164	-539.685	-36369.6	20274.4	3247.74	237.567	367.39	0	0	0	0	0	0	0	200	903	0	0	0	0	0	0	0	603	903	0
902	5	23.6396	116.927	-536.328	-35637.2	20335.5	3201.97	237.916	366.447	0	0	0	0	0	0	0	200	903	0	0	0	0	0	0	0	603	903	0
902	6	24.8603	116.622	-531.14	-34996.3	19969.3	3613.95	237.597	365.889	0	0	0	0	0	0	0	200	903	0	0	0	0	0	0	0	603	903	0
902	7	23.0292	116.622	-527.783	-34080.8	19786.2	3568.18	237.489	364.574	0	0	0	0	0	0	0	200	903	0	0	0	0	0	0	0	603	903	0
902	8	22.724	116.011	-519.238	-33897.7	19725.1	3110.41	237.989	365.284	0	0	0	0	0	0	0	200	903	0	0	0	0	0	0	0	603	903	0
902	9	23.487	116.622	-518.017	-34263.9	18748.6	3659.73	236.193	366.144	0	0	0	0	0	0	0	200	903	0	0	0	0	0	0	0	603	903	0
903	0	22.724	117.537	-514.05	-33439.9	19358.9	3613.95	237.66	365.052	0	0	0	0	0	0	0	200	903	0	0	0	0	0	0	0	603	903	0
903	1	22.5714	117.232	-510.998	-32249.7	19236.8	3385.07	237.646	363.111	0	0	0	0	0	0	0	200	903	0	0	0	0	0	0	0	603	903	0
903	2	21.6559	116.774	-507.031	-31792	18809.6	3613.95	237.098	362.702	0	0	0	0	0	0	0	200	903	0	0	0	0	0	0	0	603	903	0
903	3	20.893	114.638	-501.843	-31792	18565.4	3522.4	236.995	363.35	0	0	0	0	0	0	0	200	903	0	0	0	0	0	0	0	603	903	0
903	4	20.4352	116.469	-496.35	-32066.6	18565.4	3751.28	237.404	364.605	0	0	0	0	0	0	0	200	903	0	0	0	0	0	0	0	603	903	0
903	5	19.9774	116.622	-491.772	-30876.4	18077.2	4254.82	236.759	362.786	0	0	0	0	0	0	0	200	903	0	0	0	0	0	0	0	603	903	0
903	6	19.3671	116.469	-484.753	-29686.3	17466.8	3797.06	236.032	361.24	0	0	0	0	0	0	0	200	903	0	0	0	0	0	0	0	603	903	0
903	7	20.13	116.622	-480.786	-28770.7	18138.2	3934.39	237.726	359.841	0	0	0	0	0	0	0	200	903	0	0	0	0	0	0	0	603	903	0
903	8	19.0619	114.638	-475.293	-29228.5	17711	4025.94	237.263	361.496	0	0	0	0	0	0	0	200	903	0	0	0	0	0	0	0	603	903	0
903	9	18.4516	116.622	-470.715	-29045.4	17344.7	3934.39	236.848	361.705	0	0	0	0	0	0	0	200	903	0	0	0	0	0	0	0	603	903	0
904	0	18.4516	116.316	-466.137	-28679.2	16978.5	4209.04	236.424	361.525	0	0	0	0	0	0	0	200	903	0	0	0	0	0	0	0	603	903	0
904	1	16.1627	116.011	-460.644	-28129.9	17222.7	4209.04	237.388	361.066	0	0	0	0	0	0	0	200	903	0	0	0	0	0	0	0	603	903	0
904	2	16.3153	116.316	-455.151	-26573.5	17161.6	4025.94	237.705	358.384	0	0	0	0	0	0	0	200	903	0	0	0	0	0	0	0	603	903	0
904	3	16.1627	115.096	-447.522	-26207.2	16307.1	4254.82	236.439	358.561	0	0	0	0	0	0	0	200	903	0	0	0	0	0	0	0	603	903	0
904	4	14.7895	114.18	-439.587	-26481.9	15757.8	4117.49	235.847	360.243	0	0	0	0	0	0	0	200	903	0	0	0	0	0	0	0	603	903	0
904	5	15.705	114.79	-436.535	-24834	16002	3888.61	236.657	356.889	0	0	0	0	0	0	0	200	903	0	0	0	0	0	0	0	603	903	0
904	6	14.942	112.502	-430.127	-25200.2	16002	4300.6	237.203	358.588	0	0	0	0	0	0	0	200	903	0	0	0	0	0	0	0	603	903	0
904	7	14.0265	113.417	-426.465	-24193.1	15208.5	4300.6	235.662	356.729	0	0	0	0	0	0	0	200	903	0	0	0	0	0	0	0	603	903	0
904	8	13.8739	112.654	-420.361	-22911.3	15757.8	4209.04	237.486	354.504	0	0	0	0	0	0	0	200	903	0	0	0	0	0	0	0	603	903	0
904	9	12.8058	111.586	-415.478	-23094.5	15208.5	4300.6	236.605	355.585	0	0	0	0	0	0	0	200	903	0	0	0	0	0	0	0	603	903	0
905	0	10.6696	111.281	-408.764	-23460.7	14842.3	3980.16	236.31	357.394	0	0	0	0	0	0	0	200	903	0	0	0	0	0	0	0	603	903	0
905	1	11.4325	110.671	-401.135	-22911.3	14720.2	4529.48	236.696	357.116	0	0	0	0	0	0	0	200	903	0	0	0	0	0	0	0	603	903	0
905	2	10.6696	108.992	-396.557	-21995.8	14415.1	4987.24	236.351	355.467	0	0	0	0	0	0	0	200	903	0	0	0	0	0	0	0	603	903	0
905	3	10.9748	108.382	-389.538	-20988.7	14415.1	4163.27	237.005	353.881	0	0	0	0	0	0	0	200	903	0	0	0	0	0	0	0	603	903	0
905	4	10.2118	107.314	-383.74	-20439.4	13865.7	4346.37	236.133	353.264	0	0	0	0	0	0	0	200	903	0	0	0	0	0	0	0	603	903	0
905	5	9.60147	105.483	-380.078	-20622.5	13499.5	4437.93	235.518	354.259	0	0	0	0	0	0	0	200	903	0	0	0	0	0	0	0	603	903	0
905	6	8.07559	105.025	-369.702	-19707	13560.6	4346.37	236.68	353.305	0	0	0	0	0	0	0	200	903	0	0	0	0	0	0	0	603	903	0
905	7	7.46524	104.109	-367.26	-19798.6	13438.5	4300.6	236.591	353.909	0	0	0	0	0	0	0	200	903	0	0	0	0	0	0	0	603	903	0
905	8	8.22818	102.736	-358.716	-18333.7	13133.3	4529.48	236.612	351.109	0	0	0	0	0	0	0	200	903	0	0	0	0	0	0	0	603	903	0
905	9	6.09194	101.363	-353.833	-17601.3	12889.2	4483.7	236.427	349.745	0	0	0	0	0	0	0	200	903	0	0	0	0	0	0	0	603	903	0
906	0	7.46524	98.311	-348.34	-17509.7	12706.1	4529.48	236.476	350.266	0	0	0	0	0	0	0	200	903	0	0	0	0	0	0	0	603	903	0
906	1	6.24453	97.7007	-340.405	-17692.8	12278.8	4437.93	236.071	351.976	0	0	0	0	0	0	0	200	903	0	0	0	0	0	0	0	603	903	0
906	2	5.32901	96.6325	-335.217	-16960.4	11729.5	4346.37	234.991	350.595	0	0	0	0	0	0	0	200	903	0	0	0	0	0	0	0	603	903	0
906	3	5.02383	94.9541	-329.724	-15770.2	11790.5	4483.7	235.759	347.829	0	0	0	0	0	0	0	200	903	0	0	0	0	0	0	0	603	903	0
906	4	3.65054	93.7334	-324.536	-15495.6	11363.3	4254.82	235.014	347.747	0	0	0	0	0	0	0	200	903	0	0	0	0	0	0	0	603	903	0
906	5	3.49795	92.8178	-316.601	-14671.6	11058.1	4209.04	234.928	346.341	0	0	0	0	0	0	0	200	903	0	0	0	0	0	0	0	603	903	0
906	6	2.58242	90.2238	-309.887	-15129.4	10997.1	4254.82	235.487	348.822	0	0	0	0	0	0	0	200	903	0	0	0	0	0	0	0	603	903	0
906	7	0.598781	88.698	-299.817	-14488.5	10691.9	4529.48	235.661	348.325	0	0	0	0	0	0	0	200	903	0	0	0	0	0	0	0	603	903	0
906	8	2.73501	87.7824	-295.544	-13115.2	10814	4392.15	236.59	344.376	0	0	0	0	0	0	0	200	903	0	0	0	0	0	0	0	603	903	0
906	9	4.26089	85.4936	-290.356	-12474.3	10508.8	4483.7	236.193	342.962	0	0	0	0	0	0	0	200	903	0	0	0	0	0	0	0	603	903	0
907	0	1.6669	83.3574	-283.947	-12291.2	10081.6	4209.04	235.505	343.287	0	0	0	0	0	0	0	200	903	0	0	0	0	0	0	0	603	903	0
907	1	0.751369	81.6789	-276.623	-12474.3	9898.45	4025.94	235.783	345.095	0	0	0	0	0	0	0	200	903	0	0	0	0	0	0	0	603	903	0
907	2	0.751369	80.6108	-271.435	-12382.8	9837.42	4117.49	236.242	345.62	0	0	0	0	0	0	0	200	903	0	0	0	0	0	0	0	603	903	0
907	3	2.58242	79.8479	-263.501	-11101.1	9288.1	4071.71	235.249	342.129	0	0	0	0	0	0	0	200	903	0	0	0	0	0	0	0	603	903	0
907	4	0.141017	78.4746	-256.176	-10460.2	9410.17	3842.83	236.733	340.832	0	0	0	0	0	0	0	200	903	0	0	0	0	0	0	0	603	903	0
907	5	1.51431	76.3383	-251.599	-10277.1	9166.03	3842.83	236.431	340.847	0	0	0	0	0	0	0	200	903	0	0	0	0	0	0	0	603	903	0
907	6	1.20913	75.4228	-243.359	-10094	8616.71	3842.83	235.407	341.478	0	0	0	0	0	0	0	200	903	0	0	0	0	0	0	0	603	903	0
907	7	2.27725	74.9651	-238.171	-9270	8250.5	3613.95	234.641	338.922	0	0	0	0	0	0	0	200	903	0	0	0	0	0	0	0	603	903	0
907	8	1.36172	72.6762	-232.373	-9270	8494.64	3751.28	236.556	339.893	0	0	0	0	0	0	0	200	903	0	0	0	0	0	0	0	603	903	0
907	9	0.141017	71.9133	-226.88	-8537.58	8128.43	3613.95	235.827	337.63	0	0	0	0	0	0	0	200	903	0	0	0	0	0	0	0	603	903	0
908	0	0.446193	70.0822	-220.166	-7896.7	8067.39	3613.95	236.642	335.867	0	0	0	0	0	0	0	200	903	0	0	0	0	0	0	0	603	903	0
908	1	0.293605	68.709	-213.147	-7805.15	7579.11	3339.29	235.558	336.619	0	0	0	0	0	0	0	200	903	0	0	0	0	0	0	0	603	903	0
908	2	-0.316747	67.0305	-205.517	-7896.7	7212.9	3430.85	235.096	338.424	0	0	0	0	0	0	0	200	903	0	0	0	0	0	0	0	603	903	0
908	3	1.36172	65.9624	-198.498	-7530.49	7518.08	3293.52	237.875	337.937	0	0	0	0	0	0	0	200	903	0	0	0	0	0	0	0	603	903	0
908	4	1.81948	63.2158	-193.005	-6614.96	7212.9	3385.07	237.372	334.274	0	0	0	0	0	0	0	200	903	0	0	0	0	0	0	0	603	903	0
908	5	1.81948	60.927	-189.038	-6157.2	6785.65	3201.97	235.896	332.571	0	0	0	0	0	0	0	200	903	0	0	0	0	0	0	0	603	903	0
908	6	2.27725	59.7063	-182.019	-5333.22	6785.65	2973.08	237.28	329.3	0	0	0	0	0	0	0	200	903	0	0	0	0	0	0	0	603	903	0
908	7	1.81948	58.6381	-177.441	-5790.99	6663.58	2927.31	237.554	332.636	0	0	0	0	0	0	0	200	903	0	0	0	0	0	0	0	603	903	0
908	8	3.19278	56.1967	-168.896	-5607.88	6480.48	2698.42	238.37	333.203	0	0	0	0	0	0	0	200	903	0	0	0	0	0	0	0	603	903	0
908	9	1.97207	54.0605	-162.182	-5058.57	6175.3	2698.42	238.076	331.191	0	0	0	0	0	0	0	200	903	0	0	0	0	0	0	0	603	903	0
909	0	3.34536	51.9243	-156.384	-4875.46	6053.23	2881.53	238.708	331.176	0	0	0	0	0	0	0	200	903	0	0	0	0	0	0	0	603	903	0
909	1	3.04019	50.8562	-149.975	-4600.8	5870.13	2652.65	239.141	330.677	0	0	0	0	0	0	0	200	903	0	0	0	0	0	0	0	603	903	0
909	2	3.80313	48.8725	-145.092	-4326.14	5687.02	2744.2	239.196	329.816	0	0	0	0	0	0	0	200	903	0	0	0	0	0	0	0	603	903	0
909	3	2.73501	47.0415	-141.125	-4692.35	5381.85	2652.65	238.135	333.25	0	0	0	0	0	0	0	200	903	0	0	0	0	0	0	0	603	903	0
909	4	1.81948	45.6682	-133.801	-3502.17	5015.64	2377.99	237.486	326.174	0	0	0	0	0	0	0	200	903	0	0	0	0	0	0	0	603	903	0
909	5	2.58242	43.6845	-126.782	-3319.07	5137.71	2286.44	240.524	326.179	0	0	0	0	0	0	0	200	903	0	0	0	0	0	0	0	603	903	0
909	6	2.73501	41.5483	-122.204	-2952.85	4832.53	2194.88	239.545	324.163	0	0	0	0	0	0	0	200	903	0	0	0	0	0	0	0	603	903	0
909	7	3.65054	39.5647	-116.406	-3410.62	4710.46	1920.23	240.466	329.299	0	0	0	0	0	0	0	200	903	0	0	0	0	0	0	0	603	903	0
909	8	3.19278	37.8862	-112.439	-3502.17	4405.28	1874.45	239.179	331.147	0	0	0	0	0	0	0	200	903	0	0	0	0	0	0	0	603	903	0
909	9	5.17642	35.2922	-109.082	-2586.64	3917	2011.78	235.909	323.713	0	0	0	0	0	0	0	200	903	0	0	0	0	0	0	0	603	903	0
910	0	3.80313	32.8508	-106.03	-2037.33	4222.18	1966	239.821	319.215	0	0	0	0	0	0	0	200	903	0	0	0	0	0	0	0	603	903	0
910	1	4.26089	28.4257	-101.147	-2403.54	3367.68	1782.9	233.295	323.763	0	0	0	0	0	0	0	200	903	0	0	0	0	0	0	0	603	903	0
910	2	3.34536	27.6628	-98.0954	-2769.75	3733.89	1554.01	238.064	328.235	0	0	0	0	0	0	0	200	903	0	0	0	0	0	0	0	603	903	0
910	3	3.65054	26.2895	-91.6867	-2403.54	3428.72	1233.58	237.396	326.215	0	0	0	0	0	0	0	200	903	0	0	0	0	0	0	0	603	903	0
910	4	3.95571	23.3903	-85.8884	-1854.22	3367.68	1096.25	239.21	321.589	0	0	0	0	0	0	0	200	903	0	0	0	0	0	0	0	603	903	0
910	5	4.71865	21.8645	-83.7521	-1671.12	2757.33	1142.03	232.923	319.953	0	0	0	0	0	0	0	200	903	0	0	0	0	0	0	0	603	903	0
910	6	4.56607	19.2705	-77.9538	-1213.35	3367.68	1096.25	243.201	315.565	0	0	0	0	0	0	0	200	903	0	0	0	0	0	0	0	603	903	0
910	7	5.17642	17.8972	-80.09	-1945.77	3062.51	1096.25	238.238	324.295	0	0	0	0	0	0	0	200	903	0	0	0	0	0	0	0	603	903	0
910	8	2.73501	16.8291	-72.7658	-938.694	2513.19	1508.24	234.538	312.9	0	0	0	0	0	0	0	200	903	0	0	0	0	0	0	0	603	903	0
910	9	2.8876	14.8454	-71.8503	-1579.56	2757.33	1325.13	238.376	321.984	0	0	0	0	0	0	0	200	903	0	0	0	0	0	0	0	603	903	0
911	0	5.78677	14.0825	-66.6623	-1030.25	2879.4	821.593	243.194	315.455	0	0	0	0	0	0	0	200	903	0	0	0	0	0	0	0	603	903	0
911	1	2.73501	12.2514	-63.6105	-1030.25	2879.4	546.935	245.266	316.196	0	0	0	0	0	0	0	200	903	0	0	0	0	0	0	0	603	903	0
911	2	4.1083	11.9463	-60.2536	-847.141	2330.09	867.369	238.671	314.06	0	0	0	0	0	0	0	200	903	0	0	0	0	0	0	0	603	903	0
911	3	3.80313	11.4885	-57.2019	-1213.35	2085.95	775.817	236.466	321.212	0	0	0	0	0	0	0	200	903	0	0	0	0	0	0	0	603	903	0
911	4	3.49795	11.0307	-55.676	-1030.25	2391.12	409.606	242.947	318.504	0	0	0	0	0	0	0	200	903	0	0	0	0	0	0	0	603	903	0
911	5	3.19278	10.573	-49.2673	-755.588	2452.16	592.711	249.773	315.337	0	0	0	0	0	0	0	200	903	0	0	0	0	0	0	0	603	903	0
911	6	2.27725	8.58932	-49.2673	159.94	1841.8	730.04	237.384	296.754	0	0	0	0	0	0	0	200	903	0	0	0	0	0	0	0	603	903	0
911	7	3.65054	6.75827	-44.3845	-114.719	1597.66	730.04	235.996	302.585	0	0	0	0	0	0	0	200	903	0	0	0	0	0	0	0	603	903	0
911	8	2.42984	7.21603	-44.0793	-847.141	2024.91	455.382	245.938	319.219	0	0	0	0	0	0	0	200	903	0	0	0	0	0	0	0	603	903	0
911	9	3.95571	7.6738	-40.112	-664.035	1658.7	363.83	241.352	316.555	0	0	0	0	0	0	0	200	903	0	0	0	0	0	0	0	603	903	0
912	0	3.34536	6.45309	-36.4499	-572.483	1414.56	638.488	238.808	315.706	0	0	0	0	0	0	0	200	903	0	0	0	0	0	0	0	603	903	0
912	1	2.8876	4.92721	-35.5344	-389.377	1414.56	638.488	239.808	310.958	0	0	0	0	0	0	0	200	903	0	0	0	0	0	0	0	603	903	0
912	2	2.73501	4.62204	-33.7033	-297.824	1658.7	775.817	249.215	308.837	0	0	0	0	0	0	0	200	903	0	0	0	0	0	0	0	603	903	0
912	3	1.51431	4.16427	-31.2619	-389.377	1597.66	272.277	251.106	312.455	0	0	0	0	0	0	0	200	903	0	0	0	0	0	0	0	603	903	0
912	4	2.58242	3.55392	-29.736	-297.824	987.312	455.382	233.203	310.016	0	0	0	0	0	0	0	200	903	0	0	0	0	0	0	0	603	903	0
912	5	1.81948	2.02804	-25.4636	-572.483	682.136	134.948	226.789	322.482	0	0	0	0	0	0	0	200	903	0	0	0	0	0	0	0	603	903	0
912	6	1.36172	2.79098	-19.6652	-206.271	1170.42	89.1712	259.517	310.489	0	0	0	0	0	0	0	200	903	0	0	0	0	0	0	0	603	903	0
912	7	2.58242	1.57028	-20.2756	-206.271	1231.45	409.606	260.736	310.173	0	0	0	0	0	0	0	200	903	0	0	0	0	0	0	0	603	903	0
912	8	2.27725	1.11252	-16.6135	-664.035	865.242	226.5	252.081	339.97	0	0	0	0	0	0	0	200	903	0	0	0	0	0	0	0	603	903	0
912	9	2.12466	0.502164	-17.2238	-572.483	1048.35	43.3948	260.866	333.238	0	0	0	0	0	0	0	200	903	0	0	0	0	0	0	0	603	903	0
913	0	1.51431	0.349577	-13.2565	-755.588	682.136	134.948	251.457	356.997	0	0	0	0	0	0	0	200	903	0	0	0	0	0	0	0	603	903	0
913	1	0.446193	0.0444008	-13.8669	68.3869	621.101	-48.1579	244.79	295.068	0	0	0	0	0	0	0	200	903	0	0	0	0	0	0	0	603	903	0
913	2	2.12466	-1.48148	-11.4255	343.045	499.031	134.948	243.677	269.975	0	0	0	0	0	0	0	200	903	0	0	0	0	0	0	0	603	903	0
913	3	0.903957	-4.68582	-9.59443	-297.824	499.031	134.948	252.013	331.041	0	0	0	0	0	0	0	200	903	0	0	0	0	0	0	0	603	903	0
913	4	0	0	0	0	0	0	200	300	0	0	0	0	0	0	0	200	903	0	0	0	0	0	0	0	603	903	0
913	5	0	0	0	0	0	0	200	300	0	0	0	0	0	0	0	200	903	0	0	0	0	0	0	0	603	903	0
913	6	0	0	0	0	0	0	200	300	0	0	0	0	0	0	0	200	903	0	0	0	0	0	0	0	603	903	0
913	7	0	0	0	0	0	0	200	300	0	0	0	0	0	0	0	200	903	0	0	0	0	0	0	0	603	903	0
913	8	0	0	0	0	0	0	200	300	0	0	0	0	0	0	0	200	903	0	0	0	0	0	0	0	603	903	0
913	9	0	0	0	0	0	0	200	300	0	0	0	0	0	0	0	200	903	0	0	0	0	0	0	0	603	903	0
914	0	0	0	0	0	0	0	200	300	0	0	0	0	0	0	0	200	903	0	0	0	0	0	0	0	603	903	0
914	1	0	0	0	0	0	0	200	300	0	0	0	0	0	0	0	200	903	0	0	0	0	0	0	0	603	903	0
914	2	0	0	0	0	0	0	200	300	0	0	0	0	0	0	0	200	903	0	0	0	0	0	0	0	603	903	0
914	3	0	0	0	0	0	0	200	300	0	0	0	0	0	0	0	200	903	0	0	0	0	0	0	0	603	903	0
914	4	0	0	0	0	0	0	200	300	0	0	0	0	0	0	0	200	903	0	0	0	0	0	0	0	603	903	0
914	5	0	0	0	0	0	0	200	300	0	0	0	0	0	0	0	200	903	0	0	0	0	0	0	0	603	903	0
914	6	0	0	0	0	0	0	200	300	0	0	0	0	0	0	0	200	903	0	0	0	0	0	0	0	603	903	0
914	7	0	0	0	0	0	0	200	300	0	0	0	0	0	0	0	200	903	0	0	0	0	0	0	0	603	903	0
914	8	0	0	0	0	0	0	200	300	0	0	0	0	0	0	0	200	903	0	0	0	0	0	0	0	603	903	0
914	9	0	0	0	0	0	0	200	300	0	0	0	0	0	0	0	200	903	0	0	0	0	0	0	0	603	903	0
915	0	0	0	0	0	0	0	200	300	0	0	0	0	0	0	0	200	903	0	0	0	0	0	0	0	603	903	0
915	1	0	0	0	0	0	0	200	300	0	0	0	0	0	0	0	200	903	0	0	0	0	0	0	0	603	903	0
915	2	0	0	0	0	0	0	200	300	0	0	0	0	0	0	0	200	903	0	0	0	0	0	0	0	603	903	0
915	3	0	0	0	0	0	0	200	300	0	0	0	0	0	0	0	200	903	0	0	0	0	0	0	0	603	903	0
915	4	0	0	0	0	0	0	200	300	0	0	0	0	0	0	0	200	903	0	0	0	0	0	0	0	603	903	0
915	5	0	0	0	0	0	0	200	300	0	0	0	0	0	0	0	200	903	0	0	0	0	0	0	0	603	903	0
915	6	0	0	0	0	0	0	200	300	0	0	0	0	0	0	0	200	903	0	0	0	0	0	0	0	603	903	0
915	7	0	0	0	0	0	0	200	300	0	0	0	0	0	0	0	200	903	0	0	0	0	0	0	0	603	903	0
915	8	0	0	0	0	0	0	200	300	0	0	0	0	0	0	0	200	903	0	0	0	0	0	0	0	603	903	0
915	9	0	0	0	0	0	0	200	300	0	0	0	0	0	0	0	200	903	0	0	0	0	0	0	0	603	903	0
916	0	0	0	0	0	0	0	200	300	0	0	0	0	0	0	0	200	903	0	0	0	0	0	0	0	603	903	0
916	1	0	0	0	0	0	0	200	300	0	0	0	0	0	0	0	200	903	0	0	0	0	0	0	0	603	903	0
916	2	0	0	0	0	0	0	200	300	0	0	0	0	0	0	0	200	903	0	0	0	0	0	0	0	603	903	0
916	3	0	0	0	0	0	0	200	300	0	0	0	0	0	0	0	200	903	0	0	0	0	0	0	0	603	903	0
916	4	0	0	0	0	0	0	200	300	0	0	0	0	0	0	0	200	903	0	0	0	0	0	0	0	603	903	0
916	5	0	0	0	0	0	0	200	300	0	0	0	0	0	0	0	200	903	0	0	0	0	0	0	0	603	903	0
916	6	0	0	0	0	0	0	200	300	0	0	0	0	0	0	0	200	903	0	0	0	0	0	0	0	603	903	0
916	7	0	0	0	0	0	0	200	300	0	0	0	0	0	0	0	200	903	0	0	0	0	0	0	0	603	903	0
916	8	0	0	0	0	0	0	200	300	0	0	0	0	0	0	0	200	903	0	0	0	0	0	0	0	603	903	0
916	9	0	0	0	0	0	0	200	300	0	0	0	0	0	0	0	200	903	0	0	0	0	0	0	0	603	903	0
917	0	0	0	0	0	0	0	200	300	0	0	0	0	0	0	0	200	903	0	0	0	0	0	0	0	603	903	0
917	1	0	0	0	0	0	0	200	300	0	0	0	0	0	0	0	200	903	0	0	0	0	0	0	0	603	903	0
917	2	0	0	0	0	0	0	200	300	0	0	0	0	0	0	0	200	903	0	0	0	0	0	0	0	603	903	0
917	3	0	0	0	0	0	0	200	300	0	0	0	0	0	0	0	200	903	0	0	0	0	0	0	0	603	903	0
917	4	0	0	0	0	0	0	200	300	0	0	0	0	0	0	0	200	903	0	0	0	0	0	0	0	603	903	0
917	5	0	0	0	0	0	0	200	300	0	0	0	0	0	0	0	200	903	0	0	0	0	0	0	0	603	903	0
[truncated: 1,924 more rows]
