# Supplementary material for: The Effects of an Extemporaneous Speech Dual-task on Older Adult Gait Control
Source: Research Square preprint supplement (doi:10.21203/rs.3.rs-7674245/v1), 2025-11-18
Supplement: Supplementary file 147 [file Over3ground01.xlsx]

## Sheet: Sheet1
Trajectories
		03:LFHD			03:RFHD			03:LBHD			03:RBHD			03:C7			03:T10			03:CLAV			03:STRN			03:RBAK			03:LSHO			03:LUPA			03:LELB			03:LFRM			03:LWRA			03:LWRB			03:LFIN
Frame	Sub Frame	X	Y	Z	X	Y	Z	X	Y	Z	X	Y	Z	X	Y	Z	X	Y	Z	X	Y	Z	X	Y	Z	X	Y	Z	X	Y	Z	X	Y	Z	X	Y	Z	X	Y	Z	X	Y	Z	X	Y	Z	X	Y	Z
		mm	mm	mm	mm	mm	mm	mm	mm	mm	mm	mm	mm	mm	mm	mm	mm	mm	mm	mm	mm	mm	mm	mm	mm	mm	mm	mm	mm	mm	mm	mm	mm	mm	mm	mm	mm	mm	mm	mm	mm	mm	mm	mm	mm	mm	mm	mm	mm
442	0	266.309	2871.78	1613.87	162.503	2875.24	1608.03	291.869	3028.32	1635.54	155.409	3044.64	1631.55	214.934	3113.12	1488.93	229.651	3223.92	1269.61	224.746	2981.55	1381.03	232.407	2961.24	1197.01	175.619	3226.92	1342.87	416.651	3099.48	1440.46	478.9	3115.27	1237.53	496.667	3129.27	1117.8	491.195	3029.39	971.781	439.329	2975.5	899.016	498.752	3014.71	869.259	488.631	2935.83	802.236
443	0	266.489	2861.56	1616.52	162.665	2864.67	1610.86	291.505	3018.07	1638.17	155.063	3033.82	1634.37	213.681	3102.64	1491.6	227.076	3213.07	1271.97	224.44	2971.16	1383.94	232.374	2950.75	1199.91	173.486	3216.06	1345.49	415.701	3090.82	1443.1	477.658	3108.64	1240.3	494.922	3123.29	1120.5	490.614	3025.6	973.002	439.373	2972.16	899.257	498.469	3012.32	870.273	489.381	2934.15	802.089
444	0	266.68	2851.35	1619.11	162.838	2854.12	1613.62	291.164	3007.86	1640.7	154.736	3023.03	1637.1	212.46	3092.12	1494.15	224.572	3202.22	1274.23	224.155	2960.73	1386.75	232.328	2940.24	1202.71	171.396	3205.15	1347.97	414.75	3082.1	1445.64	476.426	3102	1243.04	493.246	3117.37	1123.21	490.124	3021.9	974.248	439.534	2968.95	899.537	498.283	3010.06	871.348	490.237	2932.66	802.014
445	0	266.881	2841.16	1621.64	163.02	2843.59	1616.31	290.844	2997.67	1643.14	154.426	3012.29	1639.72	211.27	3081.57	1496.59	222.141	3191.39	1276.4	223.893	2950.26	1389.45	232.267	2929.69	1205.4	169.349	3194.21	1350.34	413.797	3073.33	1448.07	475.203	3095.35	1245.76	491.637	3111.5	1125.91	489.725	3018.28	975.519	439.812	2965.85	899.858	498.194	3007.92	872.484	491.199	2931.35	802.011
446	0	267.092	2830.99	1624.11	163.212	2833.08	1618.94	290.547	2987.51	1645.48	154.133	3001.59	1642.24	210.112	3070.99	1498.9	219.782	3180.56	1278.47	223.652	2939.76	1392.04	232.192	2919.12	1207.98	167.346	3183.22	1352.57	412.843	3064.49	1450.39	473.99	3088.69	1248.45	490.096	3105.69	1128.62	489.416	3014.74	976.812	440.205	2962.86	900.215	498.201	3005.91	873.677	492.265	2930.23	802.077
447	0	267.311	2820.83	1626.51	163.411	2822.59	1621.49	290.271	2977.37	1647.71	153.858	2990.93	1644.64	208.986	3060.38	1501.09	217.499	3169.75	1280.44	223.433	2929.22	1394.51	232.102	2908.52	1210.45	165.388	3172.19	1354.68	411.886	3055.6	1452.59	472.787	3082.02	1251.11	488.622	3099.94	1131.32	489.196	3011.27	978.124	440.711	2959.98	900.605	498.304	3004	874.923	493.432	2929.29	802.206
448	0	267.538	2810.68	1628.85	163.618	2812.11	1623.97	290.017	2967.25	1649.84	153.6	2980.3	1646.93	207.894	3049.73	1503.16	215.298	3158.95	1282.31	223.233	2918.64	1396.86	231.996	2897.89	1212.81	163.478	3161.13	1356.65	410.928	3046.64	1454.67	471.595	3075.32	1253.72	487.213	3094.22	1134	489.064	3007.87	979.448	441.328	2957.21	901.019	498.499	3002.21	876.213	494.697	2928.52	802.387
449	0	267.77	2800.54	1631.1	163.83	2801.65	1626.35	289.782	2957.14	1651.85	153.358	2969.71	1649.1	206.838	3039.05	1505.08	213.182	3148.17	1284.07	223.053	2908.03	1399.08	231.873	2887.22	1215.03	161.618	3150.02	1358.48	409.968	3037.62	1456.62	470.415	3068.6	1256.28	485.869	3088.54	1136.66	489.018	3004.53	980.775	442.05	2954.53	901.446	498.782	3000.51	877.537	496.052	2927.92	802.608
450	0	268.004	2790.4	1633.26	164.043	2791.2	1628.63	289.568	2947.04	1653.73	153.132	2959.16	1651.13	205.821	3028.34	1506.87	211.162	3137.41	1285.7	222.892	2897.37	1401.15	231.731	2876.53	1217.11	159.814	3138.87	1360.16	409.006	3028.52	1458.41	469.248	3061.84	1258.77	484.587	3082.88	1139.28	489.052	3001.25	982.091	442.871	2951.94	901.873	499.148	2998.9	878.879	497.49	2927.45	802.852
451	0	268.237	2780.25	1635.3	164.256	2780.76	1630.79	289.374	2936.95	1655.47	152.923	2948.62	1653.01	204.845	3017.6	1508.5	209.245	3126.66	1287.21	222.748	2886.67	1403.07	231.57	2865.8	1219.03	158.071	3127.68	1361.68	408.044	3019.35	1460.04	468.093	3055.02	1261.18	483.364	3077.23	1141.83	489.163	2998	983.383	443.782	2949.43	902.281	499.59	2997.37	880.223	499.002	2927.12	803.099
452	0	268.466	2770.09	1637.22	164.465	2770.32	1632.82	289.2	2926.84	1657.06	152.731	2938.11	1654.73	203.915	3006.82	1509.97	207.442	3115.93	1288.58	222.622	2875.93	1404.82	231.388	2855.04	1220.78	156.395	3116.45	1363.03	407.082	3010.09	1461.48	466.953	3048.14	1263.47	482.197	3071.56	1144.31	489.344	2994.78	984.634	444.776	2946.98	902.652	500.099	2995.89	881.547	500.576	2926.89	803.326
453	0	268.689	2759.91	1638.99	164.668	2759.87	1634.69	289.048	2916.72	1658.48	152.558	2927.61	1656.27	203.034	2996	1511.25	205.763	3105.21	1289.79	222.512	2865.15	1406.38	231.185	2844.24	1222.33	154.793	3105.18	1364.19	406.125	3000.73	1462.73	465.827	3041.17	1265.64	481.082	3065.85	1146.69	489.588	2991.57	985.825	445.841	2944.57	902.964	500.667	2994.45	882.833	502.199	2926.74	803.513
454	0	268.904	2749.7	1640.59	164.863	2749.42	1636.39	288.918	2906.57	1659.72	152.406	2917.11	1657.62	202.208	2985.14	1512.34	204.217	3094.51	1290.83	222.42	2854.31	1407.73	230.962	2833.4	1223.66	153.273	3093.88	1365.16	405.178	2991.27	1463.75	464.718	3034.09	1267.66	480.014	3060.09	1148.94	489.888	2988.34	986.936	446.967	2942.18	903.197	501.283	2993.02	884.059	503.859	2926.66	803.635
455	0	269.109	2739.44	1642.01	165.05	2738.95	1637.89	288.813	2896.37	1660.75	152.278	2906.61	1658.76	201.442	2974.25	1513.23	202.812	3083.81	1291.69	222.346	2843.43	1408.85	230.72	2822.53	1224.77	151.844	3082.54	1365.92	404.248	2981.7	1464.54	463.627	3026.9	1269.51	478.989	3054.24	1151.06	490.234	2985.08	987.95	448.142	2939.81	903.331	501.936	2991.6	885.205	505.539	2926.61	803.673
456	0	269.307	2729.14	1643.22	165.229	2728.46	1639.18	288.737	2886.13	1661.58	152.179	2896.09	1659.68	200.744	2963.31	1513.89	201.557	3073.11	1292.36	222.291	2832.49	1409.75	230.462	2811.61	1225.63	150.515	3071.16	1366.46	403.344	2972	1465.09	462.559	3019.56	1271.17	478.001	3048.28	1153.01	490.62	2981.77	988.849	449.354	2937.42	903.347	502.616	2990.14	886.252	507.225	2926.59	803.609
457	0	269.5	2718.77	1644.21	165.404	2717.93	1640.24	288.693	2875.83	1662.19	152.112	2885.55	1660.36	200.119	2952.32	1514.33	200.454	3062.39	1292.81	222.258	2821.5	1410.39	230.191	2800.64	1226.23	149.294	3059.75	1366.77	402.48	2962.18	1465.37	461.516	3012.08	1272.63	477.047	3042.19	1154.78	491.036	2978.38	989.615	450.591	2934.99	903.227	503.313	2988.64	887.185	508.903	2926.56	803.427
458	0	269.691	2708.34	1644.96	165.578	2707.37	1641.06	288.687	2865.45	1662.56	152.084	2874.99	1660.8	199.575	2941.29	1514.53	199.506	3051.65	1293.04	222.248	2810.45	1410.77	229.91	2789.62	1226.57	148.189	3048.29	1366.85	401.667	2952.21	1465.4	460.502	3004.42	1273.87	476.121	3035.94	1156.35	491.475	2974.9	990.235	451.844	2932.52	902.959	504.017	2987.06	887.988	510.56	2926.51	803.116
459	0	269.888	2697.84	1645.47	165.759	2696.76	1641.64	288.725	2855.01	1662.69	152.1	2864.38	1661	199.12	2930.2	1514.49	198.712	3040.87	1293.04	222.266	2799.34	1410.9	229.627	2778.54	1226.64	147.209	3036.8	1366.68	400.919	2942.09	1465.15	459.524	2996.58	1274.88	475.222	3029.51	1157.71	491.931	2971.3	990.696	453.1	2929.96	902.53	504.72	2985.39	888.652	512.185	2926.4	802.671
460	0	270.097	2687.25	1645.72	165.953	2686.09	1641.95	288.812	2844.47	1662.57	152.167	2853.74	1660.93	198.761	2919.05	1514.2	198.071	3030.03	1292.8	222.316	2788.15	1410.75	229.346	2767.39	1226.43	146.36	3025.25	1366.26	400.249	2931.81	1464.64	458.585	2988.54	1275.66	474.345	3022.89	1158.86	492.398	2967.55	990.988	454.352	2927.3	901.934	505.414	2983.59	889.169	513.769	2926.21	802.087
461	0	270.329	2676.58	1645.72	166.17	2675.37	1642.02	288.957	2833.85	1662.2	152.294	2843.04	1660.62	198.505	2907.84	1513.66	197.576	3019.12	1292.32	222.401	2776.9	1410.34	229.075	2756.16	1225.95	145.649	3013.66	1365.6	399.671	2921.38	1463.87	457.691	2980.3	1276.18	473.492	3016.05	1159.77	492.872	2963.65	991.105	455.59	2924.52	901.165	506.095	2981.64	889.534	515.303	2925.93	801.365
462	0	270.594	2665.83	1645.47	166.421	2664.59	1641.82	289.166	2823.14	1661.58	152.486	2832.28	1660.05	198.359	2896.56	1512.88	197.222	3008.12	1291.58	222.528	2765.57	1409.67	228.82	2744.85	1225.21	145.081	3002.01	1364.69	399.194	2910.78	1462.83	456.847	2971.84	1276.46	472.661	3008.97	1160.44	493.347	2959.55	991.041	456.81	2921.6	900.221	506.759	2979.52	889.744	516.784	2925.5	800.509
463	0	270.902	2654.97	1644.97	166.715	2653.73	1641.38	289.448	2812.33	1660.72	152.753	2821.45	1659.23	198.329	2885.2	1511.85	197.003	2997.02	1290.59	222.701	2754.16	1408.74	228.591	2733.45	1224.21	144.659	2990.3	1363.55	398.829	2900.01	1461.55	456.059	2963.16	1276.48	471.855	3001.65	1160.88	493.823	2955.24	990.795	458.006	2918.5	899.103	507.402	2977.18	889.797	518.209	2924.91	799.525
464	0	271.265	2644.03	1644.23	167.064	2642.79	1640.7	289.81	2801.43	1659.62	153.103	2810.55	1658.18	198.419	2873.76	1510.6	196.91	2985.8	1289.36	222.927	2742.65	1407.57	228.395	2721.95	1222.96	144.387	2978.51	1362.18	398.585	2889.07	1460.02	455.332	2954.26	1276.25	471.078	2994.07	1161.07	494.299	2950.7	990.364	459.176	2915.21	897.815	508.024	2974.61	889.697	519.579	2924.11	798.419
465	0	271.693	2632.98	1643.27	167.478	2631.77	1639.81	290.26	2790.41	1658.29	153.542	2799.58	1656.9	198.634	2862.23	1509.13	196.936	2974.44	1287.9	223.213	2731.06	1406.17	228.24	2710.33	1221.49	144.265	2966.65	1360.59	398.466	2877.97	1458.25	454.672	2945.12	1275.76	470.332	2986.22	1161.02	494.774	2945.9	989.752	460.319	2911.7	896.36	508.626	2971.78	889.444	520.896	2923.08	797.199
466	0	272.195	2621.83	1642.1	167.966	2620.66	1638.71	290.808	2779.3	1656.75	154.079	2788.52	1655.4	198.978	2850.61	1507.46	197.074	2962.93	1286.22	223.563	2719.36	1404.56	228.136	2698.59	1219.8	144.294	2954.7	1358.81	398.478	2866.7	1456.28	454.083	2935.74	1275.03	469.625	2978.1	1160.73	495.25	2940.82	988.962	461.437	2907.94	894.746	509.208	2968.65	889.042	522.162	2921.76	795.874
467	0	272.779	2610.58	1640.76	168.536	2609.46	1637.43	291.458	2768.07	1655.01	154.72	2777.38	1653.71	199.451	2838.88	1505.61	197.317	2951.25	1284.33	223.985	2707.55	1402.75	228.092	2686.73	1217.93	144.472	2942.66	1356.86	398.623	2855.27	1454.1	453.571	2926.12	1274.05	468.962	2969.68	1160.19	495.73	2935.43	987.998	462.531	2903.89	892.981	509.775	2965.2	888.497	523.383	2920.14	794.45
468	0	273.452	2599.21	1639.26	169.194	2598.15	1636	292.218	2756.73	1653.09	155.47	2766.14	1651.85	200.054	2827.03	1503.6	197.659	2939.4	1282.26	224.485	2695.62	1400.79	228.116	2674.72	1215.89	144.797	2930.52	1354.76	398.901	2843.68	1451.75	453.141	2916.25	1272.85	468.351	2960.96	1159.43	496.215	2929.72	986.869	463.604	2899.54	891.073	510.328	2961.38	887.814	524.562	2918.16	792.936
469	0	274.22	2587.72	1637.64	169.945	2586.74	1634.45	293.092	2745.27	1651.03	156.336	2754.79	1649.84	200.786	2815.06	1501.46	198.094	2927.36	1280.04	225.067	2683.57	1398.68	228.218	2662.57	1213.72	145.266	2918.26	1352.54	399.312	2831.92	1449.24	452.797	2906.13	1271.42	467.799	2951.94	1158.44	496.708	2923.66	985.583	464.658	2894.84	889.034	510.87	2957.18	886.999	525.704	2915.79	791.338
470	0	275.083	2576.11	1635.92	170.792	2575.21	1632.81	294.084	2733.68	1648.84	157.32	2743.34	1647.71	201.642	2802.96	1499.23	198.616	2915.13	1277.69	225.736	2671.39	1396.47	228.406	2650.27	1211.44	145.873	2905.88	1350.23	399.853	2820.01	1446.6	452.545	2895.76	1269.78	467.314	2942.6	1157.23	497.215	2917.23	984.151	465.697	2889.77	886.878	511.404	2952.55	886.062	526.811	2912.99	789.664
471	0	276.042	2564.37	1634.15	171.734	2563.56	1631.12	295.195	2721.95	1646.56	158.423	2731.77	1645.48	202.618	2790.72	1496.92	199.219	2902.7	1275.26	226.495	2659.07	1394.18	228.688	2637.81	1209.09	146.612	2893.37	1347.86	400.52	2807.95	1443.86	452.387	2885.12	1267.96	466.903	2932.92	1155.84	497.736	2910.39	982.588	466.724	2884.29	884.618	511.933	2947.47	885.011	527.886	2909.73	787.924
472	0	277.096	2552.49	1632.36	172.77	2551.79	1629.41	296.424	2710.09	1644.22	159.645	2720.09	1643.19	203.708	2778.34	1494.59	199.899	2890.06	1272.78	227.347	2646.61	1391.86	229.072	2625.19	1206.71	147.475	2880.73	1345.48	401.31	2795.74	1441.06	452.328	2874.21	1265.97	466.572	2922.9	1154.26	498.276	2903.14	980.909	467.741	2878.36	882.272	512.458	2941.9	883.859	528.928	2905.98	786.126
473	0	278.24	2540.46	1630.58	173.896	2539.89	1627.71	297.767	2698.08	1641.85	160.984	2708.27	1640.88	204.903	2765.81	1492.25	200.649	2877.22	1270.28	228.292	2634.01	1389.53	229.564	2612.4	1204.32	148.453	2867.96	1343.1	402.214	2783.38	1438.24	452.372	2863.02	1263.85	466.328	2912.52	1152.53	498.837	2895.43	979.134	468.749	2871.96	879.862	512.98	2935.82	882.62	529.937	2901.7	784.285
474	0	279.468	2528.28	1628.85	175.106	2527.84	1626.06	299.219	2685.91	1639.5	162.432	2696.32	1638.59	206.193	2753.13	1489.96	201.467	2864.19	1267.81	229.329	2621.25	1387.25	230.17	2599.44	1201.98	149.536	2855.04	1340.79	403.227	2770.87	1435.44	452.521	2851.55	1261.63	466.176	2901.78	1150.67	499.421	2887.25	977.285	469.747	2865.05	877.41	513.502	2929.2	881.309	530.909	2896.85	782.415
475	0	280.772	2515.95	1627.2	176.392	2515.66	1624.5	300.772	2673.58	1637.2	163.982	2684.24	1636.34	207.567	2740.29	1487.75	202.345	2850.96	1265.42	230.454	2608.35	1385.04	230.893	2586.32	1199.72	150.714	2841.99	1338.56	404.34	2758.21	1432.69	452.78	2839.78	1259.33	466.12	2890.65	1148.71	500.029	2878.57	975.384	470.737	2857.59	874.943	514.025	2922	879.944	531.841	2891.39	780.533
476	0	282.142	2503.45	1625.67	177.746	2503.33	1623.04	302.414	2661.1	1634.99	165.624	2672	1634.18	209.014	2727.31	1485.66	203.281	2837.55	1263.13	231.662	2595.3	1382.95	231.734	2573.02	1197.59	151.974	2828.8	1336.45	405.544	2745.42	1430.05	453.15	2827.71	1257.01	466.162	2879.13	1146.69	500.661	2869.36	973.458	471.716	2849.56	872.489	514.55	2914.19	878.546	532.726	2885.3	778.657
477	0	283.566	2490.8	1624.28	179.156	2490.86	1621.73	304.132	2648.45	1632.9	167.343	2659.63	1632.15	210.519	2714.19	1483.71	204.27	2823.98	1260.99	232.946	2582.11	1381.01	232.693	2559.57	1195.62	153.305	2815.49	1334.51	406.83	2732.48	1427.55	453.635	2815.33	1254.68	466.306	2867.21	1144.65	501.319	2859.61	971.533	472.681	2840.91	870.079	515.08	2905.75	877.133	533.557	2878.53	776.807
478	0	285.032	2478	1623.06	180.609	2478.25	1620.58	305.91	2635.64	1630.97	169.123	2647.11	1630.28	212.071	2700.94	1481.94	205.309	2810.26	1259.03	234.295	2568.78	1379.25	233.766	2545.97	1193.85	154.694	2802.06	1332.75	408.189	2719.41	1425.24	454.236	2802.64	1252.4	466.553	2854.88	1142.6	502.002	2849.28	969.635	473.63	2831.62	867.743	515.617	2896.64	875.727	534.329	2871.03	775.001
479	0	286.526	2465.05	1622.02	182.092	2465.51	1619.62	307.73	2622.68	1629.24	170.948	2634.45	1628.6	213.655	2687.57	1480.38	206.394	2796.41	1257.28	235.699	2555.34	1377.71	234.947	2532.23	1192.31	156.13	2788.54	1331.21	409.611	2706.21	1423.16	454.954	2789.63	1250.2	466.903	2842.14	1140.6	502.709	2838.37	967.791	474.558	2821.65	865.51	516.166	2886.84	874.345	535.036	2862.77	773.256
480	0	288.034	2451.96	1621.18	183.589	2452.63	1618.85	309.574	2609.58	1627.72	172.796	2621.66	1627.14	215.257	2674.11	1479.06	207.522	2782.46	1255.77	237.144	2541.8	1376.42	236.224	2518.37	1191.03	157.601	2774.94	1329.9	411.086	2692.89	1421.34	455.79	2776.32	1248.12	467.359	2829	1138.68	503.439	2826.85	966.024	475.461	2810.99	863.408	516.729	2876.32	873.004	535.673	2853.7	771.588
481	0	289.54	2438.75	1620.55	185.087	2439.64	1618.29	311.421	2596.35	1626.45	174.648	2608.74	1625.93	216.865	2660.57	1477.98	208.689	2768.45	1254.52	238.614	2528.18	1375.38	237.586	2504.42	1190.02	159.096	2761.27	1328.85	412.603	2679.45	1419.8	456.744	2762.7	1246.19	467.92	2815.46	1136.86	504.192	2814.71	964.357	476.335	2799.6	861.462	517.312	2865.06	871.718	536.238	2843.78	770.008
482	0	291.029	2425.44	1620.13	186.569	2426.54	1617.94	313.251	2583.01	1625.44	176.483	2595.71	1624.98	218.464	2646.99	1477.17	209.893	2754.39	1253.54	240.095	2514.5	1374.62	239.018	2490.41	1189.3	160.607	2747.58	1328.06	414.153	2665.92	1418.58	457.814	2748.79	1244.44	468.589	2801.54	1135.18	504.967	2801.94	962.808	477.175	2787.46	859.695	517.919	2853.03	870.497	536.731	2832.96	768.523
483	0	292.484	2412.03	1619.93	188.019	2413.35	1617.8	315.042	2569.58	1624.72	178.279	2582.58	1624.32	220.043	2633.37	1476.64	211.13	2740.33	1252.84	241.568	2500.8	1374.14	240.501	2476.37	1188.88	162.122	2733.88	1327.54	415.722	2652.31	1417.69	458.999	2734.6	1242.89	469.365	2787.25	1133.65	505.761	2788.53	961.394	477.977	2774.57	858.122	518.555	2840.21	869.345	537.153	2821.2	767.139
484	0	293.891	2398.56	1619.95	189.421	2400.09	1617.88	316.773	2556.08	1624.28	180.015	2569.37	1623.94	221.589	2619.76	1476.38	212.396	2726.29	1252.44	243.017	2487.09	1373.96	242.015	2462.33	1188.76	163.635	2720.19	1327.31	417.299	2638.64	1417.14	460.293	2720.16	1241.57	470.252	2772.62	1132.3	506.575	2774.49	960.126	478.736	2760.91	856.758	519.224	2826.61	868.265	537.509	2808.46	765.856
485	0	295.234	2385.05	1620.19	190.759	2386.78	1618.17	318.426	2542.54	1624.14	181.673	2556.11	1623.86	223.09	2606.18	1476.41	213.684	2712.31	1252.33	244.422	2473.4	1374.05	243.536	2448.33	1188.93	165.139	2706.56	1327.34	418.872	2624.91	1416.93	461.691	2705.48	1240.48	471.249	2757.67	1131.13	507.405	2759.82	959.013	479.45	2746.47	855.612	519.928	2812.19	867.257	537.803	2794.72	764.671
486	0	296.498	2371.52	1620.62	192.018	2373.44	1618.66	319.983	2528.97	1624.29	183.234	2542.81	1624.06	224.537	2592.65	1476.72	214.991	2698.41	1252.5	245.768	2459.77	1374.43	245.041	2434.41	1189.39	166.626	2693	1327.65	420.428	2611.17	1417.06	463.186	2690.6	1239.63	472.358	2742.42	1130.15	508.25	2744.53	958.06	480.113	2731.26	854.691	520.67	2796.97	866.317	538.045	2779.93	763.582
487	0	297.668	2357.99	1621.26	193.183	2360.1	1619.35	321.426	2515.4	1624.73	184.682	2529.49	1624.56	225.92	2579.2	1477.31	216.311	2684.63	1252.96	247.036	2446.22	1375.08	246.503	2420.6	1190.12	168.093	2679.54	1328.23	421.954	2597.42	1417.53	464.769	2675.54	1239.03	473.579	2726.91	1129.36	509.107	2728.63	957.273	480.722	2715.28	853.998	521.451	2780.95	865.444	538.241	2764.09	762.589
488	0	298.731	2344.48	1622.09	194.241	2346.77	1620.22	322.741	2501.85	1625.45	186.002	2516.18	1625.33	227.23	2565.84	1478.15	217.638	2670.97	1253.69	248.211	2432.77	1375.98	247.897	2406.93	1191.1	169.536	2666.21	1329.06	423.437	2583.68	1418.31	466.428	2660.32	1238.67	474.913	2711.16	1128.77	509.972	2712.12	956.654	481.272	2698.55	853.536	522.271	2764.12	864.636	538.402	2747.19	761.693
489	0	299.675	2331.02	1623.1	195.178	2333.47	1621.27	323.916	2488.35	1626.44	187.183	2502.89	1626.37	228.462	2552.6	1479.25	218.967	2657.46	1254.67	249.277	2419.44	1377.13	249.197	2393.43	1192.31	170.953	2653.02	1330.13	424.866	2569.98	1419.4	468.152	2644.97	1238.57	476.358	2695.19	1128.37	510.84	2695.04	956.204	481.757	2681.09	853.307	523.125	2746.51	863.894	538.534	2729.22	760.899
490	0	300.489	2317.62	1624.29	195.983	2320.22	1622.49	324.942	2474.91	1627.69	188.216	2489.66	1627.66	229.608	2539.48	1480.59	220.295	2644.1	1255.9	250.22	2406.25	1378.5	250.379	2380.1	1193.75	172.342	2639.99	1331.44	426.23	2556.32	1420.78	469.928	2629.51	1238.7	477.912	2679.03	1128.16	511.705	2677.41	955.927	482.173	2662.91	853.312	524.01	2728.12	863.222	538.644	2710.19	760.22
491	0	301.163	2304.31	1625.65	196.647	2307.05	1623.87	325.811	2461.56	1629.18	189.094	2476.49	1629.19	230.667	2526.5	1482.14	221.618	2630.9	1257.36	251.031	2393.21	1380.09	251.421	2366.98	1195.39	173.704	2627.12	1332.96	427.52	2542.71	1422.43	471.741	2613.96	1239.06	479.572	2662.69	1128.13	512.562	2659.23	955.825	482.512	2644.06	853.555	524.918	2708.99	862.629	538.736	2690.13	759.674
492	0	301.688	2291.08	1627.16	197.16	2293.97	1625.41	326.52	2448.29	1630.9	189.813	2463.4	1630.94	231.635	2513.66	1483.9	222.935	2617.86	1259.03	251.7	2380.32	1381.87	252.308	2354.04	1197.21	175.039	2614.44	1334.68	428.729	2529.15	1424.33	473.578	2598.34	1239.64	481.333	2646.19	1128.27	513.403	2640.55	955.901	482.768	2624.56	854.04	525.841	2689.13	862.129	538.81	2669.07	759.285
493	0	302.06	2277.96	1628.83	197.517	2280.98	1627.08	327.066	2435.13	1632.82	190.372	2450.41	1632.89	232.515	2500.96	1485.84	224.246	2604.97	1260.89	252.224	2367.58	1383.82	253.027	2341.3	1199.19	176.351	2601.92	1336.57	429.852	2515.64	1426.46	475.426	2582.66	1240.43	483.189	2629.53	1128.59	514.221	2621.39	956.162	482.935	2604.46	854.772	526.768	2668.58	861.738	538.865	2647.06	759.08
494	0	302.274	2264.95	1630.65	197.715	2268.1	1628.89	327.451	2422.07	1634.93	190.773	2437.53	1635.02	233.307	2488.4	1487.95	225.549	2592.21	1262.92	252.601	2354.98	1385.93	253.572	2328.75	1201.33	177.64	2589.56	1338.63	430.886	2502.19	1428.78	477.271	2566.92	1241.42	485.131	2612.74	1129.08	515.009	2601.78	956.613	483.007	2583.79	855.758	527.689	2647.37	861.478	538.891	2624.15	759.093
495	0	302.33	2252.05	1632.6	197.753	2255.34	1630.83	327.678	2409.13	1637.2	191.02	2424.76	1637.29	234.015	2475.96	1490.19	226.846	2579.59	1265.09	252.834	2342.52	1388.17	253.945	2316.36	1203.58	178.91	2577.37	1340.82	431.832	2488.77	1431.28	479.103	2551.12	1242.6	487.151	2595.81	1129.73	515.759	2581.74	957.259	482.979	2562.6	857.003	528.591	2625.55	861.371	538.88	2600.39	759.355
496	0	302.229	2239.26	1634.68	197.633	2242.7	1632.86	327.756	2396.3	1639.6	191.12	2412.1	1639.68	234.646	2463.64	1492.54	228.138	2567.09	1267.38	252.929	2330.18	1390.52	254.15	2304.12	1205.94	180.161	2565.32	1343.12	432.69	2475.38	1433.93	480.913	2535.28	1243.95	489.237	2578.74	1130.52	516.466	2561.32	958.106	482.847	2540.93	858.514	529.461	2603.14	861.441	538.814	2575.87	759.899
497	0	301.978	2226.58	1636.86	197.361	2230.17	1634.99	327.692	2383.57	1642.12	191.085	2399.57	1642.16	235.205	2451.42	1494.98	229.427	2554.7	1269.78	252.894	2317.94	1392.95	254.202	2292.02	1208.38	181.396	2553.39	1345.51	433.464	2462.01	1436.7	482.693	2519.39	1245.45	491.38	2561.56	1131.47	517.123	2540.54	959.159	482.609	2518.84	860.297	530.287	2580.19	861.71	538.676	2550.64	760.752
498	0	301.584	2214.01	1639.13	196.946	2217.76	1637.19	327.501	2370.95	1644.71	190.924	2387.15	1644.69	235.7	2439.29	1497.48	230.712	2542.39	1272.24	252.741	2305.79	1395.44	254.114	2280.03	1210.87	182.616	2541.57	1347.96	434.158	2448.64	1439.55	484.436	2503.45	1247.08	493.567	2544.26	1132.54	517.727	2519.44	960.419	482.265	2496.37	862.353	531.055	2556.75	862.196	538.446	2524.79	761.938
499	0	301.06	2201.53	1641.47	196.402	2205.45	1639.43	327.194	2358.42	1647.34	190.654	2374.84	1647.24	236.139	2427.22	1500	231.995	2530.16	1274.74	252.485	2293.7	1397.95	253.908	2268.13	1213.39	183.82	2529.84	1350.44	434.779	2435.26	1442.46	486.138	2487.46	1248.82	495.786	2526.85	1133.73	518.274	2498.05	961.885	481.815	2473.56	864.684	531.752	2532.86	862.915	538.103	2498.39	763.471
500	0	300.422	2189.14	1643.85	195.744	2193.24	1641.68	326.79	2345.97	1649.99	190.288	2362.63	1649.77	236.53	2415.21	1502.52	233.275	2517.99	1277.26	252.138	2281.67	1400.45	253.606	2256.3	1215.89	185.008	2518.18	1352.93	435.331	2421.86	1445.38	487.794	2471.42	1250.64	498.025	2509.34	1135.01	518.762	2476.41	963.554	481.264	2450.46	867.285	532.368	2508.57	863.874	537.626	2471.53	765.361
501	0	299.686	2176.82	1646.23	194.99	2181.11	1643.93	326.304	2333.6	1652.61	189.845	2350.5	1652.26	236.881	2403.24	1505.01	234.551	2505.87	1279.75	251.718	2269.67	1402.91	253.228	2244.52	1218.35	186.179	2506.57	1355.39	435.822	2408.44	1448.29	489.402	2455.34	1252.51	500.272	2491.74	1136.37	519.188	2454.55	965.415	480.614	2427.12	870.146	532.89	2483.94	865.076	536.997	2444.26	767.607
502	0	298.872	2164.57	1648.59	194.159	2169.05	1646.12	325.755	2321.28	1655.17	189.34	2338.45	1654.65	237.199	2391.29	1507.43	235.821	2493.79	1282.19	251.24	2257.69	1405.3	252.798	2232.78	1220.74	187.33	2494.99	1357.79	436.258	2394.98	1451.13	490.958	2439.22	1254.4	502.516	2474.07	1137.77	519.551	2432.52	967.458	479.87	2403.57	873.257	533.307	2459	866.517	536.201	2416.68	770.203
503	0	298.001	2152.35	1650.87	193.272	2157.05	1648.24	325.161	2309.01	1657.62	188.792	2326.45	1656.93	237.491	2379.35	1509.75	237.08	2481.74	1284.55	250.718	2245.71	1407.58	252.338	2221.05	1223.01	188.459	2483.43	1360.11	436.645	2381.5	1453.88	492.46	2423.07	1256.27	504.744	2456.33	1139.18	519.851	2410.34	969.664	479.039	2379.85	876.599	533.612	2433.81	868.187	535.227	2388.83	773.137
504	0	297.092	2140.17	1653.04	192.35	2145.07	1650.24	324.538	2296.76	1659.95	188.217	2314.49	1659.06	237.761	2367.4	1511.94	238.324	2469.71	1286.79	250.168	2233.73	1409.72	251.864	2209.34	1225.14	189.562	2471.87	1362.3	436.987	2367.99	1456.5	493.903	2406.91	1258.09	506.947	2438.54	1140.58	520.086	2388.05	972.013	478.126	2356	880.151	533.795	2408.42	870.07	534.069	2360.79	776.39
505	0	296.166	2128	1655.07	191.412	2133.11	1652.08	323.904	2284.53	1662.1	187.629	2302.54	1661.02	238.014	2355.44	1513.97	239.547	2457.71	1288.88	249.601	2221.74	1411.68	251.395	2197.63	1227.1	190.633	2460.3	1364.35	437.288	2354.46	1458.95	495.284	2390.73	1259.83	509.114	2420.71	1141.93	520.256	2365.67	974.483	477.137	2332.04	883.891	533.851	2382.86	872.147	532.727	2332.62	779.941
506	0	295.24	2115.82	1656.9	190.477	2121.15	1653.74	323.271	2272.29	1664.06	187.043	2290.58	1662.78	238.251	2343.46	1515.81	240.739	2445.72	1290.8	249.031	2209.72	1413.45	250.945	2185.9	1228.86	191.667	2448.7	1366.22	437.552	2340.93	1461.2	496.598	2374.56	1261.43	511.233	2402.86	1143.19	520.358	2343.25	977.048	476.077	2308.02	887.79	533.776	2357.2	874.394	531.205	2304.36	783.766
507	0	294.331	2103.63	1658.52	189.56	2109.17	1655.18	322.651	2260.03	1665.79	186.469	2278.61	1664.31	238.474	2331.45	1517.43	241.892	2433.74	1292.52	248.466	2197.68	1414.99	250.523	2174.15	1230.39	192.658	2437.08	1367.89	437.779	2327.39	1463.22	497.841	2358.4	1262.88	513.294	2384.99	1144.34	520.391	2320.81	979.682	474.951	2283.96	891.82	533.567	2331.47	876.787	529.51	2276.07	787.837
508	0	293.453	2091.41	1659.87	188.675	2097.16	1656.38	322.055	2247.75	1667.27	185.916	2266.6	1665.61	238.681	2319.4	1518.83	242.995	2421.77	1294.01	247.914	2185.6	1416.28	250.137	2162.38	1231.68	193.597	2425.41	1369.33	437.972	2313.87	1464.98	499.007	2342.28	1264.15	515.284	2367.13	1145.34	520.354	2298.38	982.358	473.763	2259.89	895.954	533.223	2305.71	879.299	527.655	2247.8	792.129
509	0	292.615	2079.15	1660.95	187.831	2085.09	1657.3	321.488	2235.42	1668.48	185.389	2254.53	1666.65	238.868	2307.32	1519.96	244.034	2409.8	1295.26	247.38	2173.5	1417.31	249.792	2150.58	1232.69	194.475	2413.68	1370.52	438.127	2300.37	1466.47	500.091	2326.21	1265.2	517.191	2349.27	1146.16	520.242	2275.98	985.049	472.517	2235.83	900.161	532.746	2279.98	881.905	525.657	2219.58	796.614
510	0	291.825	2066.84	1661.71	187.036	2072.96	1657.93	320.954	2223.05	1669.4	184.892	2242.4	1667.43	239.03	2295.19	1520.82	244.996	2397.84	1296.24	246.868	2161.36	1418.06	249.488	2138.75	1233.43	195.283	2401.9	1371.45	438.244	2286.91	1467.66	501.088	2310.19	1266.01	519.003	2331.43	1146.79	520.055	2253.64	987.729	471.217	2211.83	904.412	532.138	2254.29	884.579	523.534	2191.47	801.263
511	0	291.088	2054.47	1662.16	186.295	2060.76	1658.27	320.454	2210.62	1670.03	184.425	2230.19	1667.93	239.161	2283.01	1521.4	245.867	2385.87	1296.95	246.379	2149.18	1418.52	249.225	2126.87	1233.87	196.009	2390.05	1372.1	438.316	2273.5	1468.54	501.992	2294.24	1266.58	520.704	2313.61	1147.2	519.79	2231.38	990.374	469.865	2187.89	908.678	531.403	2228.7	887.296	521.306	2163.5	806.05
512	0	290.404	2042.04	1662.28	185.606	2048.48	1658.29	319.984	2198.13	1670.36	183.983	2217.9	1668.16	239.253	2270.79	1521.69	246.632	2373.88	1297.37	245.91	2136.96	1418.68	248.998	2114.95	1234.02	196.642	2378.12	1372.46	438.339	2260.14	1469.12	502.799	2278.37	1266.89	522.281	2295.83	1147.39	519.445	2209.22	992.96	468.467	2164.06	912.934	530.547	2203.25	890.034	518.994	2135.72	810.945
513	0	289.771	2029.54	1662.07	184.969	2036.12	1658	319.539	2185.58	1670.38	183.562	2205.53	1668.1	239.295	2258.51	1521.69	247.276	2361.88	1297.49	245.46	2124.69	1418.54	248.801	2102.97	1233.86	197.171	2366.1	1372.53	438.307	2246.84	1469.38	503.503	2262.58	1266.93	523.719	2278.1	1147.33	519.019	2187.19	995.466	467.026	2140.36	917.151	529.576	2177.96	892.771	516.62	2108.16	815.92
514	0	289.184	2016.98	1661.53	184.376	2023.67	1657.4	319.111	2172.96	1670.1	183.153	2193.06	1667.77	239.277	2246.16	1521.39	247.786	2349.84	1297.33	245.021	2112.38	1418.1	248.625	2090.93	1233.42	197.586	2354	1372.3	438.21	2233.61	1469.32	504.099	2246.88	1266.7	525.003	2260.42	1147.02	518.51	2165.32	997.873	465.546	2116.81	921.308	528.497	2152.86	895.489	514.204	2080.86	820.947
515	0	288.634	2004.34	1660.68	183.82	2011.13	1656.51	318.69	2160.28	1669.53	182.745	2180.5	1667.15	239.189	2233.76	1520.8	248.15	2337.76	1296.87	244.587	2100.01	1417.38	248.461	2078.82	1232.68	197.876	2341.81	1371.78	438.041	2220.44	1468.97	504.579	2231.26	1266.21	526.118	2242.8	1146.47	517.917	2143.62	1000.16	464.032	2093.45	925.38	527.318	2128.01	898.168	511.768	2053.87	825.996
516	0	288.112	1991.64	1659.53	183.289	1998.49	1655.34	318.262	2147.54	1668.66	182.325	2167.84	1666.28	239.019	2221.29	1519.93	248.359	2325.62	1296.12	244.147	2087.57	1416.37	248.297	2066.64	1231.67	198.034	2329.51	1370.98	437.792	2207.33	1468.32	504.936	2215.74	1265.46	527.05	2225.26	1145.67	517.24	2122.12	1002.33	462.489	2070.29	929.349	526.047	2103.42	900.794	509.332	2027.23	831.039
517	0	287.605	1978.87	1658.1	182.769	1985.76	1653.9	317.814	2134.74	1667.52	181.879	2155.1	1665.14	238.756	2208.74	1518.8	248.405	2313.4	1295.1	243.691	2075.08	1415.1	248.121	2054.37	1230.39	198.054	2317.11	1369.9	437.454	2194.27	1467.39	505.159	2200.31	1264.46	527.784	2207.8	1144.65	516.478	2100.85	1004.34	460.921	2047.37	933.194	524.691	2079.13	903.35	506.913	2000.96	836.049
518	0	287.097	1966.04	1656.41	182.247	1972.94	1652.22	317.329	2121.88	1666.12	181.391	2142.26	1663.77	238.392	2196.12	1517.41	248.286	2301.1	1293.82	243.207	2062.5	1413.58	247.918	2041.99	1228.86	197.93	2304.59	1368.56	437.022	2181.24	1466.2	505.237	2184.97	1263.23	528.31	2190.45	1143.4	515.632	2079.82	1006.21	459.334	2024.72	936.901	523.259	2055.18	905.826	504.529	1975.12	840.997
519	0	286.572	1953.14	1654.5	181.704	1960.03	1650.33	316.792	2108.96	1664.49	180.845	2129.33	1662.17	237.916	2183.41	1515.78	248.003	2288.68	1292.28	242.681	2049.85	1411.83	247.677	2029.51	1227.1	197.662	2291.97	1366.97	436.488	2168.23	1464.79	505.161	2169.73	1261.79	528.616	2173.21	1141.94	514.702	2059.07	1007.92	457.731	2002.36	940.455	521.757	2031.59	908.206	502.196	1949.73	845.857
520	0	286.014	1940.17	1652.39	181.124	1947.03	1648.24	316.184	2095.99	1662.64	180.224	2116.32	1660.36	237.323	2170.62	1513.95	247.559	2276.15	1290.52	242.101	2037.1	1409.88	247.381	2016.91	1225.14	197.251	2279.24	1365.17	435.849	2155.23	1463.16	504.919	2154.58	1260.15	528.693	2156.11	1140.3	513.689	2038.62	1009.46	456.117	1980.33	943.844	520.191	2008.4	910.48	499.927	1924.84	850.603
521	0	285.404	1927.14	1650.11	180.489	1933.93	1646	315.49	2082.96	1660.61	179.512	2103.21	1658.38	236.606	2157.74	1511.93	246.964	2263.48	1288.56	241.451	2024.26	1407.74	247.017	2004.19	1223	196.702	2266.39	1363.17	435.102	2142.21	1461.36	504.501	2139.52	1258.33	528.537	2139.16	1138.49	512.595	2018.5	1010.84	454.496	1958.65	947.057	518.569	1985.66	912.636	497.734	1900.48	855.211
522	0	284.726	1914.04	1647.7	179.781	1920.74	1643.63	314.695	2069.86	1658.43	178.693	2090.02	1656.25	235.763	2144.76	1509.76	246.23	2250.66	1286.42	240.721	2011.31	1405.47	246.572	1991.33	1220.71	196.019	2253.44	1361	434.245	2129.14	1459.41	503.899	2124.55	1256.37	528.144	2122.38	1136.55	511.42	1998.73	1012.05	452.872	1937.35	950.085	516.892	1963.38	914.661	495.629	1876.68	859.656
523	0	283.961	1900.86	1645.2	178.985	1907.46	1641.16	313.785	2056.71	1656.13	177.755	2076.73	1653.99	234.794	2131.68	1507.46	245.371	2237.69	1284.13	239.898	1998.26	1403.07	246.032	1978.32	1218.31	195.213	2240.37	1358.69	433.279	2116.02	1457.35	503.108	2109.67	1254.28	527.515	2105.79	1134.5	510.166	1979.34	1013.09	451.249	1916.47	952.919	515.166	1941.61	916.544	493.618	1853.48	863.916
524	0	283.096	1887.62	1642.63	178.087	1894.08	1638.63	312.747	2043.48	1653.74	176.686	2063.35	1651.64	233.7	2118.51	1505.06	244.404	2224.56	1281.73	238.974	1985.09	1400.6	245.388	1965.18	1215.82	194.295	2227.21	1356.27	432.208	2102.81	1455.21	502.125	2094.88	1252.1	526.652	2089.42	1132.37	508.837	1960.35	1013.96	449.629	1896.03	955.55	513.39	1920.39	918.271	491.707	1830.92	867.965
525	0	282.117	1874.29	1640.04	177.074	1880.6	1636.05	311.574	2030.19	1651.31	175.478	2049.89	1649.24	232.485	2105.24	1502.61	243.348	2211.28	1279.26	237.94	1971.81	1398.08	244.629	1951.89	1213.29	193.275	2213.94	1353.77	431.036	2089.5	1453.04	500.953	2080.19	1249.86	525.564	2073.28	1130.18	507.434	1941.79	1014.67	448.016	1876.07	957.973	511.567	1899.74	919.829	489.899	1809.03	871.78
526	0	281.016	1860.88	1637.45	175.938	1867.04	1633.47	310.259	2016.82	1648.87	174.127	2036.33	1646.81	231.156	2091.88	1500.13	242.221	2197.84	1276.74	236.793	1958.41	1395.55	243.751	1938.45	1210.74	192.168	2200.58	1351.23	429.769	2076.08	1450.86	499.6	2065.58	1247.6	524.259	2057.39	1127.98	505.961	1923.68	1015.22	446.41	1856.61	960.177	509.696	1879.7	921.206	488.194	1787.83	875.333
527	0	279.786	1847.38	1634.89	174.675	1853.38	1630.91	308.803	2003.37	1646.45	172.631	2022.68	1644.38	229.722	2078.42	1497.66	241.041	2184.26	1274.21	235.534	1944.91	1393.04	242.751	1924.87	1208.22	190.987	2187.14	1348.68	428.415	2062.54	1448.71	498.076	2051.07	1245.34	522.753	2041.78	1125.8	504.422	1906.04	1015.61	444.815	1837.67	962.156	507.777	1860.29	922.389	486.589	1767.37	878.6
528	0	278.426	1833.8	1632.41	173.284	1839.63	1628.4	307.207	1989.84	1644.1	170.995	2008.94	1642	228.194	2064.88	1495.24	239.824	2170.55	1271.72	234.165	1931.29	1390.6	241.63	1911.14	1205.77	189.743	2173.61	1346.15	426.985	2048.87	1446.63	496.398	2036.65	1243.12	521.063	2026.44	1123.65	502.821	1888.89	1015.85	443.231	1819.29	963.902	505.812	1841.56	923.367	485.078	1747.67	881.551
529	0	276.938	1820.14	1630.02	171.771	1825.79	1625.97	305.481	1976.23	1641.85	169.226	1995.11	1639.7	226.584	2051.26	1492.89	238.585	2156.72	1269.29	232.696	1917.58	1388.25	240.396	1897.28	1203.41	188.45	2160.01	1343.67	425.488	2035.08	1444.65	494.586	2022.32	1240.98	519.207	2011.39	1121.59	501.162	1872.25	1015.94	441.658	1801.49	965.408	503.803	1823.51	924.13	483.651	1728.76	884.161
530	0	275.331	1806.39	1627.75	170.144	1811.88	1623.63	303.635	1962.55	1639.74	167.338	1981.21	1637.5	224.908	2037.57	1490.65	237.334	2142.8	1266.97	231.138	1903.78	1386.04	239.058	1883.3	1201.19	187.116	2146.34	1341.29	423.937	2021.18	1442.8	492.664	2008.09	1238.95	517.21	1996.65	1119.64	499.453	1856.11	1015.89	440.096	1784.29	966.667	501.755	1806.16	924.671	482.297	1710.65	886.402
531	0	273.616	1792.58	1625.64	168.417	1797.91	1621.43	301.687	1948.8	1637.79	165.348	1967.24	1635.44	223.181	2023.83	1488.54	236.081	2128.8	1264.78	229.508	1889.9	1383.98	237.631	1869.21	1199.14	185.752	2132.62	1339.02	422.344	2007.18	1441.1	490.658	1993.97	1237.07	515.094	1982.21	1117.82	497.699	1840.5	1015.71	438.545	1767.7	967.671	499.676	1789.54	924.988	481.001	1693.37	888.248
532	0	271.812	1778.69	1623.7	166.609	1783.88	1619.37	299.658	1934.98	1636.02	163.277	1953.2	1633.53	221.419	2010.05	1486.6	234.829	2114.74	1262.75	227.825	1875.95	1382.12	236.136	1855.01	1197.28	184.363	2118.85	1336.9	420.722	1993.11	1439.58	488.598	1979.94	1235.37	512.885	1968.08	1116.17	495.907	1825.41	1015.4	437.003	1751.74	968.416	497.576	1773.65	925.078	479.746	1676.92	889.677
533	0	269.94	1764.76	1621.95	164.742	1769.8	1617.48	297.572	1921.11	1634.46	161.151	1939.13	1631.8	219.64	1996.23	1484.85	233.582	2100.66	1260.91	226.113	1861.96	1380.45	234.594	1840.74	1195.64	182.954	2105.06	1334.95	419.085	1978.98	1438.25	486.512	1966.03	1233.86	510.61	1954.27	1114.7	494.087	1810.86	1014.97	435.469	1736.42	968.895	495.468	1758.51	924.945	478.515	1661.32	890.669
534	0	268.025	1750.78	1620.41	162.841	1755.7	1615.77	295.457	1907.21	1633.13	158.997	1925.03	1630.28	217.86	1982.4	1483.3	232.339	2086.57	1259.28	224.394	1847.95	1379.02	233.029	1826.42	1194.23	181.529	2091.24	1333.19	417.447	1964.84	1437.12	484.427	1952.25	1232.58	508.295	1940.76	1113.44	492.248	1796.84	1014.44	433.944	1721.75	969.104	493.369	1744.09	924.593	477.291	1646.56	891.211
535	0	266.097	1736.78	1619.09	160.936	1741.6	1614.27	293.341	1893.28	1632.04	156.847	1910.91	1628.96	216.095	1968.57	1481.97	231.098	2072.5	1257.87	222.696	1833.92	1377.82	231.47	1812.07	1193.07	180.088	2077.41	1331.66	415.822	1950.72	1436.21	482.372	1938.61	1231.53	505.967	1927.57	1112.39	490.4	1783.36	1013.8	432.428	1707.74	969.04	491.297	1730.42	924.033	476.058	1632.65	891.293
536	0	264.184	1722.78	1618	159.054	1727.5	1612.98	291.255	1879.35	1631.18	154.729	1896.8	1627.87	214.362	1954.76	1480.88	229.857	2058.47	1256.71	221.042	1819.91	1376.86	229.94	1797.72	1192.15	178.634	2063.59	1330.36	414.222	1936.64	1435.52	480.372	1925.12	1230.74	503.651	1914.69	1111.58	488.557	1770.4	1013.08	430.921	1694.39	968.702	489.272	1717.47	923.275	474.804	1619.56	890.917
537	0	262.318	1708.78	1617.15	157.227	1713.42	1611.93	289.23	1865.43	1630.57	152.677	1882.72	1627.01	212.676	1940.98	1480.03	228.611	2044.5	1255.81	219.459	1805.94	1376.15	228.466	1783.4	1191.49	177.166	2049.79	1329.3	412.661	1922.65	1435.05	478.447	1911.8	1230.19	501.371	1902.12	1110.99	486.732	1757.98	1012.27	429.43	1681.7	968.09	487.315	1705.25	922.331	473.524	1607.29	890.089
538	0	260.529	1694.82	1616.54	155.484	1699.39	1611.11	287.296	1851.54	1630.2	150.719	1868.68	1626.39	211.05	1927.24	1479.44	227.356	2030.6	1255.16	217.968	1792.02	1375.69	227.071	1769.16	1191.07	175.685	2036.03	1328.52	411.149	1908.78	1434.79	476.615	1898.68	1229.9	499.149	1889.87	1110.64	484.938	1746.08	1011.39	427.958	1669.68	967.206	485.448	1693.73	921.216	472.216	1595.82	888.824
539	0	258.848	1680.91	1616.17	153.853	1685.42	1610.53	285.479	1837.69	1630.07	148.884	1854.69	1626.01	209.496	1913.57	1479.11	226.09	2016.79	1254.78	216.59	1778.18	1375.47	225.777	1755.01	1190.9	174.192	2022.31	1328	409.699	1895.06	1434.74	474.891	1885.79	1229.86	497.004	1877.93	1110.52	483.192	1734.72	1010.44	426.516	1658.32	966.056	483.693	1682.91	919.946	470.888	1585.13	887.145
540	0	257.301	1667.07	1616.04	152.359	1671.53	1610.21	283.805	1823.91	1630.18	147.197	1840.78	1625.89	208.025	1899.98	1479.04	224.81	2003.07	1254.66	215.341	1764.43	1375.51	224.602	1740.98	1190.97	172.689	2008.65	1327.76	408.32	1881.51	1434.9	473.281	1873.13	1230.06	494.951	1866.31	1110.62	481.511	1723.88	1009.45	425.116	1647.63	964.647	482.07	1672.78	918.537	469.556	1575.21	885.083
541	0	255.912	1653.3	1616.15	151.025	1657.72	1610.14	282.296	1810.19	1630.52	145.681	1826.95	1626.02	206.644	1886.47	1479.23	223.515	1989.44	1254.8	214.235	1750.79	1375.79	223.562	1727.1	1191.29	171.178	1995.05	1327.79	407.019	1868.17	1435.25	471.792	1860.75	1230.5	493	1855.01	1110.95	479.91	1713.56	1008.41	423.772	1637.6	962.992	480.6	1663.33	917.009	468.242	1566.04	882.673
542	0	254.703	1639.62	1616.5	149.871	1644	1610.33	280.969	1796.56	1631.1	144.352	1813.22	1626.42	205.36	1873.06	1479.69	222.202	1975.91	1255.2	213.281	1737.28	1376.32	222.669	1713.37	1191.85	169.662	1981.52	1328.11	405.804	1855.06	1435.8	470.42	1848.67	1231.16	491.159	1844.04	1111.48	478.408	1703.77	1007.34	422.505	1628.23	961.107	479.302	1654.55	915.38	466.981	1557.6	879.956
543	0	253.689	1626.04	1617.08	148.91	1630.38	1610.79	279.838	1783.01	1631.91	143.223	1799.59	1627.09	204.177	1859.76	1480.4	220.87	1962.46	1255.86	212.486	1723.9	1377.1	221.932	1699.81	1192.66	168.146	1968.07	1328.7	404.679	1842.19	1436.54	469.163	1836.9	1232.04	489.427	1833.4	1112.22	477.02	1694.51	1006.24	421.335	1619.52	959.01	478.192	1646.45	913.673	465.812	1549.89	876.977
544	0	252.882	1612.56	1617.9	148.155	1616.87	1611.51	278.913	1769.57	1632.94	142.304	1786.06	1628.03	203.096	1846.56	1481.38	219.518	1949.1	1256.75	211.851	1710.66	1378.14	221.353	1686.4	1193.71	166.633	1954.69	1329.56	403.646	1829.57	1437.46	468.011	1825.46	1233.13	487.804	1823.09	1113.16	475.764	1685.79	1005.14	420.287	1611.46	956.724	477.284	1639.02	911.908	464.781	1542.91	873.779
545	0	252.289	1599.2	1618.94	147.609	1603.47	1612.5	278.196	1756.22	1634.19	141.598	1772.65	1629.23	202.116	1833.48	1482.6	218.144	1935.82	1257.87	211.374	1697.55	1379.42	220.934	1673.15	1195.01	165.128	1941.39	1330.67	402.705	1817.2	1438.57	466.953	1814.38	1234.42	486.282	1813.13	1114.29	474.654	1677.59	1004.04	419.389	1604.05	954.276	476.59	1632.26	910.11	463.938	1536.65	870.41
546	0	251.911	1585.95	1620.21	147.273	1590.18	1613.75	277.688	1742.97	1635.65	141.102	1759.34	1630.71	201.235	1820.5	1484.05	216.747	1922.59	1259.21	211.049	1684.58	1380.95	220.669	1660.03	1196.56	163.632	1928.14	1332.04	401.853	1805.08	1439.85	465.977	1803.65	1235.9	484.852	1803.52	1115.61	473.703	1669.93	1002.96	418.666	1597.27	951.695	476.117	1626.18	908.3	463.335	1531.13	866.912
547	0	251.746	1572.82	1621.69	147.144	1576.99	1615.26	277.383	1729.83	1637.31	140.812	1746.14	1632.44	200.448	1807.61	1485.73	215.325	1909.42	1260.75	210.868	1671.72	1382.73	220.551	1647.04	1198.36	162.15	1914.95	1333.62	401.085	1793.19	1441.3	465.068	1793.28	1237.57	483.5	1794.24	1117.12	472.923	1662.79	1001.91	418.147	1591.11	949.012	475.871	1620.77	906.502	463.024	1526.34	863.326
548	0	251.786	1559.81	1623.38	147.214	1563.91	1617.02	277.273	1716.8	1639.15	140.718	1733.04	1634.42	199.748	1794.82	1487.61	213.878	1896.3	1262.46	210.819	1658.97	1384.73	220.566	1634.16	1200.39	160.681	1901.81	1335.42	400.397	1781.51	1442.9	464.211	1783.25	1239.41	482.213	1785.3	1118.79	472.323	1656.18	1000.9	417.857	1585.55	946.257	475.851	1616.04	904.738	463.051	1522.3	859.69
549	0	252.019	1546.9	1625.26	147.471	1550.94	1619.01	277.345	1703.87	1641.15	140.805	1720.05	1636.61	199.128	1782.09	1489.67	212.405	1883.21	1264.34	210.891	1646.31	1386.93	220.701	1621.37	1202.63	159.227	1888.7	1337.4	399.779	1770.03	1444.65	463.393	1773.56	1241.41	480.978	1776.69	1120.64	471.909	1650.09	999.936	417.819	1580.58	943.46	476.054	1611.98	903.026	463.455	1519.01	856.036
550	0	252.431	1534.11	1627.32	147.899	1538.05	1621.23	277.583	1691.04	1643.28	141.055	1707.15	1639	198.579	1769.43	1491.88	210.907	1870.14	1266.35	211.068	1633.72	1389.32	220.938	1608.64	1205.06	157.788	1875.6	1339.53	399.222	1758.7	1446.53	462.598	1764.18	1243.55	479.781	1768.4	1122.64	471.685	1644.49	999.032	418.053	1576.16	940.65	476.472	1608.58	901.382	464.266	1516.48	852.392
551	0	253.003	1521.42	1629.53	148.481	1525.26	1623.63	277.966	1678.32	1645.52	141.45	1694.35	1641.53	198.092	1756.8	1494.2	209.388	1857.11	1268.46	211.335	1621.17	1391.84	221.258	1595.96	1207.65	156.364	1862.51	1341.77	398.719	1747.51	1448.5	461.813	1755.08	1245.82	478.612	1760.42	1124.77	471.652	1639.37	998.191	418.572	1572.27	937.852	477.095	1605.81	899.82	465.502	1514.69	848.778
552	0	253.717	1508.83	1631.86	149.198	1512.54	1626.18	278.475	1665.69	1647.82	141.967	1681.62	1644.17	197.659	1744.19	1496.6	207.851	1844.09	1270.66	211.678	1608.66	1394.48	221.643	1583.3	1210.34	154.955	1849.42	1344.11	398.258	1736.41	1450.54	461.026	1746.23	1248.17	477.46	1752.71	1127.02	471.806	1634.71	997.413	419.385	1568.86	935.085	477.908	1603.66	898.347	467.165	1513.63	845.211
553	0	254.551	1496.32	1634.28	150.03	1499.89	1628.86	279.087	1653.16	1650.15	142.582	1668.97	1646.87	197.271	1731.59	1499.04	206.305	1831.09	1272.89	212.082	1596.14	1397.16	222.073	1570.66	1213.1	153.562	1836.3	1346.48	397.832	1725.37	1452.62	460.226	1737.57	1250.58	476.319	1745.26	1129.35	472.143	1630.48	996.696	420.493	1565.91	932.366	478.894	1602.08	896.968	469.246	1513.27	841.703
554	0	255.485	1483.89	1636.76	150.956	1487.29	1631.6	279.778	1640.71	1652.46	143.272	1656.38	1649.58	196.92	1718.96	1501.47	204.758	1818.11	1275.13	212.531	1583.61	1399.86	222.529	1558.02	1215.87	152.189	1823.17	1348.86	397.433	1714.36	1454.69	459.405	1729.08	1253.01	475.187	1738.03	1131.74	472.653	1626.64	996.036	421.889	1563.35	929.706	480.035	1601.04	895.684	471.718	1513.59	838.26
555	0	256.497	1471.52	1639.24	151.957	1474.73	1634.37	280.525	1628.33	1654.71	144.013	1643.83	1652.24	196.599	1706.31	1503.85	203.223	1805.15	1277.34	213.012	1571.06	1402.5	222.995	1545.36	1218.59	150.838	1809.99	1351.21	397.055	1703.34	1456.73	458.559	1720.7	1255.43	474.063	1731	1134.16	473.325	1623.15	995.425	423.559	1561.16	927.108	481.31	1600.48	894.492	474.545	1514.53	834.885
556	0	257.568	1459.2	1641.68	153.012	1462.2	1637.12	281.307	1616.01	1656.85	144.782	1631.31	1654.79	196.303	1693.61	1506.13	201.714	1792.21	1279.49	213.514	1558.45	1405.05	223.457	1532.67	1221.2	149.516	1796.79	1353.47	396.694	1692.28	1458.67	457.685	1712.4	1257.8	472.948	1724.11	1136.57	474.142	1619.96	994.854	425.483	1559.29	924.575	482.698	1600.34	893.387	477.677	1516.04	831.581
557	0	258.677	1446.92	1644.04	154.105	1449.67	1639.77	282.102	1603.74	1658.84	145.56	1618.8	1657.19	196.029	1680.85	1508.27	200.248	1779.3	1281.53	214.026	1545.79	1407.44	223.901	1519.96	1223.65	148.23	1783.54	1355.6	396.347	1681.17	1460.49	456.785	1704.12	1260.07	471.847	1717.34	1138.93	475.088	1617.04	994.313	427.633	1557.68	922.103	484.178	1600.57	892.365	481.055	1518.07	828.348
558	0	259.808	1434.64	1646.27	155.219	1437.13	1642.29	282.895	1591.49	1660.64	146.329	1606.28	1659.39	195.775	1668.02	1510.24	198.842	1766.42	1283.44	214.541	1533.06	1409.62	224.317	1507.21	1225.88	146.989	1770.25	1357.58	396.011	1669.97	1462.14	455.862	1695.83	1262.21	470.766	1710.64	1141.22	476.144	1614.32	993.791	429.977	1556.3	919.686	485.731	1601.1	891.42	484.617	1520.53	825.184
559	0	260.945	1422.36	1648.32	156.338	1424.56	1644.62	283.668	1579.25	1662.21	147.073	1593.73	1661.33	195.54	1655.11	1511.98	197.515	1753.57	1285.18	215.053	1520.26	1411.56	224.701	1494.42	1227.85	145.805	1756.92	1359.36	395.689	1658.67	1463.59	454.923	1687.49	1264.2	469.711	1703.96	1143.41	477.288	1611.77	993.28	432.477	1555.1	917.317	487.337	1601.84	890.547	488.296	1523.36	822.091
560	0	262.074	1410.06	1650.14	157.452	1411.95	1646.72	284.413	1566.99	1663.53	147.783	1581.14	1663	195.328	1642.13	1513.48	196.286	1740.76	1286.71	215.559	1507.39	1413.21	225.048	1481.6	1229.52	144.69	1743.55	1360.91	395.38	1647.26	1464.8	453.979	1679.07	1266.01	468.69	1697.28	1145.48	478.5	1609.33	992.771	435.093	1554.04	914.988	488.98	1602.74	889.746	492.024	1526.49	819.073
561	0	263.183	1397.71	1651.7	158.549	1399.29	1648.52	285.121	1554.71	1664.57	148.451	1568.49	1664.34	195.143	1629.06	1514.7	195.175	1727.97	1288.02	216.059	1494.45	1414.54	225.36	1468.74	1230.84	143.658	1730.14	1362.21	395.091	1635.71	1465.76	453.039	1670.54	1267.62	467.709	1690.55	1147.39	479.759	1606.94	992.26	437.784	1553.09	912.693	490.642	1603.73	889.015	495.739	1529.84	816.135
562	0	264.265	1385.3	1652.97	159.622	1386.55	1650.01	285.789	1542.36	1665.31	149.076	1555.76	1665.34	194.992	1615.92	1515.62	194.2	1715.22	1289.08	216.555	1481.43	1415.52	225.64	1455.84	1231.8	142.724	1716.71	1363.23	394.828	1624.03	1466.44	452.117	1661.88	1269.01	466.777	1683.73	1149.15	481.045	1604.57	991.743	440.508	1552.21	910.426	492.309	1604.74	888.356	499.383	1533.33	813.285
563	0	265.314	1372.81	1653.91	160.666	1373.73	1651.15	286.418	1529.95	1665.74	149.657	1542.95	1665.99	194.884	1602.69	1516.23	193.378	1702.48	1289.88	217.051	1468.34	1416.15	225.895	1442.91	1232.38	141.903	1703.24	1363.95	394.6	1612.19	1466.84	451.225	1653.06	1270.18	465.898	1676.8	1150.73	482.34	1602.17	991.219	443.229	1551.37	908.187	493.968	1605.7	887.772	502.904	1536.89	810.537
564	0	266.327	1360.22	1654.51	161.678	1360.81	1651.92	287.013	1517.43	1665.86	150.202	1530.03	1666.28	194.83	1589.39	1516.52	192.726	1689.75	1290.39	217.555	1455.17	1416.41	226.135	1429.94	1232.58	141.211	1689.75	1364.36	394.417	1600.21	1466.93	450.377	1644.08	1271.13	465.078	1669.73	1152.14	483.629	1599.7	990.69	445.908	1550.53	905.977	495.605	1606.57	887.271	506.262	1540.45	807.904
565	0	267.304	1347.53	1654.76	162.659	1347.8	1652.3	287.584	1504.81	1665.66	150.719	1517.01	1666.22	194.842	1576.01	1516.49	192.256	1677.03	1290.61	218.074	1441.94	1416.3	226.37	1416.93	1232.4	140.662	1676.23	1364.47	394.292	1588.07	1466.74	449.587	1634.91	1271.86	464.323	1662.49	1153.38	484.898	1597.11	990.158	448.517	1549.66	903.798	497.21	1607.28	886.857	509.425	1543.95	805.405
566	0	268.249	1334.71	1654.66	163.614	1334.68	1652.29	288.141	1492.06	1665.16	151.222	1503.88	1665.8	194.933	1562.56	1516.14	191.979	1664.29	1290.54	218.62	1428.65	1415.84	226.613	1403.88	1231.84	140.271	1662.69	1364.26	394.239	1575.77	1466.25	448.868	1625.56	1272.38	463.636	1655.07	1154.44	486.138	1594.37	989.628	451.028	1548.73	901.659	498.772	1607.79	886.536	512.373	1547.32	803.059
567	0	269.17	1321.76	1654.2	164.548	1321.45	1651.9	288.701	1479.18	1664.37	151.725	1490.63	1665.05	195.12	1549.04	1515.48	191.904	1651.51	1290.18	219.202	1415.28	1415.04	226.877	1390.78	1230.93	140.051	1649.11	1363.75	394.273	1563.3	1465.48	448.234	1616.01	1272.69	463.022	1647.45	1155.33	487.34	1591.45	989.103	453.422	1547.71	899.568	500.279	1608.06	886.315	515.095	1550.5	800.884
568	0	270.075	1308.67	1653.4	165.47	1308.11	1651.15	289.28	1466.15	1663.31	152.249	1477.26	1663.98	195.416	1535.45	1514.52	192.034	1638.67	1289.53	219.833	1401.85	1413.92	227.177	1377.63	1229.7	140.015	1635.51	1362.95	394.408	1550.67	1464.44	447.697	1606.27	1272.82	462.485	1639.62	1156.05	488.502	1588.33	988.59	455.684	1546.57	897.534	501.724	1608.05	886.195	517.588	1553.44	798.896
569	0	270.978	1295.44	1652.29	166.393	1294.66	1650.04	289.9	1452.97	1661.99	152.812	1463.79	1662.64	195.837	1521.81	1513.29	192.37	1625.76	1288.59	220.526	1388.35	1412.5	227.527	1364.42	1228.17	140.171	1621.86	1361.87	394.659	1537.88	1463.15	447.269	1596.32	1272.76	462.03	1631.56	1156.63	489.621	1584.97	988.091	457.808	1545.27	895.568	503.095	1607.73	886.178	519.854	1556.09	797.107
570	0	271.892	1282.06	1650.88	167.33	1281.11	1648.62	290.581	1439.63	1660.45	153.436	1450.21	1661.03	196.399	1508.1	1511.81	192.911	1612.75	1287.39	221.292	1374.78	1410.82	227.941	1351.12	1226.39	140.529	1608.18	1360.53	395.041	1524.91	1461.63	446.963	1586.15	1272.54	461.66	1623.27	1157.05	490.7	1581.34	987.607	459.789	1543.78	893.679	504.386	1607.08	886.259	521.901	1558.41	795.525
571	0	272.835	1268.54	1649.21	168.296	1267.45	1646.92	291.344	1426.14	1658.71	154.144	1436.54	1659.2	197.115	1494.32	1510.1	193.65	1599.62	1285.93	222.144	1361.13	1408.92	228.43	1337.74	1224.38	141.095	1594.44	1358.96	395.568	1511.78	1459.88	446.789	1575.78	1272.17	461.381	1614.72	1157.34	491.74	1577.42	987.139	461.631	1542.06	891.875	505.59	1606.05	886.433	523.738	1560.34	794.15
572	0	273.822	1254.88	1647.32	169.306	1253.7	1644.97	292.211	1412.5	1656.8	154.957	1422.77	1657.18	197.999	1480.49	1508.19	194.579	1586.35	1284.25	223.094	1347.4	1406.83	229.008	1324.26	1222.19	141.873	1580.64	1357.18	396.253	1498.48	1457.95	446.756	1565.18	1271.66	461.199	1605.92	1157.49	492.747	1573.19	986.683	463.338	1540.06	890.16	506.704	1604.62	886.69	525.376	1561.84	792.975
573	0	274.871	1241.09	1645.24	170.378	1239.86	1642.82	293.202	1398.72	1654.74	155.898	1408.91	1655.01	199.062	1466.59	1506.11	195.688	1572.91	1282.35	224.153	1333.58	1404.58	229.684	1310.67	1219.86	142.865	1566.78	1355.23	397.106	1485.01	1455.83	446.874	1554.35	1271.01	461.12	1596.85	1157.52	493.726	1568.61	986.234	464.921	1537.75	888.538	507.727	1602.77	887.017	526.827	1562.88	791.989
574	0	275.999	1227.16	1643.01	171.528	1225.94	1640.51	294.335	1384.8	1652.58	156.985	1394.98	1652.71	200.312	1452.62	1503.9	196.966	1559.3	1280.28	225.328	1319.68	1402.22	230.468	1296.95	1217.42	144.069	1552.84	1353.13	398.137	1471.37	1453.56	447.15	1543.28	1270.23	461.151	1587.48	1157.41	494.682	1563.66	985.784	466.39	1535.08	887.007	508.66	1600.47	887.397	528.1	1563.41	791.172
575	0	277.222	1213.12	1640.68	172.769	1211.94	1638.1	295.627	1370.75	1650.33	158.236	1380.98	1650.34	201.755	1438.58	1501.59	198.4	1545.5	1278.05	226.628	1305.68	1399.78	231.368	1283.09	1214.93	145.482	1538.82	1350.91	399.352	1457.56	1451.16	447.591	1531.96	1269.33	461.299	1577.81	1157.18	495.622	1558.29	985.322	467.757	1531.99	885.564	509.51	1597.67	887.812	529.209	1563.39	790.502
576	0	278.552	1198.96	1638.28	174.115	1197.87	1635.63	297.092	1356.57	1648.03	159.665	1366.92	1647.91	203.392	1424.46	1499.21	199.979	1531.51	1275.71	228.058	1291.57	1397.3	232.388	1269.09	1212.4	147.096	1524.71	1348.63	400.755	1443.59	1448.65	448.201	1520.37	1268.32	461.57	1567.81	1156.83	496.553	1552.49	984.835	469.036	1528.45	884.202	510.285	1594.35	888.242	530.167	1562.78	789.952
577	0	280.001	1184.69	1635.87	175.577	1183.74	1633.13	298.738	1342.28	1645.7	161.283	1352.81	1645.46	205.222	1410.27	1496.8	201.689	1517.32	1273.29	229.619	1277.37	1394.81	233.534	1254.93	1209.89	148.902	1510.51	1346.3	402.347	1429.46	1446.06	448.985	1508.51	1267.2	461.971	1557.47	1156.36	497.482	1546.21	984.31	470.24	1524.41	882.911	511	1590.47	888.666	530.99	1561.53	789.492
578	0	281.575	1170.32	1633.47	177.162	1169.55	1630.67	300.57	1327.89	1643.37	163.095	1338.65	1643.03	207.238	1396	1494.4	203.519	1502.94	1270.82	231.312	1263.06	1392.35	234.807	1240.62	1207.41	150.885	1496.21	1343.96	404.122	1415.16	1443.41	449.943	1496.37	1265.97	462.507	1546.76	1155.76	498.415	1539.41	983.732	471.382	1519.8	881.679	511.669	1585.98	889.06	531.692	1559.6	789.094
579	0	283.279	1155.87	1631.13	178.872	1155.31	1628.27	302.589	1313.4	1641.07	165.102	1324.44	1640.63	209.43	1381.64	1492.02	205.457	1488.37	1268.35	233.131	1248.65	1389.94	236.206	1226.16	1205	153.029	1481.82	1341.66	406.075	1400.72	1440.73	451.075	1483.92	1264.63	463.181	1535.66	1155.03	499.36	1532.06	983.087	472.474	1514.58	880.491	512.312	1580.83	889.402	532.294	1556.93	788.727
580	0	285.11	1141.34	1628.88	180.708	1141.03	1625.98	304.789	1298.82	1638.81	167.299	1310.2	1638.3	211.781	1367.21	1489.72	207.49	1473.64	1265.92	235.068	1234.14	1387.61	237.728	1211.55	1202.69	155.314	1467.34	1339.42	408.194	1386.13	1438.04	452.379	1471.16	1263.2	463.997	1524.16	1154.19	500.322	1524.12	982.361	473.529	1508.7	879.331	512.949	1574.99	889.666	532.813	1553.47	788.36
581	0	287.063	1126.74	1626.75	182.663	1126.7	1623.82	307.159	1284.17	1636.63	169.676	1295.92	1636.06	214.272	1352.7	1487.52	209.605	1458.76	1263.56	237.112	1219.53	1385.4	239.368	1196.82	1200.51	157.719	1452.79	1337.29	410.462	1371.41	1435.39	453.851	1458.09	1261.68	464.957	1512.24	1153.22	501.307	1515.56	981.542	474.558	1502.11	878.183	513.602	1568.41	889.831	533.266	1549.16	787.961
582	0	289.128	1112.08	1624.76	184.727	1112.34	1621.82	309.685	1269.46	1634.53	172.216	1281.62	1633.93	216.88	1338.12	1485.45	211.788	1443.76	1261.31	239.248	1204.85	1383.32	241.117	1181.97	1198.46	160.219	1438.17	1335.28	412.862	1356.57	1432.81	455.482	1444.68	1260.08	466.059	1499.89	1152.14	502.323	1506.33	980.62	475.57	1494.76	877.031	514.294	1561.03	889.873	533.674	1543.96	787.5
583	0	291.289	1097.37	1622.94	186.886	1097.95	1620.01	312.344	1254.69	1632.56	174.899	1267.29	1631.95	219.577	1323.49	1483.53	214.024	1428.66	1259.22	241.456	1190.1	1381.4	242.962	1167.03	1196.58	162.79	1423.5	1333.44	415.369	1341.63	1430.32	457.266	1430.95	1258.41	467.303	1487.1	1150.94	503.376	1496.39	979.586	476.574	1486.6	875.858	515.047	1552.81	889.771	534.051	1537.8	786.947
584	0	293.527	1082.61	1621.29	189.122	1083.54	1618.4	315.11	1239.88	1630.72	177.697	1252.94	1630.13	222.334	1308.8	1481.81	216.298	1413.5	1257.31	243.716	1175.31	1379.65	244.889	1152.03	1194.89	165.404	1408.8	1331.79	417.959	1326.62	1427.97	459.189	1416.89	1256.67	468.686	1473.85	1149.64	504.47	1485.73	978.439	477.577	1477.58	874.652	515.88	1543.7	889.507	534.417	1530.62	786.275
585	0	295.82	1067.83	1619.84	191.41	1069.12	1617.01	317.953	1225.03	1629.03	180.58	1238.57	1628.5	225.119	1294.09	1480.29	218.593	1398.32	1255.62	246.003	1160.49	1378.1	246.88	1136.99	1193.39	168.037	1394.1	1330.36	420.604	1311.54	1425.78	461.24	1402.5	1254.9	470.201	1460.15	1148.24	505.613	1474.3	977.178	478.583	1467.66	873.401	516.813	1533.66	889.064	534.788	1522.36	785.458
586	0	298.14	1053.04	1618.6	193.727	1054.69	1615.86	320.84	1210.16	1627.53	183.513	1224.2	1627.07	227.901	1279.38	1479.01	220.893	1383.15	1254.17	248.293	1145.67	1376.77	248.915	1121.97	1192.12	170.663	1379.42	1329.17	423.274	1296.43	1423.81	463.404	1387.8	1253.1	471.844	1446	1146.76	506.808	1462.09	975.809	479.596	1456.81	872.096	517.861	1522.66	888.429	535.182	1512.97	784.478
587	0	300.461	1038.25	1617.57	196.045	1040.27	1614.94	323.735	1195.29	1626.22	186.46	1209.82	1625.88	230.648	1264.68	1477.98	223.183	1368.03	1252.99	250.558	1130.89	1375.67	250.972	1106.99	1191.07	173.26	1364.78	1328.23	425.942	1281.32	1422.08	465.664	1372.8	1251.3	473.606	1431.41	1145.21	508.06	1449.07	974.342	480.62	1444.99	870.735	519.035	1510.64	887.595	535.614	1502.4	783.32
588	0	302.753	1023.47	1616.75	198.334	1025.86	1614.26	326.6	1180.44	1625.13	189.382	1195.45	1624.94	233.329	1250.02	1477.22	225.447	1352.99	1252.11	252.773	1116.16	1374.82	253.026	1092.08	1190.27	175.806	1350.23	1327.57	428.577	1266.24	1420.63	468.002	1357.51	1249.54	475.479	1416.38	1143.62	509.371	1435.23	972.791	481.654	1432.16	869.32	520.342	1497.59	886.558	536.102	1490.58	781.977
589	0	304.988	1008.73	1616.16	200.567	1011.47	1613.82	329.397	1165.61	1624.29	192.241	1181.1	1624.27	235.918	1235.43	1476.74	227.673	1338.08	1251.53	254.915	1101.51	1374.23	255.053	1077.3	1189.73	178.284	1335.77	1327.2	431.154	1251.2	1419.48	470.401	1341.96	1247.82	477.453	1400.93	1142.01	510.74	1420.55	971.177	482.698	1418.31	867.859	521.783	1483.47	885.321	536.662	1477.48	780.451
590	0	307.137	994.033	1615.8	202.715	997.133	1613.64	332.093	1150.83	1623.71	194.999	1166.78	1623.88	238.388	1220.93	1476.55	229.85	1323.32	1251.27	256.959	1086.98	1373.91	257.028	1062.67	1189.45	180.679	1321.45	1327.12	433.647	1236.24	1418.67	472.841	1326.17	1246.2	479.519	1385.08	1140.4	512.165	1405.04	969.523	483.75	1403.42	866.366	523.354	1468.28	883.893	537.306	1463.05	778.753
591	0	309.175	979.405	1615.68	204.752	982.844	1613.7	334.653	1136.12	1623.41	197.623	1152.5	1623.8	240.721	1206.54	1476.67	231.97	1308.73	1251.34	258.886	1072.59	1373.88	258.927	1048.22	1189.45	182.98	1307.27	1327.34	436.036	1221.39	1418.23	475.304	1310.17	1244.69	481.665	1368.84	1138.83	513.64	1388.7	967.858	484.805	1387.48	864.864	525.044	1452.01	882.292	538.044	1447.27	776.903
592	0	311.078	964.86	1615.79	206.656	968.621	1614.01	337.048	1121.49	1623.41	200.082	1138.28	1624.03	242.902	1192.3	1477.09	234.028	1294.35	1251.74	260.679	1058.35	1374.14	260.728	1033.97	1189.73	185.182	1293.27	1327.86	438.305	1206.65	1418.15	477.772	1293.98	1243.35	483.883	1352.25	1137.32	515.158	1371.53	966.216	485.856	1370.48	863.381	526.838	1434.64	880.541	538.88	1430.1	774.932
593	0	312.827	950.414	1616.16	208.407	954.478	1614.56	339.254	1106.96	1623.72	202.35	1124.12	1624.59	244.919	1178.2	1477.82	236.023	1280.18	1252.47	262.324	1044.29	1374.7	262.41	1019.94	1190.3	187.282	1279.45	1328.69	440.441	1192.05	1418.47	480.228	1277.63	1242.19	486.163	1335.31	1135.9	516.709	1353.56	964.631	486.895	1352.43	861.954	528.715	1416.2	878.673	539.813	1411.54	772.882
594	0	314.405	936.081	1616.77	209.989	940.426	1615.37	341.251	1092.54	1624.36	204.407	1110.05	1625.47	246.767	1164.27	1478.86	237.955	1266.23	1253.52	263.812	1030.41	1375.56	263.957	1006.13	1191.16	189.281	1265.82	1329.81	442.437	1177.59	1419.19	482.657	1261.14	1241.25	488.497	1318.06	1134.62	518.28	1334.8	963.143	487.909	1333.35	860.625	530.652	1396.7	876.729	540.835	1391.59	770.801
595	0	315.802	921.874	1617.63	211.391	926.478	1616.42	343.027	1078.25	1625.33	206.238	1096.07	1626.68	248.447	1150.53	1480.19	239.828	1252.51	1254.9	265.138	1016.72	1376.72	265.355	992.543	1192.32	191.183	1252.39	1331.21	444.291	1163.27	1420.31	485.047	1244.53	1240.57	490.879	1300.52	1133.5	519.859	1315.28	961.792	488.887	1313.25	859.442	532.62	1376.16	874.755	541.929	1370.27	768.75
596	0	317.011	907.804	1618.75	212.607	912.643	1617.7	344.574	1064.1	1626.63	207.838	1082.19	1628.21	249.963	1136.96	1481.81	241.648	1239.01	1256.57	266.301	1003.22	1378.19	266.599	979.169	1193.78	192.994	1239.16	1332.89	446.004	1149.09	1421.82	487.387	1227.82	1240.17	493.304	1282.71	1132.57	521.432	1295.02	960.62	489.815	1292.19	858.455	534.592	1354.61	872.803	543.075	1347.59	766.793
597	0	318.029	893.878	1620.12	213.635	898.93	1619.21	345.892	1050.09	1628.26	209.204	1068.43	1630.05	251.323	1123.58	1483.71	243.42	1225.73	1258.52	267.306	989.911	1379.95	267.687	965.994	1195.53	194.722	1226.11	1334.81	447.582	1135.06	1423.71	489.672	1211.04	1240.07	495.768	1264.65	1131.87	522.984	1274.08	959.666	490.679	1270.18	857.719	536.538	1332.09	870.929	544.244	1323.6	765
598	0	318.86	880.102	1621.74	214.478	885.347	1620.95	346.986	1036.23	1630.2	210.342	1054.79	1632.18	252.54	1110.38	1485.85	245.152	1212.65	1260.72	268.16	976.78	1381.98	268.622	953	1197.55	196.378	1213.24	1336.97	449.034	1121.14	1425.95	491.899	1194.18	1240.28	498.268	1246.36	1131.41	524.503	1252.49	958.969	491.465	1247.3	857.287	538.429	1308.66	869.191	545.406	1298.34	763.447
599	0	319.511	866.479	1623.59	215.143	871.898	1622.88	347.868	1022.53	1632.44	211.265	1041.28	1634.57	253.628	1097.35	1488.22	246.851	1199.75	1263.16	268.875	963.813	1384.27	269.417	940.166	1199.84	197.969	1200.53	1339.33	450.37	1107.34	1428.53	494.068	1177.27	1240.81	500.803	1227.88	1131.21	525.974	1230.29	958.562	492.161	1223.58	857.209	540.237	1284.35	867.644	546.526	1271.89	762.205
600	0	319.994	853.009	1625.65	215.642	858.588	1625	348.555	1008.98	1634.94	211.988	1027.9	1637.18	254.604	1084.48	1490.79	248.522	1187.01	1265.78	269.466	950.997	1386.79	270.085	927.468	1202.36	199.505	1187.97	1341.86	451.604	1093.65	1431.4	496.182	1160.33	1241.66	503.371	1209.22	1131.28	527.388	1207.54	958.474	492.754	1199.11	857.533	541.938	1259.24	866.344	547.569	1244.31	761.343
601	0	320.324	839.692	1627.91	215.99	845.417	1627.27	349.066	995.592	1637.68	212.534	1014.67	1639.99	255.487	1071.76	1493.5	250.171	1174.42	1268.55	269.95	938.31	1389.51	270.644	914.883	1205.08	200.996	1175.53	1344.53	452.748	1080.03	1434.51	498.248	1143.35	1242.81	505.97	1190.42	1131.62	528.732	1184.28	958.725	493.236	1173.94	858.295	543.51	1233.37	865.337	548.498	1215.69	760.926
602	0	320.522	826.521	1630.34	216.207	832.384	1629.67	349.426	982.348	1640.6	212.926	1001.57	1642.93	256.293	1059.17	1496.34	251.8	1161.95	1271.44	270.346	925.735	1392.37	271.116	902.39	1207.96	202.448	1163.2	1347.3	453.816	1066.48	1437.82	500.272	1126.36	1244.24	508.6	1171.49	1132.22	530	1160.58	959.331	493.597	1148.16	859.528	544.935	1206.82	864.666	549.278	1186.12	761.008
603	0	320.609	813.491	1632.9	216.314	819.484	1632.17	349.661	969.247	1643.65	213.192	988.607	1645.96	257.042	1046.69	1499.24	253.41	1149.57	1274.38	270.671	913.248	1395.34	271.523	889.965	1210.95	203.868	1150.95	1350.12	454.822	1052.99	1441.27	502.264	1109.37	1245.92	511.257	1152.47	1133.06	531.185	1136.5	960.296	493.831	1121.84	861.249	546.198	1179.65	864.363	549.877	1155.7	761.633
604	0	320.61	800.593	1635.56	216.335	806.71	1634.72	349.8	956.28	1646.79	213.361	975.777	1649.03	257.749	1034.29	1502.17	255.002	1137.27	1277.35	270.945	900.83	1398.37	271.887	877.592	1214.01	205.262	1138.76	1352.95	455.777	1039.54	1444.8	504.232	1092.39	1247.81	513.938	1133.4	1134.11	532.281	1112.09	961.618	493.935	1095.06	863.468	547.289	1151.94	864.451	550.265	1124.53	762.833
605	0	320.55	787.815	1638.27	216.294	794.052	1637.3	349.869	943.437	1649.95	213.46	963.067	1652.08	258.43	1021.97	1505.07	256.573	1125.01	1280.28	271.187	888.459	1401.39	272.229	865.253	1217.06	206.632	1126.61	1355.76	456.691	1026.11	1448.34	506.184	1075.43	1249.86	516.64	1114.28	1135.33	533.287	1087.42	963.288	493.905	1067.91	866.182	548.199	1123.76	864.945	550.418	1092.73	764.627
606	0	320.453	775.144	1640.98	216.216	781.497	1639.86	349.895	930.705	1653.07	213.517	950.468	1655.06	259.096	1009.69	1507.9	258.119	1112.78	1283.14	271.412	876.115	1404.36	272.568	852.936	1220.07	207.981	1114.48	1358.5	457.573	1012.72	1451.83	508.126	1058.51	1252.01	519.356	1095.15	1136.67	534.202	1062.54	965.287	493.741	1040.46	869.377	548.926	1095.19	865.846	550.317	1060.41	767.024
607	0	320.346	762.566	1643.66	216.124	769.031	1642.35	349.905	918.068	1656.1	213.558	937.965	1657.91	259.76	997.428	1510.62	259.635	1100.56	1285.88	271.637	863.781	1407.22	272.92	840.631	1222.96	209.31	1102.35	1361.12	458.431	999.335	1455.21	510.06	1041.64	1254.2	522.08	1076.04	1138.1	535.027	1037.51	967.591	493.445	1012.78	873.031	549.468	1066.29	867.15	549.95	1027.67	770.019
608	0	320.248	750.062	1646.24	216.039	756.638	1644.74	349.92	905.513	1658.97	213.606	925.542	1660.57	260.429	985.175	1513.17	261.115	1088.34	1288.45	271.872	851.44	1409.92	273.298	828.33	1225.69	210.618	1090.21	1363.59	459.269	985.963	1458.41	511.989	1024.82	1256.37	524.802	1056.95	1139.54	535.762	1012.38	970.171	493.021	984.962	877.114	549.826	1037.14	868.844	549.307	994.631	773.597
609	0	320.18	737.616	1648.69	215.981	744.298	1646.99	349.961	893.019	1661.63	213.681	913.18	1663.01	261.109	972.906	1515.52	262.552	1076.09	1290.82	272.129	839.078	1412.41	273.711	816.028	1228.2	211.903	1078.04	1365.87	460.091	972.598	1461.37	513.909	1008.08	1258.46	527.514	1037.91	1140.95	536.409	987.203	972.992	492.474	957.063	881.587	550.003	1007.82	870.908	548.391	961.395	777.735
610	0	320.157	725.208	1650.96	215.965	731.994	1649.05	350.044	880.57	1664.04	213.798	900.861	1665.19	261.803	960.606	1517.63	263.938	1063.8	1292.96	272.415	826.684	1414.64	274.167	803.72	1230.44	213.161	1065.83	1367.93	460.898	959.239	1464.05	515.814	991.407	1260.41	530.202	1018.91	1142.28	536.97	962.025	976.018	491.812	929.149	886.409	550.007	978.377	873.316	547.206	928.064	782.402
611	0	320.192	712.821	1653.01	216.004	719.706	1650.9	350.18	868.146	1666.16	213.969	888.565	1667.06	262.513	948.258	1519.48	265.266	1051.46	1294.83	272.734	814.246	1416.58	274.666	791.403	1232.38	214.387	1053.56	1369.74	461.689	945.883	1466.4	517.696	974.817	1262.16	532.853	999.972	1143.47	537.446	936.885	979.21	491.041	901.279	891.533	549.844	948.892	876.039	545.766	894.735	787.562
612	0	320.293	700.435	1654.8	216.106	707.415	1652.49	350.379	855.729	1667.94	214.202	876.273	1668.61	263.236	935.85	1521.03	266.528	1039.07	1296.41	273.088	801.757	1418.2	275.208	779.072	1233.98	215.576	1041.23	1371.28	462.461	932.529	1468.39	519.543	958.31	1263.67	535.451	981.082	1144.47	537.838	911.82	982.529	490.172	873.506	896.91	549.525	919.423	879.045	544.091	861.5	793.176
613	0	320.463	688.033	1656.3	216.275	695.103	1653.81	350.645	843.301	1669.37	214.5	863.964	1669.8	263.969	923.37	1522.27	267.715	1026.62	1297.69	273.475	789.211	1419.47	275.788	766.723	1235.22	216.719	1028.83	1372.53	463.209	919.178	1469.99	521.34	941.885	1264.9	537.981	962.239	1145.26	538.147	886.861	985.936	489.215	845.878	902.491	549.06	890.028	882.301	542.205	828.443	799.198
614	0	320.702	675.598	1657.48	216.51	682.754	1654.83	350.976	830.844	1670.42	214.863	851.622	1670.64	264.705	910.809	1523.18	268.819	1014.1	1298.65	273.892	776.6	1420.37	276.398	754.349	1236.09	217.809	1016.35	1373.48	463.93	905.827	1471.18	523.071	925.538	1265.81	540.425	943.435	1145.81	538.371	862.038	989.394	488.178	818.439	908.226	548.461	860.762	885.771	540.136	795.64	805.583
615	0	321.008	663.115	1658.33	216.81	670.35	1655.54	351.369	818.344	1671.09	215.285	839.229	1671.11	265.437	898.158	1523.76	269.833	1001.5	1299.28	274.332	763.921	1420.9	277.029	741.942	1236.57	218.837	1003.78	1374.12	464.614	892.475	1471.96	524.718	909.263	1266.38	542.763	924.661	1146.08	538.511	837.375	992.868	487.072	791.228	914.066	547.74	831.678	889.422	537.915	763.165	812.281
616	0	321.373	650.571	1658.84	217.167	657.879	1655.93	351.816	805.786	1671.37	215.758	826.771	1671.21	266.156	885.413	1524	270.749	988.825	1299.59	274.787	751.168	1421.06	277.668	729.492	1236.66	219.797	991.12	1374.45	465.255	879.117	1472.32	526.265	893.053	1266.6	544.976	905.911	1146.07	538.566	812.897	996.324	485.908	764.281	919.964	546.909	802.824	893.219	535.577	731.08	819.242
617	0	321.786	637.955	1659.01	217.571	645.328	1656	352.306	793.161	1671.27	216.271	814.236	1670.96	266.85	872.567	1523.91	271.56	976.068	1299.58	275.246	738.337	1420.84	278.303	716.99	1236.39	220.678	978.357	1374.46	465.845	865.747	1472.29	527.692	876.897	1266.47	547.045	887.174	1145.77	538.535	788.626	999.733	484.695	737.628	925.876	545.98	774.247	897.127	533.153	699.445	826.413
618	0	322.236	625.259	1658.83	218.009	632.688	1655.75	352.825	780.459	1670.8	216.81	801.612	1670.37	267.509	859.618	1523.49	272.262	963.222	1299.25	275.699	725.424	1420.27	278.92	704.422	1235.75	221.475	965.489	1374.16	466.377	852.359	1471.86	528.982	860.783	1265.99	548.948	868.448	1145.19	538.418	764.583	1003.07	483.443	711.299	931.758	544.965	745.992	901.113	530.679	668.315	833.74
619	0	322.707	612.475	1658.32	218.468	619.951	1655.19	353.357	767.673	1669.98	217.356	788.892	1669.45	268.122	846.564	1522.77	272.85	950.282	1298.61	276.131	712.425	1419.36	279.504	691.776	1234.77	222.182	952.514	1373.56	466.843	838.943	1471.08	530.118	844.701	1265.17	550.668	849.728	1144.33	538.213	740.789	1006.3	482.161	685.321	937.571	543.874	718.102	905.143	528.188	637.738	841.167
620	0	323.182	599.6	1657.49	218.93	607.111	1654.34	353.882	754.799	1668.83	217.893	776.07	1668.24	268.675	833.404	1521.75	273.322	937.242	1297.69	276.529	699.334	1418.14	280.043	679.039	1233.47	222.793	939.428	1372.68	467.236	825.486	1469.96	531.087	828.639	1264.03	552.187	831.019	1143.21	537.921	717.266	1009.41	480.859	659.718	943.28	542.717	690.618	909.185	525.711	607.759	848.637
621	0	323.645	586.63	1656.37	219.378	594.164	1653.21	354.383	741.835	1667.38	218.4	763.142	1666.75	269.159	820.137	1520.46	273.679	924.095	1296.49	276.879	686.146	1416.62	280.523	666.199	1231.89	223.306	926.23	1371.52	467.55	811.976	1468.54	531.875	812.585	1262.6	553.487	812.327	1141.87	537.542	694.036	1012.39	479.545	634.516	948.851	541.501	663.58	913.206	523.279	578.42	856.094
622	0	324.077	573.563	1654.98	219.794	581.109	1651.84	354.838	728.78	1665.66	218.856	750.104	1665.01	269.562	806.763	1518.91	273.924	910.834	1295.03	277.168	672.858	1414.84	280.932	653.242	1230.05	223.719	912.919	1370.11	467.78	798.397	1466.87	532.471	796.53	1260.92	554.555	793.664	1140.31	537.075	671.122	1015.21	478.227	609.735	954.254	540.234	637.026	917.174	520.918	549.758	863.483
623	0	324.46	560.4	1653.36	220.16	567.943	1650.25	355.227	715.635	1663.7	219.242	736.956	1663.06	269.874	793.284	1517.14	274.063	897.456	1293.35	277.382	659.465	1412.84	281.259	640.157	1227.99	224.032	899.495	1368.46	467.921	784.733	1464.98	532.869	780.466	1259.01	555.38	775.049	1138.57	536.521	648.549	1017.86	476.912	585.401	959.463	538.921	610.996	921.058	518.654	521.807	870.748
624	0	324.776	547.142	1651.53	220.459	554.666	1648.46	355.531	702.4	1661.54	219.538	723.697	1660.92	270.086	779.701	1515.16	274.105	883.953	1291.46	277.508	645.962	1410.64	281.497	626.932	1225.75	224.247	885.959	1366.6	467.971	770.968	1462.92	533.065	764.388	1256.92	555.954	756.503	1136.68	535.882	626.341	1020.32	475.607	561.535	964.452	537.567	585.524	924.826	516.507	494.599	877.834
625	0	325.01	533.789	1649.54	220.674	541.28	1646.51	355.732	689.078	1659.22	219.726	710.328	1658.64	270.191	766.016	1513.02	274.059	870.325	1289.38	277.536	632.347	1408.29	281.636	613.56	1223.36	224.369	872.313	1364.55	467.927	757.087	1460.73	533.059	748.294	1254.69	556.274	738.054	1134.67	535.158	604.525	1022.6	474.316	538.16	969.199	536.177	560.647	928.448	514.493	468.162	884.69
626	0	325.145	520.343	1647.41	220.791	527.785	1644.44	355.812	675.669	1656.76	219.79	696.85	1656.23	270.183	752.232	1510.74	273.938	856.57	1287.15	277.456	618.616	1405.81	281.671	600.031	1220.86	224.401	858.559	1362.34	467.788	743.077	1458.44	532.853	732.185	1252.35	556.338	719.733	1132.58	534.354	583.126	1024.67	473.046	515.298	973.684	534.755	536.398	931.894	512.623	442.522	891.266
627	0	325.169	506.805	1645.2	220.796	514.183	1642.28	355.759	662.177	1654.22	219.715	683.266	1653.74	270.058	738.352	1508.34	273.756	842.692	1284.8	277.261	604.768	1403.26	281.599	586.34	1218.28	224.351	844.701	1359.99	467.555	728.926	1456.11	532.454	716.065	1249.95	556.152	701.573	1130.44	533.472	562.17	1026.54	471.8	492.973	977.886	533.305	512.81	935.135	510.905	417.7	897.512
628	0	325.072	493.178	1642.93	220.679	500.477	1640.06	355.56	648.601	1651.63	219.493	669.575	1651.2	269.815	724.38	1505.88	273.526	828.695	1282.36	276.947	590.803	1400.66	281.42	572.482	1215.67	224.224	830.743	1357.53	467.228	714.629	1453.77	531.873	699.942	1247.52	555.723	683.609	1128.27	532.517	541.684	1028.19	470.582	471.206	981.788	531.829	489.911	938.143	509.34	393.716	903.384
629	0	324.844	479.464	1640.64	220.433	486.669	1637.81	355.209	634.944	1649.03	219.115	655.783	1648.63	269.453	710.321	1503.36	273.262	814.587	1279.86	276.513	576.724	1398.04	281.134	558.456	1213.06	224.027	816.689	1354.99	466.813	700.185	1451.45	531.122	683.829	1245.11	555.065	665.877	1126.12	531.495	521.692	1029.63	469.394	450.02	985.372	530.334	467.731	940.892	507.926	370.587	908.836
630	0	324.481	465.664	1638.36	220.053	472.764	1635.57	354.702	621.207	1646.45	218.58	641.891	1646.08	268.976	696.182	1500.84	272.974	800.38	1277.33	275.964	562.534	1395.45	280.748	544.263	1210.48	223.767	802.545	1352.4	466.313	685.597	1449.2	530.218	667.742	1242.74	554.193	648.411	1123.99	530.411	502.219	1030.85	468.237	429.435	988.621	528.822	446.294	943.356	506.655	348.328	913.827
631	0	323.982	451.781	1636.13	219.538	458.765	1633.36	354.039	607.391	1643.93	217.887	627.904	1643.57	268.389	681.97	1498.34	272.67	786.086	1274.81	275.304	548.241	1392.93	280.268	529.906	1207.97	223.45	788.318	1349.8	465.734	670.879	1447.04	529.18	651.7	1240.45	553.129	631.245	1121.93	529.274	483.285	1031.84	467.113	409.472	991.517	527.301	425.62	945.513	505.516	326.95	918.317
632	0	323.348	437.818	1633.98	218.89	444.678	1631.2	353.226	593.498	1641.5	217.043	613.827	1641.13	267.7	667.695	1495.88	272.358	771.72	1272.33	274.546	533.853	1390.49	279.706	515.393	1205.56	223.081	774.016	1347.21	465.083	656.047	1445	528.028	635.727	1238.27	551.893	614.41	1119.94	528.093	464.912	1032.6	466.023	390.149	994.044	525.778	405.73	947.342	504.496	306.461	922.27
633	0	322.586	423.781	1631.93	218.115	430.512	1629.12	352.272	579.533	1639.2	216.059	599.668	1638.78	266.919	653.368	1493.52	272.039	757.298	1269.92	273.704	519.382	1388.17	279.076	500.734	1203.29	222.665	759.651	1344.67	464.37	641.124	1443.09	526.785	619.85	1236.21	550.513	597.935	1118.06	526.878	447.117	1033.13	464.967	371.486	996.185	524.261	386.638	948.826	503.578	286.868	925.651
634	0	321.706	409.676	1630	217.225	416.275	1627.15	351.191	565.498	1637.05	214.948	585.435	1636.56	266.06	638.999	1491.26	271.716	742.837	1267.62	272.797	504.842	1386.01	278.394	485.945	1201.17	222.204	745.232	1342.21	463.603	626.141	1441.34	525.476	604.098	1234.31	549.014	581.843	1116.3	525.641	429.917	1033.44	463.946	353.497	997.925	522.763	368.356	949.949	502.746	268.174	928.43
635	0	320.722	395.509	1628.23	216.232	401.977	1625.3	350.001	551.401	1635.08	213.729	571.139	1634.48	265.137	624.603	1489.15	271.384	728.353	1265.45	271.845	490.25	1384.02	277.678	471.044	1199.24	221.703	730.774	1339.87	462.794	611.13	1439.77	524.125	588.504	1232.58	547.426	566.155	1114.68	524.392	413.323	1033.52	462.961	336.198	999.249	521.294	350.895	950.7	501.982	250.381	930.582
636	0	319.651	381.291	1626.62	215.155	387.63	1623.59	348.724	537.25	1633.33	212.425	556.791	1632.57	264.169	610.194	1487.21	271.041	713.862	1263.44	270.873	475.625	1382.23	276.949	456.056	1197.51	221.164	716.292	1337.67	461.955	596.127	1438.37	522.756	573.101	1231.03	545.777	550.889	1113.2	523.147	397.349	1033.38	462.015	319.603	1000.14	519.87	334.261	951.072	501.273	233.489	932.086
637	0	318.514	367.032	1625.2	214.014	373.248	1622.04	347.385	523.053	1631.8	211.06	542.405	1630.86	263.174	595.787	1485.46	270.682	699.38	1261.62	269.903	460.988	1380.66	276.225	441.008	1196	220.591	701.801	1335.66	461.102	581.169	1437.17	521.394	557.925	1229.68	544.095	536.058	1111.89	521.919	382.003	1033.02	461.111	303.724	1000.6	518.505	318.462	951.061	500.607	217.496	932.929
638	0	317.336	352.745	1623.98	212.834	358.845	1620.67	346.011	508.822	1630.51	209.664	527.995	1629.35	262.171	581.397	1483.93	270.303	684.921	1260.02	268.961	446.361	1379.33	275.526	425.934	1194.73	219.988	687.319	1333.85	460.25	566.292	1436.16	520.062	543.008	1228.53	542.409	521.672	1110.75	520.724	367.296	1032.43	460.254	288.573	1000.61	517.219	303.503	950.665	499.978	202.4	933.103
639	0	316.143	338.442	1622.98	211.641	344.436	1619.48	344.633	494.57	1629.48	208.265	513.578	1628.07	261.181	567.04	1482.64	269.902	670.498	1258.66	268.071	431.766	1378.24	274.87	410.867	1193.7	219.357	672.863	1332.29	459.415	551.531	1435.35	518.782	528.386	1227.6	540.744	507.738	1109.8	519.577	353.233	1031.64	459.451	274.161	1000.16	516.026	289.388	949.889	499.384	188.201	932.609
640	0	314.962	324.137	1622.2	210.461	330.037	1618.5	343.28	480.309	1628.72	206.895	499.169	1627.04	260.223	552.731	1481.61	269.476	656.123	1257.55	267.255	417.227	1377.42	274.274	395.844	1192.93	218.705	658.45	1331	458.613	536.916	1434.76	517.573	514.086	1226.9	539.125	494.26	1109.03	518.494	339.821	1030.64	458.711	260.498	999.259	514.946	276.123	948.739	498.83	174.896	931.454
641	0	313.82	309.846	1621.65	209.321	315.662	1617.74	341.984	466.052	1628.25	205.583	484.784	1626.26	259.315	538.485	1480.86	269.028	641.805	1256.73	266.531	402.765	1376.87	273.749	380.9	1192.43	218.036	644.095	1330	457.862	522.475	1434.38	516.452	500.138	1226.42	537.573	481.24	1108.45	517.491	327.066	1029.44	458.042	247.595	997.906	513.995	263.713	947.226	498.326	162.489	929.653
642	0	312.745	295.58	1621.35	208.25	301.327	1617.22	340.774	451.813	1628.06	204.359	470.438	1625.77	258.474	524.315	1480.41	268.559	627.55	1256.19	265.916	388.399	1376.6	273.308	366.067	1192.2	217.357	629.813	1329.32	457.173	508.231	1434.23	515.434	486.561	1226.18	536.108	468.675	1108.08	516.583	314.972	1028.05	457.458	235.46	996.108	513.19	252.165	945.366	497.889	150.982	927.23
643	0	311.762	281.354	1621.31	207.271	287.043	1616.95	339.677	437.605	1628.16	203.25	456.144	1625.56	257.713	510.232	1480.26	268.072	613.363	1255.96	265.421	374.146	1376.63	272.959	351.37	1192.24	216.672	615.613	1328.96	456.56	494.205	1434.3	514.53	473.373	1226.18	534.743	456.562	1107.92	515.786	303.544	1026.5	456.971	224.102	993.876	512.548	241.486	943.177	497.54	140.383	924.213
644	0	310.896	267.18	1621.52	206.408	272.823	1616.94	338.717	423.44	1628.56	202.28	441.915	1625.66	257.041	496.246	1480.42	267.572	599.243	1256.05	265.055	360.02	1376.97	272.707	336.831	1192.58	215.987	601.503	1328.95	456.03	480.409	1434.61	513.746	460.583	1226.42	533.491	444.894	1107.98	515.113	292.785	1024.78	456.595	213.53	991.226	512.081	231.685	940.684	497.308	130.701	920.639
645	0	310.165	253.068	1622	205.682	258.677	1617.21	337.914	409.328	1629.27	201.469	427.761	1626.09	256.466	482.363	1480.91	267.06	585.188	1256.44	264.821	346.028	1377.61	272.556	322.46	1193.22	215.304	587.486	1329.28	455.588	466.852	1435.16	513.086	448.197	1226.92	532.357	433.661	1108.26	514.577	282.695	1022.92	456.348	203.749	988.183	511.803	222.769	937.915	497.222	121.948	916.549
646	0	309.588	239.027	1622.74	205.107	244.611	1617.78	337.283	395.28	1630.27	200.831	413.69	1626.84	255.99	468.585	1481.72	266.538	571.194	1257.15	264.72	332.175	1378.57	272.507	308.262	1194.17	214.628	573.562	1329.97	455.234	453.538	1435.95	512.548	436.211	1227.68	531.343	422.852	1108.77	514.188	273.276	1020.94	456.245	194.764	984.772	511.725	214.746	934.901	497.315	114.14	911.99
647	0	309.174	225.066	1623.76	204.695	230.633	1618.64	336.834	381.304	1631.56	200.375	399.707	1627.93	255.611	454.912	1482.85	266.005	557.254	1258.17	264.748	318.457	1379.85	272.559	294.232	1195.43	213.959	559.727	1330.99	454.966	440.463	1436.99	512.127	424.615	1228.71	530.448	412.45	1109.53	513.955	264.526	1018.86	456.302	186.579	981.028	511.855	207.621	931.681	497.624	107.292	907.014
648	0	308.932	211.192	1625.05	204.453	216.744	1619.8	336.57	367.408	1633.13	200.105	385.817	1629.35	255.327	441.339	1484.29	265.46	543.359	1259.47	264.898	304.869	1381.45	272.71	280.357	1197.02	213.296	545.971	1332.34	454.777	427.62	1438.27	511.815	413.395	1230	529.666	402.439	1110.53	513.885	256.439	1016.71	456.538	179.191	976.989	512.198	201.397	928.295	498.184	101.419	901.676
649	0	308.861	197.407	1626.6	204.381	202.949	1621.27	336.489	353.598	1634.98	200.018	372.021	1631.08	255.128	427.857	1486.02	264.896	529.502	1261.06	265.159	291.398	1383.36	272.954	266.621	1198.91	212.636	532.284	1334	454.659	414.991	1439.78	511.597	402.528	1231.55	528.989	392.798	1111.79	513.983	249.008	1014.51	456.966	172.596	972.696	512.757	196.072	924.786	499.028	96.5351	896.033
650	0	308.958	183.717	1628.41	204.476	189.246	1623.03	336.582	339.877	1637.06	200.107	358.32	1633.12	255.005	414.456	1488.01	264.31	515.674	1262.89	265.52	278.028	1385.56	273.285	253.003	1201.1	211.976	518.652	1335.95	454.6	402.556	1441.52	511.459	391.988	1233.36	528.406	383.506	1113.29	514.25	242.221	1012.28	457.601	166.785	968.197	513.531	191.639	921.2	500.187	92.6489	890.147
651	0	309.214	170.121	1630.45	204.729	175.635	1625.06	336.838	326.248	1639.36	200.359	344.713	1635.44	254.946	401.121	1490.24	263.694	501.871	1264.95	265.966	264.74	1388.02	273.693	239.48	1203.57	211.312	505.061	1338.14	454.586	390.289	1443.47	511.383	381.744	1235.41	527.906	374.539	1115.03	514.685	236.062	1010.05	458.454	161.744	963.537	514.518	188.084	917.582	501.685	89.7628	884.077
652	0	309.617	156.618	1632.71	205.127	162.111	1627.35	337.239	312.713	1641.84	200.755	331.197	1637.98	254.939	387.836	1492.67	263.043	488.087	1267.2	266.483	251.511	1390.72	274.167	226.029	1206.28	210.639	491.493	1340.54	454.605	378.159	1445.6	511.352	371.759	1237.67	527.476	365.87	1116.99	515.288	230.511	1007.84	459.535	157.453	958.764	515.712	185.382	913.977	503.54	87.8708	877.883
653	0	310.148	143.207	1635.15	205.653	148.67	1629.86	337.764	299.27	1644.46	201.276	317.766	1640.72	254.969	374.585	1495.25	262.353	474.32	1269.59	267.055	238.32	1393.6	274.694	212.628	1209.19	209.952	477.935	1343.11	454.643	366.134	1447.89	511.349	361.997	1240.12	527.105	357.474	1119.17	516.053	225.543	1005.68	460.847	153.885	953.926	517.104	183.502	910.429	505.76	86.9564	871.624
654	0	310.79	129.882	1637.73	206.288	135.305	1632.54	338.389	285.917	1647.16	201.898	304.415	1643.59	255.024	361.348	1497.94	261.621	460.57	1272.09	267.665	225.144	1396.61	275.262	199.255	1212.24	209.247	464.372	1345.8	454.688	354.178	1450.28	511.359	352.418	1242.73	526.782	349.323	1121.52	516.972	221.127	1003.58	462.392	151.008	949.066	518.682	182.403	906.978	508.342	86.9916	865.356
655	0	311.521	116.637	1640.42	207.01	122.008	1635.35	339.09	272.647	1649.9	202.595	291.134	1646.53	255.09	348.109	1500.68	260.847	446.838	1274.64	268.298	211.963	1399.69	275.856	185.892	1215.38	208.523	450.79	1348.54	454.727	342.257	1452.74	511.368	342.981	1245.44	526.497	341.388	1124.02	518.039	217.228	1001.56	464.165	148.785	944.225	520.435	182.032	903.658	511.272	87.9361	859.13
656	0	312.32	103.462	1643.16	207.8	108.767	1638.23	339.84	259.454	1652.61	203.342	277.913	1649.48	255.156	334.852	1503.41	260.035	433.127	1277.2	268.94	198.756	1402.78	276.461	172.523	1218.53	207.78	437.18	1351.29	454.752	330.338	1455.21	511.364	333.648	1248.21	526.245	333.642	1126.62	519.242	213.804	999.632	466.157	147.173	939.439	522.347	182.33	900.503	514.527	89.737	852.996
657	0	313.166	90.3463	1645.91	208.633	95.5694	1641.13	340.615	246.328	1655.25	204.113	264.74	1652.37	255.213	321.56	1506.08	259.19	419.44	1279.72	269.578	185.508	1405.81	277.063	159.136	1221.62	207.02	423.532	1353.99	454.755	318.389	1457.65	511.341	324.382	1250.99	526.017	326.055	1129.28	520.57	210.812	997.798	468.355	146.125	934.739	524.404	183.228	897.536	518.073	92.3297	846.996
658	0	314.038	77.2765	1648.59	209.492	82.4019	1643.98	341.391	233.257	1657.76	204.884	251.6	1655.13	255.254	308.221	1508.63	258.322	405.783	1282.14	270.2	172.205	1408.71	277.651	145.723	1224.58	206.248	409.841	1356.58	454.731	306.382	1459.98	511.292	315.149	1253.72	525.811	318.601	1131.96	522.01	208.203	996.066	470.739	145.588	930.15	526.589	184.651	894.78	521.868	95.6397	841.17
659	0	314.917	64.2372	1651.17	210.355	69.2484	1646.72	342.148	220.225	1660.07	205.634	238.476	1657.71	255.273	294.823	1511.01	257.44	392.158	1284.41	270.796	158.838	1411.42	278.212	132.277	1227.35	205.471	396.102	1359	454.677	294.293	1462.17	511.215	305.918	1256.36	525.624	311.25	1134.61	523.547	205.925	994.438	473.289	145.508	925.694	528.884	186.52	892.251	525.865	99.5843	835.552
660	0	315.787	51.2111	1653.57	211.206	56.0922	1649.29	342.867	207.217	1662.15	206.344	225.352	1660.04	255.269	281.356	1513.16	256.56	378.57	1286.5	271.359	145.397	1413.88	278.737	118.797	1229.85	204.699	382.316	1361.22	454.594	282.1	1464.15	511.11	296.665	1258.85	525.453	303.975	1137.18	525.165	203.925	992.916	475.977	145.828	921.387	531.272	188.751	889.961	530.011	104.076	830.171
661	0	316.631	38.1794	1655.76	212.03	42.9159	1651.63	343.535	194.212	1663.95	207	212.209	1662.07	255.242	267.815	1515.05	255.696	365.021	1288.36	271.886	131.88	1416.02	279.218	105.281	1232.03	203.942	368.48	1363.18	454.484	269.787	1465.88	510.977	287.365	1261.16	525.298	296.75	1139.63	526.85	202.148	991.497	478.776	146.489	917.244	533.736	191.261	887.918	534.254	109.024	825.052
662	0	317.438	25.1221	1657.68	212.816	29.7019	1653.69	344.142	181.192	1665.44	207.591	199.029	1663.76	255.196	254.194	1516.64	254.865	351.512	1289.95	272.375	118.285	1417.82	279.653	91.7308	1233.84	203.216	354.598	1364.84	454.352	257.34	1467.32	510.822	278.003	1263.25	525.156	289.548	1141.93	528.585	200.539	990.18	481.656	147.431	913.274	536.256	193.968	886.128	538.539	114.339	820.217
663	0	318.199	12.0189	1659.29	213.554	16.433	1655.43	344.682	168.134	1666.58	208.114	185.793	1665.08	255.137	240.49	1517.9	254.086	338.042	1291.26	272.826	104.61	1419.22	280.039	78.1484	1235.24	202.533	340.671	1366.19	454.206	244.749	1468.43	510.646	268.564	1265.09	525.026	282.345	1144.05	530.354	199.044	988.964	484.588	148.594	909.49	538.814	196.79	884.594	542.815	119.933	815.685
664	0	318.907	-1.15075	1660.55	214.238	3.09272	1656.81	345.156	155.017	1667.36	208.566	172.485	1666	255.074	226.702	1518.8	253.377	324.605	1292.25	273.244	90.8582	1420.22	280.38	64.5356	1236.2	201.91	326.701	1367.2	454.055	232.008	1469.19	510.457	259.036	1266.67	524.908	275.114	1145.97	532.141	197.61	987.849	487.543	149.915	905.9	541.391	199.651	883.321	547.035	125.723	811.471
665	0	319.559	-14.4065	1661.45	214.867	-10.3342	1657.8	345.565	141.819	1667.77	208.952	159.088	1666.52	255.018	212.831	1519.34	252.756	311.195	1292.91	273.636	77.0312	1420.78	280.68	50.8935	1236.72	201.363	312.692	1367.84	453.912	219.112	1469.59	510.258	249.409	1267.97	524.799	267.833	1147.68	533.932	196.184	986.834	490.495	151.332	902.515	543.968	202.48	882.308	551.155	131.63	807.588
666	0	320.156	-27.7666	1661.96	215.44	-23.8614	1658.38	345.917	128.52	1667.81	209.28	145.587	1666.63	254.983	198.877	1519.51	252.241	297.8	1293.25	274.01	63.1317	1420.92	280.947	37.2223	1236.78	200.908	298.643	1368.13	453.788	206.059	1469.63	510.057	239.676	1268.99	524.697	260.478	1149.18	535.712	194.718	985.921	493.419	152.784	899.346	546.523	205.209	881.558	555.137	137.581	804.049
667	0	320.7	-41.2475	1662.08	215.962	-37.5006	1658.55	346.224	115.101	1667.49	209.561	131.972	1666.34	254.981	184.841	1519.32	251.849	284.408	1293.25	274.377	49.1616	1420.63	281.192	23.5204	1236.41	200.56	284.555	1368.06	453.699	192.847	1469.31	509.861	229.828	1269.75	524.601	253.026	1150.46	537.471	193.165	985.114	496.294	154.209	896.406	549.038	207.776	881.071	558.951	143.507	800.865
668	0	321.199	-54.8628	1661.82	216.44	-51.2613	1658.32	346.497	101.547	1666.82	209.809	118.231	1665.68	255.03	170.724	1518.79	251.595	271.001	1292.93	274.749	35.1226	1419.94	281.427	9.78423	1235.62	200.333	270.428	1367.64	453.66	179.477	1468.64	509.676	219.857	1270.25	524.508	245.455	1151.55	539.195	191.48	984.417	499.101	155.546	893.708	551.492	210.124	880.847	562.571	149.345	798.046
669	0	321.661	-68.6237	1661.17	216.885	-65.1508	1657.68	346.754	87.844	1665.83	210.041	104.357	1664.65	255.143	156.526	1517.92	251.493	257.561	1292.29	275.139	21.0148	1418.88	281.665	-3.99215	1234.44	200.242	256.257	1366.9	453.684	165.948	1467.64	509.51	209.754	1270.52	524.418	237.743	1152.45	540.876	189.619	983.834	501.826	156.736	891.262	553.866	212.201	880.885	565.977	155.029	795.602
670	0	322.1	-82.5379	1660.18	217.309	-79.1741	1656.68	347.011	73.9831	1664.55	210.277	90.3446	1663.31	255.337	142.249	1516.74	251.554	244.066	1291.36	275.561	6.83749	1417.47	281.922	-17.817	1232.91	200.297	242.038	1365.84	453.787	152.261	1466.35	509.37	199.506	1270.58	524.327	229.865	1153.19	542.505	187.541	983.371	504.454	157.72	889.081	556.141	213.955	881.181	569.155	160.496	793.538
671	0	322.53	-96.6104	1658.86	217.727	-93.3338	1655.33	347.288	59.9579	1663.01	210.534	76.1923	1661.68	255.627	127.89	1515.29	251.786	230.495	1290.16	276.029	-7.41194	1415.77	282.21	-31.701	1231.08	200.508	227.766	1364.51	453.984	138.416	1464.79	509.265	189.103	1270.45	524.237	221.799	1153.79	544.073	185.206	983.03	506.976	158.44	887.174	558.3	215.34	881.732	572.095	165.682	791.862
672	0	322.966	-110.843	1657.25	218.156	-107.63	1653.67	347.603	45.7658	1661.24	210.833	61.8994	1659.81	256.027	113.448	1513.6	252.195	216.826	1288.71	276.557	-21.7373	1413.81	282.545	-45.657	1229	200.883	213.433	1362.92	454.287	124.413	1462.99	509.204	178.53	1270.17	524.146	213.522	1154.27	545.575	182.573	982.816	509.383	158.842	885.545	560.328	216.309	882.529	574.794	170.516	790.575
673	0	323.426	-125.233	1655.39	218.613	-122.062	1651.74	347.975	31.4074	1659.29	211.193	47.4681	1657.73	256.551	98.9199	1511.69	252.784	203.037	1287.05	277.158	-36.1439	1411.64	282.939	-59.6998	1226.7	201.43	199.03	1361.12	454.709	110.251	1461	509.194	167.771	1269.76	524.057	205.01	1154.65	547.005	179.603	982.728	511.666	158.869	884.199	562.211	216.818	883.561	577.251	174.927	789.677
674	0	323.926	-139.779	1653.32	219.115	-136.625	1649.6	348.421	16.8862	1657.19	211.633	32.9027	1655.48	257.211	84.3023	1509.61	253.552	189.108	1285.19	277.842	-50.638	1409.3	283.405	-73.8452	1224.25	202.151	184.549	1359.14	455.262	95.9277	1458.84	509.243	156.81	1269.24	523.972	196.239	1154.95	548.358	176.258	982.765	513.821	158.468	883.131	563.939	216.82	884.814	579.468	178.84	789.161
675	0	324.484	-154.474	1651.09	219.678	-151.314	1647.28	348.959	2.20805	1654.99	212.169	18.2089	1653.12	258.015	69.5903	1507.4	254.497	175.02	1283.18	278.622	-65.2268	1406.84	283.952	-88.1098	1221.69	203.049	169.98	1357.01	455.955	81.4418	1456.54	509.362	145.628	1268.65	523.896	187.187	1155.2	549.632	172.497	982.92	515.842	157.585	882.335	565.504	216.272	886.268	581.45	182.174	789.015
676	0	325.114	-169.309	1648.74	220.317	-166.122	1644.83	349.604	-12.6195	1652.7	212.816	3.39443	1650.68	258.972	54.7793	1505.08	255.615	160.759	1281.04	279.504	-79.918	1404.3	284.59	-102.51	1219.07	204.125	155.313	1354.77	456.796	66.7902	1454.14	509.558	134.208	1267.99	523.834	177.832	1155.4	550.826	168.283	983.184	517.728	156.166	881.799	566.903	215.128	887.9	583.205	184.851	789.221
677	0	325.829	-184.278	1646.32	221.044	-181.041	1642.3	350.367	-27.5874	1650.38	213.588	-11.5321	1648.18	260.086	39.8644	1502.7	256.898	146.314	1278.81	280.494	-94.7187	1401.73	285.326	-117.06	1216.42	205.376	140.542	1352.46	457.791	51.9697	1451.67	509.839	122.532	1267.28	523.793	168.153	1155.57	551.941	163.576	983.544	519.478	154.158	881.504	568.134	213.342	889.681	584.741	186.79	789.75
678	0	326.639	-199.369	1643.88	221.87	-196.061	1639.74	351.258	-42.6858	1648.05	214.493	-26.5609	1645.67	261.36	24.8412	1500.28	258.338	131.676	1276.51	281.596	-109.636	1399.15	286.164	-131.774	1213.79	206.799	125.659	1350.11	458.943	36.9775	1449.15	510.214	110.583	1266.54	523.783	158.129	1155.71	552.978	158.337	983.983	521.091	151.509	881.427	569.2	210.869	891.576	586.069	187.915	790.57
679	0	327.549	-214.572	1641.45	222.799	-211.173	1637.18	352.285	-57.9046	1645.73	215.54	-41.6812	1643.18	262.793	9.70663	1497.85	259.927	116.842	1274.18	282.811	-124.674	1396.61	287.107	-146.66	1211.21	208.388	110.661	1347.74	460.254	21.8114	1446.61	510.689	98.3454	1265.78	523.814	147.742	1155.84	553.943	152.527	984.479	522.57	148.167	881.538	570.108	207.664	893.548	587.199	188.152	791.637
680	0	328.562	-229.878	1639.07	223.833	-226.364	1634.68	353.449	-73.2332	1643.45	216.731	-56.8817	1640.72	264.379	-5.54059	1495.46	261.653	101.813	1271.85	284.136	-139.837	1394.12	288.158	-161.725	1208.7	210.135	95.5453	1345.4	461.72	6.47073	1444.08	511.272	85.805	1264.99	523.897	136.975	1155.94	554.842	146.109	985.007	523.922	144.082	881.804	570.868	203.684	895.553	588.14	187.435	792.901
681	0	329.676	-245.275	1636.77	224.97	-241.624	1632.25	354.751	-88.6615	1641.22	218.066	-72.1504	1638.32	266.111	-20.8993	1493.11	263.505	86.5952	1269.53	285.566	-155.124	1391.71	289.313	-176.968	1206.29	212.028	80.3157	1343.1	463.338	-9.04299	1441.56	511.97	72.9486	1264.19	524.046	125.809	1156.01	555.684	139.046	985.54	525.152	139.204	882.188	571.494	198.886	897.543	588.902	185.703	794.302
682	0	330.882	-260.754	1634.58	226.203	-256.94	1629.92	356.186	-104.179	1639.07	219.542	-87.4749	1635.99	267.977	-36.3651	1490.84	265.471	71.1994	1267.27	287.093	-170.53	1389.4	290.571	-192.386	1204	214.055	64.9787	1340.87	465.098	-24.725	1439.08	512.788	59.765	1263.36	524.274	114.23	1156.04	556.48	131.302	986.046	526.271	133.487	882.645	572.006	193.228	899.47	589.497	182.902	795.777
683	0	332.171	-276.303	1632.51	227.522	-272.301	1627.73	357.746	-119.775	1637.01	221.15	-102.843	1633.75	269.962	-51.93	1488.66	267.536	55.6416	1265.09	288.706	-186.049	1387.2	291.926	-207.965	1201.83	216.198	49.5453	1338.74	466.989	-40.5665	1436.67	513.731	46.2451	1262.51	524.595	102.223	1156.01	557.242	122.842	986.494	527.289	126.89	883.132	572.425	186.671	901.28	589.932	178.987	797.256
684	0	333.528	-291.911	1630.59	228.911	-287.693	1625.68	359.42	-135.44	1635.03	222.879	-118.241	1631.61	272.045	-67.5817	1486.59	269.686	39.9429	1263	290.39	-201.667	1385.13	293.37	-223.688	1199.8	218.441	34.0317	1336.72	468.996	-56.5541	1434.33	514.804	32.3823	1261.62	525.021	89.7728	1155.92	557.984	113.633	986.848	528.219	119.373	883.601	572.779	179.179	902.92	590.219	173.919	798.663
685	0	334.937	-307.568	1628.82	230.355	-303.104	1623.8	361.191	-151.161	1633.17	224.714	-133.658	1629.59	274.206	-83.3036	1484.66	271.903	24.1293	1261.04	292.129	-217.365	1383.19	294.893	-239.53	1197.91	220.761	18.4587	1334.84	471.1	-72.6687	1432.09	516.01	18.1734	1260.7	525.567	76.8684	1155.74	558.718	103.646	987.076	529.073	110.901	884.003	573.098	170.716	904.336	590.37	167.663	799.923
686	0	336.378	-323.26	1627.21	231.833	-318.522	1622.08	363.04	-166.927	1631.41	226.635	-149.08	1627.69	276.419	-99.0745	1482.88	274.171	8.23123	1259.22	293.905	-233.121	1381.39	296.483	-255.46	1196.18	223.138	2.85152	1333.12	473.279	-88.8857	1429.97	517.349	3.61826	1259.73	526.243	63.4997	1155.46	559.46	92.8511	987.143	529.864	101.443	884.29	573.415	161.25	905.477	590.399	160.191	800.961
687	0	337.831	-338.975	1625.76	233.326	-333.934	1620.54	364.947	-182.724	1629.78	228.619	-164.496	1625.93	278.658	-114.869	1481.27	276.47	-7.71708	1257.56	295.698	-248.907	1379.75	298.125	-271.438	1194.6	225.548	-12.7606	1331.57	475.51	-105.175	1427.99	518.82	-11.2787	1258.71	527.058	49.6592	1155.05	560.223	81.2226	987.022	530.604	90.9744	884.417	573.763	150.749	906.296	590.322	151.475	801.704
688	0	339.275	-354.698	1624.48	234.811	-349.329	1619.18	366.884	-198.538	1628.28	230.641	-179.896	1624.33	280.893	-130.658	1479.83	278.781	-23.6783	1256.09	297.485	-264.692	1378.27	299.803	-287.424	1193.19	227.964	-28.3451	1330.21	477.765	-121.5	1426.17	520.419	-26.5088	1257.62	528.021	35.3429	1154.49	561.019	68.7383	986.686	531.304	79.4734	884.341	574.179	139.188	906.75	590.158	141.491	802.087
689	0	340.692	-370.415	1623.36	236.269	-364.696	1618	368.827	-214.353	1626.93	232.674	-195.267	1622.9	283.096	-146.409	1478.6	281.083	-39.6132	1254.83	299.246	-280.439	1376.96	301.498	-303.369	1191.94	230.363	-43.8673	1329.06	480.016	-137.821	1424.54	522.137	-42.0581	1256.49	529.135	20.5507	1153.79	561.858	55.379	986.116	531.976	66.9228	884.03	574.693	126.541	906.803	589.933	130.213	802.055
690	0	342.062	-386.109	1622.39	237.68	-380.024	1617.01	370.746	-230.15	1625.73	234.686	-210.601	1621.66	285.238	-162.088	1477.59	283.355	-55.4816	1253.8	300.958	-296.111	1375.84	303.191	-319.226	1190.87	232.718	-59.2914	1328.14	482.234	-154.094	1423.13	523.963	-57.908	1255.29	530.402	5.2865	1152.91	562.749	41.1305	985.3	532.629	53.3097	883.457	575.337	112.787	906.433	589.673	117.616	801.564
691	0	343.369	-401.763	1621.59	239.025	-395.303	1616.2	372.614	-245.911	1624.72	236.649	-225.889	1620.64	287.292	-177.658	1476.81	285.578	-71.2441	1253.01	302.6	-311.671	1374.93	304.861	-334.947	1190	235.007	-74.5816	1327.45	484.391	-170.272	1421.97	525.882	-74.0347	1254.05	531.818	-10.4407	1151.87	563.696	25.9833	984.235	533.27	38.6249	882.607	576.132	97.912	905.623	589.411	103.674	800.588
692	0	344.597	-417.358	1620.95	240.289	-410.523	1615.58	374.4	-261.614	1623.92	238.531	-241.121	1619.86	289.233	-193.084	1476.28	287.733	-86.8635	1252.48	304.153	-327.079	1374.23	306.485	-350.486	1189.34	237.207	-89.704	1327.03	486.459	-186.311	1421.08	527.876	-90.4104	1252.79	533.379	-26.6172	1150.68	564.702	9.93355	982.929	533.907	22.8629	881.478	577.096	81.9037	904.374	589.179	88.3592	799.119
693	0	345.735	-432.875	1620.48	241.458	-425.674	1615.15	376.079	-277.24	1623.34	240.301	-256.288	1619.35	291.041	-208.331	1476.01	289.804	-102.306	1252.22	305.598	-342.301	1373.78	308.042	-365.805	1188.91	239.301	-104.628	1326.88	488.416	-202.168	1420.49	529.923	-107.004	1251.52	535.075	-43.2248	1149.35	565.768	-7.0164	981.401	534.544	6.0221	880.082	578.238	64.7575	902.699	589.014	71.6467	797.168
694	0	346.772	-448.294	1620.17	242.522	-440.747	1614.92	377.625	-292.765	1623.03	241.934	-271.382	1619.14	292.698	-223.366	1476.03	291.777	-117.543	1252.26	306.919	-357.304	1373.59	309.511	-380.872	1188.73	241.276	-119.328	1327	490.24	-217.805	1420.23	532.002	-123.782	1250.27	536.894	-60.2413	1147.9	566.888	-24.8577	979.68	535.184	-11.895	878.445	579.555	46.4747	900.625	588.948	53.5121	794.771
695	0	347.701	-463.597	1620.05	243.473	-455.73	1614.9	379.015	-308.168	1623	243.404	-286.394	1619.25	294.194	-238.162	1476.34	293.643	-132.551	1252.59	308.103	-372.061	1373.7	310.869	-395.663	1188.84	243.121	-133.784	1327.42	491.917	-233.191	1420.33	534.088	-140.711	1249.09	538.825	-77.6409	1146.38	568.058	-43.5752	977.809	535.827	-30.8816	876.609	581.038	27.0636	898.196	589.014	33.9354	791.984
696	0	348.515	-478.764	1620.13	244.303	-470.612	1615.09	380.231	-323.428	1623.28	244.691	-301.312	1619.71	295.521	-252.694	1476.96	295.397	-147.314	1253.23	309.14	-386.554	1374.12	312.1	-410.169	1189.26	244.834	-147.984	1328.12	493.436	-248.305	1420.8	536.161	-157.757	1248.01	540.851	-95.3954	1144.82	569.268	-63.1469	975.839	536.471	-50.9264	874.63	582.665	6.53927	895.469	589.239	12.9022	788.885
697	0	349.211	-493.775	1620.42	245.01	-485.382	1615.51	381.259	-338.525	1623.91	245.78	-316.123	1620.54	296.681	-266.949	1477.89	297.037	-161.823	1254.17	310.023	-400.77	1374.88	313.186	-424.389	1190.01	246.414	-161.923	1329.11	494.793	-263.134	1421.66	538.198	-174.891	1247.08	542.958	-113.475	1143.28	570.509	-83.545	973.832	537.11	-72.0129	872.578	584.409	-15.0761	892.516	589.64	-9.59333	785.574
698	0	349.787	-508.614	1620.93	245.592	-500.025	1616.17	382.092	-353.439	1624.89	246.662	-330.816	1621.74	297.676	-280.916	1479.13	298.568	-176.075	1255.4	310.75	-414.708	1376	314.118	-438.332	1191.12	247.869	-175.603	1330.39	495.989	-277.679	1422.91	540.183	-192.085	1246.34	545.133	-131.849	1141.81	571.768	-104.736	971.854	537.737	-94.1193	870.534	586.234	-37.7535	889.418	590.229	-33.5471	782.163
699	0	350.242	-523.265	1621.69	246.05	-514.528	1617.07	382.726	-368.156	1626.24	247.335	-345.376	1623.31	298.518	-294.595	1480.67	299.998	-190.076	1256.93	311.324	-428.371	1377.48	314.89	-452.016	1192.61	249.206	-189.036	1331.93	497.032	-291.95	1424.56	542.103	-209.317	1245.83	547.363	-150.486	1140.47	573.035	-126.681	969.979	538.344	-117.218	868.586	588.103	-61.4577	886.268	591.005	-58.9425	778.779
700	0	350.581	-537.715	1622.71	246.388	-528.876	1618.21	383.165	-382.662	1627.96	247.803	-359.787	1625.26	299.22	-307.993	1482.51	301.335	-203.836	1258.72	311.752	-441.774	1379.32	315.501	-465.468	1194.46	250.436	-202.238	1333.73	497.931	-305.966	1426.59	543.949	-226.568	1245.6	549.638	-169.355	1139.32	574.296	-149.338	968.279	538.922	-141.276	866.829	589.975	-86.1476	883.16	591.953	-85.7488	775.555
701	0	350.806	-551.954	1623.99	246.61	-543.057	1619.61	383.421	-396.948	1630.05	248.077	-374.035	1627.55	299.798	-321.127	1484.63	302.592	-217.37	1260.77	312.043	-454.939	1381.51	315.959	-478.717	1196.68	251.571	-215.232	1335.77	498.702	-319.754	1428.99	545.717	-243.824	1245.67	551.95	-188.427	1138.4	575.542	-172.659	966.826	539.461	-166.252	865.359	591.807	-111.777	880.192	593.049	-113.92	772.623
702	0	350.924	-565.975	1625.53	246.725	-557.059	1621.24	383.507	-411.009	1632.48	248.174	-388.107	1630.15	300.271	-334.017	1486.99	303.781	-230.699	1263.05	312.213	-467.892	1384.03	316.276	-491.795	1199.24	252.624	-228.043	1338.02	499.36	-333.347	1431.73	547.411	-261.077	1246.07	554.293	-207.672	1137.75	576.761	-196.594	965.685	539.951	-192.101	864.266	593.563	-138.294	877.457	594.254	-143.395	770.112
703	0	350.944	-579.776	1627.33	246.741	-570.872	1623.1	383.447	-424.845	1635.21	248.116	-401.993	1633.03	300.658	-346.692	1489.57	304.911	-243.847	1265.52	312.279	-480.665	1386.85	316.468	-504.735	1202.11	253.606	-240.701	1340.44	499.923	-346.78	1434.76	549.035	-278.32	1246.8	556.667	-227.062	1137.41	577.944	-221.089	964.915	540.383	-218.768	863.638	595.207	-165.643	875.042	595.517	-174.095	768.138
704	0	350.876	-593.362	1629.38	246.671	-584.492	1625.17	383.263	-438.461	1638.22	247.93	-415.684	1636.14	300.98	-359.186	1492.33	305.993	-256.839	1268.15	312.259	-493.293	1389.91	316.557	-517.568	1205.24	254.525	-253.236	1343	500.408	-360.089	1438.04	550.599	-295.548	1247.85	559.069	-246.568	1137.38	579.086	-246.089	964.563	540.75	-246.194	863.548	596.71	-193.767	873.026	596.782	-205.93	766.801
705	0	350.733	-606.739	1631.65	246.527	-597.915	1627.42	382.984	-451.868	1641.43	247.646	-429.178	1639.41	301.254	-371.533	1495.22	307.029	-269.702	1270.89	312.175	-505.811	1393.16	316.567	-530.325	1208.57	255.39	-265.68	1345.67	500.832	-373.309	1441.51	552.116	-312.76	1249.22	561.499	-266.164	1137.67	580.179	-271.537	964.665	541.044	-274.312	864.058	598.048	-222.603	871.473	597.984	-238.794	766.183
706	0	350.527	-619.92	1634.1	246.324	-611.147	1629.82	382.64	-465.078	1644.8	247.296	-442.476	1642.78	301.498	-383.77	1498.19	308.023	-282.464	1273.7	312.047	-518.253	1396.54	316.52	-543.033	1212.04	256.207	-278.061	1348.39	501.21	-386.469	1445.1	553.6	-329.952	1250.86	563.96	-285.825	1138.26	581.219	-297.374	965.244	541.259	-303.051	865.215	599.203	-252.085	870.434	599.056	-272.572	766.344
707	0	350.274	-632.923	1636.7	246.075	-624.194	1632.33	382.26	-478.112	1648.26	246.91	-455.583	1646.2	301.727	-395.936	1501.19	308.974	-295.15	1276.53	311.895	-530.653	1399.98	316.441	-555.715	1215.58	256.979	-290.408	1351.13	501.554	-399.597	1448.74	555.065	-347.122	1252.73	566.449	-305.529	1139.12	582.202	-323.542	966.307	541.39	-332.332	867.048	600.162	-282.146	869.946	599.935	-307.142	767.323
708	0	349.987	-645.767	1639.38	245.795	-637.069	1634.9	381.874	-490.993	1651.74	246.521	-468.512	1649.58	301.954	-408.065	1504.16	309.876	-307.784	1279.34	311.739	-543.04	1403.41	316.352	-568.392	1219.11	257.709	-302.747	1353.84	501.875	-412.713	1452.37	556.521	-364.266	1254.78	568.965	-325.254	1140.21	583.124	-349.982	967.853	541.432	-362.074	869.569	600.917	-312.715	870.034	600.561	-342.376	769.141
709	0	349.683	-658.478	1642.11	245.501	-649.788	1637.48	381.51	-503.745	1655.16	246.157	-481.278	1652.87	302.189	-420.19	1507.05	310.725	-320.389	1282.07	311.595	-555.44	1406.76	316.272	-581.08	1222.55	258.397	-315.101	1356.48	502.182	-425.834	1455.9	557.98	-381.38	1256.95	571.503	-344.983	1141.47	583.981	-376.637	969.864	541.379	-392.192	872.775	601.467	-343.719	870.707	600.885	-378.142	771.8
710	0	349.377	-671.081	1644.81	245.207	-662.373	1640.02	381.19	-516.395	1658.45	245.844	-493.902	1656	302.44	-432.343	1509.81	311.512	-332.983	1284.67	311.477	-567.874	1409.96	316.217	-593.791	1225.85	259.043	-327.49	1359	502.48	-438.969	1459.26	559.445	-398.455	1259.17	574.055	-364.704	1142.85	584.77	-403.449	972.315	541.226	-422.598	876.644	601.811	-375.082	871.962	600.87	-414.31	775.285
711	0	349.083	-683.603	1647.43	244.926	-674.848	1642.46	380.937	-528.972	1661.56	245.604	-506.406	1658.91	302.711	-444.548	1512.39	312.228	-345.583	1287.11	311.395	-580.361	1412.95	316.2	-606.534	1228.92	259.643	-339.933	1361.35	502.77	-452.125	1462.4	560.918	-415.488	1261.36	576.61	-384.405	1144.29	585.485	-430.365	975.172	540.969	-453.203	881.143	601.954	-406.726	873.785	600.492	-450.749	779.573
712	0	348.815	-696.072	1649.91	244.673	-687.238	1644.76	380.765	-541.503	1664.41	245.453	-518.818	1661.56	303.003	-456.827	1514.74	312.866	-358.204	1289.33	311.358	-592.912	1415.66	316.227	-619.317	1231.71	260.193	-352.443	1363.51	503.055	-465.306	1465.25	562.393	-432.469	1263.47	579.151	-404.082	1145.7	586.122	-457.331	978.393	540.601	-483.92	886.227	601.899	-438.574	876.154	599.742	-487.334	784.625
713	0	348.585	-708.515	1652.19	244.459	-699.571	1646.86	380.687	-554.013	1666.96	245.403	-531.166	1663.89	303.314	-469.199	1516.83	313.417	-370.855	1291.31	311.369	-605.538	1418.05	316.304	-632.141	1234.17	260.688	-365.032	1365.43	503.331	-478.51	1467.75	563.863	-449.395	1265.41	581.66	-423.734	1147.04	586.674	-484.298	981.932	540.119	-514.664	891.841	601.654	-470.545	879.037	598.624	-523.942	790.397
714	0	348.405	-720.957	1654.22	244.294	-711.876	1648.73	380.71	-566.528	1669.15	245.462	-543.477	1665.88	303.639	-481.677	1518.61	313.873	-383.549	1293	311.428	-618.245	1420.08	316.429	-645.009	1236.24	261.121	-377.71	1367.08	503.594	-491.736	1469.88	565.313	-466.26	1267.14	584.114	-443.362	1148.25	587.134	-511.217	985.739	539.521	-545.351	897.924	601.226	-502.559	882.395	597.159	-560.457	796.84
715	0	348.282	-733.42	1655.96	244.186	-724.179	1650.32	380.834	-579.07	1670.96	245.629	-555.782	1667.49	303.972	-494.272	1520.06	314.227	-396.292	1294.38	311.532	-631.039	1421.71	316.598	-657.923	1237.91	261.484	-390.485	1368.44	503.837	-504.982	1471.59	566.725	-483.062	1268.59	586.488	-462.972	1149.26	587.495	-538.045	989.762	538.805	-575.903	904.41	600.623	-534.538	886.187	595.374	-596.768	803.895
716	0	348.222	-745.927	1657.37	244.141	-736.509	1651.61	381.056	-591.656	1672.34	245.9	-568.106	1668.7	304.3	-506.991	1521.16	314.473	-409.093	1295.43	311.675	-643.922	1422.91	316.804	-670.883	1239.14	261.77	-403.363	1369.48	504.052	-518.244	1472.86	568.077	-499.803	1269.72	588.755	-482.571	1150.04	587.747	-564.738	993.951	537.97	-606.245	911.233	599.853	-566.403	890.364	593.31	-632.77	811.504
717	0	348.229	-758.493	1658.41	244.159	-748.889	1652.56	381.368	-604.303	1673.29	246.266	-580.475	1669.51	304.613	-519.84	1521.89	314.605	-421.959	1296.14	311.848	-656.897	1423.68	317.037	-683.891	1239.92	261.97	-416.348	1370.2	504.23	-531.522	1473.69	569.347	-516.486	1270.51	590.888	-502.164	1150.55	587.883	-591.254	998.256	537.018	-636.309	918.322	598.924	-598.075	894.877	591.011	-668.365	819.602
718	0	348.299	-771.135	1659.08	244.239	-761.341	1653.18	381.758	-617.023	1673.8	246.71	-592.913	1669.92	304.894	-532.821	1522.25	314.616	-434.899	1296.49	312.037	-669.965	1424.01	317.282	-696.95	1240.26	262.075	-429.445	1370.58	504.358	-544.815	1474.08	570.507	-533.116	1270.92	592.857	-521.758	1150.78	587.895	-617.553	1002.63	535.952	-666.027	925.61	597.844	-629.48	899.677	588.527	-703.462	828.125
719	0	348.429	-783.863	1659.36	244.375	-773.887	1653.44	382.206	-629.825	1673.85	247.215	-605.438	1669.92	305.129	-545.935	1522.23	314.503	-447.921	1296.49	312.228	-683.13	1423.9	317.525	-710.064	1240.14	262.077	-442.657	1370.62	504.426	-558.125	1474.04	571.533	-549.701	1270.95	594.633	-541.354	1150.7	587.775	-643.595	1007.02	534.775	-695.34	933.033	596.62	-660.543	904.711	585.907	-737.974	837.004
720	0	348.609	-796.687	1659.26	244.558	-786.541	1653.35	382.693	-642.716	1673.48	247.756	-618.067	1669.53	305.301	-559.181	1521.85	314.26	-461.033	1296.14	312.404	-696.392	1423.38	317.75	-723.241	1239.6	261.968	-455.988	1370.33	504.42	-571.457	1473.58	572.398	-566.248	1270.6	596.19	-560.948	1150.32	587.516	-669.339	1011.4	533.495	-724.191	940.53	595.261	-691.192	909.932	583.199	-771.824	846.171
721	0	348.826	-809.612	1658.78	244.773	-799.318	1652.91	383.193	-655.7	1672.69	248.306	-630.815	1668.77	305.391	-572.56	1521.11	313.886	-474.246	1295.45	312.547	-709.756	1422.45	317.94	-736.488	1238.65	261.741	-469.439	1369.7	504.328	-584.818	1472.74	573.078	-582.765	1269.87	597.502	-580.53	1149.65	587.114	-694.744	1015.73	532.118	-752.527	948.043	593.775	-721.357	915.29	580.449	-804.935	855.557
722	0	349.063	-822.644	1657.94	245.004	-812.228	1652.16	383.68	-668.778	1671.51	248.837	-643.692	1667.67	305.384	-586.069	1520.03	313.378	-487.569	1294.42	312.636	-723.225	1421.15	318.079	-749.815	1237.32	261.391	-483.014	1368.74	504.138	-598.221	1471.54	573.553	-599.258	1268.8	598.546	-600.082	1148.69	586.564	-719.767	1019.97	530.652	-780.297	955.522	592.168	-750.97	920.74	577.696	-837.241	865.091
723	0	349.3	-835.784	1656.77	245.23	-825.279	1651.11	384.123	-681.952	1669.97	249.316	-656.706	1666.24	305.262	-599.707	1518.64	312.737	-501.014	1293.09	312.652	-736.804	1419.51	318.149	-763.236	1235.64	260.915	-496.714	1367.49	503.837	-611.677	1470.02	573.802	-615.731	1267.41	599.303	-619.578	1147.48	585.865	-744.366	1024.1	529.108	-807.456	962.92	590.449	-779.965	926.237	574.976	-868.676	874.704
724	0	349.512	-849.033	1655.3	245.427	-838.477	1649.78	384.494	-695.22	1668.11	249.71	-669.862	1664.53	305.01	-613.474	1516.95	311.965	-514.592	1291.46	312.574	-750.499	1417.57	318.135	-776.762	1233.66	260.31	-510.541	1365.94	503.414	-625.205	1468.23	573.811	-632.184	1265.73	599.759	-638.984	1146.04	585.014	-768.494	1028.09	527.496	-833.96	970.194	588.624	-808.28	931.738	572.319	-899.183	884.325
725	0	349.676	-862.392	1653.58	245.57	-851.824	1648.22	384.759	-708.581	1665.98	249.988	-683.165	1662.57	304.613	-627.368	1515	311.066	-528.312	1289.57	312.381	-764.314	1415.37	318.023	-790.408	1231.43	259.577	-524.496	1364.13	502.859	-638.821	1466.22	573.569	-648.611	1263.8	599.902	-658.259	1144.41	584.013	-792.109	1031.91	525.827	-859.769	977.307	586.7	-835.855	937.199	569.746	-928.71	893.886
726	0	349.764	-875.86	1651.64	245.634	-865.323	1646.46	384.887	-722.032	1663.61	250.117	-696.615	1660.39	304.058	-641.389	1512.82	310.048	-542.185	1287.45	312.055	-778.256	1412.95	317.8	-804.188	1228.97	258.718	-538.581	1362.07	502.164	-652.543	1464.02	573.069	-665.005	1261.68	599.727	-677.353	1142.6	582.864	-815.163	1035.56	524.111	-884.844	984.223	584.683	-862.635	942.578	567.275	-957.208	903.315
727	0	349.749	-889.436	1649.53	245.591	-878.974	1644.54	384.85	-735.574	1661.05	250.065	-710.214	1658.03	303.335	-655.536	1510.45	308.92	-556.217	1285.13	311.581	-792.331	1410.36	317.457	-818.115	1226.35	257.735	-552.796	1359.81	501.322	-666.391	1461.69	572.308	-681.351	1259.39	599.233	-696.214	1140.67	581.572	-837.615	1039	522.36	-909.152	990.908	582.578	-888.567	947.832	564.918	-984.638	912.546
728	0	349.605	-903.118	1647.3	245.415	-892.776	1642.5	384.617	-749.203	1658.35	249.803	-723.962	1655.54	302.434	-669.81	1507.93	307.692	-570.415	1282.64	310.946	-806.543	1407.64	316.986	-832.203	1223.6	256.633	-567.141	1357.36	500.327	-680.38	1459.27	571.289	-697.63	1256.99	598.427	-714.786	1138.63	580.141	-859.422	1042.23	520.582	-932.66	997.331	580.39	-913.606	952.919	562.678	-1010.97	921.507
729	0	349.308	-916.906	1644.99	245.084	-906.726	1640.37	384.165	-762.918	1655.56	249.309	-737.858	1652.93	301.35	-684.211	1505.29	306.376	-584.781	1280.02	310.14	-820.898	1404.85	316.382	-846.461	1220.78	255.418	-581.615	1354.77	499.179	-694.523	1456.8	570.019	-713.82	1254.52	597.319	-733.013	1136.53	578.579	-880.545	1045.23	518.786	-955.341	1003.46	578.125	-937.711	957.792	560.555	-1036.16	930.131
730	0	348.835	-930.797	1642.66	244.576	-920.822	1638.2	383.472	-776.718	1652.72	248.559	-751.898	1650.27	300.081	-698.739	1502.58	304.987	-599.312	1277.31	309.158	-835.399	1402.01	315.646	-860.9	1217.92	254.095	-596.217	1352.07	497.877	-708.828	1454.33	568.51	-729.896	1252.02	595.926	-750.841	1134.39	576.893	-900.951	1047.97	516.98	-977.173	1009.25	575.789	-960.846	962.407	558.544	-1060.21	938.349
731	0	348.168	-944.789	1640.34	243.874	-935.059	1636.03	382.523	-790.603	1649.88	247.54	-766.08	1647.56	298.628	-713.392	1499.82	303.537	-614.005	1274.56	308.001	-850.046	1399.18	314.78	-875.523	1215.07	252.67	-610.942	1349.3	496.424	-723.3	1451.9	566.777	-745.831	1249.52	594.269	-768.22	1132.24	575.094	-920.609	1050.45	515.17	-998.135	1014.69	573.388	-982.982	966.717	556.634	-1083.1	946.091
732	0	347.293	-958.881	1638.09	242.966	-949.431	1633.88	381.306	-804.57	1647.09	246.243	-780.399	1644.85	296.995	-728.167	1497.07	302.037	-628.851	1271.79	306.675	-864.838	1396.39	313.793	-890.333	1212.27	251.15	-625.784	1346.49	494.827	-737.935	1449.54	564.841	-761.594	1247.07	592.375	-785.103	1130.12	573.192	-939.497	1052.65	513.36	-1018.21	1019.72	570.932	-1004.1	970.677	554.815	-1104.83	953.29
733	0	346.202	-973.069	1635.93	241.844	-963.932	1631.8	379.82	-818.62	1644.37	244.667	-794.849	1642.17	295.192	-743.06	1494.37	300.5	-643.835	1269.06	305.191	-879.769	1393.67	312.695	-905.326	1209.56	249.54	-640.737	1343.68	493.095	-752.725	1447.28	562.727	-777.157	1244.7	590.274	-801.455	1128.04	571.201	-957.595	1054.56	511.554	-1037.4	1024.31	568.429	-1024.18	974.242	553.069	-1125.39	959.88
734	0	344.893	-987.35	1633.91	240.508	-978.554	1629.8	378.067	-832.751	1641.78	242.817	-809.423	1639.55	293.232	-758.062	1491.73	298.932	-658.941	1266.4	303.567	-894.831	1391.07	311.505	-920.493	1206.97	247.848	-655.791	1340.92	491.241	-767.653	1445.16	560.462	-792.493	1242.44	587.997	-817.244	1126.03	569.134	-974.891	1056.15	509.755	-1055.68	1028.42	565.894	-1043.21	977.369	551.381	-1144.8	965.796
735	0	343.369	-1001.72	1632.05	238.964	-993.286	1627.92	376.06	-846.961	1639.33	240.709	-824.111	1637	291.131	-773.165	1489.22	297.34	-674.149	1263.84	301.824	-910.012	1388.61	310.24	-935.822	1204.53	246.08	-670.931	1338.25	489.281	-782.699	1443.19	558.076	-807.574	1240.33	585.578	-832.45	1124.13	567.006	-991.381	1057.43	507.966	-1073.07	1032.01	563.342	-1061.19	980.017	549.735	-1163.07	970.978
736	0	341.641	-1016.17	1630.38	237.223	-1008.12	1626.17	373.817	-861.249	1637.07	238.364	-838.904	1634.56	288.91	-788.354	1486.85	295.729	-689.436	1261.44	299.989	-925.295	1386.31	308.924	-951.291	1202.26	244.243	-686.144	1335.7	487.232	-797.836	1441.4	555.601	-822.377	1238.39	583.052	-847.062	1122.35	564.835	-1007.06	1058.38	506.188	-1089.55	1035.04	560.793	-1078.12	982.15	548.115	-1180.23	975.366
737	0	339.726	-1030.7	1628.92	235.304	-1023.03	1624.56	371.367	-875.611	1635.03	235.812	-853.787	1632.24	286.595	-803.615	1484.65	294.101	-704.777	1259.22	298.092	-940.659	1384.21	307.58	-966.875	1200.19	242.345	-701.409	1333.31	485.118	-813.034	1439.81	553.072	-836.881	1236.64	580.453	-861.076	1120.72	562.639	-1021.94	1058.98	504.426	-1105.15	1037.46	558.27	-1094.01	983.737	546.508	-1196.3	978.907
738	0	337.647	-1045.3	1627.69	233.231	-1038.02	1623.12	368.742	-890.043	1633.22	233.09	-868.749	1630.08	284.213	-818.928	1482.67	292.457	-720.146	1257.21	296.164	-956.081	1382.32	306.234	-982.542	1198.34	240.396	-716.707	1331.13	482.961	-828.258	1438.43	550.524	-851.068	1235.13	577.815	-874.498	1119.27	560.436	-1036.03	1059.24	502.683	-1119.86	1039.24	555.797	-1108.87	984.752	544.903	-1211.3	981.553
739	0	335.433	-1059.97	1626.7	231.034	-1053.07	1621.86	365.983	-904.54	1631.67	230.24	-883.772	1628.1	281.793	-834.274	1480.93	290.797	-735.515	1255.46	294.239	-971.534	1380.66	304.906	-998.254	1196.73	238.405	-732.014	1329.18	480.788	-843.474	1437.27	547.991	-864.925	1233.85	575.169	-887.344	1118.01	558.248	-1049.34	1059.15	500.965	-1133.71	1040.35	553.403	-1122.72	985.174	543.297	-1225.27	983.263
740	0	333.117	-1074.69	1625.95	228.744	-1068.16	1620.79	363.134	-919.099	1630.39	227.309	-898.841	1626.32	279.368	-849.63	1479.45	289.123	-750.858	1253.98	292.347	-986.987	1379.25	303.619	-1013.97	1195.37	236.386	-747.306	1327.51	478.625	-858.65	1436.36	545.506	-878.445	1232.85	572.542	-899.635	1116.97	556.094	-1061.89	1058.71	499.278	-1146.7	1040.75	551.115	-1135.55	984.989	541.692	-1238.23	984.002
741	0	330.735	-1089.45	1625.45	226.401	-1083.27	1619.91	360.245	-933.711	1629.41	224.347	-913.937	1624.76	276.969	-864.971	1478.26	287.438	-766.15	1252.81	290.517	-1002.41	1378.11	302.388	-1029.65	1194.27	234.354	-762.556	1326.14	476.5	-873.753	1435.69	543.1	-891.624	1232.13	569.961	-911.4	1116.16	553.997	-1073.7	1057.92	497.632	-1158.86	1040.41	548.962	-1147.4	984.192	540.095	-1250.21	983.746
742	0	328.326	-1104.25	1625.2	224.04	-1098.38	1619.24	357.367	-948.37	1628.74	221.407	-929.044	1623.46	274.629	-880.275	1477.37	285.745	-781.368	1251.96	288.775	-1017.77	1377.24	301.227	-1045.24	1193.44	232.324	-777.742	1325.11	474.438	-888.755	1435.27	540.799	-904.465	1231.7	567.448	-922.672	1115.61	551.976	-1084.8	1056.77	496.037	-1170.18	1039.33	546.973	-1158.27	982.783	538.523	-1261.22	982.481
743	0	325.93	-1119.07	1625.19	221.703	-1113.48	1618.79	354.548	-963.067	1628.39	218.54	-944.142	1622.44	272.377	-895.515	1476.82	284.052	-796.49	1251.47	287.141	-1033.04	1376.67	300.143	-1060.7	1192.89	230.314	-792.841	1324.43	472.463	-903.63	1435.11	538.627	-916.974	1231.58	565.021	-933.492	1115.31	550.053	-1095.2	1055.28	494.507	-1180.69	1037.49	545.17	-1168.19	980.769	537	-1271.29	980.205
744	0	323.587	-1133.9	1625.43	219.428	-1128.56	1618.56	351.84	-977.791	1628.36	215.798	-959.211	1621.72	270.24	-910.67	1476.6	282.366	-811.498	1251.32	285.631	-1048.2	1376.4	299.143	-1076.01	1192.64	228.339	-807.832	1324.13	470.597	-918.357	1435.21	536.6	-929.166	1231.78	562.693	-943.9	1115.29	548.246	-1104.92	1053.46	493.054	-1190.4	1034.88	543.579	-1177.15	978.169	535.555	-1280.41	976.929
745	0	321.336	-1148.72	1625.91	217.251	-1143.58	1618.58	349.289	-992.532	1628.66	213.225	-974.234	1621.34	268.241	-925.716	1476.74	280.698	-826.381	1251.55	284.255	-1063.21	1376.44	298.226	-1091.12	1192.7	226.417	-822.699	1324.21	468.857	-932.92	1435.57	534.729	-941.057	1232.29	560.476	-953.94	1115.55	546.573	-1113.99	1051.32	491.697	-1199.31	1031.53	542.216	-1185.16	975.006	534.226	-1288.59	972.677
746	0	319.214	-1163.54	1626.63	215.209	-1158.53	1618.84	346.936	-1007.27	1629.29	210.862	-989.192	1621.31	266.397	-940.637	1477.23	279.057	-841.128	1252.14	283.017	-1078.05	1376.81	297.391	-1106.03	1193.07	224.563	-837.432	1324.68	467.254	-947.305	1436.2	533.02	-952.671	1233.12	558.376	-963.657	1116.09	545.051	-1122.42	1048.88	490.454	-1207.44	1027.45	541.097	-1192.25	971.316	533.054	-1295.82	967.489
747	0	317.254	-1178.31	1627.59	213.332	-1173.4	1619.36	344.815	-1022	1630.24	208.744	-1004.07	1621.65	264.72	-955.418	1478.08	277.452	-855.735	1253.09	281.916	-1092.73	1377.5	296.632	-1120.71	1193.77	222.787	-852.023	1325.53	465.795	-961.504	1437.09	531.471	-964.034	1234.25	556.395	-973.094	1116.91	543.691	-1130.24	1046.17	489.344	-1214.77	1022.68	540.232	-1198.4	967.143	532.082	-1302.07	961.419
748	0	315.485	-1193.03	1628.78	211.646	-1188.17	1620.17	342.955	-1036.69	1631.52	206.895	-1018.84	1622.39	263.217	-970.047	1479.27	275.891	-870.202	1254.39	280.946	-1107.22	1378.54	295.941	-1135.18	1194.8	221.098	-866.472	1326.76	464.483	-975.516	1438.22	530.075	-975.174	1235.69	554.532	-982.295	1118.01	542.506	-1137.47	1043.21	488.387	-1221.33	1017.27	539.625	-1203.62	962.54	531.356	-1307.35	954.535
749	0	313.932	-1207.68	1630.21	210.174	-1202.83	1621.26	341.374	-1051.33	1633.1	205.331	-1033.5	1623.52	261.888	-984.522	1480.8	274.377	-884.532	1256.02	280.1	-1121.53	1379.91	295.306	-1149.43	1196.18	219.502	-880.782	1328.34	463.314	-989.342	1439.59	528.819	-986.122	1237.42	552.78	-991.296	1119.38	541.502	-1144.1	1040.04	487.605	-1227.1	1011.28	539.279	-1207.92	957.57	530.919	-1311.61	946.923
750	0	312.611	-1222.24	1631.86	208.929	-1217.36	1622.65	340.079	-1065.89	1634.96	204.058	-1048.04	1625.03	260.729	-998.842	1482.65	272.914	-898.731	1257.96	279.364	-1135.66	1381.61	294.716	-1163.49	1197.88	218	-894.96	1330.27	462.28	-1002.99	1441.19	527.687	-996.908	1239.41	551.133	-1000.13	1121.02	540.685	-1150.17	1036.69	487.02	-1232.1	1004.78	539.19	-1211.31	952.308	530.811	-1314.83	938.68
751	0	311.533	-1236.69	1633.74	207.92	-1231.75	1624.35	339.072	-1080.36	1637.09	203.074	-1062.43	1626.93	259.732	-1013.01	1484.78	271.499	-912.809	1260.17	278.725	-1149.64	1383.62	294.156	-1177.37	1199.9	216.589	-909.021	1332.49	461.37	-1016.48	1443	526.657	-1007.56	1241.66	549.579	-1008.84	1122.91	540.056	-1155.68	1033.23	486.65	-1236.34	997.87	539.351	-1213.8	946.833	531.064	-1317.01	929.917
752	0	310.703	-1251	1635.83	207.15	-1245.99	1626.35	338.342	-1094.7	1639.43	202.366	-1076.68	1629.17	258.883	-1027.04	1487.17	270.129	-926.775	1262.63	278.168	-1163.47	1385.92	293.613	-1191.11	1202.22	215.263	-922.978	1334.98	460.571	-1029.81	1444.98	525.709	-1018.11	1244.12	548.106	-1017.43	1125.03	539.615	-1160.66	1029.68	486.514	-1239.82	990.639	539.751	-1215.41	941.234	531.704	-1318.13	920.756
753	0	310.118	-1265.17	1638.13	206.612	-1260.08	1628.64	337.871	-1108.9	1641.96	201.914	-1090.77	1631.72	258.168	-1040.95	1489.78	268.801	-940.64	1265.28	277.679	-1177.18	1388.48	293.074	-1204.73	1204.8	214.015	-936.85	1337.68	459.868	-1043.02	1447.12	524.821	-1028.58	1246.77	546.701	-1025.94	1127.36	539.357	-1165.12	1026.11	486.625	-1242.56	983.195	540.378	-1216.17	935.604	532.747	-1318.18	911.325
754	0	309.766	-1279.17	1640.61	206.297	-1274.02	1631.19	337.634	-1122.94	1644.62	201.692	-1104.7	1634.52	257.569	-1054.75	1492.55	267.507	-954.417	1268.08	277.242	-1190.79	1391.25	292.527	-1218.26	1207.61	212.835	-950.654	1340.57	459.245	-1056.13	1449.36	523.973	-1038.99	1249.57	545.353	-1034.36	1129.88	539.276	-1169.08	1022.57	486.994	-1244.6	975.649	541.212	-1216.12	930.037	534.194	-1317.18	901.759
755	0	309.632	-1293.01	1643.25	206.188	-1287.8	1633.98	337.601	-1136.81	1647.37	201.668	-1118.47	1637.52	257.07	-1068.46	1495.45	266.245	-968.114	1270.98	276.845	-1204.33	1394.18	291.96	-1231.72	1210.58	211.713	-964.409	1343.57	458.686	-1069.16	1451.68	523.148	-1049.35	1252.47	544.05	-1042.72	1132.55	539.362	-1172.56	1019.11	487.623	-1245.97	968.112	542.235	-1215.3	924.627	536.037	-1315.16	892.196
756	0	309.695	-1306.67	1646.01	206.264	-1301.44	1636.98	337.738	-1150.51	1650.14	201.806	-1132.1	1640.65	256.652	-1082.1	1498.42	265.011	-981.744	1273.94	276.477	-1217.82	1397.22	291.363	-1245.14	1213.66	210.639	-978.132	1346.64	458.176	-1082.14	1454.03	522.329	-1059.69	1255.44	542.782	-1051.01	1135.35	539.604	-1175.61	1015.78	488.512	-1246.71	960.694	543.424	-1213.79	919.464	538.253	-1312.16	882.771
757	0	309.929	-1320.16	1648.87	206.499	-1314.93	1640.11	338.007	-1164.03	1652.89	202.071	-1145.58	1643.84	256.298	-1095.69	1501.39	263.802	-995.317	1276.9	276.128	-1231.28	1400.3	290.728	-1258.54	1216.78	209.605	-991.839	1349.72	457.702	-1095.08	1456.36	521.506	-1070	1258.43	541.545	-1059.24	1138.22	539.988	-1178.26	1012.63	489.651	-1246.88	953.499	544.753	-1211.65	914.629	540.807	-1308.26	873.611
758	0	310.307	-1333.49	1651.76	206.867	-1328.29	1643.34	338.374	-1177.37	1655.55	202.427	-1158.92	1647	255.993	-1109.24	1504.31	262.62	-1008.84	1279.8	275.791	-1244.74	1403.36	290.048	-1271.94	1219.88	208.604	-1005.54	1352.74	457.25	-1108.01	1458.63	520.671	-1080.29	1261.39	540.332	-1067.4	1141.15	540.5	-1180.54	1009.71	491.023	-1246.54	946.619	546.199	-1208.98	910.194	543.652	-1303.53	864.835
759	0	310.798	-1346.66	1654.65	207.34	-1341.54	1646.6	338.803	-1190.56	1658.08	202.841	-1172.16	1650.07	255.723	-1122.78	1507.13	261.466	-1022.32	1282.59	275.461	-1258.21	1406.34	289.32	-1285.35	1222.88	207.63	-1019.25	1355.66	456.812	-1120.95	1460.78	519.819	-1090.55	1264.29	539.141	-1075.49	1144.09	541.121	-1182.51	1007.04	492.606	-1245.76	940.135	547.733	-1205.87	906.218	546.73	-1298.08	856.546
760	0	311.372	-1359.7	1657.48	207.888	-1354.69	1649.82	339.263	-1203.6	1660.42	203.281	-1185.29	1652.97	255.475	-1136.31	1509.78	260.347	-1035.77	1285.23	275.136	-1271.71	1409.16	288.542	-1298.77	1225.71	206.682	-1032.98	1358.42	456.378	-1133.9	1462.77	518.948	-1100.8	1267.08	537.973	-1083.51	1147.01	541.835	-1184.22	1004.66	494.373	-1244.63	934.113	549.332	-1202.43	902.747	549.979	-1292.03	848.831
761	0	312.001	-1372.63	1660.2	208.487	-1367.77	1652.94	339.728	-1216.52	1662.52	203.723	-1198.35	1655.64	255.24	-1149.86	1512.22	259.268	-1049.18	1287.67	274.815	-1285.24	1411.77	287.717	-1312.2	1228.31	205.761	-1046.72	1360.97	455.943	-1146.87	1464.56	518.059	-1111.01	1269.74	536.829	-1091.46	1149.87	542.622	-1185.73	1002.59	496.291	-1243.21	928.602	550.969	-1198.76	899.812	553.331	-1285.5	841.755
762	0	312.659	-1385.48	1662.75	209.109	-1380.79	1655.89	340.175	-1229.35	1664.35	204.145	-1211.35	1658.02	255.012	-1163.42	1514.41	258.238	-1062.57	1289.86	274.499	-1298.8	1414.11	286.85	-1325.65	1230.63	204.869	-1060.48	1363.26	455.502	-1159.87	1466.11	517.152	-1121.19	1272.23	535.71	-1099.35	1152.65	543.464	-1187.09	1000.84	498.324	-1241.59	923.634	552.622	-1194.97	897.428	556.716	-1278.62	835.363
763	0	313.321	-1398.26	1665.09	209.735	-1393.77	1658.61	340.589	-1242.11	1665.87	204.533	-1224.32	1660.07	254.787	-1177.01	1516.3	257.266	-1075.94	1291.78	274.192	-1312.41	1416.15	285.95	-1339.12	1232.61	204.013	-1074.27	1365.26	455.053	-1172.91	1467.4	516.232	-1131.33	1274.54	534.618	-1107.18	1155.32	544.342	-1188.37	999.416	500.437	-1239.86	919.225	554.27	-1191.17	895.596	560.067	-1271.54	829.679
764	0	313.967	-1411.02	1667.15	210.347	-1406.74	1661.04	340.959	-1254.85	1667.05	204.878	-1237.28	1661.74	254.563	-1190.64	1517.86	256.364	-1089.29	1293.38	273.897	-1326.06	1417.84	285.029	-1352.59	1234.22	203.2	-1088.08	1366.93	454.597	-1185.97	1468.39	515.301	-1141.44	1276.64	533.555	-1114.95	1157.87	545.238	-1189.63	998.318	502.591	-1238.09	915.377	555.895	-1187.47	894.307	563.323	-1264.39	824.709
765	0	314.584	-1423.78	1668.92	210.929	-1419.73	1663.14	341.282	-1267.58	1667.89	205.175	-1250.26	1663.02	254.344	-1204.3	1519.07	255.541	-1102.63	1294.65	273.622	-1339.75	1419.15	284.102	-1366.07	1235.42	202.441	-1101.91	1368.25	454.137	-1199.07	1469.08	514.362	-1151.51	1278.53	532.52	-1122.7	1160.28	546.136	-1190.93	997.534	504.754	-1236.37	912.079	557.479	-1183.95	893.538	566.43	-1257.29	820.44
766	0	315.159	-1436.57	1670.34	211.474	-1432.74	1664.87	341.557	-1280.33	1668.37	205.427	-1263.27	1663.88	254.133	-1217.99	1519.91	254.811	-1115.97	1295.57	273.373	-1353.49	1420.08	283.187	-1379.56	1236.21	201.748	-1115.77	1369.2	453.677	-1212.19	1469.45	513.42	-1161.55	1280.21	531.514	-1130.43	1162.53	547.02	-1192.33	997.048	506.89	-1234.75	909.306	559.009	-1180.71	893.256	569.343	-1250.36	816.848
767	0	315.687	-1449.41	1671.41	211.978	-1445.8	1666.19	341.792	-1293.15	1668.49	205.64	-1276.34	1664.33	253.939	-1231.73	1520.37	254.184	-1129.31	1296.13	273.159	-1367.26	1420.6	282.303	-1393.05	1236.58	201.133	-1129.64	1369.77	453.226	-1225.35	1469.51	512.478	-1171.57	1281.68	530.533	-1138.17	1164.63	547.877	-1193.88	996.839	508.973	-1233.32	907.027	560.472	-1177.82	893.424	572.028	-1243.72	813.897
768	0	316.167	-1462.34	1672.1	212.439	-1458.92	1667.11	341.994	-1306.04	1668.25	205.824	-1289.47	1664.36	253.772	-1245.51	1520.45	253.67	-1142.67	1296.33	272.989	-1381.07	1420.72	281.469	-1406.56	1236.53	200.609	-1143.54	1369.96	452.793	-1238.54	1469.26	511.541	-1181.59	1282.93	529.574	-1145.95	1166.57	548.694	-1195.62	996.881	510.976	-1232.13	905.203	561.857	-1175.35	893.997	574.465	-1237.47	811.543
769	0	316.604	-1475.35	1672.4	212.864	-1472.12	1667.6	342.178	-1319.04	1667.68	205.993	-1302.69	1664	253.644	-1259.33	1520.17	253.28	-1156.06	1296.16	272.873	-1394.92	1420.46	280.707	-1420.09	1236.09	200.189	-1157.46	1369.77	452.389	-1251.77	1468.7	510.612	-1191.64	1283.98	528.634	-1153.79	1168.36	549.462	-1197.62	997.144	512.881	-1231.23	903.79	563.153	-1173.36	894.927	576.642	-1231.68	809.739
770	0	317.004	-1488.49	1672.33	213.258	-1485.41	1667.67	342.359	-1332.15	1666.79	206.162	-1316	1663.25	253.569	-1273.19	1519.52	253.021	-1169.5	1295.64	272.82	-1408.82	1419.83	280.036	-1433.66	1235.27	199.886	-1171.42	1369.21	452.027	-1265.05	1467.86	509.698	-1201.73	1284.82	527.709	-1161.72	1169.99	550.172	-1199.91	997.596	514.673	-1230.68	902.741	564.35	-1171.88	896.163	578.562	-1226.44	808.435
771	0	317.379	-1501.74	1671.89	213.636	-1498.79	1667.33	342.555	-1345.38	1665.6	206.349	-1329.4	1662.15	253.561	-1287.11	1518.53	252.899	-1183	1294.78	272.842	-1422.76	1418.84	279.475	-1447.28	1234.11	199.712	-1185.42	1368.3	451.722	-1278.39	1466.74	508.804	-1211.9	1285.48	526.794	-1169.79	1171.46	550.818	-1202.52	998.202	516.343	-1230.52	902.008	565.438	-1170.94	897.656	580.234	-1221.79	807.582
772	0	317.745	-1515.13	1671.11	214.01	-1512.27	1666.62	342.783	-1358.76	1664.13	206.573	-1342.91	1660.73	253.637	-1301.09	1517.22	252.917	-1196.58	1293.6	272.947	-1436.75	1417.54	279.038	-1460.98	1232.64	199.675	-1199.47	1367.06	451.488	-1291.8	1465.37	507.938	-1222.18	1285.94	525.887	-1178.02	1172.78	551.396	-1205.49	998.927	517.886	-1230.79	901.541	566.41	-1170.58	899.354	581.677	-1217.78	807.129
773	0	318.119	-1528.65	1670.01	214.396	-1525.86	1665.55	343.063	-1372.27	1662.42	206.852	-1356.52	1659.01	253.812	-1315.12	1515.62	253.077	-1210.27	1292.11	273.146	-1450.81	1415.95	278.738	-1474.76	1230.9	199.784	-1213.58	1365.52	451.34	-1305.3	1463.77	507.109	-1232.59	1286.23	524.988	-1186.45	1173.94	551.904	-1208.85	999.734	519.304	-1231.52	901.293	567.257	-1170.81	901.208	582.914	-1214.46	807.027
774	0	318.518	-1542.3	1668.62	214.814	-1539.55	1664.16	343.414	-1385.92	1660.5	207.204	-1370.25	1657.04	254.099	-1329.23	1513.75	253.377	-1224.08	1290.35	273.447	-1464.94	1414.11	278.583	-1488.65	1228.93	200.046	-1227.76	1363.71	451.294	-1318.89	1461.96	506.326	-1243.19	1286.34	524.096	-1195.12	1174.95	552.345	-1212.63	1000.59	520.6	-1232.76	901.215	567.973	-1171.64	903.169	583.972	-1211.84	807.23
775	0	318.962	-1556.1	1666.98	215.279	-1553.36	1662.49	343.853	-1399.72	1658.39	207.648	-1384.07	1654.85	254.513	-1343.42	1511.67	253.815	-1238.04	1288.34	273.859	-1479.16	1412.05	278.575	-1502.68	1226.76	200.464	-1242.03	1361.66	451.363	-1332.61	1459.96	505.602	-1253.99	1286.27	523.217	-1204.06	1175.79	552.72	-1216.86	1001.45	521.783	-1234.53	901.262	568.554	-1173.09	905.189	584.881	-1209.95	807.69
776	0	319.469	-1570.03	1665.13	215.811	-1567.27	1660.59	344.396	-1413.66	1656.13	208.199	-1398.01	1652.48	255.065	-1357.7	1509.38	254.385	-1252.17	1286.12	274.389	-1493.48	1409.82	278.717	-1516.84	1224.43	201.038	-1256.4	1359.4	451.561	-1346.45	1457.78	504.948	-1265.04	1286.02	522.355	-1213.31	1176.46	553.035	-1221.56	1002.28	522.864	-1236.87	901.39	568.999	-1175.17	907.223	585.667	-1208.8	808.361
777	0	320.056	-1584.09	1663.11	216.424	-1581.29	1658.51	345.06	-1427.74	1653.74	208.873	-1412.05	1649.95	255.764	-1372.08	1506.95	255.081	-1266.47	1283.71	275.041	-1507.9	1407.43	279.006	-1531.16	1221.98	201.769	-1270.88	1356.99	451.9	-1360.44	1455.46	504.378	-1276.37	1285.59	521.52	-1222.91	1176.96	553.298	-1226.76	1003.05	523.857	-1239.81	901.555	569.309	-1177.89	909.226	586.359	-1208.4	809.197
778	0	320.739	-1598.28	1660.97	217.134	-1595.43	1656.28	345.856	-1441.95	1651.26	209.682	-1426.2	1647.32	256.616	-1386.58	1504.39	255.897	-1280.96	1281.15	275.819	-1522.45	1404.94	279.437	-1545.65	1219.44	202.654	-1285.48	1354.44	452.389	-1374.6	1453.01	503.907	-1287.99	1284.97	520.724	-1232.88	1177.26	553.519	-1232.49	1003.73	524.776	-1243.39	901.719	569.489	-1181.26	911.155	586.978	-1208.77	810.152
779	0	321.529	-1612.61	1658.73	217.95	-1609.67	1653.95	346.795	-1456.31	1648.7	210.637	-1440.46	1644.61	257.625	-1401.19	1501.76	256.823	-1295.65	1278.49	276.724	-1537.12	1402.37	280.004	-1560.32	1216.84	203.686	-1300.21	1351.82	453.035	-1388.92	1450.45	503.549	-1299.95	1284.16	519.981	-1243.27	1177.36	553.709	-1238.78	1004.27	525.636	-1247.63	901.841	569.552	-1185.31	912.97	587.541	-1209.91	811.177
780	0	322.436	-1627.06	1656.45	218.881	-1624.02	1651.58	347.885	-1470.81	1646.1	211.745	-1454.82	1641.85	258.789	-1415.94	1499.09	257.85	-1310.53	1275.75	277.756	-1551.93	1399.76	280.7	-1575.15	1214.21	204.858	-1315.07	1349.16	453.841	-1403.42	1447.81	503.318	-1312.26	1283.15	519.309	-1254.1	1177.24	553.881	-1245.67	1004.66	526.451	-1252.58	901.888	569.51	-1190.05	914.63	588.062	-1211.84	812.222
781	0	323.462	-1641.65	1654.16	219.93	-1638.49	1649.19	349.13	-1485.44	1643.49	213.011	-1469.29	1639.08	260.106	-1430.82	1496.41	258.97	-1325.62	1273	278.909	-1566.88	1397.14	281.516	-1590.17	1211.59	206.161	-1330.06	1346.5	454.811	-1418.1	1445.11	503.23	-1324.94	1281.95	518.725	-1265.4	1176.9	554.049	-1253.18	1004.86	527.232	-1258.26	901.824	569.385	-1195.53	916.098	588.545	-1214.59	813.236
782	0	324.609	-1656.37	1651.9	221.097	-1653.06	1646.83	350.53	-1500.22	1640.9	214.434	-1483.87	1636.34	261.566	-1445.83	1493.78	260.172	-1340.88	1270.26	280.178	-1581.97	1394.55	282.443	-1605.35	1209	207.583	-1345.17	1343.89	455.94	-1432.97	1442.37	503.297	-1338.01	1280.56	518.247	-1277.2	1176.32	554.226	-1261.36	1004.85	527.986	-1264.72	901.62	569.2	-1201.77	917.337	588.992	-1218.18	814.163
783	0	325.872	-1671.22	1649.68	222.378	-1667.75	1644.54	352.082	-1515.15	1638.35	216.013	-1498.56	1633.66	263.159	-1460.98	1491.21	261.448	-1356.32	1267.57	281.551	-1597.19	1392.01	283.47	-1620.68	1206.47	209.11	-1360.4	1341.35	457.223	-1448.01	1439.62	503.53	-1351.48	1278.97	517.895	-1289.51	1175.5	554.426	-1270.24	1004.61	528.72	-1271.98	901.248	568.984	-1208.81	918.314	589.4	-1222.66	814.95
784	0	327.242	-1686.2	1647.54	223.763	-1682.55	1642.33	353.779	-1530.21	1635.86	217.737	-1513.36	1631.07	264.869	-1476.25	1488.76	262.787	-1371.91	1264.99	283.016	-1612.53	1389.55	284.587	-1636.16	1204.03	210.728	-1375.74	1338.94	458.65	-1463.23	1436.9	503.939	-1365.35	1277.2	517.686	-1302.35	1174.43	554.663	-1279.87	1004.12	529.435	-1280.08	900.684	568.769	-1216.7	919	589.762	-1228.07	815.54
785	0	328.706	-1701.32	1645.5	225.24	-1697.45	1640.25	355.606	-1545.42	1633.47	219.597	-1528.26	1628.6	266.677	-1491.63	1486.45	264.181	-1387.63	1262.54	284.555	-1627.98	1387.21	285.782	-1651.76	1201.71	212.422	-1391.16	1336.68	460.208	-1478.6	1434.24	504.53	-1379.63	1275.26	517.635	-1315.73	1173.12	554.947	-1290.27	1003.37	530.126	-1289.06	899.909	568.587	-1225.49	919.365	590.07	-1234.47	815.88
786	0	330.248	-1716.56	1643.58	226.792	-1712.45	1638.31	357.549	-1560.77	1631.21	221.573	-1543.26	1626.28	268.562	-1507.11	1484.32	265.62	-1403.45	1260.26	286.15	-1643.51	1385.01	287.041	-1667.46	1199.54	214.173	-1406.65	1334.61	461.881	-1494.11	1431.66	505.305	-1394.31	1273.17	517.755	-1329.66	1171.57	555.291	-1301.48	1002.36	530.791	-1298.94	898.908	568.473	-1235.23	919.389	590.316	-1241.92	815.92
787	0	331.848	-1731.92	1641.8	228.4	-1727.54	1636.54	359.585	-1576.24	1629.1	223.645	-1558.34	1624.16	270.498	-1522.65	1482.39	267.096	-1419.33	1258.18	287.779	-1659.11	1382.99	288.35	-1683.22	1197.54	215.964	-1422.17	1332.75	463.648	-1509.73	1429.21	506.264	-1409.37	1270.95	518.057	-1344.12	1169.81	555.701	-1313.55	1001.08	531.423	-1309.78	897.673	568.459	-1245.97	919.053	590.494	-1250.49	815.613
788	0	333.483	-1747.39	1640.18	230.044	-1742.71	1634.95	361.689	-1591.82	1627.17	225.788	-1573.51	1622.26	272.461	-1538.24	1480.68	268.599	-1435.25	1256.34	289.417	-1674.74	1381.17	289.693	-1699.01	1195.75	217.779	-1437.7	1331.12	465.486	-1525.45	1426.93	507.401	-1424.82	1268.63	518.544	-1359.11	1167.84	556.183	-1326.48	999.538	532.013	-1321.6	896.201	568.573	-1257.75	918.345	590.598	-1260.26	814.921
789	0	335.13	-1762.95	1638.72	231.699	-1757.95	1633.56	363.832	-1607.49	1625.45	227.971	-1588.73	1620.61	274.422	-1553.84	1479.23	270.12	-1451.18	1254.76	291.039	-1690.37	1379.57	291.054	-1714.81	1194.19	219.599	-1453.21	1329.76	467.371	-1541.22	1424.84	508.706	-1440.61	1266.25	519.219	-1374.61	1165.71	556.741	-1340.32	997.753	532.556	-1334.44	894.496	568.841	-1270.63	917.258	590.629	-1271.31	813.814
790	0	336.764	-1778.57	1637.44	233.341	-1773.24	1632.38	365.982	-1623.24	1623.96	230.163	-1604	1619.23	276.353	-1569.41	1478.05	271.651	-1467.06	1253.46	292.621	-1705.96	1378.23	292.414	-1730.57	1192.88	221.407	-1468.66	1328.66	469.276	-1557.03	1423	510.167	-1456.74	1263.83	520.079	-1390.6	1163.44	557.375	-1355.08	995.741	533.046	-1348.32	892.571	569.278	-1284.65	915.794	590.59	-1283.71	812.275
791	0	338.359	-1794.24	1636.35	234.945	-1788.56	1631.43	368.106	-1639.03	1622.73	232.329	-1619.3	1618.17	278.228	-1584.93	1477.16	273.181	-1482.88	1252.46	294.138	-1721.49	1377.15	293.757	-1746.26	1191.84	223.188	-1484.03	1327.86	471.173	-1572.83	1421.43	511.765	-1473.17	1261.44	521.116	-1407.05	1161.07	558.082	-1370.76	993.528	533.478	-1363.28	890.447	569.894	-1299.83	913.962	590.486	-1297.53	810.298
792	0	339.891	-1809.93	1635.48	236.486	-1803.89	1630.73	370.168	-1654.82	1621.78	234.433	-1634.59	1617.43	280.018	-1600.35	1476.57	274.701	-1498.6	1251.77	295.565	-1736.91	1376.37	295.065	-1761.83	1191.1	224.925	-1499.28	1327.34	473.037	-1588.6	1420.17	513.48	-1489.87	1259.1	522.319	-1423.93	1158.64	558.856	-1387.36	991.148	533.85	-1379.34	888.15	570.69	-1316.19	911.78	590.328	-1312.83	807.894
793	0	341.336	-1825.6	1634.82	237.941	-1819.19	1630.27	372.132	-1670.6	1621.13	236.439	-1649.87	1617.04	281.701	-1615.65	1476.29	276.2	-1514.19	1251.4	296.882	-1752.2	1375.89	296.319	-1777.26	1190.66	226.605	-1514.38	1327.13	474.839	-1604.3	1419.25	515.288	-1506.8	1256.86	523.673	-1441.21	1156.19	559.689	-1404.89	988.642	534.161	-1396.51	885.72	571.655	-1333.75	909.274	590.13	-1329.66	805.087
794	0	342.671	-1841.22	1634.4	239.287	-1834.46	1630.07	373.964	-1686.31	1620.81	238.312	-1665.09	1617.01	283.255	-1630.8	1476.33	277.668	-1529.62	1251.36	298.07	-1767.33	1375.73	297.504	-1792.51	1190.54	228.216	-1529.31	1327.22	476.556	-1619.89	1418.7	517.162	-1523.93	1254.78	525.161	-1458.84	1153.78	560.57	-1423.32	986.056	534.413	-1414.82	883.199	572.772	-1352.5	906.481	589.905	-1348.04	801.922
795	0	343.875	-1856.76	1634.23	240.503	-1849.67	1630.14	375.632	-1701.93	1620.83	240.02	-1680.25	1617.34	284.661	-1645.77	1476.69	279.095	-1544.87	1251.65	299.114	-1782.27	1375.9	298.605	-1807.55	1190.75	229.747	-1544.05	1327.62	478.164	-1635.37	1418.55	519.076	-1541.21	1252.89	526.765	-1476.79	1151.44	561.487	-1442.63	983.44	534.608	-1434.25	880.642	574.013	-1372.44	903.445	589.671	-1368.02	798.46
796	0	344.93	-1872.18	1634.33	241.572	-1864.78	1630.48	377.105	-1717.43	1621.21	241.533	-1695.32	1618.05	285.905	-1660.54	1477.38	280.471	-1559.93	1252.27	300.002	-1797.01	1376.41	299.606	-1822.36	1191.29	231.19	-1558.58	1328.32	479.647	-1650.69	1418.81	521.002	-1558.63	1251.24	528.463	-1495.04	1149.23	562.425	-1462.8	980.851	534.746	-1454.8	878.106	575.345	-1393.53	900.223	589.443	-1389.58	794.777
797	0	345.822	-1887.48	1634.7	242.477	-1879.79	1631.1	378.36	-1732.77	1621.95	242.826	-1710.27	1619.14	286.977	-1675.08	1478.39	281.789	-1574.77	1253.21	300.726	-1811.52	1377.26	300.496	-1836.93	1192.17	232.539	-1572.9	1329.31	480.988	-1665.84	1419.49	522.912	-1576.13	1249.86	530.236	-1513.54	1147.19	563.367	-1483.78	978.346	534.829	-1476.46	875.657	576.728	-1415.75	896.878	589.237	-1412.71	790.969
798	0	346.537	-1902.61	1635.35	243.208	-1894.68	1631.99	379.378	-1747.93	1623.06	243.88	-1725.1	1620.6	287.873	-1689.41	1479.71	283.042	-1589.38	1254.47	301.282	-1825.8	1378.46	301.263	-1851.26	1193.4	233.791	-1586.99	1330.59	482.177	-1680.82	1420.6	524.782	-1593.7	1248.8	532.064	-1532.26	1145.36	564.297	-1505.54	975.985	534.857	-1499.2	873.364	578.117	-1439.05	893.479	589.065	-1437.39	787.14
799	0	347.067	-1917.55	1636.28	243.754	-1909.42	1633.16	380.144	-1762.9	1624.55	244.681	-1739.79	1622.42	288.592	-1703.49	1481.34	284.227	-1603.78	1256.04	301.67	-1839.85	1380	301.901	-1865.35	1194.96	234.946	-1600.86	1332.15	483.207	-1695.6	1422.13	526.589	-1611.3	1248.08	533.928	-1551.19	1143.78	565.198	-1528.02	973.826	534.827	-1522.98	871.299	579.469	-1463.37	890.101	588.931	-1463.55	783.406
800	0	347.406	-1932.3	1637.51	244.111	-1924	1634.59	380.652	-1777.65	1626.4	245.222	-1754.32	1624.59	289.139	-1717.35	1483.26	285.34	-1617.94	1257.9	301.894	-1853.67	1381.88	302.405	-1879.2	1196.86	236.003	-1614.51	1333.96	484.078	-1710.2	1424.09	528.314	-1628.92	1247.71	535.814	-1570.3	1142.47	566.054	-1551.19	971.925	534.734	-1547.74	869.534	580.738	-1488.66	886.823	588.837	-1491.14	779.883
801	0	347.554	-1946.85	1639.01	244.277	-1938.42	1636.26	380.903	-1792.18	1628.61	245.503	-1768.69	1627.08	289.521	-1730.98	1485.45	286.382	-1631.9	1260.02	301.961	-1867.28	1384.07	302.774	-1892.85	1199.08	236.967	-1627.96	1336.02	484.793	-1724.62	1426.44	529.943	-1646.54	1247.7	537.706	-1589.58	1141.47	566.848	-1574.99	970.335	534.573	-1573.45	868.137	581.885	-1514.85	883.722	588.775	-1520.07	776.691
802	0	347.512	-1961.19	1640.78	244.253	-1952.66	1638.17	380.902	-1806.49	1631.15	245.529	-1782.89	1629.86	289.75	-1744.4	1487.88	287.354	-1645.64	1262.37	301.884	-1880.68	1386.55	303.013	-1906.3	1201.59	237.842	-1641.23	1338.28	485.357	-1738.87	1429.16	531.467	-1664.15	1248.06	539.594	-1609.01	1140.77	567.567	-1599.36	969.099	534.337	-1600.02	867.175	582.873	-1541.88	880.872	588.729	-1550.26	773.941
803	0	347.289	-1975.31	1642.79	244.046	-1966.73	1640.27	380.662	-1820.58	1634	245.313	-1796.92	1632.9	289.84	-1757.62	1490.52	288.257	-1659.19	1264.93	301.677	-1893.9	1389.3	303.13	-1919.58	1204.39	238.631	-1654.33	1340.72	485.782	-1752.96	1432.21	532.882	-1681.74	1248.76	541.47	-1628.58	1140.4	568.198	-1624.25	968.257	534.018	-1627.39	866.704	583.673	-1569.67	878.342	588.676	-1581.58	771.735
804	0	346.893	-1989.24	1645.03	243.667	-1980.63	1642.55	380.203	-1834.46	1637.12	244.874	-1810.78	1636.15	289.81	-1770.66	1493.34	289.094	-1672.56	1267.66	301.355	-1906.95	1392.27	303.136	-1932.72	1207.41	239.342	-1667.29	1343.31	486.081	-1766.9	1435.54	534.189	-1699.31	1249.8	543.328	-1648.29	1140.34	568.731	-1649.61	967.836	533.607	-1655.47	866.774	584.262	-1598.17	876.194	588.585	-1613.94	770.161
805	0	346.34	-2002.97	1647.44	243.129	-1994.35	1644.96	379.549	-1848.13	1640.46	244.233	-1824.49	1639.56	289.676	-1783.54	1496.3	289.87	-1685.77	1270.51	300.936	-1919.88	1395.43	303.046	-1945.74	1210.63	239.979	-1680.12	1346.02	486.267	-1780.73	1439.11	535.393	-1716.86	1251.14	545.165	-1668.11	1140.58	569.159	-1675.39	967.856	533.096	-1684.19	867.423	584.627	-1627.29	874.481	588.421	-1647.21	769.292
806	0	345.646	-2016.51	1650	242.448	-2007.91	1647.46	378.726	-1861.62	1643.97	243.419	-1838.03	1643.07	289.458	-1796.3	1499.34	290.588	-1698.85	1273.44	300.439	-1932.69	1398.71	302.876	-1958.67	1213.99	240.548	-1692.85	1348.79	486.356	-1794.45	1442.85	536.503	-1734.39	1252.73	546.98	-1688.04	1141.09	569.477	-1701.51	968.327	532.478	-1713.46	868.678	584.76	-1656.98	873.244	588.143	-1681.26	769.18
807	0	344.833	-2029.89	1652.66	241.646	-2021.32	1650.01	377.766	-1874.94	1647.59	242.461	-1851.44	1646.63	289.175	-1808.95	1502.42	291.25	-1711.8	1276.41	299.883	-1945.41	1402.07	302.645	-1971.53	1217.43	241.053	-1705.51	1351.6	486.362	-1808.09	1446.69	537.532	-1751.91	1254.54	548.773	-1708.06	1141.85	569.68	-1727.94	969.25	531.744	-1743.17	870.552	584.661	-1687.17	872.514	587.71	-1715.97	769.86
808	0	343.922	-2043.12	1655.37	240.742	-2034.58	1652.56	376.7	-1888.12	1651.27	241.391	-1864.7	1650.17	288.842	-1821.52	1505.49	291.861	-1724.65	1279.37	299.286	-1958.08	1405.43	302.368	-1984.34	1220.89	241.5	-1718.12	1354.4	486.301	-1821.66	1450.57	538.491	-1769.41	1256.5	550.544	-1728.17	1142.8	569.769	-1754.61	970.618	530.888	-1773.26	873.05	584.335	-1717.8	872.311	587.079	-1751.22	771.35
809	0	342.935	-2056.23	1658.07	239.76	-2047.71	1655.06	375.562	-1901.17	1654.92	240.243	-1877.85	1653.63	288.479	-1834.04	1508.5	292.421	-1737.42	1282.27	298.663	-1970.71	1408.76	302.063	-1997.12	1224.31	241.891	-1730.68	1357.14	486.186	-1835.19	1454.41	539.393	-1786.91	1258.57	552.296	-1748.34	1143.91	569.743	-1781.48	972.416	529.903	-1803.61	876.165	583.791	-1748.81	872.647	586.211	-1786.89	773.65
810	0	341.896	-2069.22	1660.73	238.724	-2060.72	1657.48	374.381	-1914.12	1658.5	239.048	-1890.88	1656.95	288.098	-1846.53	1511.4	292.932	-1750.14	1285.07	298.029	-1983.32	1411.97	301.743	-2009.87	1227.61	242.23	-1743.23	1359.79	486.028	-1848.68	1458.15	540.251	-1804.4	1260.67	554.028	-1768.56	1145.12	569.605	-1808.49	974.624	528.781	-1834.16	879.879	583.041	-1780.13	873.524	585.07	-1822.87	776.749
811	0	340.828	-2082.13	1663.28	237.655	-2073.64	1659.77	373.189	-1926.98	1661.92	237.838	-1903.83	1660.08	287.713	-1859.01	1514.15	293.396	-1762.8	1287.71	297.397	-1995.94	1415.02	301.421	-2022.61	1230.76	242.521	-1755.78	1362.31	485.839	-1862.15	1461.72	541.075	-1821.87	1262.76	555.742	-1788.82	1146.39	569.355	-1835.6	977.219	527.518	-1864.81	884.17	582.098	-1811.7	874.938	583.627	-1859.05	780.625
812	0	339.751	-2094.96	1665.69	236.574	-2086.46	1661.89	372.011	-1939.79	1665.15	236.64	-1916.69	1662.96	287.336	-1871.51	1516.69	293.812	-1775.44	1290.17	296.777	-2008.57	1417.85	301.105	-2035.36	1233.67	242.766	-1768.34	1364.66	485.628	-1875.62	1465.07	541.874	-1839.33	1264.77	557.438	-1809.09	1147.67	568.998	-1862.76	980.174	526.106	-1895.49	889.01	580.976	-1843.49	876.881	581.858	-1895.34	785.252
813	0	338.684	-2107.74	1667.91	235.501	-2099.22	1663.81	370.873	-1952.55	1668.11	235.48	-1929.49	1665.55	286.974	-1884.03	1519	294.18	-1788.05	1292.41	296.177	-2021.23	1420.42	300.802	-2048.11	1236.32	242.968	-1780.92	1366.8	485.4	-1889.08	1468.13	542.655	-1856.77	1266.66	559.116	-1829.36	1148.91	568.536	-1889.94	983.463	524.541	-1926.12	894.369	579.686	-1875.42	879.341	579.747	-1931.65	790.598
814	0	337.644	-2120.49	1669.9	234.452	-2111.92	1665.49	369.793	-1965.29	1670.76	234.381	-1942.24	1667.82	286.636	-1896.6	1521.04	294.501	-1800.66	1294.4	295.603	-2033.94	1422.68	300.518	-2060.87	1238.64	243.128	-1793.54	1368.72	485.162	-1902.55	1470.86	543.42	-1874.19	1268.37	560.775	-1849.61	1150.06	567.972	-1917.1	987.062	522.818	-1956.66	900.216	578.24	-1907.46	882.305	577.285	-1967.91	796.634
815	0	336.645	-2133.22	1671.64	233.442	-2124.57	1666.92	368.789	-1978.03	1673.07	233.361	-1954.95	1669.73	286.326	-1909.22	1522.79	294.774	-1813.27	1296.11	295.059	-2046.7	1424.6	300.256	-2073.65	1240.61	243.247	-1806.19	1370.38	484.917	-1916.04	1473.23	544.172	-1891.58	1269.87	562.414	-1869.83	1151.1	567.307	-1944.22	990.947	520.933	-1987.03	906.522	576.647	-1939.56	885.758	574.469	-2004.04	803.329
816	0	335.697	-2145.94	1673.09	232.482	-2137.19	1668.08	367.874	-1990.76	1674.99	232.433	-1967.64	1671.25	286.049	-1921.9	1524.22	294.999	-1825.89	1297.52	294.548	-2059.51	1426.16	300.016	-2086.43	1242.2	243.327	-1818.89	1371.77	484.668	-1929.54	1475.2	544.912	-1908.94	1271.12	564.031	-1890.02	1151.99	566.544	-1971.27	995.1	518.884	-2017.21	913.262	574.913	-1971.68	889.687	571.298	-2039.99	810.658
817	0	334.809	-2158.65	1674.24	231.579	-2149.78	1668.94	367.056	-2003.52	1676.51	231.611	-1980.3	1672.38	285.806	-1934.64	1525.31	295.175	-1838.52	1298.61	294.072	-2072.38	1427.33	299.799	-2099.24	1243.38	243.369	-1831.63	1372.87	484.417	-1943.06	1476.75	545.639	-1926.26	1272.1	565.625	-1910.16	1152.7	565.684	-1998.23	999.503	516.667	-2047.15	920.413	573.044	-2003.8	894.081	567.775	-2075.72	818.6
818	0	333.987	-2171.37	1675.08	230.741	-2162.34	1669.51	366.342	-2016.29	1677.61	230.901	-1992.94	1673.1	285.599	-1947.46	1526.06	295.301	-1851.17	1299.38	293.631	-2085.31	1428.11	299.606	-2112.06	1244.14	243.373	-1844.42	1373.68	484.164	-1956.6	1477.86	546.352	-1943.54	1272.78	567.194	-1930.26	1153.23	564.728	-2025.1	1004.15	514.282	-2076.84	927.959	571.041	-2035.89	898.929	563.905	-2111.2	827.137
819	0	333.234	-2184.11	1675.6	229.97	-2174.89	1669.78	365.738	-2029.1	1678.27	230.308	-2005.58	1673.4	285.429	-1960.35	1526.46	295.378	-1863.83	1299.83	293.225	-2098.31	1428.48	299.434	-2124.89	1244.47	243.339	-1857.27	1374.18	483.909	-1970.17	1478.53	547.051	-1960.77	1273.17	568.737	-1950.3	1153.55	563.676	-2051.86	1009.02	511.727	-2106.25	935.889	568.907	-2067.94	904.224	559.692	-2146.4	836.258
820	0	332.553	-2196.85	1675.78	229.269	-2187.43	1669.73	365.244	-2041.93	1678.49	229.836	-2018.21	1673.28	285.297	-1973.32	1526.51	295.405	-1876.52	1299.93	292.854	-2111.37	1428.43	299.285	-2137.74	1244.37	243.266	-1870.17	1374.38	483.653	-1983.76	1478.74	547.734	-1977.96	1273.24	570.254	-1970.3	1153.67	562.529	-2078.52	1014.12	509.003	-2135.39	944.196	566.643	-2099.93	909.962	555.139	-2181.31	845.956
821	0	331.944	-2209.61	1675.64	228.638	-2199.95	1669.38	364.862	-2054.79	1678.27	229.486	-2030.83	1672.73	285.201	-1986.37	1526.2	295.382	-1889.22	1299.7	292.519	-2124.49	1427.97	299.158	-2150.61	1243.83	243.156	-1883.12	1374.27	483.396	-1997.37	1478.5	548.4	-1995.11	1273	571.745	-1990.23	1153.57	561.287	-2105.06	1019.45	506.107	-2164.24	952.876	564.248	-2131.87	916.141	550.247	-2215.93	856.229
822	0	331.407	-2222.39	1675.17	228.079	-2212.45	1668.71	364.592	-2067.69	1677.6	229.258	-2043.45	1671.77	285.143	-1999.49	1525.53	295.309	-1901.95	1299.13	292.22	-2137.68	1427.09	299.052	-2163.49	1242.85	243.008	-1896.12	1373.84	483.136	-2011.01	1477.81	549.051	-2012.21	1272.45	573.208	-2010.12	1153.27	559.951	-2131.49	1025	503.042	-2192.8	961.927	561.723	-2163.75	922.759	545.019	-2250.24	867.074
[truncated: 69 more columns]

## Sheet: Sheet2
Devices
		025370 - Force			025370 - Moment			025370 - CoP			027571 - Force			027571 - Moment			027571 - CoP			037720 - Force			037720 - Moment			037720 - CoP
Frame	Sub Frame	Fx	Fy	Fz	Mx	My	Mz	Cx	Cy	Cz	Fx	Fy	Fz	Mx	My	Mz	Cx	Cy	Cz	Fx	Fy	Fz	Mx	My	Mz	Cx	Cy	Cz
		N	N	N	N.mm	N.mm	N.mm	mm	mm	mm	N	N	N	N.mm	N.mm	N.mm	mm	mm	mm	N	N	N	N.mm	N.mm	N.mm	mm	mm	mm
442	0	0	0	0	0	0	0	200	300	0	0	0	0	0	0	0	200	903	0	0	0	0	0	0	0	603	903	0
442	1	0	0	0	0	0	0	200	300	0	0	0	0	0	0	0	200	903	0	0	0	0	0	0	0	603	903	0
442	2	0	0	0	0	0	0	200	300	0	0	0	0	0	0	0	200	903	0	0	0	0	0	0	0	603	903	0
442	3	0	0	0	0	0	0	200	300	0	0	0	0	0	0	0	200	903	0	0	0	0	0	0	0	603	903	0
442	4	0	0	0	0	0	0	200	300	0	0	0	0	0	0	0	200	903	0	0	0	0	0	0	0	603	903	0
442	5	0	0	0	0	0	0	200	300	0	0	0	0	0	0	0	200	903	0	0	0	0	0	0	0	603	903	0
442	6	0	0	0	0	0	0	200	300	0	0	0	0	0	0	0	200	903	0	0	0	0	0	0	0	603	903	0
442	7	0	0	0	0	0	0	200	300	0	0	0	0	0	0	0	200	903	0	0	0	0	0	0	0	603	903	0
442	8	0	0	0	0	0	0	200	300	0	0	0	0	0	0	0	200	903	0	0	0	0	0	0	0	603	903	0
442	9	0	0	0	0	0	0	200	300	0	0	0	0	0	0	0	200	903	0	0	0	0	0	0	0	603	903	0
443	0	0	0	0	0	0	0	200	300	0	0	0	0	0	0	0	200	903	0	0	0	0	0	0	0	603	903	0
443	1	0	0	0	0	0	0	200	300	0	0	0	0	0	0	0	200	903	0	0	0	0	0	0	0	603	903	0
443	2	0	0	0	0	0	0	200	300	0	0	0	0	0	0	0	200	903	0	0	0	0	0	0	0	603	903	0
443	3	0	0	0	0	0	0	200	300	0	0	0	0	0	0	0	200	903	0	0	0	0	0	0	0	603	903	0
443	4	0	0	0	0	0	0	200	300	0	0	0	0	0	0	0	200	903	0	0	0	0	0	0	0	603	903	0
443	5	0	0	0	0	0	0	200	300	0	0	0	0	0	0	0	200	903	0	0	0	0	0	0	0	603	903	0
443	6	0	0	0	0	0	0	200	300	0	0	0	0	0	0	0	200	903	0	0	0	0	0	0	0	603	903	0
443	7	0	0	0	0	0	0	200	300	0	0	0	0	0	0	0	200	903	0	0	0	0	0	0	0	603	903	0
443	8	0	0	0	0	0	0	200	300	0	0	0	0	0	0	0	200	903	0	0	0	0	0	0	0	603	903	0
443	9	0	0	0	0	0	0	200	300	0	0	0	0	0	0	0	200	903	0	0	0	0	0	0	0	603	903	0
444	0	0	0	0	0	0	0	200	300	0	0	0	0	0	0	0	200	903	0	0	0	0	0	0	0	603	903	0
444	1	0	0	0	0	0	0	200	300	0	0	0	0	0	0	0	200	903	0	0	0	0	0	0	0	603	903	0
444	2	0	0	0	0	0	0	200	300	0	0	0	0	0	0	0	200	903	0	0	0	0	0	0	0	603	903	0
444	3	0	0	0	0	0	0	200	300	0	0	0	0	0	0	0	200	903	0	0	0	0	0	0	0	603	903	0
444	4	0	0	0	0	0	0	200	300	0	0	0	0	0	0	0	200	903	0	0	0	0	0	0	0	603	903	0
444	5	0	0	0	0	0	0	200	300	0	0	0	0	0	0	0	200	903	0	0	0	0	0	0	0	603	903	0
444	6	0	0	0	0	0	0	200	300	0	0	0	0	0	0	0	200	903	0	0	0	0	0	0	0	603	903	0
444	7	0	0	0	0	0	0	200	300	0	0	0	0	0	0	0	200	903	0	0	0	0	0	0	0	603	903	0
444	8	0	0	0	0	0	0	200	300	0	0	0	0	0	0	0	200	903	0	0	0	0	0	0	0	603	903	0
444	9	0	0	0	0	0	0	200	300	0	0	0	0	0	0	0	200	903	0	0	0	0	0	0	0	603	903	0
445	0	0	0	0	0	0	0	200	300	0	0	0	0	0	0	0	200	903	0	0	0	0	0	0	0	603	903	0
445	1	0	0	0	0	0	0	200	300	0	0	0	0	0	0	0	200	903	0	0	0	0	0	0	0	603	903	0
445	2	0	0	0	0	0	0	200	300	0	0	0	0	0	0	0	200	903	0	0	0	0	0	0	0	603	903	0
445	3	0	0	0	0	0	0	200	300	0	0	0	0	0	0	0	200	903	0	0	0	0	0	0	0	603	903	0
445	4	0	0	0	0	0	0	200	300	0	0	0	0	0	0	0	200	903	0	0	0	0	0	0	0	603	903	0
445	5	0	0	0	0	0	0	200	300	0	0	0	0	0	0	0	200	903	0	0	0	0	0	0	0	603	903	0
445	6	0	0	0	0	0	0	200	300	0	0	0	0	0	0	0	200	903	0	0	0	0	0	0	0	603	903	0
445	7	0	0	0	0	0	0	200	300	0	0	0	0	0	0	0	200	903	0	0	0	0	0	0	0	603	903	0
445	8	0	0	0	0	0	0	200	300	0	0	0	0	0	0	0	200	903	0	0	0	0	0	0	0	603	903	0
445	9	0	0	0	0	0	0	200	300	0	0	0	0	0	0	0	200	903	0	0	0	0	0	0	0	603	903	0
446	0	0	0	0	0	0	0	200	300	0	0	0	0	0	0	0	200	903	0	0	0	0	0	0	0	603	903	0
446	1	0	0	0	0	0	0	200	300	0	0	0	0	0	0	0	200	903	0	0	0	0	0	0	0	603	903	0
446	2	0	0	0	0	0	0	200	300	0	0	0	0	0	0	0	200	903	0	0	0	0	0	0	0	603	903	0
446	3	0	0	0	0	0	0	200	300	0	0	0	0	0	0	0	200	903	0	0	0	0	0	0	0	603	903	0
446	4	0	0	0	0	0	0	200	300	0	0	0	0	0	0	0	200	903	0	0	0	0	0	0	0	603	903	0
446	5	0	0	0	0	0	0	200	300	0	0	0	0	0	0	0	200	903	0	0	0	0	0	0	0	603	903	0
446	6	0	0	0	0	0	0	200	300	0	0	0	0	0	0	0	200	903	0	0	0	0	0	0	0	603	903	0
446	7	0	0	0	0	0	0	200	300	0	0	0	0	0	0	0	200	903	0	0	0	0	0	0	0	603	903	0
446	8	0	0	0	0	0	0	200	300	0	0	0	0	0	0	0	200	903	0	0	0	0	0	0	0	603	903	0
446	9	0	0	0	0	0	0	200	300	0	0	0	0	0	0	0	200	903	0	0	0	0	0	0	0	603	903	0
447	0	0	0	0	0	0	0	200	300	0	0	0	0	0	0	0	200	903	0	0	0	0	0	0	0	603	903	0
447	1	0	0	0	0	0	0	200	300	0	0	0	0	0	0	0	200	903	0	0	0	0	0	0	0	603	903	0
447	2	0	0	0	0	0	0	200	300	0	0	0	0	0	0	0	200	903	0	0	0	0	0	0	0	603	903	0
447	3	0	0	0	0	0	0	200	300	0	0	0	0	0	0	0	200	903	0	0	0	0	0	0	0	603	903	0
447	4	0	0	0	0	0	0	200	300	0	0	0	0	0	0	0	200	903	0	0	0	0	0	0	0	603	903	0
447	5	0	0	0	0	0	0	200	300	0	0	0	0	0	0	0	200	903	0	0	0	0	0	0	0	603	903	0
447	6	0	0	0	0	0	0	200	300	0	0	0	0	0	0	0	200	903	0	0	0	0	0	0	0	603	903	0
447	7	0	0	0	0	0	0	200	300	0	0	0	0	0	0	0	200	903	0	0	0	0	0	0	0	603	903	0
447	8	0	0	0	0	0	0	200	300	0	0	0	0	0	0	0	200	903	0	0	0	0	0	0	0	603	903	0
447	9	0	0	0	0	0	0	200	300	0	0	0	0	0	0	0	200	903	0	0	0	0	0	0	0	603	903	0
448	0	0	0	0	0	0	0	200	300	0	0	0	0	0	0	0	200	903	0	0	0	0	0	0	0	603	903	0
448	1	0	0	0	0	0	0	200	300	0	0	0	0	0	0	0	200	903	0	0	0	0	0	0	0	603	903	0
448	2	0	0	0	0	0	0	200	300	0	0	0	0	0	0	0	200	903	0	0	0	0	0	0	0	603	903	0
448	3	0	0	0	0	0	0	200	300	0	0	0	0	0	0	0	200	903	0	0	0	0	0	0	0	603	903	0
448	4	0	0	0	0	0	0	200	300	0	0	0	0	0	0	0	200	903	0	0	0	0	0	0	0	603	903	0
448	5	0	0	0	0	0	0	200	300	0	0	0	0	0	0	0	200	903	0	0	0	0	0	0	0	603	903	0
448	6	0	0	0	0	0	0	200	300	0	0	0	0	0	0	0	200	903	0	0	0	0	0	0	0	603	903	0
448	7	0	0	0	0	0	0	200	300	0	0	0	0	0	0	0	200	903	0	0	0	0	0	0	0	603	903	0
448	8	0	0	0	0	0	0	200	300	0	0	0	0	0	0	0	200	903	0	0	0	0	0	0	0	603	903	0
448	9	0	0	0	0	0	0	200	300	0	0	0	0	0	0	0	200	903	0	0	0	0	0	0	0	603	903	0
449	0	0	0	0	0	0	0	200	300	0	0	0	0	0	0	0	200	903	0	0	0	0	0	0	0	603	903	0
449	1	0	0	0	0	0	0	200	300	0	0	0	0	0	0	0	200	903	0	0	0	0	0	0	0	603	903	0
449	2	0	0	0	0	0	0	200	300	0	0	0	0	0	0	0	200	903	0	0	0	0	0	0	0	603	903	0
449	3	0	0	0	0	0	0	200	300	0	0	0	0	0	0	0	200	903	0	0	0	0	0	0	0	603	903	0
449	4	0	0	0	0	0	0	200	300	0	0	0	0	0	0	0	200	903	0	0	0	0	0	0	0	603	903	0
449	5	0	0	0	0	0	0	200	300	0	0	0	0	0	0	0	200	903	0	0	0	0	0	0	0	603	903	0
449	6	0	0	0	0	0	0	200	300	0	0	0	0	0	0	0	200	903	0	0	0	0	0	0	0	603	903	0
449	7	0	0	0	0	0	0	200	300	0	0	0	0	0	0	0	200	903	0	0	0	0	0	0	0	603	903	0
449	8	0	0	0	0	0	0	200	300	0	0	0	0	0	0	0	200	903	0	0	0	0	0	0	0	603	903	0
449	9	0	0	0	0	0	0	200	300	0	0	0	0	0	0	0	200	903	0	0	0	0	0	0	0	603	903	0
450	0	0	0	0	0	0	0	200	300	0	0	0	0	0	0	0	200	903	0	0	0	0	0	0	0	603	903	0
450	1	0	0	0	0	0	0	200	300	0	0	0	0	0	0	0	200	903	0	0	0	0	0	0	0	603	903	0
450	2	0	0	0	0	0	0	200	300	0	0	0	0	0	0	0	200	903	0	0	0	0	0	0	0	603	903	0
450	3	0	0	0	0	0	0	200	300	0	0	0	0	0	0	0	200	903	0	0	0	0	0	0	0	603	903	0
450	4	0	0	0	0	0	0	200	300	0	0	0	0	0	0	0	200	903	0	0	0	0	0	0	0	603	903	0
450	5	0	0	0	0	0	0	200	300	0	0	0	0	0	0	0	200	903	0	0	0	0	0	0	0	603	903	0
450	6	0	0	0	0	0	0	200	300	0	0	0	0	0	0	0	200	903	0	0	0	0	0	0	0	603	903	0
450	7	0	0	0	0	0	0	200	300	0	0	0	0	0	0	0	200	903	0	0	0	0	0	0	0	603	903	0
450	8	0	0	0	0	0	0	200	300	0	0	0	0	0	0	0	200	903	0	0	0	0	0	0	0	603	903	0
450	9	0	0	0	0	0	0	200	300	0	0	0	0	0	0	0	200	903	0	0	0	0	0	0	0	603	903	0
451	0	0	0	0	0	0	0	200	300	0	0	0	0	0	0	0	200	903	0	0	0	0	0	0	0	603	903	0
451	1	0	0	0	0	0	0	200	300	0	0	0	0	0	0	0	200	903	0	0	0	0	0	0	0	603	903	0
451	2	0	0	0	0	0	0	200	300	0	0	0	0	0	0	0	200	903	0	0	0	0	0	0	0	603	903	0
451	3	0	0	0	0	0	0	200	300	0	0	0	0	0	0	0	200	903	0	0	0	0	0	0	0	603	903	0
451	4	0	0	0	0	0	0	200	300	0	0	0	0	0	0	0	200	903	0	0	0	0	0	0	0	603	903	0
451	5	0	0	0	0	0	0	200	300	0	0	0	0	0	0	0	200	903	0	0	0	0	0	0	0	603	903	0
451	6	0	0	0	0	0	0	200	300	0	0	0	0	0	0	0	200	903	0	0	0	0	0	0	0	603	903	0
451	7	0	0	0	0	0	0	200	300	0	0	0	0	0	0	0	200	903	0	0	0	0	0	0	0	603	903	0
451	8	0	0	0	0	0	0	200	300	0	0	0	0	0	0	0	200	903	0	0	0	0	0	0	0	603	903	0
451	9	0	0	0	0	0	0	200	300	0	0	0	0	0	0	0	200	903	0	0	0	0	0	0	0	603	903	0
452	0	0	0	0	0	0	0	200	300	0	0	0	0	0	0	0	200	903	0	0	0	0	0	0	0	603	903	0
452	1	0	0	0	0	0	0	200	300	0	0	0	0	0	0	0	200	903	0	0	0	0	0	0	0	603	903	0
452	2	0	0	0	0	0	0	200	300	0	0	0	0	0	0	0	200	903	0	0	0	0	0	0	0	603	903	0
452	3	0	0	0	0	0	0	200	300	0	0	0	0	0	0	0	200	903	0	0	0	0	0	0	0	603	903	0
452	4	0	0	0	0	0	0	200	300	0	0	0	0	0	0	0	200	903	0	0	0	0	0	0	0	603	903	0
452	5	0	0	0	0	0	0	200	300	0	0	0	0	0	0	0	200	903	0	0	0	0	0	0	0	603	903	0
452	6	0	0	0	0	0	0	200	300	0	0	0	0	0	0	0	200	903	0	0	0	0	0	0	0	603	903	0
452	7	0	0	0	0	0	0	200	300	0	0	0	0	0	0	0	200	903	0	0	0	0	0	0	0	603	903	0
452	8	0	0	0	0	0	0	200	300	0	0	0	0	0	0	0	200	903	0	0	0	0	0	0	0	603	903	0
452	9	0	0	0	0	0	0	200	300	0	0	0	0	0	0	0	200	903	0	0	0	0	0	0	0	603	903	0
453	0	0	0	0	0	0	0	200	300	0	0	0	0	0	0	0	200	903	0	0	0	0	0	0	0	603	903	0
453	1	0	0	0	0	0	0	200	300	0	0	0	0	0	0	0	200	903	0	0	0	0	0	0	0	603	903	0
453	2	0	0	0	0	0	0	200	300	0	0	0	0	0	0	0	200	903	0	0	0	0	0	0	0	603	903	0
453	3	0	0	0	0	0	0	200	300	0	0	0	0	0	0	0	200	903	0	0	0	0	0	0	0	603	903	0
453	4	0	0	0	0	0	0	200	300	0	0	0	0	0	0	0	200	903	0	0	0	0	0	0	0	603	903	0
453	5	0	0	0	0	0	0	200	300	0	0	0	0	0	0	0	200	903	0	0	0	0	0	0	0	603	903	0
453	6	0	0	0	0	0	0	200	300	0	0	0	0	0	0	0	200	903	0	0	0	0	0	0	0	603	903	0
453	7	0	0	0	0	0	0	200	300	0	0	0	0	0	0	0	200	903	0	0	0	0	0	0	0	603	903	0
453	8	0	0	0	0	0	0	200	300	0	0	0	0	0	0	0	200	903	0	0	0	0	0	0	0	603	903	0
453	9	0	0	0	0	0	0	200	300	0	0	0	0	0	0	0	200	903	0	0	0	0	0	0	0	603	903	0
454	0	0	0	0	0	0	0	200	300	0	0	0	0	0	0	0	200	903	0	0	0	0	0	0	0	603	903	0
454	1	0	0	0	0	0	0	200	300	0	0	0	0	0	0	0	200	903	0	0	0	0	0	0	0	603	903	0
454	2	0	0	0	0	0	0	200	300	0	0	0	0	0	0	0	200	903	0	0	0	0	0	0	0	603	903	0
454	3	0	0	0	0	0	0	200	300	0	0	0	0	0	0	0	200	903	0	0	0	0	0	0	0	603	903	0
454	4	0	0	0	0	0	0	200	300	0	0	0	0	0	0	0	200	903	0	0	0	0	0	0	0	603	903	0
454	5	0	0	0	0	0	0	200	300	0	0	0	0	0	0	0	200	903	0	0	0	0	0	0	0	603	903	0
454	6	0	0	0	0	0	0	200	300	0	0	0	0	0	0	0	200	903	0	0	0	0	0	0	0	603	903	0
454	7	0	0	0	0	0	0	200	300	0	0	0	0	0	0	0	200	903	0	0	0	0	0	0	0	603	903	0
454	8	0	0	0	0	0	0	200	300	0	0	0	0	0	0	0	200	903	0	0	0	0	0	0	0	603	903	0
454	9	0	0	0	0	0	0	200	300	0	0	0	0	0	0	0	200	903	0	0	0	0	0	0	0	603	903	0
455	0	0	0	0	0	0	0	200	300	0	0	0	0	0	0	0	200	903	0	0	0	0	0	0	0	603	903	0
455	1	0	0	0	0	0	0	200	300	0	0	0	0	0	0	0	200	903	0	0	0	0	0	0	0	603	903	0
455	2	0	0	0	0	0	0	200	300	0	0	0	0	0	0	0	200	903	0	0	0	0	0	0	0	603	903	0
455	3	0	0	0	0	0	0	200	300	0	0	0	0	0	0	0	200	903	0	0	0	0	0	0	0	603	903	0
455	4	0	0	0	0	0	0	200	300	0	0	0	0	0	0	0	200	903	0	0	0	0	0	0	0	603	903	0
455	5	0	0	0	0	0	0	200	300	0	0	0	0	0	0	0	200	903	0	0	0	0	0	0	0	603	903	0
455	6	0	0	0	0	0	0	200	300	0	0	0	0	0	0	0	200	903	0	0	0	0	0	0	0	603	903	0
455	7	0	0	0	0	0	0	200	300	0	0	0	0	0	0	0	200	903	0	0	0	0	0	0	0	603	903	0
455	8	0	0	0	0	0	0	200	300	0	0	0	0	0	0	0	200	903	0	0	0	0	0	0	0	603	903	0
455	9	0	0	0	0	0	0	200	300	0	0	0	0	0	0	0	200	903	0	0	0	0	0	0	0	603	903	0
456	0	0	0	0	0	0	0	200	300	0	0	0	0	0	0	0	200	903	0	0	0	0	0	0	0	603	903	0
456	1	0	0	0	0	0	0	200	300	0	0	0	0	0	0	0	200	903	0	0	0	0	0	0	0	603	903	0
456	2	0	0	0	0	0	0	200	300	0	0	0	0	0	0	0	200	903	0	0	0	0	0	0	0	603	903	0
456	3	0	0	0	0	0	0	200	300	0	0	0	0	0	0	0	200	903	0	0	0	0	0	0	0	603	903	0
456	4	0	0	0	0	0	0	200	300	0	0	0	0	0	0	0	200	903	0	0	0	0	0	0	0	603	903	0
456	5	0	0	0	0	0	0	200	300	0	0	0	0	0	0	0	200	903	0	0	0	0	0	0	0	603	903	0
456	6	0	0	0	0	0	0	200	300	0	0	0	0	0	0	0	200	903	0	0	0	0	0	0	0	603	903	0
456	7	0	0	0	0	0	0	200	300	0	0	0	0	0	0	0	200	903	0	0	0	0	0	0	0	603	903	0
456	8	0	0	0	0	0	0	200	300	0	0	0	0	0	0	0	200	903	0	0	0	0	0	0	0	603	903	0
456	9	0	0	0	0	0	0	200	300	0	0	0	0	0	0	0	200	903	0	0	0	0	0	0	0	603	903	0
457	0	0	0	0	0	0	0	200	300	0	0	0	0	0	0	0	200	903	0	0	0	0	0	0	0	603	903	0
457	1	0	0	0	0	0	0	200	300	0	0	0	0	0	0	0	200	903	0	0	0	0	0	0	0	603	903	0
457	2	0	0	0	0	0	0	200	300	0	0	0	0	0	0	0	200	903	0	0	0	0	0	0	0	603	903	0
457	3	0	0	0	0	0	0	200	300	0	0	0	0	0	0	0	200	903	0	0	0	0	0	0	0	603	903	0
457	4	0	0	0	0	0	0	200	300	0	0	0	0	0	0	0	200	903	0	0	0	0	0	0	0	603	903	0
457	5	0	0	0	0	0	0	200	300	0	0	0	0	0	0	0	200	903	0	0	0	0	0	0	0	603	903	0
457	6	0	0	0	0	0	0	200	300	0	0	0	0	0	0	0	200	903	0	0	0	0	0	0	0	603	903	0
457	7	0	0	0	0	0	0	200	300	0	0	0	0	0	0	0	200	903	0	0	0	0	0	0	0	603	903	0
457	8	0	0	0	0	0	0	200	300	0	0	0	0	0	0	0	200	903	0	0	0	0	0	0	0	603	903	0
457	9	0	0	0	0	0	0	200	300	0	0	0	0	0	0	0	200	903	0	0	0	0	0	0	0	603	903	0
458	0	0	0	0	0	0	0	200	300	0	0	0	0	0	0	0	200	903	0	0	0	0	0	0	0	603	903	0
458	1	0	0	0	0	0	0	200	300	0	0	0	0	0	0	0	200	903	0	0	0	0	0	0	0	603	903	0
458	2	0	0	0	0	0	0	200	300	0	0	0	0	0	0	0	200	903	0	0	0	0	0	0	0	603	903	0
458	3	0	0	0	0	0	0	200	300	0	0	0	0	0	0	0	200	903	0	0	0	0	0	0	0	603	903	0
458	4	0	0	0	0	0	0	200	300	0	0	0	0	0	0	0	200	903	0	0	0	0	0	0	0	603	903	0
458	5	0	0	0	0	0	0	200	300	0	0	0	0	0	0	0	200	903	0	0	0	0	0	0	0	603	903	0
458	6	0	0	0	0	0	0	200	300	0	0	0	0	0	0	0	200	903	0	0	0	0	0	0	0	603	903	0
458	7	0	0	0	0	0	0	200	300	0	0	0	0	0	0	0	200	903	0	0	0	0	0	0	0	603	903	0
458	8	0	0	0	0	0	0	200	300	0	0	0	0	0	0	0	200	903	0	0	0	0	0	0	0	603	903	0
458	9	0	0	0	0	0	0	200	300	0	0	0	0	0	0	0	200	903	0	0	0	0	0	0	0	603	903	0
459	0	0	0	0	0	0	0	200	300	0	0	0	0	0	0	0	200	903	0	0	0	0	0	0	0	603	903	0
459	1	0	0	0	0	0	0	200	300	0	0	0	0	0	0	0	200	903	0	0	0	0	0	0	0	603	903	0
459	2	0	0	0	0	0	0	200	300	0	0	0	0	0	0	0	200	903	0	0	0	0	0	0	0	603	903	0
459	3	0	0	0	0	0	0	200	300	0	0	0	0	0	0	0	200	903	0	0	0	0	0	0	0	603	903	0
459	4	0	0	0	0	0	0	200	300	0	0	0	0	0	0	0	200	903	0	0	0	0	0	0	0	603	903	0
459	5	0	0	0	0	0	0	200	300	0	0	0	0	0	0	0	200	903	0	0	0	0	0	0	0	603	903	0
459	6	0	0	0	0	0	0	200	300	0	0	0	0	0	0	0	200	903	0	0	0	0	0	0	0	603	903	0
459	7	0	0	0	0	0	0	200	300	0	0	0	0	0	0	0	200	903	0	0	0	0	0	0	0	603	903	0
459	8	0	0	0	0	0	0	200	300	0	0	0	0	0	0	0	200	903	0	0	0	0	0	0	0	603	903	0
459	9	0	0	0	0	0	0	200	300	0	0	0	0	0	0	0	200	903	0	0	0	0	0	0	0	603	903	0
460	0	0	0	0	0	0	0	200	300	0	0	0	0	0	0	0	200	903	0	0	0	0	0	0	0	603	903	0
460	1	0	0	0	0	0	0	200	300	0	0	0	0	0	0	0	200	903	0	0	0	0	0	0	0	603	903	0
460	2	0	0	0	0	0	0	200	300	0	0	0	0	0	0	0	200	903	0	0	0	0	0	0	0	603	903	0
460	3	0	0	0	0	0	0	200	300	0	0	0	0	0	0	0	200	903	0	0	0	0	0	0	0	603	903	0
460	4	0	0	0	0	0	0	200	300	0	0	0	0	0	0	0	200	903	0	0	0	0	0	0	0	603	903	0
460	5	0	0	0	0	0	0	200	300	0	0	0	0	0	0	0	200	903	0	0	0	0	0	0	0	603	903	0
460	6	0	0	0	0	0	0	200	300	0	0	0	0	0	0	0	200	903	0	0	0	0	0	0	0	603	903	0
460	7	0	0	0	0	0	0	200	300	0	0	0	0	0	0	0	200	903	0	0	0	0	0	0	0	603	903	0
460	8	0	0	0	0	0	0	200	300	0	0	0	0	0	0	0	200	903	0	0	0	0	0	0	0	603	903	0
460	9	0	0	0	0	0	0	200	300	0	0	0	0	0	0	0	200	903	0	0	0	0	0	0	0	603	903	0
461	0	0	0	0	0	0	0	200	300	0	0	0	0	0	0	0	200	903	0	0	0	0	0	0	0	603	903	0
461	1	0	0	0	0	0	0	200	300	0	0	0	0	0	0	0	200	903	0	0	0	0	0	0	0	603	903	0
461	2	0	0	0	0	0	0	200	300	0	0	0	0	0	0	0	200	903	0	0	0	0	0	0	0	603	903	0
461	3	0	0	0	0	0	0	200	300	0	0	0	0	0	0	0	200	903	0	0	0	0	0	0	0	603	903	0
461	4	0	0	0	0	0	0	200	300	0	0	0	0	0	0	0	200	903	0	0	0	0	0	0	0	603	903	0
461	5	0	0	0	0	0	0	200	300	0	0	0	0	0	0	0	200	903	0	0	0	0	0	0	0	603	903	0
461	6	0	0	0	0	0	0	200	300	0	0	0	0	0	0	0	200	903	0	0	0	0	0	0	0	603	903	0
461	7	0	0	0	0	0	0	200	300	0	0	0	0	0	0	0	200	903	0	0	0	0	0	0	0	603	903	0
461	8	0	0	0	0	0	0	200	300	0	0	0	0	0	0	0	200	903	0	0	0	0	0	0	0	603	903	0
461	9	0	0	0	0	0	0	200	300	0	0	0	0	0	0	0	200	903	0	0	0	0	0	0	0	603	903	0
462	0	0	0	0	0	0	0	200	300	0	0	0	0	0	0	0	200	903	0	0	0	0	0	0	0	603	903	0
462	1	0	0	0	0	0	0	200	300	0	0	0	0	0	0	0	200	903	0	0	0	0	0	0	0	603	903	0
462	2	0	0	0	0	0	0	200	300	0	0	0	0	0	0	0	200	903	0	0	0	0	0	0	0	603	903	0
462	3	0	0	0	0	0	0	200	300	0	0	0	0	0	0	0	200	903	0	0	0	0	0	0	0	603	903	0
462	4	0	0	0	0	0	0	200	300	0	0	0	0	0	0	0	200	903	0	0	0	0	0	0	0	603	903	0
462	5	0	0	0	0	0	0	200	300	0	0	0	0	0	0	0	200	903	0	0	0	0	0	0	0	603	903	0
462	6	0	0	0	0	0	0	200	300	0	0	0	0	0	0	0	200	903	0	0	0	0	0	0	0	603	903	0
462	7	0	0	0	0	0	0	200	300	0	0	0	0	0	0	0	200	903	0	0	0	0	0	0	0	603	903	0
462	8	0	0	0	0	0	0	200	300	0	0	0	0	0	0	0	200	903	0	0	0	0	0	0	0	603	903	0
462	9	0	0	0	0	0	0	200	300	0	0	0	0	0	0	0	200	903	0	0	0	0	0	0	0	603	903	0
463	0	0	0	0	0	0	0	200	300	0	0	0	0	0	0	0	200	903	0	0	0	0	0	0	0	603	903	0
463	1	0	0	0	0	0	0	200	300	0	0	0	0	0	0	0	200	903	0	0	0	0	0	0	0	603	903	0
463	2	0	0	0	0	0	0	200	300	0	0	0	0	0	0	0	200	903	0	0	0	0	0	0	0	603	903	0
463	3	0	0	0	0	0	0	200	300	0	0	0	0	0	0	0	200	903	0	0	0	0	0	0	0	603	903	0
463	4	0	0	0	0	0	0	200	300	0	0	0	0	0	0	0	200	903	0	0	0	0	0	0	0	603	903	0
463	5	0	0	0	0	0	0	200	300	0	0	0	0	0	0	0	200	903	0	0	0	0	0	0	0	603	903	0
463	6	0	0	0	0	0	0	200	300	0	0	0	0	0	0	0	200	903	0	0	0	0	0	0	0	603	903	0
463	7	0	0	0	0	0	0	200	300	0	0	0	0	0	0	0	200	903	0	0	0	0	0	0	0	603	903	0
463	8	0	0	0	0	0	0	200	300	0	0	0	0	0	0	0	200	903	0	0	0	0	0	0	0	603	903	0
463	9	0	0	0	0	0	0	200	300	0	0	0	0	0	0	0	200	903	0	0	0	0	0	0	0	603	903	0
464	0	0	0	0	0	0	0	200	300	0	0	0	0	0	0	0	200	903	0	0	0	0	0	0	0	603	903	0
464	1	0	0	0	0	0	0	200	300	0	0	0	0	0	0	0	200	903	0	0	0	0	0	0	0	603	903	0
464	2	0	0	0	0	0	0	200	300	0	0	0	0	0	0	0	200	903	0	0	0	0	0	0	0	603	903	0
464	3	0	0	0	0	0	0	200	300	0	0	0	0	0	0	0	200	903	0	0	0	0	0	0	0	603	903	0
464	4	0	0	0	0	0	0	200	300	0	0	0	0	0	0	0	200	903	0	0	0	0	0	0	0	603	903	0
464	5	0	0	0	0	0	0	200	300	0	0	0	0	0	0	0	200	903	0	0	0	0	0	0	0	603	903	0
464	6	0	0	0	0	0	0	200	300	0	0	0	0	0	0	0	200	903	0	0	0	0	0	0	0	603	903	0
464	7	0	0	0	0	0	0	200	300	0	0	0	0	0	0	0	200	903	0	0	0	0	0	0	0	603	903	0
464	8	0	0	0	0	0	0	200	300	0	0	0	0	0	0	0	200	903	0	0	0	0	0	0	0	603	903	0
464	9	0	0	0	0	0	0	200	300	0	0	0	0	0	0	0	200	903	0	0	0	0	0	0	0	603	903	0
465	0	0	0	0	0	0	0	200	300	0	0	0	0	0	0	0	200	903	0	0	0	0	0	0	0	603	903	0
465	1	0	0	0	0	0	0	200	300	0	0	0	0	0	0	0	200	903	0	0	0	0	0	0	0	603	903	0
465	2	0	0	0	0	0	0	200	300	0	0	0	0	0	0	0	200	903	0	0	0	0	0	0	0	603	903	0
465	3	0	0	0	0	0	0	200	300	0	0	0	0	0	0	0	200	903	0	0	0	0	0	0	0	603	903	0
465	4	0	0	0	0	0	0	200	300	0	0	0	0	0	0	0	200	903	0	0	0	0	0	0	0	603	903	0
465	5	0	0	0	0	0	0	200	300	0	0	0	0	0	0	0	200	903	0	0	0	0	0	0	0	603	903	0
465	6	0	0	0	0	0	0	200	300	0	0	0	0	0	0	0	200	903	0	0	0	0	0	0	0	603	903	0
465	7	0	0	0	0	0	0	200	300	0	0	0	0	0	0	0	200	903	0	0	0	0	0	0	0	603	903	0
465	8	0	0	0	0	0	0	200	300	0	0	0	0	0	0	0	200	903	0	0	0	0	0	0	0	603	903	0
465	9	0	0	0	0	0	0	200	300	0	0	0	0	0	0	0	200	903	0	0	0	0	0	0	0	603	903	0
466	0	0	0	0	0	0	0	200	300	0	0	0	0	0	0	0	200	903	0	0	0	0	0	0	0	603	903	0
466	1	0	0	0	0	0	0	200	300	0	0	0	0	0	0	0	200	903	0	0	0	0	0	0	0	603	903	0
466	2	0	0	0	0	0	0	200	300	0	0	0	0	0	0	0	200	903	0	0	0	0	0	0	0	603	903	0
466	3	0	0	0	0	0	0	200	300	0	0	0	0	0	0	0	200	903	0	0	0	0	0	0	0	603	903	0
466	4	0	0	0	0	0	0	200	300	0	0	0	0	0	0	0	200	903	0	0	0	0	0	0	0	603	903	0
466	5	0	0	0	0	0	0	200	300	0	0	0	0	0	0	0	200	903	0	0	0	0	0	0	0	603	903	0
466	6	0	0	0	0	0	0	200	300	0	0	0	0	0	0	0	200	903	0	0	0	0	0	0	0	603	903	0
466	7	0	0	0	0	0	0	200	300	0	0	0	0	0	0	0	200	903	0	0	0	0	0	0	0	603	903	0
466	8	0	0	0	0	0	0	200	300	0	0	0	0	0	0	0	200	903	0	0	0	0	0	0	0	603	903	0
466	9	0	0	0	0	0	0	200	300	0	0	0	0	0	0	0	200	903	0	0	0	0	0	0	0	603	903	0
467	0	0	0	0	0	0	0	200	300	0	0	0	0	0	0	0	200	903	0	0	0	0	0	0	0	603	903	0
467	1	0	0	0	0	0	0	200	300	0	0	0	0	0	0	0	200	903	0	0	0	0	0	0	0	603	903	0
467	2	0	0	0	0	0	0	200	300	0	0	0	0	0	0	0	200	903	0	0	0	0	0	0	0	603	903	0
467	3	0	0	0	0	0	0	200	300	0	0	0	0	0	0	0	200	903	0	0	0	0	0	0	0	603	903	0
467	4	0	0	0	0	0	0	200	300	0	0	0	0	0	0	0	200	903	0	0	0	0	0	0	0	603	903	0
467	5	0	0	0	0	0	0	200	300	0	0	0	0	0	0	0	200	903	0	0	0	0	0	0	0	603	903	0
467	6	0	0	0	0	0	0	200	300	0	0	0	0	0	0	0	200	903	0	0	0	0	0	0	0	603	903	0
467	7	0	0	0	0	0	0	200	300	0	0	0	0	0	0	0	200	903	0	0	0	0	0	0	0	603	903	0
467	8	0	0	0	0	0	0	200	300	0	0	0	0	0	0	0	200	903	0	0	0	0	0	0	0	603	903	0
467	9	0	0	0	0	0	0	200	300	0	0	0	0	0	0	0	200	903	0	0	0	0	0	0	0	603	903	0
468	0	0	0	0	0	0	0	200	300	0	0	0	0	0	0	0	200	903	0	0	0	0	0	0	0	603	903	0
468	1	0	0	0	0	0	0	200	300	0	0	0	0	0	0	0	200	903	0	0	0	0	0	0	0	603	903	0
468	2	0	0	0	0	0	0	200	300	0	0	0	0	0	0	0	200	903	0	0	0	0	0	0	0	603	903	0
468	3	0	0	0	0	0	0	200	300	0	0	0	0	0	0	0	200	903	0	0	0	0	0	0	0	603	903	0
468	4	0	0	0	0	0	0	200	300	0	0	0	0	0	0	0	200	903	0	0	0	0	0	0	0	603	903	0
468	5	0	0	0	0	0	0	200	300	0	0	0	0	0	0	0	200	903	0	0	0	0	0	0	0	603	903	0
468	6	0	0	0	0	0	0	200	300	0	0	0	0	0	0	0	200	903	0	0	0	0	0	0	0	603	903	0
468	7	0	0	0	0	0	0	200	300	0	0	0	0	0	0	0	200	903	0	0	0	0	0	0	0	603	903	0
468	8	0	0	0	0	0	0	200	300	0	0	0	0	0	0	0	200	903	0	0	0	0	0	0	0	603	903	0
468	9	0	0	0	0	0	0	200	300	0	0	0	0	0	0	0	200	903	0	0	0	0	0	0	0	603	903	0
469	0	0	0	0	0	0	0	200	300	0	0	0	0	0	0	0	200	903	0	0	0	0	0	0	0	603	903	0
469	1	0	0	0	0	0	0	200	300	0	0	0	0	0	0	0	200	903	0	0	0	0	0	0	0	603	903	0
469	2	0	0	0	0	0	0	200	300	0	0	0	0	0	0	0	200	903	0	0	0	0	0	0	0	603	903	0
469	3	0	0	0	0	0	0	200	300	0	0	0	0	0	0	0	200	903	0	0	0	0	0	0	0	603	903	0
469	4	0	0	0	0	0	0	200	300	0	0	0	0	0	0	0	200	903	0	0	0	0	0	0	0	603	903	0
469	5	0	0	0	0	0	0	200	300	0	0	0	0	0	0	0	200	903	0	0	0	0	0	0	0	603	903	0
469	6	0	0	0	0	0	0	200	300	0	0	0	0	0	0	0	200	903	0	0	0	0	0	0	0	603	903	0
469	7	0	0	0	0	0	0	200	300	0	0	0	0	0	0	0	200	903	0	0	0	0	0	0	0	603	903	0
469	8	0	0	0	0	0	0	200	300	0	0	0	0	0	0	0	200	903	0	0	0	0	0	0	0	603	903	0
469	9	0	0	0	0	0	0	200	300	0	0	0	0	0	0	0	200	903	0	0	0	0	0	0	0	603	903	0
470	0	0	0	0	0	0	0	200	300	0	0	0	0	0	0	0	200	903	0	0	0	0	0	0	0	603	903	0
470	1	0	0	0	0	0	0	200	300	0	0	0	0	0	0	0	200	903	0	0	0	0	0	0	0	603	903	0
470	2	0	0	0	0	0	0	200	300	0	0	0	0	0	0	0	200	903	0	0	0	0	0	0	0	603	903	0
470	3	0	0	0	0	0	0	200	300	0	0	0	0	0	0	0	200	903	0	0	0	0	0	0	0	603	903	0
470	4	0	0	0	0	0	0	200	300	0	0	0	0	0	0	0	200	903	0	0	0	0	0	0	0	603	903	0
470	5	0	0	0	0	0	0	200	300	0	0	0	0	0	0	0	200	903	0	0	0	0	0	0	0	603	903	0
470	6	0	0	0	0	0	0	200	300	0	0	0	0	0	0	0	200	903	0	0	0	0	0	0	0	603	903	0
470	7	0	0	0	0	0	0	200	300	0	0	0	0	0	0	0	200	903	0	0	0	0	0	0	0	603	903	0
470	8	0	0	0	0	0	0	200	300	0	0	0	0	0	0	0	200	903	0	0	0	0	0	0	0	603	903	0
470	9	0	0	0	0	0	0	200	300	0	0	0	0	0	0	0	200	903	0	0	0	0	0	0	0	603	903	0
471	0	0	0	0	0	0	0	200	300	0	0	0	0	0	0	0	200	903	0	0	0	0	0	0	0	603	903	0
471	1	0	0	0	0	0	0	200	300	0	0	0	0	0	0	0	200	903	0	0	0	0	0	0	0	603	903	0
471	2	0	0	0	0	0	0	200	300	0	0	0	0	0	0	0	200	903	0	0	0	0	0	0	0	603	903	0
471	3	0	0	0	0	0	0	200	300	0	0	0	0	0	0	0	200	903	0	0	0	0	0	0	0	603	903	0
471	4	0	0	0	0	0	0	200	300	0	0	0	0	0	0	0	200	903	0	0	0	0	0	0	0	603	903	0
471	5	0	0	0	0	0	0	200	300	0	0	0	0	0	0	0	200	903	0	0	0	0	0	0	0	603	903	0
471	6	0	0	0	0	0	0	200	300	0	0	0	0	0	0	0	200	903	0	0	0	0	0	0	0	603	903	0
471	7	0	0	0	0	0	0	200	300	0	0	0	0	0	0	0	200	903	0	0	0	0	0	0	0	603	903	0
471	8	0	0	0	0	0	0	200	300	0	0	0	0	0	0	0	200	903	0	0	0	0	0	0	0	603	903	0
471	9	0	0	0	0	0	0	200	300	0	0	0	0	0	0	0	200	903	0	0	0	0	0	0	0	603	903	0
472	0	0	0	0	0	0	0	200	300	0	0	0	0	0	0	0	200	903	0	0	0	0	0	0	0	603	903	0
472	1	0	0	0	0	0	0	200	300	0	0	0	0	0	0	0	200	903	0	0	0	0	0	0	0	603	903	0
472	2	0	0	0	0	0	0	200	300	0	0	0	0	0	0	0	200	903	0	0	0	0	0	0	0	603	903	0
472	3	0	0	0	0	0	0	200	300	0	0	0	0	0	0	0	200	903	0	0	0	0	0	0	0	603	903	0
472	4	0	0	0	0	0	0	200	300	0	0	0	0	0	0	0	200	903	0	0	0	0	0	0	0	603	903	0
472	5	0	0	0	0	0	0	200	300	0	0	0	0	0	0	0	200	903	0	0	0	0	0	0	0	603	903	0
472	6	0	0	0	0	0	0	200	300	0	0	0	0	0	0	0	200	903	0	0	0	0	0	0	0	603	903	0
472	7	0	0	0	0	0	0	200	300	0	0	0	0	0	0	0	200	903	0	0	0	0	0	0	0	603	903	0
472	8	0	0	0	0	0	0	200	300	0	0	0	0	0	0	0	200	903	0	0	0	0	0	0	0	603	903	0
472	9	0	0	0	0	0	0	200	300	0	0	0	0	0	0	0	200	903	0	0	0	0	0	0	0	603	903	0
473	0	0	0	0	0	0	0	200	300	0	0	0	0	0	0	0	200	903	0	0	0	0	0	0	0	603	903	0
473	1	0	0	0	0	0	0	200	300	0	0	0	0	0	0	0	200	903	0	0	0	0	0	0	0	603	903	0
473	2	0	0	0	0	0	0	200	300	0	0	0	0	0	0	0	200	903	0	0	0	0	0	0	0	603	903	0
473	3	0	0	0	0	0	0	200	300	0	0	0	0	0	0	0	200	903	0	0	0	0	0	0	0	603	903	0
473	4	0	0	0	0	0	0	200	300	0	0	0	0	0	0	0	200	903	0	0	0	0	0	0	0	603	903	0
473	5	0	0	0	0	0	0	200	300	0	0	0	0	0	0	0	200	903	0	0	0	0	0	0	0	603	903	0
473	6	0	0	0	0	0	0	200	300	0	0	0	0	0	0	0	200	903	0	0	0	0	0	0	0	603	903	0
473	7	0	0	0	0	0	0	200	300	0	0	0	0	0	0	0	200	903	0	0	0	0	0	0	0	603	903	0
473	8	0	0	0	0	0	0	200	300	0	0	0	0	0	0	0	200	903	0	0	0	0	0	0	0	603	903	0
473	9	0	0	0	0	0	0	200	300	0	0	0	0	0	0	0	200	903	0	0	0	0	0	0	0	603	903	0
474	0	0	0	0	0	0	0	200	300	0	0	0	0	0	0	0	200	903	0	0	0	0	0	0	0	603	903	0
474	1	0	0	0	0	0	0	200	300	0	0	0	0	0	0	0	200	903	0	0	0	0	0	0	0	603	903	0
474	2	0	0	0	0	0	0	200	300	0	0	0	0	0	0	0	200	903	0	0	0	0	0	0	0	603	903	0
474	3	0	0	0	0	0	0	200	300	0	0	0	0	0	0	0	200	903	0	0	0	0	0	0	0	603	903	0
474	4	0	0	0	0	0	0	200	300	0	0	0	0	0	0	0	200	903	0	0	0	0	0	0	0	603	903	0
474	5	0	0	0	0	0	0	200	300	0	0	0	0	0	0	0	200	903	0	0	0	0	0	0	0	603	903	0
474	6	0	0	0	0	0	0	200	300	0	0	0	0	0	0	0	200	903	0	0	0	0	0	0	0	603	903	0
474	7	0	0	0	0	0	0	200	300	0	0	0	0	0	0	0	200	903	0	0	0	0	0	0	0	603	903	0
474	8	0	0	0	0	0	0	200	300	0	0	0	0	0	0	0	200	903	0	0	0	0	0	0	0	603	903	0
474	9	0	0	0	0	0	0	200	300	0	0	0	0	0	0	0	200	903	0	0	0	0	0	0	0	603	903	0
475	0	0	0	0	0	0	0	200	300	0	0	0	0	0	0	0	200	903	0	0	0	0	0	0	0	603	903	0
475	1	0	0	0	0	0	0	200	300	0	0	0	0	0	0	0	200	903	0	0	0	0	0	0	0	603	903	0
475	2	0	0	0	0	0	0	200	300	0	0	0	0	0	0	0	200	903	0	0	0	0	0	0	0	603	903	0
475	3	0	0	0	0	0	0	200	300	0	0	0	0	0	0	0	200	903	0	0	0	0	0	0	0	603	903	0
475	4	0	0	0	0	0	0	200	300	0	0	0	0	0	0	0	200	903	0	0	0	0	0	0	0	603	903	0
475	5	0	0	0	0	0	0	200	300	0	0	0	0	0	0	0	200	903	0	0	0	0	0	0	0	603	903	0
475	6	0	0	0	0	0	0	200	300	0	0	0	0	0	0	0	200	903	0	0	0	0	0	0	0	603	903	0
475	7	0	0	0	0	0	0	200	300	0	0	0	0	0	0	0	200	903	0	0	0	0	0	0	0	603	903	0
475	8	0	0	0	0	0	0	200	300	0	0	0	0	0	0	0	200	903	0	0	0	0	0	0	0	603	903	0
475	9	0	0	0	0	0	0	200	300	0	0	0	0	0	0	0	200	903	0	0	0	0	0	0	0	603	903	0
476	0	0	0	0	0	0	0	200	300	0	0	0	0	0	0	0	200	903	0	0	0	0	0	0	0	603	903	0
476	1	0	0	0	0	0	0	200	300	0	0	0	0	0	0	0	200	903	0	0	0	0	0	0	0	603	903	0
476	2	0	0	0	0	0	0	200	300	0	0	0	0	0	0	0	200	903	0	0	0	0	0	0	0	603	903	0
476	3	0	0	0	0	0	0	200	300	0	0	0	0	0	0	0	200	903	0	0	0	0	0	0	0	603	903	0
476	4	0	0	0	0	0	0	200	300	0	0	0	0	0	0	0	200	903	0	0	0	0	0	0	0	603	903	0
476	5	0	0	0	0	0	0	200	300	0	0	0	0	0	0	0	200	903	0	0	0	0	0	0	0	603	903	0
476	6	0	0	0	0	0	0	200	300	0	0	0	0	0	0	0	200	903	0	0	0	0	0	0	0	603	903	0
476	7	0	0	0	0	0	0	200	300	0	0	0	0	0	0	0	200	903	0	0	0	0	0	0	0	603	903	0
476	8	0	0	0	0	0	0	200	300	0	0	0	0	0	0	0	200	903	0	0	0	0	0	0	0	603	903	0
476	9	0	0	0	0	0	0	200	300	0	0	0	0	0	0	0	200	903	0	0	0	0	0	0	0	603	903	0
477	0	0	0	0	0	0	0	200	300	0	0	0	0	0	0	0	200	903	0	0	0	0	0	0	0	603	903	0
477	1	0	0	0	0	0	0	200	300	0	0	0	0	0	0	0	200	903	0	0	0	0	0	0	0	603	903	0
477	2	0	0	0	0	0	0	200	300	0	0	0	0	0	0	0	200	903	0	0	0	0	0	0	0	603	903	0
477	3	0	0	0	0	0	0	200	300	0	0	0	0	0	0	0	200	903	0	0	0	0	0	0	0	603	903	0
477	4	0	0	0	0	0	0	200	300	0	0	0	0	0	0	0	200	903	0	0	0	0	0	0	0	603	903	0
477	5	0	0	0	0	0	0	200	300	0	0	0	0	0	0	0	200	903	0	0	0	0	0	0	0	603	903	0
477	6	0	0	0	0	0	0	200	300	0	0	0	0	0	0	0	200	903	0	0	0	0	0	0	0	603	903	0
477	7	0	0	0	0	0	0	200	300	0	0	0	0	0	0	0	200	903	0	0	0	0	0	0	0	603	903	0
477	8	0	0	0	0	0	0	200	300	0	0	0	0	0	0	0	200	903	0	0	0	0	0	0	0	603	903	0
477	9	0	0	0	0	0	0	200	300	0	0	0	0	0	0	0	200	903	0	0	0	0	0	0	0	603	903	0
478	0	0	0	0	0	0	0	200	300	0	0	0	0	0	0	0	200	903	0	0	0	0	0	0	0	603	903	0
478	1	0	0	0	0	0	0	200	300	0	0	0	0	0	0	0	200	903	0	0	0	0	0	0	0	603	903	0
478	2	0	0	0	0	0	0	200	300	0	0	0	0	0	0	0	200	903	0	0	0	0	0	0	0	603	903	0
478	3	0	0	0	0	0	0	200	300	0	0	0	0	0	0	0	200	903	0	0	0	0	0	0	0	603	903	0
478	4	0	0	0	0	0	0	200	300	0	0	0	0	0	0	0	200	903	0	0	0	0	0	0	0	603	903	0
478	5	0	0	0	0	0	0	200	300	0	0	0	0	0	0	0	200	903	0	0	0	0	0	0	0	603	903	0
478	6	0	0	0	0	0	0	200	300	0	0	0	0	0	0	0	200	903	0	0	0	0	0	0	0	603	903	0
478	7	0	0	0	0	0	0	200	300	0	0	0	0	0	0	0	200	903	0	0	0	0	0	0	0	603	903	0
478	8	0	0	0	0	0	0	200	300	0	0	0	0	0	0	0	200	903	0	0	0	0	0	0	0	603	903	0
478	9	0	0	0	0	0	0	200	300	0	0	0	0	0	0	0	200	903	0	0	0	0	0	0	0	603	903	0
479	0	0	0	0	0	0	0	200	300	0	0	0	0	0	0	0	200	903	0	0	0	0	0	0	0	603	903	0
479	1	0	0	0	0	0	0	200	300	0	0	0	0	0	0	0	200	903	0	0	0	0	0	0	0	603	903	0
479	2	0	0	0	0	0	0	200	300	0	0	0	0	0	0	0	200	903	0	0	0	0	0	0	0	603	903	0
479	3	0	0	0	0	0	0	200	300	0	0	0	0	0	0	0	200	903	0	0	0	0	0	0	0	603	903	0
479	4	0	0	0	0	0	0	200	300	0	0	0	0	0	0	0	200	903	0	0	0	0	0	0	0	603	903	0
479	5	0	0	0	0	0	0	200	300	0	0	0	0	0	0	0	200	903	0	0	0	0	0	0	0	603	903	0
479	6	0	0	0	0	0	0	200	300	0	0	0	0	0	0	0	200	903	0	0	0	0	0	0	0	603	903	0
479	7	0	0	0	0	0	0	200	300	0	0	0	0	0	0	0	200	903	0	0	0	0	0	0	0	603	903	0
479	8	0	0	0	0	0	0	200	300	0	0	0	0	0	0	0	200	903	0	0	0	0	0	0	0	603	903	0
479	9	0	0	0	0	0	0	200	300	0	0	0	0	0	0	0	200	903	0	0	0	0	0	0	0	603	903	0
480	0	0	0	0	0	0	0	200	300	0	0	0	0	0	0	0	200	903	0	0	0	0	0	0	0	603	903	0
480	1	0	0	0	0	0	0	200	300	0	0	0	0	0	0	0	200	903	0	0	0	0	0	0	0	603	903	0
480	2	0	0	0	0	0	0	200	300	0	0	0	0	0	0	0	200	903	0	0	0	0	0	0	0	603	903	0
480	3	0	0	0	0	0	0	200	300	0	0	0	0	0	0	0	200	903	0	0	0	0	0	0	0	603	903	0
480	4	0	0	0	0	0	0	200	300	0	0	0	0	0	0	0	200	903	0	0	0	0	0	0	0	603	903	0
480	5	0	0	0	0	0	0	200	300	0	0	0	0	0	0	0	200	903	0	0	0	0	0	0	0	603	903	0
480	6	0	0	0	0	0	0	200	300	0	0	0	0	0	0	0	200	903	0	0	0	0	0	0	0	603	903	0
480	7	0	0	0	0	0	0	200	300	0	0	0	0	0	0	0	200	903	0	0	0	0	0	0	0	603	903	0
480	8	0	0	0	0	0	0	200	300	0	0	0	0	0	0	0	200	903	0	0	0	0	0	0	0	603	903	0
480	9	0	0	0	0	0	0	200	300	0	0	0	0	0	0	0	200	903	0	0	0	0	0	0	0	603	903	0
481	0	0	0	0	0	0	0	200	300	0	0	0	0	0	0	0	200	903	0	0	0	0	0	0	0	603	903	0
481	1	0	0	0	0	0	0	200	300	0	0	0	0	0	0	0	200	903	0	0	0	0	0	0	0	603	903	0
481	2	0	0	0	0	0	0	200	300	0	0	0	0	0	0	0	200	903	0	0	0	0	0	0	0	603	903	0
481	3	0	0	0	0	0	0	200	300	0	0	0	0	0	0	0	200	903	0	0	0	0	0	0	0	603	903	0
481	4	0	0	0	0	0	0	200	300	0	0	0	0	0	0	0	200	903	0	0	0	0	0	0	0	603	903	0
481	5	0	0	0	0	0	0	200	300	0	0	0	0	0	0	0	200	903	0	0	0	0	0	0	0	603	903	0
481	6	0	0	0	0	0	0	200	300	0	0	0	0	0	0	0	200	903	0	0	0	0	0	0	0	603	903	0
481	7	0	0	0	0	0	0	200	300	0	0	0	0	0	0	0	200	903	0	0	0	0	0	0	0	603	903	0
481	8	0	0	0	0	0	0	200	300	0	0	0	0	0	0	0	200	903	0	0	0	0	0	0	0	603	903	0
481	9	0	0	0	0	0	0	200	300	0	0	0	0	0	0	0	200	903	0	0	0	0	0	0	0	603	903	0
482	0	0	0	0	0	0	0	200	300	0	0	0	0	0	0	0	200	903	0	0	0	0	0	0	0	603	903	0
482	1	0	0	0	0	0	0	200	300	0	0	0	0	0	0	0	200	903	0	0	0	0	0	0	0	603	903	0
482	2	0	0	0	0	0	0	200	300	0	0	0	0	0	0	0	200	903	0	0	0	0	0	0	0	603	903	0
482	3	0	0	0	0	0	0	200	300	0	0	0	0	0	0	0	200	903	0	0	0	0	0	0	0	603	903	0
482	4	0	0	0	0	0	0	200	300	0	0	0	0	0	0	0	200	903	0	0	0	0	0	0	0	603	903	0
482	5	0	0	0	0	0	0	200	300	0	0	0	0	0	0	0	200	903	0	0	0	0	0	0	0	603	903	0
482	6	0	0	0	0	0	0	200	300	0	0	0	0	0	0	0	200	903	0	0	0	0	0	0	0	603	903	0
482	7	0	0	0	0	0	0	200	300	0	0	0	0	0	0	0	200	903	0	0	0	0	0	0	0	603	903	0
482	8	0	0	0	0	0	0	200	300	0	0	0	0	0	0	0	200	903	0	0	0	0	0	0	0	603	903	0
482	9	0	0	0	0	0	0	200	300	0	0	0	0	0	0	0	200	903	0	0	0	0	0	0	0	603	903	0
483	0	0	0	0	0	0	0	200	300	0	0	0	0	0	0	0	200	903	0	0	0	0	0	0	0	603	903	0
483	1	0	0	0	0	0	0	200	300	0	0	0	0	0	0	0	200	903	0	0	0	0	0	0	0	603	903	0
483	2	0	0	0	0	0	0	200	300	0	0	0	0	0	0	0	200	903	0	0	0	0	0	0	0	603	903	0
483	3	0	0	0	0	0	0	200	300	0	0	0	0	0	0	0	200	903	0	0	0	0	0	0	0	603	903	0
483	4	0	0	0	0	0	0	200	300	0	0	0	0	0	0	0	200	903	0	0	0	0	0	0	0	603	903	0
483	5	0	0	0	0	0	0	200	300	0	0	0	0	0	0	0	200	903	0	0	0	0	0	0	0	603	903	0
483	6	0	0	0	0	0	0	200	300	0	0	0	0	0	0	0	200	903	0	0	0	0	0	0	0	603	903	0
483	7	0	0	0	0	0	0	200	300	0	0	0	0	0	0	0	200	903	0	0	0	0	0	0	0	603	903	0
483	8	0	0	0	0	0	0	200	300	0	0	0	0	0	0	0	200	903	0	0	0	0	0	0	0	603	903	0
483	9	0	0	0	0	0	0	200	300	0	0	0	0	0	0	0	200	903	0	0	0	0	0	0	0	603	903	0
484	0	0	0	0	0	0	0	200	300	0	0	0	0	0	0	0	200	903	0	0	0	0	0	0	0	603	903	0
484	1	0	0	0	0	0	0	200	300	0	0	0	0	0	0	0	200	903	0	0	0	0	0	0	0	603	903	0
484	2	0	0	0	0	0	0	200	300	0	0	0	0	0	0	0	200	903	0	0	0	0	0	0	0	603	903	0
484	3	0	0	0	0	0	0	200	300	0	0	0	0	0	0	0	200	903	0	0	0	0	0	0	0	603	903	0
484	4	0	0	0	0	0	0	200	300	0	0	0	0	0	0	0	200	903	0	0	0	0	0	0	0	603	903	0
484	5	0	0	0	0	0	0	200	300	0	0	0	0	0	0	0	200	903	0	0	0	0	0	0	0	603	903	0
484	6	0	0	0	0	0	0	200	300	0	0	0	0	0	0	0	200	903	0	0	0	0	0	0	0	603	903	0
484	7	0	0	0	0	0	0	200	300	0	0	0	0	0	0	0	200	903	0	0	0	0	0	0	0	603	903	0
484	8	0	0	0	0	0	0	200	300	0	0	0	0	0	0	0	200	903	0	0	0	0	0	0	0	603	903	0
484	9	0	0	0	0	0	0	200	300	0	0	0	0	0	0	0	200	903	0	0	0	0	0	0	0	603	903	0
485	0	0	0	0	0	0	0	200	300	0	0	0	0	0	0	0	200	903	0	0	0	0	0	0	0	603	903	0
485	1	0	0	0	0	0	0	200	300	0	0	0	0	0	0	0	200	903	0	0	0	0	0	0	0	603	903	0
485	2	0	0	0	0	0	0	200	300	0	0	0	0	0	0	0	200	903	0	0	0	0	0	0	0	603	903	0
485	3	0	0	0	0	0	0	200	300	0	0	0	0	0	0	0	200	903	0	0	0	0	0	0	0	603	903	0
485	4	0	0	0	0	0	0	200	300	0	0	0	0	0	0	0	200	903	0	0	0	0	0	0	0	603	903	0
485	5	0	0	0	0	0	0	200	300	0	0	0	0	0	0	0	200	903	0	0	0	0	0	0	0	603	903	0
485	6	0	0	0	0	0	0	200	300	0	0	0	0	0	0	0	200	903	0	0	0	0	0	0	0	603	903	0
485	7	0	0	0	0	0	0	200	300	0	0	0	0	0	0	0	200	903	0	0	0	0	0	0	0	603	903	0
485	8	0	0	0	0	0	0	200	300	0	0	0	0	0	0	0	200	903	0	0	0	0	0	0	0	603	903	0
485	9	0	0	0	0	0	0	200	300	0	0	0	0	0	0	0	200	903	0	0	0	0	0	0	0	603	903	0
486	0	0	0	0	0	0	0	200	300	0	0	0	0	0	0	0	200	903	0	0	0	0	0	0	0	603	903	0
486	1	0	0	0	0	0	0	200	300	0	0	0	0	0	0	0	200	903	0	0	0	0	0	0	0	603	903	0
486	2	0	0	0	0	0	0	200	300	0	0	0	0	0	0	0	200	903	0	0	0	0	0	0	0	603	903	0
486	3	0	0	0	0	0	0	200	300	0	0	0	0	0	0	0	200	903	0	0	0	0	0	0	0	603	903	0
486	4	0	0	0	0	0	0	200	300	0	0	0	0	0	0	0	200	903	0	0	0	0	0	0	0	603	903	0
486	5	0	0	0	0	0	0	200	300	0	0	0	0	0	0	0	200	903	0	0	0	0	0	0	0	603	903	0
486	6	0	0	0	0	0	0	200	300	0	0	0	0	0	0	0	200	903	0	0	0	0	0	0	0	603	903	0
486	7	0	0	0	0	0	0	200	300	0	0	0	0	0	0	0	200	903	0	0	0	0	0	0	0	603	903	0
486	8	0	0	0	0	0	0	200	300	0	0	0	0	0	0	0	200	903	0	0	0	0	0	0	0	603	903	0
486	9	0	0	0	0	0	0	200	300	0	0	0	0	0	0	0	200	903	0	0	0	0	0	0	0	603	903	0
487	0	0	0	0	0	0	0	200	300	0	0	0	0	0	0	0	200	903	0	0	0	0	0	0	0	603	903	0
487	1	0	0	0	0	0	0	200	300	0	0	0	0	0	0	0	200	903	0	0	0	0	0	0	0	603	903	0
487	2	0	0	0	0	0	0	200	300	0	0	0	0	0	0	0	200	903	0	0	0	0	0	0	0	603	903	0
487	3	0	0	0	0	0	0	200	300	0	0	0	0	0	0	0	200	903	0	0	0	0	0	0	0	603	903	0
487	4	0	0	0	0	0	0	200	300	0	0	0	0	0	0	0	200	903	0	0	0	0	0	0	0	603	903	0
487	5	0	0	0	0	0	0	200	300	0	0	0	0	0	0	0	200	903	0	0	0	0	0	0	0	603	903	0
487	6	0	0	0	0	0	0	200	300	0	0	0	0	0	0	0	200	903	0	0	0	0	0	0	0	603	903	0
487	7	0	0	0	0	0	0	200	300	0	0	0	0	0	0	0	200	903	0	0	0	0	0	0	0	603	903	0
487	8	0	0	0	0	0	0	200	300	0	0	0	0	0	0	0	200	903	0	0	0	0	0	0	0	603	903	0
487	9	0	0	0	0	0	0	200	300	0	0	0	0	0	0	0	200	903	0	0	0	0	0	0	0	603	903	0
488	0	0	0	0	0	0	0	200	300	0	0	0	0	0	0	0	200	903	0	0	0	0	0	0	0	603	903	0
488	1	0	0	0	0	0	0	200	300	0	0	0	0	0	0	0	200	903	0	0	0	0	0	0	0	603	903	0
488	2	0	0	0	0	0	0	200	300	0	0	0	0	0	0	0	200	903	0	0	0	0	0	0	0	603	903	0
488	3	0	0	0	0	0	0	200	300	0	0	0	0	0	0	0	200	903	0	0	0	0	0	0	0	603	903	0
488	4	0	0	0	0	0	0	200	300	0	0	0	0	0	0	0	200	903	0	0	0	0	0	0	0	603	903	0
488	5	0	0	0	0	0	0	200	300	0	0	0	0	0	0	0	200	903	0	0	0	0	0	0	0	603	903	0
488	6	0	0	0	0	0	0	200	300	0	0	0	0	0	0	0	200	903	0	0	0	0	0	0	0	603	903	0
488	7	0	0	0	0	0	0	200	300	0	0	0	0	0	0	0	200	903	0	0	0	0	0	0	0	603	903	0
488	8	0	0	0	0	0	0	200	300	0	0	0	0	0	0	0	200	903	0	0	0	0	0	0	0	603	903	0
488	9	0	0	0	0	0	0	200	300	0	0	0	0	0	0	0	200	903	0	0	0	0	0	0	0	603	903	0
489	0	0	0	0	0	0	0	200	300	0	0	0	0	0	0	0	200	903	0	0	0	0	0	0	0	603	903	0
489	1	0	0	0	0	0	0	200	300	0	0	0	0	0	0	0	200	903	0	0	0	0	0	0	0	603	903	0
489	2	0	0	0	0	0	0	200	300	0	0	0	0	0	0	0	200	903	0	0	0	0	0	0	0	603	903	0
489	3	0	0	0	0	0	0	200	300	0	0	0	0	0	0	0	200	903	0	0	0	0	0	0	0	603	903	0
489	4	0	0	0	0	0	0	200	300	0	0	0	0	0	0	0	200	903	0	0	0	0	0	0	0	603	903	0
489	5	0	0	0	0	0	0	200	300	0	0	0	0	0	0	0	200	903	0	0	0	0	0	0	0	603	903	0
489	6	0	0	0	0	0	0	200	300	0	0	0	0	0	0	0	200	903	0	0	0	0	0	0	0	603	903	0
489	7	0	0	0	0	0	0	200	300	0	0	0	0	0	0	0	200	903	0	0	0	0	0	0	0	603	903	0
489	8	0	0	0	0	0	0	200	300	0	0	0	0	0	0	0	200	903	0	0	0	0	0	0	0	603	903	0
489	9	0	0	0	0	0	0	200	300	0	0	0	0	0	0	0	200	903	0	0	0	0	0	0	0	603	903	0
490	0	0	0	0	0	0	0	200	300	0	0	0	0	0	0	0	200	903	0	0	0	0	0	0	0	603	903	0
490	1	0	0	0	0	0	0	200	300	0	0	0	0	0	0	0	200	903	0	0	0	0	0	0	0	603	903	0
490	2	0	0	0	0	0	0	200	300	0	0	0	0	0	0	0	200	903	0	0	0	0	0	0	0	603	903	0
490	3	0	0	0	0	0	0	200	300	0	0	0	0	0	0	0	200	903	0	0	0	0	0	0	0	603	903	0
490	4	0	0	0	0	0	0	200	300	0	0	0	0	0	0	0	200	903	0	0	0	0	0	0	0	603	903	0
490	5	0	0	0	0	0	0	200	300	0	0	0	0	0	0	0	200	903	0	0	0	0	0	0	0	603	903	0
490	6	0	0	0	0	0	0	200	300	0	0	0	0	0	0	0	200	903	0	0	0	0	0	0	0	603	903	0
490	7	0	0	0	0	0	0	200	300	0	0	0	0	0	0	0	200	903	0	0	0	0	0	0	0	603	903	0
490	8	0	0	0	0	0	0	200	300	0	0	0	0	0	0	0	200	903	0	0	0	0	0	0	0	603	903	0
490	9	0	0	0	0	0	0	200	300	0	0	0	0	0	0	0	200	903	0	0	0	0	0	0	0	603	903	0
491	0	0	0	0	0	0	0	200	300	0	0	0	0	0	0	0	200	903	0	0	0	0	0	0	0	603	903	0
491	1	0	0	0	0	0	0	200	300	0	0	0	0	0	0	0	200	903	0	0	0	0	0	0	0	603	903	0
491	2	0	0	0	0	0	0	200	300	0	0	0	0	0	0	0	200	903	0	0	0	0	0	0	0	603	903	0
491	3	0	0	0	0	0	0	200	300	0	0	0	0	0	0	0	200	903	0	0	0	0	0	0	0	603	903	0
491	4	0	0	0	0	0	0	200	300	0	0	0	0	0	0	0	200	903	0	0	0	0	0	0	0	603	903	0
491	5	0	0	0	0	0	0	200	300	0	0	0	0	0	0	0	200	903	0	0	0	0	0	0	0	603	903	0
491	6	0	0	0	0	0	0	200	300	0	0	0	0	0	0	0	200	903	0	0	0	0	0	0	0	603	903	0
491	7	0	0	0	0	0	0	200	300	0	0	0	0	0	0	0	200	903	0	0	0	0	0	0	0	603	903	0
491	8	0	0	0	0	0	0	200	300	0	0	0	0	0	0	0	200	903	0	0	0	0	0	0	0	603	903	0
491	9	0	0	0	0	0	0	200	300	0	0	0	0	0	0	0	200	903	0	0	0	0	0	0	0	603	903	0
492	0	0	0	0	0	0	0	200	300	0	0	0	0	0	0	0	200	903	0	0	0	0	0	0	0	603	903	0
492	1	0	0	0	0	0	0	200	300	0	0	0	0	0	0	0	200	903	0	0	0	0	0	0	0	603	903	0
492	2	0	0	0	0	0	0	200	300	0	0	0	0	0	0	0	200	903	0	0	0	0	0	0	0	603	903	0
492	3	0	0	0	0	0	0	200	300	0	0	0	0	0	0	0	200	903	0	0	0	0	0	0	0	603	903	0
492	4	0	0	0	0	0	0	200	300	0	0	0	0	0	0	0	200	903	0	0	0	0	0	0	0	603	903	0
492	5	0	0	0	0	0	0	200	300	0	0	0	0	0	0	0	200	903	0	0	0	0	0	0	0	603	903	0
492	6	0	0	0	0	0	0	200	300	0	0	0	0	0	0	0	200	903	0	0	0	0	0	0	0	603	903	0
492	7	0	0	0	0	0	0	200	300	0	0	0	0	0	0	0	200	903	0	0	0	0	0	0	0	603	903	0
492	8	0	0	0	0	0	0	200	300	0	0	0	0	0	0	0	200	903	0	0	0	0	0	0	0	603	903	0
492	9	0	0	0	0	0	0	200	300	0	0	0	0	0	0	0	200	903	0	0	0	0	0	0	0	603	903	0
493	0	0	0	0	0	0	0	200	300	0	0	0	0	0	0	0	200	903	0	0	0	0	0	0	0	603	903	0
493	1	0	0	0	0	0	0	200	300	0	0	0	0	0	0	0	200	903	0	0	0	0	0	0	0	603	903	0
493	2	0	0	0	0	0	0	200	300	0	0	0	0	0	0	0	200	903	0	0	0	0	0	0	0	603	903	0
493	3	0	0	0	0	0	0	200	300	0	0	0	0	0	0	0	200	903	0	0	0	0	0	0	0	603	903	0
493	4	0	0	0	0	0	0	200	300	0	0	0	0	0	0	0	200	903	0	0	0	0	0	0	0	603	903	0
493	5	0	0	0	0	0	0	200	300	0	0	0	0	0	0	0	200	903	0	0	0	0	0	0	0	603	903	0
493	6	0	0	0	0	0	0	200	300	0	0	0	0	0	0	0	200	903	0	0	0	0	0	0	0	603	903	0
493	7	0	0	0	0	0	0	200	300	0	0	0	0	0	0	0	200	903	0	0	0	0	0	0	0	603	903	0
493	8	0	0	0	0	0	0	200	300	0	0	0	0	0	0	0	200	903	0	0	0	0	0	0	0	603	903	0
493	9	0	0	0	0	0	0	200	300	0	0	0	0	0	0	0	200	903	0	0	0	0	0	0	0	603	903	0
494	0	0	0	0	0	0	0	200	300	0	0	0	0	0	0	0	200	903	0	0	0	0	0	0	0	603	903	0
494	1	0	0	0	0	0	0	200	300	0	0	0	0	0	0	0	200	903	0	0	0	0	0	0	0	603	903	0
494	2	0	0	0	0	0	0	200	300	0	0	0	0	0	0	0	200	903	0	0	0	0	0	0	0	603	903	0
494	3	0	0	0	0	0	0	200	300	0	0	0	0	0	0	0	200	903	0	0	0	0	0	0	0	603	903	0
494	4	0	0	0	0	0	0	200	300	0	0	0	0	0	0	0	200	903	0	0	0	0	0	0	0	603	903	0
494	5	0	0	0	0	0	0	200	300	0	0	0	0	0	0	0	200	903	0	0	0	0	0	0	0	603	903	0
494	6	0	0	0	0	0	0	200	300	0	0	0	0	0	0	0	200	903	0	0	0	0	0	0	0	603	903	0
494	7	0	0	0	0	0	0	200	300	0	0	0	0	0	0	0	200	903	0	0	0	0	0	0	0	603	903	0
494	8	0	0	0	0	0	0	200	300	0	0	0	0	0	0	0	200	903	0	0	0	0	0	0	0	603	903	0
494	9	0	0	0	0	0	0	200	300	0	0	0	0	0	0	0	200	903	0	0	0	0	0	0	0	603	903	0
495	0	0	0	0	0	0	0	200	300	0	0	0	0	0	0	0	200	903	0	0	0	0	0	0	0	603	903	0
495	1	0	0	0	0	0	0	200	300	0	0	0	0	0	0	0	200	903	0	0	0	0	0	0	0	603	903	0
495	2	0	0	0	0	0	0	200	300	0	0	0	0	0	0	0	200	903	0	0	0	0	0	0	0	603	903	0
495	3	0	0	0	0	0	0	200	300	0	0	0	0	0	0	0	200	903	0	0	0	0	0	0	0	603	903	0
495	4	0	0	0	0	0	0	200	300	0	0	0	0	0	0	0	200	903	0	0	0	0	0	0	0	603	903	0
495	5	0	0	0	0	0	0	200	300	0	0	0	0	0	0	0	200	903	0	0	0	0	0	0	0	603	903	0
495	6	0	0	0	0	0	0	200	300	0	0	0	0	0	0	0	200	903	0	0	0	0	0	0	0	603	903	0
495	7	0	0	0	0	0	0	200	300	0	0	0	0	0	0	0	200	903	0	0	0	0	0	0	0	603	903	0
495	8	0	0	0	0	0	0	200	300	0	0	0	0	0	0	0	200	903	0	0	0	0	0	0	0	603	903	0
495	9	0	0	0	0	0	0	200	300	0	0	0	0	0	0	0	200	903	0	0	0	0	0	0	0	603	903	0
496	0	0	0	0	0	0	0	200	300	0	0	0	0	0	0	0	200	903	0	0	0	0	0	0	0	603	903	0
496	1	0	0	0	0	0	0	200	300	0	0	0	0	0	0	0	200	903	0	0	0	0	0	0	0	603	903	0
496	2	0	0	0	0	0	0	200	300	0	0	0	0	0	0	0	200	903	0	0	0	0	0	0	0	603	903	0
496	3	0	0	0	0	0	0	200	300	0	0	0	0	0	0	0	200	903	0	0	0	0	0	0	0	603	903	0
496	4	0	0	0	0	0	0	200	300	0	0	0	0	0	0	0	200	903	0	0	0	0	0	0	0	603	903	0
496	5	0	0	0	0	0	0	200	300	0	0	0	0	0	0	0	200	903	0	0	0	0	0	0	0	603	903	0
496	6	0	0	0	0	0	0	200	300	0	0	0	0	0	0	0	200	903	0	0	0	0	0	0	0	603	903	0
496	7	0	0	0	0	0	0	200	300	0	0	0	0	0	0	0	200	903	0	0	0	0	0	0	0	603	903	0
496	8	0	0	0	0	0	0	200	300	0	0	0	0	0	0	0	200	903	0	0	0	0	0	0	0	603	903	0
496	9	0	0	0	0	0	0	200	300	0	0	0	0	0	0	0	200	903	0	0	0	0	0	0	0	603	903	0
497	0	0	0	0	0	0	0	200	300	0	0	0	0	0	0	0	200	903	0	0	0	0	0	0	0	603	903	0
497	1	0	0	0	0	0	0	200	300	0	0	0	0	0	0	0	200	903	0	0	0	0	0	0	0	603	903	0
497	2	0	0	0	0	0	0	200	300	0	0	0	0	0	0	0	200	903	0	0	0	0	0	0	0	603	903	0
497	3	0	0	0	0	0	0	200	300	0	0	0	0	0	0	0	200	903	0	0	0	0	0	0	0	603	903	0
497	4	0	0	0	0	0	0	200	300	0	0	0	0	0	0	0	200	903	0	0	0	0	0	0	0	603	903	0
497	5	0	0	0	0	0	0	200	300	0	0	0	0	0	0	0	200	903	0	0	0	0	0	0	0	603	903	0
497	6	0	0	0	0	0	0	200	300	0	0	0	0	0	0	0	200	903	0	0	0	0	0	0	0	603	903	0
497	7	0	0	0	0	0	0	200	300	0	0	0	0	0	0	0	200	903	0	0	0	0	0	0	0	603	903	0
497	8	0	0	0	0	0	0	200	300	0	0	0	0	0	0	0	200	903	0	0	0	0	0	0	0	603	903	0
497	9	0	0	0	0	0	0	200	300	0	0	0	0	0	0	0	200	903	0	0	0	0	0	0	0	603	903	0
498	0	0	0	0	0	0	0	200	300	0	0	0	0	0	0	0	200	903	0	0	0	0	0	0	0	603	903	0
498	1	0	0	0	0	0	0	200	300	0	0	0	0	0	0	0	200	903	0	0	0	0	0	0	0	603	903	0
498	2	0	0	0	0	0	0	200	300	0	0	0	0	0	0	0	200	903	0	0	0	0	0	0	0	603	903	0
498	3	0	0	0	0	0	0	200	300	0	0	0	0	0	0	0	200	903	0	0	0	0	0	0	0	603	903	0
498	4	0	0	0	0	0	0	200	300	0	0	0	0	0	0	0	200	903	0	0	0	0	0	0	0	603	903	0
498	5	0	0	0	0	0	0	200	300	0	0	0	0	0	0	0	200	903	0	0	0	0	0	0	0	603	903	0
498	6	0	0	0	0	0	0	200	300	0	0	0	0	0	0	0	200	903	0	0	0	0	0	0	0	603	903	0
498	7	0	0	0	0	0	0	200	300	0	0	0	0	0	0	0	200	903	0	0	0	0	0	0	0	603	903	0
498	8	0	0	0	0	0	0	200	300	0	0	0	0	0	0	0	200	903	0	0	0	0	0	0	0	603	903	0
498	9	0	0	0	0	0	0	200	300	0	0	0	0	0	0	0	200	903	0	0	0	0	0	0	0	603	903	0
499	0	0	0	0	0	0	0	200	300	0	0	0	0	0	0	0	200	903	0	0	0	0	0	0	0	603	903	0
499	1	0	0	0	0	0	0	200	300	0	0	0	0	0	0	0	200	903	0	0	0	0	0	0	0	603	903	0
499	2	0	0	0	0	0	0	200	300	0	0	0	0	0	0	0	200	903	0	0	0	0	0	0	0	603	903	0
499	3	0	0	0	0	0	0	200	300	0	0	0	0	0	0	0	200	903	0	0	0	0	0	0	0	603	903	0
499	4	0	0	0	0	0	0	200	300	0	0	0	0	0	0	0	200	903	0	0	0	0	0	0	0	603	903	0
499	5	0	0	0	0	0	0	200	300	0	0	0	0	0	0	0	200	903	0	0	0	0	0	0	0	603	903	0
499	6	0	0	0	0	0	0	200	300	0	0	0	0	0	0	0	200	903	0	0	0	0	0	0	0	603	903	0
499	7	0	0	0	0	0	0	200	300	0	0	0	0	0	0	0	200	903	0	0	0	0	0	0	0	603	903	0
499	8	0	0	0	0	0	0	200	300	0	0	0	0	0	0	0	200	903	0	0	0	0	0	0	0	603	903	0
499	9	0	0	0	0	0	0	200	300	0	0	0	0	0	0	0	200	903	0	0	0	0	0	0	0	603	903	0
500	0	0	0	0	0	0	0	200	300	0	0	0	0	0	0	0	200	903	0	0	0	0	0	0	0	603	903	0
500	1	0	0	0	0	0	0	200	300	0	0	0	0	0	0	0	200	903	0	0	0	0	0	0	0	603	903	0
500	2	0	0	0	0	0	0	200	300	0	0	0	0	0	0	0	200	903	0	0	0	0	0	0	0	603	903	0
500	3	0	0	0	0	0	0	200	300	0	0	0	0	0	0	0	200	903	0	0	0	0	0	0	0	603	903	0
500	4	0	0	0	0	0	0	200	300	0	0	0	0	0	0	0	200	903	0	0	0	0	0	0	0	603	903	0
500	5	0	0	0	0	0	0	200	300	0	0	0	0	0	0	0	200	903	0	0	0	0	0	0	0	603	903	0
500	6	0	0	0	0	0	0	200	300	0	0	0	0	0	0	0	200	903	0	0	0	0	0	0	0	603	903	0
500	7	0	0	0	0	0	0	200	300	0	0	0	0	0	0	0	200	903	0	0	0	0	0	0	0	603	903	0
500	8	0	0	0	0	0	0	200	300	0	0	0	0	0	0	0	200	903	0	0	0	0	0	0	0	603	903	0
500	9	0	0	0	0	0	0	200	300	0	0	0	0	0	0	0	200	903	0	0	0	0	0	0	0	603	903	0
501	0	0	0	0	0	0	0	200	300	0	0	0	0	0	0	0	200	903	0	0	0	0	0	0	0	603	903	0
501	1	0	0	0	0	0	0	200	300	0	0	0	0	0	0	0	200	903	0	0	0	0	0	0	0	603	903	0
501	2	0	0	0	0	0	0	200	300	0	0	0	0	0	0	0	200	903	0	0	0	0	0	0	0	603	903	0
501	3	0	0	0	0	0	0	200	300	0	0	0	0	0	0	0	200	903	0	0	0	0	0	0	0	603	903	0
501	4	0	0	0	0	0	0	200	300	0	0	0	0	0	0	0	200	903	0	0	0	0	0	0	0	603	903	0
501	5	0	0	0	0	0	0	200	300	0	0	0	0	0	0	0	200	903	0	0	0	0	0	0	0	603	903	0
501	6	0	0	0	0	0	0	200	300	0	0	0	0	0	0	0	200	903	0	0	0	0	0	0	0	603	903	0
501	7	0	0	0	0	0	0	200	300	0	0	0	0	0	0	0	200	903	0	0	0	0	0	0	0	603	903	0
501	8	0	0	0	0	0	0	200	300	0	0	0	0	0	0	0	200	903	0	0	0	0	0	0	0	603	903	0
501	9	0	0	0	0	0	0	200	300	0	0	0	0	0	0	0	200	903	0	0	0	0	0	0	0	603	903	0
502	0	0	0	0	0	0	0	200	300	0	0	0	0	0	0	0	200	903	0	0	0	0	0	0	0	603	903	0
502	1	0	0	0	0	0	0	200	300	0	0	0	0	0	0	0	200	903	0	0	0	0	0	0	0	603	903	0
502	2	0	0	0	0	0	0	200	300	0	0	0	0	0	0	0	200	903	0	0	0	0	0	0	0	603	903	0
502	3	0	0	0	0	0	0	200	300	0	0	0	0	0	0	0	200	903	0	0	0	0	0	0	0	603	903	0
502	4	0	0	0	0	0	0	200	300	0	0	0	0	0	0	0	200	903	0	0	0	0	0	0	0	603	903	0
502	5	0	0	0	0	0	0	200	300	0	0	0	0	0	0	0	200	903	0	0	0	0	0	0	0	603	903	0
502	6	0	0	0	0	0	0	200	300	0	0	0	0	0	0	0	200	903	0	0	0	0	0	0	0	603	903	0
502	7	0	0	0	0	0	0	200	300	0	0	0	0	0	0	0	200	903	0	0	0	0	0	0	0	603	903	0
502	8	0	0	0	0	0	0	200	300	0	0	0	0	0	0	0	200	903	0	0	0	0	0	0	0	603	903	0
502	9	0	0	0	0	0	0	200	300	0	0	0	0	0	0	0	200	903	0	0	0	0	0	0	0	603	903	0
503	0	0	0	0	0	0	0	200	300	0	0	0	0	0	0	0	200	903	0	0	0	0	0	0	0	603	903	0
503	1	0	0	0	0	0	0	200	300	0	0	0	0	0	0	0	200	903	0	0	0	0	0	0	0	603	903	0
503	2	0	0	0	0	0	0	200	300	0	0	0	0	0	0	0	200	903	0	0	0	0	0	0	0	603	903	0
503	3	0	0	0	0	0	0	200	300	0	0	0	0	0	0	0	200	903	0	0	0	0	0	0	0	603	903	0
503	4	0	0	0	0	0	0	200	300	0	0	0	0	0	0	0	200	903	0	0	0	0	0	0	0	603	903	0
503	5	0	0	0	0	0	0	200	300	0	0	0	0	0	0	0	200	903	0	0	0	0	0	0	0	603	903	0
503	6	0	0	0	0	0	0	200	300	0	0	0	0	0	0	0	200	903	0	0	0	0	0	0	0	603	903	0
503	7	0	0	0	0	0	0	200	300	0	0	0	0	0	0	0	200	903	0	0	0	0	0	0	0	603	903	0
503	8	0	0	0	0	0	0	200	300	0	0	0	0	0	0	0	200	903	0	0	0	0	0	0	0	603	903	0
503	9	0	0	0	0	0	0	200	300	0	0	0	0	0	0	0	200	903	0	0	0	0	0	0	0	603	903	0
504	0	0	0	0	0	0	0	200	300	0	0	0	0	0	0	0	200	903	0	0	0	0	0	0	0	603	903	0
504	1	0	0	0	0	0	0	200	300	0	0	0	0	0	0	0	200	903	0	0	0	0	0	0	0	603	903	0
504	2	0	0	0	0	0	0	200	300	0	0	0	0	0	0	0	200	903	0	0	0	0	0	0	0	603	903	0
504	3	0	0	0	0	0	0	200	300	0	0	0	0	0	0	0	200	903	0	0	0	0	0	0	0	603	903	0
504	4	0	0	0	0	0	0	200	300	0	0	0	0	0	0	0	200	903	0	0	0	0	0	0	0	603	903	0
504	5	0	0	0	0	0	0	200	300	0	0	0	0	0	0	0	200	903	0	0	0	0	0	0	0	603	903	0
504	6	0	0	0	0	0	0	200	300	0	0	0	0	0	0	0	200	903	0	0	0	0	0	0	0	603	903	0
504	7	0	0	0	0	0	0	200	300	0	0	0	0	0	0	0	200	903	0	0	0	0	0	0	0	603	903	0
504	8	0	0	0	0	0	0	200	300	0	0	0	0	0	0	0	200	903	0	0	0	0	0	0	0	603	903	0
504	9	0	0	0	0	0	0	200	300	0	0	0	0	0	0	0	200	903	0	0	0	0	0	0	0	603	903	0
505	0	0	0	0	0	0	0	200	300	0	0	0	0	0	0	0	200	903	0	0	0	0	0	0	0	603	903	0
505	1	0	0	0	0	0	0	200	300	0	0	0	0	0	0	0	200	903	0	0	0	0	0	0	0	603	903	0
505	2	0	0	0	0	0	0	200	300	0	0	0	0	0	0	0	200	903	0	0	0	0	0	0	0	603	903	0
505	3	0	0	0	0	0	0	200	300	0	0	0	0	0	0	0	200	903	0	0	0	0	0	0	0	603	903	0
505	4	0	0	0	0	0	0	200	300	0	0	0	0	0	0	0	200	903	0	0	0	0	0	0	0	603	903	0
505	5	0	0	0	0	0	0	200	300	0	0	0	0	0	0	0	200	903	0	0	0	0	0	0	0	603	903	0
505	6	0	0	0	0	0	0	200	300	0	0	0	0	0	0	0	200	903	0	0	0	0	0	0	0	603	903	0
505	7	0	0	0	0	0	0	200	300	0	0	0	0	0	0	0	200	903	0	0	0	0	0	0	0	603	903	0
505	8	0	0	0	0	0	0	200	300	0	0	0	0	0	0	0	200	903	0	0	0	0	0	0	0	603	903	0
505	9	0	0	0	0	0	0	200	300	0	0	0	0	0	0	0	200	903	0	0	0	0	0	0	0	603	903	0
506	0	0	0	0	0	0	0	200	300	0	0	0	0	0	0	0	200	903	0	0	0	0	0	0	0	603	903	0
506	1	0	0	0	0	0	0	200	300	0	0	0	0	0	0	0	200	903	0	0	0	0	0	0	0	603	903	0
506	2	0	0	0	0	0	0	200	300	0	0	0	0	0	0	0	200	903	0	0	0	0	0	0	0	603	903	0
506	3	0	0	0	0	0	0	200	300	0	0	0	0	0	0	0	200	903	0	0	0	0	0	0	0	603	903	0
506	4	0	0	0	0	0	0	200	300	0	0	0	0	0	0	0	200	903	0	0	0	0	0	0	0	603	903	0
506	5	0	0	0	0	0	0	200	300	0	0	0	0	0	0	0	200	903	0	0	0	0	0	0	0	603	903	0
506	6	0	0	0	0	0	0	200	300	0	0	0	0	0	0	0	200	903	0	0	0	0	0	0	0	603	903	0
506	7	0	0	0	0	0	0	200	300	0	0	0	0	0	0	0	200	903	0	0	0	0	0	0	0	603	903	0
506	8	0	0	0	0	0	0	200	300	0	0	0	0	0	0	0	200	903	0	0	0	0	0	0	0	603	903	0
506	9	0	0	0	0	0	0	200	300	0	0	0	0	0	0	0	200	903	0	0	0	0	0	0	0	603	903	0
507	0	0	0	0	0	0	0	200	300	0	0	0	0	0	0	0	200	903	0	0	0	0	0	0	0	603	903	0
507	1	0	0	0	0	0	0	200	300	0	0	0	0	0	0	0	200	903	0	0	0	0	0	0	0	603	903	0
507	2	0	0	0	0	0	0	200	300	0	0	0	0	0	0	0	200	903	0	0	0	0	0	0	0	603	903	0
507	3	0	0	0	0	0	0	200	300	0	0	0	0	0	0	0	200	903	0	0	0	0	0	0	0	603	903	0
507	4	0	0	0	0	0	0	200	300	0	0	0	0	0	0	0	200	903	0	0	0	0	0	0	0	603	903	0
507	5	0	0	0	0	0	0	200	300	0	0	0	0	0	0	0	200	903	0	0	0	0	0	0	0	603	903	0
507	6	0	0	0	0	0	0	200	300	0	0	0	0	0	0	0	200	903	0	0	0	0	0	0	0	603	903	0
507	7	0	0	0	0	0	0	200	300	0	0	0	0	0	0	0	200	903	0	0	0	0	0	0	0	603	903	0
507	8	0	0	0	0	0	0	200	300	0	0	0	0	0	0	0	200	903	0	0	0	0	0	0	0	603	903	0
507	9	0	0	0	0	0	0	200	300	0	0	0	0	0	0	0	200	903	0	0	0	0	0	0	0	603	903	0
508	0	0	0	0	0	0	0	200	300	0	0	0	0	0	0	0	200	903	0	0	0	0	0	0	0	603	903	0
508	1	0	0	0	0	0	0	200	300	0	0	0	0	0	0	0	200	903	0	0	0	0	0	0	0	603	903	0
508	2	0	0	0	0	0	0	200	300	0	0	0	0	0	0	0	200	903	0	0	0	0	0	0	0	603	903	0
508	3	0	0	0	0	0	0	200	300	0	0	0	0	0	0	0	200	903	0	0	0	0	0	0	0	603	903	0
508	4	0	0	0	0	0	0	200	300	0	0	0	0	0	0	0	200	903	0	0	0	0	0	0	0	603	903	0
508	5	0	0	0	0	0	0	200	300	0	0	0	0	0	0	0	200	903	0	0	0	0	0	0	0	603	903	0
508	6	0	0	0	0	0	0	200	300	0	0	0	0	0	0	0	200	903	0	0	0	0	0	0	0	603	903	0
508	7	0	0	0	0	0	0	200	300	0	0	0	0	0	0	0	200	903	0	0	0	0	0	0	0	603	903	0
508	8	0	0	0	0	0	0	200	300	0	0	0	0	0	0	0	200	903	0	0	0	0	0	0	0	603	903	0
508	9	0	0	0	0	0	0	200	300	0	0	0	0	0	0	0	200	903	0	0	0	0	0	0	0	603	903	0
509	0	0	0	0	0	0	0	200	300	0	0	0	0	0	0	0	200	903	0	0	0	0	0	0	0	603	903	0
509	1	0	0	0	0	0	0	200	300	0	0	0	0	0	0	0	200	903	0	0	0	0	0	0	0	603	903	0
509	2	0	0	0	0	0	0	200	300	0	0	0	0	0	0	0	200	903	0	0	0	0	0	0	0	603	903	0
509	3	0	0	0	0	0	0	200	300	0	0	0	0	0	0	0	200	903	0	0	0	0	0	0	0	603	903	0
509	4	0	0	0	0	0	0	200	300	0	0	0	0	0	0	0	200	903	0	0	0	0	0	0	0	603	903	0
509	5	0	0	0	0	0	0	200	300	0	0	0	0	0	0	0	200	903	0	0	0	0	0	0	0	603	903	0
509	6	0	0	0	0	0	0	200	300	0	0	0	0	0	0	0	200	903	0	0	0	0	0	0	0	603	903	0
509	7	0	0	0	0	0	0	200	300	0	0	0	0	0	0	0	200	903	0	0	0	0	0	0	0	603	903	0
509	8	0	0	0	0	0	0	200	300	0	0	0	0	0	0	0	200	903	0	0	0	0	0	0	0	603	903	0
509	9	0	0	0	0	0	0	200	300	0	0	0	0	0	0	0	200	903	0	0	0	0	0	0	0	603	903	0
510	0	0	0	0	0	0	0	200	300	0	0	0	0	0	0	0	200	903	0	0	0	0	0	0	0	603	903	0
510	1	0	0	0	0	0	0	200	300	0	0	0	0	0	0	0	200	903	0	0	0	0	0	0	0	603	903	0
510	2	0	0	0	0	0	0	200	300	0	0	0	0	0	0	0	200	903	0	0	0	0	0	0	0	603	903	0
510	3	0	0	0	0	0	0	200	300	0	0	0	0	0	0	0	200	903	0	0	0	0	0	0	0	603	903	0
510	4	0	0	0	0	0	0	200	300	0	0	0	0	0	0	0	200	903	0	0	0	0	0	0	0	603	903	0
510	5	0	0	0	0	0	0	200	300	0	0	0	0	0	0	0	200	903	0	0	0	0	0	0	0	603	903	0
510	6	0	0	0	0	0	0	200	300	0	0	0	0	0	0	0	200	903	0	0	0	0	0	0	0	603	903	0
510	7	0	0	0	0	0	0	200	300	0	0	0	0	0	0	0	200	903	0	0	0	0	0	0	0	603	903	0
510	8	0	0	0	0	0	0	200	300	0	0	0	0	0	0	0	200	903	0	0	0	0	0	0	0	603	903	0
510	9	0	0	0	0	0	0	200	300	0	0	0	0	0	0	0	200	903	0	0	0	0	0	0	0	603	903	0
511	0	0	0	0	0	0	0	200	300	0	0	0	0	0	0	0	200	903	0	0	0	0	0	0	0	603	903	0
511	1	0	0	0	0	0	0	200	300	0	0	0	0	0	0	0	200	903	0	0	0	0	0	0	0	603	903	0
511	2	0	0	0	0	0	0	200	300	0	0	0	0	0	0	0	200	903	0	0	0	0	0	0	0	603	903	0
511	3	0	0	0	0	0	0	200	300	0	0	0	0	0	0	0	200	903	0	0	0	0	0	0	0	603	903	0
511	4	0	0	0	0	0	0	200	300	0	0	0	0	0	0	0	200	903	0	0	0	0	0	0	0	603	903	0
511	5	0	0	0	0	0	0	200	300	0	0	0	0	0	0	0	200	903	0	0	0	0	0	0	0	603	903	0
511	6	0	0	0	0	0	0	200	300	0	0	0	0	0	0	0	200	903	0	0	0	0	0	0	0	603	903	0
511	7	0	0	0	0	0	0	200	300	0	0	0	0	0	0	0	200	903	0	0	0	0	0	0	0	603	903	0
511	8	0	0	0	0	0	0	200	300	0	0	0	0	0	0	0	200	903	0	0	0	0	0	0	0	603	903	0
511	9	0	0	0	0	0	0	200	300	0	0	0	0	0	0	0	200	903	0	0	0	0	0	0	0	603	903	0
512	0	0	0	0	0	0	0	200	300	0	0	0	0	0	0	0	200	903	0	0	0	0	0	0	0	603	903	0
512	1	0	0	0	0	0	0	200	300	0	0	0	0	0	0	0	200	903	0	0	0	0	0	0	0	603	903	0
512	2	0	0	0	0	0	0	200	300	0	0	0	0	0	0	0	200	903	0	0	0	0	0	0	0	603	903	0
512	3	0	0	0	0	0	0	200	300	0	0	0	0	0	0	0	200	903	0	0	0	0	0	0	0	603	903	0
512	4	0	0	0	0	0	0	200	300	0	0	0	0	0	0	0	200	903	0	0	0	0	0	0	0	603	903	0
512	5	0	0	0	0	0	0	200	300	0	0	0	0	0	0	0	200	903	0	0	0	0	0	0	0	603	903	0
512	6	0	0	0	0	0	0	200	300	0	0	0	0	0	0	0	200	903	0	0	0	0	0	0	0	603	903	0
512	7	0	0	0	0	0	0	200	300	0	0	0	0	0	0	0	200	903	0	0	0	0	0	0	0	603	903	0
512	8	0	0	0	0	0	0	200	300	0	0	0	0	0	0	0	200	903	0	0	0	0	0	0	0	603	903	0
512	9	0	0	0	0	0	0	200	300	0	0	0	0	0	0	0	200	903	0	0	0	0	0	0	0	603	903	0
513	0	0	0	0	0	0	0	200	300	0	0	0	0	0	0	0	200	903	0	0	0	0	0	0	0	603	903	0
513	1	0	0	0	0	0	0	200	300	0	0	0	0	0	0	0	200	903	0	0	0	0	0	0	0	603	903	0
513	2	0	0	0	0	0	0	200	300	0	0	0	0	0	0	0	200	903	0	0	0	0	0	0	0	603	903	0
513	3	0	0	0	0	0	0	200	300	0	0	0	0	0	0	0	200	903	0	0	0	0	0	0	0	603	903	0
513	4	0	0	0	0	0	0	200	300	0	0	0	0	0	0	0	200	903	0	0	0	0	0	0	0	603	903	0
513	5	0	0	0	0	0	0	200	300	0	0	0	0	0	0	0	200	903	0	0	0	0	0	0	0	603	903	0
513	6	0	0	0	0	0	0	200	300	0	0	0	0	0	0	0	200	903	0	0	0	0	0	0	0	603	903	0
513	7	0	0	0	0	0	0	200	300	0	0	0	0	0	0	0	200	903	0	0	0	0	0	0	0	603	903	0
513	8	0	0	0	0	0	0	200	300	0	0	0	0	0	0	0	200	903	0	0	0	0	0	0	0	603	903	0
513	9	0	0	0	0	0	0	200	300	0	0	0	0	0	0	0	200	903	0	0	0	0	0	0	0	603	903	0
514	0	0	0	0	0	0	0	200	300	0	0	0	0	0	0	0	200	903	0	0	0	0	0	0	0	603	903	0
514	1	0	0	0	0	0	0	200	300	0	0	0	0	0	0	0	200	903	0	0	0	0	0	0	0	603	903	0
514	2	0	0	0	0	0	0	200	300	0	0	0	0	0	0	0	200	903	0	0	0	0	0	0	0	603	903	0
514	3	0	0	0	0	0	0	200	300	0	0	0	0	0	0	0	200	903	0	0	0	0	0	0	0	603	903	0
514	4	0	0	0	0	0	0	200	300	0	0	0	0	0	0	0	200	903	0	0	0	0	0	0	0	603	903	0
514	5	0	0	0	0	0	0	200	300	0	0	0	0	0	0	0	200	903	0	0	0	0	0	0	0	603	903	0
514	6	0	0	0	0	0	0	200	300	0	0	0	0	0	0	0	200	903	0	0	0	0	0	0	0	603	903	0
514	7	0	0	0	0	0	0	200	300	0	0	0	0	0	0	0	200	903	0	0	0	0	0	0	0	603	903	0
514	8	0	0	0	0	0	0	200	300	0	0	0	0	0	0	0	200	903	0	0	0	0	0	0	0	603	903	0
514	9	0	0	0	0	0	0	200	300	0	0	0	0	0	0	0	200	903	0	0	0	0	0	0	0	603	903	0
515	0	0	0	0	0	0	0	200	300	0	0	0	0	0	0	0	200	903	0	0	0	0	0	0	0	603	903	0
515	1	0	0	0	0	0	0	200	300	0	0	0	0	0	0	0	200	903	0	0	0	0	0	0	0	603	903	0
515	2	0	0	0	0	0	0	200	300	0	0	0	0	0	0	0	200	903	0	0	0	0	0	0	0	603	903	0
515	3	0	0	0	0	0	0	200	300	0	0	0	0	0	0	0	200	903	0	0	0	0	0	0	0	603	903	0
515	4	0	0	0	0	0	0	200	300	0	0	0	0	0	0	0	200	903	0	0	0	0	0	0	0	603	903	0
515	5	0	0	0	0	0	0	200	300	0	0	0	0	0	0	0	200	903	0	0	0	0	0	0	0	603	903	0
515	6	0	0	0	0	0	0	200	300	0	0	0	0	0	0	0	200	903	0	0	0	0	0	0	0	603	903	0
515	7	0	0	0	0	0	0	200	300	0	0	0	0	0	0	0	200	903	0	0	0	0	0	0	0	603	903	0
515	8	0	0	0	0	0	0	200	300	0	0	0	0	0	0	0	200	903	0	0	0	0	0	0	0	603	903	0
515	9	0	0	0	0	0	0	200	300	0	0	0	0	0	0	0	200	903	0	0	0	0	0	0	0	603	903	0
516	0	0	0	0	0	0	0	200	300	0	0	0	0	0	0	0	200	903	0	0	0	0	0	0	0	603	903	0
516	1	0	0	0	0	0	0	200	300	0	0	0	0	0	0	0	200	903	0	0	0	0	0	0	0	603	903	0
516	2	0	0	0	0	0	0	200	300	0	0	0	0	0	0	0	200	903	0	0	0	0	0	0	0	603	903	0
516	3	0	0	0	0	0	0	200	300	0	0	0	0	0	0	0	200	903	0	0	0	0	0	0	0	603	903	0
516	4	0	0	0	0	0	0	200	300	0	0	0	0	0	0	0	200	903	0	0	0	0	0	0	0	603	903	0
516	5	0	0	0	0	0	0	200	300	0	0	0	0	0	0	0	200	903	0	0	0	0	0	0	0	603	903	0
516	6	0	0	0	0	0	0	200	300	0	0	0	0	0	0	0	200	903	0	0	0	0	0	0	0	603	903	0
516	7	0	0	0	0	0	0	200	300	0	0	0	0	0	0	0	200	903	0	0	0	0	0	0	0	603	903	0
516	8	0	0	0	0	0	0	200	300	0	0	0	0	0	0	0	200	903	0	0	0	0	0	0	0	603	903	0
516	9	0	0	0	0	0	0	200	300	0	0	0	0	0	0	0	200	903	0	0	0	0	0	0	0	603	903	0
517	0	0	0	0	0	0	0	200	300	0	0	0	0	0	0	0	200	903	0	0	0	0	0	0	0	603	903	0
517	1	0	0	0	0	0	0	200	300	0	0	0	0	0	0	0	200	903	0	0	0	0	0	0	0	603	903	0
517	2	0	0	0	0	0	0	200	300	0	0	0	0	0	0	0	200	903	0	0	0	0	0	0	0	603	903	0
517	3	0	0	0	0	0	0	200	300	0	0	0	0	0	0	0	200	903	0	0	0	0	0	0	0	603	903	0
517	4	0	0	0	0	0	0	200	300	0	0	0	0	0	0	0	200	903	0	0	0	0	0	0	0	603	903	0
517	5	0	0	0	0	0	0	200	300	0	0	0	0	0	0	0	200	903	0	0	0	0	0	0	0	603	903	0
517	6	0	0	0	0	0	0	200	300	0	0	0	0	0	0	0	200	903	0	0	0	0	0	0	0	603	903	0
517	7	0	0	0	0	0	0	200	300	0	0	0	0	0	0	0	200	903	0	0	0	0	0	0	0	603	903	0
517	8	0	0	0	0	0	0	200	300	0	0	0	0	0	0	0	200	903	0	0	0	0	0	0	0	603	903	0
517	9	0	0	0	0	0	0	200	300	0	0	0	0	0	0	0	200	903	0	0	0	0	0	0	0	603	903	0
518	0	0	0	0	0	0	0	200	300	0	0	0	0	0	0	0	200	903	0	0	0	0	0	0	0	603	903	0
518	1	0	0	0	0	0	0	200	300	0	0	0	0	0	0	0	200	903	0	0	0	0	0	0	0	603	903	0
518	2	0	0	0	0	0	0	200	300	0	0	0	0	0	0	0	200	903	0	0	0	0	0	0	0	603	903	0
518	3	0	0	0	0	0	0	200	300	0	0	0	0	0	0	0	200	903	0	0	0	0	0	0	0	603	903	0
518	4	0	0	0	0	0	0	200	300	0	0	0	0	0	0	0	200	903	0	0	0	0	0	0	0	603	903	0
518	5	0	0	0	0	0	0	200	300	0	0	0	0	0	0	0	200	903	0	0	0	0	0	0	0	603	903	0
518	6	0	0	0	0	0	0	200	300	0	0	0	0	0	0	0	200	903	0	0	0	0	0	0	0	603	903	0
518	7	0	0	0	0	0	0	200	300	0	0	0	0	0	0	0	200	903	0	0	0	0	0	0	0	603	903	0
518	8	0	0	0	0	0	0	200	300	0	0	0	0	0	0	0	200	903	0	0	0	0	0	0	0	603	903	0
518	9	0	0	0	0	0	0	200	300	0	0	0	0	0	0	0	200	903	0	0	0	0	0	0	0	603	903	0
519	0	0	0	0	0	0	0	200	300	0	0	0	0	0	0	0	200	903	0	0	0	0	0	0	0	603	903	0
519	1	0	0	0	0	0	0	200	300	0	0	0	0	0	0	0	200	903	0	0	0	0	0	0	0	603	903	0
519	2	0	0	0	0	0	0	200	300	0	0	0	0	0	0	0	200	903	0	0	0	0	0	0	0	603	903	0
519	3	0	0	0	0	0	0	200	300	0	0	0	0	0	0	0	200	903	0	0	0	0	0	0	0	603	903	0
519	4	0	0	0	0	0	0	200	300	0	0	0	0	0	0	0	200	903	0	0	0	0	0	0	0	603	903	0
519	5	0	0	0	0	0	0	200	300	0	0	0	0	0	0	0	200	903	0	0	0	0	0	0	0	603	903	0
519	6	0	0	0	0	0	0	200	300	0	0	0	0	0	0	0	200	903	0	0	0	0	0	0	0	603	903	0
519	7	0	0	0	0	0	0	200	300	0	0	0	0	0	0	0	200	903	0	0	0	0	0	0	0	603	903	0
519	8	0	0	0	0	0	0	200	300	0	0	0	0	0	0	0	200	903	0	0	0	0	0	0	0	603	903	0
519	9	0	0	0	0	0	0	200	300	0	0	0	0	0	0	0	200	903	0	0	0	0	0	0	0	603	903	0
520	0	0	0	0	0	0	0	200	300	0	0	0	0	0	0	0	200	903	0	0	0	0	0	0	0	603	903	0
520	1	0	0	0	0	0	0	200	300	0	0	0	0	0	0	0	200	903	0	0	0	0	0	0	0	603	903	0
520	2	0	0	0	0	0	0	200	300	0	0	0	0	0	0	0	200	903	0	0	0	0	0	0	0	603	903	0
520	3	0	0	0	0	0	0	200	300	0	0	0	0	0	0	0	200	903	0	0	0	0	0	0	0	603	903	0
520	4	0	0	0	0	0	0	200	300	0	0	0	0	0	0	0	200	903	0	0	0	0	0	0	0	603	903	0
520	5	0	0	0	0	0	0	200	300	0	0	0	0	0	0	0	200	903	0	0	0	0	0	0	0	603	903	0
520	6	0	0	0	0	0	0	200	300	0	0	0	0	0	0	0	200	903	0	0	0	0	0	0	0	603	903	0
520	7	0	0	0	0	0	0	200	300	0	0	0	0	0	0	0	200	903	0	0	0	0	0	0	0	603	903	0
520	8	0	0	0	0	0	0	200	300	0	0	0	0	0	0	0	200	903	0	0	0	0	0	0	0	603	903	0
520	9	0	0	0	0	0	0	200	300	0	0	0	0	0	0	0	200	903	0	0	0	0	0	0	0	603	903	0
521	0	0	0	0	0	0	0	200	300	0	0	0	0	0	0	0	200	903	0	0	0	0	0	0	0	603	903	0
521	1	0	0	0	0	0	0	200	300	0	0	0	0	0	0	0	200	903	0	0	0	0	0	0	0	603	903	0
521	2	0	0	0	0	0	0	200	300	0	0	0	0	0	0	0	200	903	0	0	0	0	0	0	0	603	903	0
521	3	0	0	0	0	0	0	200	300	0	0	0	0	0	0	0	200	903	0	0	0	0	0	0	0	603	903	0
521	4	0	0	0	0	0	0	200	300	0	0	0	0	0	0	0	200	903	0	0	0	0	0	0	0	603	903	0
521	5	0	0	0	0	0	0	200	300	0	0	0	0	0	0	0	200	903	0	0	0	0	0	0	0	603	903	0
521	6	0	0	0	0	0	0	200	300	0	0	0	0	0	0	0	200	903	0	0	0	0	0	0	0	603	903	0
521	7	0	0	0	0	0	0	200	300	0	0	0	0	0	0	0	200	903	0	0	0	0	0	0	0	603	903	0
521	8	0	0	0	0	0	0	200	300	0	0	0	0	0	0	0	200	903	0	0	0	0	0	0	0	603	903	0
521	9	0	0	0	0	0	0	200	300	0	0	0	0	0	0	0	200	903	0	0	0	0	0	0	0	603	903	0
522	0	0	0	0	0	0	0	200	300	0	0	0	0	0	0	0	200	903	0	0	0	0	0	0	0	603	903	0
522	1	0	0	0	0	0	0	200	300	0	0	0	0	0	0	0	200	903	0	0	0	0	0	0	0	603	903	0
522	2	0	0	0	0	0	0	200	300	0	0	0	0	0	0	0	200	903	0	0	0	0	0	0	0	603	903	0
522	3	0	0	0	0	0	0	200	300	0	0	0	0	0	0	0	200	903	0	0	0	0	0	0	0	603	903	0
522	4	0	0	0	0	0	0	200	300	0	0	0	0	0	0	0	200	903	0	0	0	0	0	0	0	603	903	0
522	5	0	0	0	0	0	0	200	300	0	0	0	0	0	0	0	200	903	0	0	0	0	0	0	0	603	903	0
522	6	0	0	0	0	0	0	200	300	0	0	0	0	0	0	0	200	903	0	0	0	0	0	0	0	603	903	0
522	7	0	0	0	0	0	0	200	300	0	0	0	0	0	0	0	200	903	0	0	0	0	0	0	0	603	903	0
522	8	0	0	0	0	0	0	200	300	0	0	0	0	0	0	0	200	903	0	0	0	0	0	0	0	603	903	0
522	9	0	0	0	0	0	0	200	300	0	0	0	0	0	0	0	200	903	0	0	0	0	0	0	0	603	903	0
523	0	0	0	0	0	0	0	200	300	0	0	0	0	0	0	0	200	903	0	0	0	0	0	0	0	603	903	0
523	1	0	0	0	0	0	0	200	300	0	0	0	0	0	0	0	200	903	0	0	0	0	0	0	0	603	903	0
523	2	0	0	0	0	0	0	200	300	0	0	0	0	0	0	0	200	903	0	0	0	0	0	0	0	603	903	0
523	3	0	0	0	0	0	0	200	300	0	0	0	0	0	0	0	200	903	0	0	0	0	0	0	0	603	903	0
523	4	0	0	0	0	0	0	200	300	0	0	0	0	0	0	0	200	903	0	0	0	0	0	0	0	603	903	0
523	5	0	0	0	0	0	0	200	300	0	0	0	0	0	0	0	200	903	0	0	0	0	0	0	0	603	903	0
523	6	0	0	0	0	0	0	200	300	0	0	0	0	0	0	0	200	903	0	0	0	0	0	0	0	603	903	0
523	7	0	0	0	0	0	0	200	300	0	0	0	0	0	0	0	200	903	0	0	0	0	0	0	0	603	903	0
523	8	0	0	0	0	0	0	200	300	0	0	0	0	0	0	0	200	903	0	0	0	0	0	0	0	603	903	0
523	9	0	0	0	0	0	0	200	300	0	0	0	0	0	0	0	200	903	0	0	0	0	0	0	0	603	903	0
524	0	0	0	0	0	0	0	200	300	0	0	0	0	0	0	0	200	903	0	0	0	0	0	0	0	603	903	0
524	1	0	0	0	0	0	0	200	300	0	0	0	0	0	0	0	200	903	0	0	0	0	0	0	0	603	903	0
524	2	0	0	0	0	0	0	200	300	0	0	0	0	0	0	0	200	903	0	0	0	0	0	0	0	603	903	0
524	3	0	0	0	0	0	0	200	300	0	0	0	0	0	0	0	200	903	0	0	0	0	0	0	0	603	903	0
524	4	0	0	0	0	0	0	200	300	0	0	0	0	0	0	0	200	903	0	0	0	0	0	0	0	603	903	0
524	5	0	0	0	0	0	0	200	300	0	0	0	0	0	0	0	200	903	0	0	0	0	0	0	0	603	903	0
524	6	0	0	0	0	0	0	200	300	0	0	0	0	0	0	0	200	903	0	0	0	0	0	0	0	603	903	0
524	7	0	0	0	0	0	0	200	300	0	0	0	0	0	0	0	200	903	0	0	0	0	0	0	0	603	903	0
524	8	0	0	0	0	0	0	200	300	0	0	0	0	0	0	0	200	903	0	0	0	0	0	0	0	603	903	0
524	9	0	0	0	0	0	0	200	300	0	0	0	0	0	0	0	200	903	0	0	0	0	0	0	0	603	903	0
525	0	0	0	0	0	0	0	200	300	0	0	0	0	0	0	0	200	903	0	0	0	0	0	0	0	603	903	0
525	1	0	0	0	0	0	0	200	300	0	0	0	0	0	0	0	200	903	0	0	0	0	0	0	0	603	903	0
525	2	0	0	0	0	0	0	200	300	0	0	0	0	0	0	0	200	903	0	0	0	0	0	0	0	603	903	0
525	3	0	0	0	0	0	0	200	300	0	0	0	0	0	0	0	200	903	0	0	0	0	0	0	0	603	903	0
525	4	0	0	0	0	0	0	200	300	0	0	0	0	0	0	0	200	903	0	0	0	0	0	0	0	603	903	0
525	5	0	0	0	0	0	0	200	300	0	0	0	0	0	0	0	200	903	0	0	0	0	0	0	0	603	903	0
525	6	0	0	0	0	0	0	200	300	0	0	0	0	0	0	0	200	903	0	0	0	0	0	0	0	603	903	0
525	7	0	0	0	0	0	0	200	300	0	0	0	0	0	0	0	200	903	0	0	0	0	0	0	0	603	903	0
525	8	0	0	0	0	0	0	200	300	0	0	0	0	0	0	0	200	903	0	0	0	0	0	0	0	603	903	0
525	9	0	0	0	0	0	0	200	300	0	0	0	0	0	0	0	200	903	0	0	0	0	0	0	0	603	903	0
526	0	0	0	0	0	0	0	200	300	0	0	0	0	0	0	0	200	903	0	0	0	0	0	0	0	603	903	0
526	1	0	0	0	0	0	0	200	300	0	0	0	0	0	0	0	200	903	0	0	0	0	0	0	0	603	903	0
526	2	0	0	0	0	0	0	200	300	0	0	0	0	0	0	0	200	903	0	0	0	0	0	0	0	603	903	0
526	3	0	0	0	0	0	0	200	300	0	0	0	0	0	0	0	200	903	0	0	0	0	0	0	0	603	903	0
526	4	0	0	0	0	0	0	200	300	0	0	0	0	0	0	0	200	903	0	0	0	0	0	0	0	603	903	0
526	5	0	0	0	0	0	0	200	300	0	0	0	0	0	0	0	200	903	0	0	0	0	0	0	0	603	903	0
526	6	0	0	0	0	0	0	200	300	0	0	0	0	0	0	0	200	903	0	0	0	0	0	0	0	603	903	0
526	7	0	0	0	0	0	0	200	300	0	0	0	0	0	0	0	200	903	0	0	0	0	0	0	0	603	903	0
526	8	0	0	0	0	0	0	200	300	0	0	0	0	0	0	0	200	903	0	0	0	0	0	0	0	603	903	0
526	9	0	0	0	0	0	0	200	300	0	0	0	0	0	0	0	200	903	0	0	0	0	0	0	0	603	903	0
527	0	0	0	0	0	0	0	200	300	0	0	0	0	0	0	0	200	903	0	0	0	0	0	0	0	603	903	0
527	1	0	0	0	0	0	0	200	300	0	0	0	0	0	0	0	200	903	0	0	0	0	0	0	0	603	903	0
527	2	0	0	0	0	0	0	200	300	0	0	0	0	0	0	0	200	903	0	0	0	0	0	0	0	603	903	0
527	3	0	0	0	0	0	0	200	300	0	0	0	0	0	0	0	200	903	0	0	0	0	0	0	0	603	903	0
527	4	0	0	0	0	0	0	200	300	0	0	0	0	0	0	0	200	903	0	0	0	0	0	0	0	603	903	0
527	5	0	0	0	0	0	0	200	300	0	0	0	0	0	0	0	200	903	0	0	0	0	0	0	0	603	903	0
527	6	0	0	0	0	0	0	200	300	0	0	0	0	0	0	0	200	903	0	0	0	0	0	0	0	603	903	0
527	7	0	0	0	0	0	0	200	300	0	0	0	0	0	0	0	200	903	0	0	0	0	0	0	0	603	903	0
527	8	0	0	0	0	0	0	200	300	0	0	0	0	0	0	0	200	903	0	0	0	0	0	0	0	603	903	0
527	9	0	0	0	0	0	0	200	300	0	0	0	0	0	0	0	200	903	0	0	0	0	0	0	0	603	903	0
528	0	0	0	0	0	0	0	200	300	0	0	0	0	0	0	0	200	903	0	0	0	0	0	0	0	603	903	0
528	1	0	0	0	0	0	0	200	300	0	0	0	0	0	0	0	200	903	0	0	0	0	0	0	0	603	903	0
528	2	0	0	0	0	0	0	200	300	0	0	0	0	0	0	0	200	903	0	0	0	0	0	0	0	603	903	0
528	3	0	0	0	0	0	0	200	300	0	0	0	0	0	0	0	200	903	0	0	0	0	0	0	0	603	903	0
528	4	0	0	0	0	0	0	200	300	0	0	0	0	0	0	0	200	903	0	0	0	0	0	0	0	603	903	0
528	5	0	0	0	0	0	0	200	300	0	0	0	0	0	0	0	200	903	0	0	0	0	0	0	0	603	903	0
528	6	0	0	0	0	0	0	200	300	0	0	0	0	0	0	0	200	903	0	0	0	0	0	0	0	603	903	0
528	7	0	0	0	0	0	0	200	300	0	0	0	0	0	0	0	200	903	0	0	0	0	0	0	0	603	903	0
528	8	0	0	0	0	0	0	200	300	0	0	0	0	0	0	0	200	903	0	0	0	0	0	0	0	603	903	0
528	9	0	0	0	0	0	0	200	300	0	0	0	0	0	0	0	200	903	0	0	0	0	0	0	0	603	903	0
529	0	0	0	0	0	0	0	200	300	0	0	0	0	0	0	0	200	903	0	0	0	0	0	0	0	603	903	0
529	1	0	0	0	0	0	0	200	300	0	0	0	0	0	0	0	200	903	0	0	0	0	0	0	0	603	903	0
529	2	0	0	0	0	0	0	200	300	0	0	0	0	0	0	0	200	903	0	0	0	0	0	0	0	603	903	0
529	3	0	0	0	0	0	0	200	300	0	0	0	0	0	0	0	200	903	0	0	0	0	0	0	0	603	903	0
529	4	0	0	0	0	0	0	200	300	0	0	0	0	0	0	0	200	903	0	0	0	0	0	0	0	603	903	0
529	5	0	0	0	0	0	0	200	300	0	0	0	0	0	0	0	200	903	0	0	0	0	0	0	0	603	903	0
529	6	0	0	0	0	0	0	200	300	0	0	0	0	0	0	0	200	903	0	0	0	0	0	0	0	603	903	0
529	7	0	0	0	0	0	0	200	300	0	0	0	0	0	0	0	200	903	0	0	0	0	0	0	0	603	903	0
529	8	0	0	0	0	0	0	200	300	0	0	0	0	0	0	0	200	903	0	0	0	0	0	0	0	603	903	0
529	9	0	0	0	0	0	0	200	300	0	0	0	0	0	0	0	200	903	0	0	0	0	0	0	0	603	903	0
530	0	0	0	0	0	0	0	200	300	0	0	0	0	0	0	0	200	903	0	0	0	0	0	0	0	603	903	0
530	1	0	0	0	0	0	0	200	300	0	0	0	0	0	0	0	200	903	0	0	0	0	0	0	0	603	903	0
530	2	0	0	0	0	0	0	200	300	0	0	0	0	0	0	0	200	903	0	0	0	0	0	0	0	603	903	0
530	3	0	0	0	0	0	0	200	300	0	0	0	0	0	0	0	200	903	0	0	0	0	0	0	0	603	903	0
530	4	0	0	0	0	0	0	200	300	0	0	0	0	0	0	0	200	903	0	0	0	0	0	0	0	603	903	0
530	5	0	0	0	0	0	0	200	300	0	0	0	0	0	0	0	200	903	0	0	0	0	0	0	0	603	903	0
530	6	0	0	0	0	0	0	200	300	0	0	0	0	0	0	0	200	903	0	0	0	0	0	0	0	603	903	0
530	7	0	0	0	0	0	0	200	300	0	0	0	0	0	0	0	200	903	0	0	0	0	0	0	0	603	903	0
530	8	0	0	0	0	0	0	200	300	0	0	0	0	0	0	0	200	903	0	0	0	0	0	0	0	603	903	0
530	9	0	0	0	0	0	0	200	300	0	0	0	0	0	0	0	200	903	0	0	0	0	0	0	0	603	903	0
531	0	0	0	0	0	0	0	200	300	0	0	0	0	0	0	0	200	903	0	0	0	0	0	0	0	603	903	0
531	1	0	0	0	0	0	0	200	300	0	0	0	0	0	0	0	200	903	0	0	0	0	0	0	0	603	903	0
531	2	0	0	0	0	0	0	200	300	0	0	0	0	0	0	0	200	903	0	0	0	0	0	0	0	603	903	0
531	3	0	0	0	0	0	0	200	300	0	0	0	0	0	0	0	200	903	0	0	0	0	0	0	0	603	903	0
531	4	0	0	0	0	0	0	200	300	0	0	0	0	0	0	0	200	903	0	0	0	0	0	0	0	603	903	0
531	5	0	0	0	0	0	0	200	300	0	0	0	0	0	0	0	200	903	0	0	0	0	0	0	0	603	903	0
531	6	0	0	0	0	0	0	200	300	0	0	0	0	0	0	0	200	903	0	0	0	0	0	0	0	603	903	0
531	7	0	0	0	0	0	0	200	300	0	0	0	0	0	0	0	200	903	0	0	0	0	0	0	0	603	903	0
531	8	0	0	0	0	0	0	200	300	0	0	0	0	0	0	0	200	903	0	0	0	0	0	0	0	603	903	0
531	9	0	0	0	0	0	0	200	300	0	0	0	0	0	0	0	200	903	0	0	0	0	0	0	0	603	903	0
532	0	0	0	0	0	0	0	200	300	0	0	0	0	0	0	0	200	903	0	0	0	0	0	0	0	603	903	0
532	1	0	0	0	0	0	0	200	300	0	0	0	0	0	0	0	200	903	0	0	0	0	0	0	0	603	903	0
532	2	0	0	0	0	0	0	200	300	0	0	0	0	0	0	0	200	903	0	0	0	0	0	0	0	603	903	0
532	3	0	0	0	0	0	0	200	300	0	0	0	0	0	0	0	200	903	0	0	0	0	0	0	0	603	903	0
532	4	0	0	0	0	0	0	200	300	0	0	0	0	0	0	0	200	903	0	0	0	0	0	0	0	603	903	0
532	5	0	0	0	0	0	0	200	300	0	0	0	0	0	0	0	200	903	0	0	0	0	0	0	0	603	903	0
532	6	0	0	0	0	0	0	200	300	0	0	0	0	0	0	0	200	903	0	0	0	0	0	0	0	603	903	0
532	7	0	0	0	0	0	0	200	300	0	0	0	0	0	0	0	200	903	0	0	0	0	0	0	0	603	903	0
532	8	0	0	0	0	0	0	200	300	0	0	0	0	0	0	0	200	903	0	0	0	0	0	0	0	603	903	0
532	9	0	0	0	0	0	0	200	300	0	0	0	0	0	0	0	200	903	0	0	0	0	0	0	0	603	903	0
533	0	0	0	0	0	0	0	200	300	0	0	0	0	0	0	0	200	903	0	0	0	0	0	0	0	603	903	0
533	1	0	0	0	0	0	0	200	300	0	0	0	0	0	0	0	200	903	0	0	0	0	0	0	0	603	903	0
533	2	0	0	0	0	0	0	200	300	0	0	0	0	0	0	0	200	903	0	0	0	0	0	0	0	603	903	0
533	3	0	0	0	0	0	0	200	300	0	0	0	0	0	0	0	200	903	0	0	0	0	0	0	0	603	903	0
533	4	0	0	0	0	0	0	200	300	0	0	0	0	0	0	0	200	903	0	0	0	0	0	0	0	603	903	0
533	5	0	0	0	0	0	0	200	300	0	0	0	0	0	0	0	200	903	0	0	0	0	0	0	0	603	903	0
533	6	0	0	0	0	0	0	200	300	0	0	0	0	0	0	0	200	903	0	0	0	0	0	0	0	603	903	0
533	7	0	0	0	0	0	0	200	300	0	0	0	0	0	0	0	200	903	0	0	0	0	0	0	0	603	903	0
533	8	0	0	0	0	0	0	200	300	0	0	0	0	0	0	0	200	903	0	0	0	0	0	0	0	603	903	0
533	9	0	0	0	0	0	0	200	300	0	0	0	0	0	0	0	200	903	0	0	0	0	0	0	0	603	903	0
534	0	0	0	0	0	0	0	200	300	0	0	0	0	0	0	0	200	903	0	0	0	0	0	0	0	603	903	0
534	1	0	0	0	0	0	0	200	300	0	0	0	0	0	0	0	200	903	0	0	0	0	0	0	0	603	903	0
534	2	0	0	0	0	0	0	200	300	0	0	0	0	0	0	0	200	903	0	0	0	0	0	0	0	603	903	0
534	3	0	0	0	0	0	0	200	300	0	0	0	0	0	0	0	200	903	0	0	0	0	0	0	0	603	903	0
534	4	0	0	0	0	0	0	200	300	0	0	0	0	0	0	0	200	903	0	0	0	0	0	0	0	603	903	0
534	5	0	0	0	0	0	0	200	300	0	0	0	0	0	0	0	200	903	0	0	0	0	0	0	0	603	903	0
534	6	0	0	0	0	0	0	200	300	0	0	0	0	0	0	0	200	903	0	0	0	0	0	0	0	603	903	0
534	7	0	0	0	0	0	0	200	300	0	0	0	0	0	0	0	200	903	0	0	0	0	0	0	0	603	903	0
534	8	0	0	0	0	0	0	200	300	0	0	0	0	0	0	0	200	903	0	0	0	0	0	0	0	603	903	0
534	9	0	0	0	0	0	0	200	300	0	0	0	0	0	0	0	200	903	0	0	0	0	0	0	0	603	903	0
535	0	0	0	0	0	0	0	200	300	0	0	0	0	0	0	0	200	903	0	0	0	0	0	0	0	603	903	0
535	1	0	0	0	0	0	0	200	300	0	0	0	0	0	0	0	200	903	0	0	0	0	0	0	0	603	903	0
535	2	0	0	0	0	0	0	200	300	0	0	0	0	0	0	0	200	903	0	0	0	0	0	0	0	603	903	0
535	3	0	0	0	0	0	0	200	300	0	0	0	0	0	0	0	200	903	0	0	0	0	0	0	0	603	903	0
535	4	0	0	0	0	0	0	200	300	0	0	0	0	0	0	0	200	903	0	0	0	0	0	0	0	603	903	0
535	5	0	0	0	0	0	0	200	300	0	0	0	0	0	0	0	200	903	0	0	0	0	0	0	0	603	903	0
535	6	0	0	0	0	0	0	200	300	0	0	0	0	0	0	0	200	903	0	0	0	0	0	0	0	603	903	0
535	7	0	0	0	0	0	0	200	300	0	0	0	0	0	0	0	200	903	0	0	0	0	0	0	0	603	903	0
535	8	0	0	0	0	0	0	200	300	0	0	0	0	0	0	0	200	903	0	0	0	0	0	0	0	603	903	0
535	9	0	0	0	0	0	0	200	300	0	0	0	0	0	0	0	200	903	0	0	0	0	0	0	0	603	903	0
536	0	0	0	0	0	0	0	200	300	0	0	0	0	0	0	0	200	903	0	0	0	0	0	0	0	603	903	0
536	1	0	0	0	0	0	0	200	300	0	0	0	0	0	0	0	200	903	0	0	0	0	0	0	0	603	903	0
536	2	0	0	0	0	0	0	200	300	0	0	0	0	0	0	0	200	903	0	0	0	0	0	0	0	603	903	0
536	3	0	0	0	0	0	0	200	300	0	0	0	0	0	0	0	200	903	0	0	0	0	0	0	0	603	903	0
536	4	0	0	0	0	0	0	200	300	0	0	0	0	0	0	0	200	903	0	0	0	0	0	0	0	603	903	0
536	5	0	0	0	0	0	0	200	300	0	0	0	0	0	0	0	200	903	0	0	0	0	0	0	0	603	903	0
536	6	0	0	0	0	0	0	200	300	0	0	0	0	0	0	0	200	903	0	0	0	0	0	0	0	603	903	0
536	7	0	0	0	0	0	0	200	300	0	0	0	0	0	0	0	200	903	0	0	0	0	0	0	0	603	903	0
536	8	0	0	0	0	0	0	200	300	0	0	0	0	0	0	0	200	903	0	0	0	0	0	0	0	603	903	0
536	9	0	0	0	0	0	0	200	300	0	0	0	0	0	0	0	200	903	0	0	0	0	0	0	0	603	903	0
537	0	0	0	0	0	0	0	200	300	0	0	0	0	0	0	0	200	903	0	0	0	0	0	0	0	603	903	0
537	1	0	0	0	0	0	0	200	300	0	0	0	0	0	0	0	200	903	0	0	0	0	0	0	0	603	903	0
537	2	0	0	0	0	0	0	200	300	0	0	0	0	0	0	0	200	903	0	0	0	0	0	0	0	603	903	0
537	3	0	0	0	0	0	0	200	300	0	0	0	0	0	0	0	200	903	0	0	0	0	0	0	0	603	903	0
537	4	0	0	0	0	0	0	200	300	0	0	0	0	0	0	0	200	903	0	0	0	0	0	0	0	603	903	0
537	5	0	0	0	0	0	0	200	300	0	0	0	0	0	0	0	200	903	0	0	0	0	0	0	0	603	903	0
537	6	0	0	0	0	0	0	200	300	0	0	0	0	0	0	0	200	903	0	0	0	0	0	0	0	603	903	0
537	7	0	0	0	0	0	0	200	300	0	0	0	0	0	0	0	200	903	0	0	0	0	0	0	0	603	903	0
537	8	0	0	0	0	0	0	200	300	0	0	0	0	0	0	0	200	903	0	0	0	0	0	0	0	603	903	0
537	9	0	0	0	0	0	0	200	300	0	0	0	0	0	0	0	200	903	0	0	0	0	0	0	0	603	903	0
538	0	0	0	0	0	0	0	200	300	0	0	0	0	0	0	0	200	903	0	0	0	0	0	0	0	603	903	0
538	1	0	0	0	0	0	0	200	300	0	0	0	0	0	0	0	200	903	0	0	0	0	0	0	0	603	903	0
538	2	0	0	0	0	0	0	200	300	0	0	0	0	0	0	0	200	903	0	0	0	0	0	0	0	603	903	0
538	3	0	0	0	0	0	0	200	300	0	0	0	0	0	0	0	200	903	0	0	0	0	0	0	0	603	903	0
538	4	0	0	0	0	0	0	200	300	0	0	0	0	0	0	0	200	903	0	0	0	0	0	0	0	603	903	0
538	5	0	0	0	0	0	0	200	300	0	0	0	0	0	0	0	200	903	0	0	0	0	0	0	0	603	903	0
538	6	0	0	0	0	0	0	200	300	0	0	0	0	0	0	0	200	903	0	0	0	0	0	0	0	603	903	0
538	7	0	0	0	0	0	0	200	300	0	0	0	0	0	0	0	200	903	0	0	0	0	0	0	0	603	903	0
538	8	0	0	0	0	0	0	200	300	0	0	0	0	0	0	0	200	903	0	0	0	0	0	0	0	603	903	0
538	9	0	0	0	0	0	0	200	300	0	0	0	0	0	0	0	200	903	0	0	0	0	0	0	0	603	903	0
539	0	0	0	0	0	0	0	200	300	0	0	0	0	0	0	0	200	903	0	0	0	0	0	0	0	603	903	0
539	1	0	0	0	0	0	0	200	300	0	0	0	0	0	0	0	200	903	0	0	0	0	0	0	0	603	903	0
539	2	0	0	0	0	0	0	200	300	0	0	0	0	0	0	0	200	903	0	0	0	0	0	0	0	603	903	0
539	3	0	0	0	0	0	0	200	300	0	0	0	0	0	0	0	200	903	0	0	0	0	0	0	0	603	903	0
539	4	0	0	0	0	0	0	200	300	0	0	0	0	0	0	0	200	903	0	0	0	0	0	0	0	603	903	0
539	5	0	0	0	0	0	0	200	300	0	0	0	0	0	0	0	200	903	0	0	0	0	0	0	0	603	903	0
539	6	0	0	0	0	0	0	200	300	0	0	0	0	0	0	0	200	903	0	0	0	0	0	0	0	603	903	0
539	7	0	0	0	0	0	0	200	300	0	0	0	0	0	0	0	200	903	0	0	0	0	0	0	0	603	903	0
539	8	0	0	0	0	0	0	200	300	0	0	0	0	0	0	0	200	903	0	0	0	0	0	0	0	603	903	0
539	9	0	0	0	0	0	0	200	300	0	0	0	0	0	0	0	200	903	0	0	0	0	0	0	0	603	903	0
540	0	0	0	0	0	0	0	200	300	0	0	0	0	0	0	0	200	903	0	0	0	0	0	0	0	603	903	0
540	1	0	0	0	0	0	0	200	300	0	0	0	0	0	0	0	200	903	0	0	0	0	0	0	0	603	903	0
540	2	0	0	0	0	0	0	200	300	0	0	0	0	0	0	0	200	903	0	0	0	0	0	0	0	603	903	0
540	3	0	0	0	0	0	0	200	300	0	0	0	0	0	0	0	200	903	0	0	0	0	0	0	0	603	903	0
540	4	0	0	0	0	0	0	200	300	0	0	0	0	0	0	0	200	903	0	0	0	0	0	0	0	603	903	0
540	5	0	0	0	0	0	0	200	300	0	0	0	0	0	0	0	200	903	0	0	0	0	0	0	0	603	903	0
540	6	0	0	0	0	0	0	200	300	0	0	0	0	0	0	0	200	903	0	0	0	0	0	0	0	603	903	0
540	7	0	0	0	0	0	0	200	300	0	0	0	0	0	0	0	200	903	0	0	0	0	0	0	0	603	903	0
540	8	0	0	0	0	0	0	200	300	0	0	0	0	0	0	0	200	903	0	0	0	0	0	0	0	603	903	0
540	9	0	0	0	0	0	0	200	300	0	0	0	0	0	0	0	200	903	0	0	0	0	0	0	0	603	903	0
541	0	0	0	0	0	0	0	200	300	0	0	0	0	0	0	0	200	903	0	0	0	0	0	0	0	603	903	0
541	1	0	0	0	0	0	0	200	300	0	0	0	0	0	0	0	200	903	0	0	0	0	0	0	0	603	903	0
541	2	0	0	0	0	0	0	200	300	0	0	0	0	0	0	0	200	903	0	0	0	0	0	0	0	603	903	0
541	3	0	0	0	0	0	0	200	300	0	0	0	0	0	0	0	200	903	0	0	0	0	0	0	0	603	903	0
541	4	0	0	0	0	0	0	200	300	0	0	0	0	0	0	0	200	903	0	0	0	0	0	0	0	603	903	0
541	5	0	0	0	0	0	0	200	300	0	0	0	0	0	0	0	200	903	0	0	0	0	0	0	0	603	903	0
541	6	0	0	0	0	0	0	200	300	0	0	0	0	0	0	0	200	903	0	0	0	0	0	0	0	603	903	0
541	7	0	0	0	0	0	0	200	300	0	0	0	0	0	0	0	200	903	0	0	0	0	0	0	0	603	903	0
541	8	0	0	0	0	0	0	200	300	0	0	0	0	0	0	0	200	903	0	0	0	0	0	0	0	603	903	0
541	9	0	0	0	0	0	0	200	300	0	0	0	0	0	0	0	200	903	0	0	0	0	0	0	0	603	903	0
542	0	0	0	0	0	0	0	200	300	0	0	0	0	0	0	0	200	903	0	0	0	0	0	0	0	603	903	0
542	1	0	0	0	0	0	0	200	300	0	0	0	0	0	0	0	200	903	0	0	0	0	0	0	0	603	903	0
542	2	0	0	0	0	0	0	200	300	0	0	0	0	0	0	0	200	903	0	0	0	0	0	0	0	603	903	0
542	3	0	0	0	0	0	0	200	300	0	0	0	0	0	0	0	200	903	0	0	0	0	0	0	0	603	903	0
542	4	0	0	0	0	0	0	200	300	0	0	0	0	0	0	0	200	903	0	0	0	0	0	0	0	603	903	0
542	5	0	0	0	0	0	0	200	300	0	0	0	0	0	0	0	200	903	0	0	0	0	0	0	0	603	903	0
542	6	0	0	0	0	0	0	200	300	0	0	0	0	0	0	0	200	903	0	0	0	0	0	0	0	603	903	0
542	7	0	0	0	0	0	0	200	300	0	0	0	0	0	0	0	200	903	0	0	0	0	0	0	0	603	903	0
542	8	0	0	0	0	0	0	200	300	0	0	0	0	0	0	0	200	903	0	0	0	0	0	0	0	603	903	0
542	9	0	0	0	0	0	0	200	300	0	0	0	0	0	0	0	200	903	0	0	0	0	0	0	0	603	903	0
543	0	0	0	0	0	0	0	200	300	0	0	0	0	0	0	0	200	903	0	0	0	0	0	0	0	603	903	0
543	1	0	0	0	0	0	0	200	300	0	0	0	0	0	0	0	200	903	0	0	0	0	0	0	0	603	903	0
543	2	0	0	0	0	0	0	200	300	0	0	0	0	0	0	0	200	903	0	0	0	0	0	0	0	603	903	0
543	3	0	0	0	0	0	0	200	300	0	0	0	0	0	0	0	200	903	0	0	0	0	0	0	0	603	903	0
543	4	0	0	0	0	0	0	200	300	0	0	0	0	0	0	0	200	903	0	0	0	0	0	0	0	603	903	0
543	5	0	0	0	0	0	0	200	300	0	0	0	0	0	0	0	200	903	0	0	0	0	0	0	0	603	903	0
543	6	0	0	0	0	0	0	200	300	0	0	0	0	0	0	0	200	903	0	0	0	0	0	0	0	603	903	0
543	7	0	0	0	0	0	0	200	300	0	0	0	0	0	0	0	200	903	0	0	0	0	0	0	0	603	903	0
543	8	0	0	0	0	0	0	200	300	0	0	0	0	0	0	0	200	903	0	0	0	0	0	0	0	603	903	0
543	9	0	0	0	0	0	0	200	300	0	0	0	0	0	0	0	200	903	0	0	0	0	0	0	0	603	903	0
544	0	0	0	0	0	0	0	200	300	0	0	0	0	0	0	0	200	903	0	0	0	0	0	0	0	603	903	0
544	1	0	0	0	0	0	0	200	300	0	0	0	0	0	0	0	200	903	0	0	0	0	0	0	0	603	903	0
544	2	0	0	0	0	0	0	200	300	0	0	0	0	0	0	0	200	903	0	0	0	0	0	0	0	603	903	0
544	3	0	0	0	0	0	0	200	300	0	0	0	0	0	0	0	200	903	0	0	0	0	0	0	0	603	903	0
544	4	0	0	0	0	0	0	200	300	0	0	0	0	0	0	0	200	903	0	0	0	0	0	0	0	603	903	0
544	5	0	0	0	0	0	0	200	300	0	0	0	0	0	0	0	200	903	0	0	0	0	0	0	0	603	903	0
544	6	0	0	0	0	0	0	200	300	0	0	0	0	0	0	0	200	903	0	0	0	0	0	0	0	603	903	0
544	7	0	0	0	0	0	0	200	300	0	0	0	0	0	0	0	200	903	0	0	0	0	0	0	0	603	903	0
544	8	0	0	0	0	0	0	200	300	0	0	0	0	0	0	0	200	903	0	0	0	0	0	0	0	603	903	0
544	9	0	0	0	0	0	0	200	300	0	0	0	0	0	0	0	200	903	0	0	0	0	0	0	0	603	903	0
545	0	0	0	0	0	0	0	200	300	0	0	0	0	0	0	0	200	903	0	0	0	0	0	0	0	603	903	0
545	1	0	0	0	0	0	0	200	300	0	0	0	0	0	0	0	200	903	0	0	0	0	0	0	0	603	903	0
545	2	0	0	0	0	0	0	200	300	0	0	0	0	0	0	0	200	903	0	0	0	0	0	0	0	603	903	0
545	3	0	0	0	0	0	0	200	300	0	0	0	0	0	0	0	200	903	0	0	0	0	0	0	0	603	903	0
545	4	0	0	0	0	0	0	200	300	0	0	0	0	0	0	0	200	903	0	0	0	0	0	0	0	603	903	0
545	5	0	0	0	0	0	0	200	300	0	0	0	0	0	0	0	200	903	0	0	0	0	0	0	0	603	903	0
545	6	0	0	0	0	0	0	200	300	0	0	0	0	0	0	0	200	903	0	0	0	0	0	0	0	603	903	0
545	7	0	0	0	0	0	0	200	300	0	0	0	0	0	0	0	200	903	0	0	0	0	0	0	0	603	903	0
545	8	0	0	0	0	0	0	200	300	0	0	0	0	0	0	0	200	903	0	0	0	0	0	0	0	603	903	0
545	9	0	0	0	0	0	0	200	300	0	0	0	0	0	0	0	200	903	0	0	0	0	0	0	0	603	903	0
546	0	0	0	0	0	0	0	200	300	0	0	0	0	0	0	0	200	903	0	0	0	0	0	0	0	603	903	0
546	1	0	0	0	0	0	0	200	300	0	0	0	0	0	0	0	200	903	0	0	0	0	0	0	0	603	903	0
546	2	0	0	0	0	0	0	200	300	0	0	0	0	0	0	0	200	903	0	0	0	0	0	0	0	603	903	0
546	3	0	0	0	0	0	0	200	300	0	0	0	0	0	0	0	200	903	0	0	0	0	0	0	0	603	903	0
546	4	0	0	0	0	0	0	200	300	0	0	0	0	0	0	0	200	903	0	0	0	0	0	0	0	603	903	0
546	5	0	0	0	0	0	0	200	300	0	0	0	0	0	0	0	200	903	0	0	0	0	0	0	0	603	903	0
546	6	0	0	0	0	0	0	200	300	0	0	0	0	0	0	0	200	903	0	0	0	0	0	0	0	603	903	0
546	7	0	0	0	0	0	0	200	300	0	0	0	0	0	0	0	200	903	0	0	0	0	0	0	0	603	903	0
546	8	0	0	0	0	0	0	200	300	0	0	0	0	0	0	0	200	903	0	0	0	0	0	0	0	603	903	0
546	9	0	0	0	0	0	0	200	300	0	0	0	0	0	0	0	200	903	0	0	0	0	0	0	0	603	903	0
547	0	0	0	0	0	0	0	200	300	0	0	0	0	0	0	0	200	903	0	0	0	0	0	0	0	603	903	0
547	1	0	0	0	0	0	0	200	300	0	0	0	0	0	0	0	200	903	0	0	0	0	0	0	0	603	903	0
547	2	0	0	0	0	0	0	200	300	0	0	0	0	0	0	0	200	903	0	0	0	0	0	0	0	603	903	0
547	3	0	0	0	0	0	0	200	300	0	0	0	0	0	0	0	200	903	0	0	0	0	0	0	0	603	903	0
547	4	0	0	0	0	0	0	200	300	0	0	0	0	0	0	0	200	903	0	0	0	0	0	0	0	603	903	0
547	5	0	0	0	0	0	0	200	300	0	0	0	0	0	0	0	200	903	0	0	0	0	0	0	0	603	903	0
547	6	0	0	0	0	0	0	200	300	0	0	0	0	0	0	0	200	903	0	0	0	0	0	0	0	603	903	0
547	7	0	0	0	0	0	0	200	300	0	0	0	0	0	0	0	200	903	0	0	0	0	0	0	0	603	903	0
547	8	0	0	0	0	0	0	200	300	0	0	0	0	0	0	0	200	903	0	0	0	0	0	0	0	603	903	0
547	9	0	0	0	0	0	0	200	300	0	0	0	0	0	0	0	200	903	0	0	0	0	0	0	0	603	903	0
548	0	0	0	0	0	0	0	200	300	0	0	0	0	0	0	0	200	903	0	0	0	0	0	0	0	603	903	0
548	1	0	0	0	0	0	0	200	300	0	0	0	0	0	0	0	200	903	0	0	0	0	0	0	0	603	903	0
548	2	0	0	0	0	0	0	200	300	0	0	0	0	0	0	0	200	903	0	0	0	0	0	0	0	603	903	0
548	3	0	0	0	0	0	0	200	300	0	0	0	0	0	0	0	200	903	0	0	0	0	0	0	0	603	903	0
548	4	0	0	0	0	0	0	200	300	0	0	0	0	0	0	0	200	903	0	0	0	0	0	0	0	603	903	0
548	5	0	0	0	0	0	0	200	300	0	0	0	0	0	0	0	200	903	0	0	0	0	0	0	0	603	903	0
548	6	0	0	0	0	0	0	200	300	0	0	0	0	0	0	0	200	903	0	0	0	0	0	0	0	603	903	0
548	7	0	0	0	0	0	0	200	300	0	0	0	0	0	0	0	200	903	0	0	0	0	0	0	0	603	903	0
548	8	0	0	0	0	0	0	200	300	0	0	0	0	0	0	0	200	903	0	0	0	0	0	0	0	603	903	0
548	9	0	0	0	0	0	0	200	300	0	0	0	0	0	0	0	200	903	0	0	0	0	0	0	0	603	903	0
549	0	0	0	0	0	0	0	200	300	0	0	0	0	0	0	0	200	903	0	0	0	0	0	0	0	603	903	0
549	1	0	0	0	0	0	0	200	300	0	0	0	0	0	0	0	200	903	0	0	0	0	0	0	0	603	903	0
549	2	0	0	0	0	0	0	200	300	0	0	0	0	0	0	0	200	903	0	0	0	0	0	0	0	603	903	0
549	3	0	0	0	0	0	0	200	300	0	0	0	0	0	0	0	200	903	0	0	0	0	0	0	0	603	903	0
549	4	0	0	0	0	0	0	200	300	0	0	0	0	0	0	0	200	903	0	0	0	0	0	0	0	603	903	0
549	5	0	0	0	0	0	0	200	300	0	0	0	0	0	0	0	200	903	0	0	0	0	0	0	0	603	903	0
549	6	0	0	0	0	0	0	200	300	0	0	0	0	0	0	0	200	903	0	0	0	0	0	0	0	603	903	0
549	7	0	0	0	0	0	0	200	300	0	0	0	0	0	0	0	200	903	0	0	0	0	0	0	0	603	903	0
549	8	0	0	0	0	0	0	200	300	0	0	0	0	0	0	0	200	903	0	0	0	0	0	0	0	603	903	0
549	9	0	0	0	0	0	0	200	300	0	0	0	0	0	0	0	200	903	0	0	0	0	0	0	0	603	903	0
550	0	0	0	0	0	0	0	200	300	0	0	0	0	0	0	0	200	903	0	0	0	0	0	0	0	603	903	0
550	1	0	0	0	0	0	0	200	300	0	0	0	0	0	0	0	200	903	0	0	0	0	0	0	0	603	903	0
550	2	0	0	0	0	0	0	200	300	0	0	0	0	0	0	0	200	903	0	0	0	0	0	0	0	603	903	0
550	3	0	0	0	0	0	0	200	300	0	0	0	0	0	0	0	200	903	0	0	0	0	0	0	0	603	903	0
550	4	0	0	0	0	0	0	200	300	0	0	0	0	0	0	0	200	903	0	0	0	0	0	0	0	603	903	0
550	5	0	0	0	0	0	0	200	300	0	0	0	0	0	0	0	200	903	0	0	0	0	0	0	0	603	903	0
550	6	0	0	0	0	0	0	200	300	0	0	0	0	0	0	0	200	903	0	0	0	0	0	0	0	603	903	0
550	7	0	0	0	0	0	0	200	300	0	0	0	0	0	0	0	200	903	0	0	0	0	0	0	0	603	903	0
550	8	0	0	0	0	0	0	200	300	0	0	0	0	0	0	0	200	903	0	0	0	0	0	0	0	603	903	0
550	9	0	0	0	0	0	0	200	300	0	0	0	0	0	0	0	200	903	0	0	0	0	0	0	0	603	903	0
551	0	0	0	0	0	0	0	200	300	0	0	0	0	0	0	0	200	903	0	0	0	0	0	0	0	603	903	0
551	1	0	0	0	0	0	0	200	300	0	0	0	0	0	0	0	200	903	0	0	0	0	0	0	0	603	903	0
551	2	0	0	0	0	0	0	200	300	0	0	0	0	0	0	0	200	903	0	0	0	0	0	0	0	603	903	0
551	3	0	0	0	0	0	0	200	300	0	0	0	0	0	0	0	200	903	0	0	0	0	0	0	0	603	903	0
551	4	0	0	0	0	0	0	200	300	0	0	0	0	0	0	0	200	903	0	0	0	0	0	0	0	603	903	0
551	5	0	0	0	0	0	0	200	300	0	0	0	0	0	0	0	200	903	0	0	0	0	0	0	0	603	903	0
551	6	0	0	0	0	0	0	200	300	0	0	0	0	0	0	0	200	903	0	0	0	0	0	0	0	603	903	0
551	7	0	0	0	0	0	0	200	300	0	0	0	0	0	0	0	200	903	0	0	0	0	0	0	0	603	903	0
551	8	0	0	0	0	0	0	200	300	0	0	0	0	0	0	0	200	903	0	0	0	0	0	0	0	603	903	0
551	9	0	0	0	0	0	0	200	300	0	0	0	0	0	0	0	200	903	0	0	0	0	0	0	0	603	903	0
552	0	0	0	0	0	0	0	200	300	0	0	0	0	0	0	0	200	903	0	0	0	0	0	0	0	603	903	0
552	1	0	0	0	0	0	0	200	300	0	0	0	0	0	0	0	200	903	0	0	0	0	0	0	0	603	903	0
552	2	0	0	0	0	0	0	200	300	0	0	0	0	0	0	0	200	903	0	0	0	0	0	0	0	603	903	0
552	3	0	0	0	0	0	0	200	300	0	0	0	0	0	0	0	200	903	0	0	0	0	0	0	0	603	903	0
552	4	0	0	0	0	0	0	200	300	0	0	0	0	0	0	0	200	903	0	0	0	0	0	0	0	603	903	0
552	5	0	0	0	0	0	0	200	300	0	0	0	0	0	0	0	200	903	0	0	0	0	0	0	0	603	903	0
552	6	0	0	0	0	0	0	200	300	0	0	0	0	0	0	0	200	903	0	0	0	0	0	0	0	603	903	0
552	7	0	0	0	0	0	0	200	300	0	0	0	0	0	0	0	200	903	0	0	0	0	0	0	0	603	903	0
552	8	0	0	0	0	0	0	200	300	0	0	0	0	0	0	0	200	903	0	0	0	0	0	0	0	603	903	0
552	9	0	0	0	0	0	0	200	300	0	0	0	0	0	0	0	200	903	0	0	0	0	0	0	0	603	903	0
553	0	0	0	0	0	0	0	200	300	0	0	0	0	0	0	0	200	903	0	0	0	0	0	0	0	603	903	0
553	1	0	0	0	0	0	0	200	300	0	0	0	0	0	0	0	200	903	0	0	0	0	0	0	0	603	903	0
553	2	0	0	0	0	0	0	200	300	0	0	0	0	0	0	0	200	903	0	0	0	0	0	0	0	603	903	0
553	3	0	0	0	0	0	0	200	300	0	0	0	0	0	0	0	200	903	0	0	0	0	0	0	0	603	903	0
553	4	0	0	0	0	0	0	200	300	0	0	0	0	0	0	0	200	903	0	0	0	0	0	0	0	603	903	0
553	5	0	0	0	0	0	0	200	300	0	0	0	0	0	0	0	200	903	0	0	0	0	0	0	0	603	903	0
553	6	0	0	0	0	0	0	200	300	0	0	0	0	0	0	0	200	903	0	0	0	0	0	0	0	603	903	0
553	7	0	0	0	0	0	0	200	300	0	0	0	0	0	0	0	200	903	0	0	0	0	0	0	0	603	903	0
553	8	0	0	0	0	0	0	200	300	0	0	0	0	0	0	0	200	903	0	0	0	0	0	0	0	603	903	0
553	9	0	0	0	0	0	0	200	300	0	0	0	0	0	0	0	200	903	0	0	0	0	0	0	0	603	903	0
554	0	0	0	0	0	0	0	200	300	0	0	0	0	0	0	0	200	903	0	0	0	0	0	0	0	603	903	0
554	1	0	0	0	0	0	0	200	300	0	0	0	0	0	0	0	200	903	0	0	0	0	0	0	0	603	903	0
554	2	0	0	0	0	0	0	200	300	0	0	0	0	0	0	0	200	903	0	0	0	0	0	0	0	603	903	0
554	3	0	0	0	0	0	0	200	300	0	0	0	0	0	0	0	200	903	0	0	0	0	0	0	0	603	903	0
554	4	0	0	0	0	0	0	200	300	0	0	0	0	0	0	0	200	903	0	0	0	0	0	0	0	603	903	0
554	5	0	0	0	0	0	0	200	300	0	0	0	0	0	0	0	200	903	0	0	0	0	0	0	0	603	903	0
554	6	0	0	0	0	0	0	200	300	0	0	0	0	0	0	0	200	903	0	0	0	0	0	0	0	603	903	0
554	7	0	0	0	0	0	0	200	300	0	0	0	0	0	0	0	200	903	0	0	0	0	0	0	0	603	903	0
554	8	0	0	0	0	0	0	200	300	0	0	0	0	0	0	0	200	903	0	0	0	0	0	0	0	603	903	0
554	9	0	0	0	0	0	0	200	300	0	0	0	0	0	0	0	200	903	0	0	0	0	0	0	0	603	903	0
555	0	0	0	0	0	0	0	200	300	0	0	0	0	0	0	0	200	903	0	0	0	0	0	0	0	603	903	0
555	1	0	0	0	0	0	0	200	300	0	0	0	0	0	0	0	200	903	0	0	0	0	0	0	0	603	903	0
555	2	0	0	0	0	0	0	200	300	0	0	0	0	0	0	0	200	903	0	0	0	0	0	0	0	603	903	0
555	3	0	0	0	0	0	0	200	300	0	0	0	0	0	0	0	200	903	0	0	0	0	0	0	0	603	903	0
555	4	0	0	0	0	0	0	200	300	0	0	0	0	0	0	0	200	903	0	0	0	0	0	0	0	603	903	0
555	5	0	0	0	0	0	0	200	300	0	0	0	0	0	0	0	200	903	0	0	0	0	0	0	0	603	903	0
555	6	0	0	0	0	0	0	200	300	0	0	0	0	0	0	0	200	903	0	0	0	0	0	0	0	603	903	0
555	7	0	0	0	0	0	0	200	300	0	0	0	0	0	0	0	200	903	0	0	0	0	0	0	0	603	903	0
555	8	0	0	0	0	0	0	200	300	0	0	0	0	0	0	0	200	903	0	0	0	0	0	0	0	603	903	0
555	9	0	0	0	0	0	0	200	300	0	0	0	0	0	0	0	200	903	0	0	0	0	0	0	0	603	903	0
556	0	0	0	0	0	0	0	200	300	0	0	0	0	0	0	0	200	903	0	0	0	0	0	0	0	603	903	0
556	1	0	0	0	0	0	0	200	300	0	0	0	0	0	0	0	200	903	0	0	0	0	0	0	0	603	903	0
556	2	0	0	0	0	0	0	200	300	0	0	0	0	0	0	0	200	903	0	0	0	0	0	0	0	603	903	0
556	3	0	0	0	0	0	0	200	300	0	0	0	0	0	0	0	200	903	0	0	0	0	0	0	0	603	903	0
556	4	0	0	0	0	0	0	200	300	0	0	0	0	0	0	0	200	903	0	0	0	0	0	0	0	603	903	0
556	5	0	0	0	0	0	0	200	300	0	0	0	0	0	0	0	200	903	0	0	0	0	0	0	0	603	903	0
556	6	0	0	0	0	0	0	200	300	0	0	0	0	0	0	0	200	903	0	0	0	0	0	0	0	603	903	0
556	7	0	0	0	0	0	0	200	300	0	0	0	0	0	0	0	200	903	0	0	0	0	0	0	0	603	903	0
556	8	0	0	0	0	0	0	200	300	0	0	0	0	0	0	0	200	903	0	0	0	0	0	0	0	603	903	0
556	9	0	0	0	0	0	0	200	300	0	0	0	0	0	0	0	200	903	0	0	0	0	0	0	0	603	903	0
557	0	0	0	0	0	0	0	200	300	0	0	0	0	0	0	0	200	903	0	0	0	0	0	0	0	603	903	0
557	1	0	0	0	0	0	0	200	300	0	0	0	0	0	0	0	200	903	0	0	0	0	0	0	0	603	903	0
557	2	0	0	0	0	0	0	200	300	0	0	0	0	0	0	0	200	903	0	0	0	0	0	0	0	603	903	0
557	3	0	0	0	0	0	0	200	300	0	0	0	0	0	0	0	200	903	0	0	0	0	0	0	0	603	903	0
557	4	0	0	0	0	0	0	200	300	0	0	0	0	0	0	0	200	903	0	0	0	0	0	0	0	603	903	0
557	5	0	0	0	0	0	0	200	300	0	0	0	0	0	0	0	200	903	0	0	0	0	0	0	0	603	903	0
557	6	0	0	0	0	0	0	200	300	0	0	0	0	0	0	0	200	903	0	0	0	0	0	0	0	603	903	0
557	7	0	0	0	0	0	0	200	300	0	0	0	0	0	0	0	200	903	0	0	0	0	0	0	0	603	903	0
557	8	0	0	0	0	0	0	200	300	0	0	0	0	0	0	0	200	903	0	0	0	0	0	0	0	603	903	0
557	9	0	0	0	0	0	0	200	300	0	0	0	0	0	0	0	200	903	0	0	0	0	0	0	0	603	903	0
558	0	0	0	0	0	0	0	200	300	0	0	0	0	0	0	0	200	903	0	0	0	0	0	0	0	603	903	0
558	1	0	0	0	0	0	0	200	300	0	0	0	0	0	0	0	200	903	0	0	0	0	0	0	0	603	903	0
558	2	0	0	0	0	0	0	200	300	0	0	0	0	0	0	0	200	903	0	0	0	0	0	0	0	603	903	0
558	3	0	0	0	0	0	0	200	300	0	0	0	0	0	0	0	200	903	0	0	0	0	0	0	0	603	903	0
558	4	0	0	0	0	0	0	200	300	0	0	0	0	0	0	0	200	903	0	0	0	0	0	0	0	603	903	0
558	5	0	0	0	0	0	0	200	300	0	0	0	0	0	0	0	200	903	0	0	0	0	0	0	0	603	903	0
558	6	0	0	0	0	0	0	200	300	0	0	0	0	0	0	0	200	903	0	0	0	0	0	0	0	603	903	0
558	7	0	0	0	0	0	0	200	300	0	0	0	0	0	0	0	200	903	0	0	0	0	0	0	0	603	903	0
558	8	0	0	0	0	0	0	200	300	0	0	0	0	0	0	0	200	903	0	0	0	0	0	0	0	603	903	0
558	9	0	0	0	0	0	0	200	300	0	0	0	0	0	0	0	200	903	0	0	0	0	0	0	0	603	903	0
559	0	0	0	0	0	0	0	200	300	0	0	0	0	0	0	0	200	903	0	0	0	0	0	0	0	603	903	0
559	1	0	0	0	0	0	0	200	300	0	0	0	0	0	0	0	200	903	0	0	0	0	0	0	0	603	903	0
559	2	0	0	0	0	0	0	200	300	0	0	0	0	0	0	0	200	903	0	0	0	0	0	0	0	603	903	0
559	3	0	0	0	0	0	0	200	300	0	0	0	0	0	0	0	200	903	0	0	0	0	0	0	0	603	903	0
559	4	0	0	0	0	0	0	200	300	0	0	0	0	0	0	0	200	903	0	0	0	0	0	0	0	603	903	0
559	5	0	0	0	0	0	0	200	300	0	0	0	0	0	0	0	200	903	0	0	0	0	0	0	0	603	903	0
559	6	0	0	0	0	0	0	200	300	0	0	0	0	0	0	0	200	903	0	0	0	0	0	0	0	603	903	0
559	7	0	0	0	0	0	0	200	300	0	0	0	0	0	0	0	200	903	0	0	0	0	0	0	0	603	903	0
559	8	0	0	0	0	0	0	200	300	0	0	0	0	0	0	0	200	903	0	0	0	0	0	0	0	603	903	0
559	9	0	0	0	0	0	0	200	300	0	0	0	0	0	0	0	200	903	0	0	0	0	0	0	0	603	903	0
560	0	0	0	0	0	0	0	200	300	0	0	0	0	0	0	0	200	903	0	0	0	0	0	0	0	603	903	0
560	1	0	0	0	0	0	0	200	300	0	0	0	0	0	0	0	200	903	0	0	0	0	0	0	0	603	903	0
560	2	0	0	0	0	0	0	200	300	0	0	0	0	0	0	0	200	903	0	0	0	0	0	0	0	603	903	0
560	3	0	0	0	0	0	0	200	300	0	0	0	0	0	0	0	200	903	0	0	0	0	0	0	0	603	903	0
560	4	0	0	0	0	0	0	200	300	0	0	0	0	0	0	0	200	903	0	0	0	0	0	0	0	603	903	0
560	5	0	0	0	0	0	0	200	300	0	0	0	0	0	0	0	200	903	0	0	0	0	0	0	0	603	903	0
560	6	0	0	0	0	0	0	200	300	0	0	0	0	0	0	0	200	903	0	0	0	0	0	0	0	603	903	0
560	7	0	0	0	0	0	0	200	300	0	0	0	0	0	0	0	200	903	0	0	0	0	0	0	0	603	903	0
560	8	0	0	0	0	0	0	200	300	0	0	0	0	0	0	0	200	903	0	0	0	0	0	0	0	603	903	0
560	9	0	0	0	0	0	0	200	300	0	0	0	0	0	0	0	200	903	0	0	0	0	0	0	0	603	903	0
561	0	0	0	0	0	0	0	200	300	0	0	0	0	0	0	0	200	903	0	0	0	0	0	0	0	603	903	0
561	1	0	0	0	0	0	0	200	300	0	0	0	0	0	0	0	200	903	0	0	0	0	0	0	0	603	903	0
561	2	0	0	0	0	0	0	200	300	0	0	0	0	0	0	0	200	903	0	0	0	0	0	0	0	603	903	0
561	3	0	0	0	0	0	0	200	300	0	0	0	0	0	0	0	200	903	0	0	0	0	0	0	0	603	903	0
561	4	0	0	0	0	0	0	200	300	0	0	0	0	0	0	0	200	903	0	0	0	0	0	0	0	603	903	0
561	5	0	0	0	0	0	0	200	300	0	0	0	0	0	0	0	200	903	0	0	0	0	0	0	0	603	903	0
561	6	0	0	0	0	0	0	200	300	0	0	0	0	0	0	0	200	903	0	0	0	0	0	0	0	603	903	0
561	7	0	0	0	0	0	0	200	300	0	0	0	0	0	0	0	200	903	0	0	0	0	0	0	0	603	903	0
561	8	0	0	0	0	0	0	200	300	0	0	0	0	0	0	0	200	903	0	0	0	0	0	0	0	603	903	0
561	9	0	0	0	0	0	0	200	300	0	0	0	0	0	0	0	200	903	0	0	0	0	0	0	0	603	903	0
562	0	0	0	0	0	0	0	200	300	0	0	0	0	0	0	0	200	903	0	0	0	0	0	0	0	603	903	0
562	1	0	0	0	0	0	0	200	300	0	0	0	0	0	0	0	200	903	0	0	0	0	0	0	0	603	903	0
562	2	0	0	0	0	0	0	200	300	0	0	0	0	0	0	0	200	903	0	0	0	0	0	0	0	603	903	0
562	3	0	0	0	0	0	0	200	300	0	0	0	0	0	0	0	200	903	0	0	0	0	0	0	0	603	903	0
562	4	0	0	0	0	0	0	200	300	0	0	0	0	0	0	0	200	903	0	0	0	0	0	0	0	603	903	0
562	5	0	0	0	0	0	0	200	300	0	0	0	0	0	0	0	200	903	0	0	0	0	0	0	0	603	903	0
562	6	0	0	0	0	0	0	200	300	0	0	0	0	0	0	0	200	903	0	0	0	0	0	0	0	603	903	0
562	7	0	0	0	0	0	0	200	300	0	0	0	0	0	0	0	200	903	0	0	0	0	0	0	0	603	903	0
562	8	0	0	0	0	0	0	200	300	0	0	0	0	0	0	0	200	903	0	0	0	0	0	0	0	603	903	0
562	9	0	0	0	0	0	0	200	300	0	0	0	0	0	0	0	200	903	0	0	0	0	0	0	0	603	903	0
563	0	0	0	0	0	0	0	200	300	0	0	0	0	0	0	0	200	903	0	0	0	0	0	0	0	603	903	0
563	1	0	0	0	0	0	0	200	300	0	0	0	0	0	0	0	200	903	0	0	0	0	0	0	0	603	903	0
563	2	0	0	0	0	0	0	200	300	0	0	0	0	0	0	0	200	903	0	0	0	0	0	0	0	603	903	0
563	3	0	0	0	0	0	0	200	300	0	0	0	0	0	0	0	200	903	0	0	0	0	0	0	0	603	903	0
563	4	0	0	0	0	0	0	200	300	0	0	0	0	0	0	0	200	903	0	0	0	0	0	0	0	603	903	0
563	5	0	0	0	0	0	0	200	300	0	0	0	0	0	0	0	200	903	0	0	0	0	0	0	0	603	903	0
563	6	0	0	0	0	0	0	200	300	0	0	0	0	0	0	0	200	903	0	0	0	0	0	0	0	603	903	0
563	7	0	0	0	0	0	0	200	300	0	0	0	0	0	0	0	200	903	0	0	0	0	0	0	0	603	903	0
563	8	0	0	0	0	0	0	200	300	0	0	0	0	0	0	0	200	903	0	0	0	0	0	0	0	603	903	0
563	9	0	0	0	0	0	0	200	300	0	0	0	0	0	0	0	200	903	0	0	0	0	0	0	0	603	903	0
564	0	0	0	0	0	0	0	200	300	0	0	0	0	0	0	0	200	903	0	0	0	0	0	0	0	603	903	0
564	1	0	0	0	0	0	0	200	300	0	0	0	0	0	0	0	200	903	0	0	0	0	0	0	0	603	903	0
564	2	0	0	0	0	0	0	200	300	0	0	0	0	0	0	0	200	903	0	0	0	0	0	0	0	603	903	0
564	3	0	0	0	0	0	0	200	300	0	0	0	0	0	0	0	200	903	0	0	0	0	0	0	0	603	903	0
564	4	0	0	0	0	0	0	200	300	0	0	0	0	0	0	0	200	903	0	0	0	0	0	0	0	603	903	0
564	5	0	0	0	0	0	0	200	300	0	0	0	0	0	0	0	200	903	0	0	0	0	0	0	0	603	903	0
564	6	0	0	0	0	0	0	200	300	0	0	0	0	0	0	0	200	903	0	0	0	0	0	0	0	603	903	0
564	7	0	0	0	0	0	0	200	300	0	0	0	0	0	0	0	200	903	0	0	0	0	0	0	0	603	903	0
564	8	0	0	0	0	0	0	200	300	0	0	0	0	0	0	0	200	903	0	0	0	0	0	0	0	603	903	0
564	9	0	0	0	0	0	0	200	300	0	0	0	0	0	0	0	200	903	0	0	0	0	0	0	0	603	903	0
565	0	0	0	0	0	0	0	200	300	0	0	0	0	0	0	0	200	903	0	0	0	0	0	0	0	603	903	0
565	1	0	0	0	0	0	0	200	300	0	0	0	0	0	0	0	200	903	0	0	0	0	0	0	0	603	903	0
565	2	0	0	0	0	0	0	200	300	0	0	0	0	0	0	0	200	903	0	0	0	0	0	0	0	603	903	0
565	3	0	0	0	0	0	0	200	300	0	0	0	0	0	0	0	200	903	0	0	0	0	0	0	0	603	903	0
565	4	0	0	0	0	0	0	200	300	0	0	0	0	0	0	0	200	903	0	0	0	0	0	0	0	603	903	0
565	5	0	0	0	0	0	0	200	300	0	0	0	0	0	0	0	200	903	0	0	0	0	0	0	0	603	903	0
565	6	0	0	0	0	0	0	200	300	0	0	0	0	0	0	0	200	903	0	0	0	0	0	0	0	603	903	0
565	7	0	0	0	0	0	0	200	300	0	0	0	0	0	0	0	200	903	0	0	0	0	0	0	0	603	903	0
565	8	0	0	0	0	0	0	200	300	0	0	0	0	0	0	0	200	903	0	0	0	0	0	0	0	603	903	0
565	9	0	0	0	0	0	0	200	300	0	0	0	0	0	0	0	200	903	0	0	0	0	0	0	0	603	903	0
566	0	0	0	0	0	0	0	200	300	0	0	0	0	0	0	0	200	903	0	0	0	0	0	0	0	603	903	0
566	1	0	0	0	0	0	0	200	300	0	0	0	0	0	0	0	200	903	0	0	0	0	0	0	0	603	903	0
566	2	0	0	0	0	0	0	200	300	0	0	0	0	0	0	0	200	903	0	0	0	0	0	0	0	603	903	0
566	3	0	0	0	0	0	0	200	300	0	0	0	0	0	0	0	200	903	0	0	0	0	0	0	0	603	903	0
566	4	0	0	0	0	0	0	200	300	0	0	0	0	0	0	0	200	903	0	0	0	0	0	0	0	603	903	0
566	5	0	0	0	0	0	0	200	300	0	0	0	0	0	0	0	200	903	0	0	0	0	0	0	0	603	903	0
566	6	0	0	0	0	0	0	200	300	0	0	0	0	0	0	0	200	903	0	0	0	0	0	0	0	603	903	0
566	7	0	0	0	0	0	0	200	300	0	0	0	0	0	0	0	200	903	0	0	0	0	0	0	0	603	903	0
566	8	0	0	0	0	0	0	200	300	0	0	0	0	0	0	0	200	903	0	0	0	0	0	0	0	603	903	0
566	9	0	0	0	0	0	0	200	300	0	0	0	0	0	0	0	200	903	0	0	0	0	0	0	0	603	903	0
567	0	0	0	0	0	0	0	200	300	0	0	0	0	0	0	0	200	903	0	0	0	0	0	0	0	603	903	0
567	1	0	0	0	0	0	0	200	300	0	0	0	0	0	0	0	200	903	0	0	0	0	0	0	0	603	903	0
567	2	0	0	0	0	0	0	200	300	0	0	0	0	0	0	0	200	903	0	0	0	0	0	0	0	603	903	0
567	3	0	0	0	0	0	0	200	300	0	0	0	0	0	0	0	200	903	0	0	0	0	0	0	0	603	903	0
567	4	0	0	0	0	0	0	200	300	0	0	0	0	0	0	0	200	903	0	0	0	0	0	0	0	603	903	0
567	5	0	0	0	0	0	0	200	300	0	0	0	0	0	0	0	200	903	0	0	0	0	0	0	0	603	903	0
567	6	0	0	0	0	0	0	200	300	0	0	0	0	0	0	0	200	903	0	0	0	0	0	0	0	603	903	0
567	7	0	0	0	0	0	0	200	300	0	0	0	0	0	0	0	200	903	0	0	0	0	0	0	0	603	903	0
567	8	0	0	0	0	0	0	200	300	0	0	0	0	0	0	0	200	903	0	0	0	0	0	0	0	603	903	0
567	9	0	0	0	0	0	0	200	300	0	0	0	0	0	0	0	200	903	0	0	0	0	0	0	0	603	903	0
568	0	0	0	0	0	0	0	200	300	0	0	0	0	0	0	0	200	903	0	0	0	0	0	0	0	603	903	0
568	1	0	0	0	0	0	0	200	300	0	0	0	0	0	0	0	200	903	0	0	0	0	0	0	0	603	903	0
568	2	0	0	0	0	0	0	200	300	0	0	0	0	0	0	0	200	903	0	0	0	0	0	0	0	603	903	0
568	3	0	0	0	0	0	0	200	300	0	0	0	0	0	0	0	200	903	0	0	0	0	0	0	0	603	903	0
568	4	0	0	0	0	0	0	200	300	0	0	0	0	0	0	0	200	903	0	0	0	0	0	0	0	603	903	0
568	5	0	0	0	0	0	0	200	300	0	0	0	0	0	0	0	200	903	0	0	0	0	0	0	0	603	903	0
568	6	0	0	0	0	0	0	200	300	0	0	0	0	0	0	0	200	903	0	0	0	0	0	0	0	603	903	0
568	7	0	0	0	0	0	0	200	300	0	0	0	0	0	0	0	200	903	0	0	0	0	0	0	0	603	903	0
568	8	0	0	0	0	0	0	200	300	0	0	0	0	0	0	0	200	903	0	0	0	0	0	0	0	603	903	0
568	9	0	0	0	0	0	0	200	300	0	0	0	0	0	0	0	200	903	0	0	0	0	0	0	0	603	903	0
569	0	0	0	0	0	0	0	200	300	0	0	0	0	0	0	0	200	903	0	0	0	0	0	0	0	603	903	0
569	1	0	0	0	0	0	0	200	300	0	0	0	0	0	0	0	200	903	0	0	0	0	0	0	0	603	903	0
569	2	0	0	0	0	0	0	200	300	0	0	0	0	0	0	0	200	903	0	0	0	0	0	0	0	603	903	0
569	3	0	0	0	0	0	0	200	300	0	0	0	0	0	0	0	200	903	0	0	0	0	0	0	0	603	903	0
569	4	0	0	0	0	0	0	200	300	0	0	0	0	0	0	0	200	903	0	0	0	0	0	0	0	603	903	0
569	5	0	0	0	0	0	0	200	300	0	0	0	0	0	0	0	200	903	0	0	0	0	0	0	0	603	903	0
569	6	0	0	0	0	0	0	200	300	0	0	0	0	0	0	0	200	903	0	0	0	0	0	0	0	603	903	0
569	7	0	0	0	0	0	0	200	300	0	0	0	0	0	0	0	200	903	0	0	0	0	0	0	0	603	903	0
569	8	0	0	0	0	0	0	200	300	0	0	0	0	0	0	0	200	903	0	0	0	0	0	0	0	603	903	0
569	9	0	0	0	0	0	0	200	300	0	0	0	0	0	0	0	200	903	0	0	0	0	0	0	0	603	903	0
570	0	0	0	0	0	0	0	200	300	0	0	0	0	0	0	0	200	903	0	0	0	0	0	0	0	603	903	0
570	1	0	0	0	0	0	0	200	300	0	0	0	0	0	0	0	200	903	0	0	0	0	0	0	0	603	903	0
570	2	0	0	0	0	0	0	200	300	0	0	0	0	0	0	0	200	903	0	0	0	0	0	0	0	603	903	0
570	3	0	0	0	0	0	0	200	300	0	0	0	0	0	0	0	200	903	0	0	0	0	0	0	0	603	903	0
570	4	0	0	0	0	0	0	200	300	0	0	0	0	0	0	0	200	903	0	0	0	0	0	0	0	603	903	0
570	5	0	0	0	0	0	0	200	300	0	0	0	0	0	0	0	200	903	0	0	0	0	0	0	0	603	903	0
570	6	0	0	0	0	0	0	200	300	0	0	0	0	0	0	0	200	903	0	0	0	0	0	0	0	603	903	0
570	7	0	0	0	0	0	0	200	300	0	0	0	0	0	0	0	200	903	0	0	0	0	0	0	0	603	903	0
570	8	0	0	0	0	0	0	200	300	0	0	0	0	0	0	0	200	903	0	0	0	0	0	0	0	603	903	0
570	9	0	0	0	0	0	0	200	300	0	0	0	0	0	0	0	200	903	0	0	0	0	0	0	0	603	903	0
571	0	0	0	0	0	0	0	200	300	0	0	0	0	0	0	0	200	903	0	0	0	0	0	0	0	603	903	0
571	1	0	0	0	0	0	0	200	300	0	0	0	0	0	0	0	200	903	0	0	0	0	0	0	0	603	903	0
571	2	0	0	0	0	0	0	200	300	0	0	0	0	0	0	0	200	903	0	0	0	0	0	0	0	603	903	0
571	3	0	0	0	0	0	0	200	300	0	0	0	0	0	0	0	200	903	0	0	0	0	0	0	0	603	903	0
571	4	0	0	0	0	0	0	200	300	0	0	0	0	0	0	0	200	903	0	0	0	0	0	0	0	603	903	0
571	5	0	0	0	0	0	0	200	300	0	0	0	0	0	0	0	200	903	0	0	0	0	0	0	0	603	903	0
571	6	0	0	0	0	0	0	200	300	0	0	0	0	0	0	0	200	903	0	0	0	0	0	0	0	603	903	0
571	7	0	0	0	0	0	0	200	300	0	0	0	0	0	0	0	200	903	0	0	0	0	0	0	0	603	903	0
571	8	0	0	0	0	0	0	200	300	0	0	0	0	0	0	0	200	903	0	0	0	0	0	0	0	603	903	0
571	9	0	0	0	0	0	0	200	300	0	0	0	0	0	0	0	200	903	0	0	0	0	0	0	0	603	903	0
572	0	0	0	0	0	0	0	200	300	0	0	0	0	0	0	0	200	903	0	0	0	0	0	0	0	603	903	0
572	1	0	0	0	0	0	0	200	300	0	0	0	0	0	0	0	200	903	0	0	0	0	0	0	0	603	903	0
572	2	0	0	0	0	0	0	200	300	0	0	0	0	0	0	0	200	903	0	0	0	0	0	0	0	603	903	0
572	3	0	0	0	0	0	0	200	300	0	0	0	0	0	0	0	200	903	0	0	0	0	0	0	0	603	903	0
572	4	0	0	0	0	0	0	200	300	0	0	0	0	0	0	0	200	903	0	0	0	0	0	0	0	603	903	0
572	5	0	0	0	0	0	0	200	300	0	0	0	0	0	0	0	200	903	0	0	0	0	0	0	0	603	903	0
572	6	0	0	0	0	0	0	200	300	0	0	0	0	0	0	0	200	903	0	0	0	0	0	0	0	603	903	0
572	7	0	0	0	0	0	0	200	300	0	0	0	0	0	0	0	200	903	0	0	0	0	0	0	0	603	903	0
572	8	0	0	0	0	0	0	200	300	0	0	0	0	0	0	0	200	903	0	0	0	0	0	0	0	603	903	0
572	9	0	0	0	0	0	0	200	300	0	0	0	0	0	0	0	200	903	0	0	0	0	0	0	0	603	903	0
573	0	0	0	0	0	0	0	200	300	0	0	0	0	0	0	0	200	903	0	0	0	0	0	0	0	603	903	0
573	1	0	0	0	0	0	0	200	300	0	0	0	0	0	0	0	200	903	0	0	0	0	0	0	0	603	903	0
573	2	0	0	0	0	0	0	200	300	0	0	0	0	0	0	0	200	903	0	0	0	0	0	0	0	603	903	0
573	3	0	0	0	0	0	0	200	300	0	0	0	0	0	0	0	200	903	0	0	0	0	0	0	0	603	903	0
573	4	0	0	0	0	0	0	200	300	0	0	0	0	0	0	0	200	903	0	0	0	0	0	0	0	603	903	0
573	5	0	0	0	0	0	0	200	300	0	0	0	0	0	0	0	200	903	0	0	0	0	0	0	0	603	903	0
573	6	0	0	0	0	0	0	200	300	0	0	0	0	0	0	0	200	903	0	0	0	0	0	0	0	603	903	0
573	7	0	0	0	0	0	0	200	300	0	0	0	0	0	0	0	200	903	0	0	0	0	0	0	0	603	903	0
573	8	0	0	0	0	0	0	200	300	0	0	0	0	0	0	0	200	903	0	0	0	0	0	0	0	603	903	0
573	9	0	0	0	0	0	0	200	300	0	0	0	0	0	0	0	200	903	0	0	0	0	0	0	0	603	903	0
574	0	0	0	0	0	0	0	200	300	0	0	0	0	0	0	0	200	903	0	0	0	0	0	0	0	603	903	0
574	1	0	0	0	0	0	0	200	300	0	0	0	0	0	0	0	200	903	0	0	0	0	0	0	0	603	903	0
574	2	0	0	0	0	0	0	200	300	0	0	0	0	0	0	0	200	903	0	0	0	0	0	0	0	603	903	0
574	3	0	0	0	0	0	0	200	300	0	0	0	0	0	0	0	200	903	0	0	0	0	0	0	0	603	903	0
574	4	0	0	0	0	0	0	200	300	0	0	0	0	0	0	0	200	903	0	0	0	0	0	0	0	603	903	0
574	5	0	0	0	0	0	0	200	300	0	0	0	0	0	0	0	200	903	0	0	0	0	0	0	0	603	903	0
574	6	0	0	0	0	0	0	200	300	0	0	0	0	0	0	0	200	903	0	0	0	0	0	0	0	603	903	0
574	7	0	0	0	0	0	0	200	300	0	0	0	0	0	0	0	200	903	0	0	0	0	0	0	0	603	903	0
574	8	0	0	0	0	0	0	200	300	0	0	0	0	0	0	0	200	903	0	0	0	0	0	0	0	603	903	0
574	9	0	0	0	0	0	0	200	300	0	0	0	0	0	0	0	200	903	0	0	0	0	0	0	0	603	903	0
575	0	0	0	0	0	0	0	200	300	0	0	0	0	0	0	0	200	903	0	0	0	0	0	0	0	603	903	0
575	1	0	0	0	0	0	0	200	300	0	0	0	0	0	0	0	200	903	0	0	0	0	0	0	0	603	903	0
575	2	0	0	0	0	0	0	200	300	0	0	0	0	0	0	0	200	903	0	0	0	0	0	0	0	603	903	0
575	3	0	0	0	0	0	0	200	300	0	0	0	0	0	0	0	200	903	0	0	0	0	0	0	0	603	903	0
575	4	0	0	0	0	0	0	200	300	0	0	0	0	0	0	0	200	903	0	0	0	0	0	0	0	603	903	0
575	5	0	0	0	0	0	0	200	300	0	0	0	0	0	0	0	200	903	0	0	0	0	0	0	0	603	903	0
575	6	0	0	0	0	0	0	200	300	0	0	0	0	0	0	0	200	903	0	0	0	0	0	0	0	603	903	0
575	7	0	0	0	0	0	0	200	300	0	0	0	0	0	0	0	200	903	0	0	0	0	0	0	0	603	903	0
575	8	0	0	0	0	0	0	200	300	0	0	0	0	0	0	0	200	903	0	0	0	0	0	0	0	603	903	0
575	9	0	0	0	0	0	0	200	300	0	0	0	0	0	0	0	200	903	0	0	0	0	0	0	0	603	903	0
576	0	0	0	0	0	0	0	200	300	0	0	0	0	0	0	0	200	903	0	0	0	0	0	0	0	603	903	0
576	1	0	0	0	0	0	0	200	300	0	0	0	0	0	0	0	200	903	0	0	0	0	0	0	0	603	903	0
576	2	0	0	0	0	0	0	200	300	0	0	0	0	0	0	0	200	903	0	0	0	0	0	0	0	603	903	0
576	3	0	0	0	0	0	0	200	300	0	0	0	0	0	0	0	200	903	0	0	0	0	0	0	0	603	903	0
576	4	0	0	0	0	0	0	200	300	0	0	0	0	0	0	0	200	903	0	0	0	0	0	0	0	603	903	0
576	5	0	0	0	0	0	0	200	300	0	0	0	0	0	0	0	200	903	0	0	0	0	0	0	0	603	903	0
576	6	0	0	0	0	0	0	200	300	0	0	0	0	0	0	0	200	903	0	0	0	0	0	0	0	603	903	0
576	7	0	0	0	0	0	0	200	300	0	0	0	0	0	0	0	200	903	0	0	0	0	0	0	0	603	903	0
576	8	0	0	0	0	0	0	200	300	0	0	0	0	0	0	0	200	903	0	0	0	0	0	0	0	603	903	0
576	9	0	0	0	0	0	0	200	300	0	0	0	0	0	0	0	200	903	0	0	0	0	0	0	0	603	903	0
577	0	0	0	0	0	0	0	200	300	0	0	0	0	0	0	0	200	903	0	0	0	0	0	0	0	603	903	0
577	1	0	0	0	0	0	0	200	300	0	0	0	0	0	0	0	200	903	0	0	0	0	0	0	0	603	903	0
577	2	0	0	0	0	0	0	200	300	0	0	0	0	0	0	0	200	903	0	0	0	0	0	0	0	603	903	0
577	3	0	0	0	0	0	0	200	300	0	0	0	0	0	0	0	200	903	0	0	0	0	0	0	0	603	903	0
577	4	0	0	0	0	0	0	200	300	0	0	0	0	0	0	0	200	903	0	0	0	0	0	0	0	603	903	0
577	5	0	0	0	0	0	0	200	300	0	0	0	0	0	0	0	200	903	0	0	0	0	0	0	0	603	903	0
577	6	0	0	0	0	0	0	200	300	0	0	0	0	0	0	0	200	903	0	0	0	0	0	0	0	603	903	0
577	7	0	0	0	0	0	0	200	300	0	0	0	0	0	0	0	200	903	0	0	0	0	0	0	0	603	903	0
577	8	0	0	0	0	0	0	200	300	0	0	0	0	0	0	0	200	903	0	0	0	0	0	0	0	603	903	0
577	9	0	0	0	0	0	0	200	300	0	0	0	0	0	0	0	200	903	0	0	0	0	0	0	0	603	903	0
578	0	0	0	0	0	0	0	200	300	0	0	0	0	0	0	0	200	903	0	0	0	0	0	0	0	603	903	0
578	1	0	0	0	0	0	0	200	300	0	0	0	0	0	0	0	200	903	0	0	0	0	0	0	0	603	903	0
578	2	0	0	0	0	0	0	200	300	0	0	0	0	0	0	0	200	903	0	0	0	0	0	0	0	603	903	0
578	3	0	0	0	0	0	0	200	300	0	0	0	0	0	0	0	200	903	0	0	0	0	0	0	0	603	903	0
578	4	0	0	0	0	0	0	200	300	0	0	0	0	0	0	0	200	903	0	0	0	0	0	0	0	603	903	0
578	5	0	0	0	0	0	0	200	300	0	0	0	0	0	0	0	200	903	0	0	0	0	0	0	0	603	903	0
578	6	0	0	0	0	0	0	200	300	0	0	0	0	0	0	0	200	903	0	0	0	0	0	0	0	603	903	0
578	7	0	0	0	0	0	0	200	300	0	0	0	0	0	0	0	200	903	0	0	0	0	0	0	0	603	903	0
578	8	0	0	0	0	0	0	200	300	0	0	0	0	0	0	0	200	903	0	0	0	0	0	0	0	603	903	0
578	9	0	0	0	0	0	0	200	300	0	0	0	0	0	0	0	200	903	0	0	0	0	0	0	0	603	903	0
579	0	0	0	0	0	0	0	200	300	0	0	0	0	0	0	0	200	903	0	0	0	0	0	0	0	603	903	0
579	1	0	0	0	0	0	0	200	300	0	0	0	0	0	0	0	200	903	0	0	0	0	0	0	0	603	903	0
579	2	0	0	0	0	0	0	200	300	0	0	0	0	0	0	0	200	903	0	0	0	0	0	0	0	603	903	0
579	3	0	0	0	0	0	0	200	300	0	0	0	0	0	0	0	200	903	0	0	0	0	0	0	0	603	903	0
579	4	0	0	0	0	0	0	200	300	0	0	0	0	0	0	0	200	903	0	0	0	0	0	0	0	603	903	0
579	5	0	0	0	0	0	0	200	300	0	0	0	0	0	0	0	200	903	0	0	0	0	0	0	0	603	903	0
579	6	0	0	0	0	0	0	200	300	0	0	0	0	0	0	0	200	903	0	0	0	0	0	0	0	603	903	0
579	7	0	0	0	0	0	0	200	300	0	0	0	0	0	0	0	200	903	0	0	0	0	0	0	0	603	903	0
579	8	0	0	0	0	0	0	200	300	0	0	0	0	0	0	0	200	903	0	0	0	0	0	0	0	603	903	0
579	9	0	0	0	0	0	0	200	300	0	0	0	0	0	0	0	200	903	0	0	0	0	0	0	0	603	903	0
580	0	0	0	0	0	0	0	200	300	0	0	0	0	0	0	0	200	903	0	0	0	0	0	0	0	603	903	0
580	1	0	0	0	0	0	0	200	300	0	0	0	0	0	0	0	200	903	0	0	0	0	0	0	0	603	903	0
580	2	0	0	0	0	0	0	200	300	0	0	0	0	0	0	0	200	903	0	0	0	0	0	0	0	603	903	0
580	3	0	0	0	0	0	0	200	300	0	0	0	0	0	0	0	200	903	0	0	0	0	0	0	0	603	903	0
580	4	0	0	0	0	0	0	200	300	0	0	0	0	0	0	0	200	903	0	0	0	0	0	0	0	603	903	0
580	5	0	0	0	0	0	0	200	300	0	0	0	0	0	0	0	200	903	0	0	0	0	0	0	0	603	903	0
580	6	0	0	0	0	0	0	200	300	0	0	0	0	0	0	0	200	903	0	0	0	0	0	0	0	603	903	0
580	7	0	0	0	0	0	0	200	300	0	0	0	0	0	0	0	200	903	0	0	0	0	0	0	0	603	903	0
580	8	0	0	0	0	0	0	200	300	0	0	0	0	0	0	0	200	903	0	0	0	0	0	0	0	603	903	0
580	9	0	0	0	0	0	0	200	300	0	0	0	0	0	0	0	200	903	0	0	0	0	0	0	0	603	903	0
581	0	0	0	0	0	0	0	200	300	0	0	0	0	0	0	0	200	903	0	0	0	0	0	0	0	603	903	0
581	1	0	0	0	0	0	0	200	300	0	0	0	0	0	0	0	200	903	0	0	0	0	0	0	0	603	903	0
581	2	0	0	0	0	0	0	200	300	0	0	0	0	0	0	0	200	903	0	0	0	0	0	0	0	603	903	0
581	3	0	0	0	0	0	0	200	300	0	0	0	0	0	0	0	200	903	0	0	0	0	0	0	0	603	903	0
581	4	0	0	0	0	0	0	200	300	0	0	0	0	0	0	0	200	903	0	0	0	0	0	0	0	603	903	0
581	5	0	0	0	0	0	0	200	300	0	0	0	0	0	0	0	200	903	0	0	0	0	0	0	0	603	903	0
581	6	0	0	0	0	0	0	200	300	0	0	0	0	0	0	0	200	903	0	0	0	0	0	0	0	603	903	0
581	7	0	0	0	0	0	0	200	300	0	0	0	0	0	0	0	200	903	0	0	0	0	0	0	0	603	903	0
581	8	0	0	0	0	0	0	200	300	0	0	0	0	0	0	0	200	903	0	0	0	0	0	0	0	603	903	0
581	9	0	0	0	0	0	0	200	300	0	0	0	0	0	0	0	200	903	0	0	0	0	0	0	0	603	903	0
582	0	0	0	0	0	0	0	200	300	0	0	0	0	0	0	0	200	903	0	0	0	0	0	0	0	603	903	0
582	1	0	0	0	0	0	0	200	300	0	0	0	0	0	0	0	200	903	0	0	0	0	0	0	0	603	903	0
582	2	0	0	0	0	0	0	200	300	0	0	0	0	0	0	0	200	903	0	0	0	0	0	0	0	603	903	0
582	3	0	0	0	0	0	0	200	300	0	0	0	0	0	0	0	200	903	0	0	0	0	0	0	0	603	903	0
582	4	0	0	0	0	0	0	200	300	0	0	0	0	0	0	0	200	903	0	0	0	0	0	0	0	603	903	0
582	5	0	0	0	0	0	0	200	300	0	0	0	0	0	0	0	200	903	0	0	0	0	0	0	0	603	903	0
582	6	0	0	0	0	0	0	200	300	0	0	0	0	0	0	0	200	903	0	0	0	0	0	0	0	603	903	0
582	7	0	0	0	0	0	0	200	300	0	0	0	0	0	0	0	200	903	0	0	0	0	0	0	0	603	903	0
582	8	0	0	0	0	0	0	200	300	0	0	0	0	0	0	0	200	903	0	0	0	0	0	0	0	603	903	0
582	9	0	0	0	0	0	0	200	300	0	0	0	0	0	0	0	200	903	0	0	0	0	0	0	0	603	903	0
583	0	0	0	0	0	0	0	200	300	0	0	0	0	0	0	0	200	903	0	0	0	0	0	0	0	603	903	0
583	1	0	0	0	0	0	0	200	300	0	0	0	0	0	0	0	200	903	0	0	0	0	0	0	0	603	903	0
583	2	0	0	0	0	0	0	200	300	0	0	0	0	0	0	0	200	903	0	0	0	0	0	0	0	603	903	0
583	3	0	0	0	0	0	0	200	300	0	0	0	0	0	0	0	200	903	0	0	0	0	0	0	0	603	903	0
583	4	0	0	0	0	0	0	200	300	0	0	0	0	0	0	0	200	903	0	0	0	0	0	0	0	603	903	0
583	5	0	0	0	0	0	0	200	300	0	0	0	0	0	0	0	200	903	0	0	0	0	0	0	0	603	903	0
583	6	0	0	0	0	0	0	200	300	0	0	0	0	0	0	0	200	903	0	0	0	0	0	0	0	603	903	0
583	7	0	0	0	0	0	0	200	300	0	0	0	0	0	0	0	200	903	0	0	0	0	0	0	0	603	903	0
583	8	0	0	0	0	0	0	200	300	0	-6.17981	-5.49835	-34.0698	-5683.59	4845.76	671.585	342.23	1069.82	0	0	0	0	0	0	0	603	903	0
583	9	0	0	0	0	0	0	200	300	0	0.534062	3.80951	-34.375	-4127.19	3869.2	992.02	312.559	1023.06	0	0	0	0	0	0	0	603	903	0
584	0	0	0	0	0	0	0	200	300	0	5.26429	12.8122	-25.8301	-4218.75	3869.2	1037.8	349.794	1066.33	0	0	0	0	0	0	0	603	903	0
584	1	0	0	0	0	0	0	200	300	0	-1.14441	14.3381	-25.5249	-5866.7	5273.01	1541.34	406.583	1132.84	0	0	0	0	0	0	0	603	903	0
584	2	0	0	0	0	0	0	200	300	0	10.2997	20.4416	-41.394	-6141.35	5456.12	2090.65	331.809	1051.36	0	0	0	0	0	0	0	603	903	0
584	3	0	0	0	0	0	0	200	300	0	12.4359	26.5451	-54.5166	-6965.33	6676.82	2411.09	322.473	1030.77	0	0	0	0	0	0	0	603	903	0
584	4	0	0	0	0	0	0	200	300	0	4.34876	28.8339	-55.4321	-9162.6	8752.01	2914.63	357.887	1068.29	0	0	0	0	0	0	0	603	903	0
584	5	0	0	0	0	0	0	200	300	0	7.85828	33.8693	-56.6528	-8704.83	8568.91	4150.59	351.253	1056.65	0	0	0	0	0	0	0	603	903	0
584	6	0	0	0	0	0	0	200	300	0	13.8092	39.6677	-67.6392	-9711.91	9240.29	3509.72	336.612	1046.58	0	0	0	0	0	0	0	603	903	0
584	7	0	0	0	0	0	0	200	300	0	11.673	40.5832	-81.6772	-11268.3	11132.4	3647.05	336.297	1040.96	0	0	0	0	0	0	0	603	903	0
584	8	0	0	0	0	0	0	200	300	0	16.2506	41.3461	-88.6963	-12000.7	11559.6	4013.26	330.328	1038.3	0	0	0	0	0	0	0	603	903	0
584	9	0	0	0	0	0	0	200	300	0	14.1144	39.6677	-93.2739	-13374	12597.2	3875.93	335.056	1046.38	0	0	0	0	0	0	0	603	903	0
585	0	0	0	0	0	0	0	200	300	0	12.5885	38.7521	-102.124	-14198	13817.9	3418.17	335.305	1042.03	0	0	0	0	0	0	0	603	903	0
585	1	0	0	0	0	0	0	200	300	0	15.3351	39.5151	-115.247	-14838.9	14855.5	4104.81	328.902	1031.76	0	0	0	0	0	0	0	603	903	0
585	2	0	0	0	0	0	0	200	300	0	14.4196	40.278	-124.707	-16303.7	16137.3	3784.38	329.401	1033.74	0	0	0	0	0	0	0	603	903	0
585	3	0	0	0	0	0	0	200	300	0	9.84192	39.2099	-134.473	-18043.2	17907.3	4104.81	333.167	1037.18	0	0	0	0	0	0	0	603	903	0
585	4	0	0	0	0	0	0	200	300	0	13.8092	44.8557	-145.154	-19050.3	17907.3	5111.89	323.368	1034.24	0	0	0	0	0	0	0	603	903	0
585	5	0	0	0	0	0	0	200	300	0	11.0626	46.5341	-156.445	-20606.7	20226.6	4837.23	329.289	1034.72	0	0	0	0	0	0	0	603	903	0
585	6	0	0	0	0	0	0	200	300	0	6.48499	45.1608	-168.958	-21613.8	21264.2	5523.88	325.855	1030.92	0	0	0	0	0	0	0	603	903	0
585	7	0	0	0	0	0	0	200	300	0	8.62122	47.1445	-176.892	-23078.6	21935.6	5661.21	324.006	1033.47	0	0	0	0	0	0	0	603	903	0
585	8	0	0	0	0	0	0	200	300	0	7.70569	45.3134	-188.489	-24360.4	23278.4	4974.56	323.5	1032.24	0	0	0	0	0	0	0	603	903	0
585	9	0	0	0	0	0	0	200	300	0	4.65393	40.8884	-198.254	-25642.1	24865.3	4883.01	325.421	1032.34	0	0	0	0	0	0	0	603	903	0
586	0	0	0	0	0	0	0	200	300	0	4.80652	39.9728	-208.02	-25642.1	25475.6	5935.87	322.467	1026.27	0	0	0	0	0	0	0	603	903	0
586	1	0	0	0	0	0	0	200	300	0	2.21253	36.1581	-217.48	-27198.5	25902.9	4379.47	319.104	1028.06	0	0	0	0	0	0	0	603	903	0
586	2	0	0	0	0	0	0	200	300	0	0.534062	30.5124	-223.279	-27839.4	26818.4	3967.48	320.112	1027.68	0	0	0	0	0	0	0	603	903	0
586	3	0	0	0	0	0	0	200	300	0	0.686649	27.6132	-237.317	-28754.9	28100.2	4699.91	318.408	1024.17	0	0	0	0	0	0	0	603	903	0
586	4	0	0	0	0	0	0	200	300	0	-3.7384	22.7304	-247.083	-29853.5	28832.6	3509.72	316.692	1023.82	0	0	0	0	0	0	0	603	903	0
586	5	0	0	0	0	0	0	200	300	0	-4.04358	18.6105	-255.627	-31226.8	30297.4	2868.85	318.522	1025.16	0	0	0	0	0	0	0	603	903	0
586	6	0	0	0	0	0	0	200	300	0	-2.05993	15.4062	-263.562	-31776.1	30053.3	3418.17	314.027	1023.56	0	0	0	0	0	0	0	603	903	0
586	7	0	0	0	0	0	0	200	300	0	-3.58581	9.60785	-271.497	-32233.9	32311.6	1999.1	319.013	1021.73	0	0	0	0	0	0	0	603	903	0
586	8	0	0	0	0	0	0	200	300	0	-6.63757	3.80951	-280.347	-32874.8	32189.5	1587.11	314.82	1020.26	0	0	0	0	0	0	0	603	903	0
586	9	0	0	0	0	0	0	200	300	0	-7.24792	1.21552	-285.84	-33881.8	32860.9	1815.99	314.963	1021.53	0	0	0	0	0	0	0	603	903	0
587	0	0	0	0	0	0	0	200	300	0	-8.92639	-3.20953	-294.08	-34705.8	33837.5	625.809	315.062	1021.02	0	0	0	0	0	0	0	603	903	0
587	1	0	0	0	0	0	0	200	300	0	-10.2997	-8.85528	-302.014	-34705.8	34814	122.269	315.273	1017.91	0	0	0	0	0	0	0	603	903	0
587	2	0	0	0	0	0	0	200	300	0	-11.3678	-14.8062	-305.066	-34522.7	34936.1	122.269	314.52	1016.16	0	0	0	0	0	0	0	603	903	0
587	3	0	0	0	0	0	0	200	300	0	-11.9781	-21.0623	-313.611	-35621.3	35851.6	-1251.02	314.319	1016.58	0	0	0	0	0	0	0	603	903	0
587	4	0	0	0	0	0	0	200	300	0	-12.2833	-24.5718	-317.883	-35804.4	36278.9	-1800.34	314.126	1015.63	0	0	0	0	0	0	0	603	903	0
587	5	0	0	0	0	0	0	200	300	0	-12.8937	-28.6917	-323.987	-36079.1	36950.3	-1617.23	314.049	1014.36	0	0	0	0	0	0	0	603	903	0
587	6	0	0	0	0	0	0	200	300	0	-14.267	-32.3538	-331.006	-36170.7	37682.7	-2944.75	313.843	1012.27	0	0	0	0	0	0	0	603	903	0
587	7	0	0	0	0	0	0	200	300	0	-13.504	-36.3211	-335.889	-36994.6	37804.8	-3448.29	312.552	1013.14	0	0	0	0	0	0	0	603	903	0
587	8	0	0	0	0	0	0	200	300	0	-13.9618	-40.5936	-341.992	-37086.2	38720.3	-3265.18	313.22	1011.44	0	0	0	0	0	0	0	603	903	0
587	9	0	0	0	0	0	0	200	300	0	-15.0299	-44.5608	-346.875	-37727	39757.9	-4409.6	314.617	1011.76	0	0	0	0	0	0	0	603	903	0
588	0	0	0	0	0	0	0	200	300	0	-13.8092	-46.5445	-351.147	-37910.2	40368.2	-4958.91	314.961	1010.96	0	0	0	0	0	0	0	603	903	0
588	1	0	0	0	0	0	0	200	300	0	-13.8092	-49.7488	-360.303	-38001.7	40734.5	-4684.25	313.056	1008.47	0	0	0	0	0	0	0	603	903	0
588	2	0	0	0	0	0	0	200	300	0	-14.5721	-52.1902	-369.153	-39375	41527.9	-5691.33	312.495	1009.66	0	0	0	0	0	0	0	603	903	0
588	3	0	0	0	0	0	0	200	300	0	-13.8092	-54.9368	-376.172	-39924.3	42809.7	-6423.76	313.803	1009.13	0	0	0	0	0	0	0	603	903	0
588	4	0	0	0	0	0	0	200	300	0	-13.504	-56.9205	-385.632	-40015.9	44030.4	-6103.32	314.177	1006.77	0	0	0	0	0	0	0	603	903	0
588	5	0	0	0	0	0	0	200	300	0	-13.6566	-58.2938	-393.567	-40473.6	44945.9	-6606.86	314.201	1005.84	0	0	0	0	0	0	0	603	903	0
588	6	0	0	0	0	0	0	200	300	0	-14.5721	-59.9722	-404.553	-41755.4	46166.6	-7568.16	314.117	1006.21	0	0	0	0	0	0	0	603	903	0
588	7	0	0	0	0	0	0	200	300	0	-15.9454	-60.2774	-416.15	-41938.5	47448.3	-7110.4	314.017	1003.78	0	0	0	0	0	0	0	603	903	0
588	8	0	0	0	0	0	0	200	300	0	-16.098	-62.7188	-425.305	-42121.6	49035.2	-7842.82	315.294	1002.04	0	0	0	0	0	0	0	603	903	0
588	9	0	0	0	0	0	0	200	300	0	-13.1988	-64.2447	-437.512	-42945.6	49706.6	-8392.14	313.612	1001.16	0	0	0	0	0	0	0	603	903	0
589	0	0	0	0	0	0	0	200	300	0	-12.8937	-66.2283	-444.226	-43494.9	50744.2	-7934.38	314.231	1000.91	0	0	0	0	0	0	0	603	903	0
589	1	0	0	0	0	0	0	200	300	0	-14.1144	-66.3809	-452.771	-43952.7	52514.2	-8621.02	315.984	1000.07	0	0	0	0	0	0	0	603	903	0
589	2	0	0	0	0	0	0	200	300	0	-13.3514	-67.449	-463.757	-44593.5	53673.9	-9124.56	315.737	999.157	0	0	0	0	0	0	0	603	903	0
589	3	0	0	0	0	0	0	200	300	0	-12.7411	-70.6534	-472.302	-44776.6	54101.2	-8529.47	314.548	997.805	0	0	0	0	0	0	0	603	903	0
589	4	0	0	0	0	0	0	200	300	0	-12.5885	-71.2637	-480.542	-45417.5	55138.8	-9033.01	314.743	997.513	0	0	0	0	0	0	0	603	903	0
589	5	0	0	0	0	0	0	200	300	0	-11.0626	-73.0948	-489.087	-45966.8	56237.4	-9353.45	314.984	996.985	0	0	0	0	0	0	0	603	903	0
589	6	0	0	0	0	0	0	200	300	0	-12.5885	-75.231	-497.021	-46424.6	57519.1	-8941.46	315.728	996.406	0	0	0	0	0	0	0	603	903	0
589	7	0	0	0	0	0	0	200	300	0	-11.9781	-76.7569	-506.482	-46516.1	58251.5	-9582.33	315.012	994.842	0	0	0	0	0	0	0	603	903	0
589	8	0	0	0	0	0	0	200	300	0	-9.53674	-78.7405	-512.585	-46333	58800.9	-9948.54	314.714	993.391	0	0	0	0	0	0	0	603	903	0
589	9	0	0	0	0	0	0	200	300	0	-9.84192	-81.4871	-520.825	-46516.1	60082.6	-9719.66	315.36	992.312	0	0	0	0	0	0	0	603	903	0
590	0	0	0	0	0	0	0	200	300	0	-10.4523	-83.4708	-525.708	-46973.9	60937.1	-10040.1	315.914	992.354	0	0	0	0	0	0	0	603	903	0
590	1	0	0	0	0	0	0	200	300	0	-7.85827	-83.4708	-533.032	-47614.8	61120.2	-10543.6	314.665	992.328	0	0	0	0	0	0	0	603	903	0
590	2	0	0	0	0	0	0	200	300	0	-7.09533	-84.5389	-539.746	-47248.6	62340.9	-10177.4	315.5	990.539	0	0	0	0	0	0	0	603	903	0
590	3	0	0	0	0	0	0	200	300	0	-4.65393	-86.2173	-545.544	-47614.8	62951.3	-10864.1	315.392	990.279	0	0	0	0	0	0	0	603	903	0
590	4	0	0	0	0	0	0	200	300	0	-3.28064	-89.7269	-549.207	-47981	62951.3	-11230.3	314.622	990.364	0	0	0	0	0	0	0	603	903	0
590	5	0	0	0	0	0	0	200	300	0	-1.44958	-90.1846	-554.089	-48164.1	63988.9	-10955.6	315.485	989.925	0	0	0	0	0	0	0	603	903	0
590	6	0	0	0	0	0	0	200	300	0	-1.29699	-90.9476	-559.277	-47431.7	64965.4	-11138.7	316.16	987.809	0	0	0	0	0	0	0	603	903	0
590	7	0	0	0	0	0	0	200	300	0	3.28064	-92.1683	-562.939	-47706.3	65636.8	-11596.5	316.597	987.745	0	0	0	0	0	0	0	603	903	0
590	8	0	0	0	0	0	0	200	300	0	2.67029	-94.4571	-567.822	-48530.3	66247.2	-11459.2	316.669	988.467	0	0	0	0	0	0	0	603	903	0
590	9	0	0	0	0	0	0	200	300	0	4.65393	-95.6778	-572.705	-47981	66552.3	-11596.5	316.207	986.78	0	0	0	0	0	0	0	603	903	0
591	0	0	0	0	0	0	0	200	300	0	6.17981	-97.0511	-575.146	-47431.7	67406.8	-12420.5	317.199	985.469	0	0	0	0	0	0	0	603	903	0
591	1	0	0	0	0	0	0	200	300	0	7.85828	-98.1192	-578.503	-47248.6	67650.9	-12466.2	316.941	984.674	0	0	0	0	0	0	0	603	903	0
591	2	0	0	0	0	0	0	200	300	0	9.99451	-99.7977	-582.776	-47889.4	68871.6	-12466.2	318.179	985.175	0	0	0	0	0	0	0	603	903	0
591	3	0	0	0	0	0	0	200	300	0	11.0626	-101.018	-585.522	-47706.3	68139.2	-12924	316.373	984.477	0	0	0	0	0	0	0	603	903	0
591	4	0	0	0	0	0	0	200	300	0	11.3678	-103.155	-588.879	-46973.9	69726.1	-12924	318.405	982.768	0	0	0	0	0	0	0	603	903	0
591	5	0	0	0	0	0	0	200	300	0	14.5721	-105.138	-589.795	-46149.9	69970.3	-13290.2	318.635	981.247	0	0	0	0	0	0	0	603	903	0
591	6	0	0	0	0	0	0	200	300	0	16.2506	-105.291	-593.762	-47523.2	69848.2	-13931.1	317.637	983.037	0	0	0	0	0	0	0	603	903	0
591	7	0	0	0	0	0	0	200	300	0	16.5558	-106.664	-597.424	-46882.3	70031.4	-13610.6	317.222	981.474	0	0	0	0	0	0	0	603	903	0
591	8	0	0	0	0	0	0	200	300	0	17.6239	-107.885	-597.424	-47065.5	71191	-13931.1	319.163	981.781	0	0	0	0	0	0	0	603	903	0
591	9	0	0	0	0	0	0	200	300	0	19.455	-110.784	-605.359	-47157	71496.2	-14343.1	318.106	980.899	0	0	0	0	0	0	0	603	903	0
592	0	0	0	0	0	0	0	200	300	0	19.9127	-110.631	-618.176	-46333	73571.4	-14114.2	319.014	977.951	0	0	0	0	0	0	0	603	903	0
592	1	0	0	0	0	0	0	200	300	0	22.049	-111.394	-630.994	-46699.2	75463.4	-14480.4	319.595	977.009	0	0	0	0	0	0	0	603	903	0
592	2	0	0	0	0	0	0	200	300	0	33.9508	-115.362	-637.708	-46241.5	77538.6	-15670.6	321.59	975.512	0	0	0	0	0	0	0	603	903	0
592	3	0	0	0	0	0	0	200	300	0	33.3405	-121.923	-638.013	-45783.7	78149	-15762.1	322.488	974.76	0	0	0	0	0	0	0	603	903	0
592	4	0	0	0	0	0	0	200	300	0	32.5775	-126.043	-649.915	-46058.4	79186.6	-16128.3	321.842	973.868	0	0	0	0	0	0	0	603	903	0
592	5	0	0	0	0	0	0	200	300	0	41.275	-125.127	-658.765	-45600.6	79247.6	-17181.2	320.297	972.221	0	0	0	0	0	0	0	603	903	0
592	6	0	0	0	0	0	0	200	300	0	43.1061	-131.841	-665.479	-45966.8	81444.9	-17959.4	322.385	972.073	0	0	0	0	0	0	0	603	903	0
592	7	0	0	0	0	0	0	200	300	0	37.4603	-137.945	-674.329	-45966.8	81994.3	-18005.2	321.594	971.167	0	0	0	0	0	0	0	603	903	0
592	8	0	0	0	0	0	0	200	300	0	38.0707	-138.555	-681.958	-44959.7	83337	-18874.9	322.203	968.927	0	0	0	0	0	0	0	603	903	0
592	9	0	0	0	0	0	0	200	300	0	39.2914	-144.201	-691.113	-45875.2	83764.2	-19607.4	321.202	969.379	0	0	0	0	0	0	0	603	903	0
593	0	0	0	0	0	0	0	200	300	0	36.3922	-149.236	-696.606	-45600.6	84984.9	-19149.6	321.998	968.461	0	0	0	0	0	0	0	603	903	0
593	1	0	0	0	0	0	0	200	300	0	35.0189	-147.253	-702.71	-45875.2	84740.8	-19607.4	320.591	968.283	0	0	0	0	0	0	0	603	903	0
593	2	0	0	0	0	0	0	200	300	0	33.0353	-149.389	-710.339	-45325.9	86327.7	-20156.7	321.53	966.809	0	0	0	0	0	0	0	603	903	0
593	3	0	0	0	0	0	0	200	300	0	34.4086	-151.372	-718.274	-45417.5	86999.1	-19561.6	321.123	966.231	0	0	0	0	0	0	0	603	903	0
593	4	0	0	0	0	0	0	200	300	0	33.9508	-152.593	-723.462	-46149.9	87548.4	-19927.8	321.013	966.79	0	0	0	0	0	0	0	603	903	0
593	5	0	0	0	0	0	0	200	300	0	28.7628	-149.541	-726.208	-46058.4	87731.6	-19607.4	320.808	966.423	0	0	0	0	0	0	0	603	903	0
593	6	0	0	0	0	0	0	200	300	0	29.3732	-151.83	-736.89	-45142.8	89318.5	-19332.7	321.21	964.261	0	0	0	0	0	0	0	603	903	0
593	7	0	0	0	0	0	0	200	300	0	31.9672	-151.22	-742.078	-44868.2	89684.7	-19973.6	320.856	963.463	0	0	0	0	0	0	0	603	903	0
593	8	0	0	0	0	0	0	200	300	0	29.5258	-149.389	-748.792	-45417.5	90295	-20294	320.588	963.654	0	0	0	0	0	0	0	603	903	0
593	9	0	0	0	0	0	0	200	300	0	26.1688	-149.236	-752.148	-46149.9	91210.5	-19332.7	321.267	964.358	0	0	0	0	0	0	0	603	903	0
594	0	0	0	0	0	0	0	200	300	0	28.1525	-150.457	-761.609	-45875.2	91393.7	-19607.4	320.001	963.235	0	0	0	0	0	0	0	603	903	0
594	1	0	0	0	0	0	0	200	300	0	28.9154	-149.999	-765.576	-45600.6	92248.2	-19927.8	320.495	962.564	0	0	0	0	0	0	0	603	903	0
594	2	0	0	0	0	0	0	200	300	0	28.7628	-147.253	-771.68	-45234.4	93468.9	-18371.4	321.124	961.618	0	0	0	0	0	0	0	603	903	0
594	3	0	0	0	0	0	0	200	300	0	28.9154	-149.236	-778.699	-45417.5	93590.9	-19286.9	320.189	961.325	0	0	0	0	0	0	0	603	903	0
594	4	0	0	0	0	0	0	200	300	0	29.9835	-149.999	-785.413	-45783.7	95422	-20065.1	321.493	961.293	0	0	0	0	0	0	0	603	903	0
594	5	0	0	0	0	0	0	200	300	0	29.5258	-150.304	-789.99	-45325.9	95177.9	-19241.1	320.48	960.375	0	0	0	0	0	0	0	603	903	0
594	6	0	0	0	0	0	0	200	300	0	30.2887	-149.084	-791.211	-45142.8	96337.5	-19470	321.76	960.055	0	0	0	0	0	0	0	603	903	0
594	7	0	0	0	0	0	0	200	300	0	30.8991	-153.661	-798.84	-45234.4	96886.8	-20110.9	321.284	959.625	0	0	0	0	0	0	0	603	903	0
594	8	0	0	0	0	0	0	200	300	0	33.0353	-152.288	-804.028	-45417.5	97802.3	-19332.7	321.64	959.487	0	0	0	0	0	0	0	603	903	0
594	9	0	0	0	0	0	0	200	300	0	32.7301	-151.83	-809.827	-44959.7	98229.6	-19515.8	321.297	958.518	0	0	0	0	0	0	0	603	903	0
595	0	0	0	0	0	0	0	200	300	0	34.7137	-154.119	-815.015	-44227.3	98962	-20110.9	321.424	957.266	0	0	0	0	0	0	0	603	903	0
595	1	0	0	0	0	0	0	200	300	0	36.6974	-153.966	-821.423	-45234.4	99206.2	-19698.9	320.773	958.068	0	0	0	0	0	0	0	603	903	0
595	2	0	0	0	0	0	0	200	300	0	36.5448	-154.424	-823.254	-45142.8	100244	-19882	321.765	957.835	0	0	0	0	0	0	0	603	903	0
595	3	0	0	0	0	0	0	200	300	0	38.0707	-154.577	-828.137	-45234.4	100061	-20156.7	320.826	957.622	0	0	0	0	0	0	0	603	903	0
595	4	0	0	0	0	0	0	200	300	0	40.2069	-155.34	-834.851	-44135.8	101586	-19698.9	321.682	955.867	0	0	0	0	0	0	0	603	903	0
595	5	0	0	0	0	0	0	200	300	0	40.6647	-155.492	-837.903	-44776.6	101770	-19973.6	321.458	956.439	0	0	0	0	0	0	0	603	903	0
595	6	0	0	0	0	0	0	200	300	0	41.4276	-155.797	-842.48	-45142.8	102319	-20431.3	321.45	956.583	0	0	0	0	0	0	0	603	903	0
595	7	0	0	0	0	0	0	200	300	0	41.7328	-156.255	-846.143	-44959.7	103234	-19836.2	322.006	956.135	0	0	0	0	0	0	0	603	903	0
595	8	0	0	0	0	0	0	200	300	0	42.1906	-156.103	-851.025	-44318.9	103662	-20110.9	321.808	955.077	0	0	0	0	0	0	0	603	903	0
595	9	0	0	0	0	0	0	200	300	0	43.5638	-153.661	-854.993	-44318.9	104333	-20522.9	322.028	954.835	0	0	0	0	0	0	0	603	903	0
596	0	0	0	0	0	0	0	200	300	0	43.4113	-154.577	-858.96	-44593.5	104577	-19927.8	321.749	954.916	0	0	0	0	0	0	0	603	903	0
596	1	0	0	0	0	0	0	200	300	0	43.5638	-156.866	-862.622	-44593.5	105066	-20065.1	321.798	954.695	0	0	0	0	0	0	0	603	903	0
596	2	0	0	0	0	0	0	200	300	0	42.8009	-155.645	-865.369	-44593.5	105615	-19973.6	322.046	954.531	0	0	0	0	0	0	0	603	903	0
596	3	0	0	0	0	0	0	200	300	0	42.3431	-154.119	-867.2	-44318.9	106225	-19927.8	322.492	954.106	0	0	0	0	0	0	0	603	903	0
596	4	0	0	0	0	0	0	200	300	0	42.038	-154.424	-871.167	-44868.2	106225	-19790.5	321.934	954.504	0	0	0	0	0	0	0	603	903	0
596	5	0	0	0	0	0	0	200	300	0	41.5802	-153.966	-874.829	-44959.7	106286	-20248.2	321.494	954.393	0	0	0	0	0	0	0	603	903	0
596	6	0	0	0	0	0	0	200	300	0	39.9017	-153.051	-878.186	-44227.3	107080	-19790.5	321.933	953.362	0	0	0	0	0	0	0	603	903	0
596	7	0	0	0	0	0	0	200	300	0	39.9017	-153.051	-880.017	-44593.5	107507	-19607.4	322.165	953.673	0	0	0	0	0	0	0	603	903	0
596	8	0	0	0	0	0	0	200	300	0	40.0543	-151.83	-882.764	-44776.6	107019	-19424.3	321.231	953.723	0	0	0	0	0	0	0	603	903	0
596	9	0	0	0	0	0	0	200	300	0	38.3759	-148.778	-884.29	-44776.6	107202	-19241.1	321.229	953.636	0	0	0	0	0	0	0	603	903	0
597	0	0	0	0	0	0	0	200	300	0	37.6129	-148.626	-887.646	-43861.1	107995	-19058	321.665	952.413	0	0	0	0	0	0	0	603	903	0
597	1	0	0	0	0	0	0	200	300	0	37.4603	-149.694	-890.088	-43494.9	108300	-19103.8	321.674	951.866	0	0	0	0	0	0	0	603	903	0
597	2	0	0	0	0	0	0	200	300	0	37.3077	-148.778	-891.614	-43586.4	107812	-18462.9	320.918	951.885	0	0	0	0	0	0	0	603	903	0
597	3	0	0	0	0	0	0	200	300	0	36.087	-146.184	-891.309	-43494.9	108239	-18554.5	321.439	951.799	0	0	0	0	0	0	0	603	903	0
597	4	0	0	0	0	0	0	200	300	0	36.3922	-146.642	-893.75	-44410.4	108789	-18829.1	321.722	952.69	0	0	0	0	0	0	0	603	903	0
597	5	0	0	0	0	0	0	200	300	0	36.85	-144.964	-896.802	-43769.6	109033	-18462.9	321.58	951.806	0	0	0	0	0	0	0	603	903	0
597	6	0	0	0	0	0	0	200	300	0	36.5448	-144.964	-898.328	-44227.3	108667	-18188.3	320.965	952.233	0	0	0	0	0	0	0	603	903	0
597	7	0	0	0	0	0	0	200	300	0	35.9345	-143.133	-898.938	-43952.7	108544	-18371.4	320.747	951.894	0	0	0	0	0	0	0	603	903	0
597	8	0	0	0	0	0	0	200	300	0	35.6293	-142.217	-899.854	-44593.5	108850	-18005.2	320.964	952.556	0	0	0	0	0	0	0	603	903	0
597	9	0	0	0	0	0	0	200	300	0	36.6974	-141.454	-900.464	-44135.8	108789	-16998.1	320.814	952.015	0	0	0	0	0	0	0	603	903	0
598	0	0	0	0	0	0	0	200	300	0	38.0707	-139.928	-902.905	-44318.9	107995	-17913.6	319.609	952.085	0	0	0	0	0	0	0	603	903	0
598	1	0	0	0	0	0	0	200	300	0	36.85	-139.928	-902.295	-44410.4	108850	-17684.8	320.637	952.219	0	0	0	0	0	0	0	603	903	0
598	2	0	0	0	0	0	0	200	300	0	35.9345	-137.792	-902.6	-44502	109643	-17272.8	321.475	952.304	0	0	0	0	0	0	0	603	903	0
598	3	0	0	0	0	0	0	200	300	0	36.2396	-137.334	-900.159	-43861.1	108850	-17455.9	320.923	951.726	0	0	0	0	0	0	0	603	903	0
598	4	0	0	0	0	0	0	200	300	0	37.1552	-135.045	-901.074	-43586.4	108667	-17272.8	320.597	951.372	0	0	0	0	0	0	0	603	903	0
598	5	0	0	0	0	0	0	200	300	0	36.6974	-134.893	-900.769	-43586.4	109216	-16769.2	321.247	951.388	0	0	0	0	0	0	0	603	903	0
598	6	0	0	0	0	0	0	200	300	0	35.4767	-135.045	-898.633	-43311.8	109338	-16906.5	321.672	951.197	0	0	0	0	0	0	0	603	903	0
598	7	0	0	0	0	0	0	200	300	0	35.4767	-133.672	-898.938	-43586.4	108544	-17043.9	320.747	951.487	0	0	0	0	0	0	0	603	903	0
598	8	0	0	0	0	0	0	200	300	0	36.3922	-132.604	-896.191	-42579.3	108361	-16494.6	320.913	950.512	0	0	0	0	0	0	0	603	903	0
598	9	0	0	0	0	0	0	200	300	0	36.5448	-131.231	-894.36	-43311.8	108972	-16723.4	321.843	951.428	0	0	0	0	0	0	0	603	903	0
599	0	0	0	0	0	0	0	200	300	0	35.0189	-129.4	-891.614	-42854	108117	-16403	321.26	951.063	0	0	0	0	0	0	0	603	903	0
599	1	0	0	0	0	0	0	200	300	0	35.9345	-128.637	-890.088	-43586.4	107507	-16036.8	320.782	951.969	0	0	0	0	0	0	0	603	903	0
599	2	0	0	0	0	0	0	200	300	0	35.4767	-128.637	-888.562	-42487.8	107202	-16311.4	320.646	950.816	0	0	0	0	0	0	0	603	903	0
599	3	0	0	0	0	0	0	200	300	0	35.4767	-127.721	-885.205	-42487.8	107385	-16036.8	321.311	950.998	0	0	0	0	0	0	0	603	903	0
599	4	0	0	0	0	0	0	200	300	0	33.6456	-127.111	-883.069	-42762.5	107202	-15075.5	321.397	951.425	0	0	0	0	0	0	0	603	903	0
599	5	0	0	0	0	0	0	200	300	0	34.8663	-124.059	-880.322	-42579.3	106103	-15624.8	320.528	951.368	0	0	0	0	0	0	0	603	903	0
599	6	0	0	0	0	0	0	200	300	0	36.85	-123.296	-876.965	-41480.7	106103	-15487.5	320.989	950.3	0	0	0	0	0	0	0	603	903	0
599	7	0	0	0	0	0	0	200	300	0	35.6293	-122.533	-874.829	-42030	105432	-15167	320.517	951.044	0	0	0	0	0	0	0	603	903	0
599	8	0	0	0	0	0	0	200	300	0	34.1034	-121.618	-871.472	-42396.2	105371	-15167	320.911	951.649	0	0	0	0	0	0	0	603	903	0
599	9	0	0	0	0	0	0	200	300	0	33.0353	-121.16	-868.42	-41938.5	105004	-14709.3	320.914	951.293	0	0	0	0	0	0	0	603	903	0
600	0	0	0	0	0	0	0	200	300	0	32.1198	-118.108	-865.674	-41297.6	104943	-14709.3	321.228	950.706	0	0	0	0	0	0	0	603	903	0
600	1	0	0	0	0	0	0	200	300	0	32.8827	-117.65	-862.622	-41297.6	104028	-14800.8	320.595	950.875	0	0	0	0	0	0	0	603	903	0
600	2	0	0	0	0	0	0	200	300	0	33.3405	-117.498	-859.875	-41846.9	103967	-14526.2	320.909	951.666	0	0	0	0	0	0	0	603	903	0
600	3	0	0	0	0	0	0	200	300	0	31.9672	-113.531	-857.129	-40382.1	102868	-14160	320.015	950.113	0	0	0	0	0	0	0	603	903	0
600	4	0	0	0	0	0	0	200	300	0	31.3568	-114.141	-852.856	-41114.5	103357	-14434.6	321.189	951.208	0	0	0	0	0	0	0	603	903	0
600	5	0	0	0	0	0	0	200	300	0	32.5775	-112.462	-849.194	-40839.8	102929	-14251.5	321.208	951.093	0	0	0	0	0	0	0	603	903	0
600	6	0	0	0	0	0	0	200	300	0	32.1198	-111.089	-846.143	-40473.6	101892	-13656.4	320.419	950.833	0	0	0	0	0	0	0	603	903	0
600	7	0	0	0	0	0	0	200	300	0	31.2042	-110.174	-840.649	-40382.1	101709	-13793.8	320.988	951.037	0	0	0	0	0	0	0	603	903	0
600	8	0	0	0	0	0	0	200	300	0	32.2723	-107.427	-838.818	-40839.8	101648	-13839.5	321.179	951.687	0	0	0	0	0	0	0	603	903	0
600	9	0	0	0	0	0	0	200	300	0	31.662	-107.732	-833.63	-39832.8	101281	-13107.1	321.494	950.782	0	0	0	0	0	0	0	603	903	0
601	0	0	0	0	0	0	0	200	300	0	32.5775	-105.596	-830.273	-40199	100488	-12924	321.03	951.417	0	0	0	0	0	0	0	603	903	0
601	1	0	0	0	0	0	0	200	300	0	31.3568	-103.46	-826.917	-40015.9	99999.6	-13152.9	320.931	951.392	0	0	0	0	0	0	0	603	903	0
601	2	0	0	0	0	0	0	200	300	0	31.8146	-102.849	-822.339	-40290.5	99694.5	-12695.1	321.233	951.995	0	0	0	0	0	0	0	603	903	0
601	3	0	0	0	0	0	0	200	300	0	31.0516	-102.544	-818.982	-39558.1	99389.2	-12740.9	321.357	951.302	0	0	0	0	0	0	0	603	903	0
601	4	0	0	0	0	0	0	200	300	0	31.5094	-100.713	-814.099	-39283.4	98595.8	-12695.1	321.11	951.254	0	0	0	0	0	0	0	603	903	0
601	5	0	0	0	0	0	0	200	300	0	31.3568	-98.577	-808.606	-39375	98168.5	-12237.4	321.405	951.695	0	0	0	0	0	0	0	603	903	0
601	6	0	0	0	0	0	0	200	300	0	30.4413	-97.3563	-805.554	-39008.8	98168.5	-12328.9	321.865	951.425	0	0	0	0	0	0	0	603	903	0
601	7	0	0	0	0	0	0	200	300	0	31.0516	-95.5252	-802.808	-39100.3	97436.1	-11733.8	321.369	951.705	0	0	0	0	0	0	0	603	903	0
601	8	0	0	0	0	0	0	200	300	0	31.8146	-94.6097	-799.451	-38367.9	96520.6	-11733.8	320.734	950.993	0	0	0	0	0	0	0	603	903	0
601	9	0	0	0	0	0	0	200	300	0	31.662	-93.0838	-793.347	-38093.3	96154.4	-11504.9	321.201	951.016	0	0	0	0	0	0	0	603	903	0
602	0	0	0	0	0	0	0	200	300	0	33.0353	-92.626	-789.99	-38825.7	95910.3	-11367.6	321.407	952.147	0	0	0	0	0	0	0	603	903	0
602	1	0	0	0	0	0	0	200	300	0	32.4249	-89.7269	-784.802	-38184.8	95666.1	-11047.2	321.898	951.655	0	0	0	0	0	0	0	603	903	0
602	2	0	0	0	0	0	0	200	300	0	30.4413	-88.3536	-781.14	-37177.7	94872.6	-11047.2	321.454	950.594	0	0	0	0	0	0	0	603	903	0
602	3	0	0	0	0	0	0	200	300	0	32.4249	-88.0484	-776.257	-37177.7	94384.3	-10955.6	321.589	950.894	0	0	0	0	0	0	0	603	903	0
602	4	0	0	0	0	0	0	200	300	0	31.9672	-85.1492	-772.29	-38093.3	94384.3	-10269	322.214	952.325	0	0	0	0	0	0	0	603	903	0
602	5	0	0	0	0	0	0	200	300	0	30.8991	-84.9966	-768.323	-37269.3	93651.9	-10543.6	321.891	951.507	0	0	0	0	0	0	0	603	903	0
602	6	0	0	0	0	0	0	200	300	0	31.0516	-83.4708	-764.355	-36720	92980.6	-10543.6	321.646	951.041	0	0	0	0	0	0	0	603	903	0
602	7	0	0	0	0	0	0	200	300	0	31.8146	-81.7923	-760.388	-37177.7	92431.2	-10177.4	321.558	951.893	0	0	0	0	0	0	0	603	903	0
602	8	0	0	0	0	0	0	200	300	0	32.5775	-81.7923	-754.59	-36994.6	92126.1	-9765.43	322.088	952.026	0	0	0	0	0	0	0	603	903	0
602	9	0	0	0	0	0	0	200	300	0	31.2042	-80.419	-751.843	-36445.3	91637.8	-9811.21	321.884	951.475	0	0	0	0	0	0	0	603	903	0
603	0	0	0	0	0	0	0	200	300	0	31.3568	-77.9776	-746.045	-35896	90783.3	-9582.33	321.686	951.115	0	0	0	0	0	0	0	603	903	0
603	1	0	0	0	0	0	0	200	300	0	33.0353	-76.7569	-742.993	-35896	90783.3	-9582.33	322.186	951.313	0	0	0	0	0	0	0	603	903	0
603	2	0	0	0	0	0	0	200	300	0	33.1879	-74.6207	-739.026	-35987.5	89928.8	-9261.89	321.686	951.696	0	0	0	0	0	0	0	603	903	0
603	3	0	0	0	0	0	0	200	300	0	32.8827	-74.1629	-734.753	-35346.7	89318.5	-9170.34	321.563	951.107	0	0	0	0	0	0	0	603	903	0
603	4	0	0	0	0	0	0	200	300	0	31.5094	-73.0948	-729.565	-35255.1	88952.3	-9170.34	321.925	951.323	0	0	0	0	0	0	0	603	903	0
603	5	0	0	0	0	0	0	200	300	0	34.1034	-71.1111	-725.293	-34980.5	88830.2	-8621.02	322.475	951.229	0	0	0	0	0	0	0	603	903	0
603	6	0	0	0	0	0	0	200	300	0	32.4249	-69.5853	-722.241	-34980.5	88402.9	-8300.59	322.401	951.433	0	0	0	0	0	0	0	603	903	0
603	7	0	0	0	0	0	0	200	300	0	31.9672	-67.9068	-717.053	-34980.5	87731.6	-8712.58	322.35	951.784	0	0	0	0	0	0	0	603	903	0
603	8	0	0	0	0	0	0	200	300	0	31.2042	-66.5335	-713.086	-34705.8	87243.3	-8483.7	322.346	951.67	0	0	0	0	0	0	0	603	903	0
603	9	0	0	0	0	0	0	200	300	0	33.0353	-64.3973	-703.931	-34156.5	87304.3	-8071.71	324.024	951.523	0	0	0	0	0	0	0	603	903	0
604	0	0	0	0	0	0	0	200	300	0	33.0353	-64.0921	-705.151	-34431.1	86571.8	-7980.15	322.771	951.828	0	0	0	0	0	0	0	603	903	0
604	1	0	0	0	0	0	0	200	300	0	32.4249	-62.5662	-700.879	-33790.3	85839.4	-7842.82	322.474	951.211	0	0	0	0	0	0	0	603	903	0
604	2	0	0	0	0	0	0	200	300	0	32.4249	-60.43	-696.301	-33881.8	85900.5	-7613.94	323.367	951.66	0	0	0	0	0	0	0	603	903	0
604	3	0	0	0	0	0	0	200	300	0	33.0353	-58.9041	-690.808	-33332.5	84923.9	-7110.4	322.934	951.252	0	0	0	0	0	0	0	603	903	0
604	4	0	0	0	0	0	0	200	300	0	35.0189	-58.1412	-688.672	-32874.8	84862.9	-7201.95	323.227	950.737	0	0	0	0	0	0	0	603	903	0
604	5	0	0	0	0	0	0	200	300	0	32.7301	-57.0731	-684.705	-33149.4	83337	-7018.85	321.712	951.414	0	0	0	0	0	0	0	603	903	0
604	6	0	0	0	0	0	0	200	300	0	31.8146	-55.242	-678.296	-33241	84130.4	-6789.97	324.032	952.007	0	0	0	0	0	0	0	603	903	0
604	7	0	0	0	0	0	0	200	300	0	33.0353	-54.3265	-675.549	-32600.1	83642.1	-6652.64	323.814	951.257	0	0	0	0	0	0	0	603	903	0
604	8	0	0	0	0	0	0	200	300	0	33.3405	-52.0377	-671.887	-32233.9	82482.5	-6332.2	322.762	950.975	0	0	0	0	0	0	0	603	903	0
604	9	0	0	0	0	0	0	200	300	0	34.256	-51.2747	-667.92	-32783.2	82482.5	-6332.2	323.492	952.083	0	0	0	0	0	0	0	603	903	0
605	0	0	0	0	0	0	0	200	300	0	33.0353	-49.9014	-663.037	-32508.5	82482.5	-6240.65	324.401	952.03	0	0	0	0	0	0	0	603	903	0
605	1	0	0	0	0	0	0	200	300	0	33.6456	-48.9859	-660.901	-31684.6	81750.1	-6057.54	323.695	950.942	0	0	0	0	0	0	0	603	903	0
605	2	0	0	0	0	0	0	200	300	0	34.1034	-47.6126	-654.797	-31501.5	81078.7	-6103.32	323.823	951.109	0	0	0	0	0	0	0	603	903	0
605	3	0	0	0	0	0	0	200	300	0	34.5612	-45.9341	-651.746	-32233.9	80834.5	-5965.99	324.028	952.458	0	0	0	0	0	0	0	603	903	0
605	4	0	0	0	0	0	0	200	300	0	33.7982	-45.4764	-648.694	-31593	79858	-5416.68	323.106	951.703	0	0	0	0	0	0	0	603	903	0
605	5	0	0	0	0	0	0	200	300	0	33.9508	-43.9505	-645.032	-31135.3	79613.8	-5554	323.426	951.269	0	0	0	0	0	0	0	603	903	0
605	6	0	0	0	0	0	0	200	300	0	34.5612	-42.272	-640.454	-29762	79369.7	-5416.68	323.927	949.47	0	0	0	0	0	0	0	603	903	0
605	7	0	0	0	0	0	0	200	300	0	34.256	-42.1194	-635.876	-30585.9	79186.6	-5142.02	324.531	951.101	0	0	0	0	0	0	0	603	903	0
605	8	0	0	0	0	0	0	200	300	0	33.6456	-40.2884	-632.825	-30036.6	78820.4	-5050.46	324.553	950.464	0	0	0	0	0	0	0	603	903	0
605	9	0	0	0	0	0	0	200	300	0	33.493	-39.678	-627.942	-30677.5	77904.8	-5096.24	324.064	951.854	0	0	0	0	0	0	0	603	903	0
606	0	0	0	0	0	0	0	200	300	0	35.0189	-38.4573	-624.585	-29395.8	77599.7	-4775.81	324.242	950.064	0	0	0	0	0	0	0	603	903	0
606	1	0	0	0	0	0	0	200	300	0	35.4767	-38.1522	-620.923	-29670.4	77721.8	-4684.25	325.171	950.784	0	0	0	0	0	0	0	603	903	0
606	2	0	0	0	0	0	0	200	300	0	34.7137	-36.9315	-616.65	-30128.2	76806.2	-4638.48	324.554	951.858	0	0	0	0	0	0	0	603	903	0
606	3	0	0	0	0	0	0	200	300	0	33.9508	-35.5582	-612.378	-29487.3	76379	-4501.15	324.725	951.152	0	0	0	0	0	0	0	603	903	0
606	4	0	0	0	0	0	0	200	300	0	33.9508	-34.0323	-609.326	-28846.4	76623.2	-4363.82	325.751	950.342	0	0	0	0	0	0	0	603	903	0
606	5	0	0	0	0	0	0	200	300	0	35.0189	-32.8116	-602.612	-28480.2	76012.8	-3951.83	326.139	950.261	0	0	0	0	0	0	0	603	903	0
606	6	0	0	0	0	0	0	200	300	0	35.6293	-32.0486	-602.917	-29029.6	74975.2	-3951.83	324.354	951.148	0	0	0	0	0	0	0	603	903	0
606	7	0	0	0	0	0	0	200	300	0	34.4086	-32.0486	-599.255	-28846.4	74608.9	-3768.72	324.503	951.137	0	0	0	0	0	0	0	603	903	0
606	8	0	0	0	0	0	0	200	300	0	34.8663	-30.6754	-594.678	-28205.6	74853.1	-4043.38	325.872	950.43	0	0	0	0	0	0	0	603	903	0
606	9	0	0	0	0	0	0	200	300	0	36.2396	-30.5228	-590.405	-28114	74242.7	-3768.72	325.749	950.618	0	0	0	0	0	0	0	603	903	0
607	0	0	0	0	0	0	0	200	300	0	35.7819	-28.6917	-586.743	-27839.4	73266.2	-3402.51	324.869	950.447	0	0	0	0	0	0	0	603	903	0
607	1	0	0	0	0	0	0	200	300	0	37.0026	-28.0814	-582.471	-27381.6	73205.2	-3448.29	325.68	950.009	0	0	0	0	0	0	0	603	903	0
607	2	0	0	0	0	0	0	200	300	0	34.7137	-27.6236	-580.334	-26832.3	73205.2	-3448.29	326.143	949.236	0	0	0	0	0	0	0	603	903	0
607	3	0	0	0	0	0	0	200	300	0	35.7819	-26.0977	-575.146	-26832.3	72716.9	-3265.18	326.432	949.653	0	0	0	0	0	0	0	603	903	0
607	4	0	0	0	0	0	0	200	300	0	35.0189	-26.5555	-572.095	-27106.9	71679.3	-3127.85	325.293	950.382	0	0	0	0	0	0	0	603	903	0
607	5	0	0	0	0	0	0	200	300	0	34.1034	-23.6563	-569.348	-26740.7	71923.4	-3036.3	326.326	949.967	0	0	0	0	0	0	0	603	903	0
607	6	0	0	0	0	0	0	200	300	0	34.4086	-23.9615	-565.991	-26191.4	71557.2	-2807.42	326.428	949.275	0	0	0	0	0	0	0	603	903	0
607	7	0	0	0	0	0	0	200	300	0	35.1715	-22.7408	-562.939	-26374.5	70885.9	-2807.42	325.921	949.852	0	0	0	0	0	0	0	603	903	0
607	8	0	0	0	0	0	0	200	300	0	35.3241	-21.8253	-559.888	-26099.9	70580.6	-2578.54	326.062	949.616	0	0	0	0	0	0	0	603	903	0
607	9	0	0	0	0	0	0	200	300	0	34.256	-22.283	-556.836	-26099.9	70702.7	-2349.66	326.972	949.872	0	0	0	0	0	0	0	603	903	0
608	0	0	0	0	0	0	0	200	300	0	34.256	-19.689	-553.174	-25459	70275.5	-2441.21	327.041	949.024	0	0	0	0	0	0	0	603	903	0
608	1	0	0	0	0	0	0	200	300	0	35.7819	-18.9261	-551.343	-25001.2	69359.9	-2303.88	325.802	948.346	0	0	0	0	0	0	0	603	903	0
608	2	0	0	0	0	0	0	200	300	0	35.1715	-18.6209	-548.291	-24909.7	69176.9	-2075	326.168	948.432	0	0	0	0	0	0	0	603	903	0
608	3	0	0	0	0	0	0	200	300	0	34.1034	-19.2313	-546.155	-25092.8	69298.9	-1937.67	326.885	948.945	0	0	0	0	0	0	0	603	903	0
608	4	0	0	0	0	0	0	200	300	0	34.256	-17.2476	-540.967	-24635	68749.6	-1800.34	327.087	948.539	0	0	0	0	0	0	0	603	903	0
608	5	0	0	0	0	0	0	200	300	0	35.6293	-16.4847	-537.305	-24360.4	68200.3	-1571.46	326.93	948.338	0	0	0	0	0	0	0	603	903	0
608	6	0	0	0	0	0	0	200	300	0	33.7982	-16.0269	-535.779	-24177.3	68078.2	-1663.01	327.064	948.125	0	0	0	0	0	0	0	603	903	0
608	7	0	0	0	0	0	0	200	300	0	35.7819	-15.7217	-533.032	-23994.2	67284.7	-1708.79	326.23	948.015	0	0	0	0	0	0	0	603	903	0
608	8	0	0	0	0	0	0	200	300	0	34.8663	-14.9588	-529.675	-23627.9	67345.8	-1159.47	327.145	947.608	0	0	0	0	0	0	0	603	903	0
608	9	0	0	0	0	0	0	200	300	0	36.5448	-14.1959	-526.013	-23261.7	66979.6	-1342.58	327.335	947.223	0	0	0	0	0	0	0	603	903	0
609	0	0	0	0	0	0	0	200	300	0	35.1715	-12.8226	-524.182	-23536.4	67101.7	-1342.58	328.012	947.901	0	0	0	0	0	0	0	603	903	0
609	1	0	0	0	0	0	0	200	300	0	35.0189	-12.67	-521.741	-23994.2	66613.4	-1205.25	327.675	948.989	0	0	0	0	0	0	0	603	903	0
609	2	0	0	0	0	0	0	200	300	0	33.493	-11.6019	-520.215	-22620.9	66003	-839.036	326.877	946.484	0	0	0	0	0	0	0	603	903	0
609	3	0	0	0	0	0	0	200	300	0	36.087	-11.7545	-518.384	-22437.8	65881	-1113.69	327.089	946.284	0	0	0	0	0	0	0	603	903	0
609	4	0	0	0	0	0	0	200	300	0	34.1034	-10.8389	-513.196	-22529.3	65819.9	-884.812	328.255	946.9	0	0	0	0	0	0	0	603	903	0
609	5	0	0	0	0	0	0	200	300	0	34.7137	-10.076	-507.703	-22529.3	65881	-747.483	329.763	947.375	0	0	0	0	0	0	0	603	903	0
609	6	0	0	0	0	0	0	200	300	0	34.5612	-9.77081	-508.923	-21796.9	65087.5	-564.377	327.893	945.829	0	0	0	0	0	0	0	603	903	0
609	7	0	0	0	0	0	0	200	300	0	34.8663	-8.85528	-507.703	-21156	64904.4	-610.154	327.839	944.67	0	0	0	0	0	0	0	603	903	0
609	8	0	0	0	0	0	0	200	300	0	32.1198	-8.85528	-503.735	-21613.8	64965.4	-427.048	328.967	945.907	0	0	0	0	0	0	0	603	903	0
609	9	0	0	0	0	0	0	200	300	0	31.9672	-7.93975	-501.599	-21522.2	64660.2	-152.39	328.908	945.907	0	0	0	0	0	0	0	603	903	0
610	0	0	0	0	0	0	0	200	300	0	32.2723	-7.63458	-499.768	-20789.8	63927.8	-564.377	327.915	944.599	0	0	0	0	0	0	0	603	903	0
610	1	0	0	0	0	0	0	200	300	0	31.8146	-7.48199	-497.937	-20972.9	63866.8	-243.942	328.263	945.12	0	0	0	0	0	0	0	603	903	0
610	2	0	0	0	0	0	0	200	300	0	30.8991	-6.26129	-494.885	-20881.3	63744.7	-198.166	328.807	945.194	0	0	0	0	0	0	0	603	903	0
610	3	0	0	0	0	0	0	200	300	0	31.5094	-5.95611	-493.054	-20606.7	63378.5	168.045	328.543	944.794	0	0	0	0	0	0	0	603	903	0
610	4	0	0	0	0	0	0	200	300	0	31.2042	-5.65094	-491.833	-19416.5	63012.3	-60.8369	328.117	942.478	0	0	0	0	0	0	0	603	903	0
610	5	0	0	0	0	0	0	200	300	0	30.2887	-5.04058	-487.866	-19508.1	63073.3	76.4922	329.284	942.987	0	0	0	0	0	0	0	603	903	0
610	6	0	0	0	0	0	0	200	300	0	30.2887	-5.04058	-485.73	-19599.6	63073.3	168.045	329.853	943.351	0	0	0	0	0	0	0	603	903	0
610	7	0	0	0	0	0	0	200	300	0	29.6783	-2.90435	-485.73	-19965.8	62829.2	122.269	329.35	944.105	0	0	0	0	0	0	0	603	903	0
610	8	0	0	0	0	0	0	200	300	0	30.1361	-3.81988	-483.899	-18684.1	62646.1	351.15	329.461	941.612	0	0	0	0	0	0	0	603	903	0
610	9	0	0	0	0	0	0	200	300	0	29.8309	-3.51471	-479.626	-18684.1	62035.7	213.821	329.342	941.956	0	0	0	0	0	0	0	603	903	0
611	0	0	0	0	0	0	0	200	300	0	29.2206	-2.75177	-478.711	-19141.8	62157.8	808.914	329.844	942.986	0	0	0	0	0	0	0	603	903	0
611	1	0	0	0	0	0	0	200	300	0	28.1525	-2.59918	-478.101	-18226.3	61730.6	580.032	329.116	941.122	0	0	0	0	0	0	0	603	903	0
611	2	0	0	0	0	0	0	200	300	0	28.7628	-2.14141	-478.101	-18226.3	61730.6	488.48	329.116	941.122	0	0	0	0	0	0	0	603	903	0
611	3	0	0	0	0	0	0	200	300	0	28.4576	-2.294	-475.354	-18317.9	61974.7	625.809	330.376	941.535	0	0	0	0	0	0	0	603	903	0
611	4	0	0	0	0	0	0	200	300	0	28.1525	-1.22589	-473.523	-17951.7	61486.4	808.914	329.849	940.911	0	0	0	0	0	0	0	603	903	0
611	5	0	0	0	0	0	0	200	300	0	27.6947	-0.157772	-471.387	-17768.6	61120.2	625.809	329.66	940.694	0	0	0	0	0	0	0	603	903	0
611	6	0	0	0	0	0	0	200	300	0	28.1525	-0.00518374	-470.471	-17036.1	60998.1	763.138	329.653	939.211	0	0	0	0	0	0	0	603	903	0
611	7	0	0	0	0	0	0	200	300	0	27.6947	0.45258	-469.556	-17219.2	61242.3	854.691	330.426	939.671	0	0	0	0	0	0	0	603	903	0
611	8	0	0	0	0	0	0	200	300	0	26.6266	0.910344	-466.809	-16578.4	61181.2	1129.35	331.063	938.514	0	0	0	0	0	0	0	603	903	0
611	9	0	0	0	0	0	0	200	300	0	24.7955	1.5207	-463.452	-16578.4	60693	946.244	330.958	938.772	0	0	0	0	0	0	0	603	903	0
612	0	0	0	0	0	0	0	200	300	0	26.7792	0.910344	-463.757	-16303.7	60326.7	900.467	330.083	938.156	0	0	0	0	0	0	0	603	903	0
612	1	0	0	0	0	0	0	200	300	0	26.1688	1.36811	-464.368	-16212.2	60693	1312.45	330.7	937.912	0	0	0	0	0	0	0	603	903	0
612	2	0	0	0	0	0	0	200	300	0	26.6266	2.13105	-464.062	-16303.7	60509.8	1358.23	330.392	938.133	0	0	0	0	0	0	0	603	903	0
612	3	0	0	0	0	0	0	200	300	0	26.9318	2.28363	-461.621	-15662.8	59777.4	1358.23	329.495	936.93	0	0	0	0	0	0	0	603	903	0
612	4	0	0	0	0	0	0	200	300	0	24.0326	3.04657	-461.011	-15754.4	60570.9	1541.34	331.387	937.174	0	0	0	0	0	0	0	603	903	0
612	5	0	0	0	0	0	0	200	300	0	26.6266	2.58881	-460.4	-15022	60265.7	1861.77	330.898	935.628	0	0	0	0	0	0	0	603	903	0
612	6	0	0	0	0	0	0	200	300	0	23.5748	4.26728	-459.79	-15296.6	59899.5	1678.67	330.276	936.269	0	0	0	0	0	0	0	603	903	0
612	7	0	0	0	0	0	0	200	300	0	23.7274	5.03022	-457.959	-15296.6	59777.4	1678.67	330.53	936.402	0	0	0	0	0	0	0	603	903	0
612	8	0	0	0	0	0	0	200	300	0	24.4904	4.72504	-457.349	-14838.9	60265.7	1999.1	331.772	935.445	0	0	0	0	0	0	0	603	903	0
612	9	0	0	0	0	0	0	200	300	0	25.7111	5.1828	-456.738	-14381.1	60021.6	1953.32	331.414	934.487	0	0	0	0	0	0	0	603	903	0
613	0	0	0	0	0	0	0	200	300	0	24.4904	5.94574	-456.738	-14014.9	59411.2	1815.99	330.077	933.685	0	0	0	0	0	0	0	603	903	0
613	1	0	0	0	0	0	0	200	300	0	24.6429	6.5561	-451.855	-14289.6	59716.4	1724.44	332.158	934.624	0	0	0	0	0	0	0	603	903	0
613	2	0	0	0	0	0	0	200	300	0	24.3378	5.48798	-454.907	-13831.8	59411.2	1861.77	330.601	933.406	0	0	0	0	0	0	0	603	903	0
613	3	0	0	0	0	0	0	200	300	0	25.1007	6.70868	-453.687	-13557.1	59533.3	1953.32	331.221	932.882	0	0	0	0	0	0	0	603	903	0
613	4	0	0	0	0	0	0	200	300	0	22.5067	6.86127	-453.381	-13831.8	59533.3	1770.22	331.31	933.508	0	0	0	0	0	0	0	603	903	0
613	5	0	0	0	0	0	0	200	300	0	21.7438	7.16645	-453.381	-13831.8	59777.4	1953.32	331.848	933.508	0	0	0	0	0	0	0	603	903	0
613	6	0	0	0	0	0	0	200	300	0	24.1852	6.86127	-450.33	-13190.9	60021.6	2136.43	333.284	932.292	0	0	0	0	0	0	0	603	903	0
613	7	0	0	0	0	0	0	200	300	0	24.3378	7.7768	-452.466	-12916.3	59411.2	2136.43	331.305	931.546	0	0	0	0	0	0	0	603	903	0
613	8	0	0	0	0	0	0	200	300	0	20.8283	8.23456	-451.245	-12916.3	59472.2	2044.88	331.796	931.624	0	0	0	0	0	0	0	603	903	0
613	9	0	0	0	0	0	0	200	300	0	22.5067	8.9975	-451.855	-12916.3	59838.5	2182.21	332.428	931.585	0	0	0	0	0	0	0	603	903	0
614	0	0	0	0	0	0	0	200	300	0	21.4386	9.45527	-452.161	-12458.5	59899.5	2411.09	332.474	930.553	0	0	0	0	0	0	0	603	903	0
614	1	0	0	0	0	0	0	200	300	0	20.9808	8.9975	-450.024	-11634.5	59411.2	2319.53	332.018	928.853	0	0	0	0	0	0	0	603	903	0
614	2	0	0	0	0	0	0	200	300	0	20.3705	8.69233	-450.635	-11359.9	59472.2	2411.09	331.974	928.209	0	0	0	0	0	0	0	603	903	0
614	3	0	0	0	0	0	0	200	300	0	19.3024	9.30268	-451.55	-11726.1	59289.1	2502.64	331.301	928.969	0	0	0	0	0	0	0	603	903	0
614	4	0	0	0	0	0	0	200	300	0	20.9808	10.3708	-451.855	-11268.3	59228.1	2411.09	331.078	927.938	0	0	0	0	0	0	0	603	903	0
614	5	0	0	0	0	0	0	200	300	0	21.5912	10.5234	-452.161	-11268.3	59594.3	2411.09	331.799	927.921	0	0	0	0	0	0	0	603	903	0
614	6	0	0	0	0	0	0	200	300	0	19.455	10.8286	-451.855	-11268.3	60204.7	2731.52	333.239	927.938	0	0	0	0	0	0	0	603	903	0
614	7	0	0	0	0	0	0	200	300	0	19.6075	10.2182	-450.635	-11176.8	60509.8	2731.52	334.277	927.802	0	0	0	0	0	0	0	603	903	0
614	8	0	0	0	0	0	0	200	300	0	20.6757	11.2863	-449.414	-10902.1	59777.4	2777.3	333.012	927.259	0	0	0	0	0	0	0	603	903	0
614	9	0	0	0	0	0	0	200	300	0	21.4386	11.2863	-451.855	-10444.3	60021.6	2914.63	332.834	926.114	0	0	0	0	0	0	0	603	903	0
615	0	0	0	0	0	0	0	200	300	0	20.2179	11.4389	-453.381	-10627.4	60693	2868.85	333.867	926.44	0	0	0	0	0	0	0	603	903	0
615	1	0	0	0	0	0	0	200	300	0	21.7438	11.7441	-453.687	-10352.8	60754	3097.73	333.912	925.819	0	0	0	0	0	0	0	603	903	0
615	2	0	0	0	0	0	0	200	300	0	18.9972	12.3544	-452.771	-9528.81	60082.6	3097.73	332.7	924.046	0	0	0	0	0	0	0	603	903	0
615	3	0	0	0	0	0	0	200	300	0	22.2015	13.4226	-453.381	-9711.91	60509.8	3006.18	333.464	924.421	0	0	0	0	0	0	0	603	903	0
615	4	0	0	0	0	0	0	200	300	0	19.6075	12.2018	-453.992	-9895.02	60937.1	3280.84	334.225	924.796	0	0	0	0	0	0	0	603	903	0
615	5	0	0	0	0	0	0	200	300	0	21.1334	13.1174	-456.128	-9162.6	61059.2	3235.06	333.864	923.088	0	0	0	0	0	0	0	603	903	0
615	6	0	0	0	0	0	0	200	300	0	18.8446	13.7277	-456.738	-9254.15	60754	3006.18	333.017	923.261	0	0	0	0	0	0	0	603	903	0
615	7	0	0	0	0	0	0	200	300	0	20.0653	13.7277	-453.687	-8613.28	60876.1	3143.51	334.181	921.985	0	0	0	0	0	0	0	603	903	0
615	8	0	0	0	0	0	0	200	300	0	18.5394	14.0329	-453.076	-8796.38	61669.5	3235.06	336.113	922.415	0	0	0	0	0	0	0	603	903	0
615	9	0	0	0	0	0	0	200	300	0	19.3024	13.7277	-457.654	-8613.28	61425.4	3326.61	334.218	921.82	0	0	0	0	0	0	0	603	903	0
616	0	0	0	0	0	0	0	200	300	0	19.3024	15.4062	-457.654	-8155.52	61425.4	3280.84	334.218	920.82	0	0	0	0	0	0	0	603	903	0
616	1	0	0	0	0	0	0	200	300	0	19.9127	15.2536	-458.875	-7880.86	61669.5	3418.17	334.393	920.174	0	0	0	0	0	0	0	603	903	0
616	2	0	0	0	0	0	0	200	300	0	19.6075	15.101	-458.569	-7697.75	62218.8	3738.6	335.68	919.786	0	0	0	0	0	0	0	603	903	0
616	3	0	0	0	0	0	0	200	300	0	19.7601	15.5588	-460.095	-7697.75	62035.7	3418.17	334.832	919.731	0	0	0	0	0	0	0	603	903	0
616	4	0	0	0	0	0	0	200	300	0	17.7765	16.3217	-460.706	-7056.89	62218.8	3463.94	335.051	918.318	0	0	0	0	0	0	0	603	903	0
616	5	0	0	0	0	0	0	200	300	0	20.9808	13.8803	-457.959	-6782.23	62401.9	3555.5	336.261	917.81	0	0	0	0	0	0	0	603	903	0
616	6	0	0	0	0	0	0	200	300	0	18.2343	16.1691	-463.757	-6873.78	62829.2	3509.72	335.479	917.822	0	0	0	0	0	0	0	603	903	0
616	7	0	0	0	0	0	0	200	300	0	19.455	16.9321	-464.062	-6507.57	62401.9	3555.5	334.469	917.023	0	0	0	0	0	0	0	603	903	0
616	8	0	0	0	0	0	0	200	300	0	16.7084	17.2372	-463.757	-6324.46	62524	3830.15	334.821	916.637	0	0	0	0	0	0	0	603	903	0
616	9	0	0	0	0	0	0	200	300	0	20.5231	17.0847	-466.199	-6049.8	63378.5	3830.15	335.947	915.977	0	0	0	0	0	0	0	603	903	0
617	0	0	0	0	0	0	0	200	300	0	18.0817	16.0165	-463.147	-6141.35	63256.4	3967.48	336.58	916.26	0	0	0	0	0	0	0	603	903	0
617	1	0	0	0	0	0	0	200	300	0	19.455	17.0847	-467.419	-5775.14	63073.3	3875.93	334.939	915.355	0	0	0	0	0	0	0	603	903	0
617	2	0	0	0	0	0	0	200	300	0	18.5394	17.2372	-468.03	-5408.93	63561.6	3921.71	335.807	914.557	0	0	0	0	0	0	0	603	903	0
617	3	0	0	0	0	0	0	200	300	0	18.692	18.0002	-469.861	-5225.83	63317.5	4196.37	334.758	914.122	0	0	0	0	0	0	0	603	903	0
617	4	0	0	0	0	0	0	200	300	0	18.0817	18.1528	-470.471	-4951.17	64110.9	4287.92	336.27	913.524	0	0	0	0	0	0	0	603	903	0
617	5	0	0	0	0	0	0	200	300	0	17.3187	18.6105	-473.218	-4951.17	63866.8	4150.59	334.963	913.463	0	0	0	0	0	0	0	603	903	0
617	6	0	0	0	0	0	0	200	300	0	17.9291	17.8476	-474.133	-4584.96	64721.3	4287.92	336.504	912.67	0	0	0	0	0	0	0	603	903	0
617	7	0	0	0	0	0	0	200	300	0	18.0817	18.7631	-474.133	-4859.62	64782.3	4287.92	336.633	913.25	0	0	0	0	0	0	0	603	903	0
617	8	0	0	0	0	0	0	200	300	0	18.2343	19.9838	-475.354	-4493.41	64416.1	4242.14	335.512	912.453	0	0	0	0	0	0	0	603	903	0
617	9	0	0	0	0	0	0	200	300	0	17.4713	19.8312	-475.659	-3852.54	64721.3	4471.02	336.067	911.099	0	0	0	0	0	0	0	603	903	0
618	0	0	0	0	0	0	0	200	300	0	17.7765	19.5261	-478.101	-3577.88	65514.7	4333.69	337.031	910.484	0	0	0	0	0	0	0	603	903	0
618	1	0	0	0	0	0	0	200	300	0	18.8446	18.1528	-478.101	-3669.43	65331.6	4379.47	336.648	910.675	0	0	0	0	0	0	0	603	903	0
618	2	0	0	0	0	0	0	200	300	0	17.0136	20.289	-478.711	-3120.11	65392.7	4379.47	336.602	909.518	0	0	0	0	0	0	0	603	903	0
618	3	0	0	0	0	0	0	200	300	0	16.861	21.2045	-480.847	-2937.01	65881	4516.8	337.01	909.108	0	0	0	0	0	0	0	603	903	0
618	4	0	0	0	0	0	0	200	300	0	18.0817	20.5942	-483.289	-2845.46	66247.2	4745.68	337.076	908.888	0	0	0	0	0	0	0	603	903	0
618	5	0	0	0	0	0	0	200	300	0	18.8446	20.8994	-484.204	-2662.35	65758.9	4471.02	335.808	908.498	0	0	0	0	0	0	0	603	903	0
618	6	0	0	0	0	0	0	200	300	0	17.1661	21.2045	-484.509	-2204.59	66674.4	4654.13	337.612	907.55	0	0	0	0	0	0	0	603	903	0
618	7	0	0	0	0	0	0	200	300	0	17.0136	21.9675	-486.34	-1929.93	67162.7	4745.68	338.098	906.968	0	0	0	0	0	0	0	603	903	0
618	8	0	0	0	0	0	0	200	300	0	18.0817	21.0519	-486.646	-2021.48	67162.7	4745.68	338.012	907.154	0	0	0	0	0	0	0	603	903	0
618	9	0	0	0	0	0	0	200	300	0	17.7765	23.3408	-490.002	-1838.38	66857.5	4928.79	336.443	906.752	0	0	0	0	0	0	0	603	903	0
619	0	0	0	0	0	0	0	200	300	0	16.861	22.2726	-490.308	-922.85	67406.8	4974.56	337.479	904.882	0	0	0	0	0	0	0	603	903	0
619	1	0	0	0	0	0	0	200	300	0	17.1661	22.2726	-492.139	-648.191	68139.2	4928.79	338.455	904.317	0	0	0	0	0	0	0	603	903	0
619	2	0	0	0	0	0	0	200	300	0	18.3868	23.0356	-493.97	-739.744	68322.4	5066.12	338.313	904.498	0	0	0	0	0	0	0	603	903	0
619	3	0	0	0	0	0	0	200	300	0	18.0817	24.5615	-497.632	-831.297	68078.2	5203.45	336.804	904.671	0	0	0	0	0	0	0	603	903	0
619	4	0	0	0	0	0	0	200	300	0	16.4032	24.1037	-498.547	-7.32188	68627.5	5340.77	337.655	903.015	0	0	0	0	0	0	0	603	903	0
619	5	0	0	0	0	0	0	200	300	0	17.3187	23.9511	-499.463	-190.427	68505.4	5386.55	337.158	903.381	0	0	0	0	0	0	0	603	903	0
619	6	0	0	0	0	0	0	200	300	0	17.9291	23.9511	-500.989	84.2309	68871.6	5340.77	337.471	902.832	0	0	0	0	0	0	0	603	903	0
619	7	0	0	0	0	0	0	200	300	0	17.9291	24.8666	-502.515	450.442	69298.9	5432.33	337.904	902.104	0	0	0	0	0	0	0	603	903	0
619	8	0	0	0	0	0	0	200	300	0	16.4032	23.7985	-502.209	999.759	70153.4	5386.55	339.69	901.009	0	0	0	0	0	0	0	603	903	0
619	9	0	0	0	0	0	0	200	300	0	16.7084	25.3244	-508.008	816.653	70519.6	5478.1	338.816	901.393	0	0	0	0	0	0	0	603	903	0
620	0	0	0	0	0	0	0	200	300	0	17.9291	25.7822	-509.839	1274.42	70031.4	5752.76	337.36	900.5	0	0	0	0	0	0	0	603	903	0
620	1	0	0	0	0	0	0	200	300	0	17.0136	25.477	-510.144	1732.18	70519.6	5661.21	338.235	899.605	0	0	0	0	0	0	0	603	903	0
620	2	0	0	0	0	0	0	200	300	0	16.4032	26.0873	-509.534	1640.63	71313	5706.99	339.957	899.78	0	0	0	0	0	0	0	603	903	0
620	3	0	0	0	0	0	0	200	300	0	17.1661	26.2399	-514.111	2189.95	71557.2	5569.66	339.186	898.74	0	0	0	0	0	0	0	603	903	0
620	4	0	0	0	0	0	0	200	300	0	17.7765	27.1555	-517.468	3013.92	71435.1	5752.76	338.047	897.176	0	0	0	0	0	0	0	603	903	0
620	5	0	0	0	0	0	0	200	300	0	17.4713	26.8503	-518.689	2830.81	72106.6	5798.54	339.017	897.542	0	0	0	0	0	0	0	603	903	0
620	6	0	0	0	0	0	0	200	300	0	16.861	26.2399	-518.384	2739.26	72777.9	5890.09	340.394	897.716	0	0	0	0	0	0	0	603	903	0
620	7	0	0	0	0	0	0	200	300	0	19.7601	26.8503	-522.046	3380.13	72839	6164.75	339.526	896.525	0	0	0	0	0	0	0	603	903	0
620	8	0	0	0	0	0	0	200	300	0	18.3868	28.071	-525.098	3471.68	72594.8	6118.97	338.25	896.389	0	0	0	0	0	0	0	603	903	0
620	9	0	0	0	0	0	0	200	300	0	17.9291	28.071	-527.539	3654.79	73327.3	6118.97	338.999	896.072	0	0	0	0	0	0	0	603	903	0
621	0	0	0	0	0	0	0	200	300	0	17.7765	27.9184	-529.065	3471.68	73754.5	6210.53	339.405	896.438	0	0	0	0	0	0	0	603	903	0
621	1	0	0	0	0	0	0	200	300	0	17.0136	28.6813	-530.896	4112.55	73937.6	6393.63	339.27	895.254	0	0	0	0	0	0	0	603	903	0
621	2	0	0	0	0	0	0	200	300	0	16.5558	26.8503	-531.506	5028.08	73998.6	6118.97	339.224	893.54	0	0	0	0	0	0	0	603	903	0
621	3	0	0	0	0	0	0	200	300	0	17.7765	28.9865	-536.389	5394.29	74670	6347.85	339.209	892.943	0	0	0	0	0	0	0	603	903	0
621	4	0	0	0	0	0	0	200	300	0	17.9291	30.2072	-539.441	4844.98	74120.7	6668.29	337.403	894.019	0	0	0	0	0	0	0	603	903	0
621	5	0	0	0	0	0	0	200	300	0	16.7084	29.4443	-540.967	6126.71	75036.2	6668.29	338.708	891.674	0	0	0	0	0	0	0	603	903	0
621	6	0	0	0	0	0	0	200	300	0	15.9454	29.7495	-541.577	5668.95	75585.5	6714.07	339.566	892.533	0	0	0	0	0	0	0	603	903	0
621	7	0	0	0	0	0	0	200	300	0	17.9291	30.665	-541.577	6676.03	76012.8	6897.17	340.355	890.673	0	0	0	0	0	0	0	603	903	0
621	8	0	0	0	0	0	0	200	300	0	18.2343	28.6813	-546.155	6767.58	76562.1	7171.83	340.184	890.609	0	0	0	0	0	0	0	603	903	0
621	9	0	0	0	0	0	0	200	300	0	16.861	31.4279	-549.512	7042.24	76440	7080.28	339.105	890.185	0	0	0	0	0	0	0	603	903	0
622	0	0	0	0	0	0	0	200	300	0	16.861	31.4279	-550.427	6767.58	76867.3	7034.5	339.65	890.705	0	0	0	0	0	0	0	603	903	0
622	1	0	0	0	0	0	0	200	300	0	19.9127	31.8857	-551.953	6584.48	77660.7	7171.83	340.702	891.071	0	0	0	0	0	0	0	603	903	0
622	2	0	0	0	0	0	0	200	300	0	21.4386	32.6486	-554.395	7774.66	77599.7	7354.93	339.972	888.976	0	0	0	0	0	0	0	603	903	0
622	3	0	0	0	0	0	0	200	300	0	18.2343	31.2753	-555.92	7683.11	77416.6	7309.16	339.258	889.18	0	0	0	0	0	0	0	603	903	0
622	4	0	0	0	0	0	0	200	300	0	17.6239	34.0219	-559.888	7774.66	78454.2	7309.16	340.125	889.114	0	0	0	0	0	0	0	603	903	0
622	5	0	0	0	0	0	0	200	300	0	18.5394	33.4116	-562.329	8507.08	77904.8	7492.26	338.54	887.872	0	0	0	0	0	0	0	603	903	0
622	6	0	0	0	0	0	0	200	300	0	17.9291	34.3271	-563.855	8507.08	78698.4	7675.37	339.572	887.913	0	0	0	0	0	0	0	603	903	0
622	7	0	0	0	0	0	0	200	300	0	18.2343	35.3952	-565.991	9331.06	79064.6	7629.6	339.692	886.514	0	0	0	0	0	0	0	603	903	0
622	8	0	0	0	0	0	0	200	300	0	19.9127	33.7167	-565.381	9147.96	79735.9	7721.15	341.03	886.82	0	0	0	0	0	0	0	603	903	0
622	9	0	0	0	0	0	0	200	300	0	21.1334	36.4633	-569.348	9605.72	80346.2	7675.37	341.12	886.129	0	0	0	0	0	0	0	603	903	0
623	0	0	0	0	0	0	0	200	300	0	20.2179	36.3107	-572.095	9880.38	80102.1	8087.36	340.016	885.73	0	0	0	0	0	0	0	603	903	0
623	1	0	0	0	0	0	0	200	300	0	17.9291	36.3107	-573.01	10155	80529.4	8041.58	340.537	885.278	0	0	0	0	0	0	0	603	903	0
623	2	0	0	0	0	0	0	200	300	0	20.2179	37.3788	-573.01	9971.93	81200.7	8133.13	341.709	885.597	0	0	0	0	0	0	0	603	903	0
623	3	0	0	0	0	0	0	200	300	0	18.692	36.7685	-577.283	11162.1	81628	8499.34	341.4	883.664	0	0	0	0	0	0	0	603	903	0
623	4	0	0	0	0	0	0	200	300	0	18.692	38.5996	-581.86	11528.3	81506	8590.9	340.078	883.187	0	0	0	0	0	0	0	603	903	0
623	5	0	0	0	0	0	0	200	300	0	18.9972	38.447	-581.86	11528.3	81750.1	8636.67	340.498	883.187	0	0	0	0	0	0	0	603	903	0
623	6	0	0	0	0	0	0	200	300	0	19.1498	38.5996	-583.997	11528.3	82665.6	8819.78	341.552	883.26	0	0	0	0	0	0	0	603	903	0
623	7	0	0	0	0	0	0	200	300	0	18.692	40.1254	-583.997	12443.9	82421.4	8682.45	341.133	881.692	0	0	0	0	0	0	0	603	903	0
623	8	0	0	0	0	0	0	200	300	0	18.9972	39.6677	-587.659	13267.8	82665.6	8590.9	340.669	880.423	0	0	0	0	0	0	0	603	903	0
623	9	0	0	0	0	0	0	200	300	0	19.9127	40.5832	-589.49	12993.2	83520.1	8728.23	341.682	880.959	0	0	0	0	0	0	0	603	903	0
624	0	0	0	0	0	0	0	200	300	0	19.3024	40.4306	-593.152	13359.4	83825.3	9048.66	341.322	880.477	0	0	0	0	0	0	0	603	903	0
624	1	0	0	0	0	0	0	200	300	0	19.6075	41.3461	-593.762	13908.7	83703.2	9094.44	340.971	879.575	0	0	0	0	0	0	0	603	903	0
624	2	0	0	0	0	0	0	200	300	0	19.9127	41.6513	-595.593	14274.9	84191.5	9048.66	341.357	879.032	0	0	0	0	0	0	0	603	903	0
624	3	0	0	0	0	0	0	200	300	0	20.6757	42.872	-596.204	14091.8	84740.8	9323.32	342.134	879.364	0	0	0	0	0	0	0	603	903	0
624	4	0	0	0	0	0	0	200	300	0	20.3705	43.1772	-599.866	14732.7	85107	9506.42	341.877	878.44	0	0	0	0	0	0	0	603	903	0
624	5	0	0	0	0	0	0	200	300	0	19.9127	42.872	-603.223	15465.1	84740.8	9323.32	340.48	877.363	0	0	0	0	0	0	0	603	903	0
624	6	0	0	0	0	0	0	200	300	0	21.286	42.1091	-603.223	15831.3	85107	9369.09	341.087	876.755	0	0	0	0	0	0	0	603	903	0
624	7	0	0	0	0	0	0	200	300	0	21.7438	43.4824	-604.749	15922.9	85961.5	9414.87	342.144	876.67	0	0	0	0	0	0	0	603	903	0
624	8	0	0	0	0	0	0	200	300	0	20.3705	44.8557	-605.969	15648.2	86205.6	9506.42	342.261	877.177	0	0	0	0	0	0	0	603	903	0
624	9	0	0	0	0	0	0	200	300	0	19.9127	45.1608	-609.326	17204.6	85961.5	9552.2	341.076	874.765	0	0	0	0	0	0	0	603	903	0
625	0	0	0	0	0	0	0	200	300	0	22.2015	44.8557	-608.411	18303.2	86266.7	9506.42	341.79	872.916	0	0	0	0	0	0	0	603	903	0
625	1	0	0	0	0	0	0	200	300	0	22.049	45.0082	-611.768	17387.7	86938	9826.86	342.11	874.578	0	0	0	0	0	0	0	603	903	0
625	2	0	0	0	0	0	0	200	300	0	21.1334	45.9238	-612.988	17937	87365.4	9872.63	342.524	873.738	0	0	0	0	0	0	0	603	903	0
625	3	0	0	0	0	0	0	200	300	0	20.8283	45.9238	-614.514	18669.4	87548.4	9918.41	342.468	872.619	0	0	0	0	0	0	0	603	903	0
625	4	0	0	0	0	0	0	200	300	0	22.5067	46.6867	-616.65	19218.8	87670.5	10101.5	342.172	871.834	0	0	0	0	0	0	0	603	903	0
625	5	0	0	0	0	0	0	200	300	0	23.1171	46.5341	-618.787	19493.4	87548.4	10422	341.484	871.497	0	0	0	0	0	0	0	603	903	0
625	6	0	0	0	0	0	0	200	300	0	21.8964	46.5341	-621.228	19585	87731.6	10513.5	341.223	871.474	0	0	0	0	0	0	0	603	903	0
625	7	0	0	0	0	0	0	200	300	0	22.049	46.6867	-620.007	20225.8	88280.8	10376.2	342.387	870.378	0	0	0	0	0	0	0	603	903	0
625	8	0	0	0	0	0	0	200	300	0	24.1852	47.2971	-621.838	21141.4	89135.3	10238.8	343.342	869.002	0	0	0	0	0	0	0	603	903	0
625	9	0	0	0	0	0	0	200	300	0	23.7274	48.5178	-624.28	21416	89257.4	10605.1	342.977	868.695	0	0	0	0	0	0	0	603	903	0
626	0	0	0	0	0	0	0	200	300	0	22.3541	48.8229	-627.026	21507.6	88891.2	10376.2	341.766	868.699	0	0	0	0	0	0	0	603	903	0
626	1	0	0	0	0	0	0	200	300	0	22.9645	48.5178	-627.332	22240	89501.5	10376.2	342.67	867.548	0	0	0	0	0	0	0	603	903	0
626	2	0	0	0	0	0	0	200	300	0	24.1852	48.8229	-628.857	22880.9	90417.1	10467.7	343.78	866.615	0	0	0	0	0	0	0	603	903	0
626	3	0	0	0	0	0	0	200	300	0	25.1007	49.5859	-630.383	23064	90050.9	10605.1	342.851	866.413	0	0	0	0	0	0	0	603	903	0
626	4	0	0	0	0	0	0	200	300	0	22.9645	49.4333	-631.604	23247.1	90233.9	10513.5	342.865	866.194	0	0	0	0	0	0	0	603	903	0
626	5	0	0	0	0	0	0	200	300	0	24.0326	50.3488	-631.299	23979.5	90478.1	10605.1	343.321	865.016	0	0	0	0	0	0	0	603	903	0
626	6	0	0	0	0	0	0	200	300	0	25.1007	50.1962	-634.961	24711.9	91088.4	10879.7	343.455	864.081	0	0	0	0	0	0	0	603	903	0
626	7	0	0	0	0	0	0	200	300	0	25.1007	48.3652	-632.52	24895	91393.7	10788.2	344.491	863.641	0	0	0	0	0	0	0	603	903	0
626	8	0	0	0	0	0	0	200	300	0	24.4904	50.8066	-637.097	25078.1	91149.5	10650.8	343.07	863.637	0	0	0	0	0	0	0	603	903	0
626	9	0	0	0	0	0	0	200	300	0	25.8637	50.8066	-638.013	25627.5	91637.8	10879.7	343.63	862.832	0	0	0	0	0	0	0	603	903	0
627	0	0	0	0	0	0	0	200	300	0	27.6947	52.0273	-639.844	26359.9	91882	11108.6	343.601	861.803	0	0	0	0	0	0	0	603	903	0
627	1	0	0	0	0	0	0	200	300	0	24.0326	51.2643	-640.454	26909.2	91882	11154.4	343.464	860.984	0	0	0	0	0	0	0	603	903	0
627	2	0	0	0	0	0	0	200	300	0	24.9481	52.6376	-641.064	26634.5	92004	10879.7	343.518	861.453	0	0	0	0	0	0	0	603	903	0
627	3	0	0	0	0	0	0	200	300	0	26.0162	51.8747	-643.506	28007.8	92309.1	11245.9	343.447	859.476	0	0	0	0	0	0	0	603	903	0
627	4	0	0	0	0	0	0	200	300	0	26.6266	50.9592	-645.032	28190.9	92492.3	11383.3	343.392	859.295	0	0	0	0	0	0	0	603	903	0
627	5	0	0	0	0	0	0	200	300	0	24.9481	52.6376	-644.421	28923.4	92797.4	11245.9	344.001	858.117	0	0	0	0	0	0	0	603	903	0
627	6	0	0	0	0	0	0	200	300	0	25.4059	53.7058	-645.642	28831.8	92736.4	11566.4	343.634	858.344	0	0	0	0	0	0	0	603	903	0
627	7	0	0	0	0	0	0	200	300	0	27.8473	53.4006	-648.083	29655.8	93713	11520.6	344.6	857.241	0	0	0	0	0	0	0	603	903	0
627	8	0	0	0	0	0	0	200	300	0	27.2369	54.0109	-648.999	30296.6	93590.9	11429	344.208	856.318	0	0	0	0	0	0	0	603	903	0
627	9	0	0	0	0	0	0	200	300	0	26.474	54.4687	-650.83	30662.9	93713	11383.3	343.99	855.887	0	0	0	0	0	0	0	603	903	0
628	0	0	0	0	0	0	0	200	300	0	26.7792	54.9265	-651.135	31212.2	94018.1	11886.8	344.391	855.065	0	0	0	0	0	0	0	603	903	0
628	1	0	0	0	0	0	0	200	300	0	27.5421	55.3842	-651.44	31578.4	94506.4	11795.2	345.073	854.525	0	0	0	0	0	0	0	603	903	0
628	2	0	0	0	0	0	0	200	300	0	28.1525	55.9946	-653.577	31853	94567.5	11612.1	344.692	854.264	0	0	0	0	0	0	0	603	903	0
628	3	0	0	0	0	0	0	200	300	0	27.2369	56.2997	-654.187	32310.8	94689.6	11841	344.744	853.609	0	0	0	0	0	0	0	603	903	0
628	4	0	0	0	0	0	0	200	300	0	26.9318	55.9946	-656.628	32951.7	94994.7	11657.9	344.67	852.817	0	0	0	0	0	0	0	603	903	0
628	5	0	0	0	0	0	0	200	300	0	30.7465	54.7739	-659.985	33317.9	95116.8	11657.9	344.12	852.517	0	0	0	0	0	0	0	603	903	0
628	6	0	0	0	0	0	0	200	300	0	26.9318	56.9101	-658.154	33409.4	95177.9	11520.6	344.613	852.238	0	0	0	0	0	0	0	603	903	0
628	7	0	0	0	0	0	0	200	300	0	27.5421	57.5205	-659.68	34141.8	95544.1	11657.9	344.834	851.245	0	0	0	0	0	0	0	603	903	0
628	8	0	0	0	0	0	0	200	300	0	28.3051	57.5205	-662.732	35148.9	96337.5	12115.7	345.364	849.964	0	0	0	0	0	0	0	603	903	0
628	9	0	0	0	0	0	0	200	300	0	29.6783	56.6049	-659.68	34782.7	96154.4	11749.5	345.759	850.273	0	0	0	0	0	0	0	603	903	0
629	0	0	0	0	0	0	0	200	300	0	27.2369	58.8937	-664.868	35515.1	96459.5	11932.6	345.081	849.583	0	0	0	0	0	0	0	603	903	0
629	1	0	0	0	0	0	0	200	300	0	27.2369	59.5041	-666.089	35606.7	96642.7	11978.3	345.09	849.544	0	0	0	0	0	0	0	603	903	0
629	2	0	0	0	0	0	0	200	300	0	28.1525	59.6567	-668.225	36339.1	97253	12390.3	345.539	848.619	0	0	0	0	0	0	0	603	903	0
629	3	0	0	0	0	0	0	200	300	0	30.8991	59.0463	-669.141	37071.5	97008.9	12481.9	344.975	847.598	0	0	0	0	0	0	0	603	903	0
629	4	0	0	0	0	0	0	200	300	0	28.7628	61.7929	-672.498	37346.2	97314	12573.4	344.705	847.466	0	0	0	0	0	0	0	603	903	0
629	5	0	0	0	0	0	0	200	300	0	28.9154	61.6403	-674.329	37804	97863.4	12710.8	345.127	846.938	0	0	0	0	0	0	0	603	903	0
629	6	0	0	0	0	0	0	200	300	0	28.1525	62.4033	-676.465	38536.4	98473.8	12710.8	345.571	846.033	0	0	0	0	0	0	0	603	903	0
629	7	0	0	0	0	0	0	200	300	0	27.6947	63.3188	-678.296	38353.3	98351.7	12390.3	344.998	846.456	0	0	0	0	0	0	0	603	903	0
629	8	0	0	0	0	0	0	200	300	0	27.2369	64.6921	-680.432	38811.1	98595.8	12802.3	344.902	845.961	0	0	0	0	0	0	0	603	903	0
629	9	0	0	0	0	0	0	200	300	0	28.1525	65.455	-684.399	38902.6	99145.1	13077	344.864	846.158	0	0	0	0	0	0	0	603	903	0
630	0	0	0	0	0	0	0	200	300	0	27.3895	65.7602	-686.536	39635	99511.3	13305.9	344.947	845.268	0	0	0	0	0	0	0	603	903	0
630	1	0	0	0	0	0	0	200	300	0	28.1525	65.6076	-688.367	39635	100122	13443.2	345.448	845.422	0	0	0	0	0	0	0	603	903	0
630	2	0	0	0	0	0	0	200	300	0	26.474	69.1171	-690.808	40001.2	99572.4	13855.2	344.139	845.095	0	0	0	0	0	0	0	603	903	0
630	3	0	0	0	0	0	0	200	300	0	27.9999	69.8801	-693.555	40367.4	100488	13763.6	344.888	844.796	0	0	0	0	0	0	0	603	903	0
630	4	0	0	0	0	0	0	200	300	0	27.6947	71.2534	-696.606	41008.3	100366	13855.2	344.078	844.131	0	0	0	0	0	0	0	603	903	0
630	5	0	0	0	0	0	0	200	300	0	26.474	73.3896	-698.132	41374.5	100732	13809.4	344.288	843.735	0	0	0	0	0	0	0	603	903	0
630	6	0	0	0	0	0	0	200	300	0	27.6947	72.9318	-701.184	41466.1	101342	14312.9	344.53	843.863	0	0	0	0	0	0	0	603	903	0
630	7	0	0	0	0	0	0	200	300	0	27.9999	73.6948	-703.32	41557.6	101648	14038.3	344.525	843.912	0	0	0	0	0	0	0	603	903	0
630	8	0	0	0	0	0	0	200	300	0	25.7111	76.2888	-704.846	42290.1	101892	14129.8	344.559	843.001	0	0	0	0	0	0	0	603	903	0
630	9	0	0	0	0	0	0	200	300	0	25.7111	74.9155	-706.372	43114	102197	14312.9	344.678	841.964	0	0	0	0	0	0	0	603	903	0
631	0	0	0	0	0	0	0	200	300	0	26.0162	77.2043	-709.729	42839.4	102014	14267.2	343.736	842.64	0	0	0	0	0	0	0	603	903	0
631	1	0	0	0	0	0	0	200	300	0	25.2533	77.3569	-710.95	43297.1	102380	14770.7	344.005	842.1	0	0	0	0	0	0	0	603	903	0
631	2	0	0	0	0	0	0	200	300	0	25.2533	78.5776	-711.56	43846.4	102746	14679.2	344.396	841.38	0	0	0	0	0	0	0	603	903	0
631	3	0	0	0	0	0	0	200	300	0	25.7111	80.4086	-711.865	44212.6	103173	14816.5	344.934	840.892	0	0	0	0	0	0	0	603	903	0
631	4	0	0	0	0	0	0	200	300	0	26.1688	79.1879	-714.917	44395.8	103540	15091.1	344.827	840.901	0	0	0	0	0	0	0	603	903	0
631	5	0	0	0	0	0	0	200	300	0	25.5585	82.3923	-717.664	44487.3	103418	15091.1	344.103	841.011	0	0	0	0	0	0	0	603	903	0
631	6	0	0	0	0	0	0	200	300	0	25.1007	82.6975	-720.41	45036.7	103723	15320	343.977	840.485	0	0	0	0	0	0	0	603	903	0
631	7	0	0	0	0	0	0	200	300	0	25.4059	82.85	-719.8	45494.4	103418	15503.1	343.675	839.796	0	0	0	0	0	0	0	603	903	0
631	8	0	0	0	0	0	0	200	300	0	25.5585	83.3078	-719.189	45311.3	103601	15915.1	344.052	839.997	0	0	0	0	0	0	0	603	903	0
631	9	0	0	0	0	0	0	200	300	0	25.1007	86.8173	-721.021	45952.2	103906	15503.1	344.109	839.268	0	0	0	0	0	0	0	603	903	0
632	0	0	0	0	0	0	0	200	300	0	25.1007	86.9699	-724.377	47142.3	104211	15548.9	343.863	837.92	0	0	0	0	0	0	0	603	903	0
632	1	0	0	0	0	0	0	200	300	0	27.2369	86.9699	-725.598	46959.2	104577	15640.5	344.126	838.282	0	0	0	0	0	0	0	603	903	0
632	2	0	0	0	0	0	0	200	300	0	24.7955	86.6647	-724.988	46776.1	104760	15960.9	344.499	838.48	0	0	0	0	0	0	0	603	903	0
632	3	0	0	0	0	0	0	200	300	0	23.88	89.5639	-725.903	47325.4	104455	15823.6	343.897	837.805	0	0	0	0	0	0	0	603	903	0
632	4	0	0	0	0	0	0	200	300	0	24.6429	90.4794	-726.514	48790.3	104455	16006.7	343.776	835.843	0	0	0	0	0	0	0	603	903	0
632	5	0	0	0	0	0	0	200	300	0	25.5585	91.2424	-728.04	48698.8	105188	16144	344.481	836.11	0	0	0	0	0	0	0	603	903	0
632	6	0	0	0	0	0	0	200	300	0	24.4904	91.395	-726.819	48698.8	105188	16189.8	344.723	835.997	0	0	0	0	0	0	0	603	903	0
632	7	0	0	0	0	0	0	200	300	0	24.9481	91.0898	-730.176	48973.4	104638	16418.7	343.306	835.929	0	0	0	0	0	0	0	603	903	0
632	8	0	0	0	0	0	0	200	300	0	25.2533	92.6157	-729.871	49522.7	105004	16601.8	343.867	835.149	0	0	0	0	0	0	0	603	903	0
632	9	0	0	0	0	0	0	200	300	0	24.6429	94.7519	-731.396	49248.1	105310	16510.2	343.984	835.666	0	0	0	0	0	0	0	603	903	0
633	0	0	0	0	0	0	0	200	300	0	25.4059	95.82	-732.617	50346.7	105249	17059.5	343.661	834.278	0	0	0	0	0	0	0	603	903	0
633	1	0	0	0	0	0	0	200	300	0	25.1007	95.9726	-732.922	50804.4	104516	17242.6	342.602	833.682	0	0	0	0	0	0	0	603	903	0
633	2	0	0	0	0	0	0	200	300	0	25.5585	96.8881	-732.922	51170.7	105676	16739.1	344.184	833.183	0	0	0	0	0	0	0	603	903	0
633	3	0	0	0	0	0	0	200	300	0	25.7111	97.1933	-732.617	50896	105371	16968	343.828	833.529	0	0	0	0	0	0	0	603	903	0
633	4	0	0	0	0	0	0	200	300	0	24.9481	99.0244	-733.533	51445.3	105066	17105.3	343.232	832.866	0	0	0	0	0	0	0	603	903	0
633	5	0	0	0	0	0	0	200	300	0	24.7955	98.2614	-731.702	51811.6	105066	17059.5	343.591	832.19	0	0	0	0	0	0	0	603	903	0
633	6	0	0	0	0	0	0	200	300	0	25.7111	100.703	-731.702	52910.2	105432	17151.1	344.091	830.689	0	0	0	0	0	0	0	603	903	0
633	7	0	0	0	0	0	0	200	300	0	26.7792	100.55	-733.838	53459.5	105554	17380	343.838	830.151	0	0	0	0	0	0	0	603	903	0
633	8	0	0	0	0	0	0	200	300	0	25.2533	101.771	-732.617	51903.1	105127	17334.2	343.495	832.154	0	0	0	0	0	0	0	603	903	0
633	9	0	0	0	0	0	0	200	300	0	25.2533	103.144	-732.312	53551	104943	17196.9	343.304	829.874	0	0	0	0	0	0	0	603	903	0
634	0	0	0	0	0	0	0	200	300	0	26.1688	104.365	-731.702	53459.5	105493	17563.1	344.174	829.938	0	0	0	0	0	0	0	603	903	0
634	1	0	0	0	0	0	0	200	300	0	26.7792	104.518	-732.312	53459.5	105188	17837.7	343.638	829.999	0	0	0	0	0	0	0	603	903	0
634	2	0	0	0	0	0	0	200	300	0	25.4059	105.433	-728.955	53917.2	104638	17563.1	343.546	829.035	0	0	0	0	0	0	0	603	903	0
634	3	0	0	0	0	0	0	200	300	0	25.5585	106.654	-729.871	54832.8	104699	17792	343.449	827.873	0	0	0	0	0	0	0	603	903	0
634	4	0	0	0	0	0	0	200	300	0	27.0844	106.806	-728.955	54924.3	104882	17837.7	343.88	827.653	0	0	0	0	0	0	0	603	903	0
634	5	0	0	0	0	0	0	200	300	0	26.1688	108.332	-728.955	54924.3	104028	18066.6	342.708	827.653	0	0	0	0	0	0	0	603	903	0
634	6	0	0	0	0	0	0	200	300	0	25.2533	109.858	-728.04	55382.1	104211	17837.7	343.139	826.93	0	0	0	0	0	0	0	603	903	0
634	7	0	0	0	0	0	0	200	300	0	26.1688	110.468	-725.293	56297.6	104333	18158.2	343.85	825.38	0	0	0	0	0	0	0	603	903	0
634	8	0	0	0	0	0	0	200	300	0	28.1525	110.316	-725.293	55931.4	104577	18387	344.186	825.884	0	0	0	0	0	0	0	603	903	0
634	9	0	0	0	0	0	0	200	300	0	26.0162	111.079	-723.157	55931.4	103784	18799	343.515	825.657	0	0	0	0	0	0	0	603	903	0
635	0	0	0	0	0	0	0	200	300	0	26.474	112.757	-721.021	56297.6	103601	18203.9	343.686	824.92	0	0	0	0	0	0	0	603	903	0
635	1	5.00519	-5.08541	-14.3793	-1395.99	747.925	-619.263	252.014	397.084	0	25.7111	111.384	-721.021	56663.8	103967	18799	344.194	824.412	0	0	0	0	0	0	0	603	903	0
635	2	9.73541	-9.0527	-23.2294	-1670.65	-289.673	-939.698	187.53	371.92	0	26.0162	114.741	-721.021	57030	103540	19027.9	343.602	823.904	0	0	0	0	0	0	0	603	903	0
635	3	9.73541	-7.98458	-21.7035	-663.573	931.031	-756.592	242.898	330.574	0	24.9481	114.741	-720.105	57396.2	102624	19348.3	342.513	823.295	0	0	0	0	0	0	0	603	903	0
635	4	8.51471	-5.54318	-17.431	-1487.55	869.996	-710.816	249.911	385.339	0	24.4904	115.809	-717.053	57121.6	102685	19027.9	343.204	823.338	0	0	0	0	0	0	0	603	903	0
635	5	7.44659	-5.08541	-12.5482	-1762.21	76.5382	-985.474	206.1	440.435	0	24.9481	117.03	-713.696	57945.6	102685	19256.8	343.878	821.809	0	0	0	0	0	0	0	603	903	0
635	6	4.8526	-4.78024	-16.2103	-1762.21	320.679	-573.486	219.782	408.709	0	24.4904	119.013	-713.391	58128.7	102258	19531.5	343.341	821.518	0	0	0	0	0	0	0	603	903	0
635	7	6.22589	-4.16989	-25.3656	-1487.55	1053.1	-298.828	241.517	358.644	0	23.4222	119.776	-710.339	58128.7	101281	18936.4	342.582	821.168	0	0	0	0	0	0	0	603	903	0
635	8	7.14142	-2.33883	-28.1122	-1395.99	686.89	-527.71	224.434	349.658	0	22.8119	120.081	-707.288	57487.8	101342	19439.9	343.283	821.721	0	0	0	0	0	0	0	603	903	0
635	9	4.24225	1.78104	-29.3329	-1853.76	564.819	-390.381	219.256	363.197	0	23.1171	121.15	-707.288	58586.5	101098	19760.3	342.938	820.167	0	0	0	0	0	0	0	603	903	0
636	0	1.0379	5.74833	-32.995	-2036.86	992.066	-24.1699	230.067	361.733	0	22.3541	122.218	-704.236	59044.2	100854	19760.3	343.211	819.159	0	0	0	0	0	0	0	603	903	0
636	1	-0.33539	8.18973	-38.183	-2036.86	1053.1	21.6065	227.58	353.345	0	20.9808	124.201	-698.743	57854	99938.6	19531.5	343.026	820.203	0	0	0	0	0	0	0	603	903	0
636	2	0.732725	11.2415	-46.1176	-3135.5	1297.24	-24.1699	228.129	367.989	0	20.6757	124.659	-697.522	58861.1	99755.4	20309.6	343.014	818.614	0	0	0	0	0	0	0	603	903	0
636	3	1.34308	14.2932	-51.0004	-2860.84	1358.28	250.488	226.633	356.094	0	21.4386	125.575	-698.438	58861.1	99877.5	20538.5	343.001	818.725	0	0	0	0	0	0	0	603	903	0
636	4	3.47931	12.7674	-55.2728	-3227.05	1785.52	158.936	232.304	358.384	0	20.8283	126.032	-695.081	57945.6	98778.9	20492.8	342.111	819.635	0	0	0	0	0	0	0	603	903	0
636	5	3.02154	13.8355	-60.1556	-4051.02	1602.42	-253.052	226.638	367.342	0	18.9972	126.948	-690.808	58586.5	97985.5	20813.2	341.842	818.191	0	0	0	0	0	0	0	603	903	0
636	6	2.41119	14.4458	-66.2592	-4508.79	1907.59	67.3829	228.79	368.048	0	18.3868	127.863	-687.756	59227.3	98473.8	20309.6	343.181	816.883	0	0	0	0	0	0	0	603	903	0
636	7	4.08966	14.5984	-70.8368	-4875	2029.66	-24.1699	228.653	368.82	0	18.692	129.389	-685.01	59318.9	97680.2	21042.1	342.597	816.404	0	0	0	0	0	0	0	603	903	0
636	8	6.68365	15.3614	-79.3817	-5149.66	2151.73	-207.275	227.106	364.872	0	18.3868	129.847	-681.958	58769.6	96520.6	20859	341.535	816.822	0	0	0	0	0	0	0	603	903	0
636	9	9.12506	18.4131	-86.0956	-5698.97	3250.37	-115.723	237.753	366.194	0	16.2506	131.068	-680.127	58952.7	96337.5	20996.3	341.646	816.321	0	0	0	0	0	0	0	603	903	0
637	0	10.1932	21.6175	-97.6923	-6522.95	3372.44	-115.723	234.521	366.77	0	15.9454	131.068	-674.329	59593.5	96276.5	21087.8	342.774	814.625	0	0	0	0	0	0	0	603	903	0
637	1	12.3294	22.6856	-104.101	-6614.5	3738.65	-69.9462	235.914	363.539	0	15.7929	130.305	-672.192	59502	95544.1	21042.1	342.138	814.481	0	0	0	0	0	0	0	603	903	0
637	2	14.4656	27.5684	-114.172	-6980.71	4287.96	-161.499	237.557	361.142	0	14.7247	132.746	-667.004	58769.6	94323.4	20904.7	341.413	814.89	0	0	0	0	0	0	0	603	903	0
637	3	20.8743	30.9253	-127.294	-7621.58	4959.35	-24.1699	238.96	359.874	0	12.2833	134.425	-662.427	58769.6	93774	21133.6	341.561	814.281	0	0	0	0	0	0	0	603	903	0
637	4	23.3157	30.9253	-140.112	-7804.69	5325.56	-161.499	238.009	355.703	0	12.8937	132.289	-656.934	59227.3	93957.1	21454.1	343.024	812.843	0	0	0	0	0	0	0	603	903	0
637	5	24.9942	31.0779	-147.436	-7255.37	6180.06	-207.275	241.917	349.21	0	14.1144	134.883	-655.713	59227.3	92980.6	21454.1	341.801	812.675	0	0	0	0	0	0	0	603	903	0
637	6	26.5201	31.3831	-155.981	-8720.21	6546.27	-207.275	241.968	355.906	0	10.91	135.34	-651.135	58403.4	91515.7	21408.3	340.548	813.305	0	0	0	0	0	0	0	603	903	0
637	7	31.5555	30.6202	-166.357	-9269.53	7034.55	-69.9462	242.286	355.721	0	11.5204	134.425	-645.642	58494.9	91820.9	21591.4	342.216	812.401	0	0	0	0	0	0	0	603	903	0
637	8	30.7925	29.3994	-178.564	-10642.8	7461.8	-253.052	241.788	359.602	0	9.38416	136.103	-640.759	58678	90844.3	21682.9	341.776	811.424	0	0	0	0	0	0	0	603	903	0
637	9	33.0814	28.1787	-189.245	-10185.1	8560.42	-24.1699	245.235	353.819	0	11.3678	137.171	-634.961	58220.2	89623.6	21911.8	341.148	811.309	0	0	0	0	0	0	0	603	903	0
638	0	37.0486	25.5848	-199.316	-11466.8	8987.67	479.37	245.093	357.531	0	6.63758	138.392	-632.825	58220.2	88952.3	22232.3	340.564	810.999	0	0	0	0	0	0	0	603	903	0
638	1	38.1168	25.7373	-208.776	-10917.5	9536.99	113.159	245.68	352.293	0	8.77381	138.85	-625.806	58128.7	88647	21866	341.653	810.114	0	0	0	0	0	0	0	603	903	0
638	2	37.0486	22.533	-219.152	-11649.9	9720.09	-69.9462	244.353	353.159	0	6.3324	138.087	-620.618	57945.6	87609.5	21637.2	341.165	809.633	0	0	0	0	0	0	0	603	903	0
638	3	39.6426	19.4812	-228.002	-12382.3	10330.5	158.936	245.309	354.308	0	6.63758	139.002	-614.819	58037.1	86144.6	21957.6	340.114	808.603	0	0	0	0	0	0	0	603	903	0
638	4	41.1685	17.345	-239.599	-13023.2	10757.7	-69.9462	244.899	354.354	0	4.50135	139.613	-606.274	57762.5	85778.4	22049.1	341.485	807.726	0	0	0	0	0	0	0	603	903	0
638	5	42.9996	13.5303	-247.534	-12107.7	10818.7	250.488	243.706	348.913	0	2.36512	138.545	-603.833	57213.1	85046	21591.4	340.844	808.25	0	0	0	0	0	0	0	603	903	0
638	6	42.9996	9.10526	-258.825	-12473.9	11673.2	113.159	245.101	348.194	0	2.5177	137.629	-598.95	57121.6	84069.5	22049.1	340.361	807.63	0	0	0	0	0	0	0	603	903	0
638	7	43.3047	2.69657	-266.454	-12748.5	12283.6	204.712	246.1	347.845	0	2.05994	137.324	-591.626	57121.6	82421.4	21225.2	339.313	806.45	0	0	0	0	0	0	0	603	903	0
638	8	43.9151	1.62845	-275.915	-12748.5	12466.7	113.159	245.183	346.205	0	0.534062	137.171	-585.522	56389.2	82421.4	21362.5	340.766	806.694	0	0	0	0	0	0	0	603	903	0
638	9	45.5936	-2.18624	-284.765	-13023.2	13199.1	-24.1699	246.351	345.733	0	-0.07629	136.408	-576.672	55931.4	81444.9	21454.1	341.233	806.01	0	0	0	0	0	0	0	603	903	0
639	0	46.6617	-8.13717	-293.005	-12931.6	13565.3	-207.275	246.297	344.135	0	-0.381466	137.171	-568.738	55931.4	79735.9	21637.2	340.198	804.657	0	0	0	0	0	0	0	603	903	0
639	1	45.441	-10.5786	-301.55	-13938.7	14114.6	-115.723	246.807	346.224	0	0.0762979	137.782	-564.465	56206.1	79125.5	21133.6	340.178	803.426	0	0	0	0	0	0	0	603	903	0
639	2	46.5091	-12.8674	-309.789	-14304.9	14236.7	-161.499	245.956	346.176	0	-2.21252	137.629	-558.362	54832.8	78393.1	21271	340.398	804.797	0	0	0	0	0	0	0	603	903	0
639	3	46.8143	-16.5295	-316.198	-13664.1	14541.9	-115.723	245.99	343.214	0	-3.28064	137.019	-549.512	54466.6	76989.4	21362.5	340.105	803.882	0	0	0	0	0	0	0	603	903	0
639	4	48.7979	-19.8864	-328.1	-13023.2	15396.4	-390.381	246.926	339.693	0	-3.28064	137.324	-543.408	54741.2	75341.4	21271	338.646	802.263	0	0	0	0	0	0	0	603	903	0
639	5	49.1031	-24.0063	-338.781	-14396.5	15518.4	-253.052	245.807	342.495	0	-3.12805	136.103	-534.863	54466.6	74608.9	21133.6	339.492	801.167	0	0	0	0	0	0	0	603	903	0
639	6	50.7816	-28.2788	-344.274	-14213.4	15762.6	-115.723	245.785	341.285	0	-4.65393	136.408	-527.234	53734.1	73876.5	21271	340.121	801.083	0	0	0	0	0	0	0	603	903	0
639	7	49.5608	-31.9409	-356.481	-13938.7	16189.8	-161.499	245.416	339.101	0	-5.72204	134.272	-519.299	53001.7	72533.8	20996.3	339.676	800.936	0	0	0	0	0	0	0	603	903	0
639	8	47.8824	-35.1452	-363.195	-13572.5	16250.9	-298.828	244.744	337.37	0	-6.48498	134.73	-511.975	51811.6	71007.9	20950.5	338.694	801.801	0	0	0	0	0	0	0	603	903	0
639	9	48.7979	-37.7392	-370.825	-13572.5	16434	-69.9462	244.317	336.601	0	-6.17981	133.204	-504.346	53001.7	70031.4	20904.7	338.856	797.91	0	0	0	0	0	0	0	603	903	0
640	0	49.7134	-40.6384	-382.421	-13847.2	16739.1	204.712	243.771	336.209	0	-4.80651	130.915	-492.139	51445.3	69176.9	20447	340.564	798.466	0	0	0	0	0	0	0	603	903	0
640	1	48.1876	-43.8427	-391.271	-13206.3	16861.2	-115.723	243.093	333.752	0	-7.5531	131.373	-486.035	50438.2	67712	20492.8	339.315	799.225	0	0	0	0	0	0	0	603	903	0
640	2	46.9669	-46.2841	-397.68	-13572.5	17288.5	-69.9462	243.473	334.129	0	-6.63757	131.373	-476.88	50163.6	66369.3	20172.3	339.174	797.809	0	0	0	0	0	0	0	603	903	0
640	3	46.8143	-49.6411	-407.141	-13847.2	17410.5	204.712	242.763	334.011	0	-8.92639	128.474	-467.725	49888.9	65209.6	19760.3	339.419	796.337	0	0	0	0	0	0	0	603	903	0
640	4	46.8143	-49.9463	-418.127	-13023.2	17898.8	250.488	242.807	331.147	0	-8.7738	128.016	-459.485	48881.9	64049.9	19623	339.395	796.616	0	0	0	0	0	0	0	603	903	0
640	5	44.5254	-51.6247	-427.282	-14213.4	18142.9	-115.723	242.461	333.265	0	-8.31604	126.643	-449.719	48149.4	62524	19668.8	339.029	795.935	0	0	0	0	0	0	0	603	903	0
640	6	44.5254	-53.4558	-440.099	-14030.3	18387.1	250.488	241.779	331.88	0	-10.2997	124.964	-440.869	47417	60998.1	19302.6	338.359	795.447	0	0	0	0	0	0	0	603	903	0
640	7	43.9151	-54.2187	-451.086	-13938.7	19058.5	479.37	242.25	330.9	0	-11.2152	124.049	-430.188	47050.8	60021.6	18570.1	339.524	793.627	0	0	0	0	0	0	0	603	903	0
640	8	40.8633	-55.2868	-465.124	-13664.1	19058.5	342.041	240.975	329.377	0	-10.2997	122.065	-420.728	46409.9	58434.7	18387	338.89	792.691	0	0	0	0	0	0	0	603	903	0
640	9	38.2693	-56.5075	-477.026	-13847.2	19180.5	525.147	240.209	329.028	0	-10.7574	118.861	-411.267	45219.8	57091.9	18020.8	338.819	793.048	0	0	0	0	0	0	0	603	903	0
641	0	35.9805	-58.6438	-490.453	-14030.3	19851.9	616.7	240.477	328.607	0	-12.7411	119.166	-401.807	44762	55749.1	17700.4	338.746	791.598	0	0	0	0	0	0	0	603	903	0
641	1	36.1331	-57.7282	-508.154	-13664.1	20096.1	616.7	239.547	326.89	0	-12.1307	116.114	-391.736	44029.5	54833.6	17334.2	339.976	790.604	0	0	0	0	0	0	0	603	903	0
641	2	33.8443	-59.1015	-519.445	-12657	19974	342.041	238.453	324.366	0	-10.91	114.283	-381.055	43480.2	53612.9	17013.7	340.696	788.895	0	0	0	0	0	0	0	603	903	0
641	3	31.5555	-61.5429	-532.263	-12840.1	20889.5	-207.275	239.247	324.124	0	-11.673	112.3	-373.12	42381.6	51903.9	16647.5	339.108	789.413	0	0	0	0	0	0	0	603	903	0
641	4	31.0977	-62.9162	-543.249	-11741.5	21744	-344.605	240.026	321.613	0	-12.8937	110.163	-361.829	41374.5	50744.2	16144	340.244	788.652	0	0	0	0	0	0	0	603	903	0
641	5	28.9615	-63.8318	-551.183	-12107.7	21621.9	-161.499	239.228	321.967	0	-12.2833	107.264	-353.284	40550.5	49523.5	15777.8	340.181	788.218	0	0	0	0	0	0	0	603	903	0
[truncated: 1,814 more rows]
