# Supplementary material for: The Effects of an Extemporaneous Speech Dual-task on Older Adult Gait Control
Source: Research Square preprint supplement (doi:10.21203/rs.3.rs-7674245/v1), 2025-11-18
Supplement: Supplementary file 149 [file Over3ground05.xlsx]

## Sheet: Sheet1
Trajectories
		03:LFHD			03:RFHD			03:LBHD			03:RBHD			03:C7			03:T10			03:CLAV			03:STRN			03:RBAK			03:LSHO			03:LUPA			03:LELB			03:LFRM			03:LWRA			03:LWRB			03:LFIN
Frame	Sub Frame	X	Y	Z	X	Y	Z	X	Y	Z	X	Y	Z	X	Y	Z	X	Y	Z	X	Y	Z	X	Y	Z	X	Y	Z	X	Y	Z	X	Y	Z	X	Y	Z	X	Y	Z	X	Y	Z	X	Y	Z	X	Y	Z
		mm	mm	mm	mm	mm	mm	mm	mm	mm	mm	mm	mm	mm	mm	mm	mm	mm	mm	mm	mm	mm	mm	mm	mm	mm	mm	mm	mm	mm	mm	mm	mm	mm	mm	mm	mm	mm	mm	mm	mm	mm	mm	mm	mm	mm	mm	mm	mm
346	0	266.659	3091.27	1627.56	162.705	3098.83	1624.09	299.575	3245.9	1642.34	163.246	3267.82	1638.7	220.142	3327.42	1498.39	227.361	3443.17	1280.67	228.671	3198.58	1387.33	235.287	3185.8	1202.18	176.978	3445.89	1356.5	418.468	3318.31	1448.88	490.948	3329.78	1248.03	520.067	3334.08	1129.65	519.28	3212.4	1002.09	469.304	3144.61	939.22	527.684	3180.54	903.428	519.579	3091.58	848.23
347	0	264.131	3079.93	1624.85	160.164	3087.43	1621.34	297.232	3234.46	1639.61	160.953	3256.6	1636.02	218.407	3316.16	1495.59	227.218	3431.78	1277.73	226.005	3187.33	1384.55	232.525	3174.38	1199.36	176.533	3434.74	1353.39	416.71	3305.17	1446.12	488.948	3315.9	1245.19	517.998	3319.74	1126.85	516.682	3197.1	1000.23	466.675	3128.71	938.198	524.694	3164.51	901.754	517.069	3074.89	847.819
348	0	261.591	3068.55	1622.44	157.622	3076	1618.87	294.839	3223	1637.18	158.605	3245.33	1633.59	216.598	3304.85	1493.07	226.879	3420.29	1275.06	223.387	3176	1382.07	229.864	3162.86	1196.84	175.9	3423.5	1350.55	414.9	3292.19	1443.68	486.884	3302.26	1242.66	515.85	3305.77	1124.37	514.059	3182.34	998.526	464.017	3113.45	937.204	521.72	3149.12	900.198	514.503	3058.96	847.326
349	0	259.039	3057.14	1620.33	155.078	3064.53	1616.67	292.395	3211.54	1635.04	156.201	3234.02	1631.42	214.714	3293.49	1490.81	226.343	3408.72	1272.66	220.818	3164.6	1379.89	227.304	3151.23	1194.62	175.079	3412.2	1347.98	413.037	3279.37	1441.53	484.759	3288.88	1240.44	513.622	3292.15	1122.2	511.412	3168.12	996.982	461.329	3098.82	936.239	518.763	3134.4	898.76	511.882	3043.8	846.751
350	0	256.478	3045.69	1618.51	152.534	3053.03	1614.74	289.904	3200.07	1633.19	153.743	3222.65	1629.51	212.757	3282.08	1488.83	225.609	3397.05	1270.53	218.3	3153.13	1377.99	224.847	3139.48	1192.71	174.07	3400.81	1345.7	411.123	3266.71	1439.7	482.572	3275.74	1238.54	511.316	3278.89	1120.35	508.741	3154.43	995.598	458.613	3084.82	935.304	515.823	3120.34	897.441	509.206	3029.4	846.096
351	0	253.909	3034.21	1616.99	149.992	3041.49	1613.09	287.366	3188.59	1631.64	151.234	3211.24	1627.85	210.727	3270.62	1487.11	224.678	3385.3	1268.66	215.836	3141.6	1376.38	222.493	3127.64	1191.09	172.873	3389.35	1343.68	409.158	3254.21	1438.16	480.327	3262.86	1236.95	508.935	3266	1118.81	506.047	3141.27	994.374	455.871	3071.46	934.401	512.903	3106.93	896.243	506.477	3015.77	845.366
352	0	251.339	3022.7	1615.77	147.457	3029.92	1611.71	284.789	3177.1	1630.38	148.679	3199.78	1626.44	208.629	3259.12	1485.67	223.548	3373.47	1267.07	213.429	3129.99	1375.07	220.246	3115.7	1189.78	171.491	3377.82	1341.94	407.146	3241.87	1436.94	478.029	3250.24	1235.69	506.481	3253.46	1117.6	503.334	3128.66	993.313	453.105	3058.73	933.533	510.007	3094.18	895.167	503.699	3002.9	844.565
353	0	248.775	3011.17	1614.84	144.934	3018.32	1610.61	282.179	3165.62	1629.41	146.087	3188.28	1625.3	206.468	3247.58	1484.5	222.219	3361.57	1265.75	211.085	3118.33	1374.04	218.109	3103.68	1188.77	169.925	3366.23	1340.49	405.091	3229.7	1436.01	475.686	3237.89	1234.74	503.962	3241.3	1116.7	500.606	3116.58	992.415	450.322	3046.65	932.703	507.139	3082.09	894.217	500.877	2990.78	843.702
354	0	246.228	2999.61	1614.2	142.433	3006.7	1609.77	279.546	3154.13	1628.72	143.467	3176.74	1624.41	204.249	3236	1483.59	220.695	3349.61	1264.71	208.811	3106.6	1373.3	216.084	3091.58	1188.05	168.182	3354.57	1339.31	402.998	3217.69	1435.39	473.306	3225.82	1234.1	501.384	3229.52	1116.12	497.868	3105.04	991.681	447.528	3035.19	931.917	504.307	3070.66	893.395	498.019	2979.43	842.788
355	0	243.71	2988.03	1613.85	139.965	2995.06	1609.21	276.904	3142.65	1628.33	140.832	3165.16	1623.77	201.983	3224.39	1482.96	218.978	3337.6	1263.94	206.615	3094.84	1372.84	214.176	3079.44	1187.62	166.268	3342.86	1338.42	400.875	3205.85	1435.06	470.901	3214.03	1233.78	498.758	3218.12	1115.84	495.128	3094.04	991.112	444.731	3024.38	931.18	501.52	3059.88	892.706	495.137	2968.82	841.837
356	0	241.237	2976.45	1613.76	137.543	2983.42	1608.9	274.269	3131.18	1628.21	138.198	3153.56	1623.39	199.68	3212.75	1482.59	217.075	3325.57	1263.45	204.507	3083.03	1372.65	212.387	3067.28	1187.47	164.195	3331.11	1337.81	398.73	3194.18	1435.02	468.485	3202.55	1233.77	496.096	3207.12	1115.88	492.396	3083.58	990.706	441.944	3014.2	930.497	498.787	3049.75	892.153	492.244	2958.95	840.862
357	0	238.825	2964.86	1613.95	135.183	2971.76	1608.85	271.659	3119.73	1628.36	135.583	3141.93	1623.26	197.352	3201.1	1482.49	214.998	3313.52	1263.22	202.496	3071.22	1372.74	210.719	3055.13	1187.59	161.975	3319.34	1337.47	396.574	3182.7	1435.26	466.072	3191.38	1234.06	493.412	3196.52	1116.21	489.683	3073.66	990.462	439.18	3004.65	929.873	496.121	3040.26	891.736	489.359	2949.8	839.879
358	0	236.493	2953.3	1614.39	132.901	2960.12	1609.05	269.093	3108.31	1628.78	133.007	3130.3	1623.37	195.015	3189.45	1482.64	212.762	3301.5	1263.26	200.594	3059.39	1373.08	209.175	3043.01	1187.97	159.625	3307.54	1337.42	394.42	3171.39	1435.78	463.677	3180.54	1234.64	490.721	3186.32	1116.83	487	3064.28	990.376	436.453	2995.72	929.313	493.532	3031.42	891.458	486.501	2941.38	838.903
359	0	234.262	2941.75	1615.06	130.715	2948.48	1609.48	266.595	3096.92	1629.45	130.491	3118.67	1623.72	192.684	3177.81	1483.05	210.385	3289.5	1263.56	198.81	3047.59	1373.67	207.758	3030.95	1188.59	157.163	3295.74	1337.63	392.28	3160.28	1436.54	461.315	3170.03	1235.5	488.038	3176.54	1117.72	484.362	3055.43	990.444	433.781	2987.41	928.819	491.035	3023.21	891.316	483.693	2933.66	837.949
360	0	232.151	2930.24	1615.96	128.644	2936.88	1610.13	264.184	3085.57	1630.36	128.059	3107.05	1624.31	190.374	3166.2	1483.69	207.891	3277.55	1264.1	197.154	3035.82	1374.49	206.467	3018.98	1189.45	154.613	3283.95	1338.09	390.168	3149.37	1437.55	459.001	3159.88	1236.62	485.378	3167.18	1118.88	481.783	3047.11	990.658	431.182	2979.71	928.393	488.64	3015.62	891.308	480.961	2926.62	837.027
361	0	230.179	2918.78	1617.07	126.704	2925.31	1611	261.884	3074.28	1631.5	125.732	3095.45	1625.13	188.103	3154.62	1484.55	205.306	3265.68	1264.87	195.634	3024.11	1375.55	205.304	3007.11	1190.53	151.997	3272.18	1338.81	388.097	3138.65	1438.77	456.746	3150.09	1237.98	482.755	3158.24	1120.27	479.279	3039.32	991.008	428.674	2972.59	928.035	486.359	3008.65	891.427	478.332	2920.24	836.147
362	0	228.364	2907.38	1618.38	124.914	2913.79	1612.08	259.715	3063.04	1632.86	123.534	3083.89	1626.17	185.886	3143.08	1485.63	202.657	3253.88	1265.85	194.254	3012.46	1376.83	204.27	2995.36	1191.82	149.338	3260.44	1339.75	386.08	3128.13	1440.19	454.56	3140.67	1239.58	480.182	3149.7	1121.89	476.862	3032.05	991.485	426.278	2966.06	927.742	484.201	3002.29	891.667	475.831	2914.52	835.316
363	0	226.723	2896.05	1619.86	123.288	2902.32	1613.35	257.697	3051.86	1634.42	121.484	3072.37	1627.42	183.739	3131.61	1486.92	199.975	3242.18	1267.04	193.018	3000.9	1378.3	203.363	2983.73	1193.31	146.661	3248.74	1340.91	384.129	3117.81	1441.79	452.45	3131.61	1241.37	477.669	3141.58	1123.71	474.547	3025.28	992.075	424.013	2960.07	927.509	482.176	2996.52	892.017	473.489	2909.42	834.537
364	0	225.267	2884.8	1621.52	121.838	2890.93	1614.81	255.846	3040.76	1636.15	119.602	3060.91	1628.88	181.673	3120.2	1488.38	197.289	3230.58	1268.41	191.928	2989.43	1379.97	202.581	2972.22	1194.98	143.988	3237.08	1342.26	382.256	3107.69	1443.55	450.42	3122.91	1243.36	475.224	3133.84	1125.71	472.347	3019	992.765	421.896	2954.62	927.331	480.289	2991.32	892.465	471.33	2904.95	833.809
365	0	224.009	2873.65	1623.32	120.576	2879.61	1616.46	254.176	3029.74	1638.04	117.904	3049.52	1630.54	179.702	3108.85	1490.01	194.624	3219.09	1269.94	190.982	2978.05	1381.82	201.918	2960.84	1196.83	141.34	3225.47	1343.79	380.467	3097.76	1445.44	448.47	3114.56	1245.51	472.852	3126.48	1127.87	470.271	3013.21	993.538	419.944	2949.68	927.199	478.543	2986.69	892.998	469.38	2901.06	833.128
366	0	222.954	2862.59	1625.27	119.507	2868.38	1618.27	252.697	3018.8	1640.07	116.404	3038.2	1632.38	177.834	3097.59	1491.79	192.007	3207.7	1271.62	190.175	2966.77	1383.83	201.367	2949.58	1198.82	138.734	3213.9	1345.48	378.771	3088	1447.43	446.599	3106.55	1247.8	470.555	3119.48	1130.18	468.331	3007.87	994.379	418.174	2945.22	927.102	476.942	2982.61	893.601	467.661	2897.76	832.486
367	0	222.106	2851.63	1627.34	118.634	2857.23	1620.25	251.417	3007.95	1642.21	115.108	3026.96	1634.39	176.077	3086.39	1493.69	189.458	3196.42	1273.42	189.5	2955.59	1385.97	200.918	2938.43	1200.96	136.186	3202.39	1347.3	377.169	3078.39	1449.52	444.801	3098.85	1250.23	468.333	3112.8	1132.6	466.531	3002.97	995.27	416.596	2941.21	927.029	475.485	2979.06	894.258	466.191	2895.03	831.873
368	0	221.462	2840.78	1629.52	117.958	2846.17	1622.37	250.336	2997.19	1644.43	114.021	3015.81	1636.55	174.435	3075.26	1495.69	186.994	3185.24	1275.32	188.949	2944.5	1388.23	200.559	2927.38	1203.21	133.706	3190.91	1349.23	375.663	3068.93	1451.67	443.072	3091.45	1252.75	466.184	3106.42	1135.13	464.876	2998.48	996.194	415.221	2937.64	926.965	474.168	2976.01	894.952	464.983	2892.85	831.276
369	0	221.017	2830.03	1631.79	117.473	2835.21	1624.61	249.454	2986.51	1646.71	113.142	3004.74	1638.83	172.91	3064.2	1497.76	184.628	3174.15	1277.3	188.511	2933.49	1390.59	200.277	2916.42	1205.55	131.303	3179.48	1351.23	374.253	3059.57	1453.85	441.404	3084.29	1255.36	464.103	3100.3	1137.73	463.37	2994.38	997.131	414.055	2934.45	926.896	472.989	2973.46	895.666	464.044	2891.2	830.679
370	0	220.761	2819.38	1634.12	117.171	2824.33	1626.97	248.764	2975.92	1649.01	112.465	2993.76	1641.21	171.503	3053.21	1499.89	182.368	3163.15	1279.34	188.175	2922.56	1393	200.056	2905.52	1207.96	128.983	3168.07	1353.29	372.937	3050.31	1456.04	439.791	3077.35	1258.02	462.085	3094.41	1140.39	462.012	2990.64	998.063	413.1	2931.64	926.804	471.94	2971.36	896.383	463.376	2890.07	830.066
371	0	220.682	2808.82	1636.49	117.04	2813.54	1629.41	248.256	2965.42	1651.3	111.979	2982.87	1643.65	170.213	3042.26	1502.03	180.22	3152.23	1281.4	187.929	2911.69	1395.45	199.881	2894.68	1210.4	126.751	3156.68	1355.37	371.709	3041.11	1458.21	438.225	3070.58	1260.71	460.122	3088.71	1143.08	460.799	2987.23	998.973	412.356	2929.16	926.672	471.015	2969.69	897.086	462.975	2889.44	829.418
372	0	220.763	2798.35	1638.88	117.067	2802.83	1631.9	247.917	2954.99	1653.56	111.668	2972.05	1646.11	169.036	3031.36	1504.17	178.185	3141.39	1283.46	187.761	2900.87	1397.89	199.737	2883.89	1212.84	124.608	3145.31	1357.45	370.566	3031.94	1460.34	436.7	3063.93	1263.41	458.207	3083.15	1145.77	459.727	2984.11	999.841	411.817	2926.98	926.483	470.204	2968.42	897.76	462.831	2889.28	828.718
373	0	220.986	2787.95	1641.25	117.233	2792.18	1634.41	247.73	2944.63	1655.74	111.514	2961.3	1648.57	167.969	3020.49	1506.26	176.265	3130.62	1285.5	187.658	2890.09	1400.3	199.612	2873.12	1215.24	122.556	3133.95	1359.48	369.502	3022.78	1462.39	435.211	3057.36	1266.09	456.334	3077.7	1148.44	458.79	2981.25	1000.65	411.477	2925.08	926.216	469.5	2967.52	898.388	462.928	2889.57	827.948
374	0	221.331	2777.61	1643.57	117.521	2781.6	1636.89	247.675	2934.32	1657.81	111.497	2950.62	1650.97	167.007	3009.65	1508.28	174.456	3119.92	1287.48	187.608	2879.34	1402.62	199.492	2862.38	1217.57	120.596	3122.59	1361.44	368.512	3013.6	1464.33	433.753	3050.82	1268.7	454.497	3072.31	1151.06	457.98	2978.61	1001.38	411.322	2923.41	925.853	468.891	2966.94	898.958	463.247	2890.28	827.091
375	0	221.778	2767.32	1645.81	117.912	2771.05	1639.32	247.733	2924.06	1659.75	111.593	2939.98	1653.27	166.144	2998.83	1510.19	172.759	3109.27	1289.38	187.602	2868.6	1404.84	199.367	2851.64	1219.78	118.731	3111.23	1363.3	367.593	3004.37	1466.14	432.322	3044.25	1271.22	452.69	3066.94	1153.6	457.287	2976.15	1002.02	411.339	2921.96	925.378	468.369	2966.66	899.456	463.764	2891.39	826.134
376	0	222.305	2757.06	1647.93	118.386	2760.54	1641.64	247.884	2913.82	1661.52	111.78	2929.38	1655.44	165.376	2988.01	1511.97	171.173	3098.68	1291.17	187.628	2857.87	1406.9	199.228	2840.91	1221.85	116.962	3099.87	1365.02	366.74	2995.09	1467.78	430.917	3037.61	1273.61	450.909	3061.54	1156.04	456.701	2973.83	1002.54	411.511	2920.69	924.772	467.923	2966.61	899.873	464.453	2892.84	825.063
377	0	222.894	2746.81	1649.88	118.924	2750.03	1643.82	248.106	2903.6	1663.09	112.034	2918.8	1657.42	164.698	2977.19	1513.59	169.696	3088.14	1292.83	187.679	2847.13	1408.78	199.069	2830.17	1223.72	115.292	3088.5	1366.58	365.95	2985.71	1469.23	429.537	3030.87	1275.84	449.152	3056.09	1158.33	456.21	2971.61	1002.95	411.818	2919.57	924.022	467.546	2966.77	900.199	465.286	2894.62	823.872
378	0	223.526	2736.56	1651.65	119.51	2739.52	1645.81	248.381	2893.38	1664.44	112.335	2908.23	1659.19	164.105	2966.36	1515.02	168.33	3077.64	1294.32	187.746	2836.38	1410.44	198.883	2819.42	1225.36	113.726	3077.13	1367.96	365.224	2976.23	1470.46	428.183	3023.97	1277.87	447.419	3050.54	1160.45	455.802	2969.45	1003.23	412.24	2918.56	923.117	467.227	2967.09	900.429	466.233	2896.66	822.554
379	0	224.186	2726.28	1653.2	120.127	2728.99	1647.58	248.692	2883.13	1665.55	112.664	2897.64	1660.71	163.593	2955.51	1516.23	167.076	3067.18	1295.62	187.823	2825.61	1411.86	198.669	2808.65	1226.75	112.27	3065.76	1369.12	364.56	2966.63	1471.45	426.858	3016.89	1279.68	445.711	3044.85	1162.39	455.466	2967.31	1003.36	412.755	2917.65	922.047	466.959	2967.51	900.558	467.266	2898.94	821.11
380	0	224.86	2715.96	1654.49	120.762	2718.42	1649.1	249.027	2872.85	1666.4	113.005	2887.03	1661.95	163.162	2944.63	1517.22	165.938	3056.74	1296.71	187.905	2814.81	1413.01	198.424	2797.88	1227.86	110.928	3054.38	1370.06	363.959	2956.9	1472.18	425.568	3009.6	1281.24	444.029	3038.99	1164.11	455.189	2965.15	1003.34	413.342	2916.79	920.807	466.735	2968	900.586	468.354	2901.41	819.542
381	0	225.538	2705.58	1655.51	121.405	2707.8	1650.33	249.373	2862.52	1666.98	113.345	2876.38	1662.9	162.808	2933.72	1517.95	164.917	3046.31	1297.58	187.989	2803.97	1413.86	198.147	2787.08	1228.68	109.708	3043	1370.76	363.424	2947.02	1472.64	424.318	3002.07	1282.53	442.379	3032.93	1165.6	454.96	2962.94	1003.17	413.98	2915.96	919.397	466.547	2968.5	900.513	469.471	2904.01	817.858
382	0	226.21	2695.13	1656.23	122.048	2697.11	1651.26	249.723	2852.11	1667.29	113.678	2865.67	1663.53	162.531	2922.78	1518.43	164.016	3035.89	1298.2	188.072	2793.1	1414.42	197.842	2776.26	1229.18	108.618	3031.61	1371.2	362.957	2936.98	1472.82	423.115	2994.29	1283.54	440.766	3026.65	1166.85	454.769	2960.63	1002.85	414.648	2915.14	917.82	466.392	2968.97	900.343	470.588	2906.7	816.069
383	0	226.873	2684.59	1656.64	122.684	2686.35	1651.86	250.074	2841.63	1667.31	113.999	2854.89	1663.85	162.332	2911.79	1518.64	163.238	3025.45	1298.56	188.154	2782.18	1414.68	197.51	2765.41	1229.36	107.663	3020.23	1371.38	362.561	2926.79	1472.7	421.97	2986.24	1284.25	439.196	3020.13	1167.84	454.606	2958.19	1002.37	415.328	2914.27	916.083	466.263	2969.36	900.081	471.68	2909.43	814.19
384	0	227.524	2673.95	1656.74	123.313	2675.49	1652.13	250.424	2831.04	1667.05	114.308	2844.04	1663.84	162.21	2900.75	1518.58	162.584	3014.97	1298.66	188.237	2771.22	1414.62	197.157	2754.53	1229.23	106.851	3008.84	1371.3	362.241	2916.42	1472.3	420.889	2977.91	1284.66	437.675	3013.34	1168.57	454.463	2955.58	1001.75	416.002	2913.35	914.198	466.158	2969.62	899.735	472.725	2912.15	812.238
385	0	228.164	2663.2	1656.52	123.934	2664.54	1652.08	250.777	2820.36	1666.53	114.61	2833.1	1663.53	162.168	2889.65	1518.25	162.054	3004.44	1298.49	188.324	2760.2	1414.26	196.79	2743.6	1228.79	106.187	2997.45	1370.96	362.001	2905.89	1471.61	419.884	2969.31	1284.76	436.214	3006.27	1169.04	454.335	2952.78	1000.98	416.657	2912.33	912.178	466.075	2969.71	899.315	473.701	2914.8	810.232
386	0	228.795	2652.34	1655.99	124.549	2653.49	1651.7	251.138	2809.55	1665.73	114.911	2822.06	1662.91	162.208	2878.5	1517.66	161.649	2993.84	1298.03	188.419	2749.11	1413.61	196.417	2732.62	1228.05	105.675	2986.05	1370.36	361.845	2895.19	1470.65	418.961	2960.42	1284.58	434.819	2998.93	1169.25	454.216	2949.75	1000.09	417.278	2911.18	910.041	466.013	2969.58	898.83	474.591	2917.33	808.192
387	0	229.423	2641.36	1655.16	125.164	2642.34	1651.01	251.514	2798.63	1664.69	115.221	2810.93	1662.01	162.333	2867.29	1516.81	161.367	2983.14	1297.31	188.529	2737.96	1412.67	196.049	2721.58	1227.03	105.317	2974.62	1369.51	361.777	2884.32	1469.41	418.131	2951.26	1284.11	433.499	2991.29	1169.22	454.103	2946.46	999.066	417.859	2909.87	907.807	465.971	2969.18	898.291	475.381	2919.69	806.14
388	0	230.057	2630.26	1654.06	125.787	2631.08	1650.02	251.915	2787.59	1663.42	115.553	2799.69	1660.84	162.545	2856	1515.71	161.208	2972.33	1296.31	188.662	2726.73	1411.48	195.696	2710.45	1225.75	105.116	2963.17	1368.41	361.802	2873.27	1467.93	417.399	2941.84	1283.38	432.263	2983.36	1168.95	453.995	2942.9	997.935	418.39	2908.36	905.497	465.948	2968.48	897.707	476.06	2921.81	804.095
389	0	230.706	2619.03	1652.69	126.426	2619.71	1648.77	252.352	2776.43	1661.92	115.919	2788.35	1659.44	162.848	2844.64	1514.38	161.17	2961.38	1295.05	188.827	2715.41	1410.05	195.372	2699.23	1224.24	105.069	2951.67	1367.09	361.923	2862.07	1466.21	416.772	2932.16	1282.39	431.118	2975.14	1168.45	453.892	2939.02	996.703	418.87	2906.61	903.132	465.946	2967.43	897.088	476.622	2923.64	802.077
390	0	231.382	2607.69	1651.1	127.092	2608.25	1647.28	252.837	2765.14	1660.23	116.335	2776.91	1657.81	163.246	2833.19	1512.83	161.252	2950.28	1293.55	189.035	2703.99	1408.4	195.091	2687.91	1222.52	105.176	2940.13	1365.55	362.144	2850.7	1464.27	416.256	2922.24	1281.19	430.073	2966.63	1167.74	453.797	2934.82	995.383	419.297	2904.58	900.735	465.965	2965.99	896.442	477.065	2925.12	800.101
391	0	232.097	2596.23	1649.31	127.797	2596.69	1645.59	253.383	2753.74	1658.36	116.815	2765.36	1656	163.741	2821.65	1511.09	161.449	2939.01	1291.82	189.296	2692.46	1406.57	194.867	2676.45	1220.61	105.431	2928.51	1363.82	362.467	2839.18	1462.14	415.853	2912.09	1279.78	429.134	2957.85	1166.85	453.712	2930.26	993.989	419.673	2902.24	898.325	466.007	2964.13	895.776	477.388	2926.2	798.181
392	0	232.864	2584.66	1647.36	128.555	2585.03	1643.72	254.002	2742.22	1656.34	117.373	2753.72	1654.03	164.337	2810.01	1509.17	161.761	2927.55	1289.87	189.624	2680.82	1404.57	194.714	2664.86	1218.55	105.83	2916.81	1361.91	362.895	2827.51	1459.84	415.566	2901.72	1278.19	428.306	2948.79	1165.79	453.641	2925.34	992.53	420.004	2899.54	895.921	466.073	2961.81	895.092	477.599	2926.81	796.328
393	0	233.698	2572.98	1645.29	129.377	2573.28	1641.72	254.708	2730.59	1654.19	118.023	2741.99	1651.92	165.037	2798.25	1507.11	162.182	2915.91	1287.75	190.031	2669.04	1402.44	194.647	2653.11	1216.37	106.365	2905	1359.85	363.428	2815.69	1457.38	415.395	2891.16	1276.45	427.595	2939.47	1164.57	453.591	2920.02	991.019	420.295	2896.45	893.542	466.163	2958.99	894.395	477.705	2926.9	794.547
394	0	234.61	2561.2	1643.12	130.276	2561.44	1639.63	255.511	2718.85	1651.93	118.777	2730.16	1649.71	165.842	2786.38	1504.91	162.709	2904.06	1285.46	190.528	2657.13	1400.21	194.68	2641.19	1214.08	107.029	2893.08	1357.67	364.068	2803.74	1454.81	415.34	2880.4	1274.58	427.004	2929.89	1163.23	453.567	2914.3	989.467	420.556	2892.93	891.202	466.279	2955.65	893.684	477.718	2926.41	792.843
395	0	235.614	2549.32	1640.89	131.265	2549.51	1637.48	256.422	2707	1649.59	119.647	2718.24	1647.42	166.756	2774.39	1502.62	163.336	2892.01	1283.05	191.129	2645.07	1397.9	194.827	2629.09	1211.73	107.815	2881.02	1355.38	364.814	2791.65	1452.13	415.398	2869.47	1272.62	426.537	2920.06	1161.77	453.577	2908.15	987.882	420.798	2888.93	888.912	466.421	2951.75	892.957	477.655	2925.3	791.214
396	0	236.718	2537.33	1638.65	132.352	2537.48	1635.3	257.451	2695.04	1647.19	120.641	2706.23	1645.08	167.777	2762.25	1500.26	164.06	2879.76	1280.55	191.842	2632.85	1395.54	195.099	2616.8	1209.33	108.714	2868.82	1353.02	365.668	2779.43	1449.39	415.568	2858.37	1270.58	426.194	2909.99	1160.23	453.628	2901.56	986.275	421.032	2884.42	886.683	466.592	2947.28	892.212	477.532	2923.51	789.659
397	0	237.932	2525.24	1636.42	133.548	2525.36	1633.14	258.605	2682.97	1644.77	121.768	2694.12	1642.71	168.908	2749.97	1497.86	164.874	2867.3	1277.99	192.678	2620.47	1393.16	195.508	2604.31	1206.92	109.719	2856.46	1350.63	366.628	2767.09	1446.6	415.845	2847.1	1268.48	425.976	2899.67	1158.61	453.728	2894.52	984.653	421.271	2879.35	884.522	466.791	2942.21	891.445	477.369	2920.99	788.172
398	0	239.26	2513.04	1634.24	134.858	2513.13	1631.02	259.89	2670.79	1642.34	123.031	2681.91	1640.34	170.147	2737.54	1495.45	165.772	2854.64	1275.4	193.643	2607.92	1390.8	196.061	2591.62	1204.51	110.821	2843.93	1348.23	367.692	2754.62	1443.8	416.226	2835.68	1266.36	425.884	2889.11	1156.95	453.884	2887	983.024	421.527	2873.7	882.433	467.022	2936.51	890.65	477.186	2917.71	786.745
399	0	240.706	2500.72	1632.13	136.285	2500.8	1628.98	261.308	2658.49	1639.93	124.432	2669.6	1638.01	171.492	2724.95	1493.07	166.751	2841.78	1272.83	194.742	2595.21	1388.48	196.766	2578.73	1202.15	112.014	2831.22	1345.86	368.86	2742.04	1441.01	416.709	2824.09	1264.24	425.916	2878.31	1155.24	454.103	2878.99	981.396	421.812	2867.43	880.42	467.285	2930.17	889.822	477.003	2913.63	785.369
400	0	242.271	2488.28	1630.12	137.831	2488.36	1627.04	262.86	2646.06	1637.57	125.973	2657.17	1635.73	172.94	2712.2	1490.75	167.803	2828.74	1270.31	195.976	2582.32	1386.22	197.627	2565.65	1199.85	113.29	2818.34	1343.55	370.129	2729.35	1438.27	417.29	2812.34	1262.13	426.073	2867.27	1153.52	454.394	2870.49	979.774	422.14	2860.51	878.484	467.584	2923.17	888.956	476.841	2908.71	784.036
401	0	243.95	2475.72	1628.23	139.493	2475.79	1625.22	264.544	2633.5	1635.29	127.648	2644.63	1633.53	174.484	2699.29	1488.51	168.925	2815.52	1267.88	197.346	2569.27	1384.06	198.644	2552.37	1197.65	114.642	2805.29	1341.34	371.496	2716.54	1435.61	417.968	2800.43	1260.06	426.352	2855.97	1151.8	454.76	2861.46	978.166	422.522	2852.91	876.627	467.923	2915.49	888.048	476.718	2902.93	782.736
402	0	245.739	2463.01	1626.49	141.267	2463.1	1623.54	266.354	2620.81	1633.11	129.452	2631.97	1631.44	176.12	2686.22	1486.4	170.112	2802.14	1265.58	198.845	2556.06	1382.02	199.814	2538.92	1195.57	116.063	2792.07	1339.26	372.957	2703.62	1433.07	418.742	2788.33	1258.04	426.753	2844.41	1150.09	455.209	2851.9	976.578	422.968	2844.6	874.847	468.305	2907.12	887.093	476.653	2896.25	781.46
403	0	247.629	2450.17	1624.89	143.144	2450.27	1622.01	268.284	2607.96	1631.07	131.376	2619.17	1629.5	177.838	2673.01	1484.44	171.359	2788.6	1263.44	200.467	2542.71	1380.13	201.133	2525.3	1193.65	117.547	2778.69	1337.34	374.508	2690.6	1430.67	419.612	2776.04	1256.1	427.274	2832.59	1148.42	455.745	2841.8	975.015	423.485	2835.56	873.145	468.736	2898.04	886.088	476.661	2888.65	780.198
404	0	249.609	2437.18	1623.46	145.115	2437.31	1620.66	270.321	2594.97	1629.19	133.409	2606.24	1627.71	179.63	2659.67	1482.65	172.662	2774.94	1261.49	202.199	2529.22	1378.41	202.589	2511.53	1191.91	119.086	2765.18	1335.62	376.142	2677.48	1428.44	420.581	2763.56	1254.26	427.916	2820.48	1146.79	456.37	2831.13	973.484	424.082	2825.77	871.519	469.223	2888.23	885.032	476.757	2880.11	778.944
405	0	251.666	2424.04	1622.21	147.165	2424.21	1619.48	272.452	2581.84	1627.49	135.534	2593.18	1626.12	181.483	2646.2	1481.07	174.017	2761.17	1259.76	204.028	2515.62	1376.89	204.17	2497.64	1190.38	120.673	2751.54	1334.11	377.852	2664.27	1426.42	421.648	2750.86	1252.52	428.677	2808.07	1145.21	457.089	2819.89	971.991	424.763	2815.22	869.971	469.773	2877.69	883.924	476.95	2870.62	777.69
406	0	253.786	2410.76	1621.12	149.282	2410.98	1618.48	274.661	2568.56	1625.99	137.737	2579.99	1624.74	183.386	2632.64	1479.72	175.419	2747.31	1258.27	205.934	2501.93	1375.59	205.859	2483.64	1189.07	122.299	2737.8	1332.84	379.628	2650.98	1424.63	422.817	2737.94	1250.89	429.558	2795.36	1143.7	457.902	2808.05	970.543	425.53	2803.88	868.5	470.392	2866.4	882.765	477.252	2860.16	776.43
407	0	255.952	2397.35	1620.21	151.447	2397.63	1617.67	276.929	2555.15	1624.72	139.997	2566.67	1623.6	185.324	2619	1478.61	176.861	2733.38	1257.05	207.898	2488.17	1374.53	207.637	2469.57	1188.02	123.957	2723.99	1331.82	381.46	2637.62	1423.1	424.09	2724.79	1249.4	430.559	2782.34	1142.27	458.811	2795.62	969.145	426.386	2791.76	867.109	471.088	2854.35	881.557	477.668	2848.7	775.161
408	0	258.146	2383.82	1619.48	153.643	2384.16	1617.04	279.235	2541.61	1623.7	142.293	2553.24	1622.71	187.283	2605.32	1477.76	178.337	2719.42	1256.1	209.899	2474.37	1373.73	209.482	2455.46	1187.23	125.638	2710.14	1331.06	383.335	2624.2	1421.84	425.467	2711.4	1248.04	431.681	2769	1140.92	459.816	2782.58	967.805	427.33	2778.84	865.801	471.87	2841.52	880.304	478.202	2836.25	773.881
409	0	260.351	2370.19	1618.93	155.851	2370.6	1616.6	281.557	2527.98	1622.94	144.604	2539.71	1622.09	189.246	2591.62	1477.18	179.84	2705.45	1255.44	211.912	2460.56	1373.18	211.372	2441.33	1186.72	127.332	2696.28	1330.58	385.24	2610.73	1420.87	426.95	2697.77	1246.83	432.925	2755.33	1139.67	460.915	2768.93	966.529	428.359	2765.13	864.578	472.743	2827.93	879.011	478.856	2822.8	772.588
410	0	262.547	2356.48	1618.55	158.051	2356.96	1616.34	283.872	2514.26	1622.44	146.906	2526.1	1621.75	191.197	2577.93	1476.88	181.361	2691.49	1255.07	213.913	2446.78	1372.91	213.285	2427.22	1186.5	129.03	2682.44	1330.38	387.16	2597.25	1420.2	428.536	2683.9	1245.77	434.289	2741.33	1138.51	462.107	2754.65	965.325	429.468	2750.62	863.447	473.714	2813.55	877.685	479.63	2808.33	771.285
411	0	264.715	2342.72	1618.34	160.225	2343.27	1616.27	286.156	2500.49	1622.22	149.175	2512.43	1621.7	193.118	2564.27	1476.86	182.891	2677.57	1254.99	215.879	2433.04	1372.91	215.196	2413.18	1186.56	130.723	2668.65	1330.45	389.078	2583.76	1419.85	430.22	2669.79	1244.86	435.774	2727	1137.45	463.387	2739.76	964.202	430.651	2735.32	862.415	474.788	2798.38	876.335	480.522	2792.85	769.976
412	0	266.835	2328.93	1618.32	162.35	2329.55	1616.38	288.385	2486.7	1622.28	151.387	2498.73	1621.94	194.993	2550.68	1477.12	184.421	2663.72	1255.19	217.787	2419.37	1373.19	217.085	2399.23	1186.9	132.4	2654.94	1330.8	390.979	2570.28	1419.82	431.996	2655.47	1244.11	437.377	2712.35	1136.5	464.751	2724.25	963.168	431.901	2719.25	861.49	475.966	2782.44	874.973	481.529	2776.37	768.671
413	0	268.888	2315.16	1618.47	164.408	2315.83	1616.68	290.534	2472.91	1622.62	153.52	2485.03	1622.47	196.807	2537.17	1477.65	185.943	2649.97	1255.68	219.616	2405.81	1373.73	218.929	2385.4	1187.51	134.053	2641.34	1331.42	392.846	2556.83	1420.11	433.855	2640.93	1243.52	439.097	2697.39	1135.65	466.193	2708.12	962.234	433.207	2702.42	860.684	477.248	2765.72	873.612	482.645	2758.88	767.383
414	0	270.856	2301.42	1618.8	166.379	2302.15	1617.17	292.583	2459.16	1623.23	155.552	2471.35	1623.29	198.543	2523.78	1478.45	187.447	2636.31	1256.44	221.345	2392.37	1374.55	220.708	2371.72	1188.39	135.674	2627.88	1332.29	394.664	2543.42	1420.71	435.785	2626.2	1243.09	440.927	2682.13	1134.93	467.707	2691.4	961.411	434.559	2684.84	860.01	478.632	2748.24	872.268	483.864	2740.4	766.131
415	0	272.72	2287.74	1619.32	168.244	2288.52	1617.85	294.51	2445.47	1624.12	157.462	2457.72	1624.38	200.19	2510.52	1479.52	188.926	2622.79	1257.47	222.959	2379.07	1375.62	222.402	2358.22	1189.53	137.256	2614.57	1333.41	396.417	2530.08	1421.62	437.77	2611.29	1242.83	442.864	2666.58	1134.32	469.283	2674.09	960.712	435.944	2666.55	859.484	480.113	2730	870.961	485.179	2720.95	764.937
416	0	274.464	2274.17	1620.04	169.987	2274.97	1618.72	296.297	2431.88	1625.27	159.235	2444.16	1625.75	201.736	2497.4	1480.82	190.373	2609.4	1258.74	224.442	2365.93	1376.94	223.995	2344.9	1190.9	138.792	2601.43	1334.77	398.092	2516.81	1422.83	439.795	2596.23	1242.74	444.898	2650.75	1133.84	470.913	2656.22	960.15	437.35	2647.57	859.124	481.683	2711.02	869.712	486.58	2700.54	763.829
417	0	276.074	2260.7	1620.95	171.593	2261.53	1619.78	297.93	2418.39	1626.67	160.854	2430.71	1627.36	203.173	2484.43	1482.36	191.784	2596.15	1260.24	225.783	2352.95	1378.49	225.472	2331.78	1192.52	140.279	2588.48	1336.34	399.678	2503.63	1424.33	441.843	2581.03	1242.83	447.021	2634.67	1133.49	472.585	2637.8	959.741	438.764	2627.92	858.95	483.331	2691.33	868.544	488.056	2679.22	762.842
418	0	277.535	2247.38	1622.06	173.048	2248.21	1621.04	299.396	2405.04	1628.32	162.309	2417.37	1629.22	204.493	2471.63	1484.12	193.154	2583.06	1261.95	226.975	2340.13	1380.27	226.82	2318.85	1194.34	141.711	2575.7	1338.12	401.166	2490.53	1426.1	443.897	2565.73	1243.09	449.223	2618.35	1133.28	474.29	2618.85	959.499	440.171	2607.64	858.981	485.044	2670.96	867.484	489.594	2657	762.01
419	0	278.839	2234.21	1623.38	174.343	2235.04	1622.49	300.688	2391.84	1630.2	163.592	2404.18	1631.3	205.695	2458.98	1486.07	194.481	2570.11	1263.86	228.013	2327.48	1382.25	228.032	2306.11	1196.38	143.088	2563.11	1340.07	402.548	2477.51	1428.12	445.939	2550.34	1243.54	451.493	2601.81	1133.21	476.014	2599.42	959.438	441.559	2586.77	859.24	486.807	2649.92	866.557	491.177	2633.93	761.373
420	0	279.978	2221.2	1624.91	175.469	2222.03	1624.12	301.802	2378.8	1632.28	164.699	2391.14	1633.57	206.778	2446.49	1488.19	195.762	2557.31	1265.95	228.898	2314.98	1384.43	229.102	2293.55	1198.59	144.408	2550.7	1342.19	403.823	2464.57	1430.38	447.954	2534.87	1244.18	453.819	2585.07	1133.3	477.746	2579.52	959.574	442.915	2565.35	859.747	488.604	2628.26	865.79	492.789	2610.05	760.97
421	0	280.947	2208.36	1626.63	176.424	2209.17	1625.94	302.739	2365.93	1634.56	165.631	2378.25	1636	207.744	2434.14	1490.47	196.997	2544.64	1268.18	229.632	2302.63	1386.77	230.03	2281.15	1200.97	145.669	2538.45	1344.44	404.988	2451.71	1432.84	449.93	2519.34	1245	456.189	2568.15	1133.55	479.473	2559.19	959.917	444.226	2543.4	860.521	490.418	2606	865.209	494.41	2585.42	760.839
422	0	281.746	2195.69	1628.54	177.207	2196.49	1627.91	303.502	2353.22	1636.99	166.393	2365.54	1638.58	208.598	2421.94	1492.87	198.185	2532.11	1270.54	230.223	2290.4	1389.25	230.821	2268.89	1203.5	146.872	2526.36	1346.81	406.046	2438.92	1435.48	451.857	2503.78	1246	458.591	2551.07	1133.95	481.183	2538.47	960.479	445.48	2520.98	861.58	492.232	2583.19	864.837	496.019	2560.08	761.016
423	0	282.378	2183.19	1630.63	177.821	2183.97	1630.04	304.099	2340.68	1639.56	166.991	2352.99	1641.26	209.346	2409.85	1495.37	199.325	2519.69	1273	230.68	2278.29	1391.85	231.481	2256.75	1206.14	148.017	2514.4	1349.26	407	2426.18	1438.26	453.727	2488.18	1247.18	461.014	2533.86	1134.51	482.864	2517.4	961.268	446.668	2498.13	862.938	494.027	2559.87	864.695	497.593	2534.1	761.532
424	0	282.849	2170.84	1632.88	178.273	2171.62	1632.29	304.544	2328.29	1642.24	167.439	2340.61	1644.01	209.997	2397.87	1497.94	200.414	2507.38	1275.53	231.015	2266.27	1394.53	232.023	2244.7	1208.87	149.104	2502.55	1351.78	407.856	2413.49	1441.16	455.537	2472.56	1248.51	463.445	2516.53	1135.22	484.504	2496	962.285	447.782	2474.88	864.605	495.787	2536.07	864.801	499.108	2507.53	762.414
425	0	283.171	2158.64	1635.25	178.576	2159.42	1634.64	304.849	2316.05	1644.98	167.749	2328.38	1646.79	210.558	2385.97	1500.54	201.453	2495.16	1278.11	231.241	2254.32	1397.25	232.459	2232.74	1211.65	150.131	2490.79	1354.34	408.619	2400.84	1444.13	457.285	2456.93	1249.99	465.874	2499.1	1136.06	486.094	2474.33	963.532	448.812	2451.28	866.587	497.494	2511.84	865.167	500.541	2480.44	763.68
426	0	283.356	2146.56	1637.71	178.741	2147.36	1637.05	305.033	2303.94	1647.75	167.938	2316.3	1649.57	211.04	2374.15	1503.15	202.438	2483.02	1280.69	231.376	2242.44	1400	232.804	2220.84	1214.45	151.098	2479.11	1356.89	409.296	2388.22	1447.14	458.972	2441.29	1251.59	468.291	2481.59	1137.02	487.623	2452.41	965.005	449.753	2427.37	868.884	499.135	2487.23	865.802	501.868	2452.89	765.343
427	0	283.42	2134.6	1640.23	178.786	2135.42	1639.5	305.112	2291.95	1650.51	168.024	2304.35	1652.29	211.451	2362.37	1505.72	203.366	2470.95	1283.25	231.433	2230.59	1402.71	233.074	2208.99	1217.22	152.003	2467.48	1359.42	409.894	2375.61	1450.14	460.6	2425.66	1253.28	470.686	2464.03	1138.09	489.084	2430.3	966.694	450.6	2403.21	871.492	500.695	2462.28	866.707	503.068	2424.95	767.408
428	0	283.382	2122.73	1642.76	178.728	2123.58	1641.93	305.106	2280.05	1653.22	168.026	2292.5	1654.93	211.8	2350.63	1508.23	204.235	2458.93	1285.76	231.428	2218.76	1405.36	233.283	2197.16	1219.93	152.843	2455.88	1361.88	410.421	2363.02	1453.09	462.174	2410.03	1255.03	473.05	2446.44	1139.22	490.468	2408.02	968.589	451.347	2378.82	874.402	502.16	2437.03	867.881	504.121	2396.68	769.872
429	0	283.258	2110.94	1645.26	178.586	2111.83	1644.32	305.034	2268.23	1655.83	167.962	2280.74	1657.44	212.096	2338.9	1510.64	205.04	2446.94	1288.17	231.378	2206.94	1407.9	233.447	2185.36	1222.53	153.618	2444.29	1364.26	410.881	2350.44	1455.94	463.697	2394.41	1256.8	475.374	2428.82	1140.4	491.77	2385.62	970.673	451.992	2354.26	877.599	503.519	2411.53	869.316	505.011	2368.13	772.729
430	0	283.068	2099.2	1647.68	178.378	2100.15	1646.61	304.914	2256.46	1658.31	167.85	2269.05	1659.79	212.345	2327.18	1512.91	205.778	2434.99	1290.46	231.294	2195.11	1410.29	233.579	2173.55	1224.98	154.325	2432.69	1366.51	411.281	2337.88	1458.67	465.171	2378.82	1258.55	477.649	2411.21	1141.59	492.985	2363.12	972.927	452.532	2329.58	881.066	504.763	2385.84	871	505.723	2339.39	775.963
431	0	282.829	2087.49	1649.98	178.124	2088.5	1648.77	304.76	2244.73	1660.61	167.705	2257.41	1661.94	212.553	2315.44	1515.02	206.444	2423.04	1292.59	231.189	2183.27	1412.51	233.69	2161.75	1227.25	154.96	2421.08	1368.6	411.624	2325.32	1461.21	466.597	2363.25	1260.25	479.866	2393.61	1142.75	494.107	2340.58	975.328	452.964	2304.8	884.779	505.881	2359.99	872.917	506.25	2310.5	779.557
432	0	282.557	2075.78	1652.11	177.838	2076.87	1650.76	304.588	2233.01	1662.7	167.541	2245.79	1663.87	212.724	2303.67	1516.92	207.033	2411.1	1294.53	231.073	2171.4	1414.5	233.79	2149.94	1229.29	155.523	2409.43	1370.51	411.914	2312.77	1463.55	467.976	2347.72	1261.86	482.018	2376.03	1143.85	495.133	2318.01	977.852	453.286	2279.99	888.713	506.866	2334.03	875.047	506.585	2281.53	783.488
433	0	282.267	2064.07	1654.03	177.534	2065.24	1652.53	304.407	2221.28	1664.55	167.37	2234.17	1665.55	212.86	2291.86	1518.61	207.541	2399.15	1296.25	230.952	2159.5	1416.25	233.886	2138.11	1231.08	156.011	2397.74	1372.2	412.152	2300.24	1465.64	469.305	2332.24	1263.33	484.096	2358.51	1144.86	496.059	2295.46	980.473	453.498	2255.17	892.839	507.713	2308.02	877.369	506.727	2252.53	787.731
434	0	281.968	2052.33	1655.7	177.224	2053.58	1654.07	304.226	2209.53	1666.13	167.198	2222.53	1666.96	212.964	2280.01	1520.04	207.964	2387.19	1297.72	230.833	2147.56	1417.72	233.984	2126.26	1232.59	156.423	2386	1373.66	412.339	2287.71	1467.46	470.578	2316.82	1264.64	486.089	2341.03	1145.74	496.882	2272.95	983.163	453.6	2230.39	897.126	508.415	2282	879.858	506.678	2223.56	792.258
435	0	281.67	2040.55	1657.08	176.916	2041.89	1655.32	304.05	2197.74	1667.41	167.031	2210.86	1668.07	213.033	2268.1	1521.2	208.299	2375.19	1298.91	230.717	2135.58	1418.9	234.085	2114.38	1233.8	156.757	2374.19	1374.84	412.474	2275.19	1468.98	471.789	2301.46	1265.75	487.99	2323.61	1146.46	497.6	2250.51	985.896	453.591	2205.69	901.544	508.97	2256.01	882.487	506.444	2194.69	797.039
436	0	281.377	2028.7	1658.16	176.613	2030.14	1656.28	303.88	2185.89	1668.37	166.87	2199.12	1668.88	213.066	2256.14	1522.07	208.543	2363.16	1299.81	230.605	2123.55	1419.76	234.191	2102.46	1234.68	157.012	2362.32	1375.75	412.555	2262.69	1470.18	472.927	2286.17	1266.62	489.788	2306.26	1146.99	498.212	2228.18	988.643	453.475	2181.11	906.059	509.375	2230.1	885.23	506.034	2165.95	802.043
437	0	281.09	2016.79	1658.91	176.316	2018.31	1656.92	303.713	2173.98	1669.01	166.713	2187.32	1669.37	213.058	2244.11	1522.63	208.694	2351.09	1300.4	230.493	2111.47	1420.29	234.299	2090.5	1235.24	157.186	2350.37	1376.35	412.579	2250.2	1471.05	473.982	2270.97	1267.25	491.473	2288.99	1147.32	498.715	2205.98	991.378	453.254	2156.69	910.638	509.628	2204.32	888.059	505.46	2137.41	807.237
438	0	280.807	2004.8	1659.32	176.023	2006.41	1657.23	303.545	2161.99	1669.32	166.555	2175.44	1669.54	213.004	2232.01	1522.88	208.752	2338.96	1300.67	230.375	2099.34	1420.49	234.404	2078.5	1235.46	157.277	2338.34	1376.64	412.541	2237.7	1471.57	474.939	2255.84	1267.6	493.035	2271.8	1147.42	499.109	2183.94	994.075	452.932	2132.46	915.25	509.731	2178.71	890.946	504.736	2109.12	812.587
439	0	280.523	1992.73	1659.37	175.728	1994.41	1657.2	303.367	2149.91	1669.29	166.386	2163.46	1669.4	212.897	2219.85	1522.82	208.717	2326.77	1300.61	230.245	2087.15	1420.35	234.499	2066.43	1235.34	157.286	2326.23	1376.61	412.438	2225.21	1471.75	475.786	2240.81	1267.67	494.461	2254.69	1147.28	499.393	2162.09	996.708	452.515	2108.45	919.861	509.684	2153.3	893.863	503.876	2081.13	818.057
440	0	280.23	1980.56	1659.06	175.421	1982.31	1656.83	303.168	2137.75	1668.92	166.196	2151.38	1668.93	212.729	2207.61	1522.43	208.591	2314.51	1300.22	230.093	2074.91	1419.89	234.576	2054.31	1234.88	157.21	2314.03	1376.25	412.262	2212.71	1471.59	476.507	2225.87	1267.44	495.742	2237.68	1146.89	499.566	2140.44	999.256	452.008	2084.71	924.442	509.49	2128.15	896.784	502.897	2053.48	823.612
441	0	279.917	1968.31	1658.41	175.092	1970.11	1656.12	302.935	2125.49	1668.23	165.971	2139.2	1668.16	212.491	2195.29	1521.72	208.376	2302.18	1299.5	229.908	2062.6	1419.09	234.626	2042.11	1234.1	157.05	2301.74	1375.56	412.009	2200.2	1471.09	477.087	2211.01	1266.91	496.866	2220.76	1146.25	499.629	2119.02	1001.7	451.419	2061.25	928.962	509.151	2103.29	899.682	501.815	2026.22	829.214
442	0	279.572	1955.95	1657.42	174.726	1957.81	1655.09	302.651	2113.13	1667.23	165.695	2126.91	1667.1	212.175	2182.9	1520.7	208.076	2289.76	1298.46	229.678	2050.22	1417.98	234.637	2029.83	1233.01	156.805	2289.36	1374.55	411.673	2187.66	1470.26	477.512	2196.24	1266.09	497.821	2203.95	1145.36	499.58	2097.87	1004.01	450.753	2038.11	933.393	508.672	2078.77	902.532	500.646	1999.4	834.826
443	0	279.178	1943.51	1656.11	174.308	1945.39	1653.74	302.301	2100.68	1665.92	165.352	2114.51	1665.75	211.771	2170.44	1519.39	207.697	2277.25	1297.11	229.389	2037.77	1416.58	234.597	2017.45	1231.62	156.475	2276.9	1373.22	411.248	2175.07	1469.14	477.769	2181.56	1264.99	498.599	2187.24	1144.22	499.422	2076.99	1006.18	450.02	2015.31	937.709	508.059	2054.6	905.311	499.406	1973.06	840.409
444	0	278.721	1930.96	1654.49	173.822	1932.86	1652.11	301.865	2088.13	1664.34	164.921	2102	1664.14	211.272	2157.89	1517.8	207.244	2264.65	1295.46	229.028	2025.24	1414.9	234.494	2004.98	1229.95	156.063	2264.34	1371.6	410.73	2162.43	1467.73	477.847	2166.95	1263.61	499.188	2170.66	1142.86	499.153	2056.42	1008.2	449.225	1992.89	941.883	507.318	2030.85	907.995	498.112	1947.24	845.924
445	0	278.184	1918.33	1652.6	173.251	1920.22	1650.2	301.326	2075.49	1662.51	164.385	2089.37	1662.29	210.67	2145.26	1515.95	206.724	2251.96	1293.54	228.581	2012.63	1412.96	234.318	1992.4	1228.04	155.569	2251.69	1369.69	410.114	2149.73	1466.07	477.738	2152.41	1261.98	499.581	2154.2	1141.29	498.776	2036.17	1010.05	448.376	1970.86	945.891	506.454	2007.53	910.564	496.777	1921.97	851.333
446	0	277.549	1905.59	1650.47	172.577	1907.46	1648.06	300.665	2062.76	1660.45	163.726	2076.62	1660.22	209.958	2132.54	1513.86	206.146	2239.17	1291.38	228.038	1999.93	1410.8	234.057	1979.71	1225.89	154.998	2238.95	1367.52	409.399	2136.95	1464.18	477.436	2137.94	1260.13	499.771	2137.88	1139.52	498.29	2016.27	1011.72	447.48	1949.25	949.713	505.477	1984.67	912.998	495.417	1897.29	856.598
447	0	276.8	1892.76	1648.13	171.785	1894.59	1645.71	299.866	2049.93	1658.21	162.926	2063.76	1657.96	209.133	2119.74	1511.57	205.518	2226.29	1289	227.387	1987.14	1408.45	233.701	1966.9	1223.55	154.352	2226.12	1365.12	408.581	2124.07	1462.11	476.939	2123.52	1258.07	499.753	2121.7	1137.59	497.697	1996.73	1013.21	446.542	1928.08	953.326	504.393	1962.32	915.279	494.043	1873.23	861.678
448	0	275.92	1879.83	1645.63	170.861	1881.61	1643.19	298.914	2037	1655.82	161.97	2050.78	1655.55	208.191	2106.85	1509.1	204.85	2213.31	1286.43	226.62	1974.24	1405.93	233.244	1953.96	1221.05	153.637	2213.2	1362.52	407.663	2111.08	1459.88	476.249	2109.15	1255.84	499.524	2105.68	1135.52	497	1977.57	1014.5	445.568	1907.38	956.711	503.213	1940.51	917.392	492.667	1849.83	866.538
449	0	274.897	1866.8	1642.99	169.791	1868.5	1640.52	297.796	2023.98	1653.32	160.846	2037.69	1653.01	207.131	2093.87	1506.5	204.151	2200.23	1283.72	225.73	1961.24	1403.3	232.68	1940.89	1218.41	152.857	2200.2	1359.74	406.645	2097.97	1457.54	475.371	2094.81	1253.49	499.083	2089.83	1133.34	496.201	1958.82	1015.61	444.563	1887.16	959.851	501.944	1919.25	919.321	491.299	1827.12	871.14
450	0	273.719	1853.67	1640.26	168.566	1855.28	1637.76	296.504	2010.85	1650.74	159.545	2024.47	1650.39	205.956	2080.8	1503.8	203.431	2187.05	1280.91	224.716	1948.14	1400.58	232.008	1927.68	1215.7	152.019	2187.11	1356.84	405.531	2084.74	1455.14	474.314	2080.52	1251.05	498.433	2074.16	1131.08	495.303	1940.49	1016.53	443.529	1867.44	962.73	500.597	1898.58	921.054	489.946	1805.11	875.449
451	0	272.378	1840.43	1637.49	167.18	1841.95	1634.92	295.033	1997.63	1648.14	158.062	2011.14	1647.71	204.67	2067.65	1501.05	202.698	2173.79	1278.04	223.579	1934.92	1397.82	231.229	1914.35	1212.93	151.127	2173.94	1353.85	404.326	2071.38	1452.71	473.09	2066.25	1248.56	497.578	2058.68	1128.79	494.309	1922.6	1017.26	442.471	1848.26	965.335	499.18	1878.53	922.58	488.617	1783.84	879.431
452	0	270.868	1827.08	1634.72	165.629	1828.49	1632.06	293.384	1984.3	1645.57	156.398	1997.69	1645.01	203.28	2054.4	1498.28	201.96	2160.44	1275.15	222.323	1921.6	1395.06	230.348	1900.88	1210.16	150.186	2160.7	1350.82	403.037	2057.89	1450.3	471.713	2052.01	1246.06	496.526	2043.4	1126.5	493.225	1905.16	1017.8	441.39	1829.61	967.653	497.703	1859.12	923.892	487.313	1763.32	883.056
453	0	269.191	1813.61	1631.99	163.917	1814.93	1629.21	291.56	1970.86	1643.06	154.557	1984.12	1642.35	201.793	2041.07	1495.55	201.221	2147.01	1272.3	220.956	1908.18	1392.35	229.372	1887.29	1207.44	149.2	2147.38	1347.8	401.672	2044.27	1447.95	470.2	2037.81	1243.62	495.289	2028.34	1124.25	492.057	1888.2	1018.18	440.287	1811.53	969.675	496.176	1840.38	924.982	486.039	1743.59	886.294
454	0	267.35	1800.04	1629.34	162.048	1801.25	1626.4	289.574	1957.32	1640.66	152.551	1970.44	1639.74	200.22	2027.66	1492.89	200.486	2133.5	1269.53	219.493	1894.66	1389.73	228.316	1873.58	1204.8	148.173	2133.99	1344.83	400.242	2030.54	1445.72	468.571	2023.64	1241.27	493.88	2013.51	1122.09	490.81	1871.72	1018.38	439.164	1794.02	971.395	494.606	1822.33	925.846	484.795	1724.66	889.121
455	0	265.357	1786.34	1626.81	160.036	1787.46	1623.67	287.439	1943.66	1638.41	150.397	1956.65	1637.25	198.575	2014.17	1490.34	199.753	2119.93	1266.89	217.949	1881.05	1387.23	227.193	1859.76	1202.29	147.104	2120.55	1341.96	398.758	2016.7	1443.64	466.846	2009.51	1239.05	492.316	1998.92	1120.04	489.492	1855.73	1018.44	438.021	1777.12	972.807	493.004	1805	926.482	483.58	1706.56	891.514
456	0	263.227	1772.54	1624.43	157.896	1773.58	1621.06	285.176	1929.9	1636.36	148.114	1942.76	1634.9	196.87	2000.63	1487.96	199.02	2106.3	1264.41	216.342	1867.37	1384.91	226.021	1845.85	1199.95	145.996	2107.05	1339.24	397.23	2002.78	1441.74	465.048	1995.44	1237.02	490.615	1984.58	1118.16	488.111	1840.26	1018.34	436.859	1760.83	973.909	491.378	1788.39	926.893	482.39	1689.29	893.458
457	0	260.981	1758.63	1622.23	155.65	1759.61	1618.59	282.81	1916.03	1634.54	145.729	1928.78	1632.73	195.123	1987.03	1485.78	198.28	2092.63	1262.16	214.695	1853.63	1382.79	224.82	1831.87	1197.84	144.846	2093.51	1336.71	395.673	1988.81	1440.08	463.2	1981.43	1235.21	488.798	1970.51	1116.47	486.677	1825.3	1018.12	435.679	1745.16	974.702	489.739	1772.53	927.081	481.22	1672.87	894.938
458	0	258.644	1744.63	1620.24	153.323	1745.57	1616.3	280.369	1902.07	1632.97	143.27	1914.72	1630.77	193.349	1973.39	1483.83	197.525	2078.93	1260.15	213.032	1839.84	1380.91	223.609	1817.83	1195.96	143.656	2079.93	1334.41	394.099	1974.8	1438.67	461.326	1967.52	1233.65	486.889	1956.71	1115.01	485.199	1810.88	1017.79	434.481	1730.14	975.189	488.097	1757.43	927.052	480.066	1657.31	895.948
459	0	256.248	1730.55	1618.48	150.947	1731.46	1614.2	277.884	1888.03	1631.69	140.771	1900.6	1629.07	191.566	1959.72	1482.15	196.743	2065.21	1258.43	211.376	1826.04	1379.29	222.409	1803.77	1194.37	142.424	2066.34	1332.4	392.522	1960.79	1437.54	459.447	1953.72	1232.38	484.912	1943.19	1113.8	483.689	1797	1017.35	433.267	1715.77	975.376	486.461	1743.09	926.816	478.92	1642.63	896.485
460	0	253.824	1716.41	1616.96	148.553	1717.32	1612.32	275.39	1873.93	1630.72	138.266	1886.43	1627.63	189.793	1946.05	1480.76	195.923	2051.49	1257.02	209.752	1812.23	1377.97	221.238	1789.72	1193.08	141.151	2052.74	1330.68	390.956	1946.81	1436.7	457.588	1940.05	1231.42	482.891	1929.98	1112.88	482.157	1783.66	1016.83	432.039	1702.07	975.27	484.844	1729.54	926.383	477.776	1628.82	896.553
461	0	251.41	1702.22	1615.7	146.176	1703.15	1610.67	272.921	1859.77	1630.05	135.79	1872.22	1626.49	188.046	1932.39	1479.69	195.054	2037.79	1255.95	208.185	1798.45	1376.95	220.113	1775.7	1192.1	139.84	2039.16	1329.31	389.415	1932.9	1436.18	455.77	1926.55	1230.78	480.852	1917.07	1112.24	480.616	1770.88	1016.23	430.801	1689.05	974.883	483.255	1716.76	925.767	476.628	1615.88	896.161
462	0	249.041	1688.02	1614.71	143.852	1688.98	1609.28	270.513	1845.58	1629.71	133.379	1858.01	1625.66	186.346	1918.76	1478.94	194.127	2024.13	1255.22	206.695	1784.71	1376.24	219.048	1761.76	1191.44	138.495	2025.6	1328.28	387.914	1919.09	1435.97	454.012	1913.23	1230.48	478.818	1904.47	1111.91	479.078	1758.65	1015.58	429.557	1676.7	974.226	481.707	1704.77	924.982	475.472	1603.82	895.324
463	0	246.754	1673.82	1613.99	141.615	1674.84	1608.15	268.201	1831.39	1629.7	131.069	1843.82	1625.15	184.707	1905.18	1478.53	193.136	2010.52	1254.84	205.303	1771.05	1375.86	218.055	1747.93	1191.12	137.121	2012.09	1327.63	386.466	1905.41	1436.07	452.331	1900.14	1230.51	476.814	1892.21	1111.88	477.556	1746.98	1014.88	428.315	1665.04	973.313	480.212	1693.55	924.043	474.307	1592.63	894.062
464	0	244.584	1659.65	1613.53	139.501	1660.74	1607.3	266.018	1817.21	1630	128.894	1829.66	1624.97	183.148	1891.67	1478.45	192.079	1996.98	1254.81	204.024	1757.47	1375.8	217.143	1734.23	1191.11	135.727	1998.64	1327.35	385.084	1891.88	1436.48	450.741	1887.29	1230.86	474.861	1880.28	1112.16	476.063	1735.88	1014.14	427.082	1654.07	972.16	478.781	1683.11	922.969	473.136	1582.29	892.399
465	0	242.564	1645.53	1613.35	137.539	1646.71	1606.73	263.995	1803.06	1630.61	126.884	1815.56	1625.12	181.681	1878.24	1478.72	190.958	1983.54	1255.13	202.873	1744.01	1376.06	216.319	1720.69	1191.43	134.323	1985.25	1327.44	383.777	1878.54	1437.17	449.255	1874.72	1231.54	472.976	1868.7	1112.73	474.611	1725.33	1013.38	425.867	1643.78	970.783	477.425	1673.42	921.776	471.964	1572.81	890.365
466	0	240.722	1631.49	1613.43	135.759	1632.78	1606.44	262.16	1788.98	1631.52	125.067	1801.54	1625.61	180.319	1864.91	1479.31	189.779	1970.2	1255.79	201.859	1730.68	1376.64	215.587	1707.32	1192.05	132.919	1971.95	1327.91	382.557	1865.39	1438.14	447.877	1862.44	1232.51	471.175	1857.47	1113.58	473.213	1715.35	1012.6	424.682	1634.18	969.202	476.157	1664.5	920.482	470.803	1564.15	887.993
467	0	239.085	1617.56	1613.77	134.185	1618.95	1606.45	260.536	1774.98	1632.71	123.465	1787.63	1626.42	179.072	1851.7	1480.23	188.552	1956.96	1256.76	200.987	1717.49	1377.53	214.951	1694.14	1192.98	131.526	1958.75	1328.72	381.429	1852.47	1439.35	446.613	1850.47	1233.76	469.469	1846.59	1114.69	471.88	1705.92	1011.82	423.54	1625.25	967.434	474.984	1656.32	919.103	469.667	1556.32	885.317
468	0	237.672	1603.75	1614.36	132.836	1605.26	1606.75	259.141	1761.09	1634.16	122.096	1773.83	1627.56	177.947	1838.61	1481.44	187.288	1943.85	1258.02	200.26	1704.44	1378.71	214.41	1681.14	1194.21	130.155	1945.64	1329.87	380.399	1839.77	1440.79	445.46	1838.83	1235.26	467.865	1836.06	1116.04	470.622	1697.04	1011.03	422.454	1616.99	965.498	473.917	1648.86	917.657	468.577	1549.3	882.374
469	0	236.497	1590.07	1615.2	131.725	1591.71	1607.35	257.987	1747.31	1635.85	120.972	1760.17	1629	176.947	1825.64	1482.94	185.999	1930.86	1259.55	199.675	1691.55	1380.18	213.962	1668.32	1195.71	128.818	1932.62	1331.32	379.47	1827.31	1442.43	444.415	1827.53	1236.99	466.364	1825.9	1117.62	469.448	1688.7	1010.25	421.44	1609.38	963.414	472.962	1642.12	916.159	467.556	1543.07	879.199
470	0	235.57	1576.56	1616.27	130.86	1578.31	1608.23	257.081	1733.68	1637.75	120.098	1746.66	1630.74	176.075	1812.82	1484.7	184.699	1917.99	1261.32	199.23	1678.81	1381.92	213.604	1655.65	1197.48	127.522	1919.71	1333.06	378.641	1815.07	1444.25	443.47	1816.56	1238.93	464.966	1816.08	1119.39	468.367	1680.9	1009.47	420.513	1602.42	961.198	472.126	1636.08	914.624	466.628	1537.61	875.828
471	0	234.893	1563.21	1617.56	130.243	1565.07	1609.4	256.424	1720.19	1639.85	119.475	1733.3	1632.75	175.329	1800.12	1486.68	183.399	1905.23	1263.28	198.915	1666.22	1383.9	213.328	1643.13	1199.49	126.274	1906.89	1335.04	377.912	1803.05	1446.21	442.613	1805.93	1241.03	463.665	1806.61	1121.34	467.384	1673.62	1008.7	419.688	1596.07	958.87	471.412	1630.71	913.066	465.82	1532.93	872.295
472	0	234.464	1550.03	1619.06	129.87	1552	1610.84	256.011	1706.88	1642.1	119.096	1720.11	1635.02	174.706	1787.55	1488.86	182.109	1892.59	1265.42	198.722	1653.76	1386.11	213.125	1630.73	1201.73	125.081	1894.15	1337.23	377.277	1791.24	1448.28	441.833	1795.63	1243.28	462.452	1797.47	1123.43	466.503	1666.85	1007.93	418.98	1590.34	956.445	470.823	1626	911.496	465.156	1528.98	868.631
473	0	234.272	1537.04	1620.75	129.731	1539.1	1612.54	255.832	1693.73	1644.48	118.951	1707.09	1637.5	174.199	1775.1	1491.2	180.84	1880.04	1267.69	198.638	1641.43	1388.51	212.985	1618.42	1204.16	123.944	1881.48	1339.58	376.731	1779.61	1450.44	441.116	1785.63	1245.65	461.317	1788.65	1125.64	465.728	1660.57	1007.18	418.403	1585.18	953.938	470.359	1621.93	909.926	464.663	1525.77	864.866
474	0	234.305	1524.23	1622.6	129.811	1526.36	1614.47	255.872	1680.77	1646.96	119.023	1694.24	1640.16	173.801	1762.76	1493.66	179.598	1867.57	1270.06	198.651	1629.19	1391.07	212.896	1606.19	1206.75	122.868	1868.88	1342.06	376.267	1768.14	1452.65	440.446	1775.92	1248.09	460.247	1780.13	1127.94	465.059	1654.77	1006.42	417.968	1580.58	951.36	470.017	1618.46	908.363	464.359	1523.28	861.024
475	0	234.545	1511.6	1624.61	130.092	1513.78	1616.62	256.111	1667.99	1649.49	119.291	1681.56	1642.97	173.503	1750.51	1496.2	178.39	1855.18	1272.48	198.748	1617.05	1393.75	212.844	1594.01	1209.48	121.852	1856.33	1344.63	375.878	1756.81	1454.89	439.812	1766.47	1250.59	459.229	1771.88	1130.31	464.495	1649.41	1005.67	417.684	1576.51	948.724	469.795	1615.58	906.815	464.263	1521.47	857.128
476	0	234.971	1499.14	1626.74	130.552	1501.36	1618.94	256.528	1655.4	1652.04	119.734	1669.04	1645.86	173.297	1738.34	1498.79	177.223	1842.84	1274.93	198.915	1604.96	1396.51	212.818	1581.85	1212.28	120.896	1843.81	1347.23	375.556	1745.58	1457.11	439.199	1757.24	1253.11	458.25	1763.9	1132.71	464.033	1644.47	1004.92	417.556	1572.93	946.037	469.685	1613.24	905.287	464.386	1520.33	853.199
477	0	235.558	1486.85	1628.96	131.168	1489.08	1621.42	257.098	1642.98	1654.57	120.325	1656.68	1648.81	173.171	1726.24	1501.37	176.102	1830.56	1277.36	199.138	1592.92	1399.3	212.804	1569.7	1215.12	120.003	1831.32	1349.83	375.292	1734.43	1459.28	438.596	1748.21	1255.62	457.297	1756.14	1135.12	463.669	1639.93	1004.15	417.589	1569.82	943.305	469.681	1611.41	903.782	464.733	1519.82	849.251
478	0	236.283	1474.72	1631.25	131.913	1476.93	1624	257.794	1630.74	1657.03	121.037	1644.47	1651.74	173.117	1714.18	1503.91	175.036	1818.31	1279.73	199.406	1580.91	1402.08	212.791	1557.55	1217.95	119.171	1818.84	1352.38	375.08	1723.32	1461.37	437.994	1739.33	1258.07	456.359	1748.57	1137.51	463.396	1635.76	1003.37	417.782	1567.14	940.533	469.772	1610.06	902.304	465.304	1519.93	845.299
479	0	237.12	1462.73	1633.56	132.763	1464.89	1626.65	258.591	1618.66	1659.4	121.845	1632.39	1654.61	173.126	1702.14	1506.37	174.034	1806.09	1282.02	199.704	1568.89	1404.8	212.769	1545.38	1220.71	118.404	1806.36	1354.84	374.914	1712.22	1463.34	437.385	1730.56	1260.44	455.427	1741.17	1139.85	463.208	1631.91	1002.56	418.129	1564.85	937.724	469.949	1609.14	900.853	466.09	1520.6	841.357
480	0	238.044	1450.86	1635.87	133.695	1452.96	1629.32	259.464	1606.73	1661.62	122.722	1620.43	1657.37	173.19	1690.11	1508.69	173.104	1793.89	1284.19	200.023	1556.86	1407.41	212.727	1533.17	1223.36	117.702	1793.88	1357.17	374.786	1701.1	1465.16	436.765	1721.87	1262.7	454.493	1733.9	1142.1	463.095	1628.36	1001.73	418.623	1562.92	934.881	470.199	1608.62	899.431	467.077	1521.8	837.433
481	0	239.032	1439.1	1638.14	134.685	1441.1	1631.98	260.387	1594.93	1663.67	123.643	1608.57	1659.96	173.3	1678.07	1510.86	172.258	1781.71	1286.21	200.352	1544.8	1409.86	212.659	1520.93	1225.84	117.069	1781.37	1359.34	374.694	1689.93	1466.8	436.132	1713.21	1264.81	453.552	1726.73	1144.25	463.049	1625.06	1000.86	419.253	1561.3	932.005	470.509	1608.43	898.041	468.246	1523.48	833.538
482	0	240.064	1427.43	1640.34	135.713	1429.31	1634.56	261.34	1583.24	1665.5	124.589	1596.8	1662.34	173.453	1666	1512.83	171.505	1769.54	1288.05	200.684	1532.69	1412.11	212.561	1508.64	1228.11	116.51	1768.85	1361.31	374.634	1678.67	1468.22	435.484	1704.54	1266.75	452.599	1719.61	1146.27	463.06	1621.98	999.952	420.004	1559.95	929.1	470.866	1608.55	896.683	469.571	1525.61	829.682
483	0	241.12	1415.83	1642.42	136.762	1417.57	1637.04	262.303	1571.65	1667.09	125.539	1585.1	1664.47	173.642	1653.88	1514.57	170.857	1757.39	1289.69	201.012	1520.53	1414.11	212.429	1496.31	1230.12	116.028	1756.3	1363.05	374.605	1667.32	1469.42	434.825	1695.82	1268.49	451.633	1712.52	1148.14	463.117	1619.08	999.001	420.858	1558.84	926.167	471.256	1608.9	895.362	471.023	1528.12	825.875
484	0	242.186	1404.26	1644.36	137.818	1405.84	1639.37	263.262	1560.12	1668.4	126.479	1573.43	1666.29	173.867	1641.7	1516.05	170.324	1745.25	1291.11	201.333	1508.29	1415.84	212.263	1483.93	1231.84	115.629	1743.72	1364.55	374.606	1655.84	1470.35	434.157	1687.03	1270.02	450.655	1705.41	1149.84	463.21	1616.31	998.006	421.798	1557.92	923.213	471.666	1609.45	894.08	472.57	1530.96	822.129
485	0	243.249	1392.71	1646.11	138.868	1394.12	1641.5	264.205	1548.64	1669.43	127.398	1561.79	1667.8	174.125	1629.45	1517.26	169.915	1733.11	1292.3	201.643	1495.97	1417.26	212.065	1471.5	1233.23	115.317	1731.1	1365.78	374.639	1644.23	1471.01	433.487	1678.13	1271.32	449.667	1698.26	1151.36	463.329	1613.63	996.969	422.802	1557.15	920.242	472.084	1610.13	892.843	474.177	1534.08	818.457
486	0	244.3	1381.16	1647.66	139.904	1382.38	1643.41	265.124	1537.17	1670.14	128.289	1550.14	1668.96	174.418	1617.12	1518.18	169.635	1720.98	1293.23	201.942	1483.56	1418.35	211.839	1459.03	1234.27	115.1	1718.44	1366.74	374.706	1632.45	1471.38	432.821	1669.09	1272.38	448.671	1691.02	1152.69	463.465	1611	995.892	423.848	1556.48	917.264	472.496	1610.9	891.658	475.812	1537.41	814.876
487	0	245.333	1369.58	1648.97	140.922	1370.61	1645.05	266.015	1525.7	1670.54	129.148	1538.47	1669.75	174.747	1604.69	1518.79	169.492	1708.84	1293.89	202.232	1471.07	1419.09	211.59	1446.51	1234.94	114.981	1705.75	1367.4	374.81	1620.51	1471.47	432.168	1659.9	1273.19	447.672	1683.68	1153.83	463.609	1608.37	994.78	424.916	1555.87	914.287	472.894	1611.69	890.532	477.439	1540.9	811.403
488	0	246.345	1357.94	1650.02	141.918	1358.77	1646.42	266.878	1514.19	1670.6	129.975	1526.75	1670.17	175.118	1592.16	1519.1	169.489	1696.69	1294.29	202.517	1458.48	1419.48	211.327	1433.95	1235.23	114.968	1693.01	1367.77	374.957	1608.39	1471.26	431.534	1650.52	1273.76	446.677	1676.2	1154.77	463.755	1605.71	993.64	425.985	1555.29	911.325	473.266	1612.46	889.474	479.029	1544.49	808.056
489	0	247.334	1346.24	1650.8	142.893	1346.87	1647.47	267.716	1502.61	1670.35	130.775	1514.96	1670.23	175.534	1579.53	1519.09	169.626	1684.5	1294.41	202.801	1445.8	1419.51	211.057	1421.34	1235.16	115.065	1680.22	1367.85	375.151	1596.09	1470.76	430.931	1640.95	1274.09	445.691	1668.56	1155.52	463.896	1602.98	992.479	427.034	1554.69	908.39	473.607	1613.14	888.493	480.55	1548.09	804.855
490	0	248.303	1334.43	1651.28	143.849	1334.88	1648.22	268.537	1490.95	1669.77	131.554	1503.09	1669.91	176.004	1566.79	1518.78	169.905	1672.28	1294.26	203.092	1433.02	1419.18	210.79	1408.68	1234.72	115.28	1667.39	1367.64	375.4	1583.6	1469.97	430.366	1631.18	1274.19	444.722	1660.74	1156.08	464.027	1600.12	991.305	428.048	1554.02	905.497	473.908	1613.69	887.596	481.979	1551.66	801.821
491	0	249.256	1322.52	1651.47	144.789	1322.78	1648.63	269.348	1479.18	1668.89	132.322	1491.12	1669.25	176.534	1553.94	1518.17	170.323	1660	1293.83	203.398	1420.13	1418.52	210.537	1395.97	1233.92	115.617	1654.5	1367.14	375.709	1570.92	1468.91	429.849	1621.2	1274.07	443.778	1652.73	1156.47	464.146	1597.11	990.128	429.01	1553.25	902.662	474.167	1614.04	886.793	483.292	1555.12	798.97
492	0	250.196	1310.47	1651.37	145.719	1310.58	1648.73	270.161	1467.28	1667.72	133.089	1479.04	1668.25	177.134	1540.97	1517.27	170.879	1647.64	1293.14	203.726	1407.14	1417.53	210.309	1383.19	1232.79	116.081	1641.55	1366.38	376.086	1558.07	1467.58	429.389	1611	1273.74	442.868	1644.5	1156.69	464.251	1593.9	988.957	429.908	1552.33	899.9	474.381	1614.16	886.09	484.47	1558.41	796.32
493	0	251.132	1298.29	1650.98	146.646	1298.25	1648.51	270.988	1455.23	1666.27	133.87	1466.83	1666.94	177.811	1527.89	1516.11	171.569	1635.19	1292.19	204.088	1394.04	1416.24	210.116	1370.33	1231.36	116.679	1628.54	1365.36	376.538	1545.02	1466.01	428.993	1600.59	1273.23	442	1636.04	1156.76	464.342	1590.46	987.798	430.734	1551.22	897.225	474.548	1613.98	885.491	485.501	1561.46	793.883
494	0	252.07	1285.95	1650.3	147.578	1285.79	1647.99	271.843	1443.01	1664.58	134.679	1454.49	1665.35	178.574	1514.68	1514.69	172.389	1622.61	1290.99	204.493	1380.84	1414.68	209.969	1357.39	1229.65	117.413	1615.45	1364.11	377.072	1531.8	1464.22	428.671	1589.96	1272.53	441.184	1627.35	1156.67	464.42	1586.75	986.659	431.481	1549.87	894.653	474.67	1613.46	884.998	486.375	1564.21	791.668
495	0	253.02	1273.44	1649.37	148.522	1273.19	1647.19	272.741	1430.62	1662.67	135.53	1442.01	1663.51	179.431	1501.37	1513.05	173.336	1609.9	1289.56	204.951	1367.52	1412.87	209.88	1344.36	1227.7	118.287	1602.29	1362.64	377.694	1518.41	1462.21	428.431	1579.12	1271.68	440.43	1618.42	1156.46	464.488	1582.73	985.546	432.147	1548.25	892.194	474.749	1612.56	884.613	487.087	1566.58	789.681
496	0	253.991	1260.76	1648.2	149.489	1260.46	1646.13	273.695	1418.04	1660.56	136.439	1429.38	1661.45	180.39	1487.93	1511.21	174.404	1597.02	1287.92	205.472	1354.09	1410.85	209.858	1331.21	1225.55	119.303	1589.04	1360.97	378.412	1504.84	1460.02	428.279	1568.07	1270.69	439.746	1609.23	1156.12	464.55	1578.37	984.461	432.732	1546.3	889.859	474.789	1611.23	884.33	487.638	1568.53	787.922
497	0	254.992	1247.9	1646.82	150.488	1247.58	1644.84	274.719	1405.27	1658.3	137.42	1416.6	1659.22	181.456	1474.37	1509.2	175.59	1583.96	1286.08	206.066	1340.54	1408.65	209.915	1317.93	1223.22	120.462	1575.7	1359.14	379.231	1491.11	1457.68	428.222	1556.8	1269.58	439.143	1599.78	1155.68	464.612	1573.64	983.408	433.239	1543.97	887.656	474.798	1609.42	884.144	488.03	1569.98	786.386
498	0	256.034	1234.87	1645.25	151.528	1234.55	1643.36	275.826	1392.31	1655.9	138.487	1403.66	1656.84	182.635	1460.69	1507.05	176.89	1570.7	1284.08	206.741	1326.87	1406.31	210.06	1304.52	1220.77	121.763	1562.25	1357.18	380.155	1477.23	1455.19	428.267	1545.32	1268.36	438.631	1590.05	1155.13	464.68	1568.5	982.387	433.675	1541.24	885.587	474.782	1607.09	884.047	488.273	1570.89	785.065
499	0	257.124	1221.65	1643.53	152.618	1221.37	1641.71	277.026	1379.14	1653.41	139.65	1390.58	1654.35	183.929	1446.89	1504.79	178.298	1557.23	1281.93	207.505	1313.08	1403.87	210.302	1290.96	1218.23	123.202	1548.69	1355.1	381.188	1463.19	1452.6	428.419	1533.62	1267.04	438.219	1580.03	1154.49	464.761	1562.92	981.396	434.046	1538.04	883.655	474.752	1604.21	884.027	488.377	1571.19	783.944
500	0	258.272	1208.25	1641.7	153.766	1208.05	1639.95	278.328	1365.78	1650.85	140.919	1377.34	1651.79	185.339	1432.96	1502.46	179.809	1543.54	1279.68	208.365	1299.16	1401.36	210.65	1277.24	1215.63	124.776	1535.02	1352.94	382.331	1449.01	1449.94	428.683	1521.7	1265.66	437.916	1569.71	1153.78	464.863	1556.87	980.433	434.364	1534.35	881.858	474.719	1600.74	884.069	488.358	1570.82	783.008
501	0	259.485	1194.67	1639.79	154.979	1194.58	1638.1	279.737	1352.23	1648.26	142.301	1363.95	1649.2	186.861	1418.92	1500.08	181.42	1529.63	1277.35	209.325	1285.11	1398.83	211.114	1263.35	1213.03	126.476	1521.23	1350.74	383.585	1434.7	1447.22	429.065	1509.56	1264.21	437.731	1559.09	1152.99	464.994	1550.32	979.493	434.637	1530.1	880.19	474.695	1596.63	884.159	488.233	1569.74	782.233
502	0	260.767	1180.92	1637.84	156.262	1180.97	1636.21	281.258	1338.48	1645.67	143.799	1350.41	1646.6	188.493	1404.75	1497.69	183.122	1515.49	1274.98	210.388	1270.94	1396.3	211.699	1249.3	1210.44	128.293	1507.31	1348.52	384.949	1420.26	1444.5	429.568	1497.18	1262.72	437.671	1548.13	1152.14	465.165	1543.24	978.573	434.879	1525.27	878.646	474.694	1591.87	884.279	488.021	1567.9	781.597
503	0	262.121	1166.99	1635.87	157.618	1167.21	1634.31	282.889	1324.55	1643.12	145.413	1336.72	1644.05	190.226	1390.47	1495.33	184.907	1501.13	1272.61	211.555	1256.65	1393.81	212.413	1235.08	1207.92	130.215	1493.27	1346.32	386.419	1405.7	1441.78	430.196	1484.56	1261.19	437.744	1536.84	1151.23	465.383	1535.6	977.668	435.103	1519.8	877.214	474.731	1586.4	884.411	487.745	1565.24	781.074
504	0	263.548	1152.9	1633.94	159.048	1153.31	1632.44	284.627	1310.45	1640.63	147.14	1322.89	1641.56	192.05	1376.08	1493.03	186.767	1486.57	1270.26	212.824	1242.23	1391.39	213.259	1220.69	1205.48	132.227	1479.1	1344.18	387.99	1391.03	1439.12	430.95	1471.69	1259.65	437.956	1525.19	1150.27	465.658	1527.37	976.772	435.322	1513.65	875.886	474.82	1580.2	884.535	487.427	1561.71	780.635
505	0	265.046	1138.66	1632.06	160.549	1139.28	1630.63	286.464	1296.18	1638.23	148.973	1308.92	1639.17	193.954	1361.58	1490.82	188.691	1471.82	1267.99	214.191	1227.71	1389.08	214.242	1206.15	1203.17	134.315	1464.82	1342.13	389.654	1376.27	1436.55	431.834	1458.56	1258.1	438.312	1513.17	1149.28	466	1518.53	975.88	435.552	1506.8	874.649	474.977	1573.23	884.632	487.092	1557.28	780.254
506	0	266.61	1124.27	1630.26	162.116	1125.11	1628.9	288.39	1281.75	1635.95	150.9	1294.81	1636.91	195.923	1346.98	1488.73	190.665	1456.9	1265.83	215.649	1213.08	1386.9	215.362	1191.47	1201	136.458	1450.44	1340.19	391.402	1361.42	1434.09	432.847	1445.17	1256.56	438.815	1500.79	1148.25	466.417	1509.05	974.989	435.808	1499.19	873.491	475.217	1565.47	884.684	486.764	1551.89	779.902
507	0	268.232	1109.74	1628.57	163.742	1110.83	1627.28	290.389	1267.18	1633.82	152.906	1280.57	1634.8	197.939	1332.3	1486.8	192.675	1441.85	1263.8	217.19	1198.37	1384.88	216.618	1176.66	1199.01	138.639	1435.96	1338.4	393.222	1346.5	1431.79	433.991	1431.5	1255.05	439.468	1488.02	1147.21	466.917	1498.91	974.095	436.104	1490.79	872.401	475.554	1556.89	884.673	486.471	1545.51	779.551
508	0	269.9	1095.09	1627	165.414	1096.42	1625.78	292.444	1252.49	1631.85	154.974	1266.22	1632.87	199.983	1317.56	1485.04	194.707	1426.7	1261.95	218.801	1183.6	1383.04	218.004	1161.76	1197.21	140.836	1421.41	1336.78	395.1	1331.53	1429.66	435.262	1417.57	1253.58	440.271	1474.86	1146.15	467.508	1488.1	973.197	436.457	1481.57	871.369	476.003	1547.47	884.583	486.236	1538.08	779.177
509	0	271.601	1080.34	1625.58	167.12	1081.92	1624.43	294.534	1237.68	1630.08	157.081	1251.75	1631.14	202.036	1302.77	1483.48	196.745	1411.48	1260.3	220.468	1168.77	1381.39	219.513	1146.79	1195.63	143.028	1406.81	1335.36	397.021	1316.53	1427.75	436.658	1403.37	1252.16	441.225	1461.32	1145.09	468.197	1476.61	972.294	436.881	1471.5	870.385	476.574	1537.18	884.399	486.084	1529.59	778.755
510	0	273.32	1065.49	1624.3	168.844	1067.32	1623.23	296.636	1222.78	1628.52	159.205	1237.19	1629.63	204.075	1287.95	1482.15	198.771	1396.23	1258.88	222.176	1153.93	1379.97	221.134	1131.79	1194.26	145.195	1392.19	1334.16	398.967	1301.52	1426.08	438.174	1388.91	1250.81	442.327	1447.4	1144.05	468.99	1464.4	971.389	437.39	1460.55	869.442	477.28	1526	884.11	486.039	1519.98	778.263
511	0	275.038	1050.58	1623.18	170.568	1052.65	1622.19	298.724	1207.81	1627.19	161.32	1222.55	1628.37	206.079	1273.13	1481.05	200.77	1381	1257.71	223.905	1139.09	1378.78	222.853	1116.79	1193.14	147.316	1377.56	1333.19	400.918	1286.52	1424.68	439.803	1374.2	1249.55	443.573	1433.11	1143.03	469.89	1451.49	970.485	437.995	1448.71	868.536	478.129	1513.92	883.706	486.123	1509.22	777.685
512	0	276.737	1035.62	1622.22	172.272	1037.92	1621.32	300.771	1192.79	1626.11	163.397	1207.83	1627.36	208.026	1258.34	1480.21	202.726	1365.82	1256.81	225.637	1124.29	1377.83	224.653	1101.84	1192.27	149.373	1362.96	1332.48	402.854	1271.56	1423.57	441.534	1359.26	1248.39	444.961	1418.46	1142.04	470.902	1437.87	969.588	438.706	1435.94	867.665	479.127	1500.93	883.183	486.355	1497.29	777.006
513	0	278.398	1020.64	1621.42	173.938	1023.15	1620.61	302.75	1177.75	1625.29	165.409	1193.07	1626.63	209.894	1243.6	1479.63	204.625	1350.73	1256.19	227.352	1109.56	1377.13	226.512	1086.97	1191.64	151.35	1348.42	1332.02	404.754	1256.66	1422.77	443.355	1344.12	1247.36	446.484	1403.47	1141.1	472.026	1423.54	968.706	439.53	1422.25	866.832	480.277	1487.01	882.54	486.753	1484.16	776.219
514	0	279.998	1005.66	1620.8	175.544	1008.36	1620.07	304.634	1162.72	1624.74	167.326	1178.28	1626.17	211.665	1228.95	1479.34	206.454	1335.78	1255.86	229.029	1094.92	1376.7	228.409	1072.22	1191.28	153.233	1333.97	1331.83	406.599	1241.86	1422.3	445.253	1328.79	1246.46	448.137	1388.15	1140.23	473.262	1408.5	967.851	440.471	1407.62	866.043	481.581	1472.16	881.781	487.331	1469.82	775.323
515	0	281.52	990.709	1620.34	177.07	993.568	1619.7	306.394	1147.71	1624.48	169.12	1163.48	1626.02	213.321	1214.4	1479.32	208.204	1320.99	1255.84	230.647	1080.41	1376.54	230.316	1057.63	1191.18	155.01	1319.64	1331.91	408.369	1227.18	1422.17	447.21	1313.31	1245.71	449.911	1372.55	1139.43	474.61	1392.76	967.036	441.53	1392.05	865.307	483.037	1456.39	880.914	488.101	1454.24	774.327
516	0	282.941	975.811	1620.07	178.496	978.803	1619.51	308.007	1132.75	1624.51	170.764	1148.69	1626.16	214.848	1199.99	1479.58	209.869	1306.38	1256.11	232.188	1066.05	1376.66	232.207	1043.22	1191.35	156.677	1305.45	1332.25	410.047	1212.64	1422.38	449.21	1297.71	1245.14	451.799	1356.67	1138.72	476.063	1376.33	966.278	442.704	1375.56	864.642	484.639	1439.71	879.954	489.07	1437.43	773.245
517	0	284.244	960.994	1619.98	179.804	964.087	1619.49	309.448	1117.88	1624.85	172.236	1133.94	1626.6	216.236	1185.74	1480.13	211.444	1291.99	1256.68	233.632	1051.86	1377.07	234.055	1029.03	1191.79	158.232	1291.43	1332.87	411.62	1198.25	1422.94	451.232	1282.02	1244.75	453.793	1340.55	1138.13	477.619	1359.24	965.594	443.988	1358.15	864.065	486.378	1422.11	878.92	490.241	1419.39	772.102
518	0	285.41	946.283	1620.09	180.976	949.445	1619.66	310.7	1103.12	1625.49	173.513	1119.25	1627.36	217.478	1171.66	1480.96	212.93	1277.83	1257.54	234.964	1037.86	1377.75	235.831	1015.06	1192.5	159.676	1277.58	1333.74	413.077	1184.04	1423.86	453.257	1266.26	1244.57	455.883	1324.21	1137.65	479.267	1341.5	965.006	445.373	1339.84	863.602	488.243	1403.63	877.837	491.614	1400.13	770.932
519	0	286.425	931.701	1620.41	181.996	934.901	1620.03	311.746	1088.49	1626.46	174.581	1104.65	1628.42	218.572	1157.78	1482.06	214.332	1263.89	1258.69	236.168	1024.07	1378.72	237.507	1001.31	1193.49	161.017	1263.93	1334.87	414.41	1169.99	1425.13	455.268	1250.48	1244.61	458.062	1307.67	1137.33	481.001	1323.14	964.536	446.847	1320.66	863.281	490.219	1384.28	876.736	493.181	1379.66	769.778
520	0	287.274	917.269	1620.94	182.851	920.478	1620.59	312.576	1074.01	1627.73	175.429	1090.16	1629.77	219.521	1144.09	1483.43	215.655	1250.18	1260.11	237.233	1010.48	1379.98	239.061	987.791	1194.76	162.265	1250.48	1336.24	415.618	1156.12	1426.73	457.248	1234.68	1244.88	460.319	1290.97	1137.16	482.809	1304.18	964.208	448.396	1300.64	863.134	492.289	1364.09	875.65	494.93	1358.02	768.69
521	0	287.948	903.006	1621.71	183.532	906.199	1621.35	313.186	1059.71	1629.32	176.05	1075.8	1631.42	220.33	1130.61	1485.06	216.91	1236.7	1261.78	238.152	997.1	1381.52	240.469	974.482	1196.3	163.434	1237.23	1337.84	416.702	1142.41	1428.65	459.183	1218.89	1245.39	462.646	1274.11	1137.16	484.68	1284.65	964.046	450.005	1279.82	863.194	494.435	1343.08	874.616	496.843	1335.26	767.721
522	0	288.438	888.926	1622.72	184.031	892.084	1622.33	313.576	1045.58	1631.21	176.448	1061.59	1633.33	221.009	1117.33	1486.91	218.106	1223.42	1263.68	238.921	983.919	1383.32	241.717	961.368	1198.12	164.538	1224.18	1339.64	417.668	1128.86	1430.88	461.063	1203.11	1246.14	465.034	1257.12	1137.35	486.602	1264.58	964.074	451.656	1258.24	863.496	496.637	1321.3	873.675	498.897	1311.4	766.931
523	0	288.741	875.038	1623.98	184.346	878.15	1623.52	313.753	1031.65	1633.39	176.628	1047.56	1635.49	221.572	1104.25	1488.99	219.253	1210.35	1265.79	239.539	970.925	1385.38	242.794	948.426	1200.19	165.592	1211.31	1341.64	418.522	1115.43	1433.38	462.882	1187.36	1247.15	467.476	1240.01	1137.73	488.562	1244.01	964.314	453.332	1235.94	864.075	498.873	1298.79	872.867	501.061	1286.52	766.38
524	0	288.858	861.351	1625.48	184.476	864.41	1624.91	313.73	1017.92	1635.83	176.606	1033.71	1637.87	222.032	1091.35	1491.26	220.362	1197.44	1268.09	240.009	958.102	1387.67	243.695	935.634	1202.5	166.609	1198.61	1343.8	419.275	1102.11	1436.13	464.638	1171.64	1248.4	469.964	1222.78	1138.32	490.548	1222.98	964.786	455.015	1212.98	864.962	501.125	1275.57	872.231	503.302	1260.67	766.123
525	0	288.794	847.864	1627.23	184.428	850.875	1626.51	313.524	1004.39	1638.5	176.4	1020.07	1640.44	222.405	1078.62	1493.69	221.441	1184.7	1270.54	240.339	945.432	1390.16	244.422	922.968	1205.02	167.601	1186.07	1346.11	419.94	1088.88	1439.09	466.332	1155.92	1249.88	472.491	1205.46	1139.09	492.547	1201.5	965.506	456.686	1189.42	866.185	503.371	1251.7	871.803	505.581	1233.93	766.215
526	0	288.557	834.575	1629.21	184.209	837.55	1628.29	313.158	991.048	1641.36	176.034	1006.64	1643.15	222.71	1066.04	1496.25	222.494	1172.08	1273.12	240.539	932.892	1392.82	244.982	910.403	1207.73	168.579	1173.66	1348.52	420.528	1075.7	1442.22	467.971	1140.22	1251.57	475.053	1188.05	1140.06	494.546	1179.63	966.486	458.328	1165.3	867.768	505.592	1227.23	871.617	507.857	1206.37	766.702
527	0	288.162	821.477	1631.4	183.832	824.436	1630.25	312.658	977.898	1644.38	175.536	993.415	1645.96	222.961	1053.59	1498.9	223.526	1159.58	1275.77	240.62	920.458	1395.6	245.387	897.92	1210.57	169.549	1161.36	1351.02	421.052	1062.56	1445.48	469.563	1124.52	1253.44	477.643	1170.55	1141.2	496.534	1157.4	967.733	459.921	1140.68	869.726	507.77	1202.19	871.7	510.088	1178.07	767.62
528	0	287.625	808.558	1633.77	183.314	811.528	1632.34	312.053	964.923	1647.5	174.938	980.407	1648.82	223.175	1041.25	1501.61	224.537	1147.16	1278.47	240.597	908.108	1398.47	245.651	885.499	1213.51	170.515	1149.15	1353.57	421.523	1049.44	1448.8	471.12	1108.79	1255.47	480.257	1152.98	1142.5	498.497	1134.84	969.249	461.451	1115.62	872.068	509.888	1176.63	872.073	512.232	1149.1	769
529	0	286.966	795.805	1636.27	182.674	798.818	1634.55	311.373	952.11	1650.67	174.27	967.605	1651.69	223.367	1029	1504.34	225.525	1134.81	1281.17	240.485	895.819	1401.37	245.791	873.124	1216.5	171.478	1137.02	1356.13	421.95	1036.31	1452.15	472.653	1093.05	1257.61	482.89	1135.33	1143.91	500.426	1111.99	971.029	462.899	1090.19	874.794	511.929	1150.61	872.752	514.248	1119.55	770.859
530	0	286.207	783.198	1638.87	181.934	786.293	1636.82	310.648	939.439	1653.82	173.566	954.998	1654.51	223.547	1016.81	1507.04	226.487	1122.5	1283.84	240.3	883.57	1404.26	245.825	860.781	1219.47	172.437	1124.93	1358.66	422.343	1023.16	1455.46	474.174	1077.26	1259.82	485.538	1117.62	1145.42	502.31	1088.89	973.062	464.25	1064.44	877.898	513.879	1124.16	873.744	516.1	1089.5	773.207
531	0	285.372	770.718	1641.52	181.117	773.935	1639.13	309.91	926.892	1656.91	172.857	942.572	1657.24	223.726	1004.66	1509.66	227.417	1110.23	1286.42	240.056	871.342	1407.07	245.771	848.46	1222.37	173.389	1112.87	1361.13	422.708	1009.98	1458.68	475.695	1061.42	1262.05	488.196	1099.85	1146.98	504.136	1065.58	975.335	465.492	1038.43	881.365	515.724	1097.35	875.051	517.756	1059.03	776.045
532	0	284.484	758.344	1644.16	180.246	761.724	1641.43	309.185	914.445	1659.88	172.171	930.308	1659.82	223.913	992.529	1512.17	228.308	1097.97	1288.88	239.769	859.117	1409.77	245.644	836.154	1225.15	174.329	1100.82	1363.51	423.051	996.774	1461.75	477.222	1045.54	1264.24	490.857	1082.03	1148.55	505.896	1042.1	977.826	466.611	1012.21	885.174	517.452	1070.23	876.666	519.188	1028.2	779.364
533	0	283.567	746.054	1646.74	179.346	749.639	1643.66	308.5	902.078	1662.67	171.533	918.184	1662.21	224.112	980.405	1514.52	229.154	1085.7	1291.17	239.451	846.881	1412.3	245.459	823.856	1227.76	175.251	1088.77	1365.74	423.374	983.525	1464.63	478.76	1029.61	1266.36	493.515	1064.16	1150.09	507.578	1018.47	980.511	467.597	985.843	889.298	519.049	1042.83	878.58	520.376	997.113	783.149
534	0	282.644	733.824	1649.19	178.439	737.654	1645.79	307.875	889.769	1665.23	170.965	906.177	1664.38	224.327	968.269	1516.67	229.947	1073.42	1293.27	239.114	834.624	1414.61	245.229	811.564	1230.14	176.148	1076.7	1367.8	423.68	970.238	1467.26	480.31	1013.63	1268.34	496.162	1046.24	1151.54	509.172	994.738	983.361	468.441	959.38	893.706	520.506	1015.22	880.774	521.305	965.827	787.379
535	0	281.735	721.633	1651.48	177.544	725.745	1647.76	307.328	877.496	1667.51	170.483	894.26	1666.29	224.557	956.107	1518.6	230.682	1061.11	1295.13	238.766	822.334	1416.67	244.964	799.275	1232.26	177.013	1064.6	1369.66	423.968	956.915	1469.61	481.87	997.601	1270.15	498.786	1028.28	1152.88	510.667	970.934	986.347	469.137	932.871	898.362	521.812	987.448	883.227	521.968	934.42	792.025
536	0	280.857	709.462	1653.54	176.681	713.887	1649.55	306.87	865.24	1669.48	170.098	882.409	1667.91	224.799	943.909	1520.26	231.352	1048.76	1296.72	238.414	810.006	1418.44	244.67	786.985	1234.06	177.836	1052.45	1371.28	424.238	943.561	1471.63	483.43	981.542	1271.74	501.374	1010.28	1154.05	512.053	947.091	989.435	469.678	906.365	903.228	522.957	959.565	885.914	522.362	902.965	797.057
537	0	280.026	697.291	1655.34	175.865	702.055	1651.11	306.508	852.984	1671.1	169.815	870.597	1669.21	225.05	931.665	1521.63	231.949	1036.35	1298.03	238.061	797.634	1419.9	244.354	774.693	1235.54	178.609	1040.25	1372.63	424.487	930.181	1473.31	484.978	965.458	1273.07	503.912	992.238	1155.02	513.32	923.243	992.591	470.063	879.907	908.265	523.933	931.624	888.805	522.49	871.531	802.438
538	0	279.251	685.105	1656.84	175.105	690.228	1652.4	306.243	840.713	1672.36	169.633	858.8	1670.18	225.301	919.367	1522.7	232.468	1023.89	1299.03	237.71	785.214	1421.01	244.019	762.392	1236.65	179.323	1027.99	1373.7	424.709	916.779	1474.62	486.5	949.36	1274.12	506.382	974.163	1155.76	514.458	899.421	995.783	470.29	853.539	913.432	524.734	903.678	891.872	522.361	840.19	808.129
539	0	278.541	672.891	1658.01	174.411	678.383	1653.4	306.071	828.414	1673.23	169.545	846.994	1670.81	225.543	907.01	1523.43	232.903	1011.36	1299.7	237.359	772.742	1421.77	243.665	750.077	1237.4	179.968	1015.66	1374.46	424.899	903.36	1475.54	487.976	933.257	1274.86	508.766	956.052	1156.24	515.46	875.656	998.978	470.36	827.302	918.689	525.353	875.782	895.082	521.985	809.009	814.087
540	0	277.899	660.637	1658.83	173.785	666.502	1654.1	305.982	816.079	1673.7	169.541	835.158	1671.09	225.766	894.59	1523.83	233.248	998.755	1300.04	237.006	760.216	1422.17	243.294	737.739	1237.77	180.535	1003.26	1374.9	425.05	889.929	1476.08	489.385	917.159	1275.28	511.041	937.909	1156.46	516.316	851.978	1002.14	470.275	801.234	923.994	525.788	847.987	898.402	521.379	778.054	820.268
541	0	277.325	648.335	1659.28	173.225	654.567	1654.48	305.961	803.701	1673.78	169.602	823.273	1671.03	225.956	882.102	1523.89	233.498	986.066	1300.05	236.644	747.633	1422.21	242.903	725.369	1237.76	181.014	990.78	1375.01	425.154	876.489	1476.24	490.704	901.073	1275.37	513.186	919.736	1156.39	517.021	828.418	1005.25	470.039	775.37	929.307	526.035	820.345	901.799	520.56	747.391	826.625
542	0	276.813	635.98	1659.36	172.727	642.564	1654.54	305.989	791.276	1673.47	169.71	811.322	1670.63	226.1	869.545	1523.61	233.645	973.29	1299.71	236.268	734.991	1421.88	242.489	712.957	1237.38	181.398	978.215	1374.78	425.202	863.04	1476.02	491.908	885.006	1275.13	515.178	901.538	1156.03	517.567	805.004	1008.27	469.657	749.742	934.591	526.095	792.909	905.239	519.547	717.081	833.107
543	0	276.356	623.568	1659.09	172.282	630.482	1654.27	306.044	778.802	1672.78	169.838	799.292	1669.91	226.183	856.916	1522.99	233.687	960.42	1299.03	235.868	722.287	1421.21	242.05	700.491	1236.65	181.679	965.563	1374.22	425.183	849.583	1475.44	492.974	868.963	1274.55	516.993	883.323	1155.39	517.951	781.765	1011.17	469.136	724.382	939.808	525.968	765.727	908.69	518.362	687.182	839.664
544	0	275.942	611.098	1658.46	171.878	618.31	1653.69	306.1	766.28	1671.74	169.96	787.171	1668.87	226.191	844.212	1522.05	233.619	947.453	1298.03	235.435	709.517	1420.21	241.579	687.958	1235.59	181.849	952.821	1373.33	425.089	836.117	1474.52	493.878	852.947	1273.66	518.607	865.098	1154.47	518.168	758.731	1013.94	468.484	699.32	944.922	525.657	738.848	912.12	517.026	657.751	846.243
545	0	275.555	598.569	1657.51	171.497	606.041	1652.82	306.129	753.709	1670.37	170.047	774.951	1667.54	226.109	831.433	1520.79	233.439	934.385	1296.72	234.957	696.676	1418.9	241.073	675.345	1234.22	181.903	939.987	1372.11	424.908	822.637	1473.28	494.599	836.959	1272.46	519.998	846.877	1153.28	518.216	735.93	1016.55	467.707	674.584	949.901	525.167	712.32	915.496	515.562	628.839	852.794
546	0	275.179	585.981	1656.25	171.122	593.669	1651.66	306.104	741.093	1668.69	170.069	762.626	1665.95	225.924	818.575	1519.25	233.145	921.216	1295.12	234.425	683.76	1417.3	240.527	662.64	1232.56	181.836	927.058	1370.59	424.63	809.139	1471.76	495.116	821	1270.98	521.146	828.672	1151.84	518.094	713.389	1018.99	466.815	650.2	954.712	524.503	686.187	918.79	513.991	600.494	859.262
547	0	274.793	573.336	1654.72	170.732	581.19	1650.26	305.995	728.433	1666.75	169.995	750.19	1664.1	225.622	805.638	1517.44	232.739	907.944	1293.24	233.828	670.765	1415.45	239.937	649.829	1230.65	181.646	914.032	1368.78	424.246	795.617	1469.98	495.413	805.071	1269.25	522.031	810.502	1150.17	517.801	691.137	1021.24	465.816	626.196	959.327	523.671	660.493	921.972	512.336	572.759	865.598
548	0	274.375	560.635	1652.96	170.307	568.602	1648.63	305.774	715.732	1664.57	169.799	737.641	1662.04	225.192	792.618	1515.39	232.225	894.569	1291.11	233.155	657.684	1413.37	239.299	636.9	1228.52	181.329	900.909	1366.7	423.746	782.063	1467.98	495.477	789.172	1267.28	522.639	792.386	1148.31	517.338	669.202	1023.29	464.719	602.597	963.719	522.68	635.279	925.016	510.616	545.674	871.751
549	0	273.904	547.877	1651.01	169.823	555.901	1646.8	305.416	702.989	1662.19	169.453	724.977	1659.79	224.625	779.514	1513.13	231.608	881.094	1288.76	232.399	644.513	1411.1	238.609	623.843	1226.21	180.887	887.687	1364.38	423.125	768.47	1465.79	495.296	773.304	1265.12	522.958	774.346	1146.27	516.707	647.612	1025.13	463.532	579.428	967.865	521.538	610.585	927.896	508.853	519.277	877.675
550	0	273.358	535.062	1648.9	169.259	543.089	1644.82	304.898	690.206	1659.67	168.935	712.197	1657.38	223.914	766.323	1510.69	230.895	867.521	1286.23	231.552	631.247	1408.68	237.866	610.647	1223.75	180.319	874.366	1361.85	422.375	754.829	1463.46	494.865	757.47	1262.79	522.978	756.409	1144.09	515.912	626.393	1026.76	462.264	556.715	971.742	520.255	586.449	930.589	507.064	493.598	883.323
551	0	272.716	522.189	1646.69	168.594	530.166	1642.72	304.199	677.38	1657.02	168.224	699.302	1654.85	223.055	753.044	1508.11	230.095	853.854	1283.54	230.61	617.881	1406.14	237.068	597.305	1221.18	179.628	860.946	1359.14	421.495	741.134	1461.02	494.183	741.674	1260.34	522.695	738.602	1141.81	514.956	605.574	1028.16	460.923	534.482	975.334	518.84	562.906	933.074	505.266	468.67	888.655
552	0	271.958	509.256	1644.4	167.811	517.132	1640.53	303.305	664.508	1654.31	167.309	686.293	1652.21	222.045	739.675	1505.43	229.219	840.097	1280.74	229.571	604.414	1403.51	236.216	583.813	1218.54	178.817	847.427	1356.28	420.484	727.379	1458.52	493.252	725.922	1257.8	522.111	720.954	1139.45	513.847	585.181	1029.35	459.516	512.755	978.624	517.304	539.99	935.334	503.474	444.519	893.633
553	0	271.068	496.26	1642.1	166.894	503.989	1638.28	302.206	651.587	1651.56	166.178	673.172	1649.51	220.885	726.218	1502.67	228.276	826.257	1277.86	228.434	590.842	1400.85	235.312	570.168	1215.86	177.889	833.812	1353.32	419.344	713.561	1455.99	492.079	710.224	1255.21	521.229	703.495	1137.05	512.59	565.241	1030.32	458.053	491.558	981.6	515.659	517.734	937.353	501.7	421.169	898.222
554	0	270.034	483.199	1639.8	165.832	490.741	1636.02	300.897	638.612	1648.83	164.831	659.942	1646.78	219.58	712.672	1499.89	227.276	812.34	1274.95	227.204	577.168	1398.18	234.359	556.371	1213.19	176.848	820.103	1350.3	418.08	699.679	1453.48	490.676	694.591	1252.61	520.06	686.258	1134.65	511.195	545.779	1031.07	456.54	470.915	984.251	513.916	496.166	939.119	499.955	398.642	902.393
555	0	268.847	470.069	1637.57	164.617	477.39	1633.76	299.38	625.578	1646.16	163.27	646.607	1644.04	218.137	699.042	1497.12	226.225	798.352	1272.05	225.889	563.395	1395.54	233.364	542.424	1210.56	175.697	806.305	1347.25	416.699	685.74	1451.03	489.059	679.039	1250.04	518.618	669.273	1132.28	509.672	526.821	1031.62	454.984	450.852	986.571	512.087	475.314	940.62	498.246	376.958	906.12
556	0	267.503	456.868	1635.42	163.247	463.942	1631.55	297.661	612.48	1643.57	161.504	633.171	1641.34	216.565	685.331	1494.4	225.128	784.303	1269.2	224.497	549.527	1392.97	232.334	528.335	1208.01	174.439	792.424	1344.23	415.21	671.75	1448.67	487.248	663.584	1247.54	516.921	652.572	1129.97	508.032	508.391	1031.97	453.391	431.391	988.553	510.185	455.204	941.851	496.58	356.133	909.383
557	0	266.004	443.594	1633.39	161.727	450.402	1629.41	295.755	599.315	1641.12	159.549	619.641	1638.71	214.876	671.547	1491.76	223.989	770.201	1266.43	223.043	535.573	1390.51	231.277	514.115	1205.58	173.078	778.469	1341.27	413.625	657.722	1446.45	485.266	648.247	1245.14	514.994	636.185	1127.76	506.288	490.51	1032.13	451.77	412.556	990.196	508.223	435.858	942.806	494.96	336.181	912.165
558	0	264.358	430.248	1631.51	160.064	436.778	1627.37	293.68	586.079	1638.83	157.424	606.024	1636.18	213.087	657.699	1489.25	222.807	756.058	1263.8	221.542	521.545	1388.18	230.206	499.78	1203.29	171.617	764.449	1338.42	411.959	643.672	1444.39	483.141	633.052	1242.88	512.862	620.14	1125.68	504.454	473.198	1032.1	450.126	394.367	991.498	506.214	417.296	943.485	493.386	317.114	914.455
559	0	262.578	416.83	1629.8	158.271	423.078	1625.45	291.458	572.773	1636.73	155.155	592.329	1633.79	211.213	643.797	1486.91	221.579	741.886	1261.34	220.011	507.457	1386.03	229.131	485.349	1201.18	170.061	750.38	1335.73	410.227	629.62	1442.52	480.902	618.022	1240.8	510.555	604.463	1123.74	502.546	456.475	1031.91	448.466	376.845	992.461	504.173	399.536	943.887	491.859	298.94	916.246
560	0	260.68	403.345	1628.29	156.369	409.313	1623.68	289.119	559.396	1634.87	152.773	578.565	1631.55	209.276	629.854	1484.76	220.301	727.702	1259.08	218.472	493.327	1384.07	228.066	470.848	1199.28	168.416	736.276	1333.23	408.449	615.588	1440.87	478.582	603.184	1238.92	508.105	589.178	1121.99	500.58	440.356	1031.56	446.797	360.009	993.089	502.112	382.591	944.018	490.377	281.665	917.533
561	0	258.689	389.797	1627	154.379	395.493	1622.08	286.696	545.954	1633.25	150.309	564.745	1629.5	207.297	615.886	1482.83	218.968	713.521	1257.06	216.944	479.173	1382.33	227.02	456.308	1197.6	166.69	722.157	1330.97	406.644	601.597	1439.46	476.213	588.563	1237.26	505.545	574.304	1120.42	498.572	424.854	1031.07	445.126	343.875	993.385	500.047	366.474	943.882	488.935	265.292	918.319
562	0	256.631	376.194	1625.92	152.327	381.631	1620.65	284.223	532.45	1631.9	147.803	550.88	1627.68	205.299	601.907	1481.16	217.578	699.363	1255.32	215.447	465.017	1380.83	226.006	441.764	1196.16	164.892	708.042	1328.98	404.833	587.671	1438.31	473.828	574.186	1235.84	502.909	559.858	1119.07	496.541	409.981	1030.44	443.459	328.457	993.356	497.991	351.194	943.488	487.532	249.824	918.608
563	0	254.536	362.544	1625.08	150.245	367.742	1619.43	281.74	518.893	1630.83	145.291	536.986	1626.1	203.306	587.935	1479.78	216.129	685.249	1253.87	214	450.883	1379.59	225.032	427.254	1194.99	163.035	693.951	1327.3	403.04	573.831	1437.42	471.459	560.075	1234.68	500.232	545.851	1117.94	494.503	395.744	1029.7	441.806	313.768	993.01	495.96	336.755	942.847	486.162	235.258	918.409
564	0	252.438	348.857	1624.48	148.163	353.838	1618.42	279.286	505.289	1630.07	142.816	523.077	1624.78	201.343	573.988	1478.69	214.623	671.199	1252.74	212.622	436.794	1378.63	224.103	412.817	1194.07	161.136	679.906	1325.95	401.284	560.096	1436.81	469.137	546.252	1233.8	497.547	532.293	1117.05	492.476	382.15	1028.85	440.173	299.818	992.356	493.968	323.161	941.971	484.823	221.594	917.733
565	0	250.37	335.144	1624.12	146.116	339.937	1617.64	276.902	491.652	1629.61	140.416	509.167	1623.75	199.433	560.084	1477.93	213.065	657.235	1251.95	211.327	422.772	1377.95	223.225	398.494	1193.44	159.212	665.926	1324.96	399.585	546.485	1436.47	466.889	532.735	1233.19	494.884	519.188	1116.4	490.477	369.199	1027.9	438.57	286.612	991.405	492.027	310.413	940.874	483.514	208.828	916.595
566	0	248.369	321.419	1624.01	144.137	326.051	1617.1	274.626	477.991	1629.47	138.132	495.273	1623.04	197.599	546.24	1477.49	211.466	643.375	1251.5	210.128	408.841	1377.57	222.4	384.32	1193.08	157.281	652.03	1324.35	397.963	533.015	1436.41	464.742	519.537	1232.87	492.272	506.534	1115.99	488.522	356.893	1026.88	437.005	274.157	990.169	490.153	298.507	939.572	482.234	196.955	915.014
567	0	246.472	307.695	1624.14	142.262	312.196	1616.81	272.497	464.321	1629.64	135.999	481.407	1622.66	195.858	532.473	1477.41	209.837	629.637	1251.41	209.033	395.019	1377.5	221.627	370.324	1193.01	155.363	638.233	1324.12	396.431	519.697	1436.62	462.713	506.666	1232.84	489.735	494.327	1115.83	486.626	345.227	1025.78	435.488	262.453	988.66	488.357	287.44	938.083	480.988	185.971	913.01
568	0	244.712	293.987	1624.52	140.522	298.385	1616.78	270.548	450.657	1630.13	134.051	467.586	1622.63	194.228	518.798	1477.66	208.195	616.032	1251.68	208.048	381.323	1377.75	220.906	356.529	1193.23	153.477	624.546	1324.28	395.001	506.544	1437.11	460.819	494.127	1233.1	487.296	482.56	1115.92	484.802	334.197	1024.63	434.027	251.498	986.894	486.652	277.203	936.426	479.781	175.869	910.606
569	0	243.123	280.31	1625.14	138.95	284.632	1617.04	268.806	437.015	1630.94	132.316	453.82	1622.96	192.721	505.228	1478.27	206.556	602.568	1252.3	207.175	367.765	1378.31	220.234	342.947	1193.75	151.639	610.977	1324.84	393.682	493.561	1437.87	459.071	481.919	1233.65	484.97	471.219	1116.26	483.063	323.793	1023.44	432.634	241.289	984.886	485.048	267.786	934.621	478.619	166.645	907.829
570	0	241.734	266.681	1626	137.572	270.947	1617.59	267.296	423.412	1632.04	130.813	440.124	1623.67	191.344	491.769	1479.22	204.933	589.248	1253.27	206.413	354.354	1379.19	219.608	329.581	1194.58	149.864	597.529	1325.77	392.477	480.751	1438.87	457.471	470.039	1234.47	482.768	460.289	1116.85	481.42	314.005	1022.21	431.318	231.818	982.656	483.557	259.178	932.689	477.515	158.293	904.704
571	0	240.569	253.118	1627.1	136.413	257.342	1618.45	266.031	409.868	1633.44	129.557	426.507	1624.77	190.102	478.429	1480.51	203.342	576.069	1254.56	205.757	341.091	1380.39	219.025	316.422	1195.72	148.161	584.201	1327.07	391.387	468.115	1440.13	456.021	458.477	1235.58	480.698	449.752	1117.68	479.881	304.821	1020.97	430.088	223.074	980.222	482.185	251.364	930.652	476.479	150.806	901.263
572	0	239.645	239.637	1628.44	135.49	243.827	1619.63	265.02	396.399	1635.11	128.555	412.979	1626.24	188.994	465.208	1482.11	201.791	563.024	1256.17	205.201	327.972	1381.91	218.479	303.456	1197.17	146.538	570.985	1328.73	390.41	455.644	1441.61	454.713	447.222	1236.95	478.761	439.587	1118.75	478.452	296.224	1019.71	428.955	215.044	977.604	480.94	244.326	928.533	475.528	144.177	897.537
573	0	238.976	226.256	1630.02	134.813	230.409	1621.12	264.263	383.027	1637.03	127.804	399.549	1628.08	188.017	452.102	1484	200.285	550.101	1258.06	204.736	314.99	1383.73	217.966	290.658	1198.93	144.996	557.871	1330.7	389.538	443.331	1443.32	453.537	436.259	1238.57	476.955	429.774	1120.06	477.139	288.197	1018.45	427.927	207.711	974.824	479.828	238.044	926.355	474.677	138.396	893.56
574	0	238.563	212.99	1631.82	134.388	217.096	1622.94	263.752	369.767	1639.18	127.296	386.225	1630.27	187.163	439.104	1486.17	198.828	537.285	1260.22	204.352	302.13	1385.84	217.478	277.999	1200.98	143.535	544.846	1332.96	388.763	431.158	1445.21	452.479	425.57	1240.42	475.274	420.288	1121.59	475.944	280.722	1017.2	427.012	201.055	971.905	478.851	232.495	924.138	473.94	133.451	889.366
575	0	238.404	199.854	1633.86	134.209	203.894	1625.08	263.472	356.635	1641.52	127.013	373.012	1632.77	186.423	426.203	1488.56	197.418	524.559	1262.6	204.039	289.375	1388.21	217.01	265.45	1203.31	142.15	531.892	1335.47	388.074	419.107	1447.29	451.523	415.134	1242.5	473.709	411.108	1123.33	474.867	273.778	1015.97	426.218	195.052	968.868	478.011	227.653	921.906	473.335	129.328	884.991
576	0	238.486	186.858	1636.1	134.268	190.806	1627.51	263.401	343.644	1644.01	126.935	359.914	1635.55	185.785	413.386	1491.16	196.052	511.907	1265.17	203.784	276.705	1390.81	216.555	252.98	1205.88	140.833	518.99	1338.18	387.461	407.157	1449.5	450.65	404.93	1244.76	472.249	402.209	1125.27	473.906	267.341	1014.76	425.551	189.675	965.735	477.306	223.489	919.676	472.873	126.006	880.472
577	0	238.791	174.011	1638.54	134.545	177.834	1630.21	263.512	330.804	1646.62	127.033	346.933	1638.54	185.237	400.637	1493.91	194.728	499.313	1267.89	203.578	264.097	1393.6	216.107	240.559	1208.65	139.575	506.123	1341.06	386.909	395.283	1451.83	449.843	394.933	1247.17	470.882	393.569	1127.37	473.06	261.387	1013.57	425.014	184.895	962.53	476.733	219.969	917.468	472.566	123.462	875.845
578	0	239.293	161.315	1641.15	135.018	164.976	1633.15	263.776	318.118	1649.29	127.278	334.069	1641.69	184.765	387.937	1496.76	193.441	486.762	1270.73	203.412	251.529	1396.52	215.659	228.161	1211.59	138.367	493.271	1344.05	386.408	383.461	1454.24	449.084	385.117	1249.71	469.594	385.165	1129.62	472.322	255.891	1012.4	424.609	180.678	959.271	476.287	217.058	915.296	472.422	121.664	871.145
579	0	239.962	148.769	1643.89	135.658	152.23	1636.29	264.159	305.586	1651.97	127.637	321.317	1644.92	184.356	375.268	1499.67	192.189	474.244	1273.62	203.275	238.977	1399.52	215.208	215.763	1214.62	137.2	480.416	1347.09	385.945	371.666	1456.68	448.358	375.456	1252.34	468.373	376.975	1131.98	471.688	250.823	1011.27	424.339	176.989	955.977	475.96	214.716	913.174	472.445	120.577	866.406
580	0	240.765	136.365	1646.74	136.433	139.588	1639.57	264.627	293.201	1654.62	128.077	308.67	1648.18	183.998	362.612	1502.58	190.974	461.749	1276.53	203.161	226.422	1402.55	214.751	203.346	1217.69	136.066	467.544	1350.14	385.511	359.874	1459.12	447.651	365.924	1255	467.205	368.978	1134.42	471.149	246.155	1010.15	424.202	173.788	952.666	475.743	212.9	911.112	472.634	120.158	861.659
581	0	241.667	124.091	1649.64	137.308	127.041	1642.93	265.149	280.952	1657.18	128.566	296.118	1651.37	183.68	349.951	1505.44	189.796	449.275	1279.41	203.065	213.844	1405.55	214.287	190.894	1220.73	134.96	454.642	1353.13	385.097	348.064	1461.5	446.952	356.495	1257.66	466.079	361.154	1136.9	470.698	241.857	1009.06	424.195	171.035	949.353	475.624	211.566	909.118	472.985	120.362	856.933
582	0	242.632	111.93	1652.55	138.249	114.574	1646.31	265.693	268.821	1659.61	129.075	283.647	1654.44	183.392	337.268	1508.21	188.659	436.817	1282.21	202.98	201.227	1408.45	213.815	178.396	1223.69	133.879	441.7	1356.02	384.696	336.216	1463.78	446.253	347.145	1260.28	464.985	353.483	1139.39	470.327	237.896	1007.99	424.312	168.687	946.05	475.59	210.666	907.199	473.49	121.136	852.254
583	0	243.623	99.8594	1655.43	139.221	102.172	1649.65	266.233	256.785	1661.87	129.579	271.242	1657.31	183.127	324.549	1510.81	187.572	424.378	1284.89	202.904	188.56	1411.2	213.337	165.843	1226.48	132.823	428.711	1358.76	384.304	324.314	1465.92	445.546	337.853	1262.81	463.913	345.945	1141.85	470.025	234.239	1006.93	424.549	166.702	942.77	475.63	210.152	905.358	474.136	122.425	847.646
584	0	244.609	87.8526	1658.21	140.191	89.8174	1652.87	266.747	244.816	1663.89	130.056	258.883	1659.93	182.88	311.778	1513.23	186.541	411.958	1287.4	202.837	175.832	1413.75	212.856	153.232	1229.06	131.796	415.672	1361.3	383.919	312.345	1467.88	444.829	328.599	1265.21	462.855	338.522	1144.25	469.785	230.852	1005.87	424.896	165.036	939.522	475.727	209.972	903.599	474.91	124.171	843.129
585	0	245.56	75.8806	1660.84	141.132	77.4897	1655.92	267.217	232.885	1665.66	130.491	246.551	1662.24	182.647	298.947	1515.4	185.575	399.557	1289.7	202.776	163.036	1416.03	212.375	140.562	1231.36	130.804	402.58	1363.61	383.54	300.296	1469.62	444.099	319.366	1267.46	461.805	331.195	1146.55	469.595	227.7	1004.82	425.344	163.644	936.315	475.868	210.075	901.923	475.792	126.313	838.722
586	0	246.451	63.9123	1663.28	142.016	65.1682	1658.73	267.634	220.958	1667.14	130.875	234.224	1664.19	182.429	286.044	1517.3	184.685	387.174	1291.76	202.724	150.169	1418.01	211.901	127.835	1233.35	129.855	389.435	1365.64	383.169	288.161	1471.1	443.357	310.14	1269.51	460.758	323.946	1148.73	469.448	224.748	1003.77	425.88	162.483	933.156	476.038	210.411	900.332	476.763	128.792	834.441
587	0	247.261	51.916	1665.48	142.825	52.8317	1661.25	267.991	209.003	1668.31	131.202	221.881	1665.75	182.227	273.064	1518.9	183.881	374.807	1293.55	202.684	137.229	1419.66	211.439	115.056	1234.97	128.961	376.241	1367.37	382.81	275.933	1472.29	442.605	300.909	1271.35	459.711	316.757	1150.76	469.334	221.96	1002.71	426.492	161.512	930.053	476.223	210.929	898.828	477.801	131.545	830.301
588	0	247.978	39.8606	1667.4	143.543	40.4596	1663.44	268.288	196.987	1669.14	131.473	209.501	1666.9	182.045	260.001	1520.17	183.172	362.447	1295.04	202.658	124.215	1420.94	210.996	102.226	1236.2	128.135	362.999	1368.78	382.468	263.608	1473.18	441.846	291.663	1272.96	458.661	309.609	1152.62	469.245	219.3	1001.65	427.165	160.687	927.01	476.41	211.577	897.414	478.885	134.513	826.316
589	0	248.591	27.7169	1669	144.161	28.0322	1665.25	268.53	184.88	1669.63	131.695	197.065	1667.61	181.889	246.852	1521.1	182.567	350.083	1296.22	202.653	111.129	1421.83	210.581	89.3508	1237.03	127.389	349.712	1369.85	382.15	251.182	1473.76	441.083	282.391	1274.34	457.61	302.484	1154.31	469.173	216.731	1000.59	427.885	159.969	924.036	476.586	212.307	896.091	479.992	137.634	822.501
590	0	249.1	15.4584	1670.27	144.676	15.5317	1666.67	268.728	172.654	1669.77	131.878	184.554	1667.9	181.766	233.616	1521.69	182.073	337.699	1297.07	202.673	97.9718	1422.34	210.2	76.4311	1237.45	126.738	336.383	1370.58	381.863	238.654	1474.01	440.323	273.085	1275.47	456.557	295.363	1155.81	469.111	214.215	999.528	428.636	159.319	921.135	476.742	213.068	894.863	481.1	140.851	818.866
591	0	249.507	3.06264	1671.17	145.091	2.9425	1667.68	268.894	160.285	1669.57	132.034	171.955	1667.76	181.686	220.293	1521.92	181.696	325.276	1297.58	202.726	84.7454	1422.46	209.863	63.467	1237.45	126.194	323.013	1370.96	381.617	226.022	1473.93	439.571	263.736	1276.37	455.505	288.225	1157.13	469.054	211.715	998.466	429.402	158.698	918.313	476.867	213.814	893.732	482.188	144.106	815.425
592	0	249.822	-9.48863	1671.71	145.414	-9.74845	1668.27	269.044	147.756	1669.03	132.18	159.253	1667.22	181.657	206.883	1521.81	181.441	312.792	1297.75	202.818	71.451	1422.19	209.577	50.4566	1237.06	125.77	309.601	1371	381.419	213.286	1473.54	438.835	254.333	1277.04	454.46	281.049	1158.26	468.998	209.194	997.411	430.169	158.07	915.577	476.956	214.499	892.704	483.234	147.342	812.187
593	0	250.058	-22.2086	1671.89	145.657	-22.5513	1668.45	269.197	135.052	1668.17	132.333	146.441	1666.28	181.692	193.389	1521.36	181.312	300.222	1297.59	202.957	58.089	1421.56	209.352	37.3953	1236.28	125.479	296.148	1370.71	381.278	200.446	1472.84	438.122	244.865	1277.49	453.427	273.812	1159.21	468.939	206.613	996.368	430.921	157.397	912.932	477.002	215.075	891.78	484.222	150.506	809.162
594	0	250.235	-35.1054	1671.7	145.839	-35.4731	1668.23	269.373	122.165	1667.02	132.514	133.51	1664.99	181.799	179.813	1520.6	181.309	287.54	1297.09	203.152	44.6591	1420.59	209.194	24.2765	1235.16	125.328	282.65	1370.09	381.205	187.501	1471.84	437.441	235.319	1277.74	452.412	266.49	1160	468.875	203.933	995.342	431.645	156.643	910.383	477.003	215.499	890.964	485.134	153.545	806.356
595	0	250.373	-48.182	1671.18	145.981	-48.5182	1667.64	269.591	109.092	1665.58	132.742	120.457	1663.37	181.991	166.156	1519.53	181.433	274.72	1296.28	203.41	31.16	1419.3	209.111	11.0916	1233.72	125.325	269.103	1369.18	381.208	174.451	1470.57	436.8	225.679	1277.8	451.423	259.056	1160.63	468.806	201.116	994.339	432.33	155.77	907.935	476.956	215.726	890.257	485.955	156.408	803.774
596	0	250.497	-61.4367	1670.34	146.107	-61.6882	1666.7	269.871	95.8358	1663.9	133.034	107.281	1661.47	182.277	152.422	1518.2	181.683	261.741	1295.17	203.739	17.5898	1417.74	209.112	-2.1699	1232	125.474	255.501	1367.98	381.294	161.296	1469.04	436.21	215.929	1277.69	450.47	251.481	1161.11	468.731	198.121	993.364	432.966	154.741	905.592	476.863	215.714	889.66	486.675	159.043	801.417
597	0	250.632	-74.8635	1669.2	146.242	-74.9818	1665.45	270.231	82.4025	1661.99	133.411	93.9835	1659.33	182.667	138.613	1516.61	182.055	248.58	1293.79	204.147	3.94569	1415.93	209.204	-15.5195	1230.04	125.778	241.836	1366.53	381.473	148.036	1467.29	435.679	206.048	1277.43	449.561	243.738	1161.46	468.653	194.91	992.419	433.548	153.518	903.357	476.727	215.419	889.17	487.285	161.404	799.283
598	0	250.806	-88.4526	1667.8	146.413	-88.396	1663.93	270.69	68.802	1659.9	133.887	80.5672	1656.98	183.167	124.731	1514.81	182.547	235.222	1292.15	204.643	-9.77559	1413.91	209.393	-28.9694	1227.9	126.236	228.102	1364.86	381.75	134.673	1465.34	435.219	196.016	1277.04	448.706	235.794	1161.68	468.575	191.443	991.506	434.07	152.061	901.232	476.551	214.799	888.785	487.778	163.441	797.369
599	0	251.043	-102.192	1666.19	146.645	-101.926	1662.19	271.261	55.0472	1657.65	134.478	67.0372	1654.48	183.784	110.778	1512.83	183.154	221.654	1290.29	205.234	-23.5775	1411.73	209.686	-42.5319	1225.59	126.843	214.29	1362.99	382.131	121.208	1463.21	434.838	185.813	1276.52	447.916	227.619	1161.8	468.499	187.679	990.627	434.531	150.33	899.217	476.344	213.813	888.499	488.153	165.109	795.665
600	0	251.368	-116.066	1664.38	146.963	-115.564	1660.26	271.959	41.1525	1655.28	135.195	53.3999	1651.86	184.522	96.7546	1510.7	183.869	207.871	1288.23	205.927	-37.4634	1409.42	210.089	-56.2186	1223.18	127.595	200.393	1360.96	382.62	107.643	1460.94	434.546	175.414	1275.9	447.199	219.18	1161.8	468.432	183.58	989.779	434.933	148.284	897.309	476.114	212.418	888.303	488.411	166.362	794.161
601	0	251.801	-130.06	1662.44	147.388	-129.304	1658.2	272.792	27.1336	1652.83	136.048	39.6626	1649.17	185.382	82.6624	1508.44	184.686	193.871	1286.01	206.728	-51.4363	1407.02	210.607	-70.0397	1220.71	128.482	186.403	1358.79	383.22	93.9802	1458.55	434.351	164.8	1275.17	446.565	210.449	1161.71	468.378	179.107	988.959	435.279	145.88	895.506	475.87	210.576	888.189	488.557	167.155	792.843
602	0	252.36	-144.157	1660.39	147.938	-143.137	1656.05	273.767	13.0063	1650.31	137.042	25.8334	1646.45	186.366	68.5021	1506.11	185.598	179.658	1283.67	207.641	-65.4985	1404.58	211.245	-84.004	1218.2	129.494	172.314	1356.53	383.932	80.2242	1456.07	434.262	153.95	1274.35	446.022	201.394	1161.52	468.344	174.221	988.162	435.577	143.077	893.801	475.625	208.244	888.144	488.597	167.443	791.694
603	0	253.06	-158.341	1658.28	148.627	-157.054	1653.85	274.887	-1.21382	1647.77	138.181	11.9208	1643.72	187.47	54.2747	1503.72	186.595	165.242	1281.23	208.67	-79.6515	1402.13	212.006	-98.1177	1215.7	130.621	158.123	1354.2	384.758	66.3788	1453.53	434.283	142.845	1273.45	445.577	191.989	1161.24	468.337	168.885	987.383	435.835	139.83	892.187	475.391	205.384	888.154	488.542	167.182	790.694
604	0	253.907	-172.597	1656.14	149.464	-171.046	1651.65	276.153	-15.5121	1645.24	139.464	-2.06664	1641.04	188.691	39.9816	1501.31	187.669	150.636	1278.74	209.817	-93.8953	1399.7	212.892	-112.385	1213.25	131.85	143.828	1351.84	385.694	52.4485	1450.96	434.42	131.47	1272.46	445.237	182.21	1160.86	468.364	163.066	986.613	436.063	136.097	890.654	475.181	201.958	888.203	488.407	166.329	789.821
605	0	254.907	-186.912	1654.02	150.454	-185.104	1649.48	277.559	-29.8749	1642.74	140.887	-16.1199	1638.42	190.021	25.6252	1498.91	188.812	135.861	1276.22	211.08	-108.228	1397.32	213.904	-126.807	1210.87	133.167	129.428	1349.48	386.738	38.4382	1448.38	434.675	119.811	1271.4	445.004	172.035	1160.39	468.434	156.728	985.845	436.274	131.834	889.194	475.01	197.928	888.275	488.208	164.838	789.054
606	0	256.056	-201.271	1651.94	151.595	-199.219	1647.38	279.1	-44.2895	1640.3	142.443	-30.2302	1635.89	191.452	11.2089	1496.55	190.013	120.937	1273.71	212.457	-122.647	1395.03	215.039	-141.38	1208.6	134.56	114.93	1347.14	387.886	24.353	1445.82	435.05	107.858	1270.27	444.884	161.447	1159.83	468.553	149.841	985.069	436.482	127	887.793	474.892	193.257	888.352	487.964	162.666	788.369
607	0	257.349	-215.663	1649.94	152.88	-213.382	1645.37	280.763	-58.7444	1637.95	144.122	-44.3884	1633.49	192.975	-3.26183	1494.27	191.266	105.892	1271.25	213.939	-137.145	1392.84	216.292	-156.101	1206.45	136.016	100.339	1344.87	389.132	10.1981	1443.3	435.545	95.6033	1269.06	444.877	150.431	1159.17	468.73	142.375	984.279	436.7	121.551	886.441	474.84	187.911	888.418	487.695	159.77	787.741
608	0	258.774	-230.079	1648.04	154.299	-227.582	1643.48	282.536	-73.2293	1635.7	145.909	-58.5854	1631.23	194.576	-17.7798	1492.08	192.56	90.7534	1268.86	215.516	-151.715	1390.79	217.655	-170.958	1204.45	137.523	85.6682	1342.69	390.468	-4.02117	1440.86	436.157	83.0436	1267.8	444.985	138.979	1158.41	468.973	134.304	983.465	436.943	115.447	885.126	474.869	181.856	888.452	487.424	156.104	787.148
609	0	260.314	-244.509	1646.25	155.835	-241.812	1641.74	284.4	-87.7346	1633.58	147.789	-72.8121	1629.12	196.243	-32.3355	1490.01	193.889	75.5515	1266.58	217.175	-166.346	1388.88	219.117	-185.937	1202.61	139.069	70.9317	1340.62	391.886	-18.2992	1438.52	436.882	70.1771	1266.47	445.207	127.086	1157.57	469.288	125.604	982.622	437.227	108.649	883.836	474.99	175.061	888.44	487.174	151.625	786.564
610	0	261.95	-258.944	1644.61	157.467	-256.062	1640.15	286.336	-102.251	1631.61	149.741	-87.0594	1627.2	197.96	-46.917	1488.08	195.247	60.3182	1264.42	218.898	-181.023	1387.14	220.662	-201.02	1200.96	140.645	56.1481	1338.69	393.375	-32.6298	1436.29	437.715	57.0049	1265.1	445.542	114.75	1156.63	469.682	116.253	981.745	437.565	101.119	882.562	475.215	167.496	888.364	486.972	146.288	785.97
611	0	263.658	-273.377	1643.12	159.172	-270.323	1638.73	288.323	-116.771	1629.79	151.745	-101.318	1625.46	199.709	-61.5102	1486.32	196.626	45.0854	1262.42	220.664	-195.731	1385.58	222.272	-216.184	1199.49	142.239	41.3394	1336.91	394.922	-47.006	1434.21	438.651	43.5304	1263.68	445.989	101.975	1155.61	470.161	106.232	980.831	437.97	92.8213	881.296	475.555	159.132	888.209	486.84	140.047	785.344
612	0	265.413	-287.802	1641.8	160.924	-284.587	1637.5	290.337	-131.286	1628.15	153.778	-115.58	1623.92	201.473	-76.0993	1484.73	198.022	29.8851	1260.6	222.451	-210.449	1384.21	223.927	-231.398	1198.22	143.844	26.5299	1335.31	396.515	-61.4199	1432.3	439.684	29.7593	1262.23	446.546	88.7662	1154.51	470.73	95.5267	979.878	438.454	83.7229	880.029	476.017	149.945	887.964	486.804	132.859	784.669
613	0	267.187	-302.212	1640.64	162.695	-298.845	1636.45	292.351	-145.788	1626.69	155.813	-129.836	1622.59	203.233	-90.6666	1483.35	199.429	14.7477	1258.98	224.233	-225.157	1383.03	225.605	-246.629	1197.15	145.45	11.7464	1333.91	398.139	-75.8618	1430.58	440.806	15.6993	1260.76	447.211	75.1331	1153.35	471.394	84.1224	978.89	439.026	73.7935	878.76	476.61	139.911	887.617	486.887	124.678	783.93
614	0	268.952	-316.602	1639.66	164.456	-313.09	1635.59	294.339	-160.271	1625.43	157.823	-144.08	1621.48	204.969	-105.194	1482.18	200.843	-0.298043	1257.57	225.984	-239.83	1382.06	227.28	-261.841	1196.29	147.048	-2.98311	1332.72	399.776	-90.3207	1429.08	442.011	1.36018	1259.3	447.982	61.0875	1152.14	472.153	72.009	977.871	439.694	63.0063	877.488	477.339	129.007	887.162	487.11	115.462	783.116
615	0	270.681	-330.965	1638.86	166.18	-327.318	1634.92	296.274	-174.726	1624.38	159.782	-158.305	1620.6	206.662	-119.66	1481.24	202.258	-15.2261	1256.41	227.678	-254.445	1381.3	228.93	-276.991	1195.62	148.63	-17.6299	1331.75	401.409	-104.784	1427.81	443.29	-13.2462	1257.85	448.858	46.6433	1150.88	473.011	59.1786	976.828	440.462	51.3375	876.215	478.208	117.215	886.596	487.493	105.167	782.221
616	0	272.346	-345.298	1638.24	167.837	-341.522	1634.45	298.129	-189.146	1623.56	161.66	-172.505	1619.96	208.291	-134.048	1480.55	203.669	-30.0139	1255.5	229.288	-268.976	1380.76	230.532	-292.038	1195.17	150.186	-32.1658	1331.03	403.022	-119.237	1426.81	444.637	-28.1058	1256.44	449.838	31.8163	1149.61	473.967	45.6259	975.774	441.334	38.7674	874.95	479.218	104.518	885.92	488.05	93.7551	781.243
617	0	273.921	-359.596	1637.81	169.403	-355.698	1634.18	299.874	-203.525	1622.97	163.431	-186.677	1619.58	209.838	-148.336	1480.11	205.071	-44.6427	1254.87	230.792	-283.398	1380.45	232.063	-306.943	1194.92	151.707	-46.5641	1330.56	404.596	-133.664	1426.09	446.043	-43.2026	1255.1	450.921	16.6237	1148.35	475.02	31.3484	974.724	442.307	25.2802	873.707	480.37	90.9026	885.141	488.792	81.1879	780.187
618	0	275.383	-373.854	1637.57	170.853	-369.844	1634.11	301.486	-217.853	1622.65	165.067	-200.815	1619.47	211.286	-162.506	1479.95	206.457	-59.0983	1254.54	232.168	-297.689	1380.37	233.502	-321.667	1194.9	153.186	-60.8007	1330.36	406.115	-148.05	1425.68	447.499	-58.5187	1253.85	452.105	1.08397	1147.12	476.167	16.3464	973.695	443.378	10.8646	872.501	481.661	76.3579	884.267	489.727	67.4333	779.064
619	0	276.708	-388.068	1637.53	172.166	-383.954	1634.23	302.94	-232.124	1622.6	166.543	-214.916	1619.64	212.622	-176.54	1480.07	207.825	-73.3712	1254.51	233.397	-311.826	1380.55	234.833	-336.181	1195.1	154.615	-74.8556	1330.44	407.563	-162.379	1425.6	448.996	-74.0346	1252.72	453.39	-14.7838	1145.94	477.404	0.623166	972.709	444.541	-4.48606	871.357	483.087	60.8766	883.316	490.854	52.4637	777.893
620	0	277.878	-402.23	1637.69	173.322	-398.025	1634.56	304.215	-246.33	1622.84	167.838	-228.974	1620.11	213.835	-190.424	1480.48	209.169	-87.4565	1254.79	234.466	-325.794	1380.99	236.039	-350.462	1195.55	155.989	-88.7137	1330.8	408.927	-176.637	1425.86	450.525	-89.7295	1251.76	454.775	-30.9596	1144.86	478.727	-15.8147	971.79	445.787	-20.7732	870.302	484.64	44.4554	882.308	492.171	36.2577	776.7
621	0	278.877	-416.334	1638.06	174.308	-412.05	1635.1	305.296	-260.459	1623.4	168.936	-242.981	1620.9	214.917	-204.145	1481.18	210.489	-101.354	1255.4	235.365	-339.58	1381.71	237.108	-364.496	1196.26	157.305	-102.366	1331.45	410.197	-190.812	1426.49	452.078	-105.582	1250.98	456.259	-47.4232	1143.9	480.128	-32.9572	970.966	447.104	-37.9931	869.368	486.311	27.0953	881.267	493.668	18.8014	775.516
622	0	279.691	-430.371	1638.66	175.112	-426.018	1635.85	306.17	-274.503	1624.29	169.824	-256.93	1622	215.864	-217.692	1482.18	211.78	-115.069	1256.32	236.089	-353.177	1382.72	238.03	-378.283	1197.25	158.562	-115.809	1332.39	411.365	-204.896	1427.49	453.644	-121.571	1250.44	457.841	-64.1537	1143.09	481.601	-50.7908	970.263	448.481	-56.1362	868.59	488.089	8.80201	880.223	495.329	0.089042	774.381
623	0	280.313	-444.33	1639.49	175.726	-439.919	1636.8	306.833	-288.451	1625.52	170.497	-270.806	1623.42	216.679	-231.062	1483.47	213.044	-128.607	1257.56	236.637	-366.583	1384.03	238.801	-391.83	1198.54	159.761	-129.046	1333.6	412.425	-218.882	1428.87	455.216	-137.674	1250.14	459.519	-81.1302	1142.47	483.138	-69.2982	969.71	449.901	-75.1871	868.006	489.959	-10.4138	879.207	497.133	-19.8758	773.339
624	0	280.737	-458.197	1640.56	176.147	-453.737	1637.98	307.284	-302.291	1627.09	170.955	-284.598	1625.16	217.364	-244.254	1485.04	214.277	-141.982	1259.1	237.014	-379.804	1385.63	239.42	-405.155	1200.13	160.903	-142.088	1335.07	413.378	-232.77	1430.61	456.788	-153.872	1250.14	461.291	-98.3316	1142.05	484.731	-88.4581	969.335	451.351	-95.1243	867.653	491.907	-30.5358	878.253	499.057	-41.0795	772.436
625	0	280.966	-471.958	1641.88	176.376	-467.455	1639.37	307.531	-316.01	1628.99	171.205	-298.287	1627.2	217.928	-257.273	1486.88	215.478	-155.204	1260.91	237.23	-392.85	1387.54	239.892	-418.282	1202.02	161.991	-154.949	1336.8	414.224	-246.562	1432.7	458.353	-170.147	1250.43	463.157	-115.737	1141.87	486.37	-108.245	969.162	452.815	-115.92	867.569	493.915	-51.5423	877.395	501.071	-63.498	771.72
626	0	281.006	-485.598	1643.46	176.422	-481.054	1640.98	307.586	-329.598	1631.22	171.262	-311.857	1629.52	218.382	-270.128	1488.97	216.643	-168.291	1262.99	237.298	-405.739	1389.73	240.225	-431.243	1204.22	163.027	-167.651	1338.75	414.968	-260.263	1435.13	459.908	-186.482	1251.04	465.113	-133.324	1141.94	488.046	-128.631	969.215	454.278	-137.54	867.788	495.966	-73.4061	876.665	503.141	-87.0964	771.24
627	0	280.867	-499.1	1645.3	176.295	-494.514	1642.8	307.468	-343.043	1633.73	171.145	-325.289	1632.08	218.737	-282.834	1491.27	217.767	-181.256	1265.28	237.235	-418.491	1392.18	240.434	-444.069	1206.71	164.012	-180.216	1340.9	415.616	-273.883	1437.85	461.451	-202.862	1251.97	467.158	-151.074	1142.26	489.751	-149.583	969.509	455.727	-159.946	868.339	498.042	-96.0942	876.095	505.235	-111.829	771.038
628	0	280.568	-512.451	1647.38	176.011	-507.819	1644.83	307.2	-356.337	1636.5	170.878	-338.569	1634.85	219.007	-295.409	1493.75	218.842	-194.117	1267.76	237.06	-431.13	1394.86	240.536	-456.794	1209.44	164.945	-192.669	1343.21	416.175	-287.429	1440.82	462.982	-219.274	1253.19	469.288	-168.964	1142.83	491.475	-171.064	970.059	457.149	-183.091	869.249	500.125	-119.569	875.711	507.316	-137.641	771.153
629	0	280.127	-525.639	1649.69	175.591	-520.952	1647.03	306.809	-369.473	1639.48	170.491	-351.682	1637.76	219.207	-307.875	1496.37	219.859	-206.891	1270.39	236.797	-443.682	1397.73	240.551	-469.449	1212.39	165.824	-205.038	1345.65	416.655	-300.911	1444	464.502	-235.707	1254.7	471.499	-186.975	1143.64	493.21	-193.037	970.871	458.531	-206.926	870.533	502.197	-143.787	875.536	509.349	-164.466	771.62
630	0	279.571	-538.657	1652.2	175.058	-533.905	1649.39	306.324	-382.447	1642.6	170.015	-364.62	1640.77	219.349	-320.256	1499.09	220.805	-219.593	1273.11	236.468	-456.172	1400.74	240.503	-482.064	1215.5	166.644	-217.35	1348.18	417.065	-314.338	1447.32	466.014	-252.153	1256.45	473.785	-205.088	1144.67	494.946	-215.46	971.945	459.864	-231.395	872.204	504.241	-168.701	875.589	511.3	-192.233	772.464
631	0	278.924	-551.501	1654.88	174.438	-546.671	1651.88	305.777	-395.262	1645.81	169.48	-377.378	1643.8	219.446	-332.575	1501.86	221.67	-232.24	1275.87	236.097	-468.626	1403.83	240.414	-494.663	1218.7	167.401	-229.628	1350.76	417.414	-327.718	1450.72	467.52	-268.603	1258.4	476.139	-223.283	1145.87	496.674	-238.289	973.276	461.137	-256.44	874.263	506.24	-194.259	875.883	513.137	-220.861	773.705
632	0	278.216	-564.173	1657.69	173.758	-559.251	1654.46	305.198	-407.922	1649.03	168.92	-389.958	1646.8	219.511	-344.857	1504.62	222.442	-244.848	1278.62	235.707	-481.068	1406.94	240.308	-507.264	1221.93	168.088	-241.897	1353.33	417.71	-341.055	1454.14	469.024	-285.049	1260.5	478.554	-241.545	1147.21	498.386	-261.481	974.853	462.345	-281.998	876.707	508.18	-220.406	876.425	514.834	-250.264	775.354
633	0	277.473	-576.682	1660.57	173.043	-571.653	1657.08	304.616	-420.436	1652.2	168.365	-402.367	1649.7	219.553	-357.126	1507.33	223.11	-257.433	1281.31	235.32	-493.517	1410.01	240.205	-519.885	1225.13	168.7	-254.178	1355.86	417.962	-354.354	1457.52	470.527	-301.484	1262.68	481.018	-259.855	1148.65	500.073	-284.988	976.659	463.478	-308.006	879.523	510.046	-247.085	877.219	516.367	-280.355	777.417
634	0	276.724	-589.042	1663.47	172.32	-583.889	1659.69	304.057	-432.821	1655.26	167.84	-414.618	1652.45	219.581	-369.404	1509.93	223.667	-270.008	1283.89	234.954	-505.991	1412.98	240.124	-532.535	1228.22	169.231	-266.49	1358.3	418.176	-367.616	1460.77	472.03	-317.9	1264.89	483.519	-278.201	1150.12	501.724	-308.765	978.674	464.531	-334.398	882.692	511.825	-274.235	878.263	517.719	-311.04	779.895
635	0	275.992	-601.271	1666.32	171.613	-595.98	1662.24	303.546	-445.092	1658.13	167.371	-426.731	1654.97	219.603	-381.709	1512.37	224.107	-282.59	1286.3	234.626	-518.503	1415.77	240.082	-545.221	1231.12	169.675	-278.848	1360.6	418.359	-380.84	1463.84	473.531	-334.287	1267.05	486.044	-296.568	1151.57	503.332	-332.764	980.874	465.497	-361.107	886.19	513.506	-301.792	879.552	518.876	-342.224	782.781
636	0	275.299	-613.39	1669.07	170.941	-607.949	1664.68	303.101	-457.273	1660.75	166.977	-438.73	1657.22	219.621	-394.059	1514.6	224.426	-295.19	1288.51	234.349	-531.065	1418.33	240.089	-557.946	1233.79	170.028	-291.265	1362.72	418.515	-394.024	1466.67	475.026	-350.637	1269.1	488.575	-314.945	1152.95	504.885	-356.94	983.231	466.372	-388.066	889.989	515.078	-329.693	881.077	519.832	-373.814	786.067
637	0	274.665	-625.428	1671.64	170.324	-619.825	1666.94	302.738	-469.386	1663.08	166.67	-450.641	1659.16	219.64	-406.466	1516.58	224.622	-307.821	1290.46	234.134	-543.682	1420.61	240.155	-570.711	1236.16	170.286	-303.753	1364.62	418.646	-407.167	1469.21	476.509	-366.939	1270.98	491.096	-333.323	1154.2	506.375	-381.245	985.718	467.15	-415.209	894.057	516.531	-357.873	882.827	520.585	-405.713	789.741
638	0	274.105	-637.41	1673.99	169.776	-631.636	1668.99	302.466	-481.457	1665.07	166.461	-462.493	1660.76	219.658	-418.942	1518.28	224.696	-320.494	1292.13	233.986	-556.359	1422.57	240.283	-583.514	1238.18	170.447	-316.32	1366.28	418.753	-420.264	1471.41	477.968	-383.185	1272.64	493.585	-351.693	1155.28	507.79	-405.636	988.306	467.828	-442.471	898.36	517.858	-386.265	884.789	521.137	-437.828	793.786
639	0	273.629	-649.365	1676.06	169.309	-643.417	1670.76	302.29	-493.51	1666.69	166.352	-474.319	1661.98	219.674	-431.494	1519.66	224.651	-333.218	1293.49	233.906	-569.099	1424.16	240.472	-596.355	1239.83	170.508	-328.973	1367.64	418.835	-433.315	1473.23	479.394	-399.364	1274.01	496.023	-370.048	1156.13	509.122	-430.067	990.966	468.401	-469.789	902.862	519.05	-414.803	886.946	521.495	-470.067	798.186
640	0	273.244	-661.322	1677.8	168.928	-655.198	1672.22	302.211	-505.571	1667.91	166.342	-486.148	1662.8	219.683	-444.129	1520.7	224.489	-346	1294.5	233.892	-581.903	1425.36	240.718	-609.23	1241.06	170.467	-341.717	1368.7	418.89	-446.317	1474.64	480.769	-415.467	1275.07	498.386	-388.382	1156.72	510.359	-454.495	993.669	468.868	-497.102	907.528	520.103	-443.421	889.283	521.668	-502.336	802.919
641	0	272.954	-673.308	1679.18	168.637	-667.011	1673.34	302.223	-517.662	1668.7	166.423	-498.011	1663.23	219.68	-456.849	1521.39	224.215	-358.845	1295.17	233.939	-594.771	1426.16	241.014	-622.14	1241.87	170.326	-354.557	1369.44	418.913	-459.273	1475.64	482.077	-431.486	1275.78	500.652	-406.691	1157.02	511.493	-478.878	996.389	469.225	-524.35	912.323	521.009	-472.054	891.781	521.668	-534.549	807.964
642	0	272.756	-685.346	1680.15	168.434	-678.885	1674.1	302.316	-529.806	1669.08	166.585	-509.936	1663.26	219.656	-469.657	1521.7	223.832	-371.759	1295.47	234.036	-607.703	1426.54	241.347	-635.085	1242.25	170.083	-367.495	1369.83	418.899	-472.184	1476.19	483.299	-447.415	1276.11	502.798	-424.969	1157.01	512.512	-503.174	999.101	469.473	-551.477	917.214	521.765	-500.636	894.423	521.508	-566.618	813.293
643	0	272.645	-697.46	1680.72	168.315	-690.847	1674.47	302.478	-542.02	1669.02	166.812	-521.948	1662.9	219.603	-482.555	1521.63	223.345	-384.744	1295.4	234.17	-620.7	1426.5	241.704	-648.066	1242.19	169.741	-380.534	1369.87	418.84	-485.058	1476.31	484.414	-463.25	1276.05	504.8	-443.212	1156.67	513.409	-527.343	1001.78	469.612	-578.429	922.17	522.365	-529.103	897.187	521.203	-598.459	818.882
644	0	272.611	-709.667	1680.86	168.269	-702.919	1674.45	302.691	-554.321	1668.55	167.084	-534.071	1662.15	219.512	-495.544	1521.2	222.76	-397.803	1294.98	234.328	-633.763	1426.06	242.068	-661.089	1241.72	169.301	-393.676	1369.56	418.731	-497.905	1476.01	485.402	-478.99	1275.6	506.636	-461.414	1156.01	514.175	-551.346	1004.41	469.641	-605.154	927.159	522.809	-557.393	900.054	520.767	-629.994	824.697
645	0	272.64	-721.985	1680.58	168.285	-715.122	1674.05	302.934	-566.722	1667.69	167.379	-546.323	1661.06	219.371	-508.624	1520.41	222.082	-410.936	1294.2	234.49	-646.894	1425.23	242.421	-674.16	1240.85	168.768	-406.921	1368.91	418.563	-510.738	1475.29	486.243	-494.637	1274.76	508.283	-479.57	1155.01	514.801	-575.145	1006.96	469.564	-631.605	932.154	523.093	-585.444	903.004	520.216	-661.145	830.708
646	0	272.717	-734.425	1679.88	168.345	-727.474	1673.29	303.184	-579.234	1666.44	167.672	-558.72	1659.63	219.171	-521.796	1519.28	221.317	-424.146	1293.09	234.638	-660.099	1424.03	242.743	-687.289	1239.61	168.146	-420.269	1367.93	418.331	-523.576	1474.19	486.917	-510.194	1273.55	509.723	-497.671	1153.7	515.281	-598.704	1009.43	469.381	-657.734	937.127	523.216	-613.198	906.014	519.564	-691.84	836.879
647	0	272.822	-746.997	1678.8	168.431	-739.985	1672.17	303.416	-591.865	1664.85	167.937	-571.274	1657.92	218.904	-535.061	1517.82	220.475	-437.434	1291.67	234.751	-673.38	1422.5	243.015	-700.485	1238.03	167.442	-433.722	1366.63	418.026	-536.439	1472.73	487.408	-525.668	1271.99	510.936	-515.708	1152.1	515.609	-621.986	1011.79	469.097	-683.499	942.056	523.177	-640.595	909.063	518.826	-722.011	843.171
648	0	272.932	-759.709	1677.35	168.52	-752.668	1670.72	303.604	-604.622	1662.95	168.147	-583.996	1655.93	218.562	-548.421	1516.07	219.565	-450.801	1289.95	234.809	-686.745	1420.66	243.216	-713.762	1236.15	166.665	-447.278	1365.04	417.645	-549.353	1470.95	487.7	-541.069	1270.1	511.908	-533.668	1150.22	515.779	-644.958	1014.03	468.715	-708.859	946.914	522.979	-667.581	912.128	518.014	-751.593	849.543
649	0	273.024	-772.565	1675.58	168.592	-765.529	1668.99	303.721	-617.509	1660.77	168.274	-596.892	1653.73	218.137	-561.879	1514.05	218.6	-464.249	1287.98	234.79	-700.201	1418.57	243.327	-727.132	1234.01	165.823	-460.936	1363.17	417.184	-562.344	1468.89	487.782	-556.407	1267.93	512.626	-551.54	1148.1	515.788	-667.586	1016.14	468.24	-733.775	951.681	522.621	-694.103	915.186	517.142	-780.528	855.953
650	0	273.073	-785.568	1673.51	168.621	-778.571	1667	303.743	-630.529	1658.37	168.293	-609.966	1651.34	217.625	-575.436	1511.81	217.595	-477.781	1285.78	234.676	-713.757	1416.25	243.33	-740.611	1231.65	164.93	-474.695	1361.06	416.642	-575.443	1466.59	487.647	-571.694	1265.51	513.079	-569.305	1145.77	515.634	-689.839	1018.12	467.675	-758.212	956.333	522.105	-720.111	918.212	516.22	-808.762	862.354
651	0	273.056	-798.72	1671.21	168.583	-791.797	1664.8	303.645	-643.685	1655.78	168.179	-623.219	1648.8	217.025	-589.097	1509.37	216.565	-491.401	1283.39	234.449	-727.42	1413.75	243.21	-754.211	1229.11	163.997	-488.555	1358.74	416.017	-588.679	1464.1	487.291	-586.944	1262.89	513.261	-586.948	1143.27	515.315	-711.687	1019.94	467.025	-782.137	960.847	521.435	-745.558	921.18	515.259	-836.245	868.697
652	0	272.947	-812.022	1668.72	168.457	-805.207	1662.43	303.406	-656.977	1653.05	167.911	-636.652	1646.15	216.334	-602.864	1506.78	215.53	-505.11	1280.85	234.095	-741.199	1411.11	242.953	-767.946	1226.44	163.037	-502.511	1356.25	415.313	-602.081	1461.48	486.715	-602.169	1260.1	513.17	-604.449	1140.65	514.832	-733.102	1021.61	466.296	-805.52	965.201	520.614	-770.4	924.065	514.266	-862.934	874.933
653	0	272.726	-825.474	1666.09	168.222	-818.798	1659.93	303.007	-670.406	1650.23	167.473	-650.263	1643.44	215.557	-616.74	1504.08	214.507	-518.913	1278.2	233.602	-755.1	1408.38	242.55	-781.828	1223.68	162.066	-516.563	1353.61	414.533	-615.674	1458.76	485.925	-617.382	1257.21	512.807	-621.788	1137.93	514.186	-754.06	1023.11	465.491	-828.333	969.372	519.646	-794.597	926.84	513.248	-888.791	881.007
654	0	272.373	-839.074	1663.37	167.859	-832.567	1657.34	302.436	-683.974	1647.37	166.853	-664.048	1640.69	214.695	-630.727	1501.31	213.515	-532.813	1275.48	232.962	-769.131	1405.61	241.995	-795.866	1220.88	161.095	-530.707	1350.88	413.683	-629.483	1456.01	484.931	-632.595	1254.26	512.178	-638.944	1135.16	513.382	-774.536	1024.45	464.615	-850.552	973.335	518.535	-818.113	929.477	512.21	-913.783	886.866
655	0	271.872	-852.82	1660.61	167.355	-846.508	1654.72	301.683	-697.678	1644.51	166.043	-678.003	1637.94	213.757	-644.826	1498.51	212.57	-546.811	1272.74	232.172	-783.295	1402.83	241.287	-810.068	1218.08	160.136	-544.94	1348.09	412.769	-643.522	1453.26	483.748	-647.817	1251.29	511.293	-655.899	1132.39	512.423	-794.509	1025.61	463.67	-872.156	977.065	517.289	-840.915	931.949	511.154	-937.884	892.453
656	0	271.213	-866.71	1657.88	166.699	-860.613	1652.1	300.747	-711.519	1641.7	165.042	-692.119	1635.23	212.748	-659.036	1495.73	211.686	-560.909	1270.01	231.234	-797.592	1400.08	240.429	-824.438	1215.32	159.198	-559.258	1345.29	411.799	-657.801	1450.56	482.395	-663.056	1248.35	510.165	-672.632	1129.65	511.316	-813.962	1026.6	462.659	-893.125	980.536	515.913	-862.974	934.23	510.08	-961.072	897.714
657	0	270.392	-880.74	1655.2	165.889	-874.874	1649.52	299.63	-725.493	1638.98	163.854	-706.389	1632.59	211.678	-673.354	1493	210.871	-575.107	1267.33	230.155	-812.02	1397.4	239.429	-838.976	1212.63	158.288	-573.656	1342.5	410.781	-672.32	1447.95	480.895	-678.316	1245.49	508.813	-689.125	1126.98	510.07	-832.88	1027.41	461.584	-913.443	983.722	514.417	-884.267	936.292	508.985	-983.333	902.593
658	0	269.41	-894.903	1652.62	164.925	-889.28	1647.01	298.341	-739.595	1636.39	162.492	-720.802	1630.05	210.556	-687.773	1490.38	210.129	-589.404	1264.74	228.946	-826.573	1394.84	238.299	-853.68	1210.07	157.408	-588.125	1339.78	409.724	-687.068	1445.47	479.271	-693.595	1242.75	507.257	-705.364	1124.41	508.693	-851.248	1028.03	460.447	-933.097	986.597	512.808	-904.773	938.112	507.866	-1004.66	907.037
659	0	268.274	-909.193	1650.19	163.816	-903.819	1644.61	296.894	-753.82	1633.97	160.969	-735.346	1627.64	209.393	-702.284	1487.88	209.456	-603.794	1262.28	227.623	-841.24	1392.42	237.057	-868.538	1207.66	156.559	-602.659	1337.16	408.636	-702.028	1443.15	477.551	-708.888	1240.17	505.522	-721.333	1121.99	507.197	-869.058	1028.48	459.248	-952.075	989.135	511.098	-924.475	939.667	506.716	-1025.04	910.996
660	0	266.999	-923.6	1647.93	162.574	-918.477	1642.35	295.31	-768.16	1631.74	159.308	-750.006	1625.39	208.2	-716.875	1485.54	208.844	-618.271	1259.98	226.207	-856.007	1390.17	235.721	-883.537	1205.43	155.735	-617.246	1334.67	407.527	-717.169	1441.03	475.762	-724.183	1237.78	503.634	-737.02	1119.73	505.594	-886.3	1028.74	457.988	-970.367	991.313	509.298	-943.36	940.935	505.528	-1044.48	914.424
661	0	265.604	-938.113	1645.86	161.219	-933.239	1640.24	293.612	-782.602	1629.74	157.536	-764.768	1623.32	206.988	-731.53	1483.41	208.28	-632.824	1257.87	224.72	-870.855	1388.13	234.313	-898.655	1203.41	154.932	-631.872	1332.36	406.403	-732.457	1439.12	473.932	-739.462	1235.6	501.62	-752.416	1117.66	503.896	-902.969	1028.82	456.667	-987.966	993.106	507.422	-961.418	941.901	504.294	-1062.97	917.278
662	0	264.114	-952.717	1644.02	159.773	-948.086	1638.32	291.831	-797.135	1627.99	155.682	-779.613	1621.45	205.771	-746.231	1481.49	207.746	-647.439	1255.98	223.189	-885.761	1386.31	232.857	-913.865	1201.63	154.141	-646.522	1330.26	405.277	-747.848	1437.44	472.087	-754.701	1233.68	499.51	-767.51	1115.82	502.119	-919.06	1028.72	455.287	-1004.87	994.495	505.484	-978.641	942.552	503.005	-1080.54	919.523
663	0	262.558	-967.397	1642.4	158.265	-963	1636.6	289.997	-811.743	1626.51	153.779	-794.521	1619.82	204.559	-760.958	1479.83	207.223	-662.099	1254.32	221.641	-900.699	1384.74	231.376	-929.133	1200.09	153.354	-661.178	1328.4	404.155	-763.294	1436	470.251	-769.871	1232.02	497.333	-782.297	1114.2	500.277	-934.57	1028.45	453.848	-1021.06	995.462	503.501	-995.024	942.877	501.654	-1097.17	921.133
664	0	260.969	-982.136	1641.04	156.725	-977.96	1635.1	288.147	-826.41	1625.31	151.863	-809.473	1618.44	203.367	-775.688	1478.43	206.691	-676.783	1252.92	220.103	-915.642	1383.43	229.893	-944.421	1198.82	152.564	-675.82	1326.8	403.05	-778.747	1434.83	468.449	-784.936	1230.64	495.118	-796.768	1112.85	498.386	-949.496	1028.01	452.353	-1036.54	995.995	501.488	-1010.56	942.871	500.236	-1112.89	922.087
665	0	259.38	-996.916	1639.92	155.185	-992.947	1633.82	286.315	-841.117	1624.41	149.971	-824.446	1617.33	202.206	-790.398	1477.32	206.135	-691.467	1251.81	218.603	-930.559	1382.39	228.428	-959.686	1197.82	151.765	-690.426	1325.5	401.971	-794.156	1433.91	466.698	-799.859	1229.56	492.893	-810.918	1111.75	496.463	-963.835	1027.4	450.806	-1051.31	996.085	499.465	-1025.26	942.535	498.747	-1127.69	922.374
666	0	257.826	-1011.72	1639.06	153.677	-1007.94	1632.78	284.538	-855.846	1623.8	148.139	-839.419	1616.51	201.088	-805.063	1476.51	205.539	-706.129	1250.99	217.164	-945.419	1381.64	227.001	-974.883	1197.1	150.953	-704.976	1324.52	400.928	-809.473	1433.27	465.017	-814.599	1228.77	490.682	-824.741	1110.93	494.524	-977.585	1026.65	449.213	-1065.35	995.728	497.447	-1039.1	941.871	497.19	-1141.59	921.993
667	0	256.34	-1026.52	1638.45	152.234	-1022.91	1631.99	282.849	-870.578	1623.51	146.402	-854.368	1615.99	200.027	-819.658	1476.02	204.895	-720.742	1250.48	215.811	-960.192	1381.18	225.63	-989.969	1196.67	150.127	-719.45	1323.87	399.932	-824.654	1432.89	463.417	-829.116	1228.29	488.509	-838.231	1110.38	492.584	-990.745	1025.74	447.581	-1078.67	994.925	495.452	-1052.1	940.888	495.567	-1154.59	920.95
668	0	254.954	-1041.3	1638.09	150.887	-1037.84	1631.47	281.281	-885.291	1623.52	144.793	-869.273	1615.8	199.03	-834.163	1475.84	204.199	-735.282	1250.28	214.561	-974.851	1381.02	224.328	-1004.9	1196.52	149.287	-733.828	1323.56	398.99	-839.657	1432.78	461.909	-843.37	1228.12	486.393	-851.385	1110.12	490.661	-1003.31	1024.7	445.92	-1091.26	993.683	493.499	-1064.24	939.599	493.889	-1166.69	919.262
669	0	253.697	-1056.04	1637.99	149.665	-1052.72	1631.2	279.864	-899.966	1623.85	143.341	-884.111	1615.94	198.108	-848.554	1475.99	203.45	-749.73	1250.41	213.43	-989.368	1381.16	223.111	-1019.65	1196.67	148.437	-748.094	1323.6	398.111	-854.446	1432.95	460.499	-857.328	1228.24	484.352	-864.195	1110.13	488.77	-1015.28	1023.54	444.241	-1103.11	992.015	491.602	-1075.54	938.02	492.171	-1177.89	916.955
670	0	252.595	-1070.73	1638.14	148.591	-1067.51	1631.21	278.62	-914.582	1624.49	142.069	-898.862	1616.42	197.266	-862.814	1476.47	202.653	-764.066	1250.86	212.43	-1003.72	1381.61	221.99	-1034.18	1197.1	147.58	-762.238	1324	397.3	-868.993	1433.37	459.193	-870.959	1228.67	482.396	-876.66	1110.42	486.925	-1026.65	1022.26	442.558	-1114.21	989.939	489.777	-1085.98	936.173	490.432	-1188.18	914.06
671	0	251.669	-1085.33	1638.53	147.688	-1082.2	1631.51	277.568	-929.119	1625.43	140.995	-913.507	1617.27	196.508	-876.928	1477.26	201.813	-778.276	1251.62	211.569	-1017.9	1382.37	220.977	-1048.48	1197.84	146.72	-776.25	1324.74	396.559	-883.273	1434.05	457.99	-884.242	1229.38	480.534	-888.775	1110.98	485.141	-1037.42	1020.89	440.889	-1124.57	987.479	488.038	-1095.58	934.081	488.695	-1197.56	910.619
672	0	250.935	-1099.84	1639.17	146.971	-1096.78	1632.1	276.721	-943.557	1626.68	140.132	-928.03	1618.47	195.836	-890.887	1478.37	200.938	-792.351	1252.7	210.851	-1031.89	1383.44	220.08	-1062.54	1198.89	145.861	-790.128	1325.82	395.891	-897.272	1434.99	456.888	-897.16	1230.39	478.771	-900.539	1111.8	483.431	-1047.58	1019.43	439.249	-1134.19	984.661	486.399	-1104.32	931.772	486.988	-1206.02	906.679
673	0	250.405	-1114.22	1640.06	146.453	-1111.22	1632.98	276.085	-957.875	1628.22	139.484	-942.415	1620.04	195.248	-904.685	1479.79	200.033	-806.286	1254.07	210.277	-1045.69	1384.83	219.306	-1076.36	1200.24	145.006	-803.874	1327.22	395.293	-910.981	1436.17	455.883	-909.707	1231.67	477.107	-911.951	1112.89	481.805	-1057.14	1017.9	437.659	-1143.05	981.52	484.869	-1112.22	929.278	485.343	-1213.54	902.291
674	0	250.084	-1128.47	1641.2	146.141	-1125.52	1634.16	275.657	-972.055	1630.04	139.049	-956.651	1621.96	194.741	-918.322	1481.49	199.106	-820.079	1255.71	209.844	-1059.3	1386.51	218.66	-1089.97	1201.89	144.156	-817.494	1328.93	394.763	-924.401	1437.58	454.968	-921.881	1233.23	475.538	-923.012	1114.22	480.274	-1066.1	1016.32	436.139	-1151.16	978.092	483.458	-1119.28	926.631	483.793	-1220.13	897.515
675	0	249.975	-1142.56	1642.58	146.034	-1139.66	1635.65	275.431	-986.08	1632.11	138.817	-970.729	1624.21	194.309	-931.805	1483.45	198.162	-833.736	1257.61	209.549	-1072.74	1388.48	218.141	-1103.39	1203.85	143.313	-830.999	1330.91	394.294	-937.539	1439.21	454.133	-933.692	1235.03	474.059	-933.727	1115.79	478.847	-1074.46	1014.7	434.708	-1158.53	974.417	482.173	-1125.51	923.867	482.37	-1225.78	892.41
676	0	250.071	-1156.48	1644.2	146.129	-1153.63	1637.43	275.391	-999.933	1634.41	138.773	-984.642	1626.77	193.946	-945.143	1485.65	197.205	-847.263	1259.74	209.381	-1086.01	1390.72	217.749	-1116.63	1206.08	142.476	-844.405	1333.15	393.882	-950.414	1441.04	453.368	-945.153	1237.07	472.66	-944.099	1117.58	477.53	-1082.22	1013.05	433.386	-1165.16	970.536	481.022	-1130.92	921.02	481.109	-1230.48	887.04
677	0	250.364	-1170.21	1646.06	146.418	-1167.44	1639.5	275.519	-1013.6	1636.91	138.898	-998.387	1629.59	193.644	-958.353	1488.05	196.239	-860.671	1262.07	209.332	-1099.15	1393.21	217.476	-1129.73	1208.56	141.644	-857.728	1335.59	393.517	-963.046	1443.04	452.66	-956.283	1239.32	471.333	-954.136	1119.58	476.328	-1089.4	1011.4	432.192	-1171.07	966.491	480.006	-1135.54	918.127	480.039	-1234.24	881.469
678	0	250.84	-1183.74	1648.13	146.887	-1181.07	1641.84	275.792	-1027.08	1639.56	139.167	-1011.97	1632.63	193.395	-971.453	1490.62	195.269	-873.972	1264.56	209.39	-1112.17	1395.9	217.312	-1142.73	1211.27	140.817	-870.989	1338.21	393.193	-975.467	1445.19	451.998	-967.107	1241.75	470.067	-963.848	1121.76	475.245	-1096.01	1009.76	431.143	-1176.28	962.326	479.129	-1139.38	915.223	479.187	-1237.08	875.761
679	0	251.48	-1197.08	1650.4	147.519	-1194.53	1644.41	276.184	-1040.37	1642.31	139.554	-1025.39	1635.83	193.189	-984.465	1493.31	194.3	-887.18	1267.17	209.541	-1125.1	1398.75	217.246	-1155.65	1214.16	139.993	-884.206	1340.95	392.901	-987.71	1447.44	451.37	-977.654	1244.34	468.851	-973.245	1124.1	474.282	-1102.07	1008.14	430.252	-1180.81	958.082	478.392	-1142.49	912.342	478.575	-1239.01	869.98
680	0	252.264	-1210.23	1652.84	148.292	-1207.83	1647.18	276.669	-1053.46	1645.13	140.033	-1038.65	1639.12	193.019	-997.411	1496.08	193.337	-900.308	1269.86	209.772	-1137.97	1401.71	217.264	-1168.53	1217.16	139.174	-897.401	1343.77	392.635	-999.812	1449.77	450.764	-987.954	1247.03	467.677	-982.344	1126.56	473.439	-1107.6	1006.54	429.53	-1184.7	953.798	477.792	-1144.9	909.515	478.217	-1240.07	864.185
681	0	253.168	-1223.18	1655.41	149.184	-1220.98	1650.1	277.221	-1066.37	1647.94	140.574	-1051.78	1642.45	192.877	-1010.32	1498.88	192.389	-913.371	1272.58	210.068	-1150.81	1404.72	217.348	-1181.38	1220.23	138.36	-910.592	1346.62	392.386	-1011.81	1452.13	450.171	-998.039	1249.79	466.537	-991.16	1129.11	472.716	-1112.63	1004.99	428.984	-1187.97	949.509	477.326	-1146.65	906.77	478.123	-1240.3	858.432
682	0	254.165	-1235.96	1658.08	150.169	-1233.99	1653.13	277.813	-1079.11	1650.71	141.154	-1064.78	1645.74	192.758	-1023.2	1501.65	191.465	-926.381	1275.29	210.416	-1163.64	1407.73	217.485	-1194.23	1223.29	137.553	-923.794	1349.45	392.15	-1023.74	1454.47	449.581	-1007.94	1252.57	465.424	-999.715	1131.72	472.109	-1117.18	1003.48	428.619	-1190.66	945.248	476.99	-1147.79	904.131	478.292	-1239.76	852.773
683	0	255.229	-1248.58	1660.78	151.22	-1246.88	1656.21	278.422	-1091.7	1653.37	141.748	-1077.69	1648.92	192.654	-1036.09	1504.35	190.575	-939.352	1277.95	210.802	-1176.48	1410.67	217.658	-1207.09	1226.29	136.759	-937.023	1352.2	391.922	-1035.65	1456.75	448.989	-1017.69	1255.32	464.333	-1008.03	1134.34	471.614	-1121.31	1002.02	428.434	-1192.83	941.042	476.777	-1148.38	901.621	478.718	-1238.51	847.251
684	0	256.333	-1261.08	1663.48	152.311	-1259.68	1659.27	279.03	-1104.18	1655.88	142.337	-1090.51	1651.93	192.564	-1049.01	1506.92	189.73	-952.292	1280.49	211.214	-1189.36	1413.48	217.854	-1219.99	1229.15	135.984	-950.29	1354.83	391.699	-1047.55	1458.91	448.389	-1027.33	1258.01	463.263	-1016.14	1136.95	471.226	-1125.05	1000.62	428.426	-1194.53	936.916	476.679	-1148.49	899.256	479.386	-1236.62	841.905
685	0	257.451	-1273.48	1666.11	153.416	-1272.41	1662.25	279.618	-1116.56	1658.17	142.905	-1103.27	1654.7	192.485	-1061.97	1509.32	188.943	-965.211	1282.89	211.643	-1202.28	1416.1	218.063	-1232.92	1231.8	135.236	-963.602	1357.29	391.479	-1059.49	1460.92	447.778	-1036.88	1260.57	462.212	-1024.06	1139.48	470.937	-1128.45	999.268	428.587	-1195.8	932.889	476.687	-1148.17	897.048	480.275	-1234.16	836.767
686	0	258.556	-1285.82	1668.62	154.51	-1285.09	1665.08	280.176	-1128.89	1660.23	143.44	-1116.01	1657.19	192.417	-1074.98	1511.51	188.226	-978.118	1285.1	212.08	-1215.27	1418.49	218.277	-1245.9	1234.2	134.524	-976.965	1359.53	391.262	-1071.49	1462.73	447.156	-1046.37	1262.97	461.182	-1031.84	1141.93	470.74	-1131.55	997.97	428.909	-1196.71	928.975	476.791	-1147.5	895.008	481.36	-1231.22	831.859
687	0	259.628	-1298.14	1670.95	155.571	-1297.77	1667.71	280.694	-1141.2	1662	143.936	-1128.74	1659.34	192.362	-1088.07	1513.44	187.591	-991.02	1287.08	212.519	-1228.32	1420.58	218.488	-1258.92	1236.29	133.861	-990.383	1361.52	391.052	-1083.56	1464.3	446.524	-1055.82	1265.18	460.173	-1039.51	1144.24	470.628	-1134.41	996.723	429.378	-1197.31	925.186	476.979	-1146.55	893.141	482.61	-1227.87	827.198
688	0	260.645	-1310.47	1673.05	156.579	-1310.46	1670.07	281.169	-1153.54	1663.46	144.389	-1141.49	1661.13	192.325	-1101.23	1515.09	187.048	-1003.92	1288.8	212.957	-1241.45	1422.35	218.698	-1272	1238.03	133.258	-1003.86	1363.22	390.851	-1095.74	1465.61	445.885	-1065.28	1267.17	459.188	-1047.1	1146.39	470.591	-1137.08	995.524	429.979	-1197.67	921.53	477.24	-1145.38	891.452	483.993	-1224.21	822.798
689	0	261.593	-1322.87	1674.87	157.519	-1323.2	1672.12	281.603	-1165.94	1664.59	144.803	-1154.29	1662.53	192.31	-1114.49	1516.42	186.609	-1016.83	1290.23	213.394	-1254.65	1423.75	218.906	-1285.12	1239.39	132.729	-1017.39	1364.62	390.666	-1108.02	1466.62	445.243	-1074.76	1268.9	458.23	-1054.66	1148.36	470.62	-1139.62	994.371	430.696	-1197.84	918.012	477.562	-1144.06	889.942	485.473	-1220.31	818.665
690	0	262.459	-1335.36	1676.38	158.38	-1336.01	1673.8	281.999	-1178.44	1665.38	145.182	-1167.17	1663.52	192.326	-1127.83	1517.42	186.281	-1029.76	1291.35	213.83	-1267.93	1424.77	219.117	-1298.29	1240.34	132.287	-1030.97	1365.68	390.505	-1120.42	1467.33	444.606	-1084.29	1270.37	457.304	-1062.22	1150.13	470.706	-1142.07	993.261	431.511	-1197.88	914.636	477.934	-1142.68	888.61	487.017	-1216.26	814.803
691	0	263.238	-1347.98	1677.53	159.156	-1348.91	1675.08	282.365	-1191.08	1665.83	145.535	-1180.14	1664.11	192.381	-1141.27	1518.08	186.074	-1042.72	1292.15	214.271	-1281.29	1425.39	219.339	-1311.51	1240.87	131.945	-1044.61	1366.4	390.376	-1132.96	1467.71	443.98	-1093.89	1271.57	456.411	-1069.83	1151.69	470.842	-1144.5	992.191	432.406	-1197.85	911.405	478.344	-1141.29	887.454	488.591	-1212.12	811.211
692	0	263.926	-1360.76	1678.3	159.846	-1361.94	1675.93	282.711	-1203.88	1665.94	145.874	-1193.23	1664.29	192.486	-1154.81	1518.38	185.992	-1055.71	1292.61	214.722	-1294.72	1425.61	219.58	-1324.77	1240.99	131.718	-1058.3	1366.77	390.288	-1145.63	1467.78	443.375	-1103.59	1272.5	455.554	-1077.52	1153.03	471.018	-1146.96	991.16	433.363	-1197.81	908.319	478.782	-1139.96	886.471	490.166	-1207.98	807.891
693	0	264.529	-1373.74	1678.68	160.453	-1375.1	1676.34	283.052	-1216.87	1665.72	146.212	-1206.45	1664.07	192.653	-1168.45	1518.33	186.043	-1068.75	1292.74	215.192	-1308.23	1425.43	219.852	-1338.08	1240.7	131.616	-1072.05	1366.79	390.255	-1158.44	1467.52	442.801	-1113.41	1273.15	454.738	-1085.34	1154.16	471.229	-1149.49	990.166	434.364	-1197.81	905.379	479.237	-1138.75	885.657	491.714	-1203.9	804.839
694	0	265.055	-1386.92	1678.66	160.988	-1388.42	1676.31	283.403	-1230.07	1665.18	146.567	-1219.81	1663.48	192.891	-1182.18	1517.94	186.228	-1081.85	1292.54	215.69	-1321.82	1424.86	220.164	-1351.45	1240.01	131.649	-1085.85	1366.46	390.286	-1171.4	1466.95	442.269	-1123.38	1273.53	453.965	-1093.31	1155.06	471.467	-1152.15	989.208	435.394	-1197.91	902.587	479.701	-1137.73	885.007	493.21	-1199.96	802.053
695	0	265.518	-1400.33	1678.24	161.464	-1401.9	1675.83	283.779	-1243.49	1664.34	146.953	-1233.32	1662.54	193.213	-1196.02	1517.22	186.551	-1095.03	1292.01	216.225	-1335.49	1423.93	220.529	-1364.87	1238.96	131.828	-1099.71	1365.81	390.394	-1184.51	1466.08	441.791	-1133.51	1273.67	453.238	-1101.46	1155.76	471.728	-1154.99	988.286	436.436	-1198.16	899.941	480.166	-1136.95	884.515	494.637	-1196.2	799.529
696	0	265.935	-1413.97	1677.43	161.899	-1415.55	1674.92	284.199	-1257.14	1663.23	147.389	-1247	1661.28	193.63	-1209.95	1516.18	187.012	-1108.31	1291.18	216.81	-1349.25	1422.65	220.957	-1378.36	1237.56	132.158	-1113.63	1364.84	390.592	-1197.77	1464.93	441.379	-1143.84	1273.56	452.56	-1109.83	1156.26	472.008	-1158.05	987.398	437.48	-1198.62	897.442	480.626	-1136.46	884.172	495.978	-1192.71	797.264
697	0	266.326	-1427.85	1676.26	162.313	-1429.39	1673.61	284.68	-1271.03	1661.86	147.892	-1260.84	1659.72	194.153	-1223.98	1514.85	187.61	-1121.7	1290.04	217.454	-1363.09	1421.05	221.459	-1391.92	1235.85	132.643	-1127.62	1363.59	390.89	-1211.19	1463.52	441.044	-1154.37	1273.24	451.937	-1118.43	1156.56	472.305	-1161.37	986.544	438.513	-1199.33	895.09	481.075	-1136.32	883.971	497.223	-1189.54	795.251
698	0	266.716	-1441.96	1674.73	162.73	-1443.4	1671.92	285.238	-1285.14	1660.26	148.476	-1274.85	1657.91	194.791	-1238.12	1513.25	188.344	-1135.21	1288.64	218.17	-1377.04	1419.18	222.042	-1405.57	1233.86	133.287	-1141.68	1362.07	391.3	-1224.78	1461.86	440.798	-1165.12	1272.72	451.372	-1127.29	1156.7	472.618	-1165	985.724	439.529	-1200.34	892.884	481.51	-1136.59	883.9	498.366	-1186.75	793.483
699	0	267.127	-1456.29	1672.89	163.173	-1457.6	1669.91	285.889	-1299.48	1658.45	149.158	-1289.03	1655.87	195.551	-1252.37	1511.42	189.21	-1148.86	1286.99	218.967	-1391.08	1417.05	222.717	-1419.32	1231.64	134.089	-1155.82	1360.32	391.83	-1238.53	1459.99	440.651	-1176.11	1272.02	450.873	-1136.42	1156.68	472.947	-1168.98	984.935	440.522	-1201.71	890.822	481.928	-1137.29	883.948	499.405	-1184.4	791.952
700	0	267.586	-1470.84	1670.78	163.667	-1471.96	1667.6	286.645	-1314.04	1656.48	149.95	-1303.37	1653.65	196.439	-1266.73	1509.38	190.202	-1162.67	1285.13	219.856	-1405.24	1414.71	223.489	-1433.17	1229.2	135.046	-1170.05	1358.37	392.489	-1252.44	1457.92	440.612	-1187.34	1271.16	450.445	-1145.84	1156.51	473.293	-1173.33	984.177	441.488	-1203.48	888.901	482.33	-1138.49	884.101	500.34	-1182.54	790.645
701	0	268.113	-1485.6	1668.44	164.233	-1486.5	1665.05	287.519	-1328.79	1654.35	150.863	-1317.88	1651.27	197.46	-1281.19	1507.18	191.315	-1176.63	1283.08	220.845	-1419.5	1412.2	224.366	-1447.13	1226.6	136.156	-1184.37	1356.27	393.282	-1266.52	1455.69	440.689	-1198.82	1270.16	450.095	-1155.55	1156.21	473.661	-1178.11	983.445	442.428	-1205.71	887.117	482.715	-1140.23	884.342	501.176	-1181.24	789.548
702	0	268.731	-1500.54	1665.91	164.891	-1501.2	1662.31	288.519	-1343.74	1652.1	151.905	-1332.53	1648.77	198.615	-1295.77	1504.84	192.543	-1190.77	1280.88	221.943	-1433.89	1409.55	225.351	-1461.22	1223.88	137.411	-1198.79	1354.03	394.214	-1280.76	1453.33	440.888	-1210.55	1269.03	449.834	-1165.57	1155.8	474.053	-1183.33	982.738	443.342	-1208.43	885.465	483.088	-1142.54	884.656	501.919	-1180.56	788.642
703	0	269.456	-1515.65	1663.24	165.659	-1516.05	1659.44	289.653	-1358.85	1649.76	153.082	-1347.34	1646.19	199.904	-1310.47	1502.41	193.877	-1205.08	1278.58	223.153	-1448.41	1406.81	226.449	-1475.43	1221.06	138.804	-1213.3	1351.71	395.286	-1295.15	1450.85	441.213	-1222.55	1267.8	449.668	-1175.91	1155.29	474.475	-1189.04	982.051	444.235	-1211.7	883.938	483.452	-1145.47	885.024	502.579	-1180.54	787.907
704	0	270.304	-1530.92	1660.47	166.549	-1531.05	1656.48	290.923	-1374.13	1647.37	154.396	-1362.28	1643.56	201.324	-1325.27	1499.92	195.31	-1219.57	1276.2	224.481	-1463.04	1404.01	227.663	-1489.77	1218.19	140.327	-1227.91	1349.35	396.496	-1309.7	1448.31	441.668	-1234.8	1266.48	449.607	-1186.58	1154.68	474.933	-1195.26	981.379	445.111	-1215.56	882.528	483.815	-1149.06	885.427	503.165	-1181.25	787.319
705	0	271.282	-1546.32	1657.66	167.57	-1546.18	1653.48	292.329	-1389.54	1644.94	155.847	-1377.36	1640.92	202.87	-1340.19	1497.42	196.832	-1234.22	1273.78	225.925	-1477.8	1401.19	228.993	-1504.24	1215.3	141.969	-1242.63	1346.98	397.844	-1324.38	1445.72	442.254	-1247.3	1265.09	449.66	-1197.57	1154	475.434	-1202.03	980.719	445.975	-1220.06	881.226	484.186	-1153.34	885.846	503.69	-1182.73	786.852
706	0	272.396	-1561.85	1654.84	168.726	-1561.43	1650.49	293.868	-1405.08	1642.52	157.432	-1392.55	1638.3	204.534	-1355.21	1494.94	198.438	-1249.03	1271.38	227.484	-1492.67	1398.4	230.44	-1518.83	1212.44	143.719	-1257.43	1344.65	399.322	-1339.2	1443.12	442.971	-1260.07	1263.65	449.836	-1208.91	1153.24	475.984	-1209.38	980.066	446.835	-1225.23	880.023	484.574	-1158.36	886.263	504.166	-1185.06	786.48
707	0	273.645	-1577.48	1652.06	170.017	-1576.79	1647.55	295.535	-1420.73	1640.14	159.143	-1407.86	1635.74	206.307	-1370.33	1492.51	200.116	-1263.99	1269.01	229.154	-1507.65	1395.66	232	-1533.54	1209.65	145.565	-1272.31	1342.39	400.923	-1354.13	1440.56	443.82	-1273.09	1262.18	450.143	-1220.59	1152.43	476.592	-1217.32	979.416	447.697	-1231.13	878.908	484.993	-1164.14	886.658	504.607	-1188.26	786.177
708	0	275.025	-1593.2	1649.36	171.437	-1592.24	1644.71	297.32	-1436.46	1637.83	160.97	-1423.26	1633.28	208.177	-1385.53	1490.18	201.861	-1279.08	1266.73	230.925	-1522.72	1393.03	233.67	-1548.36	1206.96	147.495	-1287.28	1340.23	402.639	-1369.16	1438.05	444.799	-1286.36	1260.69	450.587	-1232.63	1151.58	477.263	-1225.9	978.766	448.567	-1237.78	877.872	485.455	-1170.72	887.014	505.028	-1192.41	785.915
709	0	276.526	-1609	1646.77	172.977	-1607.78	1642	299.21	-1452.27	1635.61	162.901	-1438.74	1630.94	210.13	-1400.81	1487.97	203.664	-1294.28	1264.57	232.786	-1537.87	1390.53	235.441	-1563.28	1204.42	149.496	-1302.3	1338.22	404.457	-1384.28	1435.64	445.906	-1299.88	1259.21	451.176	-1245.04	1150.69	478.006	-1235.13	978.11	449.454	-1245.22	876.905	485.975	-1178.13	887.316	505.442	-1197.53	785.669
710	0	278.137	-1624.84	1644.32	174.625	-1623.38	1639.45	301.191	-1468.14	1633.53	164.921	-1454.28	1628.76	212.15	-1416.13	1485.91	205.518	-1309.58	1262.56	234.725	-1553.08	1388.2	237.305	-1578.28	1202.06	151.555	-1317.37	1336.36	406.365	-1399.47	1433.36	447.141	-1313.66	1257.74	451.913	-1257.82	1149.77	478.828	-1245.04	977.448	450.362	-1253.48	875.998	486.568	-1186.4	887.547	505.864	-1203.69	785.415
711	0	279.839	-1640.73	1642.04	176.365	-1639.03	1637.09	303.247	-1484.04	1631.61	167.014	-1469.88	1626.78	214.223	-1431.49	1484.04	207.418	-1324.94	1260.72	236.725	-1568.33	1386.07	239.249	-1593.35	1199.91	153.661	-1332.46	1334.7	408.35	-1414.7	1431.25	448.501	-1327.7	1256.31	452.802	-1270.97	1148.83	479.734	-1255.65	976.777	451.297	-1262.6	875.144	487.248	-1195.56	887.695	506.308	-1210.93	785.132
712	0	281.616	-1656.63	1639.94	178.178	-1654.7	1634.94	305.361	-1499.97	1629.87	169.161	-1485.5	1625.02	216.331	-1446.87	1482.37	209.357	-1340.34	1259.08	238.768	-1583.6	1384.16	241.26	-1608.48	1198.01	155.801	-1347.57	1333.25	410.398	-1429.98	1429.33	449.986	-1341.98	1254.93	453.848	-1284.52	1147.89	480.73	-1266.98	976.095	452.265	-1272.6	874.334	488.031	-1205.63	887.747	506.79	-1219.27	784.799
713	0	283.449	-1672.53	1638.05	180.047	-1670.38	1633.02	307.515	-1515.89	1628.35	171.345	-1501.13	1623.5	218.459	-1462.23	1480.92	211.329	-1355.76	1257.66	240.836	-1598.86	1382.5	243.322	-1623.64	1196.38	157.963	-1362.67	1332.03	412.493	-1445.28	1427.63	451.592	-1356.52	1253.62	455.05	-1298.45	1146.95	481.822	-1279.04	975.401	453.27	-1283.5	873.562	488.931	-1216.63	887.695	507.321	-1228.77	784.399
714	0	285.316	-1688.4	1636.37	181.952	-1686.05	1631.34	309.69	-1531.79	1627.05	173.547	-1516.74	1622.24	220.588	-1477.57	1479.7	213.329	-1371.17	1256.48	242.909	-1614.1	1381.11	245.421	-1638.81	1195.03	160.137	-1377.74	1331.04	414.623	-1460.58	1426.18	453.319	-1371.32	1252.38	456.411	-1312.77	1146.02	483.014	-1291.85	974.694	454.316	-1295.32	872.822	489.959	-1228.58	887.528	507.915	-1239.45	783.919
715	0	287.2	-1704.24	1634.94	183.873	-1701.69	1629.92	311.87	-1547.65	1626	175.749	-1532.32	1621.27	222.705	-1492.87	1478.74	215.353	-1386.54	1255.56	244.97	-1629.3	1380	247.542	-1653.98	1193.99	162.314	-1392.77	1330.29	416.773	-1475.88	1424.99	455.166	-1386.37	1251.24	457.931	-1327.49	1145.1	484.309	-1305.43	973.973	455.406	-1308.07	872.11	491.128	-1241.5	887.239	508.584	-1251.34	783.343
716	0	289.083	-1720.01	1633.74	185.793	-1717.27	1628.76	314.038	-1563.46	1625.21	177.935	-1547.85	1620.59	224.795	-1508.1	1478.03	217.393	-1401.86	1254.89	247.002	-1644.43	1379.17	249.671	-1669.11	1193.25	164.481	-1407.74	1329.8	418.93	-1491.16	1424.08	457.131	-1401.68	1250.21	459.61	-1342.61	1144.21	485.71	-1319.78	973.239	456.543	-1321.77	871.421	492.447	-1255.4	886.822	509.336	-1264.47	782.662
717	0	290.948	-1735.7	1632.79	187.696	-1732.79	1627.88	316.179	-1579.19	1624.67	180.09	-1563.31	1620.21	226.845	-1523.25	1477.58	219.446	-1417.11	1254.49	248.989	-1659.49	1378.64	251.797	-1684.2	1192.82	166.632	-1422.63	1329.57	421.085	-1506.42	1423.46	459.214	-1417.24	1249.28	461.447	-1358.12	1143.34	487.22	-1334.9	972.489	457.728	-1336.43	870.753	493.924	-1270.3	886.272	510.181	-1278.84	781.867
718	0	292.783	-1751.3	1632.1	189.569	-1748.22	1627.27	318.282	-1594.83	1624.4	182.201	-1578.69	1620.12	228.845	-1538.31	1477.4	221.505	-1432.26	1254.37	250.921	-1674.46	1378.4	253.91	-1699.21	1192.7	168.758	-1437.45	1329.59	423.227	-1521.64	1423.14	461.411	-1433.05	1248.46	463.441	-1374.02	1142.5	488.841	-1350.81	971.725	458.963	-1352.05	870.101	495.566	-1286.18	885.584	511.126	-1294.49	780.951
719	0	294.578	-1766.79	1631.67	191.402	-1763.56	1626.94	320.336	-1610.36	1624.4	184.26	-1593.96	1620.34	230.787	-1553.28	1477.49	223.565	-1447.31	1254.53	252.788	-1689.32	1378.46	256.005	-1714.14	1192.89	170.852	-1452.16	1329.88	425.348	-1536.83	1423.14	463.725	-1449.12	1247.77	465.593	-1390.31	1141.69	490.575	-1367.51	970.946	460.249	-1368.64	869.465	497.378	-1303.08	884.755	512.177	-1311.41	779.909
720	0	296.324	-1782.16	1631.5	193.187	-1778.79	1626.9	322.333	-1625.79	1624.67	186.257	-1609.14	1620.86	232.665	-1568.15	1477.85	225.623	-1462.24	1254.97	254.583	-1704.07	1378.81	258.074	-1728.97	1193.37	172.909	-1466.78	1330.42	427.444	-1551.96	1423.44	466.152	-1465.43	1247.19	467.901	-1406.98	1140.92	492.421	-1385	970.152	461.587	-1386.2	868.843	499.362	-1320.98	883.783	513.337	-1329.62	778.737
721	0	298.016	-1797.42	1631.6	194.918	-1793.92	1627.13	324.27	-1641.1	1625.2	188.188	-1624.2	1621.68	234.476	-1582.91	1478.49	227.675	-1477.05	1255.69	256.301	-1718.71	1379.45	260.116	-1743.69	1194.16	174.926	-1481.29	1331.24	429.51	-1567.06	1424.06	468.694	-1481.99	1246.74	470.365	-1424.04	1140.18	494.381	-1403.28	969.342	462.977	-1404.73	868.234	501.521	-1339.89	882.667	514.609	-1349.13	777.432
722	0	299.652	-1812.54	1631.96	196.593	-1808.93	1627.65	326.143	-1656.3	1626.01	190.051	-1639.15	1622.8	236.216	-1597.57	1479.4	229.72	-1491.74	1256.7	257.94	-1733.24	1380.38	262.129	-1758.3	1195.23	176.899	-1495.69	1332.31	431.545	-1582.1	1425	471.35	-1498.8	1246.42	472.985	-1441.49	1139.47	496.456	-1422.35	968.516	464.418	-1424.24	867.636	503.856	-1359.81	881.405	515.995	-1369.92	775.994
723	0	301.229	-1827.55	1632.59	198.211	-1823.82	1628.46	327.951	-1671.37	1627.08	191.843	-1653.99	1624.22	237.886	-1612.11	1480.58	231.756	-1506.29	1257.99	259.499	-1747.64	1381.6	264.111	-1772.78	1196.61	178.829	-1509.98	1333.65	433.546	-1597.09	1426.26	474.12	-1515.86	1246.22	475.76	-1459.32	1138.8	498.644	-1442.22	967.674	465.912	-1444.72	867.05	506.368	-1380.74	879.998	517.496	-1392.02	774.422
724	0	302.748	-1842.42	1633.48	199.77	-1838.61	1629.55	329.692	-1686.32	1628.42	193.564	-1668.71	1625.93	239.485	-1626.54	1482.04	233.783	-1520.72	1259.57	260.977	-1761.93	1383.11	266.063	-1787.15	1198.27	180.714	-1524.16	1335.26	435.514	-1612.03	1427.83	477.003	-1533.16	1246.15	478.691	-1477.53	1138.16	500.947	-1462.88	966.817	467.458	-1466.17	866.476	509.056	-1402.68	878.445	519.112	-1415.4	772.715
[truncated: 69 more columns]

## Sheet: Sheet2
Devices
		025370 - Force			025370 - Moment			025370 - CoP			027571 - Force			027571 - Moment			027571 - CoP			037720 - Force			037720 - Moment			037720 - CoP
Frame	Sub Frame	Fx	Fy	Fz	Mx	My	Mz	Cx	Cy	Cz	Fx	Fy	Fz	Mx	My	Mz	Cx	Cy	Cz	Fx	Fy	Fz	Mx	My	Mz	Cx	Cy	Cz
		N	N	N	N.mm	N.mm	N.mm	mm	mm	mm	N	N	N	N.mm	N.mm	N.mm	mm	mm	mm	N	N	N	N.mm	N.mm	N.mm	mm	mm	mm
346	0	0	0	0	0	0	0	200	300	0	0	0	0	0	0	0	200	903	0	0	0	0	0	0	0	603	903	0
346	1	0	0	0	0	0	0	200	300	0	0	0	0	0	0	0	200	903	0	0	0	0	0	0	0	603	903	0
346	2	0	0	0	0	0	0	200	300	0	0	0	0	0	0	0	200	903	0	0	0	0	0	0	0	603	903	0
346	3	0	0	0	0	0	0	200	300	0	0	0	0	0	0	0	200	903	0	0	0	0	0	0	0	603	903	0
346	4	0	0	0	0	0	0	200	300	0	0	0	0	0	0	0	200	903	0	0	0	0	0	0	0	603	903	0
346	5	0	0	0	0	0	0	200	300	0	0	0	0	0	0	0	200	903	0	0	0	0	0	0	0	603	903	0
346	6	0	0	0	0	0	0	200	300	0	0	0	0	0	0	0	200	903	0	0	0	0	0	0	0	603	903	0
346	7	0	0	0	0	0	0	200	300	0	0	0	0	0	0	0	200	903	0	0	0	0	0	0	0	603	903	0
346	8	0	0	0	0	0	0	200	300	0	0	0	0	0	0	0	200	903	0	0	0	0	0	0	0	603	903	0
346	9	0	0	0	0	0	0	200	300	0	0	0	0	0	0	0	200	903	0	0	0	0	0	0	0	603	903	0
347	0	0	0	0	0	0	0	200	300	0	0	0	0	0	0	0	200	903	0	0	0	0	0	0	0	603	903	0
347	1	0	0	0	0	0	0	200	300	0	0	0	0	0	0	0	200	903	0	0	0	0	0	0	0	603	903	0
347	2	0	0	0	0	0	0	200	300	0	0	0	0	0	0	0	200	903	0	0	0	0	0	0	0	603	903	0
347	3	0	0	0	0	0	0	200	300	0	0	0	0	0	0	0	200	903	0	0	0	0	0	0	0	603	903	0
347	4	0	0	0	0	0	0	200	300	0	0	0	0	0	0	0	200	903	0	0	0	0	0	0	0	603	903	0
347	5	0	0	0	0	0	0	200	300	0	0	0	0	0	0	0	200	903	0	0	0	0	0	0	0	603	903	0
347	6	0	0	0	0	0	0	200	300	0	0	0	0	0	0	0	200	903	0	0	0	0	0	0	0	603	903	0
347	7	0	0	0	0	0	0	200	300	0	0	0	0	0	0	0	200	903	0	0	0	0	0	0	0	603	903	0
347	8	0	0	0	0	0	0	200	300	0	0	0	0	0	0	0	200	903	0	0	0	0	0	0	0	603	903	0
347	9	0	0	0	0	0	0	200	300	0	0	0	0	0	0	0	200	903	0	0	0	0	0	0	0	603	903	0
348	0	0	0	0	0	0	0	200	300	0	0	0	0	0	0	0	200	903	0	0	0	0	0	0	0	603	903	0
348	1	0	0	0	0	0	0	200	300	0	0	0	0	0	0	0	200	903	0	0	0	0	0	0	0	603	903	0
348	2	0	0	0	0	0	0	200	300	0	0	0	0	0	0	0	200	903	0	0	0	0	0	0	0	603	903	0
348	3	0	0	0	0	0	0	200	300	0	0	0	0	0	0	0	200	903	0	0	0	0	0	0	0	603	903	0
348	4	0	0	0	0	0	0	200	300	0	0	0	0	0	0	0	200	903	0	0	0	0	0	0	0	603	903	0
348	5	0	0	0	0	0	0	200	300	0	0	0	0	0	0	0	200	903	0	0	0	0	0	0	0	603	903	0
348	6	0	0	0	0	0	0	200	300	0	0	0	0	0	0	0	200	903	0	0	0	0	0	0	0	603	903	0
348	7	0	0	0	0	0	0	200	300	0	0	0	0	0	0	0	200	903	0	0	0	0	0	0	0	603	903	0
348	8	0	0	0	0	0	0	200	300	0	0	0	0	0	0	0	200	903	0	0	0	0	0	0	0	603	903	0
348	9	0	0	0	0	0	0	200	300	0	0	0	0	0	0	0	200	903	0	0	0	0	0	0	0	603	903	0
349	0	0	0	0	0	0	0	200	300	0	0	0	0	0	0	0	200	903	0	0	0	0	0	0	0	603	903	0
349	1	0	0	0	0	0	0	200	300	0	0	0	0	0	0	0	200	903	0	0	0	0	0	0	0	603	903	0
349	2	0	0	0	0	0	0	200	300	0	0	0	0	0	0	0	200	903	0	0	0	0	0	0	0	603	903	0
349	3	0	0	0	0	0	0	200	300	0	0	0	0	0	0	0	200	903	0	0	0	0	0	0	0	603	903	0
349	4	0	0	0	0	0	0	200	300	0	0	0	0	0	0	0	200	903	0	0	0	0	0	0	0	603	903	0
349	5	0	0	0	0	0	0	200	300	0	0	0	0	0	0	0	200	903	0	0	0	0	0	0	0	603	903	0
349	6	0	0	0	0	0	0	200	300	0	0	0	0	0	0	0	200	903	0	0	0	0	0	0	0	603	903	0
349	7	0	0	0	0	0	0	200	300	0	0	0	0	0	0	0	200	903	0	0	0	0	0	0	0	603	903	0
349	8	0	0	0	0	0	0	200	300	0	0	0	0	0	0	0	200	903	0	0	0	0	0	0	0	603	903	0
349	9	0	0	0	0	0	0	200	300	0	0	0	0	0	0	0	200	903	0	0	0	0	0	0	0	603	903	0
350	0	0	0	0	0	0	0	200	300	0	0	0	0	0	0	0	200	903	0	0	0	0	0	0	0	603	903	0
350	1	0	0	0	0	0	0	200	300	0	0	0	0	0	0	0	200	903	0	0	0	0	0	0	0	603	903	0
350	2	0	0	0	0	0	0	200	300	0	0	0	0	0	0	0	200	903	0	0	0	0	0	0	0	603	903	0
350	3	0	0	0	0	0	0	200	300	0	0	0	0	0	0	0	200	903	0	0	0	0	0	0	0	603	903	0
350	4	0	0	0	0	0	0	200	300	0	0	0	0	0	0	0	200	903	0	0	0	0	0	0	0	603	903	0
350	5	0	0	0	0	0	0	200	300	0	0	0	0	0	0	0	200	903	0	0	0	0	0	0	0	603	903	0
350	6	0	0	0	0	0	0	200	300	0	0	0	0	0	0	0	200	903	0	0	0	0	0	0	0	603	903	0
350	7	0	0	0	0	0	0	200	300	0	0	0	0	0	0	0	200	903	0	0	0	0	0	0	0	603	903	0
350	8	0	0	0	0	0	0	200	300	0	0	0	0	0	0	0	200	903	0	0	0	0	0	0	0	603	903	0
350	9	0	0	0	0	0	0	200	300	0	0	0	0	0	0	0	200	903	0	0	0	0	0	0	0	603	903	0
351	0	0	0	0	0	0	0	200	300	0	0	0	0	0	0	0	200	903	0	0	0	0	0	0	0	603	903	0
351	1	0	0	0	0	0	0	200	300	0	0	0	0	0	0	0	200	903	0	0	0	0	0	0	0	603	903	0
351	2	0	0	0	0	0	0	200	300	0	0	0	0	0	0	0	200	903	0	0	0	0	0	0	0	603	903	0
351	3	0	0	0	0	0	0	200	300	0	0	0	0	0	0	0	200	903	0	0	0	0	0	0	0	603	903	0
351	4	0	0	0	0	0	0	200	300	0	0	0	0	0	0	0	200	903	0	0	0	0	0	0	0	603	903	0
351	5	0	0	0	0	0	0	200	300	0	0	0	0	0	0	0	200	903	0	0	0	0	0	0	0	603	903	0
351	6	0	0	0	0	0	0	200	300	0	0	0	0	0	0	0	200	903	0	0	0	0	0	0	0	603	903	0
351	7	0	0	0	0	0	0	200	300	0	0	0	0	0	0	0	200	903	0	0	0	0	0	0	0	603	903	0
351	8	0	0	0	0	0	0	200	300	0	0	0	0	0	0	0	200	903	0	0	0	0	0	0	0	603	903	0
351	9	0	0	0	0	0	0	200	300	0	0	0	0	0	0	0	200	903	0	0	0	0	0	0	0	603	903	0
352	0	0	0	0	0	0	0	200	300	0	0	0	0	0	0	0	200	903	0	0	0	0	0	0	0	603	903	0
352	1	0	0	0	0	0	0	200	300	0	0	0	0	0	0	0	200	903	0	0	0	0	0	0	0	603	903	0
352	2	0	0	0	0	0	0	200	300	0	0	0	0	0	0	0	200	903	0	0	0	0	0	0	0	603	903	0
352	3	0	0	0	0	0	0	200	300	0	0	0	0	0	0	0	200	903	0	0	0	0	0	0	0	603	903	0
352	4	0	0	0	0	0	0	200	300	0	0	0	0	0	0	0	200	903	0	0	0	0	0	0	0	603	903	0
352	5	0	0	0	0	0	0	200	300	0	0	0	0	0	0	0	200	903	0	0	0	0	0	0	0	603	903	0
352	6	0	0	0	0	0	0	200	300	0	0	0	0	0	0	0	200	903	0	0	0	0	0	0	0	603	903	0
352	7	0	0	0	0	0	0	200	300	0	0	0	0	0	0	0	200	903	0	0	0	0	0	0	0	603	903	0
352	8	0	0	0	0	0	0	200	300	0	0	0	0	0	0	0	200	903	0	0	0	0	0	0	0	603	903	0
352	9	0	0	0	0	0	0	200	300	0	0	0	0	0	0	0	200	903	0	0	0	0	0	0	0	603	903	0
353	0	0	0	0	0	0	0	200	300	0	0	0	0	0	0	0	200	903	0	0	0	0	0	0	0	603	903	0
353	1	0	0	0	0	0	0	200	300	0	0	0	0	0	0	0	200	903	0	0	0	0	0	0	0	603	903	0
353	2	0	0	0	0	0	0	200	300	0	0	0	0	0	0	0	200	903	0	0	0	0	0	0	0	603	903	0
353	3	0	0	0	0	0	0	200	300	0	0	0	0	0	0	0	200	903	0	0	0	0	0	0	0	603	903	0
353	4	0	0	0	0	0	0	200	300	0	0	0	0	0	0	0	200	903	0	0	0	0	0	0	0	603	903	0
353	5	0	0	0	0	0	0	200	300	0	0	0	0	0	0	0	200	903	0	0	0	0	0	0	0	603	903	0
353	6	0	0	0	0	0	0	200	300	0	0	0	0	0	0	0	200	903	0	0	0	0	0	0	0	603	903	0
353	7	0	0	0	0	0	0	200	300	0	0	0	0	0	0	0	200	903	0	0	0	0	0	0	0	603	903	0
353	8	0	0	0	0	0	0	200	300	0	0	0	0	0	0	0	200	903	0	0	0	0	0	0	0	603	903	0
353	9	0	0	0	0	0	0	200	300	0	0	0	0	0	0	0	200	903	0	0	0	0	0	0	0	603	903	0
354	0	0	0	0	0	0	0	200	300	0	0	0	0	0	0	0	200	903	0	0	0	0	0	0	0	603	903	0
354	1	0	0	0	0	0	0	200	300	0	0	0	0	0	0	0	200	903	0	0	0	0	0	0	0	603	903	0
354	2	0	0	0	0	0	0	200	300	0	0	0	0	0	0	0	200	903	0	0	0	0	0	0	0	603	903	0
354	3	0	0	0	0	0	0	200	300	0	0	0	0	0	0	0	200	903	0	0	0	0	0	0	0	603	903	0
354	4	0	0	0	0	0	0	200	300	0	0	0	0	0	0	0	200	903	0	0	0	0	0	0	0	603	903	0
354	5	0	0	0	0	0	0	200	300	0	0	0	0	0	0	0	200	903	0	0	0	0	0	0	0	603	903	0
354	6	0	0	0	0	0	0	200	300	0	0	0	0	0	0	0	200	903	0	0	0	0	0	0	0	603	903	0
354	7	0	0	0	0	0	0	200	300	0	0	0	0	0	0	0	200	903	0	0	0	0	0	0	0	603	903	0
354	8	0	0	0	0	0	0	200	300	0	0	0	0	0	0	0	200	903	0	0	0	0	0	0	0	603	903	0
354	9	0	0	0	0	0	0	200	300	0	0	0	0	0	0	0	200	903	0	0	0	0	0	0	0	603	903	0
355	0	0	0	0	0	0	0	200	300	0	0	0	0	0	0	0	200	903	0	0	0	0	0	0	0	603	903	0
355	1	0	0	0	0	0	0	200	300	0	0	0	0	0	0	0	200	903	0	0	0	0	0	0	0	603	903	0
355	2	0	0	0	0	0	0	200	300	0	0	0	0	0	0	0	200	903	0	0	0	0	0	0	0	603	903	0
355	3	0	0	0	0	0	0	200	300	0	0	0	0	0	0	0	200	903	0	0	0	0	0	0	0	603	903	0
355	4	0	0	0	0	0	0	200	300	0	0	0	0	0	0	0	200	903	0	0	0	0	0	0	0	603	903	0
355	5	0	0	0	0	0	0	200	300	0	0	0	0	0	0	0	200	903	0	0	0	0	0	0	0	603	903	0
355	6	0	0	0	0	0	0	200	300	0	0	0	0	0	0	0	200	903	0	0	0	0	0	0	0	603	903	0
355	7	0	0	0	0	0	0	200	300	0	0	0	0	0	0	0	200	903	0	0	0	0	0	0	0	603	903	0
355	8	0	0	0	0	0	0	200	300	0	0	0	0	0	0	0	200	903	0	0	0	0	0	0	0	603	903	0
355	9	0	0	0	0	0	0	200	300	0	0	0	0	0	0	0	200	903	0	0	0	0	0	0	0	603	903	0
356	0	0	0	0	0	0	0	200	300	0	0	0	0	0	0	0	200	903	0	0	0	0	0	0	0	603	903	0
356	1	0	0	0	0	0	0	200	300	0	0	0	0	0	0	0	200	903	0	0	0	0	0	0	0	603	903	0
356	2	0	0	0	0	0	0	200	300	0	0	0	0	0	0	0	200	903	0	0	0	0	0	0	0	603	903	0
356	3	0	0	0	0	0	0	200	300	0	0	0	0	0	0	0	200	903	0	0	0	0	0	0	0	603	903	0
356	4	0	0	0	0	0	0	200	300	0	0	0	0	0	0	0	200	903	0	0	0	0	0	0	0	603	903	0
356	5	0	0	0	0	0	0	200	300	0	0	0	0	0	0	0	200	903	0	0	0	0	0	0	0	603	903	0
356	6	0	0	0	0	0	0	200	300	0	0	0	0	0	0	0	200	903	0	0	0	0	0	0	0	603	903	0
356	7	0	0	0	0	0	0	200	300	0	0	0	0	0	0	0	200	903	0	0	0	0	0	0	0	603	903	0
356	8	0	0	0	0	0	0	200	300	0	0	0	0	0	0	0	200	903	0	0	0	0	0	0	0	603	903	0
356	9	0	0	0	0	0	0	200	300	0	0	0	0	0	0	0	200	903	0	0	0	0	0	0	0	603	903	0
357	0	0	0	0	0	0	0	200	300	0	0	0	0	0	0	0	200	903	0	0	0	0	0	0	0	603	903	0
357	1	0	0	0	0	0	0	200	300	0	0	0	0	0	0	0	200	903	0	0	0	0	0	0	0	603	903	0
357	2	0	0	0	0	0	0	200	300	0	0	0	0	0	0	0	200	903	0	0	0	0	0	0	0	603	903	0
357	3	0	0	0	0	0	0	200	300	0	0	0	0	0	0	0	200	903	0	0	0	0	0	0	0	603	903	0
357	4	0	0	0	0	0	0	200	300	0	0	0	0	0	0	0	200	903	0	0	0	0	0	0	0	603	903	0
357	5	0	0	0	0	0	0	200	300	0	0	0	0	0	0	0	200	903	0	0	0	0	0	0	0	603	903	0
357	6	0	0	0	0	0	0	200	300	0	0	0	0	0	0	0	200	903	0	0	0	0	0	0	0	603	903	0
357	7	0	0	0	0	0	0	200	300	0	0	0	0	0	0	0	200	903	0	0	0	0	0	0	0	603	903	0
357	8	0	0	0	0	0	0	200	300	0	0	0	0	0	0	0	200	903	0	0	0	0	0	0	0	603	903	0
357	9	0	0	0	0	0	0	200	300	0	0	0	0	0	0	0	200	903	0	0	0	0	0	0	0	603	903	0
358	0	0	0	0	0	0	0	200	300	0	0	0	0	0	0	0	200	903	0	0	0	0	0	0	0	603	903	0
358	1	0	0	0	0	0	0	200	300	0	0	0	0	0	0	0	200	903	0	0	0	0	0	0	0	603	903	0
358	2	0	0	0	0	0	0	200	300	0	0	0	0	0	0	0	200	903	0	0	0	0	0	0	0	603	903	0
358	3	0	0	0	0	0	0	200	300	0	0	0	0	0	0	0	200	903	0	0	0	0	0	0	0	603	903	0
358	4	0	0	0	0	0	0	200	300	0	0	0	0	0	0	0	200	903	0	0	0	0	0	0	0	603	903	0
358	5	0	0	0	0	0	0	200	300	0	0	0	0	0	0	0	200	903	0	0	0	0	0	0	0	603	903	0
358	6	0	0	0	0	0	0	200	300	0	0	0	0	0	0	0	200	903	0	0	0	0	0	0	0	603	903	0
358	7	0	0	0	0	0	0	200	300	0	0	0	0	0	0	0	200	903	0	0	0	0	0	0	0	603	903	0
358	8	0	0	0	0	0	0	200	300	0	0	0	0	0	0	0	200	903	0	0	0	0	0	0	0	603	903	0
358	9	0	0	0	0	0	0	200	300	0	0	0	0	0	0	0	200	903	0	0	0	0	0	0	0	603	903	0
359	0	0	0	0	0	0	0	200	300	0	0	0	0	0	0	0	200	903	0	0	0	0	0	0	0	603	903	0
359	1	0	0	0	0	0	0	200	300	0	0	0	0	0	0	0	200	903	0	0	0	0	0	0	0	603	903	0
359	2	0	0	0	0	0	0	200	300	0	0	0	0	0	0	0	200	903	0	0	0	0	0	0	0	603	903	0
359	3	0	0	0	0	0	0	200	300	0	0	0	0	0	0	0	200	903	0	0	0	0	0	0	0	603	903	0
359	4	0	0	0	0	0	0	200	300	0	0	0	0	0	0	0	200	903	0	0	0	0	0	0	0	603	903	0
359	5	0	0	0	0	0	0	200	300	0	0	0	0	0	0	0	200	903	0	0	0	0	0	0	0	603	903	0
359	6	0	0	0	0	0	0	200	300	0	0	0	0	0	0	0	200	903	0	0	0	0	0	0	0	603	903	0
359	7	0	0	0	0	0	0	200	300	0	0	0	0	0	0	0	200	903	0	0	0	0	0	0	0	603	903	0
359	8	0	0	0	0	0	0	200	300	0	0	0	0	0	0	0	200	903	0	0	0	0	0	0	0	603	903	0
359	9	0	0	0	0	0	0	200	300	0	0	0	0	0	0	0	200	903	0	0	0	0	0	0	0	603	903	0
360	0	0	0	0	0	0	0	200	300	0	0	0	0	0	0	0	200	903	0	0	0	0	0	0	0	603	903	0
360	1	0	0	0	0	0	0	200	300	0	0	0	0	0	0	0	200	903	0	0	0	0	0	0	0	603	903	0
360	2	0	0	0	0	0	0	200	300	0	0	0	0	0	0	0	200	903	0	0	0	0	0	0	0	603	903	0
360	3	0	0	0	0	0	0	200	300	0	0	0	0	0	0	0	200	903	0	0	0	0	0	0	0	603	903	0
360	4	0	0	0	0	0	0	200	300	0	0	0	0	0	0	0	200	903	0	0	0	0	0	0	0	603	903	0
360	5	0	0	0	0	0	0	200	300	0	0	0	0	0	0	0	200	903	0	0	0	0	0	0	0	603	903	0
360	6	0	0	0	0	0	0	200	300	0	0	0	0	0	0	0	200	903	0	0	0	0	0	0	0	603	903	0
360	7	0	0	0	0	0	0	200	300	0	0	0	0	0	0	0	200	903	0	0	0	0	0	0	0	603	903	0
360	8	0	0	0	0	0	0	200	300	0	0	0	0	0	0	0	200	903	0	0	0	0	0	0	0	603	903	0
360	9	0	0	0	0	0	0	200	300	0	0	0	0	0	0	0	200	903	0	0	0	0	0	0	0	603	903	0
361	0	0	0	0	0	0	0	200	300	0	0	0	0	0	0	0	200	903	0	0	0	0	0	0	0	603	903	0
361	1	0	0	0	0	0	0	200	300	0	0	0	0	0	0	0	200	903	0	0	0	0	0	0	0	603	903	0
361	2	0	0	0	0	0	0	200	300	0	0	0	0	0	0	0	200	903	0	0	0	0	0	0	0	603	903	0
361	3	0	0	0	0	0	0	200	300	0	0	0	0	0	0	0	200	903	0	0	0	0	0	0	0	603	903	0
361	4	0	0	0	0	0	0	200	300	0	0	0	0	0	0	0	200	903	0	0	0	0	0	0	0	603	903	0
361	5	0	0	0	0	0	0	200	300	0	0	0	0	0	0	0	200	903	0	0	0	0	0	0	0	603	903	0
361	6	0	0	0	0	0	0	200	300	0	0	0	0	0	0	0	200	903	0	0	0	0	0	0	0	603	903	0
361	7	0	0	0	0	0	0	200	300	0	0	0	0	0	0	0	200	903	0	0	0	0	0	0	0	603	903	0
361	8	0	0	0	0	0	0	200	300	0	0	0	0	0	0	0	200	903	0	0	0	0	0	0	0	603	903	0
361	9	0	0	0	0	0	0	200	300	0	0	0	0	0	0	0	200	903	0	0	0	0	0	0	0	603	903	0
362	0	0	0	0	0	0	0	200	300	0	0	0	0	0	0	0	200	903	0	0	0	0	0	0	0	603	903	0
362	1	0	0	0	0	0	0	200	300	0	0	0	0	0	0	0	200	903	0	0	0	0	0	0	0	603	903	0
362	2	0	0	0	0	0	0	200	300	0	0	0	0	0	0	0	200	903	0	0	0	0	0	0	0	603	903	0
362	3	0	0	0	0	0	0	200	300	0	0	0	0	0	0	0	200	903	0	0	0	0	0	0	0	603	903	0
362	4	0	0	0	0	0	0	200	300	0	0	0	0	0	0	0	200	903	0	0	0	0	0	0	0	603	903	0
362	5	0	0	0	0	0	0	200	300	0	0	0	0	0	0	0	200	903	0	0	0	0	0	0	0	603	903	0
362	6	0	0	0	0	0	0	200	300	0	0	0	0	0	0	0	200	903	0	0	0	0	0	0	0	603	903	0
362	7	0	0	0	0	0	0	200	300	0	0	0	0	0	0	0	200	903	0	0	0	0	0	0	0	603	903	0
362	8	0	0	0	0	0	0	200	300	0	0	0	0	0	0	0	200	903	0	0	0	0	0	0	0	603	903	0
362	9	0	0	0	0	0	0	200	300	0	0	0	0	0	0	0	200	903	0	0	0	0	0	0	0	603	903	0
363	0	0	0	0	0	0	0	200	300	0	0	0	0	0	0	0	200	903	0	0	0	0	0	0	0	603	903	0
363	1	0	0	0	0	0	0	200	300	0	0	0	0	0	0	0	200	903	0	0	0	0	0	0	0	603	903	0
363	2	0	0	0	0	0	0	200	300	0	0	0	0	0	0	0	200	903	0	0	0	0	0	0	0	603	903	0
363	3	0	0	0	0	0	0	200	300	0	0	0	0	0	0	0	200	903	0	0	0	0	0	0	0	603	903	0
363	4	0	0	0	0	0	0	200	300	0	0	0	0	0	0	0	200	903	0	0	0	0	0	0	0	603	903	0
363	5	0	0	0	0	0	0	200	300	0	0	0	0	0	0	0	200	903	0	0	0	0	0	0	0	603	903	0
363	6	0	0	0	0	0	0	200	300	0	0	0	0	0	0	0	200	903	0	0	0	0	0	0	0	603	903	0
363	7	0	0	0	0	0	0	200	300	0	0	0	0	0	0	0	200	903	0	0	0	0	0	0	0	603	903	0
363	8	0	0	0	0	0	0	200	300	0	0	0	0	0	0	0	200	903	0	0	0	0	0	0	0	603	903	0
363	9	0	0	0	0	0	0	200	300	0	0	0	0	0	0	0	200	903	0	0	0	0	0	0	0	603	903	0
364	0	0	0	0	0	0	0	200	300	0	0	0	0	0	0	0	200	903	0	0	0	0	0	0	0	603	903	0
364	1	0	0	0	0	0	0	200	300	0	0	0	0	0	0	0	200	903	0	0	0	0	0	0	0	603	903	0
364	2	0	0	0	0	0	0	200	300	0	0	0	0	0	0	0	200	903	0	0	0	0	0	0	0	603	903	0
364	3	0	0	0	0	0	0	200	300	0	0	0	0	0	0	0	200	903	0	0	0	0	0	0	0	603	903	0
364	4	0	0	0	0	0	0	200	300	0	0	0	0	0	0	0	200	903	0	0	0	0	0	0	0	603	903	0
364	5	0	0	0	0	0	0	200	300	0	0	0	0	0	0	0	200	903	0	0	0	0	0	0	0	603	903	0
364	6	0	0	0	0	0	0	200	300	0	0	0	0	0	0	0	200	903	0	0	0	0	0	0	0	603	903	0
364	7	0	0	0	0	0	0	200	300	0	0	0	0	0	0	0	200	903	0	0	0	0	0	0	0	603	903	0
364	8	0	0	0	0	0	0	200	300	0	0	0	0	0	0	0	200	903	0	0	0	0	0	0	0	603	903	0
364	9	0	0	0	0	0	0	200	300	0	0	0	0	0	0	0	200	903	0	0	0	0	0	0	0	603	903	0
365	0	0	0	0	0	0	0	200	300	0	0	0	0	0	0	0	200	903	0	0	0	0	0	0	0	603	903	0
365	1	0	0	0	0	0	0	200	300	0	0	0	0	0	0	0	200	903	0	0	0	0	0	0	0	603	903	0
365	2	0	0	0	0	0	0	200	300	0	0	0	0	0	0	0	200	903	0	0	0	0	0	0	0	603	903	0
365	3	0	0	0	0	0	0	200	300	0	0	0	0	0	0	0	200	903	0	0	0	0	0	0	0	603	903	0
365	4	0	0	0	0	0	0	200	300	0	0	0	0	0	0	0	200	903	0	0	0	0	0	0	0	603	903	0
365	5	0	0	0	0	0	0	200	300	0	0	0	0	0	0	0	200	903	0	0	0	0	0	0	0	603	903	0
365	6	0	0	0	0	0	0	200	300	0	0	0	0	0	0	0	200	903	0	0	0	0	0	0	0	603	903	0
365	7	0	0	0	0	0	0	200	300	0	0	0	0	0	0	0	200	903	0	0	0	0	0	0	0	603	903	0
365	8	0	0	0	0	0	0	200	300	0	0	0	0	0	0	0	200	903	0	0	0	0	0	0	0	603	903	0
365	9	0	0	0	0	0	0	200	300	0	0	0	0	0	0	0	200	903	0	0	0	0	0	0	0	603	903	0
366	0	0	0	0	0	0	0	200	300	0	0	0	0	0	0	0	200	903	0	0	0	0	0	0	0	603	903	0
366	1	0	0	0	0	0	0	200	300	0	0	0	0	0	0	0	200	903	0	0	0	0	0	0	0	603	903	0
366	2	0	0	0	0	0	0	200	300	0	0	0	0	0	0	0	200	903	0	0	0	0	0	0	0	603	903	0
366	3	0	0	0	0	0	0	200	300	0	0	0	0	0	0	0	200	903	0	0	0	0	0	0	0	603	903	0
366	4	0	0	0	0	0	0	200	300	0	0	0	0	0	0	0	200	903	0	0	0	0	0	0	0	603	903	0
366	5	0	0	0	0	0	0	200	300	0	0	0	0	0	0	0	200	903	0	0	0	0	0	0	0	603	903	0
366	6	0	0	0	0	0	0	200	300	0	0	0	0	0	0	0	200	903	0	0	0	0	0	0	0	603	903	0
366	7	0	0	0	0	0	0	200	300	0	0	0	0	0	0	0	200	903	0	0	0	0	0	0	0	603	903	0
366	8	0	0	0	0	0	0	200	300	0	0	0	0	0	0	0	200	903	0	0	0	0	0	0	0	603	903	0
366	9	0	0	0	0	0	0	200	300	0	0	0	0	0	0	0	200	903	0	0	0	0	0	0	0	603	903	0
367	0	0	0	0	0	0	0	200	300	0	0	0	0	0	0	0	200	903	0	0	0	0	0	0	0	603	903	0
367	1	0	0	0	0	0	0	200	300	0	0	0	0	0	0	0	200	903	0	0	0	0	0	0	0	603	903	0
367	2	0	0	0	0	0	0	200	300	0	0	0	0	0	0	0	200	903	0	0	0	0	0	0	0	603	903	0
367	3	0	0	0	0	0	0	200	300	0	0	0	0	0	0	0	200	903	0	0	0	0	0	0	0	603	903	0
367	4	0	0	0	0	0	0	200	300	0	0	0	0	0	0	0	200	903	0	0	0	0	0	0	0	603	903	0
367	5	0	0	0	0	0	0	200	300	0	0	0	0	0	0	0	200	903	0	0	0	0	0	0	0	603	903	0
367	6	0	0	0	0	0	0	200	300	0	0	0	0	0	0	0	200	903	0	0	0	0	0	0	0	603	903	0
367	7	0	0	0	0	0	0	200	300	0	0	0	0	0	0	0	200	903	0	0	0	0	0	0	0	603	903	0
367	8	0	0	0	0	0	0	200	300	0	0	0	0	0	0	0	200	903	0	0	0	0	0	0	0	603	903	0
367	9	0	0	0	0	0	0	200	300	0	0	0	0	0	0	0	200	903	0	0	0	0	0	0	0	603	903	0
368	0	0	0	0	0	0	0	200	300	0	0	0	0	0	0	0	200	903	0	0	0	0	0	0	0	603	903	0
368	1	0	0	0	0	0	0	200	300	0	0	0	0	0	0	0	200	903	0	0	0	0	0	0	0	603	903	0
368	2	0	0	0	0	0	0	200	300	0	0	0	0	0	0	0	200	903	0	0	0	0	0	0	0	603	903	0
368	3	0	0	0	0	0	0	200	300	0	0	0	0	0	0	0	200	903	0	0	0	0	0	0	0	603	903	0
368	4	0	0	0	0	0	0	200	300	0	0	0	0	0	0	0	200	903	0	0	0	0	0	0	0	603	903	0
368	5	0	0	0	0	0	0	200	300	0	0	0	0	0	0	0	200	903	0	0	0	0	0	0	0	603	903	0
368	6	0	0	0	0	0	0	200	300	0	0	0	0	0	0	0	200	903	0	0	0	0	0	0	0	603	903	0
368	7	0	0	0	0	0	0	200	300	0	0	0	0	0	0	0	200	903	0	0	0	0	0	0	0	603	903	0
368	8	0	0	0	0	0	0	200	300	0	0	0	0	0	0	0	200	903	0	0	0	0	0	0	0	603	903	0
368	9	0	0	0	0	0	0	200	300	0	0	0	0	0	0	0	200	903	0	0	0	0	0	0	0	603	903	0
369	0	0	0	0	0	0	0	200	300	0	0	0	0	0	0	0	200	903	0	0	0	0	0	0	0	603	903	0
369	1	0	0	0	0	0	0	200	300	0	0	0	0	0	0	0	200	903	0	0	0	0	0	0	0	603	903	0
369	2	0	0	0	0	0	0	200	300	0	0	0	0	0	0	0	200	903	0	0	0	0	0	0	0	603	903	0
369	3	0	0	0	0	0	0	200	300	0	0	0	0	0	0	0	200	903	0	0	0	0	0	0	0	603	903	0
369	4	0	0	0	0	0	0	200	300	0	0	0	0	0	0	0	200	903	0	0	0	0	0	0	0	603	903	0
369	5	0	0	0	0	0	0	200	300	0	0	0	0	0	0	0	200	903	0	0	0	0	0	0	0	603	903	0
369	6	0	0	0	0	0	0	200	300	0	0	0	0	0	0	0	200	903	0	0	0	0	0	0	0	603	903	0
369	7	0	0	0	0	0	0	200	300	0	0	0	0	0	0	0	200	903	0	0	0	0	0	0	0	603	903	0
369	8	0	0	0	0	0	0	200	300	0	0	0	0	0	0	0	200	903	0	0	0	0	0	0	0	603	903	0
369	9	0	0	0	0	0	0	200	300	0	0	0	0	0	0	0	200	903	0	0	0	0	0	0	0	603	903	0
370	0	0	0	0	0	0	0	200	300	0	0	0	0	0	0	0	200	903	0	0	0	0	0	0	0	603	903	0
370	1	0	0	0	0	0	0	200	300	0	0	0	0	0	0	0	200	903	0	0	0	0	0	0	0	603	903	0
370	2	0	0	0	0	0	0	200	300	0	0	0	0	0	0	0	200	903	0	0	0	0	0	0	0	603	903	0
370	3	0	0	0	0	0	0	200	300	0	0	0	0	0	0	0	200	903	0	0	0	0	0	0	0	603	903	0
370	4	0	0	0	0	0	0	200	300	0	0	0	0	0	0	0	200	903	0	0	0	0	0	0	0	603	903	0
370	5	0	0	0	0	0	0	200	300	0	0	0	0	0	0	0	200	903	0	0	0	0	0	0	0	603	903	0
370	6	0	0	0	0	0	0	200	300	0	0	0	0	0	0	0	200	903	0	0	0	0	0	0	0	603	903	0
370	7	0	0	0	0	0	0	200	300	0	0	0	0	0	0	0	200	903	0	0	0	0	0	0	0	603	903	0
370	8	0	0	0	0	0	0	200	300	0	0	0	0	0	0	0	200	903	0	0	0	0	0	0	0	603	903	0
370	9	0	0	0	0	0	0	200	300	0	0	0	0	0	0	0	200	903	0	0	0	0	0	0	0	603	903	0
371	0	0	0	0	0	0	0	200	300	0	0	0	0	0	0	0	200	903	0	0	0	0	0	0	0	603	903	0
371	1	0	0	0	0	0	0	200	300	0	0	0	0	0	0	0	200	903	0	0	0	0	0	0	0	603	903	0
371	2	0	0	0	0	0	0	200	300	0	0	0	0	0	0	0	200	903	0	0	0	0	0	0	0	603	903	0
371	3	0	0	0	0	0	0	200	300	0	0	0	0	0	0	0	200	903	0	0	0	0	0	0	0	603	903	0
371	4	0	0	0	0	0	0	200	300	0	0	0	0	0	0	0	200	903	0	0	0	0	0	0	0	603	903	0
371	5	0	0	0	0	0	0	200	300	0	0	0	0	0	0	0	200	903	0	0	0	0	0	0	0	603	903	0
371	6	0	0	0	0	0	0	200	300	0	0	0	0	0	0	0	200	903	0	0	0	0	0	0	0	603	903	0
371	7	0	0	0	0	0	0	200	300	0	0	0	0	0	0	0	200	903	0	0	0	0	0	0	0	603	903	0
371	8	0	0	0	0	0	0	200	300	0	0	0	0	0	0	0	200	903	0	0	0	0	0	0	0	603	903	0
371	9	0	0	0	0	0	0	200	300	0	0	0	0	0	0	0	200	903	0	0	0	0	0	0	0	603	903	0
372	0	0	0	0	0	0	0	200	300	0	0	0	0	0	0	0	200	903	0	0	0	0	0	0	0	603	903	0
372	1	0	0	0	0	0	0	200	300	0	0	0	0	0	0	0	200	903	0	0	0	0	0	0	0	603	903	0
372	2	0	0	0	0	0	0	200	300	0	0	0	0	0	0	0	200	903	0	0	0	0	0	0	0	603	903	0
372	3	0	0	0	0	0	0	200	300	0	0	0	0	0	0	0	200	903	0	0	0	0	0	0	0	603	903	0
372	4	0	0	0	0	0	0	200	300	0	0	0	0	0	0	0	200	903	0	0	0	0	0	0	0	603	903	0
372	5	0	0	0	0	0	0	200	300	0	0	0	0	0	0	0	200	903	0	0	0	0	0	0	0	603	903	0
372	6	0	0	0	0	0	0	200	300	0	0	0	0	0	0	0	200	903	0	0	0	0	0	0	0	603	903	0
372	7	0	0	0	0	0	0	200	300	0	0	0	0	0	0	0	200	903	0	0	0	0	0	0	0	603	903	0
372	8	0	0	0	0	0	0	200	300	0	0	0	0	0	0	0	200	903	0	0	0	0	0	0	0	603	903	0
372	9	0	0	0	0	0	0	200	300	0	0	0	0	0	0	0	200	903	0	0	0	0	0	0	0	603	903	0
373	0	0	0	0	0	0	0	200	300	0	0	0	0	0	0	0	200	903	0	0	0	0	0	0	0	603	903	0
373	1	0	0	0	0	0	0	200	300	0	0	0	0	0	0	0	200	903	0	0	0	0	0	0	0	603	903	0
373	2	0	0	0	0	0	0	200	300	0	0	0	0	0	0	0	200	903	0	0	0	0	0	0	0	603	903	0
373	3	0	0	0	0	0	0	200	300	0	0	0	0	0	0	0	200	903	0	0	0	0	0	0	0	603	903	0
373	4	0	0	0	0	0	0	200	300	0	0	0	0	0	0	0	200	903	0	0	0	0	0	0	0	603	903	0
373	5	0	0	0	0	0	0	200	300	0	0	0	0	0	0	0	200	903	0	0	0	0	0	0	0	603	903	0
373	6	0	0	0	0	0	0	200	300	0	0	0	0	0	0	0	200	903	0	0	0	0	0	0	0	603	903	0
373	7	0	0	0	0	0	0	200	300	0	0	0	0	0	0	0	200	903	0	0	0	0	0	0	0	603	903	0
373	8	0	0	0	0	0	0	200	300	0	0	0	0	0	0	0	200	903	0	0	0	0	0	0	0	603	903	0
373	9	0	0	0	0	0	0	200	300	0	0	0	0	0	0	0	200	903	0	0	0	0	0	0	0	603	903	0
374	0	0	0	0	0	0	0	200	300	0	0	0	0	0	0	0	200	903	0	0	0	0	0	0	0	603	903	0
374	1	0	0	0	0	0	0	200	300	0	0	0	0	0	0	0	200	903	0	0	0	0	0	0	0	603	903	0
374	2	0	0	0	0	0	0	200	300	0	0	0	0	0	0	0	200	903	0	0	0	0	0	0	0	603	903	0
374	3	0	0	0	0	0	0	200	300	0	0	0	0	0	0	0	200	903	0	0	0	0	0	0	0	603	903	0
374	4	0	0	0	0	0	0	200	300	0	0	0	0	0	0	0	200	903	0	0	0	0	0	0	0	603	903	0
374	5	0	0	0	0	0	0	200	300	0	0	0	0	0	0	0	200	903	0	0	0	0	0	0	0	603	903	0
374	6	0	0	0	0	0	0	200	300	0	0	0	0	0	0	0	200	903	0	0	0	0	0	0	0	603	903	0
374	7	0	0	0	0	0	0	200	300	0	0	0	0	0	0	0	200	903	0	0	0	0	0	0	0	603	903	0
374	8	0	0	0	0	0	0	200	300	0	0	0	0	0	0	0	200	903	0	0	0	0	0	0	0	603	903	0
374	9	0	0	0	0	0	0	200	300	0	0	0	0	0	0	0	200	903	0	0	0	0	0	0	0	603	903	0
375	0	0	0	0	0	0	0	200	300	0	0	0	0	0	0	0	200	903	0	0	0	0	0	0	0	603	903	0
375	1	0	0	0	0	0	0	200	300	0	0	0	0	0	0	0	200	903	0	0	0	0	0	0	0	603	903	0
375	2	0	0	0	0	0	0	200	300	0	0	0	0	0	0	0	200	903	0	0	0	0	0	0	0	603	903	0
375	3	0	0	0	0	0	0	200	300	0	0	0	0	0	0	0	200	903	0	0	0	0	0	0	0	603	903	0
375	4	0	0	0	0	0	0	200	300	0	0	0	0	0	0	0	200	903	0	0	0	0	0	0	0	603	903	0
375	5	0	0	0	0	0	0	200	300	0	0	0	0	0	0	0	200	903	0	0	0	0	0	0	0	603	903	0
375	6	0	0	0	0	0	0	200	300	0	0	0	0	0	0	0	200	903	0	0	0	0	0	0	0	603	903	0
375	7	0	0	0	0	0	0	200	300	0	0	0	0	0	0	0	200	903	0	0	0	0	0	0	0	603	903	0
375	8	0	0	0	0	0	0	200	300	0	0	0	0	0	0	0	200	903	0	0	0	0	0	0	0	603	903	0
375	9	0	0	0	0	0	0	200	300	0	0	0	0	0	0	0	200	903	0	0	0	0	0	0	0	603	903	0
376	0	0	0	0	0	0	0	200	300	0	0	0	0	0	0	0	200	903	0	0	0	0	0	0	0	603	903	0
376	1	0	0	0	0	0	0	200	300	0	0	0	0	0	0	0	200	903	0	0	0	0	0	0	0	603	903	0
376	2	0	0	0	0	0	0	200	300	0	0	0	0	0	0	0	200	903	0	0	0	0	0	0	0	603	903	0
376	3	0	0	0	0	0	0	200	300	0	0	0	0	0	0	0	200	903	0	0	0	0	0	0	0	603	903	0
376	4	0	0	0	0	0	0	200	300	0	0	0	0	0	0	0	200	903	0	0	0	0	0	0	0	603	903	0
376	5	0	0	0	0	0	0	200	300	0	0	0	0	0	0	0	200	903	0	0	0	0	0	0	0	603	903	0
376	6	0	0	0	0	0	0	200	300	0	0	0	0	0	0	0	200	903	0	0	0	0	0	0	0	603	903	0
376	7	0	0	0	0	0	0	200	300	0	0	0	0	0	0	0	200	903	0	0	0	0	0	0	0	603	903	0
376	8	0	0	0	0	0	0	200	300	0	0	0	0	0	0	0	200	903	0	0	0	0	0	0	0	603	903	0
376	9	0	0	0	0	0	0	200	300	0	0	0	0	0	0	0	200	903	0	0	0	0	0	0	0	603	903	0
377	0	0	0	0	0	0	0	200	300	0	0	0	0	0	0	0	200	903	0	0	0	0	0	0	0	603	903	0
377	1	0	0	0	0	0	0	200	300	0	0	0	0	0	0	0	200	903	0	0	0	0	0	0	0	603	903	0
377	2	0	0	0	0	0	0	200	300	0	0	0	0	0	0	0	200	903	0	0	0	0	0	0	0	603	903	0
377	3	0	0	0	0	0	0	200	300	0	0	0	0	0	0	0	200	903	0	0	0	0	0	0	0	603	903	0
377	4	0	0	0	0	0	0	200	300	0	0	0	0	0	0	0	200	903	0	0	0	0	0	0	0	603	903	0
377	5	0	0	0	0	0	0	200	300	0	0	0	0	0	0	0	200	903	0	0	0	0	0	0	0	603	903	0
377	6	0	0	0	0	0	0	200	300	0	0	0	0	0	0	0	200	903	0	0	0	0	0	0	0	603	903	0
377	7	0	0	0	0	0	0	200	300	0	0	0	0	0	0	0	200	903	0	0	0	0	0	0	0	603	903	0
377	8	0	0	0	0	0	0	200	300	0	0	0	0	0	0	0	200	903	0	0	0	0	0	0	0	603	903	0
377	9	0	0	0	0	0	0	200	300	0	0	0	0	0	0	0	200	903	0	0	0	0	0	0	0	603	903	0
378	0	0	0	0	0	0	0	200	300	0	0	0	0	0	0	0	200	903	0	0	0	0	0	0	0	603	903	0
378	1	0	0	0	0	0	0	200	300	0	0	0	0	0	0	0	200	903	0	0	0	0	0	0	0	603	903	0
378	2	0	0	0	0	0	0	200	300	0	0	0	0	0	0	0	200	903	0	0	0	0	0	0	0	603	903	0
378	3	0	0	0	0	0	0	200	300	0	0	0	0	0	0	0	200	903	0	0	0	0	0	0	0	603	903	0
378	4	0	0	0	0	0	0	200	300	0	0	0	0	0	0	0	200	903	0	0	0	0	0	0	0	603	903	0
378	5	0	0	0	0	0	0	200	300	0	0	0	0	0	0	0	200	903	0	0	0	0	0	0	0	603	903	0
378	6	0	0	0	0	0	0	200	300	0	0	0	0	0	0	0	200	903	0	0	0	0	0	0	0	603	903	0
378	7	0	0	0	0	0	0	200	300	0	0	0	0	0	0	0	200	903	0	0	0	0	0	0	0	603	903	0
378	8	0	0	0	0	0	0	200	300	0	0	0	0	0	0	0	200	903	0	0	0	0	0	0	0	603	903	0
378	9	0	0	0	0	0	0	200	300	0	0	0	0	0	0	0	200	903	0	0	0	0	0	0	0	603	903	0
379	0	0	0	0	0	0	0	200	300	0	0	0	0	0	0	0	200	903	0	0	0	0	0	0	0	603	903	0
379	1	0	0	0	0	0	0	200	300	0	0	0	0	0	0	0	200	903	0	0	0	0	0	0	0	603	903	0
379	2	0	0	0	0	0	0	200	300	0	0	0	0	0	0	0	200	903	0	0	0	0	0	0	0	603	903	0
379	3	0	0	0	0	0	0	200	300	0	0	0	0	0	0	0	200	903	0	0	0	0	0	0	0	603	903	0
379	4	0	0	0	0	0	0	200	300	0	0	0	0	0	0	0	200	903	0	0	0	0	0	0	0	603	903	0
379	5	0	0	0	0	0	0	200	300	0	0	0	0	0	0	0	200	903	0	0	0	0	0	0	0	603	903	0
379	6	0	0	0	0	0	0	200	300	0	0	0	0	0	0	0	200	903	0	0	0	0	0	0	0	603	903	0
379	7	0	0	0	0	0	0	200	300	0	0	0	0	0	0	0	200	903	0	0	0	0	0	0	0	603	903	0
379	8	0	0	0	0	0	0	200	300	0	0	0	0	0	0	0	200	903	0	0	0	0	0	0	0	603	903	0
379	9	0	0	0	0	0	0	200	300	0	0	0	0	0	0	0	200	903	0	0	0	0	0	0	0	603	903	0
380	0	0	0	0	0	0	0	200	300	0	0	0	0	0	0	0	200	903	0	0	0	0	0	0	0	603	903	0
380	1	0	0	0	0	0	0	200	300	0	0	0	0	0	0	0	200	903	0	0	0	0	0	0	0	603	903	0
380	2	0	0	0	0	0	0	200	300	0	0	0	0	0	0	0	200	903	0	0	0	0	0	0	0	603	903	0
380	3	0	0	0	0	0	0	200	300	0	0	0	0	0	0	0	200	903	0	0	0	0	0	0	0	603	903	0
380	4	0	0	0	0	0	0	200	300	0	0	0	0	0	0	0	200	903	0	0	0	0	0	0	0	603	903	0
380	5	0	0	0	0	0	0	200	300	0	0	0	0	0	0	0	200	903	0	0	0	0	0	0	0	603	903	0
380	6	0	0	0	0	0	0	200	300	0	0	0	0	0	0	0	200	903	0	0	0	0	0	0	0	603	903	0
380	7	0	0	0	0	0	0	200	300	0	0	0	0	0	0	0	200	903	0	0	0	0	0	0	0	603	903	0
380	8	0	0	0	0	0	0	200	300	0	0	0	0	0	0	0	200	903	0	0	0	0	0	0	0	603	903	0
380	9	0	0	0	0	0	0	200	300	0	0	0	0	0	0	0	200	903	0	0	0	0	0	0	0	603	903	0
381	0	0	0	0	0	0	0	200	300	0	0	0	0	0	0	0	200	903	0	0	0	0	0	0	0	603	903	0
381	1	0	0	0	0	0	0	200	300	0	0	0	0	0	0	0	200	903	0	0	0	0	0	0	0	603	903	0
381	2	0	0	0	0	0	0	200	300	0	0	0	0	0	0	0	200	903	0	0	0	0	0	0	0	603	903	0
381	3	0	0	0	0	0	0	200	300	0	0	0	0	0	0	0	200	903	0	0	0	0	0	0	0	603	903	0
381	4	0	0	0	0	0	0	200	300	0	0	0	0	0	0	0	200	903	0	0	0	0	0	0	0	603	903	0
381	5	0	0	0	0	0	0	200	300	0	0	0	0	0	0	0	200	903	0	0	0	0	0	0	0	603	903	0
381	6	0	0	0	0	0	0	200	300	0	0	0	0	0	0	0	200	903	0	0	0	0	0	0	0	603	903	0
381	7	0	0	0	0	0	0	200	300	0	0	0	0	0	0	0	200	903	0	0	0	0	0	0	0	603	903	0
381	8	0	0	0	0	0	0	200	300	0	0	0	0	0	0	0	200	903	0	0	0	0	0	0	0	603	903	0
381	9	0	0	0	0	0	0	200	300	0	0	0	0	0	0	0	200	903	0	0	0	0	0	0	0	603	903	0
382	0	0	0	0	0	0	0	200	300	0	0	0	0	0	0	0	200	903	0	0	0	0	0	0	0	603	903	0
382	1	0	0	0	0	0	0	200	300	0	0	0	0	0	0	0	200	903	0	0	0	0	0	0	0	603	903	0
382	2	0	0	0	0	0	0	200	300	0	0	0	0	0	0	0	200	903	0	0	0	0	0	0	0	603	903	0
382	3	0	0	0	0	0	0	200	300	0	0	0	0	0	0	0	200	903	0	0	0	0	0	0	0	603	903	0
382	4	0	0	0	0	0	0	200	300	0	0	0	0	0	0	0	200	903	0	0	0	0	0	0	0	603	903	0
382	5	0	0	0	0	0	0	200	300	0	0	0	0	0	0	0	200	903	0	0	0	0	0	0	0	603	903	0
382	6	0	0	0	0	0	0	200	300	0	0	0	0	0	0	0	200	903	0	0	0	0	0	0	0	603	903	0
382	7	0	0	0	0	0	0	200	300	0	0	0	0	0	0	0	200	903	0	0	0	0	0	0	0	603	903	0
382	8	0	0	0	0	0	0	200	300	0	0	0	0	0	0	0	200	903	0	0	0	0	0	0	0	603	903	0
382	9	0	0	0	0	0	0	200	300	0	0	0	0	0	0	0	200	903	0	0	0	0	0	0	0	603	903	0
383	0	0	0	0	0	0	0	200	300	0	0	0	0	0	0	0	200	903	0	0	0	0	0	0	0	603	903	0
383	1	0	0	0	0	0	0	200	300	0	0	0	0	0	0	0	200	903	0	0	0	0	0	0	0	603	903	0
383	2	0	0	0	0	0	0	200	300	0	0	0	0	0	0	0	200	903	0	0	0	0	0	0	0	603	903	0
383	3	0	0	0	0	0	0	200	300	0	0	0	0	0	0	0	200	903	0	0	0	0	0	0	0	603	903	0
383	4	0	0	0	0	0	0	200	300	0	0	0	0	0	0	0	200	903	0	0	0	0	0	0	0	603	903	0
383	5	0	0	0	0	0	0	200	300	0	0	0	0	0	0	0	200	903	0	0	0	0	0	0	0	603	903	0
383	6	0	0	0	0	0	0	200	300	0	0	0	0	0	0	0	200	903	0	0	0	0	0	0	0	603	903	0
383	7	0	0	0	0	0	0	200	300	0	0	0	0	0	0	0	200	903	0	0	0	0	0	0	0	603	903	0
383	8	0	0	0	0	0	0	200	300	0	0	0	0	0	0	0	200	903	0	0	0	0	0	0	0	603	903	0
383	9	0	0	0	0	0	0	200	300	0	0	0	0	0	0	0	200	903	0	0	0	0	0	0	0	603	903	0
384	0	0	0	0	0	0	0	200	300	0	0	0	0	0	0	0	200	903	0	0	0	0	0	0	0	603	903	0
384	1	0	0	0	0	0	0	200	300	0	0	0	0	0	0	0	200	903	0	0	0	0	0	0	0	603	903	0
384	2	0	0	0	0	0	0	200	300	0	0	0	0	0	0	0	200	903	0	0	0	0	0	0	0	603	903	0
384	3	0	0	0	0	0	0	200	300	0	0	0	0	0	0	0	200	903	0	0	0	0	0	0	0	603	903	0
384	4	0	0	0	0	0	0	200	300	0	0	0	0	0	0	0	200	903	0	0	0	0	0	0	0	603	903	0
384	5	0	0	0	0	0	0	200	300	0	0	0	0	0	0	0	200	903	0	0	0	0	0	0	0	603	903	0
384	6	0	0	0	0	0	0	200	300	0	0	0	0	0	0	0	200	903	0	0	0	0	0	0	0	603	903	0
384	7	0	0	0	0	0	0	200	300	0	0	0	0	0	0	0	200	903	0	0	0	0	0	0	0	603	903	0
384	8	0	0	0	0	0	0	200	300	0	0	0	0	0	0	0	200	903	0	0	0	0	0	0	0	603	903	0
384	9	0	0	0	0	0	0	200	300	0	0	0	0	0	0	0	200	903	0	0	0	0	0	0	0	603	903	0
385	0	0	0	0	0	0	0	200	300	0	0	0	0	0	0	0	200	903	0	0	0	0	0	0	0	603	903	0
385	1	0	0	0	0	0	0	200	300	0	0	0	0	0	0	0	200	903	0	0	0	0	0	0	0	603	903	0
385	2	0	0	0	0	0	0	200	300	0	0	0	0	0	0	0	200	903	0	0	0	0	0	0	0	603	903	0
385	3	0	0	0	0	0	0	200	300	0	0	0	0	0	0	0	200	903	0	0	0	0	0	0	0	603	903	0
385	4	0	0	0	0	0	0	200	300	0	0	0	0	0	0	0	200	903	0	0	0	0	0	0	0	603	903	0
385	5	0	0	0	0	0	0	200	300	0	0	0	0	0	0	0	200	903	0	0	0	0	0	0	0	603	903	0
385	6	0	0	0	0	0	0	200	300	0	0	0	0	0	0	0	200	903	0	0	0	0	0	0	0	603	903	0
385	7	0	0	0	0	0	0	200	300	0	0	0	0	0	0	0	200	903	0	0	0	0	0	0	0	603	903	0
385	8	0	0	0	0	0	0	200	300	0	0	0	0	0	0	0	200	903	0	0	0	0	0	0	0	603	903	0
385	9	0	0	0	0	0	0	200	300	0	0	0	0	0	0	0	200	903	0	0	0	0	0	0	0	603	903	0
386	0	0	0	0	0	0	0	200	300	0	0	0	0	0	0	0	200	903	0	0	0	0	0	0	0	603	903	0
386	1	0	0	0	0	0	0	200	300	0	0	0	0	0	0	0	200	903	0	0	0	0	0	0	0	603	903	0
386	2	0	0	0	0	0	0	200	300	0	0	0	0	0	0	0	200	903	0	0	0	0	0	0	0	603	903	0
386	3	0	0	0	0	0	0	200	300	0	0	0	0	0	0	0	200	903	0	0	0	0	0	0	0	603	903	0
386	4	0	0	0	0	0	0	200	300	0	0	0	0	0	0	0	200	903	0	0	0	0	0	0	0	603	903	0
386	5	0	0	0	0	0	0	200	300	0	0	0	0	0	0	0	200	903	0	0	0	0	0	0	0	603	903	0
386	6	0	0	0	0	0	0	200	300	0	0	0	0	0	0	0	200	903	0	0	0	0	0	0	0	603	903	0
386	7	0	0	0	0	0	0	200	300	0	0	0	0	0	0	0	200	903	0	0	0	0	0	0	0	603	903	0
386	8	0	0	0	0	0	0	200	300	0	0	0	0	0	0	0	200	903	0	0	0	0	0	0	0	603	903	0
386	9	0	0	0	0	0	0	200	300	0	0	0	0	0	0	0	200	903	0	0	0	0	0	0	0	603	903	0
387	0	0	0	0	0	0	0	200	300	0	0	0	0	0	0	0	200	903	0	0	0	0	0	0	0	603	903	0
387	1	0	0	0	0	0	0	200	300	0	0	0	0	0	0	0	200	903	0	0	0	0	0	0	0	603	903	0
387	2	0	0	0	0	0	0	200	300	0	0	0	0	0	0	0	200	903	0	0	0	0	0	0	0	603	903	0
387	3	0	0	0	0	0	0	200	300	0	0	0	0	0	0	0	200	903	0	0	0	0	0	0	0	603	903	0
387	4	0	0	0	0	0	0	200	300	0	0	0	0	0	0	0	200	903	0	0	0	0	0	0	0	603	903	0
387	5	0	0	0	0	0	0	200	300	0	0	0	0	0	0	0	200	903	0	0	0	0	0	0	0	603	903	0
387	6	0	0	0	0	0	0	200	300	0	0	0	0	0	0	0	200	903	0	0	0	0	0	0	0	603	903	0
387	7	0	0	0	0	0	0	200	300	0	0	0	0	0	0	0	200	903	0	0	0	0	0	0	0	603	903	0
387	8	0	0	0	0	0	0	200	300	0	0	0	0	0	0	0	200	903	0	0	0	0	0	0	0	603	903	0
387	9	0	0	0	0	0	0	200	300	0	0	0	0	0	0	0	200	903	0	0	0	0	0	0	0	603	903	0
388	0	0	0	0	0	0	0	200	300	0	0	0	0	0	0	0	200	903	0	0	0	0	0	0	0	603	903	0
388	1	0	0	0	0	0	0	200	300	0	0	0	0	0	0	0	200	903	0	0	0	0	0	0	0	603	903	0
388	2	0	0	0	0	0	0	200	300	0	0	0	0	0	0	0	200	903	0	0	0	0	0	0	0	603	903	0
388	3	0	0	0	0	0	0	200	300	0	0	0	0	0	0	0	200	903	0	0	0	0	0	0	0	603	903	0
388	4	0	0	0	0	0	0	200	300	0	0	0	0	0	0	0	200	903	0	0	0	0	0	0	0	603	903	0
388	5	0	0	0	0	0	0	200	300	0	0	0	0	0	0	0	200	903	0	0	0	0	0	0	0	603	903	0
388	6	0	0	0	0	0	0	200	300	0	0	0	0	0	0	0	200	903	0	0	0	0	0	0	0	603	903	0
388	7	0	0	0	0	0	0	200	300	0	0	0	0	0	0	0	200	903	0	0	0	0	0	0	0	603	903	0
388	8	0	0	0	0	0	0	200	300	0	0	0	0	0	0	0	200	903	0	0	0	0	0	0	0	603	903	0
388	9	0	0	0	0	0	0	200	300	0	0	0	0	0	0	0	200	903	0	0	0	0	0	0	0	603	903	0
389	0	0	0	0	0	0	0	200	300	0	0	0	0	0	0	0	200	903	0	0	0	0	0	0	0	603	903	0
389	1	0	0	0	0	0	0	200	300	0	0	0	0	0	0	0	200	903	0	0	0	0	0	0	0	603	903	0
389	2	0	0	0	0	0	0	200	300	0	0	0	0	0	0	0	200	903	0	0	0	0	0	0	0	603	903	0
389	3	0	0	0	0	0	0	200	300	0	0	0	0	0	0	0	200	903	0	0	0	0	0	0	0	603	903	0
389	4	0	0	0	0	0	0	200	300	0	0	0	0	0	0	0	200	903	0	0	0	0	0	0	0	603	903	0
389	5	0	0	0	0	0	0	200	300	0	0	0	0	0	0	0	200	903	0	0	0	0	0	0	0	603	903	0
389	6	0	0	0	0	0	0	200	300	0	0	0	0	0	0	0	200	903	0	0	0	0	0	0	0	603	903	0
389	7	0	0	0	0	0	0	200	300	0	0	0	0	0	0	0	200	903	0	0	0	0	0	0	0	603	903	0
389	8	0	0	0	0	0	0	200	300	0	0	0	0	0	0	0	200	903	0	0	0	0	0	0	0	603	903	0
389	9	0	0	0	0	0	0	200	300	0	0	0	0	0	0	0	200	903	0	0	0	0	0	0	0	603	903	0
390	0	0	0	0	0	0	0	200	300	0	0	0	0	0	0	0	200	903	0	0	0	0	0	0	0	603	903	0
390	1	0	0	0	0	0	0	200	300	0	0	0	0	0	0	0	200	903	0	0	0	0	0	0	0	603	903	0
390	2	0	0	0	0	0	0	200	300	0	0	0	0	0	0	0	200	903	0	0	0	0	0	0	0	603	903	0
390	3	0	0	0	0	0	0	200	300	0	0	0	0	0	0	0	200	903	0	0	0	0	0	0	0	603	903	0
390	4	0	0	0	0	0	0	200	300	0	0	0	0	0	0	0	200	903	0	0	0	0	0	0	0	603	903	0
390	5	0	0	0	0	0	0	200	300	0	0	0	0	0	0	0	200	903	0	0	0	0	0	0	0	603	903	0
390	6	0	0	0	0	0	0	200	300	0	0	0	0	0	0	0	200	903	0	0	0	0	0	0	0	603	903	0
390	7	0	0	0	0	0	0	200	300	0	0	0	0	0	0	0	200	903	0	0	0	0	0	0	0	603	903	0
390	8	0	0	0	0	0	0	200	300	0	0	0	0	0	0	0	200	903	0	0	0	0	0	0	0	603	903	0
390	9	0	0	0	0	0	0	200	300	0	0	0	0	0	0	0	200	903	0	0	0	0	0	0	0	603	903	0
391	0	0	0	0	0	0	0	200	300	0	0	0	0	0	0	0	200	903	0	0	0	0	0	0	0	603	903	0
391	1	0	0	0	0	0	0	200	300	0	0	0	0	0	0	0	200	903	0	0	0	0	0	0	0	603	903	0
391	2	0	0	0	0	0	0	200	300	0	0	0	0	0	0	0	200	903	0	0	0	0	0	0	0	603	903	0
391	3	0	0	0	0	0	0	200	300	0	0	0	0	0	0	0	200	903	0	0	0	0	0	0	0	603	903	0
391	4	0	0	0	0	0	0	200	300	0	0	0	0	0	0	0	200	903	0	0	0	0	0	0	0	603	903	0
391	5	0	0	0	0	0	0	200	300	0	0	0	0	0	0	0	200	903	0	0	0	0	0	0	0	603	903	0
391	6	0	0	0	0	0	0	200	300	0	0	0	0	0	0	0	200	903	0	0	0	0	0	0	0	603	903	0
391	7	0	0	0	0	0	0	200	300	0	0	0	0	0	0	0	200	903	0	0	0	0	0	0	0	603	903	0
391	8	0	0	0	0	0	0	200	300	0	0	0	0	0	0	0	200	903	0	0	0	0	0	0	0	603	903	0
391	9	0	0	0	0	0	0	200	300	0	0	0	0	0	0	0	200	903	0	0	0	0	0	0	0	603	903	0
392	0	0	0	0	0	0	0	200	300	0	0	0	0	0	0	0	200	903	0	0	0	0	0	0	0	603	903	0
392	1	0	0	0	0	0	0	200	300	0	0	0	0	0	0	0	200	903	0	0	0	0	0	0	0	603	903	0
392	2	0	0	0	0	0	0	200	300	0	0	0	0	0	0	0	200	903	0	0	0	0	0	0	0	603	903	0
392	3	0	0	0	0	0	0	200	300	0	0	0	0	0	0	0	200	903	0	0	0	0	0	0	0	603	903	0
392	4	0	0	0	0	0	0	200	300	0	0	0	0	0	0	0	200	903	0	0	0	0	0	0	0	603	903	0
392	5	0	0	0	0	0	0	200	300	0	0	0	0	0	0	0	200	903	0	0	0	0	0	0	0	603	903	0
392	6	0	0	0	0	0	0	200	300	0	0	0	0	0	0	0	200	903	0	0	0	0	0	0	0	603	903	0
392	7	0	0	0	0	0	0	200	300	0	0	0	0	0	0	0	200	903	0	0	0	0	0	0	0	603	903	0
392	8	0	0	0	0	0	0	200	300	0	0	0	0	0	0	0	200	903	0	0	0	0	0	0	0	603	903	0
392	9	0	0	0	0	0	0	200	300	0	0	0	0	0	0	0	200	903	0	0	0	0	0	0	0	603	903	0
393	0	0	0	0	0	0	0	200	300	0	0	0	0	0	0	0	200	903	0	0	0	0	0	0	0	603	903	0
393	1	0	0	0	0	0	0	200	300	0	0	0	0	0	0	0	200	903	0	0	0	0	0	0	0	603	903	0
393	2	0	0	0	0	0	0	200	300	0	0	0	0	0	0	0	200	903	0	0	0	0	0	0	0	603	903	0
393	3	0	0	0	0	0	0	200	300	0	0	0	0	0	0	0	200	903	0	0	0	0	0	0	0	603	903	0
393	4	0	0	0	0	0	0	200	300	0	0	0	0	0	0	0	200	903	0	0	0	0	0	0	0	603	903	0
393	5	0	0	0	0	0	0	200	300	0	0	0	0	0	0	0	200	903	0	0	0	0	0	0	0	603	903	0
393	6	0	0	0	0	0	0	200	300	0	0	0	0	0	0	0	200	903	0	0	0	0	0	0	0	603	903	0
393	7	0	0	0	0	0	0	200	300	0	0	0	0	0	0	0	200	903	0	0	0	0	0	0	0	603	903	0
393	8	0	0	0	0	0	0	200	300	0	0	0	0	0	0	0	200	903	0	0	0	0	0	0	0	603	903	0
393	9	0	0	0	0	0	0	200	300	0	0	0	0	0	0	0	200	903	0	0	0	0	0	0	0	603	903	0
394	0	0	0	0	0	0	0	200	300	0	0	0	0	0	0	0	200	903	0	0	0	0	0	0	0	603	903	0
394	1	0	0	0	0	0	0	200	300	0	0	0	0	0	0	0	200	903	0	0	0	0	0	0	0	603	903	0
394	2	0	0	0	0	0	0	200	300	0	0	0	0	0	0	0	200	903	0	0	0	0	0	0	0	603	903	0
394	3	0	0	0	0	0	0	200	300	0	0	0	0	0	0	0	200	903	0	0	0	0	0	0	0	603	903	0
394	4	0	0	0	0	0	0	200	300	0	0	0	0	0	0	0	200	903	0	0	0	0	0	0	0	603	903	0
394	5	0	0	0	0	0	0	200	300	0	0	0	0	0	0	0	200	903	0	0	0	0	0	0	0	603	903	0
394	6	0	0	0	0	0	0	200	300	0	0	0	0	0	0	0	200	903	0	0	0	0	0	0	0	603	903	0
394	7	0	0	0	0	0	0	200	300	0	0	0	0	0	0	0	200	903	0	0	0	0	0	0	0	603	903	0
394	8	0	0	0	0	0	0	200	300	0	0	0	0	0	0	0	200	903	0	0	0	0	0	0	0	603	903	0
394	9	0	0	0	0	0	0	200	300	0	0	0	0	0	0	0	200	903	0	0	0	0	0	0	0	603	903	0
395	0	0	0	0	0	0	0	200	300	0	0	0	0	0	0	0	200	903	0	0	0	0	0	0	0	603	903	0
395	1	0	0	0	0	0	0	200	300	0	0	0	0	0	0	0	200	903	0	0	0	0	0	0	0	603	903	0
395	2	0	0	0	0	0	0	200	300	0	0	0	0	0	0	0	200	903	0	0	0	0	0	0	0	603	903	0
395	3	0	0	0	0	0	0	200	300	0	0	0	0	0	0	0	200	903	0	0	0	0	0	0	0	603	903	0
395	4	0	0	0	0	0	0	200	300	0	0	0	0	0	0	0	200	903	0	0	0	0	0	0	0	603	903	0
395	5	0	0	0	0	0	0	200	300	0	0	0	0	0	0	0	200	903	0	0	0	0	0	0	0	603	903	0
395	6	0	0	0	0	0	0	200	300	0	0	0	0	0	0	0	200	903	0	0	0	0	0	0	0	603	903	0
395	7	0	0	0	0	0	0	200	300	0	0	0	0	0	0	0	200	903	0	0	0	0	0	0	0	603	903	0
395	8	0	0	0	0	0	0	200	300	0	0	0	0	0	0	0	200	903	0	0	0	0	0	0	0	603	903	0
395	9	0	0	0	0	0	0	200	300	0	0	0	0	0	0	0	200	903	0	0	0	0	0	0	0	603	903	0
396	0	0	0	0	0	0	0	200	300	0	0	0	0	0	0	0	200	903	0	0	0	0	0	0	0	603	903	0
396	1	0	0	0	0	0	0	200	300	0	0	0	0	0	0	0	200	903	0	0	0	0	0	0	0	603	903	0
396	2	0	0	0	0	0	0	200	300	0	0	0	0	0	0	0	200	903	0	0	0	0	0	0	0	603	903	0
396	3	0	0	0	0	0	0	200	300	0	0	0	0	0	0	0	200	903	0	0	0	0	0	0	0	603	903	0
396	4	0	0	0	0	0	0	200	300	0	0	0	0	0	0	0	200	903	0	0	0	0	0	0	0	603	903	0
396	5	0	0	0	0	0	0	200	300	0	0	0	0	0	0	0	200	903	0	0	0	0	0	0	0	603	903	0
396	6	0	0	0	0	0	0	200	300	0	0	0	0	0	0	0	200	903	0	0	0	0	0	0	0	603	903	0
396	7	0	0	0	0	0	0	200	300	0	0	0	0	0	0	0	200	903	0	0	0	0	0	0	0	603	903	0
396	8	0	0	0	0	0	0	200	300	0	0	0	0	0	0	0	200	903	0	0	0	0	0	0	0	603	903	0
396	9	0	0	0	0	0	0	200	300	0	0	0	0	0	0	0	200	903	0	0	0	0	0	0	0	603	903	0
397	0	0	0	0	0	0	0	200	300	0	0	0	0	0	0	0	200	903	0	0	0	0	0	0	0	603	903	0
397	1	0	0	0	0	0	0	200	300	0	0	0	0	0	0	0	200	903	0	0	0	0	0	0	0	603	903	0
397	2	0	0	0	0	0	0	200	300	0	0	0	0	0	0	0	200	903	0	0	0	0	0	0	0	603	903	0
397	3	0	0	0	0	0	0	200	300	0	0	0	0	0	0	0	200	903	0	0	0	0	0	0	0	603	903	0
397	4	0	0	0	0	0	0	200	300	0	0	0	0	0	0	0	200	903	0	0	0	0	0	0	0	603	903	0
397	5	0	0	0	0	0	0	200	300	0	0	0	0	0	0	0	200	903	0	0	0	0	0	0	0	603	903	0
397	6	0	0	0	0	0	0	200	300	0	0	0	0	0	0	0	200	903	0	0	0	0	0	0	0	603	903	0
397	7	0	0	0	0	0	0	200	300	0	0	0	0	0	0	0	200	903	0	0	0	0	0	0	0	603	903	0
397	8	0	0	0	0	0	0	200	300	0	0	0	0	0	0	0	200	903	0	0	0	0	0	0	0	603	903	0
397	9	0	0	0	0	0	0	200	300	0	0	0	0	0	0	0	200	903	0	0	0	0	0	0	0	603	903	0
398	0	0	0	0	0	0	0	200	300	0	0	0	0	0	0	0	200	903	0	0	0	0	0	0	0	603	903	0
398	1	0	0	0	0	0	0	200	300	0	0	0	0	0	0	0	200	903	0	0	0	0	0	0	0	603	903	0
398	2	0	0	0	0	0	0	200	300	0	0	0	0	0	0	0	200	903	0	0	0	0	0	0	0	603	903	0
398	3	0	0	0	0	0	0	200	300	0	0	0	0	0	0	0	200	903	0	0	0	0	0	0	0	603	903	0
398	4	0	0	0	0	0	0	200	300	0	0	0	0	0	0	0	200	903	0	0	0	0	0	0	0	603	903	0
398	5	0	0	0	0	0	0	200	300	0	0	0	0	0	0	0	200	903	0	0	0	0	0	0	0	603	903	0
398	6	0	0	0	0	0	0	200	300	0	0	0	0	0	0	0	200	903	0	0	0	0	0	0	0	603	903	0
398	7	0	0	0	0	0	0	200	300	0	0	0	0	0	0	0	200	903	0	0	0	0	0	0	0	603	903	0
398	8	0	0	0	0	0	0	200	300	0	0	0	0	0	0	0	200	903	0	0	0	0	0	0	0	603	903	0
398	9	0	0	0	0	0	0	200	300	0	0	0	0	0	0	0	200	903	0	0	0	0	0	0	0	603	903	0
399	0	0	0	0	0	0	0	200	300	0	0	0	0	0	0	0	200	903	0	0	0	0	0	0	0	603	903	0
399	1	0	0	0	0	0	0	200	300	0	0	0	0	0	0	0	200	903	0	0	0	0	0	0	0	603	903	0
399	2	0	0	0	0	0	0	200	300	0	0	0	0	0	0	0	200	903	0	0	0	0	0	0	0	603	903	0
399	3	0	0	0	0	0	0	200	300	0	0	0	0	0	0	0	200	903	0	0	0	0	0	0	0	603	903	0
399	4	0	0	0	0	0	0	200	300	0	0	0	0	0	0	0	200	903	0	0	0	0	0	0	0	603	903	0
399	5	0	0	0	0	0	0	200	300	0	0	0	0	0	0	0	200	903	0	0	0	0	0	0	0	603	903	0
399	6	0	0	0	0	0	0	200	300	0	0	0	0	0	0	0	200	903	0	0	0	0	0	0	0	603	903	0
399	7	0	0	0	0	0	0	200	300	0	0	0	0	0	0	0	200	903	0	0	0	0	0	0	0	603	903	0
399	8	0	0	0	0	0	0	200	300	0	0	0	0	0	0	0	200	903	0	0	0	0	0	0	0	603	903	0
399	9	0	0	0	0	0	0	200	300	0	0	0	0	0	0	0	200	903	0	0	0	0	0	0	0	603	903	0
400	0	0	0	0	0	0	0	200	300	0	0	0	0	0	0	0	200	903	0	0	0	0	0	0	0	603	903	0
400	1	0	0	0	0	0	0	200	300	0	0	0	0	0	0	0	200	903	0	0	0	0	0	0	0	603	903	0
400	2	0	0	0	0	0	0	200	300	0	0	0	0	0	0	0	200	903	0	0	0	0	0	0	0	603	903	0
400	3	0	0	0	0	0	0	200	300	0	0	0	0	0	0	0	200	903	0	0	0	0	0	0	0	603	903	0
400	4	0	0	0	0	0	0	200	300	0	0	0	0	0	0	0	200	903	0	0	0	0	0	0	0	603	903	0
400	5	0	0	0	0	0	0	200	300	0	0	0	0	0	0	0	200	903	0	0	0	0	0	0	0	603	903	0
400	6	0	0	0	0	0	0	200	300	0	0	0	0	0	0	0	200	903	0	0	0	0	0	0	0	603	903	0
400	7	0	0	0	0	0	0	200	300	0	0	0	0	0	0	0	200	903	0	0	0	0	0	0	0	603	903	0
400	8	0	0	0	0	0	0	200	300	0	0	0	0	0	0	0	200	903	0	0	0	0	0	0	0	603	903	0
400	9	0	0	0	0	0	0	200	300	0	0	0	0	0	0	0	200	903	0	0	0	0	0	0	0	603	903	0
401	0	0	0	0	0	0	0	200	300	0	0	0	0	0	0	0	200	903	0	0	0	0	0	0	0	603	903	0
401	1	0	0	0	0	0	0	200	300	0	0	0	0	0	0	0	200	903	0	0	0	0	0	0	0	603	903	0
401	2	0	0	0	0	0	0	200	300	0	0	0	0	0	0	0	200	903	0	0	0	0	0	0	0	603	903	0
401	3	0	0	0	0	0	0	200	300	0	0	0	0	0	0	0	200	903	0	0	0	0	0	0	0	603	903	0
401	4	0	0	0	0	0	0	200	300	0	0	0	0	0	0	0	200	903	0	0	0	0	0	0	0	603	903	0
401	5	0	0	0	0	0	0	200	300	0	0	0	0	0	0	0	200	903	0	0	0	0	0	0	0	603	903	0
401	6	0	0	0	0	0	0	200	300	0	0	0	0	0	0	0	200	903	0	0	0	0	0	0	0	603	903	0
401	7	0	0	0	0	0	0	200	300	0	0	0	0	0	0	0	200	903	0	0	0	0	0	0	0	603	903	0
401	8	0	0	0	0	0	0	200	300	0	0	0	0	0	0	0	200	903	0	0	0	0	0	0	0	603	903	0
401	9	0	0	0	0	0	0	200	300	0	0	0	0	0	0	0	200	903	0	0	0	0	0	0	0	603	903	0
402	0	0	0	0	0	0	0	200	300	0	0	0	0	0	0	0	200	903	0	0	0	0	0	0	0	603	903	0
402	1	0	0	0	0	0	0	200	300	0	0	0	0	0	0	0	200	903	0	0	0	0	0	0	0	603	903	0
402	2	0	0	0	0	0	0	200	300	0	0	0	0	0	0	0	200	903	0	0	0	0	0	0	0	603	903	0
402	3	0	0	0	0	0	0	200	300	0	0	0	0	0	0	0	200	903	0	0	0	0	0	0	0	603	903	0
402	4	0	0	0	0	0	0	200	300	0	0	0	0	0	0	0	200	903	0	0	0	0	0	0	0	603	903	0
402	5	0	0	0	0	0	0	200	300	0	0	0	0	0	0	0	200	903	0	0	0	0	0	0	0	603	903	0
402	6	0	0	0	0	0	0	200	300	0	0	0	0	0	0	0	200	903	0	0	0	0	0	0	0	603	903	0
402	7	0	0	0	0	0	0	200	300	0	0	0	0	0	0	0	200	903	0	0	0	0	0	0	0	603	903	0
402	8	0	0	0	0	0	0	200	300	0	0	0	0	0	0	0	200	903	0	0	0	0	0	0	0	603	903	0
402	9	0	0	0	0	0	0	200	300	0	0	0	0	0	0	0	200	903	0	0	0	0	0	0	0	603	903	0
403	0	0	0	0	0	0	0	200	300	0	0	0	0	0	0	0	200	903	0	0	0	0	0	0	0	603	903	0
403	1	0	0	0	0	0	0	200	300	0	0	0	0	0	0	0	200	903	0	0	0	0	0	0	0	603	903	0
403	2	0	0	0	0	0	0	200	300	0	0	0	0	0	0	0	200	903	0	0	0	0	0	0	0	603	903	0
403	3	0	0	0	0	0	0	200	300	0	0	0	0	0	0	0	200	903	0	0	0	0	0	0	0	603	903	0
403	4	0	0	0	0	0	0	200	300	0	0	0	0	0	0	0	200	903	0	0	0	0	0	0	0	603	903	0
403	5	0	0	0	0	0	0	200	300	0	0	0	0	0	0	0	200	903	0	0	0	0	0	0	0	603	903	0
403	6	0	0	0	0	0	0	200	300	0	0	0	0	0	0	0	200	903	0	0	0	0	0	0	0	603	903	0
403	7	0	0	0	0	0	0	200	300	0	0	0	0	0	0	0	200	903	0	0	0	0	0	0	0	603	903	0
403	8	0	0	0	0	0	0	200	300	0	0	0	0	0	0	0	200	903	0	0	0	0	0	0	0	603	903	0
403	9	0	0	0	0	0	0	200	300	0	0	0	0	0	0	0	200	903	0	0	0	0	0	0	0	603	903	0
404	0	0	0	0	0	0	0	200	300	0	0	0	0	0	0	0	200	903	0	0	0	0	0	0	0	603	903	0
404	1	0	0	0	0	0	0	200	300	0	0	0	0	0	0	0	200	903	0	0	0	0	0	0	0	603	903	0
404	2	0	0	0	0	0	0	200	300	0	0	0	0	0	0	0	200	903	0	0	0	0	0	0	0	603	903	0
404	3	0	0	0	0	0	0	200	300	0	0	0	0	0	0	0	200	903	0	0	0	0	0	0	0	603	903	0
404	4	0	0	0	0	0	0	200	300	0	0	0	0	0	0	0	200	903	0	0	0	0	0	0	0	603	903	0
404	5	0	0	0	0	0	0	200	300	0	0	0	0	0	0	0	200	903	0	0	0	0	0	0	0	603	903	0
404	6	0	0	0	0	0	0	200	300	0	0	0	0	0	0	0	200	903	0	0	0	0	0	0	0	603	903	0
404	7	0	0	0	0	0	0	200	300	0	0	0	0	0	0	0	200	903	0	0	0	0	0	0	0	603	903	0
404	8	0	0	0	0	0	0	200	300	0	0	0	0	0	0	0	200	903	0	0	0	0	0	0	0	603	903	0
404	9	0	0	0	0	0	0	200	300	0	0	0	0	0	0	0	200	903	0	0	0	0	0	0	0	603	903	0
405	0	0	0	0	0	0	0	200	300	0	0	0	0	0	0	0	200	903	0	0	0	0	0	0	0	603	903	0
405	1	0	0	0	0	0	0	200	300	0	0	0	0	0	0	0	200	903	0	0	0	0	0	0	0	603	903	0
405	2	0	0	0	0	0	0	200	300	0	0	0	0	0	0	0	200	903	0	0	0	0	0	0	0	603	903	0
405	3	0	0	0	0	0	0	200	300	0	0	0	0	0	0	0	200	903	0	0	0	0	0	0	0	603	903	0
405	4	0	0	0	0	0	0	200	300	0	0	0	0	0	0	0	200	903	0	0	0	0	0	0	0	603	903	0
405	5	0	0	0	0	0	0	200	300	0	0	0	0	0	0	0	200	903	0	0	0	0	0	0	0	603	903	0
405	6	0	0	0	0	0	0	200	300	0	0	0	0	0	0	0	200	903	0	0	0	0	0	0	0	603	903	0
405	7	0	0	0	0	0	0	200	300	0	0	0	0	0	0	0	200	903	0	0	0	0	0	0	0	603	903	0
405	8	0	0	0	0	0	0	200	300	0	0	0	0	0	0	0	200	903	0	0	0	0	0	0	0	603	903	0
405	9	0	0	0	0	0	0	200	300	0	0	0	0	0	0	0	200	903	0	0	0	0	0	0	0	603	903	0
406	0	0	0	0	0	0	0	200	300	0	0	0	0	0	0	0	200	903	0	0	0	0	0	0	0	603	903	0
406	1	0	0	0	0	0	0	200	300	0	0	0	0	0	0	0	200	903	0	0	0	0	0	0	0	603	903	0
406	2	0	0	0	0	0	0	200	300	0	0	0	0	0	0	0	200	903	0	0	0	0	0	0	0	603	903	0
406	3	0	0	0	0	0	0	200	300	0	0	0	0	0	0	0	200	903	0	0	0	0	0	0	0	603	903	0
406	4	0	0	0	0	0	0	200	300	0	0	0	0	0	0	0	200	903	0	0	0	0	0	0	0	603	903	0
406	5	0	0	0	0	0	0	200	300	0	0	0	0	0	0	0	200	903	0	0	0	0	0	0	0	603	903	0
406	6	0	0	0	0	0	0	200	300	0	0	0	0	0	0	0	200	903	0	0	0	0	0	0	0	603	903	0
406	7	0	0	0	0	0	0	200	300	0	0	0	0	0	0	0	200	903	0	0	0	0	0	0	0	603	903	0
406	8	0	0	0	0	0	0	200	300	0	0	0	0	0	0	0	200	903	0	0	0	0	0	0	0	603	903	0
406	9	0	0	0	0	0	0	200	300	0	0	0	0	0	0	0	200	903	0	0	0	0	0	0	0	603	903	0
407	0	0	0	0	0	0	0	200	300	0	0	0	0	0	0	0	200	903	0	0	0	0	0	0	0	603	903	0
407	1	0	0	0	0	0	0	200	300	0	0	0	0	0	0	0	200	903	0	0	0	0	0	0	0	603	903	0
407	2	0	0	0	0	0	0	200	300	0	0	0	0	0	0	0	200	903	0	0	0	0	0	0	0	603	903	0
407	3	0	0	0	0	0	0	200	300	0	0	0	0	0	0	0	200	903	0	0	0	0	0	0	0	603	903	0
407	4	0	0	0	0	0	0	200	300	0	0	0	0	0	0	0	200	903	0	0	0	0	0	0	0	603	903	0
407	5	0	0	0	0	0	0	200	300	0	0	0	0	0	0	0	200	903	0	0	0	0	0	0	0	603	903	0
407	6	0	0	0	0	0	0	200	300	0	0	0	0	0	0	0	200	903	0	0	0	0	0	0	0	603	903	0
407	7	0	0	0	0	0	0	200	300	0	0	0	0	0	0	0	200	903	0	0	0	0	0	0	0	603	903	0
407	8	0	0	0	0	0	0	200	300	0	0	0	0	0	0	0	200	903	0	0	0	0	0	0	0	603	903	0
407	9	0	0	0	0	0	0	200	300	0	0	0	0	0	0	0	200	903	0	0	0	0	0	0	0	603	903	0
408	0	0	0	0	0	0	0	200	300	0	0	0	0	0	0	0	200	903	0	0	0	0	0	0	0	603	903	0
408	1	0	0	0	0	0	0	200	300	0	0	0	0	0	0	0	200	903	0	0	0	0	0	0	0	603	903	0
408	2	0	0	0	0	0	0	200	300	0	0	0	0	0	0	0	200	903	0	0	0	0	0	0	0	603	903	0
408	3	0	0	0	0	0	0	200	300	0	0	0	0	0	0	0	200	903	0	0	0	0	0	0	0	603	903	0
408	4	0	0	0	0	0	0	200	300	0	0	0	0	0	0	0	200	903	0	0	0	0	0	0	0	603	903	0
408	5	0	0	0	0	0	0	200	300	0	0	0	0	0	0	0	200	903	0	0	0	0	0	0	0	603	903	0
408	6	0	0	0	0	0	0	200	300	0	0	0	0	0	0	0	200	903	0	0	0	0	0	0	0	603	903	0
408	7	0	0	0	0	0	0	200	300	0	0	0	0	0	0	0	200	903	0	0	0	0	0	0	0	603	903	0
408	8	0	0	0	0	0	0	200	300	0	0	0	0	0	0	0	200	903	0	0	0	0	0	0	0	603	903	0
408	9	0	0	0	0	0	0	200	300	0	0	0	0	0	0	0	200	903	0	0	0	0	0	0	0	603	903	0
409	0	0	0	0	0	0	0	200	300	0	0	0	0	0	0	0	200	903	0	0	0	0	0	0	0	603	903	0
409	1	0	0	0	0	0	0	200	300	0	0	0	0	0	0	0	200	903	0	0	0	0	0	0	0	603	903	0
409	2	0	0	0	0	0	0	200	300	0	0	0	0	0	0	0	200	903	0	0	0	0	0	0	0	603	903	0
409	3	0	0	0	0	0	0	200	300	0	0	0	0	0	0	0	200	903	0	0	0	0	0	0	0	603	903	0
409	4	0	0	0	0	0	0	200	300	0	0	0	0	0	0	0	200	903	0	0	0	0	0	0	0	603	903	0
409	5	0	0	0	0	0	0	200	300	0	0	0	0	0	0	0	200	903	0	0	0	0	0	0	0	603	903	0
409	6	0	0	0	0	0	0	200	300	0	0	0	0	0	0	0	200	903	0	0	0	0	0	0	0	603	903	0
409	7	0	0	0	0	0	0	200	300	0	0	0	0	0	0	0	200	903	0	0	0	0	0	0	0	603	903	0
409	8	0	0	0	0	0	0	200	300	0	0	0	0	0	0	0	200	903	0	0	0	0	0	0	0	603	903	0
409	9	0	0	0	0	0	0	200	300	0	0	0	0	0	0	0	200	903	0	0	0	0	0	0	0	603	903	0
410	0	0	0	0	0	0	0	200	300	0	0	0	0	0	0	0	200	903	0	0	0	0	0	0	0	603	903	0
410	1	0	0	0	0	0	0	200	300	0	0	0	0	0	0	0	200	903	0	0	0	0	0	0	0	603	903	0
410	2	0	0	0	0	0	0	200	300	0	0	0	0	0	0	0	200	903	0	0	0	0	0	0	0	603	903	0
410	3	0	0	0	0	0	0	200	300	0	0	0	0	0	0	0	200	903	0	0	0	0	0	0	0	603	903	0
410	4	0	0	0	0	0	0	200	300	0	0	0	0	0	0	0	200	903	0	0	0	0	0	0	0	603	903	0
410	5	0	0	0	0	0	0	200	300	0	0	0	0	0	0	0	200	903	0	0	0	0	0	0	0	603	903	0
410	6	0	0	0	0	0	0	200	300	0	0	0	0	0	0	0	200	903	0	0	0	0	0	0	0	603	903	0
410	7	0	0	0	0	0	0	200	300	0	0	0	0	0	0	0	200	903	0	0	0	0	0	0	0	603	903	0
410	8	0	0	0	0	0	0	200	300	0	0	0	0	0	0	0	200	903	0	0	0	0	0	0	0	603	903	0
410	9	0	0	0	0	0	0	200	300	0	0	0	0	0	0	0	200	903	0	0	0	0	0	0	0	603	903	0
411	0	0	0	0	0	0	0	200	300	0	0	0	0	0	0	0	200	903	0	0	0	0	0	0	0	603	903	0
411	1	0	0	0	0	0	0	200	300	0	0	0	0	0	0	0	200	903	0	0	0	0	0	0	0	603	903	0
411	2	0	0	0	0	0	0	200	300	0	0	0	0	0	0	0	200	903	0	0	0	0	0	0	0	603	903	0
411	3	0	0	0	0	0	0	200	300	0	0	0	0	0	0	0	200	903	0	0	0	0	0	0	0	603	903	0
411	4	0	0	0	0	0	0	200	300	0	0	0	0	0	0	0	200	903	0	0	0	0	0	0	0	603	903	0
411	5	0	0	0	0	0	0	200	300	0	0	0	0	0	0	0	200	903	0	0	0	0	0	0	0	603	903	0
411	6	0	0	0	0	0	0	200	300	0	0	0	0	0	0	0	200	903	0	0	0	0	0	0	0	603	903	0
411	7	0	0	0	0	0	0	200	300	0	0	0	0	0	0	0	200	903	0	0	0	0	0	0	0	603	903	0
411	8	0	0	0	0	0	0	200	300	0	0	0	0	0	0	0	200	903	0	0	0	0	0	0	0	603	903	0
411	9	0	0	0	0	0	0	200	300	0	0	0	0	0	0	0	200	903	0	0	0	0	0	0	0	603	903	0
412	0	0	0	0	0	0	0	200	300	0	0	0	0	0	0	0	200	903	0	0	0	0	0	0	0	603	903	0
412	1	0	0	0	0	0	0	200	300	0	0	0	0	0	0	0	200	903	0	0	0	0	0	0	0	603	903	0
412	2	0	0	0	0	0	0	200	300	0	0	0	0	0	0	0	200	903	0	0	0	0	0	0	0	603	903	0
412	3	0	0	0	0	0	0	200	300	0	0	0	0	0	0	0	200	903	0	0	0	0	0	0	0	603	903	0
412	4	0	0	0	0	0	0	200	300	0	0	0	0	0	0	0	200	903	0	0	0	0	0	0	0	603	903	0
412	5	0	0	0	0	0	0	200	300	0	0	0	0	0	0	0	200	903	0	0	0	0	0	0	0	603	903	0
412	6	0	0	0	0	0	0	200	300	0	0	0	0	0	0	0	200	903	0	0	0	0	0	0	0	603	903	0
412	7	0	0	0	0	0	0	200	300	0	0	0	0	0	0	0	200	903	0	0	0	0	0	0	0	603	903	0
412	8	0	0	0	0	0	0	200	300	0	0	0	0	0	0	0	200	903	0	0	0	0	0	0	0	603	903	0
412	9	0	0	0	0	0	0	200	300	0	0	0	0	0	0	0	200	903	0	0	0	0	0	0	0	603	903	0
413	0	0	0	0	0	0	0	200	300	0	0	0	0	0	0	0	200	903	0	0	0	0	0	0	0	603	903	0
413	1	0	0	0	0	0	0	200	300	0	0	0	0	0	0	0	200	903	0	0	0	0	0	0	0	603	903	0
413	2	0	0	0	0	0	0	200	300	0	0	0	0	0	0	0	200	903	0	0	0	0	0	0	0	603	903	0
413	3	0	0	0	0	0	0	200	300	0	0	0	0	0	0	0	200	903	0	0	0	0	0	0	0	603	903	0
413	4	0	0	0	0	0	0	200	300	0	0	0	0	0	0	0	200	903	0	0	0	0	0	0	0	603	903	0
413	5	0	0	0	0	0	0	200	300	0	0	0	0	0	0	0	200	903	0	0	0	0	0	0	0	603	903	0
413	6	0	0	0	0	0	0	200	300	0	0	0	0	0	0	0	200	903	0	0	0	0	0	0	0	603	903	0
413	7	0	0	0	0	0	0	200	300	0	0	0	0	0	0	0	200	903	0	0	0	0	0	0	0	603	903	0
413	8	0	0	0	0	0	0	200	300	0	0	0	0	0	0	0	200	903	0	0	0	0	0	0	0	603	903	0
413	9	0	0	0	0	0	0	200	300	0	0	0	0	0	0	0	200	903	0	0	0	0	0	0	0	603	903	0
414	0	0	0	0	0	0	0	200	300	0	0	0	0	0	0	0	200	903	0	0	0	0	0	0	0	603	903	0
414	1	0	0	0	0	0	0	200	300	0	0	0	0	0	0	0	200	903	0	0	0	0	0	0	0	603	903	0
414	2	0	0	0	0	0	0	200	300	0	0	0	0	0	0	0	200	903	0	0	0	0	0	0	0	603	903	0
414	3	0	0	0	0	0	0	200	300	0	0	0	0	0	0	0	200	903	0	0	0	0	0	0	0	603	903	0
414	4	0	0	0	0	0	0	200	300	0	0	0	0	0	0	0	200	903	0	0	0	0	0	0	0	603	903	0
414	5	0	0	0	0	0	0	200	300	0	0	0	0	0	0	0	200	903	0	0	0	0	0	0	0	603	903	0
414	6	0	0	0	0	0	0	200	300	0	0	0	0	0	0	0	200	903	0	0	0	0	0	0	0	603	903	0
414	7	0	0	0	0	0	0	200	300	0	0	0	0	0	0	0	200	903	0	0	0	0	0	0	0	603	903	0
414	8	0	0	0	0	0	0	200	300	0	0	0	0	0	0	0	200	903	0	0	0	0	0	0	0	603	903	0
414	9	0	0	0	0	0	0	200	300	0	0	0	0	0	0	0	200	903	0	0	0	0	0	0	0	603	903	0
415	0	0	0	0	0	0	0	200	300	0	0	0	0	0	0	0	200	903	0	0	0	0	0	0	0	603	903	0
415	1	0	0	0	0	0	0	200	300	0	0	0	0	0	0	0	200	903	0	0	0	0	0	0	0	603	903	0
415	2	0	0	0	0	0	0	200	300	0	0	0	0	0	0	0	200	903	0	0	0	0	0	0	0	603	903	0
415	3	0	0	0	0	0	0	200	300	0	0	0	0	0	0	0	200	903	0	0	0	0	0	0	0	603	903	0
415	4	0	0	0	0	0	0	200	300	0	0	0	0	0	0	0	200	903	0	0	0	0	0	0	0	603	903	0
415	5	0	0	0	0	0	0	200	300	0	0	0	0	0	0	0	200	903	0	0	0	0	0	0	0	603	903	0
415	6	0	0	0	0	0	0	200	300	0	0	0	0	0	0	0	200	903	0	0	0	0	0	0	0	603	903	0
415	7	0	0	0	0	0	0	200	300	0	0	0	0	0	0	0	200	903	0	0	0	0	0	0	0	603	903	0
415	8	0	0	0	0	0	0	200	300	0	0	0	0	0	0	0	200	903	0	0	0	0	0	0	0	603	903	0
415	9	0	0	0	0	0	0	200	300	0	0	0	0	0	0	0	200	903	0	0	0	0	0	0	0	603	903	0
416	0	0	0	0	0	0	0	200	300	0	0	0	0	0	0	0	200	903	0	0	0	0	0	0	0	603	903	0
416	1	0	0	0	0	0	0	200	300	0	0	0	0	0	0	0	200	903	0	0	0	0	0	0	0	603	903	0
416	2	0	0	0	0	0	0	200	300	0	0	0	0	0	0	0	200	903	0	0	0	0	0	0	0	603	903	0
416	3	0	0	0	0	0	0	200	300	0	0	0	0	0	0	0	200	903	0	0	0	0	0	0	0	603	903	0
416	4	0	0	0	0	0	0	200	300	0	0	0	0	0	0	0	200	903	0	0	0	0	0	0	0	603	903	0
416	5	0	0	0	0	0	0	200	300	0	0	0	0	0	0	0	200	903	0	0	0	0	0	0	0	603	903	0
416	6	0	0	0	0	0	0	200	300	0	0	0	0	0	0	0	200	903	0	0	0	0	0	0	0	603	903	0
416	7	0	0	0	0	0	0	200	300	0	0	0	0	0	0	0	200	903	0	0	0	0	0	0	0	603	903	0
416	8	0	0	0	0	0	0	200	300	0	0	0	0	0	0	0	200	903	0	0	0	0	0	0	0	603	903	0
416	9	0	0	0	0	0	0	200	300	0	0	0	0	0	0	0	200	903	0	0	0	0	0	0	0	603	903	0
417	0	0	0	0	0	0	0	200	300	0	0	0	0	0	0	0	200	903	0	0	0	0	0	0	0	603	903	0
417	1	0	0	0	0	0	0	200	300	0	0	0	0	0	0	0	200	903	0	0	0	0	0	0	0	603	903	0
417	2	0	0	0	0	0	0	200	300	0	0	0	0	0	0	0	200	903	0	0	0	0	0	0	0	603	903	0
417	3	0	0	0	0	0	0	200	300	0	0	0	0	0	0	0	200	903	0	0	0	0	0	0	0	603	903	0
417	4	0	0	0	0	0	0	200	300	0	0	0	0	0	0	0	200	903	0	0	0	0	0	0	0	603	903	0
417	5	0	0	0	0	0	0	200	300	0	0	0	0	0	0	0	200	903	0	0	0	0	0	0	0	603	903	0
417	6	0	0	0	0	0	0	200	300	0	0	0	0	0	0	0	200	903	0	0	0	0	0	0	0	603	903	0
417	7	0	0	0	0	0	0	200	300	0	0	0	0	0	0	0	200	903	0	0	0	0	0	0	0	603	903	0
417	8	0	0	0	0	0	0	200	300	0	0	0	0	0	0	0	200	903	0	0	0	0	0	0	0	603	903	0
417	9	0	0	0	0	0	0	200	300	0	0	0	0	0	0	0	200	903	0	0	0	0	0	0	0	603	903	0
418	0	0	0	0	0	0	0	200	300	0	0	0	0	0	0	0	200	903	0	0	0	0	0	0	0	603	903	0
418	1	0	0	0	0	0	0	200	300	0	0	0	0	0	0	0	200	903	0	0	0	0	0	0	0	603	903	0
418	2	0	0	0	0	0	0	200	300	0	0	0	0	0	0	0	200	903	0	0	0	0	0	0	0	603	903	0
418	3	0	0	0	0	0	0	200	300	0	0	0	0	0	0	0	200	903	0	0	0	0	0	0	0	603	903	0
418	4	0	0	0	0	0	0	200	300	0	0	0	0	0	0	0	200	903	0	0	0	0	0	0	0	603	903	0
418	5	0	0	0	0	0	0	200	300	0	0	0	0	0	0	0	200	903	0	0	0	0	0	0	0	603	903	0
418	6	0	0	0	0	0	0	200	300	0	0	0	0	0	0	0	200	903	0	0	0	0	0	0	0	603	903	0
418	7	0	0	0	0	0	0	200	300	0	0	0	0	0	0	0	200	903	0	0	0	0	0	0	0	603	903	0
418	8	0	0	0	0	0	0	200	300	0	0	0	0	0	0	0	200	903	0	0	0	0	0	0	0	603	903	0
418	9	0	0	0	0	0	0	200	300	0	0	0	0	0	0	0	200	903	0	0	0	0	0	0	0	603	903	0
419	0	0	0	0	0	0	0	200	300	0	0	0	0	0	0	0	200	903	0	0	0	0	0	0	0	603	903	0
419	1	0	0	0	0	0	0	200	300	0	0	0	0	0	0	0	200	903	0	0	0	0	0	0	0	603	903	0
419	2	0	0	0	0	0	0	200	300	0	0	0	0	0	0	0	200	903	0	0	0	0	0	0	0	603	903	0
419	3	0	0	0	0	0	0	200	300	0	0	0	0	0	0	0	200	903	0	0	0	0	0	0	0	603	903	0
419	4	0	0	0	0	0	0	200	300	0	0	0	0	0	0	0	200	903	0	0	0	0	0	0	0	603	903	0
419	5	0	0	0	0	0	0	200	300	0	0	0	0	0	0	0	200	903	0	0	0	0	0	0	0	603	903	0
419	6	0	0	0	0	0	0	200	300	0	0	0	0	0	0	0	200	903	0	0	0	0	0	0	0	603	903	0
419	7	0	0	0	0	0	0	200	300	0	0	0	0	0	0	0	200	903	0	0	0	0	0	0	0	603	903	0
419	8	0	0	0	0	0	0	200	300	0	0	0	0	0	0	0	200	903	0	0	0	0	0	0	0	603	903	0
419	9	0	0	0	0	0	0	200	300	0	0	0	0	0	0	0	200	903	0	0	0	0	0	0	0	603	903	0
420	0	0	0	0	0	0	0	200	300	0	0	0	0	0	0	0	200	903	0	0	0	0	0	0	0	603	903	0
420	1	0	0	0	0	0	0	200	300	0	0	0	0	0	0	0	200	903	0	0	0	0	0	0	0	603	903	0
420	2	0	0	0	0	0	0	200	300	0	0	0	0	0	0	0	200	903	0	0	0	0	0	0	0	603	903	0
420	3	0	0	0	0	0	0	200	300	0	0	0	0	0	0	0	200	903	0	0	0	0	0	0	0	603	903	0
420	4	0	0	0	0	0	0	200	300	0	0	0	0	0	0	0	200	903	0	0	0	0	0	0	0	603	903	0
420	5	0	0	0	0	0	0	200	300	0	0	0	0	0	0	0	200	903	0	0	0	0	0	0	0	603	903	0
420	6	0	0	0	0	0	0	200	300	0	0	0	0	0	0	0	200	903	0	0	0	0	0	0	0	603	903	0
420	7	0	0	0	0	0	0	200	300	0	0	0	0	0	0	0	200	903	0	0	0	0	0	0	0	603	903	0
420	8	0	0	0	0	0	0	200	300	0	0	0	0	0	0	0	200	903	0	0	0	0	0	0	0	603	903	0
420	9	0	0	0	0	0	0	200	300	0	0	0	0	0	0	0	200	903	0	0	0	0	0	0	0	603	903	0
421	0	0	0	0	0	0	0	200	300	0	0	0	0	0	0	0	200	903	0	0	0	0	0	0	0	603	903	0
421	1	0	0	0	0	0	0	200	300	0	0	0	0	0	0	0	200	903	0	0	0	0	0	0	0	603	903	0
421	2	0	0	0	0	0	0	200	300	0	0	0	0	0	0	0	200	903	0	0	0	0	0	0	0	603	903	0
421	3	0	0	0	0	0	0	200	300	0	0	0	0	0	0	0	200	903	0	0	0	0	0	0	0	603	903	0
421	4	0	0	0	0	0	0	200	300	0	0	0	0	0	0	0	200	903	0	0	0	0	0	0	0	603	903	0
421	5	0	0	0	0	0	0	200	300	0	0	0	0	0	0	0	200	903	0	0	0	0	0	0	0	603	903	0
421	6	0	0	0	0	0	0	200	300	0	0	0	0	0	0	0	200	903	0	0	0	0	0	0	0	603	903	0
421	7	0	0	0	0	0	0	200	300	0	0	0	0	0	0	0	200	903	0	0	0	0	0	0	0	603	903	0
421	8	0	0	0	0	0	0	200	300	0	0	0	0	0	0	0	200	903	0	0	0	0	0	0	0	603	903	0
421	9	0	0	0	0	0	0	200	300	0	0	0	0	0	0	0	200	903	0	0	0	0	0	0	0	603	903	0
422	0	0	0	0	0	0	0	200	300	0	0	0	0	0	0	0	200	903	0	0	0	0	0	0	0	603	903	0
422	1	0	0	0	0	0	0	200	300	0	0	0	0	0	0	0	200	903	0	0	0	0	0	0	0	603	903	0
422	2	0	0	0	0	0	0	200	300	0	0	0	0	0	0	0	200	903	0	0	0	0	0	0	0	603	903	0
422	3	0	0	0	0	0	0	200	300	0	0	0	0	0	0	0	200	903	0	0	0	0	0	0	0	603	903	0
422	4	0	0	0	0	0	0	200	300	0	0	0	0	0	0	0	200	903	0	0	0	0	0	0	0	603	903	0
422	5	0	0	0	0	0	0	200	300	0	0	0	0	0	0	0	200	903	0	0	0	0	0	0	0	603	903	0
422	6	0	0	0	0	0	0	200	300	0	0	0	0	0	0	0	200	903	0	0	0	0	0	0	0	603	903	0
422	7	0	0	0	0	0	0	200	300	0	0	0	0	0	0	0	200	903	0	0	0	0	0	0	0	603	903	0
422	8	0	0	0	0	0	0	200	300	0	0	0	0	0	0	0	200	903	0	0	0	0	0	0	0	603	903	0
422	9	0	0	0	0	0	0	200	300	0	0	0	0	0	0	0	200	903	0	0	0	0	0	0	0	603	903	0
423	0	0	0	0	0	0	0	200	300	0	0	0	0	0	0	0	200	903	0	0	0	0	0	0	0	603	903	0
423	1	0	0	0	0	0	0	200	300	0	0	0	0	0	0	0	200	903	0	0	0	0	0	0	0	603	903	0
423	2	0	0	0	0	0	0	200	300	0	0	0	0	0	0	0	200	903	0	0	0	0	0	0	0	603	903	0
423	3	0	0	0	0	0	0	200	300	0	0	0	0	0	0	0	200	903	0	0	0	0	0	0	0	603	903	0
423	4	0	0	0	0	0	0	200	300	0	0	0	0	0	0	0	200	903	0	0	0	0	0	0	0	603	903	0
423	5	0	0	0	0	0	0	200	300	0	0	0	0	0	0	0	200	903	0	0	0	0	0	0	0	603	903	0
423	6	0	0	0	0	0	0	200	300	0	0	0	0	0	0	0	200	903	0	0	0	0	0	0	0	603	903	0
423	7	0	0	0	0	0	0	200	300	0	0	0	0	0	0	0	200	903	0	0	0	0	0	0	0	603	903	0
423	8	0	0	0	0	0	0	200	300	0	0	0	0	0	0	0	200	903	0	0	0	0	0	0	0	603	903	0
423	9	0	0	0	0	0	0	200	300	0	0	0	0	0	0	0	200	903	0	0	0	0	0	0	0	603	903	0
424	0	0	0	0	0	0	0	200	300	0	0	0	0	0	0	0	200	903	0	0	0	0	0	0	0	603	903	0
424	1	0	0	0	0	0	0	200	300	0	0	0	0	0	0	0	200	903	0	0	0	0	0	0	0	603	903	0
424	2	0	0	0	0	0	0	200	300	0	0	0	0	0	0	0	200	903	0	0	0	0	0	0	0	603	903	0
424	3	0	0	0	0	0	0	200	300	0	0	0	0	0	0	0	200	903	0	0	0	0	0	0	0	603	903	0
424	4	0	0	0	0	0	0	200	300	0	0	0	0	0	0	0	200	903	0	0	0	0	0	0	0	603	903	0
424	5	0	0	0	0	0	0	200	300	0	0	0	0	0	0	0	200	903	0	0	0	0	0	0	0	603	903	0
424	6	0	0	0	0	0	0	200	300	0	0	0	0	0	0	0	200	903	0	0	0	0	0	0	0	603	903	0
424	7	0	0	0	0	0	0	200	300	0	0	0	0	0	0	0	200	903	0	0	0	0	0	0	0	603	903	0
424	8	0	0	0	0	0	0	200	300	0	0	0	0	0	0	0	200	903	0	0	0	0	0	0	0	603	903	0
424	9	0	0	0	0	0	0	200	300	0	0	0	0	0	0	0	200	903	0	0	0	0	0	0	0	603	903	0
425	0	0	0	0	0	0	0	200	300	0	0	0	0	0	0	0	200	903	0	0	0	0	0	0	0	603	903	0
425	1	0	0	0	0	0	0	200	300	0	0	0	0	0	0	0	200	903	0	0	0	0	0	0	0	603	903	0
425	2	0	0	0	0	0	0	200	300	0	0	0	0	0	0	0	200	903	0	0	0	0	0	0	0	603	903	0
425	3	0	0	0	0	0	0	200	300	0	0	0	0	0	0	0	200	903	0	0	0	0	0	0	0	603	903	0
425	4	0	0	0	0	0	0	200	300	0	0	0	0	0	0	0	200	903	0	0	0	0	0	0	0	603	903	0
425	5	0	0	0	0	0	0	200	300	0	0	0	0	0	0	0	200	903	0	0	0	0	0	0	0	603	903	0
425	6	0	0	0	0	0	0	200	300	0	0	0	0	0	0	0	200	903	0	0	0	0	0	0	0	603	903	0
425	7	0	0	0	0	0	0	200	300	0	0	0	0	0	0	0	200	903	0	0	0	0	0	0	0	603	903	0
425	8	0	0	0	0	0	0	200	300	0	0	0	0	0	0	0	200	903	0	0	0	0	0	0	0	603	903	0
425	9	0	0	0	0	0	0	200	300	0	0	0	0	0	0	0	200	903	0	0	0	0	0	0	0	603	903	0
426	0	0	0	0	0	0	0	200	300	0	0	0	0	0	0	0	200	903	0	0	0	0	0	0	0	603	903	0
426	1	0	0	0	0	0	0	200	300	0	0	0	0	0	0	0	200	903	0	0	0	0	0	0	0	603	903	0
426	2	0	0	0	0	0	0	200	300	0	0	0	0	0	0	0	200	903	0	0	0	0	0	0	0	603	903	0
426	3	0	0	0	0	0	0	200	300	0	0	0	0	0	0	0	200	903	0	0	0	0	0	0	0	603	903	0
426	4	0	0	0	0	0	0	200	300	0	0	0	0	0	0	0	200	903	0	0	0	0	0	0	0	603	903	0
426	5	0	0	0	0	0	0	200	300	0	0	0	0	0	0	0	200	903	0	0	0	0	0	0	0	603	903	0
426	6	0	0	0	0	0	0	200	300	0	0	0	0	0	0	0	200	903	0	0	0	0	0	0	0	603	903	0
426	7	0	0	0	0	0	0	200	300	0	0	0	0	0	0	0	200	903	0	0	0	0	0	0	0	603	903	0
426	8	0	0	0	0	0	0	200	300	0	0	0	0	0	0	0	200	903	0	0	0	0	0	0	0	603	903	0
426	9	0	0	0	0	0	0	200	300	0	0	0	0	0	0	0	200	903	0	0	0	0	0	0	0	603	903	0
427	0	0	0	0	0	0	0	200	300	0	0	0	0	0	0	0	200	903	0	0	0	0	0	0	0	603	903	0
427	1	0	0	0	0	0	0	200	300	0	0	0	0	0	0	0	200	903	0	0	0	0	0	0	0	603	903	0
427	2	0	0	0	0	0	0	200	300	0	0	0	0	0	0	0	200	903	0	0	0	0	0	0	0	603	903	0
427	3	0	0	0	0	0	0	200	300	0	0	0	0	0	0	0	200	903	0	0	0	0	0	0	0	603	903	0
427	4	0	0	0	0	0	0	200	300	0	0	0	0	0	0	0	200	903	0	0	0	0	0	0	0	603	903	0
427	5	0	0	0	0	0	0	200	300	0	0	0	0	0	0	0	200	903	0	0	0	0	0	0	0	603	903	0
427	6	0	0	0	0	0	0	200	300	0	0	0	0	0	0	0	200	903	0	0	0	0	0	0	0	603	903	0
427	7	0	0	0	0	0	0	200	300	0	0	0	0	0	0	0	200	903	0	0	0	0	0	0	0	603	903	0
427	8	0	0	0	0	0	0	200	300	0	0	0	0	0	0	0	200	903	0	0	0	0	0	0	0	603	903	0
427	9	0	0	0	0	0	0	200	300	0	0	0	0	0	0	0	200	903	0	0	0	0	0	0	0	603	903	0
428	0	0	0	0	0	0	0	200	300	0	0	0	0	0	0	0	200	903	0	0	0	0	0	0	0	603	903	0
428	1	0	0	0	0	0	0	200	300	0	0	0	0	0	0	0	200	903	0	0	0	0	0	0	0	603	903	0
428	2	0	0	0	0	0	0	200	300	0	0	0	0	0	0	0	200	903	0	0	0	0	0	0	0	603	903	0
428	3	0	0	0	0	0	0	200	300	0	0	0	0	0	0	0	200	903	0	0	0	0	0	0	0	603	903	0
428	4	0	0	0	0	0	0	200	300	0	0	0	0	0	0	0	200	903	0	0	0	0	0	0	0	603	903	0
428	5	0	0	0	0	0	0	200	300	0	0	0	0	0	0	0	200	903	0	0	0	0	0	0	0	603	903	0
428	6	0	0	0	0	0	0	200	300	0	0	0	0	0	0	0	200	903	0	0	0	0	0	0	0	603	903	0
428	7	0	0	0	0	0	0	200	300	0	0	0	0	0	0	0	200	903	0	0	0	0	0	0	0	603	903	0
428	8	0	0	0	0	0	0	200	300	0	0	0	0	0	0	0	200	903	0	0	0	0	0	0	0	603	903	0
428	9	0	0	0	0	0	0	200	300	0	0	0	0	0	0	0	200	903	0	0	0	0	0	0	0	603	903	0
429	0	0	0	0	0	0	0	200	300	0	0	0	0	0	0	0	200	903	0	0	0	0	0	0	0	603	903	0
429	1	0	0	0	0	0	0	200	300	0	0	0	0	0	0	0	200	903	0	0	0	0	0	0	0	603	903	0
429	2	0	0	0	0	0	0	200	300	0	0	0	0	0	0	0	200	903	0	0	0	0	0	0	0	603	903	0
429	3	0	0	0	0	0	0	200	300	0	0	0	0	0	0	0	200	903	0	0	0	0	0	0	0	603	903	0
429	4	0	0	0	0	0	0	200	300	0	0	0	0	0	0	0	200	903	0	0	0	0	0	0	0	603	903	0
429	5	0	0	0	0	0	0	200	300	0	0	0	0	0	0	0	200	903	0	0	0	0	0	0	0	603	903	0
429	6	0	0	0	0	0	0	200	300	0	0	0	0	0	0	0	200	903	0	0	0	0	0	0	0	603	903	0
429	7	0	0	0	0	0	0	200	300	0	0	0	0	0	0	0	200	903	0	0	0	0	0	0	0	603	903	0
429	8	0	0	0	0	0	0	200	300	0	0	0	0	0	0	0	200	903	0	0	0	0	0	0	0	603	903	0
429	9	0	0	0	0	0	0	200	300	0	0	0	0	0	0	0	200	903	0	0	0	0	0	0	0	603	903	0
430	0	0	0	0	0	0	0	200	300	0	0	0	0	0	0	0	200	903	0	0	0	0	0	0	0	603	903	0
430	1	0	0	0	0	0	0	200	300	0	0	0	0	0	0	0	200	903	0	0	0	0	0	0	0	603	903	0
430	2	0	0	0	0	0	0	200	300	0	0	0	0	0	0	0	200	903	0	0	0	0	0	0	0	603	903	0
430	3	0	0	0	0	0	0	200	300	0	0	0	0	0	0	0	200	903	0	0	0	0	0	0	0	603	903	0
430	4	0	0	0	0	0	0	200	300	0	0	0	0	0	0	0	200	903	0	0	0	0	0	0	0	603	903	0
430	5	0	0	0	0	0	0	200	300	0	0	0	0	0	0	0	200	903	0	0	0	0	0	0	0	603	903	0
430	6	0	0	0	0	0	0	200	300	0	0	0	0	0	0	0	200	903	0	0	0	0	0	0	0	603	903	0
430	7	0	0	0	0	0	0	200	300	0	0	0	0	0	0	0	200	903	0	0	0	0	0	0	0	603	903	0
430	8	0	0	0	0	0	0	200	300	0	0	0	0	0	0	0	200	903	0	0	0	0	0	0	0	603	903	0
430	9	0	0	0	0	0	0	200	300	0	0	0	0	0	0	0	200	903	0	0	0	0	0	0	0	603	903	0
431	0	0	0	0	0	0	0	200	300	0	0	0	0	0	0	0	200	903	0	0	0	0	0	0	0	603	903	0
431	1	0	0	0	0	0	0	200	300	0	0	0	0	0	0	0	200	903	0	0	0	0	0	0	0	603	903	0
431	2	0	0	0	0	0	0	200	300	0	0	0	0	0	0	0	200	903	0	0	0	0	0	0	0	603	903	0
431	3	0	0	0	0	0	0	200	300	0	0	0	0	0	0	0	200	903	0	0	0	0	0	0	0	603	903	0
431	4	0	0	0	0	0	0	200	300	0	0	0	0	0	0	0	200	903	0	0	0	0	0	0	0	603	903	0
431	5	0	0	0	0	0	0	200	300	0	0	0	0	0	0	0	200	903	0	0	0	0	0	0	0	603	903	0
431	6	0	0	0	0	0	0	200	300	0	0	0	0	0	0	0	200	903	0	0	0	0	0	0	0	603	903	0
431	7	0	0	0	0	0	0	200	300	0	0	0	0	0	0	0	200	903	0	0	0	0	0	0	0	603	903	0
431	8	0	0	0	0	0	0	200	300	0	0	0	0	0	0	0	200	903	0	0	0	0	0	0	0	603	903	0
431	9	0	0	0	0	0	0	200	300	0	0	0	0	0	0	0	200	903	0	0	0	0	0	0	0	603	903	0
432	0	0	0	0	0	0	0	200	300	0	0	0	0	0	0	0	200	903	0	0	0	0	0	0	0	603	903	0
432	1	0	0	0	0	0	0	200	300	0	0	0	0	0	0	0	200	903	0	0	0	0	0	0	0	603	903	0
432	2	0	0	0	0	0	0	200	300	0	0	0	0	0	0	0	200	903	0	0	0	0	0	0	0	603	903	0
432	3	0	0	0	0	0	0	200	300	0	0	0	0	0	0	0	200	903	0	0	0	0	0	0	0	603	903	0
432	4	0	0	0	0	0	0	200	300	0	0	0	0	0	0	0	200	903	0	0	0	0	0	0	0	603	903	0
432	5	0	0	0	0	0	0	200	300	0	0	0	0	0	0	0	200	903	0	0	0	0	0	0	0	603	903	0
432	6	0	0	0	0	0	0	200	300	0	0	0	0	0	0	0	200	903	0	0	0	0	0	0	0	603	903	0
432	7	0	0	0	0	0	0	200	300	0	0	0	0	0	0	0	200	903	0	0	0	0	0	0	0	603	903	0
432	8	0	0	0	0	0	0	200	300	0	0	0	0	0	0	0	200	903	0	0	0	0	0	0	0	603	903	0
432	9	0	0	0	0	0	0	200	300	0	0	0	0	0	0	0	200	903	0	0	0	0	0	0	0	603	903	0
433	0	0	0	0	0	0	0	200	300	0	0	0	0	0	0	0	200	903	0	0	0	0	0	0	0	603	903	0
433	1	0	0	0	0	0	0	200	300	0	0	0	0	0	0	0	200	903	0	0	0	0	0	0	0	603	903	0
433	2	0	0	0	0	0	0	200	300	0	0	0	0	0	0	0	200	903	0	0	0	0	0	0	0	603	903	0
433	3	0	0	0	0	0	0	200	300	0	0	0	0	0	0	0	200	903	0	0	0	0	0	0	0	603	903	0
433	4	0	0	0	0	0	0	200	300	0	0	0	0	0	0	0	200	903	0	0	0	0	0	0	0	603	903	0
433	5	0	0	0	0	0	0	200	300	0	0	0	0	0	0	0	200	903	0	0	0	0	0	0	0	603	903	0
433	6	0	0	0	0	0	0	200	300	0	0	0	0	0	0	0	200	903	0	0	0	0	0	0	0	603	903	0
433	7	0	0	0	0	0	0	200	300	0	0	0	0	0	0	0	200	903	0	0	0	0	0	0	0	603	903	0
433	8	0	0	0	0	0	0	200	300	0	0	0	0	0	0	0	200	903	0	0	0	0	0	0	0	603	903	0
433	9	0	0	0	0	0	0	200	300	0	0	0	0	0	0	0	200	903	0	0	0	0	0	0	0	603	903	0
434	0	0	0	0	0	0	0	200	300	0	0	0	0	0	0	0	200	903	0	0	0	0	0	0	0	603	903	0
434	1	0	0	0	0	0	0	200	300	0	0	0	0	0	0	0	200	903	0	0	0	0	0	0	0	603	903	0
434	2	0	0	0	0	0	0	200	300	0	0	0	0	0	0	0	200	903	0	0	0	0	0	0	0	603	903	0
434	3	0	0	0	0	0	0	200	300	0	0	0	0	0	0	0	200	903	0	0	0	0	0	0	0	603	903	0
434	4	0	0	0	0	0	0	200	300	0	0	0	0	0	0	0	200	903	0	0	0	0	0	0	0	603	903	0
434	5	0	0	0	0	0	0	200	300	0	0	0	0	0	0	0	200	903	0	0	0	0	0	0	0	603	903	0
434	6	0	0	0	0	0	0	200	300	0	0	0	0	0	0	0	200	903	0	0	0	0	0	0	0	603	903	0
434	7	0	0	0	0	0	0	200	300	0	0	0	0	0	0	0	200	903	0	0	0	0	0	0	0	603	903	0
434	8	0	0	0	0	0	0	200	300	0	0	0	0	0	0	0	200	903	0	0	0	0	0	0	0	603	903	0
434	9	0	0	0	0	0	0	200	300	0	0	0	0	0	0	0	200	903	0	0	0	0	0	0	0	603	903	0
435	0	0	0	0	0	0	0	200	300	0	0	0	0	0	0	0	200	903	0	0	0	0	0	0	0	603	903	0
435	1	0	0	0	0	0	0	200	300	0	0	0	0	0	0	0	200	903	0	0	0	0	0	0	0	603	903	0
435	2	0	0	0	0	0	0	200	300	0	0	0	0	0	0	0	200	903	0	0	0	0	0	0	0	603	903	0
435	3	0	0	0	0	0	0	200	300	0	0	0	0	0	0	0	200	903	0	0	0	0	0	0	0	603	903	0
435	4	0	0	0	0	0	0	200	300	0	0	0	0	0	0	0	200	903	0	0	0	0	0	0	0	603	903	0
435	5	0	0	0	0	0	0	200	300	0	0	0	0	0	0	0	200	903	0	0	0	0	0	0	0	603	903	0
435	6	0	0	0	0	0	0	200	300	0	0	0	0	0	0	0	200	903	0	0	0	0	0	0	0	603	903	0
435	7	0	0	0	0	0	0	200	300	0	0	0	0	0	0	0	200	903	0	0	0	0	0	0	0	603	903	0
435	8	0	0	0	0	0	0	200	300	0	0	0	0	0	0	0	200	903	0	0	0	0	0	0	0	603	903	0
435	9	0	0	0	0	0	0	200	300	0	0	0	0	0	0	0	200	903	0	0	0	0	0	0	0	603	903	0
436	0	0	0	0	0	0	0	200	300	0	0	0	0	0	0	0	200	903	0	0	0	0	0	0	0	603	903	0
436	1	0	0	0	0	0	0	200	300	0	0	0	0	0	0	0	200	903	0	0	0	0	0	0	0	603	903	0
436	2	0	0	0	0	0	0	200	300	0	0	0	0	0	0	0	200	903	0	0	0	0	0	0	0	603	903	0
436	3	0	0	0	0	0	0	200	300	0	0	0	0	0	0	0	200	903	0	0	0	0	0	0	0	603	903	0
436	4	0	0	0	0	0	0	200	300	0	0	0	0	0	0	0	200	903	0	0	0	0	0	0	0	603	903	0
436	5	0	0	0	0	0	0	200	300	0	0	0	0	0	0	0	200	903	0	0	0	0	0	0	0	603	903	0
436	6	0	0	0	0	0	0	200	300	0	0	0	0	0	0	0	200	903	0	0	0	0	0	0	0	603	903	0
436	7	0	0	0	0	0	0	200	300	0	0	0	0	0	0	0	200	903	0	0	0	0	0	0	0	603	903	0
436	8	0	0	0	0	0	0	200	300	0	0	0	0	0	0	0	200	903	0	0	0	0	0	0	0	603	903	0
436	9	0	0	0	0	0	0	200	300	0	0	0	0	0	0	0	200	903	0	0	0	0	0	0	0	603	903	0
437	0	0	0	0	0	0	0	200	300	0	0	0	0	0	0	0	200	903	0	0	0	0	0	0	0	603	903	0
437	1	0	0	0	0	0	0	200	300	0	0	0	0	0	0	0	200	903	0	0	0	0	0	0	0	603	903	0
437	2	0	0	0	0	0	0	200	300	0	0	0	0	0	0	0	200	903	0	0	0	0	0	0	0	603	903	0
437	3	0	0	0	0	0	0	200	300	0	0	0	0	0	0	0	200	903	0	0	0	0	0	0	0	603	903	0
437	4	0	0	0	0	0	0	200	300	0	0	0	0	0	0	0	200	903	0	0	0	0	0	0	0	603	903	0
437	5	0	0	0	0	0	0	200	300	0	0	0	0	0	0	0	200	903	0	0	0	0	0	0	0	603	903	0
437	6	0	0	0	0	0	0	200	300	0	0	0	0	0	0	0	200	903	0	0	0	0	0	0	0	603	903	0
437	7	0	0	0	0	0	0	200	300	0	0	0	0	0	0	0	200	903	0	0	0	0	0	0	0	603	903	0
437	8	0	0	0	0	0	0	200	300	0	0	0	0	0	0	0	200	903	0	0	0	0	0	0	0	603	903	0
437	9	0	0	0	0	0	0	200	300	0	0	0	0	0	0	0	200	903	0	0	0	0	0	0	0	603	903	0
438	0	0	0	0	0	0	0	200	300	0	0	0	0	0	0	0	200	903	0	0	0	0	0	0	0	603	903	0
438	1	0	0	0	0	0	0	200	300	0	0	0	0	0	0	0	200	903	0	0	0	0	0	0	0	603	903	0
438	2	0	0	0	0	0	0	200	300	0	0	0	0	0	0	0	200	903	0	0	0	0	0	0	0	603	903	0
438	3	0	0	0	0	0	0	200	300	0	0	0	0	0	0	0	200	903	0	0	0	0	0	0	0	603	903	0
438	4	0	0	0	0	0	0	200	300	0	0	0	0	0	0	0	200	903	0	0	0	0	0	0	0	603	903	0
438	5	0	0	0	0	0	0	200	300	0	0	0	0	0	0	0	200	903	0	0	0	0	0	0	0	603	903	0
438	6	0	0	0	0	0	0	200	300	0	0	0	0	0	0	0	200	903	0	0	0	0	0	0	0	603	903	0
438	7	0	0	0	0	0	0	200	300	0	0	0	0	0	0	0	200	903	0	0	0	0	0	0	0	603	903	0
438	8	0	0	0	0	0	0	200	300	0	0	0	0	0	0	0	200	903	0	0	0	0	0	0	0	603	903	0
438	9	0	0	0	0	0	0	200	300	0	0	0	0	0	0	0	200	903	0	0	0	0	0	0	0	603	903	0
439	0	0	0	0	0	0	0	200	300	0	0	0	0	0	0	0	200	903	0	0	0	0	0	0	0	603	903	0
439	1	0	0	0	0	0	0	200	300	0	0	0	0	0	0	0	200	903	0	0	0	0	0	0	0	603	903	0
439	2	0	0	0	0	0	0	200	300	0	0	0	0	0	0	0	200	903	0	0	0	0	0	0	0	603	903	0
439	3	0	0	0	0	0	0	200	300	0	0	0	0	0	0	0	200	903	0	0	0	0	0	0	0	603	903	0
439	4	0	0	0	0	0	0	200	300	0	0	0	0	0	0	0	200	903	0	0	0	0	0	0	0	603	903	0
439	5	0	0	0	0	0	0	200	300	0	0	0	0	0	0	0	200	903	0	0	0	0	0	0	0	603	903	0
439	6	0	0	0	0	0	0	200	300	0	0	0	0	0	0	0	200	903	0	0	0	0	0	0	0	603	903	0
439	7	0	0	0	0	0	0	200	300	0	0	0	0	0	0	0	200	903	0	0	0	0	0	0	0	603	903	0
439	8	0	0	0	0	0	0	200	300	0	0	0	0	0	0	0	200	903	0	0	0	0	0	0	0	603	903	0
439	9	0	0	0	0	0	0	200	300	0	0	0	0	0	0	0	200	903	0	0	0	0	0	0	0	603	903	0
440	0	0	0	0	0	0	0	200	300	0	0	0	0	0	0	0	200	903	0	0	0	0	0	0	0	603	903	0
440	1	0	0	0	0	0	0	200	300	0	0	0	0	0	0	0	200	903	0	0	0	0	0	0	0	603	903	0
440	2	0	0	0	0	0	0	200	300	0	0	0	0	0	0	0	200	903	0	0	0	0	0	0	0	603	903	0
440	3	0	0	0	0	0	0	200	300	0	0	0	0	0	0	0	200	903	0	0	0	0	0	0	0	603	903	0
440	4	0	0	0	0	0	0	200	300	0	0	0	0	0	0	0	200	903	0	0	0	0	0	0	0	603	903	0
440	5	0	0	0	0	0	0	200	300	0	0	0	0	0	0	0	200	903	0	0	0	0	0	0	0	603	903	0
440	6	0	0	0	0	0	0	200	300	0	0	0	0	0	0	0	200	903	0	0	0	0	0	0	0	603	903	0
440	7	0	0	0	0	0	0	200	300	0	0	0	0	0	0	0	200	903	0	0	0	0	0	0	0	603	903	0
440	8	0	0	0	0	0	0	200	300	0	0	0	0	0	0	0	200	903	0	0	0	0	0	0	0	603	903	0
440	9	0	0	0	0	0	0	200	300	0	0	0	0	0	0	0	200	903	0	0	0	0	0	0	0	603	903	0
441	0	0	0	0	0	0	0	200	300	0	0	0	0	0	0	0	200	903	0	0	0	0	0	0	0	603	903	0
441	1	0	0	0	0	0	0	200	300	0	0	0	0	0	0	0	200	903	0	0	0	0	0	0	0	603	903	0
441	2	0	0	0	0	0	0	200	300	0	0	0	0	0	0	0	200	903	0	0	0	0	0	0	0	603	903	0
441	3	0	0	0	0	0	0	200	300	0	0	0	0	0	0	0	200	903	0	0	0	0	0	0	0	603	903	0
441	4	0	0	0	0	0	0	200	300	0	0	0	0	0	0	0	200	903	0	0	0	0	0	0	0	603	903	0
441	5	0	0	0	0	0	0	200	300	0	0	0	0	0	0	0	200	903	0	0	0	0	0	0	0	603	903	0
441	6	0	0	0	0	0	0	200	300	0	0	0	0	0	0	0	200	903	0	0	0	0	0	0	0	603	903	0
441	7	0	0	0	0	0	0	200	300	0	0	0	0	0	0	0	200	903	0	0	0	0	0	0	0	603	903	0
441	8	0	0	0	0	0	0	200	300	0	0	0	0	0	0	0	200	903	0	0	0	0	0	0	0	603	903	0
441	9	0	0	0	0	0	0	200	300	0	0	0	0	0	0	0	200	903	0	0	0	0	0	0	0	603	903	0
442	0	0	0	0	0	0	0	200	300	0	0	0	0	0	0	0	200	903	0	0	0	0	0	0	0	603	903	0
442	1	0	0	0	0	0	0	200	300	0	0	0	0	0	0	0	200	903	0	0	0	0	0	0	0	603	903	0
442	2	0	0	0	0	0	0	200	300	0	0	0	0	0	0	0	200	903	0	0	0	0	0	0	0	603	903	0
442	3	0	0	0	0	0	0	200	300	0	0	0	0	0	0	0	200	903	0	0	0	0	0	0	0	603	903	0
442	4	0	0	0	0	0	0	200	300	0	0	0	0	0	0	0	200	903	0	0	0	0	0	0	0	603	903	0
442	5	0	0	0	0	0	0	200	300	0	0	0	0	0	0	0	200	903	0	0	0	0	0	0	0	603	903	0
442	6	0	0	0	0	0	0	200	300	0	0	0	0	0	0	0	200	903	0	0	0	0	0	0	0	603	903	0
442	7	0	0	0	0	0	0	200	300	0	0	0	0	0	0	0	200	903	0	0	0	0	0	0	0	603	903	0
442	8	0	0	0	0	0	0	200	300	0	0	0	0	0	0	0	200	903	0	0	0	0	0	0	0	603	903	0
442	9	0	0	0	0	0	0	200	300	0	0	0	0	0	0	0	200	903	0	0	0	0	0	0	0	603	903	0
443	0	0	0	0	0	0	0	200	300	0	0	0	0	0	0	0	200	903	0	0	0	0	0	0	0	603	903	0
443	1	0	0	0	0	0	0	200	300	0	0	0	0	0	0	0	200	903	0	0	0	0	0	0	0	603	903	0
443	2	0	0	0	0	0	0	200	300	0	0	0	0	0	0	0	200	903	0	0	0	0	0	0	0	603	903	0
443	3	0	0	0	0	0	0	200	300	0	0	0	0	0	0	0	200	903	0	0	0	0	0	0	0	603	903	0
443	4	0	0	0	0	0	0	200	300	0	0	0	0	0	0	0	200	903	0	0	0	0	0	0	0	603	903	0
443	5	0	0	0	0	0	0	200	300	0	0	0	0	0	0	0	200	903	0	0	0	0	0	0	0	603	903	0
443	6	0	0	0	0	0	0	200	300	0	0	0	0	0	0	0	200	903	0	0	0	0	0	0	0	603	903	0
443	7	0	0	0	0	0	0	200	300	0	0	0	0	0	0	0	200	903	0	0	0	0	0	0	0	603	903	0
443	8	0	0	0	0	0	0	200	300	0	0	0	0	0	0	0	200	903	0	0	0	0	0	0	0	603	903	0
443	9	0	0	0	0	0	0	200	300	0	0	0	0	0	0	0	200	903	0	0	0	0	0	0	0	603	903	0
444	0	0	0	0	0	0	0	200	300	0	0	0	0	0	0	0	200	903	0	0	0	0	0	0	0	603	903	0
444	1	0	0	0	0	0	0	200	300	0	0	0	0	0	0	0	200	903	0	0	0	0	0	0	0	603	903	0
444	2	0	0	0	0	0	0	200	300	0	0	0	0	0	0	0	200	903	0	0	0	0	0	0	0	603	903	0
444	3	0	0	0	0	0	0	200	300	0	0	0	0	0	0	0	200	903	0	0	0	0	0	0	0	603	903	0
444	4	0	0	0	0	0	0	200	300	0	0	0	0	0	0	0	200	903	0	0	0	0	0	0	0	603	903	0
444	5	0	0	0	0	0	0	200	300	0	0	0	0	0	0	0	200	903	0	0	0	0	0	0	0	603	903	0
444	6	0	0	0	0	0	0	200	300	0	0	0	0	0	0	0	200	903	0	0	0	0	0	0	0	603	903	0
444	7	0	0	0	0	0	0	200	300	0	0	0	0	0	0	0	200	903	0	0	0	0	0	0	0	603	903	0
444	8	0	0	0	0	0	0	200	300	0	0	0	0	0	0	0	200	903	0	0	0	0	0	0	0	603	903	0
444	9	0	0	0	0	0	0	200	300	0	0	0	0	0	0	0	200	903	0	0	0	0	0	0	0	603	903	0
445	0	0	0	0	0	0	0	200	300	0	0	0	0	0	0	0	200	903	0	0	0	0	0	0	0	603	903	0
445	1	0	0	0	0	0	0	200	300	0	0	0	0	0	0	0	200	903	0	0	0	0	0	0	0	603	903	0
445	2	0	0	0	0	0	0	200	300	0	0	0	0	0	0	0	200	903	0	0	0	0	0	0	0	603	903	0
445	3	0	0	0	0	0	0	200	300	0	0	0	0	0	0	0	200	903	0	0	0	0	0	0	0	603	903	0
445	4	0	0	0	0	0	0	200	300	0	0	0	0	0	0	0	200	903	0	0	0	0	0	0	0	603	903	0
445	5	0	0	0	0	0	0	200	300	0	0	0	0	0	0	0	200	903	0	0	0	0	0	0	0	603	903	0
445	6	0	0	0	0	0	0	200	300	0	0	0	0	0	0	0	200	903	0	0	0	0	0	0	0	603	903	0
445	7	0	0	0	0	0	0	200	300	0	0	0	0	0	0	0	200	903	0	0	0	0	0	0	0	603	903	0
445	8	0	0	0	0	0	0	200	300	0	0	0	0	0	0	0	200	903	0	0	0	0	0	0	0	603	903	0
445	9	0	0	0	0	0	0	200	300	0	0	0	0	0	0	0	200	903	0	0	0	0	0	0	0	603	903	0
446	0	0	0	0	0	0	0	200	300	0	0	0	0	0	0	0	200	903	0	0	0	0	0	0	0	603	903	0
446	1	0	0	0	0	0	0	200	300	0	0	0	0	0	0	0	200	903	0	0	0	0	0	0	0	603	903	0
446	2	0	0	0	0	0	0	200	300	0	0	0	0	0	0	0	200	903	0	0	0	0	0	0	0	603	903	0
446	3	0	0	0	0	0	0	200	300	0	0	0	0	0	0	0	200	903	0	0	0	0	0	0	0	603	903	0
446	4	0	0	0	0	0	0	200	300	0	0	0	0	0	0	0	200	903	0	0	0	0	0	0	0	603	903	0
446	5	0	0	0	0	0	0	200	300	0	0	0	0	0	0	0	200	903	0	0	0	0	0	0	0	603	903	0
446	6	0	0	0	0	0	0	200	300	0	0	0	0	0	0	0	200	903	0	0	0	0	0	0	0	603	903	0
446	7	0	0	0	0	0	0	200	300	0	0	0	0	0	0	0	200	903	0	0	0	0	0	0	0	603	903	0
446	8	0	0	0	0	0	0	200	300	0	0	0	0	0	0	0	200	903	0	0	0	0	0	0	0	603	903	0
446	9	0	0	0	0	0	0	200	300	0	0	0	0	0	0	0	200	903	0	0	0	0	0	0	0	603	903	0
447	0	0	0	0	0	0	0	200	300	0	0	0	0	0	0	0	200	903	0	0	0	0	0	0	0	603	903	0
447	1	0	0	0	0	0	0	200	300	0	0	0	0	0	0	0	200	903	0	0	0	0	0	0	0	603	903	0
447	2	0	0	0	0	0	0	200	300	0	0	0	0	0	0	0	200	903	0	0	0	0	0	0	0	603	903	0
447	3	0	0	0	0	0	0	200	300	0	0	0	0	0	0	0	200	903	0	0	0	0	0	0	0	603	903	0
447	4	0	0	0	0	0	0	200	300	0	0	0	0	0	0	0	200	903	0	0	0	0	0	0	0	603	903	0
447	5	0	0	0	0	0	0	200	300	0	0	0	0	0	0	0	200	903	0	0	0	0	0	0	0	603	903	0
447	6	0	0	0	0	0	0	200	300	0	0	0	0	0	0	0	200	903	0	0	0	0	0	0	0	603	903	0
447	7	0	0	0	0	0	0	200	300	0	0	0	0	0	0	0	200	903	0	0	0	0	0	0	0	603	903	0
447	8	0	0	0	0	0	0	200	300	0	0	0	0	0	0	0	200	903	0	0	0	0	0	0	0	603	903	0
447	9	0	0	0	0	0	0	200	300	0	0	0	0	0	0	0	200	903	0	0	0	0	0	0	0	603	903	0
448	0	0	0	0	0	0	0	200	300	0	0	0	0	0	0	0	200	903	0	0	0	0	0	0	0	603	903	0
448	1	0	0	0	0	0	0	200	300	0	0	0	0	0	0	0	200	903	0	0	0	0	0	0	0	603	903	0
448	2	0	0	0	0	0	0	200	300	0	0	0	0	0	0	0	200	903	0	0	0	0	0	0	0	603	903	0
448	3	0	0	0	0	0	0	200	300	0	0	0	0	0	0	0	200	903	0	0	0	0	0	0	0	603	903	0
448	4	0	0	0	0	0	0	200	300	0	0	0	0	0	0	0	200	903	0	0	0	0	0	0	0	603	903	0
448	5	0	0	0	0	0	0	200	300	0	0	0	0	0	0	0	200	903	0	0	0	0	0	0	0	603	903	0
448	6	0	0	0	0	0	0	200	300	0	0	0	0	0	0	0	200	903	0	0	0	0	0	0	0	603	903	0
448	7	0	0	0	0	0	0	200	300	0	0	0	0	0	0	0	200	903	0	0	0	0	0	0	0	603	903	0
448	8	0	0	0	0	0	0	200	300	0	0	0	0	0	0	0	200	903	0	0	0	0	0	0	0	603	903	0
448	9	0	0	0	0	0	0	200	300	0	0	0	0	0	0	0	200	903	0	0	0	0	0	0	0	603	903	0
449	0	0	0	0	0	0	0	200	300	0	0	0	0	0	0	0	200	903	0	0	0	0	0	0	0	603	903	0
449	1	0	0	0	0	0	0	200	300	0	0	0	0	0	0	0	200	903	0	0	0	0	0	0	0	603	903	0
449	2	0	0	0	0	0	0	200	300	0	0	0	0	0	0	0	200	903	0	0	0	0	0	0	0	603	903	0
449	3	0	0	0	0	0	0	200	300	0	0	0	0	0	0	0	200	903	0	0	0	0	0	0	0	603	903	0
449	4	0	0	0	0	0	0	200	300	0	0	0	0	0	0	0	200	903	0	0	0	0	0	0	0	603	903	0
449	5	0	0	0	0	0	0	200	300	0	0	0	0	0	0	0	200	903	0	0	0	0	0	0	0	603	903	0
449	6	0	0	0	0	0	0	200	300	0	0	0	0	0	0	0	200	903	0	0	0	0	0	0	0	603	903	0
449	7	0	0	0	0	0	0	200	300	0	0	0	0	0	0	0	200	903	0	0	0	0	0	0	0	603	903	0
449	8	0	0	0	0	0	0	200	300	0	0	0	0	0	0	0	200	903	0	0	0	0	0	0	0	603	903	0
449	9	0	0	0	0	0	0	200	300	0	0	0	0	0	0	0	200	903	0	0	0	0	0	0	0	603	903	0
450	0	0	0	0	0	0	0	200	300	0	0	0	0	0	0	0	200	903	0	0	0	0	0	0	0	603	903	0
450	1	0	0	0	0	0	0	200	300	0	0	0	0	0	0	0	200	903	0	0	0	0	0	0	0	603	903	0
450	2	0	0	0	0	0	0	200	300	0	0	0	0	0	0	0	200	903	0	0	0	0	0	0	0	603	903	0
450	3	0	0	0	0	0	0	200	300	0	0	0	0	0	0	0	200	903	0	0	0	0	0	0	0	603	903	0
450	4	0	0	0	0	0	0	200	300	0	0	0	0	0	0	0	200	903	0	0	0	0	0	0	0	603	903	0
450	5	0	0	0	0	0	0	200	300	0	0	0	0	0	0	0	200	903	0	0	0	0	0	0	0	603	903	0
450	6	0	0	0	0	0	0	200	300	0	0	0	0	0	0	0	200	903	0	0	0	0	0	0	0	603	903	0
450	7	0	0	0	0	0	0	200	300	0	0	0	0	0	0	0	200	903	0	0	0	0	0	0	0	603	903	0
450	8	0	0	0	0	0	0	200	300	0	0	0	0	0	0	0	200	903	0	0	0	0	0	0	0	603	903	0
450	9	0	0	0	0	0	0	200	300	0	0	0	0	0	0	0	200	903	0	0	0	0	0	0	0	603	903	0
451	0	0	0	0	0	0	0	200	300	0	0	0	0	0	0	0	200	903	0	0	0	0	0	0	0	603	903	0
451	1	0	0	0	0	0	0	200	300	0	0	0	0	0	0	0	200	903	0	0	0	0	0	0	0	603	903	0
451	2	0	0	0	0	0	0	200	300	0	0	0	0	0	0	0	200	903	0	0	0	0	0	0	0	603	903	0
451	3	0	0	0	0	0	0	200	300	0	0	0	0	0	0	0	200	903	0	0	0	0	0	0	0	603	903	0
451	4	0	0	0	0	0	0	200	300	0	0	0	0	0	0	0	200	903	0	0	0	0	0	0	0	603	903	0
451	5	0	0	0	0	0	0	200	300	0	0	0	0	0	0	0	200	903	0	0	0	0	0	0	0	603	903	0
451	6	0	0	0	0	0	0	200	300	0	0	0	0	0	0	0	200	903	0	0	0	0	0	0	0	603	903	0
451	7	0	0	0	0	0	0	200	300	0	0	0	0	0	0	0	200	903	0	0	0	0	0	0	0	603	903	0
451	8	0	0	0	0	0	0	200	300	0	0	0	0	0	0	0	200	903	0	0	0	0	0	0	0	603	903	0
451	9	0	0	0	0	0	0	200	300	0	0	0	0	0	0	0	200	903	0	0	0	0	0	0	0	603	903	0
452	0	0	0	0	0	0	0	200	300	0	0	0	0	0	0	0	200	903	0	0	0	0	0	0	0	603	903	0
452	1	0	0	0	0	0	0	200	300	0	0	0	0	0	0	0	200	903	0	0	0	0	0	0	0	603	903	0
452	2	0	0	0	0	0	0	200	300	0	0	0	0	0	0	0	200	903	0	0	0	0	0	0	0	603	903	0
452	3	0	0	0	0	0	0	200	300	0	0	0	0	0	0	0	200	903	0	0	0	0	0	0	0	603	903	0
452	4	0	0	0	0	0	0	200	300	0	0	0	0	0	0	0	200	903	0	0	0	0	0	0	0	603	903	0
452	5	0	0	0	0	0	0	200	300	0	0	0	0	0	0	0	200	903	0	0	0	0	0	0	0	603	903	0
452	6	0	0	0	0	0	0	200	300	0	0	0	0	0	0	0	200	903	0	0	0	0	0	0	0	603	903	0
452	7	0	0	0	0	0	0	200	300	0	0	0	0	0	0	0	200	903	0	0	0	0	0	0	0	603	903	0
452	8	0	0	0	0	0	0	200	300	0	0	0	0	0	0	0	200	903	0	0	0	0	0	0	0	603	903	0
452	9	0	0	0	0	0	0	200	300	0	0	0	0	0	0	0	200	903	0	0	0	0	0	0	0	603	903	0
453	0	0	0	0	0	0	0	200	300	0	0	0	0	0	0	0	200	903	0	0	0	0	0	0	0	603	903	0
453	1	0	0	0	0	0	0	200	300	0	0	0	0	0	0	0	200	903	0	0	0	0	0	0	0	603	903	0
453	2	0	0	0	0	0	0	200	300	0	0	0	0	0	0	0	200	903	0	0	0	0	0	0	0	603	903	0
453	3	0	0	0	0	0	0	200	300	0	0	0	0	0	0	0	200	903	0	0	0	0	0	0	0	603	903	0
453	4	0	0	0	0	0	0	200	300	0	0	0	0	0	0	0	200	903	0	0	0	0	0	0	0	603	903	0
453	5	0	0	0	0	0	0	200	300	0	0	0	0	0	0	0	200	903	0	0	0	0	0	0	0	603	903	0
453	6	0	0	0	0	0	0	200	300	0	0	0	0	0	0	0	200	903	0	0	0	0	0	0	0	603	903	0
453	7	0	0	0	0	0	0	200	300	0	0	0	0	0	0	0	200	903	0	0	0	0	0	0	0	603	903	0
453	8	0	0	0	0	0	0	200	300	0	0	0	0	0	0	0	200	903	0	0	0	0	0	0	0	603	903	0
453	9	0	0	0	0	0	0	200	300	0	0	0	0	0	0	0	200	903	0	0	0	0	0	0	0	603	903	0
454	0	0	0	0	0	0	0	200	300	0	0	0	0	0	0	0	200	903	0	0	0	0	0	0	0	603	903	0
454	1	0	0	0	0	0	0	200	300	0	0	0	0	0	0	0	200	903	0	0	0	0	0	0	0	603	903	0
454	2	0	0	0	0	0	0	200	300	0	0	0	0	0	0	0	200	903	0	0	0	0	0	0	0	603	903	0
454	3	0	0	0	0	0	0	200	300	0	0	0	0	0	0	0	200	903	0	0	0	0	0	0	0	603	903	0
454	4	0	0	0	0	0	0	200	300	0	0	0	0	0	0	0	200	903	0	0	0	0	0	0	0	603	903	0
454	5	0	0	0	0	0	0	200	300	0	0	0	0	0	0	0	200	903	0	0	0	0	0	0	0	603	903	0
454	6	0	0	0	0	0	0	200	300	0	0	0	0	0	0	0	200	903	0	0	0	0	0	0	0	603	903	0
454	7	0	0	0	0	0	0	200	300	0	0	0	0	0	0	0	200	903	0	0	0	0	0	0	0	603	903	0
454	8	0	0	0	0	0	0	200	300	0	0	0	0	0	0	0	200	903	0	0	0	0	0	0	0	603	903	0
454	9	0	0	0	0	0	0	200	300	0	0	0	0	0	0	0	200	903	0	0	0	0	0	0	0	603	903	0
455	0	0	0	0	0	0	0	200	300	0	0	0	0	0	0	0	200	903	0	0	0	0	0	0	0	603	903	0
455	1	0	0	0	0	0	0	200	300	0	0	0	0	0	0	0	200	903	0	0	0	0	0	0	0	603	903	0
455	2	0	0	0	0	0	0	200	300	0	0	0	0	0	0	0	200	903	0	0	0	0	0	0	0	603	903	0
455	3	0	0	0	0	0	0	200	300	0	0	0	0	0	0	0	200	903	0	0	0	0	0	0	0	603	903	0
455	4	0	0	0	0	0	0	200	300	0	0	0	0	0	0	0	200	903	0	0	0	0	0	0	0	603	903	0
455	5	0	0	0	0	0	0	200	300	0	0	0	0	0	0	0	200	903	0	0	0	0	0	0	0	603	903	0
455	6	0	0	0	0	0	0	200	300	0	0	0	0	0	0	0	200	903	0	0	0	0	0	0	0	603	903	0
455	7	0	0	0	0	0	0	200	300	0	0	0	0	0	0	0	200	903	0	0	0	0	0	0	0	603	903	0
455	8	0	0	0	0	0	0	200	300	0	0	0	0	0	0	0	200	903	0	0	0	0	0	0	0	603	903	0
455	9	0	0	0	0	0	0	200	300	0	0	0	0	0	0	0	200	903	0	0	0	0	0	0	0	603	903	0
456	0	0	0	0	0	0	0	200	300	0	0	0	0	0	0	0	200	903	0	0	0	0	0	0	0	603	903	0
456	1	0	0	0	0	0	0	200	300	0	0	0	0	0	0	0	200	903	0	0	0	0	0	0	0	603	903	0
456	2	0	0	0	0	0	0	200	300	0	0	0	0	0	0	0	200	903	0	0	0	0	0	0	0	603	903	0
456	3	0	0	0	0	0	0	200	300	0	0	0	0	0	0	0	200	903	0	0	0	0	0	0	0	603	903	0
456	4	0	0	0	0	0	0	200	300	0	0	0	0	0	0	0	200	903	0	0	0	0	0	0	0	603	903	0
456	5	0	0	0	0	0	0	200	300	0	0	0	0	0	0	0	200	903	0	0	0	0	0	0	0	603	903	0
456	6	0	0	0	0	0	0	200	300	0	0	0	0	0	0	0	200	903	0	0	0	0	0	0	0	603	903	0
456	7	0	0	0	0	0	0	200	300	0	0	0	0	0	0	0	200	903	0	0	0	0	0	0	0	603	903	0
456	8	0	0	0	0	0	0	200	300	0	0	0	0	0	0	0	200	903	0	0	0	0	0	0	0	603	903	0
456	9	0	0	0	0	0	0	200	300	0	0	0	0	0	0	0	200	903	0	0	0	0	0	0	0	603	903	0
457	0	0	0	0	0	0	0	200	300	0	0	0	0	0	0	0	200	903	0	0	0	0	0	0	0	603	903	0
457	1	0	0	0	0	0	0	200	300	0	0	0	0	0	0	0	200	903	0	0	0	0	0	0	0	603	903	0
457	2	0	0	0	0	0	0	200	300	0	0	0	0	0	0	0	200	903	0	0	0	0	0	0	0	603	903	0
457	3	0	0	0	0	0	0	200	300	0	0	0	0	0	0	0	200	903	0	0	0	0	0	0	0	603	903	0
457	4	0	0	0	0	0	0	200	300	0	0	0	0	0	0	0	200	903	0	0	0	0	0	0	0	603	903	0
457	5	0	0	0	0	0	0	200	300	0	0	0	0	0	0	0	200	903	0	0	0	0	0	0	0	603	903	0
457	6	0	0	0	0	0	0	200	300	0	0	0	0	0	0	0	200	903	0	0	0	0	0	0	0	603	903	0
457	7	0	0	0	0	0	0	200	300	0	0	0	0	0	0	0	200	903	0	0	0	0	0	0	0	603	903	0
457	8	0	0	0	0	0	0	200	300	0	0	0	0	0	0	0	200	903	0	0	0	0	0	0	0	603	903	0
457	9	0	0	0	0	0	0	200	300	0	0	0	0	0	0	0	200	903	0	0	0	0	0	0	0	603	903	0
458	0	0	0	0	0	0	0	200	300	0	0	0	0	0	0	0	200	903	0	0	0	0	0	0	0	603	903	0
458	1	0	0	0	0	0	0	200	300	0	0	0	0	0	0	0	200	903	0	0	0	0	0	0	0	603	903	0
458	2	0	0	0	0	0	0	200	300	0	0	0	0	0	0	0	200	903	0	0	0	0	0	0	0	603	903	0
458	3	0	0	0	0	0	0	200	300	0	0	0	0	0	0	0	200	903	0	0	0	0	0	0	0	603	903	0
458	4	0	0	0	0	0	0	200	300	0	0	0	0	0	0	0	200	903	0	0	0	0	0	0	0	603	903	0
458	5	0	0	0	0	0	0	200	300	0	0	0	0	0	0	0	200	903	0	0	0	0	0	0	0	603	903	0
458	6	0	0	0	0	0	0	200	300	0	0	0	0	0	0	0	200	903	0	0	0	0	0	0	0	603	903	0
458	7	0	0	0	0	0	0	200	300	0	0	0	0	0	0	0	200	903	0	0	0	0	0	0	0	603	903	0
458	8	0	0	0	0	0	0	200	300	0	0	0	0	0	0	0	200	903	0	0	0	0	0	0	0	603	903	0
458	9	0	0	0	0	0	0	200	300	0	0	0	0	0	0	0	200	903	0	0	0	0	0	0	0	603	903	0
459	0	0	0	0	0	0	0	200	300	0	0	0	0	0	0	0	200	903	0	0	0	0	0	0	0	603	903	0
459	1	0	0	0	0	0	0	200	300	0	0	0	0	0	0	0	200	903	0	0	0	0	0	0	0	603	903	0
459	2	0	0	0	0	0	0	200	300	0	0	0	0	0	0	0	200	903	0	0	0	0	0	0	0	603	903	0
459	3	0	0	0	0	0	0	200	300	0	0	0	0	0	0	0	200	903	0	0	0	0	0	0	0	603	903	0
459	4	0	0	0	0	0	0	200	300	0	0	0	0	0	0	0	200	903	0	0	0	0	0	0	0	603	903	0
459	5	0	0	0	0	0	0	200	300	0	0	0	0	0	0	0	200	903	0	0	0	0	0	0	0	603	903	0
459	6	0	0	0	0	0	0	200	300	0	0	0	0	0	0	0	200	903	0	0	0	0	0	0	0	603	903	0
459	7	0	0	0	0	0	0	200	300	0	0	0	0	0	0	0	200	903	0	0	0	0	0	0	0	603	903	0
459	8	0	0	0	0	0	0	200	300	0	0	0	0	0	0	0	200	903	0	0	0	0	0	0	0	603	903	0
459	9	0	0	0	0	0	0	200	300	0	0	0	0	0	0	0	200	903	0	0	0	0	0	0	0	603	903	0
460	0	0	0	0	0	0	0	200	300	0	0	0	0	0	0	0	200	903	0	0	0	0	0	0	0	603	903	0
460	1	0	0	0	0	0	0	200	300	0	0	0	0	0	0	0	200	903	0	0	0	0	0	0	0	603	903	0
460	2	0	0	0	0	0	0	200	300	0	0	0	0	0	0	0	200	903	0	0	0	0	0	0	0	603	903	0
460	3	0	0	0	0	0	0	200	300	0	0	0	0	0	0	0	200	903	0	0	0	0	0	0	0	603	903	0
460	4	0	0	0	0	0	0	200	300	0	0	0	0	0	0	0	200	903	0	0	0	0	0	0	0	603	903	0
460	5	0	0	0	0	0	0	200	300	0	0	0	0	0	0	0	200	903	0	0	0	0	0	0	0	603	903	0
460	6	0	0	0	0	0	0	200	300	0	0	0	0	0	0	0	200	903	0	0	0	0	0	0	0	603	903	0
460	7	0	0	0	0	0	0	200	300	0	0	0	0	0	0	0	200	903	0	0	0	0	0	0	0	603	903	0
460	8	0	0	0	0	0	0	200	300	0	0	0	0	0	0	0	200	903	0	0	0	0	0	0	0	603	903	0
460	9	0	0	0	0	0	0	200	300	0	0	0	0	0	0	0	200	903	0	0	0	0	0	0	0	603	903	0
461	0	0	0	0	0	0	0	200	300	0	0	0	0	0	0	0	200	903	0	0	0	0	0	0	0	603	903	0
461	1	0	0	0	0	0	0	200	300	0	0	0	0	0	0	0	200	903	0	0	0	0	0	0	0	603	903	0
461	2	0	0	0	0	0	0	200	300	0	0	0	0	0	0	0	200	903	0	0	0	0	0	0	0	603	903	0
461	3	0	0	0	0	0	0	200	300	0	0	0	0	0	0	0	200	903	0	0	0	0	0	0	0	603	903	0
461	4	0	0	0	0	0	0	200	300	0	0	0	0	0	0	0	200	903	0	0	0	0	0	0	0	603	903	0
461	5	0	0	0	0	0	0	200	300	0	0	0	0	0	0	0	200	903	0	0	0	0	0	0	0	603	903	0
461	6	0	0	0	0	0	0	200	300	0	0	0	0	0	0	0	200	903	0	0	0	0	0	0	0	603	903	0
461	7	0	0	0	0	0	0	200	300	0	0	0	0	0	0	0	200	903	0	0	0	0	0	0	0	603	903	0
461	8	0	0	0	0	0	0	200	300	0	0	0	0	0	0	0	200	903	0	0	0	0	0	0	0	603	903	0
461	9	0	0	0	0	0	0	200	300	0	0	0	0	0	0	0	200	903	0	0	0	0	0	0	0	603	903	0
462	0	0	0	0	0	0	0	200	300	0	0	0	0	0	0	0	200	903	0	0	0	0	0	0	0	603	903	0
462	1	0	0	0	0	0	0	200	300	0	0	0	0	0	0	0	200	903	0	0	0	0	0	0	0	603	903	0
462	2	0	0	0	0	0	0	200	300	0	0	0	0	0	0	0	200	903	0	0	0	0	0	0	0	603	903	0
462	3	0	0	0	0	0	0	200	300	0	0	0	0	0	0	0	200	903	0	0	0	0	0	0	0	603	903	0
462	4	0	0	0	0	0	0	200	300	0	0	0	0	0	0	0	200	903	0	0	0	0	0	0	0	603	903	0
462	5	0	0	0	0	0	0	200	300	0	0	0	0	0	0	0	200	903	0	0	0	0	0	0	0	603	903	0
462	6	0	0	0	0	0	0	200	300	0	0	0	0	0	0	0	200	903	0	0	0	0	0	0	0	603	903	0
462	7	0	0	0	0	0	0	200	300	0	0	0	0	0	0	0	200	903	0	0	0	0	0	0	0	603	903	0
462	8	0	0	0	0	0	0	200	300	0	0	0	0	0	0	0	200	903	0	0	0	0	0	0	0	603	903	0
462	9	0	0	0	0	0	0	200	300	0	0	0	0	0	0	0	200	903	0	0	0	0	0	0	0	603	903	0
463	0	0	0	0	0	0	0	200	300	0	0	0	0	0	0	0	200	903	0	0	0	0	0	0	0	603	903	0
463	1	0	0	0	0	0	0	200	300	0	0	0	0	0	0	0	200	903	0	0	0	0	0	0	0	603	903	0
463	2	0	0	0	0	0	0	200	300	0	0	0	0	0	0	0	200	903	0	0	0	0	0	0	0	603	903	0
463	3	0	0	0	0	0	0	200	300	0	0	0	0	0	0	0	200	903	0	0	0	0	0	0	0	603	903	0
463	4	0	0	0	0	0	0	200	300	0	0	0	0	0	0	0	200	903	0	0	0	0	0	0	0	603	903	0
463	5	0	0	0	0	0	0	200	300	0	0	0	0	0	0	0	200	903	0	0	0	0	0	0	0	603	903	0
463	6	0	0	0	0	0	0	200	300	0	0	0	0	0	0	0	200	903	0	0	0	0	0	0	0	603	903	0
463	7	0	0	0	0	0	0	200	300	0	0	0	0	0	0	0	200	903	0	0	0	0	0	0	0	603	903	0
463	8	0	0	0	0	0	0	200	300	0	0	0	0	0	0	0	200	903	0	0	0	0	0	0	0	603	903	0
463	9	0	0	0	0	0	0	200	300	0	0	0	0	0	0	0	200	903	0	0	0	0	0	0	0	603	903	0
464	0	0	0	0	0	0	0	200	300	0	0	0	0	0	0	0	200	903	0	0	0	0	0	0	0	603	903	0
464	1	0	0	0	0	0	0	200	300	0	0	0	0	0	0	0	200	903	0	0	0	0	0	0	0	603	903	0
464	2	0	0	0	0	0	0	200	300	0	0	0	0	0	0	0	200	903	0	0	0	0	0	0	0	603	903	0
464	3	0	0	0	0	0	0	200	300	0	0	0	0	0	0	0	200	903	0	0	0	0	0	0	0	603	903	0
464	4	0	0	0	0	0	0	200	300	0	0	0	0	0	0	0	200	903	0	0	0	0	0	0	0	603	903	0
464	5	0	0	0	0	0	0	200	300	0	0	0	0	0	0	0	200	903	0	0	0	0	0	0	0	603	903	0
464	6	0	0	0	0	0	0	200	300	0	0	0	0	0	0	0	200	903	0	0	0	0	0	0	0	603	903	0
464	7	0	0	0	0	0	0	200	300	0	0	0	0	0	0	0	200	903	0	0	0	0	0	0	0	603	903	0
464	8	0	0	0	0	0	0	200	300	0	0	0	0	0	0	0	200	903	0	0	0	0	0	0	0	603	903	0
464	9	0	0	0	0	0	0	200	300	0	0	0	0	0	0	0	200	903	0	0	0	0	0	0	0	603	903	0
465	0	0	0	0	0	0	0	200	300	0	0	0	0	0	0	0	200	903	0	0	0	0	0	0	0	603	903	0
465	1	0	0	0	0	0	0	200	300	0	0	0	0	0	0	0	200	903	0	0	0	0	0	0	0	603	903	0
465	2	0	0	0	0	0	0	200	300	0	0	0	0	0	0	0	200	903	0	0	0	0	0	0	0	603	903	0
465	3	0	0	0	0	0	0	200	300	0	0	0	0	0	0	0	200	903	0	0	0	0	0	0	0	603	903	0
465	4	0	0	0	0	0	0	200	300	0	0	0	0	0	0	0	200	903	0	0	0	0	0	0	0	603	903	0
465	5	0	0	0	0	0	0	200	300	0	0	0	0	0	0	0	200	903	0	0	0	0	0	0	0	603	903	0
465	6	0	0	0	0	0	0	200	300	0	0	0	0	0	0	0	200	903	0	0	0	0	0	0	0	603	903	0
465	7	0	0	0	0	0	0	200	300	0	0	0	0	0	0	0	200	903	0	0	0	0	0	0	0	603	903	0
465	8	0	0	0	0	0	0	200	300	0	0	0	0	0	0	0	200	903	0	0	0	0	0	0	0	603	903	0
465	9	0	0	0	0	0	0	200	300	0	0	0	0	0	0	0	200	903	0	0	0	0	0	0	0	603	903	0
466	0	0	0	0	0	0	0	200	300	0	0	0	0	0	0	0	200	903	0	0	0	0	0	0	0	603	903	0
466	1	0	0	0	0	0	0	200	300	0	0	0	0	0	0	0	200	903	0	0	0	0	0	0	0	603	903	0
466	2	0	0	0	0	0	0	200	300	0	0	0	0	0	0	0	200	903	0	0	0	0	0	0	0	603	903	0
466	3	0	0	0	0	0	0	200	300	0	0	0	0	0	0	0	200	903	0	0	0	0	0	0	0	603	903	0
466	4	0	0	0	0	0	0	200	300	0	0	0	0	0	0	0	200	903	0	0	0	0	0	0	0	603	903	0
466	5	0	0	0	0	0	0	200	300	0	0	0	0	0	0	0	200	903	0	0	0	0	0	0	0	603	903	0
466	6	0	0	0	0	0	0	200	300	0	0	0	0	0	0	0	200	903	0	0	0	0	0	0	0	603	903	0
466	7	0	0	0	0	0	0	200	300	0	0	0	0	0	0	0	200	903	0	0	0	0	0	0	0	603	903	0
466	8	0	0	0	0	0	0	200	300	0	0	0	0	0	0	0	200	903	0	0	0	0	0	0	0	603	903	0
466	9	0	0	0	0	0	0	200	300	0	0	0	0	0	0	0	200	903	0	0	0	0	0	0	0	603	903	0
467	0	0	0	0	0	0	0	200	300	0	0	0	0	0	0	0	200	903	0	0	0	0	0	0	0	603	903	0
467	1	0	0	0	0	0	0	200	300	0	0	0	0	0	0	0	200	903	0	0	0	0	0	0	0	603	903	0
467	2	0	0	0	0	0	0	200	300	0	0	0	0	0	0	0	200	903	0	0	0	0	0	0	0	603	903	0
467	3	0	0	0	0	0	0	200	300	0	0	0	0	0	0	0	200	903	0	0	0	0	0	0	0	603	903	0
467	4	0	0	0	0	0	0	200	300	0	0	0	0	0	0	0	200	903	0	0	0	0	0	0	0	603	903	0
467	5	0	0	0	0	0	0	200	300	0	0	0	0	0	0	0	200	903	0	0	0	0	0	0	0	603	903	0
467	6	0	0	0	0	0	0	200	300	0	0	0	0	0	0	0	200	903	0	0	0	0	0	0	0	603	903	0
467	7	0	0	0	0	0	0	200	300	0	0	0	0	0	0	0	200	903	0	0	0	0	0	0	0	603	903	0
467	8	0	0	0	0	0	0	200	300	0	0	0	0	0	0	0	200	903	0	0	0	0	0	0	0	603	903	0
467	9	0	0	0	0	0	0	200	300	0	0	0	0	0	0	0	200	903	0	0	0	0	0	0	0	603	903	0
468	0	0	0	0	0	0	0	200	300	0	0	0	0	0	0	0	200	903	0	0	0	0	0	0	0	603	903	0
468	1	0	0	0	0	0	0	200	300	0	0	0	0	0	0	0	200	903	0	0	0	0	0	0	0	603	903	0
468	2	0	0	0	0	0	0	200	300	0	0	0	0	0	0	0	200	903	0	0	0	0	0	0	0	603	903	0
468	3	0	0	0	0	0	0	200	300	0	0	0	0	0	0	0	200	903	0	0	0	0	0	0	0	603	903	0
468	4	0	0	0	0	0	0	200	300	0	0	0	0	0	0	0	200	903	0	0	0	0	0	0	0	603	903	0
468	5	0	0	0	0	0	0	200	300	0	0	0	0	0	0	0	200	903	0	0	0	0	0	0	0	603	903	0
468	6	0	0	0	0	0	0	200	300	0	0	0	0	0	0	0	200	903	0	0	0	0	0	0	0	603	903	0
468	7	0	0	0	0	0	0	200	300	0	0	0	0	0	0	0	200	903	0	0	0	0	0	0	0	603	903	0
468	8	0	0	0	0	0	0	200	300	0	0	0	0	0	0	0	200	903	0	0	0	0	0	0	0	603	903	0
468	9	0	0	0	0	0	0	200	300	0	0	0	0	0	0	0	200	903	0	0	0	0	0	0	0	603	903	0
469	0	0	0	0	0	0	0	200	300	0	0	0	0	0	0	0	200	903	0	0	0	0	0	0	0	603	903	0
469	1	0	0	0	0	0	0	200	300	0	0	0	0	0	0	0	200	903	0	0	0	0	0	0	0	603	903	0
469	2	0	0	0	0	0	0	200	300	0	0	0	0	0	0	0	200	903	0	0	0	0	0	0	0	603	903	0
469	3	0	0	0	0	0	0	200	300	0	0	0	0	0	0	0	200	903	0	0	0	0	0	0	0	603	903	0
469	4	0	0	0	0	0	0	200	300	0	0	0	0	0	0	0	200	903	0	0	0	0	0	0	0	603	903	0
469	5	0	0	0	0	0	0	200	300	0	0	0	0	0	0	0	200	903	0	0	0	0	0	0	0	603	903	0
469	6	0	0	0	0	0	0	200	300	0	0	0	0	0	0	0	200	903	0	0	0	0	0	0	0	603	903	0
469	7	0	0	0	0	0	0	200	300	0	0	0	0	0	0	0	200	903	0	0	0	0	0	0	0	603	903	0
469	8	0	0	0	0	0	0	200	300	0	0	0	0	0	0	0	200	903	0	0	0	0	0	0	0	603	903	0
469	9	0	0	0	0	0	0	200	300	0	0	0	0	0	0	0	200	903	0	0	0	0	0	0	0	603	903	0
470	0	0	0	0	0	0	0	200	300	0	0	0	0	0	0	0	200	903	0	0	0	0	0	0	0	603	903	0
470	1	0	0	0	0	0	0	200	300	0	0	0	0	0	0	0	200	903	0	0	0	0	0	0	0	603	903	0
470	2	0	0	0	0	0	0	200	300	0	0	0	0	0	0	0	200	903	0	0	0	0	0	0	0	603	903	0
470	3	0	0	0	0	0	0	200	300	0	0	0	0	0	0	0	200	903	0	0	0	0	0	0	0	603	903	0
470	4	0	0	0	0	0	0	200	300	0	0	0	0	0	0	0	200	903	0	0	0	0	0	0	0	603	903	0
470	5	0	0	0	0	0	0	200	300	0	0	0	0	0	0	0	200	903	0	0	0	0	0	0	0	603	903	0
470	6	0	0	0	0	0	0	200	300	0	0	0	0	0	0	0	200	903	0	0	0	0	0	0	0	603	903	0
470	7	0	0	0	0	0	0	200	300	0	0	0	0	0	0	0	200	903	0	0	0	0	0	0	0	603	903	0
470	8	0	0	0	0	0	0	200	300	0	0	0	0	0	0	0	200	903	0	0	0	0	0	0	0	603	903	0
470	9	0	0	0	0	0	0	200	300	0	0	0	0	0	0	0	200	903	0	0	0	0	0	0	0	603	903	0
471	0	0	0	0	0	0	0	200	300	0	0	0	0	0	0	0	200	903	0	0	0	0	0	0	0	603	903	0
471	1	0	0	0	0	0	0	200	300	0	0	0	0	0	0	0	200	903	0	0	0	0	0	0	0	603	903	0
471	2	0	0	0	0	0	0	200	300	0	0	0	0	0	0	0	200	903	0	0	0	0	0	0	0	603	903	0
471	3	0	0	0	0	0	0	200	300	0	0	0	0	0	0	0	200	903	0	0	0	0	0	0	0	603	903	0
471	4	0	0	0	0	0	0	200	300	0	0	0	0	0	0	0	200	903	0	0	0	0	0	0	0	603	903	0
471	5	0	0	0	0	0	0	200	300	0	0	0	0	0	0	0	200	903	0	0	0	0	0	0	0	603	903	0
471	6	0	0	0	0	0	0	200	300	0	0	0	0	0	0	0	200	903	0	0	0	0	0	0	0	603	903	0
471	7	0	0	0	0	0	0	200	300	0	0	0	0	0	0	0	200	903	0	0	0	0	0	0	0	603	903	0
471	8	0	0	0	0	0	0	200	300	0	0	0	0	0	0	0	200	903	0	0	0	0	0	0	0	603	903	0
471	9	0	0	0	0	0	0	200	300	0	0	0	0	0	0	0	200	903	0	0	0	0	0	0	0	603	903	0
472	0	0	0	0	0	0	0	200	300	0	0	0	0	0	0	0	200	903	0	0	0	0	0	0	0	603	903	0
472	1	0	0	0	0	0	0	200	300	0	0	0	0	0	0	0	200	903	0	0	0	0	0	0	0	603	903	0
472	2	0	0	0	0	0	0	200	300	0	0	0	0	0	0	0	200	903	0	0	0	0	0	0	0	603	903	0
472	3	0	0	0	0	0	0	200	300	0	0	0	0	0	0	0	200	903	0	0	0	0	0	0	0	603	903	0
472	4	0	0	0	0	0	0	200	300	0	0	0	0	0	0	0	200	903	0	0	0	0	0	0	0	603	903	0
472	5	0	0	0	0	0	0	200	300	0	0	0	0	0	0	0	200	903	0	0	0	0	0	0	0	603	903	0
472	6	0	0	0	0	0	0	200	300	0	0	0	0	0	0	0	200	903	0	0	0	0	0	0	0	603	903	0
472	7	0	0	0	0	0	0	200	300	0	0	0	0	0	0	0	200	903	0	0	0	0	0	0	0	603	903	0
472	8	0	0	0	0	0	0	200	300	0	0	0	0	0	0	0	200	903	0	0	0	0	0	0	0	603	903	0
472	9	0	0	0	0	0	0	200	300	0	0	0	0	0	0	0	200	903	0	0	0	0	0	0	0	603	903	0
473	0	0	0	0	0	0	0	200	300	0	0	0	0	0	0	0	200	903	0	0	0	0	0	0	0	603	903	0
473	1	0	0	0	0	0	0	200	300	0	0	0	0	0	0	0	200	903	0	0	0	0	0	0	0	603	903	0
473	2	0	0	0	0	0	0	200	300	0	0	0	0	0	0	0	200	903	0	0	0	0	0	0	0	603	903	0
473	3	0	0	0	0	0	0	200	300	0	0	0	0	0	0	0	200	903	0	0	0	0	0	0	0	603	903	0
473	4	0	0	0	0	0	0	200	300	0	0	0	0	0	0	0	200	903	0	0	0	0	0	0	0	603	903	0
473	5	0	0	0	0	0	0	200	300	0	0	0	0	0	0	0	200	903	0	0	0	0	0	0	0	603	903	0
473	6	0	0	0	0	0	0	200	300	0	0	0	0	0	0	0	200	903	0	0	0	0	0	0	0	603	903	0
473	7	0	0	0	0	0	0	200	300	0	0	0	0	0	0	0	200	903	0	0	0	0	0	0	0	603	903	0
473	8	0	0	0	0	0	0	200	300	0	0	0	0	0	0	0	200	903	0	0	0	0	0	0	0	603	903	0
473	9	0	0	0	0	0	0	200	300	0	0	0	0	0	0	0	200	903	0	0	0	0	0	0	0	603	903	0
474	0	0	0	0	0	0	0	200	300	0	0	0	0	0	0	0	200	903	0	0	0	0	0	0	0	603	903	0
474	1	0	0	0	0	0	0	200	300	0	0	0	0	0	0	0	200	903	0	0	0	0	0	0	0	603	903	0
474	2	0	0	0	0	0	0	200	300	0	0	0	0	0	0	0	200	903	0	0	0	0	0	0	0	603	903	0
474	3	0	0	0	0	0	0	200	300	0	0	0	0	0	0	0	200	903	0	0	0	0	0	0	0	603	903	0
474	4	0	0	0	0	0	0	200	300	0	0	0	0	0	0	0	200	903	0	0	0	0	0	0	0	603	903	0
474	5	0	0	0	0	0	0	200	300	0	0	0	0	0	0	0	200	903	0	0	0	0	0	0	0	603	903	0
474	6	0	0	0	0	0	0	200	300	0	0	0	0	0	0	0	200	903	0	0	0	0	0	0	0	603	903	0
474	7	0	0	0	0	0	0	200	300	0	0	0	0	0	0	0	200	903	0	0	0	0	0	0	0	603	903	0
474	8	0	0	0	0	0	0	200	300	0	0	0	0	0	0	0	200	903	0	0	0	0	0	0	0	603	903	0
474	9	0	0	0	0	0	0	200	300	0	0	0	0	0	0	0	200	903	0	0	0	0	0	0	0	603	903	0
475	0	0	0	0	0	0	0	200	300	0	0	0	0	0	0	0	200	903	0	0	0	0	0	0	0	603	903	0
475	1	0	0	0	0	0	0	200	300	0	0	0	0	0	0	0	200	903	0	0	0	0	0	0	0	603	903	0
475	2	0	0	0	0	0	0	200	300	0	0	0	0	0	0	0	200	903	0	0	0	0	0	0	0	603	903	0
475	3	0	0	0	0	0	0	200	300	0	0	0	0	0	0	0	200	903	0	0	0	0	0	0	0	603	903	0
475	4	0	0	0	0	0	0	200	300	0	0	0	0	0	0	0	200	903	0	0	0	0	0	0	0	603	903	0
475	5	0	0	0	0	0	0	200	300	0	0	0	0	0	0	0	200	903	0	0	0	0	0	0	0	603	903	0
475	6	0	0	0	0	0	0	200	300	0	0	0	0	0	0	0	200	903	0	0	0	0	0	0	0	603	903	0
475	7	0	0	0	0	0	0	200	300	0	0	0	0	0	0	0	200	903	0	0	0	0	0	0	0	603	903	0
475	8	0	0	0	0	0	0	200	300	0	0	0	0	0	0	0	200	903	0	0	0	0	0	0	0	603	903	0
475	9	0	0	0	0	0	0	200	300	0	0	0	0	0	0	0	200	903	0	0	0	0	0	0	0	603	903	0
476	0	0	0	0	0	0	0	200	300	0	0	0	0	0	0	0	200	903	0	0	0	0	0	0	0	603	903	0
476	1	0	0	0	0	0	0	200	300	0	0	0	0	0	0	0	200	903	0	0	0	0	0	0	0	603	903	0
476	2	0	0	0	0	0	0	200	300	0	0	0	0	0	0	0	200	903	0	0	0	0	0	0	0	603	903	0
476	3	0	0	0	0	0	0	200	300	0	0	0	0	0	0	0	200	903	0	0	0	0	0	0	0	603	903	0
476	4	0	0	0	0	0	0	200	300	0	0	0	0	0	0	0	200	903	0	0	0	0	0	0	0	603	903	0
476	5	0	0	0	0	0	0	200	300	0	0	0	0	0	0	0	200	903	0	0	0	0	0	0	0	603	903	0
476	6	0	0	0	0	0	0	200	300	0	0	0	0	0	0	0	200	903	0	0	0	0	0	0	0	603	903	0
476	7	0	0	0	0	0	0	200	300	0	0	0	0	0	0	0	200	903	0	0	0	0	0	0	0	603	903	0
476	8	0	0	0	0	0	0	200	300	0	0	0	0	0	0	0	200	903	0	0	0	0	0	0	0	603	903	0
476	9	0	0	0	0	0	0	200	300	0	0	0	0	0	0	0	200	903	0	0	0	0	0	0	0	603	903	0
477	0	0	0	0	0	0	0	200	300	0	0	0	0	0	0	0	200	903	0	0	0	0	0	0	0	603	903	0
477	1	0	0	0	0	0	0	200	300	0	0	0	0	0	0	0	200	903	0	0	0	0	0	0	0	603	903	0
477	2	0	0	0	0	0	0	200	300	0	0	0	0	0	0	0	200	903	0	0	0	0	0	0	0	603	903	0
477	3	0	0	0	0	0	0	200	300	0	0	0	0	0	0	0	200	903	0	0	0	0	0	0	0	603	903	0
477	4	0	0	0	0	0	0	200	300	0	0	0	0	0	0	0	200	903	0	0	0	0	0	0	0	603	903	0
477	5	0	0	0	0	0	0	200	300	0	0	0	0	0	0	0	200	903	0	0	0	0	0	0	0	603	903	0
477	6	0	0	0	0	0	0	200	300	0	0	0	0	0	0	0	200	903	0	0	0	0	0	0	0	603	903	0
477	7	0	0	0	0	0	0	200	300	0	0	0	0	0	0	0	200	903	0	0	0	0	0	0	0	603	903	0
477	8	0	0	0	0	0	0	200	300	0	0	0	0	0	0	0	200	903	0	0	0	0	0	0	0	603	903	0
477	9	0	0	0	0	0	0	200	300	0	0	0	0	0	0	0	200	903	0	0	0	0	0	0	0	603	903	0
478	0	0	0	0	0	0	0	200	300	0	0	0	0	0	0	0	200	903	0	0	0	0	0	0	0	603	903	0
478	1	0	0	0	0	0	0	200	300	0	0	0	0	0	0	0	200	903	0	0	0	0	0	0	0	603	903	0
478	2	0	0	0	0	0	0	200	300	0	0	0	0	0	0	0	200	903	0	0	0	0	0	0	0	603	903	0
478	3	0	0	0	0	0	0	200	300	0	0	0	0	0	0	0	200	903	0	0	0	0	0	0	0	603	903	0
478	4	0	0	0	0	0	0	200	300	0	0	0	0	0	0	0	200	903	0	0	0	0	0	0	0	603	903	0
478	5	0	0	0	0	0	0	200	300	0	0	0	0	0	0	0	200	903	0	0	0	0	0	0	0	603	903	0
478	6	0	0	0	0	0	0	200	300	0	0	0	0	0	0	0	200	903	0	0	0	0	0	0	0	603	903	0
478	7	0	0	0	0	0	0	200	300	0	0	0	0	0	0	0	200	903	0	0	0	0	0	0	0	603	903	0
478	8	0	0	0	0	0	0	200	300	0	0	0	0	0	0	0	200	903	0	0	0	0	0	0	0	603	903	0
478	9	0	0	0	0	0	0	200	300	0	0	0	0	0	0	0	200	903	0	0	0	0	0	0	0	603	903	0
479	0	0	0	0	0	0	0	200	300	0	0	0	0	0	0	0	200	903	0	0	0	0	0	0	0	603	903	0
479	1	0	0	0	0	0	0	200	300	0	0	0	0	0	0	0	200	903	0	0	0	0	0	0	0	603	903	0
479	2	0	0	0	0	0	0	200	300	0	0	0	0	0	0	0	200	903	0	0	0	0	0	0	0	603	903	0
479	3	0	0	0	0	0	0	200	300	0	0	0	0	0	0	0	200	903	0	0	0	0	0	0	0	603	903	0
479	4	0	0	0	0	0	0	200	300	0	0	0	0	0	0	0	200	903	0	0	0	0	0	0	0	603	903	0
479	5	0	0	0	0	0	0	200	300	0	0	0	0	0	0	0	200	903	0	0	0	0	0	0	0	603	903	0
479	6	0	0	0	0	0	0	200	300	0	0	0	0	0	0	0	200	903	0	0	0	0	0	0	0	603	903	0
479	7	0	0	0	0	0	0	200	300	0	0	0	0	0	0	0	200	903	0	0	0	0	0	0	0	603	903	0
479	8	0	0	0	0	0	0	200	300	0	0	0	0	0	0	0	200	903	0	0	0	0	0	0	0	603	903	0
479	9	0	0	0	0	0	0	200	300	0	0	0	0	0	0	0	200	903	0	0	0	0	0	0	0	603	903	0
480	0	0	0	0	0	0	0	200	300	0	0	0	0	0	0	0	200	903	0	0	0	0	0	0	0	603	903	0
480	1	0	0	0	0	0	0	200	300	0	0	0	0	0	0	0	200	903	0	0	0	0	0	0	0	603	903	0
480	2	0	0	0	0	0	0	200	300	0	0	0	0	0	0	0	200	903	0	0	0	0	0	0	0	603	903	0
480	3	0	0	0	0	0	0	200	300	0	0	0	0	0	0	0	200	903	0	0	0	0	0	0	0	603	903	0
480	4	0	0	0	0	0	0	200	300	0	0	0	0	0	0	0	200	903	0	0	0	0	0	0	0	603	903	0
480	5	0	0	0	0	0	0	200	300	0	0	0	0	0	0	0	200	903	0	0	0	0	0	0	0	603	903	0
480	6	0	0	0	0	0	0	200	300	0	0	0	0	0	0	0	200	903	0	0	0	0	0	0	0	603	903	0
480	7	0	0	0	0	0	0	200	300	0	0	0	0	0	0	0	200	903	0	0	0	0	0	0	0	603	903	0
480	8	0	0	0	0	0	0	200	300	0	0	0	0	0	0	0	200	903	0	0	0	0	0	0	0	603	903	0
480	9	0	0	0	0	0	0	200	300	0	0	0	0	0	0	0	200	903	0	0	0	0	0	0	0	603	903	0
481	0	0	0	0	0	0	0	200	300	0	0	0	0	0	0	0	200	903	0	0	0	0	0	0	0	603	903	0
481	1	0	0	0	0	0	0	200	300	0	0	0	0	0	0	0	200	903	0	0	0	0	0	0	0	603	903	0
481	2	0	0	0	0	0	0	200	300	0	0	0	0	0	0	0	200	903	0	0	0	0	0	0	0	603	903	0
481	3	0	0	0	0	0	0	200	300	0	0	0	0	0	0	0	200	903	0	0	0	0	0	0	0	603	903	0
481	4	0	0	0	0	0	0	200	300	0	0	0	0	0	0	0	200	903	0	0	0	0	0	0	0	603	903	0
481	5	0	0	0	0	0	0	200	300	0	0	0	0	0	0	0	200	903	0	0	0	0	0	0	0	603	903	0
481	6	0	0	0	0	0	0	200	300	0	0	0	0	0	0	0	200	903	0	0	0	0	0	0	0	603	903	0
481	7	0	0	0	0	0	0	200	300	0	0	0	0	0	0	0	200	903	0	0	0	0	0	0	0	603	903	0
481	8	0	0	0	0	0	0	200	300	0	0	0	0	0	0	0	200	903	0	0	0	0	0	0	0	603	903	0
481	9	0	0	0	0	0	0	200	300	0	0	0	0	0	0	0	200	903	0	0	0	0	0	0	0	603	903	0
482	0	0	0	0	0	0	0	200	300	0	0	0	0	0	0	0	200	903	0	0	0	0	0	0	0	603	903	0
482	1	0	0	0	0	0	0	200	300	0	0	0	0	0	0	0	200	903	0	0	0	0	0	0	0	603	903	0
482	2	0	0	0	0	0	0	200	300	0	0	0	0	0	0	0	200	903	0	0	0	0	0	0	0	603	903	0
482	3	0	0	0	0	0	0	200	300	0	0	0	0	0	0	0	200	903	0	0	0	0	0	0	0	603	903	0
482	4	0	0	0	0	0	0	200	300	0	0	0	0	0	0	0	200	903	0	0	0	0	0	0	0	603	903	0
482	5	0	0	0	0	0	0	200	300	0	0	0	0	0	0	0	200	903	0	0	0	0	0	0	0	603	903	0
482	6	0	0	0	0	0	0	200	300	0	0	0	0	0	0	0	200	903	0	0	0	0	0	0	0	603	903	0
482	7	0	0	0	0	0	0	200	300	0	0	0	0	0	0	0	200	903	0	0	0	0	0	0	0	603	903	0
482	8	0	0	0	0	0	0	200	300	0	0	0	0	0	0	0	200	903	0	0	0	0	0	0	0	603	903	0
482	9	0	0	0	0	0	0	200	300	0	0	0	0	0	0	0	200	903	0	0	0	0	0	0	0	603	903	0
483	0	0	0	0	0	0	0	200	300	0	0	0	0	0	0	0	200	903	0	0	0	0	0	0	0	603	903	0
483	1	0	0	0	0	0	0	200	300	0	0	0	0	0	0	0	200	903	0	0	0	0	0	0	0	603	903	0
483	2	0	0	0	0	0	0	200	300	0	0	0	0	0	0	0	200	903	0	0	0	0	0	0	0	603	903	0
483	3	0	0	0	0	0	0	200	300	0	0	0	0	0	0	0	200	903	0	0	0	0	0	0	0	603	903	0
483	4	0	0	0	0	0	0	200	300	0	0	0	0	0	0	0	200	903	0	0	0	0	0	0	0	603	903	0
483	5	0	0	0	0	0	0	200	300	0	0	0	0	0	0	0	200	903	0	0	0	0	0	0	0	603	903	0
483	6	0	0	0	0	0	0	200	300	0	0	0	0	0	0	0	200	903	0	0	0	0	0	0	0	603	903	0
483	7	0	0	0	0	0	0	200	300	0	0	0	0	0	0	0	200	903	0	0	0	0	0	0	0	603	903	0
483	8	0	0	0	0	0	0	200	300	0	0	0	0	0	0	0	200	903	0	0	0	0	0	0	0	603	903	0
483	9	0	0	0	0	0	0	200	300	0	0	0	0	0	0	0	200	903	0	0	0	0	0	0	0	603	903	0
484	0	0	0	0	0	0	0	200	300	0	0	0	0	0	0	0	200	903	0	0	0	0	0	0	0	603	903	0
484	1	0	0	0	0	0	0	200	300	0	0	0	0	0	0	0	200	903	0	0	0	0	0	0	0	603	903	0
484	2	0	0	0	0	0	0	200	300	0	0	0	0	0	0	0	200	903	0	0	0	0	0	0	0	603	903	0
484	3	0	0	0	0	0	0	200	300	0	0	0	0	0	0	0	200	903	0	0	0	0	0	0	0	603	903	0
484	4	0	0	0	0	0	0	200	300	0	0	0	0	0	0	0	200	903	0	0	0	0	0	0	0	603	903	0
484	5	0	0	0	0	0	0	200	300	0	0	0	0	0	0	0	200	903	0	0	0	0	0	0	0	603	903	0
484	6	0	0	0	0	0	0	200	300	0	0	0	0	0	0	0	200	903	0	0	0	0	0	0	0	603	903	0
484	7	0	0	0	0	0	0	200	300	0	0	0	0	0	0	0	200	903	0	0	0	0	0	0	0	603	903	0
484	8	0	0	0	0	0	0	200	300	0	0	0	0	0	0	0	200	903	0	0	0	0	0	0	0	603	903	0
484	9	0	0	0	0	0	0	200	300	0	0	0	0	0	0	0	200	903	0	0	0	0	0	0	0	603	903	0
485	0	0	0	0	0	0	0	200	300	0	0	0	0	0	0	0	200	903	0	0	0	0	0	0	0	603	903	0
485	1	0	0	0	0	0	0	200	300	0	0	0	0	0	0	0	200	903	0	0	0	0	0	0	0	603	903	0
485	2	0	0	0	0	0	0	200	300	0	0	0	0	0	0	0	200	903	0	0	0	0	0	0	0	603	903	0
485	3	0	0	0	0	0	0	200	300	0	0	0	0	0	0	0	200	903	0	0	0	0	0	0	0	603	903	0
485	4	0	0	0	0	0	0	200	300	0	0	0	0	0	0	0	200	903	0	0	0	0	0	0	0	603	903	0
485	5	0	0	0	0	0	0	200	300	0	0	0	0	0	0	0	200	903	0	0	0	0	0	0	0	603	903	0
485	6	0	0	0	0	0	0	200	300	0	0	0	0	0	0	0	200	903	0	0	0	0	0	0	0	603	903	0
485	7	0	0	0	0	0	0	200	300	0	0	0	0	0	0	0	200	903	0	0	0	0	0	0	0	603	903	0
485	8	0	0	0	0	0	0	200	300	0	0	0	0	0	0	0	200	903	0	0	0	0	0	0	0	603	903	0
485	9	0	0	0	0	0	0	200	300	0	0	0	0	0	0	0	200	903	0	0	0	0	0	0	0	603	903	0
486	0	0	0	0	0	0	0	200	300	0	0	0	0	0	0	0	200	903	0	0	0	0	0	0	0	603	903	0
486	1	0	0	0	0	0	0	200	300	0	0	0	0	0	0	0	200	903	0	0	0	0	0	0	0	603	903	0
486	2	0	0	0	0	0	0	200	300	0	0	0	0	0	0	0	200	903	0	0	0	0	0	0	0	603	903	0
486	3	0	0	0	0	0	0	200	300	0	0	0	0	0	0	0	200	903	0	0	0	0	0	0	0	603	903	0
486	4	0	0	0	0	0	0	200	300	0	0	0	0	0	0	0	200	903	0	0	0	0	0	0	0	603	903	0
486	5	0	0	0	0	0	0	200	300	0	0	0	0	0	0	0	200	903	0	0	0	0	0	0	0	603	903	0
486	6	0	0	0	0	0	0	200	300	0	0	0	0	0	0	0	200	903	0	0	0	0	0	0	0	603	903	0
486	7	0	0	0	0	0	0	200	300	0	0	0	0	0	0	0	200	903	0	0	0	0	0	0	0	603	903	0
486	8	0	0	0	0	0	0	200	300	0	0	0	0	0	0	0	200	903	0	0	0	0	0	0	0	603	903	0
486	9	0	0	0	0	0	0	200	300	0	0	0	0	0	0	0	200	903	0	0	0	0	0	0	0	603	903	0
487	0	0	0	0	0	0	0	200	300	0	0	0	0	0	0	0	200	903	0	0	0	0	0	0	0	603	903	0
487	1	0	0	0	0	0	0	200	300	0	0	0	0	0	0	0	200	903	0	0	0	0	0	0	0	603	903	0
487	2	0	0	0	0	0	0	200	300	0	0	0	0	0	0	0	200	903	0	0	0	0	0	0	0	603	903	0
487	3	0	0	0	0	0	0	200	300	0	0	0	0	0	0	0	200	903	0	0	0	0	0	0	0	603	903	0
487	4	0	0	0	0	0	0	200	300	0	0	0	0	0	0	0	200	903	0	0	0	0	0	0	0	603	903	0
487	5	0	0	0	0	0	0	200	300	0	0	0	0	0	0	0	200	903	0	0	0	0	0	0	0	603	903	0
487	6	0	0	0	0	0	0	200	300	0	0	0	0	0	0	0	200	903	0	0	0	0	0	0	0	603	903	0
487	7	0	0	0	0	0	0	200	300	0	0	0	0	0	0	0	200	903	0	0	0	0	0	0	0	603	903	0
487	8	0	0	0	0	0	0	200	300	0	0	0	0	0	0	0	200	903	0	0	0	0	0	0	0	603	903	0
487	9	0	0	0	0	0	0	200	300	0	0	0	0	0	0	0	200	903	0	0	0	0	0	0	0	603	903	0
488	0	0	0	0	0	0	0	200	300	0	0	0	0	0	0	0	200	903	0	0	0	0	0	0	0	603	903	0
488	1	0	0	0	0	0	0	200	300	0	0	0	0	0	0	0	200	903	0	0	0	0	0	0	0	603	903	0
488	2	0	0	0	0	0	0	200	300	0	0	0	0	0	0	0	200	903	0	0	0	0	0	0	0	603	903	0
488	3	0	0	0	0	0	0	200	300	0	0	0	0	0	0	0	200	903	0	0	0	0	0	0	0	603	903	0
488	4	0	0	0	0	0	0	200	300	0	0	0	0	0	0	0	200	903	0	0	0	0	0	0	0	603	903	0
488	5	0	0	0	0	0	0	200	300	0	0	0	0	0	0	0	200	903	0	0	0	0	0	0	0	603	903	0
488	6	0	0	0	0	0	0	200	300	0	0	0	0	0	0	0	200	903	0	0	0	0	0	0	0	603	903	0
488	7	0	0	0	0	0	0	200	300	0	0	0	0	0	0	0	200	903	0	0	0	0	0	0	0	603	903	0
488	8	0	0	0	0	0	0	200	300	0	0	0	0	0	0	0	200	903	0	0	0	0	0	0	0	603	903	0
488	9	0	0	0	0	0	0	200	300	0	0	0	0	0	0	0	200	903	0	0	0	0	0	0	0	603	903	0
489	0	0	0	0	0	0	0	200	300	0	0	0	0	0	0	0	200	903	0	0	0	0	0	0	0	603	903	0
489	1	0	0	0	0	0	0	200	300	0	0	0	0	0	0	0	200	903	0	0	0	0	0	0	0	603	903	0
489	2	0	0	0	0	0	0	200	300	0	0	0	0	0	0	0	200	903	0	0	0	0	0	0	0	603	903	0
489	3	0	0	0	0	0	0	200	300	0	0	0	0	0	0	0	200	903	0	0	0	0	0	0	0	603	903	0
489	4	0	0	0	0	0	0	200	300	0	0	0	0	0	0	0	200	903	0	0	0	0	0	0	0	603	903	0
489	5	0	0	0	0	0	0	200	300	0	0	0	0	0	0	0	200	903	0	0	0	0	0	0	0	603	903	0
489	6	0	0	0	0	0	0	200	300	0	0	0	0	0	0	0	200	903	0	0	0	0	0	0	0	603	903	0
489	7	0	0	0	0	0	0	200	300	0	0	0	0	0	0	0	200	903	0	0	0	0	0	0	0	603	903	0
489	8	0	0	0	0	0	0	200	300	0	0	0	0	0	0	0	200	903	0	0	0	0	0	0	0	603	903	0
489	9	0	0	0	0	0	0	200	300	0	0	0	0	0	0	0	200	903	0	0	0	0	0	0	0	603	903	0
490	0	0	0	0	0	0	0	200	300	0	0	0	0	0	0	0	200	903	0	0	0	0	0	0	0	603	903	0
490	1	0	0	0	0	0	0	200	300	0	0	0	0	0	0	0	200	903	0	0	0	0	0	0	0	603	903	0
490	2	0	0	0	0	0	0	200	300	0	0	0	0	0	0	0	200	903	0	0	0	0	0	0	0	603	903	0
490	3	0	0	0	0	0	0	200	300	0	0	0	0	0	0	0	200	903	0	0	0	0	0	0	0	603	903	0
490	4	0	0	0	0	0	0	200	300	0	0	0	0	0	0	0	200	903	0	0	0	0	0	0	0	603	903	0
490	5	0	0	0	0	0	0	200	300	0	0	0	0	0	0	0	200	903	0	0	0	0	0	0	0	603	903	0
490	6	0	0	0	0	0	0	200	300	0	0	0	0	0	0	0	200	903	0	0	0	0	0	0	0	603	903	0
490	7	0	0	0	0	0	0	200	300	0	0	0	0	0	0	0	200	903	0	0	0	0	0	0	0	603	903	0
490	8	0	0	0	0	0	0	200	300	0	0	0	0	0	0	0	200	903	0	0	0	0	0	0	0	603	903	0
490	9	0	0	0	0	0	0	200	300	0	0	0	0	0	0	0	200	903	0	0	0	0	0	0	0	603	903	0
491	0	0	0	0	0	0	0	200	300	0	0	0	0	0	0	0	200	903	0	0	0	0	0	0	0	603	903	0
491	1	0	0	0	0	0	0	200	300	0	0	0	0	0	0	0	200	903	0	0	0	0	0	0	0	603	903	0
491	2	0	0	0	0	0	0	200	300	0	0	0	0	0	0	0	200	903	0	0	0	0	0	0	0	603	903	0
491	3	0	0	0	0	0	0	200	300	0	0	0	0	0	0	0	200	903	0	0	0	0	0	0	0	603	903	0
491	4	0	0	0	0	0	0	200	300	0	0	0	0	0	0	0	200	903	0	0	0	0	0	0	0	603	903	0
491	5	0	0	0	0	0	0	200	300	0	0	0	0	0	0	0	200	903	0	0	0	0	0	0	0	603	903	0
491	6	0	0	0	0	0	0	200	300	0	0	0	0	0	0	0	200	903	0	0	0	0	0	0	0	603	903	0
491	7	0	0	0	0	0	0	200	300	0	0	0	0	0	0	0	200	903	0	0	0	0	0	0	0	603	903	0
491	8	0	0	0	0	0	0	200	300	0	0	0	0	0	0	0	200	903	0	0	0	0	0	0	0	603	903	0
491	9	0	0	0	0	0	0	200	300	0	0	0	0	0	0	0	200	903	0	0	0	0	0	0	0	603	903	0
492	0	0	0	0	0	0	0	200	300	0	0	0	0	0	0	0	200	903	0	0	0	0	0	0	0	603	903	0
492	1	0	0	0	0	0	0	200	300	0	0	0	0	0	0	0	200	903	0	0	0	0	0	0	0	603	903	0
492	2	0	0	0	0	0	0	200	300	0	0	0	0	0	0	0	200	903	0	0	0	0	0	0	0	603	903	0
492	3	0	0	0	0	0	0	200	300	0	0	0	0	0	0	0	200	903	0	0	0	0	0	0	0	603	903	0
492	4	0	0	0	0	0	0	200	300	0	0	0	0	0	0	0	200	903	0	0	0	0	0	0	0	603	903	0
492	5	0	0	0	0	0	0	200	300	0	0	0	0	0	0	0	200	903	0	0	0	0	0	0	0	603	903	0
492	6	0	0	0	0	0	0	200	300	0	0	0	0	0	0	0	200	903	0	0	0	0	0	0	0	603	903	0
492	7	0	0	0	0	0	0	200	300	0	0	0	0	0	0	0	200	903	0	0	0	0	0	0	0	603	903	0
492	8	0	0	0	0	0	0	200	300	0	0	0	0	0	0	0	200	903	0	0	0	0	0	0	0	603	903	0
492	9	0	0	0	0	0	0	200	300	0	0	0	0	0	0	0	200	903	0	0	0	0	0	0	0	603	903	0
493	0	0	0	0	0	0	0	200	300	0	0	0	0	0	0	0	200	903	0	0	0	0	0	0	0	603	903	0
493	1	0	0	0	0	0	0	200	300	0	0	0	0	0	0	0	200	903	0	0	0	0	0	0	0	603	903	0
493	2	0	0	0	0	0	0	200	300	0	0	0	0	0	0	0	200	903	0	0	0	0	0	0	0	603	903	0
493	3	0	0	0	0	0	0	200	300	0	0	0	0	0	0	0	200	903	0	0	0	0	0	0	0	603	903	0
493	4	0	0	0	0	0	0	200	300	0	0	0	0	0	0	0	200	903	0	0	0	0	0	0	0	603	903	0
493	5	0	0	0	0	0	0	200	300	0	0	0	0	0	0	0	200	903	0	0	0	0	0	0	0	603	903	0
493	6	0	0	0	0	0	0	200	300	0	0	0	0	0	0	0	200	903	0	0	0	0	0	0	0	603	903	0
493	7	0	0	0	0	0	0	200	300	0	0	0	0	0	0	0	200	903	0	0	0	0	0	0	0	603	903	0
493	8	0	0	0	0	0	0	200	300	0	0	0	0	0	0	0	200	903	0	0	0	0	0	0	0	603	903	0
493	9	0	0	0	0	0	0	200	300	0	0	0	0	0	0	0	200	903	0	0	0	0	0	0	0	603	903	0
494	0	0	0	0	0	0	0	200	300	0	0	0	0	0	0	0	200	903	0	0	0	0	0	0	0	603	903	0
494	1	0	0	0	0	0	0	200	300	0	0	0	0	0	0	0	200	903	0	0	0	0	0	0	0	603	903	0
494	2	0	0	0	0	0	0	200	300	0	0	0	0	0	0	0	200	903	0	0	0	0	0	0	0	603	903	0
494	3	0	0	0	0	0	0	200	300	0	0	0	0	0	0	0	200	903	0	0	0	0	0	0	0	603	903	0
494	4	0	0	0	0	0	0	200	300	0	0	0	0	0	0	0	200	903	0	0	0	0	0	0	0	603	903	0
494	5	0	0	0	0	0	0	200	300	0	0	0	0	0	0	0	200	903	0	0	0	0	0	0	0	603	903	0
494	6	0	0	0	0	0	0	200	300	0	0	0	0	0	0	0	200	903	0	0	0	0	0	0	0	603	903	0
494	7	0	0	0	0	0	0	200	300	0	0	0	0	0	0	0	200	903	0	0	0	0	0	0	0	603	903	0
494	8	0	0	0	0	0	0	200	300	0	0	0	0	0	0	0	200	903	0	0	0	0	0	0	0	603	903	0
494	9	0	0	0	0	0	0	200	300	0	0	0	0	0	0	0	200	903	0	0	0	0	0	0	0	603	903	0
495	0	0	0	0	0	0	0	200	300	0	0	0	0	0	0	0	200	903	0	0	0	0	0	0	0	603	903	0
495	1	0	0	0	0	0	0	200	300	0	0	0	0	0	0	0	200	903	0	0	0	0	0	0	0	603	903	0
495	2	0	0	0	0	0	0	200	300	0	0	0	0	0	0	0	200	903	0	0	0	0	0	0	0	603	903	0
495	3	0	0	0	0	0	0	200	300	0	0	0	0	0	0	0	200	903	0	0	0	0	0	0	0	603	903	0
495	4	0	0	0	0	0	0	200	300	0	0	0	0	0	0	0	200	903	0	0	0	0	0	0	0	603	903	0
495	5	0	0	0	0	0	0	200	300	0	0	0	0	0	0	0	200	903	0	0	0	0	0	0	0	603	903	0
495	6	0	0	0	0	0	0	200	300	0	0	0	0	0	0	0	200	903	0	0	0	0	0	0	0	603	903	0
495	7	0	0	0	0	0	0	200	300	0	0	0	0	0	0	0	200	903	0	0	0	0	0	0	0	603	903	0
495	8	0	0	0	0	0	0	200	300	0	0	0	0	0	0	0	200	903	0	0	0	0	0	0	0	603	903	0
495	9	0	0	0	0	0	0	200	300	0	0	0	0	0	0	0	200	903	0	0	0	0	0	0	0	603	903	0
496	0	0	0	0	0	0	0	200	300	0	0	0	0	0	0	0	200	903	0	0	0	0	0	0	0	603	903	0
496	1	0	0	0	0	0	0	200	300	0	0	0	0	0	0	0	200	903	0	0	0	0	0	0	0	603	903	0
496	2	0	0	0	0	0	0	200	300	0	0	0	0	0	0	0	200	903	0	0	0	0	0	0	0	603	903	0
496	3	0	0	0	0	0	0	200	300	0	0	0	0	0	0	0	200	903	0	0	0	0	0	0	0	603	903	0
496	4	0	0	0	0	0	0	200	300	0	0	0	0	0	0	0	200	903	0	0	0	0	0	0	0	603	903	0
496	5	0	0	0	0	0	0	200	300	0	0	0	0	0	0	0	200	903	0	0	0	0	0	0	0	603	903	0
496	6	0	0	0	0	0	0	200	300	0	0	0	0	0	0	0	200	903	0	0	0	0	0	0	0	603	903	0
496	7	0	0	0	0	0	0	200	300	0	0	0	0	0	0	0	200	903	0	0	0	0	0	0	0	603	903	0
496	8	0	0	0	0	0	0	200	300	0	0	0	0	0	0	0	200	903	0	0	0	0	0	0	0	603	903	0
496	9	0	0	0	0	0	0	200	300	0	0	0	0	0	0	0	200	903	0	0	0	0	0	0	0	603	903	0
497	0	0	0	0	0	0	0	200	300	0	0	0	0	0	0	0	200	903	0	0	0	0	0	0	0	603	903	0
497	1	0	0	0	0	0	0	200	300	0	0	0	0	0	0	0	200	903	0	0	0	0	0	0	0	603	903	0
497	2	0	0	0	0	0	0	200	300	0	0	0	0	0	0	0	200	903	0	0	0	0	0	0	0	603	903	0
497	3	0	0	0	0	0	0	200	300	0	0	0	0	0	0	0	200	903	0	0	0	0	0	0	0	603	903	0
497	4	0	0	0	0	0	0	200	300	0	0	0	0	0	0	0	200	903	0	0	0	0	0	0	0	603	903	0
497	5	0	0	0	0	0	0	200	300	0	0	0	0	0	0	0	200	903	0	0	0	0	0	0	0	603	903	0
497	6	0	0	0	0	0	0	200	300	0	0	0	0	0	0	0	200	903	0	0	0	0	0	0	0	603	903	0
497	7	0	0	0	0	0	0	200	300	0	0	0	0	0	0	0	200	903	0	0	0	0	0	0	0	603	903	0
497	8	0	0	0	0	0	0	200	300	0	0	0	0	0	0	0	200	903	0	0	0	0	0	0	0	603	903	0
497	9	0	0	0	0	0	0	200	300	0	0	0	0	0	0	0	200	903	0	0	0	0	0	0	0	603	903	0
498	0	0	0	0	0	0	0	200	300	0	0	0	0	0	0	0	200	903	0	0	0	0	0	0	0	603	903	0
498	1	0	0	0	0	0	0	200	300	0	0	0	0	0	0	0	200	903	0	0	0	0	0	0	0	603	903	0
498	2	0	0	0	0	0	0	200	300	0	0	0	0	0	0	0	200	903	0	0	0	0	0	0	0	603	903	0
498	3	0	0	0	0	0	0	200	300	0	0	0	0	0	0	0	200	903	0	0	0	0	0	0	0	603	903	0
498	4	0	0	0	0	0	0	200	300	0	0	0	0	0	0	0	200	903	0	0	0	0	0	0	0	603	903	0
498	5	0	0	0	0	0	0	200	300	0	0	0	0	0	0	0	200	903	0	0	0	0	0	0	0	603	903	0
498	6	0	0	0	0	0	0	200	300	0	0	0	0	0	0	0	200	903	0	0	0	0	0	0	0	603	903	0
498	7	0	0	0	0	0	0	200	300	0	0	0	0	0	0	0	200	903	0	0	0	0	0	0	0	603	903	0
498	8	0	0	0	0	0	0	200	300	0	0	0	0	0	0	0	200	903	0	0	0	0	0	0	0	603	903	0
498	9	0	0	0	0	0	0	200	300	0	0	0	0	0	0	0	200	903	0	0	0	0	0	0	0	603	903	0
499	0	0	0	0	0	0	0	200	300	0	0	0	0	0	0	0	200	903	0	0	0	0	0	0	0	603	903	0
499	1	0	0	0	0	0	0	200	300	0	0	0	0	0	0	0	200	903	0	0	0	0	0	0	0	603	903	0
499	2	0	0	0	0	0	0	200	300	0	0	0	0	0	0	0	200	903	0	0	0	0	0	0	0	603	903	0
499	3	0	0	0	0	0	0	200	300	0	0	0	0	0	0	0	200	903	0	0	0	0	0	0	0	603	903	0
499	4	0	0	0	0	0	0	200	300	0	0	0	0	0	0	0	200	903	0	0	0	0	0	0	0	603	903	0
499	5	0	0	0	0	0	0	200	300	0	0	0	0	0	0	0	200	903	0	0	0	0	0	0	0	603	903	0
499	6	0	0	0	0	0	0	200	300	0	0	0	0	0	0	0	200	903	0	0	0	0	0	0	0	603	903	0
499	7	0	0	0	0	0	0	200	300	0	0	0	0	0	0	0	200	903	0	0	0	0	0	0	0	603	903	0
499	8	0	0	0	0	0	0	200	300	0	0	0	0	0	0	0	200	903	0	0	0	0	0	0	0	603	903	0
499	9	0	0	0	0	0	0	200	300	0	0	0	0	0	0	0	200	903	0	0	0	0	0	0	0	603	903	0
500	0	0	0	0	0	0	0	200	300	0	0	0	0	0	0	0	200	903	0	0	0	0	0	0	0	603	903	0
500	1	0	0	0	0	0	0	200	300	0	0	0	0	0	0	0	200	903	0	0	0	0	0	0	0	603	903	0
500	2	0	0	0	0	0	0	200	300	0	0	0	0	0	0	0	200	903	0	0	0	0	0	0	0	603	903	0
500	3	0	0	0	0	0	0	200	300	0	0	0	0	0	0	0	200	903	0	0	0	0	0	0	0	603	903	0
500	4	0	0	0	0	0	0	200	300	0	0	0	0	0	0	0	200	903	0	0	0	0	0	0	0	603	903	0
500	5	0	0	0	0	0	0	200	300	0	0	0	0	0	0	0	200	903	0	0	0	0	0	0	0	603	903	0
500	6	0	0	0	0	0	0	200	300	0	0	0	0	0	0	0	200	903	0	0	0	0	0	0	0	603	903	0
500	7	0	0	0	0	0	0	200	300	0	0	0	0	0	0	0	200	903	0	0	0	0	0	0	0	603	903	0
500	8	0	0	0	0	0	0	200	300	0	0	0	0	0	0	0	200	903	0	0	0	0	0	0	0	603	903	0
500	9	0	0	0	0	0	0	200	300	0	0	0	0	0	0	0	200	903	0	0	0	0	0	0	0	603	903	0
501	0	0	0	0	0	0	0	200	300	0	0	0	0	0	0	0	200	903	0	0	0	0	0	0	0	603	903	0
501	1	0	0	0	0	0	0	200	300	0	0	0	0	0	0	0	200	903	0	0	0	0	0	0	0	603	903	0
501	2	0	0	0	0	0	0	200	300	0	0	0	0	0	0	0	200	903	0	0	0	0	0	0	0	603	903	0
501	3	0	0	0	0	0	0	200	300	0	0	0	0	0	0	0	200	903	0	0	0	0	0	0	0	603	903	0
501	4	0	0	0	0	0	0	200	300	0	0	0	0	0	0	0	200	903	0	0	0	0	0	0	0	603	903	0
501	5	0	0	0	0	0	0	200	300	0	0	0	0	0	0	0	200	903	0	0	0	0	0	0	0	603	903	0
501	6	0	0	0	0	0	0	200	300	0	0	0	0	0	0	0	200	903	0	0	0	0	0	0	0	603	903	0
501	7	0	0	0	0	0	0	200	300	0	0	0	0	0	0	0	200	903	0	0	0	0	0	0	0	603	903	0
501	8	0	0	0	0	0	0	200	300	0	0	0	0	0	0	0	200	903	0	0	0	0	0	0	0	603	903	0
501	9	0	0	0	0	0	0	200	300	0	0	0	0	0	0	0	200	903	0	0	0	0	0	0	0	603	903	0
502	0	0	0	0	0	0	0	200	300	0	0	0	0	0	0	0	200	903	0	0	0	0	0	0	0	603	903	0
502	1	0	0	0	0	0	0	200	300	0	0	0	0	0	0	0	200	903	0	0	0	0	0	0	0	603	903	0
502	2	0	0	0	0	0	0	200	300	0	0	0	0	0	0	0	200	903	0	0	0	0	0	0	0	603	903	0
502	3	0	0	0	0	0	0	200	300	0	0	0	0	0	0	0	200	903	0	0	0	0	0	0	0	603	903	0
502	4	0	0	0	0	0	0	200	300	0	0	0	0	0	0	0	200	903	0	0	0	0	0	0	0	603	903	0
502	5	0	0	0	0	0	0	200	300	0	0	0	0	0	0	0	200	903	0	0	0	0	0	0	0	603	903	0
502	6	0	0	0	0	0	0	200	300	0	0	0	0	0	0	0	200	903	0	0	0	0	0	0	0	603	903	0
502	7	0	0	0	0	0	0	200	300	0	0	0	0	0	0	0	200	903	0	0	0	0	0	0	0	603	903	0
502	8	0	0	0	0	0	0	200	300	0	0	0	0	0	0	0	200	903	0	0	0	0	0	0	0	603	903	0
502	9	0	0	0	0	0	0	200	300	0	0	0	0	0	0	0	200	903	0	0	0	0	0	0	0	603	903	0
503	0	0	0	0	0	0	0	200	300	0	0	0	0	0	0	0	200	903	0	0	0	0	0	0	0	603	903	0
503	1	0	0	0	0	0	0	200	300	0	0	0	0	0	0	0	200	903	0	0	0	0	0	0	0	603	903	0
503	2	0	0	0	0	0	0	200	300	0	0	0	0	0	0	0	200	903	0	0	0	0	0	0	0	603	903	0
503	3	0	0	0	0	0	0	200	300	0	0	0	0	0	0	0	200	903	0	0	0	0	0	0	0	603	903	0
503	4	0	0	0	0	0	0	200	300	0	0	0	0	0	0	0	200	903	0	0	0	0	0	0	0	603	903	0
503	5	0	0	0	0	0	0	200	300	0	0	0	0	0	0	0	200	903	0	0	0	0	0	0	0	603	903	0
503	6	0	0	0	0	0	0	200	300	0	0	0	0	0	0	0	200	903	0	0	0	0	0	0	0	603	903	0
503	7	0	0	0	0	0	0	200	300	0	0	0	0	0	0	0	200	903	0	0	0	0	0	0	0	603	903	0
503	8	0	0	0	0	0	0	200	300	0	0	0	0	0	0	0	200	903	0	0	0	0	0	0	0	603	903	0
503	9	0	0	0	0	0	0	200	300	0	0	0	0	0	0	0	200	903	0	0	0	0	0	0	0	603	903	0
504	0	0	0	0	0	0	0	200	300	0	0	0	0	0	0	0	200	903	0	0	0	0	0	0	0	603	903	0
504	1	0	0	0	0	0	0	200	300	0	0	0	0	0	0	0	200	903	0	0	0	0	0	0	0	603	903	0
504	2	0	0	0	0	0	0	200	300	0	0	0	0	0	0	0	200	903	0	0	0	0	0	0	0	603	903	0
504	3	0	0	0	0	0	0	200	300	0	0	0	0	0	0	0	200	903	0	0	0	0	0	0	0	603	903	0
504	4	0	0	0	0	0	0	200	300	0	0	0	0	0	0	0	200	903	0	0	0	0	0	0	0	603	903	0
504	5	0	0	0	0	0	0	200	300	0	0	0	0	0	0	0	200	903	0	0	0	0	0	0	0	603	903	0
504	6	0	0	0	0	0	0	200	300	0	0	0	0	0	0	0	200	903	0	0	0	0	0	0	0	603	903	0
504	7	0	0	0	0	0	0	200	300	0	0	0	0	0	0	0	200	903	0	0	0	0	0	0	0	603	903	0
504	8	0	0	0	0	0	0	200	300	0	0	0	0	0	0	0	200	903	0	0	0	0	0	0	0	603	903	0
504	9	0	0	0	0	0	0	200	300	0	0	0	0	0	0	0	200	903	0	0	0	0	0	0	0	603	903	0
505	0	0	0	0	0	0	0	200	300	0	0	0	0	0	0	0	200	903	0	0	0	0	0	0	0	603	903	0
505	1	0	0	0	0	0	0	200	300	0	0	0	0	0	0	0	200	903	0	0	0	0	0	0	0	603	903	0
505	2	0	0	0	0	0	0	200	300	0	0	0	0	0	0	0	200	903	0	0	0	0	0	0	0	603	903	0
505	3	0	0	0	0	0	0	200	300	0	0	0	0	0	0	0	200	903	0	0	0	0	0	0	0	603	903	0
505	4	0	0	0	0	0	0	200	300	0	0	0	0	0	0	0	200	903	0	0	0	0	0	0	0	603	903	0
505	5	0	0	0	0	0	0	200	300	0	0	0	0	0	0	0	200	903	0	0	0	0	0	0	0	603	903	0
505	6	0	0	0	0	0	0	200	300	0	0	0	0	0	0	0	200	903	0	0	0	0	0	0	0	603	903	0
505	7	0	0	0	0	0	0	200	300	0	0	0	0	0	0	0	200	903	0	0	0	0	0	0	0	603	903	0
505	8	0	0	0	0	0	0	200	300	0	0	0	0	0	0	0	200	903	0	0	0	0	0	0	0	603	903	0
505	9	0	0	0	0	0	0	200	300	0	0	0	0	0	0	0	200	903	0	0	0	0	0	0	0	603	903	0
506	0	0	0	0	0	0	0	200	300	0	0	0	0	0	0	0	200	903	0	0	0	0	0	0	0	603	903	0
506	1	0	0	0	0	0	0	200	300	0	0	0	0	0	0	0	200	903	0	0	0	0	0	0	0	603	903	0
506	2	0	0	0	0	0	0	200	300	0	0	0	0	0	0	0	200	903	0	0	0	0	0	0	0	603	903	0
506	3	0	0	0	0	0	0	200	300	0	0	0	0	0	0	0	200	903	0	0	0	0	0	0	0	603	903	0
506	4	0	0	0	0	0	0	200	300	0	0	0	0	0	0	0	200	903	0	0	0	0	0	0	0	603	903	0
506	5	0	0	0	0	0	0	200	300	0	0	0	0	0	0	0	200	903	0	0	0	0	0	0	0	603	903	0
506	6	0	0	0	0	0	0	200	300	0	0	0	0	0	0	0	200	903	0	0	0	0	0	0	0	603	903	0
506	7	0	0	0	0	0	0	200	300	0	0	0	0	0	0	0	200	903	0	0	0	0	0	0	0	603	903	0
506	8	0	0	0	0	0	0	200	300	0	0	0	0	0	0	0	200	903	0	0	0	0	0	0	0	603	903	0
506	9	0	0	0	0	0	0	200	300	0	0	0	0	0	0	0	200	903	0	0	0	0	0	0	0	603	903	0
507	0	0	0	0	0	0	0	200	300	0	0	0	0	0	0	0	200	903	0	0	0	0	0	0	0	603	903	0
507	1	0	0	0	0	0	0	200	300	0	0	0	0	0	0	0	200	903	0	0	0	0	0	0	0	603	903	0
507	2	0	0	0	0	0	0	200	300	0	0	0	0	0	0	0	200	903	0	0	0	0	0	0	0	603	903	0
507	3	0	0	0	0	0	0	200	300	0	0	0	0	0	0	0	200	903	0	0	0	0	0	0	0	603	903	0
507	4	0	0	0	0	0	0	200	300	0	0	0	0	0	0	0	200	903	0	0	0	0	0	0	0	603	903	0
507	5	0	0	0	0	0	0	200	300	0	0	0	0	0	0	0	200	903	0	0	0	0	0	0	0	603	903	0
507	6	0	0	0	0	0	0	200	300	0	0	0	0	0	0	0	200	903	0	0	0	0	0	0	0	603	903	0
507	7	0	0	0	0	0	0	200	300	0	0	0	0	0	0	0	200	903	0	0	0	0	0	0	0	603	903	0
507	8	0	0	0	0	0	0	200	300	0	0	0	0	0	0	0	200	903	0	0	0	0	0	0	0	603	903	0
507	9	0	0	0	0	0	0	200	300	0	0	0	0	0	0	0	200	903	0	0	0	0	0	0	0	603	903	0
508	0	0	0	0	0	0	0	200	300	0	0	0	0	0	0	0	200	903	0	0	0	0	0	0	0	603	903	0
508	1	0	0	0	0	0	0	200	300	0	0	0	0	0	0	0	200	903	0	0	0	0	0	0	0	603	903	0
508	2	0	0	0	0	0	0	200	300	0	0	0	0	0	0	0	200	903	0	0	0	0	0	0	0	603	903	0
508	3	0	0	0	0	0	0	200	300	0	0	0	0	0	0	0	200	903	0	0	0	0	0	0	0	603	903	0
508	4	0	0	0	0	0	0	200	300	0	0	0	0	0	0	0	200	903	0	0	0	0	0	0	0	603	903	0
508	5	0	0	0	0	0	0	200	300	0	0	0	0	0	0	0	200	903	0	0	0	0	0	0	0	603	903	0
508	6	0	0	0	0	0	0	200	300	0	0	0	0	0	0	0	200	903	0	0	0	0	0	0	0	603	903	0
508	7	0	0	0	0	0	0	200	300	0	0	0	0	0	0	0	200	903	0	0	0	0	0	0	0	603	903	0
508	8	0	0	0	0	0	0	200	300	0	0	0	0	0	0	0	200	903	0	0	0	0	0	0	0	603	903	0
508	9	0	0	0	0	0	0	200	300	0	0	0	0	0	0	0	200	903	0	0	0	0	0	0	0	603	903	0
509	0	0	0	0	0	0	0	200	300	0	0	0	0	0	0	0	200	903	0	0	0	0	0	0	0	603	903	0
509	1	0	0	0	0	0	0	200	300	0	0	0	0	0	0	0	200	903	0	0	0	0	0	0	0	603	903	0
509	2	0	0	0	0	0	0	200	300	0	0	0	0	0	0	0	200	903	0	0	0	0	0	0	0	603	903	0
509	3	0	0	0	0	0	0	200	300	0	-1.90734	5.1828	-34.0698	-6049.8	4784.73	900.467	340.439	1080.57	0	0	0	0	0	0	0	603	903	0
509	4	0	0	0	0	0	0	200	300	0	6.79016	21.9675	-44.1406	-6324.46	6005.44	1953.32	336.052	1046.28	0	0	0	0	0	0	0	603	903	0
509	5	0	0	0	0	0	0	200	300	0	11.9782	32.9538	-39.8682	-4951.17	4784.73	2868.85	320.014	1027.19	0	0	0	0	0	0	0	603	903	0
509	6	0	0	0	0	0	0	200	300	0	-1.60217	27.6132	-31.0181	-5500.49	5334.05	2823.07	371.966	1080.33	0	0	0	0	0	0	0	603	903	0
509	7	0	0	0	0	0	0	200	300	0	0.0762979	27.308	-42.3096	-6782.23	6188.54	3326.61	346.268	1063.3	0	0	0	0	0	0	0	603	903	0
509	8	0	0	0	0	0	0	200	300	0	14.1144	40.8884	-59.7046	-7239.99	6432.68	4013.26	307.742	1024.26	0	0	0	0	0	0	0	603	903	0
509	9	0	0	0	0	0	0	200	300	0	8.46863	42.872	-63.9771	-9071.04	8019.59	3875.93	325.351	1044.79	0	0	0	0	0	0	0	603	903	0
510	0	0	0	0	0	0	0	200	300	0	-0.839229	37.8366	-60.9253	-9071.04	8690.98	4516.8	342.65	1051.89	0	0	0	0	0	0	0	603	903	0
510	1	0	0	0	0	0	0	200	300	0	8.01087	48.3652	-72.2168	-9803.46	9240.29	5157.67	327.952	1038.75	0	0	0	0	0	0	0	603	903	0
510	2	0	0	0	0	0	0	200	300	0	13.1989	50.9592	-89.917	-11909.2	10766.2	4516.8	319.735	1035.45	0	0	0	0	0	0	0	603	903	0
510	3	0	0	0	0	0	0	200	300	0	9.38416	49.5859	-95.7153	-12550.1	11315.5	5203.45	318.22	1034.12	0	0	0	0	0	0	0	603	903	0
510	4	0	0	0	0	0	0	200	300	0	5.41687	50.654	-100.598	-13190.9	11742.7	5798.54	316.729	1034.12	0	0	0	0	0	0	0	603	903	0
510	5	0	0	0	0	0	0	200	300	0	4.95911	52.1799	-110.974	-14747.3	13940	4974.56	325.615	1035.89	0	0	0	0	0	0	0	603	903	0
510	6	0	0	0	0	0	0	200	300	0	11.0626	53.4006	-127.148	-15937.5	15099.7	5798.54	318.756	1028.35	0	0	0	0	0	0	0	603	903	0
510	7	0	0	0	0	0	0	200	300	0	9.68933	53.0954	-136.304	-17402.3	15404.8	6118.97	313.019	1030.67	0	0	0	0	0	0	0	603	903	0
510	8	0	0	0	0	0	0	200	300	0	1.90735	50.0436	-144.543	-19050.3	16869.7	5432.33	316.71	1034.8	0	0	0	0	0	0	0	603	903	0
510	9	0	0	0	0	0	0	200	300	0	3.73841	53.8583	-156.445	-19599.6	18090.4	6530.96	315.634	1028.28	0	0	0	0	0	0	0	603	903	0
511	0	0	0	0	0	0	0	200	300	0	9.68933	55.6894	-168.958	-20972.9	18883.8	6668.29	311.767	1027.13	0	0	0	0	0	0	0	603	903	0
511	1	0	0	0	0	0	0	200	300	0	-0.228878	52.6376	-179.639	-23078.6	20592.8	5890.09	314.635	1031.47	0	0	0	0	0	0	0	603	903	0
511	2	0	0	0	0	0	0	200	300	0	-5.72204	51.5695	-191.235	-23811	21081.1	6805.62	310.237	1027.51	0	0	0	0	0	0	0	603	903	0
511	3	0	0	0	0	0	0	200	300	0	-0.686642	50.0436	-202.222	-24085.7	21935.6	6851.39	308.473	1022.11	0	0	0	0	0	0	0	603	903	0
511	4	0	0	0	0	0	0	200	300	0	-0.686642	44.8557	-211.377	-26191.4	23949.8	5569.66	313.304	1026.91	0	0	0	0	0	0	0	603	903	0
511	5	0	0	0	0	0	0	200	300	0	-6.33239	42.7194	-219.617	-27106.9	24560.1	6073.2	311.832	1026.43	0	0	0	0	0	0	0	603	903	0
511	6	0	0	0	0	0	0	200	300	0	-9.38415	37.8366	-230.298	-28114	24682.2	5798.54	307.175	1025.08	0	0	0	0	0	0	0	603	903	0
511	7	0	0	0	0	0	0	200	300	0	-7.40051	31.2753	-239.148	-28663.3	25841.9	4699.91	308.058	1022.86	0	0	0	0	0	0	0	603	903	0
511	8	0	0	0	0	0	0	200	300	0	-4.9591	28.9865	-248.914	-28938	26574.3	4837.23	306.761	1019.26	0	0	0	0	0	0	0	603	903	0
511	9	0	0	0	0	0	0	200	300	0	-10.1471	26.5451	-253.186	-29945.1	27611.9	4425.25	309.058	1021.27	0	0	0	0	0	0	0	603	903	0
512	0	0	0	0	0	0	0	200	300	0	-14.1144	18.6105	-260.815	-31501.5	28527.4	3372.39	309.378	1023.78	0	0	0	0	0	0	0	603	903	0
512	1	0	0	0	0	0	0	200	300	0	-10.2997	15.4062	-269.971	-30769.1	28588.4	3647.05	305.895	1016.97	0	0	0	0	0	0	0	603	903	0
512	2	0	0	0	0	0	0	200	300	0	-10.2997	13.4226	-276.379	-31501.5	28954.7	3326.61	304.764	1016.98	0	0	0	0	0	0	0	603	903	0
512	3	0	0	0	0	0	0	200	300	0	-15.1825	6.70868	-281.262	-32142.3	30114.3	2044.88	307.069	1017.28	0	0	0	0	0	0	0	603	903	0
512	4	0	0	0	0	0	0	200	300	0	-14.4196	0.910344	-286.45	-32600.1	30541.6	2182.21	306.621	1016.81	0	0	0	0	0	0	0	603	903	0
512	5	0	0	0	0	0	0	200	300	0	-13.6566	-2.44659	-291.638	-32325.4	31151.9	1724.44	306.817	1013.84	0	0	0	0	0	0	0	603	903	0
512	6	0	0	0	0	0	0	200	300	0	-14.7247	-7.3294	-296.216	-32691.6	31029.9	717.362	304.754	1013.36	0	0	0	0	0	0	0	603	903	0
512	7	0	0	0	0	0	0	200	300	0	-15.0299	-12.8226	-301.099	-32691.6	31457.1	534.256	304.474	1011.57	0	0	0	0	0	0	0	603	903	0
512	8	0	0	0	0	0	0	200	300	0	-14.267	-19.0787	-305.981	-33332.5	32372.6	-198.166	305.799	1011.94	0	0	0	0	0	0	0	603	903	0
512	9	0	0	0	0	0	0	200	300	0	-14.4196	-22.283	-310.254	-33515.6	32616.8	-1251.02	305.129	1011.03	0	0	0	0	0	0	0	603	903	0
513	0	0	0	0	0	0	0	200	300	0	-14.267	-25.7925	-317.273	-33332.5	32860.9	-1067.92	303.573	1008.06	0	0	0	0	0	0	0	603	903	0
513	1	0	0	0	0	0	0	200	300	0	-17.7765	-31.1331	-320.325	-34339.6	33593.3	-1571.46	304.873	1010.2	0	0	0	0	0	0	0	603	903	0
513	2	0	0	0	0	0	0	200	300	0	-15.7928	-35.5582	-328.564	-34248	34508.9	-2715.87	305.029	1007.24	0	0	0	0	0	0	0	603	903	0
513	3	0	0	0	0	0	0	200	300	0	-15.6403	-37.3892	-335.583	-34522.7	35424.4	-2807.42	305.561	1005.87	0	0	0	0	0	0	0	603	903	0
513	4	0	0	0	0	0	0	200	300	0	-16.861	-41.5091	-341.992	-35438.2	36339.9	-3127.85	306.26	1006.62	0	0	0	0	0	0	0	603	903	0
513	5	0	0	0	0	0	0	200	300	0	-16.7084	-45.9341	-352.063	-36170.7	37133.4	-4180.71	305.474	1005.74	0	0	0	0	0	0	0	603	903	0
513	6	0	0	0	0	0	0	200	300	0	-13.6566	-46.8497	-363.965	-36536.9	38598.2	-4455.37	306.049	1003.39	0	0	0	0	0	0	0	603	903	0
513	7	0	0	0	0	0	0	200	300	0	-16.098	-49.5962	-374.646	-37177.7	39818.9	-4913.14	306.284	1002.23	0	0	0	0	0	0	0	603	903	0
513	8	0	0	0	0	0	0	200	300	0	-13.504	-52.8006	-386.853	-38001.7	41466.9	-5554	307.19	1001.23	0	0	0	0	0	0	0	603	903	0
513	9	0	0	0	0	0	0	200	300	0	-13.6566	-54.4791	-399.365	-38917.2	42687.6	-5370.9	306.889	1000.45	0	0	0	0	0	0	0	603	903	0
514	0	0	0	0	0	0	0	200	300	0	-13.9618	-56.0049	-410.657	-39832.8	43725.2	-5920.22	306.476	999.998	0	0	0	0	0	0	0	603	903	0
514	1	0	0	0	0	0	0	200	300	0	-12.5885	-58.2938	-423.169	-40015.9	44945.9	-6423.76	306.213	997.562	0	0	0	0	0	0	0	603	903	0
514	2	0	0	0	0	0	0	200	300	0	-12.1307	-58.2938	-435.986	-40473.6	46715.9	-6606.86	307.15	995.832	0	0	0	0	0	0	0	603	903	0
514	3	0	0	0	0	0	0	200	300	0	-13.8092	-60.2774	-450.635	-42487.8	48730.1	-6561.08	308.137	997.284	0	0	0	0	0	0	0	603	903	0
514	4	0	0	0	0	0	0	200	300	0	-11.8256	-62.1085	-464.062	-42213.1	50072.8	-6927.3	307.901	993.964	0	0	0	0	0	0	0	603	903	0
514	5	0	0	0	0	0	0	200	300	0	-9.84192	-62.5662	-475.964	-42487.8	50683.2	-7018.85	306.485	992.267	0	0	0	0	0	0	0	603	903	0
514	6	0	0	0	0	0	0	200	300	0	-10.2997	-65.0076	-485.425	-43403.3	52209.1	-7247.73	307.553	992.413	0	0	0	0	0	0	0	603	903	0
514	7	0	0	0	0	0	0	200	300	0	-10.4523	-65.0076	-498.547	-43037.1	54162.2	-7293.51	308.64	989.325	0	0	0	0	0	0	0	603	903	0
514	8	0	0	0	0	0	0	200	300	0	-9.07898	-66.8387	-510.144	-44318.9	54894.6	-7110.4	307.606	989.875	0	0	0	0	0	0	0	603	903	0
514	9	0	0	0	0	0	0	200	300	0	-8.46862	-67.2964	-515.027	-45325.9	56176.4	-6927.3	309.075	991.007	0	0	0	0	0	0	0	603	903	0
515	0	0	0	0	0	0	0	200	300	0	-4.9591	-69.4327	-528.455	-44959.7	56603.6	-7293.51	307.112	988.078	0	0	0	0	0	0	0	603	903	0
515	1	0	0	0	0	0	0	200	300	0	-6.02722	-69.7378	-535.474	-45692.1	57641.2	-7568.16	307.645	988.33	0	0	0	0	0	0	0	603	903	0
515	2	0	0	0	0	0	0	200	300	0	-5.41687	-71.4163	-543.408	-46333	59228.1	-7110.4	308.994	988.264	0	0	0	0	0	0	0	603	903	0
515	3	0	0	0	0	0	0	200	300	0	-4.65393	-70.806	-549.207	-45417.5	59411.2	-7201.95	308.176	985.697	0	0	0	0	0	0	0	603	903	0
515	4	0	0	0	0	0	0	200	300	0	-2.67028	-72.4844	-558.362	-46241.5	60509.8	-7705.49	308.37	985.816	0	0	0	0	0	0	0	603	903	0
515	5	0	0	0	0	0	0	200	300	0	-0.381466	-75.231	-564.16	-46607.7	61181.2	-7613.94	308.447	985.614	0	0	0	0	0	0	0	603	903	0
515	6	0	0	0	0	0	0	200	300	0	0.381474	-75.5362	-568.127	-46241.5	61852.6	-7980.15	308.871	984.393	0	0	0	0	0	0	0	603	903	0
515	7	0	0	0	0	0	0	200	300	0	1.44959	-76.1465	-568.738	-45875.2	62646.1	-8071.71	310.149	983.662	0	0	0	0	0	0	0	603	903	0
515	8	0	0	0	0	0	0	200	300	0	4.04358	-77.0621	-576.367	-46424.6	62951.3	-7842.82	309.221	983.547	0	0	0	0	0	0	0	603	903	0
515	9	0	0	0	0	0	0	200	300	0	6.48499	-78.1302	-581.25	-46058.4	63500.6	-7934.38	309.248	982.24	0	0	0	0	0	0	0	603	903	0
516	0	0	0	0	0	0	0	200	300	0	6.17981	-79.5035	-583.081	-46333	63683.7	-8666.8	309.219	982.462	0	0	0	0	0	0	0	603	903	0
516	1	0	0	0	0	0	0	200	300	0	7.24793	-80.419	-587.354	-45966.8	64233	-8529.47	309.36	981.261	0	0	0	0	0	0	0	603	903	0
516	2	0	0	0	0	0	0	200	300	0	11.5204	-81.9449	-587.048	-45600.6	65026.4	-8666.8	310.769	980.678	0	0	0	0	0	0	0	603	903	0
516	3	0	0	0	0	0	0	200	300	0	13.1989	-81.7923	-590.71	-45966.8	65148.5	-8987.24	310.288	980.816	0	0	0	0	0	0	0	603	903	0
516	4	0	0	0	0	0	0	200	300	0	11.8256	-81.9449	-601.086	-45325.9	66796.4	-8895.68	311.126	978.407	0	0	0	0	0	0	0	603	903	0
516	5	0	0	0	0	0	0	200	300	0	14.5721	-80.2664	-613.904	-44685.1	69176.9	-8849.91	312.684	975.788	0	0	0	0	0	0	0	603	903	0
516	6	0	0	0	0	0	0	200	300	0	27.6947	-84.2337	-623.059	-44502	69604.1	-9399.22	311.713	974.425	0	0	0	0	0	0	0	603	903	0
516	7	0	0	0	0	0	0	200	300	0	31.8146	-92.0157	-626.721	-44044.2	70275.5	-9994.32	312.132	973.277	0	0	0	0	0	0	0	603	903	0
516	8	0	0	0	0	0	0	200	300	0	28.4576	-95.3726	-629.468	-44135.8	71618.3	-10452.1	313.776	973.116	0	0	0	0	0	0	0	603	903	0
516	9	0	0	0	0	0	0	200	300	0	36.087	-92.9312	-639.844	-43220.2	72045.5	-11047.2	312.599	970.548	0	0	0	0	0	0	0	603	903	0
517	0	0	0	0	0	0	0	200	300	0	45.5475	-98.2718	-646.863	-42854	72228.6	-12008.5	311.66	969.249	0	0	0	0	0	0	0	603	903	0
517	1	0	0	0	0	0	0	200	300	0	41.275	-109.563	-650.525	-43769.6	74059.7	-12557.8	313.846	970.284	0	0	0	0	0	0	0	603	903	0
517	2	0	0	0	0	0	0	200	300	0	38.681	-109.411	-652.966	-43037.1	74608.9	-12924	314.262	968.91	0	0	0	0	0	0	0	603	903	0
517	3	0	0	0	0	0	0	200	300	0	43.1061	-112.462	-664.563	-42121.6	75463.4	-13885.3	313.553	966.382	0	0	0	0	0	0	0	603	903	0
517	4	0	0	0	0	0	0	200	300	0	43.1061	-119.329	-671.277	-42121.6	76440	-13885.3	313.873	965.749	0	0	0	0	0	0	0	603	903	0
517	5	0	0	0	0	0	0	200	300	0	39.9017	-121.618	-674.939	-42030	75951.7	-14068.4	312.531	965.272	0	0	0	0	0	0	0	603	903	0
517	6	0	0	0	0	0	0	200	300	0	36.6974	-121.618	-680.737	-42121.6	77538.6	-14663.5	313.904	964.877	0	0	0	0	0	0	0	603	903	0
517	7	0	0	0	0	0	0	200	300	0	38.2233	-126.501	-688.367	-41389.2	78393.1	-14663.5	313.883	963.127	0	0	0	0	0	0	0	603	903	0
517	8	0	0	0	0	0	0	200	300	0	40.0543	-127.111	-690.808	-41206.1	78515.2	-14617.7	313.657	962.649	0	0	0	0	0	0	0	603	903	0
517	9	0	0	0	0	0	0	200	300	0	34.7137	-126.043	-692.334	-41389.2	78515.2	-15258.6	313.407	962.782	0	0	0	0	0	0	0	603	903	0
518	0	0	0	0	0	0	0	200	300	0	32.1198	-126.043	-698.743	-40931.4	78332.1	-15167	312.104	961.579	0	0	0	0	0	0	0	603	903	0
518	1	0	0	0	0	0	0	200	300	0	37.1552	-127.263	-700.269	-41022.9	79125.5	-14755.1	312.993	961.582	0	0	0	0	0	0	0	603	903	0
518	2	0	0	0	0	0	0	200	300	0	35.3241	-126.043	-706.067	-41206.1	79919.1	-15350.2	313.189	961.36	0	0	0	0	0	0	0	603	903	0
518	3	0	0	0	0	0	0	200	300	0	30.8991	-122.838	-707.593	-40199	80346.2	-15029.7	313.549	959.811	0	0	0	0	0	0	0	603	903	0
518	4	0	0	0	0	0	0	200	300	0	34.256	-122.838	-709.729	-40748.3	80285.3	-14709.3	313.121	960.414	0	0	0	0	0	0	0	603	903	0
518	5	0	0	0	0	0	0	200	300	0	34.7137	-123.144	-714.612	-40656.7	80712.5	-14983.9	312.946	959.893	0	0	0	0	0	0	0	603	903	0
518	6	0	0	0	0	0	0	200	300	0	33.7982	-120.092	-712.781	-40199	81200.7	-14755.1	313.921	959.397	0	0	0	0	0	0	0	603	903	0
518	7	0	0	0	0	0	0	200	300	0	33.7982	-120.244	-719.8	-39649.7	80529.4	-14388.8	311.878	958.084	0	0	0	0	0	0	0	603	903	0
518	8	0	0	0	0	0	0	200	300	0	35.0189	-122.991	-723.157	-39741.2	82116.3	-14892.4	313.553	957.955	0	0	0	0	0	0	0	603	903	0
518	9	0	0	0	0	0	0	200	300	0	37.7655	-121.618	-726.208	-39832.8	82055.2	-14938.2	312.991	957.85	0	0	0	0	0	0	0	603	903	0
519	0	0	0	0	0	0	0	200	300	0	37.1552	-120.55	-728.65	-39100.3	82238.4	-14572	312.864	956.661	0	0	0	0	0	0	0	603	903	0
519	1	0	0	0	0	0	0	200	300	0	38.3759	-123.449	-732.007	-39100.3	83031.8	-15075.5	313.43	956.415	0	0	0	0	0	0	0	603	903	0
519	2	0	0	0	0	0	0	200	300	0	40.3595	-125.127	-736.584	-38642.6	83092.9	-14892.4	312.808	955.462	0	0	0	0	0	0	0	603	903	0
519	3	0	0	0	0	0	0	200	300	0	41.275	-123.907	-738.416	-38917.2	84130.4	-14846.6	313.934	955.704	0	0	0	0	0	0	0	603	903	0
519	4	0	0	0	0	0	0	200	300	0	40.6647	-125.432	-740.552	-38276.4	84374.6	-15258.6	313.935	954.686	0	0	0	0	0	0	0	603	903	0
519	5	0	0	0	0	0	0	200	300	0	45.5475	-127.874	-746.655	-38276.4	84618.7	-15258.6	313.33	954.264	0	0	0	0	0	0	0	603	903	0
519	6	0	0	0	0	0	0	200	300	0	47.226	-126.348	-750.623	-38001.7	85046	-15121.3	313.301	953.627	0	0	0	0	0	0	0	603	903	0
519	7	0	0	0	0	0	0	200	300	0	46.3104	-129.095	-753.674	-37635.5	85961.5	-15258.6	314.057	952.936	0	0	0	0	0	0	0	603	903	0
519	8	0	0	0	0	0	0	200	300	0	47.8363	-130.468	-756.421	-37543.9	86144.6	-15579	313.885	952.634	0	0	0	0	0	0	0	603	903	0
519	9	0	0	0	0	0	0	200	300	0	50.5829	-130.926	-760.999	-37543.9	86510.9	-15258.6	313.681	952.335	0	0	0	0	0	0	0	603	903	0
520	0	0	0	0	0	0	0	200	300	0	51.651	-130.163	-767.712	-37177.7	87060.1	-15533.3	313.402	951.427	0	0	0	0	0	0	0	603	903	0
520	1	0	0	0	0	0	0	200	300	0	51.8036	-130.926	-770.764	-36536.9	87731.6	-15579	313.824	950.404	0	0	0	0	0	0	0	603	903	0
520	2	0	0	0	0	0	0	200	300	0	52.2614	-133.672	-774.426	-36811.5	88402.9	-15441.7	314.153	950.534	0	0	0	0	0	0	0	603	903	0
520	3	0	0	0	0	0	0	200	300	0	54.0924	-133.672	-778.088	-36628.4	88280.8	-15945.2	313.459	950.075	0	0	0	0	0	0	0	603	903	0
520	4	0	0	0	0	0	0	200	300	0	54.7028	-132.451	-782.971	-37543.9	89135.3	-16219.9	313.842	950.951	0	0	0	0	0	0	0	603	903	0
520	5	0	0	0	0	0	0	200	300	0	53.9398	-134.13	-788.464	-37177.7	89501.5	-15395.9	313.514	950.152	0	0	0	0	0	0	0	603	903	0
520	6	0	0	0	0	0	0	200	300	0	54.245	-134.283	-789.075	-36628.4	90356	-15991	314.509	949.419	0	0	0	0	0	0	0	603	903	0
520	7	0	0	0	0	0	0	200	300	0	55.0079	-133.825	-796.399	-36170.7	90661.2	-16036.8	313.839	948.418	0	0	0	0	0	0	0	603	903	0
520	8	0	0	0	0	0	0	200	300	0	54.5502	-135.808	-799.146	-37360.8	91088.4	-15853.7	313.982	949.751	0	0	0	0	0	0	0	603	903	0
520	9	0	0	0	0	0	0	200	300	0	55.1605	-135.961	-803.723	-36994.6	90966.4	-15579	313.181	949.029	0	0	0	0	0	0	0	603	903	0
521	0	0	0	0	0	0	0	200	300	0	54.7028	-135.045	-808.301	-36536.9	91882	-16082.6	313.673	948.202	0	0	0	0	0	0	0	603	903	0
521	1	0	0	0	0	0	0	200	300	0	54.7028	-135.503	-810.437	-36079.1	92675.4	-16036.8	314.352	947.518	0	0	0	0	0	0	0	603	903	0
521	2	0	0	0	0	0	0	200	300	0	52.8717	-137.792	-817.761	-36628.4	93224.7	-16174.1	314	947.791	0	0	0	0	0	0	0	603	903	0
521	3	0	0	0	0	0	0	200	300	0	54.7028	-136.419	-820.508	-37177.7	93224.7	-16128.3	313.618	948.311	0	0	0	0	0	0	0	603	903	0
521	4	0	0	0	0	0	0	200	300	0	54.245	-135.808	-825.391	-35987.5	93590.9	-15624.8	313.39	946.601	0	0	0	0	0	0	0	603	903	0
521	5	0	0	0	0	0	0	200	300	0	55.6183	-136.114	-829.968	-36079.1	94201.3	-15899.5	313.5	946.471	0	0	0	0	0	0	0	603	903	0
521	6	0	0	0	0	0	0	200	300	0	53.6346	-134.74	-828.748	-36353.8	94018.1	-15899.5	313.446	946.866	0	0	0	0	0	0	0	603	903	0
521	7	0	0	0	0	0	0	200	300	0	53.9398	-136.571	-836.377	-36811.5	95360.9	-15533.3	314.017	947.013	0	0	0	0	0	0	0	603	903	0
521	8	0	0	0	0	0	0	200	300	0	54.7028	-136.114	-840.344	-36262.2	94994.7	-15853.7	313.043	946.152	0	0	0	0	0	0	0	603	903	0
521	9	0	0	0	0	0	0	200	300	0	55.6183	-134.588	-843.701	-36170.7	95360.9	-15716.4	313.027	945.871	0	0	0	0	0	0	0	603	903	0
522	0	0	0	0	0	0	0	200	300	0	52.4139	-132.757	-845.532	-36353.8	96154.4	-15487.5	313.721	945.995	0	0	0	0	0	0	0	603	903	0
522	1	0	0	0	0	0	0	200	300	0	52.1088	-133.367	-852.246	-36262.2	96032.3	-15624.8	312.681	945.549	0	0	0	0	0	0	0	603	903	0
522	2	0	0	0	0	0	0	200	300	0	53.6346	-133.825	-854.382	-36262.2	96703.7	-15533.3	313.186	945.443	0	0	0	0	0	0	0	603	903	0
522	3	0	0	0	0	0	0	200	300	0	54.5502	-133.977	-856.824	-35712.9	96886.8	-14983.9	313.077	944.681	0	0	0	0	0	0	0	603	903	0
522	4	0	0	0	0	0	0	200	300	0	52.7191	-131.536	-860.791	-36170.7	96825.7	-15304.4	312.485	945.02	0	0	0	0	0	0	0	603	903	0
522	5	0	0	0	0	0	0	200	300	0	52.4139	-129.705	-860.486	-36262.2	97436.1	-14983.9	313.234	945.142	0	0	0	0	0	0	0	603	903	0
522	6	0	0	0	0	0	0	200	300	0	50.8881	-130.315	-864.148	-35712.9	97619.3	-14572	312.966	944.327	0	0	0	0	0	0	0	603	903	0
522	7	0	0	0	0	0	0	200	300	0	51.0407	-131.383	-868.726	-35529.8	97802.3	-14983.9	312.581	943.899	0	0	0	0	0	0	0	603	903	0
522	8	0	0	0	0	0	0	200	300	0	51.4984	-129.705	-868.726	-36353.8	97558.2	-14846.6	312.3	944.847	0	0	0	0	0	0	0	603	903	0
522	9	0	0	0	0	0	0	200	300	0	49.3622	-128.789	-869.946	-35712.9	97558.2	-14572	312.143	944.052	0	0	0	0	0	0	0	603	903	0
523	0	0	0	0	0	0	0	200	300	0	48.4467	-128.179	-872.388	-35255.1	97985.5	-14755.1	312.319	943.412	0	0	0	0	0	0	0	603	903	0
523	1	0	0	0	0	0	0	200	300	0	49.3622	-127.416	-871.777	-35346.7	97924.4	-14617.7	312.327	943.546	0	0	0	0	0	0	0	603	903	0
523	2	0	0	0	0	0	0	200	300	0	48.4467	-128.332	-873.608	-35804.4	98473.8	-14114.2	312.721	943.985	0	0	0	0	0	0	0	603	903	0
523	3	0	0	0	0	0	0	200	300	0	47.3785	-127.263	-874.219	-35621.3	97924.4	-14160	312.014	943.747	0	0	0	0	0	0	0	603	903	0
523	4	0	0	0	0	0	0	200	300	0	47.3785	-125.28	-874.524	-34797.4	97985.5	-14297.3	312.044	942.79	0	0	0	0	0	0	0	603	903	0
523	5	0	0	0	0	0	0	200	300	0	46.3104	-124.212	-873.914	-34705.8	98595.8	-13885.3	312.821	942.713	0	0	0	0	0	0	0	603	903	0
523	6	0	0	0	0	0	0	200	300	0	46.7682	-124.669	-874.524	-35438.2	97802.3	-13976.9	311.835	943.523	0	0	0	0	0	0	0	603	903	0
523	7	0	0	0	0	0	0	200	300	0	46.0053	-124.669	-875.439	-35255.1	97863.4	-13793.8	311.788	943.271	0	0	0	0	0	0	0	603	903	0
523	8	0	0	0	0	0	0	200	300	0	45.0897	-123.601	-873.914	-34064.9	97680.2	-13519.1	311.773	941.98	0	0	0	0	0	0	0	603	903	0
523	9	0	0	0	0	0	0	200	300	0	45.2423	-121.923	-870.862	-34248	97558.2	-13885.3	312.025	942.327	0	0	0	0	0	0	0	603	903	0
524	0	0	0	0	0	0	0	200	300	0	45.3949	-122.228	-873.303	-34522.7	97863.4	-13610.6	312.061	942.531	0	0	0	0	0	0	0	603	903	0
524	1	0	0	0	0	0	0	200	300	0	44.0216	-121.465	-872.693	-33424.1	97802.3	-13336	312.07	941.3	0	0	0	0	0	0	0	603	903	0
524	2	0	0	0	0	0	0	200	300	0	44.632	-121.313	-871.472	-33973.4	96947.8	-13381.8	311.246	941.984	0	0	0	0	0	0	0	603	903	0
524	3	0	0	0	0	0	0	200	300	0	44.4794	-120.702	-869.641	-33241	97008.9	-13244.4	311.551	941.224	0	0	0	0	0	0	0	603	903	0
524	4	0	0	0	0	0	0	200	300	0	44.4794	-119.024	-866.284	-33332.5	96825.7	-12878.2	311.771	941.478	0	0	0	0	0	0	0	603	903	0
524	5	0	0	0	0	0	0	200	300	0	43.5638	-118.261	-864.758	-33424.1	96703.7	-13198.7	311.827	941.651	0	0	0	0	0	0	0	603	903	0
524	6	0	0	0	0	0	0	200	300	0	44.4794	-117.956	-864.148	-33332.5	96642.7	-13061.3	311.836	941.573	0	0	0	0	0	0	0	603	903	0
524	7	0	0	0	0	0	0	200	300	0	43.869	-118.108	-862.622	-32417	95971.2	-12740.9	311.255	940.58	0	0	0	0	0	0	0	603	903	0
524	8	0	0	0	0	0	0	200	300	0	45.0897	-115.209	-859.265	-32325.4	95483	-12969.8	311.122	940.62	0	0	0	0	0	0	0	603	903	0
524	9	0	0	0	0	0	0	200	300	0	43.2587	-115.972	-855.298	-31959.2	94994.7	-12832.5	311.066	940.366	0	0	0	0	0	0	0	603	903	0
525	0	0	0	0	0	0	0	200	300	0	43.5638	-114.751	-852.551	-32233.9	95422	-12420.5	311.925	940.809	0	0	0	0	0	0	0	603	903	0
525	1	0	0	0	0	0	0	200	300	0	41.5802	-113.225	-850.72	-31776.1	94750.5	-12008.5	311.377	940.352	0	0	0	0	0	0	0	603	903	0
525	2	0	0	0	0	0	0	200	300	0	42.3431	-112.462	-844.312	-31318.4	94201.3	-12420.5	311.572	940.093	0	0	0	0	0	0	0	603	903	0
525	3	0	0	0	0	0	0	200	300	0	41.4276	-113.378	-843.701	-31135.3	93957.1	-12145.8	311.363	939.903	0	0	0	0	0	0	0	603	903	0
525	4	0	0	0	0	0	0	200	300	0	41.4276	-112.005	-838.818	-30494.4	93713	-12145.8	311.72	939.354	0	0	0	0	0	0	0	603	903	0
525	5	0	0	0	0	0	0	200	300	0	40.6647	-109.868	-836.377	-30952.2	92736.4	-12054.3	310.879	940.008	0	0	0	0	0	0	0	603	903	0
525	6	0	0	0	0	0	0	200	300	0	41.7328	-109.106	-834.546	-30311.3	92919.5	-11596.5	311.341	939.321	0	0	0	0	0	0	0	603	903	0
525	7	0	0	0	0	0	0	200	300	0	42.038	-107.427	-826.001	-30311.3	92126.1	-11779.6	311.533	939.696	0	0	0	0	0	0	0	603	903	0
525	8	0	0	0	0	0	0	200	300	0	40.3595	-108.19	-827.832	-29945.1	91882	-11504.9	310.991	939.173	0	0	0	0	0	0	0	603	903	0
525	9	0	0	0	0	0	0	200	300	0	39.9017	-106.817	-822.644	-30036.6	91820.9	-11504.9	311.617	939.512	0	0	0	0	0	0	0	603	903	0
526	0	0	0	0	0	0	0	200	300	0	41.5802	-104.528	-818.066	-29395.8	90905.4	-11001.4	311.122	938.933	0	0	0	0	0	0	0	603	903	0
526	1	0	0	0	0	0	0	200	300	0	41.7328	-103.765	-817.151	-29212.7	91027.5	-11367.6	311.396	938.749	0	0	0	0	0	0	0	603	903	0
526	2	0	0	0	0	0	0	200	300	0	40.3595	-101.934	-808.911	-28754.9	90111.9	-11001.4	311.399	938.548	0	0	0	0	0	0	0	603	903	0
526	3	0	0	0	0	0	0	200	300	0	41.4276	-101.934	-808.911	-29212.7	89989.8	-11092.9	311.248	939.114	0	0	0	0	0	0	0	603	903	0
526	4	0	0	0	0	0	0	200	300	0	41.8854	-101.171	-804.944	-28571.8	89989.8	-10864.1	311.796	938.495	0	0	0	0	0	0	0	603	903	0
526	5	0	0	0	0	0	0	200	300	0	43.7164	-98.8821	-801.892	-28388.7	89318.5	-10406.3	311.385	938.402	0	0	0	0	0	0	0	603	903	0
526	6	0	0	0	0	0	0	200	300	0	42.038	-97.3563	-798.23	-28846.4	88952.3	-10589.4	311.437	939.138	0	0	0	0	0	0	0	603	903	0
526	7	0	0	0	0	0	0	200	300	0	42.9535	-97.3563	-794.873	-27839.4	88219.8	-10726.7	310.986	938.024	0	0	0	0	0	0	0	603	903	0
526	8	0	0	0	0	0	0	200	300	0	41.7328	-93.8467	-790.906	-27656.3	87853.6	-10406.3	311.08	937.968	0	0	0	0	0	0	0	603	903	0
526	9	0	0	0	0	0	0	200	300	0	43.1061	-94.4571	-786.633	-27747.8	87914.6	-10177.4	311.761	938.274	0	0	0	0	0	0	0	603	903	0
527	0	0	0	0	0	0	0	200	300	0	42.3431	-92.3209	-782.971	-27564.7	87060.1	-10040.1	311.192	938.205	0	0	0	0	0	0	0	603	903	0
527	1	0	0	0	0	0	0	200	300	0	42.6483	-91.2527	-780.225	-26923.8	86938	-9902.76	311.427	937.508	0	0	0	0	0	0	0	603	903	0
527	2	0	0	0	0	0	0	200	300	0	42.4957	-90.4898	-775.342	-26557.6	86266.7	-9856.99	311.263	937.253	0	0	0	0	0	0	0	603	903	0
527	3	0	0	0	0	0	0	200	300	0	42.4957	-87.7432	-769.238	-26099.9	86144.6	-9719.66	311.987	936.93	0	0	0	0	0	0	0	603	903	0
527	4	0	0	0	0	0	0	200	300	0	43.5638	-87.438	-767.407	-26740.7	85290.2	-9353.45	311.141	937.846	0	0	0	0	0	0	0	603	903	0
527	5	0	0	0	0	0	0	200	300	0	42.4957	-85.9122	-763.745	-26649.2	85229.1	-9353.45	311.594	937.893	0	0	0	0	0	0	0	603	903	0
527	6	0	0	0	0	0	0	200	300	0	42.4957	-84.5389	-760.999	-25459	85290.2	-9307.67	312.077	936.455	0	0	0	0	0	0	0	603	903	0
527	7	0	0	0	0	0	0	200	300	0	43.4113	-84.2337	-757.336	-24818.1	84374.6	-9170.34	311.41	935.77	0	0	0	0	0	0	0	603	903	0
527	8	0	0	0	0	0	0	200	300	0	43.869	-83.1656	-753.369	-26008.3	83275.9	-8758.35	310.538	937.523	0	0	0	0	0	0	0	603	903	0
527	9	0	0	0	0	0	0	200	300	0	43.1061	-81.0294	-749.402	-25642.1	83642.1	-8712.58	311.612	937.217	0	0	0	0	0	0	0	603	903	0
528	0	0	0	0	0	0	0	200	300	0	42.8009	-79.0457	-744.824	-25275.9	83153.9	-8666.8	311.642	936.935	0	0	0	0	0	0	0	603	903	0
528	1	0	0	0	0	0	0	200	300	0	44.1742	-77.825	-742.383	-24635	83031.8	-8483.7	311.845	936.184	0	0	0	0	0	0	0	603	903	0
528	2	0	0	0	0	0	0	200	300	0	43.5638	-77.825	-737.805	-24726.6	82177.3	-8117.48	311.381	936.514	0	0	0	0	0	0	0	603	903	0
528	3	0	0	0	0	0	0	200	300	0	43.2587	-76.1465	-733.228	-25184.3	81811.1	-8163.26	311.577	937.347	0	0	0	0	0	0	0	603	903	0
528	4	0	0	0	0	0	0	200	300	0	45.7001	-74.1629	-729.565	-24635	81383.9	-7797.05	311.551	936.767	0	0	0	0	0	0	0	603	903	0
528	5	0	0	0	0	0	0	200	300	0	44.3268	-72.3318	-723.157	-23994.2	81322.8	-7934.38	312.455	936.18	0	0	0	0	0	0	0	603	903	0
528	6	0	0	0	0	0	0	200	300	0	44.0216	-70.6534	-723.157	-23994.2	80956.6	-7705.49	311.949	936.18	0	0	0	0	0	0	0	603	903	0
528	7	0	0	0	0	0	0	200	300	0	43.869	-71.2637	-718.884	-23994.2	80224.2	-7568.16	311.595	936.377	0	0	0	0	0	0	0	603	903	0
528	8	0	0	0	0	0	0	200	300	0	43.4113	-70.1956	-713.086	-23627.9	80041.1	-7293.51	312.246	936.135	0	0	0	0	0	0	0	603	903	0
528	9	0	0	0	0	0	0	200	300	0	44.632	-68.3646	-709.119	-23353.3	79186.6	-7201.95	311.669	935.933	0	0	0	0	0	0	0	603	903	0
529	0	0	0	0	0	0	0	200	300	0	44.4794	-65.9231	-701.489	-22712.4	79430.8	-7018.85	313.232	935.378	0	0	0	0	0	0	0	603	903	0
529	1	0	0	0	0	0	0	200	300	0	43.1061	-65.9231	-703.015	-23078.6	79003.5	-6973.07	312.378	935.828	0	0	0	0	0	0	0	603	903	0
529	2	0	0	0	0	0	0	200	300	0	43.4113	-65.1602	-697.827	-23719.5	78210.1	-6881.52	312.077	936.99	0	0	0	0	0	0	0	603	903	0
529	3	0	0	0	0	0	0	200	300	0	45.3949	-63.4817	-693.555	-22163.1	77416.6	-6149.1	311.623	934.956	0	0	0	0	0	0	0	603	903	0
529	4	0	0	0	0	0	0	200	300	0	44.4794	-62.4136	-689.587	-22529.3	77477.7	-6744.19	312.354	935.671	0	0	0	0	0	0	0	603	903	0
529	5	0	0	0	0	0	0	200	300	0	43.7164	-61.1929	-686.536	-21705.3	77233.5	-6561.08	312.497	934.616	0	0	0	0	0	0	0	603	903	0
529	6	0	0	0	0	0	0	200	300	0	43.869	-60.43	-681.042	-21796.9	77233.5	-6332.2	313.405	935.005	0	0	0	0	0	0	0	603	903	0
529	7	0	0	0	0	0	0	200	300	0	44.7845	-59.2093	-679.211	-20972.9	76134.9	-5965.99	312.093	933.878	0	0	0	0	0	0	0	603	903	0
529	8	0	0	0	0	0	0	200	300	0	44.9371	-58.1412	-672.803	-21247.6	75768.7	-5920.22	312.616	934.581	0	0	0	0	0	0	0	603	903	0
529	9	0	0	0	0	0	0	200	300	0	44.1742	-56.9205	-669.446	-20423.6	75280.4	-5370.9	312.452	933.508	0	0	0	0	0	0	0	603	903	0
530	0	0	0	0	0	0	0	200	300	0	43.5638	-55.8524	-667.615	-21064.5	75524.5	-5874.44	313.126	934.552	0	0	0	0	0	0	0	603	903	0
530	1	0	0	0	0	0	0	200	300	0	44.7845	-55.6998	-660.901	-21156	74975.2	-5691.33	313.444	935.011	0	0	0	0	0	0	0	603	903	0
530	2	0	0	0	0	0	0	200	300	0	47.6837	-54.3265	-658.459	-20423.6	73815.5	-5233.57	312.103	934.017	0	0	0	0	0	0	0	603	903	0
530	3	0	0	0	0	0	0	200	300	0	44.632	-52.9532	-654.187	-20972.9	73876.5	-5462.45	312.929	935.06	0	0	0	0	0	0	0	603	903	0
530	4	0	0	0	0	0	0	200	300	0	45.3949	-50.9695	-651.135	-20698.2	73449.3	-5462.45	312.802	934.788	0	0	0	0	0	0	0	603	903	0
530	5	0	0	0	0	0	0	200	300	0	44.9371	-50.054	-646.558	-19874.3	73571.4	-4913.14	313.789	933.739	0	0	0	0	0	0	0	603	903	0
530	6	0	0	0	0	0	0	200	300	0	45.2423	-49.9014	-643.506	-19782.7	73205.2	-4867.36	313.76	933.742	0	0	0	0	0	0	0	603	903	0
530	7	0	0	0	0	0	0	200	300	0	46.1578	-48.3755	-639.233	-20240.5	72289.6	-4775.81	313.088	934.664	0	0	0	0	0	0	0	603	903	0
530	8	0	0	0	0	0	0	200	300	0	46.0053	-47.7652	-636.487	-19782.7	71679.3	-4501.15	312.617	934.081	0	0	0	0	0	0	0	603	903	0
530	9	0	0	0	0	0	0	200	300	0	46.9208	-47.6126	-631.909	-19141.8	71557.2	-4638.48	313.24	933.292	0	0	0	0	0	0	0	603	903	0
531	0	0	0	0	0	0	0	200	300	0	46.463	-44.866	-627.332	-19050.3	71313	-4455.37	313.677	933.367	0	0	0	0	0	0	0	603	903	0
531	1	0	0	0	0	0	0	200	300	0	45.3949	-44.866	-624.28	-18958.7	71252.1	-4134.94	314.135	933.369	0	0	0	0	0	0	0	603	903	0
531	2	0	0	0	0	0	0	200	300	0	46.3104	-44.2557	-621.533	-19324.9	70458.6	-4089.16	313.363	934.092	0	0	0	0	0	0	0	603	903	0
531	3	0	0	0	0	0	0	200	300	0	45.7001	-42.272	-616.65	-18226.3	69726.1	-4363.82	313.072	932.557	0	0	0	0	0	0	0	603	903	0
531	4	0	0	0	0	0	0	200	300	0	45.3949	-43.035	-612.378	-18043.2	69604.1	-4043.38	313.662	932.464	0	0	0	0	0	0	0	603	903	0
531	5	0	0	0	0	0	0	200	300	0	45.2423	-41.2039	-608.105	-18409.4	69298.9	-3997.6	313.959	933.273	0	0	0	0	0	0	0	603	903	0
531	6	0	0	0	0	0	0	200	300	0	45.8527	-39.5254	-606.58	-18775.6	69115.8	-3722.95	313.944	933.953	0	0	0	0	0	0	0	603	903	0
531	7	0	0	0	0	0	0	200	300	0	44.0216	-38.9151	-603.833	-17493.9	68139.2	-3677.17	312.844	931.971	0	0	0	0	0	0	0	603	903	0
531	8	0	0	0	0	0	0	200	300	0	45.2423	-37.847	-598.34	-17310.8	67834.1	-3768.72	313.371	931.931	0	0	0	0	0	0	0	603	903	0
531	9	0	0	0	0	0	0	200	300	0	44.3268	-37.2366	-594.373	-17677	67528.9	-3310.96	313.614	932.741	0	0	0	0	0	0	0	603	903	0
532	0	0	0	0	0	0	0	200	300	0	44.1742	-36.7789	-590.71	-17402.3	67590	-3127.85	314.422	932.46	0	0	0	0	0	0	0	603	903	0
532	1	0	0	0	0	0	0	200	300	0	43.869	-35.7108	-589.49	-17310.8	66979.6	-3265.18	313.623	932.366	0	0	0	0	0	0	0	603	903	0
532	2	0	0	0	0	0	0	200	300	0	44.7845	-36.1685	-583.386	-15937.5	66430.2	-3127.85	313.87	930.319	0	0	0	0	0	0	0	603	903	0
532	3	0	0	0	0	0	0	200	300	0	44.1742	-33.8797	-581.25	-16029.1	66003	-2990.52	313.554	930.577	0	0	0	0	0	0	0	603	903	0
532	4	0	0	0	0	0	0	200	300	0	43.7164	-33.1168	-576.672	-16120.6	65575.7	-2944.75	313.714	930.955	0	0	0	0	0	0	0	603	903	0
532	5	0	0	0	0	0	0	200	300	0	44.1742	-32.0486	-572.705	-16029.1	66003	-2807.42	315.248	930.988	0	0	0	0	0	0	0	603	903	0
532	6	0	0	0	0	0	0	200	300	0	44.632	-31.4383	-570.264	-15205.1	65331.6	-2853.2	314.564	929.663	0	0	0	0	0	0	0	603	903	0
532	7	0	0	0	0	0	0	200	300	0	44.0216	-30.3702	-568.127	-16212.2	64477.1	-2578.54	313.491	931.536	0	0	0	0	0	0	0	603	903	0
532	8	0	0	0	0	0	0	200	300	0	43.2587	-30.3702	-563.245	-15205.1	63988.9	-2441.21	313.608	929.996	0	0	0	0	0	0	0	603	903	0
532	9	0	0	0	0	0	0	200	300	0	43.4113	-30.065	-561.414	-15846	64110.9	-2303.88	314.196	931.225	0	0	0	0	0	0	0	603	903	0
533	0	0	0	0	0	0	0	200	300	0	43.7164	-28.3865	-556.531	-15205.1	63866.8	-2120.77	314.759	930.321	0	0	0	0	0	0	0	603	903	0
533	1	0	0	0	0	0	0	200	300	0	45.3949	-27.6236	-554.7	-15205.1	63622.6	-2029.22	314.697	930.411	0	0	0	0	0	0	0	603	903	0
533	2	0	0	0	0	0	0	200	300	0	42.8009	-26.2503	-552.258	-14838.9	63073.3	-1846.12	314.21	929.869	0	0	0	0	0	0	0	603	903	0
533	3	0	0	0	0	0	0	200	300	0	42.8009	-26.4029	-548.901	-15205.1	61974.7	-1983.45	312.907	930.701	0	0	0	0	0	0	0	603	903	0
533	4	0	0	0	0	0	0	200	300	0	41.8854	-26.0977	-545.85	-14747.3	62585	-1663.01	314.656	930.017	0	0	0	0	0	0	0	603	903	0
533	5	0	0	0	0	0	0	200	300	0	42.1906	-25.3348	-542.798	-14106.5	62218.8	-1525.68	314.626	928.988	0	0	0	0	0	0	0	603	903	0
533	6	0	0	0	0	0	0	200	300	0	41.8854	-24.877	-540.051	-14564.2	61669.5	-1663.01	314.192	929.968	0	0	0	0	0	0	0	603	903	0
533	7	0	0	0	0	0	0	200	300	0	41.275	-23.6563	-536.694	-13923.3	60998.1	-1251.02	313.655	928.943	0	0	0	0	0	0	0	603	903	0
533	8	0	0	0	0	0	0	200	300	0	40.3595	-23.1985	-535.168	-13465.6	60998.1	-1113.69	313.979	928.161	0	0	0	0	0	0	0	603	903	0
533	9	0	0	0	0	0	0	200	300	0	41.4276	-21.6727	-527.844	-13374	60876.1	-1388.35	315.33	928.337	0	0	0	0	0	0	0	603	903	0
534	0	0	0	0	0	0	0	200	300	0	40.6647	-21.9778	-529.065	-13374	60326.7	-1251.02	314.025	928.279	0	0	0	0	0	0	0	603	903	0
534	1	0	0	0	0	0	0	200	300	0	39.1388	-21.3675	-525.708	-12824.7	60082.6	-1113.69	314.289	927.395	0	0	0	0	0	0	0	603	903	0
534	2	0	0	0	0	0	0	200	300	0	39.444	-22.4356	-522.961	-13557.1	59411.2	-1113.69	313.605	928.924	0	0	0	0	0	0	0	603	903	0
534	3	0	0	0	0	0	0	200	300	0	39.7491	-19.5364	-520.52	-12916.3	59411.2	-701.706	314.138	927.814	0	0	0	0	0	0	0	603	903	0
534	4	0	0	0	0	0	0	200	300	0	39.2914	-19.3838	-518.994	-12733.2	59411.2	-793.259	314.474	927.534	0	0	0	0	0	0	0	603	903	0
534	5	0	0	0	0	0	0	200	300	0	38.681	-18.4683	-513.196	-12733.2	58373.6	-747.483	313.745	927.812	0	0	0	0	0	0	0	603	903	0
534	6	0	0	0	0	0	0	200	300	0	37.9181	-18.7735	-511.975	-12366.9	58861.9	-747.483	314.97	927.155	0	0	0	0	0	0	0	603	903	0
534	7	0	0	0	0	0	0	200	300	0	37.7655	-18.0106	-509.229	-11909.2	58129.5	-610.154	314.152	926.387	0	0	0	0	0	0	0	603	903	0
534	8	0	0	0	0	0	0	200	300	0	38.2233	-17.858	-504.956	-11817.6	57763.3	-518.601	314.393	926.403	0	0	0	0	0	0	0	603	903	0
534	9	0	0	0	0	0	0	200	300	0	36.85	-16.0269	-505.261	-11909.2	58007.4	-335.495	314.807	926.57	0	0	0	0	0	0	0	603	903	0
535	0	0	0	0	0	0	0	200	300	0	36.2396	-15.5691	-503.125	-11634.5	57458.1	-243.942	314.202	926.125	0	0	0	0	0	0	0	603	903	0
535	1	0	0	0	0	0	0	200	300	0	37.3077	-14.1959	-499.463	-11726.1	57397.1	-152.39	314.918	926.477	0	0	0	0	0	0	0	603	903	0
535	2	0	0	0	0	0	0	200	300	0	37.7655	-15.1114	-498.547	-11268.3	56847.7	-198.166	314.027	925.602	0	0	0	0	0	0	0	603	903	0
535	3	0	0	0	0	0	0	200	300	0	35.7819	-14.501	-495.801	-12092.3	56481.5	30.7158	313.92	927.389	0	0	0	0	0	0	0	603	903	0
535	4	0	0	0	0	0	0	200	300	0	34.4086	-14.6536	-492.749	-11543	56176.4	213.821	314.006	926.426	0	0	0	0	0	0	0	603	903	0
535	5	0	0	0	0	0	0	200	300	0	34.256	-12.5174	-491.528	-10719	56542.6	396.927	315.034	924.808	0	0	0	0	0	0	0	603	903	0
535	6	0	0	0	0	0	0	200	300	0	35.0189	-12.2122	-489.697	-10627.4	56115.3	30.7158	314.592	924.702	0	0	0	0	0	0	0	603	903	0
535	7	0	0	0	0	0	0	200	300	0	34.5612	-12.5174	-483.899	-11359.9	55505	259.598	314.704	926.476	0	0	0	0	0	0	0	603	903	0
535	8	0	0	0	0	0	0	200	300	0	33.0353	-11.6019	-486.646	-11085.2	55443.9	763.138	313.931	925.779	0	0	0	0	0	0	0	603	903	0
535	9	0	0	0	0	0	0	200	300	0	33.1879	-11.2967	-482.983	-10444.3	55016.7	534.256	313.91	924.625	0	0	0	0	0	0	0	603	903	0
536	0	0	0	0	0	0	0	200	300	0	33.1879	-10.076	-481.152	-10261.2	54589.4	625.809	313.456	924.326	0	0	0	0	0	0	0	603	903	0
536	1	0	0	0	0	0	0	200	300	0	32.5775	-10.6863	-479.626	-10444.3	54955.6	717.362	314.58	924.776	0	0	0	0	0	0	0	603	903	0
536	2	0	0	0	0	0	0	200	300	0	31.662	-9.61822	-478.101	-10810.5	54406.3	580.032	313.797	925.612	0	0	0	0	0	0	0	603	903	0
536	3	0	0	0	0	0	0	200	300	0	31.8146	-9.31305	-476.88	-9711.91	54162.2	854.691	313.576	923.366	0	0	0	0	0	0	0	603	903	0
536	4	0	0	0	0	0	0	200	300	0	31.9672	-8.39752	-474.438	-8979.49	54223.2	763.138	314.289	921.927	0	0	0	0	0	0	0	603	903	0
536	5	0	0	0	0	0	0	200	300	0	31.662	-8.24493	-472.913	-9071.04	54040.1	717.362	314.271	922.181	0	0	0	0	0	0	0	603	903	0
536	6	0	0	0	0	0	0	200	300	0	30.5939	-7.17681	-470.776	-9071.04	54345.3	900.467	315.438	922.268	0	0	0	0	0	0	0	603	903	0
536	7	0	0	0	0	0	0	200	300	0	29.8309	-7.02423	-470.776	-9345.7	53490.8	1083.57	313.623	922.852	0	0	0	0	0	0	0	603	903	0
536	8	0	0	0	0	0	0	200	300	0	31.2042	-6.87164	-468.64	-8521.73	53185.6	1083.57	313.489	921.184	0	0	0	0	0	0	0	603	903	0
536	9	0	0	0	0	0	0	200	300	0	30.4413	-7.48199	-469.861	-8704.83	53551.8	1358.23	313.974	921.526	0	0	0	0	0	0	0	603	903	0
537	0	0	0	0	0	0	0	200	300	0	29.3732	-5.95611	-464.368	-8247.07	52941.5	992.02	314.008	920.76	0	0	0	0	0	0	0	603	903	0
537	1	0	0	0	0	0	0	200	300	0	28.7628	-5.19317	-462.842	-9620.36	53307.7	1129.35	315.175	923.785	0	0	0	0	0	0	0	603	903	0
537	2	0	0	0	0	0	0	200	300	0	30.4413	-4.43023	-463.147	-8338.62	52697.3	1358.23	313.781	921.004	0	0	0	0	0	0	0	603	903	0
537	3	0	0	0	0	0	0	200	300	0	29.9835	-3.51471	-460.095	-8338.62	52331.1	1358.23	313.74	921.124	0	0	0	0	0	0	0	603	903	0
537	4	0	0	0	0	0	0	200	300	0	28.3051	-4.58282	-459.79	-7697.75	52697.3	1083.57	314.612	919.742	0	0	0	0	0	0	0	603	903	0
537	5	0	0	0	0	0	0	200	300	0	28.3051	-4.12506	-457.654	-8613.28	53063.6	1404.01	315.947	921.82	0	0	0	0	0	0	0	603	903	0
537	6	0	0	0	0	0	0	200	300	0	29.5258	-3.36212	-457.043	-7423.1	52514.2	1404.01	314.9	919.242	0	0	0	0	0	0	0	603	903	0
537	7	0	0	0	0	0	0	200	300	0	29.2206	-4.27764	-456.128	-7606.2	51903.9	1541.34	313.792	919.676	0	0	0	0	0	0	0	603	903	0
537	8	0	0	0	0	0	0	200	300	0	28.4576	-2.294	-456.738	-7148.44	51842.9	1495.56	313.507	918.651	0	0	0	0	0	0	0	603	903	0
537	9	0	0	0	0	0	0	200	300	0	27.6947	-1.98883	-454.907	-6782.23	52209.1	1404.01	314.769	917.909	0	0	0	0	0	0	0	603	903	0
538	0	0	0	0	0	0	0	200	300	0	28.6102	-1.83624	-451.55	-6965.33	52209.1	1541.34	315.622	918.425	0	0	0	0	0	0	0	603	903	0
538	1	0	0	0	0	0	0	200	300	0	28.4576	-2.59918	-450.33	-7056.89	51842.9	1770.22	315.122	918.671	0	0	0	0	0	0	0	603	903	0
538	2	0	0	0	0	0	0	200	300	0	27.0844	-0.920711	-451.55	-7423.1	51537.7	1632.89	314.135	919.439	0	0	0	0	0	0	0	603	903	0
538	3	0	0	0	0	0	0	200	300	0	29.068	0.147404	-450.024	-7239.99	51537.7	1678.67	314.522	919.088	0	0	0	0	0	0	0	603	903	0
538	4	0	0	0	0	0	0	200	300	0	27.3895	-0.31036	-450.94	-6416.02	52026	1907.55	315.372	917.228	0	0	0	0	0	0	0	603	903	0
538	5	0	0	0	0	0	0	200	300	0	27.0844	-1.0733	-448.193	-6599.12	51720.8	1678.67	315.398	917.724	0	0	0	0	0	0	0	603	903	0
538	6	0	0	0	0	0	0	200	300	0	27.8473	0.147404	-447.888	-6690.67	50927.3	1724.44	313.705	917.938	0	0	0	0	0	0	0	603	903	0
538	7	0	0	0	0	0	0	200	300	0	26.7792	0.605168	-447.888	-6599.12	51415.6	1861.77	314.796	917.734	0	0	0	0	0	0	0	603	903	0
538	8	0	0	0	0	0	0	200	300	0	25.7111	1.06293	-447.278	-6232.91	51354.6	1770.22	314.816	916.935	0	0	0	0	0	0	0	603	903	0
538	9	0	0	0	0	0	0	200	300	0	26.474	1.06293	-443.921	-5958.25	51354.6	1999.1	315.684	916.422	0	0	0	0	0	0	0	603	903	0
539	0	0	0	0	0	0	0	200	300	0	26.9318	0.299992	-445.752	-6232.91	51415.6	1953.32	315.346	916.983	0	0	0	0	0	0	0	603	903	0
539	1	0	0	0	0	0	0	200	300	0	25.7111	1.5207	-445.447	-6324.46	50927.3	2090.65	314.329	917.198	0	0	0	0	0	0	0	603	903	0
539	2	0	0	0	0	0	0	200	300	0	25.4059	2.7414	-445.142	-5500.49	51171.5	2182.21	314.956	915.357	0	0	0	0	0	0	0	603	903	0
539	3	0	0	0	0	0	0	200	300	0	26.474	2.28363	-444.531	-5317.38	51171.5	2273.76	315.113	914.962	0	0	0	0	0	0	0	603	903	0
539	4	0	0	0	0	0	0	200	300	0	26.7792	2.43622	-440.564	-5958.25	51232.5	2227.98	316.288	916.524	0	0	0	0	0	0	0	603	903	0
539	5	0	0	0	0	0	0	200	300	0	25.4059	2.28363	-446.057	-5500.49	51354.6	2548.42	315.13	915.331	0	0	0	0	0	0	0	603	903	0
539	6	0	0	0	0	0	0	200	300	0	25.7111	3.04657	-444.531	-4676.51	51110.4	2502.64	314.976	913.52	0	0	0	0	0	0	0	603	903	0
539	7	0	0	0	0	0	0	200	300	0	26.3214	3.65693	-444.531	-5042.72	50866.3	2319.53	314.427	914.344	0	0	0	0	0	0	0	603	903	0
539	8	0	0	0	0	0	0	200	300	0	26.0162	4.41987	-445.142	-4584.96	51232.5	2548.42	315.093	913.3	0	0	0	0	0	0	0	603	903	0
539	9	0	0	0	0	0	0	200	300	0	26.1688	3.35175	-444.226	-4951.17	51476.6	2411.09	315.879	914.146	0	0	0	0	0	0	0	603	903	0
540	0	0	0	0	0	0	0	200	300	0	28.9154	3.04657	-444.226	-4951.17	51476.6	2365.31	315.879	914.146	0	0	0	0	0	0	0	603	903	0
540	1	0	0	0	0	0	0	200	300	0	26.0162	4.57245	-444.836	-4218.75	50927.3	2594.19	314.486	912.484	0	0	0	0	0	0	0	603	903	0
540	2	0	0	0	0	0	0	200	300	0	27.5421	5.1828	-444.836	-3760.99	51110.4	2639.97	314.897	911.455	0	0	0	0	0	0	0	603	903	0
540	3	0	0	0	0	0	0	200	300	0	25.7111	5.48798	-445.142	-4310.3	51781.8	2594.19	316.327	912.683	0	0	0	0	0	0	0	603	903	0
540	4	0	0	0	0	0	0	200	300	0	26.0162	4.87763	-444.226	-4127.19	51293.5	2777.3	315.467	912.291	0	0	0	0	0	0	0	603	903	0
540	5	0	0	0	0	0	0	200	300	0	24.4904	5.48798	-447.278	-3944.09	51476.6	2777.3	315.089	911.818	0	0	0	0	0	0	0	603	903	0
540	6	0	0	0	0	0	0	200	300	0	25.2533	6.86127	-445.752	-3669.43	51293.5	2594.19	315.072	911.232	0	0	0	0	0	0	0	603	903	0
540	7	0	0	0	0	0	0	200	300	0	25.4059	6.5561	-445.142	-3394.77	51537.7	2777.3	315.778	910.626	0	0	0	0	0	0	0	603	903	0
540	8	0	0	0	0	0	0	200	300	0	24.0326	6.70868	-447.888	-3760.99	52026	2960.4	316.158	911.397	0	0	0	0	0	0	0	603	903	0
540	9	0	0	0	0	0	0	200	300	0	24.7955	7.92939	-446.057	-3394.77	51842.9	3051.96	316.225	910.611	0	0	0	0	0	0	0	603	903	0
541	0	0	0	0	0	0	0	200	300	0	25.5585	7.47162	-449.109	-3211.67	51781.8	3189.29	315.299	910.151	0	0	0	0	0	0	0	603	903	0
541	1	0	0	0	0	0	0	200	300	0	24.4904	8.23456	-449.109	-3028.56	51049.4	3189.29	313.668	909.743	0	0	0	0	0	0	0	603	903	0
541	2	0	0	0	0	0	0	200	300	0	24.0326	9.30268	-449.109	-3852.54	52026	3143.51	315.843	911.578	0	0	0	0	0	0	0	603	903	0
541	3	0	0	0	0	0	0	200	300	0	23.2697	9.15009	-450.635	-2937.01	52575.3	3280.84	316.669	909.518	0	0	0	0	0	0	0	603	903	0
541	4	0	0	0	0	0	0	200	300	0	25.2533	9.60785	-453.687	-2113.03	52697.3	3326.61	316.154	907.658	0	0	0	0	0	0	0	603	903	0
541	5	0	0	0	0	0	0	200	300	0	24.9481	10.0656	-453.381	-2296.14	52087	3463.94	314.886	908.065	0	0	0	0	0	0	0	603	903	0
541	6	0	0	0	0	0	0	200	300	0	23.88	10.0656	-453.076	-2021.48	52331.1	3418.17	315.502	907.462	0	0	0	0	0	0	0	603	903	0
541	7	0	0	0	0	0	0	200	300	0	23.5748	10.8286	-449.719	-2570.8	52941.5	3280.84	317.721	908.716	0	0	0	0	0	0	0	603	903	0
541	8	0	0	0	0	0	0	200	300	0	23.88	9.91303	-454.602	-2387.69	53124.6	3555.5	316.86	908.252	0	0	0	0	0	0	0	603	903	0
541	9	0	0	0	0	0	0	200	300	0	25.8637	11.7441	-457.349	-2204.59	53673.9	4150.59	317.359	907.82	0	0	0	0	0	0	0	603	903	0
542	0	0	0	0	0	0	0	200	300	0	24.7955	12.0493	-457.349	-2021.48	52575.3	3738.6	314.957	907.42	0	0	0	0	0	0	0	603	903	0
542	1	0	0	0	0	0	0	200	300	0	23.4222	12.2018	-457.654	-2204.59	53185.6	3647.05	316.214	907.817	0	0	0	0	0	0	0	603	903	0
542	2	0	0	0	0	0	0	200	300	0	23.4222	12.2018	-458.264	-1746.82	53979.1	3830.15	317.79	906.812	0	0	0	0	0	0	0	603	903	0
542	3	0	0	0	0	0	0	200	300	0	25.1007	13.4226	-460.706	-1838.38	53857	3784.38	316.901	906.99	0	0	0	0	0	0	0	603	903	0
542	4	0	0	0	0	0	0	200	300	0	25.1007	14.1855	-462.537	-2021.48	53368.7	3967.48	315.383	907.37	0	0	0	0	0	0	0	603	903	0
542	5	0	0	0	0	0	0	200	300	0	23.7274	14.0329	-463.757	-1197.51	53857	3830.15	316.132	905.582	0	0	0	0	0	0	0	603	903	0
542	6	0	0	0	0	0	0	200	300	0	23.5748	14.9484	-463.452	-1563.72	54467.4	4013.26	317.525	906.374	0	0	0	0	0	0	0	603	903	0
542	7	0	0	0	0	0	0	200	300	0	25.1007	14.1855	-464.978	-1563.72	54284.3	4013.26	316.746	906.363	0	0	0	0	0	0	0	603	903	0
542	8	0	0	0	0	0	0	200	300	0	26.6266	15.5588	-467.419	-1472.17	54833.6	4287.92	317.311	906.15	0	0	0	0	0	0	0	603	903	0
542	9	0	0	0	0	0	0	200	300	0	24.7955	16.1691	-468.335	-1472.17	54528.4	4287.92	316.43	906.143	0	0	0	0	0	0	0	603	903	0
543	0	0	0	0	0	0	0	200	300	0	23.4222	16.4743	-470.166	-1014.4	55016.7	4379.47	317.015	905.158	0	0	0	0	0	0	0	603	903	0
543	1	0	0	0	0	0	0	200	300	0	23.1171	15.101	-471.692	-831.297	55566	4471.02	317.802	904.762	0	0	0	0	0	0	0	603	903	0
543	2	0	0	0	0	0	0	200	300	0	25.2533	17.0847	-472.913	-1014.4	55688.1	4608.35	317.756	905.145	0	0	0	0	0	0	0	603	903	0
543	3	0	0	0	0	0	0	200	300	0	25.2533	18.6105	-473.523	-831.297	55321.9	5020.34	316.83	904.756	0	0	0	0	0	0	0	603	903	0
543	4	0	0	0	0	0	0	200	300	0	24.0326	18.9157	-476.27	-373.533	55932.2	4654.13	317.438	903.784	0	0	0	0	0	0	0	603	903	0
543	5	0	0	0	0	0	0	200	300	0	23.5748	19.0683	-478.711	-1014.4	56054.3	4883.01	317.094	905.119	0	0	0	0	0	0	0	603	903	0
543	6	0	0	0	0	0	0	200	300	0	24.7955	19.0683	-479.016	175.784	56664.6	5020.34	318.294	902.633	0	0	0	0	0	0	0	603	903	0
543	7	0	0	0	0	0	0	200	300	0	24.1852	19.5261	-481.458	-373.533	57030.8	5157.67	318.455	903.776	0	0	0	0	0	0	0	603	903	0
543	8	0	0	0	0	0	0	200	300	0	24.0326	20.289	-482.678	-190.427	56847.7	5020.34	317.776	903.395	0	0	0	0	0	0	0	603	903	0
543	9	0	0	0	0	0	0	200	300	0	23.2697	21.5097	-486.34	-7.32188	57152.9	5111.89	317.516	903.015	0	0	0	0	0	0	0	603	903	0
544	0	0	0	0	0	0	0	200	300	0	24.1852	21.3571	-487.256	-7.32188	58068.4	5066.12	319.174	903.015	0	0	0	0	0	0	0	603	903	0
544	1	0	0	0	0	0	0	200	300	0	24.6429	21.9675	-488.171	-7.32188	57946.4	5203.45	318.701	903.015	0	0	0	0	0	0	0	603	903	0
544	2	0	0	0	0	0	0	200	300	0	24.1852	21.9675	-491.223	541.995	58373.6	5295	318.833	901.897	0	0	0	0	0	0	0	603	903	0
544	3	0	0	0	0	0	0	200	300	0	23.7274	23.7985	-493.359	725.1	58373.6	5386.55	318.319	901.53	0	0	0	0	0	0	0	603	903	0
544	4	0	0	0	0	0	0	200	300	0	24.7955	24.5615	-495.19	999.759	58678.8	5340.77	318.497	900.981	0	0	0	0	0	0	0	603	903	0
544	5	0	0	0	0	0	0	200	300	0	25.8637	24.2563	-497.632	633.547	59533.3	5523.88	319.633	901.727	0	0	0	0	0	0	0	603	903	0
544	6	0	0	0	0	0	0	200	300	0	24.7955	24.4089	-499.768	633.547	58984	5798.54	318.023	901.732	0	0	0	0	0	0	0	603	903	0
544	7	0	0	0	0	0	0	200	300	0	26.7792	24.8666	-501.599	725.1	59960.5	5706.99	319.539	901.554	0	0	0	0	0	0	0	603	903	0
544	8	0	0	0	0	0	0	200	300	0	25.7111	25.7822	-504.651	1549.07	59960.5	5798.54	318.816	899.93	0	0	0	0	0	0	0	603	903	0
544	9	0	0	0	0	0	0	200	300	0	26.3214	26.2399	-506.177	1182.86	60387.8	5935.87	319.302	900.663	0	0	0	0	0	0	0	603	903	0
545	0	0	0	0	0	0	0	200	300	0	26.0162	26.2399	-508.008	725.1	61120.2	5935.87	320.314	901.573	0	0	0	0	0	0	0	603	903	0
545	1	0	0	0	0	0	0	200	300	0	26.1688	26.0873	-505.872	1549.07	61364.3	6210.53	321.304	899.938	0	0	0	0	0	0	0	603	903	0
545	2	0	0	0	0	0	0	200	300	0	25.7111	26.8503	-512.891	1732.18	61242.3	6027.42	319.406	899.623	0	0	0	0	0	0	0	603	903	0
545	3	0	0	0	0	0	0	200	300	0	26.474	28.6813	-513.196	1823.73	61303.3	6073.2	319.454	899.446	0	0	0	0	0	0	0	603	903	0
545	4	0	0	0	0	0	0	200	300	0	26.7792	28.8339	-516.858	1915.29	61852.6	6256.3	319.671	899.294	0	0	0	0	0	0	0	603	903	0
545	5	0	0	0	0	0	0	200	300	0	26.1688	28.3762	-520.52	2189.95	62585	6530.96	320.236	898.793	0	0	0	0	0	0	0	603	903	0
[truncated: 1,794 more rows]
