# Supplementary material for: The Effects of an Extemporaneous Speech Dual-task on Older Adult Gait Control
Source: Research Square preprint supplement (doi:10.21203/rs.3.rs-7674245/v1), 2025-11-18
Supplement: Supplementary file 151 [file Over3ground06.xlsx]

## Sheet: Sheet1
Trajectories
		03:LFHD			03:RFHD			03:LBHD			03:RBHD			03:C7			03:T10			03:CLAV			03:STRN			03:RBAK			03:LSHO			03:LUPA			03:LELB			03:LFRM			03:LWRA			03:LWRB			03:LFIN
Frame	Sub Frame	X	Y	Z	X	Y	Z	X	Y	Z	X	Y	Z	X	Y	Z	X	Y	Z	X	Y	Z	X	Y	Z	X	Y	Z	X	Y	Z	X	Y	Z	X	Y	Z	X	Y	Z	X	Y	Z	X	Y	Z	X	Y	Z
		mm	mm	mm	mm	mm	mm	mm	mm	mm	mm	mm	mm	mm	mm	mm	mm	mm	mm	mm	mm	mm	mm	mm	mm	mm	mm	mm	mm	mm	mm	mm	mm	mm	mm	mm	mm	mm	mm	mm	mm	mm	mm	mm	mm	mm	mm	mm	mm
490	0	146.31	-1892.67	1635.03	250.032	-1892.94	1630.26	126.875	-2050.2	1641.88	264.772	-2061.57	1638.16	215.264	-2114.76	1493.37	218.197	-2230.67	1274.43	191.191	-1981.89	1391.1	188.399	-1962.75	1203.9	275.672	-2218.37	1345.57	17.8263	-2130.26	1446.52	-30.9086	-2212.7	1270.41	-39.6863	-2265.94	1159.9	-64.4277	-2254.66	983.902	-32.0951	-2232.57	885.463	-71.82	-2299.41	886.726	-82.9904	-2270.1	785.553
491	0	144.451	-1876.63	1632.26	248.16	-1877.23	1627.54	124.484	-2034.09	1639.3	262.129	-2045.67	1635.63	212.995	-2098.97	1490.99	216.72	-2214.88	1272.04	189.219	-1966.33	1388.41	187.015	-1947.38	1201.27	273.742	-2202.91	1343.61	15.8408	-2114.98	1443.34	-31.7234	-2199.01	1268.13	-39.6797	-2253.38	1158.32	-64.4495	-2246.57	982.76	-32.3869	-2226.91	884.08	-71.4924	-2293.98	886.884	-82.4785	-2267.22	785.036
492	0	142.648	-1860.65	1629.69	246.343	-1861.57	1625.03	122.146	-2018.02	1636.95	259.56	-2029.84	1633.38	210.772	-2083.31	1488.87	215.206	-2199.18	1269.9	187.331	-1950.86	1385.98	185.662	-1932.06	1198.9	271.803	-2187.58	1341.9	13.8651	-2099.68	1440.43	-32.6399	-2185.07	1265.97	-39.8241	-2240.47	1156.8	-64.598	-2237.79	981.656	-32.7505	-2220.43	882.753	-71.3338	-2287.68	886.992	-82.0922	-2263.33	784.528
493	0	140.901	-1844.71	1627.31	244.581	-1845.96	1622.75	119.861	-2002	1634.85	257.065	-2014.08	1631.42	208.596	-2067.76	1487.01	213.653	-2183.59	1268.02	185.529	-1935.49	1383.82	184.34	-1916.78	1196.82	269.855	-2172.4	1340.42	11.8998	-2084.35	1437.8	-33.6579	-2170.9	1263.94	-40.1193	-2227.22	1155.34	-64.8732	-2228.31	980.589	-33.1859	-2213.13	881.483	-71.3446	-2280.49	887.048	-81.8317	-2258.43	784.027
494	0	139.212	-1828.83	1625.13	242.875	-1830.41	1620.69	117.631	-1986.03	1632.98	254.646	-1998.4	1629.73	206.468	-2052.33	1485.4	212.064	-2168.1	1266.4	183.812	-1920.21	1381.92	183.05	-1901.55	1195.01	267.898	-2157.35	1339.18	9.94635	-2069	1435.45	-34.7766	-2156.49	1262.03	-40.5656	-2213.62	1153.94	-65.2751	-2218.14	979.56	-33.6931	-2204.99	880.269	-71.5253	-2272.42	887.052	-81.698	-2252.52	783.533
495	0	137.583	-1813	1623.15	241.228	-1814.92	1618.85	115.459	-1970.11	1631.36	252.307	-1982.81	1628.32	204.391	-2037.03	1484.06	210.44	-2152.71	1265.03	182.185	-1905.02	1380.3	181.796	-1886.38	1193.48	265.934	-2142.44	1338.19	8.00781	-2053.64	1433.37	-35.9946	-2141.83	1260.24	-41.163	-2199.68	1152.62	-65.8034	-2207.27	978.569	-34.272	-2196.02	879.11	-71.8767	-2263.46	887.003	-81.6926	-2245.58	783.042
496	0	136.019	-1797.24	1621.36	239.647	-1799.48	1617.23	113.351	-1954.24	1629.98	250.053	-1967.29	1627.2	202.37	-2021.86	1482.97	208.784	-2137.44	1263.91	180.65	-1889.94	1378.94	180.58	-1871.27	1192.23	263.966	-2127.68	1337.44	6.08923	-2038.27	1431.58	-37.3095	-2126.95	1258.58	-41.912	-2185.4	1151.36	-66.4575	-2195.7	977.617	-34.9219	-2186.22	878.006	-72.4004	-2253.61	886.898	-81.8181	-2237.61	782.548
497	0	134.527	-1781.54	1619.77	238.136	-1784.12	1615.84	111.317	-1938.44	1628.85	247.892	-1951.87	1626.35	200.411	-2006.82	1482.15	207.101	-2122.28	1263.06	179.212	-1874.97	1377.85	179.407	-1856.24	1191.24	261.999	-2113.07	1336.92	4.19796	-2022.9	1430.08	-38.7175	-2111.83	1257.06	-42.813	-2170.79	1150.17	-67.2364	-2183.43	976.705	-35.6421	-2175.57	876.955	-73.0981	-2242.86	886.732	-82.0777	-2228.57	782.044
498	0	133.115	-1765.92	1618.39	236.705	-1768.84	1614.67	109.366	-1922.72	1627.97	245.833	-1936.53	1625.79	198.522	-1991.91	1481.59	205.398	-2107.24	1262.46	177.879	-1860.13	1377.03	178.282	-1841.3	1190.53	260.04	-2098.61	1336.65	2.34363	-2007.54	1428.88	-40.2134	-2096.51	1255.68	-43.8661	-2155.85	1149.06	-68.1385	-2170.45	975.834	-36.4311	-2164.07	875.957	-73.9718	-2231.2	886.5	-82.4759	-2218.45	781.522
499	0	131.794	-1750.4	1617.22	235.365	-1753.65	1613.74	107.515	-1907.09	1627.35	243.89	-1921.3	1625.52	196.714	-1977.16	1481.3	203.684	-2092.34	1262.13	176.657	-1845.41	1376.48	177.211	-1826.48	1190.1	258.096	-2084.3	1336.62	0.537904	-1992.21	1427.98	-41.7901	-2080.97	1254.45	-45.0714	-2140.6	1148.04	-69.1613	-2156.78	975.007	-37.2865	-2151.71	875.012	-75.0231	-2218.62	886.197	-83.0172	-2207.22	780.97
500	0	130.575	-1734.99	1616.26	234.128	-1738.56	1613.03	105.777	-1891.56	1626.99	242.076	-1906.18	1625.52	194.998	-1962.57	1481.28	201.971	-2077.57	1262.06	175.552	-1830.85	1376.21	176.202	-1811.79	1189.93	256.178	-2070.17	1336.83	-1.20598	-1976.93	1427.39	-43.439	-2065.25	1253.38	-46.428	-2125.05	1147.11	-70.301	-2142.4	974.228	-38.2052	-2138.49	874.12	-76.2528	-2205.1	885.819	-83.7066	-2194.83	780.381
501	0	129.472	-1719.7	1615.53	233.007	-1723.58	1612.55	104.172	-1876.15	1626.9	240.407	-1891.18	1625.82	193.386	-1948.15	1481.52	200.27	-2062.95	1262.25	174.573	-1816.45	1376.22	175.262	-1797.27	1190.04	254.295	-2056.21	1337.28	-2.87384	-1961.73	1427.13	-45.1495	-2049.35	1252.48	-47.9345	-2109.21	1146.29	-71.5526	-2127.32	973.503	-39.183	-2124.38	873.286	-77.6599	-2190.65	885.362	-84.5483	-2181.26	779.748
502	0	128.497	-1704.56	1615.03	232.015	-1708.73	1612.32	102.716	-1860.88	1627.1	238.899	-1876.3	1626.4	191.888	-1933.9	1482.03	198.595	-2048.49	1262.7	173.725	-1802.23	1376.51	174.4	-1782.94	1190.42	252.458	-2042.43	1337.96	-4.45137	-1946.63	1427.2	-46.9093	-2033.3	1251.77	-49.5877	-2093.1	1145.58	-72.9093	-2111.54	972.838	-40.2149	-2109.39	872.516	-79.241	-2175.25	884.828	-85.5453	-2166.48	779.067
503	0	127.664	-1689.57	1614.78	231.167	-1694.02	1612.33	101.426	-1845.77	1627.59	237.566	-1861.57	1627.26	190.516	-1919.85	1482.81	196.958	-2034.2	1263.41	173.012	-1788.19	1377.09	173.622	-1768.8	1191.07	250.678	-2028.84	1338.88	-5.92497	-1931.64	1427.61	-48.7049	-2017.13	1251.26	-51.3832	-2076.73	1145	-74.3628	-2095.07	972.245	-41.2956	-2093.51	871.821	-80.9893	-2158.89	884.22	-86.6986	-2150.46	778.344
504	0	126.986	-1674.76	1614.79	230.474	-1679.47	1612.58	100.319	-1830.83	1628.38	236.423	-1847	1628.42	189.279	-1905.98	1483.85	195.369	-2020.07	1264.38	172.439	-1774.35	1377.95	172.938	-1754.87	1192.01	248.964	-2015.42	1340.03	-7.28262	-1916.8	1428.36	-50.5218	-2000.84	1250.96	-53.3146	-2060.12	1144.57	-75.9031	-2077.91	971.735	-42.4192	-2076.74	871.216	-82.8942	-2141.59	883.55	-88.0064	-2133.18	777.59
505	0	126.474	-1660.13	1615.07	229.948	-1665.09	1613.1	99.4058	-1816.07	1629.47	235.479	-1832.59	1629.85	188.181	-1892.32	1485.16	193.839	-2006.11	1265.6	172.004	-1760.71	1379.11	172.354	-1741.15	1193.22	247.323	-2002.19	1341.4	-8.51465	-1902.12	1429.47	-52.345	-1984.48	1250.88	-55.3737	-2043.29	1144.28	-77.519	-2060.09	971.324	-43.5804	-2059.09	870.722	-84.9412	-2123.34	882.834	-89.4635	-2114.65	776.826
506	0	126.136	-1645.71	1615.63	229.597	-1650.89	1613.86	98.6962	-1801.52	1630.87	234.743	-1818.35	1631.56	187.228	-1878.85	1486.72	192.375	-1992.32	1267.06	171.707	-1747.28	1380.56	171.877	-1727.65	1194.72	245.763	-1989.13	1342.98	-9.61426	-1887.61	1430.91	-54.1598	-1968.06	1251.04	-57.55	-2026.26	1144.17	-79.1978	-2041.62	971.032	-44.7738	-2040.56	870.366	-87.1115	-2104.17	882.096	-91.0609	-2094.85	776.081
507	0	125.977	-1631.5	1616.48	229.426	-1636.89	1614.88	98.194	-1787.18	1632.58	234.217	-1804.31	1633.52	186.418	-1865.58	1488.52	190.982	-1978.7	1268.76	171.542	-1734.04	1382.3	171.508	-1714.34	1196.5	244.286	-1976.24	1344.76	-10.5779	-1873.28	1432.7	-55.9523	-1951.6	1251.45	-59.8311	-2009.04	1144.23	-80.9261	-2022.52	970.877	-45.9939	-2021.16	870.177	-89.3828	-2084.09	881.364	-92.785	-2073.83	775.394
508	0	125.999	-1617.5	1617.63	229.438	-1623.09	1616.16	97.8982	-1773.05	1634.59	233.898	-1790.47	1635.73	185.749	-1852.5	1490.55	189.665	-1965.23	1270.66	171.503	-1720.98	1384.3	171.248	-1701.2	1198.56	242.898	-1963.5	1346.72	-11.4052	-1859.14	1434.8	-57.71	-1935.12	1252.11	-62.2028	-1991.65	1144.48	-82.69	-2002.83	970.88	-47.235	-2000.91	870.19	-91.7296	-2063.15	880.671	-94.6177	-2051.61	774.81
509	0	126.2	-1603.73	1619.08	229.629	-1609.5	1617.69	97.8021	-1759.15	1636.88	233.779	-1776.84	1638.15	185.214	-1839.6	1492.78	188.427	-1951.93	1272.77	171.579	-1708.1	1386.57	171.095	-1688.23	1200.87	241.601	-1950.9	1348.84	-12.0992	-1845.17	1437.2	-59.4221	-1918.65	1253.03	-64.6494	-1974.11	1144.92	-84.4757	-1982.56	971.063	-48.4906	-1979.85	870.434	-94.124	-2041.36	880.054	-96.5361	-2028.23	774.376
510	0	126.572	-1590.19	1620.82	229.991	-1596.13	1619.45	97.8937	-1745.48	1639.42	233.847	-1763.42	1640.76	184.805	-1826.86	1495.18	187.272	-1938.77	1275.04	171.758	-1695.37	1389.06	171.039	-1675.38	1203.42	240.396	-1938.42	1351.1	-12.6654	-1831.37	1439.86	-61.0799	-1902.2	1254.19	-67.1539	-1956.43	1145.56	-86.2693	-1961.77	971.442	-49.7537	-1958.02	870.943	-96.5367	-2018.79	879.548	-98.5129	-2003.77	774.141
511	0	127.103	-1576.87	1622.83	230.513	-1582.98	1621.44	98.1558	-1732.03	1642.2	234.083	-1750.23	1643.52	184.511	-1814.27	1497.73	186.205	-1925.75	1277.46	172.028	-1682.77	1391.75	171.072	-1662.65	1206.17	239.285	-1926.04	1353.47	-13.112	-1817.73	1442.76	-62.6767	-1885.78	1255.58	-69.6986	-1938.65	1146.39	-88.0578	-1940.49	972.033	-51.0167	-1935.45	871.742	-98.938	-1995.47	879.188	-100.517	-1978.28	774.151
512	0	127.777	-1563.76	1625.09	231.177	-1570.03	1623.62	98.5669	-1718.79	1645.15	234.465	-1737.25	1646.39	184.321	-1801.82	1500.39	185.23	-1912.86	1279.99	172.373	-1670.27	1394.6	171.18	-1650	1209.09	238.27	-1913.75	1355.92	-13.4488	-1804.24	1445.83	-64.2081	-1869.41	1257.19	-72.2652	-1920.77	1147.39	-89.8289	-1918.76	972.846	-52.2711	-1912.2	872.852	-101.299	-1971.47	879.003	-102.516	-1951.86	774.447
513	0	128.573	-1550.86	1627.57	231.963	-1557.3	1625.97	99.1018	-1705.78	1648.24	234.968	-1724.5	1649.32	184.221	-1789.47	1503.12	184.354	-1900.08	1282.6	172.777	-1657.87	1397.56	171.348	-1637.42	1212.12	237.352	-1901.52	1358.41	-13.6866	-1790.86	1449.04	-65.672	-1853.09	1258.97	-74.836	-1902.81	1148.55	-91.5711	-1896.64	973.884	-53.5074	-1888.32	874.285	-103.593	-1946.84	879.018	-104.474	-1924.59	775.063
514	0	129.467	-1538.15	1630.23	232.847	-1544.76	1628.45	99.7332	-1692.95	1651.41	235.564	-1711.95	1652.27	184.198	-1777.21	1505.88	183.584	-1887.4	1285.24	173.227	-1645.52	1400.58	171.561	-1624.89	1215.22	236.533	-1889.33	1360.91	-13.8368	-1777.59	1452.32	-67.0679	-1836.83	1260.91	-77.3933	-1884.81	1149.84	-93.2738	-1874.18	975.145	-54.7154	-1863.89	876.046	-105.794	-1921.65	879.248	-106.356	-1896.56	776.023
515	0	130.434	-1525.62	1633.03	233.804	-1532.41	1631.02	100.432	-1680.32	1654.6	236.223	-1699.59	1655.18	184.239	-1765.01	1508.61	182.927	-1874.81	1287.88	173.707	-1633.22	1403.6	171.802	-1612.39	1218.32	235.816	-1877.18	1363.39	-13.9108	-1764.4	1455.62	-68.3965	-1820.64	1262.95	-79.9203	-1866.77	1151.23	-94.9272	-1851.41	976.619	-55.8839	-1838.96	878.13	-107.881	-1895.96	879.703	-108.13	-1867.86	777.343
516	0	131.447	-1513.25	1635.89	234.805	-1520.22	1633.64	101.17	-1667.85	1657.75	236.918	-1687.42	1658.01	184.334	-1752.87	1511.28	182.39	-1862.3	1290.47	174.204	-1620.94	1406.57	172.056	-1599.91	1221.37	235.2	-1865.04	1365.8	-13.9192	-1751.29	1458.87	-69.6596	-1804.52	1265.04	-82.4012	-1848.72	1152.67	-96.5221	-1828.4	978.291	-57.0015	-1813.61	880.527	-109.836	-1869.84	880.384	-109.765	-1838.59	779.028
517	0	132.478	-1501.01	1638.77	235.826	-1508.17	1636.26	101.918	-1655.52	1660.79	237.62	-1675.4	1660.7	184.47	-1740.75	1513.84	181.979	-1849.84	1292.97	174.704	-1608.67	1409.43	172.31	-1587.44	1224.3	234.687	-1852.9	1368.11	-13.8716	-1738.24	1462.01	-70.8588	-1788.47	1267.14	-84.821	-1830.67	1154.13	-98.05	-1805.19	980.14	-58.0567	-1787.91	883.216	-111.644	-1843.34	881.283	-111.237	-1808.84	781.076
518	0	133.502	-1488.89	1641.61	236.839	-1496.23	1638.82	102.653	-1643.32	1663.67	238.307	-1663.51	1663.21	184.638	-1728.63	1516.25	181.699	-1837.42	1295.33	175.198	-1596.39	1412.13	172.553	-1574.98	1227.06	234.277	-1840.76	1370.28	-13.7764	-1725.25	1464.99	-71.9955	-1772.51	1269.19	-87.1654	-1812.64	1155.54	-99.5022	-1781.83	982.14	-59.0377	-1761.92	886.175	-113.293	-1816.54	882.391	-112.525	-1778.7	783.48
519	0	134.495	-1476.84	1644.33	237.822	-1484.38	1641.27	103.351	-1631.21	1666.33	238.956	-1651.72	1665.49	184.83	-1716.51	1518.46	181.55	-1825.03	1297.52	175.677	-1584.09	1414.61	172.778	-1562.51	1229.6	233.968	-1828.59	1372.28	-13.6404	-1712.31	1467.74	-73.0696	-1756.61	1271.13	-89.4209	-1794.65	1156.88	-100.87	-1758.36	984.263	-59.9336	-1735.71	889.374	-114.776	-1789.49	883.69	-113.615	-1748.26	786.226
520	0	135.437	-1464.86	1646.89	238.754	-1472.59	1643.56	103.994	-1619.16	1668.72	239.55	-1640	1667.52	185.041	-1704.37	1520.44	181.531	-1812.67	1299.49	176.135	-1571.77	1416.83	172.978	-1550.05	1231.87	233.761	-1816.4	1374.07	-13.4687	-1699.4	1470.23	-74.0798	-1740.8	1272.92	-91.5742	-1776.7	1158.08	-102.146	-1734.83	986.478	-60.7337	-1709.34	892.785	-116.085	-1762.26	885.161	-114.499	-1717.59	789.296
521	0	136.309	-1452.91	1649.22	239.617	-1460.84	1645.64	104.569	-1607.17	1670.79	240.078	-1628.33	1669.26	185.266	-1692.2	1522.15	181.64	-1800.3	1301.21	176.567	-1559.42	1418.75	173.151	-1537.58	1233.82	233.652	-1804.17	1375.63	-13.2646	-1686.54	1472.41	-75.0228	-1725.07	1274.5	-93.6122	-1758.81	1159.11	-103.321	-1711.27	988.754	-61.4288	-1682.87	896.375	-117.219	-1734.9	886.782	-115.174	-1686.77	792.672
522	0	137.097	-1440.96	1651.26	240.4	-1449.08	1647.47	105.067	-1595.19	1672.52	240.531	-1616.67	1670.69	185.505	-1679.98	1523.56	181.868	-1787.94	1302.64	176.972	-1547.03	1420.33	173.298	-1525.11	1235.43	233.639	-1791.9	1376.93	-13.0298	-1673.72	1474.24	-75.8933	-1709.42	1275.84	-95.522	-1740.97	1159.92	-104.386	-1687.72	991.06	-62.0105	-1656.35	900.113	-118.174	-1707.47	888.533	-115.644	-1655.88	796.332
523	0	137.794	-1429	1652.97	241.092	-1437.3	1649.01	105.483	-1583.2	1673.88	240.908	-1604.98	1671.78	185.757	-1667.72	1524.66	182.208	-1775.56	1303.77	177.351	-1534.61	1421.56	173.422	-1512.64	1236.67	233.721	-1779.58	1377.94	-12.7639	-1660.95	1475.7	-76.6836	-1693.85	1276.88	-97.2905	-1723.2	1160.49	-105.334	-1664.2	993.366	-62.4722	-1629.84	903.967	-118.95	-1680.01	890.392	-115.914	-1624.99	800.252
524	0	138.393	-1417	1654.32	241.689	-1425.46	1650.22	105.82	-1571.18	1674.84	241.211	-1593.25	1672.53	186.027	-1655.41	1525.43	182.65	-1763.16	1304.57	177.708	-1522.16	1422.42	173.53	-1500.16	1237.53	233.896	-1767.21	1378.65	-12.4648	-1648.21	1476.78	-77.3844	-1678.37	1277.62	-98.9044	-1705.49	1160.77	-106.155	-1640.76	995.647	-62.8085	-1603.39	907.906	-119.548	-1652.59	892.337	-115.996	-1594.16	804.409
525	0	138.894	-1404.95	1655.27	242.191	-1413.56	1651.07	106.083	-1559.12	1675.4	241.448	-1581.44	1672.94	186.319	-1643.04	1525.85	183.188	-1750.73	1305.03	178.049	-1509.67	1422.9	173.63	-1487.68	1238	234.163	-1754.78	1379.05	-12.1283	-1635.51	1477.45	-77.9841	-1662.96	1278.01	-100.351	-1687.83	1160.76	-106.842	-1617.42	997.878	-63.0158	-1577.05	911.902	-119.967	-1625.24	894.35	-115.902	-1563.47	808.776
526	0	139.3	-1392.82	1655.8	242.603	-1401.55	1651.55	106.283	-1546.99	1675.56	241.632	-1569.53	1673	186.642	-1630.62	1525.92	183.813	-1738.27	1305.14	178.381	-1497.14	1423	173.731	-1475.18	1238.08	234.522	-1742.28	1379.13	-11.7488	-1622.85	1477.73	-78.47	-1647.63	1278.05	-101.617	-1670.23	1160.44	-107.388	-1594.2	1000.04	-63.0916	-1550.84	915.927	-120.208	-1598.02	896.413	-115.644	-1532.98	813.327
527	0	139.62	-1380.62	1655.91	242.932	-1389.44	1651.64	106.435	-1534.79	1675.33	241.777	-1557.5	1672.73	187.005	-1618.14	1525.65	184.521	-1725.76	1304.9	178.715	-1484.58	1422.73	173.846	-1462.67	1237.79	234.974	-1729.71	1378.88	-11.319	-1610.23	1477.61	-78.8285	-1632.38	1277.74	-102.689	-1652.69	1159.81	-107.785	-1571.13	1002.11	-63.0349	-1524.83	919.954	-120.273	-1570.97	898.508	-115.236	-1502.75	818.033
528	0	139.866	-1368.32	1655.58	243.191	-1377.2	1651.36	106.557	-1522.49	1674.72	241.905	-1545.35	1672.14	187.42	-1605.59	1525.04	185.31	-1713.2	1304.31	179.064	-1471.98	1422.1	173.989	-1450.13	1237.13	235.519	-1717.07	1378.31	-10.8305	-1597.63	1477.12	-79.0453	-1617.19	1277.07	-103.556	-1635.19	1158.86	-108.027	-1548.24	1004.07	-62.8459	-1499.05	923.961	-120.163	-1544.13	900.621	-114.692	-1472.85	822.864
529	0	140.052	-1355.92	1654.84	243.396	-1364.83	1650.69	106.671	-1510.11	1673.74	242.036	-1533.05	1671.24	187.897	-1592.99	1524.1	186.179	-1700.58	1303.38	179.441	-1459.34	1421.12	174.172	-1437.56	1236.13	236.16	-1704.35	1377.42	-10.2742	-1585.05	1476.26	-79.1065	-1602.08	1276.05	-104.205	-1617.73	1157.61	-108.109	-1525.54	1005.92	-62.5257	-1473.53	927.925	-119.878	-1517.54	902.737	-114.024	-1443.33	827.789
530	0	140.199	-1343.42	1653.7	243.566	-1352.32	1649.66	106.802	-1497.63	1672.43	242.196	-1520.59	1670.06	188.451	-1580.33	1522.84	187.129	-1687.9	1302.12	179.86	-1446.65	1419.83	174.411	-1424.94	1234.81	236.896	-1691.56	1376.21	-9.64053	-1572.48	1475.07	-78.9987	-1587.02	1274.7	-104.628	-1600.33	1156.07	-108.027	-1503.07	1007.65	-62.076	-1448.32	931.829	-119.422	-1491.26	904.844	-113.243	-1414.25	832.777
531	0	140.329	-1330.82	1652.18	243.723	-1339.66	1648.3	106.974	-1485.06	1670.81	242.411	-1507.99	1668.63	189.094	-1567.61	1521.29	188.16	-1675.15	1300.55	180.339	-1433.91	1418.24	174.721	-1412.25	1233.2	237.728	-1678.68	1374.71	-8.91977	-1559.91	1473.58	-78.7097	-1572.01	1273.04	-104.814	-1582.98	1154.28	-107.778	-1480.85	1009.25	-61.4995	-1423.46	935.654	-118.796	-1465.32	906.931	-112.36	-1385.67	837.796
532	0	140.465	-1318.12	1650.32	243.892	-1326.87	1646.62	107.217	-1472.39	1668.92	242.707	-1495.24	1666.95	189.84	-1554.82	1519.47	189.274	-1662.32	1298.7	180.893	-1421.11	1416.39	175.115	-1399.49	1231.34	238.657	-1665.71	1372.92	-8.10262	-1547.31	1471.8	-78.2294	-1557.05	1271.11	-104.755	-1565.68	1152.24	-107.358	-1458.9	1010.71	-60.7992	-1398.97	939.386	-118.003	-1439.78	908.988	-111.382	-1357.63	842.815
533	0	140.636	-1305.33	1648.16	244.1	-1313.94	1644.67	107.557	-1459.63	1666.78	243.113	-1482.34	1665.08	190.701	-1541.96	1517.4	190.471	-1649.4	1296.58	181.538	-1408.24	1414.31	175.606	-1386.64	1229.25	239.682	-1652.66	1370.87	-7.18049	-1534.67	1469.79	-77.5497	-1542.12	1268.94	-104.447	-1548.46	1150.01	-106.768	-1437.26	1012.05	-59.9784	-1374.9	943.012	-117.046	-1414.66	911.003	-110.318	-1330.2	847.802
534	0	140.869	-1292.45	1645.75	244.373	-1300.88	1642.47	108.022	-1446.79	1664.45	243.655	-1469.3	1663.02	191.686	-1529.03	1515.11	191.751	-1636.38	1294.23	182.291	-1395.3	1412.04	176.208	-1373.69	1226.96	240.801	-1639.51	1368.57	-6.14584	-1521.96	1467.57	-76.6654	-1527.23	1266.55	-103.886	-1531.32	1147.61	-106.006	-1415.95	1013.25	-59.0406	-1351.27	946.519	-115.93	-1390.01	912.969	-109.175	-1303.41	852.727
535	0	141.192	-1279.48	1643.14	244.74	-1287.69	1640.08	108.638	-1433.87	1661.94	244.358	-1456.12	1660.81	192.806	-1516.03	1512.64	193.108	-1623.26	1291.67	183.164	-1382.26	1409.61	176.928	-1360.62	1224.53	242.009	-1626.27	1366.06	-4.99257	-1509.18	1465.2	-75.5744	-1512.36	1264	-103.072	-1514.28	1145.07	-105.074	-1395	1014.32	-57.9898	-1328.13	949.896	-114.657	-1365.88	914.873	-107.959	-1277.31	857.558
536	0	141.636	-1266.43	1640.37	245.229	-1274.39	1637.53	109.429	-1420.87	1659.32	245.246	-1442.83	1658.48	194.068	-1502.95	1510.02	194.536	-1610.03	1288.95	184.17	-1369.13	1407.05	177.775	-1347.41	1221.97	243.304	-1612.94	1363.35	-3.71626	-1496.29	1462.7	-74.2781	-1497.51	1261.32	-102.007	-1497.37	1142.44	-103.974	-1374.44	1015.27	-56.8298	-1305.5	953.133	-113.233	-1342.31	916.706	-106.677	-1251.94	862.266
537	0	142.225	-1253.3	1637.5	245.864	-1260.98	1634.88	110.418	-1407.81	1656.61	246.339	-1429.42	1656.05	195.475	-1489.78	1507.27	196.027	-1596.69	1286.09	185.317	-1355.9	1404.4	178.751	-1334.07	1219.33	244.681	-1599.51	1360.49	-2.31448	-1483.28	1460.11	-72.7813	-1482.69	1258.56	-100.697	-1480.6	1139.76	-102.711	-1354.31	1016.09	-55.5645	-1283.42	956.219	-111.662	-1319.33	918.456	-105.333	-1227.34	866.817
538	0	142.987	-1240.1	1634.58	246.67	-1247.47	1632.15	111.623	-1394.68	1653.85	247.653	-1415.91	1653.55	197.03	-1476.53	1504.44	197.568	-1583.24	1283.13	186.61	-1342.56	1401.69	179.855	-1320.58	1216.64	246.135	-1585.98	1357.5	-0.786959	-1470.14	1457.49	-71.0928	-1467.88	1255.75	-99.1527	-1464.01	1137.07	-101.289	-1334.62	1016.8	-54.1976	-1261.91	959.143	-109.95	-1296.99	920.109	-103.93	-1203.53	871.182
539	0	143.941	-1226.83	1631.67	247.667	-1233.88	1629.38	113.055	-1381.48	1651.09	249.199	-1402.3	1651	198.732	-1463.19	1501.56	199.145	-1569.68	1280.11	188.048	-1329.1	1398.96	181.082	-1306.93	1213.93	247.66	-1572.36	1354.41	0.864323	-1456.85	1454.87	-69.2247	-1453.1	1252.95	-97.3871	-1447.61	1134.39	-99.7146	-1315.39	1017.39	-52.7327	-1241	961.891	-108.102	-1275.31	921.652	-102.471	-1180.55	875.327
540	0	145.104	-1213.49	1628.8	248.869	-1220.2	1626.63	114.724	-1368.23	1648.37	250.984	-1388.62	1648.44	200.576	-1449.77	1498.67	200.747	-1556.01	1277.06	189.628	-1315.54	1396.24	182.421	-1293.13	1211.25	249.255	-1558.64	1351.26	2.63503	-1443.41	1452.29	-67.1926	-1438.35	1250.18	-95.4176	-1431.44	1131.77	-97.9958	-1296.67	1017.87	-51.1729	-1220.72	964.451	-106.124	-1254.33	923.072	-100.958	-1158.42	879.221
541	0	146.487	-1200.09	1626.01	250.286	-1206.45	1623.91	116.631	-1354.92	1645.71	253.008	-1374.86	1645.88	202.556	-1436.26	1495.8	202.361	-1542.23	1274.03	191.34	-1301.86	1393.57	183.857	-1279.18	1208.62	250.913	-1544.84	1348.09	4.51837	-1429.83	1449.79	-65.0155	-1423.63	1247.5	-93.2647	-1415.5	1129.24	-96.1418	-1278.45	1018.24	-49.5215	-1201.07	966.809	-104.025	-1234.07	924.352	-99.3891	-1137.16	882.832
542	0	148.095	-1186.63	1623.35	251.922	-1192.64	1621.25	118.772	-1341.55	1643.16	255.264	-1361.05	1643.36	204.661	-1422.67	1492.98	203.977	-1528.37	1271.05	193.169	-1288.07	1390.97	185.37	-1265.08	1206.08	252.635	-1530.95	1344.92	6.50504	-1416.13	1447.39	-62.7151	-1408.96	1244.93	-90.9519	-1399.83	1126.84	-94.163	-1260.77	1018.51	-47.7814	-1182.09	968.95	-101.812	-1214.55	925.479	-97.7615	-1116.78	886.127
543	0	149.925	-1173.11	1620.84	253.772	-1178.78	1618.69	121.137	-1328.13	1640.76	257.739	-1347.18	1640.9	206.877	-1409.01	1490.25	205.587	-1514.42	1268.15	195.096	-1274.2	1388.48	186.939	-1250.85	1203.65	254.416	-1517	1341.81	8.58311	-1402.3	1445.14	-60.3155	-1394.35	1242.52	-88.5054	-1384.45	1124.58	-92.0712	-1243.63	1018.67	-45.9553	-1163.79	970.857	-99.4958	-1195.8	926.439	-96.0703	-1097.3	889.074
544	0	151.966	-1159.54	1618.51	255.824	-1164.89	1616.24	123.708	-1314.66	1638.52	260.415	-1333.27	1638.52	209.189	-1395.29	1487.65	207.189	-1500.41	1265.38	197.099	-1260.25	1386.12	188.536	-1236.5	1201.37	256.257	-1502.99	1338.79	10.7379	-1388.4	1443.06	-57.843	-1379.82	1240.28	-85.9533	-1369.36	1122.5	-89.8794	-1227.05	1018.74	-44.0463	-1146.17	972.515	-97.089	-1177.82	927.22	-94.3091	-1078.71	891.644
545	0	154.201	-1145.93	1616.38	258.062	-1150.96	1613.92	126.459	-1301.15	1636.48	263.264	-1319.34	1636.26	211.576	-1381.53	1485.2	208.784	-1486.35	1262.77	199.151	-1246.24	1383.93	190.138	-1222.06	1199.27	258.154	-1488.93	1335.9	12.9521	-1374.43	1441.18	-55.3251	-1365.39	1238.26	-83.3248	-1354.58	1120.62	-87.6017	-1211.04	1018.71	-42.0577	-1129.26	973.909	-94.605	-1160.63	927.812	-92.4704	-1061.02	893.812
546	0	156.606	-1132.28	1614.46	260.46	-1137.02	1611.74	129.362	-1287.6	1634.67	266.255	-1305.38	1634.13	214.017	-1367.75	1482.93	210.376	-1472.27	1260.34	201.224	-1232.19	1381.91	191.718	-1207.54	1197.36	260.104	-1474.85	1333.17	15.2055	-1360.45	1439.52	-52.7897	-1351.08	1236.46	-80.6499	-1340.14	1118.95	-85.2533	-1195.6	1018.59	-39.9933	-1113.06	975.026	-92.0592	-1144.22	928.207	-90.5468	-1044.23	895.556
547	0	159.149	-1118.6	1612.76	262.987	-1123.07	1609.72	132.381	-1274.01	1633.09	269.352	-1291.41	1632.15	216.486	-1353.95	1480.87	211.97	-1458.18	1258.14	203.289	-1218.13	1380.1	193.255	-1192.99	1195.66	262.102	-1460.77	1330.65	17.4759	-1346.47	1438.08	-50.2649	-1336.92	1234.92	-77.9581	-1326.02	1117.52	-82.8505	-1180.74	1018.38	-37.8579	-1097.57	975.855	-89.4686	-1128.62	928.401	-88.5314	-1028.32	896.857
548	0	161.796	-1104.89	1611.3	265.609	-1109.13	1607.87	135.474	-1260.39	1631.78	272.513	-1277.44	1630.37	218.957	-1340.17	1479.05	213.575	-1444.11	1256.19	205.318	-1204.1	1378.5	194.731	-1178.45	1194.2	264.141	-1446.71	1328.38	19.7392	-1332.54	1436.9	-47.7775	-1322.93	1233.64	-75.2778	-1312.26	1116.34	-80.41	-1166.46	1018.08	-35.6577	-1082.79	976.387	-86.8512	-1113.8	928.393	-86.4197	-1013.3	897.707
549	0	164.506	-1091.18	1610.06	268.286	-1095.21	1606.2	138.599	-1246.74	1630.73	275.694	-1263.48	1628.79	221.403	-1326.41	1477.49	215.196	-1430.08	1254.51	207.286	-1190.1	1377.15	196.133	-1163.95	1192.97	266.209	-1432.7	1326.38	21.9705	-1318.69	1435.98	-45.3527	-1309.14	1232.65	-72.6354	-1298.85	1115.4	-77.9492	-1152.77	1017.7	-33.4002	-1068.74	976.616	-84.2256	-1099.78	928.183	-84.2099	-999.142	898.098
550	0	167.24	-1077.46	1609.06	270.978	-1081.32	1604.73	141.709	-1233.08	1629.97	278.848	-1249.54	1627.44	223.797	-1312.71	1476.23	216.838	-1416.13	1253.15	209.171	-1176.18	1376.06	197.456	-1149.56	1191.99	268.293	-1418.75	1324.7	24.1449	-1304.94	1435.32	-43.0133	-1295.58	1231.93	-70.0548	-1285.81	1114.73	-75.4854	-1139.67	1017.25	-31.0949	-1055.42	976.54	-81.6111	-1086.55	927.777	-81.9041	-985.844	898.032
551	0	169.954	-1063.74	1608.3	273.643	-1067.47	1603.46	144.758	-1219.42	1629.5	281.93	-1235.62	1626.35	226.113	-1299.09	1475.27	218.499	-1402.27	1252.1	210.954	-1162.36	1375.24	198.698	-1135.3	1191.27	270.377	-1404.91	1323.37	26.239	-1291.33	1434.93	-40.7786	-1282.27	1231.51	-67.5565	-1273.13	1114.31	-73.0362	-1127.17	1016.72	-28.7534	-1042.82	976.16	-79.0263	-1074.11	927.18	-79.5095	-973.394	897.518
552	0	172.606	-1050.05	1607.76	276.241	-1053.67	1602.4	147.7	-1205.75	1629.33	284.894	-1221.75	1625.55	228.326	-1285.56	1474.64	220.176	-1388.52	1251.41	212.622	-1148.67	1374.7	199.864	-1121.22	1190.83	272.444	-1391.18	1322.4	28.2314	-1277.87	1434.82	-38.6646	-1269.24	1231.38	-65.1569	-1260.83	1114.15	-70.6182	-1115.25	1016.13	-26.3894	-1030.94	975.48	-76.4898	-1062.45	926.402	-77.0383	-961.784	896.567
553	0	175.155	-1036.38	1607.45	278.73	-1039.94	1601.58	150.494	-1192.1	1629.46	287.7	-1207.93	1625.05	230.418	-1272.15	1474.35	221.857	-1374.91	1251.06	214.169	-1135.13	1374.47	200.961	-1107.36	1190.67	274.475	-1377.58	1321.82	30.1044	-1264.58	1434.99	-36.6827	-1256.5	1231.55	-62.868	-1248.91	1114.26	-68.2476	-1103.93	1015.48	-24.0186	-1019.79	974.51	-74.0193	-1051.57	925.455	-74.5089	-951.01	895.198
554	0	177.562	-1022.76	1607.37	281.076	-1026.29	1601	153.101	-1178.46	1629.9	290.31	-1194.17	1624.9	232.372	-1258.86	1474.42	223.53	-1361.45	1251.09	215.591	-1121.75	1374.55	201.999	-1093.73	1190.81	276.455	-1364.14	1321.64	31.8444	-1251.47	1435.44	-34.8399	-1244.07	1232	-60.6969	-1237.36	1114.61	-65.9392	-1093.2	1014.78	-21.6588	-1009.36	973.261	-71.6314	-1041.46	924.355	-71.9448	-941.068	893.434
555	0	179.794	-1009.19	1607.51	283.245	-1012.72	1600.68	155.488	-1164.86	1630.65	292.695	-1180.47	1625.11	234.177	-1245.73	1474.84	225.179	-1348.14	1251.47	216.89	-1108.56	1374.96	202.99	-1080.36	1191.26	278.368	-1350.86	1321.87	33.4433	-1238.55	1436.16	-33.1383	-1231.97	1232.75	-58.6454	-1226.19	1115.22	-63.7065	-1083.05	1014.04	-19.3294	-999.645	971.752	-69.3417	-1032.13	923.118	-69.3749	-931.96	891.303
556	0	181.821	-995.694	1607.88	285.21	-999.25	1600.65	157.631	-1151.31	1631.7	294.833	-1166.86	1625.69	235.827	-1232.75	1475.63	226.787	-1334.99	1252.2	218.071	-1095.55	1375.72	203.947	-1067.24	1192.04	280.202	-1337.75	1322.49	34.8985	-1225.83	1437.16	-31.5751	-1220.18	1233.78	-56.7103	-1215.38	1116.09	-61.5613	-1073.5	1013.27	-17.051	-990.65	970.001	-67.1644	-1023.58	921.765	-66.8326	-923.689	888.834
557	0	183.62	-982.284	1608.48	286.95	-985.882	1600.92	159.514	-1137.83	1633.04	296.709	-1153.34	1626.68	237.322	-1219.94	1476.76	228.342	-1322	1253.28	219.145	-1082.74	1376.83	204.878	-1054.36	1193.17	281.949	-1324.81	1323.51	36.2127	-1213.32	1438.42	-30.1431	-1208.72	1235.08	-54.8837	-1204.95	1117.2	-59.5135	-1064.53	1012.48	-14.8446	-982.366	968.034	-65.1123	-1015.79	920.318	-64.3545	-916.258	886.062
558	0	185.173	-968.979	1609.32	288.451	-972.625	1601.51	161.127	-1124.44	1634.68	298.319	-1139.92	1628.06	238.667	-1207.28	1478.24	229.833	-1309.15	1254.67	220.121	-1070.11	1378.29	205.795	-1041.7	1194.65	283.605	-1312.03	1324.91	37.3937	-1201	1439.93	-28.831	-1197.58	1236.65	-53.1536	-1194.86	1118.55	-57.571	-1056.13	1011.69	-12.7313	-974.783	965.878	-63.1963	-1008.77	918.802	-61.979	-909.673	883.023
559	0	186.473	-955.793	1610.4	289.705	-959.486	1602.43	162.473	-1111.15	1636.6	299.667	-1126.6	1629.85	239.869	-1194.79	1480.04	231.254	-1296.44	1256.37	221.013	-1057.65	1380.1	206.706	-1029.23	1196.48	285.168	-1299.4	1326.65	38.4533	-1188.88	1441.68	-27.6241	-1186.75	1238.47	-51.5051	-1185.13	1120.14	-55.7393	-1048.3	1010.91	-10.731	-967.89	963.561	-61.425	-1002.5	917.242	-59.7452	-903.934	879.756
560	0	187.519	-942.744	1611.72	290.713	-946.47	1603.7	163.56	-1097.98	1638.76	300.763	-1113.41	1632.02	240.941	-1182.44	1482.13	232.605	-1283.85	1258.33	221.834	-1045.36	1382.24	207.617	-1016.91	1198.65	286.642	-1286.9	1328.72	39.4067	-1176.93	1443.66	-26.5054	-1176.21	1240.53	-49.9211	-1175.72	1121.95	-54.0221	-1041.02	1010.14	-8.86199	-961.672	961.114	-59.8048	-996.967	915.665	-57.6908	-899.042	876.301
561	0	188.316	-929.844	1613.29	291.484	-933.582	1605.3	164.405	-1084.96	1641.16	301.626	-1100.35	1634.54	241.897	-1170.22	1484.49	233.887	-1271.36	1260.52	222.598	-1033.19	1384.69	208.535	-1004.72	1201.15	288.032	-1274.51	1331.06	40.2707	-1165.14	1445.83	-25.4563	-1165.95	1242.81	-48.3838	-1166.62	1123.98	-52.4207	-1034.29	1009.41	-7.14006	-956.11	958.568	-58.3389	-992.162	914.096	-55.8505	-894.989	872.7
562	0	188.881	-917.105	1615.1	292.033	-920.823	1607.25	165.031	-1072.1	1643.75	302.281	-1087.43	1637.38	242.755	-1158.12	1487.08	235.108	-1258.95	1262.91	223.318	-1021.14	1387.42	209.464	-992.607	1203.93	289.346	-1262.22	1333.65	41.0628	-1153.5	1448.18	-24.458	-1155.95	1245.28	-46.876	-1157.83	1126.21	-50.9343	-1028.07	1008.72	-5.57773	-951.18	955.951	-57.0274	-988.06	912.559	-54.2541	-891.762	868.995
563	0	189.232	-904.534	1617.15	292.381	-908.196	1609.51	165.468	-1059.41	1646.49	302.758	-1074.64	1640.48	243.53	-1146.11	1489.85	236.274	-1246.61	1265.46	224.004	-1009.17	1390.39	210.406	-980.553	1206.96	290.593	-1250	1336.42	41.8003	-1141.96	1450.66	-23.4921	-1146.18	1247.91	-45.3821	-1149.33	1128.61	-49.5603	-1022.35	1008.08	-4.18388	-946.854	953.292	-55.8665	-984.631	911.075	-52.9246	-889.338	865.227
564	0	189.398	-892.134	1619.41	292.554	-895.697	1612.06	165.748	-1046.91	1649.34	303.087	-1062.01	1643.79	244.24	-1134.16	1492.75	237.391	-1234.32	1268.13	224.669	-997.262	1393.53	211.364	-968.527	1210.18	291.78	-1237.83	1339.32	42.4994	-1130.51	1453.25	-22.5422	-1136.63	1250.68	-43.8891	-1141.08	1131.16	-48.2945	-1017.1	1007.49	-2.96345	-943.098	950.617	-54.849	-981.842	909.66	-51.877	-887.686	861.435
565	0	189.408	-879.903	1621.87	292.581	-883.323	1614.87	165.906	-1034.59	1652.25	303.303	-1049.52	1647.24	244.902	-1122.26	1495.73	238.468	-1222.07	1270.87	225.32	-985.377	1396.79	212.337	-956.507	1213.52	292.918	-1225.68	1342.31	43.1745	-1119.11	1455.89	-21.5937	-1127.26	1253.54	-42.3874	-1133.09	1133.84	-47.131	-1012.29	1006.96	-1.9173	-939.874	947.948	-53.9638	-979.652	908.328	-51.1173	-886.766	857.653
566	0	189.295	-867.834	1624.48	292.494	-871.066	1617.89	165.975	-1022.46	1655.18	303.439	-1037.17	1650.75	245.53	-1110.37	1498.74	239.508	-1209.85	1273.64	225.963	-973.492	1400.1	213.324	-944.475	1216.92	294.012	-1213.54	1345.33	43.8375	-1107.74	1458.55	-20.6354	-1118.06	1256.46	-40.8711	-1125.32	1136.61	-46.0632	-1007.9	1006.48	-1.04233	-937.14	945.304	-53.197	-978.015	907.088	-50.6412	-886.53	853.915
567	0	189.095	-855.912	1627.22	292.326	-858.917	1621.06	165.991	-1010.49	1658.06	303.528	-1024.96	1654.26	246.137	-1098.46	1501.72	240.515	-1197.66	1276.4	226.605	-961.583	1403.4	214.323	-932.417	1220.3	295.069	-1201.38	1348.31	44.498	-1096.36	1461.18	-19.6589	-1108.99	1259.41	-39.3378	-1117.75	1139.43	-45.0836	-1003.89	1006.04	-0.33159	-934.851	942.7	-52.5318	-976.883	905.942	-50.4349	-886.922	850.244
568	0	188.841	-844.119	1630.04	292.109	-846.862	1624.32	165.984	-998.69	1660.85	303.597	-1012.86	1657.68	246.734	-1086.53	1504.62	241.489	-1185.49	1279.11	227.248	-949.631	1406.62	215.331	-920.323	1223.59	296.091	-1189.2	1351.22	45.1628	-1084.94	1463.74	-18.6589	-1100.02	1262.35	-37.789	-1110.37	1142.28	-44.1841	-1000.22	1005.65	0.225496	-932.957	940.148	-51.9501	-976.199	904.893	-50.4751	-887.881	846.664
569	0	188.567	-832.433	1632.88	291.875	-834.885	1627.62	165.981	-987.022	1663.5	303.673	-1000.88	1660.95	247.329	-1074.54	1507.39	242.428	-1173.34	1281.72	227.894	-937.617	1409.7	216.343	-908.186	1226.72	297.081	-1176.98	1354.01	45.8364	-1073.47	1466.19	-17.6337	-1091.15	1265.23	-36.2294	-1103.14	1145.12	-43.3568	-996.847	1005.29	0.642788	-931.41	937.656	-51.4331	-975.909	903.938	-50.73	-889.344	843.19
570	0	188.305	-820.826	1635.7	291.651	-822.968	1630.87	166.008	-975.464	1665.96	303.775	-988.985	1664.01	247.927	-1062.48	1509.99	243.326	-1161.22	1284.21	228.542	-925.529	1412.57	217.353	-896.004	1229.62	298.036	-1164.71	1356.62	46.5207	-1061.93	1468.48	-16.584	-1082.33	1268.04	-34.6665	-1096.03	1147.93	-42.5936	-993.733	1004.97	0.93703	-930.16	935.231	-50.9625	-975.952	903.073	-51.1612	-891.243	839.836
571	0	188.08	-809.266	1638.44	291.464	-811.091	1634.01	166.08	-963.982	1668.19	303.921	-977.156	1666.8	248.532	-1050.34	1512.37	244.178	-1149.12	1286.54	229.192	-913.357	1415.19	218.355	-883.778	1232.25	298.954	-1152.39	1359.02	47.2156	-1050.28	1470.58	-15.5136	-1073.54	1270.74	-33.1097	-1089.03	1150.66	-41.8866	-990.834	1004.66	1.12734	-929.157	932.877	-50.5215	-976.269	902.294	-51.7254	-893.511	836.609
572	0	187.917	-797.723	1641.04	291.336	-799.232	1636.99	166.213	-952.541	1670.16	304.121	-965.369	1669.27	249.143	-1038.1	1514.5	244.972	-1137.05	1288.68	229.842	-901.097	1417.5	219.343	-871.512	1234.54	299.829	-1140.02	1361.18	47.919	-1038.53	1472.45	-14.4285	-1064.76	1273.3	-31.57	-1082.1	1153.31	-41.2282	-988.106	1004.38	1.23465	-928.354	930.597	-50.0953	-976.8	901.597	-52.3767	-896.081	833.518
573	0	187.833	-786.164	1643.46	291.282	-787.37	1639.73	166.412	-941.106	1671.84	304.381	-953.599	1671.37	249.757	-1025.75	1516.34	245.699	-1124.99	1290.61	230.487	-888.745	1419.47	220.309	-859.212	1236.47	300.654	-1127.59	1363.07	48.6267	-1026.66	1474.08	-13.3365	-1055.96	1275.7	-30.0591	-1075.21	1155.85	-40.6115	-985.504	1004.1	1.28098	-927.705	928.391	-49.6722	-977.485	900.98	-53.0688	-898.888	830.566
574	0	187.841	-774.556	1645.63	291.316	-775.484	1642.19	166.681	-929.638	1673.21	304.702	-941.82	1673.1	250.369	-1013.31	1517.88	246.344	-1112.96	1292.29	231.123	-876.303	1421.08	221.248	-846.884	1238	301.422	-1115.11	1364.67	49.3327	-1014.65	1475.44	-12.2472	-1047.11	1277.94	-28.5884	-1068.32	1158.26	-40.0301	-982.984	1003.84	1.2887	-927.169	926.261	-49.2437	-978.265	900.439	-53.757	-901.87	827.756
575	0	187.949	-762.869	1647.53	291.445	-763.552	1644.31	167.015	-918.102	1674.26	305.079	-930.008	1674.42	250.971	-1000.76	1519.1	246.895	-1100.93	1293.72	231.747	-863.774	1422.3	222.152	-834.534	1239.13	302.121	-1102.57	1365.96	50.0296	-1002.5	1476.51	-11.1714	-1038.2	1279.98	-27.169	-1061.41	1160.54	-39.4785	-980.501	1003.58	1.27956	-926.706	924.205	-48.8047	-979.084	899.975	-54.4002	-904.966	825.09
576	0	188.157	-751.075	1649.1	291.669	-751.556	1646.06	167.408	-906.465	1674.98	305.504	-918.139	1675.33	251.554	-988.111	1519.99	247.34	-1088.89	1294.86	232.354	-851.162	1423.12	223.017	-822.166	1239.84	302.742	-1090	1366.93	50.7084	-990.213	1477.29	-10.1207	-1029.19	1281.82	-25.8109	-1054.44	1162.66	-38.9522	-978.012	1003.32	1.2738	-926.278	922.222	-48.3543	-979.886	899.588	-54.9626	-908.119	822.567
577	0	188.464	-739.152	1650.33	291.985	-739.478	1647.41	167.846	-894.697	1675.36	305.966	-906.191	1675.84	252.106	-975.364	1520.55	247.667	-1076.84	1295.73	232.937	-838.472	1423.56	223.839	-809.783	1240.14	303.275	-1077.37	1367.58	51.3588	-977.778	1477.77	-9.10716	-1020.06	1283.46	-24.5228	-1047.37	1164.63	-38.4474	-975.472	1003.06	1.28921	-925.85	920.31	-47.895	-980.618	899.278	-55.4148	-911.275	820.186
578	0	188.859	-727.08	1651.18	292.386	-727.305	1648.34	168.315	-882.773	1675.41	306.449	-894.145	1675.95	252.614	-962.529	1520.77	247.867	-1064.74	1296.29	233.493	-825.708	1423.61	224.614	-797.384	1240.04	303.709	-1064.71	1367.92	51.9698	-965.195	1477.94	-8.14299	-1010.79	1284.88	-23.3119	-1040.18	1166.44	-37.9619	-972.84	1002.8	1.34021	-925.391	918.465	-47.4328	-981.229	899.047	-55.7353	-914.381	817.947
579	0	189.33	-714.844	1651.64	292.86	-715.025	1648.84	168.797	-870.674	1675.15	306.934	-881.988	1675.68	253.066	-949.61	1520.66	247.935	-1052.58	1296.54	234.015	-812.878	1423.29	225.342	-784.965	1239.57	304.036	-1052	1367.94	52.5298	-952.466	1477.81	-7.23999	-1001.34	1286.08	-22.1838	-1032.83	1168.08	-37.4942	-970.075	1002.53	1.43716	-924.868	916.683	-46.9762	-981.672	898.893	-55.9108	-917.39	815.846
580	0	189.859	-702.435	1651.72	293.388	-702.629	1648.92	169.27	-858.384	1674.57	307.401	-869.706	1675.06	253.446	-936.616	1520.23	247.869	-1040.34	1296.49	234.499	-799.983	1422.61	226.021	-772.521	1238.74	304.245	-1039.26	1367.65	53.027	-939.592	1477.39	-6.40918	-991.702	1287.05	-21.1423	-1025.3	1169.55	-37.0445	-967.139	1002.24	1.5858	-924.25	914.958	-46.536	-981.902	898.815	-55.9364	-920.254	813.878
581	0	190.427	-689.847	1651.4	293.953	-690.112	1648.58	169.713	-845.895	1673.7	307.828	-857.291	1674.1	253.741	-923.553	1519.5	247.671	-1028.01	1296.12	234.938	-787.027	1421.61	226.654	-760.042	1237.6	304.331	-1026.48	1367.06	53.4497	-926.575	1476.68	-5.66042	-981.849	1287.78	-20.19	-1017.54	1170.82	-36.6141	-963.994	1001.94	1.78698	-923.506	913.283	-46.1241	-981.876	898.806	-55.8154	-922.93	812.036
582	0	191.008	-677.079	1650.7	294.53	-677.469	1647.83	170.104	-833.204	1672.56	308.194	-844.737	1672.84	253.936	-910.427	1518.48	247.348	-1015.56	1295.44	235.326	-774.013	1420.31	227.24	-747.519	1236.16	304.287	-1013.65	1366.19	53.7865	-913.42	1475.67	-5.00201	-971.765	1288.27	-19.3282	-1009.53	1171.91	-36.2057	-960.606	1001.6	2.03674	-922.604	911.648	-45.7529	-981.558	898.859	-55.5592	-925.376	810.31
583	0	191.579	-664.135	1649.64	295.096	-664.701	1646.72	170.42	-820.31	1671.16	308.474	-832.043	1671.31	254.019	-897.239	1517.18	246.908	-1002.98	1294.46	235.656	-760.938	1418.74	227.781	-734.938	1234.46	304.109	-1000.77	1365.06	54.0266	-900.13	1474.4	-4.44042	-961.435	1288.51	-18.5569	-1001.25	1172.79	-35.8232	-956.94	1001.22	2.32645	-921.51	910.044	-45.4344	-980.91	898.963	-55.186	-927.552	808.692
584	0	192.113	-651.018	1648.24	295.625	-651.807	1645.25	170.639	-807.218	1669.53	308.648	-819.209	1669.55	253.978	-883.993	1515.64	246.362	-990.247	1293.19	235.922	-747.801	1416.92	228.279	-722.284	1232.53	303.795	-987.841	1363.68	54.1597	-886.71	1472.85	-3.98007	-950.845	1288.5	-17.8752	-992.667	1173.46	-35.4721	-952.966	1000.78	2.64336	-920.19	908.458	-45.1798	-979.901	899.103	-54.7204	-929.417	807.167
585	0	192.583	-637.737	1646.53	296.091	-638.789	1643.48	170.739	-793.935	1667.68	308.694	-806.235	1667.58	253.802	-870.687	1513.87	245.723	-977.357	1291.64	236.117	-734.597	1414.89	228.734	-709.543	1230.4	303.344	-974.846	1362.07	54.1766	-873.164	1471.04	-3.62328	-939.987	1288.22	-17.2814	-983.769	1173.89	-35.1587	-948.654	1000.28	2.97112	-918.608	906.879	-44.9988	-978.501	899.264	-54.1917	-930.935	805.725
586	0	192.963	-624.299	1644.54	296.469	-625.649	1641.45	170.7	-780.47	1665.65	308.593	-793.125	1665.43	253.483	-857.317	1511.9	245	-964.297	1289.84	236.232	-721.322	1412.68	229.147	-696.7	1228.1	302.757	-961.777	1360.27	54.0692	-859.494	1468.99	-3.37036	-928.855	1287.68	-16.7733	-974.534	1174.09	-34.8904	-943.977	999.688	3.29055	-916.723	905.294	-44.8993	-976.68	899.427	-53.6326	-932.068	804.351
587	0	193.229	-610.712	1642.31	296.735	-612.388	1639.2	170.506	-766.832	1663.44	308.329	-779.881	1663.14	253.014	-843.877	1509.76	244.204	-951.057	1287.81	236.261	-707.966	1410.32	229.516	-683.74	1225.66	302.038	-948.625	1358.29	53.831	-845.704	1466.7	-3.21979	-917.445	1286.87	-16.3479	-964.949	1174.04	-34.6754	-938.909	999.002	3.58039	-914.496	903.692	-44.8875	-974.411	899.572	-53.078	-932.777	803.033
588	0	193.36	-596.983	1639.89	296.868	-599.008	1636.77	170.141	-753.031	1661.08	307.887	-766.506	1660.74	252.391	-830.359	1507.47	243.344	-937.632	1285.58	236.197	-694.522	1407.83	229.839	-670.648	1223.11	301.19	-935.377	1356.17	53.4572	-831.796	1464.2	-3.16854	-905.753	1285.79	-16.0019	-955	1173.73	-34.522	-933.424	998.207	3.81822	-911.882	902.059	-44.9674	-971.667	899.682	-52.5631	-933.025	801.757
589	0	193.336	-583.118	1637.31	296.849	-585.507	1634.21	169.593	-739.075	1658.61	307.257	-753.003	1658.26	251.615	-816.751	1505.07	242.429	-924.017	1283.18	236.035	-680.979	1405.24	230.113	-657.413	1220.47	300.221	-922.025	1353.94	52.9452	-817.771	1461.51	-3.21239	-893.78	1284.45	-15.7315	-944.677	1173.16	-34.4389	-927.498	997.293	3.98147	-908.835	900.386	-45.1411	-968.421	899.738	-52.1223	-932.773	800.514
590	0	193.143	-569.12	1634.62	296.663	-571.884	1631.58	168.855	-724.971	1656.05	306.432	-739.372	1655.73	250.685	-803.043	1502.59	241.464	-910.212	1280.66	235.768	-667.329	1402.6	230.333	-644.023	1217.77	299.137	-908.557	1351.64	52.2945	-803.63	1458.65	-3.34636	-881.524	1282.84	-15.533	-933.971	1172.33	-34.4342	-921.105	996.254	4.04832	-905.308	898.664	-45.4091	-964.642	899.725	-51.7878	-931.979	799.292
591	0	192.771	-554.991	1631.86	296.3	-558.135	1628.92	167.922	-710.725	1653.41	305.409	-725.612	1653.18	249.609	-789.224	1500.06	240.455	-896.218	1278.05	235.395	-653.561	1399.91	230.494	-630.469	1215.04	297.949	-894.965	1349.3	51.5073	-789.374	1455.64	-3.56508	-868.985	1281	-15.4023	-922.878	1171.23	-34.5154	-914.221	995.085	3.99868	-901.249	896.887	-45.7704	-960.3	899.629	-51.5885	-930.597	798.086
592	0	192.213	-540.731	1629.09	295.751	-544.256	1626.27	166.795	-696.339	1650.75	304.189	-711.72	1650.64	248.394	-775.282	1497.53	239.409	-882.039	1275.4	234.912	-639.667	1397.23	230.588	-616.744	1212.32	296.667	-881.243	1346.95	50.5882	-775.005	1452.54	-3.86316	-856.165	1278.92	-15.3359	-911.39	1169.89	-34.689	-906.819	993.789	3.81507	-896.606	895.051	-46.2232	-955.363	899.438	-51.5488	-928.579	796.888
593	0	191.469	-526.34	1626.33	295.016	-530.241	1623.68	165.477	-681.818	1648.07	302.778	-697.695	1648.15	247.05	-761.207	1495.01	238.33	-867.684	1272.76	234.322	-625.641	1394.57	230.609	-602.845	1209.62	295.304	-867.385	1344.65	49.5441	-760.522	1449.36	-4.23553	-843.063	1276.64	-15.3305	-899.503	1168.31	-34.9601	-898.873	992.369	3.48339	-891.323	893.158	-46.7647	-949.792	899.147	-51.6882	-925.872	795.696
594	0	190.541	-511.815	1623.63	294.096	-516.086	1621.18	163.979	-667.161	1645.43	301.186	-683.531	1645.73	245.593	-746.995	1492.57	237.223	-853.163	1270.16	233.626	-611.479	1391.98	230.551	-588.77	1206.98	293.874	-853.392	1342.42	48.3845	-745.929	1446.16	-4.67767	-829.68	1274.18	-15.3835	-887.216	1166.52	-35.3323	-890.354	990.833	2.99362	-885.346	891.21	-47.3918	-943.549	898.749	-52.0204	-922.416	794.508
595	0	189.438	-497.157	1621.01	293	-501.787	1618.79	162.313	-652.372	1642.84	299.427	-669.227	1643.42	244.037	-732.642	1490.22	236.095	-838.49	1267.67	232.831	-597.181	1389.48	230.408	-574.523	1204.45	292.391	-839.266	1340.3	47.1209	-731.228	1442.99	-5.18583	-816.015	1271.58	-15.4933	-874.526	1164.55	-35.8073	-881.233	989.194	2.34025	-878.618	889.216	-48.1014	-936.592	898.244	-52.553	-918.147	793.324
596	0	188.174	-482.366	1618.52	291.738	-487.34	1616.56	160.497	-637.454	1640.34	297.521	-654.78	1641.25	242.403	-718.151	1488	234.951	-823.681	1265.31	231.945	-582.753	1387.1	230.175	-560.111	1202.04	290.87	-825.013	1338.34	45.7671	-716.427	1439.88	-5.75706	-802.072	1268.87	-15.6594	-861.434	1162.42	-36.3853	-871.481	987.466	1.52276	-871.083	887.183	-48.8901	-928.874	897.629	-53.2873	-912.996	792.141
597	0	186.764	-467.446	1616.17	290.326	-472.747	1614.5	158.555	-622.41	1637.97	295.489	-640.189	1639.24	240.711	-703.528	1485.96	233.797	-808.759	1263.14	230.977	-568.201	1384.87	229.851	-545.546	1199.79	289.328	-810.644	1336.56	44.339	-701.532	1436.89	-6.38918	-787.85	1266.1	-15.8826	-847.942	1160.17	-37.0645	-861.067	985.667	0.545589	-862.686	885.126	-49.7547	-920.351	896.905	-54.2186	-906.89	790.959
598	0	185.229	-452.404	1613.97	288.786	-458.011	1612.61	156.51	-607.251	1635.76	293.357	-625.458	1637.42	238.984	-688.788	1484.11	232.64	-793.746	1261.18	229.941	-553.542	1382.83	229.434	-530.847	1197.74	287.782	-796.174	1334.99	42.8538	-686.555	1434.07	-7.08075	-773.357	1263.3	-16.1652	-834.054	1157.84	-37.8417	-849.963	983.814	-0.58205	-853.375	883.055	-50.6924	-910.973	896.072	-55.3363	-899.752	789.772
599	0	183.593	-437.251	1611.96	287.138	-443.141	1610.93	154.392	-591.986	1633.73	291.155	-610.593	1635.83	237.243	-673.947	1482.48	231.489	-778.67	1259.47	228.852	-538.793	1380.99	228.926	-516.037	1195.92	286.248	-781.622	1333.66	41.3302	-671.512	1431.46	-7.8308	-758.597	1260.52	-16.5112	-819.777	1155.47	-38.7121	-838.142	981.926	-1.84661	-843.102	880.984	-51.7003	-900.694	895.126	-56.6244	-891.506	788.57
600	0	181.882	-422.005	1610.12	285.411	-428.151	1609.44	152.232	-576.633	1631.9	288.914	-595.605	1634.47	235.514	-659.03	1481.1	230.352	-763.562	1258.03	227.726	-523.978	1379.38	228.332	-501.145	1194.33	284.744	-767.01	1332.58	39.7878	-656.422	1429.11	-8.63864	-743.582	1257.81	-16.9259	-805.121	1153.09	-39.6695	-825.578	980.02	-3.23083	-831.823	878.926	-52.7756	-889.47	894.064	-58.0629	-882.078	787.342
601	0	180.123	-406.684	1608.48	283.632	-413.057	1608.15	150.063	-561.211	1630.32	286.667	-580.509	1633.37	233.82	-644.064	1479.98	229.238	-748.453	1256.88	226.577	-509.125	1378.02	227.656	-486.204	1193	283.284	-752.364	1331.76	38.2467	-641.307	1427.05	-9.50358	-728.324	1255.2	-17.416	-790.097	1150.75	-40.7069	-812.252	978.112	-4.71428	-819.503	876.891	-53.9154	-877.258	892.882	-59.6282	-871.396	786.071
602	0	178.346	-391.316	1607.03	281.83	-397.883	1607.06	147.917	-545.744	1628.98	284.448	-565.323	1632.53	232.184	-629.08	1479.13	228.157	-733.378	1256.04	225.424	-494.266	1376.91	226.905	-471.255	1191.95	281.885	-737.71	1331.22	36.7267	-626.197	1425.31	-10.4247	-712.839	1252.72	-17.989	-774.72	1148.46	-41.816	-798.144	976.218	-6.27397	-806.113	874.889	-55.1163	-864.022	891.57	-61.2939	-859.394	784.738
603	0	176.577	-375.928	1605.78	280.035	-382.654	1606.17	145.829	-530.259	1627.92	282.29	-550.073	1631.97	230.627	-614.111	1478.57	227.119	-718.372	1255.52	224.281	-479.433	1376.08	226.087	-456.338	1191.17	280.56	-723.08	1330.96	35.2474	-611.123	1423.92	-11.4003	-697.15	1250.43	-18.6527	-759.006	1146.28	-42.9875	-783.244	974.348	-7.8849	-791.631	872.928	-56.3745	-849.732	890.123	-63.0325	-846.016	783.325
604	0	174.847	-360.551	1604.73	278.277	-367.402	1605.46	143.831	-514.786	1627.14	280.227	-534.784	1631.69	229.169	-599.193	1478.29	226.133	-703.469	1255.31	223.162	-464.662	1375.51	225.209	-441.496	1190.67	279.324	-708.502	1330.97	33.8276	-596.119	1422.9	-12.4281	-681.277	1248.34	-19.415	-742.974	1144.21	-44.2109	-767.546	972.517	-9.5206	-776.048	871.015	-57.6852	-834.367	888.533	-64.8154	-831.218	781.812
605	0	173.182	-345.219	1603.88	276.584	-352.157	1604.94	141.953	-499.356	1626.66	278.288	-519.484	1631.69	227.829	-584.36	1478.31	225.211	-688.701	1255.41	222.08	-449.987	1375.23	224.282	-426.772	1190.46	278.185	-694.006	1331.25	32.4847	-581.222	1422.27	-13.5042	-665.247	1246.47	-20.2827	-726.643	1142.28	-45.4748	-751.048	970.733	-11.1537	-759.362	869.158	-59.0425	-817.911	886.796	-66.614	-814.964	780.186
606	0	171.606	-329.965	1603.23	274.98	-336.954	1604.59	140.221	-484.002	1626.48	276.501	-504.206	1631.97	226.62	-569.645	1478.6	224.36	-674.098	1255.81	221.048	-435.44	1375.22	223.315	-412.202	1190.51	277.155	-679.62	1331.8	31.2345	-566.467	1422.02	-14.6236	-649.088	1244.86	-21.2609	-710.033	1140.5	-46.7664	-733.756	969.011	-12.7562	-741.585	867.367	-60.4387	-800.359	884.915	-68.4005	-797.236	778.439
607	0	170.141	-314.821	1602.79	273.49	-321.825	1604.42	138.658	-468.753	1626.62	274.89	-488.98	1632.52	225.554	-555.08	1479.18	223.588	-659.683	1256.51	220.075	-421.052	1375.49	222.322	-397.82	1190.84	276.237	-665.368	1332.61	30.0909	-551.89	1422.16	-15.7794	-632.827	1243.52	-22.3528	-693.164	1138.9	-48.0717	-715.682	967.362	-14.3004	-722.736	865.656	-61.8645	-781.715	882.898	-70.1477	-778.029	776.575
608	0	168.805	-299.818	1602.55	272.131	-306.803	1604.42	137.282	-453.64	1627.07	273.473	-473.837	1633.35	224.639	-540.693	1480.03	222.902	-645.475	1257.48	219.171	-406.847	1376.04	221.316	-383.651	1191.44	275.438	-651.272	1333.65	29.0653	-537.521	1422.68	-16.9634	-616.493	1242.46	-23.5585	-676.055	1137.47	-49.3756	-696.842	965.806	-15.7591	-702.845	864.045	-63.3082	-761.991	880.766	-71.8298	-757.353	774.612
609	0	167.612	-284.983	1602.53	270.919	-291.917	1604.59	136.105	-438.688	1627.84	272.264	-458.804	1634.44	223.88	-526.505	1481.13	222.307	-631.485	1258.7	218.342	-392.846	1376.87	220.312	-369.711	1192.3	274.759	-637.346	1334.92	28.1667	-523.386	1423.58	-18.1659	-600.114	1241.68	-24.8753	-658.727	1136.23	-50.6623	-677.261	964.362	-17.1067	-681.95	862.562	-64.7564	-741.208	878.546	-73.4221	-735.235	772.583
610	0	166.571	-270.34	1602.72	269.863	-277.194	1604.94	135.134	-423.921	1628.91	271.271	-443.91	1635.8	223.279	-512.534	1482.49	221.807	-617.717	1260.17	217.594	-379.061	1377.96	219.326	-356.009	1193.43	274.198	-623.602	1336.4	27.4007	-509.504	1424.83	-19.3759	-583.715	1241.21	-26.297	-641.2	1135.2	-51.9153	-656.967	963.056	-18.3195	-660.097	861.242	-66.1933	-719.395	876.282	-74.9011	-711.714	770.539
611	0	165.686	-255.908	1603.15	268.968	-262.657	1605.47	134.371	-409.359	1630.3	270.497	-429.177	1637.4	222.833	-498.791	1484.07	221.403	-604.168	1261.85	216.931	-365.5	1379.32	218.373	-342.542	1194.81	273.754	-610.043	1338.07	26.7701	-495.886	1426.42	-20.5818	-567.322	1241.04	-27.8136	-623.493	1134.37	-53.118	-635.994	961.921	-19.3768	-637.339	860.128	-67.6015	-696.59	874.025	-76.2445	-686.846	768.543
612	0	164.96	-241.701	1603.81	268.236	-248.324	1606.19	133.812	-395.016	1631.98	269.939	-414.627	1639.24	222.536	-485.28	1485.87	221.098	-590.826	1263.73	216.354	-352.161	1380.94	217.468	-329.301	1196.44	273.422	-596.668	1339.92	26.2747	-482.535	1428.34	-21.7717	-550.958	1241.16	-29.4125	-605.628	1133.76	-54.2544	-614.383	960.99	-20.2613	-613.734	859.271	-68.9618	-672.838	871.84	-77.4309	-660.697	766.677
613	0	164.386	-227.727	1604.7	267.663	-234.208	1607.11	133.446	-380.903	1633.94	269.588	-400.276	1641.31	222.381	-471.998	1487.87	220.89	-577.678	1265.78	215.863	-339.039	1382.8	216.622	-316.271	1198.31	273.197	-583.471	1341.92	25.9108	-469.444	1430.54	-22.9339	-534.644	1241.59	-31.0776	-587.627	1133.37	-55.3094	-592.181	960.304	-20.9595	-589.346	858.729	-70.2539	-648.192	869.797	-78.4398	-633.346	765.032
614	0	163.958	-213.992	1605.84	267.241	-220.317	1608.21	133.26	-367.027	1636.16	269.429	-386.137	1643.57	222.355	-458.936	1490.04	220.781	-564.702	1267.97	215.455	-326.118	1384.89	215.843	-303.431	1200.41	273.073	-570.439	1344.06	25.6722	-456.599	1433.01	-24.0575	-518.4	1242.31	-32.7909	-569.516	1133.22	-56.2694	-569.438	959.903	-21.4625	-564.241	858.561	-71.4567	-622.713	867.971	-79.2519	-604.884	763.705
615	0	163.664	-200.493	1607.22	266.956	-206.653	1609.51	133.237	-353.387	1638.6	269.444	-372.218	1646.02	222.447	-446.08	1492.36	220.768	-551.877	1270.29	215.126	-313.382	1387.19	215.137	-290.759	1202.72	273.042	-557.558	1346.31	25.5504	-443.98	1435.7	-25.1327	-502.242	1243.32	-34.5326	-551.321	1133.31	-57.1229	-546.213	959.828	-21.7656	-538.49	858.83	-72.549	-596.468	866.441	-79.8494	-575.407	762.796
616	0	163.488	-187.223	1608.82	266.795	-193.213	1611	133.356	-339.981	1641.25	269.61	-358.522	1648.6	222.641	-433.409	1494.8	220.849	-539.178	1272.7	214.869	-300.808	1389.66	214.504	-278.231	1205.21	273.098	-544.809	1348.66	25.5348	-431.558	1438.6	-26.151	-486.186	1244.59	-36.2817	-533.073	1133.63	-57.8608	-522.567	960.117	-21.8685	-512.168	859.596	-73.5097	-569.533	865.28	-80.2167	-545.023	762.403
617	0	163.413	-174.17	1610.64	266.739	-179.989	1612.67	133.593	-326.8	1644.05	269.902	-345.049	1651.3	222.921	-420.9	1497.34	221.022	-526.583	1275.18	214.677	-288.37	1392.28	213.941	-265.821	1207.85	273.235	-532.173	1351.07	25.6137	-419.304	1441.64	-27.1059	-470.247	1246.11	-38.0172	-514.802	1134.2	-58.4768	-498.568	960.803	-21.7755	-485.349	860.913	-74.3186	-541.987	864.557	-80.341	-513.843	762.617
618	0	163.42	-161.32	1612.65	266.768	-166.968	1614.5	133.925	-313.833	1646.97	270.291	-331.791	1654.07	223.271	-408.526	1499.93	221.283	-514.069	1277.7	214.542	-276.042	1395	213.445	-253.507	1210.6	273.446	-519.626	1353.53	25.7748	-407.186	1444.8	-27.9921	-454.437	1247.85	-39.7185	-496.542	1134.98	-58.9668	-474.283	961.912	-21.4942	-458.111	862.828	-74.9569	-513.916	864.33	-80.2128	-481.985	763.516
619	0	163.489	-148.653	1614.82	266.861	-154.132	1616.47	134.325	-301.065	1649.95	270.751	-318.739	1656.86	223.676	-396.258	1502.55	221.63	-501.617	1280.22	214.454	-263.796	1397.78	213.009	-241.268	1213.42	273.724	-507.149	1356.01	26.0055	-395.171	1448.01	-28.8061	-438.765	1249.78	-41.3662	-478.325	1135.98	-59.3294	-449.785	963.462	-21.0353	-430.535	865.373	-75.4077	-485.409	864.644	-79.8268	-449.569	765.165
620	0	163.598	-136.147	1617.12	266.998	-141.461	1618.54	134.77	-288.475	1652.95	271.253	-305.878	1659.64	224.119	-384.069	1505.16	222.056	-489.209	1282.73	214.403	-251.607	1400.58	212.625	-229.084	1216.25	274.064	-494.719	1358.47	26.2934	-383.228	1451.24	-29.5456	-423.239	1251.84	-42.9429	-460.182	1137.15	-59.565	-425.144	965.46	-20.4119	-402.698	868.572	-75.6564	-456.556	865.53	-79.1824	-416.718	767.61
621	0	163.73	-123.779	1619.51	267.157	-128.932	1620.7	135.235	-276.045	1655.91	271.771	-293.188	1662.36	224.587	-371.931	1507.71	222.558	-476.831	1285.18	214.382	-239.45	1403.35	212.287	-216.937	1219.06	274.46	-482.317	1360.9	26.6267	-371.329	1454.44	-30.2093	-407.866	1254	-44.4334	-442.141	1138.47	-59.6755	-400.43	967.901	-19.638	-374.682	872.429	-75.6908	-427.449	867.005	-78.2832	-383.552	770.878
622	0	163.865	-111.522	1621.94	267.32	-116.52	1622.89	135.7	-263.75	1658.77	272.283	-280.649	1664.96	225.067	-359.816	1510.19	223.129	-464.47	1287.54	214.38	-227.302	1406.03	211.988	-204.812	1221.78	274.905	-469.925	1363.25	26.9947	-359.451	1457.54	-30.7969	-392.647	1256.21	-45.8253	-424.225	1139.88	-59.6641	-375.709	970.768	-18.7282	-346.562	876.937	-75.5023	-398.179	869.066	-77.1373	-350.194	774.978
623	0	163.988	-99.3523	1624.36	267.47	-104.199	1625.07	136.145	-251.565	1661.49	272.768	-268.237	1667.42	225.547	-347.701	1512.53	223.764	-452.117	1289.78	214.391	-215.145	1408.58	211.721	-192.698	1224.37	275.396	-457.526	1365.51	27.3878	-347.573	1460.51	-31.3082	-377.583	1258.39	-47.1089	-406.45	1141.36	-59.5345	-351.042	974.036	-17.6965	-318.417	882.073	-75.0854	-368.833	871.7	-75.7564	-316.76	779.898
624	0	164.085	-87.2436	1626.72	267.594	-91.9438	1627.21	136.554	-239.466	1664.02	273.208	-255.926	1669.68	226.02	-335.564	1514.72	224.458	-439.763	1291.88	214.409	-202.961	1410.96	211.483	-180.583	1226.77	275.926	-445.106	1367.64	27.7976	-335.679	1463.28	-31.7432	-362.67	1260.51	-48.2768	-388.829	1142.83	-59.2904	-326.486	977.667	-16.5561	-290.318	887.8	-74.4385	-339.495	874.877	-74.1551	-283.363	785.611
625	0	164.147	-75.1717	1628.97	267.681	-79.7297	1629.24	136.914	-227.428	1666.31	273.591	-243.69	1671.72	226.477	-323.389	1516.72	225.204	-427.401	1293.79	214.428	-190.74	1413.12	211.271	-168.459	1228.95	276.491	-432.654	1369.6	28.2176	-323.758	1465.83	-32.1018	-347.902	1262.5	-49.3242	-371.365	1144.25	-58.9356	-302.09	981.617	-15.3188	-262.337	894.068	-73.5637	-310.244	878.557	-72.3499	-250.109	792.069
626	0	164.166	-63.1137	1631.05	267.724	-67.5337	1631.14	137.218	-215.425	1668.32	273.909	-231.503	1673.49	226.914	-311.161	1518.49	225.997	-415.024	1295.5	214.445	-178.47	1415.02	211.082	-156.319	1230.87	277.087	-420.159	1371.37	28.6428	-311.802	1468.09	-32.3833	-333.269	1264.3	-50.2477	-354.055	1145.57	-58.4736	-277.896	985.833	-13.9949	-234.54	900.818	-72.4673	-281.152	882.691	-70.3584	-217.098	799.216
627	0	164.141	-51.0487	1632.93	267.719	-55.3347	1632.84	137.461	-203.433	1670.02	274.158	-219.342	1674.97	227.329	-298.869	1520	226.833	-402.625	1296.97	214.46	-166.146	1416.64	210.918	-144.155	1232.49	277.712	-407.614	1372.92	29.0703	-299.806	1470.04	-32.5864	-318.758	1265.87	-51.0453	-336.893	1146.73	-57.9074	-253.942	990.26	-12.5934	-206.99	907.982	-71.1588	-252.285	887.223	-68.1988	-184.421	806.981
628	0	164.072	-38.9579	1634.55	267.669	-43.1141	1634.32	137.64	-191.431	1671.39	274.338	-207.182	1676.13	227.721	-286.506	1521.24	227.707	-390.199	1298.18	214.471	-153.762	1417.94	210.78	-131.962	1233.78	278.363	-395.014	1374.22	29.4988	-287.767	1471.64	-32.709	-304.354	1267.16	-51.7154	-319.865	1147.68	-57.2399	-230.256	994.837	-11.122	-179.748	915.487	-69.6512	-223.701	892.094	-65.889	-152.161	815.285
629	0	163.964	-26.8252	1635.87	267.575	-30.8557	1635.53	137.761	-179.398	1672.4	274.452	-195.004	1676.97	228.094	-274.068	1522.18	228.615	-377.738	1299.12	214.483	-141.318	1418.91	210.67	-119.732	1234.73	279.038	-382.353	1375.26	29.9294	-275.684	1472.87	-32.7483	-290.04	1268.12	-52.2568	-302.957	1148.38	-56.4736	-206.866	999.506	-9.58693	-152.868	923.253	-67.9598	-195.453	897.241	-63.4468	-120.391	824.045
630	0	163.822	-14.6371	1636.87	267.447	-18.5462	1636.44	137.828	-167.317	1673.03	274.51	-182.787	1677.47	228.451	-261.552	1522.8	229.556	-365.235	1299.75	214.499	-128.811	1419.53	210.592	-107.459	1235.33	279.739	-369.628	1376.01	30.3645	-263.555	1473.71	-32.7008	-275.796	1268.73	-52.6681	-286.151	1148.8	-55.6107	-183.79	1004.21	-7.99347	-126.401	931.201	-66.1019	-167.585	902.602	-60.8896	-89.1773	833.172
631	0	163.658	-2.38249	1637.51	267.293	-6.17442	1637.03	137.852	-155.172	1673.29	274.523	-170.517	1677.62	228.801	-248.959	1523.09	230.527	-352.684	1300.07	214.526	-116.241	1419.8	210.55	-95.1355	1235.57	280.465	-356.837	1376.44	30.8087	-251.38	1474.15	-32.5624	-261.602	1268.96	-52.9474	-269.43	1148.91	-54.6535	-161.047	1008.88	-6.34596	-100.392	939.252	-64.0957	-140.14	908.113	-58.2347	-58.5784	842.576
632	0	163.483	9.94705	1637.79	267.126	6.26822	1637.28	137.847	-142.951	1673.17	274.505	-158.179	1677.43	229.152	-236.29	1523.06	231.528	-340.074	1300.07	214.572	-103.609	1419.7	210.552	-82.7537	1235.45	281.219	-343.98	1376.56	31.268	-239.157	1474.17	-32.3287	-247.438	1268.81	-53.0922	-252.78	1148.68	-53.6041	-138.65	1013.48	-4.64809	-74.8809	947.326	-61.9603	-113.153	913.713	-55.4992	-28.6444	852.169
633	0	163.311	22.3578	1637.69	266.961	18.7884	1637.18	137.827	-130.644	1672.67	274.474	-145.763	1676.91	229.515	-223.547	1522.69	232.558	-327.4	1299.73	214.648	-90.9154	1419.25	210.603	-70.3055	1234.98	282.003	-331.054	1376.35	31.7498	-226.881	1473.8	-31.9951	-233.285	1268.26	-53.0997	-236.186	1148.12	-52.4647	-116.611	1017.94	-2.90313	-49.9037	955.348	-59.7141	-86.6562	919.344	-52.7001	0.580903	861.86
634	0	163.158	34.854	1637.2	266.814	31.3912	1636.73	137.811	-118.244	1671.82	274.45	-133.26	1676.05	229.903	-210.732	1521.98	233.617	-314.652	1299.07	214.765	-78.1584	1418.45	210.711	-57.7823	1234.16	282.82	-318.06	1375.8	32.2627	-214.548	1473.03	-31.5571	-219.124	1267.32	-52.9667	-219.641	1147.21	-51.2375	-94.9435	1022.24	-1.11413	-25.4901	963.245	-57.3754	-60.6803	924.949	-49.8544	29.06	871.565
635	0	163.042	47.4384	1636.34	266.701	44.0803	1635.92	137.819	-105.747	1670.61	274.453	-120.664	1674.89	230.329	-197.847	1520.95	234.704	-301.823	1298.07	214.938	-65.3375	1417.33	210.885	-45.1751	1233.02	283.673	-304.997	1374.92	32.8158	-202.149	1471.89	-31.0104	-204.94	1266	-52.6899	-203.139	1145.96	-49.925	-73.6568	1026.31	0.715792	-1.66518	970.95	-54.9612	-35.2531	930.474	-46.979	56.7608	881.196
636	0	162.98	60.1122	1635.13	266.643	56.8584	1634.79	137.874	-93.1502	1669.08	274.508	-107.97	1673.44	230.807	-184.894	1519.61	235.816	-288.905	1296.76	215.18	-52.4503	1415.89	211.132	-32.4745	1231.57	284.565	-291.868	1373.71	33.4189	-189.673	1470.39	-30.3513	-190.719	1264.33	-52.2662	-186.682	1144.4	-48.5297	-52.7618	1030.14	2.58333	21.5515	978.397	-52.4875	-10.4006	935.865	-44.0904	83.6567	890.673
637	0	162.992	72.8763	1633.57	266.658	69.7278	1633.33	137.998	-80.4527	1667.24	274.638	-95.1753	1671.71	231.352	-171.874	1517.98	236.952	-275.893	1295.14	215.507	-39.4937	1414.16	211.463	-19.6708	1229.84	285.498	-278.672	1372.18	34.0812	-177.108	1468.57	-29.5768	-176.45	1262.33	-51.6933	-170.275	1142.53	-47.0546	-32.2693	1033.69	4.4848	44.1451	985.529	-49.9692	13.8526	941.073	-41.2048	109.726	899.915
638	0	163.096	85.7305	1631.7	266.765	82.6901	1631.59	138.214	-67.6549	1665.13	274.868	-82.278	1669.75	231.976	-158.787	1516.06	238.108	-262.779	1293.23	215.934	-26.4634	1412.17	211.886	-6.75452	1227.85	286.474	-265.411	1370.35	34.8117	-164.44	1466.46	-28.6849	-162.128	1260.03	-50.9696	-153.929	1140.4	-45.5027	-12.1898	1036.92	6.41613	66.1058	992.29	-47.4194	37.4832	946.048	-38.3376	134.952	908.844
639	0	163.314	98.675	1629.56	266.985	95.747	1629.58	138.548	-54.7579	1662.78	275.222	-69.2772	1667.56	232.693	-145.633	1513.91	239.277	-249.56	1291.05	216.475	-13.3546	1409.94	212.412	6.28359	1225.63	287.492	-252.087	1368.23	35.6183	-151.651	1464.1	-27.6747	-147.749	1257.49	-50.0952	-137.657	1138.02	-43.8775	7.46592	1039.83	8.37279	87.4283	998.631	-44.8502	60.4697	950.744	-35.5032	159.323	917.383
640	0	163.664	111.71	1627.19	267.337	108.9	1627.35	139.021	-41.7631	1660.22	275.723	-56.1724	1665.19	233.512	-132.408	1511.53	240.454	-236.235	1288.64	217.143	-0.16168	1407.52	213.047	19.4517	1223.21	288.552	-238.7	1365.86	36.5072	-138.725	1461.53	-26.547	-133.312	1254.74	-49.0716	-121.479	1135.44	-42.183	26.6876	1042.39	10.35	108.111	1004.51	-42.2724	82.7922	955.113	-32.7143	182.83	925.458
641	0	164.165	124.836	1624.62	267.84	122.15	1624.93	139.656	-28.6716	1657.5	276.394	-42.9638	1662.66	234.444	-119.111	1508.97	241.63	-222.8	1286.03	217.95	13.1211	1404.94	213.799	32.7569	1220.62	289.652	-225.253	1363.26	37.4831	-125.645	1458.79	-25.3039	-118.82	1251.82	-47.9024	-105.414	1132.71	-40.4235	45.465	1044.59	12.3428	128.157	1009.87	-39.6953	104.432	959.113	-29.9816	205.469	932.996
642	0	164.836	138.055	1621.91	268.511	135.498	1622.37	140.471	-15.4843	1654.65	277.254	-29.6519	1660.01	235.494	-105.739	1506.26	242.795	-209.259	1283.24	218.905	26.4992	1402.23	214.674	46.2043	1217.91	290.788	-211.748	1360.47	38.5485	-112.393	1455.94	-23.9491	-104.28	1248.79	-46.5928	-89.4852	1129.86	-38.6035	63.7886	1046.42	14.3465	147.569	1014.7	-37.1267	125.372	962.699	-27.3138	227.241	939.927
643	0	165.692	151.367	1619.11	269.367	148.944	1619.7	141.484	-2.20148	1651.73	278.318	-16.2377	1657.28	236.665	-92.2904	1503.45	243.941	-195.612	1280.34	220.013	39.9773	1399.43	215.677	59.797	1215.11	291.956	-198.186	1357.53	39.7039	-98.9565	1453.02	-22.4884	-89.6981	1245.71	-45.1506	-73.7143	1126.94	-36.7284	81.6493	1047.86	16.3566	166.356	1018.94	-34.5736	145.596	965.833	-24.7169	248.146	946.181
644	0	166.747	164.775	1616.27	270.421	162.489	1616.98	142.707	11.177	1648.78	279.6	-2.72301	1654.5	237.958	-78.7623	1500.57	245.057	-181.864	1277.35	221.277	53.5588	1396.59	216.807	73.5359	1212.26	293.151	-184.571	1354.48	40.9476	-85.3232	1450.08	-20.9291	-75.0849	1242.61	-43.5854	-58.1234	1124	-34.8038	99.0387	1048.91	18.3692	184.524	1022.57	-32.042	165.089	968.475	-22.1945	268.188	951.694
645	0	168.012	178.281	1613.44	271.684	176.129	1614.25	144.146	24.6515	1645.84	281.106	10.8897	1651.72	239.37	-65.1546	1497.68	246.135	-168.02	1274.33	222.695	67.2453	1393.75	218.064	87.4189	1209.41	294.368	-170.904	1351.37	42.276	-71.487	1447.17	-19.2807	-60.4511	1239.56	-41.9087	-42.733	1121.09	-32.8359	115.949	1049.58	20.3811	202.081	1025.56	-29.5372	183.837	970.593	-19.7478	287.371	956.403
646	0	169.494	191.884	1610.66	273.161	189.863	1611.54	145.804	38.222	1642.98	282.836	24.5965	1648.96	240.895	-51.4681	1494.81	247.169	-154.087	1271.32	224.261	81.0358	1390.96	219.443	101.441	1206.59	295.603	-157.189	1348.25	43.6838	-57.4472	1444.34	-17.5543	-45.8088	1236.62	-40.1337	-27.5614	1118.26	-30.8315	132.374	1049.86	22.39	219.035	1027.89	-27.0648	201.827	972.155	-17.3754	305.699	960.252
647	0	171.193	205.585	1608	274.855	203.685	1608.91	147.677	51.8879	1640.23	284.786	38.392	1646.28	242.526	-37.706	1492.02	248.153	-140.073	1268.38	225.965	94.9266	1388.25	220.936	115.595	1203.85	296.853	-143.428	1345.17	45.1644	-43.2098	1441.64	-15.763	-31.1706	1233.82	-38.2749	-12.6238	1115.55	-28.7979	148.306	1049.75	24.3942	235.391	1029.53	-24.6302	219.045	973.137	-15.0745	323.177	963.189
648	0	173.106	219.38	1605.49	276.76	217.588	1606.39	149.757	65.6468	1637.65	286.944	52.2691	1643.71	244.251	-23.8737	1489.35	249.088	-125.988	1265.56	227.793	108.911	1385.68	222.53	129.869	1201.25	298.116	-129.628	1342.18	46.7101	-28.7884	1439.12	-13.9211	-16.5503	1231.21	-36.3477	2.06745	1113.02	-26.7432	163.741	1049.26	26.3924	251.152	1030.47	-22.2399	235.48	973.519	-12.8408	339.805	965.171
649	0	175.224	233.264	1603.18	278.868	231.562	1604.02	152.026	79.494	1635.28	289.292	66.2181	1641.29	246.059	-9.97895	1486.85	249.978	-111.842	1262.9	229.727	122.979	1383.28	224.21	144.248	1198.82	299.394	-115.792	1339.33	48.3124	-14.2042	1436.82	-12.0442	-1.96221	1228.85	-34.3677	16.5035	1110.7	-24.6762	178.672	1048.4	28.3835	266.319	1030.69	-19.9011	251.119	973.288	-10.6695	355.584	966.16
650	0	177.531	247.228	1601.1	281.162	245.594	1601.84	154.466	93.4221	1633.16	291.807	80.2273	1639.05	247.936	3.96764	1484.55	250.83	-97.648	1260.45	231.748	137.116	1381.09	225.957	158.715	1196.62	300.687	-101.928	1336.66	49.9626	0.51455	1434.77	-10.1482	12.5783	1226.78	-32.3506	30.6786	1108.65	-22.6061	193.094	1047.18	30.3664	280.889	1030.19	-17.6228	265.951	972.439	-8.55652	370.511	966.132
651	0	180.005	261.26	1599.29	283.622	259.67	1599.87	157.049	107.42	1631.33	294.461	94.2823	1637.04	249.867	17.9533	1482.5	251.657	-83.4191	1258.25	233.83	151.305	1379.16	227.75	173.245	1194.67	302.002	-88.0423	1334.23	51.6513	15.3326	1433.02	-8.24897	27.0544	1225.02	-30.3115	44.59	1106.88	-20.5434	207.001	1045.62	32.3389	294.857	1028.96	-15.4158	279.964	970.975	-6.4993	384.579	965.072
652	0	182.62	275.344	1597.77	286.219	273.771	1598.16	159.746	121.474	1629.81	297.222	108.366	1635.29	251.838	31.9632	1480.74	252.477	-69.1715	1256.35	235.949	165.528	1377.51	229.566	187.814	1193.01	303.343	-74.1446	1332.08	53.3692	30.2098	1431.59	-6.36179	41.4478	1223.61	-28.2641	58.2369	1105.43	-18.4989	220.388	1043.73	34.2979	308.211	1027.01	-13.2929	293.146	968.908	-4.49791	397.78	962.978
653	0	185.344	289.461	1596.57	288.923	287.879	1596.72	162.525	135.565	1628.64	300.054	122.46	1633.81	253.833	45.9808	1479.28	253.309	-54.9233	1254.77	238.08	179.762	1376.17	231.382	202.392	1191.67	304.718	-60.2451	1330.25	55.107	45.102	1430.5	-4.50056	55.7387	1222.57	-26.2213	71.6202	1104.33	-16.4843	233.247	1041.54	36.2382	320.937	1024.34	-11.269	305.487	966.258	-2.55633	410.1	959.867
654	0	188.142	303.589	1595.69	291.7	301.974	1595.57	165.351	149.673	1627.82	302.922	136.544	1632.65	255.837	59.9884	1478.16	254.175	-40.6946	1253.54	240.196	193.984	1375.17	233.173	216.946	1190.68	306.132	-46.3549	1328.76	56.8551	59.9637	1429.77	-2.67746	69.9053	1221.91	-24.1939	84.7411	1103.59	-14.5122	245.57	1039.06	38.1521	333.018	1020.98	-9.36066	316.975	963.059	-0.68341	421.525	955.766
655	0	190.978	317.705	1595.16	294.512	316.033	1594.74	168.188	163.774	1627.37	305.789	150.597	1631.8	257.836	73.9682	1477.38	255.097	-26.5073	1252.69	242.273	208.17	1374.51	234.918	231.443	1190.03	307.593	-32.4861	1327.64	58.6042	74.7494	1429.4	-0.902476	83.9244	1221.65	-22.1913	97.6002	1103.21	-12.5958	257.347	1036.33	40.0286	344.433	1016.96	-7.58639	327.599	959.351	1.10624	432.035	950.726
656	0	193.812	331.783	1594.98	297.322	330.036	1594.23	171.002	177.845	1627.29	308.62	164.597	1631.29	259.817	87.9022	1476.97	256.094	-12.3844	1252.21	244.289	222.297	1374.21	236.596	245.848	1189.75	309.104	-18.651	1326.92	60.3451	89.416	1429.4	0.816846	97.7717	1221.78	-20.2206	110.197	1103.21	-10.7491	268.565	1033.38	41.8532	355.156	1012.31	-5.96558	337.351	955.187	2.79179	441.611	944.811
657	0	196.607	345.801	1595.15	300.093	343.963	1594.07	173.759	191.86	1627.58	311.381	178.524	1631.13	261.765	101.773	1476.93	257.182	1.65104	1252.13	246.224	236.343	1374.26	238.192	260.132	1189.83	310.667	-4.86149	1326.59	62.0685	103.924	1429.77	2.47553	111.422	1222.29	-18.2872	122.528	1103.57	-8.98659	279.213	1030.24	43.6076	365.163	1007.1	-4.51811	346.219	950.627	4.34607	450.23	938.103
658	0	199.326	359.734	1595.67	302.79	357.798	1594.25	176.43	205.794	1628.22	314.045	192.359	1631.32	263.671	115.566	1477.26	258.373	15.5773	1252.44	248.062	250.288	1374.68	239.691	274.267	1190.27	312.281	8.87095	1326.67	63.7656	118.241	1430.48	4.07116	124.85	1223.17	-16.3945	134.589	1104.28	-7.32308	289.274	1026.95	45.2696	374.427	1001.36	-3.26345	354.197	945.743	5.736	457.871	930.702
659	0	201.936	373.562	1596.54	305.379	371.523	1594.79	178.986	219.627	1629.21	316.584	206.087	1631.85	265.523	129.268	1477.95	259.671	29.3751	1253.13	249.791	264.117	1375.45	241.084	288.232	1191.06	313.942	22.5362	1327.15	65.428	132.339	1431.53	5.6037	138.032	1224.41	-14.5439	146.371	1105.32	-5.77362	298.734	1023.56	46.8133	382.925	995.194	-2.21984	361.277	940.61	6.92339	464.512	922.719
660	0	204.408	387.266	1597.74	307.833	385.128	1595.67	181.406	233.337	1630.52	318.98	219.693	1632.74	267.314	142.868	1479	261.074	43.0289	1254.18	251.403	277.815	1376.56	242.365	302.016	1192.19	315.643	36.1258	1328.03	67.0477	146.2	1432.9	7.07523	150.945	1225.98	-12.7356	157.862	1106.69	-4.35308	307.577	1020.1	48.2096	390.632	988.666	-1.40345	367.455	935.315	7.86627	470.133	914.281
661	0	206.718	400.833	1599.27	310.127	398.605	1596.91	183.672	246.909	1632.15	321.217	233.167	1633.96	269.034	156.359	1480.39	262.574	56.5279	1255.59	252.893	291.376	1378.01	243.533	315.612	1193.65	317.373	49.6333	1329.28	68.6176	159.812	1434.57	8.48955	163.566	1227.85	-10.9682	169.049	1108.35	-3.07583	315.788	1016.64	49.427	397.534	981.872	-0.827355	372.731	929.945	8.52065	474.718	905.519
662	0	208.847	414.25	1601.11	312.244	411.946	1598.48	185.772	260.329	1634.06	323.285	246.502	1635.51	270.679	169.737	1482.09	264.156	69.8661	1257.33	254.262	304.796	1379.77	244.591	329.025	1195.42	319.122	63.0546	1330.89	70.1315	173.173	1436.52	9.85182	175.88	1230	-9.23955	179.917	1110.28	-1.95535	323.354	1013.22	50.4331	403.616	974.911	-0.500722	377.108	924.592	8.84285	478.256	896.574
663	0	210.783	427.512	1603.24	314.172	425.151	1600.39	187.698	273.588	1636.23	325.18	259.695	1637.37	272.244	183	1484.09	265.8	83.0424	1259.38	255.512	318.075	1381.83	245.546	342.264	1197.48	320.875	76.3879	1332.82	71.5845	186.288	1438.71	11.168	187.869	1232.41	-7.547	190.449	1112.46	-1.00376	330.267	1009.9	51.1955	408.877	967.886	-0.428004	380.594	919.347	8.79198	480.742	887.585
664	0	212.521	440.614	1605.64	315.906	438.219	1602.61	189.448	286.682	1638.64	326.9	272.744	1639.51	273.726	196.153	1486.36	267.484	96.0607	1261.69	256.651	331.219	1384.17	246.409	355.344	1199.81	322.617	89.6341	1335.05	72.9733	199.171	1441.12	12.4444	199.525	1235.03	-5.88804	200.629	1114.88	-0.231434	336.523	1006.73	51.6842	413.322	960.903	-0.608437	383.204	914.299	8.3327	482.179	878.69
665	0	214.061	453.558	1608.3	317.446	451.152	1605.12	191.025	299.608	1641.24	328.45	285.65	1641.9	275.124	209.199	1488.86	269.181	108.929	1264.24	257.689	344.236	1386.75	247.194	368.287	1202.39	324.335	102.796	1337.54	74.2965	211.839	1443.73	13.6873	210.841	1237.84	-4.26076	210.444	1117.49	0.35345	342.123	1003.75	51.8727	416.965	954.066	-1.03585	384.962	909.531	7.4379	482.583	870.022
666	0	215.41	466.346	1611.18	318.798	463.956	1607.89	192.435	312.37	1644	329.838	298.416	1644.52	276.44	222.148	1491.55	270.868	121.658	1266.99	258.636	357.14	1389.54	247.919	381.114	1205.18	326.014	115.879	1340.24	75.5541	224.317	1446.48	14.9022	221.816	1240.81	-2.66448	219.882	1120.3	0.745275	347.076	1001.03	51.7401	419.833	947.473	-1.69887	385.9	905.12	6.09106	481.98	861.701
667	0	216.579	478.987	1614.25	319.975	476.636	1610.9	193.691	324.971	1646.89	331.077	311.048	1647.32	277.674	235.01	1494.39	272.518	134.263	1269.9	259.506	369.944	1392.5	248.601	393.848	1208.15	327.643	128.889	1343.11	76.7481	236.633	1449.35	16.094	232.454	1243.91	-1.10012	228.937	1123.26	0.941313	351.4	998.598	51.2727	421.962	941.217	-2.58138	386.06	901.132	4.28812	480.41	853.838
668	0	217.586	491.489	1617.47	320.993	489.201	1614.11	194.805	337.422	1649.87	332.179	323.553	1650.25	278.833	247.796	1497.34	274.111	146.76	1272.92	260.312	382.665	1395.6	249.258	406.51	1211.25	329.211	141.835	1346.11	77.8815	248.817	1452.31	17.2661	242.765	1247.12	0.429487	237.609	1126.36	0.941982	355.12	996.497	50.4654	423.398	935.375	-3.66332	385.495	897.622	2.03867	477.928	846.528
669	0	218.451	503.864	1620.81	321.872	501.659	1617.46	195.796	349.733	1652.88	333.163	335.938	1653.27	279.919	260.518	1500.36	275.628	159.163	1276.01	261.066	395.32	1398.78	249.906	419.122	1214.44	330.709	154.724	1349.18	78.9586	260.899	1455.31	18.4207	252.764	1250.39	1.9196	245.904	1129.58	0.751021	358.271	994.754	49.3222	424.196	930.015	-4.92167	384.267	894.632	-0.633694	474.603	839.846
670	0	219.198	516.126	1624.23	322.636	514.021	1620.92	196.682	361.918	1655.88	334.047	348.215	1656.32	280.941	273.191	1503.38	277.054	171.492	1279.12	261.782	407.925	1401.99	250.56	431.7	1217.66	332.13	167.564	1352.27	79.9839	272.911	1458.31	19.5584	262.473	1253.71	3.36375	253.837	1132.9	0.375555	360.897	993.39	47.8565	424.42	925.186	-6.33147	382.449	892.19	-3.69196	470.517	833.851
671	0	219.852	528.292	1627.67	323.31	526.299	1624.43	197.483	373.994	1658.82	334.851	360.395	1659.35	281.903	285.828	1506.37	278.377	183.759	1282.21	262.471	420.496	1405.18	251.23	444.259	1220.87	333.467	180.365	1355.32	80.9625	284.883	1461.27	20.6782	271.918	1257.04	4.75414	261.428	1136.28	-0.173989	363.049	992.414	46.0908	424.138	920.92	-7.86684	380.123	890.311	-7.08704	465.764	828.581
672	0	220.438	540.378	1631.09	323.918	538.505	1627.94	198.22	385.978	1661.67	335.593	372.492	1662.3	282.811	298.441	1509.27	279.587	195.98	1285.22	263.142	433.048	1408.3	251.925	456.809	1224.01	334.718	193.133	1358.3	81.8988	296.844	1464.14	21.7776	281.129	1260.36	6.0822	268.708	1139.72	-0.884108	364.786	991.828	44.0556	423.424	917.232	-9.50191	377.378	888.996	-10.7599	460.449	824.053
673	0	220.982	552.405	1634.45	324.485	550.652	1631.39	198.913	397.892	1664.37	336.293	384.52	1665.11	283.672	311.043	1512.05	280.679	208.167	1288.13	263.804	445.593	1411.29	252.648	469.356	1227.01	335.878	205.875	1361.14	82.7967	308.82	1466.89	22.8525	290.142	1263.64	7.33913	275.711	1143.18	-1.73862	366.174	991.622	41.7885	422.353	914.122	-11.2116	374.308	888.234	-14.6443	454.683	820.269
674	0	221.507	564.391	1637.68	325.035	562.757	1634.72	199.579	409.755	1666.89	336.968	396.498	1667.73	284.489	323.645	1514.64	281.648	220.33	1290.87	264.463	458.144	1414.09	253.399	481.903	1229.83	336.944	218.595	1363.81	83.6592	320.835	1469.48	23.8978	298.995	1266.85	8.51655	282.48	1146.65	-2.71916	367.283	991.778	39.3322	421.002	911.573	-12.9725	371.009	888.001	-18.6698	448.582	817.208
675	0	222.034	576.358	1640.74	325.587	574.834	1637.87	200.235	421.592	1669.18	337.632	408.441	1670.12	285.266	336.257	1517.03	282.491	232.477	1293.42	265.122	470.708	1416.67	254.176	494.45	1232.41	337.915	231.299	1366.27	84.488	332.909	1471.86	24.9075	307.731	1269.97	9.60696	289.062	1150.09	-3.80581	368.185	992.27	36.7328	419.447	909.554	-14.7634	367.579	888.266	-22.7647	442.261	814.838
676	0	222.582	588.326	1643.59	326.158	586.9	1640.79	200.893	433.426	1671.21	338.297	420.369	1672.22	286.005	348.886	1519.16	283.206	244.616	1295.74	265.783	483.293	1418.97	254.974	506.993	1234.7	338.788	243.988	1368.49	85.2835	345.062	1474.01	25.8745	316.391	1272.98	10.6042	295.508	1153.48	-4.97773	368.956	993.067	34.0378	417.761	908.028	-16.5654	364.113	888.99	-26.8594	435.835	813.113
677	0	223.162	600.317	1646.17	326.76	598.97	1643.42	201.562	445.28	1672.96	338.97	432.3	1674.01	286.707	361.541	1521.01	283.793	256.754	1297.8	266.445	495.903	1420.96	255.786	519.528	1236.66	339.561	256.666	1370.42	86.0445	357.306	1475.89	26.7917	325.02	1275.84	11.5036	301.871	1156.81	-6.21377	369.671	994.132	31.2943	416.015	906.945	-18.3626	360.703	890.129	-30.8891	429.41	811.975
678	0	223.784	612.351	1648.45	327.401	611.062	1645.73	202.247	457.177	1674.39	339.655	444.254	1675.46	287.368	374.227	1522.56	284.253	268.896	1299.57	267.108	508.542	1422.61	256.603	532.051	1238.27	340.232	269.333	1372.06	86.7682	369.654	1477.49	27.6514	333.662	1278.55	12.3025	308.204	1160.04	-7.49314	370.401	995.426	28.5472	414.277	906.256	-20.1414	357.435	891.635	-34.7955	423.088	811.364
679	0	224.452	624.447	1650.39	328.084	623.191	1647.67	202.948	469.139	1675.51	340.354	456.248	1676.54	287.986	386.947	1523.79	284.587	281.049	1301.03	267.766	521.211	1423.88	257.418	544.557	1239.49	340.798	281.993	1373.38	87.4503	382.114	1478.78	28.4461	342.357	1281.09	12.9999	314.56	1163.17	-8.79597	371.218	996.906	25.8374	412.61	905.906	-21.8905	354.387	893.458	-38.529	416.958	811.212
680	0	225.167	636.622	1651.97	328.809	635.372	1649.22	203.663	481.187	1676.28	341.061	468.301	1677.24	288.556	399.704	1524.69	284.799	293.219	1302.18	268.414	533.911	1424.78	258.22	557.044	1240.32	341.255	294.645	1374.37	88.0852	394.691	1479.75	29.1685	351.145	1283.44	13.5967	320.991	1166.17	-10.1039	372.186	998.533	23.2011	411.075	905.842	-23.6006	351.63	895.549	-42.0494	411.104	811.456
681	0	225.921	648.893	1653.16	329.57	647.617	1650.35	204.383	493.338	1676.72	341.769	480.426	1677.56	289.071	412.5	1525.25	284.892	305.415	1302.99	269.044	546.643	1425.29	259.002	569.513	1240.74	341.601	307.293	1375.03	88.6656	407.389	1480.4	29.8119	360.063	1285.59	14.0952	327.545	1169.03	-11.4003	373.365	1000.26	20.6682	409.727	906.013	-25.2642	349.225	897.859	-45.3266	405.594	812.029
682	0	226.708	661.273	1653.96	330.356	659.94	1651.06	205.098	505.609	1676.82	342.467	492.637	1677.52	289.521	425.335	1525.48	284.869	317.645	1303.46	269.648	559.408	1425.42	259.754	581.968	1240.76	341.831	319.94	1375.35	89.1836	420.209	1480.72	30.3703	369.143	1287.53	14.4993	334.266	1171.72	-12.6711	374.808	1002.06	18.2628	408.618	906.371	-26.8748	347.226	900.34	-48.3404	400.492	812.872
683	0	227.513	673.772	1654.34	331.156	672.348	1651.34	205.792	518.012	1676.6	343.14	504.946	1677.11	289.897	438.211	1525.37	284.734	329.919	1303.61	270.216	572.206	1425.17	260.47	594.415	1240.4	341.941	332.59	1375.35	89.6299	433.149	1480.71	30.8386	378.412	1289.24	14.8138	341.193	1174.25	-13.9045	376.564	1003.88	16.0021	407.796	906.874	-28.427	345.678	902.946	-51.0803	395.849	813.927
684	0	228.319	686.398	1654.33	331.952	684.851	1651.19	206.448	530.557	1676.06	343.77	517.36	1676.36	290.187	451.128	1524.94	284.49	342.247	1303.42	270.736	585.04	1424.56	261.142	606.864	1239.67	341.926	345.248	1375.03	89.9948	446.207	1480.39	31.2131	387.894	1290.73	15.0443	348.361	1176.58	-15.0913	378.673	1005.69	13.8976	407.304	907.48	-29.9163	344.618	905.634	-53.5441	391.709	815.145
685	0	229.108	699.155	1653.93	332.726	697.452	1650.64	207.046	543.249	1675.22	344.338	529.887	1675.3	290.379	464.086	1524.21	284.14	354.642	1302.91	271.197	597.914	1423.61	261.763	619.329	1238.6	341.781	357.922	1374.41	90.2679	459.379	1479.75	31.4911	397.605	1291.98	15.1966	355.8	1178.72	-16.2251	381.171	1007.47	11.9545	407.181	908.154	-31.3388	344.079	908.363	-55.7373	388.108	816.479
686	0	229.857	712.046	1653.15	333.455	710.155	1649.7	207.567	556.091	1674.1	344.823	542.528	1673.95	290.461	477.089	1523.18	283.687	367.117	1302.09	271.586	610.83	1422.36	262.329	631.825	1237.23	341.501	370.621	1373.5	90.439	472.66	1478.83	31.6714	407.559	1293	15.2766	363.536	1180.64	-17.3017	384.089	1009.17	10.1731	407.467	908.863	-32.6913	344.084	911.095	-57.6712	385.077	817.889
687	0	230.543	725.067	1652.03	334.118	722.961	1648.42	207.987	569.082	1672.74	345.202	555.284	1672.34	290.419	490.137	1521.89	283.132	379.683	1300.97	271.891	623.796	1420.83	262.833	644.37	1235.58	341.084	383.355	1372.32	90.4975	486.045	1477.62	31.7539	417.765	1293.77	15.2896	371.589	1182.33	-18.3198	387.451	1010.77	8.54935	408.194	909.578	-33.9713	344.655	913.792	-59.3618	382.643	819.337
688	0	231.14	738.217	1650.6	334.69	735.868	1646.81	208.285	582.217	1671.15	345.453	568.155	1670.5	290.241	503.234	1520.35	282.476	392.355	1299.59	272.098	636.818	1419.05	263.27	656.983	1233.69	340.525	396.135	1370.9	90.4334	499.529	1476.15	31.7396	428.227	1294.29	15.2407	379.975	1183.79	-19.2798	391.279	1012.24	7.07521	409.397	910.272	-35.1772	345.81	916.42	-60.8284	380.83	820.789
689	0	231.625	751.488	1648.88	335.146	748.876	1644.93	208.438	595.491	1669.35	345.555	581.136	1668.47	289.914	516.386	1518.59	281.721	405.145	1297.95	272.195	649.904	1417.07	263.634	669.685	1231.61	339.823	408.975	1369.26	90.2372	513.108	1474.44	31.6303	438.949	1294.57	15.1337	388.708	1185.01	-20.1844	395.594	1013.56	5.73999	411.107	910.918	-36.3081	347.566	918.945	-62.0919	379.659	822.214
690	0	231.971	764.873	1646.93	335.462	761.98	1642.82	208.425	608.895	1667.39	345.487	594.224	1666.29	289.428	529.597	1516.64	280.867	418.066	1296.09	272.17	663.065	1414.9	263.921	682.496	1229.36	338.976	421.885	1367.42	89.9002	526.777	1472.49	31.4281	449.929	1294.6	14.9716	397.798	1185.97	-21.0379	400.412	1014.71	4.53086	413.355	911.492	-37.3645	349.936	921.333	-63.1741	379.154	823.579
691	0	232.154	778.364	1644.77	335.616	775.176	1640.52	208.227	622.418	1665.27	345.23	607.414	1663.98	288.774	542.875	1514.53	279.917	431.128	1294.03	272.011	676.31	1412.6	264.125	695.435	1226.99	337.987	434.881	1365.42	89.4147	540.532	1470.34	31.1356	461.166	1294.37	14.7563	407.252	1186.66	-21.8459	405.748	1015.67	3.43374	416.171	911.968	-38.3477	352.936	923.552	-64.0964	379.336	824.855
692	0	232.152	791.953	1642.46	335.585	788.462	1638.08	207.826	636.052	1663.04	344.768	620.698	1661.57	287.944	556.226	1512.28	278.873	444.343	1291.8	271.709	689.647	1410.19	264.239	708.519	1224.52	336.856	447.974	1363.28	88.7743	554.37	1468	30.7548	472.658	1293.89	14.4886	417.076	1187.07	-22.6147	411.618	1016.41	2.43414	419.584	912.323	-39.2602	356.58	925.57	-64.8794	380.23	826.012
693	0	231.946	805.63	1640.04	335.351	801.833	1635.56	207.207	649.785	1660.72	344.086	634.072	1659.1	286.934	569.658	1509.92	277.739	457.718	1289.42	271.254	703.087	1407.71	264.259	721.765	1221.98	335.59	461.177	1361.03	87.9743	568.289	1465.49	30.2876	484.403	1293.15	14.1683	427.276	1187.21	-23.3516	418.037	1016.92	1.51781	423.623	912.532	-40.1055	360.884	927.357	-65.5427	381.865	827.018
694	0	231.519	819.39	1637.55	334.898	815.286	1632.99	206.356	663.608	1658.33	343.173	647.529	1656.6	285.74	583.179	1507.48	276.518	471.261	1286.94	270.641	716.639	1405.19	264.179	735.184	1219.42	334.193	474.499	1358.71	87.0119	582.285	1462.82	29.7353	496.4	1292.17	13.7946	437.855	1187.05	-24.0639	425.019	1017.17	0.6713	428.319	912.57	-40.8883	365.866	928.882	-66.1042	384.269	827.842
695	0	230.858	833.226	1635.03	334.215	828.817	1630.42	205.266	677.512	1655.89	342.022	661.065	1654.09	284.363	596.794	1505	275.216	484.975	1284.38	269.866	730.309	1402.65	263.993	748.788	1216.85	332.673	487.95	1356.34	85.8867	596.358	1460.03	29.0985	508.647	1290.94	13.3658	448.816	1186.6	-24.7588	432.582	1017.16	-0.117609	433.702	912.416	-41.6139	371.544	930.115	-66.5803	387.476	828.455
696	0	229.956	847.133	1632.52	333.294	842.426	1627.89	203.93	691.491	1653.44	340.628	674.674	1651.61	282.808	610.512	1502.5	273.841	498.863	1281.77	268.925	744.102	1400.13	263.697	762.581	1214.3	331.041	501.536	1353.96	84.6007	610.502	1457.13	28.3773	521.146	1289.46	12.8801	460.164	1185.85	-25.4433	440.742	1016.87	-0.859701	439.803	912.045	-42.2889	377.939	931.029	-66.9858	391.523	828.825
697	0	228.81	861.107	1630.06	332.132	856.109	1625.45	202.348	705.538	1651	338.992	688.353	1649.18	281.082	624.334	1500.02	272.4	512.924	1279.15	267.822	758.022	1397.65	263.287	776.567	1211.81	329.308	515.261	1351.59	83.1588	624.715	1454.15	27.5718	533.896	1287.75	12.3354	471.9	1184.81	-26.1233	449.516	1016.28	-1.56418	446.655	911.439	-42.9204	385.076	931.598	-67.3336	396.449	828.923
698	0	227.42	875.145	1627.69	330.73	869.866	1623.12	200.524	719.647	1648.59	337.119	702.1	1646.82	279.197	638.264	1497.58	270.903	527.152	1276.55	266.559	772.069	1395.25	262.758	790.743	1209.39	327.488	529.125	1349.28	81.5688	638.992	1451.13	26.6816	546.901	1285.82	11.73	484.028	1183.48	-26.8042	458.926	1015.39	-2.23859	454.291	910.578	-43.516	392.981	931.798	-67.6351	402.297	828.721
699	0	225.795	889.244	1625.43	329.095	883.695	1620.94	198.466	733.814	1646.22	335.016	715.91	1644.56	277.166	652.301	1495.21	269.36	541.54	1274.02	265.145	786.238	1392.94	262.109	805.102	1207.07	325.597	543.124	1347.04	79.8416	653.324	1448.08	25.707	560.161	1283.68	11.0628	496.549	1181.86	-27.4899	468.992	1014.2	-2.88883	462.745	909.448	-44.0836	401.682	931.609	-67.8998	409.111	828.194
700	0	223.944	903.402	1623.3	327.238	897.594	1618.94	196.189	748.034	1643.94	332.699	729.782	1642.42	275.01	666.439	1492.95	267.784	556.075	1271.57	263.589	800.522	1390.76	261.337	819.632	1204.88	323.651	557.251	1344.92	77.9911	667.704	1445.05	24.6489	573.679	1281.35	10.3331	509.467	1179.97	-28.1834	479.736	1012.7	-3.51908	472.054	908.039	-44.6312	411.209	931.016	-68.1355	416.937	827.318
701	0	221.884	917.613	1621.33	325.175	911.559	1617.13	193.712	762.3	1641.75	330.185	743.712	1640.43	272.748	680.673	1490.82	266.187	570.741	1269.26	261.905	814.909	1388.72	260.445	834.317	1202.85	321.671	571.495	1342.93	76.0341	682.12	1442.07	23.5092	587.456	1278.85	9.54136	522.781	1177.83	-28.8861	491.179	1010.9	-4.13173	482.253	906.344	-45.166	421.596	930.005	-68.3486	425.822	826.075
702	0	219.634	931.872	1619.54	322.923	925.586	1615.54	191.057	776.606	1639.68	327.497	757.696	1638.61	270.406	694.988	1488.85	264.582	585.517	1267.1	260.109	829.383	1386.85	259.435	849.135	1200.98	319.675	585.84	1341.11	73.9897	696.558	1439.18	22.2912	601.491	1276.21	8.68863	536.491	1175.45	-29.5983	503.344	1008.81	-4.72732	493.379	904.362	-45.6949	432.874	928.571	-68.5432	435.814	824.451
703	0	217.219	946.17	1617.94	320.506	939.669	1614.17	188.253	790.942	1637.74	324.664	771.729	1636.97	268.01	709.37	1487.06	262.985	600.378	1265.13	258.221	843.925	1385.16	258.311	864.058	1199.31	317.685	600.267	1339.48	71.8792	711.003	1436.42	20.9998	615.781	1273.46	7.77696	550.596	1172.87	-30.3187	516.252	1006.44	-5.30447	505.466	902.098	-46.2233	445.076	926.713	-68.7216	446.957	822.436
704	0	214.663	960.496	1616.54	317.949	953.799	1613.04	185.332	805.296	1635.97	321.716	785.803	1635.54	265.589	723.798	1485.48	261.411	615.297	1263.37	256.261	858.51	1383.68	257.082	879.055	1197.85	315.722	614.752	1338.06	69.7255	725.435	1433.82	19.6416	630.323	1270.63	6.80917	565.092	1170.1	-31.0448	529.921	1003.8	-5.85979	518.547	899.563	-46.7552	458.232	924.435	-68.8843	459.299	820.03
705	0	211.996	974.834	1615.33	315.281	967.965	1612.14	182.328	819.654	1634.38	318.688	799.911	1634.34	263.171	738.25	1484.12	259.874	630.242	1261.85	254.254	873.112	1382.42	255.758	894.09	1196.62	313.806	629.269	1336.87	67.5525	739.836	1431.43	18.2244	645.108	1267.76	5.78883	579.973	1167.19	-31.7726	544.367	1000.93	-6.38789	532.649	896.775	-47.2931	472.372	921.751	-69.0294	472.879	817.235
706	0	209.247	989.17	1614.34	312.532	982.152	1611.48	179.278	833.999	1632.98	315.615	814.039	1633.37	260.786	752.701	1483.01	258.39	645.182	1260.59	252.221	887.702	1381.4	254.35	909.123	1195.63	311.956	643.791	1335.93	65.3844	754.182	1429.28	16.7578	660.127	1264.88	4.72007	595.229	1164.18	-32.4965	559.604	997.845	-6.88138	547.796	893.759	-47.8372	487.519	918.679	-69.1534	487.736	814.065
707	0	206.448	1003.48	1613.55	309.732	996.346	1611.05	176.22	848.313	1631.79	312.535	828.176	1632.65	258.462	767.123	1482.16	256.972	660.081	1259.6	250.188	902.249	1380.63	252.873	924.112	1194.89	310.19	658.288	1335.24	63.2452	768.453	1427.41	15.2521	675.367	1262.03	3.60743	610.851	1161.08	-33.21	575.639	994.59	-7.33092	564.006	890.546	-48.3857	503.695	915.244	-69.2507	503.902	810.541
708	0	203.63	1017.75	1612.98	306.913	1010.53	1610.86	173.191	862.574	1630.84	309.486	842.306	1632.19	256.226	781.49	1481.57	255.635	674.905	1258.9	248.176	916.723	1380.11	251.341	939.016	1194.41	308.525	672.73	1334.81	61.158	782.625	1425.84	13.7191	690.812	1259.26	2.45566	626.825	1157.96	-33.9047	592.475	991.2	-7.72533	581.289	887.175	-48.9343	520.914	911.482	-69.314	521.404	806.693
709	0	200.825	1031.95	1612.61	304.106	1024.68	1610.89	170.229	876.762	1630.14	306.504	856.413	1632	254.101	795.773	1481.27	254.388	689.621	1258.49	246.209	931.095	1379.85	249.771	953.792	1194.19	306.973	687.089	1334.66	59.1441	796.677	1424.61	12.1708	706.442	1256.59	1.26966	643.133	1154.85	-34.5715	610.11	987.719	-8.05184	599.646	883.692	-49.4759	539.184	907.434	-69.3346	540.261	802.566
710	0	198.061	1046.07	1612.47	301.341	1038.78	1611.15	167.367	890.856	1629.69	303.625	870.479	1632.08	252.108	809.948	1481.25	253.241	704.197	1258.38	244.306	945.336	1379.86	248.18	968.404	1194.23	305.544	701.336	1334.78	57.2226	810.588	1423.73	10.6199	722.237	1254.08	0.05432	659.757	1151.78	-35.1999	628.535	984.198	-8.29636	619.071	880.152	-50.001	558.506	903.151	-69.302	560.482	798.213
711	0	195.369	1060.07	1612.54	298.647	1052.82	1611.64	164.638	904.836	1629.53	300.881	884.487	1632.44	250.263	823.991	1481.52	252.198	718.608	1258.58	242.486	959.424	1380.15	246.587	982.819	1194.55	304.245	715.449	1335.18	55.41	824.342	1423.22	9.07907	738.174	1251.76	-1.18554	676.675	1148.81	-35.7789	647.736	980.689	-8.44382	639.547	876.618	-50.497	578.874	898.694	-69.2043	582.067	793.703
712	0	192.773	1073.95	1612.83	296.05	1066.77	1612.34	162.069	918.685	1629.65	298.301	898.421	1633.09	248.579	837.883	1482.07	251.263	732.829	1259.08	240.764	973.339	1380.71	245.009	997.012	1195.13	303.078	729.405	1335.86	53.7194	837.925	1423.09	7.56059	754.229	1249.66	-2.44519	693.865	1145.98	-36.2967	667.689	977.252	-8.47867	661.047	873.161	-50.9491	600.271	894.131	-69.0281	605.005	789.118
713	0	190.296	1087.69	1613.36	293.573	1080.62	1613.26	159.683	932.386	1630.07	295.907	912.264	1634.02	247.064	851.607	1482.92	250.431	746.844	1259.89	239.153	987.065	1381.55	243.466	1010.97	1195.98	302.042	743.192	1336.81	52.1605	851.33	1423.36	6.07604	770.376	1247.83	-3.71999	711.303	1143.33	-36.7416	688.369	973.947	-8.38549	683.537	869.859	-51.3404	622.674	889.541	-68.758	629.276	784.553
714	0	187.959	1101.27	1614.12	291.236	1094.35	1614.4	157.498	945.928	1630.8	293.719	926.002	1635.24	245.718	865.151	1484.05	249.699	760.642	1260.99	237.663	1000.59	1382.67	241.975	1024.67	1197.1	301.133	756.797	1338.03	50.7389	864.553	1424.01	4.63583	786.59	1246.29	-5.0054	728.961	1140.89	-37.1022	709.741	970.84	-8.14962	706.972	866.798	-51.6524	646.053	885.008	-68.3771	654.842	780.113
715	0	185.777	1114.68	1615.12	289.055	1107.95	1615.76	155.527	959.301	1631.85	291.75	939.622	1636.73	244.54	878.511	1485.46	249.058	774.217	1262.38	236.301	1013.92	1384.07	240.555	1038.14	1198.49	300.344	770.219	1339.5	49.4565	877.599	1425.06	3.24871	802.847	1245.07	-6.29704	746.812	1138.71	-37.3678	731.765	967.997	-7.75786	731.301	864.067	-51.8657	670.366	880.623	-67.8671	681.659	775.912
716	0	183.762	1127.92	1616.38	287.041	1121.41	1617.33	153.775	972.5	1633.21	290.007	953.115	1638.49	243.523	891.685	1487.13	248.497	787.573	1264.04	235.068	1027.06	1385.74	239.218	1051.36	1200.16	299.663	783.458	1341.22	48.3112	890.474	1426.47	1.92144	819.123	1244.19	-7.59076	764.829	1136.82	-37.5292	754.396	965.484	-7.19923	756.462	861.757	-51.9611	695.566	876.482	-67.2083	709.665	772.07
717	0	181.92	1140.99	1617.88	285.2	1134.73	1619.11	152.245	985.521	1634.87	288.492	966.47	1640.51	242.656	904.677	1489.06	248.007	800.713	1265.96	233.964	1040	1387.67	237.976	1064.36	1202.08	299.079	796.521	1343.17	47.2972	903.194	1428.25	0.658425	835.395	1243.67	-8.88274	782.981	1135.25	-37.5793	777.582	963.364	-6.4656	782.389	859.959	-51.9201	721.598	872.678	-66.3808	738.789	768.708
718	0	180.252	1153.88	1619.63	283.536	1147.89	1621.09	150.93	998.365	1636.83	287.2	979.683	1642.77	241.926	917.496	1491.21	247.576	813.65	1268.12	232.985	1052.77	1389.86	236.836	1077.16	1204.26	298.579	809.42	1345.34	46.4055	915.775	1430.37	-0.538449	851.643	1243.51	-10.1695	801.239	1134.02	-37.5132	801.266	961.696	-5.55234	809.009	858.758	-51.7259	748.398	869.305	-65.3646	768.946	765.942
719	0	178.757	1166.6	1621.63	282.044	1160.91	1623.27	149.821	1011.04	1639.07	286.12	992.751	1645.24	241.315	930.154	1493.57	247.194	826.397	1270.49	232.122	1065.38	1392.26	235.799	1089.78	1206.67	298.151	822.172	1347.69	45.6247	928.24	1432.79	-1.66983	867.849	1243.72	-11.4481	819.572	1133.15	-37.3286	825.388	960.533	-4.45862	836.242	858.233	-51.3642	775.897	866.448	-64.1409	800.04	763.883
720	0	177.426	1179.16	1623.86	280.718	1173.77	1625.63	148.903	1023.54	1641.55	285.238	1005.67	1647.89	240.805	942.669	1496.11	246.852	838.973	1273.05	231.365	1077.86	1394.87	234.863	1102.26	1209.29	297.783	834.792	1350.21	44.9412	940.609	1435.48	-2.73875	883.995	1244.29	-12.7159	837.95	1132.64	-37.0263	849.883	959.917	-3.18763	864.006	858.45	-50.8237	804.02	864.183	-62.6931	831.966	762.627
721	0	176.246	1191.56	1626.29	279.546	1186.48	1628.15	148.154	1035.89	1644.24	284.533	1018.45	1650.69	240.378	955.058	1498.79	246.544	851.397	1275.76	230.702	1090.22	1397.64	234.021	1114.6	1212.08	297.463	847.303	1352.86	44.3408	952.907	1438.39	-3.75032	900.068	1245.18	-13.971	856.342	1132.49	-36.6094	874.685	959.878	-1.74642	892.215	859.463	-50.0966	832.688	862.574	-61.0072	864.612	762.254
722	0	175.203	1203.82	1628.9	278.512	1199.06	1630.8	147.552	1048.1	1647.09	283.98	1031.08	1653.59	240.013	967.342	1501.58	246.263	863.69	1278.59	230.116	1102.49	1400.54	233.262	1126.85	1215	297.182	859.724	1355.61	43.8089	965.152	1441.49	-4.71123	916.055	1246.38	-15.2119	874.722	1132.68	-36.0837	899.725	960.436	-0.145479	920.779	861.305	-49.1789	861.816	861.669	-59.0738	897.859	762.823
723	0	174.277	1215.95	1631.66	277.598	1211.51	1633.54	147.07	1060.18	1650.07	283.552	1043.59	1656.56	239.693	979.542	1504.43	246.008	875.875	1281.49	229.592	1114.7	1403.52	232.573	1139.02	1218.02	296.932	872.076	1358.42	43.3312	977.364	1444.7	-5.62913	931.95	1247.85	-16.4375	893.064	1133.18	-35.4568	924.935	961.596	1.60184	949.609	863.994	-48.0707	891.32	861.498	-56.888	931.584	764.375
724	0	173.447	1227.98	1634.52	276.782	1223.84	1636.35	146.68	1072.15	1653.11	283.221	1055.98	1659.53	239.4	991.679	1507.31	245.776	887.973	1284.41	229.114	1126.86	1406.54	231.938	1151.14	1221.08	296.706	884.379	1361.26	42.8948	989.557	1447.98	-6.51197	947.743	1249.52	-17.6472	911.347	1133.95	-34.7378	950.249	963.349	3.48005	978.615	867.526	-46.7756	921.114	862.076	-54.4508	965.664	766.926
725	0	172.69	1239.92	1637.44	276.043	1236.07	1639.18	146.353	1084.02	1656.15	282.955	1068.25	1662.47	239.121	1003.77	1510.16	245.568	900.008	1287.32	228.665	1138.99	1409.53	231.342	1163.22	1224.12	296.5	896.651	1364.09	42.4883	1001.74	1451.27	-7.36722	963.433	1251.36	-18.8402	929.556	1134.94	-33.9367	975.604	965.673	5.47223	1007.71	871.881	-45.301	951.113	863.4	-51.7693	999.975	770.472
726	0	171.983	1251.78	1640.35	275.356	1248.22	1641.98	146.06	1095.83	1659.14	282.725	1080.44	1665.33	238.842	1015.84	1512.94	245.386	912	1290.17	228.231	1151.11	1412.46	230.769	1175.29	1227.1	296.312	908.908	1366.85	42.1019	1013.92	1454.51	-8.2013	979.016	1253.3	-20.0156	947.679	1136.11	-33.064	1000.94	968.535	7.56079	1036.8	877.02	-43.6579	981.233	865.452	-48.8567	1034.39	774.99
727	0	171.305	1263.6	1643.2	274.701	1260.3	1644.7	145.775	1107.58	1662.02	282.503	1092.55	1668.05	238.552	1027.9	1515.61	245.232	923.972	1292.91	227.799	1163.23	1415.27	230.204	1187.36	1229.96	296.139	921.165	1369.52	41.7282	1026.11	1457.63	-9.01891	994.493	1255.28	-21.1719	965.711	1137.38	-32.1299	1026.2	971.89	9.7279	1065.8	882.888	-41.8604	1011.39	868.2	-45.7318	1068.8	780.439
728	0	170.635	1275.39	1645.93	274.056	1272.33	1647.3	145.473	1119.31	1664.74	282.262	1104.6	1670.6	238.246	1039.96	1518.13	245.11	935.941	1295.5	227.355	1175.36	1417.92	229.634	1199.43	1232.65	295.983	933.434	1372.05	41.3616	1038.29	1460.58	-9.82267	1009.87	1257.24	-22.307	983.651	1138.71	-31.1442	1051.35	975.686	11.9559	1094.64	889.416	-39.9257	1041.52	871.599	-42.4186	1103.09	786.762
729	0	169.956	1287.18	1648.48	273.403	1284.33	1649.72	145.132	1131.02	1667.24	281.98	1116.61	1672.93	237.917	1052.04	1520.45	245.023	947.925	1297.89	226.892	1187.51	1420.35	229.049	1211.52	1235.12	295.843	945.723	1374.41	40.999	1050.47	1463.31	-10.6129	1025.14	1259.11	-23.4173	1001.51	1140.02	-30.1161	1076.32	979.865	14.2277	1123.24	896.525	-37.8737	1071.53	875.595	-38.9452	1137.16	793.889
730	0	169.252	1298.97	1650.81	272.727	1296.32	1651.93	144.737	1142.75	1669.48	281.64	1128.61	1675.01	237.565	1064.14	1522.54	244.977	959.939	1300.05	226.402	1199.68	1422.52	228.441	1223.64	1237.34	295.722	958.042	1376.56	40.6392	1062.65	1465.76	-11.3875	1040.33	1260.85	-24.4985	1019.28	1141.27	-29.0543	1101.1	984.362	16.5266	1151.53	904.13	-35.7263	1101.36	880.126	-35.3429	1170.89	801.739
731	0	168.513	1310.79	1652.87	272.016	1308.32	1653.87	144.275	1154.51	1671.42	281.229	1140.6	1676.81	237.188	1076.28	1524.37	244.975	971.996	1301.95	225.881	1211.87	1424.41	227.805	1235.77	1239.26	295.621	970.397	1378.46	40.283	1074.82	1467.91	-12.1422	1055.43	1262.39	-25.5446	1036.99	1142.4	-27.9663	1125.64	989.113	18.8367	1179.45	912.139	-33.5073	1130.95	885.127	-31.6456	1204.21	810.224
732	0	167.733	1322.66	1654.6	271.263	1320.34	1655.52	143.74	1166.31	1673.03	280.738	1152.61	1678.3	236.791	1088.45	1525.91	245.022	984.107	1303.55	225.329	1224.1	1425.98	227.141	1247.93	1240.86	295.544	982.791	1380.09	39.933	1086.97	1469.72	-12.8706	1070.46	1263.69	-26.5487	1054.65	1143.35	-26.8596	1149.92	994.05	21.1425	1206.96	920.456	-31.2417	1160.24	890.526	-27.8883	1237.04	819.251
733	0	166.909	1334.58	1655.98	270.466	1332.39	1656.83	143.13	1178.17	1674.28	280.166	1164.66	1679.46	236.378	1100.66	1527.13	245.121	996.28	1304.83	224.749	1236.35	1427.21	226.45	1260.12	1242.11	295.494	995.23	1381.43	39.5933	1099.11	1471.16	-13.5649	1085.42	1264.72	-27.5028	1072.26	1144.11	-25.741	1173.92	999.109	23.4288	1233.99	928.989	-28.9547	1189.17	896.254	-24.107	1269.29	828.725
734	0	166.045	1346.57	1656.99	269.627	1344.5	1657.8	142.45	1190.11	1675.16	279.517	1176.75	1680.29	235.956	1112.92	1528.04	245.275	1008.52	1305.79	224.146	1248.64	1428.09	225.74	1272.34	1243.01	295.474	1007.72	1382.46	39.2695	1111.24	1472.22	-14.216	1100.32	1265.44	-28.3985	1089.84	1144.62	-24.6174	1197.6	1004.23	25.6809	1260.51	937.644	-26.6715	1217.69	902.239	-20.3377	1300.9	838.548
735	0	165.149	1358.64	1657.6	268.753	1356.66	1658.41	141.71	1202.12	1675.67	278.801	1188.89	1680.77	235.536	1125.23	1528.6	245.485	1020.83	1306.4	223.53	1260.96	1428.61	225.019	1284.59	1243.54	295.487	1020.25	1383.17	38.9684	1123.35	1472.89	-14.8141	1115.19	1265.84	-29.2267	1107.4	1144.88	-23.4954	1220.95	1009.35	27.8845	1286.49	946.334	-24.4162	1245.76	908.413	-16.6161	1331.83	848.624
736	0	164.232	1370.79	1657.81	267.856	1368.89	1658.64	140.924	1214.22	1675.8	278.034	1201.11	1680.91	235.128	1137.59	1528.83	245.75	1033.23	1306.66	222.913	1273.31	1428.76	224.3	1296.89	1243.7	295.536	1032.84	1383.54	38.6978	1135.46	1473.17	-15.3493	1130.02	1265.91	-29.9789	1124.93	1144.86	-22.3817	1243.95	1014.41	30.0255	1311.91	954.975	-22.211	1273.33	914.708	-12.9769	1362	858.859
737	0	163.313	1383.03	1657.63	266.952	1381.2	1658.52	140.113	1226.42	1675.55	277.235	1213.4	1680.72	234.745	1150.01	1528.72	246.068	1045.69	1306.57	222.31	1285.7	1428.56	223.598	1309.23	1243.51	295.623	1045.48	1383.58	38.4662	1147.59	1473.07	-15.812	1144.83	1265.65	-30.647	1142.43	1144.56	-21.2828	1266.58	1019.37	32.0908	1336.73	963.488	-20.076	1300.37	921.059	-9.45375	1391.4	869.161
738	0	162.411	1395.36	1657.07	266.062	1393.58	1658.03	139.3	1238.71	1674.94	276.43	1225.76	1680.2	234.401	1162.48	1528.27	246.436	1058.25	1306.14	221.739	1298.14	1428.01	222.93	1321.62	1242.97	295.75	1058.18	1383.28	38.2829	1159.73	1472.61	-16.1932	1159.63	1265.05	-31.2237	1159.9	1144	-20.2049	1288.82	1024.18	34.0679	1360.94	971.804	-18.0286	1326.84	927.403	-6.07868	1419.97	879.441
739	0	161.552	1407.79	1656.15	265.21	1406.05	1657.21	138.513	1251.1	1673.99	275.645	1238.22	1679.37	234.111	1175.02	1527.5	246.845	1070.88	1305.38	221.219	1310.64	1427.13	222.315	1334.08	1242.1	295.917	1070.94	1382.64	38.157	1171.92	1471.8	-16.4853	1174.42	1264.14	-31.7035	1177.32	1143.16	-19.1543	1310.66	1028.8	35.9453	1384.54	979.856	-16.0831	1352.71	933.677	-2.88168	1447.7	889.61
740	0	160.761	1420.3	1654.9	264.424	1418.6	1656.08	137.784	1263.59	1672.72	274.911	1250.76	1678.24	233.889	1187.63	1526.42	247.288	1083.6	1304.3	220.77	1323.2	1425.94	221.77	1346.62	1240.93	296.126	1083.76	1381.68	38.0978	1184.18	1470.67	-16.6819	1189.22	1262.94	-32.0821	1194.68	1142.08	-18.1364	1332.08	1033.18	37.7131	1407.51	987.588	-14.2508	1377.94	939.822	0.110025	1474.56	899.586
741	0	160.07	1432.92	1653.35	263.732	1431.24	1654.66	137.143	1276.17	1671.15	274.261	1263.39	1676.84	233.75	1200.32	1525.05	247.754	1096.4	1302.92	220.413	1335.84	1424.46	221.314	1359.24	1239.46	296.374	1096.65	1380.4	38.1139	1196.53	1469.26	-16.7784	1204.01	1261.47	-32.3576	1211.97	1140.76	-17.1566	1353.06	1037.3	39.3628	1429.85	994.946	-12.54	1402.51	945.78	2.87279	1500.54	909.288
742	0	159.507	1445.62	1651.54	263.165	1443.97	1652.99	136.624	1288.86	1669.32	273.729	1276.12	1675.19	233.71	1213.09	1523.41	248.23	1109.29	1301.27	220.169	1348.56	1422.72	220.964	1371.96	1237.73	296.66	1109.61	1378.83	38.2135	1209.01	1467.59	-16.772	1218.82	1259.76	-32.5302	1229.14	1139.24	-16.2192	1373.59	1041.13	40.8876	1451.56	1001.88	-10.9557	1426.4	951.495	5.38738	1525.63	918.636
743	0	159.104	1458.42	1649.51	262.755	1456.8	1651.1	136.26	1301.64	1667.26	273.347	1288.93	1673.31	233.781	1225.96	1521.52	248.702	1122.27	1299.35	220.057	1361.38	1420.75	220.732	1384.78	1235.77	296.981	1122.64	1376.98	38.4037	1221.63	1465.72	-16.6617	1233.63	1257.84	-32.602	1246.19	1137.55	-15.3284	1393.65	1044.63	42.2825	1472.64	1008.36	-9.50036	1449.57	956.912	7.6397	1549.81	927.556
744	0	158.89	1471.32	1647.3	262.532	1469.71	1649.03	136.083	1314.53	1665	273.148	1301.84	1671.22	233.976	1238.93	1519.41	249.157	1135.34	1297.21	220.094	1374.32	1418.57	220.631	1397.73	1233.6	297.333	1135.74	1374.87	38.6907	1234.43	1463.67	-16.4484	1248.45	1255.76	-32.5776	1263.09	1135.71	-14.4874	1413.23	1047.8	43.5443	1493.1	1014.34	-8.17411	1472.02	961.978	9.6212	1573.09	935.972
745	0	158.892	1484.32	1644.96	262.523	1482.72	1646.81	136.121	1327.52	1662.59	273.161	1314.85	1668.96	234.305	1252	1517.12	249.582	1148.51	1294.88	220.296	1387.38	1416.22	220.669	1410.81	1231.24	297.712	1148.93	1372.53	39.0793	1247.42	1461.5	-16.1348	1263.28	1253.56	-32.463	1279.8	1133.76	-13.6988	1432.32	1050.6	44.6714	1512.94	1019.79	-6.97525	1493.72	966.643	11.3291	1595.48	943.814
746	0	159.135	1497.43	1642.53	262.753	1495.84	1644.48	136.399	1340.61	1660.05	273.412	1327.97	1666.54	234.776	1265.2	1514.66	249.962	1161.78	1292.37	220.673	1400.57	1413.72	220.848	1424.03	1228.73	298.114	1162.2	1369.98	39.573	1260.65	1459.23	-15.7253	1278.11	1251.27	-32.266	1296.3	1131.73	-12.9647	1450.91	1053.02	45.6639	1532.17	1024.67	-5.90075	1514.66	970.858	12.7662	1616.98	951.012
747	0	159.639	1510.64	1640.05	263.244	1509.06	1642.07	136.939	1353.81	1657.42	273.922	1341.18	1664	235.395	1278.51	1512.07	250.289	1175.15	1289.73	221.232	1413.9	1411.1	221.168	1437.38	1226.1	298.536	1175.56	1367.25	40.1741	1274.11	1456.92	-15.2258	1292.93	1248.93	-31.9952	1312.57	1129.65	-12.2867	1468.99	1055.04	46.5233	1550.79	1028.96	-4.9468	1534.84	974.578	13.9407	1637.59	957.5
748	0	160.42	1523.97	1637.56	264.01	1522.4	1639.61	137.755	1367.12	1654.75	274.708	1354.51	1661.36	236.164	1291.96	1509.39	250.554	1188.63	1287	221.976	1427.38	1408.41	221.621	1450.89	1223.38	298.975	1189.01	1364.38	40.8831	1287.83	1454.6	-14.6437	1307.76	1246.58	-31.66	1328.59	1127.56	-11.6659	1486.55	1056.65	47.2524	1568.82	1032.62	-4.10938	1554.23	977.759	14.8653	1657.33	963.214
749	0	161.484	1537.41	1635.1	265.06	1535.84	1637.13	138.855	1380.55	1652.07	275.778	1367.94	1658.66	237.084	1305.53	1506.65	250.752	1202.21	1284.2	222.901	1441.01	1405.67	222.198	1464.54	1220.6	299.429	1202.55	1361.4	41.6992	1301.8	1452.3	-13.9875	1322.57	1244.28	-31.2697	1344.33	1125.49	-11.1033	1503.58	1057.84	47.8552	1586.25	1035.64	-3.38471	1572.84	980.363	15.5559	1676.21	968.093
750	0	162.836	1550.98	1632.69	266.396	1549.41	1634.66	140.242	1394.09	1649.42	277.134	1381.49	1655.91	238.151	1319.24	1503.88	250.885	1215.9	1281.37	223.998	1454.79	1402.91	222.883	1478.33	1217.79	299.9	1216.18	1358.35	42.6199	1316.03	1450.07	-13.2664	1337.37	1242.04	-30.8337	1359.78	1123.47	-10.5996	1520.09	1058.6	48.3368	1603.09	1037.99	-2.76974	1590.67	982.356	16.031	1694.24	972.082
751	0	164.468	1564.67	1630.36	268.013	1563.1	1632.21	141.908	1407.75	1646.83	278.771	1395.16	1653.15	239.36	1333.07	1501.12	250.956	1229.69	1278.55	225.255	1468.71	1400.17	223.655	1492.27	1214.99	300.388	1229.9	1355.27	43.6411	1330.48	1447.94	-12.4906	1352.14	1239.91	-30.3603	1374.94	1121.53	-10.1555	1536.07	1058.93	48.7029	1619.35	1039.64	-2.26247	1607.7	983.708	16.3099	1711.43	975.13
752	0	166.368	1578.49	1628.13	269.895	1576.92	1629.8	143.841	1421.54	1644.35	280.675	1408.95	1650.42	240.701	1347.02	1498.41	250.976	1243.59	1275.78	226.652	1482.77	1397.49	224.492	1506.35	1212.24	300.899	1243.71	1352.19	44.7573	1345.15	1445.94	-11.6704	1366.87	1237.91	-29.857	1389.78	1119.71	-9.77148	1551.52	1058.81	48.9598	1635.04	1040.57	-1.86232	1623.94	984.398	16.4117	1727.81	977.193
753	0	168.515	1592.42	1626.03	272.024	1590.85	1627.46	146.021	1435.45	1641.99	282.826	1422.85	1647.73	242.164	1361.08	1495.77	250.96	1257.59	1273.08	228.165	1496.96	1394.89	225.37	1520.56	1209.57	301.438	1257.6	1349.15	45.9612	1360	1444.08	-10.816	1381.55	1236.09	-29.3298	1404.31	1118.02	-9.44793	1566.44	1058.27	49.1137	1650.16	1040.78	-1.5703	1639.38	984.409	16.3537	1743.36	978.233
754	0	170.881	1606.47	1624.06	274.369	1604.9	1625.2	148.419	1449.46	1639.8	285.197	1436.87	1645.13	243.733	1375.23	1493.25	250.926	1271.68	1270.5	229.768	1511.25	1392.4	226.264	1534.88	1207.03	302.013	1271.57	1346.19	47.2436	1374.99	1442.41	-9.93727	1396.17	1234.47	-28.7837	1418.53	1116.5	-9.18528	1580.82	1057.29	49.1707	1664.7	1040.24	-1.38926	1654.03	983.734	16.1504	1758.1	978.222
755	0	173.431	1620.62	1622.26	276.897	1619.06	1623.04	151.004	1463.59	1637.81	287.756	1450.98	1642.65	245.392	1389.46	1490.87	250.898	1285.84	1268.07	231.43	1525.63	1390.07	227.149	1549.32	1204.64	302.63	1285.6	1343.36	48.5933	1390.07	1440.92	-9.04373	1410.71	1233.06	-28.2219	1432.44	1115.17	-8.98407	1594.68	1055.9	49.1358	1678.67	1038.94	-1.32395	1667.87	982.373	15.8127	1772.03	977.145
756	0	176.126	1634.87	1620.62	279.569	1633.3	1621	153.736	1477.8	1636.03	290.463	1465.19	1640.31	247.122	1403.75	1488.66	250.899	1300.07	1265.81	233.121	1540.07	1387.92	228.003	1563.84	1202.44	303.297	1299.68	1340.69	49.997	1405.2	1439.65	-8.14396	1425.14	1231.89	-27.6468	1446.03	1114.03	-8.84515	1608.01	1054.1	49.0131	1692.05	1036.89	-1.38098	1680.92	980.337	15.3464	1785.14	974.995
757	0	178.923	1649.18	1619.16	282.342	1647.63	1619.08	156.574	1492.09	1634.49	293.279	1479.48	1638.14	248.902	1418.07	1486.66	250.954	1314.35	1263.76	234.809	1554.55	1385.97	228.809	1578.43	1200.46	304.02	1313.8	1338.23	51.4392	1420.31	1438.61	-7.24568	1439.44	1230.96	-27.0594	1459.33	1113.11	-8.76981	1620.8	1051.91	48.805	1704.84	1034.1	-1.56861	1693.15	977.646	14.7528	1797.42	971.785
758	0	181.777	1663.55	1617.89	285.171	1662	1617.32	159.474	1506.44	1633.21	296.157	1493.82	1636.18	250.707	1432.39	1484.89	251.085	1328.66	1261.95	236.462	1569.05	1384.25	229.553	1593.05	1198.73	304.802	1327.94	1336	52.9024	1435.38	1437.79	-6.35575	1453.59	1230.29	-26.4604	1472.32	1112.42	-8.75987	1633.05	1049.35	48.5123	1717.02	1030.57	-1.89621	1704.57	974.33	14.0276	1808.85	967.539
759	0	184.643	1677.95	1616.83	288.01	1676.42	1615.72	162.388	1520.82	1632.2	299.052	1508.2	1634.44	252.516	1446.71	1483.37	251.31	1342.97	1260.4	238.054	1583.52	1382.78	230.225	1607.67	1197.25	305.643	1342.07	1334.05	54.3677	1450.35	1437.22	-5.48014	1467.56	1229.89	-25.8498	1485.02	1111.96	-8.8177	1644.75	1046.46	48.1336	1728.58	1026.33	-2.37363	1715.16	970.432	13.1621	1819.43	962.3
760	0	187.476	1692.36	1615.97	290.816	1690.83	1614.31	165.271	1535.22	1631.48	301.919	1522.59	1632.96	254.301	1460.99	1482.13	251.639	1357.27	1259.12	239.558	1597.94	1381.58	230.823	1622.26	1196.06	306.54	1356.18	1332.4	55.8152	1465.17	1436.89	-4.62407	1481.32	1229.75	-25.2274	1497.42	1111.73	-8.94627	1655.91	1043.26	47.6655	1739.48	1021.43	-3.01043	1724.92	966.002	12.1434	1829.11	956.128
761	0	190.233	1706.74	1615.33	293.546	1705.23	1613.1	168.077	1549.61	1631.05	304.712	1536.97	1631.75	256.04	1475.21	1481.18	252.08	1371.53	1258.15	240.955	1612.29	1380.66	231.348	1636.77	1195.16	307.487	1370.25	1331.07	57.2248	1479.82	1436.8	-3.79213	1494.86	1229.86	-24.5932	1509.53	1111.73	-9.14903	1666.5	1039.8	47.1026	1749.71	1015.9	-3.815	1733.84	961.101	10.9556	1837.88	949.096
762	0	192.876	1721.09	1614.93	296.163	1719.58	1612.12	170.763	1563.97	1630.92	307.389	1551.31	1630.85	257.709	1489.34	1480.55	252.63	1385.74	1257.5	242.229	1626.54	1380.04	231.803	1651.18	1194.56	308.473	1384.26	1330.1	58.5773	1494.27	1436.96	-2.98831	1508.15	1230.23	-23.9472	1521.35	1111.96	-9.42978	1676.51	1036.1	46.4376	1759.23	1009.8	-4.79386	1741.9	955.799	9.58128	1845.71	941.298
763	0	195.37	1735.37	1614.76	298.631	1733.86	1611.39	173.29	1578.27	1631.09	309.909	1565.59	1630.26	259.287	1503.37	1480.24	253.28	1399.87	1257.17	243.37	1640.65	1379.73	232.198	1665.45	1194.27	309.487	1398.18	1329.49	59.855	1508.49	1437.35	-2.21605	1521.16	1230.84	-23.2898	1532.87	1112.41	-9.79248	1685.93	1032.23	45.6615	1768.02	1003.2	-5.95099	1749.09	950.175	8.0029	1852.55	932.837
764	0	197.684	1749.56	1614.84	300.921	1748.04	1610.93	175.623	1592.49	1631.56	312.24	1579.78	1630.01	260.754	1517.28	1480.27	254.017	1413.93	1257.17	244.369	1654.63	1379.74	232.54	1679.55	1194.3	310.514	1412.02	1329.26	61.0426	1522.47	1437.98	-1.47824	1533.88	1231.68	-22.6215	1544.08	1113.08	-10.2411	1694.75	1028.23	44.7643	1776.06	996.194	-7.28731	1755.41	944.315	6.20434	1858.39	923.833
765	0	199.794	1763.65	1615.18	303.008	1762.11	1610.77	177.733	1606.63	1632.34	314.351	1593.87	1630.11	262.097	1531.05	1480.63	254.823	1427.88	1257.5	245.228	1668.44	1380.08	232.84	1693.47	1194.66	311.54	1425.75	1329.4	62.1279	1536.2	1438.84	-0.777148	1546.31	1232.75	-21.9431	1554.99	1113.96	-10.7792	1702.96	1024.15	43.735	1783.32	988.86	-8.80038	1760.86	938.31	4.17241	1863.2	914.414
766	0	201.679	1777.62	1615.79	304.872	1776.03	1610.91	179.597	1620.65	1633.43	316.22	1607.83	1630.57	263.303	1544.68	1481.33	255.681	1441.74	1258.16	245.946	1682.08	1380.75	233.106	1707.2	1195.35	312.553	1439.38	1329.92	63.1021	1549.68	1439.91	-0.114342	1558.43	1234.03	-21.2555	1565.57	1115.03	-11.4097	1710.53	1020.07	42.563	1789.78	981.304	-10.4842	1765.42	932.258	1.8983	1866.95	904.718
767	0	203.326	1791.45	1616.68	306.5	1789.81	1611.39	181.198	1634.55	1634.8	317.832	1621.65	1631.41	264.365	1558.17	1482.36	256.573	1455.5	1259.13	246.529	1695.56	1381.77	233.347	1720.75	1196.38	313.539	1452.9	1330.81	63.9601	1562.91	1441.19	0.509453	1570.23	1235.52	-20.5598	1575.82	1116.3	-12.1348	1717.47	1016.03	41.2384	1795.44	973.634	-12.3292	1769.11	926.257	-0.621314	1869.64	894.884
768	0	204.725	1805.15	1617.86	307.882	1803.43	1612.22	182.528	1648.32	1636.47	319.177	1635.32	1632.61	265.281	1571.5	1483.72	257.481	1469.15	1260.4	246.986	1708.87	1383.13	233.57	1734.12	1197.75	314.489	1466.32	1332.04	64.701	1575.9	1442.66	1.09446	1581.73	1237.19	-19.8569	1585.74	1117.76	-12.9549	1723.78	1012.1	39.7533	1800.29	965.964	-14.3221	1771.95	920.407	-3.38342	1871.26	885.057
769	0	205.87	1818.69	1619.32	309.014	1816.88	1613.4	183.584	1661.94	1638.4	320.253	1648.83	1634.18	266.052	1584.7	1485.38	258.394	1482.7	1261.96	247.324	1722.03	1384.82	233.78	1747.34	1199.45	315.397	1479.65	1333.6	65.3272	1588.66	1444.33	1.64193	1592.91	1239.04	-19.1481	1595.31	1119.4	-13.8691	1729.45	1008.35	38.1022	1804.33	958.405	-16.4464	1773.95	914.801	-6.37812	1871.83	875.376
770	0	206.763	1832.08	1621.07	309.896	1830.17	1614.94	184.37	1675.41	1640.58	321.067	1662.19	1636.09	266.682	1597.77	1487.33	259.302	1496.16	1263.79	247.556	1735.05	1386.83	233.982	1760.43	1201.47	316.258	1492.89	1335.47	65.8451	1601.22	1446.15	2.15414	1603.78	1241.06	-18.4349	1604.53	1121.22	-14.8745	1734.49	1004.82	36.2835	1807.6	951.07	-18.6825	1775.14	909.531	-9.58846	1871.36	865.977
771	0	207.407	1845.31	1623.1	310.532	1843.3	1616.83	184.896	1688.73	1642.97	321.627	1675.39	1638.33	267.182	1610.73	1489.53	260.198	1509.52	1265.84	247.691	1747.95	1389.13	234.177	1773.42	1203.79	317.073	1506.07	1337.61	66.2635	1613.6	1448.13	2.63431	1614.36	1243.24	-17.7189	1613.4	1123.23	-15.9661	1738.93	1001.59	34.2998	1810.11	944.059	-21.0082	1775.58	904.677	-12.9907	1869.89	856.982
772	0	207.811	1858.39	1625.38	310.93	1856.27	1619.05	185.179	1701.89	1645.55	321.949	1688.44	1640.84	267.561	1623.6	1491.95	261.079	1522.8	1268.1	247.741	1760.76	1391.68	234.369	1786.32	1206.37	317.843	1519.19	1339.98	66.5941	1625.82	1450.24	3.08651	1624.65	1245.55	-17.0021	1621.91	1125.4	-17.137	1742.79	998.691	32.1584	1811.91	937.466	-23.3995	1775.3	900.307	-16.5548	1867.47	848.505
773	0	207.987	1871.32	1627.91	311.103	1869.1	1621.56	185.237	1714.89	1648.28	322.052	1701.35	1643.59	267.835	1636.39	1494.55	261.944	1536	1270.53	247.717	1773.5	1394.46	234.556	1799.17	1209.17	318.574	1532.28	1342.53	66.8502	1637.91	1452.44	3.51541	1634.66	1247.98	-16.2867	1630.08	1127.73	-18.3781	1746.1	996.164	29.8715	1813.05	931.368	-25.8308	1774.38	896.476	-20.2453	1864.19	840.639
774	0	207.947	1884.11	1630.63	311.065	1881.81	1624.34	185.097	1727.75	1651.1	321.96	1714.13	1646.51	268.019	1649.13	1497.28	262.795	1549.13	1273.09	247.629	1786.19	1397.4	234.738	1811.98	1212.15	319.271	1545.35	1345.23	67.0458	1649.9	1454.72	3.92616	1644.4	1250.51	-15.5754	1637.91	1130.21	-19.6785	1748.9	994.034	27.4562	1813.59	925.825	-28.2762	1772.87	893.222	-24.0226	1860.12	833.459
775	0	207.711	1896.77	1633.51	310.832	1894.41	1627.33	184.782	1740.46	1653.96	321.695	1726.79	1649.56	268.129	1661.83	1500.09	263.631	1562.18	1275.73	247.485	1798.85	1400.45	234.912	1824.78	1215.24	319.942	1558.41	1348.01	67.1956	1661.8	1457.03	4.32415	1653.89	1253.12	-14.8706	1645.41	1132.82	-21.0259	1751.23	992.318	24.9344	1813.59	920.877	-30.7096	1770.87	890.569	-27.8439	1855.36	827.019
776	0	207.295	1909.32	1636.49	310.423	1906.92	1630.46	184.322	1753.04	1656.82	321.284	1739.35	1652.66	268.183	1674.52	1502.93	264.454	1575.16	1278.41	247.294	1811.51	1403.55	235.075	1837.58	1218.38	320.592	1571.49	1350.82	67.3134	1673.65	1459.33	4.71485	1663.14	1255.78	-14.1747	1652.61	1135.54	-22.4062	1753.16	991.018	22.3313	1813.14	916.547	-33.1059	1768.46	888.52	-31.6653	1850.02	821.349
777	0	206.719	1921.76	1639.53	309.858	1919.36	1633.69	183.745	1765.5	1659.62	320.751	1751.83	1655.75	268.195	1687.22	1505.75	265.262	1588.08	1281.08	247.061	1824.18	1406.64	235.223	1850.38	1221.51	321.228	1584.57	1353.62	67.412	1685.47	1461.59	5.10369	1672.18	1258.46	-13.4897	1659.53	1138.35	-23.8046	1754.74	990.125	19.6752	1812.3	912.836	-35.4414	1765.72	887.065	-35.4429	1844.22	816.461
778	0	206.006	1934.12	1642.55	309.159	1931.75	1636.93	183.076	1777.86	1662.31	320.122	1764.25	1658.76	268.18	1699.93	1508.48	266.052	1600.94	1283.69	246.792	1836.87	1409.64	235.35	1863.2	1224.55	321.852	1597.68	1356.33	67.5023	1697.26	1463.76	5.49592	1681.02	1261.14	-12.8167	1666.2	1141.22	-25.2057	1756.03	989.619	16.9962	1811.15	909.727	-37.6942	1762.74	886.175	-39.1345	1838.1	812.341
779	0	205.175	1946.41	1645.49	308.347	1944.11	1640.11	182.342	1790.14	1664.83	319.42	1776.62	1661.62	268.149	1712.68	1511.08	266.82	1613.74	1286.19	246.491	1849.59	1412.5	235.452	1876.04	1227.45	322.465	1610.82	1358.91	67.5925	1709.05	1465.81	5.89652	1689.68	1263.78	-12.1559	1672.64	1144.12	-26.5933	1757.09	989.469	14.325	1809.79	907.189	-39.8449	1759.63	885.812	-42.7015	1831.76	808.961
780	0	204.25	1958.65	1648.31	307.443	1956.46	1643.18	181.565	1802.35	1667.13	318.666	1788.97	1664.27	268.111	1725.46	1513.5	267.559	1626.47	1288.53	246.16	1862.35	1415.16	235.523	1888.89	1230.13	323.065	1623.99	1361.32	67.6886	1720.84	1467.68	6.31015	1698.18	1266.36	-11.5061	1678.89	1147.02	-27.9516	1758	989.638	11.6919	1808.27	905.175	-41.8763	1756.46	885.925	-46.1099	1825.35	806.273
781	0	203.249	1970.87	1650.92	306.468	1968.82	1646.06	180.762	1814.53	1669.17	317.879	1801.32	1666.65	268.071	1738.3	1515.68	268.259	1639.16	1290.67	245.801	1875.15	1417.56	235.558	1901.77	1232.54	323.647	1637.19	1363.49	67.7929	1732.65	1469.34	6.74097	1706.56	1268.85	-10.865	1684.99	1149.89	-29.2646	1758.8	990.083	9.12593	1806.69	903.631	-43.7733	1753.32	886.457	-49.3315	1818.97	804.222
782	0	202.194	1983.08	1653.29	305.442	1981.21	1648.69	179.95	1826.68	1670.93	317.075	1813.68	1668.73	268.029	1751.19	1517.58	268.908	1651.78	1292.57	245.413	1888	1419.65	235.551	1914.66	1234.63	324.202	1650.42	1365.4	67.905	1744.49	1470.75	7.19256	1714.84	1271.21	-10.2292	1690.98	1152.69	-30.5171	1759.57	990.758	6.65376	1805.1	902.496	-45.523	1750.29	887.346	-52.3442	1812.73	802.742
783	0	201.102	1995.3	1655.37	304.382	1993.64	1651.02	179.139	1838.83	1672.36	316.264	1826.07	1670.47	267.983	1764.13	1519.19	269.492	1664.36	1294.2	244.995	1900.89	1421.4	235.496	1927.55	1236.37	324.72	1663.68	1367.02	68.0212	1756.36	1471.9	7.66774	1723.05	1273.44	-9.59362	1696.9	1155.41	-31.6947	1760.36	991.615	4.29906	1803.59	901.708	-47.1138	1747.43	888.529	-55.1322	1806.74	801.763
784	0	199.989	2007.55	1657.12	303.302	2006.12	1653.01	178.335	1851.01	1673.44	315.456	1838.51	1671.83	267.926	1777.14	1520.46	269.997	1676.9	1295.54	244.543	1913.82	1422.78	235.388	1940.45	1237.71	325.186	1676.95	1368.31	68.1348	1768.28	1472.75	8.16828	1731.21	1275.49	-8.95265	1702.78	1158	-32.7842	1761.22	992.609	2.08184	1802.19	901.204	-48.5355	1744.81	889.944	-57.6857	1801.06	801.214
785	0	198.868	2019.86	1658.51	302.216	2018.67	1654.62	177.542	1863.23	1674.17	314.652	1851.01	1672.8	267.849	1790.2	1521.38	270.407	1689.41	1296.55	244.054	1926.79	1423.77	235.22	1953.36	1238.64	325.586	1690.26	1369.26	68.2363	1780.24	1473.3	8.69475	1739.35	1277.37	-8.29989	1708.67	1160.46	-33.7739	1762.21	993.696	0.018064	1800.98	900.925	-49.779	1742.47	891.533	-60.0001	1795.77	801.027
786	0	197.747	2032.24	1659.52	301.131	2031.29	1655.84	176.756	1875.52	1674.54	313.854	1863.58	1673.37	267.737	1803.32	1521.94	270.708	1701.9	1297.23	243.521	1939.81	1424.35	234.988	1966.26	1239.15	325.904	1703.58	1369.85	68.314	1792.27	1473.53	9.24623	1747.53	1279.06	-7.6288	1714.62	1162.76	-34.654	1763.38	994.836	-1.88063	1800	900.82	-50.8361	1740.47	893.242	-62.075	1790.93	801.137
787	0	196.633	2044.7	1660.14	300.052	2044	1656.65	175.974	1887.89	1674.55	313.057	1876.23	1673.54	267.577	1816.5	1522.14	270.885	1714.39	1297.57	242.939	1952.87	1424.53	234.685	1979.18	1239.24	326.122	1716.92	1370.1	68.3546	1804.36	1473.45	9.8201	1755.75	1280.54	-6.93322	1720.66	1164.89	-35.4169	1764.77	995.996	-3.60689	1799.3	900.841	-51.6997	1738.83	895.025	-63.9134	1786.57	801.485
788	0	195.527	2057.25	1660.38	298.98	2056.79	1657.06	175.187	1900.36	1674.21	312.254	1888.97	1673.32	267.352	1829.74	1521.98	270.926	1726.9	1297.57	242.299	1965.98	1424.31	234.305	1992.1	1238.93	326.225	1730.28	1370	68.3434	1816.54	1473.06	10.4119	1764.07	1281.82	-6.20794	1726.83	1166.84	-36.0573	1766.4	997.145	-5.15753	1798.92	900.948	-52.364	1737.59	896.841	-65.5205	1782.71	802.019
789	0	194.427	2069.92	1660.25	297.912	2069.68	1657.05	174.385	1912.94	1673.55	311.436	1901.81	1672.74	267.046	1843.04	1521.48	270.822	1739.45	1297.24	241.594	1979.13	1423.72	233.845	2005.04	1238.22	326.198	1743.68	1369.57	68.2649	1828.81	1472.37	11.0151	1772.51	1282.89	-5.44932	1733.18	1168.6	-36.5723	1768.33	998.259	-6.53327	1798.88	901.11	-52.8251	1736.77	898.656	-66.9027	1779.38	802.693
790	0	193.327	2082.71	1659.75	296.841	2082.66	1656.66	173.555	1925.64	1672.57	310.591	1914.75	1671.8	266.642	1856.4	1520.65	270.566	1752.06	1296.59	240.815	1992.34	1422.77	233.297	2018.01	1237.15	326.029	1757.1	1368.82	68.1038	1841.17	1471.4	11.6212	1781.1	1283.75	-4.65586	1739.73	1170.17	-36.9618	1770.58	999.318	-7.73821	1799.23	901.299	-53.0811	1736.4	900.444	-68.067	1776.58	803.469
791	0	192.217	2095.62	1658.92	295.758	2095.75	1655.91	172.682	1938.48	1671.31	309.704	1927.79	1670.55	266.126	1869.82	1519.52	270.156	1764.76	1295.64	239.954	2005.61	1421.5	232.658	2031.02	1235.76	325.708	1770.56	1367.78	67.8448	1853.65	1470.17	12.2198	1789.89	1284.4	-3.82874	1746.53	1171.55	-37.2283	1773.17	1000.31	-8.77928	1800	901.493	-53.1326	1736.5	902.181	-69.0205	1774.32	804.314
792	0	191.086	2108.67	1657.78	294.649	2108.94	1654.82	171.752	1951.46	1669.81	308.759	1940.95	1669.02	265.482	1883.32	1518.12	269.59	1777.57	1294.41	239.001	2018.95	1419.93	231.923	2044.09	1234.06	325.227	1784.07	1366.48	67.4735	1866.26	1468.71	12.7985	1798.91	1284.84	-2.97226	1753.6	1172.73	-37.3767	1776.15	1001.21	-9.66547	1801.21	901.675	-52.9834	1737.07	903.85	-69.7698	1772.61	805.2
793	0	189.921	2121.85	1656.37	293.502	2122.24	1653.42	170.747	1964.58	1668.08	307.741	1954.22	1667.23	264.699	1896.88	1516.47	268.872	1790.52	1292.93	237.948	2032.36	1418.12	231.087	2057.22	1232.12	324.583	1797.64	1364.94	66.9769	1878.99	1467.02	13.3435	1808.17	1285.09	-2.09411	1760.99	1173.71	-37.4144	1779.53	1002.02	-10.4072	1802.88	901.828	-52.6408	1738.15	905.436	-70.3211	1771.44	806.103
794	0	188.707	2135.17	1654.72	292.301	2135.64	1651.77	169.653	1977.85	1666.17	306.631	1967.6	1665.24	263.766	1910.52	1514.62	268.006	1803.63	1291.23	236.787	2045.86	1416.09	230.147	2070.43	1229.96	323.773	1811.27	1363.21	66.3435	1891.85	1465.15	13.8393	1817.71	1285.13	-1.20541	1768.73	1174.51	-37.3513	1783.34	1002.73	-11.0156	1805.05	901.937	-52.1158	1739.74	906.926	-70.6805	1770.82	807.002
795	0	187.428	2148.63	1652.87	291.03	2149.16	1649.89	168.452	1991.27	1664.1	305.414	1981.1	1663.07	262.676	1924.25	1512.59	267	1816.92	1289.33	235.512	2059.45	1413.88	229.103	2083.74	1227.64	322.8	1824.98	1361.32	65.5637	1904.86	1463.12	14.2694	1827.56	1284.98	-0.320588	1776.84	1175.1	-37.1991	1787.61	1003.32	-11.5021	1807.73	901.989	-51.4232	1741.88	908.306	-70.8544	1770.77	807.874
796	0	186.071	2162.24	1650.85	289.677	2162.78	1647.83	167.131	2004.84	1661.92	304.074	1994.71	1660.77	261.421	1938.07	1510.43	265.862	1830.4	1287.28	234.117	2073.13	1411.54	227.951	2097.16	1225.19	321.666	1838.77	1359.29	64.6305	1918.01	1460.95	14.6169	1837.73	1284.64	0.542983	1785.35	1175.49	-36.9715	1792.37	1003.79	-11.8785	1810.95	901.968	-50.582	1744.57	909.566	-70.8502	1771.3	808.698
797	0	184.622	2175.99	1648.72	288.227	2176.52	1645.64	165.675	2018.56	1659.66	302.597	2008.43	1658.38	260	1951.97	1508.17	264.603	1844.09	1285.1	232.598	2086.91	1409.11	226.692	2110.7	1222.65	320.379	1852.66	1357.18	63.5391	1931.3	1458.65	14.8645	1848.24	1284.1	1.36556	1794.29	1175.68	-36.6837	1797.64	1004.11	-12.1559	1814.72	901.859	-49.615	1747.85	910.691	-70.6765	1772.43	809.452
798	0	183.069	2189.87	1646.5	286.671	2190.36	1643.34	164.075	2032.42	1657.34	300.971	2022.25	1655.92	258.414	1965.98	1505.84	263.232	1858	1282.83	230.953	2100.81	1406.62	225.327	2124.38	1220.07	318.945	1866.65	1355.02	62.2874	1944.74	1456.27	14.9954	1859.1	1283.37	2.12571	1803.67	1175.66	-36.3523	1803.45	1004.29	-12.3454	1819.08	901.644	-48.5486	1751.74	911.667	-70.3444	1774.2	810.113
799	0	181.404	2203.89	1644.24	284.999	2204.31	1641	162.321	2046.43	1654.99	299.188	2036.18	1653.44	256.664	1980.09	1503.48	261.759	1872.11	1280.51	229.183	2114.81	1404.12	223.86	2138.2	1217.48	317.373	1880.73	1352.83	60.8761	1958.32	1453.81	14.9936	1870.33	1282.46	2.80118	1813.52	1175.42	-35.9948	1809.84	1004.31	-12.4576	1824.04	901.309	-47.4123	1756.27	912.48	-69.8672	1776.63	810.655
800	0	179.622	2218.04	1641.95	283.206	2218.37	1638.64	160.409	2060.58	1652.65	297.243	2050.21	1650.97	254.757	1994.29	1501.12	260.194	1886.43	1278.17	227.292	2128.93	1401.62	222.293	2152.16	1214.93	315.674	1894.92	1350.66	59.3084	1972.05	1451.3	14.8444	1881.94	1281.36	3.36971	1823.85	1174.97	-35.6295	1816.82	1004.15	-12.5021	1829.64	900.836	-46.2379	1761.47	913.113	-69.2612	1779.77	811.054
801	0	177.719	2232.32	1639.69	281.292	2232.52	1636.3	158.337	2074.86	1650.32	295.134	2064.32	1648.54	252.701	2008.6	1498.79	258.545	1900.93	1275.84	225.286	2143.16	1399.16	220.634	2166.27	1212.42	313.857	1909.21	1348.53	57.5899	1985.9	1448.76	14.5345	1893.92	1280.07	3.80991	1834.68	1174.3	-35.2748	1824.43	1003.8	-12.4883	1835.89	900.212	-45.0588	1767.38	913.549	-68.5451	1783.66	811.282
802	0	175.699	2246.71	1637.46	279.259	2246.77	1634.02	156.109	2089.27	1648.04	292.867	2078.52	1646.17	250.509	2023	1496.51	256.818	1915.61	1273.55	223.175	2157.49	1396.78	218.889	2180.53	1210.01	311.934	1923.58	1346.47	55.7286	1999.89	1446.21	14.0531	1906.29	1278.61	4.102	1846.01	1173.41	-34.9492	1832.7	1003.24	-12.4252	1842.83	899.422	-43.9091	1774.02	913.773	-67.7402	1788.36	811.315
803	0	173.566	2261.21	1635.31	277.113	2261.1	1631.81	153.73	2103.79	1645.81	290.448	2092.8	1643.89	248.194	2037.5	1494.32	255.02	1930.44	1271.33	220.972	2171.92	1394.48	217.071	2194.93	1207.7	309.915	1938.04	1344.5	53.7346	2014.01	1443.67	13.3912	1919.03	1276.98	4.22857	1857.84	1172.3	-34.6709	1841.64	1002.48	-12.3221	1850.48	898.455	-42.8227	1781.43	913.767	-66.8696	1793.9	811.128
804	0	171.332	2275.8	1633.23	274.865	2275.5	1629.72	151.214	2118.41	1643.67	287.892	2107.14	1641.72	245.771	2052.07	1492.23	253.156	1945.38	1269.21	218.693	2186.44	1392.3	215.19	2209.46	1205.52	307.812	1952.57	1342.64	51.6197	2028.25	1441.17	12.5427	1932.14	1275.19	4.17506	1870.19	1170.97	-34.457	1851.29	1001.49	-12.1891	1858.88	897.304	-41.8321	1789.64	913.515	-65.958	1800.34	810.698
805	0	169.009	2290.47	1631.26	272.529	2289.97	1627.75	148.576	2133.12	1641.61	285.216	2121.53	1639.68	243.261	2066.71	1490.26	251.229	1960.42	1267.21	216.359	2201.04	1390.24	213.263	2224.11	1203.49	305.637	1967.14	1340.91	49.3978	2042.61	1438.72	11.5041	1945.63	1273.25	3.93013	1883.03	1169.44	-34.3241	1861.67	1000.28	-12.0372	1868.06	895.963	-40.968	1798.69	913.002	-65.031	1807.73	810.006
806	0	166.617	2305.21	1629.41	270.123	2304.48	1625.92	145.838	2147.9	1639.65	282.443	2135.97	1637.79	240.683	2081.39	1488.42	249.244	1975.51	1265.34	213.99	2215.68	1388.33	211.305	2238.86	1201.61	303.402	1981.75	1339.33	47.0842	2057.06	1436.35	10.2747	1959.47	1271.18	3.48582	1896.37	1167.71	-34.287	1872.8	998.845	-11.8784	1878.04	894.43	-40.2583	1808.6	912.215	-64.1149	1816.12	809.035
807	0	164.176	2319.99	1627.67	267.669	2319.03	1624.25	143.023	2162.73	1637.8	279.598	2150.43	1636.05	238.059	2096.1	1486.74	247.205	1990.61	1263.63	211.611	2230.36	1386.57	209.335	2253.68	1199.91	301.118	1996.35	1337.9	44.6959	2071.62	1434.08	8.85654	1973.67	1269.01	2.83761	1910.19	1165.8	-34.3592	1884.68	997.182	-11.7259	1888.86	892.708	-39.7278	1819.41	911.144	-63.2358	1825.55	807.772
808	0	161.71	2334.8	1626.06	265.192	2333.59	1622.74	140.161	2177.59	1636.08	276.711	2164.9	1634.49	235.413	2110.81	1485.22	245.119	2005.7	1262.09	209.247	2245.06	1384.97	207.372	2268.55	1198.39	298.798	2010.94	1336.63	42.2514	2086.25	1431.93	7.25473	1988.2	1266.74	1.98421	1924.47	1163.73	-34.552	1897.34	995.301	-11.5939	1900.55	890.802	-39.3976	1831.14	909.781	-62.4195	1836.09	806.207
809	0	159.246	2349.61	1624.59	262.717	2348.16	1621.39	137.282	2192.47	1634.49	273.814	2179.38	1633.1	232.769	2125.49	1483.88	242.992	2020.73	1260.73	206.924	2259.73	1383.55	205.435	2283.43	1197.04	296.456	2025.48	1335.52	39.7704	2100.96	1429.93	5.47724	2003.04	1264.42	0.927398	1939.21	1161.52	-34.8748	1910.79	993.214	-11.4969	1913.14	888.722	-39.2854	1843.82	908.123	-61.6914	1847.76	804.336
810	0	156.812	2364.41	1623.25	260.273	2362.71	1620.22	134.419	2207.34	1633.06	270.938	2193.84	1631.92	230.154	2140.12	1482.72	240.834	2035.68	1259.56	204.669	2274.36	1382.3	203.542	2298.28	1195.89	294.105	2039.94	1334.6	37.2742	2115.7	1428.1	3.53498	2018.19	1262.05	-0.328348	1954.36	1159.19	-35.3343	1925.03	990.936	-11.4492	1926.64	886.481	-39.4044	1857.47	906.169	-61.0759	1860.61	802.16
811	0	154.437	2379.16	1622.05	257.888	2377.21	1619.21	131.605	2222.17	1631.78	268.117	2208.26	1630.93	227.593	2154.67	1481.76	238.655	2050.51	1258.59	202.504	2288.91	1381.24	201.712	2313.07	1194.92	291.762	2054.3	1333.85	34.7845	2130.47	1426.47	1.4417	2033.61	1259.68	-1.77614	1969.93	1156.77	-35.935	1940.05	988.488	-11.4644	1941.09	884.098	-39.7639	1872.1	903.927	-60.596	1874.68	799.685
812	0	152.148	2393.86	1620.99	255.589	2391.67	1618.38	128.875	2236.95	1630.67	265.384	2222.64	1630.16	225.109	2169.11	1481.01	236.47	2065.2	1257.82	200.452	2303.36	1380.38	199.958	2327.76	1194.14	289.439	2068.52	1333.29	32.324	2145.24	1425.06	-0.786037	2049.28	1257.34	-3.40705	1985.86	1154.29	-36.6785	1955.87	985.896	-11.5546	1956.5	881.594	-40.3684	1887.73	901.408	-60.2729	1890	796.926
813	0	149.973	2408.48	1620.07	253.405	2406.05	1617.71	126.26	2251.66	1629.76	262.77	2236.96	1629.61	222.727	2183.42	1480.46	234.293	2079.72	1257.28	198.533	2317.67	1379.72	198.296	2342.3	1193.56	287.154	2082.58	1332.92	29.9149	2159.97	1423.9	-3.12912	2065.17	1255.06	-5.21044	2002.14	1151.79	-37.5635	1972.46	983.19	-11.7293	1972.89	879	-41.2172	1904.36	898.632	-60.1254	1906.6	793.909
814	0	147.937	2423	1619.31	251.36	2420.35	1617.21	123.793	2266.27	1629.05	260.303	2251.2	1629.29	220.467	2197.56	1480.14	232.137	2094.04	1256.95	196.764	2331.82	1379.27	196.737	2356.65	1193.18	284.92	2096.46	1332.74	27.5788	2174.64	1423	-5.56616	2081.25	1252.86	-7.17425	2018.73	1149.28	-38.5861	1989.83	980.407	-11.9954	1990.25	876.349	-42.3041	1922	895.626	-60.169	1924.5	790.669
815	0	146.066	2437.39	1618.69	249.479	2434.54	1616.88	121.501	2280.77	1628.57	258.009	2265.35	1629.21	218.347	2211.5	1480.05	230.018	2108.16	1256.86	195.159	2345.78	1379.04	195.291	2370.8	1193.01	282.748	2110.13	1332.76	25.3354	2189.22	1422.4	-8.07404	2097.48	1250.81	-9.28538	2035.6	1146.82	-39.7394	2007.94	977.59	-12.3569	2008.59	873.685	-43.617	1940.65	892.428	-60.4149	1943.71	787.252
816	0	144.379	2451.66	1618.25	247.781	2448.61	1616.72	119.408	2295.14	1628.34	255.911	2279.39	1629.39	216.381	2225.24	1480.2	227.948	2122.06	1257	193.727	2359.53	1379.06	193.969	2384.71	1193.07	280.649	2123.57	1332.99	23.2022	2203.67	1422.11	-10.6285	2113.82	1248.91	-11.53	2052.71	1144.44	-41.0142	2026.78	974.783	-12.8142	2027.89	871.058	-45.1378	1960.29	889.084	-60.8692	1964.23	783.719
817	0	142.894	2465.77	1617.98	246.285	2462.54	1616.74	117.534	2309.37	1628.38	254.024	2293.31	1629.84	214.577	2238.75	1480.59	225.937	2135.74	1257.37	192.475	2373.06	1379.32	192.78	2398.37	1193.37	278.629	2136.78	1333.43	21.1935	2217.98	1422.14	-13.2048	2130.25	1247.22	-13.8937	2070.04	1142.18	-42.3988	2046.31	972.041	-13.3647	2048.16	868.524	-46.8427	1980.91	885.647	-61.5318	1986.06	780.141
818	0	141.627	2479.73	1617.91	245.006	2476.33	1616.95	115.894	2323.44	1628.7	252.363	2307.09	1630.56	212.942	2252.03	1481.23	223.991	2149.19	1257.98	191.408	2386.35	1379.86	191.732	2411.77	1193.93	276.689	2149.76	1334.08	19.3201	2232.13	1422.51	-15.779	2146.73	1245.77	-16.3623	2087.55	1140.08	-43.8797	2066.51	969.417	-14.0029	2069.34	866.147	-48.7026	2002.47	882.181	-62.3959	2009.17	776.602
819	0	140.587	2493.51	1618.05	243.952	2489.95	1617.35	114.496	2337.34	1629.33	250.933	2320.72	1631.56	211.476	2265.05	1482.13	222.115	2162.43	1258.83	190.525	2399.41	1380.68	190.832	2424.93	1194.78	274.831	2162.49	1334.94	17.5889	2246.1	1423.22	-18.3284	2163.22	1244.59	-18.9218	2105.2	1138.17	-45.442	2087.34	966.969	-14.7204	2091.43	863.995	-50.6845	2024.96	878.757	-63.4474	2033.54	773.195
820	0	139.781	2507.1	1618.42	243.13	2503.4	1617.96	113.343	2351.06	1630.28	249.738	2334.18	1632.84	210.175	2277.83	1483.27	220.312	2175.46	1259.91	189.823	2412.22	1381.79	190.085	2437.86	1195.91	273.051	2175	1336	16.0032	2259.88	1424.28	-20.8329	2179.71	1243.7	-21.5585	2122.98	1136.49	-47.0697	2108.76	964.755	-15.5068	2114.36	862.139	-52.7525	2048.32	875.448	-64.6648	2059.12	770.016
821	0	139.209	2520.51	1619.04	242.543	2516.67	1618.8	112.434	2364.59	1631.54	248.775	2347.46	1634.4	209.034	2290.37	1484.66	218.58	2188.3	1261.2	189.295	2424.81	1383.19	189.493	2450.57	1197.35	271.345	2187.29	1337.27	14.5623	2273.49	1425.67	-23.2753	2196.15	1243.14	-24.2599	2140.85	1135.08	-48.7465	2130.72	962.833	-16.3496	2138.1	860.65	-54.8696	2072.5	872.332	-66.0197	2085.84	767.164
822	0	138.868	2533.72	1619.93	242.186	2529.73	1619.86	111.76	2377.93	1633.12	248.036	2360.54	1636.23	208.043	2302.68	1486.28	216.92	2200.95	1262.71	188.932	2437.18	1384.88	189.054	2463.1	1199.09	269.709	2199.38	1338.73	13.2631	2286.93	1427.38	-25.6425	2212.55	1242.9	-27.0144	2158.8	1133.95	-50.4561	2153.17	961.255	-17.2346	2162.58	859.595	-56.9994	2097.46	869.485	-67.4769	2113.64	764.738
823	0	138.75	2546.74	1621.1	242.052	2542.59	1621.16	111.309	2391.07	1635	247.509	2373.41	1638.31	207.19	2314.78	1488.12	215.332	2213.44	1264.42	188.722	2449.36	1386.85	188.763	2475.46	1201.12	268.141	2211.3	1340.37	12.0995	2300.21	1429.4	-27.9253	2228.87	1243	-29.8115	2176.8	1133.12	-52.1827	2176.08	960.068	-18.1467	2187.74	859.037	-59.1077	2123.13	866.977	-68.996	2142.42	762.826
824	0	138.841	2559.55	1622.56	242.129	2555.25	1622.7	111.064	2404.01	1637.17	247.18	2386.07	1640.62	206.462	2326.69	1490.17	213.818	2225.78	1266.3	188.65	2461.38	1389.08	188.609	2487.69	1203.43	266.637	2223.06	1342.18	11.064	2313.36	1431.7	-30.1188	2245.13	1243.42	-32.6417	2194.86	1132.61	-53.9113	2199.38	959.311	-19.0696	2213.51	859.029	-61.1635	2149.44	864.876	-70.5324	2172.09	761.509
825	0	139.125	2572.17	1624.29	242.4	2567.7	1624.47	111.006	2416.76	1639.58	247.029	2398.52	1643.11	205.848	2338.45	1492.39	212.381	2238	1268.35	188.702	2473.26	1391.53	188.58	2499.82	1205.98	265.198	2234.7	1344.14	10.1481	2326.38	1434.24	-32.2218	2261.32	1244.16	-35.4966	2212.96	1132.41	-55.6276	2223.03	959.012	-19.9864	2239.81	859.611	-63.1403	2176.34	863.236	-72.0391	2202.55	760.85
826	0	139.581	2584.59	1626.29	242.845	2579.94	1626.46	111.113	2429.31	1642.22	247.038	2410.76	1645.76	205.334	2350.07	1494.75	211.024	2250.1	1270.52	188.861	2485.03	1394.17	188.661	2511.86	1208.74	263.824	2246.25	1346.23	9.34281	2339.31	1436.97	-34.2365	2277.44	1245.19	-38.3685	2231.09	1132.51	-57.3185	2246.98	959.19	-20.8796	2266.58	860.812	-65.0167	2203.75	862.102	-73.4689	2233.69	760.9
827	0	140.185	2596.83	1628.53	243.442	2591.99	1628.65	111.362	2441.67	1645.02	247.184	2422.79	1648.51	204.907	2361.6	1497.23	209.753	2262.12	1272.78	189.108	2496.71	1396.97	188.832	2523.84	1211.66	262.518	2257.72	1348.42	8.63905	2352.16	1439.87	-36.1677	2293.5	1246.47	-41.2501	2249.25	1132.89	-58.9716	2271.19	959.852	-21.7316	2293.73	862.645	-66.7761	2231.61	861.506	-74.7762	2265.39	761.688
828	0	140.915	2608.9	1630.98	244.167	2603.86	1631	111.729	2453.87	1647.94	247.447	2434.63	1651.33	204.555	2373.05	1499.77	208.575	2274.07	1275.12	189.428	2508.34	1399.86	189.077	2535.77	1214.68	261.284	2269.16	1350.68	8.02824	2364.95	1442.87	-38.0217	2309.52	1247.97	-44.1338	2267.45	1133.52	-60.5755	2295.61	960.992	-22.5243	2321.17	865.108	-68.4072	2259.85	861.467	-75.919	2297.56	763.228
829	0	141.744	2620.82	1633.6	244.994	2615.56	1633.48	112.191	2465.91	1650.92	247.803	2446.3	1654.15	204.269	2384.47	1502.35	207.494	2285.97	1277.47	189.805	2519.95	1402.79	189.377	2547.68	1217.76	260.126	2280.57	1352.97	7.50245	2377.7	1445.91	-39.8057	2325.51	1249.64	-47.0118	2285.69	1134.37	-62.1196	2320.2	962.597	-23.2405	2348.84	868.186	-69.9025	2288.41	861.99	-76.8609	2330.07	765.516
830	0	142.647	2632.61	1636.34	245.9	2627.12	1636.05	112.723	2477.8	1653.91	248.234	2457.82	1656.94	204.038	2395.86	1504.91	206.516	2297.83	1279.82	190.223	2531.54	1405.71	189.715	2559.58	1220.82	259.05	2291.99	1355.27	7.05458	2390.43	1448.95	-41.5268	2341.48	1251.42	-49.8749	2303.97	1135.38	-63.5941	2344.91	964.641	-23.8638	2376.66	871.849	-71.2583	2317.22	863.07	-77.5723	2362.84	768.536
831	0	143.601	2644.28	1639.13	246.859	2638.56	1638.64	113.305	2489.58	1656.85	248.718	2469.22	1659.64	203.854	2407.27	1507.41	205.645	2309.68	1282.11	190.669	2543.15	1408.57	190.075	2571.47	1223.82	258.06	2303.42	1357.53	6.67862	2403.14	1451.93	-43.1907	2357.45	1253.27	-52.7133	2322.29	1136.52	-64.9897	2369.72	967.091	-24.3799	2404.55	876.058	-72.4733	2346.22	864.691	-78.0314	2395.76	772.256
832	0	144.583	2655.86	1641.91	247.848	2649.91	1641.21	113.918	2501.27	1659.69	249.238	2480.51	1662.2	203.712	2418.71	1509.81	204.882	2321.52	1284.31	191.133	2554.78	1411.3	190.445	2583.36	1226.68	257.16	2314.89	1359.71	6.36974	2415.84	1454.8	-44.8017	2373.43	1255.12	-55.515	2340.66	1137.74	-66.2979	2394.57	969.908	-24.7769	2432.44	880.762	-73.5475	2375.35	866.825	-78.2246	2428.73	776.638
833	0	145.572	2667.38	1644.63	248.847	2661.19	1643.7	114.542	2512.89	1662.36	249.777	2491.74	1664.58	203.607	2430.19	1512.07	204.23	2333.38	1286.38	191.605	2566.46	1413.86	190.815	2595.26	1229.37	256.355	2326.4	1361.78	6.12452	2428.54	1457.49	-46.3614	2389.42	1256.94	-58.267	2359.08	1138.98	-67.5105	2419.43	973.047	-25.0458	2460.28	885.907	-74.4821	2404.55	869.438	-78.1462	2461.69	781.634
834	0	146.55	2678.86	1647.21	249.836	2672.44	1646.06	115.164	2524.46	1664.83	250.321	2502.94	1666.73	203.535	2441.72	1514.14	203.688	2345.26	1288.27	192.08	2578.18	1416.21	191.176	2607.17	1231.82	255.65	2337.98	1363.69	5.94099	2441.24	1459.97	-47.8688	2405.43	1258.66	-60.9544	2377.55	1140.21	-68.6202	2444.27	976.46	-25.1805	2488.01	891.432	-75.2776	2433.76	872.49	-77.7984	2494.55	787.191
835	0	147.503	2690.32	1649.59	250.801	2683.67	1648.21	115.772	2536.01	1667.04	250.859	2514.12	1668.64	203.497	2453.32	1515.98	203.256	2357.17	1289.96	192.553	2589.95	1418.28	191.524	2619.09	1233.99	255.048	2349.62	1365.42	5.81879	2453.95	1462.2	-49.3199	2421.48	1260.25	-63.5607	2396.07	1141.37	-69.62	2469.05	980.097	-25.1784	2515.58	897.272	-75.9345	2462.93	875.934	-77.1904	2527.23	793.25
836	0	148.417	2701.79	1651.72	251.727	2694.91	1650.13	116.357	2547.56	1668.96	251.382	2525.33	1670.25	203.494	2464.99	1517.58	202.934	2369.12	1291.42	193.022	2601.78	1420.06	191.858	2631.02	1235.85	254.555	2361.32	1366.92	5.75917	2466.66	1464.13	-50.7078	2437.54	1261.67	-66.0684	2414.63	1142.43	-70.5036	2493.74	983.908	-25.0396	2542.93	903.365	-76.452	2492	879.721	-76.3373	2559.66	799.752
837	0	149.286	2713.29	1653.54	252.604	2706.19	1651.76	116.914	2559.13	1670.55	251.886	2536.58	1671.57	203.53	2476.74	1518.88	202.72	2381.12	1292.61	193.489	2613.67	1421.51	192.179	2642.97	1237.36	254.173	2373.11	1368.17	5.76497	2479.37	1465.75	-52.0228	2453.63	1262.87	-68.4589	2433.23	1143.34	-71.2653	2518.3	987.84	-24.7669	2570.03	909.646	-76.8285	2520.92	883.799	-75.259	2591.79	806.633
838	0	150.101	2724.84	1655.02	253.426	2717.53	1653.06	117.441	2570.75	1671.79	252.368	2547.9	1672.56	203.61	2488.56	1519.89	202.615	2393.18	1293.51	193.957	2625.61	1422.61	192.49	2654.92	1238.51	253.908	2384.97	1369.15	5.84046	2492.07	1467.02	-53.2527	2469.73	1263.84	-70.7131	2451.86	1144.1	-71.9001	2542.69	991.846	-24.3656	2596.84	916.055	-77.0617	2549.63	888.115	-73.9792	2623.53	813.829
839	0	150.862	2736.45	1656.11	254.189	2728.96	1654.01	117.941	2582.42	1672.66	252.831	2559.32	1673.21	203.742	2500.46	1520.57	202.619	2405.29	1294.11	194.431	2637.62	1423.35	192.796	2666.89	1239.27	253.762	2396.9	1369.82	5.99113	2504.77	1467.94	-54.3832	2485.84	1264.55	-72.8119	2470.5	1144.65	-72.4033	2566.9	995.879	-23.8422	2623.33	922.534	-77.1488	2578.08	892.615	-72.5235	2654.85	821.274
840	0	151.569	2748.13	1656.79	254.895	2740.47	1654.59	118.419	2594.16	1673.15	253.28	2570.84	1673.53	203.934	2512.43	1520.91	202.733	2417.46	1294.39	194.918	2649.68	1423.71	193.104	2678.87	1239.65	253.739	2408.91	1370.19	6.22335	2517.46	1468.5	-55.3987	2501.94	1265	-74.7363	2489.15	1145	-72.7712	2590.87	999.895	-23.2046	2649.45	929.029	-77.0868	2606.22	897.248	-70.9185	2685.67	828.905
841	0	152.226	2759.9	1657.05	255.546	2752.1	1654.78	118.887	2605.98	1673.27	253.726	2582.49	1673.52	204.198	2524.47	1520.92	202.958	2429.69	1294.36	195.426	2661.79	1423.7	193.423	2690.88	1239.65	253.841	2421	1370.22	6.54408	2530.15	1468.71	-56.2822	2518.03	1265.16	-76.4681	2507.79	1145.12	-73.0003	2614.59	1003.85	-22.4613	2675.19	935.489	-76.8731	2634	901.962	-69.1906	2715.95	836.659
842	0	152.841	2771.76	1656.89	256.15	2763.85	1654.58	119.357	2617.88	1673	254.181	2594.28	1673.18	204.543	2536.59	1520.6	203.297	2441.99	1293.99	195.965	2673.96	1423.32	193.761	2702.9	1239.26	254.07	2433.16	1369.94	6.96041	2542.82	1468.57	-57.0166	2534.08	1265.04	-77.9901	2526.38	1145.02	-73.0879	2638	1007.72	-21.6207	2700.52	941.87	-76.5062	2661.35	906.709	-67.3648	2745.63	844.474
843	0	153.424	2783.71	1656.31	256.717	2775.73	1654	119.846	2629.87	1672.38	254.66	2606.2	1672.53	204.98	2548.77	1519.94	203.752	2454.34	1293.31	196.546	2686.18	1422.59	194.127	2714.96	1238.52	254.426	2445.4	1369.32	7.47914	2555.49	1468.09	-57.5849	2550.08	1264.64	-79.2864	2544.91	1144.69	-73.0316	2661.09	1011.47	-20.691	2725.41	948.133	-75.9853	2688.25	911.445	-65.4644	2774.67	852.292
844	0	153.988	2795.76	1655.32	257.262	2787.75	1653.05	120.372	2641.95	1671.41	255.183	2618.28	1671.57	205.521	2561.02	1518.97	204.323	2466.76	1292.33	197.179	2698.46	1421.53	194.531	2727.06	1237.43	254.91	2457.71	1368.38	8.1064	2568.15	1467.29	-57.9711	2566.02	1263.97	-80.3426	2563.35	1144.13	-72.8298	2683.81	1015.06	-19.6797	2749.82	954.242	-75.311	2714.63	916.126	-63.5102	2803.03	860.058
845	0	154.548	2807.91	1653.96	257.801	2799.91	1651.76	120.957	2654.12	1670.13	255.768	2630.5	1670.34	206.175	2573.34	1517.69	205.011	2479.24	1291.04	197.877	2710.8	1420.15	194.984	2739.21	1236.03	255.518	2470.1	1367.13	8.84715	2580.82	1466.21	-58.1607	2581.87	1263.05	-81.1464	2581.67	1143.35	-72.4809	2706.14	1018.47	-18.5933	2773.75	960.166	-74.4855	2740.45	920.716	-61.5209	2830.66	867.718
846	0	155.122	2820.15	1652.26	258.352	2812.21	1650.15	121.622	2666.37	1668.56	256.437	2642.86	1668.85	206.95	2585.72	1516.14	205.812	2491.77	1289.48	198.65	2723.21	1418.49	195.494	2751.42	1234.34	256.246	2482.56	1365.6	9.70493	2593.5	1464.86	-58.1413	2597.62	1261.89	-81.6874	2599.82	1142.37	-71.9842	2728.03	1021.69	-17.4377	2797.15	965.878	-73.5122	2765.68	925.179	-59.5128	2857.54	875.224
847	0	155.727	2832.49	1650.25	258.936	2824.65	1648.26	122.388	2678.7	1666.73	257.209	2655.37	1667.13	207.853	2598.17	1514.33	206.721	2504.37	1287.67	199.507	2735.68	1416.58	196.071	2763.69	1232.4	257.09	2495.09	1363.79	10.6815	2606.21	1463.29	-57.9031	2613.25	1260.51	-81.9579	2617.79	1141.2	-71.3393	2749.46	1024.7	-16.2173	2820	971.353	-72.3958	2790.26	929.484	-57.5001	2883.62	882.53
848	0	156.383	2844.91	1647.99	259.573	2837.23	1646.12	123.277	2691.11	1664.68	258.104	2668.01	1665.21	208.889	2610.7	1512.31	207.729	2517.03	1285.64	200.46	2748.22	1414.46	196.722	2776.04	1230.24	258.042	2507.69	1361.74	11.7769	2618.96	1461.53	-57.4396	2628.75	1258.94	-81.9529	2635.52	1139.87	-70.5466	2770.39	1027.49	-14.9362	2842.29	976.57	-71.142	2814.17	933.601	-55.4952	2908.88	889.594
849	0	157.109	2857.41	1645.52	260.285	2849.94	1643.79	124.307	2703.58	1662.46	259.14	2680.78	1663.12	210.06	2623.29	1510.09	208.823	2529.75	1283.41	201.515	2760.84	1412.15	197.455	2788.48	1227.9	259.094	2520.37	1359.47	12.989	2631.76	1459.61	-56.7474	2644.1	1257.2	-81.6704	2652.98	1138.38	-69.607	2790.8	1030.03	-13.5972	2863.97	981.507	-69.7574	2837.36	937.504	-53.5086	2933.31	896.374
850	0	157.922	2870	1642.89	261.091	2862.78	1641.3	125.495	2716.12	1660.1	260.33	2693.66	1660.88	211.367	2635.97	1507.71	209.989	2542.52	1281.02	202.678	2773.55	1409.7	198.274	2801.02	1225.42	260.235	2533.11	1357.02	14.3137	2644.63	1457.57	-55.8271	2659.27	1255.32	-81.1115	2670.14	1136.76	-68.5222	2810.66	1032.33	-12.2029	2885.04	986.144	-68.2488	2859.82	941.166	-51.5492	2956.87	902.83
851	0	158.837	2882.66	1640.16	262.008	2875.75	1638.7	126.853	2728.72	1657.64	261.687	2706.66	1658.54	212.805	2648.72	1505.21	211.211	2555.36	1278.51	203.953	2786.35	1407.15	199.186	2813.67	1222.83	261.456	2545.94	1354.42	15.7454	2657.58	1455.45	-54.6826	2674.27	1253.32	-80.2805	2686.96	1135.03	-67.295	2829.94	1034.38	-10.7553	2905.46	990.462	-66.6236	2881.51	944.56	-49.6243	2979.55	908.922
852	0	159.87	2895.4	1637.38	263.05	2888.83	1636.02	128.389	2741.38	1655.13	263.218	2719.75	1656.11	214.369	2661.54	1502.63	212.469	2568.26	1275.91	205.34	2799.24	1404.54	200.19	2826.44	1220.19	262.748	2558.83	1351.7	17.2764	2670.62	1453.28	-53.3219	2689.08	1251.24	-79.1852	2703.41	1133.21	-65.9294	2848.62	1036.16	-9.2562	2925.22	994.439	-64.8895	2902.42	947.662	-47.739	3001.34	914.609
853	0	161.028	2908.21	1634.59	264.228	2902.02	1633.32	130.106	2754.09	1652.61	264.926	2732.94	1653.64	216.052	2674.45	1500.01	213.748	2581.22	1273.25	206.837	2812.23	1401.91	201.288	2839.33	1217.52	264.1	2571.8	1348.9	18.8979	2683.76	1451.11	-51.7563	2703.68	1249.09	-77.8362	2719.46	1131.32	-64.4306	2866.68	1037.67	-7.70754	2944.3	998.053	-63.0546	2922.52	950.445	-45.8966	3022.24	919.851
854	0	162.319	2921.09	1631.85	265.547	2915.31	1630.63	132.004	2766.85	1650.12	266.808	2746.2	1651.16	217.842	2687.43	1497.37	215.033	2594.24	1270.58	208.439	2825.31	1399.29	202.478	2852.35	1214.87	265.506	2584.84	1346.06	20.5996	2696.99	1448.95	-50.0002	2718.08	1246.92	-76.2471	2735.09	1129.39	-62.8053	2884.12	1038.9	-6.11138	2962.7	1001.28	-61.1271	2941.8	952.885	-44.0982	3042.22	924.606
855	0	163.742	2934.03	1629.19	267.008	2928.7	1627.99	134.074	2779.66	1647.69	268.859	2759.54	1648.7	219.728	2700.49	1494.77	216.312	2607.33	1267.92	210.137	2838.49	1396.73	203.754	2865.52	1212.29	266.957	2597.95	1343.22	22.3705	2710.32	1446.85	-48.0713	2732.26	1244.74	-74.4342	2750.29	1127.45	-61.0614	2900.91	1039.85	-4.47011	2980.39	1004.11	-59.1157	2960.26	954.956	-42.3429	3061.29	928.831
856	0	165.294	2947.04	1626.65	268.607	2942.16	1625.43	136.305	2792.51	1645.37	271.065	2772.94	1646.29	221.693	2713.62	1492.22	217.579	2620.48	1265.32	211.919	2851.76	1394.26	205.11	2878.82	1209.8	268.45	2611.13	1340.41	24.1984	2723.73	1444.82	-45.9901	2746.23	1242.6	-72.4164	2765.04	1125.5	-59.2087	2917.06	1040.51	-2.78659	2997.38	1006.5	-57.0299	2977.87	956.635	-40.6276	3079.45	932.486
857	0	166.968	2960.12	1624.27	270.333	2955.69	1622.99	138.678	2805.4	1643.17	273.412	2786.4	1643.97	223.721	2726.8	1489.77	218.832	2633.7	1262.8	213.77	2865.11	1391.91	206.538	2892.27	1207.44	269.98	2624.37	1337.67	26.0703	2737.21	1442.9	-43.7793	2759.98	1240.51	-70.2143	2779.33	1123.59	-57.2581	2932.56	1040.87	-1.06422	3013.66	1008.44	-54.8796	2994.63	957.901	-38.9477	3096.69	935.53
858	0	168.75	2973.25	1622.07	272.173	2969.27	1620.69	141.172	2818.33	1641.13	275.879	2799.9	1641.74	225.794	2740.04	1487.45	220.077	2646.97	1260.41	215.672	2878.54	1389.72	208.027	2905.84	1205.25	271.544	2637.66	1335.03	27.9724	2750.74	1441.09	-41.4636	2773.51	1238.52	-67.8506	2793.17	1121.72	-55.2218	2947.41	1040.93	0.692996	3029.23	1009.91	-52.6759	3010.55	958.736	-37.2973	3113.02	937.924
859	0	170.625	2986.42	1620.07	274.109	2982.89	1618.55	143.759	2831.3	1639.28	278.442	2813.45	1639.66	227.893	2753.32	1485.28	221.32	2660.29	1258.16	217.606	2892.03	1387.69	209.564	2919.54	1203.23	273.141	2650.99	1332.54	29.8901	2764.3	1439.43	-39.0689	2786.82	1236.63	-65.3494	2806.56	1119.93	-53.1134	2961.62	1040.7	2.48034	3044.09	1010.89	-50.4309	3025.61	959.124	-35.6699	3128.43	939.633
860	0	172.573	2999.65	1618.29	276.12	2996.54	1616.59	146.408	2844.3	1637.62	281.072	2827.03	1637.73	229.997	2766.63	1483.29	222.574	2673.65	1256.08	219.55	2905.55	1385.86	211.138	2933.33	1201.42	274.768	2664.35	1330.23	31.8077	2777.88	1437.93	-36.6221	2799.91	1234.89	-62.736	2819.51	1118.24	-50.9474	2975.19	1040.16	4.29237	3058.25	1011.36	-48.1582	3039.84	959.054	-34.0592	3142.93	940.627
861	0	174.573	3012.91	1616.74	278.181	3010.2	1614.83	149.086	2857.33	1636.17	283.739	2840.63	1635.97	232.085	2779.95	1481.51	223.85	2687.04	1254.22	221.482	2919.11	1384.23	212.735	2947.19	1199.83	276.425	2677.73	1328.12	33.7091	2791.44	1436.59	-34.1503	2812.78	1233.3	-60.0366	2832.03	1116.66	-48.7394	2988.14	1039.33	6.12282	3071.71	1011.29	-45.8727	3053.22	958.518	-32.46	3156.54	940.88
862	0	176.603	3026.21	1615.42	280.268	3023.86	1613.26	151.757	2870.4	1634.95	286.408	2854.25	1634.41	234.136	2793.27	1479.95	225.16	2700.44	1252.58	223.379	2932.66	1382.83	214.343	2961.08	1198.45	278.107	2691.09	1326.26	35.5779	2804.96	1435.43	-31.6798	2825.44	1231.89	-57.2776	2844.15	1115.21	-46.5056	3000.48	1038.21	7.9646	3084.49	1010.69	-43.5907	3065.77	957.514	-30.8687	3169.26	940.375
863	0	178.638	3039.52	1614.33	282.354	3037.49	1611.9	154.384	2883.49	1633.96	289.044	2867.88	1633.07	236.129	2806.58	1478.65	226.513	2713.83	1251.2	225.222	2946.18	1381.64	215.949	2974.97	1197.3	279.808	2704.42	1324.68	37.3979	2818.43	1434.46	-29.2361	2837.89	1230.68	-54.4852	2855.88	1113.92	-44.2629	3012.23	1036.8	9.80969	3096.58	1009.54	-41.3298	3077.49	956.045	-29.2845	3181.09	939.1
864	0	180.652	3052.86	1613.45	284.414	3051.1	1610.73	156.929	2896.62	1633.2	291.608	2881.52	1631.95	238.045	2819.85	1477.6	227.916	2727.19	1250.09	226.988	2959.66	1380.69	217.541	2988.8	1196.38	281.524	2717.7	1323.38	39.1539	2831.8	1433.68	-26.8429	2850.12	1229.67	-51.6848	2867.26	1112.79	-42.0286	3023.4	1035.11	11.649	3108	1007.84	-39.1086	3088.41	954.117	-27.7098	3192.06	937.054
865	0	182.619	3066.21	1612.76	286.42	3064.66	1609.76	159.355	2909.78	1632.69	294.063	2895.15	1631.07	239.867	2833.06	1476.84	229.368	2740.49	1249.27	228.662	2973.05	1379.97	219.108	3002.54	1195.68	283.244	2730.91	1322.4	40.8322	2845.07	1433.1	-24.5213	2862.15	1228.88	-48.9004	2878.29	1111.83	-39.8199	3034	1033.15	13.4723	3118.75	1005.59	-36.9463	3098.52	951.745	-26.1508	3202.17	934.244
866	0	184.512	3079.56	1612.26	288.346	3078.16	1608.98	161.628	2922.97	1632.42	296.372	2908.77	1630.47	241.581	2846.2	1476.36	230.865	2753.7	1248.74	230.228	2986.34	1379.49	220.638	3016.14	1195.22	284.961	2744.02	1321.75	42.4214	2858.2	1432.73	-22.2897	2873.98	1228.32	-46.1537	2889.02	1111.07	-37.654	3044.06	1030.95	15.2678	3128.83	1002.78	-34.8622	3107.84	948.946	-24.6179	3211.43	930.687
867	0	186.305	3092.9	1611.92	290.166	3091.6	1608.39	163.714	2936.19	1632.39	298.502	2922.38	1630.14	243.175	2859.24	1476.17	232.4	2766.8	1248.53	231.675	2999.49	1379.25	222.119	3029.57	1195.01	286.665	2757.02	1321.43	43.913	2871.17	1432.55	-20.1629	2885.6	1227.99	-43.464	2899.46	1110.49	-35.5478	3053.58	1028.51	17.0224	3138.27	999.449	-32.8757	3116.38	945.748	-23.1258	3219.85	926.408
868	0	187.97	3106.23	1611.73	291.853	3104.96	1607.97	165.586	2949.42	1632.62	300.42	2935.95	1630.11	244.643	2872.16	1476.28	233.963	2779.77	1248.62	232.993	3012.49	1379.27	223.54	3042.79	1195.04	288.346	2769.89	1321.45	45.3015	2883.95	1432.58	-18.1517	2897.03	1227.88	-40.8473	2909.64	1110.12	-33.5176	3062.58	1025.86	18.721	3147.05	995.603	-31.0061	3124.15	942.18	-21.6941	3227.42	921.444
869	0	189.482	3119.52	1611.67	293.384	3118.24	1607.74	167.22	2962.67	1633.09	302.102	2949.47	1630.4	245.981	2884.95	1476.69	235.54	2792.6	1249.01	234.178	3025.31	1379.55	224.887	3055.81	1195.34	289.997	2782.62	1321.81	46.5845	2896.52	1432.83	-16.263	2908.26	1228.01	-38.3159	2919.59	1109.95	-31.579	3071.06	1023.02	20.3468	3155.18	991.276	-29.2717	3131.15	938.281	-20.346	3234.14	915.842
870	0	190.815	3132.76	1611.73	294.736	3131.42	1607.69	168.601	2975.92	1633.82	303.528	2962.95	1631.02	247.191	2897.59	1477.4	237.123	2805.26	1249.7	235.226	3037.94	1380.11	226.149	3068.59	1195.92	291.612	2795.21	1322.49	47.7626	2908.85	1433.27	-14.4993	2919.29	1228.38	-35.8783	2929.31	1109.98	-29.7466	3079.05	1020.02	21.8814	3162.67	986.505	-27.6904	3137.4	934.096	-19.1088	3240.01	909.657
871	0	191.949	3145.94	1611.93	295.89	3144.51	1607.84	169.718	2989.16	1634.8	304.686	2976.35	1631.98	248.276	2910.07	1478.39	238.701	2817.76	1250.67	236.139	3050.36	1380.95	227.313	3081.16	1196.8	293.187	2807.65	1323.48	48.8393	2920.93	1433.93	-12.8591	2930.13	1228.97	-33.5393	2938.82	1110.23	-28.0335	3086.53	1016.89	23.3049	3169.5	981.338	-26.2789	3142.89	929.678	-18.0129	3245.03	902.957
872	0	192.865	3159.04	1612.24	296.831	3157.49	1608.19	170.568	3002.36	1636.03	305.572	2989.68	1633.28	249.244	2922.4	1479.67	240.268	2830.09	1251.91	236.918	3062.59	1382.08	228.37	3093.52	1197.99	294.72	2819.96	1324.77	49.8201	2932.74	1434.8	-11.3372	2940.77	1229.78	-31.3	2948.14	1110.69	-26.452	3093.52	1013.68	24.5965	3175.67	975.83	-25.0526	3147.64	925.085	-17.0906	3249.17	895.816
873	0	193.553	3172.04	1612.69	297.547	3170.37	1608.75	171.154	3015.51	1637.51	306.189	3002.91	1634.91	250.104	2934.57	1481.2	241.82	2842.26	1253.39	237.57	3074.63	1383.51	229.31	3105.68	1199.48	296.211	2832.13	1326.34	50.7123	2944.3	1435.87	-9.92515	2951.21	1230.8	-29.1581	2957.27	1111.37	-25.0125	3100.02	1010.42	25.7349	3181.19	970.044	-24.0246	3151.65	920.38	-16.3751	3252.43	888.322
874	0	194.005	3184.91	1613.29	298.033	3183.13	1609.53	171.489	3028.58	1639.2	306.549	3016.03	1636.87	250.868	2946.59	1482.98	243.357	2854.27	1255.09	238.102	3086.5	1385.22	230.129	3117.68	1201.28	297.665	2844.2	1328.15	51.5243	2955.61	1437.13	-8.61188	2961.44	1232.03	-27.109	2966.2	1112.24	-23.7236	3106.03	1007.15	26.6998	3186.04	964.052	-23.206	3154.93	915.633	-15.8988	3254.79	880.568
875	0	194.221	3197.65	1614.04	298.289	3195.78	1610.55	171.587	3041.56	1641.11	306.671	3029.04	1639.13	251.547	2958.48	1484.98	244.879	2866.15	1256.99	238.523	3098.2	1387.21	230.827	3129.54	1203.38	299.083	2856.17	1330.17	52.2649	2966.68	1438.58	-7.38482	2971.47	1233.44	-25.1463	2974.94	1113.32	-22.5922	3111.54	1003.92	27.472	3190.23	957.927	-22.6047	3157.48	910.911	-15.6914	3256.26	872.655
876	0	194.209	3210.24	1614.96	298.322	3208.32	1611.8	171.473	3054.43	1643.2	306.579	3041.92	1641.64	252.155	2970.26	1487.16	246.388	2877.92	1259.07	238.844	3109.78	1389.44	231.406	3141.29	1205.74	300.472	2868.07	1332.39	52.9436	2977.54	1440.21	-6.23057	2981.28	1235.02	-23.2628	2983.47	1114.59	-21.6231	3116.57	1000.77	28.0351	3193.77	951.746	-22.2252	3159.32	906.285	-15.7782	3256.83	864.686
877	0	193.982	3222.68	1616.06	298.143	3220.74	1613.29	171.172	3067.16	1645.44	306.303	3054.66	1644.37	252.705	2981.94	1489.5	247.886	2889.58	1261.28	239.076	3121.25	1391.88	231.874	3152.95	1208.32	301.837	2879.92	1334.74	53.5694	2988.24	1441.98	-5.13578	2990.88	1236.75	-21.4514	2991.78	1116.03	-20.8191	3121.11	997.734	28.3757	3196.65	945.586	-22.0681	3160.48	901.818	-16.1782	3256.51	856.766
878	0	193.558	3234.95	1617.33	297.767	3233.05	1614.99	170.714	3079.74	1647.8	305.873	3067.27	1647.26	253.207	2993.56	1491.96	249.373	2901.16	1263.61	239.232	3132.65	1394.49	232.242	3164.54	1211.08	303.183	2891.75	1337.21	54.1514	2998.81	1443.88	-4.08787	3000.26	1238.6	-19.7059	2999.86	1117.63	-20.1808	3125.18	994.852	28.4846	3198.91	939.521	-22.1297	3160.98	897.571	-16.9023	3255.34	848.995
879	0	192.959	3247.06	1618.77	297.214	3245.25	1616.91	170.131	3092.15	1650.22	305.322	3079.74	1650.26	253.674	3005.13	1494.48	250.847	2912.68	1266.01	239.323	3144.01	1397.21	232.523	3176.08	1213.97	304.514	2903.58	1339.74	54.6982	3009.28	1445.87	-3.0756	3009.44	1240.54	-18.0217	3007.71	1119.37	-19.707	3128.79	992.154	28.3568	3200.55	933.618	-22.4019	3160.86	893.595	-17.9524	3253.35	841.468
880	0	192.212	3259.02	1620.38	296.508	3257.36	1619	169.454	3104.41	1652.66	304.683	3092.07	1653.31	254.115	3016.69	1497.03	252.302	2924.16	1268.45	239.361	3155.36	1400	232.73	3187.6	1216.9	305.832	2915.43	1342.3	55.2178	3019.71	1447.91	-2.08946	3018.41	1242.55	-16.3962	3015.31	1121.21	-19.3945	3131.94	989.665	27.9923	3201.62	927.938	-22.8724	3160.16	889.933	-19.3203	3250.58	834.268
881	0	191.344	3270.83	1622.11	295.673	3269.38	1621.23	168.717	3116.49	1655.07	303.985	3104.27	1656.33	254.538	3028.25	1499.56	253.73	2935.6	1270.89	239.357	3166.72	1402.78	232.879	3199.09	1219.83	307.138	2927.33	1344.84	55.7176	3030.13	1449.97	-1.12194	3027.19	1244.59	-14.8287	3022.65	1123.14	-19.238	3134.68	987.401	27.3959	3202.15	922.531	-23.5246	3158.93	886.619	-20.9883	3247.12	827.468
882	0	190.381	3282.52	1623.95	294.735	3281.33	1623.55	167.951	3128.4	1657.4	303.259	3116.35	1659.27	254.949	3039.84	1502.03	255.12	2947.01	1273.29	239.321	3178.13	1405.51	232.981	3210.58	1222.67	308.428	2939.28	1347.32	56.204	3040.58	1452.01	-0.167672	3035.79	1246.62	-13.3207	3029.74	1125.12	-19.2306	3137.01	985.375	26.5775	3202.2	917.44	-24.3387	3157.24	883.676	-22.9288	3243.02	821.124
883	0	189.352	3294.11	1625.86	293.721	3293.22	1625.92	167.184	3140.17	1659.61	302.528	3128.34	1662.06	255.352	3051.48	1504.38	256.46	2958.41	1275.62	239.261	3189.6	1408.11	233.05	3222.06	1225.35	309.7	2951.3	1349.69	56.6824	3051.08	1453.97	0.776616	3044.21	1248.63	-11.8755	3036.58	1127.13	-19.3633	3138.98	983.591	25.552	3201.8	912.694	-25.2919	3155.15	881.116	-25.1063	3238.38	815.277
884	0	188.283	3305.62	1627.78	292.655	3305.07	1628.28	166.441	3151.8	1661.64	301.815	3140.24	1664.65	255.749	3063.19	1506.57	257.733	2969.8	1277.84	239.185	3201.15	1410.53	233.092	3233.54	1227.82	310.944	2963.4	1351.93	57.1571	3061.66	1455.82	1.71219	3052.49	1250.58	-10.4977	3043.18	1129.15	-19.6255	3140.63	982.048	24.3388	3201.03	908.314	-26.3597	3152.73	878.943	-27.4784	3233.28	809.953
885	0	187.198	3317.08	1629.67	291.562	3316.9	1630.58	165.741	3163.31	1663.46	301.138	3152.07	1666.99	256.141	3074.97	1508.57	258.924	2981.18	1279.91	239.095	3212.79	1412.72	233.115	3245.02	1230.03	312.152	2975.58	1353.98	57.6306	3072.34	1457.53	2.63841	3060.63	1252.45	-9.19245	3049.56	1131.14	-20.0046	3141.99	980.74	22.9615	3199.94	904.311	-27.5164	3150.04	877.152	-29.998	3227.82	805.162
886	0	186.118	3328.52	1631.48	290.463	3328.74	1632.76	165.099	3174.74	1665.03	300.51	3163.88	1669.04	256.524	3086.85	1510.35	260.018	2992.56	1281.81	238.994	3224.53	1414.64	233.119	3256.51	1231.91	313.314	2987.84	1355.83	58.1036	3083.12	1459.05	3.55287	3068.65	1254.22	-7.96526	3055.74	1133.09	-20.4868	3143.12	979.658	21.4471	3198.6	900.686	-28.7363	3147.17	875.73	-32.6154	3222.09	800.904
887	0	185.06	3339.97	1633.16	289.377	3340.59	1634.76	164.525	3186.12	1666.32	299.941	3175.67	1670.76	256.896	3098.83	1511.87	261.001	3003.94	1283.5	238.882	3236.37	1416.25	233.105	3268	1233.44	314.416	3000.19	1357.44	58.5746	3094.02	1460.35	4.4515	3076.59	1255.87	-6.82122	3061.75	1134.98	-21.0567	3144.07	978.789	19.8255	3197.07	897.436	-29.9941	3144.17	874.661	-35.2803	3216.19	797.168
888	0	184.038	3351.44	1634.66	288.319	3352.48	1636.53	164.023	3197.47	1667.33	299.436	3187.48	1672.13	257.251	3110.9	1513.11	261.86	3015.34	1284.96	238.755	3248.31	1417.52	233.068	3279.49	1234.59	315.447	3012.61	1358.8	59.0397	3105.04	1461.42	5.32881	3084.45	1257.4	-5.7646	3067.62	1136.8	-21.6982	3144.88	978.121	18.128	3195.42	894.551	-31.2657	3141.14	873.925	-37.9434	3210.2	793.936
889	0	183.063	3362.97	1635.94	287.301	3364.42	1638.02	163.593	3208.85	1668.03	298.994	3199.32	1673.14	257.58	3123.07	1514.06	262.587	3026.76	1286.17	238.61	3260.36	1418.45	233.005	3290.99	1235.35	316.392	3025.1	1359.88	59.4929	3116.18	1462.23	6.17803	3092.26	1258.79	-4.79838	3073.39	1138.54	-22.3946	3145.6	977.638	16.3865	3193.7	892.017	-32.5289	3138.12	873.503	-40.5585	3204.21	791.184
890	0	182.14	3374.58	1636.96	286.334	3376.43	1639.21	163.23	3220.26	1668.43	298.613	3211.22	1673.78	257.876	3135.34	1514.71	263.174	3038.23	1287.12	238.439	3272.5	1419.02	232.908	3302.51	1235.72	317.24	3037.66	1360.68	59.9261	3127.43	1462.78	6.99144	3100.06	1260.04	-3.92395	3079.08	1140.2	-23.1292	3146.3	977.326	14.6324	3191.97	889.817	-33.7632	3135.17	873.372	-43.0838	3198.29	788.888
891	0	181.271	3386.28	1637.68	285.422	3388.52	1640.07	162.924	3231.76	1668.53	298.285	3223.21	1674.06	258.128	3147.7	1515.05	263.618	3049.74	1287.79	238.235	3284.72	1419.23	232.77	3314.06	1235.71	317.977	3050.27	1361.19	60.3295	3138.79	1463.07	7.76065	3107.86	1261.15	-3.141	3084.74	1141.77	-23.8857	3147	977.17	12.8952	3190.28	887.933	-34.9507	3132.37	873.511	-45.4828	3192.53	787.019
892	0	180.456	3398.09	1638.1	284.566	3400.69	1640.57	162.663	3243.35	1668.34	297.999	3235.28	1673.99	258.326	3160.14	1515.1	263.919	3061.33	1288.18	237.99	3297.03	1419.1	232.581	3325.66	1235.33	318.594	3062.92	1361.42	60.6918	3150.27	1463.1	8.477	3115.69	1262.14	-2.44753	3090.41	1143.26	-24.6487	3147.78	977.156	11.2017	3188.68	886.345	-36.0755	3129.76	873.896	-47.7254	3186.97	785.549
893	0	179.692	3410.02	1638.19	283.766	3412.95	1640.7	162.432	3255.07	1667.88	297.742	3247.46	1673.58	258.459	3172.65	1514.85	264.078	3073	1288.29	237.694	3309.42	1418.65	232.335	3337.32	1234.62	319.08	3075.61	1361.36	61.0008	3161.85	1462.87	9.13207	3123.58	1262.99	-1.83999	3096.12	1144.67	-25.404	3148.65	977.271	9.57456	3187.22	885.029	-37.1245	3127.38	874.504	-49.7883	3181.69	784.448
894	0	178.971	3422.08	1637.97	283.015	3425.31	1640.48	162.212	3266.92	1667.16	297.498	3259.74	1672.85	258.514	3185.23	1514.33	264.102	3084.78	1288.11	237.338	3321.87	1417.89	232.02	3349.05	1233.61	319.426	3088.34	1361.02	61.2439	3173.53	1462.4	9.71807	3131.55	1263.72	-1.31355	3101.9	1146	-26.1393	3149.68	977.499	8.03207	3185.94	883.964	-38.0868	3125.28	875.312	-51.6552	3176.73	783.683
895	0	178.286	3434.26	1637.43	282.307	3437.76	1639.91	161.987	3278.92	1666.22	297.248	3272.13	1671.85	258.483	3197.87	1513.55	263.997	3096.69	1287.66	236.913	3334.38	1416.86	231.629	3360.86	1232.32	319.628	3101.09	1360.43	61.4087	3185.31	1461.7	10.2282	3139.62	1264.34	-0.862316	3107.78	1147.26	-26.8441	3150.9	977.827	6.58713	3184.88	883.125	-38.9544	3123.49	876.294	-53.3168	3172.13	783.224
896	0	177.626	3446.57	1636.6	281.629	3450.29	1639.01	161.735	3291.07	1665.07	296.975	3284.63	1670.59	258.354	3210.56	1512.54	263.77	3108.73	1286.94	236.41	3346.95	1415.58	231.154	3372.77	1230.81	319.68	3113.86	1359.59	61.4832	3197.18	1460.79	10.657	3147.81	1264.85	-0.479643	3113.8	1148.44	-27.5103	3152.34	978.239	5.24725	3184.09	882.486	-39.7217	3122.06	877.425	-54.7705	3167.94	783.038
897	0	176.977	3459.01	1635.5	280.97	3462.9	1637.82	161.438	3303.37	1663.74	296.659	3297.22	1669.11	258.118	3223.29	1511.31	263.431	3120.91	1285.97	235.819	3359.56	1414.09	230.586	3384.77	1229.1	319.579	3126.66	1358.53	61.4569	3209.14	1459.68	11.0001	3156.14	1265.26	-0.158427	3119.99	1149.55	-28.1321	3154.04	978.719	4.01471	3183.61	882.021	-40.3857	3121	878.678	-56.0197	3164.18	783.09
898	0	176.325	3471.56	1634.15	280.314	3475.58	1636.36	161.076	3315.82	1662.26	296.282	3309.89	1667.45	257.768	3236.06	1509.9	262.987	3133.25	1284.77	235.135	3372.22	1412.43	229.919	3396.88	1227.24	319.328	3139.48	1357.27	61.3204	3221.18	1458.41	11.2549	3164.63	1265.56	0.108581	3126.37	1150.58	-28.7062	3156.04	979.25	2.8872	3183.47	881.704	-40.9463	3120.36	880.025	-57.0735	3160.91	783.345
899	0	175.656	3484.21	1632.59	279.647	3488.33	1634.67	160.632	3328.4	1660.66	295.824	3322.64	1665.63	257.298	3248.86	1508.33	262.446	3145.75	1283.36	234.351	3384.92	1410.62	229.147	3409.1	1225.26	318.925	3152.31	1355.84	61.0662	3233.29	1456.97	11.4196	3173.29	1265.78	0.32845	3132.96	1151.53	-29.2312	3158.36	979.816	1.8589	3183.71	881.506	-41.4054	3120.17	881.438	-57.9452	3158.13	783.769
900	0	174.954	3496.96	1630.87	278.95	3501.11	1632.8	160.09	3341.1	1658.96	295.269	3335.45	1663.69	256.703	3261.69	1506.63	261.815	3158.4	1281.76	233.459	3397.66	1408.7	228.267	3421.43	1223.19	318.376	3165.18	1354.26	60.6883	3245.48	1455.41	11.4941	3182.13	1265.89	0.507765	3139.79	1152.4	-29.7073	3161.04	980.397	0.921498	3184.38	881.398	-41.7673	3120.44	882.889	-58.6514	3155.9	784.323
901	0	174.203	3509.79	1629.02	278.21	3513.94	1630.78	159.434	3353.92	1657.18	294.601	3348.31	1661.67	255.979	3274.55	1504.84	261.1	3171.2	1280.01	232.457	3410.44	1406.7	227.274	3433.87	1221.07	317.685	3178.06	1352.55	60.1827	3257.72	1453.72	11.4792	3191.17	1265.91	0.65233	3146.87	1153.17	-30.1368	3164.11	980.975	0.065344	3185.5	881.353	-42.0376	3121.21	884.346	-59.2109	3154.22	784.971
902	0	173.389	3522.69	1627.07	277.408	3526.8	1628.67	158.652	3366.83	1655.35	293.809	3361.2	1659.58	255.124	3287.43	1502.97	260.306	3184.14	1278.13	231.339	3423.25	1404.65	226.167	3446.43	1218.93	316.859	3190.97	1350.76	59.5472	3270.01	1451.94	11.3762	3200.41	1265.83	0.766933	3154.23	1153.83	-30.5226	3167.58	981.53	-0.719623	3187.11	881.341	-42.2236	3122.5	885.782	-59.6432	3153.14	785.678
903	0	172.497	3535.65	1625.07	276.531	3539.68	1626.5	157.734	3379.83	1653.49	292.88	3374.11	1657.47	254.138	3300.35	1501.05	259.436	3197.2	1276.16	230.102	3436.1	1402.58	224.945	3459.1	1216.79	315.903	3203.91	1348.89	58.7809	3282.36	1450.08	11.1872	3209.86	1265.64	0.855228	3161.87	1154.38	-30.8688	3171.49	982.042	-1.44303	3189.24	881.337	-42.3327	3124.34	887.168	-59.9679	3152.67	786.409
904	0	171.514	3548.66	1623.04	275.564	3552.57	1624.3	156.672	3392.89	1651.61	291.805	3387.03	1655.34	253.02	3313.29	1499.11	258.492	3210.39	1274.12	228.745	3448.98	1400.5	223.607	3471.88	1214.68	314.826	3216.89	1346.99	57.8843	3294.74	1448.15	10.9148	3219.54	1265.34	0.919735	3169.82	1154.81	-31.18	3175.86	982.494	-2.11347	3191.92	881.315	-42.3731	3126.76	888.48	-60.2036	3152.86	787.133
905	0	170.427	3561.71	1621.03	274.496	3565.47	1622.12	155.46	3406	1649.73	290.577	3399.95	1653.22	251.773	3326.26	1497.16	257.477	3223.68	1272.03	227.264	3461.89	1398.44	222.154	3484.76	1212.62	313.635	3229.89	1345.07	56.8589	3307.16	1446.16	10.5611	3229.43	1264.93	0.961908	3178.08	1155.09	-31.461	3180.71	982.868	-2.73815	3195.17	881.253	-42.3522	3129.76	889.694	-60.3674	3153.71	787.822
906	0	169.226	3574.78	1619.06	273.317	3578.37	1619.98	154.094	3419.16	1647.86	289.192	3412.87	1651.14	250.397	3339.27	1495.22	256.392	3237.05	1269.93	225.661	3474.84	1396.41	220.586	3497.75	1210.62	312.337	3242.92	1343.15	55.7066	3319.62	1444.14	10.1287	3239.55	1264.41	0.982243	3186.68	1155.22	-31.7166	3186.07	983.148	-3.32287	3199.02	881.133	-42.2772	3133.38	890.79	-60.4738	3155.27	788.452
907	0	167.9	3587.87	1617.14	272.02	3591.28	1617.91	152.572	3432.36	1646.02	287.646	3425.77	1649.09	248.896	3352.31	1493.31	255.238	3250.5	1267.84	223.933	3487.81	1394.44	218.905	3510.84	1208.7	310.938	3255.99	1341.25	54.4298	3332.1	1442.1	9.61942	3249.9	1263.76	0.980449	3195.61	1155.2	-31.951	3191.94	983.321	-3.87197	3203.48	880.939	-42.1547	3137.63	891.752	-60.5353	3157.55	789.003
908	0	166.44	3600.97	1615.3	270.598	3604.2	1615.93	150.892	3445.59	1644.21	285.938	3438.66	1647.1	247.271	3365.39	1491.44	254.016	3264.02	1265.77	222.081	3500.82	1392.52	217.115	3524.04	1206.87	309.444	3269.09	1339.4	53.0304	3344.61	1440.03	9.03493	3260.49	1262.99	0.95568	3204.9	1155.02	-32.168	3198.34	983.376	-4.38851	3208.57	880.659	-41.9901	3142.53	892.566	-60.5617	3160.57	789.457
909	0	164.841	3614.07	1613.54	269.047	3617.11	1614.04	149.055	3458.84	1642.45	284.065	3451.54	1645.18	245.524	3378.5	1489.62	252.724	3277.59	1263.75	220.105	3513.86	1390.68	215.218	3537.34	1205.16	307.859	3282.22	1337.59	51.5105	3357.14	1437.96	8.3764	3271.32	1262.1	0.906798	3214.55	1154.67	-32.3703	3205.29	983.305	-4.87446	3214.31	880.282	-41.7879	3148.07	893.222	-60.5603	3164.34	789.801
910	0	163.096	3627.17	1611.88	267.367	3630.03	1612.28	147.06	3472.12	1640.72	282.029	3464.4	1643.33	243.657	3391.65	1487.86	251.364	3291.21	1261.77	218.007	3526.93	1388.91	213.218	3550.76	1203.56	306.185	3295.38	1335.85	49.8715	3369.7	1435.89	7.6446	3282.38	1261.08	0.832653	3224.56	1154.14	-32.5601	3212.79	983.099	-5.33095	3220.69	879.802	-41.5517	3154.28	893.714	-60.5367	3168.89	790.028
911	0	161.204	3640.26	1610.31	265.555	3642.96	1610.63	144.908	3485.42	1639.05	279.829	3477.24	1641.56	241.671	3404.84	1486.15	249.935	3304.87	1259.86	215.786	3540.03	1387.22	211.119	3564.28	1202.08	304.426	3308.57	1334.17	48.1142	3382.29	1433.81	6.83999	3293.68	1259.93	0.732292	3234.95	1153.44	-32.7387	3220.85	982.756	-5.75858	3227.73	879.214	-41.2837	3161.16	894.036	-60.4944	3174.22	790.129
912	0	159.161	3653.34	1608.85	263.611	3655.88	1609.1	142.599	3498.74	1637.42	277.465	3490.07	1639.87	239.567	3418.07	1484.51	248.437	3318.57	1258	213.443	3553.17	1385.61	208.92	3577.92	1200.73	302.581	3321.79	1332.56	46.2394	3394.9	1431.74	5.96279	3305.23	1258.65	0.604971	3245.7	1152.56	-32.9068	3229.47	982.273	-6.15763	3235.44	878.516	-40.9855	3168.71	894.185	-60.4353	3180.34	790.102
913	0	156.968	3666.41	1607.49	261.535	3668.81	1607.7	140.134	3512.08	1635.84	274.938	3502.87	1638.25	237.344	3431.34	1482.94	246.87	3332.31	1256.21	210.979	3566.33	1384.09	206.625	3591.67	1199.5	300.652	3335.04	1331.02	44.2472	3407.53	1429.67	5.0131	3317.02	1257.25	0.450141	3256.83	1151.5	-33.0648	3238.66	981.648	-6.52824	3243.8	877.706	-40.6577	3176.94	894.161	-60.3603	3187.25	789.944
914	0	154.624	3679.47	1606.23	259.327	3681.75	1606.43	137.512	3525.44	1634.31	272.247	3515.66	1636.72	235.003	3444.65	1481.43	245.234	3346.09	1254.48	208.394	3579.52	1382.65	204.232	3605.53	1198.41	298.638	3348.32	1329.55	42.1378	3420.2	1427.6	3.99094	3329.05	1255.72	0.267486	3268.33	1150.26	-33.2129	3248.41	980.882	-6.87043	3252.83	876.785	-40.3006	3185.84	893.964	-60.2699	3194.95	789.657
[truncated: 69 more columns]

## Sheet: Sheet2
Devices
		025370 - Force			025370 - Moment			025370 - CoP			027571 - Force			027571 - Moment			027571 - CoP			037720 - Force			037720 - Moment			037720 - CoP
Frame	Sub Frame	Fx	Fy	Fz	Mx	My	Mz	Cx	Cy	Cz	Fx	Fy	Fz	Mx	My	Mz	Cx	Cy	Cz	Fx	Fy	Fz	Mx	My	Mz	Cx	Cy	Cz
		N	N	N	N.mm	N.mm	N.mm	mm	mm	mm	N	N	N	N.mm	N.mm	N.mm	mm	mm	mm	N	N	N	N.mm	N.mm	N.mm	mm	mm	mm
490	0	0	0	0	0	0	0	200	300	0	0	0	0	0	0	0	200	903	0	0	0	0	0	0	0	603	903	0
490	1	0	0	0	0	0	0	200	300	0	0	0	0	0	0	0	200	903	0	0	0	0	0	0	0	603	903	0
490	2	0	0	0	0	0	0	200	300	0	0	0	0	0	0	0	200	903	0	0	0	0	0	0	0	603	903	0
490	3	0	0	0	0	0	0	200	300	0	0	0	0	0	0	0	200	903	0	0	0	0	0	0	0	603	903	0
490	4	0	0	0	0	0	0	200	300	0	0	0	0	0	0	0	200	903	0	0	0	0	0	0	0	603	903	0
490	5	0	0	0	0	0	0	200	300	0	0	0	0	0	0	0	200	903	0	0	0	0	0	0	0	603	903	0
490	6	0	0	0	0	0	0	200	300	0	0	0	0	0	0	0	200	903	0	0	0	0	0	0	0	603	903	0
490	7	0	0	0	0	0	0	200	300	0	0	0	0	0	0	0	200	903	0	0	0	0	0	0	0	603	903	0
490	8	0	0	0	0	0	0	200	300	0	0	0	0	0	0	0	200	903	0	0	0	0	0	0	0	603	903	0
490	9	0	0	0	0	0	0	200	300	0	0	0	0	0	0	0	200	903	0	0	0	0	0	0	0	603	903	0
491	0	0	0	0	0	0	0	200	300	0	0	0	0	0	0	0	200	903	0	0	0	0	0	0	0	603	903	0
491	1	0	0	0	0	0	0	200	300	0	0	0	0	0	0	0	200	903	0	0	0	0	0	0	0	603	903	0
491	2	0	0	0	0	0	0	200	300	0	0	0	0	0	0	0	200	903	0	0	0	0	0	0	0	603	903	0
491	3	0	0	0	0	0	0	200	300	0	0	0	0	0	0	0	200	903	0	0	0	0	0	0	0	603	903	0
491	4	0	0	0	0	0	0	200	300	0	0	0	0	0	0	0	200	903	0	0	0	0	0	0	0	603	903	0
491	5	0	0	0	0	0	0	200	300	0	0	0	0	0	0	0	200	903	0	0	0	0	0	0	0	603	903	0
491	6	0	0	0	0	0	0	200	300	0	0	0	0	0	0	0	200	903	0	0	0	0	0	0	0	603	903	0
491	7	0	0	0	0	0	0	200	300	0	0	0	0	0	0	0	200	903	0	0	0	0	0	0	0	603	903	0
491	8	0	0	0	0	0	0	200	300	0	0	0	0	0	0	0	200	903	0	0	0	0	0	0	0	603	903	0
491	9	0	0	0	0	0	0	200	300	0	0	0	0	0	0	0	200	903	0	0	0	0	0	0	0	603	903	0
492	0	0	0	0	0	0	0	200	300	0	0	0	0	0	0	0	200	903	0	0	0	0	0	0	0	603	903	0
492	1	0	0	0	0	0	0	200	300	0	0	0	0	0	0	0	200	903	0	0	0	0	0	0	0	603	903	0
492	2	0	0	0	0	0	0	200	300	0	0	0	0	0	0	0	200	903	0	0	0	0	0	0	0	603	903	0
492	3	0	0	0	0	0	0	200	300	0	0	0	0	0	0	0	200	903	0	0	0	0	0	0	0	603	903	0
492	4	0	0	0	0	0	0	200	300	0	0	0	0	0	0	0	200	903	0	0	0	0	0	0	0	603	903	0
492	5	0	0	0	0	0	0	200	300	0	0	0	0	0	0	0	200	903	0	0	0	0	0	0	0	603	903	0
492	6	0	0	0	0	0	0	200	300	0	0	0	0	0	0	0	200	903	0	0	0	0	0	0	0	603	903	0
492	7	0	0	0	0	0	0	200	300	0	0	0	0	0	0	0	200	903	0	0	0	0	0	0	0	603	903	0
492	8	0	0	0	0	0	0	200	300	0	0	0	0	0	0	0	200	903	0	0	0	0	0	0	0	603	903	0
492	9	0	0	0	0	0	0	200	300	0	0	0	0	0	0	0	200	903	0	0	0	0	0	0	0	603	903	0
493	0	0	0	0	0	0	0	200	300	0	0	0	0	0	0	0	200	903	0	0	0	0	0	0	0	603	903	0
493	1	0	0	0	0	0	0	200	300	0	0	0	0	0	0	0	200	903	0	0	0	0	0	0	0	603	903	0
493	2	0	0	0	0	0	0	200	300	0	0	0	0	0	0	0	200	903	0	0	0	0	0	0	0	603	903	0
493	3	0	0	0	0	0	0	200	300	0	0	0	0	0	0	0	200	903	0	0	0	0	0	0	0	603	903	0
493	4	0	0	0	0	0	0	200	300	0	0	0	0	0	0	0	200	903	0	0	0	0	0	0	0	603	903	0
493	5	0	0	0	0	0	0	200	300	0	0	0	0	0	0	0	200	903	0	0	0	0	0	0	0	603	903	0
493	6	0	0	0	0	0	0	200	300	0	0	0	0	0	0	0	200	903	0	0	0	0	0	0	0	603	903	0
493	7	0	0	0	0	0	0	200	300	0	0	0	0	0	0	0	200	903	0	0	0	0	0	0	0	603	903	0
493	8	0	0	0	0	0	0	200	300	0	0	0	0	0	0	0	200	903	0	0	0	0	0	0	0	603	903	0
493	9	0	0	0	0	0	0	200	300	0	0	0	0	0	0	0	200	903	0	0	0	0	0	0	0	603	903	0
494	0	0	0	0	0	0	0	200	300	0	0	0	0	0	0	0	200	903	0	0	0	0	0	0	0	603	903	0
494	1	0	0	0	0	0	0	200	300	0	0	0	0	0	0	0	200	903	0	0	0	0	0	0	0	603	903	0
494	2	0	0	0	0	0	0	200	300	0	0	0	0	0	0	0	200	903	0	0	0	0	0	0	0	603	903	0
494	3	0	0	0	0	0	0	200	300	0	0	0	0	0	0	0	200	903	0	0	0	0	0	0	0	603	903	0
494	4	0	0	0	0	0	0	200	300	0	0	0	0	0	0	0	200	903	0	0	0	0	0	0	0	603	903	0
494	5	0	0	0	0	0	0	200	300	0	0	0	0	0	0	0	200	903	0	0	0	0	0	0	0	603	903	0
494	6	0	0	0	0	0	0	200	300	0	0	0	0	0	0	0	200	903	0	0	0	0	0	0	0	603	903	0
494	7	0	0	0	0	0	0	200	300	0	0	0	0	0	0	0	200	903	0	0	0	0	0	0	0	603	903	0
494	8	0	0	0	0	0	0	200	300	0	0	0	0	0	0	0	200	903	0	0	0	0	0	0	0	603	903	0
494	9	0	0	0	0	0	0	200	300	0	0	0	0	0	0	0	200	903	0	0	0	0	0	0	0	603	903	0
495	0	0	0	0	0	0	0	200	300	0	0	0	0	0	0	0	200	903	0	0	0	0	0	0	0	603	903	0
495	1	0	0	0	0	0	0	200	300	0	0	0	0	0	0	0	200	903	0	0	0	0	0	0	0	603	903	0
495	2	0	0	0	0	0	0	200	300	0	0	0	0	0	0	0	200	903	0	0	0	0	0	0	0	603	903	0
495	3	0	0	0	0	0	0	200	300	0	0	0	0	0	0	0	200	903	0	0	0	0	0	0	0	603	903	0
495	4	0	0	0	0	0	0	200	300	0	0	0	0	0	0	0	200	903	0	0	0	0	0	0	0	603	903	0
495	5	0	0	0	0	0	0	200	300	0	0	0	0	0	0	0	200	903	0	0	0	0	0	0	0	603	903	0
495	6	0	0	0	0	0	0	200	300	0	0	0	0	0	0	0	200	903	0	0	0	0	0	0	0	603	903	0
495	7	0	0	0	0	0	0	200	300	0	0	0	0	0	0	0	200	903	0	0	0	0	0	0	0	603	903	0
495	8	0	0	0	0	0	0	200	300	0	0	0	0	0	0	0	200	903	0	0	0	0	0	0	0	603	903	0
495	9	0	0	0	0	0	0	200	300	0	0	0	0	0	0	0	200	903	0	0	0	0	0	0	0	603	903	0
496	0	0	0	0	0	0	0	200	300	0	0	0	0	0	0	0	200	903	0	0	0	0	0	0	0	603	903	0
496	1	0	0	0	0	0	0	200	300	0	0	0	0	0	0	0	200	903	0	0	0	0	0	0	0	603	903	0
496	2	0	0	0	0	0	0	200	300	0	0	0	0	0	0	0	200	903	0	0	0	0	0	0	0	603	903	0
496	3	0	0	0	0	0	0	200	300	0	0	0	0	0	0	0	200	903	0	0	0	0	0	0	0	603	903	0
496	4	0	0	0	0	0	0	200	300	0	0	0	0	0	0	0	200	903	0	0	0	0	0	0	0	603	903	0
496	5	0	0	0	0	0	0	200	300	0	0	0	0	0	0	0	200	903	0	0	0	0	0	0	0	603	903	0
496	6	0	0	0	0	0	0	200	300	0	0	0	0	0	0	0	200	903	0	0	0	0	0	0	0	603	903	0
496	7	0	0	0	0	0	0	200	300	0	0	0	0	0	0	0	200	903	0	0	0	0	0	0	0	603	903	0
496	8	0	0	0	0	0	0	200	300	0	0	0	0	0	0	0	200	903	0	0	0	0	0	0	0	603	903	0
496	9	0	0	0	0	0	0	200	300	0	0	0	0	0	0	0	200	903	0	0	0	0	0	0	0	603	903	0
497	0	0	0	0	0	0	0	200	300	0	0	0	0	0	0	0	200	903	0	0	0	0	0	0	0	603	903	0
497	1	0	0	0	0	0	0	200	300	0	0	0	0	0	0	0	200	903	0	0	0	0	0	0	0	603	903	0
497	2	0	0	0	0	0	0	200	300	0	0	0	0	0	0	0	200	903	0	0	0	0	0	0	0	603	903	0
497	3	0	0	0	0	0	0	200	300	0	0	0	0	0	0	0	200	903	0	0	0	0	0	0	0	603	903	0
497	4	0	0	0	0	0	0	200	300	0	0	0	0	0	0	0	200	903	0	0	0	0	0	0	0	603	903	0
497	5	0	0	0	0	0	0	200	300	0	0	0	0	0	0	0	200	903	0	0	0	0	0	0	0	603	903	0
497	6	0	0	0	0	0	0	200	300	0	0	0	0	0	0	0	200	903	0	0	0	0	0	0	0	603	903	0
497	7	0	0	0	0	0	0	200	300	0	0	0	0	0	0	0	200	903	0	0	0	0	0	0	0	603	903	0
497	8	0	0	0	0	0	0	200	300	0	0	0	0	0	0	0	200	903	0	0	0	0	0	0	0	603	903	0
497	9	0	0	0	0	0	0	200	300	0	0	0	0	0	0	0	200	903	0	0	0	0	0	0	0	603	903	0
498	0	0	0	0	0	0	0	200	300	0	0	0	0	0	0	0	200	903	0	0	0	0	0	0	0	603	903	0
498	1	0	0	0	0	0	0	200	300	0	0	0	0	0	0	0	200	903	0	0	0	0	0	0	0	603	903	0
498	2	0	0	0	0	0	0	200	300	0	0	0	0	0	0	0	200	903	0	0	0	0	0	0	0	603	903	0
498	3	0	0	0	0	0	0	200	300	0	0	0	0	0	0	0	200	903	0	0	0	0	0	0	0	603	903	0
498	4	0	0	0	0	0	0	200	300	0	0	0	0	0	0	0	200	903	0	0	0	0	0	0	0	603	903	0
498	5	0	0	0	0	0	0	200	300	0	0	0	0	0	0	0	200	903	0	0	0	0	0	0	0	603	903	0
498	6	0	0	0	0	0	0	200	300	0	0	0	0	0	0	0	200	903	0	0	0	0	0	0	0	603	903	0
498	7	0	0	0	0	0	0	200	300	0	0	0	0	0	0	0	200	903	0	0	0	0	0	0	0	603	903	0
498	8	0	0	0	0	0	0	200	300	0	0	0	0	0	0	0	200	903	0	0	0	0	0	0	0	603	903	0
498	9	0	0	0	0	0	0	200	300	0	0	0	0	0	0	0	200	903	0	0	0	0	0	0	0	603	903	0
499	0	0	0	0	0	0	0	200	300	0	0	0	0	0	0	0	200	903	0	0	0	0	0	0	0	603	903	0
499	1	0	0	0	0	0	0	200	300	0	0	0	0	0	0	0	200	903	0	0	0	0	0	0	0	603	903	0
499	2	0	0	0	0	0	0	200	300	0	0	0	0	0	0	0	200	903	0	0	0	0	0	0	0	603	903	0
499	3	0	0	0	0	0	0	200	300	0	0	0	0	0	0	0	200	903	0	0	0	0	0	0	0	603	903	0
499	4	0	0	0	0	0	0	200	300	0	0	0	0	0	0	0	200	903	0	0	0	0	0	0	0	603	903	0
499	5	0	0	0	0	0	0	200	300	0	0	0	0	0	0	0	200	903	0	0	0	0	0	0	0	603	903	0
499	6	0	0	0	0	0	0	200	300	0	0	0	0	0	0	0	200	903	0	0	0	0	0	0	0	603	903	0
499	7	0	0	0	0	0	0	200	300	0	0	0	0	0	0	0	200	903	0	0	0	0	0	0	0	603	903	0
499	8	0	0	0	0	0	0	200	300	0	0	0	0	0	0	0	200	903	0	0	0	0	0	0	0	603	903	0
499	9	0	0	0	0	0	0	200	300	0	0	0	0	0	0	0	200	903	0	0	0	0	0	0	0	603	903	0
500	0	0	0	0	0	0	0	200	300	0	0	0	0	0	0	0	200	903	0	0	0	0	0	0	0	603	903	0
500	1	0	0	0	0	0	0	200	300	0	0	0	0	0	0	0	200	903	0	0	0	0	0	0	0	603	903	0
500	2	0	0	0	0	0	0	200	300	0	0	0	0	0	0	0	200	903	0	0	0	0	0	0	0	603	903	0
500	3	0	0	0	0	0	0	200	300	0	0	0	0	0	0	0	200	903	0	0	0	0	0	0	0	603	903	0
500	4	0	0	0	0	0	0	200	300	0	0	0	0	0	0	0	200	903	0	0	0	0	0	0	0	603	903	0
500	5	0	0	0	0	0	0	200	300	0	0	0	0	0	0	0	200	903	0	0	0	0	0	0	0	603	903	0
500	6	0	0	0	0	0	0	200	300	0	0	0	0	0	0	0	200	903	0	0	0	0	0	0	0	603	903	0
500	7	0	0	0	0	0	0	200	300	0	0	0	0	0	0	0	200	903	0	0	0	0	0	0	0	603	903	0
500	8	0	0	0	0	0	0	200	300	0	0	0	0	0	0	0	200	903	0	0	0	0	0	0	0	603	903	0
500	9	0	0	0	0	0	0	200	300	0	0	0	0	0	0	0	200	903	0	0	0	0	0	0	0	603	903	0
501	0	0	0	0	0	0	0	200	300	0	0	0	0	0	0	0	200	903	0	0	0	0	0	0	0	603	903	0
501	1	0	0	0	0	0	0	200	300	0	0	0	0	0	0	0	200	903	0	0	0	0	0	0	0	603	903	0
501	2	0	0	0	0	0	0	200	300	0	0	0	0	0	0	0	200	903	0	0	0	0	0	0	0	603	903	0
501	3	0	0	0	0	0	0	200	300	0	0	0	0	0	0	0	200	903	0	0	0	0	0	0	0	603	903	0
501	4	0	0	0	0	0	0	200	300	0	0	0	0	0	0	0	200	903	0	0	0	0	0	0	0	603	903	0
501	5	0	0	0	0	0	0	200	300	0	0	0	0	0	0	0	200	903	0	0	0	0	0	0	0	603	903	0
501	6	0	0	0	0	0	0	200	300	0	0	0	0	0	0	0	200	903	0	0	0	0	0	0	0	603	903	0
501	7	0	0	0	0	0	0	200	300	0	0	0	0	0	0	0	200	903	0	0	0	0	0	0	0	603	903	0
501	8	0	0	0	0	0	0	200	300	0	0	0	0	0	0	0	200	903	0	0	0	0	0	0	0	603	903	0
501	9	0	0	0	0	0	0	200	300	0	0	0	0	0	0	0	200	903	0	0	0	0	0	0	0	603	903	0
502	0	0	0	0	0	0	0	200	300	0	0	0	0	0	0	0	200	903	0	0	0	0	0	0	0	603	903	0
502	1	0	0	0	0	0	0	200	300	0	0	0	0	0	0	0	200	903	0	0	0	0	0	0	0	603	903	0
502	2	0	0	0	0	0	0	200	300	0	0	0	0	0	0	0	200	903	0	0	0	0	0	0	0	603	903	0
502	3	0	0	0	0	0	0	200	300	0	0	0	0	0	0	0	200	903	0	0	0	0	0	0	0	603	903	0
502	4	0	0	0	0	0	0	200	300	0	0	0	0	0	0	0	200	903	0	0	0	0	0	0	0	603	903	0
502	5	0	0	0	0	0	0	200	300	0	0	0	0	0	0	0	200	903	0	0	0	0	0	0	0	603	903	0
502	6	0	0	0	0	0	0	200	300	0	0	0	0	0	0	0	200	903	0	0	0	0	0	0	0	603	903	0
502	7	0	0	0	0	0	0	200	300	0	0	0	0	0	0	0	200	903	0	0	0	0	0	0	0	603	903	0
502	8	0	0	0	0	0	0	200	300	0	0	0	0	0	0	0	200	903	0	0	0	0	0	0	0	603	903	0
502	9	0	0	0	0	0	0	200	300	0	0	0	0	0	0	0	200	903	0	0	0	0	0	0	0	603	903	0
503	0	0	0	0	0	0	0	200	300	0	0	0	0	0	0	0	200	903	0	0	0	0	0	0	0	603	903	0
503	1	0	0	0	0	0	0	200	300	0	0	0	0	0	0	0	200	903	0	0	0	0	0	0	0	603	903	0
503	2	0	0	0	0	0	0	200	300	0	0	0	0	0	0	0	200	903	0	0	0	0	0	0	0	603	903	0
503	3	0	0	0	0	0	0	200	300	0	0	0	0	0	0	0	200	903	0	0	0	0	0	0	0	603	903	0
503	4	0	0	0	0	0	0	200	300	0	0	0	0	0	0	0	200	903	0	0	0	0	0	0	0	603	903	0
503	5	0	0	0	0	0	0	200	300	0	0	0	0	0	0	0	200	903	0	0	0	0	0	0	0	603	903	0
503	6	0	0	0	0	0	0	200	300	0	0	0	0	0	0	0	200	903	0	0	0	0	0	0	0	603	903	0
503	7	0	0	0	0	0	0	200	300	0	0	0	0	0	0	0	200	903	0	0	0	0	0	0	0	603	903	0
503	8	0	0	0	0	0	0	200	300	0	0	0	0	0	0	0	200	903	0	0	0	0	0	0	0	603	903	0
503	9	0	0	0	0	0	0	200	300	0	0	0	0	0	0	0	200	903	0	0	0	0	0	0	0	603	903	0
504	0	0	0	0	0	0	0	200	300	0	0	0	0	0	0	0	200	903	0	0	0	0	0	0	0	603	903	0
504	1	0	0	0	0	0	0	200	300	0	0	0	0	0	0	0	200	903	0	0	0	0	0	0	0	603	903	0
504	2	0	0	0	0	0	0	200	300	0	0	0	0	0	0	0	200	903	0	0	0	0	0	0	0	603	903	0
504	3	0	0	0	0	0	0	200	300	0	0	0	0	0	0	0	200	903	0	0	0	0	0	0	0	603	903	0
504	4	0	0	0	0	0	0	200	300	0	0	0	0	0	0	0	200	903	0	0	0	0	0	0	0	603	903	0
504	5	0	0	0	0	0	0	200	300	0	0	0	0	0	0	0	200	903	0	0	0	0	0	0	0	603	903	0
504	6	0	0	0	0	0	0	200	300	0	0	0	0	0	0	0	200	903	0	0	0	0	0	0	0	603	903	0
504	7	0	0	0	0	0	0	200	300	0	0	0	0	0	0	0	200	903	0	0	0	0	0	0	0	603	903	0
504	8	0	0	0	0	0	0	200	300	0	0	0	0	0	0	0	200	903	0	0	0	0	0	0	0	603	903	0
504	9	0	0	0	0	0	0	200	300	0	0	0	0	0	0	0	200	903	0	0	0	0	0	0	0	603	903	0
505	0	0	0	0	0	0	0	200	300	0	0	0	0	0	0	0	200	903	0	0	0	0	0	0	0	603	903	0
505	1	0	0	0	0	0	0	200	300	0	0	0	0	0	0	0	200	903	0	0	0	0	0	0	0	603	903	0
505	2	0	0	0	0	0	0	200	300	0	0	0	0	0	0	0	200	903	0	0	0	0	0	0	0	603	903	0
505	3	0	0	0	0	0	0	200	300	0	0	0	0	0	0	0	200	903	0	0	0	0	0	0	0	603	903	0
505	4	0	0	0	0	0	0	200	300	0	0	0	0	0	0	0	200	903	0	0	0	0	0	0	0	603	903	0
505	5	0	0	0	0	0	0	200	300	0	0	0	0	0	0	0	200	903	0	0	0	0	0	0	0	603	903	0
505	6	0	0	0	0	0	0	200	300	0	0	0	0	0	0	0	200	903	0	0	0	0	0	0	0	603	903	0
505	7	0	0	0	0	0	0	200	300	0	0	0	0	0	0	0	200	903	0	0	0	0	0	0	0	603	903	0
505	8	0	0	0	0	0	0	200	300	0	0	0	0	0	0	0	200	903	0	0	0	0	0	0	0	603	903	0
505	9	0	0	0	0	0	0	200	300	0	0	0	0	0	0	0	200	903	0	0	0	0	0	0	0	603	903	0
506	0	0	0	0	0	0	0	200	300	0	0	0	0	0	0	0	200	903	0	0	0	0	0	0	0	603	903	0
506	1	0	0	0	0	0	0	200	300	0	0	0	0	0	0	0	200	903	0	0	0	0	0	0	0	603	903	0
506	2	0	0	0	0	0	0	200	300	0	0	0	0	0	0	0	200	903	0	0	0	0	0	0	0	603	903	0
506	3	0	0	0	0	0	0	200	300	0	0	0	0	0	0	0	200	903	0	0	0	0	0	0	0	603	903	0
506	4	0	0	0	0	0	0	200	300	0	0	0	0	0	0	0	200	903	0	0	0	0	0	0	0	603	903	0
506	5	0	0	0	0	0	0	200	300	0	0	0	0	0	0	0	200	903	0	0	0	0	0	0	0	603	903	0
506	6	0	0	0	0	0	0	200	300	0	0	0	0	0	0	0	200	903	0	0	0	0	0	0	0	603	903	0
506	7	0	0	0	0	0	0	200	300	0	0	0	0	0	0	0	200	903	0	0	0	0	0	0	0	603	903	0
506	8	0	0	0	0	0	0	200	300	0	0	0	0	0	0	0	200	903	0	0	0	0	0	0	0	603	903	0
506	9	0	0	0	0	0	0	200	300	0	0	0	0	0	0	0	200	903	0	0	0	0	0	0	0	603	903	0
507	0	0	0	0	0	0	0	200	300	0	0	0	0	0	0	0	200	903	0	0	0	0	0	0	0	603	903	0
507	1	0	0	0	0	0	0	200	300	0	0	0	0	0	0	0	200	903	0	0	0	0	0	0	0	603	903	0
507	2	0	0	0	0	0	0	200	300	0	0	0	0	0	0	0	200	903	0	0	0	0	0	0	0	603	903	0
507	3	0	0	0	0	0	0	200	300	0	0	0	0	0	0	0	200	903	0	0	0	0	0	0	0	603	903	0
507	4	0	0	0	0	0	0	200	300	0	0	0	0	0	0	0	200	903	0	0	0	0	0	0	0	603	903	0
507	5	0	0	0	0	0	0	200	300	0	0	0	0	0	0	0	200	903	0	0	0	0	0	0	0	603	903	0
507	6	0	0	0	0	0	0	200	300	0	0	0	0	0	0	0	200	903	0	0	0	0	0	0	0	603	903	0
507	7	0	0	0	0	0	0	200	300	0	0	0	0	0	0	0	200	903	0	0	0	0	0	0	0	603	903	0
507	8	0	0	0	0	0	0	200	300	0	0	0	0	0	0	0	200	903	0	0	0	0	0	0	0	603	903	0
507	9	0	0	0	0	0	0	200	300	0	0	0	0	0	0	0	200	903	0	0	0	0	0	0	0	603	903	0
508	0	0	0	0	0	0	0	200	300	0	0	0	0	0	0	0	200	903	0	0	0	0	0	0	0	603	903	0
508	1	0	0	0	0	0	0	200	300	0	0	0	0	0	0	0	200	903	0	0	0	0	0	0	0	603	903	0
508	2	0	0	0	0	0	0	200	300	0	0	0	0	0	0	0	200	903	0	0	0	0	0	0	0	603	903	0
508	3	0	0	0	0	0	0	200	300	0	0	0	0	0	0	0	200	903	0	0	0	0	0	0	0	603	903	0
508	4	0	0	0	0	0	0	200	300	0	0	0	0	0	0	0	200	903	0	0	0	0	0	0	0	603	903	0
508	5	0	0	0	0	0	0	200	300	0	0	0	0	0	0	0	200	903	0	0	0	0	0	0	0	603	903	0
508	6	0	0	0	0	0	0	200	300	0	0	0	0	0	0	0	200	903	0	0	0	0	0	0	0	603	903	0
508	7	0	0	0	0	0	0	200	300	0	0	0	0	0	0	0	200	903	0	0	0	0	0	0	0	603	903	0
508	8	0	0	0	0	0	0	200	300	0	0	0	0	0	0	0	200	903	0	0	0	0	0	0	0	603	903	0
508	9	0	0	0	0	0	0	200	300	0	0	0	0	0	0	0	200	903	0	0	0	0	0	0	0	603	903	0
509	0	0	0	0	0	0	0	200	300	0	0	0	0	0	0	0	200	903	0	0	0	0	0	0	0	603	903	0
509	1	0	0	0	0	0	0	200	300	0	0	0	0	0	0	0	200	903	0	0	0	0	0	0	0	603	903	0
509	2	0	0	0	0	0	0	200	300	0	0	0	0	0	0	0	200	903	0	0	0	0	0	0	0	603	903	0
509	3	0	0	0	0	0	0	200	300	0	0	0	0	0	0	0	200	903	0	0	0	0	0	0	0	603	903	0
509	4	0	0	0	0	0	0	200	300	0	0	0	0	0	0	0	200	903	0	0	0	0	0	0	0	603	903	0
509	5	0	0	0	0	0	0	200	300	0	0	0	0	0	0	0	200	903	0	0	0	0	0	0	0	603	903	0
509	6	0	0	0	0	0	0	200	300	0	0	0	0	0	0	0	200	903	0	0	0	0	0	0	0	603	903	0
509	7	0	0	0	0	0	0	200	300	0	0	0	0	0	0	0	200	903	0	0	0	0	0	0	0	603	903	0
509	8	0	0	0	0	0	0	200	300	0	0	0	0	0	0	0	200	903	0	0	0	0	0	0	0	603	903	0
509	9	0	0	0	0	0	0	200	300	0	0	0	0	0	0	0	200	903	0	0	0	0	0	0	0	603	903	0
510	0	0	0	0	0	0	0	200	300	0	0	0	0	0	0	0	200	903	0	0	0	0	0	0	0	603	903	0
510	1	0	0	0	0	0	0	200	300	0	0	0	0	0	0	0	200	903	0	0	0	0	0	0	0	603	903	0
510	2	0	0	0	0	0	0	200	300	0	0	0	0	0	0	0	200	903	0	0	0	0	0	0	0	603	903	0
510	3	0	0	0	0	0	0	200	300	0	0	0	0	0	0	0	200	903	0	0	0	0	0	0	0	603	903	0
510	4	0	0	0	0	0	0	200	300	0	0	0	0	0	0	0	200	903	0	0	0	0	0	0	0	603	903	0
510	5	0	0	0	0	0	0	200	300	0	0	0	0	0	0	0	200	903	0	0	0	0	0	0	0	603	903	0
510	6	0	0	0	0	0	0	200	300	0	0	0	0	0	0	0	200	903	0	0	0	0	0	0	0	603	903	0
510	7	0	0	0	0	0	0	200	300	0	0	0	0	0	0	0	200	903	0	0	0	0	0	0	0	603	903	0
510	8	0	0	0	0	0	0	200	300	0	0	0	0	0	0	0	200	903	0	0	0	0	0	0	0	603	903	0
510	9	0	0	0	0	0	0	200	300	0	0	0	0	0	0	0	200	903	0	0	0	0	0	0	0	603	903	0
511	0	0	0	0	0	0	0	200	300	0	0	0	0	0	0	0	200	903	0	0	0	0	0	0	0	603	903	0
511	1	0	0	0	0	0	0	200	300	0	0	0	0	0	0	0	200	903	0	0	0	0	0	0	0	603	903	0
511	2	0	0	0	0	0	0	200	300	0	0	0	0	0	0	0	200	903	0	0	0	0	0	0	0	603	903	0
511	3	0	0	0	0	0	0	200	300	0	0	0	0	0	0	0	200	903	0	0	0	0	0	0	0	603	903	0
511	4	0	0	0	0	0	0	200	300	0	0	0	0	0	0	0	200	903	0	0	0	0	0	0	0	603	903	0
511	5	0	0	0	0	0	0	200	300	0	0	0	0	0	0	0	200	903	0	0	0	0	0	0	0	603	903	0
511	6	0	0	0	0	0	0	200	300	0	0	0	0	0	0	0	200	903	0	0	0	0	0	0	0	603	903	0
511	7	0	0	0	0	0	0	200	300	0	0	0	0	0	0	0	200	903	0	0	0	0	0	0	0	603	903	0
511	8	0	0	0	0	0	0	200	300	0	0	0	0	0	0	0	200	903	0	0	0	0	0	0	0	603	903	0
511	9	0	0	0	0	0	0	200	300	0	0	0	0	0	0	0	200	903	0	0	0	0	0	0	0	603	903	0
512	0	0	0	0	0	0	0	200	300	0	0	0	0	0	0	0	200	903	0	0	0	0	0	0	0	603	903	0
512	1	0	0	0	0	0	0	200	300	0	0	0	0	0	0	0	200	903	0	0	0	0	0	0	0	603	903	0
512	2	0	0	0	0	0	0	200	300	0	0	0	0	0	0	0	200	903	0	0	0	0	0	0	0	603	903	0
512	3	0	0	0	0	0	0	200	300	0	0	0	0	0	0	0	200	903	0	0	0	0	0	0	0	603	903	0
512	4	0	0	0	0	0	0	200	300	0	0	0	0	0	0	0	200	903	0	0	0	0	0	0	0	603	903	0
512	5	0	0	0	0	0	0	200	300	0	0	0	0	0	0	0	200	903	0	0	0	0	0	0	0	603	903	0
512	6	0	0	0	0	0	0	200	300	0	0	0	0	0	0	0	200	903	0	0	0	0	0	0	0	603	903	0
512	7	0	0	0	0	0	0	200	300	0	0	0	0	0	0	0	200	903	0	0	0	0	0	0	0	603	903	0
512	8	0	0	0	0	0	0	200	300	0	0	0	0	0	0	0	200	903	0	0	0	0	0	0	0	603	903	0
512	9	0	0	0	0	0	0	200	300	0	0	0	0	0	0	0	200	903	0	0	0	0	0	0	0	603	903	0
513	0	0	0	0	0	0	0	200	300	0	0	0	0	0	0	0	200	903	0	0	0	0	0	0	0	603	903	0
513	1	0	0	0	0	0	0	200	300	0	0	0	0	0	0	0	200	903	0	0	0	0	0	0	0	603	903	0
513	2	0	0	0	0	0	0	200	300	0	0	0	0	0	0	0	200	903	0	0	0	0	0	0	0	603	903	0
513	3	0	0	0	0	0	0	200	300	0	0	0	0	0	0	0	200	903	0	0	0	0	0	0	0	603	903	0
513	4	0	0	0	0	0	0	200	300	0	0	0	0	0	0	0	200	903	0	0	0	0	0	0	0	603	903	0
513	5	0	0	0	0	0	0	200	300	0	0	0	0	0	0	0	200	903	0	0	0	0	0	0	0	603	903	0
513	6	0	0	0	0	0	0	200	300	0	0	0	0	0	0	0	200	903	0	0	0	0	0	0	0	603	903	0
513	7	0	0	0	0	0	0	200	300	0	0	0	0	0	0	0	200	903	0	0	0	0	0	0	0	603	903	0
513	8	0	0	0	0	0	0	200	300	0	0	0	0	0	0	0	200	903	0	0	0	0	0	0	0	603	903	0
513	9	0	0	0	0	0	0	200	300	0	0	0	0	0	0	0	200	903	0	0	0	0	0	0	0	603	903	0
514	0	0	0	0	0	0	0	200	300	0	0	0	0	0	0	0	200	903	0	0	0	0	0	0	0	603	903	0
514	1	0	0	0	0	0	0	200	300	0	0	0	0	0	0	0	200	903	0	0	0	0	0	0	0	603	903	0
514	2	0	0	0	0	0	0	200	300	0	0	0	0	0	0	0	200	903	0	0	0	0	0	0	0	603	903	0
514	3	0	0	0	0	0	0	200	300	0	0	0	0	0	0	0	200	903	0	0	0	0	0	0	0	603	903	0
514	4	0	0	0	0	0	0	200	300	0	0	0	0	0	0	0	200	903	0	0	0	0	0	0	0	603	903	0
514	5	0	0	0	0	0	0	200	300	0	0	0	0	0	0	0	200	903	0	0	0	0	0	0	0	603	903	0
514	6	0	0	0	0	0	0	200	300	0	0	0	0	0	0	0	200	903	0	0	0	0	0	0	0	603	903	0
514	7	0	0	0	0	0	0	200	300	0	0	0	0	0	0	0	200	903	0	0	0	0	0	0	0	603	903	0
514	8	0	0	0	0	0	0	200	300	0	0	0	0	0	0	0	200	903	0	0	0	0	0	0	0	603	903	0
514	9	0	0	0	0	0	0	200	300	0	0	0	0	0	0	0	200	903	0	0	0	0	0	0	0	603	903	0
515	0	0	0	0	0	0	0	200	300	0	0	0	0	0	0	0	200	903	0	0	0	0	0	0	0	603	903	0
515	1	0	0	0	0	0	0	200	300	0	0	0	0	0	0	0	200	903	0	0	0	0	0	0	0	603	903	0
515	2	0	0	0	0	0	0	200	300	0	0	0	0	0	0	0	200	903	0	0	0	0	0	0	0	603	903	0
515	3	0	0	0	0	0	0	200	300	0	0	0	0	0	0	0	200	903	0	0	0	0	0	0	0	603	903	0
515	4	0	0	0	0	0	0	200	300	0	0	0	0	0	0	0	200	903	0	0	0	0	0	0	0	603	903	0
515	5	0	0	0	0	0	0	200	300	0	0	0	0	0	0	0	200	903	0	0	0	0	0	0	0	603	903	0
515	6	0	0	0	0	0	0	200	300	0	0	0	0	0	0	0	200	903	0	0	0	0	0	0	0	603	903	0
515	7	0	0	0	0	0	0	200	300	0	0	0	0	0	0	0	200	903	0	0	0	0	0	0	0	603	903	0
515	8	0	0	0	0	0	0	200	300	0	0	0	0	0	0	0	200	903	0	0	0	0	0	0	0	603	903	0
515	9	0	0	0	0	0	0	200	300	0	0	0	0	0	0	0	200	903	0	0	0	0	0	0	0	603	903	0
516	0	0	0	0	0	0	0	200	300	0	0	0	0	0	0	0	200	903	0	0	0	0	0	0	0	603	903	0
516	1	0	0	0	0	0	0	200	300	0	0	0	0	0	0	0	200	903	0	0	0	0	0	0	0	603	903	0
516	2	0	0	0	0	0	0	200	300	0	0	0	0	0	0	0	200	903	0	0	0	0	0	0	0	603	903	0
516	3	0	0	0	0	0	0	200	300	0	0	0	0	0	0	0	200	903	0	0	0	0	0	0	0	603	903	0
516	4	0	0	0	0	0	0	200	300	0	0	0	0	0	0	0	200	903	0	0	0	0	0	0	0	603	903	0
516	5	0	0	0	0	0	0	200	300	0	0	0	0	0	0	0	200	903	0	0	0	0	0	0	0	603	903	0
516	6	0	0	0	0	0	0	200	300	0	0	0	0	0	0	0	200	903	0	0	0	0	0	0	0	603	903	0
516	7	0	0	0	0	0	0	200	300	0	0	0	0	0	0	0	200	903	0	0	0	0	0	0	0	603	903	0
516	8	0	0	0	0	0	0	200	300	0	0	0	0	0	0	0	200	903	0	0	0	0	0	0	0	603	903	0
516	9	0	0	0	0	0	0	200	300	0	0	0	0	0	0	0	200	903	0	0	0	0	0	0	0	603	903	0
517	0	0	0	0	0	0	0	200	300	0	0	0	0	0	0	0	200	903	0	0	0	0	0	0	0	603	903	0
517	1	0	0	0	0	0	0	200	300	0	0	0	0	0	0	0	200	903	0	0	0	0	0	0	0	603	903	0
517	2	0	0	0	0	0	0	200	300	0	0	0	0	0	0	0	200	903	0	0	0	0	0	0	0	603	903	0
517	3	0	0	0	0	0	0	200	300	0	0	0	0	0	0	0	200	903	0	0	0	0	0	0	0	603	903	0
517	4	0	0	0	0	0	0	200	300	0	0	0	0	0	0	0	200	903	0	0	0	0	0	0	0	603	903	0
517	5	0	0	0	0	0	0	200	300	0	0	0	0	0	0	0	200	903	0	0	0	0	0	0	0	603	903	0
517	6	0	0	0	0	0	0	200	300	0	0	0	0	0	0	0	200	903	0	0	0	0	0	0	0	603	903	0
517	7	0	0	0	0	0	0	200	300	0	0	0	0	0	0	0	200	903	0	0	0	0	0	0	0	603	903	0
517	8	0	0	0	0	0	0	200	300	0	0	0	0	0	0	0	200	903	0	0	0	0	0	0	0	603	903	0
517	9	0	0	0	0	0	0	200	300	0	0	0	0	0	0	0	200	903	0	0	0	0	0	0	0	603	903	0
518	0	0	0	0	0	0	0	200	300	0	0	0	0	0	0	0	200	903	0	0	0	0	0	0	0	603	903	0
518	1	0	0	0	0	0	0	200	300	0	0	0	0	0	0	0	200	903	0	0	0	0	0	0	0	603	903	0
518	2	0	0	0	0	0	0	200	300	0	0	0	0	0	0	0	200	903	0	0	0	0	0	0	0	603	903	0
518	3	0	0	0	0	0	0	200	300	0	0	0	0	0	0	0	200	903	0	0	0	0	0	0	0	603	903	0
518	4	0	0	0	0	0	0	200	300	0	0	0	0	0	0	0	200	903	0	0	0	0	0	0	0	603	903	0
518	5	0	0	0	0	0	0	200	300	0	0	0	0	0	0	0	200	903	0	0	0	0	0	0	0	603	903	0
518	6	0	0	0	0	0	0	200	300	0	0	0	0	0	0	0	200	903	0	0	0	0	0	0	0	603	903	0
518	7	0	0	0	0	0	0	200	300	0	0	0	0	0	0	0	200	903	0	0	0	0	0	0	0	603	903	0
518	8	0	0	0	0	0	0	200	300	0	0	0	0	0	0	0	200	903	0	0	0	0	0	0	0	603	903	0
518	9	0	0	0	0	0	0	200	300	0	0	0	0	0	0	0	200	903	0	0	0	0	0	0	0	603	903	0
519	0	0	0	0	0	0	0	200	300	0	0	0	0	0	0	0	200	903	0	0	0	0	0	0	0	603	903	0
519	1	0	0	0	0	0	0	200	300	0	0	0	0	0	0	0	200	903	0	0	0	0	0	0	0	603	903	0
519	2	0	0	0	0	0	0	200	300	0	0	0	0	0	0	0	200	903	0	0	0	0	0	0	0	603	903	0
519	3	0	0	0	0	0	0	200	300	0	0	0	0	0	0	0	200	903	0	0	0	0	0	0	0	603	903	0
519	4	0	0	0	0	0	0	200	300	0	0	0	0	0	0	0	200	903	0	0	0	0	0	0	0	603	903	0
519	5	0	0	0	0	0	0	200	300	0	0	0	0	0	0	0	200	903	0	0	0	0	0	0	0	603	903	0
519	6	0	0	0	0	0	0	200	300	0	0	0	0	0	0	0	200	903	0	0	0	0	0	0	0	603	903	0
519	7	0	0	0	0	0	0	200	300	0	0	0	0	0	0	0	200	903	0	0	0	0	0	0	0	603	903	0
519	8	0	0	0	0	0	0	200	300	0	0	0	0	0	0	0	200	903	0	0	0	0	0	0	0	603	903	0
519	9	0	0	0	0	0	0	200	300	0	0	0	0	0	0	0	200	903	0	0	0	0	0	0	0	603	903	0
520	0	0	0	0	0	0	0	200	300	0	0	0	0	0	0	0	200	903	0	0	0	0	0	0	0	603	903	0
520	1	0	0	0	0	0	0	200	300	0	0	0	0	0	0	0	200	903	0	0	0	0	0	0	0	603	903	0
520	2	0	0	0	0	0	0	200	300	0	0	0	0	0	0	0	200	903	0	0	0	0	0	0	0	603	903	0
520	3	0	0	0	0	0	0	200	300	0	0	0	0	0	0	0	200	903	0	0	0	0	0	0	0	603	903	0
520	4	0	0	0	0	0	0	200	300	0	0	0	0	0	0	0	200	903	0	0	0	0	0	0	0	603	903	0
520	5	0	0	0	0	0	0	200	300	0	0	0	0	0	0	0	200	903	0	0	0	0	0	0	0	603	903	0
520	6	0	0	0	0	0	0	200	300	0	0	0	0	0	0	0	200	903	0	0	0	0	0	0	0	603	903	0
520	7	0	0	0	0	0	0	200	300	0	0	0	0	0	0	0	200	903	0	0	0	0	0	0	0	603	903	0
520	8	0	0	0	0	0	0	200	300	0	0	0	0	0	0	0	200	903	0	0	0	0	0	0	0	603	903	0
520	9	0	0	0	0	0	0	200	300	0	0	0	0	0	0	0	200	903	0	0	0	0	0	0	0	603	903	0
521	0	0	0	0	0	0	0	200	300	0	0	0	0	0	0	0	200	903	0	0	0	0	0	0	0	603	903	0
521	1	0	0	0	0	0	0	200	300	0	0	0	0	0	0	0	200	903	0	0	0	0	0	0	0	603	903	0
521	2	0	0	0	0	0	0	200	300	0	0	0	0	0	0	0	200	903	0	0	0	0	0	0	0	603	903	0
521	3	0	0	0	0	0	0	200	300	0	0	0	0	0	0	0	200	903	0	0	0	0	0	0	0	603	903	0
521	4	0	0	0	0	0	0	200	300	0	0	0	0	0	0	0	200	903	0	0	0	0	0	0	0	603	903	0
521	5	0	0	0	0	0	0	200	300	0	0	0	0	0	0	0	200	903	0	0	0	0	0	0	0	603	903	0
521	6	0	0	0	0	0	0	200	300	0	0	0	0	0	0	0	200	903	0	0	0	0	0	0	0	603	903	0
521	7	0	0	0	0	0	0	200	300	0	0	0	0	0	0	0	200	903	0	0	0	0	0	0	0	603	903	0
521	8	0	0	0	0	0	0	200	300	0	0	0	0	0	0	0	200	903	0	0	0	0	0	0	0	603	903	0
521	9	0	0	0	0	0	0	200	300	0	0	0	0	0	0	0	200	903	0	0	0	0	0	0	0	603	903	0
522	0	0	0	0	0	0	0	200	300	0	0	0	0	0	0	0	200	903	0	0	0	0	0	0	0	603	903	0
522	1	0	0	0	0	0	0	200	300	0	0	0	0	0	0	0	200	903	0	0	0	0	0	0	0	603	903	0
522	2	0	0	0	0	0	0	200	300	0	0	0	0	0	0	0	200	903	0	0	0	0	0	0	0	603	903	0
522	3	0	0	0	0	0	0	200	300	0	0	0	0	0	0	0	200	903	0	0	0	0	0	0	0	603	903	0
522	4	0	0	0	0	0	0	200	300	0	0	0	0	0	0	0	200	903	0	0	0	0	0	0	0	603	903	0
522	5	0	0	0	0	0	0	200	300	0	0	0	0	0	0	0	200	903	0	0	0	0	0	0	0	603	903	0
522	6	0	0	0	0	0	0	200	300	0	0	0	0	0	0	0	200	903	0	0	0	0	0	0	0	603	903	0
522	7	0	0	0	0	0	0	200	300	0	0	0	0	0	0	0	200	903	0	0	0	0	0	0	0	603	903	0
522	8	0	0	0	0	0	0	200	300	0	0	0	0	0	0	0	200	903	0	0	0	0	0	0	0	603	903	0
522	9	0	0	0	0	0	0	200	300	0	0	0	0	0	0	0	200	903	0	0	0	0	0	0	0	603	903	0
523	0	0	0	0	0	0	0	200	300	0	0	0	0	0	0	0	200	903	0	0	0	0	0	0	0	603	903	0
523	1	0	0	0	0	0	0	200	300	0	0	0	0	0	0	0	200	903	0	0	0	0	0	0	0	603	903	0
523	2	0	0	0	0	0	0	200	300	0	0	0	0	0	0	0	200	903	0	0	0	0	0	0	0	603	903	0
523	3	0	0	0	0	0	0	200	300	0	0	0	0	0	0	0	200	903	0	0	0	0	0	0	0	603	903	0
523	4	0	0	0	0	0	0	200	300	0	0	0	0	0	0	0	200	903	0	0	0	0	0	0	0	603	903	0
523	5	0	0	0	0	0	0	200	300	0	0	0	0	0	0	0	200	903	0	0	0	0	0	0	0	603	903	0
523	6	0	0	0	0	0	0	200	300	0	0	0	0	0	0	0	200	903	0	0	0	0	0	0	0	603	903	0
523	7	0	0	0	0	0	0	200	300	0	0	0	0	0	0	0	200	903	0	0	0	0	0	0	0	603	903	0
523	8	0	0	0	0	0	0	200	300	0	0	0	0	0	0	0	200	903	0	0	0	0	0	0	0	603	903	0
523	9	0	0	0	0	0	0	200	300	0	0	0	0	0	0	0	200	903	0	0	0	0	0	0	0	603	903	0
524	0	0	0	0	0	0	0	200	300	0	0	0	0	0	0	0	200	903	0	0	0	0	0	0	0	603	903	0
524	1	0	0	0	0	0	0	200	300	0	0	0	0	0	0	0	200	903	0	0	0	0	0	0	0	603	903	0
524	2	0	0	0	0	0	0	200	300	0	0	0	0	0	0	0	200	903	0	0	0	0	0	0	0	603	903	0
524	3	0	0	0	0	0	0	200	300	0	0	0	0	0	0	0	200	903	0	0	0	0	0	0	0	603	903	0
524	4	0	0	0	0	0	0	200	300	0	0	0	0	0	0	0	200	903	0	0	0	0	0	0	0	603	903	0
524	5	0	0	0	0	0	0	200	300	0	0	0	0	0	0	0	200	903	0	0	0	0	0	0	0	603	903	0
524	6	0	0	0	0	0	0	200	300	0	0	0	0	0	0	0	200	903	0	0	0	0	0	0	0	603	903	0
524	7	0	0	0	0	0	0	200	300	0	0	0	0	0	0	0	200	903	0	0	0	0	0	0	0	603	903	0
524	8	0	0	0	0	0	0	200	300	0	0	0	0	0	0	0	200	903	0	0	0	0	0	0	0	603	903	0
524	9	0	0	0	0	0	0	200	300	0	0	0	0	0	0	0	200	903	0	0	0	0	0	0	0	603	903	0
525	0	0	0	0	0	0	0	200	300	0	0	0	0	0	0	0	200	903	0	0	0	0	0	0	0	603	903	0
525	1	0	0	0	0	0	0	200	300	0	0	0	0	0	0	0	200	903	0	0	0	0	0	0	0	603	903	0
525	2	0	0	0	0	0	0	200	300	0	0	0	0	0	0	0	200	903	0	0	0	0	0	0	0	603	903	0
525	3	0	0	0	0	0	0	200	300	0	0	0	0	0	0	0	200	903	0	0	0	0	0	0	0	603	903	0
525	4	0	0	0	0	0	0	200	300	0	0	0	0	0	0	0	200	903	0	0	0	0	0	0	0	603	903	0
525	5	0	0	0	0	0	0	200	300	0	0	0	0	0	0	0	200	903	0	0	0	0	0	0	0	603	903	0
525	6	0	0	0	0	0	0	200	300	0	0	0	0	0	0	0	200	903	0	0	0	0	0	0	0	603	903	0
525	7	0	0	0	0	0	0	200	300	0	0	0	0	0	0	0	200	903	0	0	0	0	0	0	0	603	903	0
525	8	0	0	0	0	0	0	200	300	0	0	0	0	0	0	0	200	903	0	0	0	0	0	0	0	603	903	0
525	9	0	0	0	0	0	0	200	300	0	0	0	0	0	0	0	200	903	0	0	0	0	0	0	0	603	903	0
526	0	0	0	0	0	0	0	200	300	0	0	0	0	0	0	0	200	903	0	0	0	0	0	0	0	603	903	0
526	1	0	0	0	0	0	0	200	300	0	0	0	0	0	0	0	200	903	0	0	0	0	0	0	0	603	903	0
526	2	0	0	0	0	0	0	200	300	0	0	0	0	0	0	0	200	903	0	0	0	0	0	0	0	603	903	0
526	3	0	0	0	0	0	0	200	300	0	0	0	0	0	0	0	200	903	0	0	0	0	0	0	0	603	903	0
526	4	0	0	0	0	0	0	200	300	0	0	0	0	0	0	0	200	903	0	0	0	0	0	0	0	603	903	0
526	5	0	0	0	0	0	0	200	300	0	0	0	0	0	0	0	200	903	0	0	0	0	0	0	0	603	903	0
526	6	0	0	0	0	0	0	200	300	0	0	0	0	0	0	0	200	903	0	0	0	0	0	0	0	603	903	0
526	7	0	0	0	0	0	0	200	300	0	0	0	0	0	0	0	200	903	0	0	0	0	0	0	0	603	903	0
526	8	0	0	0	0	0	0	200	300	0	0	0	0	0	0	0	200	903	0	0	0	0	0	0	0	603	903	0
526	9	0	0	0	0	0	0	200	300	0	0	0	0	0	0	0	200	903	0	0	0	0	0	0	0	603	903	0
527	0	0	0	0	0	0	0	200	300	0	0	0	0	0	0	0	200	903	0	0	0	0	0	0	0	603	903	0
527	1	0	0	0	0	0	0	200	300	0	0	0	0	0	0	0	200	903	0	0	0	0	0	0	0	603	903	0
527	2	0	0	0	0	0	0	200	300	0	0	0	0	0	0	0	200	903	0	0	0	0	0	0	0	603	903	0
527	3	0	0	0	0	0	0	200	300	0	0	0	0	0	0	0	200	903	0	0	0	0	0	0	0	603	903	0
527	4	0	0	0	0	0	0	200	300	0	0	0	0	0	0	0	200	903	0	0	0	0	0	0	0	603	903	0
527	5	0	0	0	0	0	0	200	300	0	0	0	0	0	0	0	200	903	0	0	0	0	0	0	0	603	903	0
527	6	0	0	0	0	0	0	200	300	0	0	0	0	0	0	0	200	903	0	0	0	0	0	0	0	603	903	0
527	7	0	0	0	0	0	0	200	300	0	0	0	0	0	0	0	200	903	0	0	0	0	0	0	0	603	903	0
527	8	0	0	0	0	0	0	200	300	0	0	0	0	0	0	0	200	903	0	0	0	0	0	0	0	603	903	0
527	9	0	0	0	0	0	0	200	300	0	0	0	0	0	0	0	200	903	0	0	0	0	0	0	0	603	903	0
528	0	0	0	0	0	0	0	200	300	0	0	0	0	0	0	0	200	903	0	0	0	0	0	0	0	603	903	0
528	1	0	0	0	0	0	0	200	300	0	0	0	0	0	0	0	200	903	0	0	0	0	0	0	0	603	903	0
528	2	0	0	0	0	0	0	200	300	0	0	0	0	0	0	0	200	903	0	0	0	0	0	0	0	603	903	0
528	3	0	0	0	0	0	0	200	300	0	0	0	0	0	0	0	200	903	0	0	0	0	0	0	0	603	903	0
528	4	0	0	0	0	0	0	200	300	0	0	0	0	0	0	0	200	903	0	0	0	0	0	0	0	603	903	0
528	5	0	0	0	0	0	0	200	300	0	0	0	0	0	0	0	200	903	0	0	0	0	0	0	0	603	903	0
528	6	0	0	0	0	0	0	200	300	0	0	0	0	0	0	0	200	903	0	0	0	0	0	0	0	603	903	0
528	7	0	0	0	0	0	0	200	300	0	0	0	0	0	0	0	200	903	0	0	0	0	0	0	0	603	903	0
528	8	0	0	0	0	0	0	200	300	0	0	0	0	0	0	0	200	903	0	0	0	0	0	0	0	603	903	0
528	9	0	0	0	0	0	0	200	300	0	0	0	0	0	0	0	200	903	0	0	0	0	0	0	0	603	903	0
529	0	0	0	0	0	0	0	200	300	0	0	0	0	0	0	0	200	903	0	0	0	0	0	0	0	603	903	0
529	1	0	0	0	0	0	0	200	300	0	0	0	0	0	0	0	200	903	0	0	0	0	0	0	0	603	903	0
529	2	0	0	0	0	0	0	200	300	0	0	0	0	0	0	0	200	903	0	0	0	0	0	0	0	603	903	0
529	3	0	0	0	0	0	0	200	300	0	0	0	0	0	0	0	200	903	0	0	0	0	0	0	0	603	903	0
529	4	0	0	0	0	0	0	200	300	0	0	0	0	0	0	0	200	903	0	0	0	0	0	0	0	603	903	0
529	5	0	0	0	0	0	0	200	300	0	0	0	0	0	0	0	200	903	0	0	0	0	0	0	0	603	903	0
529	6	0	0	0	0	0	0	200	300	0	0	0	0	0	0	0	200	903	0	0	0	0	0	0	0	603	903	0
529	7	0	0	0	0	0	0	200	300	0	0	0	0	0	0	0	200	903	0	0	0	0	0	0	0	603	903	0
529	8	0	0	0	0	0	0	200	300	0	0	0	0	0	0	0	200	903	0	0	0	0	0	0	0	603	903	0
529	9	0	0	0	0	0	0	200	300	0	0	0	0	0	0	0	200	903	0	0	0	0	0	0	0	603	903	0
530	0	0	0	0	0	0	0	200	300	0	0	0	0	0	0	0	200	903	0	0	0	0	0	0	0	603	903	0
530	1	0	0	0	0	0	0	200	300	0	0	0	0	0	0	0	200	903	0	0	0	0	0	0	0	603	903	0
530	2	0	0	0	0	0	0	200	300	0	0	0	0	0	0	0	200	903	0	0	0	0	0	0	0	603	903	0
530	3	0	0	0	0	0	0	200	300	0	0	0	0	0	0	0	200	903	0	0	0	0	0	0	0	603	903	0
530	4	0	0	0	0	0	0	200	300	0	0	0	0	0	0	0	200	903	0	0	0	0	0	0	0	603	903	0
530	5	0	0	0	0	0	0	200	300	0	0	0	0	0	0	0	200	903	0	0	0	0	0	0	0	603	903	0
530	6	0	0	0	0	0	0	200	300	0	0	0	0	0	0	0	200	903	0	0	0	0	0	0	0	603	903	0
530	7	0	0	0	0	0	0	200	300	0	0	0	0	0	0	0	200	903	0	0	0	0	0	0	0	603	903	0
530	8	0	0	0	0	0	0	200	300	0	0	0	0	0	0	0	200	903	0	0	0	0	0	0	0	603	903	0
530	9	0	0	0	0	0	0	200	300	0	0	0	0	0	0	0	200	903	0	0	0	0	0	0	0	603	903	0
531	0	0	0	0	0	0	0	200	300	0	0	0	0	0	0	0	200	903	0	0	0	0	0	0	0	603	903	0
531	1	0	0	0	0	0	0	200	300	0	0	0	0	0	0	0	200	903	0	0	0	0	0	0	0	603	903	0
531	2	0	0	0	0	0	0	200	300	0	0	0	0	0	0	0	200	903	0	0	0	0	0	0	0	603	903	0
531	3	0	0	0	0	0	0	200	300	0	0	0	0	0	0	0	200	903	0	0	0	0	0	0	0	603	903	0
531	4	0	0	0	0	0	0	200	300	0	0	0	0	0	0	0	200	903	0	0	0	0	0	0	0	603	903	0
531	5	0	0	0	0	0	0	200	300	0	0	0	0	0	0	0	200	903	0	0	0	0	0	0	0	603	903	0
531	6	0	0	0	0	0	0	200	300	0	0	0	0	0	0	0	200	903	0	0	0	0	0	0	0	603	903	0
531	7	0	0	0	0	0	0	200	300	0	0	0	0	0	0	0	200	903	0	0	0	0	0	0	0	603	903	0
531	8	0	0	0	0	0	0	200	300	0	0	0	0	0	0	0	200	903	0	0	0	0	0	0	0	603	903	0
531	9	0	0	0	0	0	0	200	300	0	0	0	0	0	0	0	200	903	0	0	0	0	0	0	0	603	903	0
532	0	0	0	0	0	0	0	200	300	0	0	0	0	0	0	0	200	903	0	0	0	0	0	0	0	603	903	0
532	1	0	0	0	0	0	0	200	300	0	0	0	0	0	0	0	200	903	0	0	0	0	0	0	0	603	903	0
532	2	0	0	0	0	0	0	200	300	0	0	0	0	0	0	0	200	903	0	0	0	0	0	0	0	603	903	0
532	3	0	0	0	0	0	0	200	300	0	0	0	0	0	0	0	200	903	0	0	0	0	0	0	0	603	903	0
532	4	0	0	0	0	0	0	200	300	0	0	0	0	0	0	0	200	903	0	0	0	0	0	0	0	603	903	0
532	5	0	0	0	0	0	0	200	300	0	0	0	0	0	0	0	200	903	0	0	0	0	0	0	0	603	903	0
532	6	0	0	0	0	0	0	200	300	0	0	0	0	0	0	0	200	903	0	0	0	0	0	0	0	603	903	0
532	7	0	0	0	0	0	0	200	300	0	0	0	0	0	0	0	200	903	0	0	0	0	0	0	0	603	903	0
532	8	0	0	0	0	0	0	200	300	0	0	0	0	0	0	0	200	903	0	0	0	0	0	0	0	603	903	0
532	9	0	0	0	0	0	0	200	300	0	0	0	0	0	0	0	200	903	0	0	0	0	0	0	0	603	903	0
533	0	0	0	0	0	0	0	200	300	0	0	0	0	0	0	0	200	903	0	0	0	0	0	0	0	603	903	0
533	1	0	0	0	0	0	0	200	300	0	0	0	0	0	0	0	200	903	0	0	0	0	0	0	0	603	903	0
533	2	0	0	0	0	0	0	200	300	0	0	0	0	0	0	0	200	903	0	0	0	0	0	0	0	603	903	0
533	3	0	0	0	0	0	0	200	300	0	0	0	0	0	0	0	200	903	0	0	0	0	0	0	0	603	903	0
533	4	0	0	0	0	0	0	200	300	0	0	0	0	0	0	0	200	903	0	0	0	0	0	0	0	603	903	0
533	5	0	0	0	0	0	0	200	300	0	0	0	0	0	0	0	200	903	0	0	0	0	0	0	0	603	903	0
533	6	0	0	0	0	0	0	200	300	0	0	0	0	0	0	0	200	903	0	0	0	0	0	0	0	603	903	0
533	7	0	0	0	0	0	0	200	300	0	0	0	0	0	0	0	200	903	0	0	0	0	0	0	0	603	903	0
533	8	0	0	0	0	0	0	200	300	0	0	0	0	0	0	0	200	903	0	0	0	0	0	0	0	603	903	0
533	9	0	0	0	0	0	0	200	300	0	0	0	0	0	0	0	200	903	0	0	0	0	0	0	0	603	903	0
534	0	0	0	0	0	0	0	200	300	0	0	0	0	0	0	0	200	903	0	0	0	0	0	0	0	603	903	0
534	1	0	0	0	0	0	0	200	300	0	0	0	0	0	0	0	200	903	0	0	0	0	0	0	0	603	903	0
534	2	0	0	0	0	0	0	200	300	0	0	0	0	0	0	0	200	903	0	0	0	0	0	0	0	603	903	0
534	3	0	0	0	0	0	0	200	300	0	0	0	0	0	0	0	200	903	0	0	0	0	0	0	0	603	903	0
534	4	0	0	0	0	0	0	200	300	0	0	0	0	0	0	0	200	903	0	0	0	0	0	0	0	603	903	0
534	5	0	0	0	0	0	0	200	300	0	0	0	0	0	0	0	200	903	0	0	0	0	0	0	0	603	903	0
534	6	0	0	0	0	0	0	200	300	0	0	0	0	0	0	0	200	903	0	0	0	0	0	0	0	603	903	0
534	7	0	0	0	0	0	0	200	300	0	0	0	0	0	0	0	200	903	0	0	0	0	0	0	0	603	903	0
534	8	0	0	0	0	0	0	200	300	0	0	0	0	0	0	0	200	903	0	0	0	0	0	0	0	603	903	0
534	9	0	0	0	0	0	0	200	300	0	0	0	0	0	0	0	200	903	0	0	0	0	0	0	0	603	903	0
535	0	0	0	0	0	0	0	200	300	0	0	0	0	0	0	0	200	903	0	0	0	0	0	0	0	603	903	0
535	1	0	0	0	0	0	0	200	300	0	0	0	0	0	0	0	200	903	0	0	0	0	0	0	0	603	903	0
535	2	0	0	0	0	0	0	200	300	0	0	0	0	0	0	0	200	903	0	0	0	0	0	0	0	603	903	0
535	3	0	0	0	0	0	0	200	300	0	0	0	0	0	0	0	200	903	0	0	0	0	0	0	0	603	903	0
535	4	0	0	0	0	0	0	200	300	0	0	0	0	0	0	0	200	903	0	0	0	0	0	0	0	603	903	0
535	5	0	0	0	0	0	0	200	300	0	0	0	0	0	0	0	200	903	0	0	0	0	0	0	0	603	903	0
535	6	0	0	0	0	0	0	200	300	0	0	0	0	0	0	0	200	903	0	0	0	0	0	0	0	603	903	0
535	7	0	0	0	0	0	0	200	300	0	0	0	0	0	0	0	200	903	0	0	0	0	0	0	0	603	903	0
535	8	0	0	0	0	0	0	200	300	0	0	0	0	0	0	0	200	903	0	0	0	0	0	0	0	603	903	0
535	9	0	0	0	0	0	0	200	300	0	0	0	0	0	0	0	200	903	0	0	0	0	0	0	0	603	903	0
536	0	0	0	0	0	0	0	200	300	0	0	0	0	0	0	0	200	903	0	0	0	0	0	0	0	603	903	0
536	1	0	0	0	0	0	0	200	300	0	0	0	0	0	0	0	200	903	0	0	0	0	0	0	0	603	903	0
536	2	0	0	0	0	0	0	200	300	0	0	0	0	0	0	0	200	903	0	0	0	0	0	0	0	603	903	0
536	3	0	0	0	0	0	0	200	300	0	0	0	0	0	0	0	200	903	0	0	0	0	0	0	0	603	903	0
536	4	0	0	0	0	0	0	200	300	0	0	0	0	0	0	0	200	903	0	0	0	0	0	0	0	603	903	0
536	5	0	0	0	0	0	0	200	300	0	0	0	0	0	0	0	200	903	0	0	0	0	0	0	0	603	903	0
536	6	0	0	0	0	0	0	200	300	0	0	0	0	0	0	0	200	903	0	0	0	0	0	0	0	603	903	0
536	7	0	0	0	0	0	0	200	300	0	0	0	0	0	0	0	200	903	0	0	0	0	0	0	0	603	903	0
536	8	0	0	0	0	0	0	200	300	0	0	0	0	0	0	0	200	903	0	0	0	0	0	0	0	603	903	0
536	9	0	0	0	0	0	0	200	300	0	0	0	0	0	0	0	200	903	0	0	0	0	0	0	0	603	903	0
537	0	0	0	0	0	0	0	200	300	0	0	0	0	0	0	0	200	903	0	0	0	0	0	0	0	603	903	0
537	1	0	0	0	0	0	0	200	300	0	0	0	0	0	0	0	200	903	0	0	0	0	0	0	0	603	903	0
537	2	0	0	0	0	0	0	200	300	0	0	0	0	0	0	0	200	903	0	0	0	0	0	0	0	603	903	0
537	3	0	0	0	0	0	0	200	300	0	0	0	0	0	0	0	200	903	0	0	0	0	0	0	0	603	903	0
537	4	0	0	0	0	0	0	200	300	0	0	0	0	0	0	0	200	903	0	0	0	0	0	0	0	603	903	0
537	5	0	0	0	0	0	0	200	300	0	0	0	0	0	0	0	200	903	0	0	0	0	0	0	0	603	903	0
537	6	0	0	0	0	0	0	200	300	0	0	0	0	0	0	0	200	903	0	0	0	0	0	0	0	603	903	0
537	7	0	0	0	0	0	0	200	300	0	0	0	0	0	0	0	200	903	0	0	0	0	0	0	0	603	903	0
537	8	0	0	0	0	0	0	200	300	0	0	0	0	0	0	0	200	903	0	0	0	0	0	0	0	603	903	0
537	9	0	0	0	0	0	0	200	300	0	0	0	0	0	0	0	200	903	0	0	0	0	0	0	0	603	903	0
538	0	0	0	0	0	0	0	200	300	0	0	0	0	0	0	0	200	903	0	0	0	0	0	0	0	603	903	0
538	1	0	0	0	0	0	0	200	300	0	0	0	0	0	0	0	200	903	0	0	0	0	0	0	0	603	903	0
538	2	0	0	0	0	0	0	200	300	0	0	0	0	0	0	0	200	903	0	0	0	0	0	0	0	603	903	0
538	3	0	0	0	0	0	0	200	300	0	0	0	0	0	0	0	200	903	0	0	0	0	0	0	0	603	903	0
538	4	0	0	0	0	0	0	200	300	0	0	0	0	0	0	0	200	903	0	0	0	0	0	0	0	603	903	0
538	5	0	0	0	0	0	0	200	300	0	0	0	0	0	0	0	200	903	0	0	0	0	0	0	0	603	903	0
538	6	0	0	0	0	0	0	200	300	0	0	0	0	0	0	0	200	903	0	0	0	0	0	0	0	603	903	0
538	7	0	0	0	0	0	0	200	300	0	0	0	0	0	0	0	200	903	0	0	0	0	0	0	0	603	903	0
538	8	0	0	0	0	0	0	200	300	0	0	0	0	0	0	0	200	903	0	0	0	0	0	0	0	603	903	0
538	9	0	0	0	0	0	0	200	300	0	0	0	0	0	0	0	200	903	0	0	0	0	0	0	0	603	903	0
539	0	0	0	0	0	0	0	200	300	0	0	0	0	0	0	0	200	903	0	0	0	0	0	0	0	603	903	0
539	1	0	0	0	0	0	0	200	300	0	0	0	0	0	0	0	200	903	0	0	0	0	0	0	0	603	903	0
539	2	0	0	0	0	0	0	200	300	0	0	0	0	0	0	0	200	903	0	0	0	0	0	0	0	603	903	0
539	3	0	0	0	0	0	0	200	300	0	0	0	0	0	0	0	200	903	0	0	0	0	0	0	0	603	903	0
539	4	0	0	0	0	0	0	200	300	0	0	0	0	0	0	0	200	903	0	0	0	0	0	0	0	603	903	0
539	5	0	0	0	0	0	0	200	300	0	0	0	0	0	0	0	200	903	0	0	0	0	0	0	0	603	903	0
539	6	0	0	0	0	0	0	200	300	0	0	0	0	0	0	0	200	903	0	0	0	0	0	0	0	603	903	0
539	7	0	0	0	0	0	0	200	300	0	0	0	0	0	0	0	200	903	0	0	0	0	0	0	0	603	903	0
539	8	0	0	0	0	0	0	200	300	0	0	0	0	0	0	0	200	903	0	0	0	0	0	0	0	603	903	0
539	9	0	0	0	0	0	0	200	300	0	0	0	0	0	0	0	200	903	0	0	0	0	0	0	0	603	903	0
540	0	0	0	0	0	0	0	200	300	0	0	0	0	0	0	0	200	903	0	0	0	0	0	0	0	603	903	0
540	1	0	0	0	0	0	0	200	300	0	0	0	0	0	0	0	200	903	0	0	0	0	0	0	0	603	903	0
540	2	0	0	0	0	0	0	200	300	0	0	0	0	0	0	0	200	903	0	0	0	0	0	0	0	603	903	0
540	3	0	0	0	0	0	0	200	300	0	0	0	0	0	0	0	200	903	0	0	0	0	0	0	0	603	903	0
540	4	0	0	0	0	0	0	200	300	0	0	0	0	0	0	0	200	903	0	0	0	0	0	0	0	603	903	0
540	5	0	0	0	0	0	0	200	300	0	0	0	0	0	0	0	200	903	0	0	0	0	0	0	0	603	903	0
540	6	0	0	0	0	0	0	200	300	0	0	0	0	0	0	0	200	903	0	0	0	0	0	0	0	603	903	0
540	7	0	0	0	0	0	0	200	300	0	0	0	0	0	0	0	200	903	0	0	0	0	0	0	0	603	903	0
540	8	0	0	0	0	0	0	200	300	0	0	0	0	0	0	0	200	903	0	0	0	0	0	0	0	603	903	0
540	9	0	0	0	0	0	0	200	300	0	0	0	0	0	0	0	200	903	0	0	0	0	0	0	0	603	903	0
541	0	0	0	0	0	0	0	200	300	0	0	0	0	0	0	0	200	903	0	0	0	0	0	0	0	603	903	0
541	1	0	0	0	0	0	0	200	300	0	0	0	0	0	0	0	200	903	0	0	0	0	0	0	0	603	903	0
541	2	0	0	0	0	0	0	200	300	0	0	0	0	0	0	0	200	903	0	0	0	0	0	0	0	603	903	0
541	3	0	0	0	0	0	0	200	300	0	0	0	0	0	0	0	200	903	0	0	0	0	0	0	0	603	903	0
541	4	0	0	0	0	0	0	200	300	0	0	0	0	0	0	0	200	903	0	0	0	0	0	0	0	603	903	0
541	5	0	0	0	0	0	0	200	300	0	0	0	0	0	0	0	200	903	0	0	0	0	0	0	0	603	903	0
541	6	0	0	0	0	0	0	200	300	0	0	0	0	0	0	0	200	903	0	0	0	0	0	0	0	603	903	0
541	7	0	0	0	0	0	0	200	300	0	0	0	0	0	0	0	200	903	0	0	0	0	0	0	0	603	903	0
541	8	0	0	0	0	0	0	200	300	0	0	0	0	0	0	0	200	903	0	0	0	0	0	0	0	603	903	0
541	9	0	0	0	0	0	0	200	300	0	0	0	0	0	0	0	200	903	0	0	0	0	0	0	0	603	903	0
542	0	0	0	0	0	0	0	200	300	0	0	0	0	0	0	0	200	903	0	0	0	0	0	0	0	603	903	0
542	1	0	0	0	0	0	0	200	300	0	0	0	0	0	0	0	200	903	0	0	0	0	0	0	0	603	903	0
542	2	0	0	0	0	0	0	200	300	0	0	0	0	0	0	0	200	903	0	0	0	0	0	0	0	603	903	0
542	3	0	0	0	0	0	0	200	300	0	0	0	0	0	0	0	200	903	0	0	0	0	0	0	0	603	903	0
542	4	0	0	0	0	0	0	200	300	0	0	0	0	0	0	0	200	903	0	0	0	0	0	0	0	603	903	0
542	5	0	0	0	0	0	0	200	300	0	0	0	0	0	0	0	200	903	0	0	0	0	0	0	0	603	903	0
542	6	0	0	0	0	0	0	200	300	0	0	0	0	0	0	0	200	903	0	0	0	0	0	0	0	603	903	0
542	7	0	0	0	0	0	0	200	300	0	0	0	0	0	0	0	200	903	0	0	0	0	0	0	0	603	903	0
542	8	0	0	0	0	0	0	200	300	0	0	0	0	0	0	0	200	903	0	0	0	0	0	0	0	603	903	0
542	9	0	0	0	0	0	0	200	300	0	0	0	0	0	0	0	200	903	0	0	0	0	0	0	0	603	903	0
543	0	0	0	0	0	0	0	200	300	0	0	0	0	0	0	0	200	903	0	0	0	0	0	0	0	603	903	0
543	1	0	0	0	0	0	0	200	300	0	0	0	0	0	0	0	200	903	0	0	0	0	0	0	0	603	903	0
543	2	0	0	0	0	0	0	200	300	0	0	0	0	0	0	0	200	903	0	0	0	0	0	0	0	603	903	0
543	3	0	0	0	0	0	0	200	300	0	0	0	0	0	0	0	200	903	0	0	0	0	0	0	0	603	903	0
543	4	0	0	0	0	0	0	200	300	0	0	0	0	0	0	0	200	903	0	0	0	0	0	0	0	603	903	0
543	5	0	0	0	0	0	0	200	300	0	0	0	0	0	0	0	200	903	0	0	0	0	0	0	0	603	903	0
543	6	0	0	0	0	0	0	200	300	0	0	0	0	0	0	0	200	903	0	0	0	0	0	0	0	603	903	0
543	7	0	0	0	0	0	0	200	300	0	0	0	0	0	0	0	200	903	0	0	0	0	0	0	0	603	903	0
543	8	0	0	0	0	0	0	200	300	0	0	0	0	0	0	0	200	903	0	0	0	0	0	0	0	603	903	0
543	9	0	0	0	0	0	0	200	300	0	0	0	0	0	0	0	200	903	0	0	0	0	0	0	0	603	903	0
544	0	0	0	0	0	0	0	200	300	0	0	0	0	0	0	0	200	903	0	0	0	0	0	0	0	603	903	0
544	1	0	0	0	0	0	0	200	300	0	0	0	0	0	0	0	200	903	0	0	0	0	0	0	0	603	903	0
544	2	0	0	0	0	0	0	200	300	0	0	0	0	0	0	0	200	903	0	0	0	0	0	0	0	603	903	0
544	3	0	0	0	0	0	0	200	300	0	0	0	0	0	0	0	200	903	0	0	0	0	0	0	0	603	903	0
544	4	0	0	0	0	0	0	200	300	0	0	0	0	0	0	0	200	903	0	0	0	0	0	0	0	603	903	0
544	5	0	0	0	0	0	0	200	300	0	0	0	0	0	0	0	200	903	0	0	0	0	0	0	0	603	903	0
544	6	0	0	0	0	0	0	200	300	0	0	0	0	0	0	0	200	903	0	0	0	0	0	0	0	603	903	0
544	7	0	0	0	0	0	0	200	300	0	0	0	0	0	0	0	200	903	0	0	0	0	0	0	0	603	903	0
544	8	0	0	0	0	0	0	200	300	0	0	0	0	0	0	0	200	903	0	0	0	0	0	0	0	603	903	0
544	9	0	0	0	0	0	0	200	300	0	0	0	0	0	0	0	200	903	0	0	0	0	0	0	0	603	903	0
545	0	0	0	0	0	0	0	200	300	0	0	0	0	0	0	0	200	903	0	0	0	0	0	0	0	603	903	0
545	1	0	0	0	0	0	0	200	300	0	0	0	0	0	0	0	200	903	0	0	0	0	0	0	0	603	903	0
545	2	0	0	0	0	0	0	200	300	0	0	0	0	0	0	0	200	903	0	0	0	0	0	0	0	603	903	0
545	3	0	0	0	0	0	0	200	300	0	0	0	0	0	0	0	200	903	0	0	0	0	0	0	0	603	903	0
545	4	0	0	0	0	0	0	200	300	0	0	0	0	0	0	0	200	903	0	0	0	0	0	0	0	603	903	0
545	5	0	0	0	0	0	0	200	300	0	0	0	0	0	0	0	200	903	0	0	0	0	0	0	0	603	903	0
545	6	0	0	0	0	0	0	200	300	0	0	0	0	0	0	0	200	903	0	0	0	0	0	0	0	603	903	0
545	7	0	0	0	0	0	0	200	300	0	0	0	0	0	0	0	200	903	0	0	0	0	0	0	0	603	903	0
545	8	0	0	0	0	0	0	200	300	0	0	0	0	0	0	0	200	903	0	0	0	0	0	0	0	603	903	0
545	9	0	0	0	0	0	0	200	300	0	0	0	0	0	0	0	200	903	0	0	0	0	0	0	0	603	903	0
546	0	0	0	0	0	0	0	200	300	0	0	0	0	0	0	0	200	903	0	0	0	0	0	0	0	603	903	0
546	1	0	0	0	0	0	0	200	300	0	0	0	0	0	0	0	200	903	0	0	0	0	0	0	0	603	903	0
546	2	0	0	0	0	0	0	200	300	0	0	0	0	0	0	0	200	903	0	0	0	0	0	0	0	603	903	0
546	3	0	0	0	0	0	0	200	300	0	0	0	0	0	0	0	200	903	0	0	0	0	0	0	0	603	903	0
546	4	0	0	0	0	0	0	200	300	0	0	0	0	0	0	0	200	903	0	0	0	0	0	0	0	603	903	0
546	5	0	0	0	0	0	0	200	300	0	0	0	0	0	0	0	200	903	0	0	0	0	0	0	0	603	903	0
546	6	0	0	0	0	0	0	200	300	0	0	0	0	0	0	0	200	903	0	0	0	0	0	0	0	603	903	0
546	7	0	0	0	0	0	0	200	300	0	0	0	0	0	0	0	200	903	0	0	0	0	0	0	0	603	903	0
546	8	0	0	0	0	0	0	200	300	0	0	0	0	0	0	0	200	903	0	0	0	0	0	0	0	603	903	0
546	9	0	0	0	0	0	0	200	300	0	0	0	0	0	0	0	200	903	0	0	0	0	0	0	0	603	903	0
547	0	0	0	0	0	0	0	200	300	0	0	0	0	0	0	0	200	903	0	0	0	0	0	0	0	603	903	0
547	1	0	0	0	0	0	0	200	300	0	0	0	0	0	0	0	200	903	0	0	0	0	0	0	0	603	903	0
547	2	0	0	0	0	0	0	200	300	0	0	0	0	0	0	0	200	903	0	0	0	0	0	0	0	603	903	0
547	3	0	0	0	0	0	0	200	300	0	0	0	0	0	0	0	200	903	0	0	0	0	0	0	0	603	903	0
547	4	0	0	0	0	0	0	200	300	0	0	0	0	0	0	0	200	903	0	0	0	0	0	0	0	603	903	0
547	5	0	0	0	0	0	0	200	300	0	0	0	0	0	0	0	200	903	0	0	0	0	0	0	0	603	903	0
547	6	0	0	0	0	0	0	200	300	0	0	0	0	0	0	0	200	903	0	0	0	0	0	0	0	603	903	0
547	7	0	0	0	0	0	0	200	300	0	0	0	0	0	0	0	200	903	0	0	0	0	0	0	0	603	903	0
547	8	0	0	0	0	0	0	200	300	0	0	0	0	0	0	0	200	903	0	0	0	0	0	0	0	603	903	0
547	9	0	0	0	0	0	0	200	300	0	0	0	0	0	0	0	200	903	0	0	0	0	0	0	0	603	903	0
548	0	0	0	0	0	0	0	200	300	0	0	0	0	0	0	0	200	903	0	0	0	0	0	0	0	603	903	0
548	1	0	0	0	0	0	0	200	300	0	0	0	0	0	0	0	200	903	0	0	0	0	0	0	0	603	903	0
548	2	0	0	0	0	0	0	200	300	0	0	0	0	0	0	0	200	903	0	0	0	0	0	0	0	603	903	0
548	3	0	0	0	0	0	0	200	300	0	0	0	0	0	0	0	200	903	0	0	0	0	0	0	0	603	903	0
548	4	0	0	0	0	0	0	200	300	0	0	0	0	0	0	0	200	903	0	0	0	0	0	0	0	603	903	0
548	5	0	0	0	0	0	0	200	300	0	0	0	0	0	0	0	200	903	0	0	0	0	0	0	0	603	903	0
548	6	0	0	0	0	0	0	200	300	0	0	0	0	0	0	0	200	903	0	0	0	0	0	0	0	603	903	0
548	7	0	0	0	0	0	0	200	300	0	0	0	0	0	0	0	200	903	0	0	0	0	0	0	0	603	903	0
548	8	0	0	0	0	0	0	200	300	0	0	0	0	0	0	0	200	903	0	0	0	0	0	0	0	603	903	0
548	9	0	0	0	0	0	0	200	300	0	0	0	0	0	0	0	200	903	0	0	0	0	0	0	0	603	903	0
549	0	0	0	0	0	0	0	200	300	0	0	0	0	0	0	0	200	903	0	0	0	0	0	0	0	603	903	0
549	1	0	0	0	0	0	0	200	300	0	0	0	0	0	0	0	200	903	0	0	0	0	0	0	0	603	903	0
549	2	0	0	0	0	0	0	200	300	0	0	0	0	0	0	0	200	903	0	0	0	0	0	0	0	603	903	0
549	3	0	0	0	0	0	0	200	300	0	0	0	0	0	0	0	200	903	0	0	0	0	0	0	0	603	903	0
549	4	0	0	0	0	0	0	200	300	0	0	0	0	0	0	0	200	903	0	0	0	0	0	0	0	603	903	0
549	5	0	0	0	0	0	0	200	300	0	0	0	0	0	0	0	200	903	0	0	0	0	0	0	0	603	903	0
549	6	0	0	0	0	0	0	200	300	0	0	0	0	0	0	0	200	903	0	0	0	0	0	0	0	603	903	0
549	7	0	0	0	0	0	0	200	300	0	0	0	0	0	0	0	200	903	0	0	0	0	0	0	0	603	903	0
549	8	0	0	0	0	0	0	200	300	0	0	0	0	0	0	0	200	903	0	0	0	0	0	0	0	603	903	0
549	9	0	0	0	0	0	0	200	300	0	0	0	0	0	0	0	200	903	0	0	0	0	0	0	0	603	903	0
550	0	0	0	0	0	0	0	200	300	0	0	0	0	0	0	0	200	903	0	0	0	0	0	0	0	603	903	0
550	1	0	0	0	0	0	0	200	300	0	0	0	0	0	0	0	200	903	0	0	0	0	0	0	0	603	903	0
550	2	0	0	0	0	0	0	200	300	0	0	0	0	0	0	0	200	903	0	0	0	0	0	0	0	603	903	0
550	3	0	0	0	0	0	0	200	300	0	0	0	0	0	0	0	200	903	0	0	0	0	0	0	0	603	903	0
550	4	0	0	0	0	0	0	200	300	0	0	0	0	0	0	0	200	903	0	0	0	0	0	0	0	603	903	0
550	5	0	0	0	0	0	0	200	300	0	0	0	0	0	0	0	200	903	0	0	0	0	0	0	0	603	903	0
550	6	0	0	0	0	0	0	200	300	0	0	0	0	0	0	0	200	903	0	0	0	0	0	0	0	603	903	0
550	7	0	0	0	0	0	0	200	300	0	0	0	0	0	0	0	200	903	0	0	0	0	0	0	0	603	903	0
550	8	0	0	0	0	0	0	200	300	0	0	0	0	0	0	0	200	903	0	0	0	0	0	0	0	603	903	0
550	9	0	0	0	0	0	0	200	300	0	0	0	0	0	0	0	200	903	0	0	0	0	0	0	0	603	903	0
551	0	0	0	0	0	0	0	200	300	0	0	0	0	0	0	0	200	903	0	0	0	0	0	0	0	603	903	0
551	1	0	0	0	0	0	0	200	300	0	0	0	0	0	0	0	200	903	0	0	0	0	0	0	0	603	903	0
551	2	0	0	0	0	0	0	200	300	0	0	0	0	0	0	0	200	903	0	0	0	0	0	0	0	603	903	0
551	3	0	0	0	0	0	0	200	300	0	0	0	0	0	0	0	200	903	0	0	0	0	0	0	0	603	903	0
551	4	0	0	0	0	0	0	200	300	0	0	0	0	0	0	0	200	903	0	0	0	0	0	0	0	603	903	0
551	5	0	0	0	0	0	0	200	300	0	0	0	0	0	0	0	200	903	0	0	0	0	0	0	0	603	903	0
551	6	0	0	0	0	0	0	200	300	0	0	0	0	0	0	0	200	903	0	0	0	0	0	0	0	603	903	0
551	7	0	0	0	0	0	0	200	300	0	0	0	0	0	0	0	200	903	0	0	0	0	0	0	0	603	903	0
551	8	0	0	0	0	0	0	200	300	0	0	0	0	0	0	0	200	903	0	0	0	0	0	0	0	603	903	0
551	9	0	0	0	0	0	0	200	300	0	0	0	0	0	0	0	200	903	0	0	0	0	0	0	0	603	903	0
552	0	0	0	0	0	0	0	200	300	0	0	0	0	0	0	0	200	903	0	0	0	0	0	0	0	603	903	0
552	1	0	0	0	0	0	0	200	300	0	0	0	0	0	0	0	200	903	0	0	0	0	0	0	0	603	903	0
552	2	0	0	0	0	0	0	200	300	0	0	0	0	0	0	0	200	903	0	0	0	0	0	0	0	603	903	0
552	3	0	0	0	0	0	0	200	300	0	0	0	0	0	0	0	200	903	0	0	0	0	0	0	0	603	903	0
552	4	0	0	0	0	0	0	200	300	0	0	0	0	0	0	0	200	903	0	0	0	0	0	0	0	603	903	0
552	5	0	0	0	0	0	0	200	300	0	0	0	0	0	0	0	200	903	0	0	0	0	0	0	0	603	903	0
552	6	0	0	0	0	0	0	200	300	0	0	0	0	0	0	0	200	903	0	0	0	0	0	0	0	603	903	0
552	7	0	0	0	0	0	0	200	300	0	0	0	0	0	0	0	200	903	0	0	0	0	0	0	0	603	903	0
552	8	0	0	0	0	0	0	200	300	0	0	0	0	0	0	0	200	903	0	0	0	0	0	0	0	603	903	0
552	9	0	0	0	0	0	0	200	300	0	0	0	0	0	0	0	200	903	0	0	0	0	0	0	0	603	903	0
553	0	0	0	0	0	0	0	200	300	0	0	0	0	0	0	0	200	903	0	0	0	0	0	0	0	603	903	0
553	1	0	0	0	0	0	0	200	300	0	0	0	0	0	0	0	200	903	0	0	0	0	0	0	0	603	903	0
553	2	0	0	0	0	0	0	200	300	0	0	0	0	0	0	0	200	903	0	0	0	0	0	0	0	603	903	0
553	3	0	0	0	0	0	0	200	300	0	0	0	0	0	0	0	200	903	0	0	0	0	0	0	0	603	903	0
553	4	0	0	0	0	0	0	200	300	0	0	0	0	0	0	0	200	903	0	0	0	0	0	0	0	603	903	0
553	5	0	0	0	0	0	0	200	300	0	0	0	0	0	0	0	200	903	0	0	0	0	0	0	0	603	903	0
553	6	0	0	0	0	0	0	200	300	0	0	0	0	0	0	0	200	903	0	0	0	0	0	0	0	603	903	0
553	7	0	0	0	0	0	0	200	300	0	0	0	0	0	0	0	200	903	0	0	0	0	0	0	0	603	903	0
553	8	0	0	0	0	0	0	200	300	0	0	0	0	0	0	0	200	903	0	0	0	0	0	0	0	603	903	0
553	9	0	0	0	0	0	0	200	300	0	0	0	0	0	0	0	200	903	0	0	0	0	0	0	0	603	903	0
554	0	0	0	0	0	0	0	200	300	0	0	0	0	0	0	0	200	903	0	0	0	0	0	0	0	603	903	0
554	1	0	0	0	0	0	0	200	300	0	0	0	0	0	0	0	200	903	0	0	0	0	0	0	0	603	903	0
554	2	0	0	0	0	0	0	200	300	0	0	0	0	0	0	0	200	903	0	0	0	0	0	0	0	603	903	0
554	3	0	0	0	0	0	0	200	300	0	0	0	0	0	0	0	200	903	0	0	0	0	0	0	0	603	903	0
554	4	0	0	0	0	0	0	200	300	0	0	0	0	0	0	0	200	903	0	0	0	0	0	0	0	603	903	0
554	5	0	0	0	0	0	0	200	300	0	0	0	0	0	0	0	200	903	0	0	0	0	0	0	0	603	903	0
554	6	0	0	0	0	0	0	200	300	0	0	0	0	0	0	0	200	903	0	0	0	0	0	0	0	603	903	0
554	7	0	0	0	0	0	0	200	300	0	0	0	0	0	0	0	200	903	0	0	0	0	0	0	0	603	903	0
554	8	0	0	0	0	0	0	200	300	0	0	0	0	0	0	0	200	903	0	0	0	0	0	0	0	603	903	0
554	9	0	0	0	0	0	0	200	300	0	0	0	0	0	0	0	200	903	0	0	0	0	0	0	0	603	903	0
555	0	0	0	0	0	0	0	200	300	0	0	0	0	0	0	0	200	903	0	0	0	0	0	0	0	603	903	0
555	1	0	0	0	0	0	0	200	300	0	0	0	0	0	0	0	200	903	0	0	0	0	0	0	0	603	903	0
555	2	0	0	0	0	0	0	200	300	0	0	0	0	0	0	0	200	903	0	0	0	0	0	0	0	603	903	0
555	3	0	0	0	0	0	0	200	300	0	0	0	0	0	0	0	200	903	0	0	0	0	0	0	0	603	903	0
555	4	0	0	0	0	0	0	200	300	0	0	0	0	0	0	0	200	903	0	0	0	0	0	0	0	603	903	0
555	5	0	0	0	0	0	0	200	300	0	0	0	0	0	0	0	200	903	0	0	0	0	0	0	0	603	903	0
555	6	0	0	0	0	0	0	200	300	0	0	0	0	0	0	0	200	903	0	0	0	0	0	0	0	603	903	0
555	7	0	0	0	0	0	0	200	300	0	0	0	0	0	0	0	200	903	0	0	0	0	0	0	0	603	903	0
555	8	0	0	0	0	0	0	200	300	0	0	0	0	0	0	0	200	903	0	0	0	0	0	0	0	603	903	0
555	9	0	0	0	0	0	0	200	300	0	0	0	0	0	0	0	200	903	0	0	0	0	0	0	0	603	903	0
556	0	0	0	0	0	0	0	200	300	0	0	0	0	0	0	0	200	903	0	0	0	0	0	0	0	603	903	0
556	1	0	0	0	0	0	0	200	300	0	0	0	0	0	0	0	200	903	0	0	0	0	0	0	0	603	903	0
556	2	0	0	0	0	0	0	200	300	0	0	0	0	0	0	0	200	903	0	0	0	0	0	0	0	603	903	0
556	3	0	0	0	0	0	0	200	300	0	0	0	0	0	0	0	200	903	0	0	0	0	0	0	0	603	903	0
556	4	0	0	0	0	0	0	200	300	0	0	0	0	0	0	0	200	903	0	0	0	0	0	0	0	603	903	0
556	5	0	0	0	0	0	0	200	300	0	0	0	0	0	0	0	200	903	0	0	0	0	0	0	0	603	903	0
556	6	0	0	0	0	0	0	200	300	0	0	0	0	0	0	0	200	903	0	0	0	0	0	0	0	603	903	0
556	7	0	0	0	0	0	0	200	300	0	0	0	0	0	0	0	200	903	0	0	0	0	0	0	0	603	903	0
556	8	0	0	0	0	0	0	200	300	0	0	0	0	0	0	0	200	903	0	0	0	0	0	0	0	603	903	0
556	9	0	0	0	0	0	0	200	300	0	0	0	0	0	0	0	200	903	0	0	0	0	0	0	0	603	903	0
557	0	0	0	0	0	0	0	200	300	0	0	0	0	0	0	0	200	903	0	0	0	0	0	0	0	603	903	0
557	1	0	0	0	0	0	0	200	300	0	0	0	0	0	0	0	200	903	0	0	0	0	0	0	0	603	903	0
557	2	0	0	0	0	0	0	200	300	0	0	0	0	0	0	0	200	903	0	0	0	0	0	0	0	603	903	0
557	3	0	0	0	0	0	0	200	300	0	0	0	0	0	0	0	200	903	0	0	0	0	0	0	0	603	903	0
557	4	0	0	0	0	0	0	200	300	0	0	0	0	0	0	0	200	903	0	0	0	0	0	0	0	603	903	0
557	5	0	0	0	0	0	0	200	300	0	0	0	0	0	0	0	200	903	0	0	0	0	0	0	0	603	903	0
557	6	0	0	0	0	0	0	200	300	0	0	0	0	0	0	0	200	903	0	0	0	0	0	0	0	603	903	0
557	7	0	0	0	0	0	0	200	300	0	0	0	0	0	0	0	200	903	0	0	0	0	0	0	0	603	903	0
557	8	0	0	0	0	0	0	200	300	0	0	0	0	0	0	0	200	903	0	0	0	0	0	0	0	603	903	0
557	9	0	0	0	0	0	0	200	300	0	0	0	0	0	0	0	200	903	0	0	0	0	0	0	0	603	903	0
558	0	0	0	0	0	0	0	200	300	0	0	0	0	0	0	0	200	903	0	0	0	0	0	0	0	603	903	0
558	1	0	0	0	0	0	0	200	300	0	0	0	0	0	0	0	200	903	0	0	0	0	0	0	0	603	903	0
558	2	0	0	0	0	0	0	200	300	0	0	0	0	0	0	0	200	903	0	0	0	0	0	0	0	603	903	0
558	3	0	0	0	0	0	0	200	300	0	0	0	0	0	0	0	200	903	0	0	0	0	0	0	0	603	903	0
558	4	0	0	0	0	0	0	200	300	0	0	0	0	0	0	0	200	903	0	0	0	0	0	0	0	603	903	0
558	5	0	0	0	0	0	0	200	300	0	0	0	0	0	0	0	200	903	0	0	0	0	0	0	0	603	903	0
558	6	0	0	0	0	0	0	200	300	0	0	0	0	0	0	0	200	903	0	0	0	0	0	0	0	603	903	0
558	7	0	0	0	0	0	0	200	300	0	0	0	0	0	0	0	200	903	0	0	0	0	0	0	0	603	903	0
558	8	0	0	0	0	0	0	200	300	0	0	0	0	0	0	0	200	903	0	0	0	0	0	0	0	603	903	0
558	9	0	0	0	0	0	0	200	300	0	0	0	0	0	0	0	200	903	0	0	0	0	0	0	0	603	903	0
559	0	0	0	0	0	0	0	200	300	0	0	0	0	0	0	0	200	903	0	0	0	0	0	0	0	603	903	0
559	1	0	0	0	0	0	0	200	300	0	0	0	0	0	0	0	200	903	0	0	0	0	0	0	0	603	903	0
559	2	0	0	0	0	0	0	200	300	0	0	0	0	0	0	0	200	903	0	0	0	0	0	0	0	603	903	0
559	3	0	0	0	0	0	0	200	300	0	0	0	0	0	0	0	200	903	0	0	0	0	0	0	0	603	903	0
559	4	0	0	0	0	0	0	200	300	0	0	0	0	0	0	0	200	903	0	0	0	0	0	0	0	603	903	0
559	5	0	0	0	0	0	0	200	300	0	0	0	0	0	0	0	200	903	0	0	0	0	0	0	0	603	903	0
559	6	0	0	0	0	0	0	200	300	0	0	0	0	0	0	0	200	903	0	0	0	0	0	0	0	603	903	0
559	7	0	0	0	0	0	0	200	300	0	0	0	0	0	0	0	200	903	0	0	0	0	0	0	0	603	903	0
559	8	0	0	0	0	0	0	200	300	0	0	0	0	0	0	0	200	903	0	0	0	0	0	0	0	603	903	0
559	9	0	0	0	0	0	0	200	300	0	0	0	0	0	0	0	200	903	0	0	0	0	0	0	0	603	903	0
560	0	0	0	0	0	0	0	200	300	0	0	0	0	0	0	0	200	903	0	0	0	0	0	0	0	603	903	0
560	1	0	0	0	0	0	0	200	300	0	0	0	0	0	0	0	200	903	0	0	0	0	0	0	0	603	903	0
560	2	0	0	0	0	0	0	200	300	0	0	0	0	0	0	0	200	903	0	0	0	0	0	0	0	603	903	0
560	3	0	0	0	0	0	0	200	300	0	0	0	0	0	0	0	200	903	0	0	0	0	0	0	0	603	903	0
560	4	0	0	0	0	0	0	200	300	0	0	0	0	0	0	0	200	903	0	0	0	0	0	0	0	603	903	0
560	5	0	0	0	0	0	0	200	300	0	0	0	0	0	0	0	200	903	0	0	0	0	0	0	0	603	903	0
560	6	0	0	0	0	0	0	200	300	0	0	0	0	0	0	0	200	903	0	0	0	0	0	0	0	603	903	0
560	7	0	0	0	0	0	0	200	300	0	0	0	0	0	0	0	200	903	0	0	0	0	0	0	0	603	903	0
560	8	0	0	0	0	0	0	200	300	0	0	0	0	0	0	0	200	903	0	0	0	0	0	0	0	603	903	0
560	9	0	0	0	0	0	0	200	300	0	0	0	0	0	0	0	200	903	0	0	0	0	0	0	0	603	903	0
561	0	0	0	0	0	0	0	200	300	0	0	0	0	0	0	0	200	903	0	0	0	0	0	0	0	603	903	0
561	1	0	0	0	0	0	0	200	300	0	0	0	0	0	0	0	200	903	0	0	0	0	0	0	0	603	903	0
561	2	0	0	0	0	0	0	200	300	0	0	0	0	0	0	0	200	903	0	0	0	0	0	0	0	603	903	0
561	3	0	0	0	0	0	0	200	300	0	0	0	0	0	0	0	200	903	0	0	0	0	0	0	0	603	903	0
561	4	0	0	0	0	0	0	200	300	0	0	0	0	0	0	0	200	903	0	0	0	0	0	0	0	603	903	0
561	5	0	0	0	0	0	0	200	300	0	0	0	0	0	0	0	200	903	0	0	0	0	0	0	0	603	903	0
561	6	0	0	0	0	0	0	200	300	0	0	0	0	0	0	0	200	903	0	0	0	0	0	0	0	603	903	0
561	7	0	0	0	0	0	0	200	300	0	0	0	0	0	0	0	200	903	0	0	0	0	0	0	0	603	903	0
561	8	0	0	0	0	0	0	200	300	0	0	0	0	0	0	0	200	903	0	0	0	0	0	0	0	603	903	0
561	9	0	0	0	0	0	0	200	300	0	0	0	0	0	0	0	200	903	0	0	0	0	0	0	0	603	903	0
562	0	0	0	0	0	0	0	200	300	0	0	0	0	0	0	0	200	903	0	0	0	0	0	0	0	603	903	0
562	1	0	0	0	0	0	0	200	300	0	0	0	0	0	0	0	200	903	0	0	0	0	0	0	0	603	903	0
562	2	0	0	0	0	0	0	200	300	0	0	0	0	0	0	0	200	903	0	0	0	0	0	0	0	603	903	0
562	3	0	0	0	0	0	0	200	300	0	0	0	0	0	0	0	200	903	0	0	0	0	0	0	0	603	903	0
562	4	0	0	0	0	0	0	200	300	0	0	0	0	0	0	0	200	903	0	0	0	0	0	0	0	603	903	0
562	5	0	0	0	0	0	0	200	300	0	0	0	0	0	0	0	200	903	0	0	0	0	0	0	0	603	903	0
562	6	0	0	0	0	0	0	200	300	0	0	0	0	0	0	0	200	903	0	0	0	0	0	0	0	603	903	0
562	7	0	0	0	0	0	0	200	300	0	0	0	0	0	0	0	200	903	0	0	0	0	0	0	0	603	903	0
562	8	0	0	0	0	0	0	200	300	0	0	0	0	0	0	0	200	903	0	0	0	0	0	0	0	603	903	0
562	9	0	0	0	0	0	0	200	300	0	0	0	0	0	0	0	200	903	0	0	0	0	0	0	0	603	903	0
563	0	0	0	0	0	0	0	200	300	0	0	0	0	0	0	0	200	903	0	0	0	0	0	0	0	603	903	0
563	1	0	0	0	0	0	0	200	300	0	0	0	0	0	0	0	200	903	0	0	0	0	0	0	0	603	903	0
563	2	0	0	0	0	0	0	200	300	0	0	0	0	0	0	0	200	903	0	0	0	0	0	0	0	603	903	0
563	3	0	0	0	0	0	0	200	300	0	0	0	0	0	0	0	200	903	0	0	0	0	0	0	0	603	903	0
563	4	0	0	0	0	0	0	200	300	0	0	0	0	0	0	0	200	903	0	0	0	0	0	0	0	603	903	0
563	5	0	0	0	0	0	0	200	300	0	0	0	0	0	0	0	200	903	0	0	0	0	0	0	0	603	903	0
563	6	0	0	0	0	0	0	200	300	0	0	0	0	0	0	0	200	903	0	0	0	0	0	0	0	603	903	0
563	7	0	0	0	0	0	0	200	300	0	0	0	0	0	0	0	200	903	0	0	0	0	0	0	0	603	903	0
563	8	0	0	0	0	0	0	200	300	0	0	0	0	0	0	0	200	903	0	0	0	0	0	0	0	603	903	0
563	9	0	0	0	0	0	0	200	300	0	0	0	0	0	0	0	200	903	0	0	0	0	0	0	0	603	903	0
564	0	0	0	0	0	0	0	200	300	0	0	0	0	0	0	0	200	903	0	0	0	0	0	0	0	603	903	0
564	1	0	0	0	0	0	0	200	300	0	0	0	0	0	0	0	200	903	0	0	0	0	0	0	0	603	903	0
564	2	0	0	0	0	0	0	200	300	0	0	0	0	0	0	0	200	903	0	0	0	0	0	0	0	603	903	0
564	3	0	0	0	0	0	0	200	300	0	0	0	0	0	0	0	200	903	0	0	0	0	0	0	0	603	903	0
564	4	0	0	0	0	0	0	200	300	0	0	0	0	0	0	0	200	903	0	0	0	0	0	0	0	603	903	0
564	5	0	0	0	0	0	0	200	300	0	0	0	0	0	0	0	200	903	0	0	0	0	0	0	0	603	903	0
564	6	0	0	0	0	0	0	200	300	0	0	0	0	0	0	0	200	903	0	0	0	0	0	0	0	603	903	0
564	7	0	0	0	0	0	0	200	300	0	0	0	0	0	0	0	200	903	0	0	0	0	0	0	0	603	903	0
564	8	0	0	0	0	0	0	200	300	0	0	0	0	0	0	0	200	903	0	0	0	0	0	0	0	603	903	0
564	9	0	0	0	0	0	0	200	300	0	0	0	0	0	0	0	200	903	0	0	0	0	0	0	0	603	903	0
565	0	0	0	0	0	0	0	200	300	0	0	0	0	0	0	0	200	903	0	0	0	0	0	0	0	603	903	0
565	1	0	0	0	0	0	0	200	300	0	0	0	0	0	0	0	200	903	0	0	0	0	0	0	0	603	903	0
565	2	0	0	0	0	0	0	200	300	0	0	0	0	0	0	0	200	903	0	0	0	0	0	0	0	603	903	0
565	3	0	0	0	0	0	0	200	300	0	0	0	0	0	0	0	200	903	0	0	0	0	0	0	0	603	903	0
565	4	0	0	0	0	0	0	200	300	0	0	0	0	0	0	0	200	903	0	0	0	0	0	0	0	603	903	0
565	5	0	0	0	0	0	0	200	300	0	0	0	0	0	0	0	200	903	0	0	0	0	0	0	0	603	903	0
565	6	0	0	0	0	0	0	200	300	0	0	0	0	0	0	0	200	903	0	0	0	0	0	0	0	603	903	0
565	7	0	0	0	0	0	0	200	300	0	0	0	0	0	0	0	200	903	0	0	0	0	0	0	0	603	903	0
565	8	0	0	0	0	0	0	200	300	0	0	0	0	0	0	0	200	903	0	0	0	0	0	0	0	603	903	0
565	9	0	0	0	0	0	0	200	300	0	0	0	0	0	0	0	200	903	0	0	0	0	0	0	0	603	903	0
566	0	0	0	0	0	0	0	200	300	0	0	0	0	0	0	0	200	903	0	0	0	0	0	0	0	603	903	0
566	1	0	0	0	0	0	0	200	300	0	0	0	0	0	0	0	200	903	0	0	0	0	0	0	0	603	903	0
566	2	0	0	0	0	0	0	200	300	0	0	0	0	0	0	0	200	903	0	0	0	0	0	0	0	603	903	0
566	3	0	0	0	0	0	0	200	300	0	0	0	0	0	0	0	200	903	0	0	0	0	0	0	0	603	903	0
566	4	0	0	0	0	0	0	200	300	0	0	0	0	0	0	0	200	903	0	0	0	0	0	0	0	603	903	0
566	5	0	0	0	0	0	0	200	300	0	0	0	0	0	0	0	200	903	0	0	0	0	0	0	0	603	903	0
566	6	0	0	0	0	0	0	200	300	0	0	0	0	0	0	0	200	903	0	0	0	0	0	0	0	603	903	0
566	7	0	0	0	0	0	0	200	300	0	0	0	0	0	0	0	200	903	0	0	0	0	0	0	0	603	903	0
566	8	0	0	0	0	0	0	200	300	0	0	0	0	0	0	0	200	903	0	0	0	0	0	0	0	603	903	0
566	9	0	0	0	0	0	0	200	300	0	0	0	0	0	0	0	200	903	0	0	0	0	0	0	0	603	903	0
567	0	0	0	0	0	0	0	200	300	0	0	0	0	0	0	0	200	903	0	0	0	0	0	0	0	603	903	0
567	1	0	0	0	0	0	0	200	300	0	0	0	0	0	0	0	200	903	0	0	0	0	0	0	0	603	903	0
567	2	0	0	0	0	0	0	200	300	0	0	0	0	0	0	0	200	903	0	0	0	0	0	0	0	603	903	0
567	3	0	0	0	0	0	0	200	300	0	0	0	0	0	0	0	200	903	0	0	0	0	0	0	0	603	903	0
567	4	0	0	0	0	0	0	200	300	0	0	0	0	0	0	0	200	903	0	0	0	0	0	0	0	603	903	0
567	5	0	0	0	0	0	0	200	300	0	0	0	0	0	0	0	200	903	0	0	0	0	0	0	0	603	903	0
567	6	0	0	0	0	0	0	200	300	0	0	0	0	0	0	0	200	903	0	0	0	0	0	0	0	603	903	0
567	7	0	0	0	0	0	0	200	300	0	0	0	0	0	0	0	200	903	0	0	0	0	0	0	0	603	903	0
567	8	0	0	0	0	0	0	200	300	0	0	0	0	0	0	0	200	903	0	0	0	0	0	0	0	603	903	0
567	9	0	0	0	0	0	0	200	300	0	0	0	0	0	0	0	200	903	0	0	0	0	0	0	0	603	903	0
568	0	0	0	0	0	0	0	200	300	0	0	0	0	0	0	0	200	903	0	0	0	0	0	0	0	603	903	0
568	1	0	0	0	0	0	0	200	300	0	0	0	0	0	0	0	200	903	0	0	0	0	0	0	0	603	903	0
568	2	0	0	0	0	0	0	200	300	0	0	0	0	0	0	0	200	903	0	0	0	0	0	0	0	603	903	0
568	3	0	0	0	0	0	0	200	300	0	0	0	0	0	0	0	200	903	0	0	0	0	0	0	0	603	903	0
568	4	0	0	0	0	0	0	200	300	0	0	0	0	0	0	0	200	903	0	0	0	0	0	0	0	603	903	0
568	5	0	0	0	0	0	0	200	300	0	0	0	0	0	0	0	200	903	0	0	0	0	0	0	0	603	903	0
568	6	0	0	0	0	0	0	200	300	0	0	0	0	0	0	0	200	903	0	0	0	0	0	0	0	603	903	0
568	7	0	0	0	0	0	0	200	300	0	0	0	0	0	0	0	200	903	0	0	0	0	0	0	0	603	903	0
568	8	0	0	0	0	0	0	200	300	0	0	0	0	0	0	0	200	903	0	0	0	0	0	0	0	603	903	0
568	9	0	0	0	0	0	0	200	300	0	0	0	0	0	0	0	200	903	0	0	0	0	0	0	0	603	903	0
569	0	0	0	0	0	0	0	200	300	0	0	0	0	0	0	0	200	903	0	0	0	0	0	0	0	603	903	0
569	1	0	0	0	0	0	0	200	300	0	0	0	0	0	0	0	200	903	0	0	0	0	0	0	0	603	903	0
569	2	0	0	0	0	0	0	200	300	0	0	0	0	0	0	0	200	903	0	0	0	0	0	0	0	603	903	0
569	3	0	0	0	0	0	0	200	300	0	0	0	0	0	0	0	200	903	0	0	0	0	0	0	0	603	903	0
569	4	0	0	0	0	0	0	200	300	0	0	0	0	0	0	0	200	903	0	0	0	0	0	0	0	603	903	0
569	5	0	0	0	0	0	0	200	300	0	0	0	0	0	0	0	200	903	0	0	0	0	0	0	0	603	903	0
569	6	0	0	0	0	0	0	200	300	0	0	0	0	0	0	0	200	903	0	0	0	0	0	0	0	603	903	0
569	7	0	0	0	0	0	0	200	300	0	0	0	0	0	0	0	200	903	0	0	0	0	0	0	0	603	903	0
569	8	0	0	0	0	0	0	200	300	0	0	0	0	0	0	0	200	903	0	0	0	0	0	0	0	603	903	0
569	9	0	0	0	0	0	0	200	300	0	0	0	0	0	0	0	200	903	0	0	0	0	0	0	0	603	903	0
570	0	0	0	0	0	0	0	200	300	0	0	0	0	0	0	0	200	903	0	0	0	0	0	0	0	603	903	0
570	1	0	0	0	0	0	0	200	300	0	0	0	0	0	0	0	200	903	0	0	0	0	0	0	0	603	903	0
570	2	0	0	0	0	0	0	200	300	0	0	0	0	0	0	0	200	903	0	0	0	0	0	0	0	603	903	0
570	3	0	0	0	0	0	0	200	300	0	0	0	0	0	0	0	200	903	0	0	0	0	0	0	0	603	903	0
570	4	0	0	0	0	0	0	200	300	0	0	0	0	0	0	0	200	903	0	0	0	0	0	0	0	603	903	0
570	5	0	0	0	0	0	0	200	300	0	0	0	0	0	0	0	200	903	0	0	0	0	0	0	0	603	903	0
570	6	0	0	0	0	0	0	200	300	0	0	0	0	0	0	0	200	903	0	0	0	0	0	0	0	603	903	0
570	7	0	0	0	0	0	0	200	300	0	0	0	0	0	0	0	200	903	0	0	0	0	0	0	0	603	903	0
570	8	0	0	0	0	0	0	200	300	0	0	0	0	0	0	0	200	903	0	0	0	0	0	0	0	603	903	0
570	9	0	0	0	0	0	0	200	300	0	0	0	0	0	0	0	200	903	0	0	0	0	0	0	0	603	903	0
571	0	0	0	0	0	0	0	200	300	0	0	0	0	0	0	0	200	903	0	0	0	0	0	0	0	603	903	0
571	1	0	0	0	0	0	0	200	300	0	0	0	0	0	0	0	200	903	0	0	0	0	0	0	0	603	903	0
571	2	0	0	0	0	0	0	200	300	0	0	0	0	0	0	0	200	903	0	0	0	0	0	0	0	603	903	0
571	3	0	0	0	0	0	0	200	300	0	0	0	0	0	0	0	200	903	0	0	0	0	0	0	0	603	903	0
571	4	0	0	0	0	0	0	200	300	0	0	0	0	0	0	0	200	903	0	0	0	0	0	0	0	603	903	0
571	5	0	0	0	0	0	0	200	300	0	0	0	0	0	0	0	200	903	0	0	0	0	0	0	0	603	903	0
571	6	0	0	0	0	0	0	200	300	0	0	0	0	0	0	0	200	903	0	0	0	0	0	0	0	603	903	0
571	7	0	0	0	0	0	0	200	300	0	0	0	0	0	0	0	200	903	0	0	0	0	0	0	0	603	903	0
571	8	0	0	0	0	0	0	200	300	0	0	0	0	0	0	0	200	903	0	0	0	0	0	0	0	603	903	0
571	9	0	0	0	0	0	0	200	300	0	0	0	0	0	0	0	200	903	0	0	0	0	0	0	0	603	903	0
572	0	0	0	0	0	0	0	200	300	0	0	0	0	0	0	0	200	903	0	0	0	0	0	0	0	603	903	0
572	1	0	0	0	0	0	0	200	300	0	0	0	0	0	0	0	200	903	0	0	0	0	0	0	0	603	903	0
572	2	0	0	0	0	0	0	200	300	0	0	0	0	0	0	0	200	903	0	0	0	0	0	0	0	603	903	0
572	3	0	0	0	0	0	0	200	300	0	0	0	0	0	0	0	200	903	0	0	0	0	0	0	0	603	903	0
572	4	0	0	0	0	0	0	200	300	0	0	0	0	0	0	0	200	903	0	0	0	0	0	0	0	603	903	0
572	5	0	0	0	0	0	0	200	300	0	0	0	0	0	0	0	200	903	0	0	0	0	0	0	0	603	903	0
572	6	0	0	0	0	0	0	200	300	0	0	0	0	0	0	0	200	903	0	0	0	0	0	0	0	603	903	0
572	7	0	0	0	0	0	0	200	300	0	0	0	0	0	0	0	200	903	0	0	0	0	0	0	0	603	903	0
572	8	0	0	0	0	0	0	200	300	0	0	0	0	0	0	0	200	903	0	0	0	0	0	0	0	603	903	0
572	9	0	0	0	0	0	0	200	300	0	0	0	0	0	0	0	200	903	0	0	0	0	0	0	0	603	903	0
573	0	0	0	0	0	0	0	200	300	0	0	0	0	0	0	0	200	903	0	0	0	0	0	0	0	603	903	0
573	1	0	0	0	0	0	0	200	300	0	0	0	0	0	0	0	200	903	0	0	0	0	0	0	0	603	903	0
573	2	0	0	0	0	0	0	200	300	0	0	0	0	0	0	0	200	903	0	0	0	0	0	0	0	603	903	0
573	3	0	0	0	0	0	0	200	300	0	0	0	0	0	0	0	200	903	0	0	0	0	0	0	0	603	903	0
573	4	0	0	0	0	0	0	200	300	0	0	0	0	0	0	0	200	903	0	0	0	0	0	0	0	603	903	0
573	5	0	0	0	0	0	0	200	300	0	0	0	0	0	0	0	200	903	0	0	0	0	0	0	0	603	903	0
573	6	0	0	0	0	0	0	200	300	0	0	0	0	0	0	0	200	903	0	0	0	0	0	0	0	603	903	0
573	7	0	0	0	0	0	0	200	300	0	0	0	0	0	0	0	200	903	0	0	0	0	0	0	0	603	903	0
573	8	0	0	0	0	0	0	200	300	0	0	0	0	0	0	0	200	903	0	0	0	0	0	0	0	603	903	0
573	9	0	0	0	0	0	0	200	300	0	0	0	0	0	0	0	200	903	0	0	0	0	0	0	0	603	903	0
574	0	0	0	0	0	0	0	200	300	0	0	0	0	0	0	0	200	903	0	0	0	0	0	0	0	603	903	0
574	1	0	0	0	0	0	0	200	300	0	0	0	0	0	0	0	200	903	0	0	0	0	0	0	0	603	903	0
574	2	0	0	0	0	0	0	200	300	0	0	0	0	0	0	0	200	903	0	0	0	0	0	0	0	603	903	0
574	3	0	0	0	0	0	0	200	300	0	0	0	0	0	0	0	200	903	0	0	0	0	0	0	0	603	903	0
574	4	0	0	0	0	0	0	200	300	0	0	0	0	0	0	0	200	903	0	0	0	0	0	0	0	603	903	0
574	5	0	0	0	0	0	0	200	300	0	0	0	0	0	0	0	200	903	0	0	0	0	0	0	0	603	903	0
574	6	0	0	0	0	0	0	200	300	0	0	0	0	0	0	0	200	903	0	0	0	0	0	0	0	603	903	0
574	7	0	0	0	0	0	0	200	300	0	0	0	0	0	0	0	200	903	0	0	0	0	0	0	0	603	903	0
574	8	0	0	0	0	0	0	200	300	0	0	0	0	0	0	0	200	903	0	0	0	0	0	0	0	603	903	0
574	9	0	0	0	0	0	0	200	300	0	0	0	0	0	0	0	200	903	0	0	0	0	0	0	0	603	903	0
575	0	0	0	0	0	0	0	200	300	0	0	0	0	0	0	0	200	903	0	0	0	0	0	0	0	603	903	0
575	1	0	0	0	0	0	0	200	300	0	0	0	0	0	0	0	200	903	0	0	0	0	0	0	0	603	903	0
575	2	0	0	0	0	0	0	200	300	0	0	0	0	0	0	0	200	903	0	0	0	0	0	0	0	603	903	0
575	3	0	0	0	0	0	0	200	300	0	0	0	0	0	0	0	200	903	0	0	0	0	0	0	0	603	903	0
575	4	0	0	0	0	0	0	200	300	0	0	0	0	0	0	0	200	903	0	0	0	0	0	0	0	603	903	0
575	5	0	0	0	0	0	0	200	300	0	0	0	0	0	0	0	200	903	0	0	0	0	0	0	0	603	903	0
575	6	0	0	0	0	0	0	200	300	0	0	0	0	0	0	0	200	903	0	0	0	0	0	0	0	603	903	0
575	7	0	0	0	0	0	0	200	300	0	0	0	0	0	0	0	200	903	0	0	0	0	0	0	0	603	903	0
575	8	0	0	0	0	0	0	200	300	0	0	0	0	0	0	0	200	903	0	0	0	0	0	0	0	603	903	0
575	9	0	0	0	0	0	0	200	300	0	0	0	0	0	0	0	200	903	0	0	0	0	0	0	0	603	903	0
576	0	0	0	0	0	0	0	200	300	0	0	0	0	0	0	0	200	903	0	0	0	0	0	0	0	603	903	0
576	1	0	0	0	0	0	0	200	300	0	0	0	0	0	0	0	200	903	0	0	0	0	0	0	0	603	903	0
576	2	0	0	0	0	0	0	200	300	0	0	0	0	0	0	0	200	903	0	0	0	0	0	0	0	603	903	0
576	3	0	0	0	0	0	0	200	300	0	0	0	0	0	0	0	200	903	0	0	0	0	0	0	0	603	903	0
576	4	0	0	0	0	0	0	200	300	0	0	0	0	0	0	0	200	903	0	0	0	0	0	0	0	603	903	0
576	5	0	0	0	0	0	0	200	300	0	0	0	0	0	0	0	200	903	0	0	0	0	0	0	0	603	903	0
576	6	0	0	0	0	0	0	200	300	0	0	0	0	0	0	0	200	903	0	0	0	0	0	0	0	603	903	0
576	7	0	0	0	0	0	0	200	300	0	0	0	0	0	0	0	200	903	0	0	0	0	0	0	0	603	903	0
576	8	0	0	0	0	0	0	200	300	0	0	0	0	0	0	0	200	903	0	0	0	0	0	0	0	603	903	0
576	9	0	0	0	0	0	0	200	300	0	0	0	0	0	0	0	200	903	0	0	0	0	0	0	0	603	903	0
577	0	0	0	0	0	0	0	200	300	0	0	0	0	0	0	0	200	903	0	0	0	0	0	0	0	603	903	0
577	1	0	0	0	0	0	0	200	300	0	0	0	0	0	0	0	200	903	0	0	0	0	0	0	0	603	903	0
577	2	0	0	0	0	0	0	200	300	0	0	0	0	0	0	0	200	903	0	0	0	0	0	0	0	603	903	0
577	3	0	0	0	0	0	0	200	300	0	0	0	0	0	0	0	200	903	0	0	0	0	0	0	0	603	903	0
577	4	0	0	0	0	0	0	200	300	0	0	0	0	0	0	0	200	903	0	0	0	0	0	0	0	603	903	0
577	5	0	0	0	0	0	0	200	300	0	0	0	0	0	0	0	200	903	0	0	0	0	0	0	0	603	903	0
577	6	0	0	0	0	0	0	200	300	0	0	0	0	0	0	0	200	903	0	0	0	0	0	0	0	603	903	0
577	7	0	0	0	0	0	0	200	300	0	0	0	0	0	0	0	200	903	0	0	0	0	0	0	0	603	903	0
577	8	0	0	0	0	0	0	200	300	0	0	0	0	0	0	0	200	903	0	0	0	0	0	0	0	603	903	0
577	9	0	0	0	0	0	0	200	300	0	0	0	0	0	0	0	200	903	0	0	0	0	0	0	0	603	903	0
578	0	0	0	0	0	0	0	200	300	0	0	0	0	0	0	0	200	903	0	0	0	0	0	0	0	603	903	0
578	1	0	0	0	0	0	0	200	300	0	0	0	0	0	0	0	200	903	0	0	0	0	0	0	0	603	903	0
578	2	0	0	0	0	0	0	200	300	0	0	0	0	0	0	0	200	903	0	0	0	0	0	0	0	603	903	0
578	3	0	0	0	0	0	0	200	300	0	0	0	0	0	0	0	200	903	0	0	0	0	0	0	0	603	903	0
578	4	0	0	0	0	0	0	200	300	0	0	0	0	0	0	0	200	903	0	0	0	0	0	0	0	603	903	0
578	5	0	0	0	0	0	0	200	300	0	0	0	0	0	0	0	200	903	0	0	0	0	0	0	0	603	903	0
578	6	0	0	0	0	0	0	200	300	0	0	0	0	0	0	0	200	903	0	0	0	0	0	0	0	603	903	0
578	7	0	0	0	0	0	0	200	300	0	0	0	0	0	0	0	200	903	0	0	0	0	0	0	0	603	903	0
578	8	0	0	0	0	0	0	200	300	0	0	0	0	0	0	0	200	903	0	0	0	0	0	0	0	603	903	0
578	9	0	0	0	0	0	0	200	300	0	0	0	0	0	0	0	200	903	0	0	0	0	0	0	0	603	903	0
579	0	0	0	0	0	0	0	200	300	0	0	0	0	0	0	0	200	903	0	0	0	0	0	0	0	603	903	0
579	1	0	0	0	0	0	0	200	300	0	0	0	0	0	0	0	200	903	0	0	0	0	0	0	0	603	903	0
579	2	0	0	0	0	0	0	200	300	0	0	0	0	0	0	0	200	903	0	0	0	0	0	0	0	603	903	0
579	3	0	0	0	0	0	0	200	300	0	0	0	0	0	0	0	200	903	0	0	0	0	0	0	0	603	903	0
579	4	0	0	0	0	0	0	200	300	0	0	0	0	0	0	0	200	903	0	0	0	0	0	0	0	603	903	0
579	5	0	0	0	0	0	0	200	300	0	0	0	0	0	0	0	200	903	0	0	0	0	0	0	0	603	903	0
579	6	0	0	0	0	0	0	200	300	0	0	0	0	0	0	0	200	903	0	0	0	0	0	0	0	603	903	0
579	7	0	0	0	0	0	0	200	300	0	0	0	0	0	0	0	200	903	0	0	0	0	0	0	0	603	903	0
579	8	0	0	0	0	0	0	200	300	0	0	0	0	0	0	0	200	903	0	0	0	0	0	0	0	603	903	0
579	9	0	0	0	0	0	0	200	300	0	0	0	0	0	0	0	200	903	0	0	0	0	0	0	0	603	903	0
580	0	0	0	0	0	0	0	200	300	0	0	0	0	0	0	0	200	903	0	0	0	0	0	0	0	603	903	0
580	1	0	0	0	0	0	0	200	300	0	0	0	0	0	0	0	200	903	0	0	0	0	0	0	0	603	903	0
580	2	0	0	0	0	0	0	200	300	0	0	0	0	0	0	0	200	903	0	0	0	0	0	0	0	603	903	0
580	3	0	0	0	0	0	0	200	300	0	0	0	0	0	0	0	200	903	0	0	0	0	0	0	0	603	903	0
580	4	0	0	0	0	0	0	200	300	0	0	0	0	0	0	0	200	903	0	0	0	0	0	0	0	603	903	0
580	5	0	0	0	0	0	0	200	300	0	0	0	0	0	0	0	200	903	0	0	0	0	0	0	0	603	903	0
580	6	0	0	0	0	0	0	200	300	0	0	0	0	0	0	0	200	903	0	0	0	0	0	0	0	603	903	0
580	7	0	0	0	0	0	0	200	300	0	0	0	0	0	0	0	200	903	0	0	0	0	0	0	0	603	903	0
580	8	0	0	0	0	0	0	200	300	0	0	0	0	0	0	0	200	903	0	0	0	0	0	0	0	603	903	0
580	9	0	0	0	0	0	0	200	300	0	0	0	0	0	0	0	200	903	0	0	0	0	0	0	0	603	903	0
581	0	0	0	0	0	0	0	200	300	0	0	0	0	0	0	0	200	903	0	0	0	0	0	0	0	603	903	0
581	1	0	0	0	0	0	0	200	300	0	0	0	0	0	0	0	200	903	0	0	0	0	0	0	0	603	903	0
581	2	0	0	0	0	0	0	200	300	0	0	0	0	0	0	0	200	903	0	0	0	0	0	0	0	603	903	0
581	3	0	0	0	0	0	0	200	300	0	0	0	0	0	0	0	200	903	0	0	0	0	0	0	0	603	903	0
581	4	0	0	0	0	0	0	200	300	0	0	0	0	0	0	0	200	903	0	0	0	0	0	0	0	603	903	0
581	5	0	0	0	0	0	0	200	300	0	0	0	0	0	0	0	200	903	0	0	0	0	0	0	0	603	903	0
581	6	0	0	0	0	0	0	200	300	0	0	0	0	0	0	0	200	903	0	0	0	0	0	0	0	603	903	0
581	7	0	0	0	0	0	0	200	300	0	0	0	0	0	0	0	200	903	0	0	0	0	0	0	0	603	903	0
581	8	0	0	0	0	0	0	200	300	0	0	0	0	0	0	0	200	903	0	0	0	0	0	0	0	603	903	0
581	9	0	0	0	0	0	0	200	300	0	0	0	0	0	0	0	200	903	0	0	0	0	0	0	0	603	903	0
582	0	0	0	0	0	0	0	200	300	0	0	0	0	0	0	0	200	903	0	0	0	0	0	0	0	603	903	0
582	1	0	0	0	0	0	0	200	300	0	0	0	0	0	0	0	200	903	0	0	0	0	0	0	0	603	903	0
582	2	0	0	0	0	0	0	200	300	0	0	0	0	0	0	0	200	903	0	0	0	0	0	0	0	603	903	0
582	3	0	0	0	0	0	0	200	300	0	0	0	0	0	0	0	200	903	0	0	0	0	0	0	0	603	903	0
582	4	0	0	0	0	0	0	200	300	0	0	0	0	0	0	0	200	903	0	0	0	0	0	0	0	603	903	0
582	5	0	0	0	0	0	0	200	300	0	0	0	0	0	0	0	200	903	0	0	0	0	0	0	0	603	903	0
582	6	0	0	0	0	0	0	200	300	0	0	0	0	0	0	0	200	903	0	0	0	0	0	0	0	603	903	0
582	7	0	0	0	0	0	0	200	300	0	0	0	0	0	0	0	200	903	0	0	0	0	0	0	0	603	903	0
582	8	0	0	0	0	0	0	200	300	0	0	0	0	0	0	0	200	903	0	0	0	0	0	0	0	603	903	0
582	9	0	0	0	0	0	0	200	300	0	0	0	0	0	0	0	200	903	0	0	0	0	0	0	0	603	903	0
583	0	0	0	0	0	0	0	200	300	0	0	0	0	0	0	0	200	903	0	0	0	0	0	0	0	603	903	0
583	1	0	0	0	0	0	0	200	300	0	0	0	0	0	0	0	200	903	0	0	0	0	0	0	0	603	903	0
583	2	0	0	0	0	0	0	200	300	0	0	0	0	0	0	0	200	903	0	0	0	0	0	0	0	603	903	0
583	3	0	0	0	0	0	0	200	300	0	0	0	0	0	0	0	200	903	0	0	0	0	0	0	0	603	903	0
583	4	0	0	0	0	0	0	200	300	0	0	0	0	0	0	0	200	903	0	0	0	0	0	0	0	603	903	0
583	5	0	0	0	0	0	0	200	300	0	0	0	0	0	0	0	200	903	0	0	0	0	0	0	0	603	903	0
583	6	0	0	0	0	0	0	200	300	0	0	0	0	0	0	0	200	903	0	0	0	0	0	0	0	603	903	0
583	7	0	0	0	0	0	0	200	300	0	0	0	0	0	0	0	200	903	0	0	0	0	0	0	0	603	903	0
583	8	0	0	0	0	0	0	200	300	0	0	0	0	0	0	0	200	903	0	0	0	0	0	0	0	603	903	0
583	9	0	0	0	0	0	0	200	300	0	0	0	0	0	0	0	200	903	0	0	0	0	0	0	0	603	903	0
584	0	0	0	0	0	0	0	200	300	0	0	0	0	0	0	0	200	903	0	0	0	0	0	0	0	603	903	0
584	1	0	0	0	0	0	0	200	300	0	0	0	0	0	0	0	200	903	0	0	0	0	0	0	0	603	903	0
584	2	0	0	0	0	0	0	200	300	0	0	0	0	0	0	0	200	903	0	0	0	0	0	0	0	603	903	0
584	3	0	0	0	0	0	0	200	300	0	0	0	0	0	0	0	200	903	0	0	0	0	0	0	0	603	903	0
584	4	0	0	0	0	0	0	200	300	0	0	0	0	0	0	0	200	903	0	0	0	0	0	0	0	603	903	0
584	5	0	0	0	0	0	0	200	300	0	0	0	0	0	0	0	200	903	0	0	0	0	0	0	0	603	903	0
584	6	0	0	0	0	0	0	200	300	0	0	0	0	0	0	0	200	903	0	0	0	0	0	0	0	603	903	0
584	7	0	0	0	0	0	0	200	300	0	0	0	0	0	0	0	200	903	0	0	0	0	0	0	0	603	903	0
584	8	0	0	0	0	0	0	200	300	0	0	0	0	0	0	0	200	903	0	0	0	0	0	0	0	603	903	0
584	9	0	0	0	0	0	0	200	300	0	0	0	0	0	0	0	200	903	0	0	0	0	0	0	0	603	903	0
585	0	0	0	0	0	0	0	200	300	0	0	0	0	0	0	0	200	903	0	0	0	0	0	0	0	603	903	0
585	1	0	0	0	0	0	0	200	300	0	0	0	0	0	0	0	200	903	0	0	0	0	0	0	0	603	903	0
585	2	0	0	0	0	0	0	200	300	0	0	0	0	0	0	0	200	903	0	0	0	0	0	0	0	603	903	0
585	3	0	0	0	0	0	0	200	300	0	0	0	0	0	0	0	200	903	0	0	0	0	0	0	0	603	903	0
585	4	0	0	0	0	0	0	200	300	0	0	0	0	0	0	0	200	903	0	0	0	0	0	0	0	603	903	0
585	5	0	0	0	0	0	0	200	300	0	0	0	0	0	0	0	200	903	0	0	0	0	0	0	0	603	903	0
585	6	0	0	0	0	0	0	200	300	0	0	0	0	0	0	0	200	903	0	0	0	0	0	0	0	603	903	0
585	7	0	0	0	0	0	0	200	300	0	0	0	0	0	0	0	200	903	0	0	0	0	0	0	0	603	903	0
585	8	0	0	0	0	0	0	200	300	0	0	0	0	0	0	0	200	903	0	0	0	0	0	0	0	603	903	0
585	9	0	0	0	0	0	0	200	300	0	0	0	0	0	0	0	200	903	0	0	0	0	0	0	0	603	903	0
586	0	0	0	0	0	0	0	200	300	0	0	0	0	0	0	0	200	903	0	0	0	0	0	0	0	603	903	0
586	1	0	0	0	0	0	0	200	300	0	0	0	0	0	0	0	200	903	0	0	0	0	0	0	0	603	903	0
586	2	0	0	0	0	0	0	200	300	0	0	0	0	0	0	0	200	903	0	0	0	0	0	0	0	603	903	0
586	3	0	0	0	0	0	0	200	300	0	0	0	0	0	0	0	200	903	0	0	0	0	0	0	0	603	903	0
586	4	0	0	0	0	0	0	200	300	0	0	0	0	0	0	0	200	903	0	0	0	0	0	0	0	603	903	0
586	5	0	0	0	0	0	0	200	300	0	0	0	0	0	0	0	200	903	0	0	0	0	0	0	0	603	903	0
586	6	0	0	0	0	0	0	200	300	0	0	0	0	0	0	0	200	903	0	0	0	0	0	0	0	603	903	0
586	7	0	0	0	0	0	0	200	300	0	0	0	0	0	0	0	200	903	0	0	0	0	0	0	0	603	903	0
586	8	0	0	0	0	0	0	200	300	0	0	0	0	0	0	0	200	903	0	0	0	0	0	0	0	603	903	0
586	9	0	0	0	0	0	0	200	300	0	0	0	0	0	0	0	200	903	0	0	0	0	0	0	0	603	903	0
587	0	0	0	0	0	0	0	200	300	0	0	0	0	0	0	0	200	903	0	0	0	0	0	0	0	603	903	0
587	1	0	0	0	0	0	0	200	300	0	0	0	0	0	0	0	200	903	0	0	0	0	0	0	0	603	903	0
587	2	0	0	0	0	0	0	200	300	0	0	0	0	0	0	0	200	903	0	0	0	0	0	0	0	603	903	0
587	3	0	0	0	0	0	0	200	300	0	0	0	0	0	0	0	200	903	0	0	0	0	0	0	0	603	903	0
587	4	0	0	0	0	0	0	200	300	0	0	0	0	0	0	0	200	903	0	0	0	0	0	0	0	603	903	0
587	5	0	0	0	0	0	0	200	300	0	0	0	0	0	0	0	200	903	0	0	0	0	0	0	0	603	903	0
587	6	0	0	0	0	0	0	200	300	0	0	0	0	0	0	0	200	903	0	0	0	0	0	0	0	603	903	0
587	7	0	0	0	0	0	0	200	300	0	0	0	0	0	0	0	200	903	0	0	0	0	0	0	0	603	903	0
587	8	0	0	0	0	0	0	200	300	0	0	0	0	0	0	0	200	903	0	0	0	0	0	0	0	603	903	0
587	9	0	0	0	0	0	0	200	300	0	0	0	0	0	0	0	200	903	0	0	0	0	0	0	0	603	903	0
588	0	0	0	0	0	0	0	200	300	0	0	0	0	0	0	0	200	903	0	0	0	0	0	0	0	603	903	0
588	1	0	0	0	0	0	0	200	300	0	0	0	0	0	0	0	200	903	0	0	0	0	0	0	0	603	903	0
588	2	0	0	0	0	0	0	200	300	0	0	0	0	0	0	0	200	903	0	0	0	0	0	0	0	603	903	0
588	3	0	0	0	0	0	0	200	300	0	0	0	0	0	0	0	200	903	0	0	0	0	0	0	0	603	903	0
588	4	0	0	0	0	0	0	200	300	0	0	0	0	0	0	0	200	903	0	0	0	0	0	0	0	603	903	0
588	5	0	0	0	0	0	0	200	300	0	0	0	0	0	0	0	200	903	0	0	0	0	0	0	0	603	903	0
588	6	0	0	0	0	0	0	200	300	0	0	0	0	0	0	0	200	903	0	0	0	0	0	0	0	603	903	0
588	7	0	0	0	0	0	0	200	300	0	0	0	0	0	0	0	200	903	0	0	0	0	0	0	0	603	903	0
588	8	0	0	0	0	0	0	200	300	0	0	0	0	0	0	0	200	903	0	0	0	0	0	0	0	603	903	0
588	9	0	0	0	0	0	0	200	300	0	0	0	0	0	0	0	200	903	0	0	0	0	0	0	0	603	903	0
589	0	0	0	0	0	0	0	200	300	0	0	0	0	0	0	0	200	903	0	0	0	0	0	0	0	603	903	0
589	1	0	0	0	0	0	0	200	300	0	0	0	0	0	0	0	200	903	0	0	0	0	0	0	0	603	903	0
589	2	0	0	0	0	0	0	200	300	0	0	0	0	0	0	0	200	903	0	0	0	0	0	0	0	603	903	0
589	3	0	0	0	0	0	0	200	300	0	0	0	0	0	0	0	200	903	0	0	0	0	0	0	0	603	903	0
589	4	0	0	0	0	0	0	200	300	0	0	0	0	0	0	0	200	903	0	0	0	0	0	0	0	603	903	0
589	5	0	0	0	0	0	0	200	300	0	0	0	0	0	0	0	200	903	0	0	0	0	0	0	0	603	903	0
589	6	0	0	0	0	0	0	200	300	0	0	0	0	0	0	0	200	903	0	0	0	0	0	0	0	603	903	0
589	7	0	0	0	0	0	0	200	300	0	0	0	0	0	0	0	200	903	0	0	0	0	0	0	0	603	903	0
589	8	0	0	0	0	0	0	200	300	0	0	0	0	0	0	0	200	903	0	0	0	0	0	0	0	603	903	0
589	9	0	0	0	0	0	0	200	300	0	0	0	0	0	0	0	200	903	0	0	0	0	0	0	0	603	903	0
590	0	0	0	0	0	0	0	200	300	0	0	0	0	0	0	0	200	903	0	0	0	0	0	0	0	603	903	0
590	1	0	0	0	0	0	0	200	300	0	0	0	0	0	0	0	200	903	0	0	0	0	0	0	0	603	903	0
590	2	0	0	0	0	0	0	200	300	0	0	0	0	0	0	0	200	903	0	0	0	0	0	0	0	603	903	0
590	3	0	0	0	0	0	0	200	300	0	0	0	0	0	0	0	200	903	0	0	0	0	0	0	0	603	903	0
590	4	0	0	0	0	0	0	200	300	0	0	0	0	0	0	0	200	903	0	0	0	0	0	0	0	603	903	0
590	5	0	0	0	0	0	0	200	300	0	0	0	0	0	0	0	200	903	0	0	0	0	0	0	0	603	903	0
590	6	0	0	0	0	0	0	200	300	0	0	0	0	0	0	0	200	903	0	0	0	0	0	0	0	603	903	0
590	7	0	0	0	0	0	0	200	300	0	0	0	0	0	0	0	200	903	0	0	0	0	0	0	0	603	903	0
590	8	0	0	0	0	0	0	200	300	0	0	0	0	0	0	0	200	903	0	0	0	0	0	0	0	603	903	0
590	9	0	0	0	0	0	0	200	300	0	0	0	0	0	0	0	200	903	0	0	0	0	0	0	0	603	903	0
591	0	0	0	0	0	0	0	200	300	0	0	0	0	0	0	0	200	903	0	0	0	0	0	0	0	603	903	0
591	1	0	0	0	0	0	0	200	300	0	0	0	0	0	0	0	200	903	0	0	0	0	0	0	0	603	903	0
591	2	0	0	0	0	0	0	200	300	0	0	0	0	0	0	0	200	903	0	0	0	0	0	0	0	603	903	0
591	3	0	0	0	0	0	0	200	300	0	0	0	0	0	0	0	200	903	0	0	0	0	0	0	0	603	903	0
591	4	0	0	0	0	0	0	200	300	0	0	0	0	0	0	0	200	903	0	0	0	0	0	0	0	603	903	0
591	5	0	0	0	0	0	0	200	300	0	0	0	0	0	0	0	200	903	0	0	0	0	0	0	0	603	903	0
591	6	0	0	0	0	0	0	200	300	0	0	0	0	0	0	0	200	903	0	0	0	0	0	0	0	603	903	0
591	7	0	0	0	0	0	0	200	300	0	0	0	0	0	0	0	200	903	0	0	0	0	0	0	0	603	903	0
591	8	0	0	0	0	0	0	200	300	0	0	0	0	0	0	0	200	903	0	0	0	0	0	0	0	603	903	0
591	9	0	0	0	0	0	0	200	300	0	0	0	0	0	0	0	200	903	0	0	0	0	0	0	0	603	903	0
592	0	0	0	0	0	0	0	200	300	0	0	0	0	0	0	0	200	903	0	0	0	0	0	0	0	603	903	0
592	1	0	0	0	0	0	0	200	300	0	0	0	0	0	0	0	200	903	0	0	0	0	0	0	0	603	903	0
592	2	0	0	0	0	0	0	200	300	0	0	0	0	0	0	0	200	903	0	0	0	0	0	0	0	603	903	0
592	3	0	0	0	0	0	0	200	300	0	0	0	0	0	0	0	200	903	0	0	0	0	0	0	0	603	903	0
592	4	0	0	0	0	0	0	200	300	0	0	0	0	0	0	0	200	903	0	0	0	0	0	0	0	603	903	0
592	5	0	0	0	0	0	0	200	300	0	0	0	0	0	0	0	200	903	0	0	0	0	0	0	0	603	903	0
592	6	0	0	0	0	0	0	200	300	0	0	0	0	0	0	0	200	903	0	0	0	0	0	0	0	603	903	0
592	7	0	0	0	0	0	0	200	300	0	0	0	0	0	0	0	200	903	0	0	0	0	0	0	0	603	903	0
592	8	0	0	0	0	0	0	200	300	0	0	0	0	0	0	0	200	903	0	0	0	0	0	0	0	603	903	0
592	9	0	0	0	0	0	0	200	300	0	0	0	0	0	0	0	200	903	0	0	0	0	0	0	0	603	903	0
593	0	0	0	0	0	0	0	200	300	0	0	0	0	0	0	0	200	903	0	0	0	0	0	0	0	603	903	0
593	1	0	0	0	0	0	0	200	300	0	0	0	0	0	0	0	200	903	0	0	0	0	0	0	0	603	903	0
593	2	0	0	0	0	0	0	200	300	0	0	0	0	0	0	0	200	903	0	0	0	0	0	0	0	603	903	0
593	3	0	0	0	0	0	0	200	300	0	0	0	0	0	0	0	200	903	0	0	0	0	0	0	0	603	903	0
593	4	0	0	0	0	0	0	200	300	0	0	0	0	0	0	0	200	903	0	0	0	0	0	0	0	603	903	0
593	5	0	0	0	0	0	0	200	300	0	0	0	0	0	0	0	200	903	0	0	0	0	0	0	0	603	903	0
593	6	0	0	0	0	0	0	200	300	0	0	0	0	0	0	0	200	903	0	0	0	0	0	0	0	603	903	0
593	7	0	0	0	0	0	0	200	300	0	0	0	0	0	0	0	200	903	0	0	0	0	0	0	0	603	903	0
593	8	0	0	0	0	0	0	200	300	0	0	0	0	0	0	0	200	903	0	0	0	0	0	0	0	603	903	0
593	9	0	0	0	0	0	0	200	300	0	0	0	0	0	0	0	200	903	0	0	0	0	0	0	0	603	903	0
594	0	0	0	0	0	0	0	200	300	0	0	0	0	0	0	0	200	903	0	0	0	0	0	0	0	603	903	0
594	1	0	0	0	0	0	0	200	300	0	0	0	0	0	0	0	200	903	0	0	0	0	0	0	0	603	903	0
594	2	0	0	0	0	0	0	200	300	0	0	0	0	0	0	0	200	903	0	0	0	0	0	0	0	603	903	0
594	3	0	0	0	0	0	0	200	300	0	0	0	0	0	0	0	200	903	0	0	0	0	0	0	0	603	903	0
594	4	0	0	0	0	0	0	200	300	0	0	0	0	0	0	0	200	903	0	0	0	0	0	0	0	603	903	0
594	5	0	0	0	0	0	0	200	300	0	0	0	0	0	0	0	200	903	0	0	0	0	0	0	0	603	903	0
594	6	0	0	0	0	0	0	200	300	0	0	0	0	0	0	0	200	903	0	0	0	0	0	0	0	603	903	0
594	7	0	0	0	0	0	0	200	300	0	0	0	0	0	0	0	200	903	0	0	0	0	0	0	0	603	903	0
594	8	0	0	0	0	0	0	200	300	0	0	0	0	0	0	0	200	903	0	0	0	0	0	0	0	603	903	0
594	9	0	0	0	0	0	0	200	300	0	0	0	0	0	0	0	200	903	0	0	0	0	0	0	0	603	903	0
595	0	0	0	0	0	0	0	200	300	0	0	0	0	0	0	0	200	903	0	0	0	0	0	0	0	603	903	0
595	1	0	0	0	0	0	0	200	300	0	0	0	0	0	0	0	200	903	0	0	0	0	0	0	0	603	903	0
595	2	0	0	0	0	0	0	200	300	0	0	0	0	0	0	0	200	903	0	0	0	0	0	0	0	603	903	0
595	3	0	0	0	0	0	0	200	300	0	0	0	0	0	0	0	200	903	0	0	0	0	0	0	0	603	903	0
595	4	0	0	0	0	0	0	200	300	0	0	0	0	0	0	0	200	903	0	0	0	0	0	0	0	603	903	0
595	5	0	0	0	0	0	0	200	300	0	0	0	0	0	0	0	200	903	0	0	0	0	0	0	0	603	903	0
595	6	0	0	0	0	0	0	200	300	0	0	0	0	0	0	0	200	903	0	0	0	0	0	0	0	603	903	0
595	7	0	0	0	0	0	0	200	300	0	0	0	0	0	0	0	200	903	0	0	0	0	0	0	0	603	903	0
595	8	0	0	0	0	0	0	200	300	0	0	0	0	0	0	0	200	903	0	0	0	0	0	0	0	603	903	0
595	9	0	0	0	0	0	0	200	300	0	0	0	0	0	0	0	200	903	0	0	0	0	0	0	0	603	903	0
596	0	0	0	0	0	0	0	200	300	0	0	0	0	0	0	0	200	903	0	0	0	0	0	0	0	603	903	0
596	1	0	0	0	0	0	0	200	300	0	0	0	0	0	0	0	200	903	0	0	0	0	0	0	0	603	903	0
596	2	0	0	0	0	0	0	200	300	0	0	0	0	0	0	0	200	903	0	0	0	0	0	0	0	603	903	0
596	3	0	0	0	0	0	0	200	300	0	0	0	0	0	0	0	200	903	0	0	0	0	0	0	0	603	903	0
596	4	0	0	0	0	0	0	200	300	0	0	0	0	0	0	0	200	903	0	0	0	0	0	0	0	603	903	0
596	5	0	0	0	0	0	0	200	300	0	0	0	0	0	0	0	200	903	0	0	0	0	0	0	0	603	903	0
596	6	0	0	0	0	0	0	200	300	0	0	0	0	0	0	0	200	903	0	0	0	0	0	0	0	603	903	0
596	7	0	0	0	0	0	0	200	300	0	0	0	0	0	0	0	200	903	0	0	0	0	0	0	0	603	903	0
596	8	0	0	0	0	0	0	200	300	0	0	0	0	0	0	0	200	903	0	0	0	0	0	0	0	603	903	0
596	9	0	0	0	0	0	0	200	300	0	0	0	0	0	0	0	200	903	0	0	0	0	0	0	0	603	903	0
597	0	0	0	0	0	0	0	200	300	0	0	0	0	0	0	0	200	903	0	0	0	0	0	0	0	603	903	0
597	1	0	0	0	0	0	0	200	300	0	0	0	0	0	0	0	200	903	0	0	0	0	0	0	0	603	903	0
597	2	0	0	0	0	0	0	200	300	0	0	0	0	0	0	0	200	903	0	0	0	0	0	0	0	603	903	0
597	3	0	0	0	0	0	0	200	300	0	0	0	0	0	0	0	200	903	0	0	0	0	0	0	0	603	903	0
597	4	0	0	0	0	0	0	200	300	0	0	0	0	0	0	0	200	903	0	0	0	0	0	0	0	603	903	0
597	5	0	0	0	0	0	0	200	300	0	0	0	0	0	0	0	200	903	0	0	0	0	0	0	0	603	903	0
597	6	0	0	0	0	0	0	200	300	0	0	0	0	0	0	0	200	903	0	0	0	0	0	0	0	603	903	0
597	7	0	0	0	0	0	0	200	300	0	0	0	0	0	0	0	200	903	0	0	0	0	0	0	0	603	903	0
597	8	0	0	0	0	0	0	200	300	0	0	0	0	0	0	0	200	903	0	0	0	0	0	0	0	603	903	0
597	9	0	0	0	0	0	0	200	300	0	0	0	0	0	0	0	200	903	0	0	0	0	0	0	0	603	903	0
598	0	0	0	0	0	0	0	200	300	0	0	0	0	0	0	0	200	903	0	0	0	0	0	0	0	603	903	0
598	1	0	0	0	0	0	0	200	300	0	0	0	0	0	0	0	200	903	0	0	0	0	0	0	0	603	903	0
598	2	0	0	0	0	0	0	200	300	0	0	0	0	0	0	0	200	903	0	0	0	0	0	0	0	603	903	0
598	3	0	0	0	0	0	0	200	300	0	0	0	0	0	0	0	200	903	0	0	0	0	0	0	0	603	903	0
598	4	0	0	0	0	0	0	200	300	0	0	0	0	0	0	0	200	903	0	0	0	0	0	0	0	603	903	0
598	5	0	0	0	0	0	0	200	300	0	0	0	0	0	0	0	200	903	0	0	0	0	0	0	0	603	903	0
598	6	0	0	0	0	0	0	200	300	0	0	0	0	0	0	0	200	903	0	0	0	0	0	0	0	603	903	0
598	7	0	0	0	0	0	0	200	300	0	0	0	0	0	0	0	200	903	0	0	0	0	0	0	0	603	903	0
598	8	0	0	0	0	0	0	200	300	0	0	0	0	0	0	0	200	903	0	0	0	0	0	0	0	603	903	0
598	9	0	0	0	0	0	0	200	300	0	0	0	0	0	0	0	200	903	0	0	0	0	0	0	0	603	903	0
599	0	0	0	0	0	0	0	200	300	0	0	0	0	0	0	0	200	903	0	0	0	0	0	0	0	603	903	0
599	1	0	0	0	0	0	0	200	300	0	0	0	0	0	0	0	200	903	0	0	0	0	0	0	0	603	903	0
599	2	0	0	0	0	0	0	200	300	0	0	0	0	0	0	0	200	903	0	0	0	0	0	0	0	603	903	0
599	3	0	0	0	0	0	0	200	300	0	0	0	0	0	0	0	200	903	0	0	0	0	0	0	0	603	903	0
599	4	0	0	0	0	0	0	200	300	0	0	0	0	0	0	0	200	903	0	0	0	0	0	0	0	603	903	0
599	5	0	0	0	0	0	0	200	300	0	0	0	0	0	0	0	200	903	0	0	0	0	0	0	0	603	903	0
599	6	0	0	0	0	0	0	200	300	0	0	0	0	0	0	0	200	903	0	0	0	0	0	0	0	603	903	0
599	7	0	0	0	0	0	0	200	300	0	0	0	0	0	0	0	200	903	0	0	0	0	0	0	0	603	903	0
599	8	0	0	0	0	0	0	200	300	0	0	0	0	0	0	0	200	903	0	0	0	0	0	0	0	603	903	0
599	9	0	0	0	0	0	0	200	300	0	0	0	0	0	0	0	200	903	0	0	0	0	0	0	0	603	903	0
600	0	0	0	0	0	0	0	200	300	0	0	0	0	0	0	0	200	903	0	0	0	0	0	0	0	603	903	0
600	1	0	0	0	0	0	0	200	300	0	0	0	0	0	0	0	200	903	0	0	0	0	0	0	0	603	903	0
600	2	0	0	0	0	0	0	200	300	0	0	0	0	0	0	0	200	903	0	0	0	0	0	0	0	603	903	0
600	3	0	0	0	0	0	0	200	300	0	0	0	0	0	0	0	200	903	0	0	0	0	0	0	0	603	903	0
600	4	0	0	0	0	0	0	200	300	0	0	0	0	0	0	0	200	903	0	0	0	0	0	0	0	603	903	0
600	5	0	0	0	0	0	0	200	300	0	0	0	0	0	0	0	200	903	0	0	0	0	0	0	0	603	903	0
600	6	0	0	0	0	0	0	200	300	0	0	0	0	0	0	0	200	903	0	0	0	0	0	0	0	603	903	0
600	7	0	0	0	0	0	0	200	300	0	0	0	0	0	0	0	200	903	0	0	0	0	0	0	0	603	903	0
600	8	0	0	0	0	0	0	200	300	0	0	0	0	0	0	0	200	903	0	0	0	0	0	0	0	603	903	0
600	9	0	0	0	0	0	0	200	300	0	0	0	0	0	0	0	200	903	0	0	0	0	0	0	0	603	903	0
601	0	0	0	0	0	0	0	200	300	0	0	0	0	0	0	0	200	903	0	0	0	0	0	0	0	603	903	0
601	1	0	0	0	0	0	0	200	300	0	0	0	0	0	0	0	200	903	0	0	0	0	0	0	0	603	903	0
601	2	0	0	0	0	0	0	200	300	0	0	0	0	0	0	0	200	903	0	0	0	0	0	0	0	603	903	0
601	3	0	0	0	0	0	0	200	300	0	0	0	0	0	0	0	200	903	0	0	0	0	0	0	0	603	903	0
601	4	0	0	0	0	0	0	200	300	0	0	0	0	0	0	0	200	903	0	0	0	0	0	0	0	603	903	0
601	5	0	0	0	0	0	0	200	300	0	0	0	0	0	0	0	200	903	0	0	0	0	0	0	0	603	903	0
601	6	0	0	0	0	0	0	200	300	0	0	0	0	0	0	0	200	903	0	0	0	0	0	0	0	603	903	0
601	7	0	0	0	0	0	0	200	300	0	0	0	0	0	0	0	200	903	0	0	0	0	0	0	0	603	903	0
601	8	0	0	0	0	0	0	200	300	0	0	0	0	0	0	0	200	903	0	0	0	0	0	0	0	603	903	0
601	9	0	0	0	0	0	0	200	300	0	0	0	0	0	0	0	200	903	0	0	0	0	0	0	0	603	903	0
602	0	0	0	0	0	0	0	200	300	0	0	0	0	0	0	0	200	903	0	0	0	0	0	0	0	603	903	0
602	1	0	0	0	0	0	0	200	300	0	0	0	0	0	0	0	200	903	0	0	0	0	0	0	0	603	903	0
602	2	0	0	0	0	0	0	200	300	0	0	0	0	0	0	0	200	903	0	0	0	0	0	0	0	603	903	0
602	3	0	0	0	0	0	0	200	300	0	0	0	0	0	0	0	200	903	0	0	0	0	0	0	0	603	903	0
602	4	0	0	0	0	0	0	200	300	0	0	0	0	0	0	0	200	903	0	0	0	0	0	0	0	603	903	0
602	5	0	0	0	0	0	0	200	300	0	0	0	0	0	0	0	200	903	0	0	0	0	0	0	0	603	903	0
602	6	0	0	0	0	0	0	200	300	0	0	0	0	0	0	0	200	903	0	0	0	0	0	0	0	603	903	0
602	7	0	0	0	0	0	0	200	300	0	0	0	0	0	0	0	200	903	0	0	0	0	0	0	0	603	903	0
602	8	0	0	0	0	0	0	200	300	0	0	0	0	0	0	0	200	903	0	0	0	0	0	0	0	603	903	0
602	9	0	0	0	0	0	0	200	300	0	0	0	0	0	0	0	200	903	0	0	0	0	0	0	0	603	903	0
603	0	0	0	0	0	0	0	200	300	0	0	0	0	0	0	0	200	903	0	0	0	0	0	0	0	603	903	0
603	1	0	0	0	0	0	0	200	300	0	0	0	0	0	0	0	200	903	0	0	0	0	0	0	0	603	903	0
603	2	0	0	0	0	0	0	200	300	0	0	0	0	0	0	0	200	903	0	0	0	0	0	0	0	603	903	0
603	3	0	0	0	0	0	0	200	300	0	0	0	0	0	0	0	200	903	0	0	0	0	0	0	0	603	903	0
603	4	0	0	0	0	0	0	200	300	0	0	0	0	0	0	0	200	903	0	0	0	0	0	0	0	603	903	0
603	5	0	0	0	0	0	0	200	300	0	0	0	0	0	0	0	200	903	0	0	0	0	0	0	0	603	903	0
603	6	0	0	0	0	0	0	200	300	0	0	0	0	0	0	0	200	903	0	0	0	0	0	0	0	603	903	0
603	7	0	0	0	0	0	0	200	300	0	0	0	0	0	0	0	200	903	0	0	0	0	0	0	0	603	903	0
603	8	0	0	0	0	0	0	200	300	0	0	0	0	0	0	0	200	903	0	0	0	0	0	0	0	603	903	0
603	9	0	0	0	0	0	0	200	300	0	0	0	0	0	0	0	200	903	0	0	0	0	0	0	0	603	903	0
604	0	0	0	0	0	0	0	200	300	0	0	0	0	0	0	0	200	903	0	0	0	0	0	0	0	603	903	0
604	1	0	0	0	0	0	0	200	300	0	0	0	0	0	0	0	200	903	0	0	0	0	0	0	0	603	903	0
604	2	0	0	0	0	0	0	200	300	0	0	0	0	0	0	0	200	903	0	0	0	0	0	0	0	603	903	0
604	3	0	0	0	0	0	0	200	300	0	0	0	0	0	0	0	200	903	0	0	0	0	0	0	0	603	903	0
604	4	0	0	0	0	0	0	200	300	0	0	0	0	0	0	0	200	903	0	0	0	0	0	0	0	603	903	0
604	5	0	0	0	0	0	0	200	300	0	0	0	0	0	0	0	200	903	0	0	0	0	0	0	0	603	903	0
604	6	0	0	0	0	0	0	200	300	0	0	0	0	0	0	0	200	903	0	0	0	0	0	0	0	603	903	0
604	7	0	0	0	0	0	0	200	300	0	0	0	0	0	0	0	200	903	0	0	0	0	0	0	0	603	903	0
604	8	0	0	0	0	0	0	200	300	0	0	0	0	0	0	0	200	903	0	0	0	0	0	0	0	603	903	0
604	9	0	0	0	0	0	0	200	300	0	0	0	0	0	0	0	200	903	0	0	0	0	0	0	0	603	903	0
605	0	0	0	0	0	0	0	200	300	0	0	0	0	0	0	0	200	903	0	0	0	0	0	0	0	603	903	0
605	1	0	0	0	0	0	0	200	300	0	0	0	0	0	0	0	200	903	0	0	0	0	0	0	0	603	903	0
605	2	0	0	0	0	0	0	200	300	0	0	0	0	0	0	0	200	903	0	0	0	0	0	0	0	603	903	0
605	3	0	0	0	0	0	0	200	300	0	0	0	0	0	0	0	200	903	0	0	0	0	0	0	0	603	903	0
605	4	0	0	0	0	0	0	200	300	0	0	0	0	0	0	0	200	903	0	0	0	0	0	0	0	603	903	0
605	5	0	0	0	0	0	0	200	300	0	0	0	0	0	0	0	200	903	0	0	0	0	0	0	0	603	903	0
605	6	0	0	0	0	0	0	200	300	0	0	0	0	0	0	0	200	903	0	0	0	0	0	0	0	603	903	0
605	7	0	0	0	0	0	0	200	300	0	0	0	0	0	0	0	200	903	0	0	0	0	0	0	0	603	903	0
605	8	0	0	0	0	0	0	200	300	0	0	0	0	0	0	0	200	903	0	0	0	0	0	0	0	603	903	0
605	9	0	0	0	0	0	0	200	300	0	0	0	0	0	0	0	200	903	0	0	0	0	0	0	0	603	903	0
606	0	0	0	0	0	0	0	200	300	0	0	0	0	0	0	0	200	903	0	0	0	0	0	0	0	603	903	0
606	1	0	0	0	0	0	0	200	300	0	0	0	0	0	0	0	200	903	0	0	0	0	0	0	0	603	903	0
606	2	0	0	0	0	0	0	200	300	0	0	0	0	0	0	0	200	903	0	0	0	0	0	0	0	603	903	0
606	3	0	0	0	0	0	0	200	300	0	0	0	0	0	0	0	200	903	0	0	0	0	0	0	0	603	903	0
606	4	0	0	0	0	0	0	200	300	0	0	0	0	0	0	0	200	903	0	0	0	0	0	0	0	603	903	0
606	5	0	0	0	0	0	0	200	300	0	0	0	0	0	0	0	200	903	0	0	0	0	0	0	0	603	903	0
606	6	0	0	0	0	0	0	200	300	0	0	0	0	0	0	0	200	903	0	0	0	0	0	0	0	603	903	0
606	7	0	0	0	0	0	0	200	300	0	0	0	0	0	0	0	200	903	0	0	0	0	0	0	0	603	903	0
606	8	0	0	0	0	0	0	200	300	0	0	0	0	0	0	0	200	903	0	0	0	0	0	0	0	603	903	0
606	9	0	0	0	0	0	0	200	300	0	0	0	0	0	0	0	200	903	0	0	0	0	0	0	0	603	903	0
607	0	0	0	0	0	0	0	200	300	0	0	0	0	0	0	0	200	903	0	0	0	0	0	0	0	603	903	0
607	1	0	0	0	0	0	0	200	300	0	0	0	0	0	0	0	200	903	0	0	0	0	0	0	0	603	903	0
607	2	0	0	0	0	0	0	200	300	0	0	0	0	0	0	0	200	903	0	0	0	0	0	0	0	603	903	0
607	3	0	0	0	0	0	0	200	300	0	0	0	0	0	0	0	200	903	0	0	0	0	0	0	0	603	903	0
607	4	0	0	0	0	0	0	200	300	0	0	0	0	0	0	0	200	903	0	0	0	0	0	0	0	603	903	0
607	5	0	0	0	0	0	0	200	300	0	0	0	0	0	0	0	200	903	0	0	0	0	0	0	0	603	903	0
607	6	0	0	0	0	0	0	200	300	0	0	0	0	0	0	0	200	903	0	0	0	0	0	0	0	603	903	0
607	7	0	0	0	0	0	0	200	300	0	0	0	0	0	0	0	200	903	0	0	0	0	0	0	0	603	903	0
607	8	0	0	0	0	0	0	200	300	0	0	0	0	0	0	0	200	903	0	0	0	0	0	0	0	603	903	0
607	9	0	0	0	0	0	0	200	300	0	0	0	0	0	0	0	200	903	0	0	0	0	0	0	0	603	903	0
608	0	0	0	0	0	0	0	200	300	0	0	0	0	0	0	0	200	903	0	0	0	0	0	0	0	603	903	0
608	1	0	0	0	0	0	0	200	300	0	0	0	0	0	0	0	200	903	0	0	0	0	0	0	0	603	903	0
608	2	0	0	0	0	0	0	200	300	0	0	0	0	0	0	0	200	903	0	0	0	0	0	0	0	603	903	0
608	3	0	0	0	0	0	0	200	300	0	0	0	0	0	0	0	200	903	0	0	0	0	0	0	0	603	903	0
608	4	0	0	0	0	0	0	200	300	0	0	0	0	0	0	0	200	903	0	0	0	0	0	0	0	603	903	0
608	5	0	0	0	0	0	0	200	300	0	0	0	0	0	0	0	200	903	0	0	0	0	0	0	0	603	903	0
608	6	0	0	0	0	0	0	200	300	0	0	0	0	0	0	0	200	903	0	0	0	0	0	0	0	603	903	0
608	7	0	0	0	0	0	0	200	300	0	0	0	0	0	0	0	200	903	0	0	0	0	0	0	0	603	903	0
608	8	0	0	0	0	0	0	200	300	0	0	0	0	0	0	0	200	903	0	0	0	0	0	0	0	603	903	0
608	9	0	0	0	0	0	0	200	300	0	0	0	0	0	0	0	200	903	0	0	0	0	0	0	0	603	903	0
609	0	0	0	0	0	0	0	200	300	0	0	0	0	0	0	0	200	903	0	0	0	0	0	0	0	603	903	0
609	1	0	0	0	0	0	0	200	300	0	0	0	0	0	0	0	200	903	0	0	0	0	0	0	0	603	903	0
609	2	0	0	0	0	0	0	200	300	0	0	0	0	0	0	0	200	903	0	0	0	0	0	0	0	603	903	0
609	3	0	0	0	0	0	0	200	300	0	0	0	0	0	0	0	200	903	0	0	0	0	0	0	0	603	903	0
609	4	0	0	0	0	0	0	200	300	0	0	0	0	0	0	0	200	903	0	0	0	0	0	0	0	603	903	0
609	5	0	0	0	0	0	0	200	300	0	0	0	0	0	0	0	200	903	0	0	0	0	0	0	0	603	903	0
609	6	0	0	0	0	0	0	200	300	0	0	0	0	0	0	0	200	903	0	0	0	0	0	0	0	603	903	0
609	7	0	0	0	0	0	0	200	300	0	0	0	0	0	0	0	200	903	0	0	0	0	0	0	0	603	903	0
609	8	0	0	0	0	0	0	200	300	0	0	0	0	0	0	0	200	903	0	0	0	0	0	0	0	603	903	0
609	9	0	0	0	0	0	0	200	300	0	0	0	0	0	0	0	200	903	0	0	0	0	0	0	0	603	903	0
610	0	0	0	0	0	0	0	200	300	0	0	0	0	0	0	0	200	903	0	0	0	0	0	0	0	603	903	0
610	1	0	0	0	0	0	0	200	300	0	0	0	0	0	0	0	200	903	0	0	0	0	0	0	0	603	903	0
610	2	0	0	0	0	0	0	200	300	0	0	0	0	0	0	0	200	903	0	0	0	0	0	0	0	603	903	0
610	3	0	0	0	0	0	0	200	300	0	0	0	0	0	0	0	200	903	0	0	0	0	0	0	0	603	903	0
610	4	0	0	0	0	0	0	200	300	0	0	0	0	0	0	0	200	903	0	0	0	0	0	0	0	603	903	0
610	5	0	0	0	0	0	0	200	300	0	0	0	0	0	0	0	200	903	0	0	0	0	0	0	0	603	903	0
610	6	0	0	0	0	0	0	200	300	0	0	0	0	0	0	0	200	903	0	0	0	0	0	0	0	603	903	0
610	7	0	0	0	0	0	0	200	300	0	0	0	0	0	0	0	200	903	0	0	0	0	0	0	0	603	903	0
610	8	0	0	0	0	0	0	200	300	0	0	0	0	0	0	0	200	903	0	0	0	0	0	0	0	603	903	0
610	9	0	0	0	0	0	0	200	300	0	0	0	0	0	0	0	200	903	0	0	0	0	0	0	0	603	903	0
611	0	0	0	0	0	0	0	200	300	0	0	0	0	0	0	0	200	903	0	0	0	0	0	0	0	603	903	0
611	1	0	0	0	0	0	0	200	300	0	0	0	0	0	0	0	200	903	0	0	0	0	0	0	0	603	903	0
611	2	0	0	0	0	0	0	200	300	0	0	0	0	0	0	0	200	903	0	0	0	0	0	0	0	603	903	0
611	3	0	0	0	0	0	0	200	300	0	0	0	0	0	0	0	200	903	0	0	0	0	0	0	0	603	903	0
611	4	0	0	0	0	0	0	200	300	0	0	0	0	0	0	0	200	903	0	0	0	0	0	0	0	603	903	0
611	5	0	0	0	0	0	0	200	300	0	0	0	0	0	0	0	200	903	0	0	0	0	0	0	0	603	903	0
611	6	0	0	0	0	0	0	200	300	0	0	0	0	0	0	0	200	903	0	0	0	0	0	0	0	603	903	0
611	7	0	0	0	0	0	0	200	300	0	0	0	0	0	0	0	200	903	0	0	0	0	0	0	0	603	903	0
611	8	0	0	0	0	0	0	200	300	0	0	0	0	0	0	0	200	903	0	0	0	0	0	0	0	603	903	0
611	9	0	0	0	0	0	0	200	300	0	0	0	0	0	0	0	200	903	0	0	0	0	0	0	0	603	903	0
612	0	0	0	0	0	0	0	200	300	0	0	0	0	0	0	0	200	903	0	0	0	0	0	0	0	603	903	0
612	1	0	0	0	0	0	0	200	300	0	0	0	0	0	0	0	200	903	0	0	0	0	0	0	0	603	903	0
612	2	0	0	0	0	0	0	200	300	0	0	0	0	0	0	0	200	903	0	0	0	0	0	0	0	603	903	0
612	3	0	0	0	0	0	0	200	300	0	0	0	0	0	0	0	200	903	0	0	0	0	0	0	0	603	903	0
612	4	0	0	0	0	0	0	200	300	0	0	0	0	0	0	0	200	903	0	0	0	0	0	0	0	603	903	0
612	5	0	0	0	0	0	0	200	300	0	0	0	0	0	0	0	200	903	0	0	0	0	0	0	0	603	903	0
612	6	0	0	0	0	0	0	200	300	0	0	0	0	0	0	0	200	903	0	0	0	0	0	0	0	603	903	0
612	7	0	0	0	0	0	0	200	300	0	0	0	0	0	0	0	200	903	0	0	0	0	0	0	0	603	903	0
612	8	0	0	0	0	0	0	200	300	0	0	0	0	0	0	0	200	903	0	0	0	0	0	0	0	603	903	0
612	9	0	0	0	0	0	0	200	300	0	0	0	0	0	0	0	200	903	0	0	0	0	0	0	0	603	903	0
613	0	0	0	0	0	0	0	200	300	0	0	0	0	0	0	0	200	903	0	0	0	0	0	0	0	603	903	0
613	1	0	0	0	0	0	0	200	300	0	0	0	0	0	0	0	200	903	0	0	0	0	0	0	0	603	903	0
613	2	0	0	0	0	0	0	200	300	0	0	0	0	0	0	0	200	903	0	0	0	0	0	0	0	603	903	0
613	3	0	0	0	0	0	0	200	300	0	0	0	0	0	0	0	200	903	0	0	0	0	0	0	0	603	903	0
613	4	0	0	0	0	0	0	200	300	0	0	0	0	0	0	0	200	903	0	0	0	0	0	0	0	603	903	0
613	5	0	0	0	0	0	0	200	300	0	0	0	0	0	0	0	200	903	0	0	0	0	0	0	0	603	903	0
613	6	0	0	0	0	0	0	200	300	0	0	0	0	0	0	0	200	903	0	0	0	0	0	0	0	603	903	0
613	7	0	0	0	0	0	0	200	300	0	0	0	0	0	0	0	200	903	0	0	0	0	0	0	0	603	903	0
613	8	0	0	0	0	0	0	200	300	0	0	0	0	0	0	0	200	903	0	0	0	0	0	0	0	603	903	0
613	9	0	0	0	0	0	0	200	300	0	0	0	0	0	0	0	200	903	0	0	0	0	0	0	0	603	903	0
614	0	0	0	0	0	0	0	200	300	0	0	0	0	0	0	0	200	903	0	0	0	0	0	0	0	603	903	0
614	1	0	0	0	0	0	0	200	300	0	0	0	0	0	0	0	200	903	0	0	0	0	0	0	0	603	903	0
614	2	0	0	0	0	0	0	200	300	0	0	0	0	0	0	0	200	903	0	0	0	0	0	0	0	603	903	0
614	3	0	0	0	0	0	0	200	300	0	0	0	0	0	0	0	200	903	0	0	0	0	0	0	0	603	903	0
614	4	0	0	0	0	0	0	200	300	0	0	0	0	0	0	0	200	903	0	0	0	0	0	0	0	603	903	0
614	5	0	0	0	0	0	0	200	300	0	0	0	0	0	0	0	200	903	0	0	0	0	0	0	0	603	903	0
614	6	0	0	0	0	0	0	200	300	0	0	0	0	0	0	0	200	903	0	0	0	0	0	0	0	603	903	0
614	7	0	0	0	0	0	0	200	300	0	0	0	0	0	0	0	200	903	0	0	0	0	0	0	0	603	903	0
614	8	0	0	0	0	0	0	200	300	0	0	0	0	0	0	0	200	903	0	0	0	0	0	0	0	603	903	0
614	9	0	0	0	0	0	0	200	300	0	0	0	0	0	0	0	200	903	0	0	0	0	0	0	0	603	903	0
615	0	0	0	0	0	0	0	200	300	0	0	0	0	0	0	0	200	903	0	0	0	0	0	0	0	603	903	0
615	1	0	0	0	0	0	0	200	300	0	0	0	0	0	0	0	200	903	0	0	0	0	0	0	0	603	903	0
615	2	0	0	0	0	0	0	200	300	0	0	0	0	0	0	0	200	903	0	0	0	0	0	0	0	603	903	0
615	3	0	0	0	0	0	0	200	300	0	0	0	0	0	0	0	200	903	0	0	0	0	0	0	0	603	903	0
615	4	0	0	0	0	0	0	200	300	0	0	0	0	0	0	0	200	903	0	0	0	0	0	0	0	603	903	0
615	5	0	0	0	0	0	0	200	300	0	0	0	0	0	0	0	200	903	0	0	0	0	0	0	0	603	903	0
615	6	0	0	0	0	0	0	200	300	0	0	0	0	0	0	0	200	903	0	0	0	0	0	0	0	603	903	0
615	7	0	0	0	0	0	0	200	300	0	0	0	0	0	0	0	200	903	0	0	0	0	0	0	0	603	903	0
615	8	0	0	0	0	0	0	200	300	0	0	0	0	0	0	0	200	903	0	0	0	0	0	0	0	603	903	0
615	9	0	0	0	0	0	0	200	300	0	0	0	0	0	0	0	200	903	0	0	0	0	0	0	0	603	903	0
616	0	0	0	0	0	0	0	200	300	0	0	0	0	0	0	0	200	903	0	0	0	0	0	0	0	603	903	0
616	1	0	0	0	0	0	0	200	300	0	0	0	0	0	0	0	200	903	0	0	0	0	0	0	0	603	903	0
616	2	0	0	0	0	0	0	200	300	0	0	0	0	0	0	0	200	903	0	0	0	0	0	0	0	603	903	0
616	3	0	0	0	0	0	0	200	300	0	0	0	0	0	0	0	200	903	0	0	0	0	0	0	0	603	903	0
616	4	0	0	0	0	0	0	200	300	0	0	0	0	0	0	0	200	903	0	0	0	0	0	0	0	603	903	0
616	5	0	0	0	0	0	0	200	300	0	0	0	0	0	0	0	200	903	0	0	0	0	0	0	0	603	903	0
616	6	0	0	0	0	0	0	200	300	0	0	0	0	0	0	0	200	903	0	0	0	0	0	0	0	603	903	0
616	7	0	0	0	0	0	0	200	300	0	0	0	0	0	0	0	200	903	0	0	0	0	0	0	0	603	903	0
616	8	0	0	0	0	0	0	200	300	0	0	0	0	0	0	0	200	903	0	0	0	0	0	0	0	603	903	0
616	9	0	0	0	0	0	0	200	300	0	0	0	0	0	0	0	200	903	0	0	0	0	0	0	0	603	903	0
617	0	0	0	0	0	0	0	200	300	0	0	0	0	0	0	0	200	903	0	0	0	0	0	0	0	603	903	0
617	1	0	0	0	0	0	0	200	300	0	0	0	0	0	0	0	200	903	0	0	0	0	0	0	0	603	903	0
617	2	0	0	0	0	0	0	200	300	0	0	0	0	0	0	0	200	903	0	0	0	0	0	0	0	603	903	0
617	3	0	0	0	0	0	0	200	300	0	0	0	0	0	0	0	200	903	0	0	0	0	0	0	0	603	903	0
617	4	0	0	0	0	0	0	200	300	0	0	0	0	0	0	0	200	903	0	0	0	0	0	0	0	603	903	0
617	5	0	0	0	0	0	0	200	300	0	0	0	0	0	0	0	200	903	0	0	0	0	0	0	0	603	903	0
617	6	0	0	0	0	0	0	200	300	0	0	0	0	0	0	0	200	903	0	0	0	0	0	0	0	603	903	0
617	7	0	0	0	0	0	0	200	300	0	0	0	0	0	0	0	200	903	0	0	0	0	0	0	0	603	903	0
617	8	0	0	0	0	0	0	200	300	0	0	0	0	0	0	0	200	903	0	0	0	0	0	0	0	603	903	0
617	9	0	0	0	0	0	0	200	300	0	0	0	0	0	0	0	200	903	0	0	0	0	0	0	0	603	903	0
618	0	0	0	0	0	0	0	200	300	0	0	0	0	0	0	0	200	903	0	0	0	0	0	0	0	603	903	0
618	1	0	0	0	0	0	0	200	300	0	0	0	0	0	0	0	200	903	0	0	0	0	0	0	0	603	903	0
618	2	0	0	0	0	0	0	200	300	0	0	0	0	0	0	0	200	903	0	0	0	0	0	0	0	603	903	0
618	3	0	0	0	0	0	0	200	300	0	0	0	0	0	0	0	200	903	0	0	0	0	0	0	0	603	903	0
618	4	0	0	0	0	0	0	200	300	0	0	0	0	0	0	0	200	903	0	0	0	0	0	0	0	603	903	0
618	5	0	0	0	0	0	0	200	300	0	0	0	0	0	0	0	200	903	0	0	0	0	0	0	0	603	903	0
618	6	0	0	0	0	0	0	200	300	0	0	0	0	0	0	0	200	903	0	0	0	0	0	0	0	603	903	0
618	7	0	0	0	0	0	0	200	300	0	0	0	0	0	0	0	200	903	0	0	0	0	0	0	0	603	903	0
618	8	0	0	0	0	0	0	200	300	0	0	0	0	0	0	0	200	903	0	0	0	0	0	0	0	603	903	0
618	9	0	0	0	0	0	0	200	300	0	0	0	0	0	0	0	200	903	0	0	0	0	0	0	0	603	903	0
619	0	0	0	0	0	0	0	200	300	0	0	0	0	0	0	0	200	903	0	0	0	0	0	0	0	603	903	0
619	1	0	0	0	0	0	0	200	300	0	0	0	0	0	0	0	200	903	0	0	0	0	0	0	0	603	903	0
619	2	0	0	0	0	0	0	200	300	0	0	0	0	0	0	0	200	903	0	0	0	0	0	0	0	603	903	0
619	3	0	0	0	0	0	0	200	300	0	0	0	0	0	0	0	200	903	0	0	0	0	0	0	0	603	903	0
619	4	0	0	0	0	0	0	200	300	0	0	0	0	0	0	0	200	903	0	0	0	0	0	0	0	603	903	0
619	5	0	0	0	0	0	0	200	300	0	0	0	0	0	0	0	200	903	0	0	0	0	0	0	0	603	903	0
619	6	0	0	0	0	0	0	200	300	0	0	0	0	0	0	0	200	903	0	0	0	0	0	0	0	603	903	0
619	7	0	0	0	0	0	0	200	300	0	0	0	0	0	0	0	200	903	0	0	0	0	0	0	0	603	903	0
619	8	0	0	0	0	0	0	200	300	0	0	0	0	0	0	0	200	903	0	0	0	0	0	0	0	603	903	0
619	9	0	0	0	0	0	0	200	300	0	0	0	0	0	0	0	200	903	0	0	0	0	0	0	0	603	903	0
620	0	0	0	0	0	0	0	200	300	0	0	0	0	0	0	0	200	903	0	0	0	0	0	0	0	603	903	0
620	1	0	0	0	0	0	0	200	300	0	0	0	0	0	0	0	200	903	0	0	0	0	0	0	0	603	903	0
620	2	0	0	0	0	0	0	200	300	0	0	0	0	0	0	0	200	903	0	0	0	0	0	0	0	603	903	0
620	3	0	0	0	0	0	0	200	300	0	0	0	0	0	0	0	200	903	0	0	0	0	0	0	0	603	903	0
620	4	0	0	0	0	0	0	200	300	0	0	0	0	0	0	0	200	903	0	0	0	0	0	0	0	603	903	0
620	5	0	0	0	0	0	0	200	300	0	0	0	0	0	0	0	200	903	0	0	0	0	0	0	0	603	903	0
620	6	0	0	0	0	0	0	200	300	0	0	0	0	0	0	0	200	903	0	0	0	0	0	0	0	603	903	0
620	7	0	0	0	0	0	0	200	300	0	0	0	0	0	0	0	200	903	0	0	0	0	0	0	0	603	903	0
620	8	0	0	0	0	0	0	200	300	0	0	0	0	0	0	0	200	903	0	0	0	0	0	0	0	603	903	0
620	9	0	0	0	0	0	0	200	300	0	0	0	0	0	0	0	200	903	0	0	0	0	0	0	0	603	903	0
621	0	0	0	0	0	0	0	200	300	0	0	0	0	0	0	0	200	903	0	0	0	0	0	0	0	603	903	0
621	1	0	0	0	0	0	0	200	300	0	0	0	0	0	0	0	200	903	0	0	0	0	0	0	0	603	903	0
621	2	0	0	0	0	0	0	200	300	0	0	0	0	0	0	0	200	903	0	0	0	0	0	0	0	603	903	0
621	3	0	0	0	0	0	0	200	300	0	0	0	0	0	0	0	200	903	0	0	0	0	0	0	0	603	903	0
621	4	0	0	0	0	0	0	200	300	0	0	0	0	0	0	0	200	903	0	0	0	0	0	0	0	603	903	0
621	5	0	0	0	0	0	0	200	300	0	0	0	0	0	0	0	200	903	0	0	0	0	0	0	0	603	903	0
621	6	0	0	0	0	0	0	200	300	0	0	0	0	0	0	0	200	903	0	0	0	0	0	0	0	603	903	0
621	7	0	0	0	0	0	0	200	300	0	0	0	0	0	0	0	200	903	0	0	0	0	0	0	0	603	903	0
621	8	0	0	0	0	0	0	200	300	0	0	0	0	0	0	0	200	903	0	0	0	0	0	0	0	603	903	0
621	9	0	0	0	0	0	0	200	300	0	0	0	0	0	0	0	200	903	0	0	0	0	0	0	0	603	903	0
622	0	0	0	0	0	0	0	200	300	0	0	0	0	0	0	0	200	903	0	0	0	0	0	0	0	603	903	0
622	1	0	0	0	0	0	0	200	300	0	0	0	0	0	0	0	200	903	0	0	0	0	0	0	0	603	903	0
622	2	0	0	0	0	0	0	200	300	0	0	0	0	0	0	0	200	903	0	0	0	0	0	0	0	603	903	0
622	3	0	0	0	0	0	0	200	300	0	0	0	0	0	0	0	200	903	0	0	0	0	0	0	0	603	903	0
622	4	0	0	0	0	0	0	200	300	0	0	0	0	0	0	0	200	903	0	0	0	0	0	0	0	603	903	0
622	5	0	0	0	0	0	0	200	300	0	0	0	0	0	0	0	200	903	0	0	0	0	0	0	0	603	903	0
622	6	0	0	0	0	0	0	200	300	0	0	0	0	0	0	0	200	903	0	0	0	0	0	0	0	603	903	0
622	7	0	0	0	0	0	0	200	300	0	0	0	0	0	0	0	200	903	0	0	0	0	0	0	0	603	903	0
622	8	0	0	0	0	0	0	200	300	0	0	0	0	0	0	0	200	903	0	0	0	0	0	0	0	603	903	0
622	9	0	0	0	0	0	0	200	300	0	0	0	0	0	0	0	200	903	0	0	0	0	0	0	0	603	903	0
623	0	0	0	0	0	0	0	200	300	0	0	0	0	0	0	0	200	903	0	0	0	0	0	0	0	603	903	0
623	1	0	0	0	0	0	0	200	300	0	0	0	0	0	0	0	200	903	0	0	0	0	0	0	0	603	903	0
623	2	0	0	0	0	0	0	200	300	0	0	0	0	0	0	0	200	903	0	0	0	0	0	0	0	603	903	0
623	3	0	0	0	0	0	0	200	300	0	0	0	0	0	0	0	200	903	0	0	0	0	0	0	0	603	903	0
623	4	0	0	0	0	0	0	200	300	0	0	0	0	0	0	0	200	903	0	0	0	0	0	0	0	603	903	0
623	5	0	0	0	0	0	0	200	300	0	0	0	0	0	0	0	200	903	0	0	0	0	0	0	0	603	903	0
623	6	0	0	0	0	0	0	200	300	0	0	0	0	0	0	0	200	903	0	0	0	0	0	0	0	603	903	0
623	7	0	0	0	0	0	0	200	300	0	0	0	0	0	0	0	200	903	0	0	0	0	0	0	0	603	903	0
623	8	0	0	0	0	0	0	200	300	0	0	0	0	0	0	0	200	903	0	0	0	0	0	0	0	603	903	0
623	9	0	0	0	0	0	0	200	300	0	0	0	0	0	0	0	200	903	0	0	0	0	0	0	0	603	903	0
624	0	0	0	0	0	0	0	200	300	0	0	0	0	0	0	0	200	903	0	0	0	0	0	0	0	603	903	0
624	1	0	0	0	0	0	0	200	300	0	0	0	0	0	0	0	200	903	0	0	0	0	0	0	0	603	903	0
624	2	0	0	0	0	0	0	200	300	0	0	0	0	0	0	0	200	903	0	0	0	0	0	0	0	603	903	0
624	3	0	0	0	0	0	0	200	300	0	0	0	0	0	0	0	200	903	0	0	0	0	0	0	0	603	903	0
624	4	0	0	0	0	0	0	200	300	0	0	0	0	0	0	0	200	903	0	0	0	0	0	0	0	603	903	0
624	5	0	0	0	0	0	0	200	300	0	0	0	0	0	0	0	200	903	0	0	0	0	0	0	0	603	903	0
624	6	0	0	0	0	0	0	200	300	0	0	0	0	0	0	0	200	903	0	0	0	0	0	0	0	603	903	0
624	7	0	0	0	0	0	0	200	300	0	0	0	0	0	0	0	200	903	0	0	0	0	0	0	0	603	903	0
624	8	0	0	0	0	0	0	200	300	0	0	0	0	0	0	0	200	903	0	0	0	0	0	0	0	603	903	0
624	9	0	0	0	0	0	0	200	300	0	0	0	0	0	0	0	200	903	0	0	0	0	0	0	0	603	903	0
625	0	0	0	0	0	0	0	200	300	0	0	0	0	0	0	0	200	903	0	0	0	0	0	0	0	603	903	0
625	1	0	0	0	0	0	0	200	300	0	0	0	0	0	0	0	200	903	0	0	0	0	0	0	0	603	903	0
625	2	0	0	0	0	0	0	200	300	0	0	0	0	0	0	0	200	903	0	0	0	0	0	0	0	603	903	0
625	3	0	0	0	0	0	0	200	300	0	0	0	0	0	0	0	200	903	0	0	0	0	0	0	0	603	903	0
625	4	0	0	0	0	0	0	200	300	0	0	0	0	0	0	0	200	903	0	0	0	0	0	0	0	603	903	0
625	5	0	0	0	0	0	0	200	300	0	0	0	0	0	0	0	200	903	0	0	0	0	0	0	0	603	903	0
625	6	0	0	0	0	0	0	200	300	0	0	0	0	0	0	0	200	903	0	0	0	0	0	0	0	603	903	0
625	7	0	0	0	0	0	0	200	300	0	0	0	0	0	0	0	200	903	0	0	0	0	0	0	0	603	903	0
625	8	0	0	0	0	0	0	200	300	0	0	0	0	0	0	0	200	903	0	0	0	0	0	0	0	603	903	0
625	9	0	0	0	0	0	0	200	300	0	0	0	0	0	0	0	200	903	0	0	0	0	0	0	0	603	903	0
626	0	0	0	0	0	0	0	200	300	0	0	0	0	0	0	0	200	903	0	0	0	0	0	0	0	603	903	0
626	1	0	0	0	0	0	0	200	300	0	0	0	0	0	0	0	200	903	0	0	0	0	0	0	0	603	903	0
626	2	0	0	0	0	0	0	200	300	0	0	0	0	0	0	0	200	903	0	0	0	0	0	0	0	603	903	0
626	3	0	0	0	0	0	0	200	300	0	0	0	0	0	0	0	200	903	0	0	0	0	0	0	0	603	903	0
626	4	0	0	0	0	0	0	200	300	0	0	0	0	0	0	0	200	903	0	0	0	0	0	0	0	603	903	0
626	5	0	0	0	0	0	0	200	300	0	0	0	0	0	0	0	200	903	0	0	0	0	0	0	0	603	903	0
626	6	0	0	0	0	0	0	200	300	0	0	0	0	0	0	0	200	903	0	0	0	0	0	0	0	603	903	0
626	7	0	0	0	0	0	0	200	300	0	0	0	0	0	0	0	200	903	0	0	0	0	0	0	0	603	903	0
626	8	0	0	0	0	0	0	200	300	0	0	0	0	0	0	0	200	903	0	0	0	0	0	0	0	603	903	0
626	9	0	0	0	0	0	0	200	300	0	0	0	0	0	0	0	200	903	0	0	0	0	0	0	0	603	903	0
627	0	0	0	0	0	0	0	200	300	0	0	0	0	0	0	0	200	903	0	0	0	0	0	0	0	603	903	0
627	1	0	0	0	0	0	0	200	300	0	0	0	0	0	0	0	200	903	0	0	0	0	0	0	0	603	903	0
627	2	0	0	0	0	0	0	200	300	0	0	0	0	0	0	0	200	903	0	0	0	0	0	0	0	603	903	0
627	3	0	0	0	0	0	0	200	300	0	0	0	0	0	0	0	200	903	0	0	0	0	0	0	0	603	903	0
627	4	0	0	0	0	0	0	200	300	0	0	0	0	0	0	0	200	903	0	0	0	0	0	0	0	603	903	0
627	5	0	0	0	0	0	0	200	300	0	0	0	0	0	0	0	200	903	0	0	0	0	0	0	0	603	903	0
627	6	0	0	0	0	0	0	200	300	0	0	0	0	0	0	0	200	903	0	0	0	0	0	0	0	603	903	0
627	7	0	0	0	0	0	0	200	300	0	0	0	0	0	0	0	200	903	0	0	0	0	0	0	0	603	903	0
627	8	0	0	0	0	0	0	200	300	0	0	0	0	0	0	0	200	903	0	0	0	0	0	0	0	603	903	0
627	9	0	0	0	0	0	0	200	300	0	0	0	0	0	0	0	200	903	0	0	0	0	0	0	0	603	903	0
628	0	0	0	0	0	0	0	200	300	0	0	0	0	0	0	0	200	903	0	0	0	0	0	0	0	603	903	0
628	1	0	0	0	0	0	0	200	300	0	0	0	0	0	0	0	200	903	0	0	0	0	0	0	0	603	903	0
628	2	0	0	0	0	0	0	200	300	0	0	0	0	0	0	0	200	903	0	0	0	0	0	0	0	603	903	0
628	3	0	0	0	0	0	0	200	300	0	0	0	0	0	0	0	200	903	0	0	0	0	0	0	0	603	903	0
628	4	0	0	0	0	0	0	200	300	0	0	0	0	0	0	0	200	903	0	0	0	0	0	0	0	603	903	0
628	5	0	0	0	0	0	0	200	300	0	0	0	0	0	0	0	200	903	0	0	0	0	0	0	0	603	903	0
628	6	0	0	0	0	0	0	200	300	0	0	0	0	0	0	0	200	903	0	0	0	0	0	0	0	603	903	0
628	7	0	0	0	0	0	0	200	300	0	0	0	0	0	0	0	200	903	0	0	0	0	0	0	0	603	903	0
628	8	0	0	0	0	0	0	200	300	0	0	0	0	0	0	0	200	903	0	0	0	0	0	0	0	603	903	0
628	9	0	0	0	0	0	0	200	300	0	0	0	0	0	0	0	200	903	0	0	0	0	0	0	0	603	903	0
629	0	0	0	0	0	0	0	200	300	0	0	0	0	0	0	0	200	903	0	0	0	0	0	0	0	603	903	0
629	1	0	0	0	0	0	0	200	300	0	0	0	0	0	0	0	200	903	0	0	0	0	0	0	0	603	903	0
629	2	0	0	0	0	0	0	200	300	0	0	0	0	0	0	0	200	903	0	0	0	0	0	0	0	603	903	0
629	3	0	0	0	0	0	0	200	300	0	0	0	0	0	0	0	200	903	0	0	0	0	0	0	0	603	903	0
629	4	0	0	0	0	0	0	200	300	0	0	0	0	0	0	0	200	903	0	0	0	0	0	0	0	603	903	0
629	5	0	0	0	0	0	0	200	300	0	0	0	0	0	0	0	200	903	0	0	0	0	0	0	0	603	903	0
629	6	0	0	0	0	0	0	200	300	0	0	0	0	0	0	0	200	903	0	0	0	0	0	0	0	603	903	0
629	7	0	0	0	0	0	0	200	300	0	0	0	0	0	0	0	200	903	0	0	0	0	0	0	0	603	903	0
629	8	0	0	0	0	0	0	200	300	0	0	0	0	0	0	0	200	903	0	0	0	0	0	0	0	603	903	0
629	9	0	0	0	0	0	0	200	300	0	0	0	0	0	0	0	200	903	0	0	0	0	0	0	0	603	903	0
630	0	0	0	0	0	0	0	200	300	0	0	0	0	0	0	0	200	903	0	0	0	0	0	0	0	603	903	0
630	1	0	0	0	0	0	0	200	300	0	0	0	0	0	0	0	200	903	0	0	0	0	0	0	0	603	903	0
630	2	0	0	0	0	0	0	200	300	0	0	0	0	0	0	0	200	903	0	0	0	0	0	0	0	603	903	0
630	3	0	0	0	0	0	0	200	300	0	0	0	0	0	0	0	200	903	0	0	0	0	0	0	0	603	903	0
630	4	0	0	0	0	0	0	200	300	0	0	0	0	0	0	0	200	903	0	0	0	0	0	0	0	603	903	0
630	5	0	0	0	0	0	0	200	300	0	0	0	0	0	0	0	200	903	0	0	0	0	0	0	0	603	903	0
630	6	0	0	0	0	0	0	200	300	0	0	0	0	0	0	0	200	903	0	0	0	0	0	0	0	603	903	0
630	7	0	0	0	0	0	0	200	300	0	0	0	0	0	0	0	200	903	0	0	0	0	0	0	0	603	903	0
630	8	0	0	0	0	0	0	200	300	0	0	0	0	0	0	0	200	903	0	0	0	0	0	0	0	603	903	0
630	9	0	0	0	0	0	0	200	300	0	0	0	0	0	0	0	200	903	0	0	0	0	0	0	0	603	903	0
631	0	0	0	0	0	0	0	200	300	0	0	0	0	0	0	0	200	903	0	0	0	0	0	0	0	603	903	0
631	1	0	0	0	0	0	0	200	300	0	0	0	0	0	0	0	200	903	0	0	0	0	0	0	0	603	903	0
631	2	0	0	0	0	0	0	200	300	0	0	0	0	0	0	0	200	903	0	0	0	0	0	0	0	603	903	0
631	3	0	0	0	0	0	0	200	300	0	0	0	0	0	0	0	200	903	0	0	0	0	0	0	0	603	903	0
631	4	0	0	0	0	0	0	200	300	0	0	0	0	0	0	0	200	903	0	0	0	0	0	0	0	603	903	0
631	5	0	0	0	0	0	0	200	300	0	0	0	0	0	0	0	200	903	0	0	0	0	0	0	0	603	903	0
631	6	0	0	0	0	0	0	200	300	0	0	0	0	0	0	0	200	903	0	0	0	0	0	0	0	603	903	0
631	7	0	0	0	0	0	0	200	300	0	0	0	0	0	0	0	200	903	0	0	0	0	0	0	0	603	903	0
631	8	0	0	0	0	0	0	200	300	0	0	0	0	0	0	0	200	903	0	0	0	0	0	0	0	603	903	0
631	9	0	0	0	0	0	0	200	300	0	0	0	0	0	0	0	200	903	0	0	0	0	0	0	0	603	903	0
632	0	0	0	0	0	0	0	200	300	0	0	0	0	0	0	0	200	903	0	0	0	0	0	0	0	603	903	0
632	1	0	0	0	0	0	0	200	300	0	0	0	0	0	0	0	200	903	0	0	0	0	0	0	0	603	903	0
632	2	0	0	0	0	0	0	200	300	0	0	0	0	0	0	0	200	903	0	0	0	0	0	0	0	603	903	0
632	3	0	0	0	0	0	0	200	300	0	0	0	0	0	0	0	200	903	0	0	0	0	0	0	0	603	903	0
632	4	0	0	0	0	0	0	200	300	0	0	0	0	0	0	0	200	903	0	0	0	0	0	0	0	603	903	0
632	5	0	0	0	0	0	0	200	300	0	0	0	0	0	0	0	200	903	0	0	0	0	0	0	0	603	903	0
632	6	0	0	0	0	0	0	200	300	0	0	0	0	0	0	0	200	903	0	0	0	0	0	0	0	603	903	0
632	7	0	0	0	0	0	0	200	300	0	0	0	0	0	0	0	200	903	0	0	0	0	0	0	0	603	903	0
632	8	0	0	0	0	0	0	200	300	0	0	0	0	0	0	0	200	903	0	0	0	0	0	0	0	603	903	0
632	9	0	0	0	0	0	0	200	300	0	0	0	0	0	0	0	200	903	0	0	0	0	0	0	0	603	903	0
633	0	0	0	0	0	0	0	200	300	0	0	0	0	0	0	0	200	903	0	0	0	0	0	0	0	603	903	0
633	1	0	0	0	0	0	0	200	300	0	0	0	0	0	0	0	200	903	0	0	0	0	0	0	0	603	903	0
633	2	0	0	0	0	0	0	200	300	0	0	0	0	0	0	0	200	903	0	0	0	0	0	0	0	603	903	0
633	3	0	0	0	0	0	0	200	300	0	0	0	0	0	0	0	200	903	0	0	0	0	0	0	0	603	903	0
633	4	0	0	0	0	0	0	200	300	0	0	0	0	0	0	0	200	903	0	0	0	0	0	0	0	603	903	0
633	5	0	0	0	0	0	0	200	300	0	0	0	0	0	0	0	200	903	0	0	0	0	0	0	0	603	903	0
633	6	0	0	0	0	0	0	200	300	0	0	0	0	0	0	0	200	903	0	0	0	0	0	0	0	603	903	0
633	7	0	0	0	0	0	0	200	300	0	0	0	0	0	0	0	200	903	0	0	0	0	0	0	0	603	903	0
633	8	0	0	0	0	0	0	200	300	0	0	0	0	0	0	0	200	903	0	0	0	0	0	0	0	603	903	0
633	9	0	0	0	0	0	0	200	300	0	0	0	0	0	0	0	200	903	0	0	0	0	0	0	0	603	903	0
634	0	0	0	0	0	0	0	200	300	0	0	0	0	0	0	0	200	903	0	0	0	0	0	0	0	603	903	0
634	1	0	0	0	0	0	0	200	300	0	0	0	0	0	0	0	200	903	0	0	0	0	0	0	0	603	903	0
634	2	0	0	0	0	0	0	200	300	0	0	0	0	0	0	0	200	903	0	0	0	0	0	0	0	603	903	0
634	3	0	0	0	0	0	0	200	300	0	0	0	0	0	0	0	200	903	0	0	0	0	0	0	0	603	903	0
634	4	0	0	0	0	0	0	200	300	0	0	0	0	0	0	0	200	903	0	0	0	0	0	0	0	603	903	0
634	5	0	0	0	0	0	0	200	300	0	0	0	0	0	0	0	200	903	0	0	0	0	0	0	0	603	903	0
634	6	0	0	0	0	0	0	200	300	0	0	0	0	0	0	0	200	903	0	0	0	0	0	0	0	603	903	0
634	7	0	0	0	0	0	0	200	300	0	0	0	0	0	0	0	200	903	0	0	0	0	0	0	0	603	903	0
634	8	0	0	0	0	0	0	200	300	0	0	0	0	0	0	0	200	903	0	0	0	0	0	0	0	603	903	0
634	9	0	0	0	0	0	0	200	300	0	0	0	0	0	0	0	200	903	0	0	0	0	0	0	0	603	903	0
635	0	0	0	0	0	0	0	200	300	0	0	0	0	0	0	0	200	903	0	0	0	0	0	0	0	603	903	0
635	1	0	0	0	0	0	0	200	300	0	0	0	0	0	0	0	200	903	0	0	0	0	0	0	0	603	903	0
635	2	0	0	0	0	0	0	200	300	0	0	0	0	0	0	0	200	903	0	0	0	0	0	0	0	603	903	0
635	3	0	0	0	0	0	0	200	300	0	0	0	0	0	0	0	200	903	0	0	0	0	0	0	0	603	903	0
635	4	0	0	0	0	0	0	200	300	0	0	0	0	0	0	0	200	903	0	0	0	0	0	0	0	603	903	0
635	5	0	0	0	0	0	0	200	300	0	0	0	0	0	0	0	200	903	0	0	0	0	0	0	0	603	903	0
635	6	0	0	0	0	0	0	200	300	0	0	0	0	0	0	0	200	903	0	0	0	0	0	0	0	603	903	0
635	7	0	0	0	0	0	0	200	300	0	0	0	0	0	0	0	200	903	0	0	0	0	0	0	0	603	903	0
635	8	0	0	0	0	0	0	200	300	0	0	0	0	0	0	0	200	903	0	0	0	0	0	0	0	603	903	0
635	9	0	0	0	0	0	0	200	300	0	0	0	0	0	0	0	200	903	0	0	0	0	0	0	0	603	903	0
636	0	0	0	0	0	0	0	200	300	0	0	0	0	0	0	0	200	903	0	0	0	0	0	0	0	603	903	0
636	1	0	0	0	0	0	0	200	300	0	0	0	0	0	0	0	200	903	0	0	0	0	0	0	0	603	903	0
636	2	0	0	0	0	0	0	200	300	0	0	0	0	0	0	0	200	903	0	0	0	0	0	0	0	603	903	0
636	3	0	0	0	0	0	0	200	300	0	0	0	0	0	0	0	200	903	0	0	0	0	0	0	0	603	903	0
636	4	0	0	0	0	0	0	200	300	0	0	0	0	0	0	0	200	903	0	0	0	0	0	0	0	603	903	0
636	5	0	0	0	0	0	0	200	300	0	0	0	0	0	0	0	200	903	0	0	0	0	0	0	0	603	903	0
636	6	0	0	0	0	0	0	200	300	0	0	0	0	0	0	0	200	903	0	0	0	0	0	0	0	603	903	0
636	7	0	0	0	0	0	0	200	300	0	0	0	0	0	0	0	200	903	0	0	0	0	0	0	0	603	903	0
636	8	0	0	0	0	0	0	200	300	0	0	0	0	0	0	0	200	903	0	0	0	0	0	0	0	603	903	0
636	9	0	0	0	0	0	0	200	300	0	0	0	0	0	0	0	200	903	0	0	0	0	0	0	0	603	903	0
637	0	0	0	0	0	0	0	200	300	0	0	0	0	0	0	0	200	903	0	0	0	0	0	0	0	603	903	0
637	1	0	0	0	0	0	0	200	300	0	0	0	0	0	0	0	200	903	0	0	0	0	0	0	0	603	903	0
637	2	0	0	0	0	0	0	200	300	0	0	0	0	0	0	0	200	903	0	0	0	0	0	0	0	603	903	0
637	3	0	0	0	0	0	0	200	300	0	0	0	0	0	0	0	200	903	0	0	0	0	0	0	0	603	903	0
637	4	0	0	0	0	0	0	200	300	0	0	0	0	0	0	0	200	903	0	0	0	0	0	0	0	603	903	0
637	5	0	0	0	0	0	0	200	300	0	0	0	0	0	0	0	200	903	0	0	0	0	0	0	0	603	903	0
637	6	0	0	0	0	0	0	200	300	0	0	0	0	0	0	0	200	903	0	0	0	0	0	0	0	603	903	0
637	7	0	0	0	0	0	0	200	300	0	0	0	0	0	0	0	200	903	0	0	0	0	0	0	0	603	903	0
637	8	0	0	0	0	0	0	200	300	0	0	0	0	0	0	0	200	903	0	0	0	0	0	0	0	603	903	0
637	9	0	0	0	0	0	0	200	300	0	0	0	0	0	0	0	200	903	0	0	0	0	0	0	0	603	903	0
638	0	0	0	0	0	0	0	200	300	0	0	0	0	0	0	0	200	903	0	0	0	0	0	0	0	603	903	0
638	1	0	0	0	0	0	0	200	300	0	0	0	0	0	0	0	200	903	0	0	0	0	0	0	0	603	903	0
638	2	0	0	0	0	0	0	200	300	0	0	0	0	0	0	0	200	903	0	0	0	0	0	0	0	603	903	0
638	3	0	0	0	0	0	0	200	300	0	0	0	0	0	0	0	200	903	0	0	0	0	0	0	0	603	903	0
638	4	0	0	0	0	0	0	200	300	0	0	0	0	0	0	0	200	903	0	0	0	0	0	0	0	603	903	0
638	5	0	0	0	0	0	0	200	300	0	0	0	0	0	0	0	200	903	0	0	0	0	0	0	0	603	903	0
638	6	0	0	0	0	0	0	200	300	0	0	0	0	0	0	0	200	903	0	0	0	0	0	0	0	603	903	0
638	7	0	0	0	0	0	0	200	300	0	0	0	0	0	0	0	200	903	0	0	0	0	0	0	0	603	903	0
638	8	0	0	0	0	0	0	200	300	0	0	0	0	0	0	0	200	903	0	0	0	0	0	0	0	603	903	0
638	9	0	0	0	0	0	0	200	300	0	0	0	0	0	0	0	200	903	0	0	0	0	0	0	0	603	903	0
639	0	0	0	0	0	0	0	200	300	0	0	0	0	0	0	0	200	903	0	0	0	0	0	0	0	603	903	0
639	1	0	0	0	0	0	0	200	300	0	0	0	0	0	0	0	200	903	0	0	0	0	0	0	0	603	903	0
639	2	0	0	0	0	0	0	200	300	0	0	0	0	0	0	0	200	903	0	0	0	0	0	0	0	603	903	0
639	3	0	0	0	0	0	0	200	300	0	0	0	0	0	0	0	200	903	0	0	0	0	0	0	0	603	903	0
639	4	0	0	0	0	0	0	200	300	0	0	0	0	0	0	0	200	903	0	0	0	0	0	0	0	603	903	0
639	5	0	0	0	0	0	0	200	300	0	0	0	0	0	0	0	200	903	0	0	0	0	0	0	0	603	903	0
639	6	0	0	0	0	0	0	200	300	0	0	0	0	0	0	0	200	903	0	0	0	0	0	0	0	603	903	0
639	7	0	0	0	0	0	0	200	300	0	0	0	0	0	0	0	200	903	0	0	0	0	0	0	0	603	903	0
639	8	0	0	0	0	0	0	200	300	0	0	0	0	0	0	0	200	903	0	0	0	0	0	0	0	603	903	0
639	9	0	0	0	0	0	0	200	300	0	0	0	0	0	0	0	200	903	0	0	0	0	0	0	0	603	903	0
640	0	0	0	0	0	0	0	200	300	0	0	0	0	0	0	0	200	903	0	0	0	0	0	0	0	603	903	0
640	1	0	0	0	0	0	0	200	300	0	0	0	0	0	0	0	200	903	0	0	0	0	0	0	0	603	903	0
640	2	0	0	0	0	0	0	200	300	0	0	0	0	0	0	0	200	903	0	0	0	0	0	0	0	603	903	0
640	3	0	0	0	0	0	0	200	300	0	0	0	0	0	0	0	200	903	0	0	0	0	0	0	0	603	903	0
640	4	0	0	0	0	0	0	200	300	0	0	0	0	0	0	0	200	903	0	0	0	0	0	0	0	603	903	0
640	5	0	0	0	0	0	0	200	300	0	0	0	0	0	0	0	200	903	0	0	0	0	0	0	0	603	903	0
640	6	0	0	0	0	0	0	200	300	0	0	0	0	0	0	0	200	903	0	0	0	0	0	0	0	603	903	0
640	7	0	0	0	0	0	0	200	300	0	0	0	0	0	0	0	200	903	0	0	0	0	0	0	0	603	903	0
640	8	0	0	0	0	0	0	200	300	0	0	0	0	0	0	0	200	903	0	0	0	0	0	0	0	603	903	0
640	9	0	0	0	0	0	0	200	300	0	0	0	0	0	0	0	200	903	0	0	0	0	0	0	0	603	903	0
641	0	0	0	0	0	0	0	200	300	0	0	0	0	0	0	0	200	903	0	0	0	0	0	0	0	603	903	0
641	1	0	0	0	0	0	0	200	300	0	0	0	0	0	0	0	200	903	0	0	0	0	0	0	0	603	903	0
641	2	0	0	0	0	0	0	200	300	0	0	0	0	0	0	0	200	903	0	0	0	0	0	0	0	603	903	0
641	3	0	0	0	0	0	0	200	300	0	0	0	0	0	0	0	200	903	0	0	0	0	0	0	0	603	903	0
641	4	0	0	0	0	0	0	200	300	0	0	0	0	0	0	0	200	903	0	0	0	0	0	0	0	603	903	0
641	5	0	0	0	0	0	0	200	300	0	0	0	0	0	0	0	200	903	0	0	0	0	0	0	0	603	903	0
641	6	0	0	0	0	0	0	200	300	0	0	0	0	0	0	0	200	903	0	0	0	0	0	0	0	603	903	0
641	7	0	0	0	0	0	0	200	300	0	0	0	0	0	0	0	200	903	0	0	0	0	0	0	0	603	903	0
641	8	0	0	0	0	0	0	200	300	0	0	0	0	0	0	0	200	903	0	0	0	0	0	0	0	603	903	0
641	9	0	0	0	0	0	0	200	300	0	0	0	0	0	0	0	200	903	0	0	0	0	0	0	0	603	903	0
642	0	0	0	0	0	0	0	200	300	0	0	0	0	0	0	0	200	903	0	0	0	0	0	0	0	603	903	0
642	1	0	0	0	0	0	0	200	300	0	0	0	0	0	0	0	200	903	0	0	0	0	0	0	0	603	903	0
642	2	0	0	0	0	0	0	200	300	0	0	0	0	0	0	0	200	903	0	0	0	0	0	0	0	603	903	0
642	3	0	0	0	0	0	0	200	300	0	0	0	0	0	0	0	200	903	0	0	0	0	0	0	0	603	903	0
642	4	0	0	0	0	0	0	200	300	0	0	0	0	0	0	0	200	903	0	0	0	0	0	0	0	603	903	0
642	5	0	0	0	0	0	0	200	300	0	0	0	0	0	0	0	200	903	0	0	0	0	0	0	0	603	903	0
642	6	0	0	0	0	0	0	200	300	0	0	0	0	0	0	0	200	903	0	0	0	0	0	0	0	603	903	0
642	7	0	0	0	0	0	0	200	300	0	0	0	0	0	0	0	200	903	0	0	0	0	0	0	0	603	903	0
642	8	0	0	0	0	0	0	200	300	0	0	0	0	0	0	0	200	903	0	0	0	0	0	0	0	603	903	0
642	9	0	0	0	0	0	0	200	300	0	0	0	0	0	0	0	200	903	0	0	0	0	0	0	0	603	903	0
643	0	0	0	0	0	0	0	200	300	0	0	0	0	0	0	0	200	903	0	0	0	0	0	0	0	603	903	0
643	1	0	0	0	0	0	0	200	300	0	0	0	0	0	0	0	200	903	0	0	0	0	0	0	0	603	903	0
643	2	0	0	0	0	0	0	200	300	0	0	0	0	0	0	0	200	903	0	0	0	0	0	0	0	603	903	0
643	3	0	0	0	0	0	0	200	300	0	0	0	0	0	0	0	200	903	0	0	0	0	0	0	0	603	903	0
643	4	0	0	0	0	0	0	200	300	0	0	0	0	0	0	0	200	903	0	0	0	0	0	0	0	603	903	0
643	5	0	0	0	0	0	0	200	300	0	0	0	0	0	0	0	200	903	0	0	0	0	0	0	0	603	903	0
643	6	0	0	0	0	0	0	200	300	0	0	0	0	0	0	0	200	903	0	0	0	0	0	0	0	603	903	0
643	7	0	0	0	0	0	0	200	300	0	0	0	0	0	0	0	200	903	0	0	0	0	0	0	0	603	903	0
643	8	0	0	0	0	0	0	200	300	0	0	0	0	0	0	0	200	903	0	0	0	0	0	0	0	603	903	0
643	9	0	0	0	0	0	0	200	300	0	0	0	0	0	0	0	200	903	0	0	0	0	0	0	0	603	903	0
644	0	0	0	0	0	0	0	200	300	0	0	0	0	0	0	0	200	903	0	0	0	0	0	0	0	603	903	0
644	1	0	0	0	0	0	0	200	300	0	0	0	0	0	0	0	200	903	0	0	0	0	0	0	0	603	903	0
644	2	0	0	0	0	0	0	200	300	0	0	0	0	0	0	0	200	903	0	0	0	0	0	0	0	603	903	0
644	3	0	0	0	0	0	0	200	300	0	0	0	0	0	0	0	200	903	0	0	0	0	0	0	0	603	903	0
644	4	0	0	0	0	0	0	200	300	0	0	0	0	0	0	0	200	903	0	0	0	0	0	0	0	603	903	0
644	5	0	0	0	0	0	0	200	300	0	0	0	0	0	0	0	200	903	0	0	0	0	0	0	0	603	903	0
644	6	0	0	0	0	0	0	200	300	0	0	0	0	0	0	0	200	903	0	0	0	0	0	0	0	603	903	0
644	7	0	0	0	0	0	0	200	300	0	0	0	0	0	0	0	200	903	0	0	0	0	0	0	0	603	903	0
644	8	0	0	0	0	0	0	200	300	0	0	0	0	0	0	0	200	903	0	0	0	0	0	0	0	603	903	0
644	9	0	0	0	0	0	0	200	300	0	0	0	0	0	0	0	200	903	0	0	0	0	0	0	0	603	903	0
645	0	0	0	0	0	0	0	200	300	0	0	0	0	0	0	0	200	903	0	0	0	0	0	0	0	603	903	0
645	1	0	0	0	0	0	0	200	300	0	0	0	0	0	0	0	200	903	0	0	0	0	0	0	0	603	903	0
645	2	0	0	0	0	0	0	200	300	0	0	0	0	0	0	0	200	903	0	0	0	0	0	0	0	603	903	0
645	3	0	0	0	0	0	0	200	300	0	0	0	0	0	0	0	200	903	0	0	0	0	0	0	0	603	903	0
645	4	0	0	0	0	0	0	200	300	0	0	0	0	0	0	0	200	903	0	0	0	0	0	0	0	603	903	0
645	5	0	0	0	0	0	0	200	300	0	0	0	0	0	0	0	200	903	0	0	0	0	0	0	0	603	903	0
645	6	0	0	0	0	0	0	200	300	0	0	0	0	0	0	0	200	903	0	0	0	0	0	0	0	603	903	0
645	7	0	0	0	0	0	0	200	300	0	0	0	0	0	0	0	200	903	0	0	0	0	0	0	0	603	903	0
645	8	0	0	0	0	0	0	200	300	0	0	0	0	0	0	0	200	903	0	0	0	0	0	0	0	603	903	0
645	9	0	0	0	0	0	0	200	300	0	0	0	0	0	0	0	200	903	0	0	0	0	0	0	0	603	903	0
646	0	0	0	0	0	0	0	200	300	0	0	0	0	0	0	0	200	903	0	0	0	0	0	0	0	603	903	0
646	1	0	0	0	0	0	0	200	300	0	0	0	0	0	0	0	200	903	0	0	0	0	0	0	0	603	903	0
646	2	0	0	0	0	0	0	200	300	0	0	0	0	0	0	0	200	903	0	0	0	0	0	0	0	603	903	0
646	3	0	0	0	0	0	0	200	300	0	0	0	0	0	0	0	200	903	0	0	0	0	0	0	0	603	903	0
646	4	0	0	0	0	0	0	200	300	0	0	0	0	0	0	0	200	903	0	0	0	0	0	0	0	603	903	0
646	5	0	0	0	0	0	0	200	300	0	0	0	0	0	0	0	200	903	0	0	0	0	0	0	0	603	903	0
646	6	0	0	0	0	0	0	200	300	0	0	0	0	0	0	0	200	903	0	0	0	0	0	0	0	603	903	0
646	7	0	0	0	0	0	0	200	300	0	0	0	0	0	0	0	200	903	0	0	0	0	0	0	0	603	903	0
646	8	0	0	0	0	0	0	200	300	0	0	0	0	0	0	0	200	903	0	0	0	0	0	0	0	603	903	0
646	9	0	0	0	0	0	0	200	300	0	0	0	0	0	0	0	200	903	0	0	0	0	0	0	0	603	903	0
647	0	0	0	0	0	0	0	200	300	0	0	0	0	0	0	0	200	903	0	0	0	0	0	0	0	603	903	0
647	1	0	0	0	0	0	0	200	300	0	0	0	0	0	0	0	200	903	0	0	0	0	0	0	0	603	903	0
647	2	0	0	0	0	0	0	200	300	0	0	0	0	0	0	0	200	903	0	0	0	0	0	0	0	603	903	0
647	3	0	0	0	0	0	0	200	300	0	0	0	0	0	0	0	200	903	0	0	0	0	0	0	0	603	903	0
647	4	0	0	0	0	0	0	200	300	0	0	0	0	0	0	0	200	903	0	0	0	0	0	0	0	603	903	0
647	5	0	0	0	0	0	0	200	300	0	0	0	0	0	0	0	200	903	0	0	0	0	0	0	0	603	903	0
647	6	0	0	0	0	0	0	200	300	0	0	0	0	0	0	0	200	903	0	0	0	0	0	0	0	603	903	0
647	7	0	0	0	0	0	0	200	300	0	0	0	0	0	0	0	200	903	0	0	0	0	0	0	0	603	903	0
647	8	0	0	0	0	0	0	200	300	0	0	0	0	0	0	0	200	903	0	0	0	0	0	0	0	603	903	0
647	9	0	0	0	0	0	0	200	300	0	0	0	0	0	0	0	200	903	0	0	0	0	0	0	0	603	903	0
648	0	0	0	0	0	0	0	200	300	0	0	0	0	0	0	0	200	903	0	0	0	0	0	0	0	603	903	0
648	1	0	0	0	0	0	0	200	300	0	0	0	0	0	0	0	200	903	0	0	0	0	0	0	0	603	903	0
648	2	0	0	0	0	0	0	200	300	0	0	0	0	0	0	0	200	903	0	0	0	0	0	0	0	603	903	0
648	3	0	0	0	0	0	0	200	300	0	0	0	0	0	0	0	200	903	0	0	0	0	0	0	0	603	903	0
648	4	-3.38715	3.15433	-8.88611	-114.256	1236.21	570.923	339.117	312.858	0	0	0	0	0	0	0	200	903	0	0	0	0	0	0	0	603	903	0
648	5	-6.59149	12.0044	-18.3466	526.613	1968.63	1303.35	307.302	271.296	0	0	0	0	0	0	0	200	903	0	0	0	0	0	0	0	603	903	0
648	6	-2.01386	10.4786	-17.431	526.613	1663.45	982.911	295.431	269.789	0	0	0	0	0	0	0	200	903	0	0	0	0	0	0	0	603	903	0
648	7	-1.55609	2.84916	-9.49646	68.8494	1175.17	570.923	323.748	292.75	0	0	0	0	0	0	0	200	903	0	0	0	0	0	0	0	603	903	0
648	8	0	0	0	0	0	0	200	300	0	0	0	0	0	0	0	200	903	0	0	0	0	0	0	0	603	903	0
648	9	-5.82855	8.80008	-11.6327	892.824	1541.38	1074.46	332.504	223.249	0	0	0	0	0	0	0	200	903	0	0	0	0	0	0	0	603	903	0
649	0	-1.40351	8.18973	-18.0414	-22.7034	1663.45	754.029	292.202	301.258	0	0	0	0	0	0	0	200	903	0	0	0	0	0	0	0	603	903	0
649	1	-2.92938	6.0535	-16.2103	709.719	2029.66	1257.57	325.208	256.218	0	0	0	0	0	0	0	200	903	0	0	0	0	0	0	0	603	903	0
649	2	-5.98114	7.12162	-14.0741	435.06	2029.66	1394.9	344.213	269.088	0	0	0	0	0	0	0	200	903	0	0	0	0	0	0	0	603	903	0
649	3	-0.33539	9.25785	-14.3793	68.8494	1907.59	937.134	332.663	295.212	0	0	0	0	0	0	0	200	903	0	0	0	0	0	0	0	603	903	0
649	4	-2.47162	11.5467	-18.0414	-22.7034	2029.66	1257.57	312.5	301.258	0	0	0	0	0	0	0	200	903	0	0	0	0	0	0	0	603	903	0
649	5	-6.59149	8.95267	-20.1776	-22.7034	2029.66	1715.33	300.59	301.125	0	0	0	0	0	0	0	200	903	0	0	0	0	0	0	0	603	903	0
649	6	-0.945742	9.25785	-19.5673	-22.7034	2456.91	1715.33	325.562	301.16	0	0	0	0	0	0	0	200	903	0	0	0	0	0	0	0	603	903	0
649	7	2.41119	15.8191	-20.4828	-297.362	2517.95	1669.56	322.93	314.518	0	0	0	0	0	0	0	200	903	0	0	0	0	0	0	0	603	903	0
649	8	-1.25092	15.9717	-24.1449	801.271	2945.19	2173.1	321.98	266.814	0	0	0	0	0	0	0	200	903	0	0	0	0	0	0	0	603	903	0
649	9	-0.945742	13.2251	-29.0277	68.8494	3494.51	2035.77	320.385	297.628	0	0	0	0	0	0	0	200	903	0	0	0	0	0	0	0	603	903	0
650	0	-0.0302147	15.9717	-30.5536	-205.809	3067.26	2264.65	300.39	306.736	0	0	0	0	0	0	0	200	903	0	0	0	0	0	0	0	603	903	0
650	1	-0.793154	18.7183	-29.9432	68.8494	3128.3	1944.21	304.474	297.701	0	0	0	0	0	0	0	200	903	0	0	0	0	0	0	0	603	903	0
650	2	0.732725	18.2605	-32.995	526.613	3799.68	1944.21	315.159	284.04	0	0	0	0	0	0	0	200	903	0	0	0	0	0	0	0	603	903	0
650	3	1.0379	14.751	-39.0985	618.166	4104.86	1989.99	304.988	284.19	0	0	0	0	0	0	0	200	903	0	0	0	0	0	0	0	603	903	0
650	4	-1.70868	16.5821	-40.9296	709.719	4410.03	1898.44	307.747	282.66	0	0	0	0	0	0	0	200	903	0	0	0	0	0	0	0	603	903	0
650	5	-1.09833	15.6665	-48.559	618.166	5081.42	1715.33	304.644	287.27	0	0	0	0	0	0	0	200	903	0	0	0	0	0	0	0	603	903	0
650	6	-0.945742	10.0208	-53.4418	526.613	5386.6	1257.57	300.794	290.146	0	0	0	0	0	0	0	200	903	0	0	0	0	0	0	0	603	903	0
650	7	-2.7768	7.42679	-61.0712	892.824	6180.06	1257.57	301.194	285.381	0	0	0	0	0	0	0	200	903	0	0	0	0	0	0	0	603	903	0
650	8	-0.793154	8.95267	-69.3109	1075.93	7278.69	937.134	305.015	284.477	0	0	0	0	0	0	0	200	903	0	0	0	0	0	0	0	603	903	0
650	9	1.19049	5.13797	-77.5507	984.377	7644.9	433.594	298.579	287.307	0	0	0	0	0	0	0	200	903	0	0	0	0	0	0	0	603	903	0
651	0	-2.62421	3.15433	-84.2645	1442.14	8377.32	799.805	299.417	282.886	0	0	0	0	0	0	0	200	903	0	0	0	0	0	0	0	603	903	0
651	1	-4.30268	2.39139	-92.1991	1075.93	9475.95	525.147	302.777	288.33	0	0	0	0	0	0	0	200	903	0	0	0	0	0	0	0	603	903	0
651	2	-0.640566	2.84916	-101.049	709.719	10147.3	-69.9462	300.42	292.977	0	0	0	0	0	0	0	200	903	0	0	0	0	0	0	0	603	903	0
651	3	-2.31903	-0.202602	-110.204	1075.93	11062.9	-161.499	300.385	290.237	0	0	0	0	0	0	0	200	903	0	0	0	0	0	0	0	603	903	0
651	4	-5.2182	-2.33883	-122.106	1716.8	12100.5	113.159	299.098	285.94	0	0	0	0	0	0	0	200	903	0	0	0	0	0	0	0	603	903	0
651	5	-5.52338	-4.93283	-131.872	801.271	12832.9	-390.381	297.313	293.924	0	0	0	0	0	0	0	200	903	0	0	0	0	0	0	0	603	903	0
651	6	-5.67597	-4.78024	-140.112	984.377	13931.5	-756.592	299.432	292.974	0	0	0	0	0	0	0	200	903	0	0	0	0	0	0	0	603	903	0
651	7	-7.8122	-6.15353	-150.793	1625.25	14786	-619.263	298.055	289.222	0	0	0	0	0	0	0	200	903	0	0	0	0	0	0	0	603	903	0
651	8	-7.50702	-11.9519	-160.253	1167.48	15640.5	-756.592	297.599	292.715	0	0	0	0	0	0	0	200	903	0	0	0	0	0	0	0	603	903	0
651	9	-7.8122	-11.4941	-173.986	2083.01	16556	-1214.36	295.157	288.028	0	0	0	0	0	0	0	200	903	0	0	0	0	0	0	0	603	903	0
652	0	-11.3217	-10.2734	-187.414	1625.25	17532.6	-1214.36	293.55	291.328	0	0	0	0	0	0	0	200	903	0	0	0	0	0	0	0	603	903	0
652	1	-13.4579	-11.6467	-195.043	1350.59	18204	-1168.58	293.333	293.075	0	0	0	0	0	0	0	200	903	0	0	0	0	0	0	0	603	903	0
652	2	-12.2372	-12.1045	-203.283	1625.25	19424.7	-1260.13	295.555	292.005	0	0	0	0	0	0	0	200	903	0	0	0	0	0	0	0	603	903	0
652	3	-13.9157	-8.90011	-213.354	1899.9	20218.1	-985.474	294.763	291.095	0	0	0	0	0	0	0	200	903	0	0	0	0	0	0	0	603	903	0
652	4	-13.6105	-7.37423	-227.697	1259.04	21194.7	-665.039	293.083	294.471	0	0	0	0	0	0	0	200	903	0	0	0	0	0	0	0	603	903	0
652	5	-15.7468	-7.67941	-238.073	1075.93	22476.4	-344.605	294.41	295.481	0	0	0	0	0	0	0	200	903	0	0	0	0	0	0	0	603	903	0
652	6	-16.6623	-6.15353	-244.177	1350.59	23025.8	-298.828	294.3	294.469	0	0	0	0	0	0	0	200	903	0	0	0	0	0	0	0	603	903	0
652	7	-15.7468	0.102574	-253.637	435.06	23208.9	-24.1699	291.504	298.285	0	0	0	0	0	0	0	200	903	0	0	0	0	0	0	0	603	903	0
652	8	-15.289	2.84916	-261.877	435.06	24795.8	433.594	294.685	298.339	0	0	0	0	0	0	0	200	903	0	0	0	0	0	0	0	603	903	0
652	9	-17.2726	4.8328	-272.558	-297.362	25467.2	708.252	293.438	301.091	0	0	0	0	0	0	0	200	903	0	0	0	0	0	0	0	603	903	0
653	0	-19.2563	9.10526	-281.408	618.166	25589.2	1166.02	290.933	297.803	0	0	0	0	0	0	0	200	903	0	0	0	0	0	0	0	603	903	0
653	1	-16.9675	14.1407	-286.901	-572.02	26321.7	1440.67	291.745	301.994	0	0	0	0	0	0	0	200	903	0	0	0	0	0	0	0	603	903	0
653	2	-19.4089	18.2605	-292.089	-846.678	27237.2	1989.99	293.25	302.899	0	0	0	0	0	0	0	200	903	0	0	0	0	0	0	0	603	903	0
653	3	-18.9511	19.3286	-301.245	-1670.65	27908.6	2539.31	292.644	305.546	0	0	0	0	0	0	0	200	903	0	0	0	0	0	0	0	603	903	0
653	4	-18.6459	25.2796	-311.01	-1029.78	28396.9	3088.62	291.305	303.311	0	0	0	0	0	0	0	200	903	0	0	0	0	0	0	0	603	903	0
653	5	-19.2563	29.552	-317.114	-1304.44	29068.2	3271.73	291.665	304.113	0	0	0	0	0	0	0	200	903	0	0	0	0	0	0	0	603	903	0
653	6	-21.0873	33.5193	-322.912	-1762.21	30105.8	3729.49	293.232	305.457	0	0	0	0	0	0	0	200	903	0	0	0	0	0	0	0	603	903	0
653	7	-21.2399	35.9607	-330.236	-2219.97	30777.2	4278.81	293.198	306.722	0	0	0	0	0	0	0	200	903	0	0	0	0	0	0	0	603	903	0
653	8	-20.9348	39.6228	-335.729	-2860.84	31326.5	4553.47	293.309	308.521	0	0	0	0	0	0	0	200	903	0	0	0	0	0	0	0	603	903	0
653	9	-21.5451	44.3531	-343.359	-2769.29	31875.9	5194.34	292.835	308.065	0	0	0	0	0	0	0	200	903	0	0	0	0	0	0	0	603	903	0
654	0	-20.7822	45.5738	-350.683	-3227.05	32181	5514.77	291.767	309.202	0	0	0	0	0	0	0	200	903	0	0	0	0	0	0	0	603	903	0
654	1	-20.6296	48.4729	-356.481	-3867.92	32974.5	5606.33	292.5	310.85	0	0	0	0	0	0	0	200	903	0	0	0	0	0	0	0	603	903	0
654	2	-22.1555	52.2876	-362.89	-4417.23	33951.1	6109.87	293.557	312.172	0	0	0	0	0	0	0	200	903	0	0	0	0	0	0	0	603	903	0
654	3	-20.0192	55.6446	-369.909	-4783.45	34683.5	6842.29	293.762	312.931	0	0	0	0	0	0	0	200	903	0	0	0	0	0	0	0	603	903	0
654	4	-20.7822	55.7972	-381.506	-5698.97	34988.7	6888.06	291.712	314.938	0	0	0	0	0	0	0	200	903	0	0	0	0	0	0	0	603	903	0
654	5	-20.9348	58.5437	-393.713	-5058.1	37002.8	7025.39	293.984	312.847	0	0	0	0	0	0	0	200	903	0	0	0	0	0	0	0	603	903	0
654	6	-16.3571	60.68	-403.784	-6339.84	38223.5	7437.38	294.663	315.701	0	0	0	0	0	0	0	200	903	0	0	0	0	0	0	0	603	903	0
654	7	-15.7468	61.7481	-413.549	-7438.48	39078	7712.04	294.494	317.987	0	0	0	0	0	0	0	200	903	0	0	0	0	0	0	0	603	903	0
654	8	-16.2045	61.7481	-424.23	-7530.03	40420.8	7940.92	295.28	317.75	0	0	0	0	0	0	0	200	903	0	0	0	0	0	0	0	603	903	0
654	9	-16.0519	63.7317	-439.184	-8720.21	41702.5	7849.37	294.955	319.855	0	0	0	0	0	0	0	200	903	0	0	0	0	0	0	0	603	903	0
655	0	-15.1364	63.8843	-450.781	-9086.42	42557	8032.47	294.407	320.157	0	0	0	0	0	0	0	200	903	0	0	0	0	0	0	0	603	903	0
655	1	-14.6787	67.5464	-463.293	-9818.85	44082.9	8261.35	295.151	321.194	0	0	0	0	0	0	0	200	903	0	0	0	0	0	0	0	603	903	0
655	2	-13.7631	68.1568	-470.007	-9727.29	45303.6	8581.79	296.389	320.696	0	0	0	0	0	0	0	200	903	0	0	0	0	0	0	0	603	903	0
655	3	-12.5424	70.293	-482.214	-10734.4	46280.2	8673.34	295.974	322.261	0	0	0	0	0	0	0	200	903	0	0	0	0	0	0	0	603	903	0
655	4	-12.8476	73.0396	-495.336	-11375.2	46585.4	9039.55	294.048	322.965	0	0	0	0	0	0	0	200	903	0	0	0	0	0	0	0	603	903	0
655	5	-14.0683	74.2603	-504.797	-12107.7	48233.3	8810.67	295.55	323.985	0	0	0	0	0	0	0	200	903	0	0	0	0	0	0	0	603	903	0
655	6	-14.2209	76.0913	-510.9	-12107.7	49331.9	9451.54	296.559	323.699	0	0	0	0	0	0	0	200	903	0	0	0	0	0	0	0	603	903	0
655	7	-12.8476	79.2957	-520.361	-13297.9	50064.4	9176.88	296.211	325.555	0	0	0	0	0	0	0	200	903	0	0	0	0	0	0	0	603	903	0
655	8	-12.695	81.4319	-530.126	-14396.5	50674.7	9588.87	295.59	327.157	0	0	0	0	0	0	0	200	903	0	0	0	0	0	0	0	603	903	0
655	9	-11.7795	80.669	-538.976	-14945.8	50979.9	9680.42	294.587	327.73	0	0	0	0	0	0	0	200	903	0	0	0	0	0	0	0	603	903	0
656	0	-12.5424	84.6363	-543.249	-15312	52322.7	9817.75	296.314	328.186	0	0	0	0	0	0	0	200	903	0	0	0	0	0	0	0	603	903	0
656	1	-12.2372	87.2303	-550.878	-16685.3	52994	9909.3	296.199	330.289	0	0	0	0	0	0	0	200	903	0	0	0	0	0	0	0	603	903	0
656	2	-10.4062	88.1458	-556.677	-17417.7	53909.6	10321.3	296.842	331.289	0	0	0	0	0	0	0	200	903	0	0	0	0	0	0	0	603	903	0
656	3	-8.88031	88.9087	-563.391	-17600.8	54336.8	10000.9	296.446	331.241	0	0	0	0	0	0	0	200	903	0	0	0	0	0	0	0	603	903	0
656	4	-8.57514	91.6553	-569.799	-17783.9	54703	10000.9	296.004	331.211	0	0	0	0	0	0	0	200	903	0	0	0	0	0	0	0	603	903	0
656	5	-6.89667	92.4183	-569.494	-18424.8	55130.3	10229.7	296.806	332.353	0	0	0	0	0	0	0	200	903	0	0	0	0	0	0	0	603	903	0
656	6	-5.82855	93.0286	-577.734	-19065.7	55557.5	10229.7	296.165	333.001	0	0	0	0	0	0	0	200	903	0	0	0	0	0	0	0	603	903	0
656	7	-5.98114	92.876	-580.786	-19798.1	56228.9	10000.9	296.815	334.088	0	0	0	0	0	0	0	200	903	0	0	0	0	0	0	0	603	903	0
656	8	-2.7768	91.9605	-584.448	-20072.8	56656.2	10184	296.94	334.345	0	0	0	0	0	0	0	200	903	0	0	0	0	0	0	0	603	903	0
656	9	-0.182803	94.7071	-587.805	-20164.3	56961.3	10138.2	296.905	334.304	0	0	0	0	0	0	0	200	903	0	0	0	0	0	0	0	603	903	0
657	0	-1.25092	94.8597	-586.889	-20164.3	57693.8	10092.4	298.304	334.358	0	0	0	0	0	0	0	200	903	0	0	0	0	0	0	0	603	903	0
657	1	-0.182803	94.8597	-593.908	-20530.5	57693.8	10184	297.143	334.569	0	0	0	0	0	0	0	200	903	0	0	0	0	0	0	0	603	903	0
657	2	0.885313	95.3174	-593.908	-21079.8	57998.9	10184	297.656	335.493	0	0	0	0	0	0	0	200	903	0	0	0	0	0	0	0	603	903	0
657	3	2.41119	95.47	-593.908	-20439	57754.8	9680.42	297.245	334.414	0	0	0	0	0	0	0	200	903	0	0	0	0	0	0	0	603	903	0
657	4	4.54742	96.0804	-597.265	-21629.2	58487.2	9726.2	297.925	336.214	0	0	0	0	0	0	0	200	903	0	0	0	0	0	0	0	603	903	0
657	5	4.54742	95.6226	-598.181	-22086.9	58365.1	9955.08	297.571	336.924	0	0	0	0	0	0	0	200	903	0	0	0	0	0	0	0	603	903	0
657	6	4.70001	96.8433	-600.317	-22544.7	59158.6	10046.6	298.546	337.555	0	0	0	0	0	0	0	200	903	0	0	0	0	0	0	0	603	903	0
657	7	6.22589	98.6744	-600.622	-23094	59280.7	10321.3	298.699	338.45	0	0	0	0	0	0	0	200	903	0	0	0	0	0	0	0	603	903	0
657	8	7.75177	98.2166	-600.012	-23551.8	59097.6	10092.4	298.494	339.252	0	0	0	0	0	0	0	200	903	0	0	0	0	0	0	0	603	903	0
657	9	7.75177	99.4373	-602.453	-23734.9	59707.9	10321.3	299.108	339.397	0	0	0	0	0	0	0	200	903	0	0	0	0	0	0	0	603	903	0
658	0	8.97247	100.2	-604.589	-24284.2	59707.9	10367.1	298.758	340.166	0	0	0	0	0	0	0	200	903	0	0	0	0	0	0	0	603	903	0
658	1	9.12506	102.336	-605.505	-23918	59891	10367.1	298.911	339.501	0	0	0	0	0	0	0	200	903	0	0	0	0	0	0	0	603	903	0
658	2	10.1932	102.947	-605.505	-24925.1	60440.3	10733.3	299.818	341.164	0	0	0	0	0	0	0	200	903	0	0	0	0	0	0	0	603	903	0
658	3	9.43023	103.557	-609.777	-25657.5	61172.8	10550.2	300.32	342.077	0	0	0	0	0	0	0	200	903	0	0	0	0	0	0	0	603	903	0
658	4	8.81988	103.557	-618.932	-27213.9	62454.5	10962.2	300.907	343.969	0	0	0	0	0	0	0	200	903	0	0	0	0	0	0	0	603	903	0
658	5	10.6509	105.693	-631.14	-28221	63675.2	10962.2	300.889	344.714	0	0	0	0	0	0	0	200	903	0	0	0	0	0	0	0	603	903	0
658	6	18.1277	110.118	-638.159	-28861.8	64224.5	11236.8	300.64	345.227	0	0	0	0	0	0	0	200	903	0	0	0	0	0	0	0	603	903	0
658	7	20.8743	113.475	-641.516	-29594.2	65506.3	11282.6	302.112	346.132	0	0	0	0	0	0	0	200	903	0	0	0	0	0	0	0	603	903	0
658	8	21.3321	116.68	-643.957	-30052	66543.8	10779.1	303.336	346.668	0	0	0	0	0	0	0	200	903	0	0	0	0	0	0	0	603	903	0
658	9	26.2149	118.511	-655.859	-30967.5	66727	10916.4	301.74	347.217	0	0	0	0	0	0	0	200	903	0	0	0	0	0	0	0	603	903	0
659	0	29.1141	120.342	-664.404	-32249.3	68008.7	11099.5	302.36	348.539	0	0	0	0	0	0	0	200	903	0	0	0	0	0	0	0	603	903	0
659	1	28.8089	125.377	-672.643	-32707	69290.5	11419.9	303.012	348.625	0	0	0	0	0	0	0	200	903	0	0	0	0	0	0	0	603	903	0
659	2	29.5718	127.361	-675.39	-33988.8	69351.4	11694.6	302.684	350.325	0	0	0	0	0	0	0	200	903	0	0	0	0	0	0	0	603	903	0
659	3	28.6563	129.345	-684.85	-34812.7	70511.2	12243.9	302.958	350.833	0	0	0	0	0	0	0	200	903	0	0	0	0	0	0	0	603	903	0
659	4	28.5037	132.549	-694.311	-35179	71548.7	12335.5	303.05	350.667	0	0	0	0	0	0	0	200	903	0	0	0	0	0	0	0	603	903	0
659	5	30.0296	132.854	-704.077	-36735.4	72281.1	12335.5	302.661	352.175	0	0	0	0	0	0	0	200	903	0	0	0	0	0	0	0	603	903	0
659	6	30.64	134.99	-708.959	-38383.3	72525.3	12701.7	302.298	354.14	0	0	0	0	0	0	0	200	903	0	0	0	0	0	0	0	603	903	0
659	7	29.1141	135.906	-717.809	-38749.5	73807.1	12701.7	302.823	353.983	0	0	0	0	0	0	0	200	903	0	0	0	0	0	0	0	603	903	0
659	8	29.1141	135.601	-722.997	-39848.1	74722.5	12381.2	303.351	355.115	0	0	0	0	0	0	0	200	903	0	0	0	0	0	0	0	603	903	0
659	9	31.5555	136.974	-727.88	-40122.8	75149.8	12655.9	303.245	355.123	0	0	0	0	0	0	0	200	903	0	0	0	0	0	0	0	603	903	0
660	0	31.0977	136.669	-734.594	-40946.8	76126.4	12564.3	303.631	355.741	0	0	0	0	0	0	0	200	903	0	0	0	0	0	0	0	603	903	0
660	1	30.9451	136.058	-740.698	-42045.4	76614.7	12518.6	303.436	356.765	0	0	0	0	0	0	0	200	903	0	0	0	0	0	0	0	603	903	0
660	2	31.7081	134.38	-748.632	-42777.9	77103	12381.2	302.992	357.141	0	0	0	0	0	0	0	200	903	0	0	0	0	0	0	0	603	903	0
660	3	32.0132	135.448	-751.684	-42320.1	77835.4	12518.6	303.548	356.3	0	0	0	0	0	0	0	200	903	0	0	0	0	0	0	0	603	903	0
660	4	32.9288	134.38	-754.125	-42961	78567.8	12335.5	304.184	356.968	0	0	0	0	0	0	0	200	903	0	0	0	0	0	0	0	603	903	0
660	5	33.9969	134.838	-759.619	-43876.5	79605.3	11969.2	304.796	357.761	0	0	0	0	0	0	0	200	903	0	0	0	0	0	0	0	603	903	0
660	6	35.065	134.533	-767.248	-44792	79666.4	12243.9	303.834	358.38	0	0	0	0	0	0	0	200	903	0	0	0	0	0	0	0	603	903	0
660	7	34.1495	133.464	-771.215	-44608.9	80032.6	12152.3	303.775	357.842	0	0	0	0	0	0	0	200	903	0	0	0	0	0	0	0	603	903	0
660	8	35.8279	133.312	-773.962	-45066.6	80643	12015	304.195	358.229	0	0	0	0	0	0	0	200	903	0	0	0	0	0	0	0	603	903	0
660	9	36.7435	133.464	-777.014	-46348.4	81253.3	11923.5	304.571	359.649	0	0	0	0	0	0	0	200	903	0	0	0	0	0	0	0	603	903	0
661	0	37.9642	133.007	-782.507	-47355.5	81802.6	12152.3	304.539	360.518	0	0	0	0	0	0	0	200	903	0	0	0	0	0	0	0	603	903	0
661	1	39.3375	134.685	-788.915	-48637.2	82718.2	12198.1	304.851	361.651	0	0	0	0	0	0	0	200	903	0	0	0	0	0	0	0	603	903	0
661	2	38.1168	135.601	-792.272	-49278.1	83023.3	11877.7	304.791	362.198	0	0	0	0	0	0	0	200	903	0	0	0	0	0	0	0	603	903	0
661	3	38.2693	136.669	-794.103	-49827.4	83389.5	11969.2	305.011	362.747	0	0	0	0	0	0	0	200	903	0	0	0	0	0	0	0	603	903	0
661	4	40.253	136.974	-795.324	-50559.8	83877.8	12015	305.464	363.571	0	0	0	0	0	0	0	200	903	0	0	0	0	0	0	0	603	903	0
661	5	40.8633	138.042	-803.259	-50376.7	84488.2	12152.3	305.182	362.715	0	0	0	0	0	0	0	200	903	0	0	0	0	0	0	0	603	903	0
661	6	41.4737	138.5	-809.973	-52390.9	85098.5	12289.7	305.063	364.682	0	0	0	0	0	0	0	200	903	0	0	0	0	0	0	0	603	903	0
661	7	41.7789	139.415	-814.245	-52940.2	85769.9	11969.2	305.337	365.018	0	0	0	0	0	0	0	200	903	0	0	0	0	0	0	0	603	903	0
661	8	42.2366	138.805	-818.517	-53398	86624.4	12015	305.831	365.237	0	0	0	0	0	0	0	200	903	0	0	0	0	0	0	0	603	903	0
661	9	42.847	139.72	-821.874	-54405	87234.8	12152.3	306.141	366.196	0	0	0	0	0	0	0	200	903	0	0	0	0	0	0	0	603	903	0
662	0	44.5254	140.026	-826.757	-54130.4	87417.8	11969.2	305.736	365.473	0	0	0	0	0	0	0	200	903	0	0	0	0	0	0	0	603	903	0
662	1	44.2203	139.873	-831.945	-55229	88272.3	12243.9	306.104	366.385	0	0	0	0	0	0	0	200	903	0	0	0	0	0	0	0	603	903	0
662	2	44.0677	139.415	-833.776	-55503.7	88821.7	12152.3	306.529	366.569	0	0	0	0	0	0	0	200	903	0	0	0	0	0	0	0	603	903	0
662	3	44.2203	139.11	-841.1	-56419.2	89187.9	11786.1	306.037	367.078	0	0	0	0	0	0	0	200	903	0	0	0	0	0	0	0	603	903	0
662	4	43.6099	138.042	-843.237	-57426.3	89798.3	11831.9	306.492	368.102	0	0	0	0	0	0	0	200	903	0	0	0	0	0	0	0	603	903	0
662	5	44.9832	137.889	-849.035	-57884	90530.7	12060.8	306.628	368.176	0	0	0	0	0	0	0	200	903	0	0	0	0	0	0	0	603	903	0
662	6	43.1522	136.821	-856.054	-58708	90713.7	12015	305.967	368.58	0	0	0	0	0	0	0	200	903	0	0	0	0	0	0	0	603	903	0
662	7	43.9151	136.974	-858.801	-59440.5	90713.7	11648.8	305.628	369.213	0	0	0	0	0	0	0	200	903	0	0	0	0	0	0	0	603	903	0
662	8	42.847	136.821	-861.852	-60172.9	92239.7	11740.4	307.025	369.818	0	0	0	0	0	0	0	200	903	0	0	0	0	0	0	0	603	903	0
662	9	43.4573	136.058	-863.378	-60813.7	92300.7	11877.7	306.906	370.437	0	0	0	0	0	0	0	200	903	0	0	0	0	0	0	0	603	903	0
663	0	43.1522	135.448	-866.125	-61637.7	92544.8	11603	306.849	371.165	0	0	0	0	0	0	0	200	903	0	0	0	0	0	0	0	603	903	0
663	1	42.847	135.295	-868.261	-61363	92972.1	11786.1	307.079	370.673	0	0	0	0	0	0	0	200	903	0	0	0	0	0	0	0	603	903	0
663	2	42.6944	135.143	-875.585	-62278.6	93094.2	11374.2	306.322	371.128	0	0	0	0	0	0	0	200	903	0	0	0	0	0	0	0	603	903	0
663	3	41.0159	133.312	-876.196	-63194.1	93826.6	11786.1	307.084	372.123	0	0	0	0	0	0	0	200	903	0	0	0	0	0	0	0	603	903	0
663	4	41.4737	133.617	-878.027	-63285.7	94009.6	11374.2	307.069	372.077	0	0	0	0	0	0	0	200	903	0	0	0	0	0	0	0	603	903	0
663	5	40.4056	132.854	-878.942	-63743.4	94253.8	11191	307.235	372.523	0	0	0	0	0	0	0	200	903	0	0	0	0	0	0	0	603	903	0
663	6	40.253	132.396	-883.215	-64292.7	94803.1	11603	307.339	372.794	0	0	0	0	0	0	0	200	903	0	0	0	0	0	0	0	603	903	0
663	7	40.1004	133.007	-886.877	-64384.3	94986.2	11557.3	307.102	372.597	0	0	0	0	0	0	0	200	903	0	0	0	0	0	0	0	603	903	0
663	8	40.1004	131.023	-887.792	-65116.7	94925.2	11419.9	306.923	373.347	0	0	0	0	0	0	0	200	903	0	0	0	0	0	0	0	603	903	0
663	9	40.4056	130.107	-887.182	-65391.4	95901.8	11419.9	308.097	373.707	0	0	0	0	0	0	0	200	903	0	0	0	0	0	0	0	603	903	0
664	0	39.49	129.955	-889.929	-65849.1	95535.6	11465.7	307.352	373.994	0	0	0	0	0	0	0	200	903	0	0	0	0	0	0	0	603	903	0
664	1	39.49	129.955	-890.844	-66581.5	95840.7	11282.6	307.584	374.74	0	0	0	0	0	0	0	200	903	0	0	0	0	0	0	0	603	903	0
664	2	39.9478	129.955	-892.37	-66306.9	96329	11419.9	307.947	374.304	0	0	0	0	0	0	0	200	903	0	0	0	0	0	0	0	603	903	0
664	3	38.8797	129.192	-894.811	-68137.9	96634.2	11191	307.994	376.148	0	0	0	0	0	0	0	200	903	0	0	0	0	0	0	0	603	903	0
664	4	39.6426	128.887	-896.032	-68870.4	96512.1	11145.3	307.711	376.862	0	0	0	0	0	0	0	200	903	0	0	0	0	0	0	0	603	903	0
664	5	39.0323	128.887	-894.506	-69328.1	96206.9	11282.6	307.553	377.504	0	0	0	0	0	0	0	200	903	0	0	0	0	0	0	0	603	903	0
664	6	40.253	128.734	-895.422	-69145	96878.3	10824.8	308.193	377.221	0	0	0	0	0	0	0	200	903	0	0	0	0	0	0	0	603	903	0
664	7	40.1004	128.276	-895.422	-70152.1	96756.3	11007.9	308.057	378.345	0	0	0	0	0	0	0	200	903	0	0	0	0	0	0	0	603	903	0
664	8	40.5582	128.276	-892.37	-70701.4	97244.6	11236.8	308.973	379.229	0	0	0	0	0	0	0	200	903	0	0	0	0	0	0	0	603	903	0
664	9	39.9478	127.208	-895.422	-70701.4	97122.5	10962.2	308.466	378.959	0	0	0	0	0	0	0	200	903	0	0	0	0	0	0	0	603	903	0
665	0	39.6426	127.666	-894.506	-71250.8	97122.5	10962.2	308.577	379.654	0	0	0	0	0	0	0	200	903	0	0	0	0	0	0	0	603	903	0
665	1	40.4056	126.445	-891.76	-70335.2	97061.4	11191	308.843	378.872	0	0	0	0	0	0	0	200	903	0	0	0	0	0	0	0	603	903	0
665	2	40.7108	126.293	-894.506	-70884.6	97183.5	10916.4	308.645	379.244	0	0	0	0	0	0	0	200	903	0	0	0	0	0	0	0	603	903	0
665	3	40.1004	125.835	-892.98	-71433.8	97488.7	10779.1	309.172	379.995	0	0	0	0	0	0	0	200	903	0	0	0	0	0	0	0	603	903	0
665	4	39.3375	124.157	-892.675	-70976.1	97244.6	10916.4	308.936	379.509	0	0	0	0	0	0	0	200	903	0	0	0	0	0	0	0	603	903	0
665	5	40.1004	123.088	-888.403	-71800	96817.3	11007.9	308.979	380.819	0	0	0	0	0	0	0	200	903	0	0	0	0	0	0	0	603	903	0
665	6	39.0323	122.478	-884.741	-71891.6	97305.5	11099.5	309.982	381.257	0	0	0	0	0	0	0	200	903	0	0	0	0	0	0	0	603	903	0
665	7	40.1004	122.02	-885.656	-72257.8	97427.6	10779.1	310.006	381.587	0	0	0	0	0	0	0	200	903	0	0	0	0	0	0	0	603	903	0
665	8	39.9478	120.8	-886.572	-73081.8	96939.3	10412.8	309.342	382.432	0	0	0	0	0	0	0	200	903	0	0	0	0	0	0	0	603	903	0
665	9	39.6426	119.274	-885.351	-73905.8	96695.2	10275.5	309.217	383.476	0	0	0	0	0	0	0	200	903	0	0	0	0	0	0	0	603	903	0
666	0	39.1849	119.274	-878.027	-73905.8	96451	10321.3	309.85	384.173	0	0	0	0	0	0	0	200	903	0	0	0	0	0	0	0	603	903	0
666	1	39.6426	118.358	-878.637	-74088.9	96878.3	10275.5	310.26	384.322	0	0	0	0	0	0	0	200	903	0	0	0	0	0	0	0	603	903	0
666	2	40.1004	117.137	-878.027	-74363.5	96878.3	10275.5	310.336	384.694	0	0	0	0	0	0	0	200	903	0	0	0	0	0	0	0	603	903	0
666	3	40.5582	116.375	-878.942	-74455.1	96939.3	10046.6	310.291	384.71	0	0	0	0	0	0	0	200	903	0	0	0	0	0	0	0	603	903	0
666	4	39.49	115.917	-873.144	-74546.7	96695.2	9863.53	310.744	385.377	0	0	0	0	0	0	0	200	903	0	0	0	0	0	0	0	603	903	0
666	5	39.1849	115.001	-873.754	-74729.7	96573.1	9817.75	310.527	385.527	0	0	0	0	0	0	0	200	903	0	0	0	0	0	0	0	603	903	0
666	6	39.3375	113.475	-869.177	-75370.6	96695.2	9863.53	311.249	386.715	0	0	0	0	0	0	0	200	903	0	0	0	0	0	0	0	603	903	0
666	7	39.6426	113.018	-866.735	-74912.9	96695.2	10046.6	311.563	386.431	0	0	0	0	0	0	0	200	903	0	0	0	0	0	0	0	603	903	0
666	8	40.1004	112.102	-866.43	-74821.3	96084.8	9771.97	310.897	386.356	0	0	0	0	0	0	0	200	903	0	0	0	0	0	0	0	603	903	0
666	9	39.9478	111.644	-862.463	-74912.9	95840.7	9726.2	311.124	386.859	0	0	0	0	0	0	0	200	903	0	0	0	0	0	0	0	603	903	0
667	0	39.1849	109.661	-860.021	-75187.5	95901.8	9543.09	311.511	387.425	0	0	0	0	0	0	0	200	903	0	0	0	0	0	0	0	603	903	0
667	1	39.3375	109.508	-855.749	-74455.1	96451	9543.09	312.71	387.006	0	0	0	0	0	0	0	200	903	0	0	0	0	0	0	0	603	903	0
667	2	40.1004	108.287	-852.697	-75279.1	95596.6	9680.42	312.111	388.284	0	0	0	0	0	0	0	200	903	0	0	0	0	0	0	0	603	903	0
667	3	39.9478	107.524	-852.392	-75645.3	95413.5	9268.43	311.936	388.745	0	0	0	0	0	0	0	200	903	0	0	0	0	0	0	0	603	903	0
667	4	40.1004	106.609	-845.678	-75370.6	95291.4	9359.99	312.68	389.125	0	0	0	0	0	0	0	200	903	0	0	0	0	0	0	0	603	903	0
667	5	40.1004	106.609	-844.457	-76011.5	94925.2	9359.99	312.41	390.012	0	0	0	0	0	0	0	200	903	0	0	0	0	0	0	0	603	903	0
667	6	39.49	105.388	-839.575	-76560.8	94620	8948	312.7	391.19	0	0	0	0	0	0	0	200	903	0	0	0	0	0	0	0	603	903	0
667	7	41.1685	103.557	-836.828	-76286.1	93826.6	9222.66	312.122	391.161	0	0	0	0	0	0	0	200	903	0	0	0	0	0	0	0	603	903	0
667	8	40.253	103.099	-833.471	-76194.6	94253.8	8902.22	313.086	391.418	0	0	0	0	0	0	0	200	903	0	0	0	0	0	0	0	603	903	0
667	9	39.6426	102.336	-831.03	-75462.2	93948.7	8719.12	313.051	390.806	0	0	0	0	0	0	0	200	903	0	0	0	0	0	0	0	603	903	0
668	0	39.6426	101.268	-826.147	-76469.2	94009.6	8536.01	313.793	392.561	0	0	0	0	0	0	0	200	903	0	0	0	0	0	0	0	603	903	0
668	1	40.7108	100.505	-820.959	-76194.6	93582.4	8673.34	313.992	392.812	0	0	0	0	0	0	0	200	903	0	0	0	0	0	0	0	603	903	0
668	2	39.7952	98.064	-813.94	-76469.2	92788.9	8261.35	314	393.95	0	0	0	0	0	0	0	200	903	0	0	0	0	0	0	0	603	903	0
668	3	40.8633	98.5218	-812.414	-76469.2	92666.9	8215.58	314.064	394.126	0	0	0	0	0	0	0	200	903	0	0	0	0	0	0	0	603	903	0
668	4	41.0159	97.1485	-809.667	-75279.1	91873.5	8078.25	313.471	392.975	0	0	0	0	0	0	0	200	903	0	0	0	0	0	0	0	603	903	0
668	5	39.7952	96.3855	-806.005	-75553.7	92117.6	8032.47	314.289	393.738	0	0	0	0	0	0	0	200	903	0	0	0	0	0	0	0	603	903	0
668	6	40.7108	94.2493	-799.597	-75279.1	91873.5	8078.25	314.9	394.146	0	0	0	0	0	0	0	200	903	0	0	0	0	0	0	0	603	903	0
668	7	39.7952	93.7915	-795.324	-74821.3	91385.2	7803.59	314.903	394.077	0	0	0	0	0	0	0	200	903	0	0	0	0	0	0	0	603	903	0
668	8	40.1004	92.2657	-790.746	-74912.9	91324.1	7620.49	315.491	394.737	0	0	0	0	0	0	0	200	903	0	0	0	0	0	0	0	603	903	0
668	9	40.5582	91.5027	-788.305	-74912.9	90774.8	7895.14	315.152	395.03	0	0	0	0	0	0	0	200	903	0	0	0	0	0	0	0	603	903	0
669	0	41.7789	90.1294	-779.15	-74729.7	90225.5	7940.92	315.8	395.912	0	0	0	0	0	0	0	200	903	0	0	0	0	0	0	0	603	903	0
669	1	39.7952	88.9087	-778.234	-74821.3	90164.5	7345.83	315.858	396.142	0	0	0	0	0	0	0	200	903	0	0	0	0	0	0	0	603	903	0
669	2	40.253	87.9932	-770.91	-75187.5	90103.4	7208.5	316.879	397.531	0	0	0	0	0	0	0	200	903	0	0	0	0	0	0	0	603	903	0
669	3	40.5582	87.5354	-766.943	-75187.5	89248.9	6796.51	316.37	398.035	0	0	0	0	0	0	0	200	903	0	0	0	0	0	0	0	603	903	0
669	4	40.7108	86.4673	-762.365	-74729.7	89065.8	6979.62	316.828	398.024	0	0	0	0	0	0	0	200	903	0	0	0	0	0	0	0	603	903	0
669	5	40.7108	85.7044	-760.229	-74821.3	88882.7	6796.51	316.916	398.419	0	0	0	0	0	0	0	200	903	0	0	0	0	0	0	0	603	903	0
669	6	40.4056	84.0259	-755.346	-74729.7	87967.2	6659.18	316.459	398.934	0	0	0	0	0	0	0	200	903	0	0	0	0	0	0	0	603	903	0
669	7	39.9478	83.4156	-749.853	-74455.1	87845.1	6384.52	317.15	399.293	0	0	0	0	0	0	0	200	903	0	0	0	0	0	0	0	603	903	0
669	8	41.7789	80.9742	-745.58	-73997.3	87295.8	6338.75	317.084	399.248	0	0	0	0	0	0	0	200	903	0	0	0	0	0	0	0	603	903	0
669	9	40.8633	81.1267	-738.561	-73356.4	87051.6	5972.54	317.867	399.323	0	0	0	0	0	0	0	200	903	0	0	0	0	0	0	0	603	903	0
670	0	41.1685	79.7535	-737.341	-73448	86502.4	6338.75	317.317	399.612	0	0	0	0	0	0	0	200	903	0	0	0	0	0	0	0	603	903	0
670	1	40.4056	78.3802	-731.848	-73081.8	86380.3	5835.21	318.03	399.859	0	0	0	0	0	0	0	200	903	0	0	0	0	0	0	0	603	903	0
670	2	41.4737	77.312	-727.27	-72349.4	85830.9	5606.33	318.018	399.481	0	0	0	0	0	0	0	200	903	0	0	0	0	0	0	0	603	903	0
670	3	40.7108	76.0913	-718.725	-72440.9	85342.6	5514.77	318.742	400.791	0	0	0	0	0	0	0	200	903	0	0	0	0	0	0	0	603	903	0
670	4	41.1685	75.1758	-716.589	-72807.1	85159.6	5469	318.84	401.602	0	0	0	0	0	0	0	200	903	0	0	0	0	0	0	0	603	903	0
670	5	41.1685	72.7344	-713.842	-72624	84121.9	5331.67	317.844	401.737	0	0	0	0	0	0	0	200	903	0	0	0	0	0	0	0	603	903	0
670	6	40.5582	72.2766	-711.096	-73081.8	84427.2	5194.34	318.728	402.774	0	0	0	0	0	0	0	200	903	0	0	0	0	0	0	0	603	903	0
670	7	40.4056	71.5137	-703.466	-72715.6	83816.8	5194.34	319.148	403.368	0	0	0	0	0	0	0	200	903	0	0	0	0	0	0	0	603	903	0
670	8	39.9478	70.4456	-699.194	-72532.5	83755.7	4965.45	319.789	403.737	0	0	0	0	0	0	0	200	903	0	0	0	0	0	0	0	603	903	0
670	9	40.253	70.1404	-696.142	-72166.3	83633.7	4919.68	320.139	403.666	0	0	0	0	0	0	0	200	903	0	0	0	0	0	0	0	603	903	0
671	0	39.9478	68.9197	-692.175	-72074.7	83084.4	4553.47	320.034	404.128	0	0	0	0	0	0	0	200	903	0	0	0	0	0	0	0	603	903	0
671	1	38.8797	65.868	-688.513	-72349.4	82535	4553.47	319.874	405.081	0	0	0	0	0	0	0	200	903	0	0	0	0	0	0	0	603	903	0
671	2	39.49	66.3257	-684.24	-70793	82474	4690.8	320.534	403.462	0	0	0	0	0	0	0	200	903	0	0	0	0	0	0	0	603	903	0
671	3	39.1849	65.4102	-678.137	-71067.6	81619.6	4233.03	320.359	404.798	0	0	0	0	0	0	0	200	903	0	0	0	0	0	0	0	603	903	0
671	4	39.3375	64.4947	-673.864	-70976.1	81558.5	4049.93	321.031	405.327	0	0	0	0	0	0	0	200	903	0	0	0	0	0	0	0	603	903	0
671	5	39.49	62.6636	-672.033	-70335.2	81192.3	4141.48	320.816	404.66	0	0	0	0	0	0	0	200	903	0	0	0	0	0	0	0	603	903	0
671	6	38.5745	62.2058	-666.845	-70152.1	80581.9	3912.6	320.841	405.2	0	0	0	0	0	0	0	200	903	0	0	0	0	0	0	0	603	903	0
671	7	37.5064	60.2222	-662.267	-70243.7	80398.9	3912.6	321.399	406.065	0	0	0	0	0	0	0	200	903	0	0	0	0	0	0	0	603	903	0
671	8	38.4219	59.917	-656.774	-69694.3	79544.4	3912.6	321.114	406.116	0	0	0	0	0	0	0	200	903	0	0	0	0	0	0	0	603	903	0
671	9	37.9642	58.5437	-653.112	-70609.9	79605.3	3683.72	321.886	408.113	0	0	0	0	0	0	0	200	903	0	0	0	0	0	0	0	603	903	0
672	0	37.8116	57.0179	-650.366	-70335.2	78934	3546.39	321.369	408.147	0	0	0	0	0	0	0	200	903	0	0	0	0	0	0	0	603	903	0
672	1	37.0486	57.1704	-646.398	-68321.1	78750.9	3271.73	321.83	405.695	0	0	0	0	0	0	0	200	903	0	0	0	0	0	0	0	603	903	0
672	2	36.5909	55.9497	-642.431	-69694.3	78689.9	3317.51	322.488	408.485	0	0	0	0	0	0	0	200	903	0	0	0	0	0	0	0	603	903	0
672	3	37.659	53.8135	-636.022	-69602.8	78140.5	3225.95	322.858	409.435	0	0	0	0	0	0	0	200	903	0	0	0	0	0	0	0	603	903	0
672	4	37.5064	54.4239	-633.581	-69236.6	77163.9	3225.95	321.79	409.278	0	0	0	0	0	0	0	200	903	0	0	0	0	0	0	0	603	903	0
672	5	37.3538	53.0506	-629.614	-68412.6	77163.9	2997.07	322.558	408.658	0	0	0	0	0	0	0	200	903	0	0	0	0	0	0	0	603	903	0
672	6	35.8279	51.9825	-627.477	-68046.4	77225	2813.97	323.072	408.444	0	0	0	0	0	0	0	200	903	0	0	0	0	0	0	0	603	903	0
672	7	36.7435	49.3885	-621.069	-68137.9	76736.7	2768.19	323.556	409.711	0	0	0	0	0	0	0	200	903	0	0	0	0	0	0	0	603	903	0
672	8	36.5909	49.8462	-617.407	-67405.5	76431.5	2630.86	323.794	409.175	0	0	0	0	0	0	0	200	903	0	0	0	0	0	0	0	603	903	0
672	9	36.8961	48.4729	-612.219	-67863.3	76004.3	2585.08	324.146	410.848	0	0	0	0	0	0	0	200	903	0	0	0	0	0	0	0	603	903	0
673	0	37.2012	47.5574	-610.693	-67130.9	75821.2	2585.08	324.156	409.926	0	0	0	0	0	0	0	200	903	0	0	0	0	0	0	0	603	903	0
673	1	36.5909	46.0315	-606.42	-67130.9	75271.9	2493.53	324.125	410.7	0	0	0	0	0	0	0	200	903	0	0	0	0	0	0	0	603	903	0
673	2	36.7435	45.7264	-602.758	-67954.9	75271.9	2173.1	324.879	412.74	0	0	0	0	0	0	0	200	903	0	0	0	0	0	0	0	603	903	0
673	3	36.5909	44.6582	-597.265	-67405.5	74844.6	2218.87	325.312	412.857	0	0	0	0	0	0	0	200	903	0	0	0	0	0	0	0	603	903	0
673	4	37.2012	43.7427	-593.298	-67497.1	74051.2	1944.21	324.813	413.766	0	0	0	0	0	0	0	200	903	0	0	0	0	0	0	0	603	903	0
673	5	37.5064	43.5901	-591.161	-66673.1	73929.1	2218.87	325.057	412.783	0	0	0	0	0	0	0	200	903	0	0	0	0	0	0	0	603	903	0
673	6	36.8961	42.3694	-584.448	-66581.5	73929.1	1989.99	326.494	413.922	0	0	0	0	0	0	0	200	903	0	0	0	0	0	0	0	603	903	0
673	7	35.8279	41.4539	-582.922	-66764.6	73440.8	1623.78	325.988	414.535	0	0	0	0	0	0	0	200	903	0	0	0	0	0	0	0	603	903	0
673	8	37.0486	37.9444	-577.429	-66215.3	72342.2	1806.89	325.283	414.673	0	0	0	0	0	0	0	200	903	0	0	0	0	0	0	0	603	903	0
673	9	36.2857	39.6228	-574.682	-65666	72647.3	1623.78	326.413	414.265	0	0	0	0	0	0	0	200	903	0	0	0	0	0	0	0	603	903	0
674	0	36.8961	39.1651	-572.241	-65116.7	72220.1	1166.02	326.206	413.793	0	0	0	0	0	0	0	200	903	0	0	0	0	0	0	0	603	903	0
674	1	36.1331	36.1133	-565.222	-64842	71853.9	1394.9	327.125	414.72	0	0	0	0	0	0	0	200	903	0	0	0	0	0	0	0	603	903	0
674	2	36.8961	36.4185	-565.832	-64842	71365.6	1440.67	326.125	414.596	0	0	0	0	0	0	0	200	903	0	0	0	0	0	0	0	603	903	0
674	3	35.5228	35.6556	-559.728	-64842	70999.4	1120.24	326.846	415.846	0	0	0	0	0	0	0	200	903	0	0	0	0	0	0	0	603	903	0
674	4	36.2857	33.6719	-558.203	-64201.2	70633.2	982.911	326.537	415.014	0	0	0	0	0	0	0	200	903	0	0	0	0	0	0	0	603	903	0
674	5	36.1331	34.1297	-554.846	-63743.4	70633.2	937.134	327.303	414.885	0	0	0	0	0	0	0	200	903	0	0	0	0	0	0	0	603	903	0
674	6	35.8279	33.0616	-545.385	-64658.9	70572.1	937.134	329.399	418.557	0	0	0	0	0	0	0	200	903	0	0	0	0	0	0	0	603	903	0
674	7	35.5228	32.4512	-548.742	-64384.3	70205.9	799.805	327.94	417.331	0	0	0	0	0	0	0	200	903	0	0	0	0	0	0	0	603	903	0
674	8	35.2176	32.4512	-543.859	-64201.2	69107.3	616.7	327.068	418.047	0	0	0	0	0	0	0	200	903	0	0	0	0	0	0	0	603	903	0
674	9	34.7598	31.9934	-540.197	-63560.3	69229.4	616.7	328.156	417.661	0	0	0	0	0	0	0	200	903	0	0	0	0	0	0	0	603	903	0
675	0	36.1331	31.2305	-538.976	-63743.4	69290.5	662.476	328.559	418.268	0	0	0	0	0	0	0	200	903	0	0	0	0	0	0	0	603	903	0
675	1	37.0486	28.1787	-534.094	-64018.1	68558	296.265	328.363	419.863	0	0	0	0	0	0	0	200	903	0	0	0	0	0	0	0	603	903	0
675	2	34.4546	29.552	-532.263	-63285.7	68496.9	387.818	328.69	418.899	0	0	0	0	0	0	0	200	903	0	0	0	0	0	0	0	603	903	0
675	3	33.9969	28.4839	-528.295	-62553.2	68252.8	570.923	329.194	418.406	0	0	0	0	0	0	0	200	903	0	0	0	0	0	0	0	603	903	0
675	4	34.4546	27.721	-524.938	-62187	68069.8	204.712	329.672	418.465	0	0	0	0	0	0	0	200	903	0	0	0	0	0	0	0	603	903	0
675	5	34.4546	27.721	-523.107	-62003.9	67337.3	387.818	328.726	418.53	0	0	0	0	0	0	0	200	903	0	0	0	0	0	0	0	603	903	0
675	6	33.8443	26.1951	-520.056	-61546.1	67215.3	570.923	329.246	418.345	0	0	0	0	0	0	0	200	903	0	0	0	0	0	0	0	603	903	0
675	7	32.7762	25.2796	-516.699	-62003.9	66849	479.37	329.377	420	0	0	0	0	0	0	0	200	903	0	0	0	0	0	0	0	603	903	0
675	8	33.2339	24.6692	-512.731	-61454.6	66055.5	-115.723	328.831	419.857	0	0	0	0	0	0	0	200	903	0	0	0	0	0	0	0	603	903	0
675	9	33.8443	22.6856	-510.9	-61363	66482.8	-298.828	330.129	420.108	0	0	0	0	0	0	0	200	903	0	0	0	0	0	0	0	603	903	0
676	0	34.3021	23.4485	-508.764	-61912.4	66116.6	-161.499	329.955	421.692	0	0	0	0	0	0	0	200	903	0	0	0	0	0	0	0	603	903	0
676	1	32.7762	22.6856	-506.628	-62187	66055.5	-298.828	330.383	422.747	0	0	0	0	0	0	0	200	903	0	0	0	0	0	0	0	603	903	0
676	2	32.7762	21.4649	-502.661	-61729.2	65567.3	-436.157	330.44	422.805	0	0	0	0	0	0	0	200	903	0	0	0	0	0	0	0	603	903	0
676	3	32.7762	21.6175	-501.135	-61454.6	65384.2	-619.263	330.472	422.631	0	0	0	0	0	0	0	200	903	0	0	0	0	0	0	0	603	903	0
676	4	32.9288	21.1597	-497.167	-61271.5	64651.8	-481.934	330.04	423.241	0	0	0	0	0	0	0	200	903	0	0	0	0	0	0	0	603	903	0
676	5	33.2339	21.1597	-497.167	-59806.7	64957	-573.486	330.654	420.295	0	0	0	0	0	0	0	200	903	0	0	0	0	0	0	0	603	903	0
676	6	32.1658	19.7864	-494.726	-61179.9	64590.7	-665.039	330.559	423.664	0	0	0	0	0	0	0	200	903	0	0	0	0	0	0	0	603	903	0
676	7	32.7762	19.7864	-491.674	-60996.8	64651.8	-893.921	331.493	424.059	0	0	0	0	0	0	0	200	903	0	0	0	0	0	0	0	603	903	0
676	8	31.7081	19.0235	-486.181	-60447.5	64468.7	-893.921	332.602	424.331	0	0	0	0	0	0	0	200	903	0	0	0	0	0	0	0	603	903	0
676	9	32.6236	18.1079	-485.876	-60447.5	63797.3	-893.921	331.304	424.409	0	0	0	0	0	0	0	200	903	0	0	0	0	0	0	0	603	903	0
677	0	32.6236	17.6502	-486.181	-60081.3	63797.3	-939.698	331.221	423.578	0	0	0	0	0	0	0	200	903	0	0	0	0	0	0	0	603	903	0
677	1	31.8607	17.4976	-484.655	-59440.5	63736.2	-985.474	331.508	422.645	0	0	0	0	0	0	0	200	903	0	0	0	0	0	0	0	603	903	0
677	2	32.6236	16.1243	-480.383	-59348.9	63614.2	-1351.69	332.424	423.545	0	0	0	0	0	0	0	200	903	0	0	0	0	0	0	0	603	903	0
677	3	31.8607	15.514	-474.584	-59348.9	62515.5	-985.474	331.727	425.054	0	0	0	0	0	0	0	200	903	0	0	0	0	0	0	0	603	903	0
677	4	32.6236	14.9036	-476.11	-59257.3	63247.9	-1260.13	332.843	424.461	0	0	0	0	0	0	0	200	903	0	0	0	0	0	0	0	603	903	0
677	5	31.7081	14.1407	-475.5	-59532	63064.8	-1168.58	332.629	425.199	0	0	0	0	0	0	0	200	903	0	0	0	0	0	0	0	603	903	0
677	6	30.4874	13.9881	-474.584	-59898.2	62759.7	-1534.79	332.241	426.212	0	0	0	0	0	0	0	200	903	0	0	0	0	0	0	0	603	903	0
677	7	31.0977	13.9881	-470.312	-59257.3	62332.4	-1672.12	332.534	425.996	0	0	0	0	0	0	0	200	903	0	0	0	0	0	0	0	603	903	0
677	8	31.4029	13.3777	-467.565	-58891.1	62210.4	-1855.23	333.052	425.953	0	0	0	0	0	0	0	200	903	0	0	0	0	0	0	0	603	903	0
677	9	30.4874	12.4622	-469.091	-59532	62149.3	-1626.34	332.489	426.909	0	0	0	0	0	0	0	200	903	0	0	0	0	0	0	0	603	903	0
678	0	31.0977	11.5467	-462.377	-59348.9	61233.8	-1809.45	332.432	428.356	0	0	0	0	0	0	0	200	903	0	0	0	0	0	0	0	603	903	0
678	1	30.0296	12.6148	-465.734	-58708	61661	-1717.9	332.395	426.055	0	0	0	0	0	0	0	200	903	0	0	0	0	0	0	0	603	903	0
678	2	30.1822	11.8518	-462.072	-58250.2	61477.9	-1855.23	333.048	426.063	0	0	0	0	0	0	0	200	903	0	0	0	0	0	0	0	603	903	0
678	3	30.4874	10.9363	-460.851	-57609.4	61416.9	-1672.12	333.268	425.006	0	0	0	0	0	0	0	200	903	0	0	0	0	0	0	0	603	903	0
678	4	30.3348	10.0208	-460.241	-58524.9	61111.7	-2038.33	332.782	427.161	0	0	0	0	0	0	0	200	903	0	0	0	0	0	0	0	603	903	0
678	5	29.1141	9.8682	-459.936	-58616.5	61294.8	-2038.33	333.268	427.445	0	0	0	0	0	0	0	200	903	0	0	0	0	0	0	0	603	903	0
678	6	30.4874	9.41044	-456.274	-58708	61172.8	-2084.11	334.07	428.668	0	0	0	0	0	0	0	200	903	0	0	0	0	0	0	0	603	903	0
678	7	30.7925	8.18973	-455.053	-59165.8	61172.8	-2175.66	334.43	430.02	0	0	0	0	0	0	0	200	903	0	0	0	0	0	0	0	603	903	0
678	8	30.3348	8.95267	-453.527	-58799.6	60440.3	-2358.76	333.267	429.65	0	0	0	0	0	0	0	200	903	0	0	0	0	0	0	0	603	903	0
678	9	29.877	8.18973	-455.358	-58799.6	60684.5	-2450.32	333.268	429.128	0	0	0	0	0	0	0	200	903	0	0	0	0	0	0	0	603	903	0
679	0	28.5037	8.34232	-454.138	-57884	60196.2	-2358.76	332.551	427.459	0	0	0	0	0	0	0	200	903	0	0	0	0	0	0	0	603	903	0
679	1	29.1141	7.88456	-450.17	-57700.9	60379.3	-2312.99	334.125	428.176	0	0	0	0	0	0	0	200	903	0	0	0	0	0	0	0	603	903	0
679	2	29.7244	7.2742	-449.56	-58524.9	60623.4	-2679.2	334.851	430.183	0	0	0	0	0	0	0	200	903	0	0	0	0	0	0	0	603	903	0
679	3	30.7925	6.35868	-448.034	-58158.7	60440.3	-2541.87	334.901	429.809	0	0	0	0	0	0	0	200	903	0	0	0	0	0	0	0	603	903	0
679	4	29.1141	6.20609	-450.475	-57975.6	60013.1	-2404.54	333.222	428.699	0	0	0	0	0	0	0	200	903	0	0	0	0	0	0	0	603	903	0
679	5	28.3511	6.20609	-449.56	-57426.3	59891	-2587.65	333.221	427.739	0	0	0	0	0	0	0	200	903	0	0	0	0	0	0	0	603	903	0
679	6	28.3511	5.44315	-446.813	-58891.1	60013.1	-2724.98	334.314	431.803	0	0	0	0	0	0	0	200	903	0	0	0	0	0	0	0	603	903	0
679	7	28.8089	4.37503	-446.203	-58708	60501.4	-2633.42	335.592	431.572	0	0	0	0	0	0	0	200	903	0	0	0	0	0	0	0	603	903	0
679	8	29.4192	5.13797	-447.119	-58433.4	59891	-2496.09	333.949	430.689	0	0	0	0	0	0	0	200	903	0	0	0	0	0	0	0	603	903	0
679	9	27.8934	5.13797	-443.762	-58708	59891	-2633.42	334.962	432.296	0	0	0	0	0	0	0	200	903	0	0	0	0	0	0	0	603	903	0
680	0	27.7408	3.15433	-446.203	-58341.8	59952.1	-2587.65	334.36	430.752	0	0	0	0	0	0	0	200	903	0	0	0	0	0	0	0	603	903	0
680	1	27.283	4.22245	-444.372	-58067.1	59952.1	-2770.75	334.914	430.672	0	0	0	0	0	0	0	200	903	0	0	0	0	0	0	0	603	903	0
680	2	28.046	3.30692	-442.541	-58341.8	59402.7	-2908.08	334.231	431.834	0	0	0	0	0	0	0	200	903	0	0	0	0	0	0	0	603	903	0
680	3	27.4356	2.39139	-444.982	-58067.1	59891	-3045.41	334.592	430.493	0	0	0	0	0	0	0	200	903	0	0	0	0	0	0	0	603	903	0
680	4	26.8253	2.39139	-444.677	-57884	59646.9	-3182.74	334.135	430.171	0	0	0	0	0	0	0	200	903	0	0	0	0	0	0	0	603	903	0
680	5	27.283	2.69657	-442.541	-58158.7	59463.8	-3411.62	334.369	431.42	0	0	0	0	0	0	0	200	903	0	0	0	0	0	0	0	603	903	0
680	6	26.6727	1.93363	-439.489	-58891.1	59830	-3274.29	336.135	433.999	0	0	0	0	0	0	0	200	903	0	0	0	0	0	0	0	603	903	0
680	7	27.1304	1.47587	-441.931	-59074.2	59707.9	-3365.85	335.107	433.673	0	0	0	0	0	0	0	200	903	0	0	0	0	0	0	0	603	903	0
680	8	26.0623	0.712926	-443.762	-59440.5	59097.6	-3320.07	333.174	433.947	0	0	0	0	0	0	0	200	903	0	0	0	0	0	0	0	603	903	0
680	9	26.3675	1.32328	-443.762	-58891.1	59585.8	-3365.85	334.274	432.709	0	0	0	0	0	0	0	200	903	0	0	0	0	0	0	0	603	903	0
681	0	25.9097	0.712926	-441.625	-59440.5	59707.9	-3228.52	335.2	434.595	0	0	0	0	0	0	0	200	903	0	0	0	0	0	0	0	603	903	0
681	1	26.5201	0.560338	-441.015	-58891.1	59646.9	-3457.4	335.249	433.535	0	0	0	0	0	0	0	200	903	0	0	0	0	0	0	0	603	903	0
681	2	26.3675	0.560338	-444.677	-58799.6	59463.8	-3411.62	333.723	432.23	0	0	0	0	0	0	0	200	903	0	0	0	0	0	0	0	603	903	0
681	3	24.9942	-0.812953	-443.762	-57792.5	59463.8	-3365.85	333.999	430.233	0	0	0	0	0	0	0	200	903	0	0	0	0	0	0	0	603	903	0
681	4	24.9942	-0.965541	-443.151	-58982.7	59524.8	-3548.95	334.322	433.098	0	0	0	0	0	0	0	200	903	0	0	0	0	0	0	0	603	903	0
681	5	25.7571	-1.11813	-442.846	-59440.5	59646.9	-3594.73	334.69	434.224	0	0	0	0	0	0	0	200	903	0	0	0	0	0	0	0	603	903	0
681	6	25.7571	-1.27072	-443.151	-60264.4	59768.9	-3686.28	334.873	435.991	0	0	0	0	0	0	0	200	903	0	0	0	0	0	0	0	603	903	0
681	7	24.8416	-3.71212	-444.677	-60264.4	59830	-3457.4	334.547	435.524	0	0	0	0	0	0	0	200	903	0	0	0	0	0	0	0	603	903	0
681	8	25.2994	-1.57589	-445.593	-59989.8	59830	-3640.5	334.271	434.629	0	0	0	0	0	0	0	200	903	0	0	0	0	0	0	0	603	903	0
681	9	26.0623	-1.27072	-443.151	-60172.9	59524.8	-3594.73	334.322	435.784	0	0	0	0	0	0	0	200	903	0	0	0	0	0	0	0	603	903	0
682	0	24.3838	-2.18624	-442.846	-60356	59952.1	-3777.83	335.379	436.291	0	0	0	0	0	0	0	200	903	0	0	0	0	0	0	0	603	903	0
682	1	24.9942	-1.88107	-444.677	-59715.1	60013.1	-3594.73	334.959	434.289	0	0	0	0	0	0	0	200	903	0	0	0	0	0	0	0	603	903	0
682	2	25.1468	-1.88107	-445.593	-59806.7	59646.9	-4098.27	333.86	434.218	0	0	0	0	0	0	0	200	903	0	0	0	0	0	0	0	603	903	0
682	3	24.2313	-2.7966	-447.119	-60081.3	60074.1	-4189.82	334.358	434.374	0	0	0	0	0	0	0	200	903	0	0	0	0	0	0	0	603	903	0
682	4	26.3675	-2.7966	-446.203	-60264.4	60318.3	-4006.71	335.181	435.061	0	0	0	0	0	0	0	200	903	0	0	0	0	0	0	0	603	903	0
682	5	24.8416	-3.55954	-443.762	-61546.1	60562.4	-4098.27	336.475	438.692	0	0	0	0	0	0	0	200	903	0	0	0	0	0	0	0	603	903	0
682	6	24.2313	-4.32247	-447.424	-61546.1	60074.1	-4098.27	334.267	437.557	0	0	0	0	0	0	0	200	903	0	0	0	0	0	0	0	603	903	0
682	7	24.5364	-3.55954	-450.475	-61637.7	60196.2	-4281.37	333.628	436.828	0	0	0	0	0	0	0	200	903	0	0	0	0	0	0	0	603	903	0
682	8	23.7735	-3.86471	-448.95	-61546.1	60440.3	-4144.04	334.626	437.089	0	0	0	0	0	0	0	200	903	0	0	0	0	0	0	0	603	903	0
682	9	24.5364	-4.62765	-448.95	-62370.1	60623.4	-4510.25	335.034	438.925	0	0	0	0	0	0	0	200	903	0	0	0	0	0	0	0	603	903	0
683	0	25.452	-4.47506	-451.391	-61637.7	60623.4	-4464.48	334.304	436.551	0	0	0	0	0	0	0	200	903	0	0	0	0	0	0	0	603	903	0
683	1	24.0787	-5.08541	-450.17	-61729.2	60989.6	-4601.81	335.481	437.124	0	0	0	0	0	0	0	200	903	0	0	0	0	0	0	0	603	903	0
683	2	24.2313	-5.54318	-454.748	-61729.2	61111.7	-4647.58	334.386	435.744	0	0	0	0	0	0	0	200	903	0	0	0	0	0	0	0	603	903	0
683	3	23.6209	-6.45871	-454.138	-62187	61050.7	-4556.03	334.432	436.934	0	0	0	0	0	0	0	200	903	0	0	0	0	0	0	0	603	903	0
683	4	23.4683	-6.30612	-453.222	-62553.2	60928.6	-4647.58	334.434	438.019	0	0	0	0	0	0	0	200	903	0	0	0	0	0	0	0	603	903	0
683	5	24.5364	-6.61129	-454.748	-63011	61416.9	-4556.03	335.057	438.562	0	0	0	0	0	0	0	200	903	0	0	0	0	0	0	0	603	903	0
683	6	24.689	-7.06906	-458.41	-63285.7	61600	-4464.48	334.378	438.055	0	0	0	0	0	0	0	200	903	0	0	0	0	0	0	0	603	903	0
683	7	23.6209	-6.61129	-458.715	-63743.4	61416.9	-4830.69	333.889	438.961	0	0	0	0	0	0	0	200	903	0	0	0	0	0	0	0	603	903	0
683	8	23.3157	-6.30612	-460.241	-64018.1	61844.1	-5059.57	334.373	439.097	0	0	0	0	0	0	0	200	903	0	0	0	0	0	0	0	603	903	0
683	9	23.7735	-6.76388	-458.715	-64475.8	61355.9	-4739.14	333.756	440.557	0	0	0	0	0	0	0	200	903	0	0	0	0	0	0	0	603	903	0
684	0	23.7735	-7.06906	-460.546	-63377.2	61661	-4922.24	333.887	437.613	0	0	0	0	0	0	0	200	903	0	0	0	0	0	0	0	603	903	0
684	1	24.2313	-7.832	-464.208	-63926.5	61966.2	-5059.57	333.488	437.711	0	0	0	0	0	0	0	200	903	0	0	0	0	0	0	0	603	903	0
684	2	22.858	-7.67941	-463.903	-64109.6	62515.5	-5196.9	334.76	438.196	0	0	0	0	0	0	0	200	903	0	0	0	0	0	0	0	603	903	0
684	3	23.3157	-8.44235	-462.072	-64842	63003.8	-5105.35	336.351	440.329	0	0	0	0	0	0	0	200	903	0	0	0	0	0	0	0	603	903	0
684	4	23.3157	-8.74752	-465.734	-64475.8	62393.5	-5151.13	333.968	438.439	0	0	0	0	0	0	0	200	903	0	0	0	0	0	0	0	603	903	0
684	5	23.1631	-8.90011	-467.26	-65666	62759.7	-4876.46	334.314	440.534	0	0	0	0	0	0	0	200	903	0	0	0	0	0	0	0	603	903	0
684	6	23.1631	-9.0527	-470.007	-65849.1	62942.8	-5517.34	333.919	440.103	0	0	0	0	0	0	0	200	903	0	0	0	0	0	0	0	603	903	0
684	7	23.1631	-8.90011	-472.143	-66306.9	63492.1	-5151.13	334.476	440.438	0	0	0	0	0	0	0	200	903	0	0	0	0	0	0	0	603	903	0
684	8	24.5364	-8.90011	-469.702	-66490	62637.6	-5700.44	333.356	441.558	0	0	0	0	0	0	0	200	903	0	0	0	0	0	0	0	603	903	0
684	9	23.3157	-10.2734	-471.533	-67130.9	63492.1	-5746.22	334.65	442.367	0	0	0	0	0	0	0	200	903	0	0	0	0	0	0	0	603	903	0
685	0	23.3157	-9.66305	-474.584	-66947.8	63736.2	-5563.11	334.299	441.066	0	0	0	0	0	0	0	200	903	0	0	0	0	0	0	0	603	903	0
685	1	23.4683	-9.81564	-477.636	-66764.6	63736.2	-5837.77	333.441	439.781	0	0	0	0	0	0	0	200	903	0	0	0	0	0	0	0	603	903	0
685	2	23.4683	-10.5786	-478.552	-66856.2	63858.3	-6112.43	333.441	439.705	0	0	0	0	0	0	0	200	903	0	0	0	0	0	0	0	603	903	0
685	3	23.4683	-11.9519	-479.162	-67130.9	64468.7	-6020.88	334.545	440.101	0	0	0	0	0	0	0	200	903	0	0	0	0	0	0	0	603	903	0
685	4	24.0787	-11.9519	-480.688	-67771.7	64346.6	-6066.65	333.864	440.989	0	0	0	0	0	0	0	200	903	0	0	0	0	0	0	0	603	903	0
685	5	23.9261	-12.1045	-482.824	-67863.3	64163.5	-6112.43	332.892	440.555	0	0	0	0	0	0	0	200	903	0	0	0	0	0	0	0	603	903	0
685	6	22.7054	-11.9519	-484.655	-68595.7	64590.7	-6249.76	333.272	441.535	0	0	0	0	0	0	0	200	903	0	0	0	0	0	0	0	603	903	0
685	7	24.0787	-13.1726	-485.876	-69145	64834.9	-6341.31	333.439	442.31	0	0	0	0	0	0	0	200	903	0	0	0	0	0	0	0	603	903	0
685	8	23.3157	-12.257	-485.571	-69602.8	64895.9	-6295.54	333.649	443.342	0	0	0	0	0	0	0	200	903	0	0	0	0	0	0	0	603	903	0
685	9	23.7735	-11.9519	-488.012	-69694.3	65018	-6478.64	333.23	442.813	0	0	0	0	0	0	0	200	903	0	0	0	0	0	0	0	603	903	0
686	0	23.6209	-12.257	-491.064	-70152.1	65628.3	-6707.52	333.645	442.858	0	0	0	0	0	0	0	200	903	0	0	0	0	0	0	0	603	903	0
686	1	23.7735	-12.5622	-492.285	-70060.5	65872.5	-6615.97	333.81	442.317	0	0	0	0	0	0	0	200	903	0	0	0	0	0	0	0	603	903	0
686	2	23.4683	-13.9355	-493.2	-70152.1	65933.5	-6615.97	333.685	442.239	0	0	0	0	0	0	0	200	903	0	0	0	0	0	0	0	603	903	0
686	3	23.4683	-14.0881	-494.116	-70335.2	65689.3	-6570.19	332.943	442.346	0	0	0	0	0	0	0	200	903	0	0	0	0	0	0	0	603	903	0
686	4	23.6209	-13.9355	-497.167	-71067.6	65567.3	-6936.4	331.882	442.945	0	0	0	0	0	0	0	200	903	0	0	0	0	0	0	0	603	903	0
686	5	23.9261	-14.0881	-499.609	-70701.4	66910	-6936.4	333.925	441.514	0	0	0	0	0	0	0	200	903	0	0	0	0	0	0	0	603	903	0
686	6	25.452	-14.851	-498.998	-72532.5	66543.8	-6844.85	333.355	445.356	0	0	0	0	0	0	0	200	903	0	0	0	0	0	0	0	603	903	0
686	7	23.3157	-14.0881	-503.271	-71800	67032.1	-6890.63	333.193	442.667	0	0	0	0	0	0	0	200	903	0	0	0	0	0	0	0	603	903	0
686	8	23.4683	-15.0036	-504.186	-72898.7	67215.3	-6799.08	333.314	444.587	0	0	0	0	0	0	0	200	903	0	0	0	0	0	0	0	603	903	0
686	9	23.7735	-15.9192	-506.933	-73356.4	67093.2	-7165.29	332.351	444.706	0	0	0	0	0	0	0	200	903	0	0	0	0	0	0	0	603	903	0
687	0	23.6209	-15.4614	-509.985	-72807.1	67398.3	-6707.52	332.158	442.763	0	0	0	0	0	0	0	200	903	0	0	0	0	0	0	0	603	903	0
687	1	23.1631	-15.7666	-511.816	-73448	67398.3	-6936.4	331.685	443.505	0	0	0	0	0	0	0	200	903	0	0	0	0	0	0	0	603	903	0
687	2	22.858	-16.3769	-511.816	-73997.3	68008.7	-6982.18	332.877	444.578	0	0	0	0	0	0	0	200	903	0	0	0	0	0	0	0	603	903	0
687	3	22.7054	-17.1399	-514.868	-74638.2	68130.7	-7531.5	332.327	444.966	0	0	0	0	0	0	0	200	903	0	0	0	0	0	0	0	603	903	0
687	4	23.3157	-16.8347	-517.309	-74455.1	68619	-7119.51	332.646	443.928	0	0	0	0	0	0	0	200	903	0	0	0	0	0	0	0	603	903	0
687	5	23.0106	-17.445	-520.056	-76103	68924.2	-7668.83	332.533	446.336	0	0	0	0	0	0	0	200	903	0	0	0	0	0	0	0	603	903	0
687	6	22.5528	-18.3606	-523.107	-76743.9	68863.2	-7394.17	331.643	446.708	0	0	0	0	0	0	0	200	903	0	0	0	0	0	0	0	603	903	0
687	7	22.4002	-17.5976	-525.244	-76835.5	69107.3	-7714.6	331.572	446.285	0	0	0	0	0	0	0	200	903	0	0	0	0	0	0	0	603	903	0
687	8	21.7899	-17.7502	-525.549	-77384.8	69168.4	-7348.39	331.612	447.246	0	0	0	0	0	0	0	200	903	0	0	0	0	0	0	0	603	903	0
687	9	22.4002	-19.4287	-527.075	-77659.4	69656.7	-7989.26	332.157	447.34	0	0	0	0	0	0	0	200	903	0	0	0	0	0	0	0	603	903	0
688	0	23.1631	-18.5131	-531.957	-77659.4	69839.7	-8035.03	331.288	445.988	0	0	0	0	0	0	0	200	903	0	0	0	0	0	0	0	603	903	0
688	1	22.4002	-19.4287	-530.737	-77934.1	70205.9	-7943.48	332.28	446.841	0	0	0	0	0	0	0	200	903	0	0	0	0	0	0	0	603	903	0
688	2	21.1795	-19.5813	-536.535	-78575	70572.1	-7989.26	331.533	446.449	0	0	0	0	0	0	0	200	903	0	0	0	0	0	0	0	603	903	0
688	3	21.3321	-20.1916	-537.145	-78208.8	70450.1	-8309.69	331.156	445.601	0	0	0	0	0	0	0	200	903	0	0	0	0	0	0	0	603	903	0
688	4	22.095	-21.1071	-539.282	-79398.9	70816.3	-8401.25	331.316	447.231	0	0	0	0	0	0	0	200	903	0	0	0	0	0	0	0	603	903	0
688	5	21.6373	-21.1071	-541.113	-79765.1	71182.5	-7851.93	331.548	447.41	0	0	0	0	0	0	0	200	903	0	0	0	0	0	0	0	603	903	0
688	6	21.9424	-22.0227	-544.47	-80772.3	71365.6	-8263.92	331.074	448.35	0	0	0	0	0	0	0	200	903	0	0	0	0	0	0	0	603	903	0
688	7	20.5692	-22.633	-547.521	-81779.3	71426.6	-8630.13	330.455	449.363	0	0	0	0	0	0	0	200	903	0	0	0	0	0	0	0	603	903	0
688	8	22.2476	-22.7856	-548.742	-81779.3	72037	-8584.35	331.277	449.031	0	0	0	0	0	0	0	200	903	0	0	0	0	0	0	0	603	903	0
688	9	20.7217	-23.2434	-549.658	-82328.6	72525.3	-8675.9	331.946	449.782	0	0	0	0	0	0	0	200	903	0	0	0	0	0	0	0	603	903	0
689	0	21.0269	-23.2434	-552.099	-83335.7	72403.2	-8721.68	331.142	450.944	0	0	0	0	0	0	0	200	903	0	0	0	0	0	0	0	603	903	0
689	1	21.3321	-23.7011	-557.287	-82786.4	72830.5	-8584.35	330.688	448.553	0	0	0	0	0	0	0	200	903	0	0	0	0	0	0	0	603	903	0
689	2	20.8743	-24.3115	-560.034	-83793.5	72769.4	-8950.56	329.938	449.622	0	0	0	0	0	0	0	200	903	0	0	0	0	0	0	0	603	903	0
689	3	19.8062	-24.6167	-560.949	-84342.8	73135.6	-8721.68	330.378	450.357	0	0	0	0	0	0	0	200	903	0	0	0	0	0	0	0	603	903	0
689	4	20.4166	-26.1425	-561.559	-84892.1	73318.8	-8996.34	330.563	451.172	0	0	0	0	0	0	0	200	903	0	0	0	0	0	0	0	603	903	0
689	5	21.0269	-25.8374	-563.696	-84800.6	73746	-9225.22	330.826	450.437	0	0	0	0	0	0	0	200	903	0	0	0	0	0	0	0	603	903	0
[truncated: 2,254 more rows]
