# Supplementary material for: The Effects of an Extemporaneous Speech Dual-task on Older Adult Gait Control
Source: Research Square preprint supplement (doi:10.21203/rs.3.rs-7674245/v1), 2025-11-18
Supplement: Supplementary file 153 [file Over3ground08.xlsx]

## Sheet: Sheet1
Trajectories
		03:LFHD			03:RFHD			03:LBHD			03:RBHD			03:C7			03:T10			03:CLAV			03:STRN			03:RBAK			03:LSHO			03:LUPA			03:LELB			03:LFRM			03:LWRA			03:LWRB			03:LFIN
Frame	Sub Frame	X	Y	Z	X	Y	Z	X	Y	Z	X	Y	Z	X	Y	Z	X	Y	Z	X	Y	Z	X	Y	Z	X	Y	Z	X	Y	Z	X	Y	Z	X	Y	Z	X	Y	Z	X	Y	Z	X	Y	Z	X	Y	Z
		mm	mm	mm	mm	mm	mm	mm	mm	mm	mm	mm	mm	mm	mm	mm	mm	mm	mm	mm	mm	mm	mm	mm	mm	mm	mm	mm	mm	mm	mm	mm	mm	mm	mm	mm	mm	mm	mm	mm	mm	mm	mm	mm	mm	mm	mm	mm	mm
468	0	187.167	-1871.89	1622.2	290.518	-1875.81	1614.39	162.728	-2028.54	1633	299.068	-2043.24	1624.99	238.205	-2100.35	1481.37	231.728	-2204.11	1259.4	224.664	-1966.05	1377.96	213.704	-1943.82	1192.34	285.676	-2210.51	1332.33	38.8221	-2093.42	1438.12	-23.7946	-2103.02	1235.39	-45.6214	-2110.41	1116.98	-51.6266	-1981.25	998.349	-6.38271	-1905.67	943.2	-60.1341	-1942.71	902.925	-58.446	-1848.19	856.947
469	0	186.073	-1858.86	1625.08	289.447	-1862.57	1617.77	161.796	-2015.54	1636.46	297.973	-2030.2	1629.03	238.546	-2087.95	1485.21	233.139	-2191.22	1262.82	224.617	-1953.62	1381.94	213.876	-1931.23	1196.21	286.851	-2197.6	1336.28	39.241	-2082.15	1441.45	-22.9907	-2092.42	1238.65	-44.2081	-2100.31	1119.91	-50.303	-1973.94	998.176	-5.07925	-1899.46	941.159	-58.8214	-1937.57	901.707	-56.9754	-1843.82	853.46
470	0	184.987	-1845.92	1627.96	288.385	-1849.43	1621.13	160.896	-2002.64	1639.77	296.938	-2017.23	1632.93	238.901	-2075.5	1488.88	234.559	-2178.36	1266.14	224.551	-1941.15	1385.76	214.029	-1918.61	1199.96	288.055	-2184.63	1340.06	39.676	-2070.84	1444.64	-22.1613	-2081.96	1241.82	-42.7818	-2090.43	1122.8	-49.0518	-1966.95	998.012	-3.91183	-1893.64	939.153	-57.5978	-1932.82	900.575	-55.6964	-1839.97	850.065
471	0	183.912	-1833.09	1630.83	287.333	-1836.39	1624.46	160.027	-1989.84	1642.95	295.966	-2004.32	1636.67	239.27	-2062.99	1492.38	235.987	-2165.51	1269.35	224.464	-1928.63	1389.43	214.164	-1905.97	1203.58	289.287	-2171.6	1343.65	40.127	-2059.49	1447.69	-21.3066	-2071.63	1244.9	-41.3426	-2080.79	1125.63	-47.8727	-1960.27	997.858	-2.88036	-1888.18	937.18	-56.4632	-1928.47	899.53	-54.6086	-1836.64	846.762
472	0	182.846	-1820.36	1633.7	286.292	-1823.43	1627.77	159.192	-1977.15	1645.98	295.056	-1991.49	1640.27	239.653	-2050.43	1495.72	237.422	-2152.68	1272.45	224.358	-1916.06	1392.95	214.28	-1893.31	1207.07	290.547	-2158.51	1347.07	40.5939	-2048.11	1450.61	-20.4267	-2061.43	1247.88	-39.8905	-2071.37	1128.41	-46.7658	-1953.91	997.712	-1.98449	-1883.08	935.24	-55.4168	-1924.5	898.569	-53.7106	-1833.83	843.55
473	0	181.795	-1807.72	1636.55	285.263	-1810.57	1631.05	158.391	-1964.55	1648.86	294.21	-1978.72	1643.7	240.05	-2037.82	1498.88	238.861	-2139.86	1275.44	224.233	-1903.44	1396.3	214.377	-1880.62	1210.42	291.833	-2145.37	1350.29	41.0763	-2036.68	1453.38	-19.5224	-2051.37	1250.76	-38.4255	-2062.17	1131.14	-45.7304	-1947.85	997.571	-1.22339	-1878.35	933.329	-54.4569	-1920.92	897.688	-53.0001	-1831.53	840.428
474	0	180.76	-1795.18	1639.37	284.252	-1797.79	1634.28	157.628	-1952.05	1651.58	293.432	-1966.01	1646.96	240.461	-2025.15	1501.86	240.301	-2127.07	1278.31	224.089	-1890.77	1399.48	214.455	-1867.9	1213.62	293.143	-2132.17	1353.33	41.5734	-2025.21	1455.99	-18.5944	-2041.43	1253.54	-36.9482	-2053.19	1133.8	-44.766	-1942.11	997.43	-0.595462	-1873.98	931.444	-53.5809	-1917.72	896.882	-52.4726	-1829.73	837.392
475	0	179.748	-1782.71	1642.14	283.262	-1785.09	1637.43	156.906	-1939.63	1654.13	292.724	-1953.36	1650.05	240.885	-2012.42	1504.65	241.735	-2114.31	1281.04	223.929	-1878.05	1402.47	214.516	-1855.16	1216.66	294.473	-2118.91	1356.16	42.0843	-2013.7	1458.45	-17.6443	-2031.61	1256.19	-35.4592	-2044.41	1136.39	-43.8711	-1936.65	997.283	-0.097953	-1869.94	929.579	-52.7849	-1914.87	896.142	-52.1212	-1828.4	834.437
476	0	178.765	-1770.32	1644.84	282.301	-1772.45	1640.5	156.231	-1927.28	1656.5	292.087	-1940.74	1652.93	241.323	-1999.65	1507.24	243.157	-2101.58	1283.63	223.754	-1865.29	1405.27	214.558	-1842.38	1219.51	295.818	-2105.61	1358.79	42.6074	-2002.15	1460.73	-16.6738	-2021.9	1258.73	-33.9603	-2035.84	1138.89	-43.0439	-1931.48	997.121	0.273302	-1866.22	927.728	-52.0636	-1912.37	895.458	-51.9366	-1827.53	831.557
477	0	177.819	-1757.99	1647.44	281.376	-1759.87	1643.43	155.607	-1914.99	1658.67	291.523	-1928.16	1655.59	241.771	-1986.81	1509.61	244.559	-2088.9	1286.06	223.567	-1852.47	1407.84	214.582	-1829.58	1222.14	297.171	-2092.27	1361.18	43.1407	-1990.55	1462.83	-15.6852	-2012.29	1261.12	-32.4538	-2027.45	1141.29	-42.2817	-1926.57	996.935	0.524145	-1862.8	925.883	-51.4107	-1910.17	894.818	-51.9066	-1827.07	828.745
478	0	176.919	-1745.69	1649.9	280.495	-1747.32	1646.2	155.041	-1902.74	1660.62	291.035	-1915.6	1658	242.23	-1973.91	1511.75	245.932	-2076.25	1288.3	223.368	-1839.61	1410.17	214.589	-1816.75	1224.54	298.522	-2078.88	1363.34	43.6815	-1978.91	1464.72	-14.6811	-2002.78	1263.35	-30.9426	-2019.24	1143.56	-41.5809	-1921.9	996.715	0.662271	-1859.65	924.035	-50.8185	-1908.27	894.209	-52.0161	-1827	825.995
479	0	176.071	-1733.41	1652.19	279.667	-1734.78	1648.77	154.535	-1890.51	1662.34	290.62	-1903.04	1660.15	242.694	-1960.96	1513.63	247.266	-2063.66	1290.35	223.162	-1826.7	1412.24	214.58	-1803.89	1226.67	299.862	-2065.47	1365.25	44.2262	-1967.21	1466.38	-13.6646	-1993.33	1265.41	-29.4306	-2011.17	1145.7	-40.9371	-1917.45	996.449	0.697299	-1856.74	922.175	-50.2783	-1906.62	893.618	-52.2469	-1827.26	823.297
480	0	175.285	-1721.12	1654.28	278.899	-1722.25	1651.11	154.096	-1878.28	1663.8	290.28	-1890.46	1662	243.16	-1947.94	1515.25	248.552	-2051.12	1292.17	222.949	-1813.74	1414.01	214.554	-1791.01	1228.5	301.178	-2052.02	1366.88	44.7702	-1955.45	1467.81	-12.6395	-1983.95	1267.29	-27.9221	-2003.22	1147.69	-40.3449	-1913.19	996.13	0.64073	-1854.04	920.296	-49.781	-1905.18	893.032	-52.5785	-1827.82	820.646
481	0	174.568	-1708.81	1656.12	278.199	-1709.69	1653.16	153.724	-1866.03	1665	290.01	-1877.86	1663.53	243.623	-1934.86	1516.58	249.779	-2038.64	1293.75	222.73	-1800.74	1415.48	214.512	-1778.11	1230.01	302.454	-2038.56	1368.24	45.3079	-1943.63	1468.98	-11.61	-1974.61	1268.97	-26.4223	-1995.38	1149.51	-39.7985	-1909.09	995.747	0.505815	-1851.51	918.389	-49.3167	-1903.92	892.44	-52.988	-1828.63	818.034
482	0	173.924	-1696.45	1657.68	277.571	-1697.09	1654.9	153.42	-1853.72	1665.9	289.808	-1865.2	1664.73	244.074	-1921.72	1517.61	250.936	-2026.21	1295.08	222.506	-1787.68	1416.63	214.453	-1765.19	1231.18	303.674	-2025.07	1369.29	45.8324	-1931.73	1469.88	-10.5811	-1965.29	1270.44	-24.9367	-1987.61	1151.15	-39.2913	-1905.11	995.295	0.307331	-1849.12	916.448	-48.8756	-1902.79	891.833	-53.4509	-1829.63	815.459
483	0	173.357	-1684.02	1658.93	277.019	-1684.42	1656.29	153.183	-1841.35	1666.52	289.668	-1852.47	1665.58	244.505	-1908.51	1518.34	252.01	-2013.82	1296.14	222.276	-1774.57	1417.43	214.377	-1752.25	1231.99	304.819	-2011.58	1370.05	46.3356	-1919.76	1470.51	-9.55902	-1955.96	1271.69	-23.4714	-1979.88	1152.61	-38.8167	-1901.23	994.769	0.061284	-1846.83	914.469	-48.4478	-1901.76	891.206	-53.9421	-1830.79	812.919
484	0	172.867	-1671.48	1659.85	276.544	-1671.67	1657.32	153.009	-1828.88	1666.83	289.583	-1839.67	1666.07	244.906	-1895.24	1518.76	252.989	-2001.46	1296.91	222.038	-1761.41	1417.88	214.282	-1739.28	1232.42	305.869	-1998.07	1370.49	46.8079	-1907.68	1470.86	-8.55078	-1946.62	1272.72	-22.0334	-1972.16	1153.87	-38.3678	-1897.4	994.167	-0.215489	-1844.6	912.451	-48.0238	-1900.78	890.555	-54.436	-1832.05	810.415
485	0	172.454	-1658.84	1660.42	276.143	-1658.82	1657.96	152.891	-1816.29	1666.84	289.544	-1826.76	1666.2	245.265	-1881.9	1518.86	253.857	-1989.12	1297.39	221.789	-1748.19	1417.99	214.166	-1726.29	1232.48	306.805	-1984.54	1370.62	47.2388	-1895.5	1470.91	-7.56475	-1937.22	1273.53	-20.63	-1964.42	1154.94	-37.938	-1893.59	993.49	-0.505743	-1842.41	910.395	-47.5947	-1899.8	889.88	-54.9078	-1833.35	807.952
486	0	172.111	-1646.05	1660.63	275.812	-1645.86	1658.2	152.819	-1803.57	1666.55	289.541	-1813.74	1665.98	245.569	-1868.49	1518.65	254.601	-1976.76	1297.57	221.526	-1734.92	1417.74	214.027	-1713.27	1232.18	307.608	-1971.01	1370.44	47.6164	-1883.2	1470.69	-6.61064	-1927.75	1274.12	-19.2691	-1956.62	1155.82	-37.5214	-1889.76	992.74	-0.792287	-1840.21	908.306	-47.1524	-1898.79	889.185	-55.3341	-1834.66	805.535
487	0	171.832	-1633.13	1660.48	275.544	-1632.76	1658.04	152.78	-1790.7	1665.98	289.561	-1800.61	1665.41	245.804	-1855.01	1518.13	255.205	-1964.36	1297.44	221.242	-1721.59	1417.16	213.86	-1700.22	1231.51	308.257	-1957.46	1369.96	47.928	-1870.77	1470.18	-5.69954	-1918.17	1274.49	-17.959	-1948.73	1156.51	-37.1126	-1885.87	991.923	-1.05846	-1837.97	906.188	-46.6901	-1897.7	888.474	-55.6931	-1835.91	803.174
488	0	171.604	-1620.04	1659.97	275.325	-1619.53	1657.49	152.76	-1777.68	1665.13	289.588	-1787.34	1664.51	245.957	-1841.47	1517.33	255.653	-1951.88	1297.01	220.931	-1708.19	1416.26	213.662	-1687.12	1230.5	308.736	-1943.88	1369.19	48.1601	-1858.19	1469.4	-4.84387	-1908.46	1274.65	-16.7085	-1940.72	1157.02	-36.7074	-1881.89	991.045	-1.28865	-1835.67	904.052	-46.2019	-1896.48	887.756	-55.9661	-1837.08	800.877
489	0	171.413	-1606.79	1659.11	275.142	-1606.17	1656.56	152.742	-1764.48	1664.04	289.606	-1773.95	1663.31	246.012	-1827.86	1516.25	255.933	-1939.3	1296.29	220.586	-1694.74	1415.07	213.426	-1673.96	1229.19	309.031	-1930.28	1368.15	48.299	-1845.45	1468.37	-4.05722	-1898.59	1274.6	-15.5267	-1932.55	1157.37	-36.3026	-1877.76	990.112	-1.46878	-1833.27	901.905	-45.6842	-1895.11	887.039	-56.137	-1838.1	798.653
490	0	171.243	-1593.37	1657.93	274.979	-1592.66	1655.28	152.704	-1751.12	1662.72	289.597	-1760.42	1661.85	245.956	-1814.18	1514.92	256.032	-1926.58	1295.28	220.198	-1681.21	1413.6	213.147	-1660.73	1227.59	309.13	-1916.64	1366.85	48.3309	-1832.56	1467.1	-3.354	-1888.53	1274.37	-14.4228	-1924.19	1157.55	-35.8964	-1873.45	989.133	-1.58686	-1830.73	899.757	-45.1351	-1893.53	886.331	-56.1936	-1838.94	796.511
491	0	171.075	-1579.78	1656.46	274.815	-1579.01	1653.69	152.628	-1737.58	1661.2	289.54	-1746.76	1660.14	245.775	-1800.44	1513.37	255.945	-1913.69	1293.99	219.758	-1667.61	1411.89	212.818	-1647.43	1225.76	309.024	-1902.96	1365.33	48.2427	-1819.49	1465.6	-2.74902	-1878.26	1273.96	-13.4061	-1915.6	1157.58	-35.4888	-1868.93	988.114	-1.63338	-1828.04	897.618	-44.5548	-1891.7	885.641	-56.1273	-1839.55	794.46
492	0	170.888	-1566.04	1654.73	274.631	-1565.23	1651.81	152.49	-1723.87	1659.51	289.415	-1732.98	1658.23	245.457	-1786.63	1511.61	255.667	-1900.61	1292.45	219.255	-1653.93	1409.98	212.431	-1634.02	1223.73	308.71	-1889.23	1363.6	48.0224	-1806.25	1463.91	-2.25692	-1867.75	1273.37	-12.486	-1906.75	1157.47	-35.081	-1864.15	987.061	-1.60165	-1825.16	895.497	-43.9463	-1889.59	884.976	-55.9338	-1839.89	792.505
493	0	170.663	-1552.13	1652.77	274.407	-1551.33	1649.69	152.268	-1710	1657.68	289.2	-1719.08	1656.16	244.991	-1772.75	1509.69	255.198	-1887.32	1290.69	218.681	-1640.17	1407.91	211.979	-1620.51	1221.54	308.187	-1875.44	1361.7	47.6594	-1792.83	1462.03	-1.89156	-1856.97	1272.63	-11.6713	-1897.61	1157.23	-34.6762	-1859.07	985.981	-1.48807	-1822.05	893.403	-43.3148	-1887.16	884.344	-55.6131	-1839.91	790.651
494	0	170.379	-1538.09	1650.64	274.121	-1537.31	1647.39	151.941	-1695.98	1655.75	288.874	-1705.08	1653.97	244.368	-1758.8	1507.63	254.542	-1873.8	1288.74	218.026	-1626.33	1405.72	211.456	-1606.88	1219.24	307.457	-1861.58	1359.66	47.1451	-1779.24	1460	-1.66537	-1845.92	1271.74	-10.9705	-1888.16	1156.87	-34.2791	-1853.67	984.878	-1.29225	-1818.69	891.342	-42.6681	-1884.37	883.747	-55.1694	-1839.57	788.901
495	0	170.015	-1523.91	1648.38	273.755	-1523.19	1644.95	151.488	-1681.82	1653.74	288.418	-1690.98	1651.69	243.582	-1744.79	1505.47	253.705	-1860.06	1286.61	217.281	-1612.4	1403.44	210.856	-1593.12	1216.87	306.527	-1847.65	1357.51	46.473	-1765.47	1457.84	-1.58877	-1834.57	1270.72	-10.3912	-1878.36	1156.39	-33.8961	-1847.89	983.755	-1.01709	-1815.03	889.321	-42.0164	-1881.17	883.19	-54.611	-1838.83	787.255
496	0	169.555	-1509.62	1646.03	273.291	-1508.99	1642.42	150.891	-1667.53	1651.68	287.813	-1676.81	1649.37	242.63	-1730.71	1503.24	252.697	-1846.09	1284.37	216.441	-1598.37	1401.12	210.174	-1579.21	1214.48	305.406	-1833.64	1355.28	45.6396	-1751.53	1455.57	-1.66974	-1822.9	1269.57	-9.94015	-1868.2	1155.8	-33.5349	-1841.71	982.614	-0.668822	-1811.05	887.343	-41.3718	-1877.52	882.672	-53.9502	-1837.64	785.713
497	0	168.983	-1495.23	1643.64	272.714	-1494.72	1639.86	150.137	-1653.13	1649.61	287.046	-1662.57	1647.04	241.51	-1716.56	1500.97	251.527	-1831.91	1282.03	215.5	-1584.24	1398.79	209.409	-1565.14	1212.1	304.105	-1819.54	1353.02	44.6436	-1737.44	1453.22	-1.91348	-1810.92	1268.3	-9.62306	-1857.65	1155.1	-33.2042	-1835.09	981.455	-0.257068	-1806.7	885.41	-40.7481	-1873.4	882.191	-53.203	-1835.95	784.269
498	0	168.287	-1480.75	1641.25	272.013	-1480.39	1637.32	149.212	-1638.63	1647.54	286.104	-1648.29	1644.73	240.226	-1702.35	1498.69	250.209	-1817.53	1279.64	214.457	-1570.02	1396.49	208.559	-1550.92	1209.77	302.638	-1805.37	1350.74	43.4875	-1723.18	1450.81	-2.32218	-1798.62	1266.93	-9.44426	-1846.7	1154.3	-32.9137	-1828.01	980.279	0.205233	-1801.94	883.525	-40.1605	-1868.75	881.742	-52.3886	-1833.72	782.92
499	0	167.46	-1466.2	1638.91	271.183	-1466.02	1634.84	148.113	-1624.06	1645.5	284.981	-1633.97	1642.47	238.783	-1688.07	1496.44	248.754	-1802.96	1277.24	213.313	-1555.71	1394.24	207.626	-1536.54	1207.52	301.02	-1791.11	1348.49	42.1763	-1708.78	1448.36	-2.89509	-1785.98	1265.46	-9.40682	-1835.34	1153.4	-32.6738	-1820.42	979.083	0.701856	-1796.72	881.687	-39.6251	-1863.54	881.32	-51.5289	-1830.9	781.659
500	0	166.5	-1451.61	1636.65	270.219	-1451.63	1632.47	146.838	-1609.41	1643.5	283.675	-1619.63	1640.28	237.191	-1673.72	1494.23	247.177	-1788.23	1274.86	212.073	-1541.29	1392.08	206.616	-1521.99	1205.38	299.267	-1776.78	1346.29	40.7188	-1694.24	1445.91	-3.62862	-1773.02	1263.9	-9.51249	-1823.56	1152.4	-32.4952	-1812.31	977.867	1.21346	-1791.01	879.895	-39.1586	-1857.73	880.914	-50.6482	-1827.43	780.478
501	0	165.408	-1436.97	1634.51	269.125	-1437.22	1630.24	145.391	-1594.72	1641.57	282.191	-1605.29	1638.19	235.463	-1659.32	1492.1	245.492	-1773.36	1272.54	210.746	-1526.8	1390.03	205.535	-1507.29	1203.36	297.397	-1762.37	1344.18	39.1265	-1679.57	1443.47	-4.51672	-1759.74	1262.27	-9.76179	-1811.37	1151.31	-32.3888	-1803.64	976.629	1.71791	-1784.75	878.147	-38.7781	-1851.28	880.515	-49.7725	-1823.27	779.366
502	0	164.191	-1422.31	1632.5	267.909	-1422.8	1628.19	143.783	-1580	1639.72	280.538	-1590.95	1636.22	233.615	-1644.87	1490.07	243.712	-1758.39	1270.31	209.343	-1512.22	1388.1	204.396	-1492.45	1201.5	295.427	-1747.91	1342.16	37.4138	-1664.79	1441.07	-5.55129	-1746.13	1260.57	-10.1542	-1798.75	1150.13	-32.3659	-1794.4	975.369	2.19083	-1777.89	876.443	-38.5007	-1844.15	880.109	-48.929	-1818.36	778.312
503	0	162.861	-1407.63	1630.65	266.583	-1408.4	1626.32	142.03	-1565.25	1637.96	278.731	-1576.62	1634.38	231.667	-1630.37	1488.16	241.853	-1743.34	1268.19	207.881	-1497.57	1386.31	203.21	-1477.49	1199.78	293.376	-1733.41	1340.28	35.5981	-1649.89	1438.73	-6.72268	-1732.22	1258.83	-10.6883	-1785.71	1148.88	-32.4371	-1784.55	974.086	2.60649	-1770.38	874.779	-38.3428	-1836.3	879.682	-48.1451	-1812.66	777.301
504	0	161.436	-1392.95	1628.97	265.164	-1394.01	1624.67	140.152	-1550.49	1636.3	276.791	-1562.32	1632.68	229.642	-1615.84	1486.39	239.928	-1728.23	1266.22	206.378	-1482.87	1384.68	201.992	-1462.42	1198.24	291.262	-1718.88	1338.54	33.6988	-1634.91	1436.47	-8.02005	-1718	1257.05	-11.3623	-1772.26	1147.56	-32.6131	-1774.08	972.781	2.93895	-1762.16	873.156	-38.3202	-1827.7	879.219	-47.4484	-1806.1	776.316
505	0	159.935	-1378.29	1627.47	263.672	-1379.63	1623.23	138.176	-1535.74	1634.75	274.744	-1548.04	1631.14	227.564	-1601.3	1484.78	237.952	-1713.11	1264.41	204.856	-1468.14	1383.21	200.76	-1447.28	1196.87	289.103	-1704.35	1336.97	31.7381	-1619.84	1434.33	-9.43174	-1703.5	1255.25	-12.1737	-1758.41	1146.18	-32.9038	-1762.98	971.454	3.16336	-1753.19	871.571	-38.4478	-1818.32	878.703	-46.8658	-1798.65	775.339
506	0	158.384	-1363.63	1626.15	262.13	-1365.29	1622.01	136.13	-1520.99	1633.32	272.622	-1533.79	1629.77	225.462	-1586.76	1483.34	235.94	-1698	1262.78	203.339	-1453.4	1381.92	199.531	-1432.11	1195.67	286.921	-1689.84	1335.58	29.7398	-1604.72	1432.34	-10.9455	-1688.71	1253.46	-13.1199	-1744.17	1144.75	-33.3183	-1751.21	970.109	3.25703	-1743.42	870.023	-38.7397	-1808.12	878.12	-46.4233	-1790.24	774.352
507	0	156.807	-1349	1625	260.567	-1350.97	1621.01	134.048	-1506.27	1632.03	270.457	-1519.58	1628.58	223.363	-1572.23	1482.1	233.908	-1682.93	1261.35	201.851	-1438.67	1380.8	198.323	-1416.93	1194.66	284.733	-1675.37	1334.39	27.7291	-1589.55	1430.51	-12.5484	-1673.66	1251.7	-14.1981	-1729.56	1143.29	-33.8646	-1738.78	968.753	3.20034	-1732.81	868.514	-39.2084	-1797.07	877.455	-46.1459	-1780.82	773.334
508	0	155.233	-1334.4	1624.03	259.008	-1336.68	1620.22	131.965	-1491.57	1630.89	268.289	-1505.39	1627.59	221.298	-1557.75	1481.07	231.874	-1667.93	1260.15	200.417	-1423.97	1379.87	197.153	-1401.8	1193.82	282.56	-1660.97	1333.41	25.732	-1574.37	1428.88	-14.2273	-1658.37	1249.98	-15.4054	-1714.59	1141.82	-34.549	-1725.66	967.392	2.97749	-1721.31	867.044	-39.8653	-1785.14	876.699	-46.0569	-1770.35	772.272
509	0	153.691	-1319.84	1623.24	257.482	-1322.43	1619.65	129.918	-1476.91	1629.91	266.157	-1491.24	1626.82	219.296	-1543.32	1480.26	229.855	-1653.03	1259.18	199.059	-1409.34	1379.14	196.038	-1386.76	1193.17	280.422	-1646.67	1332.66	23.7747	-1559.2	1427.48	-15.9685	-1642.85	1248.34	-16.7388	-1699.27	1140.35	-35.3762	-1711.84	966.039	2.57705	-1708.89	865.619	-40.7194	-1772.32	875.846	-46.1778	-1758.78	771.153
510	0	152.21	-1305.31	1622.61	256.019	-1308.2	1619.27	127.945	-1462.28	1629.12	264.101	-1477.12	1626.27	217.384	-1528.97	1479.69	227.869	-1638.26	1258.47	197.802	-1394.81	1378.61	194.992	-1371.85	1192.7	278.335	-1632.49	1332.15	21.8822	-1544.06	1426.34	-17.7577	-1627.12	1246.8	-18.195	-1683.64	1138.92	-36.3488	-1697.33	964.708	1.99233	-1695.54	864.249	-41.7778	-1758.57	874.893	-46.5277	-1746.05	769.972
511	0	150.818	-1290.83	1622.14	254.646	-1294	1619.08	126.082	-1447.71	1628.53	262.162	-1463.02	1625.97	215.587	-1514.73	1479.37	225.934	-1623.64	1258.02	196.665	-1380.39	1378.3	194.031	-1357.11	1192.44	276.317	-1618.44	1331.89	20.0781	-1528.98	1425.49	-19.5803	-1611.21	1245.39	-19.7708	-1667.71	1137.54	-37.4669	-1682.11	963.419	1.22149	-1681.22	862.945	-43.0441	-1743.89	873.847	-47.1218	-1732.13	768.734
512	0	149.544	-1276.4	1621.85	253.389	-1279.83	1619.08	124.364	-1433.19	1628.16	260.377	-1448.94	1625.94	213.929	-1500.6	1479.31	224.063	-1609.19	1257.86	195.665	-1366.12	1378.22	193.168	-1342.57	1192.38	274.38	-1604.56	1331.9	18.3837	-1513.98	1424.96	-21.4213	-1595.14	1244.16	-21.4626	-1651.51	1136.26	-38.7281	-1666.19	962.195	0.267502	-1665.94	861.728	-44.5185	-1728.25	872.722	-47.9709	-1716.99	767.45
513	0	148.411	-1262.03	1621.72	252.273	-1265.69	1619.27	122.822	-1418.72	1628.06	258.781	-1434.89	1626.19	212.427	-1486.61	1479.53	222.269	-1594.92	1258	194.818	-1352.01	1378.39	192.417	-1328.27	1192.55	272.536	-1590.85	1332.18	16.817	-1499.09	1424.77	-23.2655	-1578.94	1243.13	-23.2664	-1635.04	1135.09	-40.1273	-1649.56	961.063	-0.862177	-1649.68	860.622	-46.1967	-1711.65	871.54	-49.0798	-1700.59	766.144
514	0	147.442	-1247.72	1621.77	251.319	-1251.59	1619.64	121.483	-1404.33	1628.22	257.403	-1420.86	1626.75	211.093	-1472.78	1480.04	220.559	-1580.86	1258.44	194.133	-1338.09	1378.81	191.789	-1314.22	1192.96	270.791	-1577.34	1332.73	15.3925	-1484.32	1424.95	-25.0983	-1562.63	1242.33	-25.1781	-1618.34	1134.08	-41.6569	-1632.25	960.056	-2.15603	-1632.46	859.659	-48.0701	-1694.09	870.331	-50.447	-1682.92	764.851
515	0	146.657	-1233.48	1622.02	250.546	-1237.54	1620.19	120.371	-1390.02	1628.7	256.268	-1406.86	1627.62	209.935	-1459.11	1480.84	218.936	-1567	1259.18	193.619	-1324.36	1379.52	191.297	-1300.42	1193.64	269.147	-1564.01	1333.57	14.1206	-1469.68	1425.51	-26.9057	-1546.24	1241.8	-27.1931	-1601.43	1133.26	-43.307	-1614.25	959.208	-3.59903	-1614.28	858.875	-50.1255	-1675.58	869.134	-52.064	-1663.98	763.615
516	0	146.07	-1219.31	1622.46	249.967	-1223.53	1620.94	119.499	-1375.79	1629.49	255.39	-1392.9	1628.81	208.955	-1445.61	1481.94	217.401	-1553.35	1260.24	193.279	-1310.82	1380.51	190.948	-1286.87	1194.6	267.603	-1550.88	1334.69	13.0072	-1455.18	1426.46	-28.6755	-1529.8	1241.58	-29.3063	-1584.32	1132.67	-45.0657	-1595.6	958.557	-5.17332	-1595.17	858.312	-52.3448	-1656.12	867.995	-53.9149	-1643.77	762.491
517	0	145.69	-1205.24	1623.14	249.592	-1209.59	1621.88	118.878	-1361.65	1630.62	254.78	-1378.98	1630.33	208.151	-1432.29	1483.33	215.951	-1539.9	1261.6	193.111	-1297.48	1381.8	190.75	-1273.56	1195.86	266.156	-1537.94	1336.08	12.0539	-1440.82	1427.8	-30.3974	-1513.32	1241.68	-31.5119	-1567.04	1132.34	-46.9196	-1576.32	958.14	-6.85883	-1575.16	858.016	-54.7064	-1635.75	866.965	-55.9769	-1622.31	761.54
518	0	145.525	-1191.27	1624.05	249.427	-1195.72	1623.02	118.508	-1347.63	1632.1	254.437	-1365.13	1632.17	207.515	-1419.13	1485.01	214.579	-1526.65	1263.26	193.111	-1284.33	1383.39	190.704	-1260.47	1197.43	264.8	-1525.18	1337.74	11.2584	-1426.59	1429.53	-32.064	-1496.84	1242.14	-33.8037	-1549.6	1132.3	-48.854	-1556.43	957.996	-8.6339	-1554.29	858.033	-57.1852	-1614.48	866.098	-58.2202	-1599.64	760.831
519	0	145.572	-1177.42	1625.21	249.471	-1181.95	1624.37	118.385	-1333.72	1633.92	254.354	-1351.36	1634.32	207.036	-1406.15	1486.96	213.281	-1513.58	1265.19	193.27	-1271.36	1385.28	190.81	-1247.56	1199.31	263.53	-1512.58	1339.65	10.6147	-1412.49	1431.62	-33.6708	-1480.35	1242.95	-36.1745	-1532.03	1132.58	-50.8536	-1535.97	958.159	-10.4759	-1532.59	858.409	-59.7537	-1592.35	865.448	-60.6088	-1575.81	760.429
520	0	145.828	-1163.68	1626.63	249.72	-1168.29	1625.93	118.496	-1319.93	1636.06	254.516	-1337.68	1636.74	206.7	-1393.31	1489.16	212.051	-1500.67	1267.39	193.577	-1258.55	1387.44	191.059	-1234.82	1201.48	262.337	-1500.12	1341.8	10.1144	-1398.49	1434.06	-35.2163	-1463.89	1244.13	-38.617	-1514.35	1133.19	-52.9025	-1514.98	958.659	-12.3616	-1510.13	859.184	-62.3828	-1569.41	865.066	-63.1015	-1550.86	760.4
521	0	146.28	-1150.09	1628.31	250.161	-1154.76	1627.7	118.823	-1306.28	1638.5	254.902	-1324.12	1639.41	206.49	-1380.61	1491.58	210.887	-1487.91	1269.81	194.018	-1245.87	1389.86	191.442	-1222.2	1203.93	261.217	-1487.78	1344.15	9.74671	-1384.59	1436.81	-36.7022	-1447.46	1245.67	-41.1233	-1496.57	1134.13	-54.9848	-1493.49	959.52	-14.2678	-1486.95	860.395	-65.043	-1545.7	864.998	-65.6528	-1524.88	760.802
522	0	146.915	-1136.63	1630.24	250.781	-1141.36	1629.66	119.341	-1292.77	1641.21	255.485	-1310.68	1642.27	206.388	-1368.03	1494.2	209.784	-1475.27	1272.43	194.574	-1233.3	1392.5	191.944	-1209.69	1206.62	260.165	-1475.54	1346.68	9.4995	-1370.76	1439.83	-38.1328	-1431.07	1247.54	-43.6852	-1478.72	1135.4	-57.085	-1471.57	960.757	-16.1715	-1463.11	862.069	-67.7047	-1521.27	865.281	-68.2148	-1497.93	761.684
523	0	147.712	-1123.31	1632.41	251.56	-1128.12	1631.81	120.023	-1279.4	1644.13	256.234	-1297.38	1645.29	206.378	-1355.54	1496.96	208.745	-1462.72	1275.19	195.23	-1220.82	1395.32	192.548	-1197.24	1209.51	259.178	-1463.38	1349.34	9.35973	-1356.98	1443.05	-39.5145	-1414.72	1249.72	-46.2942	-1460.82	1136.98	-59.1875	-1449.25	962.374	-18.0501	-1438.69	864.22	-70.3392	-1496.18	865.943	-70.7389	-1470.11	763.081
524	0	148.649	-1110.15	1634.78	252.477	-1115.03	1634.1	120.839	-1266.17	1647.21	257.116	-1284.23	1648.41	206.442	-1343.12	1499.82	207.772	-1450.25	1278.06	195.965	-1208.4	1398.26	193.234	-1184.84	1212.55	258.253	-1451.27	1352.1	9.31381	-1343.24	1446.43	-40.8554	-1398.42	1252.17	-48.9419	-1442.88	1138.84	-61.2777	-1426.58	964.369	-19.8819	-1413.74	866.854	-72.9194	-1470.5	866.998	-73.1775	-1441.51	765.019
525	0	149.703	-1097.12	1637.33	253.507	-1102.1	1636.52	121.756	-1253.08	1650.39	258.096	-1271.23	1651.56	206.565	-1330.76	1502.73	206.868	-1437.83	1280.97	196.762	-1196.01	1401.27	193.982	-1172.46	1215.67	257.39	-1439.18	1354.9	9.34799	-1329.53	1449.9	-42.1641	-1382.17	1254.82	-51.6196	-1424.93	1140.92	-63.3413	-1403.61	966.726	-21.6462	-1388.35	869.964	-75.4201	-1444.28	868.45	-75.4862	-1412.21	767.508
526	0	150.847	-1084.22	1639.99	254.625	-1089.32	1639.01	122.743	-1240.12	1653.6	259.139	-1258.38	1654.69	206.73	-1318.42	1505.64	206.04	-1425.44	1283.89	197.602	-1183.64	1404.29	194.773	-1160.09	1218.82	256.59	-1427.1	1357.71	9.44874	-1315.82	1453.39	-43.4495	-1365.98	1257.63	-54.3186	-1406.98	1143.19	-65.3647	-1380.4	969.422	-23.3237	-1362.57	873.531	-77.818	-1417.6	870.293	-77.625	-1382.31	770.546
527	0	152.056	-1071.45	1642.71	255.805	-1076.68	1641.54	123.769	-1227.28	1656.78	260.214	-1245.68	1657.74	206.927	-1306.09	1508.49	205.293	-1413.05	1286.74	198.468	-1171.27	1407.26	195.587	-1147.7	1221.92	255.854	-1415	1360.48	9.60339	-1302.13	1456.83	-44.7193	-1349.83	1260.52	-57.0295	-1389.05	1145.58	-67.3349	-1356.99	972.424	-24.8967	-1336.49	877.527	-80.0924	-1390.51	872.506	-79.5594	-1351.91	774.12
528	0	153.307	-1058.78	1645.44	257.024	-1064.18	1644.04	124.806	-1214.54	1659.84	261.291	-1233.11	1660.64	207.145	-1293.75	1511.23	204.633	-1400.65	1289.48	199.344	-1158.88	1410.11	196.407	-1135.29	1224.92	255.186	-1402.88	1363.14	9.80081	-1288.43	1460.16	-45.9794	-1333.73	1263.43	-59.7425	-1371.13	1148.02	-69.2391	-1333.42	975.692	-26.3496	-1310.16	881.914	-82.225	-1363.1	875.064	-81.2614	-1321.1	778.206
529	0	154.575	-1046.2	1648.11	258.258	-1051.79	1646.47	125.829	-1201.88	1662.74	262.344	-1220.66	1663.34	207.376	-1281.39	1513.81	204.068	-1388.21	1292.05	200.216	-1146.45	1412.79	197.217	-1122.84	1227.74	254.587	-1390.7	1365.66	10.032	-1274.74	1463.31	-47.2337	-1317.68	1266.28	-62.4468	-1353.25	1150.44	-71.0653	-1309.74	979.182	-27.6685	-1283.66	886.648	-84.2001	-1335.42	877.93	-82.7093	-1289.98	782.771
530	0	155.842	-1033.69	1650.65	259.487	-1039.49	1648.76	126.818	-1189.29	1665.41	263.351	-1208.3	1665.79	207.615	-1268.99	1516.17	203.601	-1375.72	1294.4	201.073	-1133.98	1415.25	198.006	-1110.36	1230.32	254.064	-1378.47	1367.99	10.2903	-1261.05	1466.22	-48.4827	-1301.67	1268.99	-65.1304	-1335.39	1152.77	-72.8017	-1285.98	982.845	-28.8419	-1257.04	891.678	-86.0045	-1307.54	881.065	-83.8887	-1258.63	787.775
531	0	157.087	-1021.22	1653	260.692	-1027.26	1650.86	127.756	-1176.75	1667.8	264.298	-1196.03	1667.95	207.861	-1256.55	1518.28	203.239	-1363.17	1296.49	201.907	-1121.47	1417.43	198.762	-1097.84	1232.62	253.621	-1366.17	1370.08	10.5719	-1247.38	1468.83	-49.7241	-1285.71	1271.52	-67.7794	-1317.56	1154.95	-74.4367	-1262.19	986.631	-29.8604	-1230.36	896.953	-87.6275	-1279.52	884.426	-84.7913	-1227.14	793.173
532	0	158.296	-1008.78	1655.1	261.86	-1015.08	1652.72	128.634	-1164.24	1669.85	265.172	-1183.8	1669.76	208.113	-1244.05	1520.1	202.987	-1350.54	1298.28	202.711	-1108.9	1419.29	199.48	-1085.28	1234.59	253.263	-1353.8	1371.9	10.8755	-1233.72	1471.1	-50.9519	-1269.79	1273.78	-70.3787	-1299.76	1156.92	-75.9594	-1238.39	990.489	-30.717	-1203.67	902.418	-89.0606	-1251.43	887.97	-85.4155	-1195.6	798.919
533	0	159.457	-996.343	1656.91	262.978	-1002.91	1654.29	129.445	-1151.73	1671.54	265.97	-1171.61	1671.22	208.376	-1231.5	1521.59	202.848	-1337.84	1299.74	203.484	-1096.28	1420.8	200.156	-1072.67	1236.19	252.997	-1341.35	1373.41	11.2027	-1220.09	1472.99	-52.1565	-1253.91	1275.74	-72.9106	-1281.97	1158.62	-77.3593	-1214.61	994.371	-31.4069	-1177.02	908.021	-90.2975	-1223.31	891.654	-85.765	-1164.07	804.964
534	0	160.561	-983.891	1658.37	264.039	-990.739	1655.54	130.188	-1139.21	1672.83	266.69	-1159.41	1672.29	208.654	-1218.88	1522.72	202.827	-1325.05	1300.84	204.225	-1083.61	1421.93	200.791	-1060.03	1237.4	252.83	-1328.81	1374.59	11.5574	-1206.49	1474.48	-53.3254	-1238.06	1277.35	-75.3558	-1264.18	1160.01	-78.6261	-1190.89	998.23	-31.9275	-1150.47	913.709	-91.3336	-1195.23	895.436	-85.8485	-1132.64	811.26
535	0	161.601	-971.41	1659.45	265.039	-978.535	1656.43	130.867	-1126.67	1673.7	267.337	-1147.2	1672.96	208.956	-1206.21	1523.48	202.93	-1312.18	1301.57	204.938	-1070.88	1422.66	201.386	-1047.35	1238.19	252.768	-1316.2	1375.41	11.946	-1192.93	1475.53	-54.4425	-1222.24	1278.57	-77.693	-1246.4	1161.05	-79.7503	-1167.24	1002.02	-32.2778	-1124.04	919.433	-92.1659	-1167.24	899.279	-85.6785	-1101.38	817.758
536	0	162.576	-958.883	1660.13	265.975	-966.279	1656.95	131.489	-1114.08	1674.14	267.921	-1134.94	1673.23	209.292	-1193.47	1523.87	203.161	-1299.24	1301.92	205.63	-1058.09	1422.99	201.949	-1034.63	1238.55	252.82	-1303.49	1375.86	12.3768	-1179.42	1476.15	-55.4894	-1206.46	1279.38	-79.8991	-1228.6	1161.72	-80.7225	-1143.7	1005.72	-32.4585	-1097.78	925.148	-92.7929	-1139.38	903.149	-85.2705	-1070.35	824.412
537	0	163.487	-946.301	1660.39	266.851	-953.953	1657.08	132.067	-1101.45	1674.16	268.455	-1122.62	1673.1	209.674	-1180.67	1523.86	203.526	-1286.21	1301.88	206.31	-1045.26	1422.92	202.488	-1021.88	1238.5	252.991	-1290.7	1375.95	12.8595	-1165.96	1476.33	-56.445	-1190.7	1279.78	-81.9495	-1210.79	1162.01	-81.5339	-1120.29	1009.27	-32.4715	-1071.73	930.812	-93.2135	-1111.7	907.014	-84.6426	-1039.61	831.176
538	0	164.339	-933.654	1660.22	267.672	-941.541	1656.82	132.615	-1088.76	1673.75	268.956	-1110.22	1672.59	210.114	-1167.81	1523.48	204.031	-1273.11	1301.47	206.99	-1032.38	1422.44	203.018	-1009.08	1238.04	253.286	-1277.83	1375.66	13.4045	-1152.55	1476.08	-57.2868	-1174.97	1279.75	-83.819	-1192.96	1161.91	-82.1758	-1097.03	1012.67	-32.3194	-1045.92	936.388	-93.4275	-1084.24	910.847	-83.814	-1009.24	838.008
539	0	165.14	-920.938	1659.64	268.448	-929.032	1656.17	133.151	-1076.01	1672.94	269.443	-1097.72	1671.7	210.626	-1154.89	1522.73	204.681	-1259.95	1300.69	207.684	-1019.44	1421.58	203.552	-996.228	1237.18	253.711	-1264.88	1375	14.0228	-1139.19	1475.43	-57.9912	-1159.26	1279.3	-85.4816	-1175.1	1161.42	-82.6399	-1073.95	1015.88	-32.0056	-1020.38	941.844	-93.4351	-1057.06	914.625	-82.8046	-979.273	844.864
540	0	165.903	-908.149	1658.66	269.192	-916.418	1655.17	133.695	-1063.2	1671.74	269.938	-1085.13	1670.47	211.223	-1141.92	1521.62	205.479	-1246.73	1299.56	208.407	-1006.46	1420.36	204.106	-983.328	1235.96	254.268	-1251.84	1373.99	14.725	-1125.86	1474.39	-58.5342	-1143.57	1278.46	-86.912	-1157.23	1160.57	-82.918	-1051.08	1018.89	-31.5336	-995.148	947.151	-93.2365	-1030.19	918.326	-81.6347	-949.78	851.706
541	0	166.642	-895.286	1657.31	269.917	-903.692	1653.82	134.269	-1050.32	1670.19	270.465	-1072.43	1668.93	211.917	-1128.87	1520.19	206.426	-1233.45	1298.1	209.176	-993.415	1418.81	204.7	-970.366	1234.4	254.958	-1238.73	1372.64	15.5208	-1112.57	1472.99	-58.8921	-1127.9	1277.25	-88.0854	-1139.35	1159.38	-83.0025	-1028.44	1021.68	-30.907	-970.257	952.285	-92.8323	-1003.68	921.931	-80.3238	-920.812	858.493
542	0	167.374	-882.349	1655.62	270.642	-890.852	1652.16	134.894	-1037.38	1668.31	271.047	-1059.61	1667.1	212.72	-1115.77	1518.44	207.519	-1220.13	1296.33	210.006	-980.315	1416.96	205.35	-957.333	1232.53	255.78	-1225.53	1370.97	16.4187	-1099.28	1471.29	-59.0426	-1112.24	1275.69	-88.9791	-1121.48	1157.87	-82.8859	-1006.06	1024.26	-30.1291	-945.738	957.226	-92.223	-977.582	925.424	-78.8903	-892.418	865.189
543	0	168.118	-869.342	1653.63	271.386	-877.898	1650.23	135.593	-1024.38	1666.16	271.709	-1046.68	1665.02	213.642	-1102.61	1516.43	208.754	-1206.75	1294.29	210.914	-967.151	1414.84	206.076	-944.218	1230.41	256.731	-1212.26	1369.02	17.4255	-1086	1469.3	-58.9654	-1096.62	1273.83	-89.5723	-1103.64	1156.07	-82.5619	-983.974	1026.61	-29.2032	-921.621	961.956	-91.4094	-951.933	928.788	-77.3511	-864.648	871.754
544	0	168.895	-856.266	1651.38	272.168	-864.832	1648.07	136.386	-1011.32	1663.76	272.474	-1033.64	1662.73	214.69	-1089.38	1514.17	210.12	-1193.33	1292.01	211.915	-953.918	1412.5	206.894	-931.012	1228.06	257.806	-1198.9	1366.8	18.5461	-1072.7	1467.08	-58.6428	-1081.02	1271.7	-89.8475	-1085.84	1154.04	-82.0248	-962.214	1028.73	-28.1323	-897.939	966.46	-90.3925	-926.78	932.008	-75.7209	-837.548	878.152
545	0	169.726	-843.126	1648.92	273.008	-851.656	1645.72	137.296	-998.207	1661.17	273.363	-1020.48	1660.27	215.87	-1076.08	1511.71	211.601	-1179.85	1289.52	213.023	-940.61	1409.98	207.819	-917.703	1225.54	258.998	-1185.47	1364.35	19.7832	-1059.35	1464.68	-58.061	-1065.45	1269.34	-89.7908	-1068.13	1151.8	-81.2703	-940.813	1030.62	-26.9193	-874.723	970.727	-89.1736	-902.169	935.066	-74.0117	-811.16	884.344
546	0	170.631	-829.924	1646.31	273.927	-838.376	1643.22	138.34	-985.048	1658.43	274.396	-1007.23	1657.67	217.186	-1062.71	1509.08	213.181	-1166.31	1286.85	214.247	-927.219	1407.32	208.865	-904.281	1222.87	260.3	-1171.95	1361.71	21.1372	-1045.95	1462.13	-57.21	-1049.93	1266.8	-89.3925	-1050.53	1149.39	-80.2959	-919.802	1032.28	-25.5667	-852.002	974.742	-87.7545	-878.142	937.946	-72.2331	-785.525	890.293
547	0	171.629	-816.665	1643.59	274.942	-824.996	1640.62	139.533	-971.842	1655.58	275.589	-993.866	1654.98	218.638	-1049.26	1506.32	214.836	-1152.71	1284.05	215.595	-913.741	1404.55	210.039	-890.735	1220.12	261.703	-1158.35	1358.9	22.6063	-1032.47	1459.49	-56.0845	-1034.46	1264.12	-88.6476	-1033.07	1146.85	-79.1007	-899.215	1033.72	-24.0773	-829.807	978.495	-86.1379	-854.741	940.631	-70.3916	-760.678	895.958
548	0	172.737	-803.351	1640.82	276.069	-811.523	1637.97	140.889	-958.594	1652.68	276.955	-980.412	1652.22	220.225	-1035.74	1503.48	216.543	-1139.05	1281.14	217.073	-900.168	1401.74	211.347	-877.055	1217.31	263.198	-1144.67	1355.97	24.1865	-1018.89	1456.79	-54.6843	-1019.04	1261.34	-87.5563	-1015.81	1144.23	-77.6862	-879.084	1034.93	-22.4538	-808.166	981.973	-84.3275	-832.002	943.102	-68.4909	-736.65	901.301
549	0	173.969	-789.986	1638.04	277.321	-797.963	1635.31	142.414	-945.306	1649.76	278.503	-966.869	1649.44	221.942	-1022.14	1500.59	218.281	-1125.3	1278.18	218.679	-886.498	1398.91	212.789	-863.235	1214.49	264.776	-1130.9	1352.95	25.8716	-1005.21	1454.09	-53.0145	-1003.7	1258.51	-86.1235	-998.763	1141.56	-76.056	-859.438	1035.92	-20.6996	-787.105	985.164	-82.3289	-809.961	945.341	-66.5323	-713.467	906.282
550	0	175.334	-776.571	1635.32	278.707	-784.322	1632.68	144.111	-931.979	1646.88	280.235	-953.243	1646.67	223.783	-1008.46	1497.69	220.029	-1111.47	1275.19	220.411	-872.726	1396.1	214.362	-849.267	1211.71	266.43	-1117.05	1349.88	27.6534	-991.413	1451.41	-51.0853	-988.447	1255.66	-84.3592	-981.977	1138.86	-74.2164	-840.306	1036.7	-18.8183	-766.648	988.056	-80.1492	-788.649	947.329	-64.5148	-691.151	910.862
551	0	176.839	-763.111	1632.68	280.231	-770.606	1630.11	145.981	-918.615	1644.07	282.149	-939.541	1643.94	225.738	-994.699	1494.82	221.772	-1097.55	1272.21	222.259	-858.853	1393.36	216.057	-835.146	1208.99	268.153	-1103.12	1346.81	29.5225	-977.504	1448.79	-48.9119	-973.292	1252.83	-82.2781	-965.483	1136.19	-72.1756	-821.712	1037.25	-16.8142	-746.819	990.633	-77.798	-768.091	949.048	-62.4362	-669.718	915.004
552	0	178.483	-749.606	1630.18	281.894	-756.824	1627.66	148.015	-905.214	1641.38	284.24	-925.77	1641.28	227.798	-980.862	1492.02	223.499	-1083.54	1269.28	224.213	-844.88	1390.72	217.86	-820.871	1206.38	269.943	-1089.1	1343.75	31.4678	-963.489	1446.28	-46.5141	-958.251	1250.05	-79.899	-949.311	1133.55	-69.9445	-803.679	1037.59	-14.6924	-727.637	992.882	-75.2869	-748.31	950.481	-60.2937	-649.18	918.671
553	0	180.262	-736.06	1627.85	283.69	-742.981	1625.34	150.203	-891.776	1638.83	286.493	-911.937	1638.73	229.948	-966.952	1489.32	225.207	-1069.42	1266.44	226.254	-830.813	1388.21	219.753	-806.445	1203.91	271.795	-1075.01	1340.77	33.4773	-949.378	1443.89	-43.9161	-943.339	1247.37	-77.2446	-933.487	1131	-67.5362	-786.225	1037.72	-12.4593	-709.12	994.787	-72.6303	-729.322	951.612	-58.0845	-629.545	921.83
554	0	182.167	-722.476	1625.71	285.61	-729.086	1623.18	152.528	-878.303	1636.46	288.893	-898.049	1636.29	232.175	-952.975	1486.76	226.9	-1055.22	1263.72	228.364	-816.659	1385.87	221.717	-791.875	1201.61	273.709	-1060.85	1337.89	35.5378	-935.191	1441.65	-41.1453	-928.573	1244.8	-74.3409	-918.032	1128.54	-64.9657	-769.365	1037.64	-10.122	-691.282	996.333	-69.8452	-711.142	952.427	-55.8071	-610.816	924.451
555	0	184.185	-708.855	1623.79	287.639	-715.146	1621.21	154.969	-864.795	1634.29	291.417	-884.113	1634.01	234.461	-938.939	1484.36	228.588	-1040.92	1261.15	230.52	-802.429	1383.71	223.726	-777.177	1199.51	275.683	-1046.63	1335.16	37.6351	-920.951	1439.6	-38.2323	-913.969	1242.38	-71.2169	-902.965	1126.2	-62.2503	-753.113	1037.35	-7.68944	-674.137	997.506	-66.9508	-693.781	952.916	-53.4617	-592.994	926.509
556	0	186.297	-695.199	1622.12	289.759	-701.17	1619.44	157.501	-851.251	1632.35	294.038	-870.138	1631.91	236.789	-924.855	1482.17	230.284	-1026.55	1258.77	232.695	-788.138	1381.77	225.757	-762.372	1197.61	277.717	-1032.36	1332.61	39.7538	-906.684	1437.74	-35.2098	-899.543	1240.14	-67.9041	-888.299	1124.02	-59.4094	-737.477	1036.86	-5.17169	-657.695	998.292	-63.9687	-677.244	953.071	-51.0511	-576.076	927.982
557	0	188.482	-681.512	1620.7	291.951	-687.164	1617.89	160.097	-837.671	1630.65	296.726	-856.131	1630	239.139	-910.735	1480.2	232.004	-1012.11	1256.62	234.864	-773.804	1380.05	227.784	-747.49	1195.95	279.809	-1018.06	1330.28	41.8778	-892.419	1436.1	-32.112	-885.313	1238.09	-64.4361	-874.041	1122	-56.464	-722.465	1036.18	-2.58069	-641.966	998.68	-60.9223	-661.538	952.889	-48.5813	-560.062	928.857
558	0	190.716	-667.793	1619.54	294.189	-673.137	1616.57	162.724	-824.057	1629.21	299.447	-842.1	1628.3	241.491	-896.592	1478.48	233.763	-997.64	1254.71	236.999	-759.446	1378.58	229.781	-732.568	1194.52	281.954	-1003.75	1328.2	43.9901	-878.185	1434.69	-28.9737	-871.294	1236.27	-60.8482	-860.196	1120.17	-53.4371	-708.08	1035.3	0.069693	-626.957	998.662	-57.8365	-646.666	952.368	-46.0618	-544.946	929.125
559	0	192.975	-654.045	1618.65	296.449	-659.098	1615.48	165.351	-810.407	1628.05	302.166	-828.055	1626.83	243.823	-882.442	1477.04	235.574	-983.157	1253.09	239.076	-745.087	1377.35	231.728	-717.648	1193.35	284.146	-989.439	1326.42	46.0734	-864.011	1433.53	-25.8293	-857.503	1234.69	-57.1764	-846.766	1118.54	-50.3531	-694.326	1034.25	2.76349	-612.676	998.233	-54.737	-632.631	951.513	-43.506	-530.728	928.785
560	0	195.229	-640.27	1618.02	298.703	-645.055	1614.63	167.942	-796.723	1627.17	304.846	-814.002	1625.62	246.115	-868.302	1475.89	237.443	-968.695	1251.78	241.07	-730.753	1376.4	233.603	-702.778	1192.43	286.376	-975.158	1324.96	48.1111	-849.925	1432.63	-22.7124	-843.955	1233.36	-53.4573	-833.748	1117.14	-47.238	-681.203	1033.03	5.48244	-599.127	997.393	-51.6499	-619.436	950.331	-40.9312	-517.405	927.84
561	0	197.45	-626.471	1617.65	300.922	-631.016	1614.02	170.462	-783.007	1626.58	307.449	-799.951	1624.67	248.347	-854.191	1475.05	239.368	-954.288	1250.8	242.961	-716.469	1375.72	235.389	-688.003	1191.77	288.634	-960.925	1323.84	50.0873	-835.953	1432	-19.6546	-830.662	1232.31	-49.7267	-821.139	1115.99	-44.1189	-668.713	1031.65	8.20595	-586.318	996.145	-48.6011	-607.082	948.832	-38.358	-504.977	926.302
562	0	199.607	-612.652	1617.52	303.074	-616.99	1613.64	172.878	-769.263	1626.28	309.941	-785.912	1624.01	250.499	-840.129	1474.55	241.344	-939.972	1250.16	244.731	-702.261	1375.31	237.071	-673.367	1191.38	290.907	-946.758	1323.09	51.9882	-822.12	1431.64	-16.6849	-817.637	1231.55	-46.0193	-808.93	1115.09	-41.0236	-656.855	1030.14	10.9111	-574.251	994.497	-45.6158	-595.573	947.033	-35.8106	-493.447	924.187
563	0	201.67	-598.822	1617.63	305.13	-602.987	1613.49	175.157	-755.497	1626.29	312.287	-771.893	1623.65	252.558	-826.133	1474.37	243.355	-925.774	1249.89	246.368	-688.152	1375.2	238.635	-658.909	1191.26	293.183	-932.673	1322.72	53.8024	-808.449	1431.56	-13.8289	-804.889	1231.1	-42.3678	-797.115	1114.46	-37.9805	-645.626	1028.49	13.573	-562.931	992.465	-42.7185	-584.91	944.951	-33.3156	-482.819	921.518
564	0	203.607	-584.991	1617.97	307.057	-589.017	1613.58	177.271	-741.721	1626.6	314.458	-757.905	1623.61	254.51	-812.224	1474.54	245.383	-911.721	1249.98	247.861	-674.165	1375.38	240.072	-644.658	1191.42	295.451	-918.685	1322.73	55.5215	-794.962	1431.77	-11.108	-792.426	1230.95	-38.802	-785.684	1114.1	-35.0178	-635.024	1026.74	16.1648	-552.361	990.068	-39.932	-575.094	942.612	-30.9017	-473.099	918.325
565	0	205.386	-571.172	1618.53	308.827	-575.088	1613.91	179.196	-727.948	1627.21	316.43	-743.958	1623.91	256.348	-798.417	1475.06	247.404	-897.829	1250.42	249.205	-660.317	1375.88	241.373	-630.632	1191.88	297.699	-904.802	1323.12	57.1402	-781.677	1432.26	-8.53897	-780.254	1231.12	-35.3478	-774.626	1114.04	-32.1629	-625.046	1024.9	18.6587	-542.541	987.332	-37.2782	-566.128	940.043	-28.5995	-464.294	914.643
566	0	206.981	-557.383	1619.31	310.411	-561.213	1614.49	180.914	-714.196	1628.13	318.185	-730.064	1624.55	258.066	-784.726	1475.91	249.399	-884.107	1251.22	250.397	-646.62	1376.68	242.532	-616.837	1192.64	299.92	-891.03	1323.88	58.6565	-768.608	1433.03	-6.13299	-768.376	1231.62	-32.0268	-763.93	1114.28	-29.4419	-615.688	1023	21.0261	-533.471	984.29	-34.7767	-558.01	937.277	-26.4402	-456.412	910.511
567	0	208.367	-543.645	1620.31	311.786	-547.403	1615.33	182.411	-700.486	1629.34	319.712	-716.234	1625.55	259.665	-771.159	1477.09	251.347	-870.553	1252.36	251.439	-633.082	1377.8	243.544	-603.269	1193.72	302.108	-877.369	1325.01	60.0713	-755.766	1434.08	-3.89556	-756.797	1232.44	-28.8554	-753.587	1114.82	-26.8784	-606.945	1021.05	23.2388	-525.151	980.977	-32.4455	-550.74	934.352	-24.4554	-449.463	905.977
568	0	209.525	-529.978	1621.54	312.934	-533.669	1616.45	183.682	-686.841	1630.83	321.006	-702.48	1626.91	261.148	-757.721	1478.59	253.236	-857.157	1253.81	252.334	-619.702	1379.24	244.409	-589.913	1195.12	304.261	-863.815	1326.47	61.3884	-743.153	1435.4	-1.82642	-745.516	1233.58	-25.8449	-743.586	1115.66	-24.4933	-598.812	1019.09	25.2699	-517.575	977.436	-30.3004	-544.313	931.309	-22.676	-443.454	901.092
569	0	210.441	-516.407	1622.99	313.843	-520.024	1617.85	184.729	-673.286	1632.6	322.071	-688.817	1628.61	262.519	-744.409	1480.38	255.057	-843.901	1255.54	253.088	-606.472	1381	245.129	-576.744	1196.84	306.378	-850.357	1328.26	62.6137	-730.768	1436.98	0.080179	-734.533	1235.03	-23.0011	-733.916	1116.8	-22.3039	-591.279	1017.15	27.0946	-510.736	973.712	-28.3546	-538.722	928.191	-21.1316	-438.39	895.914
570	0	211.111	-502.953	1624.68	314.508	-506.481	1619.54	185.557	-659.844	1634.61	322.914	-675.255	1630.64	263.786	-731.218	1482.45	256.81	-830.762	1257.55	253.709	-593.38	1383.06	245.709	-563.735	1198.87	308.459	-836.983	1330.33	63.7544	-718.598	1438.79	1.83462	-723.846	1236.79	-20.3251	-724.57	1118.23	-20.3236	-584.339	1015.23	28.6913	-504.625	969.85	-26.619	-533.955	925.045	-19.8492	-434.274	890.504
571	0	211.537	-489.636	1626.61	314.932	-493.05	1621.52	186.18	-646.537	1636.85	323.55	-661.807	1632.96	264.957	-718.136	1484.76	258.501	-817.714	1259.78	254.207	-580.406	1385.39	246.159	-550.854	1201.19	310.507	-823.677	1332.65	64.8187	-706.628	1440.82	3.45097	-713.448	1238.82	-17.8137	-715.536	1119.95	-18.5614	-577.979	1013.37	30.0422	-499.228	965.9	-25.1013	-529.994	921.917	-18.8522	-431.101	884.927
572	0	211.731	-476.471	1628.77	315.128	-479.742	1623.78	186.616	-633.381	1639.27	323.998	-648.482	1635.54	266.043	-705.147	1487.28	260.14	-804.73	1262.22	254.59	-567.53	1387.98	246.49	-538.072	1203.78	312.521	-810.422	1335.19	65.8151	-694.832	1443.04	4.94568	-703.33	1241.1	-15.4605	-706.807	1121.93	-17.0219	-572.182	1011.6	31.1347	-494.525	961.905	-23.8064	-526.815	918.85	-18.1591	-428.86	879.249
573	0	211.711	-463.469	1631.15	315.112	-466.564	1626.32	186.886	-620.389	1641.85	324.281	-635.288	1638.33	267.051	-692.235	1489.96	261.743	-791.79	1264.81	254.87	-554.727	1390.78	246.715	-525.358	1206.59	314.505	-797.197	1337.9	66.7519	-683.184	1445.42	6.33641	-693.478	1243.61	-13.2564	-698.371	1124.15	-15.7056	-566.93	1009.92	31.9612	-490.494	957.909	-22.7359	-524.388	915.886	-17.7823	-427.532	873.534
574	0	211.5	-450.634	1633.74	314.91	-453.518	1629.09	187.013	-607.566	1644.54	324.422	-622.228	1641.27	267.991	-679.379	1492.76	263.323	-778.872	1267.54	255.056	-541.971	1393.74	246.849	-512.687	1209.57	316.458	-783.986	1340.73	67.6369	-671.651	1447.91	7.64088	-683.875	1246.3	-11.1909	-690.216	1126.59	-14.6086	-562.199	1008.35	32.5198	-487.104	953.949	-21.8877	-522.674	913.061	-17.7268	-427.085	867.847
575	0	211.129	-437.964	1636.51	314.551	-440.605	1632.07	187.022	-594.911	1647.29	324.445	-609.302	1644.31	268.869	-666.56	1495.63	264.892	-765.962	1270.34	255.16	-529.241	1396.81	246.906	-500.034	1212.67	318.379	-770.771	1343.63	68.4772	-660.201	1450.47	8.87599	-674.5	1249.13	-9.25269	-682.326	1129.21	-13.7232	-557.961	1006.91	32.8143	-484.321	950.058	-21.2561	-521.627	910.405	-17.9898	-427.479	862.245
576	0	210.63	-425.448	1639.42	314.067	-427.82	1635.21	186.938	-582.416	1650.05	324.377	-596.506	1647.38	269.693	-653.757	1498.53	266.459	-753.049	1273.18	255.192	-516.513	1399.93	246.902	-487.379	1215.83	320.264	-757.535	1346.55	69.2788	-648.802	1453.06	10.0571	-665.324	1252.06	-7.43036	-674.684	1131.96	-13.0382	-554.181	1005.59	32.8539	-482.105	946.262	-20.8313	-521.193	907.94	-18.5599	-428.662	856.778
577	0	210.035	-413.072	1642.43	313.491	-415.153	1638.45	186.785	-570.063	1652.77	324.239	-583.829	1650.41	270.467	-640.953	1501.39	268.024	-740.13	1276	255.16	-503.769	1403.04	246.85	-474.705	1218.97	322.108	-744.267	1349.44	70.0468	-637.425	1455.63	11.1974	-656.319	1255.03	-5.713	-667.268	1134.81	-12.5394	-550.822	1004.39	32.6533	-480.408	942.58	-20.5997	-521.313	905.68	-19.417	-430.573	851.487
578	0	209.378	-400.812	1645.47	312.855	-402.588	1641.72	186.584	-557.832	1655.4	324.053	-571.258	1653.34	271.195	-628.131	1504.16	269.584	-727.201	1278.76	255.074	-490.993	1406.07	246.761	-462	1222.04	323.905	-730.956	1352.26	70.7849	-626.041	1458.12	12.3076	-647.452	1257.99	-4.09054	-660.051	1137.71	-12.21	-547.841	1003.31	32.2315	-479.181	939.022	-20.5442	-521.922	903.631	-20.5331	-433.144	846.404
579	0	208.688	-388.643	1648.5	312.189	-390.109	1644.97	186.353	-545.695	1657.89	323.837	-558.774	1656.1	271.879	-615.275	1506.8	271.129	-714.267	1281.42	254.942	-478.172	1408.97	246.646	-449.254	1224.96	325.644	-717.595	1354.93	71.4954	-614.627	1460.5	13.3959	-638.689	1260.9	-2.55392	-653.004	1140.62	-12.0313	-545.191	1002.34	31.6117	-478.371	935.594	-20.6446	-522.949	901.793	-21.8729	-436.299	841.55
580	0	207.995	-376.533	1651.44	311.52	-377.693	1648.12	186.107	-533.622	1660.19	323.606	-546.355	1658.65	272.52	-602.374	1509.25	272.643	-701.332	1283.91	254.77	-465.297	1411.68	246.513	-436.462	1227.69	327.316	-704.18	1357.43	72.1793	-603.161	1462.7	14.4675	-629.996	1263.7	-1.09522	-646.093	1143.47	-11.9829	-542.824	1001.46	30.8201	-477.919	932.297	-20.8783	-524.324	900.159	-23.3955	-439.959	836.94
581	0	207.319	-364.451	1654.24	310.871	-365.315	1651.1	185.86	-521.58	1662.25	323.371	-533.978	1660.93	273.117	-589.417	1511.48	274.111	-688.402	1286.2	254.563	-452.364	1414.15	246.366	-423.624	1230.15	328.911	-690.709	1359.71	72.8361	-591.626	1464.69	15.5252	-621.339	1266.35	0.292427	-639.282	1146.24	-12.0437	-540.687	1000.66	29.8858	-477.769	929.125	-21.2207	-525.974	898.718	-25.0562	-444.043	832.577
582	0	206.679	-352.363	1656.83	310.258	-352.95	1653.84	185.618	-509.534	1664.05	323.139	-521.616	1662.9	273.668	-576.396	1513.43	275.511	-675.484	1288.25	254.325	-439.367	1416.32	246.21	-410.737	1232.31	330.415	-677.183	1361.72	73.4636	-580.009	1466.42	16.569	-612.682	1268.81	1.61498	-632.532	1148.88	-12.1921	-538.727	999.92	28.839	-477.863	926.07	-21.6463	-527.826	897.454	-26.808	-448.468	828.461
583	0	206.088	-340.236	1659.16	309.692	-340.572	1656.3	185.386	-497.452	1665.54	322.916	-509.243	1664.52	274.169	-563.306	1515.08	276.824	-662.58	1290.03	254.056	-426.307	1418.15	246.046	-397.806	1234.11	331.816	-663.604	1363.45	74.0585	-568.296	1467.88	17.5968	-603.995	1271.05	2.87761	-625.805	1151.36	-12.4067	-536.89	999.228	27.711	-478.142	923.122	-22.1289	-529.809	896.351	-28.6034	-453.153	824.587
584	0	205.551	-328.041	1661.18	309.18	-328.154	1658.41	185.164	-485.301	1666.71	322.701	-496.832	1665.78	274.615	-550.142	1516.41	278.032	-649.693	1291.49	253.759	-413.182	1419.62	245.872	-384.833	1235.53	333.104	-649.974	1364.85	74.6154	-556.479	1469.01	18.6049	-595.248	1273.04	4.08489	-619.061	1153.64	-12.6665	-535.124	998.566	26.5325	-478.552	920.272	-22.6432	-531.854	895.395	-30.3964	-458.017	820.948
585	0	205.069	-315.749	1662.84	308.721	-315.672	1660.13	184.95	-473.055	1667.53	322.493	-484.358	1666.64	274.998	-536.901	1517.39	279.117	-636.819	1292.62	253.43	-399.992	1420.7	245.686	-371.821	1236.55	334.264	-636.298	1365.9	75.1275	-544.549	1469.82	19.5878	-586.412	1274.76	5.24089	-612.259	1155.7	-12.9517	-533.376	997.921	25.3336	-479.039	917.509	-23.1648	-533.895	894.57	-32.144	-462.984	817.537
586	0	204.638	-303.336	1664.11	308.311	-303.104	1661.43	184.738	-460.686	1667.99	322.284	-471.799	1667.1	275.312	-523.582	1518	280.065	-623.953	1293.41	253.068	-386.739	1421.37	245.485	-358.771	1237.14	335.287	-622.577	1366.61	75.5866	-532.497	1470.28	20.539	-577.461	1276.2	6.34922	-605.364	1157.54	-13.2443	-531.597	997.282	24.142	-479.55	914.826	-23.671	-535.871	893.863	-33.8077	-467.977	814.347
587	0	204.249	-290.782	1664.97	307.94	-290.43	1662.29	184.52	-448.176	1668.1	322.067	-459.134	1667.16	275.547	-510.183	1518.25	280.864	-611.084	1293.84	252.668	-373.421	1421.63	245.266	-345.684	1237.3	336.161	-608.815	1366.96	75.9828	-520.315	1470.38	21.4514	-568.373	1277.35	7.41294	-598.339	1159.13	-13.5278	-529.738	996.639	22.9832	-480.036	912.219	-24.1413	-537.724	893.264	-35.3543	-472.926	811.374
588	0	203.89	-278.072	1665.41	307.595	-277.633	1662.7	184.284	-435.506	1667.84	321.832	-446.346	1666.84	275.692	-496.703	1518.14	281.504	-598.198	1293.91	252.224	-360.038	1421.49	245.022	-332.558	1237.04	336.875	-595.013	1366.94	76.3052	-507.997	1470.13	22.3171	-559.126	1278.21	8.4345	-591.154	1160.48	-13.7884	-527.757	995.988	21.8793	-480.45	909.684	-24.5577	-539.401	892.766	-36.7568	-477.762	808.615
589	0	203.543	-265.194	1665.42	307.26	-264.701	1662.66	184.018	-422.667	1667.25	321.564	-433.42	1666.14	275.737	-483.141	1517.67	281.978	-585.28	1293.63	251.731	-346.586	1420.94	244.748	-319.388	1236.37	337.422	-581.17	1366.58	76.542	-495.535	1469.54	23.1279	-549.702	1278.79	9.41553	-583.778	1161.59	-14.0143	-525.609	995.325	20.8487	-480.747	907.223	-24.905	-540.851	892.365	-37.9948	-482.419	806.072
590	0	203.19	-252.142	1665.02	306.917	-251.623	1662.19	183.706	-409.648	1666.32	321.25	-420.347	1665.08	275.671	-469.494	1516.86	282.283	-572.311	1293	251.181	-333.061	1420.01	244.438	-306.169	1235.32	337.793	-567.285	1365.88	76.6808	-482.92	1468.6	23.8757	-540.083	1279.1	10.3567	-576.186	1162.47	-14.1969	-523.256	994.652	19.9058	-480.88	904.841	-25.1708	-542.03	892.057	-39.0546	-486.835	803.747
591	0	202.812	-238.911	1664.22	306.545	-238.393	1661.3	183.333	-396.447	1665.08	320.874	-407.12	1663.7	275.482	-455.761	1515.72	282.414	-559.271	1292.05	250.566	-319.46	1418.73	244.087	-292.89	1233.89	337.982	-553.357	1364.87	76.7092	-470.146	1467.36	24.5523	-530.255	1279.15	11.2573	-568.355	1163.12	-14.3302	-520.659	993.969	19.0607	-480.806	902.543	-25.3458	-542.894	891.842	-39.9286	-490.95	801.644
592	0	202.387	-225.501	1663.06	306.124	-225.007	1660.03	182.882	-383.062	1663.56	320.419	-393.734	1662.02	275.159	-441.939	1514.3	282.373	-546.141	1290.79	249.878	-305.775	1417.12	243.688	-279.541	1232.14	337.984	-539.379	1363.57	76.6152	-457.207	1465.81	25.1495	-520.205	1278.96	12.1157	-560.264	1163.56	-14.4112	-517.784	993.279	18.3196	-480.48	900.339	-25.424	-543.402	891.719	-40.615	-494.707	799.767
593	0	201.894	-211.914	1661.56	305.633	-211.463	1658.42	182.336	-369.495	1661.79	319.868	-380.188	1660.09	274.692	-428.025	1512.61	282.158	-532.902	1289.26	249.109	-292.001	1415.22	243.232	-266.11	1230.1	337.796	-525.347	1362.01	76.3876	-444.097	1463.99	25.6595	-509.923	1278.54	12.9282	-551.896	1163.8	-14.4399	-514.596	992.587	17.6845	-479.86	898.235	-25.4024	-543.514	891.687	-41.1169	-498.053	798.117
594	0	201.311	-198.154	1659.76	305.051	-197.762	1656.5	181.677	-355.75	1659.8	319.204	-366.483	1657.93	274.073	-414.015	1510.69	281.773	-519.535	1287.48	248.25	-278.129	1413.08	242.712	-252.582	1227.81	337.417	-511.254	1360.22	76.0166	-430.814	1461.93	26.0748	-499.398	1277.92	13.6903	-543.234	1163.86	-14.4193	-511.062	991.895	17.1536	-478.9	896.241	-25.2814	-543.193	891.743	-41.4418	-500.935	796.695
595	0	200.619	-184.226	1657.72	304.359	-183.908	1654.34	180.89	-341.832	1657.62	318.411	-352.623	1655.58	273.294	-399.905	1508.57	281.222	-506.026	1285.5	247.292	-264.154	1410.73	242.12	-238.945	1225.32	336.849	-497.094	1358.25	75.4943	-417.357	1459.66	26.3881	-488.621	1277.11	14.3957	-534.265	1163.75	-14.3549	-507.151	991.205	16.7223	-477.557	894.362	-25.0648	-542.399	891.884	-41.6002	-503.302	795.497
596	0	199.801	-170.138	1655.47	303.541	-169.904	1651.98	179.959	-327.748	1655.29	317.475	-338.612	1653.1	272.352	-385.691	1506.3	280.51	-492.362	1283.35	246.227	-250.069	1408.21	241.446	-225.185	1222.67	336.094	-482.859	1356.13	74.8147	-403.725	1457.21	26.5928	-477.586	1276.14	15.0372	-524.973	1163.49	-14.2544	-502.828	990.52	16.3832	-475.786	892.601	-24.7597	-541.095	892.104	-41.6054	-505.107	794.514
597	0	198.84	-155.896	1653.07	302.58	-155.755	1649.47	178.874	-313.505	1652.86	316.383	-324.456	1650.52	271.243	-371.37	1503.91	279.645	-478.533	1281.07	245.049	-235.87	1405.58	240.682	-211.29	1219.91	335.159	-468.544	1353.9	73.9745	-389.924	1454.62	26.6829	-466.286	1275.01	15.6066	-515.346	1163.09	-14.1276	-498.063	989.837	16.1267	-473.542	890.96	-24.3764	-539.241	892.394	-41.4722	-506.302	793.733
598	0	197.725	-141.508	1650.56	301.465	-141.466	1646.86	177.623	-299.112	1650.35	315.125	-310.161	1647.89	269.969	-356.939	1501.46	278.636	-464.533	1278.71	243.752	-221.553	1402.88	239.817	-197.252	1217.1	334.051	-454.143	1351.62	72.9726	-375.958	1451.92	26.6532	-454.715	1273.75	16.0956	-505.371	1162.56	-13.9859	-492.824	989.155	15.9418	-470.78	889.436	-23.928	-536.799	892.742	-41.2171	-506.837	793.138
599	0	196.445	-126.983	1648	300.187	-127.043	1644.22	176.202	-284.578	1647.81	313.696	-295.733	1645.24	268.532	-342.398	1498.97	277.493	-450.36	1276.31	242.333	-207.116	1400.15	238.844	-183.064	1214.26	332.782	-439.652	1349.31	71.811	-361.837	1449.14	26.4994	-442.868	1272.38	16.4958	-495.036	1161.91	-13.8415	-487.078	988.47	15.8162	-467.454	888.022	-23.4305	-533.728	893.133	-40.8576	-506.666	792.706
600	0	194.996	-112.33	1645.43	298.74	-112.494	1641.59	174.606	-269.912	1645.27	312.093	-281.182	1642.62	266.941	-327.748	1496.5	276.229	-436.017	1273.91	240.79	-192.562	1397.43	237.756	-168.724	1211.46	331.364	-425.072	1347.03	70.4941	-347.57	1446.34	26.218	-430.742	1270.9	16.7991	-484.33	1161.15	-13.7071	-480.793	987.775	15.7365	-463.52	886.709	-22.9019	-529.99	893.552	-40.4122	-505.74	792.411
601	0	193.377	-97.5587	1642.89	297.124	-97.8253	1639	172.838	-255.124	1642.77	310.318	-266.514	1640.07	265.204	-312.993	1494.07	274.856	-421.508	1271.55	239.125	-177.895	1394.78	236.546	-154.231	1208.74	329.811	-410.404	1344.8	69.0291	-333.17	1443.54	25.8069	-418.333	1269.34	16.9984	-473.241	1160.29	-13.5957	-473.937	987.063	15.689	-458.934	885.485	-22.3616	-525.543	893.977	-39.9004	-504.008	792.222
602	0	191.591	-82.6793	1640.42	295.343	-83.0462	1636.51	170.906	-240.227	1640.34	308.378	-251.74	1637.61	263.335	-298.139	1491.73	273.386	-406.846	1269.28	237.344	-163.123	1392.22	235.213	-139.593	1206.12	328.139	-395.654	1342.67	67.4258	-318.65	1440.78	25.2651	-405.639	1267.72	17.0878	-461.759	1159.33	-13.5199	-466.479	986.327	15.6591	-453.65	884.335	-21.8301	-520.35	894.388	-39.3422	-501.421	792.109
603	0	189.649	-67.7037	1638.05	293.405	-68.1664	1634.15	168.82	-225.232	1638.02	306.284	-236.87	1635.29	261.348	-283.198	1489.52	271.832	-392.044	1267.12	235.455	-148.256	1389.8	233.756	-124.819	1203.66	326.366	-380.831	1340.68	65.6963	-304.026	1438.1	24.5926	-392.658	1266.04	17.0626	-449.878	1158.29	-13.4915	-458.388	985.557	15.6323	-447.624	883.242	-21.3279	-514.371	894.76	-38.759	-497.927	792.036
604	0	187.563	-52.6452	1635.82	291.324	-53.1977	1631.94	166.597	-210.153	1635.83	304.053	-221.915	1633.14	259.263	-268.184	1487.45	270.208	-377.119	1265.11	233.472	-133.309	1387.54	232.18	-109.923	1201.39	324.508	-365.946	1338.84	63.855	-289.315	1435.53	23.7907	-379.391	1264.32	16.9194	-437.592	1157.17	-13.5215	-449.635	984.745	15.5936	-440.814	882.189	-20.8752	-507.57	895.069	-38.1725	-493.474	791.968
605	0	185.354	-37.5185	1633.74	289.118	-38.1538	1629.92	164.258	-195.007	1633.79	301.706	-206.89	1631.18	257.099	-253.115	1485.57	268.527	-362.094	1263.28	231.41	-118.302	1385.47	230.495	-94.9243	1199.32	322.583	-351.018	1337.2	61.9183	-274.532	1433.11	22.8618	-365.84	1262.58	16.6561	-424.898	1155.98	-13.6199	-440.194	983.883	15.5282	-433.178	881.159	-20.4911	-499.913	895.289	-37.6057	-488.012	791.87
606	0	183.043	-22.34	1631.84	286.811	-23.0504	1628.09	161.829	-179.809	1631.95	299.268	-191.81	1629.43	254.879	-238.012	1483.89	266.8	-346.992	1261.65	229.29	-103.254	1383.62	228.711	-79.8468	1197.49	320.609	-336.064	1335.75	59.9046	-259.698	1430.86	21.8095	-352.01	1260.84	16.2721	-411.796	1154.72	-13.7955	-430.039	982.966	15.4218	-424.674	880.135	-20.1938	-491.365	895.396	-37.0817	-481.488	791.706
607	0	180.661	-7.128	1630.13	284.431	-7.90536	1626.48	159.338	-164.579	1630.31	296.769	-176.692	1627.93	252.628	-222.899	1482.44	265.039	-331.839	1260.23	227.136	-88.1903	1382.01	226.846	-64.7178	1195.91	318.603	-321.108	1334.53	57.8338	-244.83	1428.83	20.6381	-337.905	1259.11	15.7673	-398.29	1153.41	-14.056	-419.148	981.988	15.2609	-415.265	879.102	-19.9997	-481.898	895.362	-36.6242	-473.85	791.444
608	0	178.236	8.09764	1628.63	282.009	7.26153	1625.09	156.818	-149.336	1628.9	294.241	-161.553	1626.69	250.37	-207.802	1481.22	263.256	-316.665	1259.05	224.972	-73.1373	1380.65	224.92	-49.5684	1194.59	316.582	-306.175	1333.55	55.7269	-229.949	1427.04	19.3533	-323.535	1257.42	15.1423	-384.388	1152.07	-14.4076	-407.503	980.947	15.0331	-404.914	878.047	-19.9232	-471.482	895.165	-36.2563	-465.05	791.052
609	0	175.805	23.3158	1627.33	279.579	22.429	1623.94	154.304	-134.102	1627.73	291.719	-146.415	1625.71	248.132	-192.749	1480.26	261.463	-301.499	1258.1	222.828	-58.1228	1379.55	222.956	-34.4332	1193.55	314.562	-291.293	1332.81	53.6057	-215.072	1425.51	17.9615	-308.911	1255.79	14.3982	-370.1	1150.7	-14.8553	-395.089	979.843	14.7277	-393.59	876.958	-19.9772	-460.094	894.783	-36.0003	-455.039	790.505
610	0	173.4	38.5048	1626.26	277.176	37.575	1623.02	151.83	-118.899	1626.81	289.239	-131.298	1625.01	245.938	-177.768	1479.57	259.671	-286.369	1257.41	220.729	-43.1755	1378.73	220.978	-19.349	1192.79	312.558	-276.488	1332.32	51.4924	-200.221	1424.27	16.4704	-294.045	1254.23	13.5356	-355.44	1149.31	-15.4029	-381.893	978.678	14.3361	-381.264	875.83	-20.1723	-447.712	894.198	-35.8766	-443.773	789.779
611	0	171.06	53.6426	1625.41	274.838	52.6767	1622.34	149.432	-103.748	1626.16	286.836	-116.223	1624.61	243.815	-162.887	1479.14	257.891	-271.307	1256.97	218.705	-28.3239	1378.19	219.012	-4.35309	1192.31	310.582	-261.789	1332.08	49.4089	-185.415	1423.33	14.8884	-278.953	1252.77	12.5549	-340.423	1147.94	-16.0526	-367.907	977.458	13.8523	-367.912	874.661	-20.5168	-434.319	893.399	-35.9032	-431.213	788.858
612	0	168.818	68.708	1624.79	272.599	67.7121	1621.9	147.147	-88.6706	1625.79	284.546	-101.21	1624.49	241.783	-148.13	1478.99	256.133	-256.338	1256.8	216.783	-13.5952	1377.93	217.086	10.5179	1192.1	308.648	-247.225	1332.09	47.3762	-170.67	1422.72	13.225	-263.651	1251.43	11.4561	-325.066	1146.59	-16.8053	-353.127	976.194	13.2734	-353.518	873.455	-21.0167	-419.9	892.378	-36.094	-417.324	787.735
613	0	166.708	83.6807	1624.4	270.494	82.6599	1621.69	145.005	-73.6865	1625.7	282.401	-86.28	1624.67	239.866	-133.523	1479.12	254.405	-241.487	1256.88	214.986	0.985507	1377.96	215.228	25.2305	1192.16	306.764	-232.819	1332.36	45.4141	-156.005	1422.44	11.4901	-248.158	1250.23	10.2385	-309.388	1145.29	-17.6604	-337.552	974.899	12.5997	-338.069	872.222	-21.6755	-404.445	891.137	-36.4587	-402.077	786.413
614	0	164.763	98.5424	1624.25	268.554	97.5002	1621.73	143.037	-58.8139	1625.91	280.432	-71.4513	1625.15	238.079	-119.086	1479.53	252.714	-226.775	1257.22	213.339	15.3962	1378.28	213.463	39.7559	1192.5	304.938	-218.595	1332.89	43.5405	-141.432	1422.51	9.69458	-232.49	1249.2	8.90067	-293.405	1144.05	-18.6157	-321.186	973.591	11.8351	-321.562	870.981	-22.4941	-387.949	889.687	-37.0016	-385.454	784.903
615	0	163.01	113.277	1624.34	266.808	112.215	1622	141.268	-44.0686	1626.42	278.663	-56.7411	1625.93	236.438	-104.837	1480.22	251.063	-212.22	1257.82	211.86	29.6189	1378.88	211.82	54.0721	1193.11	303.175	-204.572	1333.66	41.7709	-126.963	1422.95	7.84915	-216.667	1248.37	7.44078	-277.134	1142.91	-19.6673	-304.034	972.296	10.9871	-304.001	869.758	-23.4705	-370.412	888.05	-37.7211	-367.444	783.233
616	0	161.473	127.87	1624.68	265.278	126.79	1622.5	139.719	-29.4639	1627.23	277.116	-42.1647	1627.01	234.953	-90.7901	1481.18	249.454	-197.834	1258.68	210.566	43.6405	1379.77	210.321	68.165	1193.99	301.478	-190.762	1334.67	40.1181	-112.606	1423.74	5.96478	-200.704	1247.75	5.85648	-260.59	1141.89	-20.8102	-286.106	971.042	10.0666	-285.395	868.587	-24.6001	-351.837	886.258	-38.6091	-348.045	781.439
617	0	160.17	142.312	1625.27	263.983	141.21	1623.24	138.405	-15.0106	1628.35	275.805	-27.7353	1628.38	233.631	-76.954	1482.41	247.885	-183.623	1259.8	209.467	57.453	1380.94	208.988	82.0288	1195.14	299.846	-177.174	1335.92	38.5917	-98.3658	1424.89	4.05206	-184.618	1247.36	4.14541	-243.787	1141.01	-22.0378	-267.416	969.861	9.08718	-265.765	867.51	-25.8755	-332.233	884.352	-39.6511	-327.267	779.571
618	0	159.115	156.591	1626.11	262.936	155.465	1624.22	137.337	-0.716922	1629.78	274.741	-13.4641	1630.04	232.474	-63.3332	1483.9	246.355	-169.593	1261.16	208.572	71.0542	1382.39	207.838	95.6662	1196.57	298.28	-163.81	1337.4	37.1985	-84.2415	1426.41	2.12089	-168.421	1247.23	2.30546	-226.737	1140.3	-23.3424	-247.982	968.794	8.06523	-245.137	866.576	-27.2866	-311.616	882.386	-40.8264	-305.131	777.692
619	0	158.314	170.704	1627.2	262.143	169.548	1625.42	136.519	13.4113	1631.52	273.927	0.640063	1631.98	231.482	-49.927	1485.65	244.859	-155.74	1262.77	207.883	84.4475	1384.13	206.883	109.087	1198.27	296.776	-150.668	1339.09	35.9416	-70.2298	1428.27	0.180149	-152.127	1247.37	0.335228	-209.45	1139.79	-24.7151	-227.824	967.879	7.01884	-223.547	865.84	-28.8205	-290.004	880.42	-42.1086	-281.67	775.873
620	0	157.77	184.644	1628.55	261.606	183.451	1626.85	135.949	27.3706	1633.55	273.362	14.5705	1634.19	230.65	-36.7298	1487.63	243.395	-142.06	1264.6	207.397	97.6415	1386.13	206.128	122.309	1200.23	295.334	-137.737	1340.99	34.8213	-56.3233	1430.47	-1.76268	-135.746	1247.79	-1.76551	-191.938	1139.49	-26.1464	-206.97	967.16	5.96715	-201.036	865.36	-30.4622	-267.424	878.519	-43.4667	-256.924	774.192
621	0	157.477	198.412	1630.15	261.319	197.173	1628.5	135.619	41.1598	1635.87	273.039	28.3227	1636.65	229.97	-23.7315	1489.82	241.959	-128.545	1266.65	207.108	110.65	1388.38	205.574	135.353	1202.45	293.95	-125.004	1343.07	33.835	-42.5116	1432.97	-3.70166	-119.288	1248.5	-3.99538	-174.214	1139.44	-27.6259	-185.45	966.679	4.92945	-177.655	865.195	-32.1947	-243.91	876.753	-44.8661	-230.949	772.732
622	0	157.426	212.005	1631.98	261.273	210.712	1630.36	135.518	54.7795	1638.45	272.945	41.8944	1639.32	229.432	-10.9175	1492.21	240.551	-115.183	1268.89	207.004	123.491	1390.86	205.212	148.243	1204.92	292.622	-112.452	1345.31	32.9776	-28.7821	1435.77	-5.63245	-102.761	1249.49	-6.35107	-156.29	1139.64	-29.1431	-163.303	966.476	3.92435	-153.458	865.403	-33.9992	-219.499	875.192	-46.2702	-203.806	771.577
623	0	157.601	225.428	1634.04	261.453	224.07	1632.4	135.628	68.2326	1641.26	273.063	55.2854	1642.19	229.022	1.73046	1494.77	239.172	-101.961	1271.3	207.072	136.186	1393.55	205.031	161.005	1207.6	291.348	-100.059	1347.69	32.242	-15.1205	1438.81	-7.55218	-86.1746	1250.77	-8.82693	-138.181	1140.1	-30.687	-140.571	966.587	2.9689	-128.51	866.036	-35.8556	-194.239	873.902	-47.6413	-175.569	770.807
624	0	157.985	238.685	1636.3	261.839	237.251	1634.62	135.93	81.5241	1644.27	273.372	68.498	1645.21	228.727	14.2337	1497.46	237.826	-88.8643	1273.86	207.293	148.758	1396.41	205.015	173.665	1210.48	290.128	-87.802	1350.19	31.6196	-1.51181	1442.06	-9.45919	-69.5375	1252.31	-11.4149	-119.907	1140.82	-32.2466	-117.302	967.043	2.07802	-102.876	867.14	-37.7428	-168.181	872.944	-48.9426	-146.317	770.498
625	0	158.553	251.783	1638.74	262.41	250.261	1636.98	136.399	94.6613	1647.43	273.847	81.5369	1648.34	228.53	26.6156	1500.25	236.518	-75.878	1276.52	207.648	161.232	1399.4	205.142	186.248	1213.5	288.962	-75.6558	1352.77	31.1009	12.0588	1445.47	-11.3526	-52.8595	1254.09	-14.1042	-101.488	1141.78	-33.8111	-93.5489	967.867	1.26395	-76.6301	868.752	-39.6391	-141.386	872.37	-50.1396	-116.14	770.716
626	0	159.283	264.732	1641.33	263.141	263.11	1639.44	137.008	107.653	1650.7	274.463	94.4088	1651.53	228.417	38.901	1503.09	235.255	-62.9865	1279.25	208.116	173.634	1402.47	205.391	198.776	1216.62	287.848	-63.5955	1355.39	30.6755	25.6052	1448.99	-13.232	-36.1513	1256.08	-16.8818	-82.9475	1142.97	-35.3698	-69.3702	969.072	0.536043	-49.8485	870.896	-41.5224	-113.919	872.222	-51.202	-85.1336	771.513
627	0	160.148	277.543	1644.02	264.007	275.807	1641.99	137.73	120.513	1654.01	275.189	107.123	1654.72	228.371	51.115	1505.94	234.044	-50.1747	1282	208.676	185.987	1405.58	205.738	211.27	1219.79	286.788	-51.5965	1358.03	30.3332	39.14	1452.55	-15.0966	-19.4244	1258.24	-19.7325	-64.309	1144.36	-36.9126	-44.8266	970.662	-0.099313	-22.611	873.584	-43.3704	-85.8509	872.53	-52.1041	-53.3997	772.93
628	0	161.122	290.231	1646.77	264.983	288.366	1644.57	138.535	133.253	1657.32	275.998	119.691	1657.86	228.377	63.2822	1508.76	232.892	-37.4287	1284.74	209.308	198.315	1408.67	206.162	223.746	1222.95	285.783	-39.6355	1360.63	30.0636	52.6735	1456.1	-16.9451	-2.69101	1260.51	-22.6392	-45.5977	1145.9	-38.4297	-19.9809	972.632	-0.638578	5.00111	876.816	-45.1615	-57.2592	873.311	-52.8266	-21.0451	774.996
629	0	162.18	302.812	1649.54	266.042	300.802	1647.14	139.395	145.89	1660.55	276.859	132.126	1660.9	228.42	75.4258	1511.51	231.806	-24.7355	1287.41	209.991	210.636	1411.68	206.641	236.218	1226.04	284.832	-27.6909	1363.17	29.8568	66.214	1459.58	-18.7753	14.0363	1262.85	-25.5835	-26.8377	1147.56	-39.9118	5.10337	974.966	-1.08083	32.9058	880.575	-46.8748	-28.2234	874.569	-53.3564	11.8202	777.722
630	0	163.297	315.304	1652.26	267.161	313.13	1649.66	140.283	158.443	1663.65	277.746	144.444	1663.78	228.489	87.5671	1514.12	230.792	-12.0832	1289.97	210.708	222.97	1414.56	207.156	248.697	1229	283.936	-15.743	1365.6	29.7041	79.7674	1462.92	-20.5834	30.7453	1265.19	-28.5462	-8.05102	1149.27	-41.3501	30.3637	977.639	-1.4274	61.0222	884.835	-48.4912	1.17388	876.295	-53.6866	45.0841	781.108
631	0	164.453	327.728	1654.9	268.317	325.371	1652.09	141.173	170.93	1666.56	278.63	156.662	1666.45	228.573	99.7246	1516.57	229.855	0.538795	1292.37	211.444	235.329	1417.26	207.692	261.192	1231.78	283.096	-3.77472	1367.89	29.5975	93.3373	1466.06	-22.3643	47.4245	1267.49	-31.5074	10.7436	1150.99	-42.7365	55.7398	980.618	-1.68143	89.2719	889.557	-49.9939	30.8496	878.471	-53.8163	78.6343	785.136
632	0	165.625	340.104	1657.4	269.49	337.541	1654.36	142.042	183.371	1669.22	279.49	168.8	1668.87	228.661	111.914	1518.8	228.998	13.1403	1294.57	212.186	247.725	1419.72	208.236	273.707	1234.31	282.312	8.22904	1369.98	29.5306	106.925	1468.95	-24.1109	64.0641	1269.68	-34.4476	29.5315	1152.65	-44.063	81.1745	983.864	-1.84747	117.581	894.693	-51.3685	60.7212	881.067	-53.7495	112.36	789.781
633	0	166.796	352.452	1659.69	270.662	349.66	1656.44	142.87	195.787	1671.59	280.305	180.877	1670.98	228.75	124.149	1520.78	228.224	25.7306	1296.53	212.922	260.166	1421.91	208.779	286.247	1236.56	281.586	20.281	1371.86	29.4987	120.53	1471.55	-25.8144	80.6568	1271.7	-37.3469	48.3022	1154.2	-45.3224	106.615	987.329	-1.931	145.88	900.189	-52.604	90.7084	884.046	-53.4945	146.153	795.002
634	0	167.95	364.792	1661.75	271.817	361.75	1658.29	143.643	208.197	1673.63	281.059	192.914	1672.76	228.834	136.438	1522.48	227.533	38.3186	1298.21	213.647	272.657	1423.77	209.315	298.813	1238.48	280.919	32.392	1373.48	29.4989	134.15	1473.79	-27.4644	97.1977	1273.5	-40.1861	67.0503	1155.58	-46.5078	132.013	990.967	-1.93795	174.106	905.986	-53.6922	120.734	887.364	-53.0629	179.912	800.751
635	0	169.075	377.143	1663.51	272.942	373.829	1659.87	144.351	220.619	1675.29	281.74	204.934	1674.19	228.913	148.79	1523.86	226.929	50.9132	1299.58	214.356	285.201	1425.28	209.843	311.409	1240.04	280.313	44.571	1374.81	29.5304	147.781	1475.66	-29.0486	113.685	1275.03	-42.9457	85.7745	1156.74	-47.6126	157.326	994.725	-1.87417	202.201	912.02	-54.6281	150.725	890.974	-52.4688	213.538	806.972
636	0	170.161	389.521	1664.94	274.027	385.917	1661.13	144.986	233.069	1676.55	282.343	216.957	1675.23	228.989	161.209	1524.91	226.413	63.5237	1300.62	215.048	297.801	1426.42	210.364	324.035	1241.21	279.772	56.8255	1375.83	29.5941	161.421	1477.12	-30.5532	130.12	1276.25	-45.6065	104.477	1157.65	-48.6307	182.515	998.554	-1.74509	230.116	918.229	-55.4093	180.612	894.827	-51.7278	246.942	813.603
637	0	171.199	401.943	1666.01	275.063	398.032	1662.07	145.549	245.562	1677.4	282.865	229.004	1675.88	229.067	173.699	1525.59	225.989	76.1596	1301.3	215.724	310.455	1427.16	210.881	336.694	1241.98	279.3	69.162	1376.52	29.6935	175.066	1478.16	-31.9632	146.506	1277.13	-48.1488	123.164	1158.27	-49.5558	207.545	1002.4	-1.55541	257.804	924.551	-56.0355	210.331	898.871	-50.8564	280.041	820.58
638	0	172.186	414.419	1666.7	276.046	410.193	1662.64	146.044	258.109	1677.82	283.312	241.095	1676.13	229.155	186.261	1525.91	225.661	88.8311	1301.61	216.39	323.165	1427.5	211.4	349.388	1242.34	278.902	81.5858	1376.86	29.8336	188.712	1478.75	-33.2626	162.849	1277.65	-50.553	141.842	1158.57	-50.3824	232.388	1006.23	-1.30903	285.224	930.926	-56.5087	239.823	903.057	-49.8715	312.76	827.835
639	0	173.12	426.959	1666.98	276.976	422.413	1662.84	146.478	270.72	1677.82	283.692	253.248	1675.99	229.263	198.897	1525.86	225.435	101.549	1301.54	217.051	335.93	1427.44	211.929	362.121	1242.29	278.585	94.1017	1376.85	30.0212	202.358	1478.91	-34.4348	179.156	1277.78	-52.7991	160.516	1158.53	-51.1046	257.016	1009.98	-1.00887	312.341	937.298	-56.832	269.032	907.338	-48.7901	345.032	835.301
640	0	174.002	439.571	1666.86	277.852	434.708	1662.67	146.866	283.4	1677.39	284.019	265.48	1675.46	229.402	211.606	1525.43	225.318	114.323	1301.1	217.717	348.751	1426.98	212.478	374.898	1241.83	278.354	106.714	1376.47	30.2647	216.004	1478.64	-35.4627	195.434	1277.52	-54.8668	179.191	1158.16	-51.7169	281.404	1013.64	-0.656927	339.121	943.615	-57.0094	297.909	911.67	-47.6285	376.794	842.911
641	0	174.839	452.259	1666.32	278.682	447.09	1662.12	147.224	296.153	1676.55	284.312	277.805	1674.56	229.585	224.391	1524.63	225.316	127.166	1300.28	218.399	361.63	1426.13	213.055	387.725	1240.99	278.216	119.426	1375.73	30.5732	229.651	1477.96	-36.3297	211.692	1276.88	-56.7359	197.868	1157.46	-52.2137	305.529	1017.15	-0.254332	365.534	949.831	-57.0454	326.405	916.011	-46.4027	407.993	850.602
642	0	175.637	465.026	1665.39	279.473	459.57	1661.21	147.573	308.981	1675.33	284.591	290.234	1673.32	229.828	237.253	1523.49	225.437	140.089	1299.1	219.107	374.569	1424.92	213.671	400.612	1239.77	278.179	132.241	1374.65	30.9565	243.305	1476.88	-37.0195	227.933	1275.88	-58.3866	216.544	1156.43	-52.5894	329.368	1020.5	0.198519	391.551	955.904	-56.9441	354.476	920.325	-45.1282	438.58	858.312
643	0	176.41	477.873	1664.09	280.237	472.154	1659.95	147.934	321.884	1673.74	284.882	302.777	1671.74	230.145	250.192	1522	225.688	153.102	1297.58	219.854	387.573	1423.36	214.336	413.566	1238.22	278.246	145.163	1373.22	31.4244	256.97	1475.44	-37.5169	244.163	1274.52	-59.7997	235.209	1155.09	-52.8385	352.895	1023.66	0.701764	417.145	961.8	-56.7096	382.078	924.577	-43.8195	468.51	865.984
644	0	177.169	490.801	1662.43	280.989	484.851	1658.36	148.332	334.862	1671.83	285.211	315.442	1669.87	230.551	263.212	1520.2	226.072	166.217	1295.73	220.655	400.647	1421.49	215.06	426.598	1236.35	278.425	158.193	1371.47	31.9865	270.656	1473.66	-37.8082	260.382	1272.84	-60.9575	253.848	1153.48	-52.9555	376.086	1026.62	1.25588	442.289	967.489	-56.3457	409.171	928.738	-42.4907	497.742	873.565
645	0	177.934	503.809	1660.47	281.747	497.666	1656.49	148.793	347.913	1669.62	285.606	328.234	1667.74	231.06	276.317	1518.12	226.592	179.444	1293.59	221.521	413.798	1419.33	215.852	439.72	1234.2	278.717	171.333	1369.42	32.6511	284.374	1471.6	-37.8814	276.587	1270.87	-61.8439	272.438	1151.61	-52.9357	398.914	1029.36	1.86151	466.957	972.945	-55.8556	435.714	932.78	-41.155	526.241	881.004
646	0	178.722	516.897	1658.22	282.53	510.603	1654.36	149.341	361.036	1667.16	286.093	341.157	1665.37	231.684	289.51	1515.79	227.246	192.791	1291.19	222.465	427.034	1416.93	216.719	452.942	1231.8	279.126	184.584	1367.1	33.4254	298.136	1469.29	-37.7267	292.772	1268.64	-62.4457	290.951	1149.53	-52.7747	421.35	1031.88	2.51927	491.122	978.147	-55.2425	461.667	936.678	-39.8246	553.971	888.255
647	0	179.554	530.065	1655.76	283.359	523.664	1652.01	149.999	374.231	1664.48	286.698	354.212	1662.81	232.434	302.798	1513.23	228.031	206.265	1288.56	223.499	440.364	1414.33	217.669	466.277	1229.2	279.653	197.948	1364.54	34.3147	311.954	1466.78	-37.3371	308.927	1266.21	-62.7524	309.353	1147.27	-52.4688	443.364	1034.17	3.2297	514.757	983.076	-54.5095	486.991	940.407	-38.5107	580.901	895.273
648	0	180.45	543.315	1653.11	284.254	536.852	1649.49	150.79	387.498	1661.65	287.445	367.4	1660.1	233.318	316.186	1510.5	228.938	219.872	1285.75	224.629	453.795	1411.56	218.706	479.734	1226.44	280.296	211.423	1361.78	35.3221	325.842	1464.12	-36.7086	325.04	1263.6	-62.7574	327.607	1144.87	-52.0157	464.925	1036.22	3.99312	537.835	987.717	-53.6597	511.648	943.945	-37.223	607	902.015
649	0	181.43	556.648	1650.34	285.235	550.167	1646.84	151.731	400.839	1658.69	288.353	380.721	1657.27	234.342	329.678	1507.64	229.955	233.613	1282.79	225.864	467.337	1408.66	219.834	493.324	1223.56	281.054	225.009	1358.86	36.4484	339.811	1461.35	-35.8407	341.094	1260.87	-62.4583	345.671	1142.37	-51.4141	486	1038.04	4.8096	560.327	992.053	-52.6962	535.6	947.269	-35.9697	632.24	908.439
650	0	182.514	570.067	1647.49	286.321	563.61	1644.12	152.836	414.256	1655.66	289.437	394.173	1654.36	235.508	343.279	1504.67	231.069	247.488	1279.73	227.206	480.994	1405.69	221.053	507.052	1220.6	281.922	238.703	1355.82	37.6922	353.872	1458.52	-34.7366	357.071	1258.06	-61.8567	363.501	1139.8	-50.6642	506.558	1039.63	5.67894	582.205	996.071	-51.6226	558.809	950.356	-34.757	656.595	914.505
651	0	183.717	583.576	1644.62	287.527	577.179	1641.35	154.115	427.752	1652.62	290.707	407.753	1651.41	236.814	356.993	1501.67	232.263	261.492	1276.62	228.656	494.772	1402.69	222.361	520.925	1217.62	282.897	252.502	1352.7	39.0495	368.031	1455.69	-33.4032	372.951	1255.21	-60.9589	381.055	1137.21	-49.7675	526.566	1040.99	6.60062	603.443	999.755	-50.443	581.24	953.182	-33.5887	680.038	920.17
652	0	185.051	597.178	1641.78	288.864	590.873	1638.59	155.572	441.331	1649.6	292.167	421.458	1648.46	238.257	370.819	1498.65	233.519	275.618	1273.51	230.209	508.672	1399.7	223.753	534.945	1214.64	283.974	266.401	1349.56	40.5141	382.29	1452.9	-31.8518	388.713	1252.38	-59.7755	398.29	1134.63	-48.7276	545.995	1042.12	7.57379	624.013	1003.09	-49.1619	602.86	955.726	-32.4667	702.547	925.393
653	0	186.524	610.876	1639.02	290.338	604.689	1635.88	157.205	454.997	1646.65	293.815	435.284	1645.56	239.828	384.757	1495.69	234.822	289.853	1270.44	231.86	522.693	1396.77	225.222	549.109	1211.72	285.149	280.394	1346.44	42.0776	396.647	1450.19	-30.0975	404.335	1249.59	-58.3215	415.168	1132.1	-47.5494	564.815	1043.02	8.5973	643.889	1006.06	-47.7853	623.638	957.965	-31.3899	724.1	930.131
654	0	188.138	624.673	1636.37	291.952	618.62	1633.26	159.008	468.752	1643.82	295.641	449.224	1642.74	241.519	398.802	1492.81	236.155	304.182	1267.46	233.597	536.829	1393.94	226.757	563.412	1208.9	286.419	294.472	1343.38	43.73	411.094	1447.6	-28.1592	419.796	1246.91	-56.6158	431.652	1129.66	-46.2395	583.001	1043.69	9.66976	663.048	1008.64	-46.3199	643.545	959.877	-30.3551	744.679	934.343
655	0	189.889	638.568	1633.88	293.699	632.661	1630.76	160.967	482.598	1641.15	297.632	463.272	1640.04	243.315	412.944	1490.06	237.508	318.589	1264.62	235.406	551.072	1391.25	228.344	577.845	1206.22	287.78	308.625	1340.44	45.4595	425.615	1445.18	-26.0595	435.074	1244.36	-54.6808	447.711	1127.34	-44.8065	600.529	1044.14	10.7896	681.468	1010.82	-44.7741	662.557	961.44	-29.3571	764.267	937.986
656	0	191.768	652.559	1631.57	295.57	646.803	1628.41	163.065	496.534	1638.68	299.767	477.417	1637.5	245.203	427.172	1487.48	238.87	333.051	1261.96	237.27	565.408	1388.74	229.969	592.392	1203.73	289.231	322.841	1337.65	47.253	440.191	1442.96	-23.8239	450.148	1241.98	-52.542	463.321	1125.17	-43.2604	617.381	1044.36	11.9548	699.129	1012.59	-43.1578	680.652	962.636	-28.3886	782.85	941.019
657	0	193.757	666.64	1629.48	297.548	661.035	1626.24	165.277	510.554	1636.44	302.022	491.65	1635.15	247.164	441.47	1485.12	240.239	347.546	1259.51	239.169	579.819	1386.45	231.615	607.033	1201.46	290.768	337.104	1335.06	49.0963	454.797	1440.96	-21.4803	464.998	1239.82	-50.2273	478.461	1123.18	-41.613	633.541	1044.37	13.1636	716.014	1013.91	-41.4825	697.813	963.448	-27.4416	800.419	943.405
658	0	195.837	680.803	1627.63	299.61	675.343	1624.28	167.578	524.651	1634.47	304.368	505.958	1633.03	249.181	455.821	1482.99	241.617	362.051	1257.32	241.081	594.285	1384.4	233.262	621.742	1199.43	292.39	351.399	1332.72	50.974	469.401	1439.22	-19.0582	479.605	1237.89	-47.7664	493.118	1121.4	-39.8775	648.998	1044.16	14.4136	732.111	1014.79	-39.7611	714.027	963.863	-26.5073	816.966	945.11
659	0	197.98	695.034	1626.04	301.731	689.712	1622.54	169.938	538.815	1632.78	306.772	520.327	1631.16	251.232	470.202	1481.14	243.008	376.54	1255.41	242.984	608.78	1382.63	234.894	636.488	1197.68	294.093	365.707	1330.64	52.8703	483.972	1437.74	-16.5879	493.95	1236.23	-45.1899	507.282	1119.85	-38.0682	663.742	1043.73	15.7024	747.407	1015.19	-38.0082	729.286	963.872	-25.5773	832.486	946.105
660	0	200.158	709.319	1624.7	303.881	704.125	1621.03	172.324	553.033	1631.4	309.201	534.74	1629.56	253.299	484.592	1479.58	244.42	390.99	1253.82	244.855	623.279	1381.15	236.493	651.236	1196.22	295.871	380.01	1328.87	54.7686	498.476	1436.56	-14.0996	508.016	1234.86	-42.5289	520.952	1118.54	-36.2006	677.77	1043.1	17.027	761.896	1015.11	-36.2391	743.584	963.47	-24.6445	846.977	946.369
661	0	202.337	723.64	1623.65	306.029	718.562	1619.78	174.704	567.286	1630.34	311.621	549.179	1628.27	255.36	498.967	1478.35	245.864	405.377	1252.55	246.67	637.754	1379.97	238.044	665.945	1195.07	297.719	394.287	1327.43	56.6525	512.877	1435.67	-11.6222	521.786	1233.8	-39.814	534.13	1117.5	-34.2907	691.079	1042.25	18.3838	775.571	1014.54	-34.4701	756.918	962.657	-23.7034	860.441	945.89
662	0	204.486	737.976	1622.86	308.142	733.005	1618.79	177.044	581.557	1629.61	313.995	563.626	1627.29	257.394	513.301	1477.45	247.351	419.679	1251.64	248.41	652.174	1379.12	239.53	680.576	1194.24	299.626	408.52	1326.34	58.506	527.142	1435.08	-9.18263	535.247	1233.05	-37.0749	546.823	1116.73	-32.3551	703.67	1041.21	19.7683	788.428	1013.48	-32.7174	769.291	961.437	-22.7512	872.878	944.663
663	0	206.57	752.306	1622.36	310.187	747.431	1618.07	179.311	595.826	1629.22	316.292	578.061	1626.64	259.382	527.572	1476.89	248.888	433.877	1251.08	250.055	666.513	1378.59	240.94	695.091	1193.72	301.583	422.689	1325.61	60.314	541.242	1434.8	-6.80515	548.384	1232.62	-34.3393	559.04	1116.25	-30.4101	715.546	1039.97	21.1748	800.464	1011.91	-30.9971	780.704	959.822	-21.7878	884.291	942.696
664	0	208.556	766.608	1622.13	312.132	761.82	1617.62	181.474	610.07	1629.17	318.48	592.464	1626.33	261.306	541.758	1476.68	250.482	447.954	1250.88	251.59	680.745	1378.39	242.262	709.454	1193.53	303.576	436.779	1325.26	62.063	555.149	1434.82	-4.51042	561.187	1232.52	-31.6322	570.795	1116.04	-28.4718	726.711	1038.53	22.5961	811.676	1009.86	-29.3242	791.164	957.826	-20.8167	894.683	940.004
665	0	210.414	780.86	1622.18	313.949	776.152	1617.45	183.507	624.268	1629.45	320.53	606.816	1626.36	263.15	555.837	1476.82	252.134	461.897	1251.05	253.001	694.846	1378.52	243.487	723.636	1193.66	305.593	450.774	1325.29	63.7412	568.84	1435.14	-2.31503	573.65	1232.74	-28.9756	582.104	1116.12	-26.5558	737.171	1036.92	24.0235	822.064	1007.33	-27.7124	800.676	955.471	-19.8449	904.055	936.615
666	0	212.116	795.04	1622.5	315.61	790.408	1617.57	185.384	638.399	1630.06	322.421	621.097	1626.75	264.901	569.792	1477.31	253.842	475.697	1251.57	254.281	708.798	1378.99	244.607	737.617	1194.1	307.619	464.666	1325.68	65.3391	582.297	1435.74	-0.231059	585.767	1233.28	-26.3877	592.982	1116.48	-24.6766	746.932	1035.15	25.4468	831.625	1004.33	-26.1741	809.246	952.784	-18.8826	912.408	932.565
667	0	213.639	809.128	1623.09	317.093	804.571	1617.97	187.084	652.442	1630.99	324.132	635.291	1627.48	266.549	583.611	1478.14	255.6	489.348	1252.44	255.422	722.586	1379.77	245.615	751.387	1194.87	309.641	478.445	1326.44	66.8496	595.511	1436.62	1.73409	597.536	1234.13	-23.8823	603.448	1117.11	-22.8477	756.001	1033.22	26.8537	840.361	1000.9	-24.7193	816.883	949.796	-17.9433	919.741	927.902
668	0	214.963	823.103	1623.94	318.38	818.625	1618.67	188.594	666.378	1632.22	325.649	649.38	1628.56	268.086	597.284	1479.3	257.399	502.85	1253.63	256.423	736.203	1380.88	246.51	764.942	1195.95	311.645	492.109	1327.55	68.2682	608.475	1437.75	3.57773	608.961	1235.28	-21.4687	613.519	1118	-21.0811	764.386	1031.16	28.2311	848.27	997.059	-23.3561	823.593	946.545	-17.0428	926.053	922.68
669	0	216.074	836.95	1625.05	319.457	832.558	1619.67	189.902	680.187	1633.74	326.963	663.353	1629.99	269.509	610.807	1480.77	259.226	516.204	1255.12	257.286	749.644	1382.3	247.288	778.291	1197.33	313.62	505.657	1328.99	69.5929	621.19	1439.14	5.30161	620.046	1236.71	-19.1516	623.214	1119.15	-19.387	772.097	1028.99	29.5644	855.356	992.853	-22.0906	829.387	943.073	-16.1992	931.34	916.962
670	0	216.963	850.654	1626.42	320.317	846.359	1620.96	191.004	693.855	1635.53	328.072	677.197	1631.73	270.815	624.179	1482.53	261.07	529.417	1256.9	258.014	762.915	1384.01	247.953	791.449	1199.02	315.556	519.095	1330.73	70.824	633.666	1440.75	6.91147	630.803	1238.41	-16.9313	632.552	1120.54	-17.774	779.145	1026.74	30.8385	861.624	988.328	-20.9263	834.275	939.426	-15.431	935.602	910.818
671	0	217.627	864.201	1628.04	320.959	860.02	1622.55	191.902	707.368	1637.57	328.977	690.904	1633.78	272.007	637.406	1484.56	262.915	542.496	1258.93	258.615	776.023	1386.01	248.509	804.436	1201	317.444	532.428	1332.76	71.9638	645.917	1442.56	8.41638	641.245	1240.35	-14.8044	641.551	1122.17	-16.2489	785.543	1024.42	32.0383	867.082	983.534	-19.8646	838.273	935.654	-14.7568	938.838	904.322
672	0	218.071	877.584	1629.91	321.386	873.536	1624.43	192.601	720.717	1639.82	329.686	704.466	1636.11	273.088	650.498	1486.82	264.748	555.454	1261.19	259.098	788.983	1388.26	248.964	817.278	1203.24	319.279	545.667	1335.04	73.0163	657.963	1444.56	9.82791	651.39	1242.51	-12.7643	650.231	1124.01	-14.8165	791.308	1022.08	33.1489	871.744	978.528	-18.9046	841.398	931.808	-14.194	941.054	897.551
673	0	218.302	890.796	1632	321.609	886.905	1626.59	193.114	733.895	1642.26	330.209	717.88	1638.69	274.063	663.466	1489.29	266.557	568.304	1263.64	259.474	801.811	1390.75	249.33	829.999	1205.73	321.055	558.823	1337.52	73.9864	669.831	1446.71	11.1592	661.261	1244.88	-10.802	658.611	1126.06	-13.4798	796.459	1019.73	34.1569	875.627	973.37	-18.0438	843.674	927.941	-13.7575	942.259	890.586
674	0	218.336	903.838	1634.3	321.641	900.127	1629.01	193.454	746.899	1644.84	330.563	731.146	1641.46	274.938	676.326	1491.93	268.331	581.06	1266.25	259.756	814.528	1393.43	249.62	842.626	1208.43	322.767	571.909	1340.19	74.8801	681.548	1448.99	12.4241	670.881	1247.41	-8.90737	666.712	1128.28	-12.2396	801.02	1017.4	35.0508	878.757	968.119	-17.2777	845.132	924.105	-13.4587	942.472	883.507
675	0	218.192	916.71	1636.78	321.501	913.205	1631.65	193.642	759.731	1647.53	330.766	744.265	1644.4	275.721	689.094	1494.7	270.059	593.737	1268.98	259.955	827.155	1396.27	249.848	855.184	1211.3	324.412	584.938	1342.98	75.7034	693.148	1451.35	13.6361	680.279	1250.07	-7.06956	674.557	1130.65	-11.0954	805.02	1015.13	35.8215	881.163	962.835	-16.6002	845.811	920.351	-13.3046	941.721	876.395
676	0	217.892	929.421	1639.42	321.212	926.145	1634.48	193.697	772.399	1650.29	330.839	757.243	1647.44	276.42	701.789	1497.55	271.732	606.35	1271.79	260.086	839.714	1399.23	250.03	867.695	1214.3	325.987	597.922	1345.86	76.4622	704.662	1453.78	14.8078	689.486	1252.83	-5.27809	682.168	1133.16	-10.0446	808.491	1012.93	36.4636	882.884	957.576	-16.004	845.757	916.725	-13.2972	940.045	869.328
677	0	217.461	941.981	1642.18	320.8	938.957	1637.46	193.641	784.913	1653.06	330.804	770.088	1650.53	277.042	714.427	1500.43	273.339	618.914	1274.63	260.161	852.227	1402.24	250.179	880.181	1217.37	327.487	610.874	1348.78	77.1621	716.123	1456.21	15.9503	698.533	1255.65	-3.5234	689.569	1135.77	-9.08286	811.473	1010.83	36.9749	883.963	952.394	-15.4806	845.026	913.271	-13.433	937.493	862.379
678	0	216.928	954.406	1645	320.289	951.652	1640.54	193.498	797.286	1655.81	330.682	782.811	1653.62	277.593	727.026	1503.3	274.87	631.438	1277.47	260.192	864.713	1405.27	250.311	892.659	1220.46	328.909	623.804	1351.69	77.8081	727.562	1458.63	17.0723	707.455	1258.49	-1.79733	696.788	1138.44	-8.20462	814.008	1008.85	37.3574	884.451	947.337	-15.0205	843.681	910.027	-13.7033	934.128	855.617
679	0	216.319	966.713	1647.86	319.707	964.243	1643.65	193.288	809.54	1658.49	330.495	795.425	1656.65	278.08	739.602	1506.11	276.315	643.934	1280.26	260.189	877.191	1408.26	250.438	905.144	1223.52	330.248	636.722	1354.53	78.4044	739.008	1460.97	18.1805	716.283	1261.3	-0.09347	703.852	1141.15	-7.40275	816.145	1007	37.617	884.405	942.447	-14.6133	841.794	907.024	-14.0943	930.024	849.103
680	0	215.661	978.925	1650.69	319.078	976.747	1646.75	193.032	821.693	1661.05	330.263	807.946	1659.56	278.508	752.17	1508.82	277.661	656.407	1282.95	260.163	889.675	1411.14	250.569	917.646	1226.48	331.5	649.635	1357.27	78.9544	750.487	1463.21	19.2791	725.052	1264.05	1.59265	710.79	1143.86	-6.66913	817.936	1005.29	37.7634	883.887	937.757	-14.2479	839.443	904.289	-14.5875	925.262	842.891
681	0	214.979	991.065	1653.43	318.428	989.182	1649.77	192.746	833.772	1663.46	330.002	820.392	1662.3	278.882	764.742	1511.37	278.895	668.861	1285.5	260.121	902.18	1413.88	250.714	930.172	1229.28	332.657	662.548	1359.85	79.4606	762.02	1465.29	20.37	733.793	1266.7	3.26354	717.632	1146.53	-5.99478	819.436	1003.72	37.8096	882.962	933.294	-13.9129	836.709	901.839	-15.161	919.935	837.026
682	0	214.294	1003.16	1656.05	317.775	1001.57	1652.65	192.447	845.801	1665.65	329.726	832.781	1664.82	279.205	777.329	1513.72	280.004	681.298	1287.88	260.069	914.716	1416.42	250.878	942.725	1231.88	333.714	675.467	1362.23	79.9244	773.628	1467.19	21.453	742.534	1269.21	4.9198	724.41	1149.13	-5.37034	820.705	1002.3	37.7711	881.701	929.079	-13.5972	833.681	899.687	-15.7902	914.14	831.543
683	0	213.626	1015.23	1658.48	317.139	1013.92	1655.33	192.144	857.808	1667.62	329.447	845.135	1667.08	279.478	789.94	1515.84	280.975	693.718	1290.04	260.01	927.29	1418.71	251.064	955.307	1234.22	334.666	688.395	1364.37	80.3464	785.326	1468.87	22.5262	751.305	1271.56	6.56031	731.156	1151.64	-4.78634	821.804	1001.04	37.6657	880.174	925.125	-13.29	830.444	897.838	-16.4489	907.978	826.468
684	0	212.989	1027.31	1660.67	316.532	1026.26	1657.76	191.845	869.819	1669.31	329.172	857.474	1669.04	279.702	802.584	1517.68	281.796	706.121	1291.94	259.949	939.909	1420.72	251.273	967.918	1236.25	335.505	701.334	1366.24	80.726	797.127	1470.29	23.5861	760.131	1273.7	8.18245	737.903	1154.02	-4.23367	822.792	999.911	37.512	878.453	921.439	-12.9815	827.087	896.294	-17.1109	901.553	821.819
685	0	212.394	1039.41	1662.59	315.964	1038.61	1659.89	191.555	881.86	1670.7	328.905	869.818	1670.66	279.876	815.267	1519.22	282.458	718.507	1293.57	259.884	952.578	1422.4	251.504	980.557	1237.94	336.226	714.287	1367.8	81.0616	809.042	1471.44	24.6283	769.034	1275.64	9.78243	744.682	1156.26	-3.70397	823.73	998.925	37.3287	876.612	918.024	-12.6632	823.696	895.05	-17.7507	894.97	817.606
686	0	211.844	1051.57	1664.19	315.44	1050.98	1661.68	191.273	893.956	1671.78	328.645	882.188	1671.94	279.997	827.995	1520.43	282.954	730.88	1294.9	259.813	965.299	1423.73	251.752	993.222	1239.27	336.822	727.256	1369.04	81.3503	821.077	1472.29	25.6472	778.034	1277.34	11.3556	751.524	1158.33	-3.18997	824.679	998.073	37.1337	874.722	914.878	-12.3284	820.354	894.099	-18.3445	888.33	813.833
687	0	211.342	1063.81	1665.44	314.96	1063.41	1663.09	190.998	906.131	1672.52	328.39	894.603	1672.84	280.063	840.774	1521.31	283.279	743.243	1295.91	259.734	978.077	1424.7	252.013	1005.91	1240.2	337.287	740.244	1369.94	81.5884	833.239	1472.83	26.6371	787.151	1278.8	12.8965	758.461	1160.22	-2.68579	825.695	997.345	36.943	872.852	911.997	-11.9717	817.14	893.429	-18.8719	881.734	810.495
688	0	210.884	1076.14	1666.32	314.522	1075.89	1664.12	190.722	918.405	1672.92	328.133	907.08	1673.37	280.067	853.608	1521.83	283.433	755.605	1296.58	259.641	990.913	1425.28	252.28	1018.63	1240.74	337.617	753.254	1370.48	81.7707	845.535	1473.05	27.5914	796.402	1280	14.3995	765.519	1161.92	-2.18724	826.834	996.734	36.7701	871.071	909.375	-11.5897	814.129	893.027	-19.316	875.276	807.588
689	0	210.463	1088.58	1666.81	314.117	1088.46	1664.73	190.438	930.795	1672.98	327.866	919.636	1673.53	280.003	866.503	1521.99	283.416	767.978	1296.91	259.528	1003.81	1425.47	252.546	1031.39	1240.87	337.807	766.292	1370.67	81.8913	857.967	1472.94	28.5033	805.801	1280.96	15.8584	772.725	1163.43	-1.69199	828.147	996.231	36.6253	869.443	907.003	-11.1805	811.387	892.878	-19.6649	869.047	805.098
690	0	210.068	1101.15	1666.91	313.736	1101.12	1664.93	190.134	943.316	1672.69	327.577	932.285	1673.31	279.864	879.466	1521.8	283.235	780.377	1296.91	259.387	1016.78	1425.28	252.8	1044.18	1240.6	337.851	779.363	1370.52	81.9433	870.541	1472.52	29.3658	815.361	1281.68	17.2668	780.104	1164.75	-1.19964	829.682	995.827	36.5153	868.03	904.87	-10.7436	808.978	892.964	-19.9119	863.132	803.01
691	0	209.685	1113.85	1666.62	313.363	1113.88	1664.73	189.797	955.981	1672.07	327.252	945.039	1672.74	279.641	892.502	1521.27	282.896	792.82	1296.56	259.209	1029.81	1424.72	253.033	1057.01	1239.94	337.747	792.474	1370.02	81.9193	883.259	1471.78	30.1713	825.094	1282.16	18.6179	787.678	1165.88	-0.711777	831.484	995.512	36.4429	866.892	902.968	-10.2799	806.958	893.264	-20.0552	857.609	801.308
692	0	209.298	1126.7	1665.95	312.984	1126.76	1664.13	189.414	968.797	1671.13	326.879	957.91	1671.84	279.325	905.62	1520.41	282.408	805.33	1295.89	258.984	1042.93	1423.79	253.236	1069.9	1238.92	337.493	805.636	1369.2	81.8111	896.125	1470.74	30.912	835.012	1282.41	19.9047	795.467	1166.83	-0.231953	833.597	995.276	36.4068	866.084	901.282	-9.79155	805.377	893.759	-20.0984	852.551	799.969
693	0	208.889	1139.7	1664.93	312.581	1139.76	1663.17	188.97	981.771	1669.9	326.442	970.905	1670.62	278.908	918.826	1519.24	281.784	817.93	1294.91	258.702	1056.13	1422.54	253.395	1082.86	1237.56	337.086	818.857	1368.08	81.6106	909.14	1469.41	31.5797	845.124	1282.44	21.1196	803.489	1167.59	0.234346	836.058	995.11	36.4016	865.66	899.799	-9.28208	804.282	894.425	-20.0497	848.027	798.969
694	0	208.439	1152.86	1663.58	312.134	1152.89	1661.87	188.449	994.907	1668.38	325.926	984.032	1669.11	278.379	932.128	1517.79	281.036	830.645	1293.63	258.351	1069.42	1420.98	253.501	1095.9	1235.88	336.529	832.147	1366.68	81.3094	922.306	1467.82	32.1658	855.438	1282.27	22.2547	811.761	1168.19	0.679813	838.904	994.999	36.4187	865.673	898.503	-8.75615	803.715	895.236	-19.9211	844.096	798.28
695	0	207.928	1166.17	1661.93	311.625	1166.16	1660.27	187.836	1008.21	1666.62	325.315	997.294	1667.35	277.73	945.536	1516.09	280.176	843.502	1292.08	257.918	1082.81	1419.14	253.539	1109.03	1233.93	335.822	845.518	1365.04	80.8994	935.625	1465.98	32.6618	865.963	1281.9	23.3017	820.298	1168.63	1.09549	842.17	994.933	36.4458	866.172	897.378	-8.21987	803.714	896.167	-19.7277	840.816	797.871
696	0	207.336	1179.64	1660.02	311.034	1179.56	1658.41	187.116	1021.67	1664.63	324.595	1010.69	1665.36	276.953	959.057	1514.16	279.216	856.524	1290.29	257.393	1096.31	1417.07	253.498	1122.27	1231.75	334.969	858.98	1363.2	80.3732	949.095	1463.92	33.0589	876.706	1281.37	24.2517	829.116	1168.91	1.47102	845.889	994.897	36.4686	867.207	896.404	-7.68088	804.315	897.187	-19.4865	838.238	797.708
697	0	206.646	1193.26	1657.91	310.343	1193.1	1656.33	186.276	1035.29	1662.46	323.751	1024.23	1663.19	276.042	972.699	1512.06	278.169	869.733	1288.29	256.763	1109.92	1414.8	253.364	1135.63	1229.36	333.975	872.543	1361.18	79.7242	962.715	1461.67	33.3482	887.674	1280.67	25.0952	838.229	1169.05	1.79497	850.094	994.874	36.471	868.823	895.561	-7.14856	805.555	898.266	-19.2156	836.411	797.751
698	0	205.841	1207.03	1655.62	309.535	1206.79	1654.08	185.301	1049.07	1660.14	322.771	1037.92	1660.86	274.992	986.468	1509.8	277.043	883.147	1286.11	256.019	1123.66	1412.36	253.125	1149.12	1226.83	332.847	886.215	1359.04	78.9472	976.481	1459.26	33.5212	898.874	1279.82	25.8227	847.652	1169.04	2.05523	854.815	994.85	36.4363	871.068	894.825	-6.63412	807.467	899.373	-18.9335	835.38	797.959
699	0	204.906	1220.96	1653.21	308.597	1220.61	1651.7	184.182	1063	1657.71	321.644	1051.73	1658.42	273.8	1000.37	1507.44	275.849	896.779	1283.81	255.15	1137.52	1409.81	252.769	1162.75	1224.18	331.591	900.005	1356.81	78.0382	990.388	1456.71	33.5698	910.314	1278.83	26.4242	857.401	1168.89	2.23944	860.084	994.804	36.3481	873.985	894.173	-6.15064	810.086	900.473	-18.6584	835.19	798.288
700	0	203.828	1235.03	1650.72	307.516	1234.56	1649.25	182.908	1077.09	1655.19	320.36	1065.69	1655.91	272.465	1014.41	1505.01	274.594	910.636	1281.41	254.15	1151.52	1407.19	252.283	1176.52	1221.46	330.219	913.915	1354.52	76.9954	1004.43	1454.06	33.4865	922	1277.72	26.8896	867.489	1168.61	2.33546	865.933	994.719	36.1908	877.618	893.578	-5.71302	813.448	901.532	-18.4075	835.882	798.691
701	0	202.6	1249.24	1648.2	306.284	1248.65	1646.76	181.475	1091.32	1652.64	318.914	1079.77	1653.37	270.99	1028.58	1502.55	273.285	924.719	1278.97	253.014	1165.64	1404.53	251.658	1190.45	1218.73	328.739	927.949	1352.24	75.8188	1018.6	1451.35	33.2647	933.939	1276.5	27.2095	877.934	1168.19	2.33178	872.393	994.576	35.9507	882.009	893.014	-5.33774	817.588	902.516	-18.1975	837.499	799.121
702	0	201.216	1263.58	1645.69	304.896	1262.87	1644.29	179.877	1105.68	1650.09	317.301	1093.98	1650.83	269.379	1042.89	1500.11	271.926	939.02	1276.52	251.741	1179.89	1401.88	250.888	1204.53	1216.01	327.164	942.105	1349.98	74.5107	1032.88	1448.6	32.8988	946.138	1275.17	27.3746	888.751	1167.64	2.21797	879.495	994.354	35.6161	887.197	892.453	-5.04242	822.541	903.39	-18.0438	840.084	799.532
703	0	199.675	1278.05	1643.23	303.35	1277.21	1641.86	178.115	1120.18	1647.57	315.523	1108.31	1648.33	267.64	1057.32	1497.71	270.524	953.527	1274.11	250.331	1194.27	1399.28	249.967	1218.77	1213.35	325.506	956.379	1347.79	73.0758	1047.27	1445.85	32.3847	958.605	1273.74	27.377	899.955	1166.95	1.98495	887.271	994.035	35.1776	893.22	891.867	-4.8453	828.343	904.121	-17.9608	843.681	799.876
704	0	197.981	1292.64	1640.85	301.65	1291.66	1639.52	176.193	1134.8	1645.11	313.581	1122.75	1645.9	265.783	1071.87	1495.4	269.082	968.22	1271.77	248.791	1208.76	1396.76	248.896	1233.14	1210.8	323.776	970.763	1345.71	71.5211	1061.75	1443.14	31.7193	971.347	1272.23	27.2098	911.562	1166.12	1.62528	895.749	993.6	34.6283	900.114	891.231	-4.76455	835.03	904.676	-17.9621	848.331	800.112
705	0	196.141	1307.34	1638.58	299.804	1306.22	1637.3	174.119	1149.53	1642.75	311.485	1137.28	1643.59	263.822	1086.53	1493.21	267.604	983.074	1269.55	247.13	1223.34	1394.37	247.678	1247.65	1208.38	321.99	985.244	1343.76	69.8561	1076.31	1440.51	30.9016	984.368	1270.65	26.8677	923.583	1165.16	1.13333	904.958	993.033	33.9637	907.914	890.518	-4.81762	842.634	905.025	-18.0602	854.078	800.197
706	0	194.168	1322.13	1636.44	297.823	1320.86	1635.22	171.904	1164.37	1640.51	309.246	1151.9	1641.43	261.773	1101.28	1491.16	266.095	998.059	1267.48	245.362	1238.02	1392.12	246.322	1262.28	1206.13	320.159	999.808	1341.96	68.0925	1090.92	1437.97	29.9319	997.675	1269	26.3475	936.031	1164.07	0.505384	914.926	992.318	33.1818	916.65	889.705	-5.02051	851.189	905.141	-18.2671	860.963	800.096
707	0	192.078	1337.01	1634.45	295.725	1335.57	1633.31	169.565	1179.28	1638.41	306.88	1166.59	1639.43	259.656	1116.1	1489.29	264.558	1013.14	1265.59	243.504	1252.76	1390.06	244.84	1277.01	1204.08	318.299	1014.44	1340.35	66.2445	1105.59	1435.58	28.8125	1011.27	1267.3	25.6477	948.914	1162.85	-0.26034	925.677	991.443	32.2825	926.351	888.773	-5.3872	860.724	904.999	-18.5939	869.025	799.776
708	0	189.892	1351.95	1632.64	293.529	1350.35	1631.58	167.122	1194.26	1636.49	304.407	1181.33	1637.63	257.49	1130.96	1487.61	262.999	1028.28	1263.89	241.577	1267.54	1388.19	243.251	1291.82	1202.26	316.421	1029.11	1338.94	64.3285	1120.28	1433.34	27.5477	1025.16	1265.56	24.769	962.237	1161.5	-1.16368	937.229	990.4	31.2679	937.042	887.704	-5.92908	871.262	904.578	-19.0509	878.302	799.209
709	0	187.632	1366.94	1631	291.258	1365.16	1630.05	164.599	1209.29	1634.75	301.851	1196.11	1636.05	255.299	1145.84	1486.14	261.421	1043.45	1262.42	239.605	1282.34	1386.55	241.573	1306.69	1200.66	314.541	1043.8	1337.75	62.3627	1134.98	1431.3	26.1436	1039.33	1263.79	23.7141	976.001	1160.03	-2.20261	949.6	989.183	30.1415	948.743	886.487	-6.65456	882.828	903.863	-19.6472	888.828	798.374
710	0	185.325	1381.95	1629.55	288.938	1379.99	1628.72	162.024	1224.34	1633.22	299.241	1210.91	1634.71	253.106	1160.71	1484.9	259.832	1058.59	1261.18	237.612	1297.12	1385.13	239.83	1321.58	1199.32	312.672	1058.48	1336.77	60.3671	1149.67	1429.48	24.6086	1053.8	1262	22.4876	990.204	1158.45	-3.37331	962.803	987.792	28.9087	961.472	885.113	-7.56874	895.435	902.841	-20.3908	900.633	797.253
711	0	182.999	1396.96	1628.29	286.598	1394.81	1627.61	159.428	1239.39	1631.9	296.607	1225.7	1633.61	250.937	1175.55	1483.89	258.24	1073.69	1260.19	235.625	1311.88	1383.96	238.047	1336.45	1198.24	310.826	1073.13	1336.03	58.3629	1164.33	1427.9	22.953	1068.54	1260.21	21.096	1004.84	1156.77	-4.67024	976.844	986.23	27.5761	975.241	883.583	-8.67318	909.099	901.507	-21.2881	913.742	795.84
712	0	180.682	1411.95	1627.22	284.265	1409.61	1626.72	156.843	1254.42	1630.81	293.981	1240.47	1632.78	248.816	1190.32	1483.14	256.653	1088.69	1259.45	233.669	1326.56	1383.04	236.247	1351.29	1197.41	309.016	1087.72	1335.52	56.3719	1178.94	1426.58	21.1892	1083.55	1258.44	19.5474	1019.9	1155	-6.08617	991.726	984.508	26.1519	990.058	881.902	-9.96582	923.824	899.864	-22.3438	928.174	794.133
713	0	178.403	1426.89	1626.36	281.97	1424.36	1626.04	154.303	1269.41	1629.95	291.399	1255.2	1632.21	246.768	1205.01	1482.63	255.083	1103.58	1258.98	231.769	1341.16	1382.37	234.456	1366.04	1196.85	307.257	1102.22	1335.25	54.416	1193.48	1425.54	19.3316	1098.81	1256.7	17.851	1035.36	1153.17	-7.61219	1007.45	982.643	24.6459	1005.92	880.083	-11.4409	939.615	897.92	-23.5602	943.944	792.143
714	0	176.192	1441.76	1625.69	279.74	1439.05	1625.59	151.842	1284.32	1629.35	288.895	1269.87	1631.92	244.816	1219.58	1482.39	253.542	1118.31	1258.77	229.949	1355.63	1381.96	232.696	1380.68	1196.54	305.558	1116.62	1335.22	52.5165	1207.93	1424.81	17.396	1114.31	1255.03	16.0176	1051.22	1151.29	-9.23774	1024	980.658	23.0695	1022.84	878.15	-13.0891	956.467	895.695	-24.9367	961.059	789.892
715	0	174.076	1456.55	1625.24	277.603	1453.66	1625.35	149.492	1299.15	1629	286.502	1284.48	1631.92	242.98	1234.02	1482.41	252.042	1132.88	1258.84	228.229	1369.97	1381.81	230.988	1395.18	1196.48	303.93	1130.87	1335.43	50.6933	1222.28	1424.38	15.4	1130.03	1253.44	14.0585	1067.46	1149.39	-10.9507	1041.37	978.583	21.4358	1040.78	876.133	-14.8972	974.373	893.218	-26.4691	979.519	787.413
716	0	172.079	1471.23	1624.99	275.584	1468.18	1625.34	147.285	1313.86	1628.92	284.252	1298.99	1632.19	241.279	1248.31	1482.7	250.597	1147.26	1259.17	226.627	1384.15	1381.93	229.351	1409.5	1196.68	302.382	1144.98	1335.88	48.964	1236.5	1424.28	13.3615	1145.94	1251.96	11.9859	1084.04	1147.5	-12.7373	1059.54	976.456	19.7597	1059.75	874.073	-16.8489	993.322	890.528	-28.1487	999.316	784.751
717	0	170.225	1485.79	1624.96	273.707	1482.59	1625.54	145.247	1328.45	1629.13	282.172	1313.41	1632.76	239.725	1262.43	1483.26	249.216	1161.44	1259.77	225.157	1398.16	1382.31	227.804	1423.62	1197.13	300.919	1158.92	1336.57	47.3435	1250.59	1424.52	11.2993	1162.02	1250.63	9.81203	1100.96	1145.66	-14.5828	1078.5	974.323	18.0576	1079.71	872.021	-18.9242	1013.29	887.675	-29.9617	1020.43	781.967
718	0	168.532	1500.21	1625.16	271.99	1496.89	1625.97	143.401	1342.9	1629.62	280.288	1327.72	1633.61	238.329	1276.36	1484.08	247.909	1175.42	1260.63	223.831	1411.97	1382.96	226.36	1437.54	1197.84	299.545	1172.68	1337.49	45.8435	1264.54	1425.11	9.23157	1178.25	1249.48	7.54948	1118.19	1143.9	-16.4713	1098.21	972.233	16.3475	1100.64	870.036	-21.1003	1034.27	884.72	-31.8889	1042.85	779.131
719	0	167.015	1514.48	1625.58	270.449	1511.06	1626.62	141.766	1357.2	1630.42	278.616	1341.92	1634.75	237.097	1290.11	1485.17	246.683	1189.2	1261.75	222.655	1425.6	1383.88	225.031	1451.25	1198.81	298.26	1186.25	1338.65	44.4718	1278.33	1426.04	7.17546	1194.6	1248.53	5.2106	1135.69	1142.26	-18.3862	1118.64	970.243	14.6483	1122.51	868.185	-23.3519	1056.22	881.732	-33.9054	1066.53	776.325
720	0	165.688	1528.6	1626.24	269.096	1525.11	1627.49	140.353	1371.35	1631.52	277.171	1355.99	1636.18	236.027	1303.67	1486.52	245.54	1202.78	1263.12	221.633	1439.04	1385.08	223.827	1464.74	1200.04	297.062	1199.64	1340.03	43.2322	1291.99	1427.33	5.14652	1211.04	1247.83	2.80746	1153.46	1140.78	-20.3106	1139.76	968.413	12.9802	1145.26	866.541	-25.6519	1079.11	878.788	-35.9804	1091.44	773.639
721	0	164.554	1542.55	1627.15	267.938	1539.02	1628.57	139.17	1385.32	1632.93	275.959	1369.94	1637.89	235.118	1317.03	1488.11	244.481	1216.18	1264.72	220.765	1452.29	1386.54	222.751	1478.03	1201.54	295.947	1212.86	1341.63	42.1245	1305.49	1428.96	3.15789	1227.55	1247.39	0.351646	1171.46	1139.51	-22.2276	1161.54	966.803	11.3633	1168.86	865.18	-27.9721	1102.9	875.97	-38.078	1117.51	771.17
722	0	163.617	1556.34	1628.29	266.976	1552.8	1629.87	138.215	1399.13	1634.66	274.981	1383.76	1639.87	234.361	1330.2	1489.94	243.503	1229.41	1266.54	220.045	1465.37	1388.28	221.806	1491.13	1203.3	294.91	1225.89	1343.42	41.1451	1318.87	1430.93	1.21981	1244.11	1247.26	-2.14586	1189.67	1138.48	-24.1211	1183.91	965.474	9.81805	1193.24	864.178	-30.284	1127.55	873.361	-40.1577	1144.7	769.016
723	0	162.873	1569.97	1629.67	266.208	1566.44	1631.37	137.485	1412.78	1636.67	274.231	1397.45	1642.1	233.746	1343.19	1491.99	242.601	1242.49	1268.56	219.465	1478.28	1390.28	220.986	1504.06	1205.32	293.943	1238.78	1345.4	40.2871	1332.13	1433.21	-0.660774	1260.69	1247.43	-4.67474	1208.06	1137.73	-25.9754	1206.85	964.482	8.36425	1218.36	863.61	-32.5598	1153	871.043	-42.176	1172.92	767.273
724	0	162.314	1583.42	1631.28	265.627	1579.93	1633.06	136.967	1426.25	1638.97	273.699	1410.99	1644.56	233.258	1356.01	1494.23	241.769	1255.44	1270.76	219.016	1491.04	1392.51	220.283	1516.84	1207.58	293.04	1251.51	1347.53	39.5412	1345.28	1435.79	-2.48036	1277.29	1247.92	-7.22536	1226.61	1137.27	-27.7764	1230.29	963.877	7.02044	1244.13	863.542	-34.7729	1179.22	869.092	-44.0881	1202.12	766.03
725	0	161.928	1596.72	1633.11	265.219	1593.28	1634.93	136.646	1439.57	1641.51	273.367	1424.4	1647.21	232.883	1368.68	1496.64	240.998	1268.28	1273.1	218.681	1503.67	1394.96	219.686	1529.49	1210.06	292.195	1264.13	1349.8	38.8962	1358.34	1438.63	-4.23877	1293.87	1248.73	-9.78879	1245.28	1137.12	-29.5114	1254.18	963.703	5.80332	1270.5	864.033	-36.8984	1206.12	867.579	-45.8499	1232.2	765.369
726	0	161.699	1609.85	1635.13	264.969	1606.49	1636.95	136.502	1452.72	1644.27	273.216	1437.66	1650.02	232.602	1381.21	1499.17	240.282	1281.03	1275.56	218.446	1516.2	1397.59	219.179	1542.04	1212.73	291.401	1276.64	1352.18	38.3403	1371.33	1441.69	-5.9388	1310.43	1249.85	-12.3567	1264.04	1137.29	-31.1694	1278.47	963.99	4.72708	1297.38	865.131	-38.914	1233.65	866.561	-47.42	1263.07	765.357
727	0	161.607	1622.82	1637.32	264.86	1619.55	1639.1	136.512	1465.71	1647.2	273.22	1450.78	1652.94	232.4	1393.63	1501.8	239.614	1293.7	1278.09	218.293	1528.64	1400.36	218.747	1554.5	1215.55	290.655	1289.07	1354.62	37.8609	1384.26	1444.91	-7.58557	1326.95	1251.25	-14.9212	1282.86	1137.77	-32.7411	1303.08	964.76	3.80292	1324.71	866.868	-40.7998	1261.74	866.083	-48.7622	1294.65	766.052
728	0	161.631	1635.64	1639.64	264.868	1632.49	1641.34	136.649	1478.56	1650.24	273.353	1463.75	1655.93	232.259	1405.94	1504.47	238.986	1306.31	1280.66	218.206	1541.01	1403.23	218.37	1566.91	1218.46	289.952	1301.43	1357.1	37.4459	1397.14	1448.25	-9.18574	1343.43	1252.91	-17.4747	1301.71	1138.53	-34.2194	1327.96	966.021	3.0387	1352.4	869.262	-42.5383	1290.31	866.178	-49.8469	1326.83	767.491
729	0	161.75	1648.33	1642.06	264.974	1645.28	1643.64	136.887	1491.28	1653.35	273.589	1476.59	1658.92	232.163	1418.19	1507.15	238.394	1318.88	1283.22	218.166	1553.33	1406.14	218.032	1579.28	1221.43	289.288	1313.76	1359.58	37.0841	1410	1451.64	-10.7466	1359.84	1254.77	-20.0101	1320.56	1139.55	-35.5984	1353.04	967.77	2.43891	1380.37	872.316	-44.1147	1319.29	866.862	-50.6527	1359.51	769.699
730	0	161.941	1660.89	1644.53	265.153	1657.96	1645.96	137.2	1503.87	1656.45	273.898	1489.3	1661.87	232.097	1430.37	1509.78	237.835	1331.41	1285.73	218.159	1565.64	1409.04	217.718	1591.62	1224.38	288.664	1326.05	1362.01	36.7652	1422.82	1455.03	-12.2752	1376.19	1256.78	-22.5201	1339.38	1140.77	-36.8743	1378.26	969.991	2.00473	1408.55	876.02	-45.5168	1348.6	868.138	-51.1667	1392.6	772.686
731	0	162.182	1673.34	1647	265.386	1670.52	1648.25	137.562	1516.35	1659.49	274.254	1501.89	1664.71	232.05	1442.53	1512.32	237.306	1343.92	1288.14	218.169	1577.93	1411.87	217.411	1603.96	1227.26	288.076	1338.34	1364.35	36.4806	1435.64	1458.35	-13.7775	1392.46	1258.89	-24.998	1358.15	1142.16	-38.0441	1403.56	972.655	1.73438	1436.85	880.346	-46.7346	1378.16	869.995	-51.3846	1425.98	776.446
732	0	162.456	1685.7	1649.42	265.652	1682.99	1650.47	137.949	1528.74	1662.41	274.633	1514.37	1667.39	232.01	1454.67	1514.72	236.807	1356.42	1290.41	218.185	1590.23	1414.58	217.102	1616.31	1230.02	287.524	1350.64	1366.57	36.2231	1448.44	1461.53	-15.2576	1408.66	1261.03	-27.4367	1376.85	1143.65	-39.1061	1428.88	975.727	1.62342	1465.21	885.256	-47.761	1407.9	872.41	-51.3103	1459.56	780.96
733	0	162.744	1697.98	1651.74	265.934	1695.36	1652.58	138.34	1541.06	1665.15	275.012	1526.76	1669.86	231.967	1466.82	1516.93	236.34	1368.91	1292.51	218.194	1602.55	1417.1	216.781	1628.67	1232.58	287.009	1362.95	1368.62	35.9871	1461.24	1464.52	-16.7173	1424.78	1263.14	-29.8294	1395.46	1145.18	-40.0595	1454.17	979.161	1.6652	1493.55	890.701	-48.5914	1437.73	875.35	-50.954	1493.22	786.195
734	0	163.033	1710.21	1653.92	266.218	1707.67	1654.52	138.715	1553.32	1667.64	275.373	1539.06	1672.07	231.916	1478.99	1518.92	235.907	1381.39	1294.38	218.191	1614.9	1419.4	216.443	1641.06	1234.91	286.53	1375.3	1370.48	35.7687	1474.05	1467.26	-18.1557	1440.81	1265.15	-32.169	1413.97	1146.68	-40.9041	1479.39	982.906	1.85132	1521.81	896.623	-49.2238	1467.58	878.771	-50.3319	1526.88	792.11
735	0	163.312	1722.41	1655.9	266.493	1719.92	1656.27	139.062	1565.54	1669.85	275.702	1551.31	1673.98	231.853	1491.2	1520.66	235.513	1393.88	1296.01	218.17	1627.29	1421.42	216.086	1653.48	1236.94	286.088	1387.69	1372.1	35.5657	1486.85	1469.71	-19.5693	1456.76	1267.01	-34.4481	1432.39	1148.09	-41.6404	1504.47	986.907	2.17211	1549.91	902.958	-49.6592	1497.38	882.626	-49.4637	1560.42	798.652
736	0	163.574	1734.59	1657.64	266.75	1732.13	1657.77	139.368	1577.76	1671.73	275.987	1563.52	1675.54	231.774	1503.47	1522.09	235.162	1406.39	1297.35	218.129	1639.72	1423.11	215.712	1665.93	1238.64	285.685	1400.14	1373.46	35.3776	1499.67	1471.81	-20.9517	1472.62	1268.65	-36.6588	1450.71	1149.36	-42.2693	1529.4	991.107	2.61708	1577.8	909.638	-49.9012	1527.07	886.86	-48.3716	1593.76	805.762
737	0	163.814	1746.78	1659.11	266.986	1744.34	1659	139.626	1589.98	1673.24	276.222	1575.71	1676.75	231.68	1515.8	1523.22	234.862	1418.92	1298.4	218.068	1652.22	1424.46	215.326	1678.42	1239.98	285.321	1412.63	1374.54	35.2053	1512.5	1473.54	-22.2943	1488.41	1270.02	-38.7927	1468.94	1150.43	-42.7921	1554.13	995.446	3.17532	1605.42	916.592	-49.9565	1556.57	891.416	-47.0791	1626.81	813.373
738	0	164.031	1759	1660.27	267.198	1756.54	1659.93	139.835	1602.23	1674.36	276.406	1587.9	1677.57	231.574	1528.21	1524	234.618	1431.47	1299.13	217.992	1664.77	1425.43	214.935	1690.95	1240.92	284.997	1425.2	1375.32	35.0513	1525.35	1474.86	-23.5865	1504.12	1271.08	-40.8406	1487.09	1151.26	-43.2104	1578.63	999.868	3.83588	1632.73	923.75	-49.8336	1585.84	896.236	-45.6098	1659.48	821.414
739	0	164.226	1771.27	1661.09	267.388	1768.77	1660.54	139.994	1614.53	1675.08	276.542	1600.11	1678	231.46	1540.7	1524.44	234.438	1444.06	1299.52	217.906	1677.4	1426.01	214.55	1703.52	1241.46	284.716	1437.83	1375.78	34.9194	1538.23	1475.76	-24.816	1519.77	1271.81	-42.7927	1505.17	1151.82	-43.5262	1602.88	1004.32	4.58794	1659.68	931.041	-49.5438	1614.8	901.262	-43.9869	1691.7	829.808
740	0	164.405	1783.61	1661.57	267.562	1781.05	1660.81	140.108	1626.89	1675.37	276.635	1612.37	1678.03	231.345	1553.29	1524.53	234.327	1456.71	1299.59	217.819	1690.09	1426.19	214.184	1716.14	1241.59	284.479	1450.54	1375.93	34.8144	1551.14	1476.24	-25.9697	1535.36	1272.18	-44.6381	1523.19	1152.07	-43.7412	1626.85	1008.74	5.42106	1686.23	938.397	-49.0993	1643.43	906.436	-42.2331	1723.4	838.477
741	0	164.574	1796.03	1661.68	267.725	1793.38	1660.74	140.185	1639.34	1675.26	276.696	1624.7	1677.67	231.236	1565.98	1524.26	234.292	1469.41	1299.32	217.742	1702.87	1425.97	213.853	1728.81	1241.31	284.288	1463.32	1375.75	34.7422	1564.11	1476.29	-27.0337	1550.91	1272.17	-46.3656	1541.17	1152	-43.8574	1650.52	1013.09	6.32529	1712.36	945.751	-48.5135	1671.65	911.7	-40.3702	1754.51	847.34
742	0	164.742	1808.55	1661.44	267.889	1805.8	1660.33	140.236	1651.89	1674.74	276.739	1637.11	1676.94	231.143	1578.78	1523.65	234.335	1482.19	1298.73	217.686	1715.73	1425.36	213.572	1741.55	1240.63	284.144	1476.19	1375.25	34.7089	1577.13	1475.92	-27.9943	1566.43	1271.79	-47.9629	1559.11	1151.6	-43.8763	1673.88	1017.33	7.29135	1738.02	953.041	-47.8002	1699.44	917.002	-38.4195	1784.99	856.318
743	0	164.921	1821.18	1660.83	268.063	1818.31	1659.59	140.276	1664.54	1673.83	276.778	1649.63	1675.85	231.077	1591.69	1522.71	234.46	1495.06	1297.82	217.665	1728.68	1424.37	213.357	1754.35	1239.58	284.05	1489.15	1374.44	34.7211	1590.24	1475.15	-28.8382	1581.92	1271.03	-49.4176	1577.02	1150.88	-43.7995	1696.9	1021.4	8.31064	1763.21	960.206	-46.9727	1726.76	922.288	-36.402	1814.79	865.33
744	0	165.123	1833.93	1659.88	268.262	1830.93	1658.53	140.321	1677.32	1672.55	276.832	1662.25	1674.43	231.049	1604.72	1521.46	234.665	1508.03	1296.62	217.693	1741.72	1423.04	213.224	1767.23	1238.17	284.006	1502.2	1373.33	34.7855	1603.43	1474.01	-29.5528	1597.41	1269.92	-50.7166	1594.9	1149.84	-43.628	1719.58	1025.29	9.37527	1787.89	967.193	-46.0439	1753.56	927.51	-34.3383	1843.86	874.297
745	0	165.361	1846.81	1658.61	268.499	1843.68	1657.18	140.389	1690.22	1670.94	276.919	1675.01	1672.7	231.07	1617.88	1519.92	234.947	1521.11	1295.14	217.785	1754.87	1421.38	213.188	1780.2	1236.44	284.013	1515.35	1371.94	34.9081	1616.74	1472.52	-30.1267	1612.91	1268.48	-51.8472	1612.74	1148.52	-43.3628	1741.88	1028.95	10.478	1812.05	973.949	-45.0255	1779.82	932.619	-32.249	1872.17	883.143
746	0	165.651	1859.82	1657.04	268.79	1856.56	1655.55	140.501	1703.26	1669.04	277.059	1687.91	1670.71	231.151	1631.15	1518.11	235.298	1534.31	1293.4	217.954	1768.12	1419.43	213.262	1793.27	1234.43	284.07	1528.59	1370.28	35.0945	1630.17	1470.73	-30.5503	1628.43	1266.74	-52.7971	1630.54	1146.92	-43.0046	1763.81	1032.36	11.6122	1835.67	980.427	-43.9282	1805.5	937.571	-30.1539	1899.69	891.794
747	0	166.009	1872.98	1655.2	269.15	1869.59	1653.67	140.677	1716.44	1666.86	277.27	1700.95	1668.48	231.304	1644.56	1516.07	235.708	1547.65	1291.43	218.213	1781.49	1417.23	213.458	1806.44	1232.17	284.178	1541.94	1368.38	35.3496	1643.75	1468.67	-30.8154	1643.97	1264.73	-53.5547	1648.29	1145.08	-42.5537	1785.34	1035.51	12.7718	1858.74	986.583	-42.7614	1830.57	942.322	-28.0723	1926.39	900.175
748	0	166.447	1886.27	1653.14	269.594	1882.76	1651.59	140.937	1729.75	1664.47	277.573	1714.14	1666.05	231.538	1658.09	1513.83	236.164	1561.12	1289.25	218.574	1794.97	1414.82	213.783	1819.74	1229.69	284.333	1555.39	1366.27	35.6768	1657.49	1466.4	-30.9162	1659.55	1262.5	-54.1102	1665.97	1143.04	-42.0107	1806.47	1038.36	13.9513	1881.26	992.378	-41.5333	1855.01	946.827	-26.0223	1952.27	908.217
749	0	166.982	1899.72	1650.88	270.138	1896.08	1649.33	141.302	1743.2	1661.9	277.984	1727.48	1663.46	231.862	1671.75	1511.42	236.65	1574.72	1286.91	219.046	1808.58	1412.23	214.242	1833.17	1227.06	284.534	1568.93	1363.96	36.0788	1671.4	1463.95	-30.8487	1675.17	1260.08	-54.4552	1683.57	1140.83	-41.3762	1827.16	1040.91	15.1455	1903.22	997.774	-40.2512	1878.8	951.048	-24.0202	1977.3	915.849
750	0	167.624	1913.3	1648.47	270.792	1909.56	1646.94	141.789	1756.8	1659.2	278.518	1740.98	1660.75	232.282	1685.55	1508.89	237.149	1588.47	1284.42	219.635	1822.31	1409.51	214.837	1846.74	1224.29	284.778	1582.58	1361.5	36.5568	1685.49	1461.37	-30.6116	1690.83	1257.52	-54.5841	1701.05	1138.48	-40.6512	1847.42	1043.14	16.3496	1924.6	1002.74	-38.9215	1901.9	954.943	-22.0809	2001.48	923.007
751	0	168.384	1927.02	1645.96	271.568	1923.2	1644.44	142.412	1770.52	1656.41	279.188	1754.63	1657.95	232.803	1699.47	1506.25	237.642	1602.35	1281.82	220.346	1836.17	1406.7	215.564	1860.45	1221.44	285.061	1596.33	1358.9	37.1105	1699.77	1458.71	-30.2055	1706.53	1254.86	-54.4936	1718.4	1136.04	-39.8374	1867.23	1045.04	17.5594	1945.41	1007.24	-37.5504	1924.31	958.476	-20.2167	2024.8	929.626
752	0	169.27	1940.88	1643.37	272.473	1936.99	1641.88	143.184	1784.39	1653.57	280.005	1768.43	1655.11	233.427	1713.51	1503.55	238.112	1616.36	1279.15	221.18	1850.16	1403.83	216.418	1874.31	1218.55	285.379	1610.18	1356.21	37.7385	1714.24	1456.02	-29.634	1722.27	1252.14	-54.1836	1735.58	1133.54	-38.937	1886.58	1046.6	18.7709	1965.64	1011.25	-36.1434	1946.01	961.611	-18.4376	2047.25	935.647
753	0	170.284	1954.87	1640.76	273.509	1950.93	1639.28	144.111	1798.37	1650.73	280.973	1782.37	1652.25	234.152	1727.68	1500.83	238.545	1630.49	1276.43	222.134	1864.28	1400.96	217.386	1888.33	1215.66	285.731	1624.12	1353.45	38.4379	1728.9	1453.33	-28.9029	1738.03	1249.41	-53.6566	1752.58	1131.02	-37.9534	1905.45	1047.82	19.9805	1985.3	1014.75	-34.7061	1966.98	964.315	-16.7506	2068.85	941.015
754	0	171.428	1968.99	1638.16	274.676	1965.01	1636.69	145.195	1812.48	1647.93	282.093	1796.45	1649.41	234.977	1741.95	1498.12	238.928	1644.74	1273.71	223.2	1878.51	1398.12	218.458	1902.5	1212.79	286.113	1638.15	1350.65	39.2041	1743.74	1450.69	-28.0207	1753.79	1246.7	-52.9188	1769.36	1128.51	-36.8911	1923.83	1048.69	21.1852	2004.39	1017.71	-33.2443	1987.21	966.557	-15.1604	2089.59	945.677
755	0	172.695	1983.22	1635.61	275.969	1979.23	1634.13	146.435	1826.71	1645.2	283.361	1810.67	1646.63	235.893	1756.33	1495.45	239.256	1659.08	1271.01	224.37	1892.85	1395.33	219.616	1916.83	1210	286.524	1652.26	1347.86	40.0312	1758.74	1448.13	-26.9981	1769.56	1244.05	-51.979	1785.9	1126.05	-35.7556	1941.72	1049.21	22.3819	2022.9	1020.11	-31.7641	2006.69	968.312	-13.6687	2109.48	949.589
756	0	174.079	1997.55	1633.15	277.377	1993.57	1631.64	147.821	1841.03	1642.58	284.769	1825	1643.92	236.892	1770.79	1492.85	239.528	1673.51	1268.37	225.629	1907.29	1392.64	220.842	1931.29	1207.31	286.965	1666.44	1345.1	40.9115	1773.88	1445.69	-25.8484	1785.3	1241.48	-50.849	1802.18	1123.65	-34.5536	1959.11	1049.36	23.5682	2040.83	1021.93	-30.272	2025.41	969.557	-12.2753	2128.54	952.711
757	0	175.566	2011.98	1630.79	278.889	2008.02	1629.23	149.338	1855.45	1640.09	286.302	1839.45	1641.33	237.962	1785.32	1490.36	239.749	1688.02	1265.81	226.96	1921.82	1390.08	222.118	1945.89	1204.75	287.437	1680.68	1342.41	41.8356	1789.13	1443.38	-24.5872	1800.99	1239.04	-49.5433	1818.18	1121.35	-33.2932	1975.98	1049.17	24.7412	2058.19	1023.17	-28.7752	2043.37	970.271	-10.978	2146.76	955.008
758	0	177.14	2026.49	1628.56	280.485	2022.56	1626.93	150.969	1869.94	1637.78	287.943	1853.98	1638.87	239.086	1799.91	1488	239.929	1702.59	1263.38	228.342	1936.42	1387.67	223.423	1960.61	1202.35	287.94	1694.97	1339.83	42.7924	1804.47	1441.24	-23.2319	1816.62	1236.74	-48.0789	1833.88	1119.17	-31.9835	1992.34	1048.61	25.8982	2074.97	1023.8	-27.2817	2060.56	970.443	-9.77342	2164.15	956.455
759	0	178.78	2041.06	1626.48	282.145	2037.19	1624.75	152.689	1884.51	1635.65	289.666	1868.6	1636.57	240.249	1814.53	1485.8	240.082	1717.19	1261.1	229.752	1951.07	1385.44	224.737	1975.42	1200.14	288.476	1709.29	1337.38	43.7688	1819.84	1439.28	-21.8014	1832.14	1234.61	-46.4746	1849.26	1117.12	-30.6347	2008.17	1047.71	27.0358	2091.18	1023.83	-25.8003	2076.99	970.063	-8.65801	2180.72	957.032
760	0	180.465	2055.69	1624.57	283.845	2051.87	1622.73	154.47	1899.12	1633.73	291.445	1883.27	1634.46	241.429	1829.16	1483.79	240.226	1731.82	1259	231.165	1965.73	1383.41	226.038	1990.3	1198.13	289.048	1723.63	1335.09	44.7507	1835.23	1437.51	-20.3162	1847.54	1232.65	-44.751	1864.32	1115.23	-29.2582	2023.47	1046.45	28.1501	2106.82	1023.24	-24.3404	2092.63	969.128	-7.62835	2196.48	956.73
761	0	182.168	2070.35	1622.85	285.56	2066.59	1620.85	156.279	1913.77	1632.04	293.249	1897.98	1632.54	242.606	1843.78	1481.97	240.378	1746.45	1257.1	232.556	1980.4	1381.59	227.31	2005.22	1196.35	289.655	1737.97	1333.01	45.7223	1850.58	1435.95	-18.7971	1862.78	1230.89	-42.93	1879.05	1113.49	-27.8664	2038.24	1044.86	29.2361	2121.86	1022.03	-22.9125	2107.5	967.642	-6.68204	2211.43	955.546
762	0	183.864	2085.02	1621.32	287.263	2081.32	1619.15	158.083	1928.43	1630.6	295.045	1912.7	1630.84	243.758	1858.36	1480.38	240.557	1761.05	1255.43	233.9	1995.04	1380	228.535	2020.14	1194.79	290.296	1752.29	1331.15	46.6674	1865.86	1434.61	-17.2658	1877.83	1229.34	-41.034	1893.43	1111.92	-26.4726	2052.47	1042.94	30.2875	2136.32	1020.22	-21.5272	2121.59	965.614	-5.81837	2225.57	953.489
763	0	185.526	2099.7	1619.98	288.926	2096.04	1617.63	159.845	1943.1	1629.4	296.797	1927.42	1629.38	244.864	1872.88	1479.03	240.775	1775.61	1254.01	235.17	2009.63	1378.66	229.698	2035.03	1193.48	290.968	1766.57	1329.55	47.5695	1881.02	1433.49	-15.7432	1892.66	1228	-39.0863	1907.48	1110.53	-25.0904	2066.15	1040.71	31.2968	2150.19	1017.81	-20.1961	2134.89	963.058	-5.03873	2238.89	950.574
764	0	187.124	2114.35	1618.85	290.521	2110.73	1616.3	161.53	1957.75	1628.47	298.469	1942.11	1628.17	245.903	1887.32	1477.95	241.045	1790.08	1252.85	236.345	2024.13	1377.56	230.785	2049.83	1192.41	291.668	1780.8	1328.22	48.413	1896.04	1432.59	-14.2498	1907.26	1226.87	-37.1094	1921.18	1109.32	-23.7345	2079.28	1038.17	32.2549	2163.44	1014.81	-18.9307	2147.41	959.996	-4.34704	2251.38	946.827
765	0	188.632	2128.96	1617.92	292.021	2125.37	1615.16	163.1	1972.38	1627.8	300.026	1956.75	1627.21	246.855	1901.65	1477.13	241.371	1804.45	1251.98	237.404	2038.53	1376.73	231.787	2064.51	1191.6	292.39	1794.94	1327.18	49.1834	1910.86	1431.92	-12.8046	1921.59	1225.97	-35.1257	1934.53	1108.3	-22.4194	2091.85	1035.36	33.1515	2176.07	1011.25	-17.743	2159.12	956.458	-3.74989	2263.04	942.285
766	0	190.022	2143.52	1617.2	293.398	2139.93	1614.23	164.524	1986.95	1627.41	301.435	1971.31	1626.54	247.706	1915.86	1476.6	241.757	1818.69	1251.4	238.329	2052.79	1376.17	232.694	2079.04	1191.04	293.128	1809	1326.46	49.8681	1925.48	1431.47	-11.4249	1935.63	1225.29	-33.1562	1947.54	1107.46	-21.1597	2103.86	1032.29	33.9747	2188.06	1007.15	-16.6448	2170.02	952.478	-3.25661	2273.84	936.993
767	0	191.268	2158.01	1616.69	294.629	2154.4	1613.52	165.768	2001.46	1627.29	302.665	1985.78	1626.16	248.442	1929.92	1476.35	242.199	1832.77	1251.13	239.106	2066.9	1375.88	233.496	2093.38	1190.76	293.876	1822.96	1326.05	50.4572	1939.84	1431.25	-10.1257	1949.37	1224.83	-31.2204	1960.21	1106.81	-19.9701	2115.28	1029	34.7116	2199.4	1002.55	-15.6482	2180.12	948.1	-2.87904	2283.77	931.005
768	0	192.347	2172.42	1616.4	295.688	2168.75	1613.05	166.809	2015.9	1627.45	303.689	2000.15	1626.09	249.055	1943.83	1476.41	242.694	1846.7	1251.15	239.726	2080.85	1375.89	234.186	2107.52	1190.75	294.627	1836.8	1325.97	50.9438	1953.94	1431.26	-8.91928	1962.79	1224.6	-29.3355	1972.54	1106.35	-18.8642	2126.13	1025.52	35.3486	2210.06	997.502	-14.7648	2189.38	943.375	-2.63115	2292.8	924.388
769	0	193.235	2186.72	1616.33	296.556	2182.98	1612.81	167.623	2030.24	1627.9	304.487	2014.39	1626.33	249.537	1957.57	1476.77	243.233	1860.44	1251.48	240.182	2094.61	1376.19	234.757	2121.43	1191.02	295.376	1850.53	1326.22	51.3239	1967.76	1431.49	-7.8147	1975.88	1224.6	-27.5167	1984.53	1106.09	-17.855	2136.38	1021.88	35.8716	2220.03	992.042	-14.0063	2197.82	938.36	-2.52845	2300.92	917.214
770	0	193.913	2200.9	1616.5	297.213	2197.08	1612.85	168.196	2044.47	1628.62	305.045	2028.49	1626.9	249.889	1971.13	1477.44	243.81	1874.02	1252.11	240.471	2108.18	1376.79	235.201	2135.13	1191.6	296.118	1864.14	1326.8	51.5973	1981.29	1431.94	-6.81794	1988.64	1224.83	-25.7762	1996.19	1106.03	-16.9541	2146.04	1018.13	36.2666	2229.28	986.23	-13.3835	2205.42	933.119	-2.58736	2308.1	909.566
771	0	194.366	2214.95	1616.9	297.646	2211.03	1613.16	168.52	2058.58	1629.63	305.353	2042.45	1627.81	250.112	1984.52	1478.4	244.418	1887.42	1253.04	240.595	2121.57	1377.71	235.514	2148.61	1192.5	296.851	1877.63	1327.69	51.7667	1994.52	1432.61	-5.9317	2001.07	1225.29	-24.1237	2007.52	1106.18	-16.1718	2155.09	1014.31	36.5207	2237.81	980.132	-12.9068	2212.17	927.723	-2.82437	2314.32	901.535
772	0	194.583	2228.87	1617.55	297.843	2224.83	1613.76	168.592	2072.55	1630.9	305.412	2056.26	1629.05	250.213	1997.74	1479.65	245.051	1900.67	1254.24	240.558	2134.78	1378.94	235.693	2161.9	1193.71	297.572	1891.02	1328.89	51.8377	2007.45	1433.49	-5.1555	2013.16	1225.99	-22.5662	2018.52	1106.55	-15.5166	2163.53	1010.48	36.622	2245.59	973.813	-12.5855	2218.09	922.244	-3.25514	2319.56	893.216
773	0	194.556	2242.62	1618.46	297.8	2238.48	1614.67	168.419	2086.36	1632.43	305.227	2069.92	1630.62	250.198	2010.8	1481.18	245.704	1913.78	1255.71	240.369	2147.83	1380.48	235.736	2175.01	1195.24	298.28	1904.32	1330.37	51.8186	2020.11	1434.59	-4.48608	2024.92	1226.9	-21.1084	2029.19	1107.13	-14.9954	2171.37	1006.67	36.5606	2252.62	967.347	-12.4277	2223.16	916.761	-3.89347	2323.81	884.712
774	0	194.285	2256.22	1619.62	297.516	2251.97	1615.89	168.011	2100.02	1634.2	304.809	2083.42	1632.51	250.081	2023.71	1482.97	246.375	1926.76	1257.42	240.038	2160.73	1382.32	235.647	2187.98	1197.09	298.975	1917.54	1332.12	51.7193	2032.51	1435.88	-3.91777	2036.36	1228.04	-19.7534	2039.53	1107.94	-14.613	2178.6	1002.95	36.3292	2258.88	960.81	-12.4399	2227.41	911.35	-4.75011	2327.07	876.127
775	0	193.773	2269.64	1621.04	296.997	2265.32	1617.42	167.386	2113.49	1636.19	304.177	2096.77	1634.68	249.871	2036.5	1484.99	247.062	1939.64	1259.36	239.578	2173.51	1384.45	235.43	2200.83	1199.23	299.656	1930.69	1334.11	51.5512	2044.67	1437.36	-3.44305	2047.49	1229.39	-18.5026	2049.55	1108.96	-14.3728	2185.23	999.363	35.9234	2264.39	954.276	-12.6262	2230.85	906.087	-5.83169	2329.34	867.565
776	0	193.031	2282.88	1622.72	296.251	2278.51	1619.25	166.565	2126.79	1638.37	303.353	2109.97	1637.11	249.585	2049.17	1487.22	247.764	1952.44	1261.49	239.003	2186.19	1386.83	235.094	2213.6	1201.66	300.326	1943.8	1336.31	51.3265	2056.63	1439.01	-3.05315	2058.32	1230.94	-17.3568	2059.24	1110.21	-14.2761	2191.28	995.947	35.3419	2269.15	947.821	-12.9884	2233.51	901.041	-7.13964	2330.65	859.126
777	0	192.072	2295.95	1624.63	295.295	2291.56	1621.37	165.576	2139.89	1640.7	302.364	2123.02	1639.75	249.235	2061.76	1489.61	248.478	1965.19	1263.78	238.33	2198.79	1389.42	234.65	2226.31	1204.31	300.983	1956.88	1338.67	51.0575	2068.41	1440.79	-2.73875	2068.86	1232.67	-16.3162	2068.62	1111.66	-14.3226	2196.76	992.743	34.5867	2273.17	941.515	-13.5251	2235.44	896.277	-8.66942	2331.02	850.907
778	0	190.916	2308.84	1626.76	294.148	2304.48	1623.75	164.446	2152.81	1643.15	301.238	2135.94	1642.56	248.835	2074.29	1492.12	249.202	1977.88	1266.2	237.573	2211.35	1392.19	234.11	2238.98	1207.17	301.627	1969.95	1341.16	50.7564	2080.07	1442.7	-2.49052	2079.14	1234.55	-15.3809	2077.68	1113.31	-14.5102	2201.71	989.783	33.6628	2276.49	935.422	-14.232	2236.67	891.848	-10.4101	2330.52	842.993
779	0	189.586	2321.55	1629.07	292.832	2317.27	1626.35	163.207	2165.54	1645.67	300.005	2148.72	1645.49	248.4	2086.79	1494.72	249.93	1990.56	1268.7	236.749	2223.89	1395.08	233.49	2251.65	1210.15	302.259	1983.02	1343.73	50.4345	2091.63	1444.68	-2.29964	2089.17	1236.56	-14.551	2086.43	1115.12	-14.8352	2206.14	987.089	32.5786	2279.15	929.596	-15.1013	2237.26	887.796	-12.3441	2329.2	835.457
780	0	188.109	2334.11	1631.54	291.374	2329.95	1629.12	161.888	2178.09	1648.2	298.696	2161.39	1648.46	247.941	2099.27	1497.35	250.658	2003.21	1271.24	235.872	2236.43	1398.04	232.803	2264.32	1213.22	302.875	1996.11	1346.33	50.102	2103.13	1446.7	-2.15824	2098.98	1238.66	-13.8268	2094.89	1117.08	-15.2922	2210.11	984.675	31.3446	2281.19	924.083	-16.1224	2237.28	884.151	-14.4483	2327.12	828.359
781	0	186.511	2346.51	1634.11	289.8	2342.53	1632.01	160.519	2190.48	1650.72	297.34	2173.96	1651.42	247.47	2111.75	1499.95	251.377	2015.87	1273.77	234.956	2248.99	1401.01	232.064	2277.02	1216.29	303.472	2009.24	1348.91	49.7677	2114.61	1448.72	-2.0596	2108.59	1240.82	-13.2083	2103.07	1119.16	-15.8742	2213.64	982.547	29.9743	2282.66	918.915	-17.2817	2236.8	880.93	-16.6943	2324.39	821.743
782	0	184.823	2358.78	1636.74	288.14	2355.03	1634.97	159.129	2202.72	1653.15	295.963	2186.43	1654.31	246.994	2124.26	1502.49	252.078	2028.52	1276.25	234.014	2261.6	1403.92	231.288	2289.76	1219.31	304.045	2022.4	1351.42	49.4383	2126.09	1450.71	-1.99832	2118.02	1243.01	-12.6954	2110.99	1121.32	-16.5726	2216.79	980.701	28.4829	2283.63	914.114	-18.5636	2235.9	878.137	-19.0502	2321.09	815.637
783	0	183.074	2370.93	1639.37	286.422	2367.45	1637.93	157.741	2214.83	1655.46	294.589	2198.84	1657.06	246.522	2136.82	1504.91	252.747	2041.18	1278.63	233.054	2274.27	1406.72	230.487	2302.54	1222.2	304.588	2035.62	1353.82	49.1187	2137.6	1452.6	-1.97033	2127.31	1245.17	-12.2872	2118.68	1123.52	-17.3776	2219.61	979.127	26.8878	2284.17	909.691	-19.951	2234.66	875.767	-21.4818	2317.32	810.055
784	0	181.29	2383	1641.94	284.672	2379.83	1640.83	156.376	2226.84	1657.6	293.237	2211.19	1659.62	246.056	2149.43	1507.15	253.373	2053.85	1280.86	232.086	2287	1409.34	229.67	2315.37	1224.91	305.092	2048.88	1356.05	48.8116	2149.16	1454.37	-1.97275	2136.48	1247.29	-11.9818	2126.15	1125.73	-18.2778	2222.15	977.807	25.2072	2284.33	905.643	-21.4256	2233.15	873.801	-23.9547	2313.19	804.994
785	0	179.499	2395.01	1644.41	282.916	2392.19	1643.6	155.051	2238.78	1659.53	291.925	2223.52	1661.94	245.599	2162.12	1509.19	253.942	2066.51	1282.9	231.115	2299.8	1411.74	228.845	2328.26	1227.37	305.549	2062.21	1358.07	48.5169	2160.79	1455.97	-2.00373	2145.55	1249.32	-11.7757	2133.45	1127.92	-19.2608	2224.46	976.717	23.4608	2284.2	901.962	-22.969	2231.47	872.216	-26.4357	2308.78	800.443
786	0	177.724	2406.99	1646.71	281.177	2404.53	1646.17	153.778	2250.67	1661.2	290.661	2235.83	1663.97	245.149	2174.89	1510.98	254.437	2079.18	1284.71	230.145	2312.68	1413.86	228.018	2341.21	1229.53	305.949	2075.59	1359.85	48.2323	2172.51	1457.37	-2.06221	2154.56	1251.23	-11.664	2140.6	1130.05	-20.3132	2226.6	975.832	21.6684	2283.84	898.629	-24.5625	2229.68	870.981	-28.8941	2304.2	796.378
787	0	175.984	2418.96	1648.79	279.471	2416.89	1648.51	152.563	2262.56	1662.6	289.454	2248.16	1665.67	244.701	2187.74	1512.47	254.843	2091.86	1286.26	229.175	2325.64	1415.66	227.19	2354.2	1231.34	306.28	2089.02	1361.35	47.9527	2184.32	1458.53	-2.14777	2163.53	1253	-11.64	2147.64	1132.09	-21.4209	2228.63	975.123	19.8498	2283.33	895.62	-26.1877	2227.86	870.061	-31.3031	2299.55	792.77
788	0	174.295	2430.97	1650.6	277.815	2429.29	1650.54	151.409	2274.48	1663.69	288.303	2260.52	1667.02	244.25	2200.68	1513.66	255.145	2104.53	1287.52	228.205	2338.68	1417.11	226.362	2367.25	1232.78	306.53	2102.51	1362.55	47.6704	2196.25	1459.43	-2.26052	2172.48	1254.6	-11.695	2154.6	1134.01	-22.5696	2230.6	974.562	18.0243	2282.73	892.909	-27.8266	2226.09	869.42	-33.6405	2294.9	789.585
789	0	172.668	2443.03	1652.11	276.219	2441.74	1652.23	150.313	2286.45	1664.45	287.205	2272.94	1667.99	243.785	2213.72	1514.51	255.326	2117.21	1288.47	227.23	2351.8	1418.18	225.53	2380.35	1233.82	306.687	2116.05	1363.41	47.3757	2208.29	1460.05	-2.40103	2181.44	1256.02	-11.8193	2161.53	1135.8	-23.7449	2232.56	974.12	16.2098	2282.11	890.466	-29.4616	2224.41	869.023	-35.8889	2290.33	786.788
790	0	171.109	2455.18	1653.28	274.688	2454.26	1653.55	149.267	2298.51	1664.88	286.153	2285.43	1668.57	243.295	2226.86	1515.02	255.373	2129.91	1289.09	226.246	2364.99	1418.86	224.69	2393.51	1234.43	306.738	2129.65	1363.94	47.0564	2220.46	1460.36	-2.57034	2190.44	1257.24	-12.0018	2168.45	1137.43	-24.933	2234.55	973.77	14.4226	2281.53	888.261	-31.0756	2222.89	868.833	-38.0363	2285.91	784.345
791	0	169.621	2467.45	1654.08	273.223	2466.88	1654.47	148.261	2310.69	1664.97	285.135	2298.01	1668.76	242.766	2240.1	1515.17	255.271	2142.62	1289.38	225.245	2378.26	1419.14	223.834	2406.71	1234.63	306.669	2143.3	1364.11	46.699	2232.76	1460.37	-2.76999	2199.49	1258.25	-12.2309	2175.41	1138.9	-26.1206	2236.63	973.488	12.6767	2281.05	886.264	-32.6521	2221.57	868.819	-40.0754	2281.7	782.22
792	0	168.199	2479.86	1654.51	271.821	2479.61	1654.97	147.279	2323.02	1664.72	284.136	2310.71	1668.56	242.184	2253.44	1514.97	255.009	2155.38	1289.33	224.217	2391.6	1419.01	222.955	2419.97	1234.4	306.469	2157	1363.94	46.2886	2245.21	1460.07	-3.00214	2208.63	1259.05	-12.4952	2182.44	1140.2	-27.2962	2238.83	973.253	10.9834	2280.71	884.448	-34.1755	2220.49	868.952	-42.003	2277.75	780.384
793	0	166.836	2492.42	1654.54	270.473	2492.47	1655.05	146.306	2335.51	1664.14	283.141	2323.54	1667.99	241.533	2266.89	1514.43	254.577	2168.18	1288.95	223.154	2405.03	1418.5	222.042	2433.28	1233.77	306.126	2170.75	1363.42	45.8099	2257.8	1459.46	-3.26956	2217.88	1259.64	-12.7836	2189.57	1141.32	-28.4493	2241.19	973.047	9.35119	2280.57	882.79	-35.6308	2219.7	869.206	-43.8192	2274.11	778.811
794	0	165.521	2505.16	1654.19	269.169	2505.46	1654.72	145.322	2348.19	1663.24	282.131	2336.5	1667.06	240.797	2280.44	1513.55	253.968	2181.06	1288.25	222.044	2418.53	1417.61	221.086	2446.66	1232.76	305.629	2184.56	1362.58	45.2472	2270.55	1458.55	-3.5758	2227.25	1260.02	-13.0867	2196.84	1142.26	-29.5717	2243.75	972.856	7.7854	2280.66	881.267	-37.0049	2219.21	869.559	-45.5266	2270.8	777.476
795	0	164.238	2518.09	1653.47	267.894	2518.6	1653.99	144.309	2361.07	1662.05	281.086	2349.62	1665.8	239.962	2294.09	1512.36	253.178	2194.03	1287.24	220.877	2432.12	1416.37	220.074	2460.11	1231.38	304.97	2198.42	1361.43	44.5856	2283.46	1457.37	-3.92514	2236.78	1260.21	-13.397	2204.28	1143.03	-30.6571	2246.54	972.667	6.2883	2281.02	879.861	-38.2864	2219.06	869.994	-47.1293	2267.87	776.359
796	0	162.97	2531.22	1652.4	266.629	2531.9	1652.88	143.246	2374.17	1660.57	279.988	2362.9	1664.23	239.014	2307.86	1510.88	252.206	2207.11	1285.94	219.641	2445.8	1414.81	218.996	2473.64	1229.68	304.143	2212.35	1360	43.811	2296.54	1455.91	-4.32271	2246.49	1260.21	-13.7091	2211.91	1143.63	-31.7014	2249.6	972.472	4.85926	2281.69	878.555	-39.4667	2219.28	870.493	-48.6321	2265.33	775.441
797	0	161.697	2544.56	1650.99	265.357	2545.37	1651.43	142.116	2387.48	1658.85	278.817	2376.35	1662.39	237.94	2321.74	1509.14	251.057	2220.33	1284.37	218.324	2459.58	1412.96	217.837	2487.25	1227.69	303.144	2226.35	1358.31	42.9112	2309.79	1454.21	-4.77445	2256.4	1260.02	-14.0207	2219.78	1144.07	-32.7029	2252.96	972.264	3.49507	2282.72	877.337	-40.54	2219.89	871.044	-50.0395	2263.23	774.706
798	0	160.399	2558.11	1649.29	264.058	2559.01	1649.66	140.898	2401.02	1656.9	277.556	2389.98	1660.31	236.731	2335.74	1507.17	249.736	2233.7	1282.57	216.917	2473.46	1410.85	216.586	2500.96	1225.45	301.971	2240.42	1356.39	41.8757	2323.21	1452.3	-5.28709	2266.52	1259.66	-14.3324	2227.9	1144.36	-33.6621	2256.65	972.038	2.19038	2284.13	876.194	-41.5044	2220.92	871.635	-51.3557	2261.58	774.135
799	0	159.057	2571.87	1647.32	262.712	2572.82	1647.61	139.579	2414.78	1654.76	276.19	2403.78	1658.03	235.38	2349.85	1505.01	248.255	2247.24	1280.56	215.408	2487.44	1408.52	215.229	2514.77	1223	300.626	2254.57	1354.3	40.6968	2336.8	1450.19	-5.86809	2276.88	1259.15	-14.6477	2236.31	1144.5	-34.5816	2260.7	971.79	0.938384	2285.97	875.116	-42.3618	2222.4	872.254	-52.5844	2260.41	773.714
800	0	157.651	2585.84	1645.13	261.3	2586.8	1645.34	138.144	2428.76	1652.47	274.706	2417.76	1655.58	233.881	2364.08	1502.69	246.625	2260.97	1278.39	213.789	2501.54	1406.02	213.754	2528.68	1220.39	299.113	2268.81	1352.06	39.3692	2350.57	1447.93	-6.52551	2287.51	1258.48	-14.9733	2245.03	1144.51	-35.4665	2265.15	971.518	-0.268454	2288.26	874.094	-43.1182	2224.36	872.89	-53.7288	2259.76	773.422
801	0	156.164	2600.01	1642.75	259.805	2600.96	1642.88	136.583	2442.96	1650.05	273.094	2431.91	1653.01	232.235	2378.43	1500.26	244.861	2274.88	1276.08	212.052	2515.75	1403.39	212.149	2542.71	1217.65	297.44	2283.12	1349.72	37.8907	2364.49	1445.55	-7.26773	2298.4	1257.68	-15.3183	2254.1	1144.38	-36.3234	2270.04	971.217	-1.43777	2291.06	873.119	-43.7839	2226.83	873.533	-54.7919	2259.67	773.242
802	0	154.582	2614.39	1640.24	258.214	2615.3	1640.28	134.889	2457.36	1647.55	271.349	2446.24	1650.36	230.443	2392.89	1497.76	242.98	2288.98	1273.69	210.192	2530.07	1400.67	210.402	2556.86	1214.83	295.616	2297.52	1347.32	36.2618	2378.56	1443.08	-8.10329	2309.58	1256.76	-15.6944	2263.53	1144.13	-37.1607	2275.4	970.885	-2.577	2294.39	872.183	-44.3729	2229.86	874.17	-55.777	2260.17	773.153
803	0	152.894	2628.95	1637.63	256.514	2629.8	1637.58	133.058	2471.95	1645	269.468	2460.72	1647.66	228.511	2407.47	1495.23	240.996	2303.26	1271.26	208.204	2544.49	1397.91	208.504	2571.11	1211.99	293.654	2311.99	1344.9	34.486	2392.78	1440.57	-9.04061	2321.07	1255.72	-16.1149	2273.35	1143.77	-37.9886	2281.27	970.52	-3.69331	2298.29	871.278	-44.9031	2233.48	874.789	-56.688	2261.31	773.132
804	0	151.093	2643.68	1634.96	254.7	2644.45	1634.84	131.092	2486.72	1642.44	267.453	2475.37	1644.97	226.448	2422.14	1492.71	238.923	2317.71	1268.82	206.09	2559.02	1395.15	206.449	2585.48	1209.16	291.566	2326.54	1342.51	32.5699	2407.11	1438.04	-10.0877	2332.86	1254.59	-16.5945	2283.59	1143.3	-38.818	2287.69	970.117	-4.79369	2302.81	870.396	-45.3955	2237.73	875.377	-57.53	2263.15	773.156
805	0	149.176	2658.57	1632.29	252.769	2659.26	1632.08	128.995	2501.65	1639.91	265.309	2490.15	1642.33	224.267	2436.91	1490.25	236.776	2332.31	1266.42	203.852	2573.63	1392.43	204.233	2599.94	1206.38	289.367	2341.15	1340.18	30.5223	2421.54	1435.55	-11.252	2344.97	1253.37	-17.1484	2294.25	1142.72	-39.6612	2294.69	969.673	-5.88519	2307.99	869.529	-45.8734	2242.66	875.92	-58.3102	2265.73	773.201
806	0	147.146	2673.6	1629.63	250.721	2674.2	1629.35	126.777	2516.72	1637.45	263.046	2505.06	1639.76	221.981	2451.75	1487.87	234.563	2347.03	1264.1	201.496	2588.32	1389.8	201.858	2614.49	1203.71	287.073	2355.81	1337.96	28.3551	2436.06	1433.13	-12.5396	2357.4	1252.08	-17.7916	2305.36	1142.05	-40.5311	2302.32	969.185	-6.97515	2313.86	868.672	-46.3625	2248.33	876.403	-59.038	2269.13	773.242
807	0	145.008	2688.74	1627.03	248.563	2689.26	1626.7	124.45	2531.91	1635.1	260.678	2520.09	1637.32	219.607	2466.65	1485.63	232.293	2361.86	1261.91	199.034	2603.07	1387.29	199.33	2629.12	1201.18	284.699	2370.49	1335.87	26.082	2450.63	1430.81	-13.9558	2370.14	1250.75	-18.5387	2316.91	1141.3	-41.4411	2310.6	968.652	-8.07147	2320.47	867.819	-46.8891	2254.76	876.81	-59.7262	2273.39	773.256
808	0	142.773	2703.98	1624.53	246.307	2704.42	1624.14	122.032	2547.19	1632.88	258.22	2535.2	1635.04	217.165	2481.58	1483.54	229.973	2376.75	1259.87	196.48	2617.85	1384.95	196.66	2643.8	1198.82	282.261	2385.19	1333.95	23.7189	2465.24	1428.64	-15.5035	2383.2	1249.39	-19.4029	2328.91	1140.47	-42.4047	2319.57	968.071	-9.18289	2327.87	866.964	-47.4799	2262.01	877.127	-60.3907	2278.59	773.218
809	0	140.457	2719.27	1622.14	243.966	2719.65	1621.71	119.543	2562.52	1630.84	255.694	2550.38	1632.95	214.676	2496.51	1481.64	227.609	2391.67	1258.02	193.853	2632.64	1382.8	193.866	2658.52	1196.68	279.776	2399.87	1332.22	21.2836	2479.85	1426.66	-17.1842	2396.55	1248.02	-20.396	2341.36	1139.59	-43.4356	2329.26	967.444	-10.3191	2336.09	866.105	-48.1608	2270.12	877.337	-61.0513	2284.78	773.108
810	0	138.077	2734.6	1619.9	241.56	2734.92	1619.44	117.007	2577.89	1629	253.122	2565.6	1631.08	212.16	2511.42	1479.96	225.205	2406.59	1256.39	191.175	2647.41	1380.87	190.97	2673.24	1194.79	277.259	2414.52	1330.71	18.795	2494.45	1424.88	-18.9967	2410.19	1246.68	-21.5276	2354.25	1138.67	-44.547	2339.68	966.771	-11.4909	2345.17	865.241	-48.9562	2279.13	877.427	-61.7309	2292.04	772.904
811	0	135.655	2749.92	1617.83	239.11	2750.21	1617.35	114.449	2593.25	1627.39	250.53	2580.83	1629.46	209.64	2526.28	1478.52	222.768	2421.47	1255	188.47	2662.13	1379.2	188	2687.95	1193.16	274.725	2429.1	1329.43	16.2731	2509.01	1423.35	-20.9376	2424.09	1245.37	-22.8054	2367.55	1137.72	-45.7515	2350.86	966.056	-12.7101	2355.15	864.372	-49.8884	2289.07	877.382	-62.4554	2300.43	772.591
812	0	133.214	2765.2	1615.96	236.643	2765.48	1615.46	111.895	2608.58	1626.03	247.945	2596.04	1628.1	207.137	2541.06	1477.33	220.303	2436.27	1253.86	185.764	2676.78	1377.8	184.988	2702.61	1191.82	272.188	2443.59	1328.4	13.7379	2523.5	1422.09	-23.0009	2438.24	1244.13	-24.2348	2381.25	1136.76	-47.0605	2362.8	965.306	-13.9892	2366.06	863.501	-50.9763	2299.98	877.191	-63.2533	2310.01	772.154
813	0	130.782	2780.41	1614.29	234.183	2780.7	1613.79	109.374	2623.84	1624.93	245.394	2611.21	1627.03	204.674	2555.72	1476.41	217.821	2450.97	1253	183.087	2691.31	1376.69	181.967	2717.19	1190.78	269.663	2457.95	1327.62	11.2096	2537.91	1421.12	-25.1783	2452.61	1242.99	-25.8192	2395.33	1135.82	-48.4841	2375.52	964.528	-15.3412	2377.94	862.633	-52.2352	2311.88	876.847	-64.1542	2320.82	771.587
814	0	128.384	2795.51	1612.85	231.76	2795.83	1612.36	106.912	2639	1624.12	242.904	2626.29	1626.26	202.269	2570.24	1475.76	215.329	2465.53	1252.41	180.464	2705.72	1375.88	178.974	2731.66	1190.05	267.162	2472.18	1327.1	8.70725	2552.22	1420.46	-27.4596	2467.17	1241.96	-27.56	2409.74	1134.92	-50.0305	2389	963.733	-16.7787	2390.81	861.778	-53.6762	2324.79	876.345	-65.1879	2332.91	770.888
815	0	126.048	2810.49	1611.64	229.402	2810.84	1611.18	104.536	2654.02	1623.6	240.501	2641.26	1625.8	199.941	2584.58	1475.4	212.838	2479.94	1252.1	177.922	2719.96	1375.37	176.046	2745.99	1189.63	264.697	2486.23	1326.84	6.24885	2566.4	1420.11	-29.8324	2481.9	1241.08	-29.4569	2424.47	1134.06	-51.7058	2403.26	962.935	-18.3131	2404.67	860.948	-55.3061	2338.71	875.686	-66.3832	2346.33	770.062
816	0	123.799	2825.3	1610.69	227.135	2825.71	1610.26	102.268	2668.89	1623.38	238.208	2656.1	1625.64	197.703	2598.73	1475.32	210.36	2494.16	1252.07	175.486	2734.01	1375.18	173.216	2760.16	1189.54	262.275	2500.09	1326.85	3.85041	2580.45	1420.09	-32.2833	2496.76	1240.37	-31.5083	2439.48	1133.29	-53.5141	2418.27	962.15	-19.954	2419.55	860.16	-57.1271	2353.65	874.88	-67.766	2361.09	769.124
817	0	121.663	2839.93	1610	224.985	2840.4	1609.6	100.129	2683.59	1623.46	236.043	2670.78	1625.79	195.568	2612.67	1475.52	207.905	2508.19	1252.31	173.178	2747.86	1375.3	170.517	2774.14	1189.76	259.904	2513.75	1327.11	1.52581	2594.35	1420.41	-34.7978	2511.73	1239.84	-33.7113	2454.73	1132.61	-55.457	2434.02	961.398	-21.7083	2435.43	859.436	-59.1369	2369.6	873.94	-69.3577	2377.2	768.098
818	0	119.662	2854.36	1609.57	222.974	2854.89	1609.21	98.1354	2698.09	1623.86	234.022	2685.29	1626.26	193.543	2626.38	1476	205.482	2522.02	1252.82	171.016	2761.5	1375.73	167.977	2787.92	1190.3	257.59	2527.19	1327.62	-0.71342	2608.11	1421.06	-37.3611	2526.77	1239.52	-36.0619	2470.21	1132.06	-57.5333	2450.49	960.702	-23.5792	2452.32	858.801	-61.3293	2386.56	872.889	-71.1737	2394.67	767.017
819	0	117.813	2868.59	1609.41	221.123	2869.17	1609.1	96.2974	2712.39	1624.57	232.155	2699.59	1627.03	191.634	2639.84	1476.76	203.099	2535.65	1253.59	169.015	2774.91	1376.47	165.621	2801.48	1191.15	255.334	2540.4	1328.37	-2.85825	2621.7	1422.03	-39.9588	2541.88	1239.42	-38.5554	2485.87	1131.63	-59.7395	2467.65	960.087	-25.5665	2470.18	858.287	-63.6944	2404.5	871.759	-73.2216	2413.49	765.924
820	0	116.13	2882.6	1609.53	219.444	2883.21	1609.26	94.6221	2726.48	1625.58	230.445	2713.69	1628.1	189.841	2653.06	1477.79	200.762	2549.08	1254.61	167.185	2788.08	1377.52	163.465	2814.82	1192.3	253.138	2553.38	1329.36	-4.9021	2635.14	1423.32	-42.5767	2557.02	1239.55	-41.1866	2501.71	1131.36	-62.0694	2485.48	959.581	-27.6652	2489	857.927	-66.2191	2423.39	870.586	-75.5006	2433.61	764.868
821	0	114.623	2896.4	1609.92	217.947	2897.03	1609.69	93.1112	2740.36	1626.89	228.893	2727.57	1629.46	188.164	2666.03	1479.06	198.477	2562.31	1255.86	165.53	2801.03	1378.85	161.521	2827.95	1193.75	251.003	2566.14	1330.57	-6.84069	2648.43	1424.91	-45.2023	2572.18	1239.93	-43.9497	2517.71	1131.26	-64.5146	2503.95	959.213	-29.8663	2508.74	857.761	-68.8881	2443.21	869.416	-78.0003	2455.02	763.909
822	0	113.295	2909.98	1610.58	216.636	2910.6	1610.39	91.762	2754.03	1628.48	227.495	2741.24	1631.1	186.601	2678.76	1480.58	196.249	2575.37	1257.32	164.053	2813.76	1380.48	159.792	2840.87	1195.48	248.931	2578.69	1331.98	-8.6718	2661.57	1426.8	-47.8241	2587.35	1240.56	-46.839	2533.83	1131.34	-67.0642	2523.03	959.013	-32.1568	2529.35	857.828	-71.6839	2463.93	868.297	-80.7008	2477.65	763.107
823	0	112.144	2923.37	1611.51	215.509	2923.93	1611.34	90.5679	2767.49	1630.35	226.244	2754.69	1633	185.147	2691.26	1482.32	194.082	2588.25	1258.99	162.748	2826.29	1382.36	158.276	2853.6	1197.48	246.922	2591.04	1333.58	-10.3949	2674.58	1428.95	-50.433	2602.52	1241.44	-49.8482	2550.08	1131.62	-69.7056	2542.68	959.014	-34.5194	2550.78	858.172	-74.5878	2485.5	867.282	-83.5728	2501.44	762.527
824	0	111.163	2936.55	1612.69	214.559	2937.03	1612.55	89.519	2780.75	1632.46	225.13	2767.92	1635.13	183.797	2703.55	1484.26	191.981	2600.97	1260.84	161.607	2838.62	1384.5	156.963	2866.15	1199.73	244.981	2603.21	1335.36	-12.0106	2687.47	1431.34	-53.0216	2617.67	1242.56	-52.9713	2566.45	1132.09	-72.4246	2562.87	959.244	-36.934	2572.97	858.834	-77.5803	2507.89	866.426	-86.579	2526.34	762.235
825	0	110.342	2949.55	1614.11	213.773	2949.91	1613.98	88.6035	2793.82	1634.8	224.144	2780.94	1637.48	182.547	2715.64	1486.39	189.951	2613.54	1262.86	160.619	2850.79	1386.85	155.838	2878.55	1202.21	243.111	2615.22	1337.3	-13.5205	2700.24	1433.95	-55.5847	2632.82	1243.92	-56.202	2582.92	1132.76	-75.2059	2583.56	959.732	-39.3779	2595.88	859.853	-80.6414	2531.04	865.782	-89.6749	2552.25	762.292
826	0	109.666	2962.37	1615.75	213.137	2962.58	1615.64	87.8077	2806.7	1637.34	223.273	2793.77	1640.02	181.391	2727.55	1488.67	188.001	2625.99	1265.02	159.769	2862.81	1389.4	154.881	2890.81	1204.89	241.319	2627.09	1339.37	-14.9265	2712.91	1436.75	-58.1193	2647.94	1245.51	-59.534	2599.49	1133.63	-78.0335	2604.72	960.505	-41.8268	2619.43	861.266	-83.7515	2554.93	865.399	-92.8115	2579.12	762.755
827	0	109.118	2975.03	1617.6	212.632	2975.05	1617.49	87.1176	2819.4	1640.05	222.506	2806.41	1642.72	180.323	2739.31	1491.09	186.136	2638.31	1267.31	159.04	2874.71	1392.12	154.069	2902.95	1207.73	239.611	2638.85	1341.57	-16.2304	2725.48	1439.7	-60.624	2663.05	1247.3	-62.9611	2616.16	1134.7	-80.8914	2626.32	961.583	-44.2562	2643.56	863.106	-86.8911	2579.49	865.324	-95.9367	2606.85	763.675
828	0	108.681	2987.53	1619.64	212.241	2987.35	1619.52	86.5193	2831.93	1642.9	221.834	2818.87	1645.55	179.34	2750.94	1493.63	184.367	2650.53	1269.7	158.414	2886.51	1394.97	153.38	2915.01	1210.7	237.995	2650.51	1343.87	-17.4343	2737.97	1442.79	-63.0988	2678.15	1249.29	-66.4771	2632.91	1135.95	-83.7641	2648.33	962.986	-46.6418	2668.22	865.397	-90.0418	2604.69	865.595	-98.9984	2635.38	765.095
829	0	108.337	2999.88	1621.86	211.942	2999.48	1621.7	85.9997	2844.3	1645.85	221.247	2831.17	1648.47	178.436	2762.47	1496.25	182.702	2662.65	1272.17	157.874	2898.23	1397.92	152.788	2926.99	1213.78	236.478	2662.09	1346.26	-18.5395	2750.38	1445.98	-65.5446	2693.23	1251.45	-70.0757	2649.75	1137.38	-86.6366	2670.71	964.728	-48.9607	2693.34	868.161	-93.1859	2630.49	866.247	-101.947	2664.63	767.049
830	0	108.07	3012.09	1624.22	211.717	3011.45	1624.02	85.547	2856.52	1648.89	220.737	2843.32	1651.46	177.609	2773.9	1498.94	181.152	2674.68	1274.71	157.401	2909.89	1400.94	152.272	2938.92	1216.91	235.068	2673.62	1348.72	-19.5475	2762.71	1449.23	-67.9633	2708.3	1253.76	-73.7509	2666.68	1138.97	-89.4955	2693.45	966.818	-51.1922	2718.87	871.413	-96.3073	2656.85	867.304	-104.735	2694.54	769.565
831	0	107.865	3024.17	1626.71	211.551	3023.3	1626.45	85.1508	2868.58	1651.97	220.297	2855.32	1654.49	176.856	2785.26	1501.68	179.725	2686.63	1277.29	156.981	2921.51	1404	151.811	2950.8	1220.09	233.772	2685.11	1351.23	-20.4593	2774.98	1452.54	-70.3566	2723.36	1256.2	-77.4971	2683.68	1140.72	-92.3291	2716.51	969.263	-53.3182	2744.77	875.164	-99.3912	2683.74	868.788	-107.325	2725.05	772.664
832	0	107.708	3036.12	1629.32	211.428	3035.01	1628.98	84.8027	2880.49	1655.09	219.922	2867.2	1657.54	176.174	2796.57	1504.45	178.429	2698.5	1279.89	156.601	2933.1	1407.07	151.388	2962.66	1223.26	232.594	2696.56	1353.79	-21.2757	2787.18	1455.86	-72.7263	2738.41	1258.76	-81.3089	2700.75	1142.6	-95.1273	2739.87	972.068	-55.3239	2771	879.42	-102.425	2711.12	870.714	-109.682	2756.12	776.361
833	0	107.59	3047.95	1632.03	211.338	3046.61	1631.58	84.4961	2892.25	1658.21	219.608	2878.94	1660.58	175.562	2807.84	1507.24	177.273	2710.3	1282.51	156.249	2944.67	1410.14	150.991	2974.5	1226.42	231.539	2707.99	1356.38	-21.9974	2799.32	1459.2	-75.0742	2753.45	1261.42	-85.182	2717.89	1144.62	-97.8823	2763.53	975.235	-57.1976	2797.53	884.186	-105.398	2738.97	873.091	-111.781	2787.69	780.666
834	0	107.503	3059.65	1634.83	211.272	3058.1	1634.26	84.2261	2903.88	1661.32	219.35	2890.57	1663.6	175.018	2819.07	1510.04	176.261	2722.04	1285.13	155.917	2956.23	1413.18	150.61	2986.32	1229.54	230.61	2719.41	1359	-22.6249	2811.39	1462.53	-77.4015	2768.48	1264.17	-89.1126	2735.1	1146.76	-100.588	2787.46	978.765	-58.9308	2824.33	889.463	-108.301	2767.28	875.928	-113.605	2819.75	785.588
835	0	107.441	3071.24	1637.71	211.225	3069.48	1637	83.9892	2915.36	1664.43	219.148	2902.09	1666.6	174.542	2830.28	1512.84	175.397	2733.71	1287.75	155.599	2967.79	1416.19	150.239	2998.13	1232.62	229.81	2730.82	1361.64	-23.1585	2823.4	1465.84	-79.709	2783.49	1267	-93.0979	2752.37	1149.01	-103.242	2811.67	982.657	-60.518	2851.4	895.253	-111.129	2796.03	879.228	-115.142	2852.27	791.13
836	0	107.401	3082.7	1640.67	211.194	3080.76	1639.79	83.7835	2926.7	1667.51	219	2913.5	1669.55	174.132	2841.45	1515.63	174.683	2745.31	1290.36	155.291	2979.34	1419.15	149.873	3009.94	1235.64	229.139	2742.22	1364.3	-23.5985	2835.35	1469.14	-81.9973	2798.5	1269.92	-97.1364	2769.7	1151.38	-105.84	2836.14	986.912	-61.9562	2878.71	901.555	-113.879	2825.21	882.992	-116.384	2885.23	797.294
837	0	107.382	3094.05	1643.71	211.176	3091.93	1642.64	83.6078	2937.9	1670.57	218.905	2924.8	1672.47	173.788	2852.61	1518.43	174.12	2756.86	1292.96	154.992	2990.9	1422.08	149.511	3021.74	1238.6	228.598	2753.61	1366.98	-23.945	2847.24	1472.41	-84.2664	2813.49	1272.91	-101.227	2787.09	1153.85	-108.382	2860.87	991.53	-63.2437	2906.27	908.37	-116.548	2854.82	887.223	-117.329	2918.64	804.081
838	0	107.384	3105.28	1646.81	211.173	3103.01	1645.54	83.462	2948.96	1673.61	218.863	2935.99	1675.35	173.511	2863.74	1521.21	173.709	2768.34	1295.54	154.702	3002.45	1424.95	149.153	3033.54	1241.5	228.187	2764.99	1369.68	-24.1982	2859.06	1475.65	-86.5166	2828.47	1275.98	-105.369	2804.54	1156.44	-110.867	2885.86	996.509	-64.38	2934.08	915.697	-119.135	2884.85	891.921	-117.976	2952.49	811.492
[truncated: 69 more columns]

## Sheet: Sheet2
Devices
		025370 - Force			025370 - Moment			025370 - CoP			027571 - Force			027571 - Moment			027571 - CoP			037720 - Force			037720 - Moment			037720 - CoP
Frame	Sub Frame	Fx	Fy	Fz	Mx	My	Mz	Cx	Cy	Cz	Fx	Fy	Fz	Mx	My	Mz	Cx	Cy	Cz	Fx	Fy	Fz	Mx	My	Mz	Cx	Cy	Cz
		N	N	N	N.mm	N.mm	N.mm	mm	mm	mm	N	N	N	N.mm	N.mm	N.mm	mm	mm	mm	N	N	N	N.mm	N.mm	N.mm	mm	mm	mm
468	0	0	0	0	0	0	0	200	300	0	0	0	0	0	0	0	200	903	0	0	0	0	0	0	0	603	903	0
468	1	0	0	0	0	0	0	200	300	0	0	0	0	0	0	0	200	903	0	0	0	0	0	0	0	603	903	0
468	2	0	0	0	0	0	0	200	300	0	0	0	0	0	0	0	200	903	0	0	0	0	0	0	0	603	903	0
468	3	0	0	0	0	0	0	200	300	0	0	0	0	0	0	0	200	903	0	0	0	0	0	0	0	603	903	0
468	4	0	0	0	0	0	0	200	300	0	0	0	0	0	0	0	200	903	0	0	0	0	0	0	0	603	903	0
468	5	0	0	0	0	0	0	200	300	0	0	0	0	0	0	0	200	903	0	0	0	0	0	0	0	603	903	0
468	6	0	0	0	0	0	0	200	300	0	0	0	0	0	0	0	200	903	0	0	0	0	0	0	0	603	903	0
468	7	0	0	0	0	0	0	200	300	0	0	0	0	0	0	0	200	903	0	0	0	0	0	0	0	603	903	0
468	8	0	0	0	0	0	0	200	300	0	0	0	0	0	0	0	200	903	0	0	0	0	0	0	0	603	903	0
468	9	0	0	0	0	0	0	200	300	0	0	0	0	0	0	0	200	903	0	0	0	0	0	0	0	603	903	0
469	0	0	0	0	0	0	0	200	300	0	0	0	0	0	0	0	200	903	0	0	0	0	0	0	0	603	903	0
469	1	0	0	0	0	0	0	200	300	0	0	0	0	0	0	0	200	903	0	0	0	0	0	0	0	603	903	0
469	2	0	0	0	0	0	0	200	300	0	0	0	0	0	0	0	200	903	0	0	0	0	0	0	0	603	903	0
469	3	0	0	0	0	0	0	200	300	0	0	0	0	0	0	0	200	903	0	0	0	0	0	0	0	603	903	0
469	4	0	0	0	0	0	0	200	300	0	0	0	0	0	0	0	200	903	0	0	0	0	0	0	0	603	903	0
469	5	0	0	0	0	0	0	200	300	0	0	0	0	0	0	0	200	903	0	0	0	0	0	0	0	603	903	0
469	6	0	0	0	0	0	0	200	300	0	0	0	0	0	0	0	200	903	0	0	0	0	0	0	0	603	903	0
469	7	0	0	0	0	0	0	200	300	0	0	0	0	0	0	0	200	903	0	0	0	0	0	0	0	603	903	0
469	8	0	0	0	0	0	0	200	300	0	0	0	0	0	0	0	200	903	0	0	0	0	0	0	0	603	903	0
469	9	0	0	0	0	0	0	200	300	0	0	0	0	0	0	0	200	903	0	0	0	0	0	0	0	603	903	0
470	0	0	0	0	0	0	0	200	300	0	0	0	0	0	0	0	200	903	0	0	0	0	0	0	0	603	903	0
470	1	0	0	0	0	0	0	200	300	0	0	0	0	0	0	0	200	903	0	0	0	0	0	0	0	603	903	0
470	2	0	0	0	0	0	0	200	300	0	0	0	0	0	0	0	200	903	0	0	0	0	0	0	0	603	903	0
470	3	0	0	0	0	0	0	200	300	0	0	0	0	0	0	0	200	903	0	0	0	0	0	0	0	603	903	0
470	4	0	0	0	0	0	0	200	300	0	0	0	0	0	0	0	200	903	0	0	0	0	0	0	0	603	903	0
470	5	0	0	0	0	0	0	200	300	0	0	0	0	0	0	0	200	903	0	0	0	0	0	0	0	603	903	0
470	6	0	0	0	0	0	0	200	300	0	0	0	0	0	0	0	200	903	0	0	0	0	0	0	0	603	903	0
470	7	0	0	0	0	0	0	200	300	0	0	0	0	0	0	0	200	903	0	0	0	0	0	0	0	603	903	0
470	8	0	0	0	0	0	0	200	300	0	0	0	0	0	0	0	200	903	0	0	0	0	0	0	0	603	903	0
470	9	0	0	0	0	0	0	200	300	0	0	0	0	0	0	0	200	903	0	0	0	0	0	0	0	603	903	0
471	0	0	0	0	0	0	0	200	300	0	0	0	0	0	0	0	200	903	0	0	0	0	0	0	0	603	903	0
471	1	0	0	0	0	0	0	200	300	0	0	0	0	0	0	0	200	903	0	0	0	0	0	0	0	603	903	0
471	2	0	0	0	0	0	0	200	300	0	0	0	0	0	0	0	200	903	0	0	0	0	0	0	0	603	903	0
471	3	0	0	0	0	0	0	200	300	0	0	0	0	0	0	0	200	903	0	0	0	0	0	0	0	603	903	0
471	4	0	0	0	0	0	0	200	300	0	0	0	0	0	0	0	200	903	0	0	0	0	0	0	0	603	903	0
471	5	0	0	0	0	0	0	200	300	0	0	0	0	0	0	0	200	903	0	0	0	0	0	0	0	603	903	0
471	6	0	0	0	0	0	0	200	300	0	0	0	0	0	0	0	200	903	0	0	0	0	0	0	0	603	903	0
471	7	0	0	0	0	0	0	200	300	0	0	0	0	0	0	0	200	903	0	0	0	0	0	0	0	603	903	0
471	8	0	0	0	0	0	0	200	300	0	0	0	0	0	0	0	200	903	0	0	0	0	0	0	0	603	903	0
471	9	0	0	0	0	0	0	200	300	0	0	0	0	0	0	0	200	903	0	0	0	0	0	0	0	603	903	0
472	0	0	0	0	0	0	0	200	300	0	0	0	0	0	0	0	200	903	0	0	0	0	0	0	0	603	903	0
472	1	0	0	0	0	0	0	200	300	0	0	0	0	0	0	0	200	903	0	0	0	0	0	0	0	603	903	0
472	2	0	0	0	0	0	0	200	300	0	0	0	0	0	0	0	200	903	0	0	0	0	0	0	0	603	903	0
472	3	0	0	0	0	0	0	200	300	0	0	0	0	0	0	0	200	903	0	0	0	0	0	0	0	603	903	0
472	4	0	0	0	0	0	0	200	300	0	0	0	0	0	0	0	200	903	0	0	0	0	0	0	0	603	903	0
472	5	0	0	0	0	0	0	200	300	0	0	0	0	0	0	0	200	903	0	0	0	0	0	0	0	603	903	0
472	6	0	0	0	0	0	0	200	300	0	0	0	0	0	0	0	200	903	0	0	0	0	0	0	0	603	903	0
472	7	0	0	0	0	0	0	200	300	0	0	0	0	0	0	0	200	903	0	0	0	0	0	0	0	603	903	0
472	8	0	0	0	0	0	0	200	300	0	0	0	0	0	0	0	200	903	0	0	0	0	0	0	0	603	903	0
472	9	0	0	0	0	0	0	200	300	0	0	0	0	0	0	0	200	903	0	0	0	0	0	0	0	603	903	0
473	0	0	0	0	0	0	0	200	300	0	0	0	0	0	0	0	200	903	0	0	0	0	0	0	0	603	903	0
473	1	0	0	0	0	0	0	200	300	0	0	0	0	0	0	0	200	903	0	0	0	0	0	0	0	603	903	0
473	2	0	0	0	0	0	0	200	300	0	0	0	0	0	0	0	200	903	0	0	0	0	0	0	0	603	903	0
473	3	0	0	0	0	0	0	200	300	0	0	0	0	0	0	0	200	903	0	0	0	0	0	0	0	603	903	0
473	4	0	0	0	0	0	0	200	300	0	0	0	0	0	0	0	200	903	0	0	0	0	0	0	0	603	903	0
473	5	0	0	0	0	0	0	200	300	0	0	0	0	0	0	0	200	903	0	0	0	0	0	0	0	603	903	0
473	6	0	0	0	0	0	0	200	300	0	0	0	0	0	0	0	200	903	0	0	0	0	0	0	0	603	903	0
473	7	0	0	0	0	0	0	200	300	0	0	0	0	0	0	0	200	903	0	0	0	0	0	0	0	603	903	0
473	8	0	0	0	0	0	0	200	300	0	0	0	0	0	0	0	200	903	0	0	0	0	0	0	0	603	903	0
473	9	0	0	0	0	0	0	200	300	0	0	0	0	0	0	0	200	903	0	0	0	0	0	0	0	603	903	0
474	0	0	0	0	0	0	0	200	300	0	0	0	0	0	0	0	200	903	0	0	0	0	0	0	0	603	903	0
474	1	0	0	0	0	0	0	200	300	0	0	0	0	0	0	0	200	903	0	0	0	0	0	0	0	603	903	0
474	2	0	0	0	0	0	0	200	300	0	0	0	0	0	0	0	200	903	0	0	0	0	0	0	0	603	903	0
474	3	0	0	0	0	0	0	200	300	0	0	0	0	0	0	0	200	903	0	0	0	0	0	0	0	603	903	0
474	4	0	0	0	0	0	0	200	300	0	0	0	0	0	0	0	200	903	0	0	0	0	0	0	0	603	903	0
474	5	0	0	0	0	0	0	200	300	0	0	0	0	0	0	0	200	903	0	0	0	0	0	0	0	603	903	0
474	6	0	0	0	0	0	0	200	300	0	0	0	0	0	0	0	200	903	0	0	0	0	0	0	0	603	903	0
474	7	0	0	0	0	0	0	200	300	0	0	0	0	0	0	0	200	903	0	0	0	0	0	0	0	603	903	0
474	8	0	0	0	0	0	0	200	300	0	0	0	0	0	0	0	200	903	0	0	0	0	0	0	0	603	903	0
474	9	0	0	0	0	0	0	200	300	0	0	0	0	0	0	0	200	903	0	0	0	0	0	0	0	603	903	0
475	0	0	0	0	0	0	0	200	300	0	0	0	0	0	0	0	200	903	0	0	0	0	0	0	0	603	903	0
475	1	0	0	0	0	0	0	200	300	0	0	0	0	0	0	0	200	903	0	0	0	0	0	0	0	603	903	0
475	2	0	0	0	0	0	0	200	300	0	0	0	0	0	0	0	200	903	0	0	0	0	0	0	0	603	903	0
475	3	0	0	0	0	0	0	200	300	0	0	0	0	0	0	0	200	903	0	0	0	0	0	0	0	603	903	0
475	4	0	0	0	0	0	0	200	300	0	0	0	0	0	0	0	200	903	0	0	0	0	0	0	0	603	903	0
475	5	0	0	0	0	0	0	200	300	0	0	0	0	0	0	0	200	903	0	0	0	0	0	0	0	603	903	0
475	6	0	0	0	0	0	0	200	300	0	0	0	0	0	0	0	200	903	0	0	0	0	0	0	0	603	903	0
475	7	0	0	0	0	0	0	200	300	0	0	0	0	0	0	0	200	903	0	0	0	0	0	0	0	603	903	0
475	8	0	0	0	0	0	0	200	300	0	0	0	0	0	0	0	200	903	0	0	0	0	0	0	0	603	903	0
475	9	0	0	0	0	0	0	200	300	0	0	0	0	0	0	0	200	903	0	0	0	0	0	0	0	603	903	0
476	0	0	0	0	0	0	0	200	300	0	0	0	0	0	0	0	200	903	0	0	0	0	0	0	0	603	903	0
476	1	0	0	0	0	0	0	200	300	0	0	0	0	0	0	0	200	903	0	0	0	0	0	0	0	603	903	0
476	2	0	0	0	0	0	0	200	300	0	0	0	0	0	0	0	200	903	0	0	0	0	0	0	0	603	903	0
476	3	0	0	0	0	0	0	200	300	0	0	0	0	0	0	0	200	903	0	0	0	0	0	0	0	603	903	0
476	4	0	0	0	0	0	0	200	300	0	0	0	0	0	0	0	200	903	0	0	0	0	0	0	0	603	903	0
476	5	0	0	0	0	0	0	200	300	0	0	0	0	0	0	0	200	903	0	0	0	0	0	0	0	603	903	0
476	6	0	0	0	0	0	0	200	300	0	0	0	0	0	0	0	200	903	0	0	0	0	0	0	0	603	903	0
476	7	0	0	0	0	0	0	200	300	0	0	0	0	0	0	0	200	903	0	0	0	0	0	0	0	603	903	0
476	8	0	0	0	0	0	0	200	300	0	0	0	0	0	0	0	200	903	0	0	0	0	0	0	0	603	903	0
476	9	0	0	0	0	0	0	200	300	0	0	0	0	0	0	0	200	903	0	0	0	0	0	0	0	603	903	0
477	0	0	0	0	0	0	0	200	300	0	0	0	0	0	0	0	200	903	0	0	0	0	0	0	0	603	903	0
477	1	0	0	0	0	0	0	200	300	0	0	0	0	0	0	0	200	903	0	0	0	0	0	0	0	603	903	0
477	2	0	0	0	0	0	0	200	300	0	0	0	0	0	0	0	200	903	0	0	0	0	0	0	0	603	903	0
477	3	0	0	0	0	0	0	200	300	0	0	0	0	0	0	0	200	903	0	0	0	0	0	0	0	603	903	0
477	4	0	0	0	0	0	0	200	300	0	0	0	0	0	0	0	200	903	0	0	0	0	0	0	0	603	903	0
477	5	0	0	0	0	0	0	200	300	0	0	0	0	0	0	0	200	903	0	0	0	0	0	0	0	603	903	0
477	6	0	0	0	0	0	0	200	300	0	0	0	0	0	0	0	200	903	0	0	0	0	0	0	0	603	903	0
477	7	0	0	0	0	0	0	200	300	0	0	0	0	0	0	0	200	903	0	0	0	0	0	0	0	603	903	0
477	8	0	0	0	0	0	0	200	300	0	0	0	0	0	0	0	200	903	0	0	0	0	0	0	0	603	903	0
477	9	0	0	0	0	0	0	200	300	0	0	0	0	0	0	0	200	903	0	0	0	0	0	0	0	603	903	0
478	0	0	0	0	0	0	0	200	300	0	0	0	0	0	0	0	200	903	0	0	0	0	0	0	0	603	903	0
478	1	0	0	0	0	0	0	200	300	0	0	0	0	0	0	0	200	903	0	0	0	0	0	0	0	603	903	0
478	2	0	0	0	0	0	0	200	300	0	0	0	0	0	0	0	200	903	0	0	0	0	0	0	0	603	903	0
478	3	0	0	0	0	0	0	200	300	0	0	0	0	0	0	0	200	903	0	0	0	0	0	0	0	603	903	0
478	4	0	0	0	0	0	0	200	300	0	0	0	0	0	0	0	200	903	0	0	0	0	0	0	0	603	903	0
478	5	0	0	0	0	0	0	200	300	0	0	0	0	0	0	0	200	903	0	0	0	0	0	0	0	603	903	0
478	6	0	0	0	0	0	0	200	300	0	0	0	0	0	0	0	200	903	0	0	0	0	0	0	0	603	903	0
478	7	0	0	0	0	0	0	200	300	0	0	0	0	0	0	0	200	903	0	0	0	0	0	0	0	603	903	0
478	8	0	0	0	0	0	0	200	300	0	0	0	0	0	0	0	200	903	0	0	0	0	0	0	0	603	903	0
478	9	0	0	0	0	0	0	200	300	0	0	0	0	0	0	0	200	903	0	0	0	0	0	0	0	603	903	0
479	0	0	0	0	0	0	0	200	300	0	0	0	0	0	0	0	200	903	0	0	0	0	0	0	0	603	903	0
479	1	0	0	0	0	0	0	200	300	0	0	0	0	0	0	0	200	903	0	0	0	0	0	0	0	603	903	0
479	2	0	0	0	0	0	0	200	300	0	0	0	0	0	0	0	200	903	0	0	0	0	0	0	0	603	903	0
479	3	0	0	0	0	0	0	200	300	0	0	0	0	0	0	0	200	903	0	0	0	0	0	0	0	603	903	0
479	4	0	0	0	0	0	0	200	300	0	0	0	0	0	0	0	200	903	0	0	0	0	0	0	0	603	903	0
479	5	0	0	0	0	0	0	200	300	0	0	0	0	0	0	0	200	903	0	0	0	0	0	0	0	603	903	0
479	6	0	0	0	0	0	0	200	300	0	0	0	0	0	0	0	200	903	0	0	0	0	0	0	0	603	903	0
479	7	0	0	0	0	0	0	200	300	0	0	0	0	0	0	0	200	903	0	0	0	0	0	0	0	603	903	0
479	8	0	0	0	0	0	0	200	300	0	0	0	0	0	0	0	200	903	0	0	0	0	0	0	0	603	903	0
479	9	0	0	0	0	0	0	200	300	0	0	0	0	0	0	0	200	903	0	0	0	0	0	0	0	603	903	0
480	0	0	0	0	0	0	0	200	300	0	0	0	0	0	0	0	200	903	0	0	0	0	0	0	0	603	903	0
480	1	0	0	0	0	0	0	200	300	0	0	0	0	0	0	0	200	903	0	0	0	0	0	0	0	603	903	0
480	2	0	0	0	0	0	0	200	300	0	0	0	0	0	0	0	200	903	0	0	0	0	0	0	0	603	903	0
480	3	0	0	0	0	0	0	200	300	0	0	0	0	0	0	0	200	903	0	0	0	0	0	0	0	603	903	0
480	4	0	0	0	0	0	0	200	300	0	0	0	0	0	0	0	200	903	0	0	0	0	0	0	0	603	903	0
480	5	0	0	0	0	0	0	200	300	0	0	0	0	0	0	0	200	903	0	0	0	0	0	0	0	603	903	0
480	6	0	0	0	0	0	0	200	300	0	0	0	0	0	0	0	200	903	0	0	0	0	0	0	0	603	903	0
480	7	0	0	0	0	0	0	200	300	0	0	0	0	0	0	0	200	903	0	0	0	0	0	0	0	603	903	0
480	8	0	0	0	0	0	0	200	300	0	0	0	0	0	0	0	200	903	0	0	0	0	0	0	0	603	903	0
480	9	0	0	0	0	0	0	200	300	0	0	0	0	0	0	0	200	903	0	0	0	0	0	0	0	603	903	0
481	0	0	0	0	0	0	0	200	300	0	0	0	0	0	0	0	200	903	0	0	0	0	0	0	0	603	903	0
481	1	0	0	0	0	0	0	200	300	0	0	0	0	0	0	0	200	903	0	0	0	0	0	0	0	603	903	0
481	2	0	0	0	0	0	0	200	300	0	0	0	0	0	0	0	200	903	0	0	0	0	0	0	0	603	903	0
481	3	0	0	0	0	0	0	200	300	0	0	0	0	0	0	0	200	903	0	0	0	0	0	0	0	603	903	0
481	4	0	0	0	0	0	0	200	300	0	0	0	0	0	0	0	200	903	0	0	0	0	0	0	0	603	903	0
481	5	0	0	0	0	0	0	200	300	0	0	0	0	0	0	0	200	903	0	0	0	0	0	0	0	603	903	0
481	6	0	0	0	0	0	0	200	300	0	0	0	0	0	0	0	200	903	0	0	0	0	0	0	0	603	903	0
481	7	0	0	0	0	0	0	200	300	0	0	0	0	0	0	0	200	903	0	0	0	0	0	0	0	603	903	0
481	8	0	0	0	0	0	0	200	300	0	0	0	0	0	0	0	200	903	0	0	0	0	0	0	0	603	903	0
481	9	0	0	0	0	0	0	200	300	0	0	0	0	0	0	0	200	903	0	0	0	0	0	0	0	603	903	0
482	0	0	0	0	0	0	0	200	300	0	0	0	0	0	0	0	200	903	0	0	0	0	0	0	0	603	903	0
482	1	0	0	0	0	0	0	200	300	0	0	0	0	0	0	0	200	903	0	0	0	0	0	0	0	603	903	0
482	2	0	0	0	0	0	0	200	300	0	0	0	0	0	0	0	200	903	0	0	0	0	0	0	0	603	903	0
482	3	0	0	0	0	0	0	200	300	0	0	0	0	0	0	0	200	903	0	0	0	0	0	0	0	603	903	0
482	4	0	0	0	0	0	0	200	300	0	0	0	0	0	0	0	200	903	0	0	0	0	0	0	0	603	903	0
482	5	0	0	0	0	0	0	200	300	0	0	0	0	0	0	0	200	903	0	0	0	0	0	0	0	603	903	0
482	6	0	0	0	0	0	0	200	300	0	0	0	0	0	0	0	200	903	0	0	0	0	0	0	0	603	903	0
482	7	0	0	0	0	0	0	200	300	0	0	0	0	0	0	0	200	903	0	0	0	0	0	0	0	603	903	0
482	8	0	0	0	0	0	0	200	300	0	0	0	0	0	0	0	200	903	0	0	0	0	0	0	0	603	903	0
482	9	0	0	0	0	0	0	200	300	0	0	0	0	0	0	0	200	903	0	0	0	0	0	0	0	603	903	0
483	0	0	0	0	0	0	0	200	300	0	0	0	0	0	0	0	200	903	0	0	0	0	0	0	0	603	903	0
483	1	0	0	0	0	0	0	200	300	0	0	0	0	0	0	0	200	903	0	0	0	0	0	0	0	603	903	0
483	2	0	0	0	0	0	0	200	300	0	0	0	0	0	0	0	200	903	0	0	0	0	0	0	0	603	903	0
483	3	0	0	0	0	0	0	200	300	0	0	0	0	0	0	0	200	903	0	0	0	0	0	0	0	603	903	0
483	4	0	0	0	0	0	0	200	300	0	0	0	0	0	0	0	200	903	0	0	0	0	0	0	0	603	903	0
483	5	0	0	0	0	0	0	200	300	0	0	0	0	0	0	0	200	903	0	0	0	0	0	0	0	603	903	0
483	6	0	0	0	0	0	0	200	300	0	0	0	0	0	0	0	200	903	0	0	0	0	0	0	0	603	903	0
483	7	0	0	0	0	0	0	200	300	0	0	0	0	0	0	0	200	903	0	0	0	0	0	0	0	603	903	0
483	8	0	0	0	0	0	0	200	300	0	0	0	0	0	0	0	200	903	0	0	0	0	0	0	0	603	903	0
483	9	0	0	0	0	0	0	200	300	0	0	0	0	0	0	0	200	903	0	0	0	0	0	0	0	603	903	0
484	0	0	0	0	0	0	0	200	300	0	0	0	0	0	0	0	200	903	0	0	0	0	0	0	0	603	903	0
484	1	0	0	0	0	0	0	200	300	0	0	0	0	0	0	0	200	903	0	0	0	0	0	0	0	603	903	0
484	2	0	0	0	0	0	0	200	300	0	0	0	0	0	0	0	200	903	0	0	0	0	0	0	0	603	903	0
484	3	0	0	0	0	0	0	200	300	0	0	0	0	0	0	0	200	903	0	0	0	0	0	0	0	603	903	0
484	4	0	0	0	0	0	0	200	300	0	0	0	0	0	0	0	200	903	0	0	0	0	0	0	0	603	903	0
484	5	0	0	0	0	0	0	200	300	0	0	0	0	0	0	0	200	903	0	0	0	0	0	0	0	603	903	0
484	6	0	0	0	0	0	0	200	300	0	0	0	0	0	0	0	200	903	0	0	0	0	0	0	0	603	903	0
484	7	0	0	0	0	0	0	200	300	0	0	0	0	0	0	0	200	903	0	0	0	0	0	0	0	603	903	0
484	8	0	0	0	0	0	0	200	300	0	0	0	0	0	0	0	200	903	0	0	0	0	0	0	0	603	903	0
484	9	0	0	0	0	0	0	200	300	0	0	0	0	0	0	0	200	903	0	0	0	0	0	0	0	603	903	0
485	0	0	0	0	0	0	0	200	300	0	0	0	0	0	0	0	200	903	0	0	0	0	0	0	0	603	903	0
485	1	0	0	0	0	0	0	200	300	0	0	0	0	0	0	0	200	903	0	0	0	0	0	0	0	603	903	0
485	2	0	0	0	0	0	0	200	300	0	0	0	0	0	0	0	200	903	0	0	0	0	0	0	0	603	903	0
485	3	0	0	0	0	0	0	200	300	0	0	0	0	0	0	0	200	903	0	0	0	0	0	0	0	603	903	0
485	4	0	0	0	0	0	0	200	300	0	0	0	0	0	0	0	200	903	0	0	0	0	0	0	0	603	903	0
485	5	0	0	0	0	0	0	200	300	0	0	0	0	0	0	0	200	903	0	0	0	0	0	0	0	603	903	0
485	6	0	0	0	0	0	0	200	300	0	0	0	0	0	0	0	200	903	0	0	0	0	0	0	0	603	903	0
485	7	0	0	0	0	0	0	200	300	0	0	0	0	0	0	0	200	903	0	0	0	0	0	0	0	603	903	0
485	8	0	0	0	0	0	0	200	300	0	0	0	0	0	0	0	200	903	0	0	0	0	0	0	0	603	903	0
485	9	0	0	0	0	0	0	200	300	0	0	0	0	0	0	0	200	903	0	0	0	0	0	0	0	603	903	0
486	0	0	0	0	0	0	0	200	300	0	0	0	0	0	0	0	200	903	0	0	0	0	0	0	0	603	903	0
486	1	0	0	0	0	0	0	200	300	0	0	0	0	0	0	0	200	903	0	0	0	0	0	0	0	603	903	0
486	2	0	0	0	0	0	0	200	300	0	0	0	0	0	0	0	200	903	0	0	0	0	0	0	0	603	903	0
486	3	0	0	0	0	0	0	200	300	0	0	0	0	0	0	0	200	903	0	0	0	0	0	0	0	603	903	0
486	4	0	0	0	0	0	0	200	300	0	0	0	0	0	0	0	200	903	0	0	0	0	0	0	0	603	903	0
486	5	0	0	0	0	0	0	200	300	0	0	0	0	0	0	0	200	903	0	0	0	0	0	0	0	603	903	0
486	6	0	0	0	0	0	0	200	300	0	0	0	0	0	0	0	200	903	0	0	0	0	0	0	0	603	903	0
486	7	0	0	0	0	0	0	200	300	0	0	0	0	0	0	0	200	903	0	0	0	0	0	0	0	603	903	0
486	8	0	0	0	0	0	0	200	300	0	0	0	0	0	0	0	200	903	0	0	0	0	0	0	0	603	903	0
486	9	0	0	0	0	0	0	200	300	0	0	0	0	0	0	0	200	903	0	0	0	0	0	0	0	603	903	0
487	0	0	0	0	0	0	0	200	300	0	0	0	0	0	0	0	200	903	0	0	0	0	0	0	0	603	903	0
487	1	0	0	0	0	0	0	200	300	0	0	0	0	0	0	0	200	903	0	0	0	0	0	0	0	603	903	0
487	2	0	0	0	0	0	0	200	300	0	0	0	0	0	0	0	200	903	0	0	0	0	0	0	0	603	903	0
487	3	0	0	0	0	0	0	200	300	0	0	0	0	0	0	0	200	903	0	0	0	0	0	0	0	603	903	0
487	4	0	0	0	0	0	0	200	300	0	0	0	0	0	0	0	200	903	0	0	0	0	0	0	0	603	903	0
487	5	0	0	0	0	0	0	200	300	0	0	0	0	0	0	0	200	903	0	0	0	0	0	0	0	603	903	0
487	6	0	0	0	0	0	0	200	300	0	0	0	0	0	0	0	200	903	0	0	0	0	0	0	0	603	903	0
487	7	0	0	0	0	0	0	200	300	0	0	0	0	0	0	0	200	903	0	0	0	0	0	0	0	603	903	0
487	8	0	0	0	0	0	0	200	300	0	0	0	0	0	0	0	200	903	0	0	0	0	0	0	0	603	903	0
487	9	0	0	0	0	0	0	200	300	0	0	0	0	0	0	0	200	903	0	0	0	0	0	0	0	603	903	0
488	0	0	0	0	0	0	0	200	300	0	0	0	0	0	0	0	200	903	0	0	0	0	0	0	0	603	903	0
488	1	0	0	0	0	0	0	200	300	0	0	0	0	0	0	0	200	903	0	0	0	0	0	0	0	603	903	0
488	2	0	0	0	0	0	0	200	300	0	0	0	0	0	0	0	200	903	0	0	0	0	0	0	0	603	903	0
488	3	0	0	0	0	0	0	200	300	0	0	0	0	0	0	0	200	903	0	0	0	0	0	0	0	603	903	0
488	4	0	0	0	0	0	0	200	300	0	0	0	0	0	0	0	200	903	0	0	0	0	0	0	0	603	903	0
488	5	0	0	0	0	0	0	200	300	0	0	0	0	0	0	0	200	903	0	0	0	0	0	0	0	603	903	0
488	6	0	0	0	0	0	0	200	300	0	0	0	0	0	0	0	200	903	0	0	0	0	0	0	0	603	903	0
488	7	0	0	0	0	0	0	200	300	0	0	0	0	0	0	0	200	903	0	0	0	0	0	0	0	603	903	0
488	8	0	0	0	0	0	0	200	300	0	0	0	0	0	0	0	200	903	0	0	0	0	0	0	0	603	903	0
488	9	0	0	0	0	0	0	200	300	0	0	0	0	0	0	0	200	903	0	0	0	0	0	0	0	603	903	0
489	0	0	0	0	0	0	0	200	300	0	0	0	0	0	0	0	200	903	0	0	0	0	0	0	0	603	903	0
489	1	0	0	0	0	0	0	200	300	0	0	0	0	0	0	0	200	903	0	0	0	0	0	0	0	603	903	0
489	2	0	0	0	0	0	0	200	300	0	0	0	0	0	0	0	200	903	0	0	0	0	0	0	0	603	903	0
489	3	0	0	0	0	0	0	200	300	0	0	0	0	0	0	0	200	903	0	0	0	0	0	0	0	603	903	0
489	4	0	0	0	0	0	0	200	300	0	0	0	0	0	0	0	200	903	0	0	0	0	0	0	0	603	903	0
489	5	0	0	0	0	0	0	200	300	0	0	0	0	0	0	0	200	903	0	0	0	0	0	0	0	603	903	0
489	6	0	0	0	0	0	0	200	300	0	0	0	0	0	0	0	200	903	0	0	0	0	0	0	0	603	903	0
489	7	0	0	0	0	0	0	200	300	0	0	0	0	0	0	0	200	903	0	0	0	0	0	0	0	603	903	0
489	8	0	0	0	0	0	0	200	300	0	0	0	0	0	0	0	200	903	0	0	0	0	0	0	0	603	903	0
489	9	0	0	0	0	0	0	200	300	0	0	0	0	0	0	0	200	903	0	0	0	0	0	0	0	603	903	0
490	0	0	0	0	0	0	0	200	300	0	0	0	0	0	0	0	200	903	0	0	0	0	0	0	0	603	903	0
490	1	0	0	0	0	0	0	200	300	0	0	0	0	0	0	0	200	903	0	0	0	0	0	0	0	603	903	0
490	2	0	0	0	0	0	0	200	300	0	0	0	0	0	0	0	200	903	0	0	0	0	0	0	0	603	903	0
490	3	0	0	0	0	0	0	200	300	0	0	0	0	0	0	0	200	903	0	0	0	0	0	0	0	603	903	0
490	4	0	0	0	0	0	0	200	300	0	0	0	0	0	0	0	200	903	0	0	0	0	0	0	0	603	903	0
490	5	0	0	0	0	0	0	200	300	0	0	0	0	0	0	0	200	903	0	0	0	0	0	0	0	603	903	0
490	6	0	0	0	0	0	0	200	300	0	0	0	0	0	0	0	200	903	0	0	0	0	0	0	0	603	903	0
490	7	0	0	0	0	0	0	200	300	0	0	0	0	0	0	0	200	903	0	0	0	0	0	0	0	603	903	0
490	8	0	0	0	0	0	0	200	300	0	0	0	0	0	0	0	200	903	0	0	0	0	0	0	0	603	903	0
490	9	0	0	0	0	0	0	200	300	0	0	0	0	0	0	0	200	903	0	0	0	0	0	0	0	603	903	0
491	0	0	0	0	0	0	0	200	300	0	0	0	0	0	0	0	200	903	0	0	0	0	0	0	0	603	903	0
491	1	0	0	0	0	0	0	200	300	0	0	0	0	0	0	0	200	903	0	0	0	0	0	0	0	603	903	0
491	2	0	0	0	0	0	0	200	300	0	0	0	0	0	0	0	200	903	0	0	0	0	0	0	0	603	903	0
491	3	0	0	0	0	0	0	200	300	0	0	0	0	0	0	0	200	903	0	0	0	0	0	0	0	603	903	0
491	4	0	0	0	0	0	0	200	300	0	0	0	0	0	0	0	200	903	0	0	0	0	0	0	0	603	903	0
491	5	0	0	0	0	0	0	200	300	0	0	0	0	0	0	0	200	903	0	0	0	0	0	0	0	603	903	0
491	6	0	0	0	0	0	0	200	300	0	0	0	0	0	0	0	200	903	0	0	0	0	0	0	0	603	903	0
491	7	0	0	0	0	0	0	200	300	0	0	0	0	0	0	0	200	903	0	0	0	0	0	0	0	603	903	0
491	8	0	0	0	0	0	0	200	300	0	0	0	0	0	0	0	200	903	0	0	0	0	0	0	0	603	903	0
491	9	0	0	0	0	0	0	200	300	0	0	0	0	0	0	0	200	903	0	0	0	0	0	0	0	603	903	0
492	0	0	0	0	0	0	0	200	300	0	0	0	0	0	0	0	200	903	0	0	0	0	0	0	0	603	903	0
492	1	0	0	0	0	0	0	200	300	0	0	0	0	0	0	0	200	903	0	0	0	0	0	0	0	603	903	0
492	2	0	0	0	0	0	0	200	300	0	0	0	0	0	0	0	200	903	0	0	0	0	0	0	0	603	903	0
492	3	0	0	0	0	0	0	200	300	0	0	0	0	0	0	0	200	903	0	0	0	0	0	0	0	603	903	0
492	4	0	0	0	0	0	0	200	300	0	0	0	0	0	0	0	200	903	0	0	0	0	0	0	0	603	903	0
492	5	0	0	0	0	0	0	200	300	0	0	0	0	0	0	0	200	903	0	0	0	0	0	0	0	603	903	0
492	6	0	0	0	0	0	0	200	300	0	0	0	0	0	0	0	200	903	0	0	0	0	0	0	0	603	903	0
492	7	0	0	0	0	0	0	200	300	0	0	0	0	0	0	0	200	903	0	0	0	0	0	0	0	603	903	0
492	8	0	0	0	0	0	0	200	300	0	0	0	0	0	0	0	200	903	0	0	0	0	0	0	0	603	903	0
492	9	0	0	0	0	0	0	200	300	0	0	0	0	0	0	0	200	903	0	0	0	0	0	0	0	603	903	0
493	0	0	0	0	0	0	0	200	300	0	0	0	0	0	0	0	200	903	0	0	0	0	0	0	0	603	903	0
493	1	0	0	0	0	0	0	200	300	0	0	0	0	0	0	0	200	903	0	0	0	0	0	0	0	603	903	0
493	2	0	0	0	0	0	0	200	300	0	0	0	0	0	0	0	200	903	0	0	0	0	0	0	0	603	903	0
493	3	0	0	0	0	0	0	200	300	0	0	0	0	0	0	0	200	903	0	0	0	0	0	0	0	603	903	0
493	4	0	0	0	0	0	0	200	300	0	0	0	0	0	0	0	200	903	0	0	0	0	0	0	0	603	903	0
493	5	0	0	0	0	0	0	200	300	0	0	0	0	0	0	0	200	903	0	0	0	0	0	0	0	603	903	0
493	6	0	0	0	0	0	0	200	300	0	0	0	0	0	0	0	200	903	0	0	0	0	0	0	0	603	903	0
493	7	0	0	0	0	0	0	200	300	0	0	0	0	0	0	0	200	903	0	0	0	0	0	0	0	603	903	0
493	8	0	0	0	0	0	0	200	300	0	0	0	0	0	0	0	200	903	0	0	0	0	0	0	0	603	903	0
493	9	0	0	0	0	0	0	200	300	0	0	0	0	0	0	0	200	903	0	0	0	0	0	0	0	603	903	0
494	0	0	0	0	0	0	0	200	300	0	0	0	0	0	0	0	200	903	0	0	0	0	0	0	0	603	903	0
494	1	0	0	0	0	0	0	200	300	0	0	0	0	0	0	0	200	903	0	0	0	0	0	0	0	603	903	0
494	2	0	0	0	0	0	0	200	300	0	0	0	0	0	0	0	200	903	0	0	0	0	0	0	0	603	903	0
494	3	0	0	0	0	0	0	200	300	0	0	0	0	0	0	0	200	903	0	0	0	0	0	0	0	603	903	0
494	4	0	0	0	0	0	0	200	300	0	0	0	0	0	0	0	200	903	0	0	0	0	0	0	0	603	903	0
494	5	0	0	0	0	0	0	200	300	0	0	0	0	0	0	0	200	903	0	0	0	0	0	0	0	603	903	0
494	6	0	0	0	0	0	0	200	300	0	0	0	0	0	0	0	200	903	0	0	0	0	0	0	0	603	903	0
494	7	0	0	0	0	0	0	200	300	0	0	0	0	0	0	0	200	903	0	0	0	0	0	0	0	603	903	0
494	8	0	0	0	0	0	0	200	300	0	0	0	0	0	0	0	200	903	0	0	0	0	0	0	0	603	903	0
494	9	0	0	0	0	0	0	200	300	0	0	0	0	0	0	0	200	903	0	0	0	0	0	0	0	603	903	0
495	0	0	0	0	0	0	0	200	300	0	0	0	0	0	0	0	200	903	0	0	0	0	0	0	0	603	903	0
495	1	0	0	0	0	0	0	200	300	0	0	0	0	0	0	0	200	903	0	0	0	0	0	0	0	603	903	0
495	2	0	0	0	0	0	0	200	300	0	0	0	0	0	0	0	200	903	0	0	0	0	0	0	0	603	903	0
495	3	0	0	0	0	0	0	200	300	0	0	0	0	0	0	0	200	903	0	0	0	0	0	0	0	603	903	0
495	4	0	0	0	0	0	0	200	300	0	0	0	0	0	0	0	200	903	0	0	0	0	0	0	0	603	903	0
495	5	0	0	0	0	0	0	200	300	0	0	0	0	0	0	0	200	903	0	0	0	0	0	0	0	603	903	0
495	6	0	0	0	0	0	0	200	300	0	0	0	0	0	0	0	200	903	0	0	0	0	0	0	0	603	903	0
495	7	0	0	0	0	0	0	200	300	0	0	0	0	0	0	0	200	903	0	0	0	0	0	0	0	603	903	0
495	8	0	0	0	0	0	0	200	300	0	0	0	0	0	0	0	200	903	0	0	0	0	0	0	0	603	903	0
495	9	0	0	0	0	0	0	200	300	0	0	0	0	0	0	0	200	903	0	0	0	0	0	0	0	603	903	0
496	0	0	0	0	0	0	0	200	300	0	0	0	0	0	0	0	200	903	0	0	0	0	0	0	0	603	903	0
496	1	0	0	0	0	0	0	200	300	0	0	0	0	0	0	0	200	903	0	0	0	0	0	0	0	603	903	0
496	2	0	0	0	0	0	0	200	300	0	0	0	0	0	0	0	200	903	0	0	0	0	0	0	0	603	903	0
496	3	0	0	0	0	0	0	200	300	0	0	0	0	0	0	0	200	903	0	0	0	0	0	0	0	603	903	0
496	4	0	0	0	0	0	0	200	300	0	0	0	0	0	0	0	200	903	0	0	0	0	0	0	0	603	903	0
496	5	0	0	0	0	0	0	200	300	0	0	0	0	0	0	0	200	903	0	0	0	0	0	0	0	603	903	0
496	6	0	0	0	0	0	0	200	300	0	0	0	0	0	0	0	200	903	0	0	0	0	0	0	0	603	903	0
496	7	0	0	0	0	0	0	200	300	0	0	0	0	0	0	0	200	903	0	0	0	0	0	0	0	603	903	0
496	8	0	0	0	0	0	0	200	300	0	0	0	0	0	0	0	200	903	0	0	0	0	0	0	0	603	903	0
496	9	0	0	0	0	0	0	200	300	0	0	0	0	0	0	0	200	903	0	0	0	0	0	0	0	603	903	0
497	0	0	0	0	0	0	0	200	300	0	0	0	0	0	0	0	200	903	0	0	0	0	0	0	0	603	903	0
497	1	0	0	0	0	0	0	200	300	0	0	0	0	0	0	0	200	903	0	0	0	0	0	0	0	603	903	0
497	2	0	0	0	0	0	0	200	300	0	0	0	0	0	0	0	200	903	0	0	0	0	0	0	0	603	903	0
497	3	0	0	0	0	0	0	200	300	0	0	0	0	0	0	0	200	903	0	0	0	0	0	0	0	603	903	0
497	4	0	0	0	0	0	0	200	300	0	0	0	0	0	0	0	200	903	0	0	0	0	0	0	0	603	903	0
497	5	0	0	0	0	0	0	200	300	0	0	0	0	0	0	0	200	903	0	0	0	0	0	0	0	603	903	0
497	6	0	0	0	0	0	0	200	300	0	0	0	0	0	0	0	200	903	0	0	0	0	0	0	0	603	903	0
497	7	0	0	0	0	0	0	200	300	0	0	0	0	0	0	0	200	903	0	0	0	0	0	0	0	603	903	0
497	8	0	0	0	0	0	0	200	300	0	0	0	0	0	0	0	200	903	0	0	0	0	0	0	0	603	903	0
497	9	0	0	0	0	0	0	200	300	0	0	0	0	0	0	0	200	903	0	0	0	0	0	0	0	603	903	0
498	0	0	0	0	0	0	0	200	300	0	0	0	0	0	0	0	200	903	0	0	0	0	0	0	0	603	903	0
498	1	0	0	0	0	0	0	200	300	0	0	0	0	0	0	0	200	903	0	0	0	0	0	0	0	603	903	0
498	2	0	0	0	0	0	0	200	300	0	0	0	0	0	0	0	200	903	0	0	0	0	0	0	0	603	903	0
498	3	0	0	0	0	0	0	200	300	0	0	0	0	0	0	0	200	903	0	0	0	0	0	0	0	603	903	0
498	4	0	0	0	0	0	0	200	300	0	0	0	0	0	0	0	200	903	0	0	0	0	0	0	0	603	903	0
498	5	0	0	0	0	0	0	200	300	0	0	0	0	0	0	0	200	903	0	0	0	0	0	0	0	603	903	0
498	6	0	0	0	0	0	0	200	300	0	0	0	0	0	0	0	200	903	0	0	0	0	0	0	0	603	903	0
498	7	0	0	0	0	0	0	200	300	0	0	0	0	0	0	0	200	903	0	0	0	0	0	0	0	603	903	0
498	8	0	0	0	0	0	0	200	300	0	0	0	0	0	0	0	200	903	0	0	0	0	0	0	0	603	903	0
498	9	0	0	0	0	0	0	200	300	0	0	0	0	0	0	0	200	903	0	0	0	0	0	0	0	603	903	0
499	0	0	0	0	0	0	0	200	300	0	0	0	0	0	0	0	200	903	0	0	0	0	0	0	0	603	903	0
499	1	0	0	0	0	0	0	200	300	0	0	0	0	0	0	0	200	903	0	0	0	0	0	0	0	603	903	0
499	2	0	0	0	0	0	0	200	300	0	0	0	0	0	0	0	200	903	0	0	0	0	0	0	0	603	903	0
499	3	0	0	0	0	0	0	200	300	0	0	0	0	0	0	0	200	903	0	0	0	0	0	0	0	603	903	0
499	4	0	0	0	0	0	0	200	300	0	0	0	0	0	0	0	200	903	0	0	0	0	0	0	0	603	903	0
499	5	0	0	0	0	0	0	200	300	0	0	0	0	0	0	0	200	903	0	0	0	0	0	0	0	603	903	0
499	6	0	0	0	0	0	0	200	300	0	0	0	0	0	0	0	200	903	0	0	0	0	0	0	0	603	903	0
499	7	0	0	0	0	0	0	200	300	0	0	0	0	0	0	0	200	903	0	0	0	0	0	0	0	603	903	0
499	8	0	0	0	0	0	0	200	300	0	0	0	0	0	0	0	200	903	0	0	0	0	0	0	0	603	903	0
499	9	0	0	0	0	0	0	200	300	0	0	0	0	0	0	0	200	903	0	0	0	0	0	0	0	603	903	0
500	0	0	0	0	0	0	0	200	300	0	0	0	0	0	0	0	200	903	0	0	0	0	0	0	0	603	903	0
500	1	0	0	0	0	0	0	200	300	0	0	0	0	0	0	0	200	903	0	0	0	0	0	0	0	603	903	0
500	2	0	0	0	0	0	0	200	300	0	0	0	0	0	0	0	200	903	0	0	0	0	0	0	0	603	903	0
500	3	0	0	0	0	0	0	200	300	0	0	0	0	0	0	0	200	903	0	0	0	0	0	0	0	603	903	0
500	4	0	0	0	0	0	0	200	300	0	0	0	0	0	0	0	200	903	0	0	0	0	0	0	0	603	903	0
500	5	0	0	0	0	0	0	200	300	0	0	0	0	0	0	0	200	903	0	0	0	0	0	0	0	603	903	0
500	6	0	0	0	0	0	0	200	300	0	0	0	0	0	0	0	200	903	0	0	0	0	0	0	0	603	903	0
500	7	0	0	0	0	0	0	200	300	0	0	0	0	0	0	0	200	903	0	0	0	0	0	0	0	603	903	0
500	8	0	0	0	0	0	0	200	300	0	0	0	0	0	0	0	200	903	0	0	0	0	0	0	0	603	903	0
500	9	0	0	0	0	0	0	200	300	0	0	0	0	0	0	0	200	903	0	0	0	0	0	0	0	603	903	0
501	0	0	0	0	0	0	0	200	300	0	0	0	0	0	0	0	200	903	0	0	0	0	0	0	0	603	903	0
501	1	0	0	0	0	0	0	200	300	0	0	0	0	0	0	0	200	903	0	0	0	0	0	0	0	603	903	0
501	2	0	0	0	0	0	0	200	300	0	0	0	0	0	0	0	200	903	0	0	0	0	0	0	0	603	903	0
501	3	0	0	0	0	0	0	200	300	0	0	0	0	0	0	0	200	903	0	0	0	0	0	0	0	603	903	0
501	4	0	0	0	0	0	0	200	300	0	0	0	0	0	0	0	200	903	0	0	0	0	0	0	0	603	903	0
501	5	0	0	0	0	0	0	200	300	0	0	0	0	0	0	0	200	903	0	0	0	0	0	0	0	603	903	0
501	6	0	0	0	0	0	0	200	300	0	0	0	0	0	0	0	200	903	0	0	0	0	0	0	0	603	903	0
501	7	0	0	0	0	0	0	200	300	0	0	0	0	0	0	0	200	903	0	0	0	0	0	0	0	603	903	0
501	8	0	0	0	0	0	0	200	300	0	0	0	0	0	0	0	200	903	0	0	0	0	0	0	0	603	903	0
501	9	0	0	0	0	0	0	200	300	0	0	0	0	0	0	0	200	903	0	0	0	0	0	0	0	603	903	0
502	0	0	0	0	0	0	0	200	300	0	0	0	0	0	0	0	200	903	0	0	0	0	0	0	0	603	903	0
502	1	0	0	0	0	0	0	200	300	0	0	0	0	0	0	0	200	903	0	0	0	0	0	0	0	603	903	0
502	2	0	0	0	0	0	0	200	300	0	0	0	0	0	0	0	200	903	0	0	0	0	0	0	0	603	903	0
502	3	0	0	0	0	0	0	200	300	0	0	0	0	0	0	0	200	903	0	0	0	0	0	0	0	603	903	0
502	4	0	0	0	0	0	0	200	300	0	0	0	0	0	0	0	200	903	0	0	0	0	0	0	0	603	903	0
502	5	0	0	0	0	0	0	200	300	0	0	0	0	0	0	0	200	903	0	0	0	0	0	0	0	603	903	0
502	6	0	0	0	0	0	0	200	300	0	0	0	0	0	0	0	200	903	0	0	0	0	0	0	0	603	903	0
502	7	0	0	0	0	0	0	200	300	0	0	0	0	0	0	0	200	903	0	0	0	0	0	0	0	603	903	0
502	8	0	0	0	0	0	0	200	300	0	0	0	0	0	0	0	200	903	0	0	0	0	0	0	0	603	903	0
502	9	0	0	0	0	0	0	200	300	0	0	0	0	0	0	0	200	903	0	0	0	0	0	0	0	603	903	0
503	0	0	0	0	0	0	0	200	300	0	0	0	0	0	0	0	200	903	0	0	0	0	0	0	0	603	903	0
503	1	0	0	0	0	0	0	200	300	0	0	0	0	0	0	0	200	903	0	0	0	0	0	0	0	603	903	0
503	2	0	0	0	0	0	0	200	300	0	0	0	0	0	0	0	200	903	0	0	0	0	0	0	0	603	903	0
503	3	0	0	0	0	0	0	200	300	0	0	0	0	0	0	0	200	903	0	0	0	0	0	0	0	603	903	0
503	4	0	0	0	0	0	0	200	300	0	0	0	0	0	0	0	200	903	0	0	0	0	0	0	0	603	903	0
503	5	0	0	0	0	0	0	200	300	0	0	0	0	0	0	0	200	903	0	0	0	0	0	0	0	603	903	0
503	6	0	0	0	0	0	0	200	300	0	0	0	0	0	0	0	200	903	0	0	0	0	0	0	0	603	903	0
503	7	0	0	0	0	0	0	200	300	0	0	0	0	0	0	0	200	903	0	0	0	0	0	0	0	603	903	0
503	8	0	0	0	0	0	0	200	300	0	0	0	0	0	0	0	200	903	0	0	0	0	0	0	0	603	903	0
503	9	0	0	0	0	0	0	200	300	0	0	0	0	0	0	0	200	903	0	0	0	0	0	0	0	603	903	0
504	0	0	0	0	0	0	0	200	300	0	0	0	0	0	0	0	200	903	0	0	0	0	0	0	0	603	903	0
504	1	0	0	0	0	0	0	200	300	0	0	0	0	0	0	0	200	903	0	0	0	0	0	0	0	603	903	0
504	2	0	0	0	0	0	0	200	300	0	0	0	0	0	0	0	200	903	0	0	0	0	0	0	0	603	903	0
504	3	0	0	0	0	0	0	200	300	0	0	0	0	0	0	0	200	903	0	0	0	0	0	0	0	603	903	0
504	4	0	0	0	0	0	0	200	300	0	0	0	0	0	0	0	200	903	0	0	0	0	0	0	0	603	903	0
504	5	0	0	0	0	0	0	200	300	0	0	0	0	0	0	0	200	903	0	0	0	0	0	0	0	603	903	0
504	6	0	0	0	0	0	0	200	300	0	0	0	0	0	0	0	200	903	0	0	0	0	0	0	0	603	903	0
504	7	0	0	0	0	0	0	200	300	0	0	0	0	0	0	0	200	903	0	0	0	0	0	0	0	603	903	0
504	8	0	0	0	0	0	0	200	300	0	0	0	0	0	0	0	200	903	0	0	0	0	0	0	0	603	903	0
504	9	0	0	0	0	0	0	200	300	0	0	0	0	0	0	0	200	903	0	0	0	0	0	0	0	603	903	0
505	0	0	0	0	0	0	0	200	300	0	0	0	0	0	0	0	200	903	0	0	0	0	0	0	0	603	903	0
505	1	0	0	0	0	0	0	200	300	0	0	0	0	0	0	0	200	903	0	0	0	0	0	0	0	603	903	0
505	2	0	0	0	0	0	0	200	300	0	0	0	0	0	0	0	200	903	0	0	0	0	0	0	0	603	903	0
505	3	0	0	0	0	0	0	200	300	0	0	0	0	0	0	0	200	903	0	0	0	0	0	0	0	603	903	0
505	4	0	0	0	0	0	0	200	300	0	0	0	0	0	0	0	200	903	0	0	0	0	0	0	0	603	903	0
505	5	0	0	0	0	0	0	200	300	0	0	0	0	0	0	0	200	903	0	0	0	0	0	0	0	603	903	0
505	6	0	0	0	0	0	0	200	300	0	0	0	0	0	0	0	200	903	0	0	0	0	0	0	0	603	903	0
505	7	0	0	0	0	0	0	200	300	0	0	0	0	0	0	0	200	903	0	0	0	0	0	0	0	603	903	0
505	8	0	0	0	0	0	0	200	300	0	0	0	0	0	0	0	200	903	0	0	0	0	0	0	0	603	903	0
505	9	0	0	0	0	0	0	200	300	0	0	0	0	0	0	0	200	903	0	0	0	0	0	0	0	603	903	0
506	0	0	0	0	0	0	0	200	300	0	0	0	0	0	0	0	200	903	0	0	0	0	0	0	0	603	903	0
506	1	0	0	0	0	0	0	200	300	0	0	0	0	0	0	0	200	903	0	0	0	0	0	0	0	603	903	0
506	2	0	0	0	0	0	0	200	300	0	0	0	0	0	0	0	200	903	0	0	0	0	0	0	0	603	903	0
506	3	0	0	0	0	0	0	200	300	0	0	0	0	0	0	0	200	903	0	0	0	0	0	0	0	603	903	0
506	4	0	0	0	0	0	0	200	300	0	0	0	0	0	0	0	200	903	0	0	0	0	0	0	0	603	903	0
506	5	0	0	0	0	0	0	200	300	0	0	0	0	0	0	0	200	903	0	0	0	0	0	0	0	603	903	0
506	6	0	0	0	0	0	0	200	300	0	0	0	0	0	0	0	200	903	0	0	0	0	0	0	0	603	903	0
506	7	0	0	0	0	0	0	200	300	0	0	0	0	0	0	0	200	903	0	0	0	0	0	0	0	603	903	0
506	8	0	0	0	0	0	0	200	300	0	0	0	0	0	0	0	200	903	0	0	0	0	0	0	0	603	903	0
506	9	0	0	0	0	0	0	200	300	0	0	0	0	0	0	0	200	903	0	0	0	0	0	0	0	603	903	0
507	0	0	0	0	0	0	0	200	300	0	0	0	0	0	0	0	200	903	0	0	0	0	0	0	0	603	903	0
507	1	0	0	0	0	0	0	200	300	0	0	0	0	0	0	0	200	903	0	0	0	0	0	0	0	603	903	0
507	2	0	0	0	0	0	0	200	300	0	0	0	0	0	0	0	200	903	0	0	0	0	0	0	0	603	903	0
507	3	0	0	0	0	0	0	200	300	0	0	0	0	0	0	0	200	903	0	0	0	0	0	0	0	603	903	0
507	4	0	0	0	0	0	0	200	300	0	0	0	0	0	0	0	200	903	0	0	0	0	0	0	0	603	903	0
507	5	0	0	0	0	0	0	200	300	0	0	0	0	0	0	0	200	903	0	0	0	0	0	0	0	603	903	0
507	6	0	0	0	0	0	0	200	300	0	0	0	0	0	0	0	200	903	0	0	0	0	0	0	0	603	903	0
507	7	0	0	0	0	0	0	200	300	0	0	0	0	0	0	0	200	903	0	0	0	0	0	0	0	603	903	0
507	8	0	0	0	0	0	0	200	300	0	0	0	0	0	0	0	200	903	0	0	0	0	0	0	0	603	903	0
507	9	0	0	0	0	0	0	200	300	0	0	0	0	0	0	0	200	903	0	0	0	0	0	0	0	603	903	0
508	0	0	0	0	0	0	0	200	300	0	0	0	0	0	0	0	200	903	0	0	0	0	0	0	0	603	903	0
508	1	0	0	0	0	0	0	200	300	0	0	0	0	0	0	0	200	903	0	0	0	0	0	0	0	603	903	0
508	2	0	0	0	0	0	0	200	300	0	0	0	0	0	0	0	200	903	0	0	0	0	0	0	0	603	903	0
508	3	0	0	0	0	0	0	200	300	0	0	0	0	0	0	0	200	903	0	0	0	0	0	0	0	603	903	0
508	4	0	0	0	0	0	0	200	300	0	0	0	0	0	0	0	200	903	0	0	0	0	0	0	0	603	903	0
508	5	0	0	0	0	0	0	200	300	0	0	0	0	0	0	0	200	903	0	0	0	0	0	0	0	603	903	0
508	6	0	0	0	0	0	0	200	300	0	0	0	0	0	0	0	200	903	0	0	0	0	0	0	0	603	903	0
508	7	0	0	0	0	0	0	200	300	0	0	0	0	0	0	0	200	903	0	0	0	0	0	0	0	603	903	0
508	8	0	0	0	0	0	0	200	300	0	0	0	0	0	0	0	200	903	0	0	0	0	0	0	0	603	903	0
508	9	0	0	0	0	0	0	200	300	0	0	0	0	0	0	0	200	903	0	0	0	0	0	0	0	603	903	0
509	0	0	0	0	0	0	0	200	300	0	0	0	0	0	0	0	200	903	0	0	0	0	0	0	0	603	903	0
509	1	0	0	0	0	0	0	200	300	0	0	0	0	0	0	0	200	903	0	0	0	0	0	0	0	603	903	0
509	2	0	0	0	0	0	0	200	300	0	0	0	0	0	0	0	200	903	0	0	0	0	0	0	0	603	903	0
509	3	0	0	0	0	0	0	200	300	0	0	0	0	0	0	0	200	903	0	0	0	0	0	0	0	603	903	0
509	4	0	0	0	0	0	0	200	300	0	0	0	0	0	0	0	200	903	0	0	0	0	0	0	0	603	903	0
509	5	0	0	0	0	0	0	200	300	0	0	0	0	0	0	0	200	903	0	0	0	0	0	0	0	603	903	0
509	6	0	0	0	0	0	0	200	300	0	0	0	0	0	0	0	200	903	0	0	0	0	0	0	0	603	903	0
509	7	0	0	0	0	0	0	200	300	0	0	0	0	0	0	0	200	903	0	0	0	0	0	0	0	603	903	0
509	8	0	0	0	0	0	0	200	300	0	0	0	0	0	0	0	200	903	0	0	0	0	0	0	0	603	903	0
509	9	0	0	0	0	0	0	200	300	0	0	0	0	0	0	0	200	903	0	0	0	0	0	0	0	603	903	0
510	0	0	0	0	0	0	0	200	300	0	0	0	0	0	0	0	200	903	0	0	0	0	0	0	0	603	903	0
510	1	0	0	0	0	0	0	200	300	0	0	0	0	0	0	0	200	903	0	0	0	0	0	0	0	603	903	0
510	2	0	0	0	0	0	0	200	300	0	0	0	0	0	0	0	200	903	0	0	0	0	0	0	0	603	903	0
510	3	0	0	0	0	0	0	200	300	0	0	0	0	0	0	0	200	903	0	0	0	0	0	0	0	603	903	0
510	4	0	0	0	0	0	0	200	300	0	0	0	0	0	0	0	200	903	0	0	0	0	0	0	0	603	903	0
510	5	0	0	0	0	0	0	200	300	0	0	0	0	0	0	0	200	903	0	0	0	0	0	0	0	603	903	0
510	6	0	0	0	0	0	0	200	300	0	0	0	0	0	0	0	200	903	0	0	0	0	0	0	0	603	903	0
510	7	0	0	0	0	0	0	200	300	0	0	0	0	0	0	0	200	903	0	0	0	0	0	0	0	603	903	0
510	8	0	0	0	0	0	0	200	300	0	0	0	0	0	0	0	200	903	0	0	0	0	0	0	0	603	903	0
510	9	0	0	0	0	0	0	200	300	0	0	0	0	0	0	0	200	903	0	0	0	0	0	0	0	603	903	0
511	0	0	0	0	0	0	0	200	300	0	0	0	0	0	0	0	200	903	0	0	0	0	0	0	0	603	903	0
511	1	0	0	0	0	0	0	200	300	0	0	0	0	0	0	0	200	903	0	0	0	0	0	0	0	603	903	0
511	2	0	0	0	0	0	0	200	300	0	0	0	0	0	0	0	200	903	0	0	0	0	0	0	0	603	903	0
511	3	0	0	0	0	0	0	200	300	0	0	0	0	0	0	0	200	903	0	0	0	0	0	0	0	603	903	0
511	4	0	0	0	0	0	0	200	300	0	0	0	0	0	0	0	200	903	0	0	0	0	0	0	0	603	903	0
511	5	0	0	0	0	0	0	200	300	0	0	0	0	0	0	0	200	903	0	0	0	0	0	0	0	603	903	0
511	6	0	0	0	0	0	0	200	300	0	0	0	0	0	0	0	200	903	0	0	0	0	0	0	0	603	903	0
511	7	0	0	0	0	0	0	200	300	0	0	0	0	0	0	0	200	903	0	0	0	0	0	0	0	603	903	0
511	8	0	0	0	0	0	0	200	300	0	0	0	0	0	0	0	200	903	0	0	0	0	0	0	0	603	903	0
511	9	0	0	0	0	0	0	200	300	0	0	0	0	0	0	0	200	903	0	0	0	0	0	0	0	603	903	0
512	0	0	0	0	0	0	0	200	300	0	0	0	0	0	0	0	200	903	0	0	0	0	0	0	0	603	903	0
512	1	0	0	0	0	0	0	200	300	0	0	0	0	0	0	0	200	903	0	0	0	0	0	0	0	603	903	0
512	2	0	0	0	0	0	0	200	300	0	0	0	0	0	0	0	200	903	0	0	0	0	0	0	0	603	903	0
512	3	0	0	0	0	0	0	200	300	0	0	0	0	0	0	0	200	903	0	0	0	0	0	0	0	603	903	0
512	4	0	0	0	0	0	0	200	300	0	0	0	0	0	0	0	200	903	0	0	0	0	0	0	0	603	903	0
512	5	0	0	0	0	0	0	200	300	0	0	0	0	0	0	0	200	903	0	0	0	0	0	0	0	603	903	0
512	6	0	0	0	0	0	0	200	300	0	0	0	0	0	0	0	200	903	0	0	0	0	0	0	0	603	903	0
512	7	0	0	0	0	0	0	200	300	0	0	0	0	0	0	0	200	903	0	0	0	0	0	0	0	603	903	0
512	8	0	0	0	0	0	0	200	300	0	0	0	0	0	0	0	200	903	0	0	0	0	0	0	0	603	903	0
512	9	0	0	0	0	0	0	200	300	0	0	0	0	0	0	0	200	903	0	0	0	0	0	0	0	603	903	0
513	0	0	0	0	0	0	0	200	300	0	0	0	0	0	0	0	200	903	0	0	0	0	0	0	0	603	903	0
513	1	0	0	0	0	0	0	200	300	0	0	0	0	0	0	0	200	903	0	0	0	0	0	0	0	603	903	0
513	2	0	0	0	0	0	0	200	300	0	0	0	0	0	0	0	200	903	0	0	0	0	0	0	0	603	903	0
513	3	0	0	0	0	0	0	200	300	0	0	0	0	0	0	0	200	903	0	0	0	0	0	0	0	603	903	0
513	4	0	0	0	0	0	0	200	300	0	0	0	0	0	0	0	200	903	0	0	0	0	0	0	0	603	903	0
513	5	0	0	0	0	0	0	200	300	0	0	0	0	0	0	0	200	903	0	0	0	0	0	0	0	603	903	0
513	6	0	0	0	0	0	0	200	300	0	0	0	0	0	0	0	200	903	0	0	0	0	0	0	0	603	903	0
513	7	0	0	0	0	0	0	200	300	0	0	0	0	0	0	0	200	903	0	0	0	0	0	0	0	603	903	0
513	8	0	0	0	0	0	0	200	300	0	0	0	0	0	0	0	200	903	0	0	0	0	0	0	0	603	903	0
513	9	0	0	0	0	0	0	200	300	0	0	0	0	0	0	0	200	903	0	0	0	0	0	0	0	603	903	0
514	0	0	0	0	0	0	0	200	300	0	0	0	0	0	0	0	200	903	0	0	0	0	0	0	0	603	903	0
514	1	0	0	0	0	0	0	200	300	0	0	0	0	0	0	0	200	903	0	0	0	0	0	0	0	603	903	0
514	2	0	0	0	0	0	0	200	300	0	0	0	0	0	0	0	200	903	0	0	0	0	0	0	0	603	903	0
514	3	0	0	0	0	0	0	200	300	0	0	0	0	0	0	0	200	903	0	0	0	0	0	0	0	603	903	0
514	4	0	0	0	0	0	0	200	300	0	0	0	0	0	0	0	200	903	0	0	0	0	0	0	0	603	903	0
514	5	0	0	0	0	0	0	200	300	0	0	0	0	0	0	0	200	903	0	0	0	0	0	0	0	603	903	0
514	6	0	0	0	0	0	0	200	300	0	0	0	0	0	0	0	200	903	0	0	0	0	0	0	0	603	903	0
514	7	0	0	0	0	0	0	200	300	0	0	0	0	0	0	0	200	903	0	0	0	0	0	0	0	603	903	0
514	8	0	0	0	0	0	0	200	300	0	0	0	0	0	0	0	200	903	0	0	0	0	0	0	0	603	903	0
514	9	0	0	0	0	0	0	200	300	0	0	0	0	0	0	0	200	903	0	0	0	0	0	0	0	603	903	0
515	0	0	0	0	0	0	0	200	300	0	0	0	0	0	0	0	200	903	0	0	0	0	0	0	0	603	903	0
515	1	0	0	0	0	0	0	200	300	0	0	0	0	0	0	0	200	903	0	0	0	0	0	0	0	603	903	0
515	2	0	0	0	0	0	0	200	300	0	0	0	0	0	0	0	200	903	0	0	0	0	0	0	0	603	903	0
515	3	0	0	0	0	0	0	200	300	0	0	0	0	0	0	0	200	903	0	0	0	0	0	0	0	603	903	0
515	4	0	0	0	0	0	0	200	300	0	0	0	0	0	0	0	200	903	0	0	0	0	0	0	0	603	903	0
515	5	0	0	0	0	0	0	200	300	0	0	0	0	0	0	0	200	903	0	0	0	0	0	0	0	603	903	0
515	6	0	0	0	0	0	0	200	300	0	0	0	0	0	0	0	200	903	0	0	0	0	0	0	0	603	903	0
515	7	0	0	0	0	0	0	200	300	0	0	0	0	0	0	0	200	903	0	0	0	0	0	0	0	603	903	0
515	8	0	0	0	0	0	0	200	300	0	0	0	0	0	0	0	200	903	0	0	0	0	0	0	0	603	903	0
515	9	0	0	0	0	0	0	200	300	0	0	0	0	0	0	0	200	903	0	0	0	0	0	0	0	603	903	0
516	0	0	0	0	0	0	0	200	300	0	0	0	0	0	0	0	200	903	0	0	0	0	0	0	0	603	903	0
516	1	0	0	0	0	0	0	200	300	0	0	0	0	0	0	0	200	903	0	0	0	0	0	0	0	603	903	0
516	2	0	0	0	0	0	0	200	300	0	0	0	0	0	0	0	200	903	0	0	0	0	0	0	0	603	903	0
516	3	0	0	0	0	0	0	200	300	0	0	0	0	0	0	0	200	903	0	0	0	0	0	0	0	603	903	0
516	4	0	0	0	0	0	0	200	300	0	0	0	0	0	0	0	200	903	0	0	0	0	0	0	0	603	903	0
516	5	0	0	0	0	0	0	200	300	0	0	0	0	0	0	0	200	903	0	0	0	0	0	0	0	603	903	0
516	6	0	0	0	0	0	0	200	300	0	0	0	0	0	0	0	200	903	0	0	0	0	0	0	0	603	903	0
516	7	0	0	0	0	0	0	200	300	0	0	0	0	0	0	0	200	903	0	0	0	0	0	0	0	603	903	0
516	8	0	0	0	0	0	0	200	300	0	0	0	0	0	0	0	200	903	0	0	0	0	0	0	0	603	903	0
516	9	0	0	0	0	0	0	200	300	0	0	0	0	0	0	0	200	903	0	0	0	0	0	0	0	603	903	0
517	0	0	0	0	0	0	0	200	300	0	0	0	0	0	0	0	200	903	0	0	0	0	0	0	0	603	903	0
517	1	0	0	0	0	0	0	200	300	0	0	0	0	0	0	0	200	903	0	0	0	0	0	0	0	603	903	0
517	2	0	0	0	0	0	0	200	300	0	0	0	0	0	0	0	200	903	0	0	0	0	0	0	0	603	903	0
517	3	0	0	0	0	0	0	200	300	0	0	0	0	0	0	0	200	903	0	0	0	0	0	0	0	603	903	0
517	4	0	0	0	0	0	0	200	300	0	0	0	0	0	0	0	200	903	0	0	0	0	0	0	0	603	903	0
517	5	0	0	0	0	0	0	200	300	0	0	0	0	0	0	0	200	903	0	0	0	0	0	0	0	603	903	0
517	6	0	0	0	0	0	0	200	300	0	0	0	0	0	0	0	200	903	0	0	0	0	0	0	0	603	903	0
517	7	0	0	0	0	0	0	200	300	0	0	0	0	0	0	0	200	903	0	0	0	0	0	0	0	603	903	0
517	8	0	0	0	0	0	0	200	300	0	0	0	0	0	0	0	200	903	0	0	0	0	0	0	0	603	903	0
517	9	0	0	0	0	0	0	200	300	0	0	0	0	0	0	0	200	903	0	0	0	0	0	0	0	603	903	0
518	0	0	0	0	0	0	0	200	300	0	0	0	0	0	0	0	200	903	0	0	0	0	0	0	0	603	903	0
518	1	0	0	0	0	0	0	200	300	0	0	0	0	0	0	0	200	903	0	0	0	0	0	0	0	603	903	0
518	2	0	0	0	0	0	0	200	300	0	0	0	0	0	0	0	200	903	0	0	0	0	0	0	0	603	903	0
518	3	0	0	0	0	0	0	200	300	0	0	0	0	0	0	0	200	903	0	0	0	0	0	0	0	603	903	0
518	4	0	0	0	0	0	0	200	300	0	0	0	0	0	0	0	200	903	0	0	0	0	0	0	0	603	903	0
518	5	0	0	0	0	0	0	200	300	0	0	0	0	0	0	0	200	903	0	0	0	0	0	0	0	603	903	0
518	6	0	0	0	0	0	0	200	300	0	0	0	0	0	0	0	200	903	0	0	0	0	0	0	0	603	903	0
518	7	0	0	0	0	0	0	200	300	0	0	0	0	0	0	0	200	903	0	0	0	0	0	0	0	603	903	0
518	8	0	0	0	0	0	0	200	300	0	0	0	0	0	0	0	200	903	0	0	0	0	0	0	0	603	903	0
518	9	0	0	0	0	0	0	200	300	0	0	0	0	0	0	0	200	903	0	0	0	0	0	0	0	603	903	0
519	0	0	0	0	0	0	0	200	300	0	0	0	0	0	0	0	200	903	0	0	0	0	0	0	0	603	903	0
519	1	0	0	0	0	0	0	200	300	0	0	0	0	0	0	0	200	903	0	0	0	0	0	0	0	603	903	0
519	2	0	0	0	0	0	0	200	300	0	0	0	0	0	0	0	200	903	0	0	0	0	0	0	0	603	903	0
519	3	0	0	0	0	0	0	200	300	0	0	0	0	0	0	0	200	903	0	0	0	0	0	0	0	603	903	0
519	4	0	0	0	0	0	0	200	300	0	0	0	0	0	0	0	200	903	0	0	0	0	0	0	0	603	903	0
519	5	0	0	0	0	0	0	200	300	0	0	0	0	0	0	0	200	903	0	0	0	0	0	0	0	603	903	0
519	6	0	0	0	0	0	0	200	300	0	0	0	0	0	0	0	200	903	0	0	0	0	0	0	0	603	903	0
519	7	0	0	0	0	0	0	200	300	0	0	0	0	0	0	0	200	903	0	0	0	0	0	0	0	603	903	0
519	8	0	0	0	0	0	0	200	300	0	0	0	0	0	0	0	200	903	0	0	0	0	0	0	0	603	903	0
519	9	0	0	0	0	0	0	200	300	0	0	0	0	0	0	0	200	903	0	0	0	0	0	0	0	603	903	0
520	0	0	0	0	0	0	0	200	300	0	0	0	0	0	0	0	200	903	0	0	0	0	0	0	0	603	903	0
520	1	0	0	0	0	0	0	200	300	0	0	0	0	0	0	0	200	903	0	0	0	0	0	0	0	603	903	0
520	2	0	0	0	0	0	0	200	300	0	0	0	0	0	0	0	200	903	0	0	0	0	0	0	0	603	903	0
520	3	0	0	0	0	0	0	200	300	0	0	0	0	0	0	0	200	903	0	0	0	0	0	0	0	603	903	0
520	4	0	0	0	0	0	0	200	300	0	0	0	0	0	0	0	200	903	0	0	0	0	0	0	0	603	903	0
520	5	0	0	0	0	0	0	200	300	0	0	0	0	0	0	0	200	903	0	0	0	0	0	0	0	603	903	0
520	6	0	0	0	0	0	0	200	300	0	0	0	0	0	0	0	200	903	0	0	0	0	0	0	0	603	903	0
520	7	0	0	0	0	0	0	200	300	0	0	0	0	0	0	0	200	903	0	0	0	0	0	0	0	603	903	0
520	8	0	0	0	0	0	0	200	300	0	0	0	0	0	0	0	200	903	0	0	0	0	0	0	0	603	903	0
520	9	0	0	0	0	0	0	200	300	0	0	0	0	0	0	0	200	903	0	0	0	0	0	0	0	603	903	0
521	0	0	0	0	0	0	0	200	300	0	0	0	0	0	0	0	200	903	0	0	0	0	0	0	0	603	903	0
521	1	0	0	0	0	0	0	200	300	0	0	0	0	0	0	0	200	903	0	0	0	0	0	0	0	603	903	0
521	2	0	0	0	0	0	0	200	300	0	0	0	0	0	0	0	200	903	0	0	0	0	0	0	0	603	903	0
521	3	0	0	0	0	0	0	200	300	0	0	0	0	0	0	0	200	903	0	0	0	0	0	0	0	603	903	0
521	4	0	0	0	0	0	0	200	300	0	0	0	0	0	0	0	200	903	0	0	0	0	0	0	0	603	903	0
521	5	0	0	0	0	0	0	200	300	0	0	0	0	0	0	0	200	903	0	0	0	0	0	0	0	603	903	0
521	6	0	0	0	0	0	0	200	300	0	0	0	0	0	0	0	200	903	0	0	0	0	0	0	0	603	903	0
521	7	0	0	0	0	0	0	200	300	0	0	0	0	0	0	0	200	903	0	0	0	0	0	0	0	603	903	0
521	8	0	0	0	0	0	0	200	300	0	0	0	0	0	0	0	200	903	0	0	0	0	0	0	0	603	903	0
521	9	0	0	0	0	0	0	200	300	0	0	0	0	0	0	0	200	903	0	0	0	0	0	0	0	603	903	0
522	0	0	0	0	0	0	0	200	300	0	0	0	0	0	0	0	200	903	0	0	0	0	0	0	0	603	903	0
522	1	0	0	0	0	0	0	200	300	0	0	0	0	0	0	0	200	903	0	0	0	0	0	0	0	603	903	0
522	2	0	0	0	0	0	0	200	300	0	0	0	0	0	0	0	200	903	0	0	0	0	0	0	0	603	903	0
522	3	0	0	0	0	0	0	200	300	0	0	0	0	0	0	0	200	903	0	0	0	0	0	0	0	603	903	0
522	4	0	0	0	0	0	0	200	300	0	0	0	0	0	0	0	200	903	0	0	0	0	0	0	0	603	903	0
522	5	0	0	0	0	0	0	200	300	0	0	0	0	0	0	0	200	903	0	0	0	0	0	0	0	603	903	0
522	6	0	0	0	0	0	0	200	300	0	0	0	0	0	0	0	200	903	0	0	0	0	0	0	0	603	903	0
522	7	0	0	0	0	0	0	200	300	0	0	0	0	0	0	0	200	903	0	0	0	0	0	0	0	603	903	0
522	8	0	0	0	0	0	0	200	300	0	0	0	0	0	0	0	200	903	0	0	0	0	0	0	0	603	903	0
522	9	0	0	0	0	0	0	200	300	0	0	0	0	0	0	0	200	903	0	0	0	0	0	0	0	603	903	0
523	0	0	0	0	0	0	0	200	300	0	0	0	0	0	0	0	200	903	0	0	0	0	0	0	0	603	903	0
523	1	0	0	0	0	0	0	200	300	0	0	0	0	0	0	0	200	903	0	0	0	0	0	0	0	603	903	0
523	2	0	0	0	0	0	0	200	300	0	0	0	0	0	0	0	200	903	0	0	0	0	0	0	0	603	903	0
523	3	0	0	0	0	0	0	200	300	0	0	0	0	0	0	0	200	903	0	0	0	0	0	0	0	603	903	0
523	4	0	0	0	0	0	0	200	300	0	0	0	0	0	0	0	200	903	0	0	0	0	0	0	0	603	903	0
523	5	0	0	0	0	0	0	200	300	0	0	0	0	0	0	0	200	903	0	0	0	0	0	0	0	603	903	0
523	6	0	0	0	0	0	0	200	300	0	0	0	0	0	0	0	200	903	0	0	0	0	0	0	0	603	903	0
523	7	0	0	0	0	0	0	200	300	0	0	0	0	0	0	0	200	903	0	0	0	0	0	0	0	603	903	0
523	8	0	0	0	0	0	0	200	300	0	0	0	0	0	0	0	200	903	0	0	0	0	0	0	0	603	903	0
523	9	0	0	0	0	0	0	200	300	0	0	0	0	0	0	0	200	903	0	0	0	0	0	0	0	603	903	0
524	0	0	0	0	0	0	0	200	300	0	0	0	0	0	0	0	200	903	0	0	0	0	0	0	0	603	903	0
524	1	0	0	0	0	0	0	200	300	0	0	0	0	0	0	0	200	903	0	0	0	0	0	0	0	603	903	0
524	2	0	0	0	0	0	0	200	300	0	0	0	0	0	0	0	200	903	0	0	0	0	0	0	0	603	903	0
524	3	0	0	0	0	0	0	200	300	0	0	0	0	0	0	0	200	903	0	0	0	0	0	0	0	603	903	0
524	4	0	0	0	0	0	0	200	300	0	0	0	0	0	0	0	200	903	0	0	0	0	0	0	0	603	903	0
524	5	0	0	0	0	0	0	200	300	0	0	0	0	0	0	0	200	903	0	0	0	0	0	0	0	603	903	0
524	6	0	0	0	0	0	0	200	300	0	0	0	0	0	0	0	200	903	0	0	0	0	0	0	0	603	903	0
524	7	0	0	0	0	0	0	200	300	0	0	0	0	0	0	0	200	903	0	0	0	0	0	0	0	603	903	0
524	8	0	0	0	0	0	0	200	300	0	0	0	0	0	0	0	200	903	0	0	0	0	0	0	0	603	903	0
524	9	0	0	0	0	0	0	200	300	0	0	0	0	0	0	0	200	903	0	0	0	0	0	0	0	603	903	0
525	0	0	0	0	0	0	0	200	300	0	0	0	0	0	0	0	200	903	0	0	0	0	0	0	0	603	903	0
525	1	0	0	0	0	0	0	200	300	0	0	0	0	0	0	0	200	903	0	0	0	0	0	0	0	603	903	0
525	2	0	0	0	0	0	0	200	300	0	0	0	0	0	0	0	200	903	0	0	0	0	0	0	0	603	903	0
525	3	0	0	0	0	0	0	200	300	0	0	0	0	0	0	0	200	903	0	0	0	0	0	0	0	603	903	0
525	4	0	0	0	0	0	0	200	300	0	0	0	0	0	0	0	200	903	0	0	0	0	0	0	0	603	903	0
525	5	0	0	0	0	0	0	200	300	0	0	0	0	0	0	0	200	903	0	0	0	0	0	0	0	603	903	0
525	6	0	0	0	0	0	0	200	300	0	0	0	0	0	0	0	200	903	0	0	0	0	0	0	0	603	903	0
525	7	0	0	0	0	0	0	200	300	0	0	0	0	0	0	0	200	903	0	0	0	0	0	0	0	603	903	0
525	8	0	0	0	0	0	0	200	300	0	0	0	0	0	0	0	200	903	0	0	0	0	0	0	0	603	903	0
525	9	0	0	0	0	0	0	200	300	0	0	0	0	0	0	0	200	903	0	0	0	0	0	0	0	603	903	0
526	0	0	0	0	0	0	0	200	300	0	0	0	0	0	0	0	200	903	0	0	0	0	0	0	0	603	903	0
526	1	0	0	0	0	0	0	200	300	0	0	0	0	0	0	0	200	903	0	0	0	0	0	0	0	603	903	0
526	2	0	0	0	0	0	0	200	300	0	0	0	0	0	0	0	200	903	0	0	0	0	0	0	0	603	903	0
526	3	0	0	0	0	0	0	200	300	0	0	0	0	0	0	0	200	903	0	0	0	0	0	0	0	603	903	0
526	4	0	0	0	0	0	0	200	300	0	0	0	0	0	0	0	200	903	0	0	0	0	0	0	0	603	903	0
526	5	0	0	0	0	0	0	200	300	0	0	0	0	0	0	0	200	903	0	0	0	0	0	0	0	603	903	0
526	6	0	0	0	0	0	0	200	300	0	0	0	0	0	0	0	200	903	0	0	0	0	0	0	0	603	903	0
526	7	0	0	0	0	0	0	200	300	0	0	0	0	0	0	0	200	903	0	0	0	0	0	0	0	603	903	0
526	8	0	0	0	0	0	0	200	300	0	0	0	0	0	0	0	200	903	0	0	0	0	0	0	0	603	903	0
526	9	0	0	0	0	0	0	200	300	0	0	0	0	0	0	0	200	903	0	0	0	0	0	0	0	603	903	0
527	0	0	0	0	0	0	0	200	300	0	0	0	0	0	0	0	200	903	0	0	0	0	0	0	0	603	903	0
527	1	0	0	0	0	0	0	200	300	0	0	0	0	0	0	0	200	903	0	0	0	0	0	0	0	603	903	0
527	2	0	0	0	0	0	0	200	300	0	0	0	0	0	0	0	200	903	0	0	0	0	0	0	0	603	903	0
527	3	0	0	0	0	0	0	200	300	0	0	0	0	0	0	0	200	903	0	0	0	0	0	0	0	603	903	0
527	4	0	0	0	0	0	0	200	300	0	0	0	0	0	0	0	200	903	0	0	0	0	0	0	0	603	903	0
527	5	0	0	0	0	0	0	200	300	0	0	0	0	0	0	0	200	903	0	0	0	0	0	0	0	603	903	0
527	6	0	0	0	0	0	0	200	300	0	0	0	0	0	0	0	200	903	0	0	0	0	0	0	0	603	903	0
527	7	0	0	0	0	0	0	200	300	0	0	0	0	0	0	0	200	903	0	0	0	0	0	0	0	603	903	0
527	8	0	0	0	0	0	0	200	300	0	0	0	0	0	0	0	200	903	0	0	0	0	0	0	0	603	903	0
527	9	0	0	0	0	0	0	200	300	0	0	0	0	0	0	0	200	903	0	0	0	0	0	0	0	603	903	0
528	0	0	0	0	0	0	0	200	300	0	0	0	0	0	0	0	200	903	0	0	0	0	0	0	0	603	903	0
528	1	0	0	0	0	0	0	200	300	0	0	0	0	0	0	0	200	903	0	0	0	0	0	0	0	603	903	0
528	2	0	0	0	0	0	0	200	300	0	0	0	0	0	0	0	200	903	0	0	0	0	0	0	0	603	903	0
528	3	0	0	0	0	0	0	200	300	0	0	0	0	0	0	0	200	903	0	0	0	0	0	0	0	603	903	0
528	4	0	0	0	0	0	0	200	300	0	0	0	0	0	0	0	200	903	0	0	0	0	0	0	0	603	903	0
528	5	0	0	0	0	0	0	200	300	0	0	0	0	0	0	0	200	903	0	0	0	0	0	0	0	603	903	0
528	6	0	0	0	0	0	0	200	300	0	0	0	0	0	0	0	200	903	0	0	0	0	0	0	0	603	903	0
528	7	0	0	0	0	0	0	200	300	0	0	0	0	0	0	0	200	903	0	0	0	0	0	0	0	603	903	0
528	8	0	0	0	0	0	0	200	300	0	0	0	0	0	0	0	200	903	0	0	0	0	0	0	0	603	903	0
528	9	0	0	0	0	0	0	200	300	0	0	0	0	0	0	0	200	903	0	0	0	0	0	0	0	603	903	0
529	0	0	0	0	0	0	0	200	300	0	0	0	0	0	0	0	200	903	0	0	0	0	0	0	0	603	903	0
529	1	0	0	0	0	0	0	200	300	0	0	0	0	0	0	0	200	903	0	0	0	0	0	0	0	603	903	0
529	2	0	0	0	0	0	0	200	300	0	0	0	0	0	0	0	200	903	0	0	0	0	0	0	0	603	903	0
529	3	0	0	0	0	0	0	200	300	0	0	0	0	0	0	0	200	903	0	0	0	0	0	0	0	603	903	0
529	4	0	0	0	0	0	0	200	300	0	0	0	0	0	0	0	200	903	0	0	0	0	0	0	0	603	903	0
529	5	0	0	0	0	0	0	200	300	0	0	0	0	0	0	0	200	903	0	0	0	0	0	0	0	603	903	0
529	6	0	0	0	0	0	0	200	300	0	0	0	0	0	0	0	200	903	0	0	0	0	0	0	0	603	903	0
529	7	0	0	0	0	0	0	200	300	0	0	0	0	0	0	0	200	903	0	0	0	0	0	0	0	603	903	0
529	8	0	0	0	0	0	0	200	300	0	0	0	0	0	0	0	200	903	0	0	0	0	0	0	0	603	903	0
529	9	0	0	0	0	0	0	200	300	0	0	0	0	0	0	0	200	903	0	0	0	0	0	0	0	603	903	0
530	0	0	0	0	0	0	0	200	300	0	0	0	0	0	0	0	200	903	0	0	0	0	0	0	0	603	903	0
530	1	0	0	0	0	0	0	200	300	0	0	0	0	0	0	0	200	903	0	0	0	0	0	0	0	603	903	0
530	2	0	0	0	0	0	0	200	300	0	0	0	0	0	0	0	200	903	0	0	0	0	0	0	0	603	903	0
530	3	0	0	0	0	0	0	200	300	0	0	0	0	0	0	0	200	903	0	0	0	0	0	0	0	603	903	0
530	4	0	0	0	0	0	0	200	300	0	0	0	0	0	0	0	200	903	0	0	0	0	0	0	0	603	903	0
530	5	0	0	0	0	0	0	200	300	0	0	0	0	0	0	0	200	903	0	0	0	0	0	0	0	603	903	0
530	6	0	0	0	0	0	0	200	300	0	0	0	0	0	0	0	200	903	0	0	0	0	0	0	0	603	903	0
530	7	0	0	0	0	0	0	200	300	0	0	0	0	0	0	0	200	903	0	0	0	0	0	0	0	603	903	0
530	8	0	0	0	0	0	0	200	300	0	0	0	0	0	0	0	200	903	0	0	0	0	0	0	0	603	903	0
530	9	0	0	0	0	0	0	200	300	0	0	0	0	0	0	0	200	903	0	0	0	0	0	0	0	603	903	0
531	0	0	0	0	0	0	0	200	300	0	0	0	0	0	0	0	200	903	0	0	0	0	0	0	0	603	903	0
531	1	0	0	0	0	0	0	200	300	0	0	0	0	0	0	0	200	903	0	0	0	0	0	0	0	603	903	0
531	2	0	0	0	0	0	0	200	300	0	0	0	0	0	0	0	200	903	0	0	0	0	0	0	0	603	903	0
531	3	0	0	0	0	0	0	200	300	0	0	0	0	0	0	0	200	903	0	0	0	0	0	0	0	603	903	0
531	4	0	0	0	0	0	0	200	300	0	0	0	0	0	0	0	200	903	0	0	0	0	0	0	0	603	903	0
531	5	0	0	0	0	0	0	200	300	0	0	0	0	0	0	0	200	903	0	0	0	0	0	0	0	603	903	0
531	6	0	0	0	0	0	0	200	300	0	0	0	0	0	0	0	200	903	0	0	0	0	0	0	0	603	903	0
531	7	0	0	0	0	0	0	200	300	0	0	0	0	0	0	0	200	903	0	0	0	0	0	0	0	603	903	0
531	8	0	0	0	0	0	0	200	300	0	0	0	0	0	0	0	200	903	0	0	0	0	0	0	0	603	903	0
531	9	0	0	0	0	0	0	200	300	0	0	0	0	0	0	0	200	903	0	0	0	0	0	0	0	603	903	0
532	0	0	0	0	0	0	0	200	300	0	0	0	0	0	0	0	200	903	0	0	0	0	0	0	0	603	903	0
532	1	0	0	0	0	0	0	200	300	0	0	0	0	0	0	0	200	903	0	0	0	0	0	0	0	603	903	0
532	2	0	0	0	0	0	0	200	300	0	0	0	0	0	0	0	200	903	0	0	0	0	0	0	0	603	903	0
532	3	0	0	0	0	0	0	200	300	0	0	0	0	0	0	0	200	903	0	0	0	0	0	0	0	603	903	0
532	4	0	0	0	0	0	0	200	300	0	0	0	0	0	0	0	200	903	0	0	0	0	0	0	0	603	903	0
532	5	0	0	0	0	0	0	200	300	0	0	0	0	0	0	0	200	903	0	0	0	0	0	0	0	603	903	0
532	6	0	0	0	0	0	0	200	300	0	0	0	0	0	0	0	200	903	0	0	0	0	0	0	0	603	903	0
532	7	0	0	0	0	0	0	200	300	0	0	0	0	0	0	0	200	903	0	0	0	0	0	0	0	603	903	0
532	8	0	0	0	0	0	0	200	300	0	0	0	0	0	0	0	200	903	0	0	0	0	0	0	0	603	903	0
532	9	0	0	0	0	0	0	200	300	0	0	0	0	0	0	0	200	903	0	0	0	0	0	0	0	603	903	0
533	0	0	0	0	0	0	0	200	300	0	0	0	0	0	0	0	200	903	0	0	0	0	0	0	0	603	903	0
533	1	0	0	0	0	0	0	200	300	0	0	0	0	0	0	0	200	903	0	0	0	0	0	0	0	603	903	0
533	2	0	0	0	0	0	0	200	300	0	0	0	0	0	0	0	200	903	0	0	0	0	0	0	0	603	903	0
533	3	0	0	0	0	0	0	200	300	0	0	0	0	0	0	0	200	903	0	0	0	0	0	0	0	603	903	0
533	4	0	0	0	0	0	0	200	300	0	0	0	0	0	0	0	200	903	0	0	0	0	0	0	0	603	903	0
533	5	0	0	0	0	0	0	200	300	0	0	0	0	0	0	0	200	903	0	0	0	0	0	0	0	603	903	0
533	6	0	0	0	0	0	0	200	300	0	0	0	0	0	0	0	200	903	0	0	0	0	0	0	0	603	903	0
533	7	0	0	0	0	0	0	200	300	0	0	0	0	0	0	0	200	903	0	0	0	0	0	0	0	603	903	0
533	8	0	0	0	0	0	0	200	300	0	0	0	0	0	0	0	200	903	0	0	0	0	0	0	0	603	903	0
533	9	0	0	0	0	0	0	200	300	0	0	0	0	0	0	0	200	903	0	0	0	0	0	0	0	603	903	0
534	0	0	0	0	0	0	0	200	300	0	0	0	0	0	0	0	200	903	0	0	0	0	0	0	0	603	903	0
534	1	0	0	0	0	0	0	200	300	0	0	0	0	0	0	0	200	903	0	0	0	0	0	0	0	603	903	0
534	2	0	0	0	0	0	0	200	300	0	0	0	0	0	0	0	200	903	0	0	0	0	0	0	0	603	903	0
534	3	0	0	0	0	0	0	200	300	0	0	0	0	0	0	0	200	903	0	0	0	0	0	0	0	603	903	0
534	4	0	0	0	0	0	0	200	300	0	0	0	0	0	0	0	200	903	0	0	0	0	0	0	0	603	903	0
534	5	0	0	0	0	0	0	200	300	0	0	0	0	0	0	0	200	903	0	0	0	0	0	0	0	603	903	0
534	6	0	0	0	0	0	0	200	300	0	0	0	0	0	0	0	200	903	0	0	0	0	0	0	0	603	903	0
534	7	0	0	0	0	0	0	200	300	0	0	0	0	0	0	0	200	903	0	0	0	0	0	0	0	603	903	0
534	8	0	0	0	0	0	0	200	300	0	0	0	0	0	0	0	200	903	0	0	0	0	0	0	0	603	903	0
534	9	0	0	0	0	0	0	200	300	0	0	0	0	0	0	0	200	903	0	0	0	0	0	0	0	603	903	0
535	0	0	0	0	0	0	0	200	300	0	0	0	0	0	0	0	200	903	0	0	0	0	0	0	0	603	903	0
535	1	0	0	0	0	0	0	200	300	0	0	0	0	0	0	0	200	903	0	0	0	0	0	0	0	603	903	0
535	2	0	0	0	0	0	0	200	300	0	0	0	0	0	0	0	200	903	0	0	0	0	0	0	0	603	903	0
535	3	0	0	0	0	0	0	200	300	0	0	0	0	0	0	0	200	903	0	0	0	0	0	0	0	603	903	0
535	4	0	0	0	0	0	0	200	300	0	0	0	0	0	0	0	200	903	0	0	0	0	0	0	0	603	903	0
535	5	0	0	0	0	0	0	200	300	0	0	0	0	0	0	0	200	903	0	0	0	0	0	0	0	603	903	0
535	6	0	0	0	0	0	0	200	300	0	0	0	0	0	0	0	200	903	0	0	0	0	0	0	0	603	903	0
535	7	0	0	0	0	0	0	200	300	0	0	0	0	0	0	0	200	903	0	0	0	0	0	0	0	603	903	0
535	8	0	0	0	0	0	0	200	300	0	0	0	0	0	0	0	200	903	0	0	0	0	0	0	0	603	903	0
535	9	0	0	0	0	0	0	200	300	0	0	0	0	0	0	0	200	903	0	0	0	0	0	0	0	603	903	0
536	0	0	0	0	0	0	0	200	300	0	0	0	0	0	0	0	200	903	0	0	0	0	0	0	0	603	903	0
536	1	0	0	0	0	0	0	200	300	0	0	0	0	0	0	0	200	903	0	0	0	0	0	0	0	603	903	0
536	2	0	0	0	0	0	0	200	300	0	0	0	0	0	0	0	200	903	0	0	0	0	0	0	0	603	903	0
536	3	0	0	0	0	0	0	200	300	0	0	0	0	0	0	0	200	903	0	0	0	0	0	0	0	603	903	0
536	4	0	0	0	0	0	0	200	300	0	0	0	0	0	0	0	200	903	0	0	0	0	0	0	0	603	903	0
536	5	0	0	0	0	0	0	200	300	0	0	0	0	0	0	0	200	903	0	0	0	0	0	0	0	603	903	0
536	6	0	0	0	0	0	0	200	300	0	0	0	0	0	0	0	200	903	0	0	0	0	0	0	0	603	903	0
536	7	0	0	0	0	0	0	200	300	0	0	0	0	0	0	0	200	903	0	0	0	0	0	0	0	603	903	0
536	8	0	0	0	0	0	0	200	300	0	0	0	0	0	0	0	200	903	0	0	0	0	0	0	0	603	903	0
536	9	0	0	0	0	0	0	200	300	0	0	0	0	0	0	0	200	903	0	0	0	0	0	0	0	603	903	0
537	0	0	0	0	0	0	0	200	300	0	0	0	0	0	0	0	200	903	0	0	0	0	0	0	0	603	903	0
537	1	0	0	0	0	0	0	200	300	0	0	0	0	0	0	0	200	903	0	0	0	0	0	0	0	603	903	0
537	2	0	0	0	0	0	0	200	300	0	0	0	0	0	0	0	200	903	0	0	0	0	0	0	0	603	903	0
537	3	0	0	0	0	0	0	200	300	0	0	0	0	0	0	0	200	903	0	0	0	0	0	0	0	603	903	0
537	4	0	0	0	0	0	0	200	300	0	0	0	0	0	0	0	200	903	0	0	0	0	0	0	0	603	903	0
537	5	0	0	0	0	0	0	200	300	0	0	0	0	0	0	0	200	903	0	0	0	0	0	0	0	603	903	0
537	6	0	0	0	0	0	0	200	300	0	0	0	0	0	0	0	200	903	0	0	0	0	0	0	0	603	903	0
537	7	0	0	0	0	0	0	200	300	0	0	0	0	0	0	0	200	903	0	0	0	0	0	0	0	603	903	0
537	8	0	0	0	0	0	0	200	300	0	0	0	0	0	0	0	200	903	0	0	0	0	0	0	0	603	903	0
537	9	0	0	0	0	0	0	200	300	0	0	0	0	0	0	0	200	903	0	0	0	0	0	0	0	603	903	0
538	0	0	0	0	0	0	0	200	300	0	0	0	0	0	0	0	200	903	0	0	0	0	0	0	0	603	903	0
538	1	0	0	0	0	0	0	200	300	0	0	0	0	0	0	0	200	903	0	0	0	0	0	0	0	603	903	0
538	2	0	0	0	0	0	0	200	300	0	0	0	0	0	0	0	200	903	0	0	0	0	0	0	0	603	903	0
538	3	0	0	0	0	0	0	200	300	0	0	0	0	0	0	0	200	903	0	0	0	0	0	0	0	603	903	0
538	4	0	0	0	0	0	0	200	300	0	0	0	0	0	0	0	200	903	0	0	0	0	0	0	0	603	903	0
538	5	0	0	0	0	0	0	200	300	0	0	0	0	0	0	0	200	903	0	0	0	0	0	0	0	603	903	0
538	6	0	0	0	0	0	0	200	300	0	0	0	0	0	0	0	200	903	0	0	0	0	0	0	0	603	903	0
538	7	0	0	0	0	0	0	200	300	0	0	0	0	0	0	0	200	903	0	0	0	0	0	0	0	603	903	0
538	8	0	0	0	0	0	0	200	300	0	0	0	0	0	0	0	200	903	0	0	0	0	0	0	0	603	903	0
538	9	0	0	0	0	0	0	200	300	0	0	0	0	0	0	0	200	903	0	0	0	0	0	0	0	603	903	0
539	0	0	0	0	0	0	0	200	300	0	0	0	0	0	0	0	200	903	0	0	0	0	0	0	0	603	903	0
539	1	0	0	0	0	0	0	200	300	0	0	0	0	0	0	0	200	903	0	0	0	0	0	0	0	603	903	0
539	2	0	0	0	0	0	0	200	300	0	0	0	0	0	0	0	200	903	0	0	0	0	0	0	0	603	903	0
539	3	0	0	0	0	0	0	200	300	0	0	0	0	0	0	0	200	903	0	0	0	0	0	0	0	603	903	0
539	4	0	0	0	0	0	0	200	300	0	0	0	0	0	0	0	200	903	0	0	0	0	0	0	0	603	903	0
539	5	0	0	0	0	0	0	200	300	0	0	0	0	0	0	0	200	903	0	0	0	0	0	0	0	603	903	0
539	6	0	0	0	0	0	0	200	300	0	0	0	0	0	0	0	200	903	0	0	0	0	0	0	0	603	903	0
539	7	0	0	0	0	0	0	200	300	0	0	0	0	0	0	0	200	903	0	0	0	0	0	0	0	603	903	0
539	8	0	0	0	0	0	0	200	300	0	0	0	0	0	0	0	200	903	0	0	0	0	0	0	0	603	903	0
539	9	0	0	0	0	0	0	200	300	0	0	0	0	0	0	0	200	903	0	0	0	0	0	0	0	603	903	0
540	0	0	0	0	0	0	0	200	300	0	0	0	0	0	0	0	200	903	0	0	0	0	0	0	0	603	903	0
540	1	0	0	0	0	0	0	200	300	0	0	0	0	0	0	0	200	903	0	0	0	0	0	0	0	603	903	0
540	2	0	0	0	0	0	0	200	300	0	0	0	0	0	0	0	200	903	0	0	0	0	0	0	0	603	903	0
540	3	0	0	0	0	0	0	200	300	0	0	0	0	0	0	0	200	903	0	0	0	0	0	0	0	603	903	0
540	4	0	0	0	0	0	0	200	300	0	0	0	0	0	0	0	200	903	0	0	0	0	0	0	0	603	903	0
540	5	0	0	0	0	0	0	200	300	0	0	0	0	0	0	0	200	903	0	0	0	0	0	0	0	603	903	0
540	6	0	0	0	0	0	0	200	300	0	0	0	0	0	0	0	200	903	0	0	0	0	0	0	0	603	903	0
540	7	0	0	0	0	0	0	200	300	0	0	0	0	0	0	0	200	903	0	0	0	0	0	0	0	603	903	0
540	8	0	0	0	0	0	0	200	300	0	0	0	0	0	0	0	200	903	0	0	0	0	0	0	0	603	903	0
540	9	0	0	0	0	0	0	200	300	0	0	0	0	0	0	0	200	903	0	0	0	0	0	0	0	603	903	0
541	0	0	0	0	0	0	0	200	300	0	0	0	0	0	0	0	200	903	0	0	0	0	0	0	0	603	903	0
541	1	0	0	0	0	0	0	200	300	0	0	0	0	0	0	0	200	903	0	0	0	0	0	0	0	603	903	0
541	2	0	0	0	0	0	0	200	300	0	0	0	0	0	0	0	200	903	0	0	0	0	0	0	0	603	903	0
541	3	0	0	0	0	0	0	200	300	0	0	0	0	0	0	0	200	903	0	0	0	0	0	0	0	603	903	0
541	4	0	0	0	0	0	0	200	300	0	0	0	0	0	0	0	200	903	0	0	0	0	0	0	0	603	903	0
541	5	0	0	0	0	0	0	200	300	0	0	0	0	0	0	0	200	903	0	0	0	0	0	0	0	603	903	0
541	6	0	0	0	0	0	0	200	300	0	0	0	0	0	0	0	200	903	0	0	0	0	0	0	0	603	903	0
541	7	0	0	0	0	0	0	200	300	0	0	0	0	0	0	0	200	903	0	0	0	0	0	0	0	603	903	0
541	8	0	0	0	0	0	0	200	300	0	0	0	0	0	0	0	200	903	0	0	0	0	0	0	0	603	903	0
541	9	0	0	0	0	0	0	200	300	0	0	0	0	0	0	0	200	903	0	0	0	0	0	0	0	603	903	0
542	0	0	0	0	0	0	0	200	300	0	0	0	0	0	0	0	200	903	0	0	0	0	0	0	0	603	903	0
542	1	0	0	0	0	0	0	200	300	0	0	0	0	0	0	0	200	903	0	0	0	0	0	0	0	603	903	0
542	2	0	0	0	0	0	0	200	300	0	0	0	0	0	0	0	200	903	0	0	0	0	0	0	0	603	903	0
542	3	0	0	0	0	0	0	200	300	0	0	0	0	0	0	0	200	903	0	0	0	0	0	0	0	603	903	0
542	4	0	0	0	0	0	0	200	300	0	0	0	0	0	0	0	200	903	0	0	0	0	0	0	0	603	903	0
542	5	0	0	0	0	0	0	200	300	0	0	0	0	0	0	0	200	903	0	0	0	0	0	0	0	603	903	0
542	6	0	0	0	0	0	0	200	300	0	0	0	0	0	0	0	200	903	0	0	0	0	0	0	0	603	903	0
542	7	0	0	0	0	0	0	200	300	0	0	0	0	0	0	0	200	903	0	0	0	0	0	0	0	603	903	0
542	8	0	0	0	0	0	0	200	300	0	0	0	0	0	0	0	200	903	0	0	0	0	0	0	0	603	903	0
542	9	0	0	0	0	0	0	200	300	0	0	0	0	0	0	0	200	903	0	0	0	0	0	0	0	603	903	0
543	0	0	0	0	0	0	0	200	300	0	0	0	0	0	0	0	200	903	0	0	0	0	0	0	0	603	903	0
543	1	0	0	0	0	0	0	200	300	0	0	0	0	0	0	0	200	903	0	0	0	0	0	0	0	603	903	0
543	2	0	0	0	0	0	0	200	300	0	0	0	0	0	0	0	200	903	0	0	0	0	0	0	0	603	903	0
543	3	0	0	0	0	0	0	200	300	0	0	0	0	0	0	0	200	903	0	0	0	0	0	0	0	603	903	0
543	4	0	0	0	0	0	0	200	300	0	0	0	0	0	0	0	200	903	0	0	0	0	0	0	0	603	903	0
543	5	0	0	0	0	0	0	200	300	0	0	0	0	0	0	0	200	903	0	0	0	0	0	0	0	603	903	0
543	6	0	0	0	0	0	0	200	300	0	0	0	0	0	0	0	200	903	0	0	0	0	0	0	0	603	903	0
543	7	0	0	0	0	0	0	200	300	0	0	0	0	0	0	0	200	903	0	0	0	0	0	0	0	603	903	0
543	8	0	0	0	0	0	0	200	300	0	0	0	0	0	0	0	200	903	0	0	0	0	0	0	0	603	903	0
543	9	0	0	0	0	0	0	200	300	0	0	0	0	0	0	0	200	903	0	0	0	0	0	0	0	603	903	0
544	0	0	0	0	0	0	0	200	300	0	0	0	0	0	0	0	200	903	0	0	0	0	0	0	0	603	903	0
544	1	0	0	0	0	0	0	200	300	0	0	0	0	0	0	0	200	903	0	0	0	0	0	0	0	603	903	0
544	2	0	0	0	0	0	0	200	300	0	0	0	0	0	0	0	200	903	0	0	0	0	0	0	0	603	903	0
544	3	0	0	0	0	0	0	200	300	0	0	0	0	0	0	0	200	903	0	0	0	0	0	0	0	603	903	0
544	4	0	0	0	0	0	0	200	300	0	0	0	0	0	0	0	200	903	0	0	0	0	0	0	0	603	903	0
544	5	0	0	0	0	0	0	200	300	0	0	0	0	0	0	0	200	903	0	0	0	0	0	0	0	603	903	0
544	6	0	0	0	0	0	0	200	300	0	0	0	0	0	0	0	200	903	0	0	0	0	0	0	0	603	903	0
544	7	0	0	0	0	0	0	200	300	0	0	0	0	0	0	0	200	903	0	0	0	0	0	0	0	603	903	0
544	8	0	0	0	0	0	0	200	300	0	0	0	0	0	0	0	200	903	0	0	0	0	0	0	0	603	903	0
544	9	0	0	0	0	0	0	200	300	0	0	0	0	0	0	0	200	903	0	0	0	0	0	0	0	603	903	0
545	0	0	0	0	0	0	0	200	300	0	0	0	0	0	0	0	200	903	0	0	0	0	0	0	0	603	903	0
545	1	0	0	0	0	0	0	200	300	0	0	0	0	0	0	0	200	903	0	0	0	0	0	0	0	603	903	0
545	2	0	0	0	0	0	0	200	300	0	0	0	0	0	0	0	200	903	0	0	0	0	0	0	0	603	903	0
545	3	0	0	0	0	0	0	200	300	0	0	0	0	0	0	0	200	903	0	0	0	0	0	0	0	603	903	0
545	4	0	0	0	0	0	0	200	300	0	0	0	0	0	0	0	200	903	0	0	0	0	0	0	0	603	903	0
545	5	0	0	0	0	0	0	200	300	0	0	0	0	0	0	0	200	903	0	0	0	0	0	0	0	603	903	0
545	6	0	0	0	0	0	0	200	300	0	0	0	0	0	0	0	200	903	0	0	0	0	0	0	0	603	903	0
545	7	0	0	0	0	0	0	200	300	0	0	0	0	0	0	0	200	903	0	0	0	0	0	0	0	603	903	0
545	8	0	0	0	0	0	0	200	300	0	0	0	0	0	0	0	200	903	0	0	0	0	0	0	0	603	903	0
545	9	0	0	0	0	0	0	200	300	0	0	0	0	0	0	0	200	903	0	0	0	0	0	0	0	603	903	0
546	0	0	0	0	0	0	0	200	300	0	0	0	0	0	0	0	200	903	0	0	0	0	0	0	0	603	903	0
546	1	0	0	0	0	0	0	200	300	0	0	0	0	0	0	0	200	903	0	0	0	0	0	0	0	603	903	0
546	2	0	0	0	0	0	0	200	300	0	0	0	0	0	0	0	200	903	0	0	0	0	0	0	0	603	903	0
546	3	0	0	0	0	0	0	200	300	0	0	0	0	0	0	0	200	903	0	0	0	0	0	0	0	603	903	0
546	4	0	0	0	0	0	0	200	300	0	0	0	0	0	0	0	200	903	0	0	0	0	0	0	0	603	903	0
546	5	0	0	0	0	0	0	200	300	0	0	0	0	0	0	0	200	903	0	0	0	0	0	0	0	603	903	0
546	6	0	0	0	0	0	0	200	300	0	0	0	0	0	0	0	200	903	0	0	0	0	0	0	0	603	903	0
546	7	0	0	0	0	0	0	200	300	0	0	0	0	0	0	0	200	903	0	0	0	0	0	0	0	603	903	0
546	8	0	0	0	0	0	0	200	300	0	0	0	0	0	0	0	200	903	0	0	0	0	0	0	0	603	903	0
546	9	0	0	0	0	0	0	200	300	0	0	0	0	0	0	0	200	903	0	0	0	0	0	0	0	603	903	0
547	0	0	0	0	0	0	0	200	300	0	0	0	0	0	0	0	200	903	0	0	0	0	0	0	0	603	903	0
547	1	0	0	0	0	0	0	200	300	0	0	0	0	0	0	0	200	903	0	0	0	0	0	0	0	603	903	0
547	2	0	0	0	0	0	0	200	300	0	0	0	0	0	0	0	200	903	0	0	0	0	0	0	0	603	903	0
547	3	0	0	0	0	0	0	200	300	0	0	0	0	0	0	0	200	903	0	0	0	0	0	0	0	603	903	0
547	4	0	0	0	0	0	0	200	300	0	0	0	0	0	0	0	200	903	0	0	0	0	0	0	0	603	903	0
547	5	0	0	0	0	0	0	200	300	0	0	0	0	0	0	0	200	903	0	0	0	0	0	0	0	603	903	0
547	6	0	0	0	0	0	0	200	300	0	0	0	0	0	0	0	200	903	0	0	0	0	0	0	0	603	903	0
547	7	0	0	0	0	0	0	200	300	0	0	0	0	0	0	0	200	903	0	0	0	0	0	0	0	603	903	0
547	8	0	0	0	0	0	0	200	300	0	0	0	0	0	0	0	200	903	0	0	0	0	0	0	0	603	903	0
547	9	0	0	0	0	0	0	200	300	0	0	0	0	0	0	0	200	903	0	0	0	0	0	0	0	603	903	0
548	0	0	0	0	0	0	0	200	300	0	0	0	0	0	0	0	200	903	0	0	0	0	0	0	0	603	903	0
548	1	0	0	0	0	0	0	200	300	0	0	0	0	0	0	0	200	903	0	0	0	0	0	0	0	603	903	0
548	2	0	0	0	0	0	0	200	300	0	0	0	0	0	0	0	200	903	0	0	0	0	0	0	0	603	903	0
548	3	0	0	0	0	0	0	200	300	0	0	0	0	0	0	0	200	903	0	0	0	0	0	0	0	603	903	0
548	4	0	0	0	0	0	0	200	300	0	0	0	0	0	0	0	200	903	0	0	0	0	0	0	0	603	903	0
548	5	0	0	0	0	0	0	200	300	0	0	0	0	0	0	0	200	903	0	0	0	0	0	0	0	603	903	0
548	6	0	0	0	0	0	0	200	300	0	0	0	0	0	0	0	200	903	0	0	0	0	0	0	0	603	903	0
548	7	0	0	0	0	0	0	200	300	0	0	0	0	0	0	0	200	903	0	0	0	0	0	0	0	603	903	0
548	8	0	0	0	0	0	0	200	300	0	0	0	0	0	0	0	200	903	0	0	0	0	0	0	0	603	903	0
548	9	0	0	0	0	0	0	200	300	0	0	0	0	0	0	0	200	903	0	0	0	0	0	0	0	603	903	0
549	0	0	0	0	0	0	0	200	300	0	0	0	0	0	0	0	200	903	0	0	0	0	0	0	0	603	903	0
549	1	0	0	0	0	0	0	200	300	0	0	0	0	0	0	0	200	903	0	0	0	0	0	0	0	603	903	0
549	2	0	0	0	0	0	0	200	300	0	0	0	0	0	0	0	200	903	0	0	0	0	0	0	0	603	903	0
549	3	0	0	0	0	0	0	200	300	0	0	0	0	0	0	0	200	903	0	0	0	0	0	0	0	603	903	0
549	4	0	0	0	0	0	0	200	300	0	0	0	0	0	0	0	200	903	0	0	0	0	0	0	0	603	903	0
549	5	0	0	0	0	0	0	200	300	0	0	0	0	0	0	0	200	903	0	0	0	0	0	0	0	603	903	0
549	6	0	0	0	0	0	0	200	300	0	0	0	0	0	0	0	200	903	0	0	0	0	0	0	0	603	903	0
549	7	0	0	0	0	0	0	200	300	0	0	0	0	0	0	0	200	903	0	0	0	0	0	0	0	603	903	0
549	8	0	0	0	0	0	0	200	300	0	0	0	0	0	0	0	200	903	0	0	0	0	0	0	0	603	903	0
549	9	0	0	0	0	0	0	200	300	0	0	0	0	0	0	0	200	903	0	0	0	0	0	0	0	603	903	0
550	0	0	0	0	0	0	0	200	300	0	0	0	0	0	0	0	200	903	0	0	0	0	0	0	0	603	903	0
550	1	0	0	0	0	0	0	200	300	0	0	0	0	0	0	0	200	903	0	0	0	0	0	0	0	603	903	0
550	2	0	0	0	0	0	0	200	300	0	0	0	0	0	0	0	200	903	0	0	0	0	0	0	0	603	903	0
550	3	0	0	0	0	0	0	200	300	0	0	0	0	0	0	0	200	903	0	0	0	0	0	0	0	603	903	0
550	4	0	0	0	0	0	0	200	300	0	0	0	0	0	0	0	200	903	0	0	0	0	0	0	0	603	903	0
550	5	0	0	0	0	0	0	200	300	0	0	0	0	0	0	0	200	903	0	0	0	0	0	0	0	603	903	0
550	6	0	0	0	0	0	0	200	300	0	0	0	0	0	0	0	200	903	0	0	0	0	0	0	0	603	903	0
550	7	0	0	0	0	0	0	200	300	0	0	0	0	0	0	0	200	903	0	0	0	0	0	0	0	603	903	0
550	8	0	0	0	0	0	0	200	300	0	0	0	0	0	0	0	200	903	0	0	0	0	0	0	0	603	903	0
550	9	0	0	0	0	0	0	200	300	0	0	0	0	0	0	0	200	903	0	0	0	0	0	0	0	603	903	0
551	0	0	0	0	0	0	0	200	300	0	0	0	0	0	0	0	200	903	0	0	0	0	0	0	0	603	903	0
551	1	0	0	0	0	0	0	200	300	0	0	0	0	0	0	0	200	903	0	0	0	0	0	0	0	603	903	0
551	2	0	0	0	0	0	0	200	300	0	0	0	0	0	0	0	200	903	0	0	0	0	0	0	0	603	903	0
551	3	0	0	0	0	0	0	200	300	0	0	0	0	0	0	0	200	903	0	0	0	0	0	0	0	603	903	0
551	4	0	0	0	0	0	0	200	300	0	0	0	0	0	0	0	200	903	0	0	0	0	0	0	0	603	903	0
551	5	0	0	0	0	0	0	200	300	0	0	0	0	0	0	0	200	903	0	0	0	0	0	0	0	603	903	0
551	6	0	0	0	0	0	0	200	300	0	0	0	0	0	0	0	200	903	0	0	0	0	0	0	0	603	903	0
551	7	0	0	0	0	0	0	200	300	0	0	0	0	0	0	0	200	903	0	0	0	0	0	0	0	603	903	0
551	8	0	0	0	0	0	0	200	300	0	0	0	0	0	0	0	200	903	0	0	0	0	0	0	0	603	903	0
551	9	0	0	0	0	0	0	200	300	0	0	0	0	0	0	0	200	903	0	0	0	0	0	0	0	603	903	0
552	0	0	0	0	0	0	0	200	300	0	0	0	0	0	0	0	200	903	0	0	0	0	0	0	0	603	903	0
552	1	0	0	0	0	0	0	200	300	0	0	0	0	0	0	0	200	903	0	0	0	0	0	0	0	603	903	0
552	2	0	0	0	0	0	0	200	300	0	0	0	0	0	0	0	200	903	0	0	0	0	0	0	0	603	903	0
552	3	0	0	0	0	0	0	200	300	0	0	0	0	0	0	0	200	903	0	0	0	0	0	0	0	603	903	0
552	4	0	0	0	0	0	0	200	300	0	0	0	0	0	0	0	200	903	0	0	0	0	0	0	0	603	903	0
552	5	0	0	0	0	0	0	200	300	0	0	0	0	0	0	0	200	903	0	0	0	0	0	0	0	603	903	0
552	6	0	0	0	0	0	0	200	300	0	0	0	0	0	0	0	200	903	0	0	0	0	0	0	0	603	903	0
552	7	0	0	0	0	0	0	200	300	0	0	0	0	0	0	0	200	903	0	0	0	0	0	0	0	603	903	0
552	8	0	0	0	0	0	0	200	300	0	0	0	0	0	0	0	200	903	0	0	0	0	0	0	0	603	903	0
552	9	0	0	0	0	0	0	200	300	0	0	0	0	0	0	0	200	903	0	0	0	0	0	0	0	603	903	0
553	0	0	0	0	0	0	0	200	300	0	0	0	0	0	0	0	200	903	0	0	0	0	0	0	0	603	903	0
553	1	0	0	0	0	0	0	200	300	0	0	0	0	0	0	0	200	903	0	0	0	0	0	0	0	603	903	0
553	2	0	0	0	0	0	0	200	300	0	0	0	0	0	0	0	200	903	0	0	0	0	0	0	0	603	903	0
553	3	0	0	0	0	0	0	200	300	0	0	0	0	0	0	0	200	903	0	0	0	0	0	0	0	603	903	0
553	4	0	0	0	0	0	0	200	300	0	0	0	0	0	0	0	200	903	0	0	0	0	0	0	0	603	903	0
553	5	0	0	0	0	0	0	200	300	0	0	0	0	0	0	0	200	903	0	0	0	0	0	0	0	603	903	0
553	6	0	0	0	0	0	0	200	300	0	0	0	0	0	0	0	200	903	0	0	0	0	0	0	0	603	903	0
553	7	0	0	0	0	0	0	200	300	0	0	0	0	0	0	0	200	903	0	0	0	0	0	0	0	603	903	0
553	8	0	0	0	0	0	0	200	300	0	0	0	0	0	0	0	200	903	0	0	0	0	0	0	0	603	903	0
553	9	0	0	0	0	0	0	200	300	0	0	0	0	0	0	0	200	903	0	0	0	0	0	0	0	603	903	0
554	0	0	0	0	0	0	0	200	300	0	0	0	0	0	0	0	200	903	0	0	0	0	0	0	0	603	903	0
554	1	0	0	0	0	0	0	200	300	0	0	0	0	0	0	0	200	903	0	0	0	0	0	0	0	603	903	0
554	2	0	0	0	0	0	0	200	300	0	0	0	0	0	0	0	200	903	0	0	0	0	0	0	0	603	903	0
554	3	0	0	0	0	0	0	200	300	0	0	0	0	0	0	0	200	903	0	0	0	0	0	0	0	603	903	0
554	4	0	0	0	0	0	0	200	300	0	0	0	0	0	0	0	200	903	0	0	0	0	0	0	0	603	903	0
554	5	0	0	0	0	0	0	200	300	0	0	0	0	0	0	0	200	903	0	0	0	0	0	0	0	603	903	0
554	6	0	0	0	0	0	0	200	300	0	0	0	0	0	0	0	200	903	0	0	0	0	0	0	0	603	903	0
554	7	0	0	0	0	0	0	200	300	0	0	0	0	0	0	0	200	903	0	0	0	0	0	0	0	603	903	0
554	8	0	0	0	0	0	0	200	300	0	0	0	0	0	0	0	200	903	0	0	0	0	0	0	0	603	903	0
554	9	0	0	0	0	0	0	200	300	0	0	0	0	0	0	0	200	903	0	0	0	0	0	0	0	603	903	0
555	0	0	0	0	0	0	0	200	300	0	0	0	0	0	0	0	200	903	0	0	0	0	0	0	0	603	903	0
555	1	0	0	0	0	0	0	200	300	0	0	0	0	0	0	0	200	903	0	0	0	0	0	0	0	603	903	0
555	2	0	0	0	0	0	0	200	300	0	0	0	0	0	0	0	200	903	0	0	0	0	0	0	0	603	903	0
555	3	0	0	0	0	0	0	200	300	0	0	0	0	0	0	0	200	903	0	0	0	0	0	0	0	603	903	0
555	4	0	0	0	0	0	0	200	300	0	0	0	0	0	0	0	200	903	0	0	0	0	0	0	0	603	903	0
555	5	0	0	0	0	0	0	200	300	0	0	0	0	0	0	0	200	903	0	0	0	0	0	0	0	603	903	0
555	6	0	0	0	0	0	0	200	300	0	0	0	0	0	0	0	200	903	0	0	0	0	0	0	0	603	903	0
555	7	0	0	0	0	0	0	200	300	0	0	0	0	0	0	0	200	903	0	0	0	0	0	0	0	603	903	0
555	8	0	0	0	0	0	0	200	300	0	0	0	0	0	0	0	200	903	0	0	0	0	0	0	0	603	903	0
555	9	0	0	0	0	0	0	200	300	0	0	0	0	0	0	0	200	903	0	0	0	0	0	0	0	603	903	0
556	0	0	0	0	0	0	0	200	300	0	0	0	0	0	0	0	200	903	0	0	0	0	0	0	0	603	903	0
556	1	0	0	0	0	0	0	200	300	0	0	0	0	0	0	0	200	903	0	0	0	0	0	0	0	603	903	0
556	2	0	0	0	0	0	0	200	300	0	0	0	0	0	0	0	200	903	0	0	0	0	0	0	0	603	903	0
556	3	0	0	0	0	0	0	200	300	0	0	0	0	0	0	0	200	903	0	0	0	0	0	0	0	603	903	0
556	4	0	0	0	0	0	0	200	300	0	0	0	0	0	0	0	200	903	0	0	0	0	0	0	0	603	903	0
556	5	0	0	0	0	0	0	200	300	0	0	0	0	0	0	0	200	903	0	0	0	0	0	0	0	603	903	0
556	6	0	0	0	0	0	0	200	300	0	0	0	0	0	0	0	200	903	0	0	0	0	0	0	0	603	903	0
556	7	0	0	0	0	0	0	200	300	0	0	0	0	0	0	0	200	903	0	0	0	0	0	0	0	603	903	0
556	8	0	0	0	0	0	0	200	300	0	0	0	0	0	0	0	200	903	0	0	0	0	0	0	0	603	903	0
556	9	0	0	0	0	0	0	200	300	0	0	0	0	0	0	0	200	903	0	0	0	0	0	0	0	603	903	0
557	0	0	0	0	0	0	0	200	300	0	0	0	0	0	0	0	200	903	0	0	0	0	0	0	0	603	903	0
557	1	0	0	0	0	0	0	200	300	0	0	0	0	0	0	0	200	903	0	0	0	0	0	0	0	603	903	0
557	2	0	0	0	0	0	0	200	300	0	0	0	0	0	0	0	200	903	0	0	0	0	0	0	0	603	903	0
557	3	0	0	0	0	0	0	200	300	0	0	0	0	0	0	0	200	903	0	0	0	0	0	0	0	603	903	0
557	4	0	0	0	0	0	0	200	300	0	0	0	0	0	0	0	200	903	0	0	0	0	0	0	0	603	903	0
557	5	0	0	0	0	0	0	200	300	0	0	0	0	0	0	0	200	903	0	0	0	0	0	0	0	603	903	0
557	6	0	0	0	0	0	0	200	300	0	0	0	0	0	0	0	200	903	0	0	0	0	0	0	0	603	903	0
557	7	0	0	0	0	0	0	200	300	0	0	0	0	0	0	0	200	903	0	0	0	0	0	0	0	603	903	0
557	8	0	0	0	0	0	0	200	300	0	0	0	0	0	0	0	200	903	0	0	0	0	0	0	0	603	903	0
557	9	0	0	0	0	0	0	200	300	0	0	0	0	0	0	0	200	903	0	0	0	0	0	0	0	603	903	0
558	0	0	0	0	0	0	0	200	300	0	0	0	0	0	0	0	200	903	0	0	0	0	0	0	0	603	903	0
558	1	0	0	0	0	0	0	200	300	0	0	0	0	0	0	0	200	903	0	0	0	0	0	0	0	603	903	0
558	2	0	0	0	0	0	0	200	300	0	0	0	0	0	0	0	200	903	0	0	0	0	0	0	0	603	903	0
558	3	0	0	0	0	0	0	200	300	0	0	0	0	0	0	0	200	903	0	0	0	0	0	0	0	603	903	0
558	4	0	0	0	0	0	0	200	300	0	0	0	0	0	0	0	200	903	0	0	0	0	0	0	0	603	903	0
558	5	0	0	0	0	0	0	200	300	0	0	0	0	0	0	0	200	903	0	0	0	0	0	0	0	603	903	0
558	6	0	0	0	0	0	0	200	300	0	0	0	0	0	0	0	200	903	0	0	0	0	0	0	0	603	903	0
558	7	0	0	0	0	0	0	200	300	0	0	0	0	0	0	0	200	903	0	0	0	0	0	0	0	603	903	0
558	8	0	0	0	0	0	0	200	300	0	0	0	0	0	0	0	200	903	0	0	0	0	0	0	0	603	903	0
558	9	0	0	0	0	0	0	200	300	0	0	0	0	0	0	0	200	903	0	0	0	0	0	0	0	603	903	0
559	0	0	0	0	0	0	0	200	300	0	0	0	0	0	0	0	200	903	0	0	0	0	0	0	0	603	903	0
559	1	0	0	0	0	0	0	200	300	0	0	0	0	0	0	0	200	903	0	0	0	0	0	0	0	603	903	0
559	2	0	0	0	0	0	0	200	300	0	0	0	0	0	0	0	200	903	0	0	0	0	0	0	0	603	903	0
559	3	0	0	0	0	0	0	200	300	0	0	0	0	0	0	0	200	903	0	0	0	0	0	0	0	603	903	0
559	4	0	0	0	0	0	0	200	300	0	0	0	0	0	0	0	200	903	0	0	0	0	0	0	0	603	903	0
559	5	0	0	0	0	0	0	200	300	0	0	0	0	0	0	0	200	903	0	0	0	0	0	0	0	603	903	0
559	6	0	0	0	0	0	0	200	300	0	0	0	0	0	0	0	200	903	0	0	0	0	0	0	0	603	903	0
559	7	0	0	0	0	0	0	200	300	0	0	0	0	0	0	0	200	903	0	0	0	0	0	0	0	603	903	0
559	8	0	0	0	0	0	0	200	300	0	0	0	0	0	0	0	200	903	0	0	0	0	0	0	0	603	903	0
559	9	0	0	0	0	0	0	200	300	0	0	0	0	0	0	0	200	903	0	0	0	0	0	0	0	603	903	0
560	0	0	0	0	0	0	0	200	300	0	0	0	0	0	0	0	200	903	0	0	0	0	0	0	0	603	903	0
560	1	0	0	0	0	0	0	200	300	0	0	0	0	0	0	0	200	903	0	0	0	0	0	0	0	603	903	0
560	2	0	0	0	0	0	0	200	300	0	0	0	0	0	0	0	200	903	0	0	0	0	0	0	0	603	903	0
560	3	0	0	0	0	0	0	200	300	0	0	0	0	0	0	0	200	903	0	0	0	0	0	0	0	603	903	0
560	4	0	0	0	0	0	0	200	300	0	0	0	0	0	0	0	200	903	0	0	0	0	0	0	0	603	903	0
560	5	0	0	0	0	0	0	200	300	0	0	0	0	0	0	0	200	903	0	0	0	0	0	0	0	603	903	0
560	6	0	0	0	0	0	0	200	300	0	0	0	0	0	0	0	200	903	0	0	0	0	0	0	0	603	903	0
560	7	0	0	0	0	0	0	200	300	0	0	0	0	0	0	0	200	903	0	0	0	0	0	0	0	603	903	0
560	8	0	0	0	0	0	0	200	300	0	0	0	0	0	0	0	200	903	0	0	0	0	0	0	0	603	903	0
560	9	0	0	0	0	0	0	200	300	0	0	0	0	0	0	0	200	903	0	0	0	0	0	0	0	603	903	0
561	0	0	0	0	0	0	0	200	300	0	0	0	0	0	0	0	200	903	0	0	0	0	0	0	0	603	903	0
561	1	0	0	0	0	0	0	200	300	0	0	0	0	0	0	0	200	903	0	0	0	0	0	0	0	603	903	0
561	2	0	0	0	0	0	0	200	300	0	0	0	0	0	0	0	200	903	0	0	0	0	0	0	0	603	903	0
561	3	0	0	0	0	0	0	200	300	0	0	0	0	0	0	0	200	903	0	0	0	0	0	0	0	603	903	0
561	4	0	0	0	0	0	0	200	300	0	0	0	0	0	0	0	200	903	0	0	0	0	0	0	0	603	903	0
561	5	0	0	0	0	0	0	200	300	0	0	0	0	0	0	0	200	903	0	0	0	0	0	0	0	603	903	0
561	6	0	0	0	0	0	0	200	300	0	0	0	0	0	0	0	200	903	0	0	0	0	0	0	0	603	903	0
561	7	0	0	0	0	0	0	200	300	0	0	0	0	0	0	0	200	903	0	0	0	0	0	0	0	603	903	0
561	8	0	0	0	0	0	0	200	300	0	0	0	0	0	0	0	200	903	0	0	0	0	0	0	0	603	903	0
561	9	0	0	0	0	0	0	200	300	0	0	0	0	0	0	0	200	903	0	0	0	0	0	0	0	603	903	0
562	0	0	0	0	0	0	0	200	300	0	0	0	0	0	0	0	200	903	0	0	0	0	0	0	0	603	903	0
562	1	0	0	0	0	0	0	200	300	0	0	0	0	0	0	0	200	903	0	0	0	0	0	0	0	603	903	0
562	2	0	0	0	0	0	0	200	300	0	0	0	0	0	0	0	200	903	0	0	0	0	0	0	0	603	903	0
562	3	0	0	0	0	0	0	200	300	0	0	0	0	0	0	0	200	903	0	0	0	0	0	0	0	603	903	0
562	4	0	0	0	0	0	0	200	300	0	0	0	0	0	0	0	200	903	0	0	0	0	0	0	0	603	903	0
562	5	0	0	0	0	0	0	200	300	0	0	0	0	0	0	0	200	903	0	0	0	0	0	0	0	603	903	0
562	6	0	0	0	0	0	0	200	300	0	0	0	0	0	0	0	200	903	0	0	0	0	0	0	0	603	903	0
562	7	0	0	0	0	0	0	200	300	0	0	0	0	0	0	0	200	903	0	0	0	0	0	0	0	603	903	0
562	8	0	0	0	0	0	0	200	300	0	0	0	0	0	0	0	200	903	0	0	0	0	0	0	0	603	903	0
562	9	0	0	0	0	0	0	200	300	0	0	0	0	0	0	0	200	903	0	0	0	0	0	0	0	603	903	0
563	0	0	0	0	0	0	0	200	300	0	0	0	0	0	0	0	200	903	0	0	0	0	0	0	0	603	903	0
563	1	0	0	0	0	0	0	200	300	0	0	0	0	0	0	0	200	903	0	0	0	0	0	0	0	603	903	0
563	2	0	0	0	0	0	0	200	300	0	0	0	0	0	0	0	200	903	0	0	0	0	0	0	0	603	903	0
563	3	0	0	0	0	0	0	200	300	0	0	0	0	0	0	0	200	903	0	0	0	0	0	0	0	603	903	0
563	4	0	0	0	0	0	0	200	300	0	0	0	0	0	0	0	200	903	0	0	0	0	0	0	0	603	903	0
563	5	0	0	0	0	0	0	200	300	0	0	0	0	0	0	0	200	903	0	0	0	0	0	0	0	603	903	0
563	6	0	0	0	0	0	0	200	300	0	0	0	0	0	0	0	200	903	0	0	0	0	0	0	0	603	903	0
563	7	0	0	0	0	0	0	200	300	0	0	0	0	0	0	0	200	903	0	0	0	0	0	0	0	603	903	0
563	8	0	0	0	0	0	0	200	300	0	0	0	0	0	0	0	200	903	0	0	0	0	0	0	0	603	903	0
563	9	0	0	0	0	0	0	200	300	0	0	0	0	0	0	0	200	903	0	0	0	0	0	0	0	603	903	0
564	0	0	0	0	0	0	0	200	300	0	0	0	0	0	0	0	200	903	0	0	0	0	0	0	0	603	903	0
564	1	0	0	0	0	0	0	200	300	0	0	0	0	0	0	0	200	903	0	0	0	0	0	0	0	603	903	0
564	2	0	0	0	0	0	0	200	300	0	0	0	0	0	0	0	200	903	0	0	0	0	0	0	0	603	903	0
564	3	0	0	0	0	0	0	200	300	0	0	0	0	0	0	0	200	903	0	0	0	0	0	0	0	603	903	0
564	4	0	0	0	0	0	0	200	300	0	0	0	0	0	0	0	200	903	0	0	0	0	0	0	0	603	903	0
564	5	0	0	0	0	0	0	200	300	0	0	0	0	0	0	0	200	903	0	0	0	0	0	0	0	603	903	0
564	6	0	0	0	0	0	0	200	300	0	0	0	0	0	0	0	200	903	0	0	0	0	0	0	0	603	903	0
564	7	0	0	0	0	0	0	200	300	0	0	0	0	0	0	0	200	903	0	0	0	0	0	0	0	603	903	0
564	8	0	0	0	0	0	0	200	300	0	0	0	0	0	0	0	200	903	0	0	0	0	0	0	0	603	903	0
564	9	0	0	0	0	0	0	200	300	0	0	0	0	0	0	0	200	903	0	0	0	0	0	0	0	603	903	0
565	0	0	0	0	0	0	0	200	300	0	0	0	0	0	0	0	200	903	0	0	0	0	0	0	0	603	903	0
565	1	0	0	0	0	0	0	200	300	0	0	0	0	0	0	0	200	903	0	0	0	0	0	0	0	603	903	0
565	2	0	0	0	0	0	0	200	300	0	0	0	0	0	0	0	200	903	0	0	0	0	0	0	0	603	903	0
565	3	0	0	0	0	0	0	200	300	0	0	0	0	0	0	0	200	903	0	0	0	0	0	0	0	603	903	0
565	4	0	0	0	0	0	0	200	300	0	0	0	0	0	0	0	200	903	0	0	0	0	0	0	0	603	903	0
565	5	0	0	0	0	0	0	200	300	0	0	0	0	0	0	0	200	903	0	0	0	0	0	0	0	603	903	0
565	6	0	0	0	0	0	0	200	300	0	0	0	0	0	0	0	200	903	0	0	0	0	0	0	0	603	903	0
565	7	0	0	0	0	0	0	200	300	0	0	0	0	0	0	0	200	903	0	0	0	0	0	0	0	603	903	0
565	8	0	0	0	0	0	0	200	300	0	0	0	0	0	0	0	200	903	0	0	0	0	0	0	0	603	903	0
565	9	0	0	0	0	0	0	200	300	0	0	0	0	0	0	0	200	903	0	0	0	0	0	0	0	603	903	0
566	0	0	0	0	0	0	0	200	300	0	0	0	0	0	0	0	200	903	0	0	0	0	0	0	0	603	903	0
566	1	0	0	0	0	0	0	200	300	0	0	0	0	0	0	0	200	903	0	0	0	0	0	0	0	603	903	0
566	2	0	0	0	0	0	0	200	300	0	0	0	0	0	0	0	200	903	0	0	0	0	0	0	0	603	903	0
566	3	0	0	0	0	0	0	200	300	0	0	0	0	0	0	0	200	903	0	0	0	0	0	0	0	603	903	0
566	4	0	0	0	0	0	0	200	300	0	0	0	0	0	0	0	200	903	0	0	0	0	0	0	0	603	903	0
566	5	0	0	0	0	0	0	200	300	0	0	0	0	0	0	0	200	903	0	0	0	0	0	0	0	603	903	0
566	6	0	0	0	0	0	0	200	300	0	0	0	0	0	0	0	200	903	0	0	0	0	0	0	0	603	903	0
566	7	0	0	0	0	0	0	200	300	0	0	0	0	0	0	0	200	903	0	0	0	0	0	0	0	603	903	0
566	8	0	0	0	0	0	0	200	300	0	0	0	0	0	0	0	200	903	0	0	0	0	0	0	0	603	903	0
566	9	0	0	0	0	0	0	200	300	0	0	0	0	0	0	0	200	903	0	0	0	0	0	0	0	603	903	0
567	0	0	0	0	0	0	0	200	300	0	0	0	0	0	0	0	200	903	0	0	0	0	0	0	0	603	903	0
567	1	0	0	0	0	0	0	200	300	0	0	0	0	0	0	0	200	903	0	0	0	0	0	0	0	603	903	0
567	2	0	0	0	0	0	0	200	300	0	0	0	0	0	0	0	200	903	0	0	0	0	0	0	0	603	903	0
567	3	0	0	0	0	0	0	200	300	0	0	0	0	0	0	0	200	903	0	0	0	0	0	0	0	603	903	0
567	4	0	0	0	0	0	0	200	300	0	0	0	0	0	0	0	200	903	0	0	0	0	0	0	0	603	903	0
567	5	0	0	0	0	0	0	200	300	0	0	0	0	0	0	0	200	903	0	0	0	0	0	0	0	603	903	0
567	6	0	0	0	0	0	0	200	300	0	0	0	0	0	0	0	200	903	0	0	0	0	0	0	0	603	903	0
567	7	0	0	0	0	0	0	200	300	0	0	0	0	0	0	0	200	903	0	0	0	0	0	0	0	603	903	0
567	8	0	0	0	0	0	0	200	300	0	0	0	0	0	0	0	200	903	0	0	0	0	0	0	0	603	903	0
567	9	0	0	0	0	0	0	200	300	0	0	0	0	0	0	0	200	903	0	0	0	0	0	0	0	603	903	0
568	0	0	0	0	0	0	0	200	300	0	0	0	0	0	0	0	200	903	0	0	0	0	0	0	0	603	903	0
568	1	0	0	0	0	0	0	200	300	0	0	0	0	0	0	0	200	903	0	0	0	0	0	0	0	603	903	0
568	2	0	0	0	0	0	0	200	300	0	0	0	0	0	0	0	200	903	0	0	0	0	0	0	0	603	903	0
568	3	0	0	0	0	0	0	200	300	0	0	0	0	0	0	0	200	903	0	0	0	0	0	0	0	603	903	0
568	4	0	0	0	0	0	0	200	300	0	0	0	0	0	0	0	200	903	0	0	0	0	0	0	0	603	903	0
568	5	0	0	0	0	0	0	200	300	0	0	0	0	0	0	0	200	903	0	0	0	0	0	0	0	603	903	0
568	6	0	0	0	0	0	0	200	300	0	0	0	0	0	0	0	200	903	0	0	0	0	0	0	0	603	903	0
568	7	0	0	0	0	0	0	200	300	0	0	0	0	0	0	0	200	903	0	0	0	0	0	0	0	603	903	0
568	8	0	0	0	0	0	0	200	300	0	0	0	0	0	0	0	200	903	0	0	0	0	0	0	0	603	903	0
568	9	0	0	0	0	0	0	200	300	0	0	0	0	0	0	0	200	903	0	0	0	0	0	0	0	603	903	0
569	0	0	0	0	0	0	0	200	300	0	0	0	0	0	0	0	200	903	0	0	0	0	0	0	0	603	903	0
569	1	0	0	0	0	0	0	200	300	0	0	0	0	0	0	0	200	903	0	0	0	0	0	0	0	603	903	0
569	2	0	0	0	0	0	0	200	300	0	0	0	0	0	0	0	200	903	0	0	0	0	0	0	0	603	903	0
569	3	0	0	0	0	0	0	200	300	0	0	0	0	0	0	0	200	903	0	0	0	0	0	0	0	603	903	0
569	4	0	0	0	0	0	0	200	300	0	0	0	0	0	0	0	200	903	0	0	0	0	0	0	0	603	903	0
569	5	0	0	0	0	0	0	200	300	0	0	0	0	0	0	0	200	903	0	0	0	0	0	0	0	603	903	0
569	6	0	0	0	0	0	0	200	300	0	0	0	0	0	0	0	200	903	0	0	0	0	0	0	0	603	903	0
569	7	0	0	0	0	0	0	200	300	0	0	0	0	0	0	0	200	903	0	0	0	0	0	0	0	603	903	0
569	8	0	0	0	0	0	0	200	300	0	0	0	0	0	0	0	200	903	0	0	0	0	0	0	0	603	903	0
569	9	0	0	0	0	0	0	200	300	0	0	0	0	0	0	0	200	903	0	0	0	0	0	0	0	603	903	0
570	0	0	0	0	0	0	0	200	300	0	0	0	0	0	0	0	200	903	0	0	0	0	0	0	0	603	903	0
570	1	0	0	0	0	0	0	200	300	0	0	0	0	0	0	0	200	903	0	0	0	0	0	0	0	603	903	0
570	2	0	0	0	0	0	0	200	300	0	0	0	0	0	0	0	200	903	0	0	0	0	0	0	0	603	903	0
570	3	0	0	0	0	0	0	200	300	0	0	0	0	0	0	0	200	903	0	0	0	0	0	0	0	603	903	0
570	4	0	0	0	0	0	0	200	300	0	0	0	0	0	0	0	200	903	0	0	0	0	0	0	0	603	903	0
570	5	0	0	0	0	0	0	200	300	0	0	0	0	0	0	0	200	903	0	0	0	0	0	0	0	603	903	0
570	6	0	0	0	0	0	0	200	300	0	0	0	0	0	0	0	200	903	0	0	0	0	0	0	0	603	903	0
570	7	0	0	0	0	0	0	200	300	0	0	0	0	0	0	0	200	903	0	0	0	0	0	0	0	603	903	0
570	8	0	0	0	0	0	0	200	300	0	0	0	0	0	0	0	200	903	0	0	0	0	0	0	0	603	903	0
570	9	0	0	0	0	0	0	200	300	0	0	0	0	0	0	0	200	903	0	0	0	0	0	0	0	603	903	0
571	0	0	0	0	0	0	0	200	300	0	0	0	0	0	0	0	200	903	0	0	0	0	0	0	0	603	903	0
571	1	0	0	0	0	0	0	200	300	0	0	0	0	0	0	0	200	903	0	0	0	0	0	0	0	603	903	0
571	2	0	0	0	0	0	0	200	300	0	0	0	0	0	0	0	200	903	0	0	0	0	0	0	0	603	903	0
571	3	0	0	0	0	0	0	200	300	0	0	0	0	0	0	0	200	903	0	0	0	0	0	0	0	603	903	0
571	4	0	0	0	0	0	0	200	300	0	0	0	0	0	0	0	200	903	0	0	0	0	0	0	0	603	903	0
571	5	0	0	0	0	0	0	200	300	0	0	0	0	0	0	0	200	903	0	0	0	0	0	0	0	603	903	0
571	6	0	0	0	0	0	0	200	300	0	0	0	0	0	0	0	200	903	0	0	0	0	0	0	0	603	903	0
571	7	0	0	0	0	0	0	200	300	0	0	0	0	0	0	0	200	903	0	0	0	0	0	0	0	603	903	0
571	8	0	0	0	0	0	0	200	300	0	0	0	0	0	0	0	200	903	0	0	0	0	0	0	0	603	903	0
571	9	0	0	0	0	0	0	200	300	0	0	0	0	0	0	0	200	903	0	0	0	0	0	0	0	603	903	0
572	0	0	0	0	0	0	0	200	300	0	0	0	0	0	0	0	200	903	0	0	0	0	0	0	0	603	903	0
572	1	0	0	0	0	0	0	200	300	0	0	0	0	0	0	0	200	903	0	0	0	0	0	0	0	603	903	0
572	2	0	0	0	0	0	0	200	300	0	0	0	0	0	0	0	200	903	0	0	0	0	0	0	0	603	903	0
572	3	0	0	0	0	0	0	200	300	0	0	0	0	0	0	0	200	903	0	0	0	0	0	0	0	603	903	0
572	4	0	0	0	0	0	0	200	300	0	0	0	0	0	0	0	200	903	0	0	0	0	0	0	0	603	903	0
572	5	0	0	0	0	0	0	200	300	0	0	0	0	0	0	0	200	903	0	0	0	0	0	0	0	603	903	0
572	6	0	0	0	0	0	0	200	300	0	0	0	0	0	0	0	200	903	0	0	0	0	0	0	0	603	903	0
572	7	0	0	0	0	0	0	200	300	0	0	0	0	0	0	0	200	903	0	0	0	0	0	0	0	603	903	0
572	8	0	0	0	0	0	0	200	300	0	0	0	0	0	0	0	200	903	0	0	0	0	0	0	0	603	903	0
572	9	0	0	0	0	0	0	200	300	0	0	0	0	0	0	0	200	903	0	0	0	0	0	0	0	603	903	0
573	0	0	0	0	0	0	0	200	300	0	0	0	0	0	0	0	200	903	0	0	0	0	0	0	0	603	903	0
573	1	0	0	0	0	0	0	200	300	0	0	0	0	0	0	0	200	903	0	0	0	0	0	0	0	603	903	0
573	2	0	0	0	0	0	0	200	300	0	0	0	0	0	0	0	200	903	0	0	0	0	0	0	0	603	903	0
573	3	0	0	0	0	0	0	200	300	0	0	0	0	0	0	0	200	903	0	0	0	0	0	0	0	603	903	0
573	4	0	0	0	0	0	0	200	300	0	0	0	0	0	0	0	200	903	0	0	0	0	0	0	0	603	903	0
573	5	0	0	0	0	0	0	200	300	0	0	0	0	0	0	0	200	903	0	0	0	0	0	0	0	603	903	0
573	6	0	0	0	0	0	0	200	300	0	0	0	0	0	0	0	200	903	0	0	0	0	0	0	0	603	903	0
573	7	0	0	0	0	0	0	200	300	0	0	0	0	0	0	0	200	903	0	0	0	0	0	0	0	603	903	0
573	8	0	0	0	0	0	0	200	300	0	0	0	0	0	0	0	200	903	0	0	0	0	0	0	0	603	903	0
573	9	0	0	0	0	0	0	200	300	0	0	0	0	0	0	0	200	903	0	0	0	0	0	0	0	603	903	0
574	0	0	0	0	0	0	0	200	300	0	0	0	0	0	0	0	200	903	0	0	0	0	0	0	0	603	903	0
574	1	0	0	0	0	0	0	200	300	0	0	0	0	0	0	0	200	903	0	0	0	0	0	0	0	603	903	0
574	2	0	0	0	0	0	0	200	300	0	0	0	0	0	0	0	200	903	0	0	0	0	0	0	0	603	903	0
574	3	0	0	0	0	0	0	200	300	0	0	0	0	0	0	0	200	903	0	0	0	0	0	0	0	603	903	0
574	4	0	0	0	0	0	0	200	300	0	0	0	0	0	0	0	200	903	0	0	0	0	0	0	0	603	903	0
574	5	0	0	0	0	0	0	200	300	0	0	0	0	0	0	0	200	903	0	0	0	0	0	0	0	603	903	0
574	6	0	0	0	0	0	0	200	300	0	0	0	0	0	0	0	200	903	0	0	0	0	0	0	0	603	903	0
574	7	0	0	0	0	0	0	200	300	0	0	0	0	0	0	0	200	903	0	0	0	0	0	0	0	603	903	0
574	8	0	0	0	0	0	0	200	300	0	0	0	0	0	0	0	200	903	0	0	0	0	0	0	0	603	903	0
574	9	0	0	0	0	0	0	200	300	0	0	0	0	0	0	0	200	903	0	0	0	0	0	0	0	603	903	0
575	0	0	0	0	0	0	0	200	300	0	0	0	0	0	0	0	200	903	0	0	0	0	0	0	0	603	903	0
575	1	0	0	0	0	0	0	200	300	0	0	0	0	0	0	0	200	903	0	0	0	0	0	0	0	603	903	0
575	2	0	0	0	0	0	0	200	300	0	0	0	0	0	0	0	200	903	0	0	0	0	0	0	0	603	903	0
575	3	0	0	0	0	0	0	200	300	0	0	0	0	0	0	0	200	903	0	0	0	0	0	0	0	603	903	0
575	4	0	0	0	0	0	0	200	300	0	0	0	0	0	0	0	200	903	0	0	0	0	0	0	0	603	903	0
575	5	0	0	0	0	0	0	200	300	0	0	0	0	0	0	0	200	903	0	0	0	0	0	0	0	603	903	0
575	6	0	0	0	0	0	0	200	300	0	0	0	0	0	0	0	200	903	0	0	0	0	0	0	0	603	903	0
575	7	0	0	0	0	0	0	200	300	0	0	0	0	0	0	0	200	903	0	0	0	0	0	0	0	603	903	0
575	8	0	0	0	0	0	0	200	300	0	0	0	0	0	0	0	200	903	0	0	0	0	0	0	0	603	903	0
575	9	0	0	0	0	0	0	200	300	0	0	0	0	0	0	0	200	903	0	0	0	0	0	0	0	603	903	0
576	0	0	0	0	0	0	0	200	300	0	0	0	0	0	0	0	200	903	0	0	0	0	0	0	0	603	903	0
576	1	0	0	0	0	0	0	200	300	0	0	0	0	0	0	0	200	903	0	0	0	0	0	0	0	603	903	0
576	2	0	0	0	0	0	0	200	300	0	0	0	0	0	0	0	200	903	0	0	0	0	0	0	0	603	903	0
576	3	0	0	0	0	0	0	200	300	0	0	0	0	0	0	0	200	903	0	0	0	0	0	0	0	603	903	0
576	4	0	0	0	0	0	0	200	300	0	0	0	0	0	0	0	200	903	0	0	0	0	0	0	0	603	903	0
576	5	0	0	0	0	0	0	200	300	0	0	0	0	0	0	0	200	903	0	0	0	0	0	0	0	603	903	0
576	6	0	0	0	0	0	0	200	300	0	0	0	0	0	0	0	200	903	0	0	0	0	0	0	0	603	903	0
576	7	0	0	0	0	0	0	200	300	0	0	0	0	0	0	0	200	903	0	0	0	0	0	0	0	603	903	0
576	8	0	0	0	0	0	0	200	300	0	0	0	0	0	0	0	200	903	0	0	0	0	0	0	0	603	903	0
576	9	0	0	0	0	0	0	200	300	0	0	0	0	0	0	0	200	903	0	0	0	0	0	0	0	603	903	0
577	0	0	0	0	0	0	0	200	300	0	0	0	0	0	0	0	200	903	0	0	0	0	0	0	0	603	903	0
577	1	0	0	0	0	0	0	200	300	0	0	0	0	0	0	0	200	903	0	0	0	0	0	0	0	603	903	0
577	2	0	0	0	0	0	0	200	300	0	0	0	0	0	0	0	200	903	0	0	0	0	0	0	0	603	903	0
577	3	0	0	0	0	0	0	200	300	0	0	0	0	0	0	0	200	903	0	0	0	0	0	0	0	603	903	0
577	4	0	0	0	0	0	0	200	300	0	0	0	0	0	0	0	200	903	0	0	0	0	0	0	0	603	903	0
577	5	0	0	0	0	0	0	200	300	0	0	0	0	0	0	0	200	903	0	0	0	0	0	0	0	603	903	0
577	6	0	0	0	0	0	0	200	300	0	0	0	0	0	0	0	200	903	0	0	0	0	0	0	0	603	903	0
577	7	0	0	0	0	0	0	200	300	0	0	0	0	0	0	0	200	903	0	0	0	0	0	0	0	603	903	0
577	8	0	0	0	0	0	0	200	300	0	0	0	0	0	0	0	200	903	0	0	0	0	0	0	0	603	903	0
577	9	0	0	0	0	0	0	200	300	0	0	0	0	0	0	0	200	903	0	0	0	0	0	0	0	603	903	0
578	0	0	0	0	0	0	0	200	300	0	0	0	0	0	0	0	200	903	0	0	0	0	0	0	0	603	903	0
578	1	0	0	0	0	0	0	200	300	0	0	0	0	0	0	0	200	903	0	0	0	0	0	0	0	603	903	0
578	2	0	0	0	0	0	0	200	300	0	0	0	0	0	0	0	200	903	0	0	0	0	0	0	0	603	903	0
578	3	0	0	0	0	0	0	200	300	0	0	0	0	0	0	0	200	903	0	0	0	0	0	0	0	603	903	0
578	4	0	0	0	0	0	0	200	300	0	0	0	0	0	0	0	200	903	0	0	0	0	0	0	0	603	903	0
578	5	0	0	0	0	0	0	200	300	0	0	0	0	0	0	0	200	903	0	0	0	0	0	0	0	603	903	0
578	6	0	0	0	0	0	0	200	300	0	0	0	0	0	0	0	200	903	0	0	0	0	0	0	0	603	903	0
578	7	0	0	0	0	0	0	200	300	0	0	0	0	0	0	0	200	903	0	0	0	0	0	0	0	603	903	0
578	8	0	0	0	0	0	0	200	300	0	0	0	0	0	0	0	200	903	0	0	0	0	0	0	0	603	903	0
578	9	0	0	0	0	0	0	200	300	0	0	0	0	0	0	0	200	903	0	0	0	0	0	0	0	603	903	0
579	0	0	0	0	0	0	0	200	300	0	0	0	0	0	0	0	200	903	0	0	0	0	0	0	0	603	903	0
579	1	0	0	0	0	0	0	200	300	0	0	0	0	0	0	0	200	903	0	0	0	0	0	0	0	603	903	0
579	2	0	0	0	0	0	0	200	300	0	0	0	0	0	0	0	200	903	0	0	0	0	0	0	0	603	903	0
579	3	0	0	0	0	0	0	200	300	0	0	0	0	0	0	0	200	903	0	0	0	0	0	0	0	603	903	0
579	4	0	0	0	0	0	0	200	300	0	0	0	0	0	0	0	200	903	0	0	0	0	0	0	0	603	903	0
579	5	0	0	0	0	0	0	200	300	0	0	0	0	0	0	0	200	903	0	0	0	0	0	0	0	603	903	0
579	6	0	0	0	0	0	0	200	300	0	0	0	0	0	0	0	200	903	0	0	0	0	0	0	0	603	903	0
579	7	0	0	0	0	0	0	200	300	0	0	0	0	0	0	0	200	903	0	0	0	0	0	0	0	603	903	0
579	8	0	0	0	0	0	0	200	300	0	0	0	0	0	0	0	200	903	0	0	0	0	0	0	0	603	903	0
579	9	0	0	0	0	0	0	200	300	0	0	0	0	0	0	0	200	903	0	0	0	0	0	0	0	603	903	0
580	0	0	0	0	0	0	0	200	300	0	0	0	0	0	0	0	200	903	0	0	0	0	0	0	0	603	903	0
580	1	0	0	0	0	0	0	200	300	0	0	0	0	0	0	0	200	903	0	0	0	0	0	0	0	603	903	0
580	2	0	0	0	0	0	0	200	300	0	0	0	0	0	0	0	200	903	0	0	0	0	0	0	0	603	903	0
580	3	0	0	0	0	0	0	200	300	0	0	0	0	0	0	0	200	903	0	0	0	0	0	0	0	603	903	0
580	4	0	0	0	0	0	0	200	300	0	0	0	0	0	0	0	200	903	0	0	0	0	0	0	0	603	903	0
580	5	0	0	0	0	0	0	200	300	0	0	0	0	0	0	0	200	903	0	0	0	0	0	0	0	603	903	0
580	6	0	0	0	0	0	0	200	300	0	0	0	0	0	0	0	200	903	0	0	0	0	0	0	0	603	903	0
580	7	0	0	0	0	0	0	200	300	0	0	0	0	0	0	0	200	903	0	0	0	0	0	0	0	603	903	0
580	8	0	0	0	0	0	0	200	300	0	0	0	0	0	0	0	200	903	0	0	0	0	0	0	0	603	903	0
580	9	0	0	0	0	0	0	200	300	0	0	0	0	0	0	0	200	903	0	0	0	0	0	0	0	603	903	0
581	0	0	0	0	0	0	0	200	300	0	0	0	0	0	0	0	200	903	0	0	0	0	0	0	0	603	903	0
581	1	0	0	0	0	0	0	200	300	0	0	0	0	0	0	0	200	903	0	0	0	0	0	0	0	603	903	0
581	2	0	0	0	0	0	0	200	300	0	0	0	0	0	0	0	200	903	0	0	0	0	0	0	0	603	903	0
581	3	0	0	0	0	0	0	200	300	0	0	0	0	0	0	0	200	903	0	0	0	0	0	0	0	603	903	0
581	4	0	0	0	0	0	0	200	300	0	0	0	0	0	0	0	200	903	0	0	0	0	0	0	0	603	903	0
581	5	0	0	0	0	0	0	200	300	0	0	0	0	0	0	0	200	903	0	0	0	0	0	0	0	603	903	0
581	6	0	0	0	0	0	0	200	300	0	0	0	0	0	0	0	200	903	0	0	0	0	0	0	0	603	903	0
581	7	0	0	0	0	0	0	200	300	0	0	0	0	0	0	0	200	903	0	0	0	0	0	0	0	603	903	0
581	8	0	0	0	0	0	0	200	300	0	0	0	0	0	0	0	200	903	0	0	0	0	0	0	0	603	903	0
581	9	0	0	0	0	0	0	200	300	0	0	0	0	0	0	0	200	903	0	0	0	0	0	0	0	603	903	0
582	0	0	0	0	0	0	0	200	300	0	0	0	0	0	0	0	200	903	0	0	0	0	0	0	0	603	903	0
582	1	0	0	0	0	0	0	200	300	0	0	0	0	0	0	0	200	903	0	0	0	0	0	0	0	603	903	0
582	2	0	0	0	0	0	0	200	300	0	0	0	0	0	0	0	200	903	0	0	0	0	0	0	0	603	903	0
582	3	0	0	0	0	0	0	200	300	0	0	0	0	0	0	0	200	903	0	0	0	0	0	0	0	603	903	0
582	4	0	0	0	0	0	0	200	300	0	0	0	0	0	0	0	200	903	0	0	0	0	0	0	0	603	903	0
582	5	0	0	0	0	0	0	200	300	0	0	0	0	0	0	0	200	903	0	0	0	0	0	0	0	603	903	0
582	6	0	0	0	0	0	0	200	300	0	0	0	0	0	0	0	200	903	0	0	0	0	0	0	0	603	903	0
582	7	0	0	0	0	0	0	200	300	0	0	0	0	0	0	0	200	903	0	0	0	0	0	0	0	603	903	0
582	8	0	0	0	0	0	0	200	300	0	0	0	0	0	0	0	200	903	0	0	0	0	0	0	0	603	903	0
582	9	0	0	0	0	0	0	200	300	0	0	0	0	0	0	0	200	903	0	0	0	0	0	0	0	603	903	0
583	0	0	0	0	0	0	0	200	300	0	0	0	0	0	0	0	200	903	0	0	0	0	0	0	0	603	903	0
583	1	0	0	0	0	0	0	200	300	0	0	0	0	0	0	0	200	903	0	0	0	0	0	0	0	603	903	0
583	2	0	0	0	0	0	0	200	300	0	0	0	0	0	0	0	200	903	0	0	0	0	0	0	0	603	903	0
583	3	0	0	0	0	0	0	200	300	0	0	0	0	0	0	0	200	903	0	0	0	0	0	0	0	603	903	0
583	4	0	0	0	0	0	0	200	300	0	0	0	0	0	0	0	200	903	0	0	0	0	0	0	0	603	903	0
583	5	0	0	0	0	0	0	200	300	0	0	0	0	0	0	0	200	903	0	0	0	0	0	0	0	603	903	0
583	6	0	0	0	0	0	0	200	300	0	0	0	0	0	0	0	200	903	0	0	0	0	0	0	0	603	903	0
583	7	0	0	0	0	0	0	200	300	0	0	0	0	0	0	0	200	903	0	0	0	0	0	0	0	603	903	0
583	8	0	0	0	0	0	0	200	300	0	0	0	0	0	0	0	200	903	0	0	0	0	0	0	0	603	903	0
583	9	0	0	0	0	0	0	200	300	0	0	0	0	0	0	0	200	903	0	0	0	0	0	0	0	603	903	0
584	0	0	0	0	0	0	0	200	300	0	0	0	0	0	0	0	200	903	0	0	0	0	0	0	0	603	903	0
584	1	0	0	0	0	0	0	200	300	0	0	0	0	0	0	0	200	903	0	0	0	0	0	0	0	603	903	0
584	2	0	0	0	0	0	0	200	300	0	0	0	0	0	0	0	200	903	0	0	0	0	0	0	0	603	903	0
584	3	0	0	0	0	0	0	200	300	0	0	0	0	0	0	0	200	903	0	0	0	0	0	0	0	603	903	0
584	4	0	0	0	0	0	0	200	300	0	0	0	0	0	0	0	200	903	0	0	0	0	0	0	0	603	903	0
584	5	0	0	0	0	0	0	200	300	0	0	0	0	0	0	0	200	903	0	0	0	0	0	0	0	603	903	0
584	6	0	0	0	0	0	0	200	300	0	0	0	0	0	0	0	200	903	0	0	0	0	0	0	0	603	903	0
584	7	0	0	0	0	0	0	200	300	0	0	0	0	0	0	0	200	903	0	0	0	0	0	0	0	603	903	0
584	8	0	0	0	0	0	0	200	300	0	0	0	0	0	0	0	200	903	0	0	0	0	0	0	0	603	903	0
584	9	0	0	0	0	0	0	200	300	0	0	0	0	0	0	0	200	903	0	0	0	0	0	0	0	603	903	0
585	0	0	0	0	0	0	0	200	300	0	0	0	0	0	0	0	200	903	0	0	0	0	0	0	0	603	903	0
585	1	0	0	0	0	0	0	200	300	0	0	0	0	0	0	0	200	903	0	0	0	0	0	0	0	603	903	0
585	2	0	0	0	0	0	0	200	300	0	0	0	0	0	0	0	200	903	0	0	0	0	0	0	0	603	903	0
585	3	0	0	0	0	0	0	200	300	0	0	0	0	0	0	0	200	903	0	0	0	0	0	0	0	603	903	0
585	4	0	0	0	0	0	0	200	300	0	0	0	0	0	0	0	200	903	0	0	0	0	0	0	0	603	903	0
585	5	0	0	0	0	0	0	200	300	0	0	0	0	0	0	0	200	903	0	0	0	0	0	0	0	603	903	0
585	6	0	0	0	0	0	0	200	300	0	0	0	0	0	0	0	200	903	0	0	0	0	0	0	0	603	903	0
585	7	0	0	0	0	0	0	200	300	0	0	0	0	0	0	0	200	903	0	0	0	0	0	0	0	603	903	0
585	8	0	0	0	0	0	0	200	300	0	0	0	0	0	0	0	200	903	0	0	0	0	0	0	0	603	903	0
585	9	0	0	0	0	0	0	200	300	0	0	0	0	0	0	0	200	903	0	0	0	0	0	0	0	603	903	0
586	0	0	0	0	0	0	0	200	300	0	0	0	0	0	0	0	200	903	0	0	0	0	0	0	0	603	903	0
586	1	0	0	0	0	0	0	200	300	0	0	0	0	0	0	0	200	903	0	0	0	0	0	0	0	603	903	0
586	2	0	0	0	0	0	0	200	300	0	0	0	0	0	0	0	200	903	0	0	0	0	0	0	0	603	903	0
586	3	0	0	0	0	0	0	200	300	0	0	0	0	0	0	0	200	903	0	0	0	0	0	0	0	603	903	0
586	4	0	0	0	0	0	0	200	300	0	0	0	0	0	0	0	200	903	0	0	0	0	0	0	0	603	903	0
586	5	0	0	0	0	0	0	200	300	0	0	0	0	0	0	0	200	903	0	0	0	0	0	0	0	603	903	0
586	6	0	0	0	0	0	0	200	300	0	0	0	0	0	0	0	200	903	0	0	0	0	0	0	0	603	903	0
586	7	0	0	0	0	0	0	200	300	0	0	0	0	0	0	0	200	903	0	0	0	0	0	0	0	603	903	0
586	8	0	0	0	0	0	0	200	300	0	0	0	0	0	0	0	200	903	0	0	0	0	0	0	0	603	903	0
586	9	0	0	0	0	0	0	200	300	0	0	0	0	0	0	0	200	903	0	0	0	0	0	0	0	603	903	0
587	0	0	0	0	0	0	0	200	300	0	0	0	0	0	0	0	200	903	0	0	0	0	0	0	0	603	903	0
587	1	0	0	0	0	0	0	200	300	0	0	0	0	0	0	0	200	903	0	0	0	0	0	0	0	603	903	0
587	2	0	0	0	0	0	0	200	300	0	0	0	0	0	0	0	200	903	0	0	0	0	0	0	0	603	903	0
587	3	0	0	0	0	0	0	200	300	0	0	0	0	0	0	0	200	903	0	0	0	0	0	0	0	603	903	0
587	4	0	0	0	0	0	0	200	300	0	0	0	0	0	0	0	200	903	0	0	0	0	0	0	0	603	903	0
587	5	0	0	0	0	0	0	200	300	0	0	0	0	0	0	0	200	903	0	0	0	0	0	0	0	603	903	0
587	6	0	0	0	0	0	0	200	300	0	0	0	0	0	0	0	200	903	0	0	0	0	0	0	0	603	903	0
587	7	0	0	0	0	0	0	200	300	0	0	0	0	0	0	0	200	903	0	0	0	0	0	0	0	603	903	0
587	8	0	0	0	0	0	0	200	300	0	0	0	0	0	0	0	200	903	0	0	0	0	0	0	0	603	903	0
587	9	0	0	0	0	0	0	200	300	0	0	0	0	0	0	0	200	903	0	0	0	0	0	0	0	603	903	0
588	0	0	0	0	0	0	0	200	300	0	0	0	0	0	0	0	200	903	0	0	0	0	0	0	0	603	903	0
588	1	0	0	0	0	0	0	200	300	0	0	0	0	0	0	0	200	903	0	0	0	0	0	0	0	603	903	0
588	2	0	0	0	0	0	0	200	300	0	0	0	0	0	0	0	200	903	0	0	0	0	0	0	0	603	903	0
588	3	0	0	0	0	0	0	200	300	0	0	0	0	0	0	0	200	903	0	0	0	0	0	0	0	603	903	0
588	4	0	0	0	0	0	0	200	300	0	0	0	0	0	0	0	200	903	0	0	0	0	0	0	0	603	903	0
588	5	0	0	0	0	0	0	200	300	0	0	0	0	0	0	0	200	903	0	0	0	0	0	0	0	603	903	0
588	6	0	0	0	0	0	0	200	300	0	0	0	0	0	0	0	200	903	0	0	0	0	0	0	0	603	903	0
588	7	0	0	0	0	0	0	200	300	0	0	0	0	0	0	0	200	903	0	0	0	0	0	0	0	603	903	0
588	8	0	0	0	0	0	0	200	300	0	0	0	0	0	0	0	200	903	0	0	0	0	0	0	0	603	903	0
588	9	0	0	0	0	0	0	200	300	0	0	0	0	0	0	0	200	903	0	0	0	0	0	0	0	603	903	0
589	0	0	0	0	0	0	0	200	300	0	0	0	0	0	0	0	200	903	0	0	0	0	0	0	0	603	903	0
589	1	0	0	0	0	0	0	200	300	0	0	0	0	0	0	0	200	903	0	0	0	0	0	0	0	603	903	0
589	2	0	0	0	0	0	0	200	300	0	0	0	0	0	0	0	200	903	0	0	0	0	0	0	0	603	903	0
589	3	0	0	0	0	0	0	200	300	0	0	0	0	0	0	0	200	903	0	0	0	0	0	0	0	603	903	0
589	4	0	0	0	0	0	0	200	300	0	0	0	0	0	0	0	200	903	0	0	0	0	0	0	0	603	903	0
589	5	0	0	0	0	0	0	200	300	0	0	0	0	0	0	0	200	903	0	0	0	0	0	0	0	603	903	0
589	6	0	0	0	0	0	0	200	300	0	0	0	0	0	0	0	200	903	0	0	0	0	0	0	0	603	903	0
589	7	0	0	0	0	0	0	200	300	0	0	0	0	0	0	0	200	903	0	0	0	0	0	0	0	603	903	0
589	8	0	0	0	0	0	0	200	300	0	0	0	0	0	0	0	200	903	0	0	0	0	0	0	0	603	903	0
589	9	0	0	0	0	0	0	200	300	0	0	0	0	0	0	0	200	903	0	0	0	0	0	0	0	603	903	0
590	0	0	0	0	0	0	0	200	300	0	0	0	0	0	0	0	200	903	0	0	0	0	0	0	0	603	903	0
590	1	0	0	0	0	0	0	200	300	0	0	0	0	0	0	0	200	903	0	0	0	0	0	0	0	603	903	0
590	2	0	0	0	0	0	0	200	300	0	0	0	0	0	0	0	200	903	0	0	0	0	0	0	0	603	903	0
590	3	0	0	0	0	0	0	200	300	0	0	0	0	0	0	0	200	903	0	0	0	0	0	0	0	603	903	0
590	4	0	0	0	0	0	0	200	300	0	0	0	0	0	0	0	200	903	0	0	0	0	0	0	0	603	903	0
590	5	0	0	0	0	0	0	200	300	0	0	0	0	0	0	0	200	903	0	0	0	0	0	0	0	603	903	0
590	6	0	0	0	0	0	0	200	300	0	0	0	0	0	0	0	200	903	0	0	0	0	0	0	0	603	903	0
590	7	0	0	0	0	0	0	200	300	0	0	0	0	0	0	0	200	903	0	0	0	0	0	0	0	603	903	0
590	8	0	0	0	0	0	0	200	300	0	0	0	0	0	0	0	200	903	0	0	0	0	0	0	0	603	903	0
590	9	0	0	0	0	0	0	200	300	0	0	0	0	0	0	0	200	903	0	0	0	0	0	0	0	603	903	0
591	0	0	0	0	0	0	0	200	300	0	0	0	0	0	0	0	200	903	0	0	0	0	0	0	0	603	903	0
591	1	0	0	0	0	0	0	200	300	0	0	0	0	0	0	0	200	903	0	0	0	0	0	0	0	603	903	0
591	2	0	0	0	0	0	0	200	300	0	0	0	0	0	0	0	200	903	0	0	0	0	0	0	0	603	903	0
591	3	0	0	0	0	0	0	200	300	0	0	0	0	0	0	0	200	903	0	0	0	0	0	0	0	603	903	0
591	4	0	0	0	0	0	0	200	300	0	0	0	0	0	0	0	200	903	0	0	0	0	0	0	0	603	903	0
591	5	0	0	0	0	0	0	200	300	0	0	0	0	0	0	0	200	903	0	0	0	0	0	0	0	603	903	0
591	6	0	0	0	0	0	0	200	300	0	0	0	0	0	0	0	200	903	0	0	0	0	0	0	0	603	903	0
591	7	0	0	0	0	0	0	200	300	0	0	0	0	0	0	0	200	903	0	0	0	0	0	0	0	603	903	0
591	8	0	0	0	0	0	0	200	300	0	0	0	0	0	0	0	200	903	0	0	0	0	0	0	0	603	903	0
591	9	0	0	0	0	0	0	200	300	0	0	0	0	0	0	0	200	903	0	0	0	0	0	0	0	603	903	0
592	0	0	0	0	0	0	0	200	300	0	0	0	0	0	0	0	200	903	0	0	0	0	0	0	0	603	903	0
592	1	0	0	0	0	0	0	200	300	0	0	0	0	0	0	0	200	903	0	0	0	0	0	0	0	603	903	0
592	2	0	0	0	0	0	0	200	300	0	0	0	0	0	0	0	200	903	0	0	0	0	0	0	0	603	903	0
592	3	0	0	0	0	0	0	200	300	0	0	0	0	0	0	0	200	903	0	0	0	0	0	0	0	603	903	0
592	4	0	0	0	0	0	0	200	300	0	0	0	0	0	0	0	200	903	0	0	0	0	0	0	0	603	903	0
592	5	0	0	0	0	0	0	200	300	0	0	0	0	0	0	0	200	903	0	0	0	0	0	0	0	603	903	0
592	6	0	0	0	0	0	0	200	300	0	0	0	0	0	0	0	200	903	0	0	0	0	0	0	0	603	903	0
592	7	0	0	0	0	0	0	200	300	0	0	0	0	0	0	0	200	903	0	0	0	0	0	0	0	603	903	0
592	8	0	0	0	0	0	0	200	300	0	0	0	0	0	0	0	200	903	0	0	0	0	0	0	0	603	903	0
592	9	0	0	0	0	0	0	200	300	0	0	0	0	0	0	0	200	903	0	0	0	0	0	0	0	603	903	0
593	0	0	0	0	0	0	0	200	300	0	0	0	0	0	0	0	200	903	0	0	0	0	0	0	0	603	903	0
593	1	0	0	0	0	0	0	200	300	0	0	0	0	0	0	0	200	903	0	0	0	0	0	0	0	603	903	0
593	2	0	0	0	0	0	0	200	300	0	0	0	0	0	0	0	200	903	0	0	0	0	0	0	0	603	903	0
593	3	0	0	0	0	0	0	200	300	0	0	0	0	0	0	0	200	903	0	0	0	0	0	0	0	603	903	0
593	4	0	0	0	0	0	0	200	300	0	0	0	0	0	0	0	200	903	0	0	0	0	0	0	0	603	903	0
593	5	0	0	0	0	0	0	200	300	0	0	0	0	0	0	0	200	903	0	0	0	0	0	0	0	603	903	0
593	6	0	0	0	0	0	0	200	300	0	0	0	0	0	0	0	200	903	0	0	0	0	0	0	0	603	903	0
593	7	0	0	0	0	0	0	200	300	0	0	0	0	0	0	0	200	903	0	0	0	0	0	0	0	603	903	0
593	8	0	0	0	0	0	0	200	300	0	0	0	0	0	0	0	200	903	0	0	0	0	0	0	0	603	903	0
593	9	0	0	0	0	0	0	200	300	0	0	0	0	0	0	0	200	903	0	0	0	0	0	0	0	603	903	0
594	0	0	0	0	0	0	0	200	300	0	0	0	0	0	0	0	200	903	0	0	0	0	0	0	0	603	903	0
594	1	0	0	0	0	0	0	200	300	0	0	0	0	0	0	0	200	903	0	0	0	0	0	0	0	603	903	0
594	2	0	0	0	0	0	0	200	300	0	0	0	0	0	0	0	200	903	0	0	0	0	0	0	0	603	903	0
594	3	0	0	0	0	0	0	200	300	0	0	0	0	0	0	0	200	903	0	0	0	0	0	0	0	603	903	0
594	4	0	0	0	0	0	0	200	300	0	0	0	0	0	0	0	200	903	0	0	0	0	0	0	0	603	903	0
594	5	0	0	0	0	0	0	200	300	0	0	0	0	0	0	0	200	903	0	0	0	0	0	0	0	603	903	0
594	6	0	0	0	0	0	0	200	300	0	0	0	0	0	0	0	200	903	0	0	0	0	0	0	0	603	903	0
594	7	0	0	0	0	0	0	200	300	0	0	0	0	0	0	0	200	903	0	0	0	0	0	0	0	603	903	0
594	8	0	0	0	0	0	0	200	300	0	0	0	0	0	0	0	200	903	0	0	0	0	0	0	0	603	903	0
594	9	0	0	0	0	0	0	200	300	0	0	0	0	0	0	0	200	903	0	0	0	0	0	0	0	603	903	0
595	0	0	0	0	0	0	0	200	300	0	0	0	0	0	0	0	200	903	0	0	0	0	0	0	0	603	903	0
595	1	0	0	0	0	0	0	200	300	0	0	0	0	0	0	0	200	903	0	0	0	0	0	0	0	603	903	0
595	2	0	0	0	0	0	0	200	300	0	0	0	0	0	0	0	200	903	0	0	0	0	0	0	0	603	903	0
595	3	0	0	0	0	0	0	200	300	0	0	0	0	0	0	0	200	903	0	0	0	0	0	0	0	603	903	0
595	4	0	0	0	0	0	0	200	300	0	0	0	0	0	0	0	200	903	0	0	0	0	0	0	0	603	903	0
595	5	0	0	0	0	0	0	200	300	0	0	0	0	0	0	0	200	903	0	0	0	0	0	0	0	603	903	0
595	6	0	0	0	0	0	0	200	300	0	0	0	0	0	0	0	200	903	0	0	0	0	0	0	0	603	903	0
595	7	0	0	0	0	0	0	200	300	0	0	0	0	0	0	0	200	903	0	0	0	0	0	0	0	603	903	0
595	8	0	0	0	0	0	0	200	300	0	0	0	0	0	0	0	200	903	0	0	0	0	0	0	0	603	903	0
595	9	0	0	0	0	0	0	200	300	0	0	0	0	0	0	0	200	903	0	0	0	0	0	0	0	603	903	0
596	0	0	0	0	0	0	0	200	300	0	0	0	0	0	0	0	200	903	0	0	0	0	0	0	0	603	903	0
596	1	0	0	0	0	0	0	200	300	0	0	0	0	0	0	0	200	903	0	0	0	0	0	0	0	603	903	0
596	2	0	0	0	0	0	0	200	300	0	0	0	0	0	0	0	200	903	0	0	0	0	0	0	0	603	903	0
596	3	0	0	0	0	0	0	200	300	0	0	0	0	0	0	0	200	903	0	0	0	0	0	0	0	603	903	0
596	4	0	0	0	0	0	0	200	300	0	0	0	0	0	0	0	200	903	0	0	0	0	0	0	0	603	903	0
596	5	0	0	0	0	0	0	200	300	0	0	0	0	0	0	0	200	903	0	0	0	0	0	0	0	603	903	0
596	6	0	0	0	0	0	0	200	300	0	0	0	0	0	0	0	200	903	0	0	0	0	0	0	0	603	903	0
596	7	0	0	0	0	0	0	200	300	0	0	0	0	0	0	0	200	903	0	0	0	0	0	0	0	603	903	0
596	8	0	0	0	0	0	0	200	300	0	0	0	0	0	0	0	200	903	0	0	0	0	0	0	0	603	903	0
596	9	0	0	0	0	0	0	200	300	0	0	0	0	0	0	0	200	903	0	0	0	0	0	0	0	603	903	0
597	0	0	0	0	0	0	0	200	300	0	0	0	0	0	0	0	200	903	0	0	0	0	0	0	0	603	903	0
597	1	0	0	0	0	0	0	200	300	0	0	0	0	0	0	0	200	903	0	0	0	0	0	0	0	603	903	0
597	2	0	0	0	0	0	0	200	300	0	0	0	0	0	0	0	200	903	0	0	0	0	0	0	0	603	903	0
597	3	0	0	0	0	0	0	200	300	0	0	0	0	0	0	0	200	903	0	0	0	0	0	0	0	603	903	0
597	4	0	0	0	0	0	0	200	300	0	0	0	0	0	0	0	200	903	0	0	0	0	0	0	0	603	903	0
597	5	0	0	0	0	0	0	200	300	0	0	0	0	0	0	0	200	903	0	0	0	0	0	0	0	603	903	0
597	6	0	0	0	0	0	0	200	300	0	0	0	0	0	0	0	200	903	0	0	0	0	0	0	0	603	903	0
597	7	0	0	0	0	0	0	200	300	0	0	0	0	0	0	0	200	903	0	0	0	0	0	0	0	603	903	0
597	8	0	0	0	0	0	0	200	300	0	0	0	0	0	0	0	200	903	0	0	0	0	0	0	0	603	903	0
597	9	0	0	0	0	0	0	200	300	0	0	0	0	0	0	0	200	903	0	0	0	0	0	0	0	603	903	0
598	0	0	0	0	0	0	0	200	300	0	0	0	0	0	0	0	200	903	0	0	0	0	0	0	0	603	903	0
598	1	0	0	0	0	0	0	200	300	0	0	0	0	0	0	0	200	903	0	0	0	0	0	0	0	603	903	0
598	2	0	0	0	0	0	0	200	300	0	0	0	0	0	0	0	200	903	0	0	0	0	0	0	0	603	903	0
598	3	0	0	0	0	0	0	200	300	0	0	0	0	0	0	0	200	903	0	0	0	0	0	0	0	603	903	0
598	4	0	0	0	0	0	0	200	300	0	0	0	0	0	0	0	200	903	0	0	0	0	0	0	0	603	903	0
598	5	0	0	0	0	0	0	200	300	0	0	0	0	0	0	0	200	903	0	0	0	0	0	0	0	603	903	0
598	6	0	0	0	0	0	0	200	300	0	0	0	0	0	0	0	200	903	0	0	0	0	0	0	0	603	903	0
598	7	0	0	0	0	0	0	200	300	0	0	0	0	0	0	0	200	903	0	0	0	0	0	0	0	603	903	0
598	8	0	0	0	0	0	0	200	300	0	0	0	0	0	0	0	200	903	0	0	0	0	0	0	0	603	903	0
598	9	0	0	0	0	0	0	200	300	0	0	0	0	0	0	0	200	903	0	0	0	0	0	0	0	603	903	0
599	0	0	0	0	0	0	0	200	300	0	0	0	0	0	0	0	200	903	0	0	0	0	0	0	0	603	903	0
599	1	0	0	0	0	0	0	200	300	0	0	0	0	0	0	0	200	903	0	0	0	0	0	0	0	603	903	0
599	2	0	0	0	0	0	0	200	300	0	0	0	0	0	0	0	200	903	0	0	0	0	0	0	0	603	903	0
599	3	0	0	0	0	0	0	200	300	0	0	0	0	0	0	0	200	903	0	0	0	0	0	0	0	603	903	0
599	4	0	0	0	0	0	0	200	300	0	0	0	0	0	0	0	200	903	0	0	0	0	0	0	0	603	903	0
599	5	0	0	0	0	0	0	200	300	0	0	0	0	0	0	0	200	903	0	0	0	0	0	0	0	603	903	0
599	6	0	0	0	0	0	0	200	300	0	0	0	0	0	0	0	200	903	0	0	0	0	0	0	0	603	903	0
599	7	0	0	0	0	0	0	200	300	0	0	0	0	0	0	0	200	903	0	0	0	0	0	0	0	603	903	0
599	8	0	0	0	0	0	0	200	300	0	0	0	0	0	0	0	200	903	0	0	0	0	0	0	0	603	903	0
599	9	0	0	0	0	0	0	200	300	0	0	0	0	0	0	0	200	903	0	0	0	0	0	0	0	603	903	0
600	0	0	0	0	0	0	0	200	300	0	0	0	0	0	0	0	200	903	0	0	0	0	0	0	0	603	903	0
600	1	0	0	0	0	0	0	200	300	0	0	0	0	0	0	0	200	903	0	0	0	0	0	0	0	603	903	0
600	2	0	0	0	0	0	0	200	300	0	0	0	0	0	0	0	200	903	0	0	0	0	0	0	0	603	903	0
600	3	0	0	0	0	0	0	200	300	0	0	0	0	0	0	0	200	903	0	0	0	0	0	0	0	603	903	0
600	4	0	0	0	0	0	0	200	300	0	0	0	0	0	0	0	200	903	0	0	0	0	0	0	0	603	903	0
600	5	0	0	0	0	0	0	200	300	0	0	0	0	0	0	0	200	903	0	0	0	0	0	0	0	603	903	0
600	6	0	0	0	0	0	0	200	300	0	0	0	0	0	0	0	200	903	0	0	0	0	0	0	0	603	903	0
600	7	0	0	0	0	0	0	200	300	0	0	0	0	0	0	0	200	903	0	0	0	0	0	0	0	603	903	0
600	8	0	0	0	0	0	0	200	300	0	0	0	0	0	0	0	200	903	0	0	0	0	0	0	0	603	903	0
600	9	0	0	0	0	0	0	200	300	0	0	0	0	0	0	0	200	903	0	0	0	0	0	0	0	603	903	0
601	0	0	0	0	0	0	0	200	300	0	0	0	0	0	0	0	200	903	0	0	0	0	0	0	0	603	903	0
601	1	0	0	0	0	0	0	200	300	0	0	0	0	0	0	0	200	903	0	0	0	0	0	0	0	603	903	0
601	2	0	0	0	0	0	0	200	300	0	0	0	0	0	0	0	200	903	0	0	0	0	0	0	0	603	903	0
601	3	0	0	0	0	0	0	200	300	0	0	0	0	0	0	0	200	903	0	0	0	0	0	0	0	603	903	0
601	4	0	0	0	0	0	0	200	300	0	0	0	0	0	0	0	200	903	0	0	0	0	0	0	0	603	903	0
601	5	0	0	0	0	0	0	200	300	0	0	0	0	0	0	0	200	903	0	0	0	0	0	0	0	603	903	0
601	6	0	0	0	0	0	0	200	300	0	0	0	0	0	0	0	200	903	0	0	0	0	0	0	0	603	903	0
601	7	0	0	0	0	0	0	200	300	0	0	0	0	0	0	0	200	903	0	0	0	0	0	0	0	603	903	0
601	8	0	0	0	0	0	0	200	300	0	0	0	0	0	0	0	200	903	0	0	0	0	0	0	0	603	903	0
601	9	0	0	0	0	0	0	200	300	0	0	0	0	0	0	0	200	903	0	0	0	0	0	0	0	603	903	0
602	0	0	0	0	0	0	0	200	300	0	0	0	0	0	0	0	200	903	0	0	0	0	0	0	0	603	903	0
602	1	0	0	0	0	0	0	200	300	0	0	0	0	0	0	0	200	903	0	0	0	0	0	0	0	603	903	0
602	2	0	0	0	0	0	0	200	300	0	0	0	0	0	0	0	200	903	0	0	0	0	0	0	0	603	903	0
602	3	0	0	0	0	0	0	200	300	0	0	0	0	0	0	0	200	903	0	0	0	0	0	0	0	603	903	0
602	4	0	0	0	0	0	0	200	300	0	0	0	0	0	0	0	200	903	0	0	0	0	0	0	0	603	903	0
602	5	0	0	0	0	0	0	200	300	0	0	0	0	0	0	0	200	903	0	0	0	0	0	0	0	603	903	0
602	6	0	0	0	0	0	0	200	300	0	0	0	0	0	0	0	200	903	0	0	0	0	0	0	0	603	903	0
602	7	0	0	0	0	0	0	200	300	0	0	0	0	0	0	0	200	903	0	0	0	0	0	0	0	603	903	0
602	8	0	0	0	0	0	0	200	300	0	0	0	0	0	0	0	200	903	0	0	0	0	0	0	0	603	903	0
602	9	0	0	0	0	0	0	200	300	0	0	0	0	0	0	0	200	903	0	0	0	0	0	0	0	603	903	0
603	0	0	0	0	0	0	0	200	300	0	0	0	0	0	0	0	200	903	0	0	0	0	0	0	0	603	903	0
603	1	0	0	0	0	0	0	200	300	0	0	0	0	0	0	0	200	903	0	0	0	0	0	0	0	603	903	0
603	2	0	0	0	0	0	0	200	300	0	0	0	0	0	0	0	200	903	0	0	0	0	0	0	0	603	903	0
603	3	0	0	0	0	0	0	200	300	0	0	0	0	0	0	0	200	903	0	0	0	0	0	0	0	603	903	0
603	4	0	0	0	0	0	0	200	300	0	0	0	0	0	0	0	200	903	0	0	0	0	0	0	0	603	903	0
603	5	0	0	0	0	0	0	200	300	0	0	0	0	0	0	0	200	903	0	0	0	0	0	0	0	603	903	0
603	6	0	0	0	0	0	0	200	300	0	0	0	0	0	0	0	200	903	0	0	0	0	0	0	0	603	903	0
603	7	0	0	0	0	0	0	200	300	0	0	0	0	0	0	0	200	903	0	0	0	0	0	0	0	603	903	0
603	8	0	0	0	0	0	0	200	300	0	0	0	0	0	0	0	200	903	0	0	0	0	0	0	0	603	903	0
603	9	0	0	0	0	0	0	200	300	0	0	0	0	0	0	0	200	903	0	0	0	0	0	0	0	603	903	0
604	0	0	0	0	0	0	0	200	300	0	0	0	0	0	0	0	200	903	0	0	0	0	0	0	0	603	903	0
604	1	0	0	0	0	0	0	200	300	0	0	0	0	0	0	0	200	903	0	0	0	0	0	0	0	603	903	0
604	2	0	0	0	0	0	0	200	300	0	0	0	0	0	0	0	200	903	0	0	0	0	0	0	0	603	903	0
604	3	0	0	0	0	0	0	200	300	0	0	0	0	0	0	0	200	903	0	0	0	0	0	0	0	603	903	0
604	4	0	0	0	0	0	0	200	300	0	0	0	0	0	0	0	200	903	0	0	0	0	0	0	0	603	903	0
604	5	0	0	0	0	0	0	200	300	0	0	0	0	0	0	0	200	903	0	0	0	0	0	0	0	603	903	0
604	6	0	0	0	0	0	0	200	300	0	0	0	0	0	0	0	200	903	0	0	0	0	0	0	0	603	903	0
604	7	0	0	0	0	0	0	200	300	0	0	0	0	0	0	0	200	903	0	0	0	0	0	0	0	603	903	0
604	8	0	0	0	0	0	0	200	300	0	0	0	0	0	0	0	200	903	0	0	0	0	0	0	0	603	903	0
604	9	0	0	0	0	0	0	200	300	0	0	0	0	0	0	0	200	903	0	0	0	0	0	0	0	603	903	0
605	0	0	0	0	0	0	0	200	300	0	0	0	0	0	0	0	200	903	0	0	0	0	0	0	0	603	903	0
605	1	0	0	0	0	0	0	200	300	0	0	0	0	0	0	0	200	903	0	0	0	0	0	0	0	603	903	0
605	2	0	0	0	0	0	0	200	300	0	0	0	0	0	0	0	200	903	0	0	0	0	0	0	0	603	903	0
605	3	0	0	0	0	0	0	200	300	0	0	0	0	0	0	0	200	903	0	0	0	0	0	0	0	603	903	0
605	4	0	0	0	0	0	0	200	300	0	0	0	0	0	0	0	200	903	0	0	0	0	0	0	0	603	903	0
605	5	0	0	0	0	0	0	200	300	0	0	0	0	0	0	0	200	903	0	0	0	0	0	0	0	603	903	0
605	6	0	0	0	0	0	0	200	300	0	0	0	0	0	0	0	200	903	0	0	0	0	0	0	0	603	903	0
605	7	0	0	0	0	0	0	200	300	0	0	0	0	0	0	0	200	903	0	0	0	0	0	0	0	603	903	0
605	8	0	0	0	0	0	0	200	300	0	0	0	0	0	0	0	200	903	0	0	0	0	0	0	0	603	903	0
605	9	12.1768	3.76468	-22.3138	5470.46	-1022.09	3409.06	154.195	54.8399	0	0	0	0	0	0	0	200	903	0	0	0	0	0	0	0	603	903	0
606	0	20.1114	-1.4233	-35.1312	6660.65	-1327.27	6247.2	162.22	110.407	0	0	0	0	0	0	0	200	903	0	0	0	0	0	0	0	603	903	0
606	1	18.7381	-12.257	-33.9105	6843.75	-777.954	4278.81	177.059	98.182	0	0	0	0	0	0	0	200	903	0	0	0	0	0	0	0	603	903	0
606	2	9.43023	-15.7666	-26.5863	7118.41	-1083.13	1623.78	159.26	32.2526	0	0	0	0	0	0	0	200	903	0	0	0	0	0	0	0	603	903	0
606	3	-0.487978	-17.1399	-26.8915	7209.97	-1571.41	2585.08	141.565	31.8866	0	0	0	0	0	0	0	200	903	0	0	0	0	0	0	0	603	903	0
606	4	-1.86127	-17.1399	-42.7606	10505.9	-2731.08	2722.41	136.131	54.3098	0	0	0	0	0	0	0	200	903	0	0	0	0	0	0	0	603	903	0
606	5	1.49566	-25.5322	-54.0521	12245.4	-2242.8	1623.78	158.507	73.4526	0	0	0	0	0	0	0	200	903	0	0	0	0	0	0	0	603	903	0
606	6	5.92071	-33.3142	-59.2401	13710.2	-1693.48	3088.62	171.413	68.5654	0	0	0	0	0	0	0	200	903	0	0	0	0	0	0	0	603	903	0
606	7	9.73541	-34.8401	-55.2728	15541.3	-2609.01	3729.49	152.798	18.8263	0	0	0	0	0	0	0	200	903	0	0	0	0	0	0	0	603	903	0
606	8	3.47931	-35.1452	-63.2074	15175.1	-3036.26	2401.98	151.964	59.9165	0	0	0	0	0	0	0	200	903	0	0	0	0	0	0	0	603	903	0
606	9	-0.640566	-38.0444	-74.1937	17830.1	-3463.5	3180.18	153.318	59.6821	0	0	0	0	0	0	0	200	903	0	0	0	0	0	0	0	603	903	0
607	0	1.95343	-40.4858	-85.7904	19752.7	-3646.61	4690.8	157.494	69.7563	0	0	0	0	0	0	0	200	903	0	0	0	0	0	0	0	603	903	0
607	1	6.37848	-41.2487	-91.5887	21126	-3524.54	3454.84	161.518	69.3386	0	0	0	0	0	0	0	200	903	0	0	0	0	0	0	0	603	903	0
607	2	10.3458	-39.4177	-96.1664	24147.2	-3646.61	3363.28	162.08	48.9016	0	0	0	0	0	0	0	200	903	0	0	0	0	0	0	0	603	903	0
607	3	6.53106	-41.0962	-104.711	25337.4	-4256.96	4828.12	159.346	58.026	0	0	0	0	0	0	0	200	903	0	0	0	0	0	0	0	603	903	0
607	4	3.32672	-40.3332	-116.918	28175.6	-4928.34	4645.02	157.848	59.0151	0	0	0	0	0	0	0	200	903	0	0	0	0	0	0	0	603	903	0
607	5	4.54742	-38.3496	-126.379	30555.9	-5233.52	3637.94	158.589	58.2195	0	0	0	0	0	0	0	200	903	0	0	0	0	0	0	0	603	903	0
607	6	9.888	-39.2651	-133.703	32661.6	-5355.59	5377.44	159.944	55.7151	0	0	0	0	0	0	0	200	903	0	0	0	0	0	0	0	603	903	0
607	7	14.6182	-42.1643	-144.995	35499.8	-5660.77	6064.09	160.959	55.1648	0	0	0	0	0	0	0	200	903	0	0	0	0	0	0	0	603	903	0
607	8	13.2449	-43.385	-155.676	37788.6	-5965.95	5331.67	161.677	57.2609	0	0	0	0	0	0	0	200	903	0	0	0	0	0	0	0	603	903	0
607	9	12.482	-42.1643	-166.052	39619.6	-6271.12	6064.09	162.234	61.4018	0	0	0	0	0	0	0	200	903	0	0	0	0	0	0	0	603	903	0
608	0	13.3975	-38.197	-171.24	41267.6	-6942.51	6933.84	159.457	59.0067	0	0	0	0	0	0	0	200	903	0	0	0	0	0	0	0	603	903	0
608	1	15.3812	-39.2651	-183.141	43190.2	-7247.68	6430.3	160.426	64.1704	0	0	0	0	0	0	0	200	903	0	0	0	0	0	0	0	603	903	0
608	2	18.5855	-36.5185	-192.297	45570.6	-7125.61	6613.41	162.945	63.0196	0	0	0	0	0	0	0	200	903	0	0	0	0	0	0	0	603	903	0
608	3	20.1114	-32.0935	-200.536	47401.6	-7247.68	7345.83	163.859	63.626	0	0	0	0	0	0	0	200	903	0	0	0	0	0	0	0	603	903	0
608	4	20.264	-27.5158	-204.809	49049.6	-7858.04	6933.84	161.632	60.5107	0	0	0	0	0	0	0	200	903	0	0	0	0	0	0	0	603	903	0
608	5	18.2803	-24.9218	-211.828	50056.7	-8285.28	6567.63	160.887	63.6919	0	0	0	0	0	0	0	200	903	0	0	0	0	0	0	0	603	903	0
608	6	21.3321	-21.4123	-221.594	52070.8	-8407.35	7025.39	162.06	65.0166	0	0	0	0	0	0	0	200	903	0	0	0	0	0	0	0	603	903	0
608	7	24.8416	-18.208	-229.833	54085	-8651.49	6613.41	162.358	64.6774	0	0	0	0	0	0	0	200	903	0	0	0	0	0	0	0	603	903	0
608	8	24.8416	-16.3769	-234.716	54908.9	-8651.49	6109.87	163.141	66.0624	0	0	0	0	0	0	0	200	903	0	0	0	0	0	0	0	603	903	0
608	9	24.5364	-13.4777	-238.378	56740	-9017.7	6659.18	162.171	61.975	0	0	0	0	0	0	0	200	903	0	0	0	0	0	0	0	603	903	0
609	0	23.0106	-10.426	-242.956	57289.3	-8956.67	6247.2	163.135	64.1988	0	0	0	0	0	0	0	200	903	0	0	0	0	0	0	0	603	903	0
609	1	23.1631	-5.54318	-248.449	57289.3	-9628.05	5606.33	161.247	69.4123	0	0	0	0	0	0	0	200	903	0	0	0	0	0	0	0	603	903	0
609	2	25.452	-2.94918	-254.247	58296.4	-9689.09	5835.21	161.891	70.71	0	0	0	0	0	0	0	200	903	0	0	0	0	0	0	0	603	903	0
609	3	25.6046	-0.965541	-257.299	59578.1	-9567.02	6247.2	162.818	68.448	0	0	0	0	0	0	0	200	903	0	0	0	0	0	0	0	603	903	0
609	4	25.1468	3.76468	-261.877	60127.5	-10055.3	4873.9	161.603	70.3979	0	0	0	0	0	0	0	200	903	0	0	0	0	0	0	0	603	903	0
609	5	22.7054	8.18973	-262.792	60402.1	-10482.5	4965.45	160.111	70.1527	0	0	0	0	0	0	0	200	903	0	0	0	0	0	0	0	603	903	0
609	6	23.6209	11.6993	-267.065	60676.8	-9994.26	5148.56	162.577	72.8013	0	0	0	0	0	0	0	200	903	0	0	0	0	0	0	0	603	903	0
609	7	24.9942	13.9881	-272.863	62050	-10238.4	4461.91	162.478	72.5965	0	0	0	0	0	0	0	200	903	0	0	0	0	0	0	0	603	903	0
609	8	24.2313	16.5821	-276.525	62507.8	-10604.6	3958.38	161.65	73.9525	0	0	0	0	0	0	0	200	903	0	0	0	0	0	0	0	603	903	0
609	9	23.7735	19.7864	-280.493	64155.8	-10604.6	4461.91	162.193	71.2746	0	0	0	0	0	0	0	200	903	0	0	0	0	0	0	0	603	903	0
610	0	21.4847	22.0752	-285.681	64613.5	-10848.8	3729.49	162.025	73.826	0	0	0	0	0	0	0	200	903	0	0	0	0	0	0	0	603	903	0
610	1	21.3321	25.2796	-289.648	65437.5	-11337	3592.16	160.859	74.0791	0	0	0	0	0	0	0	200	903	0	0	0	0	0	0	0	603	903	0
610	2	24.5364	27.2632	-296.057	66627.7	-11459.1	3775.27	161.294	74.9493	0	0	0	0	0	0	0	200	903	0	0	0	0	0	0	0	603	903	0
610	3	26.8253	28.9417	-302.77	67177	-11581.2	3546.39	161.749	78.1256	0	0	0	0	0	0	0	200	903	0	0	0	0	0	0	0	603	903	0
610	4	23.7735	30.1624	-309.789	68458.8	-11947.4	2722.41	161.434	79.0151	0	0	0	0	0	0	0	200	903	0	0	0	0	0	0	0	603	903	0
610	5	22.858	33.8245	-316.503	69740.5	-12435.7	3088.62	160.709	79.6532	0	0	0	0	0	0	0	200	903	0	0	0	0	0	0	0	603	903	0
610	6	22.858	36.7237	-321.386	71022.3	-13168.1	2951.3	159.027	79.0127	0	0	0	0	0	0	0	200	903	0	0	0	0	0	0	0	603	903	0
610	7	22.2476	38.097	-326.879	71846.2	-12924	2081.54	160.463	80.2057	0	0	0	0	0	0	0	200	903	0	0	0	0	0	0	0	603	903	0
610	8	23.9261	38.8599	-336.035	73311	-13839.5	2081.54	158.815	81.8348	0	0	0	0	0	0	0	200	903	0	0	0	0	0	0	0	603	903	0
610	9	22.7054	39.928	-346.411	75050.6	-14205.7	2035.77	158.992	83.3479	0	0	0	0	0	0	0	200	903	0	0	0	0	0	0	0	603	903	0
611	0	20.7217	42.3694	-355.261	76973.1	-14632.9	1211.79	158.811	83.3333	0	0	0	0	0	0	0	200	903	0	0	0	0	0	0	0	603	903	0
611	1	19.501	43.8953	-366.552	79628.2	-15487.4	799.805	157.748	82.7644	0	0	0	0	0	0	0	200	903	0	0	0	0	0	0	0	603	903	0
611	2	17.5174	44.3531	-374.487	81001.5	-16219.8	845.581	156.688	83.7	0	0	0	0	0	0	0	200	903	0	0	0	0	0	0	0	603	903	0
611	3	17.2122	45.5738	-386.083	83931.2	-16586.1	204.712	157.04	82.6087	0	0	0	0	0	0	0	200	903	0	0	0	0	0	0	0	603	903	0
611	4	15.8389	47.4048	-398.29	85029.8	-17013.3	-115.723	157.284	86.5131	0	0	0	0	0	0	0	200	903	0	0	0	0	0	0	0	603	903	0
611	5	14.4656	48.1678	-408.666	87135.5	-18050.9	-665.039	155.83	86.7807	0	0	0	0	0	0	0	200	903	0	0	0	0	0	0	0	603	903	0
611	6	12.0242	48.0152	-419.348	89058.1	-18417.1	-848.145	156.081	87.627	0	0	0	0	0	0	0	200	903	0	0	0	0	0	0	0	603	903	0
611	7	10.0406	50.9143	-427.587	89332.8	-18661.3	-1168.58	156.357	91.077	0	0	0	0	0	0	0	200	903	0	0	0	0	0	0	0	603	903	0
611	8	11.4139	52.135	-436.132	91896.3	-19454.7	-756.592	155.393	89.2926	0	0	0	0	0	0	0	200	903	0	0	0	0	0	0	0	603	903	0
611	9	10.3458	53.0506	-448.644	93361.1	-20126.1	-1489.01	155.14	91.9039	0	0	0	0	0	0	0	200	903	0	0	0	0	0	0	0	603	903	0
612	0	9.43023	55.3394	-457.189	95375.2	-20736.4	-1992.55	154.644	91.3879	0	0	0	0	0	0	0	200	903	0	0	0	0	0	0	0	603	903	0
612	1	7.75177	57.4756	-464.514	96107.7	-20431.3	-1672.12	156.016	93.1004	0	0	0	0	0	0	0	200	903	0	0	0	0	0	0	0	603	903	0
612	2	8.36212	58.6963	-471.533	97389.5	-21652	-1855.23	154.082	93.4619	0	0	0	0	0	0	0	200	903	0	0	0	0	0	0	0	603	903	0
612	3	5.92071	58.8489	-479.772	98304.9	-22079.2	-2404.54	153.98	95.1009	0	0	0	0	0	0	0	200	903	0	0	0	0	0	0	0	603	903	0
612	4	5.15777	60.5274	-486.791	99769.8	-21896.1	-2450.32	155.02	95.0462	0	0	0	0	0	0	0	200	903	0	0	0	0	0	0	0	603	903	0
612	5	3.93707	63.1214	-493.81	101418	-22323.4	-2496.09	154.794	94.6221	0	0	0	0	0	0	0	200	903	0	0	0	0	0	0	0	603	903	0
612	6	1.95343	63.8843	-495.641	102333	-23238.9	-2770.75	153.113	93.5337	0	0	0	0	0	0	0	200	903	0	0	0	0	0	0	0	603	903	0
612	7	-0.33539	64.7998	-506.017	102883	-23361	-3136.96	153.834	96.6817	0	0	0	0	0	0	0	200	903	0	0	0	0	0	0	0	603	903	0
612	8	-2.01386	66.0205	-508.459	103340	-23971.3	-3365.85	152.855	96.7577	0	0	0	0	0	0	0	200	903	0	0	0	0	0	0	0	603	903	0
612	9	-3.53974	67.699	-513.647	104164	-24154.4	-3915.16	152.975	97.2064	0	0	0	0	0	0	0	200	903	0	0	0	0	0	0	0	603	903	0
613	0	-4.45526	68.462	-520.361	104714	-24825.8	-4601.81	152.291	98.7672	0	0	0	0	0	0	0	200	903	0	0	0	0	0	0	0	603	903	0
613	1	-8.88031	69.8352	-524.328	105263	-24947.9	-4968.02	152.419	99.2422	0	0	0	0	0	0	0	200	903	0	0	0	0	0	0	0	603	903	0
613	2	-11.0165	71.6663	-527.99	104988	-25069.9	-5196.9	152.518	101.155	0	0	0	0	0	0	0	200	903	0	0	0	0	0	0	0	603	903	0
613	3	-13.3054	72.4292	-531.652	105263	-25680.3	-5883.55	151.697	102.008	0	0	0	0	0	0	0	200	903	0	0	0	0	0	0	0	603	903	0
613	4	-14.9838	73.6499	-534.094	106179	-26290.6	-5975.1	150.775	101.199	0	0	0	0	0	0	0	200	903	0	0	0	0	0	0	0	603	903	0
613	5	-16.8149	75.0232	-538.366	105629	-26046.5	-6387.09	151.619	103.797	0	0	0	0	0	0	0	200	903	0	0	0	0	0	0	0	603	903	0
613	6	-19.2563	76.0913	-543.554	106453	-26168.6	-7211.06	151.857	104.153	0	0	0	0	0	0	0	200	903	0	0	0	0	0	0	0	603	903	0
613	7	-22.4606	77.0069	-546.911	106453	-26901	-7439.94	150.813	105.356	0	0	0	0	0	0	0	200	903	0	0	0	0	0	0	0	603	903	0
613	8	-21.5451	76.8543	-548.437	107094	-27023.1	-7623.05	150.727	104.729	0	0	0	0	0	0	0	200	903	0	0	0	0	0	0	0	603	903	0
613	9	-25.665	78.8379	-550.878	107369	-27450.3	-8172.36	150.17	105.095	0	0	0	0	0	0	0	200	903	0	0	0	0	0	0	0	603	903	0
614	0	-26.2753	79.1431	-553.625	108193	-28060.7	-8401.25	149.315	104.574	0	0	0	0	0	0	0	200	903	0	0	0	0	0	0	0	603	903	0
614	1	-27.0383	79.7535	-566.747	109566	-29037.2	-8675.9	148.765	106.676	0	0	0	0	0	0	0	200	903	0	0	0	0	0	0	0	603	903	0
614	2	-31.0056	77.312	-578.344	110665	-30074.8	-9362.55	147.998	108.653	0	0	0	0	0	0	0	200	903	0	0	0	0	0	0	0	603	903	0
614	3	-40.9238	80.2112	-589.33	110024	-30074.8	-9957.64	148.968	113.307	0	0	0	0	0	0	0	200	903	0	0	0	0	0	0	0	603	903	0
614	4	-46.4169	89.3665	-590.856	111397	-31661.7	-11376.7	146.414	111.465	0	0	0	0	0	0	0	200	903	0	0	0	0	0	0	0	603	903	0
614	5	-49.6213	93.0286	-594.518	111763	-31722.8	-11834.5	146.641	112.011	0	0	0	0	0	0	0	200	903	0	0	0	0	0	0	0	603	903	0
614	6	-53.1308	90.8924	-603.674	113137	-32089	-13070.4	146.844	112.587	0	0	0	0	0	0	0	200	903	0	0	0	0	0	0	0	603	903	0
614	7	-56.4877	94.8597	-613.439	113045	-33004.5	-13940.2	146.198	115.719	0	0	0	0	0	0	0	200	903	0	0	0	0	0	0	0	603	903	0
614	8	-57.0981	105.388	-618.932	113137	-33614.9	-14306.4	145.689	117.207	0	0	0	0	0	0	0	200	903	0	0	0	0	0	0	0	603	903	0
614	9	-57.0981	108.287	-624.731	114052	-33981.1	-15038.8	145.607	117.438	0	0	0	0	0	0	0	200	903	0	0	0	0	0	0	0	603	903	0
615	0	-61.3705	109.661	-632.36	114418	-34347.3	-14901.5	145.684	119.062	0	0	0	0	0	0	0	200	903	0	0	0	0	0	0	0	603	903	0
615	1	-54.6567	113.628	-642.736	116066	-34713.5	-14855.7	145.991	119.419	0	0	0	0	0	0	0	200	903	0	0	0	0	0	0	0	603	903	0
615	2	-53.1308	117.595	-649.45	116341	-34774.5	-15313.5	146.455	120.863	0	0	0	0	0	0	0	200	903	0	0	0	0	0	0	0	603	903	0
615	3	-55.8774	119.884	-655.859	117531	-35262.8	-15405	146.234	120.798	0	0	0	0	0	0	0	200	903	0	0	0	0	0	0	0	603	903	0
615	4	-55.1144	118.816	-662.573	117806	-35934.2	-14672.6	145.766	122.2	0	0	0	0	0	0	0	200	903	0	0	0	0	0	0	0	603	903	0
615	5	-52.5205	122.173	-666.54	118263	-36239.4	-14718.4	145.631	122.571	0	0	0	0	0	0	0	200	903	0	0	0	0	0	0	0	603	903	0
615	6	-50.6894	125.377	-670.507	118630	-36117.3	-15176.2	146.134	123.075	0	0	0	0	0	0	0	200	903	0	0	0	0	0	0	0	603	903	0
615	7	-48.5532	121.715	-676	119728	-36056.3	-14672.6	146.662	122.887	0	0	0	0	0	0	0	200	903	0	0	0	0	0	0	0	603	903	0
615	8	-50.5368	119.884	-680.578	119728	-36605.6	-14214.8	146.214	124.078	0	0	0	0	0	0	0	200	903	0	0	0	0	0	0	0	603	903	0
615	9	-50.6894	122.936	-685.156	120461	-36483.5	-15130.4	146.752	124.185	0	0	0	0	0	0	0	200	903	0	0	0	0	0	0	0	603	903	0
616	0	-49.3161	121.868	-688.207	120186	-36849.7	-14947.3	146.455	125.364	0	0	0	0	0	0	0	200	903	0	0	0	0	0	0	0	603	903	0
616	1	-50.079	118.511	-690.649	120644	-37338	-14626.8	145.938	125.318	0	0	0	0	0	0	0	200	903	0	0	0	0	0	0	0	603	903	0
616	2	-49.1635	120.342	-697.668	121376	-37460.1	-14993	146.307	126.026	0	0	0	0	0	0	0	200	903	0	0	0	0	0	0	0	603	903	0
616	3	-49.3161	121.868	-702.551	121559	-37826.3	-14718.4	146.159	126.974	0	0	0	0	0	0	0	200	903	0	0	0	0	0	0	0	603	903	0
616	4	-50.6894	120.189	-708.959	122017	-38009.4	-14718.4	146.387	127.893	0	0	0	0	0	0	0	200	903	0	0	0	0	0	0	0	603	903	0
616	5	-50.3842	119.579	-712.316	123299	-38558.7	-14901.5	145.869	126.904	0	0	0	0	0	0	0	200	903	0	0	0	0	0	0	0	603	903	0
616	6	-52.8256	121.257	-716.589	123757	-38680.8	-15313.5	146.021	127.298	0	0	0	0	0	0	0	200	903	0	0	0	0	0	0	0	603	903	0
616	7	-51.7575	124.004	-722.692	124764	-38924.9	-15176.2	146.139	127.363	0	0	0	0	0	0	0	200	903	0	0	0	0	0	0	0	603	903	0
616	8	-55.1144	122.783	-730.016	123940	-39413.2	-15267.7	146.011	130.223	0	0	0	0	0	0	0	200	903	0	0	0	0	0	0	0	603	903	0
616	9	-56.1826	122.936	-732.763	124855	-39840.5	-15725.5	145.63	129.61	0	0	0	0	0	0	0	200	903	0	0	0	0	0	0	0	603	903	0
617	0	-56.3351	123.851	-741.003	125679	-40084.6	-15496.6	145.905	130.393	0	0	0	0	0	0	0	200	903	0	0	0	0	0	0	0	603	903	0
617	1	-58.9291	126.751	-744.055	125313	-40878.1	-15817	145.06	131.581	0	0	0	0	0	0	0	200	903	0	0	0	0	0	0	0	603	903	0
617	2	-60.7602	126.293	-748.937	126320	-40756	-16183.2	145.582	131.334	0	0	0	0	0	0	0	200	903	0	0	0	0	0	0	0	603	903	0
617	3	-60.6076	128.734	-755.041	126869	-40817	-16366.3	145.941	131.97	0	0	0	0	0	0	0	200	903	0	0	0	0	0	0	0	603	903	0
617	4	-61.6757	130.87	-762.365	126686	-41244.3	-16457.9	145.9	133.825	0	0	0	0	0	0	0	200	903	0	0	0	0	0	0	0	603	903	0
617	5	-62.4387	131.176	-768.163	127968	-41732.5	-16595.2	145.672	133.41	0	0	0	0	0	0	0	200	903	0	0	0	0	0	0	0	603	903	0
617	6	-61.9809	131.176	-772.741	128426	-42403.9	-16457.9	145.125	133.805	0	0	0	0	0	0	0	200	903	0	0	0	0	0	0	0	603	903	0
617	7	-65.3378	133.77	-778.234	129341	-42098.8	-16366.3	145.905	133.802	0	0	0	0	0	0	0	200	903	0	0	0	0	0	0	0	603	903	0
617	8	-63.5068	134.99	-784.338	130715	-42526	-17053	145.781	133.344	0	0	0	0	0	0	0	200	903	0	0	0	0	0	0	0	603	903	0
617	9	-62.5913	133.617	-790.746	130898	-43136.4	-16366.3	145.449	134.463	0	0	0	0	0	0	0	200	903	0	0	0	0	0	0	0	603	903	0
618	0	-63.5068	133.464	-795.934	130715	-42648.1	-16824.1	146.418	135.772	0	0	0	0	0	0	0	200	903	0	0	0	0	0	0	0	603	903	0
618	1	-64.1171	134.38	-802.953	132363	-43197.4	-16869.9	146.202	135.155	0	0	0	0	0	0	0	200	903	0	0	0	0	0	0	0	603	903	0
618	2	-63.812	133.007	-804.785	132729	-43685.7	-16732.5	145.718	135.075	0	0	0	0	0	0	0	200	903	0	0	0	0	0	0	0	603	903	0
618	3	-61.8283	134.38	-809.667	134651	-43502.6	-16457.9	146.271	133.695	0	0	0	0	0	0	0	200	903	0	0	0	0	0	0	0	603	903	0
618	4	-61.6757	135.295	-813.024	133461	-43807.7	-16824.1	146.118	135.846	0	0	0	0	0	0	0	200	903	0	0	0	0	0	0	0	603	903	0
618	5	-60.6076	134.99	-819.738	133644	-44418.1	-16641	145.814	136.967	0	0	0	0	0	0	0	200	903	0	0	0	0	0	0	0	603	903	0
618	6	-61.218	136.058	-826.147	134377	-44601.2	-16091.7	146.013	137.345	0	0	0	0	0	0	0	200	903	0	0	0	0	0	0	0	603	903	0
618	7	-60.3024	135.753	-826.757	135384	-44601.2	-16229	146.053	136.247	0	0	0	0	0	0	0	200	903	0	0	0	0	0	0	0	603	903	0
618	8	-60.455	135.448	-832.25	135842	-44601.2	-16412.1	146.409	136.778	0	0	0	0	0	0	0	200	903	0	0	0	0	0	0	0	603	903	0
618	9	-57.7084	135.753	-835.912	135933	-44662.2	-15908.6	146.571	137.383	0	0	0	0	0	0	0	200	903	0	0	0	0	0	0	0	603	903	0
619	0	-57.2507	135.448	-843.237	136574	-44784.3	-15496.6	146.89	138.036	0	0	0	0	0	0	0	200	903	0	0	0	0	0	0	0	603	903	0
619	1	-56.7929	133.464	-847.204	137673	-44601.2	-15771.2	147.355	137.498	0	0	0	0	0	0	0	200	903	0	0	0	0	0	0	0	603	903	0
619	2	-57.2507	134.075	-852.392	137490	-45333.6	-15862.8	146.816	138.702	0	0	0	0	0	0	0	200	903	0	0	0	0	0	0	0	603	903	0
619	3	-57.2507	133.922	-854.223	138771	-45516.7	-15633.9	146.716	137.547	0	0	0	0	0	0	0	200	903	0	0	0	0	0	0	0	603	903	0
619	4	-56.6403	132.701	-855.749	139229	-45089.5	-15405	147.31	137.302	0	0	0	0	0	0	0	200	903	0	0	0	0	0	0	0	603	903	0
619	5	-54.8093	132.701	-861.547	139778	-45577.8	-15496.6	147.098	137.759	0	0	0	0	0	0	0	200	903	0	0	0	0	0	0	0	603	903	0
619	6	-55.4196	132.091	-867.04	138863	-45699.8	-15176.2	147.292	139.843	0	0	0	0	0	0	0	200	903	0	0	0	0	0	0	0	603	903	0
619	7	-54.1989	131.481	-867.04	139595	-45699.8	-15084.6	147.292	138.998	0	0	0	0	0	0	0	200	903	0	0	0	0	0	0	0	603	903	0
619	8	-55.8774	130.718	-873.144	139870	-45577.8	-15221.9	147.8	139.809	0	0	0	0	0	0	0	200	903	0	0	0	0	0	0	0	603	903	0
619	9	-54.9619	131.328	-874.059	139778	-46066	-14764.2	147.296	140.081	0	0	0	0	0	0	0	200	903	0	0	0	0	0	0	0	603	903	0
620	0	-53.5886	131.481	-873.449	140511	-46066	-14489.5	147.26	139.131	0	0	0	0	0	0	0	200	903	0	0	0	0	0	0	0	603	903	0
620	1	-52.5205	127.819	-877.416	140785	-46005	-14581.1	147.568	139.545	0	0	0	0	0	0	0	200	903	0	0	0	0	0	0	0	603	903	0
620	2	-52.3679	129.802	-882.604	141060	-46066	-14260.6	147.807	140.177	0	0	0	0	0	0	0	200	903	0	0	0	0	0	0	0	603	903	0
620	3	-51.6049	130.107	-878.942	141976	-46371.2	-14306.4	147.242	138.47	0	0	0	0	0	0	0	200	903	0	0	0	0	0	0	0	603	903	0
620	4	-52.5205	128.734	-885.961	141518	-45821.9	-14031.7	148.28	140.266	0	0	0	0	0	0	0	200	903	0	0	0	0	0	0	0	603	903	0
620	5	-51.2997	127.208	-885.046	141793	-45638.8	-13574	148.433	139.791	0	0	0	0	0	0	0	200	903	0	0	0	0	0	0	0	603	903	0
620	6	-50.842	126.293	-885.961	141701	-46249.1	-13894.4	147.798	140.06	0	0	0	0	0	0	0	200	903	0	0	0	0	0	0	0	603	903	0
620	7	-50.079	125.225	-887.182	141335	-46310.2	-13482.4	147.801	140.692	0	0	0	0	0	0	0	200	903	0	0	0	0	0	0	0	603	903	0
620	8	-49.7739	122.936	-891.149	141793	-45944	-13345.1	148.444	140.888	0	0	0	0	0	0	0	200	903	0	0	0	0	0	0	0	603	903	0
620	9	-50.2316	123.546	-889.929	140968	-46127.1	-13574	148.168	141.596	0	0	0	0	0	0	0	200	903	0	0	0	0	0	0	0	603	903	0
621	0	-48.8583	123.546	-889.013	140511	-45944	-13528.2	148.32	141.947	0	0	0	0	0	0	0	200	903	0	0	0	0	0	0	0	603	903	0
621	1	-49.3161	122.783	-887.182	140511	-45516.7	-12978.9	148.695	141.621	0	0	0	0	0	0	0	200	903	0	0	0	0	0	0	0	603	903	0
621	2	-48.248	121.868	-889.623	140419	-45516.7	-13116.2	148.836	142.159	0	0	0	0	0	0	0	200	903	0	0	0	0	0	0	0	603	903	0
621	3	-47.1799	121.868	-889.929	139778	-45944	-12795.8	148.373	142.933	0	0	0	0	0	0	0	200	903	0	0	0	0	0	0	0	603	903	0
621	4	-48.4006	121.41	-889.013	140053	-45394.7	-12887.3	148.938	142.462	0	0	0	0	0	0	0	200	903	0	0	0	0	0	0	0	603	903	0
621	5	-47.7902	120.952	-889.318	139870	-45333.6	-12841.6	149.024	142.722	0	0	0	0	0	0	0	200	903	0	0	0	0	0	0	0	603	903	0
621	6	-47.6376	118.969	-887.487	139595	-45516.7	-12933.1	148.713	142.707	0	0	0	0	0	0	0	200	903	0	0	0	0	0	0	0	603	903	0
621	7	-46.4169	117.748	-885.961	139229	-45577.8	-12841.6	148.556	142.85	0	0	0	0	0	0	0	200	903	0	0	0	0	0	0	0	603	903	0
621	8	-45.654	118.969	-883.52	138954	-44845.3	-12566.9	149.242	142.726	0	0	0	0	0	0	0	200	903	0	0	0	0	0	0	0	603	903	0
621	9	-45.1962	118.206	-886.572	139504	-45150.5	-12566.9	149.073	142.648	0	0	0	0	0	0	0	200	903	0	0	0	0	0	0	0	603	903	0
622	0	-45.654	117.443	-883.825	138863	-45272.6	-12566.9	148.777	142.884	0	0	0	0	0	0	0	200	903	0	0	0	0	0	0	0	603	903	0
622	1	-43.6704	116.069	-881.994	138680	-44540.2	-12429.6	149.501	142.766	0	0	0	0	0	0	0	200	903	0	0	0	0	0	0	0	603	903	0
622	2	-45.5014	115.612	-878.942	137673	-44540.2	-11788.7	149.325	143.365	0	0	0	0	0	0	0	200	903	0	0	0	0	0	0	0	603	903	0
622	3	-45.0436	114.696	-877.416	137123	-44723.3	-12338	149.028	143.719	0	0	0	0	0	0	0	200	903	0	0	0	0	0	0	0	603	903	0
622	4	-44.1281	114.238	-878.332	137490	-44357.1	-12109.1	149.499	143.465	0	0	0	0	0	0	0	200	903	0	0	0	0	0	0	0	603	903	0
622	5	-43.9755	113.018	-875.28	136666	-44173.9	-11926	149.532	143.861	0	0	0	0	0	0	0	200	903	0	0	0	0	0	0	0	603	903	0
622	6	-44.4333	112.255	-873.144	135384	-44479.1	-11697.1	149.059	144.947	0	0	0	0	0	0	0	200	903	0	0	0	0	0	0	0	603	903	0
622	7	-44.5859	111.644	-868.871	135109	-44173.9	-11697.1	149.159	144.5	0	0	0	0	0	0	0	200	903	0	0	0	0	0	0	0	603	903	0
622	8	-43.06	110.729	-865.82	134285	-44051.9	-11788.7	149.121	144.904	0	0	0	0	0	0	0	200	903	0	0	0	0	0	0	0	603	903	0
622	9	-41.0764	111.034	-866.125	134102	-43624.6	-11422.5	149.632	145.17	0	0	0	0	0	0	0	200	903	0	0	0	0	0	0	0	603	903	0
623	0	-42.2971	110.118	-862.158	132546	-43746.7	-11559.8	149.259	146.263	0	0	0	0	0	0	0	200	903	0	0	0	0	0	0	0	603	903	0
623	1	-43.8229	108.745	-860.327	132179	-42770.1	-11147.8	150.286	146.361	0	0	0	0	0	0	0	200	903	0	0	0	0	0	0	0	603	903	0
623	2	-43.06	107.677	-855.444	131996	-43075.3	-10873.2	149.646	145.698	0	0	0	0	0	0	0	200	903	0	0	0	0	0	0	0	603	903	0
623	3	-42.6022	105.388	-850.866	131630	-43380.5	-11239.4	149.016	145.299	0	0	0	0	0	0	0	200	903	0	0	0	0	0	0	0	603	903	0
623	4	-42.4496	105.236	-849.951	131172	-43136.4	-11559.8	149.248	145.671	0	0	0	0	0	0	0	200	903	0	0	0	0	0	0	0	603	903	0
623	5	-42.7548	105.541	-846.899	131264	-42403.9	-11285.2	149.93	145.006	0	0	0	0	0	0	0	200	903	0	0	0	0	0	0	0	603	903	0
623	6	-41.5341	104.015	-844.763	130440	-42709.1	-11147.8	149.442	145.59	0	0	0	0	0	0	0	200	903	0	0	0	0	0	0	0	603	903	0
623	7	-43.06	102.184	-843.542	130165	-42953.2	-11056.3	149.08	145.692	0	0	0	0	0	0	0	200	903	0	0	0	0	0	0	0	603	903	0
623	8	-42.9074	100.963	-838.049	129433	-42709.1	-11056.3	149.037	145.555	0	0	0	0	0	0	0	200	903	0	0	0	0	0	0	0	603	903	0
623	9	-42.9074	100.048	-834.692	128609	-42281.9	-11239.4	149.344	145.921	0	0	0	0	0	0	0	200	903	0	0	0	0	0	0	0	603	903	0
624	0	-41.0764	98.064	-833.471	128151	-42342.9	-11010.5	149.197	146.244	0	0	0	0	0	0	0	200	903	0	0	0	0	0	0	0	603	903	0
624	1	-42.4496	98.2166	-829.504	127236	-42342.9	-11239.4	148.954	146.612	0	0	0	0	0	0	0	200	903	0	0	0	0	0	0	0	603	903	0
624	2	-44.4333	96.6907	-827.062	126137	-41854.6	-11056.3	149.394	147.488	0	0	0	0	0	0	0	200	903	0	0	0	0	0	0	0	603	903	0
624	3	-43.9755	95.9278	-823.095	125130	-41610.5	-10781.6	149.446	147.976	0	0	0	0	0	0	0	200	903	0	0	0	0	0	0	0	603	903	0
624	4	-44.2807	95.3174	-814.55	125313	-41305.3	-10827.4	149.291	146.157	0	0	0	0	0	0	0	200	903	0	0	0	0	0	0	0	603	903	0
624	5	-43.9755	92.7234	-815.466	124855	-41976.7	-10827.4	148.524	146.891	0	0	0	0	0	0	0	200	903	0	0	0	0	0	0	0	603	903	0
624	6	-43.3652	93.3338	-814.55	123757	-40939.1	-10781.6	149.74	148.068	0	0	0	0	0	0	0	200	903	0	0	0	0	0	0	0	603	903	0
624	7	-44.8911	91.5027	-809.973	123665	-41488.4	-10278.1	148.778	147.322	0	0	0	0	0	0	0	200	903	0	0	0	0	0	0	0	603	903	0
624	8	-45.0436	90.282	-805.395	123299	-41366.3	-10827.4	148.638	146.909	0	0	0	0	0	0	0	200	903	0	0	0	0	0	0	0	603	903	0
624	9	-45.1962	88.6036	-802.038	122841	-40694.9	-10827.4	149.261	146.839	0	0	0	0	0	0	0	200	903	0	0	0	0	0	0	0	603	903	0
625	0	-44.5859	88.1458	-797.155	121651	-40511.8	-10644.3	149.179	147.394	0	0	0	0	0	0	0	200	903	0	0	0	0	0	0	0	603	903	0
625	1	-45.5014	86.7725	-796.85	121010	-40694.9	-10598.5	148.93	148.14	0	0	0	0	0	0	0	200	903	0	0	0	0	0	0	0	603	903	0
625	2	-44.7385	84.7889	-790.746	120278	-40511.8	-10827.4	148.768	147.894	0	0	0	0	0	0	0	200	903	0	0	0	0	0	0	0	603	903	0
625	3	-46.4169	84.4837	-787.695	118904	-39840.5	-10735.8	149.421	149.048	0	0	0	0	0	0	0	200	903	0	0	0	0	0	0	0	603	903	0
625	4	-47.0273	83.263	-782.507	118813	-40145.6	-10369.6	148.696	148.164	0	0	0	0	0	0	0	200	903	0	0	0	0	0	0	0	603	903	0
625	5	-45.0436	82.6526	-780.065	117897	-39779.4	-10552.7	149.005	148.862	0	0	0	0	0	0	0	200	903	0	0	0	0	0	0	0	603	903	0
625	6	-45.5014	81.7371	-774.267	116890	-39352.2	-10735.8	149.175	149.031	0	0	0	0	0	0	0	200	903	0	0	0	0	0	0	0	603	903	0
625	7	-45.1962	80.0586	-771.826	116341	-39108	-10507	149.33	149.265	0	0	0	0	0	0	0	200	903	0	0	0	0	0	0	0	603	903	0
625	8	-47.7902	79.7535	-768.774	115792	-39474.2	-9591.43	148.653	149.382	0	0	0	0	0	0	0	200	903	0	0	0	0	0	0	0	603	903	0
625	9	-47.3325	77.312	-762.67	115242	-38741.8	-10461.2	149.202	148.896	0	0	0	0	0	0	0	200	903	0	0	0	0	0	0	0	603	903	0
626	0	-48.248	77.9224	-757.482	115334	-38375.6	-10507	149.338	147.741	0	0	0	0	0	0	0	200	903	0	0	0	0	0	0	0	603	903	0
626	1	-46.5695	76.7017	-754.125	114235	-38863.9	-10415.4	148.465	148.52	0	0	0	0	0	0	0	200	903	0	0	0	0	0	0	0	603	903	0
626	2	-47.1799	76.7017	-752.905	113320	-38497.7	-10049.2	148.868	149.49	0	0	0	0	0	0	0	200	903	0	0	0	0	0	0	0	603	903	0
626	3	-48.5532	73.8025	-748.937	112313	-38253.5	-10232.3	148.923	150.037	0	0	0	0	0	0	0	200	903	0	0	0	0	0	0	0	603	903	0
626	4	-45.8066	73.0396	-743.444	112038	-38558.7	-10278.1	148.135	149.299	0	0	0	0	0	0	0	200	903	0	0	0	0	0	0	0	603	903	0
626	5	-49.0109	70.9034	-738.867	111763	-38131.5	-9911.87	148.392	148.737	0	0	0	0	0	0	0	200	903	0	0	0	0	0	0	0	603	903	0
626	6	-47.6376	70.4456	-735.51	111214	-37460.1	-10049.2	149.069	148.793	0	0	0	0	0	0	0	200	903	0	0	0	0	0	0	0	603	903	0
626	7	-48.248	69.3775	-732.763	109108	-37215.9	-10186.5	149.212	151.1	0	0	0	0	0	0	0	200	903	0	0	0	0	0	0	0	603	903	0
626	8	-48.8583	67.2412	-729.101	108559	-37704.2	-9820.31	148.287	151.106	0	0	0	0	0	0	0	200	903	0	0	0	0	0	0	0	603	903	0
626	9	-49.1635	67.8516	-721.166	108742	-37582.2	-9545.65	147.887	149.214	0	0	0	0	0	0	0	200	903	0	0	0	0	0	0	0	603	903	0
627	0	-49.6213	66.6309	-717.809	107277	-36788.7	-9820.31	148.749	150.549	0	0	0	0	0	0	0	200	903	0	0	0	0	0	0	0	603	903	0
627	1	-47.9428	65.2576	-713.842	106270	-37032.8	-9591.43	148.122	151.13	0	0	0	0	0	0	0	200	903	0	0	0	0	0	0	0	603	903	0
627	2	-48.0954	63.4265	-711.401	105446	-36605.6	-9591.43	148.544	151.777	0	0	0	0	0	0	0	200	903	0	0	0	0	0	0	0	603	903	0
627	3	-48.7058	62.9688	-705.297	105538	-36178.3	-9225.22	148.705	150.364	0	0	0	0	0	0	0	200	903	0	0	0	0	0	0	0	603	903	0
627	4	-49.9265	62.2058	-704.382	104897	-36178.3	-9545.65	148.638	151.08	0	0	0	0	0	0	0	200	903	0	0	0	0	0	0	0	603	903	0
627	5	-49.6213	61.1377	-698.278	104164	-35629	-9637.21	148.976	150.827	0	0	0	0	0	0	0	200	903	0	0	0	0	0	0	0	603	903	0
627	6	-49.4687	59.6119	-694.311	102883	-35323.9	-9225.22	149.124	151.821	0	0	0	0	0	0	0	200	903	0	0	0	0	0	0	0	603	903	0
627	7	-48.248	58.5437	-689.428	102699	-35445.9	-9087.89	148.587	151.037	0	0	0	0	0	0	0	200	903	0	0	0	0	0	0	0	603	903	0
627	8	-48.4006	56.5601	-687.902	101692	-35568	-9362.55	148.295	152.17	0	0	0	0	0	0	0	200	903	0	0	0	0	0	0	0	603	903	0
627	9	-49.7739	56.2549	-685.156	101875	-35384.9	-9271	148.355	151.31	0	0	0	0	0	0	0	200	903	0	0	0	0	0	0	0	603	903	0
628	0	-50.2316	55.6446	-675.39	99769.8	-34835.6	-9225.22	148.422	152.278	0	0	0	0	0	0	0	200	903	0	0	0	0	0	0	0	603	903	0
628	1	-49.7739	54.729	-675.085	99220.5	-34652.5	-9133.67	148.669	153.025	0	0	0	0	0	0	0	200	903	0	0	0	0	0	0	0	603	903	0
628	2	-48.5532	54.5765	-671.728	98854.3	-34835.6	-8721.68	148.14	152.836	0	0	0	0	0	0	0	200	903	0	0	0	0	0	0	0	603	903	0
628	3	-47.1799	52.5928	-668.371	97114.8	-34103.1	-8675.9	148.976	154.699	0	0	0	0	0	0	0	200	903	0	0	0	0	0	0	0	603	903	0
628	4	-49.4687	51.8299	-664.709	97297.9	-33981.1	-8721.68	148.878	153.623	0	0	0	0	0	0	0	200	903	0	0	0	0	0	0	0	603	903	0
628	5	-50.079	49.8462	-661.352	96840.1	-34103.1	-8859.01	148.434	153.573	0	0	0	0	0	0	0	200	903	0	0	0	0	0	0	0	603	903	0
628	6	-49.3161	49.9988	-654.943	96748.5	-34103.1	-8950.56	147.93	152.28	0	0	0	0	0	0	0	200	903	0	0	0	0	0	0	0	603	903	0
628	7	-49.7739	49.3885	-648.84	95833.1	-33309.7	-8492.8	148.663	152.301	0	0	0	0	0	0	0	200	903	0	0	0	0	0	0	0	603	903	0
628	8	-48.7058	47.71	-647.619	95283.7	-33736.9	-8447.02	147.906	152.871	0	0	0	0	0	0	0	200	903	0	0	0	0	0	0	0	603	903	0
628	9	-49.4687	46.7945	-646.398	93086.4	-33614.9	-8813.23	147.997	155.992	0	0	0	0	0	0	0	200	903	0	0	0	0	0	0	0	603	903	0
629	0	-49.1635	45.4212	-641.821	94276.6	-33065.6	-8859.01	148.482	153.111	0	0	0	0	0	0	0	200	903	0	0	0	0	0	0	0	603	903	0
629	1	-49.6213	44.2005	-637.853	93178	-32699.3	-8309.69	148.735	153.919	0	0	0	0	0	0	0	200	903	0	0	0	0	0	0	0	603	903	0
629	2	-49.3161	43.5901	-632.055	91163.9	-32821.4	-8172.36	148.072	155.766	0	0	0	0	0	0	0	200	903	0	0	0	0	0	0	0	603	903	0
629	3	-48.4006	43.2849	-628.698	91255.4	-32516.2	-8080.81	148.28	154.85	0	0	0	0	0	0	0	200	903	0	0	0	0	0	0	0	603	903	0
629	4	-49.0109	42.2168	-625.646	90614.5	-32150	-8218.14	148.613	155.167	0	0	0	0	0	0	0	200	903	0	0	0	0	0	0	0	603	903	0
629	5	-49.1635	41.4539	-622.595	90156.7	-32394.2	-7989.26	147.969	155.192	0	0	0	0	0	0	0	200	903	0	0	0	0	0	0	0	603	903	0
629	6	-49.9265	40.691	-618.627	89332.8	-32211.1	-7714.6	147.931	155.595	0	0	0	0	0	0	0	200	903	0	0	0	0	0	0	0	603	903	0
629	7	-49.1635	39.3177	-612.829	88417.2	-31478.6	-7897.71	148.634	155.723	0	0	0	0	0	0	0	200	903	0	0	0	0	0	0	0	603	903	0
629	8	-49.3161	38.8599	-607.031	88691.9	-31173.5	-7760.38	148.646	153.892	0	0	0	0	0	0	0	200	903	0	0	0	0	0	0	0	603	903	0
629	9	-48.8583	37.7918	-606.725	88051	-31417.6	-7577.27	148.218	154.875	0	0	0	0	0	0	0	200	903	0	0	0	0	0	0	0	603	903	0
630	0	-48.4006	35.0452	-603.369	87684.8	-30807.2	-7531.5	148.941	154.675	0	0	0	0	0	0	0	200	903	0	0	0	0	0	0	0	603	903	0
630	1	-47.7902	35.3504	-598.791	86494.6	-30502.1	-7027.96	149.061	155.551	0	0	0	0	0	0	0	200	903	0	0	0	0	0	0	0	603	903	0
630	2	-48.4006	34.1297	-594.824	85945.4	-31112.4	-7348.39	147.695	155.511	0	0	0	0	0	0	0	200	903	0	0	0	0	0	0	0	603	903	0
630	3	-49.0109	31.2305	-590.551	85121.3	-30380	-6661.75	148.557	155.861	0	0	0	0	0	0	0	200	903	0	0	0	0	0	0	0	603	903	0
630	4	-47.6376	32.6038	-586.584	84114.3	-30196.9	-7302.62	148.521	156.603	0	0	0	0	0	0	0	200	903	0	0	0	0	0	0	0	603	903	0
630	5	-46.5695	31.8409	-584.142	83656.5	-30380	-7394.17	147.992	156.788	0	0	0	0	0	0	0	200	903	0	0	0	0	0	0	0	603	903	0
630	6	-47.3325	30.4676	-581.396	82924.1	-30013.8	-6936.4	148.376	157.371	0	0	0	0	0	0	0	200	903	0	0	0	0	0	0	0	603	903	0
630	7	-47.0273	30.7727	-577.123	81825.4	-29342.4	-6799.08	149.158	158.218	0	0	0	0	0	0	0	200	903	0	0	0	0	0	0	0	603	903	0
630	8	-46.1118	30.1624	-573.156	81550.8	-29769.7	-6890.63	148.06	157.716	0	0	0	0	0	0	0	200	903	0	0	0	0	0	0	0	603	903	0
630	9	-47.9428	29.2469	-569.189	80910	-29464.5	-6478.64	148.234	157.85	0	0	0	0	0	0	0	200	903	0	0	0	0	0	0	0	603	903	0
631	0	-45.654	28.4839	-564.916	80910	-28793.1	-6432.86	149.031	156.775	0	0	0	0	0	0	0	200	903	0	0	0	0	0	0	0	603	903	0
631	1	-45.3488	27.8736	-561.559	80177.5	-29342.4	-6615.97	147.748	157.223	0	0	0	0	0	0	0	200	903	0	0	0	0	0	0	0	603	903	0
631	2	-44.8911	27.2632	-557.287	79902.8	-28854.1	-6295.54	148.224	156.622	0	0	0	0	0	0	0	200	903	0	0	0	0	0	0	0	603	903	0
631	3	-45.654	26.0425	-557.287	78712.7	-28487.9	-5837.77	148.881	158.757	0	0	0	0	0	0	0	200	903	0	0	0	0	0	0	0	603	903	0
631	4	-46.4169	25.127	-552.404	78712.7	-28976.2	-5792	147.545	157.509	0	0	0	0	0	0	0	200	903	0	0	0	0	0	0	0	603	903	0
631	5	-43.9755	23.7537	-547.827	78438	-28548.9	-5792	147.887	156.82	0	0	0	0	0	0	0	200	903	0	0	0	0	0	0	0	603	903	0
631	6	-43.5178	24.0589	-543.859	76423.8	-28060.7	-5654.67	148.405	159.479	0	0	0	0	0	0	0	200	903	0	0	0	0	0	0	0	603	903	0
631	7	-43.5178	22.9908	-542.944	76240.7	-27877.6	-5380.01	148.655	159.579	0	0	0	0	0	0	0	200	903	0	0	0	0	0	0	0	603	903	0
631	8	-43.5178	21.4649	-540.807	75783	-27694.5	-5105.35	148.791	159.871	0	0	0	0	0	0	0	200	903	0	0	0	0	0	0	0	603	903	0
631	9	-42.1445	21.7701	-535.314	74959	-27511.4	-5425.78	148.607	159.972	0	0	0	0	0	0	0	200	903	0	0	0	0	0	0	0	603	903	0
632	0	-42.7548	21.7701	-531.652	75050.6	-27145.1	-5013.79	148.942	158.835	0	0	0	0	0	0	0	200	903	0	0	0	0	0	0	0	603	903	0
632	1	-40.7712	19.4812	-528.906	74226.6	-27389.3	-4968.02	148.215	159.66	0	0	0	0	0	0	0	200	903	0	0	0	0	0	0	0	603	903	0
632	2	-40.7712	20.3968	-526.464	73768.8	-27389.3	-5059.57	147.975	159.879	0	0	0	0	0	0	0	200	903	0	0	0	0	0	0	0	603	903	0
632	3	-39.8557	19.1761	-521.276	73768.8	-26656.9	-4464.48	148.862	158.484	0	0	0	0	0	0	0	200	903	0	0	0	0	0	0	0	603	903	0
632	4	-40.466	18.5657	-522.192	73036.4	-26717.9	-4556.03	148.835	160.135	0	0	0	0	0	0	0	200	903	0	0	0	0	0	0	0	603	903	0
632	5	-40.6186	17.4976	-516.393	72761.7	-26473.8	-4601.81	148.733	159.096	0	0	0	0	0	0	0	200	903	0	0	0	0	0	0	0	603	903	0
632	6	-38.9401	17.4976	-514.257	72212.4	-25924.4	-4006.71	149.589	159.579	0	0	0	0	0	0	0	200	903	0	0	0	0	0	0	0	603	903	0
632	7	-37.7194	17.0398	-513.647	71388.5	-26046.5	-4235.6	149.291	161.016	0	0	0	0	0	0	0	200	903	0	0	0	0	0	0	0	603	903	0
632	8	-38.3298	16.2769	-509.069	71113.8	-26046.5	-4052.49	148.835	160.306	0	0	0	0	0	0	0	200	903	0	0	0	0	0	0	0	603	903	0
632	9	-38.4824	16.1243	-507.238	70747.6	-25985.5	-4144.04	148.771	160.524	0	0	0	0	0	0	0	200	903	0	0	0	0	0	0	0	603	903	0
633	0	-37.872	15.2088	-502.966	69648.9	-25680.3	-4235.6	148.942	161.524	0	0	0	0	0	0	0	200	903	0	0	0	0	0	0	0	603	903	0
633	1	-36.4987	14.1407	-498.998	69557.4	-25497.2	-3823.61	148.903	160.606	0	0	0	0	0	0	0	200	903	0	0	0	0	0	0	0	603	903	0
633	2	-35.7358	13.9881	-496.862	68825	-25436.2	-3960.94	148.806	161.481	0	0	0	0	0	0	0	200	903	0	0	0	0	0	0	0	603	903	0
633	3	-36.1935	13.9881	-496.557	68001	-25497.2	-3686.28	148.652	163.055	0	0	0	0	0	0	0	200	903	0	0	0	0	0	0	0	603	903	0
633	4	-37.2617	13.6829	-495.031	67909.4	-25008.9	-3548.95	149.48	162.818	0	0	0	0	0	0	0	200	903	0	0	0	0	0	0	0	603	903	0
633	5	-35.7358	13.2251	-489.538	67817.9	-25192	-3320.07	148.539	161.466	0	0	0	0	0	0	0	200	903	0	0	0	0	0	0	0	603	903	0
633	6	-35.1254	11.5467	-488.622	67085.5	-24825.8	-3411.62	149.192	162.705	0	0	0	0	0	0	0	200	903	0	0	0	0	0	0	0	603	903	0
633	7	-34.2099	12.3096	-484.655	66810.8	-24520.6	-3457.4	149.406	162.148	0	0	0	0	0	0	0	200	903	0	0	0	0	0	0	0	603	903	0
633	8	-34.3625	11.6993	-483.129	66719.2	-24337.5	-3136.96	149.625	161.902	0	0	0	0	0	0	0	200	903	0	0	0	0	0	0	0	603	903	0
633	9	-35.278	10.326	-482.214	66353	-24764.8	-2908.08	148.644	162.399	0	0	0	0	0	0	0	200	903	0	0	0	0	0	0	0	603	903	0
634	0	-34.8203	10.4786	-478.552	65895.3	-24703.7	-2816.53	148.378	162.303	0	0	0	0	0	0	0	200	903	0	0	0	0	0	0	0	603	903	0
634	1	-34.3625	9.71561	-474.89	65437.5	-24337.5	-2816.53	148.751	162.205	0	0	0	0	0	0	0	200	903	0	0	0	0	0	0	0	603	903	0
634	2	-33.447	9.10526	-474.89	64247.3	-23666.1	-2862.31	150.165	164.711	0	0	0	0	0	0	0	200	903	0	0	0	0	0	0	0	603	903	0
634	3	-32.9892	8.49491	-473.364	64705.1	-24032.3	-2679.2	149.231	163.308	0	0	0	0	0	0	0	200	903	0	0	0	0	0	0	0	603	903	0
634	4	-34.0573	7.57938	-471.533	64247.3	-23971.3	-2816.53	149.163	163.748	0	0	0	0	0	0	0	200	903	0	0	0	0	0	0	0	603	903	0
634	5	-32.0737	5.90091	-468.786	63881.1	-23788.2	-2770.75	149.256	163.731	0	0	0	0	0	0	0	200	903	0	0	0	0	0	0	0	603	903	0
634	6	-33.2944	7.42679	-465.734	64064.2	-23483	-2770.75	149.578	162.445	0	0	0	0	0	0	0	200	903	0	0	0	0	0	0	0	603	903	0
634	7	-32.3788	6.96903	-462.988	62782.5	-23605.1	-2587.65	149.016	164.397	0	0	0	0	0	0	0	200	903	0	0	0	0	0	0	0	603	903	0
634	8	-31.7685	6.51127	-463.903	62416.3	-23177.9	-2633.42	150.037	165.454	0	0	0	0	0	0	0	200	903	0	0	0	0	0	0	0	603	903	0
634	9	-32.3788	6.66385	-462.072	62233.2	-23299.9	-2541.87	149.575	165.317	0	0	0	0	0	0	0	200	903	0	0	0	0	0	0	0	603	903	0
635	0	-33.447	6.35868	-459.936	61409.2	-23544.1	-2038.33	148.81	166.483	0	0	0	0	0	0	0	200	903	0	0	0	0	0	0	0	603	903	0
635	1	-32.8366	6.66385	-457.495	61775.4	-23361	-2724.98	148.937	164.97	0	0	0	0	0	0	0	200	903	0	0	0	0	0	0	0	603	903	0
635	2	-31.6159	5.59574	-454.748	61226.1	-23055.8	-2587.65	149.3	165.363	0	0	0	0	0	0	0	200	903	0	0	0	0	0	0	0	603	903	0
635	3	-30.853	3.91727	-453.222	60676.8	-22811.6	-2267.21	149.668	166.121	0	0	0	0	0	0	0	200	903	0	0	0	0	0	0	0	603	903	0
635	4	-31.0056	4.68021	-454.138	60127.5	-23177.9	-2221.44	148.963	167.601	0	0	0	0	0	0	0	200	903	0	0	0	0	0	0	0	603	903	0
635	5	-32.5314	4.37503	-452.307	60676.8	-23361	-2175.66	148.351	165.85	0	0	0	0	0	0	0	200	903	0	0	0	0	0	0	0	603	903	0
635	6	-29.7849	3.6121	-450.781	60676.8	-22872.7	-2221.44	149.26	165.396	0	0	0	0	0	0	0	200	903	0	0	0	0	0	0	0	603	903	0
635	7	-32.2263	4.06986	-446.508	60219	-22689.6	-2084.11	149.184	165.134	0	0	0	0	0	0	0	200	903	0	0	0	0	0	0	0	603	903	0
635	8	-30.3952	2.54398	-446.203	58662.6	-22933.7	-2038.33	148.603	168.529	0	0	0	0	0	0	0	200	903	0	0	0	0	0	0	0	603	903	0
635	9	-30.2426	1.93363	-447.729	59303.5	-22689.6	-1946.78	149.323	167.546	0	0	0	0	0	0	0	200	903	0	0	0	0	0	0	0	603	903	0
636	0	-30.853	1.78104	-444.372	58937.3	-22567.5	-2038.33	149.215	167.37	0	0	0	0	0	0	0	200	903	0	0	0	0	0	0	0	603	903	0
636	1	-31.9211	1.32328	-445.287	58845.7	-22811.6	-1901	148.771	167.848	0	0	0	0	0	0	0	200	903	0	0	0	0	0	0	0	603	903	0
636	2	-31.4633	1.17069	-441.32	57838.6	-22567.5	-2038.33	148.864	168.942	0	0	0	0	0	0	0	200	903	0	0	0	0	0	0	0	603	903	0
636	3	-30.5478	0.255162	-439.794	57380.9	-22262.3	-1946.78	149.38	169.528	0	0	0	0	0	0	0	200	903	0	0	0	0	0	0	0	603	903	0
636	4	-30.09	1.0181	-438.574	57930.2	-22323.4	-1489.01	149.1	167.912	0	0	0	0	0	0	0	200	903	0	0	0	0	0	0	0	603	903	0
636	5	-30.7004	0.102574	-440.099	57106.2	-22689.6	-1672.12	148.444	170.243	0	0	0	0	0	0	0	200	903	0	0	0	0	0	0	0	603	903	0
636	6	-31.9211	0.102574	-437.963	57106.2	-22628.5	-2038.33	148.332	169.61	0	0	0	0	0	0	0	200	903	0	0	0	0	0	0	0	603	903	0
636	7	-30.5478	-1.72848	-434.606	57014.7	-22018.2	-1855.23	149.338	168.813	0	0	0	0	0	0	0	200	903	0	0	0	0	0	0	0	603	903	0
636	8	-30.853	-0.202602	-434.911	57106.2	-22201.3	-1534.79	148.952	168.695	0	0	0	0	0	0	0	200	903	0	0	0	0	0	0	0	603	903	0
636	9	-30.2426	-1.11813	-434.301	57106.2	-22018.2	-1489.01	149.302	168.51	0	0	0	0	0	0	0	200	903	0	0	0	0	0	0	0	603	903	0
637	0	-30.09	-2.49142	-436.132	57197.8	-22811.6	-1397.46	147.696	168.852	0	0	0	0	0	0	0	200	903	0	0	0	0	0	0	0	603	903	0
637	1	-30.2426	-1.88107	-430.639	56282.2	-22140.3	-1672.12	148.587	169.305	0	0	0	0	0	0	0	200	903	0	0	0	0	0	0	0	603	903	0
637	2	-31.3107	-2.64401	-433.386	56648.5	-22323.4	-1077.03	148.491	169.289	0	0	0	0	0	0	0	200	903	0	0	0	0	0	0	0	603	903	0
637	3	-30.7004	-2.33883	-431.86	56282.2	-22140.3	-1443.24	148.733	169.675	0	0	0	0	0	0	0	200	903	0	0	0	0	0	0	0	603	903	0
637	4	-29.6323	-3.40695	-431.86	56007.6	-21957.2	-1397.46	149.157	170.311	0	0	0	0	0	0	0	200	903	0	0	0	0	0	0	0	603	903	0
637	5	-28.5641	-3.25436	-433.996	55366.7	-22140.3	-1077.03	148.985	172.426	0	0	0	0	0	0	0	200	903	0	0	0	0	0	0	0	603	903	0
637	6	-29.6323	-2.94918	-432.775	55000.5	-22567.5	-1214.36	147.854	172.912	0	0	0	0	0	0	0	200	903	0	0	0	0	0	0	0	603	903	0
637	7	-31.0056	-3.10177	-433.08	54817.4	-22384.4	-1168.58	148.314	173.424	0	0	0	0	0	0	0	200	903	0	0	0	0	0	0	0	603	903	0
637	8	-29.4797	-3.86471	-430.944	54908.9	-21774	-1077.03	149.474	172.585	0	0	0	0	0	0	0	200	903	0	0	0	0	0	0	0	603	903	0
637	9	-30.5478	-5.238	-428.503	54359.6	-22323.4	-1214.36	147.904	173.141	0	0	0	0	0	0	0	200	903	0	0	0	0	0	0	0	603	903	0
638	0	-29.4797	-5.238	-430.334	54359.6	-22262.3	-1077.03	148.267	173.68	0	0	0	0	0	0	0	200	903	0	0	0	0	0	0	0	603	903	0
638	1	-29.4797	-4.93283	-433.08	54817.4	-22079.2	-985.474	149.018	173.424	0	0	0	0	0	0	0	200	903	0	0	0	0	0	0	0	603	903	0
638	2	-29.3271	-5.08541	-432.165	54908.9	-22140.3	-985.474	148.769	172.944	0	0	0	0	0	0	0	200	903	0	0	0	0	0	0	0	603	903	0
638	3	-29.7849	-6.15353	-432.775	54725.8	-22140.3	-527.71	148.841	173.547	0	0	0	0	0	0	0	200	903	0	0	0	0	0	0	0	603	903	0
638	4	-29.4797	-6.30612	-431.249	54725.8	-22384.4	-756.592	148.094	173.099	0	0	0	0	0	0	0	200	903	0	0	0	0	0	0	0	603	903	0
638	5	-29.1745	-7.37423	-430.944	54451.2	-22140.3	-710.816	148.624	173.647	0	0	0	0	0	0	0	200	903	0	0	0	0	0	0	0	603	903	0
638	6	-27.8012	-8.74752	-433.08	54451.2	-22262.3	-665.039	148.595	174.27	0	0	0	0	0	0	0	200	903	0	0	0	0	0	0	0	603	903	0
638	7	-28.8693	-7.67941	-433.996	54634.3	-22140.3	-802.368	148.985	174.113	0	0	0	0	0	0	0	200	903	0	0	0	0	0	0	0	603	903	0
638	8	-29.4797	-8.13717	-433.691	53901.9	-22201.3	-665.039	148.808	175.714	0	0	0	0	0	0	0	200	903	0	0	0	0	0	0	0	603	903	0
638	9	-29.4797	-8.28976	-433.08	53627.2	-22079.2	-756.592	149.018	176.173	0	0	0	0	0	0	0	200	903	0	0	0	0	0	0	0	603	903	0
639	0	-29.7849	-8.90011	-429.418	53444.1	-22689.6	-527.71	147.162	175.543	0	0	0	0	0	0	0	200	903	0	0	0	0	0	0	0	603	903	0
639	1	-28.5641	-7.98458	-434.911	53535.7	-22628.5	-390.381	147.97	176.904	0	0	0	0	0	0	0	200	903	0	0	0	0	0	0	0	603	903	0
639	2	-29.4797	-8.28976	-435.827	53901.9	-22201.3	-481.934	149.059	176.323	0	0	0	0	0	0	0	200	903	0	0	0	0	0	0	0	603	903	0
639	3	-30.09	-9.35787	-436.132	53535.7	-22445.4	-527.71	148.535	177.249	0	0	0	0	0	0	0	200	903	0	0	0	0	0	0	0	603	903	0
639	4	-27.9538	-8.90011	-434.911	53169.5	-22933.7	-344.605	147.268	177.747	0	0	0	0	0	0	0	200	903	0	0	0	0	0	0	0	603	903	0
639	5	-29.4797	-9.81564	-436.132	53993.4	-22750.6	-253.052	147.836	176.199	0	0	0	0	0	0	0	200	903	0	0	0	0	0	0	0	603	903	0
639	6	-29.6323	-10.7312	-437.353	53718.8	-22933.7	-253.052	147.562	177.173	0	0	0	0	0	0	0	200	903	0	0	0	0	0	0	0	603	903	0
639	7	-28.4116	-11.0363	-439.184	53901.9	-22811.6	-115.723	148.059	177.268	0	0	0	0	0	0	0	200	903	0	0	0	0	0	0	0	603	903	0
639	8	-29.1745	-11.7993	-438.574	53901.9	-23238.9	113.159	147.013	177.097	0	0	0	0	0	0	0	200	903	0	0	0	0	0	0	0	603	903	0
639	9	-29.4797	-12.5622	-439.489	53535.7	-22689.6	158.936	148.373	178.187	0	0	0	0	0	0	0	200	903	0	0	0	0	0	0	0	603	903	0
640	0	-29.0219	-13.02	-438.879	53444.1	-22689.6	296.265	148.301	178.226	0	0	0	0	0	0	0	200	903	0	0	0	0	0	0	0	603	903	0
640	1	-27.8012	-13.6303	-441.015	53352.6	-23055.8	21.6065	147.721	179.023	0	0	0	0	0	0	0	200	903	0	0	0	0	0	0	0	603	903	0
640	2	-28.4116	-13.1726	-440.405	53901.9	-23238.9	67.3829	147.233	177.608	0	0	0	0	0	0	0	200	903	0	0	0	0	0	0	0	603	903	0
640	3	-28.7167	-13.7829	-442.846	53169.5	-22994.8	67.3829	148.075	179.937	0	0	0	0	0	0	0	200	903	0	0	0	0	0	0	0	603	903	0
640	4	-30.2426	-14.5459	-443.762	52894.8	-22994.8	204.712	148.182	180.804	0	0	0	0	0	0	0	200	903	0	0	0	0	0	0	0	603	903	0
640	5	-29.6323	-15.7666	-442.236	52894.8	-23116.8	387.818	147.727	180.392	0	0	0	0	0	0	0	200	903	0	0	0	0	0	0	0	603	903	0
640	6	-30.09	-14.6985	-445.287	53352.6	-23788.2	387.818	146.578	180.184	0	0	0	0	0	0	0	200	903	0	0	0	0	0	0	0	603	903	0
640	7	-29.6323	-14.6985	-445.898	53261	-23238.9	158.936	147.883	180.553	0	0	0	0	0	0	0	200	903	0	0	0	0	0	0	0	603	903	0
640	8	-29.3271	-15.0036	-448.644	53444.1	-23544.1	570.923	147.522	180.877	0	0	0	0	0	0	0	200	903	0	0	0	0	0	0	0	603	903	0
640	9	-29.3271	-16.9873	-445.593	53261	-23788.2	433.594	146.614	180.472	0	0	0	0	0	0	0	200	903	0	0	0	0	0	0	0	603	903	0
641	0	-30.7004	-16.5295	-451.086	53169.5	-23727.2	1028.69	147.4	182.13	0	0	0	0	0	0	0	200	903	0	0	0	0	0	0	0	603	903	0
641	1	-30.853	-16.2243	-451.391	53993.4	-23849.2	616.7	147.165	180.384	0	0	0	0	0	0	0	200	903	0	0	0	0	0	0	0	603	903	0
641	2	-29.7849	-16.9873	-453.527	53718.8	-24398.6	616.7	146.203	181.553	0	0	0	0	0	0	0	200	903	0	0	0	0	0	0	0	603	903	0
641	3	-30.3952	-18.0554	-453.222	54359.6	-24337.5	708.252	146.301	180.06	0	0	0	0	0	0	0	200	903	0	0	0	0	0	0	0	603	903	0
641	4	-30.5478	-17.9028	-457.189	53993.4	-24093.4	662.476	147.301	181.901	0	0	0	0	0	0	0	200	903	0	0	0	0	0	0	0	603	903	0
641	5	-31.4633	-18.8183	-458.715	53535.7	-23971.3	708.252	147.742	183.292	0	0	0	0	0	0	0	200	903	0	0	0	0	0	0	0	603	903	0
641	6	-31.0056	-18.9709	-462.072	53993.4	-24825.8	1120.24	146.273	183.149	0	0	0	0	0	0	0	200	903	0	0	0	0	0	0	0	603	903	0
641	7	-31.9211	-19.8864	-460.851	53444.1	-24886.8	845.581	145.998	184.032	0	0	0	0	0	0	0	200	903	0	0	0	0	0	0	0	603	903	0
641	8	-30.5478	-19.8864	-462.988	53718.8	-24703.7	662.476	146.643	183.974	0	0	0	0	0	0	0	200	903	0	0	0	0	0	0	0	603	903	0
641	9	-29.9374	-20.1916	-468.176	53077.9	-25008.9	982.911	146.582	186.628	0	0	0	0	0	0	0	200	903	0	0	0	0	0	0	0	603	903	0
642	0	-31.0056	-20.3442	-468.786	53444.1	-25069.9	937.134	146.522	185.995	0	0	0	0	0	0	0	200	903	0	0	0	0	0	0	0	603	903	0
642	1	-32.3788	-21.2597	-470.312	53352.6	-25192	982.911	146.436	186.559	0	0	0	0	0	0	0	200	903	0	0	0	0	0	0	0	603	903	0
642	2	-30.853	-21.1071	-471.227	53627.2	-25375.1	982.911	146.151	186.197	0	0	0	0	0	0	0	200	903	0	0	0	0	0	0	0	603	903	0
642	3	-32.8366	-23.7011	-473.058	53810.3	-25680.3	982.911	145.714	186.25	0	0	0	0	0	0	0	200	903	0	0	0	0	0	0	0	603	903	0
642	4	-31.3107	-21.8701	-474.279	54268.1	-25375.1	1120.24	146.497	185.578	0	0	0	0	0	0	0	200	903	0	0	0	0	0	0	0	603	903	0
642	5	-31.7685	-22.4804	-477.331	54268.1	-25497.2	1486.45	146.584	186.309	0	0	0	0	0	0	0	200	903	0	0	0	0	0	0	0	603	903	0
642	6	-31.9211	-23.0908	-479.162	54176.5	-25558.2	1257.57	146.661	186.935	0	0	0	0	0	0	0	200	903	0	0	0	0	0	0	0	603	903	0
642	7	-33.1418	-23.7011	-482.519	53901.9	-25619.3	1120.24	146.905	188.291	0	0	0	0	0	0	0	200	903	0	0	0	0	0	0	0	603	903	0
642	8	-32.684	-23.8537	-481.909	54268.1	-26046.5	937.134	145.951	187.389	0	0	0	0	0	0	0	200	903	0	0	0	0	0	0	0	603	903	0
642	9	-33.5996	-24.6167	-481.603	54359.6	-26351.7	1257.57	145.283	187.128	0	0	0	0	0	0	0	200	903	0	0	0	0	0	0	0	603	903	0
643	0	-32.0737	-24.6167	-485.571	54085	-26595.8	1349.12	145.228	188.616	0	0	0	0	0	0	0	200	903	0	0	0	0	0	0	0	603	903	0
643	1	-32.9892	-25.6848	-490.453	53901.9	-26778.9	1257.57	145.4	190.098	0	0	0	0	0	0	0	200	903	0	0	0	0	0	0	0	603	903	0
643	2	-33.7521	-25.227	-491.979	54085	-26412.7	1394.9	146.313	190.067	0	0	0	0	0	0	0	200	903	0	0	0	0	0	0	0	603	903	0
643	3	-34.5151	-25.227	-495.031	54451.2	-27145.1	1486.45	145.165	190.005	0	0	0	0	0	0	0	200	903	0	0	0	0	0	0	0	603	903	0
643	4	-34.6677	-25.8374	-494.726	54176.5	-27328.2	1440.67	144.761	190.492	0	0	0	0	0	0	0	200	903	0	0	0	0	0	0	0	603	903	0
643	5	-34.0573	-26.1425	-498.388	54451.2	-27389.3	1532.23	145.044	190.745	0	0	0	0	0	0	0	200	903	0	0	0	0	0	0	0	603	903	0
643	6	-33.5996	-26.2951	-499.609	54176.5	-27267.2	1440.67	145.423	191.562	0	0	0	0	0	0	0	200	903	0	0	0	0	0	0	0	603	903	0
643	7	-34.5151	-27.5158	-503.881	55000.5	-27938.6	1486.45	144.553	190.846	0	0	0	0	0	0	0	200	903	0	0	0	0	0	0	0	603	903	0
643	8	-35.5832	-26.9055	-505.712	55183.6	-27633.4	1852.66	145.357	190.879	0	0	0	0	0	0	0	200	903	0	0	0	0	0	0	0	603	903	0
643	9	-34.5151	-28.1262	-506.628	55458.2	-27938.6	1669.56	144.854	190.535	0	0	0	0	0	0	0	200	903	0	0	0	0	0	0	0	603	903	0
644	0	-35.5832	-28.4314	-509.069	54725.8	-27938.6	1669.56	145.118	192.498	0	0	0	0	0	0	0	200	903	0	0	0	0	0	0	0	603	903	0
644	1	-34.6677	-29.1943	-512.426	55092	-28671	1623.78	144.048	192.488	0	0	0	0	0	0	0	200	903	0	0	0	0	0	0	0	603	903	0
644	2	-34.5151	-30.2624	-515.173	54908.9	-28793.1	1944.21	144.11	193.416	0	0	0	0	0	0	0	200	903	0	0	0	0	0	0	0	603	903	0
644	3	-35.4306	-31.4831	-518.835	55549.8	-28732.1	1532.23	144.622	192.934	0	0	0	0	0	0	0	200	903	0	0	0	0	0	0	0	603	903	0
644	4	-36.4987	-30.1098	-520.666	54817.4	-28793.1	1532.23	144.699	194.717	0	0	0	0	0	0	0	200	903	0	0	0	0	0	0	0	603	903	0
644	5	-36.8039	-31.0254	-520.971	54634.3	-29586.5	1898.44	143.209	195.13	0	0	0	0	0	0	0	200	903	0	0	0	0	0	0	0	603	903	0
644	6	-36.041	-30.7202	-522.192	55183.6	-29525.5	1944.21	143.458	194.323	0	0	0	0	0	0	0	200	903	0	0	0	0	0	0	0	603	903	0
644	7	-36.041	-31.1779	-527.99	54634.3	-29586.5	1989.99	143.964	196.524	0	0	0	0	0	0	0	200	903	0	0	0	0	0	0	0	603	903	0
644	8	-37.1091	-31.0254	-530.126	55000.5	-29891.7	1806.89	143.614	196.25	0	0	0	0	0	0	0	200	903	0	0	0	0	0	0	0	603	903	0
644	9	-36.8039	-32.3986	-531.957	55275.1	-29830.7	2173.1	143.923	196.091	0	0	0	0	0	0	0	200	903	0	0	0	0	0	0	0	603	903	0
645	0	-36.9565	-31.9409	-535.314	55641.4	-30380	2081.54	143.248	196.059	0	0	0	0	0	0	0	200	903	0	0	0	0	0	0	0	603	903	0
645	1	-36.9565	-33.1616	-537.451	55275.1	-30196.9	1989.99	143.815	197.153	0	0	0	0	0	0	0	200	903	0	0	0	0	0	0	0	603	903	0
645	2	-36.6513	-32.8564	-540.807	56007.6	-30441	2264.65	143.712	196.437	0	0	0	0	0	0	0	200	903	0	0	0	0	0	0	0	603	903	0
645	3	-35.278	-34.0771	-542.333	55458.2	-30563.1	1989.99	143.645	197.741	0	0	0	0	0	0	0	200	903	0	0	0	0	0	0	0	603	903	0
645	4	-36.9565	-34.5349	-546.911	56282.2	-30685.2	2264.65	143.894	197.091	0	0	0	0	0	0	0	200	903	0	0	0	0	0	0	0	603	903	0
645	5	-37.7194	-34.8401	-549.352	55824.5	-31173.5	2218.87	143.254	198.381	0	0	0	0	0	0	0	200	903	0	0	0	0	0	0	0	603	903	0
645	6	-36.1935	-36.3659	-551.489	55824.5	-31051.4	2264.65	143.695	198.775	0	0	0	0	0	0	0	200	903	0	0	0	0	0	0	0	603	903	0
645	7	-38.7875	-36.0608	-555.151	54908.9	-31722.8	2447.75	142.857	201.092	0	0	0	0	0	0	0	200	903	0	0	0	0	0	0	0	603	903	0
645	8	-37.872	-36.0608	-556.371	55641.4	-32089	2401.98	142.325	199.992	0	0	0	0	0	0	0	200	903	0	0	0	0	0	0	0	603	903	0
645	9	-38.4824	-36.8237	-560.949	55366.7	-32028	2493.53	142.904	201.298	0	0	0	0	0	0	0	200	903	0	0	0	0	0	0	0	603	903	0
646	0	-38.3298	-36.5185	-562.78	55092	-31600.7	2813.97	143.849	202.107	0	0	0	0	0	0	0	200	903	0	0	0	0	0	0	0	603	903	0
646	1	-39.5505	-37.2815	-567.358	55458.2	-32028	2813.97	143.549	202.252	0	0	0	0	0	0	0	200	903	0	0	0	0	0	0	0	603	903	0
646	2	-39.5505	-38.197	-567.358	55458.2	-33126.6	2997.07	141.613	202.252	0	0	0	0	0	0	0	200	903	0	0	0	0	0	0	0	603	903	0
646	3	-38.4824	-37.8918	-570.715	55366.7	-32943.5	2722.41	142.277	202.987	0	0	0	0	0	0	0	200	903	0	0	0	0	0	0	0	603	903	0
646	4	-37.4142	-39.1125	-575.292	55641.4	-33126.6	2859.74	142.418	203.282	0	0	0	0	0	0	0	200	903	0	0	0	0	0	0	0	603	903	0
646	5	-39.2453	-39.4177	-577.429	55549.8	-32760.4	2813.97	143.265	203.798	0	0	0	0	0	0	0	200	903	0	0	0	0	0	0	0	603	903	0
646	6	-39.3979	-39.7229	-579.565	55732.9	-33248.7	3088.62	142.632	203.837	0	0	0	0	0	0	0	200	903	0	0	0	0	0	0	0	603	903	0
646	7	-39.7031	-40.791	-581.701	55641.4	-33492.8	3042.85	142.423	204.347	0	0	0	0	0	0	0	200	903	0	0	0	0	0	0	0	603	903	0
646	8	-40.466	-40.6384	-583.227	56007.6	-33553.8	2951.3	142.469	203.97	0	0	0	0	0	0	0	200	903	0	0	0	0	0	0	0	603	903	0
646	9	-40.0082	-40.791	-586.279	55549.8	-33981.1	2859.74	142.039	205.25	0	0	0	0	0	0	0	200	903	0	0	0	0	0	0	0	603	903	0
647	0	-39.5505	-42.0117	-590.856	55458.2	-34103.1	2905.52	142.282	206.139	0	0	0	0	0	0	0	200	903	0	0	0	0	0	0	0	603	903	0
647	1	-37.872	-42.4694	-592.687	55641.4	-34042.1	3088.62	142.563	206.12	0	0	0	0	0	0	0	200	903	0	0	0	0	0	0	0	603	903	0
647	2	-40.7712	-43.5376	-596.044	55641.4	-34591.4	3088.62	141.965	206.649	0	0	0	0	0	0	0	200	903	0	0	0	0	0	0	0	603	903	0
647	3	-41.5341	-43.385	-598.181	54451.2	-34896.6	3180.18	141.662	208.972	0	0	0	0	0	0	0	200	903	0	0	0	0	0	0	0	603	903	0
647	4	-39.2453	-43.6902	-601.232	55641.4	-35140.7	3271.73	141.552	207.454	0	0	0	0	0	0	0	200	903	0	0	0	0	0	0	0	603	903	0
647	5	-40.7712	-45.216	-602.148	54817.4	-35201.8	3500.61	141.54	208.964	0	0	0	0	0	0	0	200	903	0	0	0	0	0	0	0	603	903	0
647	6	-41.2289	-43.6902	-607.336	55458.2	-35201.8	3683.72	142.039	208.686	0	0	0	0	0	0	0	200	903	0	0	0	0	0	0	0	603	903	0
647	7	-40.7712	-44.7583	-609.472	54451.2	-35568	3180.18	141.641	210.658	0	0	0	0	0	0	0	200	903	0	0	0	0	0	0	0	603	903	0
647	8	-43.6704	-45.0634	-613.439	54634.3	-35995.2	3363.28	141.322	210.938	0	0	0	0	0	0	0	200	903	0	0	0	0	0	0	0	603	903	0
647	9	-43.2126	-44.9109	-614.355	54268.1	-35690.1	3409.06	141.906	211.667	0	0	0	0	0	0	0	200	903	0	0	0	0	0	0	0	603	903	0
648	0	-43.06	-45.3686	-615.881	54908.9	-36361.4	3317.51	140.96	210.845	0	0	0	0	0	0	0	200	903	0	0	0	0	0	0	0	603	903	0
648	1	-42.7548	-46.4367	-618.017	54451.2	-36483.5	3363.28	140.967	211.894	0	0	0	0	0	0	0	200	903	0	0	0	0	0	0	0	603	903	0
648	2	-42.4496	-47.81	-623.51	54634.3	-36422.5	3775.27	141.585	212.376	0	0	0	0	0	0	0	200	903	0	0	0	0	0	0	0	603	903	0
648	3	-44.4333	-48.2678	-621.374	54268.1	-36605.6	3454.84	141.089	212.664	0	0	0	0	0	0	0	200	903	0	0	0	0	0	0	0	603	903	0
648	4	-44.4333	-48.1152	-628.393	54542.7	-37277	3592.16	140.679	213.203	0	0	0	0	0	0	0	200	903	0	0	0	0	0	0	0	603	903	0
648	5	-44.5859	-47.9626	-627.783	54268.1	-37338	3409.06	140.524	213.556	0	0	0	0	0	0	0	200	903	0	0	0	0	0	0	0	603	903	0
648	6	-44.4333	-48.7256	-630.224	53535.7	-37154.9	3958.38	141.045	215.053	0	0	0	0	0	0	0	200	903	0	0	0	0	0	0	0	603	903	0
648	7	-43.9755	-49.3359	-634.496	53077.9	-37215.9	3821.05	141.346	216.346	0	0	0	0	0	0	0	200	903	0	0	0	0	0	0	0	603	903	0
648	8	-44.8911	-49.7937	-637.853	52437	-38192.5	3775.27	140.123	217.791	0	0	0	0	0	0	0	200	903	0	0	0	0	0	0	0	603	903	0
648	9	-47.0273	-49.1833	-639.684	52620.1	-38131.5	3637.94	140.39	217.74	0	0	0	0	0	0	0	200	903	0	0	0	0	0	0	0	603	903	0
649	0	-45.3488	-48.1152	-638.464	53444.1	-38009.4	3317.51	140.467	216.293	0	0	0	0	0	0	0	200	903	0	0	0	0	0	0	0	603	903	0
649	1	-47.7902	-49.3359	-640.905	52437	-38192.5	3454.84	140.409	218.183	0	0	0	0	0	0	0	200	903	0	0	0	0	0	0	0	603	903	0
649	2	-46.1118	-50.0988	-643.347	52070.8	-38619.8	3775.27	139.971	219.063	0	0	0	0	0	0	0	200	903	0	0	0	0	0	0	0	603	903	0
649	3	-45.654	-50.0988	-649.45	51338.4	-38924.9	3729.49	140.065	220.951	0	0	0	0	0	0	0	200	903	0	0	0	0	0	0	0	603	903	0
649	4	-47.1799	-50.0988	-650.366	51796.1	-38986	3637.94	140.055	220.358	0	0	0	0	0	0	0	200	903	0	0	0	0	0	0	0	603	903	0
649	5	-48.7058	-50.2514	-652.197	52162.4	-39047	3683.72	140.13	220.021	0	0	0	0	0	0	0	200	903	0	0	0	0	0	0	0	603	903	0
649	6	-47.6376	-51.6247	-649.45	51613	-39169.1	3500.61	139.689	220.528	0	0	0	0	0	0	0	200	903	0	0	0	0	0	0	0	603	903	0
649	7	-49.7739	-52.5402	-654.943	50972.2	-39352.2	3821.05	139.915	222.173	0	0	0	0	0	0	0	200	903	0	0	0	0	0	0	0	603	903	0
649	8	-48.5532	-51.9299	-657.69	50056.7	-39596.3	3729.49	139.795	223.89	0	0	0	0	0	0	0	200	903	0	0	0	0	0	0	0	603	903	0
649	9	-47.4851	-52.6928	-658.3	49873.6	-40511.8	3729.49	138.46	224.239	0	0	0	0	0	0	0	200	903	0	0	0	0	0	0	0	603	903	0
650	0	-49.4687	-51.6247	-661.352	49782	-40450.8	3729.49	138.836	224.727	0	0	0	0	0	0	0	200	903	0	0	0	0	0	0	0	603	903	0
650	1	-50.842	-51.9299	-662.267	49598.9	-40145.6	3729.49	139.382	225.107	0	0	0	0	0	0	0	200	903	0	0	0	0	0	0	0	603	903	0
650	2	-49.4687	-53.1506	-663.183	48866.5	-40511.8	3454.84	138.913	226.315	0	0	0	0	0	0	0	200	903	0	0	0	0	0	0	0	603	903	0
650	3	-51.1472	-53.4558	-665.319	49507.3	-41122.2	3729.49	138.192	225.589	0	0	0	0	0	0	0	200	903	0	0	0	0	0	0	0	603	903	0
650	4	-50.9946	-52.8454	-667.15	48866.5	-41000.1	3592.16	138.544	226.753	0	0	0	0	0	0	0	200	903	0	0	0	0	0	0	0	603	903	0
650	5	-51.2997	-52.998	-669.897	48225.6	-40939.1	3409.06	138.887	228.01	0	0	0	0	0	0	0	200	903	0	0	0	0	0	0	0	603	903	0
650	6	-51.6049	-53.761	-672.338	48134	-40878.1	3546.39	139.2	228.408	0	0	0	0	0	0	0	200	903	0	0	0	0	0	0	0	603	903	0
650	7	-52.5205	-53.761	-673.254	47401.6	-41610.5	3637.94	138.195	229.593	0	0	0	0	0	0	0	200	903	0	0	0	0	0	0	0	603	903	0
650	8	-52.673	-54.6765	-673.864	47401.6	-41732.5	3637.94	138.07	229.657	0	0	0	0	0	0	0	200	903	0	0	0	0	0	0	0	603	903	0
650	9	-53.2834	-55.1342	-672.949	47035.4	-41244.3	3454.84	138.711	230.105	0	0	0	0	0	0	0	200	903	0	0	0	0	0	0	0	603	903	0
651	0	-52.8256	-54.5239	-676.916	46394.6	-42220.8	3225.95	137.628	231.462	0	0	0	0	0	0	0	200	903	0	0	0	0	0	0	0	603	903	0
651	1	-53.2834	-54.9817	-679.968	45845.2	-42159.8	3683.72	137.997	232.577	0	0	0	0	0	0	0	200	903	0	0	0	0	0	0	0	603	903	0
651	2	-52.8256	-55.1342	-679.968	45662.1	-42037.7	3775.27	138.177	232.847	0	0	0	0	0	0	0	200	903	0	0	0	0	0	0	0	603	903	0
651	3	-55.4196	-55.2868	-683.019	45479	-42587	3500.61	137.649	233.415	0	0	0	0	0	0	0	200	903	0	0	0	0	0	0	0	603	903	0
651	4	-56.03	-55.4394	-685.156	44563.5	-42892.2	3546.39	137.398	234.959	0	0	0	0	0	0	0	200	903	0	0	0	0	0	0	0	603	903	0
651	5	-54.6567	-55.2868	-686.682	44655	-43136.4	3454.84	137.181	234.97	0	0	0	0	0	0	0	200	903	0	0	0	0	0	0	0	603	903	0
651	6	-55.267	-56.0498	-687.292	43831.1	-42953.2	3271.73	137.504	236.226	0	0	0	0	0	0	0	200	903	0	0	0	0	0	0	0	603	903	0
651	7	-54.8093	-56.5075	-690.649	43922.6	-43075.3	3546.39	137.631	236.404	0	0	0	0	0	0	0	200	903	0	0	0	0	0	0	0	603	903	0
651	8	-56.4877	-57.1179	-692.785	43281.8	-43502.6	3500.61	137.206	237.525	0	0	0	0	0	0	0	200	903	0	0	0	0	0	0	0	603	903	0
651	9	-56.6403	-58.186	-694.616	43556.4	-44296	3683.72	136.23	237.294	0	0	0	0	0	0	0	200	903	0	0	0	0	0	0	0	603	903	0
652	0	-56.9455	-58.4912	-694.616	43098.7	-43685.7	3409.06	137.108	237.953	0	0	0	0	0	0	0	200	903	0	0	0	0	0	0	0	603	903	0
652	1	-56.03	-59.1015	-696.142	42640.9	-43685.7	3363.28	137.246	238.747	0	0	0	0	0	0	0	200	903	0	0	0	0	0	0	0	603	903	0
652	2	-55.4196	-58.6438	-698.889	41725.3	-43868.8	3592.16	137.231	240.298	0	0	0	0	0	0	0	200	903	0	0	0	0	0	0	0	603	903	0
652	3	-55.7248	-59.1015	-700.72	41450.7	-44357.1	3637.94	136.698	240.846	0	0	0	0	0	0	0	200	903	0	0	0	0	0	0	0	603	903	0
652	4	-57.5559	-59.5593	-701.33	40901.4	-43990.8	3546.39	137.275	241.68	0	0	0	0	0	0	0	200	903	0	0	0	0	0	0	0	603	903	0
652	5	-58.1662	-58.9489	-701.635	40718.3	-44845.3	3363.28	136.085	241.967	0	0	0	0	0	0	0	200	903	0	0	0	0	0	0	0	603	903	0
652	6	-58.0136	-59.4067	-701.025	40443.6	-44784.3	3180.18	136.116	242.308	0	0	0	0	0	0	0	200	903	0	0	0	0	0	0	0	603	903	0
652	7	-57.2507	-59.5593	-702.245	39985.8	-44418.1	3363.28	136.748	243.06	0	0	0	0	0	0	0	200	903	0	0	0	0	0	0	0	603	903	0
652	8	-57.4033	-61.2378	-706.823	39436.5	-44357.1	3409.06	137.244	244.206	0	0	0	0	0	0	0	200	903	0	0	0	0	0	0	0	603	903	0
652	9	-58.0136	-60.78	-706.518	38887.2	-45272.6	3409.06	135.922	244.959	0	0	0	0	0	0	0	200	903	0	0	0	0	0	0	0	603	903	0
653	0	-59.2343	-60.6274	-708.959	38978.8	-45516.7	3409.06	135.798	245.02	0	0	0	0	0	0	0	200	903	0	0	0	0	0	0	0	603	903	0
653	1	-59.5395	-60.1696	-707.433	39070.3	-45333.6	3409.06	135.918	244.772	0	0	0	0	0	0	0	200	903	0	0	0	0	0	0	0	603	903	0
653	2	-58.3188	-61.3903	-708.959	38704.1	-45028.4	3225.95	136.487	245.407	0	0	0	0	0	0	0	200	903	0	0	0	0	0	0	0	603	903	0
653	3	-57.4033	-61.6955	-711.096	37971.7	-45150.5	3775.27	136.506	246.601	0	0	0	0	0	0	0	200	903	0	0	0	0	0	0	0	603	903	0
653	4	-58.9291	-62.611	-714.147	37788.6	-45272.6	3592.16	136.606	247.086	0	0	0	0	0	0	0	200	903	0	0	0	0	0	0	0	603	903	0
653	5	-60.6076	-62.9162	-715.063	37605.5	-45882.9	3592.16	135.834	247.41	0	0	0	0	0	0	0	200	903	0	0	0	0	0	0	0	603	903	0
653	6	-59.3869	-64.8999	-715.368	37330.8	-45944	3454.84	135.776	247.816	0	0	0	0	0	0	0	200	903	0	0	0	0	0	0	0	603	903	0
653	7	-59.3869	-63.6792	-716.284	36232.2	-46066	3866.82	135.687	249.416	0	0	0	0	0	0	0	200	903	0	0	0	0	0	0	0	603	903	0
653	8	-57.861	-64.1369	-719.03	36232.2	-45638.8	3683.72	136.527	249.61	0	0	0	0	0	0	0	200	903	0	0	0	0	0	0	0	603	903	0
653	9	-57.4033	-64.5947	-724.523	36140.6	-45944	4095.7	136.587	250.118	0	0	0	0	0	0	0	200	903	0	0	0	0	0	0	0	603	903	0
654	0	-58.0136	-66.7309	-725.744	36049.1	-46432.2	4049.93	136.021	250.328	0	0	0	0	0	0	0	200	903	0	0	0	0	0	0	0	603	903	0
654	1	-54.6567	-67.9516	-727.575	35225.1	-45882.9	4187.26	136.937	251.586	0	0	0	0	0	0	0	200	903	0	0	0	0	0	0	0	603	903	0
654	2	-56.6403	-67.3413	-726.965	35774.4	-46005	4278.81	136.716	250.789	0	0	0	0	0	0	0	200	903	0	0	0	0	0	0	0	603	903	0
654	3	-55.4196	-70.8508	-728.796	35225.1	-46615.4	4507.69	136.038	251.667	0	0	0	0	0	0	0	200	903	0	0	0	0	0	0	0	603	903	0
654	4	-55.1144	-71.156	-732.458	35866	-46920.5	5102.79	135.941	251.033	0	0	0	0	0	0	0	200	903	0	0	0	0	0	0	0	603	903	0
654	5	-55.8774	-72.3767	-733.373	35408.2	-46615.4	4873.9	136.437	251.719	0	0	0	0	0	0	0	200	903	0	0	0	0	0	0	0	603	903	0
654	6	-56.1826	-73.2922	-733.373	35133.5	-46859.5	4736.57	136.104	252.093	0	0	0	0	0	0	0	200	903	0	0	0	0	0	0	0	603	903	0
654	7	-56.6403	-74.6655	-735.204	34858.9	-47042.6	4461.91	136.014	252.586	0	0	0	0	0	0	0	200	903	0	0	0	0	0	0	0	603	903	0
654	8	-56.03	-76.4965	-735.815	34675.8	-47164.7	4736.57	135.901	252.874	0	0	0	0	0	0	0	200	903	0	0	0	0	0	0	0	603	903	0
654	9	-55.8774	-77.1069	-738.256	34767.3	-46615.4	4736.57	136.857	252.906	0	0	0	0	0	0	0	200	903	0	0	0	0	0	0	0	603	903	0
655	0	-56.3351	-79.2431	-740.087	34401.1	-47042.6	5057.01	136.436	253.517	0	0	0	0	0	0	0	200	903	0	0	0	0	0	0	0	603	903	0
655	1	-57.7084	-78.3276	-740.698	33485.6	-47469.8	4965.45	135.912	254.792	0	0	0	0	0	0	0	200	903	0	0	0	0	0	0	0	603	903	0
655	2	-57.861	-80.4638	-738.561	33760.3	-47103.6	5011.23	136.222	254.289	0	0	0	0	0	0	0	200	903	0	0	0	0	0	0	0	603	903	0
655	3	-56.6403	-81.6845	-739.782	32936.3	-46981.6	4919.68	136.493	255.478	0	0	0	0	0	0	0	200	903	0	0	0	0	0	0	0	603	903	0
655	4	-56.3351	-81.9897	-742.834	32936.3	-47714	5194.34	135.768	255.661	0	0	0	0	0	0	0	200	903	0	0	0	0	0	0	0	603	903	0
655	5	-56.4877	-83.8208	-740.087	32570.1	-47591.9	5423.22	135.694	255.992	0	0	0	0	0	0	0	200	903	0	0	0	0	0	0	0	603	903	0
655	6	-57.861	-84.4311	-742.224	32387	-47347.8	5194.34	136.208	256.365	0	0	0	0	0	0	0	200	903	0	0	0	0	0	0	0	603	903	0
655	7	-58.1662	-86.5673	-741.003	32112.3	-47286.7	5194.34	136.185	256.664	0	0	0	0	0	0	0	200	903	0	0	0	0	0	0	0	603	903	0
655	8	-57.0981	-86.4148	-741.613	32112.3	-47530.9	5514.77	135.909	256.699	0	0	0	0	0	0	0	200	903	0	0	0	0	0	0	0	603	903	0
655	9	-57.2507	-88.0932	-741.918	31471.4	-47591.9	5514.77	135.853	257.581	0	0	0	0	0	0	0	200	903	0	0	0	0	0	0	0	603	903	0
656	0	-57.0981	-89.1613	-743.139	31105.2	-46859.5	5606.33	136.944	258.143	0	0	0	0	0	0	0	200	903	0	0	0	0	0	0	0	603	903	0
656	1	-58.1662	-90.382	-742.529	31563	-47530.9	5423.22	135.988	257.493	0	0	0	0	0	0	0	200	903	0	0	0	0	0	0	0	603	903	0
656	2	-58.4714	-91.2976	-740.392	30555.9	-47469.8	5560.55	135.886	258.73	0	0	0	0	0	0	0	200	903	0	0	0	0	0	0	0	603	903	0
656	3	-58.0136	-92.3657	-738.867	30464.4	-46798.5	5652.1	136.662	258.769	0	0	0	0	0	0	0	200	903	0	0	0	0	0	0	0	603	903	0
656	4	-56.1826	-94.3493	-739.172	30006.6	-47042.6	5880.98	136.358	259.405	0	0	0	0	0	0	0	200	903	0	0	0	0	0	0	0	603	903	0
656	5	-56.1826	-94.1967	-739.782	29091.1	-47469.8	5514.77	135.833	260.676	0	0	0	0	0	0	0	200	903	0	0	0	0	0	0	0	603	903	0
656	6	-57.5559	-95.1123	-739.477	28908	-47530.9	5926.76	135.724	260.908	0	0	0	0	0	0	0	200	903	0	0	0	0	0	0	0	603	903	0
656	7	-57.861	-96.333	-733.068	28633.3	-46920.5	5560.55	135.994	260.94	0	1.75476	5.1828	-21.2524	4387.21	3258.85	1678.67	353.34	696.567	0	0	0	0	0	0	0	603	903	0
656	8	-56.9455	-95.57	-734.289	28541.8	-46798.5	6018.31	136.267	261.13	0	8.16346	6.09833	-37.1216	5211.19	4357.48	2411.09	317.384	762.618	0	0	0	0	0	0	0	603	903	0
656	9	-55.4196	-96.4856	-734.289	27626.2	-47225.7	6155.64	135.685	262.377	0	8.46863	-5.95611	-33.4595	4844.98	4113.34	-198.166	322.935	758.199	0	0	0	0	0	0	0	603	903	0
657	0	-55.7248	-99.3847	-734.289	27260	-47164.7	6292.97	135.768	262.876	0	-1.90734	-14.6536	-22.7783	4112.55	3319.89	-1525.68	345.748	722.453	0	0	0	0	0	0	0	603	903	0
657	1	-56.03	-99.3847	-734.289	27626.2	-46493.3	6567.63	136.683	262.377	0	-5.41687	-12.67	-22.7783	4478.77	3380.92	-152.39	348.427	706.376	0	0	0	0	0	0	0	603	903	0
657	2	-56.6403	-99.9951	-729.711	27351.6	-46554.3	6384.52	136.202	262.517	0	4.95911	-12.2122	-38.9526	5394.29	4845.76	-1617.23	324.401	764.517	0	0	0	0	0	0	0	603	903	0
657	3	-54.6567	-102.131	-727.88	26527.6	-46981.6	6613.41	135.454	263.555	0	5.87464	-18.1631	-48.1079	6767.58	5578.19	-2578.54	315.952	762.325	0	0	0	0	0	0	0	603	903	0
657	4	-56.3351	-103.047	-727.27	26527.6	-46371.2	6613.41	136.239	263.524	0	-6.63757	-21.5201	-45.6665	8781.74	5700.26	-1479.91	324.824	710.698	0	0	0	0	0	0	0	603	903	0
657	5	-54.8093	-104.42	-725.439	25612.1	-46249.1	6796.51	136.247	264.694	0	-3.58581	-22.8934	-46.582	8781.74	6066.47	-2853.2	330.232	714.478	0	0	0	0	0	0	0	603	903	0
657	6	-54.1989	-105.641	-723.608	25429	-46188.1	7116.95	136.17	264.858	0	7.09534	-24.1141	-59.0942	9971.93	7348.21	-3356.74	324.347	734.254	0	0	0	0	0	0	0	603	903	0
657	7	-52.673	-107.014	-718.725	25337.4	-45944	7483.16	136.076	264.747	0	3.28064	-24.5718	-67.6392	10612.8	7409.24	-1754.56	309.541	746.097	0	0	0	0	0	0	0	603	903	0
657	8	-54.1989	-107.014	-720.556	24238.8	-45516.7	7208.5	136.831	266.361	0	-9.07898	-22.7408	-70.3857	12627	8385.8	-2853.2	319.141	723.603	0	0	0	0	0	0	0	603	903	0
657	9	-54.6567	-108.998	-716.589	23781	-45394.7	7300.05	136.652	266.814	0	-2.5177	-22.8934	-72.8271	13817.1	8568.91	-3585.62	317.661	713.275	0	0	0	0	0	0	0	603	903	0
658	0	-51.1472	-109.456	-713.537	23506.4	-45821.9	7757.82	135.782	267.057	0	5.41687	-22.4356	-83.8135	14183.4	10644.1	-1983.45	326.998	733.775	0	0	0	0	0	0	0	603	903	0
658	1	-49.3161	-110.218	-713.842	23506.4	-45333.6	7712.04	136.493	267.071	0	-1.60217	-20.7571	-95.105	15465.1	11071.3	-2715.87	316.412	740.389	0	0	0	0	0	0	0	603	903	0
658	2	-51.4523	-110.981	-711.401	23048.6	-44662.2	8169.8	137.219	267.601	0	-9.84192	-21.9778	-102.124	17204.6	11376.5	-3997.6	311.399	734.532	0	0	0	0	0	0	0	603	903	0
658	3	-51.4523	-112.507	-707.739	22224.6	-44601.2	8215.58	136.981	268.598	0	-5.26428	-24.7244	-108.838	18761	12292.1	-2395.43	312.939	730.625	0	0	0	0	0	0	0	603	903	0
658	4	-51.1472	-114.491	-703.466	21766.9	-45028.4	8032.47	135.991	269.058	0	-1.44958	-22.4356	-117.383	20134.3	14001	-3219.41	319.277	731.473	0	0	0	0	0	0	0	603	903	0
658	5	-49.4687	-113.881	-700.414	21583.8	-44296	8307.13	136.757	269.184	0	-5.72204	-20.2994	-127.454	21416	14550.4	-4501.15	314.162	734.97	0	0	0	0	0	0	0	603	903	0
658	6	-47.9428	-115.864	-697.057	21583.8	-44173.9	8810.67	136.628	269.036	0	-12.4359	-23.046	-136.914	23247.1	15343.8	-3310.96	312.069	733.207	0	0	0	0	0	0	0	603	903	0
658	7	-47.7902	-117.238	-695.837	20942.9	-44235	8581.79	136.429	269.903	0	-9.84192	-24.2667	-146.375	24620.4	16320.4	-3539.84	311.497	734.799	0	0	0	0	0	0	0	603	903	0
658	8	-49.0109	-116.627	-691.259	20942.9	-43563.6	8764.89	136.979	269.703	0	-4.04358	-16.9424	-152.783	25627.5	17419	-4775.81	314.011	735.263	0	0	0	0	0	0	0	603	903	0
658	9	-47.3325	-118.153	-687.292	20210.5	-43136.4	9039.55	137.237	270.594	0	-9.9945	-15.1114	-158.582	27000.7	17785.2	-3494.06	312.152	732.736	0	0	0	0	0	0	0	603	903	0
659	0	-46.8747	-120.137	-683.325	19478	-42831.2	9634.64	137.319	271.495	0	-16.098	-18.9261	-167.737	28374	18151.4	-3677.17	308.214	733.842	0	0	0	0	0	0	0	603	903	0
659	1	-45.5014	-121.205	-679.968	19294.9	-43197.4	9268.43	136.471	271.624	0	-11.673	-12.9752	-178.418	29472.7	19738.3	-4363.82	310.63	737.811	0	0	0	0	0	0	0	603	903	0
659	2	-44.8911	-121.968	-677.526	18928.7	-42770.1	9268.43	136.873	272.062	0	-10.4523	-6.87164	-186.963	30937.5	20775.9	-3082.08	311.123	737.526	0	0	0	0	0	0	0	603	903	0
659	3	-42.7548	-121.357	-668.066	19844.3	-42220.8	9726.2	136.801	270.296	0	-14.7247	-6.87164	-193.677	31853	21081.1	-2944.75	308.847	738.535	0	0	0	0	0	0	0	603	903	0
659	4	-43.9755	-123.799	-667.455	17738.5	-41732.5	9680.42	137.475	273.424	0	-15.9454	-6.41388	-202.222	33317.9	21813.5	-3814.5	307.869	738.241	0	0	0	0	0	0	0	603	903	0
659	5	-43.06	-124.257	-661.047	17097.7	-41549.4	9955.08	137.146	274.135	0	-15.7928	0.45258	-213.208	35423.6	23217.3	-1983.45	308.895	736.854	0	0	0	0	0	0	0	603	903	0
659	6	-39.7031	-123.494	-658.3	17097.7	-40939.1	10000.9	137.811	274.028	0	-14.7247	4.87763	-222.363	35881.4	24438	-1937.67	309.901	741.636	0	0	0	0	0	0	0	603	903	0
659	7	-38.1772	-124.867	-655.859	16365.2	-40694.9	10367.1	137.952	275.048	0	-15.3351	4.57245	-228.467	37346.2	24804.3	-2486.98	308.568	739.536	0	0	0	0	0	0	0	603	903	0
659	8	-38.9401	-125.935	-649.45	15999	-40878.1	10779.1	137.057	275.365	0	-18.0817	7.7768	-240.369	38628	25902.9	-1342.58	307.763	742.297	0	0	0	0	0	0	0	603	903	0
659	9	-37.5668	-126.698	-644.262	15724.4	-40084.6	10458.6	137.782	275.593	0	-17.1661	14.4907	-249.524	40092.8	26818.4	-60.8369	307.478	742.323	0	0	0	0	0	0	0	603	903	0
660	0	-37.5668	-125.477	-637.548	14534.2	-39413.2	10687.5	138.18	277.203	0	-12.5885	18.0002	-258.069	41832.3	28588.4	-1067.92	310.778	740.903	0	0	0	0	0	0	0	603	903	0
660	1	-35.1254	-127.308	-632.665	14808.8	-38924.9	11145.3	138.475	276.593	0	-14.7247	19.2209	-267.224	42564.7	28466.4	30.7158	306.526	743.715	0	0	0	0	0	0	0	603	903	0
660	2	-34.6677	-128.071	-627.477	14259.5	-39047	11419.9	137.771	277.275	0	-18.9972	23.6459	-279.126	43754.9	30541.6	717.362	309.419	746.243	0	0	0	0	0	0	0	603	903	0
660	3	-33.9047	-126.851	-624.12	14168	-38680.8	10779.1	138.024	277.299	0	-15.3351	28.071	-290.417	45860.6	31518.1	396.927	308.527	745.087	0	0	0	0	0	0	0	603	903	0
660	4	-33.5996	-128.682	-618.017	14168	-37948.4	11145.3	138.597	277.075	0	-11.8256	28.2236	-297.437	46409.9	32433.7	1266.68	309.044	746.967	0	0	0	0	0	0	0	603	903	0
660	5	-31.3107	-129.292	-610.388	13618.7	-37521.1	11236.8	138.529	277.689	0	-14.5721	32.6486	-307.812	47874.8	33715.4	2411.09	309.532	747.468	0	0	0	0	0	0	0	603	903	0
660	6	-32.2263	-128.834	-602.148	12794.7	-37521.1	11099.5	137.688	278.752	0	-15.4877	37.8366	-317.273	48698.8	35302.3	1770.22	311.268	749.508	0	0	0	0	0	0	0	603	903	0
660	7	-29.1745	-127.766	-599.096	12153.8	-36910.8	11328.4	138.389	279.713	0	-13.1988	40.5832	-327.649	50163.6	36339.9	2365.31	310.911	749.898	0	0	0	0	0	0	0	603	903	0
660	8	-28.7167	-129.445	-594.824	11787.6	-36605.6	11419.9	138.46	280.183	0	-12.5885	42.7194	-340.466	51262.2	37438.6	3875.93	309.963	752.435	0	0	0	0	0	0	0	603	903	0
660	9	-28.8693	-131.123	-588.415	11696.1	-35873.2	11603	139.034	280.123	0	-12.2833	46.8393	-349.622	53184.8	38293.1	3418.17	309.527	750.879	0	0	0	0	0	0	0	603	903	0
661	0	-26.5805	-128.529	-578.954	11421.4	-35445.9	11374.2	138.776	280.272	0	-13.1988	49.4333	-358.777	53825.7	40063.1	4013.26	311.666	752.974	0	0	0	0	0	0	0	603	903	0
661	1	-25.2072	-128.834	-571.935	10231.2	-34652.5	11648.8	139.412	282.111	0	-11.2152	51.2643	-365.796	55199	41161.7	5340.77	312.526	752.099	0	0	0	0	0	0	0	603	903	0
661	2	-23.9865	-129.75	-566.442	9865	-34164.2	11786.1	139.686	282.584	0	-9.07898	53.4006	-377.698	56389.2	41772.1	4837.23	310.597	753.703	0	0	0	0	0	0	0	603	903	0
661	3	-24.4443	-129.75	-559.423	9407.23	-34286.3	11740.4	138.711	283.184	0	-8.92639	57.2153	-388.074	58037.1	43053.8	5432.33	310.942	753.448	0	0	0	0	0	0	0	603	903	0
661	4	-21.6977	-128.682	-547.827	9865	-33798	11648.8	138.305	281.992	0	-10.6049	56.9101	-399.976	58586.5	44274.5	6576.74	310.693	756.525	0	0	0	0	0	0	0	603	903	0
661	5	-21.0873	-127.461	-545.385	8674.81	-32455.2	11603	140.491	284.094	0	-7.09533	59.8093	-411.877	60417.5	45922.4	6027.42	311.495	756.312	0	0	0	0	0	0	0	603	903	0
661	6	-20.7822	-128.376	-535.62	8033.94	-31966.9	11969.2	140.318	285.001	0	-6.48498	62.7084	-425.61	62523.2	47448.3	6805.62	311.483	756.098	0	0	0	0	0	0	0	603	903	0
661	7	-18.4933	-130.36	-527.685	7667.73	-31722.8	11603	139.883	285.469	0	-4.34875	65.3024	-439.954	63621.8	49889.7	7950.03	313.398	758.39	0	0	0	0	0	0	0	603	903	0
661	8	-16.3571	-127.613	-520.666	7209.97	-31539.7	11740.4	139.424	286.152	0	-3.7384	65.9128	-453.381	64628.9	51171.5	7400.71	312.866	760.451	0	0	0	0	0	0	0	603	903	0
661	9	-17.4252	-127.156	-512.121	7759.28	-30135.9	11831.9	141.155	284.849	0	-1.44958	67.7438	-468.335	66460	52819.4	8224.69	312.781	761.093	0	0	0	0	0	0	0	603	903	0
662	0	-16.6623	-127.156	-504.186	7301.52	-29891.7	11557.3	140.713	285.518	0	-1.29699	70.3378	-483.289	67924.8	54406.3	9094.44	312.575	762.453	0	0	0	0	0	0	0	603	903	0
662	1	-14.2209	-127.308	-492.895	6477.54	-29342.4	11419.9	140.469	286.858	0	0.381474	71.1008	-496.716	69847.5	56481.5	8590.9	313.71	762.382	0	0	0	0	0	0	0	603	903	0
662	2	-14.6787	-126.088	-483.434	5928.23	-28610	11740.4	140.819	287.737	0	-1.75476	73.5422	-508.313	71037.6	57946.4	8774	313.997	763.248	0	0	0	0	0	0	0	603	903	0
662	3	-12.2372	-125.477	-476.721	6385.99	-28121.7	11603	141.01	286.604	0	-1.60217	75.831	-520.52	71495.4	58739.8	9781.08	312.848	765.646	0	0	0	0	0	0	0	603	903	0
662	4	-12.0847	-125.019	-469.396	5562.02	-27999.6	11099.5	140.35	288.151	0	1.14441	77.9672	-535.474	73692.6	61425.4	9460.65	314.712	765.379	0	0	0	0	0	0	0	603	903	0
662	5	-12.2372	-123.646	-459.631	5104.25	-27572.4	11465.7	140.012	288.895	0	2.5177	79.7983	-547.986	74791.3	62218.8	9597.98	313.541	766.516	0	0	0	0	0	0	0	603	903	0
662	6	-10.4062	-122.12	-451.086	4188.73	-25924.4	11328.4	142.529	290.714	0	-0.381466	82.5449	-557.141	75523.7	63195.4	10559.3	313.428	767.444	0	0	0	0	0	0	0	603	903	0
662	7	-10.101	-120.9	-438.268	3639.41	-26168.6	11053.7	140.291	291.696	0	0.839237	84.8337	-566.602	76897	64721.3	10284.6	314.227	767.284	0	0	0	0	0	0	0	603	903	0
662	8	-8.26996	-119.832	-430.639	3639.41	-25436.2	10916.4	140.934	291.549	0	1.90735	86.8173	-577.283	77171.7	65942	10147.3	314.228	769.319	0	0	0	0	0	0	0	603	903	0
662	9	-5.2182	-118.763	-420.873	2906.99	-24764.8	10824.8	141.159	293.093	0	2.05994	88.9536	-586.743	78087.2	67040.6	11062.8	314.259	769.914	0	0	0	0	0	0	0	603	903	0
663	0	-6.59149	-116.932	-412.023	2815.43	-23910.3	10687.5	141.969	293.167	0	0.991825	89.8691	-595.288	78178.7	67650.9	10879.7	313.644	771.671	0	0	0	0	0	0	0	603	903	0
663	1	-6.74408	-115.559	-401.342	2174.56	-23666.1	10412.8	141.033	294.582	0	5.87464	92.0053	-602.917	79277.3	68566.5	10971.3	313.725	771.51	0	0	0	0	0	0	0	603	903	0
663	2	-3.38715	-114.186	-389.135	2449.22	-22506.5	10321.3	142.163	293.706	0	4.95911	92.6157	-607.8	80101.4	69787.2	12253	314.819	771.211	0	0	0	0	0	0	0	603	903	0
663	3	-4.76044	-111.592	-380.59	2174.56	-22079.2	10229.7	141.987	294.286	0	5.1117	94.5993	-612.378	80376	70275.5	11749.5	314.758	771.748	0	0	0	0	0	0	0	603	903	0
663	4	-3.53974	-111.134	-368.994	1442.14	-21774	9909.3	140.991	296.092	0	6.3324	95.6674	-618.787	80009.8	70824.8	11245.9	314.458	773.699	0	0	0	0	0	0	0	603	903	0
663	5	-3.84491	-108.235	-359.838	2357.67	-21285.8	9314.21	140.846	293.448	0	6.94275	95.0571	-625.195	80467.6	71862.4	12756.6	314.944	774.292	0	0	0	0	0	0	0	603	903	0
663	6	-2.31903	-105.946	-347.326	1625.25	-20187.1	9268.43	141.878	295.321	0	9.23157	96.8881	-629.163	80925.3	71923.4	12253	314.316	774.376	0	0	0	0	0	0	0	603	903	0
663	7	-2.31903	-103.81	-338.476	984.377	-19882	9176.88	141.26	297.092	0	10.6049	97.4985	-631.604	81108.4	72655.8	12344.6	315.034	774.583	0	0	0	0	0	0	0	603	903	0
663	8	-2.47162	-101.674	-327.49	984.377	-19271.6	8993.77	141.154	296.994	0	10.4523	97.6511	-633.74	80650.6	73327.3	13077	315.706	775.739	0	0	0	0	0	0	0	603	903	0
663	9	-0.182803	-99.2321	-318.64	68.8494	-18600.2	8948	141.626	299.784	0	11.8256	96.7355	-637.097	80284.4	73693.5	12756.6	315.671	776.984	0	0	0	0	0	0	0	603	903	0
664	0	-1.55609	-96.7907	-306.738	-663.573	-18050.9	8581.79	141.152	302.163	0	13.6566	99.4821	-640.149	81016.8	73449.3	13031.2	314.738	776.441	0	0	0	0	0	0	0	603	903	0
664	1	-0.182803	-93.4338	-298.193	160.402	-17318.5	8169.8	141.922	299.462	0	13.9618	99.0244	-641.37	81200	73937.6	13901	315.281	776.396	0	0	0	0	0	0	0	603	903	0
664	2	-1.40351	-91.6027	-286.901	-663.573	-16525	7849.37	142.402	302.313	0	16.098	98.8718	-641.675	80742.2	74608.9	13717.9	316.272	777.17	0	0	0	0	0	0	0	603	903	0
664	3	-1.25092	-89.4665	-277.136	-1121.34	-16036.7	7803.59	142.134	304.046	0	15.0299	99.1769	-641.675	80742.2	74608.9	12939.7	316.272	777.17	0	0	0	0	0	0	0	603	903	0
664	4	-0.487978	-87.0251	-267.065	-1212.89	-15853.6	7757.82	140.637	304.542	0	17.3187	101.161	-642.285	80284.4	74548	14084.1	316.067	778.002	0	0	0	0	0	0	0	603	903	0
664	5	-0.0302147	-83.0578	-256.384	-1212.89	-15426.4	7300.05	139.831	304.731	0	15.7929	100.703	-645.032	80192.9	74853.1	14221.4	316.046	778.676	0	0	0	0	0	0	0	603	903	0
664	6	1.0379	-80.0061	-247.534	-1121.34	-14388.8	6933.84	141.871	304.53	0	18.5394	101.466	-644.421	80101.4	74731	13992.5	315.966	778.7	0	0	0	0	0	0	0	603	903	0
664	7	0.885313	-76.8017	-239.294	-1487.55	-13778.4	6979.62	142.42	306.216	0	17.1661	101.466	-646.558	79094.2	74853.1	14267.2	315.772	780.669	0	0	0	0	0	0	0	603	903	0
664	8	0.885313	-74.8181	-229.528	-2036.86	-13473.3	6613.41	141.3	308.874	0	17.4713	103.144	-644.116	79460.5	75341.4	14358.7	316.969	779.636	0	0	0	0	0	0	0	603	903	0
664	9	1.80084	-72.2241	-217.321	-2128.42	-12985	6384.52	140.25	309.794	0	17.0136	104.518	-644.421	79368.9	75219.3	13946.7	316.724	779.837	0	0	0	0	0	0	0	603	903	0
665	0	0.427549	-69.4775	-211.218	-2311.52	-12313.6	6064.09	141.702	310.944	0	18.0817	105.433	-645.642	78728	75402.5	14953.8	316.787	781.062	0	0	0	0	0	0	0	603	903	0
665	1	1.0379	-68.1042	-201.757	-2036.86	-12252.6	5514.77	139.271	310.096	0	17.4713	105.433	-645.032	78178.7	74731	15091.1	315.856	781.799	0	0	0	0	0	0	0	603	903	0
665	2	0.885313	-63.8318	-194.738	-2403.07	-11642.2	5377.44	140.216	312.34	0	19.1498	105.586	-645.642	78178.7	75463.4	14862.3	316.881	781.913	0	0	0	0	0	0	0	603	903	0
665	3	1.0379	-62.0007	-182.836	-2494.63	-11276	5240.12	138.327	313.644	0	17.0136	106.196	-646.252	78544.9	75402.5	15320	316.676	781.461	0	0	0	0	0	0	0	603	903	0
665	4	-1.40351	-59.4067	-175.817	-2769.29	-10726.7	5011.23	138.99	315.751	0	18.3868	107.569	-647.778	78453.4	76134.9	15548.9	317.532	781.889	0	0	0	0	0	0	0	603	903	0
665	5	-1.25092	-56.6601	-167.272	-1579.1	-10421.5	4782.35	137.697	309.44	0	18.0817	106.349	-655.103	77995.6	77843.9	15045.4	318.827	783.941	0	0	0	0	0	0	0	603	903	0
665	6	-1.86127	-53.6084	-158.727	-3043.94	-9872.19	4553.47	137.804	319.177	0	18.0817	107.112	-666.089	77629.4	79003.5	16144	318.608	786.455	0	0	0	0	0	0	0	603	903	0
665	7	-1.25092	-52.0825	-153.539	-2586.18	-9261.84	4461.91	139.678	316.844	0	23.4222	111.842	-670.056	78361.8	78820.4	17380	317.633	786.052	0	0	0	0	0	0	0	603	903	0
665	8	-2.7768	-50.8618	-142.553	-2769.29	-8895.63	3775.27	137.598	319.426	0	27.5421	114.894	-672.498	78361.8	80224.2	16876.4	319.293	786.477	0	0	0	0	0	0	0	603	903	0
665	9	-4.15009	-47.1997	-138.891	-2860.84	-8895.63	3637.94	135.952	320.598	0	28.4576	114.588	-676.16	77812.5	81506	17654.6	320.542	787.92	0	0	0	0	0	0	0	603	903	0
666	0	-4.15009	-43.6902	-132.787	-2219.97	-8041.14	3592.16	139.444	316.718	0	34.256	117.487	-682.263	77995.6	81322.8	18295.5	319.196	788.681	0	0	0	0	0	0	0	603	903	0
666	1	-2.92938	-40.791	-126.379	-2494.63	-8224.24	3225.95	134.924	319.739	0	35.4767	120.692	-688.672	78087.2	82177.3	18203.9	319.327	789.612	0	0	0	0	0	0	0	603	903	0
666	2	-3.38715	-40.3332	-121.191	-2128.42	-7674.93	3088.62	136.671	317.563	0	36.087	122.065	-694.47	78453.4	83275.9	19073.7	319.913	790.031	0	0	0	0	0	0	0	603	903	0
666	3	-3.53974	-36.9763	-117.834	-1579.1	-6942.51	2813.97	141.082	313.401	0	38.3759	123.744	-699.048	78544.9	83825.3	18936.4	319.914	790.64	0	0	0	0	0	0	0	603	903	0
666	4	-5.06562	-33.7719	-111.73	-3227.05	-6515.26	2585.08	141.688	328.882	0	39.2914	125.88	-703.015	78544.9	83520.1	18707.5	318.803	791.274	0	0	0	0	0	0	0	603	903	0
666	5	-3.69232	-29.9572	-105.016	-2311.52	-6576.3	2722.41	137.378	322.011	0	37.4603	129.084	-709.119	78636.5	85717.3	19302.6	320.879	792.107	0	0	0	0	0	0	0	603	903	0
666	6	-5.52338	-30.415	-97.0819	-2494.63	-6088.02	2356.2	137.29	325.696	0	40.0543	130.763	-712.781	78453.4	86266.7	19668.8	321.028	792.933	0	0	0	0	0	0	0	603	903	0
666	7	-6.28632	-27.5158	-94.0302	-2403.07	-5782.84	1989.99	138.5	325.556	0	41.5802	130	-717.358	78728	86571.8	19302.6	320.681	793.253	0	0	0	0	0	0	0	603	903	0
666	8	-5.98114	-24.7693	-91.2836	-2311.52	-5355.59	2173.1	141.33	325.322	0	41.8854	131.983	-725.598	78361.8	87121.2	19714.6	320.068	795.004	0	0	0	0	0	0	0	603	903	0
666	9	-6.43891	-22.4804	-86.0956	-2586.18	-5111.45	1806.89	140.63	330.038	0	42.8009	133.357	-729.26	78911.1	88219.8	19989.2	320.972	794.793	0	0	0	0	0	0	0	603	903	0
667	0	-5.52338	-21.4123	-80.6024	-2128.42	-4562.13	1761.11	143.4	326.406	0	43.4113	132.899	-732.007	79185.8	88891.2	19714.6	321.435	794.824	0	0	0	0	0	0	0	603	903	0
667	1	-7.8122	-20.6494	-75.7196	-2311.52	-4562.13	1669.56	139.75	330.527	0	45.2423	131.983	-737.805	79002.7	89013.2	19714.6	320.646	795.922	0	0	0	0	0	0	0	603	903	0
667	2	-7.50702	-18.208	-71.142	-2494.63	-4440.06	1578	137.589	335.066	0	46.6156	133.662	-742.078	79094.2	89867.7	20584.3	321.103	796.415	0	0	0	0	0	0	0	603	903	0
667	3	-6.59149	-17.7502	-68.7006	-2036.86	-4012.82	1394.9	141.59	329.648	0	45.8527	132.289	-746.045	77904.1	90600.2	20035	321.441	798.577	0	0	0	0	0	0	0	603	903	0
667	4	-5.98114	-15.614	-62.9022	-2128.42	-3646.61	937.134	142.027	333.837	0	47.226	130.763	-749.097	78911.1	90905.4	20172.3	321.353	797.658	0	0	0	0	0	0	0	603	903	0
667	5	-7.35443	-14.851	-62.597	-1945.31	-3951.78	1349.12	136.87	331.077	0	48.7518	132.289	-752.759	79094.2	91637.8	20721.6	321.736	797.927	0	0	0	0	0	0	0	603	903	0
[truncated: 1,714 more rows]
