# Supplementary material for: The Effects of an Extemporaneous Speech Dual-task on Older Adult Gait Control
Source: Research Square preprint supplement (doi:10.21203/rs.3.rs-7674245/v1), 2025-11-18
Supplement: Supplementary file 155 [file Over3ground09.xlsx]

## Sheet: Sheet1
Trajectories
		03:LFHD			03:RFHD			03:LBHD			03:RBHD			03:C7			03:T10			03:CLAV			03:STRN			03:RBAK			03:LSHO			03:LUPA			03:LELB			03:LFRM			03:LWRA			03:LWRB			03:LFIN
Frame	Sub Frame	X	Y	Z	X	Y	Z	X	Y	Z	X	Y	Z	X	Y	Z	X	Y	Z	X	Y	Z	X	Y	Z	X	Y	Z	X	Y	Z	X	Y	Z	X	Y	Z	X	Y	Z	X	Y	Z	X	Y	Z	X	Y	Z
		mm	mm	mm	mm	mm	mm	mm	mm	mm	mm	mm	mm	mm	mm	mm	mm	mm	mm	mm	mm	mm	mm	mm	mm	mm	mm	mm	mm	mm	mm	mm	mm	mm	mm	mm	mm	mm	mm	mm	mm	mm	mm	mm	mm	mm	mm	mm	mm
448	0	140.295	-1840.19	1624.11	243.276	-1846.81	1617.29	111.595	-1995.62	1640.67	247.529	-2014.15	1634.46	187.154	-2073.04	1486.92	180.888	-2178.33	1264.97	177.193	-1937.27	1385.59	165.958	-1910.76	1200.85	233.173	-2182.37	1335.55	-11.7223	-2060.26	1444.11	-76.7553	-2056.81	1240.47	-99.8271	-2058.2	1121.29	-95.9353	-1943.75	985.729	-44.196	-1885.66	915.815	-108.239	-1917.08	887.486	-95.2004	-1831.33	826.668
449	0	139.911	-1827.66	1627.15	242.918	-1834.16	1620.68	111.305	-1983.15	1643.81	247.26	-2001.53	1638.12	187.774	-2060.76	1490.36	182.712	-2165.49	1268.22	177.461	-1924.91	1389.23	166.441	-1898.29	1204.34	234.412	-2169.48	1339.07	-11.0946	-2049.12	1446.92	-75.3904	-2047.44	1242.94	-97.7059	-2049.99	1123.53	-94.8135	-1939.15	985.161	-43.7551	-1882.2	913.569	-107.201	-1915.24	886.036	-95.3511	-1830.78	823.024
450	0	139.499	-1815.18	1630.11	242.536	-1821.54	1623.98	111.03	-1970.73	1646.82	247.009	-1988.94	1641.62	188.41	-2048.45	1493.64	184.514	-2152.69	1271.32	177.704	-1912.53	1392.71	166.884	-1885.8	1207.7	235.684	-2156.57	1342.42	-10.4488	-2037.95	1449.64	-74.0505	-2038.2	1245.42	-95.6445	-2041.97	1125.81	-93.7686	-1934.72	984.746	-43.391	-1878.96	911.537	-106.238	-1913.57	884.833	-95.5479	-1830.51	819.669
451	0	139.062	-1802.74	1633.01	242.128	-1808.94	1627.2	110.77	-1958.35	1649.68	246.777	-1976.36	1644.96	189.063	-2036.09	1496.76	186.293	-2139.94	1274.29	177.919	-1900.11	1396.04	167.286	-1873.31	1210.92	236.987	-2143.64	1345.61	-9.7848	-2026.77	1452.25	-72.7357	-2029.09	1247.9	-93.643	-2034.14	1128.13	-92.8007	-1930.48	984.484	-43.1032	-1875.93	909.719	-105.35	-1912.08	883.877	-95.7902	-1830.5	816.603
452	0	138.599	-1790.35	1635.84	241.697	-1796.36	1630.34	110.528	-1946.03	1652.41	246.564	-1963.8	1648.14	189.732	-2023.69	1499.71	188.049	-2127.23	1277.12	178.109	-1887.66	1399.21	167.647	-1860.8	1214.02	238.321	-2130.7	1348.64	-9.10272	-2015.56	1454.77	-71.4461	-2020.1	1250.38	-91.7016	-2026.5	1130.49	-91.9092	-1926.41	984.372	-42.8907	-1873.11	908.112	-104.538	-1910.75	883.163	-96.0766	-1830.75	813.823
453	0	138.113	-1778	1638.59	241.245	-1783.79	1633.38	110.303	-1933.75	1655	246.372	-1951.26	1651.14	190.418	-2011.24	1502.5	189.78	-2114.56	1279.8	178.273	-1875.17	1402.22	167.969	-1848.27	1216.98	239.686	-2117.75	1351.51	-8.403	-2004.33	1457.18	-70.182	-2011.23	1252.85	-89.8201	-2019.05	1132.89	-91.0931	-1922.51	984.406	-42.7516	-1870.5	906.711	-103.801	-1909.58	882.689	-96.405	-1831.25	811.326
454	0	137.608	-1765.68	1641.25	240.775	-1771.24	1636.32	110.099	-1921.51	1657.43	246.204	-1938.74	1653.97	191.12	-1998.76	1505.11	191.482	-2101.94	1282.34	178.414	-1862.65	1405.06	168.254	-1835.73	1219.79	241.079	-2104.78	1354.2	-7.68665	-1993.07	1459.47	-68.9437	-2002.48	1255.3	-87.9986	-2011.78	1135.31	-90.3508	-1918.78	984.58	-42.6826	-1868.08	905.51	-103.136	-1908.57	882.446	-96.7716	-1832	809.105
455	0	137.088	-1753.41	1643.81	240.292	-1758.7	1639.14	109.92	-1909.31	1659.71	246.063	-1926.22	1656.6	191.836	-1986.22	1507.54	193.149	-2089.35	1284.72	178.532	-1850.1	1407.71	168.503	-1823.17	1222.43	242.497	-2091.8	1356.71	-6.95544	-1981.79	1461.64	-67.7319	-1993.83	1257.74	-86.2368	-2004.68	1137.75	-89.6801	-1915.21	984.883	-42.6797	-1865.85	904.497	-102.543	-1907.69	882.421	-97.1719	-1832.96	807.152
456	0	136.56	-1741.15	1646.25	239.802	-1746.17	1641.82	109.77	-1897.14	1661.81	245.953	-1913.71	1659.04	192.564	-1973.64	1509.78	194.776	-2076.8	1286.93	178.629	-1837.5	1410.17	168.719	-1810.59	1224.9	243.935	-2078.8	1359.04	-6.21197	-1970.47	1463.68	-66.547	-1985.28	1260.14	-84.534	-1997.74	1140.2	-89.0776	-1911.77	985.302	-42.7376	-1863.78	903.658	-102.018	-1906.93	882.598	-97.6008	-1834.11	805.452
457	0	136.033	-1728.92	1648.55	239.313	-1733.63	1644.34	109.652	-1884.99	1663.73	245.877	-1901.19	1661.25	193.301	-1961	1511.82	196.355	-2064.28	1288.97	178.707	-1824.88	1412.41	168.906	-1798.01	1227.16	245.388	-2065.8	1361.18	-5.45965	-1959.11	1465.56	-65.3897	-1976.8	1262.48	-82.8891	-1990.94	1142.63	-88.5395	-1908.47	985.821	-42.8503	-1861.87	902.974	-101.558	-1906.27	882.955	-98.0528	-1835.41	803.987
458	0	135.513	-1716.68	1650.68	238.834	-1721.07	1646.68	109.572	-1872.85	1665.45	245.841	-1888.65	1663.23	194.043	-1948.31	1513.65	197.876	-2051.8	1290.82	178.769	-1812.21	1414.42	169.068	-1785.4	1229.2	246.847	-2052.79	1363.1	-4.7028	-1947.7	1467.28	-64.2601	-1968.39	1264.76	-81.3004	-1984.26	1145.04	-88.0611	-1905.27	986.42	-43.0112	-1860.08	902.425	-101.157	-1905.68	883.468	-98.5225	-1836.83	802.736
459	0	135.012	-1704.44	1652.62	238.373	-1708.49	1648.8	109.533	-1860.69	1666.95	245.848	-1876.1	1664.95	194.785	-1935.56	1515.24	199.33	-2039.34	1292.48	178.814	-1799.51	1416.18	169.207	-1772.79	1230.99	248.301	-2039.77	1364.81	-3.94666	-1936.24	1468.81	-63.1584	-1960.01	1266.95	-79.7655	-1977.68	1147.39	-87.6369	-1902.16	987.079	-43.2132	-1858.39	901.985	-100.81	-1905.14	884.11	-99.0047	-1838.34	801.675
460	0	134.539	-1692.17	1654.35	237.94	-1695.88	1650.68	109.537	-1848.52	1668.22	245.899	-1863.5	1666.41	195.519	-1922.75	1516.6	200.707	-2026.91	1293.92	178.844	-1786.77	1417.67	169.328	-1760.17	1232.5	249.739	-2026.74	1366.28	-3.1974	-1924.73	1470.13	-62.0842	-1951.66	1269.03	-78.2815	-1971.18	1149.67	-87.2614	-1899.1	987.776	-43.4493	-1856.78	901.632	-100.509	-1904.62	884.851	-99.4951	-1839.89	800.778
461	0	134.101	-1679.85	1655.83	237.542	-1683.22	1652.28	109.586	-1836.3	1669.25	245.995	-1850.86	1667.57	196.238	-1909.88	1517.7	201.997	-2014.49	1295.13	178.859	-1773.98	1418.87	169.432	-1747.54	1233.71	251.146	-2013.7	1367.5	-2.46209	-1913.14	1471.23	-61.0369	-1943.31	1270.99	-76.8449	-1964.72	1151.86	-86.9285	-1896.08	988.488	-43.7126	-1855.2	901.339	-100.246	-1904.1	885.663	-99.9899	-1841.45	800.02
462	0	133.707	-1667.48	1657.04	237.186	-1670.5	1653.58	109.678	-1824.02	1670.01	246.135	-1838.16	1668.44	196.934	-1896.95	1518.53	203.187	-2002.09	1296.11	178.857	-1761.16	1419.76	169.522	-1734.9	1234.61	252.506	-2000.64	1368.47	-1.74856	-1901.47	1472.1	-60.0157	-1934.94	1272.8	-75.4521	-1958.27	1153.95	-86.6322	-1893.08	989.196	-43.9966	-1853.65	901.083	-100.013	-1903.55	886.518	-100.486	-1842.99	799.375
463	0	133.361	-1655.03	1657.96	236.876	-1657.72	1654.57	109.81	-1811.66	1670.52	246.313	-1825.4	1669	197.597	-1883.94	1519.09	204.268	-1989.69	1296.85	178.836	-1748.28	1420.34	169.598	-1722.25	1235.19	253.803	-1987.57	1369.17	-1.06517	-1889.71	1472.72	-59.0201	-1926.51	1274.45	-74.099	-1951.81	1155.91	-86.3668	-1890.05	989.879	-44.2957	-1852.08	900.841	-99.7999	-1902.95	887.391	-100.982	-1844.46	798.819
464	0	133.067	-1642.49	1658.57	236.615	-1644.86	1655.22	109.975	-1799.22	1670.75	246.523	-1812.56	1669.24	198.217	-1870.87	1519.37	205.229	-1977.28	1297.33	178.794	-1735.37	1420.61	169.659	-1709.59	1235.42	255.017	-1974.47	1369.6	-0.420577	-1877.85	1473.08	-58.0495	-1918.01	1275.93	-72.782	-1945.3	1157.74	-86.1269	-1886.98	990.522	-44.6049	-1850.47	900.591	-99.599	-1902.27	888.26	-101.474	-1845.85	798.331
465	0	132.824	-1629.84	1658.87	236.402	-1631.91	1655.52	110.164	-1786.66	1670.71	246.754	-1799.63	1669.17	198.782	-1857.72	1519.37	206.061	-1964.84	1297.54	178.725	-1722.39	1420.55	169.704	-1696.91	1235.32	256.13	-1961.35	1369.75	0.176497	-1865.89	1473.17	-57.1035	-1909.41	1277.23	-71.4979	-1938.7	1159.42	-85.9079	-1883.83	991.108	-44.9209	-1848.79	900.317	-99.4015	-1901.5	889.106	-101.961	-1847.12	797.892
466	0	132.628	-1617.08	1658.84	236.23	-1618.87	1655.46	110.366	-1773.98	1670.4	246.994	-1786.61	1668.78	199.282	-1844.5	1519.08	206.755	-1952.37	1297.5	178.625	-1709.37	1420.17	169.73	-1684.2	1234.89	257.124	-1948.18	1369.62	0.717374	-1853.81	1473	-56.1825	-1900.69	1278.34	-70.2445	-1931.99	1160.94	-85.7058	-1880.59	991.627	-45.2412	-1847.01	900.002	-99.1999	-1900.61	889.915	-102.442	-1848.26	797.488
467	0	132.47	-1604.2	1658.49	236.093	-1605.74	1655.06	110.565	-1761.18	1669.82	247.226	-1773.5	1668.09	199.705	-1831.21	1518.52	207.306	-1939.85	1297.19	178.488	-1696.28	1419.48	169.733	-1671.45	1234.13	257.981	-1934.95	1369.2	1.19341	-1841.6	1472.57	-55.2875	-1891.82	1279.26	-69.0204	-1925.14	1162.3	-85.5176	-1877.22	992.068	-45.5648	-1845.11	899.635	-98.9884	-1899.58	890.678	-102.915	-1849.24	797.107
468	0	132.338	-1591.18	1657.82	235.976	-1592.51	1654.32	110.746	-1748.24	1668.98	247.435	-1760.29	1667.1	200.041	-1817.83	1517.69	207.708	-1927.26	1296.62	178.308	-1683.12	1418.49	169.71	-1658.65	1233.06	258.686	-1921.67	1368.52	1.59598	-1829.26	1471.87	-54.4204	-1882.78	1279.97	-67.8259	-1918.1	1163.5	-85.3415	-1873.69	992.427	-45.892	-1843.07	899.205	-98.7625	-1898.38	891.388	-103.38	-1850.05	796.743
469	0	132.219	-1578.04	1656.86	235.867	-1579.19	1653.25	110.89	-1735.15	1667.89	247.6	-1746.99	1665.84	200.277	-1804.38	1516.6	207.96	-1914.57	1295.79	178.077	-1669.89	1417.22	169.655	-1645.79	1231.7	259.226	-1908.3	1367.57	1.91637	-1816.78	1470.91	-53.5847	-1873.55	1280.47	-66.6626	-1910.84	1164.52	-85.1767	-1869.97	992.697	-46.2242	-1840.86	898.708	-98.5203	-1896.99	892.043	-103.835	-1850.66	796.391
470	0	132.093	-1564.76	1655.61	235.745	-1565.76	1651.89	110.977	-1721.93	1666.57	247.7	-1733.58	1664.32	200.402	-1790.84	1515.26	208.063	-1901.78	1294.71	177.79	-1656.58	1415.69	169.566	-1632.86	1230.07	259.592	-1894.86	1366.37	2.14566	-1804.15	1469.71	-52.7852	-1864.1	1280.78	-65.5341	-1903.34	1165.37	-85.0236	-1866.05	992.877	-46.5635	-1838.46	898.138	-98.262	-1895.4	892.644	-104.28	-1851.05	796.051
471	0	131.94	-1551.35	1654.1	235.592	-1552.24	1650.26	110.987	-1708.56	1665.03	247.716	-1720.08	1662.56	200.408	-1777.21	1513.7	208.019	-1888.86	1293.4	177.437	-1643.17	1413.92	169.437	-1619.83	1228.2	259.778	-1881.31	1364.94	2.27472	-1791.37	1468.26	-52.0286	-1854.42	1280.87	-64.4454	-1895.56	1166.05	-84.8843	-1861.88	992.965	-46.9128	-1835.85	897.494	-97.9902	-1893.55	893.194	-104.717	-1851.21	795.722
472	0	131.738	-1537.81	1652.36	235.386	-1538.63	1648.39	110.899	-1695.07	1663.28	247.627	-1706.49	1660.59	200.284	-1763.49	1511.93	207.835	-1875.79	1291.87	177.013	-1629.66	1411.93	169.264	-1606.7	1226.11	259.781	-1867.66	1363.3	2.29445	-1778.42	1466.6	-51.3227	-1844.48	1280.77	-63.4036	-1887.47	1166.54	-84.7618	-1857.44	992.961	-47.2755	-1832.99	896.775	-97.7096	-1891.44	893.697	-105.147	-1851.1	795.408
473	0	131.466	-1524.14	1650.42	235.107	-1524.92	1646.33	110.693	-1681.43	1661.35	247.413	-1692.8	1658.44	200.021	-1749.67	1509.98	207.517	-1862.57	1290.14	176.51	-1616.05	1409.76	169.044	-1593.45	1223.84	259.602	-1853.9	1361.47	2.19604	-1765.31	1464.72	-50.6768	-1834.27	1280.45	-62.4171	-1879.05	1166.86	-84.6606	-1852.69	992.864	-47.6553	-1829.88	895.983	-97.4271	-1889.02	894.156	-105.572	-1850.72	795.108
474	0	131.101	-1510.36	1648.32	234.735	-1511.12	1644.11	110.35	-1667.68	1659.27	247.055	-1679.03	1656.14	199.613	-1735.75	1507.88	207.073	-1849.17	1288.24	175.923	-1602.31	1407.44	168.772	-1580.05	1221.42	259.244	-1840.03	1359.48	1.97136	-1752.03	1462.66	-50.101	-1823.77	1279.94	-61.4955	-1870.27	1166.99	-84.586	-1847.62	992.674	-48.0561	-1826.47	895.119	-97.151	-1886.26	894.575	-105.995	-1850.02	794.824
475	0	130.623	-1496.46	1646.09	234.25	-1497.23	1641.79	109.853	-1653.8	1657.04	246.538	-1665.17	1653.72	199.054	-1721.72	1505.65	206.51	-1835.59	1286.18	175.245	-1588.46	1404.99	168.446	-1566.51	1218.88	258.711	-1826.03	1357.37	1.61323	-1738.57	1460.42	-49.6061	-1812.95	1279.22	-60.6493	-1861.1	1166.94	-84.5444	-1842.18	992.39	-48.4815	-1822.74	894.186	-96.8911	-1883.13	894.957	-106.421	-1848.99	794.556
476	0	130.017	-1482.45	1643.78	233.637	-1483.26	1639.39	109.188	-1639.8	1654.71	245.849	-1651.23	1651.21	198.338	-1707.58	1503.32	205.838	-1821.81	1283.99	174.473	-1574.47	1402.45	168.062	-1552.8	1216.26	258.01	-1811.91	1355.16	1.1157	-1724.93	1458.03	-49.203	-1801.81	1278.31	-59.8892	-1851.52	1166.69	-84.5423	-1836.34	992.01	-48.935	-1818.67	893.186	-96.6577	-1879.59	895.302	-106.853	-1847.58	794.302
477	0	129.267	-1468.33	1641.41	232.883	-1469.21	1636.96	108.342	-1625.68	1652.29	244.978	-1637.21	1648.66	197.464	-1693.33	1500.93	205.062	-1807.84	1281.72	173.604	-1560.34	1399.85	167.621	-1538.92	1213.59	257.149	-1797.66	1352.9	0.474355	-1711.11	1455.5	-48.9029	-1790.34	1277.2	-59.2264	-1841.51	1166.26	-84.5869	-1830.07	991.535	-49.4198	-1814.21	892.124	-96.4622	-1875.6	895.611	-107.296	-1845.76	794.061
478	0	128.367	-1454.11	1639.04	231.983	-1455.07	1634.55	107.31	-1611.46	1649.82	243.919	-1623.11	1646.08	196.432	-1678.96	1498.51	204.189	-1793.67	1279.38	172.637	-1546.07	1397.23	167.119	-1524.87	1210.91	256.138	-1783.3	1350.62	-0.313337	-1697.12	1452.88	-48.7164	-1778.52	1275.91	-58.6716	-1831.05	1165.65	-84.6851	-1823.35	990.964	-49.9381	-1809.33	891.004	-96.3161	-1871.12	895.881	-107.754	-1843.48	793.829
479	0	127.312	-1439.78	1636.69	230.931	-1440.84	1632.2	106.086	-1597.12	1647.33	242.67	-1608.93	1643.52	195.243	-1664.47	1496.09	203.224	-1779.32	1277.03	171.574	-1531.66	1394.62	166.559	-1510.63	1208.25	254.987	-1768.81	1348.34	-1.24783	-1682.94	1450.17	-48.6537	-1766.34	1274.45	-58.2349	-1820.13	1164.85	-84.844	-1816.13	990.298	-50.4921	-1803.99	889.831	-96.2311	-1866.12	896.109	-108.231	-1840.71	793.6
480	0	126.105	-1425.34	1634.39	229.729	-1426.54	1629.93	104.672	-1582.67	1644.84	241.234	-1594.67	1641.01	193.904	-1649.86	1493.71	202.171	-1764.78	1274.68	170.418	-1517.12	1392.05	165.94	-1496.21	1205.64	253.707	-1754.21	1346.12	-2.32727	-1668.58	1447.41	-48.7244	-1753.79	1272.82	-57.9258	-1808.74	1163.88	-85.0701	-1808.38	989.536	-51.0831	-1798.16	888.609	-96.2189	-1860.54	896.292	-108.73	-1837.39	793.368
481	0	124.753	-1410.8	1632.19	228.386	-1412.15	1627.78	103.074	-1568.11	1642.38	239.617	-1580.33	1638.58	192.422	-1635.14	1491.4	201.035	-1750.08	1272.38	169.177	-1502.43	1389.55	165.267	-1481.62	1203.13	252.31	-1739.51	1343.99	-3.54732	-1654.04	1444.63	-48.9369	-1740.87	1271.06	-57.753	-1796.88	1162.74	-85.3695	-1800.08	988.683	-51.7118	-1791.78	887.346	-96.291	-1854.35	896.423	-109.253	-1833.46	793.125
482	0	123.269	-1396.16	1630.1	226.913	-1397.69	1625.78	101.303	-1553.44	1639.99	237.832	-1565.93	1636.26	190.809	-1620.31	1489.19	199.819	-1735.22	1270.17	167.862	-1487.63	1387.16	164.542	-1466.86	1200.73	250.808	-1724.72	1341.97	-4.90107	-1639.33	1441.87	-49.2988	-1727.58	1269.17	-57.7239	-1784.52	1161.45	-85.7476	-1791.19	987.74	-52.3785	-1784.81	886.047	-96.4586	-1847.49	896.495	-109.803	-1828.87	792.861
483	0	121.67	-1381.42	1628.15	225.326	-1383.15	1623.95	99.3761	-1538.67	1637.7	235.894	-1551.46	1634.08	189.079	-1605.39	1487.11	198.53	-1720.24	1268.07	166.484	-1472.7	1384.91	163.772	-1451.95	1198.48	249.216	-1709.85	1340.1	-6.37893	-1624.45	1439.15	-49.8162	-1713.92	1267.18	-57.8448	-1771.69	1160.03	-86.2087	-1781.67	986.713	-53.0827	-1777.21	884.72	-96.7323	-1839.93	896.499	-110.382	-1823.55	792.563
484	0	119.978	-1366.59	1626.35	223.645	-1368.54	1622.31	97.3125	-1523.79	1635.53	233.823	-1536.92	1632.07	187.248	-1590.39	1485.2	197.171	-1705.15	1266.13	165.059	-1457.69	1382.82	162.963	-1436.91	1196.42	247.546	-1694.93	1338.4	-7.96862	-1609.42	1436.52	-50.4936	-1699.88	1265.13	-58.1207	-1758.38	1158.5	-86.7566	-1771.51	985.607	-53.8231	-1768.91	883.372	-97.122	-1831.62	896.427	-110.99	-1817.43	792.22
485	0	118.218	-1351.67	1624.72	221.896	-1353.87	1620.86	95.1378	-1508.82	1633.51	231.645	-1522.34	1630.26	185.337	-1575.32	1483.47	195.75	-1689.99	1264.36	163.607	-1442.6	1380.91	162.124	-1421.75	1194.55	245.813	-1679.98	1336.9	-9.65515	-1594.24	1434	-51.3335	-1685.48	1263.03	-58.5556	-1744.6	1156.88	-87.3937	-1760.66	984.429	-54.5979	-1759.87	882.009	-97.6366	-1822.5	896.266	-111.629	-1810.44	791.815
486	0	116.419	-1336.67	1623.27	220.105	-1339.15	1619.63	92.881	-1493.76	1631.66	229.388	-1507.71	1628.67	183.369	-1560.22	1481.95	194.273	-1674.77	1262.8	162.148	-1427.45	1379.22	161.264	-1406.52	1192.9	244.031	-1665.01	1335.62	-11.4209	-1578.92	1431.64	-52.3363	-1670.72	1260.91	-59.1519	-1730.36	1155.19	-88.1213	-1749.11	983.188	-55.4047	-1750.05	880.638	-98.284	-1812.53	896.004	-112.298	-1802.51	791.331
487	0	114.609	-1321.61	1622	218.302	-1324.39	1618.6	90.5742	-1478.63	1630.01	227.083	-1493.05	1627.31	181.367	-1545.11	1480.67	192.75	-1659.54	1261.47	160.702	-1412.29	1377.76	160.395	-1391.24	1191.5	242.216	-1650.06	1334.57	-13.2459	-1563.5	1429.47	-53.4997	-1655.62	1258.82	-59.9108	-1715.67	1153.47	-88.9394	-1736.82	981.892	-56.2406	-1739.39	879.262	-99.0702	-1801.67	895.627	-113	-1793.55	790.752
488	0	112.82	-1306.5	1620.93	216.515	-1309.6	1617.79	88.252	-1463.45	1628.58	224.765	-1478.36	1626.22	179.356	-1530.01	1479.63	191.191	-1644.31	1260.39	159.292	-1397.13	1376.55	159.526	-1375.95	1190.35	240.382	-1635.16	1333.77	-15.108	-1548	1427.53	-54.8186	-1640.19	1256.77	-60.8322	-1700.56	1151.73	-89.8469	-1723.79	980.548	-57.1024	-1727.85	877.888	-99.9998	-1789.87	895.121	-113.733	-1783.5	790.057
489	0	111.08	-1291.37	1620.04	214.774	-1294.8	1617.19	85.9509	-1448.23	1627.39	222.468	-1463.67	1625.39	177.364	-1514.95	1478.85	189.606	-1629.13	1259.57	157.94	-1382.02	1375.6	158.671	-1360.69	1189.47	238.544	-1620.33	1333.23	-16.9838	-1532.44	1425.84	-56.2848	-1624.45	1254.81	-61.9145	-1685.05	1150.01	-90.841	-1709.99	979.167	-57.9871	-1715.39	876.518	-101.075	-1777.11	894.471	-114.501	-1772.28	789.228
490	0	109.419	-1276.23	1619.36	213.108	-1280.01	1616.81	83.7077	-1433	1626.45	220.23	-1448.99	1624.86	175.415	-1499.97	1478.35	188.009	-1614.02	1259.02	156.666	-1366.97	1374.92	157.84	-1345.51	1188.86	236.718	-1605.59	1332.94	-18.8491	-1516.86	1424.44	-57.8869	-1608.44	1252.95	-63.1545	-1669.16	1148.33	-91.9178	-1695.42	977.758	-58.8914	-1701.97	875.156	-102.295	-1763.34	893.666	-115.304	-1759.84	788.248
491	0	107.862	-1261.12	1618.86	211.545	-1265.25	1616.63	81.5592	-1417.79	1625.79	218.086	-1434.34	1624.61	173.536	-1485.1	1478.12	186.411	-1599	1258.76	155.489	-1352.03	1374.53	157.043	-1330.44	1188.53	234.917	-1590.98	1332.93	-20.68	-1501.28	1423.35	-59.6102	-1592.17	1251.24	-64.5477	-1652.91	1146.71	-93.0716	-1680.06	976.333	-59.812	-1687.57	873.806	-103.657	-1748.54	892.696	-116.143	-1746.12	787.103
492	0	106.434	-1246.06	1618.57	210.108	-1250.53	1616.66	79.5404	-1402.62	1625.41	216.07	-1419.73	1624.67	171.749	-1470.35	1478.18	184.825	-1584.1	1258.77	154.426	-1337.23	1374.43	156.292	-1315.52	1188.49	233.154	-1576.52	1333.17	-22.4529	-1485.76	1422.6	-61.4373	-1575.68	1249.68	-66.0876	-1636.34	1145.17	-94.2954	-1663.92	974.904	-60.7453	-1672.17	872.475	-105.152	-1732.71	891.554	-117.02	-1731.07	785.787
493	0	105.155	-1231.06	1618.48	208.818	-1235.88	1616.89	77.6841	-1387.53	1625.33	214.215	-1405.17	1625.03	170.075	-1455.77	1478.53	183.262	-1569.34	1259.07	153.49	-1322.59	1374.63	155.597	-1300.78	1188.73	231.442	-1562.23	1333.67	-24.146	-1470.31	1422.2	-63.3476	-1559.01	1248.32	-67.7663	-1619.46	1143.73	-95.5806	-1647.01	973.486	-61.6876	-1655.75	871.17	-106.771	-1715.82	890.243	-117.936	-1714.65	784.301
494	0	104.042	-1216.17	1618.6	207.694	-1221.32	1617.32	76.019	-1372.53	1625.56	212.548	-1390.69	1625.7	168.533	-1441.36	1479.16	181.731	-1554.73	1259.66	152.692	-1308.14	1375.12	154.966	-1286.25	1189.26	229.791	-1548.12	1334.43	-25.7396	-1454.97	1422.17	-65.3185	-1542.18	1247.16	-69.5739	-1602.31	1142.42	-96.917	-1629.32	972.097	-62.6343	-1638.32	869.905	-108.498	-1697.88	888.769	-118.891	-1696.85	782.657
495	0	103.108	-1201.41	1618.93	206.748	-1206.86	1617.96	74.5694	-1357.66	1626.11	211.094	-1376.3	1626.67	167.137	-1427.15	1480.07	180.242	-1540.29	1260.51	152.04	-1293.89	1375.92	154.41	-1271.95	1190.08	228.21	-1534.2	1335.43	-27.2168	-1439.77	1422.51	-67.3254	-1525.23	1246.24	-71.4989	-1584.91	1141.25	-98.2932	-1610.88	970.757	-63.5803	-1619.86	868.696	-110.313	-1678.89	887.15	-119.882	-1677.67	780.876
496	0	102.362	-1186.79	1619.48	205.99	-1192.52	1618.79	73.354	-1342.94	1626.99	209.87	-1362.02	1627.93	165.897	-1413.15	1481.25	178.8	-1526.02	1261.63	151.537	-1279.86	1377.01	153.936	-1257.87	1191.19	226.704	-1520.49	1336.66	-28.5639	-1424.73	1423.23	-69.3435	-1508.19	1245.56	-73.5285	-1567.27	1140.23	-99.6963	-1591.7	969.49	-64.5194	-1600.4	867.566	-112.195	-1658.88	885.411	-120.904	-1657.1	778.993
497	0	101.809	-1172.34	1620.27	205.426	-1178.31	1619.83	72.3851	-1328.39	1628.18	208.889	-1347.85	1629.49	164.818	-1399.37	1482.69	177.411	-1511.91	1263.01	151.184	-1266.04	1378.39	153.552	-1244.03	1192.59	225.28	-1506.98	1338.12	-29.7709	-1409.88	1424.32	-71.3478	-1491.09	1245.13	-75.6483	-1549.42	1139.39	-101.113	-1571.82	968.322	-65.4444	-1579.96	866.543	-114.119	-1637.86	883.586	-121.949	-1635.17	777.053
498	0	101.451	-1158.07	1621.29	205.057	-1164.24	1621.07	71.6686	-1314.02	1629.69	208.159	-1333.81	1631.32	163.902	-1385.8	1484.38	176.079	-1497.97	1264.61	150.977	-1252.45	1380.06	153.261	-1230.4	1194.27	223.939	-1493.66	1339.78	-30.8317	-1395.22	1425.77	-73.3151	-1473.96	1244.98	-77.8429	-1531.38	1138.73	-102.528	-1551.27	967.283	-66.3469	-1558.57	865.661	-116.057	-1615.88	881.719	-123.006	-1611.92	775.112
499	0	101.283	-1143.99	1622.55	204.879	-1150.34	1622.51	71.2034	-1299.85	1631.51	207.677	-1319.91	1633.42	163.148	-1372.44	1486.3	174.807	-1484.18	1266.44	150.909	-1239.07	1381.99	153.066	-1216.98	1196.22	222.683	-1480.53	1341.63	-31.7447	-1380.75	1427.57	-75.2243	-1456.82	1245.11	-80.0965	-1513.17	1138.28	-103.928	-1530.07	966.404	-67.2173	-1536.26	864.959	-117.982	-1592.97	879.859	-124.059	-1587.39	773.235
500	0	101.301	-1130.11	1624.06	204.886	-1136.6	1624.15	70.9815	-1285.89	1633.63	207.438	-1306.17	1635.74	162.548	-1359.28	1488.43	173.596	-1470.54	1268.45	150.972	-1225.89	1384.18	152.965	-1203.73	1198.44	221.513	-1467.56	1343.65	-32.5118	-1366.47	1429.7	-77.0578	-1439.69	1245.51	-82.3926	-1494.8	1138.04	-105.299	-1508.27	965.717	-68.0451	-1513.1	864.477	-119.865	-1569.17	878.062	-125.089	-1561.66	771.49
501	0	101.493	-1116.44	1625.81	205.067	-1123.03	1625.98	70.9888	-1272.14	1636.01	207.427	-1292.57	1638.28	162.093	-1346.32	1490.75	172.447	-1457.03	1270.63	151.153	-1212.89	1386.6	152.954	-1190.65	1200.89	220.428	-1454.75	1345.81	-33.1388	-1352.38	1432.12	-78.8019	-1422.59	1246.19	-84.7148	-1476.28	1138.01	-106.626	-1485.91	965.253	-68.8189	-1489.11	864.259	-121.679	-1544.55	876.385	-126.074	-1534.79	769.954
502	0	101.846	-1102.96	1627.79	205.408	-1109.64	1627.99	71.2056	-1258.59	1638.63	207.626	-1279.14	1640.99	161.772	-1333.51	1493.22	171.362	-1443.64	1272.95	151.438	-1200.04	1389.22	153.025	-1177.69	1203.55	219.426	-1442.08	1348.1	-33.6339	-1338.44	1434.8	-80.4473	-1405.52	1247.14	-87.047	-1457.64	1138.21	-107.898	-1463.04	965.042	-69.527	-1464.38	864.346	-123.397	-1519.15	874.887	-126.989	-1506.87	768.699
503	0	102.344	-1089.67	1629.98	205.893	-1096.41	1630.16	71.6075	-1245.24	1641.45	208.012	-1265.86	1643.83	161.569	-1320.86	1495.82	170.34	-1430.35	1275.38	151.812	-1187.32	1392	153.17	-1164.84	1206.39	218.505	-1429.51	1350.48	-34.0074	-1324.65	1437.69	-81.9886	-1388.49	1248.35	-89.3734	-1438.89	1138.63	-109.102	-1439.7	965.107	-70.1579	-1438.95	864.779	-124.996	-1493.04	873.622	-127.81	-1477.97	767.797
504	0	102.967	-1076.56	1632.37	206.502	-1083.35	1632.47	72.1666	-1232.08	1644.42	208.557	-1252.74	1646.77	161.471	-1308.32	1498.5	169.381	-1417.15	1277.87	152.261	-1174.7	1394.9	153.377	-1152.08	1209.35	217.663	-1417.03	1352.92	-34.2706	-1310.97	1440.77	-83.4242	-1371.52	1249.79	-91.6791	-1420.05	1139.26	-110.229	-1415.95	965.471	-70.7004	-1412.9	865.593	-126.455	-1466.29	872.642	-128.508	-1448.21	767.313
505	0	103.697	-1063.62	1634.91	207.215	-1070.45	1634.89	72.8529	-1219.09	1647.49	209.232	-1239.77	1649.76	161.462	-1295.87	1501.23	168.483	-1404.03	1280.39	152.77	-1162.16	1397.87	153.635	-1139.37	1212.41	216.898	-1404.62	1355.4	-34.4354	-1297.39	1443.96	-84.756	-1354.61	1251.44	-93.95	-1401.13	1140.09	-111.27	-1391.85	966.146	-71.144	-1386.31	866.816	-127.755	-1438.96	871.987	-129.059	-1417.67	767.304
506	0	104.511	-1050.83	1637.56	208.011	-1057.7	1637.38	73.6356	-1206.26	1650.62	210.006	-1226.94	1652.75	161.526	-1283.5	1503.97	167.644	-1390.97	1282.92	153.323	-1149.67	1400.88	153.932	-1126.7	1215.5	216.208	-1392.25	1357.87	-34.5135	-1283.89	1447.22	-85.9882	-1337.75	1253.25	-96.1731	-1382.17	1141.08	-112.217	-1367.45	967.139	-71.4794	-1359.23	868.469	-128.882	-1411.12	871.693	-129.44	-1386.46	767.816
507	0	105.39	-1038.16	1640.29	208.869	-1045.08	1639.91	74.4841	-1193.55	1653.74	210.848	-1214.25	1655.69	161.651	-1271.17	1506.67	166.862	-1377.96	1285.39	153.908	-1137.21	1403.85	154.257	-1114.06	1218.56	215.59	-1379.91	1360.31	-34.5163	-1270.43	1450.49	-87.127	-1320.96	1255.2	-98.3363	-1363.19	1142.22	-113.064	-1342.79	968.449	-71.6988	-1331.76	870.564	-129.824	-1382.85	871.781	-129.631	-1354.67	768.883
508	0	106.312	-1025.6	1643.04	209.769	-1032.57	1642.44	75.3698	-1180.95	1656.79	211.728	-1201.66	1658.54	161.823	-1258.86	1509.3	166.133	-1364.97	1287.79	154.514	-1124.74	1406.75	154.601	-1101.42	1221.56	215.041	-1367.56	1362.68	-34.4547	-1257.01	1453.71	-88.1797	-1304.23	1257.22	-100.429	-1344.2	1143.46	-113.808	-1317.95	970.067	-71.7954	-1303.96	873.104	-130.571	-1354.21	872.265	-129.616	-1322.41	770.528
509	0	107.259	-1013.11	1645.75	210.693	-1020.15	1644.92	76.2667	-1168.44	1659.72	212.621	-1189.17	1661.24	162.032	-1246.55	1511.8	165.455	-1352.01	1290.06	155.129	-1112.26	1409.52	154.954	-1088.77	1224.42	214.56	-1355.21	1364.94	-34.3384	-1243.6	1456.82	-89.1536	-1287.56	1259.27	-102.441	-1325.22	1144.76	-114.445	-1292.97	971.978	-71.7647	-1275.91	876.08	-131.118	-1325.28	873.144	-129.384	-1289.78	772.76
510	0	108.216	-1000.69	1648.37	211.624	-1007.81	1647.3	77.1526	-1155.98	1662.48	213.503	-1176.76	1663.76	162.267	-1234.21	1514.15	164.827	-1339.06	1292.18	155.746	-1099.75	1412.11	155.309	-1076.11	1227.1	214.146	-1342.82	1367.05	-34.1758	-1230.2	1459.78	-90.0556	-1270.96	1261.29	-104.365	-1306.28	1146.07	-114.973	-1267.9	974.157	-71.6035	-1247.68	879.476	-131.462	-1296.13	874.409	-128.93	-1256.86	775.576
511	0	109.169	-988.29	1650.84	212.551	-995.515	1649.53	78.0095	-1143.55	1665.01	214.356	-1164.4	1666.04	162.523	-1221.84	1516.3	164.249	-1326.12	1294.1	156.359	-1087.2	1414.48	155.662	-1063.43	1229.55	213.796	-1330.39	1368.98	-33.974	-1216.79	1462.52	-90.891	-1254.43	1263.23	-106.193	-1287.39	1147.34	-115.39	-1242.79	976.574	-71.3103	-1219.33	883.266	-131.601	-1266.83	876.042	-128.252	-1223.77	778.961
512	0	110.109	-975.901	1653.12	213.463	-983.247	1651.58	78.8245	-1131.13	1667.26	215.165	-1152.08	1668.06	162.796	-1209.41	1518.21	163.723	-1313.17	1295.8	156.962	-1074.59	1416.59	156.007	-1050.72	1231.73	213.51	-1317.91	1370.71	-33.7379	-1203.38	1465.01	-91.6635	-1237.97	1265.03	-107.918	-1268.56	1148.53	-115.695	-1217.69	979.195	-70.8854	-1190.94	887.418	-131.537	-1237.45	878.013	-127.354	-1190.57	782.89
513	0	111.027	-963.497	1655.16	214.354	-970.982	1653.39	79.5894	-1118.7	1669.21	215.922	-1139.77	1669.78	163.082	-1196.92	1519.85	163.254	-1300.21	1297.24	157.553	-1061.92	1418.39	156.342	-1037.97	1233.6	213.29	-1305.37	1372.19	-33.4708	-1189.96	1467.19	-92.3739	-1221.58	1266.64	-109.536	-1249.79	1149.58	-115.888	-1192.63	981.979	-70.3303	-1162.56	891.89	-131.275	-1208.04	880.287	-126.242	-1157.37	787.326
514	0	111.92	-951.059	1656.9	215.22	-958.699	1654.94	80.3013	-1106.23	1670.81	216.622	-1127.45	1671.18	163.384	-1184.35	1521.21	162.85	-1287.25	1298.4	158.132	-1049.18	1419.87	156.664	-1025.18	1235.12	213.138	-1292.75	1373.4	-33.174	-1176.53	1469.04	-93.0211	-1205.26	1268	-111.04	-1231.09	1150.44	-115.968	-1167.64	984.884	-69.6481	-1134.25	896.635	-130.819	-1178.68	882.825	-124.926	-1124.24	792.224
515	0	112.788	-938.568	1658.33	216.061	-946.378	1656.18	80.9614	-1093.71	1672.05	217.267	-1115.1	1672.22	163.702	-1171.7	1522.24	162.519	-1274.26	1299.27	158.697	-1036.38	1420.99	156.975	-1012.35	1236.28	213.056	-1280.06	1374.33	-32.847	-1163.1	1470.52	-93.601	-1189.01	1269.08	-112.424	-1212.46	1151.08	-115.934	-1142.77	987.866	-68.8429	-1106.07	901.605	-130.176	-1149.41	885.583	-123.419	-1091.26	797.533
516	0	113.632	-926.008	1659.4	216.879	-933.998	1657.09	81.5756	-1081.12	1672.91	217.863	-1102.71	1672.9	164.042	-1158.96	1522.95	162.273	-1261.25	1299.82	159.253	-1023.51	1421.74	157.274	-999.484	1237.06	213.049	-1267.28	1374.95	-32.4877	-1149.67	1471.62	-94.1074	-1172.82	1269.84	-113.683	-1193.87	1151.45	-115.786	-1118.03	990.883	-67.9196	-1078.07	906.745	-129.356	-1120.29	888.516	-121.737	-1058.51	803.195
517	0	114.455	-913.368	1660.1	217.677	-921.544	1657.65	82.1534	-1068.45	1673.39	218.419	-1090.25	1673.21	164.411	-1146.13	1523.31	162.122	-1248.21	1300.05	159.802	-1010.57	1422.11	157.566	-986.567	1237.44	213.122	-1254.42	1375.25	-32.0922	-1136.24	1472.33	-94.5319	-1156.68	1270.26	-114.809	-1175.34	1151.54	-115.525	-1093.45	993.893	-66.8838	-1050.29	912.001	-128.368	-1091.36	891.581	-119.897	-1026.05	809.149
518	0	115.264	-900.637	1660.42	218.462	-909	1657.85	82.707	-1055.69	1673.47	218.948	-1077.71	1673.15	164.816	-1133.21	1523.32	162.079	-1235.14	1299.95	160.351	-997.552	1422.11	157.854	-973.6	1237.43	213.28	-1241.47	1375.23	-31.6556	-1122.82	1472.63	-94.8642	-1140.6	1270.31	-115.795	-1156.83	1151.33	-115.148	-1069.05	996.858	-65.7412	-1022.77	917.319	-127.222	-1062.67	894.733	-117.916	-993.951	815.331
519	0	116.065	-887.809	1660.36	219.242	-896.355	1657.68	83.2516	-1042.84	1673.18	219.466	-1065.07	1672.72	165.267	-1120.19	1522.99	162.156	-1222.02	1299.51	160.907	-984.466	1421.73	158.146	-960.579	1237.04	213.53	-1228.42	1374.88	-31.1714	-1109.4	1472.54	-95.0928	-1124.56	1269.98	-116.633	-1138.34	1150.8	-114.655	-1044.86	999.742	-64.4976	-995.558	922.647	-125.929	-1034.26	897.933	-115.815	-962.274	821.677
520	0	116.866	-874.878	1659.91	220.025	-883.599	1657.15	83.8038	-1029.88	1672.52	219.991	-1052.33	1671.94	165.773	-1107.08	1522.32	162.361	-1208.84	1298.75	161.478	-971.307	1420.98	158.451	-947.496	1236.27	213.877	-1215.27	1374.19	-30.6323	-1095.98	1472.07	-95.205	-1108.55	1269.29	-117.312	-1119.86	1149.96	-114.045	-1020.88	1002.51	-63.1586	-968.687	927.934	-124.498	-1006.18	901.143	-113.611	-931.076	828.123
521	0	117.679	-861.843	1659.1	220.82	-870.725	1656.26	84.3816	-1016.82	1671.51	220.542	-1039.48	1670.82	166.346	-1093.87	1521.31	162.706	-1195.59	1297.67	162.077	-958.072	1419.89	158.778	-934.345	1235.15	214.327	-1202.03	1373.19	-30.0299	-1082.56	1471.23	-95.1879	-1092.55	1268.25	-117.822	-1101.37	1148.82	-113.317	-997.152	1005.15	-61.7295	-942.192	933.133	-122.942	-978.444	904.33	-111.323	-900.411	834.606
522	0	118.512	-848.703	1657.94	221.64	-857.727	1655.04	85.0034	-1003.67	1670.17	221.14	-1026.51	1669.38	166.997	-1080.57	1519.99	163.195	-1182.27	1296.29	162.714	-944.759	1418.48	159.141	-921.118	1233.7	214.883	-1188.68	1371.88	-29.3555	-1069.13	1470.06	-95.0289	-1076.57	1266.86	-118.153	-1082.89	1147.4	-112.47	-973.678	1007.63	-60.215	-916.108	938.203	-121.269	-951.107	907.466	-108.97	-870.33	841.067
523	0	119.378	-835.459	1656.46	222.494	-844.602	1653.5	85.6881	-990.406	1668.54	221.804	-1013.4	1667.65	167.737	-1067.18	1518.38	163.833	-1168.84	1294.62	163.404	-931.364	1416.77	159.554	-907.803	1231.94	215.548	-1175.22	1370.28	-28.6003	-1055.67	1468.58	-94.7161	-1060.58	1265.18	-118.294	-1064.39	1145.72	-111.502	-950.485	1009.94	-58.6197	-890.463	943.104	-119.489	-924.202	910.524	-106.568	-840.881	847.451
524	0	120.288	-822.112	1654.69	223.395	-831.348	1651.69	86.4539	-977.05	1666.64	222.555	-1000.17	1665.66	168.575	-1053.68	1516.51	164.62	-1155.31	1292.68	164.16	-917.882	1414.8	160.031	-894.39	1229.93	216.325	-1161.66	1368.4	-27.7555	-1042.16	1466.83	-94.2392	-1044.59	1263.22	-118.235	-1045.91	1143.81	-110.411	-927.595	1012.06	-56.9476	-865.289	947.805	-117.611	-897.766	913.485	-104.131	-812.107	853.707
525	0	121.255	-808.665	1652.67	224.357	-817.966	1649.62	87.3185	-963.599	1664.51	223.411	-986.81	1663.46	169.522	-1040.1	1514.39	165.553	-1141.66	1290.51	164.997	-904.308	1412.6	160.59	-880.868	1227.68	217.212	-1147.98	1366.27	-26.8124	-1028.6	1464.85	-93.5896	-1028.57	1261.04	-117.967	-1027.43	1141.72	-109.199	-905.032	1013.99	-55.2026	-840.613	952.279	-115.644	-871.837	916.329	-101.675	-784.049	859.787
526	0	122.291	-795.121	1650.43	225.391	-804.456	1647.35	88.2983	-950.057	1662.19	224.389	-973.316	1661.06	170.585	-1026.41	1512.06	166.626	-1127.88	1288.12	165.929	-890.635	1410.21	161.246	-867.224	1225.25	218.208	-1134.2	1363.92	-25.7635	-1014.96	1462.67	-92.7613	-1012.53	1258.67	-117.484	-1009	1139.47	-107.863	-882.822	1015.73	-53.3884	-816.461	956.5	-113.596	-846.453	919.04	-99.2108	-756.744	865.65
527	0	123.409	-781.482	1648.03	226.511	-790.819	1644.91	89.4082	-936.427	1659.71	225.505	-959.692	1658.52	171.77	-1012.63	1509.56	167.829	-1113.96	1285.55	166.969	-876.857	1407.66	162.016	-853.446	1222.66	219.31	-1120.31	1361.38	-24.6021	-1001.21	1460.35	-91.7504	-996.472	1256.17	-116.781	-990.629	1137.12	-106.405	-860.99	1017.28	-51.5085	-792.858	960.452	-111.472	-821.65	921.604	-96.748	-730.225	871.255
528	0	124.622	-767.751	1645.49	227.73	-777.058	1642.35	90.6613	-922.711	1657.11	226.772	-945.94	1655.87	173.082	-998.747	1506.92	169.147	-1099.89	1282.83	168.13	-862.968	1405	162.912	-839.523	1219.97	220.512	-1106.3	1358.66	-23.323	-987.348	1457.92	-90.5563	-980.388	1253.57	-115.856	-972.353	1134.7	-104.826	-839.566	1018.63	-49.5667	-769.829	964.116	-109.28	-797.466	924.006	-94.2945	-704.522	876.564
529	0	125.942	-753.929	1642.88	229.059	-763.177	1639.71	92.068	-908.913	1654.43	228.202	-932.063	1653.14	174.523	-984.766	1504.18	170.566	-1085.68	1280	169.42	-848.961	1402.27	163.946	-825.446	1217.21	221.808	-1092.18	1355.82	-21.9231	-973.342	1455.43	-89.1812	-964.285	1250.93	-114.712	-954.205	1132.25	-103.129	-818.575	1019.79	-47.5667	-747.393	967.479	-107.024	-773.935	926.23	-91.8555	-679.66	881.543
530	0	127.381	-740.019	1640.22	230.509	-749.178	1637.03	93.6361	-895.034	1651.71	229.801	-918.065	1650.38	176.092	-970.684	1501.37	172.067	-1071.32	1277.09	170.845	-834.833	1399.51	165.127	-811.207	1214.43	223.191	-1077.96	1352.88	-20.4018	-959.182	1452.91	-87.6307	-948.171	1248.29	-113.354	-936.221	1129.81	-101.318	-798.046	1020.76	-45.5126	-725.57	970.529	-104.71	-751.088	928.261	-89.4346	-655.659	886.156
531	0	128.945	-726.023	1637.57	232.089	-735.066	1634.35	95.37	-881.076	1648.99	231.574	-903.951	1647.61	177.787	-956.502	1498.53	173.631	-1056.83	1274.13	172.407	-820.58	1396.75	166.457	-796.799	1211.66	224.655	-1063.62	1349.87	-18.7613	-944.859	1450.41	-85.9131	-932.059	1245.68	-111.791	-918.438	1127.4	-99.3973	-778.002	1021.54	-43.4087	-704.377	973.255	-102.343	-728.955	930.081	-87.033	-632.534	890.371
532	0	130.643	-711.943	1634.95	233.804	-720.847	1631.72	97.2706	-867.041	1646.31	233.519	-889.728	1644.87	179.602	-942.223	1495.69	175.24	-1042.19	1271.17	174.106	-806.203	1394.02	167.935	-782.22	1208.94	226.19	-1049.19	1346.84	-17.0073	-930.369	1447.95	-84.04	-915.961	1243.14	-110.036	-900.891	1125.06	-97.3752	-758.467	1022.14	-41.2594	-683.826	975.647	-99.9291	-707.559	931.674	-84.6508	-610.296	894.156
533	0	132.477	-697.782	1632.42	235.656	-706.527	1629.15	99.3348	-852.932	1643.7	235.633	-875.403	1642.19	181.528	-927.85	1492.89	176.876	-1027.45	1268.24	175.932	-791.705	1391.37	169.555	-767.469	1206.31	227.792	-1034.65	1343.81	-15.1481	-915.716	1445.57	-82.0257	-899.894	1240.69	-108.105	-883.612	1122.82	-95.2594	-739.463	1022.54	-39.0695	-663.931	977.695	-97.474	-686.92	933.021	-82.2867	-588.951	897.48
534	0	134.446	-683.543	1630	237.644	-692.113	1626.67	101.555	-838.75	1641.19	237.907	-860.983	1639.59	183.554	-913.39	1490.16	178.525	-1012.59	1265.37	177.876	-777.09	1388.82	171.302	-752.551	1203.79	229.452	-1020.03	1340.82	-13.1955	-900.91	1443.3	-79.8868	-883.879	1238.37	-106.014	-866.632	1120.68	-93.0597	-721.006	1022.76	-36.8441	-644.699	979.389	-94.9852	-667.054	934.105	-79.9387	-568.502	900.315
535	0	136.544	-669.231	1627.71	239.761	-677.615	1624.32	103.92	-824.501	1638.81	240.327	-846.479	1637.1	185.666	-898.85	1487.54	180.174	-997.659	1262.6	179.918	-762.368	1386.4	173.16	-737.475	1201.41	231.164	-1005.32	1337.91	-11.1637	-885.968	1441.15	-77.642	-867.936	1236.19	-103.783	-849.975	1118.67	-90.787	-703.111	1022.79	-34.5886	-626.138	980.72	-92.4706	-647.973	934.908	-77.6046	-548.946	902.633
536	0	138.76	-654.852	1625.59	241.995	-663.042	1622.11	106.412	-810.188	1636.59	242.875	-831.901	1634.74	187.848	-884.241	1485.05	181.815	-982.664	1259.96	182.04	-747.553	1384.14	175.104	-722.257	1199.2	232.923	-990.549	1335.11	-9.06963	-870.914	1439.16	-75.3119	-852.09	1234.17	-101.433	-833.663	1116.81	-88.4533	-685.792	1022.63	-32.3088	-608.253	981.678	-89.9392	-629.683	935.416	-75.2827	-530.28	904.412
537	0	141.08	-640.413	1623.65	244.329	-648.405	1620.06	109.011	-795.818	1634.55	245.527	-817.26	1632.53	190.08	-869.576	1482.72	183.442	-967.629	1257.48	184.215	-732.66	1382.05	177.109	-706.916	1197.18	234.724	-975.721	1332.45	-6.93229	-855.778	1437.34	-72.9184	-836.366	1232.33	-98.9858	-817.714	1115.09	-86.0715	-669.058	1022.28	-30.0111	-591.048	982.257	-87.4011	-612.191	935.616	-72.9718	-512.497	905.634
538	0	143.483	-625.922	1621.91	246.743	-633.718	1618.17	111.692	-781.397	1632.72	248.258	-802.568	1630.49	192.343	-854.869	1480.57	185.055	-952.581	1255.19	186.416	-717.71	1380.15	179.146	-691.482	1195.36	236.56	-960.856	1329.98	-4.77268	-840.594	1435.71	-70.4841	-820.791	1230.67	-96.4622	-802.142	1113.54	-83.6554	-652.916	1021.74	-27.7024	-574.528	982.449	-84.8673	-595.497	935.5	-70.6724	-495.59	906.286
539	0	145.944	-611.388	1620.37	249.211	-618.992	1616.47	114.424	-766.933	1631.11	251.035	-787.837	1628.63	194.615	-840.136	1478.64	186.655	-937.542	1253.13	188.613	-702.725	1378.46	181.186	-675.987	1193.76	238.426	-945.973	1327.71	-2.61311	-825.397	1434.27	-68.0324	-805.393	1229.21	-93.8843	-786.957	1112.15	-81.2193	-637.373	1021.01	-25.3906	-558.694	982.252	-82.3504	-579.603	935.063	-68.3868	-479.551	906.363
540	0	148.435	-596.822	1619.06	251.704	-604.241	1614.95	117.176	-752.433	1629.74	253.826	-773.08	1626.97	196.873	-825.395	1476.95	188.244	-922.535	1251.31	190.776	-687.731	1376.99	183.199	-660.473	1192.37	240.314	-931.092	1325.69	-0.476511	-810.225	1433.04	-65.5867	-790.2	1227.95	-91.2736	-772.167	1110.93	-78.7782	-622.433	1020.1	-23.0847	-543.551	981.664	-79.864	-564.507	934.304	-66.1198	-464.372	905.865
541	0	150.924	-582.233	1617.97	254.191	-589.479	1613.63	119.911	-737.907	1628.61	256.594	-758.31	1625.53	199.094	-810.664	1475.51	189.828	-907.584	1249.77	192.877	-672.754	1375.75	185.159	-644.982	1191.21	242.216	-916.235	1323.94	1.61444	-795.117	1432.04	-63.1696	-775.24	1226.91	-88.6507	-757.776	1109.89	-76.3476	-608.1	1019.02	-20.7948	-529.102	980.689	-77.4227	-550.209	933.23	-63.8789	-450.047	904.803
542	0	153.377	-567.632	1617.1	256.636	-574.719	1612.51	122.592	-723.364	1627.74	259.302	-743.541	1624.32	201.256	-795.963	1474.35	191.412	-892.706	1248.52	194.888	-657.823	1374.76	187.041	-629.56	1190.29	244.123	-901.422	1322.49	3.63829	-780.107	1431.25	-60.8026	-760.54	1226.07	-86.0355	-743.789	1109.03	-73.9433	-594.377	1017.76	-18.5326	-515.351	979.333	-75.0419	-536.708	931.849	-61.6744	-436.57	903.192
543	0	155.759	-553.029	1616.47	259.007	-559.974	1611.59	125.183	-708.812	1627.14	261.912	-728.785	1623.35	203.339	-781.311	1473.48	192.998	-877.92	1247.58	196.786	-642.963	1374.02	188.825	-614.253	1189.61	246.026	-886.674	1321.37	5.57569	-765.231	1430.71	-58.5054	-746.125	1225.46	-83.4462	-730.207	1108.35	-71.5813	-581.267	1016.36	-16.3113	-502.302	977.608	-72.7377	-524.004	930.178	-59.52	-423.941	901.056
544	0	158.035	-538.436	1616.06	261.268	-545.258	1610.9	127.646	-694.264	1626.81	264.388	-714.056	1622.66	205.325	-766.726	1472.93	194.591	-863.238	1246.97	198.549	-628.203	1373.55	190.492	-599.101	1189.18	247.916	-872.01	1320.59	7.41018	-750.521	1430.4	-56.2958	-732.016	1225.07	-80.8991	-717.031	1107.87	-69.278	-568.771	1014.81	-14.146	-489.961	975.532	-70.5263	-512.098	928.236	-57.4328	-412.158	898.426
545	0	160.17	-523.865	1615.87	263.385	-530.582	1610.43	129.947	-679.73	1626.77	266.698	-699.365	1622.25	207.198	-752.228	1472.69	196.19	-848.671	1246.7	200.162	-613.564	1373.35	192.029	-584.138	1189.01	249.783	-857.443	1320.17	9.12892	-736.005	1430.34	-54.1883	-718.232	1224.92	-78.4083	-704.26	1107.58	-67.0493	-556.892	1013.15	-12.0535	-478.332	973.126	-68.4237	-500.993	926.049	-55.4327	-401.227	895.337
546	0	162.132	-509.329	1615.92	265.328	-515.959	1610.21	132.056	-665.223	1627.02	268.811	-684.723	1622.15	208.946	-737.831	1472.78	197.798	-834.225	1246.77	201.614	-599.067	1373.44	193.425	-569.391	1189.11	251.621	-842.988	1320.12	10.7231	-721.706	1430.53	-52.1947	-704.788	1225.01	-75.9849	-691.892	1107.5	-64.9112	-545.632	1011.38	-10.0523	-467.421	970.416	-66.4459	-490.691	923.647	-53.5427	-391.152	891.832
547	0	163.891	-494.843	1616.2	267.067	-501.399	1610.24	133.948	-650.758	1627.55	270.705	-670.143	1622.37	210.562	-723.548	1473.21	199.413	-819.901	1247.19	202.899	-584.726	1373.83	194.673	-554.873	1189.5	253.423	-828.65	1320.44	12.1883	-707.645	1430.97	-50.3228	-691.693	1225.34	-73.6375	-679.925	1107.63	-62.8792	-534.99	1009.54	-8.16235	-457.23	967.436	-64.608	-481.196	921.065	-51.7881	-381.943	887.956
548	0	165.421	-480.421	1616.72	268.579	-486.914	1610.54	135.601	-636.351	1628.38	272.36	-655.636	1622.94	212.042	-709.389	1473.97	201.036	-805.698	1247.95	204.013	-570.551	1374.53	195.77	-540.59	1190.19	255.184	-814.432	1321.13	13.5242	-693.836	1431.67	-48.5766	-678.955	1225.93	-71.3715	-668.354	1107.99	-60.9678	-524.967	1007.64	-6.40462	-447.762	964.22	-62.9247	-472.511	918.341	-50.1962	-373.611	883.758
549	0	166.701	-466.081	1617.48	269.845	-472.513	1611.13	137.004	-622.02	1629.51	273.767	-641.211	1623.86	213.386	-695.358	1475.05	202.666	-791.609	1249.04	204.96	-556.545	1375.56	196.716	-526.535	1191.2	256.904	-800.332	1322.18	14.7343	-680.286	1432.62	-46.9563	-666.576	1226.78	-69.1895	-657.175	1108.57	-59.1909	-515.561	1005.72	-4.80055	-439.018	960.808	-61.4092	-464.637	915.517	-48.7948	-366.166	879.289
550	0	167.716	-451.838	1618.49	270.85	-458.206	1612.03	138.15	-607.782	1630.91	274.921	-626.879	1625.13	214.599	-681.457	1476.45	204.304	-777.629	1250.44	205.744	-542.704	1376.9	197.512	-512.692	1192.53	258.582	-786.343	1323.58	15.8256	-666.995	1433.81	-45.458	-654.553	1227.89	-67.0917	-646.381	1109.4	-57.5609	-506.768	1003.8	-3.37139	-430.995	957.243	-60.0734	-457.574	912.635	-47.6122	-359.618	874.601
551	0	168.459	-437.709	1619.76	271.588	-444.002	1613.25	139.04	-593.657	1632.59	275.826	-612.649	1626.76	215.686	-667.68	1478.16	205.952	-763.747	1252.13	206.374	-529.018	1378.56	198.167	-499.037	1194.19	260.222	-772.455	1325.31	16.808	-653.956	1435.25	-44.0744	-642.88	1229.25	-65.0759	-635.965	1110.46	-56.0884	-498.58	1001.92	-2.1373	-423.687	953.567	-58.9272	-451.315	909.738	-46.6751	-353.974	869.747
552	0	168.927	-423.711	1621.29	272.058	-429.909	1614.79	139.683	-579.663	1634.52	276.49	-598.53	1628.72	216.657	-654.021	1480.13	207.609	-749.955	1254.08	206.861	-515.472	1380.53	198.689	-485.543	1196.17	261.825	-758.654	1327.33	17.6933	-641.156	1436.91	-42.7954	-631.549	1230.86	-63.1388	-625.919	1111.76	-54.7822	-490.988	1000.08	-1.11653	-417.083	949.824	-57.9781	-445.851	906.868	-46.0076	-349.237	864.78
553	0	169.128	-409.855	1623.08	272.267	-415.933	1616.65	140.093	-565.816	1636.67	276.929	-584.528	1630.98	217.524	-640.465	1482.36	209.277	-736.245	1256.27	207.219	-502.046	1382.78	199.091	-472.18	1198.44	263.398	-744.923	1329.62	18.4948	-628.572	1438.78	-41.6086	-620.546	1232.71	-61.2762	-616.231	1113.28	-53.6486	-483.98	998.326	-0.324502	-411.167	946.056	-57.2305	-441.166	904.064	-45.6302	-345.401	859.751
554	0	169.074	-396.153	1625.12	272.229	-402.078	1618.83	140.291	-552.128	1639.01	277.164	-570.648	1633.52	218.299	-626.997	1484.8	210.955	-722.608	1258.67	207.461	-488.717	1385.28	199.389	-458.915	1200.97	264.946	-731.243	1332.13	19.2263	-616.18	1440.82	-40.5002	-609.854	1234.76	-59.4836	-606.89	1115.03	-52.6916	-477.537	996.665	0.226999	-405.919	942.299	-56.6859	-437.237	901.362	-45.558	-342.455	854.709
555	0	168.785	-382.61	1627.4	271.961	-388.346	1621.3	140.3	-538.607	1641.51	277.219	-556.894	1636.28	218.995	-613.6	1487.41	212.64	-709.036	1261.22	207.603	-475.461	1387.99	199.598	-445.721	1203.74	266.473	-717.598	1334.82	19.9017	-603.947	1443.02	-39.456	-599.452	1237	-57.7573	-597.881	1116.98	-51.9123	-471.639	995.115	0.53054	-401.312	938.59	-56.3424	-434.034	898.79	-45.7997	-340.375	849.7
556	0	168.286	-369.228	1629.9	271.489	-374.737	1624.03	140.149	-525.257	1644.11	277.121	-543.265	1639.22	219.625	-600.253	1490.14	214.328	-695.523	1263.89	207.66	-462.251	1390.87	199.735	-432.569	1206.68	267.985	-703.967	1337.64	20.5339	-591.84	1445.32	-38.4621	-589.318	1239.39	-56.0939	-589.189	1119.1	-51.3091	-466.261	993.684	0.583526	-397.313	934.958	-56.1944	-431.518	896.375	-46.357	-339.129	844.766
557	0	167.606	-356.003	1632.57	270.84	-361.246	1626.99	139.867	-512.075	1646.77	276.896	-529.757	1642.26	220.2	-586.937	1492.95	216.013	-682.064	1266.64	207.648	-449.063	1393.86	199.818	-419.434	1209.74	269.484	-690.336	1340.55	21.1348	-579.826	1447.69	-37.5057	-579.425	1241.9	-54.4912	-580.793	1121.37	-50.8778	-461.372	992.379	0.388482	-393.886	931.426	-56.2332	-429.645	894.132	-47.2239	-338.673	839.944
558	0	166.776	-342.927	1635.39	270.045	-347.865	1630.12	139.483	-499.052	1649.43	276.573	-516.364	1645.35	220.732	-573.633	1495.79	217.687	-668.653	1269.42	207.581	-435.875	1396.91	199.863	-406.295	1212.85	270.971	-676.689	1343.48	21.7145	-567.869	1450.09	-36.5752	-569.745	1244.48	-52.9475	-572.674	1123.75	-50.6112	-456.938	991.2	-0.046955	-390.988	928.012	-56.4464	-428.361	892.075	-48.3867	-338.953	835.267
559	0	165.832	-329.984	1638.3	269.137	-334.584	1633.36	139.027	-486.174	1652.05	276.18	-503.074	1648.42	221.23	-560.323	1498.61	219.339	-655.287	1272.18	207.471	-422.666	1399.94	199.885	-393.135	1215.96	272.446	-663.014	1346.39	22.2812	-555.937	1452.47	-35.6609	-560.246	1247.09	-51.4621	-564.806	1126.21	-50.5	-452.922	990.145	-0.710267	-388.572	924.728	-56.819	-427.61	890.207	-49.8245	-339.908	830.76
560	0	164.805	-317.154	1641.24	268.148	-321.388	1636.65	138.525	-473.422	1654.56	275.74	-489.874	1651.4	221.702	-546.989	1501.34	220.957	-641.961	1274.88	207.331	-409.419	1402.9	199.899	-379.939	1218.98	273.904	-649.302	1349.22	22.8409	-544	1454.77	-34.7551	-550.9	1249.68	-50.0346	-557.164	1128.7	-50.5323	-449.282	989.205	-1.5845	-386.589	921.581	-57.3332	-427.33	888.528	-51.5101	-341.468	826.444
561	0	163.729	-304.415	1644.16	267.11	-308.259	1639.93	138.002	-460.769	1656.93	275.278	-476.746	1654.24	222.154	-533.617	1503.94	222.528	-628.674	1277.47	207.17	-396.122	1405.72	199.914	-366.7	1221.86	275.34	-635.547	1351.93	23.3975	-532.031	1456.96	-33.852	-541.674	1252.21	-48.6651	-549.72	1131.19	-50.6945	-445.975	988.373	-2.64885	-384.987	918.572	-57.9693	-427.455	887.034	-53.4112	-343.559	822.332
562	0	162.633	-291.739	1647	266.052	-295.177	1643.12	137.48	-448.188	1659.1	274.813	-463.67	1656.86	222.589	-520.196	1506.37	224.038	-615.423	1279.9	206.994	-382.764	1408.36	199.939	-353.412	1224.54	276.745	-621.744	1354.46	23.9522	-520.007	1458.99	-32.9479	-532.538	1254.65	-47.3536	-542.442	1133.65	-50.9714	-442.955	987.637	-3.87944	-383.714	915.701	-58.7061	-427.919	885.715	-55.4913	-346.102	818.436
563	0	161.546	-279.097	1649.7	265.001	-282.121	1646.15	136.975	-435.647	1661.03	274.36	-450.625	1659.23	223.008	-506.716	1508.58	225.472	-602.203	1282.15	206.811	-369.341	1410.75	199.98	-340.074	1226.95	278.108	-607.893	1356.77	24.5041	-507.908	1460.81	-32.041	-523.464	1256.96	-46.0997	-535.298	1136.03	-51.3465	-440.176	986.984	-5.25019	-382.718	912.962	-59.5214	-428.656	884.562	-57.7115	-349.021	814.76
564	0	160.492	-266.457	1652.19	263.981	-269.07	1648.96	136.5	-423.113	1662.69	273.932	-437.587	1661.3	223.41	-493.171	1510.53	226.813	-589.013	1284.16	206.622	-355.848	1412.85	200.039	-326.687	1229.05	279.415	-593.994	1358.83	25.0501	-495.717	1462.4	-31.1316	-514.424	1259.11	-44.9027	-528.257	1138.31	-51.8027	-437.591	986.404	-6.7337	-381.947	910.35	-60.393	-429.6	883.566	-60.0319	-352.238	811.308
565	0	159.488	-253.79	1654.43	263.01	-256	1651.5	136.064	-410.555	1664.04	273.535	-424.534	1663.02	223.791	-479.555	1512.19	228.046	-575.846	1285.92	206.428	-342.285	1414.62	200.116	-313.255	1230.8	280.652	-580.049	1360.6	25.5845	-483.421	1463.72	-30.222	-505.39	1261.07	-43.761	-521.285	1140.48	-52.3227	-435.153	985.885	-8.30227	-381.351	907.857	-61.2987	-430.689	882.715	-62.4124	-355.679	808.081
566	0	158.551	-241.066	1656.37	262.102	-242.89	1653.7	135.671	-397.94	1665.08	273.175	-411.444	1664.38	224.144	-465.867	1513.54	229.155	-562.695	1287.39	206.229	-328.653	1416.03	200.208	-299.78	1232.17	281.802	-566.061	1362.06	26.0998	-471.008	1464.76	-29.3158	-496.338	1262.84	-42.6723	-514.347	1142.5	-52.8893	-432.816	985.418	-9.92868	-380.882	905.479	-62.2173	-431.86	882.002	-64.8147	-359.274	805.081
567	0	157.689	-228.258	1657.97	261.267	-229.722	1655.53	135.32	-385.239	1665.78	272.85	-398.296	1665.36	224.461	-452.103	1514.54	230.122	-549.553	1288.56	206.021	-314.952	1417.07	200.31	-286.265	1233.14	282.847	-552.034	1363.18	26.5865	-458.469	1465.49	-28.4186	-487.242	1264.38	-41.6335	-507.413	1144.36	-53.4859	-430.537	984.994	-11.587	-380.494	903.208	-63.129	-433.057	881.419	-67.2029	-362.956	802.306
568	0	156.906	-215.342	1659.2	260.508	-216.476	1656.95	135.006	-372.427	1666.13	272.556	-385.073	1665.94	224.732	-438.265	1515.2	230.933	-536.408	1289.4	205.798	-301.186	1417.71	200.413	-272.713	1233.69	283.77	-537.97	1363.95	27.0333	-445.794	1465.9	-27.5371	-478.08	1265.71	-40.6409	-500.448	1146.07	-54.0968	-428.27	984.607	-13.2531	-380.143	901.04	-64.0152	-434.226	880.961	-69.5441	-366.664	799.757
569	0	156.201	-202.297	1660.03	259.823	-203.138	1657.95	134.721	-359.481	1666.15	272.284	-371.759	1666.12	224.942	-424.353	1515.51	231.572	-523.246	1289.92	205.555	-287.355	1417.95	200.509	-259.123	1233.82	284.553	-523.872	1364.38	27.4275	-432.977	1465.99	-26.6794	-468.827	1266.82	-39.6905	-493.42	1147.6	-54.7081	-425.976	984.251	-14.9056	-379.788	898.972	-64.8597	-435.317	880.624	-71.8094	-370.341	797.433
570	0	155.568	-189.108	1660.47	259.208	-189.696	1658.5	134.452	-346.384	1665.83	272.022	-358.34	1665.92	225.08	-410.366	1515.46	232.028	-510.053	1290.09	205.284	-273.46	1417.81	200.587	-245.494	1233.55	285.18	-509.743	1364.45	27.7553	-420.009	1465.76	-25.8548	-459.462	1267.72	-38.7786	-486.298	1148.97	-55.3071	-423.611	983.923	-16.5255	-379.388	897.002	-65.6481	-436.282	880.407	-73.9738	-373.935	795.334
571	0	154.996	-175.762	1660.51	258.65	-176.141	1658.63	134.185	-333.122	1665.18	271.757	-344.808	1665.35	225.129	-396.306	1515.06	232.289	-496.81	1289.94	204.977	-259.502	1417.28	200.638	-231.821	1232.89	285.634	-495.582	1364.17	28.002	-406.883	1465.22	-25.0736	-449.96	1268.4	-37.9022	-479.05	1150.18	-55.8837	-421.138	983.621	-18.0969	-378.904	895.129	-66.3684	-437.078	880.308	-76.0169	-377.398	793.459
572	0	154.469	-162.253	1660.16	258.134	-162.467	1658.33	133.902	-319.688	1664.23	271.472	-331.156	1664.42	225.075	-382.172	1514.34	232.348	-483.502	1289.46	204.624	-245.478	1416.39	200.65	-218.097	1231.85	285.901	-481.389	1363.56	28.1525	-393.593	1464.37	-24.3469	-440.299	1268.89	-37.0596	-471.642	1151.24	-56.4298	-418.517	983.343	-19.607	-378.298	893.354	-67.0107	-437.662	880.326	-77.9223	-380.683	791.808
573	0	153.969	-148.576	1659.44	257.643	-148.67	1657.62	133.583	-306.077	1663	271.147	-317.38	1663.16	224.902	-367.964	1513.29	232.2	-470.108	1288.67	204.216	-231.385	1415.17	200.613	-204.313	1230.47	285.97	-467.16	1362.64	28.1914	-380.132	1463.24	-23.6864	-430.456	1269.19	-36.2506	-464.042	1152.14	-56.94	-415.709	983.087	-21.0456	-377.532	891.677	-67.5683	-437.995	880.461	-79.6778	-383.749	790.378
574	0	153.474	-134.733	1658.38	257.154	-134.749	1656.55	133.206	-292.289	1661.5	270.762	-303.478	1661.61	224.595	-353.681	1511.96	231.844	-456.611	1287.58	203.743	-217.219	1413.64	200.516	-190.459	1228.79	285.829	-452.894	1361.43	28.1038	-366.493	1461.83	-23.1041	-420.407	1269.31	-35.4773	-456.219	1152.9	-57.4115	-412.676	982.852	-22.4056	-376.568	890.099	-68.037	-438.037	880.709	-81.2746	-386.553	789.165
575	0	152.96	-120.725	1657	256.644	-120.706	1655.13	132.751	-278.325	1659.76	270.297	-289.451	1659.79	224.139	-339.319	1510.36	231.282	-442.993	1286.21	203.196	-202.976	1411.84	200.35	-176.522	1226.83	285.473	-438.586	1359.95	27.8754	-352.671	1460.17	-22.6125	-410.128	1269.26	-34.7439	-448.139	1153.52	-57.8442	-409.379	982.634	-23.6825	-375.366	888.621	-68.4158	-437.749	881.069	-82.7077	-389.054	788.163
576	0	152.402	-106.559	1655.34	256.091	-106.542	1653.43	132.195	-264.192	1657.82	269.731	-275.301	1657.74	223.523	-324.878	1508.53	230.52	-429.24	1284.6	202.566	-188.648	1409.8	200.106	-162.491	1224.64	284.897	-424.229	1358.24	27.4932	-338.66	1458.28	-22.2238	-399.597	1269.05	-34.0571	-439.768	1154.01	-58.2404	-405.777	982.432	-24.8739	-373.887	887.242	-68.7071	-437.093	881.535	-83.9753	-391.213	787.362
577	0	151.778	-92.2412	1653.45	255.47	-92.2629	1651.48	131.519	-249.896	1655.7	269.044	-261.034	1655.5	222.734	-310.355	1506.5	229.565	-415.338	1282.77	201.843	-174.231	1407.56	199.777	-148.354	1222.25	284.1	-409.821	1356.34	26.9459	-324.458	1456.18	-21.9503	-388.79	1268.68	-33.4261	-431.075	1154.38	-58.6051	-401.832	982.24	-25.9799	-372.091	885.96	-68.9166	-436.026	882.102	-85.0784	-392.985	786.752
578	0	151.064	-77.7792	1651.36	254.759	-77.8721	1649.33	130.703	-235.445	1653.43	268.217	-246.654	1653.11	221.766	-295.747	1504.31	228.428	-401.276	1280.75	201.021	-159.719	1405.17	199.356	-134.1	1219.72	283.082	-395.354	1354.28	26.2239	-310.062	1453.91	-21.8038	-377.686	1268.18	-32.8621	-422.028	1154.62	-58.9456	-397.501	982.052	-27.002	-369.934	884.771	-69.0534	-434.508	882.76	-86.0212	-394.326	786.318
579	0	150.24	-63.1808	1649.13	253.939	-63.3751	1647.04	129.731	-220.847	1651.04	267.233	-232.166	1650.61	220.611	-281.051	1501.99	227.121	-387.048	1278.58	200.092	-145.106	1402.66	198.836	-119.72	1217.08	281.85	-380.825	1352.1	25.3203	-295.473	1451.48	-21.7958	-366.263	1267.54	-32.3782	-412.596	1154.74	-59.2708	-392.744	981.86	-27.9436	-367.375	883.67	-69.13	-432.495	883.498	-86.8106	-395.187	786.042
580	0	149.29	-48.4541	1646.81	252.994	-48.7769	1644.65	128.59	-206.109	1648.58	266.079	-217.577	1648.04	219.268	-266.265	1499.6	225.657	-372.651	1276.3	199.052	-130.389	1400.08	198.213	-105.208	1214.38	280.41	-366.231	1349.84	24.231	-280.693	1448.93	-21.9367	-354.503	1266.76	-31.9889	-402.75	1154.74	-59.5917	-387.515	981.656	-28.8093	-364.366	882.648	-69.1622	-429.941	884.302	-87.4565	-395.518	785.906
581	0	148.2	-33.6064	1644.42	251.91	-34.0829	1642.22	127.269	-191.241	1646.06	264.746	-202.892	1645.44	217.738	-251.39	1497.15	224.05	-358.086	1273.95	197.898	-115.566	1397.47	197.485	-90.5597	1211.66	278.774	-351.57	1347.55	22.9548	-265.726	1446.29	-22.2364	-342.39	1265.86	-31.7093	-392.464	1154.62	-59.9204	-381.773	981.429	-29.6052	-360.86	881.698	-69.1686	-426.798	885.154	-87.9711	-395.263	785.888
582	0	146.963	-18.6448	1642.03	250.68	-19.2984	1639.8	125.765	-176.248	1643.53	263.227	-188.118	1642.84	216.026	-236.425	1494.71	222.315	-343.358	1271.58	196.63	-100.64	1394.87	196.649	-75.7769	1208.96	276.955	-336.844	1345.27	21.4939	-250.581	1443.59	-22.7032	-329.911	1264.83	-31.555	-381.715	1154.37	-60.2699	-375.473	981.169	-30.3387	-356.807	880.807	-69.1704	-423.018	886.033	-88.3693	-394.36	785.961
583	0	145.576	-3.57639	1639.67	249.302	-4.42894	1637.42	124.077	-161.14	1641.02	261.521	-173.262	1640.28	214.14	-221.375	1492.3	220.466	-328.475	1269.21	195.251	-85.6124	1392.31	195.706	-60.8638	1206.32	274.968	-322.055	1343.05	19.8537	-235.267	1440.87	-23.3442	-317.054	1263.68	-31.5409	-370.483	1154	-60.6535	-368.571	980.863	-31.0185	-352.157	879.962	-69.1909	-418.549	886.917	-88.6686	-392.746	786.1
584	0	144.044	11.592	1637.37	247.779	10.5193	1635.12	122.209	-145.924	1638.56	259.634	-158.33	1637.8	212.093	-206.246	1489.97	218.519	-313.451	1266.9	193.767	-70.4924	1389.84	194.659	-45.8294	1203.78	272.832	-307.211	1340.91	18.0433	-219.797	1438.16	-24.1646	-303.814	1262.43	-31.6811	-358.755	1153.49	-61.0847	-361.025	980.499	-31.6545	-346.855	879.149	-69.255	-413.34	887.779	-88.8892	-390.35	786.273
585	0	142.373	26.8528	1635.17	246.117	25.5398	1632.94	120.172	-130.607	1636.18	257.575	-143.33	1635.43	209.902	-191.046	1487.75	216.487	-298.304	1264.69	192.187	-55.291	1387.49	193.512	-30.6878	1201.37	270.566	-292.321	1338.9	16.0751	-204.187	1435.49	-25.1675	-290.189	1261.07	-31.9879	-346.521	1152.87	-61.5765	-352.793	980.067	-32.2577	-340.848	878.355	-69.3882	-407.339	888.591	-89.0534	-387.098	786.451
586	0	140.579	42.1974	1633.1	244.331	40.6244	1630.91	117.981	-115.2	1633.92	255.358	-128.271	1633.21	207.586	-175.788	1485.68	214.386	-283.054	1262.62	190.524	-40.0236	1385.28	192.275	-15.4577	1199.12	268.191	-277.399	1337.05	13.9648	-188.456	1432.91	-26.3538	-276.18	1259.62	-32.4718	-333.778	1152.11	-62.1411	-343.836	979.555	-32.8401	-334.078	877.562	-69.6158	-400.494	889.324	-89.1853	-382.913	786.599
587	0	138.678	57.6155	1631.17	242.437	55.7641	1629.06	115.657	-99.7144	1631.8	253.003	-113.161	1631.16	205.167	-160.488	1483.79	212.232	-267.725	1260.72	188.793	-24.7095	1383.26	190.956	-0.162983	1197.07	265.73	-262.461	1335.4	11.7311	-172.627	1430.44	-27.7216	-261.794	1258.09	-33.1404	-320.526	1151.23	-62.7896	-334.117	978.954	-33.4142	-326.491	876.759	-69.9625	-392.753	889.945	-89.3107	-377.715	786.686
588	0	136.692	73.0948	1629.42	240.456	70.9477	1627.39	113.222	-84.1632	1629.84	250.536	-98.0121	1629.32	202.672	-145.165	1482.11	210.038	-252.344	1259.03	187.012	-9.37159	1381.44	189.571	15.1682	1195.24	263.205	-247.525	1333.98	9.3957	-156.724	1428.13	-29.2663	-247.041	1256.51	-33.9992	-306.773	1150.24	-63.5313	-323.603	978.258	-33.9929	-318.031	875.93	-70.4511	-384.066	890.425	-89.4557	-371.422	786.678
589	0	134.647	88.6201	1627.84	238.412	86.1623	1625.92	110.707	-68.5628	1628.08	247.985	-82.8372	1627.7	200.127	-129.842	1480.66	207.819	-236.939	1257.57	185.204	5.96429	1379.84	188.133	30.5037	1193.66	260.64	-232.612	1332.8	6.98262	-140.773	1426.02	-30.9804	-231.939	1254.88	-35.0508	-292.533	1149.14	-64.374	-312.267	977.461	-34.5887	-308.645	875.064	-71.1018	-374.388	890.734	-89.6467	-363.954	786.543
590	0	132.567	104.174	1626.45	236.332	101.393	1624.67	108.141	-52.9321	1626.55	245.381	-67.6508	1626.34	197.562	-114.543	1479.47	205.591	-221.54	1256.37	183.388	21.2701	1378.5	186.662	45.8081	1192.33	258.057	-217.746	1331.88	4.51783	-124.804	1424.12	-32.8534	-216.507	1253.24	-36.2951	-277.822	1147.96	-65.3228	-300.085	976.561	-35.2128	-298.282	874.151	-71.9311	-363.674	890.841	-89.9088	-355.232	786.251
591	0	130.481	119.735	1625.27	234.243	116.622	1623.64	105.558	-37.2931	1625.25	242.758	-52.4691	1625.26	195.004	-99.2923	1478.55	203.368	-206.177	1255.46	181.59	36.5166	1377.42	185.177	61.0446	1191.27	255.478	-202.95	1331.25	2.02856	-108.848	1422.49	-34.8721	-200.768	1251.6	-37.7298	-262.661	1146.7	-66.3803	-287.037	975.56	-35.8749	-286.896	873.185	-72.9509	-351.886	890.723	-90.2648	-345.181	785.774
592	0	128.416	135.282	1624.3	232.172	131.832	1622.84	102.991	-21.6698	1624.22	240.152	-37.3101	1624.47	192.483	-84.1174	1477.93	201.163	-190.878	1254.84	179.83	51.6743	1376.62	183.698	76.1762	1190.5	252.925	-188.246	1330.91	-0.457376	-92.9354	1421.14	-37.0205	-184.751	1250	-39.3505	-247.073	1145.39	-67.5467	-273.112	974.462	-36.5821	-274.448	872.163	-74.1676	-338.989	890.359	-90.7341	-333.735	785.089
593	0	126.4	150.788	1623.54	230.147	147.001	1622.27	100.475	-6.08826	1623.46	237.597	-22.1931	1623.99	190.027	-69.0434	1477.61	198.991	-175.672	1254.54	178.132	66.715	1376.1	182.247	91.1677	1190.01	250.417	-173.657	1330.88	-2.91241	-77.0963	1420.11	-39.2806	-168.485	1248.46	-41.1506	-231.083	1144.05	-68.8188	-258.302	973.277	-37.3389	-260.904	871.085	-75.5816	-324.959	889.734	-91.3315	-320.833	784.181
594	0	124.457	166.228	1623.01	228.194	162.109	1621.95	98.0419	9.42435	1623.01	235.127	-7.13833	1623.83	187.659	-54.0944	1477.59	196.862	-160.582	1254.55	176.517	81.6125	1375.89	180.844	105.988	1189.82	247.97	-159.202	1331.14	-5.30999	-61.3602	1419.43	-41.6321	-152	1247.02	-43.1221	-214.716	1142.7	-70.1909	-242.605	972.017	-38.146	-246.242	869.959	-77.1867	-309.773	888.843	-92.0664	-306.43	783.042
595	0	122.612	181.575	1622.72	226.336	177.133	1621.87	95.7217	24.8408	1622.86	232.772	7.83355	1624	185.404	-39.2919	1477.9	194.789	-145.631	1254.89	175.002	96.344	1375.98	179.51	120.61	1189.93	245.6	-144.9	1331.72	-7.62534	-45.7537	1419.1	-44.0538	-135.328	1245.71	-45.2555	-197.997	1141.38	-71.6544	-226.025	970.702	-39.0007	-230.445	868.798	-78.9707	-293.42	887.689	-92.9411	-290.488	781.677
596	0	120.885	196.803	1622.68	224.596	192.053	1622.05	93.5413	40.1347	1623.04	230.559	22.702	1624.5	183.28	-24.6547	1478.52	192.779	-130.836	1255.56	173.603	110.891	1376.38	178.265	135.017	1190.35	243.319	-130.764	1332.59	-9.83615	-30.2999	1419.14	-46.5234	-118.498	1244.56	-47.5396	-180.948	1140.11	-73.1981	-208.57	969.356	-39.8966	-213.508	867.62	-80.9155	-275.895	886.287	-93.9508	-272.986	780.105
597	0	119.294	211.887	1622.9	222.992	206.845	1622.49	91.5231	55.281	1623.55	228.512	37.4472	1625.35	181.302	-10.1975	1479.45	190.841	-116.211	1256.54	172.335	125.24	1377.09	177.124	149.194	1191.07	241.139	-116.802	1333.77	-11.9233	-15.0178	1419.58	-49.0184	-101.539	1243.61	-49.9626	-163.59	1138.92	-74.8085	-190.253	968.01	-40.8239	-195.436	866.454	-82.9978	-257.199	884.663	-95.0821	-253.918	778.357
598	0	117.854	226.805	1623.39	221.539	221.492	1623.21	89.6851	70.2573	1624.4	226.648	52.0505	1626.52	179.482	4.06888	1480.69	188.98	-101.767	1257.84	171.205	139.382	1378.13	176.102	163.14	1192.1	239.066	-103.02	1335.23	-13.8712	0.078281	1420.4	-51.5169	-84.4761	1242.87	-52.5112	-145.94	1137.85	-76.4698	-171.094	966.696	-41.7695	-176.244	865.333	-85.1906	-237.343	882.855	-96.3136	-233.292	776.478
599	0	116.576	241.536	1624.17	220.249	235.976	1624.2	88.0402	85.0438	1625.59	224.98	66.4946	1628.03	177.828	18.1379	1482.24	187.201	-87.5084	1259.44	170.219	153.314	1379.48	175.207	176.857	1193.44	237.109	-89.4185	1336.97	-15.6685	14.9791	1421.61	-53.9982	-67.3324	1242.38	-55.1715	-128.014	1136.92	-78.1649	-151.114	965.453	-42.7178	-155.955	864.297	-87.4634	-216.344	880.911	-97.6162	-211.133	774.524
600	0	115.467	256.064	1625.25	219.129	250.279	1625.47	86.596	99.6245	1627.12	223.515	80.7643	1629.86	176.341	32.0073	1484.08	185.506	-73.4396	1261.33	169.378	167.038	1381.14	174.443	190.355	1195.09	235.272	-75.9933	1338.96	-17.308	29.6802	1423.2	-56.4434	-50.1272	1242.15	-57.9289	-109.825	1136.16	-79.8755	-130.342	964.322	-43.6509	-134.605	863.392	-89.7837	-194.228	878.888	-98.9542	-187.481	772.563
601	0	114.531	270.376	1626.63	218.183	264.39	1627.01	85.3545	113.987	1628.97	222.255	94.847	1631.98	175.022	45.6787	1486.18	183.901	-59.5607	1263.5	168.68	180.562	1383.09	173.809	203.648	1197.04	233.559	-62.7371	1341.2	-18.7866	44.1821	1425.16	-58.8363	-32.8773	1242.21	-60.768	-91.3879	1135.6	-81.5827	-108.811	963.345	-44.5499	-112.237	862.665	-92.1181	-171.028	876.851	-100.287	-162.388	770.671
602	0	113.766	284.463	1628.3	217.409	278.297	1628.83	84.3129	128.123	1631.13	221.197	108.732	1634.37	173.866	59.1576	1488.53	182.386	-45.8693	1265.91	168.116	193.895	1385.33	173.299	216.756	1199.27	231.973	-49.639	1343.66	-20.1056	58.489	1427.46	-61.1637	-15.5974	1242.56	-63.6725	-72.7148	1135.25	-83.2679	-86.56	962.562	-45.3955	-88.9033	862.169	-94.4327	-146.787	874.87	-101.572	-135.923	768.927
603	0	113.167	298.319	1630.27	216.802	291.995	1630.92	83.463	142.027	1633.57	220.332	122.413	1637.01	172.864	72.4526	1491.11	180.965	-32.3611	1268.55	167.678	207.053	1387.83	172.9	229.7	1201.76	230.515	-36.6858	1346.32	-21.2696	72.6084	1430.07	-63.4158	1.69981	1243.21	-66.6254	-53.8215	1135.12	-84.9131	-63.6335	962.013	-46.1691	-64.6641	861.951	-96.6949	-121.554	873.015	-102.764	-108.164	767.414
604	0	112.725	311.943	1632.52	216.354	305.478	1633.24	82.7924	155.698	1636.28	219.647	135.886	1639.86	172.007	85.5754	1493.88	179.641	-19.0298	1271.37	167.35	220.052	1390.56	172.597	242.502	1204.49	229.187	-23.8624	1349.13	-22.2865	86.5498	1432.95	-65.5859	19.0021	1244.14	-69.6088	-34.7262	1135.22	-86.5015	-40.0819	961.733	-46.854	-39.586	862.06	-98.8733	-95.389	871.356	-103.821	-79.2041	766.212
605	0	112.426	325.337	1635.01	216.049	318.748	1635.78	82.2845	169.14	1639.2	219.127	149.15	1642.87	171.28	98.5395	1496.79	178.416	-5.86715	1274.35	167.118	232.911	1393.48	172.37	255.184	1207.42	227.988	-11.1526	1352.08	-23.1666	100.324	1436.07	-67.6701	36.2979	1245.34	-72.6039	-15.4504	1135.56	-88.0181	-15.9617	961.753	-47.4363	-13.7413	862.537	-100.939	-68.3598	869.956	-104.703	-49.1459	765.398
606	0	112.253	338.507	1637.73	215.871	331.809	1638.5	81.9196	182.359	1642.3	218.751	162.209	1646	170.672	111.36	1499.83	177.294	7.13659	1277.44	166.964	245.649	1396.55	172.198	267.766	1210.52	226.917	1.46008	1355.12	-23.9216	113.942	1439.37	-69.6672	53.5751	1246.79	-75.591	3.98062	1136.11	-89.45	8.66528	962.096	-47.9057	12.7929	863.417	-102.866	-40.5427	868.873	-105.377	-18.1011	765.038
607	0	112.185	351.464	1640.63	215.799	344.668	1641.36	81.6754	195.364	1645.52	218.498	175.07	1649.21	170.166	124.054	1502.93	176.277	19.9927	1280.6	166.869	258.284	1399.73	172.059	280.269	1213.73	225.972	13.992	1358.21	-24.5643	127.416	1442.8	-71.5774	70.8214	1248.45	-78.5496	23.5377	1136.87	-90.7862	33.7325	962.777	-48.2558	39.9364	864.727	-104.632	-12.0216	868.155	-105.818	13.8105	765.19
608	0	112.199	364.219	1643.67	215.811	357.336	1644.33	81.5281	208.167	1648.8	218.342	187.743	1652.43	169.748	136.637	1506.05	175.368	32.7137	1283.78	166.816	270.835	1402.96	171.935	292.709	1216.99	225.15	26.4587	1361.32	-25.1078	140.753	1446.29	-73.4017	88.0236	1250.3	-81.4586	43.1887	1137.79	-92.0184	59.1698	963.805	-48.4842	67.6068	866.485	-106.217	17.1127	867.839	-106.01	46.4641	765.899
609	0	112.273	376.788	1646.78	215.882	369.829	1647.34	81.4532	220.785	1652.1	218.259	200.242	1655.62	169.403	149.126	1509.15	174.571	45.3129	1286.95	166.788	283.317	1406.19	171.805	305.1	1220.27	224.449	38.8745	1364.39	-25.5646	153.963	1449.78	-75.1414	105.168	1252.27	-84.2967	62.8993	1138.86	-93.1401	84.9046	965.178	-48.5919	95.7207	868.699	-107.605	46.764	867.95	-105.948	79.7315	767.2
610	0	112.38	389.191	1649.91	215.989	382.164	1650.35	81.4263	233.235	1655.35	218.225	212.585	1658.72	169.12	161.536	1512.18	173.886	57.8045	1290.04	166.768	295.745	1409.36	171.655	317.454	1223.48	223.866	51.2525	1367.39	-25.9467	167.052	1453.23	-76.797	122.241	1254.32	-87.042	82.6345	1140.03	-94.1469	110.864	966.889	-48.5832	124.195	871.368	-108.786	76.8327	868.504	-105.637	113.484	769.117
611	0	112.498	401.447	1653.01	216.107	394.362	1653.29	81.4242	245.538	1658.49	218.215	224.789	1661.68	168.885	173.882	1515.09	173.317	70.2026	1293.02	166.743	308.132	1412.41	171.471	329.779	1226.59	223.395	63.6041	1370.28	-26.2647	180.026	1456.56	-78.3673	139.226	1256.4	-89.6728	102.36	1141.26	-95.0362	136.974	968.922	-48.4645	152.948	874.482	-109.752	107.218	869.505	-105.089	147.595	771.659
612	0	112.605	413.579	1656	216.215	406.445	1656.13	81.426	257.714	1661.46	218.209	236.877	1664.46	168.689	186.177	1517.83	172.864	82.5215	1295.83	166.701	320.485	1415.3	171.247	342.081	1229.53	223.033	75.9394	1373.01	-26.5276	192.888	1459.71	-79.8498	156.11	1258.45	-92.1682	122.042	1142.5	-95.8065	163.166	971.256	-48.2436	181.899	878.024	-110.499	137.819	870.947	-104.327	181.94	774.827
613	0	112.682	425.61	1658.83	216.295	418.435	1658.8	81.4131	269.787	1664.21	218.188	248.871	1667.02	168.524	198.434	1520.37	172.528	94.7749	1298.45	166.635	332.815	1417.98	170.975	354.366	1232.25	222.775	88.2673	1375.55	-26.7425	205.641	1462.65	-81.2394	172.878	1260.41	-94.5079	141.653	1143.7	-96.4573	189.371	973.865	-47.929	210.973	881.972	-111.027	168.54	872.815	-103.377	216.401	778.612
614	0	112.715	437.565	1661.43	216.33	430.356	1661.26	81.3706	281.78	1666.7	218.136	260.795	1669.3	168.385	210.662	1522.67	172.31	106.976	1300.82	166.538	345.126	1420.39	170.657	366.635	1234.7	222.618	100.595	1377.86	-26.9148	218.289	1465.32	-82.5291	189.516	1262.24	-96.6733	161.166	1144.82	-96.9887	215.527	976.718	-47.5287	240.094	886.296	-111.339	199.287	875.088	-102.27	250.867	782.996
615	0	112.692	449.465	1663.77	216.31	442.231	1663.45	81.2876	293.716	1668.89	218.041	272.671	1671.29	168.269	222.87	1524.69	172.209	119.137	1302.91	166.407	357.423	1422.51	170.293	378.892	1236.85	222.558	112.93	1379.9	-27.0473	230.833	1467.68	-83.7101	206.01	1263.88	-98.6478	180.563	1145.83	-97.401	241.576	979.782	-47.0501	269.192	890.964	-111.443	229.973	877.738	-101.037	285.233	787.95
616	0	112.605	461.335	1665.8	216.227	454.084	1665.35	81.1573	305.616	1670.73	217.898	284.521	1672.96	168.175	235.066	1526.41	172.224	131.269	1304.7	166.244	369.709	1424.3	169.89	391.138	1238.67	222.591	125.277	1381.66	-27.1408	243.276	1469.71	-84.7718	222.351	1265.3	-100.417	199.828	1146.67	-97.6949	267.467	983.023	-46.4993	298.202	895.941	-111.347	260.518	880.734	-99.7075	319.403	793.439
617	0	112.455	473.194	1667.46	216.081	465.933	1666.91	80.9777	317.502	1672.21	217.703	296.366	1674.29	168.107	247.257	1527.8	172.355	143.384	1306.16	166.052	381.988	1425.74	169.456	403.377	1240.13	222.717	137.642	1383.09	-27.1939	255.623	1471.37	-85.7024	238.529	1266.45	-101.97	218.951	1147.32	-97.8709	293.153	986.403	-45.881	327.06	901.191	-111.064	290.85	884.042	-98.3082	353.288	799.424
618	0	112.243	485.062	1668.75	215.873	477.799	1668.11	80.7514	329.391	1673.31	217.46	308.226	1675.27	168.067	259.448	1528.84	172.6	155.491	1307.27	165.838	394.262	1426.8	169.003	415.611	1241.21	222.932	150.03	1384.2	-27.203	267.879	1472.65	-86.4893	254.538	1267.31	-103.297	237.928	1147.75	-97.9295	318.593	989.889	-45.1988	355.706	906.676	-110.605	320.904	887.626	-96.8613	386.807	805.859
619	0	111.977	496.954	1669.63	215.611	489.697	1668.94	80.4856	341.301	1674.02	217.176	320.115	1675.88	168.063	271.644	1529.53	172.958	167.601	1308.02	165.611	406.533	1427.5	168.542	427.845	1241.9	223.237	162.445	1384.95	-27.1626	280.049	1473.54	-87.1199	270.377	1267.86	-104.393	256.758	1147.94	-97.8715	343.752	993.447	-44.4547	384.084	912.356	-109.985	350.622	891.451	-95.3843	419.888	812.694
620	0	111.67	508.886	1670.1	215.307	501.641	1669.38	80.1923	353.245	1674.33	216.865	332.049	1676.15	168.104	283.849	1529.87	173.427	179.724	1308.39	165.384	418.806	1427.81	168.087	440.086	1242.22	223.631	174.893	1385.35	-27.0655	292.144	1474.04	-87.5821	286.045	1268.07	-105.256	275.439	1147.89	-97.6974	368.598	997.043	-43.65	412.139	918.195	-109.216	379.953	895.482	-93.8898	452.463	819.877
621	0	111.336	520.867	1670.15	214.978	513.642	1669.43	79.8875	365.233	1674.26	216.542	344.038	1676.06	168.199	296.069	1529.84	174.005	191.871	1308.4	165.17	431.085	1427.75	167.655	452.343	1242.16	224.114	187.378	1385.39	-26.9033	304.174	1474.15	-87.8648	301.546	1267.95	-105.885	293.974	1147.58	-97.4083	393.102	1000.65	-42.7855	439.82	924.154	-108.313	408.852	899.685	-92.3859	484.472	827.356
622	0	110.996	532.907	1669.79	214.643	525.71	1669.1	79.5912	377.275	1673.82	216.229	356.093	1675.64	168.361	308.308	1529.46	174.689	204.052	1308.03	164.986	443.376	1427.33	167.259	464.625	1241.73	224.688	199.905	1385.06	-26.6665	316.153	1473.88	-87.9585	316.885	1267.5	-106.283	312.363	1147.02	-97.0053	417.238	1004.24	-41.8618	467.079	930.198	-107.288	437.276	904.025	-90.877	515.86	835.074
623	0	110.671	545.01	1669.04	214.324	537.849	1668.41	79.3267	389.376	1673.02	215.949	368.219	1674.89	168.603	320.57	1528.73	175.475	216.281	1307.3	164.849	455.686	1426.56	166.915	476.945	1240.96	225.351	212.48	1384.38	-26.3449	328.096	1473.26	-87.8563	332.072	1266.73	-106.454	330.604	1146.21	-96.49	440.981	1007.78	-40.8794	493.87	936.29	-106.153	465.188	908.471	-89.3651	546.575	842.978
624	0	110.387	557.181	1667.93	214.048	550.066	1667.37	79.1199	401.539	1671.89	215.729	380.421	1673.85	168.938	332.863	1527.68	176.361	228.57	1306.21	164.778	468.023	1425.47	166.638	489.316	1239.87	226.105	225.107	1383.34	-25.9283	340.023	1472.29	-87.5537	347.117	1265.65	-106.406	348.695	1145.17	-95.8646	464.306	1011.26	-39.8396	520.147	942.395	-104.919	492.553	912.992	-87.8504	576.571	851.012
625	0	110.171	569.422	1666.47	213.84	562.362	1666.02	78.9988	413.767	1670.45	215.598	392.704	1672.52	169.378	345.192	1526.31	177.339	240.933	1304.79	164.791	480.399	1424.08	166.443	501.753	1238.49	226.949	237.792	1381.96	-25.407	351.954	1471.02	-87.0492	362.031	1264.28	-106.148	366.627	1143.92	-95.1318	487.19	1014.65	-38.7441	545.87	948.481	-103.595	519.335	917.554	-86.3326	605.806	859.12
626	0	110.049	581.732	1664.72	213.728	574.739	1664.38	78.9925	426.061	1668.74	215.586	405.07	1670.94	169.936	357.566	1524.65	178.403	253.385	1303.06	164.907	492.823	1422.43	166.342	514.272	1236.84	227.881	250.542	1380.27	-24.7718	363.912	1469.46	-86.3447	376.825	1262.66	-105.688	384.389	1142.48	-94.2949	509.607	1017.93	-37.5955	571	954.513	-102.189	545.502	922.127	-84.8113	634.24	867.247
627	0	110.051	594.113	1662.7	213.742	587.198	1662.48	79.1303	438.419	1666.79	215.721	417.521	1669.14	170.624	369.992	1522.73	179.546	265.939	1301.03	165.143	505.309	1420.53	166.346	526.887	1234.96	228.899	263.361	1378.27	-24.0151	375.92	1467.66	-85.4453	391.511	1260.8	-105.039	401.965	1140.87	-93.3581	531.534	1021.1	-36.3969	595.498	960.459	-100.708	571.021	926.679	-83.2869	661.836	875.339
628	0	110.203	606.564	1660.47	213.907	599.74	1660.38	79.4406	450.843	1664.63	216.033	430.058	1667.13	171.452	382.481	1520.57	180.757	278.608	1298.73	165.516	517.87	1418.43	166.467	539.616	1232.87	229.999	276.254	1375.99	-23.1308	388.004	1465.65	-84.3597	406.1	1258.75	-104.214	419.336	1139.11	-92.3259	552.946	1024.13	-35.1522	619.331	966.286	-99.1586	595.857	931.177	-81.7601	688.561	883.342
629	0	110.533	619.085	1658.08	214.252	612.367	1658.1	79.9502	463.333	1662.31	216.549	442.683	1664.95	172.429	395.042	1518.21	182.026	291.405	1296.2	166.039	530.518	1416.16	166.712	552.472	1230.61	231.177	289.228	1373.47	-22.1147	400.189	1463.47	-83.0996	420.601	1256.55	-103.227	436.478	1137.24	-91.2034	573.818	1027	-33.8658	642.466	971.965	-97.5458	619.979	935.588	-80.2325	714.381	891.201
630	0	111.064	631.679	1655.56	214.799	625.079	1655.69	80.6829	475.89	1659.85	217.293	455.397	1662.63	173.56	407.685	1515.68	183.34	304.34	1293.47	166.723	543.268	1413.75	167.087	565.469	1228.21	232.426	302.286	1370.73	-20.965	412.499	1461.16	-81.6798	435.023	1254.23	-102.092	453.367	1135.28	-89.9964	594.127	1029.72	-32.542	664.874	977.462	-95.8735	643.353	939.878	-78.7053	739.271	898.864
631	0	111.818	644.348	1652.97	215.57	637.879	1653.18	81.6585	488.517	1657.31	218.283	468.203	1660.19	174.848	420.421	1513.01	184.686	317.419	1290.58	167.575	556.131	1411.24	167.594	578.618	1225.72	233.742	315.433	1367.8	-19.6819	424.957	1458.78	-80.1175	449.37	1251.84	-100.825	469.974	1133.27	-88.7112	613.847	1032.26	-31.1852	686.529	982.747	-94.1449	665.948	944.013	-77.1793	763.202	906.276
632	0	112.812	657.095	1650.36	216.58	650.769	1650.63	82.8919	501.217	1654.71	219.536	481.103	1657.66	176.295	433.257	1510.24	186.05	330.648	1287.57	168.6	569.118	1408.66	168.235	591.93	1223.15	235.115	328.672	1364.72	-18.2682	437.582	1456.35	-78.432	463.646	1249.41	-99.4424	486.271	1131.22	-87.3541	632.958	1034.62	-29.7996	707.405	987.791	-92.3626	687.733	947.958	-75.6543	786.153	913.383
633	0	114.059	669.925	1647.76	217.842	663.752	1648.06	84.3926	513.996	1652.11	221.06	494.099	1655.08	177.896	446.203	1507.41	187.42	344.026	1284.48	169.797	582.237	1406.04	169.006	605.409	1220.55	236.54	342.005	1361.54	-16.7287	450.39	1453.93	-76.6442	477.851	1247	-97.9621	502.229	1129.18	-85.9321	651.438	1036.78	-28.3887	727.484	992.56	-90.529	708.68	951.677	-74.1282	808.105	920.13
634	0	115.566	682.844	1645.23	219.361	676.832	1645.5	86.1634	526.858	1649.53	222.857	507.194	1652.48	179.647	459.261	1504.55	188.782	357.551	1281.34	171.161	595.493	1403.43	169.903	619.061	1217.95	238.009	355.431	1358.29	-15.0705	463.389	1451.55	-74.776	491.983	1244.63	-96.4011	517.822	1127.17	-84.4524	669.269	1038.74	-26.9554	746.75	997.025	-88.6463	728.763	955.136	-72.5969	829.043	926.462
635	0	117.332	695.857	1642.78	221.136	690.01	1643	88.2006	539.81	1647.02	224.924	520.39	1649.88	181.538	472.436	1501.71	190.125	371.216	1278.21	172.685	608.888	1400.85	170.916	632.883	1215.38	239.516	368.949	1355.01	-13.3025	476.584	1449.26	-72.8498	506.037	1242.36	-94.7773	533.025	1125.22	-82.9221	686.437	1040.48	-25.5019	765.189	1001.15	-86.7177	747.961	958.299	-71.0545	848.957	932.322
636	0	119.35	708.969	1640.46	223.159	703.291	1640.56	90.4936	552.857	1644.62	227.248	533.688	1647.32	183.558	485.726	1498.91	191.44	385.01	1275.13	174.355	622.42	1398.35	172.035	646.872	1212.89	241.056	382.555	1351.74	-11.4359	489.972	1447.08	-70.8876	520.004	1240.21	-93.1076	547.815	1123.35	-81.3488	702.93	1041.99	-24.0302	782.794	1004.91	-84.747	766.256	961.134	-69.4933	867.844	937.654
637	0	121.608	722.183	1638.29	225.416	716.674	1638.23	93.0249	566.004	1642.34	229.812	547.09	1644.83	185.692	499.128	1496.21	192.722	398.919	1272.13	176.155	636.082	1395.95	173.246	661.019	1210.51	242.623	396.243	1348.54	-9.48365	503.541	1445.05	-68.9108	533.873	1238.22	-91.4085	562.176	1121.6	-79.7399	718.741	1043.28	-22.5416	799.562	1008.27	-82.7395	783.637	963.608	-67.9045	885.704	942.402
638	0	124.084	735.502	1636.29	227.885	730.159	1636.02	95.7705	579.252	1640.24	232.59	560.592	1642.44	187.922	512.632	1493.63	193.967	412.925	1269.27	178.062	649.863	1393.68	174.534	675.308	1208.27	244.213	410.003	1345.43	-7.4604	517.275	1443.19	-66.9391	547.629	1236.42	-89.6949	576.096	1119.99	-78.1032	733.867	1044.31	-21.0374	815.496	1011.2	-80.7025	800.095	965.688	-66.2794	902.545	946.512
639	0	126.751	748.924	1634.48	230.54	743.742	1633.94	98.7005	592.603	1638.33	235.553	574.193	1640.18	190.23	526.229	1491.2	195.175	427.01	1266.56	180.055	663.748	1391.57	175.882	689.722	1206.19	245.824	423.824	1342.47	-5.38257	531.148	1441.53	-64.9901	561.256	1234.84	-87.9802	589.568	1118.53	-76.4463	748.311	1045.09	-19.5192	830.602	1013.65	-78.6452	815.63	967.347	-64.6102	918.378	949.93
640	0	129.577	762.448	1632.86	233.346	757.418	1632	101.78	606.054	1636.63	238.664	587.885	1638.08	192.592	539.904	1488.96	196.351	441.15	1264.06	182.106	677.718	1389.65	177.272	704.236	1204.31	247.451	437.692	1339.69	-3.26802	545.132	1440.09	-63.0791	574.736	1233.48	-86.2753	602.591	1117.25	-74.7772	762.077	1045.61	-17.9892	844.892	1015.6	-76.5791	830.245	968.557	-62.8919	933.22	952.607
641	0	132.524	776.066	1631.45	236.268	771.178	1630.23	104.969	619.6	1635.18	241.881	601.661	1636.16	194.987	553.639	1486.94	197.5	455.325	1261.79	184.188	691.75	1387.93	178.688	718.819	1202.65	249.09	451.589	1337.12	-1.13579	559.194	1438.89	-61.2185	588.048	1232.38	-84.5888	615.17	1116.17	-73.1038	775.176	1045.85	-16.4502	858.378	1017.02	-74.5184	843.948	969.297	-61.1229	947.09	954.499
642	0	135.552	789.768	1630.25	239.264	785.011	1628.63	108.224	633.233	1633.98	245.162	615.509	1634.45	197.388	567.416	1485.15	198.632	469.509	1259.78	186.273	705.818	1386.44	180.114	733.437	1201.22	250.738	465.497	1334.81	0.994238	573.297	1437.92	-59.4178	601.172	1231.54	-82.9266	627.316	1115.29	-71.4342	787.621	1045.81	-14.9064	871.08	1017.88	-72.4794	856.751	969.547	-59.307	960.009	955.568
643	0	138.618	803.544	1629.26	242.293	798.901	1627.2	111.502	646.942	1633.05	248.46	629.415	1632.96	199.771	581.213	1483.63	199.756	483.681	1258.05	188.334	719.897	1385.2	181.536	748.052	1200.04	252.387	479.397	1332.78	3.10197	587.405	1437.2	-57.6839	614.089	1230.97	-81.2922	639.042	1114.64	-69.7767	799.425	1045.48	-13.3636	883.015	1018.15	-70.4801	868.668	969.293	-57.4537	971.998	955.785
644	0	141.68	817.379	1628.47	245.312	812.832	1625.96	114.755	660.713	1632.38	251.727	643.362	1631.72	202.112	595.008	1482.38	200.881	497.817	1256.62	190.344	733.957	1384.2	182.94	762.623	1199.11	254.033	493.27	1331.06	5.16778	601.481	1436.74	-56.021	626.78	1230.67	-79.6866	650.369	1114.2	-68.1399	810.605	1044.86	-11.8294	894.206	1017.81	-68.5398	879.715	968.526	-55.5788	983.078	955.129
645	0	144.696	831.256	1627.9	248.28	826.784	1624.9	117.939	674.532	1632	254.919	657.333	1630.74	204.387	608.781	1481.43	202.015	511.899	1255.52	192.28	747.97	1383.47	184.317	777.109	1198.44	255.668	507.095	1329.67	7.17324	615.491	1436.52	-54.4309	639.23	1230.63	-78.1086	661.317	1113.98	-66.5327	821.177	1043.94	-10.3133	904.67	1016.85	-66.6777	889.908	967.245	-53.7047	993.264	953.59
646	0	147.624	845.156	1627.53	251.156	840.737	1624.05	121.008	688.381	1631.89	257.99	671.307	1630.04	206.574	622.509	1480.78	203.164	525.909	1254.74	194.122	761.911	1383.01	185.658	791.473	1198.03	257.286	520.856	1328.63	9.10189	629.402	1436.55	-52.9132	651.429	1230.86	-76.5551	671.912	1113.99	-64.9643	831.158	1042.72	-8.82737	914.429	1015.25	-64.9127	899.262	965.454	-51.8599	1002.57	951.173
647	0	150.428	859.06	1627.37	253.906	854.67	1623.41	123.923	702.242	1632.05	260.9	685.263	1629.62	208.655	636.172	1480.45	204.334	539.832	1254.29	195.853	775.754	1382.82	186.955	805.68	1197.89	258.88	534.536	1327.94	10.9399	643.184	1436.82	-51.4656	663.369	1231.34	-75.0215	682.177	1114.22	-63.4441	840.562	1041.21	-7.38584	923.498	1013.03	-63.2624	907.788	963.163	-50.0785	1011	947.891
648	0	153.072	872.949	1627.41	256.493	868.563	1622.99	126.648	716.096	1632.48	263.614	699.182	1629.5	210.617	649.753	1480.43	205.527	553.658	1254.19	197.462	789.479	1382.91	188.2	819.704	1198.01	260.444	548.125	1327.62	12.6767	656.811	1437.33	-50.084	675.047	1232.06	-73.5014	692.14	1114.66	-61.9817	849.403	1039.41	-6.00539	931.892	1010.18	-61.7432	915.496	960.393	-48.3987	1018.57	943.772
649	0	155.526	886.802	1627.66	258.892	882.397	1622.8	129.153	729.923	1633.18	266.101	713.045	1629.69	212.449	663.237	1480.72	206.743	567.378	1254.41	198.938	803.07	1383.28	189.388	833.527	1198.4	261.976	561.613	1327.66	14.305	670.261	1438.07	-48.7627	686.468	1233.01	-71.9873	701.825	1115.31	-60.5871	857.692	1037.34	-4.70482	939.623	1006.74	-60.3696	922.393	957.17	-46.8617	1025.25	938.855
650	0	157.765	900.599	1628.11	261.077	896.156	1622.87	131.415	743.703	1634.14	268.342	726.834	1630.19	214.145	676.614	1481.33	207.984	580.991	1254.97	200.278	816.515	1383.94	190.512	847.141	1199.06	263.472	574.997	1328.06	15.8214	683.519	1439.03	-47.4947	697.636	1234.17	-70.471	711.255	1116.15	-59.2697	865.439	1035.02	-3.50473	946.698	1002.72	-59.1546	928.483	953.532	-45.5099	1031.06	933.192
651	0	159.768	914.322	1628.79	263.03	909.824	1623.21	133.419	757.416	1635.35	270.321	740.536	1631.01	215.703	689.876	1482.24	209.249	594.496	1255.83	201.481	829.808	1384.89	191.566	860.547	1200.01	264.932	588.276	1328.81	17.2259	696.572	1440.19	-46.2715	708.562	1235.55	-68.9433	720.451	1117.19	-58.039	872.651	1032.46	-2.42678	953.123	998.184	-58.1091	933.769	949.524	-44.3852	1035.96	926.846
652	0	161.524	927.953	1629.68	264.739	923.391	1623.83	135.158	771.044	1636.8	272.034	754.136	1632.15	217.126	703.02	1483.45	210.538	607.895	1257	202.548	842.951	1386.12	192.548	873.757	1201.23	266.358	601.455	1329.89	18.5214	709.415	1441.56	-45.0836	719.258	1237.11	-67.3951	729.434	1118.4	-56.9037	879.333	1029.71	-1.49286	958.899	993.17	-57.2425	938.253	945.2	-43.527	1039.95	919.894
653	0	163.023	941.474	1630.8	266.199	936.849	1624.75	136.634	784.568	1638.49	273.484	767.628	1633.61	218.419	716.05	1484.94	211.853	621.194	1258.44	203.486	855.949	1387.63	193.452	886.788	1202.74	267.751	614.543	1331.29	19.7141	722.05	1443.11	-43.9206	729.737	1238.85	-65.8181	738.219	1119.79	-55.8717	885.492	1026.8	-0.724064	964.03	987.744	-56.5618	941.937	940.624	-42.9706	1043	912.42
654	0	164.264	954.874	1632.16	267.408	950.192	1625.96	137.854	797.973	1640.38	274.682	781.005	1635.36	219.591	728.972	1486.68	213.193	634.4	1260.14	204.302	868.813	1389.41	194.279	899.664	1204.52	269.117	627.549	1332.97	20.8119	734.485	1444.83	-42.7717	740.016	1240.76	-64.2046	746.821	1121.34	-54.9496	891.132	1023.76	-0.139511	968.514	981.976	-56.072	944.826	935.865	-42.7451	1045.1	904.521
655	0	165.253	968.14	1633.74	268.373	963.417	1627.48	138.836	811.245	1642.48	275.643	794.262	1637.39	220.652	741.797	1488.66	214.56	647.52	1262.06	205.007	881.56	1391.44	195.03	912.411	1206.56	270.459	640.49	1334.91	21.8248	746.733	1446.71	-41.6264	750.109	1242.82	-62.5492	755.249	1123.05	-54.1428	896.26	1020.65	0.24472	972.353	975.944	-55.7752	946.932	930.999	-42.872	1046.23	896.299
656	0	166.001	981.266	1635.55	269.106	976.525	1629.29	139.598	824.375	1644.74	276.391	807.401	1639.67	221.614	754.538	1490.84	215.952	660.563	1264.18	205.609	894.209	1393.71	195.707	925.058	1208.84	271.783	653.38	1337.07	22.7634	758.814	1448.72	-40.4751	760.033	1245	-60.8486	763.513	1124.9	-53.455	900.885	1017.52	0.416569	975.552	969.728	-55.6711	948.269	926.106	-43.3637	1046.4	887.866
657	0	166.522	994.246	1637.58	269.62	989.518	1631.38	140.167	837.356	1647.15	276.952	820.422	1642.17	222.49	767.211	1493.19	217.369	673.538	1266.47	206.123	906.782	1396.17	196.316	937.631	1211.34	273.093	666.237	1339.42	23.6392	770.751	1450.85	-39.3095	769.802	1247.3	-59.1024	771.619	1126.89	-52.8881	905.017	1014.4	0.368762	978.117	963.414	-55.7558	948.862	921.264	-44.2226	1045.6	879.336
658	0	166.838	1007.08	1639.81	269.938	1002.4	1633.72	140.57	850.187	1649.68	277.353	833.333	1644.84	223.293	779.835	1495.68	218.808	686.452	1268.88	206.56	919.304	1398.8	196.863	950.158	1214	274.393	679.078	1341.91	24.4635	782.571	1453.05	-38.123	779.432	1249.68	-57.3136	779.569	1128.99	-52.4422	908.673	1011.35	0.099329	980.063	957.084	-56.0227	948.744	916.554	-45.4403	1043.86	870.825
659	0	166.973	1019.78	1642.21	270.081	1015.19	1636.27	140.837	862.871	1652.27	277.624	846.14	1647.63	224.035	792.429	1498.25	220.262	699.314	1271.38	206.932	931.796	1401.55	197.357	962.662	1216.8	275.686	691.919	1344.5	25.2468	794.302	1455.31	-36.9117	788.936	1252.11	-55.4881	787.368	1131.19	-52.1154	911.873	1008.42	-0.38816	981.408	950.82	-56.4618	947.957	912.049	-46.9978	1041.2	862.446
660	0	166.951	1032.34	1644.74	270.075	1027.88	1639	140.995	875.416	1654.89	277.793	858.855	1650.49	224.729	805.012	1500.88	221.725	712.13	1273.92	207.25	944.282	1404.37	197.806	975.165	1219.67	276.973	704.775	1347.15	25.999	805.974	1457.58	-35.6737	798.328	1254.58	-53.6351	795.016	1133.47	-51.9038	914.643	1005.65	-1.08466	982.179	944.699	-57.0602	946.556	907.818	-48.8656	1037.69	854.308
661	0	166.801	1044.79	1647.38	269.946	1040.5	1641.85	141.072	887.835	1657.5	277.889	871.489	1653.36	225.384	817.603	1503.5	223.186	724.906	1276.47	207.525	956.783	1407.2	198.22	987.684	1222.56	278.254	717.659	1349.79	26.7285	817.615	1459.84	-34.4101	807.62	1257.04	-51.7666	802.518	1135.8	-51.802	917.012	1003.06	-1.97605	982.411	938.791	-57.8018	944.601	903.92	-51.0056	1033.39	846.513
662	0	166.549	1057.14	1650.06	269.721	1053.06	1644.76	141.093	900.147	1660.04	277.934	884.06	1656.19	226.01	830.22	1506.08	224.634	737.648	1278.98	207.768	969.318	1410	198.607	1000.23	1225.41	279.526	730.582	1352.4	27.4425	829.252	1462.03	-33.124	816.824	1259.48	-49.8965	809.878	1138.17	-51.8025	919.019	1000.7	-3.04369	982.146	933.157	-58.6679	942.164	900.403	-53.3723	1028.38	839.147
663	0	166.224	1069.41	1652.74	269.425	1065.57	1647.67	141.081	912.373	1662.47	277.95	896.584	1658.9	226.614	842.879	1508.56	226.057	750.361	1281.42	207.984	981.901	1412.7	198.974	1012.83	1228.16	280.787	743.551	1354.92	28.1462	840.91	1464.13	-31.8209	825.951	1261.86	-48.0402	817.1	1140.54	-51.8966	920.704	998.583	-4.26528	981.435	927.85	-59.6371	939.322	897.303	-55.9149	1022.75	832.286
664	0	165.85	1081.63	1655.37	269.084	1078.06	1650.53	141.054	924.539	1664.75	277.956	909.08	1661.45	227.199	855.593	1510.91	227.44	763.048	1283.73	208.181	994.546	1415.26	199.328	1025.46	1230.75	282.029	756.573	1357.3	28.8433	852.609	1466.09	-30.5077	835.011	1264.16	-46.2134	824.195	1142.91	-52.0741	922.114	996.726	-5.61572	980.335	922.912	-60.6862	936.159	894.646	-58.5797	1016.61	825.987
665	0	165.452	1093.83	1657.89	268.718	1090.54	1653.26	141.028	936.673	1666.82	277.966	921.571	1663.79	227.77	868.375	1513.08	228.77	775.713	1285.89	208.362	1007.26	1417.61	199.671	1038.15	1233.12	283.246	769.65	1359.52	29.5355	864.369	1467.88	-29.1925	844.016	1266.34	-44.4314	831.174	1145.23	-52.3239	923.298	995.138	-7.06803	978.91	918.374	-61.7905	932.759	892.443	-61.3128	1010.07	820.293
666	0	165.048	1106.03	1660.23	268.348	1103.04	1655.82	141.014	948.807	1668.66	277.99	934.077	1665.87	228.327	881.232	1515.03	230.033	788.359	1287.87	208.53	1020.05	1419.71	200.007	1050.88	1235.23	284.428	782.784	1361.52	30.2226	876.204	1469.47	-27.8841	852.976	1268.4	-42.7085	838.049	1147.5	-52.6337	924.307	993.823	-8.59428	977.23	914.256	-62.9251	929.21	890.695	-64.0613	1003.25	815.23
667	0	164.657	1118.26	1662.35	267.99	1115.58	1658.13	141.019	960.971	1670.23	278.034	946.62	1667.65	228.868	894.171	1516.73	231.216	800.988	1289.62	208.685	1032.92	1421.53	200.334	1063.65	1237.04	285.567	795.974	1363.28	30.9023	888.127	1470.82	-26.5917	861.904	1270.31	-41.0566	844.84	1149.69	-52.9908	925.196	992.778	-10.1665	975.364	910.569	-64.0653	925.598	889.397	-66.7763	996.26	810.809
668	0	164.292	1130.55	1664.21	267.656	1128.18	1660.15	141.048	973.196	1671.5	278.102	959.223	1669.11	229.389	907.197	1518.16	232.308	813.605	1291.13	208.824	1045.87	1423.02	200.65	1076.47	1238.49	286.649	809.218	1364.78	31.5704	900.146	1471.92	-25.3244	870.813	1272.06	-39.4856	851.565	1151.8	-53.3824	926.018	991.995	-11.7573	973.387	907.315	-65.1872	922.007	888.532	-69.4136	989.221	807.028
669	0	163.963	1142.94	1665.75	267.354	1140.86	1661.84	141.1	985.51	1672.46	278.193	971.905	1670.22	229.886	920.312	1519.28	233.296	826.212	1292.38	208.943	1058.9	1424.16	200.951	1089.32	1239.58	287.664	822.514	1366	32.2207	912.269	1472.75	-24.0907	879.716	1273.64	-38.0022	858.245	1153.82	-53.7954	926.827	991.462	-13.341	971.372	904.49	-66.2688	918.516	888.079	-71.9352	982.242	803.873
670	0	163.675	1155.44	1666.95	267.091	1153.65	1663.15	141.174	997.942	1673.09	278.303	984.687	1670.96	230.35	933.515	1520.1	234.169	838.817	1293.35	209.038	1072	1424.94	201.23	1102.19	1240.29	288.599	835.859	1366.92	32.8454	924.5	1473.31	-22.8989	888.629	1275.06	-36.6101	864.903	1155.73	-54.2175	927.675	991.166	-14.8938	969.392	902.081	-67.29	915.199	888.011	-74.3099	975.427	801.321
671	0	163.43	1168.08	1667.78	266.867	1166.55	1664.06	141.263	1010.51	1673.4	278.427	997.586	1671.34	230.773	946.807	1520.6	234.917	851.424	1294.03	209.102	1085.17	1425.35	201.48	1115.1	1240.6	289.441	849.249	1367.53	33.4352	936.844	1473.57	-21.7568	897.57	1276.32	-35.3102	871.565	1157.55	-54.6369	928.612	991.089	-16.3947	967.517	900.073	-68.2329	912.125	888.298	-76.5135	968.872	799.341
672	0	163.225	1180.87	1668.22	266.679	1179.58	1664.55	141.359	1023.25	1673.38	278.556	1010.61	1671.35	231.145	960.184	1520.77	235.531	864.043	1294.42	209.126	1098.42	1425.38	201.693	1128.03	1240.52	290.177	862.682	1367.83	33.9795	949.303	1473.56	-20.6712	906.556	1277.41	-34.1009	878.257	1159.26	-55.0428	929.686	991.213	-17.8257	965.813	898.445	-69.0823	909.355	888.91	-78.5287	962.663	797.898
673	0	163.054	1193.84	1668.26	266.521	1192.75	1664.62	141.453	1036.16	1673.04	278.678	1023.79	1671.01	231.454	973.645	1520.63	236.003	876.684	1294.53	209.102	1111.73	1425.05	201.859	1140.99	1240.07	290.796	876.157	1367.83	34.4671	961.879	1473.27	-19.6487	915.607	1278.36	-32.9782	885.005	1160.88	-55.426	930.945	991.519	-19.1722	964.344	897.174	-69.8259	906.942	889.811	-80.3444	956.875	796.951
674	0	162.907	1206.99	1667.92	266.382	1206.07	1664.27	141.532	1049.25	1672.41	278.78	1037.11	1670.34	231.689	987.187	1520.18	236.327	889.359	1294.35	209.02	1125.11	1424.37	201.97	1153.97	1239.25	291.286	889.674	1367.53	34.8861	974.575	1472.72	-18.6951	924.742	1279.17	-31.9369	891.839	1162.41	-55.7788	932.431	991.986	-20.4231	963.168	896.231	-70.454	904.936	890.969	-81.9554	951.575	796.459
675	0	162.77	1220.32	1667.19	266.251	1219.55	1663.52	141.582	1062.54	1671.5	278.849	1050.58	1669.35	231.838	1000.81	1519.43	236.498	902.083	1293.9	208.872	1138.55	1423.36	202.016	1166.99	1238.11	291.638	903.232	1366.96	35.2247	987.392	1471.93	-17.8154	933.983	1279.84	-30.9711	898.789	1163.84	-56.095	934.185	992.593	-21.5711	962.338	895.589	-70.9598	903.376	892.348	-83.3614	946.816	796.375
676	0	162.628	1233.84	1666.11	266.111	1233.18	1662.38	141.588	1076.02	1670.34	278.868	1064.22	1668.08	231.888	1014.5	1518.42	236.513	914.87	1293.2	208.647	1152.06	1422.06	201.991	1180.05	1236.66	291.843	916.834	1366.12	35.4711	1000.33	1470.91	-17.0145	943.35	1280.41	-30.0749	905.885	1165.2	-56.3707	936.246	993.318	-22.612	961.902	895.217	-71.3397	902.3	893.915	-84.5659	942.645	796.654
677	0	162.463	1247.55	1664.7	265.944	1246.97	1660.89	141.534	1089.69	1668.95	278.821	1078.01	1666.56	231.83	1028.27	1517.16	236.373	927.739	1292.25	208.336	1165.64	1420.49	201.885	1193.16	1234.94	291.896	930.482	1365.05	35.6141	1013.39	1469.67	-16.2968	952.864	1280.86	-29.2431	913.158	1166.48	-56.6039	938.651	994.14	-23.5448	961.905	895.08	-71.5932	901.738	895.636	-85.5759	939.098	797.248
678	0	162.253	1261.43	1662.99	265.732	1260.91	1659.08	141.403	1103.54	1667.37	278.692	1091.95	1664.82	231.65	1042.12	1515.68	236.077	940.706	1291.09	207.932	1179.29	1418.68	201.693	1206.32	1233	291.791	944.182	1363.76	35.6434	1026.58	1468.25	-15.6665	962.547	1281.22	-28.4719	920.643	1167.67	-56.7946	941.436	995.035	-24.3715	962.384	895.146	-71.7231	901.718	897.476	-86.4007	936.206	798.11
679	0	161.981	1275.47	1661.02	265.455	1274.99	1657	141.179	1117.57	1665.62	278.464	1106.03	1662.9	231.341	1056.04	1514.01	235.631	953.79	1289.73	207.426	1193.01	1416.68	201.408	1219.56	1230.87	291.525	957.937	1362.29	35.5493	1039.89	1466.67	-15.1279	972.42	1281.48	-27.7593	928.372	1168.78	-56.9448	944.635	995.979	-25.0964	963.377	895.376	-71.735	902.265	899.401	-87.0514	933.993	799.192
680	0	161.624	1289.67	1658.84	265.094	1289.2	1654.69	140.845	1131.76	1663.74	278.121	1120.24	1660.84	230.893	1070.03	1512.17	235.04	967.007	1288.19	206.812	1206.8	1414.52	201.028	1232.88	1228.59	291.098	971.753	1360.66	35.3237	1053.32	1464.95	-14.6855	982.504	1281.64	-27.1055	936.379	1169.8	-57.0584	948.281	996.946	-25.7256	964.915	895.736	-71.6381	903.401	901.378	-87.5403	932.48	800.444
681	0	161.165	1304.01	1656.5	264.63	1303.53	1652.22	140.386	1146.09	1661.75	277.648	1134.58	1658.67	230.299	1084.1	1510.21	234.31	980.372	1286.52	206.083	1220.68	1412.25	200.546	1246.3	1226.21	290.509	985.634	1358.91	34.9593	1066.87	1463.1	-14.3439	992.821	1281.71	-26.5126	944.698	1170.72	-57.1406	952.407	997.911	-26.2666	967.028	896.187	-71.4441	905.15	903.372	-87.8805	931.685	801.819
682	0	160.585	1318.47	1654.03	264.047	1317.97	1649.62	139.788	1160.56	1659.7	277.033	1149.03	1656.43	229.554	1098.24	1508.15	233.448	993.897	1284.72	205.237	1234.64	1409.9	199.963	1259.83	1223.76	289.762	999.585	1357.07	34.4506	1080.54	1461.15	-14.1084	1003.39	1281.69	-25.9849	953.363	1171.54	-57.1984	957.044	998.846	-26.7278	969.743	896.693	-71.1675	907.533	905.35	-88.0856	931.625	803.268
683	0	159.871	1333.05	1651.49	263.33	1332.51	1646.95	139.039	1175.14	1657.6	276.264	1163.58	1654.16	228.654	1112.46	1506.03	232.464	1007.59	1282.83	204.27	1248.69	1407.51	199.276	1273.48	1221.29	288.858	1013.61	1355.16	33.7933	1094.34	1459.12	-13.9843	1014.24	1281.55	-25.5287	962.406	1172.22	-57.2394	962.225	999.725	-27.1178	973.088	897.216	-70.8251	910.573	907.278	-88.1689	932.318	804.745
684	0	159.012	1347.72	1648.92	262.468	1347.14	1644.27	138.129	1189.82	1655.48	275.333	1178.21	1651.88	227.597	1126.75	1503.87	231.365	1021.46	1280.89	203.184	1262.83	1405.11	198.486	1287.27	1218.83	287.804	1027.71	1353.23	32.9847	1108.25	1457.03	-13.9774	1025.38	1281.3	-25.1517	971.858	1172.77	-57.2726	967.981	1000.52	-27.4451	977.087	897.721	-70.4356	914.294	909.121	-88.144	933.782	806.204
685	0	158	1362.48	1646.36	261.455	1361.83	1641.6	137.052	1204.59	1653.37	274.234	1192.92	1649.62	226.384	1141.13	1501.72	230.158	1035.5	1278.91	201.982	1277.07	1402.73	197.595	1301.19	1216.42	286.603	1041.89	1351.3	32.0236	1122.29	1454.9	-14.0938	1036.83	1280.92	-24.863	981.747	1173.16	-57.3071	974.343	1001.2	-27.7181	981.767	898.175	-70.0191	918.721	910.848	-88.0238	936.04	807.599
686	0	156.834	1377.3	1643.86	260.286	1376.58	1639.01	135.805	1219.43	1651.28	272.966	1207.68	1647.43	225.018	1155.58	1499.6	228.851	1049.71	1276.93	200.668	1291.39	1400.42	196.607	1315.27	1214.08	285.263	1056.14	1349.4	30.9109	1136.45	1452.74	-14.3399	1048.62	1280.41	-24.6726	992.099	1173.37	-57.3528	981.341	1001.75	-27.9447	987.152	898.543	-69.5966	923.882	912.425	-87.8211	939.114	808.888
687	0	155.516	1392.18	1641.44	258.965	1391.38	1636.52	134.39	1234.33	1649.25	271.529	1222.48	1645.31	223.507	1170.1	1497.53	227.449	1064.08	1274.97	199.251	1305.81	1398.18	195.527	1329.49	1211.85	283.792	1070.46	1347.56	29.649	1150.73	1450.57	-14.722	1060.75	1279.76	-24.591	1002.94	1173.4	-57.4196	989.006	1002.13	-28.1326	993.269	898.797	-69.1898	929.804	913.82	-87.5483	943.032	810.029
688	0	154.052	1407.1	1639.14	257.498	1406.21	1634.17	132.811	1249.28	1647.28	269.93	1237.32	1643.28	221.857	1184.69	1495.55	225.958	1078.59	1273.07	197.743	1320.32	1396.06	194.364	1343.86	1209.74	282.198	1084.84	1345.8	28.2426	1165.14	1448.43	-15.2466	1073.25	1278.96	-24.6285	1014.28	1173.23	-57.5176	997.366	1002.33	-28.2894	1000.14	898.909	-68.8204	936.519	915.004	-87.2179	947.824	810.982
689	0	152.455	1422.06	1636.97	255.895	1421.06	1631.98	131.077	1264.26	1645.39	268.179	1252.17	1641.38	220.083	1199.33	1493.67	224.383	1093.23	1271.25	196.158	1334.9	1394.05	193.129	1358.38	1207.78	280.489	1099.26	1344.16	26.6988	1179.66	1446.31	-15.9196	1086.13	1278.01	-24.7956	1026.14	1172.85	-57.6569	1006.45	1002.33	-28.4224	1007.8	898.855	-68.5097	944.058	915.947	-86.8424	953.526	811.712
690	0	150.742	1437.04	1634.96	254.174	1435.92	1629.97	129.203	1279.28	1643.59	266.288	1267.03	1639.62	218.197	1214.03	1491.92	222.727	1107.98	1269.54	194.513	1349.55	1392.19	191.834	1373.02	1205.97	278.678	1113.73	1342.64	25.027	1194.31	1444.25	-16.7464	1099.39	1276.91	-25.1019	1038.53	1172.26	-57.8468	1016.28	1002.11	-28.5388	1016.28	898.615	-68.2786	952.455	916.621	-86.4345	960.175	812.184
691	0	148.933	1452.05	1633.12	252.354	1450.77	1628.16	127.206	1294.31	1641.91	264.275	1281.89	1638	216.22	1228.76	1490.31	220.997	1122.8	1267.96	192.829	1364.25	1390.48	190.496	1387.77	1204.34	276.775	1128.21	1341.26	23.2395	1209.06	1442.26	-17.7309	1113.04	1275.66	-25.5562	1051.45	1171.46	-58.0966	1026.89	1001.66	-28.6458	1025.59	898.173	-68.147	961.743	917.003	-86.0073	967.813	812.369
692	0	147.052	1467.05	1631.45	250.459	1465.62	1626.55	125.108	1309.35	1640.33	262.163	1296.74	1636.55	214.17	1243.5	1488.88	219.2	1137.66	1266.53	191.128	1378.98	1388.94	189.132	1402.61	1202.88	274.795	1142.7	1340.05	21.3515	1223.92	1440.37	-18.8757	1127.09	1274.28	-26.1663	1064.89	1170.46	-58.4142	1038.29	1000.97	-28.7504	1035.77	897.518	-68.1338	971.958	917.071	-85.5742	976.487	812.239
693	0	145.126	1482.06	1629.95	248.516	1480.45	1625.15	122.933	1324.4	1638.89	259.974	1311.56	1635.28	212.074	1258.25	1487.62	217.345	1152.54	1265.28	189.435	1393.72	1387.57	187.759	1417.51	1201.61	272.752	1157.16	1339.02	19.3814	1238.88	1438.6	-20.1811	1141.53	1272.77	-26.9387	1078.87	1169.26	-58.807	1050.5	1000.04	-28.8593	1046.84	896.644	-68.2567	983.133	916.808	-85.1494	986.245	811.771
694	0	143.183	1497.05	1628.63	246.553	1495.24	1623.96	120.711	1339.43	1637.58	257.738	1326.35	1634.2	209.955	1272.97	1486.56	215.441	1167.41	1264.22	187.774	1408.44	1386.37	186.396	1432.42	1200.53	270.665	1171.57	1338.18	17.3501	1253.91	1436.98	-21.6446	1156.36	1271.16	-27.8786	1093.36	1167.88	-59.2808	1063.55	998.869	-28.9789	1058.84	895.55	-68.5315	995.302	916.199	-84.748	997.137	810.951
695	0	141.253	1512.02	1627.48	244.601	1509.99	1622.98	118.472	1354.45	1636.42	255.485	1341.1	1633.32	207.843	1287.66	1485.7	213.505	1182.22	1263.38	186.169	1423.13	1385.37	185.061	1447.3	1199.63	268.552	1185.91	1337.54	15.2815	1269.01	1435.54	-23.261	1171.56	1269.46	-28.9894	1108.35	1166.34	-59.84	1077.44	997.471	-29.1153	1071.78	894.241	-68.9721	1008.5	915.24	-84.3854	1009.22	809.767
696	0	139.367	1526.95	1626.49	242.689	1524.69	1622.2	116.25	1369.43	1635.42	253.247	1355.8	1632.65	205.765	1302.27	1485.07	211.551	1196.96	1262.75	184.644	1437.74	1384.56	183.769	1462.12	1198.91	266.434	1200.16	1337.11	13.2011	1284.13	1434.3	-25.0216	1187.12	1267.72	-30.2727	1123.82	1164.67	-60.4875	1092.19	995.858	-29.2737	1085.69	892.729	-69.5891	1022.75	913.928	-84.0775	1022.53	808.218
697	0	137.554	1541.84	1625.67	240.848	1539.34	1621.61	114.08	1384.37	1634.6	251.059	1370.45	1632.21	203.751	1316.79	1484.67	209.599	1211.59	1262.37	183.219	1452.25	1383.94	182.534	1476.83	1198.39	264.332	1214.29	1336.91	11.1361	1299.25	1433.3	-26.9144	1203	1265.96	-31.728	1139.75	1162.88	-61.2239	1107.8	994.054	-29.4582	1100.58	891.034	-70.3895	1038.08	912.273	-83.8402	1037.14	806.313
698	0	135.843	1556.67	1625	239.107	1553.92	1621.22	111.996	1399.26	1633.98	248.956	1385.03	1632	201.828	1331.2	1484.51	207.668	1226.08	1262.24	181.914	1466.64	1383.54	181.368	1491.37	1198.06	262.267	1228.27	1336.94	9.11382	1314.35	1432.57	-28.9244	1219.18	1264.21	-33.3525	1156.11	1161.03	-62.0481	1124.27	992.088	-29.6717	1116.48	889.182	-71.3753	1054.51	910.292	-83.6884	1053.09	804.071
699	0	134.26	1571.43	1624.49	237.493	1568.44	1621.02	110.035	1414.08	1633.57	246.972	1399.54	1632.05	200.02	1345.47	1484.6	205.779	1240.41	1262.36	180.742	1480.87	1383.36	180.279	1505.71	1197.93	260.259	1242.09	1337.2	7.16079	1329.38	1432.13	-31.0335	1235.62	1262.52	-35.1412	1172.87	1159.15	-62.9566	1141.59	989.998	-29.9154	1133.38	887.209	-72.5431	1072.05	908.011	-83.6358	1070.42	801.526
700	0	132.828	1586.1	1624.14	236.029	1582.87	1620.99	108.228	1428.82	1633.4	245.138	1413.98	1632.36	198.348	1359.58	1484.95	203.948	1254.57	1262.75	179.715	1494.93	1383.41	179.274	1519.81	1198.01	258.324	1255.74	1337.71	5.3017	1344.31	1432.01	-33.221	1252.29	1260.94	-37.0866	1189.99	1157.26	-63.9441	1159.76	987.826	-30.1892	1151.31	885.159	-73.8832	1090.71	905.469	-83.6931	1089.16	798.725
701	0	131.569	1600.67	1623.96	234.736	1597.21	1621.14	106.604	1443.45	1633.5	243.485	1428.33	1632.94	196.831	1373.51	1485.56	202.193	1268.54	1263.4	178.838	1508.78	1383.72	178.36	1533.66	1198.33	256.478	1269.19	1338.45	3.55813	1359.1	1432.23	-35.4648	1269.13	1259.5	-39.1791	1207.44	1155.44	-65.0036	1178.74	985.623	-30.4919	1170.25	883.085	-75.3798	1110.49	902.715	-83.8676	1109.34	795.729
702	0	130.499	1615.11	1623.94	233.63	1611.46	1621.47	105.19	1457.98	1633.89	242.037	1442.58	1633.81	195.478	1387.24	1486.43	200.524	1282.32	1264.3	178.116	1522.42	1384.28	177.539	1547.24	1198.88	254.73	1282.43	1339.43	1.94771	1373.73	1432.81	-37.7415	1286.1	1258.25	-41.4073	1225.17	1153.7	-66.1266	1198.51	983.445	-30.821	1190.21	881.048	-77.0108	1131.36	899.808	-84.1615	1130.96	792.613
703	0	129.628	1629.42	1624.12	232.723	1625.59	1621.97	104.004	1472.37	1634.58	240.814	1456.73	1634.96	194.296	1400.75	1487.56	198.951	1295.9	1265.46	177.546	1535.84	1385.12	176.814	1560.54	1199.7	253.087	1295.48	1340.64	0.483337	1388.18	1433.76	-40.0279	1303.14	1257.23	-43.7578	1243.15	1152.11	-67.3035	1219.04	981.352	-31.1734	1211.16	879.115	-78.7485	1153.3	896.816	-84.5715	1154.02	789.465
704	0	128.964	1643.58	1624.5	232.023	1639.59	1622.66	103.06	1486.6	1635.61	239.829	1470.75	1636.41	193.285	1414.05	1488.94	197.477	1309.28	1266.86	177.124	1549.03	1386.25	176.187	1573.59	1200.8	251.551	1308.32	1342.08	-0.827102	1402.43	1435.08	-42.3016	1320.23	1256.49	-46.2161	1261.34	1150.7	-68.524	1240.29	979.405	-31.5457	1233.09	877.358	-80.5608	1176.27	893.813	-85.0876	1178.49	786.381
705	0	128.506	1657.56	1625.1	231.529	1653.45	1623.52	102.363	1500.68	1636.96	239.087	1484.64	1638.13	192.442	1427.12	1490.57	196.104	1322.48	1268.48	176.841	1561.99	1387.66	175.658	1586.38	1202.18	250.123	1320.97	1343.72	-1.98077	1416.46	1436.76	-44.5422	1337.31	1256.05	-48.767	1279.7	1149.52	-69.7778	1262.2	977.666	-31.9345	1255.96	875.85	-82.4122	1200.22	890.882	-85.6935	1204.32	783.461
706	0	128.248	1671.35	1625.93	231.237	1667.15	1624.57	101.909	1514.56	1638.64	238.586	1498.37	1640.12	191.756	1439.97	1492.42	194.828	1335.5	1270.3	176.685	1574.75	1389.36	175.222	1598.96	1203.85	248.799	1333.44	1345.55	-2.97953	1430.27	1438.79	-46.7322	1354.34	1255.94	-51.3944	1298.19	1148.59	-71.0544	1284.72	976.192	-32.3362	1279.74	874.665	-84.2661	1225.1	888.102	-86.3661	1231.45	780.812
707	0	128.18	1684.93	1627.01	231.137	1680.68	1625.8	101.688	1528.24	1640.65	238.316	1511.94	1642.35	191.215	1452.61	1494.47	193.648	1348.35	1272.31	176.642	1587.31	1391.33	174.877	1611.35	1205.8	247.577	1345.74	1347.55	-3.82934	1443.88	1441.14	-48.8574	1371.3	1256.17	-54.0824	1316.77	1147.95	-72.3438	1307.79	975.037	-32.7473	1304.38	873.872	-86.0859	1250.83	885.553	-87.077	1259.81	778.532
708	0	128.284	1698.29	1628.33	231.213	1694.01	1627.23	101.683	1541.72	1642.94	238.261	1525.32	1644.8	190.804	1465.05	1496.7	192.558	1361.06	1274.46	176.696	1599.7	1393.54	174.614	1623.59	1208.01	246.453	1357.9	1349.7	-4.53948	1457.28	1443.77	-50.9071	1388.16	1256.73	-56.8146	1335.41	1147.59	-73.6364	1331.36	974.247	-33.1638	1329.82	873.533	-87.8372	1277.34	883.31	-87.7935	1289.29	776.717
709	0	128.539	1711.44	1629.91	231.445	1707.15	1628.83	101.87	1554.97	1645.5	238.397	1538.51	1647.41	190.505	1477.31	1499.07	191.556	1373.64	1276.74	176.83	1611.93	1395.98	174.427	1635.7	1210.45	245.424	1369.94	1351.95	-5.12158	1470.49	1446.63	-52.8746	1404.89	1257.63	-59.575	1354.09	1147.53	-74.9227	1355.35	973.856	-33.5811	1356	873.701	-89.4886	1304.54	881.438	-88.4801	1319.79	775.449
710	0	128.922	1724.36	1631.72	231.809	1720.07	1630.6	102.217	1567.99	1648.26	238.695	1551.5	1650.15	190.301	1489.42	1501.55	190.638	1386.1	1279.11	177.027	1624.03	1398.58	174.304	1647.72	1213.08	244.487	1381.88	1354.3	-5.58883	1483.54	1449.68	-54.7565	1421.49	1258.81	-62.3477	1372.78	1147.75	-76.1941	1379.71	973.89	-33.9937	1382.84	874.417	-91.0133	1332.35	879.993	-89.1013	1351.18	774.797
711	0	129.405	1737.05	1633.73	232.278	1732.79	1632.51	102.693	1580.79	1651.18	239.124	1564.29	1652.97	190.174	1501.39	1504.09	189.806	1398.46	1281.53	177.269	1636.03	1401.31	174.234	1659.67	1215.86	243.641	1393.75	1356.69	-5.9551	1496.44	1452.85	-56.5524	1437.95	1260.26	-65.1167	1391.45	1148.23	-77.4418	1404.36	974.36	-34.3952	1410.28	875.708	-92.3896	1360.7	879.017	-89.6231	1383.33	774.816
712	0	129.961	1749.54	1635.92	232.824	1745.3	1634.54	103.262	1593.38	1654.19	239.648	1576.87	1655.81	190.108	1513.25	1506.66	189.058	1410.74	1283.96	177.54	1647.96	1404.11	174.207	1671.58	1218.71	242.885	1405.56	1359.09	-6.23429	1509.21	1456.07	-58.264	1454.28	1261.92	-67.8659	1410.09	1148.94	-78.6572	1429.25	975.268	-34.7777	1438.21	877.589	-93.6013	1389.48	878.54	-90.0153	1416.12	775.542
713	0	130.563	1761.83	1638.25	233.42	1757.61	1636.66	103.887	1605.77	1657.23	240.232	1589.25	1658.62	190.087	1525.03	1509.2	188.398	1422.95	1286.37	177.824	1659.83	1406.92	174.211	1683.47	1221.59	242.218	1417.34	1361.47	-6.4398	1521.86	1459.29	-59.8945	1470.47	1263.73	-70.5793	1428.69	1149.83	-79.832	1454.32	976.602	-35.1321	1466.55	880.056	-94.6373	1418.62	878.578	-90.2528	1449.43	776.995
714	0	131.185	1773.94	1640.65	234.04	1769.73	1638.83	104.534	1617.97	1660.23	240.843	1601.45	1661.35	190.097	1536.76	1511.67	187.829	1435.1	1288.71	178.108	1671.67	1409.68	174.237	1695.35	1224.42	241.638	1429.11	1363.78	-6.58398	1534.43	1462.43	-61.4474	1486.53	1265.62	-73.2409	1447.24	1150.86	-80.9572	1479.51	978.34	-35.4484	1495.2	883.096	-95.4916	1448.04	879.132	-90.3173	1483.11	779.177
715	0	131.805	1785.91	1643.06	234.658	1781.69	1640.98	105.171	1630.02	1663.12	241.449	1613.48	1663.95	190.126	1548.45	1514.03	187.355	1447.21	1290.94	178.383	1683.5	1412.34	174.275	1707.23	1227.14	241.146	1440.89	1366	-6.67778	1546.91	1465.44	-62.9258	1502.47	1267.53	-75.8347	1465.73	1151.95	-82.0242	1504.76	980.45	-35.7158	1524.09	886.68	-96.1628	1477.67	880.193	-90.1971	1517.05	782.077
716	0	132.401	1797.75	1645.44	235.254	1793.51	1643.09	105.77	1641.94	1665.84	242.021	1625.38	1666.37	190.166	1560.14	1516.24	186.978	1459.28	1293.02	178.639	1695.33	1414.83	174.319	1719.13	1229.69	240.739	1452.68	1368.07	-6.73044	1559.34	1468.24	-64.3314	1518.31	1269.39	-78.3449	1484.17	1153.05	-83.0236	1530.03	982.895	-35.9231	1553.1	890.767	-96.6529	1507.43	881.74	-89.8878	1551.13	785.669
717	0	132.957	1809.5	1647.71	235.808	1805.22	1645.09	106.305	1653.76	1668.32	242.537	1637.16	1668.56	190.21	1571.83	1518.24	186.704	1471.34	1294.91	178.872	1707.18	1417.1	174.364	1731.05	1232.02	240.416	1464.51	1369.97	-6.74929	1571.71	1470.79	-65.6636	1534.06	1271.14	-80.756	1502.54	1154.11	-83.946	1555.28	985.628	-36.0598	1582.15	895.309	-96.9671	1537.24	883.743	-89.3909	1585.24	789.916
718	0	133.46	1821.19	1649.81	236.306	1816.85	1646.94	106.76	1665.51	1670.53	242.979	1648.85	1670.49	190.253	1583.54	1520.02	186.535	1483.39	1296.59	179.078	1719.06	1419.12	174.407	1742.99	1234.08	240.175	1476.38	1371.67	-6.73957	1584.05	1473.04	-66.9199	1549.72	1272.71	-83.0527	1520.86	1155.07	-84.782	1580.46	988.602	-36.1157	1611.16	900.248	-97.1129	1567.06	886.166	-88.7139	1619.28	794.772
719	0	133.899	1832.86	1651.69	236.739	1828.42	1648.59	107.122	1677.22	1672.42	243.335	1660.49	1672.14	190.296	1595.3	1521.54	186.472	1495.44	1298.03	179.259	1730.97	1420.83	174.446	1754.96	1235.83	240.014	1488.3	1373.14	-6.7044	1596.35	1474.95	-68.095	1565.3	1274.04	-85.2199	1539.14	1155.86	-85.5223	1605.54	991.766	-36.0823	1640.05	905.523	-97.0992	1596.81	888.965	-87.8683	1653.15	800.182
720	0	134.268	1844.52	1653.29	237.098	1839.97	1650	107.386	1688.93	1673.95	243.599	1672.1	1673.47	190.338	1607.1	1522.77	186.517	1507.5	1299.19	179.417	1742.91	1422.22	174.483	1766.95	1237.23	239.931	1500.27	1374.35	-6.64477	1608.64	1476.48	-69.1811	1580.83	1275.1	-87.2433	1557.39	1156.46	-86.1579	1630.49	995.069	-35.9523	1668.73	911.069	-96.936	1626.43	892.094	-86.8688	1686.77	806.086
721	0	134.566	1856.21	1654.57	237.382	1851.54	1651.12	107.55	1700.66	1675.11	243.772	1683.72	1674.47	190.385	1618.97	1523.7	186.668	1519.58	1300.07	179.557	1754.91	1423.25	174.521	1778.96	1238.27	239.924	1512.31	1375.29	-6.5596	1620.92	1477.63	-70.1684	1596.32	1275.84	-89.1088	1575.62	1156.83	-86.6803	1655.27	998.463	-35.7204	1697.14	916.822	-96.6337	1655.88	895.505	-85.7321	1720.06	812.418
722	0	134.795	1867.95	1655.51	237.592	1863.14	1651.93	107.623	1712.43	1675.87	243.859	1695.37	1675.14	190.443	1630.91	1524.32	186.925	1531.69	1300.64	179.686	1766.95	1423.92	174.564	1791	1238.92	239.992	1524.41	1375.93	-6.44596	1633.2	1478.37	-71.0451	1611.76	1276.24	-90.8027	1593.83	1156.94	-87.0822	1679.87	1001.9	-35.3832	1725.23	922.719	-96.2027	1685.1	899.147	-84.4761	1752.94	819.11
723	0	134.959	1879.76	1656.06	237.735	1874.8	1652.41	107.615	1724.26	1676.25	243.872	1707.09	1675.47	190.521	1642.93	1524.61	187.284	1543.84	1300.91	179.815	1779.03	1424.22	174.621	1803.06	1239.19	240.132	1536.57	1376.29	-6.2993	1645.48	1478.72	-71.7984	1627.18	1276.29	-92.3122	1612.04	1156.76	-87.3571	1704.25	1005.34	-34.9396	1752.94	928.698	-95.6528	1714.04	902.97	-83.1189	1785.35	826.092
724	0	135.067	1891.66	1656.23	237.819	1886.55	1652.54	107.544	1736.18	1676.23	243.827	1718.88	1675.46	190.629	1655.03	1524.59	187.74	1556.03	1300.87	179.954	1791.18	1424.15	174.7	1815.15	1239.08	240.344	1548.8	1376.34	-6.11371	1657.79	1478.66	-72.4148	1642.59	1275.98	-93.6247	1630.25	1156.31	-87.4997	1728.4	1008.73	-34.3902	1780.24	934.702	-94.9931	1742.64	906.926	-81.6783	1817.23	833.292
725	0	135.133	1903.66	1656	237.859	1898.41	1652.33	107.431	1748.19	1675.84	243.745	1730.77	1675.13	190.779	1667.21	1524.24	188.289	1568.27	1300.53	180.117	1803.37	1423.72	174.812	1827.27	1238.61	240.625	1561.1	1376.09	-5.88223	1670.13	1478.23	-72.8808	1657.99	1275.31	-94.7288	1648.46	1155.57	-87.5059	1752.28	1012.05	-33.7378	1807.09	940.677	-94.2313	1770.87	910.965	-80.1715	1848.51	840.639
726	0	135.171	1915.76	1655.4	237.87	1910.38	1651.77	107.302	1760.3	1675.09	243.648	1742.78	1674.48	190.982	1679.48	1523.59	188.924	1580.58	1299.88	180.317	1815.63	1422.95	174.969	1839.43	1237.78	240.974	1573.47	1375.54	-5.59717	1682.51	1477.44	-73.1835	1673.39	1274.31	-95.6138	1666.68	1154.55	-87.3727	1775.89	1015.26	-32.9864	1833.46	946.574	-93.3738	1798.68	915.042	-78.6148	1879.17	848.063
727	0	135.2	1927.97	1654.43	237.873	1922.48	1650.89	107.183	1772.53	1674	243.564	1754.91	1673.55	191.251	1691.85	1522.66	189.636	1592.95	1298.95	180.569	1827.96	1421.86	175.183	1851.64	1236.64	241.389	1585.92	1374.7	-5.25044	1694.95	1476.32	-73.3114	1688.79	1272.99	-96.2703	1684.9	1153.28	-87.0983	1799.19	1018.34	-32.1411	1859.33	952.349	-92.4251	1826.03	919.113	-77.0237	1909.14	855.496
728	0	135.242	1940.3	1653.12	237.889	1934.72	1649.69	107.105	1784.86	1672.62	243.521	1767.18	1672.35	191.598	1704.31	1521.44	190.417	1605.39	1297.75	180.889	1840.35	1420.49	175.467	1863.91	1235.2	241.869	1598.43	1373.59	-4.8338	1707.47	1474.9	-73.2548	1704.22	1271.38	-96.6907	1703.11	1151.78	-86.6818	1822.16	1021.26	-31.2074	1884.68	957.963	-91.3883	1852.87	923.138	-75.4123	1938.39	862.874
729	0	135.32	1952.73	1651.5	237.943	1947.1	1648.21	107.097	1797.31	1670.97	243.548	1779.58	1670.91	192.034	1716.86	1519.98	191.255	1617.91	1296.29	181.291	1852.82	1418.85	175.832	1876.25	1233.51	242.411	1611.02	1372.21	-4.3392	1720.08	1473.23	-73.0062	1719.66	1269.53	-96.8691	1721.28	1150.07	-86.1233	1844.77	1024	-30.1911	1909.49	963.381	-90.2643	1879.17	927.08	-73.7937	1966.9	870.134
730	0	135.457	1965.28	1649.62	238.06	1959.62	1646.48	107.189	1809.86	1669.08	243.674	1792.12	1669.26	192.569	1729.51	1518.29	192.138	1630.51	1294.61	181.789	1865.37	1416.99	176.29	1888.67	1231.59	243.012	1623.69	1370.58	-3.75902	1732.79	1471.35	-72.5614	1735.12	1267.46	-96.8019	1739.41	1148.18	-85.4238	1867.01	1026.56	-29.0979	1933.75	968.572	-89.0529	1904.89	930.904	-72.1787	1994.61	877.219
731	0	135.678	1977.94	1647.51	238.265	1972.29	1644.53	107.41	1822.52	1667.01	243.927	1804.8	1667.41	193.213	1742.26	1516.4	193.054	1643.19	1292.72	182.397	1878.01	1414.93	176.852	1901.19	1229.48	243.669	1636.44	1368.74	-3.08647	1745.63	1469.29	-71.9187	1750.61	1265.22	-96.4879	1757.46	1146.16	-84.5847	1888.84	1028.91	-27.9326	1957.44	973.512	-87.7526	1929.99	934.578	-70.5759	2021.52	884.077
732	0	136.007	1990.69	1645.22	238.585	1985.08	1642.41	107.785	1835.29	1664.78	244.333	1817.62	1665.42	193.972	1755.1	1514.34	193.989	1655.97	1290.64	183.127	1890.75	1412.72	177.525	1913.83	1227.23	244.379	1649.27	1366.69	-2.31573	1758.61	1467.11	-71.0802	1766.12	1262.85	-95.9291	1775.4	1144.02	-83.6084	1910.25	1031.06	-26.6997	1980.55	978.177	-86.3615	1954.44	938.075	-68.9911	2047.58	890.659
733	0	136.467	2003.55	1642.79	239.042	1998.02	1640.16	108.34	1848.14	1662.43	244.914	1830.56	1663.29	194.852	1768.04	1512.13	194.932	1668.84	1288.42	183.986	1903.59	1410.38	178.314	1926.59	1224.87	245.14	1662.19	1364.46	-1.44214	1771.74	1464.84	-70.051	1781.64	1260.4	-95.1304	1793.21	1141.82	-82.4981	1931.19	1033	-25.4023	2003.06	982.55	-84.8775	1978.21	941.367	-67.4268	2072.78	896.918
734	0	137.077	2016.5	1640.28	239.659	2011.08	1637.81	109.091	1861.09	1660.01	245.689	1843.62	1661.07	195.857	1781.08	1509.81	195.87	1681.82	1286.07	184.982	1916.55	1407.96	179.224	1939.49	1222.43	245.951	1675.2	1362.08	-0.46237	1785.03	1462.53	-68.8399	1797.17	1257.91	-94.1002	1810.83	1139.58	-81.2575	1951.66	1034.72	-24.0431	2024.95	986.615	-83.2992	2001.26	944.431	-65.8821	2097.1	902.815
735	0	137.856	2029.54	1637.73	240.453	2024.26	1635.4	110.056	1874.13	1657.55	246.673	1856.81	1658.78	196.988	1794.22	1507.41	196.794	1694.9	1283.63	186.118	1929.61	1405.49	180.253	1952.53	1219.94	246.81	1688.3	1359.58	0.625495	1798.48	1460.21	-67.4586	1812.7	1255.41	-92.8506	1828.25	1137.35	-79.8913	1971.61	1036.23	-22.6236	2046.21	990.358	-81.6263	2023.57	947.248	-64.3527	2120.52	908.309
736	0	138.817	2042.67	1635.17	241.437	2037.55	1632.98	111.244	1887.25	1655.09	247.876	1870.1	1656.45	198.245	1807.45	1504.95	197.697	1708.09	1281.12	187.392	1942.8	1402.99	181.396	1965.73	1217.45	247.718	1701.49	1356.99	1.82182	1812.11	1457.92	-65.9216	1828.21	1252.95	-91.3968	1845.41	1135.14	-78.4053	1991.03	1037.53	-21.1444	2066.82	993.767	-79.86	2045.1	949.797	-62.831	2143.03	913.368
737	0	139.968	2055.88	1632.67	242.62	2050.94	1630.57	112.659	1900.44	1652.66	249.302	1883.49	1654.1	199.627	1820.78	1502.48	198.578	1721.38	1278.59	188.802	1956.11	1400.51	182.646	1979.09	1214.98	248.677	1714.78	1354.33	3.12529	1825.9	1455.7	-64.2462	1843.69	1250.57	-89.7574	1862.29	1133	-76.8065	2009.9	1038.62	-19.6058	2086.76	996.832	-78.0035	2065.85	952.065	-61.3067	2164.61	917.961
738	0	141.313	2069.17	1630.24	244.005	2064.44	1628.22	114.3	1913.7	1650.29	250.95	1896.97	1651.77	201.129	1834.2	1500.02	199.437	1734.79	1276.06	190.338	1969.54	1398.07	183.99	1992.61	1212.56	249.692	1728.16	1351.65	4.53273	1839.84	1453.57	-62.4515	1859.11	1248.29	-87.954	1878.84	1130.94	-75.1031	2028.18	1039.5	-18.0075	2106	999.542	-76.0621	2085.79	954.035	-59.7672	2185.26	922.06
739	0	142.849	2082.53	1627.93	245.586	2078.01	1625.94	116.159	1927.03	1648.01	252.811	1910.54	1649.46	202.745	1847.7	1497.6	200.28	1748.3	1273.56	191.988	1983.08	1395.7	185.414	2006.29	1210.22	250.767	1741.64	1348.97	6.03894	1853.91	1451.55	-60.5583	1874.45	1246.13	-86.0102	1895.04	1128.99	-73.3046	2045.86	1040.18	-16.3496	2124.55	1001.89	-74.0438	2104.9	955.696	-58.1991	2204.97	925.64
740	0	144.567	2095.96	1625.75	247.356	2091.67	1623.76	118.224	1940.41	1645.86	254.873	1924.18	1647.22	204.467	1861.28	1495.24	201.118	1761.91	1271.12	193.738	1996.73	1393.43	186.901	2020.12	1207.99	251.908	1755.21	1346.32	7.63639	1868.1	1449.67	-58.5883	1889.69	1244.13	-83.9519	1910.86	1127.17	-71.4219	2062.92	1040.65	-14.6324	2142.37	1003.86	-71.9587	2123.18	957.037	-56.5887	2223.74	928.681
741	0	146.456	2109.44	1623.75	249.297	2105.39	1621.7	120.475	1953.85	1643.85	257.116	1937.88	1645.05	206.283	1874.92	1492.99	201.966	1775.62	1268.77	195.566	2010.48	1391.28	188.431	2034.1	1205.9	253.122	1768.86	1343.74	9.31503	1882.37	1447.93	-56.5638	1904.78	1242.3	-81.8058	1926.26	1125.49	-69.4672	2079.34	1040.92	-12.8574	2159.46	1005.44	-69.8197	2140.61	958.05	-54.9235	2241.56	931.162
742	0	148.495	2122.98	1621.93	251.39	2119.16	1619.78	122.886	1967.34	1642.01	259.516	1951.64	1642.99	208.179	1888.63	1490.86	202.84	1789.41	1266.55	197.452	2024.31	1389.27	189.984	2048.21	1203.95	254.414	1782.59	1341.26	11.0621	1896.7	1446.36	-54.5068	1919.71	1240.65	-79.5992	1941.24	1123.96	-67.4539	2095.13	1041	-11.0276	2175.8	1006.63	-67.6425	2157.19	958.728	-53.1937	2258.46	933.07
743	0	150.663	2136.57	1620.3	253.608	2132.98	1618.01	125.429	1980.87	1640.35	262.043	1965.43	1641.04	210.139	1902.37	1488.88	203.76	1803.27	1264.47	199.371	2038.21	1387.42	191.541	2062.43	1202.18	255.788	1796.39	1338.92	12.862	1911.04	1444.95	-52.439	1934.42	1239.2	-77.3587	1955.77	1122.6	-65.3968	2110.25	1040.87	-9.14777	2191.37	1007.4	-65.4449	2172.91	959.067	-51.3933	2274.42	934.392
744	0	152.932	2150.19	1618.89	255.925	2146.82	1616.41	128.069	1994.43	1638.9	264.662	1979.26	1639.24	212.144	1916.15	1487.08	204.745	1817.19	1262.57	201.298	2052.16	1385.76	193.083	2076.74	1200.59	257.246	1810.22	1336.75	14.6968	1925.36	1443.71	-50.3811	1948.89	1237.95	-75.1101	1969.83	1121.41	-63.3117	2124.72	1040.55	-7.22521	2206.18	1007.77	-63.2471	2187.79	959.065	-49.5211	2289.46	935.121
745	0	155.274	2163.84	1617.69	258.307	2160.68	1614.97	130.767	2008.01	1637.65	267.336	1993.1	1637.6	214.172	1929.93	1485.47	205.81	1831.13	1260.86	203.207	2066.12	1384.29	194.594	2091.09	1199.21	258.786	1824.09	1334.78	16.5462	1939.62	1442.66	-48.3527	1963.09	1236.9	-72.8773	1983.42	1120.39	-61.2157	2138.52	1040.04	-5.26988	2220.21	1007.7	-61.0708	2201.81	958.723	-47.5815	2303.58	935.252
746	0	157.658	2177.5	1616.71	260.724	2174.53	1613.7	133.482	2021.62	1636.64	270.023	2006.94	1636.14	216.201	1943.71	1484.08	206.967	1845.09	1259.38	205.073	2080.08	1383.03	196.06	2105.45	1198.02	260.402	1837.96	1333.03	18.3888	1953.8	1441.78	-46.3717	1976.97	1236.06	-70.6815	1996.54	1119.54	-59.1266	2151.65	1039.33	-3.29464	2233.46	1007.21	-58.9384	2214.98	958.042	-45.5853	2316.8	934.784
747	0	160.052	2191.18	1615.93	263.143	2188.36	1612.61	136.172	2035.24	1635.85	272.681	2020.76	1634.88	218.205	1957.46	1482.94	208.223	1859.04	1258.13	206.873	2094.01	1381.99	197.471	2119.78	1197.06	262.085	1851.82	1331.54	20.2027	1967.86	1441.1	-44.4542	1990.52	1235.43	-68.5412	2009.17	1118.87	-57.0629	2164.12	1038.43	-1.31537	2245.93	1006.28	-56.8729	2227.3	957.026	-43.5495	2329.11	933.72
748	0	162.424	2204.86	1615.37	265.531	2202.16	1611.71	138.793	2048.87	1635.32	275.266	2034.55	1633.84	220.162	1971.15	1482.05	209.577	1872.94	1257.15	208.586	2107.88	1381.18	198.821	2134.03	1196.31	263.822	1865.64	1330.33	21.9668	1981.76	1440.6	-42.6139	2003.7	1235.01	-66.4713	2021.32	1118.37	-55.0433	2175.92	1037.34	0.649156	2257.62	1004.91	-54.8961	2238.77	955.678	-41.4976	2340.52	932.066
749	0	164.743	2218.53	1615	267.855	2215.92	1610.98	141.302	2062.51	1635.03	277.739	2048.3	1633.04	222.048	1984.78	1481.43	211.024	1886.78	1256.44	210.195	2121.66	1380.62	200.106	2148.17	1195.79	265.599	1879.39	1329.42	23.6615	1995.5	1440.29	-40.8621	2016.51	1234.79	-64.4829	2032.99	1118.04	-53.0867	2187.06	1036.06	2.57739	2268.53	1003.1	-53.0291	2249.41	954.004	-39.4592	2351.04	929.831
750	0	166.978	2232.19	1614.83	270.087	2229.61	1610.45	143.66	2076.15	1635	280.058	2061.99	1632.5	223.843	1998.31	1481.09	212.551	1900.53	1256.01	211.686	2135.33	1380.31	201.326	2162.16	1195.5	267.396	1893.07	1328.82	25.27	2009.03	1440.17	-39.2072	2028.92	1234.77	-62.5831	2044.2	1117.89	-51.2115	2197.54	1034.6	4.4454	2278.67	1000.87	-51.291	2259.2	952.012	-37.4692	2360.67	927.028
751	0	169.1	2245.81	1614.85	272.196	2243.22	1610.12	145.83	2089.77	1635.22	282.19	2075.6	1632.25	225.529	2011.73	1481.04	214.14	1914.16	1255.88	213.049	2148.86	1380.27	202.482	2175.96	1195.47	269.197	1906.64	1328.55	26.7787	2022.36	1440.25	-37.6547	2040.95	1234.96	-60.7747	2054.96	1117.9	-49.4352	2207.37	1032.96	6.22729	2288.05	998.219	-49.6988	2268.15	949.714	-35.5673	2369.4	923.675
752	0	171.079	2259.4	1615.05	274.156	2256.74	1609.99	147.782	2103.38	1635.71	284.105	2089.13	1632.3	227.092	2025.02	1481.3	215.772	1927.66	1256.04	214.279	2162.23	1380.51	203.573	2189.55	1195.7	270.983	1920.1	1328.6	28.1781	2035.45	1440.52	-36.2062	2052.58	1235.35	-59.0568	2065.29	1118.09	-47.7742	2216.55	1031.15	7.89586	2296.68	995.167	-48.2674	2276.26	947.122	-33.7965	2377.23	919.794
753	0	172.889	2272.93	1615.43	275.941	2270.17	1610.08	149.49	2116.95	1636.47	285.78	2102.56	1632.68	228.522	2038.16	1481.85	217.427	1941.02	1256.5	215.375	2175.43	1381.04	204.602	2202.92	1196.21	272.737	1933.44	1328.99	29.4628	2048.31	1440.99	-34.86	2063.82	1235.94	-57.4243	2075.19	1118.45	-46.2429	2225.09	1029.19	9.4233	2304.57	991.739	-47.0092	2283.52	944.258	-32.2017	2384.16	915.414
754	0	174.508	2286.38	1615.99	277.531	2283.48	1610.41	150.939	2130.47	1637.49	287.199	2115.89	1633.4	229.814	2051.16	1482.7	219.085	1954.22	1257.25	216.338	2188.45	1381.87	205.57	2216.08	1197.01	274.444	1946.64	1329.69	30.6316	2060.92	1441.67	-33.611	2074.71	1236.74	-55.8687	2084.71	1118.98	-44.8541	2232.99	1027.08	10.7821	2311.72	987.962	-45.9337	2289.94	941.145	-30.8285	2390.17	910.566
755	0	175.914	2299.76	1616.75	278.907	2296.68	1611	152.12	2143.92	1638.76	288.357	2129.11	1634.47	230.968	2063.99	1483.84	220.73	1967.26	1258.27	217.173	2201.29	1383.01	206.478	2229.02	1198.12	276.095	1959.71	1330.71	31.6875	2073.29	1442.55	-32.4504	2085.24	1237.75	-54.3787	2093.84	1119.7	-43.6177	2240.27	1024.85	11.9462	2318.16	983.869	-45.048	2295.52	937.813	-29.7212	2395.26	905.291
756	0	177.092	2313.03	1617.7	280.056	2309.76	1611.86	153.033	2157.28	1640.28	289.253	2142.2	1635.89	231.986	2076.67	1485.26	222.349	1980.15	1259.56	217.89	2213.95	1384.46	207.327	2241.77	1199.55	277.679	1972.66	1332.03	32.6365	2085.43	1443.63	-31.3668	2095.45	1238.95	-52.9408	2102.63	1120.6	-42.5412	2246.93	1022.51	12.8916	2323.89	979.501	-44.3561	2300.26	934.297	-28.9211	2399.41	899.635
757	0	178.031	2326.17	1618.86	280.968	2322.72	1613	153.687	2170.53	1642.04	289.898	2155.17	1637.65	232.876	2089.21	1486.95	223.933	1992.9	1261.1	218.498	2226.44	1386.21	208.12	2254.35	1201.3	279.193	1985.48	1333.62	33.4875	2097.33	1444.9	-30.3466	2105.36	1240.35	-51.5405	2111.09	1121.69	-41.6293	2252.99	1020.11	13.5981	2328.93	974.901	-43.8592	2304.16	930.638	-28.4649	2402.62	893.651
758	0	178.727	2339.18	1620.23	281.642	2335.54	1614.44	154.098	2183.64	1644	290.308	2168.01	1639.74	233.648	2101.6	1488.87	225.473	2005.51	1262.86	219.011	2238.79	1388.26	208.86	2266.8	1203.36	280.633	1998.2	1335.46	34.2512	2109.04	1446.36	-29.3747	2114.99	1241.95	-50.1632	2119.25	1122.96	-40.8835	2258.46	1017.65	14.0498	2333.3	970.116	-43.556	2307.24	926.881	-28.3825	2404.89	887.402
759	0	179.18	2352.03	1621.82	282.08	2348.24	1616.18	154.289	2196.6	1646.15	290.506	2180.72	1642.12	234.314	2113.87	1491	226.967	2018	1264.81	219.441	2251.01	1390.57	209.55	2279.13	1205.71	282	2010.82	1337.53	34.9396	2120.56	1447.99	-28.4359	2124.38	1243.72	-48.7952	2127.13	1124.41	-40.3027	2263.36	1015.18	14.2362	2337	965.194	-43.4418	2309.5	923.076	-28.6953	2406.21	880.954
760	0	179.398	2364.71	1623.63	282.29	2360.81	1618.21	154.289	2209.38	1648.45	290.521	2193.3	1644.76	234.887	2126.04	1493.31	228.411	2030.39	1266.94	219.803	2263.13	1393.12	210.196	2291.39	1208.32	283.296	2023.37	1339.77	35.5651	2131.94	1449.76	-27.5154	2133.55	1245.66	-47.4247	2134.76	1126.03	-39.8827	2267.72	1012.72	14.1532	2340.07	960.188	-43.5095	2310.99	919.275	-29.4148	2406.6	874.381
761	0	179.393	2377.22	1625.64	282.288	2373.26	1620.52	154.13	2221.97	1650.85	290.384	2205.76	1647.6	235.382	2138.12	1495.76	229.801	2042.7	1269.2	220.11	2275.18	1395.86	210.805	2303.6	1211.15	284.524	2035.86	1342.15	36.1398	2143.2	1451.66	-26.5999	2142.53	1247.74	-46.043	2142.15	1127.82	-39.6169	2271.54	1010.3	13.8028	2342.51	955.146	-43.7493	2311.72	915.53	-30.5411	2406.08	867.758
762	0	179.185	2389.54	1627.86	282.091	2385.59	1623.08	153.847	2234.36	1653.33	290.13	2218.09	1650.57	235.812	2150.15	1498.3	231.134	2054.93	1271.55	220.376	2287.18	1398.74	211.383	2315.78	1214.14	285.688	2048.31	1344.64	36.6753	2154.39	1453.66	-25.6786	2151.36	1249.93	-44.6444	2149.33	1129.75	-39.4958	2274.87	1007.95	13.1938	2344.37	950.116	-44.1489	2311.74	911.891	-32.0624	2404.69	861.16
763	0	178.797	2401.68	1630.23	281.725	2397.81	1625.86	153.475	2246.55	1655.82	289.794	2230.3	1653.63	236.193	2162.15	1500.89	232.404	2067.11	1273.97	220.613	2299.17	1401.7	211.937	2327.95	1217.22	286.792	2060.72	1347.18	37.1819	2165.54	1455.7	-24.7434	2160.05	1252.2	-43.2271	2156.32	1131.8	-39.5084	2277.74	1005.69	12.3413	2345.66	945.144	-44.6936	2311.1	908.404	-33.9547	2402.46	854.663
764	0	178.257	2413.65	1632.74	281.216	2409.93	1628.79	153.051	2258.54	1658.29	289.409	2242.41	1656.69	236.535	2174.14	1503.47	233.604	2079.23	1276.4	220.831	2311.16	1404.68	212.475	2340.13	1220.33	287.839	2073.13	1349.72	37.6684	2176.68	1457.76	-23.7897	2168.64	1254.53	-41.7928	2163.14	1133.94	-39.6414	2280.19	1003.55	11.2662	2346.42	940.272	-45.367	2309.85	905.11	-36.1823	2399.47	848.335
765	0	177.596	2425.45	1635.35	280.594	2421.97	1631.83	152.607	2270.34	1660.68	289.006	2254.43	1659.68	236.851	2186.15	1506	234.726	2091.31	1278.81	221.039	2323.18	1407.61	213.005	2352.33	1223.4	288.832	2085.54	1352.23	38.1416	2187.86	1459.8	-22.816	2177.15	1256.87	-40.3471	2169.83	1136.15	-39.8806	2282.25	1001.54	9.99442	2346.7	935.537	-46.1509	2308.08	902.044	-38.6989	2395.77	842.237
766	0	176.846	2437.11	1637.99	279.89	2433.93	1634.92	152.171	2281.98	1662.93	288.614	2266.37	1662.55	237.15	2198.19	1508.43	235.762	2103.34	1281.16	221.244	2335.24	1410.43	213.531	2364.56	1226.34	289.772	2097.95	1354.64	38.6065	2199.1	1461.76	-21.8244	2185.61	1259.19	-38.8981	2176.39	1138.39	-40.2108	2283.99	999.68	8.55597	2346.54	930.97	-47.0264	2305.84	899.235	-41.4502	2391.44	836.422
767	0	176.041	2448.66	1640.62	279.135	2445.85	1637.98	151.771	2293.48	1665.01	288.257	2278.26	1665.21	237.438	2210.28	1510.71	236.701	2115.34	1283.4	221.451	2347.37	1413.08	214.059	2376.81	1229.09	290.658	2110.38	1356.93	39.0661	2210.42	1463.6	-20.8199	2194.06	1261.44	-37.4567	2182.87	1140.64	-40.6166	2285.45	997.969	6.98383	2345.99	926.598	-47.9739	2303.22	896.704	-44.3757	2386.56	830.933
768	0	175.214	2460.12	1643.18	278.362	2457.73	1640.95	151.426	2304.86	1666.88	287.952	2290.1	1667.62	237.721	2222.43	1512.8	237.535	2127.29	1285.5	221.662	2359.56	1415.49	214.591	2389.09	1231.58	291.488	2122.83	1359.04	39.5211	2221.84	1465.3	-19.8099	2202.5	1263.61	-36.0352	2189.29	1142.86	-41.0826	2286.68	996.416	5.31283	2345.1	922.443	-48.9741	2300.3	894.463	-47.4114	2381.23	825.802
769	0	174.396	2471.52	1645.6	277.599	2469.59	1643.76	151.151	2316.18	1668.5	287.714	2301.92	1669.73	237.999	2234.65	1514.66	238.257	2139.21	1287.42	221.878	2371.83	1417.62	215.126	2401.4	1233.75	292.259	2135.3	1360.94	39.9702	2233.39	1466.8	-18.8039	2210.97	1265.65	-34.6467	2195.69	1145.02	-41.5938	2287.74	995.023	3.57843	2343.93	918.52	-50.0085	2297.16	892.521	-50.493	2375.54	821.054
770	0	173.616	2482.91	1647.84	276.872	2481.47	1646.34	150.954	2327.46	1669.83	287.549	2313.75	1671.49	238.271	2246.96	1516.25	238.859	2151.09	1289.14	222.098	2384.17	1419.43	215.663	2413.73	1235.57	292.965	2147.8	1362.6	40.41	2245.06	1468.07	-17.8125	2219.49	1267.55	-33.304	2202.08	1147.1	-42.1361	2288.68	993.785	1.81564	2342.54	914.842	-51.0597	2293.88	890.88	-53.5581	2369.58	816.7
771	0	172.898	2494.32	1649.84	276.206	2493.37	1648.63	150.84	2338.75	1670.87	287.46	2325.6	1672.88	238.535	2259.34	1517.56	239.336	2162.93	1290.62	222.318	2396.58	1420.88	216.197	2426.07	1236.99	293.601	2160.32	1363.99	40.8349	2256.86	1469.1	-16.8473	2228.08	1269.26	-32.0193	2208.51	1149.07	-42.6961	2289.56	992.698	0.057937	2340.98	911.415	-52.1123	2290.55	889.535	-56.5489	2363.44	812.746
772	0	172.264	2505.78	1651.54	275.619	2505.31	1650.57	150.806	2350.09	1671.59	287.445	2337.49	1673.87	238.785	2271.8	1518.57	239.687	2174.76	1291.83	222.533	2409.05	1421.95	216.723	2438.42	1238	294.159	2172.86	1365.09	41.238	2268.8	1469.85	-15.9197	2236.75	1270.79	-30.8029	2215.01	1150.92	-43.2617	2290.44	991.754	-1.66364	2339.32	908.243	-53.1528	2287.25	888.479	-59.4141	2357.22	809.19
773	0	171.728	2517.34	1652.92	275.125	2517.32	1652.14	150.845	2361.52	1672	287.494	2349.43	1674.47	239.01	2284.35	1519.25	239.91	2186.57	1292.77	222.734	2421.59	1422.63	217.232	2450.77	1238.58	294.63	2185.42	1365.89	41.6103	2280.87	1470.32	-15.0412	2245.53	1272.11	-29.6631	2221.59	1152.63	-43.8222	2291.37	990.944	-3.32133	2337.62	905.324	-54.1698	2284.05	887.702	-62.1105	2350.99	806.025
774	0	171.3	2529.02	1653.94	274.732	2529.41	1653.29	150.943	2373.07	1672.08	287.596	2361.45	1674.68	239.202	2296.97	1519.62	240.008	2198.39	1293.42	222.915	2434.19	1422.92	217.714	2463.12	1238.74	295.006	2198	1366.38	41.9419	2293.07	1470.5	-14.2227	2254.43	1273.23	-28.6062	2228.3	1154.18	-44.3684	2292.4	990.26	-4.8914	2335.93	902.656	-55.1537	2281.01	887.192	-64.604	2344.86	803.241
775	0	170.981	2540.84	1654.57	274.441	2541.59	1654.01	151.085	2384.77	1671.86	287.735	2373.56	1674.5	239.348	2309.65	1519.66	239.981	2210.23	1293.76	223.066	2446.83	1422.82	218.16	2475.47	1238.49	295.278	2210.59	1366.56	42.2216	2305.38	1470.38	-13.4743	2263.47	1274.12	-27.6359	2235.16	1155.57	-44.8926	2293.58	989.692	-6.3547	2334.31	900.235	-56.0968	2278.22	886.935	-66.87	2338.89	800.823
776	0	170.769	2552.82	1654.81	274.248	2553.86	1654.28	151.251	2396.64	1671.35	287.89	2385.76	1673.96	239.435	2322.4	1519.38	239.836	2222.12	1293.8	223.175	2459.52	1422.35	218.558	2487.83	1237.86	295.437	2223.21	1366.43	42.4379	2317.82	1469.98	-12.8052	2272.66	1274.8	-26.7537	2242.18	1156.81	-45.3887	2294.96	989.23	-7.69701	2332.82	898.055	-56.9929	2275.72	886.916	-68.8936	2333.15	798.757
777	0	170.652	2564.98	1654.67	274.142	2566.25	1654.12	151.418	2408.71	1670.57	288.039	2398.07	1673.09	239.448	2335.2	1518.81	239.577	2234.08	1293.53	223.233	2472.24	1421.55	218.895	2500.2	1236.88	295.475	2235.85	1366.01	42.5788	2330.36	1469.31	-12.2234	2282.02	1275.28	-25.9592	2249.39	1157.88	-45.8524	2296.57	988.864	-8.90929	2331.51	896.107	-57.8374	2273.57	887.118	-70.6688	2327.73	797.027
778	0	170.613	2577.33	1654.14	274.108	2578.74	1653.54	151.562	2420.97	1669.53	288.159	2410.48	1671.92	239.374	2348.05	1517.95	239.21	2246.13	1292.97	223.227	2485	1420.43	219.161	2512.59	1235.6	295.383	2248.52	1365.3	42.6325	2343	1468.37	-11.7355	2291.54	1275.55	-25.2504	2256.81	1158.8	-46.2809	2298.46	988.585	-9.98777	2330.43	894.383	-58.6266	2271.82	887.523	-72.1978	2322.68	795.615
779	0	170.631	2589.86	1653.26	274.123	2591.34	1652.57	151.657	2433.44	1668.27	288.223	2423	1670.47	239.199	2360.95	1516.83	238.74	2258.29	1292.11	223.146	2497.8	1419.04	219.344	2525.02	1234.04	295.155	2261.22	1364.32	42.588	2355.74	1467.19	-11.3468	2301.25	1275.63	-24.624	2264.45	1159.56	-46.6734	2300.66	988.382	-10.9338	2329.63	892.872	-59.3577	2270.52	888.111	-73.4897	2318.07	794.504
780	0	170.677	2602.57	1652.06	274.16	2604.04	1651.24	151.677	2446.11	1666.81	288.206	2435.62	1668.8	238.909	2373.89	1515.47	238.174	2270.59	1290.99	222.978	2510.65	1417.41	219.434	2537.51	1232.27	294.786	2273.95	1363.11	42.4348	2368.57	1465.78	-11.0605	2311.14	1275.53	-24.0761	2272.32	1160.18	-47.0307	2303.21	988.246	-11.7537	2329.18	891.561	-60.0283	2269.7	888.859	-74.5596	2313.95	793.673
781	0	170.72	2615.45	1650.56	274.188	2616.84	1649.6	151.596	2458.96	1665.18	288.084	2448.34	1666.94	238.493	2386.87	1513.89	237.516	2283.04	1289.61	222.713	2523.53	1415.59	219.42	2550.06	1230.31	294.272	2286.74	1361.67	42.1638	2381.49	1464.17	-10.8784	2321.21	1275.26	-23.6026	2280.43	1160.66	-47.3553	2306.13	988.163	-12.4581	2329.11	890.435	-60.6368	2269.4	889.744	-75.4269	2310.38	793.098
782	0	170.726	2628.48	1648.82	274.174	2629.74	1647.7	151.391	2471.98	1663.41	287.831	2461.15	1664.93	237.941	2399.9	1512.14	236.771	2295.66	1287.99	222.341	2536.46	1413.61	219.295	2562.7	1228.22	293.612	2299.58	1360.04	41.7672	2394.48	1462.37	-10.8004	2331.48	1274.84	-23.1996	2288.8	1161.01	-47.6515	2309.46	988.122	-13.0615	2329.49	889.477	-61.1824	2269.66	890.739	-76.114	2307.4	792.757
783	0	170.658	2641.64	1646.88	274.083	2642.72	1645.6	151.038	2485.15	1661.51	287.425	2474.05	1662.8	237.245	2412.96	1510.23	235.943	2308.46	1286.18	221.851	2549.45	1411.51	219.051	2575.45	1226.03	292.805	2312.48	1358.24	41.2389	2407.55	1460.42	-10.8252	2341.93	1274.28	-22.8636	2297.42	1161.22	-47.9251	2313.21	988.109	-13.5809	2330.36	888.668	-61.6648	2270.5	891.817	-76.6456	2305.07	792.62
784	0	170.481	2654.91	1644.77	273.882	2655.78	1643.35	150.518	2498.45	1659.52	286.848	2487.03	1660.59	236.398	2426.08	1508.19	235.034	2321.45	1284.19	221.237	2562.51	1409.32	218.681	2588.31	1223.78	291.854	2325.44	1356.32	40.5747	2420.69	1458.33	-10.95	2352.57	1273.58	-22.5924	2306.3	1161.31	-48.1832	2317.42	988.109	-14.0352	2331.77	887.986	-62.0853	2271.94	892.947	-77.0469	2303.43	792.658
785	0	170.16	2668.28	1642.56	273.535	2668.91	1641	149.815	2511.85	1657.46	286.081	2500.07	1658.33	235.399	2439.24	1506.06	234.046	2334.61	1282.06	220.493	2575.64	1407.09	218.183	2601.31	1221.5	290.764	2338.49	1354.28	39.7724	2433.9	1456.12	-11.1717	2363.4	1272.77	-22.3849	2315.45	1161.28	-48.4339	2322.1	988.105	-14.4441	2333.77	887.407	-62.4463	2274.01	894.097	-77.3433	2302.53	792.836
786	0	169.664	2681.72	1640.29	273.015	2682.1	1638.61	148.917	2525.33	1655.34	285.114	2513.18	1656.05	234.246	2452.46	1503.86	232.981	2347.96	1279.82	219.616	2588.84	1404.84	217.556	2614.45	1219.23	289.54	2351.61	1352.18	38.832	2447.18	1453.81	-11.4865	2374.41	1271.84	-22.241	2324.88	1161.13	-48.6863	2327.27	988.079	-14.8274	2336.4	886.905	-62.7522	2276.75	895.232	-77.5592	2302.4	793.116
787	0	168.968	2695.21	1637.99	272.296	2695.34	1636.23	147.815	2538.88	1653.18	283.94	2526.35	1653.77	232.943	2465.73	1501.62	231.842	2361.47	1277.5	218.603	2602.13	1402.59	216.8	2627.73	1216.98	288.191	2364.82	1350.03	37.7557	2460.53	1451.44	-11.8908	2385.6	1270.81	-22.1627	2334.58	1160.86	-48.9495	2332.96	988.011	-15.2039	2339.71	886.451	-63.009	2280.16	896.318	-77.7175	2303.08	793.458
788	0	168.05	2708.74	1635.71	271.358	2708.64	1633.89	146.506	2552.46	1651.01	282.554	2539.58	1651.52	231.497	2479.07	1499.36	230.63	2375.14	1275.14	217.459	2615.49	1400.38	215.92	2641.16	1214.78	286.728	2378.1	1347.87	36.5478	2473.93	1449.01	-12.3817	2396.99	1269.67	-22.1529	2344.57	1160.46	-49.2331	2339.19	987.88	-15.5906	2343.75	886.015	-63.2255	2284.28	897.316	-77.8391	2304.63	793.819
789	0	166.899	2722.29	1633.46	270.188	2721.99	1631.64	144.992	2566.06	1648.83	280.961	2552.85	1649.33	229.916	2492.46	1497.12	229.348	2388.95	1272.78	216.187	2628.95	1398.23	214.922	2654.73	1212.65	285.161	2391.47	1345.72	35.215	2487.39	1446.55	-12.9568	2408.57	1268.45	-22.216	2354.86	1159.94	-49.5462	2345.98	987.666	-16.0025	2348.54	885.565	-63.4124	2289.13	898.19	-77.9426	2307.07	794.154
790	0	165.51	2735.85	1631.28	268.784	2735.39	1629.5	143.282	2579.68	1646.66	279.169	2566.18	1647.2	228.214	2505.91	1494.93	228	2402.87	1270.44	214.797	2642.48	1396.14	213.817	2668.43	1210.61	283.506	2404.9	1343.62	33.7662	2500.9	1444.07	-13.6149	2420.34	1267.13	-22.3575	2365.45	1159.27	-49.8976	2353.37	987.345	-16.4514	2354.12	885.07	-63.5828	2294.74	898.903	-78.0441	2310.44	794.419
791	0	163.888	2749.41	1629.18	267.147	2748.82	1627.48	141.387	2593.29	1644.51	277.192	2579.55	1645.16	226.406	2519.41	1492.79	226.589	2416.87	1268.15	213.302	2656.07	1394.14	212.615	2682.25	1208.66	281.775	2418.39	1341.58	32.2125	2514.46	1441.62	-14.3558	2432.32	1265.72	-22.5838	2376.36	1158.47	-50.295	2361.37	986.896	-16.9461	2360.53	884.499	-63.7519	2301.14	899.418	-78.157	2314.79	794.568
792	0	162.044	2762.98	1627.18	265.29	2762.3	1625.61	139.326	2606.9	1642.4	275.05	2592.97	1643.23	224.51	2532.96	1490.74	225.122	2430.94	1265.95	211.716	2669.73	1392.24	211.331	2696.17	1206.82	279.986	2431.93	1339.63	30.5671	2528.05	1439.19	-15.1803	2444.51	1264.22	-22.9017	2387.61	1157.53	-50.7458	2370.01	986.297	-17.4925	2367.79	883.821	-63.9368	2308.36	899.702	-78.2924	2320.15	794.558
793	0	159.999	2776.53	1625.26	263.234	2775.81	1623.88	137.123	2620.49	1640.35	272.767	2606.43	1641.41	222.549	2546.53	1488.79	223.605	2445.03	1263.86	210.058	2683.42	1390.44	209.979	2710.17	1205.11	278.156	2445.49	1337.8	28.8453	2541.67	1436.83	-16.0897	2456.92	1262.65	-23.3184	2399.2	1156.44	-51.2557	2379.33	985.529	-18.0929	2375.94	883.01	-64.156	2316.43	899.722	-78.459	2326.56	794.346
794	0	157.784	2790.07	1623.44	261.006	2789.36	1622.3	134.805	2634.06	1638.37	270.373	2619.92	1639.73	220.544	2560.11	1486.96	222.046	2459.13	1261.91	208.351	2697.13	1388.77	208.576	2724.21	1203.53	276.301	2459.05	1336.09	27.0646	2555.3	1434.55	-17.0856	2469.57	1260.99	-23.8408	2411.15	1155.19	-51.8297	2389.34	984.575	-18.7468	2385	882.041	-64.4287	2325.37	899.451	-78.6638	2334.06	793.893
795	0	155.432	2803.6	1621.71	258.641	2802.93	1620.85	132.405	2647.61	1636.47	267.901	2633.45	1638.2	218.521	2573.68	1485.28	220.457	2473.19	1260.11	206.617	2710.82	1387.23	207.142	2738.26	1202.09	274.442	2472.6	1334.54	25.244	2568.93	1432.37	-18.1694	2482.44	1259.25	-24.4755	2423.48	1153.79	-52.4713	2400.08	983.422	-19.4509	2394.98	880.893	-64.7743	2335.23	898.863	-78.9119	2342.68	793.165
796	0	152.984	2817.12	1620.07	256.18	2816.52	1619.53	129.959	2661.14	1634.69	265.388	2647	1636.84	216.506	2587.22	1483.76	218.849	2487.18	1258.49	204.883	2724.49	1385.84	205.694	2752.29	1200.79	272.596	2486.1	1333.14	23.4042	2582.54	1430.33	-19.3412	2495.57	1257.45	-25.2281	2436.2	1152.23	-53.1822	2411.57	982.061	-20.1991	2405.9	879.552	-65.2112	2346.02	897.942	-79.2075	2352.45	792.13
797	0	150.484	2830.6	1618.51	253.668	2830.12	1618.33	127.504	2674.64	1633.03	262.872	2660.56	1635.65	214.524	2600.7	1482.41	217.235	2501.08	1257.06	203.173	2738.09	1384.6	204.25	2766.27	1199.66	270.781	2499.54	1331.91	21.5668	2596.1	1428.46	-20.6001	2508.94	1255.59	-26.1031	2449.31	1150.53	-53.9628	2423.84	980.491	-20.983	2417.78	878.012	-65.7559	2357.79	896.674	-79.5536	2363.41	790.768
798	0	147.979	2844.06	1617.03	251.15	2843.72	1617.25	125.081	2688.11	1631.51	260.393	2674.13	1634.65	212.604	2614.1	1481.25	215.63	2514.85	1255.84	201.514	2751.59	1383.52	202.828	2780.14	1198.69	269.016	2512.87	1330.86	19.754	2609.6	1426.77	-21.9429	2522.56	1253.69	-27.1034	2462.83	1148.69	-54.8112	2436.9	978.715	-21.7924	2430.62	876.271	-66.422	2370.54	895.058	-79.9526	2375.6	789.067
799	0	145.516	2857.47	1615.64	248.675	2857.29	1616.28	122.73	2701.53	1630.17	257.992	2687.68	1633.85	210.768	2627.39	1480.3	214.05	2528.46	1254.83	199.928	2764.98	1382.62	201.443	2793.89	1197.9	267.318	2526.08	1330.01	17.9878	2623.02	1425.29	-23.3644	2536.44	1251.76	-28.2304	2476.76	1146.73	-55.7237	2450.77	976.748	-22.6155	2444.45	874.34	-67.219	2384.32	893.099	-80.4055	2389.03	787.027
800	0	143.14	2870.82	1614.34	246.291	2870.83	1615.41	120.49	2714.89	1629.03	255.708	2701.19	1633.27	209.042	2640.54	1479.55	212.511	2541.89	1254.06	198.437	2778.21	1381.91	200.109	2807.45	1197.29	265.703	2539.15	1329.35	16.2893	2636.32	1424.06	-24.8567	2550.55	1249.83	-29.4834	2491.09	1144.67	-56.6949	2465.46	974.61	-23.4399	2459.24	872.24	-68.1518	2399.13	890.813	-80.9127	2403.74	784.66
801	0	140.894	2884.11	1613.14	244.041	2884.3	1614.66	118.4	2728.19	1628.1	253.579	2714.66	1632.91	207.446	2653.54	1479.04	211.028	2555.12	1253.52	197.061	2791.28	1381.4	198.838	2820.82	1196.88	264.184	2552.05	1328.91	14.678	2649.5	1423.1	-26.4099	2564.9	1247.93	-30.8599	2505.82	1142.54	-57.717	2480.97	972.332	-24.2528	2475.02	870	-69.2196	2414.99	888.23	-81.4723	2419.75	781.993
802	0	138.817	2897.31	1612.06	241.967	2897.7	1614.01	116.493	2741.4	1627.42	251.639	2728.05	1632.78	205.997	2666.35	1478.76	209.615	2568.13	1253.23	195.814	2804.15	1381.11	197.639	2833.95	1196.66	262.772	2564.76	1328.68	13.1711	2662.52	1422.43	-28.0116	2579.46	1246.09	-32.3552	2520.94	1140.37	-58.7809	2497.3	969.954	-25.0415	2491.77	867.662	-70.4156	2431.9	885.388	-82.0806	2437.06	779.072
803	0	136.942	2910.41	1611.12	240.104	2910.99	1613.49	114.8	2754.51	1627	249.919	2741.36	1632.9	204.71	2678.97	1478.73	208.286	2580.92	1253.18	194.709	2816.82	1381.05	196.522	2846.83	1196.66	261.477	2577.28	1328.66	11.7834	2675.38	1422.08	-29.648	2594.22	1244.35	-33.9629	2536.44	1138.2	-59.8758	2514.45	967.524	-25.7938	2509.49	865.278	-71.727	2449.87	882.34	-82.7312	2455.7	775.953
804	0	135.297	2923.39	1610.34	238.48	2924.17	1613.09	113.344	2767.5	1626.88	248.443	2754.57	1633.26	203.593	2691.38	1478.94	207.05	2593.46	1253.38	193.755	2829.27	1381.23	195.494	2859.44	1196.89	260.301	2589.58	1328.87	10.5259	2688.05	1422.05	-31.3038	2609.15	1242.76	-35.6747	2552.28	1136.09	-60.9897	2532.38	965.097	-26.4981	2528.17	862.91	-73.1351	2468.88	879.148	-83.414	2475.66	772.711
805	0	133.9	2936.23	1609.74	237.117	2937.2	1612.85	112.142	2780.37	1627.07	247.229	2767.65	1633.88	202.65	2703.56	1479.41	205.914	2605.76	1253.84	192.955	2841.5	1381.67	194.564	2871.79	1197.36	259.248	2601.66	1329.31	9.40678	2700.54	1422.37	-32.9633	2624.23	1241.35	-37.4805	2568.45	1134.07	-62.1099	2551.08	962.737	-27.1435	2547.77	860.629	-74.6158	2488.92	875.885	-84.1153	2496.93	769.435
806	0	132.764	2948.93	1609.35	236.029	2950.06	1612.76	111.205	2793.09	1627.58	246.288	2780.59	1634.76	201.883	2715.51	1480.14	204.884	2617.83	1254.54	192.311	2853.5	1382.38	193.736	2883.88	1198.08	258.315	2613.53	1329.96	8.43028	2712.84	1423.05	-34.6113	2639.42	1240.16	-39.3688	2584.91	1132.21	-63.2234	2570.51	960.51	-27.7203	2568.29	858.513	-76.1407	2509.95	872.633	-84.8177	2519.49	766.224
807	0	131.893	2961.46	1609.18	235.218	2962.75	1612.85	110.535	2805.65	1628.42	245.624	2793.38	1635.9	201.288	2727.24	1481.11	203.961	2629.66	1255.48	191.821	2865.29	1383.37	193.015	2895.71	1199.07	257.498	2625.18	1330.83	7.59749	2724.94	1424.07	-36.2331	2654.7	1239.25	-41.3268	2601.63	1130.55	-64.3174	2590.63	958.486	-28.2199	2589.69	856.645	-77.6782	2531.95	869.479	-85.4997	2543.32	763.186
808	0	131.284	2973.81	1609.26	234.683	2975.25	1613.13	110.129	2818.03	1629.59	245.234	2806.02	1637.29	200.857	2738.73	1482.33	203.146	2641.29	1256.65	191.479	2876.86	1384.64	192.404	2907.31	1200.33	256.792	2636.63	1331.91	6.90637	2736.86	1425.45	-37.816	2670.03	1238.65	-43.341	2618.56	1129.14	-65.3795	2611.38	956.734	-28.6349	2611.93	855.11	-79.1949	2554.87	866.513	-86.1363	2568.36	760.432
809	0	130.925	2985.98	1609.6	234.411	2987.54	1613.61	109.976	2830.24	1631.1	245.107	2818.47	1638.93	200.579	2750.01	1483.78	202.436	2652.71	1258.03	191.277	2888.24	1386.18	191.902	2918.7	1201.86	256.19	2647.89	1333.19	6.35227	2748.6	1427.16	-39.3491	2685.37	1238.39	-45.3971	2635.66	1128.02	-66.3984	2632.72	955.323	-28.9593	2634.97	853.994	-80.6567	2578.65	863.826	-86.7002	2594.56	758.077
810	0	130.8	2997.95	1610.22	234.383	2999.61	1614.3	110.057	2842.25	1632.92	245.227	2830.75	1640.79	200.442	2761.08	1485.45	201.831	2663.95	1259.61	191.204	2899.45	1387.99	191.508	2929.91	1203.66	255.684	2658.98	1334.66	5.92841	2760.17	1429.18	-40.8237	2700.7	1238.48	-47.4807	2652.89	1127.24	-67.3639	2654.58	954.312	-29.1885	2658.74	853.375	-82.0303	2603.23	861.503	-87.1626	2621.85	756.227
811	0	130.889	3009.72	1611.1	234.577	3011.46	1615.2	110.35	2854.07	1635.02	245.571	2842.85	1642.86	200.431	2771.96	1487.31	201.328	2675.03	1261.36	191.248	2910.49	1390.05	191.217	2940.97	1205.72	255.266	2669.92	1336.29	5.6265	2771.6	1431.5	-42.2337	2715.98	1238.95	-49.5773	2670.2	1126.81	-68.2673	2676.9	953.755	-29.3195	2683.19	853.328	-83.2845	2628.53	859.625	-87.4949	2650.13	754.985
812	0	131.167	3021.29	1612.26	234.964	3023.09	1616.3	110.827	2865.69	1637.39	246.115	2854.76	1645.11	200.53	2782.67	1489.34	200.922	2685.97	1263.27	191.393	2921.39	1392.33	191.02	2951.9	1208	254.929	2680.72	1338.07	5.43726	2782.88	1434.06	-43.5749	2731.18	1239.78	-51.6726	2687.54	1126.74	-69.1013	2699.59	953.696	-29.3504	2708.25	853.913	-84.3909	2654.49	858.26	-87.6705	2679.31	754.437
813	0	131.607	3032.67	1613.68	235.513	3034.51	1617.62	111.46	2877.12	1639.97	246.826	2866.48	1647.51	200.724	2793.22	1491.51	200.613	2696.79	1265.3	191.625	2932.18	1394.79	190.908	2962.73	1210.49	254.668	2691.42	1339.98	5.35096	2794.05	1436.84	-44.8452	2746.27	1240.97	-53.7526	2704.88	1127.04	-69.8597	2722.59	954.165	-29.2807	2733.83	855.182	-85.3252	2681	857.467	-87.6657	2709.28	754.657
814	0	132.179	3043.85	1615.33	236.193	3045.72	1619.11	112.216	2888.36	1642.73	247.674	2878.02	1650.02	200.996	2803.65	1493.79	200.397	2707.53	1267.42	191.928	2942.87	1397.41	190.868	2973.48	1213.14	254.476	2702.02	1341.98	5.35775	2805.11	1439.78	-46.0441	2761.24	1242.48	-55.804	2722.16	1127.7	-70.5379	2745.82	955.182	-29.1107	2759.86	857.166	-86.0674	2707.99	857.288	-87.4616	2739.92	755.703
815	0	132.857	3054.85	1617.2	236.972	3056.73	1620.78	113.064	2899.42	1645.61	248.625	2889.38	1652.6	201.332	2813.98	1496.14	200.273	2718.19	1269.6	192.287	2953.49	1400.14	190.888	2984.19	1215.9	254.351	2712.56	1344.05	5.44801	2816.08	1442.85	-47.1719	2776.06	1244.28	-57.8138	2739.35	1128.67	-71.1318	2769.22	956.753	-28.8413	2786.25	859.887	-86.6021	2735.35	857.753	-87.0444	2771.11	757.611
816	0	133.612	3065.69	1619.26	237.821	3067.56	1622.59	113.971	2910.32	1648.57	249.646	2900.55	1655.21	201.719	2824.24	1498.52	200.238	2728.79	1271.81	192.687	2964.05	1402.92	190.954	2994.87	1218.74	254.287	2723.06	1346.16	5.61249	2826.97	1445.97	-48.2294	2790.71	1246.33	-59.7699	2756.42	1129.94	-71.6383	2792.7	958.87	-28.4736	2812.91	863.343	-86.9194	2763.01	858.875	-86.4061	2802.71	760.403
817	0	134.419	3076.38	1621.45	238.712	3078.23	1624.52	114.91	2921.07	1651.53	250.705	2911.56	1657.8	202.144	2834.44	1500.9	200.289	2739.37	1274.01	193.114	2974.58	1405.72	191.053	3005.53	1221.6	254.284	2733.53	1348.29	5.84246	2837.79	1449.11	-49.2172	2805.2	1248.55	-61.6605	2773.35	1131.44	-72.0545	2816.21	961.512	-28.0088	2839.75	867.522	-87.0138	2790.86	860.654	-85.5444	2834.6	764.078
818	0	135.257	3086.94	1623.74	239.621	3088.77	1626.52	115.855	2931.7	1654.46	251.775	2922.41	1660.33	202.597	2844.63	1503.23	200.424	2749.94	1276.17	193.557	2985.1	1408.47	191.173	3016.21	1224.43	254.339	2744	1350.38	6.12981	2848.57	1452.2	-50.1352	2819.5	1250.9	-63.4748	2790.13	1133.13	-72.3778	2839.68	964.65	-27.4479	2866.67	872.392	-86.8849	2818.82	863.073	-84.4621	2866.64	768.62
819	0	136.106	3097.39	1626.09	240.529	3099.18	1628.56	116.782	2942.22	1657.31	252.828	2933.11	1662.76	203.07	2854.81	1505.49	200.642	2760.5	1278.26	194.005	2995.62	1411.15	191.303	3026.89	1227.18	254.452	2754.49	1352.43	6.46715	2859.3	1455.2	-50.9825	2833.63	1253.3	-65.2023	2806.73	1134.95	-72.6056	2863.05	968.242	-26.7915	2893.59	877.908	-86.5364	2846.8	866.107	-83.1662	2898.71	773.994
820	0	136.951	3107.76	1628.44	241.42	3109.51	1630.61	117.675	2952.67	1660.01	253.845	2943.69	1665.05	203.555	2865.01	1507.63	200.938	2771.08	1280.26	194.451	3006.15	1413.68	191.435	3037.61	1229.81	254.622	2765	1354.4	6.8479	2870.01	1458.07	-51.7567	2847.57	1255.7	-66.8334	2823.17	1136.83	-72.7351	2886.28	972.241	-26.0403	2920.42	884.016	-85.976	2874.72	869.717	-81.6673	2930.69	780.152
821	0	137.779	3118.08	1630.75	242.283	3119.78	1632.61	118.52	2963.07	1662.53	254.808	2954.15	1667.17	204.05	2875.26	1509.63	201.309	2781.69	1282.12	194.889	3016.71	1416.05	191.564	3048.36	1232.26	254.85	2775.55	1356.25	7.26639	2880.7	1460.75	-52.4547	2861.35	1258.04	-68.359	2839.45	1138.72	-72.7636	2909.32	976.592	-25.1946	2947.08	890.649	-85.2149	2902.51	873.857	-79.9784	2962.47	787.034
822	0	138.584	3128.36	1632.96	243.112	3130.01	1634.54	119.309	2973.44	1664.83	255.704	2964.53	1669.07	204.551	2885.56	1511.45	201.753	2792.33	1283.83	195.316	3027.32	1418.2	191.685	3059.14	1234.5	255.135	2786.15	1357.96	7.71799	2891.4	1463.21	-53.0719	2874.98	1260.25	-69.7705	2855.57	1140.57	-72.6886	2932.15	981.236	-24.2547	2973.49	897.733	-84.2667	2930.11	878.474	-78.1141	2993.95	794.569
823	0	139.36	3138.64	1635.03	243.903	3140.22	1636.34	120.038	2983.8	1666.88	256.528	2974.84	1670.74	205.059	2895.95	1513.07	202.266	2803.01	1285.36	195.732	3037.97	1420.11	191.798	3069.97	1236.5	255.48	2796.82	1359.52	8.19923	2902.1	1465.42	-53.6035	2888.46	1262.28	-71.0599	2871.57	1142.31	-72.5074	2954.71	986.113	-23.2209	2999.58	905.191	-83.1471	2957.44	883.508	-76.0902	3025.03	802.677
824	0	140.109	3148.94	1636.92	244.658	3150.45	1637.99	120.709	2994.19	1668.65	257.277	2985.12	1672.16	205.576	2906.42	1514.47	202.844	2813.73	1286.69	196.138	3048.68	1421.75	191.905	3080.85	1238.23	255.884	2807.56	1360.88	8.70789	2912.83	1467.36	-54.0439	2901.82	1264.09	-72.2202	2887.45	1143.91	-72.2181	2977.01	991.161	-22.0933	3025.31	912.942	-81.8734	2984.47	888.896	-73.9231	3055.63	811.276
825	0	140.831	3159.27	1638.58	245.381	3160.71	1639.44	121.326	3004.62	1670.12	257.954	2995.38	1673.3	206.105	2917	1515.63	203.482	2824.5	1287.81	196.538	3059.46	1423.1	192.01	3091.77	1239.67	256.35	2818.37	1362.05	9.24304	2923.61	1469	-54.3874	2915.08	1265.65	-73.2445	2903.23	1145.32	-71.8189	2999.01	996.318	-20.8727	3050.61	920.904	-80.463	3011.13	894.573	-71.6295	3085.68	820.277
826	0	141.534	3169.67	1640	246.08	3171.02	1640.68	121.898	3015.1	1671.27	258.566	3005.65	1674.15	206.654	2927.68	1516.53	204.179	2835.32	1288.69	196.937	3070.32	1424.15	192.119	3102.75	1240.79	256.876	2829.27	1362.98	9.80501	2934.43	1470.34	-54.6288	2928.27	1266.93	-74.1269	2918.95	1146.52	-71.3087	3020.7	1001.52	-19.5601	3075.45	928.995	-78.9337	3037.4	900.473	-69.2264	3115.13	829.589
827	0	142.224	3180.14	1641.13	246.764	3181.4	1641.67	122.438	3025.66	1672.09	259.125	3015.96	1674.72	207.228	2938.48	1517.16	204.927	2846.18	1289.34	197.343	3081.26	1424.88	192.242	3113.77	1241.6	257.464	2840.24	1363.68	10.3953	2945.33	1471.37	-54.7633	2941.4	1267.9	-74.8621	2934.6	1147.48	-70.6871	3042.06	1006.72	-18.1576	3099.78	937.138	-77.302	3063.23	906.529	-66.731	3143.92	839.123
828	0	142.913	3190.7	1641.97	247.444	3191.86	1642.39	122.96	3036.29	1672.59	259.644	3026.33	1674.99	207.836	2949.41	1517.52	205.724	2857.1	1289.73	197.765	3092.28	1425.29	192.387	3124.85	1242.08	258.114	2851.31	1364.13	11.0166	2956.3	1472.08	-54.7868	2954.5	1268.55	-75.4454	2950.21	1148.19	-69.9547	3063.1	1011.86	-16.6679	3123.59	945.256	-75.5831	3088.59	912.676	-64.1606	3172.02	848.791
829	0	143.611	3201.36	1642.49	248.135	3202.42	1642.83	123.481	3047.03	1672.75	260.14	3036.77	1674.97	208.486	2960.46	1517.61	206.565	2868.07	1289.88	198.212	3103.39	1425.4	192.566	3136	1242.24	258.825	2862.47	1364.32	11.6725	2967.38	1472.48	-54.6963	2967.59	1268.89	-75.873	2965.79	1148.63	-69.1125	3083.78	1016.89	-15.0952	3146.84	953.281	-73.7904	3113.45	918.851	-61.5328	3199.38	858.507
830	0	144.332	3212.14	1642.7	248.849	3213.09	1642.99	124.017	3057.86	1672.6	260.632	3047.31	1674.66	209.186	2971.65	1517.42	207.442	2879.09	1289.76	198.695	3114.59	1425.19	192.79	3147.2	1242.08	259.596	2873.71	1364.25	12.3675	2978.55	1472.58	-54.4898	2980.71	1268.92	-76.1419	2981.34	1148.82	-68.1626	3104.12	1021.75	-13.4444	3169.54	961.145	-71.9347	3137.78	924.991	-58.8651	3226	868.186
831	0	145.088	3223.02	1642.6	249.6	3223.87	1642.85	124.587	3068.79	1672.14	261.14	3057.95	1674.07	209.945	2982.96	1516.96	208.352	2890.17	1289.39	199.225	3125.89	1424.68	193.069	3158.47	1241.61	260.426	2885.05	1363.91	13.1066	2989.84	1472.39	-54.1663	2993.85	1268.65	-76.2504	2996.86	1148.74	-67.1077	3124.09	1026.42	-11.7216	3191.66	968.788	-70.0247	3161.56	931.039	-56.1743	3251.84	877.748
832	0	145.893	3234.02	1642.18	250.403	3234.77	1642.42	125.209	3079.83	1671.38	261.685	3068.71	1673.21	210.77	2994.4	1516.23	209.286	2901.3	1288.76	199.814	3137.28	1423.88	193.414	3169.82	1240.84	261.311	2896.47	1363.3	13.8955	3001.26	1471.93	-53.7255	3007.05	1268.09	-76.1981	3012.35	1148.41	-65.9512	3143.68	1030.85	-9.93336	3213.2	976.157	-68.0665	3184.77	936.937	-53.4762	3276.9	887.119
833	0	146.76	3245.14	1641.47	251.271	3245.79	1641.72	125.9	3090.99	1670.34	262.289	3079.6	1672.1	211.665	3005.96	1515.25	210.24	2912.51	1287.89	200.473	3148.77	1422.81	193.836	3181.25	1239.79	262.248	2907.99	1362.44	14.7399	3012.8	1471.21	-53.1681	3020.31	1267.26	-75.9861	3027.8	1147.85	-64.6971	3162.89	1035.02	-8.08705	3234.16	983.203	-66.0644	3207.4	942.632	-50.7849	3301.16	896.223
834	0	147.702	3256.38	1640.49	252.217	3256.92	1640.74	126.678	3102.25	1669.04	262.973	3090.61	1670.74	212.635	3017.65	1514.03	211.205	2923.78	1286.79	201.213	3160.36	1421.49	194.344	3192.75	1238.48	263.232	2919.59	1361.31	15.6451	3024.47	1470.26	-52.4958	3033.63	1266.2	-75.6171	3043.18	1147.06	-63.3503	3181.71	1038.88	-6.19012	3254.54	989.88	-64.0209	3229.41	948.075	-48.1123	3324.62	904.992
835	0	148.73	3267.73	1639.25	253.251	3268.18	1639.52	127.559	3113.61	1667.52	263.758	3101.77	1669.16	213.683	3029.46	1512.58	212.174	2935.13	1285.46	202.042	3172.05	1419.94	194.946	3204.35	1236.93	264.257	2931.28	1359.95	16.6158	3036.28	1469.1	-51.711	3047.02	1264.92	-75.0955	3058.49	1146.07	-61.9161	3200.12	1042.43	-4.25005	3274.35	996.152	-61.9371	3250.8	953.218	-45.4674	3347.28	913.361
836	0	149.854	3279.19	1637.79	254.385	3279.55	1638.07	128.555	3125.08	1665.79	264.661	3113.05	1667.39	214.809	3041.37	1510.92	213.141	2946.56	1283.92	202.97	3183.83	1418.18	195.647	3216.04	1235.16	265.319	2943.06	1358.36	17.6557	3048.23	1467.75	-50.817	3060.47	1263.45	-74.4272	3073.7	1144.89	-60.4006	3218.11	1045.63	-2.2741	3293.58	1001.98	-59.8139	3271.54	958.017	-42.8562	3369.13	921.267
837	0	151.084	3290.76	1636.14	255.627	3291.04	1636.43	129.678	3136.64	1663.88	265.695	3124.46	1665.43	216.013	3053.39	1509.08	214.098	2958.08	1282.2	204.003	3195.7	1416.24	196.453	3227.82	1233.2	266.411	2954.92	1356.56	18.7673	3060.3	1466.25	-49.8183	3073.97	1261.83	-73.6199	3088.79	1143.56	-58.8104	3235.66	1048.47	-0.269182	3312.24	1007.34	-57.652	3291.63	962.432	-40.2817	3390.17	928.653
838	0	152.427	3302.43	1634.33	256.982	3302.65	1634.61	130.937	3148.3	1661.82	266.872	3136	1663.33	217.294	3065.5	1507.09	215.04	2969.71	1280.32	205.145	3207.67	1414.16	197.366	3239.71	1231.08	267.527	2966.87	1354.58	19.9514	3072.52	1464.61	-48.72	3087.51	1260.09	-72.6822	3103.73	1142.1	-57.1527	3252.77	1050.94	1.75829	3330.32	1012.21	-55.4526	3311.05	966.429	-37.7439	3410.41	935.463
839	0	153.887	3314.2	1632.4	258.455	3314.36	1632.66	132.337	3160.05	1659.66	268.197	3147.66	1661.1	218.647	3077.7	1504.96	215.963	2981.43	1278.3	206.397	3219.73	1411.96	198.385	3251.69	1228.83	268.662	2978.9	1352.45	21.2077	3084.86	1462.87	-47.5283	3101.08	1258.25	-71.6241	3118.5	1140.52	-55.4351	3269.41	1053.04	3.80234	3347.83	1016.56	-53.2182	3329.79	969.974	-35.2407	3429.84	941.649
840	0	155.467	3326.06	1630.39	260.048	3326.18	1630.61	133.88	3171.89	1657.41	269.672	3159.43	1658.78	220.07	3089.97	1502.74	216.865	2993.26	1276.17	207.76	3231.88	1409.67	199.507	3263.78	1226.49	269.812	2991.01	1350.19	22.5338	3097.33	1461.05	-46.2499	3114.65	1256.35	-70.4561	3133.05	1138.87	-53.6657	3285.59	1054.75	5.85741	3364.76	1020.37	-50.9526	3347.82	973.041	-32.7684	3448.47	947.164
841	0	157.167	3338.02	1628.33	261.76	3338.1	1628.48	135.565	3183.81	1655.13	271.295	3171.31	1656.39	221.558	3102.31	1500.46	217.745	3005.2	1273.97	209.229	3244.11	1407.34	200.727	3275.97	1224.09	270.975	3003.21	1347.83	23.9262	3109.91	1459.18	-44.8922	3128.21	1254.42	-69.189	3147.38	1137.16	-51.8526	3301.27	1056.07	7.91819	3381.11	1023.63	-48.6614	3365.15	975.607	-30.3228	3466.3	951.97
842	0	158.986	3350.06	1626.27	263.587	3350.11	1626.33	137.386	3195.82	1652.85	273.06	3183.29	1653.98	223.108	3114.7	1498.14	218.607	3017.25	1271.72	210.798	3256.41	1404.99	202.037	3288.27	1221.68	272.151	3015.47	1345.42	25.3799	3122.6	1457.3	-43.4629	3141.72	1252.49	-67.8334	3161.45	1135.43	-50.0044	3316.46	1057.02	9.97943	3396.88	1026.32	-46.3523	3381.75	977.658	-27.9	3483.34	956.032
843	0	160.917	3362.19	1624.24	265.523	3362.22	1624.18	139.333	3207.92	1650.6	274.956	3195.36	1651.58	224.714	3127.14	1495.84	219.458	3029.42	1269.47	212.458	3268.8	1402.67	203.426	3300.68	1219.3	273.341	3027.81	1342.99	26.8888	3135.39	1455.43	-41.9697	3155.16	1250.59	-66.3991	3175.23	1133.69	-48.1296	3331.13	1057.58	12.0358	3412.05	1028.44	-44.0349	3397.62	979.182	-25.4981	3499.57	959.323
844	0	162.952	3374.41	1622.27	267.559	3374.42	1622.06	141.393	3220.09	1648.43	276.969	3207.52	1649.21	226.371	3139.63	1493.58	220.308	3041.69	1267.25	214.197	3281.24	1400.41	204.883	3313.18	1216.98	274.55	3040.21	1340.58	28.4462	3148.26	1453.61	-40.4205	3168.51	1248.75	-64.8952	3188.71	1131.98	-46.2367	3345.27	1057.77	14.0815	3426.61	1029.98	-41.721	3412.74	980.174	-23.1174	3514.99	961.821
845	0	165.08	3386.7	1620.4	269.684	3386.69	1620.01	143.551	3232.34	1646.36	279.083	3219.75	1646.93	228.075	3152.15	1491.4	221.169	3054.07	1265.1	216	3293.75	1398.25	206.394	3325.79	1214.77	275.783	3052.67	1338.23	30.0448	3161.2	1451.85	-38.8229	3181.73	1247	-63.3293	3201.86	1130.33	-44.3343	3358.87	1057.61	16.1103	3440.55	1030.93	-39.4241	3427.09	980.634	-20.7621	3529.61	963.512
846	0	167.286	3399.07	1618.67	271.883	3399.03	1618.07	145.789	3244.67	1644.44	281.277	3232.06	1644.75	229.818	3164.71	1489.34	222.056	3066.53	1263.06	217.854	3306.3	1396.22	207.946	3338.48	1212.7	277.047	3065.19	1335.99	31.6774	3174.18	1450.2	-37.1838	3194.8	1245.36	-61.7076	3214.66	1128.76	-42.4305	3371.92	1057.11	18.1155	3453.87	1031.3	-37.1599	3440.67	980.567	-18.4402	3543.4	964.389
847	0	169.555	3411.51	1617.08	274.139	3411.44	1616.26	148.086	3257.07	1642.69	283.532	3244.42	1642.73	231.595	3177.28	1487.42	222.987	3079.08	1261.16	219.739	3318.9	1394.36	209.526	3351.25	1210.82	278.352	3077.74	1333.88	33.3372	3187.19	1448.67	-35.5097	3207.69	1243.87	-60.0348	3227.1	1127.31	-40.5333	3384.41	1056.28	20.0896	3466.53	1031.07	-34.9453	3453.46	979.984	-16.1642	3556.36	964.45
848	0	171.868	3424.01	1615.67	276.436	3423.9	1614.6	150.421	3269.53	1641.13	285.823	3256.84	1640.88	233.4	3189.86	1485.69	223.98	3091.69	1259.43	221.64	3331.53	1392.69	211.122	3364.08	1209.15	279.705	3090.32	1331.94	35.0176	3200.2	1447.3	-33.8063	3220.37	1242.56	-58.3142	3239.17	1125.99	-38.6504	3396.32	1055.14	22.0245	3478.53	1030.27	-32.7982	3465.44	978.898	-13.951	3568.48	963.701
849	0	174.206	3436.56	1614.44	278.754	3436.4	1613.12	152.772	3282.05	1639.79	288.129	3269.31	1639.22	235.224	3202.46	1484.17	225.052	3104.35	1257.9	223.538	3344.17	1391.23	212.725	3376.96	1207.71	281.116	3102.93	1330.22	36.7122	3213.19	1446.1	-32.0785	3232.82	1241.43	-56.548	3250.85	1124.83	-36.7892	3407.66	1053.71	23.9119	3489.86	1028.89	-30.737	3476.61	977.328	-11.8208	3579.73	962.153
850	0	176.55	3449.16	1613.42	281.074	3448.94	1611.82	155.12	3294.61	1638.67	290.426	3281.81	1637.79	237.06	3215.05	1482.88	226.222	3117.05	1256.61	225.418	3356.82	1390.01	214.327	3389.86	1206.52	282.591	3115.54	1328.74	38.415	3226.13	1445.09	-30.3304	3245.02	1240.51	-54.7375	3262.13	1123.85	-34.9568	3418.4	1052.01	25.7431	3500.51	1026.95	-28.7802	3486.96	975.292	-9.79706	3590.09	959.822
851	0	178.88	3461.79	1612.6	283.376	3461.49	1610.73	157.444	3307.19	1637.8	292.693	3294.34	1636.6	238.901	3227.64	1481.83	227.502	3129.76	1255.58	227.265	3369.46	1389.03	215.923	3402.77	1205.6	284.139	3128.15	1327.51	40.1202	3239.01	1444.29	-28.5658	3256.94	1239.82	-52.8836	3273.02	1123.07	-33.1596	3428.55	1050.06	27.5094	3510.45	1024.45	-26.9452	3496.47	972.814	-7.90441	3599.57	956.73
852	0	181.177	3474.45	1611.99	285.641	3474.06	1609.85	159.727	3319.8	1637.17	294.909	3306.89	1635.65	240.738	3240.21	1481.05	228.907	3142.47	1254.81	229.064	3382.09	1388.31	217.51	3415.65	1204.94	285.764	3140.76	1326.58	41.8225	3251.8	1443.71	-26.7875	3268.57	1239.37	-50.9869	3283.5	1122.49	-31.404	3438.1	1047.86	29.2025	3519.69	1021.41	-25.2482	3505.13	969.915	-6.16786	3608.13	952.902
853	0	183.426	3487.12	1611.59	287.852	3486.62	1609.18	161.954	3332.39	1636.78	297.057	3319.44	1634.97	242.565	3252.76	1480.54	230.445	3155.16	1254.34	230.805	3394.68	1387.85	219.088	3428.5	1204.55	287.471	3153.34	1325.94	43.5171	3264.48	1443.35	-24.9983	3279.9	1239.17	-49.0482	3293.58	1122.14	-29.6955	3447.04	1045.44	30.8148	3528.22	1017.83	-23.7037	3512.94	966.616	-4.61122	3615.76	948.365
854	0	185.613	3499.8	1611.39	289.993	3499.16	1608.72	164.112	3344.97	1636.64	299.121	3331.99	1634.54	244.373	3265.27	1480.3	232.124	3167.82	1254.16	232.479	3407.24	1387.64	220.656	3441.27	1204.43	289.262	3165.89	1325.6	45.1999	3277.04	1443.23	-23.2005	3290.91	1239.21	-47.0683	3303.24	1122.01	-28.039	3455.37	1042.81	32.3393	3536.02	1013.73	-22.3239	3519.91	962.936	-3.25599	3622.46	943.146
855	0	187.725	3512.48	1611.39	292.05	3511.68	1608.47	166.193	3357.52	1636.74	301.09	3344.53	1634.38	246.158	3277.74	1480.35	233.948	3180.45	1254.28	234.079	3419.74	1387.7	222.215	3453.97	1204.57	291.139	3178.42	1325.58	46.8672	3289.48	1443.34	-21.3962	3301.6	1239.5	-45.0484	3312.5	1122.1	-26.4387	3463.08	1039.98	33.7702	3543.09	1009.12	-21.1186	3526.01	958.893	-2.12046	3628.22	937.271
856	0	189.754	3525.16	1611.58	294.013	3524.16	1608.43	168.189	3370.01	1637.08	302.952	3357.06	1634.49	247.913	3290.17	1480.68	235.918	3193.02	1254.71	235.6	3432.18	1388.02	223.766	3466.57	1204.98	293.104	3190.9	1325.88	48.5164	3301.76	1443.68	-19.5873	3311.97	1240.03	-42.9895	3321.34	1122.41	-24.898	3470.18	1036.95	35.1026	3549.43	1004.01	-20.0953	3531.26	954.499	-1.21921	3633.04	930.763
857	0	191.692	3537.83	1611.97	295.871	3536.6	1608.6	170.098	3382.45	1637.65	304.703	3369.56	1634.85	249.635	3302.55	1481.3	238.038	3205.55	1255.45	237.038	3444.55	1388.59	225.312	3479.07	1205.63	295.155	3203.33	1326.49	50.1452	3313.9	1444.24	-17.7752	3322	1240.81	-40.8929	3329.78	1122.94	-23.4195	3476.67	1033.72	36.3329	3555.04	998.394	-19.2592	3535.65	949.765	-0.562948	3636.91	923.639
858	0	193.537	3550.49	1612.55	297.62	3548.99	1608.97	171.916	3394.8	1638.45	306.336	3382.04	1635.49	251.321	3314.87	1482.19	240.306	3218.01	1256.48	238.391	3456.86	1389.42	226.851	3491.45	1206.53	297.295	3215.72	1327.42	51.7523	3325.87	1445.04	-15.9611	3331.71	1241.84	-38.7593	3337.81	1123.7	-22.0052	3482.54	1030.3	37.4586	3559.91	992.285	-18.614	3539.19	944.698	-0.158885	3639.84	915.912
859	0	195.283	3563.13	1613.32	299.256	3561.33	1609.54	173.644	3407.08	1639.47	307.85	3394.49	1636.38	252.968	3327.14	1483.37	242.724	3230.41	1257.83	239.657	3469.09	1390.51	228.386	3503.73	1207.68	299.522	3228.06	1328.67	53.3366	3337.69	1446.07	-14.1457	3341.08	1243.1	-36.5893	3345.43	1124.67	-20.6562	3487.79	1026.69	38.4781	3564.05	985.685	-18.1615	3541.87	939.303	-0.011259	3641.82	907.591
860	0	196.932	3575.77	1614.27	300.777	3573.63	1610.31	175.282	3419.28	1640.73	309.244	3406.92	1637.54	254.576	3339.35	1484.82	245.29	3242.75	1259.48	240.836	3481.26	1391.85	229.916	3515.89	1209.08	301.836	3240.35	1330.24	54.8978	3349.34	1447.32	-12.3294	3350.12	1244.6	-34.3834	3352.64	1125.86	-19.3731	3492.42	1022.9	39.3906	3567.45	978.593	-17.9028	3543.69	933.581	-0.12214	3642.86	898.68
861	0	198.482	3588.39	1615.42	302.182	3585.87	1611.29	176.829	3431.39	1642.2	310.516	3419.32	1638.96	256.145	3351.5	1486.56	248.005	3255.03	1261.43	241.927	3493.35	1393.44	231.442	3527.93	1210.72	304.237	3252.59	1332.13	56.4355	3360.83	1448.79	-10.5124	3358.83	1246.35	-32.1415	3359.44	1127.27	-18.1563	3496.44	1018.91	40.1959	3570.12	971.011	-17.8382	3544.66	927.534	-0.492252	3642.96	889.181
[truncated: 69 more columns]

## Sheet: Sheet2
Devices
		025370 - Force			025370 - Moment			025370 - CoP			027571 - Force			027571 - Moment			027571 - CoP			037720 - Force			037720 - Moment			037720 - CoP
Frame	Sub Frame	Fx	Fy	Fz	Mx	My	Mz	Cx	Cy	Cz	Fx	Fy	Fz	Mx	My	Mz	Cx	Cy	Cz	Fx	Fy	Fz	Mx	My	Mz	Cx	Cy	Cz
		N	N	N	N.mm	N.mm	N.mm	mm	mm	mm	N	N	N	N.mm	N.mm	N.mm	mm	mm	mm	N	N	N	N.mm	N.mm	N.mm	mm	mm	mm
448	0	0	0	0	0	0	0	200	300	0	0	0	0	0	0	0	200	903	0	0	0	0	0	0	0	603	903	0
448	1	0	0	0	0	0	0	200	300	0	0	0	0	0	0	0	200	903	0	0	0	0	0	0	0	603	903	0
448	2	0	0	0	0	0	0	200	300	0	0	0	0	0	0	0	200	903	0	0	0	0	0	0	0	603	903	0
448	3	0	0	0	0	0	0	200	300	0	0	0	0	0	0	0	200	903	0	0	0	0	0	0	0	603	903	0
448	4	0	0	0	0	0	0	200	300	0	0	0	0	0	0	0	200	903	0	0	0	0	0	0	0	603	903	0
448	5	0	0	0	0	0	0	200	300	0	0	0	0	0	0	0	200	903	0	0	0	0	0	0	0	603	903	0
448	6	0	0	0	0	0	0	200	300	0	0	0	0	0	0	0	200	903	0	0	0	0	0	0	0	603	903	0
448	7	0	0	0	0	0	0	200	300	0	0	0	0	0	0	0	200	903	0	0	0	0	0	0	0	603	903	0
448	8	0	0	0	0	0	0	200	300	0	0	0	0	0	0	0	200	903	0	0	0	0	0	0	0	603	903	0
448	9	0	0	0	0	0	0	200	300	0	0	0	0	0	0	0	200	903	0	0	0	0	0	0	0	603	903	0
449	0	0	0	0	0	0	0	200	300	0	0	0	0	0	0	0	200	903	0	0	0	0	0	0	0	603	903	0
449	1	0	0	0	0	0	0	200	300	0	0	0	0	0	0	0	200	903	0	0	0	0	0	0	0	603	903	0
449	2	0	0	0	0	0	0	200	300	0	0	0	0	0	0	0	200	903	0	0	0	0	0	0	0	603	903	0
449	3	0	0	0	0	0	0	200	300	0	0	0	0	0	0	0	200	903	0	0	0	0	0	0	0	603	903	0
449	4	0	0	0	0	0	0	200	300	0	0	0	0	0	0	0	200	903	0	0	0	0	0	0	0	603	903	0
449	5	0	0	0	0	0	0	200	300	0	0	0	0	0	0	0	200	903	0	0	0	0	0	0	0	603	903	0
449	6	0	0	0	0	0	0	200	300	0	0	0	0	0	0	0	200	903	0	0	0	0	0	0	0	603	903	0
449	7	0	0	0	0	0	0	200	300	0	0	0	0	0	0	0	200	903	0	0	0	0	0	0	0	603	903	0
449	8	0	0	0	0	0	0	200	300	0	0	0	0	0	0	0	200	903	0	0	0	0	0	0	0	603	903	0
449	9	0	0	0	0	0	0	200	300	0	0	0	0	0	0	0	200	903	0	0	0	0	0	0	0	603	903	0
450	0	0	0	0	0	0	0	200	300	0	0	0	0	0	0	0	200	903	0	0	0	0	0	0	0	603	903	0
450	1	0	0	0	0	0	0	200	300	0	0	0	0	0	0	0	200	903	0	0	0	0	0	0	0	603	903	0
450	2	0	0	0	0	0	0	200	300	0	0	0	0	0	0	0	200	903	0	0	0	0	0	0	0	603	903	0
450	3	0	0	0	0	0	0	200	300	0	0	0	0	0	0	0	200	903	0	0	0	0	0	0	0	603	903	0
450	4	0	0	0	0	0	0	200	300	0	0	0	0	0	0	0	200	903	0	0	0	0	0	0	0	603	903	0
450	5	0	0	0	0	0	0	200	300	0	0	0	0	0	0	0	200	903	0	0	0	0	0	0	0	603	903	0
450	6	0	0	0	0	0	0	200	300	0	0	0	0	0	0	0	200	903	0	0	0	0	0	0	0	603	903	0
450	7	0	0	0	0	0	0	200	300	0	0	0	0	0	0	0	200	903	0	0	0	0	0	0	0	603	903	0
450	8	0	0	0	0	0	0	200	300	0	0	0	0	0	0	0	200	903	0	0	0	0	0	0	0	603	903	0
450	9	0	0	0	0	0	0	200	300	0	0	0	0	0	0	0	200	903	0	0	0	0	0	0	0	603	903	0
451	0	0	0	0	0	0	0	200	300	0	0	0	0	0	0	0	200	903	0	0	0	0	0	0	0	603	903	0
451	1	0	0	0	0	0	0	200	300	0	0	0	0	0	0	0	200	903	0	0	0	0	0	0	0	603	903	0
451	2	0	0	0	0	0	0	200	300	0	0	0	0	0	0	0	200	903	0	0	0	0	0	0	0	603	903	0
451	3	0	0	0	0	0	0	200	300	0	0	0	0	0	0	0	200	903	0	0	0	0	0	0	0	603	903	0
451	4	0	0	0	0	0	0	200	300	0	0	0	0	0	0	0	200	903	0	0	0	0	0	0	0	603	903	0
451	5	0	0	0	0	0	0	200	300	0	0	0	0	0	0	0	200	903	0	0	0	0	0	0	0	603	903	0
451	6	0	0	0	0	0	0	200	300	0	0	0	0	0	0	0	200	903	0	0	0	0	0	0	0	603	903	0
451	7	0	0	0	0	0	0	200	300	0	0	0	0	0	0	0	200	903	0	0	0	0	0	0	0	603	903	0
451	8	0	0	0	0	0	0	200	300	0	0	0	0	0	0	0	200	903	0	0	0	0	0	0	0	603	903	0
451	9	0	0	0	0	0	0	200	300	0	0	0	0	0	0	0	200	903	0	0	0	0	0	0	0	603	903	0
452	0	0	0	0	0	0	0	200	300	0	0	0	0	0	0	0	200	903	0	0	0	0	0	0	0	603	903	0
452	1	0	0	0	0	0	0	200	300	0	0	0	0	0	0	0	200	903	0	0	0	0	0	0	0	603	903	0
452	2	0	0	0	0	0	0	200	300	0	0	0	0	0	0	0	200	903	0	0	0	0	0	0	0	603	903	0
452	3	0	0	0	0	0	0	200	300	0	0	0	0	0	0	0	200	903	0	0	0	0	0	0	0	603	903	0
452	4	0	0	0	0	0	0	200	300	0	0	0	0	0	0	0	200	903	0	0	0	0	0	0	0	603	903	0
452	5	0	0	0	0	0	0	200	300	0	0	0	0	0	0	0	200	903	0	0	0	0	0	0	0	603	903	0
452	6	0	0	0	0	0	0	200	300	0	0	0	0	0	0	0	200	903	0	0	0	0	0	0	0	603	903	0
452	7	0	0	0	0	0	0	200	300	0	0	0	0	0	0	0	200	903	0	0	0	0	0	0	0	603	903	0
452	8	0	0	0	0	0	0	200	300	0	0	0	0	0	0	0	200	903	0	0	0	0	0	0	0	603	903	0
452	9	0	0	0	0	0	0	200	300	0	0	0	0	0	0	0	200	903	0	0	0	0	0	0	0	603	903	0
453	0	0	0	0	0	0	0	200	300	0	0	0	0	0	0	0	200	903	0	0	0	0	0	0	0	603	903	0
453	1	0	0	0	0	0	0	200	300	0	0	0	0	0	0	0	200	903	0	0	0	0	0	0	0	603	903	0
453	2	0	0	0	0	0	0	200	300	0	0	0	0	0	0	0	200	903	0	0	0	0	0	0	0	603	903	0
453	3	0	0	0	0	0	0	200	300	0	0	0	0	0	0	0	200	903	0	0	0	0	0	0	0	603	903	0
453	4	0	0	0	0	0	0	200	300	0	0	0	0	0	0	0	200	903	0	0	0	0	0	0	0	603	903	0
453	5	0	0	0	0	0	0	200	300	0	0	0	0	0	0	0	200	903	0	0	0	0	0	0	0	603	903	0
453	6	0	0	0	0	0	0	200	300	0	0	0	0	0	0	0	200	903	0	0	0	0	0	0	0	603	903	0
453	7	0	0	0	0	0	0	200	300	0	0	0	0	0	0	0	200	903	0	0	0	0	0	0	0	603	903	0
453	8	0	0	0	0	0	0	200	300	0	0	0	0	0	0	0	200	903	0	0	0	0	0	0	0	603	903	0
453	9	0	0	0	0	0	0	200	300	0	0	0	0	0	0	0	200	903	0	0	0	0	0	0	0	603	903	0
454	0	0	0	0	0	0	0	200	300	0	0	0	0	0	0	0	200	903	0	0	0	0	0	0	0	603	903	0
454	1	0	0	0	0	0	0	200	300	0	0	0	0	0	0	0	200	903	0	0	0	0	0	0	0	603	903	0
454	2	0	0	0	0	0	0	200	300	0	0	0	0	0	0	0	200	903	0	0	0	0	0	0	0	603	903	0
454	3	0	0	0	0	0	0	200	300	0	0	0	0	0	0	0	200	903	0	0	0	0	0	0	0	603	903	0
454	4	0	0	0	0	0	0	200	300	0	0	0	0	0	0	0	200	903	0	0	0	0	0	0	0	603	903	0
454	5	0	0	0	0	0	0	200	300	0	0	0	0	0	0	0	200	903	0	0	0	0	0	0	0	603	903	0
454	6	0	0	0	0	0	0	200	300	0	0	0	0	0	0	0	200	903	0	0	0	0	0	0	0	603	903	0
454	7	0	0	0	0	0	0	200	300	0	0	0	0	0	0	0	200	903	0	0	0	0	0	0	0	603	903	0
454	8	0	0	0	0	0	0	200	300	0	0	0	0	0	0	0	200	903	0	0	0	0	0	0	0	603	903	0
454	9	0	0	0	0	0	0	200	300	0	0	0	0	0	0	0	200	903	0	0	0	0	0	0	0	603	903	0
455	0	0	0	0	0	0	0	200	300	0	0	0	0	0	0	0	200	903	0	0	0	0	0	0	0	603	903	0
455	1	0	0	0	0	0	0	200	300	0	0	0	0	0	0	0	200	903	0	0	0	0	0	0	0	603	903	0
455	2	0	0	0	0	0	0	200	300	0	0	0	0	0	0	0	200	903	0	0	0	0	0	0	0	603	903	0
455	3	0	0	0	0	0	0	200	300	0	0	0	0	0	0	0	200	903	0	0	0	0	0	0	0	603	903	0
455	4	0	0	0	0	0	0	200	300	0	0	0	0	0	0	0	200	903	0	0	0	0	0	0	0	603	903	0
455	5	0	0	0	0	0	0	200	300	0	0	0	0	0	0	0	200	903	0	0	0	0	0	0	0	603	903	0
455	6	0	0	0	0	0	0	200	300	0	0	0	0	0	0	0	200	903	0	0	0	0	0	0	0	603	903	0
455	7	0	0	0	0	0	0	200	300	0	0	0	0	0	0	0	200	903	0	0	0	0	0	0	0	603	903	0
455	8	0	0	0	0	0	0	200	300	0	0	0	0	0	0	0	200	903	0	0	0	0	0	0	0	603	903	0
455	9	0	0	0	0	0	0	200	300	0	0	0	0	0	0	0	200	903	0	0	0	0	0	0	0	603	903	0
456	0	0	0	0	0	0	0	200	300	0	0	0	0	0	0	0	200	903	0	0	0	0	0	0	0	603	903	0
456	1	0	0	0	0	0	0	200	300	0	0	0	0	0	0	0	200	903	0	0	0	0	0	0	0	603	903	0
456	2	0	0	0	0	0	0	200	300	0	0	0	0	0	0	0	200	903	0	0	0	0	0	0	0	603	903	0
456	3	0	0	0	0	0	0	200	300	0	0	0	0	0	0	0	200	903	0	0	0	0	0	0	0	603	903	0
456	4	0	0	0	0	0	0	200	300	0	0	0	0	0	0	0	200	903	0	0	0	0	0	0	0	603	903	0
456	5	0	0	0	0	0	0	200	300	0	0	0	0	0	0	0	200	903	0	0	0	0	0	0	0	603	903	0
456	6	0	0	0	0	0	0	200	300	0	0	0	0	0	0	0	200	903	0	0	0	0	0	0	0	603	903	0
456	7	0	0	0	0	0	0	200	300	0	0	0	0	0	0	0	200	903	0	0	0	0	0	0	0	603	903	0
456	8	0	0	0	0	0	0	200	300	0	0	0	0	0	0	0	200	903	0	0	0	0	0	0	0	603	903	0
456	9	0	0	0	0	0	0	200	300	0	0	0	0	0	0	0	200	903	0	0	0	0	0	0	0	603	903	0
457	0	0	0	0	0	0	0	200	300	0	0	0	0	0	0	0	200	903	0	0	0	0	0	0	0	603	903	0
457	1	0	0	0	0	0	0	200	300	0	0	0	0	0	0	0	200	903	0	0	0	0	0	0	0	603	903	0
457	2	0	0	0	0	0	0	200	300	0	0	0	0	0	0	0	200	903	0	0	0	0	0	0	0	603	903	0
457	3	0	0	0	0	0	0	200	300	0	0	0	0	0	0	0	200	903	0	0	0	0	0	0	0	603	903	0
457	4	0	0	0	0	0	0	200	300	0	0	0	0	0	0	0	200	903	0	0	0	0	0	0	0	603	903	0
457	5	0	0	0	0	0	0	200	300	0	0	0	0	0	0	0	200	903	0	0	0	0	0	0	0	603	903	0
457	6	0	0	0	0	0	0	200	300	0	0	0	0	0	0	0	200	903	0	0	0	0	0	0	0	603	903	0
457	7	0	0	0	0	0	0	200	300	0	0	0	0	0	0	0	200	903	0	0	0	0	0	0	0	603	903	0
457	8	0	0	0	0	0	0	200	300	0	0	0	0	0	0	0	200	903	0	0	0	0	0	0	0	603	903	0
457	9	0	0	0	0	0	0	200	300	0	0	0	0	0	0	0	200	903	0	0	0	0	0	0	0	603	903	0
458	0	0	0	0	0	0	0	200	300	0	0	0	0	0	0	0	200	903	0	0	0	0	0	0	0	603	903	0
458	1	0	0	0	0	0	0	200	300	0	0	0	0	0	0	0	200	903	0	0	0	0	0	0	0	603	903	0
458	2	0	0	0	0	0	0	200	300	0	0	0	0	0	0	0	200	903	0	0	0	0	0	0	0	603	903	0
458	3	0	0	0	0	0	0	200	300	0	0	0	0	0	0	0	200	903	0	0	0	0	0	0	0	603	903	0
458	4	0	0	0	0	0	0	200	300	0	0	0	0	0	0	0	200	903	0	0	0	0	0	0	0	603	903	0
458	5	0	0	0	0	0	0	200	300	0	0	0	0	0	0	0	200	903	0	0	0	0	0	0	0	603	903	0
458	6	0	0	0	0	0	0	200	300	0	0	0	0	0	0	0	200	903	0	0	0	0	0	0	0	603	903	0
458	7	0	0	0	0	0	0	200	300	0	0	0	0	0	0	0	200	903	0	0	0	0	0	0	0	603	903	0
458	8	0	0	0	0	0	0	200	300	0	0	0	0	0	0	0	200	903	0	0	0	0	0	0	0	603	903	0
458	9	0	0	0	0	0	0	200	300	0	0	0	0	0	0	0	200	903	0	0	0	0	0	0	0	603	903	0
459	0	0	0	0	0	0	0	200	300	0	0	0	0	0	0	0	200	903	0	0	0	0	0	0	0	603	903	0
459	1	0	0	0	0	0	0	200	300	0	0	0	0	0	0	0	200	903	0	0	0	0	0	0	0	603	903	0
459	2	0	0	0	0	0	0	200	300	0	0	0	0	0	0	0	200	903	0	0	0	0	0	0	0	603	903	0
459	3	0	0	0	0	0	0	200	300	0	0	0	0	0	0	0	200	903	0	0	0	0	0	0	0	603	903	0
459	4	0	0	0	0	0	0	200	300	0	0	0	0	0	0	0	200	903	0	0	0	0	0	0	0	603	903	0
459	5	0	0	0	0	0	0	200	300	0	0	0	0	0	0	0	200	903	0	0	0	0	0	0	0	603	903	0
459	6	0	0	0	0	0	0	200	300	0	0	0	0	0	0	0	200	903	0	0	0	0	0	0	0	603	903	0
459	7	0	0	0	0	0	0	200	300	0	0	0	0	0	0	0	200	903	0	0	0	0	0	0	0	603	903	0
459	8	0	0	0	0	0	0	200	300	0	0	0	0	0	0	0	200	903	0	0	0	0	0	0	0	603	903	0
459	9	0	0	0	0	0	0	200	300	0	0	0	0	0	0	0	200	903	0	0	0	0	0	0	0	603	903	0
460	0	0	0	0	0	0	0	200	300	0	0	0	0	0	0	0	200	903	0	0	0	0	0	0	0	603	903	0
460	1	0	0	0	0	0	0	200	300	0	0	0	0	0	0	0	200	903	0	0	0	0	0	0	0	603	903	0
460	2	0	0	0	0	0	0	200	300	0	0	0	0	0	0	0	200	903	0	0	0	0	0	0	0	603	903	0
460	3	0	0	0	0	0	0	200	300	0	0	0	0	0	0	0	200	903	0	0	0	0	0	0	0	603	903	0
460	4	0	0	0	0	0	0	200	300	0	0	0	0	0	0	0	200	903	0	0	0	0	0	0	0	603	903	0
460	5	0	0	0	0	0	0	200	300	0	0	0	0	0	0	0	200	903	0	0	0	0	0	0	0	603	903	0
460	6	0	0	0	0	0	0	200	300	0	0	0	0	0	0	0	200	903	0	0	0	0	0	0	0	603	903	0
460	7	0	0	0	0	0	0	200	300	0	0	0	0	0	0	0	200	903	0	0	0	0	0	0	0	603	903	0
460	8	0	0	0	0	0	0	200	300	0	0	0	0	0	0	0	200	903	0	0	0	0	0	0	0	603	903	0
460	9	0	0	0	0	0	0	200	300	0	0	0	0	0	0	0	200	903	0	0	0	0	0	0	0	603	903	0
461	0	0	0	0	0	0	0	200	300	0	0	0	0	0	0	0	200	903	0	0	0	0	0	0	0	603	903	0
461	1	0	0	0	0	0	0	200	300	0	0	0	0	0	0	0	200	903	0	0	0	0	0	0	0	603	903	0
461	2	0	0	0	0	0	0	200	300	0	0	0	0	0	0	0	200	903	0	0	0	0	0	0	0	603	903	0
461	3	0	0	0	0	0	0	200	300	0	0	0	0	0	0	0	200	903	0	0	0	0	0	0	0	603	903	0
461	4	0	0	0	0	0	0	200	300	0	0	0	0	0	0	0	200	903	0	0	0	0	0	0	0	603	903	0
461	5	0	0	0	0	0	0	200	300	0	0	0	0	0	0	0	200	903	0	0	0	0	0	0	0	603	903	0
461	6	0	0	0	0	0	0	200	300	0	0	0	0	0	0	0	200	903	0	0	0	0	0	0	0	603	903	0
461	7	0	0	0	0	0	0	200	300	0	0	0	0	0	0	0	200	903	0	0	0	0	0	0	0	603	903	0
461	8	0	0	0	0	0	0	200	300	0	0	0	0	0	0	0	200	903	0	0	0	0	0	0	0	603	903	0
461	9	0	0	0	0	0	0	200	300	0	0	0	0	0	0	0	200	903	0	0	0	0	0	0	0	603	903	0
462	0	0	0	0	0	0	0	200	300	0	0	0	0	0	0	0	200	903	0	0	0	0	0	0	0	603	903	0
462	1	0	0	0	0	0	0	200	300	0	0	0	0	0	0	0	200	903	0	0	0	0	0	0	0	603	903	0
462	2	0	0	0	0	0	0	200	300	0	0	0	0	0	0	0	200	903	0	0	0	0	0	0	0	603	903	0
462	3	0	0	0	0	0	0	200	300	0	0	0	0	0	0	0	200	903	0	0	0	0	0	0	0	603	903	0
462	4	0	0	0	0	0	0	200	300	0	0	0	0	0	0	0	200	903	0	0	0	0	0	0	0	603	903	0
462	5	0	0	0	0	0	0	200	300	0	0	0	0	0	0	0	200	903	0	0	0	0	0	0	0	603	903	0
462	6	0	0	0	0	0	0	200	300	0	0	0	0	0	0	0	200	903	0	0	0	0	0	0	0	603	903	0
462	7	0	0	0	0	0	0	200	300	0	0	0	0	0	0	0	200	903	0	0	0	0	0	0	0	603	903	0
462	8	0	0	0	0	0	0	200	300	0	0	0	0	0	0	0	200	903	0	0	0	0	0	0	0	603	903	0
462	9	0	0	0	0	0	0	200	300	0	0	0	0	0	0	0	200	903	0	0	0	0	0	0	0	603	903	0
463	0	0	0	0	0	0	0	200	300	0	0	0	0	0	0	0	200	903	0	0	0	0	0	0	0	603	903	0
463	1	0	0	0	0	0	0	200	300	0	0	0	0	0	0	0	200	903	0	0	0	0	0	0	0	603	903	0
463	2	0	0	0	0	0	0	200	300	0	0	0	0	0	0	0	200	903	0	0	0	0	0	0	0	603	903	0
463	3	0	0	0	0	0	0	200	300	0	0	0	0	0	0	0	200	903	0	0	0	0	0	0	0	603	903	0
463	4	0	0	0	0	0	0	200	300	0	0	0	0	0	0	0	200	903	0	0	0	0	0	0	0	603	903	0
463	5	0	0	0	0	0	0	200	300	0	0	0	0	0	0	0	200	903	0	0	0	0	0	0	0	603	903	0
463	6	0	0	0	0	0	0	200	300	0	0	0	0	0	0	0	200	903	0	0	0	0	0	0	0	603	903	0
463	7	0	0	0	0	0	0	200	300	0	0	0	0	0	0	0	200	903	0	0	0	0	0	0	0	603	903	0
463	8	0	0	0	0	0	0	200	300	0	0	0	0	0	0	0	200	903	0	0	0	0	0	0	0	603	903	0
463	9	0	0	0	0	0	0	200	300	0	0	0	0	0	0	0	200	903	0	0	0	0	0	0	0	603	903	0
464	0	0	0	0	0	0	0	200	300	0	0	0	0	0	0	0	200	903	0	0	0	0	0	0	0	603	903	0
464	1	0	0	0	0	0	0	200	300	0	0	0	0	0	0	0	200	903	0	0	0	0	0	0	0	603	903	0
464	2	0	0	0	0	0	0	200	300	0	0	0	0	0	0	0	200	903	0	0	0	0	0	0	0	603	903	0
464	3	0	0	0	0	0	0	200	300	0	0	0	0	0	0	0	200	903	0	0	0	0	0	0	0	603	903	0
464	4	0	0	0	0	0	0	200	300	0	0	0	0	0	0	0	200	903	0	0	0	0	0	0	0	603	903	0
464	5	0	0	0	0	0	0	200	300	0	0	0	0	0	0	0	200	903	0	0	0	0	0	0	0	603	903	0
464	6	0	0	0	0	0	0	200	300	0	0	0	0	0	0	0	200	903	0	0	0	0	0	0	0	603	903	0
464	7	0	0	0	0	0	0	200	300	0	0	0	0	0	0	0	200	903	0	0	0	0	0	0	0	603	903	0
464	8	0	0	0	0	0	0	200	300	0	0	0	0	0	0	0	200	903	0	0	0	0	0	0	0	603	903	0
464	9	0	0	0	0	0	0	200	300	0	0	0	0	0	0	0	200	903	0	0	0	0	0	0	0	603	903	0
465	0	0	0	0	0	0	0	200	300	0	0	0	0	0	0	0	200	903	0	0	0	0	0	0	0	603	903	0
465	1	0	0	0	0	0	0	200	300	0	0	0	0	0	0	0	200	903	0	0	0	0	0	0	0	603	903	0
465	2	0	0	0	0	0	0	200	300	0	0	0	0	0	0	0	200	903	0	0	0	0	0	0	0	603	903	0
465	3	0	0	0	0	0	0	200	300	0	0	0	0	0	0	0	200	903	0	0	0	0	0	0	0	603	903	0
465	4	0	0	0	0	0	0	200	300	0	0	0	0	0	0	0	200	903	0	0	0	0	0	0	0	603	903	0
465	5	0	0	0	0	0	0	200	300	0	0	0	0	0	0	0	200	903	0	0	0	0	0	0	0	603	903	0
465	6	0	0	0	0	0	0	200	300	0	0	0	0	0	0	0	200	903	0	0	0	0	0	0	0	603	903	0
465	7	0	0	0	0	0	0	200	300	0	0	0	0	0	0	0	200	903	0	0	0	0	0	0	0	603	903	0
465	8	0	0	0	0	0	0	200	300	0	0	0	0	0	0	0	200	903	0	0	0	0	0	0	0	603	903	0
465	9	0	0	0	0	0	0	200	300	0	0	0	0	0	0	0	200	903	0	0	0	0	0	0	0	603	903	0
466	0	0	0	0	0	0	0	200	300	0	0	0	0	0	0	0	200	903	0	0	0	0	0	0	0	603	903	0
466	1	0	0	0	0	0	0	200	300	0	0	0	0	0	0	0	200	903	0	0	0	0	0	0	0	603	903	0
466	2	0	0	0	0	0	0	200	300	0	0	0	0	0	0	0	200	903	0	0	0	0	0	0	0	603	903	0
466	3	0	0	0	0	0	0	200	300	0	0	0	0	0	0	0	200	903	0	0	0	0	0	0	0	603	903	0
466	4	0	0	0	0	0	0	200	300	0	0	0	0	0	0	0	200	903	0	0	0	0	0	0	0	603	903	0
466	5	0	0	0	0	0	0	200	300	0	0	0	0	0	0	0	200	903	0	0	0	0	0	0	0	603	903	0
466	6	0	0	0	0	0	0	200	300	0	0	0	0	0	0	0	200	903	0	0	0	0	0	0	0	603	903	0
466	7	0	0	0	0	0	0	200	300	0	0	0	0	0	0	0	200	903	0	0	0	0	0	0	0	603	903	0
466	8	0	0	0	0	0	0	200	300	0	0	0	0	0	0	0	200	903	0	0	0	0	0	0	0	603	903	0
466	9	0	0	0	0	0	0	200	300	0	0	0	0	0	0	0	200	903	0	0	0	0	0	0	0	603	903	0
467	0	0	0	0	0	0	0	200	300	0	0	0	0	0	0	0	200	903	0	0	0	0	0	0	0	603	903	0
467	1	0	0	0	0	0	0	200	300	0	0	0	0	0	0	0	200	903	0	0	0	0	0	0	0	603	903	0
467	2	0	0	0	0	0	0	200	300	0	0	0	0	0	0	0	200	903	0	0	0	0	0	0	0	603	903	0
467	3	0	0	0	0	0	0	200	300	0	0	0	0	0	0	0	200	903	0	0	0	0	0	0	0	603	903	0
467	4	0	0	0	0	0	0	200	300	0	0	0	0	0	0	0	200	903	0	0	0	0	0	0	0	603	903	0
467	5	0	0	0	0	0	0	200	300	0	0	0	0	0	0	0	200	903	0	0	0	0	0	0	0	603	903	0
467	6	0	0	0	0	0	0	200	300	0	0	0	0	0	0	0	200	903	0	0	0	0	0	0	0	603	903	0
467	7	0	0	0	0	0	0	200	300	0	0	0	0	0	0	0	200	903	0	0	0	0	0	0	0	603	903	0
467	8	0	0	0	0	0	0	200	300	0	0	0	0	0	0	0	200	903	0	0	0	0	0	0	0	603	903	0
467	9	0	0	0	0	0	0	200	300	0	0	0	0	0	0	0	200	903	0	0	0	0	0	0	0	603	903	0
468	0	0	0	0	0	0	0	200	300	0	0	0	0	0	0	0	200	903	0	0	0	0	0	0	0	603	903	0
468	1	0	0	0	0	0	0	200	300	0	0	0	0	0	0	0	200	903	0	0	0	0	0	0	0	603	903	0
468	2	0	0	0	0	0	0	200	300	0	0	0	0	0	0	0	200	903	0	0	0	0	0	0	0	603	903	0
468	3	0	0	0	0	0	0	200	300	0	0	0	0	0	0	0	200	903	0	0	0	0	0	0	0	603	903	0
468	4	0	0	0	0	0	0	200	300	0	0	0	0	0	0	0	200	903	0	0	0	0	0	0	0	603	903	0
468	5	0	0	0	0	0	0	200	300	0	0	0	0	0	0	0	200	903	0	0	0	0	0	0	0	603	903	0
468	6	0	0	0	0	0	0	200	300	0	0	0	0	0	0	0	200	903	0	0	0	0	0	0	0	603	903	0
468	7	0	0	0	0	0	0	200	300	0	0	0	0	0	0	0	200	903	0	0	0	0	0	0	0	603	903	0
468	8	0	0	0	0	0	0	200	300	0	0	0	0	0	0	0	200	903	0	0	0	0	0	0	0	603	903	0
468	9	0	0	0	0	0	0	200	300	0	0	0	0	0	0	0	200	903	0	0	0	0	0	0	0	603	903	0
469	0	0	0	0	0	0	0	200	300	0	0	0	0	0	0	0	200	903	0	0	0	0	0	0	0	603	903	0
469	1	0	0	0	0	0	0	200	300	0	0	0	0	0	0	0	200	903	0	0	0	0	0	0	0	603	903	0
469	2	0	0	0	0	0	0	200	300	0	0	0	0	0	0	0	200	903	0	0	0	0	0	0	0	603	903	0
469	3	0	0	0	0	0	0	200	300	0	0	0	0	0	0	0	200	903	0	0	0	0	0	0	0	603	903	0
469	4	0	0	0	0	0	0	200	300	0	0	0	0	0	0	0	200	903	0	0	0	0	0	0	0	603	903	0
469	5	0	0	0	0	0	0	200	300	0	0	0	0	0	0	0	200	903	0	0	0	0	0	0	0	603	903	0
469	6	0	0	0	0	0	0	200	300	0	0	0	0	0	0	0	200	903	0	0	0	0	0	0	0	603	903	0
469	7	0	0	0	0	0	0	200	300	0	0	0	0	0	0	0	200	903	0	0	0	0	0	0	0	603	903	0
469	8	0	0	0	0	0	0	200	300	0	0	0	0	0	0	0	200	903	0	0	0	0	0	0	0	603	903	0
469	9	0	0	0	0	0	0	200	300	0	0	0	0	0	0	0	200	903	0	0	0	0	0	0	0	603	903	0
470	0	0	0	0	0	0	0	200	300	0	0	0	0	0	0	0	200	903	0	0	0	0	0	0	0	603	903	0
470	1	0	0	0	0	0	0	200	300	0	0	0	0	0	0	0	200	903	0	0	0	0	0	0	0	603	903	0
470	2	0	0	0	0	0	0	200	300	0	0	0	0	0	0	0	200	903	0	0	0	0	0	0	0	603	903	0
470	3	0	0	0	0	0	0	200	300	0	0	0	0	0	0	0	200	903	0	0	0	0	0	0	0	603	903	0
470	4	0	0	0	0	0	0	200	300	0	0	0	0	0	0	0	200	903	0	0	0	0	0	0	0	603	903	0
470	5	0	0	0	0	0	0	200	300	0	0	0	0	0	0	0	200	903	0	0	0	0	0	0	0	603	903	0
470	6	0	0	0	0	0	0	200	300	0	0	0	0	0	0	0	200	903	0	0	0	0	0	0	0	603	903	0
470	7	0	0	0	0	0	0	200	300	0	0	0	0	0	0	0	200	903	0	0	0	0	0	0	0	603	903	0
470	8	0	0	0	0	0	0	200	300	0	0	0	0	0	0	0	200	903	0	0	0	0	0	0	0	603	903	0
470	9	0	0	0	0	0	0	200	300	0	0	0	0	0	0	0	200	903	0	0	0	0	0	0	0	603	903	0
471	0	0	0	0	0	0	0	200	300	0	0	0	0	0	0	0	200	903	0	0	0	0	0	0	0	603	903	0
471	1	0	0	0	0	0	0	200	300	0	0	0	0	0	0	0	200	903	0	0	0	0	0	0	0	603	903	0
471	2	0	0	0	0	0	0	200	300	0	0	0	0	0	0	0	200	903	0	0	0	0	0	0	0	603	903	0
471	3	0	0	0	0	0	0	200	300	0	0	0	0	0	0	0	200	903	0	0	0	0	0	0	0	603	903	0
471	4	0	0	0	0	0	0	200	300	0	0	0	0	0	0	0	200	903	0	0	0	0	0	0	0	603	903	0
471	5	0	0	0	0	0	0	200	300	0	0	0	0	0	0	0	200	903	0	0	0	0	0	0	0	603	903	0
471	6	0	0	0	0	0	0	200	300	0	0	0	0	0	0	0	200	903	0	0	0	0	0	0	0	603	903	0
471	7	0	0	0	0	0	0	200	300	0	0	0	0	0	0	0	200	903	0	0	0	0	0	0	0	603	903	0
471	8	0	0	0	0	0	0	200	300	0	0	0	0	0	0	0	200	903	0	0	0	0	0	0	0	603	903	0
471	9	0	0	0	0	0	0	200	300	0	0	0	0	0	0	0	200	903	0	0	0	0	0	0	0	603	903	0
472	0	0	0	0	0	0	0	200	300	0	0	0	0	0	0	0	200	903	0	0	0	0	0	0	0	603	903	0
472	1	0	0	0	0	0	0	200	300	0	0	0	0	0	0	0	200	903	0	0	0	0	0	0	0	603	903	0
472	2	0	0	0	0	0	0	200	300	0	0	0	0	0	0	0	200	903	0	0	0	0	0	0	0	603	903	0
472	3	0	0	0	0	0	0	200	300	0	0	0	0	0	0	0	200	903	0	0	0	0	0	0	0	603	903	0
472	4	0	0	0	0	0	0	200	300	0	0	0	0	0	0	0	200	903	0	0	0	0	0	0	0	603	903	0
472	5	0	0	0	0	0	0	200	300	0	0	0	0	0	0	0	200	903	0	0	0	0	0	0	0	603	903	0
472	6	0	0	0	0	0	0	200	300	0	0	0	0	0	0	0	200	903	0	0	0	0	0	0	0	603	903	0
472	7	0	0	0	0	0	0	200	300	0	0	0	0	0	0	0	200	903	0	0	0	0	0	0	0	603	903	0
472	8	0	0	0	0	0	0	200	300	0	0	0	0	0	0	0	200	903	0	0	0	0	0	0	0	603	903	0
472	9	0	0	0	0	0	0	200	300	0	0	0	0	0	0	0	200	903	0	0	0	0	0	0	0	603	903	0
473	0	0	0	0	0	0	0	200	300	0	0	0	0	0	0	0	200	903	0	0	0	0	0	0	0	603	903	0
473	1	0	0	0	0	0	0	200	300	0	0	0	0	0	0	0	200	903	0	0	0	0	0	0	0	603	903	0
473	2	0	0	0	0	0	0	200	300	0	0	0	0	0	0	0	200	903	0	0	0	0	0	0	0	603	903	0
473	3	0	0	0	0	0	0	200	300	0	0	0	0	0	0	0	200	903	0	0	0	0	0	0	0	603	903	0
473	4	0	0	0	0	0	0	200	300	0	0	0	0	0	0	0	200	903	0	0	0	0	0	0	0	603	903	0
473	5	0	0	0	0	0	0	200	300	0	0	0	0	0	0	0	200	903	0	0	0	0	0	0	0	603	903	0
473	6	0	0	0	0	0	0	200	300	0	0	0	0	0	0	0	200	903	0	0	0	0	0	0	0	603	903	0
473	7	0	0	0	0	0	0	200	300	0	0	0	0	0	0	0	200	903	0	0	0	0	0	0	0	603	903	0
473	8	0	0	0	0	0	0	200	300	0	0	0	0	0	0	0	200	903	0	0	0	0	0	0	0	603	903	0
473	9	0	0	0	0	0	0	200	300	0	0	0	0	0	0	0	200	903	0	0	0	0	0	0	0	603	903	0
474	0	0	0	0	0	0	0	200	300	0	0	0	0	0	0	0	200	903	0	0	0	0	0	0	0	603	903	0
474	1	0	0	0	0	0	0	200	300	0	0	0	0	0	0	0	200	903	0	0	0	0	0	0	0	603	903	0
474	2	0	0	0	0	0	0	200	300	0	0	0	0	0	0	0	200	903	0	0	0	0	0	0	0	603	903	0
474	3	0	0	0	0	0	0	200	300	0	0	0	0	0	0	0	200	903	0	0	0	0	0	0	0	603	903	0
474	4	0	0	0	0	0	0	200	300	0	0	0	0	0	0	0	200	903	0	0	0	0	0	0	0	603	903	0
474	5	0	0	0	0	0	0	200	300	0	0	0	0	0	0	0	200	903	0	0	0	0	0	0	0	603	903	0
474	6	0	0	0	0	0	0	200	300	0	0	0	0	0	0	0	200	903	0	0	0	0	0	0	0	603	903	0
474	7	0	0	0	0	0	0	200	300	0	0	0	0	0	0	0	200	903	0	0	0	0	0	0	0	603	903	0
474	8	0	0	0	0	0	0	200	300	0	0	0	0	0	0	0	200	903	0	0	0	0	0	0	0	603	903	0
474	9	0	0	0	0	0	0	200	300	0	0	0	0	0	0	0	200	903	0	0	0	0	0	0	0	603	903	0
475	0	0	0	0	0	0	0	200	300	0	0	0	0	0	0	0	200	903	0	0	0	0	0	0	0	603	903	0
475	1	0	0	0	0	0	0	200	300	0	0	0	0	0	0	0	200	903	0	0	0	0	0	0	0	603	903	0
475	2	0	0	0	0	0	0	200	300	0	0	0	0	0	0	0	200	903	0	0	0	0	0	0	0	603	903	0
475	3	0	0	0	0	0	0	200	300	0	0	0	0	0	0	0	200	903	0	0	0	0	0	0	0	603	903	0
475	4	0	0	0	0	0	0	200	300	0	0	0	0	0	0	0	200	903	0	0	0	0	0	0	0	603	903	0
475	5	0	0	0	0	0	0	200	300	0	0	0	0	0	0	0	200	903	0	0	0	0	0	0	0	603	903	0
475	6	0	0	0	0	0	0	200	300	0	0	0	0	0	0	0	200	903	0	0	0	0	0	0	0	603	903	0
475	7	0	0	0	0	0	0	200	300	0	0	0	0	0	0	0	200	903	0	0	0	0	0	0	0	603	903	0
475	8	0	0	0	0	0	0	200	300	0	0	0	0	0	0	0	200	903	0	0	0	0	0	0	0	603	903	0
475	9	0	0	0	0	0	0	200	300	0	0	0	0	0	0	0	200	903	0	0	0	0	0	0	0	603	903	0
476	0	0	0	0	0	0	0	200	300	0	0	0	0	0	0	0	200	903	0	0	0	0	0	0	0	603	903	0
476	1	0	0	0	0	0	0	200	300	0	0	0	0	0	0	0	200	903	0	0	0	0	0	0	0	603	903	0
476	2	0	0	0	0	0	0	200	300	0	0	0	0	0	0	0	200	903	0	0	0	0	0	0	0	603	903	0
476	3	0	0	0	0	0	0	200	300	0	0	0	0	0	0	0	200	903	0	0	0	0	0	0	0	603	903	0
476	4	0	0	0	0	0	0	200	300	0	0	0	0	0	0	0	200	903	0	0	0	0	0	0	0	603	903	0
476	5	0	0	0	0	0	0	200	300	0	0	0	0	0	0	0	200	903	0	0	0	0	0	0	0	603	903	0
476	6	0	0	0	0	0	0	200	300	0	0	0	0	0	0	0	200	903	0	0	0	0	0	0	0	603	903	0
476	7	0	0	0	0	0	0	200	300	0	0	0	0	0	0	0	200	903	0	0	0	0	0	0	0	603	903	0
476	8	0	0	0	0	0	0	200	300	0	0	0	0	0	0	0	200	903	0	0	0	0	0	0	0	603	903	0
476	9	0	0	0	0	0	0	200	300	0	0	0	0	0	0	0	200	903	0	0	0	0	0	0	0	603	903	0
477	0	0	0	0	0	0	0	200	300	0	0	0	0	0	0	0	200	903	0	0	0	0	0	0	0	603	903	0
477	1	0	0	0	0	0	0	200	300	0	0	0	0	0	0	0	200	903	0	0	0	0	0	0	0	603	903	0
477	2	0	0	0	0	0	0	200	300	0	0	0	0	0	0	0	200	903	0	0	0	0	0	0	0	603	903	0
477	3	0	0	0	0	0	0	200	300	0	0	0	0	0	0	0	200	903	0	0	0	0	0	0	0	603	903	0
477	4	0	0	0	0	0	0	200	300	0	0	0	0	0	0	0	200	903	0	0	0	0	0	0	0	603	903	0
477	5	0	0	0	0	0	0	200	300	0	0	0	0	0	0	0	200	903	0	0	0	0	0	0	0	603	903	0
477	6	0	0	0	0	0	0	200	300	0	0	0	0	0	0	0	200	903	0	0	0	0	0	0	0	603	903	0
477	7	0	0	0	0	0	0	200	300	0	0	0	0	0	0	0	200	903	0	0	0	0	0	0	0	603	903	0
477	8	0	0	0	0	0	0	200	300	0	0	0	0	0	0	0	200	903	0	0	0	0	0	0	0	603	903	0
477	9	0	0	0	0	0	0	200	300	0	0	0	0	0	0	0	200	903	0	0	0	0	0	0	0	603	903	0
478	0	0	0	0	0	0	0	200	300	0	0	0	0	0	0	0	200	903	0	0	0	0	0	0	0	603	903	0
478	1	0	0	0	0	0	0	200	300	0	0	0	0	0	0	0	200	903	0	0	0	0	0	0	0	603	903	0
478	2	0	0	0	0	0	0	200	300	0	0	0	0	0	0	0	200	903	0	0	0	0	0	0	0	603	903	0
478	3	0	0	0	0	0	0	200	300	0	0	0	0	0	0	0	200	903	0	0	0	0	0	0	0	603	903	0
478	4	0	0	0	0	0	0	200	300	0	0	0	0	0	0	0	200	903	0	0	0	0	0	0	0	603	903	0
478	5	0	0	0	0	0	0	200	300	0	0	0	0	0	0	0	200	903	0	0	0	0	0	0	0	603	903	0
478	6	0	0	0	0	0	0	200	300	0	0	0	0	0	0	0	200	903	0	0	0	0	0	0	0	603	903	0
478	7	0	0	0	0	0	0	200	300	0	0	0	0	0	0	0	200	903	0	0	0	0	0	0	0	603	903	0
478	8	0	0	0	0	0	0	200	300	0	0	0	0	0	0	0	200	903	0	0	0	0	0	0	0	603	903	0
478	9	0	0	0	0	0	0	200	300	0	0	0	0	0	0	0	200	903	0	0	0	0	0	0	0	603	903	0
479	0	0	0	0	0	0	0	200	300	0	0	0	0	0	0	0	200	903	0	0	0	0	0	0	0	603	903	0
479	1	0	0	0	0	0	0	200	300	0	0	0	0	0	0	0	200	903	0	0	0	0	0	0	0	603	903	0
479	2	0	0	0	0	0	0	200	300	0	0	0	0	0	0	0	200	903	0	0	0	0	0	0	0	603	903	0
479	3	0	0	0	0	0	0	200	300	0	0	0	0	0	0	0	200	903	0	0	0	0	0	0	0	603	903	0
479	4	0	0	0	0	0	0	200	300	0	0	0	0	0	0	0	200	903	0	0	0	0	0	0	0	603	903	0
479	5	0	0	0	0	0	0	200	300	0	0	0	0	0	0	0	200	903	0	0	0	0	0	0	0	603	903	0
479	6	0	0	0	0	0	0	200	300	0	0	0	0	0	0	0	200	903	0	0	0	0	0	0	0	603	903	0
479	7	0	0	0	0	0	0	200	300	0	0	0	0	0	0	0	200	903	0	0	0	0	0	0	0	603	903	0
479	8	0	0	0	0	0	0	200	300	0	0	0	0	0	0	0	200	903	0	0	0	0	0	0	0	603	903	0
479	9	0	0	0	0	0	0	200	300	0	0	0	0	0	0	0	200	903	0	0	0	0	0	0	0	603	903	0
480	0	0	0	0	0	0	0	200	300	0	0	0	0	0	0	0	200	903	0	0	0	0	0	0	0	603	903	0
480	1	0	0	0	0	0	0	200	300	0	0	0	0	0	0	0	200	903	0	0	0	0	0	0	0	603	903	0
480	2	0	0	0	0	0	0	200	300	0	0	0	0	0	0	0	200	903	0	0	0	0	0	0	0	603	903	0
480	3	0	0	0	0	0	0	200	300	0	0	0	0	0	0	0	200	903	0	0	0	0	0	0	0	603	903	0
480	4	0	0	0	0	0	0	200	300	0	0	0	0	0	0	0	200	903	0	0	0	0	0	0	0	603	903	0
480	5	0	0	0	0	0	0	200	300	0	0	0	0	0	0	0	200	903	0	0	0	0	0	0	0	603	903	0
480	6	0	0	0	0	0	0	200	300	0	0	0	0	0	0	0	200	903	0	0	0	0	0	0	0	603	903	0
480	7	0	0	0	0	0	0	200	300	0	0	0	0	0	0	0	200	903	0	0	0	0	0	0	0	603	903	0
480	8	0	0	0	0	0	0	200	300	0	0	0	0	0	0	0	200	903	0	0	0	0	0	0	0	603	903	0
480	9	0	0	0	0	0	0	200	300	0	0	0	0	0	0	0	200	903	0	0	0	0	0	0	0	603	903	0
481	0	0	0	0	0	0	0	200	300	0	0	0	0	0	0	0	200	903	0	0	0	0	0	0	0	603	903	0
481	1	0	0	0	0	0	0	200	300	0	0	0	0	0	0	0	200	903	0	0	0	0	0	0	0	603	903	0
481	2	0	0	0	0	0	0	200	300	0	0	0	0	0	0	0	200	903	0	0	0	0	0	0	0	603	903	0
481	3	0	0	0	0	0	0	200	300	0	0	0	0	0	0	0	200	903	0	0	0	0	0	0	0	603	903	0
481	4	0	0	0	0	0	0	200	300	0	0	0	0	0	0	0	200	903	0	0	0	0	0	0	0	603	903	0
481	5	0	0	0	0	0	0	200	300	0	0	0	0	0	0	0	200	903	0	0	0	0	0	0	0	603	903	0
481	6	0	0	0	0	0	0	200	300	0	0	0	0	0	0	0	200	903	0	0	0	0	0	0	0	603	903	0
481	7	0	0	0	0	0	0	200	300	0	0	0	0	0	0	0	200	903	0	0	0	0	0	0	0	603	903	0
481	8	0	0	0	0	0	0	200	300	0	0	0	0	0	0	0	200	903	0	0	0	0	0	0	0	603	903	0
481	9	0	0	0	0	0	0	200	300	0	0	0	0	0	0	0	200	903	0	0	0	0	0	0	0	603	903	0
482	0	0	0	0	0	0	0	200	300	0	0	0	0	0	0	0	200	903	0	0	0	0	0	0	0	603	903	0
482	1	0	0	0	0	0	0	200	300	0	0	0	0	0	0	0	200	903	0	0	0	0	0	0	0	603	903	0
482	2	0	0	0	0	0	0	200	300	0	0	0	0	0	0	0	200	903	0	0	0	0	0	0	0	603	903	0
482	3	0	0	0	0	0	0	200	300	0	0	0	0	0	0	0	200	903	0	0	0	0	0	0	0	603	903	0
482	4	0	0	0	0	0	0	200	300	0	0	0	0	0	0	0	200	903	0	0	0	0	0	0	0	603	903	0
482	5	0	0	0	0	0	0	200	300	0	0	0	0	0	0	0	200	903	0	0	0	0	0	0	0	603	903	0
482	6	0	0	0	0	0	0	200	300	0	0	0	0	0	0	0	200	903	0	0	0	0	0	0	0	603	903	0
482	7	0	0	0	0	0	0	200	300	0	0	0	0	0	0	0	200	903	0	0	0	0	0	0	0	603	903	0
482	8	0	0	0	0	0	0	200	300	0	0	0	0	0	0	0	200	903	0	0	0	0	0	0	0	603	903	0
482	9	0	0	0	0	0	0	200	300	0	0	0	0	0	0	0	200	903	0	0	0	0	0	0	0	603	903	0
483	0	0	0	0	0	0	0	200	300	0	0	0	0	0	0	0	200	903	0	0	0	0	0	0	0	603	903	0
483	1	0	0	0	0	0	0	200	300	0	0	0	0	0	0	0	200	903	0	0	0	0	0	0	0	603	903	0
483	2	0	0	0	0	0	0	200	300	0	0	0	0	0	0	0	200	903	0	0	0	0	0	0	0	603	903	0
483	3	0	0	0	0	0	0	200	300	0	0	0	0	0	0	0	200	903	0	0	0	0	0	0	0	603	903	0
483	4	0	0	0	0	0	0	200	300	0	0	0	0	0	0	0	200	903	0	0	0	0	0	0	0	603	903	0
483	5	0	0	0	0	0	0	200	300	0	0	0	0	0	0	0	200	903	0	0	0	0	0	0	0	603	903	0
483	6	0	0	0	0	0	0	200	300	0	0	0	0	0	0	0	200	903	0	0	0	0	0	0	0	603	903	0
483	7	0	0	0	0	0	0	200	300	0	0	0	0	0	0	0	200	903	0	0	0	0	0	0	0	603	903	0
483	8	0	0	0	0	0	0	200	300	0	0	0	0	0	0	0	200	903	0	0	0	0	0	0	0	603	903	0
483	9	0	0	0	0	0	0	200	300	0	0	0	0	0	0	0	200	903	0	0	0	0	0	0	0	603	903	0
484	0	0	0	0	0	0	0	200	300	0	0	0	0	0	0	0	200	903	0	0	0	0	0	0	0	603	903	0
484	1	0	0	0	0	0	0	200	300	0	0	0	0	0	0	0	200	903	0	0	0	0	0	0	0	603	903	0
484	2	0	0	0	0	0	0	200	300	0	0	0	0	0	0	0	200	903	0	0	0	0	0	0	0	603	903	0
484	3	0	0	0	0	0	0	200	300	0	0	0	0	0	0	0	200	903	0	0	0	0	0	0	0	603	903	0
484	4	0	0	0	0	0	0	200	300	0	0	0	0	0	0	0	200	903	0	0	0	0	0	0	0	603	903	0
484	5	0	0	0	0	0	0	200	300	0	0	0	0	0	0	0	200	903	0	0	0	0	0	0	0	603	903	0
484	6	0	0	0	0	0	0	200	300	0	0	0	0	0	0	0	200	903	0	0	0	0	0	0	0	603	903	0
484	7	0	0	0	0	0	0	200	300	0	0	0	0	0	0	0	200	903	0	0	0	0	0	0	0	603	903	0
484	8	0	0	0	0	0	0	200	300	0	0	0	0	0	0	0	200	903	0	0	0	0	0	0	0	603	903	0
484	9	0	0	0	0	0	0	200	300	0	0	0	0	0	0	0	200	903	0	0	0	0	0	0	0	603	903	0
485	0	0	0	0	0	0	0	200	300	0	0	0	0	0	0	0	200	903	0	0	0	0	0	0	0	603	903	0
485	1	0	0	0	0	0	0	200	300	0	0	0	0	0	0	0	200	903	0	0	0	0	0	0	0	603	903	0
485	2	0	0	0	0	0	0	200	300	0	0	0	0	0	0	0	200	903	0	0	0	0	0	0	0	603	903	0
485	3	0	0	0	0	0	0	200	300	0	0	0	0	0	0	0	200	903	0	0	0	0	0	0	0	603	903	0
485	4	0	0	0	0	0	0	200	300	0	0	0	0	0	0	0	200	903	0	0	0	0	0	0	0	603	903	0
485	5	0	0	0	0	0	0	200	300	0	0	0	0	0	0	0	200	903	0	0	0	0	0	0	0	603	903	0
485	6	0	0	0	0	0	0	200	300	0	0	0	0	0	0	0	200	903	0	0	0	0	0	0	0	603	903	0
485	7	0	0	0	0	0	0	200	300	0	0	0	0	0	0	0	200	903	0	0	0	0	0	0	0	603	903	0
485	8	0	0	0	0	0	0	200	300	0	0	0	0	0	0	0	200	903	0	0	0	0	0	0	0	603	903	0
485	9	0	0	0	0	0	0	200	300	0	0	0	0	0	0	0	200	903	0	0	0	0	0	0	0	603	903	0
486	0	0	0	0	0	0	0	200	300	0	0	0	0	0	0	0	200	903	0	0	0	0	0	0	0	603	903	0
486	1	0	0	0	0	0	0	200	300	0	0	0	0	0	0	0	200	903	0	0	0	0	0	0	0	603	903	0
486	2	0	0	0	0	0	0	200	300	0	0	0	0	0	0	0	200	903	0	0	0	0	0	0	0	603	903	0
486	3	0	0	0	0	0	0	200	300	0	0	0	0	0	0	0	200	903	0	0	0	0	0	0	0	603	903	0
486	4	0	0	0	0	0	0	200	300	0	0	0	0	0	0	0	200	903	0	0	0	0	0	0	0	603	903	0
486	5	0	0	0	0	0	0	200	300	0	0	0	0	0	0	0	200	903	0	0	0	0	0	0	0	603	903	0
486	6	0	0	0	0	0	0	200	300	0	0	0	0	0	0	0	200	903	0	0	0	0	0	0	0	603	903	0
486	7	0	0	0	0	0	0	200	300	0	0	0	0	0	0	0	200	903	0	0	0	0	0	0	0	603	903	0
486	8	0	0	0	0	0	0	200	300	0	0	0	0	0	0	0	200	903	0	0	0	0	0	0	0	603	903	0
486	9	0	0	0	0	0	0	200	300	0	0	0	0	0	0	0	200	903	0	0	0	0	0	0	0	603	903	0
487	0	0	0	0	0	0	0	200	300	0	0	0	0	0	0	0	200	903	0	0	0	0	0	0	0	603	903	0
487	1	0	0	0	0	0	0	200	300	0	0	0	0	0	0	0	200	903	0	0	0	0	0	0	0	603	903	0
487	2	0	0	0	0	0	0	200	300	0	0	0	0	0	0	0	200	903	0	0	0	0	0	0	0	603	903	0
487	3	0	0	0	0	0	0	200	300	0	0	0	0	0	0	0	200	903	0	0	0	0	0	0	0	603	903	0
487	4	0	0	0	0	0	0	200	300	0	0	0	0	0	0	0	200	903	0	0	0	0	0	0	0	603	903	0
487	5	0	0	0	0	0	0	200	300	0	0	0	0	0	0	0	200	903	0	0	0	0	0	0	0	603	903	0
487	6	0	0	0	0	0	0	200	300	0	0	0	0	0	0	0	200	903	0	0	0	0	0	0	0	603	903	0
487	7	0	0	0	0	0	0	200	300	0	0	0	0	0	0	0	200	903	0	0	0	0	0	0	0	603	903	0
487	8	0	0	0	0	0	0	200	300	0	0	0	0	0	0	0	200	903	0	0	0	0	0	0	0	603	903	0
487	9	0	0	0	0	0	0	200	300	0	0	0	0	0	0	0	200	903	0	0	0	0	0	0	0	603	903	0
488	0	0	0	0	0	0	0	200	300	0	0	0	0	0	0	0	200	903	0	0	0	0	0	0	0	603	903	0
488	1	0	0	0	0	0	0	200	300	0	0	0	0	0	0	0	200	903	0	0	0	0	0	0	0	603	903	0
488	2	0	0	0	0	0	0	200	300	0	0	0	0	0	0	0	200	903	0	0	0	0	0	0	0	603	903	0
488	3	0	0	0	0	0	0	200	300	0	0	0	0	0	0	0	200	903	0	0	0	0	0	0	0	603	903	0
488	4	0	0	0	0	0	0	200	300	0	0	0	0	0	0	0	200	903	0	0	0	0	0	0	0	603	903	0
488	5	0	0	0	0	0	0	200	300	0	0	0	0	0	0	0	200	903	0	0	0	0	0	0	0	603	903	0
488	6	0	0	0	0	0	0	200	300	0	0	0	0	0	0	0	200	903	0	0	0	0	0	0	0	603	903	0
488	7	0	0	0	0	0	0	200	300	0	0	0	0	0	0	0	200	903	0	0	0	0	0	0	0	603	903	0
488	8	0	0	0	0	0	0	200	300	0	0	0	0	0	0	0	200	903	0	0	0	0	0	0	0	603	903	0
488	9	0	0	0	0	0	0	200	300	0	0	0	0	0	0	0	200	903	0	0	0	0	0	0	0	603	903	0
489	0	0	0	0	0	0	0	200	300	0	0	0	0	0	0	0	200	903	0	0	0	0	0	0	0	603	903	0
489	1	0	0	0	0	0	0	200	300	0	0	0	0	0	0	0	200	903	0	0	0	0	0	0	0	603	903	0
489	2	0	0	0	0	0	0	200	300	0	0	0	0	0	0	0	200	903	0	0	0	0	0	0	0	603	903	0
489	3	0	0	0	0	0	0	200	300	0	0	0	0	0	0	0	200	903	0	0	0	0	0	0	0	603	903	0
489	4	0	0	0	0	0	0	200	300	0	0	0	0	0	0	0	200	903	0	0	0	0	0	0	0	603	903	0
489	5	0	0	0	0	0	0	200	300	0	0	0	0	0	0	0	200	903	0	0	0	0	0	0	0	603	903	0
489	6	0	0	0	0	0	0	200	300	0	0	0	0	0	0	0	200	903	0	0	0	0	0	0	0	603	903	0
489	7	0	0	0	0	0	0	200	300	0	0	0	0	0	0	0	200	903	0	0	0	0	0	0	0	603	903	0
489	8	0	0	0	0	0	0	200	300	0	0	0	0	0	0	0	200	903	0	0	0	0	0	0	0	603	903	0
489	9	0	0	0	0	0	0	200	300	0	0	0	0	0	0	0	200	903	0	0	0	0	0	0	0	603	903	0
490	0	0	0	0	0	0	0	200	300	0	0	0	0	0	0	0	200	903	0	0	0	0	0	0	0	603	903	0
490	1	0	0	0	0	0	0	200	300	0	0	0	0	0	0	0	200	903	0	0	0	0	0	0	0	603	903	0
490	2	0	0	0	0	0	0	200	300	0	0	0	0	0	0	0	200	903	0	0	0	0	0	0	0	603	903	0
490	3	0	0	0	0	0	0	200	300	0	0	0	0	0	0	0	200	903	0	0	0	0	0	0	0	603	903	0
490	4	0	0	0	0	0	0	200	300	0	0	0	0	0	0	0	200	903	0	0	0	0	0	0	0	603	903	0
490	5	0	0	0	0	0	0	200	300	0	0	0	0	0	0	0	200	903	0	0	0	0	0	0	0	603	903	0
490	6	0	0	0	0	0	0	200	300	0	0	0	0	0	0	0	200	903	0	0	0	0	0	0	0	603	903	0
490	7	0	0	0	0	0	0	200	300	0	0	0	0	0	0	0	200	903	0	0	0	0	0	0	0	603	903	0
490	8	0	0	0	0	0	0	200	300	0	0	0	0	0	0	0	200	903	0	0	0	0	0	0	0	603	903	0
490	9	0	0	0	0	0	0	200	300	0	0	0	0	0	0	0	200	903	0	0	0	0	0	0	0	603	903	0
491	0	0	0	0	0	0	0	200	300	0	0	0	0	0	0	0	200	903	0	0	0	0	0	0	0	603	903	0
491	1	0	0	0	0	0	0	200	300	0	0	0	0	0	0	0	200	903	0	0	0	0	0	0	0	603	903	0
491	2	0	0	0	0	0	0	200	300	0	0	0	0	0	0	0	200	903	0	0	0	0	0	0	0	603	903	0
491	3	0	0	0	0	0	0	200	300	0	0	0	0	0	0	0	200	903	0	0	0	0	0	0	0	603	903	0
491	4	0	0	0	0	0	0	200	300	0	0	0	0	0	0	0	200	903	0	0	0	0	0	0	0	603	903	0
491	5	0	0	0	0	0	0	200	300	0	0	0	0	0	0	0	200	903	0	0	0	0	0	0	0	603	903	0
491	6	0	0	0	0	0	0	200	300	0	0	0	0	0	0	0	200	903	0	0	0	0	0	0	0	603	903	0
491	7	0	0	0	0	0	0	200	300	0	0	0	0	0	0	0	200	903	0	0	0	0	0	0	0	603	903	0
491	8	0	0	0	0	0	0	200	300	0	0	0	0	0	0	0	200	903	0	0	0	0	0	0	0	603	903	0
491	9	0	0	0	0	0	0	200	300	0	0	0	0	0	0	0	200	903	0	0	0	0	0	0	0	603	903	0
492	0	0	0	0	0	0	0	200	300	0	0	0	0	0	0	0	200	903	0	0	0	0	0	0	0	603	903	0
492	1	0	0	0	0	0	0	200	300	0	0	0	0	0	0	0	200	903	0	0	0	0	0	0	0	603	903	0
492	2	0	0	0	0	0	0	200	300	0	0	0	0	0	0	0	200	903	0	0	0	0	0	0	0	603	903	0
492	3	0	0	0	0	0	0	200	300	0	0	0	0	0	0	0	200	903	0	0	0	0	0	0	0	603	903	0
492	4	0	0	0	0	0	0	200	300	0	0	0	0	0	0	0	200	903	0	0	0	0	0	0	0	603	903	0
492	5	0	0	0	0	0	0	200	300	0	0	0	0	0	0	0	200	903	0	0	0	0	0	0	0	603	903	0
492	6	0	0	0	0	0	0	200	300	0	0	0	0	0	0	0	200	903	0	0	0	0	0	0	0	603	903	0
492	7	0	0	0	0	0	0	200	300	0	0	0	0	0	0	0	200	903	0	0	0	0	0	0	0	603	903	0
492	8	0	0	0	0	0	0	200	300	0	0	0	0	0	0	0	200	903	0	0	0	0	0	0	0	603	903	0
492	9	0	0	0	0	0	0	200	300	0	0	0	0	0	0	0	200	903	0	0	0	0	0	0	0	603	903	0
493	0	0	0	0	0	0	0	200	300	0	0	0	0	0	0	0	200	903	0	0	0	0	0	0	0	603	903	0
493	1	0	0	0	0	0	0	200	300	0	0	0	0	0	0	0	200	903	0	0	0	0	0	0	0	603	903	0
493	2	0	0	0	0	0	0	200	300	0	0	0	0	0	0	0	200	903	0	0	0	0	0	0	0	603	903	0
493	3	0	0	0	0	0	0	200	300	0	0	0	0	0	0	0	200	903	0	0	0	0	0	0	0	603	903	0
493	4	0	0	0	0	0	0	200	300	0	0	0	0	0	0	0	200	903	0	0	0	0	0	0	0	603	903	0
493	5	0	0	0	0	0	0	200	300	0	0	0	0	0	0	0	200	903	0	0	0	0	0	0	0	603	903	0
493	6	0	0	0	0	0	0	200	300	0	0	0	0	0	0	0	200	903	0	0	0	0	0	0	0	603	903	0
493	7	0	0	0	0	0	0	200	300	0	0	0	0	0	0	0	200	903	0	0	0	0	0	0	0	603	903	0
493	8	0	0	0	0	0	0	200	300	0	0	0	0	0	0	0	200	903	0	0	0	0	0	0	0	603	903	0
493	9	0	0	0	0	0	0	200	300	0	0	0	0	0	0	0	200	903	0	0	0	0	0	0	0	603	903	0
494	0	0	0	0	0	0	0	200	300	0	0	0	0	0	0	0	200	903	0	0	0	0	0	0	0	603	903	0
494	1	0	0	0	0	0	0	200	300	0	0	0	0	0	0	0	200	903	0	0	0	0	0	0	0	603	903	0
494	2	0	0	0	0	0	0	200	300	0	0	0	0	0	0	0	200	903	0	0	0	0	0	0	0	603	903	0
494	3	0	0	0	0	0	0	200	300	0	0	0	0	0	0	0	200	903	0	0	0	0	0	0	0	603	903	0
494	4	0	0	0	0	0	0	200	300	0	0	0	0	0	0	0	200	903	0	0	0	0	0	0	0	603	903	0
494	5	0	0	0	0	0	0	200	300	0	0	0	0	0	0	0	200	903	0	0	0	0	0	0	0	603	903	0
494	6	0	0	0	0	0	0	200	300	0	0	0	0	0	0	0	200	903	0	0	0	0	0	0	0	603	903	0
494	7	0	0	0	0	0	0	200	300	0	0	0	0	0	0	0	200	903	0	0	0	0	0	0	0	603	903	0
494	8	0	0	0	0	0	0	200	300	0	0	0	0	0	0	0	200	903	0	0	0	0	0	0	0	603	903	0
494	9	0	0	0	0	0	0	200	300	0	0	0	0	0	0	0	200	903	0	0	0	0	0	0	0	603	903	0
495	0	0	0	0	0	0	0	200	300	0	0	0	0	0	0	0	200	903	0	0	0	0	0	0	0	603	903	0
495	1	0	0	0	0	0	0	200	300	0	0	0	0	0	0	0	200	903	0	0	0	0	0	0	0	603	903	0
495	2	0	0	0	0	0	0	200	300	0	0	0	0	0	0	0	200	903	0	0	0	0	0	0	0	603	903	0
495	3	0	0	0	0	0	0	200	300	0	0	0	0	0	0	0	200	903	0	0	0	0	0	0	0	603	903	0
495	4	0	0	0	0	0	0	200	300	0	0	0	0	0	0	0	200	903	0	0	0	0	0	0	0	603	903	0
495	5	0	0	0	0	0	0	200	300	0	0	0	0	0	0	0	200	903	0	0	0	0	0	0	0	603	903	0
495	6	0	0	0	0	0	0	200	300	0	0	0	0	0	0	0	200	903	0	0	0	0	0	0	0	603	903	0
495	7	0	0	0	0	0	0	200	300	0	0	0	0	0	0	0	200	903	0	0	0	0	0	0	0	603	903	0
495	8	0	0	0	0	0	0	200	300	0	0	0	0	0	0	0	200	903	0	0	0	0	0	0	0	603	903	0
495	9	0	0	0	0	0	0	200	300	0	0	0	0	0	0	0	200	903	0	0	0	0	0	0	0	603	903	0
496	0	0	0	0	0	0	0	200	300	0	0	0	0	0	0	0	200	903	0	0	0	0	0	0	0	603	903	0
496	1	0	0	0	0	0	0	200	300	0	0	0	0	0	0	0	200	903	0	0	0	0	0	0	0	603	903	0
496	2	0	0	0	0	0	0	200	300	0	0	0	0	0	0	0	200	903	0	0	0	0	0	0	0	603	903	0
496	3	0	0	0	0	0	0	200	300	0	0	0	0	0	0	0	200	903	0	0	0	0	0	0	0	603	903	0
496	4	0	0	0	0	0	0	200	300	0	0	0	0	0	0	0	200	903	0	0	0	0	0	0	0	603	903	0
496	5	0	0	0	0	0	0	200	300	0	0	0	0	0	0	0	200	903	0	0	0	0	0	0	0	603	903	0
496	6	0	0	0	0	0	0	200	300	0	0	0	0	0	0	0	200	903	0	0	0	0	0	0	0	603	903	0
496	7	0	0	0	0	0	0	200	300	0	0	0	0	0	0	0	200	903	0	0	0	0	0	0	0	603	903	0
496	8	0	0	0	0	0	0	200	300	0	0	0	0	0	0	0	200	903	0	0	0	0	0	0	0	603	903	0
496	9	0	0	0	0	0	0	200	300	0	0	0	0	0	0	0	200	903	0	0	0	0	0	0	0	603	903	0
497	0	0	0	0	0	0	0	200	300	0	0	0	0	0	0	0	200	903	0	0	0	0	0	0	0	603	903	0
497	1	0	0	0	0	0	0	200	300	0	0	0	0	0	0	0	200	903	0	0	0	0	0	0	0	603	903	0
497	2	0	0	0	0	0	0	200	300	0	0	0	0	0	0	0	200	903	0	0	0	0	0	0	0	603	903	0
497	3	0	0	0	0	0	0	200	300	0	0	0	0	0	0	0	200	903	0	0	0	0	0	0	0	603	903	0
497	4	0	0	0	0	0	0	200	300	0	0	0	0	0	0	0	200	903	0	0	0	0	0	0	0	603	903	0
497	5	0	0	0	0	0	0	200	300	0	0	0	0	0	0	0	200	903	0	0	0	0	0	0	0	603	903	0
497	6	0	0	0	0	0	0	200	300	0	0	0	0	0	0	0	200	903	0	0	0	0	0	0	0	603	903	0
497	7	0	0	0	0	0	0	200	300	0	0	0	0	0	0	0	200	903	0	0	0	0	0	0	0	603	903	0
497	8	0	0	0	0	0	0	200	300	0	0	0	0	0	0	0	200	903	0	0	0	0	0	0	0	603	903	0
497	9	0	0	0	0	0	0	200	300	0	0	0	0	0	0	0	200	903	0	0	0	0	0	0	0	603	903	0
498	0	0	0	0	0	0	0	200	300	0	0	0	0	0	0	0	200	903	0	0	0	0	0	0	0	603	903	0
498	1	0	0	0	0	0	0	200	300	0	0	0	0	0	0	0	200	903	0	0	0	0	0	0	0	603	903	0
498	2	0	0	0	0	0	0	200	300	0	0	0	0	0	0	0	200	903	0	0	0	0	0	0	0	603	903	0
498	3	0	0	0	0	0	0	200	300	0	0	0	0	0	0	0	200	903	0	0	0	0	0	0	0	603	903	0
498	4	0	0	0	0	0	0	200	300	0	0	0	0	0	0	0	200	903	0	0	0	0	0	0	0	603	903	0
498	5	0	0	0	0	0	0	200	300	0	0	0	0	0	0	0	200	903	0	0	0	0	0	0	0	603	903	0
498	6	0	0	0	0	0	0	200	300	0	0	0	0	0	0	0	200	903	0	0	0	0	0	0	0	603	903	0
498	7	0	0	0	0	0	0	200	300	0	0	0	0	0	0	0	200	903	0	0	0	0	0	0	0	603	903	0
498	8	0	0	0	0	0	0	200	300	0	0	0	0	0	0	0	200	903	0	0	0	0	0	0	0	603	903	0
498	9	0	0	0	0	0	0	200	300	0	0	0	0	0	0	0	200	903	0	0	0	0	0	0	0	603	903	0
499	0	0	0	0	0	0	0	200	300	0	0	0	0	0	0	0	200	903	0	0	0	0	0	0	0	603	903	0
499	1	0	0	0	0	0	0	200	300	0	0	0	0	0	0	0	200	903	0	0	0	0	0	0	0	603	903	0
499	2	0	0	0	0	0	0	200	300	0	0	0	0	0	0	0	200	903	0	0	0	0	0	0	0	603	903	0
499	3	0	0	0	0	0	0	200	300	0	0	0	0	0	0	0	200	903	0	0	0	0	0	0	0	603	903	0
499	4	0	0	0	0	0	0	200	300	0	0	0	0	0	0	0	200	903	0	0	0	0	0	0	0	603	903	0
499	5	0	0	0	0	0	0	200	300	0	0	0	0	0	0	0	200	903	0	0	0	0	0	0	0	603	903	0
499	6	0	0	0	0	0	0	200	300	0	0	0	0	0	0	0	200	903	0	0	0	0	0	0	0	603	903	0
499	7	0	0	0	0	0	0	200	300	0	0	0	0	0	0	0	200	903	0	0	0	0	0	0	0	603	903	0
499	8	0	0	0	0	0	0	200	300	0	0	0	0	0	0	0	200	903	0	0	0	0	0	0	0	603	903	0
499	9	0	0	0	0	0	0	200	300	0	0	0	0	0	0	0	200	903	0	0	0	0	0	0	0	603	903	0
500	0	0	0	0	0	0	0	200	300	0	0	0	0	0	0	0	200	903	0	0	0	0	0	0	0	603	903	0
500	1	0	0	0	0	0	0	200	300	0	0	0	0	0	0	0	200	903	0	0	0	0	0	0	0	603	903	0
500	2	0	0	0	0	0	0	200	300	0	0	0	0	0	0	0	200	903	0	0	0	0	0	0	0	603	903	0
500	3	0	0	0	0	0	0	200	300	0	0	0	0	0	0	0	200	903	0	0	0	0	0	0	0	603	903	0
500	4	0	0	0	0	0	0	200	300	0	0	0	0	0	0	0	200	903	0	0	0	0	0	0	0	603	903	0
500	5	0	0	0	0	0	0	200	300	0	0	0	0	0	0	0	200	903	0	0	0	0	0	0	0	603	903	0
500	6	0	0	0	0	0	0	200	300	0	0	0	0	0	0	0	200	903	0	0	0	0	0	0	0	603	903	0
500	7	0	0	0	0	0	0	200	300	0	0	0	0	0	0	0	200	903	0	0	0	0	0	0	0	603	903	0
500	8	0	0	0	0	0	0	200	300	0	0	0	0	0	0	0	200	903	0	0	0	0	0	0	0	603	903	0
500	9	0	0	0	0	0	0	200	300	0	0	0	0	0	0	0	200	903	0	0	0	0	0	0	0	603	903	0
501	0	0	0	0	0	0	0	200	300	0	0	0	0	0	0	0	200	903	0	0	0	0	0	0	0	603	903	0
501	1	0	0	0	0	0	0	200	300	0	0	0	0	0	0	0	200	903	0	0	0	0	0	0	0	603	903	0
501	2	0	0	0	0	0	0	200	300	0	0	0	0	0	0	0	200	903	0	0	0	0	0	0	0	603	903	0
501	3	0	0	0	0	0	0	200	300	0	0	0	0	0	0	0	200	903	0	0	0	0	0	0	0	603	903	0
501	4	0	0	0	0	0	0	200	300	0	0	0	0	0	0	0	200	903	0	0	0	0	0	0	0	603	903	0
501	5	0	0	0	0	0	0	200	300	0	0	0	0	0	0	0	200	903	0	0	0	0	0	0	0	603	903	0
501	6	0	0	0	0	0	0	200	300	0	0	0	0	0	0	0	200	903	0	0	0	0	0	0	0	603	903	0
501	7	0	0	0	0	0	0	200	300	0	0	0	0	0	0	0	200	903	0	0	0	0	0	0	0	603	903	0
501	8	0	0	0	0	0	0	200	300	0	0	0	0	0	0	0	200	903	0	0	0	0	0	0	0	603	903	0
501	9	0	0	0	0	0	0	200	300	0	0	0	0	0	0	0	200	903	0	0	0	0	0	0	0	603	903	0
502	0	0	0	0	0	0	0	200	300	0	0	0	0	0	0	0	200	903	0	0	0	0	0	0	0	603	903	0
502	1	0	0	0	0	0	0	200	300	0	0	0	0	0	0	0	200	903	0	0	0	0	0	0	0	603	903	0
502	2	0	0	0	0	0	0	200	300	0	0	0	0	0	0	0	200	903	0	0	0	0	0	0	0	603	903	0
502	3	0	0	0	0	0	0	200	300	0	0	0	0	0	0	0	200	903	0	0	0	0	0	0	0	603	903	0
502	4	0	0	0	0	0	0	200	300	0	0	0	0	0	0	0	200	903	0	0	0	0	0	0	0	603	903	0
502	5	0	0	0	0	0	0	200	300	0	0	0	0	0	0	0	200	903	0	0	0	0	0	0	0	603	903	0
502	6	0	0	0	0	0	0	200	300	0	0	0	0	0	0	0	200	903	0	0	0	0	0	0	0	603	903	0
502	7	0	0	0	0	0	0	200	300	0	0	0	0	0	0	0	200	903	0	0	0	0	0	0	0	603	903	0
502	8	0	0	0	0	0	0	200	300	0	0	0	0	0	0	0	200	903	0	0	0	0	0	0	0	603	903	0
502	9	0	0	0	0	0	0	200	300	0	0	0	0	0	0	0	200	903	0	0	0	0	0	0	0	603	903	0
503	0	0	0	0	0	0	0	200	300	0	0	0	0	0	0	0	200	903	0	0	0	0	0	0	0	603	903	0
503	1	0	0	0	0	0	0	200	300	0	0	0	0	0	0	0	200	903	0	0	0	0	0	0	0	603	903	0
503	2	0	0	0	0	0	0	200	300	0	0	0	0	0	0	0	200	903	0	0	0	0	0	0	0	603	903	0
503	3	0	0	0	0	0	0	200	300	0	0	0	0	0	0	0	200	903	0	0	0	0	0	0	0	603	903	0
503	4	0	0	0	0	0	0	200	300	0	0	0	0	0	0	0	200	903	0	0	0	0	0	0	0	603	903	0
503	5	0	0	0	0	0	0	200	300	0	0	0	0	0	0	0	200	903	0	0	0	0	0	0	0	603	903	0
503	6	0	0	0	0	0	0	200	300	0	0	0	0	0	0	0	200	903	0	0	0	0	0	0	0	603	903	0
503	7	0	0	0	0	0	0	200	300	0	0	0	0	0	0	0	200	903	0	0	0	0	0	0	0	603	903	0
503	8	0	0	0	0	0	0	200	300	0	0	0	0	0	0	0	200	903	0	0	0	0	0	0	0	603	903	0
503	9	0	0	0	0	0	0	200	300	0	0	0	0	0	0	0	200	903	0	0	0	0	0	0	0	603	903	0
504	0	0	0	0	0	0	0	200	300	0	0	0	0	0	0	0	200	903	0	0	0	0	0	0	0	603	903	0
504	1	0	0	0	0	0	0	200	300	0	0	0	0	0	0	0	200	903	0	0	0	0	0	0	0	603	903	0
504	2	0	0	0	0	0	0	200	300	0	0	0	0	0	0	0	200	903	0	0	0	0	0	0	0	603	903	0
504	3	0	0	0	0	0	0	200	300	0	0	0	0	0	0	0	200	903	0	0	0	0	0	0	0	603	903	0
504	4	0	0	0	0	0	0	200	300	0	0	0	0	0	0	0	200	903	0	0	0	0	0	0	0	603	903	0
504	5	0	0	0	0	0	0	200	300	0	0	0	0	0	0	0	200	903	0	0	0	0	0	0	0	603	903	0
504	6	0	0	0	0	0	0	200	300	0	0	0	0	0	0	0	200	903	0	0	0	0	0	0	0	603	903	0
504	7	0	0	0	0	0	0	200	300	0	0	0	0	0	0	0	200	903	0	0	0	0	0	0	0	603	903	0
504	8	0	0	0	0	0	0	200	300	0	0	0	0	0	0	0	200	903	0	0	0	0	0	0	0	603	903	0
504	9	0	0	0	0	0	0	200	300	0	0	0	0	0	0	0	200	903	0	0	0	0	0	0	0	603	903	0
505	0	0	0	0	0	0	0	200	300	0	0	0	0	0	0	0	200	903	0	0	0	0	0	0	0	603	903	0
505	1	0	0	0	0	0	0	200	300	0	0	0	0	0	0	0	200	903	0	0	0	0	0	0	0	603	903	0
505	2	0	0	0	0	0	0	200	300	0	0	0	0	0	0	0	200	903	0	0	0	0	0	0	0	603	903	0
505	3	0	0	0	0	0	0	200	300	0	0	0	0	0	0	0	200	903	0	0	0	0	0	0	0	603	903	0
505	4	0	0	0	0	0	0	200	300	0	0	0	0	0	0	0	200	903	0	0	0	0	0	0	0	603	903	0
505	5	0	0	0	0	0	0	200	300	0	0	0	0	0	0	0	200	903	0	0	0	0	0	0	0	603	903	0
505	6	0	0	0	0	0	0	200	300	0	0	0	0	0	0	0	200	903	0	0	0	0	0	0	0	603	903	0
505	7	0	0	0	0	0	0	200	300	0	0	0	0	0	0	0	200	903	0	0	0	0	0	0	0	603	903	0
505	8	0	0	0	0	0	0	200	300	0	0	0	0	0	0	0	200	903	0	0	0	0	0	0	0	603	903	0
505	9	0	0	0	0	0	0	200	300	0	0	0	0	0	0	0	200	903	0	0	0	0	0	0	0	603	903	0
506	0	0	0	0	0	0	0	200	300	0	0	0	0	0	0	0	200	903	0	0	0	0	0	0	0	603	903	0
506	1	0	0	0	0	0	0	200	300	0	0	0	0	0	0	0	200	903	0	0	0	0	0	0	0	603	903	0
506	2	0	0	0	0	0	0	200	300	0	0	0	0	0	0	0	200	903	0	0	0	0	0	0	0	603	903	0
506	3	0	0	0	0	0	0	200	300	0	0	0	0	0	0	0	200	903	0	0	0	0	0	0	0	603	903	0
506	4	0	0	0	0	0	0	200	300	0	0	0	0	0	0	0	200	903	0	0	0	0	0	0	0	603	903	0
506	5	0	0	0	0	0	0	200	300	0	0	0	0	0	0	0	200	903	0	0	0	0	0	0	0	603	903	0
506	6	0	0	0	0	0	0	200	300	0	0	0	0	0	0	0	200	903	0	0	0	0	0	0	0	603	903	0
506	7	0	0	0	0	0	0	200	300	0	0	0	0	0	0	0	200	903	0	0	0	0	0	0	0	603	903	0
506	8	0	0	0	0	0	0	200	300	0	0	0	0	0	0	0	200	903	0	0	0	0	0	0	0	603	903	0
506	9	0	0	0	0	0	0	200	300	0	0	0	0	0	0	0	200	903	0	0	0	0	0	0	0	603	903	0
507	0	0	0	0	0	0	0	200	300	0	0	0	0	0	0	0	200	903	0	0	0	0	0	0	0	603	903	0
507	1	0	0	0	0	0	0	200	300	0	0	0	0	0	0	0	200	903	0	0	0	0	0	0	0	603	903	0
507	2	0	0	0	0	0	0	200	300	0	0	0	0	0	0	0	200	903	0	0	0	0	0	0	0	603	903	0
507	3	0	0	0	0	0	0	200	300	0	0	0	0	0	0	0	200	903	0	0	0	0	0	0	0	603	903	0
507	4	0	0	0	0	0	0	200	300	0	0	0	0	0	0	0	200	903	0	0	0	0	0	0	0	603	903	0
507	5	0	0	0	0	0	0	200	300	0	0	0	0	0	0	0	200	903	0	0	0	0	0	0	0	603	903	0
507	6	0	0	0	0	0	0	200	300	0	0	0	0	0	0	0	200	903	0	0	0	0	0	0	0	603	903	0
507	7	0	0	0	0	0	0	200	300	0	0	0	0	0	0	0	200	903	0	0	0	0	0	0	0	603	903	0
507	8	0	0	0	0	0	0	200	300	0	0	0	0	0	0	0	200	903	0	0	0	0	0	0	0	603	903	0
507	9	0	0	0	0	0	0	200	300	0	0	0	0	0	0	0	200	903	0	0	0	0	0	0	0	603	903	0
508	0	0	0	0	0	0	0	200	300	0	0	0	0	0	0	0	200	903	0	0	0	0	0	0	0	603	903	0
508	1	0	0	0	0	0	0	200	300	0	0	0	0	0	0	0	200	903	0	0	0	0	0	0	0	603	903	0
508	2	0	0	0	0	0	0	200	300	0	0	0	0	0	0	0	200	903	0	0	0	0	0	0	0	603	903	0
508	3	0	0	0	0	0	0	200	300	0	0	0	0	0	0	0	200	903	0	0	0	0	0	0	0	603	903	0
508	4	0	0	0	0	0	0	200	300	0	0	0	0	0	0	0	200	903	0	0	0	0	0	0	0	603	903	0
508	5	0	0	0	0	0	0	200	300	0	0	0	0	0	0	0	200	903	0	0	0	0	0	0	0	603	903	0
508	6	0	0	0	0	0	0	200	300	0	0	0	0	0	0	0	200	903	0	0	0	0	0	0	0	603	903	0
508	7	0	0	0	0	0	0	200	300	0	0	0	0	0	0	0	200	903	0	0	0	0	0	0	0	603	903	0
508	8	0	0	0	0	0	0	200	300	0	0	0	0	0	0	0	200	903	0	0	0	0	0	0	0	603	903	0
508	9	0	0	0	0	0	0	200	300	0	0	0	0	0	0	0	200	903	0	0	0	0	0	0	0	603	903	0
509	0	0	0	0	0	0	0	200	300	0	0	0	0	0	0	0	200	903	0	0	0	0	0	0	0	603	903	0
509	1	0	0	0	0	0	0	200	300	0	0	0	0	0	0	0	200	903	0	0	0	0	0	0	0	603	903	0
509	2	0	0	0	0	0	0	200	300	0	0	0	0	0	0	0	200	903	0	0	0	0	0	0	0	603	903	0
509	3	0	0	0	0	0	0	200	300	0	0	0	0	0	0	0	200	903	0	0	0	0	0	0	0	603	903	0
509	4	0	0	0	0	0	0	200	300	0	0	0	0	0	0	0	200	903	0	0	0	0	0	0	0	603	903	0
509	5	0	0	0	0	0	0	200	300	0	0	0	0	0	0	0	200	903	0	0	0	0	0	0	0	603	903	0
509	6	0	0	0	0	0	0	200	300	0	0	0	0	0	0	0	200	903	0	0	0	0	0	0	0	603	903	0
509	7	0	0	0	0	0	0	200	300	0	0	0	0	0	0	0	200	903	0	0	0	0	0	0	0	603	903	0
509	8	0	0	0	0	0	0	200	300	0	0	0	0	0	0	0	200	903	0	0	0	0	0	0	0	603	903	0
509	9	0	0	0	0	0	0	200	300	0	0	0	0	0	0	0	200	903	0	0	0	0	0	0	0	603	903	0
510	0	0	0	0	0	0	0	200	300	0	0	0	0	0	0	0	200	903	0	0	0	0	0	0	0	603	903	0
510	1	0	0	0	0	0	0	200	300	0	0	0	0	0	0	0	200	903	0	0	0	0	0	0	0	603	903	0
510	2	0	0	0	0	0	0	200	300	0	0	0	0	0	0	0	200	903	0	0	0	0	0	0	0	603	903	0
510	3	0	0	0	0	0	0	200	300	0	0	0	0	0	0	0	200	903	0	0	0	0	0	0	0	603	903	0
510	4	0	0	0	0	0	0	200	300	0	0	0	0	0	0	0	200	903	0	0	0	0	0	0	0	603	903	0
510	5	0	0	0	0	0	0	200	300	0	0	0	0	0	0	0	200	903	0	0	0	0	0	0	0	603	903	0
510	6	0	0	0	0	0	0	200	300	0	0	0	0	0	0	0	200	903	0	0	0	0	0	0	0	603	903	0
510	7	0	0	0	0	0	0	200	300	0	0	0	0	0	0	0	200	903	0	0	0	0	0	0	0	603	903	0
510	8	0	0	0	0	0	0	200	300	0	0	0	0	0	0	0	200	903	0	0	0	0	0	0	0	603	903	0
510	9	0	0	0	0	0	0	200	300	0	0	0	0	0	0	0	200	903	0	0	0	0	0	0	0	603	903	0
511	0	0	0	0	0	0	0	200	300	0	0	0	0	0	0	0	200	903	0	0	0	0	0	0	0	603	903	0
511	1	0	0	0	0	0	0	200	300	0	0	0	0	0	0	0	200	903	0	0	0	0	0	0	0	603	903	0
511	2	0	0	0	0	0	0	200	300	0	0	0	0	0	0	0	200	903	0	0	0	0	0	0	0	603	903	0
511	3	0	0	0	0	0	0	200	300	0	0	0	0	0	0	0	200	903	0	0	0	0	0	0	0	603	903	0
511	4	0	0	0	0	0	0	200	300	0	0	0	0	0	0	0	200	903	0	0	0	0	0	0	0	603	903	0
511	5	0	0	0	0	0	0	200	300	0	0	0	0	0	0	0	200	903	0	0	0	0	0	0	0	603	903	0
511	6	0	0	0	0	0	0	200	300	0	0	0	0	0	0	0	200	903	0	0	0	0	0	0	0	603	903	0
511	7	0	0	0	0	0	0	200	300	0	0	0	0	0	0	0	200	903	0	0	0	0	0	0	0	603	903	0
511	8	0	0	0	0	0	0	200	300	0	0	0	0	0	0	0	200	903	0	0	0	0	0	0	0	603	903	0
511	9	0	0	0	0	0	0	200	300	0	0	0	0	0	0	0	200	903	0	0	0	0	0	0	0	603	903	0
512	0	0	0	0	0	0	0	200	300	0	0	0	0	0	0	0	200	903	0	0	0	0	0	0	0	603	903	0
512	1	0	0	0	0	0	0	200	300	0	0	0	0	0	0	0	200	903	0	0	0	0	0	0	0	603	903	0
512	2	0	0	0	0	0	0	200	300	0	0	0	0	0	0	0	200	903	0	0	0	0	0	0	0	603	903	0
512	3	0	0	0	0	0	0	200	300	0	0	0	0	0	0	0	200	903	0	0	0	0	0	0	0	603	903	0
512	4	0	0	0	0	0	0	200	300	0	0	0	0	0	0	0	200	903	0	0	0	0	0	0	0	603	903	0
512	5	0	0	0	0	0	0	200	300	0	0	0	0	0	0	0	200	903	0	0	0	0	0	0	0	603	903	0
512	6	0	0	0	0	0	0	200	300	0	0	0	0	0	0	0	200	903	0	0	0	0	0	0	0	603	903	0
512	7	0	0	0	0	0	0	200	300	0	0	0	0	0	0	0	200	903	0	0	0	0	0	0	0	603	903	0
512	8	0	0	0	0	0	0	200	300	0	0	0	0	0	0	0	200	903	0	0	0	0	0	0	0	603	903	0
512	9	0	0	0	0	0	0	200	300	0	0	0	0	0	0	0	200	903	0	0	0	0	0	0	0	603	903	0
513	0	0	0	0	0	0	0	200	300	0	0	0	0	0	0	0	200	903	0	0	0	0	0	0	0	603	903	0
513	1	0	0	0	0	0	0	200	300	0	0	0	0	0	0	0	200	903	0	0	0	0	0	0	0	603	903	0
513	2	0	0	0	0	0	0	200	300	0	0	0	0	0	0	0	200	903	0	0	0	0	0	0	0	603	903	0
513	3	0	0	0	0	0	0	200	300	0	0	0	0	0	0	0	200	903	0	0	0	0	0	0	0	603	903	0
513	4	0	0	0	0	0	0	200	300	0	0	0	0	0	0	0	200	903	0	0	0	0	0	0	0	603	903	0
513	5	0	0	0	0	0	0	200	300	0	0	0	0	0	0	0	200	903	0	0	0	0	0	0	0	603	903	0
513	6	0	0	0	0	0	0	200	300	0	0	0	0	0	0	0	200	903	0	0	0	0	0	0	0	603	903	0
513	7	0	0	0	0	0	0	200	300	0	0	0	0	0	0	0	200	903	0	0	0	0	0	0	0	603	903	0
513	8	0	0	0	0	0	0	200	300	0	0	0	0	0	0	0	200	903	0	0	0	0	0	0	0	603	903	0
513	9	0	0	0	0	0	0	200	300	0	0	0	0	0	0	0	200	903	0	0	0	0	0	0	0	603	903	0
514	0	0	0	0	0	0	0	200	300	0	0	0	0	0	0	0	200	903	0	0	0	0	0	0	0	603	903	0
514	1	0	0	0	0	0	0	200	300	0	0	0	0	0	0	0	200	903	0	0	0	0	0	0	0	603	903	0
514	2	0	0	0	0	0	0	200	300	0	0	0	0	0	0	0	200	903	0	0	0	0	0	0	0	603	903	0
514	3	0	0	0	0	0	0	200	300	0	0	0	0	0	0	0	200	903	0	0	0	0	0	0	0	603	903	0
514	4	0	0	0	0	0	0	200	300	0	0	0	0	0	0	0	200	903	0	0	0	0	0	0	0	603	903	0
514	5	0	0	0	0	0	0	200	300	0	0	0	0	0	0	0	200	903	0	0	0	0	0	0	0	603	903	0
514	6	0	0	0	0	0	0	200	300	0	0	0	0	0	0	0	200	903	0	0	0	0	0	0	0	603	903	0
514	7	0	0	0	0	0	0	200	300	0	0	0	0	0	0	0	200	903	0	0	0	0	0	0	0	603	903	0
514	8	0	0	0	0	0	0	200	300	0	0	0	0	0	0	0	200	903	0	0	0	0	0	0	0	603	903	0
514	9	0	0	0	0	0	0	200	300	0	0	0	0	0	0	0	200	903	0	0	0	0	0	0	0	603	903	0
515	0	0	0	0	0	0	0	200	300	0	0	0	0	0	0	0	200	903	0	0	0	0	0	0	0	603	903	0
515	1	0	0	0	0	0	0	200	300	0	0	0	0	0	0	0	200	903	0	0	0	0	0	0	0	603	903	0
515	2	0	0	0	0	0	0	200	300	0	0	0	0	0	0	0	200	903	0	0	0	0	0	0	0	603	903	0
515	3	0	0	0	0	0	0	200	300	0	0	0	0	0	0	0	200	903	0	0	0	0	0	0	0	603	903	0
515	4	0	0	0	0	0	0	200	300	0	0	0	0	0	0	0	200	903	0	0	0	0	0	0	0	603	903	0
515	5	0	0	0	0	0	0	200	300	0	0	0	0	0	0	0	200	903	0	0	0	0	0	0	0	603	903	0
515	6	0	0	0	0	0	0	200	300	0	0	0	0	0	0	0	200	903	0	0	0	0	0	0	0	603	903	0
515	7	0	0	0	0	0	0	200	300	0	0	0	0	0	0	0	200	903	0	0	0	0	0	0	0	603	903	0
515	8	0	0	0	0	0	0	200	300	0	0	0	0	0	0	0	200	903	0	0	0	0	0	0	0	603	903	0
515	9	0	0	0	0	0	0	200	300	0	0	0	0	0	0	0	200	903	0	0	0	0	0	0	0	603	903	0
516	0	0	0	0	0	0	0	200	300	0	0	0	0	0	0	0	200	903	0	0	0	0	0	0	0	603	903	0
516	1	0	0	0	0	0	0	200	300	0	0	0	0	0	0	0	200	903	0	0	0	0	0	0	0	603	903	0
516	2	0	0	0	0	0	0	200	300	0	0	0	0	0	0	0	200	903	0	0	0	0	0	0	0	603	903	0
516	3	0	0	0	0	0	0	200	300	0	0	0	0	0	0	0	200	903	0	0	0	0	0	0	0	603	903	0
516	4	0	0	0	0	0	0	200	300	0	0	0	0	0	0	0	200	903	0	0	0	0	0	0	0	603	903	0
516	5	0	0	0	0	0	0	200	300	0	0	0	0	0	0	0	200	903	0	0	0	0	0	0	0	603	903	0
516	6	0	0	0	0	0	0	200	300	0	0	0	0	0	0	0	200	903	0	0	0	0	0	0	0	603	903	0
516	7	0	0	0	0	0	0	200	300	0	0	0	0	0	0	0	200	903	0	0	0	0	0	0	0	603	903	0
516	8	0	0	0	0	0	0	200	300	0	0	0	0	0	0	0	200	903	0	0	0	0	0	0	0	603	903	0
516	9	0	0	0	0	0	0	200	300	0	0	0	0	0	0	0	200	903	0	0	0	0	0	0	0	603	903	0
517	0	0	0	0	0	0	0	200	300	0	0	0	0	0	0	0	200	903	0	0	0	0	0	0	0	603	903	0
517	1	0	0	0	0	0	0	200	300	0	0	0	0	0	0	0	200	903	0	0	0	0	0	0	0	603	903	0
517	2	0	0	0	0	0	0	200	300	0	0	0	0	0	0	0	200	903	0	0	0	0	0	0	0	603	903	0
517	3	0	0	0	0	0	0	200	300	0	0	0	0	0	0	0	200	903	0	0	0	0	0	0	0	603	903	0
517	4	0	0	0	0	0	0	200	300	0	0	0	0	0	0	0	200	903	0	0	0	0	0	0	0	603	903	0
517	5	0	0	0	0	0	0	200	300	0	0	0	0	0	0	0	200	903	0	0	0	0	0	0	0	603	903	0
517	6	0	0	0	0	0	0	200	300	0	0	0	0	0	0	0	200	903	0	0	0	0	0	0	0	603	903	0
517	7	0	0	0	0	0	0	200	300	0	0	0	0	0	0	0	200	903	0	0	0	0	0	0	0	603	903	0
517	8	0	0	0	0	0	0	200	300	0	0	0	0	0	0	0	200	903	0	0	0	0	0	0	0	603	903	0
517	9	0	0	0	0	0	0	200	300	0	0	0	0	0	0	0	200	903	0	0	0	0	0	0	0	603	903	0
518	0	0	0	0	0	0	0	200	300	0	0	0	0	0	0	0	200	903	0	0	0	0	0	0	0	603	903	0
518	1	0	0	0	0	0	0	200	300	0	0	0	0	0	0	0	200	903	0	0	0	0	0	0	0	603	903	0
518	2	0	0	0	0	0	0	200	300	0	0	0	0	0	0	0	200	903	0	0	0	0	0	0	0	603	903	0
518	3	0	0	0	0	0	0	200	300	0	0	0	0	0	0	0	200	903	0	0	0	0	0	0	0	603	903	0
518	4	0	0	0	0	0	0	200	300	0	0	0	0	0	0	0	200	903	0	0	0	0	0	0	0	603	903	0
518	5	0	0	0	0	0	0	200	300	0	0	0	0	0	0	0	200	903	0	0	0	0	0	0	0	603	903	0
518	6	0	0	0	0	0	0	200	300	0	0	0	0	0	0	0	200	903	0	0	0	0	0	0	0	603	903	0
518	7	0	0	0	0	0	0	200	300	0	0	0	0	0	0	0	200	903	0	0	0	0	0	0	0	603	903	0
518	8	0	0	0	0	0	0	200	300	0	0	0	0	0	0	0	200	903	0	0	0	0	0	0	0	603	903	0
518	9	0	0	0	0	0	0	200	300	0	0	0	0	0	0	0	200	903	0	0	0	0	0	0	0	603	903	0
519	0	0	0	0	0	0	0	200	300	0	0	0	0	0	0	0	200	903	0	0	0	0	0	0	0	603	903	0
519	1	0	0	0	0	0	0	200	300	0	0	0	0	0	0	0	200	903	0	0	0	0	0	0	0	603	903	0
519	2	0	0	0	0	0	0	200	300	0	0	0	0	0	0	0	200	903	0	0	0	0	0	0	0	603	903	0
519	3	0	0	0	0	0	0	200	300	0	0	0	0	0	0	0	200	903	0	0	0	0	0	0	0	603	903	0
519	4	0	0	0	0	0	0	200	300	0	0	0	0	0	0	0	200	903	0	0	0	0	0	0	0	603	903	0
519	5	0	0	0	0	0	0	200	300	0	0	0	0	0	0	0	200	903	0	0	0	0	0	0	0	603	903	0
519	6	0	0	0	0	0	0	200	300	0	0	0	0	0	0	0	200	903	0	0	0	0	0	0	0	603	903	0
519	7	0	0	0	0	0	0	200	300	0	0	0	0	0	0	0	200	903	0	0	0	0	0	0	0	603	903	0
519	8	0	0	0	0	0	0	200	300	0	0	0	0	0	0	0	200	903	0	0	0	0	0	0	0	603	903	0
519	9	0	0	0	0	0	0	200	300	0	0	0	0	0	0	0	200	903	0	0	0	0	0	0	0	603	903	0
520	0	0	0	0	0	0	0	200	300	0	0	0	0	0	0	0	200	903	0	0	0	0	0	0	0	603	903	0
520	1	0	0	0	0	0	0	200	300	0	0	0	0	0	0	0	200	903	0	0	0	0	0	0	0	603	903	0
520	2	0	0	0	0	0	0	200	300	0	0	0	0	0	0	0	200	903	0	0	0	0	0	0	0	603	903	0
520	3	0	0	0	0	0	0	200	300	0	0	0	0	0	0	0	200	903	0	0	0	0	0	0	0	603	903	0
520	4	0	0	0	0	0	0	200	300	0	0	0	0	0	0	0	200	903	0	0	0	0	0	0	0	603	903	0
520	5	0	0	0	0	0	0	200	300	0	0	0	0	0	0	0	200	903	0	0	0	0	0	0	0	603	903	0
520	6	0	0	0	0	0	0	200	300	0	0	0	0	0	0	0	200	903	0	0	0	0	0	0	0	603	903	0
520	7	0	0	0	0	0	0	200	300	0	0	0	0	0	0	0	200	903	0	0	0	0	0	0	0	603	903	0
520	8	0	0	0	0	0	0	200	300	0	0	0	0	0	0	0	200	903	0	0	0	0	0	0	0	603	903	0
520	9	0	0	0	0	0	0	200	300	0	0	0	0	0	0	0	200	903	0	0	0	0	0	0	0	603	903	0
521	0	0	0	0	0	0	0	200	300	0	0	0	0	0	0	0	200	903	0	0	0	0	0	0	0	603	903	0
521	1	0	0	0	0	0	0	200	300	0	0	0	0	0	0	0	200	903	0	0	0	0	0	0	0	603	903	0
521	2	0	0	0	0	0	0	200	300	0	0	0	0	0	0	0	200	903	0	0	0	0	0	0	0	603	903	0
521	3	0	0	0	0	0	0	200	300	0	0	0	0	0	0	0	200	903	0	0	0	0	0	0	0	603	903	0
521	4	0	0	0	0	0	0	200	300	0	0	0	0	0	0	0	200	903	0	0	0	0	0	0	0	603	903	0
521	5	0	0	0	0	0	0	200	300	0	0	0	0	0	0	0	200	903	0	0	0	0	0	0	0	603	903	0
521	6	0	0	0	0	0	0	200	300	0	0	0	0	0	0	0	200	903	0	0	0	0	0	0	0	603	903	0
521	7	0	0	0	0	0	0	200	300	0	0	0	0	0	0	0	200	903	0	0	0	0	0	0	0	603	903	0
521	8	0	0	0	0	0	0	200	300	0	0	0	0	0	0	0	200	903	0	0	0	0	0	0	0	603	903	0
521	9	0	0	0	0	0	0	200	300	0	0	0	0	0	0	0	200	903	0	0	0	0	0	0	0	603	903	0
522	0	0	0	0	0	0	0	200	300	0	0	0	0	0	0	0	200	903	0	0	0	0	0	0	0	603	903	0
522	1	0	0	0	0	0	0	200	300	0	0	0	0	0	0	0	200	903	0	0	0	0	0	0	0	603	903	0
522	2	0	0	0	0	0	0	200	300	0	0	0	0	0	0	0	200	903	0	0	0	0	0	0	0	603	903	0
522	3	0	0	0	0	0	0	200	300	0	0	0	0	0	0	0	200	903	0	0	0	0	0	0	0	603	903	0
522	4	0	0	0	0	0	0	200	300	0	0	0	0	0	0	0	200	903	0	0	0	0	0	0	0	603	903	0
522	5	0	0	0	0	0	0	200	300	0	0	0	0	0	0	0	200	903	0	0	0	0	0	0	0	603	903	0
522	6	0	0	0	0	0	0	200	300	0	0	0	0	0	0	0	200	903	0	0	0	0	0	0	0	603	903	0
522	7	0	0	0	0	0	0	200	300	0	0	0	0	0	0	0	200	903	0	0	0	0	0	0	0	603	903	0
522	8	0	0	0	0	0	0	200	300	0	0	0	0	0	0	0	200	903	0	0	0	0	0	0	0	603	903	0
522	9	0	0	0	0	0	0	200	300	0	0	0	0	0	0	0	200	903	0	0	0	0	0	0	0	603	903	0
523	0	0	0	0	0	0	0	200	300	0	0	0	0	0	0	0	200	903	0	0	0	0	0	0	0	603	903	0
523	1	0	0	0	0	0	0	200	300	0	0	0	0	0	0	0	200	903	0	0	0	0	0	0	0	603	903	0
523	2	0	0	0	0	0	0	200	300	0	0	0	0	0	0	0	200	903	0	0	0	0	0	0	0	603	903	0
523	3	0	0	0	0	0	0	200	300	0	0	0	0	0	0	0	200	903	0	0	0	0	0	0	0	603	903	0
523	4	0	0	0	0	0	0	200	300	0	0	0	0	0	0	0	200	903	0	0	0	0	0	0	0	603	903	0
523	5	0	0	0	0	0	0	200	300	0	0	0	0	0	0	0	200	903	0	0	0	0	0	0	0	603	903	0
523	6	0	0	0	0	0	0	200	300	0	0	0	0	0	0	0	200	903	0	0	0	0	0	0	0	603	903	0
523	7	0	0	0	0	0	0	200	300	0	0	0	0	0	0	0	200	903	0	0	0	0	0	0	0	603	903	0
523	8	0	0	0	0	0	0	200	300	0	0	0	0	0	0	0	200	903	0	0	0	0	0	0	0	603	903	0
523	9	0	0	0	0	0	0	200	300	0	0	0	0	0	0	0	200	903	0	0	0	0	0	0	0	603	903	0
524	0	0	0	0	0	0	0	200	300	0	0	0	0	0	0	0	200	903	0	0	0	0	0	0	0	603	903	0
524	1	0	0	0	0	0	0	200	300	0	0	0	0	0	0	0	200	903	0	0	0	0	0	0	0	603	903	0
524	2	0	0	0	0	0	0	200	300	0	0	0	0	0	0	0	200	903	0	0	0	0	0	0	0	603	903	0
524	3	0	0	0	0	0	0	200	300	0	0	0	0	0	0	0	200	903	0	0	0	0	0	0	0	603	903	0
524	4	0	0	0	0	0	0	200	300	0	0	0	0	0	0	0	200	903	0	0	0	0	0	0	0	603	903	0
524	5	0	0	0	0	0	0	200	300	0	0	0	0	0	0	0	200	903	0	0	0	0	0	0	0	603	903	0
524	6	0	0	0	0	0	0	200	300	0	0	0	0	0	0	0	200	903	0	0	0	0	0	0	0	603	903	0
524	7	0	0	0	0	0	0	200	300	0	0	0	0	0	0	0	200	903	0	0	0	0	0	0	0	603	903	0
524	8	0	0	0	0	0	0	200	300	0	0	0	0	0	0	0	200	903	0	0	0	0	0	0	0	603	903	0
524	9	0	0	0	0	0	0	200	300	0	0	0	0	0	0	0	200	903	0	0	0	0	0	0	0	603	903	0
525	0	0	0	0	0	0	0	200	300	0	0	0	0	0	0	0	200	903	0	0	0	0	0	0	0	603	903	0
525	1	0	0	0	0	0	0	200	300	0	0	0	0	0	0	0	200	903	0	0	0	0	0	0	0	603	903	0
525	2	0	0	0	0	0	0	200	300	0	0	0	0	0	0	0	200	903	0	0	0	0	0	0	0	603	903	0
525	3	0	0	0	0	0	0	200	300	0	0	0	0	0	0	0	200	903	0	0	0	0	0	0	0	603	903	0
525	4	0	0	0	0	0	0	200	300	0	0	0	0	0	0	0	200	903	0	0	0	0	0	0	0	603	903	0
525	5	0	0	0	0	0	0	200	300	0	0	0	0	0	0	0	200	903	0	0	0	0	0	0	0	603	903	0
525	6	0	0	0	0	0	0	200	300	0	0	0	0	0	0	0	200	903	0	0	0	0	0	0	0	603	903	0
525	7	0	0	0	0	0	0	200	300	0	0	0	0	0	0	0	200	903	0	0	0	0	0	0	0	603	903	0
525	8	0	0	0	0	0	0	200	300	0	0	0	0	0	0	0	200	903	0	0	0	0	0	0	0	603	903	0
525	9	0	0	0	0	0	0	200	300	0	0	0	0	0	0	0	200	903	0	0	0	0	0	0	0	603	903	0
526	0	0	0	0	0	0	0	200	300	0	0	0	0	0	0	0	200	903	0	0	0	0	0	0	0	603	903	0
526	1	0	0	0	0	0	0	200	300	0	0	0	0	0	0	0	200	903	0	0	0	0	0	0	0	603	903	0
526	2	0	0	0	0	0	0	200	300	0	0	0	0	0	0	0	200	903	0	0	0	0	0	0	0	603	903	0
526	3	0	0	0	0	0	0	200	300	0	0	0	0	0	0	0	200	903	0	0	0	0	0	0	0	603	903	0
526	4	0	0	0	0	0	0	200	300	0	0	0	0	0	0	0	200	903	0	0	0	0	0	0	0	603	903	0
526	5	0	0	0	0	0	0	200	300	0	0	0	0	0	0	0	200	903	0	0	0	0	0	0	0	603	903	0
526	6	0	0	0	0	0	0	200	300	0	0	0	0	0	0	0	200	903	0	0	0	0	0	0	0	603	903	0
526	7	0	0	0	0	0	0	200	300	0	0	0	0	0	0	0	200	903	0	0	0	0	0	0	0	603	903	0
526	8	0	0	0	0	0	0	200	300	0	0	0	0	0	0	0	200	903	0	0	0	0	0	0	0	603	903	0
526	9	0	0	0	0	0	0	200	300	0	0	0	0	0	0	0	200	903	0	0	0	0	0	0	0	603	903	0
527	0	0	0	0	0	0	0	200	300	0	0	0	0	0	0	0	200	903	0	0	0	0	0	0	0	603	903	0
527	1	0	0	0	0	0	0	200	300	0	0	0	0	0	0	0	200	903	0	0	0	0	0	0	0	603	903	0
527	2	0	0	0	0	0	0	200	300	0	0	0	0	0	0	0	200	903	0	0	0	0	0	0	0	603	903	0
527	3	0	0	0	0	0	0	200	300	0	0	0	0	0	0	0	200	903	0	0	0	0	0	0	0	603	903	0
527	4	0	0	0	0	0	0	200	300	0	0	0	0	0	0	0	200	903	0	0	0	0	0	0	0	603	903	0
527	5	0	0	0	0	0	0	200	300	0	0	0	0	0	0	0	200	903	0	0	0	0	0	0	0	603	903	0
527	6	0	0	0	0	0	0	200	300	0	0	0	0	0	0	0	200	903	0	0	0	0	0	0	0	603	903	0
527	7	0	0	0	0	0	0	200	300	0	0	0	0	0	0	0	200	903	0	0	0	0	0	0	0	603	903	0
527	8	0	0	0	0	0	0	200	300	0	0	0	0	0	0	0	200	903	0	0	0	0	0	0	0	603	903	0
527	9	0	0	0	0	0	0	200	300	0	0	0	0	0	0	0	200	903	0	0	0	0	0	0	0	603	903	0
528	0	0	0	0	0	0	0	200	300	0	0	0	0	0	0	0	200	903	0	0	0	0	0	0	0	603	903	0
528	1	0	0	0	0	0	0	200	300	0	0	0	0	0	0	0	200	903	0	0	0	0	0	0	0	603	903	0
528	2	0	0	0	0	0	0	200	300	0	0	0	0	0	0	0	200	903	0	0	0	0	0	0	0	603	903	0
528	3	0	0	0	0	0	0	200	300	0	0	0	0	0	0	0	200	903	0	0	0	0	0	0	0	603	903	0
528	4	0	0	0	0	0	0	200	300	0	0	0	0	0	0	0	200	903	0	0	0	0	0	0	0	603	903	0
528	5	0	0	0	0	0	0	200	300	0	0	0	0	0	0	0	200	903	0	0	0	0	0	0	0	603	903	0
528	6	0	0	0	0	0	0	200	300	0	0	0	0	0	0	0	200	903	0	0	0	0	0	0	0	603	903	0
528	7	0	0	0	0	0	0	200	300	0	0	0	0	0	0	0	200	903	0	0	0	0	0	0	0	603	903	0
528	8	0	0	0	0	0	0	200	300	0	0	0	0	0	0	0	200	903	0	0	0	0	0	0	0	603	903	0
528	9	0	0	0	0	0	0	200	300	0	0	0	0	0	0	0	200	903	0	0	0	0	0	0	0	603	903	0
529	0	0	0	0	0	0	0	200	300	0	0	0	0	0	0	0	200	903	0	0	0	0	0	0	0	603	903	0
529	1	0	0	0	0	0	0	200	300	0	0	0	0	0	0	0	200	903	0	0	0	0	0	0	0	603	903	0
529	2	0	0	0	0	0	0	200	300	0	0	0	0	0	0	0	200	903	0	0	0	0	0	0	0	603	903	0
529	3	0	0	0	0	0	0	200	300	0	0	0	0	0	0	0	200	903	0	0	0	0	0	0	0	603	903	0
529	4	0	0	0	0	0	0	200	300	0	0	0	0	0	0	0	200	903	0	0	0	0	0	0	0	603	903	0
529	5	0	0	0	0	0	0	200	300	0	0	0	0	0	0	0	200	903	0	0	0	0	0	0	0	603	903	0
529	6	0	0	0	0	0	0	200	300	0	0	0	0	0	0	0	200	903	0	0	0	0	0	0	0	603	903	0
529	7	0	0	0	0	0	0	200	300	0	0	0	0	0	0	0	200	903	0	0	0	0	0	0	0	603	903	0
529	8	0	0	0	0	0	0	200	300	0	0	0	0	0	0	0	200	903	0	0	0	0	0	0	0	603	903	0
529	9	0	0	0	0	0	0	200	300	0	0	0	0	0	0	0	200	903	0	0	0	0	0	0	0	603	903	0
530	0	0	0	0	0	0	0	200	300	0	0	0	0	0	0	0	200	903	0	0	0	0	0	0	0	603	903	0
530	1	0	0	0	0	0	0	200	300	0	0	0	0	0	0	0	200	903	0	0	0	0	0	0	0	603	903	0
530	2	0	0	0	0	0	0	200	300	0	0	0	0	0	0	0	200	903	0	0	0	0	0	0	0	603	903	0
530	3	0	0	0	0	0	0	200	300	0	0	0	0	0	0	0	200	903	0	0	0	0	0	0	0	603	903	0
530	4	0	0	0	0	0	0	200	300	0	0	0	0	0	0	0	200	903	0	0	0	0	0	0	0	603	903	0
530	5	0	0	0	0	0	0	200	300	0	0	0	0	0	0	0	200	903	0	0	0	0	0	0	0	603	903	0
530	6	0	0	0	0	0	0	200	300	0	0	0	0	0	0	0	200	903	0	0	0	0	0	0	0	603	903	0
530	7	0	0	0	0	0	0	200	300	0	0	0	0	0	0	0	200	903	0	0	0	0	0	0	0	603	903	0
530	8	0	0	0	0	0	0	200	300	0	0	0	0	0	0	0	200	903	0	0	0	0	0	0	0	603	903	0
530	9	0	0	0	0	0	0	200	300	0	0	0	0	0	0	0	200	903	0	0	0	0	0	0	0	603	903	0
531	0	0	0	0	0	0	0	200	300	0	0	0	0	0	0	0	200	903	0	0	0	0	0	0	0	603	903	0
531	1	0	0	0	0	0	0	200	300	0	0	0	0	0	0	0	200	903	0	0	0	0	0	0	0	603	903	0
531	2	0	0	0	0	0	0	200	300	0	0	0	0	0	0	0	200	903	0	0	0	0	0	0	0	603	903	0
531	3	0	0	0	0	0	0	200	300	0	0	0	0	0	0	0	200	903	0	0	0	0	0	0	0	603	903	0
531	4	0	0	0	0	0	0	200	300	0	0	0	0	0	0	0	200	903	0	0	0	0	0	0	0	603	903	0
531	5	0	0	0	0	0	0	200	300	0	0	0	0	0	0	0	200	903	0	0	0	0	0	0	0	603	903	0
531	6	0	0	0	0	0	0	200	300	0	0	0	0	0	0	0	200	903	0	0	0	0	0	0	0	603	903	0
531	7	0	0	0	0	0	0	200	300	0	0	0	0	0	0	0	200	903	0	0	0	0	0	0	0	603	903	0
531	8	0	0	0	0	0	0	200	300	0	0	0	0	0	0	0	200	903	0	0	0	0	0	0	0	603	903	0
531	9	0	0	0	0	0	0	200	300	0	0	0	0	0	0	0	200	903	0	0	0	0	0	0	0	603	903	0
532	0	0	0	0	0	0	0	200	300	0	0	0	0	0	0	0	200	903	0	0	0	0	0	0	0	603	903	0
532	1	0	0	0	0	0	0	200	300	0	0	0	0	0	0	0	200	903	0	0	0	0	0	0	0	603	903	0
532	2	0	0	0	0	0	0	200	300	0	0	0	0	0	0	0	200	903	0	0	0	0	0	0	0	603	903	0
532	3	0	0	0	0	0	0	200	300	0	0	0	0	0	0	0	200	903	0	0	0	0	0	0	0	603	903	0
532	4	0	0	0	0	0	0	200	300	0	0	0	0	0	0	0	200	903	0	0	0	0	0	0	0	603	903	0
532	5	0	0	0	0	0	0	200	300	0	0	0	0	0	0	0	200	903	0	0	0	0	0	0	0	603	903	0
532	6	0	0	0	0	0	0	200	300	0	0	0	0	0	0	0	200	903	0	0	0	0	0	0	0	603	903	0
532	7	0	0	0	0	0	0	200	300	0	0	0	0	0	0	0	200	903	0	0	0	0	0	0	0	603	903	0
532	8	0	0	0	0	0	0	200	300	0	0	0	0	0	0	0	200	903	0	0	0	0	0	0	0	603	903	0
532	9	0	0	0	0	0	0	200	300	0	0	0	0	0	0	0	200	903	0	0	0	0	0	0	0	603	903	0
533	0	0	0	0	0	0	0	200	300	0	0	0	0	0	0	0	200	903	0	0	0	0	0	0	0	603	903	0
533	1	0	0	0	0	0	0	200	300	0	0	0	0	0	0	0	200	903	0	0	0	0	0	0	0	603	903	0
533	2	0	0	0	0	0	0	200	300	0	0	0	0	0	0	0	200	903	0	0	0	0	0	0	0	603	903	0
533	3	0	0	0	0	0	0	200	300	0	0	0	0	0	0	0	200	903	0	0	0	0	0	0	0	603	903	0
533	4	0	0	0	0	0	0	200	300	0	0	0	0	0	0	0	200	903	0	0	0	0	0	0	0	603	903	0
533	5	0	0	0	0	0	0	200	300	0	0	0	0	0	0	0	200	903	0	0	0	0	0	0	0	603	903	0
533	6	0	0	0	0	0	0	200	300	0	0	0	0	0	0	0	200	903	0	0	0	0	0	0	0	603	903	0
533	7	0	0	0	0	0	0	200	300	0	0	0	0	0	0	0	200	903	0	0	0	0	0	0	0	603	903	0
533	8	0	0	0	0	0	0	200	300	0	0	0	0	0	0	0	200	903	0	0	0	0	0	0	0	603	903	0
533	9	0	0	0	0	0	0	200	300	0	0	0	0	0	0	0	200	903	0	0	0	0	0	0	0	603	903	0
534	0	0	0	0	0	0	0	200	300	0	0	0	0	0	0	0	200	903	0	0	0	0	0	0	0	603	903	0
534	1	0	0	0	0	0	0	200	300	0	0	0	0	0	0	0	200	903	0	0	0	0	0	0	0	603	903	0
534	2	0	0	0	0	0	0	200	300	0	0	0	0	0	0	0	200	903	0	0	0	0	0	0	0	603	903	0
534	3	0	0	0	0	0	0	200	300	0	0	0	0	0	0	0	200	903	0	0	0	0	0	0	0	603	903	0
534	4	0	0	0	0	0	0	200	300	0	0	0	0	0	0	0	200	903	0	0	0	0	0	0	0	603	903	0
534	5	0	0	0	0	0	0	200	300	0	0	0	0	0	0	0	200	903	0	0	0	0	0	0	0	603	903	0
534	6	0	0	0	0	0	0	200	300	0	0	0	0	0	0	0	200	903	0	0	0	0	0	0	0	603	903	0
534	7	0	0	0	0	0	0	200	300	0	0	0	0	0	0	0	200	903	0	0	0	0	0	0	0	603	903	0
534	8	0	0	0	0	0	0	200	300	0	0	0	0	0	0	0	200	903	0	0	0	0	0	0	0	603	903	0
534	9	0	0	0	0	0	0	200	300	0	0	0	0	0	0	0	200	903	0	0	0	0	0	0	0	603	903	0
535	0	0	0	0	0	0	0	200	300	0	0	0	0	0	0	0	200	903	0	0	0	0	0	0	0	603	903	0
535	1	0	0	0	0	0	0	200	300	0	0	0	0	0	0	0	200	903	0	0	0	0	0	0	0	603	903	0
535	2	0	0	0	0	0	0	200	300	0	0	0	0	0	0	0	200	903	0	0	0	0	0	0	0	603	903	0
535	3	0	0	0	0	0	0	200	300	0	0	0	0	0	0	0	200	903	0	0	0	0	0	0	0	603	903	0
535	4	0	0	0	0	0	0	200	300	0	0	0	0	0	0	0	200	903	0	0	0	0	0	0	0	603	903	0
535	5	0	0	0	0	0	0	200	300	0	0	0	0	0	0	0	200	903	0	0	0	0	0	0	0	603	903	0
535	6	0	0	0	0	0	0	200	300	0	0	0	0	0	0	0	200	903	0	0	0	0	0	0	0	603	903	0
535	7	0	0	0	0	0	0	200	300	0	0	0	0	0	0	0	200	903	0	0	0	0	0	0	0	603	903	0
535	8	0	0	0	0	0	0	200	300	0	0	0	0	0	0	0	200	903	0	0	0	0	0	0	0	603	903	0
535	9	0	0	0	0	0	0	200	300	0	0	0	0	0	0	0	200	903	0	0	0	0	0	0	0	603	903	0
536	0	0	0	0	0	0	0	200	300	0	0	0	0	0	0	0	200	903	0	0	0	0	0	0	0	603	903	0
536	1	0	0	0	0	0	0	200	300	0	0	0	0	0	0	0	200	903	0	0	0	0	0	0	0	603	903	0
536	2	0	0	0	0	0	0	200	300	0	0	0	0	0	0	0	200	903	0	0	0	0	0	0	0	603	903	0
536	3	0	0	0	0	0	0	200	300	0	0	0	0	0	0	0	200	903	0	0	0	0	0	0	0	603	903	0
536	4	0	0	0	0	0	0	200	300	0	0	0	0	0	0	0	200	903	0	0	0	0	0	0	0	603	903	0
536	5	0	0	0	0	0	0	200	300	0	0	0	0	0	0	0	200	903	0	0	0	0	0	0	0	603	903	0
536	6	0	0	0	0	0	0	200	300	0	0	0	0	0	0	0	200	903	0	0	0	0	0	0	0	603	903	0
536	7	0	0	0	0	0	0	200	300	0	0	0	0	0	0	0	200	903	0	0	0	0	0	0	0	603	903	0
536	8	0	0	0	0	0	0	200	300	0	0	0	0	0	0	0	200	903	0	0	0	0	0	0	0	603	903	0
536	9	0	0	0	0	0	0	200	300	0	0	0	0	0	0	0	200	903	0	0	0	0	0	0	0	603	903	0
537	0	0	0	0	0	0	0	200	300	0	0	0	0	0	0	0	200	903	0	0	0	0	0	0	0	603	903	0
537	1	0	0	0	0	0	0	200	300	0	0	0	0	0	0	0	200	903	0	0	0	0	0	0	0	603	903	0
537	2	0	0	0	0	0	0	200	300	0	0	0	0	0	0	0	200	903	0	0	0	0	0	0	0	603	903	0
537	3	0	0	0	0	0	0	200	300	0	0	0	0	0	0	0	200	903	0	0	0	0	0	0	0	603	903	0
537	4	0	0	0	0	0	0	200	300	0	0	0	0	0	0	0	200	903	0	0	0	0	0	0	0	603	903	0
537	5	0	0	0	0	0	0	200	300	0	0	0	0	0	0	0	200	903	0	0	0	0	0	0	0	603	903	0
537	6	0	0	0	0	0	0	200	300	0	0	0	0	0	0	0	200	903	0	0	0	0	0	0	0	603	903	0
537	7	0	0	0	0	0	0	200	300	0	0	0	0	0	0	0	200	903	0	0	0	0	0	0	0	603	903	0
537	8	0	0	0	0	0	0	200	300	0	0	0	0	0	0	0	200	903	0	0	0	0	0	0	0	603	903	0
537	9	0	0	0	0	0	0	200	300	0	0	0	0	0	0	0	200	903	0	0	0	0	0	0	0	603	903	0
538	0	0	0	0	0	0	0	200	300	0	0	0	0	0	0	0	200	903	0	0	0	0	0	0	0	603	903	0
538	1	0	0	0	0	0	0	200	300	0	0	0	0	0	0	0	200	903	0	0	0	0	0	0	0	603	903	0
538	2	0	0	0	0	0	0	200	300	0	0	0	0	0	0	0	200	903	0	0	0	0	0	0	0	603	903	0
538	3	0	0	0	0	0	0	200	300	0	0	0	0	0	0	0	200	903	0	0	0	0	0	0	0	603	903	0
538	4	0	0	0	0	0	0	200	300	0	0	0	0	0	0	0	200	903	0	0	0	0	0	0	0	603	903	0
538	5	0	0	0	0	0	0	200	300	0	0	0	0	0	0	0	200	903	0	0	0	0	0	0	0	603	903	0
538	6	0	0	0	0	0	0	200	300	0	0	0	0	0	0	0	200	903	0	0	0	0	0	0	0	603	903	0
538	7	0	0	0	0	0	0	200	300	0	0	0	0	0	0	0	200	903	0	0	0	0	0	0	0	603	903	0
538	8	0	0	0	0	0	0	200	300	0	0	0	0	0	0	0	200	903	0	0	0	0	0	0	0	603	903	0
538	9	0	0	0	0	0	0	200	300	0	0	0	0	0	0	0	200	903	0	0	0	0	0	0	0	603	903	0
539	0	0	0	0	0	0	0	200	300	0	0	0	0	0	0	0	200	903	0	0	0	0	0	0	0	603	903	0
539	1	0	0	0	0	0	0	200	300	0	0	0	0	0	0	0	200	903	0	0	0	0	0	0	0	603	903	0
539	2	0	0	0	0	0	0	200	300	0	0	0	0	0	0	0	200	903	0	0	0	0	0	0	0	603	903	0
539	3	0	0	0	0	0	0	200	300	0	0	0	0	0	0	0	200	903	0	0	0	0	0	0	0	603	903	0
539	4	0	0	0	0	0	0	200	300	0	0	0	0	0	0	0	200	903	0	0	0	0	0	0	0	603	903	0
539	5	0	0	0	0	0	0	200	300	0	0	0	0	0	0	0	200	903	0	0	0	0	0	0	0	603	903	0
539	6	0	0	0	0	0	0	200	300	0	0	0	0	0	0	0	200	903	0	0	0	0	0	0	0	603	903	0
539	7	0	0	0	0	0	0	200	300	0	0	0	0	0	0	0	200	903	0	0	0	0	0	0	0	603	903	0
539	8	0	0	0	0	0	0	200	300	0	0	0	0	0	0	0	200	903	0	0	0	0	0	0	0	603	903	0
539	9	0	0	0	0	0	0	200	300	0	0	0	0	0	0	0	200	903	0	0	0	0	0	0	0	603	903	0
540	0	0	0	0	0	0	0	200	300	0	0	0	0	0	0	0	200	903	0	0	0	0	0	0	0	603	903	0
540	1	0	0	0	0	0	0	200	300	0	0	0	0	0	0	0	200	903	0	0	0	0	0	0	0	603	903	0
540	2	0	0	0	0	0	0	200	300	0	0	0	0	0	0	0	200	903	0	0	0	0	0	0	0	603	903	0
540	3	0	0	0	0	0	0	200	300	0	0	0	0	0	0	0	200	903	0	0	0	0	0	0	0	603	903	0
540	4	0	0	0	0	0	0	200	300	0	0	0	0	0	0	0	200	903	0	0	0	0	0	0	0	603	903	0
540	5	0	0	0	0	0	0	200	300	0	0	0	0	0	0	0	200	903	0	0	0	0	0	0	0	603	903	0
540	6	0	0	0	0	0	0	200	300	0	0	0	0	0	0	0	200	903	0	0	0	0	0	0	0	603	903	0
540	7	0	0	0	0	0	0	200	300	0	0	0	0	0	0	0	200	903	0	0	0	0	0	0	0	603	903	0
540	8	0	0	0	0	0	0	200	300	0	0	0	0	0	0	0	200	903	0	0	0	0	0	0	0	603	903	0
540	9	0	0	0	0	0	0	200	300	0	0	0	0	0	0	0	200	903	0	0	0	0	0	0	0	603	903	0
541	0	0	0	0	0	0	0	200	300	0	0	0	0	0	0	0	200	903	0	0	0	0	0	0	0	603	903	0
541	1	0	0	0	0	0	0	200	300	0	0	0	0	0	0	0	200	903	0	0	0	0	0	0	0	603	903	0
541	2	0	0	0	0	0	0	200	300	0	0	0	0	0	0	0	200	903	0	0	0	0	0	0	0	603	903	0
541	3	0	0	0	0	0	0	200	300	0	0	0	0	0	0	0	200	903	0	0	0	0	0	0	0	603	903	0
541	4	0	0	0	0	0	0	200	300	0	0	0	0	0	0	0	200	903	0	0	0	0	0	0	0	603	903	0
541	5	0	0	0	0	0	0	200	300	0	0	0	0	0	0	0	200	903	0	0	0	0	0	0	0	603	903	0
541	6	0	0	0	0	0	0	200	300	0	0	0	0	0	0	0	200	903	0	0	0	0	0	0	0	603	903	0
541	7	0	0	0	0	0	0	200	300	0	0	0	0	0	0	0	200	903	0	0	0	0	0	0	0	603	903	0
541	8	0	0	0	0	0	0	200	300	0	0	0	0	0	0	0	200	903	0	0	0	0	0	0	0	603	903	0
541	9	0	0	0	0	0	0	200	300	0	0	0	0	0	0	0	200	903	0	0	0	0	0	0	0	603	903	0
542	0	0	0	0	0	0	0	200	300	0	0	0	0	0	0	0	200	903	0	0	0	0	0	0	0	603	903	0
542	1	0	0	0	0	0	0	200	300	0	0	0	0	0	0	0	200	903	0	0	0	0	0	0	0	603	903	0
542	2	0	0	0	0	0	0	200	300	0	0	0	0	0	0	0	200	903	0	0	0	0	0	0	0	603	903	0
542	3	0	0	0	0	0	0	200	300	0	0	0	0	0	0	0	200	903	0	0	0	0	0	0	0	603	903	0
542	4	0	0	0	0	0	0	200	300	0	0	0	0	0	0	0	200	903	0	0	0	0	0	0	0	603	903	0
542	5	0	0	0	0	0	0	200	300	0	0	0	0	0	0	0	200	903	0	0	0	0	0	0	0	603	903	0
542	6	0	0	0	0	0	0	200	300	0	0	0	0	0	0	0	200	903	0	0	0	0	0	0	0	603	903	0
542	7	0	0	0	0	0	0	200	300	0	0	0	0	0	0	0	200	903	0	0	0	0	0	0	0	603	903	0
542	8	0	0	0	0	0	0	200	300	0	0	0	0	0	0	0	200	903	0	0	0	0	0	0	0	603	903	0
542	9	0	0	0	0	0	0	200	300	0	0	0	0	0	0	0	200	903	0	0	0	0	0	0	0	603	903	0
543	0	0	0	0	0	0	0	200	300	0	0	0	0	0	0	0	200	903	0	0	0	0	0	0	0	603	903	0
543	1	0	0	0	0	0	0	200	300	0	0	0	0	0	0	0	200	903	0	0	0	0	0	0	0	603	903	0
543	2	0	0	0	0	0	0	200	300	0	0	0	0	0	0	0	200	903	0	0	0	0	0	0	0	603	903	0
543	3	0	0	0	0	0	0	200	300	0	0	0	0	0	0	0	200	903	0	0	0	0	0	0	0	603	903	0
543	4	0	0	0	0	0	0	200	300	0	0	0	0	0	0	0	200	903	0	0	0	0	0	0	0	603	903	0
543	5	0	0	0	0	0	0	200	300	0	0	0	0	0	0	0	200	903	0	0	0	0	0	0	0	603	903	0
543	6	0	0	0	0	0	0	200	300	0	0	0	0	0	0	0	200	903	0	0	0	0	0	0	0	603	903	0
543	7	0	0	0	0	0	0	200	300	0	0	0	0	0	0	0	200	903	0	0	0	0	0	0	0	603	903	0
543	8	0	0	0	0	0	0	200	300	0	0	0	0	0	0	0	200	903	0	0	0	0	0	0	0	603	903	0
543	9	0	0	0	0	0	0	200	300	0	0	0	0	0	0	0	200	903	0	0	0	0	0	0	0	603	903	0
544	0	0	0	0	0	0	0	200	300	0	0	0	0	0	0	0	200	903	0	0	0	0	0	0	0	603	903	0
544	1	0	0	0	0	0	0	200	300	0	0	0	0	0	0	0	200	903	0	0	0	0	0	0	0	603	903	0
544	2	0	0	0	0	0	0	200	300	0	0	0	0	0	0	0	200	903	0	0	0	0	0	0	0	603	903	0
544	3	0	0	0	0	0	0	200	300	0	0	0	0	0	0	0	200	903	0	0	0	0	0	0	0	603	903	0
544	4	0	0	0	0	0	0	200	300	0	0	0	0	0	0	0	200	903	0	0	0	0	0	0	0	603	903	0
544	5	0	0	0	0	0	0	200	300	0	0	0	0	0	0	0	200	903	0	0	0	0	0	0	0	603	903	0
544	6	0	0	0	0	0	0	200	300	0	0	0	0	0	0	0	200	903	0	0	0	0	0	0	0	603	903	0
544	7	0	0	0	0	0	0	200	300	0	0	0	0	0	0	0	200	903	0	0	0	0	0	0	0	603	903	0
544	8	0	0	0	0	0	0	200	300	0	0	0	0	0	0	0	200	903	0	0	0	0	0	0	0	603	903	0
544	9	0	0	0	0	0	0	200	300	0	0	0	0	0	0	0	200	903	0	0	0	0	0	0	0	603	903	0
545	0	0	0	0	0	0	0	200	300	0	0	0	0	0	0	0	200	903	0	0	0	0	0	0	0	603	903	0
545	1	0	0	0	0	0	0	200	300	0	0	0	0	0	0	0	200	903	0	0	0	0	0	0	0	603	903	0
545	2	0	0	0	0	0	0	200	300	0	0	0	0	0	0	0	200	903	0	0	0	0	0	0	0	603	903	0
545	3	0	0	0	0	0	0	200	300	0	0	0	0	0	0	0	200	903	0	0	0	0	0	0	0	603	903	0
545	4	0	0	0	0	0	0	200	300	0	0	0	0	0	0	0	200	903	0	0	0	0	0	0	0	603	903	0
545	5	0	0	0	0	0	0	200	300	0	0	0	0	0	0	0	200	903	0	0	0	0	0	0	0	603	903	0
545	6	0	0	0	0	0	0	200	300	0	0	0	0	0	0	0	200	903	0	0	0	0	0	0	0	603	903	0
545	7	0	0	0	0	0	0	200	300	0	0	0	0	0	0	0	200	903	0	0	0	0	0	0	0	603	903	0
545	8	0	0	0	0	0	0	200	300	0	0	0	0	0	0	0	200	903	0	0	0	0	0	0	0	603	903	0
545	9	0	0	0	0	0	0	200	300	0	0	0	0	0	0	0	200	903	0	0	0	0	0	0	0	603	903	0
546	0	0	0	0	0	0	0	200	300	0	0	0	0	0	0	0	200	903	0	0	0	0	0	0	0	603	903	0
546	1	0	0	0	0	0	0	200	300	0	0	0	0	0	0	0	200	903	0	0	0	0	0	0	0	603	903	0
546	2	0	0	0	0	0	0	200	300	0	0	0	0	0	0	0	200	903	0	0	0	0	0	0	0	603	903	0
546	3	0	0	0	0	0	0	200	300	0	0	0	0	0	0	0	200	903	0	0	0	0	0	0	0	603	903	0
546	4	0	0	0	0	0	0	200	300	0	0	0	0	0	0	0	200	903	0	0	0	0	0	0	0	603	903	0
546	5	0	0	0	0	0	0	200	300	0	0	0	0	0	0	0	200	903	0	0	0	0	0	0	0	603	903	0
546	6	0	0	0	0	0	0	200	300	0	0	0	0	0	0	0	200	903	0	0	0	0	0	0	0	603	903	0
546	7	0	0	0	0	0	0	200	300	0	0	0	0	0	0	0	200	903	0	0	0	0	0	0	0	603	903	0
546	8	0	0	0	0	0	0	200	300	0	0	0	0	0	0	0	200	903	0	0	0	0	0	0	0	603	903	0
546	9	0	0	0	0	0	0	200	300	0	0	0	0	0	0	0	200	903	0	0	0	0	0	0	0	603	903	0
547	0	0	0	0	0	0	0	200	300	0	0	0	0	0	0	0	200	903	0	0	0	0	0	0	0	603	903	0
547	1	0	0	0	0	0	0	200	300	0	0	0	0	0	0	0	200	903	0	0	0	0	0	0	0	603	903	0
547	2	0	0	0	0	0	0	200	300	0	0	0	0	0	0	0	200	903	0	0	0	0	0	0	0	603	903	0
547	3	0	0	0	0	0	0	200	300	0	0	0	0	0	0	0	200	903	0	0	0	0	0	0	0	603	903	0
547	4	0	0	0	0	0	0	200	300	0	0	0	0	0	0	0	200	903	0	0	0	0	0	0	0	603	903	0
547	5	0	0	0	0	0	0	200	300	0	0	0	0	0	0	0	200	903	0	0	0	0	0	0	0	603	903	0
547	6	0	0	0	0	0	0	200	300	0	0	0	0	0	0	0	200	903	0	0	0	0	0	0	0	603	903	0
547	7	0	0	0	0	0	0	200	300	0	0	0	0	0	0	0	200	903	0	0	0	0	0	0	0	603	903	0
547	8	0	0	0	0	0	0	200	300	0	0	0	0	0	0	0	200	903	0	0	0	0	0	0	0	603	903	0
547	9	0	0	0	0	0	0	200	300	0	0	0	0	0	0	0	200	903	0	0	0	0	0	0	0	603	903	0
548	0	0	0	0	0	0	0	200	300	0	0	0	0	0	0	0	200	903	0	0	0	0	0	0	0	603	903	0
548	1	0	0	0	0	0	0	200	300	0	0	0	0	0	0	0	200	903	0	0	0	0	0	0	0	603	903	0
548	2	0	0	0	0	0	0	200	300	0	0	0	0	0	0	0	200	903	0	0	0	0	0	0	0	603	903	0
548	3	0	0	0	0	0	0	200	300	0	0	0	0	0	0	0	200	903	0	0	0	0	0	0	0	603	903	0
548	4	0	0	0	0	0	0	200	300	0	0	0	0	0	0	0	200	903	0	0	0	0	0	0	0	603	903	0
548	5	0	0	0	0	0	0	200	300	0	0	0	0	0	0	0	200	903	0	0	0	0	0	0	0	603	903	0
548	6	0	0	0	0	0	0	200	300	0	0	0	0	0	0	0	200	903	0	0	0	0	0	0	0	603	903	0
548	7	0	0	0	0	0	0	200	300	0	0	0	0	0	0	0	200	903	0	0	0	0	0	0	0	603	903	0
548	8	0	0	0	0	0	0	200	300	0	0	0	0	0	0	0	200	903	0	0	0	0	0	0	0	603	903	0
548	9	0	0	0	0	0	0	200	300	0	0	0	0	0	0	0	200	903	0	0	0	0	0	0	0	603	903	0
549	0	0	0	0	0	0	0	200	300	0	0	0	0	0	0	0	200	903	0	0	0	0	0	0	0	603	903	0
549	1	0	0	0	0	0	0	200	300	0	0	0	0	0	0	0	200	903	0	0	0	0	0	0	0	603	903	0
549	2	0	0	0	0	0	0	200	300	0	0	0	0	0	0	0	200	903	0	0	0	0	0	0	0	603	903	0
549	3	0	0	0	0	0	0	200	300	0	0	0	0	0	0	0	200	903	0	0	0	0	0	0	0	603	903	0
549	4	0	0	0	0	0	0	200	300	0	0	0	0	0	0	0	200	903	0	0	0	0	0	0	0	603	903	0
549	5	0	0	0	0	0	0	200	300	0	0	0	0	0	0	0	200	903	0	0	0	0	0	0	0	603	903	0
549	6	0	0	0	0	0	0	200	300	0	0	0	0	0	0	0	200	903	0	0	0	0	0	0	0	603	903	0
549	7	0	0	0	0	0	0	200	300	0	0	0	0	0	0	0	200	903	0	0	0	0	0	0	0	603	903	0
549	8	0	0	0	0	0	0	200	300	0	0	0	0	0	0	0	200	903	0	0	0	0	0	0	0	603	903	0
549	9	0	0	0	0	0	0	200	300	0	0	0	0	0	0	0	200	903	0	0	0	0	0	0	0	603	903	0
550	0	0	0	0	0	0	0	200	300	0	0	0	0	0	0	0	200	903	0	0	0	0	0	0	0	603	903	0
550	1	0	0	0	0	0	0	200	300	0	0	0	0	0	0	0	200	903	0	0	0	0	0	0	0	603	903	0
550	2	0	0	0	0	0	0	200	300	0	0	0	0	0	0	0	200	903	0	0	0	0	0	0	0	603	903	0
550	3	0	0	0	0	0	0	200	300	0	0	0	0	0	0	0	200	903	0	0	0	0	0	0	0	603	903	0
550	4	0	0	0	0	0	0	200	300	0	0	0	0	0	0	0	200	903	0	0	0	0	0	0	0	603	903	0
550	5	0	0	0	0	0	0	200	300	0	0	0	0	0	0	0	200	903	0	0	0	0	0	0	0	603	903	0
550	6	0	0	0	0	0	0	200	300	0	0	0	0	0	0	0	200	903	0	0	0	0	0	0	0	603	903	0
550	7	0	0	0	0	0	0	200	300	0	0	0	0	0	0	0	200	903	0	0	0	0	0	0	0	603	903	0
550	8	0	0	0	0	0	0	200	300	0	0	0	0	0	0	0	200	903	0	0	0	0	0	0	0	603	903	0
550	9	0	0	0	0	0	0	200	300	0	0	0	0	0	0	0	200	903	0	0	0	0	0	0	0	603	903	0
551	0	0	0	0	0	0	0	200	300	0	0	0	0	0	0	0	200	903	0	0	0	0	0	0	0	603	903	0
551	1	0	0	0	0	0	0	200	300	0	0	0	0	0	0	0	200	903	0	0	0	0	0	0	0	603	903	0
551	2	0	0	0	0	0	0	200	300	0	0	0	0	0	0	0	200	903	0	0	0	0	0	0	0	603	903	0
551	3	0	0	0	0	0	0	200	300	0	0	0	0	0	0	0	200	903	0	0	0	0	0	0	0	603	903	0
551	4	0	0	0	0	0	0	200	300	0	0	0	0	0	0	0	200	903	0	0	0	0	0	0	0	603	903	0
551	5	0	0	0	0	0	0	200	300	0	0	0	0	0	0	0	200	903	0	0	0	0	0	0	0	603	903	0
551	6	0	0	0	0	0	0	200	300	0	0	0	0	0	0	0	200	903	0	0	0	0	0	0	0	603	903	0
551	7	0	0	0	0	0	0	200	300	0	0	0	0	0	0	0	200	903	0	0	0	0	0	0	0	603	903	0
551	8	0	0	0	0	0	0	200	300	0	0	0	0	0	0	0	200	903	0	0	0	0	0	0	0	603	903	0
551	9	0	0	0	0	0	0	200	300	0	0	0	0	0	0	0	200	903	0	0	0	0	0	0	0	603	903	0
552	0	0	0	0	0	0	0	200	300	0	0	0	0	0	0	0	200	903	0	0	0	0	0	0	0	603	903	0
552	1	0	0	0	0	0	0	200	300	0	0	0	0	0	0	0	200	903	0	0	0	0	0	0	0	603	903	0
552	2	0	0	0	0	0	0	200	300	0	0	0	0	0	0	0	200	903	0	0	0	0	0	0	0	603	903	0
552	3	0	0	0	0	0	0	200	300	0	0	0	0	0	0	0	200	903	0	0	0	0	0	0	0	603	903	0
552	4	0	0	0	0	0	0	200	300	0	0	0	0	0	0	0	200	903	0	0	0	0	0	0	0	603	903	0
552	5	0	0	0	0	0	0	200	300	0	0	0	0	0	0	0	200	903	0	0	0	0	0	0	0	603	903	0
552	6	0	0	0	0	0	0	200	300	0	0	0	0	0	0	0	200	903	0	0	0	0	0	0	0	603	903	0
552	7	0	0	0	0	0	0	200	300	0	0	0	0	0	0	0	200	903	0	0	0	0	0	0	0	603	903	0
552	8	0	0	0	0	0	0	200	300	0	0	0	0	0	0	0	200	903	0	0	0	0	0	0	0	603	903	0
552	9	0	0	0	0	0	0	200	300	0	0	0	0	0	0	0	200	903	0	0	0	0	0	0	0	603	903	0
553	0	0	0	0	0	0	0	200	300	0	0	0	0	0	0	0	200	903	0	0	0	0	0	0	0	603	903	0
553	1	0	0	0	0	0	0	200	300	0	0	0	0	0	0	0	200	903	0	0	0	0	0	0	0	603	903	0
553	2	0	0	0	0	0	0	200	300	0	0	0	0	0	0	0	200	903	0	0	0	0	0	0	0	603	903	0
553	3	0	0	0	0	0	0	200	300	0	0	0	0	0	0	0	200	903	0	0	0	0	0	0	0	603	903	0
553	4	0	0	0	0	0	0	200	300	0	0	0	0	0	0	0	200	903	0	0	0	0	0	0	0	603	903	0
553	5	0	0	0	0	0	0	200	300	0	0	0	0	0	0	0	200	903	0	0	0	0	0	0	0	603	903	0
553	6	0	0	0	0	0	0	200	300	0	0	0	0	0	0	0	200	903	0	0	0	0	0	0	0	603	903	0
553	7	0	0	0	0	0	0	200	300	0	0	0	0	0	0	0	200	903	0	0	0	0	0	0	0	603	903	0
553	8	0	0	0	0	0	0	200	300	0	0	0	0	0	0	0	200	903	0	0	0	0	0	0	0	603	903	0
553	9	0	0	0	0	0	0	200	300	0	0	0	0	0	0	0	200	903	0	0	0	0	0	0	0	603	903	0
554	0	0	0	0	0	0	0	200	300	0	0	0	0	0	0	0	200	903	0	0	0	0	0	0	0	603	903	0
554	1	0	0	0	0	0	0	200	300	0	0	0	0	0	0	0	200	903	0	0	0	0	0	0	0	603	903	0
554	2	0	0	0	0	0	0	200	300	0	0	0	0	0	0	0	200	903	0	0	0	0	0	0	0	603	903	0
554	3	0	0	0	0	0	0	200	300	0	0	0	0	0	0	0	200	903	0	0	0	0	0	0	0	603	903	0
554	4	0	0	0	0	0	0	200	300	0	0	0	0	0	0	0	200	903	0	0	0	0	0	0	0	603	903	0
554	5	0	0	0	0	0	0	200	300	0	0	0	0	0	0	0	200	903	0	0	0	0	0	0	0	603	903	0
554	6	0	0	0	0	0	0	200	300	0	0	0	0	0	0	0	200	903	0	0	0	0	0	0	0	603	903	0
554	7	0	0	0	0	0	0	200	300	0	0	0	0	0	0	0	200	903	0	0	0	0	0	0	0	603	903	0
554	8	0	0	0	0	0	0	200	300	0	0	0	0	0	0	0	200	903	0	0	0	0	0	0	0	603	903	0
554	9	0	0	0	0	0	0	200	300	0	0	0	0	0	0	0	200	903	0	0	0	0	0	0	0	603	903	0
555	0	0	0	0	0	0	0	200	300	0	0	0	0	0	0	0	200	903	0	0	0	0	0	0	0	603	903	0
555	1	0	0	0	0	0	0	200	300	0	0	0	0	0	0	0	200	903	0	0	0	0	0	0	0	603	903	0
555	2	0	0	0	0	0	0	200	300	0	0	0	0	0	0	0	200	903	0	0	0	0	0	0	0	603	903	0
555	3	0	0	0	0	0	0	200	300	0	0	0	0	0	0	0	200	903	0	0	0	0	0	0	0	603	903	0
555	4	0	0	0	0	0	0	200	300	0	0	0	0	0	0	0	200	903	0	0	0	0	0	0	0	603	903	0
555	5	0	0	0	0	0	0	200	300	0	0	0	0	0	0	0	200	903	0	0	0	0	0	0	0	603	903	0
555	6	0	0	0	0	0	0	200	300	0	0	0	0	0	0	0	200	903	0	0	0	0	0	0	0	603	903	0
555	7	0	0	0	0	0	0	200	300	0	0	0	0	0	0	0	200	903	0	0	0	0	0	0	0	603	903	0
555	8	0	0	0	0	0	0	200	300	0	0	0	0	0	0	0	200	903	0	0	0	0	0	0	0	603	903	0
555	9	0	0	0	0	0	0	200	300	0	0	0	0	0	0	0	200	903	0	0	0	0	0	0	0	603	903	0
556	0	0	0	0	0	0	0	200	300	0	0	0	0	0	0	0	200	903	0	0	0	0	0	0	0	603	903	0
556	1	0	0	0	0	0	0	200	300	0	0	0	0	0	0	0	200	903	0	0	0	0	0	0	0	603	903	0
556	2	0	0	0	0	0	0	200	300	0	0	0	0	0	0	0	200	903	0	0	0	0	0	0	0	603	903	0
556	3	0	0	0	0	0	0	200	300	0	0	0	0	0	0	0	200	903	0	0	0	0	0	0	0	603	903	0
556	4	0	0	0	0	0	0	200	300	0	0	0	0	0	0	0	200	903	0	0	0	0	0	0	0	603	903	0
556	5	0	0	0	0	0	0	200	300	0	0	0	0	0	0	0	200	903	0	0	0	0	0	0	0	603	903	0
556	6	0	0	0	0	0	0	200	300	0	0	0	0	0	0	0	200	903	0	0	0	0	0	0	0	603	903	0
556	7	0	0	0	0	0	0	200	300	0	0	0	0	0	0	0	200	903	0	0	0	0	0	0	0	603	903	0
556	8	0	0	0	0	0	0	200	300	0	0	0	0	0	0	0	200	903	0	0	0	0	0	0	0	603	903	0
556	9	0	0	0	0	0	0	200	300	0	0	0	0	0	0	0	200	903	0	0	0	0	0	0	0	603	903	0
557	0	0	0	0	0	0	0	200	300	0	0	0	0	0	0	0	200	903	0	0	0	0	0	0	0	603	903	0
557	1	0	0	0	0	0	0	200	300	0	0	0	0	0	0	0	200	903	0	0	0	0	0	0	0	603	903	0
557	2	0	0	0	0	0	0	200	300	0	0	0	0	0	0	0	200	903	0	0	0	0	0	0	0	603	903	0
557	3	0	0	0	0	0	0	200	300	0	0	0	0	0	0	0	200	903	0	0	0	0	0	0	0	603	903	0
557	4	0	0	0	0	0	0	200	300	0	0	0	0	0	0	0	200	903	0	0	0	0	0	0	0	603	903	0
557	5	0	0	0	0	0	0	200	300	0	0	0	0	0	0	0	200	903	0	0	0	0	0	0	0	603	903	0
557	6	0	0	0	0	0	0	200	300	0	0	0	0	0	0	0	200	903	0	0	0	0	0	0	0	603	903	0
557	7	0	0	0	0	0	0	200	300	0	0	0	0	0	0	0	200	903	0	0	0	0	0	0	0	603	903	0
557	8	0	0	0	0	0	0	200	300	0	0	0	0	0	0	0	200	903	0	0	0	0	0	0	0	603	903	0
557	9	0	0	0	0	0	0	200	300	0	0	0	0	0	0	0	200	903	0	0	0	0	0	0	0	603	903	0
558	0	0	0	0	0	0	0	200	300	0	0	0	0	0	0	0	200	903	0	0	0	0	0	0	0	603	903	0
558	1	0	0	0	0	0	0	200	300	0	0	0	0	0	0	0	200	903	0	0	0	0	0	0	0	603	903	0
558	2	0	0	0	0	0	0	200	300	0	0	0	0	0	0	0	200	903	0	0	0	0	0	0	0	603	903	0
558	3	0	0	0	0	0	0	200	300	0	0	0	0	0	0	0	200	903	0	0	0	0	0	0	0	603	903	0
558	4	0	0	0	0	0	0	200	300	0	0	0	0	0	0	0	200	903	0	0	0	0	0	0	0	603	903	0
558	5	0	0	0	0	0	0	200	300	0	0	0	0	0	0	0	200	903	0	0	0	0	0	0	0	603	903	0
558	6	0	0	0	0	0	0	200	300	0	0	0	0	0	0	0	200	903	0	0	0	0	0	0	0	603	903	0
558	7	0	0	0	0	0	0	200	300	0	0	0	0	0	0	0	200	903	0	0	0	0	0	0	0	603	903	0
558	8	0	0	0	0	0	0	200	300	0	0	0	0	0	0	0	200	903	0	0	0	0	0	0	0	603	903	0
558	9	0	0	0	0	0	0	200	300	0	0	0	0	0	0	0	200	903	0	0	0	0	0	0	0	603	903	0
559	0	0	0	0	0	0	0	200	300	0	0	0	0	0	0	0	200	903	0	0	0	0	0	0	0	603	903	0
559	1	0	0	0	0	0	0	200	300	0	0	0	0	0	0	0	200	903	0	0	0	0	0	0	0	603	903	0
559	2	0	0	0	0	0	0	200	300	0	0	0	0	0	0	0	200	903	0	0	0	0	0	0	0	603	903	0
559	3	0	0	0	0	0	0	200	300	0	0	0	0	0	0	0	200	903	0	0	0	0	0	0	0	603	903	0
559	4	0	0	0	0	0	0	200	300	0	0	0	0	0	0	0	200	903	0	0	0	0	0	0	0	603	903	0
559	5	0	0	0	0	0	0	200	300	0	0	0	0	0	0	0	200	903	0	0	0	0	0	0	0	603	903	0
559	6	0	0	0	0	0	0	200	300	0	0	0	0	0	0	0	200	903	0	0	0	0	0	0	0	603	903	0
559	7	0	0	0	0	0	0	200	300	0	0	0	0	0	0	0	200	903	0	0	0	0	0	0	0	603	903	0
559	8	0	0	0	0	0	0	200	300	0	0	0	0	0	0	0	200	903	0	0	0	0	0	0	0	603	903	0
559	9	0	0	0	0	0	0	200	300	0	0	0	0	0	0	0	200	903	0	0	0	0	0	0	0	603	903	0
560	0	0	0	0	0	0	0	200	300	0	0	0	0	0	0	0	200	903	0	0	0	0	0	0	0	603	903	0
560	1	0	0	0	0	0	0	200	300	0	0	0	0	0	0	0	200	903	0	0	0	0	0	0	0	603	903	0
560	2	0	0	0	0	0	0	200	300	0	0	0	0	0	0	0	200	903	0	0	0	0	0	0	0	603	903	0
560	3	0	0	0	0	0	0	200	300	0	0	0	0	0	0	0	200	903	0	0	0	0	0	0	0	603	903	0
560	4	0	0	0	0	0	0	200	300	0	0	0	0	0	0	0	200	903	0	0	0	0	0	0	0	603	903	0
560	5	0	0	0	0	0	0	200	300	0	0	0	0	0	0	0	200	903	0	0	0	0	0	0	0	603	903	0
560	6	0	0	0	0	0	0	200	300	0	0	0	0	0	0	0	200	903	0	0	0	0	0	0	0	603	903	0
560	7	0	0	0	0	0	0	200	300	0	0	0	0	0	0	0	200	903	0	0	0	0	0	0	0	603	903	0
560	8	0	0	0	0	0	0	200	300	0	0	0	0	0	0	0	200	903	0	0	0	0	0	0	0	603	903	0
560	9	0	0	0	0	0	0	200	300	0	0	0	0	0	0	0	200	903	0	0	0	0	0	0	0	603	903	0
561	0	0	0	0	0	0	0	200	300	0	0	0	0	0	0	0	200	903	0	0	0	0	0	0	0	603	903	0
561	1	0	0	0	0	0	0	200	300	0	0	0	0	0	0	0	200	903	0	0	0	0	0	0	0	603	903	0
561	2	0	0	0	0	0	0	200	300	0	0	0	0	0	0	0	200	903	0	0	0	0	0	0	0	603	903	0
561	3	0	0	0	0	0	0	200	300	0	0	0	0	0	0	0	200	903	0	0	0	0	0	0	0	603	903	0
561	4	0	0	0	0	0	0	200	300	0	0	0	0	0	0	0	200	903	0	0	0	0	0	0	0	603	903	0
561	5	0	0	0	0	0	0	200	300	0	0	0	0	0	0	0	200	903	0	0	0	0	0	0	0	603	903	0
561	6	0	0	0	0	0	0	200	300	0	0	0	0	0	0	0	200	903	0	0	0	0	0	0	0	603	903	0
561	7	0	0	0	0	0	0	200	300	0	0	0	0	0	0	0	200	903	0	0	0	0	0	0	0	603	903	0
561	8	0	0	0	0	0	0	200	300	0	0	0	0	0	0	0	200	903	0	0	0	0	0	0	0	603	903	0
561	9	0	0	0	0	0	0	200	300	0	0	0	0	0	0	0	200	903	0	0	0	0	0	0	0	603	903	0
562	0	0	0	0	0	0	0	200	300	0	0	0	0	0	0	0	200	903	0	0	0	0	0	0	0	603	903	0
562	1	0	0	0	0	0	0	200	300	0	0	0	0	0	0	0	200	903	0	0	0	0	0	0	0	603	903	0
562	2	0	0	0	0	0	0	200	300	0	0	0	0	0	0	0	200	903	0	0	0	0	0	0	0	603	903	0
562	3	0	0	0	0	0	0	200	300	0	0	0	0	0	0	0	200	903	0	0	0	0	0	0	0	603	903	0
562	4	0	0	0	0	0	0	200	300	0	0	0	0	0	0	0	200	903	0	0	0	0	0	0	0	603	903	0
562	5	0	0	0	0	0	0	200	300	0	0	0	0	0	0	0	200	903	0	0	0	0	0	0	0	603	903	0
562	6	0	0	0	0	0	0	200	300	0	0	0	0	0	0	0	200	903	0	0	0	0	0	0	0	603	903	0
562	7	0	0	0	0	0	0	200	300	0	0	0	0	0	0	0	200	903	0	0	0	0	0	0	0	603	903	0
562	8	0	0	0	0	0	0	200	300	0	0	0	0	0	0	0	200	903	0	0	0	0	0	0	0	603	903	0
562	9	0	0	0	0	0	0	200	300	0	0	0	0	0	0	0	200	903	0	0	0	0	0	0	0	603	903	0
563	0	0	0	0	0	0	0	200	300	0	0	0	0	0	0	0	200	903	0	0	0	0	0	0	0	603	903	0
563	1	0	0	0	0	0	0	200	300	0	0	0	0	0	0	0	200	903	0	0	0	0	0	0	0	603	903	0
563	2	0	0	0	0	0	0	200	300	0	0	0	0	0	0	0	200	903	0	0	0	0	0	0	0	603	903	0
563	3	0	0	0	0	0	0	200	300	0	0	0	0	0	0	0	200	903	0	0	0	0	0	0	0	603	903	0
563	4	0	0	0	0	0	0	200	300	0	0	0	0	0	0	0	200	903	0	0	0	0	0	0	0	603	903	0
563	5	0	0	0	0	0	0	200	300	0	0	0	0	0	0	0	200	903	0	0	0	0	0	0	0	603	903	0
563	6	0	0	0	0	0	0	200	300	0	0	0	0	0	0	0	200	903	0	0	0	0	0	0	0	603	903	0
563	7	0	0	0	0	0	0	200	300	0	0	0	0	0	0	0	200	903	0	0	0	0	0	0	0	603	903	0
563	8	0	0	0	0	0	0	200	300	0	0	0	0	0	0	0	200	903	0	0	0	0	0	0	0	603	903	0
563	9	0	0	0	0	0	0	200	300	0	0	0	0	0	0	0	200	903	0	0	0	0	0	0	0	603	903	0
564	0	0	0	0	0	0	0	200	300	0	0	0	0	0	0	0	200	903	0	0	0	0	0	0	0	603	903	0
564	1	0	0	0	0	0	0	200	300	0	0	0	0	0	0	0	200	903	0	0	0	0	0	0	0	603	903	0
564	2	0	0	0	0	0	0	200	300	0	0	0	0	0	0	0	200	903	0	0	0	0	0	0	0	603	903	0
564	3	0	0	0	0	0	0	200	300	0	0	0	0	0	0	0	200	903	0	0	0	0	0	0	0	603	903	0
564	4	0	0	0	0	0	0	200	300	0	0	0	0	0	0	0	200	903	0	0	0	0	0	0	0	603	903	0
564	5	0	0	0	0	0	0	200	300	0	0	0	0	0	0	0	200	903	0	0	0	0	0	0	0	603	903	0
564	6	0	0	0	0	0	0	200	300	0	0	0	0	0	0	0	200	903	0	0	0	0	0	0	0	603	903	0
564	7	0	0	0	0	0	0	200	300	0	0	0	0	0	0	0	200	903	0	0	0	0	0	0	0	603	903	0
564	8	0	0	0	0	0	0	200	300	0	0	0	0	0	0	0	200	903	0	0	0	0	0	0	0	603	903	0
564	9	0	0	0	0	0	0	200	300	0	0	0	0	0	0	0	200	903	0	0	0	0	0	0	0	603	903	0
565	0	0	0	0	0	0	0	200	300	0	0	0	0	0	0	0	200	903	0	0	0	0	0	0	0	603	903	0
565	1	0	0	0	0	0	0	200	300	0	0	0	0	0	0	0	200	903	0	0	0	0	0	0	0	603	903	0
565	2	0	0	0	0	0	0	200	300	0	0	0	0	0	0	0	200	903	0	0	0	0	0	0	0	603	903	0
565	3	0	0	0	0	0	0	200	300	0	0	0	0	0	0	0	200	903	0	0	0	0	0	0	0	603	903	0
565	4	0	0	0	0	0	0	200	300	0	0	0	0	0	0	0	200	903	0	0	0	0	0	0	0	603	903	0
565	5	0	0	0	0	0	0	200	300	0	0	0	0	0	0	0	200	903	0	0	0	0	0	0	0	603	903	0
565	6	0	0	0	0	0	0	200	300	0	0	0	0	0	0	0	200	903	0	0	0	0	0	0	0	603	903	0
565	7	0	0	0	0	0	0	200	300	0	0	0	0	0	0	0	200	903	0	0	0	0	0	0	0	603	903	0
565	8	0	0	0	0	0	0	200	300	0	0	0	0	0	0	0	200	903	0	0	0	0	0	0	0	603	903	0
565	9	0	0	0	0	0	0	200	300	0	0	0	0	0	0	0	200	903	0	0	0	0	0	0	0	603	903	0
566	0	0	0	0	0	0	0	200	300	0	0	0	0	0	0	0	200	903	0	0	0	0	0	0	0	603	903	0
566	1	0	0	0	0	0	0	200	300	0	0	0	0	0	0	0	200	903	0	0	0	0	0	0	0	603	903	0
566	2	0	0	0	0	0	0	200	300	0	0	0	0	0	0	0	200	903	0	0	0	0	0	0	0	603	903	0
566	3	0	0	0	0	0	0	200	300	0	0	0	0	0	0	0	200	903	0	0	0	0	0	0	0	603	903	0
566	4	0	0	0	0	0	0	200	300	0	0	0	0	0	0	0	200	903	0	0	0	0	0	0	0	603	903	0
566	5	0	0	0	0	0	0	200	300	0	0	0	0	0	0	0	200	903	0	0	0	0	0	0	0	603	903	0
566	6	0	0	0	0	0	0	200	300	0	0	0	0	0	0	0	200	903	0	0	0	0	0	0	0	603	903	0
566	7	0	0	0	0	0	0	200	300	0	0	0	0	0	0	0	200	903	0	0	0	0	0	0	0	603	903	0
566	8	0	0	0	0	0	0	200	300	0	0	0	0	0	0	0	200	903	0	0	0	0	0	0	0	603	903	0
566	9	0	0	0	0	0	0	200	300	0	0	0	0	0	0	0	200	903	0	0	0	0	0	0	0	603	903	0
567	0	0	0	0	0	0	0	200	300	0	0	0	0	0	0	0	200	903	0	0	0	0	0	0	0	603	903	0
567	1	0	0	0	0	0	0	200	300	0	0	0	0	0	0	0	200	903	0	0	0	0	0	0	0	603	903	0
567	2	0	0	0	0	0	0	200	300	0	0	0	0	0	0	0	200	903	0	0	0	0	0	0	0	603	903	0
567	3	0	0	0	0	0	0	200	300	0	0	0	0	0	0	0	200	903	0	0	0	0	0	0	0	603	903	0
567	4	0	0	0	0	0	0	200	300	0	0	0	0	0	0	0	200	903	0	0	0	0	0	0	0	603	903	0
567	5	0	0	0	0	0	0	200	300	0	0	0	0	0	0	0	200	903	0	0	0	0	0	0	0	603	903	0
567	6	0	0	0	0	0	0	200	300	0	0	0	0	0	0	0	200	903	0	0	0	0	0	0	0	603	903	0
567	7	0	0	0	0	0	0	200	300	0	0	0	0	0	0	0	200	903	0	0	0	0	0	0	0	603	903	0
567	8	0	0	0	0	0	0	200	300	0	0	0	0	0	0	0	200	903	0	0	0	0	0	0	0	603	903	0
567	9	0	0	0	0	0	0	200	300	0	0	0	0	0	0	0	200	903	0	0	0	0	0	0	0	603	903	0
568	0	0	0	0	0	0	0	200	300	0	0	0	0	0	0	0	200	903	0	0	0	0	0	0	0	603	903	0
568	1	0	0	0	0	0	0	200	300	0	0	0	0	0	0	0	200	903	0	0	0	0	0	0	0	603	903	0
568	2	0	0	0	0	0	0	200	300	0	0	0	0	0	0	0	200	903	0	0	0	0	0	0	0	603	903	0
568	3	0	0	0	0	0	0	200	300	0	0	0	0	0	0	0	200	903	0	0	0	0	0	0	0	603	903	0
568	4	0	0	0	0	0	0	200	300	0	0	0	0	0	0	0	200	903	0	0	0	0	0	0	0	603	903	0
568	5	0	0	0	0	0	0	200	300	0	0	0	0	0	0	0	200	903	0	0	0	0	0	0	0	603	903	0
568	6	0	0	0	0	0	0	200	300	0	0	0	0	0	0	0	200	903	0	0	0	0	0	0	0	603	903	0
568	7	0	0	0	0	0	0	200	300	0	0	0	0	0	0	0	200	903	0	0	0	0	0	0	0	603	903	0
568	8	0	0	0	0	0	0	200	300	0	0	0	0	0	0	0	200	903	0	0	0	0	0	0	0	603	903	0
568	9	0	0	0	0	0	0	200	300	0	0	0	0	0	0	0	200	903	0	0	0	0	0	0	0	603	903	0
569	0	0	0	0	0	0	0	200	300	0	0	0	0	0	0	0	200	903	0	0	0	0	0	0	0	603	903	0
569	1	0	0	0	0	0	0	200	300	0	0	0	0	0	0	0	200	903	0	0	0	0	0	0	0	603	903	0
569	2	0	0	0	0	0	0	200	300	0	0	0	0	0	0	0	200	903	0	0	0	0	0	0	0	603	903	0
569	3	0	0	0	0	0	0	200	300	0	0	0	0	0	0	0	200	903	0	0	0	0	0	0	0	603	903	0
569	4	0	0	0	0	0	0	200	300	0	0	0	0	0	0	0	200	903	0	0	0	0	0	0	0	603	903	0
569	5	0	0	0	0	0	0	200	300	0	0	0	0	0	0	0	200	903	0	0	0	0	0	0	0	603	903	0
569	6	0	0	0	0	0	0	200	300	0	0	0	0	0	0	0	200	903	0	0	0	0	0	0	0	603	903	0
569	7	0	0	0	0	0	0	200	300	0	0	0	0	0	0	0	200	903	0	0	0	0	0	0	0	603	903	0
569	8	0	0	0	0	0	0	200	300	0	0	0	0	0	0	0	200	903	0	0	0	0	0	0	0	603	903	0
569	9	0	0	0	0	0	0	200	300	0	0	0	0	0	0	0	200	903	0	0	0	0	0	0	0	603	903	0
570	0	0	0	0	0	0	0	200	300	0	0	0	0	0	0	0	200	903	0	0	0	0	0	0	0	603	903	0
570	1	0	0	0	0	0	0	200	300	0	0	0	0	0	0	0	200	903	0	0	0	0	0	0	0	603	903	0
570	2	0	0	0	0	0	0	200	300	0	0	0	0	0	0	0	200	903	0	0	0	0	0	0	0	603	903	0
570	3	0	0	0	0	0	0	200	300	0	0	0	0	0	0	0	200	903	0	0	0	0	0	0	0	603	903	0
570	4	0	0	0	0	0	0	200	300	0	0	0	0	0	0	0	200	903	0	0	0	0	0	0	0	603	903	0
570	5	0	0	0	0	0	0	200	300	0	0	0	0	0	0	0	200	903	0	0	0	0	0	0	0	603	903	0
570	6	0	0	0	0	0	0	200	300	0	0	0	0	0	0	0	200	903	0	0	0	0	0	0	0	603	903	0
570	7	0	0	0	0	0	0	200	300	0	0	0	0	0	0	0	200	903	0	0	0	0	0	0	0	603	903	0
570	8	0	0	0	0	0	0	200	300	0	0	0	0	0	0	0	200	903	0	0	0	0	0	0	0	603	903	0
570	9	0	0	0	0	0	0	200	300	0	0	0	0	0	0	0	200	903	0	0	0	0	0	0	0	603	903	0
571	0	0	0	0	0	0	0	200	300	0	0	0	0	0	0	0	200	903	0	0	0	0	0	0	0	603	903	0
571	1	0	0	0	0	0	0	200	300	0	0	0	0	0	0	0	200	903	0	0	0	0	0	0	0	603	903	0
571	2	0	0	0	0	0	0	200	300	0	0	0	0	0	0	0	200	903	0	0	0	0	0	0	0	603	903	0
571	3	0	0	0	0	0	0	200	300	0	0	0	0	0	0	0	200	903	0	0	0	0	0	0	0	603	903	0
571	4	0	0	0	0	0	0	200	300	0	0	0	0	0	0	0	200	903	0	0	0	0	0	0	0	603	903	0
571	5	0	0	0	0	0	0	200	300	0	0	0	0	0	0	0	200	903	0	0	0	0	0	0	0	603	903	0
571	6	0	0	0	0	0	0	200	300	0	0	0	0	0	0	0	200	903	0	0	0	0	0	0	0	603	903	0
571	7	0	0	0	0	0	0	200	300	0	0	0	0	0	0	0	200	903	0	0	0	0	0	0	0	603	903	0
571	8	0	0	0	0	0	0	200	300	0	0	0	0	0	0	0	200	903	0	0	0	0	0	0	0	603	903	0
571	9	0	0	0	0	0	0	200	300	0	0	0	0	0	0	0	200	903	0	0	0	0	0	0	0	603	903	0
572	0	0	0	0	0	0	0	200	300	0	0	0	0	0	0	0	200	903	0	0	0	0	0	0	0	603	903	0
572	1	0	0	0	0	0	0	200	300	0	0	0	0	0	0	0	200	903	0	0	0	0	0	0	0	603	903	0
572	2	0	0	0	0	0	0	200	300	0	0	0	0	0	0	0	200	903	0	0	0	0	0	0	0	603	903	0
572	3	0	0	0	0	0	0	200	300	0	0	0	0	0	0	0	200	903	0	0	0	0	0	0	0	603	903	0
572	4	0	0	0	0	0	0	200	300	0	0	0	0	0	0	0	200	903	0	0	0	0	0	0	0	603	903	0
572	5	0	0	0	0	0	0	200	300	0	0	0	0	0	0	0	200	903	0	0	0	0	0	0	0	603	903	0
572	6	0	0	0	0	0	0	200	300	0	0	0	0	0	0	0	200	903	0	0	0	0	0	0	0	603	903	0
572	7	0	0	0	0	0	0	200	300	0	0	0	0	0	0	0	200	903	0	0	0	0	0	0	0	603	903	0
572	8	0	0	0	0	0	0	200	300	0	0	0	0	0	0	0	200	903	0	0	0	0	0	0	0	603	903	0
572	9	0	0	0	0	0	0	200	300	0	0	0	0	0	0	0	200	903	0	0	0	0	0	0	0	603	903	0
573	0	0	0	0	0	0	0	200	300	0	0	0	0	0	0	0	200	903	0	0	0	0	0	0	0	603	903	0
573	1	0	0	0	0	0	0	200	300	0	0	0	0	0	0	0	200	903	0	0	0	0	0	0	0	603	903	0
573	2	0	0	0	0	0	0	200	300	0	0	0	0	0	0	0	200	903	0	0	0	0	0	0	0	603	903	0
573	3	0	0	0	0	0	0	200	300	0	0	0	0	0	0	0	200	903	0	0	0	0	0	0	0	603	903	0
573	4	0	0	0	0	0	0	200	300	0	0	0	0	0	0	0	200	903	0	0	0	0	0	0	0	603	903	0
573	5	0	0	0	0	0	0	200	300	0	0	0	0	0	0	0	200	903	0	0	0	0	0	0	0	603	903	0
573	6	0	0	0	0	0	0	200	300	0	0	0	0	0	0	0	200	903	0	0	0	0	0	0	0	603	903	0
573	7	0	0	0	0	0	0	200	300	0	0	0	0	0	0	0	200	903	0	0	0	0	0	0	0	603	903	0
573	8	0	0	0	0	0	0	200	300	0	0	0	0	0	0	0	200	903	0	0	0	0	0	0	0	603	903	0
573	9	0	0	0	0	0	0	200	300	0	0	0	0	0	0	0	200	903	0	0	0	0	0	0	0	603	903	0
574	0	0	0	0	0	0	0	200	300	0	0	0	0	0	0	0	200	903	0	0	0	0	0	0	0	603	903	0
574	1	0	0	0	0	0	0	200	300	0	0	0	0	0	0	0	200	903	0	0	0	0	0	0	0	603	903	0
574	2	0	0	0	0	0	0	200	300	0	0	0	0	0	0	0	200	903	0	0	0	0	0	0	0	603	903	0
574	3	0	0	0	0	0	0	200	300	0	0	0	0	0	0	0	200	903	0	0	0	0	0	0	0	603	903	0
574	4	0	0	0	0	0	0	200	300	0	0	0	0	0	0	0	200	903	0	0	0	0	0	0	0	603	903	0
574	5	0	0	0	0	0	0	200	300	0	0	0	0	0	0	0	200	903	0	0	0	0	0	0	0	603	903	0
574	6	0	0	0	0	0	0	200	300	0	0	0	0	0	0	0	200	903	0	0	0	0	0	0	0	603	903	0
574	7	0	0	0	0	0	0	200	300	0	0	0	0	0	0	0	200	903	0	0	0	0	0	0	0	603	903	0
574	8	0	0	0	0	0	0	200	300	0	0	0	0	0	0	0	200	903	0	0	0	0	0	0	0	603	903	0
574	9	0	0	0	0	0	0	200	300	0	0	0	0	0	0	0	200	903	0	0	0	0	0	0	0	603	903	0
575	0	0	0	0	0	0	0	200	300	0	0	0	0	0	0	0	200	903	0	0	0	0	0	0	0	603	903	0
575	1	0	0	0	0	0	0	200	300	0	0	0	0	0	0	0	200	903	0	0	0	0	0	0	0	603	903	0
575	2	0	0	0	0	0	0	200	300	0	0	0	0	0	0	0	200	903	0	0	0	0	0	0	0	603	903	0
575	3	0	0	0	0	0	0	200	300	0	0	0	0	0	0	0	200	903	0	0	0	0	0	0	0	603	903	0
575	4	0	0	0	0	0	0	200	300	0	0	0	0	0	0	0	200	903	0	0	0	0	0	0	0	603	903	0
575	5	0	0	0	0	0	0	200	300	0	0	0	0	0	0	0	200	903	0	0	0	0	0	0	0	603	903	0
575	6	0	0	0	0	0	0	200	300	0	0	0	0	0	0	0	200	903	0	0	0	0	0	0	0	603	903	0
575	7	0	0	0	0	0	0	200	300	0	0	0	0	0	0	0	200	903	0	0	0	0	0	0	0	603	903	0
575	8	0	0	0	0	0	0	200	300	0	0	0	0	0	0	0	200	903	0	0	0	0	0	0	0	603	903	0
575	9	0	0	0	0	0	0	200	300	0	0	0	0	0	0	0	200	903	0	0	0	0	0	0	0	603	903	0
576	0	0	0	0	0	0	0	200	300	0	0	0	0	0	0	0	200	903	0	0	0	0	0	0	0	603	903	0
576	1	0	0	0	0	0	0	200	300	0	0	0	0	0	0	0	200	903	0	0	0	0	0	0	0	603	903	0
576	2	0	0	0	0	0	0	200	300	0	0	0	0	0	0	0	200	903	0	0	0	0	0	0	0	603	903	0
576	3	0	0	0	0	0	0	200	300	0	0	0	0	0	0	0	200	903	0	0	0	0	0	0	0	603	903	0
576	4	0	0	0	0	0	0	200	300	0	0	0	0	0	0	0	200	903	0	0	0	0	0	0	0	603	903	0
576	5	0	0	0	0	0	0	200	300	0	0	0	0	0	0	0	200	903	0	0	0	0	0	0	0	603	903	0
576	6	0	0	0	0	0	0	200	300	0	0	0	0	0	0	0	200	903	0	0	0	0	0	0	0	603	903	0
576	7	0	0	0	0	0	0	200	300	0	0	0	0	0	0	0	200	903	0	0	0	0	0	0	0	603	903	0
576	8	0	0	0	0	0	0	200	300	0	0	0	0	0	0	0	200	903	0	0	0	0	0	0	0	603	903	0
576	9	0	0	0	0	0	0	200	300	0	0	0	0	0	0	0	200	903	0	0	0	0	0	0	0	603	903	0
577	0	0	0	0	0	0	0	200	300	0	0	0	0	0	0	0	200	903	0	0	0	0	0	0	0	603	903	0
577	1	0	0	0	0	0	0	200	300	0	0	0	0	0	0	0	200	903	0	0	0	0	0	0	0	603	903	0
577	2	0	0	0	0	0	0	200	300	0	0	0	0	0	0	0	200	903	0	0	0	0	0	0	0	603	903	0
577	3	0	0	0	0	0	0	200	300	0	0	0	0	0	0	0	200	903	0	0	0	0	0	0	0	603	903	0
577	4	0	0	0	0	0	0	200	300	0	0	0	0	0	0	0	200	903	0	0	0	0	0	0	0	603	903	0
577	5	0	0	0	0	0	0	200	300	0	0	0	0	0	0	0	200	903	0	0	0	0	0	0	0	603	903	0
577	6	0	0	0	0	0	0	200	300	0	0	0	0	0	0	0	200	903	0	0	0	0	0	0	0	603	903	0
577	7	0	0	0	0	0	0	200	300	0	0	0	0	0	0	0	200	903	0	0	0	0	0	0	0	603	903	0
577	8	0	0	0	0	0	0	200	300	0	0	0	0	0	0	0	200	903	0	0	0	0	0	0	0	603	903	0
577	9	0	0	0	0	0	0	200	300	0	0	0	0	0	0	0	200	903	0	0	0	0	0	0	0	603	903	0
578	0	0	0	0	0	0	0	200	300	0	0	0	0	0	0	0	200	903	0	0	0	0	0	0	0	603	903	0
578	1	0	0	0	0	0	0	200	300	0	0	0	0	0	0	0	200	903	0	0	0	0	0	0	0	603	903	0
578	2	0	0	0	0	0	0	200	300	0	0	0	0	0	0	0	200	903	0	0	0	0	0	0	0	603	903	0
578	3	0	0	0	0	0	0	200	300	0	0	0	0	0	0	0	200	903	0	0	0	0	0	0	0	603	903	0
578	4	0	0	0	0	0	0	200	300	0	0	0	0	0	0	0	200	903	0	0	0	0	0	0	0	603	903	0
578	5	0	0	0	0	0	0	200	300	0	0	0	0	0	0	0	200	903	0	0	0	0	0	0	0	603	903	0
578	6	0	0	0	0	0	0	200	300	0	0	0	0	0	0	0	200	903	0	0	0	0	0	0	0	603	903	0
578	7	0	0	0	0	0	0	200	300	0	0	0	0	0	0	0	200	903	0	0	0	0	0	0	0	603	903	0
578	8	0	0	0	0	0	0	200	300	0	0	0	0	0	0	0	200	903	0	0	0	0	0	0	0	603	903	0
578	9	0	0	0	0	0	0	200	300	0	0	0	0	0	0	0	200	903	0	0	0	0	0	0	0	603	903	0
579	0	0	0	0	0	0	0	200	300	0	0	0	0	0	0	0	200	903	0	0	0	0	0	0	0	603	903	0
579	1	0	0	0	0	0	0	200	300	0	0	0	0	0	0	0	200	903	0	0	0	0	0	0	0	603	903	0
579	2	0	0	0	0	0	0	200	300	0	0	0	0	0	0	0	200	903	0	0	0	0	0	0	0	603	903	0
579	3	0	0	0	0	0	0	200	300	0	0	0	0	0	0	0	200	903	0	0	0	0	0	0	0	603	903	0
579	4	0	0	0	0	0	0	200	300	0	0	0	0	0	0	0	200	903	0	0	0	0	0	0	0	603	903	0
579	5	0	0	0	0	0	0	200	300	0	0	0	0	0	0	0	200	903	0	0	0	0	0	0	0	603	903	0
579	6	0	0	0	0	0	0	200	300	0	0	0	0	0	0	0	200	903	0	0	0	0	0	0	0	603	903	0
579	7	0	0	0	0	0	0	200	300	0	0	0	0	0	0	0	200	903	0	0	0	0	0	0	0	603	903	0
579	8	0	0	0	0	0	0	200	300	0	0	0	0	0	0	0	200	903	0	0	0	0	0	0	0	603	903	0
579	9	0	0	0	0	0	0	200	300	0	0	0	0	0	0	0	200	903	0	0	0	0	0	0	0	603	903	0
580	0	0	0	0	0	0	0	200	300	0	0	0	0	0	0	0	200	903	0	0	0	0	0	0	0	603	903	0
580	1	0	0	0	0	0	0	200	300	0	0	0	0	0	0	0	200	903	0	0	0	0	0	0	0	603	903	0
580	2	0	0	0	0	0	0	200	300	0	0	0	0	0	0	0	200	903	0	0	0	0	0	0	0	603	903	0
580	3	0	0	0	0	0	0	200	300	0	0	0	0	0	0	0	200	903	0	0	0	0	0	0	0	603	903	0
580	4	0	0	0	0	0	0	200	300	0	0	0	0	0	0	0	200	903	0	0	0	0	0	0	0	603	903	0
580	5	0	0	0	0	0	0	200	300	0	0	0	0	0	0	0	200	903	0	0	0	0	0	0	0	603	903	0
580	6	0	0	0	0	0	0	200	300	0	0	0	0	0	0	0	200	903	0	0	0	0	0	0	0	603	903	0
580	7	0	0	0	0	0	0	200	300	0	0	0	0	0	0	0	200	903	0	0	0	0	0	0	0	603	903	0
580	8	0	0	0	0	0	0	200	300	0	0	0	0	0	0	0	200	903	0	0	0	0	0	0	0	603	903	0
580	9	0	0	0	0	0	0	200	300	0	0	0	0	0	0	0	200	903	0	0	0	0	0	0	0	603	903	0
581	0	0	0	0	0	0	0	200	300	0	0	0	0	0	0	0	200	903	0	0	0	0	0	0	0	603	903	0
581	1	0	0	0	0	0	0	200	300	0	0	0	0	0	0	0	200	903	0	0	0	0	0	0	0	603	903	0
581	2	0	0	0	0	0	0	200	300	0	0	0	0	0	0	0	200	903	0	0	0	0	0	0	0	603	903	0
581	3	0	0	0	0	0	0	200	300	0	0	0	0	0	0	0	200	903	0	0	0	0	0	0	0	603	903	0
581	4	0	0	0	0	0	0	200	300	0	0	0	0	0	0	0	200	903	0	0	0	0	0	0	0	603	903	0
581	5	0	0	0	0	0	0	200	300	0	0	0	0	0	0	0	200	903	0	0	0	0	0	0	0	603	903	0
581	6	0	0	0	0	0	0	200	300	0	0	0	0	0	0	0	200	903	0	0	0	0	0	0	0	603	903	0
581	7	0	0	0	0	0	0	200	300	0	0	0	0	0	0	0	200	903	0	0	0	0	0	0	0	603	903	0
581	8	0	0	0	0	0	0	200	300	0	0	0	0	0	0	0	200	903	0	0	0	0	0	0	0	603	903	0
581	9	0	0	0	0	0	0	200	300	0	0	0	0	0	0	0	200	903	0	0	0	0	0	0	0	603	903	0
582	0	0	0	0	0	0	0	200	300	0	0	0	0	0	0	0	200	903	0	0	0	0	0	0	0	603	903	0
582	1	0	0	0	0	0	0	200	300	0	0	0	0	0	0	0	200	903	0	0	0	0	0	0	0	603	903	0
582	2	0	0	0	0	0	0	200	300	0	0	0	0	0	0	0	200	903	0	0	0	0	0	0	0	603	903	0
582	3	0	0	0	0	0	0	200	300	0	0	0	0	0	0	0	200	903	0	0	0	0	0	0	0	603	903	0
582	4	0	0	0	0	0	0	200	300	0	0	0	0	0	0	0	200	903	0	0	0	0	0	0	0	603	903	0
582	5	0	0	0	0	0	0	200	300	0	0	0	0	0	0	0	200	903	0	0	0	0	0	0	0	603	903	0
582	6	0	0	0	0	0	0	200	300	0	0	0	0	0	0	0	200	903	0	0	0	0	0	0	0	603	903	0
582	7	0	0	0	0	0	0	200	300	0	0	0	0	0	0	0	200	903	0	0	0	0	0	0	0	603	903	0
582	8	0	0	0	0	0	0	200	300	0	0	0	0	0	0	0	200	903	0	0	0	0	0	0	0	603	903	0
582	9	0	0	0	0	0	0	200	300	0	0	0	0	0	0	0	200	903	0	0	0	0	0	0	0	603	903	0
583	0	0	0	0	0	0	0	200	300	0	0	0	0	0	0	0	200	903	0	0	0	0	0	0	0	603	903	0
583	1	0	0	0	0	0	0	200	300	0	0	0	0	0	0	0	200	903	0	0	0	0	0	0	0	603	903	0
583	2	0	0	0	0	0	0	200	300	0	0	0	0	0	0	0	200	903	0	0	0	0	0	0	0	603	903	0
583	3	0	0	0	0	0	0	200	300	0	0	0	0	0	0	0	200	903	0	0	0	0	0	0	0	603	903	0
583	4	0	0	0	0	0	0	200	300	0	0	0	0	0	0	0	200	903	0	0	0	0	0	0	0	603	903	0
583	5	0	0	0	0	0	0	200	300	0	0	0	0	0	0	0	200	903	0	0	0	0	0	0	0	603	903	0
583	6	0	0	0	0	0	0	200	300	0	0	0	0	0	0	0	200	903	0	0	0	0	0	0	0	603	903	0
583	7	0	0	0	0	0	0	200	300	0	0	0	0	0	0	0	200	903	0	0	0	0	0	0	0	603	903	0
583	8	0	0	0	0	0	0	200	300	0	0	0	0	0	0	0	200	903	0	0	0	0	0	0	0	603	903	0
583	9	0	0	0	0	0	0	200	300	0	0	0	0	0	0	0	200	903	0	0	0	0	0	0	0	603	903	0
584	0	0	0	0	0	0	0	200	300	0	0	0	0	0	0	0	200	903	0	0	0	0	0	0	0	603	903	0
584	1	0	0	0	0	0	0	200	300	0	0	0	0	0	0	0	200	903	0	0	0	0	0	0	0	603	903	0
584	2	0	0	0	0	0	0	200	300	0	0	0	0	0	0	0	200	903	0	0	0	0	0	0	0	603	903	0
584	3	0	0	0	0	0	0	200	300	0	0	0	0	0	0	0	200	903	0	0	0	0	0	0	0	603	903	0
584	4	0	0	0	0	0	0	200	300	0	0	0	0	0	0	0	200	903	0	0	0	0	0	0	0	603	903	0
584	5	0	0	0	0	0	0	200	300	0	0	0	0	0	0	0	200	903	0	0	0	0	0	0	0	603	903	0
584	6	0	0	0	0	0	0	200	300	0	0	0	0	0	0	0	200	903	0	0	0	0	0	0	0	603	903	0
584	7	0	0	0	0	0	0	200	300	0	0	0	0	0	0	0	200	903	0	0	0	0	0	0	0	603	903	0
584	8	0	0	0	0	0	0	200	300	0	0	0	0	0	0	0	200	903	0	0	0	0	0	0	0	603	903	0
584	9	0	0	0	0	0	0	200	300	0	0	0	0	0	0	0	200	903	0	0	0	0	0	0	0	603	903	0
585	0	0	0	0	0	0	0	200	300	0	0	0	0	0	0	0	200	903	0	0	0	0	0	0	0	603	903	0
585	1	0	0	0	0	0	0	200	300	0	0	0	0	0	0	0	200	903	0	0	0	0	0	0	0	603	903	0
585	2	0	0	0	0	0	0	200	300	0	0	0	0	0	0	0	200	903	0	0	0	0	0	0	0	603	903	0
585	3	0	0	0	0	0	0	200	300	0	0	0	0	0	0	0	200	903	0	0	0	0	0	0	0	603	903	0
585	4	0	0	0	0	0	0	200	300	0	0	0	0	0	0	0	200	903	0	0	0	0	0	0	0	603	903	0
585	5	0	0	0	0	0	0	200	300	0	0	0	0	0	0	0	200	903	0	0	0	0	0	0	0	603	903	0
585	6	0	0	0	0	0	0	200	300	0	0	0	0	0	0	0	200	903	0	0	0	0	0	0	0	603	903	0
585	7	0	0	0	0	0	0	200	300	0	0	0	0	0	0	0	200	903	0	0	0	0	0	0	0	603	903	0
585	8	0	0	0	0	0	0	200	300	0	0	0	0	0	0	0	200	903	0	0	0	0	0	0	0	603	903	0
585	9	0	0	0	0	0	0	200	300	0	0	0	0	0	0	0	200	903	0	0	0	0	0	0	0	603	903	0
586	0	0	0	0	0	0	0	200	300	0	0	0	0	0	0	0	200	903	0	0	0	0	0	0	0	603	903	0
586	1	0	0	0	0	0	0	200	300	0	0	0	0	0	0	0	200	903	0	0	0	0	0	0	0	603	903	0
586	2	0	0	0	0	0	0	200	300	0	0	0	0	0	0	0	200	903	0	0	0	0	0	0	0	603	903	0
586	3	0	0	0	0	0	0	200	300	0	0	0	0	0	0	0	200	903	0	0	0	0	0	0	0	603	903	0
586	4	0	0	0	0	0	0	200	300	0	0	0	0	0	0	0	200	903	0	0	0	0	0	0	0	603	903	0
586	5	0	0	0	0	0	0	200	300	0	0	0	0	0	0	0	200	903	0	0	0	0	0	0	0	603	903	0
586	6	0	0	0	0	0	0	200	300	0	0	0	0	0	0	0	200	903	0	0	0	0	0	0	0	603	903	0
586	7	0	0	0	0	0	0	200	300	0	0	0	0	0	0	0	200	903	0	0	0	0	0	0	0	603	903	0
586	8	0	0	0	0	0	0	200	300	0	0	0	0	0	0	0	200	903	0	0	0	0	0	0	0	603	903	0
586	9	2.2586	5.90091	-10.412	2083.01	-472.778	-253.052	154.593	99.9411	0	0	0	0	0	0	0	200	903	0	0	0	0	0	0	0	603	903	0
587	0	6.53106	15.3614	-22.3138	3456.3	-961.06	-390.381	156.93	145.105	0	0	0	0	0	0	0	200	903	0	0	0	0	0	0	0	603	903	0
587	1	4.24225	15.514	-21.0931	2632.33	-1449.34	-527.71	131.288	175.205	0	0	0	0	0	0	0	200	903	0	0	0	0	0	0	0	603	903	0
587	2	0.732725	8.6475	-16.2103	2083.01	-594.849	-298.828	163.304	171.501	0	0	0	0	0	0	0	200	903	0	0	0	0	0	0	0	603	903	0
587	3	-0.33539	6.0535	-11.0223	2632.33	-716.919	-390.381	134.958	61.1825	0	0	0	0	0	0	0	200	903	0	0	0	0	0	0	0	603	903	0
587	4	2.10602	12.157	-16.5155	2632.33	-1205.2	-390.381	127.026	140.615	0	0	0	0	0	0	0	200	903	0	0	0	0	0	0	0	603	903	0
587	5	4.54742	15.3614	-25.6708	2998.54	-1449.34	-710.816	143.541	183.193	0	0	0	0	0	0	0	200	903	0	0	0	0	0	0	0	603	903	0
587	6	-0.0302147	11.6993	-27.5018	3364.75	-1388.31	-939.698	149.52	177.654	0	0	0	0	0	0	0	200	903	0	0	0	0	0	0	0	603	903	0
587	7	-3.08197	10.4786	-25.976	3547.85	-1571.41	-756.592	139.505	163.418	0	0	0	0	0	0	0	200	903	0	0	0	0	0	0	0	603	903	0
587	8	-1.25092	10.326	-28.4174	4280.28	-2059.69	-665.039	127.52	149.378	0	0	0	0	0	0	0	200	903	0	0	0	0	0	0	0	603	903	0
587	9	0.122373	3.91727	-37.8778	5653.57	-2303.83	-436.157	139.177	150.742	0	0	0	0	0	0	0	200	903	0	0	0	0	0	0	0	603	903	0
588	0	-4.15009	-5.08541	-49.7797	7484.62	-3036.26	21.6065	139.006	149.645	0	0	0	0	0	0	0	200	903	0	0	0	0	0	0	0	603	903	0
588	1	-5.82855	-9.0527	-56.4935	8674.81	-4012.82	387.818	128.969	146.446	0	0	0	0	0	0	0	200	903	0	0	0	0	0	0	0	603	903	0
588	2	-5.06562	-7.67941	-60.4608	9956.55	-4317.99	479.37	128.582	135.322	0	0	0	0	0	0	0	200	903	0	0	0	0	0	0	0	603	903	0
588	3	-5.06562	-9.66305	-67.785	11696.1	-4684.2	479.37	130.896	127.454	0	0	0	0	0	0	0	200	903	0	0	0	0	0	0	0	603	903	0
588	4	-4.76044	-14.0881	-78.7714	11696.1	-5172.49	570.923	134.335	151.519	0	0	0	0	0	0	0	200	903	0	0	0	0	0	0	0	603	903	0
588	5	-2.92938	-11.4941	-87.0111	13252.4	-5782.84	845.581	133.539	147.692	0	0	0	0	0	0	0	200	903	0	0	0	0	0	0	0	603	903	0
588	6	-3.84491	-7.67941	-96.7767	14351.1	-6515.26	662.476	132.677	151.709	0	0	0	0	0	0	0	200	903	0	0	0	0	0	0	0	603	903	0
588	7	-5.37079	-10.1208	-104.101	16090.6	-7369.75	708.252	129.206	145.433	0	0	0	0	0	0	0	200	903	0	0	0	0	0	0	0	603	903	0
588	8	-5.2182	-13.7829	-116.613	18104.7	-8285.28	937.134	128.951	144.745	0	0	0	0	0	0	0	200	903	0	0	0	0	0	0	0	603	903	0
588	9	-2.62421	-16.0717	-131.262	19935.8	-9078.74	1623.78	130.835	148.122	0	0	0	0	0	0	0	200	903	0	0	0	0	0	0	0	603	903	0
589	0	-0.640566	-17.7502	-142.858	22041.5	-9750.12	1898.44	131.75	145.711	0	0	0	0	0	0	0	200	903	0	0	0	0	0	0	0	603	903	0
589	1	-0.487978	-25.99	-159.948	24238.8	-10726.7	2539.31	132.936	148.458	0	0	0	0	0	0	0	200	903	0	0	0	0	0	0	0	603	903	0
589	2	-1.70868	-29.0417	-171.545	26161.4	-11581.2	3134.4	132.489	147.495	0	0	0	0	0	0	0	200	903	0	0	0	0	0	0	0	603	903	0
589	3	0.274961	-29.0417	-186.498	28084	-12557.7	3500.61	132.666	149.414	0	0	0	0	0	0	0	200	903	0	0	0	0	0	0	0	603	903	0
589	4	1.95343	-28.2788	-201.757	30098.2	-13229.1	3409.06	134.43	150.82	0	0	0	0	0	0	0	200	903	0	0	0	0	0	0	0	603	903	0
589	5	1.49566	-31.4831	-212.133	32112.3	-14327.8	3409.06	132.459	148.622	0	0	0	0	0	0	0	200	903	0	0	0	0	0	0	0	603	903	0
589	6	2.86896	-32.3986	-226.476	33668.7	-15182.3	3683.72	132.963	151.337	0	0	0	0	0	0	0	200	903	0	0	0	0	0	0	0	603	903	0
589	7	4.70001	-26.9055	-239.599	35957.5	-16036.7	3821.05	133.068	149.926	0	0	0	0	0	0	0	200	903	0	0	0	0	0	0	0	603	903	0
589	8	4.70001	-25.3796	-251.501	37422.4	-16891.2	3134.4	132.838	151.204	0	0	0	0	0	0	0	200	903	0	0	0	0	0	0	0	603	903	0
589	9	3.93707	-24.7693	-264.929	39070.3	-17623.7	3363.28	133.478	152.525	0	0	0	0	0	0	0	200	903	0	0	0	0	0	0	0	603	903	0
590	0	4.54742	-20.802	-275.305	40718.3	-18111.9	3180.18	134.211	152.097	0	0	0	0	0	0	0	200	903	0	0	0	0	0	0	0	603	903	0
590	1	6.53106	-16.6821	-283.849	40992.9	-18783.3	2768.19	133.826	155.582	0	0	0	0	0	0	0	200	903	0	0	0	0	0	0	0	603	903	0
590	2	6.22589	-13.3252	-288.427	41725.3	-19088.5	2676.64	133.819	155.335	0	0	0	0	0	0	0	200	903	0	0	0	0	0	0	0	603	903	0
590	3	5.61554	-10.2734	-299.719	42549.3	-19820.9	2356.2	133.868	158.036	0	0	0	0	0	0	0	200	903	0	0	0	0	0	0	0	603	903	0
590	4	6.37848	-4.78024	-309.484	43648	-20492.3	2218.87	133.786	158.965	0	0	0	0	0	0	0	200	903	0	0	0	0	0	0	0	603	903	0
590	5	6.22589	1.78104	-315.893	44288.8	-20858.5	1761.11	133.97	159.798	0	0	0	0	0	0	0	200	903	0	0	0	0	0	0	0	603	903	0
590	6	7.59918	6.0535	-320.165	45753.7	-21346.8	1028.69	133.326	157.094	0	0	0	0	0	0	0	200	903	0	0	0	0	0	0	0	603	903	0
590	7	6.53106	10.1734	-325.964	46852.3	-21285.8	1074.46	134.699	156.265	0	0	0	0	0	0	0	200	903	0	0	0	0	0	0	0	603	903	0
590	8	7.294	16.5821	-330.236	46394.6	-22018.2	662.476	133.326	159.511	0	0	0	0	0	0	0	200	903	0	0	0	0	0	0	0	603	903	0
590	9	7.90436	22.8382	-338.476	46577.7	-22384.4	67.3829	133.867	162.39	0	0	0	0	0	0	0	200	903	0	0	0	0	0	0	0	603	903	0
591	0	6.98883	25.8899	-343.054	46303	-22262.3	-207.275	135.105	165.027	0	0	0	0	0	0	0	200	903	0	0	0	0	0	0	0	603	903	0
591	1	6.37848	30.9253	-346.105	46852.3	-22567.5	-481.934	134.796	164.63	0	0	0	0	0	0	0	200	903	0	0	0	0	0	0	0	603	903	0
591	2	8.05694	37.1814	-350.378	47584.7	-23177.9	-1031.25	133.849	164.19	0	0	0	0	0	0	0	200	903	0	0	0	0	0	0	0	603	903	0
591	3	8.81988	40.8435	-353.735	47493.2	-23544.1	-1489.01	133.441	165.738	0	0	0	0	0	0	0	200	903	0	0	0	0	0	0	0	603	903	0
591	4	8.6673	45.2686	-361.669	48683.4	-22994.8	-1626.34	136.421	165.393	0	0	0	0	0	0	0	200	903	0	0	0	0	0	0	0	603	903	0
591	5	9.12506	48.7781	-367.162	48958	-24215.5	-2084.11	134.047	166.658	0	0	0	0	0	0	0	200	903	0	0	0	0	0	0	0	603	903	0
591	6	9.27765	52.898	-373.876	49415.8	-24459.6	-2496.09	134.578	167.829	0	0	0	0	0	0	0	200	903	0	0	0	0	0	0	0	603	903	0
591	7	8.05694	55.492	-381.201	50331.3	-25131	-3136.96	134.074	167.966	0	0	0	0	0	0	0	200	903	0	0	0	0	0	0	0	603	903	0
591	8	5.92071	57.4756	-390.966	50514.4	-25741.3	-3365.85	134.16	170.796	0	0	0	0	0	0	0	200	903	0	0	0	0	0	0	0	603	903	0
591	9	6.83624	60.0696	-401.342	51429.9	-27023.1	-3594.73	132.668	171.855	0	0	0	0	0	0	0	200	903	0	0	0	0	0	0	0	603	903	0
592	0	5.31036	62.6636	-409.887	52253.9	-27145.1	-3915.16	133.774	172.516	0	0	0	0	0	0	0	200	903	0	0	0	0	0	0	0	603	903	0
592	1	7.14142	62.6636	-417.516	52711.7	-27816.5	-3777.83	133.376	173.749	0	0	0	0	0	0	0	200	903	0	0	0	0	0	0	0	603	903	0
592	2	5.61554	62.3584	-428.503	53169.5	-29098.3	-4418.7	132.093	175.918	0	0	0	0	0	0	0	200	903	0	0	0	0	0	0	0	603	903	0
592	3	4.24225	63.7317	-437.658	54542.7	-29830.7	-4876.46	131.84	175.376	0	0	0	0	0	0	0	200	903	0	0	0	0	0	0	0	603	903	0
592	4	3.32672	64.7998	-449.255	55549.8	-30624.1	-4876.46	131.833	176.351	0	0	0	0	0	0	0	200	903	0	0	0	0	0	0	0	603	903	0
592	5	3.02154	64.6473	-458.105	56556.9	-31356.6	-5196.9	131.552	176.542	0	0	0	0	0	0	0	200	903	0	0	0	0	0	0	0	603	903	0
592	6	3.47931	65.2576	-466.039	57380.9	-32150	-5334.23	131.014	176.875	0	0	0	0	0	0	0	200	903	0	0	0	0	0	0	0	603	903	0
592	7	1.95343	66.9361	-475.805	56831.6	-32333.1	-5563.11	132.045	180.557	0	0	0	0	0	0	0	200	903	0	0	0	0	0	0	0	603	903	0
592	8	2.10602	67.699	-484.35	57472.4	-33187.6	-5425.78	131.48	181.341	0	0	0	0	0	0	0	200	903	0	0	0	0	0	0	0	603	903	0
592	9	2.10602	68.0042	-494.726	58296.4	-33981.1	-5471.56	131.313	182.164	0	0	0	0	0	0	0	200	903	0	0	0	0	0	0	0	603	903	0
593	0	1.19049	68.9197	-501.135	59120.4	-34347.3	-5837.77	131.461	182.027	0	0	0	0	0	0	0	200	903	0	0	0	0	0	0	0	603	903	0
593	1	2.2586	71.5137	-506.323	59578.1	-34896.6	-5837.77	131.078	182.332	0	0	0	0	0	0	0	200	903	0	0	0	0	0	0	0	603	903	0
593	2	1.19049	72.4292	-514.257	60676.8	-35568	-6112.43	130.836	182.011	0	0	0	0	0	0	0	200	903	0	0	0	0	0	0	0	603	903	0
593	3	0.274961	72.887	-519.445	59761.3	-35995.2	-6158.21	130.704	184.952	0	0	0	0	0	0	0	200	903	0	0	0	0	0	0	0	603	903	0
593	4	0.122373	75.3284	-527.99	60951.4	-36300.4	-6432.86	131.248	184.56	0	0	0	0	0	0	0	200	903	0	0	0	0	0	0	0	603	903	0
593	5	-1.40351	76.8543	-533.178	61226.1	-37154.9	-6982.18	130.314	185.168	0	0	0	0	0	0	0	200	903	0	0	0	0	0	0	0	603	903	0
593	6	-2.31903	78.2276	-535.314	60859.9	-37338	-6432.86	130.25	186.31	0	0	0	0	0	0	0	200	903	0	0	0	0	0	0	0	603	903	0
593	7	-4.30268	80.0586	-540.807	61683.8	-37704.2	-7256.84	130.282	185.941	0	0	0	0	0	0	0	200	903	0	0	0	0	0	0	0	603	903	0
593	8	-4.76044	82.1949	-544.47	61226.1	-37887.3	-7485.72	130.414	187.549	0	0	0	0	0	0	0	200	903	0	0	0	0	0	0	0	603	903	0
593	9	-5.98114	84.0259	-550.268	60951.4	-38375.6	-7394.17	130.26	189.233	0	0	0	0	0	0	0	200	903	0	0	0	0	0	0	0	603	903	0
594	0	-8.42255	84.9414	-552.709	61226.1	-38558.7	-7623.05	130.237	189.226	0	0	0	0	0	0	0	200	903	0	0	0	0	0	0	0	603	903	0
594	1	-7.96479	85.5518	-554.846	61683.8	-38619.8	-7714.6	130.396	188.827	0	0	0	0	0	0	0	200	903	0	0	0	0	0	0	0	603	903	0
594	2	-11.1691	87.688	-553.32	61317.6	-39352.2	-8172.36	128.88	189.182	0	0	0	0	0	0	0	200	903	0	0	0	0	0	0	0	603	903	0
594	3	-11.7795	87.9932	-556.982	61226.1	-39657.3	-8035.03	128.8	190.075	0	0	0	0	0	0	0	200	903	0	0	0	0	0	0	0	603	903	0
594	4	-13.3054	89.9768	-560.339	61226.1	-39291.1	-8859.01	129.88	190.734	0	0	0	0	0	0	0	200	903	0	0	0	0	0	0	0	603	903	0
594	5	-15.4416	91.5027	-560.339	60859.9	-39962.5	-9087.89	128.682	191.387	0	0	0	0	0	0	0	200	903	0	0	0	0	0	0	0	603	903	0
594	6	-14.8312	93.3338	-560.644	60402.1	-39962.5	-8813.23	128.72	192.263	0	0	0	0	0	0	0	200	903	0	0	0	0	0	0	0	603	903	0
594	7	-17.883	92.7234	-559.423	59852.8	-39962.5	-9179.44	128.565	193.01	0	0	0	0	0	0	0	200	903	0	0	0	0	0	0	0	603	903	0
594	8	-18.6459	93.4864	-564.001	60768.3	-40572.9	-9316.77	128.062	192.255	0	0	0	0	0	0	0	200	903	0	0	0	0	0	0	0	603	903	0
594	9	-19.7141	93.1812	-571.63	60585.2	-41671.5	-9591.43	127.101	194.013	0	0	0	0	0	0	0	200	903	0	0	0	0	0	0	0	603	903	0
595	0	-22.308	93.4864	-582.006	60219	-42892.2	-9682.98	126.303	196.532	0	0	0	0	0	0	0	200	903	0	0	0	0	0	0	0	603	903	0
595	1	-28.5641	94.7071	-591.161	60219	-43563.6	-10278.1	126.308	198.134	0	0	0	0	0	0	0	200	903	0	0	0	0	0	0	0	603	903	0
595	2	-36.041	101.726	-593.908	59303.5	-44662.2	-10644.3	124.799	200.147	0	0	0	0	0	0	0	200	903	0	0	0	0	0	0	0	603	903	0
595	3	-37.4142	105.693	-601.537	59211.9	-45211.5	-11422.5	124.84	201.566	0	0	0	0	0	0	0	200	903	0	0	0	0	0	0	0	603	903	0
595	4	-40.466	109.508	-609.777	59120.4	-45394.7	-11514	125.555	203.046	0	0	0	0	0	0	0	200	903	0	0	0	0	0	0	0	603	903	0
595	5	-45.9592	109.966	-618.627	59395	-46554.3	-12704.2	124.746	203.989	0	0	0	0	0	0	0	200	903	0	0	0	0	0	0	0	603	903	0
595	6	-43.8229	119.426	-623.51	59486.6	-47164.7	-13528.2	124.356	204.594	0	0	0	0	0	0	0	200	903	0	0	0	0	0	0	0	603	903	0
595	7	-46.4169	125.835	-624.12	59578.1	-47653	-13802.9	123.648	204.541	0	0	0	0	0	0	0	200	903	0	0	0	0	0	0	0	603	903	0
595	8	-46.2643	129.497	-634.191	59761.3	-47469.8	-14352.2	125.149	205.768	0	0	0	0	0	0	0	200	903	0	0	0	0	0	0	0	603	903	0
595	9	-44.1281	131.023	-643.347	59852.8	-48629.5	-14672.6	124.412	206.967	0	0	0	0	0	0	0	200	903	0	0	0	0	0	0	0	603	903	0
596	0	-42.2971	135.906	-650.06	59303.5	-48812.6	-14809.9	124.911	208.772	0	0	0	0	0	0	0	200	903	0	0	0	0	0	0	0	603	903	0
596	1	-43.5178	139.873	-655.859	59578.1	-49239.9	-14855.7	124.923	209.16	0	0	0	0	0	0	0	200	903	0	0	0	0	0	0	0	603	903	0
596	2	-45.3488	141.246	-660.436	59395	-50399.5	-15130.4	123.688	210.067	0	0	0	0	0	0	0	200	903	0	0	0	0	0	0	0	603	903	0
596	3	-42.9074	142.009	-666.235	59944.4	-50460.6	-15038.8	124.26	210.025	0	0	0	0	0	0	0	200	903	0	0	0	0	0	0	0	603	903	0
596	4	-41.0764	145.061	-674.169	60219	-50887.8	-14901.5	124.518	210.677	0	0	0	0	0	0	0	200	903	0	0	0	0	0	0	0	603	903	0
596	5	-40.3134	144.908	-676	60035.9	-51009.9	-15267.7	124.542	211.19	0	0	0	0	0	0	0	200	903	0	0	0	0	0	0	0	603	903	0
596	6	-41.5341	142.772	-686.987	60219	-51681.3	-15588.1	124.771	212.343	0	0	0	0	0	0	0	200	903	0	0	0	0	0	0	0	603	903	0
596	7	-43.3652	144.146	-691.564	60127.5	-52535.8	-15771.2	124.033	213.056	0	0	0	0	0	0	0	200	903	0	0	0	0	0	0	0	603	903	0
596	8	-41.8393	145.214	-698.889	60035.9	-53329.2	-15954.4	123.694	214.098	0	0	0	0	0	0	0	200	903	0	0	0	0	0	0	0	603	903	0
596	9	-39.5505	143.383	-705.908	59761.3	-53207.2	-15954.4	124.626	215.341	0	0	0	0	0	0	0	200	903	0	0	0	0	0	0	0	603	903	0
597	0	-40.6186	143.993	-707.739	59852.8	-53695.4	-16000.1	124.131	215.431	0	0	0	0	0	0	0	200	903	0	0	0	0	0	0	0	603	903	0
597	1	-42.2971	146.434	-719.335	60402.1	-54672	-16320.6	123.997	216.031	0	0	0	0	0	0	0	200	903	0	0	0	0	0	0	0	603	903	0
597	2	-42.1445	147.197	-723.303	60676.8	-55343.4	-16137.5	123.485	216.111	0	0	0	0	0	0	0	200	903	0	0	0	0	0	0	0	603	903	0
597	3	-41.5341	147.045	-731.237	61226.1	-55343.4	-16000.1	124.315	216.271	0	0	0	0	0	0	0	200	903	0	0	0	0	0	0	0	603	903	0
597	4	-38.9401	147.502	-736.73	61317.6	-56319.9	-16412.1	123.554	216.771	0	0	0	0	0	0	0	200	903	0	0	0	0	0	0	0	603	903	0
597	5	-40.3134	150.096	-744.665	61500.7	-56625.1	-16549.4	123.959	217.412	0	0	0	0	0	0	0	200	903	0	0	0	0	0	0	0	603	903	0
597	6	-41.8393	151.47	-749.853	60585.2	-56503.1	-16320.6	124.648	219.204	0	0	0	0	0	0	0	200	903	0	0	0	0	0	0	0	603	903	0
597	7	-43.8229	152.08	-754.736	60585.2	-57296.5	-16641	124.084	219.727	0	0	0	0	0	0	0	200	903	0	0	0	0	0	0	0	603	903	0
597	8	-41.3815	153.759	-762.975	60859.9	-58334.1	-16869.9	123.544	220.234	0	0	0	0	0	0	0	200	903	0	0	0	0	0	0	0	603	903	0
597	9	-41.5341	156.353	-767.858	61134.5	-58456.2	-16824.1	123.871	220.383	0	0	0	0	0	0	0	200	903	0	0	0	0	0	0	0	603	903	0
598	0	-42.9074	156.81	-775.488	61592.3	-58700.3	-16869.9	124.305	220.576	0	0	0	0	0	0	0	200	903	0	0	0	0	0	0	0	603	903	0
598	1	-43.9755	157.726	-781.286	62690.9	-59798.9	-17007.2	123.461	219.759	0	0	0	0	0	0	0	200	903	0	0	0	0	0	0	0	603	903	0
598	2	-44.7385	158.336	-784.948	62416.3	-60226.2	-16732.5	123.274	220.484	0	0	0	0	0	0	0	200	903	0	0	0	0	0	0	0	603	903	0
598	3	-44.7385	159.557	-789.526	62599.4	-60165.2	-16961.4	123.796	220.713	0	0	0	0	0	0	0	200	903	0	0	0	0	0	0	0	603	903	0
598	4	-43.9755	158.336	-798.071	62324.7	-60714.5	-16595.2	123.923	221.906	0	0	0	0	0	0	0	200	903	0	0	0	0	0	0	0	603	903	0
598	5	-44.1281	158.336	-804.479	62324.7	-61446.9	-17007.2	123.619	222.528	0	0	0	0	0	0	0	200	903	0	0	0	0	0	0	0	603	903	0
598	6	-45.654	160.167	-810.888	62324.7	-62118.3	-17098.8	123.395	223.14	0	0	0	0	0	0	0	200	903	0	0	0	0	0	0	0	603	903	0
598	7	-45.9592	160.778	-814.855	62874	-61874.2	-17144.5	124.067	222.84	0	0	0	0	0	0	0	200	903	0	0	0	0	0	0	0	603	903	0
598	8	-46.1118	160.625	-819.738	63148.7	-62484.5	-17053	123.775	222.965	0	0	0	0	0	0	0	200	903	0	0	0	0	0	0	0	603	903	0
598	9	-45.0436	160.015	-824.621	63240.3	-62789.7	-17419.2	123.856	223.31	0	0	0	0	0	0	0	200	903	0	0	0	0	0	0	0	603	903	0
599	0	-45.1962	160.93	-832.556	63789.6	-63094.9	-17373.4	124.215	223.381	0	0	0	0	0	0	0	200	903	0	0	0	0	0	0	0	603	903	0
599	1	-45.654	159.71	-833.776	63514.9	-63644.2	-17190.3	123.668	223.823	0	0	0	0	0	0	0	200	903	0	0	0	0	0	0	0	603	903	0
599	2	-46.4169	159.557	-842.626	63972.7	-64864.9	-17053	123.021	224.079	0	0	0	0	0	0	0	200	903	0	0	0	0	0	0	0	603	903	0
599	3	-45.3488	159.404	-845.983	64705.1	-64864.9	-17053	123.326	223.515	0	0	0	0	0	0	0	200	903	0	0	0	0	0	0	0	603	903	0
599	4	-43.5178	159.71	-849.035	63698	-64559.7	-17373.4	123.961	224.976	0	0	0	0	0	0	0	200	903	0	0	0	0	0	0	0	603	903	0
599	5	-41.6867	159.252	-853.613	63331.8	-64620.7	-16686.8	124.297	225.807	0	0	0	0	0	0	0	200	903	0	0	0	0	0	0	0	603	903	0
599	6	-42.9074	158.489	-859.106	64155.8	-65414.2	-17419.2	123.858	225.323	0	0	0	0	0	0	0	200	903	0	0	0	0	0	0	0	603	903	0
599	7	-43.06	158.031	-863.378	64430.4	-65048	-17236.1	124.659	225.374	0	0	0	0	0	0	0	200	903	0	0	0	0	0	0	0	603	903	0
599	8	-42.9074	157.421	-865.515	65071.3	-65780.4	-17053	123.998	224.818	0	0	0	0	0	0	0	200	903	0	0	0	0	0	0	0	603	903	0
599	9	-41.8393	156.2	-868.261	64888.2	-66634.9	-17190.3	123.255	225.267	0	0	0	0	0	0	0	200	903	0	0	0	0	0	0	0	603	903	0
600	0	-40.6186	154.369	-871.923	65071.3	-66573.9	-17190.3	123.647	225.37	0	0	0	0	0	0	0	200	903	0	0	0	0	0	0	0	603	903	0
600	1	-40.7712	155.895	-876.501	64064.2	-66451.8	-17098.8	124.185	226.909	0	0	0	0	0	0	0	200	903	0	0	0	0	0	0	0	603	903	0
600	2	-41.3815	155.742	-880.468	64522	-66634.9	-16824.1	124.319	226.719	0	0	0	0	0	0	0	200	903	0	0	0	0	0	0	0	603	903	0
600	3	-38.9401	155.132	-882.299	64155.8	-67306.3	-16686.8	123.715	227.286	0	0	0	0	0	0	0	200	903	0	0	0	0	0	0	0	603	903	0
600	4	-40.7712	154.369	-883.52	63881.1	-67733.6	-16961.4	123.337	227.697	0	0	0	0	0	0	0	200	903	0	0	0	0	0	0	0	603	903	0
600	5	-39.0927	154.216	-887.487	64613.5	-67672.5	-16824.1	123.748	227.195	0	0	0	0	0	0	0	200	903	0	0	0	0	0	0	0	603	903	0
600	6	-39.2453	153.301	-891.454	64613.5	-67977.7	-16824.1	123.745	227.519	0	0	0	0	0	0	0	200	903	0	0	0	0	0	0	0	603	903	0
600	7	-40.0082	152.69	-893.896	64888.2	-67977.7	-16457.9	123.953	227.41	0	0	0	0	0	0	0	200	903	0	0	0	0	0	0	0	603	903	0
600	8	-37.7194	152.385	-894.811	64064.2	-67489.4	-16274.8	124.577	228.405	0	0	0	0	0	0	0	200	903	0	0	0	0	0	0	0	603	903	0
600	9	-38.9401	151.165	-892.98	64064.2	-68038.7	-16320.6	123.807	228.258	0	0	0	0	0	0	0	200	903	0	0	0	0	0	0	0	603	903	0
601	0	-38.1772	151.47	-898.168	63789.6	-68588.1	-16091.7	123.636	228.978	0	0	0	0	0	0	0	200	903	0	0	0	0	0	0	0	603	903	0
601	1	-37.872	148.571	-900.305	63698	-69015.3	-16595.2	123.342	229.248	0	0	0	0	0	0	0	200	903	0	0	0	0	0	0	0	603	903	0
601	2	-38.9401	150.249	-903.661	64430.4	-68466	-16091.7	124.235	228.701	0	0	0	0	0	0	0	200	903	0	0	0	0	0	0	0	603	903	0
601	3	-37.1091	148.723	-900.61	64522	-68710.1	-16000.1	123.707	228.357	0	0	0	0	0	0	0	200	903	0	0	0	0	0	0	0	603	903	0
601	4	-38.1772	147.808	-902.746	63789.6	-69076.3	-16000.1	123.482	229.338	0	0	0	0	0	0	0	200	903	0	0	0	0	0	0	0	603	903	0
601	5	-36.6513	146.892	-903.356	64522	-68466	-16320.6	124.209	228.575	0	0	0	0	0	0	0	200	903	0	0	0	0	0	0	0	603	903	0
601	6	-36.3461	146.129	-905.798	63057.2	-68893.2	-16274.8	123.942	230.385	0	0	0	0	0	0	0	200	903	0	0	0	0	0	0	0	603	903	0
601	7	-37.872	146.129	-906.713	62507.8	-69198.4	-15908.6	123.682	231.061	0	0	0	0	0	0	0	200	903	0	0	0	0	0	0	0	603	903	0
601	8	-36.4987	144.908	-903.967	62965.6	-69625.6	-16000.1	122.978	230.345	0	0	0	0	0	0	0	200	903	0	0	0	0	0	0	0	603	903	0
601	9	-37.1091	144.603	-900.915	63057.2	-69015.3	-16183.2	123.394	230.008	0	0	0	0	0	0	0	200	903	0	0	0	0	0	0	0	603	903	0
602	0	-35.278	143.84	-903.051	62874	-68893.2	-15862.8	123.711	230.376	0	0	0	0	0	0	0	200	903	0	0	0	0	0	0	0	603	903	0
602	1	-35.1254	142.772	-905.798	62507.8	-68466	-15817	124.414	230.991	0	0	0	0	0	0	0	200	903	0	0	0	0	0	0	0	603	903	0
602	2	-35.1254	141.552	-904.882	62324.7	-68771.1	-15771.2	124	231.124	0	0	0	0	0	0	0	200	903	0	0	0	0	0	0	0	603	903	0
602	3	-35.5832	141.399	-901.525	61226.1	-69015.3	-15817	123.446	232.086	0	0	0	0	0	0	0	200	903	0	0	0	0	0	0	0	603	903	0
602	4	-34.5151	141.246	-899.999	61500.7	-69442.5	-16091.7	122.842	231.666	0	0	0	0	0	0	0	200	903	0	0	0	0	0	0	0	603	903	0
602	5	-34.2099	141.094	-899.694	61226.1	-69015.3	-15771.2	123.29	231.948	0	0	0	0	0	0	0	200	903	0	0	0	0	0	0	0	603	903	0
602	6	-34.5151	140.178	-899.999	61317.6	-68771.1	-15633.9	123.588	231.869	0	0	0	0	0	0	0	200	903	0	0	0	0	0	0	0	603	903	0
602	7	-34.5151	139.415	-900.305	61226.1	-68588.1	-15633.9	123.817	231.994	0	0	0	0	0	0	0	200	903	0	0	0	0	0	0	0	603	903	0
602	8	-34.6677	138.195	-896.948	60493.7	-68954.3	-15679.7	123.123	232.556	0	0	0	0	0	0	0	200	903	0	0	0	0	0	0	0	603	903	0
602	9	-34.6677	137.279	-895.117	60402.1	-68954.3	-15221.9	122.966	232.52	0	0	0	0	0	0	0	200	903	0	0	0	0	0	0	0	603	903	0
603	0	-32.684	136.974	-897.558	59303.5	-68771.1	-15267.7	123.38	233.928	0	0	0	0	0	0	0	200	903	0	0	0	0	0	0	0	603	903	0
603	1	-33.7521	136.669	-892.065	58937.3	-68649	-15588.1	123.045	233.932	0	0	0	0	0	0	0	200	903	0	0	0	0	0	0	0	603	903	0
603	2	-34.6677	134.38	-891.454	59120.4	-68404.9	-15496.6	123.266	233.681	0	0	0	0	0	0	0	200	903	0	0	0	0	0	0	0	603	903	0
603	3	-33.7521	134.685	-885.961	58754.1	-68588.1	-14993	122.583	233.683	0	0	0	0	0	0	0	200	903	0	0	0	0	0	0	0	603	903	0
603	4	-33.5996	133.159	-885.046	57655.5	-67977.7	-15084.6	123.193	234.856	0	0	0	0	0	0	0	200	903	0	0	0	0	0	0	0	603	903	0
603	5	-32.3788	132.854	-884.741	58296.4	-68527	-14718.4	122.546	234.109	0	0	0	0	0	0	0	200	903	0	0	0	0	0	0	0	603	903	0
603	6	-34.3625	131.481	-883.825	57655.5	-68527	-15221.9	122.465	234.766	0	0	0	0	0	0	0	200	903	0	0	0	0	0	0	0	603	903	0
603	7	-34.8203	130.565	-880.163	57106.2	-67672.5	-14581.1	123.114	235.119	0	0	0	0	0	0	0	200	903	0	0	0	0	0	0	0	603	903	0
603	8	-35.278	129.955	-876.196	57106.2	-68466	-14718.4	121.86	234.825	0	0	0	0	0	0	0	200	903	0	0	0	0	0	0	0	603	903	0
603	9	-33.5996	128.276	-873.449	56190.7	-67794.6	-14672.6	122.383	235.668	0	0	0	0	0	0	0	200	903	0	0	0	0	0	0	0	603	903	0
604	0	-32.8366	127.208	-873.754	55641.4	-67611.5	-14764.2	122.62	236.319	0	0	0	0	0	0	0	200	903	0	0	0	0	0	0	0	603	903	0
604	1	-33.2944	125.682	-866.125	55916	-67672.5	-14123.3	121.868	235.441	0	0	0	0	0	0	0	200	903	0	0	0	0	0	0	0	603	903	0
604	2	-35.278	124.157	-868.871	55641.4	-67794.6	-14764.2	121.974	235.961	0	0	0	0	0	0	0	200	903	0	0	0	0	0	0	0	603	903	0
604	3	-35.7358	123.851	-863.989	55366.7	-67672.5	-14993	121.674	235.917	0	0	0	0	0	0	0	200	903	0	0	0	0	0	0	0	603	903	0
604	4	-34.5151	121.868	-860.327	55366.7	-67001.1	-14489.5	122.121	235.645	0	0	0	0	0	0	0	200	903	0	0	0	0	0	0	0	603	903	0
604	5	-34.3625	121.105	-859.411	53901.9	-66879.1	-14489.5	122.18	237.28	0	0	0	0	0	0	0	200	903	0	0	0	0	0	0	0	603	903	0
604	6	-35.7358	120.189	-856.054	53627.2	-67001.1	-14489.5	121.733	237.355	0	0	0	0	0	0	0	200	903	0	0	0	0	0	0	0	603	903	0
604	7	-33.7521	118.816	-851.476	53077.9	-66695.9	-14260.6	121.67	237.664	0	0	0	0	0	0	0	200	903	0	0	0	0	0	0	0	603	903	0
604	8	-36.041	117.443	-846.288	52803.2	-66695.9	-14169.1	121.19	237.606	0	0	0	0	0	0	0	200	903	0	0	0	0	0	0	0	603	903	0
604	9	-35.278	116.985	-844.152	52894.8	-66757	-14031.7	120.918	237.34	0	0	0	0	0	0	0	200	903	0	0	0	0	0	0	0	603	903	0
605	0	-35.278	115.459	-843.237	52528.6	-66451.8	-14306.4	121.194	237.706	0	0	0	0	0	0	0	200	903	0	0	0	0	0	0	0	603	903	0
605	1	-36.6513	114.086	-836.218	52070.8	-65963.5	-13802.9	121.117	237.731	0	0	0	0	0	0	0	200	903	0	0	0	0	0	0	0	603	903	0
605	2	-35.8884	112.712	-832.556	52253.9	-65658.4	-13757.1	121.136	237.237	0	0	0	0	0	0	0	200	903	0	0	0	0	0	0	0	603	903	0
605	3	-36.9565	111.492	-828.588	50422.9	-66024.6	-13894.4	120.317	239.146	0	0	0	0	0	0	0	200	903	0	0	0	0	0	0	0	603	903	0
605	4	-36.8039	111.034	-826.147	50422.9	-65902.5	-13574	120.229	238.966	0	0	0	0	0	0	0	200	903	0	0	0	0	0	0	0	603	903	0
605	5	-36.041	109.966	-823.4	49873.6	-65353.1	-13574	120.63	239.43	0	0	0	0	0	0	0	200	903	0	0	0	0	0	0	0	603	903	0
605	6	-37.7194	108.44	-820.043	49690.5	-65536.3	-13619.8	120.082	239.405	0	0	0	0	0	0	0	200	903	0	0	0	0	0	0	0	603	903	0
605	7	-37.2617	107.677	-814.855	49690.5	-65231.1	-13665.5	119.948	239.019	0	0	0	0	0	0	0	200	903	0	0	0	0	0	0	0	603	903	0
605	8	-36.9565	105.846	-810.583	49049.6	-64559.7	-13482.4	120.354	239.489	0	0	0	0	0	0	0	200	903	0	0	0	0	0	0	0	603	903	0
605	9	-35.7358	104.32	-808.141	48774.9	-64437.6	-13162	120.264	239.646	0	0	0	0	0	0	0	200	903	0	0	0	0	0	0	0	603	903	0
606	0	-36.8039	103.252	-797.46	48500.2	-64620.7	-13162	118.967	239.182	0	0	0	0	0	0	0	200	903	0	0	0	0	0	0	0	603	903	0
606	1	-39.0927	101.574	-799.902	47310.1	-64559.7	-13390.9	119.29	240.855	0	0	0	0	0	0	0	200	903	0	0	0	0	0	0	0	603	903	0
606	2	-38.7875	101.116	-793.798	47127	-63583.2	-13162	119.9	240.631	0	0	0	0	0	0	0	200	903	0	0	0	0	0	0	0	603	903	0
606	3	-37.872	100.048	-788.61	46303	-64132.4	-13162	118.677	241.285	0	0	0	0	0	0	0	200	903	0	0	0	0	0	0	0	603	903	0
606	4	-37.872	98.6744	-787.084	46119.9	-63766.3	-12795.8	118.984	241.404	0	0	0	0	0	0	0	200	903	0	0	0	0	0	0	0	603	903	0
606	5	-38.9401	96.3855	-783.422	45936.8	-63094.9	-12841.6	119.462	241.364	0	0	0	0	0	0	0	200	903	0	0	0	0	0	0	0	603	903	0
606	6	-40.0082	94.2493	-779.76	45753.7	-63155.9	-12658.5	119.006	241.323	0	0	0	0	0	0	0	200	903	0	0	0	0	0	0	0	603	903	0
606	7	-39.5505	93.4864	-773.351	45295.9	-63216.9	-12429.6	118.256	241.429	0	0	0	0	0	0	0	200	903	0	0	0	0	0	0	0	603	903	0
606	8	-38.9401	91.045	-768.469	44380.4	-62850.7	-12521.1	118.213	242.248	0	0	0	0	0	0	0	200	903	0	0	0	0	0	0	0	603	903	0
606	9	-38.7875	90.7398	-766.027	44288.8	-62362.4	-12475.3	118.59	242.184	0	0	0	0	0	0	0	200	903	0	0	0	0	0	0	0	603	903	0
607	0	-39.5505	89.5191	-758.398	43098.7	-62301.4	-12154.9	117.851	243.171	0	0	0	0	0	0	0	200	903	0	0	0	0	0	0	0	603	903	0
607	1	-40.7712	88.1458	-758.093	43190.2	-61874.2	-12109.1	118.382	243.028	0	0	0	0	0	0	0	200	903	0	0	0	0	0	0	0	603	903	0
607	2	-40.6186	86.7725	-752.599	43464.9	-61691.1	-12154.9	118.029	242.247	0	0	0	0	0	0	0	200	903	0	0	0	0	0	0	0	603	903	0
607	3	-40.0082	85.094	-747.411	42640.9	-61630	-11880.3	117.542	242.949	0	0	0	0	0	0	0	200	903	0	0	0	0	0	0	0	603	903	0
607	4	-39.3979	83.7207	-746.191	42549.3	-61813.1	-11651.4	117.162	242.978	0	0	0	0	0	0	0	200	903	0	0	0	0	0	0	0	603	903	0
607	5	-40.7712	82.1949	-740.698	42000	-61446.9	-11788.7	117.042	243.297	0	0	0	0	0	0	0	200	903	0	0	0	0	0	0	0	603	903	0
607	6	-41.5341	80.9742	-737.951	40992.9	-60653.4	-11559.8	117.808	244.45	0	0	0	0	0	0	0	200	903	0	0	0	0	0	0	0	603	903	0
607	7	-40.7712	79.6009	-731.542	40626.7	-60592.4	-11376.7	117.172	244.464	0	0	0	0	0	0	0	200	903	0	0	0	0	0	0	0	603	903	0
607	8	-40.7712	78.3802	-726.965	39985.8	-60897.6	-10873.2	116.23	244.996	0	0	0	0	0	0	0	200	903	0	0	0	0	0	0	0	603	903	0
607	9	-40.7712	77.6172	-725.744	39894.3	-60470.3	-11239.4	116.678	245.03	0	0	0	0	0	0	0	200	903	0	0	0	0	0	0	0	603	903	0
608	0	-41.9919	76.5491	-720.861	40535.2	-59982.1	-11330.9	116.791	243.768	0	0	0	0	0	0	0	200	903	0	0	0	0	0	0	0	603	903	0
608	1	-41.2289	74.8706	-713.842	39894.3	-60226.2	-10781.6	115.631	244.113	0	0	0	0	0	0	0	200	903	0	0	0	0	0	0	0	603	903	0
608	2	-42.9074	73.0396	-711.401	39711.2	-59860	-10507	115.856	244.179	0	0	0	0	0	0	0	200	903	0	0	0	0	0	0	0	603	903	0
608	3	-41.8393	71.2085	-706.518	38704.1	-59066.5	-10690.1	116.398	245.219	0	0	0	0	0	0	0	200	903	0	0	0	0	0	0	0	603	903	0
608	4	-41.6867	70.7508	-704.992	38887.2	-59127.6	-10415.4	116.13	244.84	0	0	0	0	0	0	0	200	903	0	0	0	0	0	0	0	603	903	0
608	5	-43.3652	68.7671	-700.72	37147.7	-59249.6	-10232.3	115.445	246.986	0	0	0	0	0	0	0	200	903	0	0	0	0	0	0	0	603	903	0
608	6	-41.0764	68.6145	-696.142	37605.5	-59005.5	-10095	115.239	245.98	0	0	0	0	0	0	0	200	903	0	0	0	0	0	0	0	603	903	0
608	7	-42.7548	67.2412	-689.733	36781.5	-58395.1	-10232.3	115.337	246.673	0	0	0	0	0	0	0	200	903	0	0	0	0	0	0	0	603	903	0
608	8	-41.6867	66.1731	-684.545	36506.8	-57967.9	-9911.87	115.319	246.67	0	0	0	0	0	0	0	200	903	0	0	0	0	0	0	0	603	903	0
608	9	-41.5341	65.5628	-682.409	36506.8	-58273.1	-9820.31	114.607	246.503	0	0	0	0	0	0	0	200	903	0	0	0	0	0	0	0	603	903	0
609	0	-42.6022	62.9688	-678.137	35866	-58151	-9499.88	114.249	247.111	0	0	0	0	0	0	0	200	903	0	0	0	0	0	0	0	603	903	0
609	1	-43.06	61.5955	-674.169	35499.8	-57113.4	-9042.11	115.283	247.343	0	0	0	0	0	0	0	200	903	0	0	0	0	0	0	0	603	903	0
609	2	-42.9074	58.3911	-667.761	34950.4	-57723.8	-9316.77	113.556	247.66	0	0	0	0	0	0	0	200	903	0	0	0	0	0	0	0	603	903	0
609	3	-42.6022	59.1541	-663.793	34492.7	-57357.5	-9042.11	113.591	248.037	0	0	0	0	0	0	0	200	903	0	0	0	0	0	0	0	603	903	0
609	4	-41.8393	57.9334	-661.962	33851.8	-56442	-9179.44	114.735	248.861	0	0	0	0	0	0	0	200	903	0	0	0	0	0	0	0	603	903	0
609	5	-42.9074	57.6282	-654.943	33119.4	-56258.9	-8859.01	114.101	249.432	0	0	0	0	0	0	0	200	903	0	0	0	0	0	0	0	603	903	0
609	6	-40.6186	56.2549	-650.06	33119.4	-56381	-8675.9	113.268	249.052	0	0	0	0	0	0	0	200	903	0	0	0	0	0	0	0	603	903	0
609	7	-42.6022	55.1868	-646.703	33210.9	-56319.9	-8538.57	112.912	248.646	0	0	0	0	0	0	0	200	903	0	0	0	0	0	0	0	603	903	0
609	8	-41.8393	53.2032	-642.736	33302.5	-55465.5	-8492.8	113.704	248.186	0	0	0	0	0	0	0	200	903	0	0	0	0	0	0	0	603	903	0
609	9	-41.0764	52.7454	-639.379	32844.7	-55465.5	-8218.14	113.251	248.63	0	0	0	0	0	0	0	200	903	0	0	0	0	0	0	0	603	903	0
610	0	-41.9919	49.3885	-635.412	32112.3	-55648.6	-7531.5	112.421	249.462	0	0	0	0	0	0	0	200	903	0	0	0	0	0	0	0	603	903	0
610	1	-41.9919	50.6092	-632.36	31288.3	-55282.3	-7760.38	112.578	250.521	0	0	0	0	0	0	0	200	903	0	0	0	0	0	0	0	603	903	0
610	2	-42.2971	49.541	-626.562	30372.8	-54427.9	-7577.27	113.133	251.525	0	0	0	0	0	0	0	200	903	0	0	0	0	0	0	0	603	903	0
610	3	-40.7712	48.3203	-622.289	30555.9	-54611	-7485.72	112.242	250.898	0	0	0	0	0	0	0	200	903	0	0	0	0	0	0	0	603	903	0
610	4	-41.2289	48.1678	-621.069	29731.9	-54366.8	-7577.27	112.462	252.128	0	0	0	0	0	0	0	200	903	0	0	0	0	0	0	0	603	903	0
610	5	-41.0764	46.6419	-613.134	30555.9	-53756.5	-7439.94	112.325	250.164	0	0	0	0	0	0	0	200	903	0	0	0	0	0	0	0	603	903	0
610	6	-41.3815	46.0315	-611.913	30098.2	-53390.3	-7348.39	112.749	250.813	0	0	0	0	0	0	0	200	903	0	0	0	0	0	0	0	603	903	0
610	7	-41.6867	44.3531	-605.2	29182.6	-53695.4	-7211.06	111.276	251.78	0	0	0	0	0	0	0	200	903	0	0	0	0	0	0	0	603	903	0
610	8	-40.0082	42.0642	-602.453	29091.1	-53329.2	-6890.63	111.48	251.712	0	0	0	0	0	0	0	200	903	0	0	0	0	0	0	0	603	903	0
610	9	-38.4824	41.7591	-600.012	28267.1	-52779.9	-6844.85	112.035	252.889	0	0	0	0	0	0	0	200	903	0	0	0	0	0	0	0	603	903	0
611	0	-40.6186	40.691	-593.603	27900.9	-53268.2	-6753.3	110.263	252.997	0	0	0	0	0	0	0	200	903	0	0	0	0	0	0	0	603	903	0
611	1	-40.9238	40.691	-592.687	27900.9	-53085.1	-6570.19	110.433	252.925	0	0	0	0	0	0	0	200	903	0	0	0	0	0	0	0	603	903	0
611	2	-40.7712	39.6228	-585.668	27260	-52169.6	-6524.42	110.923	253.455	0	0	0	0	0	0	0	200	903	0	0	0	0	0	0	0	603	903	0
611	3	-39.5505	38.8599	-582.922	27717.8	-51620.2	-6524.42	111.446	252.45	0	0	0	0	0	0	0	200	903	0	0	0	0	0	0	0	603	903	0
611	4	-39.5505	37.6392	-580.48	27260	-52108.5	-6432.86	110.232	253.039	0	0	0	0	0	0	0	200	903	0	0	0	0	0	0	0	603	903	0
611	5	-37.4142	36.1133	-576.208	26619.2	-51620.2	-6066.65	110.414	253.803	0	0	0	0	0	0	0	200	903	0	0	0	0	0	0	0	603	903	0
611	6	-40.3134	35.1978	-574.682	26436	-51376.1	-5883.55	110.601	253.999	0	0	0	0	0	0	0	200	903	0	0	0	0	0	0	0	603	903	0
611	7	-40.9238	34.5874	-569.494	26710.7	-51070.9	-6158.21	110.322	253.097	0	0	0	0	0	0	0	200	903	0	0	0	0	0	0	0	603	903	0
611	8	-39.5505	33.8245	-564.916	25886.7	-50887.8	-5792	109.92	254.176	0	0	0	0	0	0	0	200	903	0	0	0	0	0	0	0	603	903	0
611	9	-39.3979	33.6719	-563.085	25978.3	-50826.8	-5654.67	109.735	253.864	0	0	0	0	0	0	0	200	903	0	0	0	0	0	0	0	603	903	0
612	0	-40.0082	32.2986	-560.644	24513.4	-50338.5	-5563.11	110.213	256.276	0	0	0	0	0	0	0	200	903	0	0	0	0	0	0	0	603	903	0
612	1	-38.0246	31.9934	-556.982	24421.9	-50460.6	-5288.46	109.404	256.153	0	0	0	0	0	0	0	200	903	0	0	0	0	0	0	0	603	903	0
612	2	-40.3134	30.4676	-553.015	24330.3	-50399.5	-5471.56	108.864	256.004	0	0	0	0	0	0	0	200	903	0	0	0	0	0	0	0	603	903	0
612	3	-39.2453	29.0943	-549.352	24330.3	-49789.2	-5196.9	109.368	255.711	0	0	0	0	0	0	0	200	903	0	0	0	0	0	0	0	603	903	0
612	4	-38.9401	28.1787	-548.132	23872.6	-49545	-5380.01	109.611	256.447	0	0	0	0	0	0	0	200	903	0	0	0	0	0	0	0	603	903	0
612	5	-38.635	27.8736	-543.249	23231.7	-49972.3	-5425.78	108.012	257.236	0	0	0	0	0	0	0	200	903	0	0	0	0	0	0	0	603	903	0
612	6	-39.7031	26.6529	-540.502	22957	-49361.9	-5059.57	108.674	257.526	0	0	0	0	0	0	0	200	903	0	0	0	0	0	0	0	603	903	0
612	7	-39.5505	26.5003	-536.23	22316.2	-48873.7	-4784.91	108.857	258.383	0	0	0	0	0	0	0	200	903	0	0	0	0	0	0	0	603	903	0
612	8	-38.9401	24.9744	-535.009	22682.4	-48995.7	-4784.91	108.421	257.604	0	0	0	0	0	0	0	200	903	0	0	0	0	0	0	0	603	903	0
612	9	-38.4824	25.4322	-532.873	22773.9	-49239.9	-4830.69	107.595	257.262	0	0	0	0	0	0	0	200	903	0	0	0	0	0	0	0	603	903	0
613	0	-39.3979	24.6692	-530.432	22499.3	-48324.3	-4647.58	108.896	257.583	0	0	0	0	0	0	0	200	903	0	0	0	0	0	0	0	603	903	0
613	1	-37.5668	23.4485	-525.244	21950	-48202.3	-4556.03	108.229	258.21	0	0	0	0	0	0	0	200	903	0	0	0	0	0	0	0	603	903	0
613	2	-38.0246	21.4649	-521.581	21217.5	-48446.4	-4647.58	107.116	259.321	0	0	0	0	0	0	0	200	903	0	0	0	0	0	0	0	603	903	0
613	3	-37.872	21.4649	-520.361	21217.5	-48202.3	-4372.92	107.368	259.225	0	0	0	0	0	0	0	200	903	0	0	0	0	0	0	0	603	903	0
613	4	-37.7194	20.7019	-518.53	20851.3	-47775	-4510.25	107.864	259.788	0	0	0	0	0	0	0	200	903	0	0	0	0	0	0	0	603	903	0
613	5	-39.2453	21.0071	-516.088	20668.2	-47591.9	-4372.92	107.783	259.952	0	0	0	0	0	0	0	200	903	0	0	0	0	0	0	0	603	903	0
613	6	-38.3298	19.6338	-512.121	20576.7	-47469.8	-4144.04	107.307	259.821	0	0	0	0	0	0	0	200	903	0	0	0	0	0	0	0	603	903	0
613	7	-37.2617	19.6338	-509.374	20668.2	-47103.6	-4189.82	107.526	259.424	0	0	0	0	0	0	0	200	903	0	0	0	0	0	0	0	603	903	0
613	8	-35.7358	19.3286	-508.459	20485.1	-46981.6	-3777.83	107.6	259.711	0	0	0	0	0	0	0	200	903	0	0	0	0	0	0	0	603	903	0
613	9	-36.4987	18.2605	-504.797	20485.1	-47103.6	-3869.39	106.688	259.419	0	0	0	0	0	0	0	200	903	0	0	0	0	0	0	0	603	903	0
614	0	-37.4142	17.1924	-504.492	19935.8	-47286.7	-3411.62	106.269	260.483	0	0	0	0	0	0	0	200	903	0	0	0	0	0	0	0	603	903	0
614	1	-37.2617	16.5821	-500.219	19844.3	-46615.4	-3640.5	106.81	260.329	0	0	0	0	0	0	0	200	903	0	0	0	0	0	0	0	603	903	0
614	2	-36.8039	16.1243	-497.473	19111.8	-46493.3	-3503.18	106.541	261.582	0	0	0	0	0	0	0	200	903	0	0	0	0	0	0	0	603	903	0
614	3	-35.7358	16.7347	-496.557	18837.2	-46432.2	-3136.96	106.492	262.064	0	0	0	0	0	0	0	200	903	0	0	0	0	0	0	0	603	903	0
614	4	-35.5832	15.6665	-492.895	18562.5	-46188.1	-2999.64	106.292	262.34	0	0	0	0	0	0	0	200	903	0	0	0	0	0	0	0	603	903	0
614	5	-36.3461	14.751	-489.843	18654.1	-46005	-2724.98	106.082	261.918	0	0	0	0	0	0	0	200	903	0	0	0	0	0	0	0	603	903	0
614	6	-36.1935	14.2932	-489.233	19020.3	-46188.1	-3411.62	105.591	261.122	0	0	0	0	0	0	0	200	903	0	0	0	0	0	0	0	603	903	0
614	7	-35.7358	13.9881	-486.181	18287.8	-46432.2	-3228.52	104.496	262.385	0	0	0	0	0	0	0	200	903	0	0	0	0	0	0	0	603	903	0
614	8	-35.1254	12.7674	-485.571	18562.5	-45882.9	-3182.74	105.507	261.772	0	0	0	0	0	0	0	200	903	0	0	0	0	0	0	0	603	903	0
614	9	-35.7358	12.4622	-484.35	18013.2	-45455.7	-3045.41	106.151	262.81	0	0	0	0	0	0	0	200	903	0	0	0	0	0	0	0	603	903	0
615	0	-35.4306	11.5467	-479.772	17555.4	-45455.7	-2953.86	105.256	263.409	0	0	0	0	0	0	0	200	903	0	0	0	0	0	0	0	603	903	0
615	1	-34.2099	11.2415	-479.162	17097.7	-45211.5	-2724.98	105.645	264.318	0	0	0	0	0	0	0	200	903	0	0	0	0	0	0	0	603	903	0
615	2	-34.2099	10.4786	-473.974	16914.6	-45272.6	-2633.42	104.483	264.313	0	0	0	0	0	0	0	200	903	0	0	0	0	0	0	0	603	903	0
615	3	-33.5996	11.0889	-477.026	17189.2	-45455.7	-2541.87	104.71	263.966	0	0	0	0	0	0	0	200	903	0	0	0	0	0	0	0	603	903	0
615	4	-34.9728	10.6311	-475.195	16548.3	-45577.8	-2541.87	104.086	265.176	0	0	0	0	0	0	0	200	903	0	0	0	0	0	0	0	603	903	0
615	5	-34.5151	10.1734	-469.702	16914.6	-44845.3	-2312.99	104.524	263.989	0	0	0	0	0	0	0	200	903	0	0	0	0	0	0	0	603	903	0
615	6	-32.9892	9.71561	-468.786	16731.4	-45150.5	-2450.32	103.686	264.309	0	0	0	0	0	0	0	200	903	0	0	0	0	0	0	0	603	903	0
615	7	-31.6159	7.57938	-469.396	16456.8	-44906.4	-2175.66	104.332	264.941	0	0	0	0	0	0	0	200	903	0	0	0	0	0	0	0	603	903	0
615	8	-32.5314	7.42679	-470.007	16548.3	-44357.1	-2175.66	105.625	264.791	0	0	0	0	0	0	0	200	903	0	0	0	0	0	0	0	603	903	0
615	9	-33.5996	6.66385	-466.955	15999	-44296	-2358.76	105.139	265.738	0	0	0	0	0	0	0	200	903	0	0	0	0	0	0	0	603	903	0
616	0	-33.1418	6.81644	-463.293	15724.4	-44601.2	-2175.66	103.73	266.06	0	0	0	0	0	0	0	200	903	0	0	0	0	0	0	0	603	903	0
616	1	-31.9211	6.51127	-462.377	15541.3	-44418.1	-2175.66	103.935	266.388	0	0	0	0	0	0	0	200	903	0	0	0	0	0	0	0	603	903	0
616	2	-29.6323	6.35868	-460.546	15907.5	-44112.9	-2038.33	104.216	265.46	0	0	0	0	0	0	0	200	903	0	0	0	0	0	0	0	603	903	0
616	3	-31.0056	6.35868	-458.41	15449.7	-43868.8	-1809.45	104.302	266.297	0	0	0	0	0	0	0	200	903	0	0	0	0	0	0	0	603	903	0
616	4	-31.9211	5.59574	-460.241	15175.1	-44112.9	-1580.57	104.153	267.028	0	0	0	0	0	0	0	200	903	0	0	0	0	0	0	0	603	903	0
616	5	-31.9211	5.13797	-458.41	15541.3	-43929.8	-1992.55	104.169	266.097	0	0	0	0	0	0	0	200	903	0	0	0	0	0	0	0	603	903	0
616	6	-30.7004	2.84916	-456.274	15724.4	-44051.9	-2038.33	103.453	265.537	0	0	0	0	0	0	0	200	903	0	0	0	0	0	0	0	603	903	0
616	7	-30.3952	3.30692	-456.579	15632.8	-44051.9	-1672.12	103.518	265.761	0	0	0	0	0	0	0	200	903	0	0	0	0	0	0	0	603	903	0
616	8	-29.7849	3.15433	-451.391	15358.2	-43868.8	-1626.34	102.814	265.976	0	0	0	0	0	0	0	200	903	0	0	0	0	0	0	0	603	903	0
616	9	-31.0056	2.54398	-454.138	14808.8	-43563.6	-1672.12	104.074	267.391	0	0	0	0	0	0	0	200	903	0	0	0	0	0	0	0	603	903	0
617	0	-30.3952	2.39139	-452.001	14625.7	-43258.4	-1534.79	104.296	267.642	0	0	0	0	0	0	0	200	903	0	0	0	0	0	0	0	603	903	0
617	1	-29.9374	2.2388	-451.696	15266.6	-44173.9	-1305.91	102.204	266.202	0	0	0	0	0	0	0	200	903	0	0	0	0	0	0	0	603	903	0
617	2	-29.7849	2.08622	-452.612	14534.2	-43746.7	-1443.24	103.346	267.888	0	0	0	0	0	0	0	200	903	0	0	0	0	0	0	0	603	903	0
617	3	-30.853	0.865513	-448.034	14534.2	-43380.5	-1443.24	103.176	267.56	0	0	0	0	0	0	0	200	903	0	0	0	0	0	0	0	603	903	0
617	4	-30.3952	1.93363	-450.17	14442.6	-43685.7	-1260.13	102.957	267.917	0	0	0	0	0	0	0	200	903	0	0	0	0	0	0	0	603	903	0
617	5	-29.4797	1.17069	-449.56	14442.6	-43441.5	-1031.25	103.369	267.874	0	0	0	0	0	0	0	200	903	0	0	0	0	0	0	0	603	903	0
617	6	-29.0219	-0.0500139	-447.119	14076.4	-43075.3	-1122.8	103.66	268.517	0	0	0	0	0	0	0	200	903	0	0	0	0	0	0	0	603	903	0
617	7	-28.259	-1.4233	-448.95	14351.1	-43014.3	-939.698	104.189	268.034	0	0	0	0	0	0	0	200	903	0	0	0	0	0	0	0	603	903	0
617	8	-29.4797	-0.660365	-448.034	13344	-43624.6	-939.698	102.631	270.217	0	0	0	0	0	0	0	200	903	0	0	0	0	0	0	0	603	903	0
617	9	-28.7167	-1.11813	-446.813	13527.1	-43319.5	-1031.25	103.048	269.725	0	0	0	0	0	0	0	200	903	0	0	0	0	0	0	0	603	903	0
618	0	-28.8693	-0.35519	-444.982	13984.9	-42892.2	-893.921	103.609	268.572	0	0	0	0	0	0	0	200	903	0	0	0	0	0	0	0	603	903	0
618	1	-27.9538	-1.4233	-444.067	13435.6	-42892.2	-665.039	103.41	269.744	0	0	0	0	0	0	0	200	903	0	0	0	0	0	0	0	603	903	0
618	2	-27.6486	-0.660365	-445.593	13252.4	-43319.5	-756.592	102.782	270.259	0	0	0	0	0	0	0	200	903	0	0	0	0	0	0	0	603	903	0
618	3	-28.7167	-1.4233	-445.898	13618.7	-43319.5	-298.828	102.849	269.458	0	0	0	0	0	0	0	200	903	0	0	0	0	0	0	0	603	903	0
618	4	-28.8693	-2.94918	-442.846	13252.4	-42892.2	-756.592	103.144	270.074	0	0	0	0	0	0	0	200	903	0	0	0	0	0	0	0	603	903	0
618	5	-28.1064	-3.55954	-444.067	13435.6	-43258.4	-756.592	102.586	269.744	0	0	0	0	0	0	0	200	903	0	0	0	0	0	0	0	603	903	0
618	6	-27.496	-4.32247	-443.151	13160.9	-43319.5	-665.039	102.247	270.302	0	0	0	0	0	0	0	200	903	0	0	0	0	0	0	0	603	903	0
618	7	-27.3434	-3.25436	-444.677	12794.7	-42648.1	-344.605	104.092	271.227	0	0	0	0	0	0	0	200	903	0	0	0	0	0	0	0	603	903	0
618	8	-27.0383	-3.86471	-445.287	12794.7	-42892.2	-573.486	103.675	271.266	0	0	0	0	0	0	0	200	903	0	0	0	0	0	0	0	603	903	0
618	9	-25.9702	-3.71212	-443.762	12520	-43258.4	-436.157	102.519	271.787	0	0	0	0	0	0	0	200	903	0	0	0	0	0	0	0	603	903	0
619	0	-27.6486	-5.54318	-441.32	12520	-43563.6	-69.9462	101.288	271.631	0	0	0	0	0	0	0	200	903	0	0	0	0	0	0	0	603	903	0
619	1	-27.496	-4.32247	-443.151	12794.7	-43197.4	-390.381	102.522	271.128	0	0	0	0	0	0	0	200	903	0	0	0	0	0	0	0	603	903	0
619	2	-26.4279	-5.54318	-446.508	13160.9	-43075.3	-344.605	103.528	270.525	0	0	0	0	0	0	0	200	903	0	0	0	0	0	0	0	603	903	0
619	3	-27.6486	-5.238	-445.593	12520	-43014.3	-253.052	103.467	271.903	0	0	0	0	0	0	0	200	903	0	0	0	0	0	0	0	603	903	0
619	4	-27.0383	-7.52682	-444.372	12336.9	-43319.5	-24.1699	102.515	272.237	0	0	0	0	0	0	0	200	903	0	0	0	0	0	0	0	603	903	0
619	5	-25.5124	-6.15353	-444.677	11879.2	-43502.6	158.936	102.17	273.286	0	0	0	0	0	0	0	200	903	0	0	0	0	0	0	0	603	903	0
619	6	-24.1391	-6.76388	-445.593	12153.8	-43319.5	21.6065	102.782	272.724	0	0	0	0	0	0	0	200	903	0	0	0	0	0	0	0	603	903	0
619	7	-25.665	-6.91647	-444.982	12153.8	-43380.5	67.3829	102.512	272.687	0	0	0	0	0	0	0	200	903	0	0	0	0	0	0	0	603	903	0
619	8	-26.5805	-6.76388	-447.729	12153.8	-43441.5	-24.1699	102.974	272.855	0	0	0	0	0	0	0	200	903	0	0	0	0	0	0	0	603	903	0
619	9	-25.9702	-6.45871	-445.593	12245.4	-43258.4	204.712	102.919	272.519	0	0	0	0	0	0	0	200	903	0	0	0	0	0	0	0	603	903	0
620	0	-25.0546	-7.832	-446.508	12428.5	-43685.7	387.818	102.162	272.165	0	0	0	0	0	0	0	200	903	0	0	0	0	0	0	0	603	903	0
620	1	-23.5287	-8.59494	-447.424	11970.7	-43929.8	250.488	101.816	273.245	0	0	0	0	0	0	0	200	903	0	0	0	0	0	0	0	603	903	0
620	2	-25.0546	-8.59494	-450.475	11604.5	-43441.5	662.476	103.565	274.239	0	0	0	0	0	0	0	200	903	0	0	0	0	0	0	0	603	903	0
620	3	-25.8176	-9.20529	-448.644	11421.4	-43563.6	616.7	102.899	274.542	0	0	0	0	0	0	0	200	903	0	0	0	0	0	0	0	603	903	0
620	4	-25.2072	-8.90011	-448.95	11696.1	-43929.8	616.7	102.15	273.948	0	0	0	0	0	0	0	200	903	0	0	0	0	0	0	0	603	903	0
620	5	-24.4443	-8.90011	-448.95	11146.7	-43868.8	616.7	102.286	275.172	0	0	0	0	0	0	0	200	903	0	0	0	0	0	0	0	603	903	0
620	6	-23.071	-9.51046	-450.781	10963.6	-43502.6	799.805	103.495	275.679	0	0	0	0	0	0	0	200	903	0	0	0	0	0	0	0	603	903	0
620	7	-23.6813	-10.1208	-452.001	11329.8	-43685.7	662.476	103.351	274.934	0	0	0	0	0	0	0	200	903	0	0	0	0	0	0	0	603	903	0
620	8	-24.5969	-11.0363	-452.917	11604.5	-44418.1	891.358	101.929	274.378	0	0	0	0	0	0	0	200	903	0	0	0	0	0	0	0	603	903	0
620	9	-25.3598	-11.6467	-451.391	11329.8	-44540.2	1028.69	101.327	274.9	0	0	0	0	0	0	0	200	903	0	0	0	0	0	0	0	603	903	0
621	0	-23.6813	-11.0363	-452.917	11238.3	-44357.1	1028.69	102.064	275.187	0	0	0	0	0	0	0	200	903	0	0	0	0	0	0	0	603	903	0
621	1	-23.3762	-11.7993	-456.884	10872.1	-44296	1028.69	103.048	276.204	0	0	0	0	0	0	0	200	903	0	0	0	0	0	0	0	603	903	0
621	2	-23.3762	-11.4941	-455.053	11146.7	-44051.9	1120.24	103.194	275.505	0	0	0	0	0	0	0	200	903	0	0	0	0	0	0	0	603	903	0
621	3	-24.7495	-12.257	-458.41	10139.7	-44173.9	1211.79	103.637	277.881	0	0	0	0	0	0	0	200	903	0	0	0	0	0	0	0	603	903	0
621	4	-24.4443	-12.7148	-456.579	10872.1	-44173.9	1303.35	103.25	276.188	0	0	0	0	0	0	0	200	903	0	0	0	0	0	0	0	603	903	0
621	5	-23.6813	-13.02	-459.326	10780.5	-44662.2	1349.12	102.766	276.53	0	0	0	0	0	0	0	200	903	0	0	0	0	0	0	0	603	903	0
621	6	-23.8339	-13.6303	-456.884	11238.3	-44967.4	1166.02	101.578	275.402	0	0	0	0	0	0	0	200	903	0	0	0	0	0	0	0	603	903	0
621	7	-24.1391	-13.7829	-462.072	10963.6	-44784.3	1669.56	103.079	276.273	0	0	0	0	0	0	0	200	903	0	0	0	0	0	0	0	603	903	0
621	8	-24.5969	-14.5459	-462.682	10322.8	-44540.2	1440.67	103.735	277.689	0	0	0	0	0	0	0	200	903	0	0	0	0	0	0	0	603	903	0
621	9	-24.4443	-14.0881	-463.293	10231.2	-44357.1	1532.23	104.257	277.916	0	0	0	0	0	0	0	200	903	0	0	0	0	0	0	0	603	903	0
622	0	-23.9865	-14.3933	-464.819	10322.8	-45028.4	1623.78	103.127	277.792	0	0	0	0	0	0	0	200	903	0	0	0	0	0	0	0	603	903	0
622	1	-22.4606	-14.851	-469.702	10231.2	-45333.6	2081.54	103.484	278.218	0	0	0	0	0	0	0	200	903	0	0	0	0	0	0	0	603	903	0
622	2	-23.6813	-15.0036	-469.702	10231.2	-45699.8	1944.21	102.705	278.218	0	0	0	0	0	0	0	200	903	0	0	0	0	0	0	0	603	903	0
622	3	-24.902	-15.4614	-469.702	10231.2	-45944	1806.89	102.185	278.218	0	0	0	0	0	0	0	200	903	0	0	0	0	0	0	0	603	903	0
622	4	-24.4443	-15.4614	-470.312	10689	-45394.7	1852.66	103.48	277.273	0	0	0	0	0	0	0	200	903	0	0	0	0	0	0	0	603	903	0
622	5	-23.8339	-16.2243	-470.007	10231.2	-45577.8	1852.66	103.027	278.232	0	0	0	0	0	0	0	200	903	0	0	0	0	0	0	0	603	903	0
622	6	-23.9865	-17.5976	-472.448	9865	-46310.2	2127.32	101.978	279.119	0	0	0	0	0	0	0	200	903	0	0	0	0	0	0	0	603	903	0
622	7	-23.6813	-17.1399	-476.721	9498.79	-46493.3	2218.87	102.473	280.075	0	0	0	0	0	0	0	200	903	0	0	0	0	0	0	0	603	903	0
622	8	-25.2072	-18.208	-477.941	9498.79	-46066	2447.75	103.616	280.126	0	0	0	0	0	0	0	200	903	0	0	0	0	0	0	0	603	903	0
622	9	-23.071	-16.9873	-478.246	9498.79	-46554.3	2585.08	102.656	280.138	0	0	0	0	0	0	0	200	903	0	0	0	0	0	0	0	603	903	0
623	0	-25.2072	-17.5976	-477.331	9498.79	-46737.4	2447.75	102.086	280.1	0	0	0	0	0	0	0	200	903	0	0	0	0	0	0	0	603	903	0
623	1	-24.4443	-19.5813	-481.603	9498.79	-46310.2	2447.75	103.842	280.277	0	0	0	0	0	0	0	200	903	0	0	0	0	0	0	0	603	903	0
623	2	-23.8339	-18.5131	-483.434	9773.45	-46615.4	2493.53	103.575	279.783	0	0	0	0	0	0	0	200	903	0	0	0	0	0	0	0	603	903	0
623	3	-25.3598	-19.5813	-484.96	9681.89	-46737.4	2859.74	103.626	280.036	0	0	0	0	0	0	0	200	903	0	0	0	0	0	0	0	603	903	0
623	4	-23.8339	-20.4968	-485.571	9681.89	-47225.7	2722.41	102.742	280.061	0	0	0	0	0	0	0	200	903	0	0	0	0	0	0	0	603	903	0
623	5	-25.8176	-20.6494	-483.74	9407.23	-47164.7	2722.41	102.5	280.553	0	0	0	0	0	0	0	200	903	0	0	0	0	0	0	0	603	903	0
623	6	-24.5969	-22.1753	-487.707	9590.34	-47286.7	2905.52	103.043	280.336	0	0	0	0	0	0	0	200	903	0	0	0	0	0	0	0	603	903	0
623	7	-24.7495	-21.2597	-490.759	9041.02	-47286.7	2997.07	103.646	281.577	0	0	0	0	0	0	0	200	903	0	0	0	0	0	0	0	603	903	0
623	8	-25.0546	-22.633	-493.505	8491.7	-47469.8	3042.85	103.811	282.793	0	0	0	0	0	0	0	200	903	0	0	0	0	0	0	0	603	903	0
623	9	-25.0546	-22.0227	-494.726	9041.02	-47775	3180.18	103.431	281.725	0	0	0	0	0	0	0	200	903	0	0	0	0	0	0	0	603	903	0
624	0	-25.2072	-22.4804	-494.726	8491.7	-48263.3	3271.73	102.444	282.836	0	0	0	0	0	0	0	200	903	0	0	0	0	0	0	0	603	903	0
624	1	-24.7495	-23.0908	-496.862	9041.02	-48385.4	3317.51	102.618	281.804	0	0	0	0	0	0	0	200	903	0	0	0	0	0	0	0	603	903	0
624	2	-25.2072	-23.0908	-500.524	8308.6	-48263.3	3225.95	103.575	283.4	0	0	0	0	0	0	0	200	903	0	0	0	0	0	0	0	603	903	0
624	3	-25.8176	-24.3115	-500.829	9132.58	-48263.3	3409.06	103.633	281.765	0	0	0	0	0	0	0	200	903	0	0	0	0	0	0	0	603	903	0
624	4	-25.9702	-24.1589	-502.355	8491.7	-48690.6	3500.61	103.075	283.096	0	0	0	0	0	0	0	200	903	0	0	0	0	0	0	0	603	903	0
624	5	-25.2072	-26.9055	-503.881	8125.49	-49056.8	3683.72	102.642	283.874	0	0	0	0	0	0	0	200	903	0	0	0	0	0	0	0	603	903	0
624	6	-23.3762	-25.0744	-509.68	7942.39	-48812.6	3729.49	104.229	284.417	0	0	0	0	0	0	0	200	903	0	0	0	0	0	0	0	603	903	0
624	7	-25.3598	-25.99	-510.29	7942.39	-49300.9	3729.49	103.386	284.436	0	0	0	0	0	0	0	200	903	0	0	0	0	0	0	0	603	903	0
624	8	-26.1227	-25.8374	-512.426	8308.6	-49606.1	4324.58	103.194	283.786	0	0	0	0	0	0	0	200	903	0	0	0	0	0	0	0	603	903	0
624	9	-25.9702	-25.8374	-511.816	7667.73	-49606.1	3500.61	103.078	285.019	0	0	0	0	0	0	0	200	903	0	0	0	0	0	0	0	603	903	0
625	0	-25.0546	-27.821	-513.647	7759.28	-49239.9	4049.93	104.137	284.894	0	0	0	0	0	0	0	200	903	0	0	0	0	0	0	0	603	903	0
625	1	-23.2236	-26.7529	-517.919	7850.83	-49789.2	4233.03	103.867	284.842	0	0	0	0	0	0	0	200	903	0	0	0	0	0	0	0	603	903	0
625	2	-25.8176	-29.3469	-516.699	7759.28	-50338.5	4187.26	102.577	284.983	0	0	0	0	0	0	0	200	903	0	0	0	0	0	0	0	603	903	0
625	3	-27.0383	-28.4314	-521.887	7484.62	-50094.4	4416.14	104.013	285.659	0	0	0	0	0	0	0	200	903	0	0	0	0	0	0	0	603	903	0
625	4	-26.7331	-30.415	-521.887	7759.28	-50521.6	4553.47	103.194	285.132	0	0	0	0	0	0	0	200	903	0	0	0	0	0	0	0	603	903	0
625	5	-25.9702	-28.8891	-524.023	7026.86	-50887.8	4461.91	102.89	286.591	0	0	0	0	0	0	0	200	903	0	0	0	0	0	0	0	603	903	0
625	6	-25.2072	-28.7365	-528.6	6843.75	-50887.8	4461.91	103.731	287.053	0	0	0	0	0	0	0	200	903	0	0	0	0	0	0	0	603	903	0
625	7	-26.2753	-28.8891	-527.99	6111.33	-50704.7	4599.24	103.967	288.425	0	0	0	0	0	0	0	200	903	0	0	0	0	0	0	0	603	903	0
625	8	-26.7331	-29.8047	-532.568	6569.1	-50948.9	4828.12	104.334	287.665	0	0	0	0	0	0	0	200	903	0	0	0	0	0	0	0	603	903	0
625	9	-26.7331	-30.1098	-533.788	7667.73	-51681.3	4828.12	103.18	285.635	0	0	0	0	0	0	0	200	903	0	0	0	0	0	0	0	603	903	0
626	0	-26.8857	-30.8728	-535.009	6752.2	-51742.3	4873.9	103.287	287.379	0	0	0	0	0	0	0	200	903	0	0	0	0	0	0	0	603	903	0
626	1	-26.4279	-31.1779	-538.366	6660.65	-51315.1	4965.45	104.684	287.628	0	0	0	0	0	0	0	200	903	0	0	0	0	0	0	0	603	903	0
626	2	-27.1909	-32.2461	-538.976	6294.44	-51986.4	5011.23	103.546	288.322	0	0	0	0	0	0	0	200	903	0	0	0	0	0	0	0	603	903	0
626	3	-26.2753	-33.9245	-541.113	6294.44	-51925.4	5240.12	104.04	288.368	0	0	0	0	0	0	0	200	903	0	0	0	0	0	0	0	603	903	0
626	4	-27.6486	-32.8564	-542.639	5562.02	-51864.4	5148.56	104.422	289.75	0	0	0	0	0	0	0	200	903	0	0	0	0	0	0	0	603	903	0
626	5	-27.0383	-33.6194	-545.995	5653.57	-52413.7	5606.33	104.003	289.645	0	0	0	0	0	0	0	200	903	0	0	0	0	0	0	0	603	903	0
626	6	-26.7331	-32.7038	-549.658	5653.57	-52779.9	5560.55	103.977	289.714	0	0	0	0	0	0	0	200	903	0	0	0	0	0	0	0	603	903	0
626	7	-27.1909	-33.3142	-550.878	5287.36	-52840.9	5423.22	104.079	290.402	0	0	0	0	0	0	0	200	903	0	0	0	0	0	0	0	603	903	0
626	8	-26.2753	-33.9245	-552.709	5470.46	-52474.7	5652.1	105.059	290.102	0	0	0	0	0	0	0	200	903	0	0	0	0	0	0	0	603	903	0
626	9	-26.8857	-34.5349	-552.404	5378.91	-53268.2	5697.88	103.57	290.263	0	0	0	0	0	0	0	200	903	0	0	0	0	0	0	0	603	903	0
627	0	-26.4279	-38.0444	-555.456	5287.36	-53329.2	5789.43	103.99	290.481	0	0	0	0	0	0	0	200	903	0	0	0	0	0	0	0	603	903	0
627	1	-26.7331	-35.7556	-559.423	4829.59	-53146.1	6109.87	104.998	291.367	0	0	0	0	0	0	0	200	903	0	0	0	0	0	0	0	603	903	0
627	2	-26.5805	-36.9763	-558.508	4921.15	-53634.4	5926.76	103.968	291.189	0	0	0	0	0	0	0	200	903	0	0	0	0	0	0	0	603	903	0
627	3	-27.6486	-36.6711	-563.085	4463.38	-54122.7	6247.2	103.882	292.073	0	0	0	0	0	0	0	200	903	0	0	0	0	0	0	0	603	903	0
627	4	-27.9538	-37.434	-562.78	4097.17	-54061.6	6064.09	103.938	292.72	0	0	0	0	0	0	0	200	903	0	0	0	0	0	0	0	603	903	0
627	5	-27.0383	-37.1289	-565.527	4097.17	-53695.4	6292.97	105.052	292.755	0	0	0	0	0	0	0	200	903	0	0	0	0	0	0	0	603	903	0
627	6	-26.2753	-37.8918	-568.884	3547.85	-54305.8	6613.41	104.54	293.763	0	0	0	0	0	0	0	200	903	0	0	0	0	0	0	0	603	903	0
627	7	-28.1064	-38.5022	-571.02	3273.2	-54427.9	6567.63	104.683	294.268	0	0	0	0	0	0	0	200	903	0	0	0	0	0	0	0	603	903	0
627	8	-27.8012	-38.8073	-573.766	3639.41	-54244.8	6704.96	105.458	293.657	0	0	0	0	0	0	0	200	903	0	0	0	0	0	0	0	603	903	0
627	9	-29.4797	-39.8755	-574.682	3914.07	-54611	6567.63	104.972	293.189	0	0	0	0	0	0	0	200	903	0	0	0	0	0	0	0	603	903	0
628	0	-27.496	-40.028	-575.598	3730.96	-55038.2	7116.95	104.381	293.518	0	0	0	0	0	0	0	200	903	0	0	0	0	0	0	0	603	903	0
628	1	-27.496	-40.4858	-578.039	2723.88	-55404.4	7208.5	104.151	295.288	0	0	0	0	0	0	0	200	903	0	0	0	0	0	0	0	603	903	0
628	2	-28.4116	-41.4013	-581.091	2632.33	-54733	6933.84	105.81	295.47	0	0	0	0	0	0	0	200	903	0	0	0	0	0	0	0	603	903	0
628	3	-27.496	-41.0962	-582.922	1899.9	-55465.5	7528.93	104.849	296.741	0	0	0	0	0	0	0	200	903	0	0	0	0	0	0	0	603	903	0
628	4	-29.1745	-42.3169	-582.922	1899.9	-55831.7	7528.93	104.221	296.741	0	0	0	0	0	0	0	200	903	0	0	0	0	0	0	0	603	903	0
628	5	-28.259	-42.3169	-585.363	2083.01	-55404.4	7300.05	105.35	296.442	0	0	0	0	0	0	0	200	903	0	0	0	0	0	0	0	603	903	0
628	6	-28.1064	-42.622	-589.025	1991.46	-55587.5	7300.05	105.628	296.619	0	0	0	0	0	0	0	200	903	0	0	0	0	0	0	0	603	903	0
628	7	-29.6323	-43.6902	-590.856	1991.46	-56136.8	7620.49	104.991	296.63	0	0	0	0	0	0	0	200	903	0	0	0	0	0	0	0	603	903	0
628	8	-28.259	-43.8427	-591.467	1716.8	-56319.9	7391.6	104.779	297.097	0	0	0	0	0	0	0	200	903	0	0	0	0	0	0	0	603	903	0
628	9	-29.7849	-44.4531	-593.603	709.719	-56319.9	7666.26	105.122	298.804	0	0	0	0	0	0	0	200	903	0	0	0	0	0	0	0	603	903	0
629	0	-28.8693	-44.7583	-595.129	343.508	-56442	7986.7	105.16	299.423	0	0	0	0	0	0	0	200	903	0	0	0	0	0	0	0	603	903	0
629	1	-29.0219	-44.3005	-599.096	343.508	-57052.4	8078.25	104.769	299.427	0	0	0	0	0	0	0	200	903	0	0	0	0	0	0	0	603	903	0
629	2	-29.6323	-45.6738	-601.537	343.508	-56686.2	8124.02	105.765	299.429	0	0	0	0	0	0	0	200	903	0	0	0	0	0	0	0	603	903	0
629	3	-30.5478	-45.216	-599.706	68.8494	-56686.2	7895.14	105.477	299.885	0	0	0	0	0	0	0	200	903	0	0	0	0	0	0	0	603	903	0
629	4	-30.7004	-47.0471	-602.148	68.8494	-57235.5	8169.8	104.948	299.886	0	0	0	0	0	0	0	200	903	0	0	0	0	0	0	0	603	903	0
629	5	-29.3271	-47.1997	-605.2	-22.7034	-57235.5	8581.79	105.427	300.038	0	0	0	0	0	0	0	200	903	0	0	0	0	0	0	0	603	903	0
629	6	-29.6323	-48.1152	-608.251	-755.126	-57723.8	8398.68	105.099	301.241	0	0	0	0	0	0	0	200	903	0	0	0	0	0	0	0	603	903	0
629	7	-30.7004	-47.81	-610.082	-1304.44	-57784.8	8444.46	105.284	302.138	0	0	0	0	0	0	0	200	903	0	0	0	0	0	0	0	603	903	0
629	8	-29.7849	-48.7256	-610.693	-1212.89	-58151	8352.91	104.779	301.986	0	0	0	0	0	0	0	200	903	0	0	0	0	0	0	0	603	903	0
629	9	-31.9211	-47.5048	-611.608	-1670.65	-57601.7	8810.67	105.819	302.732	0	0	0	0	0	0	0	200	903	0	0	0	0	0	0	0	603	903	0
630	0	-30.853	-49.0307	-613.745	-2403.07	-57601.7	8993.77	106.147	303.915	0	0	0	0	0	0	0	200	903	0	0	0	0	0	0	0	603	903	0
630	1	-30.853	-48.2678	-617.712	-2403.07	-58028.9	8673.34	106.058	303.89	0	0	0	0	0	0	0	200	903	0	0	0	0	0	0	0	603	903	0
630	2	-31.4633	-49.4885	-618.017	-2403.07	-57967.9	8993.77	106.203	303.888	0	0	0	0	0	0	0	200	903	0	0	0	0	0	0	0	603	903	0
630	3	-32.2263	-49.6411	-620.458	-2769.29	-58273.1	8993.77	106.081	304.463	0	0	0	0	0	0	0	200	903	0	0	0	0	0	0	0	603	903	0
630	4	-32.684	-51.167	-619.848	-3135.5	-58456.2	8719.12	105.693	305.059	0	0	0	0	0	0	0	200	903	0	0	0	0	0	0	0	603	903	0
630	5	-32.0737	-49.9463	-622.595	-3593.26	-58395.1	8948	106.207	305.771	0	0	0	0	0	0	0	200	903	0	0	0	0	0	0	0	603	903	0
630	6	-31.9211	-51.3195	-625.646	-4234.13	-58578.2	9085.33	106.372	306.768	0	0	0	0	0	0	0	200	903	0	0	0	0	0	0	0	603	903	0
630	7	-32.9892	-50.404	-626.867	-4691.89	-58944.5	9222.66	105.97	307.485	0	0	0	0	0	0	0	200	903	0	0	0	0	0	0	0	603	903	0
630	8	-33.447	-52.2351	-628.088	-5241.21	-58761.4	9359.99	106.444	308.345	0	0	0	0	0	0	0	200	903	0	0	0	0	0	0	0	603	903	0
630	9	-33.9047	-51.6247	-627.783	-4600.34	-58883.4	9543.09	106.204	307.328	0	0	0	0	0	0	0	200	903	0	0	0	0	0	0	0	603	903	0
631	0	-33.1418	-51.7773	-630.224	-5058.1	-59371.7	9680.42	105.793	308.026	0	0	0	0	0	0	0	200	903	0	0	0	0	0	0	0	603	903	0
631	1	-33.9047	-52.6928	-632.055	-5424.31	-59982.1	9588.87	105.1	308.582	0	0	0	0	0	0	0	200	903	0	0	0	0	0	0	0	603	903	0
631	2	-34.0573	-54.3713	-634.496	-5332.76	-58761.4	9176.88	107.389	308.405	0	0	0	0	0	0	0	200	903	0	0	0	0	0	0	0	603	903	0
631	3	-33.7521	-53.3032	-632.665	-6614.5	-59860	9680.42	105.384	310.455	0	0	0	0	0	0	0	200	903	0	0	0	0	0	0	0	603	903	0
631	4	-34.6677	-53.6084	-635.717	-7346.92	-59860	9771.97	105.839	311.557	0	0	0	0	0	0	0	200	903	0	0	0	0	0	0	0	603	903	0
631	5	-34.6677	-53.1506	-638.159	-7804.69	-59615.8	9588.87	106.581	312.23	0	0	0	0	0	0	0	200	903	0	0	0	0	0	0	0	603	903	0
631	6	-35.278	-53.761	-641.516	-8170.9	-60104.1	9497.31	106.309	312.737	0	0	0	0	0	0	0	200	903	0	0	0	0	0	0	0	603	903	0
631	7	-36.1935	-53.761	-643.041	-8079.34	-60470.3	9817.75	105.962	312.564	0	0	0	0	0	0	0	200	903	0	0	0	0	0	0	0	603	903	0
631	8	-35.5832	-54.0661	-640.6	-8170.9	-60531.4	9726.2	105.508	312.755	0	0	0	0	0	0	0	200	903	0	0	0	0	0	0	0	603	903	0
631	9	-36.3461	-54.6765	-643.041	-8170.9	-59798.9	9680.42	107.006	312.707	0	0	0	0	0	0	0	200	903	0	0	0	0	0	0	0	603	903	0
632	0	-35.1254	-55.2868	-645.483	-8994.87	-60653.4	9634.64	106.034	313.935	0	0	0	0	0	0	0	200	903	0	0	0	0	0	0	0	603	903	0
632	1	-36.1935	-57.2705	-648.229	-9635.74	-60775.5	9817.75	106.244	314.865	0	0	0	0	0	0	0	200	903	0	0	0	0	0	0	0	603	903	0
632	2	-37.2617	-55.7446	-650.366	-10459.7	-60470.3	9909.3	107.021	316.083	0	0	0	0	0	0	0	200	903	0	0	0	0	0	0	0	603	903	0
632	3	-38.635	-56.0498	-649.755	-11009	-60958.6	9955.08	106.182	316.943	0	0	0	0	0	0	0	200	903	0	0	0	0	0	0	0	603	903	0
632	4	-36.9565	-55.8972	-651.586	-11100.6	-61263.8	10000.9	105.977	317.036	0	0	0	0	0	0	0	200	903	0	0	0	0	0	0	0	603	903	0
632	5	-36.1935	-56.3549	-652.807	-11375.2	-61630	10046.6	105.592	317.425	0	0	0	0	0	0	0	200	903	0	0	0	0	0	0	0	603	903	0
632	6	-37.1091	-56.8127	-657.079	-11192.1	-60775.5	10092.4	107.507	317.033	0	0	0	0	0	0	0	200	903	0	0	0	0	0	0	0	603	903	0
632	7	-37.5668	-56.9653	-658.3	-11741.5	-61630	9726.2	106.38	317.836	0	0	0	0	0	0	0	200	903	0	0	0	0	0	0	0	603	903	0
632	8	-38.9401	-57.8808	-657.69	-12748.5	-61569	10184	106.386	319.384	0	0	0	0	0	0	0	200	903	0	0	0	0	0	0	0	603	903	0
632	9	-38.0246	-57.8808	-659.826	-12748.5	-61569	10184	106.689	319.321	0	0	0	0	0	0	0	200	903	0	0	0	0	0	0	0	603	903	0
633	0	-37.2617	-58.0334	-664.099	-12748.5	-61752.1	9817.75	107.014	319.197	0	0	0	0	0	0	0	200	903	0	0	0	0	0	0	0	603	903	0
633	1	-38.1772	-58.4912	-663.488	-13755.6	-61324.9	10092.4	107.572	320.732	0	0	0	0	0	0	0	200	903	0	0	0	0	0	0	0	603	903	0
633	2	-39.2453	-58.186	-665.624	-14488	-61263.8	10184	107.96	321.766	0	0	0	0	0	0	0	200	903	0	0	0	0	0	0	0	603	903	0
633	3	-39.2453	-58.7964	-665.624	-15403.6	-61630	10046.6	107.41	323.142	0	0	0	0	0	0	0	200	903	0	0	0	0	0	0	0	603	903	0
633	4	-39.0927	-59.5593	-667.455	-15586.7	-62301.4	10779.1	106.658	323.352	0	0	0	0	0	0	0	200	903	0	0	0	0	0	0	0	603	903	0
633	5	-38.7875	-60.1696	-668.676	-15861.3	-62423.5	10184	106.646	323.721	0	0	0	0	0	0	0	200	903	0	0	0	0	0	0	0	603	903	0
633	6	-38.7875	-59.8645	-672.949	-15312	-62179.3	10596	107.602	322.754	0	0	0	0	0	0	0	200	903	0	0	0	0	0	0	0	603	903	0
633	7	-39.3979	-59.2541	-674.474	-15678.2	-61996.2	10184	108.082	323.245	0	0	0	0	0	0	0	200	903	0	0	0	0	0	0	0	603	903	0
633	8	-38.7875	-60.78	-673.559	-16227.5	-62301.4	10367.1	107.504	324.092	0	0	0	0	0	0	0	200	903	0	0	0	0	0	0	0	603	903	0
633	9	-37.7194	-61.3903	-676.306	-16502.2	-62301.4	10687.5	107.88	324.401	0	0	0	0	0	0	0	200	903	0	0	0	0	0	0	0	603	903	0
634	0	-36.1935	-62.611	-681.494	-17234.6	-62606.6	10733.3	108.133	325.29	0	0	0	0	0	0	0	200	903	0	0	0	0	0	0	0	603	903	0
634	1	-37.872	-63.0688	-683.325	-17783.9	-63033.8	10870.6	107.754	326.026	0	0	0	0	0	0	0	200	903	0	0	0	0	0	0	0	603	903	0
634	2	-38.7875	-63.374	-684.545	-17783.9	-63400	10962.2	107.384	325.979	0	0	0	0	0	0	0	200	903	0	0	0	0	0	0	0	603	903	0
634	3	-38.4824	-63.9843	-684.545	-18699.5	-62789.7	10962.2	108.275	327.317	0	0	0	0	0	0	0	200	903	0	0	0	0	0	0	0	603	903	0
634	4	-37.7194	-65.968	-686.682	-18607.9	-63094.9	11053.7	108.116	327.098	0	0	0	0	0	0	0	200	903	0	0	0	0	0	0	0	603	903	0
634	5	-35.5832	-65.5102	-690.344	-18699.5	-63644.2	11328.4	107.808	327.087	0	0	0	0	0	0	0	200	903	0	0	0	0	0	0	0	603	903	0
634	6	-35.8884	-65.8154	-694.311	-18699.5	-62850.7	11236.8	109.478	326.932	0	0	0	0	0	0	0	200	903	0	0	0	0	0	0	0	603	903	0
634	7	-37.7194	-67.6464	-696.142	-19157.2	-63461.1	11511.5	108.839	327.519	0	0	0	0	0	0	0	200	903	0	0	0	0	0	0	0	603	903	0
634	8	-37.7194	-69.9353	-697.057	-19615	-63827.3	11603	108.433	328.14	0	0	0	0	0	0	0	200	903	0	0	0	0	0	0	0	603	903	0
634	9	-35.5832	-68.8671	-698.583	-20255.9	-63949.4	11374.2	108.459	328.996	0	0	0	0	0	0	0	200	903	0	0	0	0	0	0	0	603	903	0
635	0	-34.3625	-70.2404	-700.72	-20896.7	-63461.1	11511.5	109.434	329.822	0	0	0	0	0	0	0	200	903	0	0	0	0	0	0	0	603	903	0
635	1	-34.8203	-69.9353	-703.161	-20255.9	-63705.2	11923.5	109.402	328.807	0	0	0	0	0	0	0	200	903	0	0	0	0	0	0	0	603	903	0
635	2	-35.8884	-70.5456	-707.128	-21812.3	-64010.4	11877.7	109.478	330.846	0	0	0	0	0	0	0	200	903	0	0	0	0	0	0	0	603	903	0
635	3	-35.4306	-71.6137	-707.128	-21812.3	-63766.3	12106.6	109.824	330.846	0	0	0	0	0	0	0	200	903	0	0	0	0	0	0	0	603	903	0
635	4	-34.6677	-72.0715	-708.654	-21995.4	-63705.2	11786.1	110.104	331.038	0	0	0	0	0	0	0	200	903	0	0	0	0	0	0	0	603	903	0
635	5	-33.7521	-72.987	-713.842	-21812.3	-64132.4	12198.1	110.159	330.556	0	0	0	0	0	0	0	200	903	0	0	0	0	0	0	0	603	903	0
635	6	-34.0573	-74.3603	-713.842	-22178.5	-63705.2	12243.9	110.757	331.069	0	0	0	0	0	0	0	200	903	0	0	0	0	0	0	0	603	903	0
635	7	-35.1254	-75.2758	-714.758	-22544.7	-63949.4	12060.8	110.53	331.542	0	0	0	0	0	0	0	200	903	0	0	0	0	0	0	0	603	903	0
635	8	-34.9728	-76.6491	-715.368	-22819.3	-64437.6	12289.7	109.924	331.899	0	0	0	0	0	0	0	200	903	0	0	0	0	0	0	0	603	903	0
635	9	-34.0573	-75.7336	-716.589	-24192.6	-64376.6	12198.1	110.162	333.761	0	0	0	0	0	0	0	200	903	0	0	0	0	0	0	0	603	903	0
636	0	-34.5151	-77.8698	-718.42	-23918	-64559.7	12655.9	110.137	333.292	0	0	0	0	0	0	0	200	903	0	0	0	0	0	0	0	603	903	0
636	1	-33.7521	-77.7172	-721.472	-23185.6	-64437.6	12198.1	110.686	332.136	0	0	0	0	0	0	0	200	903	0	0	0	0	0	0	0	603	903	0
636	2	-34.8203	-79.2431	-722.692	-24650.4	-64376.6	12381.2	110.921	334.109	0	0	0	0	0	0	0	200	903	0	0	0	0	0	0	0	603	903	0
636	3	-33.447	-80.4638	-722.082	-24925.1	-63949.4	12655.9	111.438	334.518	0	0	0	0	0	0	0	200	903	0	0	0	0	0	0	0	603	903	0
636	4	-33.9047	-80.769	-720.556	-24833.5	-64132.4	12655.9	110.996	334.464	0	0	0	0	0	0	0	200	903	0	0	0	0	0	0	0	603	903	0
636	5	-33.7521	-81.9897	-724.218	-25108.2	-64071.4	12610.1	111.53	334.669	0	0	0	0	0	0	0	200	903	0	0	0	0	0	0	0	603	903	0
636	6	-33.447	-83.0578	-728.491	-24650.4	-64193.5	12701.7	111.882	333.838	0	0	0	0	0	0	0	200	903	0	0	0	0	0	0	0	603	903	0
636	7	-35.1254	-83.0578	-729.406	-26023.7	-64315.6	12884.8	111.825	335.678	0	0	0	0	0	0	0	200	903	0	0	0	0	0	0	0	603	903	0
636	8	-33.447	-85.4992	-728.796	-25749	-64925.9	12793.2	110.913	335.331	0	0	0	0	0	0	0	200	903	0	0	0	0	0	0	0	603	903	0
636	9	-35.4306	-85.0415	-730.016	-27030.8	-64254.5	12839	111.982	337.028	0	0	0	0	0	0	0	200	903	0	0	0	0	0	0	0	603	903	0
637	0	-34.5151	-85.4992	-730.322	-27671.6	-64254.5	13022.1	112.019	337.89	0	0	0	0	0	0	0	200	903	0	0	0	0	0	0	0	603	903	0
637	1	-33.9047	-85.6518	-733.984	-27030.8	-64681.8	13342.5	111.876	336.827	0	0	0	0	0	0	0	200	903	0	0	0	0	0	0	0	603	903	0
637	2	-35.5832	-86.5673	-733.679	-28495.6	-64742.8	12839	111.756	338.839	0	0	0	0	0	0	0	200	903	0	0	0	0	0	0	0	603	903	0
637	3	-34.2099	-88.551	-733.679	-28404.1	-64681.8	12976.3	111.839	338.715	0	0	0	0	0	0	0	200	903	0	0	0	0	0	0	0	603	903	0
637	4	-35.7358	-87.788	-732.153	-28404.1	-64437.6	12930.5	111.989	338.795	0	0	0	0	0	0	0	200	903	0	0	0	0	0	0	0	603	903	0
637	5	-35.278	-89.0088	-733.373	-28495.6	-64620.7	13067.9	111.886	338.856	0	0	0	0	0	0	0	200	903	0	0	0	0	0	0	0	603	903	0
637	6	-34.6677	-89.7717	-737.036	-28495.6	-64315.6	13067.9	112.738	338.663	0	0	0	0	0	0	0	200	903	0	0	0	0	0	0	0	603	903	0
637	7	-36.4987	-91.4502	-737.951	-29319.6	-64620.7	13205.2	112.432	339.731	0	0	0	0	0	0	0	200	903	0	0	0	0	0	0	0	603	903	0
637	8	-36.3461	-92.2131	-736.73	-29502.7	-64681.8	13342.5	112.204	340.045	0	0	0	0	0	0	0	200	903	0	0	0	0	0	0	0	603	903	0
637	9	-37.4142	-92.5183	-735.204	-30326.7	-64681.8	13251	112.022	341.249	0	0	0	0	0	0	0	200	903	0	0	0	0	0	0	0	603	903	0
638	0	-36.6513	-92.6709	-736.12	-29868.9	-63949.4	13159.4	113.126	340.576	0	0	0	0	0	0	0	200	903	0	0	0	0	0	0	0	603	903	0
638	1	-36.4987	-93.5864	-738.256	-31242.2	-64559.7	13296.8	112.551	342.319	0	0	0	0	0	0	0	200	903	0	0	0	0	0	0	0	603	903	0
638	2	-38.3298	-94.6545	-737.951	-31700	-64559.7	13342.5	112.515	342.957	0	0	0	0	0	0	0	200	903	0	0	0	0	0	0	0	603	903	0
638	3	-36.4987	-95.7226	-735.204	-31059.1	-63949.4	13388.3	113.018	342.246	0	0	0	0	0	0	0	200	903	0	0	0	0	0	0	0	603	903	0
638	4	-38.7875	-96.7907	-733.068	-31700	-64254.5	13296.8	112.349	343.243	0	0	0	0	0	0	0	200	903	0	0	0	0	0	0	0	603	903	0
638	5	-38.4824	-97.5537	-734.289	-32066.2	-64071.4	13479.9	112.744	343.67	0	0	0	0	0	0	0	200	903	0	0	0	0	0	0	0	603	903	0
638	6	-38.3298	-98.164	-736.73	-31516.9	-63949.4	13571.4	113.198	342.779	0	0	0	0	0	0	0	200	903	0	0	0	0	0	0	0	603	903	0
638	7	-40.0082	-99.3847	-735.815	-33073.2	-64071.4	13388.3	112.925	344.948	0	0	0	0	0	0	0	200	903	0	0	0	0	0	0	0	603	903	0
638	8	-37.7194	-99.3847	-733.984	-32157.7	-64071.4	13434.1	112.707	343.813	0	0	0	0	0	0	0	200	903	0	0	0	0	0	0	0	603	903	0
638	9	-40.1608	-100.3	-730.932	-34171.9	-63949.4	13708.7	112.51	346.751	0	0	0	0	0	0	0	200	903	0	0	0	0	0	0	0	603	903	0
639	0	-39.2453	-101.979	-733.068	-32890.1	-63827.3	13891.9	112.931	344.866	0	0	0	0	0	0	0	200	903	0	0	0	0	0	0	0	603	903	0
639	1	-39.0927	-102.436	-733.679	-33622.6	-63766.3	13800.3	113.087	345.827	0	0	0	0	0	0	0	200	903	0	0	0	0	0	0	0	603	903	0
639	2	-40.6186	-104.115	-732.458	-33164.8	-63583.2	13663	113.192	345.279	0	0	0	0	0	0	0	200	903	0	0	0	0	0	0	0	603	903	0
639	3	-38.635	-104.573	-731.542	-34263.4	-62789.7	13983.4	114.168	346.837	0	0	0	0	0	0	0	200	903	0	0	0	0	0	0	0	603	903	0
639	4	-39.8557	-105.641	-728.185	-34629.6	-63094.9	13846.1	113.353	347.556	0	0	0	0	0	0	0	200	903	0	0	0	0	0	0	0	603	903	0
639	5	-39.0927	-106.556	-726.965	-35728.3	-63155.9	14075	113.124	349.147	0	0	0	0	0	0	0	200	903	0	0	0	0	0	0	0	603	903	0
639	6	-38.9401	-107.014	-728.491	-35362.1	-63033.8	13754.5	113.473	348.542	0	0	0	0	0	0	0	200	903	0	0	0	0	0	0	0	603	903	0
639	7	-40.1608	-108.54	-726.965	-36277.6	-62362.4	14303.8	114.215	349.903	0	1.90735	14.3381	-21.2524	1640.63	2099.18	1312.45	298.774	825.803	0	0	0	0	0	0	0	603	903	0
639	8	-38.4824	-108.693	-724.218	-35453.6	-62789.7	14258.1	113.3	348.954	0	5.1117	18.9157	-27.356	1274.42	1794.01	1587.11	265.58	856.414	0	0	0	0	0	0	0	603	903	0
639	9	-38.7875	-109.608	-721.777	-36002.9	-62362.4	14166.5	113.599	349.881	0	3.12806	10.676	-20.0317	633.547	939.515	900.467	246.901	871.373	0	0	0	0	0	0	0	603	903	0
640	0	-37.872	-110.981	-720.556	-36460.7	-61630	14303.8	114.469	350.601	0	0	0	0	0	0	0	200	903	0	0	0	0	0	0	0	603	903	0
640	1	-37.5668	-112.66	-720.556	-36826.9	-61630	14532.7	114.469	351.109	0	2.82288	9.30268	-16.3696	1091.31	1610.9	992.02	298.408	836.333	0	0	0	0	0	0	0	603	903	0
640	2	-38.7875	-113.423	-718.42	-37559.3	-61385.9	14395.4	114.554	352.28	0	4.19617	5.64057	-25.8301	1457.52	2343.32	351.15	290.721	846.573	0	0	0	0	0	0	0	603	903	0
640	3	-38.3298	-114.033	-714.758	-37559.3	-61569	14441.2	113.86	352.548	0	3.73841	-1.83624	-30.1025	1365.97	2343.32	351.15	277.845	857.623	0	0	0	0	0	0	0	603	903	0
640	4	-37.5668	-114.644	-712.011	-37101.6	-60897.6	14486.9	114.471	352.108	0	-1.29699	-4.43023	-34.6802	2556.16	2343.32	259.598	267.57	829.294	0	0	0	0	0	0	0	603	903	0
640	5	-36.8039	-115.864	-712.621	-38017.1	-60958.6	14944.7	114.459	353.348	0	2.36512	-6.1087	-41.394	2922.37	3136.78	-564.377	275.779	832.401	0	0	0	0	0	0	0	603	903	0
640	6	-37.2617	-116.475	-708.654	-37925.5	-60653.4	14624.3	114.41	353.518	0	5.56946	-12.2122	-49.939	3013.92	3686.1	-518.601	273.812	842.648	0	0	0	0	0	0	0	603	903	0
640	7	-36.4987	-117.39	-703.466	-38108.6	-59860	14853.2	114.907	354.173	0	0.0762979	-14.1959	-54.8218	4295.66	3991.27	-152.39	272.805	824.643	0	0	0	0	0	0	0	603	903	0
640	8	-35.5832	-118.306	-703.771	-38017.1	-59676.9	15219.4	115.204	354.019	0	-2.82287	-9.61822	-59.0942	4387.21	4113.34	-1067.92	269.607	828.759	0	0	0	0	0	0	0	603	903	0
640	9	-34.6677	-120.594	-699.194	-38383.3	-59371.7	15219.4	115.085	354.897	0	1.297	-8.09234	-65.8081	5028.08	4540.59	-655.93	268.997	826.595	0	0	0	0	0	0	0	603	903	0
641	0	-33.2944	-121.052	-699.194	-38108.6	-58883.4	15310.9	115.784	354.504	0	2.67029	-9.16046	-75.2686	4844.98	4784.73	-335.495	263.569	838.631	0	0	0	0	0	0	0	603	903	0
641	1	-32.3788	-121.663	-691.259	-39298.8	-58700.3	15356.7	115.082	356.851	0	-2.36511	-4.888	-80.7617	5852.06	5150.94	-747.483	263.78	830.539	0	0	0	0	0	0	0	603	903	0
641	2	-32.8366	-123.036	-691.87	-39024.2	-58578.2	15494	115.333	356.404	0	-4.80651	-3.81988	-86.5601	6309.82	5456.12	-518.601	263.033	830.105	0	0	0	0	0	0	0	603	903	0
641	3	-31.7685	-123.494	-686.682	-38932.6	-58090	15402.5	115.405	356.697	0	-0.534054	-6.1087	-95.105	7225.35	5761.29	-381.272	260.578	827.028	0	0	0	0	0	0	0	603	903	0
641	4	-29.6323	-124.104	-683.935	-39756.6	-57418.6	15402.5	116.047	358.129	0	-1.60217	-7.02423	-106.091	7957.77	6493.72	-1159.47	261.209	827.991	0	0	0	0	0	0	0	603	903	0
641	5	-27.3434	-126.088	-684.24	-39756.6	-56991.3	15997.6	116.709	358.103	0	-8.46862	-7.02423	-116.467	8781.74	6859.93	-1617.23	258.9	827.599	0	0	0	0	0	0	0	603	903	0
641	6	-28.7167	-126.851	-678.747	-39207.3	-56747.2	16134.9	116.394	357.764	0	-11.3678	-11.7545	-125.928	9880.38	7592.35	-1113.69	260.291	824.539	0	0	0	0	0	0	0	603	903	0
641	7	-28.8693	-127.766	-675.695	-39298.8	-56197.9	15906	116.83	358.161	0	-9.68933	-14.9588	-139.661	10704.4	7592.35	-1937.67	254.363	826.355	0	0	0	0	0	0	0	603	903	0
641	8	-27.496	-128.071	-670.812	-39573.5	-55709.6	15951.8	116.952	358.993	0	-10.6049	-11.7545	-150.037	11345.2	7470.28	-2120.77	249.79	827.384	0	0	0	0	0	0	0	603	903	0
641	9	-25.3598	-129.139	-663.793	-39298.8	-55709.6	16226.4	116.074	359.203	0	-16.5558	-13.4329	-160.718	12077.6	8324.77	-1937.67	251.797	827.852	0	0	0	0	0	0	0	603	903	0
642	0	-24.2917	-130.97	-660.742	-39390.4	-55099.2	16363.8	116.61	359.615	0	-17.4713	-14.0433	-169.263	12627	9118.22	-2349.66	253.87	828.4	0	0	0	0	0	0	0	603	903	0
642	1	-24.1391	-130.818	-657.385	-40305.9	-54122.7	16226.4	117.67	361.313	0	-16.5558	-10.5337	-180.859	14091.8	9850.65	-2258.1	254.466	825.084	0	0	0	0	0	0	0	603	903	0
642	2	-24.1391	-130.818	-653.723	-40580.6	-54244.8	16272.2	117.022	362.076	0	-18.2342	-5.80352	-190.625	14274.9	9972.72	-1937.67	252.316	828.115	0	0	0	0	0	0	0	603	903	0
642	3	-22.308	-130.97	-646.398	-39848.1	-53817.5	16043.3	116.743	361.646	0	-21.286	-6.41388	-203.137	15190.4	10094.8	-1937.67	249.694	828.221	0	0	0	0	0	0	0	603	903	0
642	4	-22.6132	-132.344	-638.769	-40305.9	-52718.9	15951.8	117.468	363.099	0	-22.5067	-5.80352	-215.649	16014.4	11071.3	-1891.89	251.34	828.739	0	0	0	0	0	0	0	603	903	0
642	5	-19.1037	-131.886	-637.243	-40031.2	-51986.4	16089.1	118.42	362.819	0	-23.2696	-0.768123	-226.331	16563.7	11498.6	-1617.23	250.804	829.816	0	0	0	0	0	0	0	603	903	0
642	6	-18.4933	-131.733	-634.496	-40031.2	-51986.4	16455.3	118.067	363.091	0	-23.88	3.80951	-236.707	17387.7	12108.9	-1754.56	251.156	829.543	0	0	0	0	0	0	0	603	903	0
642	7	-18.0356	-133.259	-628.393	-38566.4	-51132	16363.8	118.631	361.373	0	-24.3378	3.19916	-248.914	17570.8	12353.1	-1708.79	249.628	832.41	0	0	0	0	0	0	0	603	903	0
642	8	-18.0356	-134.022	-620.153	-39573.5	-50643.7	16363.8	118.337	363.812	0	-26.1688	6.25092	-261.731	17937	12841.4	-839.036	249.063	834.468	0	0	0	0	0	0	0	603	903	0
642	9	-15.7468	-133.717	-613.745	-39939.7	-50399.5	16226.4	117.882	365.075	0	-26.9318	13.4226	-270.886	18577.9	14001	-518.601	251.686	834.418	0	0	0	0	0	0	0	603	903	0
643	0	-14.5261	-133.107	-604.894	-39573.5	-49239.9	16409.5	118.598	365.422	0	-24.6429	15.5588	-284.619	19218.8	14123.1	-289.719	249.621	835.476	0	0	0	0	0	0	0	603	903	0
643	1	-13.4579	-133.564	-603.674	-39848.1	-48568.5	16363.8	119.545	366.009	0	-24.7955	17.3898	-295.3	20134.3	14794.5	76.4922	250.1	834.818	0	0	0	0	0	0	0	603	903	0
643	2	-13.3054	-134.175	-597.265	-40122.8	-48446.4	16409.5	118.886	367.178	0	-28.1525	23.7985	-307.507	20500.5	15160.7	-15.0605	249.302	836.333	0	0	0	0	0	0	0	603	903	0
643	3	-12.2372	-134.785	-588.415	-40214.4	-47836.1	16318	118.704	368.344	0	-27.5421	29.2917	-318.494	20958.3	15832.1	351.15	249.709	837.196	0	0	0	0	0	0	0	603	903	0
643	4	-10.5588	-134.022	-582.617	-39390.4	-47103.6	16455.3	119.152	367.609	0	-26.9318	30.665	-330.701	21232.9	16869.7	1083.57	251.012	838.794	0	0	0	0	0	0	0	603	903	0
643	5	-8.72772	-133.87	-576.208	-38291.8	-46310.2	16272.2	119.629	366.455	0	-26.474	34.0219	-341.382	21965.3	17113.8	717.362	250.131	838.658	0	0	0	0	0	0	0	603	903	0
643	6	-8.57514	-135.09	-568.884	-38658	-45821.9	16043.3	119.453	367.954	0	-28.1525	39.9728	-355.115	22148.5	17663.1	1266.68	249.739	840.63	0	0	0	0	0	0	0	603	903	0
643	7	-8.57514	-133.717	-563.085	-38383.3	-44601.2	16089.1	120.791	368.166	0	-27.9999	42.4142	-364.88	22697.8	17724.2	1815.99	248.575	840.794	0	0	0	0	0	0	0	603	903	0
643	8	-7.35443	-134.633	-553.93	-38566.4	-43929.8	16089.1	120.694	369.623	0	-27.8473	46.5341	-374.341	23247.1	18822.8	2044.88	250.283	840.899	0	0	0	0	0	0	0	603	903	0
643	9	-6.28632	-133.87	-546.606	-38932.6	-43380.5	16043.3	120.637	371.226	0	-27.6947	50.654	-385.938	23613.3	19738.3	2136.43	251.144	841.816	0	0	0	0	0	0	0	603	903	0
644	0	-5.98114	-133.87	-539.892	-38383.3	-42831.2	15860.2	120.667	371.094	0	-27.9999	54.0109	-396.619	22972.4	20165.6	2685.75	250.844	845.079	0	0	0	0	0	0	0	603	903	0
644	1	-5.52338	-132.496	-527.99	-38200.2	-42281.9	15631.4	119.919	372.35	0	-27.0843	55.079	-405.164	23521.7	20348.7	3097.73	250.223	844.945	0	0	0	0	0	0	0	603	903	0
644	2	-5.2182	-132.496	-522.802	-37650.9	-41671.5	15722.9	120.292	372.017	0	-26.7792	58.1308	-415.234	24071.1	20959	3051.96	250.475	845.03	0	0	0	0	0	0	0	603	903	0
644	3	-4.76044	-132.191	-513.036	-37925.5	-41061.2	15494	119.964	373.924	0	-26.3214	61.4877	-423.474	24254.2	21630.4	3509.72	251.079	845.726	0	0	0	0	0	0	0	603	903	0
644	4	-3.08197	-132.344	-504.492	-36918.5	-39474.2	15356.7	121.754	373.18	0	-25.8636	63.3188	-429.883	24528.8	22607	3738.6	252.589	845.941	0	0	0	0	0	0	0	603	903	0
644	5	-1.86127	-132.496	-497.778	-36277.6	-39413.2	15310.9	120.822	372.879	0	-25.1007	64.8447	-440.259	24437.3	22973.2	3875.93	252.181	847.493	0	0	0	0	0	0	0	603	903	0
644	6	-1.86127	-131.123	-489.233	-35911.4	-38558.7	15310.9	121.185	373.403	0	-26.474	68.2016	-451.855	24620.4	23461.5	4562.58	251.923	848.513	0	0	0	0	0	0	0	603	903	0
644	7	-0.793154	-130.665	-478.552	-35453.6	-37582.2	14853.2	121.467	374.085	0	-23.7274	69.7275	-465.283	25078.1	24193.9	4562.58	251.998	849.101	0	0	0	0	0	0	0	603	903	0
644	8	-1.40351	-128.834	-468.481	-35728.3	-36544.6	14486.9	121.993	376.264	0	-20.2179	69.8801	-476.88	25352.8	24254.9	4928.79	250.862	849.836	0	0	0	0	0	0	0	603	903	0
644	9	0.427549	-127.308	-458.105	-35545.2	-35995.2	14807.4	121.426	377.592	0	-20.2179	73.0844	-488.171	24986.6	26086	5020.34	253.436	851.816	0	0	0	0	0	0	0	603	903	0
645	0	0.580137	-125.935	-452.001	-35087.4	-34957.6	14395.4	122.66	377.627	0	-20.8282	75.9836	-499.158	25169.7	27184.6	5340.77	254.461	852.576	0	0	0	0	0	0	0	603	903	0
645	1	0.580137	-125.325	-441.32	-34721.2	-34347.3	13937.6	122.172	378.676	0	-18.8446	75.831	-513.501	25810.6	27795	5203.45	254.128	852.736	0	0	0	0	0	0	0	603	903	0
645	2	2.2586	-122.425	-431.555	-33714.1	-33981.1	13983.4	121.259	378.122	0	-16.5558	77.6621	-526.624	25993.7	28283.3	5615.43	253.707	853.641	0	0	0	0	0	0	0	603	903	0
645	3	1.80084	-120.594	-417.822	-32890.1	-33309.7	13708.7	120.278	378.718	0	-14.4196	79.4931	-537.305	25719	29504	5935.87	254.911	855.133	0	0	0	0	0	0	0	603	903	0
645	4	2.2586	-119.221	-409.582	-32890.1	-31844.8	13434.1	122.25	380.302	0	-15.6403	80.4086	-550.122	25810.6	30114.3	5752.76	254.741	856.082	0	0	0	0	0	0	0	603	903	0
645	5	2.41119	-116.932	-401.953	-32432.4	-31356.6	12976.3	121.989	380.687	0	-15.7928	82.85	-561.414	25627.5	30602.6	5844.31	254.51	857.352	0	0	0	0	0	0	0	603	903	0
645	6	2.56378	-116.322	-390.051	-32066.2	-30624.1	12747.4	121.487	382.21	0	-15.9454	86.5122	-571.484	25993.7	31213	5935.87	254.617	857.516	0	0	0	0	0	0	0	603	903	0
645	7	3.47931	-113.423	-379.064	-31791.5	-29281.4	12747.4	122.754	383.868	0	-13.8092	88.3432	-580.334	25810.6	31762.3	5890.09	254.731	858.525	0	0	0	0	0	0	0	603	903	0
645	8	2.56378	-110.981	-365.942	-31700	-28793.1	12335.5	121.318	386.626	0	-13.3514	89.8691	-591.321	25993.7	32922	6347.85	255.675	859.041	0	0	0	0	0	0	0	603	903	0
645	9	2.86896	-108.082	-358.618	-30967.5	-28060.7	12335.5	121.753	386.353	0	-13.0463	90.4794	-599.866	25810.6	32250.5	6805.62	253.763	859.973	0	0	0	0	0	0	0	603	903	0
646	0	3.47931	-106.404	-350.378	-30235.1	-27023.1	11648.8	122.874	386.293	0	-10.2997	92.7683	-607.8	25627.5	33898.5	6302.08	255.772	860.836	0	0	0	0	0	0	0	603	903	0
646	1	3.02154	-102.742	-341.223	-29319.6	-26290.6	11419.9	122.952	385.925	0	-11.9781	94.2941	-614.514	25719	33959.6	6668.29	255.262	861.147	0	0	0	0	0	0	0	603	903	0
646	2	3.93707	-100.148	-329.016	-28587.2	-25680.3	11191	121.948	386.887	0	-9.68933	95.9726	-620.618	25261.2	34325.8	6439.41	255.309	862.297	0	0	0	0	0	0	0	603	903	0
646	3	3.63189	-98.0114	-320.471	-27488.5	-24947.9	10184	122.152	385.776	0	-8.62121	95.6674	-623.975	25535.9	35180.3	6439.41	256.381	862.076	0	0	0	0	0	0	0	603	903	0
646	4	4.39483	-95.2649	-309.789	-27580.1	-23971.3	10458.6	122.621	389.029	0	-8.7738	98.1088	-633.13	25169.7	35180.3	6576.74	255.566	863.246	0	0	0	0	0	0	0	603	903	0
646	5	3.93707	-91.6027	-302.77	-27305.4	-23605.1	9909.3	122.036	390.185	0	-6.48498	97.9562	-636.792	24986.6	35912.7	6668.29	256.396	863.762	0	0	0	0	0	0	0	603	903	0
646	6	3.63189	-88.551	-291.479	-27397	-22689.6	9176.88	122.157	393.993	0	-3.89099	97.4985	-641.675	25261.2	35790.6	6714.07	255.777	863.632	0	0	0	0	0	0	0	603	903	0
646	7	5.15777	-84.7363	-281.408	-26389.9	-21774	8993.77	122.625	393.778	0	-2.21252	100.245	-641.98	24437.3	35912.7	6897.17	255.941	864.935	0	0	0	0	0	0	0	603	903	0
646	8	3.17413	-81.0742	-269.811	-26206.8	-21407.8	8810.67	120.656	397.13	0	-2.36511	101.313	-645.642	25352.8	36584.1	7080.28	256.663	863.732	0	0	0	0	0	0	0	603	903	0
646	9	3.17413	-79.8535	-263.403	-25199.7	-20553.3	8673.34	121.97	395.67	0	-1.29699	100.092	-646.863	24071.1	36278.9	6714.07	256.084	865.788	0	0	0	0	0	0	0	603	903	0
647	0	3.17413	-75.4284	-256.384	-24101.1	-19820.9	8215.58	122.69	394.004	0	1.75476	101.924	-648.389	23888	37133.4	7171.83	257.27	866.158	0	0	0	0	0	0	0	603	903	0
647	1	1.49566	-73.5974	-247.534	-23277.1	-19393.7	7940.92	121.652	394.036	0	1.60218	101.771	-650.83	23521.7	37133.4	7171.83	257.055	866.859	0	0	0	0	0	0	0	603	903	0
647	2	2.86896	-70.0879	-237.158	-22727.8	-18722.3	7620.49	121.055	395.834	0	2.05994	101.924	-650.525	22972.4	37133.4	7217.61	257.082	867.686	0	0	0	0	0	0	0	603	903	0
647	3	1.34308	-68.8671	-224.645	-22178.5	-17745.7	7025.39	121.006	398.727	0	4.95911	102.229	-652.356	22880.9	36889.2	7309.16	256.548	867.926	0	0	0	0	0	0	0	603	903	0
647	4	1.64825	-65.3576	-219.763	-22361.6	-17013.3	7162.72	122.583	401.753	0	5.1117	103.907	-652.051	22972.4	37499.6	7538.04	257.51	867.769	0	0	0	0	0	0	0	603	903	0
647	5	1.80084	-62.611	-213.049	-21903.8	-16769.2	6933.84	121.29	402.811	0	6.17981	104.06	-652.966	22514.7	37804.8	7446.49	257.897	868.519	0	0	0	0	0	0	0	603	903	0
[truncated: 2,144 more rows]
