# Supplementary material for: The Effects of an Extemporaneous Speech Dual-task on Older Adult Gait Control
Source: Research Square preprint supplement (doi:10.21203/rs.3.rs-7674245/v1), 2025-11-18
Supplement: Supplementary file 157 [file Over4ground06.xlsx]

## Sheet: Sheet1
Trajectories
		04:LFHD			04:RFHD			04:LBHD			04:RBHD			04:C7			04:T10			04:CLAV			04:STRN			04:RBAK			04:LSHO			04:LUPA			04:LELB			04:LFRM			04:LWRA			04:LWRB			04:LFIN
Frame	Sub Frame	X	Y	Z	X	Y	Z	X	Y	Z	X	Y	Z	X	Y	Z	X	Y	Z	X	Y	Z	X	Y	Z	X	Y	Z	X	Y	Z	X	Y	Z	X	Y	Z	X	Y	Z	X	Y	Z	X	Y	Z	X	Y	Z
		mm	mm	mm	mm	mm	mm	mm	mm	mm	mm	mm	mm	mm	mm	mm	mm	mm	mm	mm	mm	mm	mm	mm	mm	mm	mm	mm	mm	mm	mm	mm	mm	mm	mm	mm	mm	mm	mm	mm	mm	mm	mm	mm	mm	mm	mm	mm	mm
523	0	122.919	-2214.68	1592.52	240.569	-2209.27	1598.98	132.512	-2381.18	1547.69	240.173	-2373.5	1551.2	187.002	-2356.52	1455.5	180.592	-2439.06	1175.63	186.28	-2236.08	1360.8	193.339	-2177.07	1165.61	262.293	-2453.63	1253.64	7.31209	-2283.82	1379.6	-66.68	-2285.34	1136.44	-69.1875	-2282.53	1060.44	-69.3214	-2171.01	921.454	-15.5991	-2141.38	851.393	-82.5564	-2164.35	832.488	-48.7732	-2104.71	785.018
524	0	122.96	-2204.49	1591.09	240.671	-2199.11	1597.42	132.408	-2371.03	1546.23	240.107	-2363.35	1549.62	186.634	-2346.25	1454.06	180.186	-2429.29	1174.57	186.018	-2225.88	1359.33	192.998	-2166.96	1164.25	261.685	-2443.67	1252.65	7.01747	-2273.28	1378.33	-67.4322	-2272.02	1135.94	-70.0947	-2268.15	1059.91	-68.6341	-2154.09	923.322	-14.4593	-2123.52	854.315	-81.3729	-2145.74	834.539	-47.0695	-2085.36	788.758
525	0	123.084	-2194.25	1589.65	240.852	-2188.91	1595.84	132.394	-2360.82	1544.73	240.127	-2353.16	1548.01	186.372	-2335.92	1452.59	179.872	-2419.4	1173.45	185.85	-2215.61	1357.82	192.755	-2156.78	1162.84	261.191	-2433.63	1251.57	6.81922	-2262.7	1377.03	-68.0585	-2258.87	1135.34	-70.863	-2253.96	1059.29	-67.9024	-2137.5	924.984	-13.2975	-2106.02	856.987	-80.1599	-2127.52	836.387	-45.3818	-2066.43	792.232
526	0	123.292	-2183.96	1588.18	241.111	-2178.66	1594.25	132.472	-2350.56	1543.2	240.233	-2342.91	1546.37	186.218	-2325.53	1451.09	179.649	-2409.41	1172.25	185.776	-2205.27	1356.29	192.611	-2146.54	1161.38	260.81	-2423.5	1250.42	6.71738	-2252.08	1375.68	-68.5589	-2245.9	1134.62	-71.4925	-2239.96	1058.58	-67.1261	-2121.23	926.442	-12.1137	-2088.87	859.407	-78.9172	-2109.7	838.032	-43.7099	-2047.93	795.44
527	0	123.582	-2173.63	1586.7	241.45	-2168.37	1592.63	132.639	-2340.24	1541.63	240.423	-2332.61	1544.69	186.171	-2315.08	1449.55	179.517	-2399.3	1170.98	185.798	-2194.85	1354.73	192.565	-2136.22	1159.87	260.543	-2413.28	1249.19	6.71205	-2241.43	1374.29	-68.9335	-2233.11	1133.8	-71.9831	-2226.16	1057.78	-66.3055	-2105.28	927.694	-10.908	-2072.09	861.576	-77.6451	-2092.28	839.473	-42.054	-2029.86	798.382
528	0	123.956	-2163.25	1585.19	241.869	-2158.03	1591	132.898	-2329.87	1540.03	240.699	-2322.26	1542.97	186.232	-2304.57	1447.99	179.477	-2389.08	1169.64	185.915	-2184.37	1353.14	192.616	-2125.83	1158.32	260.389	-2402.97	1247.88	6.80341	-2230.73	1372.86	-69.1822	-2220.49	1132.87	-72.3346	-2212.54	1056.9	-65.4406	-2089.65	928.741	-9.68055	-2055.66	863.494	-76.3437	-2075.26	840.709	-40.4145	-2012.21	801.056
529	0	124.414	-2152.82	1583.67	242.367	-2147.65	1589.35	133.248	-2319.45	1538.4	241.061	-2311.85	1541.23	186.399	-2294	1446.4	179.528	-2378.75	1168.23	186.128	-2173.81	1351.53	192.764	-2115.36	1156.73	260.349	-2392.57	1246.49	6.99173	-2219.99	1371.4	-69.305	-2208.04	1131.83	-72.547	-2199.12	1055.92	-64.5318	-2074.34	929.583	-8.43151	-2039.6	865.159	-75.0132	-2058.64	841.74	-38.7916	-1995	803.46
530	0	124.957	-2142.35	1582.13	242.946	-2137.22	1587.69	133.691	-2308.97	1536.73	241.511	-2301.4	1539.46	186.675	-2283.37	1444.78	179.671	-2368.31	1166.75	186.436	-2163.18	1349.9	193.005	-2104.82	1155.09	260.422	-2382.07	1245.03	7.27733	-2209.2	1369.9	-69.3021	-2195.77	1130.7	-72.6202	-2185.88	1054.86	-63.5795	-2059.36	930.221	-7.16118	-2023.9	866.573	-73.6542	-2042.42	842.563	-37.1858	-1978.21	805.591
531	0	125.586	-2131.83	1580.59	243.607	-2126.74	1586.02	134.227	-2298.43	1535.05	242.049	-2290.89	1537.66	187.058	-2272.68	1443.14	179.905	-2357.75	1165.22	186.84	-2152.48	1348.26	193.338	-2094.2	1153.42	260.607	-2371.48	1243.5	7.66055	-2198.37	1368.37	-69.1736	-2183.66	1129.47	-72.5545	-2172.85	1053.73	-62.5841	-2044.7	930.653	-5.86993	-2008.56	867.733	-72.2671	-2026.62	843.177	-35.5976	-1961.87	807.444
532	0	126.302	-2121.26	1579.04	244.351	-2116.21	1584.36	134.857	-2287.84	1533.35	242.677	-2280.32	1535.85	187.548	-2261.93	1441.48	180.23	-2347.08	1163.64	187.342	-2141.7	1346.6	193.76	-2083.49	1151.73	260.902	-2360.8	1241.91	8.14168	-2187.49	1366.83	-68.92	-2171.72	1128.16	-72.3502	-2160	1052.52	-61.5462	-2030.38	930.882	-4.5582	-1993.6	868.64	-70.8525	-2011.24	843.58	-34.0275	-1945.98	809.016
533	0	127.107	-2110.65	1577.5	245.18	-2105.63	1582.7	135.582	-2277.19	1531.63	243.396	-2269.71	1534.03	188.146	-2251.12	1439.82	180.645	-2336.3	1162.01	187.941	-2130.84	1344.95	194.266	-2072.68	1150.03	261.305	-2350.02	1240.27	8.72089	-2176.55	1365.27	-68.5417	-2159.94	1126.78	-72.008	-2147.35	1051.25	-60.4666	-2016.39	930.909	-3.2265	-1979.02	869.293	-69.4113	-1996.29	843.769	-32.4757	-1930.54	810.3
534	0	128.002	-2099.98	1575.98	246.096	-2095	1581.07	136.405	-2266.48	1529.92	244.21	-2259.03	1532.2	188.85	-2240.24	1438.16	181.148	-2325.4	1160.35	188.638	-2119.91	1343.3	194.854	-2061.77	1148.32	261.813	-2339.13	1238.58	9.39814	-2165.56	1363.72	-68.0398	-2148.31	1125.34	-71.5292	-2134.89	1049.92	-59.3459	-2002.75	930.737	-1.87539	-1964.82	869.693	-67.9445	-1981.78	843.745	-30.9424	-1915.57	811.291
535	0	128.99	-2089.27	1574.49	247.101	-2084.32	1579.46	137.327	-2255.71	1528.22	245.119	-2248.29	1530.39	189.66	-2229.3	1436.51	181.737	-2314.4	1158.66	189.432	-2108.89	1341.69	195.519	-2050.74	1146.63	262.423	-2328.15	1236.85	10.173	-2154.51	1362.18	-67.4154	-2136.82	1123.86	-70.9156	-2122.62	1048.56	-58.1848	-1989.45	930.37	-0.505514	-1951.02	869.842	-66.4534	-1967.73	843.505	-29.4273	-1901.07	811.985
536	0	130.072	-2078.5	1573.04	248.197	-2073.59	1577.9	138.348	-2244.89	1526.54	246.125	-2237.5	1528.61	190.573	-2218.29	1434.88	182.41	-2303.27	1156.97	190.323	-2097.79	1340.11	196.259	-2039.6	1144.97	263.131	-2317.06	1235.1	11.0448	-2143.39	1360.68	-66.6702	-2125.46	1122.35	-70.1698	-2110.55	1047.17	-56.9841	-1976.5	929.814	0.882407	-1937.62	869.741	-64.9395	-1954.14	843.052	-27.93	-1887.06	812.377
537	0	131.25	-2067.68	1571.65	249.386	-2062.79	1576.39	139.471	-2234	1524.9	247.232	-2226.64	1526.86	191.588	-2207.22	1433.29	183.162	-2292.03	1155.29	191.311	-2086.61	1338.58	197.07	-2028.33	1143.36	263.931	-2305.87	1233.35	12.0121	-2132.19	1359.23	-65.8065	-2114.22	1120.84	-69.2951	-2098.66	1045.78	-55.7446	-1963.91	929.075	2.28756	-1924.63	869.394	-63.405	-1941.02	842.389	-26.4495	-1873.56	812.465
538	0	132.526	-2056.81	1570.33	250.669	-2051.94	1574.95	140.696	-2223.06	1523.32	248.439	-2215.72	1525.16	192.701	-2196.08	1431.75	183.99	-2280.68	1153.63	192.392	-2075.35	1337.12	197.95	-2016.92	1141.82	264.817	-2294.57	1231.61	13.0729	-2120.92	1357.84	-64.8269	-2103.08	1119.36	-68.2958	-2086.95	1044.4	-54.4671	-1951.68	928.164	3.70901	-1912.06	868.806	-61.8524	-1928.4	841.522	-24.9844	-1860.58	812.247
539	0	133.9	-2045.89	1569.09	252.049	-2041.04	1573.6	142.022	-2212.06	1521.8	249.747	-2204.74	1523.52	193.91	-2184.88	1430.27	184.888	-2269.22	1152.02	193.565	-2064	1335.75	198.896	-2005.38	1140.38	265.783	-2283.16	1229.89	14.2243	-2109.58	1356.54	-63.7349	-2092.03	1117.91	-67.177	-2075.43	1043.04	-53.1528	-1939.81	927.092	5.14564	-1899.92	867.987	-60.285	-1916.28	840.461	-23.5329	-1848.13	811.724
540	0	135.373	-2034.92	1567.96	253.525	-2030.07	1572.34	143.449	-2201	1520.37	251.158	-2193.7	1521.97	195.21	-2173.62	1428.88	185.851	-2257.64	1150.47	194.826	-2052.57	1334.48	199.908	-1993.69	1139.05	266.823	-2271.65	1228.22	15.4629	-2098.15	1355.34	-62.5346	-2081.04	1116.54	-65.9448	-2064.07	1041.74	-51.8029	-1928.31	925.873	6.59613	-1888.23	866.944	-58.7069	-1904.67	839.216	-22.0931	-1836.23	810.901
541	0	136.944	-2023.89	1566.95	255.098	-2019.05	1571.2	144.975	-2189.89	1519.04	252.668	-2182.59	1520.51	196.595	-2162.29	1427.57	186.874	-2245.95	1149	196.17	-2041.06	1333.33	200.982	-1981.86	1137.86	267.93	-2260.02	1226.61	16.7838	-2086.64	1354.27	-61.231	-2070.11	1115.26	-64.6061	-2052.89	1040.51	-50.4188	-1917.18	924.523	8.05885	-1877	865.689	-57.1232	-1893.58	837.804	-20.6625	-1824.88	809.784
542	0	138.613	-2012.82	1566.08	256.766	-2007.96	1570.17	146.597	-2178.72	1517.83	254.277	-2171.43	1519.16	198.059	-2150.91	1426.38	187.95	-2234.16	1147.63	197.591	-2029.48	1332.31	202.117	-1969.88	1136.82	269.097	-2248.3	1225.07	18.1813	-2075.05	1353.34	-59.8298	-2059.21	1114.09	-63.1689	-2041.87	1039.37	-49.0021	-1906.41	923.061	9.53184	-1866.22	864.238	-55.5398	-1883	836.243	-19.2388	-1814.11	808.382
543	0	140.377	-2001.7	1565.34	258.528	-1996.83	1569.28	148.311	-2167.51	1516.75	255.979	-2160.21	1517.93	199.596	-2139.48	1425.31	189.073	-2222.27	1146.37	199.082	-2017.83	1331.44	203.308	-1957.78	1135.97	270.316	-2236.48	1223.64	19.6487	-2063.39	1352.56	-58.3379	-2048.33	1113.06	-61.6419	-2031	1038.35	-47.5552	-1896.01	921.506	11.0127	-1855.92	862.606	-53.9636	-1872.94	834.556	-17.8196	-1803.93	806.709
544	0	142.233	-1990.53	1564.77	260.381	-1985.64	1568.53	150.11	-2156.25	1515.82	257.771	-2148.93	1516.83	201.198	-2128	1424.37	190.239	-2210.3	1145.25	200.633	-2006.11	1330.73	204.549	-1945.55	1135.3	271.582	-2224.56	1222.32	21.1777	-2051.66	1351.96	-56.7631	-2037.45	1112.19	-60.0347	-2020.28	1037.46	-46.0805	-1885.97	919.879	12.4986	-1846.08	860.813	-52.4025	-1863.4	832.767	-16.4028	-1794.33	804.779
545	0	144.176	-1979.32	1564.36	262.32	-1974.41	1567.92	151.989	-2144.95	1515.06	259.646	-2137.61	1515.88	202.857	-2116.49	1423.58	191.439	-2198.24	1144.28	202.235	-1994.34	1330.19	205.834	-1933.2	1134.84	272.885	-2212.56	1221.13	22.7593	-2039.88	1351.53	-55.1142	-2026.57	1111.5	-58.3577	-2009.69	1036.71	-44.5811	-1876.27	918.205	13.9862	-1836.73	858.88	-50.8653	-1854.35	830.903	-14.9869	-1785.32	802.613
546	0	146.201	-1968.08	1564.12	264.34	-1963.13	1567.45	153.938	-2133.62	1514.46	261.595	-2126.25	1515.08	204.562	-2104.94	1422.94	192.671	-2186.11	1143.46	203.876	-1982.53	1329.83	207.151	-1920.77	1134.6	274.22	-2200.49	1220.08	24.383	-2028.05	1351.3	-53.4013	-2015.66	1110.99	-56.6224	-1999.24	1036.13	-43.0607	-1866.92	916.506	15.4716	-1827.85	856.828	-49.3611	-1845.79	828.995	-13.5709	-1776.91	800.233
547	0	148.3	-1956.8	1564.05	266.433	-1951.82	1567.14	155.948	-2122.26	1514.04	263.607	-2114.86	1514.43	206.304	-2093.38	1422.46	193.928	-2173.93	1142.82	205.544	-1970.68	1329.64	208.489	-1908.26	1134.56	275.578	-2188.35	1219.18	26.0373	-2016.19	1351.26	-51.6355	-2004.74	1110.68	-54.8408	-1988.91	1035.73	-41.5238	-1857.89	914.806	16.95	-1819.45	854.684	-47.9	-1837.69	827.073	-12.1548	-1769.09	797.665
548	0	150.464	-1945.5	1564.15	268.593	-1940.47	1566.97	158.007	-2110.87	1513.81	265.673	-2103.45	1513.95	208.073	-2081.8	1422.14	195.205	-2161.71	1142.35	207.224	-1958.82	1329.63	209.834	-1895.7	1134.74	276.953	-2176.17	1218.44	27.71	-2004.31	1351.42	-49.8291	-1993.78	1110.57	-53.0259	-1978.71	1035.5	-39.9757	-1849.18	913.13	18.4164	-1811.51	852.472	-46.4921	-1830.04	825.167	-10.7399	-1761.84	794.936
549	0	152.686	-1934.17	1564.43	270.808	-1929.11	1566.93	160.103	-2099.48	1513.77	267.78	-2092.02	1513.64	209.857	-2070.23	1421.99	196.498	-2149.48	1142.06	208.904	-1946.96	1329.8	211.168	-1883.12	1135.13	278.337	-2163.96	1217.86	29.3881	-1992.45	1351.78	-47.9955	-1982.81	1110.67	-51.1914	-1968.62	1035.47	-38.4225	-1840.77	911.501	19.8646	-1804.01	850.22	-45.1477	-1822.79	823.309	-9.32858	-1755.15	792.078
550	0	154.953	-1922.83	1564.87	273.069	-1917.74	1567.04	162.224	-2088.08	1513.93	269.913	-2080.59	1513.49	211.645	-2058.67	1422.01	197.802	-2137.25	1141.95	210.567	-1935.11	1330.14	212.476	-1870.55	1135.7	279.722	-2151.75	1217.46	31.0582	-1980.61	1352.33	-46.1492	-1971.81	1110.96	-49.3515	-1958.64	1035.62	-36.8712	-1832.63	909.941	21.2881	-1796.96	847.955	-43.8769	-1815.91	821.528	-7.92469	-1749.01	789.122
551	0	157.253	-1911.49	1565.47	275.364	-1906.36	1567.26	164.354	-2076.69	1514.27	272.058	-2069.16	1513.5	213.427	-2047.13	1422.19	199.114	-2125.04	1142.03	212.199	-1923.29	1330.65	213.74	-1858.02	1136.46	281.102	-2139.55	1217.23	32.7068	-1968.82	1353.06	-44.3052	-1960.82	1111.45	-47.521	-1948.77	1035.96	-35.3304	-1824.75	908.471	22.6791	-1790.32	845.704	-42.6899	-1809.37	819.852	-6.53374	-1743.38	786.105
552	0	159.575	-1900.14	1566.23	277.679	-1894.98	1567.61	166.481	-2065.3	1514.8	274.2	-2057.76	1513.68	215.191	-2035.63	1422.54	200.43	-2112.88	1142.29	213.786	-1911.51	1331.31	214.942	-1845.57	1137.38	282.471	-2127.38	1217.17	34.3204	-1957.1	1353.97	-42.4797	-1949.83	1112.12	-45.7149	-1939.01	1036.48	-33.8094	-1817.12	907.109	24.0292	-1784.06	843.495	-41.5962	-1803.13	818.306	-5.16293	-1738.23	783.061
553	0	161.905	-1888.8	1567.12	280.002	-1883.63	1568.06	168.589	-2053.94	1515.52	276.324	-2046.38	1514	216.927	-2024.17	1423.04	201.747	-2100.79	1142.71	215.313	-1899.8	1332.12	216.066	-1833.22	1138.45	283.823	-2115.26	1217.28	35.8863	-1945.48	1355.04	-40.6888	-1938.87	1112.96	-43.9484	-1929.36	1037.17	-32.319	-1809.69	905.872	25.3289	-1778.17	841.354	-40.6052	-1797.15	816.912	-3.82127	-1733.53	780.026
554	0	164.229	-1877.47	1568.14	282.318	-1872.3	1568.6	170.664	-2042.61	1516.41	278.415	-2035.05	1514.48	218.625	-2012.77	1423.69	203.062	-2088.79	1143.3	216.768	-1888.16	1333.05	217.096	-1821	1139.63	285.155	-2103.22	1217.56	37.3924	-1933.96	1356.26	-38.949	-1927.97	1113.95	-42.2362	-1919.83	1038.03	-30.8714	-1802.47	904.775	26.5675	-1772.61	839.307	-39.7258	-1791.37	815.689	-2.51969	-1729.22	777.036
555	0	166.533	-1866.17	1569.27	284.612	-1861	1569.24	172.691	-2031.31	1517.46	280.457	-2023.76	1515.09	220.276	-2001.43	1424.48	204.371	-2076.89	1144.05	218.137	-1876.61	1334.1	218.018	-1808.94	1140.91	286.463	-2091.28	1217.99	38.8276	-1922.59	1357.6	-37.2765	-1917.16	1115.08	-40.5928	-1910.43	1039.04	-29.4799	-1795.42	903.828	27.7337	-1767.33	837.378	-38.9664	-1785.77	814.653	-1.27113	-1725.27	774.128
556	0	168.802	-1854.89	1570.51	286.871	-1849.75	1569.94	174.659	-2020.05	1518.66	282.437	-2012.53	1515.84	221.873	-1990.17	1425.4	205.674	-2065.12	1144.93	219.411	-1865.16	1335.26	218.819	-1797.05	1142.26	287.748	-2079.44	1218.57	40.1825	-1911.37	1359.06	-35.6869	-1906.47	1116.32	-39.0314	-1901.16	1040.19	-28.1589	-1788.53	903.042	28.8149	-1762.31	835.59	-38.3344	-1780.3	813.815	-0.090529	-1721.62	771.335
557	0	171.022	-1843.65	1571.83	289.08	-1838.55	1570.72	176.554	-2008.85	1520	284.341	-2001.37	1516.7	223.409	-1978.99	1426.44	206.969	-2053.49	1145.95	220.581	-1853.83	1336.5	219.492	-1785.37	1143.68	289.01	-2067.72	1219.29	41.449	-1900.32	1360.62	-34.1947	-1895.92	1117.67	-37.5644	-1892.03	1041.45	-26.9239	-1781.78	902.422	29.7978	-1757.5	833.963	-37.8364	-1774.93	813.183	1.00516	-1718.21	768.692
558	0	173.18	-1832.45	1573.22	291.225	-1827.41	1571.55	178.365	-1997.7	1521.46	286.158	-1990.27	1517.68	224.879	-1967.9	1427.59	208.256	-2042.01	1147.08	221.639	-1842.61	1337.81	220.028	-1773.89	1145.13	290.252	-2056.13	1220.15	42.6209	-1889.45	1362.25	-32.8131	-1885.57	1119.09	-36.2027	-1883.05	1042.82	-25.7908	-1775.15	901.972	30.6687	-1752.86	832.514	-37.4779	-1769.63	812.758	1.99719	-1714.99	766.229
559	0	175.262	-1821.3	1574.67	293.292	-1816.33	1572.43	180.083	-1986.61	1523.03	287.878	-1979.25	1518.75	226.279	-1956.89	1428.83	209.534	-2030.69	1148.31	222.581	-1831.52	1339.18	220.423	-1762.62	1146.61	291.477	-2044.68	1221.12	43.6942	-1878.78	1363.95	-31.5532	-1875.43	1120.58	-34.9552	-1874.24	1044.27	-24.7762	-1768.64	901.693	31.4132	-1748.35	831.26	-37.2631	-1764.38	812.541	2.8653	-1711.9	763.976
560	0	177.257	-1810.2	1576.18	295.27	-1805.32	1573.36	181.701	-1975.58	1524.7	289.494	-1968.31	1519.91	227.606	-1945.97	1430.15	210.804	-2019.54	1149.63	223.405	-1820.55	1340.6	220.675	-1751.58	1148.1	292.692	-2033.37	1222.22	44.6664	-1868.31	1365.68	-30.4237	-1865.55	1122.11	-33.8291	-1865.62	1045.8	-23.8962	-1762.23	901.584	32.0173	-1743.91	830.213	-37.1948	-1759.15	812.528	3.58817	-1708.89	761.956
561	0	179.153	-1799.15	1577.71	297.148	-1794.37	1574.33	183.211	-1964.62	1526.43	290.997	-1957.44	1521.15	228.86	-1935.15	1431.55	212.066	-2008.57	1151.03	224.111	-1809.71	1342.05	220.787	-1740.74	1149.59	293.901	-2022.21	1223.41	45.5376	-1858.04	1367.44	-29.4308	-1855.96	1123.68	-32.8294	-1857.18	1047.38	-23.1667	-1755.92	901.642	32.467	-1739.52	829.38	-37.2748	-1753.94	812.709	4.14403	-1705.88	760.192
562	0	180.94	-1788.16	1579.27	298.915	-1783.5	1575.33	184.608	-1953.72	1528.23	292.384	-1946.66	1522.46	230.04	-1924.41	1433.01	213.322	-1997.75	1152.48	224.699	-1799	1343.53	220.762	-1730.11	1151.08	295.112	-2011.18	1224.69	46.3096	-1847.98	1369.22	-28.5778	-1846.69	1125.28	-31.9589	-1848.96	1049	-22.6026	-1749.7	901.861	32.7493	-1735.13	828.768	-37.503	-1748.73	813.073	4.51136	-1702.84	758.702
563	0	182.609	-1777.23	1580.84	300.562	-1772.69	1576.35	185.89	-1942.89	1530.06	293.652	-1935.94	1523.82	231.148	-1913.77	1434.51	214.571	-1987.1	1153.99	225.174	-1788.41	1345.02	220.607	-1719.67	1152.56	296.331	-2000.29	1226.06	46.9859	-1838.11	1371	-27.8646	-1837.75	1126.88	-31.2181	-1840.94	1050.66	-22.2171	-1743.56	902.232	32.8524	-1730.7	828.377	-37.8783	-1743.53	813.607	4.66969	-1699.71	757.497
564	0	184.154	-1766.36	1582.4	302.084	-1761.96	1577.4	187.055	-1932.12	1531.92	294.799	-1925.3	1525.22	232.185	-1903.2	1436.05	215.813	-1976.61	1155.53	225.542	-1777.93	1346.51	220.333	-1709.41	1154.02	297.561	-1989.52	1227.49	47.5719	-1828.44	1372.76	-27.2885	-1829.16	1128.5	-30.605	-1833.15	1052.33	-22.0216	-1737.51	902.746	32.766	-1726.2	828.206	-38.3978	-1738.34	814.294	4.60045	-1696.44	756.585
565	0	185.569	-1755.56	1583.95	303.473	-1751.29	1578.46	188.103	-1921.42	1533.79	295.827	-1914.73	1526.66	233.154	-1892.72	1437.6	217.049	-1966.25	1157.09	225.811	-1767.57	1347.99	219.953	-1699.31	1155.47	298.808	-1978.87	1228.98	48.0743	-1818.94	1374.49	-26.8436	-1820.93	1130.1	-30.1159	-1825.59	1054.01	-22.0249	-1731.54	903.39	32.4819	-1721.59	828.246	-39.0571	-1733.17	815.113	4.28778	-1693.01	755.967
566	0	186.849	-1744.81	1585.48	304.727	-1740.68	1579.53	189.034	-1910.77	1535.64	296.736	-1904.22	1528.12	234.06	-1882.3	1439.16	218.278	-1956.03	1158.66	225.988	-1757.3	1349.45	219.48	-1689.36	1156.89	300.074	-1968.33	1230.5	48.5009	-1809.61	1376.19	-26.5212	-1813.05	1131.7	-29.7447	-1818.26	1055.68	-22.2329	-1725.65	904.152	31.9943	-1716.86	828.488	-39.8505	-1728.03	816.046	3.71933	-1689.36	755.639
567	0	187.992	-1734.12	1586.97	305.843	-1730.12	1580.61	189.851	-1900.19	1537.47	297.53	-1893.76	1529.58	234.905	-1871.95	1440.7	219.495	-1945.92	1160.21	226.085	-1747.12	1350.88	218.931	-1679.53	1158.29	301.36	-1957.87	1232.05	48.8602	-1800.43	1377.84	-26.3103	-1805.53	1133.28	-29.4835	-1811.16	1057.33	-22.648	-1719.85	905.013	31.3002	-1711.99	828.915	-40.7701	-1722.93	817.069	2.88683	-1685.48	755.59
568	0	188.996	-1723.48	1588.4	306.821	-1719.62	1581.67	190.557	-1889.66	1539.25	298.212	-1883.36	1531.04	235.694	-1861.67	1442.22	220.701	-1935.92	1161.75	226.111	-1737.02	1352.27	218.323	-1669.81	1159.66	302.665	-1947.49	1233.6	49.1613	-1791.38	1379.42	-26.1982	-1798.35	1134.83	-29.3229	-1804.28	1058.97	-23.2691	-1714.13	905.958	30.3997	-1706.94	829.509	-41.8068	-1717.88	818.158	1.78661	-1681.35	755.803
569	0	189.861	-1712.89	1589.78	307.66	-1709.16	1582.72	191.156	-1879.17	1540.98	298.788	-1872.99	1532.48	236.431	-1851.43	1443.71	221.889	-1926	1163.24	226.078	-1726.99	1353.61	217.676	-1660.17	1161	303.984	-1937.18	1235.14	49.4129	-1782.43	1380.94	-26.1705	-1791.47	1136.36	-29.2523	-1797.61	1060.56	-24.0913	-1708.49	906.965	29.2958	-1701.72	830.247	-42.9494	-1712.89	819.289	0.419932	-1676.96	756.255
570	0	190.59	-1702.35	1591.08	308.364	-1698.74	1583.75	191.651	-1868.74	1542.62	299.261	-1862.67	1533.89	237.119	-1841.23	1445.13	223.055	-1916.15	1164.68	225.995	-1717.01	1354.89	217.006	-1650.59	1162.29	305.314	-1926.91	1236.64	49.6238	-1773.58	1382.36	-26.2121	-1784.88	1137.84	-29.26	-1791.13	1062.12	-25.1057	-1702.93	908.015	27.9953	-1696.32	831.103	-44.1853	-1707.96	820.438	-1.20695	-1672.31	756.916
571	0	191.185	-1691.85	1592.28	308.935	-1688.35	1584.73	192.049	-1858.34	1544.17	299.638	-1852.37	1535.25	237.761	-1831.07	1446.49	224.195	-1906.35	1166.04	225.872	-1707.08	1356.09	216.33	-1641.07	1163.52	306.646	-1916.68	1238.1	49.8018	-1764.78	1383.7	-26.3075	-1778.54	1139.28	-29.3339	-1784.82	1063.61	-26.2997	-1697.44	909.084	26.5078	-1690.74	832.048	-45.5004	-1703.1	821.578	-3.08276	-1667.4	757.755
572	0	191.65	-1681.39	1593.39	309.378	-1677.98	1585.66	192.353	-1847.97	1545.62	299.924	-1842.09	1536.55	238.359	-1820.94	1447.75	225.302	-1896.6	1167.32	225.72	-1697.18	1357.2	215.666	-1631.57	1164.68	307.971	-1906.47	1239.49	49.9541	-1756.03	1384.92	-26.4417	-1772.39	1140.66	-29.4615	-1778.66	1065.04	-27.6572	-1692	910.151	24.8464	-1684.97	833.052	-46.8795	-1698.31	822.686	-5.19143	-1662.25	758.732
573	0	191.989	-1670.97	1594.38	309.699	-1667.64	1586.53	192.568	-1837.64	1546.93	300.124	-1831.83	1537.76	238.915	-1810.83	1448.92	226.371	-1886.87	1168.5	225.546	-1687.3	1358.21	215.026	-1622.08	1165.75	309.279	-1896.28	1240.78	50.0864	-1747.3	1386.03	-26.6003	-1766.4	1141.96	-29.6306	-1772.63	1066.39	-29.159	-1686.62	911.191	23.0271	-1679.02	834.081	-48.3065	-1693.58	823.738	-7.51243	-1656.87	759.808
574	0	192.209	-1660.56	1595.25	309.902	-1657.31	1587.32	192.701	-1827.32	1548.11	300.244	-1821.58	1538.89	239.431	-1800.72	1449.97	227.394	-1877.17	1169.56	225.357	-1677.43	1359.11	214.422	-1612.59	1166.72	310.559	-1886.1	1241.98	50.2033	-1738.57	1387	-26.7701	-1760.53	1143.19	-29.8294	-1766.68	1067.65	-30.7834	-1681.27	912.179	21.0688	-1672.9	835.103	-49.765	-1688.91	824.71	-10.0212	-1651.29	760.938
575	0	192.315	-1650.18	1595.98	309.996	-1646.99	1588.02	192.755	-1817.02	1549.14	300.289	-1811.33	1539.9	239.905	-1790.62	1450.89	228.366	-1867.47	1170.5	225.159	-1667.57	1359.87	213.864	-1603.08	1167.57	311.799	-1875.92	1243.05	50.3079	-1729.81	1387.83	-26.9396	-1754.71	1144.31	-30.0465	-1760.79	1068.8	-32.5067	-1675.95	913.094	18.9925	-1666.63	836.083	-51.2387	-1684.28	825.581	-12.6898	-1645.52	762.08
576	0	192.314	-1639.82	1596.56	309.986	-1636.67	1588.62	192.736	-1806.74	1550.01	300.264	-1801.08	1540.78	240.338	-1780.52	1451.67	229.28	-1857.77	1171.3	224.957	-1657.69	1360.5	213.358	-1593.55	1168.28	312.987	-1865.73	1243.99	50.4018	-1721.01	1388.51	-27.0993	-1748.9	1145.32	-30.2717	-1754.92	1069.83	-34.3038	-1670.63	913.91	16.8216	-1660.22	836.99	-52.7119	-1679.67	826.331	-15.4873	-1639.6	763.188
577	0	192.214	-1629.46	1596.99	309.879	-1626.35	1589.09	192.648	-1796.45	1550.7	300.173	-1790.82	1541.53	240.727	-1770.4	1452.3	230.131	-1848.06	1171.94	224.752	-1647.8	1360.98	212.907	-1583.98	1168.83	314.109	-1855.54	1244.78	50.485	-1712.15	1389.02	-27.2414	-1743.04	1146.21	-30.4957	-1749.04	1070.73	-36.1493	-1665.29	914.606	14.5805	-1653.68	837.789	-54.17	-1675.07	826.943	-18.3809	-1633.56	764.221
578	0	192.021	-1619.11	1597.25	309.683	-1616.02	1589.44	192.495	-1786.17	1551.21	300.02	-1780.55	1542.12	241.07	-1760.27	1452.76	230.912	-1838.34	1172.43	224.546	-1637.88	1361.29	212.513	-1574.36	1169.22	315.155	-1845.34	1245.41	50.5562	-1703.21	1389.36	-27.3605	-1737.1	1146.96	-30.7106	-1743.1	1071.49	-38.0177	-1659.92	915.161	12.295	-1647.03	838.453	-55.5999	-1670.45	827.402	-21.3364	-1627.43	765.137
579	0	191.741	-1608.75	1597.33	309.403	-1605.68	1589.65	192.281	-1775.88	1551.52	299.808	-1770.26	1542.56	241.364	-1750.12	1453.05	231.618	-1828.6	1172.76	224.34	-1627.93	1361.44	212.173	-1564.7	1169.43	316.113	-1835.12	1245.87	50.6128	-1694.18	1389.53	-27.4533	-1731.03	1147.55	-30.9099	-1737.08	1072.09	-39.8845	-1654.5	915.556	9.99083	-1640.28	838.95	-56.9907	-1665.8	827.695	-24.319	-1621.22	765.899
580	0	191.381	-1598.39	1597.24	309.046	-1595.33	1589.71	192.008	-1765.58	1551.64	299.542	-1759.95	1542.82	241.605	-1739.93	1453.17	232.243	-1818.83	1172.91	224.131	-1617.94	1361.41	211.884	-1554.98	1169.45	316.972	-1824.9	1246.15	50.6505	-1685.05	1389.51	-27.5187	-1724.78	1147.98	-31.0885	-1730.93	1072.53	-41.7265	-1649.01	915.773	7.69382	-1633.46	839.258	-58.3337	-1661.08	827.81	-27.2944	-1614.97	766.472
581	0	190.947	-1588.02	1596.97	308.618	-1584.96	1589.61	191.679	-1755.27	1551.56	299.222	-1749.62	1542.9	241.787	-1729.71	1453.1	232.783	-1809.03	1172.89	223.918	-1607.91	1361.2	211.639	-1545.2	1169.28	317.723	-1814.66	1246.26	50.6643	-1675.8	1389.3	-27.5575	-1718.32	1148.23	-31.243	-1724.63	1072.79	-43.5224	-1643.41	915.797	5.42884	-1626.58	839.352	-59.6224	-1656.28	827.74	-30.2291	-1608.7	766.827
582	0	190.445	-1577.63	1596.52	308.124	-1574.56	1589.35	191.297	-1744.93	1551.28	298.85	-1739.25	1542.79	241.907	-1719.46	1452.84	233.231	-1799.19	1172.68	223.695	-1597.83	1360.8	211.43	-1535.37	1168.9	318.357	-1804.41	1246.17	50.6479	-1666.42	1388.9	-27.5725	-1711.62	1148.29	-31.3716	-1718.15	1072.86	-45.2538	-1637.7	915.615	3.21945	-1619.66	839.213	-60.853	-1651.37	827.477	-33.0915	-1602.42	766.939
583	0	189.88	-1567.23	1595.89	307.568	-1564.14	1588.91	190.862	-1734.57	1550.8	298.428	-1728.86	1542.5	241.958	-1709.16	1452.4	233.584	-1789.31	1172.3	223.458	-1587.69	1360.22	211.248	-1525.47	1168.33	318.867	-1794.15	1245.9	50.5942	-1656.92	1388.3	-27.5685	-1704.65	1148.15	-31.4743	-1711.45	1072.74	-46.9045	-1631.86	915.218	1.08739	-1612.7	838.826	-62.0239	-1646.33	827.018	-35.8525	-1596.15	766.787
584	0	189.255	-1556.8	1595.07	306.955	-1553.69	1588.31	190.374	-1724.18	1550.12	297.956	-1718.43	1542.01	241.934	-1698.81	1451.77	233.837	-1779.38	1171.73	223.201	-1577.5	1359.46	211.082	-1515.51	1167.55	319.246	-1783.87	1245.44	50.4957	-1647.27	1387.52	-27.5517	-1697.38	1147.8	-31.5526	-1704.52	1072.42	-48.4617	-1625.86	914.596	-0.947852	-1605.72	838.18	-63.1355	-1641.14	826.361	-38.4856	-1589.89	766.356
585	0	188.575	-1546.34	1594.09	306.287	-1543.2	1587.53	189.834	-1713.75	1549.25	297.432	-1707.97	1541.33	241.829	-1688.42	1450.95	233.985	-1769.4	1170.98	222.916	-1567.25	1358.51	210.921	-1505.48	1166.59	319.49	-1773.57	1244.8	50.344	-1637.49	1386.55	-27.53	-1689.8	1147.25	-31.6097	-1697.32	1071.89	-49.9156	-1619.68	913.746	-2.86941	-1598.71	837.266	-64.1901	-1635.78	825.505	-40.9682	-1583.66	765.634
586	0	187.842	-1535.86	1592.93	305.568	-1532.69	1586.59	189.239	-1703.29	1548.19	296.856	-1697.46	1540.46	241.637	-1677.97	1449.96	234.023	-1759.36	1170.06	222.597	-1556.93	1357.39	210.753	-1495.37	1165.44	319.594	-1763.25	1243.96	50.1309	-1627.56	1385.4	-27.5122	-1681.9	1146.48	-31.6505	-1689.85	1071.16	-51.2596	-1613.31	912.666	-4.66331	-1591.69	836.082	-65.1915	-1630.23	824.452	-43.2811	-1577.43	764.618
587	0	187.057	-1525.33	1591.62	304.799	-1522.13	1585.48	188.589	-1692.79	1546.96	296.225	-1686.92	1539.41	241.351	-1667.47	1448.79	233.949	-1749.24	1168.96	222.234	-1546.54	1356.1	210.568	-1485.19	1164.11	319.557	-1752.9	1242.95	49.848	-1617.48	1384.07	-27.5083	-1673.66	1145.49	-31.6811	-1682.09	1070.23	-52.4903	-1606.74	911.356	-6.31869	-1584.66	834.629	-66.1443	-1624.48	823.204	-45.4092	-1571.22	763.306
588	0	186.222	-1514.77	1590.17	303.979	-1511.54	1584.21	187.88	-1682.24	1545.56	295.537	-1676.33	1538.18	240.965	-1656.9	1447.47	233.758	-1739.05	1167.69	221.819	-1536.08	1354.65	210.353	-1474.92	1162.62	319.376	-1742.52	1241.77	49.487	-1607.26	1382.57	-27.5289	-1665.09	1144.29	-31.7091	-1674.03	1069.1	-53.6073	-1599.94	909.821	-7.82791	-1577.61	832.91	-67.0541	-1618.51	821.768	-47.3415	-1565.02	761.702
589	0	185.336	-1504.17	1588.58	303.111	-1500.91	1582.79	187.11	-1671.65	1544	294.788	-1665.7	1536.78	240.474	-1646.27	1445.99	233.449	-1728.76	1166.27	221.343	-1525.54	1353.06	210.097	-1464.56	1160.97	319.052	-1732.09	1240.42	49.04	-1596.9	1380.92	-27.585	-1656.18	1142.89	-31.7429	-1665.65	1067.77	-54.6129	-1592.92	908.069	-9.1866	-1570.53	830.938	-67.9268	-1612.3	820.15	-49.0712	-1558.8	759.816
590	0	184.399	-1493.52	1586.89	302.191	-1490.24	1581.25	186.274	-1661	1542.31	293.974	-1655.02	1535.23	239.873	-1635.58	1444.38	233.019	-1718.38	1164.71	220.797	-1514.92	1351.34	209.79	-1454.1	1159.18	318.585	-1721.62	1238.93	48.4999	-1586.39	1379.12	-27.6874	-1646.93	1141.28	-31.7915	-1656.97	1066.26	-55.5119	-1585.64	906.109	-10.3936	-1563.41	828.724	-68.7683	-1605.85	818.359	-50.5952	-1552.55	757.661
591	0	183.409	-1482.83	1585.09	301.219	-1479.53	1579.59	185.368	-1650.29	1540.51	293.09	-1644.29	1533.54	239.157	-1624.82	1442.66	232.468	-1707.89	1163.01	220.174	-1504.22	1349.51	209.423	-1443.53	1157.27	317.977	-1711.08	1237.3	47.86	-1575.74	1377.19	-27.847	-1637.36	1139.48	-31.8646	-1647.97	1064.57	-56.3111	-1578.12	903.957	-11.4509	-1556.23	826.289	-69.5845	-1599.14	816.407	-51.9145	-1546.26	755.256
592	0	182.363	-1472.09	1583.23	300.192	-1468.78	1577.83	184.387	-1639.53	1538.6	292.132	-1633.51	1531.73	238.322	-1613.98	1440.84	231.797	-1697.29	1161.2	219.464	-1493.43	1347.58	208.986	-1432.85	1155.26	317.231	-1700.49	1235.55	47.1149	-1564.96	1375.15	-28.0737	-1627.48	1137.51	-31.9715	-1638.67	1062.72	-57.0195	-1570.33	901.63	-12.3635	-1548.99	823.655	-70.3809	-1592.17	814.308	-53.0333	-1539.89	752.623
593	0	181.258	-1461.29	1581.32	299.106	-1457.97	1576	183.327	-1628.7	1536.62	291.094	-1622.68	1529.83	237.366	-1603.08	1438.94	231.008	-1686.56	1159.3	218.661	-1482.56	1345.59	208.472	-1422.05	1153.16	316.353	-1689.81	1233.71	46.26	-1554.04	1373.01	-28.3766	-1617.29	1135.39	-32.1215	-1629.05	1060.72	-57.647	-1562.26	899.149	-13.1388	-1541.66	820.848	-71.1628	-1584.92	812.078	-53.9594	-1533.43	749.79
594	0	180.09	-1450.44	1579.39	297.958	-1447.13	1574.12	182.182	-1617.81	1534.59	289.971	-1611.79	1527.85	236.288	-1592.09	1437	230.105	-1675.71	1157.33	217.757	-1471.59	1343.54	207.874	-1411.12	1150.99	315.348	-1679.06	1231.81	45.2923	-1543	1370.8	-28.7633	-1606.81	1133.13	-32.3233	-1619.14	1058.6	-58.2049	-1553.93	896.539	-13.7871	-1534.21	817.9	-71.9346	-1577.38	809.738	-54.7035	-1526.85	746.786
595	0	178.855	-1439.53	1577.46	296.744	-1436.23	1572.22	180.947	-1606.86	1532.54	288.757	-1600.85	1525.82	235.087	-1581.03	1435.03	229.091	-1664.71	1155.31	216.748	-1460.53	1341.48	207.185	-1400.07	1148.79	314.222	-1668.21	1229.86	44.2099	-1531.84	1368.53	-29.2403	-1596.05	1130.76	-32.5842	-1608.94	1056.38	-58.705	-1545.31	893.827	-14.3205	-1526.62	814.844	-72.7006	-1569.54	807.31	-55.2788	-1520.11	743.648
596	0	177.549	-1428.56	1575.56	295.459	-1425.28	1570.33	179.618	-1595.83	1530.48	287.448	-1589.84	1523.77	233.765	-1569.9	1433.06	227.974	-1653.58	1153.28	215.63	-1449.38	1339.43	206.4	-1388.87	1146.57	312.986	-1657.26	1227.89	43.0125	-1520.56	1366.25	-29.8118	-1585.04	1128.31	-32.9109	-1598.47	1054.09	-59.1596	-1536.4	891.045	-14.7532	-1518.87	811.719	-73.4642	-1561.39	804.82	-55.7013	-1513.19	740.413
597	0	176.168	-1417.53	1573.72	294.098	-1414.29	1568.48	178.19	-1584.73	1528.45	286.041	-1578.78	1521.73	232.326	-1558.69	1431.13	226.762	-1642.31	1151.25	214.4	-1438.14	1337.41	205.515	-1377.54	1144.38	311.648	-1646.2	1225.94	41.7014	-1509.18	1363.96	-30.4805	-1573.79	1125.81	-33.3084	-1587.73	1051.75	-59.5809	-1527.2	888.225	-15.1008	-1510.92	808.565	-74.2287	-1552.92	802.296	-55.9888	-1506.05	737.123
598	0	174.706	-1406.43	1571.97	292.658	-1403.24	1566.7	176.662	-1573.55	1526.48	284.53	-1567.66	1519.73	230.773	-1547.4	1429.25	225.463	-1630.9	1149.28	213.058	-1426.81	1335.46	204.527	-1366.07	1142.23	310.22	-1635.03	1224.04	40.2793	-1497.71	1361.71	-31.2469	-1562.32	1123.3	-33.7804	-1576.74	1049.39	-59.9811	-1517.7	885.404	-15.3797	-1502.74	805.422	-74.9965	-1544.12	799.769	-56.1611	-1498.66	733.821
599	0	173.16	-1395.27	1570.33	291.132	-1392.14	1565.03	175.029	-1562.31	1524.59	282.915	-1556.48	1517.81	229.112	-1536.04	1427.46	224.087	-1619.34	1147.37	211.604	-1415.39	1333.61	203.433	-1354.47	1140.16	308.714	-1623.75	1222.23	38.7508	-1486.16	1359.52	-32.1095	-1550.65	1120.8	-34.329	-1565.52	1047.05	-60.3718	-1507.91	882.618	-15.6071	-1494.32	802.334	-75.77	-1534.98	797.273	-56.2392	-1490.98	730.553
600	0	171.527	-1384.05	1568.82	289.519	-1380.99	1563.49	173.292	-1551	1522.82	281.194	-1545.24	1516.01	227.351	-1524.61	1425.79	222.647	-1607.66	1145.57	210.042	-1403.89	1331.89	202.233	-1342.74	1138.22	307.143	-1612.34	1220.53	37.1222	-1474.53	1357.41	-33.0648	-1538.8	1118.36	-34.9549	-1554.08	1044.76	-60.764	-1497.81	879.907	-15.8004	-1485.61	799.345	-76.5507	-1525.5	794.842	-56.2453	-1482.99	727.365
601	0	169.804	-1372.76	1567.48	287.815	-1369.78	1562.12	171.451	-1539.61	1521.18	279.368	-1533.94	1514.34	225.5	-1513.11	1424.27	221.155	-1595.85	1143.9	208.378	-1392.3	1330.33	200.929	-1330.89	1136.44	305.52	-1600.82	1218.98	35.4013	-1462.84	1355.44	-34.1077	-1526.79	1116.01	-35.6573	-1542.44	1042.56	-61.1681	-1487.42	877.309	-15.9766	-1476.58	796.496	-77.3403	-1515.66	792.511	-56.2019	-1474.65	724.303
602	0	167.988	-1361.41	1566.31	286.016	-1358.52	1560.94	169.508	-1528.16	1519.71	277.438	-1522.58	1512.85	223.567	-1501.56	1422.91	219.621	-1583.92	1142.4	206.618	-1380.65	1328.95	199.522	-1318.92	1134.84	303.86	-1589.19	1217.6	33.598	-1451.1	1353.61	-35.2316	-1514.64	1113.79	-36.4343	-1530.61	1040.46	-61.5936	-1476.72	874.86	-16.1523	-1467.22	793.828	-78.1399	-1505.45	790.314	-56.1317	-1465.92	721.412
603	0	166.079	-1350.01	1565.35	284.124	-1347.21	1559.98	167.467	-1516.65	1518.42	275.409	-1511.18	1511.57	221.565	-1489.97	1421.74	218.06	-1571.89	1141.09	204.774	-1368.93	1327.78	198.021	-1306.85	1133.48	302.175	-1577.44	1216.43	31.7232	-1439.32	1351.96	-36.4284	-1502.35	1111.73	-37.283	-1518.6	1038.52	-62.0488	-1465.71	872.596	-16.3429	-1457.49	791.38	-78.9502	-1494.87	788.285	-56.0568	-1456.77	718.735
604	0	164.078	-1338.54	1564.58	282.137	-1335.85	1559.25	165.332	-1505.09	1517.35	273.284	-1499.73	1510.52	219.505	-1478.33	1420.79	216.483	-1559.78	1139.99	202.857	-1357.17	1326.84	196.433	-1294.7	1132.36	300.478	-1565.61	1215.49	29.7896	-1427.52	1350.51	-37.6894	-1489.96	1109.86	-38.1995	-1506.45	1036.75	-62.5412	-1454.41	870.551	-16.5629	-1447.37	789.184	-79.772	-1483.92	786.452	-55.9982	-1447.17	716.311
605	0	161.987	-1327.03	1564.04	280.057	-1324.45	1558.78	163.111	-1493.48	1516.49	271.073	-1488.23	1509.72	217.401	-1466.66	1420.05	214.9	-1547.6	1139.12	200.881	-1345.36	1326.15	194.772	-1282.48	1131.53	298.782	-1553.69	1214.79	27.8108	-1415.7	1349.28	-39.0051	-1477.48	1108.21	-39.1794	-1494.14	1035.18	-63.0772	-1442.8	868.752	-16.8254	-1436.84	787.272	-80.6055	-1472.59	784.845	-55.9756	-1437.1	714.175
606	0	159.81	-1315.46	1563.72	277.888	-1313	1558.57	160.812	-1481.83	1515.88	268.783	-1476.7	1509.21	215.267	-1454.98	1419.56	213.321	-1535.37	1138.5	198.862	-1333.53	1325.71	193.052	-1270.21	1131	297.096	-1541.7	1214.35	25.8014	-1403.88	1348.3	-40.366	-1464.92	1106.81	-40.2181	-1481.72	1033.83	-63.662	-1430.9	867.225	-17.1414	-1425.88	785.668	-81.4509	-1460.87	783.485	-56.0066	-1426.53	712.355
607	0	157.551	-1303.86	1563.61	275.635	-1301.51	1558.62	158.446	-1470.15	1515.51	266.424	-1465.15	1508.99	213.115	-1443.29	1419.3	211.755	-1523.12	1138.13	196.816	-1321.68	1325.55	191.293	-1257.92	1130.77	295.428	-1529.66	1214.18	23.7762	-1392.07	1347.56	-41.7627	-1452.31	1105.67	-41.3108	-1469.17	1032.72	-64.2996	-1418.7	865.989	-17.5205	-1414.48	784.391	-82.3082	-1448.78	782.389	-56.1064	-1415.43	710.875
608	0	155.218	-1292.23	1563.72	273.306	-1289.99	1558.94	156.024	-1458.45	1515.4	264.01	-1453.58	1509.07	210.96	-1431.61	1419.3	210.207	-1510.87	1138.02	194.761	-1309.84	1325.65	189.517	-1245.62	1130.86	293.784	-1517.6	1214.27	21.7504	-1380.28	1347.09	-43.1864	-1439.64	1104.8	-42.4529	-1456.52	1031.86	-64.9931	-1406.21	865.059	-17.97	-1402.62	783.455	-83.177	-1436.31	781.57	-56.2876	-1403.8	709.751
609	0	152.82	-1280.58	1564.03	270.907	-1278.45	1559.53	153.559	-1446.74	1515.54	261.552	-1441.99	1509.45	208.813	-1419.95	1419.53	208.68	-1498.64	1138.16	192.717	-1298.02	1326.01	187.746	-1233.34	1131.27	292.167	-1505.53	1214.63	19.7387	-1368.51	1346.88	-44.6289	-1426.94	1104.22	-43.6399	-1443.78	1031.26	-65.7441	-1393.44	864.442	-18.4951	-1390.32	782.866	-84.0569	-1423.47	781.032	-56.5597	-1391.62	708.993
610	0	150.367	-1268.91	1564.54	268.452	-1266.88	1560.36	151.064	-1435.04	1515.93	259.065	-1430.41	1510.14	206.687	-1408.33	1420.01	207.177	-1486.46	1138.56	190.7	-1286.23	1326.63	186.007	-1221.11	1131.97	290.577	-1493.49	1215.25	17.7552	-1356.77	1346.92	-46.0834	-1414.22	1103.91	-44.8679	-1430.96	1030.91	-66.5532	-1380.4	864.14	-19.0989	-1377.55	782.625	-84.9471	-1410.25	780.776	-56.9291	-1378.87	708.603
611	0	147.871	-1257.23	1565.22	265.95	-1255.31	1561.42	148.555	-1423.35	1516.57	256.563	-1418.84	1511.12	204.592	-1396.76	1420.71	205.696	-1474.34	1139.2	188.727	-1274.5	1327.48	184.325	-1208.95	1132.94	289.011	-1481.49	1216.1	15.8129	-1345.07	1347.22	-47.5439	-1401.48	1103.88	-46.1336	-1418.06	1030.81	-67.4197	-1367.08	864.149	-19.7819	-1364.33	782.726	-85.8465	-1396.68	780.796	-57.3988	-1365.57	708.578
612	0	145.346	-1245.56	1566.06	263.418	-1243.73	1562.69	146.046	-1411.69	1517.43	254.062	-1407.29	1512.38	202.537	-1385.24	1421.62	204.233	-1462.32	1140.06	186.816	-1262.83	1328.56	182.725	-1196.89	1134.18	287.465	-1469.56	1217.18	13.9235	-1333.41	1347.75	-49.0059	-1388.74	1104.11	-47.434	-1405.09	1030.95	-68.3416	-1353.49	864.46	-20.5429	-1350.66	783.159	-86.7537	-1382.75	781.078	-57.9686	-1351.71	708.906
613	0	142.807	-1233.91	1567.03	260.868	-1232.16	1564.15	143.552	-1400.07	1518.5	251.576	-1395.76	1513.9	200.531	-1373.8	1422.72	202.783	-1450.4	1141.13	184.981	-1251.24	1329.83	181.23	-1184.93	1135.63	285.932	-1457.74	1218.45	12.097	-1321.8	1348.5	-50.466	-1375.99	1104.58	-48.7667	-1392.06	1031.32	-69.3161	-1339.66	865.058	-21.3784	-1336.56	783.908	-87.667	-1368.48	781.607	-58.6353	-1337.29	709.572
614	0	140.268	-1222.29	1568.12	258.318	-1220.6	1565.76	141.088	-1388.49	1519.77	249.121	-1384.28	1515.65	198.579	-1362.44	1424	201.34	-1438.6	1142.38	183.234	-1239.74	1331.27	179.862	-1173.11	1137.28	284.403	-1446.04	1219.89	10.3419	-1310.23	1349.45	-51.9223	-1363.25	1105.27	-50.1295	-1378.97	1031.89	-70.3392	-1325.58	865.925	-22.2828	-1322.04	784.952	-88.5846	-1353.87	782.362	-59.3928	-1322.35	710.556
615	0	137.745	-1210.7	1569.31	255.783	-1209.07	1567.51	138.668	-1376.97	1521.21	246.71	-1372.85	1517.6	196.685	-1351.16	1425.42	199.894	-1426.95	1143.79	181.585	-1228.34	1332.86	178.638	-1161.44	1139.07	282.87	-1434.48	1221.47	8.66442	-1298.71	1350.57	-53.3735	-1350.52	1106.17	-51.5207	-1365.83	1032.65	-71.4059	-1311.26	867.039	-23.2491	-1307.13	786.268	-89.5045	-1338.95	783.321	-60.2327	-1306.88	711.834
616	0	135.255	-1199.15	1570.57	253.279	-1197.58	1569.35	136.306	-1365.52	1522.8	244.357	-1361.47	1519.72	194.853	-1339.98	1426.97	198.439	-1415.44	1145.33	180.042	-1217.05	1334.56	177.571	-1149.92	1140.98	281.323	-1423.09	1223.17	7.06909	-1287.24	1351.85	-54.8194	-1337.79	1107.23	-52.9385	-1352.64	1033.57	-72.5105	-1296.72	868.376	-24.2687	-1291.84	787.833	-90.4245	-1323.71	784.461	-61.1449	-1290.93	713.383
617	0	132.812	-1187.67	1571.88	250.824	-1186.13	1571.27	134.012	-1354.14	1524.51	242.074	-1350.15	1521.98	193.084	-1328.89	1428.63	196.965	-1404.09	1146.97	178.61	-1205.88	1336.34	176.67	-1138.57	1142.96	279.753	-1411.87	1224.96	5.55835	-1275.81	1353.24	-56.2603	-1325.06	1108.43	-54.3811	-1339.4	1034.63	-73.6464	-1281.97	869.91	-25.3319	-1276.19	789.619	-91.3425	-1308.18	785.756	-62.1176	-1274.5	715.176
618	0	130.432	-1176.24	1573.23	248.432	-1174.73	1573.22	131.8	-1342.83	1526.32	239.872	-1338.9	1524.34	191.379	-1317.91	1430.36	195.466	-1392.9	1148.69	177.289	-1194.83	1338.18	175.938	-1127.39	1144.98	278.154	-1400.84	1226.81	4.13282	-1264.42	1354.72	-57.6963	-1312.34	1109.75	-55.8465	-1326.11	1035.8	-74.8067	-1267.02	871.617	-26.428	-1260.23	791.599	-92.2561	-1292.38	787.184	-63.1381	-1257.65	717.188
619	0	128.129	-1164.89	1574.6	246.117	-1163.39	1575.19	129.677	-1331.62	1528.21	237.761	-1327.73	1526.76	189.735	-1307.02	1432.14	193.937	-1381.87	1150.48	176.079	-1183.9	1340.04	175.373	-1116.37	1147	276.52	-1390.01	1228.69	2.79131	-1253.08	1356.28	-59.1278	-1299.63	1111.16	-57.3322	-1312.77	1037.06	-75.984	-1251.88	873.471	-27.5462	-1243.98	793.75	-93.1633	-1276.31	788.723	-64.1931	-1240.39	719.394
620	0	125.914	-1153.61	1575.98	243.892	-1152.12	1577.15	127.652	-1320.49	1530.13	235.748	-1316.63	1529.22	188.151	-1296.23	1433.96	192.375	-1371	1152.29	174.977	-1173.09	1341.91	174.966	-1105.52	1149.01	274.849	-1379.37	1230.59	1.5311	-1241.78	1357.88	-60.5546	-1286.91	1112.63	-58.8357	-1299.39	1038.38	-77.1705	-1236.57	875.449	-28.6749	-1227.46	796.045	-94.0617	-1260	790.355	-65.2692	-1222.77	721.772
621	0	123.8	-1142.42	1577.34	241.769	-1140.93	1579.08	125.731	-1309.44	1532.08	233.839	-1305.61	1531.67	186.625	-1285.54	1435.78	190.778	-1360.29	1154.11	173.977	-1162.4	1343.76	174.706	-1094.83	1150.97	273.138	-1368.92	1232.49	0.348123	-1230.52	1359.49	-61.9761	-1274.18	1114.14	-60.3536	-1285.96	1039.74	-78.3584	-1221.09	877.528	-29.8032	-1210.72	798.461	-94.9492	-1243.46	792.063	-66.3532	-1204.83	724.299
622	0	121.796	-1131.31	1578.68	239.757	-1129.81	1580.95	123.918	-1298.49	1534.03	232.04	-1294.67	1534.09	185.154	-1274.94	1437.59	189.149	-1349.72	1155.92	173.07	-1151.82	1345.57	174.574	-1084.3	1152.87	271.391	-1358.65	1234.35	-0.762786	-1219.29	1361.11	-63.3909	-1261.44	1115.67	-61.8824	-1272.49	1041.12	-79.5402	-1205.47	879.689	-30.9202	-1193.77	800.979	-95.8235	-1226.71	793.834	-67.4324	-1186.61	726.957
623	0	119.908	-1120.29	1579.98	237.864	-1118.77	1582.75	122.217	-1287.63	1535.95	230.351	-1283.81	1536.44	183.733	-1264.43	1439.37	187.491	-1339.28	1157.69	172.248	-1141.35	1347.31	174.548	-1073.91	1154.68	269.612	-1348.55	1236.18	-1.80759	-1208.11	1362.71	-64.7974	-1248.68	1117.2	-63.418	-1258.98	1042.51	-80.7084	-1189.72	881.913	-32.016	-1176.66	803.578	-96.6825	-1209.78	795.658	-68.4949	-1168.15	729.728
624	0	118.144	-1109.35	1581.24	236.096	-1107.82	1584.46	120.629	-1276.85	1537.83	228.776	-1273.03	1538.71	182.362	-1254	1441.09	185.81	-1328.97	1159.42	171.5	-1130.98	1348.98	174.604	-1063.65	1156.4	267.807	-1338.6	1237.94	-2.79277	-1196.97	1364.27	-66.1932	-1235.9	1118.71	-64.9562	-1245.43	1043.88	-81.856	-1173.86	884.186	-33.0817	-1159.4	806.244	-97.5239	-1192.67	797.526	-69.5299	-1149.49	732.598
625	0	116.506	-1098.51	1582.45	234.456	-1096.95	1586.07	119.153	-1266.16	1539.65	227.313	-1262.33	1540.87	181.036	-1243.64	1442.76	184.117	-1318.76	1161.08	170.814	-1120.7	1350.57	174.716	-1053.51	1158.02	265.986	-1328.78	1239.63	-3.72503	-1185.87	1365.77	-67.5756	-1223.1	1120.18	-66.4923	-1231.84	1045.23	-82.9768	-1157.89	886.492	-34.1094	-1142.04	808.962	-98.3455	-1175.41	799.434	-70.5276	-1130.66	735.552
626	0	114.997	-1087.75	1583.6	232.947	-1086.17	1587.57	117.789	-1255.55	1541.39	225.962	-1251.71	1542.91	179.753	-1233.35	1444.34	182.42	-1308.65	1162.67	170.181	-1110.5	1352.05	174.855	-1043.47	1159.54	264.159	-1319.08	1241.24	-4.611	-1174.82	1367.22	-68.9415	-1210.28	1121.61	-68.0218	-1218.23	1046.54	-84.0648	-1141.83	888.822	-35.0925	-1124.58	811.719	-99.1449	-1158.03	801.376	-71.4797	-1111.72	738.579
627	0	113.617	-1077.07	1584.69	231.569	-1075.47	1588.95	116.534	-1245.01	1543.03	224.719	-1241.16	1544.79	178.512	-1223.12	1445.83	180.731	-1298.61	1164.16	169.588	-1100.37	1353.43	174.994	-1033.54	1160.94	262.34	-1309.47	1242.75	-5.45693	-1163.81	1368.58	-70.2879	-1197.43	1122.99	-69.5399	-1204.59	1047.8	-85.115	-1125.71	891.163	-36.0254	-1107.07	814.507	-99.9196	-1140.53	803.349	-72.3785	-1092.69	741.667
628	0	112.364	-1066.48	1585.7	230.319	-1064.85	1590.21	115.386	-1234.55	1544.57	223.583	-1230.68	1546.52	177.312	-1212.94	1447.21	179.063	-1288.65	1165.54	169.026	-1090.3	1354.69	175.11	-1023.68	1162.22	260.541	-1299.94	1244.16	-6.26846	-1152.86	1369.86	-71.6115	-1184.56	1124.29	-71.0422	-1190.93	1049.01	-86.1229	-1109.54	893.506	-36.9036	-1089.52	817.315	-100.667	-1122.94	805.35	-73.2181	-1073.61	744.805
629	0	111.237	-1055.96	1586.63	229.197	-1054.32	1591.33	114.34	-1224.15	1545.98	222.548	-1220.26	1548.08	176.152	-1202.8	1448.49	177.429	-1278.73	1166.82	168.485	-1080.28	1355.82	175.179	-1013.89	1163.37	258.775	-1290.45	1245.45	-7.05038	-1141.95	1371.05	-72.9094	-1171.68	1125.53	-72.5242	-1177.26	1050.14	-87.0848	-1093.33	895.844	-37.7236	-1071.95	820.135	-101.384	-1105.29	807.376	-73.9932	-1054.52	747.982
630	0	110.23	-1045.51	1587.48	228.197	-1043.85	1592.31	113.394	-1213.81	1547.27	221.612	-1209.9	1549.46	175.032	-1192.69	1449.64	175.841	-1268.85	1167.97	167.959	-1070.3	1356.83	175.184	-1004.16	1164.4	257.057	-1281	1246.63	-7.80647	-1131.1	1372.13	-74.1786	-1158.78	1126.68	-73.9817	-1163.59	1051.21	-87.9974	-1077.11	898.166	-38.4825	-1054.4	822.958	-102.069	-1087.59	809.422	-74.6996	-1035.44	751.19
631	0	109.341	-1035.12	1588.24	227.315	-1033.45	1593.15	112.542	-1203.52	1548.42	220.769	-1199.6	1550.66	173.955	-1182.61	1450.66	174.312	-1259	1168.99	167.441	-1060.34	1357.71	175.11	-994.469	1165.29	255.399	-1271.56	1247.68	-8.53934	-1120.3	1373.1	-75.4162	-1145.87	1127.74	-75.4107	-1149.92	1052.19	-88.8582	-1060.88	900.464	-39.1783	-1036.87	825.778	-102.717	-1069.86	811.483	-75.3342	-1016.4	754.416
632	0	108.563	-1024.8	1588.91	226.546	-1023.12	1593.84	111.78	-1193.27	1549.42	220.016	-1189.34	1551.66	172.921	-1172.54	1451.54	172.852	-1249.17	1169.89	166.928	-1050.4	1358.45	174.948	-984.808	1166.04	253.813	-1262.11	1248.59	-9.25037	-1109.55	1373.95	-76.6198	-1132.97	1128.71	-76.8072	-1136.26	1053.09	-89.6651	-1044.67	902.731	-39.8096	-1019.39	828.585	-103.325	-1052.12	813.553	-75.8946	-997.428	757.651
633	0	107.89	-1014.52	1589.47	225.883	-1012.84	1594.39	111.105	-1183.07	1550.26	219.347	-1179.11	1552.48	171.934	-1162.48	1452.28	171.472	-1239.34	1170.64	166.418	-1040.48	1359.04	174.696	-975.164	1166.64	252.312	-1252.65	1249.38	-9.93968	-1098.86	1374.68	-77.7868	-1120.09	1129.58	-78.1679	-1122.63	1053.89	-90.4164	-1028.49	904.957	-40.3753	-1001.98	831.37	-103.89	-1034.41	815.623	-76.3792	-978.547	760.884
634	0	107.317	-1004.29	1589.93	225.319	-1002.6	1594.8	110.513	-1172.89	1550.95	218.76	-1168.92	1553.1	170.997	-1152.42	1452.88	170.18	-1229.52	1171.26	165.909	-1030.55	1359.49	174.354	-965.528	1167.1	250.903	-1243.16	1250.03	-10.6062	-1088.23	1375.28	-78.915	-1107.23	1130.34	-79.4893	-1109.03	1054.6	-91.1108	-1012.36	907.134	-40.8749	-984.648	834.126	-104.409	-1016.73	817.685	-76.7873	-959.779	764.105
635	0	106.837	-994.091	1590.28	224.85	-992.398	1595.06	109.999	-1162.73	1551.46	218.25	-1158.75	1553.52	170.114	-1142.34	1453.33	168.985	-1219.7	1171.73	165.405	-1020.61	1359.79	173.928	-955.888	1167.39	249.596	-1233.62	1250.54	-11.2476	-1077.64	1375.74	-80.002	-1094.41	1130.99	-80.7681	-1095.47	1055.2	-91.7472	-996.3	909.253	-41.3083	-967.424	836.842	-104.877	-999.122	819.728	-77.1185	-941.145	767.303
636	0	106.445	-983.919	1590.51	224.469	-982.227	1595.18	109.561	-1152.59	1551.81	217.814	-1148.6	1553.75	169.288	-1132.25	1453.63	167.893	-1209.86	1172.07	164.908	-1010.65	1359.95	173.43	-946.237	1167.51	248.397	-1224.04	1250.91	-11.8608	-1067.1	1376.06	-81.0454	-1081.65	1131.53	-82.0013	-1081.96	1055.7	-92.3246	-980.326	911.304	-41.6755	-950.323	839.508	-105.292	-981.597	821.742	-77.3733	-922.662	770.468
637	0	106.137	-973.766	1590.63	224.171	-972.075	1595.16	109.196	-1142.46	1551.99	217.449	-1138.45	1553.79	168.523	-1122.14	1453.78	166.908	-1200.02	1172.27	164.422	-1000.68	1359.95	172.872	-936.567	1167.48	247.31	-1214.39	1251.14	-12.4415	-1056.61	1376.24	-82.0428	-1068.95	1131.94	-83.1857	-1068.51	1056.08	-92.8422	-964.455	913.278	-41.9766	-933.361	842.114	-105.65	-964.183	823.716	-77.5524	-904.351	773.589
638	0	105.906	-963.623	1590.62	223.95	-961.935	1594.99	108.901	-1132.32	1551.99	217.153	-1128.29	1553.64	167.826	-1111.99	1453.78	166.034	-1190.16	1172.33	163.953	-990.666	1359.8	172.273	-926.872	1167.27	246.34	-1204.68	1251.24	-12.9848	-1046.15	1376.28	-82.9912	-1056.33	1132.23	-84.318	-1055.14	1056.35	-93.2994	-948.703	915.165	-42.2122	-916.555	844.65	-105.948	-946.901	825.636	-77.6569	-886.227	776.653
639	0	105.749	-953.481	1590.5	223.804	-951.798	1594.68	108.674	-1122.17	1551.82	216.924	-1118.13	1553.3	167.199	-1101.81	1453.63	165.273	-1180.28	1172.25	163.509	-980.621	1359.5	171.65	-917.149	1166.89	245.489	-1194.9	1251.2	-13.4853	-1035.72	1376.17	-83.8878	-1043.81	1132.39	-85.3951	-1041.84	1056.5	-93.6955	-933.087	916.955	-42.3825	-899.922	847.104	-106.182	-929.773	827.491	-77.6881	-868.308	779.65
640	0	105.664	-943.333	1590.25	223.727	-941.655	1594.24	108.514	-1112.01	1551.48	216.759	-1107.95	1552.78	166.648	-1091.59	1453.33	164.625	-1170.38	1172.04	163.095	-970.535	1359.04	171.025	-907.392	1166.34	244.756	-1185.05	1251.03	-13.937	-1025.32	1375.91	-84.729	-1031.39	1132.42	-86.4134	-1028.64	1056.53	-94.03	-917.622	918.638	-42.4882	-883.478	849.463	-106.351	-912.822	829.267	-77.6475	-850.61	782.565
641	0	105.646	-933.172	1589.87	223.717	-931.498	1593.67	108.419	-1101.82	1550.97	216.658	-1097.74	1552.08	166.177	-1081.31	1452.88	164.091	-1160.46	1171.7	162.721	-960.403	1358.44	170.416	-897.601	1165.63	244.144	-1175.13	1250.73	-14.3338	-1014.93	1375.49	-85.5113	-1019.08	1132.32	-87.3693	-1015.54	1056.43	-94.3021	-902.324	920.204	-42.5298	-867.237	851.716	-106.452	-896.068	830.952	-77.5367	-833.15	785.387
642	0	105.695	-922.988	1589.37	223.774	-921.322	1592.96	108.39	-1091.6	1550.29	216.62	-1087.51	1551.22	165.79	-1070.99	1452.29	163.669	-1150.51	1171.23	162.392	-950.222	1357.69	169.844	-887.771	1164.76	243.65	-1165.13	1250.3	-14.6693	-1004.56	1374.94	-86.2306	-1006.9	1132.09	-88.2589	-1002.55	1056.2	-94.5115	-887.207	921.641	-42.5079	-851.214	853.849	-106.483	-879.531	832.53	-77.3573	-815.944	788.099
643	0	105.809	-912.776	1588.74	223.895	-911.117	1592.13	108.425	-1081.35	1549.45	216.645	-1077.24	1550.2	165.492	-1060.61	1451.56	163.359	-1140.52	1170.63	162.119	-939.988	1356.8	169.328	-877.9	1163.73	243.275	-1155.06	1249.74	-14.9375	-994.181	1374.23	-86.8825	-994.854	1131.71	-89.0778	-989.682	1055.85	-94.6577	-872.285	922.939	-42.4233	-835.423	855.849	-106.442	-863.229	833.99	-77.1113	-799.006	790.687
644	0	105.988	-902.53	1587.99	224.08	-900.879	1591.18	108.525	-1071.05	1548.45	216.733	-1066.92	1549.02	165.287	-1050.18	1450.7	163.158	-1130.5	1169.91	161.907	-929.699	1355.77	168.882	-867.986	1162.55	243.017	-1144.91	1249.06	-15.1321	-983.803	1373.38	-87.4625	-982.949	1131.21	-89.8212	-976.943	1055.37	-94.7402	-857.573	924.087	-42.277	-819.877	857.702	-106.328	-847.181	835.315	-76.8006	-782.352	793.135
645	0	106.232	-892.242	1587.12	224.329	-890.602	1590.11	108.692	-1060.71	1547.3	216.885	-1056.57	1547.7	165.178	-1039.69	1449.7	163.066	-1120.44	1169.06	161.766	-919.352	1354.6	168.522	-858.026	1161.24	242.875	-1134.69	1248.25	-15.2474	-973.412	1372.39	-87.9655	-971.187	1130.56	-90.484	-964.342	1054.76	-94.7586	-843.082	925.074	-42.0698	-804.587	859.393	-106.141	-831.403	836.493	-76.4272	-765.998	795.423
646	0	106.542	-881.909	1586.14	224.645	-880.28	1588.93	108.927	-1050.32	1546.02	217.104	-1046.16	1546.26	165.168	-1029.14	1448.59	163.081	-1110.32	1168.09	161.701	-908.945	1353.32	168.258	-848.014	1159.79	242.847	-1124.39	1247.33	-15.2779	-963.004	1371.27	-88.3862	-959.573	1129.78	-91.0602	-951.886	1054.01	-94.7126	-828.826	925.889	-41.8031	-789.565	860.909	-105.879	-815.913	837.507	-75.9936	-749.957	797.536
647	0	106.92	-871.525	1585.04	225.027	-869.908	1587.65	109.232	-1039.87	1544.61	217.39	-1035.7	1544.69	165.262	-1018.53	1447.35	163.202	-1100.15	1167.01	161.719	-898.477	1351.92	168.099	-837.947	1158.22	242.934	-1114.02	1246.29	-15.2186	-952.57	1370.03	-88.7191	-948.105	1128.87	-91.5437	-939.58	1053.15	-94.6017	-814.814	926.523	-41.478	-774.822	862.235	-105.543	-800.726	838.345	-75.5025	-734.244	799.453
648	0	107.367	-861.087	1583.84	225.478	-859.484	1586.27	109.609	-1029.37	1543.09	217.748	-1025.18	1543.02	165.462	-1007.87	1446.01	163.427	-1089.92	1165.82	161.826	-887.947	1350.41	168.05	-827.817	1156.55	243.133	-1103.56	1245.13	-15.065	-942.107	1368.66	-88.958	-936.782	1127.83	-91.9275	-927.432	1052.15	-94.4254	-801.06	926.967	-41.096	-760.368	863.356	-105.133	-785.858	838.991	-74.9569	-718.873	801.156
649	0	107.886	-850.592	1582.54	226	-849.004	1584.81	110.063	-1018.8	1541.47	218.18	-1014.61	1541.25	165.77	-997.149	1444.57	163.756	-1079.61	1164.52	162.028	-877.353	1348.82	168.115	-817.616	1154.79	243.443	-1093.03	1243.87	-14.8131	-931.606	1367.2	-89.0969	-925.599	1126.67	-92.2045	-915.443	1051.04	-94.1831	-787.572	927.21	-40.6585	-746.212	864.26	-104.65	-771.325	839.433	-74.3605	-703.857	802.628
650	0	108.479	-840.039	1581.16	226.597	-838.466	1583.27	110.596	-1008.18	1539.76	218.69	-1003.98	1539.42	166.19	-986.373	1443.04	164.188	-1069.22	1163.11	162.329	-866.695	1347.14	168.293	-807.337	1152.94	243.864	-1082.41	1242.49	-14.4596	-921.065	1365.63	-89.1292	-914.549	1125.4	-92.3669	-903.618	1049.81	-93.8741	-774.361	927.248	-40.1672	-732.365	864.933	-104.093	-757.142	839.659	-73.7175	-689.212	803.848
651	0	109.15	-829.426	1579.7	227.27	-827.866	1581.67	111.212	-997.5	1537.99	219.283	-993.286	1537.53	166.722	-975.544	1441.44	164.721	-1058.75	1161.62	162.733	-855.972	1345.4	168.583	-796.968	1151.04	244.393	-1071.72	1241.02	-14.0017	-910.477	1363.99	-89.0484	-903.623	1124.02	-92.4074	-891.958	1048.47	-93.4976	-761.437	927.074	-39.6235	-718.836	865.365	-103.465	-743.325	839.658	-73.0325	-674.95	804.802
652	0	109.9	-818.753	1578.18	228.023	-817.205	1580.02	111.915	-986.76	1536.16	219.963	-982.536	1535.59	167.368	-964.663	1439.77	165.353	-1048.18	1160.04	163.244	-845.183	1343.62	168.982	-786.499	1149.09	245.027	-1060.93	1239.46	-13.4375	-899.839	1362.29	-88.8477	-892.812	1122.54	-92.3181	-880.463	1047.04	-93.0525	-748.808	926.684	-39.0289	-705.635	865.545	-102.767	-729.889	839.422	-72.3103	-661.085	805.473
653	0	110.734	-808.021	1576.62	228.86	-806.481	1578.34	112.711	-975.963	1534.31	220.735	-971.727	1533.64	168.129	-953.733	1438.06	166.082	-1037.5	1158.39	163.863	-834.328	1341.8	169.486	-775.919	1147.12	245.766	-1050.06	1237.81	-12.7656	-889.145	1360.54	-88.5208	-882.103	1120.99	-92.0921	-869.131	1045.52	-92.5375	-736.483	926.079	-38.3846	-692.771	865.466	-102	-716.849	838.945	-71.556	-647.633	805.847
654	0	111.655	-797.231	1575.03	229.782	-795.695	1576.63	113.603	-965.11	1532.44	221.603	-960.861	1531.68	169.006	-942.756	1436.32	166.905	-1026.71	1156.67	164.593	-823.406	1339.98	170.09	-765.216	1145.15	246.604	-1039.11	1236.09	-11.9856	-878.394	1358.76	-88.0616	-871.485	1119.38	-91.7226	-857.96	1043.94	-91.9515	-724.47	925.259	-37.6915	-680.255	865.123	-101.167	-704.223	838.227	-70.7746	-634.608	805.915
655	0	112.665	-786.386	1573.43	230.794	-784.849	1574.93	114.595	-954.204	1530.59	222.572	-949.939	1529.75	169.997	-931.733	1434.56	167.819	-1015.81	1154.91	165.434	-812.416	1338.17	170.791	-754.378	1143.2	247.539	-1028.06	1234.3	-11.0974	-867.581	1356.98	-87.4646	-860.943	1117.72	-91.2037	-846.947	1042.31	-91.2926	-712.775	924.229	-36.9502	-668.098	864.512	-100.268	-692.025	837.266	-69.9704	-622.026	805.668
656	0	113.767	-775.489	1571.84	231.897	-773.942	1573.24	115.691	-943.249	1528.76	223.646	-938.962	1527.84	171.102	-920.667	1432.81	168.819	-1004.78	1153.12	166.387	-801.359	1336.38	171.583	-743.394	1141.3	248.567	-1016.92	1232.47	-10.102	-856.704	1355.22	-86.725	-850.464	1116.04	-90.5308	-836.085	1040.64	-90.5595	-701.406	922.997	-36.1611	-656.31	863.636	-99.3072	-680.271	836.069	-69.1473	-609.901	805.102
657	0	114.964	-764.545	1570.28	233.096	-762.98	1571.59	116.895	-932.248	1526.98	224.829	-927.935	1525.99	172.318	-909.562	1431.07	169.901	-993.629	1151.32	167.45	-790.236	1334.66	172.465	-732.256	1139.47	249.684	-1005.69	1230.61	-9.00111	-845.761	1353.5	-85.8391	-840.034	1114.36	-89.7003	-825.37	1038.96	-89.7502	-690.367	921.574	-35.3237	-644.903	862.496	-98.2854	-668.974	834.645	-68.3083	-598.251	804.214
658	0	116.257	-753.557	1568.77	234.39	-751.964	1570	118.209	-921.207	1525.28	226.125	-916.86	1524.22	173.643	-898.418	1429.38	171.057	-982.352	1149.52	168.622	-779.046	1333	173.432	-720.954	1137.74	250.884	-994.367	1228.74	-7.79712	-834.75	1351.84	-84.8046	-829.641	1112.7	-88.7102	-814.795	1037.3	-88.8631	-679.662	919.975	-34.4373	-633.888	861.102	-97.205	-658.147	833.006	-67.455	-587.092	803.01
659	0	117.65	-742.531	1567.33	235.783	-740.899	1568.48	119.635	-910.129	1523.66	227.535	-905.741	1522.54	175.074	-887.24	1427.75	172.284	-970.951	1147.75	169.899	-767.792	1331.44	174.482	-709.485	1136.14	252.163	-982.954	1226.88	-6.49342	-823.67	1350.27	-83.6209	-819.271	1111.08	-87.5601	-804.352	1035.67	-87.8966	-669.295	918.217	-33.5008	-623.277	859.465	-96.0684	-647.802	831.17	-66.588	-576.438	801.495
660	0	119.141	-731.474	1565.99	237.275	-729.79	1567.06	121.174	-899.022	1522.15	229.06	-894.584	1520.96	176.606	-876.03	1426.2	173.573	-959.429	1146.03	171.278	-756.477	1330	175.613	-697.846	1134.68	253.515	-971.452	1225.04	-5.09436	-812.523	1348.81	-82.2889	-808.914	1109.54	-86.2514	-794.033	1034.11	-86.8491	-659.267	916.321	-32.5126	-613.082	857.598	-94.8781	-637.947	829.159	-65.7062	-566.305	799.682
661	0	120.732	-720.39	1564.76	238.866	-718.643	1565.74	122.825	-887.89	1520.77	230.7	-883.393	1519.51	178.233	-864.792	1424.75	174.918	-947.792	1144.39	172.753	-745.104	1328.69	176.822	-686.04	1133.39	254.934	-959.863	1223.26	-3.60533	-801.311	1347.48	-80.8118	-798.559	1108.09	-84.7876	-783.83	1032.63	-85.7197	-649.576	914.311	-31.4707	-603.312	855.521	-93.6372	-628.588	827	-64.8074	-556.708	797.587
662	0	122.422	-709.287	1563.66	240.556	-707.464	1564.56	124.589	-876.74	1519.54	232.455	-872.176	1518.19	179.949	-853.53	1423.41	176.312	-936.049	1142.84	174.317	-733.679	1327.54	178.105	-674.074	1132.29	256.414	-948.193	1221.55	-2.03281	-790.037	1346.32	-79.195	-788.198	1106.76	-83.1741	-773.735	1031.27	-84.5074	-640.221	912.214	-30.3731	-593.977	853.257	-92.349	-619.727	824.721	-63.8877	-547.659	795.231
663	0	124.21	-698.172	1562.73	242.343	-696.261	1563.52	126.461	-865.579	1518.46	234.321	-860.937	1517.03	181.747	-842.25	1422.21	177.747	-924.211	1141.41	175.962	-722.208	1326.55	179.456	-661.96	1131.4	257.948	-936.448	1219.94	-0.38443	-778.708	1345.33	-77.4461	-777.823	1105.58	-81.4186	-763.739	1030.05	-83.2121	-631.196	910.058	-29.2173	-585.086	850.831	-91.0173	-611.361	822.356	-62.9418	-539.17	792.638
664	0	126.094	-687.052	1561.96	244.226	-685.04	1562.64	128.438	-854.414	1517.55	236.295	-849.684	1516.02	183.618	-830.956	1421.17	179.216	-912.292	1140.11	177.678	-710.699	1325.76	180.871	-649.715	1130.73	259.528	-924.637	1218.45	1.33109	-767.33	1344.53	-75.575	-767.43	1104.57	-79.5312	-753.836	1028.99	-81.834	-622.495	907.873	-28.0011	-576.644	848.274	-89.6469	-603.486	819.942	-61.9633	-531.248	789.837
665	0	128.069	-675.934	1561.37	246.201	-673.809	1561.93	130.514	-843.252	1516.83	238.371	-838.425	1515.19	185.553	-819.656	1420.29	180.711	-900.307	1138.99	179.454	-699.162	1325.15	182.338	-637.361	1130.29	261.148	-912.771	1217.1	3.10399	-755.914	1343.95	-73.5941	-757.014	1103.74	-77.5241	-744.018	1028.12	-80.3745	-614.109	905.692	-26.7226	-568.654	845.617	-88.2428	-596.088	817.516	-60.9442	-523.899	786.86
666	0	130.133	-664.825	1560.98	248.264	-662.578	1561.4	132.682	-832.1	1516.31	240.541	-827.167	1514.53	187.543	-808.356	1419.58	182.224	-888.274	1138.04	181.278	-687.608	1324.75	183.848	-624.928	1130.09	262.797	-900.862	1215.91	4.92363	-744.471	1343.6	-71.5177	-746.574	1103.12	-75.4122	-734.279	1027.45	-78.8356	-606.024	903.547	-25.3802	-561.117	842.893	-86.811	-589.15	815.119	-59.8762	-517.124	783.743
667	0	132.278	-653.733	1560.79	250.409	-651.354	1561.04	134.935	-820.967	1515.98	242.798	-815.917	1514.05	189.576	-797.065	1419.06	183.748	-876.213	1137.28	183.137	-676.05	1324.56	185.388	-612.448	1130.13	264.469	-888.926	1214.89	6.77863	-733.015	1343.48	-69.3624	-736.111	1102.71	-73.2122	-724.617	1027	-77.2205	-598.227	901.469	-23.9732	-554.03	840.141	-85.3583	-582.649	812.789	-58.7499	-510.919	780.522
668	0	134.499	-642.666	1560.81	252.63	-640.146	1560.87	137.261	-809.859	1515.86	245.13	-804.686	1513.75	191.642	-785.791	1418.73	185.276	-864.145	1136.73	185.017	-664.5	1324.58	186.941	-599.956	1130.4	266.154	-876.979	1214.07	8.65709	-721.561	1343.6	-67.1466	-725.627	1102.54	-70.9434	-715.027	1026.78	-75.5339	-590.701	899.491	-22.5017	-547.386	837.396	-83.8925	-576.556	810.568	-57.5562	-505.275	777.238
669	0	136.787	-631.629	1561.03	254.918	-628.964	1560.87	139.651	-798.784	1515.94	247.527	-793.482	1513.63	193.729	-774.545	1418.6	186.801	-852.091	1136.39	186.904	-652.975	1324.8	188.492	-587.492	1130.9	267.844	-865.041	1213.44	10.5468	-710.128	1343.96	-64.8904	-715.129	1102.6	-68.6267	-705.509	1026.8	-73.782	-583.427	897.642	-20.9674	-541.172	834.696	-82.4225	-570.835	808.493	-56.2861	-500.177	773.93
670	0	139.134	-620.631	1561.46	257.264	-617.816	1561.05	142.092	-787.751	1516.23	249.976	-782.313	1513.69	195.828	-763.335	1418.67	188.317	-840.073	1136.27	188.782	-641.489	1325.22	190.022	-575.095	1131.62	269.532	-853.128	1213.02	12.4357	-698.734	1344.56	-62.6152	-704.625	1102.9	-66.2843	-696.066	1027.07	-71.9725	-576.384	895.95	-19.3736	-535.372	832.078	-80.9581	-565.445	806.599	-54.9317	-495.603	770.638
671	0	141.529	-609.677	1562.09	259.657	-606.711	1561.39	144.571	-776.766	1516.72	252.463	-771.189	1513.93	197.927	-752.173	1418.93	189.82	-828.113	1136.37	190.639	-630.056	1325.84	191.512	-562.804	1132.53	271.211	-841.26	1212.81	14.3116	-687.399	1345.4	-60.3432	-694.127	1103.44	-63.9396	-686.699	1027.58	-70.1153	-569.549	894.439	-17.7255	-529.964	829.578	-79.5103	-560.34	804.921	-53.4866	-491.523	767.402
672	0	143.96	-598.776	1562.9	262.087	-595.658	1561.89	147.074	-765.837	1517.4	254.974	-760.118	1514.32	200.017	-741.068	1419.37	191.304	-816.232	1136.68	192.46	-618.694	1326.64	192.942	-550.654	1133.62	272.876	-829.457	1212.81	16.163	-676.144	1346.45	-58.0972	-683.651	1104.22	-61.6163	-677.416	1028.33	-68.2222	-562.9	893.13	-16.0305	-524.92	827.23	-78.091	-555.471	803.485	-51.9473	-487.901	764.26
673	0	146.415	-587.932	1563.89	264.541	-584.664	1562.52	149.588	-754.97	1518.26	257.495	-749.11	1514.87	202.087	-730.03	1420	192.769	-804.45	1137.19	194.233	-607.415	1327.6	194.294	-538.677	1134.87	274.523	-817.735	1213	17.9791	-664.99	1347.72	-55.8997	-673.216	1105.21	-59.338	-668.224	1029.31	-66.3068	-556.413	892.04	-14.2988	-520.209	825.065	-76.7126	-550.785	802.315	-50.3135	-484.694	761.248
674	0	148.882	-577.152	1565.04	267.005	-573.737	1563.29	152.098	-744.172	1519.29	260.01	-738.171	1515.57	204.129	-719.067	1420.78	194.212	-792.785	1137.89	195.947	-596.233	1328.71	195.549	-526.9	1136.25	276.149	-806.111	1213.38	19.75	-653.955	1349.18	-53.7727	-662.845	1106.41	-57.1275	-659.134	1030.5	-64.3846	-550.064	891.181	-12.5426	-515.792	823.109	-75.3876	-546.229	801.426	-48.5889	-481.85	758.401
675	0	151.346	-566.44	1566.33	269.465	-562.882	1564.16	154.59	-733.448	1520.48	262.505	-727.309	1516.39	206.135	-708.189	1421.73	195.633	-781.254	1138.77	197.59	-585.161	1329.95	196.692	-515.343	1137.73	277.752	-794.601	1213.94	21.4669	-643.057	1350.8	-51.7367	-652.564	1107.8	-55.0061	-650.156	1031.89	-62.4728	-543.831	890.561	-10.7769	-511.628	821.387	-74.1284	-541.754	800.829	-46.7827	-479.312	755.75
676	0	153.794	-555.801	1567.74	271.907	-552.107	1565.13	157.049	-722.801	1521.81	264.965	-716.53	1517.33	208.098	-697.401	1422.8	197.034	-769.872	1139.8	199.156	-574.208	1331.3	197.707	-504.019	1139.3	279.332	-783.217	1214.66	23.1223	-632.314	1352.57	-49.8101	-642.403	1109.36	-52.9932	-641.305	1033.46	-60.5899	-537.693	890.183	-9.01904	-507.672	819.916	-72.9466	-537.309	800.527	-44.909	-477.018	753.321
677	0	156.212	-545.239	1569.26	274.317	-541.414	1566.18	159.463	-712.236	1523.26	267.377	-705.839	1518.37	210.013	-686.709	1424	198.417	-758.652	1140.97	200.637	-563.383	1332.75	198.585	-492.935	1140.93	280.891	-771.971	1215.52	24.7101	-621.736	1354.47	-48.009	-632.394	1111.06	-51.1054	-632.595	1035.18	-58.7555	-531.633	890.044	-7.28855	-503.877	818.71	-71.8525	-532.854	800.516	-42.9882	-474.902	751.14
678	0	158.585	-534.755	1570.87	276.681	-530.809	1567.29	161.819	-701.755	1524.81	269.727	-695.238	1519.49	211.873	-676.116	1425.31	199.783	-747.605	1142.27	202.03	-552.69	1334.26	199.32	-482.09	1142.6	282.428	-760.873	1216.52	26.2258	-611.333	1356.46	-46.3461	-622.571	1112.89	-49.3564	-624.038	1037.03	-56.9896	-525.634	890.139	-5.60658	-500.192	817.777	-70.8549	-528.352	800.786	-41.046	-472.895	749.227
679	0	160.902	-524.352	1572.54	278.987	-520.292	1568.46	164.106	-691.358	1526.45	272.005	-684.73	1520.69	213.676	-665.625	1426.7	201.136	-736.737	1143.66	203.332	-542.133	1335.83	199.908	-471.481	1144.29	283.947	-749.929	1217.62	27.6666	-601.111	1358.51	-44.8303	-612.967	1114.82	-47.756	-615.65	1038.98	-55.3126	-519.685	890.456	-3.99553	-496.569	817.12	-69.9608	-523.777	801.321	-39.1133	-470.927	747.598
680	0	163.15	-514.03	1574.26	281.221	-509.864	1569.67	166.312	-681.045	1528.14	274.199	-674.316	1521.94	215.418	-655.236	1428.16	202.478	-726.053	1145.14	204.542	-531.713	1337.43	200.353	-461.096	1145.97	285.449	-739.143	1218.83	29.031	-591.072	1360.62	-43.4667	-603.612	1116.82	-46.3105	-607.443	1041.02	-53.7441	-513.777	890.981	-2.47838	-492.957	816.736	-69.1749	-519.111	802.097	-37.2255	-468.929	746.265
681	0	165.318	-503.788	1576	283.372	-499.526	1570.9	168.43	-670.816	1529.88	276.301	-663.994	1523.23	217.096	-644.947	1429.68	203.811	-715.555	1146.67	205.664	-521.427	1339.05	200.663	-450.922	1147.64	286.935	-728.517	1220.11	30.3194	-581.213	1362.74	-42.2561	-594.535	1118.88	-45.0217	-599.425	1043.11	-52.303	-507.904	891.697	-1.07795	-489.31	816.619	-68.5001	-514.346	803.089	-35.4207	-466.835	745.236
682	0	167.396	-493.624	1577.75	285.432	-489.275	1572.15	170.45	-660.667	1531.65	278.302	-653.764	1524.55	218.709	-634.757	1431.22	205.134	-705.24	1148.25	206.699	-511.272	1340.67	200.85	-440.942	1149.28	288.408	-718.049	1221.46	31.5334	-571.528	1364.86	-41.1949	-585.76	1120.96	-43.8876	-591.607	1045.24	-51.0063	-502.063	892.584	0.183783	-485.584	816.756	-67.9367	-509.482	804.265	-33.7384	-464.581	744.513
683	0	169.375	-483.534	1579.5	287.391	-479.108	1573.4	172.367	-650.595	1533.42	280.196	-643.62	1525.89	220.257	-624.661	1432.79	206.45	-695.103	1149.86	207.653	-501.243	1342.27	200.93	-431.137	1150.88	289.868	-707.735	1222.87	32.676	-562.008	1366.96	-40.2758	-577.303	1123.06	-42.9023	-583.991	1047.37	-49.8691	-496.253	893.618	1.28653	-481.738	817.129	-67.4834	-504.529	805.594	-32.218	-462.113	744.093
684	0	171.248	-473.516	1581.21	289.244	-469.021	1574.65	174.175	-640.595	1535.17	281.979	-633.56	1527.22	221.739	-614.654	1434.36	207.755	-685.136	1151.47	208.531	-491.33	1343.84	200.926	-421.488	1152.43	291.317	-697.566	1224.3	33.7513	-552.641	1369.01	-39.4877	-569.173	1125.14	-42.0562	-576.58	1049.5	-48.9039	-490.477	894.777	2.21239	-477.736	817.717	-67.1369	-499.5	807.04	-30.8966	-459.379	743.968
685	0	173.01	-463.563	1582.89	290.984	-459.01	1575.88	175.871	-630.663	1536.9	283.647	-623.576	1528.55	223.155	-604.731	1435.91	209.049	-675.33	1153.08	209.341	-481.526	1345.37	200.858	-411.975	1153.93	292.753	-687.534	1225.76	34.7639	-543.414	1371	-38.8163	-561.37	1127.2	-41.3366	-569.368	1051.6	-48.12	-484.735	896.035	2.94658	-473.547	818.497	-66.892	-494.416	808.569	-29.8074	-456.339	744.125
686	0	174.656	-453.669	1584.51	292.608	-449.067	1577.09	177.453	-620.791	1538.58	285.198	-613.664	1529.86	224.507	-594.885	1437.44	210.328	-665.671	1154.67	210.089	-471.82	1346.85	200.751	-402.579	1155.37	294.175	-677.625	1227.22	35.7192	-534.311	1372.91	-38.2451	-553.885	1129.21	-40.7282	-562.348	1053.65	-47.5233	-479.031	897.366	3.47802	-469.147	819.44	-66.7425	-489.297	810.145	-28.9785	-452.96	744.544
687	0	176.184	-443.83	1586.05	294.114	-439.186	1578.26	178.92	-610.974	1540.2	286.633	-603.815	1531.14	225.795	-585.108	1438.93	211.589	-656.144	1156.22	210.783	-462.202	1348.26	200.63	-393.282	1156.74	295.583	-667.826	1228.67	36.6227	-525.315	1374.73	-37.7562	-546.699	1131.17	-40.2142	-555.508	1055.65	-47.1156	-473.363	898.744	3.79984	-464.515	820.517	-66.6806	-484.166	811.735	-28.4314	-449.22	745.202
688	0	177.593	-434.036	1587.52	295.5	-429.36	1579.39	180.273	-601.205	1541.75	287.951	-594.023	1532.38	227.022	-575.394	1440.36	212.828	-646.735	1157.71	211.43	-452.661	1349.6	200.517	-384.066	1158.04	296.973	-658.123	1230.09	37.4797	-516.411	1376.44	-37.3308	-539.785	1133.05	-39.7767	-548.829	1057.57	-46.8949	-467.733	900.143	3.9097	-459.639	821.696	-66.6976	-479.04	813.306	-28.1798	-445.106	746.071
689	0	178.881	-424.282	1588.88	296.768	-419.58	1580.46	181.513	-591.478	1543.21	289.156	-584.279	1533.57	228.188	-565.735	1441.72	214.042	-637.428	1159.15	212.036	-443.185	1350.85	200.431	-374.915	1159.26	298.342	-648.499	1231.47	38.2952	-507.58	1378.03	-36.9502	-533.106	1134.85	-39.3976	-542.291	1059.4	-46.8552	-462.135	901.539	3.81005	-454.51	822.944	-66.7837	-473.934	814.831	-28.2297	-440.617	747.118
690	0	180.051	-414.56	1590.14	297.918	-409.837	1581.47	182.644	-581.784	1544.57	290.252	-574.575	1534.7	229.295	-556.123	1443	215.227	-628.206	1160.5	212.607	-433.762	1352.02	200.388	-365.815	1160.4	299.686	-638.942	1232.8	39.0734	-498.807	1379.49	-36.597	-526.62	1136.55	-39.0594	-535.867	1061.13	-46.9863	-456.563	902.907	3.50813	-449.125	824.228	-66.9287	-468.858	816.283	-28.5787	-435.756	748.306
691	0	181.104	-404.863	1591.28	298.953	-400.124	1582.4	183.669	-572.119	1545.83	291.241	-564.902	1535.77	230.345	-546.551	1444.19	216.378	-619.053	1161.77	213.148	-424.384	1353.07	200.402	-356.754	1161.45	301.001	-629.436	1234.06	39.818	-490.076	1380.82	-36.2551	-520.279	1138.14	-38.7458	-529.528	1062.76	-47.2743	-451.008	904.224	3.01587	-443.484	825.517	-67.1218	-463.815	817.639	-29.2163	-430.54	749.597
692	0	182.043	-395.185	1592.28	299.876	-390.431	1583.25	184.594	-562.474	1546.97	292.13	-555.252	1536.75	231.339	-537.011	1445.27	217.494	-609.956	1162.93	213.662	-415.039	1354.02	200.478	-347.72	1162.39	302.281	-619.969	1235.23	40.5315	-481.373	1382	-35.9109	-514.031	1139.6	-38.442	-523.244	1064.26	-47.702	-445.454	905.469	2.34958	-437.593	826.777	-67.3521	-458.798	818.879	-30.1244	-424.989	750.951
693	0	182.872	-385.518	1593.16	300.691	-380.75	1584.01	185.424	-552.844	1547.98	292.924	-545.617	1537.65	232.279	-527.496	1446.24	218.57	-600.899	1163.98	214.152	-405.717	1354.85	200.618	-338.703	1163.23	303.523	-610.532	1236.3	41.2159	-472.684	1383.04	-35.5532	-507.824	1140.94	-38.1355	-516.982	1065.63	-48.2495	-439.885	906.621	1.52947	-431.46	827.979	-67.609	-453.797	819.988	-31.2778	-419.13	752.327
694	0	183.595	-375.857	1593.88	301.401	-371.073	1584.66	186.164	-543.224	1548.86	293.63	-535.99	1538.46	233.165	-517.999	1447.09	219.604	-591.871	1164.92	214.619	-396.409	1355.56	200.819	-329.694	1163.96	304.72	-601.114	1237.27	41.8719	-463.997	1383.92	-35.1741	-501.606	1142.13	-37.816	-510.707	1066.86	-48.8949	-434.28	907.662	0.578987	-425.096	829.094	-67.8825	-448.793	820.952	-32.6453	-412.991	753.684
695	0	184.216	-366.197	1594.45	302.012	-361.393	1585.19	186.821	-533.607	1549.6	294.255	-526.363	1539.16	233.998	-508.512	1447.8	220.593	-582.859	1165.72	215.063	-387.108	1356.13	201.074	-320.685	1164.56	305.868	-591.708	1238.11	42.4995	-455.301	1384.64	-34.7683	-495.326	1143.17	-37.4761	-504.386	1067.93	-49.6149	-428.618	908.577	-0.475853	-418.512	830.097	-68.1636	-443.759	821.764	-34.1907	-406.606	754.982
696	0	184.741	-356.532	1594.87	302.528	-351.703	1585.6	187.4	-523.99	1550.2	294.804	-516.729	1539.75	234.779	-499.03	1448.37	221.535	-573.854	1166.39	215.485	-377.805	1356.56	201.373	-311.67	1165.02	306.961	-582.308	1238.83	43.0976	-446.584	1385.2	-34.3336	-488.94	1144.05	-37.1105	-497.988	1068.85	-50.3859	-422.873	909.35	-1.60734	-411.723	830.963	-68.4447	-438.667	822.416	-35.8738	-400.006	756.184
697	0	185.174	-346.859	1595.12	302.954	-341.996	1585.88	187.907	-514.368	1550.65	295.283	-507.083	1540.21	235.506	-489.546	1448.8	222.428	-564.846	1166.92	215.882	-368.494	1356.85	201.701	-302.643	1165.35	307.995	-572.908	1239.4	43.6645	-437.838	1385.6	-33.8709	-482.407	1144.76	-36.7169	-491.479	1069.61	-51.1844	-417.02	909.97	-2.78691	-404.743	831.674	-68.7198	-433.483	822.905	-37.6518	-393.221	757.256
698	0	185.52	-337.172	1595.21	303.296	-332.269	1586.02	188.348	-504.736	1550.94	295.698	-497.42	1540.55	236.179	-480.054	1449.07	223.268	-555.827	1167.3	216.252	-359.167	1357	202.043	-293.597	1165.53	308.965	-563.504	1239.83	44.1977	-429.054	1385.83	-33.3832	-475.693	1145.3	-36.2953	-484.833	1070.19	-51.9883	-411.033	910.426	-3.98604	-397.587	832.211	-68.9848	-428.171	823.229	-39.4806	-386.279	758.167
699	0	185.785	-327.471	1595.12	303.558	-322.515	1586.01	188.726	-495.091	1551.08	296.054	-487.735	1540.76	236.797	-470.548	1449.19	224.053	-546.79	1167.52	216.593	-349.818	1356.98	202.383	-284.527	1165.56	309.867	-554.091	1240.11	44.6941	-420.223	1385.9	-32.8759	-468.772	1145.65	-35.8479	-478.022	1070.6	-52.7771	-404.886	910.71	-5.17713	-390.268	832.56	-69.2371	-422.695	823.387	-41.3165	-379.203	758.89
700	0	185.974	-317.75	1594.87	303.745	-312.734	1585.85	189.046	-485.43	1551.06	296.355	-478.024	1540.82	237.357	-461.023	1449.14	224.779	-537.726	1167.59	216.901	-340.442	1356.82	202.707	-275.428	1165.44	310.697	-544.666	1240.23	45.15	-411.338	1385.8	-32.356	-461.621	1145.83	-35.3789	-471.026	1070.82	-53.5326	-398.556	910.815	-6.33429	-382.801	832.711	-69.476	-417.019	823.381	-43.1172	-372.013	759.404
701	0	186.09	-308.009	1594.45	303.862	-302.92	1585.54	189.31	-475.75	1550.87	296.603	-468.285	1540.73	237.858	-451.473	1448.93	225.443	-528.629	1167.5	217.172	-331.034	1356.49	202.998	-266.295	1165.15	311.451	-535.226	1240.19	45.5615	-402.393	1385.54	-31.8319	-454.228	1145.81	-34.8942	-463.825	1070.85	-54.2395	-392.021	910.736	-7.43409	-375.197	832.656	-69.7023	-411.112	823.211	-44.843	-364.723	759.69
702	0	186.137	-298.245	1593.87	303.911	-293.075	1585.07	189.521	-466.047	1550.53	296.801	-458.516	1540.5	238.297	-441.894	1448.56	226.041	-519.49	1167.24	217.401	-321.587	1356	203.245	-257.121	1164.7	312.124	-525.765	1239.98	45.9239	-393.379	1385.12	-31.3128	-446.585	1145.61	-34.4012	-456.403	1070.7	-54.8858	-385.26	910.468	-8.45623	-367.468	832.388	-69.9179	-404.943	822.88	-46.4586	-357.341	759.735
703	0	186.12	-288.455	1593.12	303.898	-283.195	1584.44	189.679	-456.32	1550.02	296.948	-448.714	1540.11	238.668	-432.28	1448.02	226.57	-510.303	1166.82	217.585	-312.098	1355.36	203.437	-247.9	1164.1	312.714	-516.279	1239.6	46.2326	-384.292	1384.53	-30.8087	-438.688	1145.22	-33.9083	-448.75	1070.36	-55.4624	-378.258	910.01	-9.38407	-359.621	831.904	-70.1255	-398.49	822.387	-47.9337	-349.872	759.529
704	0	186.04	-278.64	1592.21	303.824	-273.282	1583.65	189.783	-446.566	1549.36	297.045	-438.879	1539.56	238.969	-422.628	1447.32	227.025	-501.06	1166.23	217.719	-302.56	1354.56	203.566	-238.626	1163.33	313.216	-506.764	1239.06	46.4826	-375.124	1383.79	-30.3297	-430.54	1144.65	-33.4244	-440.859	1069.82	-55.9641	-371.002	909.36	-10.2051	-351.662	831.204	-70.3281	-391.732	821.735	-49.2441	-342.316	759.067
705	0	185.899	-268.796	1591.16	303.692	-263.336	1582.71	189.833	-436.782	1548.54	297.09	-429.009	1538.85	239.195	-412.933	1446.46	227.402	-491.754	1165.48	217.799	-292.969	1353.61	203.629	-229.292	1162.4	313.627	-497.213	1238.34	46.669	-365.869	1382.88	-29.8858	-422.144	1143.88	-32.959	-432.724	1069.09	-56.3886	-363.482	908.519	-10.911	-343.595	830.29	-70.529	-384.656	820.924	-50.3721	-334.667	758.348
706	0	185.7	-258.923	1589.96	303.503	-253.357	1581.62	189.825	-426.965	1547.58	297.08	-419.104	1538	239.341	-403.19	1445.44	227.698	-482.377	1164.57	217.819	-283.321	1352.51	203.622	-219.89	1161.32	313.943	-487.621	1237.47	46.7866	-356.523	1381.82	-29.4869	-413.509	1142.93	-32.5214	-424.345	1068.18	-56.7373	-355.693	907.487	-11.4979	-335.419	829.166	-70.731	-377.254	819.953	-51.3074	-326.917	757.375
707	0	185.442	-249.018	1588.63	303.257	-243.346	1580.4	189.756	-417.114	1546.47	297.01	-409.164	1536.98	239.402	-393.396	1444.28	227.908	-472.922	1163.5	217.776	-273.61	1351.27	203.548	-210.412	1160.08	314.161	-477.982	1236.43	46.8305	-347.08	1380.61	-29.1424	-404.643	1141.8	-32.1209	-415.723	1067.08	-57.0139	-347.633	906.269	-11.9663	-327.134	827.839	-70.9363	-369.526	818.826	-52.0464	-319.055	756.155
708	0	185.124	-239.081	1587.19	302.954	-233.305	1579.04	189.622	-407.225	1545.22	296.877	-399.188	1535.83	239.372	-383.545	1442.99	228.031	-463.382	1162.28	217.665	-263.832	1349.9	203.408	-200.85	1158.7	314.279	-468.287	1235.24	46.7957	-337.535	1379.25	-28.8607	-395.555	1140.5	-31.7657	-406.862	1065.8	-57.2248	-339.302	904.87	-12.3204	-318.733	826.317	-71.1466	-361.473	817.541	-52.5927	-311.068	754.697
709	0	184.747	-229.11	1585.64	302.592	-223.235	1577.57	189.416	-397.295	1543.85	296.674	-389.176	1534.54	239.247	-373.635	1441.56	228.063	-453.75	1160.91	217.482	-253.983	1348.41	203.209	-191.195	1157.19	314.294	-458.529	1233.92	46.6777	-327.884	1377.75	-28.6494	-386.255	1139.03	-31.4635	-397.767	1064.34	-57.3784	-330.704	903.297	-12.568	-310.211	824.612	-71.3624	-353.103	816.101	-52.9559	-302.943	753.015
710	0	184.307	-219.102	1584.01	302.171	-213.136	1575.99	189.134	-387.322	1542.37	296.396	-379.127	1533.12	239.022	-363.661	1440.03	228.003	-444.019	1159.42	217.224	-244.057	1346.81	202.955	-181.439	1155.55	314.205	-448.7	1232.46	46.4722	-318.122	1376.12	-28.5149	-376.752	1137.4	-31.2207	-388.444	1062.72	-57.4844	-321.845	901.559	-12.7198	-301.558	822.735	-71.5838	-344.427	814.51	-53.1513	-294.663	751.125
711	0	183.803	-209.057	1582.31	301.687	-203.009	1574.33	188.768	-377.302	1540.79	296.035	-369.041	1531.59	238.692	-353.62	1438.4	227.851	-434.181	1157.81	216.885	-234.05	1345.13	202.654	-171.574	1153.81	314.011	-438.792	1230.88	46.1753	-308.247	1374.37	-28.4623	-367.055	1135.61	-31.0425	-378.902	1060.95	-57.5537	-312.733	899.668	-12.7887	-292.765	820.704	-71.81	-335.46	812.773	-53.1988	-286.215	749.048
712	0	183.231	-198.972	1580.56	301.137	-192.855	1572.61	188.313	-367.233	1539.13	295.586	-358.916	1529.96	238.255	-343.508	1436.69	227.608	-424.229	1156.1	216.464	-223.959	1343.37	202.31	-161.592	1151.97	313.713	-428.794	1229.21	45.7838	-298.256	1372.52	-28.4952	-357.172	1133.7	-30.9324	-369.147	1059.04	-57.5973	-303.378	897.636	-12.7892	-283.821	818.534	-72.0397	-326.217	810.896	-53.1217	-277.582	746.805
713	0	182.588	-188.844	1578.79	300.518	-182.674	1570.86	187.761	-357.112	1537.4	295.041	-348.753	1528.26	237.706	-333.322	1434.92	227.275	-414.157	1154.3	215.958	-213.78	1341.57	201.931	-151.485	1150.05	313.312	-418.699	1227.46	45.2951	-288.147	1370.57	-28.6156	-347.108	1131.66	-30.8926	-359.187	1057.01	-57.6262	-293.788	895.482	-12.7368	-274.713	816.246	-72.2713	-316.715	808.892	-52.9454	-268.752	744.421
714	0	181.87	-178.673	1577.01	299.825	-172.465	1569.08	187.108	-346.936	1535.63	294.395	-338.548	1526.5	237.044	-323.06	1433.12	226.855	-403.956	1152.45	215.363	-203.509	1339.73	201.519	-141.247	1148.08	312.811	-408.498	1225.66	44.7076	-277.921	1368.54	-28.8239	-336.871	1129.52	-30.9237	-349.029	1054.88	-57.6511	-283.973	893.224	-12.6471	-265.431	813.862	-72.5032	-306.972	806.774	-52.6965	-259.711	741.924
715	0	181.072	-168.455	1575.25	299.054	-162.229	1567.32	186.347	-336.701	1533.84	293.641	-328.302	1524.7	236.269	-312.718	1431.31	226.353	-393.62	1150.55	214.679	-193.143	1337.89	201.077	-130.871	1146.09	312.214	-398.181	1223.83	44.0203	-267.578	1366.46	-29.1192	-326.463	1127.29	-31.0249	-338.68	1052.66	-57.6818	-273.943	890.884	-12.5352	-255.963	811.405	-72.7335	-297.003	804.558	-52.4016	-250.448	739.344
716	0	180.192	-158.189	1573.54	298.202	-151.963	1565.59	185.474	-326.407	1532.04	292.776	-318.011	1522.9	235.38	-302.297	1429.5	225.774	-383.141	1148.64	213.903	-182.681	1336.07	200.607	-120.352	1144.1	311.525	-387.742	1221.99	43.2335	-257.12	1364.35	-29.4989	-315.889	1125.01	-31.1941	-328.146	1050.38	-57.7268	-263.705	888.487	-12.4154	-246.297	808.902	-72.9609	-286.822	802.265	-52.0857	-240.951	736.711
717	0	179.226	-147.874	1571.9	297.264	-141.668	1563.93	184.485	-316.05	1530.27	291.796	-307.676	1521.11	234.38	-291.794	1427.74	225.124	-372.515	1146.75	213.037	-172.12	1334.3	200.106	-109.687	1142.14	310.75	-377.173	1220.18	42.3484	-246.549	1362.23	-29.9589	-305.153	1122.69	-31.428	-317.43	1048.07	-57.7933	-253.266	886.059	-12.3006	-236.423	806.38	-73.1844	-276.441	799.92	-51.7717	-231.211	734.06
718	0	178.17	-137.508	1570.35	296.237	-131.341	1562.37	183.379	-305.63	1528.54	290.699	-297.293	1519.38	233.271	-281.21	1426.03	224.41	-361.736	1144.89	212.08	-161.461	1332.61	199.573	-98.8719	1140.25	309.896	-366.469	1218.43	41.3675	-235.87	1360.14	-30.4943	-294.256	1120.36	-31.7228	-306.539	1045.75	-57.8873	-242.632	883.63	-12.2018	-226.332	803.868	-73.4035	-265.869	797.55	-51.4797	-221.222	731.422
719	0	177.022	-127.09	1568.92	295.117	-120.982	1560.93	182.155	-295.146	1526.88	289.484	-286.862	1517.71	232.059	-270.545	1424.42	223.639	-350.803	1143.1	211.035	-150.703	1331.02	199.002	-87.9057	1138.46	308.971	-355.625	1216.75	40.2945	-225.087	1358.08	-31.0989	-283.2	1118.06	-32.0736	-295.475	1043.46	-58.013	-231.805	881.23	-12.128	-216.016	801.398	-73.6185	-255.112	795.185	-51.2258	-210.976	728.833
720	0	175.78	-116.619	1567.63	293.904	-110.588	1559.63	180.813	-284.597	1525.31	288.152	-276.382	1516.15	230.75	-259.8	1422.91	222.818	-339.713	1141.4	209.904	-139.848	1329.56	198.389	-76.7883	1136.8	307.982	-344.641	1215.19	39.1345	-214.207	1356.11	-31.7658	-271.99	1115.81	-32.4756	-284.243	1041.21	-58.1733	-220.789	878.89	-12.0864	-205.466	799.001	-73.8302	-244.172	792.857	-51.0224	-200.469	726.328
721	0	174.443	-106.096	1566.49	292.595	-100.158	1558.52	179.356	-273.984	1523.86	286.706	-265.851	1514.71	229.351	-248.978	1421.54	221.957	-328.471	1139.83	208.692	-128.898	1328.26	197.728	-65.5215	1135.31	306.939	-333.517	1213.76	37.8937	-203.235	1354.23	-32.4877	-260.626	1113.63	-32.9238	-272.845	1039.06	-58.3695	-209.583	876.643	-12.0816	-194.676	796.708	-74.0402	-233.048	790.602	-50.8777	-189.696	723.94
722	0	173.012	-95.5201	1565.54	291.191	-89.6906	1557.59	177.789	-263.309	1522.55	285.151	-255.271	1513.43	227.87	-238.082	1420.33	221.061	-317.081	1138.41	207.406	-117.858	1327.14	197.016	-54.1096	1134.02	305.85	-322.256	1212.5	36.5797	-192.179	1352.49	-33.257	-249.113	1111.58	-33.4135	-261.284	1037.01	-58.6018	-198.187	874.521	-12.1167	-183.642	794.552	-74.2506	-221.737	788.452	-50.7962	-178.654	721.704
723	0	171.488	-84.894	1564.77	289.692	-79.185	1556.89	176.118	-252.574	1521.39	283.492	-244.64	1512.33	226.319	-227.117	1419.3	220.139	-305.552	1137.16	206.052	-106.732	1326.21	196.247	-42.5594	1132.97	304.725	-310.865	1211.42	35.2015	-181.046	1350.91	-34.066	-237.455	1109.66	-33.9404	-249.565	1035.1	-58.8692	-186.599	872.555	-12.1928	-172.359	792.564	-74.4638	-210.232	786.443	-50.7783	-167.341	719.65
724	0	169.874	-74.2189	1564.21	288.102	-68.6401	1556.42	174.351	-241.782	1520.41	281.739	-233.959	1511.43	224.708	-216.089	1418.45	219.196	-293.896	1136.11	204.641	-95.5279	1325.51	195.422	-30.8809	1132.16	303.571	-299.354	1210.55	33.769	-169.844	1349.51	-34.9076	-225.657	1107.92	-34.5009	-237.69	1033.37	-59.17	-174.817	870.774	-12.3095	-160.824	790.773	-74.6828	-198.525	784.609	-50.8216	-155.755	717.808
725	0	168.174	-63.4975	1563.87	286.425	-58.0557	1556.19	172.498	-230.938	1519.61	279.9	-223.232	1510.74	223.049	-205.003	1417.82	218.238	-282.129	1135.27	203.182	-84.2532	1325.04	194.541	-19.0871	1131.63	302.397	-287.735	1209.91	32.293	-158.58	1348.31	-35.7748	-213.725	1106.37	-35.0924	-225.666	1031.82	-59.5015	-162.836	869.205	-12.4651	-149.034	789.207	-74.9104	-186.606	782.979	-50.9208	-143.894	716.205
726	0	166.394	-52.733	1563.74	284.666	-47.4319	1556.22	170.57	-220.046	1519.01	277.988	-212.459	1510.29	221.353	-193.867	1417.4	217.269	-270.268	1134.66	201.689	-72.9177	1324.8	193.608	-7.19475	1131.38	301.21	-276.024	1209.5	30.7852	-147.262	1347.34	-36.6615	-201.664	1105.04	-35.7133	-213.496	1030.49	-59.8609	-150.656	867.872	-12.6573	-136.988	787.891	-75.1497	-174.465	781.582	-51.0683	-131.759	714.864
727	0	164.54	-41.9292	1563.83	282.831	-36.7694	1556.5	168.579	-209.112	1518.62	276.014	-201.644	1510.08	219.634	-182.691	1417.2	216.294	-258.336	1134.29	200.173	-61.5322	1324.81	192.631	4.77606	1131.43	300.017	-264.242	1209.34	29.2576	-135.899	1346.6	-37.5626	-189.483	1103.95	-36.3629	-201.188	1029.39	-60.2451	-138.273	866.796	-12.8829	-124.686	786.845	-75.4036	-162.092	780.442	-51.2551	-119.348	713.804
728	0	162.622	-31.0906	1564.13	280.93	-26.0698	1557.04	166.54	-198.143	1518.44	273.993	-190.791	1510.12	217.904	-171.484	1417.24	215.314	-246.354	1134.16	198.648	-50.109	1325.07	191.618	16.8022	1131.77	298.823	-252.41	1209.42	27.7226	-124.495	1346.11	-38.4742	-177.19	1103.1	-37.0416	-188.75	1028.53	-60.6511	-125.687	865.991	-13.1385	-112.129	786.086	-75.6749	-149.475	779.575	-51.4715	-106.66	713.039
729	0	160.65	-20.2223	1564.64	278.972	-15.3353	1557.82	164.467	-187.145	1518.47	271.939	-179.906	1510.41	216.175	-160.255	1417.49	214.33	-234.348	1134.28	197.13	-38.661	1325.56	190.585	28.8582	1132.39	297.632	-240.551	1209.75	26.1924	-113.06	1345.86	-39.3933	-164.793	1102.52	-37.751	-176.19	1027.93	-61.0759	-112.896	865.469	-13.421	-99.3172	785.627	-75.9659	-136.608	778.994	-51.7075	-93.6962	712.576
730	0	158.633	-9.32965	1565.34	276.967	-4.56887	1558.84	162.374	-176.128	1518.71	269.866	-168.994	1510.94	214.458	-149.016	1417.96	213.343	-222.342	1134.64	195.631	-27.2023	1326.29	189.546	40.9165	1133.28	296.445	-228.693	1210.32	24.6788	-101.6	1345.86	-40.3186	-152.301	1102.21	-38.4932	-163.519	1027.57	-61.5171	-99.9016	865.235	-13.7271	-86.2543	785.474	-76.2787	-123.481	778.706	-51.9537	-80.4548	712.421
731	0	156.585	1.58154	1566.21	274.929	6.22582	1560.07	160.276	-165.098	1519.15	267.79	-158.061	1511.71	212.764	-137.778	1418.64	212.353	-210.363	1135.23	194.167	-15.7471	1327.22	188.518	52.949	1134.42	295.265	-216.863	1211.11	23.1932	-90.1214	1346.11	-41.2499	-139.726	1102.15	-39.2711	-150.748	1027.47	-61.9728	-86.7073	865.289	-14.0539	-72.9439	785.627	-76.6149	-110.092	778.71	-52.2016	-66.9357	712.571
732	0	154.518	12.5053	1567.24	272.87	17.0443	1561.49	158.189	-154.063	1519.78	265.725	-147.114	1512.71	211.103	-126.552	1419.52	211.356	-198.435	1136.04	192.751	-4.31005	1328.35	187.521	64.9276	1135.76	294.09	-205.087	1212.11	21.7458	-78.63	1346.58	-42.1879	-127.076	1102.35	-40.0881	-137.887	1027.61	-62.4413	-73.3172	865.625	-14.3991	-59.3912	786.083	-76.9754	-96.4365	778.998	-52.4447	-53.1386	713.02
733	0	152.447	23.4355	1568.41	270.803	27.8815	1563.08	156.128	-143.032	1520.59	263.687	-136.161	1513.91	209.483	-115.349	1420.57	210.351	-186.583	1137.05	191.395	7.09443	1329.65	186.573	76.8254	1137.3	292.919	-193.392	1213.31	20.3458	-67.1323	1347.27	-43.1344	-114.363	1102.78	-40.9475	-124.951	1027.99	-62.9218	-59.7378	866.234	-14.7605	-45.6028	786.834	-77.3607	-82.5172	779.559	-52.6782	-39.0637	713.757
734	0	150.384	34.3661	1569.7	268.744	38.7319	1564.82	154.104	-132.012	1521.56	261.688	-125.21	1515.3	207.911	-104.181	1421.78	209.334	-174.828	1138.24	190.111	18.4525	1331.1	185.694	88.6177	1138.97	291.749	-181.804	1214.66	19.0012	-55.6337	1348.15	-44.0918	-101.599	1103.44	-41.8523	-111.951	1028.58	-63.4139	-45.9773	867.101	-15.1364	-31.5869	787.864	-77.7707	-68.3381	780.375	-52.8993	-24.7121	714.768
735	0	148.345	45.2913	1571.07	266.707	49.5894	1566.67	152.132	-121.011	1522.68	259.741	-114.267	1516.86	206.392	-93.0572	1423.14	208.302	-163.19	1139.59	188.909	29.7511	1332.67	184.9	100.283	1140.76	290.576	-170.347	1216.17	17.7184	-44.14	1349.21	-45.0627	-88.7932	1104.29	-42.8054	-98.8987	1029.36	-63.9172	-32.0457	868.209	-15.5253	-17.3534	789.157	-78.2045	-53.9069	781.423	-53.1072	-10.0858	716.036
736	0	146.344	56.2055	1572.52	264.707	60.4478	1568.61	150.223	-110.035	1523.93	257.858	-103.34	1518.57	204.931	-81.9869	1424.61	207.252	-151.687	1141.07	187.795	40.9786	1334.33	184.205	111.801	1142.62	289.397	-159.039	1217.78	16.5026	-32.6563	1350.42	-46.0497	-75.9586	1105.33	-43.8083	-85.8074	1030.32	-64.432	-17.9546	869.535	-15.9257	-2.91377	790.691	-78.6606	-39.2348	782.679	-53.3029	4.81118	717.542
737	0	144.393	67.1037	1574.02	262.756	71.3005	1570.61	148.386	-99.0901	1525.28	256.048	-92.4359	1520.39	203.53	-70.9779	1426.18	206.181	-140.331	1142.66	186.776	52.1245	1336.06	183.624	123.16	1144.51	288.207	-147.899	1219.49	15.3572	-21.1878	1351.75	-47.0548	-63.1061	1106.51	-44.862	-72.6879	1031.43	-64.9581	-3.71676	871.058	-16.3361	11.7187	792.443	-79.137	-24.3361	784.116	-53.489	19.973	719.267
738	0	142.506	77.9813	1575.54	260.87	82.1412	1572.64	146.629	-88.1812	1526.73	254.32	-81.5607	1522.3	202.191	-60.037	1427.82	205.084	-129.134	1144.33	185.854	63.1803	1337.83	183.163	134.348	1146.4	287.003	-136.939	1221.26	14.2841	-9.73965	1353.18	-48.0796	-50.2467	1107.82	-45.9659	-59.5507	1032.66	-65.4955	10.6537	872.753	-16.755	26.5291	794.388	-79.6312	-9.22781	785.709	-53.669	35.3911	721.19
739	0	140.696	88.8341	1577.07	259.061	92.9637	1574.67	144.959	-77.3125	1528.24	252.679	-70.7203	1524.27	200.913	-49.1693	1429.52	203.961	-118.1	1146.06	185.03	74.1392	1339.61	182.827	145.359	1148.27	285.78	-126.167	1223.08	13.284	1.68338	1354.69	-49.1243	-37.3909	1109.23	-47.1184	-46.4052	1033.99	-66.0435	25.1419	874.597	-17.1805	41.5014	796.502	-80.1402	6.07073	787.431	-53.8474	51.0542	723.291
740	0	138.972	99.6588	1578.6	257.339	103.762	1576.68	143.381	-66.4873	1529.81	251.131	-59.9196	1526.29	199.696	-38.3786	1431.25	202.809	-107.233	1147.83	184.303	84.9964	1341.4	182.617	156.19	1150.09	284.537	-115.588	1224.92	12.3558	13.0764	1356.24	-50.1884	-24.5486	1110.72	-48.3161	-33.2597	1035.4	-66.6014	39.7325	876.566	-17.6104	56.6179	798.759	-80.6608	21.5384	789.258	-54.0287	66.9478	725.552
741	0	137.344	110.452	1580.1	255.714	114.531	1578.66	141.899	-55.708	1531.41	249.679	-49.1627	1528.31	198.538	-27.6674	1432.99	201.628	-96.5299	1149.62	183.668	95.7492	1343.16	182.528	166.844	1151.84	283.271	-105.201	1226.75	11.4973	24.4347	1357.83	-51.2698	-11.7289	1112.26	-49.5548	-20.1214	1036.87	-67.168	54.4098	878.638	-18.0424	71.8604	801.136	-81.1895	37.1529	791.17	-54.2175	83.0544	727.956
742	0	135.82	121.213	1581.57	254.194	125.266	1580.57	140.512	-44.9761	1533.02	248.324	-38.453	1530.33	197.435	-17.0364	1434.73	200.419	-85.9868	1151.4	183.121	106.397	1344.88	182.552	177.324	1153.5	281.983	-95.0001	1228.58	10.705	35.7537	1359.42	-52.3656	1.05967	1113.83	-50.8288	-6.99634	1038.37	-67.7415	69.1583	880.793	-18.474	87.21	803.61	-81.7228	52.8915	793.148	-54.4175	99.3531	730.486
743	0	134.404	131.938	1582.99	252.786	135.962	1582.41	139.223	-34.2927	1534.64	247.066	-27.7931	1532.32	196.385	-6.48542	1436.45	199.183	-75.5957	1153.16	182.654	116.94	1346.54	182.677	187.638	1155.08	280.673	-84.9778	1230.37	9.97453	47.0289	1361.01	-53.4717	13.8095	1115.42	-52.1314	6.11027	1039.89	-68.3197	83.9627	883.012	-18.9026	102.648	806.162	-82.2571	68.7313	795.176	-54.6315	115.821	733.128
744	0	133.101	142.627	1584.37	251.493	146.617	1584.16	138.03	-23.658	1536.24	245.903	-17.1846	1534.27	195.385	3.9872	1438.14	197.924	-65.3465	1154.89	182.258	127.382	1348.14	182.885	197.796	1156.56	279.345	-75.1214	1232.13	9.30061	58.2561	1362.57	-54.5835	26.514	1117	-53.4554	19.1943	1041.41	-68.9001	98.8082	885.279	-19.3256	118.154	808.774	-82.7887	84.6499	797.244	-54.8612	132.432	735.869
745	0	131.913	153.278	1585.68	250.317	157.228	1585.81	136.93	-13.0717	1537.81	244.833	-6.62848	1536.14	194.429	14.3841	1439.77	196.645	-55.2272	1156.57	181.923	137.727	1349.65	183.161	207.809	1157.94	278.002	-65.4154	1233.83	8.67759	69.4312	1364.09	-55.6956	39.167	1118.57	-54.7928	32.2524	1042.92	-69.4799	113.681	887.58	-19.7403	133.711	811.428	-83.314	100.626	799.34	-55.1064	149.158	738.694
746	0	130.84	163.893	1586.92	249.258	167.794	1587.35	135.921	-2.53311	1539.34	243.853	3.87511	1537.94	193.515	24.7091	1441.35	195.352	-45.2242	1158.19	181.641	147.981	1351.09	183.483	217.689	1159.24	276.649	-55.8423	1235.47	8.09957	80.5507	1365.57	-56.8028	51.7636	1120.11	-56.1355	45.2818	1044.41	-70.0558	128.567	889.899	-20.1441	149.301	814.112	-83.8294	116.639	801.456	-55.3655	165.972	741.591
747	0	129.879	174.469	1588.08	248.314	178.312	1588.77	134.999	7.95899	1540.82	242.96	14.3268	1539.65	192.64	34.9666	1442.85	194.051	-35.3231	1159.74	181.4	158.15	1352.43	183.831	227.452	1160.44	275.294	-46.3827	1237.04	7.56068	91.6115	1366.99	-57.8998	64.2994	1121.61	-57.4753	58.2804	1045.86	-70.6245	143.455	892.227	-20.5343	164.907	816.811	-84.3315	132.67	803.587	-55.6351	182.844	744.546
748	0	129.029	185.009	1589.17	247.483	188.784	1590.07	134.161	18.4062	1542.23	242.147	24.728	1541.25	191.8	45.162	1444.27	192.75	-25.5091	1161.2	181.192	168.244	1353.68	184.186	237.111	1161.55	273.943	-37.0166	1238.53	7.05533	102.611	1368.34	-58.9817	76.7709	1123.06	-58.8043	71.2465	1047.26	-71.1827	158.332	894.549	-20.9083	180.514	819.513	-84.8166	148.701	805.724	-55.9104	199.746	747.545
749	0	128.285	195.512	1590.17	246.758	199.211	1591.23	133.401	28.8104	1543.57	241.413	35.081	1542.74	190.994	55.3015	1445.59	191.455	-15.7672	1162.57	181.008	178.27	1354.82	184.528	246.682	1162.58	272.605	-27.7232	1239.94	6.57845	113.548	1369.62	-60.044	89.1757	1124.45	-60.1149	84.1784	1048.62	-71.7268	173.189	896.856	-21.2633	196.105	822.207	-85.2813	164.718	807.863	-56.1851	216.648	750.573
750	0	127.64	205.979	1591.08	246.135	209.593	1592.26	132.718	39.1739	1544.82	240.751	45.3885	1544.11	190.22	65.3919	1446.82	190.177	-6.08298	1163.85	180.84	188.238	1355.86	184.841	256.181	1163.53	271.289	-18.4824	1241.24	6.12567	124.42	1370.82	-61.0829	101.512	1125.78	-61.4001	97.0751	1049.91	-72.2534	188.014	899.135	-21.5963	211.669	824.881	-85.7221	180.705	809.994	-56.452	233.524	753.611
751	0	127.091	216.412	1591.89	245.606	219.934	1593.15	132.106	49.4994	1545.97	240.159	55.6543	1545.34	189.478	75.4402	1447.93	188.921	3.55717	1165.02	180.681	198.159	1356.78	185.11	265.624	1164.38	270.004	-9.27454	1242.45	5.6935	135.229	1371.93	-62.095	113.778	1127.03	-62.6536	109.935	1051.13	-72.7593	202.799	901.376	-21.9044	227.191	827.523	-86.1357	196.649	812.109	-56.7033	250.349	756.644
752	0	126.628	226.812	1592.6	245.165	230.237	1593.91	131.562	59.7898	1547.01	239.632	65.8825	1546.44	188.768	85.4544	1448.92	187.698	13.1658	1166.07	180.527	208.042	1357.59	185.325	275.027	1165.15	268.757	-0.081159	1243.55	5.27939	145.975	1372.94	-63.0777	125.975	1128.2	-63.8696	122.758	1052.26	-73.2411	217.535	903.565	-22.1846	242.659	830.12	-86.5186	212.537	814.198	-56.9309	267.1	759.653
753	0	126.247	237.18	1593.2	244.804	240.505	1594.52	131.083	70.0486	1547.94	239.168	76.0782	1547.4	188.09	95.4424	1449.79	186.515	22.7539	1167	180.374	217.897	1358.28	185.478	284.403	1165.82	267.558	9.11471	1244.53	4.88182	156.66	1373.85	-64.0285	138.104	1129.28	-65.0433	135.543	1053.31	-73.6958	232.213	905.69	-22.4337	258.063	832.661	-86.8676	228.36	816.249	-57.1267	283.755	762.619
754	0	125.94	247.519	1593.69	244.516	250.744	1594.98	130.668	80.2793	1548.74	238.764	86.2467	1548.21	187.448	105.412	1450.53	185.379	32.3311	1167.8	180.221	227.735	1358.84	185.565	293.768	1166.38	266.414	18.3283	1245.38	4.50029	167.288	1374.65	-64.9455	150.165	1130.26	-66.1704	148.288	1054.26	-74.1202	246.824	907.739	-22.6487	273.39	835.131	-87.1796	244.104	818.249	-57.2831	300.296	765.521
755	0	125.701	257.83	1594.06	244.295	260.957	1595.31	130.314	90.4861	1549.41	238.42	96.3939	1548.86	186.843	115.373	1451.13	184.299	41.9053	1168.47	180.068	237.565	1359.27	185.587	303.134	1166.83	265.332	27.573	1246.11	4.13534	177.863	1375.33	-65.8266	162.162	1131.13	-67.2472	160.992	1055.11	-74.5111	261.361	909.697	-22.8266	288.63	837.516	-87.4516	259.76	820.183	-57.3933	316.706	768.342
756	0	125.525	268.118	1594.3	244.135	271.15	1595.49	130.02	100.673	1549.93	238.133	106.526	1549.35	186.278	125.333	1451.59	183.279	51.4831	1169.01	179.915	247.396	1359.57	185.546	312.515	1167.15	264.318	36.86	1246.7	3.78847	188.391	1375.89	-66.6697	174.096	1131.88	-68.2706	173.653	1055.84	-74.8653	275.815	911.552	-22.9646	303.771	839.801	-87.6804	275.317	822.037	-57.4513	332.971	771.061
757	0	125.407	278.384	1594.42	244.03	281.33	1595.52	129.785	110.846	1550.3	237.904	116.649	1549.67	185.756	135.299	1451.9	182.326	61.0696	1169.4	179.766	257.237	1359.72	185.448	321.92	1167.33	263.376	46.1985	1247.15	3.46209	198.877	1376.31	-67.4724	185.971	1132.51	-69.2379	186.27	1056.45	-75.1795	290.179	913.289	-23.06	318.803	841.972	-87.8634	290.764	823.795	-57.4523	349.077	773.662
758	0	125.343	288.632	1594.41	243.977	291.501	1595.41	129.61	121.008	1550.51	237.733	126.77	1549.83	185.282	145.281	1452.06	181.445	70.6687	1169.65	179.623	267.096	1359.73	185.302	331.359	1167.37	262.51	55.5958	1247.45	3.15944	209.329	1376.6	-68.2321	197.791	1133	-70.1466	198.841	1056.93	-75.4502	304.443	914.896	-23.1101	333.715	844.015	-87.9978	306.089	825.44	-57.393	365.013	776.126
759	0	125.329	298.867	1594.27	243.973	301.669	1595.16	129.495	131.165	1550.55	237.62	136.895	1549.81	184.859	155.285	1452.07	180.64	80.2839	1169.76	179.491	276.98	1359.59	185.119	340.839	1167.24	261.723	65.057	1247.62	2.8844	219.756	1376.74	-68.9454	209.559	1133.36	-70.9942	211.362	1057.27	-75.6741	318.6	916.361	-23.1127	348.496	845.913	-88.0812	321.281	826.959	-57.271	380.769	778.437
760	0	125.364	309.093	1593.99	244.014	311.841	1594.77	129.439	141.323	1550.44	237.566	147.031	1549.62	184.492	165.318	1451.94	179.915	89.9178	1169.73	179.376	286.896	1359.3	184.91	350.367	1166.96	261.017	74.5857	1247.63	2.64137	230.164	1376.73	-69.6089	221.276	1133.57	-71.7783	223.83	1057.47	-75.8478	332.641	917.672	-23.0655	363.134	847.655	-88.1112	336.328	828.336	-57.0854	396.334	780.582
761	0	125.446	319.315	1593.58	244.101	322.021	1594.24	129.445	151.487	1550.15	237.572	157.182	1549.26	184.183	175.386	1451.65	179.271	99.5731	1169.56	179.282	296.85	1358.86	184.688	359.947	1166.5	260.394	84.1836	1247.49	2.43511	240.562	1376.58	-70.2183	232.946	1133.64	-72.4964	236.242	1057.53	-75.9678	346.556	918.819	-22.9668	377.619	849.228	-88.086	351.217	829.558	-56.836	411.699	782.547
762	0	125.574	329.537	1593.04	244.234	332.216	1593.57	129.513	161.662	1549.7	237.639	167.356	1548.73	183.938	185.494	1451.21	178.71	109.253	1169.25	179.216	306.846	1358.26	184.467	369.582	1165.87	259.855	93.8514	1247.21	2.27055	250.959	1376.28	-70.7691	244.571	1133.55	-73.1456	248.593	1057.45	-76.031	360.337	919.792	-22.8149	391.937	850.618	-88.0037	365.937	830.614	-56.5236	426.855	784.321
763	0	125.751	339.766	1592.36	244.412	342.43	1592.77	129.643	171.855	1549.08	237.769	177.557	1548.03	183.76	195.646	1450.63	178.233	118.96	1168.8	179.185	316.888	1357.52	184.259	379.273	1165.06	259.399	103.589	1246.79	2.15268	261.362	1375.82	-71.2564	256.15	1133.31	-73.7226	260.879	1057.22	-76.0343	373.973	920.585	-22.6084	406.079	851.817	-87.863	380.473	831.493	-56.1498	441.792	785.893
764	0	125.975	350.007	1591.56	244.637	352.669	1591.85	129.838	182.07	1548.31	237.961	187.789	1547.17	183.651	205.846	1449.91	177.841	128.698	1168.22	179.193	326.979	1356.64	184.076	389.023	1164.08	259.027	113.396	1246.22	2.08638	271.778	1375.23	-71.6751	267.683	1132.93	-74.224	273.094	1056.85	-75.975	387.456	921.19	-22.3462	420.032	852.814	-87.6626	394.813	832.186	-55.7165	456.501	787.255
765	0	126.25	360.266	1590.64	244.912	362.936	1590.81	130.098	192.312	1547.39	238.219	198.058	1546.16	183.617	216.096	1449.07	177.532	138.472	1167.51	179.248	337.122	1355.62	183.929	398.83	1162.94	258.74	123.27	1245.52	2.07627	282.215	1374.49	-72.0201	279.17	1132.4	-74.6458	285.232	1056.33	-75.8505	400.775	921.605	-22.0273	433.784	853.602	-87.4013	408.943	832.686	-55.2259	470.97	788.399
766	0	126.578	370.549	1589.6	245.239	373.238	1589.65	130.425	202.587	1546.33	238.542	208.365	1545	183.659	226.397	1448.09	177.307	148.286	1166.69	179.355	347.317	1354.47	183.827	408.694	1161.64	258.536	133.211	1244.69	2.12663	292.678	1373.63	-72.2862	290.609	1131.72	-74.9838	297.289	1055.68	-75.6589	413.921	921.825	-21.6511	447.324	854.175	-87.0782	422.849	832.989	-54.6806	485.189	789.319
767	0	126.961	380.861	1588.45	245.622	383.576	1588.39	130.819	212.9	1545.15	238.932	218.715	1543.72	183.779	236.749	1447.01	177.163	158.146	1165.75	179.518	357.566	1353.2	183.778	418.614	1160.2	258.415	143.217	1243.73	2.24131	303.173	1372.64	-72.4685	301.998	1130.92	-75.2335	309.259	1054.9	-75.3982	426.883	921.85	-21.217	460.639	854.529	-86.6924	436.516	833.092	-54.0832	499.145	790.011
768	0	127.403	391.208	1587.21	246.064	393.956	1587.05	131.283	223.253	1543.85	239.39	229.109	1542.33	183.98	247.153	1445.82	177.1	168.058	1164.71	179.744	367.869	1351.83	183.787	428.591	1158.63	258.377	153.287	1242.67	2.42362	313.704	1371.55	-72.5624	313.335	1129.99	-75.3905	321.135	1054	-75.0673	439.652	921.683	-20.7245	473.719	854.662	-86.2433	449.931	832.993	-53.4364	512.827	790.469
769	0	127.908	401.595	1585.88	246.569	404.38	1585.62	131.817	233.651	1542.47	239.917	239.55	1540.85	184.263	257.606	1444.55	177.115	178.029	1163.57	180.037	378.227	1350.36	183.859	438.624	1156.95	258.42	163.42	1241.49	2.67634	324.278	1370.37	-72.5637	324.618	1128.95	-75.4503	332.914	1052.99	-74.6652	452.217	921.325	-20.1734	486.552	854.575	-85.7304	463.078	832.694	-52.7429	526.222	790.694
770	0	128.478	412.028	1584.48	247.141	414.852	1584.12	132.423	244.097	1541.01	240.515	250.038	1539.29	184.628	268.109	1443.2	177.207	188.064	1162.35	180.4	388.639	1348.82	183.997	448.715	1155.17	258.543	173.615	1240.23	3.00166	334.896	1369.11	-72.469	335.845	1127.81	-75.4088	344.59	1051.88	-74.1916	464.568	920.782	-19.5637	499.126	854.27	-85.1537	475.944	832.199	-52.0053	539.314	790.686
771	0	129.118	422.509	1583.02	247.784	425.373	1582.57	133.103	254.592	1539.5	241.185	260.574	1537.67	185.077	278.658	1441.79	177.371	198.172	1161.07	180.838	399.104	1347.23	184.204	458.867	1153.33	258.741	183.872	1238.88	3.40122	345.563	1367.79	-72.2752	347.015	1126.58	-75.2624	356.159	1050.69	-73.6463	476.697	920.064	-18.8954	511.431	853.752	-84.5132	488.514	831.514	-51.2261	552.091	790.445
772	0	129.832	433.043	1581.52	248.501	435.945	1580.98	133.857	265.139	1537.96	241.928	271.158	1536.03	185.608	289.251	1440.34	177.605	208.359	1159.73	181.352	409.623	1345.6	184.482	469.084	1151.44	259.014	194.189	1237.47	3.8761	356.281	1366.44	-71.9802	358.128	1125.29	-75.0081	367.617	1049.44	-73.0299	488.594	919.179	-18.1691	523.457	853.029	-83.8097	500.773	830.648	-50.4076	564.537	789.977
773	0	130.622	443.632	1580	249.297	446.57	1579.37	134.687	275.738	1536.41	242.745	281.789	1534.38	186.22	299.886	1438.87	177.905	218.631	1158.35	181.944	420.195	1343.96	184.831	479.373	1149.54	259.356	204.569	1236.01	4.42687	367.054	1365.07	-71.5825	369.183	1123.96	-74.6438	378.96	1048.14	-72.3432	500.251	918.14	-17.3852	535.192	852.112	-83.0441	512.709	829.611	-49.5517	576.637	789.288
774	0	131.493	454.278	1578.48	250.175	457.247	1577.75	135.594	286.388	1534.89	243.639	292.466	1532.75	186.914	310.561	1437.39	178.265	228.997	1156.95	182.617	430.821	1342.33	185.254	489.742	1147.66	259.765	215.012	1234.51	5.05362	377.882	1363.7	-71.0817	380.184	1122.6	-74.1686	390.187	1046.81	-71.5875	511.661	916.962	-16.5447	546.628	851.013	-82.2179	524.309	828.419	-48.66	588.378	788.387
775	0	132.448	464.981	1576.97	251.139	467.977	1576.15	136.579	297.09	1533.4	244.61	303.188	1531.16	187.685	321.272	1435.91	178.683	239.461	1155.54	183.37	441.5	1340.73	185.752	500.199	1145.82	260.235	225.518	1232.99	5.75598	388.77	1362.36	-70.4782	391.13	1121.25	-73.5827	401.295	1045.47	-70.7644	522.818	915.661	-15.6488	557.755	849.747	-81.3332	535.563	827.087	-47.7339	599.746	787.285
776	0	133.489	475.741	1575.49	252.191	478.759	1574.57	137.644	307.841	1531.97	245.659	313.952	1529.62	188.533	332.018	1434.47	179.151	250.029	1154.14	184.204	452.233	1339.18	186.326	510.755	1144.06	260.761	236.091	1231.48	6.53307	399.716	1361.08	-69.7734	402.026	1119.91	-72.8876	412.284	1044.15	-69.8762	533.717	914.257	-14.6991	568.567	848.333	-80.3928	546.461	825.635	-46.7741	610.728	785.995
777	0	134.619	486.556	1574.07	253.333	489.591	1573.05	138.788	318.639	1530.64	246.786	324.757	1528.17	189.455	342.796	1433.07	179.665	260.706	1152.77	185.118	463.021	1337.72	186.979	521.42	1142.41	261.34	246.732	1229.97	7.38352	410.724	1359.86	-68.9699	412.875	1118.61	-72.0862	423.155	1042.86	-68.9254	544.354	912.768	-13.6977	579.056	846.789	-79.4003	556.998	824.083	-45.7812	621.313	784.534
778	0	135.839	497.425	1572.73	254.567	500.469	1571.58	140.012	329.481	1529.4	247.993	335.598	1526.81	190.447	353.604	1431.74	180.219	271.495	1151.44	186.109	473.863	1336.35	187.71	532.204	1140.9	261.966	257.445	1228.51	8.30537	421.791	1358.73	-68.0713	423.682	1117.39	-71.1827	433.906	1041.64	-67.9152	554.729	911.218	-12.6471	589.217	845.137	-78.3599	567.169	822.454	-44.7554	631.493	782.918
779	0	137.15	508.344	1571.47	255.893	511.391	1570.2	141.314	340.364	1528.29	249.278	346.473	1525.57	191.505	364.44	1430.49	180.808	282.397	1150.17	187.175	484.76	1335.09	188.521	543.117	1139.55	262.635	268.233	1227.09	9.29603	432.919	1357.72	-67.0823	434.449	1116.25	-70.1829	444.541	1040.49	-66.8493	564.842	909.628	-11.5504	599.047	843.401	-77.2769	576.975	820.774	-43.6966	641.259	781.167
780	0	138.553	519.309	1570.33	257.312	522.353	1568.91	142.695	351.283	1527.31	250.64	357.377	1524.45	192.626	375.303	1429.33	181.427	293.413	1148.97	188.312	495.712	1333.98	189.41	554.168	1138.39	263.342	279.099	1225.73	10.3522	444.105	1356.84	-66.0091	445.181	1115.23	-69.0939	455.062	1039.45	-65.7318	574.696	908.023	-10.4112	608.546	841.604	-76.1572	586.418	819.068	-42.605	650.609	779.304
781	0	140.047	530.313	1569.31	258.823	533.348	1567.73	144.151	362.234	1526.48	252.079	368.307	1523.47	193.805	386.191	1428.27	182.071	304.54	1147.86	189.514	506.717	1333.01	190.374	565.362	1137.43	264.082	290.048	1224.45	11.4696	455.346	1356.1	-64.8587	455.883	1114.33	-67.9238	465.471	1038.53	-64.5675	584.295	906.425	-9.2339	617.715	839.772	-75.0078	595.505	817.362	-41.4809	659.541	777.35
782	0	141.63	541.35	1568.43	260.423	544.37	1566.67	145.68	373.21	1525.81	253.59	379.257	1522.63	195.038	397.101	1427.34	182.737	315.776	1146.85	190.776	517.776	1332.21	191.407	576.702	1136.7	264.853	301.08	1223.26	12.6433	466.639	1355.53	-63.6395	466.557	1113.58	-66.6821	475.771	1037.75	-63.3617	593.647	904.859	-8.02354	626.557	837.928	-73.8364	604.247	815.684	-40.3249	668.058	775.329
783	0	143.301	552.415	1567.7	262.11	555.414	1565.73	147.278	384.208	1525.3	255.171	390.223	1521.94	196.319	408.032	1426.53	183.419	327.113	1145.96	192.091	528.884	1331.58	192.502	588.188	1136.21	265.65	312.197	1222.16	13.8673	477.979	1355.12	-62.3608	477.207	1113	-65.3793	485.968	1037.12	-62.1205	602.761	903.347	-6.7859	635.079	836.099	-72.6515	612.659	814.06	-39.1385	676.165	773.265
784	0	145.055	563.499	1567.14	263.88	566.472	1564.94	148.94	395.221	1524.96	256.817	401.199	1521.39	197.642	418.982	1425.86	184.117	338.544	1145.19	193.449	540.04	1331.13	193.648	599.815	1135.95	266.469	323.396	1221.18	15.1346	489.358	1354.9	-61.0329	487.834	1112.58	-64.027	496.065	1036.65	-60.8504	611.65	901.912	-5.52754	643.291	834.308	-71.4625	620.759	812.516	-37.9239	683.874	771.183
785	0	146.889	574.594	1566.74	265.729	577.536	1564.28	150.661	406.243	1524.79	258.522	412.18	1520.99	199.001	429.948	1425.33	184.826	350.057	1144.56	194.841	551.238	1330.86	194.832	611.574	1135.94	267.307	334.675	1220.32	16.4374	500.77	1354.85	-59.6673	498.442	1112.35	-62.6373	506.066	1036.37	-59.5589	620.326	900.572	-4.25584	651.206	832.579	-70.2794	628.571	811.076	-36.6842	691.197	769.107
786	0	148.797	585.691	1566.52	267.649	588.597	1563.77	152.433	417.268	1524.78	260.278	423.161	1520.73	200.389	440.926	1424.95	185.545	361.64	1144.06	196.257	562.472	1330.77	196.041	623.451	1136.15	268.16	346.026	1219.59	17.7671	512.206	1355	-58.2759	509.029	1112.31	-61.2234	515.978	1036.27	-58.2542	628.806	899.348	-2.97903	658.839	830.933	-69.113	636.119	809.764	-35.4241	698.153	767.062
787	0	150.773	596.784	1566.47	269.635	599.647	1563.4	154.248	428.29	1524.93	262.078	434.134	1520.6	201.8	451.914	1424.71	186.273	373.279	1143.71	197.685	573.736	1330.86	197.256	635.428	1136.58	269.025	357.439	1218.99	19.1144	523.653	1355.32	-56.8716	519.597	1112.45	-59.7989	525.805	1036.35	-56.9453	637.108	898.255	-1.70621	666.21	829.39	-67.9746	643.432	808.598	-34.1494	704.764	765.069
788	0	152.808	607.864	1566.6	271.678	610.679	1563.18	156.096	439.304	1525.24	263.912	445.094	1520.58	203.225	462.908	1424.62	187.01	384.957	1143.51	199.113	585.02	1331.11	198.463	647.481	1137.21	269.899	368.904	1218.52	20.4697	535.099	1355.83	-55.4674	530.144	1112.78	-58.3778	535.552	1036.62	-55.6421	645.25	897.307	-0.447351	673.341	827.969	-66.8759	650.543	807.597	-32.8676	711.057	763.152
789	0	154.894	618.922	1566.9	273.768	621.683	1563.08	157.968	450.303	1525.68	265.768	456.036	1520.68	204.658	473.901	1424.67	187.755	396.655	1143.45	200.529	596.315	1331.53	199.643	659.584	1138.03	270.778	380.405	1218.19	21.8227	546.531	1356.51	-54.0769	540.667	1113.29	-56.9742	545.223	1037.08	-54.3557	653.252	896.516	0.786726	680.256	826.684	-65.8292	657.483	806.773	-31.5875	717.061	761.329
790	0	157.022	629.953	1567.36	275.896	632.651	1563.12	159.853	461.282	1526.27	267.637	466.952	1520.88	206.089	484.889	1424.86	188.51	408.355	1143.55	201.92	607.61	1332.09	200.779	671.705	1139	271.66	391.927	1218	23.1634	557.933	1357.35	-52.7134	551.163	1113.98	-55.602	554.821	1037.71	-53.0977	661.136	895.889	1.98436	686.982	825.549	-64.8471	664.289	806.138	-30.3199	722.81	759.618
791	0	159.179	640.948	1567.98	278.05	643.576	1563.28	161.737	472.236	1526.97	269.504	477.836	1521.17	207.513	495.864	1425.19	189.275	420.037	1143.79	203.274	618.892	1332.79	201.855	683.814	1140.11	272.545	403.452	1217.95	24.4815	569.287	1358.33	-51.3901	561.625	1114.84	-54.2745	564.35	1038.52	-51.8807	668.92	895.433	3.13315	693.551	824.573	-63.9421	670.995	805.698	-29.077	728.343	758.036
792	0	161.354	651.904	1568.74	280.217	654.452	1563.55	163.609	483.158	1527.79	271.358	488.682	1521.54	208.921	506.821	1425.64	190.052	431.681	1144.17	204.579	630.149	1333.6	202.856	695.876	1141.32	273.43	414.964	1218.04	25.7671	580.576	1359.46	-50.1195	572.047	1115.84	-53.0045	573.812	1039.48	-50.7178	676.628	895.15	4.22004	699.993	823.764	-63.1264	677.636	805.457	-27.8729	733.7	756.596
793	0	163.534	662.814	1569.64	282.385	665.273	1563.92	165.456	494.045	1528.71	273.184	499.486	1521.97	210.306	517.75	1426.22	190.842	443.267	1144.68	205.822	641.367	1334.52	203.769	707.859	1142.61	274.316	426.444	1218.26	27.0108	591.782	1360.7	-48.9132	582.419	1116.99	-51.8035	583.208	1040.59	-49.6227	684.277	895.04	5.23145	706.341	823.128	-62.4121	684.246	805.412	-26.7236	738.923	755.308
794	0	165.705	673.674	1570.65	284.539	676.032	1564.38	167.266	504.892	1529.72	274.97	510.24	1522.46	211.661	528.645	1426.9	191.649	454.776	1145.32	206.995	652.534	1335.53	204.582	719.73	1143.95	275.204	437.876	1218.6	28.2038	602.886	1362.05	-47.7819	592.729	1118.25	-50.6817	592.537	1041.83	-48.6092	691.888	895.099	6.1535	712.631	822.664	-61.8101	690.858	805.56	-25.6464	744.059	754.181
795	0	167.852	684.482	1571.77	286.666	686.728	1564.92	169.024	515.696	1530.81	276.702	520.941	1523.01	212.979	539.496	1427.69	192.474	466.19	1146.07	208.087	663.636	1336.61	205.285	731.461	1145.32	276.096	449.243	1219.07	29.338	613.869	1363.47	-46.7345	602.965	1119.62	-49.6477	601.799	1043.18	-47.6908	699.476	895.324	6.97223	718.896	822.375	-61.3305	697.499	805.892	-24.6602	749.153	753.223
796	0	169.962	695.236	1572.97	288.75	697.358	1565.52	170.719	526.452	1531.96	278.367	531.585	1523.6	214.255	550.296	1428.57	193.321	477.491	1146.93	209.092	674.662	1337.74	205.871	743.026	1146.7	276.993	460.53	1219.65	30.4065	624.714	1364.97	-45.7783	613.112	1121.07	-48.7081	610.991	1044.62	-46.8808	707.057	895.707	7.67392	725.169	822.255	-60.9819	704.194	806.4	-23.785	754.252	752.438
797	0	172.019	705.934	1574.24	290.779	707.919	1566.17	172.34	537.159	1533.18	279.954	542.167	1524.23	215.483	561.038	1429.53	194.192	488.665	1147.88	210.001	685.599	1338.93	206.334	754.404	1148.07	277.898	471.723	1220.33	31.4034	635.406	1366.51	-44.919	623.154	1122.59	-47.8677	620.109	1046.15	-46.1915	714.642	896.238	8.24539	731.484	822.301	-60.7713	710.963	807.071	-23.0417	759.402	751.83
798	0	174.008	716.576	1575.57	292.737	718.411	1566.88	173.876	547.814	1534.45	281.452	552.687	1524.9	216.66	571.712	1430.56	195.091	499.699	1148.92	210.812	696.438	1340.14	206.671	765.578	1149.42	278.815	482.81	1221.11	32.3241	645.931	1368.08	-44.1597	633.073	1124.15	-47.129	629.148	1047.73	-45.6343	722.242	896.909	8.67441	737.869	822.507	-60.7037	717.821	807.891	-22.451	764.647	751.401
799	0	175.917	727.163	1576.93	294.612	728.836	1567.61	175.317	558.415	1535.76	282.851	563.141	1525.62	217.781	582.314	1431.66	196.018	510.585	1150.04	211.52	707.171	1341.38	206.881	776.538	1150.74	279.746	493.782	1221.99	33.1656	656.278	1369.67	-43.5016	642.852	1125.75	-46.4927	638.104	1049.35	-45.2187	729.863	897.708	8.95004	744.353	822.865	-60.7821	724.777	808.844	-22.0332	770.029	751.155
800	0	177.733	737.697	1578.32	296.39	739.195	1568.38	176.654	568.962	1537.11	284.144	573.531	1526.37	218.844	592.837	1432.8	196.978	521.316	1151.21	212.126	717.791	1342.63	206.966	787.278	1152.02	280.695	504.631	1222.94	33.9264	666.439	1371.26	-42.9436	652.474	1127.37	-45.9569	646.97	1051	-44.9525	737.509	898.624	9.063	750.959	823.365	-61.0069	731.836	809.916	-21.8074	775.585	751.091
801	0	179.443	748.179	1579.72	298.061	749.491	1569.17	177.882	579.454	1538.49	285.324	583.854	1527.17	219.848	603.277	1434	197.97	531.888	1152.44	212.631	728.294	1343.89	206.929	797.798	1153.26	281.665	515.353	1223.98	34.6063	676.409	1372.85	-42.4823	661.922	1128.98	-45.5182	655.741	1052.66	-44.8415	745.183	899.645	9.00602	757.707	824	-61.3763	738.995	811.09	-21.7904	781.351	751.21
802	0	181.037	758.611	1581.12	299.615	759.728	1569.98	178.994	589.891	1539.89	286.387	594.114	1528.01	220.791	613.629	1435.22	198.994	542.301	1153.71	213.036	738.676	1345.14	206.778	808.102	1154.47	282.658	525.946	1225.09	35.207	686.186	1374.42	-42.1126	671.181	1130.59	-45.171	664.411	1054.32	-44.889	752.882	900.76	8.77409	764.614	824.758	-61.8861	746.251	812.351	-21.9963	787.354	751.513
803	0	182.505	768.998	1582.5	301.043	769.908	1570.8	179.987	600.275	1541.32	287.329	604.311	1528.9	221.675	623.893	1436.48	200.051	552.558	1155.02	213.347	748.937	1346.39	206.522	818.2	1155.64	283.678	536.411	1226.25	35.7313	695.772	1375.96	-41.8272	680.238	1132.18	-44.9083	672.975	1055.97	-45.0959	760.605	901.955	8.36471	771.69	825.629	-62.5298	753.593	813.684	-22.4357	793.618	751.997
804	0	183.842	779.34	1583.85	302.338	780.036	1571.63	180.859	610.605	1542.76	288.15	614.448	1529.84	222.499	634.067	1437.75	201.137	562.663	1156.35	213.569	759.079	1347.63	206.173	828.104	1156.78	284.724	546.75	1227.48	36.1835	705.174	1377.46	-41.6176	689.084	1133.75	-44.722	681.43	1057.6	-45.4606	768.347	903.22	7.77808	778.945	826.603	-63.2984	761.011	815.073	-23.1149	800.159	752.659
805	0	185.04	789.642	1585.16	303.497	790.119	1572.46	181.61	620.884	1544.21	288.85	624.528	1530.83	223.266	644.151	1439.03	202.25	572.624	1157.69	213.711	769.104	1348.86	205.744	837.828	1157.9	285.797	556.972	1228.74	36.5688	714.398	1378.93	-41.4743	697.711	1135.28	-44.6028	689.771	1059.2	-45.9788	776.104	904.543	7.01718	786.38	827.668	-64.1815	768.49	816.505	-24.0358	806.987	753.493
806	0	186.097	799.905	1586.42	304.514	800.159	1573.29	182.241	631.113	1545.66	289.432	634.555	1531.87	223.977	654.149	1440.31	203.384	582.451	1159.03	213.779	779.019	1350.07	205.25	847.391	1159	286.896	567.084	1230.04	36.8933	723.457	1380.35	-41.3868	706.12	1136.77	-44.5411	697.998	1060.75	-46.6438	783.869	905.91	6.08786	793.997	828.813	-65.1665	776.018	817.967	-25.1952	814.105	754.494
807	0	187.009	810.133	1587.63	305.39	810.162	1574.12	182.755	641.294	1547.1	289.898	644.534	1532.95	224.636	664.062	1441.59	204.533	592.153	1160.37	213.782	788.829	1351.25	204.708	856.811	1160.09	288.02	577.097	1231.36	37.1638	732.365	1381.71	-41.3445	714.311	1138.22	-44.5272	706.112	1062.26	-47.4467	791.638	907.311	4.99876	801.792	830.026	-66.2394	783.582	819.444	-26.5851	821.51	755.648
808	0	187.778	820.327	1588.77	306.124	820.135	1574.94	183.155	651.43	1548.52	290.255	654.468	1534.07	225.244	673.896	1442.84	205.689	601.741	1161.69	213.73	798.544	1352.4	204.135	866.107	1161.17	289.164	587.022	1232.69	37.3869	741.138	1383.02	-41.3369	722.293	1139.61	-44.5514	714.115	1063.72	-48.376	799.407	908.732	3.76121	809.757	831.293	-67.3854	791.169	820.922	-28.1926	829.193	756.944
809	0	188.404	830.49	1589.83	306.719	830.08	1575.74	183.449	661.523	1549.91	290.509	664.363	1535.22	225.806	683.656	1444.06	206.843	611.228	1162.98	213.632	808.172	1353.52	203.546	875.301	1162.24	290.323	596.872	1234.02	37.5696	749.795	1384.27	-41.354	730.079	1140.96	-44.6049	722.013	1065.12	-49.4185	807.172	910.16	2.38899	817.885	832.6	-68.5885	798.771	822.389	-30.0002	837.138	758.363
810	0	188.891	840.623	1590.81	307.179	840.004	1576.51	183.641	671.576	1551.27	290.665	674.224	1536.39	226.323	693.349	1445.25	207.986	620.626	1164.23	213.495	817.724	1354.59	202.956	884.41	1163.29	291.491	606.659	1235.33	37.7184	758.354	1385.45	-41.3866	737.685	1142.24	-44.6795	729.815	1066.45	-50.5591	814.932	911.58	0.898073	826.165	833.932	-69.8324	806.38	823.83	-31.9863	845.325	759.886
811	0	189.244	850.728	1591.69	307.508	849.911	1577.26	183.739	681.591	1552.57	290.734	684.055	1537.57	226.798	702.982	1446.38	209.108	629.945	1165.42	213.329	827.21	1355.61	202.381	893.455	1164.31	292.661	616.395	1236.61	37.8391	766.838	1386.55	-41.4268	745.133	1143.45	-44.7682	737.529	1067.71	-51.7817	822.685	912.978	-0.69367	834.583	835.274	-71.1007	813.991	825.231	-34.1255	853.73	761.488
812	0	189.467	860.805	1592.48	307.713	859.805	1577.97	183.752	691.572	1553.81	290.721	693.864	1538.74	227.233	712.564	1447.45	210.197	639.197	1166.55	213.139	836.642	1356.57	201.83	902.452	1165.29	293.823	626.091	1237.83	37.9368	775.266	1387.56	-41.468	752.447	1144.58	-44.8653	745.167	1068.88	-53.069	830.434	914.337	-2.36683	843.128	836.608	-72.3772	821.603	826.576	-36.3894	862.326	763.142
813	0	189.57	870.857	1593.17	307.801	869.691	1578.62	183.687	701.52	1554.98	290.637	703.655	1539.88	227.629	722.104	1448.45	211.245	648.393	1167.61	212.932	846.032	1357.46	201.313	911.419	1166.23	294.968	635.755	1239	38.0155	783.66	1388.49	-41.5054	759.657	1145.64	-44.9664	752.746	1069.97	-54.4032	838.18	915.641	-4.10086	851.784	837.917	-73.6464	829.218	827.851	-38.7472	871.083	764.819
814	0	189.558	880.883	1593.74	307.781	879.571	1579.22	183.553	711.44	1556.05	290.488	713.432	1540.98	227.987	731.61	1449.36	212.241	657.541	1168.58	212.714	855.39	1358.26	200.838	920.371	1167.1	296.085	645.396	1240.09	38.0781	792.041	1389.31	-41.5359	766.792	1146.6	-45.0685	760.28	1070.96	-55.7665	845.929	916.874	-5.87446	860.536	839.181	-74.8934	836.837	829.041	-41.1665	879.972	766.49
815	0	189.441	890.885	1594.2	307.659	889.449	1579.76	183.358	721.334	1557.01	290.285	723.202	1542.02	228.306	741.091	1450.17	213.177	666.652	1169.45	212.487	864.728	1358.97	200.407	929.32	1167.88	297.164	655.019	1241.09	38.1263	800.429	1390.03	-41.5584	773.885	1147.46	-45.1697	767.787	1071.84	-57.1413	853.685	918.019	-7.66599	869.37	840.381	-76.1047	844.467	830.129	-43.6138	888.962	768.121
816	0	189.227	900.865	1594.54	307.446	899.329	1580.21	183.109	731.205	1557.86	290.033	732.969	1542.98	228.587	750.557	1450.88	214.043	675.734	1170.22	212.255	874.055	1359.57	200.021	938.278	1168.57	298.192	664.629	1241.99	38.1605	808.844	1390.64	-41.573	780.967	1148.21	-45.2696	775.286	1072.61	-58.5105	861.456	919.059	-9.45393	878.271	841.497	-77.2682	852.113	831.101	-46.0557	898.024	769.682
817	0	188.925	910.822	1594.75	307.149	909.212	1580.57	182.814	741.056	1558.58	289.74	742.737	1543.84	228.827	760.015	1451.47	214.834	684.796	1170.87	212.02	883.383	1360.06	199.679	947.256	1169.15	299.159	674.228	1242.78	38.1797	817.302	1391.12	-41.582	788.07	1148.84	-45.3688	782.795	1073.25	-59.8583	869.247	919.976	-11.2172	887.223	842.511	-78.3732	859.784	831.943	-48.4594	907.129	771.14
818	0	188.545	920.76	1594.83	306.777	919.1	1580.83	182.479	750.891	1559.16	289.411	752.51	1544.59	229.024	769.475	1451.93	215.541	693.845	1171.4	211.78	892.719	1360.42	199.377	956.261	1169.59	300.052	683.817	1243.45	38.1821	825.822	1391.47	-41.5886	795.226	1149.34	-45.4686	790.335	1073.77	-61.17	877.068	920.756	-12.9357	896.212	843.402	-79.4109	867.486	832.639	-50.7931	916.254	772.466
819	0	188.093	930.681	1594.77	306.337	928.997	1580.98	182.109	760.713	1559.59	289.052	762.292	1545.21	229.175	778.944	1452.26	216.16	702.89	1171.8	211.536	902.071	1360.65	199.11	965.302	1169.9	300.861	693.397	1243.98	38.1646	834.418	1391.68	-41.5975	802.464	1149.72	-45.5715	797.922	1074.14	-62.4323	884.925	921.382	-14.5905	905.225	844.152	-80.3739	875.229	833.178	-53.0275	925.375	773.63
820	0	187.579	940.586	1594.58	305.838	938.903	1581	181.708	770.525	1559.86	288.666	772.085	1545.68	229.277	788.429	1452.45	216.685	711.937	1172.06	211.287	911.448	1360.73	198.87	974.382	1170.05	301.575	702.968	1244.37	38.1232	843.104	1391.75	-41.6142	809.811	1149.95	-45.6803	805.577	1074.37	-63.6341	892.827	921.841	-16.1644	914.248	844.744	-81.2572	883.018	833.547	-55.136	934.473	774.607
821	0	187.008	950.478	1594.25	305.285	948.819	1580.9	181.278	780.331	1559.96	288.255	781.892	1546	229.326	797.936	1452.48	217.111	720.995	1172.18	211.029	920.854	1360.66	198.65	983.509	1170.03	302.185	712.528	1244.62	38.0532	851.892	1391.67	-41.645	817.293	1150.03	-45.7983	813.316	1074.44	-64.7658	900.782	922.119	-17.6422	923.271	845.161	-82.0573	890.862	833.736	-57.0951	943.534	775.372
822	0	186.388	960.361	1593.77	304.685	958.747	1580.67	180.823	790.134	1559.9	287.82	791.716	1546.15	229.316	807.471	1452.37	217.435	730.07	1172.15	210.759	930.297	1360.45	198.442	992.685	1169.85	302.68	722.079	1244.72	37.9493	860.791	1391.44	-41.6964	824.93	1149.96	-45.9291	821.156	1074.36	-65.8201	908.797	922.207	-19.0109	932.283	845.389	-82.7726	898.767	833.736	-58.8853	952.544	775.906
823	0	185.722	970.238	1593.16	304.041	968.688	1580.29	180.34	799.939	1559.67	287.361	801.557	1546.13	229.242	817.038	1452.1	217.654	739.17	1171.98	210.473	939.781	1360.07	198.238	1001.92	1169.49	303.053	731.62	1244.66	37.8056	869.809	1391.06	-41.7752	832.742	1149.73	-46.0765	829.11	1074.11	-66.7919	916.879	922.094	-20.2602	941.277	845.414	-83.4035	906.738	833.54	-60.491	961.496	776.192
824	0	185.015	980.113	1592.41	303.357	978.642	1579.77	179.83	809.748	1559.26	286.876	811.418	1545.93	229.1	826.643	1451.67	217.763	748.304	1171.64	210.167	949.309	1359.54	198.031	1011.2	1168.96	303.297	741.153	1244.44	37.6158	878.953	1390.52	-41.8879	840.744	1149.34	-46.2442	837.192	1073.7	-67.6778	925.036	921.774	-21.3827	950.246	845.228	-83.9518	914.78	833.143	-61.9011	970.384	776.215
825	0	184.27	989.99	1591.51	302.635	988.611	1579.1	179.29	819.567	1558.69	286.362	821.3	1545.56	228.882	836.289	1451.09	217.76	757.477	1171.16	209.834	958.887	1358.85	197.814	1020.55	1168.26	303.406	750.68	1244.05	37.3732	888.227	1389.83	-42.041	848.949	1148.79	-46.436	845.414	1073.12	-68.4767	933.273	921.241	-22.3735	959.187	844.821	-84.421	922.897	832.539	-63.1088	979.206	775.966
826	0	183.486	999.874	1590.49	301.877	998.595	1578.29	178.715	829.398	1557.95	285.814	831.204	1545.01	228.583	845.979	1450.35	217.643	766.7	1170.51	209.469	968.518	1358	197.581	1029.97	1167.4	303.375	760.206	1243.51	37.0711	897.634	1388.98	-42.2406	857.367	1148.07	-46.6554	853.786	1072.37	-69.1895	941.596	920.492	-23.2309	968.096	844.188	-84.816	931.091	831.729	-64.1119	987.962	775.438
827	0	182.665	1009.77	1589.33	301.081	1008.59	1577.33	178.102	839.247	1557.06	285.228	841.132	1544.28	228.198	855.717	1449.46	217.408	775.979	1169.72	209.065	978.204	1357.01	197.328	1039.46	1166.37	303.203	769.734	1242.81	36.7027	907.176	1387.97	-42.492	866.003	1147.19	-46.9056	862.314	1071.45	-69.8187	950.01	919.526	-23.9559	976.974	843.326	-85.1429	939.365	830.711	-64.9123	996.655	774.63
828	0	181.804	1019.68	1588.06	300.247	1018.61	1576.23	177.443	849.118	1556.01	284.596	851.084	1543.39	227.72	865.507	1448.43	217.054	785.325	1168.78	208.615	987.95	1355.88	197.05	1049.02	1165.19	302.887	779.273	1241.96	36.2613	916.852	1386.82	-42.8001	874.862	1146.15	-47.1897	871.006	1070.37	-70.3687	958.52	918.346	-24.5523	985.823	842.234	-85.409	947.721	829.488	-65.5162	1005.29	773.542
829	0	180.901	1029.61	1586.68	299.371	1028.65	1575.01	176.734	859.014	1554.81	283.913	861.064	1542.33	227.143	875.351	1447.26	216.581	794.745	1167.69	208.113	997.758	1354.61	196.743	1058.66	1163.87	302.427	788.829	1240.95	35.7404	926.662	1385.53	-43.1692	883.944	1144.94	-47.5101	879.868	1069.13	-70.8449	967.129	916.955	-25.0263	994.646	840.916	-85.6225	956.16	828.065	-65.9334	1013.87	772.18
830	0	179.953	1039.56	1585.2	298.45	1038.7	1573.66	175.965	868.94	1553.49	283.17	871.071	1541.13	226.464	885.252	1445.97	215.988	804.251	1166.47	207.55	1007.63	1353.22	196.406	1068.39	1162.42	301.825	798.412	1239.81	35.134	936.604	1384.1	-43.6027	893.249	1143.57	-47.869	888.901	1067.72	-71.2545	975.842	915.36	-25.3865	1003.45	839.378	-85.7923	964.684	826.447	-66.1773	1022.41	770.551
831	0	178.954	1049.54	1583.63	297.478	1048.78	1572.21	175.13	878.901	1552.05	282.36	881.11	1539.79	225.677	895.215	1444.56	215.277	813.853	1165.12	206.92	1017.57	1351.72	196.034	1078.2	1160.85	301.084	808.032	1238.54	34.4365	946.673	1382.54	-44.1031	902.771	1142.05	-48.2681	898.109	1066.17	-71.6054	984.661	913.571	-25.6434	1012.24	837.629	-85.9278	973.294	824.645	-66.2638	1030.92	768.669
832	0	177.899	1059.55	1582	296.45	1058.88	1570.67	174.22	888.902	1550.51	281.473	891.182	1538.33	224.779	905.242	1443.06	214.452	823.559	1163.66	206.215	1027.59	1350.13	195.625	1088.12	1159.18	300.209	817.701	1237.16	33.6432	956.866	1380.87	-44.6719	912.506	1140.39	-48.7084	907.493	1064.49	-71.9063	993.59	911.601	-25.8092	1021.02	835.68	-86.0389	981.992	822.669	-66.2115	1039.4	766.55
833	0	176.781	1069.6	1580.32	295.36	1069.01	1569.07	173.228	898.945	1548.88	280.503	901.289	1536.76	223.768	915.337	1441.48	213.517	833.38	1162.1	205.428	1037.68	1348.47	195.175	1098.13	1157.42	299.206	827.43	1235.68	32.7502	967.177	1379.09	-45.3097	922.446	1138.6	-49.1905	917.053	1062.67	-72.1665	1002.63	909.465	-25.8975	1029.8	833.547	-86.1359	990.779	820.534	-66.0409	1047.87	764.214
834	0	175.593	1079.69	1578.61	294.2	1079.16	1567.41	172.145	909.038	1547.18	279.44	911.437	1535.11	222.641	925.505	1439.84	212.477	843.324	1160.47	204.553	1047.84	1346.74	194.68	1108.25	1155.6	298.084	837.233	1234.12	31.7547	977.601	1377.22	-46.0161	932.583	1136.69	-49.7143	926.787	1060.74	-72.3957	1011.79	907.181	-25.9225	1038.6	831.249	-86.2288	999.657	818.258	-65.7734	1056.34	761.683
835	0	174.329	1089.83	1576.89	292.964	1089.35	1565.74	170.964	919.182	1545.44	278.278	921.627	1533.41	221.397	935.748	1438.16	211.342	853.401	1158.78	203.582	1058.1	1344.99	194.135	1118.48	1153.73	296.852	847.124	1232.52	30.6546	988.13	1375.28	-46.7896	942.905	1134.68	-50.2791	936.693	1058.71	-72.6037	1021.06	904.77	-25.8993	1047.42	828.806	-86.3278	1008.63	815.861	-65.4317	1064.82	758.984
836	0	172.981	1100.01	1575.19	291.643	1099.57	1564.06	169.678	929.384	1543.66	277.009	931.863	1531.66	220.039	946.07	1436.46	210.12	863.618	1157.05	202.512	1068.43	1343.22	193.534	1128.83	1151.83	295.523	857.114	1230.88	29.4495	998.757	1373.29	-47.6276	953.403	1132.58	-50.8836	946.769	1056.61	-72.8	1030.45	902.256	-25.8431	1056.27	826.244	-86.4428	1017.7	813.366	-65.0383	1073.33	756.147
837	0	171.542	1110.24	1573.53	290.23	1109.83	1562.42	168.28	939.646	1541.88	275.628	942.15	1529.9	218.567	956.474	1434.77	208.824	873.979	1155.31	201.338	1078.86	1341.46	192.869	1139.29	1149.93	294.108	867.217	1229.23	28.1399	1009.47	1371.27	-48.5268	964.064	1130.41	-51.5261	957.01	1054.45	-72.9944	1039.96	899.667	-25.769	1065.17	823.588	-86.5831	1026.87	810.8	-64.6162	1081.87	753.205
838	0	170.006	1120.52	1571.92	288.72	1120.13	1560.84	166.767	949.973	1540.11	274.128	952.492	1528.15	216.984	966.963	1433.11	207.465	884.488	1153.58	200.057	1089.38	1339.75	192.134	1149.87	1148.06	292.622	877.444	1227.62	26.7278	1020.27	1369.23	-49.4826	974.875	1128.2	-52.2041	967.412	1052.25	-73.196	1049.59	897.03	-25.6919	1074.12	820.87	-86.7577	1036.14	808.193	-64.1874	1090.46	750.19
839	0	168.367	1130.86	1570.4	287.105	1130.48	1559.34	165.133	960.366	1538.37	272.508	962.89	1526.44	215.297	977.539	1431.5	206.056	895.146	1151.89	198.668	1099.99	1338.09	191.321	1160.58	1146.24	291.079	887.805	1226.05	25.2165	1031.14	1367.21	-50.49	985.825	1125.98	-52.915	977.967	1050.05	-73.4137	1059.35	894.376	-25.6262	1083.14	818.12	-86.9748	1045.53	805.574	-63.7735	1099.11	747.142
840	0	166.621	1141.26	1568.99	285.381	1140.88	1557.97	163.378	970.829	1536.69	270.763	973.35	1524.79	213.509	988.201	1429.98	204.613	905.951	1150.27	197.171	1110.7	1336.52	190.422	1171.42	1144.5	289.495	898.308	1224.57	23.6107	1042.08	1365.22	-51.5432	996.899	1123.76	-53.6557	988.67	1047.86	-73.6558	1069.23	891.739	-25.5852	1092.24	815.372	-87.2418	1055.02	802.977	-63.3947	1107.84	744.098
841	0	164.763	1151.72	1567.71	283.543	1151.32	1556.74	161.499	981.362	1535.09	268.895	983.872	1523.24	211.63	998.951	1428.56	203.148	916.9	1148.75	195.568	1121.5	1335.06	189.43	1182.37	1142.87	287.884	908.959	1223.2	21.9164	1053.07	1363.3	-52.6358	1008.08	1121.59	-54.4229	999.511	1045.72	-73.93	1079.23	889.15	-25.5817	1101.44	812.66	-87.5652	1064.63	800.436	-63.0702	1116.65	741.097
842	0	162.79	1162.24	1566.57	281.589	1161.82	1555.67	159.499	991.967	1533.59	266.903	994.46	1521.81	209.666	1009.79	1427.26	201.676	927.983	1147.35	193.864	1132.39	1333.73	188.34	1193.45	1141.39	286.26	919.759	1221.97	20.1411	1064.11	1361.47	-53.7613	1019.37	1119.47	-55.2132	1010.48	1043.65	-74.2435	1089.36	886.643	-25.6272	1110.74	810.02	-87.9503	1074.36	797.985	-62.8171	1125.57	738.179
843	0	160.702	1172.82	1565.6	279.516	1172.38	1554.81	157.379	1002.64	1532.2	264.792	1005.11	1520.51	207.628	1020.7	1426.12	200.209	939.191	1146.09	192.064	1143.38	1332.56	187.15	1204.65	1140.06	284.638	930.707	1220.89	18.2932	1075.19	1359.74	-54.9129	1030.74	1117.45	-56.0233	1021.58	1041.68	-74.6024	1099.61	884.252	-25.7319	1120.15	807.485	-88.4011	1084.22	795.657	-62.6509	1134.6	735.382
844	0	158.5	1183.46	1564.81	277.327	1182.99	1554.15	155.146	1013.38	1530.96	262.566	1015.83	1519.39	205.525	1031.69	1425.14	198.757	950.511	1145	190.178	1154.44	1331.57	185.859	1215.96	1138.93	283.03	941.798	1220.01	16.3824	1086.3	1358.16	-56.0838	1042.18	1115.55	-56.8501	1032.78	1039.83	-75.0124	1109.98	882.006	-25.9052	1129.7	805.09	-88.9205	1094.2	793.485	-62.5848	1143.76	732.744
845	0	156.185	1194.15	1564.2	275.022	1193.65	1553.73	152.805	1024.19	1529.86	260.233	1026.62	1518.45	203.369	1042.76	1424.34	197.332	961.927	1144.1	188.217	1165.59	1330.76	184.472	1227.37	1138.01	281.444	953.023	1219.33	14.4194	1097.44	1356.72	-57.2675	1053.68	1113.79	-57.691	1044.09	1038.13	-75.478	1120.48	879.936	-26.1547	1139.38	802.865	-89.5099	1104.31	791.498	-62.6297	1153.05	730.298
846	0	153.761	1204.9	1563.79	272.605	1204.37	1553.54	150.366	1035.06	1528.93	257.801	1037.46	1517.72	201.171	1053.88	1423.75	195.939	973.421	1143.41	186.191	1176.8	1330.17	182.994	1238.87	1137.32	279.891	964.368	1218.88	12.4154	1108.59	1355.47	-58.4581	1065.22	1112.2	-58.5437	1055.49	1036.6	-76.0029	1131.09	878.069	-26.4867	1149.22	800.841	-90.1692	1114.56	789.724	-62.7941	1162.51	728.077
847	0	151.236	1215.7	1563.58	270.083	1215.15	1553.61	147.838	1045.98	1528.17	255.282	1048.36	1517.21	198.943	1065.06	1423.36	194.583	984.973	1142.93	184.117	1188.07	1329.78	181.439	1250.44	1136.88	278.374	975.816	1218.66	10.3825	1119.76	1354.41	-59.6504	1076.8	1110.81	-59.4068	1066.96	1035.26	-76.5899	1141.83	876.426	-26.9058	1159.22	799.043	-90.8976	1124.94	788.184	-63.0839	1172.13	726.108
848	0	148.616	1226.54	1563.57	267.464	1225.97	1553.93	145.235	1056.95	1527.6	252.688	1059.31	1516.94	196.696	1076.28	1423.18	193.265	996.564	1142.69	182.008	1199.38	1329.62	179.822	1262.06	1136.68	276.897	987.346	1218.68	8.33282	1130.93	1353.55	-60.84	1088.41	1109.62	-60.2795	1078.51	1034.13	-77.2405	1152.68	875.029	-27.4152	1169.4	797.493	-91.6926	1135.46	786.899	-63.5023	1181.92	724.413
849	0	145.912	1237.42	1563.75	264.758	1236.83	1554.49	142.57	1067.96	1527.23	250.033	1070.3	1516.9	194.441	1087.52	1423.22	191.985	1008.17	1142.67	179.883	1210.73	1329.68	178.162	1273.72	1136.73	275.458	998.935	1218.94	6.27878	1142.1	1352.9	-62.0237	1100.03	1108.65	-61.1619	1090.11	1033.21	-77.9554	1163.65	873.89	-28.0161	1179.75	796.21	-92.5511	1146.12	785.879	-64.0498	1191.91	723.012
850	0	143.136	1248.33	1564.12	261.976	1247.74	1555.3	139.858	1078.99	1527.04	247.333	1081.33	1517.11	192.189	1098.78	1423.47	190.739	1019.78	1142.88	177.758	1222.08	1329.95	176.48	1285.39	1137.04	274.056	1010.56	1219.44	4.23249	1153.27	1352.47	-63.1994	1111.67	1107.92	-62.0548	1101.77	1032.53	-78.7345	1174.73	873.02	-28.7082	1190.3	795.204	-93.4691	1156.92	785.135	-64.7241	1202.11	721.915
851	0	140.301	1259.26	1564.66	259.134	1258.67	1556.34	137.115	1090.04	1527.06	244.604	1092.38	1517.56	189.951	1110.04	1423.94	189.52	1031.36	1143.32	175.65	1233.44	1330.44	174.803	1297.04	1137.58	272.684	1022.18	1220.17	2.20559	1164.44	1352.26	-64.3662	1123.29	1107.42	-62.96	1113.46	1032.07	-79.5763	1185.93	872.424	-29.4892	1201.03	794.485	-94.4419	1167.87	784.666	-65.5201	1212.52	721.129
852	0	137.424	1270.2	1565.36	256.246	1269.63	1557.58	134.357	1101.1	1527.26	241.863	1103.44	1518.25	187.735	1121.29	1424.6	188.319	1042.9	1143.97	173.576	1244.78	1331.12	173.155	1308.65	1138.34	271.334	1033.78	1221.12	0.209015	1175.59	1352.26	-65.5244	1134.92	1107.16	-63.8799	1125.17	1031.84	-80.4785	1197.23	872.1	-30.3553	1211.97	794.053	-95.4642	1178.97	784.47	-66.4302	1223.15	720.653
853	0	134.521	1281.14	1566.2	253.33	1280.6	1559.02	131.602	1112.15	1527.65	239.127	1114.51	1519.17	185.55	1132.5	1425.46	187.128	1054.37	1144.83	171.553	1256.09	1331.99	171.562	1320.19	1139.31	269.996	1045.33	1222.26	-1.74728	1186.74	1352.47	-66.6756	1146.53	1107.12	-64.8177	1136.91	1031.83	-81.4382	1208.65	872.045	-31.3012	1223.1	793.905	-96.5304	1190.21	784.537	-67.4446	1234.02	720.482
854	0	131.61	1292.07	1567.18	250.403	1291.57	1560.62	128.867	1123.18	1528.21	236.414	1125.56	1520.3	183.404	1143.67	1426.49	185.935	1065.77	1145.87	169.594	1267.35	1333.03	170.049	1331.64	1140.46	268.661	1056.79	1223.59	-3.6545	1197.86	1352.87	-67.8222	1158.13	1107.31	-65.7768	1148.66	1032.04	-82.4513	1220.19	872.247	-32.3199	1234.44	794.033	-97.6342	1201.61	784.854	-68.5513	1245.12	720.605
855	0	128.709	1302.98	1568.26	247.486	1302.54	1562.37	126.169	1134.18	1528.94	233.741	1136.59	1521.62	181.303	1154.78	1427.67	184.727	1077.06	1147.07	167.713	1278.54	1334.23	168.638	1342.98	1141.77	267.316	1068.15	1225.07	-5.50515	1208.97	1353.46	-68.9674	1169.71	1107.7	-66.7611	1160.42	1032.45	-83.513	1231.83	872.693	-33.4035	1245.97	794.425	-98.7692	1213.17	785.402	-69.7368	1256.48	721.007
856	0	125.839	1313.86	1569.43	244.597	1313.48	1564.23	123.523	1145.13	1529.83	231.123	1147.58	1523.12	179.252	1165.82	1428.99	183.494	1088.25	1148.42	165.921	1289.65	1335.54	167.348	1354.2	1143.2	265.952	1079.37	1226.68	-7.29318	1220.06	1354.21	-70.115	1181.27	1108.29	-67.7745	1172.18	1033.05	-84.618	1243.57	873.368	-34.5426	1257.69	795.065	-99.9289	1224.89	786.16	-70.9866	1268.08	721.669
857	0	123.017	1324.69	1570.68	241.755	1324.39	1566.17	120.945	1156.03	1530.85	228.577	1158.53	1524.78	177.254	1176.78	1430.44	182.225	1099.32	1149.9	164.225	1300.67	1336.97	166.194	1365.27	1144.74	264.556	1090.44	1228.39	-9.01401	1231.12	1355.12	-71.2691	1192.81	1109.05	-68.8205	1183.94	1033.81	-85.7602	1255.43	874.251	-35.7274	1269.6	795.933	-101.107	1236.76	787.105	-72.2853	1279.94	722.57
858	0	120.263	1335.48	1571.99	238.981	1335.27	1568.18	118.45	1166.87	1532	226.115	1169.42	1526.56	175.315	1187.64	1431.98	180.911	1110.26	1151.47	162.633	1311.59	1338.49	165.185	1376.19	1146.35	263.122	1101.34	1230.19	-10.6645	1242.15	1356.15	-72.4333	1204.33	1109.96	-69.9027	1195.69	1034.73	-86.933	1267.39	875.323	-36.9473	1281.69	797.011	-102.296	1248.8	788.213	-73.6176	1292.04	723.69
859	0	117.593	1346.21	1573.34	236.291	1346.08	1570.22	116.049	1177.64	1533.26	223.75	1180.23	1528.45	173.435	1198.41	1433.59	179.546	1121.05	1153.13	161.147	1322.4	1340.07	164.324	1386.95	1148.01	261.642	1112.06	1232.04	-12.2431	1253.15	1357.29	-73.6111	1215.83	1111.01	-71.0238	1207.43	1035.77	-88.1294	1279.45	876.562	-38.1914	1293.95	798.278	-103.49	1261	789.461	-74.9679	1304.4	725.005
860	0	115.024	1356.87	1574.72	233.703	1356.84	1572.28	113.754	1188.33	1534.61	221.493	1190.97	1530.41	171.616	1209.08	1435.27	178.124	1131.71	1154.84	159.768	1333.09	1341.7	163.608	1397.56	1149.7	260.111	1122.59	1233.92	-13.7495	1264.12	1358.52	-74.8053	1227.32	1112.17	-72.186	1219.16	1036.92	-89.3424	1291.61	877.948	-39.4492	1306.38	799.712	-104.683	1273.35	790.827	-76.3217	1316.99	726.494
861	0	112.572	1367.45	1576.11	231.232	1367.53	1574.32	111.573	1198.93	1536.04	219.352	1201.63	1532.43	169.859	1219.64	1436.98	176.645	1142.21	1156.58	158.493	1343.65	1343.35	163.028	1408	1151.39	258.529	1132.93	1235.82	-15.1845	1275.04	1359.82	-76.0175	1238.79	1113.42	-73.3908	1230.88	1038.16	-90.5647	1303.86	879.46	-40.7099	1318.95	801.293	-105.87	1285.85	792.291	-77.6649	1329.82	728.136
862	0	110.248	1377.96	1577.51	228.892	1378.13	1576.33	109.514	1209.44	1537.52	217.334	1212.19	1534.47	168.164	1230.09	1438.71	175.111	1152.57	1158.35	157.319	1354.1	1345.01	162.571	1418.29	1153.07	256.897	1143.08	1237.71	-16.5502	1285.92	1361.18	-77.2488	1250.26	1114.76	-74.6388	1242.59	1039.48	-91.7893	1316.21	881.079	-41.9639	1331.66	803.002	-107.045	1298.51	793.833	-78.9849	1342.86	729.912
863	0	108.063	1388.38	1578.9	226.692	1388.65	1578.29	107.581	1219.86	1539.04	215.444	1222.66	1536.51	166.532	1240.43	1440.45	173.525	1162.79	1160.11	156.24	1364.41	1346.67	162.218	1428.43	1154.74	255.217	1153.06	1239.57	-17.8495	1296.75	1362.58	-78.4991	1261.71	1116.16	-75.9298	1254.28	1040.85	-93.0097	1328.64	882.788	-43.2019	1344.49	804.822	-108.204	1311.31	795.44	-80.2703	1356.11	731.805
864	0	106.027	1398.72	1580.29	224.642	1399.08	1580.19	105.778	1230.18	1540.59	213.683	1233.03	1538.53	164.961	1250.66	1442.16	171.894	1172.87	1161.86	155.247	1374.61	1348.3	161.945	1438.43	1156.36	253.496	1162.86	1241.4	-19.0862	1307.52	1364	-79.7677	1273.15	1117.6	-77.2627	1265.96	1042.26	-94.2197	1341.15	884.57	-44.4157	1357.45	806.735	-109.343	1324.25	797.099	-81.5114	1369.56	733.798
865	0	104.144	1408.97	1581.64	222.748	1409.41	1582.01	104.105	1240.41	1542.14	212.052	1243.3	1540.5	163.451	1260.8	1443.85	170.227	1182.82	1163.57	154.331	1384.69	1349.89	161.727	1448.3	1157.94	251.742	1172.51	1243.17	-20.2644	1318.23	1365.43	-81.0529	1284.59	1119.07	-78.6359	1277.62	1043.7	-95.4142	1353.73	886.41	-45.598	1370.5	808.728	-110.458	1337.32	798.797	-82.7001	1383.18	735.878
866	0	102.419	1419.13	1582.97	221.014	1419.64	1583.73	102.563	1250.55	1543.68	210.551	1253.47	1542.41	162	1270.83	1445.49	168.536	1192.65	1165.23	153.482	1394.66	1351.43	161.539	1458.05	1159.47	249.965	1182.02	1244.87	-21.3887	1328.88	1366.86	-82.353	1296.01	1120.55	-80.0467	1289.26	1045.15	-96.5887	1366.38	888.294	-46.7429	1383.65	810.786	-111.546	1350.51	800.527	-83.8299	1396.96	738.033
867	0	100.852	1429.2	1584.26	219.439	1429.77	1585.36	101.149	1260.59	1545.19	209.175	1263.53	1544.24	160.609	1280.77	1447.07	166.832	1202.37	1166.84	152.691	1404.52	1352.92	161.353	1467.69	1160.93	248.177	1191.41	1246.49	-22.4637	1339.46	1368.27	-83.6654	1307.43	1122.04	-81.492	1300.88	1046.59	-97.7398	1379.08	890.21	-47.8455	1396.87	812.898	-112.605	1363.82	802.28	-84.8961	1410.88	740.249
868	0	99.443	1439.19	1585.51	218.024	1439.8	1586.88	99.8584	1270.54	1546.66	207.922	1273.5	1545.96	159.275	1290.62	1448.57	165.129	1211.98	1168.37	151.948	1414.28	1354.33	161.147	1477.24	1162.33	246.389	1200.7	1248.03	-23.4937	1349.97	1369.66	-84.9878	1318.82	1123.52	-82.9681	1312.47	1048.02	-98.865	1391.84	892.145	-48.9022	1410.16	815.049	-113.632	1377.23	804.048	-85.8956	1424.93	742.516
869	0	98.1874	1449.09	1586.69	216.763	1449.73	1588.28	98.6867	1280.41	1548.08	206.784	1283.38	1547.57	157.998	1300.39	1449.99	163.439	1221.51	1169.82	151.244	1423.95	1355.65	160.9	1486.7	1163.65	244.613	1209.91	1249.46	-24.4829	1360.4	1371	-86.3176	1330.19	1124.97	-84.4708	1324.03	1049.42	-99.9628	1404.63	894.086	-49.911	1423.51	817.229	-114.627	1390.73	805.824	-86.8268	1439.08	744.823
870	0	97.0801	1458.92	1587.82	215.652	1459.57	1589.56	97.6273	1290.2	1549.42	205.755	1293.17	1549.06	156.779	1310.08	1451.32	161.775	1230.95	1171.16	150.571	1433.54	1356.89	160.593	1496.08	1164.88	242.863	1219.05	1250.78	-25.4346	1370.75	1372.29	-87.6524	1341.53	1126.39	-85.9956	1335.55	1050.78	-101.033	1417.46	896.022	-50.8711	1436.91	819.426	-115.589	1404.31	807.598	-87.6898	1453.31	747.156
871	0	96.114	1468.67	1588.87	214.682	1469.31	1590.71	96.6735	1299.92	1550.67	204.828	1302.87	1550.4	155.615	1319.72	1452.53	160.151	1240.33	1172.41	149.922	1443.06	1358.02	160.215	1505.4	1166.02	241.151	1228.14	1251.98	-26.3517	1381.03	1373.51	-88.9896	1352.82	1127.75	-87.5374	1347.03	1052.08	-102.074	1430.31	897.939	-51.7829	1450.34	821.625	-116.516	1417.96	809.361	-88.4859	1467.62	749.505
872	0	95.2807	1478.36	1589.85	213.844	1478.98	1591.72	95.8175	1309.57	1551.82	203.994	1312.5	1551.59	154.507	1329.29	1453.63	158.576	1249.65	1173.53	149.293	1452.52	1359.03	159.76	1514.67	1167.04	239.486	1237.2	1253.05	-27.2362	1391.22	1374.65	-90.3267	1364.07	1129.06	-89.0909	1358.47	1053.32	-103.089	1443.16	899.825	-52.648	1463.79	823.814	-117.409	1431.66	811.102	-89.218	1481.97	751.855
873	0	94.5704	1487.98	1590.73	213.129	1488.56	1592.6	95.0518	1319.17	1552.86	203.246	1322.07	1552.63	153.456	1338.82	1454.61	157.062	1258.93	1174.53	148.679	1461.92	1359.93	159.224	1523.9	1167.95	237.88	1246.24	1253.99	-28.0891	1401.34	1375.7	-91.6612	1375.26	1130.28	-90.6501	1369.85	1054.47	-104.077	1456.02	901.665	-53.4689	1477.26	825.979	-118.268	1445.4	812.808	-89.8901	1496.37	754.193
874	0	93.973	1497.56	1591.51	212.526	1498.08	1593.33	94.3684	1328.71	1553.78	202.577	1331.57	1553.51	152.461	1348.31	1455.45	155.617	1268.17	1175.4	148.08	1471.29	1360.69	158.613	1533.1	1168.73	236.34	1255.28	1254.78	-28.9106	1411.39	1376.65	-92.99	1386.37	1131.41	-92.209	1381.18	1055.52	-105.039	1468.86	903.447	-54.2489	1490.73	828.106	-119.093	1459.17	814.468	-90.5074	1510.78	756.507
875	0	93.4778	1507.08	1592.18	212.025	1507.54	1593.92	93.7599	1338.21	1554.56	201.977	1341.02	1554.22	151.524	1357.76	1456.15	154.248	1277.37	1176.13	147.495	1480.61	1361.32	157.933	1542.27	1169.37	234.874	1264.32	1255.44	-29.7	1421.36	1377.47	-94.3099	1397.41	1132.44	-93.7608	1392.45	1056.47	-105.978	1481.67	905.156	-54.9915	1504.19	830.181	-119.885	1472.94	816.066	-91.076	1525.19	758.781
876	0	93.0743	1516.57	1592.74	211.613	1516.95	1594.36	93.2193	1347.68	1555.2	201.441	1350.43	1554.75	150.644	1367.19	1456.71	152.96	1286.56	1176.71	146.924	1489.92	1361.81	157.197	1551.43	1169.85	233.488	1273.37	1255.94	-30.4557	1431.27	1378.17	-95.6167	1408.36	1133.35	-95.2984	1403.66	1057.29	-106.895	1494.46	906.778	-55.7008	1517.63	832.188	-120.643	1486.7	817.589	-91.6029	1539.59	761.002
877	0	92.7523	1526.03	1593.17	211.281	1526.31	1594.66	92.74	1357.12	1555.69	200.962	1359.8	1555.12	149.823	1376.6	1457.12	151.757	1295.72	1177.15	146.37	1499.21	1362.15	156.422	1560.59	1170.18	232.186	1282.45	1256.29	-31.1753	1441.12	1378.73	-96.9058	1419.22	1134.13	-96.8144	1414.81	1057.99	-107.788	1507.19	908.299	-56.3804	1531.04	834.112	-121.368	1500.43	819.023	-92.0952	1553.96	763.155
878	0	92.5019	1535.46	1593.47	211.019	1535.64	1594.8	92.3166	1366.54	1556.02	200.535	1369.15	1555.31	149.062	1386.01	1457.37	150.641	1304.88	1177.43	145.837	1508.49	1362.33	155.623	1569.75	1170.34	230.971	1291.55	1256.49	-31.8557	1450.91	1379.15	-98.1712	1429.98	1134.78	-98.3008	1425.89	1058.55	-108.66	1519.87	909.707	-57.0341	1544.41	835.939	-122.059	1514.11	820.352	-92.5602	1568.29	765.227
879	0	92.3144	1544.88	1593.62	210.819	1544.95	1594.8	91.9443	1375.94	1556.18	200.155	1378.48	1555.34	148.363	1395.41	1457.47	149.613	1314.04	1177.57	145.329	1517.76	1362.36	154.821	1578.91	1170.34	229.846	1300.68	1256.53	-32.4935	1460.66	1379.4	-99.4063	1440.64	1135.27	-99.7491	1436.9	1058.95	-109.51	1532.48	910.989	-57.6652	1557.72	837.654	-122.716	1527.73	821.564	-93.0052	1582.56	767.202
880	0	92.1818	1554.28	1593.64	210.672	1554.24	1594.65	91.6197	1385.34	1556.19	199.82	1387.8	1555.19	147.728	1404.81	1457.41	148.674	1323.2	1177.54	144.851	1527.05	1362.24	154.034	1588.09	1170.16	228.812	1309.84	1256.42	-33.0844	1470.37	1379.5	-100.604	1451.19	1135.61	-101.151	1447.85	1059.21	-110.336	1545	912.132	-58.2764	1570.97	839.242	-123.339	1541.26	822.646	-93.4369	1596.75	769.067
881	0	92.0974	1563.69	1593.5	210.571	1563.53	1594.35	91.3401	1394.74	1556.03	199.526	1397.12	1554.88	147.157	1414.23	1457.19	147.823	1332.37	1177.37	144.407	1536.34	1361.95	153.283	1597.28	1169.82	227.871	1319.04	1256.17	-33.6242	1480.04	1379.43	-101.755	1461.64	1135.78	-102.497	1458.73	1059.3	-111.137	1557.44	913.128	-58.87	1584.14	840.691	-123.927	1554.69	823.587	-93.8613	1610.84	770.809
882	0	92.0556	1573.09	1593.22	210.512	1572.82	1593.91	91.1042	1404.15	1555.7	199.274	1406.45	1554.41	146.654	1423.65	1456.82	147.06	1341.55	1177.04	144.005	1545.66	1361.51	152.584	1606.5	1169.31	227.023	1328.28	1255.76	-34.1085	1489.68	1379.19	-102.851	1471.98	1135.79	-103.778	1469.54	1059.24	-111.911	1569.79	913.966	-59.4475	1597.22	841.987	-124.479	1568	824.377	-94.2837	1624.82	772.414
883	0	92.0522	1582.51	1592.79	210.491	1582.13	1593.32	90.9116	1413.57	1555.21	199.063	1415.79	1553.78	146.221	1433.1	1456.3	146.384	1350.76	1176.56	143.648	1554.99	1360.92	151.952	1615.74	1168.63	226.269	1337.56	1255.21	-34.5327	1499.31	1378.79	-103.883	1482.23	1135.64	-104.984	1480.29	1059.01	-112.654	1582.02	914.639	-60.0097	1610.19	843.118	-124.994	1581.18	825.009	-94.7082	1638.67	773.87
884	0	92.0842	1591.94	1592.2	210.504	1591.45	1592.6	90.763	1423	1554.56	198.894	1425.15	1553.01	145.861	1442.57	1455.63	145.796	1360	1175.94	143.344	1564.36	1360.18	151.402	1625.02	1167.81	225.612	1346.88	1254.52	-34.8925	1508.92	1378.22	-104.841	1492.39	1135.31	-106.108	1490.98	1058.62	-113.364	1594.14	915.14	-60.5565	1623.06	844.075	-125.472	1594.2	825.474	-95.1377	1652.38	775.165
885	0	92.1499	1601.38	1591.47	210.551	1600.79	1591.74	90.6603	1432.46	1553.75	198.769	1434.53	1552.09	145.575	1452.07	1454.81	145.295	1369.28	1175.17	143.097	1573.76	1359.3	150.942	1634.33	1166.85	225.051	1356.24	1253.69	-35.1837	1518.53	1377.49	-105.716	1502.46	1134.83	-107.14	1501.6	1058.08	-114.036	1606.14	915.464	-61.0871	1635.79	844.848	-125.912	1607.05	825.767	-95.5741	1665.92	776.286
886	0	92.2489	1610.85	1590.6	210.632	1610.16	1590.76	90.6061	1441.94	1552.8	198.693	1443.94	1551.04	145.367	1461.59	1453.85	144.882	1378.6	1174.26	142.913	1583.2	1358.29	150.58	1643.69	1165.75	224.589	1365.66	1252.73	-35.4024	1528.14	1376.61	-106.499	1512.45	1134.18	-108.07	1512.17	1057.38	-114.666	1618.01	915.607	-61.5999	1648.38	845.428	-126.312	1619.73	825.885	-96.0176	1679.27	777.222
887	0	92.3819	1620.34	1589.6	210.749	1619.57	1589.66	90.6038	1451.44	1551.71	198.668	1453.38	1549.87	145.24	1471.15	1452.77	144.558	1387.98	1173.22	142.796	1592.68	1357.14	150.32	1653.09	1164.52	224.227	1375.13	1251.64	-35.5451	1537.76	1375.58	-107.182	1522.38	1133.38	-108.892	1522.69	1056.54	-115.249	1629.74	915.567	-62.0922	1660.82	845.808	-126.672	1632.21	825.825	-96.4672	1692.43	777.962
888	0	92.5509	1629.86	1588.46	210.902	1629.02	1588.46	90.6577	1460.98	1550.48	198.699	1462.86	1548.57	145.196	1480.75	1451.55	144.324	1397.42	1172.05	142.751	1602.21	1355.88	150.162	1662.55	1163.19	223.966	1384.66	1250.43	-35.6086	1547.4	1374.42	-107.756	1532.26	1132.44	-109.597	1533.15	1055.56	-115.78	1641.33	915.343	-62.561	1673.1	845.982	-126.991	1644.49	825.585	-96.9205	1705.36	778.496
889	0	92.7585	1639.41	1587.22	211.096	1638.51	1587.15	90.7725	1470.55	1549.13	198.793	1472.38	1547.18	145.238	1490.39	1450.23	144.18	1406.92	1170.77	142.78	1611.79	1354.51	150.105	1672.07	1161.75	223.806	1394.25	1249.11	-35.5903	1557.06	1373.13	-108.214	1542.09	1131.35	-110.179	1543.56	1054.44	-116.254	1652.77	914.935	-63.0021	1685.21	845.944	-127.268	1656.55	825.164	-97.374	1718.06	778.815
890	0	93.0085	1648.99	1585.87	211.333	1648.05	1585.76	90.9532	1480.15	1547.67	198.953	1481.94	1545.68	145.368	1500.08	1448.8	144.127	1416.51	1169.37	142.888	1621.43	1353.04	150.146	1681.66	1160.23	223.748	1403.91	1247.67	-35.488	1566.74	1371.73	-108.551	1551.89	1130.14	-110.631	1553.93	1053.21	-116.666	1664.06	914.345	-63.4112	1697.12	845.694	-127.502	1668.39	824.565	-97.823	1730.52	778.911
891	0	93.3049	1658.6	1584.42	211.619	1657.64	1584.29	91.2053	1489.79	1546.12	199.187	1491.55	1544.1	145.589	1509.81	1447.27	144.166	1426.17	1167.87	143.076	1631.12	1351.49	150.279	1691.33	1158.62	223.792	1413.64	1246.13	-35.3002	1576.45	1370.24	-108.761	1561.67	1128.81	-110.95	1564.25	1051.87	-117.011	1675.19	913.577	-63.7831	1708.85	845.228	-127.69	1680.01	823.79	-98.262	1742.7	778.779
892	0	93.6526	1668.25	1582.91	211.959	1667.28	1582.76	91.5341	1499.47	1544.48	199.499	1501.22	1542.44	145.901	1519.59	1445.67	144.296	1435.92	1166.28	143.346	1640.87	1349.87	150.497	1701.07	1156.95	223.937	1423.44	1244.5	-35.0258	1586.21	1368.67	-108.841	1571.44	1127.38	-111.13	1574.54	1050.44	-117.283	1686.17	912.636	-64.1121	1720.36	844.549	-127.832	1691.38	822.843	-98.6845	1754.61	778.413
893	0	94.0565	1677.94	1581.34	212.356	1676.98	1581.18	91.9448	1509.18	1542.77	199.895	1510.93	1540.73	146.305	1529.43	1444	144.518	1445.78	1164.61	143.699	1650.69	1348.19	150.794	1710.91	1155.23	224.181	1433.32	1242.79	-34.6644	1596.01	1367.03	-108.789	1581.23	1125.86	-111.17	1584.8	1048.93	-117.477	1696.98	911.531	-64.3924	1731.66	843.658	-127.925	1702.51	821.731	-99.0836	1766.23	777.812
894	0	94.522	1687.65	1579.73	212.817	1686.72	1579.56	92.4423	1518.94	1541.01	200.38	1520.7	1538.96	146.803	1539.32	1442.28	144.829	1455.73	1162.88	144.134	1660.59	1346.48	151.163	1720.84	1153.47	224.523	1443.29	1241	-34.2161	1605.85	1365.35	-108.604	1591.03	1124.28	-111.067	1595.02	1047.35	-117.589	1707.63	910.27	-64.6175	1742.73	842.563	-127.966	1713.38	820.462	-99.4518	1777.55	776.979
895	0	95.0541	1697.41	1578.1	213.346	1696.53	1577.93	93.031	1528.74	1539.22	200.959	1530.52	1537.17	147.394	1549.26	1440.53	145.228	1465.8	1161.09	144.653	1670.55	1344.75	151.597	1730.87	1151.68	224.959	1453.33	1239.16	-33.6819	1615.75	1363.64	-108.285	1600.86	1122.63	-110.822	1605.21	1045.72	-117.614	1718.1	908.866	-64.7812	1753.56	841.272	-127.953	1724.01	819.047	-99.7813	1788.55	775.918
896	0	95.658	1707.21	1576.47	213.948	1706.39	1576.3	93.7146	1538.59	1537.41	201.636	1540.4	1535.35	148.077	1559.27	1438.76	145.713	1475.98	1159.27	145.253	1680.59	1343.01	152.089	1741.02	1149.89	225.486	1463.47	1237.27	-33.0633	1625.71	1361.93	-107.835	1610.72	1120.96	-110.434	1615.38	1044.07	-117.549	1728.41	907.334	-64.877	1764.15	839.795	-127.883	1734.36	817.499	-100.064	1799.23	774.636
897	0	96.3382	1717.04	1574.87	214.626	1716.3	1574.69	94.4959	1548.48	1535.61	202.413	1550.35	1533.54	148.85	1569.35	1436.99	146.279	1486.29	1157.43	145.933	1690.71	1341.3	152.636	1751.28	1148.12	226.099	1473.71	1235.36	-32.3624	1635.74	1360.23	-107.256	1620.63	1119.26	-109.908	1625.52	1042.41	-117.39	1738.54	905.689	-64.8985	1774.48	838.148	-127.752	1744.46	815.834	-100.292	1809.58	773.146
898	0	97.0989	1726.91	1573.31	215.386	1726.27	1573.12	95.3768	1558.41	1533.82	203.291	1560.35	1531.74	149.711	1579.49	1435.24	146.923	1496.72	1155.59	146.69	1700.91	1339.62	153.232	1761.67	1146.39	226.795	1484.03	1233.44	-31.5821	1645.83	1358.57	-106.551	1630.59	1117.58	-109.246	1635.64	1040.77	-117.135	1748.49	903.952	-64.8399	1784.56	836.349	-127.558	1754.28	814.071	-100.457	1819.59	771.464
899	0	97.9437	1736.82	1571.82	216.229	1736.29	1571.6	96.3581	1568.4	1532.08	204.272	1570.41	1529.97	150.657	1589.7	1433.53	147.639	1507.28	1153.77	147.521	1711.19	1338	153.874	1772.19	1144.71	227.567	1494.46	1231.53	-30.726	1655.99	1356.97	-105.727	1640.6	1115.93	-108.453	1645.73	1039.16	-116.782	1758.26	902.143	-64.6958	1794.37	834.417	-127.298	1763.83	812.231	-100.551	1829.26	769.609
900	0	98.8751	1746.77	1570.42	217.158	1746.37	1570.15	97.4395	1578.43	1530.4	205.355	1580.53	1528.24	151.683	1599.98	1431.87	148.422	1517.97	1151.99	148.422	1721.56	1336.47	154.559	1782.85	1143.13	228.41	1504.99	1229.64	-29.7984	1666.23	1355.45	-104.788	1650.66	1114.33	-107.535	1655.8	1037.61	-116.329	1767.85	900.286	-64.4614	1803.91	832.378	-126.969	1773.11	810.339	-100.566	1838.57	767.604
901	0	99.8949	1756.77	1569.13	218.175	1756.49	1568.8	98.6195	1588.51	1528.81	206.538	1590.71	1526.59	152.785	1610.32	1430.29	149.265	1528.8	1150.27	149.387	1732.02	1335.03	155.282	1793.64	1141.65	229.318	1515.62	1227.8	-28.8042	1676.55	1354.03	-103.741	1660.78	1112.81	-106.499	1665.84	1036.14	-115.778	1777.27	898.405	-64.1331	1813.17	830.257	-126.57	1782.11	808.421	-100.496	1847.54	765.475
902	0	101.004	1766.8	1567.97	219.28	1766.66	1567.55	99.8952	1598.63	1527.31	207.818	1600.96	1525.01	153.958	1620.74	1428.81	150.161	1539.75	1148.62	150.413	1742.56	1333.71	156.042	1804.58	1140.32	230.284	1526.36	1226.04	-27.7489	1686.94	1352.74	-102.596	1670.95	1111.4	-105.354	1675.86	1034.77	-115.128	1786.5	896.527	-63.708	1822.15	828.084	-126.1	1790.84	806.505	-100.332	1856.15	763.253
903	0	102.202	1776.88	1566.96	220.472	1776.88	1566.43	101.263	1608.81	1525.93	209.191	1611.26	1523.53	155.195	1631.23	1427.43	151.105	1550.83	1147.08	151.491	1753.19	1332.53	156.834	1815.67	1139.15	231.301	1537.2	1224.35	-26.6388	1697.4	1351.58	-101.361	1681.16	1110.11	-104.108	1685.84	1033.53	-114.382	1795.55	894.68	-63.1844	1830.86	825.889	-125.559	1799.3	804.62	-100.07	1864.41	760.967
904	0	103.487	1786.99	1566.11	221.751	1787.15	1565.44	102.717	1619.03	1524.68	210.65	1621.61	1522.17	156.49	1641.78	1426.19	152.088	1562.03	1145.64	152.616	1763.9	1331.51	157.653	1826.9	1138.17	232.364	1548.14	1222.78	-25.4808	1707.94	1350.59	-100.046	1691.42	1108.96	-102.773	1695.79	1032.43	-113.543	1804.43	892.889	-62.5619	1839.29	823.703	-124.948	1807.51	802.797	-99.7038	1872.33	758.65
905	0	104.857	1797.15	1565.44	223.113	1797.45	1564.61	104.252	1629.3	1523.59	212.19	1632.03	1520.93	157.836	1652.4	1425.08	153.103	1573.33	1144.35	153.78	1774.7	1330.66	158.494	1838.27	1137.39	233.464	1559.19	1221.33	-24.282	1718.55	1349.78	-98.6616	1701.71	1107.98	-101.359	1705.69	1031.5	-112.614	1813.14	891.183	-61.8411	1847.45	821.559	-124.267	1815.46	801.066	-99.2286	1879.91	756.337
906	0	106.308	1807.35	1564.95	224.555	1807.8	1563.93	105.86	1639.61	1522.65	213.802	1642.49	1519.83	159.225	1663.08	1424.13	154.144	1584.74	1143.2	154.974	1785.57	1329.99	159.349	1849.76	1136.83	234.597	1570.32	1220.02	-23.0503	1729.22	1349.15	-97.2204	1712.02	1107.19	-99.8795	1715.55	1030.75	-111.602	1821.68	889.586	-61.024	1855.35	819.489	-123.52	1823.18	799.456	-98.6412	1887.16	754.061
907	0	107.835	1817.58	1564.66	226.072	1818.19	1563.42	107.533	1649.97	1521.89	215.479	1653.01	1518.87	160.648	1673.82	1423.35	155.203	1596.23	1142.22	156.189	1796.5	1329.5	160.21	1861.38	1136.51	235.754	1581.55	1218.87	-21.7937	1739.96	1348.73	-95.7344	1722.35	1106.59	-98.3463	1725.36	1030.2	-110.513	1830.06	888.122	-60.1143	1863	817.522	-122.711	1830.67	797.994	-97.9396	1894.1	751.854
908	0	109.432	1827.86	1564.56	227.657	1828.62	1563.08	109.262	1660.37	1521.31	217.209	1663.56	1518.07	162.099	1684.61	1422.74	156.276	1607.8	1141.42	157.416	1807.5	1329.21	161.07	1873.09	1136.41	236.929	1592.85	1217.89	-20.5204	1750.74	1348.51	-94.217	1732.69	1106.2	-96.7731	1735.1	1029.85	-109.354	1838.29	886.814	-59.1168	1870.4	815.688	-121.842	1837.96	796.706	-97.1233	1900.74	749.747
909	0	111.092	1838.17	1564.67	229.304	1839.07	1562.91	111.036	1670.81	1520.91	218.984	1674.16	1517.44	163.567	1695.44	1422.32	157.355	1619.41	1140.8	158.645	1818.55	1329.12	161.918	1884.88	1136.55	238.118	1604.22	1217.09	-19.2388	1761.57	1348.51	-92.6818	1743.02	1106.03	-95.1741	1744.78	1029.72	-108.133	1846.37	885.68	-58.0377	1877.59	814.013	-120.92	1845.07	795.611	-96.1931	1907.11	747.768
910	0	112.806	1848.52	1564.97	231.004	1849.56	1562.91	112.845	1681.28	1520.7	220.791	1684.8	1516.97	165.046	1706.32	1422.08	158.436	1631.06	1140.39	159.867	1829.64	1329.22	162.746	1896.73	1136.92	239.313	1615.65	1216.49	-17.9571	1772.43	1348.71	-91.1425	1753.33	1106.09	-93.5633	1754.4	1029.8	-106.861	1854.33	884.736	-56.8849	1884.57	812.521	-119.95	1852.01	794.728	-95.152	1913.22	745.942
911	0	114.566	1858.9	1565.46	232.748	1860.07	1563.07	114.678	1691.79	1520.69	222.619	1695.46	1516.66	166.526	1717.22	1422.02	159.516	1642.72	1140.17	161.071	1840.75	1329.51	163.545	1908.6	1137.49	240.51	1627.11	1216.08	-16.6837	1783.31	1349.13	-89.6133	1763.62	1106.37	-91.9551	1763.94	1030.1	-105.547	1862.17	883.993	-55.6675	1891.37	811.229	-118.94	1858.81	794.07	-94.0048	1919.11	744.291
912	0	116.362	1869.31	1566.14	234.527	1870.61	1563.39	116.523	1702.32	1520.86	224.457	1706.15	1516.52	167.999	1728.15	1422.15	160.59	1654.38	1140.15	162.25	1851.88	1329.98	164.306	1920.47	1138.27	241.705	1638.6	1215.87	-15.4262	1794.19	1349.75	-88.1076	1773.86	1106.86	-90.3633	1773.4	1030.61	-104.205	1869.9	883.459	-54.396	1898.01	810.155	-117.898	1865.51	793.643	-92.7583	1924.8	742.831
913	0	118.181	1879.75	1566.98	236.329	1881.17	1563.85	118.369	1712.88	1521.22	226.293	1716.86	1516.55	169.459	1739.08	1422.45	161.656	1666.01	1140.33	163.393	1863.01	1330.62	165.019	1932.3	1139.21	242.893	1650.09	1215.86	-14.1922	1805.05	1350.57	-86.6387	1784.05	1107.57	-88.8015	1782.77	1031.33	-102.845	1877.54	883.139	-53.0822	1904.52	809.307	-116.832	1872.11	793.451	-91.4216	1930.34	741.573
914	0	120.013	1890.22	1567.98	238.143	1891.74	1564.45	120.203	1723.45	1521.76	228.114	1727.58	1516.73	170.898	1750.01	1422.93	162.713	1677.59	1140.71	164.493	1874.13	1331.41	165.677	1944.06	1140.31	244.072	1661.57	1216.04	-12.9887	1815.89	1351.56	-85.2187	1794.18	1108.48	-87.2822	1792.06	1032.25	-101.48	1885.11	883.031	-51.739	1910.94	808.692	-115.752	1878.67	793.49	-90.0064	1935.74	740.527
915	0	121.845	1900.71	1569.11	239.957	1902.33	1565.16	122.016	1734.04	1522.47	229.909	1738.31	1517.06	172.309	1760.94	1423.57	163.76	1689.11	1141.26	165.542	1885.21	1332.33	166.272	1955.73	1141.52	245.24	1673.03	1216.39	-11.8221	1826.68	1352.72	-83.8586	1804.23	1109.57	-85.8169	1801.26	1033.35	-100.125	1892.62	883.131	-50.38	1917.28	808.31	-114.668	1885.19	793.754	-88.5264	1941.06	739.694
916	0	123.666	1911.22	1570.37	241.758	1912.92	1565.97	123.795	1744.64	1523.34	231.667	1749.03	1517.54	173.687	1771.83	1424.36	164.797	1700.55	1141.99	166.532	1896.25	1333.38	166.796	1967.26	1142.83	246.394	1684.44	1216.92	-10.6984	1837.41	1354.02	-82.5679	1814.2	1110.82	-84.4157	1810.38	1034.6	-98.791	1900.09	883.432	-49.0199	1923.57	808.16	-113.592	1891.72	794.231	-86.998	1946.33	739.075
917	0	125.461	1921.75	1571.72	243.535	1923.53	1566.87	125.531	1755.23	1524.36	233.377	1759.75	1518.16	175.028	1782.7	1425.28	165.824	1711.88	1142.88	167.459	1907.22	1334.53	167.244	1978.64	1144.21	247.535	1695.79	1217.61	-9.62249	1848.05	1355.44	-81.3544	1824.06	1112.22	-83.0871	1819.39	1036	-97.4919	1907.53	883.922	-47.6735	1929.86	808.231	-112.535	1898.27	794.907	-85.4397	1951.59	738.666
918	0	127.219	1932.29	1573.14	245.275	1934.13	1567.83	127.213	1765.83	1525.52	235.031	1770.46	1518.9	176.325	1793.51	1426.33	166.844	1723.1	1143.9	168.317	1918.12	1335.77	167.608	1989.85	1145.62	248.661	1707.06	1218.43	-8.59878	1858.59	1356.97	-80.2239	1833.81	1113.73	-81.838	1828.31	1037.53	-96.2399	1914.96	884.588	-46.3558	1936.17	808.515	-111.506	1904.87	795.761	-83.872	1956.88	738.46
919	0	128.928	1942.83	1574.62	246.965	1944.73	1568.85	128.834	1776.41	1526.8	236.62	1781.14	1519.76	177.577	1804.26	1427.49	167.857	1734.19	1145.05	169.103	1928.94	1337.07	167.885	2000.86	1147.05	249.774	1718.24	1219.39	-7.63063	1869.02	1358.58	-79.1803	1843.45	1115.34	-80.673	1837.14	1039.15	-95.0466	1922.38	885.415	-45.0819	1942.52	808.998	-110.517	1911.54	796.775	-82.3171	1962.24	738.448
920	0	130.575	1953.38	1576.14	248.595	1955.33	1569.9	130.385	1786.98	1528.2	238.137	1791.79	1520.73	178.78	1814.95	1428.73	168.865	1745.13	1146.31	169.815	1939.65	1338.41	168.071	2011.67	1148.48	250.875	1729.32	1220.45	-6.72041	1879.32	1360.26	-78.225	1852.94	1117.03	-79.5951	1845.87	1040.84	-93.9227	1929.82	886.385	-43.8661	1948.95	809.662	-109.576	1918.29	797.927	-80.7981	1967.71	738.623
921	0	132.15	1963.93	1577.67	250.154	1965.92	1570.97	131.861	1797.52	1529.7	239.576	1802.42	1521.81	179.932	1825.55	1430.06	169.868	1755.93	1147.66	170.452	1950.25	1339.79	168.164	2022.27	1149.88	251.964	1740.28	1221.61	-5.86945	1889.47	1361.97	-77.3575	1862.3	1118.77	-78.6053	1854.51	1042.6	-92.8777	1937.27	887.481	-42.7222	1955.48	810.492	-108.693	1925.15	799.194	-79.3387	1973.33	738.972
922	0	133.643	1974.47	1579.2	251.632	1976.49	1572.04	133.254	1808.03	1531.28	240.932	1813	1522.98	181.032	1836.07	1431.44	170.869	1766.56	1149.08	171.014	1960.73	1341.19	168.164	2032.65	1151.25	253.042	1751.11	1222.85	-5.07804	1899.47	1363.71	-76.5748	1871.5	1120.53	-77.7025	1863.05	1044.39	-91.9195	1944.76	888.685	-41.663	1962.13	811.468	-107.873	1932.11	800.554	-77.9622	1979.12	739.487
923	0	135.044	1985	1580.71	253.02	1987.05	1573.11	134.562	1818.51	1532.94	242.201	1823.54	1524.23	182.079	1846.5	1432.87	171.865	1777.02	1150.55	171.504	1971.09	1342.59	168.074	2042.82	1152.59	254.111	1761.8	1224.15	-4.34541	1909.32	1365.46	-75.8722	1880.54	1122.31	-76.884	1871.5	1046.19	-91.0547	1952.28	889.98	-40.6997	1968.92	812.573	-107.122	1939.19	801.987	-76.6909	1985.12	740.156
924	0	136.346	1995.51	1582.18	254.311	1997.6	1574.17	135.78	1828.95	1534.65	243.382	1834.04	1525.56	183.074	1856.82	1434.32	172.858	1787.32	1152.06	171.925	1981.32	1343.98	167.899	2052.78	1153.87	255.173	1772.36	1225.51	-3.66981	1919	1367.2	-75.2434	1889.42	1124.08	-76.1456	1879.86	1047.99	-90.2883	1959.84	891.348	-39.8419	1975.86	813.788	-106.443	1946.39	803.472	-75.5452	1991.35	740.97
925	0	137.542	2006	1583.61	255.499	2008.12	1575.2	136.907	1839.34	1536.41	244.472	1844.48	1526.95	184.016	1867.04	1435.8	173.844	1797.45	1153.59	172.28	1991.42	1345.36	167.647	2062.55	1155.11	256.228	1782.77	1226.89	-3.04855	1928.52	1368.91	-74.6806	1898.12	1125.82	-75.4816	1888.14	1049.77	-89.6233	1967.45	892.772	-39.0974	1982.96	815.095	-105.84	1953.69	804.991	-74.5432	1997.84	741.918
926	0	138.629	2016.46	1584.97	256.579	2018.61	1576.2	137.942	1849.68	1538.19	245.472	1854.87	1528.4	184.908	1877.15	1437.27	174.823	1807.42	1155.12	172.575	2001.39	1346.71	167.328	2072.14	1156.31	257.277	1793.04	1228.3	-2.47813	1937.89	1370.59	-74.1753	1906.64	1127.54	-74.8854	1896.32	1051.52	-89.0615	1975.1	894.238	-38.4719	1990.24	816.475	-105.313	1961.11	806.527	-73.6998	2004.58	742.99
927	0	139.601	2026.89	1586.26	257.548	2029.07	1577.16	138.884	1859.97	1539.99	246.383	1865.19	1529.89	185.749	1887.16	1438.73	175.792	1817.23	1156.64	172.817	2011.24	1348.02	166.956	2081.56	1157.46	258.32	1803.17	1229.72	-1.9544	1947.1	1372.22	-73.7186	1915	1129.2	-74.3499	1904.43	1053.22	-88.6028	1982.79	895.729	-37.9692	1997.7	817.913	-104.86	1968.64	808.065	-73.0262	2011.6	744.175
928	0	140.457	2037.27	1587.48	258.404	2039.49	1578.09	139.735	1870.2	1541.79	247.204	1875.46	1531.41	186.543	1897.06	1440.17	176.748	1826.9	1158.13	173.011	2020.97	1349.3	166.544	2090.84	1158.58	259.356	1813.17	1231.13	-1.47278	1956.17	1373.8	-73.3012	1923.19	1130.81	-73.8673	1912.47	1054.87	-88.2456	1990.54	897.233	-37.591	2005.33	819.392	-104.48	1976.27	809.591	-72.5299	2018.9	745.461
929	0	141.198	2047.62	1588.6	259.148	2049.88	1578.96	140.496	1880.37	1543.57	247.94	1885.67	1532.96	187.292	1906.87	1441.57	177.686	1836.44	1159.58	173.165	2030.59	1350.53	166.109	2099.98	1159.66	260.383	1823.05	1232.53	-1.02847	1965.11	1375.31	-72.9142	1931.22	1132.35	-73.4302	1920.44	1056.45	-87.9869	1998.33	898.734	-37.3368	2013.15	820.896	-104.17	1983.99	811.092	-72.2142	2026.48	746.833
930	0	141.823	2057.91	1589.64	259.78	2060.22	1579.79	141.171	1890.48	1545.31	248.592	1895.82	1534.51	187.996	1916.57	1442.92	178.604	1845.86	1160.97	173.285	2040.1	1351.7	165.666	2109.02	1160.71	261.401	1832.81	1233.88	-0.61677	1973.93	1376.74	-72.5492	1939.11	1133.82	-73.0316	1928.36	1057.95	-87.8224	2006.17	900.219	-37.2044	2021.14	822.409	-103.925	1991.79	812.556	-72.0784	2034.33	748.277
931	0	142.335	2068.15	1590.57	260.303	2070.52	1580.56	141.762	1900.52	1547	249.164	1905.91	1536.04	188.657	1926.19	1444.21	179.498	1855.17	1162.3	173.378	2049.52	1352.81	165.231	2117.98	1161.72	262.405	1842.48	1235.2	-0.233308	1982.66	1378.08	-72.1986	1946.87	1135.21	-72.6648	1936.23	1059.37	-87.7465	2014.06	901.674	-37.1896	2029.3	823.916	-103.742	1999.68	813.971	-72.1179	2042.44	749.777
932	0	142.738	2078.33	1591.41	260.719	2080.77	1581.28	142.275	1910.5	1548.62	249.661	1915.93	1537.55	189.278	1935.73	1445.42	180.364	1864.39	1163.55	173.448	2058.85	1353.85	164.818	2126.86	1162.7	263.393	1852.07	1236.45	0.125761	1991.29	1379.33	-71.856	1954.53	1136.51	-72.3245	1944.06	1060.69	-87.7526	2021.99	903.087	-37.2863	2037.64	825.402	-103.613	2007.65	815.327	-72.3241	2050.79	751.312
933	0	143.036	2088.46	1592.14	261.035	2090.97	1581.94	142.713	1920.42	1550.15	250.088	1925.9	1539.02	189.86	1945.19	1446.55	181.198	1873.53	1164.71	173.503	2068.12	1354.82	164.439	2135.7	1163.63	264.36	1861.58	1237.63	0.463585	1999.86	1380.48	-71.5163	1962.09	1137.71	-72.0061	1951.87	1061.92	-87.8332	2029.99	904.443	-37.4867	2046.13	826.851	-103.534	2015.69	816.612	-72.685	2059.37	752.863
934	0	143.236	2098.52	1592.76	261.254	2101.12	1582.54	143.082	1930.28	1551.59	250.448	1935.82	1540.41	190.402	1954.6	1447.58	181.997	1882.62	1165.77	173.545	2077.33	1355.7	164.105	2144.5	1164.51	265.302	1871.05	1238.73	0.782497	2008.38	1381.52	-71.1757	1969.61	1138.8	-71.7062	1959.66	1063.03	-87.9798	2038.03	905.727	-37.7814	2054.78	828.246	-103.499	2023.8	817.814	-73.1854	2068.17	754.406
935	0	143.343	2108.52	1593.27	261.384	2111.22	1583.07	143.387	1940.08	1552.9	250.748	1945.69	1541.73	190.906	1963.95	1448.51	182.757	1891.66	1166.73	173.578	2086.5	1356.48	163.819	2153.29	1165.32	266.212	1880.47	1239.73	1.08393	2016.87	1382.44	-70.8324	1977.09	1139.79	-71.4227	1967.47	1064.03	-88.1835	2046.13	906.926	-38.1595	2063.57	829.572	-103.5	2031.99	818.922	-73.8077	2077.14	755.918
936	0	143.364	2118.45	1593.66	261.43	2121.26	1583.53	143.633	1949.83	1554.07	250.991	1955.51	1542.94	191.372	1973.26	1449.33	183.476	1900.67	1167.56	173.605	2095.63	1357.17	163.587	2162.07	1166.05	267.086	1889.86	1240.62	1.36837	2025.34	1383.23	-70.4859	1984.56	1140.65	-71.1544	1975.28	1064.91	-88.435	2054.3	908.026	-38.6088	2072.49	830.812	-103.531	2040.25	819.922	-74.5321	2086.29	757.375
937	0	143.307	2128.32	1593.95	261.4	2131.26	1583.91	143.825	1959.52	1555.09	251.185	1965.29	1544.03	191.798	1982.55	1450.02	184.149	1909.65	1168.27	173.626	2104.75	1357.74	163.407	2170.87	1166.69	267.917	1899.24	1241.4	1.63536	2033.83	1383.89	-70.1376	1992.06	1141.38	-70.9013	1983.13	1065.65	-88.725	2062.53	909.011	-39.1163	2081.54	831.949	-103.586	2048.58	820.805	-75.3373	2095.57	758.751
938	0	143.179	2138.13	1594.11	261.299	2141.22	1584.2	143.969	1969.16	1555.96	251.331	1975.04	1544.99	192.184	1991.82	1450.58	184.775	1918.63	1168.85	173.641	2113.86	1358.19	163.276	2179.69	1167.22	268.698	1908.6	1242.05	1.88354	2042.33	1384.41	-69.7901	1999.6	1141.97	-70.6644	1991.03	1066.26	-89.0439	2070.83	909.87	-39.6679	2090.69	832.969	-103.658	2056.99	821.557	-76.2012	2104.97	760.024
939	0	142.985	2147.89	1594.16	261.135	2151.13	1584.4	144.068	1978.77	1556.65	251.436	1984.76	1545.8	192.527	2001.09	1451	185.351	1927.6	1169.3	173.65	2122.98	1358.51	163.187	2188.54	1167.63	269.424	1917.96	1242.57	2.11069	2050.88	1384.78	-69.4478	2007.22	1142.42	-70.4454	1998.99	1066.72	-89.3827	2079.2	910.587	-40.2495	2099.94	833.855	-103.741	2065.47	822.169	-77.1013	2114.46	761.171
940	0	142.735	2157.59	1594.09	260.913	2161	1584.51	144.127	1988.34	1557.15	251.502	1994.45	1546.44	192.826	2010.36	1451.28	185.872	1936.58	1169.6	173.65	2132.11	1358.7	163.132	2197.42	1167.89	270.087	1927.33	1242.96	2.31383	2059.49	1385	-69.1158	2014.93	1142.72	-70.2465	2007.03	1067.02	-89.7328	2087.65	911.152	-40.8467	2109.28	834.593	-103.829	2074.03	822.629	-78.0153	2124.03	762.169
941	0	142.432	2167.25	1593.9	260.639	2170.83	1584.51	144.147	1997.89	1557.47	251.531	2004.14	1546.91	193.078	2019.65	1451.41	186.336	1945.58	1169.76	173.641	2141.27	1358.75	163.101	2206.35	1168.01	270.681	1936.7	1243.2	2.48926	2068.16	1385.06	-68.8005	2022.77	1142.87	-70.0707	2015.16	1067.18	-90.0864	2096.18	911.554	-41.4459	2118.69	835.17	-103.918	2082.67	822.928	-78.9217	2133.66	763
942	0	142.084	2176.87	1593.58	260.319	2180.64	1584.39	144.131	2007.41	1557.6	251.526	2013.81	1547.19	193.279	2028.97	1451.39	186.74	1954.6	1169.77	173.617	2150.47	1358.65	163.084	2215.33	1167.97	271.2	1946.09	1243.3	2.63273	2076.92	1384.96	-68.5086	2030.73	1142.85	-69.9209	2023.39	1067.17	-90.4363	2104.79	911.781	-42.0342	2128.15	835.574	-104.004	2091.39	823.058	-79.8006	2143.32	763.646
943	0	141.695	2186.46	1593.14	259.956	2190.43	1584.16	144.079	2016.93	1557.53	251.486	2023.48	1547.28	193.426	2038.32	1451.21	187.079	1963.65	1169.63	173.575	2159.7	1358.39	163.069	2224.36	1167.76	271.638	1955.49	1243.25	2.73951	2085.77	1384.71	-68.2476	2038.85	1142.68	-69.8005	2031.73	1067	-90.7768	2113.5	911.827	-42.5999	2137.67	835.794	-104.083	2100.19	823.013	-80.6338	2153.01	764.091
944	0	141.269	2196.03	1592.58	259.554	2200.2	1583.81	143.991	2026.44	1557.26	251.412	2033.16	1547.18	193.516	2047.72	1450.87	187.349	1972.73	1169.35	173.512	2168.99	1357.98	163.048	2233.45	1167.38	271.988	1964.91	1243.05	2.80453	2094.72	1384.28	-68.0249	2047.13	1142.34	-69.7128	2040.2	1066.66	-91.1031	2122.3	911.684	-43.1331	2147.23	835.821	-104.154	2109.08	822.786	-81.4055	2162.71	764.324
945	0	140.809	2205.59	1591.89	259.115	2209.97	1583.32	143.865	2035.95	1556.8	251.301	2042.85	1546.88	193.544	2057.16	1450.37	187.546	1981.85	1168.91	173.421	2178.33	1357.42	163.009	2242.6	1166.83	272.246	1974.35	1242.69	2.82251	2103.78	1383.7	-67.8478	2055.59	1141.84	-69.6609	2048.8	1066.15	-91.4118	2131.19	911.348	-43.6257	2156.81	835.648	-104.215	2118.05	822.374	-82.1026	2172.41	764.333
946	0	140.316	2215.14	1591.08	258.642	2219.73	1582.71	143.699	2045.48	1556.15	251.15	2052.55	1546.39	193.507	2066.66	1449.72	187.665	1991.01	1168.32	173.299	2187.74	1356.7	162.947	2251.81	1166.1	272.408	1983.81	1242.18	2.78808	2112.97	1382.96	-67.7235	2064.22	1141.17	-69.648	2057.54	1065.48	-91.7009	2140.18	910.816	-44.0717	2166.42	835.27	-104.267	2127.11	821.774	-82.7151	2182.11	764.112
947	0	139.792	2224.71	1590.15	258.135	2229.49	1581.96	143.49	2055.03	1555.32	250.957	2062.27	1545.72	193.399	2076.22	1448.92	187.701	2000.23	1167.58	173.139	2197.22	1355.83	162.854	2261.1	1165.21	272.468	1993.3	1241.53	2.69585	2122.27	1382.06	-67.6583	2073.05	1140.34	-69.6766	2066.43	1064.64	-91.9697	2149.27	910.085	-44.4671	2176.05	834.684	-104.31	2136.25	820.986	-83.2364	2191.8	763.655
948	0	139.236	2234.29	1589.1	257.594	2239.27	1581.09	143.232	2064.61	1554.32	250.715	2072.03	1544.85	193.216	2085.85	1447.97	187.65	2009.51	1166.7	172.936	2206.76	1354.81	162.726	2270.46	1164.14	272.424	2002.82	1240.72	2.54051	2131.7	1381.01	-67.658	2082.06	1139.35	-69.7492	2075.47	1063.64	-92.2187	2158.47	909.158	-44.8102	2185.69	833.889	-104.348	2145.48	820.012	-83.663	2201.48	762.96
949	0	138.647	2243.9	1587.93	257.018	2249.06	1580.08	142.921	2074.23	1553.16	250.421	2081.81	1543.81	192.955	2095.55	1446.88	187.509	2018.85	1165.67	172.684	2216.38	1353.65	162.558	2279.9	1162.92	272.274	2012.38	1239.76	2.31688	2141.25	1379.8	-67.7273	2091.27	1138.2	-69.8679	2084.66	1062.48	-92.4497	2167.77	908.036	-45.1012	2195.34	832.885	-104.383	2154.8	818.852	-83.9948	2211.15	762.028
950	0	138.022	2253.54	1586.67	256.406	2258.88	1578.95	142.551	2083.9	1551.84	250.067	2091.64	1542.61	192.61	2105.32	1445.65	187.275	2028.27	1164.5	172.378	2226.08	1352.36	162.35	2289.42	1161.55	272.016	2021.98	1238.67	2.02002	2150.93	1378.46	-67.8703	2100.67	1136.9	-70.0339	2094.01	1061.16	-92.6656	2177.17	906.725	-45.3426	2205	831.677	-104.418	2164.21	817.513	-84.235	2220.8	760.862
951	0	137.359	2263.23	1585.3	255.753	2268.72	1577.7	142.116	2093.62	1550.39	249.648	2101.5	1541.26	192.178	2115.16	1444.31	186.944	2037.76	1163.21	172.01	2235.86	1350.94	162.098	2299.03	1160.03	271.65	2031.63	1237.44	1.6453	2160.73	1376.98	-68.0897	2110.26	1135.45	-70.2485	2103.52	1059.69	-92.87	2186.67	905.232	-45.5382	2214.68	830.27	-104.459	2173.7	815.999	-84.3894	2230.45	759.468
952	0	136.653	2272.98	1583.85	255.058	2278.6	1576.35	141.608	2103.4	1548.82	249.157	2111.41	1539.78	191.656	2125.08	1442.86	186.517	2047.36	1161.79	171.575	2245.72	1349.41	161.801	2308.74	1158.4	271.176	2041.34	1236.09	1.18849	2170.66	1375.37	-68.387	2120.04	1133.85	-70.5121	2113.19	1058.08	-93.0672	2196.28	903.566	-45.6937	2224.37	828.673	-104.51	2183.28	814.319	-84.4666	2240.08	757.856
953	0	135.899	2282.78	1582.33	254.314	2288.52	1574.91	141.022	2113.24	1547.15	248.586	2121.38	1538.18	191.04	2135.08	1441.31	185.994	2057.05	1160.27	171.067	2255.67	1347.79	161.459	2318.55	1156.65	270.597	2051.11	1234.63	0.645841	2180.7	1373.66	-68.7628	2130	1132.13	-70.8246	2123.02	1056.34	-93.2621	2205.99	901.739	-45.8158	2234.07	826.896	-104.576	2192.94	812.484	-84.4776	2249.72	756.038
954	0	135.091	2292.66	1580.75	253.518	2298.49	1573.39	140.352	2123.16	1545.4	247.93	2131.39	1536.48	190.329	2145.16	1439.68	185.376	2066.85	1158.65	170.482	2265.7	1346.09	161.069	2328.46	1154.81	269.916	2060.96	1233.08	0.014178	2190.86	1371.84	-69.2163	2140.13	1130.28	-71.1853	2133	1054.49	-93.4599	2215.81	899.766	-45.9123	2243.8	824.953	-104.663	2202.68	810.507	-84.435	2259.36	754.032
955	0	134.224	2302.6	1579.13	252.663	2308.51	1571.81	139.59	2133.15	1543.58	247.183	2141.46	1534.72	189.519	2155.32	1438	184.668	2076.76	1156.96	169.814	2275.82	1344.33	160.628	2338.48	1152.9	269.138	2070.89	1231.45	-0.708985	2201.12	1369.94	-69.7458	2150.44	1128.33	-71.5931	2143.13	1052.53	-93.6659	2225.72	897.663	-45.9915	2253.54	822.862	-104.776	2212.5	808.404	-84.3529	2269.01	751.855
956	0	133.292	2312.62	1577.5	251.743	2318.58	1570.2	138.732	2143.22	1541.73	246.338	2151.59	1532.9	188.61	2165.56	1436.28	183.873	2086.81	1155.21	169.058	2286.03	1342.54	160.134	2348.62	1150.93	268.267	2080.91	1229.77	-1.52536	2211.49	1367.98	-70.3484	2160.89	1126.29	-72.0461	2153.42	1050.49	-93.8854	2235.73	895.452	-46.0625	2263.31	820.643	-104.92	2222.39	806.194	-84.2464	2278.67	749.531
957	0	132.287	2322.71	1575.86	250.752	2328.71	1568.59	137.773	2153.37	1539.86	245.39	2161.78	1531.05	187.603	2175.88	1434.54	182.999	2096.98	1153.43	168.211	2296.33	1340.73	159.581	2358.87	1148.94	267.312	2091.03	1228.05	-2.43576	2221.95	1365.98	-71.0202	2171.5	1124.18	-72.5421	2163.85	1048.38	-94.1237	2245.84	893.154	-46.1343	2273.12	818.317	-105.1	2232.37	803.898	-84.1309	2288.35	747.088
958	0	131.203	2332.89	1574.24	249.683	2338.9	1566.98	136.709	2163.6	1538	244.336	2172.04	1529.21	186.498	2186.28	1432.82	182.053	2107.29	1151.64	167.27	2306.71	1338.94	158.965	2369.25	1146.95	266.28	2101.26	1226.33	-3.44005	2232.49	1363.95	-71.7565	2182.26	1122.02	-73.0784	2174.43	1046.23	-94.3857	2256.05	890.795	-46.216	2282.96	815.911	-105.323	2242.41	801.541	-84.0218	2298.05	744.552
959	0	130.034	2343.15	1572.67	248.529	2349.15	1565.42	135.537	2173.91	1536.17	243.172	2182.36	1527.4	185.298	2196.76	1431.12	181.044	2117.74	1149.86	166.234	2317.19	1337.18	158.28	2379.75	1144.99	265.18	2111.6	1224.63	-4.53701	2243.12	1361.92	-72.5519	2193.14	1119.83	-73.6521	2185.14	1044.06	-94.6763	2266.34	888.403	-46.3168	2292.84	813.452	-105.591	2252.53	799.151	-83.934	2307.79	741.957
960	0	128.775	2353.48	1571.17	247.285	2359.46	1563.92	134.254	2184.3	1534.4	241.897	2192.75	1525.65	184.004	2207.31	1429.48	179.982	2128.34	1148.11	165.102	2327.75	1335.49	157.521	2390.37	1143.09	264.022	2122.06	1222.97	-5.7243	2253.81	1359.93	-73.4004	2204.14	1117.65	-74.26	2195.98	1041.9	-94.9996	2276.73	886.006	-46.4453	2302.77	810.972	-105.911	2262.72	796.759	-83.8815	2317.57	739.336
961	0	127.419	2363.9	1569.75	245.945	2369.84	1562.52	132.86	2194.77	1532.71	240.51	2203.2	1523.98	182.623	2217.94	1427.93	178.879	2139.07	1146.44	163.875	2338.39	1333.89	156.681	2401.11	1141.28	262.816	2132.65	1221.4	-6.99839	2264.56	1357.98	-74.2955	2215.25	1115.49	-74.899	2206.95	1039.78	-95.3598	2287.2	883.636	-46.6097	2312.75	808.502	-106.285	2272.97	794.396	-83.8773	2327.38	736.725
962	0	125.963	2374.39	1568.44	244.504	2380.28	1561.25	131.357	2205.31	1531.13	239.011	2213.72	1522.44	181.158	2228.63	1426.48	177.744	2149.94	1144.86	162.556	2349.11	1332.4	155.758	2411.98	1139.6	261.573	2143.36	1219.93	-8.35452	2275.37	1356.12	-75.2305	2226.46	1113.39	-75.566	2218.02	1037.72	-95.7605	2297.77	881.324	-46.8178	2322.8	806.076	-106.718	2283.3	792.096	-83.9332	2337.25	734.16
963	0	124.403	2384.95	1567.26	242.958	2390.79	1560.12	129.745	2215.92	1529.67	237.404	2224.3	1521.03	179.617	2239.39	1425.16	176.587	2160.95	1143.4	161.15	2359.9	1331.06	154.747	2422.96	1138.07	260.302	2154.18	1218.59	-9.78667	2286.22	1354.36	-76.1986	2237.75	1111.38	-76.2581	2229.21	1035.74	-96.205	2308.41	879.102	-47.0767	2332.9	803.727	-107.213	2293.69	789.892	-84.0593	2347.17	731.678
964	0	122.737	2395.57	1566.23	241.305	2401.37	1559.16	128.029	2226.59	1528.36	235.69	2234.95	1519.8	178.006	2250.21	1423.99	175.419	2172.07	1142.08	159.664	2370.76	1329.88	153.65	2434.06	1136.74	259.013	2165.13	1217.41	-11.2876	2297.11	1352.73	-77.1934	2249.13	1109.48	-76.9727	2240.49	1033.89	-96.6963	2319.14	877.002	-47.3929	2343.08	801.49	-107.771	2304.15	787.818	-84.2643	2357.15	729.315
965	0	120.964	2406.26	1565.35	239.542	2412	1558.39	126.213	2237.32	1527.21	233.877	2245.65	1518.76	176.335	2261.07	1422.98	174.249	2183.3	1140.93	158.106	2381.68	1328.89	152.47	2445.25	1135.61	257.716	2176.18	1216.41	-12.8488	2308.02	1351.25	-78.2085	2260.57	1107.72	-77.7079	2251.86	1032.18	-97.2368	2329.94	875.054	-47.7719	2353.34	799.397	-108.395	2314.68	785.905	-84.555	2367.2	727.106
966	0	119.086	2417	1564.64	237.672	2422.69	1557.83	124.304	2248.1	1526.25	231.97	2256.4	1517.94	174.612	2271.98	1422.17	173.083	2194.63	1139.97	156.487	2392.64	1328.09	151.213	2456.54	1134.73	256.419	2187.33	1215.61	-14.4607	2318.96	1349.95	-79.2386	2272.06	1106.13	-78.462	2263.3	1030.64	-97.8289	2340.83	873.285	-48.2183	2363.69	797.479	-109.085	2325.29	784.184	-84.9365	2377.32	725.082
967	0	117.103	2427.79	1564.1	235.694	2433.44	1557.49	122.31	2258.93	1525.48	229.978	2267.2	1517.35	172.847	2282.92	1421.55	171.927	2206.03	1139.21	154.819	2403.65	1327.52	149.891	2467.9	1134.1	255.129	2198.56	1215.04	-16.1128	2329.91	1348.85	-80.2788	2283.6	1104.72	-79.2342	2274.81	1029.28	-98.4741	2351.79	871.723	-48.7361	2374.12	795.764	-109.841	2335.97	782.68	-85.4124	2387.52	723.273
968	0	115.022	2438.62	1563.75	233.615	2444.23	1557.38	120.241	2269.79	1524.92	227.909	2278.04	1517.01	171.05	2293.88	1421.13	170.786	2217.48	1138.66	153.115	2414.69	1327.16	148.516	2479.32	1133.74	253.85	2209.85	1214.69	-17.7939	2340.87	1347.94	-81.3254	2295.17	1103.53	-80.0245	2286.38	1028.14	-99.1739	2362.83	870.387	-49.3277	2384.66	794.277	-110.662	2346.74	781.415	-85.9842	2397.82	721.703
969	0	112.849	2449.48	1563.58	231.44	2455.07	1557.5	118.106	2280.69	1524.57	225.776	2288.92	1516.93	169.232	2304.84	1420.93	169.66	2228.97	1138.34	151.391	2425.74	1327.04	147.106	2490.78	1133.66	252.588	2221.19	1214.57	-19.492	2351.83	1347.26	-82.3756	2306.76	1102.56	-80.8332	2297.99	1027.21	-99.9289	2373.94	869.296	-49.9949	2395.31	793.038	-111.548	2357.59	780.407	-86.652	2408.21	720.393
970	0	110.591	2460.37	1563.58	229.178	2465.95	1557.85	115.918	2291.6	1524.43	223.591	2299.82	1517.11	167.405	2315.81	1420.95	168.55	2240.47	1138.25	149.662	2436.8	1327.15	145.682	2502.25	1133.85	251.343	2232.56	1214.7	-21.195	2362.79	1346.8	-83.4278	2318.36	1101.83	-81.6618	2309.64	1026.52	-100.739	2385.13	868.462	-50.7383	2406.07	792.062	-112.496	2368.53	779.668	-87.4142	2418.72	719.359
971	0	108.26	2471.27	1563.76	226.839	2476.86	1558.43	113.69	2302.52	1524.51	221.365	2310.74	1517.56	165.577	2326.76	1421.18	167.452	2251.95	1138.39	147.945	2447.85	1327.47	144.265	2513.72	1134.3	250.115	2243.92	1215.06	-22.8907	2373.74	1346.56	-84.4812	2329.97	1101.34	-82.5121	2321.31	1026.06	-101.605	2396.39	867.895	-51.5571	2416.95	791.362	-113.504	2379.57	779.204	-88.268	2429.34	718.609
972	0	105.867	2482.18	1564.09	224.436	2487.79	1559.22	111.434	2313.44	1524.8	219.114	2321.67	1518.26	163.759	2337.69	1421.61	166.363	2263.4	1138.76	146.254	2458.87	1328.02	142.879	2525.15	1135.01	248.902	2255.25	1215.64	-24.5675	2384.68	1346.54	-85.5362	2341.58	1101.1	-83.3865	2333	1025.85	-102.525	2407.73	867.597	-52.4498	2427.96	790.941	-114.568	2390.7	779.015	-89.2091	2440.1	718.149
973	0	103.427	2493.08	1564.56	221.984	2498.74	1560.2	109.166	2324.35	1525.29	216.85	2332.6	1519.21	161.962	2348.57	1422.24	165.277	2274.79	1139.34	144.605	2469.86	1328.77	141.546	2536.53	1135.94	247.701	2266.53	1216.43	-26.2142	2395.6	1346.74	-86.5941	2353.18	1101.09	-84.2878	2344.69	1025.86	-103.497	2419.14	867.566	-53.4133	2439.1	790.8	-115.686	2401.95	779.096	-90.2324	2451	717.978
974	0	100.956	2503.98	1565.17	219.498	2509.7	1561.37	106.901	2335.25	1525.98	214.59	2343.52	1520.4	160.193	2359.41	1423.06	164.187	2286.1	1140.12	143.012	2480.8	1329.7	140.288	2547.82	1137.08	246.505	2277.73	1217.42	-27.8207	2406.51	1347.15	-87.6572	2364.75	1101.32	-85.2194	2356.38	1026.1	-104.52	2430.62	867.796	-54.4438	2450.37	790.935	-116.852	2413.31	779.436	-91.3314	2462.05	718.09
975	0	98.4716	2514.85	1565.9	216.997	2520.65	1562.69	104.652	2346.12	1526.84	212.348	2354.42	1521.79	158.461	2370.19	1424.05	163.085	2297.3	1141.08	141.487	2491.67	1330.79	139.126	2559	1138.4	245.309	2288.82	1218.59	-29.3782	2417.39	1347.74	-88.7281	2376.31	1101.76	-86.1843	2368.06	1026.55	-105.59	2442.17	868.275	-55.5362	2461.77	791.336	-118.064	2424.78	780.02	-92.499	2473.26	718.474
976	0	95.9913	2525.7	1566.72	214.5	2531.59	1564.14	102.434	2356.95	1527.87	210.138	2365.29	1523.39	156.773	2380.9	1425.19	161.964	2308.39	1142.22	140.04	2502.48	1332.03	138.076	2570.05	1139.86	244.104	2299.78	1219.91	-30.8794	2428.24	1348.51	-89.8102	2387.83	1102.41	-87.1856	2379.73	1027.2	-106.703	2453.8	868.991	-56.6843	2473.3	791.989	-119.315	2436.38	780.831	-93.7273	2484.65	719.118
977	0	93.5346	2536.51	1567.62	212.026	2542.51	1565.69	100.263	2367.75	1529.05	207.974	2376.12	1525.15	155.133	2391.54	1426.46	160.815	2319.35	1143.49	138.68	2513.19	1333.39	137.151	2580.96	1141.43	242.884	2310.59	1221.36	-32.3184	2439.07	1349.43	-90.9067	2399.32	1103.24	-88.2263	2391.37	1028.02	-107.855	2465.5	869.925	-57.8813	2484.97	792.878	-120.601	2448.1	781.845	-95.0077	2496.21	720.004
978	0	91.1206	2547.28	1568.59	209.596	2553.4	1567.33	98.15	2378.5	1530.35	205.871	2386.92	1527.05	153.548	2402.09	1427.84	159.631	2330.16	1144.9	137.413	2523.82	1334.84	136.361	2591.72	1143.08	241.641	2321.24	1222.92	-33.6913	2449.86	1350.5	-92.0209	2410.77	1104.24	-89.3086	2402.98	1029.01	-109.041	2477.27	871.057	-59.1194	2496.77	793.982	-121.917	2459.95	783.041	-96.3315	2507.97	721.115
979	0	88.7684	2558	1569.6	207.228	2564.24	1569.01	96.1084	2389.19	1531.77	203.84	2397.65	1529.06	152.019	2412.55	1429.32	158.406	2340.81	1146.4	136.241	2534.34	1336.36	135.708	2602.31	1144.78	240.368	2331.7	1224.56	-34.9958	2460.62	1351.67	-93.1554	2422.19	1105.38	-90.4342	2414.56	1030.14	-110.256	2489.1	872.366	-60.3907	2508.69	795.283	-123.256	2471.92	784.394	-97.6898	2519.91	722.43
980	0	86.4964	2568.67	1570.65	204.942	2575.04	1570.72	94.1491	2399.82	1533.29	201.892	2408.33	1531.16	150.55	2422.92	1430.86	157.136	2351.3	1147.98	135.167	2544.75	1337.94	135.193	2612.72	1146.5	239.061	2341.97	1226.25	-36.2309	2471.34	1352.95	-94.3126	2433.56	1106.64	-91.6043	2426.11	1031.39	-111.493	2501	873.832	-61.687	2520.73	796.759	-124.613	2484.02	785.882	-99.0736	2532.04	723.931
981	0	84.3217	2579.28	1571.72	202.756	2585.79	1572.44	92.2814	2410.39	1534.87	200.038	2418.95	1533.32	149.141	2433.19	1432.46	155.818	2361.63	1149.63	134.189	2555.06	1339.54	134.809	2622.97	1148.22	237.716	2352.05	1227.99	-37.3976	2482.02	1354.3	-95.4936	2444.88	1108.01	-92.8189	2437.62	1032.73	-112.748	2512.96	875.433	-62.9999	2532.88	798.387	-125.983	2496.24	787.484	-100.474	2544.35	725.598
982	0	82.2598	2589.83	1572.8	200.686	2596.47	1574.14	90.5131	2420.89	1536.52	198.285	2429.49	1535.5	147.793	2443.37	1434.09	154.452	2371.79	1151.3	133.303	2565.25	1341.15	134.546	2633.04	1149.92	236.33	2361.93	1229.74	-38.4979	2492.65	1355.71	-96.6991	2456.16	1109.46	-94.0775	2449.09	1034.16	-114.013	2524.98	877.149	-64.3217	2545.13	800.149	-127.359	2508.57	789.178	-101.883	2556.85	727.413
983	0	80.3245	2600.31	1573.87	198.746	2607.07	1575.79	88.8505	2431.33	1538.2	196.639	2439.95	1537.69	146.505	2453.45	1435.73	153.039	2381.79	1153	132.504	2575.34	1342.75	134.39	2642.94	1151.58	234.906	2371.63	1231.49	-39.535	2503.23	1357.17	-97.9285	2467.4	1110.98	-95.3784	2460.52	1035.64	-115.283	2537.04	878.96	-65.6447	2557.47	802.025	-128.737	2521.02	790.946	-103.292	2569.53	729.359
984	0	78.5271	2610.72	1574.93	196.948	2617.61	1577.39	87.2978	2441.68	1539.9	195.106	2450.34	1539.86	145.276	2463.44	1437.37	151.583	2391.63	1154.69	131.785	2585.31	1344.32	134.323	2652.68	1153.19	233.445	2381.14	1233.23	-40.513	2513.76	1358.65	-99.1804	2478.58	1112.54	-96.7193	2471.91	1037.17	-116.554	2549.16	880.847	-66.9621	2569.89	803.995	-130.111	2533.57	792.774	-104.694	2582.37	731.417
985	0	76.8765	2621.07	1575.98	195.302	2628.06	1578.92	85.8577	2451.97	1541.6	193.688	2460.65	1541.98	144.104	2473.33	1438.99	150.091	2401.33	1156.36	131.138	2595.18	1345.85	134.323	2662.28	1154.74	231.951	2390.48	1234.93	-41.4366	2524.24	1360.14	-100.453	2489.72	1114.13	-98.0968	2483.26	1038.72	-117.82	2561.32	882.793	-68.2678	2582.39	806.044	-131.475	2546.21	794.645	-106.08	2595.36	733.573
986	0	75.3789	2631.34	1577	193.813	2638.42	1580.36	84.5314	2462.18	1543.3	192.387	2470.87	1544.03	142.987	2483.14	1440.57	148.57	2410.9	1158	130.555	2604.94	1347.32	134.369	2671.73	1156.23	230.431	2399.67	1236.58	-42.3111	2534.65	1361.63	-101.743	2500.82	1115.74	-99.5071	2494.56	1040.28	-119.078	2573.51	884.782	-69.5562	2594.95	808.154	-132.827	2558.94	796.548	-107.444	2608.49	735.81
987	0	74.0381	2641.55	1577.98	192.486	2648.7	1581.7	83.3183	2472.32	1544.96	191.201	2481.01	1545.99	141.923	2492.87	1442.1	147.03	2420.34	1159.59	130.025	2614.61	1348.73	134.438	2681.05	1157.64	228.893	2408.73	1238.17	-43.1416	2545	1363.1	-103.047	2511.86	1117.35	-100.945	2505.82	1041.84	-120.323	2585.73	886.799	-70.8228	2607.56	810.311	-134.161	2571.74	798.471	-108.78	2621.74	738.112
988	0	72.855	2651.69	1578.93	191.321	2658.89	1582.94	82.2168	2482.39	1546.59	190.129	2491.07	1547.86	140.908	2502.51	1443.57	145.481	2429.68	1161.12	129.541	2624.19	1350.06	134.506	2690.26	1158.97	227.346	2417.67	1239.69	-43.9331	2555.29	1364.54	-104.362	2522.86	1118.95	-102.407	2517.04	1043.38	-121.553	2597.97	888.828	-72.064	2620.21	812.501	-135.474	2584.61	800.403	-110.083	2635.09	740.464
989	0	71.8278	2661.75	1579.82	190.317	2669	1584.06	81.224	2492.39	1548.15	189.168	2501.05	1549.6	139.943	2512.09	1444.97	143.937	2438.93	1162.57	129.094	2633.69	1351.31	134.553	2699.37	1160.23	225.801	2426.52	1241.12	-44.6903	2565.51	1365.95	-105.682	2533.8	1120.52	-103.885	2528.2	1044.89	-122.766	2610.23	890.856	-73.2766	2632.9	814.708	-136.763	2597.53	802.334	-111.348	2648.52	742.85
990	0	70.9527	2671.75	1580.67	189.47	2679.01	1585.07	80.3361	2502.32	1549.65	188.314	2510.94	1551.22	139.023	2521.6	1446.28	142.407	2448.1	1163.93	128.676	2643.12	1352.47	134.561	2708.4	1161.39	224.268	2435.29	1242.46	-45.4171	2575.66	1367.31	-107.005	2544.7	1122.05	-105.374	2539.32	1046.36	-123.96	2622.49	892.869	-74.4586	2645.62	816.919	-138.025	2610.49	804.251	-112.571	2662.02	745.255
991	0	70.2234	2681.69	1581.46	188.772	2688.94	1585.95	79.5488	2512.19	1551.07	187.561	2520.76	1552.7	138.148	2531.06	1447.49	140.905	2457.21	1165.2	128.281	2652.48	1353.53	134.515	2717.35	1162.47	222.759	2444.01	1243.7	-46.1166	2585.74	1368.61	-108.326	2555.54	1123.53	-106.868	2550.39	1047.77	-125.133	2634.75	894.853	-75.6081	2658.35	819.121	-139.257	2623.48	806.145	-113.749	2675.56	747.661
992	0	69.6322	2691.56	1582.19	188.215	2698.79	1586.71	78.8571	2522	1552.4	186.905	2530.51	1554.03	137.317	2540.46	1448.6	139.443	2466.27	1166.36	127.904	2661.79	1354.48	134.403	2726.24	1163.45	221.284	2452.69	1244.82	-46.7911	2595.75	1369.83	-109.64	2566.33	1124.94	-108.361	2561.4	1049.11	-126.285	2647	896.795	-76.724	2671.09	821.3	-140.456	2636.49	808.002	-114.882	2689.14	750.052
993	0	69.17	2701.38	1582.84	187.79	2708.57	1587.34	78.2559	2531.75	1553.62	186.338	2540.2	1555.2	136.529	2549.83	1449.6	138.033	2475.3	1167.41	127.542	2671.06	1355.33	134.217	2735.09	1164.33	219.854	2461.35	1245.82	-47.4418	2605.69	1370.97	-110.941	2577.06	1126.28	-109.845	2572.37	1050.37	-127.414	2659.23	898.68	-77.8052	2683.83	823.44	-141.62	2649.49	809.81	-115.967	2702.72	752.411
994	0	68.8265	2711.13	1583.42	187.486	2718.27	1587.84	77.7401	2541.46	1554.72	185.857	2549.82	1556.21	135.785	2559.16	1450.49	136.683	2484.3	1168.34	127.192	2680.29	1356.06	133.956	2743.9	1165.09	218.478	2470.01	1246.7	-48.069	2615.57	1372.03	-112.226	2587.73	1127.53	-111.314	2583.28	1051.54	-128.519	2671.43	900.495	-78.8511	2696.56	825.527	-142.746	2662.49	811.554	-117.005	2716.29	754.721
995	0	68.5911	2720.84	1583.92	187.29	2727.91	1588.21	77.3044	2551.12	1555.7	185.454	2559.39	1557.05	135.083	2568.47	1451.25	135.405	2493.29	1169.14	126.855	2689.5	1356.67	133.621	2752.7	1165.73	217.165	2478.68	1247.45	-48.672	2625.38	1372.97	-113.489	2598.34	1128.68	-112.761	2594.14	1052.61	-129.598	2683.59	902.227	-79.8611	2709.27	827.547	-143.831	2675.47	813.222	-117.996	2729.84	756.966
996	0	68.4529	2730.51	1584.34	187.192	2737.49	1588.46	76.944	2560.73	1556.55	185.124	2568.92	1557.73	134.425	2577.75	1451.88	134.206	2502.27	1169.82	126.529	2698.69	1357.16	133.216	2761.48	1166.24	215.923	2487.38	1248.06	-49.2495	2635.14	1373.81	-114.723	2608.9	1129.72	-114.18	2604.95	1053.56	-130.649	2695.71	903.863	-80.8345	2721.96	829.485	-144.874	2688.4	814.8	-118.939	2743.34	759.129
997	0	68.4013	2740.13	1584.66	187.178	2747.03	1588.58	76.6546	2570.32	1557.26	184.862	2578.4	1558.23	133.812	2587.03	1452.39	133.093	2511.25	1170.36	126.218	2707.88	1357.52	132.751	2770.26	1166.62	214.757	2496.11	1248.54	-49.7993	2644.84	1374.53	-115.924	2619.38	1130.64	-115.564	2615.71	1054.4	-131.671	2707.78	905.391	-81.7711	2734.6	831.327	-145.872	2701.29	816.274	-119.837	2756.79	761.194
998	0	68.426	2749.72	1584.89	187.239	2756.52	1588.58	76.432	2579.87	1557.83	184.665	2587.86	1558.57	133.246	2596.31	1452.76	132.071	2520.22	1170.78	125.924	2717.07	1357.75	132.236	2779.05	1166.84	213.674	2504.89	1248.89	-50.3189	2654.49	1375.11	-117.086	2629.81	1131.44	-116.906	2626.41	1055.11	-132.659	2719.79	906.801	-82.6701	2747.2	833.058	-146.823	2714.11	817.633	-120.689	2770.18	763.148
999	0	68.5177	2759.28	1585.03	187.363	2765.98	1588.46	76.2727	2589.4	1558.24	184.527	2597.29	1558.73	132.728	2605.6	1453	131.144	2529.21	1171.06	125.65	2726.27	1357.86	131.687	2787.85	1166.92	212.677	2513.71	1249.09	-50.8054	2664.1	1375.57	-118.201	2640.16	1132.09	-118.201	2637.07	1055.69	-133.612	2731.73	908.081	-83.5309	2759.74	834.668	-147.726	2726.86	818.864	-121.497	2783.47	764.978
1000	0	68.668	2768.81	1585.06	187.541	2775.42	1588.23	76.1738	2598.91	1558.5	184.446	2606.71	1558.73	132.259	2614.9	1453.11	130.314	2538.19	1171.22	125.399	2735.49	1357.83	131.116	2796.67	1166.84	211.768	2522.58	1249.17	-51.2559	2673.68	1375.88	-119.264	2650.45	1132.6	-119.441	2647.68	1056.13	-134.526	2743.6	909.224	-84.3526	2772.2	836.143	-148.579	2739.52	819.96	-122.262	2796.68	766.674
1001	0	68.8695	2778.33	1584.98	187.765	2784.84	1587.87	76.1326	2608.41	1558.6	184.418	2616.13	1558.56	131.842	2624.22	1453.09	129.582	2547.19	1171.25	125.175	2744.73	1357.67	130.541	2805.51	1166.6	210.95	2531.52	1249.11	-51.6671	2683.23	1376.06	-120.269	2660.68	1132.97	-120.621	2658.23	1056.43	-135.398	2755.39	910.222	-85.1338	2784.59	837.474	-149.381	2752.08	820.911	-122.986	2809.77	768.224
1002	0	69.116	2787.84	1584.8	188.027	2794.25	1587.41	76.1472	2617.9	1558.54	184.442	2625.54	1558.23	131.477	2633.56	1452.93	128.948	2556.19	1171.15	124.982	2754	1357.38	129.975	2814.37	1166.2	210.223	2540.51	1248.93	-52.036	2692.75	1376.08	-121.21	2670.83	1133.19	-121.735	2668.74	1056.59	-136.223	2767.09	911.069	-85.8733	2796.89	838.651	-150.13	2764.52	821.711	-123.667	2822.75	769.621
1003	0	69.4025	2797.35	1584.52	188.322	2803.66	1586.84	76.2159	2627.38	1558.32	184.516	2634.96	1557.75	131.168	2642.94	1452.65	128.411	2565.2	1170.93	124.821	2763.3	1356.97	129.435	2823.26	1165.65	209.589	2549.55	1248.63	-52.3596	2702.25	1375.96	-122.081	2680.93	1133.25	-122.777	2679.21	1056.61	-137	2778.71	911.76	-86.5692	2809.09	839.667	-150.826	2776.85	822.356	-124.308	2835.59	770.858
1004	0	69.7252	2806.85	1584.13	188.644	2813.08	1586.16	76.3373	2636.86	1557.94	184.638	2644.39	1557.1	130.915	2652.35	1452.23	127.97	2574.22	1170.58	124.697	2772.64	1356.42	128.934	2832.18	1164.95	209.048	2558.66	1248.21	-52.6352	2711.75	1375.68	-122.876	2690.95	1133.16	-123.741	2689.62	1056.48	-137.723	2790.23	912.291	-87.2198	2821.18	840.515	-151.467	2789.05	822.841	-124.907	2848.29	771.931
1005	0	70.081	2816.37	1583.63	188.991	2822.5	1585.38	76.5105	2646.34	1557.4	184.807	2653.83	1556.31	130.72	2661.8	1451.69	127.623	2583.25	1170.13	124.611	2782.02	1355.74	128.484	2841.14	1164.1	208.601	2567.82	1247.68	-52.8606	2721.23	1375.26	-123.592	2700.91	1132.92	-124.624	2699.99	1056.2	-138.391	2801.66	912.66	-87.8231	2833.15	841.189	-152.052	2801.12	823.164	-125.465	2860.85	772.833
1006	0	70.4678	2825.89	1583.02	189.359	2831.94	1584.5	76.7348	2655.83	1556.7	185.023	2663.3	1555.36	130.584	2671.29	1451.03	127.368	2592.3	1169.55	124.566	2791.43	1354.94	128.095	2850.12	1163.1	208.247	2577.04	1247.04	-53.0338	2730.71	1374.69	-124.222	2710.81	1132.52	-125.421	2710.31	1055.79	-139	2812.98	912.864	-88.3773	2845.01	841.686	-152.58	2813.04	823.323	-125.98	2873.25	773.564
1007	0	70.8842	2835.42	1582.31	189.745	2841.39	1583.52	77.0096	2665.33	1555.85	185.284	2672.79	1554.27	130.508	2680.83	1450.24	127.203	2601.36	1168.87	124.563	2800.88	1354.01	127.777	2859.15	1161.97	207.986	2586.32	1246.3	-53.1534	2740.19	1373.97	-124.765	2720.64	1131.97	-126.127	2720.58	1055.23	-139.549	2824.2	912.903	-88.8809	2856.73	842.003	-153.05	2824.81	823.319	-126.454	2885.49	774.119
1008	0	71.3293	2844.97	1581.49	190.15	2850.86	1582.44	77.3345	2674.83	1554.83	185.591	2682.31	1553.04	130.493	2690.41	1449.33	127.129	2610.44	1168.08	124.604	2810.38	1352.96	127.535	2868.21	1160.7	207.821	2595.66	1245.45	-53.2183	2749.68	1373.11	-125.216	2730.4	1131.27	-126.741	2730.81	1054.53	-140.035	2835.32	912.776	-89.3323	2868.31	842.138	-153.462	2836.44	823.15	-126.884	2897.56	774.498
1009	0	71.8025	2854.54	1580.56	190.572	2860.36	1581.27	77.7093	2684.34	1553.67	185.942	2691.86	1551.67	130.54	2700.04	1448.3	127.142	2619.54	1167.17	124.689	2819.91	1351.79	127.375	2877.3	1159.31	207.749	2605.06	1244.51	-53.2275	2759.16	1372.1	-125.574	2740.11	1130.43	-127.261	2740.99	1053.69	-140.457	2846.33	912.482	-89.7306	2879.76	842.089	-153.814	2847.91	822.818	-127.27	2909.46	774.701
1010	0	72.3034	2864.13	1579.53	191.011	2869.88	1580	78.1337	2693.87	1552.34	186.337	2701.44	1550.16	130.65	2709.72	1447.15	127.243	2628.65	1166.17	124.819	2829.49	1350.49	127.301	2886.44	1157.8	207.773	2614.51	1243.47	-53.1807	2768.65	1370.94	-125.837	2749.75	1129.43	-127.683	2751.11	1052.71	-140.815	2857.22	912.022	-90.0749	2891.07	841.855	-154.108	2859.22	822.322	-127.611	2921.18	774.725
1011	0	72.8318	2873.74	1578.39	191.466	2879.42	1578.63	78.6078	2703.41	1550.86	186.777	2711.05	1548.51	130.822	2719.44	1445.88	127.432	2637.79	1165.05	124.996	2839.11	1349.08	127.313	2895.61	1156.16	207.892	2624.02	1242.33	-53.0773	2778.15	1369.65	-126.004	2759.32	1128.29	-128.008	2761.2	1051.59	-141.107	2868.01	911.395	-90.3647	2902.24	841.437	-154.342	2870.37	821.663	-127.907	2932.73	774.571
1012	0	73.3876	2883.37	1577.15	191.938	2888.98	1577.18	79.1314	2712.96	1549.23	187.26	2720.69	1546.72	131.057	2729.21	1444.49	127.707	2646.95	1163.83	125.219	2848.77	1347.54	127.414	2904.82	1154.41	208.107	2633.59	1241.1	-52.9171	2787.65	1368.2	-126.074	2768.84	1127	-128.235	2771.23	1050.34	-141.333	2878.69	910.603	-90.5997	2913.26	840.833	-154.517	2881.36	820.841	-128.158	2944.09	774.239
1013	0	73.9707	2893.03	1575.81	192.425	2898.57	1575.62	79.7045	2722.52	1547.45	187.788	2730.36	1544.8	131.355	2739.03	1442.98	128.07	2656.13	1162.5	125.489	2858.47	1345.89	127.604	2914.07	1152.53	208.417	2643.21	1239.77	-52.7	2797.16	1366.62	-126.048	2778.29	1125.57	-128.364	2781.22	1048.95	-141.493	2889.26	909.644	-90.7796	2924.14	840.045	-154.633	2892.2	819.857	-128.363	2955.28	773.729
1014	0	74.5811	2902.7	1574.36	192.929	2908.19	1573.98	80.3271	2732.1	1545.5	188.36	2740.07	1542.73	131.716	2748.9	1441.35	128.519	2665.33	1161.07	125.806	2868.21	1344.11	127.883	2923.36	1150.54	208.823	2652.9	1238.34	-52.426	2806.68	1364.89	-125.926	2787.68	1123.99	-128.394	2791.16	1047.42	-141.587	2899.72	908.518	-90.9044	2934.88	839.071	-154.689	2902.88	818.711	-128.522	2966.28	773.04
[truncated: 69 more columns]

## Sheet: Sheet2
Devices
		025370 - Force			025370 - Moment			025370 - CoP			027571 - Force			027571 - Moment			027571 - CoP			037720 - Force			037720 - Moment			037720 - CoP
Frame	Sub Frame	Fx	Fy	Fz	Mx	My	Mz	Cx	Cy	Cz	Fx	Fy	Fz	Mx	My	Mz	Cx	Cy	Cz	Fx	Fy	Fz	Mx	My	Mz	Cx	Cy	Cz
		N	N	N	N.mm	N.mm	N.mm	mm	mm	mm	N	N	N	N.mm	N.mm	N.mm	mm	mm	mm	N	N	N	N.mm	N.mm	N.mm	mm	mm	mm
523	0	0	0	0	0	0	0	200	300	0	0	0	0	0	0	0	200	903	0	0	0	0	0	0	0	603	903	0
523	1	0	0	0	0	0	0	200	300	0	0	0	0	0	0	0	200	903	0	0	0	0	0	0	0	603	903	0
523	2	0	0	0	0	0	0	200	300	0	0	0	0	0	0	0	200	903	0	0	0	0	0	0	0	603	903	0
523	3	0	0	0	0	0	0	200	300	0	0	0	0	0	0	0	200	903	0	0	0	0	0	0	0	603	903	0
523	4	0	0	0	0	0	0	200	300	0	0	0	0	0	0	0	200	903	0	0	0	0	0	0	0	603	903	0
523	5	0	0	0	0	0	0	200	300	0	0	0	0	0	0	0	200	903	0	0	0	0	0	0	0	603	903	0
523	6	0	0	0	0	0	0	200	300	0	0	0	0	0	0	0	200	903	0	0	0	0	0	0	0	603	903	0
523	7	0	0	0	0	0	0	200	300	0	0	0	0	0	0	0	200	903	0	0	0	0	0	0	0	603	903	0
523	8	0	0	0	0	0	0	200	300	0	0	0	0	0	0	0	200	903	0	0	0	0	0	0	0	603	903	0
523	9	0	0	0	0	0	0	200	300	0	0	0	0	0	0	0	200	903	0	0	0	0	0	0	0	603	903	0
524	0	0	0	0	0	0	0	200	300	0	0	0	0	0	0	0	200	903	0	0	0	0	0	0	0	603	903	0
524	1	0	0	0	0	0	0	200	300	0	0	0	0	0	0	0	200	903	0	0	0	0	0	0	0	603	903	0
524	2	0	0	0	0	0	0	200	300	0	0	0	0	0	0	0	200	903	0	0	0	0	0	0	0	603	903	0
524	3	0	0	0	0	0	0	200	300	0	0	0	0	0	0	0	200	903	0	0	0	0	0	0	0	603	903	0
524	4	0	0	0	0	0	0	200	300	0	0	0	0	0	0	0	200	903	0	0	0	0	0	0	0	603	903	0
524	5	0	0	0	0	0	0	200	300	0	0	0	0	0	0	0	200	903	0	0	0	0	0	0	0	603	903	0
524	6	0	0	0	0	0	0	200	300	0	0	0	0	0	0	0	200	903	0	0	0	0	0	0	0	603	903	0
524	7	0	0	0	0	0	0	200	300	0	0	0	0	0	0	0	200	903	0	0	0	0	0	0	0	603	903	0
524	8	0	0	0	0	0	0	200	300	0	0	0	0	0	0	0	200	903	0	0	0	0	0	0	0	603	903	0
524	9	0	0	0	0	0	0	200	300	0	0	0	0	0	0	0	200	903	0	0	0	0	0	0	0	603	903	0
525	0	0	0	0	0	0	0	200	300	0	0	0	0	0	0	0	200	903	0	0	0	0	0	0	0	603	903	0
525	1	0	0	0	0	0	0	200	300	0	0	0	0	0	0	0	200	903	0	0	0	0	0	0	0	603	903	0
525	2	0	0	0	0	0	0	200	300	0	0	0	0	0	0	0	200	903	0	0	0	0	0	0	0	603	903	0
525	3	0	0	0	0	0	0	200	300	0	0	0	0	0	0	0	200	903	0	0	0	0	0	0	0	603	903	0
525	4	0	0	0	0	0	0	200	300	0	0	0	0	0	0	0	200	903	0	0	0	0	0	0	0	603	903	0
525	5	0	0	0	0	0	0	200	300	0	0	0	0	0	0	0	200	903	0	0	0	0	0	0	0	603	903	0
525	6	0	0	0	0	0	0	200	300	0	0	0	0	0	0	0	200	903	0	0	0	0	0	0	0	603	903	0
525	7	0	0	0	0	0	0	200	300	0	0	0	0	0	0	0	200	903	0	0	0	0	0	0	0	603	903	0
525	8	0	0	0	0	0	0	200	300	0	0	0	0	0	0	0	200	903	0	0	0	0	0	0	0	603	903	0
525	9	0	0	0	0	0	0	200	300	0	0	0	0	0	0	0	200	903	0	0	0	0	0	0	0	603	903	0
526	0	0	0	0	0	0	0	200	300	0	0	0	0	0	0	0	200	903	0	0	0	0	0	0	0	603	903	0
526	1	0	0	0	0	0	0	200	300	0	0	0	0	0	0	0	200	903	0	0	0	0	0	0	0	603	903	0
526	2	0	0	0	0	0	0	200	300	0	0	0	0	0	0	0	200	903	0	0	0	0	0	0	0	603	903	0
526	3	0	0	0	0	0	0	200	300	0	0	0	0	0	0	0	200	903	0	0	0	0	0	0	0	603	903	0
526	4	0	0	0	0	0	0	200	300	0	0	0	0	0	0	0	200	903	0	0	0	0	0	0	0	603	903	0
526	5	0	0	0	0	0	0	200	300	0	0	0	0	0	0	0	200	903	0	0	0	0	0	0	0	603	903	0
526	6	0	0	0	0	0	0	200	300	0	0	0	0	0	0	0	200	903	0	0	0	0	0	0	0	603	903	0
526	7	0	0	0	0	0	0	200	300	0	0	0	0	0	0	0	200	903	0	0	0	0	0	0	0	603	903	0
526	8	0	0	0	0	0	0	200	300	0	0	0	0	0	0	0	200	903	0	0	0	0	0	0	0	603	903	0
526	9	0	0	0	0	0	0	200	300	0	0	0	0	0	0	0	200	903	0	0	0	0	0	0	0	603	903	0
527	0	0	0	0	0	0	0	200	300	0	0	0	0	0	0	0	200	903	0	0	0	0	0	0	0	603	903	0
527	1	0	0	0	0	0	0	200	300	0	0	0	0	0	0	0	200	903	0	0	0	0	0	0	0	603	903	0
527	2	0	0	0	0	0	0	200	300	0	0	0	0	0	0	0	200	903	0	0	0	0	0	0	0	603	903	0
527	3	0	0	0	0	0	0	200	300	0	0	0	0	0	0	0	200	903	0	0	0	0	0	0	0	603	903	0
527	4	0	0	0	0	0	0	200	300	0	0	0	0	0	0	0	200	903	0	0	0	0	0	0	0	603	903	0
527	5	0	0	0	0	0	0	200	300	0	0	0	0	0	0	0	200	903	0	0	0	0	0	0	0	603	903	0
527	6	0	0	0	0	0	0	200	300	0	0	0	0	0	0	0	200	903	0	0	0	0	0	0	0	603	903	0
527	7	0	0	0	0	0	0	200	300	0	0	0	0	0	0	0	200	903	0	0	0	0	0	0	0	603	903	0
527	8	0	0	0	0	0	0	200	300	0	0	0	0	0	0	0	200	903	0	0	0	0	0	0	0	603	903	0
527	9	0	0	0	0	0	0	200	300	0	0	0	0	0	0	0	200	903	0	0	0	0	0	0	0	603	903	0
528	0	0	0	0	0	0	0	200	300	0	0	0	0	0	0	0	200	903	0	0	0	0	0	0	0	603	903	0
528	1	0	0	0	0	0	0	200	300	0	0	0	0	0	0	0	200	903	0	0	0	0	0	0	0	603	903	0
528	2	0	0	0	0	0	0	200	300	0	0	0	0	0	0	0	200	903	0	0	0	0	0	0	0	603	903	0
528	3	0	0	0	0	0	0	200	300	0	0	0	0	0	0	0	200	903	0	0	0	0	0	0	0	603	903	0
528	4	0	0	0	0	0	0	200	300	0	0	0	0	0	0	0	200	903	0	0	0	0	0	0	0	603	903	0
528	5	0	0	0	0	0	0	200	300	0	0	0	0	0	0	0	200	903	0	0	0	0	0	0	0	603	903	0
528	6	0	0	0	0	0	0	200	300	0	0	0	0	0	0	0	200	903	0	0	0	0	0	0	0	603	903	0
528	7	0	0	0	0	0	0	200	300	0	0	0	0	0	0	0	200	903	0	0	0	0	0	0	0	603	903	0
528	8	0	0	0	0	0	0	200	300	0	0	0	0	0	0	0	200	903	0	0	0	0	0	0	0	603	903	0
528	9	0	0	0	0	0	0	200	300	0	0	0	0	0	0	0	200	903	0	0	0	0	0	0	0	603	903	0
529	0	0	0	0	0	0	0	200	300	0	0	0	0	0	0	0	200	903	0	0	0	0	0	0	0	603	903	0
529	1	0	0	0	0	0	0	200	300	0	0	0	0	0	0	0	200	903	0	0	0	0	0	0	0	603	903	0
529	2	0	0	0	0	0	0	200	300	0	0	0	0	0	0	0	200	903	0	0	0	0	0	0	0	603	903	0
529	3	0	0	0	0	0	0	200	300	0	0	0	0	0	0	0	200	903	0	0	0	0	0	0	0	603	903	0
529	4	0	0	0	0	0	0	200	300	0	0	0	0	0	0	0	200	903	0	0	0	0	0	0	0	603	903	0
529	5	0	0	0	0	0	0	200	300	0	0	0	0	0	0	0	200	903	0	0	0	0	0	0	0	603	903	0
529	6	0	0	0	0	0	0	200	300	0	0	0	0	0	0	0	200	903	0	0	0	0	0	0	0	603	903	0
529	7	0	0	0	0	0	0	200	300	0	0	0	0	0	0	0	200	903	0	0	0	0	0	0	0	603	903	0
529	8	0	0	0	0	0	0	200	300	0	0	0	0	0	0	0	200	903	0	0	0	0	0	0	0	603	903	0
529	9	0	0	0	0	0	0	200	300	0	0	0	0	0	0	0	200	903	0	0	0	0	0	0	0	603	903	0
530	0	0	0	0	0	0	0	200	300	0	0	0	0	0	0	0	200	903	0	0	0	0	0	0	0	603	903	0
530	1	0	0	0	0	0	0	200	300	0	0	0	0	0	0	0	200	903	0	0	0	0	0	0	0	603	903	0
530	2	0	0	0	0	0	0	200	300	0	0	0	0	0	0	0	200	903	0	0	0	0	0	0	0	603	903	0
530	3	0	0	0	0	0	0	200	300	0	0	0	0	0	0	0	200	903	0	0	0	0	0	0	0	603	903	0
530	4	0	0	0	0	0	0	200	300	0	0	0	0	0	0	0	200	903	0	0	0	0	0	0	0	603	903	0
530	5	0	0	0	0	0	0	200	300	0	0	0	0	0	0	0	200	903	0	0	0	0	0	0	0	603	903	0
530	6	0	0	0	0	0	0	200	300	0	0	0	0	0	0	0	200	903	0	0	0	0	0	0	0	603	903	0
530	7	0	0	0	0	0	0	200	300	0	0	0	0	0	0	0	200	903	0	0	0	0	0	0	0	603	903	0
530	8	0	0	0	0	0	0	200	300	0	0	0	0	0	0	0	200	903	0	0	0	0	0	0	0	603	903	0
530	9	0	0	0	0	0	0	200	300	0	0	0	0	0	0	0	200	903	0	0	0	0	0	0	0	603	903	0
531	0	0	0	0	0	0	0	200	300	0	0	0	0	0	0	0	200	903	0	0	0	0	0	0	0	603	903	0
531	1	0	0	0	0	0	0	200	300	0	0	0	0	0	0	0	200	903	0	0	0	0	0	0	0	603	903	0
531	2	0	0	0	0	0	0	200	300	0	0	0	0	0	0	0	200	903	0	0	0	0	0	0	0	603	903	0
531	3	0	0	0	0	0	0	200	300	0	0	0	0	0	0	0	200	903	0	0	0	0	0	0	0	603	903	0
531	4	0	0	0	0	0	0	200	300	0	0	0	0	0	0	0	200	903	0	0	0	0	0	0	0	603	903	0
531	5	0	0	0	0	0	0	200	300	0	0	0	0	0	0	0	200	903	0	0	0	0	0	0	0	603	903	0
531	6	0	0	0	0	0	0	200	300	0	0	0	0	0	0	0	200	903	0	0	0	0	0	0	0	603	903	0
531	7	0	0	0	0	0	0	200	300	0	0	0	0	0	0	0	200	903	0	0	0	0	0	0	0	603	903	0
531	8	0	0	0	0	0	0	200	300	0	0	0	0	0	0	0	200	903	0	0	0	0	0	0	0	603	903	0
531	9	0	0	0	0	0	0	200	300	0	0	0	0	0	0	0	200	903	0	0	0	0	0	0	0	603	903	0
532	0	0	0	0	0	0	0	200	300	0	0	0	0	0	0	0	200	903	0	0	0	0	0	0	0	603	903	0
532	1	0	0	0	0	0	0	200	300	0	0	0	0	0	0	0	200	903	0	0	0	0	0	0	0	603	903	0
532	2	0	0	0	0	0	0	200	300	0	0	0	0	0	0	0	200	903	0	0	0	0	0	0	0	603	903	0
532	3	0	0	0	0	0	0	200	300	0	0	0	0	0	0	0	200	903	0	0	0	0	0	0	0	603	903	0
532	4	0	0	0	0	0	0	200	300	0	0	0	0	0	0	0	200	903	0	0	0	0	0	0	0	603	903	0
532	5	0	0	0	0	0	0	200	300	0	0	0	0	0	0	0	200	903	0	0	0	0	0	0	0	603	903	0
532	6	0	0	0	0	0	0	200	300	0	0	0	0	0	0	0	200	903	0	0	0	0	0	0	0	603	903	0
532	7	0	0	0	0	0	0	200	300	0	0	0	0	0	0	0	200	903	0	0	0	0	0	0	0	603	903	0
532	8	0	0	0	0	0	0	200	300	0	0	0	0	0	0	0	200	903	0	0	0	0	0	0	0	603	903	0
532	9	0	0	0	0	0	0	200	300	0	0	0	0	0	0	0	200	903	0	0	0	0	0	0	0	603	903	0
533	0	0	0	0	0	0	0	200	300	0	0	0	0	0	0	0	200	903	0	0	0	0	0	0	0	603	903	0
533	1	0	0	0	0	0	0	200	300	0	0	0	0	0	0	0	200	903	0	0	0	0	0	0	0	603	903	0
533	2	0	0	0	0	0	0	200	300	0	0	0	0	0	0	0	200	903	0	0	0	0	0	0	0	603	903	0
533	3	0	0	0	0	0	0	200	300	0	0	0	0	0	0	0	200	903	0	0	0	0	0	0	0	603	903	0
533	4	0	0	0	0	0	0	200	300	0	0	0	0	0	0	0	200	903	0	0	0	0	0	0	0	603	903	0
533	5	0	0	0	0	0	0	200	300	0	0	0	0	0	0	0	200	903	0	0	0	0	0	0	0	603	903	0
533	6	0	0	0	0	0	0	200	300	0	0	0	0	0	0	0	200	903	0	0	0	0	0	0	0	603	903	0
533	7	0	0	0	0	0	0	200	300	0	0	0	0	0	0	0	200	903	0	0	0	0	0	0	0	603	903	0
533	8	0	0	0	0	0	0	200	300	0	0	0	0	0	0	0	200	903	0	0	0	0	0	0	0	603	903	0
533	9	0	0	0	0	0	0	200	300	0	0	0	0	0	0	0	200	903	0	0	0	0	0	0	0	603	903	0
534	0	0	0	0	0	0	0	200	300	0	0	0	0	0	0	0	200	903	0	0	0	0	0	0	0	603	903	0
534	1	0	0	0	0	0	0	200	300	0	0	0	0	0	0	0	200	903	0	0	0	0	0	0	0	603	903	0
534	2	0	0	0	0	0	0	200	300	0	0	0	0	0	0	0	200	903	0	0	0	0	0	0	0	603	903	0
534	3	0	0	0	0	0	0	200	300	0	0	0	0	0	0	0	200	903	0	0	0	0	0	0	0	603	903	0
534	4	0	0	0	0	0	0	200	300	0	0	0	0	0	0	0	200	903	0	0	0	0	0	0	0	603	903	0
534	5	0	0	0	0	0	0	200	300	0	0	0	0	0	0	0	200	903	0	0	0	0	0	0	0	603	903	0
534	6	0	0	0	0	0	0	200	300	0	0	0	0	0	0	0	200	903	0	0	0	0	0	0	0	603	903	0
534	7	0	0	0	0	0	0	200	300	0	0	0	0	0	0	0	200	903	0	0	0	0	0	0	0	603	903	0
534	8	0	0	0	0	0	0	200	300	0	0	0	0	0	0	0	200	903	0	0	0	0	0	0	0	603	903	0
534	9	0	0	0	0	0	0	200	300	0	0	0	0	0	0	0	200	903	0	0	0	0	0	0	0	603	903	0
535	0	0	0	0	0	0	0	200	300	0	0	0	0	0	0	0	200	903	0	0	0	0	0	0	0	603	903	0
535	1	0	0	0	0	0	0	200	300	0	0	0	0	0	0	0	200	903	0	0	0	0	0	0	0	603	903	0
535	2	0	0	0	0	0	0	200	300	0	0	0	0	0	0	0	200	903	0	0	0	0	0	0	0	603	903	0
535	3	0	0	0	0	0	0	200	300	0	0	0	0	0	0	0	200	903	0	0	0	0	0	0	0	603	903	0
535	4	0	0	0	0	0	0	200	300	0	0	0	0	0	0	0	200	903	0	0	0	0	0	0	0	603	903	0
535	5	0	0	0	0	0	0	200	300	0	0	0	0	0	0	0	200	903	0	0	0	0	0	0	0	603	903	0
535	6	0	0	0	0	0	0	200	300	0	0	0	0	0	0	0	200	903	0	0	0	0	0	0	0	603	903	0
535	7	0	0	0	0	0	0	200	300	0	0	0	0	0	0	0	200	903	0	0	0	0	0	0	0	603	903	0
535	8	0	0	0	0	0	0	200	300	0	0	0	0	0	0	0	200	903	0	0	0	0	0	0	0	603	903	0
535	9	0	0	0	0	0	0	200	300	0	0	0	0	0	0	0	200	903	0	0	0	0	0	0	0	603	903	0
536	0	0	0	0	0	0	0	200	300	0	0	0	0	0	0	0	200	903	0	0	0	0	0	0	0	603	903	0
536	1	0	0	0	0	0	0	200	300	0	0	0	0	0	0	0	200	903	0	0	0	0	0	0	0	603	903	0
536	2	0	0	0	0	0	0	200	300	0	0	0	0	0	0	0	200	903	0	0	0	0	0	0	0	603	903	0
536	3	0	0	0	0	0	0	200	300	0	0	0	0	0	0	0	200	903	0	0	0	0	0	0	0	603	903	0
536	4	0	0	0	0	0	0	200	300	0	0	0	0	0	0	0	200	903	0	0	0	0	0	0	0	603	903	0
536	5	0	0	0	0	0	0	200	300	0	0	0	0	0	0	0	200	903	0	0	0	0	0	0	0	603	903	0
536	6	0	0	0	0	0	0	200	300	0	0	0	0	0	0	0	200	903	0	0	0	0	0	0	0	603	903	0
536	7	0	0	0	0	0	0	200	300	0	0	0	0	0	0	0	200	903	0	0	0	0	0	0	0	603	903	0
536	8	0	0	0	0	0	0	200	300	0	0	0	0	0	0	0	200	903	0	0	0	0	0	0	0	603	903	0
536	9	0	0	0	0	0	0	200	300	0	0	0	0	0	0	0	200	903	0	0	0	0	0	0	0	603	903	0
537	0	0	0	0	0	0	0	200	300	0	0	0	0	0	0	0	200	903	0	0	0	0	0	0	0	603	903	0
537	1	0	0	0	0	0	0	200	300	0	0	0	0	0	0	0	200	903	0	0	0	0	0	0	0	603	903	0
537	2	0	0	0	0	0	0	200	300	0	0	0	0	0	0	0	200	903	0	0	0	0	0	0	0	603	903	0
537	3	0	0	0	0	0	0	200	300	0	0	0	0	0	0	0	200	903	0	0	0	0	0	0	0	603	903	0
537	4	0	0	0	0	0	0	200	300	0	0	0	0	0	0	0	200	903	0	0	0	0	0	0	0	603	903	0
537	5	0	0	0	0	0	0	200	300	0	0	0	0	0	0	0	200	903	0	0	0	0	0	0	0	603	903	0
537	6	0	0	0	0	0	0	200	300	0	0	0	0	0	0	0	200	903	0	0	0	0	0	0	0	603	903	0
537	7	0	0	0	0	0	0	200	300	0	0	0	0	0	0	0	200	903	0	0	0	0	0	0	0	603	903	0
537	8	0	0	0	0	0	0	200	300	0	0	0	0	0	0	0	200	903	0	0	0	0	0	0	0	603	903	0
537	9	0	0	0	0	0	0	200	300	0	0	0	0	0	0	0	200	903	0	0	0	0	0	0	0	603	903	0
538	0	0	0	0	0	0	0	200	300	0	0	0	0	0	0	0	200	903	0	0	0	0	0	0	0	603	903	0
538	1	0	0	0	0	0	0	200	300	0	0	0	0	0	0	0	200	903	0	0	0	0	0	0	0	603	903	0
538	2	0	0	0	0	0	0	200	300	0	0	0	0	0	0	0	200	903	0	0	0	0	0	0	0	603	903	0
538	3	0	0	0	0	0	0	200	300	0	0	0	0	0	0	0	200	903	0	0	0	0	0	0	0	603	903	0
538	4	0	0	0	0	0	0	200	300	0	0	0	0	0	0	0	200	903	0	0	0	0	0	0	0	603	903	0
538	5	0	0	0	0	0	0	200	300	0	0	0	0	0	0	0	200	903	0	0	0	0	0	0	0	603	903	0
538	6	0	0	0	0	0	0	200	300	0	0	0	0	0	0	0	200	903	0	0	0	0	0	0	0	603	903	0
538	7	0	0	0	0	0	0	200	300	0	0	0	0	0	0	0	200	903	0	0	0	0	0	0	0	603	903	0
538	8	0	0	0	0	0	0	200	300	0	0	0	0	0	0	0	200	903	0	0	0	0	0	0	0	603	903	0
538	9	0	0	0	0	0	0	200	300	0	0	0	0	0	0	0	200	903	0	0	0	0	0	0	0	603	903	0
539	0	0	0	0	0	0	0	200	300	0	0	0	0	0	0	0	200	903	0	0	0	0	0	0	0	603	903	0
539	1	0	0	0	0	0	0	200	300	0	0	0	0	0	0	0	200	903	0	0	0	0	0	0	0	603	903	0
539	2	0	0	0	0	0	0	200	300	0	0	0	0	0	0	0	200	903	0	0	0	0	0	0	0	603	903	0
539	3	0	0	0	0	0	0	200	300	0	0	0	0	0	0	0	200	903	0	0	0	0	0	0	0	603	903	0
539	4	0	0	0	0	0	0	200	300	0	0	0	0	0	0	0	200	903	0	0	0	0	0	0	0	603	903	0
539	5	0	0	0	0	0	0	200	300	0	0	0	0	0	0	0	200	903	0	0	0	0	0	0	0	603	903	0
539	6	0	0	0	0	0	0	200	300	0	0	0	0	0	0	0	200	903	0	0	0	0	0	0	0	603	903	0
539	7	0	0	0	0	0	0	200	300	0	0	0	0	0	0	0	200	903	0	0	0	0	0	0	0	603	903	0
539	8	0	0	0	0	0	0	200	300	0	0	0	0	0	0	0	200	903	0	0	0	0	0	0	0	603	903	0
539	9	0	0	0	0	0	0	200	300	0	0	0	0	0	0	0	200	903	0	0	0	0	0	0	0	603	903	0
540	0	0	0	0	0	0	0	200	300	0	0	0	0	0	0	0	200	903	0	0	0	0	0	0	0	603	903	0
540	1	0	0	0	0	0	0	200	300	0	0	0	0	0	0	0	200	903	0	0	0	0	0	0	0	603	903	0
540	2	0	0	0	0	0	0	200	300	0	0	0	0	0	0	0	200	903	0	0	0	0	0	0	0	603	903	0
540	3	0	0	0	0	0	0	200	300	0	0	0	0	0	0	0	200	903	0	0	0	0	0	0	0	603	903	0
540	4	0	0	0	0	0	0	200	300	0	0	0	0	0	0	0	200	903	0	0	0	0	0	0	0	603	903	0
540	5	0	0	0	0	0	0	200	300	0	0	0	0	0	0	0	200	903	0	0	0	0	0	0	0	603	903	0
540	6	0	0	0	0	0	0	200	300	0	0	0	0	0	0	0	200	903	0	0	0	0	0	0	0	603	903	0
540	7	0	0	0	0	0	0	200	300	0	0	0	0	0	0	0	200	903	0	0	0	0	0	0	0	603	903	0
540	8	0	0	0	0	0	0	200	300	0	0	0	0	0	0	0	200	903	0	0	0	0	0	0	0	603	903	0
540	9	0	0	0	0	0	0	200	300	0	0	0	0	0	0	0	200	903	0	0	0	0	0	0	0	603	903	0
541	0	0	0	0	0	0	0	200	300	0	0	0	0	0	0	0	200	903	0	0	0	0	0	0	0	603	903	0
541	1	0	0	0	0	0	0	200	300	0	0	0	0	0	0	0	200	903	0	0	0	0	0	0	0	603	903	0
541	2	0	0	0	0	0	0	200	300	0	0	0	0	0	0	0	200	903	0	0	0	0	0	0	0	603	903	0
541	3	0	0	0	0	0	0	200	300	0	0	0	0	0	0	0	200	903	0	0	0	0	0	0	0	603	903	0
541	4	0	0	0	0	0	0	200	300	0	0	0	0	0	0	0	200	903	0	0	0	0	0	0	0	603	903	0
541	5	0	0	0	0	0	0	200	300	0	0	0	0	0	0	0	200	903	0	0	0	0	0	0	0	603	903	0
541	6	0	0	0	0	0	0	200	300	0	0	0	0	0	0	0	200	903	0	0	0	0	0	0	0	603	903	0
541	7	0	0	0	0	0	0	200	300	0	0	0	0	0	0	0	200	903	0	0	0	0	0	0	0	603	903	0
541	8	0	0	0	0	0	0	200	300	0	0	0	0	0	0	0	200	903	0	0	0	0	0	0	0	603	903	0
541	9	0	0	0	0	0	0	200	300	0	0	0	0	0	0	0	200	903	0	0	0	0	0	0	0	603	903	0
542	0	0	0	0	0	0	0	200	300	0	0	0	0	0	0	0	200	903	0	0	0	0	0	0	0	603	903	0
542	1	0	0	0	0	0	0	200	300	0	0	0	0	0	0	0	200	903	0	0	0	0	0	0	0	603	903	0
542	2	0	0	0	0	0	0	200	300	0	0	0	0	0	0	0	200	903	0	0	0	0	0	0	0	603	903	0
542	3	0	0	0	0	0	0	200	300	0	0	0	0	0	0	0	200	903	0	0	0	0	0	0	0	603	903	0
542	4	0	0	0	0	0	0	200	300	0	0	0	0	0	0	0	200	903	0	0	0	0	0	0	0	603	903	0
542	5	0	0	0	0	0	0	200	300	0	0	0	0	0	0	0	200	903	0	0	0	0	0	0	0	603	903	0
542	6	0	0	0	0	0	0	200	300	0	0	0	0	0	0	0	200	903	0	0	0	0	0	0	0	603	903	0
542	7	0	0	0	0	0	0	200	300	0	0	0	0	0	0	0	200	903	0	0	0	0	0	0	0	603	903	0
542	8	0	0	0	0	0	0	200	300	0	0	0	0	0	0	0	200	903	0	0	0	0	0	0	0	603	903	0
542	9	0	0	0	0	0	0	200	300	0	0	0	0	0	0	0	200	903	0	0	0	0	0	0	0	603	903	0
543	0	0	0	0	0	0	0	200	300	0	0	0	0	0	0	0	200	903	0	0	0	0	0	0	0	603	903	0
543	1	0	0	0	0	0	0	200	300	0	0	0	0	0	0	0	200	903	0	0	0	0	0	0	0	603	903	0
543	2	0	0	0	0	0	0	200	300	0	0	0	0	0	0	0	200	903	0	0	0	0	0	0	0	603	903	0
543	3	0	0	0	0	0	0	200	300	0	0	0	0	0	0	0	200	903	0	0	0	0	0	0	0	603	903	0
543	4	0	0	0	0	0	0	200	300	0	0	0	0	0	0	0	200	903	0	0	0	0	0	0	0	603	903	0
543	5	0	0	0	0	0	0	200	300	0	0	0	0	0	0	0	200	903	0	0	0	0	0	0	0	603	903	0
543	6	0	0	0	0	0	0	200	300	0	0	0	0	0	0	0	200	903	0	0	0	0	0	0	0	603	903	0
543	7	0	0	0	0	0	0	200	300	0	0	0	0	0	0	0	200	903	0	0	0	0	0	0	0	603	903	0
543	8	0	0	0	0	0	0	200	300	0	0	0	0	0	0	0	200	903	0	0	0	0	0	0	0	603	903	0
543	9	0	0	0	0	0	0	200	300	0	0	0	0	0	0	0	200	903	0	0	0	0	0	0	0	603	903	0
544	0	0	0	0	0	0	0	200	300	0	0	0	0	0	0	0	200	903	0	0	0	0	0	0	0	603	903	0
544	1	0	0	0	0	0	0	200	300	0	0	0	0	0	0	0	200	903	0	0	0	0	0	0	0	603	903	0
544	2	0	0	0	0	0	0	200	300	0	0	0	0	0	0	0	200	903	0	0	0	0	0	0	0	603	903	0
544	3	0	0	0	0	0	0	200	300	0	0	0	0	0	0	0	200	903	0	0	0	0	0	0	0	603	903	0
544	4	0	0	0	0	0	0	200	300	0	0	0	0	0	0	0	200	903	0	0	0	0	0	0	0	603	903	0
544	5	0	0	0	0	0	0	200	300	0	0	0	0	0	0	0	200	903	0	0	0	0	0	0	0	603	903	0
544	6	0	0	0	0	0	0	200	300	0	0	0	0	0	0	0	200	903	0	0	0	0	0	0	0	603	903	0
544	7	0	0	0	0	0	0	200	300	0	0	0	0	0	0	0	200	903	0	0	0	0	0	0	0	603	903	0
544	8	0	0	0	0	0	0	200	300	0	0	0	0	0	0	0	200	903	0	0	0	0	0	0	0	603	903	0
544	9	0	0	0	0	0	0	200	300	0	0	0	0	0	0	0	200	903	0	0	0	0	0	0	0	603	903	0
545	0	0	0	0	0	0	0	200	300	0	0	0	0	0	0	0	200	903	0	0	0	0	0	0	0	603	903	0
545	1	0	0	0	0	0	0	200	300	0	0	0	0	0	0	0	200	903	0	0	0	0	0	0	0	603	903	0
545	2	0	0	0	0	0	0	200	300	0	0	0	0	0	0	0	200	903	0	0	0	0	0	0	0	603	903	0
545	3	0	0	0	0	0	0	200	300	0	0	0	0	0	0	0	200	903	0	0	0	0	0	0	0	603	903	0
545	4	0	0	0	0	0	0	200	300	0	0	0	0	0	0	0	200	903	0	0	0	0	0	0	0	603	903	0
545	5	0	0	0	0	0	0	200	300	0	0	0	0	0	0	0	200	903	0	0	0	0	0	0	0	603	903	0
545	6	0	0	0	0	0	0	200	300	0	0	0	0	0	0	0	200	903	0	0	0	0	0	0	0	603	903	0
545	7	0	0	0	0	0	0	200	300	0	0	0	0	0	0	0	200	903	0	0	0	0	0	0	0	603	903	0
545	8	0	0	0	0	0	0	200	300	0	0	0	0	0	0	0	200	903	0	0	0	0	0	0	0	603	903	0
545	9	0	0	0	0	0	0	200	300	0	0	0	0	0	0	0	200	903	0	0	0	0	0	0	0	603	903	0
546	0	0	0	0	0	0	0	200	300	0	0	0	0	0	0	0	200	903	0	0	0	0	0	0	0	603	903	0
546	1	0	0	0	0	0	0	200	300	0	0	0	0	0	0	0	200	903	0	0	0	0	0	0	0	603	903	0
546	2	0	0	0	0	0	0	200	300	0	0	0	0	0	0	0	200	903	0	0	0	0	0	0	0	603	903	0
546	3	0	0	0	0	0	0	200	300	0	0	0	0	0	0	0	200	903	0	0	0	0	0	0	0	603	903	0
546	4	0	0	0	0	0	0	200	300	0	0	0	0	0	0	0	200	903	0	0	0	0	0	0	0	603	903	0
546	5	0	0	0	0	0	0	200	300	0	0	0	0	0	0	0	200	903	0	0	0	0	0	0	0	603	903	0
546	6	0	0	0	0	0	0	200	300	0	0	0	0	0	0	0	200	903	0	0	0	0	0	0	0	603	903	0
546	7	0	0	0	0	0	0	200	300	0	0	0	0	0	0	0	200	903	0	0	0	0	0	0	0	603	903	0
546	8	0	0	0	0	0	0	200	300	0	0	0	0	0	0	0	200	903	0	0	0	0	0	0	0	603	903	0
546	9	0	0	0	0	0	0	200	300	0	0	0	0	0	0	0	200	903	0	0	0	0	0	0	0	603	903	0
547	0	0	0	0	0	0	0	200	300	0	0	0	0	0	0	0	200	903	0	0	0	0	0	0	0	603	903	0
547	1	0	0	0	0	0	0	200	300	0	0	0	0	0	0	0	200	903	0	0	0	0	0	0	0	603	903	0
547	2	0	0	0	0	0	0	200	300	0	0	0	0	0	0	0	200	903	0	0	0	0	0	0	0	603	903	0
547	3	0	0	0	0	0	0	200	300	0	0	0	0	0	0	0	200	903	0	0	0	0	0	0	0	603	903	0
547	4	0	0	0	0	0	0	200	300	0	0	0	0	0	0	0	200	903	0	0	0	0	0	0	0	603	903	0
547	5	0	0	0	0	0	0	200	300	0	0	0	0	0	0	0	200	903	0	0	0	0	0	0	0	603	903	0
547	6	0	0	0	0	0	0	200	300	0	0	0	0	0	0	0	200	903	0	0	0	0	0	0	0	603	903	0
547	7	0	0	0	0	0	0	200	300	0	0	0	0	0	0	0	200	903	0	0	0	0	0	0	0	603	903	0
547	8	0	0	0	0	0	0	200	300	0	0	0	0	0	0	0	200	903	0	0	0	0	0	0	0	603	903	0
547	9	0	0	0	0	0	0	200	300	0	0	0	0	0	0	0	200	903	0	0	0	0	0	0	0	603	903	0
548	0	0	0	0	0	0	0	200	300	0	0	0	0	0	0	0	200	903	0	0	0	0	0	0	0	603	903	0
548	1	0	0	0	0	0	0	200	300	0	0	0	0	0	0	0	200	903	0	0	0	0	0	0	0	603	903	0
548	2	0	0	0	0	0	0	200	300	0	0	0	0	0	0	0	200	903	0	0	0	0	0	0	0	603	903	0
548	3	0	0	0	0	0	0	200	300	0	0	0	0	0	0	0	200	903	0	0	0	0	0	0	0	603	903	0
548	4	0	0	0	0	0	0	200	300	0	0	0	0	0	0	0	200	903	0	0	0	0	0	0	0	603	903	0
548	5	0	0	0	0	0	0	200	300	0	0	0	0	0	0	0	200	903	0	0	0	0	0	0	0	603	903	0
548	6	0	0	0	0	0	0	200	300	0	0	0	0	0	0	0	200	903	0	0	0	0	0	0	0	603	903	0
548	7	0	0	0	0	0	0	200	300	0	0	0	0	0	0	0	200	903	0	0	0	0	0	0	0	603	903	0
548	8	0	0	0	0	0	0	200	300	0	0	0	0	0	0	0	200	903	0	0	0	0	0	0	0	603	903	0
548	9	0	0	0	0	0	0	200	300	0	0	0	0	0	0	0	200	903	0	0	0	0	0	0	0	603	903	0
549	0	0	0	0	0	0	0	200	300	0	0	0	0	0	0	0	200	903	0	0	0	0	0	0	0	603	903	0
549	1	0	0	0	0	0	0	200	300	0	0	0	0	0	0	0	200	903	0	0	0	0	0	0	0	603	903	0
549	2	0	0	0	0	0	0	200	300	0	0	0	0	0	0	0	200	903	0	0	0	0	0	0	0	603	903	0
549	3	0	0	0	0	0	0	200	300	0	0	0	0	0	0	0	200	903	0	0	0	0	0	0	0	603	903	0
549	4	0	0	0	0	0	0	200	300	0	0	0	0	0	0	0	200	903	0	0	0	0	0	0	0	603	903	0
549	5	0	0	0	0	0	0	200	300	0	0	0	0	0	0	0	200	903	0	0	0	0	0	0	0	603	903	0
549	6	0	0	0	0	0	0	200	300	0	0	0	0	0	0	0	200	903	0	0	0	0	0	0	0	603	903	0
549	7	0	0	0	0	0	0	200	300	0	0	0	0	0	0	0	200	903	0	0	0	0	0	0	0	603	903	0
549	8	0	0	0	0	0	0	200	300	0	0	0	0	0	0	0	200	903	0	0	0	0	0	0	0	603	903	0
549	9	0	0	0	0	0	0	200	300	0	0	0	0	0	0	0	200	903	0	0	0	0	0	0	0	603	903	0
550	0	0	0	0	0	0	0	200	300	0	0	0	0	0	0	0	200	903	0	0	0	0	0	0	0	603	903	0
550	1	0	0	0	0	0	0	200	300	0	0	0	0	0	0	0	200	903	0	0	0	0	0	0	0	603	903	0
550	2	0	0	0	0	0	0	200	300	0	0	0	0	0	0	0	200	903	0	0	0	0	0	0	0	603	903	0
550	3	0	0	0	0	0	0	200	300	0	0	0	0	0	0	0	200	903	0	0	0	0	0	0	0	603	903	0
550	4	0	0	0	0	0	0	200	300	0	0	0	0	0	0	0	200	903	0	0	0	0	0	0	0	603	903	0
550	5	0	0	0	0	0	0	200	300	0	0	0	0	0	0	0	200	903	0	0	0	0	0	0	0	603	903	0
550	6	0	0	0	0	0	0	200	300	0	0	0	0	0	0	0	200	903	0	0	0	0	0	0	0	603	903	0
550	7	0	0	0	0	0	0	200	300	0	0	0	0	0	0	0	200	903	0	0	0	0	0	0	0	603	903	0
550	8	0	0	0	0	0	0	200	300	0	0	0	0	0	0	0	200	903	0	0	0	0	0	0	0	603	903	0
550	9	0	0	0	0	0	0	200	300	0	0	0	0	0	0	0	200	903	0	0	0	0	0	0	0	603	903	0
551	0	0	0	0	0	0	0	200	300	0	0	0	0	0	0	0	200	903	0	0	0	0	0	0	0	603	903	0
551	1	0	0	0	0	0	0	200	300	0	0	0	0	0	0	0	200	903	0	0	0	0	0	0	0	603	903	0
551	2	0	0	0	0	0	0	200	300	0	0	0	0	0	0	0	200	903	0	0	0	0	0	0	0	603	903	0
551	3	0	0	0	0	0	0	200	300	0	0	0	0	0	0	0	200	903	0	0	0	0	0	0	0	603	903	0
551	4	0	0	0	0	0	0	200	300	0	0	0	0	0	0	0	200	903	0	0	0	0	0	0	0	603	903	0
551	5	0	0	0	0	0	0	200	300	0	0	0	0	0	0	0	200	903	0	0	0	0	0	0	0	603	903	0
551	6	0	0	0	0	0	0	200	300	0	0	0	0	0	0	0	200	903	0	0	0	0	0	0	0	603	903	0
551	7	0	0	0	0	0	0	200	300	0	0	0	0	0	0	0	200	903	0	0	0	0	0	0	0	603	903	0
551	8	0	0	0	0	0	0	200	300	0	0	0	0	0	0	0	200	903	0	0	0	0	0	0	0	603	903	0
551	9	0	0	0	0	0	0	200	300	0	0	0	0	0	0	0	200	903	0	0	0	0	0	0	0	603	903	0
552	0	0	0	0	0	0	0	200	300	0	0	0	0	0	0	0	200	903	0	0	0	0	0	0	0	603	903	0
552	1	0	0	0	0	0	0	200	300	0	0	0	0	0	0	0	200	903	0	0	0	0	0	0	0	603	903	0
552	2	0	0	0	0	0	0	200	300	0	0	0	0	0	0	0	200	903	0	0	0	0	0	0	0	603	903	0
552	3	0	0	0	0	0	0	200	300	0	0	0	0	0	0	0	200	903	0	0	0	0	0	0	0	603	903	0
552	4	0	0	0	0	0	0	200	300	0	0	0	0	0	0	0	200	903	0	0	0	0	0	0	0	603	903	0
552	5	0	0	0	0	0	0	200	300	0	0	0	0	0	0	0	200	903	0	0	0	0	0	0	0	603	903	0
552	6	0	0	0	0	0	0	200	300	0	0	0	0	0	0	0	200	903	0	0	0	0	0	0	0	603	903	0
552	7	0	0	0	0	0	0	200	300	0	0	0	0	0	0	0	200	903	0	0	0	0	0	0	0	603	903	0
552	8	0	0	0	0	0	0	200	300	0	0	0	0	0	0	0	200	903	0	0	0	0	0	0	0	603	903	0
552	9	0	0	0	0	0	0	200	300	0	0	0	0	0	0	0	200	903	0	0	0	0	0	0	0	603	903	0
553	0	0	0	0	0	0	0	200	300	0	0	0	0	0	0	0	200	903	0	0	0	0	0	0	0	603	903	0
553	1	0	0	0	0	0	0	200	300	0	0	0	0	0	0	0	200	903	0	0	0	0	0	0	0	603	903	0
553	2	0	0	0	0	0	0	200	300	0	0	0	0	0	0	0	200	903	0	0	0	0	0	0	0	603	903	0
553	3	0	0	0	0	0	0	200	300	0	0	0	0	0	0	0	200	903	0	0	0	0	0	0	0	603	903	0
553	4	0	0	0	0	0	0	200	300	0	0	0	0	0	0	0	200	903	0	0	0	0	0	0	0	603	903	0
553	5	0	0	0	0	0	0	200	300	0	0	0	0	0	0	0	200	903	0	0	0	0	0	0	0	603	903	0
553	6	0	0	0	0	0	0	200	300	0	0	0	0	0	0	0	200	903	0	0	0	0	0	0	0	603	903	0
553	7	0	0	0	0	0	0	200	300	0	0	0	0	0	0	0	200	903	0	0	0	0	0	0	0	603	903	0
553	8	0	0	0	0	0	0	200	300	0	0	0	0	0	0	0	200	903	0	0	0	0	0	0	0	603	903	0
553	9	0	0	0	0	0	0	200	300	0	0	0	0	0	0	0	200	903	0	0	0	0	0	0	0	603	903	0
554	0	0	0	0	0	0	0	200	300	0	0	0	0	0	0	0	200	903	0	0	0	0	0	0	0	603	903	0
554	1	0	0	0	0	0	0	200	300	0	0	0	0	0	0	0	200	903	0	0	0	0	0	0	0	603	903	0
554	2	0	0	0	0	0	0	200	300	0	0	0	0	0	0	0	200	903	0	0	0	0	0	0	0	603	903	0
554	3	0	0	0	0	0	0	200	300	0	0	0	0	0	0	0	200	903	0	0	0	0	0	0	0	603	903	0
554	4	0	0	0	0	0	0	200	300	0	0	0	0	0	0	0	200	903	0	0	0	0	0	0	0	603	903	0
554	5	0	0	0	0	0	0	200	300	0	0	0	0	0	0	0	200	903	0	0	0	0	0	0	0	603	903	0
554	6	0	0	0	0	0	0	200	300	0	0	0	0	0	0	0	200	903	0	0	0	0	0	0	0	603	903	0
554	7	0	0	0	0	0	0	200	300	0	0	0	0	0	0	0	200	903	0	0	0	0	0	0	0	603	903	0
554	8	0	0	0	0	0	0	200	300	0	0	0	0	0	0	0	200	903	0	0	0	0	0	0	0	603	903	0
554	9	0	0	0	0	0	0	200	300	0	0	0	0	0	0	0	200	903	0	0	0	0	0	0	0	603	903	0
555	0	0	0	0	0	0	0	200	300	0	0	0	0	0	0	0	200	903	0	0	0	0	0	0	0	603	903	0
555	1	0	0	0	0	0	0	200	300	0	0	0	0	0	0	0	200	903	0	0	0	0	0	0	0	603	903	0
555	2	0	0	0	0	0	0	200	300	0	0	0	0	0	0	0	200	903	0	0	0	0	0	0	0	603	903	0
555	3	0	0	0	0	0	0	200	300	0	0	0	0	0	0	0	200	903	0	0	0	0	0	0	0	603	903	0
555	4	0	0	0	0	0	0	200	300	0	0	0	0	0	0	0	200	903	0	0	0	0	0	0	0	603	903	0
555	5	0	0	0	0	0	0	200	300	0	0	0	0	0	0	0	200	903	0	0	0	0	0	0	0	603	903	0
555	6	0	0	0	0	0	0	200	300	0	0	0	0	0	0	0	200	903	0	0	0	0	0	0	0	603	903	0
555	7	0	0	0	0	0	0	200	300	0	0	0	0	0	0	0	200	903	0	0	0	0	0	0	0	603	903	0
555	8	0	0	0	0	0	0	200	300	0	0	0	0	0	0	0	200	903	0	0	0	0	0	0	0	603	903	0
555	9	0	0	0	0	0	0	200	300	0	0	0	0	0	0	0	200	903	0	0	0	0	0	0	0	603	903	0
556	0	0	0	0	0	0	0	200	300	0	0	0	0	0	0	0	200	903	0	0	0	0	0	0	0	603	903	0
556	1	0	0	0	0	0	0	200	300	0	0	0	0	0	0	0	200	903	0	0	0	0	0	0	0	603	903	0
556	2	0	0	0	0	0	0	200	300	0	0	0	0	0	0	0	200	903	0	0	0	0	0	0	0	603	903	0
556	3	0	0	0	0	0	0	200	300	0	0	0	0	0	0	0	200	903	0	0	0	0	0	0	0	603	903	0
556	4	0	0	0	0	0	0	200	300	0	0	0	0	0	0	0	200	903	0	0	0	0	0	0	0	603	903	0
556	5	0	0	0	0	0	0	200	300	0	0	0	0	0	0	0	200	903	0	0	0	0	0	0	0	603	903	0
556	6	0	0	0	0	0	0	200	300	0	0	0	0	0	0	0	200	903	0	0	0	0	0	0	0	603	903	0
556	7	0	0	0	0	0	0	200	300	0	0	0	0	0	0	0	200	903	0	0	0	0	0	0	0	603	903	0
556	8	0	0	0	0	0	0	200	300	0	0	0	0	0	0	0	200	903	0	0	0	0	0	0	0	603	903	0
556	9	0	0	0	0	0	0	200	300	0	0	0	0	0	0	0	200	903	0	0	0	0	0	0	0	603	903	0
557	0	0	0	0	0	0	0	200	300	0	0	0	0	0	0	0	200	903	0	0	0	0	0	0	0	603	903	0
557	1	0	0	0	0	0	0	200	300	0	0	0	0	0	0	0	200	903	0	0	0	0	0	0	0	603	903	0
557	2	0	0	0	0	0	0	200	300	0	0	0	0	0	0	0	200	903	0	0	0	0	0	0	0	603	903	0
557	3	0	0	0	0	0	0	200	300	0	0	0	0	0	0	0	200	903	0	0	0	0	0	0	0	603	903	0
557	4	0	0	0	0	0	0	200	300	0	0	0	0	0	0	0	200	903	0	0	0	0	0	0	0	603	903	0
557	5	0	0	0	0	0	0	200	300	0	0	0	0	0	0	0	200	903	0	0	0	0	0	0	0	603	903	0
557	6	0	0	0	0	0	0	200	300	0	0	0	0	0	0	0	200	903	0	0	0	0	0	0	0	603	903	0
557	7	0	0	0	0	0	0	200	300	0	0	0	0	0	0	0	200	903	0	0	0	0	0	0	0	603	903	0
557	8	0	0	0	0	0	0	200	300	0	0	0	0	0	0	0	200	903	0	0	0	0	0	0	0	603	903	0
557	9	0	0	0	0	0	0	200	300	0	0	0	0	0	0	0	200	903	0	0	0	0	0	0	0	603	903	0
558	0	0	0	0	0	0	0	200	300	0	0	0	0	0	0	0	200	903	0	0	0	0	0	0	0	603	903	0
558	1	0	0	0	0	0	0	200	300	0	0	0	0	0	0	0	200	903	0	0	0	0	0	0	0	603	903	0
558	2	0	0	0	0	0	0	200	300	0	0	0	0	0	0	0	200	903	0	0	0	0	0	0	0	603	903	0
558	3	0	0	0	0	0	0	200	300	0	0	0	0	0	0	0	200	903	0	0	0	0	0	0	0	603	903	0
558	4	0	0	0	0	0	0	200	300	0	0	0	0	0	0	0	200	903	0	0	0	0	0	0	0	603	903	0
558	5	0	0	0	0	0	0	200	300	0	0	0	0	0	0	0	200	903	0	0	0	0	0	0	0	603	903	0
558	6	0	0	0	0	0	0	200	300	0	0	0	0	0	0	0	200	903	0	0	0	0	0	0	0	603	903	0
558	7	0	0	0	0	0	0	200	300	0	0	0	0	0	0	0	200	903	0	0	0	0	0	0	0	603	903	0
558	8	0	0	0	0	0	0	200	300	0	0	0	0	0	0	0	200	903	0	0	0	0	0	0	0	603	903	0
558	9	0	0	0	0	0	0	200	300	0	0	0	0	0	0	0	200	903	0	0	0	0	0	0	0	603	903	0
559	0	0	0	0	0	0	0	200	300	0	0	0	0	0	0	0	200	903	0	0	0	0	0	0	0	603	903	0
559	1	0	0	0	0	0	0	200	300	0	0	0	0	0	0	0	200	903	0	0	0	0	0	0	0	603	903	0
559	2	0	0	0	0	0	0	200	300	0	0	0	0	0	0	0	200	903	0	0	0	0	0	0	0	603	903	0
559	3	0	0	0	0	0	0	200	300	0	0	0	0	0	0	0	200	903	0	0	0	0	0	0	0	603	903	0
559	4	0	0	0	0	0	0	200	300	0	0	0	0	0	0	0	200	903	0	0	0	0	0	0	0	603	903	0
559	5	0	0	0	0	0	0	200	300	0	0	0	0	0	0	0	200	903	0	0	0	0	0	0	0	603	903	0
559	6	0	0	0	0	0	0	200	300	0	0	0	0	0	0	0	200	903	0	0	0	0	0	0	0	603	903	0
559	7	0	0	0	0	0	0	200	300	0	0	0	0	0	0	0	200	903	0	0	0	0	0	0	0	603	903	0
559	8	0	0	0	0	0	0	200	300	0	0	0	0	0	0	0	200	903	0	0	0	0	0	0	0	603	903	0
559	9	0	0	0	0	0	0	200	300	0	0	0	0	0	0	0	200	903	0	0	0	0	0	0	0	603	903	0
560	0	0	0	0	0	0	0	200	300	0	0	0	0	0	0	0	200	903	0	0	0	0	0	0	0	603	903	0
560	1	0	0	0	0	0	0	200	300	0	0	0	0	0	0	0	200	903	0	0	0	0	0	0	0	603	903	0
560	2	0	0	0	0	0	0	200	300	0	0	0	0	0	0	0	200	903	0	0	0	0	0	0	0	603	903	0
560	3	0	0	0	0	0	0	200	300	0	0	0	0	0	0	0	200	903	0	0	0	0	0	0	0	603	903	0
560	4	0	0	0	0	0	0	200	300	0	0	0	0	0	0	0	200	903	0	0	0	0	0	0	0	603	903	0
560	5	0	0	0	0	0	0	200	300	0	0	0	0	0	0	0	200	903	0	0	0	0	0	0	0	603	903	0
560	6	0	0	0	0	0	0	200	300	0	0	0	0	0	0	0	200	903	0	0	0	0	0	0	0	603	903	0
560	7	0	0	0	0	0	0	200	300	0	0	0	0	0	0	0	200	903	0	0	0	0	0	0	0	603	903	0
560	8	0	0	0	0	0	0	200	300	0	0	0	0	0	0	0	200	903	0	0	0	0	0	0	0	603	903	0
560	9	0	0	0	0	0	0	200	300	0	0	0	0	0	0	0	200	903	0	0	0	0	0	0	0	603	903	0
561	0	0	0	0	0	0	0	200	300	0	0	0	0	0	0	0	200	903	0	0	0	0	0	0	0	603	903	0
561	1	0	0	0	0	0	0	200	300	0	0	0	0	0	0	0	200	903	0	0	0	0	0	0	0	603	903	0
561	2	0	0	0	0	0	0	200	300	0	0	0	0	0	0	0	200	903	0	0	0	0	0	0	0	603	903	0
561	3	0	0	0	0	0	0	200	300	0	0	0	0	0	0	0	200	903	0	0	0	0	0	0	0	603	903	0
561	4	0	0	0	0	0	0	200	300	0	0	0	0	0	0	0	200	903	0	0	0	0	0	0	0	603	903	0
561	5	0	0	0	0	0	0	200	300	0	0	0	0	0	0	0	200	903	0	0	0	0	0	0	0	603	903	0
561	6	0	0	0	0	0	0	200	300	0	0	0	0	0	0	0	200	903	0	0	0	0	0	0	0	603	903	0
561	7	0	0	0	0	0	0	200	300	0	0	0	0	0	0	0	200	903	0	0	0	0	0	0	0	603	903	0
561	8	0	0	0	0	0	0	200	300	0	0	0	0	0	0	0	200	903	0	0	0	0	0	0	0	603	903	0
561	9	0	0	0	0	0	0	200	300	0	0	0	0	0	0	0	200	903	0	0	0	0	0	0	0	603	903	0
562	0	0	0	0	0	0	0	200	300	0	0	0	0	0	0	0	200	903	0	0	0	0	0	0	0	603	903	0
562	1	0	0	0	0	0	0	200	300	0	0	0	0	0	0	0	200	903	0	0	0	0	0	0	0	603	903	0
562	2	0	0	0	0	0	0	200	300	0	0	0	0	0	0	0	200	903	0	0	0	0	0	0	0	603	903	0
562	3	0	0	0	0	0	0	200	300	0	0	0	0	0	0	0	200	903	0	0	0	0	0	0	0	603	903	0
562	4	0	0	0	0	0	0	200	300	0	0	0	0	0	0	0	200	903	0	0	0	0	0	0	0	603	903	0
562	5	0	0	0	0	0	0	200	300	0	0	0	0	0	0	0	200	903	0	0	0	0	0	0	0	603	903	0
562	6	0	0	0	0	0	0	200	300	0	0	0	0	0	0	0	200	903	0	0	0	0	0	0	0	603	903	0
562	7	0	0	0	0	0	0	200	300	0	0	0	0	0	0	0	200	903	0	0	0	0	0	0	0	603	903	0
562	8	0	0	0	0	0	0	200	300	0	0	0	0	0	0	0	200	903	0	0	0	0	0	0	0	603	903	0
562	9	0	0	0	0	0	0	200	300	0	0	0	0	0	0	0	200	903	0	0	0	0	0	0	0	603	903	0
563	0	0	0	0	0	0	0	200	300	0	0	0	0	0	0	0	200	903	0	0	0	0	0	0	0	603	903	0
563	1	0	0	0	0	0	0	200	300	0	0	0	0	0	0	0	200	903	0	0	0	0	0	0	0	603	903	0
563	2	0	0	0	0	0	0	200	300	0	0	0	0	0	0	0	200	903	0	0	0	0	0	0	0	603	903	0
563	3	0	0	0	0	0	0	200	300	0	0	0	0	0	0	0	200	903	0	0	0	0	0	0	0	603	903	0
563	4	0	0	0	0	0	0	200	300	0	0	0	0	0	0	0	200	903	0	0	0	0	0	0	0	603	903	0
563	5	0	0	0	0	0	0	200	300	0	0	0	0	0	0	0	200	903	0	0	0	0	0	0	0	603	903	0
563	6	0	0	0	0	0	0	200	300	0	0	0	0	0	0	0	200	903	0	0	0	0	0	0	0	603	903	0
563	7	0	0	0	0	0	0	200	300	0	0	0	0	0	0	0	200	903	0	0	0	0	0	0	0	603	903	0
563	8	0	0	0	0	0	0	200	300	0	0	0	0	0	0	0	200	903	0	0	0	0	0	0	0	603	903	0
563	9	0	0	0	0	0	0	200	300	0	0	0	0	0	0	0	200	903	0	0	0	0	0	0	0	603	903	0
564	0	0	0	0	0	0	0	200	300	0	0	0	0	0	0	0	200	903	0	0	0	0	0	0	0	603	903	0
564	1	0	0	0	0	0	0	200	300	0	0	0	0	0	0	0	200	903	0	0	0	0	0	0	0	603	903	0
564	2	0	0	0	0	0	0	200	300	0	0	0	0	0	0	0	200	903	0	0	0	0	0	0	0	603	903	0
564	3	0	0	0	0	0	0	200	300	0	0	0	0	0	0	0	200	903	0	0	0	0	0	0	0	603	903	0
564	4	0	0	0	0	0	0	200	300	0	0	0	0	0	0	0	200	903	0	0	0	0	0	0	0	603	903	0
564	5	0	0	0	0	0	0	200	300	0	0	0	0	0	0	0	200	903	0	0	0	0	0	0	0	603	903	0
564	6	0	0	0	0	0	0	200	300	0	0	0	0	0	0	0	200	903	0	0	0	0	0	0	0	603	903	0
564	7	0	0	0	0	0	0	200	300	0	0	0	0	0	0	0	200	903	0	0	0	0	0	0	0	603	903	0
564	8	0	0	0	0	0	0	200	300	0	0	0	0	0	0	0	200	903	0	0	0	0	0	0	0	603	903	0
564	9	0	0	0	0	0	0	200	300	0	0	0	0	0	0	0	200	903	0	0	0	0	0	0	0	603	903	0
565	0	0	0	0	0	0	0	200	300	0	0	0	0	0	0	0	200	903	0	0	0	0	0	0	0	603	903	0
565	1	0	0	0	0	0	0	200	300	0	0	0	0	0	0	0	200	903	0	0	0	0	0	0	0	603	903	0
565	2	0	0	0	0	0	0	200	300	0	0	0	0	0	0	0	200	903	0	0	0	0	0	0	0	603	903	0
565	3	0	0	0	0	0	0	200	300	0	0	0	0	0	0	0	200	903	0	0	0	0	0	0	0	603	903	0
565	4	0	0	0	0	0	0	200	300	0	0	0	0	0	0	0	200	903	0	0	0	0	0	0	0	603	903	0
565	5	0	0	0	0	0	0	200	300	0	0	0	0	0	0	0	200	903	0	0	0	0	0	0	0	603	903	0
565	6	0	0	0	0	0	0	200	300	0	0	0	0	0	0	0	200	903	0	0	0	0	0	0	0	603	903	0
565	7	0	0	0	0	0	0	200	300	0	0	0	0	0	0	0	200	903	0	0	0	0	0	0	0	603	903	0
565	8	0	0	0	0	0	0	200	300	0	0	0	0	0	0	0	200	903	0	0	0	0	0	0	0	603	903	0
565	9	0	0	0	0	0	0	200	300	0	0	0	0	0	0	0	200	903	0	0	0	0	0	0	0	603	903	0
566	0	0	0	0	0	0	0	200	300	0	0	0	0	0	0	0	200	903	0	0	0	0	0	0	0	603	903	0
566	1	0	0	0	0	0	0	200	300	0	0	0	0	0	0	0	200	903	0	0	0	0	0	0	0	603	903	0
566	2	0	0	0	0	0	0	200	300	0	0	0	0	0	0	0	200	903	0	0	0	0	0	0	0	603	903	0
566	3	0	0	0	0	0	0	200	300	0	0	0	0	0	0	0	200	903	0	0	0	0	0	0	0	603	903	0
566	4	0	0	0	0	0	0	200	300	0	0	0	0	0	0	0	200	903	0	0	0	0	0	0	0	603	903	0
566	5	0	0	0	0	0	0	200	300	0	0	0	0	0	0	0	200	903	0	0	0	0	0	0	0	603	903	0
566	6	0	0	0	0	0	0	200	300	0	0	0	0	0	0	0	200	903	0	0	0	0	0	0	0	603	903	0
566	7	0	0	0	0	0	0	200	300	0	0	0	0	0	0	0	200	903	0	0	0	0	0	0	0	603	903	0
566	8	0	0	0	0	0	0	200	300	0	0	0	0	0	0	0	200	903	0	0	0	0	0	0	0	603	903	0
566	9	0	0	0	0	0	0	200	300	0	0	0	0	0	0	0	200	903	0	0	0	0	0	0	0	603	903	0
567	0	0	0	0	0	0	0	200	300	0	0	0	0	0	0	0	200	903	0	0	0	0	0	0	0	603	903	0
567	1	0	0	0	0	0	0	200	300	0	0	0	0	0	0	0	200	903	0	0	0	0	0	0	0	603	903	0
567	2	0	0	0	0	0	0	200	300	0	0	0	0	0	0	0	200	903	0	0	0	0	0	0	0	603	903	0
567	3	0	0	0	0	0	0	200	300	0	0	0	0	0	0	0	200	903	0	0	0	0	0	0	0	603	903	0
567	4	0	0	0	0	0	0	200	300	0	0	0	0	0	0	0	200	903	0	0	0	0	0	0	0	603	903	0
567	5	0	0	0	0	0	0	200	300	0	0	0	0	0	0	0	200	903	0	0	0	0	0	0	0	603	903	0
567	6	0	0	0	0	0	0	200	300	0	0	0	0	0	0	0	200	903	0	0	0	0	0	0	0	603	903	0
567	7	0	0	0	0	0	0	200	300	0	0	0	0	0	0	0	200	903	0	0	0	0	0	0	0	603	903	0
567	8	0	0	0	0	0	0	200	300	0	0	0	0	0	0	0	200	903	0	0	0	0	0	0	0	603	903	0
567	9	0	0	0	0	0	0	200	300	0	0	0	0	0	0	0	200	903	0	0	0	0	0	0	0	603	903	0
568	0	0	0	0	0	0	0	200	300	0	0	0	0	0	0	0	200	903	0	0	0	0	0	0	0	603	903	0
568	1	0	0	0	0	0	0	200	300	0	0	0	0	0	0	0	200	903	0	0	0	0	0	0	0	603	903	0
568	2	0	0	0	0	0	0	200	300	0	0	0	0	0	0	0	200	903	0	0	0	0	0	0	0	603	903	0
568	3	0	0	0	0	0	0	200	300	0	0	0	0	0	0	0	200	903	0	0	0	0	0	0	0	603	903	0
568	4	0	0	0	0	0	0	200	300	0	0	0	0	0	0	0	200	903	0	0	0	0	0	0	0	603	903	0
568	5	0	0	0	0	0	0	200	300	0	0	0	0	0	0	0	200	903	0	0	0	0	0	0	0	603	903	0
568	6	0	0	0	0	0	0	200	300	0	0	0	0	0	0	0	200	903	0	0	0	0	0	0	0	603	903	0
568	7	0	0	0	0	0	0	200	300	0	0	0	0	0	0	0	200	903	0	0	0	0	0	0	0	603	903	0
568	8	0	0	0	0	0	0	200	300	0	0	0	0	0	0	0	200	903	0	0	0	0	0	0	0	603	903	0
568	9	0	0	0	0	0	0	200	300	0	0	0	0	0	0	0	200	903	0	0	0	0	0	0	0	603	903	0
569	0	0	0	0	0	0	0	200	300	0	0	0	0	0	0	0	200	903	0	0	0	0	0	0	0	603	903	0
569	1	0	0	0	0	0	0	200	300	0	0	0	0	0	0	0	200	903	0	0	0	0	0	0	0	603	903	0
569	2	0	0	0	0	0	0	200	300	0	0	0	0	0	0	0	200	903	0	0	0	0	0	0	0	603	903	0
569	3	0	0	0	0	0	0	200	300	0	0	0	0	0	0	0	200	903	0	0	0	0	0	0	0	603	903	0
569	4	0	0	0	0	0	0	200	300	0	0	0	0	0	0	0	200	903	0	0	0	0	0	0	0	603	903	0
569	5	0	0	0	0	0	0	200	300	0	0	0	0	0	0	0	200	903	0	0	0	0	0	0	0	603	903	0
569	6	0	0	0	0	0	0	200	300	0	0	0	0	0	0	0	200	903	0	0	0	0	0	0	0	603	903	0
569	7	0	0	0	0	0	0	200	300	0	0	0	0	0	0	0	200	903	0	0	0	0	0	0	0	603	903	0
569	8	0	0	0	0	0	0	200	300	0	0	0	0	0	0	0	200	903	0	0	0	0	0	0	0	603	903	0
569	9	0	0	0	0	0	0	200	300	0	0	0	0	0	0	0	200	903	0	0	0	0	0	0	0	603	903	0
570	0	0	0	0	0	0	0	200	300	0	0	0	0	0	0	0	200	903	0	0	0	0	0	0	0	603	903	0
570	1	0	0	0	0	0	0	200	300	0	0	0	0	0	0	0	200	903	0	0	0	0	0	0	0	603	903	0
570	2	0	0	0	0	0	0	200	300	0	0	0	0	0	0	0	200	903	0	0	0	0	0	0	0	603	903	0
570	3	0	0	0	0	0	0	200	300	0	0	0	0	0	0	0	200	903	0	0	0	0	0	0	0	603	903	0
570	4	0	0	0	0	0	0	200	300	0	0	0	0	0	0	0	200	903	0	0	0	0	0	0	0	603	903	0
570	5	0	0	0	0	0	0	200	300	0	0	0	0	0	0	0	200	903	0	0	0	0	0	0	0	603	903	0
570	6	0	0	0	0	0	0	200	300	0	0	0	0	0	0	0	200	903	0	0	0	0	0	0	0	603	903	0
570	7	0	0	0	0	0	0	200	300	0	0	0	0	0	0	0	200	903	0	0	0	0	0	0	0	603	903	0
570	8	0	0	0	0	0	0	200	300	0	0	0	0	0	0	0	200	903	0	0	0	0	0	0	0	603	903	0
570	9	0	0	0	0	0	0	200	300	0	0	0	0	0	0	0	200	903	0	0	0	0	0	0	0	603	903	0
571	0	0	0	0	0	0	0	200	300	0	0	0	0	0	0	0	200	903	0	0	0	0	0	0	0	603	903	0
571	1	0	0	0	0	0	0	200	300	0	0	0	0	0	0	0	200	903	0	0	0	0	0	0	0	603	903	0
571	2	0	0	0	0	0	0	200	300	0	0	0	0	0	0	0	200	903	0	0	0	0	0	0	0	603	903	0
571	3	0	0	0	0	0	0	200	300	0	0	0	0	0	0	0	200	903	0	0	0	0	0	0	0	603	903	0
571	4	0	0	0	0	0	0	200	300	0	0	0	0	0	0	0	200	903	0	0	0	0	0	0	0	603	903	0
571	5	0	0	0	0	0	0	200	300	0	0	0	0	0	0	0	200	903	0	0	0	0	0	0	0	603	903	0
571	6	0	0	0	0	0	0	200	300	0	0	0	0	0	0	0	200	903	0	0	0	0	0	0	0	603	903	0
571	7	0	0	0	0	0	0	200	300	0	0	0	0	0	0	0	200	903	0	0	0	0	0	0	0	603	903	0
571	8	0	0	0	0	0	0	200	300	0	0	0	0	0	0	0	200	903	0	0	0	0	0	0	0	603	903	0
571	9	0	0	0	0	0	0	200	300	0	0	0	0	0	0	0	200	903	0	0	0	0	0	0	0	603	903	0
572	0	0	0	0	0	0	0	200	300	0	0	0	0	0	0	0	200	903	0	0	0	0	0	0	0	603	903	0
572	1	0	0	0	0	0	0	200	300	0	0	0	0	0	0	0	200	903	0	0	0	0	0	0	0	603	903	0
572	2	0	0	0	0	0	0	200	300	0	0	0	0	0	0	0	200	903	0	0	0	0	0	0	0	603	903	0
572	3	0	0	0	0	0	0	200	300	0	0	0	0	0	0	0	200	903	0	0	0	0	0	0	0	603	903	0
572	4	0	0	0	0	0	0	200	300	0	0	0	0	0	0	0	200	903	0	0	0	0	0	0	0	603	903	0
572	5	0	0	0	0	0	0	200	300	0	0	0	0	0	0	0	200	903	0	0	0	0	0	0	0	603	903	0
572	6	0	0	0	0	0	0	200	300	0	0	0	0	0	0	0	200	903	0	0	0	0	0	0	0	603	903	0
572	7	0	0	0	0	0	0	200	300	0	0	0	0	0	0	0	200	903	0	0	0	0	0	0	0	603	903	0
572	8	0	0	0	0	0	0	200	300	0	0	0	0	0	0	0	200	903	0	0	0	0	0	0	0	603	903	0
572	9	0	0	0	0	0	0	200	300	0	0	0	0	0	0	0	200	903	0	0	0	0	0	0	0	603	903	0
573	0	0	0	0	0	0	0	200	300	0	0	0	0	0	0	0	200	903	0	0	0	0	0	0	0	603	903	0
573	1	0	0	0	0	0	0	200	300	0	0	0	0	0	0	0	200	903	0	0	0	0	0	0	0	603	903	0
573	2	0	0	0	0	0	0	200	300	0	0	0	0	0	0	0	200	903	0	0	0	0	0	0	0	603	903	0
573	3	0	0	0	0	0	0	200	300	0	0	0	0	0	0	0	200	903	0	0	0	0	0	0	0	603	903	0
573	4	0	0	0	0	0	0	200	300	0	0	0	0	0	0	0	200	903	0	0	0	0	0	0	0	603	903	0
573	5	0	0	0	0	0	0	200	300	0	0	0	0	0	0	0	200	903	0	0	0	0	0	0	0	603	903	0
573	6	0	0	0	0	0	0	200	300	0	0	0	0	0	0	0	200	903	0	0	0	0	0	0	0	603	903	0
573	7	0	0	0	0	0	0	200	300	0	0	0	0	0	0	0	200	903	0	0	0	0	0	0	0	603	903	0
573	8	0	0	0	0	0	0	200	300	0	0	0	0	0	0	0	200	903	0	0	0	0	0	0	0	603	903	0
573	9	0	0	0	0	0	0	200	300	0	0	0	0	0	0	0	200	903	0	0	0	0	0	0	0	603	903	0
574	0	0	0	0	0	0	0	200	300	0	0	0	0	0	0	0	200	903	0	0	0	0	0	0	0	603	903	0
574	1	0	0	0	0	0	0	200	300	0	0	0	0	0	0	0	200	903	0	0	0	0	0	0	0	603	903	0
574	2	0	0	0	0	0	0	200	300	0	0	0	0	0	0	0	200	903	0	0	0	0	0	0	0	603	903	0
574	3	0	0	0	0	0	0	200	300	0	0	0	0	0	0	0	200	903	0	0	0	0	0	0	0	603	903	0
574	4	0	0	0	0	0	0	200	300	0	0	0	0	0	0	0	200	903	0	0	0	0	0	0	0	603	903	0
574	5	0	0	0	0	0	0	200	300	0	0	0	0	0	0	0	200	903	0	0	0	0	0	0	0	603	903	0
574	6	0	0	0	0	0	0	200	300	0	0	0	0	0	0	0	200	903	0	0	0	0	0	0	0	603	903	0
574	7	0	0	0	0	0	0	200	300	0	0	0	0	0	0	0	200	903	0	0	0	0	0	0	0	603	903	0
574	8	0	0	0	0	0	0	200	300	0	0	0	0	0	0	0	200	903	0	0	0	0	0	0	0	603	903	0
574	9	0	0	0	0	0	0	200	300	0	0	0	0	0	0	0	200	903	0	0	0	0	0	0	0	603	903	0
575	0	0	0	0	0	0	0	200	300	0	0	0	0	0	0	0	200	903	0	0	0	0	0	0	0	603	903	0
575	1	0	0	0	0	0	0	200	300	0	0	0	0	0	0	0	200	903	0	0	0	0	0	0	0	603	903	0
575	2	0	0	0	0	0	0	200	300	0	0	0	0	0	0	0	200	903	0	0	0	0	0	0	0	603	903	0
575	3	0	0	0	0	0	0	200	300	0	0	0	0	0	0	0	200	903	0	0	0	0	0	0	0	603	903	0
575	4	0	0	0	0	0	0	200	300	0	0	0	0	0	0	0	200	903	0	0	0	0	0	0	0	603	903	0
575	5	0	0	0	0	0	0	200	300	0	0	0	0	0	0	0	200	903	0	0	0	0	0	0	0	603	903	0
575	6	0	0	0	0	0	0	200	300	0	0	0	0	0	0	0	200	903	0	0	0	0	0	0	0	603	903	0
575	7	0	0	0	0	0	0	200	300	0	0	0	0	0	0	0	200	903	0	0	0	0	0	0	0	603	903	0
575	8	0	0	0	0	0	0	200	300	0	0	0	0	0	0	0	200	903	0	0	0	0	0	0	0	603	903	0
575	9	0	0	0	0	0	0	200	300	0	0	0	0	0	0	0	200	903	0	0	0	0	0	0	0	603	903	0
576	0	0	0	0	0	0	0	200	300	0	0	0	0	0	0	0	200	903	0	0	0	0	0	0	0	603	903	0
576	1	0	0	0	0	0	0	200	300	0	0	0	0	0	0	0	200	903	0	0	0	0	0	0	0	603	903	0
576	2	0	0	0	0	0	0	200	300	0	0	0	0	0	0	0	200	903	0	0	0	0	0	0	0	603	903	0
576	3	0	0	0	0	0	0	200	300	0	0	0	0	0	0	0	200	903	0	0	0	0	0	0	0	603	903	0
576	4	0	0	0	0	0	0	200	300	0	0	0	0	0	0	0	200	903	0	0	0	0	0	0	0	603	903	0
576	5	0	0	0	0	0	0	200	300	0	0	0	0	0	0	0	200	903	0	0	0	0	0	0	0	603	903	0
576	6	0	0	0	0	0	0	200	300	0	0	0	0	0	0	0	200	903	0	0	0	0	0	0	0	603	903	0
576	7	0	0	0	0	0	0	200	300	0	0	0	0	0	0	0	200	903	0	0	0	0	0	0	0	603	903	0
576	8	0	0	0	0	0	0	200	300	0	0	0	0	0	0	0	200	903	0	0	0	0	0	0	0	603	903	0
576	9	0	0	0	0	0	0	200	300	0	0	0	0	0	0	0	200	903	0	0	0	0	0	0	0	603	903	0
577	0	0	0	0	0	0	0	200	300	0	0	0	0	0	0	0	200	903	0	0	0	0	0	0	0	603	903	0
577	1	0	0	0	0	0	0	200	300	0	0	0	0	0	0	0	200	903	0	0	0	0	0	0	0	603	903	0
577	2	0	0	0	0	0	0	200	300	0	0	0	0	0	0	0	200	903	0	0	0	0	0	0	0	603	903	0
577	3	0	0	0	0	0	0	200	300	0	0	0	0	0	0	0	200	903	0	0	0	0	0	0	0	603	903	0
577	4	0	0	0	0	0	0	200	300	0	0	0	0	0	0	0	200	903	0	0	0	0	0	0	0	603	903	0
577	5	0	0	0	0	0	0	200	300	0	0	0	0	0	0	0	200	903	0	0	0	0	0	0	0	603	903	0
577	6	0	0	0	0	0	0	200	300	0	0	0	0	0	0	0	200	903	0	0	0	0	0	0	0	603	903	0
577	7	0	0	0	0	0	0	200	300	0	0	0	0	0	0	0	200	903	0	0	0	0	0	0	0	603	903	0
577	8	0	0	0	0	0	0	200	300	0	0	0	0	0	0	0	200	903	0	0	0	0	0	0	0	603	903	0
577	9	0	0	0	0	0	0	200	300	0	0	0	0	0	0	0	200	903	0	0	0	0	0	0	0	603	903	0
578	0	0	0	0	0	0	0	200	300	0	0	0	0	0	0	0	200	903	0	0	0	0	0	0	0	603	903	0
578	1	0	0	0	0	0	0	200	300	0	0	0	0	0	0	0	200	903	0	0	0	0	0	0	0	603	903	0
578	2	0	0	0	0	0	0	200	300	0	0	0	0	0	0	0	200	903	0	0	0	0	0	0	0	603	903	0
578	3	0	0	0	0	0	0	200	300	0	0	0	0	0	0	0	200	903	0	0	0	0	0	0	0	603	903	0
578	4	0	0	0	0	0	0	200	300	0	0	0	0	0	0	0	200	903	0	0	0	0	0	0	0	603	903	0
578	5	0	0	0	0	0	0	200	300	0	0	0	0	0	0	0	200	903	0	0	0	0	0	0	0	603	903	0
578	6	0	0	0	0	0	0	200	300	0	0	0	0	0	0	0	200	903	0	0	0	0	0	0	0	603	903	0
578	7	0	0	0	0	0	0	200	300	0	0	0	0	0	0	0	200	903	0	0	0	0	0	0	0	603	903	0
578	8	0	0	0	0	0	0	200	300	0	0	0	0	0	0	0	200	903	0	0	0	0	0	0	0	603	903	0
578	9	0	0	0	0	0	0	200	300	0	0	0	0	0	0	0	200	903	0	0	0	0	0	0	0	603	903	0
579	0	0	0	0	0	0	0	200	300	0	0	0	0	0	0	0	200	903	0	0	0	0	0	0	0	603	903	0
579	1	0	0	0	0	0	0	200	300	0	0	0	0	0	0	0	200	903	0	0	0	0	0	0	0	603	903	0
579	2	0	0	0	0	0	0	200	300	0	0	0	0	0	0	0	200	903	0	0	0	0	0	0	0	603	903	0
579	3	0	0	0	0	0	0	200	300	0	0	0	0	0	0	0	200	903	0	0	0	0	0	0	0	603	903	0
579	4	0	0	0	0	0	0	200	300	0	0	0	0	0	0	0	200	903	0	0	0	0	0	0	0	603	903	0
579	5	0	0	0	0	0	0	200	300	0	0	0	0	0	0	0	200	903	0	0	0	0	0	0	0	603	903	0
579	6	0	0	0	0	0	0	200	300	0	0	0	0	0	0	0	200	903	0	0	0	0	0	0	0	603	903	0
579	7	0	0	0	0	0	0	200	300	0	0	0	0	0	0	0	200	903	0	0	0	0	0	0	0	603	903	0
579	8	0	0	0	0	0	0	200	300	0	0	0	0	0	0	0	200	903	0	0	0	0	0	0	0	603	903	0
579	9	0	0	0	0	0	0	200	300	0	0	0	0	0	0	0	200	903	0	0	0	0	0	0	0	603	903	0
580	0	0	0	0	0	0	0	200	300	0	0	0	0	0	0	0	200	903	0	0	0	0	0	0	0	603	903	0
580	1	0	0	0	0	0	0	200	300	0	0	0	0	0	0	0	200	903	0	0	0	0	0	0	0	603	903	0
580	2	0	0	0	0	0	0	200	300	0	0	0	0	0	0	0	200	903	0	0	0	0	0	0	0	603	903	0
580	3	0	0	0	0	0	0	200	300	0	0	0	0	0	0	0	200	903	0	0	0	0	0	0	0	603	903	0
580	4	0	0	0	0	0	0	200	300	0	0	0	0	0	0	0	200	903	0	0	0	0	0	0	0	603	903	0
580	5	0	0	0	0	0	0	200	300	0	0	0	0	0	0	0	200	903	0	0	0	0	0	0	0	603	903	0
580	6	0	0	0	0	0	0	200	300	0	0	0	0	0	0	0	200	903	0	0	0	0	0	0	0	603	903	0
580	7	0	0	0	0	0	0	200	300	0	0	0	0	0	0	0	200	903	0	0	0	0	0	0	0	603	903	0
580	8	0	0	0	0	0	0	200	300	0	0	0	0	0	0	0	200	903	0	0	0	0	0	0	0	603	903	0
580	9	0	0	0	0	0	0	200	300	0	0	0	0	0	0	0	200	903	0	0	0	0	0	0	0	603	903	0
581	0	0	0	0	0	0	0	200	300	0	0	0	0	0	0	0	200	903	0	0	0	0	0	0	0	603	903	0
581	1	0	0	0	0	0	0	200	300	0	0	0	0	0	0	0	200	903	0	0	0	0	0	0	0	603	903	0
581	2	0	0	0	0	0	0	200	300	0	0	0	0	0	0	0	200	903	0	0	0	0	0	0	0	603	903	0
581	3	0	0	0	0	0	0	200	300	0	0	0	0	0	0	0	200	903	0	0	0	0	0	0	0	603	903	0
581	4	0	0	0	0	0	0	200	300	0	0	0	0	0	0	0	200	903	0	0	0	0	0	0	0	603	903	0
581	5	0	0	0	0	0	0	200	300	0	0	0	0	0	0	0	200	903	0	0	0	0	0	0	0	603	903	0
581	6	0	0	0	0	0	0	200	300	0	0	0	0	0	0	0	200	903	0	0	0	0	0	0	0	603	903	0
581	7	0	0	0	0	0	0	200	300	0	0	0	0	0	0	0	200	903	0	0	0	0	0	0	0	603	903	0
581	8	0	0	0	0	0	0	200	300	0	0	0	0	0	0	0	200	903	0	0	0	0	0	0	0	603	903	0
581	9	0	0	0	0	0	0	200	300	0	0	0	0	0	0	0	200	903	0	0	0	0	0	0	0	603	903	0
582	0	0	0	0	0	0	0	200	300	0	0	0	0	0	0	0	200	903	0	0	0	0	0	0	0	603	903	0
582	1	0	0	0	0	0	0	200	300	0	0	0	0	0	0	0	200	903	0	0	0	0	0	0	0	603	903	0
582	2	0	0	0	0	0	0	200	300	0	0	0	0	0	0	0	200	903	0	0	0	0	0	0	0	603	903	0
582	3	0	0	0	0	0	0	200	300	0	0	0	0	0	0	0	200	903	0	0	0	0	0	0	0	603	903	0
582	4	0	0	0	0	0	0	200	300	0	0	0	0	0	0	0	200	903	0	0	0	0	0	0	0	603	903	0
582	5	0	0	0	0	0	0	200	300	0	0	0	0	0	0	0	200	903	0	0	0	0	0	0	0	603	903	0
582	6	0	0	0	0	0	0	200	300	0	0	0	0	0	0	0	200	903	0	0	0	0	0	0	0	603	903	0
582	7	0	0	0	0	0	0	200	300	0	0	0	0	0	0	0	200	903	0	0	0	0	0	0	0	603	903	0
582	8	0	0	0	0	0	0	200	300	0	0	0	0	0	0	0	200	903	0	0	0	0	0	0	0	603	903	0
582	9	0	0	0	0	0	0	200	300	0	0	0	0	0	0	0	200	903	0	0	0	0	0	0	0	603	903	0
583	0	0	0	0	0	0	0	200	300	0	0	0	0	0	0	0	200	903	0	0	0	0	0	0	0	603	903	0
583	1	0	0	0	0	0	0	200	300	0	0	0	0	0	0	0	200	903	0	0	0	0	0	0	0	603	903	0
583	2	0	0	0	0	0	0	200	300	0	0	0	0	0	0	0	200	903	0	0	0	0	0	0	0	603	903	0
583	3	0	0	0	0	0	0	200	300	0	0	0	0	0	0	0	200	903	0	0	0	0	0	0	0	603	903	0
583	4	0	0	0	0	0	0	200	300	0	0	0	0	0	0	0	200	903	0	0	0	0	0	0	0	603	903	0
583	5	0	0	0	0	0	0	200	300	0	0	0	0	0	0	0	200	903	0	0	0	0	0	0	0	603	903	0
583	6	0	0	0	0	0	0	200	300	0	0	0	0	0	0	0	200	903	0	0	0	0	0	0	0	603	903	0
583	7	0	0	0	0	0	0	200	300	0	0	0	0	0	0	0	200	903	0	0	0	0	0	0	0	603	903	0
583	8	0	0	0	0	0	0	200	300	0	0	0	0	0	0	0	200	903	0	0	0	0	0	0	0	603	903	0
583	9	0	0	0	0	0	0	200	300	0	0	0	0	0	0	0	200	903	0	0	0	0	0	0	0	603	903	0
584	0	0	0	0	0	0	0	200	300	0	0	0	0	0	0	0	200	903	0	0	0	0	0	0	0	603	903	0
584	1	0	0	0	0	0	0	200	300	0	0	0	0	0	0	0	200	903	0	0	0	0	0	0	0	603	903	0
584	2	0	0	0	0	0	0	200	300	0	0	0	0	0	0	0	200	903	0	0	0	0	0	0	0	603	903	0
584	3	0	0	0	0	0	0	200	300	0	0	0	0	0	0	0	200	903	0	0	0	0	0	0	0	603	903	0
584	4	0	0	0	0	0	0	200	300	0	0	0	0	0	0	0	200	903	0	0	0	0	0	0	0	603	903	0
584	5	0	0	0	0	0	0	200	300	0	0	0	0	0	0	0	200	903	0	0	0	0	0	0	0	603	903	0
584	6	0	0	0	0	0	0	200	300	0	0	0	0	0	0	0	200	903	0	0	0	0	0	0	0	603	903	0
584	7	0	0	0	0	0	0	200	300	0	0	0	0	0	0	0	200	903	0	0	0	0	0	0	0	603	903	0
584	8	0	0	0	0	0	0	200	300	0	0	0	0	0	0	0	200	903	0	0	0	0	0	0	0	603	903	0
584	9	0	0	0	0	0	0	200	300	0	0	0	0	0	0	0	200	903	0	0	0	0	0	0	0	603	903	0
585	0	0	0	0	0	0	0	200	300	0	0	0	0	0	0	0	200	903	0	0	0	0	0	0	0	603	903	0
585	1	0	0	0	0	0	0	200	300	0	0	0	0	0	0	0	200	903	0	0	0	0	0	0	0	603	903	0
585	2	0	0	0	0	0	0	200	300	0	0	0	0	0	0	0	200	903	0	0	0	0	0	0	0	603	903	0
585	3	0	0	0	0	0	0	200	300	0	0	0	0	0	0	0	200	903	0	0	0	0	0	0	0	603	903	0
585	4	0	0	0	0	0	0	200	300	0	0	0	0	0	0	0	200	903	0	0	0	0	0	0	0	603	903	0
585	5	0	0	0	0	0	0	200	300	0	0	0	0	0	0	0	200	903	0	0	0	0	0	0	0	603	903	0
585	6	0	0	0	0	0	0	200	300	0	0	0	0	0	0	0	200	903	0	0	0	0	0	0	0	603	903	0
585	7	0	0	0	0	0	0	200	300	0	0	0	0	0	0	0	200	903	0	0	0	0	0	0	0	603	903	0
585	8	0	0	0	0	0	0	200	300	0	0	0	0	0	0	0	200	903	0	0	0	0	0	0	0	603	903	0
585	9	0	0	0	0	0	0	200	300	0	0	0	0	0	0	0	200	903	0	0	0	0	0	0	0	603	903	0
586	0	0	0	0	0	0	0	200	300	0	0	0	0	0	0	0	200	903	0	0	0	0	0	0	0	603	903	0
586	1	0	0	0	0	0	0	200	300	0	0	0	0	0	0	0	200	903	0	0	0	0	0	0	0	603	903	0
586	2	0	0	0	0	0	0	200	300	0	0	0	0	0	0	0	200	903	0	0	0	0	0	0	0	603	903	0
586	3	0	0	0	0	0	0	200	300	0	0	0	0	0	0	0	200	903	0	0	0	0	0	0	0	603	903	0
586	4	0	0	0	0	0	0	200	300	0	0	0	0	0	0	0	200	903	0	0	0	0	0	0	0	603	903	0
586	5	0	0	0	0	0	0	200	300	0	0	0	0	0	0	0	200	903	0	0	0	0	0	0	0	603	903	0
586	6	0	0	0	0	0	0	200	300	0	0	0	0	0	0	0	200	903	0	0	0	0	0	0	0	603	903	0
586	7	0	0	0	0	0	0	200	300	0	0	0	0	0	0	0	200	903	0	0	0	0	0	0	0	603	903	0
586	8	0	0	0	0	0	0	200	300	0	0	0	0	0	0	0	200	903	0	0	0	0	0	0	0	603	903	0
586	9	0	0	0	0	0	0	200	300	0	0	0	0	0	0	0	200	903	0	0	0	0	0	0	0	603	903	0
587	0	0	0	0	0	0	0	200	300	0	0	0	0	0	0	0	200	903	0	0	0	0	0	0	0	603	903	0
587	1	0	0	0	0	0	0	200	300	0	0	0	0	0	0	0	200	903	0	0	0	0	0	0	0	603	903	0
587	2	0	0	0	0	0	0	200	300	0	0	0	0	0	0	0	200	903	0	0	0	0	0	0	0	603	903	0
587	3	0	0	0	0	0	0	200	300	0	0	0	0	0	0	0	200	903	0	0	0	0	0	0	0	603	903	0
587	4	0	0	0	0	0	0	200	300	0	0	0	0	0	0	0	200	903	0	0	0	0	0	0	0	603	903	0
587	5	0	0	0	0	0	0	200	300	0	0	0	0	0	0	0	200	903	0	0	0	0	0	0	0	603	903	0
587	6	0	0	0	0	0	0	200	300	0	0	0	0	0	0	0	200	903	0	0	0	0	0	0	0	603	903	0
587	7	0	0	0	0	0	0	200	300	0	0	0	0	0	0	0	200	903	0	0	0	0	0	0	0	603	903	0
587	8	0	0	0	0	0	0	200	300	0	0	0	0	0	0	0	200	903	0	0	0	0	0	0	0	603	903	0
587	9	0	0	0	0	0	0	200	300	0	0	0	0	0	0	0	200	903	0	0	0	0	0	0	0	603	903	0
588	0	0	0	0	0	0	0	200	300	0	0	0	0	0	0	0	200	903	0	0	0	0	0	0	0	603	903	0
588	1	0	0	0	0	0	0	200	300	0	0	0	0	0	0	0	200	903	0	0	0	0	0	0	0	603	903	0
588	2	0	0	0	0	0	0	200	300	0	0	0	0	0	0	0	200	903	0	0	0	0	0	0	0	603	903	0
588	3	0	0	0	0	0	0	200	300	0	0	0	0	0	0	0	200	903	0	0	0	0	0	0	0	603	903	0
588	4	0	0	0	0	0	0	200	300	0	0	0	0	0	0	0	200	903	0	0	0	0	0	0	0	603	903	0
588	5	0	0	0	0	0	0	200	300	0	0	0	0	0	0	0	200	903	0	0	0	0	0	0	0	603	903	0
588	6	0	0	0	0	0	0	200	300	0	0	0	0	0	0	0	200	903	0	0	0	0	0	0	0	603	903	0
588	7	0	0	0	0	0	0	200	300	0	0	0	0	0	0	0	200	903	0	0	0	0	0	0	0	603	903	0
588	8	0	0	0	0	0	0	200	300	0	0	0	0	0	0	0	200	903	0	0	0	0	0	0	0	603	903	0
588	9	0	0	0	0	0	0	200	300	0	0	0	0	0	0	0	200	903	0	0	0	0	0	0	0	603	903	0
589	0	0	0	0	0	0	0	200	300	0	0	0	0	0	0	0	200	903	0	0	0	0	0	0	0	603	903	0
589	1	0	0	0	0	0	0	200	300	0	0	0	0	0	0	0	200	903	0	0	0	0	0	0	0	603	903	0
589	2	0	0	0	0	0	0	200	300	0	0	0	0	0	0	0	200	903	0	0	0	0	0	0	0	603	903	0
589	3	0	0	0	0	0	0	200	300	0	0	0	0	0	0	0	200	903	0	0	0	0	0	0	0	603	903	0
589	4	0	0	0	0	0	0	200	300	0	0	0	0	0	0	0	200	903	0	0	0	0	0	0	0	603	903	0
589	5	0	0	0	0	0	0	200	300	0	0	0	0	0	0	0	200	903	0	0	0	0	0	0	0	603	903	0
589	6	0	0	0	0	0	0	200	300	0	0	0	0	0	0	0	200	903	0	0	0	0	0	0	0	603	903	0
589	7	0	0	0	0	0	0	200	300	0	0	0	0	0	0	0	200	903	0	0	0	0	0	0	0	603	903	0
589	8	0	0	0	0	0	0	200	300	0	0	0	0	0	0	0	200	903	0	0	0	0	0	0	0	603	903	0
589	9	0	0	0	0	0	0	200	300	0	0	0	0	0	0	0	200	903	0	0	0	0	0	0	0	603	903	0
590	0	0	0	0	0	0	0	200	300	0	0	0	0	0	0	0	200	903	0	0	0	0	0	0	0	603	903	0
590	1	0	0	0	0	0	0	200	300	0	0	0	0	0	0	0	200	903	0	0	0	0	0	0	0	603	903	0
590	2	0	0	0	0	0	0	200	300	0	0	0	0	0	0	0	200	903	0	0	0	0	0	0	0	603	903	0
590	3	0	0	0	0	0	0	200	300	0	0	0	0	0	0	0	200	903	0	0	0	0	0	0	0	603	903	0
590	4	0	0	0	0	0	0	200	300	0	0	0	0	0	0	0	200	903	0	0	0	0	0	0	0	603	903	0
590	5	0	0	0	0	0	0	200	300	0	0	0	0	0	0	0	200	903	0	0	0	0	0	0	0	603	903	0
590	6	0	0	0	0	0	0	200	300	0	0	0	0	0	0	0	200	903	0	0	0	0	0	0	0	603	903	0
590	7	0	0	0	0	0	0	200	300	0	0	0	0	0	0	0	200	903	0	0	0	0	0	0	0	603	903	0
590	8	0	0	0	0	0	0	200	300	0	0	0	0	0	0	0	200	903	0	0	0	0	0	0	0	603	903	0
590	9	0	0	0	0	0	0	200	300	0	0	0	0	0	0	0	200	903	0	0	0	0	0	0	0	603	903	0
591	0	0	0	0	0	0	0	200	300	0	0	0	0	0	0	0	200	903	0	0	0	0	0	0	0	603	903	0
591	1	0	0	0	0	0	0	200	300	0	0	0	0	0	0	0	200	903	0	0	0	0	0	0	0	603	903	0
591	2	0	0	0	0	0	0	200	300	0	0	0	0	0	0	0	200	903	0	0	0	0	0	0	0	603	903	0
591	3	0	0	0	0	0	0	200	300	0	0	0	0	0	0	0	200	903	0	0	0	0	0	0	0	603	903	0
591	4	0	0	0	0	0	0	200	300	0	0	0	0	0	0	0	200	903	0	0	0	0	0	0	0	603	903	0
591	5	0	0	0	0	0	0	200	300	0	0	0	0	0	0	0	200	903	0	0	0	0	0	0	0	603	903	0
591	6	0	0	0	0	0	0	200	300	0	0	0	0	0	0	0	200	903	0	0	0	0	0	0	0	603	903	0
591	7	0	0	0	0	0	0	200	300	0	0	0	0	0	0	0	200	903	0	0	0	0	0	0	0	603	903	0
591	8	0	0	0	0	0	0	200	300	0	0	0	0	0	0	0	200	903	0	0	0	0	0	0	0	603	903	0
591	9	0	0	0	0	0	0	200	300	0	0	0	0	0	0	0	200	903	0	0	0	0	0	0	0	603	903	0
592	0	0	0	0	0	0	0	200	300	0	0	0	0	0	0	0	200	903	0	0	0	0	0	0	0	603	903	0
592	1	0	0	0	0	0	0	200	300	0	0	0	0	0	0	0	200	903	0	0	0	0	0	0	0	603	903	0
592	2	0	0	0	0	0	0	200	300	0	0	0	0	0	0	0	200	903	0	0	0	0	0	0	0	603	903	0
592	3	0	0	0	0	0	0	200	300	0	0	0	0	0	0	0	200	903	0	0	0	0	0	0	0	603	903	0
592	4	0	0	0	0	0	0	200	300	0	0	0	0	0	0	0	200	903	0	0	0	0	0	0	0	603	903	0
592	5	0	0	0	0	0	0	200	300	0	0	0	0	0	0	0	200	903	0	0	0	0	0	0	0	603	903	0
592	6	0	0	0	0	0	0	200	300	0	0	0	0	0	0	0	200	903	0	0	0	0	0	0	0	603	903	0
592	7	0	0	0	0	0	0	200	300	0	0	0	0	0	0	0	200	903	0	0	0	0	0	0	0	603	903	0
592	8	0	0	0	0	0	0	200	300	0	0	0	0	0	0	0	200	903	0	0	0	0	0	0	0	603	903	0
592	9	0	0	0	0	0	0	200	300	0	0	0	0	0	0	0	200	903	0	0	0	0	0	0	0	603	903	0
593	0	0	0	0	0	0	0	200	300	0	0	0	0	0	0	0	200	903	0	0	0	0	0	0	0	603	903	0
593	1	0	0	0	0	0	0	200	300	0	0	0	0	0	0	0	200	903	0	0	0	0	0	0	0	603	903	0
593	2	0	0	0	0	0	0	200	300	0	0	0	0	0	0	0	200	903	0	0	0	0	0	0	0	603	903	0
593	3	0	0	0	0	0	0	200	300	0	0	0	0	0	0	0	200	903	0	0	0	0	0	0	0	603	903	0
593	4	0	0	0	0	0	0	200	300	0	0	0	0	0	0	0	200	903	0	0	0	0	0	0	0	603	903	0
593	5	0	0	0	0	0	0	200	300	0	0	0	0	0	0	0	200	903	0	0	0	0	0	0	0	603	903	0
593	6	0	0	0	0	0	0	200	300	0	0	0	0	0	0	0	200	903	0	0	0	0	0	0	0	603	903	0
593	7	0	0	0	0	0	0	200	300	0	0	0	0	0	0	0	200	903	0	0	0	0	0	0	0	603	903	0
593	8	0	0	0	0	0	0	200	300	0	0	0	0	0	0	0	200	903	0	0	0	0	0	0	0	603	903	0
593	9	0	0	0	0	0	0	200	300	0	0	0	0	0	0	0	200	903	0	0	0	0	0	0	0	603	903	0
594	0	0	0	0	0	0	0	200	300	0	0	0	0	0	0	0	200	903	0	0	0	0	0	0	0	603	903	0
594	1	0	0	0	0	0	0	200	300	0	0	0	0	0	0	0	200	903	0	0	0	0	0	0	0	603	903	0
594	2	0	0	0	0	0	0	200	300	0	0	0	0	0	0	0	200	903	0	0	0	0	0	0	0	603	903	0
594	3	0	0	0	0	0	0	200	300	0	0	0	0	0	0	0	200	903	0	0	0	0	0	0	0	603	903	0
594	4	0	0	0	0	0	0	200	300	0	0	0	0	0	0	0	200	903	0	0	0	0	0	0	0	603	903	0
594	5	0	0	0	0	0	0	200	300	0	0	0	0	0	0	0	200	903	0	0	0	0	0	0	0	603	903	0
594	6	0	0	0	0	0	0	200	300	0	0	0	0	0	0	0	200	903	0	0	0	0	0	0	0	603	903	0
594	7	0	0	0	0	0	0	200	300	0	0	0	0	0	0	0	200	903	0	0	0	0	0	0	0	603	903	0
594	8	0	0	0	0	0	0	200	300	0	0	0	0	0	0	0	200	903	0	0	0	0	0	0	0	603	903	0
594	9	0	0	0	0	0	0	200	300	0	0	0	0	0	0	0	200	903	0	0	0	0	0	0	0	603	903	0
595	0	0	0	0	0	0	0	200	300	0	0	0	0	0	0	0	200	903	0	0	0	0	0	0	0	603	903	0
595	1	0	0	0	0	0	0	200	300	0	0	0	0	0	0	0	200	903	0	0	0	0	0	0	0	603	903	0
595	2	0	0	0	0	0	0	200	300	0	0	0	0	0	0	0	200	903	0	0	0	0	0	0	0	603	903	0
595	3	0	0	0	0	0	0	200	300	0	0	0	0	0	0	0	200	903	0	0	0	0	0	0	0	603	903	0
595	4	0	0	0	0	0	0	200	300	0	0	0	0	0	0	0	200	903	0	0	0	0	0	0	0	603	903	0
595	5	0	0	0	0	0	0	200	300	0	0	0	0	0	0	0	200	903	0	0	0	0	0	0	0	603	903	0
595	6	0	0	0	0	0	0	200	300	0	0	0	0	0	0	0	200	903	0	0	0	0	0	0	0	603	903	0
595	7	0	0	0	0	0	0	200	300	0	0	0	0	0	0	0	200	903	0	0	0	0	0	0	0	603	903	0
595	8	0	0	0	0	0	0	200	300	0	0	0	0	0	0	0	200	903	0	0	0	0	0	0	0	603	903	0
595	9	0	0	0	0	0	0	200	300	0	0	0	0	0	0	0	200	903	0	0	0	0	0	0	0	603	903	0
596	0	0	0	0	0	0	0	200	300	0	0	0	0	0	0	0	200	903	0	0	0	0	0	0	0	603	903	0
596	1	0	0	0	0	0	0	200	300	0	0	0	0	0	0	0	200	903	0	0	0	0	0	0	0	603	903	0
596	2	0	0	0	0	0	0	200	300	0	0	0	0	0	0	0	200	903	0	0	0	0	0	0	0	603	903	0
596	3	0	0	0	0	0	0	200	300	0	0	0	0	0	0	0	200	903	0	0	0	0	0	0	0	603	903	0
596	4	0	0	0	0	0	0	200	300	0	0	0	0	0	0	0	200	903	0	0	0	0	0	0	0	603	903	0
596	5	0	0	0	0	0	0	200	300	0	0	0	0	0	0	0	200	903	0	0	0	0	0	0	0	603	903	0
596	6	0	0	0	0	0	0	200	300	0	0	0	0	0	0	0	200	903	0	0	0	0	0	0	0	603	903	0
596	7	0	0	0	0	0	0	200	300	0	0	0	0	0	0	0	200	903	0	0	0	0	0	0	0	603	903	0
596	8	0	0	0	0	0	0	200	300	0	0	0	0	0	0	0	200	903	0	0	0	0	0	0	0	603	903	0
596	9	0	0	0	0	0	0	200	300	0	0	0	0	0	0	0	200	903	0	0	0	0	0	0	0	603	903	0
597	0	0	0	0	0	0	0	200	300	0	0	0	0	0	0	0	200	903	0	0	0	0	0	0	0	603	903	0
597	1	0	0	0	0	0	0	200	300	0	0	0	0	0	0	0	200	903	0	0	0	0	0	0	0	603	903	0
597	2	0	0	0	0	0	0	200	300	0	0	0	0	0	0	0	200	903	0	0	0	0	0	0	0	603	903	0
597	3	0	0	0	0	0	0	200	300	0	0	0	0	0	0	0	200	903	0	0	0	0	0	0	0	603	903	0
597	4	0	0	0	0	0	0	200	300	0	0	0	0	0	0	0	200	903	0	0	0	0	0	0	0	603	903	0
597	5	0	0	0	0	0	0	200	300	0	0	0	0	0	0	0	200	903	0	0	0	0	0	0	0	603	903	0
597	6	0	0	0	0	0	0	200	300	0	0	0	0	0	0	0	200	903	0	0	0	0	0	0	0	603	903	0
597	7	0	0	0	0	0	0	200	300	0	0	0	0	0	0	0	200	903	0	0	0	0	0	0	0	603	903	0
597	8	0	0	0	0	0	0	200	300	0	0	0	0	0	0	0	200	903	0	0	0	0	0	0	0	603	903	0
597	9	0	0	0	0	0	0	200	300	0	0	0	0	0	0	0	200	903	0	0	0	0	0	0	0	603	903	0
598	0	0	0	0	0	0	0	200	300	0	0	0	0	0	0	0	200	903	0	0	0	0	0	0	0	603	903	0
598	1	0	0	0	0	0	0	200	300	0	0	0	0	0	0	0	200	903	0	0	0	0	0	0	0	603	903	0
598	2	0	0	0	0	0	0	200	300	0	0	0	0	0	0	0	200	903	0	0	0	0	0	0	0	603	903	0
598	3	0	0	0	0	0	0	200	300	0	0	0	0	0	0	0	200	903	0	0	0	0	0	0	0	603	903	0
598	4	0	0	0	0	0	0	200	300	0	0	0	0	0	0	0	200	903	0	0	0	0	0	0	0	603	903	0
598	5	0	0	0	0	0	0	200	300	0	0	0	0	0	0	0	200	903	0	0	0	0	0	0	0	603	903	0
598	6	0	0	0	0	0	0	200	300	0	0	0	0	0	0	0	200	903	0	0	0	0	0	0	0	603	903	0
598	7	0	0	0	0	0	0	200	300	0	0	0	0	0	0	0	200	903	0	0	0	0	0	0	0	603	903	0
598	8	0	0	0	0	0	0	200	300	0	0	0	0	0	0	0	200	903	0	0	0	0	0	0	0	603	903	0
598	9	0	0	0	0	0	0	200	300	0	0	0	0	0	0	0	200	903	0	0	0	0	0	0	0	603	903	0
599	0	0	0	0	0	0	0	200	300	0	0	0	0	0	0	0	200	903	0	0	0	0	0	0	0	603	903	0
599	1	0	0	0	0	0	0	200	300	0	0	0	0	0	0	0	200	903	0	0	0	0	0	0	0	603	903	0
599	2	0	0	0	0	0	0	200	300	0	0	0	0	0	0	0	200	903	0	0	0	0	0	0	0	603	903	0
599	3	0	0	0	0	0	0	200	300	0	0	0	0	0	0	0	200	903	0	0	0	0	0	0	0	603	903	0
599	4	0	0	0	0	0	0	200	300	0	0	0	0	0	0	0	200	903	0	0	0	0	0	0	0	603	903	0
599	5	0	0	0	0	0	0	200	300	0	0	0	0	0	0	0	200	903	0	0	0	0	0	0	0	603	903	0
599	6	0	0	0	0	0	0	200	300	0	0	0	0	0	0	0	200	903	0	0	0	0	0	0	0	603	903	0
599	7	0	0	0	0	0	0	200	300	0	0	0	0	0	0	0	200	903	0	0	0	0	0	0	0	603	903	0
599	8	0	0	0	0	0	0	200	300	0	0	0	0	0	0	0	200	903	0	0	0	0	0	0	0	603	903	0
599	9	0	0	0	0	0	0	200	300	0	0	0	0	0	0	0	200	903	0	0	0	0	0	0	0	603	903	0
600	0	0	0	0	0	0	0	200	300	0	0	0	0	0	0	0	200	903	0	0	0	0	0	0	0	603	903	0
600	1	0	0	0	0	0	0	200	300	0	0	0	0	0	0	0	200	903	0	0	0	0	0	0	0	603	903	0
600	2	0	0	0	0	0	0	200	300	0	0	0	0	0	0	0	200	903	0	0	0	0	0	0	0	603	903	0
600	3	0	0	0	0	0	0	200	300	0	0	0	0	0	0	0	200	903	0	0	0	0	0	0	0	603	903	0
600	4	0	0	0	0	0	0	200	300	0	0	0	0	0	0	0	200	903	0	0	0	0	0	0	0	603	903	0
600	5	0	0	0	0	0	0	200	300	0	0	0	0	0	0	0	200	903	0	0	0	0	0	0	0	603	903	0
600	6	0	0	0	0	0	0	200	300	0	0	0	0	0	0	0	200	903	0	0	0	0	0	0	0	603	903	0
600	7	0	0	0	0	0	0	200	300	0	0	0	0	0	0	0	200	903	0	0	0	0	0	0	0	603	903	0
600	8	0	0	0	0	0	0	200	300	0	0	0	0	0	0	0	200	903	0	0	0	0	0	0	0	603	903	0
600	9	0	0	0	0	0	0	200	300	0	0	0	0	0	0	0	200	903	0	0	0	0	0	0	0	603	903	0
601	0	0	0	0	0	0	0	200	300	0	0	0	0	0	0	0	200	903	0	0	0	0	0	0	0	603	903	0
601	1	0	0	0	0	0	0	200	300	0	0	0	0	0	0	0	200	903	0	0	0	0	0	0	0	603	903	0
601	2	0	0	0	0	0	0	200	300	0	0	0	0	0	0	0	200	903	0	0	0	0	0	0	0	603	903	0
601	3	0	0	0	0	0	0	200	300	0	0	0	0	0	0	0	200	903	0	0	0	0	0	0	0	603	903	0
601	4	0	0	0	0	0	0	200	300	0	0	0	0	0	0	0	200	903	0	0	0	0	0	0	0	603	903	0
601	5	0	0	0	0	0	0	200	300	0	0	0	0	0	0	0	200	903	0	0	0	0	0	0	0	603	903	0
601	6	0	0	0	0	0	0	200	300	0	0	0	0	0	0	0	200	903	0	0	0	0	0	0	0	603	903	0
601	7	0	0	0	0	0	0	200	300	0	0	0	0	0	0	0	200	903	0	0	0	0	0	0	0	603	903	0
601	8	0	0	0	0	0	0	200	300	0	0	0	0	0	0	0	200	903	0	0	0	0	0	0	0	603	903	0
601	9	0	0	0	0	0	0	200	300	0	0	0	0	0	0	0	200	903	0	0	0	0	0	0	0	603	903	0
602	0	0	0	0	0	0	0	200	300	0	0	0	0	0	0	0	200	903	0	0	0	0	0	0	0	603	903	0
602	1	0	0	0	0	0	0	200	300	0	0	0	0	0	0	0	200	903	0	0	0	0	0	0	0	603	903	0
602	2	0	0	0	0	0	0	200	300	0	0	0	0	0	0	0	200	903	0	0	0	0	0	0	0	603	903	0
602	3	0	0	0	0	0	0	200	300	0	0	0	0	0	0	0	200	903	0	0	0	0	0	0	0	603	903	0
602	4	0	0	0	0	0	0	200	300	0	0	0	0	0	0	0	200	903	0	0	0	0	0	0	0	603	903	0
602	5	0	0	0	0	0	0	200	300	0	0	0	0	0	0	0	200	903	0	0	0	0	0	0	0	603	903	0
602	6	0	0	0	0	0	0	200	300	0	0	0	0	0	0	0	200	903	0	0	0	0	0	0	0	603	903	0
602	7	0	0	0	0	0	0	200	300	0	0	0	0	0	0	0	200	903	0	0	0	0	0	0	0	603	903	0
602	8	0	0	0	0	0	0	200	300	0	0	0	0	0	0	0	200	903	0	0	0	0	0	0	0	603	903	0
602	9	0	0	0	0	0	0	200	300	0	0	0	0	0	0	0	200	903	0	0	0	0	0	0	0	603	903	0
603	0	0	0	0	0	0	0	200	300	0	0	0	0	0	0	0	200	903	0	0	0	0	0	0	0	603	903	0
603	1	0	0	0	0	0	0	200	300	0	0	0	0	0	0	0	200	903	0	0	0	0	0	0	0	603	903	0
603	2	0	0	0	0	0	0	200	300	0	0	0	0	0	0	0	200	903	0	0	0	0	0	0	0	603	903	0
603	3	0	0	0	0	0	0	200	300	0	0	0	0	0	0	0	200	903	0	0	0	0	0	0	0	603	903	0
603	4	0	0	0	0	0	0	200	300	0	0	0	0	0	0	0	200	903	0	0	0	0	0	0	0	603	903	0
603	5	0	0	0	0	0	0	200	300	0	0	0	0	0	0	0	200	903	0	0	0	0	0	0	0	603	903	0
603	6	0	0	0	0	0	0	200	300	0	0	0	0	0	0	0	200	903	0	0	0	0	0	0	0	603	903	0
603	7	0	0	0	0	0	0	200	300	0	0	0	0	0	0	0	200	903	0	0	0	0	0	0	0	603	903	0
603	8	0	0	0	0	0	0	200	300	0	0	0	0	0	0	0	200	903	0	0	0	0	0	0	0	603	903	0
603	9	0	0	0	0	0	0	200	300	0	0	0	0	0	0	0	200	903	0	0	0	0	0	0	0	603	903	0
604	0	0	0	0	0	0	0	200	300	0	0	0	0	0	0	0	200	903	0	0	0	0	0	0	0	603	903	0
604	1	0	0	0	0	0	0	200	300	0	0	0	0	0	0	0	200	903	0	0	0	0	0	0	0	603	903	0
604	2	0	0	0	0	0	0	200	300	0	0	0	0	0	0	0	200	903	0	0	0	0	0	0	0	603	903	0
604	3	0	0	0	0	0	0	200	300	0	0	0	0	0	0	0	200	903	0	0	0	0	0	0	0	603	903	0
604	4	0	0	0	0	0	0	200	300	0	0	0	0	0	0	0	200	903	0	0	0	0	0	0	0	603	903	0
604	5	0	0	0	0	0	0	200	300	0	0	0	0	0	0	0	200	903	0	0	0	0	0	0	0	603	903	0
604	6	0	0	0	0	0	0	200	300	0	0	0	0	0	0	0	200	903	0	0	0	0	0	0	0	603	903	0
604	7	0	0	0	0	0	0	200	300	0	0	0	0	0	0	0	200	903	0	0	0	0	0	0	0	603	903	0
604	8	0	0	0	0	0	0	200	300	0	0	0	0	0	0	0	200	903	0	0	0	0	0	0	0	603	903	0
604	9	0	0	0	0	0	0	200	300	0	0	0	0	0	0	0	200	903	0	0	0	0	0	0	0	603	903	0
605	0	0	0	0	0	0	0	200	300	0	0	0	0	0	0	0	200	903	0	0	0	0	0	0	0	603	903	0
605	1	0	0	0	0	0	0	200	300	0	0	0	0	0	0	0	200	903	0	0	0	0	0	0	0	603	903	0
605	2	0	0	0	0	0	0	200	300	0	0	0	0	0	0	0	200	903	0	0	0	0	0	0	0	603	903	0
605	3	0	0	0	0	0	0	200	300	0	0	0	0	0	0	0	200	903	0	0	0	0	0	0	0	603	903	0
605	4	0	0	0	0	0	0	200	300	0	0	0	0	0	0	0	200	903	0	0	0	0	0	0	0	603	903	0
605	5	0	0	0	0	0	0	200	300	0	0	0	0	0	0	0	200	903	0	0	0	0	0	0	0	603	903	0
605	6	0	0	0	0	0	0	200	300	0	0	0	0	0	0	0	200	903	0	0	0	0	0	0	0	603	903	0
605	7	0	0	0	0	0	0	200	300	0	0	0	0	0	0	0	200	903	0	0	0	0	0	0	0	603	903	0
605	8	0	0	0	0	0	0	200	300	0	0	0	0	0	0	0	200	903	0	0	0	0	0	0	0	603	903	0
605	9	0	0	0	0	0	0	200	300	0	0	0	0	0	0	0	200	903	0	0	0	0	0	0	0	603	903	0
606	0	0	0	0	0	0	0	200	300	0	0	0	0	0	0	0	200	903	0	0	0	0	0	0	0	603	903	0
606	1	0	0	0	0	0	0	200	300	0	0	0	0	0	0	0	200	903	0	0	0	0	0	0	0	603	903	0
606	2	0	0	0	0	0	0	200	300	0	0	0	0	0	0	0	200	903	0	0	0	0	0	0	0	603	903	0
606	3	0	0	0	0	0	0	200	300	0	0	0	0	0	0	0	200	903	0	0	0	0	0	0	0	603	903	0
606	4	0	0	0	0	0	0	200	300	0	0	0	0	0	0	0	200	903	0	0	0	0	0	0	0	603	903	0
606	5	0	0	0	0	0	0	200	300	0	0	0	0	0	0	0	200	903	0	0	0	0	0	0	0	603	903	0
606	6	0	0	0	0	0	0	200	300	0	0	0	0	0	0	0	200	903	0	0	0	0	0	0	0	603	903	0
606	7	0	0	0	0	0	0	200	300	0	0	0	0	0	0	0	200	903	0	0	0	0	0	0	0	603	903	0
606	8	0	0	0	0	0	0	200	300	0	0	0	0	0	0	0	200	903	0	0	0	0	0	0	0	603	903	0
606	9	0	0	0	0	0	0	200	300	0	0	0	0	0	0	0	200	903	0	0	0	0	0	0	0	603	903	0
607	0	0	0	0	0	0	0	200	300	0	0	0	0	0	0	0	200	903	0	0	0	0	0	0	0	603	903	0
607	1	0	0	0	0	0	0	200	300	0	0	0	0	0	0	0	200	903	0	0	0	0	0	0	0	603	903	0
607	2	0	0	0	0	0	0	200	300	0	0	0	0	0	0	0	200	903	0	0	0	0	0	0	0	603	903	0
607	3	0	0	0	0	0	0	200	300	0	0	0	0	0	0	0	200	903	0	0	0	0	0	0	0	603	903	0
607	4	0	0	0	0	0	0	200	300	0	0	0	0	0	0	0	200	903	0	0	0	0	0	0	0	603	903	0
607	5	0	0	0	0	0	0	200	300	0	0	0	0	0	0	0	200	903	0	0	0	0	0	0	0	603	903	0
607	6	0	0	0	0	0	0	200	300	0	0	0	0	0	0	0	200	903	0	0	0	0	0	0	0	603	903	0
607	7	0	0	0	0	0	0	200	300	0	0	0	0	0	0	0	200	903	0	0	0	0	0	0	0	603	903	0
607	8	0	0	0	0	0	0	200	300	0	0	0	0	0	0	0	200	903	0	0	0	0	0	0	0	603	903	0
607	9	0	0	0	0	0	0	200	300	0	0	0	0	0	0	0	200	903	0	0	0	0	0	0	0	603	903	0
608	0	0	0	0	0	0	0	200	300	0	0	0	0	0	0	0	200	903	0	0	0	0	0	0	0	603	903	0
608	1	0	0	0	0	0	0	200	300	0	0	0	0	0	0	0	200	903	0	0	0	0	0	0	0	603	903	0
608	2	0	0	0	0	0	0	200	300	0	0	0	0	0	0	0	200	903	0	0	0	0	0	0	0	603	903	0
608	3	0	0	0	0	0	0	200	300	0	0	0	0	0	0	0	200	903	0	0	0	0	0	0	0	603	903	0
608	4	0	0	0	0	0	0	200	300	0	0	0	0	0	0	0	200	903	0	0	0	0	0	0	0	603	903	0
608	5	0	0	0	0	0	0	200	300	0	0	0	0	0	0	0	200	903	0	0	0	0	0	0	0	603	903	0
608	6	0	0	0	0	0	0	200	300	0	0	0	0	0	0	0	200	903	0	0	0	0	0	0	0	603	903	0
608	7	0	0	0	0	0	0	200	300	0	0	0	0	0	0	0	200	903	0	0	0	0	0	0	0	603	903	0
608	8	0	0	0	0	0	0	200	300	0	0	0	0	0	0	0	200	903	0	0	0	0	0	0	0	603	903	0
608	9	0	0	0	0	0	0	200	300	0	0	0	0	0	0	0	200	903	0	0	0	0	0	0	0	603	903	0
609	0	0	0	0	0	0	0	200	300	0	0	0	0	0	0	0	200	903	0	0	0	0	0	0	0	603	903	0
609	1	0	0	0	0	0	0	200	300	0	0	0	0	0	0	0	200	903	0	0	0	0	0	0	0	603	903	0
609	2	0	0	0	0	0	0	200	300	0	0	0	0	0	0	0	200	903	0	0	0	0	0	0	0	603	903	0
609	3	0	0	0	0	0	0	200	300	0	0	0	0	0	0	0	200	903	0	0	0	0	0	0	0	603	903	0
609	4	0	0	0	0	0	0	200	300	0	0	0	0	0	0	0	200	903	0	0	0	0	0	0	0	603	903	0
609	5	0	0	0	0	0	0	200	300	0	0	0	0	0	0	0	200	903	0	0	0	0	0	0	0	603	903	0
609	6	0	0	0	0	0	0	200	300	0	0	0	0	0	0	0	200	903	0	0	0	0	0	0	0	603	903	0
609	7	0	0	0	0	0	0	200	300	0	0	0	0	0	0	0	200	903	0	0	0	0	0	0	0	603	903	0
609	8	0	0	0	0	0	0	200	300	0	0	0	0	0	0	0	200	903	0	0	0	0	0	0	0	603	903	0
609	9	0	0	0	0	0	0	200	300	0	0	0	0	0	0	0	200	903	0	0	0	0	0	0	0	603	903	0
610	0	0	0	0	0	0	0	200	300	0	0	0	0	0	0	0	200	903	0	0	0	0	0	0	0	603	903	0
610	1	0	0	0	0	0	0	200	300	0	0	0	0	0	0	0	200	903	0	0	0	0	0	0	0	603	903	0
610	2	0	0	0	0	0	0	200	300	0	0	0	0	0	0	0	200	903	0	0	0	0	0	0	0	603	903	0
610	3	0	0	0	0	0	0	200	300	0	0	0	0	0	0	0	200	903	0	0	0	0	0	0	0	603	903	0
610	4	0	0	0	0	0	0	200	300	0	0	0	0	0	0	0	200	903	0	0	0	0	0	0	0	603	903	0
610	5	0	0	0	0	0	0	200	300	0	0	0	0	0	0	0	200	903	0	0	0	0	0	0	0	603	903	0
610	6	0	0	0	0	0	0	200	300	0	0	0	0	0	0	0	200	903	0	0	0	0	0	0	0	603	903	0
610	7	0	0	0	0	0	0	200	300	0	0	0	0	0	0	0	200	903	0	0	0	0	0	0	0	603	903	0
610	8	0	0	0	0	0	0	200	300	0	0	0	0	0	0	0	200	903	0	0	0	0	0	0	0	603	903	0
610	9	0	0	0	0	0	0	200	300	0	0	0	0	0	0	0	200	903	0	0	0	0	0	0	0	603	903	0
611	0	0	0	0	0	0	0	200	300	0	0	0	0	0	0	0	200	903	0	0	0	0	0	0	0	603	903	0
611	1	0	0	0	0	0	0	200	300	0	0	0	0	0	0	0	200	903	0	0	0	0	0	0	0	603	903	0
611	2	0	0	0	0	0	0	200	300	0	0	0	0	0	0	0	200	903	0	0	0	0	0	0	0	603	903	0
611	3	0	0	0	0	0	0	200	300	0	0	0	0	0	0	0	200	903	0	0	0	0	0	0	0	603	903	0
611	4	0	0	0	0	0	0	200	300	0	0	0	0	0	0	0	200	903	0	0	0	0	0	0	0	603	903	0
611	5	0	0	0	0	0	0	200	300	0	0	0	0	0	0	0	200	903	0	0	0	0	0	0	0	603	903	0
611	6	0	0	0	0	0	0	200	300	0	0	0	0	0	0	0	200	903	0	0	0	0	0	0	0	603	903	0
611	7	0	0	0	0	0	0	200	300	0	0	0	0	0	0	0	200	903	0	0	0	0	0	0	0	603	903	0
611	8	0	0	0	0	0	0	200	300	0	0	0	0	0	0	0	200	903	0	0	0	0	0	0	0	603	903	0
611	9	0	0	0	0	0	0	200	300	0	0	0	0	0	0	0	200	903	0	0	0	0	0	0	0	603	903	0
612	0	0	0	0	0	0	0	200	300	0	0	0	0	0	0	0	200	903	0	0	0	0	0	0	0	603	903	0
612	1	0	0	0	0	0	0	200	300	0	0	0	0	0	0	0	200	903	0	0	0	0	0	0	0	603	903	0
612	2	0	0	0	0	0	0	200	300	0	0	0	0	0	0	0	200	903	0	0	0	0	0	0	0	603	903	0
612	3	0	0	0	0	0	0	200	300	0	0	0	0	0	0	0	200	903	0	0	0	0	0	0	0	603	903	0
612	4	0	0	0	0	0	0	200	300	0	0	0	0	0	0	0	200	903	0	0	0	0	0	0	0	603	903	0
612	5	0	0	0	0	0	0	200	300	0	0	0	0	0	0	0	200	903	0	0	0	0	0	0	0	603	903	0
612	6	0	0	0	0	0	0	200	300	0	0	0	0	0	0	0	200	903	0	0	0	0	0	0	0	603	903	0
612	7	0	0	0	0	0	0	200	300	0	0	0	0	0	0	0	200	903	0	0	0	0	0	0	0	603	903	0
612	8	0	0	0	0	0	0	200	300	0	0	0	0	0	0	0	200	903	0	0	0	0	0	0	0	603	903	0
612	9	0	0	0	0	0	0	200	300	0	0	0	0	0	0	0	200	903	0	0	0	0	0	0	0	603	903	0
613	0	0	0	0	0	0	0	200	300	0	0	0	0	0	0	0	200	903	0	0	0	0	0	0	0	603	903	0
613	1	0	0	0	0	0	0	200	300	0	0	0	0	0	0	0	200	903	0	0	0	0	0	0	0	603	903	0
613	2	0	0	0	0	0	0	200	300	0	0	0	0	0	0	0	200	903	0	0	0	0	0	0	0	603	903	0
613	3	0	0	0	0	0	0	200	300	0	0	0	0	0	0	0	200	903	0	0	0	0	0	0	0	603	903	0
613	4	0	0	0	0	0	0	200	300	0	0	0	0	0	0	0	200	903	0	0	0	0	0	0	0	603	903	0
613	5	0	0	0	0	0	0	200	300	0	0	0	0	0	0	0	200	903	0	0	0	0	0	0	0	603	903	0
613	6	0	0	0	0	0	0	200	300	0	0	0	0	0	0	0	200	903	0	0	0	0	0	0	0	603	903	0
613	7	0	0	0	0	0	0	200	300	0	0	0	0	0	0	0	200	903	0	0	0	0	0	0	0	603	903	0
613	8	0	0	0	0	0	0	200	300	0	0	0	0	0	0	0	200	903	0	0	0	0	0	0	0	603	903	0
613	9	0	0	0	0	0	0	200	300	0	0	0	0	0	0	0	200	903	0	0	0	0	0	0	0	603	903	0
614	0	0	0	0	0	0	0	200	300	0	0	0	0	0	0	0	200	903	0	0	0	0	0	0	0	603	903	0
614	1	0	0	0	0	0	0	200	300	0	0	0	0	0	0	0	200	903	0	0	0	0	0	0	0	603	903	0
614	2	0	0	0	0	0	0	200	300	0	0	0	0	0	0	0	200	903	0	0	0	0	0	0	0	603	903	0
614	3	0	0	0	0	0	0	200	300	0	0	0	0	0	0	0	200	903	0	0	0	0	0	0	0	603	903	0
614	4	0	0	0	0	0	0	200	300	0	0	0	0	0	0	0	200	903	0	0	0	0	0	0	0	603	903	0
614	5	0	0	0	0	0	0	200	300	0	0	0	0	0	0	0	200	903	0	0	0	0	0	0	0	603	903	0
614	6	0	0	0	0	0	0	200	300	0	0	0	0	0	0	0	200	903	0	0	0	0	0	0	0	603	903	0
614	7	0	0	0	0	0	0	200	300	0	0	0	0	0	0	0	200	903	0	0	0	0	0	0	0	603	903	0
614	8	0	0	0	0	0	0	200	300	0	0	0	0	0	0	0	200	903	0	0	0	0	0	0	0	603	903	0
614	9	0	0	0	0	0	0	200	300	0	0	0	0	0	0	0	200	903	0	0	0	0	0	0	0	603	903	0
615	0	0	0	0	0	0	0	200	300	0	0	0	0	0	0	0	200	903	0	0	0	0	0	0	0	603	903	0
615	1	0	0	0	0	0	0	200	300	0	0	0	0	0	0	0	200	903	0	0	0	0	0	0	0	603	903	0
615	2	0	0	0	0	0	0	200	300	0	0	0	0	0	0	0	200	903	0	0	0	0	0	0	0	603	903	0
615	3	0	0	0	0	0	0	200	300	0	0	0	0	0	0	0	200	903	0	0	0	0	0	0	0	603	903	0
615	4	0	0	0	0	0	0	200	300	0	0	0	0	0	0	0	200	903	0	0	0	0	0	0	0	603	903	0
615	5	0	0	0	0	0	0	200	300	0	0	0	0	0	0	0	200	903	0	0	0	0	0	0	0	603	903	0
615	6	0	0	0	0	0	0	200	300	0	0	0	0	0	0	0	200	903	0	0	0	0	0	0	0	603	903	0
615	7	0	0	0	0	0	0	200	300	0	0	0	0	0	0	0	200	903	0	0	0	0	0	0	0	603	903	0
615	8	0	0	0	0	0	0	200	300	0	0	0	0	0	0	0	200	903	0	0	0	0	0	0	0	603	903	0
615	9	0	0	0	0	0	0	200	300	0	0	0	0	0	0	0	200	903	0	0	0	0	0	0	0	603	903	0
616	0	0	0	0	0	0	0	200	300	0	0	0	0	0	0	0	200	903	0	0	0	0	0	0	0	603	903	0
616	1	0	0	0	0	0	0	200	300	0	0	0	0	0	0	0	200	903	0	0	0	0	0	0	0	603	903	0
616	2	0	0	0	0	0	0	200	300	0	0	0	0	0	0	0	200	903	0	0	0	0	0	0	0	603	903	0
616	3	0	0	0	0	0	0	200	300	0	0	0	0	0	0	0	200	903	0	0	0	0	0	0	0	603	903	0
616	4	0	0	0	0	0	0	200	300	0	0	0	0	0	0	0	200	903	0	0	0	0	0	0	0	603	903	0
616	5	0	0	0	0	0	0	200	300	0	0	0	0	0	0	0	200	903	0	0	0	0	0	0	0	603	903	0
616	6	0	0	0	0	0	0	200	300	0	0	0	0	0	0	0	200	903	0	0	0	0	0	0	0	603	903	0
616	7	0	0	0	0	0	0	200	300	0	0	0	0	0	0	0	200	903	0	0	0	0	0	0	0	603	903	0
616	8	0	0	0	0	0	0	200	300	0	0	0	0	0	0	0	200	903	0	0	0	0	0	0	0	603	903	0
616	9	0	0	0	0	0	0	200	300	0	0	0	0	0	0	0	200	903	0	0	0	0	0	0	0	603	903	0
617	0	0	0	0	0	0	0	200	300	0	0	0	0	0	0	0	200	903	0	0	0	0	0	0	0	603	903	0
617	1	0	0	0	0	0	0	200	300	0	0	0	0	0	0	0	200	903	0	0	0	0	0	0	0	603	903	0
617	2	0	0	0	0	0	0	200	300	0	0	0	0	0	0	0	200	903	0	0	0	0	0	0	0	603	903	0
617	3	0	0	0	0	0	0	200	300	0	0	0	0	0	0	0	200	903	0	0	0	0	0	0	0	603	903	0
617	4	0	0	0	0	0	0	200	300	0	0	0	0	0	0	0	200	903	0	0	0	0	0	0	0	603	903	0
617	5	0	0	0	0	0	0	200	300	0	0	0	0	0	0	0	200	903	0	0	0	0	0	0	0	603	903	0
617	6	0	0	0	0	0	0	200	300	0	0	0	0	0	0	0	200	903	0	0	0	0	0	0	0	603	903	0
617	7	0	0	0	0	0	0	200	300	0	0	0	0	0	0	0	200	903	0	0	0	0	0	0	0	603	903	0
617	8	0	0	0	0	0	0	200	300	0	0	0	0	0	0	0	200	903	0	0	0	0	0	0	0	603	903	0
617	9	0	0	0	0	0	0	200	300	0	0	0	0	0	0	0	200	903	0	0	0	0	0	0	0	603	903	0
618	0	0	0	0	0	0	0	200	300	0	0	0	0	0	0	0	200	903	0	0	0	0	0	0	0	603	903	0
618	1	0	0	0	0	0	0	200	300	0	0	0	0	0	0	0	200	903	0	0	0	0	0	0	0	603	903	0
618	2	0	0	0	0	0	0	200	300	0	0	0	0	0	0	0	200	903	0	0	0	0	0	0	0	603	903	0
618	3	0	0	0	0	0	0	200	300	0	0	0	0	0	0	0	200	903	0	0	0	0	0	0	0	603	903	0
618	4	0	0	0	0	0	0	200	300	0	0	0	0	0	0	0	200	903	0	0	0	0	0	0	0	603	903	0
618	5	0	0	0	0	0	0	200	300	0	0	0	0	0	0	0	200	903	0	0	0	0	0	0	0	603	903	0
618	6	0	0	0	0	0	0	200	300	0	0	0	0	0	0	0	200	903	0	0	0	0	0	0	0	603	903	0
618	7	0	0	0	0	0	0	200	300	0	0	0	0	0	0	0	200	903	0	0	0	0	0	0	0	603	903	0
618	8	0	0	0	0	0	0	200	300	0	0	0	0	0	0	0	200	903	0	0	0	0	0	0	0	603	903	0
618	9	0	0	0	0	0	0	200	300	0	0	0	0	0	0	0	200	903	0	0	0	0	0	0	0	603	903	0
619	0	0	0	0	0	0	0	200	300	0	0	0	0	0	0	0	200	903	0	0	0	0	0	0	0	603	903	0
619	1	0	0	0	0	0	0	200	300	0	0	0	0	0	0	0	200	903	0	0	0	0	0	0	0	603	903	0
619	2	0	0	0	0	0	0	200	300	0	0	0	0	0	0	0	200	903	0	0	0	0	0	0	0	603	903	0
619	3	0	0	0	0	0	0	200	300	0	0	0	0	0	0	0	200	903	0	0	0	0	0	0	0	603	903	0
619	4	0	0	0	0	0	0	200	300	0	0	0	0	0	0	0	200	903	0	0	0	0	0	0	0	603	903	0
619	5	0	0	0	0	0	0	200	300	0	0	0	0	0	0	0	200	903	0	0	0	0	0	0	0	603	903	0
619	6	0	0	0	0	0	0	200	300	0	0	0	0	0	0	0	200	903	0	0	0	0	0	0	0	603	903	0
619	7	0	0	0	0	0	0	200	300	0	0	0	0	0	0	0	200	903	0	0	0	0	0	0	0	603	903	0
619	8	0	0	0	0	0	0	200	300	0	0	0	0	0	0	0	200	903	0	0	0	0	0	0	0	603	903	0
619	9	0	0	0	0	0	0	200	300	0	0	0	0	0	0	0	200	903	0	0	0	0	0	0	0	603	903	0
620	0	0	0	0	0	0	0	200	300	0	0	0	0	0	0	0	200	903	0	0	0	0	0	0	0	603	903	0
620	1	0	0	0	0	0	0	200	300	0	0	0	0	0	0	0	200	903	0	0	0	0	0	0	0	603	903	0
620	2	0	0	0	0	0	0	200	300	0	0	0	0	0	0	0	200	903	0	0	0	0	0	0	0	603	903	0
620	3	0	0	0	0	0	0	200	300	0	0	0	0	0	0	0	200	903	0	0	0	0	0	0	0	603	903	0
620	4	0	0	0	0	0	0	200	300	0	0	0	0	0	0	0	200	903	0	0	0	0	0	0	0	603	903	0
620	5	0	0	0	0	0	0	200	300	0	0	0	0	0	0	0	200	903	0	0	0	0	0	0	0	603	903	0
620	6	0	0	0	0	0	0	200	300	0	0	0	0	0	0	0	200	903	0	0	0	0	0	0	0	603	903	0
620	7	0	0	0	0	0	0	200	300	0	0	0	0	0	0	0	200	903	0	0	0	0	0	0	0	603	903	0
620	8	0	0	0	0	0	0	200	300	0	0	0	0	0	0	0	200	903	0	0	0	0	0	0	0	603	903	0
620	9	0	0	0	0	0	0	200	300	0	0	0	0	0	0	0	200	903	0	0	0	0	0	0	0	603	903	0
621	0	0	0	0	0	0	0	200	300	0	0	0	0	0	0	0	200	903	0	0	0	0	0	0	0	603	903	0
621	1	0	0	0	0	0	0	200	300	0	0	0	0	0	0	0	200	903	0	0	0	0	0	0	0	603	903	0
621	2	0	0	0	0	0	0	200	300	0	0	0	0	0	0	0	200	903	0	0	0	0	0	0	0	603	903	0
621	3	0	0	0	0	0	0	200	300	0	0	0	0	0	0	0	200	903	0	0	0	0	0	0	0	603	903	0
621	4	0	0	0	0	0	0	200	300	0	0	0	0	0	0	0	200	903	0	0	0	0	0	0	0	603	903	0
621	5	0	0	0	0	0	0	200	300	0	0	0	0	0	0	0	200	903	0	0	0	0	0	0	0	603	903	0
621	6	0	0	0	0	0	0	200	300	0	0	0	0	0	0	0	200	903	0	0	0	0	0	0	0	603	903	0
621	7	0	0	0	0	0	0	200	300	0	0	0	0	0	0	0	200	903	0	0	0	0	0	0	0	603	903	0
621	8	0	0	0	0	0	0	200	300	0	0	0	0	0	0	0	200	903	0	0	0	0	0	0	0	603	903	0
621	9	0	0	0	0	0	0	200	300	0	0	0	0	0	0	0	200	903	0	0	0	0	0	0	0	603	903	0
622	0	0	0	0	0	0	0	200	300	0	0	0	0	0	0	0	200	903	0	0	0	0	0	0	0	603	903	0
622	1	0	0	0	0	0	0	200	300	0	0	0	0	0	0	0	200	903	0	0	0	0	0	0	0	603	903	0
622	2	0	0	0	0	0	0	200	300	0	0	0	0	0	0	0	200	903	0	0	0	0	0	0	0	603	903	0
622	3	0	0	0	0	0	0	200	300	0	0	0	0	0	0	0	200	903	0	0	0	0	0	0	0	603	903	0
622	4	0	0	0	0	0	0	200	300	0	0	0	0	0	0	0	200	903	0	0	0	0	0	0	0	603	903	0
622	5	0	0	0	0	0	0	200	300	0	0	0	0	0	0	0	200	903	0	0	0	0	0	0	0	603	903	0
622	6	0	0	0	0	0	0	200	300	0	0	0	0	0	0	0	200	903	0	0	0	0	0	0	0	603	903	0
622	7	0	0	0	0	0	0	200	300	0	0	0	0	0	0	0	200	903	0	0	0	0	0	0	0	603	903	0
622	8	0	0	0	0	0	0	200	300	0	0	0	0	0	0	0	200	903	0	0	0	0	0	0	0	603	903	0
622	9	0	0	0	0	0	0	200	300	0	0	0	0	0	0	0	200	903	0	0	0	0	0	0	0	603	903	0
623	0	0	0	0	0	0	0	200	300	0	0	0	0	0	0	0	200	903	0	0	0	0	0	0	0	603	903	0
623	1	0	0	0	0	0	0	200	300	0	0	0	0	0	0	0	200	903	0	0	0	0	0	0	0	603	903	0
623	2	0	0	0	0	0	0	200	300	0	0	0	0	0	0	0	200	903	0	0	0	0	0	0	0	603	903	0
623	3	0	0	0	0	0	0	200	300	0	0	0	0	0	0	0	200	903	0	0	0	0	0	0	0	603	903	0
623	4	0	0	0	0	0	0	200	300	0	0	0	0	0	0	0	200	903	0	0	0	0	0	0	0	603	903	0
623	5	0	0	0	0	0	0	200	300	0	0	0	0	0	0	0	200	903	0	0	0	0	0	0	0	603	903	0
623	6	0	0	0	0	0	0	200	300	0	0	0	0	0	0	0	200	903	0	0	0	0	0	0	0	603	903	0
623	7	0	0	0	0	0	0	200	300	0	0	0	0	0	0	0	200	903	0	0	0	0	0	0	0	603	903	0
623	8	0	0	0	0	0	0	200	300	0	0	0	0	0	0	0	200	903	0	0	0	0	0	0	0	603	903	0
623	9	0	0	0	0	0	0	200	300	0	0	0	0	0	0	0	200	903	0	0	0	0	0	0	0	603	903	0
624	0	0	0	0	0	0	0	200	300	0	0	0	0	0	0	0	200	903	0	0	0	0	0	0	0	603	903	0
624	1	0	0	0	0	0	0	200	300	0	0	0	0	0	0	0	200	903	0	0	0	0	0	0	0	603	903	0
624	2	0	0	0	0	0	0	200	300	0	0	0	0	0	0	0	200	903	0	0	0	0	0	0	0	603	903	0
624	3	0	0	0	0	0	0	200	300	0	0	0	0	0	0	0	200	903	0	0	0	0	0	0	0	603	903	0
624	4	0	0	0	0	0	0	200	300	0	0	0	0	0	0	0	200	903	0	0	0	0	0	0	0	603	903	0
624	5	0	0	0	0	0	0	200	300	0	0	0	0	0	0	0	200	903	0	0	0	0	0	0	0	603	903	0
624	6	0	0	0	0	0	0	200	300	0	0	0	0	0	0	0	200	903	0	0	0	0	0	0	0	603	903	0
624	7	0	0	0	0	0	0	200	300	0	0	0	0	0	0	0	200	903	0	0	0	0	0	0	0	603	903	0
624	8	0	0	0	0	0	0	200	300	0	0	0	0	0	0	0	200	903	0	0	0	0	0	0	0	603	903	0
624	9	0	0	0	0	0	0	200	300	0	0	0	0	0	0	0	200	903	0	0	0	0	0	0	0	603	903	0
625	0	0	0	0	0	0	0	200	300	0	0	0	0	0	0	0	200	903	0	0	0	0	0	0	0	603	903	0
625	1	0	0	0	0	0	0	200	300	0	0	0	0	0	0	0	200	903	0	0	0	0	0	0	0	603	903	0
625	2	0	0	0	0	0	0	200	300	0	0	0	0	0	0	0	200	903	0	0	0	0	0	0	0	603	903	0
625	3	0	0	0	0	0	0	200	300	0	0	0	0	0	0	0	200	903	0	0	0	0	0	0	0	603	903	0
625	4	0	0	0	0	0	0	200	300	0	0	0	0	0	0	0	200	903	0	0	0	0	0	0	0	603	903	0
625	5	0	0	0	0	0	0	200	300	0	0	0	0	0	0	0	200	903	0	0	0	0	0	0	0	603	903	0
625	6	0	0	0	0	0	0	200	300	0	0	0	0	0	0	0	200	903	0	0	0	0	0	0	0	603	903	0
625	7	0	0	0	0	0	0	200	300	0	0	0	0	0	0	0	200	903	0	0	0	0	0	0	0	603	903	0
625	8	0	0	0	0	0	0	200	300	0	0	0	0	0	0	0	200	903	0	0	0	0	0	0	0	603	903	0
625	9	0	0	0	0	0	0	200	300	0	0	0	0	0	0	0	200	903	0	0	0	0	0	0	0	603	903	0
626	0	0	0	0	0	0	0	200	300	0	0	0	0	0	0	0	200	903	0	0	0	0	0	0	0	603	903	0
626	1	0	0	0	0	0	0	200	300	0	0	0	0	0	0	0	200	903	0	0	0	0	0	0	0	603	903	0
626	2	0	0	0	0	0	0	200	300	0	0	0	0	0	0	0	200	903	0	0	0	0	0	0	0	603	903	0
626	3	0	0	0	0	0	0	200	300	0	0	0	0	0	0	0	200	903	0	0	0	0	0	0	0	603	903	0
626	4	0	0	0	0	0	0	200	300	0	0	0	0	0	0	0	200	903	0	0	0	0	0	0	0	603	903	0
626	5	0	0	0	0	0	0	200	300	0	0	0	0	0	0	0	200	903	0	0	0	0	0	0	0	603	903	0
626	6	0	0	0	0	0	0	200	300	0	0	0	0	0	0	0	200	903	0	0	0	0	0	0	0	603	903	0
626	7	0	0	0	0	0	0	200	300	0	0	0	0	0	0	0	200	903	0	0	0	0	0	0	0	603	903	0
626	8	0	0	0	0	0	0	200	300	0	0	0	0	0	0	0	200	903	0	0	0	0	0	0	0	603	903	0
626	9	0	0	0	0	0	0	200	300	0	0	0	0	0	0	0	200	903	0	0	0	0	0	0	0	603	903	0
627	0	0	0	0	0	0	0	200	300	0	0	0	0	0	0	0	200	903	0	0	0	0	0	0	0	603	903	0
627	1	0	0	0	0	0	0	200	300	0	0	0	0	0	0	0	200	903	0	0	0	0	0	0	0	603	903	0
627	2	0	0	0	0	0	0	200	300	0	0	0	0	0	0	0	200	903	0	0	0	0	0	0	0	603	903	0
627	3	0	0	0	0	0	0	200	300	0	0	0	0	0	0	0	200	903	0	0	0	0	0	0	0	603	903	0
627	4	0	0	0	0	0	0	200	300	0	0	0	0	0	0	0	200	903	0	0	0	0	0	0	0	603	903	0
627	5	0	0	0	0	0	0	200	300	0	0	0	0	0	0	0	200	903	0	0	0	0	0	0	0	603	903	0
627	6	0	0	0	0	0	0	200	300	0	0	0	0	0	0	0	200	903	0	0	0	0	0	0	0	603	903	0
627	7	0	0	0	0	0	0	200	300	0	0	0	0	0	0	0	200	903	0	0	0	0	0	0	0	603	903	0
627	8	0	0	0	0	0	0	200	300	0	0	0	0	0	0	0	200	903	0	0	0	0	0	0	0	603	903	0
627	9	0	0	0	0	0	0	200	300	0	0	0	0	0	0	0	200	903	0	0	0	0	0	0	0	603	903	0
628	0	0	0	0	0	0	0	200	300	0	0	0	0	0	0	0	200	903	0	0	0	0	0	0	0	603	903	0
628	1	0	0	0	0	0	0	200	300	0	0	0	0	0	0	0	200	903	0	0	0	0	0	0	0	603	903	0
628	2	0	0	0	0	0	0	200	300	0	0	0	0	0	0	0	200	903	0	0	0	0	0	0	0	603	903	0
628	3	0	0	0	0	0	0	200	300	0	0	0	0	0	0	0	200	903	0	0	0	0	0	0	0	603	903	0
628	4	0	0	0	0	0	0	200	300	0	0	0	0	0	0	0	200	903	0	0	0	0	0	0	0	603	903	0
628	5	0	0	0	0	0	0	200	300	0	0	0	0	0	0	0	200	903	0	0	0	0	0	0	0	603	903	0
628	6	0	0	0	0	0	0	200	300	0	0	0	0	0	0	0	200	903	0	0	0	0	0	0	0	603	903	0
628	7	0	0	0	0	0	0	200	300	0	0	0	0	0	0	0	200	903	0	0	0	0	0	0	0	603	903	0
628	8	0	0	0	0	0	0	200	300	0	0	0	0	0	0	0	200	903	0	0	0	0	0	0	0	603	903	0
628	9	0	0	0	0	0	0	200	300	0	0	0	0	0	0	0	200	903	0	0	0	0	0	0	0	603	903	0
629	0	0	0	0	0	0	0	200	300	0	0	0	0	0	0	0	200	903	0	0	0	0	0	0	0	603	903	0
629	1	0	0	0	0	0	0	200	300	0	0	0	0	0	0	0	200	903	0	0	0	0	0	0	0	603	903	0
629	2	0	0	0	0	0	0	200	300	0	0	0	0	0	0	0	200	903	0	0	0	0	0	0	0	603	903	0
629	3	0	0	0	0	0	0	200	300	0	0	0	0	0	0	0	200	903	0	0	0	0	0	0	0	603	903	0
629	4	0	0	0	0	0	0	200	300	0	0	0	0	0	0	0	200	903	0	0	0	0	0	0	0	603	903	0
629	5	0	0	0	0	0	0	200	300	0	0	0	0	0	0	0	200	903	0	0	0	0	0	0	0	603	903	0
629	6	0	0	0	0	0	0	200	300	0	0	0	0	0	0	0	200	903	0	0	0	0	0	0	0	603	903	0
629	7	0	0	0	0	0	0	200	300	0	0	0	0	0	0	0	200	903	0	0	0	0	0	0	0	603	903	0
629	8	0	0	0	0	0	0	200	300	0	0	0	0	0	0	0	200	903	0	0	0	0	0	0	0	603	903	0
629	9	0	0	0	0	0	0	200	300	0	0	0	0	0	0	0	200	903	0	0	0	0	0	0	0	603	903	0
630	0	0	0	0	0	0	0	200	300	0	0	0	0	0	0	0	200	903	0	0	0	0	0	0	0	603	903	0
630	1	0	0	0	0	0	0	200	300	0	0	0	0	0	0	0	200	903	0	0	0	0	0	0	0	603	903	0
630	2	0	0	0	0	0	0	200	300	0	0	0	0	0	0	0	200	903	0	0	0	0	0	0	0	603	903	0
630	3	0	0	0	0	0	0	200	300	0	0	0	0	0	0	0	200	903	0	0	0	0	0	0	0	603	903	0
630	4	0	0	0	0	0	0	200	300	0	0	0	0	0	0	0	200	903	0	0	0	0	0	0	0	603	903	0
630	5	0	0	0	0	0	0	200	300	0	0	0	0	0	0	0	200	903	0	0	0	0	0	0	0	603	903	0
630	6	0	0	0	0	0	0	200	300	0	0	0	0	0	0	0	200	903	0	0	0	0	0	0	0	603	903	0
630	7	0	0	0	0	0	0	200	300	0	0	0	0	0	0	0	200	903	0	0	0	0	0	0	0	603	903	0
630	8	0	0	0	0	0	0	200	300	0	0	0	0	0	0	0	200	903	0	0	0	0	0	0	0	603	903	0
630	9	0	0	0	0	0	0	200	300	0	0	0	0	0	0	0	200	903	0	0	0	0	0	0	0	603	903	0
631	0	0	0	0	0	0	0	200	300	0	0	0	0	0	0	0	200	903	0	0	0	0	0	0	0	603	903	0
631	1	0	0	0	0	0	0	200	300	0	0	0	0	0	0	0	200	903	0	0	0	0	0	0	0	603	903	0
631	2	0	0	0	0	0	0	200	300	0	0	0	0	0	0	0	200	903	0	0	0	0	0	0	0	603	903	0
631	3	0	0	0	0	0	0	200	300	0	0	0	0	0	0	0	200	903	0	0	0	0	0	0	0	603	903	0
631	4	0	0	0	0	0	0	200	300	0	0	0	0	0	0	0	200	903	0	0	0	0	0	0	0	603	903	0
631	5	0	0	0	0	0	0	200	300	0	0	0	0	0	0	0	200	903	0	0	0	0	0	0	0	603	903	0
631	6	0	0	0	0	0	0	200	300	0	0	0	0	0	0	0	200	903	0	0	0	0	0	0	0	603	903	0
631	7	0	0	0	0	0	0	200	300	0	0	0	0	0	0	0	200	903	0	0	0	0	0	0	0	603	903	0
631	8	0	0	0	0	0	0	200	300	0	0	0	0	0	0	0	200	903	0	0	0	0	0	0	0	603	903	0
631	9	0	0	0	0	0	0	200	300	0	0	0	0	0	0	0	200	903	0	0	0	0	0	0	0	603	903	0
632	0	0	0	0	0	0	0	200	300	0	0	0	0	0	0	0	200	903	0	0	0	0	0	0	0	603	903	0
632	1	0	0	0	0	0	0	200	300	0	0	0	0	0	0	0	200	903	0	0	0	0	0	0	0	603	903	0
632	2	0	0	0	0	0	0	200	300	0	0	0	0	0	0	0	200	903	0	0	0	0	0	0	0	603	903	0
632	3	0	0	0	0	0	0	200	300	0	0	0	0	0	0	0	200	903	0	0	0	0	0	0	0	603	903	0
632	4	0	0	0	0	0	0	200	300	0	0	0	0	0	0	0	200	903	0	0	0	0	0	0	0	603	903	0
632	5	0	0	0	0	0	0	200	300	0	0	0	0	0	0	0	200	903	0	0	0	0	0	0	0	603	903	0
632	6	0	0	0	0	0	0	200	300	0	0	0	0	0	0	0	200	903	0	0	0	0	0	0	0	603	903	0
632	7	0	0	0	0	0	0	200	300	0	0	0	0	0	0	0	200	903	0	0	0	0	0	0	0	603	903	0
632	8	0	0	0	0	0	0	200	300	0	0	0	0	0	0	0	200	903	0	0	0	0	0	0	0	603	903	0
632	9	0	0	0	0	0	0	200	300	0	0	0	0	0	0	0	200	903	0	0	0	0	0	0	0	603	903	0
633	0	0	0	0	0	0	0	200	300	0	0	0	0	0	0	0	200	903	0	0	0	0	0	0	0	603	903	0
633	1	0	0	0	0	0	0	200	300	0	0	0	0	0	0	0	200	903	0	0	0	0	0	0	0	603	903	0
633	2	0	0	0	0	0	0	200	300	0	0	0	0	0	0	0	200	903	0	0	0	0	0	0	0	603	903	0
633	3	0	0	0	0	0	0	200	300	0	0	0	0	0	0	0	200	903	0	0	0	0	0	0	0	603	903	0
633	4	0	0	0	0	0	0	200	300	0	0	0	0	0	0	0	200	903	0	0	0	0	0	0	0	603	903	0
633	5	0	0	0	0	0	0	200	300	0	0	0	0	0	0	0	200	903	0	0	0	0	0	0	0	603	903	0
633	6	0	0	0	0	0	0	200	300	0	0	0	0	0	0	0	200	903	0	0	0	0	0	0	0	603	903	0
633	7	0	0	0	0	0	0	200	300	0	0	0	0	0	0	0	200	903	0	0	0	0	0	0	0	603	903	0
633	8	0	0	0	0	0	0	200	300	0	0	0	0	0	0	0	200	903	0	0	0	0	0	0	0	603	903	0
633	9	0	0	0	0	0	0	200	300	0	0	0	0	0	0	0	200	903	0	0	0	0	0	0	0	603	903	0
634	0	0	0	0	0	0	0	200	300	0	0	0	0	0	0	0	200	903	0	0	0	0	0	0	0	603	903	0
634	1	0	0	0	0	0	0	200	300	0	0	0	0	0	0	0	200	903	0	0	0	0	0	0	0	603	903	0
634	2	0	0	0	0	0	0	200	300	0	0	0	0	0	0	0	200	903	0	0	0	0	0	0	0	603	903	0
634	3	0	0	0	0	0	0	200	300	0	0	0	0	0	0	0	200	903	0	0	0	0	0	0	0	603	903	0
634	4	0	0	0	0	0	0	200	300	0	0	0	0	0	0	0	200	903	0	0	0	0	0	0	0	603	903	0
634	5	0	0	0	0	0	0	200	300	0	0	0	0	0	0	0	200	903	0	0	0	0	0	0	0	603	903	0
634	6	0	0	0	0	0	0	200	300	0	0	0	0	0	0	0	200	903	0	0	0	0	0	0	0	603	903	0
634	7	0	0	0	0	0	0	200	300	0	0	0	0	0	0	0	200	903	0	0	0	0	0	0	0	603	903	0
634	8	0	0	0	0	0	0	200	300	0	0	0	0	0	0	0	200	903	0	0	0	0	0	0	0	603	903	0
634	9	0	0	0	0	0	0	200	300	0	0	0	0	0	0	0	200	903	0	0	0	0	0	0	0	603	903	0
635	0	0	0	0	0	0	0	200	300	0	0	0	0	0	0	0	200	903	0	0	0	0	0	0	0	603	903	0
635	1	0	0	0	0	0	0	200	300	0	0	0	0	0	0	0	200	903	0	0	0	0	0	0	0	603	903	0
635	2	0	0	0	0	0	0	200	300	0	0	0	0	0	0	0	200	903	0	0	0	0	0	0	0	603	903	0
635	3	0	0	0	0	0	0	200	300	0	0	0	0	0	0	0	200	903	0	0	0	0	0	0	0	603	903	0
635	4	0	0	0	0	0	0	200	300	0	0	0	0	0	0	0	200	903	0	0	0	0	0	0	0	603	903	0
635	5	0	0	0	0	0	0	200	300	0	0	0	0	0	0	0	200	903	0	0	0	0	0	0	0	603	903	0
635	6	0	0	0	0	0	0	200	300	0	0	0	0	0	0	0	200	903	0	0	0	0	0	0	0	603	903	0
635	7	0	0	0	0	0	0	200	300	0	0	0	0	0	0	0	200	903	0	0	0	0	0	0	0	603	903	0
635	8	0	0	0	0	0	0	200	300	0	0	0	0	0	0	0	200	903	0	0	0	0	0	0	0	603	903	0
635	9	0	0	0	0	0	0	200	300	0	0	0	0	0	0	0	200	903	0	0	0	0	0	0	0	603	903	0
636	0	0	0	0	0	0	0	200	300	0	0	0	0	0	0	0	200	903	0	0	0	0	0	0	0	603	903	0
636	1	0	0	0	0	0	0	200	300	0	0	0	0	0	0	0	200	903	0	0	0	0	0	0	0	603	903	0
636	2	0	0	0	0	0	0	200	300	0	0	0	0	0	0	0	200	903	0	0	0	0	0	0	0	603	903	0
636	3	0	0	0	0	0	0	200	300	0	0	0	0	0	0	0	200	903	0	0	0	0	0	0	0	603	903	0
636	4	0	0	0	0	0	0	200	300	0	0	0	0	0	0	0	200	903	0	0	0	0	0	0	0	603	903	0
636	5	0	0	0	0	0	0	200	300	0	0	0	0	0	0	0	200	903	0	0	0	0	0	0	0	603	903	0
636	6	0	0	0	0	0	0	200	300	0	0	0	0	0	0	0	200	903	0	0	0	0	0	0	0	603	903	0
636	7	0	0	0	0	0	0	200	300	0	0	0	0	0	0	0	200	903	0	0	0	0	0	0	0	603	903	0
636	8	0	0	0	0	0	0	200	300	0	0	0	0	0	0	0	200	903	0	0	0	0	0	0	0	603	903	0
636	9	0	0	0	0	0	0	200	300	0	0	0	0	0	0	0	200	903	0	0	0	0	0	0	0	603	903	0
637	0	0	0	0	0	0	0	200	300	0	0	0	0	0	0	0	200	903	0	0	0	0	0	0	0	603	903	0
637	1	0	0	0	0	0	0	200	300	0	0	0	0	0	0	0	200	903	0	0	0	0	0	0	0	603	903	0
637	2	0	0	0	0	0	0	200	300	0	0	0	0	0	0	0	200	903	0	0	0	0	0	0	0	603	903	0
637	3	0	0	0	0	0	0	200	300	0	0	0	0	0	0	0	200	903	0	0	0	0	0	0	0	603	903	0
637	4	0	0	0	0	0	0	200	300	0	0	0	0	0	0	0	200	903	0	0	0	0	0	0	0	603	903	0
637	5	0	0	0	0	0	0	200	300	0	0	0	0	0	0	0	200	903	0	0	0	0	0	0	0	603	903	0
637	6	0	0	0	0	0	0	200	300	0	0	0	0	0	0	0	200	903	0	0	0	0	0	0	0	603	903	0
637	7	0	0	0	0	0	0	200	300	0	0	0	0	0	0	0	200	903	0	0	0	0	0	0	0	603	903	0
637	8	0	0	0	0	0	0	200	300	0	0	0	0	0	0	0	200	903	0	0	0	0	0	0	0	603	903	0
637	9	0	0	0	0	0	0	200	300	0	0	0	0	0	0	0	200	903	0	0	0	0	0	0	0	603	903	0
638	0	0	0	0	0	0	0	200	300	0	0	0	0	0	0	0	200	903	0	0	0	0	0	0	0	603	903	0
638	1	0	0	0	0	0	0	200	300	0	0	0	0	0	0	0	200	903	0	0	0	0	0	0	0	603	903	0
638	2	0	0	0	0	0	0	200	300	0	0	0	0	0	0	0	200	903	0	0	0	0	0	0	0	603	903	0
638	3	0	0	0	0	0	0	200	300	0	0	0	0	0	0	0	200	903	0	0	0	0	0	0	0	603	903	0
638	4	0	0	0	0	0	0	200	300	0	0	0	0	0	0	0	200	903	0	0	0	0	0	0	0	603	903	0
638	5	0	0	0	0	0	0	200	300	0	0	0	0	0	0	0	200	903	0	0	0	0	0	0	0	603	903	0
638	6	0	0	0	0	0	0	200	300	0	0	0	0	0	0	0	200	903	0	0	0	0	0	0	0	603	903	0
638	7	0	0	0	0	0	0	200	300	0	0	0	0	0	0	0	200	903	0	0	0	0	0	0	0	603	903	0
638	8	0	0	0	0	0	0	200	300	0	0	0	0	0	0	0	200	903	0	0	0	0	0	0	0	603	903	0
638	9	0	0	0	0	0	0	200	300	0	0	0	0	0	0	0	200	903	0	0	0	0	0	0	0	603	903	0
639	0	0	0	0	0	0	0	200	300	0	0	0	0	0	0	0	200	903	0	0	0	0	0	0	0	603	903	0
639	1	0	0	0	0	0	0	200	300	0	0	0	0	0	0	0	200	903	0	0	0	0	0	0	0	603	903	0
639	2	0	0	0	0	0	0	200	300	0	0	0	0	0	0	0	200	903	0	0	0	0	0	0	0	603	903	0
639	3	0	0	0	0	0	0	200	300	0	0	0	0	0	0	0	200	903	0	0	0	0	0	0	0	603	903	0
639	4	0	0	0	0	0	0	200	300	0	0	0	0	0	0	0	200	903	0	0	0	0	0	0	0	603	903	0
639	5	0	0	0	0	0	0	200	300	0	0	0	0	0	0	0	200	903	0	0	0	0	0	0	0	603	903	0
639	6	0	0	0	0	0	0	200	300	0	0	0	0	0	0	0	200	903	0	0	0	0	0	0	0	603	903	0
639	7	0	0	0	0	0	0	200	300	0	0	0	0	0	0	0	200	903	0	0	0	0	0	0	0	603	903	0
639	8	0	0	0	0	0	0	200	300	0	0	0	0	0	0	0	200	903	0	0	0	0	0	0	0	603	903	0
639	9	0	0	0	0	0	0	200	300	0	0	0	0	0	0	0	200	903	0	0	0	0	0	0	0	603	903	0
640	0	0	0	0	0	0	0	200	300	0	0	0	0	0	0	0	200	903	0	0	0	0	0	0	0	603	903	0
640	1	0	0	0	0	0	0	200	300	0	0	0	0	0	0	0	200	903	0	0	0	0	0	0	0	603	903	0
640	2	0	0	0	0	0	0	200	300	0	0	0	0	0	0	0	200	903	0	0	0	0	0	0	0	603	903	0
640	3	0	0	0	0	0	0	200	300	0	0	0	0	0	0	0	200	903	0	0	0	0	0	0	0	603	903	0
640	4	0	0	0	0	0	0	200	300	0	0	0	0	0	0	0	200	903	0	0	0	0	0	0	0	603	903	0
640	5	0	0	0	0	0	0	200	300	0	0	0	0	0	0	0	200	903	0	0	0	0	0	0	0	603	903	0
640	6	0	0	0	0	0	0	200	300	0	0	0	0	0	0	0	200	903	0	0	0	0	0	0	0	603	903	0
640	7	0	0	0	0	0	0	200	300	0	0	0	0	0	0	0	200	903	0	0	0	0	0	0	0	603	903	0
640	8	0	0	0	0	0	0	200	300	0	0	0	0	0	0	0	200	903	0	0	0	0	0	0	0	603	903	0
640	9	0	0	0	0	0	0	200	300	0	0	0	0	0	0	0	200	903	0	0	0	0	0	0	0	603	903	0
641	0	0	0	0	0	0	0	200	300	0	0	0	0	0	0	0	200	903	0	0	0	0	0	0	0	603	903	0
641	1	0	0	0	0	0	0	200	300	0	0	0	0	0	0	0	200	903	0	0	0	0	0	0	0	603	903	0
641	2	0	0	0	0	0	0	200	300	0	0	0	0	0	0	0	200	903	0	0	0	0	0	0	0	603	903	0
641	3	0	0	0	0	0	0	200	300	0	0	0	0	0	0	0	200	903	0	0	0	0	0	0	0	603	903	0
641	4	0	0	0	0	0	0	200	300	0	0	0	0	0	0	0	200	903	0	0	0	0	0	0	0	603	903	0
641	5	0	0	0	0	0	0	200	300	0	0	0	0	0	0	0	200	903	0	0	0	0	0	0	0	603	903	0
641	6	0	0	0	0	0	0	200	300	0	0	0	0	0	0	0	200	903	0	0	0	0	0	0	0	603	903	0
641	7	0	0	0	0	0	0	200	300	0	0	0	0	0	0	0	200	903	0	0	0	0	0	0	0	603	903	0
641	8	0	0	0	0	0	0	200	300	0	0	0	0	0	0	0	200	903	0	0	0	0	0	0	0	603	903	0
641	9	0	0	0	0	0	0	200	300	0	0	0	0	0	0	0	200	903	0	0	0	0	0	0	0	603	903	0
642	0	0	0	0	0	0	0	200	300	0	0	0	0	0	0	0	200	903	0	0	0	0	0	0	0	603	903	0
642	1	0	0	0	0	0	0	200	300	0	0	0	0	0	0	0	200	903	0	0	0	0	0	0	0	603	903	0
642	2	0	0	0	0	0	0	200	300	0	0	0	0	0	0	0	200	903	0	0	0	0	0	0	0	603	903	0
642	3	0	0	0	0	0	0	200	300	0	0	0	0	0	0	0	200	903	0	0	0	0	0	0	0	603	903	0
642	4	0	0	0	0	0	0	200	300	0	0	0	0	0	0	0	200	903	0	0	0	0	0	0	0	603	903	0
642	5	0	0	0	0	0	0	200	300	0	0	0	0	0	0	0	200	903	0	0	0	0	0	0	0	603	903	0
642	6	0	0	0	0	0	0	200	300	0	0	0	0	0	0	0	200	903	0	0	0	0	0	0	0	603	903	0
642	7	0	0	0	0	0	0	200	300	0	0	0	0	0	0	0	200	903	0	0	0	0	0	0	0	603	903	0
642	8	0	0	0	0	0	0	200	300	0	0	0	0	0	0	0	200	903	0	0	0	0	0	0	0	603	903	0
642	9	0	0	0	0	0	0	200	300	0	0	0	0	0	0	0	200	903	0	0	0	0	0	0	0	603	903	0
643	0	0	0	0	0	0	0	200	300	0	0	0	0	0	0	0	200	903	0	0	0	0	0	0	0	603	903	0
643	1	0	0	0	0	0	0	200	300	0	0	0	0	0	0	0	200	903	0	0	0	0	0	0	0	603	903	0
643	2	0	0	0	0	0	0	200	300	0	0	0	0	0	0	0	200	903	0	0	0	0	0	0	0	603	903	0
643	3	0	0	0	0	0	0	200	300	0	0	0	0	0	0	0	200	903	0	0	0	0	0	0	0	603	903	0
643	4	0	0	0	0	0	0	200	300	0	0	0	0	0	0	0	200	903	0	0	0	0	0	0	0	603	903	0
643	5	0	0	0	0	0	0	200	300	0	0	0	0	0	0	0	200	903	0	0	0	0	0	0	0	603	903	0
643	6	0	0	0	0	0	0	200	300	0	0	0	0	0	0	0	200	903	0	0	0	0	0	0	0	603	903	0
643	7	0	0	0	0	0	0	200	300	0	0	0	0	0	0	0	200	903	0	0	0	0	0	0	0	603	903	0
643	8	0	0	0	0	0	0	200	300	0	0	0	0	0	0	0	200	903	0	0	0	0	0	0	0	603	903	0
643	9	0	0	0	0	0	0	200	300	0	0	0	0	0	0	0	200	903	0	0	0	0	0	0	0	603	903	0
644	0	0	0	0	0	0	0	200	300	0	0	0	0	0	0	0	200	903	0	0	0	0	0	0	0	603	903	0
644	1	0	0	0	0	0	0	200	300	0	0	0	0	0	0	0	200	903	0	0	0	0	0	0	0	603	903	0
644	2	0	0	0	0	0	0	200	300	0	0	0	0	0	0	0	200	903	0	0	0	0	0	0	0	603	903	0
644	3	0	0	0	0	0	0	200	300	0	0	0	0	0	0	0	200	903	0	0	0	0	0	0	0	603	903	0
644	4	0	0	0	0	0	0	200	300	0	0	0	0	0	0	0	200	903	0	0	0	0	0	0	0	603	903	0
644	5	0	0	0	0	0	0	200	300	0	0	0	0	0	0	0	200	903	0	0	0	0	0	0	0	603	903	0
644	6	0	0	0	0	0	0	200	300	0	0	0	0	0	0	0	200	903	0	0	0	0	0	0	0	603	903	0
644	7	0	0	0	0	0	0	200	300	0	0	0	0	0	0	0	200	903	0	0	0	0	0	0	0	603	903	0
644	8	0	0	0	0	0	0	200	300	0	0	0	0	0	0	0	200	903	0	0	0	0	0	0	0	603	903	0
644	9	0	0	0	0	0	0	200	300	0	0	0	0	0	0	0	200	903	0	0	0	0	0	0	0	603	903	0
645	0	0	0	0	0	0	0	200	300	0	0	0	0	0	0	0	200	903	0	0	0	0	0	0	0	603	903	0
645	1	0	0	0	0	0	0	200	300	0	0	0	0	0	0	0	200	903	0	0	0	0	0	0	0	603	903	0
645	2	0	0	0	0	0	0	200	300	0	0	0	0	0	0	0	200	903	0	0	0	0	0	0	0	603	903	0
645	3	0	0	0	0	0	0	200	300	0	0	0	0	0	0	0	200	903	0	0	0	0	0	0	0	603	903	0
645	4	0	0	0	0	0	0	200	300	0	0	0	0	0	0	0	200	903	0	0	0	0	0	0	0	603	903	0
645	5	0	0	0	0	0	0	200	300	0	0	0	0	0	0	0	200	903	0	0	0	0	0	0	0	603	903	0
645	6	0	0	0	0	0	0	200	300	0	0	0	0	0	0	0	200	903	0	0	0	0	0	0	0	603	903	0
645	7	0	0	0	0	0	0	200	300	0	0	0	0	0	0	0	200	903	0	0	0	0	0	0	0	603	903	0
645	8	0	0	0	0	0	0	200	300	0	0	0	0	0	0	0	200	903	0	0	0	0	0	0	0	603	903	0
645	9	0	0	0	0	0	0	200	300	0	0	0	0	0	0	0	200	903	0	0	0	0	0	0	0	603	903	0
646	0	0	0	0	0	0	0	200	300	0	0	0	0	0	0	0	200	903	0	0	0	0	0	0	0	603	903	0
646	1	0	0	0	0	0	0	200	300	0	0	0	0	0	0	0	200	903	0	0	0	0	0	0	0	603	903	0
646	2	0	0	0	0	0	0	200	300	0	0	0	0	0	0	0	200	903	0	0	0	0	0	0	0	603	903	0
646	3	0	0	0	0	0	0	200	300	0	0	0	0	0	0	0	200	903	0	0	0	0	0	0	0	603	903	0
646	4	0	0	0	0	0	0	200	300	0	0	0	0	0	0	0	200	903	0	0	0	0	0	0	0	603	903	0
646	5	0	0	0	0	0	0	200	300	0	0	0	0	0	0	0	200	903	0	0	0	0	0	0	0	603	903	0
646	6	0	0	0	0	0	0	200	300	0	0	0	0	0	0	0	200	903	0	0	0	0	0	0	0	603	903	0
646	7	0	0	0	0	0	0	200	300	0	0	0	0	0	0	0	200	903	0	0	0	0	0	0	0	603	903	0
646	8	0	0	0	0	0	0	200	300	0	0	0	0	0	0	0	200	903	0	0	0	0	0	0	0	603	903	0
646	9	0	0	0	0	0	0	200	300	0	0	0	0	0	0	0	200	903	0	0	0	0	0	0	0	603	903	0
647	0	0	0	0	0	0	0	200	300	0	0	0	0	0	0	0	200	903	0	0	0	0	0	0	0	603	903	0
647	1	0	0	0	0	0	0	200	300	0	0	0	0	0	0	0	200	903	0	0	0	0	0	0	0	603	903	0
647	2	0	0	0	0	0	0	200	300	0	0	0	0	0	0	0	200	903	0	0	0	0	0	0	0	603	903	0
647	3	0	0	0	0	0	0	200	300	0	0	0	0	0	0	0	200	903	0	0	0	0	0	0	0	603	903	0
647	4	0	0	0	0	0	0	200	300	0	0	0	0	0	0	0	200	903	0	0	0	0	0	0	0	603	903	0
647	5	0	0	0	0	0	0	200	300	0	0	0	0	0	0	0	200	903	0	0	0	0	0	0	0	603	903	0
647	6	0	0	0	0	0	0	200	300	0	0	0	0	0	0	0	200	903	0	0	0	0	0	0	0	603	903	0
647	7	0	0	0	0	0	0	200	300	0	0	0	0	0	0	0	200	903	0	0	0	0	0	0	0	603	903	0
647	8	0	0	0	0	0	0	200	300	0	0	0	0	0	0	0	200	903	0	0	0	0	0	0	0	603	903	0
647	9	0	0	0	0	0	0	200	300	0	0	0	0	0	0	0	200	903	0	0	0	0	0	0	0	603	903	0
648	0	0	0	0	0	0	0	200	300	0	0	0	0	0	0	0	200	903	0	0	0	0	0	0	0	603	903	0
648	1	0	0	0	0	0	0	200	300	0	0	0	0	0	0	0	200	903	0	0	0	0	0	0	0	603	903	0
648	2	0	0	0	0	0	0	200	300	0	0	0	0	0	0	0	200	903	0	0	0	0	0	0	0	603	903	0
648	3	0	0	0	0	0	0	200	300	0	0	0	0	0	0	0	200	903	0	0	0	0	0	0	0	603	903	0
648	4	0	0	0	0	0	0	200	300	0	0	0	0	0	0	0	200	903	0	0	0	0	0	0	0	603	903	0
648	5	0	0	0	0	0	0	200	300	0	0	0	0	0	0	0	200	903	0	0	0	0	0	0	0	603	903	0
648	6	0	0	0	0	0	0	200	300	0	0	0	0	0	0	0	200	903	0	0	0	0	0	0	0	603	903	0
648	7	0	0	0	0	0	0	200	300	0	0	0	0	0	0	0	200	903	0	0	0	0	0	0	0	603	903	0
648	8	0	0	0	0	0	0	200	300	0	0	0	0	0	0	0	200	903	0	0	0	0	0	0	0	603	903	0
648	9	0	0	0	0	0	0	200	300	0	0	0	0	0	0	0	200	903	0	0	0	0	0	0	0	603	903	0
649	0	0	0	0	0	0	0	200	300	0	0	0	0	0	0	0	200	903	0	0	0	0	0	0	0	603	903	0
649	1	0	0	0	0	0	0	200	300	0	0	0	0	0	0	0	200	903	0	0	0	0	0	0	0	603	903	0
649	2	0	0	0	0	0	0	200	300	0	0	0	0	0	0	0	200	903	0	0	0	0	0	0	0	603	903	0
649	3	0	0	0	0	0	0	200	300	0	0	0	0	0	0	0	200	903	0	0	0	0	0	0	0	603	903	0
649	4	0	0	0	0	0	0	200	300	0	0	0	0	0	0	0	200	903	0	0	0	0	0	0	0	603	903	0
649	5	0	0	0	0	0	0	200	300	0	0	0	0	0	0	0	200	903	0	0	0	0	0	0	0	603	903	0
649	6	0	0	0	0	0	0	200	300	0	0	0	0	0	0	0	200	903	0	0	0	0	0	0	0	603	903	0
649	7	0	0	0	0	0	0	200	300	0	0	0	0	0	0	0	200	903	0	0	0	0	0	0	0	603	903	0
649	8	0	0	0	0	0	0	200	300	0	0	0	0	0	0	0	200	903	0	0	0	0	0	0	0	603	903	0
649	9	0	0	0	0	0	0	200	300	0	0	0	0	0	0	0	200	903	0	0	0	0	0	0	0	603	903	0
650	0	0	0	0	0	0	0	200	300	0	0	0	0	0	0	0	200	903	0	0	0	0	0	0	0	603	903	0
650	1	0	0	0	0	0	0	200	300	0	0	0	0	0	0	0	200	903	0	0	0	0	0	0	0	603	903	0
650	2	0	0	0	0	0	0	200	300	0	0	0	0	0	0	0	200	903	0	0	0	0	0	0	0	603	903	0
650	3	0	0	0	0	0	0	200	300	0	0	0	0	0	0	0	200	903	0	0	0	0	0	0	0	603	903	0
650	4	0	0	0	0	0	0	200	300	0	0	0	0	0	0	0	200	903	0	0	0	0	0	0	0	603	903	0
650	5	0	0	0	0	0	0	200	300	0	0	0	0	0	0	0	200	903	0	0	0	0	0	0	0	603	903	0
650	6	0	0	0	0	0	0	200	300	0	0	0	0	0	0	0	200	903	0	0	0	0	0	0	0	603	903	0
650	7	0	0	0	0	0	0	200	300	0	0	0	0	0	0	0	200	903	0	0	0	0	0	0	0	603	903	0
650	8	0	0	0	0	0	0	200	300	0	0	0	0	0	0	0	200	903	0	0	0	0	0	0	0	603	903	0
650	9	0	0	0	0	0	0	200	300	0	0	0	0	0	0	0	200	903	0	0	0	0	0	0	0	603	903	0
651	0	0	0	0	0	0	0	200	300	0	0	0	0	0	0	0	200	903	0	0	0	0	0	0	0	603	903	0
651	1	0	0	0	0	0	0	200	300	0	0	0	0	0	0	0	200	903	0	0	0	0	0	0	0	603	903	0
651	2	0	0	0	0	0	0	200	300	0	0	0	0	0	0	0	200	903	0	0	0	0	0	0	0	603	903	0
651	3	0	0	0	0	0	0	200	300	0	0	0	0	0	0	0	200	903	0	0	0	0	0	0	0	603	903	0
651	4	0	0	0	0	0	0	200	300	0	0	0	0	0	0	0	200	903	0	0	0	0	0	0	0	603	903	0
651	5	0	0	0	0	0	0	200	300	0	0	0	0	0	0	0	200	903	0	0	0	0	0	0	0	603	903	0
651	6	0	0	0	0	0	0	200	300	0	0	0	0	0	0	0	200	903	0	0	0	0	0	0	0	603	903	0
651	7	0	0	0	0	0	0	200	300	0	0	0	0	0	0	0	200	903	0	0	0	0	0	0	0	603	903	0
651	8	0	0	0	0	0	0	200	300	0	0	0	0	0	0	0	200	903	0	0	0	0	0	0	0	603	903	0
651	9	0	0	0	0	0	0	200	300	0	0	0	0	0	0	0	200	903	0	0	0	0	0	0	0	603	903	0
652	0	0	0	0	0	0	0	200	300	0	0	0	0	0	0	0	200	903	0	0	0	0	0	0	0	603	903	0
652	1	0	0	0	0	0	0	200	300	0	0	0	0	0	0	0	200	903	0	0	0	0	0	0	0	603	903	0
652	2	0	0	0	0	0	0	200	300	0	0	0	0	0	0	0	200	903	0	0	0	0	0	0	0	603	903	0
652	3	0	0	0	0	0	0	200	300	0	0	0	0	0	0	0	200	903	0	0	0	0	0	0	0	603	903	0
652	4	0	0	0	0	0	0	200	300	0	0	0	0	0	0	0	200	903	0	0	0	0	0	0	0	603	903	0
652	5	0	0	0	0	0	0	200	300	0	0	0	0	0	0	0	200	903	0	0	0	0	0	0	0	603	903	0
652	6	0	0	0	0	0	0	200	300	0	0	0	0	0	0	0	200	903	0	0	0	0	0	0	0	603	903	0
652	7	0	0	0	0	0	0	200	300	0	0	0	0	0	0	0	200	903	0	0	0	0	0	0	0	603	903	0
652	8	0	0	0	0	0	0	200	300	0	0	0	0	0	0	0	200	903	0	0	0	0	0	0	0	603	903	0
652	9	0	0	0	0	0	0	200	300	0	0	0	0	0	0	0	200	903	0	0	0	0	0	0	0	603	903	0
653	0	0	0	0	0	0	0	200	300	0	0	0	0	0	0	0	200	903	0	0	0	0	0	0	0	603	903	0
653	1	0	0	0	0	0	0	200	300	0	0	0	0	0	0	0	200	903	0	0	0	0	0	0	0	603	903	0
653	2	0	0	0	0	0	0	200	300	0	0	0	0	0	0	0	200	903	0	0	0	0	0	0	0	603	903	0
653	3	0	0	0	0	0	0	200	300	0	0	0	0	0	0	0	200	903	0	0	0	0	0	0	0	603	903	0
653	4	0	0	0	0	0	0	200	300	0	0	0	0	0	0	0	200	903	0	0	0	0	0	0	0	603	903	0
653	5	0	0	0	0	0	0	200	300	0	0	0	0	0	0	0	200	903	0	0	0	0	0	0	0	603	903	0
653	6	0	0	0	0	0	0	200	300	0	0	0	0	0	0	0	200	903	0	0	0	0	0	0	0	603	903	0
653	7	0	0	0	0	0	0	200	300	0	0	0	0	0	0	0	200	903	0	0	0	0	0	0	0	603	903	0
653	8	0	0	0	0	0	0	200	300	0	0	0	0	0	0	0	200	903	0	0	0	0	0	0	0	603	903	0
653	9	0	0	0	0	0	0	200	300	0	0	0	0	0	0	0	200	903	0	0	0	0	0	0	0	603	903	0
654	0	0	0	0	0	0	0	200	300	0	0	0	0	0	0	0	200	903	0	0	0	0	0	0	0	603	903	0
654	1	0	0	0	0	0	0	200	300	0	0	0	0	0	0	0	200	903	0	0	0	0	0	0	0	603	903	0
654	2	0	0	0	0	0	0	200	300	0	0	0	0	0	0	0	200	903	0	0	0	0	0	0	0	603	903	0
654	3	0	0	0	0	0	0	200	300	0	0	0	0	0	0	0	200	903	0	0	0	0	0	0	0	603	903	0
654	4	0	0	0	0	0	0	200	300	0	0	0	0	0	0	0	200	903	0	0	0	0	0	0	0	603	903	0
654	5	0	0	0	0	0	0	200	300	0	0	0	0	0	0	0	200	903	0	0	0	0	0	0	0	603	903	0
654	6	0	0	0	0	0	0	200	300	0	0	0	0	0	0	0	200	903	0	0	0	0	0	0	0	603	903	0
654	7	0	0	0	0	0	0	200	300	0	0	0	0	0	0	0	200	903	0	0	0	0	0	0	0	603	903	0
654	8	0	0	0	0	0	0	200	300	0	0	0	0	0	0	0	200	903	0	0	0	0	0	0	0	603	903	0
654	9	0	0	0	0	0	0	200	300	0	0	0	0	0	0	0	200	903	0	0	0	0	0	0	0	603	903	0
655	0	0	0	0	0	0	0	200	300	0	0	0	0	0	0	0	200	903	0	0	0	0	0	0	0	603	903	0
655	1	0	0	0	0	0	0	200	300	0	0	0	0	0	0	0	200	903	0	0	0	0	0	0	0	603	903	0
655	2	0	0	0	0	0	0	200	300	0	0	0	0	0	0	0	200	903	0	0	0	0	0	0	0	603	903	0
655	3	0	0	0	0	0	0	200	300	0	0	0	0	0	0	0	200	903	0	0	0	0	0	0	0	603	903	0
655	4	0	0	0	0	0	0	200	300	0	0	0	0	0	0	0	200	903	0	0	0	0	0	0	0	603	903	0
655	5	0	0	0	0	0	0	200	300	0	0	0	0	0	0	0	200	903	0	0	0	0	0	0	0	603	903	0
655	6	0	0	0	0	0	0	200	300	0	0	0	0	0	0	0	200	903	0	0	0	0	0	0	0	603	903	0
655	7	0	0	0	0	0	0	200	300	0	0	0	0	0	0	0	200	903	0	0	0	0	0	0	0	603	903	0
655	8	0	0	0	0	0	0	200	300	0	0	0	0	0	0	0	200	903	0	0	0	0	0	0	0	603	903	0
655	9	0	0	0	0	0	0	200	300	0	0	0	0	0	0	0	200	903	0	0	0	0	0	0	0	603	903	0
656	0	0	0	0	0	0	0	200	300	0	0	0	0	0	0	0	200	903	0	0	0	0	0	0	0	603	903	0
656	1	0	0	0	0	0	0	200	300	0	0	0	0	0	0	0	200	903	0	0	0	0	0	0	0	603	903	0
656	2	0	0	0	0	0	0	200	300	0	0	0	0	0	0	0	200	903	0	0	0	0	0	0	0	603	903	0
656	3	0	0	0	0	0	0	200	300	0	0	0	0	0	0	0	200	903	0	0	0	0	0	0	0	603	903	0
656	4	0	0	0	0	0	0	200	300	0	0	0	0	0	0	0	200	903	0	0	0	0	0	0	0	603	903	0
656	5	0	0	0	0	0	0	200	300	0	0	0	0	0	0	0	200	903	0	0	0	0	0	0	0	603	903	0
656	6	0	0	0	0	0	0	200	300	0	0	0	0	0	0	0	200	903	0	0	0	0	0	0	0	603	903	0
656	7	0	0	0	0	0	0	200	300	0	0	0	0	0	0	0	200	903	0	0	0	0	0	0	0	603	903	0
656	8	0	0	0	0	0	0	200	300	0	0	0	0	0	0	0	200	903	0	0	0	0	0	0	0	603	903	0
656	9	0	0	0	0	0	0	200	300	0	0	0	0	0	0	0	200	903	0	0	0	0	0	0	0	603	903	0
657	0	0	0	0	0	0	0	200	300	0	0	0	0	0	0	0	200	903	0	0	0	0	0	0	0	603	903	0
657	1	0	0	0	0	0	0	200	300	0	0	0	0	0	0	0	200	903	0	0	0	0	0	0	0	603	903	0
657	2	0	0	0	0	0	0	200	300	0	0	0	0	0	0	0	200	903	0	0	0	0	0	0	0	603	903	0
657	3	0	0	0	0	0	0	200	300	0	0	0	0	0	0	0	200	903	0	0	0	0	0	0	0	603	903	0
657	4	0	0	0	0	0	0	200	300	0	0	0	0	0	0	0	200	903	0	0	0	0	0	0	0	603	903	0
657	5	0	0	0	0	0	0	200	300	0	0	0	0	0	0	0	200	903	0	0	0	0	0	0	0	603	903	0
657	6	0	0	0	0	0	0	200	300	0	0	0	0	0	0	0	200	903	0	0	0	0	0	0	0	603	903	0
657	7	0	0	0	0	0	0	200	300	0	0	0	0	0	0	0	200	903	0	0	0	0	0	0	0	603	903	0
657	8	0	0	0	0	0	0	200	300	0	0	0	0	0	0	0	200	903	0	0	0	0	0	0	0	603	903	0
657	9	0	0	0	0	0	0	200	300	0	0	0	0	0	0	0	200	903	0	0	0	0	0	0	0	603	903	0
658	0	0	0	0	0	0	0	200	300	0	0	0	0	0	0	0	200	903	0	0	0	0	0	0	0	603	903	0
658	1	0	0	0	0	0	0	200	300	0	0	0	0	0	0	0	200	903	0	0	0	0	0	0	0	603	903	0
658	2	0	0	0	0	0	0	200	300	0	0	0	0	0	0	0	200	903	0	0	0	0	0	0	0	603	903	0
658	3	0	0	0	0	0	0	200	300	0	0	0	0	0	0	0	200	903	0	0	0	0	0	0	0	603	903	0
658	4	0	0	0	0	0	0	200	300	0	0	0	0	0	0	0	200	903	0	0	0	0	0	0	0	603	903	0
658	5	0	0	0	0	0	0	200	300	0	0	0	0	0	0	0	200	903	0	0	0	0	0	0	0	603	903	0
658	6	0	0	0	0	0	0	200	300	0	0	0	0	0	0	0	200	903	0	0	0	0	0	0	0	603	903	0
658	7	0	0	0	0	0	0	200	300	0	0	0	0	0	0	0	200	903	0	0	0	0	0	0	0	603	903	0
658	8	0	0	0	0	0	0	200	300	0	0	0	0	0	0	0	200	903	0	0	0	0	0	0	0	603	903	0
658	9	0	0	0	0	0	0	200	300	0	0	0	0	0	0	0	200	903	0	0	0	0	0	0	0	603	903	0
659	0	0	0	0	0	0	0	200	300	0	0	0	0	0	0	0	200	903	0	0	0	0	0	0	0	603	903	0
659	1	0	0	0	0	0	0	200	300	0	0	0	0	0	0	0	200	903	0	0	0	0	0	0	0	603	903	0
659	2	0	0	0	0	0	0	200	300	0	0	0	0	0	0	0	200	903	0	0	0	0	0	0	0	603	903	0
659	3	0	0	0	0	0	0	200	300	0	0	0	0	0	0	0	200	903	0	0	0	0	0	0	0	603	903	0
659	4	0	0	0	0	0	0	200	300	0	0	0	0	0	0	0	200	903	0	0	0	0	0	0	0	603	903	0
659	5	0	0	0	0	0	0	200	300	0	0	0	0	0	0	0	200	903	0	0	0	0	0	0	0	603	903	0
659	6	0	0	0	0	0	0	200	300	0	0	0	0	0	0	0	200	903	0	0	0	0	0	0	0	603	903	0
659	7	0	0	0	0	0	0	200	300	0	0	0	0	0	0	0	200	903	0	0	0	0	0	0	0	603	903	0
659	8	0	0	0	0	0	0	200	300	0	0	0	0	0	0	0	200	903	0	0	0	0	0	0	0	603	903	0
659	9	0	0	0	0	0	0	200	300	0	0	0	0	0	0	0	200	903	0	0	0	0	0	0	0	603	903	0
660	0	0	0	0	0	0	0	200	300	0	0	0	0	0	0	0	200	903	0	0	0	0	0	0	0	603	903	0
660	1	0	0	0	0	0	0	200	300	0	0	0	0	0	0	0	200	903	0	0	0	0	0	0	0	603	903	0
660	2	0	0	0	0	0	0	200	300	0	0	0	0	0	0	0	200	903	0	0	0	0	0	0	0	603	903	0
660	3	0	0	0	0	0	0	200	300	0	0	0	0	0	0	0	200	903	0	0	0	0	0	0	0	603	903	0
660	4	0	0	0	0	0	0	200	300	0	0	0	0	0	0	0	200	903	0	0	0	0	0	0	0	603	903	0
660	5	0	0	0	0	0	0	200	300	0	0	0	0	0	0	0	200	903	0	0	0	0	0	0	0	603	903	0
660	6	0	0	0	0	0	0	200	300	0	0	0	0	0	0	0	200	903	0	0	0	0	0	0	0	603	903	0
660	7	0	0	0	0	0	0	200	300	0	0	0	0	0	0	0	200	903	0	0	0	0	0	0	0	603	903	0
660	8	0	0	0	0	0	0	200	300	0	0	0	0	0	0	0	200	903	0	0	0	0	0	0	0	603	903	0
660	9	0	0	0	0	0	0	200	300	0	0	0	0	0	0	0	200	903	0	0	0	0	0	0	0	603	903	0
661	0	0	0	0	0	0	0	200	300	0	0	0	0	0	0	0	200	903	0	0	0	0	0	0	0	603	903	0
661	1	0	0	0	0	0	0	200	300	0	0	0	0	0	0	0	200	903	0	0	0	0	0	0	0	603	903	0
661	2	0	0	0	0	0	0	200	300	0	0	0	0	0	0	0	200	903	0	0	0	0	0	0	0	603	903	0
661	3	0	0	0	0	0	0	200	300	0	0	0	0	0	0	0	200	903	0	0	0	0	0	0	0	603	903	0
661	4	0	0	0	0	0	0	200	300	0	0	0	0	0	0	0	200	903	0	0	0	0	0	0	0	603	903	0
661	5	0	0	0	0	0	0	200	300	0	0	0	0	0	0	0	200	903	0	0	0	0	0	0	0	603	903	0
661	6	0	0	0	0	0	0	200	300	0	0	0	0	0	0	0	200	903	0	0	0	0	0	0	0	603	903	0
661	7	0	0	0	0	0	0	200	300	0	0	0	0	0	0	0	200	903	0	0	0	0	0	0	0	603	903	0
661	8	0	0	0	0	0	0	200	300	0	0	0	0	0	0	0	200	903	0	0	0	0	0	0	0	603	903	0
661	9	0	0	0	0	0	0	200	300	0	0	0	0	0	0	0	200	903	0	0	0	0	0	0	0	603	903	0
662	0	0	0	0	0	0	0	200	300	0	0	0	0	0	0	0	200	903	0	0	0	0	0	0	0	603	903	0
662	1	0	0	0	0	0	0	200	300	0	0	0	0	0	0	0	200	903	0	0	0	0	0	0	0	603	903	0
662	2	0	0	0	0	0	0	200	300	0	0	0	0	0	0	0	200	903	0	0	0	0	0	0	0	603	903	0
662	3	0	0	0	0	0	0	200	300	0	0	0	0	0	0	0	200	903	0	0	0	0	0	0	0	603	903	0
662	4	0	0	0	0	0	0	200	300	0	0	0	0	0	0	0	200	903	0	0	0	0	0	0	0	603	903	0
662	5	0	0	0	0	0	0	200	300	0	0	0	0	0	0	0	200	903	0	0	0	0	0	0	0	603	903	0
662	6	0	0	0	0	0	0	200	300	0	0	0	0	0	0	0	200	903	0	0	0	0	0	0	0	603	903	0
662	7	0	0	0	0	0	0	200	300	0	0	0	0	0	0	0	200	903	0	0	0	0	0	0	0	603	903	0
662	8	0	0	0	0	0	0	200	300	0	0	0	0	0	0	0	200	903	0	0	0	0	0	0	0	603	903	0
662	9	0	0	0	0	0	0	200	300	0	0	0	0	0	0	0	200	903	0	0	0	0	0	0	0	603	903	0
663	0	0	0	0	0	0	0	200	300	0	0	0	0	0	0	0	200	903	0	0	0	0	0	0	0	603	903	0
663	1	0	0	0	0	0	0	200	300	0	0	0	0	0	0	0	200	903	0	0	0	0	0	0	0	603	903	0
663	2	0	0	0	0	0	0	200	300	0	0	0	0	0	0	0	200	903	0	0	0	0	0	0	0	603	903	0
663	3	0	0	0	0	0	0	200	300	0	0	0	0	0	0	0	200	903	0	0	0	0	0	0	0	603	903	0
663	4	0	0	0	0	0	0	200	300	0	0	0	0	0	0	0	200	903	0	0	0	0	0	0	0	603	903	0
663	5	0	0	0	0	0	0	200	300	0	0	0	0	0	0	0	200	903	0	0	0	0	0	0	0	603	903	0
663	6	0	0	0	0	0	0	200	300	0	0	0	0	0	0	0	200	903	0	0	0	0	0	0	0	603	903	0
663	7	0	0	0	0	0	0	200	300	0	0	0	0	0	0	0	200	903	0	0	0	0	0	0	0	603	903	0
663	8	0	0	0	0	0	0	200	300	0	0	0	0	0	0	0	200	903	0	0	0	0	0	0	0	603	903	0
663	9	0	0	0	0	0	0	200	300	0	0	0	0	0	0	0	200	903	0	0	0	0	0	0	0	603	903	0
664	0	0	0	0	0	0	0	200	300	0	0	0	0	0	0	0	200	903	0	0	0	0	0	0	0	603	903	0
664	1	0	0	0	0	0	0	200	300	0	0	0	0	0	0	0	200	903	0	0	0	0	0	0	0	603	903	0
664	2	0	0	0	0	0	0	200	300	0	0	0	0	0	0	0	200	903	0	0	0	0	0	0	0	603	903	0
664	3	0	0	0	0	0	0	200	300	0	0	0	0	0	0	0	200	903	0	0	0	0	0	0	0	603	903	0
664	4	0	0	0	0	0	0	200	300	0	0	0	0	0	0	0	200	903	0	0	0	0	0	0	0	603	903	0
664	5	0	0	0	0	0	0	200	300	0	0	0	0	0	0	0	200	903	0	0	0	0	0	0	0	603	903	0
664	6	0	0	0	0	0	0	200	300	0	0	0	0	0	0	0	200	903	0	0	0	0	0	0	0	603	903	0
664	7	0	0	0	0	0	0	200	300	0	0	0	0	0	0	0	200	903	0	0	0	0	0	0	0	603	903	0
664	8	0	0	0	0	0	0	200	300	0	0	0	0	0	0	0	200	903	0	0	0	0	0	0	0	603	903	0
664	9	0	0	0	0	0	0	200	300	0	0	0	0	0	0	0	200	903	0	0	0	0	0	0	0	603	903	0
665	0	0	0	0	0	0	0	200	300	0	0	0	0	0	0	0	200	903	0	0	0	0	0	0	0	603	903	0
665	1	0	0	0	0	0	0	200	300	0	0	0	0	0	0	0	200	903	0	0	0	0	0	0	0	603	903	0
665	2	0	0	0	0	0	0	200	300	0	0	0	0	0	0	0	200	903	0	0	0	0	0	0	0	603	903	0
665	3	0	0	0	0	0	0	200	300	0	0	0	0	0	0	0	200	903	0	0	0	0	0	0	0	603	903	0
665	4	0	0	0	0	0	0	200	300	0	0	0	0	0	0	0	200	903	0	0	0	0	0	0	0	603	903	0
665	5	0	0	0	0	0	0	200	300	0	0	0	0	0	0	0	200	903	0	0	0	0	0	0	0	603	903	0
665	6	0	0	0	0	0	0	200	300	0	0	0	0	0	0	0	200	903	0	0	0	0	0	0	0	603	903	0
665	7	0	0	0	0	0	0	200	300	0	0	0	0	0	0	0	200	903	0	0	0	0	0	0	0	603	903	0
665	8	0	0	0	0	0	0	200	300	0	0	0	0	0	0	0	200	903	0	0	0	0	0	0	0	603	903	0
665	9	0	0	0	0	0	0	200	300	0	0	0	0	0	0	0	200	903	0	0	0	0	0	0	0	603	903	0
666	0	0	0	0	0	0	0	200	300	0	0	0	0	0	0	0	200	903	0	0	0	0	0	0	0	603	903	0
666	1	0	0	0	0	0	0	200	300	0	0	0	0	0	0	0	200	903	0	0	0	0	0	0	0	603	903	0
666	2	0	0	0	0	0	0	200	300	0	0	0	0	0	0	0	200	903	0	0	0	0	0	0	0	603	903	0
666	3	0	0	0	0	0	0	200	300	0	0	0	0	0	0	0	200	903	0	0	0	0	0	0	0	603	903	0
666	4	0	0	0	0	0	0	200	300	0	0	0	0	0	0	0	200	903	0	0	0	0	0	0	0	603	903	0
666	5	0	0	0	0	0	0	200	300	0	0	0	0	0	0	0	200	903	0	0	0	0	0	0	0	603	903	0
666	6	0	0	0	0	0	0	200	300	0	0	0	0	0	0	0	200	903	0	0	0	0	0	0	0	603	903	0
666	7	0	0	0	0	0	0	200	300	0	0	0	0	0	0	0	200	903	0	0	0	0	0	0	0	603	903	0
666	8	0	0	0	0	0	0	200	300	0	0	0	0	0	0	0	200	903	0	0	0	0	0	0	0	603	903	0
666	9	0	0	0	0	0	0	200	300	0	0	0	0	0	0	0	200	903	0	0	0	0	0	0	0	603	903	0
667	0	0	0	0	0	0	0	200	300	0	0	0	0	0	0	0	200	903	0	0	0	0	0	0	0	603	903	0
667	1	0	0	0	0	0	0	200	300	0	0	0	0	0	0	0	200	903	0	0	0	0	0	0	0	603	903	0
667	2	0	0	0	0	0	0	200	300	0	0	0	0	0	0	0	200	903	0	0	0	0	0	0	0	603	903	0
667	3	0	0	0	0	0	0	200	300	0	0	0	0	0	0	0	200	903	0	0	0	0	0	0	0	603	903	0
667	4	0	0	0	0	0	0	200	300	0	0	0	0	0	0	0	200	903	0	0	0	0	0	0	0	603	903	0
667	5	0	0	0	0	0	0	200	300	0	0	0	0	0	0	0	200	903	0	0	0	0	0	0	0	603	903	0
667	6	0	0	0	0	0	0	200	300	0	0	0	0	0	0	0	200	903	0	0	0	0	0	0	0	603	903	0
667	7	0	0	0	0	0	0	200	300	0	0	0	0	0	0	0	200	903	0	0	0	0	0	0	0	603	903	0
667	8	0	0	0	0	0	0	200	300	0	0	0	0	0	0	0	200	903	0	0	0	0	0	0	0	603	903	0
667	9	0	0	0	0	0	0	200	300	0	0	0	0	0	0	0	200	903	0	0	0	0	0	0	0	603	903	0
668	0	0	0	0	0	0	0	200	300	0	0	0	0	0	0	0	200	903	0	0	0	0	0	0	0	603	903	0
668	1	0	0	0	0	0	0	200	300	0	0	0	0	0	0	0	200	903	0	0	0	0	0	0	0	603	903	0
668	2	0	0	0	0	0	0	200	300	0	0	0	0	0	0	0	200	903	0	0	0	0	0	0	0	603	903	0
668	3	0	0	0	0	0	0	200	300	0	0	0	0	0	0	0	200	903	0	0	0	0	0	0	0	603	903	0
668	4	0	0	0	0	0	0	200	300	0	0	0	0	0	0	0	200	903	0	0	0	0	0	0	0	603	903	0
668	5	0	0	0	0	0	0	200	300	0	0	0	0	0	0	0	200	903	0	0	0	0	0	0	0	603	903	0
668	6	0	0	0	0	0	0	200	300	0	0	0	0	0	0	0	200	903	0	0	0	0	0	0	0	603	903	0
668	7	0	0	0	0	0	0	200	300	0	0	0	0	0	0	0	200	903	0	0	0	0	0	0	0	603	903	0
668	8	0	0	0	0	0	0	200	300	0	0	0	0	0	0	0	200	903	0	0	0	0	0	0	0	603	903	0
668	9	0	0	0	0	0	0	200	300	0	0	0	0	0	0	0	200	903	0	0	0	0	0	0	0	603	903	0
669	0	0	0	0	0	0	0	200	300	0	0	0	0	0	0	0	200	903	0	0	0	0	0	0	0	603	903	0
669	1	0	0	0	0	0	0	200	300	0	0	0	0	0	0	0	200	903	0	0	0	0	0	0	0	603	903	0
669	2	0	0	0	0	0	0	200	300	0	0	0	0	0	0	0	200	903	0	0	0	0	0	0	0	603	903	0
669	3	0	0	0	0	0	0	200	300	0	0	0	0	0	0	0	200	903	0	0	0	0	0	0	0	603	903	0
669	4	0	0	0	0	0	0	200	300	0	0	0	0	0	0	0	200	903	0	0	0	0	0	0	0	603	903	0
669	5	0	0	0	0	0	0	200	300	0	0	0	0	0	0	0	200	903	0	0	0	0	0	0	0	603	903	0
669	6	0	0	0	0	0	0	200	300	0	0	0	0	0	0	0	200	903	0	0	0	0	0	0	0	603	903	0
669	7	0	0	0	0	0	0	200	300	0	0	0	0	0	0	0	200	903	0	0	0	0	0	0	0	603	903	0
669	8	0	0	0	0	0	0	200	300	0	0	0	0	0	0	0	200	903	0	0	0	0	0	0	0	603	903	0
669	9	0	0	0	0	0	0	200	300	0	0	0	0	0	0	0	200	903	0	0	0	0	0	0	0	603	903	0
670	0	0	0	0	0	0	0	200	300	0	0	0	0	0	0	0	200	903	0	0	0	0	0	0	0	603	903	0
670	1	0	0	0	0	0	0	200	300	0	0	0	0	0	0	0	200	903	0	0	0	0	0	0	0	603	903	0
670	2	0	0	0	0	0	0	200	300	0	0	0	0	0	0	0	200	903	0	0	0	0	0	0	0	603	903	0
670	3	0	0	0	0	0	0	200	300	0	0	0	0	0	0	0	200	903	0	0	0	0	0	0	0	603	903	0
670	4	0	0	0	0	0	0	200	300	0	0	0	0	0	0	0	200	903	0	0	0	0	0	0	0	603	903	0
670	5	0	0	0	0	0	0	200	300	0	0	0	0	0	0	0	200	903	0	0	0	0	0	0	0	603	903	0
670	6	0	0	0	0	0	0	200	300	0	0	0	0	0	0	0	200	903	0	0	0	0	0	0	0	603	903	0
670	7	0	0	0	0	0	0	200	300	0	0	0	0	0	0	0	200	903	0	0	0	0	0	0	0	603	903	0
670	8	0	0	0	0	0	0	200	300	0	0	0	0	0	0	0	200	903	0	0	0	0	0	0	0	603	903	0
670	9	0	0	0	0	0	0	200	300	0	0	0	0	0	0	0	200	903	0	0	0	0	0	0	0	603	903	0
671	0	0	0	0	0	0	0	200	300	0	0	0	0	0	0	0	200	903	0	0	0	0	0	0	0	603	903	0
671	1	0	0	0	0	0	0	200	300	0	0	0	0	0	0	0	200	903	0	0	0	0	0	0	0	603	903	0
671	2	0	0	0	0	0	0	200	300	0	0	0	0	0	0	0	200	903	0	0	0	0	0	0	0	603	903	0
671	3	0	0	0	0	0	0	200	300	0	0	0	0	0	0	0	200	903	0	0	0	0	0	0	0	603	903	0
671	4	0	0	0	0	0	0	200	300	0	0	0	0	0	0	0	200	903	0	0	0	0	0	0	0	603	903	0
671	5	0	0	0	0	0	0	200	300	0	0	0	0	0	0	0	200	903	0	0	0	0	0	0	0	603	903	0
671	6	0	0	0	0	0	0	200	300	0	0	0	0	0	0	0	200	903	0	0	0	0	0	0	0	603	903	0
671	7	0	0	0	0	0	0	200	300	0	0	0	0	0	0	0	200	903	0	0	0	0	0	0	0	603	903	0
671	8	0	0	0	0	0	0	200	300	0	0	0	0	0	0	0	200	903	0	0	0	0	0	0	0	603	903	0
671	9	0	0	0	0	0	0	200	300	0	0	0	0	0	0	0	200	903	0	0	0	0	0	0	0	603	903	0
672	0	0	0	0	0	0	0	200	300	0	0	0	0	0	0	0	200	903	0	0	0	0	0	0	0	603	903	0
672	1	0	0	0	0	0	0	200	300	0	0	0	0	0	0	0	200	903	0	0	0	0	0	0	0	603	903	0
672	2	0	0	0	0	0	0	200	300	0	0	0	0	0	0	0	200	903	0	0	0	0	0	0	0	603	903	0
672	3	0	0	0	0	0	0	200	300	0	0	0	0	0	0	0	200	903	0	0	0	0	0	0	0	603	903	0
672	4	0	0	0	0	0	0	200	300	0	0	0	0	0	0	0	200	903	0	0	0	0	0	0	0	603	903	0
672	5	0	0	0	0	0	0	200	300	0	0	0	0	0	0	0	200	903	0	0	0	0	0	0	0	603	903	0
672	6	0	0	0	0	0	0	200	300	0	0	0	0	0	0	0	200	903	0	0	0	0	0	0	0	603	903	0
672	7	0	0	0	0	0	0	200	300	0	0	0	0	0	0	0	200	903	0	0	0	0	0	0	0	603	903	0
672	8	0	0	0	0	0	0	200	300	0	0	0	0	0	0	0	200	903	0	0	0	0	0	0	0	603	903	0
672	9	0	0	0	0	0	0	200	300	0	0	0	0	0	0	0	200	903	0	0	0	0	0	0	0	603	903	0
673	0	0	0	0	0	0	0	200	300	0	0	0	0	0	0	0	200	903	0	0	0	0	0	0	0	603	903	0
673	1	0	0	0	0	0	0	200	300	0	0	0	0	0	0	0	200	903	0	0	0	0	0	0	0	603	903	0
673	2	0	0	0	0	0	0	200	300	0	0	0	0	0	0	0	200	903	0	0	0	0	0	0	0	603	903	0
673	3	0	0	0	0	0	0	200	300	0	0	0	0	0	0	0	200	903	0	0	0	0	0	0	0	603	903	0
673	4	0	0	0	0	0	0	200	300	0	0	0	0	0	0	0	200	903	0	0	0	0	0	0	0	603	903	0
673	5	0	0	0	0	0	0	200	300	0	0	0	0	0	0	0	200	903	0	0	0	0	0	0	0	603	903	0
673	6	0	0	0	0	0	0	200	300	0	0	0	0	0	0	0	200	903	0	0	0	0	0	0	0	603	903	0
673	7	0	0	0	0	0	0	200	300	0	0	0	0	0	0	0	200	903	0	0	0	0	0	0	0	603	903	0
673	8	0	0	0	0	0	0	200	300	0	0	0	0	0	0	0	200	903	0	0	0	0	0	0	0	603	903	0
673	9	0	0	0	0	0	0	200	300	0	0	0	0	0	0	0	200	903	0	0	0	0	0	0	0	603	903	0
674	0	0	0	0	0	0	0	200	300	0	0	0	0	0	0	0	200	903	0	0	0	0	0	0	0	603	903	0
674	1	0	0	0	0	0	0	200	300	0	0	0	0	0	0	0	200	903	0	0	0	0	0	0	0	603	903	0
674	2	0	0	0	0	0	0	200	300	0	0	0	0	0	0	0	200	903	0	0	0	0	0	0	0	603	903	0
674	3	0	0	0	0	0	0	200	300	0	0	0	0	0	0	0	200	903	0	0	0	0	0	0	0	603	903	0
674	4	0	0	0	0	0	0	200	300	0	0	0	0	0	0	0	200	903	0	0	0	0	0	0	0	603	903	0
674	5	0	0	0	0	0	0	200	300	0	0	0	0	0	0	0	200	903	0	0	0	0	0	0	0	603	903	0
674	6	0	0	0	0	0	0	200	300	0	0	0	0	0	0	0	200	903	0	0	0	0	0	0	0	603	903	0
674	7	0	0	0	0	0	0	200	300	0	0	0	0	0	0	0	200	903	0	0	0	0	0	0	0	603	903	0
674	8	0	0	0	0	0	0	200	300	0	0	0	0	0	0	0	200	903	0	0	0	0	0	0	0	603	903	0
674	9	0	0	0	0	0	0	200	300	0	0	0	0	0	0	0	200	903	0	0	0	0	0	0	0	603	903	0
675	0	0	0	0	0	0	0	200	300	0	0	0	0	0	0	0	200	903	0	0	0	0	0	0	0	603	903	0
675	1	0	0	0	0	0	0	200	300	0	0	0	0	0	0	0	200	903	0	0	0	0	0	0	0	603	903	0
675	2	0	0	0	0	0	0	200	300	0	0	0	0	0	0	0	200	903	0	0	0	0	0	0	0	603	903	0
675	3	0	0	0	0	0	0	200	300	0	0	0	0	0	0	0	200	903	0	0	0	0	0	0	0	603	903	0
675	4	0	0	0	0	0	0	200	300	0	0	0	0	0	0	0	200	903	0	0	0	0	0	0	0	603	903	0
675	5	0	0	0	0	0	0	200	300	0	0	0	0	0	0	0	200	903	0	0	0	0	0	0	0	603	903	0
675	6	0	0	0	0	0	0	200	300	0	0	0	0	0	0	0	200	903	0	0	0	0	0	0	0	603	903	0
675	7	0	0	0	0	0	0	200	300	0	0	0	0	0	0	0	200	903	0	0	0	0	0	0	0	603	903	0
675	8	0	0	0	0	0	0	200	300	0	0	0	0	0	0	0	200	903	0	0	0	0	0	0	0	603	903	0
675	9	0	0	0	0	0	0	200	300	0	0	0	0	0	0	0	200	903	0	0	0	0	0	0	0	603	903	0
676	0	0	0	0	0	0	0	200	300	0	0	0	0	0	0	0	200	903	0	0	0	0	0	0	0	603	903	0
676	1	0	0	0	0	0	0	200	300	0	0	0	0	0	0	0	200	903	0	0	0	0	0	0	0	603	903	0
676	2	0	0	0	0	0	0	200	300	0	0	0	0	0	0	0	200	903	0	0	0	0	0	0	0	603	903	0
676	3	0	0	0	0	0	0	200	300	0	0	0	0	0	0	0	200	903	0	0	0	0	0	0	0	603	903	0
676	4	0	0	0	0	0	0	200	300	0	0	0	0	0	0	0	200	903	0	0	0	0	0	0	0	603	903	0
676	5	0	0	0	0	0	0	200	300	0	0	0	0	0	0	0	200	903	0	0	0	0	0	0	0	603	903	0
676	6	0	0	0	0	0	0	200	300	0	0	0	0	0	0	0	200	903	0	0	0	0	0	0	0	603	903	0
676	7	0	0	0	0	0	0	200	300	0	0	0	0	0	0	0	200	903	0	0	0	0	0	0	0	603	903	0
676	8	0	0	0	0	0	0	200	300	0	0	0	0	0	0	0	200	903	0	0	0	0	0	0	0	603	903	0
676	9	0	0	0	0	0	0	200	300	0	0	0	0	0	0	0	200	903	0	0	0	0	0	0	0	603	903	0
677	0	0	0	0	0	0	0	200	300	0	0	0	0	0	0	0	200	903	0	0	0	0	0	0	0	603	903	0
677	1	0	0	0	0	0	0	200	300	0	0	0	0	0	0	0	200	903	0	0	0	0	0	0	0	603	903	0
677	2	0	0	0	0	0	0	200	300	0	0	0	0	0	0	0	200	903	0	0	0	0	0	0	0	603	903	0
677	3	0	0	0	0	0	0	200	300	0	0	0	0	0	0	0	200	903	0	0	0	0	0	0	0	603	903	0
677	4	0	0	0	0	0	0	200	300	0	0	0	0	0	0	0	200	903	0	0	0	0	0	0	0	603	903	0
677	5	0	0	0	0	0	0	200	300	0	0	0	0	0	0	0	200	903	0	0	0	0	0	0	0	603	903	0
677	6	0	0	0	0	0	0	200	300	0	0	0	0	0	0	0	200	903	0	0	0	0	0	0	0	603	903	0
677	7	0	0	0	0	0	0	200	300	0	0	0	0	0	0	0	200	903	0	0	0	0	0	0	0	603	903	0
677	8	0	0	0	0	0	0	200	300	0	0	0	0	0	0	0	200	903	0	0	0	0	0	0	0	603	903	0
677	9	0	0	0	0	0	0	200	300	0	0	0	0	0	0	0	200	903	0	0	0	0	0	0	0	603	903	0
678	0	0	0	0	0	0	0	200	300	0	0	0	0	0	0	0	200	903	0	0	0	0	0	0	0	603	903	0
678	1	0	0	0	0	0	0	200	300	0	0	0	0	0	0	0	200	903	0	0	0	0	0	0	0	603	903	0
678	2	0	0	0	0	0	0	200	300	0	0	0	0	0	0	0	200	903	0	0	0	0	0	0	0	603	903	0
678	3	0	0	0	0	0	0	200	300	0	0	0	0	0	0	0	200	903	0	0	0	0	0	0	0	603	903	0
678	4	0	0	0	0	0	0	200	300	0	0	0	0	0	0	0	200	903	0	0	0	0	0	0	0	603	903	0
678	5	0	0	0	0	0	0	200	300	0	0	0	0	0	0	0	200	903	0	0	0	0	0	0	0	603	903	0
678	6	0	0	0	0	0	0	200	300	0	0	0	0	0	0	0	200	903	0	0	0	0	0	0	0	603	903	0
678	7	0	0	0	0	0	0	200	300	0	0	0	0	0	0	0	200	903	0	0	0	0	0	0	0	603	903	0
678	8	0	0	0	0	0	0	200	300	0	0	0	0	0	0	0	200	903	0	0	0	0	0	0	0	603	903	0
678	9	0	0	0	0	0	0	200	300	0	0	0	0	0	0	0	200	903	0	0	0	0	0	0	0	603	903	0
679	0	0	0	0	0	0	0	200	300	0	0	0	0	0	0	0	200	903	0	0	0	0	0	0	0	603	903	0
679	1	0	0	0	0	0	0	200	300	0	0	0	0	0	0	0	200	903	0	0	0	0	0	0	0	603	903	0
679	2	0	0	0	0	0	0	200	300	0	0	0	0	0	0	0	200	903	0	0	0	0	0	0	0	603	903	0
679	3	0	0	0	0	0	0	200	300	0	0	0	0	0	0	0	200	903	0	0	0	0	0	0	0	603	903	0
679	4	0	0	0	0	0	0	200	300	0	0	0	0	0	0	0	200	903	0	0	0	0	0	0	0	603	903	0
679	5	0	0	0	0	0	0	200	300	0	0	0	0	0	0	0	200	903	0	0	0	0	0	0	0	603	903	0
679	6	0	0	0	0	0	0	200	300	0	0	0	0	0	0	0	200	903	0	0	0	0	0	0	0	603	903	0
679	7	0	0	0	0	0	0	200	300	0	0	0	0	0	0	0	200	903	0	0	0	0	0	0	0	603	903	0
679	8	0	0	0	0	0	0	200	300	0	0	0	0	0	0	0	200	903	0	0	0	0	0	0	0	603	903	0
679	9	0	0	0	0	0	0	200	300	0	0	0	0	0	0	0	200	903	0	0	0	0	0	0	0	603	903	0
680	0	0	0	0	0	0	0	200	300	0	0	0	0	0	0	0	200	903	0	0	0	0	0	0	0	603	903	0
680	1	0	0	0	0	0	0	200	300	0	0	0	0	0	0	0	200	903	0	0	0	0	0	0	0	603	903	0
680	2	0	0	0	0	0	0	200	300	0	0	0	0	0	0	0	200	903	0	0	0	0	0	0	0	603	903	0
680	3	0	0	0	0	0	0	200	300	0	0	0	0	0	0	0	200	903	0	0	0	0	0	0	0	603	903	0
680	4	0	0	0	0	0	0	200	300	0	0	0	0	0	0	0	200	903	0	0	0	0	0	0	0	603	903	0
680	5	0	0	0	0	0	0	200	300	0	0	0	0	0	0	0	200	903	0	0	0	0	0	0	0	603	903	0
680	6	0	0	0	0	0	0	200	300	0	0	0	0	0	0	0	200	903	0	0	0	0	0	0	0	603	903	0
680	7	0	0	0	0	0	0	200	300	0	0	0	0	0	0	0	200	903	0	0	0	0	0	0	0	603	903	0
680	8	0	0	0	0	0	0	200	300	0	0	0	0	0	0	0	200	903	0	0	0	0	0	0	0	603	903	0
680	9	0	0	0	0	0	0	200	300	0	0	0	0	0	0	0	200	903	0	0	0	0	0	0	0	603	903	0
681	0	0	0	0	0	0	0	200	300	0	0	0	0	0	0	0	200	903	0	0	0	0	0	0	0	603	903	0
681	1	0	0	0	0	0	0	200	300	0	0	0	0	0	0	0	200	903	0	0	0	0	0	0	0	603	903	0
681	2	0	0	0	0	0	0	200	300	0	0	0	0	0	0	0	200	903	0	0	0	0	0	0	0	603	903	0
681	3	0	0	0	0	0	0	200	300	0	0	0	0	0	0	0	200	903	0	0	0	0	0	0	0	603	903	0
681	4	0	0	0	0	0	0	200	300	0	0	0	0	0	0	0	200	903	0	0	0	0	0	0	0	603	903	0
681	5	0	0	0	0	0	0	200	300	0	0	0	0	0	0	0	200	903	0	0	0	0	0	0	0	603	903	0
681	6	0	0	0	0	0	0	200	300	0	0	0	0	0	0	0	200	903	0	0	0	0	0	0	0	603	903	0
681	7	0	0	0	0	0	0	200	300	0	0	0	0	0	0	0	200	903	0	0	0	0	0	0	0	603	903	0
681	8	0	0	0	0	0	0	200	300	0	0	0	0	0	0	0	200	903	0	0	0	0	0	0	0	603	903	0
681	9	0	0	0	0	0	0	200	300	0	0	0	0	0	0	0	200	903	0	0	0	0	0	0	0	603	903	0
682	0	0	0	0	0	0	0	200	300	0	0	0	0	0	0	0	200	903	0	0	0	0	0	0	0	603	903	0
682	1	0	0	0	0	0	0	200	300	0	0	0	0	0	0	0	200	903	0	0	0	0	0	0	0	603	903	0
682	2	0	0	0	0	0	0	200	300	0	0	0	0	0	0	0	200	903	0	0	0	0	0	0	0	603	903	0
682	3	0	0	0	0	0	0	200	300	0	0	0	0	0	0	0	200	903	0	0	0	0	0	0	0	603	903	0
682	4	0	0	0	0	0	0	200	300	0	0	0	0	0	0	0	200	903	0	0	0	0	0	0	0	603	903	0
682	5	0	0	0	0	0	0	200	300	0	0	0	0	0	0	0	200	903	0	0	0	0	0	0	0	603	903	0
682	6	0	0	0	0	0	0	200	300	0	0	0	0	0	0	0	200	903	0	0	0	0	0	0	0	603	903	0
682	7	0	0	0	0	0	0	200	300	0	0	0	0	0	0	0	200	903	0	0	0	0	0	0	0	603	903	0
682	8	0	0	0	0	0	0	200	300	0	0	0	0	0	0	0	200	903	0	0	0	0	0	0	0	603	903	0
682	9	0	0	0	0	0	0	200	300	0	0	0	0	0	0	0	200	903	0	0	0	0	0	0	0	603	903	0
683	0	0	0	0	0	0	0	200	300	0	0	0	0	0	0	0	200	903	0	0	0	0	0	0	0	603	903	0
683	1	0	0	0	0	0	0	200	300	0	0	0	0	0	0	0	200	903	0	0	0	0	0	0	0	603	903	0
683	2	0	0	0	0	0	0	200	300	0	0	0	0	0	0	0	200	903	0	0	0	0	0	0	0	603	903	0
683	3	0	0	0	0	0	0	200	300	0	0	0	0	0	0	0	200	903	0	0	0	0	0	0	0	603	903	0
683	4	0	0	0	0	0	0	200	300	0	0	0	0	0	0	0	200	903	0	0	0	0	0	0	0	603	903	0
683	5	0	0	0	0	0	0	200	300	0	0	0	0	0	0	0	200	903	0	0	0	0	0	0	0	603	903	0
683	6	0	0	0	0	0	0	200	300	0	0	0	0	0	0	0	200	903	0	0	0	0	0	0	0	603	903	0
683	7	0	0	0	0	0	0	200	300	0	0	0	0	0	0	0	200	903	0	0	0	0	0	0	0	603	903	0
683	8	0	0	0	0	0	0	200	300	0	0	0	0	0	0	0	200	903	0	0	0	0	0	0	0	603	903	0
683	9	0	0	0	0	0	0	200	300	0	0	0	0	0	0	0	200	903	0	0	0	0	0	0	0	603	903	0
684	0	0	0	0	0	0	0	200	300	0	0	0	0	0	0	0	200	903	0	0	0	0	0	0	0	603	903	0
684	1	0	0	0	0	0	0	200	300	0	0	0	0	0	0	0	200	903	0	0	0	0	0	0	0	603	903	0
684	2	0	0	0	0	0	0	200	300	0	0	0	0	0	0	0	200	903	0	0	0	0	0	0	0	603	903	0
684	3	0	0	0	0	0	0	200	300	0	0	0	0	0	0	0	200	903	0	0	0	0	0	0	0	603	903	0
684	4	0	0	0	0	0	0	200	300	0	0	0	0	0	0	0	200	903	0	0	0	0	0	0	0	603	903	0
684	5	0	0	0	0	0	0	200	300	0	0	0	0	0	0	0	200	903	0	0	0	0	0	0	0	603	903	0
684	6	0	0	0	0	0	0	200	300	0	0	0	0	0	0	0	200	903	0	0	0	0	0	0	0	603	903	0
684	7	0	0	0	0	0	0	200	300	0	0	0	0	0	0	0	200	903	0	0	0	0	0	0	0	603	903	0
684	8	0	0	0	0	0	0	200	300	0	0	0	0	0	0	0	200	903	0	0	0	0	0	0	0	603	903	0
684	9	0	0	0	0	0	0	200	300	0	0	0	0	0	0	0	200	903	0	0	0	0	0	0	0	603	903	0
685	0	0	0	0	0	0	0	200	300	0	0	0	0	0	0	0	200	903	0	0	0	0	0	0	0	603	903	0
685	1	0	0	0	0	0	0	200	300	0	0	0	0	0	0	0	200	903	0	0	0	0	0	0	0	603	903	0
685	2	0	0	0	0	0	0	200	300	0	0	0	0	0	0	0	200	903	0	0	0	0	0	0	0	603	903	0
685	3	0	0	0	0	0	0	200	300	0	0	0	0	0	0	0	200	903	0	0	0	0	0	0	0	603	903	0
685	4	0	0	0	0	0	0	200	300	0	0	0	0	0	0	0	200	903	0	0	0	0	0	0	0	603	903	0
685	5	0	0	0	0	0	0	200	300	0	0	0	0	0	0	0	200	903	0	0	0	0	0	0	0	603	903	0
685	6	0	0	0	0	0	0	200	300	0	0	0	0	0	0	0	200	903	0	0	0	0	0	0	0	603	903	0
685	7	0	0	0	0	0	0	200	300	0	0	0	0	0	0	0	200	903	0	0	0	0	0	0	0	603	903	0
685	8	0	0	0	0	0	0	200	300	0	0	0	0	0	0	0	200	903	0	0	0	0	0	0	0	603	903	0
685	9	0	0	0	0	0	0	200	300	0	0	0	0	0	0	0	200	903	0	0	0	0	0	0	0	603	903	0
686	0	0	0	0	0	0	0	200	300	0	0	0	0	0	0	0	200	903	0	0	0	0	0	0	0	603	903	0
686	1	0	0	0	0	0	0	200	300	0	0	0	0	0	0	0	200	903	0	0	0	0	0	0	0	603	903	0
686	2	0	0	0	0	0	0	200	300	0	0	0	0	0	0	0	200	903	0	0	0	0	0	0	0	603	903	0
686	3	0	0	0	0	0	0	200	300	0	0	0	0	0	0	0	200	903	0	0	0	0	0	0	0	603	903	0
686	4	0	0	0	0	0	0	200	300	0	0	0	0	0	0	0	200	903	0	0	0	0	0	0	0	603	903	0
686	5	0	0	0	0	0	0	200	300	0	0	0	0	0	0	0	200	903	0	0	0	0	0	0	0	603	903	0
686	6	0	0	0	0	0	0	200	300	0	0	0	0	0	0	0	200	903	0	0	0	0	0	0	0	603	903	0
686	7	0	0	0	0	0	0	200	300	0	0	0	0	0	0	0	200	903	0	0	0	0	0	0	0	603	903	0
686	8	0	0	0	0	0	0	200	300	0	0	0	0	0	0	0	200	903	0	0	0	0	0	0	0	603	903	0
686	9	0	0	0	0	0	0	200	300	0	0	0	0	0	0	0	200	903	0	0	0	0	0	0	0	603	903	0
687	0	0	0	0	0	0	0	200	300	0	0	0	0	0	0	0	200	903	0	0	0	0	0	0	0	603	903	0
687	1	0	0	0	0	0	0	200	300	0	0	0	0	0	0	0	200	903	0	0	0	0	0	0	0	603	903	0
687	2	0	0	0	0	0	0	200	300	0	0	0	0	0	0	0	200	903	0	0	0	0	0	0	0	603	903	0
687	3	0	0	0	0	0	0	200	300	0	0	0	0	0	0	0	200	903	0	0	0	0	0	0	0	603	903	0
687	4	0	0	0	0	0	0	200	300	0	0	0	0	0	0	0	200	903	0	0	0	0	0	0	0	603	903	0
687	5	0	0	0	0	0	0	200	300	0	0	0	0	0	0	0	200	903	0	0	0	0	0	0	0	603	903	0
687	6	0	0	0	0	0	0	200	300	0	0	0	0	0	0	0	200	903	0	0	0	0	0	0	0	603	903	0
687	7	0	0	0	0	0	0	200	300	0	0	0	0	0	0	0	200	903	0	0	0	0	0	0	0	603	903	0
687	8	0	0	0	0	0	0	200	300	0	0	0	0	0	0	0	200	903	0	0	0	0	0	0	0	603	903	0
687	9	0	0	0	0	0	0	200	300	0	0	0	0	0	0	0	200	903	0	0	0	0	0	0	0	603	903	0
688	0	0	0	0	0	0	0	200	300	0	0	0	0	0	0	0	200	903	0	0	0	0	0	0	0	603	903	0
688	1	0	0	0	0	0	0	200	300	0	0	0	0	0	0	0	200	903	0	0	0	0	0	0	0	603	903	0
688	2	0	0	0	0	0	0	200	300	0	0	0	0	0	0	0	200	903	0	0	0	0	0	0	0	603	903	0
688	3	0	0	0	0	0	0	200	300	0	0	0	0	0	0	0	200	903	0	0	0	0	0	0	0	603	903	0
688	4	0	0	0	0	0	0	200	300	0	0	0	0	0	0	0	200	903	0	0	0	0	0	0	0	603	903	0
688	5	0	0	0	0	0	0	200	300	0	0	0	0	0	0	0	200	903	0	0	0	0	0	0	0	603	903	0
688	6	0	0	0	0	0	0	200	300	0	0	0	0	0	0	0	200	903	0	0	0	0	0	0	0	603	903	0
688	7	0	0	0	0	0	0	200	300	0	0	0	0	0	0	0	200	903	0	0	0	0	0	0	0	603	903	0
688	8	0	0	0	0	0	0	200	300	0	0	0	0	0	0	0	200	903	0	0	0	0	0	0	0	603	903	0
688	9	0	0	0	0	0	0	200	300	0	0	0	0	0	0	0	200	903	0	0	0	0	0	0	0	603	903	0
689	0	0	0	0	0	0	0	200	300	0	0	0	0	0	0	0	200	903	0	0	0	0	0	0	0	603	903	0
689	1	0	0	0	0	0	0	200	300	0	0	0	0	0	0	0	200	903	0	0	0	0	0	0	0	603	903	0
689	2	0	0	0	0	0	0	200	300	0	0	0	0	0	0	0	200	903	0	0	0	0	0	0	0	603	903	0
689	3	0	0	0	0	0	0	200	300	0	0	0	0	0	0	0	200	903	0	0	0	0	0	0	0	603	903	0
689	4	0	0	0	0	0	0	200	300	0	0	0	0	0	0	0	200	903	0	0	0	0	0	0	0	603	903	0
689	5	0	0	0	0	0	0	200	300	0	0	0	0	0	0	0	200	903	0	0	0	0	0	0	0	603	903	0
689	6	0	0	0	0	0	0	200	300	0	0	0	0	0	0	0	200	903	0	0	0	0	0	0	0	603	903	0
689	7	0	0	0	0	0	0	200	300	0	0	0	0	0	0	0	200	903	0	0	0	0	0	0	0	603	903	0
689	8	0	0	0	0	0	0	200	300	0	0	0	0	0	0	0	200	903	0	0	0	0	0	0	0	603	903	0
689	9	0	0	0	0	0	0	200	300	0	0	0	0	0	0	0	200	903	0	0	0	0	0	0	0	603	903	0
690	0	0	0	0	0	0	0	200	300	0	0	0	0	0	0	0	200	903	0	0	0	0	0	0	0	603	903	0
690	1	0	0	0	0	0	0	200	300	0	0	0	0	0	0	0	200	903	0	0	0	0	0	0	0	603	903	0
690	2	0	0	0	0	0	0	200	300	0	0	0	0	0	0	0	200	903	0	0	0	0	0	0	0	603	903	0
690	3	0	0	0	0	0	0	200	300	0	0	0	0	0	0	0	200	903	0	0	0	0	0	0	0	603	903	0
690	4	0	0	0	0	0	0	200	300	0	0	0	0	0	0	0	200	903	0	0	0	0	0	0	0	603	903	0
690	5	0	0	0	0	0	0	200	300	0	0	0	0	0	0	0	200	903	0	0	0	0	0	0	0	603	903	0
690	6	0	0	0	0	0	0	200	300	0	0	0	0	0	0	0	200	903	0	0	0	0	0	0	0	603	903	0
690	7	0	0	0	0	0	0	200	300	0	0	0	0	0	0	0	200	903	0	0	0	0	0	0	0	603	903	0
690	8	0	0	0	0	0	0	200	300	0	0	0	0	0	0	0	200	903	0	0	0	0	0	0	0	603	903	0
690	9	0	0	0	0	0	0	200	300	0	0	0	0	0	0	0	200	903	0	0	0	0	0	0	0	603	903	0
691	0	0	0	0	0	0	0	200	300	0	0	0	0	0	0	0	200	903	0	0	0	0	0	0	0	603	903	0
691	1	0	0	0	0	0	0	200	300	0	0	0	0	0	0	0	200	903	0	0	0	0	0	0	0	603	903	0
691	2	0	0	0	0	0	0	200	300	0	0	0	0	0	0	0	200	903	0	0	0	0	0	0	0	603	903	0
691	3	0	0	0	0	0	0	200	300	0	0	0	0	0	0	0	200	903	0	0	0	0	0	0	0	603	903	0
691	4	0	0	0	0	0	0	200	300	0	0	0	0	0	0	0	200	903	0	0	0	0	0	0	0	603	903	0
691	5	0	0	0	0	0	0	200	300	0	0	0	0	0	0	0	200	903	0	0	0	0	0	0	0	603	903	0
691	6	0	0	0	0	0	0	200	300	0	0	0	0	0	0	0	200	903	0	0	0	0	0	0	0	603	903	0
691	7	0	0	0	0	0	0	200	300	0	0	0	0	0	0	0	200	903	0	0	0	0	0	0	0	603	903	0
691	8	0	0	0	0	0	0	200	300	0	0	0	0	0	0	0	200	903	0	0	0	0	0	0	0	603	903	0
691	9	0	0	0	0	0	0	200	300	0	0	0	0	0	0	0	200	903	0	0	0	0	0	0	0	603	903	0
692	0	0	0	0	0	0	0	200	300	0	0	0	0	0	0	0	200	903	0	0	0	0	0	0	0	603	903	0
692	1	0	0	0	0	0	0	200	300	0	0	0	0	0	0	0	200	903	0	0	0	0	0	0	0	603	903	0
692	2	0	0	0	0	0	0	200	300	0	0	0	0	0	0	0	200	903	0	0	0	0	0	0	0	603	903	0
692	3	0	0	0	0	0	0	200	300	0	0	0	0	0	0	0	200	903	0	0	0	0	0	0	0	603	903	0
692	4	0	0	0	0	0	0	200	300	0	0	0	0	0	0	0	200	903	0	0	0	0	0	0	0	603	903	0
692	5	0	0	0	0	0	0	200	300	0	0	0	0	0	0	0	200	903	0	0	0	0	0	0	0	603	903	0
692	6	0	0	0	0	0	0	200	300	0	0	0	0	0	0	0	200	903	0	0	0	0	0	0	0	603	903	0
692	7	0	0	0	0	0	0	200	300	0	0	0	0	0	0	0	200	903	0	0	0	0	0	0	0	603	903	0
692	8	0	0	0	0	0	0	200	300	0	0	0	0	0	0	0	200	903	0	0	0	0	0	0	0	603	903	0
692	9	0	0	0	0	0	0	200	300	0	0	0	0	0	0	0	200	903	0	0	0	0	0	0	0	603	903	0
693	0	0	0	0	0	0	0	200	300	0	0	0	0	0	0	0	200	903	0	0	0	0	0	0	0	603	903	0
693	1	0	0	0	0	0	0	200	300	0	0	0	0	0	0	0	200	903	0	0	0	0	0	0	0	603	903	0
693	2	0	0	0	0	0	0	200	300	0	0	0	0	0	0	0	200	903	0	0	0	0	0	0	0	603	903	0
693	3	0	0	0	0	0	0	200	300	0	0	0	0	0	0	0	200	903	0	0	0	0	0	0	0	603	903	0
693	4	0	0	0	0	0	0	200	300	0	0	0	0	0	0	0	200	903	0	0	0	0	0	0	0	603	903	0
693	5	0	0	0	0	0	0	200	300	0	0	0	0	0	0	0	200	903	0	0	0	0	0	0	0	603	903	0
693	6	0	0	0	0	0	0	200	300	0	0	0	0	0	0	0	200	903	0	0	0	0	0	0	0	603	903	0
693	7	0	0	0	0	0	0	200	300	0	0	0	0	0	0	0	200	903	0	0	0	0	0	0	0	603	903	0
693	8	0	0	0	0	0	0	200	300	0	0	0	0	0	0	0	200	903	0	0	0	0	0	0	0	603	903	0
693	9	0	0	0	0	0	0	200	300	0	0	0	0	0	0	0	200	903	0	0	0	0	0	0	0	603	903	0
694	0	0	0	0	0	0	0	200	300	0	0	0	0	0	0	0	200	903	0	0	0	0	0	0	0	603	903	0
694	1	0	0	0	0	0	0	200	300	0	0	0	0	0	0	0	200	903	0	0	0	0	0	0	0	603	903	0
694	2	0	0	0	0	0	0	200	300	0	0	0	0	0	0	0	200	903	0	0	0	0	0	0	0	603	903	0
694	3	0	0	0	0	0	0	200	300	0	0	0	0	0	0	0	200	903	0	0	0	0	0	0	0	603	903	0
694	4	0	0	0	0	0	0	200	300	0	0	0	0	0	0	0	200	903	0	0	0	0	0	0	0	603	903	0
694	5	0	0	0	0	0	0	200	300	0	0	0	0	0	0	0	200	903	0	0	0	0	0	0	0	603	903	0
694	6	0	0	0	0	0	0	200	300	0	0	0	0	0	0	0	200	903	0	0	0	0	0	0	0	603	903	0
694	7	0	0	0	0	0	0	200	300	0	0	0	0	0	0	0	200	903	0	0	0	0	0	0	0	603	903	0
694	8	0	0	0	0	0	0	200	300	0	0	0	0	0	0	0	200	903	0	0	0	0	0	0	0	603	903	0
694	9	0	0	0	0	0	0	200	300	0	0	0	0	0	0	0	200	903	0	0	0	0	0	0	0	603	903	0
695	0	0	0	0	0	0	0	200	300	0	0	0	0	0	0	0	200	903	0	0	0	0	0	0	0	603	903	0
695	1	0	0	0	0	0	0	200	300	0	0	0	0	0	0	0	200	903	0	0	0	0	0	0	0	603	903	0
695	2	0	0	0	0	0	0	200	300	0	0	0	0	0	0	0	200	903	0	0	0	0	0	0	0	603	903	0
695	3	0	0	0	0	0	0	200	300	0	0	0	0	0	0	0	200	903	0	0	0	0	0	0	0	603	903	0
695	4	0	0	0	0	0	0	200	300	0	0	0	0	0	0	0	200	903	0	0	0	0	0	0	0	603	903	0
695	5	0	0	0	0	0	0	200	300	0	0	0	0	0	0	0	200	903	0	0	0	0	0	0	0	603	903	0
695	6	0	0	0	0	0	0	200	300	0	0	0	0	0	0	0	200	903	0	0	0	0	0	0	0	603	903	0
695	7	0	0	0	0	0	0	200	300	0	0	0	0	0	0	0	200	903	0	0	0	0	0	0	0	603	903	0
695	8	0	0	0	0	0	0	200	300	0	0	0	0	0	0	0	200	903	0	0	0	0	0	0	0	603	903	0
695	9	0	0	0	0	0	0	200	300	0	0	0	0	0	0	0	200	903	0	0	0	0	0	0	0	603	903	0
696	0	0	0	0	0	0	0	200	300	0	0	0	0	0	0	0	200	903	0	0	0	0	0	0	0	603	903	0
696	1	0	0	0	0	0	0	200	300	0	0	0	0	0	0	0	200	903	0	0	0	0	0	0	0	603	903	0
696	2	0	0	0	0	0	0	200	300	0	0	0	0	0	0	0	200	903	0	0	0	0	0	0	0	603	903	0
696	3	0	0	0	0	0	0	200	300	0	0	0	0	0	0	0	200	903	0	0	0	0	0	0	0	603	903	0
696	4	0	0	0	0	0	0	200	300	0	0	0	0	0	0	0	200	903	0	0	0	0	0	0	0	603	903	0
696	5	0	0	0	0	0	0	200	300	0	0	0	0	0	0	0	200	903	0	0	0	0	0	0	0	603	903	0
696	6	0	0	0	0	0	0	200	300	0	0	0	0	0	0	0	200	903	0	0	0	0	0	0	0	603	903	0
696	7	0	0	0	0	0	0	200	300	0	0	0	0	0	0	0	200	903	0	0	0	0	0	0	0	603	903	0
696	8	0	0	0	0	0	0	200	300	0	0	0	0	0	0	0	200	903	0	0	0	0	0	0	0	603	903	0
696	9	0	0	0	0	0	0	200	300	0	0	0	0	0	0	0	200	903	0	0	0	0	0	0	0	603	903	0
697	0	0	0	0	0	0	0	200	300	0	0	0	0	0	0	0	200	903	0	0	0	0	0	0	0	603	903	0
697	1	0	0	0	0	0	0	200	300	0	0	0	0	0	0	0	200	903	0	0	0	0	0	0	0	603	903	0
697	2	0	0	0	0	0	0	200	300	0	0	0	0	0	0	0	200	903	0	0	0	0	0	0	0	603	903	0
697	3	0	0	0	0	0	0	200	300	0	0	0	0	0	0	0	200	903	0	0	0	0	0	0	0	603	903	0
697	4	0	0	0	0	0	0	200	300	0	0	0	0	0	0	0	200	903	0	0	0	0	0	0	0	603	903	0
697	5	0	0	0	0	0	0	200	300	0	0	0	0	0	0	0	200	903	0	0	0	0	0	0	0	603	903	0
697	6	0	0	0	0	0	0	200	300	0	0	0	0	0	0	0	200	903	0	0	0	0	0	0	0	603	903	0
697	7	0	0	0	0	0	0	200	300	0	0	0	0	0	0	0	200	903	0	0	0	0	0	0	0	603	903	0
697	8	0	0	0	0	0	0	200	300	0	0	0	0	0	0	0	200	903	0	0	0	0	0	0	0	603	903	0
697	9	0	0	0	0	0	0	200	300	0	0	0	0	0	0	0	200	903	0	0	0	0	0	0	0	603	903	0
698	0	0	0	0	0	0	0	200	300	0	0	0	0	0	0	0	200	903	0	0	0	0	0	0	0	603	903	0
698	1	0	0	0	0	0	0	200	300	0	0	0	0	0	0	0	200	903	0	0	0	0	0	0	0	603	903	0
698	2	0	0	0	0	0	0	200	300	0	0	0	0	0	0	0	200	903	0	0	0	0	0	0	0	603	903	0
698	3	0	0	0	0	0	0	200	300	0	0	0	0	0	0	0	200	903	0	0	0	0	0	0	0	603	903	0
698	4	0	0	0	0	0	0	200	300	0	0	0	0	0	0	0	200	903	0	0	0	0	0	0	0	603	903	0
698	5	0	0	0	0	0	0	200	300	0	0	0	0	0	0	0	200	903	0	0	0	0	0	0	0	603	903	0
698	6	0	0	0	0	0	0	200	300	0	0	0	0	0	0	0	200	903	0	0	0	0	0	0	0	603	903	0
698	7	0	0	0	0	0	0	200	300	0	0	0	0	0	0	0	200	903	0	0	0	0	0	0	0	603	903	0
698	8	0	0	0	0	0	0	200	300	0	0	0	0	0	0	0	200	903	0	0	0	0	0	0	0	603	903	0
698	9	0	0	0	0	0	0	200	300	0	0	0	0	0	0	0	200	903	0	0	0	0	0	0	0	603	903	0
699	0	0	0	0	0	0	0	200	300	0	0	0	0	0	0	0	200	903	0	0	0	0	0	0	0	603	903	0
699	1	0	0	0	0	0	0	200	300	0	0	0	0	0	0	0	200	903	0	0	0	0	0	0	0	603	903	0
699	2	0	0	0	0	0	0	200	300	0	0	0	0	0	0	0	200	903	0	0	0	0	0	0	0	603	903	0
699	3	0	0	0	0	0	0	200	300	0	0	0	0	0	0	0	200	903	0	0	0	0	0	0	0	603	903	0
699	4	0	0	0	0	0	0	200	300	0	0	0	0	0	0	0	200	903	0	0	0	0	0	0	0	603	903	0
699	5	0	0	0	0	0	0	200	300	0	0	0	0	0	0	0	200	903	0	0	0	0	0	0	0	603	903	0
699	6	0	0	0	0	0	0	200	300	0	0	0	0	0	0	0	200	903	0	0	0	0	0	0	0	603	903	0
699	7	0	0	0	0	0	0	200	300	0	0	0	0	0	0	0	200	903	0	0	0	0	0	0	0	603	903	0
699	8	0	0	0	0	0	0	200	300	0	0	0	0	0	0	0	200	903	0	0	0	0	0	0	0	603	903	0
699	9	0	0	0	0	0	0	200	300	0	0	0	0	0	0	0	200	903	0	0	0	0	0	0	0	603	903	0
700	0	0	0	0	0	0	0	200	300	0	0	0	0	0	0	0	200	903	0	0	0	0	0	0	0	603	903	0
700	1	0	0	0	0	0	0	200	300	0	0	0	0	0	0	0	200	903	0	0	0	0	0	0	0	603	903	0
700	2	0	0	0	0	0	0	200	300	0	0	0	0	0	0	0	200	903	0	0	0	0	0	0	0	603	903	0
700	3	0	0	0	0	0	0	200	300	0	0	0	0	0	0	0	200	903	0	0	0	0	0	0	0	603	903	0
700	4	0	0	0	0	0	0	200	300	0	0	0	0	0	0	0	200	903	0	0	0	0	0	0	0	603	903	0
700	5	0	0	0	0	0	0	200	300	0	0	0	0	0	0	0	200	903	0	0	0	0	0	0	0	603	903	0
700	6	0	0	0	0	0	0	200	300	0	0	0	0	0	0	0	200	903	0	0	0	0	0	0	0	603	903	0
700	7	0	0	0	0	0	0	200	300	0	0	0	0	0	0	0	200	903	0	0	0	0	0	0	0	603	903	0
700	8	0	0	0	0	0	0	200	300	0	0	0	0	0	0	0	200	903	0	0	0	0	0	0	0	603	903	0
700	9	0	0	0	0	0	0	200	300	0	0	0	0	0	0	0	200	903	0	0	0	0	0	0	0	603	903	0
701	0	0	0	0	0	0	0	200	300	0	0	0	0	0	0	0	200	903	0	0	0	0	0	0	0	603	903	0
701	1	0	0	0	0	0	0	200	300	0	0	0	0	0	0	0	200	903	0	0	0	0	0	0	0	603	903	0
701	2	0	0	0	0	0	0	200	300	0	0	0	0	0	0	0	200	903	0	0	0	0	0	0	0	603	903	0
701	3	0	0	0	0	0	0	200	300	0	0	0	0	0	0	0	200	903	0	0	0	0	0	0	0	603	903	0
701	4	0	0	0	0	0	0	200	300	0	0	0	0	0	0	0	200	903	0	0	0	0	0	0	0	603	903	0
701	5	0	0	0	0	0	0	200	300	0	0	0	0	0	0	0	200	903	0	0	0	0	0	0	0	603	903	0
701	6	0	0	0	0	0	0	200	300	0	0	0	0	0	0	0	200	903	0	0	0	0	0	0	0	603	903	0
701	7	0	0	0	0	0	0	200	300	0	0	0	0	0	0	0	200	903	0	0	0	0	0	0	0	603	903	0
701	8	0	0	0	0	0	0	200	300	0	0	0	0	0	0	0	200	903	0	0	0	0	0	0	0	603	903	0
701	9	0	0	0	0	0	0	200	300	0	0	0	0	0	0	0	200	903	0	0	0	0	0	0	0	603	903	0
702	0	0	0	0	0	0	0	200	300	0	0	0	0	0	0	0	200	903	0	0	0	0	0	0	0	603	903	0
702	1	0	0	0	0	0	0	200	300	0	0	0	0	0	0	0	200	903	0	0	0	0	0	0	0	603	903	0
702	2	0	0	0	0	0	0	200	300	0	0	0	0	0	0	0	200	903	0	0	0	0	0	0	0	603	903	0
702	3	0	0	0	0	0	0	200	300	0	0	0	0	0	0	0	200	903	0	0	0	0	0	0	0	603	903	0
702	4	0	0	0	0	0	0	200	300	0	0	0	0	0	0	0	200	903	0	0	0	0	0	0	0	603	903	0
702	5	0	0	0	0	0	0	200	300	0	0	0	0	0	0	0	200	903	0	0	0	0	0	0	0	603	903	0
702	6	0	0	0	0	0	0	200	300	0	0	0	0	0	0	0	200	903	0	0	0	0	0	0	0	603	903	0
702	7	0	0	0	0	0	0	200	300	0	0	0	0	0	0	0	200	903	0	0	0	0	0	0	0	603	903	0
702	8	0	0	0	0	0	0	200	300	0	0	0	0	0	0	0	200	903	0	0	0	0	0	0	0	603	903	0
702	9	0	0	0	0	0	0	200	300	0	0	0	0	0	0	0	200	903	0	0	0	0	0	0	0	603	903	0
703	0	0	0	0	0	0	0	200	300	0	0	0	0	0	0	0	200	903	0	0	0	0	0	0	0	603	903	0
703	1	0	0	0	0	0	0	200	300	0	0	0	0	0	0	0	200	903	0	0	0	0	0	0	0	603	903	0
703	2	0	0	0	0	0	0	200	300	0	0	0	0	0	0	0	200	903	0	0	0	0	0	0	0	603	903	0
703	3	0	0	0	0	0	0	200	300	0	0	0	0	0	0	0	200	903	0	0	0	0	0	0	0	603	903	0
703	4	0	0	0	0	0	0	200	300	0	0	0	0	0	0	0	200	903	0	0	0	0	0	0	0	603	903	0
703	5	0	0	0	0	0	0	200	300	0	0	0	0	0	0	0	200	903	0	0	0	0	0	0	0	603	903	0
703	6	0	0	0	0	0	0	200	300	0	0	0	0	0	0	0	200	903	0	0	0	0	0	0	0	603	903	0
703	7	0	0	0	0	0	0	200	300	0	0	0	0	0	0	0	200	903	0	0	0	0	0	0	0	603	903	0
703	8	0	0	0	0	0	0	200	300	0	0	0	0	0	0	0	200	903	0	0	0	0	0	0	0	603	903	0
703	9	0	0	0	0	0	0	200	300	0	0	0	0	0	0	0	200	903	0	0	0	0	0	0	0	603	903	0
704	0	0	0	0	0	0	0	200	300	0	0	0	0	0	0	0	200	903	0	0	0	0	0	0	0	603	903	0
704	1	0	0	0	0	0	0	200	300	0	0	0	0	0	0	0	200	903	0	0	0	0	0	0	0	603	903	0
704	2	0	0	0	0	0	0	200	300	0	0	0	0	0	0	0	200	903	0	0	0	0	0	0	0	603	903	0
704	3	0	0	0	0	0	0	200	300	0	0	0	0	0	0	0	200	903	0	0	0	0	0	0	0	603	903	0
704	4	0	0	0	0	0	0	200	300	0	0	0	0	0	0	0	200	903	0	0	0	0	0	0	0	603	903	0
704	5	0	0	0	0	0	0	200	300	0	0	0	0	0	0	0	200	903	0	0	0	0	0	0	0	603	903	0
704	6	0	0	0	0	0	0	200	300	0	0	0	0	0	0	0	200	903	0	0	0	0	0	0	0	603	903	0
704	7	0	0	0	0	0	0	200	300	0	0	0	0	0	0	0	200	903	0	0	0	0	0	0	0	603	903	0
704	8	0	0	0	0	0	0	200	300	0	0	0	0	0	0	0	200	903	0	0	0	0	0	0	0	603	903	0
704	9	0	0	0	0	0	0	200	300	0	0	0	0	0	0	0	200	903	0	0	0	0	0	0	0	603	903	0
705	0	0	0	0	0	0	0	200	300	0	0	0	0	0	0	0	200	903	0	0	0	0	0	0	0	603	903	0
705	1	0	0	0	0	0	0	200	300	0	0	0	0	0	0	0	200	903	0	0	0	0	0	0	0	603	903	0
705	2	0	0	0	0	0	0	200	300	0	0	0	0	0	0	0	200	903	0	0	0	0	0	0	0	603	903	0
705	3	0	0	0	0	0	0	200	300	0	0	0	0	0	0	0	200	903	0	0	0	0	0	0	0	603	903	0
705	4	0	0	0	0	0	0	200	300	0	0	0	0	0	0	0	200	903	0	0	0	0	0	0	0	603	903	0
705	5	0	0	0	0	0	0	200	300	0	0	0	0	0	0	0	200	903	0	0	0	0	0	0	0	603	903	0
705	6	0	0	0	0	0	0	200	300	0	0	0	0	0	0	0	200	903	0	0	0	0	0	0	0	603	903	0
705	7	0	0	0	0	0	0	200	300	0	0	0	0	0	0	0	200	903	0	0	0	0	0	0	0	603	903	0
705	8	0	0	0	0	0	0	200	300	0	0	0	0	0	0	0	200	903	0	0	0	0	0	0	0	603	903	0
705	9	0	0	0	0	0	0	200	300	0	0	0	0	0	0	0	200	903	0	0	0	0	0	0	0	603	903	0
706	0	0	0	0	0	0	0	200	300	0	0	0	0	0	0	0	200	903	0	0	0	0	0	0	0	603	903	0
706	1	0	0	0	0	0	0	200	300	0	0	0	0	0	0	0	200	903	0	0	0	0	0	0	0	603	903	0
706	2	0	0	0	0	0	0	200	300	0	0	0	0	0	0	0	200	903	0	0	0	0	0	0	0	603	903	0
706	3	0	0	0	0	0	0	200	300	0	0	0	0	0	0	0	200	903	0	0	0	0	0	0	0	603	903	0
706	4	0	0	0	0	0	0	200	300	0	0	0	0	0	0	0	200	903	0	0	0	0	0	0	0	603	903	0
706	5	0	0	0	0	0	0	200	300	0	0	0	0	0	0	0	200	903	0	0	0	0	0	0	0	603	903	0
706	6	0	0	0	0	0	0	200	300	0	0	0	0	0	0	0	200	903	0	0	0	0	0	0	0	603	903	0
706	7	0	0	0	0	0	0	200	300	0	0	0	0	0	0	0	200	903	0	0	0	0	0	0	0	603	903	0
706	8	0	0	0	0	0	0	200	300	0	0	0	0	0	0	0	200	903	0	0	0	0	0	0	0	603	903	0
706	9	0	0	0	0	0	0	200	300	0	0	0	0	0	0	0	200	903	0	0	0	0	0	0	0	603	903	0
707	0	0	0	0	0	0	0	200	300	0	0	0	0	0	0	0	200	903	0	0	0	0	0	0	0	603	903	0
707	1	0	0	0	0	0	0	200	300	0	0	0	0	0	0	0	200	903	0	0	0	0	0	0	0	603	903	0
707	2	0	0	0	0	0	0	200	300	0	0	0	0	0	0	0	200	903	0	0	0	0	0	0	0	603	903	0
707	3	0	0	0	0	0	0	200	300	0	0	0	0	0	0	0	200	903	0	0	0	0	0	0	0	603	903	0
707	4	0	0	0	0	0	0	200	300	0	0	0	0	0	0	0	200	903	0	0	0	0	0	0	0	603	903	0
707	5	0	0	0	0	0	0	200	300	0	0	0	0	0	0	0	200	903	0	0	0	0	0	0	0	603	903	0
707	6	0	0	0	0	0	0	200	300	0	0	0	0	0	0	0	200	903	0	0	0	0	0	0	0	603	903	0
707	7	0	0	0	0	0	0	200	300	0	0	0	0	0	0	0	200	903	0	0	0	0	0	0	0	603	903	0
707	8	0	0	0	0	0	0	200	300	0	0	0	0	0	0	0	200	903	0	0	0	0	0	0	0	603	903	0
707	9	0	0	0	0	0	0	200	300	0	0	0	0	0	0	0	200	903	0	0	0	0	0	0	0	603	903	0
708	0	0	0	0	0	0	0	200	300	0	0	0	0	0	0	0	200	903	0	0	0	0	0	0	0	603	903	0
708	1	0	0	0	0	0	0	200	300	0	0	0	0	0	0	0	200	903	0	0	0	0	0	0	0	603	903	0
708	2	0	0	0	0	0	0	200	300	0	0	0	0	0	0	0	200	903	0	0	0	0	0	0	0	603	903	0
708	3	0	0	0	0	0	0	200	300	0	0	0	0	0	0	0	200	903	0	0	0	0	0	0	0	603	903	0
708	4	0	0	0	0	0	0	200	300	0	0	0	0	0	0	0	200	903	0	0	0	0	0	0	0	603	903	0
708	5	0	0	0	0	0	0	200	300	0	0	0	0	0	0	0	200	903	0	0	0	0	0	0	0	603	903	0
708	6	0	0	0	0	0	0	200	300	0	0	0	0	0	0	0	200	903	0	0	0	0	0	0	0	603	903	0
708	7	0	0	0	0	0	0	200	300	0	0	0	0	0	0	0	200	903	0	0	0	0	0	0	0	603	903	0
708	8	0	0	0	0	0	0	200	300	0	0	0	0	0	0	0	200	903	0	0	0	0	0	0	0	603	903	0
708	9	0	0	0	0	0	0	200	300	0	0	0	0	0	0	0	200	903	0	0	0	0	0	0	0	603	903	0
709	0	0	0	0	0	0	0	200	300	0	0	0	0	0	0	0	200	903	0	0	0	0	0	0	0	603	903	0
709	1	0	0	0	0	0	0	200	300	0	0	0	0	0	0	0	200	903	0	0	0	0	0	0	0	603	903	0
709	2	0	0	0	0	0	0	200	300	0	0	0	0	0	0	0	200	903	0	0	0	0	0	0	0	603	903	0
709	3	0	0	0	0	0	0	200	300	0	0	0	0	0	0	0	200	903	0	0	0	0	0	0	0	603	903	0
709	4	0	0	0	0	0	0	200	300	0	0	0	0	0	0	0	200	903	0	0	0	0	0	0	0	603	903	0
709	5	0	0	0	0	0	0	200	300	0	0	0	0	0	0	0	200	903	0	0	0	0	0	0	0	603	903	0
709	6	0	0	0	0	0	0	200	300	0	0	0	0	0	0	0	200	903	0	0	0	0	0	0	0	603	903	0
709	7	0	0	0	0	0	0	200	300	0	0	0	0	0	0	0	200	903	0	0	0	0	0	0	0	603	903	0
709	8	0	0	0	0	0	0	200	300	0	0	0	0	0	0	0	200	903	0	0	0	0	0	0	0	603	903	0
709	9	0	0	0	0	0	0	200	300	0	0	0	0	0	0	0	200	903	0	0	0	0	0	0	0	603	903	0
710	0	0	0	0	0	0	0	200	300	0	0	0	0	0	0	0	200	903	0	0	0	0	0	0	0	603	903	0
710	1	0	0	0	0	0	0	200	300	0	0	0	0	0	0	0	200	903	0	0	0	0	0	0	0	603	903	0
710	2	0	0	0	0	0	0	200	300	0	0	0	0	0	0	0	200	903	0	0	0	0	0	0	0	603	903	0
710	3	0	0	0	0	0	0	200	300	0	0	0	0	0	0	0	200	903	0	0	0	0	0	0	0	603	903	0
710	4	0	0	0	0	0	0	200	300	0	0	0	0	0	0	0	200	903	0	0	0	0	0	0	0	603	903	0
710	5	0	0	0	0	0	0	200	300	0	0	0	0	0	0	0	200	903	0	0	0	0	0	0	0	603	903	0
710	6	0	0	0	0	0	0	200	300	0	0	0	0	0	0	0	200	903	0	0	0	0	0	0	0	603	903	0
710	7	0	0	0	0	0	0	200	300	0	0	0	0	0	0	0	200	903	0	0	0	0	0	0	0	603	903	0
710	8	0	0	0	0	0	0	200	300	0	0	0	0	0	0	0	200	903	0	0	0	0	0	0	0	603	903	0
710	9	0	0	0	0	0	0	200	300	0	0	0	0	0	0	0	200	903	0	0	0	0	0	0	0	603	903	0
711	0	0	0	0	0	0	0	200	300	0	0	0	0	0	0	0	200	903	0	0	0	0	0	0	0	603	903	0
711	1	0	0	0	0	0	0	200	300	0	0	0	0	0	0	0	200	903	0	0	0	0	0	0	0	603	903	0
711	2	0	0	0	0	0	0	200	300	0	0	0	0	0	0	0	200	903	0	0	0	0	0	0	0	603	903	0
711	3	0	0	0	0	0	0	200	300	0	0	0	0	0	0	0	200	903	0	0	0	0	0	0	0	603	903	0
711	4	0	0	0	0	0	0	200	300	0	0	0	0	0	0	0	200	903	0	0	0	0	0	0	0	603	903	0
711	5	0	0	0	0	0	0	200	300	0	0	0	0	0	0	0	200	903	0	0	0	0	0	0	0	603	903	0
711	6	0	0	0	0	0	0	200	300	0	0	0	0	0	0	0	200	903	0	0	0	0	0	0	0	603	903	0
711	7	0	0	0	0	0	0	200	300	0	0	0	0	0	0	0	200	903	0	0	0	0	0	0	0	603	903	0
711	8	0	0	0	0	0	0	200	300	0	0	0	0	0	0	0	200	903	0	0	0	0	0	0	0	603	903	0
711	9	0	0	0	0	0	0	200	300	0	0	0	0	0	0	0	200	903	0	0	0	0	0	0	0	603	903	0
712	0	0	0	0	0	0	0	200	300	0	0	0	0	0	0	0	200	903	0	0	0	0	0	0	0	603	903	0
712	1	0	0	0	0	0	0	200	300	0	0	0	0	0	0	0	200	903	0	0	0	0	0	0	0	603	903	0
712	2	0	0	0	0	0	0	200	300	0	0	0	0	0	0	0	200	903	0	0	0	0	0	0	0	603	903	0
712	3	0	0	0	0	0	0	200	300	0	0	0	0	0	0	0	200	903	0	0	0	0	0	0	0	603	903	0
712	4	0	0	0	0	0	0	200	300	0	0	0	0	0	0	0	200	903	0	0	0	0	0	0	0	603	903	0
712	5	0	0	0	0	0	0	200	300	0	0	0	0	0	0	0	200	903	0	0	0	0	0	0	0	603	903	0
712	6	0	0	0	0	0	0	200	300	0	0	0	0	0	0	0	200	903	0	0	0	0	0	0	0	603	903	0
712	7	0	0	0	0	0	0	200	300	0	0	0	0	0	0	0	200	903	0	0	0	0	0	0	0	603	903	0
712	8	0	0	0	0	0	0	200	300	0	0	0	0	0	0	0	200	903	0	0	0	0	0	0	0	603	903	0
712	9	0	0	0	0	0	0	200	300	0	0	0	0	0	0	0	200	903	0	0	0	0	0	0	0	603	903	0
713	0	0	0	0	0	0	0	200	300	0	0	0	0	0	0	0	200	903	0	0	0	0	0	0	0	603	903	0
713	1	0	0	0	0	0	0	200	300	0	0	0	0	0	0	0	200	903	0	0	0	0	0	0	0	603	903	0
713	2	0	0	0	0	0	0	200	300	0	0	0	0	0	0	0	200	903	0	0	0	0	0	0	0	603	903	0
713	3	0	0	0	0	0	0	200	300	0	0	0	0	0	0	0	200	903	0	0	0	0	0	0	0	603	903	0
713	4	0	0	0	0	0	0	200	300	0	0	0	0	0	0	0	200	903	0	0	0	0	0	0	0	603	903	0
713	5	0	0	0	0	0	0	200	300	0	0	0	0	0	0	0	200	903	0	0	0	0	0	0	0	603	903	0
713	6	0	0	0	0	0	0	200	300	0	0	0	0	0	0	0	200	903	0	0	0	0	0	0	0	603	903	0
713	7	0	0	0	0	0	0	200	300	0	0	0	0	0	0	0	200	903	0	0	0	0	0	0	0	603	903	0
713	8	0	0	0	0	0	0	200	300	0	0	0	0	0	0	0	200	903	0	0	0	0	0	0	0	603	903	0
713	9	0	0	0	0	0	0	200	300	0	0	0	0	0	0	0	200	903	0	0	0	0	0	0	0	603	903	0
714	0	0	0	0	0	0	0	200	300	0	0	0	0	0	0	0	200	903	0	0	0	0	0	0	0	603	903	0
714	1	0	0	0	0	0	0	200	300	0	0	0	0	0	0	0	200	903	0	0	0	0	0	0	0	603	903	0
714	2	0	0	0	0	0	0	200	300	0	0	0	0	0	0	0	200	903	0	0	0	0	0	0	0	603	903	0
714	3	0	0	0	0	0	0	200	300	0	0	0	0	0	0	0	200	903	0	0	0	0	0	0	0	603	903	0
714	4	0	0	0	0	0	0	200	300	0	0	0	0	0	0	0	200	903	0	0	0	0	0	0	0	603	903	0
714	5	0	0	0	0	0	0	200	300	0	0	0	0	0	0	0	200	903	0	0	0	0	0	0	0	603	903	0
714	6	0	0	0	0	0	0	200	300	0	0	0	0	0	0	0	200	903	0	0	0	0	0	0	0	603	903	0
714	7	0	0	0	0	0	0	200	300	0	0	0	0	0	0	0	200	903	0	0	0	0	0	0	0	603	903	0
714	8	0	0	0	0	0	0	200	300	0	0	0	0	0	0	0	200	903	0	0	0	0	0	0	0	603	903	0
714	9	0	0	0	0	0	0	200	300	0	0	0	0	0	0	0	200	903	0	0	0	0	0	0	0	603	903	0
715	0	0	0	0	0	0	0	200	300	0	0	0	0	0	0	0	200	903	0	0	0	0	0	0	0	603	903	0
715	1	0	0	0	0	0	0	200	300	0	0	0	0	0	0	0	200	903	0	0	0	0	0	0	0	603	903	0
715	2	0	0	0	0	0	0	200	300	0	0	0	0	0	0	0	200	903	0	0	0	0	0	0	0	603	903	0
715	3	0	0	0	0	0	0	200	300	0	0	0	0	0	0	0	200	903	0	0	0	0	0	0	0	603	903	0
715	4	0	0	0	0	0	0	200	300	0	0	0	0	0	0	0	200	903	0	0	0	0	0	0	0	603	903	0
715	5	0	0	0	0	0	0	200	300	0	0	0	0	0	0	0	200	903	0	0	0	0	0	0	0	603	903	0
715	6	0	0	0	0	0	0	200	300	0	0	0	0	0	0	0	200	903	0	0	0	0	0	0	0	603	903	0
715	7	0	0	0	0	0	0	200	300	0	0	0	0	0	0	0	200	903	0	0	0	0	0	0	0	603	903	0
715	8	0	0	0	0	0	0	200	300	0	0	0	0	0	0	0	200	903	0	0	0	0	0	0	0	603	903	0
715	9	0	0	0	0	0	0	200	300	0	0	0	0	0	0	0	200	903	0	0	0	0	0	0	0	603	903	0
716	0	0	0	0	0	0	0	200	300	0	0	0	0	0	0	0	200	903	0	0	0	0	0	0	0	603	903	0
716	1	0	0	0	0	0	0	200	300	0	0	0	0	0	0	0	200	903	0	0	0	0	0	0	0	603	903	0
716	2	0	0	0	0	0	0	200	300	0	0	0	0	0	0	0	200	903	0	0	0	0	0	0	0	603	903	0
716	3	0	0	0	0	0	0	200	300	0	0	0	0	0	0	0	200	903	0	0	0	0	0	0	0	603	903	0
716	4	0	0	0	0	0	0	200	300	0	0	0	0	0	0	0	200	903	0	0	0	0	0	0	0	603	903	0
716	5	0	0	0	0	0	0	200	300	0	0	0	0	0	0	0	200	903	0	0	0	0	0	0	0	603	903	0
716	6	0	0	0	0	0	0	200	300	0	0	0	0	0	0	0	200	903	0	0	0	0	0	0	0	603	903	0
716	7	0	0	0	0	0	0	200	300	0	0	0	0	0	0	0	200	903	0	0	0	0	0	0	0	603	903	0
716	8	0	0	0	0	0	0	200	300	0	0	0	0	0	0	0	200	903	0	0	0	0	0	0	0	603	903	0
716	9	0	0	0	0	0	0	200	300	0	0	0	0	0	0	0	200	903	0	0	0	0	0	0	0	603	903	0
717	0	0	0	0	0	0	0	200	300	0	0	0	0	0	0	0	200	903	0	0	0	0	0	0	0	603	903	0
717	1	0	0	0	0	0	0	200	300	0	0	0	0	0	0	0	200	903	0	0	0	0	0	0	0	603	903	0
717	2	0	0	0	0	0	0	200	300	0	0	0	0	0	0	0	200	903	0	0	0	0	0	0	0	603	903	0
717	3	0	0	0	0	0	0	200	300	0	0	0	0	0	0	0	200	903	0	0	0	0	0	0	0	603	903	0
717	4	0	0	0	0	0	0	200	300	0	0	0	0	0	0	0	200	903	0	0	0	0	0	0	0	603	903	0
717	5	0	0	0	0	0	0	200	300	0	0	0	0	0	0	0	200	903	0	0	0	0	0	0	0	603	903	0
717	6	0	0	0	0	0	0	200	300	0	0	0	0	0	0	0	200	903	0	0	0	0	0	0	0	603	903	0
717	7	0	0	0	0	0	0	200	300	0	0	0	0	0	0	0	200	903	0	0	0	0	0	0	0	603	903	0
717	8	0	0	0	0	0	0	200	300	0	0	0	0	0	0	0	200	903	0	0	0	0	0	0	0	603	903	0
717	9	0	0	0	0	0	0	200	300	0	0	0	0	0	0	0	200	903	0	0	0	0	0	0	0	603	903	0
718	0	0	0	0	0	0	0	200	300	0	0	0	0	0	0	0	200	903	0	0	0	0	0	0	0	603	903	0
718	1	0	0	0	0	0	0	200	300	0	0	0	0	0	0	0	200	903	0	0	0	0	0	0	0	603	903	0
718	2	0	0	0	0	0	0	200	300	0	0	0	0	0	0	0	200	903	0	0	0	0	0	0	0	603	903	0
718	3	0	0	0	0	0	0	200	300	0	0	0	0	0	0	0	200	903	0	0	0	0	0	0	0	603	903	0
718	4	0	0	0	0	0	0	200	300	0	0	0	0	0	0	0	200	903	0	0	0	0	0	0	0	603	903	0
718	5	0	0	0	0	0	0	200	300	0	0	0	0	0	0	0	200	903	0	0	0	0	0	0	0	603	903	0
718	6	0	0	0	0	0	0	200	300	0	0	0	0	0	0	0	200	903	0	0	0	0	0	0	0	603	903	0
718	7	0	0	0	0	0	0	200	300	0	0	0	0	0	0	0	200	903	0	0	0	0	0	0	0	603	903	0
718	8	0	0	0	0	0	0	200	300	0	0	0	0	0	0	0	200	903	0	0	0	0	0	0	0	603	903	0
718	9	0	0	0	0	0	0	200	300	0	0	0	0	0	0	0	200	903	0	0	0	0	0	0	0	603	903	0
719	0	0	0	0	0	0	0	200	300	0	0	0	0	0	0	0	200	903	0	0	0	0	0	0	0	603	903	0
719	1	0	0	0	0	0	0	200	300	0	0	0	0	0	0	0	200	903	0	0	0	0	0	0	0	603	903	0
719	2	0	0	0	0	0	0	200	300	0	0	0	0	0	0	0	200	903	0	0	0	0	0	0	0	603	903	0
719	3	0	0	0	0	0	0	200	300	0	0	0	0	0	0	0	200	903	0	0	0	0	0	0	0	603	903	0
719	4	0	0	0	0	0	0	200	300	0	0	0	0	0	0	0	200	903	0	0	0	0	0	0	0	603	903	0
719	5	0	0	0	0	0	0	200	300	0	0	0	0	0	0	0	200	903	0	0	0	0	0	0	0	603	903	0
719	6	0	0	0	0	0	0	200	300	0	0	0	0	0	0	0	200	903	0	0	0	0	0	0	0	603	903	0
719	7	0	0	0	0	0	0	200	300	0	0	0	0	0	0	0	200	903	0	0	0	0	0	0	0	603	903	0
719	8	0	0	0	0	0	0	200	300	0	0	0	0	0	0	0	200	903	0	0	0	0	0	0	0	603	903	0
719	9	0	0	0	0	0	0	200	300	0	0	0	0	0	0	0	200	903	0	0	0	0	0	0	0	603	903	0
720	0	0	0	0	0	0	0	200	300	0	0	0	0	0	0	0	200	903	0	0	0	0	0	0	0	603	903	0
720	1	0	0	0	0	0	0	200	300	0	0	0	0	0	0	0	200	903	0	0	0	0	0	0	0	603	903	0
720	2	0	0	0	0	0	0	200	300	0	0	0	0	0	0	0	200	903	0	0	0	0	0	0	0	603	903	0
720	3	0	0	0	0	0	0	200	300	0	0	0	0	0	0	0	200	903	0	0	0	0	0	0	0	603	903	0
720	4	0	0	0	0	0	0	200	300	0	0	0	0	0	0	0	200	903	0	0	0	0	0	0	0	603	903	0
720	5	0	0	0	0	0	0	200	300	0	0	0	0	0	0	0	200	903	0	0	0	0	0	0	0	603	903	0
720	6	0	0	0	0	0	0	200	300	0	0	0	0	0	0	0	200	903	0	0	0	0	0	0	0	603	903	0
720	7	0	0	0	0	0	0	200	300	0	0	0	0	0	0	0	200	903	0	0	0	0	0	0	0	603	903	0
720	8	0	0	0	0	0	0	200	300	0	0	0	0	0	0	0	200	903	0	0	0	0	0	0	0	603	903	0
720	9	0	0	0	0	0	0	200	300	0	0	0	0	0	0	0	200	903	0	0	0	0	0	0	0	603	903	0
721	0	0	0	0	0	0	0	200	300	0	0	0	0	0	0	0	200	903	0	0	0	0	0	0	0	603	903	0
721	1	0	0	0	0	0	0	200	300	0	0	0	0	0	0	0	200	903	0	0	0	0	0	0	0	603	903	0
721	2	0	0	0	0	0	0	200	300	0	0	0	0	0	0	0	200	903	0	0	0	0	0	0	0	603	903	0
721	3	0	0	0	0	0	0	200	300	0	0	0	0	0	0	0	200	903	0	0	0	0	0	0	0	603	903	0
721	4	0	0	0	0	0	0	200	300	0	0	0	0	0	0	0	200	903	0	0	0	0	0	0	0	603	903	0
721	5	0	0	0	0	0	0	200	300	0	0	0	0	0	0	0	200	903	0	0	0	0	0	0	0	603	903	0
721	6	0	0	0	0	0	0	200	300	0	0	0	0	0	0	0	200	903	0	0	0	0	0	0	0	603	903	0
721	7	0	0	0	0	0	0	200	300	0	0	0	0	0	0	0	200	903	0	0	0	0	0	0	0	603	903	0
721	8	0	0	0	0	0	0	200	300	0	0	0	0	0	0	0	200	903	0	0	0	0	0	0	0	603	903	0
721	9	0	0	0	0	0	0	200	300	0	0	0	0	0	0	0	200	903	0	0	0	0	0	0	0	603	903	0
722	0	0	0	0	0	0	0	200	300	0	0	0	0	0	0	0	200	903	0	0	0	0	0	0	0	603	903	0
722	1	0	0	0	0	0	0	200	300	0	0	0	0	0	0	0	200	903	0	0	0	0	0	0	0	603	903	0
722	2	0	0	0	0	0	0	200	300	0	0	0	0	0	0	0	200	903	0	0	0	0	0	0	0	603	903	0
722	3	0	0	0	0	0	0	200	300	0	0	0	0	0	0	0	200	903	0	0	0	0	0	0	0	603	903	0
722	4	0	0	0	0	0	0	200	300	0	0	0	0	0	0	0	200	903	0	0	0	0	0	0	0	603	903	0
722	5	0	0	0	0	0	0	200	300	0	0	0	0	0	0	0	200	903	0	0	0	0	0	0	0	603	903	0
[truncated: 2,924 more rows]
