# Supplementary material for: The Effects of an Extemporaneous Speech Dual-task on Older Adult Gait Control
Source: Research Square preprint supplement (doi:10.21203/rs.3.rs-7674245/v1), 2025-11-18
Supplement: Supplementary file 159 [file Over4ground08.xlsx]

## Sheet: Sheet1
Trajectories
		04:LFHD			04:RFHD			04:LBHD			04:RBHD			04:C7			04:T10			04:CLAV			04:STRN			04:RBAK			04:LSHO			04:LUPA			04:LELB			04:LFRM			04:LWRA			04:LWRB			04:LFIN
Frame	Sub Frame	X	Y	Z	X	Y	Z	X	Y	Z	X	Y	Z	X	Y	Z	X	Y	Z	X	Y	Z	X	Y	Z	X	Y	Z	X	Y	Z	X	Y	Z	X	Y	Z	X	Y	Z	X	Y	Z	X	Y	Z	X	Y	Z
		mm	mm	mm	mm	mm	mm	mm	mm	mm	mm	mm	mm	mm	mm	mm	mm	mm	mm	mm	mm	mm	mm	mm	mm	mm	mm	mm	mm	mm	mm	mm	mm	mm	mm	mm	mm	mm	mm	mm	mm	mm	mm	mm	mm	mm	mm	mm	mm
528	0	160.893	-2234.65	1570.43	279.226	-2229.95	1571.36	167.365	-2400.26	1521.53	275.231	-2393.08	1520.18	221.62	-2369.13	1424.84	219.897	-2436.19	1142.26	211.358	-2242.73	1337.58	210.328	-2169.45	1147.16	303.827	-2448.56	1218.65	35.3432	-2306.89	1355.07	-28.0874	-2353.39	1110.32	-26.4376	-2367.29	1036.37	-42.8429	-2310.58	871.369	4.53585	-2307.3	792.561	-61.8509	-2336.84	787.755	-30.903	-2305.48	716.981
529	0	158.218	-2223.09	1571.79	276.475	-2218.41	1573.62	165.007	-2388.7	1523.02	272.85	-2381.56	1522.45	220.137	-2357.74	1426.77	218.795	-2424.96	1144.17	210.452	-2231.41	1339.23	210.196	-2158.31	1148.51	302.602	-2437.58	1220.71	34.2603	-2295.16	1356.08	-29.3626	-2339.82	1111.05	-27.8501	-2353.2	1037.12	-44.6886	-2295.09	872.572	2.49459	-2291.3	793.393	-63.9859	-2320.75	788.704	-33.3539	-2288.76	717.982
530	0	155.701	-2211.56	1573.13	273.888	-2206.9	1575.81	162.789	-2377.2	1524.52	270.61	-2370.09	1524.68	218.712	-2346.41	1428.66	217.673	-2413.84	1146.06	209.602	-2220.15	1340.85	210.108	-2147.27	1149.85	301.361	-2426.7	1222.74	33.233	-2283.46	1357.14	-30.6173	-2326.32	1111.86	-29.2533	-2339.15	1037.95	-46.4613	-2279.55	873.897	0.547959	-2275.17	794.409	-66.008	-2304.55	789.77	-35.6947	-2271.81	719.198
531	0	153.342	-2200.08	1574.46	271.464	-2195.44	1577.93	160.71	-2365.74	1526.01	268.512	-2358.67	1526.86	217.346	-2335.14	1430.52	216.532	-2402.83	1147.93	208.808	-2208.97	1342.44	210.065	-2136.34	1151.2	300.103	-2415.9	1224.74	32.2612	-2271.81	1358.24	-31.8516	-2312.87	1112.75	-30.6472	-2325.14	1038.85	-48.1611	-2263.96	875.344	-1.30395	-2258.9	795.608	-67.9173	-2288.22	790.954	-37.9251	-2254.65	720.628
532	0	151.141	-2188.64	1575.77	269.204	-2184.02	1579.98	158.771	-2354.34	1527.51	266.554	-2347.28	1529	216.038	-2323.93	1432.35	215.373	-2391.94	1149.78	208.069	-2197.86	1344.01	210.065	-2125.51	1152.55	298.827	-2405.2	1226.71	31.3445	-2260.19	1359.37	-33.0654	-2299.49	1113.73	-32.0317	-2311.16	1039.82	-49.7878	-2248.32	876.912	-3.06088	-2242.5	796.989	-69.7134	-2271.78	792.255	-40.0445	-2237.28	722.273
533	0	149.098	-2177.24	1577.05	267.106	-2172.63	1581.96	156.97	-2342.98	1529.01	264.737	-2335.95	1531.1	214.787	-2312.78	1434.14	214.196	-2381.15	1151.62	207.385	-2186.82	1345.54	210.105	-2114.78	1153.91	297.536	-2394.59	1228.64	30.4821	-2248.61	1360.55	-34.2586	-2286.17	1114.79	-33.4066	-2297.22	1040.85	-51.3412	-2232.63	878.602	-4.72228	-2225.96	798.553	-71.3962	-2255.23	793.674	-42.0514	-2219.68	724.131
534	0	147.213	-2165.88	1578.32	265.172	-2161.28	1583.87	155.307	-2331.68	1530.5	263.06	-2324.66	1533.14	213.594	-2301.69	1435.89	213.003	-2370.47	1153.42	206.754	-2175.85	1347.05	210.179	-2104.16	1155.26	296.229	-2384.06	1230.54	29.6728	-2237.07	1361.76	-35.4314	-2272.91	1115.94	-34.7718	-2283.31	1041.95	-52.8209	-2216.89	880.412	-6.28726	-2209.29	800.299	-72.965	-2238.56	795.21	-43.9433	-2201.89	726.199
535	0	145.484	-2154.56	1579.57	263.399	-2149.98	1585.7	153.78	-2320.42	1531.99	261.521	-2313.41	1535.14	212.458	-2290.66	1437.6	211.796	-2359.89	1155.2	206.173	-2164.95	1348.52	210.279	-2093.63	1156.61	294.909	-2373.62	1232.4	28.9146	-2225.57	1363.01	-36.5838	-2259.71	1117.16	-36.1269	-2269.45	1043.12	-54.2264	-2201.1	882.34	-7.75447	-2192.49	802.225	-74.4189	-2221.77	796.862	-45.7169	-2183.89	728.475
536	0	143.911	-2143.29	1580.79	261.788	-2138.71	1587.45	152.389	-2309.22	1533.46	260.12	-2302.21	1537.08	211.377	-2279.69	1439.27	210.577	-2349.42	1156.95	205.638	-2154.12	1349.96	210.397	-2083.2	1157.96	293.578	-2363.25	1234.23	28.2052	-2214.11	1364.3	-37.7163	-2246.57	1118.45	-37.4719	-2255.63	1044.34	-55.557	-2185.28	884.383	-9.12215	-2175.57	804.329	-75.7571	-2204.88	798.629	-47.3675	-2165.71	730.954
537	0	142.492	-2132.05	1581.98	260.336	-2127.48	1589.12	151.131	-2298.06	1534.93	258.853	-2291.06	1538.96	210.351	-2268.78	1440.88	209.352	-2339.03	1158.66	205.146	-2143.35	1351.35	210.519	-2072.85	1159.29	292.239	-2352.96	1236	27.5415	-2202.69	1365.61	-38.8296	-2233.5	1119.81	-38.8064	-2241.85	1045.62	-56.8119	-2169.41	886.536	-10.388	-2158.53	806.607	-76.9784	-2187.89	800.508	-48.8895	-2147.35	733.628
538	0	141.224	-2120.86	1583.13	259.04	-2116.28	1590.7	150.002	-2286.95	1536.37	257.718	-2279.95	1540.77	209.378	-2257.92	1442.45	208.123	-2328.73	1160.33	204.692	-2132.64	1352.7	210.631	-2062.6	1160.6	290.897	-2342.74	1237.72	26.9198	-2191.31	1366.94	-39.9248	-2220.5	1121.23	-40.1305	-2228.12	1046.94	-57.9905	-2153.51	888.793	-11.5495	-2141.39	809.054	-78.0815	-2170.8	802.496	-50.2763	-2128.85	736.488
539	0	140.104	-2109.7	1584.24	257.898	-2105.13	1592.18	148.999	-2275.89	1537.79	256.711	-2268.88	1542.5	208.458	-2247.11	1443.95	206.897	-2318.5	1161.94	204.271	-2121.99	1353.99	210.72	-2052.42	1161.88	289.556	-2332.58	1239.37	26.3364	-2179.98	1368.28	-41.0034	-2207.56	1122.7	-41.4444	-2214.45	1048.3	-59.0919	-2137.58	891.145	-12.6035	-2124.14	811.664	-79.0653	-2153.61	804.588	-51.5207	-2110.21	739.523
540	0	139.127	-2098.59	1585.31	256.906	-2094.02	1593.55	148.117	-2264.88	1539.16	255.828	-2257.86	1544.14	207.588	-2236.34	1445.38	205.68	-2308.34	1163.49	203.877	-2111.39	1355.21	210.77	-2042.31	1163.11	288.222	-2322.47	1240.95	25.7873	-2168.69	1369.62	-42.0677	-2194.69	1124.2	-42.7483	-2200.82	1049.69	-60.115	-2121.63	893.584	-13.5468	-2106.82	814.427	-79.9285	-2136.34	806.777	-52.6149	-2091.47	742.72
541	0	138.289	-2087.51	1586.32	256.057	-2082.94	1594.81	147.352	-2253.9	1540.49	255.063	-2246.88	1545.68	206.768	-2225.63	1446.73	204.477	-2298.23	1164.96	203.506	-2100.84	1356.35	210.769	-2032.28	1164.28	286.902	-2312.41	1242.45	25.2686	-2157.45	1370.94	-43.1199	-2181.9	1125.72	-44.0427	-2187.26	1051.08	-61.0589	-2105.67	896.098	-14.3761	-2089.42	817.333	-80.6701	-2119	809.053	-53.5508	-2072.63	746.063
542	0	137.584	-2076.48	1587.25	255.345	-2071.9	1595.93	146.697	-2242.98	1541.76	254.411	-2235.93	1547.11	205.995	-2214.95	1447.98	203.296	-2288.16	1166.33	203.152	-2090.33	1357.41	210.704	-2022.3	1165.37	285.604	-2302.39	1243.85	24.7766	-2146.25	1372.24	-44.163	-2169.17	1127.24	-45.3281	-2173.76	1052.47	-61.9226	-2089.7	898.672	-15.0879	-2071.97	820.369	-81.2889	-2101.59	811.405	-54.3204	-2053.74	749.534
543	0	137.005	-2065.48	1588.11	254.764	-2060.89	1596.93	146.146	-2232.09	1542.95	253.865	-2225.03	1548.41	205.27	-2204.31	1449.14	202.143	-2278.12	1167.61	202.811	-2079.86	1358.37	210.567	-2012.37	1166.37	284.333	-2292.4	1245.15	24.3081	-2135.11	1373.5	-45.1995	-2156.52	1128.74	-46.6053	-2160.33	1053.84	-62.7047	-2073.73	901.291	-15.6791	-2054.49	823.519	-81.784	-2084.12	813.82	-54.9165	-2034.81	753.114
544	0	136.544	-2054.51	1588.88	254.306	-2049.92	1597.77	145.694	-2221.23	1544.05	253.418	-2214.17	1549.57	204.59	-2193.7	1450.19	201.025	-2268.11	1168.78	202.48	-2069.43	1359.21	210.352	-2002.48	1167.24	283.1	-2282.43	1246.33	23.8605	-2124.01	1374.69	-46.232	-2143.94	1130.2	-47.8746	-2146.97	1055.16	-63.4041	-2057.78	903.938	-16.1467	-2036.99	826.765	-82.1544	-2066.62	816.284	-55.3325	-2015.88	756.783
545	0	136.194	-2043.58	1589.55	253.962	-2038.98	1598.46	145.332	-2210.42	1545.05	253.064	-2203.33	1550.59	203.956	-2183.11	1451.11	199.949	-2258.11	1169.82	202.157	-2059.02	1359.92	210.058	-1992.62	1167.99	281.911	-2272.46	1247.37	23.4318	-2112.96	1375.79	-47.2623	-2131.44	1131.61	-49.1362	-2133.68	1056.42	-64.0191	-2041.85	906.596	-16.4882	-2019.5	830.089	-82.3995	-2049.09	818.78	-55.5631	-1996.95	760.52
546	0	135.946	-2032.68	1590.11	253.723	-2028.07	1598.99	145.054	-2199.63	1545.93	252.795	-2192.53	1551.44	203.367	-2172.55	1451.9	198.921	-2248.12	1170.73	201.839	-2048.63	1360.5	209.688	-1982.8	1168.58	280.774	-2262.5	1248.28	23.0209	-2101.95	1376.8	-48.2917	-2119	1132.93	-50.3901	-2120.46	1057.6	-64.5483	-2025.95	909.245	-16.7016	-2002.04	833.468	-82.5189	-2031.54	821.291	-55.6047	-1978.06	764.304
547	0	135.792	-2021.81	1590.54	253.58	-2017.18	1599.35	144.853	-2188.87	1546.68	252.605	-2181.76	1552.12	202.822	-2162	1452.54	197.948	-2238.12	1171.5	201.526	-2038.27	1360.93	209.246	-1972.98	1168.99	279.698	-2252.54	1249.03	22.6274	-2091	1377.68	-49.3199	-2106.64	1134.14	-51.6354	-2107.33	1058.68	-64.9898	-2010.11	911.867	-16.7857	-1984.63	836.881	-82.5124	-2014	823.801	-55.4559	-1959.23	768.115
548	0	135.723	-2010.96	1590.84	253.525	-2006.32	1599.53	144.723	-2178.13	1547.3	252.486	-2171	1552.62	202.322	-2151.47	1453.03	197.035	-2228.12	1172.11	201.219	-2027.91	1361.2	208.743	-1963.18	1169.23	278.687	-2242.56	1249.63	22.2516	-2080.09	1378.43	-50.3457	-2094.34	1135.24	-52.8706	-2094.27	1059.64	-65.342	-1994.32	914.444	-16.7401	-1967.29	840.306	-82.3804	-1996.48	826.291	-55.117	-1940.48	771.934
549	0	135.733	-2000.14	1591	253.549	-1995.47	1599.53	144.656	-2167.41	1547.76	252.431	-2160.27	1552.94	201.868	-2140.94	1453.36	196.189	-2218.12	1172.56	200.919	-2017.56	1361.3	208.19	-1953.38	1169.27	277.749	-2232.55	1250.05	21.8946	-2069.22	1379.01	-51.3661	-2082.12	1136.19	-54.0933	-2081.3	1060.46	-65.6031	-1978.6	916.956	-16.5653	-1950.06	843.72	-82.1238	-1979	828.746	-54.5911	-1921.83	775.742
550	0	135.812	-1989.33	1591	253.643	-1984.64	1599.35	144.648	-2156.71	1548.06	252.435	-2149.56	1553.06	201.459	-2130.42	1453.53	195.412	-2208.09	1172.85	200.628	-2007.22	1361.23	207.603	-1943.56	1169.11	276.889	-2222.52	1250.3	21.5585	-2058.41	1379.43	-52.3766	-2069.96	1136.98	-55.3002	-2068.41	1061.13	-65.7714	-1962.97	919.389	-16.2624	-1932.95	847.1	-81.7441	-1961.58	831.148	-53.8833	-1903.31	779.523
551	0	135.953	-1978.54	1590.86	253.8	-1973.83	1598.98	144.691	-2146.01	1548.19	252.49	-2138.85	1553	201.097	-2119.89	1453.52	194.711	-2198.06	1172.96	200.349	-1996.87	1360.99	206.998	-1933.74	1168.75	276.111	-2212.46	1250.38	21.2455	-2047.63	1379.66	-53.3713	-2057.87	1137.59	-56.4869	-2055.6	1061.64	-65.8456	-1947.44	921.725	-15.8341	-1915.98	850.427	-81.2438	-1944.24	833.485	-53.0009	-1884.93	783.262
552	0	136.151	-1967.76	1590.55	254.013	-1963.03	1598.44	144.782	-2135.32	1548.16	252.593	-2128.16	1552.74	200.783	-2109.36	1453.34	194.087	-2188	1172.91	200.087	-1986.52	1360.57	206.391	-1923.89	1168.18	275.418	-2202.35	1250.28	20.959	-2036.89	1379.7	-54.3426	-2045.86	1138.02	-57.6476	-2042.88	1061.98	-65.8247	-1932.01	923.95	-15.2834	-1899.18	853.677	-80.6259	-1927	835.741	-51.9534	-1866.71	786.943
553	0	136.399	-1956.99	1590.09	254.275	-1952.23	1597.71	144.916	-2124.64	1547.95	252.738	-2117.47	1552.28	200.518	-2098.82	1452.99	193.544	-2177.92	1172.68	199.846	-1976.15	1359.96	205.801	-1914.01	1167.42	274.813	-2192.2	1250	20.7024	-2026.19	1379.55	-55.2819	-2033.91	1138.26	-58.7758	-2030.25	1062.13	-65.7082	-1916.71	926.051	-14.6148	-1882.57	856.833	-79.8945	-1909.87	837.904	-50.7518	-1848.67	790.553
554	0	136.691	-1946.23	1589.46	254.581	-1941.44	1596.8	145.09	-2113.95	1547.57	252.922	-2106.78	1551.65	200.306	-2088.27	1452.47	193.082	-2167.8	1172.28	199.63	-1965.78	1359.19	205.243	-1904.09	1166.47	274.297	-2182.01	1249.55	20.4799	-2015.52	1379.19	-56.1795	-2022.05	1138.3	-59.8636	-2017.71	1062.11	-65.4962	-1901.55	928.016	-13.8335	-1866.16	859.874	-79.0542	-1892.89	839.962	-49.4092	-1830.83	794.077
555	0	137.024	-1935.46	1588.68	254.927	-1930.64	1595.73	145.3	-2103.26	1547.02	253.142	-2096.09	1550.84	200.147	-2077.7	1451.78	192.703	-2157.66	1171.71	199.446	-1955.38	1358.25	204.733	-1894.14	1165.34	273.873	-2171.77	1248.92	20.2959	-2004.89	1378.63	-57.025	-2010.26	1138.14	-60.9021	-2005.27	1061.89	-65.1895	-1886.54	929.835	-12.9459	-1849.97	862.784	-78.1106	-1876.08	841.902	-47.9393	-1813.22	797.503
556	0	137.394	-1924.69	1587.75	255.309	-1919.85	1594.5	145.546	-2092.56	1546.3	253.395	-2085.4	1549.86	200.045	-2067.12	1450.93	192.407	-2147.47	1170.97	199.298	-1944.97	1357.15	204.285	-1884.14	1164.05	273.54	-2161.48	1248.13	20.1551	-1994.28	1377.87	-57.8076	-1998.57	1137.78	-61.8818	-1992.92	1061.5	-64.7896	-1871.7	931.497	-11.9589	-1834.02	865.546	-77.0696	-1859.45	843.716	-46.3572	-1795.84	800.817
557	0	137.798	-1913.91	1586.67	255.723	-1909.05	1593.13	145.825	-2081.85	1545.43	253.681	-2074.7	1548.72	200.004	-2056.52	1449.93	192.196	-2137.24	1170.07	199.193	-1934.53	1355.91	203.91	-1874.08	1162.61	273.3	-2151.14	1247.18	20.0624	-1983.69	1376.93	-58.5166	-1986.96	1137.23	-62.7921	-1980.67	1060.92	-64.2991	-1857.03	932.995	-10.8806	-1818.32	868.143	-75.938	-1843.03	845.391	-44.6785	-1778.73	804.002
558	0	138.235	-1903.13	1585.45	256.169	-1898.24	1591.62	146.138	-2071.13	1544.41	253.999	-2063.99	1547.44	200.024	-2045.89	1448.78	192.069	-2126.96	1169.02	199.137	-1924.05	1354.52	203.617	-1863.96	1161.05	273.152	-2140.74	1246.07	20.0229	-1973.11	1375.8	-59.1415	-1975.46	1136.49	-63.6222	-1968.53	1060.17	-63.721	-1842.55	934.32	-9.71955	-1802.89	870.561	-74.7229	-1826.85	846.917	-42.9192	-1761.9	807.043
559	0	138.704	-1892.33	1584.1	256.644	-1887.41	1589.99	146.487	-2060.39	1543.26	254.351	-2053.26	1546.03	200.112	-2035.25	1447.49	192.027	-2116.62	1167.83	199.135	-1913.55	1353.02	203.411	-1853.77	1159.37	273.096	-2130.29	1244.82	20.0415	-1962.55	1374.52	-59.6723	-1964.05	1135.57	-64.3609	-1956.49	1059.26	-63.0594	-1828.28	935.464	-8.48495	-1787.73	872.786	-73.4321	-1810.92	848.284	-41.0953	-1745.36	809.922
560	0	139.205	-1881.52	1582.64	257.151	-1876.58	1588.27	146.873	-2049.62	1541.98	254.738	-2042.52	1544.51	200.268	-2024.57	1446.09	192.071	-2106.21	1166.5	199.193	-1903	1351.41	203.297	-1843.51	1157.61	273.132	-2119.77	1243.44	20.1231	-1951.99	1373.09	-60.0998	-1952.76	1134.49	-64.9972	-1944.56	1058.2	-62.3187	-1814.22	936.424	-7.18636	-1772.86	874.805	-72.0736	-1795.26	849.481	-39.2227	-1729.15	812.621
561	0	139.739	-1870.69	1581.09	257.688	-1865.73	1586.46	147.299	-2038.84	1540.59	255.162	-2031.76	1542.9	200.498	-2013.87	1444.58	192.199	-2095.73	1165.05	199.316	-1892.42	1349.72	203.276	-1833.16	1155.77	273.26	-2109.19	1241.94	20.2722	-1941.43	1371.53	-60.4156	-1941.58	1133.25	-65.52	-1932.75	1056.99	-61.504	-1800.39	937.192	-5.83356	-1758.27	876.605	-70.6557	-1779.9	850.499	-37.317	-1713.27	815.119
562	0	140.307	-1859.84	1579.45	258.26	-1854.86	1584.59	147.768	-2028.03	1539.11	255.629	-2020.97	1541.21	200.803	-2003.14	1442.98	192.412	-2085.17	1163.49	199.51	-1881.78	1347.96	203.347	-1822.72	1153.88	273.478	-2098.55	1240.33	20.4931	-1930.86	1369.87	-60.6124	-1930.51	1131.88	-65.9192	-1921.05	1055.66	-60.6207	-1786.8	937.765	-4.43634	-1743.99	878.175	-69.187	-1764.87	851.328	-35.393	-1697.74	817.397
563	0	140.913	-1848.97	1577.76	258.867	-1843.98	1582.67	148.285	-2017.2	1537.56	256.141	-2010.17	1539.47	201.186	-1992.37	1441.3	192.709	-2074.53	1161.84	199.779	-1871.1	1346.16	203.509	-1812.18	1151.97	273.785	-2087.83	1238.62	20.7896	-1920.27	1368.13	-60.6841	-1919.55	1130.39	-66.1852	-1909.46	1054.23	-59.6743	-1773.45	938.139	-3.00432	-1730.01	879.503	-67.6758	-1750.16	851.958	-33.4651	-1682.59	819.432
564	0	141.559	-1838.08	1576.02	259.514	-1833.07	1580.74	148.855	-2006.33	1535.96	256.705	-1999.33	1537.7	201.651	-1981.57	1439.58	193.089	-2063.79	1160.12	200.127	-1860.35	1344.33	203.758	-1801.52	1150.05	274.18	-2077.04	1236.84	21.1649	-1909.65	1366.32	-60.6258	-1908.69	1128.81	-66.3096	-1898	1052.7	-58.6704	-1760.36	938.313	-1.54676	-1716.35	880.58	-66.1309	-1735.82	852.382	-31.5464	-1667.82	821.205
565	0	142.249	-1827.17	1574.27	260.204	-1822.14	1578.8	149.482	-1995.44	1534.32	257.326	-1988.47	1535.9	202.198	-1970.72	1437.82	193.551	-2052.95	1158.34	200.557	-1849.55	1342.49	204.091	-1790.74	1148.15	274.661	-2066.16	1235.01	21.6217	-1898.99	1364.48	-60.4337	-1897.94	1127.15	-66.2852	-1886.65	1051.1	-57.6146	-1747.54	938.285	-0.07242	-1703	881.397	-64.5606	-1721.85	852.593	-29.6493	-1653.45	822.694
566	0	142.987	-1816.23	1572.51	260.942	-1811.18	1576.89	150.173	-1984.52	1532.66	258.009	-1977.57	1534.12	202.829	-1959.84	1436.04	194.093	-2042	1156.52	201.071	-1838.68	1340.68	204.506	-1779.83	1146.29	275.225	-2055.21	1233.13	22.1619	-1888.29	1362.64	-60.1052	-1887.29	1125.44	-66.1062	-1875.41	1049.46	-56.5121	-1734.98	938.056	1.41053	-1689.97	881.947	-62.9734	-1708.26	852.584	-27.7848	-1639.5	823.881
567	0	143.777	-1805.27	1570.79	261.731	-1800.19	1575.03	150.931	-1973.57	1531.02	258.76	-1966.64	1532.36	203.544	-1948.91	1434.27	194.712	-2030.94	1154.69	201.672	-1827.74	1338.91	204.998	-1768.78	1144.49	275.87	-2044.16	1231.24	22.7869	-1877.53	1360.81	-59.6388	-1876.72	1123.71	-65.7684	-1864.29	1047.78	-55.368	-1722.71	937.628	2.89462	-1677.26	882.224	-61.3773	-1695.09	852.352	-25.963	-1625.98	824.748
568	0	144.625	-1794.28	1569.12	262.578	-1789.18	1573.24	151.763	-1962.59	1529.4	259.585	-1955.67	1530.64	204.343	-1937.93	1432.54	195.405	-2019.77	1152.86	202.361	-1816.73	1337.2	205.567	-1757.59	1142.77	276.592	-2033.03	1229.35	23.4971	-1866.71	1359.03	-59.0342	-1866.22	1121.97	-65.2693	-1853.28	1046.1	-54.1869	-1710.71	937.006	4.37314	-1664.9	882.224	-59.7803	-1682.33	851.896	-24.1929	-1612.9	825.28
569	0	145.533	-1783.27	1567.52	263.485	-1778.14	1571.53	152.673	-1951.58	1527.83	260.488	-1944.66	1528.99	205.225	-1926.91	1430.85	196.169	-2008.48	1151.06	203.137	-1805.65	1335.58	206.211	-1746.25	1141.16	277.389	-2021.8	1227.48	24.2921	-1855.82	1357.31	-58.2921	-1855.77	1120.26	-64.608	-1842.37	1044.44	-52.9732	-1699	936.196	5.84015	-1652.87	881.946	-58.1903	-1670	851.216	-22.4819	-1600.29	825.466
570	0	146.505	-1772.23	1566.02	264.456	-1767.07	1569.94	153.664	-1940.54	1526.34	261.473	-1933.61	1527.42	206.188	-1915.83	1429.23	197	-1997.07	1149.31	203.999	-1794.49	1334.06	206.929	-1734.75	1139.69	278.256	-2010.48	1225.65	25.1705	-1844.86	1355.69	-57.4143	-1845.36	1118.6	-63.7854	-1831.56	1042.82	-51.7307	-1687.59	935.206	7.29049	-1641.19	881.388	-56.615	-1658.12	850.317	-20.8366	-1588.14	825.297
571	0	147.546	-1761.17	1564.64	265.496	-1755.96	1568.47	154.739	-1929.46	1524.93	262.545	-1922.53	1525.95	207.23	-1904.71	1427.71	197.893	-1985.54	1147.64	204.946	-1783.25	1332.68	207.723	-1723.1	1138.36	279.19	-1999.05	1223.89	26.1301	-1833.81	1354.19	-56.4035	-1834.97	1117.01	-62.8042	-1820.85	1041.27	-50.4629	-1676.47	934.046	8.71979	-1629.86	880.555	-55.0617	-1646.7	849.205	-19.2623	-1576.47	824.767
572	0	148.657	-1750.09	1563.4	266.608	-1744.83	1567.16	155.9	-1918.36	1523.63	263.703	-1911.4	1524.6	208.345	-1893.53	1426.3	198.844	-1973.89	1146.05	205.975	-1771.94	1331.43	208.59	-1711.29	1137.2	280.187	-1987.54	1222.22	27.1675	-1822.68	1352.83	-55.2635	-1824.58	1115.53	-61.6685	-1810.22	1039.81	-49.1728	-1665.64	932.729	10.1244	-1618.9	879.451	-53.5378	-1635.74	847.889	-17.7632	-1565.29	823.877
573	0	149.842	-1738.99	1562.31	267.792	-1733.67	1566	157.147	-1907.22	1522.46	264.951	-1900.23	1523.37	209.531	-1882.31	1425.01	199.848	-1962.14	1144.58	207.08	-1760.55	1330.35	209.531	-1699.34	1136.23	281.243	-1975.93	1220.66	28.278	-1811.46	1351.62	-53.9992	-1814.17	1114.17	-60.3844	-1799.66	1038.45	-47.8632	-1655.11	931.268	11.5015	-1608.31	878.084	-52.0502	-1625.25	846.385	-16.3423	-1554.62	822.628
574	0	151.101	-1727.86	1561.41	269.051	-1722.49	1565.02	158.479	-1896.07	1521.44	266.286	-1889.03	1522.29	210.781	-1871.05	1423.88	200.9	-1950.28	1143.25	208.255	-1749.1	1329.44	210.543	-1687.25	1135.46	282.353	-1964.22	1219.22	29.4562	-1800.17	1350.6	-52.6163	-1803.73	1112.95	-58.9591	-1789.17	1037.23	-46.5364	-1644.87	929.68	12.8489	-1598.11	876.466	-50.6054	-1615.23	844.706	-15.0016	-1544.47	821.031
575	0	152.434	-1716.72	1560.68	270.385	-1711.28	1564.22	159.894	-1884.88	1520.57	267.706	-1877.79	1521.35	212.088	-1859.74	1422.9	201.994	-1938.33	1142.07	209.494	-1737.58	1328.72	211.622	-1675.04	1134.91	283.511	-1952.44	1217.93	30.6951	-1788.79	1349.76	-51.1218	-1793.23	1111.9	-57.4016	-1778.74	1036.16	-45.1945	-1634.94	927.982	14.165	-1588.29	874.611	-49.2094	-1605.68	842.874	-13.742	-1534.84	819.096
576	0	153.841	-1705.57	1560.16	271.793	-1700.05	1563.61	161.389	-1873.68	1519.87	269.208	-1866.52	1520.59	213.447	-1848.4	1422.09	203.124	-1926.31	1141.05	210.787	-1726.01	1328.19	212.763	-1662.72	1134.57	284.713	-1940.57	1216.8	31.987	-1777.35	1349.12	-49.5239	-1782.67	1111.04	-55.7225	-1768.37	1035.26	-43.8395	-1625.29	926.195	15.4489	-1578.87	872.535	-47.8677	-1596.62	840.911	-12.5631	-1525.75	816.842
577	0	155.32	-1694.4	1559.84	273.273	-1688.81	1563.19	162.958	-1862.47	1519.36	270.786	-1855.23	1519.99	214.849	-1837.03	1421.47	204.287	-1914.21	1140.22	212.125	-1714.4	1327.87	213.955	-1650.32	1134.46	285.952	-1928.64	1215.84	33.3228	-1765.84	1348.7	-47.8318	-1772.03	1110.36	-53.9334	-1758.04	1034.54	-42.4733	-1615.94	924.338	16.7003	-1569.86	870.26	-46.5848	-1588.02	838.84	-11.4633	-1517.19	814.29
578	0	156.867	-1683.23	1559.73	274.822	-1677.55	1562.97	164.595	-1851.24	1519.03	272.434	-1843.91	1519.56	216.287	-1825.64	1421.03	205.477	-1902.08	1139.58	213.497	-1702.75	1327.74	215.19	-1637.85	1134.58	287.223	-1916.65	1215.06	34.6929	-1754.29	1348.49	-46.0561	-1761.29	1109.89	-52.0477	-1747.76	1034.01	-41.0978	-1606.87	922.433	17.9195	-1561.26	867.808	-45.3646	-1579.89	836.689	-10.4397	-1509.18	811.466
579	0	158.48	-1672.05	1559.84	276.436	-1666.29	1562.94	166.291	-1840.01	1518.9	274.143	-1832.58	1519.31	217.751	-1814.23	1420.79	206.688	-1889.91	1139.14	214.89	-1691.08	1327.82	216.452	-1625.36	1134.91	288.519	-1904.63	1214.47	36.0866	-1742.71	1348.5	-44.2089	-1750.47	1109.63	-50.0799	-1737.51	1033.68	-39.7149	-1598.08	920.502	19.107	-1553.07	865.206	-44.21	-1572.21	834.486	-9.48808	-1501.72	808.401
580	0	160.152	-1660.88	1560.15	278.109	-1655.03	1563.09	168.039	-1828.77	1518.97	275.904	-1821.25	1519.23	219.234	-1802.82	1420.74	207.918	-1877.73	1138.91	216.292	-1679.4	1328.1	217.725	-1612.86	1135.45	289.834	-1892.57	1214.08	37.4929	-1731.12	1348.73	-42.3034	-1739.56	1109.58	-48.0459	-1727.3	1033.55	-38.3269	-1589.58	918.568	20.2637	-1545.31	862.483	-43.1232	-1564.98	832.26	-8.60261	-1494.81	805.127
581	0	161.878	-1649.71	1560.67	279.836	-1643.78	1563.41	169.829	-1817.55	1519.23	277.707	-1809.93	1519.32	220.727	-1791.42	1420.89	209.16	-1865.57	1138.89	217.689	-1667.73	1328.57	218.993	-1600.4	1136.18	291.163	-1880.51	1213.88	38.9005	-1719.53	1349.18	-40.3544	-1728.56	1109.73	-45.9626	-1717.13	1033.63	-36.9365	-1581.34	916.655	21.3908	-1537.96	859.669	-42.1054	-1558.16	830.042	-7.77628	-1488.43	801.683
582	0	163.648	-1638.56	1561.39	281.607	-1632.54	1563.9	171.65	-1806.34	1519.69	279.54	-1798.61	1519.58	222.221	-1780.03	1421.22	210.412	-1853.43	1139.06	219.069	-1656.08	1329.22	220.235	-1587.99	1137.09	292.5	-1868.46	1213.88	40.298	-1707.97	1349.83	-38.3778	-1717.49	1110.09	-43.848	-1707.01	1033.92	-35.5468	-1573.36	914.784	22.4893	-1531.02	856.796	-41.1575	-1551.75	827.861	-7.00091	-1482.59	798.108
583	0	165.456	-1627.42	1562.29	283.415	-1621.33	1564.54	173.491	-1795.15	1520.34	281.393	-1787.31	1520	223.709	-1768.67	1421.74	211.67	-1841.35	1139.44	220.416	-1644.47	1330.03	221.431	-1575.67	1138.17	293.839	-1856.43	1214.07	41.6742	-1696.47	1350.68	-36.3909	-1706.36	1110.64	-41.7205	-1696.94	1034.4	-34.1618	-1565.64	912.977	23.56	-1524.49	853.9	-40.2795	-1545.71	825.747	-6.2674	-1477.27	794.443
584	0	167.29	-1616.31	1563.36	285.249	-1610.15	1565.32	175.341	-1783.99	1521.17	283.252	-1776.05	1520.57	225.184	-1757.34	1422.43	212.932	-1829.34	1140.01	221.72	-1632.91	1331.01	222.562	-1563.48	1139.38	295.177	-1844.45	1214.45	43.0183	-1685.03	1351.71	-34.4118	-1695.2	1111.38	-39.5994	-1686.93	1035.07	-32.786	-1558.16	911.255	24.6035	-1518.35	851.014	-39.4715	-1540.02	823.729	-5.56623	-1472.44	790.731
585	0	169.142	-1605.23	1564.59	287.1	-1599	1566.21	177.189	-1772.86	1522.17	285.107	-1764.82	1521.28	226.638	-1746.06	1423.28	214.194	-1817.41	1140.76	222.968	-1621.41	1332.12	223.606	-1551.43	1140.71	296.51	-1832.53	1215.01	44.3203	-1673.7	1352.91	-32.4594	-1684.03	1112.27	-37.5037	-1677	1035.92	-31.425	-1550.91	909.638	25.6197	-1512.59	848.175	-38.7332	-1534.63	821.834	-4.88795	-1468.09	787.017
586	0	170.999	-1594.18	1565.95	288.955	-1587.89	1567.21	179.023	-1761.78	1523.34	286.946	-1753.64	1522.12	228.065	-1734.84	1424.29	215.455	-1805.6	1141.68	224.149	-1609.99	1333.36	224.547	-1539.54	1142.13	297.836	-1820.68	1215.73	45.5711	-1662.47	1354.27	-30.5528	-1672.9	1113.32	-35.4525	-1667.16	1036.94	-30.0852	-1543.88	908.145	26.6076	-1507.2	845.416	-38.0645	-1529.53	820.086	-4.22379	-1464.17	783.343
587	0	172.85	-1583.18	1567.44	290.803	-1576.84	1568.3	180.832	-1750.75	1524.65	288.756	-1742.51	1523.07	229.461	-1723.68	1425.42	216.714	-1793.91	1142.75	225.254	-1598.67	1334.7	225.365	-1527.84	1143.63	299.154	-1808.93	1216.6	46.7629	-1651.39	1355.75	-28.7108	-1661.83	1114.5	-33.4641	-1657.43	1038.1	-28.7739	-1537.06	906.791	27.5653	-1502.14	842.771	-37.4655	-1524.67	818.508	-3.56637	-1460.67	779.752
588	0	174.684	-1572.22	1569.04	292.633	-1565.83	1569.46	182.607	-1739.77	1526.09	290.529	-1731.44	1524.13	230.821	-1712.6	1426.68	217.967	-1782.35	1143.96	226.275	-1587.44	1336.14	226.049	-1516.34	1145.18	300.462	-1797.28	1217.61	47.8891	-1640.45	1357.36	-26.9517	-1650.88	1115.79	-31.5558	-1647.82	1039.4	-27.4994	-1530.44	905.59	28.4895	-1497.39	840.273	-36.9366	-1520.01	817.118	-2.91032	-1457.53	776.286
589	0	176.488	-1561.31	1570.71	294.431	-1554.89	1570.67	184.337	-1728.85	1527.65	292.253	-1720.44	1525.28	232.141	-1701.59	1428.05	219.216	-1770.95	1145.28	227.206	-1576.32	1337.64	226.587	-1505.04	1146.77	301.762	-1785.75	1218.75	48.9448	-1629.67	1359.05	-25.2924	-1640.08	1117.18	-29.7433	-1638.37	1040.82	-26.271	-1524	904.554	29.3758	-1492.92	837.95	-36.4782	-1515.52	815.933	-2.25294	-1454.7	772.984
590	0	178.25	-1550.46	1572.45	296.187	-1544.01	1571.93	186.013	-1718	1529.31	293.92	-1709.51	1526.51	233.419	-1690.66	1429.5	220.458	-1759.7	1146.71	228.045	-1565.31	1339.2	226.973	-1493.95	1148.38	303.053	-1774.34	1220	49.9268	-1619.08	1360.83	-23.748	-1629.49	1118.65	-28.0407	-1629.09	1042.33	-25.0987	-1517.74	903.691	30.2182	-1488.7	835.829	-36.0912	-1511.16	814.964	-1.59464	-1452.15	769.882
591	0	179.96	-1539.67	1574.24	297.888	-1533.19	1573.21	187.628	-1707.22	1531.04	295.522	-1698.65	1527.81	234.652	-1679.82	1431.02	221.692	-1748.62	1148.22	228.791	-1554.43	1340.8	227.205	-1483.06	1149.99	304.336	-1763.05	1221.34	50.8336	-1608.66	1362.66	-22.3311	-1619.15	1120.19	-26.4596	-1620	1043.92	-23.9931	-1511.64	903.009	31.0095	-1484.69	833.931	-35.7764	-1506.91	814.219	-0.939351	-1449.81	767.013
592	0	181.605	-1528.94	1576.05	299.524	-1522.43	1574.51	189.173	-1696.5	1532.85	297.051	-1687.86	1529.16	235.84	-1669.07	1432.6	222.917	-1737.71	1149.79	229.442	-1543.67	1342.42	227.285	-1472.37	1151.59	305.614	-1751.91	1222.77	51.6654	-1598.42	1364.53	-21.0515	-1609.09	1121.77	-25.0092	-1611.13	1045.58	-22.9655	-1505.69	902.508	31.7407	-1480.85	832.276	-35.5348	-1502.73	813.699	-0.294731	-1447.64	764.404
593	0	183.177	-1518.27	1577.87	301.084	-1511.74	1575.81	190.642	-1685.86	1534.69	298.501	-1677.15	1530.54	236.981	-1658.41	1434.21	224.133	-1726.96	1151.4	230.004	-1533.02	1344.06	227.222	-1461.88	1153.19	306.887	-1740.89	1224.25	52.4241	-1588.37	1366.43	-19.9156	-1599.36	1123.39	-23.6957	-1602.49	1047.28	-22.0272	-1499.88	902.189	32.4022	-1477.14	830.875	-35.367	-1498.59	813.402	0.327864	-1445.58	762.077
594	0	184.665	-1507.67	1579.68	302.559	-1501.11	1577.11	192.03	-1675.28	1536.56	299.868	-1666.51	1531.96	238.076	-1647.85	1435.84	225.337	-1716.38	1153.05	230.481	-1522.5	1345.68	227.028	-1451.55	1154.76	308.156	-1730.01	1225.78	53.1132	-1578.49	1368.32	-18.9259	-1589.99	1125.03	-22.5223	-1594.1	1049.01	-21.1895	-1494.21	902.048	32.983	-1473.53	829.736	-35.2734	-1494.5	813.321	0.913587	-1443.57	760.051
595	0	186.061	-1497.12	1581.46	303.94	-1490.55	1578.38	193.332	-1664.78	1538.44	301.147	-1655.95	1533.4	239.126	-1637.37	1437.48	226.528	-1705.95	1154.7	230.88	-1512.09	1347.29	226.72	-1441.4	1156.3	309.422	-1719.26	1227.34	53.7373	-1568.78	1370.2	-18.0815	-1581.01	1126.68	-21.4893	-1585.98	1050.76	-20.4633	-1488.66	902.075	33.4717	-1469.96	828.859	-35.2539	-1490.41	813.444	1.44457	-1441.57	758.333
596	0	187.358	-1486.64	1583.19	305.222	-1480.04	1579.63	194.544	-1654.34	1540.3	302.335	-1645.46	1534.84	240.132	-1626.97	1439.1	227.704	-1695.67	1156.34	231.207	-1501.79	1348.86	226.317	-1431.38	1157.81	310.684	-1708.64	1228.91	54.3022	-1559.24	1372.05	-17.3774	-1572.41	1128.34	-20.594	-1578.13	1052.5	-19.8586	-1483.23	902.261	33.8569	-1466.41	828.239	-35.3076	-1486.34	813.753	1.90061	-1439.51	756.929
597	0	188.551	-1476.22	1584.86	306.397	-1469.6	1580.85	195.664	-1643.97	1542.14	303.43	-1635.03	1536.27	241.093	-1616.66	1440.68	228.862	-1685.53	1157.95	231.474	-1491.59	1350.39	225.842	-1421.5	1159.29	311.94	-1698.13	1230.47	54.8145	-1549.83	1373.85	-16.8053	-1564.22	1129.98	-19.8307	-1570.55	1054.24	-19.3841	-1477.91	902.591	34.1275	-1462.82	827.866	-35.4331	-1482.27	814.227	2.26011	-1437.36	755.835
598	0	189.635	-1465.85	1586.45	307.462	-1459.2	1582.02	196.691	-1633.66	1543.93	304.432	-1624.67	1537.68	242.013	-1606.43	1442.22	229.999	-1675.51	1159.51	231.688	-1481.49	1351.86	225.32	-1411.73	1160.72	313.189	-1687.72	1232.01	55.2809	-1540.56	1375.58	-16.3536	-1556.42	1131.61	-19.1914	-1563.25	1055.95	-19.0469	-1472.7	903.046	34.2731	-1459.18	827.721	-35.6279	-1478.2	814.842	2.50107	-1435.07	755.038
599	0	190.606	-1455.53	1587.95	308.415	-1448.86	1583.13	197.623	-1623.41	1545.65	305.339	-1614.37	1539.07	242.891	-1596.27	1443.7	231.11	-1665.59	1161.01	231.86	-1471.47	1353.26	224.774	-1402.05	1162.1	314.427	-1677.41	1233.5	55.7083	-1531.4	1377.24	-16.0081	-1549	1133.2	-18.6659	-1556.21	1057.63	-18.8519	-1467.58	903.605	34.2849	-1455.45	827.782	-35.8887	-1474.14	815.568	2.60234	-1432.61	754.521
600	0	191.464	-1445.26	1589.33	309.254	-1438.55	1584.18	198.46	-1613.2	1547.29	306.153	-1604.12	1540.41	243.728	-1586.18	1445.1	232.192	-1655.78	1162.43	231.999	-1461.52	1354.59	224.23	-1392.45	1163.43	315.649	-1667.18	1234.92	56.1034	-1522.33	1378.8	-15.7525	-1541.93	1134.76	-18.2423	-1549.42	1059.26	-18.8016	-1462.55	904.246	34.1562	-1451.6	828.02	-36.2112	-1470.1	816.376	2.54478	-1429.95	754.259
601	0	192.208	-1435.03	1590.59	309.979	-1428.29	1585.16	199.203	-1603.05	1548.83	306.874	-1593.92	1541.7	244.525	-1576.14	1446.4	233.24	-1646.04	1163.76	232.113	-1451.64	1355.82	223.708	-1382.9	1164.68	316.851	-1657.02	1236.27	56.4719	-1513.33	1380.25	-15.5692	-1535.18	1136.26	-17.9074	-1542.86	1060.82	-18.896	-1457.6	904.942	33.8823	-1447.6	828.404	-36.5901	-1466.06	817.233	2.31238	-1427.06	754.223
602	0	192.839	-1424.84	1591.72	310.592	-1418.07	1586.05	199.855	-1592.93	1550.25	307.505	-1583.76	1542.91	245.283	-1566.16	1447.6	234.25	-1636.37	1164.98	232.209	-1441.81	1356.94	223.227	-1373.4	1165.86	318.026	-1646.91	1237.52	56.8187	-1504.39	1381.58	-15.4401	-1528.69	1137.7	-17.6471	-1536.5	1062.31	-19.132	-1452.71	905.668	33.4619	-1443.45	828.897	-37.0195	-1462.05	818.108	1.89325	-1423.93	754.376
603	0	193.36	-1414.69	1592.7	311.095	-1407.87	1586.85	200.417	-1582.85	1551.54	308.048	-1573.63	1544.05	245.999	-1556.21	1448.67	235.216	-1626.75	1166.07	232.294	-1432.02	1357.95	222.803	-1363.92	1166.94	319.166	-1636.86	1238.65	57.1476	-1495.48	1382.78	-15.3475	-1522.42	1139.06	-17.4472	-1530.31	1063.71	-19.5039	-1447.88	906.397	32.8965	-1439.12	829.462	-37.4924	-1458.05	818.968	1.2804	-1420.54	754.679
604	0	193.774	-1404.55	1593.53	311.493	-1397.69	1587.55	200.892	-1572.8	1552.7	308.506	-1563.53	1545.09	246.673	-1546.3	1449.61	236.134	-1617.16	1167.03	232.372	-1422.27	1358.84	222.446	-1354.46	1167.91	320.266	-1626.84	1239.66	57.4608	-1486.59	1383.82	-15.2746	-1516.32	1140.32	-17.2934	-1524.25	1065.01	-20.0033	-1443.08	907.1	32.1911	-1434.6	830.06	-38.0013	-1454.08	819.782	0.47226	-1416.9	755.09
605	0	194.084	-1394.44	1594.19	311.79	-1387.53	1588.14	201.284	-1562.76	1553.69	308.882	-1553.46	1546.01	247.303	-1536.42	1450.41	236.999	-1607.61	1167.85	232.445	-1412.53	1359.58	222.162	-1345	1168.76	321.315	-1616.85	1240.53	57.7592	-1477.7	1384.7	-15.2065	-1510.32	1141.48	-17.1721	-1518.29	1066.19	-20.6191	-1438.31	907.751	31.3539	-1429.89	830.652	-38.5384	-1450.12	820.522	-0.527091	-1413.01	755.566
606	0	194.296	-1384.34	1594.69	311.989	-1377.38	1588.61	201.595	-1552.74	1554.52	309.181	-1543.39	1546.82	247.886	-1526.54	1451.06	237.806	-1598.07	1168.51	232.516	-1402.79	1360.18	221.954	-1335.53	1169.47	322.307	-1606.88	1241.25	58.0424	-1468.78	1385.42	-15.1306	-1504.37	1142.51	-17.0705	-1512.39	1067.25	-21.3381	-1433.53	908.325	30.3965	-1425	831.2	-39.0958	-1446.16	821.163	-1.70794	-1408.88	756.063
607	0	194.415	-1374.25	1595.01	312.098	-1367.24	1588.94	201.83	-1542.72	1555.18	309.406	-1533.33	1547.49	248.42	-1516.67	1451.55	238.55	-1588.54	1169.02	232.582	-1393.06	1360.63	221.818	-1326.04	1170.03	323.234	-1596.92	1241.81	58.3083	-1459.82	1385.95	-15.0372	-1498.41	1143.4	-16.9771	-1506.51	1068.17	-22.1454	-1428.74	908.796	29.3331	-1419.92	831.667	-39.6658	-1442.2	821.681	-3.05528	-1404.51	756.539
608	0	194.445	-1364.16	1595.15	312.121	-1357.09	1589.14	201.991	-1532.7	1555.65	309.559	-1523.26	1548.01	248.899	-1506.8	1451.87	239.227	-1579.01	1169.36	232.643	-1383.31	1360.91	221.748	-1316.52	1170.42	324.086	-1586.97	1242.21	58.5535	-1450.81	1386.31	-14.9193	-1492.39	1144.14	-16.8818	-1500.59	1068.94	-23.0248	-1423.91	909.144	28.1805	-1414.65	832.021	-40.2414	-1438.21	822.057	-4.54932	-1399.93	756.955
609	0	194.392	-1354.07	1595.11	312.063	-1346.94	1589.19	202.082	-1522.68	1555.94	309.645	-1513.19	1548.37	249.32	-1496.91	1452.02	239.832	-1569.46	1169.53	232.695	-1373.55	1361.02	221.733	-1306.97	1170.63	324.857	-1577.01	1242.43	58.7736	-1441.72	1386.47	-14.7732	-1486.24	1144.72	-16.7764	-1494.61	1069.55	-23.9595	-1419.01	909.348	26.9572	-1409.2	832.232	-40.8164	-1434.18	822.276	-6.16628	-1395.16	757.272
610	0	194.26	-1343.97	1594.89	311.928	-1336.78	1589.09	202.106	-1512.64	1556.03	309.665	-1503.1	1548.58	249.678	-1487	1452	240.36	-1559.9	1169.54	232.732	-1363.76	1360.95	221.76	-1297.39	1170.66	325.54	-1567.06	1242.49	58.9629	-1432.56	1386.45	-14.5981	-1479.93	1145.12	-16.6549	-1488.52	1069.99	-24.9323	-1414.02	909.392	25.6827	-1403.59	832.274	-41.386	-1430.07	822.326	-7.87927	-1390.2	757.457
611	0	194.053	-1333.85	1594.5	311.722	-1326.59	1588.84	202.063	-1502.59	1555.93	309.622	-1492.99	1548.6	249.967	-1477.06	1451.8	240.806	-1550.31	1169.37	232.749	-1353.92	1360.71	221.816	-1287.76	1170.49	326.127	-1557.09	1242.37	59.1151	-1423.3	1386.23	-14.3962	-1473.42	1145.33	-16.513	-1482.29	1070.25	-25.9268	-1408.91	909.261	24.3772	-1397.81	832.127	-41.9468	-1425.87	822.198	-9.6593	-1385.08	757.481
612	0	193.775	-1323.72	1593.93	311.447	-1316.38	1588.42	201.956	-1492.5	1555.64	309.517	-1482.85	1548.45	250.182	-1467.08	1451.43	241.166	-1540.69	1169.04	232.739	-1344.05	1360.28	221.885	-1278.07	1170.12	326.613	-1547.1	1242.08	59.223	-1413.93	1385.82	-14.1722	-1466.67	1145.36	-16.3491	-1475.87	1070.32	-26.9271	-1403.66	908.945	23.0604	-1391.87	831.773	-42.4969	-1421.54	821.888	-11.4764	-1379.82	757.32
613	0	193.429	-1313.55	1593.18	311.106	-1306.15	1587.85	201.784	-1482.39	1555.16	309.349	-1472.68	1548.13	250.316	-1457.06	1450.88	241.435	-1531.03	1168.54	232.695	-1334.12	1359.68	221.95	-1268.34	1169.56	326.991	-1537.1	1241.61	59.2789	-1404.45	1385.22	-13.9333	-1459.66	1145.18	-16.1636	-1469.24	1070.2	-27.919	-1398.24	908.436	21.7512	-1385.79	831.201	-43.0364	-1417.06	821.394	-13.3005	-1374.43	756.953
614	0	193.016	-1303.36	1592.28	310.701	-1295.88	1587.12	201.547	-1472.24	1554.5	309.118	-1462.47	1547.62	250.363	-1446.98	1450.17	241.609	-1521.32	1167.87	232.609	-1324.14	1358.91	221.998	-1258.54	1168.8	327.257	-1527.08	1240.98	59.2749	-1394.86	1384.44	-13.6886	-1452.35	1144.81	-15.9593	-1462.36	1069.88	-28.8899	-1392.62	907.728	20.4669	-1379.56	830.403	-43.5668	-1412.38	820.715	-15.1027	-1368.92	756.366
615	0	192.538	-1293.13	1591.21	310.233	-1285.57	1586.22	201.243	-1462.05	1553.65	308.822	-1452.22	1546.93	250.318	-1436.85	1449.3	241.684	-1511.55	1167.04	232.473	-1314.1	1357.96	222.014	-1248.68	1167.85	327.406	-1517.03	1240.19	59.2032	-1385.13	1383.48	-13.4486	-1444.73	1144.23	-15.7411	-1455.21	1069.37	-29.8294	-1386.79	906.819	19.2226	-1373.18	829.377	-44.0912	-1407.49	819.855	-16.8559	-1363.29	755.549
616	0	191.996	-1282.86	1590	309.702	-1275.23	1585.18	200.868	-1451.82	1552.64	308.458	-1441.93	1546.08	250.174	-1426.66	1448.27	241.655	-1501.72	1166.06	232.279	-1303.99	1356.85	221.985	-1238.74	1166.71	327.434	-1506.94	1239.24	59.056	-1375.28	1382.35	-13.2252	-1436.79	1143.44	-15.516	-1447.77	1068.65	-30.7293	-1380.7	905.71	18.0314	-1366.66	828.123	-44.614	-1402.35	818.818	-18.5358	-1357.55	754.495
617	0	191.388	-1272.54	1588.66	309.108	-1264.84	1584	200.42	-1441.53	1551.48	308.022	-1431.58	1545.05	249.925	-1416.41	1447.09	241.52	-1491.8	1164.93	232.019	-1293.81	1355.59	221.903	-1228.73	1165.4	327.337	-1496.82	1238.15	58.8259	-1365.3	1381.05	-13.0308	-1428.53	1142.46	-15.2924	-1440.03	1067.74	-31.5838	-1374.35	904.405	16.9034	-1360	826.648	-45.1404	-1396.93	817.61	-20.1216	-1351.7	753.204
618	0	190.713	-1262.18	1587.2	308.448	-1254.41	1582.68	199.895	-1431.19	1550.17	307.511	-1421.19	1543.88	249.566	-1406.08	1445.79	241.276	-1481.81	1163.66	231.685	-1283.56	1354.19	221.757	-1218.63	1163.93	327.114	-1486.65	1236.91	58.5058	-1355.19	1379.6	-12.8785	-1419.93	1141.27	-15.0803	-1431.96	1066.64	-32.3895	-1367.71	902.91	15.8462	-1353.17	824.958	-45.6764	-1391.2	816.239	-21.5963	-1345.72	751.678
619	0	189.969	-1251.76	1585.63	307.721	-1243.92	1581.25	199.286	-1420.79	1548.73	306.919	-1410.74	1542.56	249.091	-1395.69	1444.36	240.921	-1471.72	1162.27	231.271	-1273.23	1352.66	221.543	-1208.45	1162.32	326.762	-1476.44	1235.56	58.0896	-1344.94	1378.02	-12.7811	-1411	1139.9	-14.8904	-1423.56	1065.35	-33.1451	-1360.76	901.233	14.8645	-1346.19	823.068	-46.228	-1385.15	814.714	-22.9472	-1339.61	749.924
620	0	189.154	-1241.28	1583.97	306.925	-1233.39	1579.71	198.59	-1410.33	1547.18	306.24	-1400.23	1541.11	248.497	-1385.23	1442.83	240.456	-1461.52	1160.76	230.771	-1262.82	1351.03	221.256	-1198.16	1160.58	326.283	-1466.17	1234.1	57.5718	-1334.57	1376.3	-12.7508	-1401.74	1138.34	-14.7343	-1414.82	1063.88	-33.8516	-1353.49	899.387	13.9602	-1339.03	820.99	-46.8012	-1378.74	813.044	-24.1664	-1333.35	747.955
621	0	188.264	-1230.75	1582.25	306.055	-1222.81	1578.08	197.801	-1399.81	1545.53	305.47	-1389.67	1539.56	247.781	-1374.69	1441.21	239.88	-1451.22	1159.15	230.178	-1252.33	1349.3	220.894	-1187.78	1158.73	325.675	-1455.84	1232.54	56.9481	-1324.06	1374.47	-12.7994	-1392.16	1136.6	-14.6234	-1405.74	1062.25	-34.5118	-1345.88	897.386	13.133	-1331.69	818.745	-47.4016	-1371.96	811.242	-25.2505	-1326.91	745.786
622	0	187.296	-1220.15	1580.48	305.108	-1212.18	1576.4	196.913	-1389.21	1543.82	304.602	-1379.06	1537.92	246.939	-1364.08	1439.53	239.195	-1440.8	1157.46	229.488	-1241.77	1347.51	220.457	-1177.28	1156.8	324.942	-1445.44	1230.92	56.2151	-1313.44	1372.55	-12.9369	-1382.26	1134.71	-14.5686	-1396.33	1060.46	-35.1302	-1337.91	895.247	12.3797	-1324.14	816.354	-48.0341	-1364.8	809.323	-26.2007	-1320.27	743.438
623	0	186.247	-1209.49	1578.68	304.082	-1201.5	1574.67	195.922	-1378.55	1542.05	303.631	-1368.38	1536.22	245.971	-1353.4	1437.8	238.405	-1430.25	1155.7	228.698	-1231.11	1345.67	219.945	-1166.67	1154.82	324.087	-1434.97	1229.24	55.371	-1302.69	1370.55	-13.172	-1372.04	1132.68	-14.5803	-1386.58	1058.54	-35.7124	-1329.59	892.991	11.6955	-1316.37	813.84	-48.7027	-1357.22	807.301	-27.0224	-1313.41	740.934
624	0	185.113	-1198.76	1576.88	302.971	-1190.76	1572.92	194.824	-1367.82	1540.27	302.554	-1357.65	1534.49	244.877	-1342.64	1436.05	237.514	-1419.58	1153.9	227.805	-1220.38	1343.81	219.359	-1155.93	1152.8	323.115	-1424.43	1227.54	54.4152	-1291.84	1368.49	-13.5111	-1361.53	1130.52	-14.6675	-1376.5	1056.51	-36.2651	-1320.9	890.639	11.0734	-1308.36	811.232	-49.4102	-1349.24	805.195	-27.7251	-1306.29	738.303
625	0	183.89	-1187.96	1575.1	301.773	-1179.97	1571.19	193.615	-1357.02	1538.47	301.365	-1346.86	1532.74	243.659	-1331.82	1434.3	236.53	-1408.78	1152.09	226.809	-1209.57	1341.95	218.7	-1145.08	1150.78	322.033	-1413.8	1225.84	53.3486	-1280.87	1366.39	-13.9585	-1350.74	1128.27	-14.8377	-1366.11	1054.38	-36.7958	-1311.83	888.218	10.5052	-1300.09	808.557	-50.1582	-1340.83	803.025	-28.3212	-1298.89	735.577
626	0	182.575	-1177.1	1573.36	300.484	-1169.13	1569.49	192.293	-1346.15	1536.71	300.064	-1336.01	1531.01	242.321	-1320.93	1432.58	235.461	-1397.86	1150.28	225.711	-1198.67	1340.13	217.971	-1134.09	1148.79	320.85	-1403.09	1224.16	52.1738	-1269.81	1364.29	-14.5157	-1339.67	1125.95	-15.0965	-1355.41	1052.18	-37.312	-1302.39	885.755	9.98156	-1291.53	805.849	-50.9473	-1331.98	800.815	-28.826	-1291.16	732.791
627	0	181.166	-1166.17	1571.69	299.101	-1158.24	1567.86	190.858	-1335.21	1534.99	298.648	-1325.11	1529.33	240.868	-1309.97	1430.91	234.315	-1386.8	1148.51	224.512	-1187.7	1338.37	217.174	-1122.98	1146.86	319.574	-1392.29	1222.53	50.895	-1258.66	1362.2	-15.1819	-1328.34	1123.59	-15.4479	-1344.42	1049.95	-37.8216	-1292.58	883.28	9.49223	-1282.66	803.14	-51.7765	-1322.7	798.59	-29.2565	-1283.07	729.981
628	0	179.661	-1155.18	1570.11	297.622	-1147.3	1566.33	189.309	-1324.21	1533.34	297.118	-1314.16	1527.72	239.308	-1298.95	1429.31	233.104	-1375.61	1146.8	223.216	-1176.65	1336.7	216.311	-1111.75	1145.03	318.217	-1381.41	1220.99	49.5179	-1247.43	1360.16	-15.9534	-1316.78	1121.21	-15.8934	-1333.15	1047.7	-38.3323	-1282.38	880.824	9.0266	-1273.47	800.466	-52.6437	-1312.98	796.377	-29.631	-1274.6	727.188
629	0	178.06	-1144.12	1568.63	296.046	-1136.3	1564.92	187.649	-1313.14	1531.79	295.475	-1303.15	1526.22	237.648	-1287.87	1427.81	231.838	-1364.31	1145.17	221.829	-1165.53	1335.14	215.384	-1100.4	1143.33	316.792	-1370.43	1219.55	48.0502	-1236.12	1358.19	-16.8243	-1304.99	1118.87	-16.4328	-1321.61	1045.48	-38.8515	-1271.81	878.419	8.57387	-1263.92	797.861	-53.5456	-1302.81	794.204	-29.9683	-1265.7	724.451
630	0	176.361	-1133.01	1567.29	294.371	-1125.26	1563.65	185.882	-1302.01	1530.36	293.724	-1292.09	1524.86	235.9	-1276.74	1426.43	230.531	-1352.89	1143.66	220.36	-1154.34	1333.72	214.397	-1088.94	1141.79	315.31	-1359.37	1218.25	46.501	-1224.76	1356.31	-17.7865	-1293	1116.58	-17.0639	-1309.83	1043.31	-39.386	-1260.86	876.098	8.12338	-1253.99	795.361	-54.4783	-1292.21	792.099	-30.2867	-1256.34	721.812
631	0	174.568	-1121.85	1566.09	292.6	-1114.18	1562.55	184.014	-1290.83	1529.07	291.869	-1280.99	1523.65	234.075	-1265.57	1425.2	229.193	-1341.37	1142.29	218.816	-1143.09	1332.46	213.352	-1077.37	1140.44	313.787	-1348.23	1217.1	44.881	-1213.34	1354.55	-18.8302	-1280.81	1114.39	-17.7829	-1297.82	1041.23	-39.9421	-1249.55	873.894	7.66486	-1243.67	793	-55.437	-1281.16	790.093	-30.604	-1246.51	719.309
632	0	172.681	-1110.64	1565.05	290.733	-1103.05	1561.64	182.052	-1279.6	1527.94	289.918	-1269.85	1522.62	232.188	-1254.35	1424.13	227.838	-1329.77	1141.09	217.209	-1131.8	1331.38	212.256	-1065.71	1139.3	312.236	-1337.02	1216.13	43.2024	-1201.88	1352.95	-19.9447	-1268.47	1112.33	-18.5844	-1285.59	1039.26	-40.5252	-1237.88	871.836	7.1887	-1232.93	790.811	-56.4165	-1269.68	788.212	-30.9363	-1236.16	716.98
633	0	170.707	-1099.39	1564.19	288.775	-1091.89	1560.94	180.006	-1268.33	1526.98	287.88	-1258.67	1521.8	230.251	-1243.11	1423.23	226.477	-1318.08	1140.06	215.552	-1120.46	1330.5	211.114	-1053.98	1138.39	310.671	-1325.74	1215.36	41.4786	-1190.4	1351.51	-21.1184	-1255.97	1110.43	-19.4619	-1273.17	1037.43	-41.1399	-1225.85	869.955	6.68614	-1221.75	788.825	-57.4115	-1257.76	786.484	-31.2981	-1225.28	714.859
634	0	168.651	-1088.1	1563.51	286.731	-1080.69	1560.46	177.888	-1257.03	1526.2	285.766	-1247.45	1521.2	228.282	-1231.84	1422.53	225.121	-1306.34	1139.24	213.858	-1109.08	1329.84	209.935	-1042.19	1137.74	309.105	-1314.4	1214.8	39.7241	-1178.89	1350.26	-22.3395	-1243.34	1108.71	-20.4082	-1260.57	1035.76	-41.7899	-1213.47	868.277	6.14953	-1210.13	787.068	-58.4166	-1245.41	784.933	-31.7014	-1213.84	712.979
635	0	166.52	-1076.8	1563.01	284.607	-1069.46	1560.21	175.709	-1245.71	1525.62	283.589	-1236.21	1520.83	226.295	-1220.55	1422.03	223.78	-1294.56	1138.62	212.144	-1097.69	1329.39	208.73	-1030.36	1137.34	307.551	-1303.01	1214.46	37.9544	-1167.38	1349.21	-23.5964	-1230.6	1107.21	-21.4154	-1247.81	1034.29	-42.4779	-1200.75	866.826	5.57251	-1198.06	785.566	-59.4267	-1232.65	783.578	-32.1557	-1201.84	711.365
636	0	164.324	-1065.47	1562.69	282.413	-1058.21	1560.19	173.484	-1234.37	1525.24	281.362	-1224.95	1520.71	224.307	-1209.26	1421.74	222.462	-1282.76	1138.23	210.424	-1086.28	1329.16	207.51	-1018.52	1137.2	306.019	-1291.6	1214.35	36.185	-1155.86	1348.39	-24.8779	-1217.76	1105.93	-22.4758	-1234.9	1033.02	-43.2055	-1187.71	865.619	4.95021	-1185.51	784.336	-60.437	-1219.47	782.438	-32.6677	-1189.26	710.039
637	0	162.073	-1054.14	1562.56	280.159	-1046.94	1560.4	171.229	-1223.02	1525.05	279.101	-1213.68	1520.82	222.333	-1197.98	1421.65	221.174	-1270.96	1138.06	208.716	-1074.88	1329.16	206.291	-1006.69	1137.32	304.519	-1280.17	1214.45	34.4319	-1144.36	1347.78	-26.1736	-1204.84	1104.9	-23.5817	-1221.86	1031.97	-43.9731	-1174.35	864.673	4.27943	-1172.5	783.395	-61.4432	-1205.88	781.523	-33.2415	-1176.1	709.017
638	0	159.781	-1042.82	1562.61	277.857	-1035.67	1560.84	168.961	-1211.69	1525.06	276.823	-1202.41	1521.18	220.39	-1186.71	1421.77	219.921	-1259.17	1138.11	207.036	-1063.48	1329.38	205.087	-994.884	1137.69	303.057	-1268.74	1214.78	32.7107	-1132.87	1347.4	-27.4742	-1191.87	1104.13	-24.726	-1208.71	1031.14	-44.7804	-1160.68	863.997	3.55872	-1159.01	782.751	-62.4416	-1191.91	780.843	-33.8783	-1162.36	708.309
639	0	157.46	-1031.51	1562.83	275.522	-1024.39	1561.49	166.695	-1200.37	1525.26	274.545	-1191.14	1521.77	218.491	-1175.46	1422.09	218.705	-1247.42	1138.38	205.401	-1052.12	1329.81	203.918	-983.135	1138.29	301.639	-1257.32	1215.32	31.0361	-1121.41	1347.24	-28.7716	-1178.84	1103.6	-25.9022	-1195.46	1030.54	-45.6258	-1146.71	863.597	2.78839	-1145.07	782.41	-63.4287	-1177.54	780.4	-34.5769	-1148.05	707.922
640	0	155.126	-1020.22	1563.21	273.168	-1013.12	1562.35	164.451	-1189.07	1525.65	272.285	-1179.88	1522.59	216.65	-1164.24	1422.6	217.527	-1235.72	1138.86	203.825	-1040.79	1330.43	202.799	-971.46	1139.1	300.267	-1245.93	1216.05	29.4218	-1109.97	1347.31	-30.0591	-1165.79	1103.33	-27.1044	-1182.12	1030.17	-46.5066	-1132.47	863.474	1.97056	-1130.67	782.371	-64.4015	-1162.81	780.193	-35.3339	-1133.16	707.853
641	0	152.796	-1008.97	1563.73	270.812	-1001.87	1563.4	162.245	-1177.81	1526.2	270.06	-1168.64	1523.61	214.877	-1153.07	1423.29	216.386	-1224.09	1139.54	202.323	-1029.51	1331.23	201.749	-959.879	1140.1	298.939	-1234.6	1216.96	27.8801	-1098.57	1347.58	-31.3316	-1152.71	1103.29	-28.3278	-1168.71	1030.02	-47.4193	-1117.96	863.624	1.10912	-1115.83	782.631	-65.3573	-1147.72	780.219	-36.1435	-1117.73	708.1
642	0	150.486	-997.756	1564.38	268.471	-990.646	1564.61	160.093	-1166.6	1526.91	267.887	-1157.42	1524.82	213.183	-1141.94	1424.15	215.276	-1212.55	1140.39	200.909	-1018.28	1332.2	200.784	-948.407	1141.25	297.655	-1223.32	1218.02	26.4214	-1087.21	1348.04	-32.5853	-1139.63	1103.49	-29.568	-1155.24	1030.07	-48.3594	-1103.2	864.041	0.209606	-1100.56	783.184	-66.2934	-1132.29	780.469	-36.9986	-1101.77	708.655
643	0	148.214	-986.596	1565.16	266.165	-979.45	1565.97	158.014	-1155.44	1527.76	265.784	-1146.25	1526.19	211.575	-1130.86	1425.15	214.194	-1201.1	1141.41	199.591	-1007.12	1333.3	199.918	-937.057	1142.54	296.41	-1212.13	1219.23	25.0539	-1075.88	1348.68	-33.8177	-1126.56	1103.89	-30.8218	-1141.71	1030.33	-49.3215	-1088.21	864.715	-0.720853	-1084.9	784.017	-67.2072	-1116.54	780.933	-37.8904	-1085.31	709.508
644	0	145.996	-975.493	1566.04	263.91	-968.294	1567.45	156.02	-1144.33	1528.73	263.765	-1135.11	1527.7	210.059	-1119.84	1426.29	213.132	-1189.77	1142.56	198.38	-996.031	1334.53	199.164	-925.839	1143.92	295.197	-1201.04	1220.56	23.7837	-1064.6	1349.48	-35.0276	-1113.49	1104.48	-32.0864	-1128.15	1030.76	-50.2995	-1073	865.633	-1.67376	-1068.86	785.12	-68.0959	-1100.48	781.602	-38.8091	-1068.37	710.648
645	0	143.851	-964.453	1567	261.725	-957.185	1569.03	154.127	-1133.29	1529.81	261.846	-1124.03	1529.33	208.637	-1108.87	1427.54	212.083	-1178.57	1143.85	197.28	-985.02	1335.85	198.531	-914.76	1145.37	294.01	-1190.05	1221.98	22.6146	-1053.35	1350.42	-36.2147	-1100.45	1105.24	-33.3598	-1114.56	1031.36	-51.2867	-1057.6	866.782	-2.63946	-1052.48	786.48	-68.9566	-1084.13	782.463	-39.7438	-1050.98	712.061
646	0	141.794	-953.479	1568.05	259.627	-946.127	1570.69	152.346	-1122.32	1530.96	260.038	-1112.99	1531.04	207.311	-1097.97	1428.88	211.038	-1167.49	1145.23	196.295	-974.088	1337.25	198.024	-903.821	1146.87	292.841	-1179.17	1223.48	21.548	-1042.13	1351.49	-37.3795	-1087.44	1106.15	-34.6405	-1100.95	1032.1	-52.2759	-1042.01	868.147	-3.60737	-1035.79	788.081	-69.786	-1067.51	783.506	-40.6831	-1033.19	713.736
647	0	139.841	-942.575	1569.16	257.634	-935.126	1572.41	150.687	-1111.41	1532.18	258.353	-1102.01	1532.81	206.08	-1087.12	1430.3	209.992	-1156.55	1146.7	195.425	-963.238	1338.7	197.643	-893.025	1148.38	291.684	-1168.42	1225.04	20.583	-1030.95	1352.66	-38.5229	-1074.47	1107.19	-35.9274	-1087.33	1032.98	-53.2599	-1026.26	869.713	-4.56631	-1018.82	789.911	-70.5806	-1050.64	784.719	-41.615	-1015.03	715.661
648	0	138.005	-931.741	1570.32	255.759	-924.185	1574.15	149.157	-1100.57	1533.45	256.798	-1091.08	1534.6	204.942	-1076.34	1431.77	208.937	-1145.75	1148.24	194.669	-952.468	1340.18	197.385	-882.368	1149.89	290.531	-1157.8	1226.63	19.7168	-1019.8	1353.91	-39.6463	-1061.53	1108.33	-37.2201	-1073.7	1033.97	-54.231	-1010.37	871.464	-5.50478	-1001.6	791.956	-71.3366	-1033.55	786.095	-42.5273	-996.53	717.825
649	0	136.299	-920.976	1571.52	254.016	-913.307	1575.91	147.763	-1089.8	1534.75	255.38	-1080.22	1536.4	203.892	-1065.6	1433.28	207.868	-1135.09	1149.82	194.022	-941.777	1341.68	197.242	-871.847	1151.38	289.376	-1147.31	1228.26	18.9443	-1008.66	1355.22	-40.7516	-1048.64	1109.57	-38.5183	-1060.08	1035.05	-55.182	-994.348	873.386	-6.41132	-984.173	794.203	-72.0499	-1016.26	787.624	-43.4078	-977.742	720.218
650	0	134.733	-910.279	1572.75	252.416	-902.492	1577.66	146.508	-1079.1	1536.06	254.102	-1069.41	1538.19	202.925	-1054.92	1434.81	206.78	-1124.57	1151.42	193.479	-931.161	1343.17	197.203	-861.454	1152.83	288.215	-1136.95	1229.89	18.2593	-997.544	1356.59	-41.841	-1035.81	1110.88	-39.822	-1046.46	1036.22	-56.1061	-978.223	875.466	-7.27485	-966.568	796.64	-72.7163	-998.79	789.301	-44.2445	-958.704	722.832
651	0	133.314	-899.644	1573.99	250.967	-891.739	1579.38	145.392	-1068.45	1537.37	252.966	-1058.66	1539.92	202.035	-1044.29	1436.35	205.671	-1114.18	1153.04	193.03	-920.614	1344.63	197.252	-851.182	1154.22	287.043	-1126.7	1231.51	17.654	-986.439	1357.98	-42.917	-1023.02	1112.25	-41.1315	-1032.87	1037.44	-56.9968	-962.012	877.688	-8.08497	-948.82	799.256	-73.3314	-981.16	791.119	-45.0253	-939.457	725.656
652	0	132.048	-889.068	1575.23	249.674	-881.047	1581.06	144.414	-1057.86	1538.66	251.97	-1047.96	1541.6	201.214	-1033.69	1437.87	204.541	-1103.9	1154.66	192.666	-910.13	1346.06	197.372	-841.023	1155.55	285.859	-1116.57	1233.11	17.1198	-975.341	1359.4	-43.9824	-1010.29	1113.66	-42.4475	-1019.3	1038.73	-57.8485	-945.73	880.039	-8.83236	-930.963	802.041	-73.8905	-963.395	793.072	-45.7387	-920.043	728.682
653	0	130.937	-878.544	1576.47	248.542	-870.413	1582.67	143.57	-1047.32	1539.91	251.112	-1037.31	1543.19	200.455	-1023.14	1439.36	203.389	-1093.74	1156.25	192.377	-899.704	1347.44	197.542	-830.965	1156.8	284.662	-1106.55	1234.69	16.6474	-964.246	1360.81	-45.0404	-997.613	1115.1	-43.7704	-1005.75	1040.04	-58.6563	-929.397	882.507	-9.5089	-913.027	804.984	-74.3894	-945.517	795.154	-46.3736	-900.5	731.901
654	0	129.982	-868.065	1577.69	247.571	-859.832	1584.21	142.855	-1036.83	1541.13	250.385	-1026.7	1544.69	199.751	-1012.61	1440.81	202.218	-1083.67	1157.81	192.151	-889.328	1348.75	197.744	-820.998	1157.98	283.454	-1096.62	1236.21	16.2276	-953.151	1362.22	-46.0944	-984.994	1116.56	-45.1011	-992.247	1041.38	-59.4161	-913.029	885.077	-10.1079	-895.041	808.074	-74.8236	-927.548	797.36	-46.9195	-880.87	735.301
655	0	129.181	-857.624	1578.88	246.759	-849.3	1585.65	142.262	-1026.37	1542.28	249.784	-1016.14	1546.07	199.095	-1002.11	1442.2	201.032	-1073.69	1159.32	191.978	-878.994	1349.98	197.956	-811.111	1159.06	282.236	-1086.76	1237.68	15.851	-942.054	1363.6	-47.1478	-972.431	1118.03	-46.4398	-978.78	1042.74	-60.1248	-896.643	887.736	-10.624	-877.032	811.301	-75.1888	-909.511	799.681	-47.3666	-861.187	738.87
656	0	128.53	-847.213	1580.02	246.102	-838.811	1586.98	141.782	-1015.93	1543.37	249.299	-1005.62	1547.34	198.479	-991.631	1443.51	199.836	-1063.78	1160.77	191.845	-868.695	1351.12	198.161	-801.292	1160.05	281.013	-1076.98	1239.09	15.5091	-930.952	1364.94	-48.2038	-959.922	1119.49	-47.7869	-965.356	1044.08	-60.7802	-880.255	890.47	-11.0535	-859.025	814.654	-75.4812	-891.426	802.109	-47.706	-841.489	742.595
657	0	128.022	-836.822	1581.11	245.593	-828.358	1588.2	141.407	-1005.52	1544.39	248.921	-995.123	1548.47	197.899	-981.165	1444.75	198.636	-1053.92	1162.14	191.743	-858.424	1352.16	198.341	-791.529	1160.93	279.791	-1067.24	1240.42	15.194	-919.846	1366.23	-49.2654	-947.464	1120.93	-49.1422	-951.978	1045.42	-61.3806	-863.88	893.262	-11.3937	-841.045	818.119	-75.6971	-873.314	804.631	-47.9301	-821.808	746.458
658	0	127.651	-826.444	1582.13	245.224	-817.934	1589.28	141.125	-995.128	1545.32	248.639	-984.653	1549.46	197.348	-970.708	1445.89	197.439	-1044.1	1163.42	191.662	-848.174	1353.08	198.484	-781.81	1161.7	278.574	-1057.55	1241.66	14.8989	-908.736	1367.46	-50.3349	-935.055	1122.33	-50.5051	-938.648	1046.72	-61.9252	-847.532	896.096	-11.6436	-823.113	821.681	-75.8336	-855.197	807.235	-48.0325	-802.175	750.441
659	0	127.405	-816.07	1583.07	244.986	-807.532	1590.23	140.925	-984.737	1546.15	248.442	-974.202	1550.3	196.823	-960.255	1446.92	196.253	-1034.31	1164.61	191.594	-837.937	1353.89	198.578	-772.125	1162.36	277.372	-1047.88	1242.8	14.6182	-897.622	1368.6	-51.4137	-922.687	1123.69	-51.8743	-925.367	1047.97	-62.4133	-831.226	898.956	-11.8031	-805.248	825.324	-75.8881	-837.094	809.905	-48.0086	-782.619	754.523
660	0	127.276	-805.692	1583.91	244.868	-797.145	1591.02	140.798	-974.344	1546.88	248.319	-963.764	1550.99	196.321	-949.802	1447.84	195.087	-1024.54	1165.69	191.532	-827.708	1354.57	198.619	-762.463	1162.88	276.191	-1038.21	1243.84	14.3477	-886.509	1369.66	-52.5021	-910.357	1124.99	-53.2481	-912.136	1049.16	-62.8449	-814.975	901.825	-11.8732	-787.469	829.031	-75.8588	-819.025	812.625	-47.8556	-763.164	758.683
661	0	127.252	-795.302	1584.65	244.858	-786.766	1591.66	140.732	-963.941	1547.5	248.26	-953.333	1551.52	195.84	-939.343	1448.63	193.95	-1014.78	1166.65	191.47	-817.481	1355.11	198.602	-752.814	1163.27	275.04	-1028.55	1244.76	14.0845	-875.397	1370.6	-53.5992	-898.056	1126.22	-54.6235	-898.953	1050.28	-63.2199	-798.791	904.683	-11.8558	-769.794	832.781	-75.7445	-801.01	815.377	-47.5726	-743.834	762.898
662	0	127.323	-784.894	1585.27	244.945	-776.386	1592.13	140.717	-953.522	1548	248.254	-942.903	1551.89	195.38	-928.874	1449.28	192.851	-1005.01	1167.49	191.406	-807.252	1355.51	198.528	-743.168	1163.51	273.928	-1018.86	1245.56	13.8271	-864.292	1371.43	-54.7025	-885.779	1127.35	-55.9969	-885.818	1051.31	-63.5384	-782.686	907.512	-11.7537	-752.237	836.554	-75.5452	-783.067	818.141	-47.161	-724.651	767.144
663	0	127.476	-774.461	1585.76	245.115	-765.999	1592.43	140.744	-943.081	1548.37	248.291	-932.469	1552.09	194.941	-918.393	1449.8	191.8	-995.239	1168.19	191.335	-797.014	1355.75	198.401	-733.518	1163.61	272.864	-1009.15	1246.22	13.5752	-853.197	1372.12	-55.8078	-873.517	1128.38	-57.3635	-872.73	1052.23	-63.8001	-766.67	910.295	-11.5698	-734.815	840.329	-75.2614	-765.214	820.897	-46.6236	-705.634	771.397
664	0	127.7	-763.996	1586.11	245.359	-755.599	1592.55	140.803	-932.611	1548.61	248.362	-922.025	1552.14	194.525	-907.896	1450.16	190.807	-985.451	1168.76	191.258	-786.764	1355.84	198.227	-723.856	1163.54	271.855	-999.404	1246.74	13.3297	-842.117	1372.67	-56.9093	-861.265	1129.29	-58.7176	-859.687	1053.04	-64.0046	-750.755	913.013	-11.3076	-717.539	844.083	-74.8949	-747.468	823.627	-45.9656	-686.798	775.633
665	0	127.985	-753.494	1586.31	245.664	-745.179	1592.5	140.888	-922.109	1548.71	248.459	-911.567	1552.01	194.133	-897.381	1450.37	189.879	-975.642	1169.17	191.175	-776.497	1355.77	198.014	-714.175	1163.32	270.909	-989.608	1247.12	13.0925	-831.055	1373.07	-57.9995	-849.019	1130.07	-60.0522	-846.689	1053.72	-64.1511	-734.95	915.648	-10.9707	-700.424	847.792	-74.448	-729.845	826.31	-45.1935	-668.161	779.829
666	0	128.32	-742.952	1586.35	246.02	-734.734	1592.27	140.993	-911.569	1548.67	248.577	-901.091	1551.73	193.77	-886.844	1450.42	189.026	-965.81	1169.44	191.087	-766.212	1355.54	197.772	-704.47	1162.93	270.035	-979.758	1247.35	12.8665	-820.017	1373.29	-59.0693	-836.773	1130.71	-61.3597	-833.734	1054.25	-64.2385	-719.263	918.184	-10.5625	-683.481	851.433	-73.9239	-712.362	828.929	-44.315	-649.734	783.961
667	0	128.698	-732.364	1586.23	246.418	-724.258	1591.86	141.112	-900.987	1548.48	248.71	-890.592	1551.29	193.439	-876.285	1450.31	188.255	-955.951	1169.55	190.996	-755.903	1355.14	197.511	-694.736	1162.37	269.239	-969.848	1247.42	12.6553	-809.007	1373.35	-60.1084	-824.528	1131.19	-62.6314	-820.825	1054.64	-64.2654	-703.706	920.603	-10.0864	-666.722	854.983	-73.3263	-695.032	831.463	-43.3392	-631.531	788.008
668	0	129.109	-721.728	1585.94	246.85	-713.746	1591.27	141.243	-890.361	1548.15	248.854	-880.067	1550.69	193.145	-865.701	1450.04	187.572	-946.062	1169.5	190.906	-745.569	1354.58	197.242	-684.967	1161.64	268.528	-959.874	1247.34	12.4633	-798.028	1373.23	-61.1057	-812.286	1131.5	-63.8578	-807.962	1054.87	-64.2301	-688.286	922.89	-9.54544	-650.158	858.418	-72.6598	-677.87	833.897	-42.2755	-613.564	791.948
669	0	129.548	-711.042	1585.48	247.309	-703.195	1590.5	141.383	-879.688	1547.66	249.008	-869.512	1549.93	192.893	-855.091	1449.61	186.983	-936.139	1169.3	190.821	-735.206	1353.85	196.975	-675.16	1160.74	267.907	-949.833	1247.1	12.2952	-787.084	1372.92	-62.0496	-800.05	1131.64	-65.0286	-795.149	1054.94	-64.131	-673.013	925.031	-8.94265	-633.8	861.715	-71.9291	-660.888	836.215	-41.1343	-595.842	795.76
670	0	130.008	-700.304	1584.84	247.791	-692.601	1589.56	141.532	-868.968	1547.03	249.17	-858.924	1549.03	192.689	-844.454	1449.01	186.491	-926.179	1168.93	190.746	-724.813	1352.95	196.722	-665.311	1159.68	267.383	-939.724	1246.69	12.1564	-776.177	1372.43	-62.9281	-787.828	1131.59	-66.133	-782.39	1054.84	-63.9663	-657.894	927.012	-8.28075	-617.657	864.852	-71.1393	-644.101	838.4	-39.9257	-578.376	799.424
671	0	130.487	-689.512	1584.03	248.29	-681.96	1588.46	141.691	-858.197	1546.25	249.341	-848.3	1547.98	192.537	-833.79	1448.25	186.1	-916.179	1168.4	190.686	-714.386	1351.9	196.49	-655.414	1158.46	266.959	-929.544	1246.13	12.0521	-765.309	1371.76	-63.7298	-775.63	1131.37	-67.1599	-769.691	1054.56	-63.7346	-642.941	928.82	-7.56243	-601.741	867.808	-70.2958	-627.521	840.438	-38.6601	-561.175	802.923
672	0	130.981	-678.666	1583.05	248.805	-671.27	1587.19	141.863	-847.377	1545.32	249.523	-837.638	1546.8	192.445	-823.098	1447.34	185.812	-906.134	1167.7	190.647	-703.923	1350.7	196.287	-645.466	1157.09	266.64	-919.293	1245.4	11.9882	-754.48	1370.91	-64.4436	-763.47	1130.95	-68.0981	-757.059	1054.11	-63.4347	-628.161	930.443	-6.79037	-586.061	870.562	-69.4037	-611.161	842.316	-37.3478	-544.25	806.236
673	0	131.489	-667.766	1581.9	249.335	-660.529	1585.78	142.051	-836.508	1544.26	249.72	-826.934	1545.5	192.419	-812.376	1446.28	185.629	-896.04	1166.85	190.635	-693.422	1349.35	196.121	-635.461	1155.58	266.43	-908.969	1244.52	11.9704	-743.692	1369.88	-65.0594	-751.361	1130.34	-68.9364	-744.502	1053.49	-63.0659	-613.565	931.872	-5.96739	-570.625	873.095	-68.4684	-595.034	844.021	-35.9987	-527.611	809.347
674	0	132.012	-656.813	1580.6	249.878	-649.735	1584.22	142.262	-825.589	1543.08	249.937	-816.187	1544.08	192.464	-801.624	1445.07	185.551	-885.893	1165.85	190.657	-682.88	1347.87	195.996	-625.395	1153.93	266.333	-898.573	1243.49	12.0044	-732.941	1368.69	-65.5678	-739.32	1129.55	-69.664	-732.027	1052.7	-62.6279	-599.163	933.096	-5.09652	-555.442	875.389	-67.4945	-579.155	845.538	-34.6227	-511.267	812.237
675	0	132.55	-645.807	1579.14	250.438	-638.886	1582.53	142.5	-814.622	1541.77	250.18	-805.393	1542.56	192.585	-790.842	1443.74	185.58	-875.686	1164.7	190.718	-672.294	1346.27	195.916	-615.261	1152.16	266.351	-888.102	1242.3	12.0959	-722.226	1367.35	-65.9606	-727.363	1128.59	-70.2706	-719.646	1051.74	-62.1212	-584.965	934.106	-4.1811	-540.522	877.429	-66.4866	-563.539	846.856	-33.2291	-495.228	814.89
676	0	133.108	-634.751	1577.56	251.017	-627.982	1580.73	142.774	-803.608	1540.35	250.456	-794.551	1540.94	192.789	-780.029	1442.28	185.716	-865.414	1163.41	190.826	-661.662	1344.55	195.883	-605.051	1150.29	266.486	-877.555	1240.98	12.2505	-711.542	1365.87	-66.2309	-715.507	1127.45	-70.7465	-707.367	1050.63	-61.5467	-570.982	934.897	-3.22484	-525.873	879.2	-65.449	-548.201	847.962	-31.8273	-479.508	817.286
677	0	133.687	-623.646	1575.85	251.618	-617.021	1578.84	143.092	-792.549	1538.84	250.774	-783.659	1539.25	193.081	-769.182	1440.71	185.959	-855.071	1161.99	190.986	-650.98	1342.74	195.899	-594.76	1148.33	266.738	-866.931	1239.53	12.4732	-700.883	1364.26	-66.3726	-703.767	1126.14	-71.0831	-695.201	1049.38	-60.9061	-557.226	935.46	-2.23181	-511.503	880.688	-64.3854	-533.16	848.845	-30.4262	-464.117	819.41
678	0	134.295	-612.495	1574.04	252.246	-606.003	1576.86	143.463	-781.447	1537.24	251.142	-772.715	1537.49	193.464	-758.302	1439.04	186.307	-844.648	1160.45	191.206	-640.245	1340.86	195.965	-584.378	1146.29	267.108	-856.226	1237.96	12.7689	-690.244	1362.55	-66.3811	-692.158	1124.7	-71.2728	-683.156	1047.98	-60.2018	-543.707	935.793	-1.20647	-497.42	881.883	-63.2991	-518.432	849.495	-29.0346	-449.069	821.245
679	0	134.936	-601.301	1572.14	252.907	-594.929	1574.81	143.895	-770.303	1535.59	251.57	-761.719	1535.69	193.943	-747.386	1437.3	186.759	-834.139	1158.8	191.49	-629.454	1338.91	196.081	-573.897	1144.21	267.594	-845.44	1236.27	13.1418	-679.614	1360.76	-66.2527	-680.69	1123.12	-71.3091	-671.242	1046.47	-59.4364	-530.439	935.892	-0.153575	-483.634	882.777	-62.1936	-504.038	849.903	-27.6609	-434.378	822.775
680	0	135.616	-590.066	1570.19	253.607	-583.798	1572.73	144.398	-759.12	1533.88	252.067	-750.668	1533.85	194.52	-736.432	1435.5	187.313	-823.536	1157.07	191.846	-618.601	1336.92	196.248	-563.307	1142.09	268.194	-834.568	1234.5	13.5955	-668.984	1358.9	-65.9852	-669.373	1121.43	-71.1871	-659.467	1044.86	-58.6135	-517.432	935.757	0.921901	-470.154	883.363	-61.0717	-489.997	850.06	-26.3133	-420.058	823.987
681	0	136.343	-578.794	1568.2	254.352	-572.612	1570.62	144.981	-747.9	1532.15	252.642	-739.564	1532	195.196	-725.439	1433.65	187.964	-812.831	1155.26	192.277	-607.685	1334.92	196.466	-552.599	1139.96	268.902	-823.609	1232.65	14.1328	-658.344	1357.01	-65.5773	-658.211	1119.66	-70.9036	-647.836	1043.17	-57.7369	-504.7	935.388	2.01487	-456.99	883.637	-59.9364	-476.332	849.961	-24.9991	-406.127	824.867
682	0	137.124	-567.489	1566.2	255.149	-561.373	1568.52	145.652	-736.646	1530.4	253.305	-728.405	1530.16	195.972	-714.404	1431.78	188.707	-802.016	1153.41	192.789	-596.701	1332.92	196.738	-541.763	1137.85	269.716	-812.56	1230.74	14.756	-647.682	1355.11	-65.0291	-647.207	1117.82	-70.4569	-636.356	1041.41	-56.8105	-492.255	934.789	3.12026	-444.153	883.598	-58.7903	-463.064	849.603	-23.7252	-392.6	825.405
683	0	137.967	-556.153	1564.21	256.007	-550.081	1566.44	146.42	-725.359	1528.67	254.063	-717.192	1528.34	196.847	-703.325	1429.91	189.537	-791.086	1151.52	193.384	-585.645	1330.95	197.064	-530.791	1135.79	270.627	-801.417	1228.79	15.466	-636.984	1353.23	-64.3416	-636.357	1115.94	-69.8473	-625.029	1039.62	-55.8387	-480.107	933.965	4.23317	-431.653	883.245	-57.6362	-450.214	848.984	-22.4976	-379.496	825.59
684	0	138.878	-544.791	1562.27	256.931	-538.741	1564.41	147.29	-714.043	1526.98	254.924	-705.926	1526.55	197.82	-692.201	1428.06	190.446	-780.033	1149.62	194.066	-574.514	1329.04	197.449	-519.673	1133.8	271.627	-790.179	1226.83	16.263	-626.238	1351.39	-63.5171	-625.655	1114.05	-69.0767	-613.855	1037.81	-54.8261	-468.268	932.924	5.34892	-419.504	882.582	-56.4769	-437.804	848.107	-21.3214	-366.834	825.418
685	0	139.864	-533.405	1560.4	257.928	-527.354	1562.46	148.267	-702.699	1525.34	255.892	-694.61	1524.83	198.886	-681.03	1426.25	191.426	-768.855	1147.74	194.835	-563.306	1327.2	197.895	-508.403	1131.9	272.709	-778.843	1224.87	17.1462	-615.43	1349.62	-62.5593	-615.091	1112.19	-68.1489	-602.836	1036.02	-53.777	-456.747	931.675	6.46319	-407.718	881.614	-55.3154	-425.854	846.974	-20.2003	-354.633	824.882
686	0	140.933	-522	1558.62	259.006	-515.927	1560.6	149.355	-691.33	1523.77	256.972	-683.246	1523.18	200.042	-669.81	1424.51	192.466	-757.548	1145.89	195.692	-552.019	1325.46	198.406	-496.975	1130.14	273.862	-767.409	1222.95	18.1133	-604.55	1347.94	-61.473	-604.649	1110.38	-67.0696	-591.965	1034.28	-52.6959	-445.554	930.23	7.57209	-396.309	880.348	-54.1548	-414.385	845.594	-19.1371	-342.913	823.981
687	0	142.089	-510.579	1556.97	260.169	-504.463	1558.86	150.556	-679.939	1522.3	258.165	-671.838	1521.62	201.28	-658.542	1422.86	193.558	-746.111	1144.11	196.636	-540.653	1323.85	198.988	-485.386	1128.52	275.075	-755.878	1221.07	19.1612	-593.586	1346.39	-60.2646	-594.312	1108.64	-65.8461	-581.239	1032.6	-51.5871	-434.696	928.605	8.67215	-385.291	878.793	-52.9989	-403.413	843.979	-18.133	-331.694	822.717
688	0	143.337	-499.145	1555.47	261.423	-492.969	1557.26	151.867	-668.528	1520.94	259.471	-660.389	1520.16	202.594	-647.225	1421.31	194.69	-734.547	1142.42	197.663	-529.208	1322.38	199.643	-473.635	1127.07	276.337	-744.249	1219.28	20.2851	-582.528	1344.99	-58.9417	-584.058	1107.01	-64.4871	-570.648	1031.01	-50.4549	-424.177	926.815	9.76036	-374.677	876.962	-51.8519	-392.954	842.141	-17.1884	-320.995	821.094
689	0	144.68	-487.702	1554.15	262.77	-481.451	1555.81	153.286	-657.101	1519.72	260.887	-648.906	1518.83	203.975	-635.861	1419.89	195.851	-722.859	1140.84	198.77	-517.687	1321.08	200.374	-461.726	1125.83	277.636	-732.527	1217.58	21.4791	-571.37	1343.76	-57.5134	-573.863	1105.52	-63.0025	-560.183	1029.55	-49.3032	-414.001	924.878	10.8341	-364.482	874.869	-50.7188	-383.018	840.1	-16.3021	-310.835	819.119
690	0	146.12	-476.253	1553.01	264.213	-469.917	1554.54	154.808	-645.66	1518.65	262.408	-637.396	1517.62	205.414	-624.453	1418.62	197.031	-711.054	1139.4	199.951	-506.093	1319.96	201.183	-449.663	1124.8	278.96	-720.716	1216	22.7361	-560.107	1342.71	-55.9899	-563.7	1104.2	-61.4036	-549.832	1028.23	-48.136	-404.169	922.816	11.8911	-354.718	872.531	-49.6049	-373.614	837.876	-15.4721	-301.233	816.804
691	0	147.657	-464.803	1552.1	265.752	-458.375	1553.46	156.424	-634.21	1517.74	264.026	-625.865	1516.57	206.901	-613.004	1417.52	198.218	-699.141	1138.11	201.198	-494.432	1319.04	202.069	-437.46	1124	280.297	-708.823	1214.56	24.0478	-548.738	1341.87	-54.3826	-553.542	1103.05	-59.7025	-539.581	1027.08	-46.9568	-394.68	920.649	12.9294	-345.397	869.967	-48.5168	-364.745	835.495	-14.6953	-292.205	814.163
692	0	149.29	-453.354	1551.4	267.387	-446.834	1552.58	158.125	-622.753	1517.01	265.731	-614.323	1515.66	208.424	-601.52	1416.59	199.404	-687.131	1137	202.503	-482.712	1318.34	203.031	-425.129	1123.44	281.636	-696.857	1213.29	25.4046	-537.266	1341.24	-52.7038	-543.361	1102.11	-57.9124	-529.415	1026.11	-45.7693	-385.528	918.402	13.947	-336.528	867.2	-47.4615	-356.409	832.983	-13.9681	-283.766	811.216
693	0	151.015	-441.911	1550.95	269.115	-435.305	1551.91	159.899	-611.295	1516.48	267.511	-602.779	1514.92	209.971	-590.006	1415.86	200.58	-675.039	1136.08	203.854	-470.943	1317.85	204.063	-412.69	1123.13	282.965	-684.829	1212.19	26.7963	-525.697	1340.84	-50.9665	-533.128	1101.39	-56.0469	-519.32	1025.34	-44.577	-376.706	916.099	14.942	-328.12	864.253	-46.4469	-348.6	830.372	-13.2863	-275.926	807.984
694	0	152.828	-430.479	1550.75	270.93	-423.796	1551.45	161.733	-599.84	1516.13	269.353	-591.243	1514.34	211.533	-578.471	1415.33	201.737	-662.88	1135.37	205.241	-459.135	1317.58	205.157	-400.167	1123.08	284.275	-672.752	1211.29	28.2116	-514.04	1340.68	-49.1841	-522.817	1100.9	-54.1205	-509.281	1024.8	-43.3834	-368.206	913.767	15.9124	-320.176	861.154	-45.4816	-341.306	827.694	-12.6454	-268.695	804.493
695	0	154.721	-419.062	1550.8	272.825	-412.319	1551.21	163.611	-588.395	1516	271.24	-579.726	1513.94	213.096	-566.923	1415.01	202.871	-650.671	1134.87	206.65	-447.303	1317.55	206.304	-387.587	1123.28	285.558	-660.641	1210.59	29.6391	-502.309	1340.75	-47.3706	-512.404	1100.65	-52.1481	-499.284	1024.47	-42.1924	-360.014	911.431	16.8558	-312.699	857.932	-44.575	-334.507	824.986	-12.0412	-262.075	800.774
696	0	156.684	-407.667	1551.09	274.793	-400.884	1551.19	165.518	-576.966	1516.06	273.158	-568.24	1513.71	214.65	-555.373	1414.9	203.977	-638.431	1134.6	208.069	-435.46	1317.74	207.49	-374.979	1123.72	286.804	-648.511	1210.1	31.0669	-490.521	1341.06	-45.5397	-501.868	1100.65	-50.145	-489.317	1024.38	-41.0081	-352.115	909.119	17.7694	-305.685	854.618	-43.7372	-328.179	822.284	-11.4696	-256.065	796.861
697	0	158.707	-396.298	1551.64	276.82	-389.502	1551.37	167.436	-565.559	1516.34	275.087	-556.795	1513.66	216.185	-543.83	1415	205.052	-626.181	1134.56	209.482	-423.622	1318.15	208.7	-362.376	1124.39	288.01	-636.38	1209.82	32.4829	-478.696	1341.59	-43.7053	-491.196	1100.88	-48.1269	-479.368	1024.52	-39.8352	-344.492	906.859	18.6498	-299.129	851.246	-42.9786	-322.291	819.625	-10.9275	-250.657	792.791
698	0	160.777	-384.963	1552.42	278.896	-378.182	1551.76	169.35	-554.181	1516.81	277.011	-545.402	1513.79	217.69	-532.305	1415.32	206.095	-613.941	1134.74	210.878	-411.805	1318.78	209.917	-349.809	1125.29	289.171	-624.264	1209.77	33.8755	-466.858	1342.35	-41.8807	-480.377	1101.34	-46.1094	-469.432	1024.9	-38.6791	-337.125	904.676	19.4928	-293.019	847.85	-42.3102	-316.807	817.05	-10.4127	-245.839	788.605
699	0	162.879	-373.667	1553.43	281.005	-366.933	1552.34	171.242	-542.841	1517.49	278.913	-534.073	1514.08	219.157	-520.81	1415.84	207.106	-601.731	1135.15	212.24	-400.025	1319.61	211.122	-337.312	1126.38	290.286	-612.182	1209.93	35.2333	-455.031	1343.32	-40.0791	-469.412	1102.03	-44.1085	-459.505	1025.5	-37.5457	-329.994	902.597	20.2936	-287.338	844.469	-41.7427	-311.684	814.596	-9.92433	-241.59	784.348
700	0	164.997	-362.418	1554.65	283.131	-355.764	1553.11	173.096	-531.546	1518.35	280.776	-522.816	1514.54	220.578	-509.357	1416.56	208.088	-589.573	1135.78	213.557	-388.299	1320.64	212.295	-324.914	1127.66	291.353	-600.15	1210.31	36.5459	-443.241	1344.49	-38.3129	-458.308	1102.93	-42.1398	-449.586	1026.32	-36.442	-323.075	900.648	21.0463	-282.064	841.138	-41.2868	-306.878	812.299	-9.46344	-237.88	780.066
701	0	167.114	-351.222	1556.07	285.256	-344.68	1554.04	174.898	-520.303	1519.4	282.583	-511.639	1515.16	221.947	-497.955	1417.48	209.044	-577.486	1136.62	214.816	-376.641	1321.84	213.414	-312.645	1129.09	292.375	-588.185	1210.89	37.8034	-431.516	1345.84	-36.5941	-447.083	1104.01	-40.2185	-439.68	1027.35	-35.3758	-316.346	898.852	21.7441	-277.171	837.897	-40.9522	-302.338	810.196	-9.03306	-234.674	775.808
702	0	169.213	-340.087	1557.66	287.363	-333.689	1555.14	176.633	-509.119	1520.61	284.321	-500.55	1515.92	223.258	-486.614	1418.57	209.977	-565.49	1137.65	216.006	-365.067	1323.2	214.458	-300.53	1130.66	293.355	-576.301	1211.67	38.9973	-419.879	1347.36	-34.9343	-435.764	1105.27	-38.3597	-429.796	1028.56	-34.3559	-309.784	897.231	22.3795	-272.627	834.781	-40.7479	-298.014	808.317	-8.63856	-231.929	771.625
703	0	171.274	-329.018	1559.41	289.433	-322.793	1556.38	178.29	-498.002	1521.97	285.978	-489.553	1516.84	224.508	-475.344	1419.82	210.893	-553.603	1138.86	217.116	-353.589	1324.71	215.409	-288.589	1132.34	294.297	-564.512	1212.63	40.1204	-408.357	1349.02	-33.3443	-424.389	1106.67	-36.5774	-419.948	1029.96	-33.3919	-303.367	895.805	22.9438	-268.394	831.828	-40.6813	-293.854	806.691	-8.28771	-229.594	767.566
704	0	173.28	-318.021	1561.29	291.448	-311.994	1557.74	179.857	-486.958	1523.47	287.541	-478.652	1517.88	225.693	-464.153	1421.22	211.795	-541.84	1140.23	218.14	-342.217	1326.33	216.248	-276.838	1134.11	295.208	-552.83	1213.76	41.167	-396.972	1350.81	-31.8347	-413.002	1108.2	-34.8851	-410.152	1031.51	-32.4943	-297.071	894.59	23.4279	-264.432	829.071	-40.7581	-289.808	805.341	-7.99079	-227.611	763.681
705	0	175.213	-307.102	1563.28	293.389	-301.292	1559.22	181.326	-475.991	1525.09	289.003	-467.848	1519.05	226.814	-453.046	1422.75	212.69	-530.215	1141.76	219.07	-330.962	1328.07	216.958	-265.29	1135.94	296.094	-541.265	1215.05	42.1329	-385.741	1352.7	-30.4157	-401.656	1109.84	-33.2949	-400.429	1033.2	-31.6744	-290.878	893.599	23.8216	-260.695	826.543	-40.9824	-285.828	804.286	-7.76037	-225.918	760.019
706	0	177.057	-296.264	1565.37	295.239	-290.686	1560.8	182.691	-465.107	1526.81	290.358	-457.142	1520.32	227.868	-442.029	1424.4	213.58	-518.739	1143.4	219.904	-319.829	1329.89	217.528	-253.95	1137.83	296.962	-529.824	1216.48	43.0156	-374.682	1354.69	-29.0969	-390.411	1111.57	-31.8179	-390.803	1035.01	-30.9443	-284.77	892.844	24.1144	-257.136	824.273	-41.3561	-281.87	803.539	-7.61116	-224.446	756.626
707	0	178.795	-285.51	1567.52	296.982	-280.173	1562.46	183.947	-454.308	1528.61	291.599	-446.531	1521.7	228.858	-431.105	1426.14	214.471	-507.418	1145.16	220.64	-308.823	1331.77	217.95	-242.821	1139.75	297.82	-518.513	1218.04	43.8142	-363.806	1356.74	-27.8869	-379.326	1113.37	-30.4637	-381.3	1036.92	-30.3168	-278.731	892.33	24.2951	-253.705	822.283	-41.8789	-277.896	803.105	-7.55956	-223.122	753.541
708	0	180.414	-274.843	1569.72	298.604	-269.748	1564.19	185.09	-443.597	1530.47	292.725	-436.011	1523.16	229.783	-420.276	1427.96	215.363	-496.258	1147	221.277	-297.945	1333.71	218.22	-231.899	1141.68	298.674	-507.334	1219.7	44.5297	-353.12	1358.84	-26.7937	-368.464	1115.22	-29.2401	-371.946	1038.91	-29.8047	-272.748	892.06	24.3525	-250.35	820.595	-42.5487	-273.875	802.984	-7.6232	-221.875	750.801
709	0	181.901	-264.264	1571.94	300.092	-259.405	1565.98	186.12	-432.974	1532.38	293.735	-425.579	1524.69	230.647	-409.542	1429.84	216.259	-485.258	1148.9	221.818	-287.195	1335.68	218.338	-221.179	1143.62	299.532	-496.289	1221.46	45.1642	-342.629	1360.97	-25.8239	-357.883	1117.12	-28.1533	-362.767	1040.96	-29.4213	-266.812	892.033	24.2754	-247.019	819.223	-43.3612	-269.781	803.171	-7.82037	-220.627	748.435
710	0	183.246	-253.771	1574.16	301.436	-249.138	1567.8	187.036	-422.439	1534.31	294.629	-415.228	1526.28	231.451	-398.903	1431.76	217.16	-474.417	1150.85	222.266	-276.571	1337.66	218.312	-210.65	1145.55	300.397	-485.374	1223.29	45.7216	-332.33	1363.12	-24.9825	-347.636	1119.04	-27.2072	-353.789	1043.06	-29.1794	-260.915	892.242	24.0528	-243.661	818.173	-44.3103	-265.597	803.651	-8.16932	-219.307	746.464
711	0	184.44	-243.363	1576.36	302.628	-238.939	1569.65	187.84	-411.991	1536.25	295.409	-404.951	1527.91	232.199	-388.355	1433.7	218.065	-463.73	1152.82	222.628	-266.067	1339.64	218.151	-200.3	1147.46	301.275	-474.587	1225.17	46.2064	-322.22	1365.26	-24.2725	-337.767	1120.99	-26.4037	-345.034	1045.19	-29.0911	-255.053	892.677	23.6748	-240.228	817.447	-45.3882	-261.311	804.404	-8.68752	-217.843	744.902
712	0	185.479	-233.037	1578.53	303.663	-228.8	1571.51	188.533	-401.625	1538.17	296.078	-394.742	1529.58	232.893	-377.896	1435.64	218.971	-453.189	1154.79	222.91	-255.677	1341.6	217.872	-190.113	1149.35	302.168	-463.921	1227.08	46.6244	-312.29	1367.38	-23.6949	-328.31	1122.95	-25.7427	-336.519	1047.34	-29.1673	-249.223	893.323	23.1322	-236.672	817.041	-46.5854	-256.922	805.406	-9.39082	-216.168	743.753
713	0	186.359	-222.789	1580.64	304.537	-218.712	1573.37	189.121	-391.338	1540.06	296.641	-384.593	1531.26	233.536	-367.521	1437.56	219.878	-442.785	1156.74	223.12	-245.392	1343.53	217.493	-180.072	1151.2	303.077	-453.369	1229	46.9816	-302.528	1369.45	-23.2482	-319.287	1124.9	-25.2217	-328.26	1049.48	-29.417	-243.425	894.161	22.4176	-232.952	816.94	-47.891	-252.43	806.625	-10.2928	-214.223	743.009
714	0	187.079	-212.613	1582.67	305.249	-208.669	1575.2	189.605	-381.125	1541.9	297.102	-374.495	1532.93	234.131	-357.223	1439.45	220.781	-432.506	1158.66	223.266	-235.205	1345.4	217.034	-170.16	1153.01	304	-442.921	1230.91	47.2845	-292.919	1371.48	-22.9281	-310.706	1126.85	-24.8365	-320.262	1051.6	-29.8468	-237.657	895.168	21.5255	-229.03	817.126	-49.2926	-247.843	808.025	-11.4037	-211.954	742.658
715	0	187.64	-202.502	1584.61	305.803	-198.66	1577	189.991	-370.98	1543.67	297.466	-364.44	1534.59	234.679	-346.995	1441.28	221.675	-422.342	1160.51	223.357	-225.104	1347.21	216.519	-160.357	1154.76	304.935	-432.567	1232.79	47.5394	-283.447	1373.42	-22.728	-302.561	1128.78	-24.5806	-312.527	1053.68	-30.4605	-231.92	896.317	20.453	-224.875	817.572	-50.7766	-243.172	809.567	-12.7304	-209.317	742.675
716	0	188.046	-192.451	1586.43	306.201	-188.679	1578.75	190.284	-360.896	1545.35	297.738	-354.42	1536.21	235.182	-336.831	1443.03	222.557	-412.28	1162.28	223.4	-215.078	1348.94	215.971	-150.647	1156.44	305.878	-422.297	1234.62	47.7522	-274.093	1375.27	-22.6386	-294.834	1130.67	-24.4461	-305.05	1055.72	-31.2583	-226.215	897.579	19.1999	-220.461	818.247	-52.3283	-238.43	811.208	-14.2749	-206.279	743.027
717	0	188.302	-182.451	1588.13	306.45	-178.717	1580.42	190.488	-350.864	1546.93	297.923	-344.428	1537.78	235.641	-326.721	1444.69	223.42	-402.308	1163.96	223.404	-205.116	1350.56	215.411	-141.01	1158.05	306.822	-412.1	1236.38	47.9284	-264.836	1377.01	-22.6487	-287.492	1132.52	-24.4236	-297.816	1057.68	-32.2367	-220.54	898.922	17.7697	-215.77	819.113	-53.9319	-233.629	812.904	-16.0351	-202.815	743.676
718	0	188.415	-172.494	1589.69	306.556	-168.767	1582.01	190.607	-340.877	1548.39	298.028	-334.455	1539.27	236.057	-316.658	1446.24	224.259	-392.415	1165.52	223.376	-195.207	1352.07	214.861	-131.431	1159.56	307.759	-401.966	1238.04	48.0724	-255.655	1378.62	-22.7456	-280.494	1134.31	-24.5023	-290.808	1059.57	-33.3881	-214.892	900.313	16.1691	-210.789	820.129	-55.5708	-228.782	814.611	-18.0035	-198.912	744.576
719	0	188.394	-162.57	1591.1	306.529	-158.823	1583.5	190.648	-330.925	1549.71	298.057	-324.494	1540.68	236.429	-306.632	1447.67	225.068	-382.59	1166.96	223.321	-185.338	1353.46	214.338	-121.893	1160.96	308.681	-391.884	1239.6	48.1878	-246.529	1380.09	-22.9153	-273.788	1136.01	-24.6704	-284	1061.35	-34.701	-209.266	901.716	14.4088	-205.513	821.254	-57.2278	-223.9	816.286	-20.1679	-194.567	745.678
720	0	188.247	-152.672	1592.34	306.378	-148.878	1584.86	190.614	-321	1550.88	298.014	-314.537	1541.97	236.756	-296.633	1448.95	225.842	-372.823	1168.25	223.244	-175.498	1354.69	213.857	-112.382	1162.23	309.579	-381.846	1241.03	48.2775	-237.437	1381.39	-23.1437	-267.315	1137.62	-24.9154	-277.361	1063.01	-36.1601	-203.655	903.097	12.5032	-199.941	822.441	-58.8852	-218.989	817.887	-22.5115	-189.787	746.929
721	0	187.985	-142.789	1593.4	306.113	-138.926	1586.1	190.509	-311.093	1551.89	297.905	-304.578	1543.15	237.037	-286.653	1450.08	226.575	-363.105	1169.39	223.149	-165.677	1355.78	213.429	-102.885	1163.35	310.442	-371.843	1242.31	48.3428	-228.358	1382.52	-23.4167	-261.014	1139.12	-25.2244	-270.856	1064.54	-37.7464	-198.048	904.422	10.4703	-194.079	823.647	-60.5253	-214.051	819.376	-25.0129	-184.589	748.275
722	0	187.618	-132.912	1594.28	305.746	-128.962	1587.18	190.336	-301.194	1552.73	297.732	-294.61	1544.17	237.269	-276.682	1451.05	227.261	-353.429	1170.36	223.037	-155.863	1356.69	213.06	-93.3925	1164.31	311.261	-361.866	1243.44	48.3845	-219.272	1383.46	-23.7211	-254.82	1140.47	-25.584	-264.449	1065.92	-39.4384	-192.434	905.657	8.33112	-187.937	824.826	-62.1308	-209.085	820.718	-27.6469	-178.996	749.662
723	0	187.155	-123.034	1594.96	305.285	-118.979	1588.1	190.1	-291.294	1553.38	297.499	-284.628	1545.05	237.45	-266.711	1451.84	227.896	-343.786	1171.16	222.908	-146.046	1357.42	212.754	-83.893	1165.09	312.026	-351.91	1244.4	48.4018	-210.16	1384.19	-24.0451	-248.668	1141.68	-25.9814	-258.099	1067.13	-41.2119	-186.797	906.773	6.10954	-181.527	825.939	-63.6854	-204.085	821.884	-30.385	-173.038	751.037
724	0	186.607	-113.144	1595.44	304.742	-108.973	1588.84	189.802	-281.385	1553.84	297.208	-274.624	1545.75	237.576	-256.73	1452.45	228.475	-334.172	1171.79	222.762	-136.218	1357.96	212.507	-74.3786	1165.68	312.727	-341.967	1245.19	48.3932	-201.006	1384.71	-24.378	-242.497	1142.71	-26.4038	-251.765	1068.16	-43.0415	-181.118	907.74	3.83128	-174.867	826.946	-65.1737	-199.039	822.848	-33.1962	-166.75	752.352
725	0	185.983	-103.235	1595.72	304.124	-98.9401	1589.4	189.443	-271.458	1554.11	296.86	-264.595	1546.27	237.645	-246.732	1452.86	228.992	-324.578	1172.23	222.596	-126.369	1358.3	212.316	-64.8418	1166.06	313.355	-332.031	1245.8	48.3562	-191.793	1385.02	-24.7115	-236.246	1143.56	-26.8395	-245.405	1069	-44.901	-175.38	908.534	1.52334	-167.973	827.812	-66.5826	-193.93	823.591	-36.0473	-160.168	753.559
726	0	185.29	-93.2979	1595.78	303.44	-88.875	1589.76	189.025	-261.506	1554.17	296.457	-254.535	1546.6	237.652	-236.709	1453.08	229.444	-315	1172.49	222.407	-116.492	1358.44	212.172	-55.2763	1166.22	313.903	-322.098	1246.22	48.2871	-182.509	1385.1	-25.0388	-229.864	1144.21	-27.2776	-238.981	1069.64	-46.7642	-169.559	909.133	-0.786659	-160.865	828.506	-67.901	-188.74	824.098	-38.9044	-153.331	754.617
727	0	184.535	-83.3265	1595.64	302.697	-78.774	1589.92	188.548	-251.522	1554.03	295.998	-244.44	1546.74	237.592	-226.655	1453.1	229.826	-305.43	1172.57	222.19	-106.58	1358.38	212.062	-45.6761	1166.16	314.362	-312.161	1246.45	48.1815	-173.142	1384.96	-25.3554	-223.302	1144.65	-27.7087	-232.454	1070.07	-48.6059	-163.632	909.519	-3.07113	-153.56	829.002	-69.1204	-183.445	824.359	-41.7328	-146.275	755.489
728	0	183.724	-73.3137	1595.29	301.899	-68.6339	1589.88	188.01	-241.498	1553.7	295.482	-234.307	1546.67	237.461	-216.562	1452.93	230.133	-295.861	1172.46	221.94	-96.6257	1358.1	211.974	-36.0359	1165.87	314.726	-302.215	1246.49	48.0341	-163.683	1384.59	-25.6588	-216.52	1144.86	-28.1252	-225.788	1070.27	-50.4022	-157.578	909.677	-5.30315	-146.077	829.278	-70.2351	-178.02	824.37	-44.4986	-139.037	756.143
729	0	182.86	-63.2535	1594.74	301.051	-58.4514	1589.62	187.411	-231.429	1553.16	294.906	-224.131	1546.41	237.255	-206.426	1452.55	230.361	-286.284	1172.18	221.65	-86.6241	1357.62	211.893	-26.3502	1165.36	314.989	-292.254	1246.35	47.8391	-154.124	1384	-25.9484	-209.485	1144.84	-28.5212	-218.95	1070.25	-52.1316	-151.37	909.597	-7.45708	-138.433	829.316	-71.2424	-172.438	824.129	-47.1688	-131.648	756.553
730	0	181.947	-53.1407	1593.99	300.156	-48.2243	1589.16	186.746	-221.31	1552.43	294.269	-213.911	1545.94	236.968	-196.242	1451.99	230.506	-276.691	1171.71	221.315	-76.5701	1356.93	211.803	-16.6139	1164.62	315.146	-282.274	1246.01	47.5897	-144.461	1383.19	-26.2255	-202.168	1144.59	-28.8929	-211.91	1070	-53.7751	-144.987	909.271	-9.50911	-130.644	829.105	-72.1422	-166.671	823.639	-49.7124	-124.135	756.697
731	0	180.986	-42.9707	1593.04	299.214	-37.9504	1588.5	186.014	-211.137	1551.51	293.566	-203.645	1545.27	236.595	-186.007	1451.23	230.561	-267.07	1171.06	220.926	-66.4594	1356.05	211.687	-6.82148	1163.66	315.192	-272.267	1245.5	47.2789	-134.689	1382.17	-26.4932	-194.552	1144.11	-29.2388	-204.642	1069.52	-55.3171	-138.405	908.696	-11.4378	-122.723	828.635	-72.9373	-160.694	822.905	-52.1003	-116.52	756.56
732	0	179.976	-32.74	1591.91	298.226	-27.6286	1587.63	185.21	-200.906	1550.41	292.792	-193.331	1544.41	236.131	-175.719	1450.29	230.524	-257.408	1170.25	220.476	-56.2883	1354.97	211.531	3.03274	1162.5	315.124	-262.229	1244.8	46.8989	-124.808	1380.96	-26.7561	-186.622	1143.39	-29.5593	-197.125	1068.81	-56.7449	-131.602	907.872	-13.2244	-114.681	827.902	-73.6326	-154.481	821.936	-54.3069	-108.818	756.131
733	0	178.916	-22.4458	1590.6	297.188	-17.2582	1586.58	184.328	-190.615	1549.15	291.943	-182.968	1543.37	235.57	-165.374	1449.18	230.389	-247.691	1169.26	219.957	-46.0536	1353.72	211.318	12.9547	1161.15	314.938	-252.152	1243.93	46.4421	-114.816	1379.56	-27.0204	-178.372	1142.43	-29.8573	-189.34	1067.88	-58.0495	-124.561	906.802	-14.8534	-106.526	826.907	-74.2353	-148.007	820.74	-56.3097	-101.042	755.405
734	0	177.803	-12.0863	1589.14	296.099	-6.83908	1585.34	183.364	-180.261	1547.74	291.013	-172.557	1542.16	234.908	-154.972	1447.9	230.153	-237.907	1168.12	219.363	-35.7527	1352.3	211.037	22.9505	1159.62	314.633	-242.032	1242.9	45.9005	-104.713	1377.98	-27.2938	-169.799	1141.25	-30.1376	-181.274	1066.73	-59.2256	-117.262	905.491	-16.3127	-98.2662	825.653	-74.7539	-141.253	819.329	-58.0904	-93.1945	754.381
735	0	176.634	-1.66046	1587.53	294.955	3.62805	1583.94	182.312	-169.844	1546.18	289.995	-162.096	1540.79	234.139	-144.512	1446.48	229.812	-228.04	1166.83	218.684	-25.3834	1350.73	210.676	33.0266	1157.93	314.206	-231.86	1241.72	45.2664	-94.5031	1376.24	-27.5848	-160.907	1139.86	-30.4066	-172.915	1065.37	-60.2709	-109.691	903.949	-17.594	-89.9035	824.148	-75.1981	-134.2	817.716	-59.6351	-85.2749	753.064
736	0	175.404	8.83194	1585.8	293.75	14.142	1582.39	181.166	-159.363	1544.5	288.884	-151.588	1539.28	233.259	-133.995	1444.93	229.362	-218.076	1165.4	217.915	-14.9441	1349.03	210.225	43.1896	1156.1	313.658	-221.633	1240.4	44.5322	-84.1872	1374.36	-27.9033	-151.703	1138.25	-30.6724	-164.258	1063.81	-61.1865	-101.836	902.187	-18.6924	-81.4386	822.404	-75.5782	-126.833	815.914	-60.935	-77.2772	751.461
737	0	174.107	19.3902	1583.96	292.479	24.7008	1580.72	179.919	-148.818	1542.72	287.672	-141.032	1537.65	232.263	-123.42	1443.26	228.803	-208.001	1163.84	217.049	-4.43345	1347.22	209.679	53.446	1154.15	312.986	-211.342	1238.95	43.6914	-73.7688	1372.35	-28.2594	-142.196	1136.44	-30.9443	-155.3	1062.06	-61.9766	-93.6873	900.221	-19.6069	-72.8696	820.434	-75.9045	-119.142	813.936	-61.9859	-69.1907	749.588
738	0	172.738	30.0127	1582.04	291.137	35.3023	1578.94	178.566	-138.21	1540.86	286.354	-130.431	1535.92	231.147	-112.788	1441.49	228.132	-197.804	1162.17	216.081	6.14949	1345.31	209.031	63.8025	1152.1	312.192	-200.984	1237.4	42.738	-63.2515	1370.24	-28.6638	-132.4	1134.46	-31.232	-146.041	1060.14	-62.6476	-85.2384	898.066	-20.3401	-64.1916	818.257	-76.1871	-111.118	811.801	-62.7888	-61.001	747.462
739	0	171.29	40.6974	1580.06	289.717	45.9437	1577.07	177.102	-127.541	1538.93	284.924	-119.787	1534.1	229.91	-102.1	1439.66	227.35	-187.474	1160.41	215.004	16.8052	1343.34	208.281	74.2652	1149.98	311.278	-190.552	1235.76	41.6671	-52.6391	1368.03	-29.1267	-122.329	1132.31	-31.5456	-136.486	1058.06	-63.2082	-76.485	895.743	-20.898	-55.3976	815.896	-76.4357	-102.758	809.524	-63.3497	-52.6907	745.106
740	0	169.758	51.4411	1578.05	288.213	56.6218	1575.16	175.521	-116.813	1536.95	283.376	-109.101	1532.23	228.547	-91.3573	1437.77	226.457	-177.002	1158.57	213.816	27.5337	1341.33	207.426	84.84	1147.82	310.245	-180.041	1234.05	40.4752	-41.936	1365.76	-29.658	-112	1130.01	-31.8952	-126.638	1055.84	-63.6689	-67.4255	893.276	-21.2894	-46.4783	813.375	-76.6587	-94.059	807.124	-63.6791	-44.24	742.547
741	0	168.134	62.2402	1576.03	286.618	67.3332	1573.23	173.819	-106.028	1534.97	281.705	-98.3757	1530.33	227.06	-80.5609	1435.86	225.456	-166.381	1156.68	212.514	38.3346	1339.31	206.47	95.5322	1145.64	309.097	-169.448	1232.31	39.1605	-31.1465	1363.44	-30.2664	-101.428	1127.61	-32.2898	-116.508	1053.52	-64.0414	-58.0602	890.69	-21.5262	-37.4223	810.724	-76.8641	-85.0219	804.624	-63.7922	-35.6278	739.816
742	0	166.414	73.0904	1574.04	284.926	78.0744	1571.31	171.993	-95.1888	1532.98	279.909	-87.6135	1528.42	225.448	-69.7128	1433.95	224.349	-155.608	1154.77	211.098	49.207	1337.3	205.413	106.346	1143.48	307.839	-158.769	1230.55	37.7226	-20.2754	1361.11	-30.9592	-90.6316	1125.1	-32.7376	-106.105	1051.1	-64.3382	-48.3917	888.014	-21.6226	-28.2167	807.972	-77.0584	-75.6498	802.046	-63.7073	-26.832	736.949
743	0	164.592	83.9868	1572.09	283.132	88.8416	1569.43	170.041	-84.2998	1531.03	277.985	-76.8171	1526.55	223.714	-58.8149	1432.07	223.143	-144.679	1152.86	209.567	60.1494	1335.34	204.262	117.285	1141.36	306.477	-148	1228.81	36.1631	-9.32755	1358.78	-31.7419	-79.6259	1122.54	-33.2454	-95.4397	1048.63	-64.5725	-38.4239	885.278	-21.5949	-18.8469	805.156	-77.2471	-65.9471	799.416	-63.4464	-17.8303	733.985
744	0	162.663	94.9241	1570.23	281.232	99.6311	1567.64	167.964	-73.3647	1529.14	275.932	-65.9893	1524.72	221.862	-47.8696	1430.25	221.843	-133.597	1150.97	207.925	71.1597	1333.46	203.02	128.35	1139.33	305.018	-137.141	1227.12	34.4858	1.69184	1356.49	-32.6178	-68.4265	1119.95	-33.8184	-84.5249	1046.13	-64.757	-28.1618	882.516	-21.4606	-9.29703	802.311	-77.4345	-55.9193	796.763	-63.0334	-8.60055	730.965
745	0	160.624	105.896	1568.48	279.221	110.439	1565.96	165.762	-62.3881	1527.32	273.752	-55.1331	1522.99	219.896	-36.88	1428.52	220.457	-122.364	1149.16	206.175	82.235	1331.68	201.695	139.542	1137.41	303.471	-126.192	1225.51	32.6962	12.7774	1354.26	-33.5879	-57.0476	1117.36	-34.4599	-73.3735	1043.63	-64.9047	-17.6116	879.762	-21.2388	0.449648	799.477	-77.6243	-45.5728	794.116	-62.4942	0.878501	727.932
746	0	158.472	116.897	1566.87	277.096	121.262	1564.44	163.438	-51.3752	1525.61	271.447	-44.2514	1521.37	217.825	-25.8493	1426.9	218.994	-110.986	1147.43	204.325	93.3713	1330.04	200.292	150.858	1135.64	301.845	-115.153	1224	30.8021	23.9233	1352.12	-34.6507	-45.5019	1114.82	-35.1715	-61.9987	1041.17	-65.0277	-6.77948	877.053	-20.9489	10.4107	796.694	-77.819	-34.9139	791.51	-61.8553	10.6273	724.934
747	0	156.207	127.92	1565.41	274.857	132.097	1563.09	160.999	-40.3317	1524.03	269.023	-33.3478	1519.89	215.657	-14.782	1425.42	217.462	-99.4731	1145.82	202.382	104.564	1328.57	198.82	162.295	1134.05	300.151	-104.028	1222.63	28.813	35.1237	1350.1	-35.8023	-33.8007	1112.35	-35.9529	-50.4138	1038.77	-65.1376	4.32794	874.427	-20.6106	20.6039	794.003	-78.0208	-23.9488	788.977	-61.1437	20.6648	722.017
748	0	153.829	138.959	1564.14	272.502	142.939	1561.96	158.45	-29.2636	1522.59	266.485	-22.426	1518.59	213.403	-3.6828	1424.1	215.873	-87.837	1144.37	200.358	115.807	1327.29	197.288	173.845	1132.67	298.4	-92.8219	1221.43	26.7406	46.3721	1348.23	-37.0363	-21.9538	1109.99	-36.8022	-38.6319	1036.48	-65.2449	15.7042	871.921	-20.2434	31.0472	791.445	-78.2318	-12.6833	786.553	-60.3861	31.009	719.225
749	0	151.341	150.006	1563.08	270.035	153.786	1561.07	155.801	-18.1778	1521.32	263.843	-11.4898	1517.49	211.076	7.44247	1422.98	214.239	-76.0926	1143.1	198.266	127.094	1326.22	195.705	185.499	1131.54	296.603	-81.5409	1220.42	24.5981	57.6622	1346.53	-38.3445	-9.96977	1107.79	-37.7162	-26.6657	1034.33	-65.3591	27.343	869.57	-19.8659	41.7579	789.06	-78.4539	-1.12229	784.272	-59.6081	41.6758	716.606
750	0	148.746	161.053	1562.23	267.459	164.635	1560.44	153.063	-7.08137	1520.23	261.109	-0.543631	1516.61	208.688	18.5873	1422.06	212.569	-64.2575	1142.03	196.12	138.416	1325.39	194.083	197.244	1130.68	294.772	-70.1944	1219.63	22.4004	68.987	1345.03	-39.7168	2.1436	1105.77	-38.6903	-14.5278	1032.35	-65.4889	39.2385	867.411	-19.4958	52.7526	786.886	-78.689	10.7304	782.169	-58.8339	52.68	714.201
751	0	146.051	172.095	1561.61	264.778	175.481	1560.09	150.25	4.01808	1519.34	258.294	10.4077	1515.97	206.255	29.7442	1421.37	210.875	-52.3514	1141.19	193.937	149.764	1324.81	192.434	209.065	1130.11	292.919	-58.7937	1219.07	20.1635	80.34	1343.75	-41.1418	14.379	1103.96	-39.7195	-2.2303	1030.57	-65.6416	51.3853	865.475	-19.1494	64.0462	784.957	-78.9393	22.8718	780.275	-58.0861	64.0345	712.049
752	0	143.264	183.123	1561.23	262.002	186.322	1560.04	147.375	15.1127	1518.66	255.413	21.359	1515.59	203.793	40.9053	1420.92	209.168	-40.3958	1140.59	191.734	161.128	1324.49	190.772	220.944	1129.84	291.055	-47.3522	1218.76	17.9043	91.7144	1342.72	-42.6074	26.7292	1102.4	-40.7978	10.2151	1029.02	-65.8238	63.7784	863.792	-18.841	75.6519	783.304	-79.2076	35.3	778.62	-57.3846	75.7505	710.185
753	0	140.395	194.131	1561.09	259.14	197.154	1560.28	144.455	26.1942	1518.2	252.483	32.3046	1515.49	201.316	52.0618	1420.71	207.458	-28.4135	1140.24	189.53	172.497	1324.45	189.112	232.859	1129.9	289.188	-35.8855	1218.71	15.6403	103.104	1341.94	-44.1015	39.1865	1101.1	-41.9196	22.7969	1027.71	-66.0409	76.4131	862.386	-18.5833	87.5809	781.953	-79.4964	48.0139	777.227	-56.7469	87.8378	708.638
754	0	137.458	205.112	1561.18	256.204	207.974	1560.82	141.506	37.2546	1517.95	249.521	43.2386	1515.66	198.841	63.2047	1420.75	205.751	-16.4277	1140.16	187.344	183.86	1324.68	187.472	244.789	1130.26	287.326	-24.4107	1218.92	13.3889	114.502	1341.43	-45.612	51.7421	1100.08	-43.0793	35.5037	1026.66	-66.2973	89.2847	861.277	-18.3868	99.8418	780.925	-79.8088	61.0132	776.116	-56.1875	100.304	707.43
755	0	134.465	216.06	1561.49	253.208	218.776	1561.66	138.547	48.2859	1517.93	246.544	54.1547	1516.11	196.383	74.3246	1421.04	204.056	-4.46195	1140.34	185.194	195.204	1325.18	185.869	256.709	1130.94	285.476	-12.9466	1219.38	11.1671	125.903	1341.19	-47.1279	64.3867	1099.35	-44.2716	48.3244	1025.88	-66.5963	102.389	860.479	-18.2598	112.44	780.234	-80.1474	74.2974	775.303	-55.7173	113.155	706.577
756	0	131.434	226.968	1562.03	250.168	229.558	1562.78	135.595	59.2801	1518.12	243.571	65.0465	1516.83	193.957	85.4125	1421.57	202.376	7.46101	1140.78	183.101	206.518	1325.93	184.322	268.596	1131.91	283.642	-1.51293	1220.09	8.99106	137.303	1341.22	-48.6396	77.1093	1098.92	-45.4921	61.248	1025.38	-66.9402	115.72	860.001	-18.2083	125.379	779.886	-80.5149	87.8664	774.794	-55.3446	126.395	706.087
757	0	128.382	237.832	1562.76	247.102	240.315	1564.16	132.669	70.2302	1518.52	240.62	75.9076	1517.83	191.576	96.4595	1422.33	200.713	19.3194	1141.46	181.08	217.79	1326.94	182.85	280.425	1133.16	281.825	9.87023	1221.04	6.87566	148.696	1341.51	-50.1389	89.8981	1098.78	-46.7371	74.2636	1025.15	-67.3307	129.274	859.845	-18.2364	138.659	779.883	-80.9135	101.719	774.59	-55.0739	140.026	705.961
758	0	125.327	248.647	1563.68	244.027	251.043	1565.78	129.787	81.1296	1519.12	237.71	86.7319	1519.07	189.252	107.457	1423.31	199.068	31.093	1142.38	179.147	229.008	1328.17	181.472	292.175	1134.66	280.026	21.1831	1222.2	4.83422	160.08	1342.06	-51.6198	102.74	1098.92	-48.0039	87.3608	1025.19	-67.7682	143.043	860.006	-18.3457	152.275	780.221	-81.3448	115.853	774.687	-54.9072	154.045	706.193
759	0	122.291	259.409	1564.76	240.966	261.737	1567.62	126.965	91.9727	1519.91	234.859	97.5137	1520.55	186.996	118.399	1424.49	197.438	42.7634	1143.51	177.317	240.164	1329.62	180.206	303.826	1136.38	278.243	32.4067	1223.56	2.87812	171.452	1342.84	-53.0784	115.623	1099.33	-49.2904	100.529	1025.49	-68.2527	157.022	860.476	-18.5361	166.22	780.887	-81.8097	130.266	775.076	-54.8437	168.45	706.772
760	0	119.292	270.115	1565.98	237.937	272.393	1569.64	124.22	102.755	1520.86	232.082	108.248	1522.24	184.814	129.277	1425.85	195.82	54.3144	1144.84	175.6	251.247	1331.24	179.067	315.359	1138.28	276.473	43.524	1225.1	1.01656	182.81	1343.85	-54.5127	128.532	1099.99	-50.5955	113.759	1026.03	-68.7832	171.201	861.24	-18.8057	180.486	781.867	-82.3085	144.951	775.739	-54.8801	183.236	707.681
761	0	116.352	280.764	1567.33	234.962	283.009	1571.81	121.566	113.473	1521.97	229.395	118.93	1524.11	182.715	140.089	1427.37	194.209	65.7321	1146.34	174.005	262.251	1333.01	178.069	326.761	1140.33	274.712	54.52	1226.78	-0.743564	194.153	1345.04	-55.9225	141.456	1100.87	-51.9188	127.042	1026.78	-69.3583	185.573	862.281	-19.1509	195.06	783.141	-82.8405	159.903	776.659	-55.0115	198.392	708.899
762	0	113.488	291.354	1568.77	232.061	293.58	1574.11	119.017	124.125	1523.21	226.811	129.558	1526.13	180.702	150.829	1429.02	192.6	77.0055	1147.98	172.537	273.169	1334.92	177.222	338.02	1142.48	272.956	65.3824	1228.58	-2.39777	205.48	1346.41	-57.3092	154.382	1101.96	-53.2602	140.369	1027.73	-69.9757	200.126	863.578	-19.5668	209.925	784.687	-83.4044	175.111	777.813	-55.231	213.908	710.405
763	0	110.721	301.886	1570.29	229.252	304.104	1576.49	116.582	134.71	1524.56	224.343	140.128	1528.27	178.777	161.496	1430.78	190.988	88.1262	1149.74	171.199	283.998	1336.91	176.533	349.128	1144.71	271.2	76.1022	1230.47	-3.94399	216.791	1347.92	-58.675	167.3	1103.21	-54.6203	153.731	1028.85	-70.6328	214.85	865.107	-20.0475	225.065	786.48	-83.9979	190.563	779.177	-55.5308	229.769	712.172
764	0	108.067	312.36	1571.87	226.556	314.581	1578.92	114.272	145.229	1526	221.999	150.64	1530.5	176.941	172.09	1432.63	189.367	99.0888	1151.59	169.99	294.736	1338.98	176.002	360.081	1146.98	269.441	86.6738	1232.43	-5.38253	228.084	1349.55	-60.0232	180.202	1104.61	-55.9995	167.122	1030.11	-71.3266	229.733	866.844	-20.5859	240.461	788.496	-84.6183	206.248	780.727	-55.9021	245.959	714.177
765	0	105.54	322.779	1573.48	223.987	325.008	1581.37	112.094	155.682	1527.51	219.787	161.094	1532.79	175.194	182.61	1434.54	187.733	109.891	1153.5	168.907	305.381	1341.08	175.626	370.877	1149.25	267.674	97.095	1234.43	-6.71586	239.361	1351.26	-61.3568	193.083	1106.13	-57.3983	180.536	1031.49	-72.0536	244.762	868.763	-21.1746	256.091	790.706	-85.2621	222.149	782.437	-56.3356	262.457	716.394
766	0	103.155	333.145	1575.11	221.56	335.387	1583.81	110.053	166.074	1529.07	217.714	171.49	1535.1	173.533	193.059	1436.48	186.084	120.533	1155.46	167.943	315.934	1343.2	175.398	381.518	1151.5	265.899	107.367	1236.45	-7.94848	250.619	1353.04	-62.6791	205.937	1107.74	-58.8171	193.966	1032.96	-72.81	259.923	870.839	-21.8057	271.934	793.088	-85.9254	238.25	784.286	-56.8217	279.242	718.8
767	0	100.923	343.462	1576.75	219.287	345.718	1586.21	108.151	176.408	1530.66	215.782	181.832	1537.4	171.955	203.439	1438.43	184.417	131.019	1157.42	167.091	326.399	1345.3	175.302	392.007	1153.7	264.113	117.494	1238.47	-9.08663	261.858	1354.85	-63.9931	218.764	1109.41	-60.2558	207.406	1034.5	-73.592	275.204	873.047	-22.471	287.968	795.615	-86.6042	254.533	786.25	-57.3509	296.289	721.372
768	0	98.8503	353.735	1578.37	217.177	356.004	1588.55	106.39	186.687	1532.26	213.993	192.121	1539.66	170.454	213.754	1440.37	182.733	141.355	1159.38	166.338	336.777	1347.36	175.322	402.351	1155.83	262.318	127.484	1240.46	-10.138	273.075	1356.68	-65.3011	231.563	1111.12	-61.7139	220.853	1036.08	-74.3954	290.589	875.365	-23.1622	304.17	798.266	-87.2939	270.981	788.31	-57.9136	313.573	724.09
769	0	96.9443	363.968	1579.95	215.238	366.247	1590.79	104.769	196.917	1533.86	212.348	202.36	1541.86	169.028	224.007	1442.28	181.032	151.549	1161.31	165.674	347.075	1349.36	175.434	412.557	1157.87	260.515	137.346	1242.41	-11.1113	284.267	1358.5	-66.605	244.335	1112.84	-63.1906	234.302	1037.69	-75.2162	306.065	877.768	-23.8714	320.518	801.017	-87.9902	287.573	790.446	-58.5006	331.066	726.932
770	0	95.2079	374.167	1581.5	213.474	376.452	1592.91	103.285	207.103	1535.43	210.844	212.555	1543.98	167.671	234.205	1444.13	179.319	161.613	1163.19	165.085	357.298	1351.29	175.615	422.635	1159.8	258.709	147.092	1244.29	-12.0161	295.429	1360.29	-67.9064	257.081	1114.57	-64.6842	247.748	1039.3	-76.0501	321.616	880.237	-24.5907	336.989	803.848	-88.6887	304.291	792.642	-59.103	348.739	729.883
771	0	93.642	384.337	1582.98	211.887	386.622	1594.9	101.936	217.25	1536.97	209.478	222.71	1545.99	166.378	244.35	1445.92	177.596	171.557	1164.99	164.558	367.452	1353.11	175.838	432.596	1161.62	256.905	156.736	1246.09	-12.8619	306.559	1362.03	-69.206	269.805	1116.27	-66.1927	261.189	1040.89	-76.8932	337.23	882.751	-25.3129	353.561	806.741	-89.3852	321.116	794.883	-59.7122	366.564	732.924
772	0	92.2452	394.483	1584.39	210.475	396.762	1596.74	100.716	227.365	1538.45	208.246	232.83	1547.87	165.144	254.45	1447.61	175.871	181.396	1166.71	164.078	377.543	1354.83	176.075	442.451	1163.31	255.108	166.29	1247.79	-13.6585	317.65	1363.71	-70.5044	282.508	1117.94	-67.7135	274.621	1042.45	-77.7412	352.891	885.293	-26.0313	370.211	809.677	-90.0757	338.028	797.156	-60.3201	384.51	736.039
773	0	91.0139	404.612	1585.72	209.237	406.878	1598.41	99.62	237.453	1539.87	207.142	242.92	1549.61	163.966	264.51	1449.2	174.15	191.144	1168.33	163.633	387.579	1356.41	176.3	452.212	1164.86	253.327	175.771	1249.39	-14.4148	328.698	1365.31	-71.8014	295.194	1119.55	-69.2433	288.041	1043.97	-78.5903	368.585	887.844	-26.74	386.92	812.64	-90.7566	355.009	799.446	-60.9191	402.549	739.211
774	0	89.9428	414.728	1586.96	208.166	416.975	1599.9	98.6412	247.519	1541.22	206.161	252.986	1551.2	162.84	274.536	1450.68	172.442	200.814	1169.83	163.211	397.568	1357.86	176.489	461.892	1166.27	251.571	185.194	1250.87	-15.1392	339.696	1366.82	-73.0965	307.864	1121.09	-70.7786	301.445	1045.42	-79.4365	384.299	890.388	-27.4337	403.667	815.614	-91.4246	372.04	801.743	-61.502	420.651	742.427
775	0	89.025	424.837	1588.09	207.256	427.06	1601.2	97.7731	257.57	1542.48	205.296	263.034	1552.62	161.764	284.533	1452.02	170.756	210.42	1171.2	162.801	407.517	1359.16	176.619	471.502	1167.52	249.849	194.572	1252.21	-15.8388	350.64	1368.23	-74.3887	320.518	1122.55	-72.3152	314.832	1046.81	-80.2758	400.019	892.911	-28.1079	420.431	818.584	-92.0769	389.103	804.034	-62.0623	438.79	745.669
776	0	88.2522	434.944	1589.11	206.498	437.139	1602.3	97.0086	267.611	1543.64	204.54	273.07	1553.87	160.736	294.508	1453.23	169.103	219.976	1172.43	162.393	417.434	1360.3	176.673	481.056	1168.62	248.172	203.922	1253.41	-16.5194	361.525	1369.52	-75.6766	333.157	1123.93	-73.8489	328.198	1048.1	-81.1045	415.731	895.397	-28.7585	437.193	821.535	-92.7109	406.179	806.309	-62.5941	456.937	748.923
777	0	87.6152	445.053	1590	205.884	447.216	1603.2	96.3409	277.648	1544.69	203.886	283.1	1554.94	159.755	304.468	1454.29	167.493	229.494	1173.51	161.982	427.326	1361.28	176.637	490.564	1169.55	246.548	213.257	1254.46	-17.1853	372.348	1370.68	-76.9581	345.78	1125.2	-75.3749	341.541	1049.3	-81.9187	431.422	897.833	-29.3823	453.934	824.455	-93.3247	423.253	808.557	-63.0926	475.067	752.174
778	0	87.1044	455.169	1590.76	205.401	457.298	1603.89	95.763	287.685	1545.63	203.327	293.13	1555.82	158.822	314.419	1455.19	165.937	238.985	1174.44	161.561	437.201	1362.09	176.503	500.038	1170.31	244.989	222.59	1255.36	-17.8393	383.105	1371.71	-78.2306	358.383	1126.36	-76.8885	354.856	1050.39	-82.7148	447.08	900.207	-29.9763	470.636	827.328	-93.9162	440.304	810.767	-63.5536	493.155	755.405
779	0	86.7095	465.295	1591.39	205.04	467.389	1604.37	95.2684	297.729	1546.44	202.856	303.165	1556.51	157.938	324.367	1455.93	164.445	248.458	1175.21	161.128	447.066	1362.72	176.266	509.489	1170.88	243.504	231.933	1256.1	-18.4824	393.796	1372.6	-79.4911	370.964	1127.4	-78.3846	368.141	1051.37	-83.4891	462.691	902.506	-30.5383	487.28	830.144	-94.4839	457.318	812.929	-63.9739	511.177	758.604
780	0	86.4202	475.434	1591.87	204.788	477.495	1604.65	94.8509	307.783	1547.12	202.467	313.211	1557.02	157.103	334.318	1456.5	163.028	257.921	1175.82	160.682	456.929	1363.17	175.928	518.927	1171.28	242.101	241.298	1256.68	-19.1142	404.421	1373.34	-80.7356	383.516	1128.31	-79.858	381.392	1052.23	-84.238	478.242	904.719	-31.0661	503.849	832.888	-95.0261	474.275	815.034	-64.3512	529.109	761.756
781	0	86.2265	485.591	1592.21	204.634	487.62	1604.73	94.5045	317.853	1547.66	202.152	323.274	1557.33	156.321	344.28	1456.91	161.694	267.381	1176.27	160.226	466.797	1363.44	175.494	528.364	1171.48	240.789	250.695	1257.09	-19.7329	414.981	1373.93	-81.9599	396.033	1129.09	-81.3037	394.604	1052.96	-84.958	493.721	906.836	-31.5581	520.325	835.549	-95.5412	491.158	817.07	-64.684	546.932	764.847
782	0	86.1189	495.767	1592.39	204.568	497.768	1604.61	94.224	327.944	1548.05	201.906	333.357	1557.46	155.594	354.257	1457.14	160.452	276.845	1176.56	159.761	476.675	1363.54	174.973	537.807	1171.49	239.574	260.131	1257.35	-20.3355	425.48	1374.35	-83.1588	408.507	1129.74	-82.7163	407.772	1053.56	-85.6456	509.115	908.847	-32.0127	536.691	838.116	-96.0276	507.951	819.029	-64.9716	564.623	767.865
783	0	86.0881	505.966	1592.42	204.579	507.941	1604.3	94.0045	338.059	1548.29	201.723	343.465	1557.4	154.925	364.255	1457.21	159.309	286.317	1176.69	159.293	486.572	1363.45	174.38	547.268	1171.32	238.462	269.615	1257.45	-20.9177	435.923	1374.62	-84.3267	420.93	1130.24	-84.0906	420.89	1054.03	-86.2975	524.41	910.743	-32.4285	552.929	840.577	-96.4835	524.635	820.902	-65.2139	582.164	770.797
784	0	86.126	516.19	1592.3	204.657	518.143	1603.81	93.8419	348.202	1548.37	201.598	353.602	1557.15	154.317	374.28	1457.11	158.271	295.802	1176.66	158.828	496.491	1363.19	173.729	556.752	1170.96	237.458	279.152	1257.39	-21.4744	446.314	1374.72	-85.4573	433.291	1130.6	-85.4211	433.952	1054.36	-86.9105	539.596	912.516	-32.8044	569.024	842.921	-96.9074	541.192	822.68	-65.4113	599.535	773.631
785	0	86.2251	526.441	1592.02	204.794	528.375	1603.15	93.7323	358.378	1548.29	201.527	363.77	1556.73	153.774	384.336	1456.85	157.34	305.305	1176.48	158.373	506.439	1362.76	173.039	566.27	1170.41	236.565	288.747	1257.18	-22	456.661	1374.66	-86.5444	445.58	1130.82	-86.7026	446.949	1054.55	-87.4817	554.657	914.158	-33.1394	584.959	845.138	-97.2976	557.606	824.352	-65.5649	616.718	776.354
786	0	86.379	536.721	1591.58	204.982	538.639	1602.32	93.6729	368.588	1548.05	201.504	373.973	1556.14	153.298	394.427	1456.43	156.52	314.832	1176.15	157.936	516.42	1362.15	172.33	575.827	1169.69	235.784	298.403	1256.83	-22.4881	466.971	1374.44	-87.5811	457.788	1130.89	-87.9295	459.876	1054.6	-88.0084	569.582	915.661	-33.4327	600.719	847.216	-97.6526	573.858	825.911	-65.6761	633.695	778.956
787	0	86.5824	547.034	1590.99	205.216	548.936	1601.34	93.6611	378.837	1547.65	201.528	384.212	1555.38	152.893	404.557	1455.86	155.811	324.388	1175.68	157.526	526.439	1361.39	171.62	585.43	1168.79	235.117	308.123	1256.33	-22.9323	477.252	1374.06	-88.5608	469.902	1130.81	-89.096	472.722	1054.51	-88.4882	584.359	917.019	-33.6839	616.288	849.146	-97.9709	589.931	827.348	-65.7465	650.45	781.424
788	0	86.8309	557.379	1590.26	205.49	559.268	1600.22	93.6952	389.125	1547.1	201.595	394.489	1554.47	152.563	414.728	1455.14	155.213	333.979	1175.08	157.15	536.5	1360.48	170.93	595.084	1167.74	234.563	317.91	1255.7	-23.3261	487.514	1373.53	-89.4769	481.913	1130.58	-90.1964	485.48	1054.29	-88.9191	598.973	918.223	-33.8927	631.653	850.917	-98.2513	605.806	828.652	-65.7779	666.965	783.746
789	0	87.1212	567.76	1589.37	205.801	569.635	1598.97	93.7744	399.456	1546.39	201.703	404.804	1553.42	152.309	424.941	1454.27	154.727	343.611	1174.34	156.817	546.605	1359.41	170.278	604.794	1166.54	234.121	327.764	1254.93	-23.6629	497.763	1372.84	-90.3231	493.812	1130.21	-91.2247	498.14	1053.93	-89.2992	613.412	919.268	-34.0591	646.8	852.519	-98.4924	621.466	829.815	-65.7727	683.225	785.911
790	0	87.4512	578.177	1588.35	206.147	580.038	1597.59	93.8983	409.831	1545.53	201.853	415.159	1552.23	152.134	435.199	1453.27	154.349	353.292	1173.48	156.537	556.758	1358.22	169.681	614.564	1165.21	233.789	337.688	1254.04	-23.9367	508.01	1372.02	-91.0934	505.59	1129.7	-92.1748	510.695	1053.44	-89.6274	627.664	920.147	-34.1835	661.717	853.943	-98.6932	636.894	830.828	-65.733	699.214	787.905
791	0	87.8198	588.632	1587.2	206.528	590.477	1596.11	94.0674	420.25	1544.53	202.043	425.554	1550.92	152.04	445.502	1452.15	154.078	363.029	1172.49	156.316	566.961	1356.9	169.153	624.398	1163.75	233.566	347.681	1253.04	-24.1416	518.262	1371.05	-91.7823	517.242	1129.05	-93.0401	523.136	1052.82	-89.9024	641.715	920.854	-34.2664	676.39	855.178	-98.8525	652.071	831.682	-65.6616	714.916	789.715
792	0	88.227	599.125	1585.92	206.942	600.952	1594.53	94.2829	430.714	1543.4	202.275	435.987	1549.51	152.029	455.85	1450.91	153.912	372.829	1171.4	156.162	577.215	1355.47	168.708	634.3	1162.19	233.447	357.744	1251.92	-24.2724	528.527	1369.96	-92.3846	528.762	1128.27	-93.8144	535.456	1052.08	-90.1233	655.553	921.383	-34.3086	690.81	856.215	-98.9691	666.979	832.365	-65.5611	730.316	791.328
793	0	88.6736	609.658	1584.53	207.393	611.464	1592.87	94.5467	441.223	1542.15	202.551	446.46	1547.99	152.102	466.243	1449.57	153.847	382.702	1170.2	156.082	587.522	1353.94	168.355	644.274	1160.53	233.429	367.878	1250.69	-24.3245	538.813	1368.76	-92.8954	540.15	1127.36	-94.4908	547.646	1051.21	-90.2895	669.166	921.73	-34.3109	704.964	857.046	-99.0418	681.602	832.871	-65.4346	745.4	792.73
794	0	89.1616	620.231	1583.04	207.883	622.011	1591.14	94.8615	451.775	1540.8	202.873	456.97	1546.4	152.261	476.679	1448.13	153.88	392.655	1168.9	156.081	597.883	1352.33	168.102	654.323	1158.8	233.509	378.083	1249.37	-24.2938	549.127	1367.45	-93.3102	551.405	1126.33	-95.0628	559.703	1050.23	-90.4004	682.543	921.889	-34.2745	718.843	857.663	-99.0693	695.921	833.19	-65.2851	760.151	793.908
795	0	89.6936	630.844	1581.46	208.414	632.595	1589.34	95.2306	462.371	1539.36	203.245	467.518	1544.75	152.507	487.158	1446.61	154.008	402.696	1167.51	156.165	608.3	1350.64	167.952	664.452	1157	233.682	388.36	1247.96	-24.1773	559.477	1366.05	-93.6248	562.531	1125.18	-95.5237	571.62	1049.14	-90.4554	695.671	921.857	-34.2004	732.438	858.058	-99.0504	709.918	833.314	-65.116	774.556	794.849
796	0	90.2732	641.495	1579.81	208.991	643.213	1587.5	95.6576	473.009	1537.85	203.67	478.102	1543.04	152.839	497.678	1445.02	154.226	412.832	1166.04	156.338	618.772	1348.9	167.91	674.666	1155.15	233.944	398.708	1246.46	-23.9722	569.868	1364.58	-93.8349	573.534	1123.94	-95.8672	583.393	1047.96	-90.4539	708.54	921.634	-34.0895	745.738	858.225	-98.9836	723.578	833.236	-64.9304	788.6	795.541
797	0	90.9042	652.184	1578.1	209.619	653.867	1585.62	96.1467	483.686	1536.28	204.154	488.72	1541.3	153.258	508.238	1443.38	154.529	423.07	1164.5	156.603	629.301	1347.13	167.975	684.97	1153.28	234.289	409.128	1244.89	-23.6769	580.308	1363.04	-93.9364	584.421	1122.6	-96.0869	595.022	1046.69	-90.3953	721.14	921.217	-33.9429	758.735	858.16	-98.8676	736.881	832.953	-64.7314	802.267	795.973
798	0	91.5909	662.909	1576.35	210.303	664.554	1583.73	96.7024	494.399	1534.68	204.7	499.371	1539.55	153.763	518.837	1441.7	154.912	433.418	1162.9	156.963	639.888	1345.34	168.147	695.37	1151.39	234.711	419.621	1243.26	-23.2902	590.801	1361.47	-93.9255	595.202	1121.19	-96.1772	606.504	1045.35	-90.2788	733.461	920.61	-33.7611	771.419	857.862	-98.7011	749.813	832.46	-64.522	815.545	796.136
799	0	92.3377	673.668	1574.59	211.047	675.274	1581.84	97.3294	505.146	1533.06	205.316	510.053	1537.8	154.354	529.473	1440	155.37	443.88	1161.26	157.419	650.532	1343.55	168.426	705.874	1149.5	235.207	430.187	1241.58	-22.8117	601.353	1359.88	-93.7982	605.889	1119.72	-96.1326	617.84	1043.94	-90.1034	745.494	919.815	-33.5445	783.781	857.328	-98.4828	762.356	831.758	-64.3045	828.417	796.024
800	0	93.149	684.458	1572.82	211.857	686.025	1579.96	98.032	515.924	1531.44	206.005	520.766	1536.06	155.03	540.144	1438.29	155.898	454.463	1159.58	157.972	661.236	1341.78	168.808	716.488	1147.65	235.771	440.827	1239.86	-22.2416	611.97	1358.28	-93.551	616.496	1118.21	-95.9486	629.032	1042.49	-89.8682	757.232	918.839	-33.2935	795.811	856.561	-98.2116	774.496	830.849	-64.081	840.87	795.633
801	0	94.029	695.276	1571.07	212.737	696.804	1578.12	98.8147	526.728	1529.85	206.772	531.505	1534.36	155.789	550.85	1436.59	156.489	465.169	1157.88	158.623	671.999	1340.05	169.292	727.22	1145.85	236.397	451.542	1238.12	-21.5808	622.654	1356.7	-93.1805	627.037	1116.67	-95.6215	640.082	1041.01	-89.5717	768.667	917.691	-33.0076	807.5	855.566	-97.8869	786.219	829.74	-63.8526	852.889	794.961
802	0	94.9814	706.117	1569.37	213.691	707.61	1576.32	99.6814	537.555	1528.3	207.623	542.271	1532.71	156.629	561.588	1434.92	157.138	476.003	1156.19	159.369	682.822	1338.39	169.875	738.078	1144.12	237.08	462.333	1236.36	-20.8309	633.409	1355.16	-92.6838	637.525	1115.14	-95.1486	650.994	1039.53	-89.2127	779.794	916.382	-32.6863	818.838	854.351	-97.5082	797.511	828.44	-63.6198	864.459	794.012
803	0	96.0093	716.978	1567.73	214.723	718.439	1574.59	100.636	548.402	1526.82	208.561	553.06	1531.13	157.55	572.359	1433.29	157.839	486.965	1154.5	160.211	693.705	1336.8	170.554	749.069	1142.49	237.817	473.202	1234.61	-19.994	644.238	1353.69	-92.0588	647.975	1113.62	-94.5283	661.773	1038.06	-88.7897	790.61	914.927	-32.3286	829.816	852.925	-97.0753	808.363	826.962	-63.382	875.568	792.792
804	0	97.1151	727.853	1566.18	215.835	729.288	1572.95	101.68	559.262	1525.41	209.589	563.87	1529.63	158.546	583.161	1431.72	158.586	498.057	1152.85	161.144	704.649	1335.32	171.327	760.199	1140.99	238.603	484.15	1232.89	-19.0731	655.141	1352.3	-91.3039	658.401	1112.15	-93.7605	672.424	1036.63	-88.3013	801.11	913.343	-31.9331	840.424	851.303	-96.5887	818.766	825.323	-63.1378	886.2	791.311
805	0	98.3005	738.737	1564.75	217.028	740.154	1571.41	102.816	570.133	1524.11	210.711	574.698	1528.22	159.617	593.992	1430.24	159.376	509.276	1151.25	162.165	715.651	1333.96	172.188	771.473	1139.63	239.434	495.179	1231.2	-18.0716	666.119	1351.02	-90.4187	668.815	1110.75	-92.8466	682.952	1035.26	-87.7459	811.295	911.649	-31.498	850.653	849.501	-96.0493	828.715	823.544	-62.8844	896.346	789.582
806	0	99.5661	749.625	1563.44	218.304	751.031	1570	104.044	581.01	1522.92	211.926	585.541	1526.93	160.758	604.85	1428.86	160.202	520.622	1149.72	163.269	726.712	1332.75	173.135	782.894	1138.45	240.307	506.29	1229.57	-16.994	677.169	1349.86	-89.404	679.228	1109.44	-91.7897	693.365	1033.97	-87.1225	821.165	909.868	-31.0212	860.497	847.54	-95.4585	838.207	821.649	-62.6184	905.993	787.624
807	0	100.912	760.512	1562.29	219.662	761.917	1568.72	105.364	591.887	1521.87	213.234	596.396	1525.75	161.964	615.736	1427.58	161.062	532.088	1148.28	164.452	737.828	1331.68	174.161	794.462	1137.46	241.219	517.484	1228.02	-15.8451	688.289	1348.86	-88.2624	689.651	1108.24	-90.5945	703.666	1032.78	-86.4301	830.723	908.023	-30.5005	869.948	845.442	-94.8185	847.243	819.666	-62.3349	915.133	785.457
808	0	102.335	771.39	1561.3	221.101	772.805	1567.6	106.774	602.76	1520.95	214.635	607.259	1524.71	163.232	626.645	1426.44	161.952	543.669	1146.94	165.705	748.997	1330.8	175.261	806.176	1136.68	242.166	528.759	1226.56	-14.631	699.475	1348.01	-86.9979	700.09	1107.18	-89.2679	713.863	1031.72	-85.668	839.973	906.14	-29.9335	879.003	843.231	-94.132	855.828	817.625	-62.0284	923.76	783.108
809	0	103.835	782.255	1560.51	222.616	783.69	1566.64	108.271	613.624	1520.19	216.125	618.127	1523.81	164.557	637.577	1425.43	162.869	555.355	1145.72	167.022	760.216	1330.09	176.424	818.027	1136.13	243.146	540.112	1225.2	-13.3582	710.721	1347.35	-85.6169	710.552	1106.28	-87.8185	723.961	1030.81	-84.8363	848.924	904.246	-29.3177	887.657	840.937	-93.4026	863.972	815.558	-61.6924	931.87	780.602
810	0	105.408	793.101	1559.91	224.205	794.566	1565.87	109.85	624.475	1519.59	217.699	628.995	1523.05	165.932	648.529	1424.58	163.811	567.138	1144.64	168.393	771.478	1329.58	177.643	830.006	1135.82	244.157	551.542	1223.97	-12.0341	722.018	1346.88	-84.1278	721.041	1105.56	-86.2569	733.964	1030.06	-83.9356	857.583	902.368	-28.6512	895.913	838.588	-92.6347	871.689	813.499	-61.3198	939.464	777.972
811	0	107.048	803.921	1559.52	225.863	805.427	1565.28	111.504	635.309	1519.15	219.352	639.86	1522.44	167.351	659.497	1423.9	164.776	579.003	1143.72	169.809	782.778	1329.28	178.907	842.098	1135.76	245.195	563.04	1222.87	-10.6667	733.357	1346.61	-82.5412	731.556	1105.02	-84.5957	743.876	1029.49	-82.9675	865.964	900.533	-27.9319	903.771	836.214	-91.8332	878.998	811.481	-60.903	946.546	775.249
812	0	108.75	814.71	1559.35	227.583	816.267	1564.89	113.227	646.12	1518.88	221.074	650.715	1521.99	168.808	670.478	1423.38	165.764	590.937	1142.96	171.258	794.108	1329.17	180.202	854.284	1135.93	246.26	574.601	1221.93	-9.26472	744.726	1346.55	-80.8697	742.097	1104.69	-82.8492	753.702	1029.11	-81.9344	874.08	898.768	-27.1587	911.24	833.847	-91.0041	885.923	809.539	-60.4342	953.126	772.466
813	0	110.508	825.463	1559.39	229.359	827.08	1564.69	115.008	656.906	1518.78	222.859	661.556	1521.68	170.296	681.466	1423.04	166.773	602.922	1142.38	172.731	805.46	1329.27	181.516	866.541	1136.35	247.348	586.214	1221.14	-7.83721	756.113	1346.7	-79.1281	752.661	1104.57	-81.0332	763.443	1028.94	-80.8399	881.946	897.097	-26.3312	918.33	831.516	-90.1539	892.493	807.704	-59.9059	959.218	769.657
814	0	112.315	836.175	1559.66	231.183	837.859	1564.69	116.84	667.662	1518.84	224.695	672.378	1521.51	171.809	692.459	1422.87	167.804	614.941	1141.98	174.215	816.824	1329.56	182.835	878.842	1136.99	248.459	597.869	1220.53	-6.3936	767.502	1347.06	-77.3327	763.241	1104.66	-79.1651	773.101	1028.97	-79.689	889.582	895.544	-25.4499	925.055	829.251	-89.2899	898.741	806.005	-59.3112	964.842	766.854
815	0	114.163	846.843	1560.14	233.047	848.598	1564.88	118.711	678.385	1519.06	226.572	683.176	1521.49	173.338	703.449	1422.89	168.856	626.974	1141.76	175.697	828.19	1330.05	184.145	891.159	1137.85	249.59	609.553	1220.09	-4.94359	778.877	1347.63	-75.5015	773.828	1104.95	-77.2633	782.675	1029.2	-78.4879	897.006	894.13	-24.5169	931.434	827.08	-88.4203	904.704	804.471	-58.6443	970.023	764.091
816	0	116.042	857.461	1560.83	234.943	859.292	1565.26	120.609	689.072	1519.43	228.477	693.944	1521.6	174.877	714.432	1423.07	169.929	639.001	1141.73	177.167	839.546	1330.71	185.43	903.461	1138.9	250.741	621.253	1219.82	-3.49692	790.221	1348.39	-73.6534	784.412	1105.46	-75.3466	792.165	1029.64	-77.2443	904.241	892.871	-23.5357	937.491	825.029	-87.5538	910.424	803.123	-57.9013	974.794	761.397
817	0	117.945	868.029	1561.71	236.859	869.936	1565.81	122.522	699.721	1519.94	230.399	704.679	1521.84	176.419	725.4	1423.43	171.024	651.001	1141.89	178.611	850.882	1331.55	186.675	915.717	1140.12	251.911	632.956	1219.73	-2.06327	801.515	1349.34	-71.8082	794.979	1106.15	-73.4347	801.569	1030.28	-75.9675	911.308	891.783	-22.5117	943.252	823.123	-86.6995	915.943	801.98	-57.0805	979.191	758.801
818	0	119.86	878.542	1562.78	238.788	880.527	1566.53	124.44	710.329	1520.58	232.324	715.374	1522.18	177.957	736.348	1423.95	172.141	662.952	1142.23	180.019	862.186	1332.53	187.864	927.896	1141.48	253.1	644.647	1219.81	-0.652054	812.741	1350.46	-69.9857	805.51	1107.03	-71.5466	810.882	1031.1	-74.6681	918.229	890.876	-21.4521	948.75	821.381	-85.867	921.305	801.058	-56.183	983.258	756.33
819	0	121.78	889.001	1564.02	240.72	891.061	1567.4	126.349	720.894	1521.35	234.241	726.027	1522.64	179.486	747.269	1424.62	173.279	674.834	1142.74	181.38	873.446	1333.65	188.983	939.97	1142.95	254.309	656.311	1220.05	0.727786	823.88	1351.73	-68.2056	815.986	1108.08	-69.7012	820.101	1032.09	-73.3582	925.028	890.158	-20.366	954.019	819.822	-85.0658	926.554	800.365	-55.2135	987.042	754.008
820	0	123.693	899.404	1565.41	242.644	901.536	1568.41	128.239	731.417	1522.22	236.138	736.635	1523.18	181	758.156	1425.43	174.44	686.626	1143.41	182.684	884.652	1334.89	190.016	951.913	1144.52	255.538	667.935	1220.46	2.06797	834.915	1353.13	-66.4867	826.384	1109.27	-67.9164	829.22	1033.25	-72.0508	931.724	889.634	-19.2645	959.096	818.46	-84.3053	931.734	799.905	-54.1801	990.596	751.857
821	0	125.591	909.753	1566.94	244.551	911.953	1569.53	130.099	741.895	1523.18	238.004	747.194	1523.81	182.494	769.004	1426.37	175.622	698.309	1144.23	183.922	895.792	1336.22	190.95	963.702	1146.14	256.788	679.505	1221.01	3.36112	845.829	1354.65	-64.8463	836.679	1110.59	-66.2085	838.231	1034.54	-70.7601	938.34	889.305	-18.1604	964.022	817.307	-83.5943	936.884	799.679	-53.0947	993.974	749.895
822	0	127.463	920.048	1568.58	246.433	922.31	1570.76	131.92	752.33	1524.23	239.829	757.704	1524.51	183.963	779.807	1427.43	176.826	709.866	1145.19	185.087	906.858	1337.63	191.772	975.319	1147.79	258.059	691.007	1221.71	4.60093	856.607	1356.27	-63.2999	846.846	1112.02	-64.5923	847.128	1035.95	-69.5008	944.893	889.169	-17.0682	968.837	816.37	-82.9411	942.04	799.682	-51.9729	997.234	748.14
823	0	129.301	930.292	1570.31	248.28	932.61	1572.07	133.691	762.72	1525.35	241.603	768.163	1525.27	185.403	790.559	1428.59	178.049	721.281	1146.27	186.174	917.841	1339.11	192.472	986.749	1149.46	259.352	702.431	1222.53	5.78238	867.238	1357.97	-61.8607	856.857	1113.54	-63.0801	855.903	1037.47	-68.2883	951.4	889.221	-16.0038	973.583	815.654	-82.3525	947.233	799.906	-50.8336	1000.43	746.605
824	0	131.097	940.489	1572.11	250.084	942.857	1573.46	135.407	773.068	1526.54	243.319	778.572	1526.09	186.812	801.255	1429.84	179.292	732.542	1147.46	187.178	928.735	1340.63	193.042	997.985	1151.11	260.668	713.764	1223.47	6.90183	877.712	1359.72	-60.5387	866.685	1115.13	-61.6821	864.547	1039.07	-67.1379	957.875	889.456	-14.9838	978.301	815.161	-81.8347	952.489	800.338	-49.699	1003.63	745.303
825	0	132.842	950.641	1573.97	251.837	953.053	1574.89	137.061	783.375	1527.77	244.97	788.932	1526.95	188.188	811.892	1431.17	180.551	743.64	1148.74	188.096	939.533	1342.18	193.477	1009.02	1152.74	262.006	724.998	1224.52	7.95715	888.022	1361.51	-59.3412	876.304	1116.77	-60.4052	873.053	1040.74	-66.0649	964.33	889.864	-14.0257	983.031	814.889	-81.3921	957.826	800.964	-48.5935	1006.89	744.243
826	0	134.53	960.753	1575.85	253.533	963.205	1576.35	138.648	793.641	1529.05	246.552	799.244	1527.86	189.528	822.465	1432.56	181.826	754.569	1150.1	188.929	950.232	1343.75	193.775	1019.86	1154.33	263.365	736.125	1225.67	8.94773	898.165	1363.33	-58.272	885.691	1118.44	-59.2539	881.413	1042.46	-65.0838	970.772	890.435	-13.1469	987.812	814.834	-81.0279	963.257	801.767	-47.5432	1010.25	743.432
827	0	136.155	970.831	1577.75	255.165	973.317	1577.84	140.165	803.869	1530.37	248.062	809.51	1528.8	190.833	832.973	1434	183.113	765.327	1151.53	189.677	960.83	1345.32	193.938	1030.49	1155.88	264.745	747.139	1226.89	9.87449	908.14	1365.15	-57.3317	894.825	1120.15	-58.2295	889.622	1044.21	-64.2086	977.209	891.158	-12.3643	992.679	814.99	-80.744	968.789	802.729	-46.5751	1013.78	742.875
828	0	137.711	980.88	1579.65	256.729	983.396	1579.33	141.609	814.061	1531.72	249.497	819.732	1529.78	192.102	843.412	1435.48	184.409	775.915	1153	190.344	971.324	1346.88	193.973	1040.95	1157.37	266.143	758.038	1228.18	10.7398	917.948	1366.98	-56.5177	903.691	1121.86	-57.3303	897.675	1045.99	-63.4517	983.645	892.021	-11.6939	997.665	815.349	-80.5406	974.42	803.83	-45.7156	1017.51	742.574
829	0	139.193	990.904	1581.52	258.219	993.449	1580.81	142.98	824.22	1533.08	250.856	829.916	1530.8	193.336	853.781	1436.97	185.712	786.338	1154.51	190.935	981.717	1348.43	193.89	1051.22	1158.81	267.557	768.82	1229.53	11.5473	927.595	1368.79	-55.8241	912.279	1123.59	-56.5519	905.569	1047.78	-62.8237	990.081	893.01	-11.1502	1002.8	815.898	-80.4169	980.148	805.05	-44.9904	1021.49	742.527
830	0	140.599	1000.91	1583.35	259.633	1003.48	1582.27	144.279	834.347	1534.47	252.141	840.062	1531.84	194.536	864.081	1438.48	187.016	796.602	1156.04	191.454	992.008	1349.95	193.701	1061.33	1160.2	268.985	779.486	1230.92	12.302	937.089	1370.57	-55.2425	920.586	1125.31	-55.8875	913.304	1049.58	-62.3334	996.519	894.112	-10.7455	1008.1	816.626	-80.3707	985.965	806.368	-44.4227	1025.74	742.731
831	0	141.927	1010.9	1585.13	260.968	1013.5	1583.69	145.507	844.445	1535.86	253.353	850.177	1532.91	195.705	874.311	1439.98	188.318	806.717	1157.58	191.911	1002.2	1351.43	193.424	1071.29	1161.55	270.422	790.04	1232.34	13.0095	946.439	1372.32	-54.762	928.614	1127.03	-55.328	920.883	1051.36	-61.987	1002.96	895.31	-10.4896	1013.6	817.517	-80.3989	991.859	807.764	-44.0326	1030.31	743.177
832	0	143.174	1020.89	1586.83	262.223	1023.52	1585.06	146.667	854.518	1537.26	254.495	860.264	1533.99	196.843	884.473	1441.46	189.612	816.696	1159.1	192.311	1012.3	1352.87	193.076	1081.12	1162.85	271.864	800.487	1233.77	13.6762	955.657	1374.03	-54.3697	936.375	1128.74	-54.863	928.312	1053.14	-61.7884	1009.4	896.591	-10.3895	1019.3	818.553	-80.497	997.82	809.216	-43.8364	1035.2	743.852
833	0	144.342	1030.87	1588.44	263.396	1033.54	1586.37	147.762	864.567	1538.65	255.571	870.327	1535.1	197.955	894.569	1442.91	190.893	826.55	1160.6	192.665	1022.32	1354.26	192.677	1090.83	1164.1	273.306	810.835	1235.19	14.309	964.757	1375.69	-54.0512	943.888	1130.43	-54.4808	935.6	1054.88	-61.7382	1015.85	897.937	-10.4493	1025.23	819.716	-80.6598	1003.83	810.704	-43.846	1040.43	744.741
834	0	145.429	1040.86	1589.96	264.488	1043.56	1587.6	148.798	874.596	1540.02	256.587	880.372	1536.22	199.04	904.603	1444.32	192.155	836.294	1162.06	192.98	1032.25	1355.59	192.247	1100.44	1165.32	274.743	821.091	1236.58	14.9144	973.755	1377.28	-53.7915	951.177	1132.09	-54.1692	942.759	1056.59	-61.8344	1022.3	899.331	-10.6695	1031.38	820.983	-80.8814	1009.9	812.208	-44.0681	1046	745.821
835	0	146.439	1050.85	1591.35	265.499	1053.6	1588.76	149.778	884.607	1541.38	257.547	890.403	1537.34	200.102	914.578	1445.67	193.391	845.941	1163.47	193.266	1042.11	1356.84	191.805	1109.97	1166.48	276.168	831.263	1237.94	15.4989	982.666	1378.81	-53.5753	958.271	1133.73	-53.9163	949.805	1058.27	-62.0718	1028.76	900.755	-11.0476	1037.76	822.333	-81.155	1015.99	813.709	-44.5041	1051.91	747.07
836	0	147.372	1060.85	1592.63	266.432	1063.66	1589.81	150.709	894.603	1542.69	258.457	900.425	1538.45	201.141	924.501	1446.94	194.596	855.506	1164.8	193.53	1051.91	1358.03	191.368	1119.44	1167.6	277.574	841.362	1239.23	16.0681	991.507	1380.26	-53.3881	965.208	1135.32	-53.7104	956.757	1059.89	-62.4425	1035.23	902.19	-11.5777	1044.37	823.742	-81.4734	1022.13	815.187	-45.15	1058.14	748.457
837	0	148.234	1070.87	1593.76	267.289	1073.74	1590.77	151.596	904.588	1543.96	259.323	910.445	1539.53	202.159	934.376	1448.13	195.763	865.001	1166.05	193.78	1061.64	1359.12	190.952	1128.86	1168.66	278.953	851.396	1240.46	16.6268	1000.3	1381.62	-53.2165	972.023	1136.87	-53.5409	963.635	1061.45	-62.9358	1041.72	903.618	-12.2508	1051.2	825.183	-81.8291	1028.29	816.623	-45.9964	1064.69	749.953
838	0	149.026	1080.89	1594.75	268.073	1083.84	1591.6	152.444	914.564	1545.16	260.151	920.467	1540.59	203.156	944.211	1449.23	196.885	874.44	1167.21	194.022	1071.34	1360.11	190.57	1138.24	1169.65	280.297	861.372	1241.59	17.1786	1009.06	1382.88	-53.049	978.759	1138.34	-53.3985	970.462	1062.94	-63.5388	1048.24	905.018	-13.055	1058.26	826.632	-82.2148	1034.49	818	-47.029	1071.53	751.524
839	0	149.754	1090.93	1595.59	268.788	1093.98	1592.31	153.259	924.535	1546.29	260.946	930.496	1541.59	204.129	954.013	1450.21	197.958	883.835	1168.25	194.26	1080.99	1360.99	190.231	1147.6	1170.55	281.596	871.3	1242.61	17.7255	1017.8	1384.03	-52.8763	985.453	1139.75	-53.2755	977.264	1064.34	-64.237	1054.81	906.372	-13.9759	1065.52	828.062	-82.623	1040.74	819.3	-48.2289	1078.64	753.134
840	0	150.421	1100.99	1596.26	269.438	1104.15	1592.88	154.045	934.504	1547.33	261.714	940.537	1542.53	205.079	963.791	1451.07	198.974	893.197	1169.17	194.5	1090.62	1361.75	189.941	1156.95	1171.36	282.842	881.186	1243.51	18.2685	1026.55	1385.07	-52.6918	992.148	1141.06	-53.1657	984.066	1065.65	-65.0143	1061.42	907.658	-14.9968	1072.98	829.448	-83.0469	1047.04	820.508	-49.5734	1085.98	754.747
841	0	151.031	1111.07	1596.76	270.027	1114.35	1593.3	154.806	944.474	1548.26	262.458	950.595	1543.38	206.002	973.553	1451.79	199.929	902.535	1169.96	194.743	1100.23	1362.38	189.702	1166.3	1172.06	284.027	891.037	1244.27	18.8068	1035.32	1385.97	-52.4917	998.879	1142.27	-53.0647	990.895	1066.85	-65.8539	1068.1	908.857	-16.0994	1080.63	830.764	-83.4803	1053.41	821.607	-51.0364	1093.55	756.326
842	0	151.59	1121.16	1597.09	270.559	1124.59	1593.58	155.544	954.448	1549.08	263.182	960.673	1544.12	206.894	983.308	1452.37	200.817	911.859	1170.6	194.991	1109.83	1362.86	189.516	1175.67	1172.64	285.14	900.86	1244.89	19.3384	1044.14	1386.74	-52.2746	1005.68	1143.36	-52.9699	997.777	1067.93	-66.7388	1074.87	909.951	-17.2642	1088.45	831.984	-83.9179	1059.87	822.584	-52.5895	1101.3	757.836
843	0	152.101	1131.27	1597.24	271.039	1134.87	1593.68	156.262	964.43	1549.76	263.887	970.776	1544.75	207.752	993.064	1452.79	201.633	921.179	1171.09	195.242	1119.44	1363.19	189.378	1185.05	1173.06	286.175	910.659	1245.34	19.8601	1053.01	1387.36	-52.0421	1012.59	1144.33	-52.8802	1004.74	1068.88	-67.6526	1081.73	910.919	-18.471	1096.43	833.086	-84.3555	1066.42	823.426	-54.2027	1109.22	759.242
844	0	152.567	1141.4	1597.22	271.47	1145.18	1593.63	156.959	974.425	1550.29	264.574	980.905	1545.23	208.568	1002.83	1453.04	202.374	930.503	1171.41	195.495	1129.06	1363.36	189.285	1194.46	1173.34	287.122	920.442	1245.63	20.3675	1061.95	1387.82	-51.7977	1019.63	1145.15	-52.7961	1011.8	1069.68	-68.5797	1088.7	911.745	-19.6998	1104.54	834.045	-84.7903	1073.1	824.119	-55.8458	1117.27	760.51
845	0	152.992	1151.54	1597.01	271.856	1155.52	1593.39	157.633	984.434	1550.66	265.242	991.064	1545.57	209.338	1012.62	1453.13	203.033	939.84	1171.57	195.747	1138.7	1363.36	189.228	1203.91	1173.44	287.974	930.214	1245.75	20.855	1070.98	1388.12	-51.5472	1026.83	1145.81	-52.7193	1018.99	1070.32	-69.5059	1095.8	912.412	-20.9311	1112.78	834.843	-85.2205	1079.92	824.653	-57.4893	1125.44	761.611
846	0	153.377	1161.71	1596.63	272.2	1165.9	1592.98	158.282	994.463	1550.87	265.886	1001.25	1545.73	210.055	1022.43	1453.04	203.607	949.199	1171.55	195.993	1148.37	1363.18	189.201	1213.4	1173.35	288.725	939.981	1245.69	21.3165	1080.11	1388.25	-51.2977	1034.21	1146.31	-52.6526	1026.33	1070.79	-70.4188	1103.04	912.904	-22.1471	1121.14	835.458	-85.6461	1086.89	825.017	-59.1054	1133.71	762.517
847	0	153.724	1171.9	1596.07	272.504	1176.3	1592.4	158.9	1004.51	1550.89	266.503	1011.48	1545.72	210.711	1032.28	1452.77	204.092	958.588	1171.35	196.228	1158.09	1362.82	189.195	1222.94	1173.08	289.368	949.75	1245.44	21.7451	1089.36	1388.2	-51.0577	1041.78	1146.64	-52.5997	1033.85	1071.09	-71.3083	1110.44	913.209	-23.3318	1129.59	835.875	-86.0678	1094.03	825.202	-60.6692	1142.06	763.205
848	0	154.032	1182.11	1595.34	272.77	1186.74	1591.63	159.482	1014.59	1550.74	267.086	1021.73	1545.51	211.298	1042.17	1452.32	204.485	968.018	1170.97	196.446	1167.85	1362.27	189.202	1232.54	1172.62	289.899	959.529	1245.01	22.1331	1098.72	1387.97	-50.8363	1049.58	1146.77	-52.5648	1041.54	1071.2	-72.1662	1118.01	913.315	-24.4715	1138.13	836.079	-86.4877	1101.35	825.2	-62.1591	1150.49	763.655
849	0	154.302	1192.35	1594.44	272.998	1197.2	1590.69	160.02	1024.7	1550.39	267.627	1032.02	1545.11	211.809	1052.11	1451.68	204.781	977.497	1170.41	196.64	1177.67	1361.55	189.214	1242.21	1171.95	290.312	969.325	1244.4	22.4727	1108.22	1387.55	-50.6429	1057.6	1146.72	-52.5526	1049.45	1071.12	-72.987	1125.75	913.211	-25.5558	1146.75	836.058	-86.9085	1108.87	825.005	-63.5578	1158.97	763.85
850	0	154.53	1202.61	1593.38	273.187	1207.68	1589.58	160.505	1034.85	1549.86	268.117	1042.34	1544.51	212.235	1062.11	1450.87	204.977	987.039	1169.68	196.801	1187.56	1360.64	189.221	1251.94	1171.09	290.606	979.147	1243.61	22.756	1117.86	1386.95	-50.487	1065.87	1146.47	-52.5678	1057.57	1070.84	-73.7675	1133.68	912.892	-26.5768	1155.44	835.802	-87.3339	1116.59	824.612	-64.8528	1167.5	763.779
851	0	154.715	1212.91	1592.18	273.335	1218.18	1588.31	160.927	1045.03	1549.14	268.545	1052.7	1543.71	212.569	1072.18	1449.89	205.071	996.653	1168.77	196.922	1197.52	1359.57	189.218	1261.75	1170.04	290.778	989.004	1242.64	22.9748	1127.64	1386.16	-50.3776	1074.39	1146.02	-52.6149	1065.92	1070.36	-74.5063	1141.81	912.352	-27.5302	1164.21	835.306	-87.7677	1124.51	824.018	-66.0361	1176.09	763.432
852	0	154.851	1223.23	1590.84	273.439	1228.7	1586.89	161.275	1055.26	1548.25	268.901	1063.09	1542.71	212.803	1082.31	1448.74	205.061	1006.35	1167.68	196.993	1207.55	1358.32	189.196	1271.65	1168.79	290.827	998.904	1241.5	23.1215	1137.56	1385.19	-50.3232	1083.17	1145.36	-52.6984	1074.51	1069.67	-75.2044	1150.14	911.59	-28.4145	1173.04	834.565	-88.2143	1132.65	823.22	-67.1046	1184.72	762.807
853	0	154.933	1233.6	1589.38	273.495	1239.23	1585.32	161.538	1065.54	1547.17	269.172	1073.51	1541.53	212.929	1092.51	1447.43	204.946	1016.15	1166.44	197.008	1217.67	1356.93	189.151	1281.65	1167.37	290.753	1008.86	1240.2	23.1884	1147.63	1384.05	-50.3312	1092.22	1144.5	-52.8219	1083.35	1068.79	-75.8643	1158.68	910.605	-29.2311	1181.94	833.581	-88.6778	1140.99	822.221	-68.0599	1193.41	761.903
854	0	154.955	1244	1587.82	273.498	1249.78	1583.63	161.703	1075.87	1545.94	269.348	1083.96	1540.17	212.942	1102.79	1445.99	204.727	1026.05	1165.05	196.957	1227.88	1355.39	189.076	1291.75	1165.79	290.558	1018.88	1238.75	23.1685	1157.85	1382.73	-50.4079	1101.54	1143.44	-52.9886	1092.44	1067.71	-76.4897	1167.43	909.403	-29.984	1190.91	832.357	-89.1625	1149.54	821.023	-68.9079	1202.15	760.726
855	0	154.91	1254.44	1586.16	273.442	1260.34	1581.84	161.759	1086.25	1544.55	269.415	1094.44	1538.65	212.835	1113.15	1444.41	204.404	1036.07	1163.52	196.832	1238.17	1353.73	188.966	1301.96	1164.06	290.245	1028.97	1237.18	23.0554	1168.21	1381.25	-50.5583	1111.13	1142.19	-53.2005	1101.79	1066.44	-77.0857	1176.38	907.991	-30.6793	1199.96	830.898	-89.6724	1158.3	819.634	-69.6579	1210.95	759.285
856	0	154.791	1264.92	1584.44	273.318	1270.91	1579.97	161.696	1096.69	1543.03	269.364	1104.96	1536.98	212.603	1123.6	1442.73	203.982	1046.22	1161.87	196.625	1248.57	1351.96	188.815	1312.28	1162.2	289.817	1039.15	1235.49	22.8432	1178.71	1379.62	-50.7861	1121	1140.74	-53.4589	1111.4	1064.99	-77.6577	1185.55	906.379	-31.3249	1209.09	829.218	-90.211	1167.25	818.062	-70.3225	1219.81	757.593
857	0	154.588	1275.45	1582.66	273.12	1281.5	1578.03	161.503	1107.19	1541.39	269.184	1115.5	1535.18	212.243	1134.13	1440.96	203.462	1056.52	1160.11	196.328	1259.06	1350.12	188.62	1322.73	1160.23	289.279	1049.41	1233.71	22.5271	1189.34	1377.87	-51.0929	1131.15	1139.12	-53.7641	1121.28	1063.38	-78.2119	1194.93	904.581	-31.9295	1218.32	827.329	-90.7816	1176.41	816.32	-70.9165	1228.75	755.669
858	0	154.293	1286.03	1580.86	272.838	1292.09	1576.06	161.171	1117.76	1539.66	268.866	1126.09	1533.29	211.753	1144.75	1439.12	202.851	1066.95	1158.27	195.937	1269.66	1348.21	188.376	1333.31	1158.18	288.637	1059.79	1231.86	22.1031	1200.11	1375.99	-51.4791	1141.56	1137.33	-54.1151	1131.41	1061.61	-78.7542	1204.52	902.616	-32.5027	1227.64	825.25	-91.3867	1185.75	814.423	-71.4559	1237.77	753.536
859	0	153.898	1296.66	1579.06	272.464	1302.71	1574.09	160.692	1128.39	1537.86	268.4	1136.7	1531.32	211.13	1155.45	1437.24	202.155	1077.55	1156.37	195.444	1280.35	1346.27	188.078	1344.02	1156.07	287.899	1070.27	1229.96	21.5685	1211	1374.03	-51.9429	1152.24	1135.4	-54.51	1141.79	1059.71	-79.2905	1214.31	900.503	-33.054	1237.07	823.002	-92.0285	1195.27	812.393	-71.9575	1246.89	751.219
860	0	153.394	1307.34	1577.29	271.988	1313.33	1572.14	160.059	1139.09	1536	267.782	1147.35	1529.31	210.376	1166.25	1435.34	201.381	1088.3	1154.43	194.846	1291.15	1344.33	187.721	1354.87	1153.94	287.072	1080.87	1228.04	20.9219	1222	1371.99	-52.4812	1163.18	1133.34	-54.9459	1152.43	1057.69	-79.8262	1224.31	898.268	-33.5927	1246.62	820.612	-92.7083	1204.98	810.25	-72.4378	1256.11	748.747
861	0	152.774	1318.07	1575.56	271.403	1323.98	1570.24	159.269	1149.86	1534.12	267.006	1158.05	1527.28	209.491	1177.13	1433.45	200.538	1099.22	1152.49	194.14	1302.05	1342.4	187.303	1365.86	1151.82	286.165	1091.59	1226.13	20.1632	1233.11	1369.9	-53.0891	1174.36	1131.18	-55.4192	1163.32	1055.59	-80.3661	1234.52	895.938	-34.1273	1256.31	818.107	-93.4268	1214.88	808.022	-72.9121	1265.44	746.155
862	0	152.03	1328.85	1573.9	270.7	1334.64	1568.43	158.32	1160.7	1532.25	266.071	1168.78	1525.27	208.481	1188.1	1431.59	199.635	1110.3	1150.56	193.324	1313.06	1340.53	186.818	1377	1149.74	285.19	1102.44	1224.27	19.2941	1244.31	1367.8	-53.7605	1185.77	1128.95	-55.9253	1174.44	1053.43	-80.9143	1244.93	893.543	-34.6652	1266.12	815.519	-94.1841	1224.95	805.736	-73.3945	1274.91	743.475
863	0	151.157	1339.69	1572.35	269.872	1345.33	1566.73	157.21	1171.6	1530.4	264.975	1179.56	1523.3	207.349	1199.16	1429.8	198.682	1121.54	1148.68	192.4	1324.16	1338.73	186.266	1388.27	1147.74	284.156	1113.42	1222.47	18.3178	1255.6	1365.7	-54.4882	1197.4	1126.67	-56.4591	1185.8	1051.23	-81.4739	1255.54	891.113	-35.2128	1276.09	812.882	-94.9794	1235.2	803.424	-73.8969	1284.51	740.747
864	0	150.149	1350.57	1570.91	268.912	1356.05	1565.18	155.943	1182.57	1528.62	263.72	1190.38	1521.42	206.104	1210.29	1428.1	197.692	1132.94	1146.88	191.369	1335.35	1337.05	185.642	1399.69	1145.84	283.074	1124.54	1220.77	17.2392	1266.97	1363.63	-55.264	1209.22	1124.38	-57.0154	1197.37	1049.03	-82.0474	1266.35	888.684	-35.7748	1286.23	810.231	-95.8111	1245.64	801.118	-74.4288	1294.27	738.009
865	0	149.005	1361.51	1569.61	267.818	1366.8	1563.8	154.522	1193.61	1526.91	262.311	1201.25	1519.65	204.753	1221.5	1426.52	196.675	1144.49	1145.18	190.236	1346.64	1335.5	184.947	1411.24	1144.1	281.958	1135.78	1219.2	16.0652	1278.39	1361.63	-56.0792	1221.23	1122.11	-57.5886	1209.15	1046.86	-82.6361	1277.36	886.29	-36.3547	1296.53	807.603	-96.6771	1256.27	798.853	-74.9974	1304.21	735.3
866	0	147.723	1372.5	1568.47	266.585	1377.58	1562.62	152.955	1204.71	1525.31	260.755	1212.17	1518.02	203.308	1232.79	1425.08	195.644	1156.17	1143.62	189.008	1358.01	1334.1	184.183	1422.92	1142.52	280.818	1147.15	1217.79	14.8041	1289.87	1359.73	-56.9248	1233.4	1119.88	-58.1731	1221.13	1044.74	-83.2405	1288.56	883.966	-36.9542	1307.01	805.036	-97.5742	1267.09	796.663	-75.6073	1314.32	732.662
867	0	146.304	1383.53	1567.51	265.214	1388.4	1561.66	151.25	1215.87	1523.85	259.061	1223.14	1516.57	201.779	1244.14	1423.81	194.61	1167.99	1142.22	187.694	1369.45	1332.9	183.351	1434.72	1141.16	279.667	1158.64	1216.56	13.4661	1301.39	1357.94	-57.7914	1245.72	1117.75	-58.7636	1233.28	1042.7	-83.86	1299.97	881.747	-37.5738	1317.68	802.569	-98.4983	1278.12	794.582	-76.2604	1324.64	730.134
868	0	144.751	1394.61	1566.74	263.706	1399.26	1560.94	149.42	1227.09	1522.54	257.239	1234.16	1515.31	200.18	1255.55	1422.72	193.584	1179.91	1141	186.304	1380.97	1331.89	182.458	1446.63	1140.02	278.517	1170.24	1215.53	12.0628	1312.95	1356.29	-58.6698	1258.15	1115.73	-59.3552	1245.6	1040.79	-84.4934	1311.57	879.666	-38.2124	1328.56	800.238	-99.4448	1289.35	792.643	-76.9562	1335.17	727.755
869	0	143.071	1405.74	1566.17	262.066	1410.16	1560.48	147.477	1238.36	1521.4	255.304	1245.23	1514.28	198.526	1267.02	1421.83	192.576	1191.93	1139.99	184.853	1392.54	1331.1	181.511	1458.64	1139.14	277.377	1181.93	1214.73	10.6074	1324.53	1354.82	-59.5511	1270.7	1113.86	-59.9437	1258.08	1039.02	-85.1385	1323.37	877.755	-38.8679	1339.65	798.079	-100.408	1300.8	790.878	-77.6922	1345.94	725.562
870	0	141.272	1416.9	1565.8	260.301	1421.11	1560.28	145.437	1249.67	1520.46	253.271	1256.35	1513.49	196.831	1278.52	1421.17	191.595	1204.02	1139.2	183.355	1404.16	1330.55	180.522	1470.73	1138.52	276.257	1193.71	1214.18	9.11416	1336.12	1353.54	-60.4267	1283.32	1112.17	-60.5255	1270.68	1037.42	-85.7924	1335.36	876.044	-39.537	1350.95	796.124	-101.382	1312.47	789.313	-78.4636	1356.95	723.587
871	0	139.363	1428.1	1565.64	258.419	1432.1	1560.35	143.318	1261.03	1519.71	251.158	1267.52	1512.96	195.112	1290.06	1420.73	190.648	1216.15	1138.65	181.826	1415.82	1330.23	179.503	1482.88	1138.18	275.166	1205.56	1213.87	7.59845	1347.71	1352.46	-61.2887	1296.02	1110.69	-61.0978	1283.41	1036.01	-86.4515	1347.54	874.559	-40.2154	1362.49	794.404	-102.359	1324.37	787.975	-79.2641	1368.23	721.863
872	0	137.359	1439.34	1565.68	256.433	1443.14	1560.69	141.137	1272.42	1519.19	248.982	1278.73	1512.71	193.383	1301.62	1420.53	189.74	1228.3	1138.35	180.286	1427.49	1330.16	178.469	1495.06	1138.12	274.109	1217.45	1213.82	6.07613	1359.31	1351.61	-62.1303	1308.76	1109.43	-61.6589	1296.23	1034.82	-87.112	1359.91	873.321	-40.8982	1374.26	792.946	-103.332	1336.5	786.883	-80.086	1379.78	720.415
873	0	135.274	1450.61	1565.92	254.356	1454.23	1561.3	138.915	1283.83	1518.88	246.765	1289.97	1512.74	191.661	1313.19	1420.56	188.874	1240.45	1138.3	178.751	1439.18	1330.33	177.439	1507.25	1138.34	273.09	1229.36	1214.03	4.56331	1370.89	1350.99	-62.9457	1321.54	1108.42	-62.2081	1309.13	1033.85	-87.7694	1372.47	872.349	-41.5799	1386.28	791.77	-104.294	1348.88	786.053	-80.9205	1391.62	719.263
874	0	133.125	1461.9	1566.34	252.206	1465.36	1562.15	136.673	1295.27	1518.8	244.526	1301.26	1513.05	189.962	1324.75	1420.83	188.051	1252.57	1138.51	177.242	1450.85	1330.73	176.429	1519.42	1138.83	272.111	1241.27	1214.49	3.07587	1382.46	1350.61	-63.7304	1334.34	1107.65	-62.7457	1322.11	1033.13	-88.4192	1385.21	871.655	-42.2545	1398.55	790.894	-105.235	1361.51	785.494	-81.7577	1403.77	718.424
875	0	130.931	1473.22	1566.94	250.001	1476.54	1563.24	134.432	1306.72	1518.95	242.289	1312.57	1513.64	188.298	1336.31	1421.33	187.269	1264.64	1138.96	175.777	1462.51	1331.36	175.46	1531.55	1139.57	271.172	1253.17	1215.2	1.62905	1394.01	1350.47	-64.4815	1347.13	1107.16	-63.273	1335.13	1032.65	-89.0569	1398.13	871.247	-42.9159	1411.07	790.33	-106.148	1374.37	785.212	-82.5874	1416.23	717.906
876	0	128.712	1484.56	1567.69	247.76	1487.76	1564.55	132.213	1318.17	1519.31	240.073	1323.9	1514.5	186.684	1347.84	1422.04	186.526	1276.63	1139.64	174.374	1474.13	1332.2	174.551	1543.6	1140.54	270.27	1265.01	1216.13	0.23704	1405.53	1350.57	-65.198	1359.92	1106.92	-63.7924	1348.18	1032.42	-89.6778	1411.21	871.127	-43.5579	1423.86	790.083	-107.023	1387.49	785.204	-83.3987	1429.01	717.715
877	0	126.489	1495.91	1568.59	245.505	1499.02	1566.04	130.038	1329.61	1519.9	237.901	1335.25	1515.62	185.131	1359.33	1422.96	185.813	1288.53	1140.55	173.049	1485.7	1333.23	173.719	1555.56	1141.72	269.4	1276.79	1217.28	-1.08743	1417.03	1350.89	-65.8803	1372.68	1106.94	-64.3073	1361.26	1032.43	-90.2774	1424.47	871.294	-44.174	1436.9	790.154	-107.854	1400.85	785.465	-84.1804	1442.12	717.849
878	0	124.285	1507.26	1569.59	243.258	1510.31	1567.69	127.928	1341.04	1520.68	235.794	1346.6	1516.99	183.65	1370.77	1424.07	185.125	1300.31	1141.66	171.817	1497.21	1334.43	172.982	1567.4	1143.07	268.556	1288.48	1218.61	-2.33339	1428.5	1351.43	-66.5305	1385.41	1107.21	-64.8214	1374.33	1032.67	-90.8515	1437.88	871.74	-44.7579	1450.21	790.538	-108.631	1414.44	785.983	-84.9215	1455.56	718.3
879	0	122.12	1518.62	1570.7	241.044	1521.63	1569.48	125.9	1352.45	1521.66	233.77	1357.96	1518.58	182.248	1382.15	1425.34	184.451	1311.95	1142.96	170.691	1508.64	1335.79	172.353	1579.1	1144.58	267.73	1300.05	1220.11	-3.49192	1439.94	1352.18	-67.1525	1398.09	1107.71	-65.3396	1387.41	1033.14	-91.3961	1451.43	872.454	-45.3034	1463.77	791.227	-109.348	1428.27	786.743	-85.6109	1469.34	719.059
880	0	120.017	1529.98	1571.88	238.883	1532.98	1571.36	123.974	1363.84	1522.82	231.848	1369.31	1520.36	180.932	1393.47	1426.76	183.78	1323.45	1144.41	169.679	1519.99	1337.26	171.843	1590.64	1146.19	266.913	1311.49	1221.75	-4.55628	1451.35	1353.11	-67.7511	1410.72	1108.43	-65.8666	1400.46	1033.82	-91.9074	1465.13	873.421	-45.8042	1477.58	792.208	-109.998	1442.32	787.727	-86.2378	1483.44	720.111
881	0	117.996	1541.33	1573.12	236.799	1544.35	1573.32	122.166	1375.19	1524.14	230.045	1380.65	1522.33	179.707	1404.71	1428.3	183.104	1334.79	1146	168.789	1531.24	1338.84	171.461	1602.01	1147.9	266.096	1322.78	1223.5	-5.52205	1462.73	1354.21	-68.332	1423.29	1109.36	-66.4077	1413.48	1034.69	-92.3823	1478.95	874.625	-46.2545	1491.63	793.465	-110.574	1456.59	788.914	-86.7921	1497.87	721.439
882	0	116.076	1552.66	1574.4	234.813	1555.72	1575.31	120.489	1386.5	1525.6	228.374	1391.97	1524.43	178.576	1415.87	1429.95	182.41	1345.97	1147.69	168.025	1542.4	1340.49	171.209	1613.21	1149.65	265.27	1333.9	1225.34	-6.38703	1474.07	1355.46	-68.9018	1435.8	1110.46	-66.9679	1426.48	1035.73	-92.8178	1492.89	876.045	-46.6485	1505.9	794.979	-111.072	1471.05	790.284	-87.2643	1512.61	723.025
883	0	114.276	1563.98	1575.71	232.946	1567.11	1577.31	118.954	1397.76	1527.19	226.846	1403.27	1526.65	177.539	1426.95	1431.67	181.69	1356.99	1149.47	167.387	1553.45	1342.19	171.087	1624.23	1151.43	264.427	1344.87	1227.23	-7.15122	1485.39	1356.84	-69.4668	1448.25	1111.72	-67.552	1439.43	1036.92	-93.2113	1506.93	877.661	-46.9811	1520.39	796.732	-111.486	1485.7	791.813	-87.6455	1527.65	724.849
884	0	112.612	1575.27	1577.02	231.214	1578.48	1579.3	117.572	1408.98	1528.88	225.471	1414.53	1528.94	176.596	1437.94	1433.45	180.936	1367.84	1151.31	166.872	1564.4	1343.92	171.09	1635.07	1153.21	263.561	1355.65	1229.17	-7.81667	1496.67	1358.32	-70.0332	1460.63	1113.12	-68.1642	1452.33	1038.25	-93.5609	1521.07	879.453	-47.2478	1535.06	798.703	-111.814	1500.53	793.482	-87.928	1542.97	726.893
885	0	111.097	1586.53	1578.32	229.634	1589.85	1581.24	116.349	1420.14	1530.64	224.256	1425.76	1531.28	175.745	1448.85	1435.26	180.142	1378.54	1153.18	166.476	1575.25	1345.65	171.209	1645.73	1154.97	262.666	1366.27	1231.11	-8.38716	1507.93	1359.89	-70.6066	1472.94	1114.63	-68.8082	1465.18	1039.68	-93.865	1535.29	881.4	-47.4447	1549.92	800.872	-112.054	1515.51	795.271	-88.1051	1558.55	729.135
886	0	109.743	1597.76	1579.61	228.219	1601.2	1583.12	115.287	1431.26	1532.47	223.202	1436.94	1533.64	174.983	1459.68	1437.08	179.304	1389.08	1155.06	166.192	1585.99	1347.37	171.43	1656.22	1156.69	261.738	1376.71	1233.04	-8.86803	1519.15	1361.52	-71.1918	1485.19	1116.23	-69.4869	1477.98	1041.2	-94.1223	1549.59	883.481	-47.5689	1564.92	803.217	-112.205	1530.63	797.16	-88.1713	1574.37	731.555
887	0	108.559	1608.95	1580.87	226.979	1612.52	1584.92	114.389	1442.31	1534.33	222.312	1448.08	1535.99	174.305	1470.42	1438.89	178.421	1399.47	1156.93	166.01	1596.63	1349.05	171.736	1666.56	1158.34	260.778	1387	1234.94	-9.26577	1530.35	1363.19	-71.7926	1497.39	1117.91	-70.2022	1490.73	1042.79	-94.3325	1563.94	885.676	-47.6181	1580.06	805.72	-112.267	1545.89	799.135	-88.1226	1590.4	734.136
888	0	107.551	1620.1	1582.1	225.922	1623.8	1586.62	113.653	1453.32	1536.2	221.584	1459.17	1538.29	173.707	1481.09	1440.67	177.494	1409.74	1158.78	165.918	1607.18	1350.67	172.109	1676.75	1159.93	259.785	1397.14	1236.79	-9.58775	1541.52	1364.88	-72.4118	1509.52	1119.63	-70.9551	1503.42	1044.43	-94.4954	1578.35	887.965	-47.5912	1595.32	808.361	-112.241	1561.26	801.18	-87.9566	1606.62	736.859
889	0	106.722	1631.21	1583.28	225.051	1635.05	1588.2	113.076	1464.27	1538.07	221.013	1470.21	1540.51	173.184	1491.68	1442.4	176.528	1419.89	1160.58	165.906	1617.64	1352.23	172.527	1686.81	1161.43	258.763	1407.14	1238.58	-9.84189	1552.65	1366.58	-73.0512	1521.61	1121.39	-71.7457	1516.05	1046.09	-94.6115	1592.8	890.331	-47.4878	1610.67	811.121	-112.13	1576.74	803.283	-87.6727	1623.01	739.705
890	0	106.075	1642.27	1584.41	224.369	1646.24	1589.65	112.652	1475.16	1539.9	220.594	1481.2	1542.64	172.73	1502.21	1444.07	175.526	1429.93	1162.32	165.961	1628.02	1353.7	172.968	1696.74	1162.83	257.716	1417.02	1240.29	-10.0362	1563.76	1368.26	-73.7117	1533.65	1123.16	-72.5729	1528.62	1047.77	-94.6819	1607.28	892.756	-47.3085	1626.1	813.983	-111.938	1592.3	805.432	-87.2717	1639.53	742.659
891	0	105.606	1653.28	1585.49	223.873	1657.38	1590.97	112.373	1486.01	1541.69	220.319	1492.13	1544.64	172.339	1512.69	1445.65	174.498	1439.89	1163.97	166.07	1638.33	1355.07	173.412	1706.58	1164.14	256.652	1426.8	1241.91	-10.1787	1574.83	1369.91	-74.3933	1545.65	1124.93	-73.4349	1541.13	1049.44	-94.7081	1621.78	895.223	-47.0547	1641.58	816.93	-111.667	1607.95	807.617	-86.7564	1656.15	745.703
892	0	105.311	1664.25	1586.5	223.56	1668.47	1592.15	112.232	1496.81	1543.4	220.179	1503	1546.49	172.008	1523.11	1447.14	173.453	1449.78	1165.54	166.222	1648.58	1356.34	173.838	1716.33	1165.33	255.578	1436.49	1243.42	-10.2768	1585.87	1371.51	-75.0949	1557.6	1126.68	-74.3289	1553.58	1051.07	-94.692	1636.29	897.716	-46.7285	1657.1	819.944	-111.324	1623.65	809.827	-86.131	1672.86	748.822
893	0	105.184	1675.16	1587.44	223.423	1679.49	1593.18	112.218	1507.56	1545.02	220.165	1513.82	1548.19	171.73	1533.49	1448.52	172.4	1459.62	1167.01	166.406	1658.77	1357.48	174.229	1726.01	1166.4	254.505	1446.12	1244.82	-10.3372	1596.87	1373.04	-75.815	1569.52	1128.38	-75.2515	1565.97	1052.67	-94.6355	1650.81	900.219	-46.3327	1672.64	823.008	-110.912	1639.41	812.054	-85.4011	1689.63	751.999
894	0	105.216	1686.03	1588.3	223.452	1690.45	1594.05	112.322	1518.26	1546.54	220.264	1524.59	1549.71	171.502	1543.83	1449.79	171.352	1469.42	1168.36	166.613	1668.93	1358.5	174.572	1735.64	1167.34	253.442	1455.7	1246.1	-10.3659	1607.84	1374.5	-76.551	1581.4	1130.03	-76.1981	1578.3	1054.2	-94.5408	1665.31	902.717	-45.8705	1688.19	826.105	-110.438	1655.2	814.287	-84.5735	1706.43	755.22
895	0	105.397	1696.85	1589.08	223.636	1701.35	1594.77	112.531	1528.93	1547.93	220.468	1535.3	1551.03	171.321	1554.15	1450.92	170.32	1479.19	1169.58	166.836	1679.05	1359.38	174.855	1745.24	1168.15	252.401	1465.24	1247.24	-10.3678	1618.78	1375.85	-77.2998	1593.24	1131.61	-77.1637	1590.58	1055.66	-94.41	1679.8	905.195	-45.3457	1703.73	829.218	-109.905	1671.02	816.516	-83.6556	1723.24	758.469
896	0	105.716	1707.62	1589.77	223.962	1712.18	1595.33	112.837	1539.56	1549.18	220.764	1545.96	1552.16	171.184	1564.44	1451.91	169.315	1488.95	1170.68	167.067	1689.14	1360.12	175.071	1754.82	1168.81	251.393	1474.77	1248.25	-10.3467	1629.68	1377.1	-78.0573	1605.05	1133.1	-78.1427	1602.79	1057.03	-94.2448	1694.27	907.636	-44.7624	1719.24	832.329	-109.319	1686.85	818.73	-82.6559	1740.04	761.729
897	0	106.16	1718.35	1590.36	224.418	1722.95	1595.73	113.227	1550.16	1550.28	221.144	1556.58	1553.08	171.089	1574.72	1452.76	168.351	1498.7	1171.63	167.303	1699.22	1360.7	175.22	1764.39	1169.33	250.429	1484.3	1249.12	-10.3053	1640.54	1378.22	-78.8189	1616.82	1134.48	-79.1287	1614.95	1058.29	-94.0468	1708.7	910.027	-44.1248	1734.72	835.42	-108.685	1702.67	820.919	-81.583	1756.81	764.985
898	0	106.716	1729.03	1590.84	224.989	1733.65	1595.98	113.693	1560.74	1551.22	221.597	1567.16	1553.79	171.035	1585	1453.45	167.438	1508.46	1172.45	167.542	1709.29	1361.13	175.302	1773.96	1169.69	249.519	1493.84	1249.83	-10.245	1651.37	1379.21	-79.5789	1628.55	1135.75	-80.1147	1627.05	1059.43	-93.8171	1723.09	912.352	-43.4371	1750.14	838.474	-108.008	1718.48	823.071	-80.446	1773.53	768.223
899	0	107.371	1739.68	1591.21	225.661	1744.31	1596.06	114.224	1571.28	1551.99	222.114	1577.69	1554.29	171.021	1595.28	1453.99	166.587	1518.23	1173.11	167.783	1719.36	1361.4	175.325	1783.55	1169.88	248.673	1503.4	1250.4	-10.1663	1662.16	1380.05	-80.3312	1640.23	1136.89	-81.0933	1639.1	1060.44	-93.5563	1737.43	914.598	-42.7035	1765.5	841.471	-107.29	1734.25	825.174	-79.2539	1790.19	771.426
900	0	108.112	1750.3	1591.46	226.419	1754.9	1596	114.814	1581.81	1552.58	222.688	1588.2	1554.58	171.048	1605.56	1454.37	165.807	1528.02	1173.62	168.027	1729.43	1361.51	175.295	1793.15	1169.92	247.899	1513	1250.81	-10.0683	1672.92	1380.74	-81.0686	1651.87	1137.88	-82.0565	1651.1	1061.31	-93.2647	1751.71	916.75	-41.928	1780.78	844.396	-106.537	1749.98	827.214	-78.0156	1806.76	774.58
901	0	108.928	1760.89	1591.58	227.25	1765.46	1595.77	115.454	1592.32	1552.98	223.313	1598.68	1554.65	171.117	1615.85	1454.58	165.108	1537.83	1173.98	168.277	1739.52	1361.46	175.226	1802.79	1169.78	247.205	1522.64	1251.07	-9.94946	1683.65	1381.26	-81.7834	1663.46	1138.73	-82.9959	1663.05	1062.04	-92.9421	1765.92	918.794	-41.1147	1795.97	847.23	-105.75	1765.64	829.18	-76.7397	1823.24	777.67
902	0	109.806	1771.45	1591.56	228.141	1775.97	1595.4	116.138	1602.82	1553.2	223.982	1609.13	1554.53	171.228	1626.15	1454.63	164.494	1547.67	1174.18	168.535	1749.61	1361.24	175.132	1812.46	1169.48	246.595	1532.33	1251.17	-9.80695	1694.35	1381.62	-82.4669	1675	1139.42	-83.9027	1674.96	1062.61	-92.588	1780.05	920.719	-40.2673	1811.06	849.956	-104.933	1781.22	831.059	-75.4343	1839.6	780.68
903	0	110.735	1781.99	1591.41	229.082	1786.45	1594.87	116.861	1613.31	1553.24	224.691	1619.58	1554.21	171.383	1636.47	1454.52	163.972	1557.53	1174.22	168.806	1759.73	1360.86	175.027	1822.16	1169	246.075	1542.07	1251.12	-9.63741	1705.02	1381.8	-83.1103	1686.48	1139.94	-84.7677	1686.83	1063.02	-92.2015	1794.1	922.511	-39.3894	1826.03	852.557	-104.088	1796.7	832.837	-74.1067	1855.84	783.593
904	0	111.708	1792.51	1591.12	230.063	1796.91	1594.2	117.619	1623.79	1553.09	225.435	1630.01	1553.7	171.585	1646.81	1454.24	163.543	1567.42	1174.11	169.096	1769.87	1360.33	174.927	1831.9	1168.37	245.648	1551.87	1250.91	-9.43685	1715.67	1381.81	-83.7041	1697.91	1140.28	-85.5816	1698.65	1063.26	-91.7816	1808.05	924.16	-38.4845	1840.88	855.018	-103.217	1812.07	834.502	-72.7635	1871.93	786.394
905	0	112.716	1803.03	1590.69	231.074	1807.35	1593.39	118.41	1634.28	1552.77	226.213	1640.44	1553.01	171.835	1657.17	1453.81	163.211	1577.34	1173.84	169.409	1780.04	1359.64	174.847	1841.68	1167.57	245.315	1561.73	1250.55	-9.20085	1726.3	1381.65	-84.2387	1709.29	1140.46	-86.3346	1710.44	1063.35	-91.3268	1821.9	925.654	-37.5556	1855.59	857.322	-102.32	1827.31	836.041	-71.4105	1887.86	789.066
906	0	113.752	1813.54	1590.11	232.11	1817.78	1592.43	119.23	1644.77	1552.27	227.023	1650.88	1552.15	172.137	1667.55	1453.22	162.975	1587.3	1173.42	169.752	1790.23	1358.8	174.803	1851.5	1166.62	245.077	1571.64	1250.04	-8.92473	1736.91	1381.31	-84.7047	1720.6	1140.46	-87.0172	1722.19	1063.27	-90.8358	1835.64	926.983	-36.6054	1870.15	859.454	-101.401	1842.4	837.441	-70.0526	1903.61	791.59
907	0	114.813	1824.05	1589.39	233.167	1828.21	1591.35	120.079	1655.26	1551.6	227.863	1661.32	1551.14	172.493	1677.96	1452.48	162.835	1597.29	1172.85	170.131	1800.46	1357.82	174.808	1861.35	1165.53	244.934	1581.62	1249.39	-8.60368	1747.51	1380.81	-85.0929	1731.86	1140.28	-87.6196	1733.9	1063.02	-90.3071	1849.27	928.138	-35.6366	1884.56	861.4	-100.458	1857.34	838.689	-68.6943	1919.17	793.949
908	0	115.895	1834.57	1588.53	234.24	1838.64	1590.14	120.957	1665.76	1550.78	228.733	1671.78	1549.99	172.906	1688.39	1451.59	162.789	1607.32	1172.13	170.552	1810.72	1356.71	174.873	1871.25	1164.29	244.884	1591.65	1248.59	-8.23288	1758.1	1380.14	-85.3946	1743.06	1139.93	-88.1323	1745.58	1062.61	-89.7393	1862.77	929.11	-34.6511	1898.8	863.146	-99.4937	1872.1	839.775	-67.3391	1934.52	796.125
909	0	116.997	1845.09	1587.54	235.328	1849.08	1588.81	121.864	1676.28	1549.81	229.634	1682.25	1548.71	173.379	1698.84	1450.57	162.837	1617.4	1171.27	171.02	1821.02	1355.47	175.008	1881.18	1162.94	244.928	1601.75	1247.65	-7.80763	1768.68	1379.32	-85.6016	1754.2	1139.41	-88.546	1757.21	1062.05	-89.131	1876.13	929.893	-33.6507	1912.86	864.68	-98.5078	1886.67	840.686	-65.9902	1949.65	798.1
910	0	118.117	1855.63	1586.41	236.433	1859.53	1587.37	122.803	1686.81	1548.71	230.566	1692.74	1547.31	173.915	1709.33	1449.43	162.976	1627.53	1170.28	171.542	1831.35	1354.12	175.221	1891.17	1161.47	245.063	1611.9	1246.57	-7.32339	1779.27	1378.36	-85.7067	1765.29	1138.73	-88.852	1768.81	1061.34	-88.4807	1889.35	930.481	-32.6368	1926.74	865.99	-97.5006	1901.03	841.412	-64.6503	1964.55	799.858
911	0	119.259	1866.19	1585.18	237.556	1870	1585.83	123.774	1697.36	1547.48	231.532	1703.25	1545.81	174.518	1719.84	1448.16	163.205	1637.71	1169.15	172.122	1841.72	1352.67	175.517	1901.2	1159.89	245.289	1622.11	1245.37	-6.7759	1789.85	1377.26	-85.7033	1776.33	1137.89	-89.0418	1780.37	1060.48	-87.787	1902.42	930.868	-31.6102	1940.43	867.068	-96.4721	1915.17	841.945	-63.3215	1979.19	801.381
912	0	120.423	1876.76	1583.83	238.7	1880.5	1584.21	124.78	1707.94	1546.15	232.535	1713.79	1544.22	175.19	1730.37	1446.79	163.522	1647.96	1167.9	172.766	1852.13	1351.13	175.899	1911.3	1158.24	245.603	1632.39	1244.06	-6.16116	1800.45	1376.03	-85.5859	1787.32	1136.9	-89.1079	1791.88	1059.49	-87.0487	1915.33	931.052	-30.5715	1953.92	867.903	-95.4221	1929.09	842.277	-62.0058	1993.56	802.656
913	0	121.615	1887.36	1582.39	239.869	1891.02	1582.51	125.826	1718.53	1544.73	233.576	1724.35	1542.57	175.934	1740.94	1445.33	163.926	1658.27	1166.55	173.478	1862.58	1349.51	176.369	1921.45	1156.5	246.005	1642.73	1242.63	-5.47552	1811.06	1374.7	-85.3495	1798.26	1135.79	-89.0435	1803.35	1058.37	-86.2643	1928.08	931.031	-29.5205	1967.2	868.491	-94.3505	1942.75	842.4	-60.7048	2007.66	803.667
914	0	122.838	1897.99	1580.87	241.07	1901.57	1580.76	126.914	1729.16	1543.23	234.659	1734.94	1540.86	176.753	1751.54	1443.79	164.413	1668.66	1165.09	174.263	1873.08	1347.84	176.927	1931.68	1154.71	246.492	1653.13	1241.1	-4.71571	1821.68	1373.28	-84.9903	1809.17	1134.55	-88.8429	1814.77	1057.14	-85.4325	1940.65	930.807	-28.457	1980.26	868.826	-93.2572	1956.16	842.313	-59.4199	2021.47	804.406
915	0	124.097	1908.64	1579.29	242.308	1912.15	1578.96	128.049	1739.81	1541.68	235.789	1745.56	1539.12	177.649	1762.17	1442.18	164.984	1679.12	1163.55	175.123	1883.63	1346.12	177.571	1941.99	1152.88	247.063	1663.6	1239.48	-3.87888	1832.33	1371.79	-84.5053	1820.05	1133.2	-88.5014	1826.15	1055.82	-84.5522	1953.03	930.381	-27.3801	1993.09	868.904	-92.1422	1969.29	842.012	-58.1522	2034.97	804.862
916	0	125.399	1919.32	1577.67	243.588	1922.77	1577.14	129.236	1750.49	1540.09	236.969	1756.21	1537.35	178.625	1772.83	1440.53	165.636	1689.67	1161.94	176.061	1894.23	1344.38	178.3	1952.39	1151.03	247.717	1674.14	1237.79	-2.96268	1843.02	1370.24	-83.8921	1830.9	1131.77	-88.0154	1837.47	1054.41	-83.6222	1965.23	929.759	-26.2888	2005.69	868.727	-91.0058	1982.14	841.5	-56.9028	2048.15	805.03
917	0	126.749	1930.03	1576.03	244.919	1933.41	1575.32	130.478	1761.19	1538.47	238.204	1766.9	1535.58	179.681	1783.53	1438.85	166.367	1700.3	1160.27	177.081	1904.88	1342.63	179.112	1962.89	1149.18	248.452	1684.74	1236.04	-1.9653	1853.73	1368.66	-83.1495	1841.74	1130.27	-87.3827	1848.74	1052.94	-82.6418	1977.23	928.95	-25.1821	2018.04	868.297	-89.8485	1994.69	840.781	-55.6726	2060.99	804.91
918	0	128.154	1940.78	1574.39	246.306	1944.1	1573.51	131.782	1771.93	1536.86	239.499	1777.61	1533.82	180.818	1794.27	1437.15	167.176	1711.03	1158.57	178.183	1915.58	1340.9	180.006	1973.5	1147.35	249.266	1695.43	1234.26	-0.885542	1864.49	1367.06	-82.2771	1852.57	1128.72	-86.6025	1859.95	1051.43	-81.6104	1989.02	927.963	-24.059	2030.13	867.618	-88.6714	2006.92	839.863	-54.4623	2073.5	804.502
919	0	129.618	1951.55	1572.77	247.755	1954.81	1571.74	133.15	1782.71	1535.26	240.857	1788.35	1532.09	182.038	1805.04	1435.47	168.061	1721.85	1156.85	179.368	1926.34	1339.2	180.981	1984.23	1145.56	250.159	1706.19	1232.45	0.277166	1875.3	1365.48	-81.2754	1863.39	1127.14	-85.6753	1871.11	1049.9	-80.528	2000.6	926.813	-22.9187	2041.95	866.701	-87.4759	2018.83	838.756	-53.2723	2085.64	803.814
920	0	131.148	1962.35	1571.19	249.273	1965.56	1570.03	134.588	1793.51	1533.7	242.285	1799.13	1530.4	183.339	1815.86	1433.81	169.019	1732.78	1155.13	180.636	1937.17	1337.56	182.035	1995.09	1143.84	251.127	1717.02	1230.63	1.52269	1886.15	1363.92	-80.146	1874.22	1125.57	-84.6031	1882.21	1048.37	-79.3949	2011.95	925.514	-21.7607	2053.49	865.556	-86.264	2030.39	837.476	-52.1032	2097.42	802.855
921	0	132.748	1973.18	1569.69	250.863	1976.34	1568.39	136.099	1804.34	1532.19	243.784	1809.94	1528.78	184.721	1826.71	1432.2	170.048	1743.8	1153.44	181.987	1948.05	1336	183.169	2006.09	1142.21	252.17	1727.94	1228.84	2.85013	1897.06	1362.43	-78.8913	1885.06	1124.02	-83.3892	1893.25	1046.87	-78.2121	2023.08	924.085	-20.5848	2064.74	864.2	-85.0381	2041.61	836.039	-50.9549	2108.81	801.638
922	0	134.421	1984.03	1568.27	252.53	1987.14	1566.85	137.685	1815.2	1530.75	245.359	1820.78	1527.23	186.182	1837.61	1430.65	171.146	1754.94	1151.78	183.418	1959.01	1334.53	184.38	2017.22	1140.7	253.284	1738.95	1227.08	4.25772	1908.03	1361.01	-77.5151	1895.91	1122.53	-82.0385	1904.23	1045.42	-76.9809	2033.98	922.546	-19.3916	2075.68	862.648	-83.8011	2052.48	834.467	-49.8275	2119.8	800.181
923	0	136.171	1994.91	1566.97	254.277	1997.98	1565.41	139.349	1826.09	1529.41	247.012	1831.64	1525.78	187.719	1848.55	1429.19	172.309	1766.17	1150.19	184.926	1970.02	1333.18	185.669	2028.5	1139.34	254.467	1750.04	1225.37	5.74272	1919.05	1359.7	-76.0223	1906.79	1121.11	-80.5573	1915.15	1044.04	-75.7035	2044.64	920.92	-18.1822	2086.3	860.923	-82.5566	2062.97	832.783	-48.7206	2130.39	798.504
924	0	137.999	2005.82	1565.79	256.105	2008.85	1564.11	141.092	1837.01	1528.17	248.745	1842.54	1524.43	189.328	1859.54	1427.82	173.532	1777.51	1148.69	186.508	1981.1	1331.97	187.033	2039.92	1138.14	255.716	1761.22	1223.74	7.30132	1930.14	1358.51	-74.4191	1917.69	1119.8	-78.9532	1926	1042.76	-74.3829	2055.06	919.23	-16.9581	2096.6	859.047	-81.3086	2073.1	831.012	-47.6339	2140.56	796.63
925	0	139.905	2016.74	1564.77	258.015	2019.74	1562.95	142.912	1847.94	1527.06	250.556	1853.46	1523.2	191.004	1870.56	1426.57	174.813	1788.95	1147.29	188.157	1992.24	1330.9	188.47	2051.48	1137.12	257.027	1772.49	1222.21	8.92853	1941.28	1357.47	-72.713	1928.61	1118.61	-77.2352	1936.79	1041.59	-73.0224	2065.23	917.501	-15.7219	2106.57	857.045	-80.0616	2082.86	829.182	-46.567	2150.3	794.583
926	0	141.889	2027.67	1563.91	260.005	2030.66	1561.95	144.808	1858.9	1526.08	252.446	1864.41	1522.09	192.742	1881.62	1425.46	176.147	1800.48	1146	189.867	2003.44	1329.99	189.974	2063.18	1136.3	258.397	1783.84	1220.78	10.6181	1952.48	1356.58	-70.9132	1939.56	1117.58	-75.4134	1947.52	1040.57	-71.6264	2075.16	915.757	-14.4766	2116.19	854.944	-78.8206	2092.24	827.32	-45.5192	2159.61	792.391
927	0	143.948	2038.62	1563.22	262.073	2041.59	1561.11	146.776	1869.88	1525.25	254.41	1875.38	1521.12	194.535	1892.72	1424.48	177.528	1812.1	1144.85	191.63	2014.7	1329.26	191.54	2075	1135.7	259.82	1795.28	1219.48	12.3625	1963.73	1355.87	-69.03	1950.53	1116.7	-73.4995	1958.18	1039.71	-70.2001	2084.86	914.023	-13.2258	2125.47	852.771	-77.5912	2101.26	825.457	-44.4902	2168.48	790.081
928	0	146.078	2049.58	1562.72	264.215	2052.54	1560.44	148.812	1880.87	1524.57	256.445	1886.36	1520.29	196.375	1903.84	1423.66	178.95	1823.8	1143.85	193.436	2026	1328.71	193.158	2086.94	1135.32	261.291	1806.79	1218.32	14.1529	1975.03	1355.35	-67.0752	1961.52	1116.01	-71.5059	1968.78	1039.03	-68.7492	2094.31	912.324	-11.9737	2134.41	850.555	-76.3793	2109.92	823.62	-43.4793	2176.91	787.681
929	0	148.274	2060.55	1562.4	266.425	2063.5	1559.94	150.908	1891.88	1524.06	258.544	1897.37	1519.6	198.253	1915	1423	180.409	1835.56	1143.02	195.275	2037.34	1328.34	194.818	2098.96	1135.16	262.804	1818.37	1217.31	15.9794	1986.37	1355.02	-65.0619	1972.53	1115.52	-69.4463	1979.31	1038.53	-67.2803	2103.54	910.682	-10.7251	2143.01	848.323	-75.191	2118.23	821.837	-42.4863	2184.91	785.22
930	0	150.529	2071.51	1562.28	268.696	2074.46	1559.62	153.056	1902.88	1523.71	260.698	1908.38	1519.07	200.16	1926.17	1422.52	181.897	1847.36	1142.35	197.135	2048.72	1328.16	196.506	2111.06	1135.23	264.353	1830.01	1216.47	17.831	1997.73	1354.89	-63.0041	1983.55	1115.23	-67.3354	1989.78	1038.22	-65.8006	2112.54	909.12	-9.48491	2151.28	846.103	-74.0331	2126.22	820.136	-41.5107	2192.49	782.726
931	0	152.834	2082.48	1562.36	271.02	2085.43	1559.47	155.246	1913.89	1523.53	262.897	1919.4	1518.68	202.086	1937.35	1422.2	183.409	1859.21	1141.86	199.003	2060.12	1328.17	198.208	2123.21	1135.51	265.929	1841.7	1215.79	19.6959	2009.12	1354.97	-60.9167	1994.58	1115.14	-65.1885	2000.18	1038.11	-64.3179	2121.33	907.657	-8.25871	2159.22	843.921	-72.9125	2133.89	818.541	-40.5527	2199.65	780.226
932	0	155.179	2093.43	1562.62	273.385	2096.39	1559.48	157.468	1924.9	1523.53	265.13	1930.42	1518.45	204.021	1948.55	1422.05	184.938	1871.07	1141.56	200.866	2071.53	1328.35	199.908	2135.38	1135.99	267.526	1853.42	1215.28	21.5619	2020.51	1355.24	-58.8153	2005.6	1115.26	-63.0214	2010.51	1038.21	-62.8406	2129.92	906.311	-7.05221	2166.85	841.803	-71.8364	2141.28	817.075	-39.6123	2206.4	777.745
933	0	157.554	2104.38	1563.07	275.78	2107.34	1559.65	159.708	1935.89	1523.69	267.385	1941.43	1518.36	205.953	1959.74	1422.08	186.479	1882.93	1141.44	202.711	2082.94	1328.71	201.588	2147.54	1136.67	269.135	1865.16	1214.95	23.4164	2031.89	1355.71	-56.7156	2016.62	1115.58	-60.8504	2020.78	1038.5	-61.3775	2138.32	905.096	-5.87148	2174.2	839.772	-70.8124	2148.41	815.757	-38.6906	2212.78	775.308
934	0	159.943	2115.31	1563.69	278.192	2118.28	1559.97	161.954	1946.87	1524.01	269.648	1952.43	1518.4	207.872	1970.91	1422.27	188.026	1894.77	1141.49	204.523	2094.33	1329.23	203.232	2159.65	1137.51	270.751	1876.89	1214.8	25.2468	2043.25	1356.37	-54.6335	2027.62	1116.1	-58.6918	2030.98	1038.99	-59.9379	2146.56	904.025	-4.72288	2181.27	837.849	-69.8484	2155.31	814.603	-37.7888	2218.81	772.936
935	0	162.334	2126.22	1564.47	280.605	2129.19	1560.42	164.192	1957.83	1524.5	271.903	1963.41	1518.59	209.768	1982.07	1422.63	189.576	1906.58	1141.72	206.29	2105.69	1329.9	204.821	2171.7	1138.49	272.366	1888.61	1214.82	27.041	2054.56	1357.2	-52.5845	2038.59	1116.8	-56.5617	2041.1	1039.65	-58.5315	2154.64	903.108	-3.61312	2188.1	836.051	-68.9524	2162.01	813.626	-36.9096	2224.52	770.651
936	0	164.711	2137.1	1565.4	283.005	2140.08	1560.99	166.407	1968.76	1525.14	274.138	1974.36	1518.9	211.632	1993.2	1423.13	191.123	1918.34	1142.12	207.999	2117.01	1330.7	206.338	2183.64	1139.6	273.974	1900.29	1215	28.7872	2065.81	1358.18	-50.5834	2049.53	1117.66	-54.4755	2051.15	1040.49	-57.1682	2162.58	902.352	-2.54932	2194.71	834.396	-68.1324	2168.55	812.837	-36.0566	2229.93	768.47
937	0	167.058	2147.96	1566.46	285.375	2150.94	1561.67	168.587	1979.66	1525.92	276.336	1985.28	1519.34	213.454	2004.28	1423.79	192.667	1930.02	1142.68	209.637	2128.28	1331.63	207.769	2195.46	1140.8	275.571	1911.91	1215.35	30.4749	2076.98	1359.31	-48.6441	2060.41	1118.67	-52.4478	2061.11	1041.48	-55.8581	2170.4	901.76	-1.53903	2201.14	832.897	-67.3962	2174.96	812.242	-35.2352	2235.1	766.411
938	0	169.358	2158.78	1567.63	287.698	2161.76	1562.45	170.717	1990.52	1526.83	278.483	1996.16	1519.9	215.228	2015.31	1424.57	194.204	1941.61	1143.39	211.196	2139.47	1332.66	209.098	2207.12	1142.08	277.154	1923.47	1215.84	32.0944	2088.05	1360.56	-46.7794	2071.22	1119.81	-50.4917	2070.99	1042.61	-54.6112	2178.12	901.336	-0.590252	2207.41	831.564	-66.751	2181.29	811.842	-34.4523	2240.06	764.489
939	0	171.595	2169.56	1568.89	289.958	2172.54	1563.3	172.784	2001.34	1527.86	280.566	2007	1520.56	216.945	2026.29	1425.48	195.736	1953.1	1144.23	212.664	2150.59	1333.78	210.313	2218.62	1143.41	278.72	1934.95	1216.48	33.6376	2099	1361.91	-45.0006	2081.94	1121.05	-48.6189	2080.78	1043.86	-53.4373	2185.75	901.077	0.288656	2213.56	830.406	-66.2032	2187.55	811.638	-33.7167	2244.87	762.718
940	0	173.753	2180.3	1570.23	292.137	2183.28	1564.23	174.777	2012.11	1529	282.573	2017.79	1521.33	218.6	2037.2	1426.49	197.261	1964.47	1145.19	214.035	2161.61	1334.97	211.403	2229.93	1144.77	280.27	1946.32	1217.25	35.098	2109.82	1363.34	-43.317	2092.56	1122.39	-46.8392	2090.46	1045.2	-52.346	2193.3	900.981	1.0891	2219.63	829.428	-65.758	2193.78	811.626	-33.0387	2249.55	761.111
941	0	175.816	2190.99	1571.63	294.221	2193.98	1565.21	176.685	2022.83	1530.24	284.492	2028.52	1522.2	220.189	2048.03	1427.6	198.781	1975.7	1146.25	215.304	2172.53	1336.23	212.36	2241.05	1146.14	281.803	1957.6	1218.14	36.4706	2120.49	1364.84	-41.7361	2103.05	1123.78	-45.1603	2100.04	1046.62	-51.3458	2200.8	901.043	1.80248	2225.64	828.634	-65.4191	2200.01	811.799	-32.4307	2254.17	759.679
942	0	177.771	2201.64	1573.07	296.195	2204.63	1566.24	178.498	2033.49	1531.57	286.313	2039.2	1523.15	221.71	2058.77	1428.79	200.296	1986.8	1147.41	216.467	2183.34	1337.53	213.178	2251.97	1147.52	283.321	1968.75	1219.13	37.7525	2131	1366.39	-40.2633	2113.38	1125.22	-43.5874	2109.49	1048.11	-50.4449	2208.24	901.257	2.4204	2231.64	828.022	-65.1885	2206.26	812.148	-31.9058	2258.78	758.433
943	0	179.604	2212.24	1574.54	298.046	2215.23	1567.3	180.209	2044.1	1532.97	288.028	2049.83	1524.19	223.159	2069.44	1430.05	201.808	1997.74	1148.64	217.522	2194.04	1338.86	213.856	2262.69	1148.89	284.827	1979.79	1220.22	38.9423	2141.34	1367.96	-38.9016	2123.55	1126.69	-42.1239	2118.81	1049.63	-49.6501	2215.65	901.613	2.93499	2237.64	827.592	-65.0661	2212.55	812.661	-31.4782	2263.41	757.381
944	0	181.304	2222.79	1576.02	299.762	2225.79	1568.39	181.812	2054.64	1534.44	289.631	2060.39	1525.31	224.537	2080.01	1431.37	203.317	2008.53	1149.94	218.471	2204.62	1340.22	214.393	2273.22	1150.24	286.322	1990.69	1221.4	40.0406	2151.5	1369.55	-37.6515	2133.51	1128.16	-40.7703	2128	1051.18	-48.9672	2223.02	902.103	3.33914	2243.68	827.34	-65.0499	2218.89	813.323	-31.1622	2268.12	756.532
945	0	182.863	2233.28	1577.5	301.334	2236.3	1569.5	183.302	2065.12	1535.95	291.117	2070.9	1526.5	225.844	2090.48	1432.74	204.824	2019.16	1151.28	219.314	2215.07	1341.59	214.793	2283.57	1151.57	287.811	2001.48	1222.64	41.0496	2161.49	1371.13	-36.5112	2143.26	1129.64	-39.5254	2137.03	1052.74	-48.4006	2230.36	902.716	3.62681	2249.78	827.258	-65.1354	2225.28	814.12	-30.9717	2272.94	755.891
946	0	184.274	2243.72	1578.95	302.756	2246.77	1570.63	184.678	2075.54	1537.5	292.483	2081.35	1527.76	227.082	2100.86	1434.13	206.328	2029.63	1152.66	220.057	2225.41	1342.96	215.065	2293.74	1152.88	289.295	2012.13	1223.95	41.9733	2171.29	1372.7	-35.4768	2152.77	1131.09	-38.3857	2145.92	1054.29	-47.9532	2237.67	903.439	3.79324	2255.96	827.34	-65.3163	2231.73	815.035	-30.9191	2277.91	755.464
947	0	185.533	2254.11	1580.38	304.022	2257.2	1571.76	185.938	2085.89	1539.08	293.728	2091.75	1529.08	228.252	2111.15	1435.54	207.829	2039.95	1154.06	220.705	2235.64	1344.33	215.218	2303.74	1154.16	290.779	2022.66	1225.3	42.8167	2180.92	1374.24	-34.5418	2162.02	1132.53	-37.3459	2154.63	1055.83	-47.6261	2244.95	904.26	3.8352	2262.25	827.576	-65.5842	2238.24	816.05	-31.015	2283.08	755.25
948	0	186.636	2264.45	1581.76	305.131	2267.59	1572.89	187.082	2096.18	1540.67	294.853	2102.09	1530.45	229.357	2121.35	1436.96	209.324	2050.13	1155.47	221.266	2245.75	1345.68	215.267	2313.6	1155.42	292.264	2033.08	1226.69	43.5863	2190.38	1375.74	-33.6982	2171	1133.93	-36.3991	2163.19	1057.34	-47.4188	2252.21	905.166	3.7512	2268.65	827.955	-65.9288	2244.81	817.146	-31.2671	2288.45	755.248
949	0	187.585	2274.74	1583.09	306.083	2277.95	1574.02	188.114	2106.41	1542.27	295.861	2112.38	1531.87	230.402	2131.45	1438.38	210.81	2060.16	1156.88	221.748	2255.75	1347.01	215.227	2323.33	1156.66	293.751	2043.38	1228.11	44.2891	2199.68	1377.2	-32.9362	2179.71	1135.29	-35.5376	2171.57	1058.82	-47.3289	2259.44	906.142	3.54169	2275.18	828.464	-66.3384	2251.42	818.304	-31.6799	2294.06	755.454
950	0	188.381	2284.98	1584.36	306.879	2288.27	1575.14	189.036	2116.58	1543.86	296.756	2122.62	1533.32	231.39	2141.48	1439.78	212.285	2070.08	1158.27	222.159	2265.65	1348.32	215.116	2332.93	1157.88	295.24	2053.59	1229.53	44.9328	2208.84	1378.6	-32.245	2188.14	1136.61	-34.7525	2179.79	1060.25	-47.3521	2266.65	907.173	3.2092	2281.85	829.089	-66.8003	2258.07	819.503	-32.2542	2299.92	755.857
951	0	189.028	2295.17	1585.56	307.524	2298.57	1576.23	189.853	2126.69	1545.42	297.544	2132.82	1534.8	232.324	2151.42	1441.15	213.742	2079.87	1159.63	222.509	2275.47	1349.59	214.953	2342.44	1159.07	296.731	2063.71	1230.95	45.5253	2217.86	1379.94	-31.6129	2196.3	1137.88	-34.0348	2187.84	1061.63	-47.4823	2273.82	908.243	2.7584	2288.67	829.815	-67.3009	2264.75	820.724	-32.9867	2306.03	756.444
952	0	189.532	2305.32	1586.67	308.024	2308.84	1577.3	190.571	2136.76	1546.94	298.231	2142.98	1536.29	233.207	2161.29	1442.48	215.178	2089.57	1160.95	222.807	2285.2	1350.81	214.756	2351.87	1160.24	298.222	2073.76	1232.35	46.0742	2226.78	1381.21	-31.0279	2204.2	1139.09	-33.3755	2195.74	1062.95	-47.7116	2280.97	909.336	2.19622	2295.62	830.624	-67.8258	2271.45	821.946	-33.8699	2312.41	757.198
953	0	189.9	2315.43	1587.69	308.387	2319.09	1578.34	191.196	2146.77	1548.42	298.825	2153.11	1537.78	234.044	2171.1	1443.75	216.588	2099.18	1162.22	223.061	2294.87	1351.98	214.543	2361.23	1161.37	299.708	2083.75	1233.71	46.5868	2235.6	1382.4	-30.4783	2211.87	1140.25	-32.7658	2203.49	1064.2	-48.0304	2288.1	910.432	1.5318	2302.73	831.498	-68.3609	2278.17	823.148	-34.8926	2319.03	758.095
954	0	190.143	2325.51	1588.61	308.623	2329.32	1579.32	191.735	2156.74	1549.83	299.333	2163.21	1539.24	234.837	2180.85	1444.96	217.964	2108.72	1163.41	223.281	2304.48	1353.09	214.331	2370.54	1162.47	301.185	2093.69	1235.03	47.0696	2244.34	1383.5	-29.9527	2219.32	1141.33	-32.1976	2211.11	1065.37	-48.4276	2295.2	911.516	0.776498	2309.98	832.417	-68.8917	2284.9	824.309	-36.0394	2325.91	759.109
955	0	190.268	2335.55	1589.43	308.74	2339.54	1580.26	192.195	2166.68	1551.16	299.763	2173.29	1540.68	235.588	2190.55	1446.08	219.302	2118.2	1164.52	223.472	2314.04	1354.12	214.133	2379.83	1163.52	302.646	2103.59	1236.27	47.5281	2253.03	1384.5	-29.4411	2226.59	1142.33	-31.6636	2218.61	1066.46	-48.8908	2302.29	912.566	-0.056322	2317.38	833.358	-69.4046	2291.64	825.409	-37.292	2333.01	760.212
956	0	190.287	2345.57	1590.13	308.751	2349.75	1581.12	192.584	2176.58	1552.39	300.124	2183.34	1542.06	236.298	2200.22	1447.11	220.595	2127.64	1165.55	223.641	2323.57	1355.07	213.962	2389.09	1164.51	304.082	2113.48	1237.44	47.9666	2261.69	1385.39	-28.9348	2233.71	1143.25	-31.1576	2226.01	1067.45	-49.4064	2309.36	913.564	-0.951481	2324.91	834.299	-69.8865	2298.39	826.427	-38.6288	2340.33	761.369
957	0	190.211	2355.56	1590.71	308.665	2359.94	1581.9	192.909	2186.45	1553.52	300.424	2193.39	1543.36	236.968	2209.86	1448.04	221.838	2137.04	1166.46	223.793	2333.07	1355.92	213.825	2398.35	1165.43	305.486	2123.35	1238.5	48.388	2270.33	1386.17	-28.4272	2240.71	1144.08	-30.6744	2233.34	1068.34	-49.9604	2316.43	914.491	-1.89234	2332.57	835.218	-70.3252	2305.16	827.346	-40.0262	2347.84	762.548
958	0	190.05	2365.52	1591.17	308.495	2370.14	1582.59	193.177	2196.3	1554.53	300.669	2203.43	1544.58	237.597	2219.49	1448.85	223.025	2146.41	1167.26	223.931	2342.57	1356.67	213.728	2407.62	1166.26	306.847	2133.22	1239.46	48.794	2278.97	1386.82	-27.9135	2247.65	1144.8	-30.21	2240.61	1069.12	-50.538	2323.51	915.328	-2.86115	2340.36	836.09	-70.71	2311.94	828.147	-41.4585	2355.51	763.713
959	0	189.815	2375.47	1591.49	308.251	2380.33	1583.18	193.395	2206.13	1555.39	300.867	2213.47	1545.68	238.185	2229.11	1449.54	224.149	2155.77	1167.94	224.058	2352.06	1357.29	213.672	2416.91	1166.99	308.154	2143.09	1240.29	49.1847	2287.65	1387.34	-27.3913	2254.56	1145.4	-29.7613	2247.85	1069.77	-51.1247	2330.6	916.055	-3.83948	2348.26	836.893	-71.0316	2318.75	828.814	-42.8992	2363.34	764.829
960	0	189.515	2385.41	1591.67	307.943	2390.52	1583.66	193.568	2215.96	1556.11	301.024	2223.51	1546.66	238.729	2238.73	1450.09	225.207	2165.13	1168.49	224.173	2361.57	1357.79	213.656	2426.22	1167.59	309.397	2152.97	1240.98	49.5587	2296.37	1387.71	-26.8606	2261.47	1145.88	-29.3263	2255.09	1070.3	-51.7062	2337.72	916.654	-4.80858	2356.26	837.603	-71.2823	2325.6	829.33	-44.321	2371.29	765.861
961	0	189.16	2395.34	1591.71	307.58	2400.72	1584.01	193.701	2225.78	1556.67	301.143	2233.56	1547.48	239.228	2248.37	1450.49	226.192	2174.49	1168.89	224.276	2371.1	1358.14	213.677	2435.57	1168.06	310.566	2162.86	1241.53	49.9133	2305.15	1387.94	-26.3233	2268.43	1146.23	-28.9042	2262.36	1070.68	-52.2689	2344.87	917.109	-5.74988	2364.36	838.197	-71.4562	2332.49	829.683	-45.697	2379.33	766.777
962	0	188.758	2405.27	1591.61	307.172	2410.92	1584.22	193.798	2235.61	1557.06	301.23	2243.63	1548.15	239.678	2258.04	1450.73	227.1	2183.85	1169.14	224.366	2380.66	1358.34	213.726	2444.96	1168.37	311.649	2172.76	1241.92	50.2445	2314.01	1388.01	-25.7834	2275.48	1146.43	-28.4949	2269.67	1070.92	-52.8001	2352.08	917.402	-6.64531	2372.53	838.655	-71.5495	2339.44	829.861	-47.0011	2387.45	767.544
963	0	188.316	2415.19	1591.35	306.726	2421.13	1584.29	193.863	2245.44	1557.27	301.285	2253.71	1548.63	240.074	2267.74	1450.82	227.925	2193.24	1169.24	224.44	2390.26	1358.39	213.797	2454.4	1168.52	312.638	2182.68	1242.15	50.5472	2322.96	1387.92	-25.2468	2282.65	1146.49	-28.0992	2277.05	1071	-53.2885	2359.35	917.521	-7.47787	2380.78	838.956	-71.5601	2346.45	829.855	-48.2084	2395.63	768.136
964	0	187.839	2425.11	1590.95	306.247	2431.36	1584.21	193.895	2255.29	1557.3	301.311	2263.82	1548.93	240.413	2277.48	1450.73	228.663	2202.65	1169.18	224.495	2399.91	1358.27	213.879	2463.9	1168.49	313.523	2192.62	1242.21	50.8154	2332.02	1387.67	-24.721	2289.96	1146.4	-27.7185	2284.53	1070.91	-53.7241	2366.7	917.452	-8.23205	2389.09	839.082	-71.488	2353.55	829.655	-49.2966	2403.86	768.526
965	0	187.332	2435.05	1590.4	305.741	2441.6	1583.97	193.896	2265.16	1557.13	301.307	2273.95	1549.03	240.69	2287.27	1450.48	229.309	2212.09	1168.96	224.525	2409.61	1357.98	213.962	2473.45	1168.28	314.296	2202.58	1242.1	51.0421	2341.2	1387.25	-24.2144	2297.45	1146.14	-27.355	2292.13	1070.66	-54.0989	2374.14	917.185	-8.89422	2397.45	839.016	-71.3352	2360.73	829.256	-50.2457	2412.1	768.691
966	0	186.798	2444.99	1589.7	305.211	2451.85	1583.56	193.864	2275.05	1556.77	301.271	2284.11	1548.92	240.899	2297.12	1450.06	229.857	2221.58	1168.57	224.526	2419.37	1357.51	214.035	2483.06	1167.87	314.95	2212.56	1241.81	51.2199	2350.5	1386.66	-23.7368	2305.14	1145.71	-27.0113	2299.87	1070.24	-54.4067	2381.68	916.71	-9.45308	2405.85	838.746	-71.1052	2368.02	828.653	-51.0393	2420.36	768.614
967	0	186.239	2454.96	1588.85	304.658	2462.13	1583	193.796	2284.98	1556.22	301.201	2294.3	1548.61	241.035	2307.03	1449.47	230.304	2231.11	1168.02	224.492	2429.2	1356.87	214.089	2492.74	1167.27	315.479	2222.57	1241.35	51.3412	2359.94	1385.9	-23.2981	2313.05	1145.12	-26.6904	2307.76	1069.64	-54.6431	2389.34	916.022	-9.89985	2414.29	838.258	-70.8035	2375.42	827.844	-51.6644	2428.63	768.279
968	0	185.655	2464.95	1587.87	304.085	2472.42	1582.27	193.688	2294.95	1555.48	301.091	2304.53	1548.09	241.091	2317.01	1448.71	230.646	2240.7	1167.3	224.417	2439.1	1356.06	214.114	2502.5	1166.47	315.878	2232.6	1240.71	51.398	2369.51	1384.97	-22.9083	2321.2	1144.36	-26.3959	2315.83	1068.86	-54.8062	2397.12	915.118	-10.2285	2422.75	837.546	-70.4367	2382.94	826.828	-52.112	2436.9	767.674
969	0	185.046	2474.96	1586.74	303.49	2482.74	1581.39	193.534	2304.96	1554.56	300.937	2314.79	1547.36	241.063	2327.06	1447.78	230.878	2250.36	1166.42	224.295	2449.08	1355.08	214.103	2512.32	1165.47	316.144	2242.66	1239.91	51.3828	2379.23	1383.88	-22.5771	2329.59	1143.42	-26.1312	2324.09	1067.9	-54.8956	2405.04	913.996	-10.436	2431.25	836.602	-70.013	2390.6	825.607	-52.3775	2445.17	766.794
970	0	184.41	2485.01	1585.5	302.871	2493.08	1580.35	193.329	2315.02	1553.46	300.732	2325.09	1546.43	240.944	2337.18	1446.7	230.998	2260.1	1165.38	224.118	2459.13	1353.94	214.048	2522.23	1164.29	316.273	2252.76	1238.94	51.2883	2389.09	1382.64	-22.3137	2338.25	1142.31	-25.9003	2332.54	1066.76	-54.9133	2413.1	912.657	-10.5221	2439.77	835.425	-69.5415	2398.39	824.183	-52.4602	2453.44	765.636
971	0	183.743	2495.1	1584.14	302.225	2503.45	1579.17	193.065	2325.13	1552.2	300.469	2335.42	1545.31	240.728	2347.38	1445.48	231.004	2269.93	1164.19	223.88	2469.26	1352.64	213.944	2532.23	1162.93	316.266	2262.89	1237.82	51.1076	2399.1	1381.23	-22.1258	2347.16	1141.03	-25.7069	2341.21	1065.46	-54.8627	2421.32	911.107	-10.4893	2448.31	834.016	-69.032	2406.32	822.563	-52.3637	2461.71	764.2
972	0	183.042	2505.23	1582.67	301.547	2513.84	1577.86	192.734	2335.3	1550.78	300.139	2345.8	1544.01	240.41	2357.67	1444.12	230.894	2279.85	1162.86	223.573	2479.48	1351.21	213.786	2542.31	1161.4	316.121	2273.07	1236.55	50.8346	2409.24	1379.69	-22.0202	2356.35	1139.57	-25.5545	2350.09	1063.98	-54.7492	2429.7	909.353	-10.3431	2456.88	832.378	-68.4952	2414.41	820.754	-52.0956	2469.99	762.494
973	0	182.3	2515.42	1581.12	300.833	2524.26	1576.43	192.327	2345.52	1549.23	299.734	2356.22	1542.56	239.985	2368.03	1442.64	230.67	2289.89	1161.4	223.192	2489.78	1349.65	213.572	2552.5	1159.72	315.841	2283.3	1235.16	50.4639	2419.53	1378.01	-22.0022	2365.8	1137.96	-25.4467	2359.2	1062.35	-54.5794	2438.25	907.407	-10.0912	2465.48	830.522	-67.9421	2422.66	818.768	-51.667	2478.29	760.528
974	0	181.512	2525.65	1579.51	300.075	2534.71	1574.91	191.835	2355.82	1547.57	299.246	2366.68	1540.97	239.449	2378.47	1441.06	230.331	2300.04	1159.83	222.73	2500.17	1347.98	213.298	2562.78	1157.91	315.428	2293.58	1233.66	49.9909	2429.94	1376.21	-22.0756	2375.52	1136.19	-25.3862	2368.53	1060.56	-54.361	2446.97	905.282	-9.74332	2474.12	828.459	-67.3837	2431.07	816.618	-51.0924	2486.6	758.318
975	0	180.671	2535.94	1577.84	299.266	2545.2	1573.31	191.25	2366.18	1545.8	298.664	2377.18	1539.26	238.797	2388.99	1439.4	229.882	2310.33	1158.16	222.181	2510.65	1346.24	212.962	2573.17	1155.98	314.885	2303.92	1232.06	49.4118	2440.49	1374.3	-22.2427	2385.49	1134.27	-25.3757	2378.09	1058.65	-54.1028	2455.87	902.997	-9.31123	2482.8	826.207	-66.8315	2439.64	814.32	-50.3893	2494.96	755.885
976	0	179.769	2546.29	1576.15	298.398	2555.72	1571.67	190.563	2376.6	1543.97	297.982	2387.73	1537.46	238.028	2399.59	1437.68	229.326	2320.74	1156.42	221.54	2521.21	1344.43	212.564	2583.68	1153.98	314.218	2314.33	1230.39	48.7241	2451.16	1372.31	-22.5043	2395.72	1132.23	-25.4168	2387.89	1056.62	-53.8144	2464.95	900.574	-8.80804	2491.53	823.785	-66.2966	2448.38	811.896	-49.5775	2503.36	753.253
977	0	178.799	2556.71	1574.45	297.464	2566.27	1570	189.767	2387.1	1542.09	297.19	2398.33	1535.6	237.138	2410.28	1435.93	228.667	2331.3	1154.62	220.802	2531.86	1342.59	212.1	2594.3	1151.92	313.433	2324.81	1228.69	47.926	2461.94	1370.26	-22.8593	2406.19	1130.07	-25.5107	2397.91	1054.49	-53.5058	2474.22	898.036	-8.24799	2500.33	821.22	-65.7897	2457.29	809.368	-48.679	2511.82	750.452
978	0	177.752	2567.19	1572.78	296.454	2576.86	1568.34	188.853	2397.67	1540.19	296.283	2408.97	1533.71	236.128	2421.04	1434.17	227.912	2342	1152.8	219.964	2542.59	1340.74	211.571	2605.03	1149.83	312.538	2335.37	1226.97	47.0173	2472.82	1368.16	-23.3053	2416.89	1127.83	-25.6577	2408.15	1052.28	-53.1872	2483.67	895.411	-7.64607	2509.2	818.541	-65.3211	2466.37	806.764	-47.7171	2520.36	747.517
979	0	176.62	2577.74	1571.15	295.361	2587.49	1566.71	187.817	2408.31	1538.3	295.253	2419.66	1531.82	234.998	2431.87	1432.43	227.067	2352.85	1150.98	219.024	2553.41	1338.92	210.973	2615.89	1147.76	311.541	2346.01	1225.26	45.9987	2483.81	1366.04	-23.8385	2427.81	1125.52	-25.8576	2418.61	1050.03	-52.8691	2493.31	892.732	-7.01772	2518.16	815.78	-64.9006	2475.63	804.114	-46.7158	2528.98	744.487
980	0	175.397	2588.36	1569.59	294.176	2598.16	1565.15	186.652	2419.02	1536.45	294.097	2430.39	1529.97	233.75	2442.78	1430.74	226.142	2363.84	1149.19	217.982	2564.31	1337.15	210.307	2626.87	1145.74	310.452	2356.75	1223.6	44.8725	2494.88	1363.94	-24.4538	2438.93	1123.18	-26.1096	2429.29	1047.76	-52.5617	2503.14	890.031	-6.37851	2527.23	812.974	-64.5369	2485.07	801.45	-45.6997	2537.71	741.402
981	0	174.075	2599.04	1568.12	292.892	2608.87	1563.69	185.357	2429.8	1534.66	292.81	2441.18	1528.18	232.387	2453.76	1429.12	225.143	2374.98	1147.46	216.838	2575.29	1335.46	209.571	2637.97	1143.8	309.28	2367.57	1222.02	43.6422	2506.03	1361.88	-25.1447	2450.24	1120.84	-26.4122	2440.17	1045.5	-52.2751	2513.16	887.344	-5.7439	2536.41	810.161	-64.2381	2494.7	798.809	-44.6927	2546.55	738.307
982	0	172.649	2609.78	1566.77	291.503	2619.62	1562.36	183.93	2440.65	1532.96	291.393	2452.02	1526.5	230.914	2464.81	1427.6	224.081	2386.26	1145.81	215.595	2586.34	1333.89	208.763	2649.18	1141.99	308.035	2378.49	1220.54	42.3127	2517.26	1359.88	-25.9044	2461.72	1118.53	-26.7638	2451.25	1043.28	-52.019	2523.37	884.708	-5.12898	2545.72	807.382	-64.0112	2504.51	796.227	-43.7181	2555.53	735.248
983	0	171.114	2620.59	1565.56	290.003	2630.41	1561.18	182.37	2451.56	1531.37	289.844	2462.91	1524.95	229.336	2475.91	1426.21	222.963	2397.66	1144.29	214.259	2597.47	1332.46	207.886	2660.51	1140.34	306.729	2389.5	1219.2	40.8901	2528.54	1357.99	-26.7249	2473.35	1116.29	-27.1626	2462.52	1041.13	-51.8025	2533.78	882.158	-4.54825	2555.18	804.677	-63.8621	2514.51	793.741	-42.7977	2564.66	732.27
984	0	169.468	2631.47	1564.51	288.389	2641.25	1560.19	180.681	2462.53	1529.93	288.166	2473.84	1523.57	227.661	2487.07	1424.98	221.799	2409.19	1142.91	212.835	2608.67	1331.2	206.939	2671.94	1138.89	305.372	2400.6	1218.02	39.3821	2539.89	1356.21	-27.5985	2485.12	1114.15	-27.6071	2473.95	1039.09	-51.6344	2544.37	879.731	-4.01543	2564.81	802.088	-63.7955	2524.7	791.389	-41.9518	2573.95	729.419
985	0	167.708	2642.39	1563.63	286.66	2652.13	1559.4	178.867	2473.55	1528.64	286.364	2484.82	1522.37	225.899	2498.28	1423.91	220.597	2420.82	1141.7	211.334	2619.92	1330.13	205.927	2683.46	1137.66	303.974	2411.79	1217.03	37.7975	2551.27	1354.59	-28.5171	2497.01	1112.15	-28.0959	2485.55	1037.19	-51.5228	2555.14	877.461	-3.54329	2574.62	799.655	-63.8149	2535.09	789.205	-41.1983	2583.43	726.737
986	0	165.837	2653.37	1562.93	284.815	2663.05	1558.84	176.934	2484.63	1527.54	284.443	2495.84	1521.4	224.059	2509.52	1423.04	219.364	2432.55	1140.69	209.764	2631.23	1329.26	204.855	2695.07	1136.68	302.545	2423.05	1216.25	36.1461	2562.7	1353.15	-29.4733	2509	1110.31	-28.6282	2497.3	1035.45	-51.4751	2566.11	875.382	-3.14355	2584.63	797.414	-63.9226	2545.69	787.221	-40.5525	2593.11	724.266
987	0	163.857	2664.4	1562.43	282.857	2674.02	1558.51	174.891	2495.76	1526.62	282.412	2506.91	1520.65	222.151	2520.8	1422.37	218.107	2444.35	1139.88	208.139	2642.59	1328.63	203.733	2706.75	1135.98	301.092	2434.38	1215.68	34.439	2574.16	1351.91	-30.4604	2521.07	1108.68	-29.2037	2509.18	1033.9	-51.4979	2577.26	873.52	-2.82679	2594.84	795.399	-64.12	2556.49	785.467	-40.0273	2603	722.042
988	0	161.772	2675.47	1562.12	280.789	2685.02	1558.43	172.748	2506.92	1525.92	280.281	2518.01	1520.16	220.188	2532.11	1421.91	216.832	2456.2	1139.3	206.474	2653.99	1328.22	202.57	2718.48	1135.56	299.624	2445.77	1215.36	32.6878	2585.65	1350.87	-31.4726	2533.21	1107.26	-29.823	2521.18	1032.56	-51.5969	2588.59	871.902	-2.6023	2605.29	793.64	-64.4072	2567.49	783.967	-39.6325	2613.12	720.095
989	0	159.591	2686.58	1562.01	278.62	2696.06	1558.59	170.516	2518.12	1525.42	278.063	2529.15	1519.92	218.182	2543.43	1421.67	215.542	2468.08	1138.96	204.782	2665.41	1328.06	201.38	2730.24	1135.43	298.146	2457.2	1215.27	30.9048	2597.16	1350.07	-32.5056	2545.42	1106.09	-30.4873	2533.28	1031.44	-51.777	2600.09	870.546	-2.47795	2615.96	792.159	-64.7832	2578.71	782.738	-39.3749	2623.49	718.45
990	0	157.321	2697.71	1562.09	276.359	2707.13	1559	168.211	2529.35	1525.14	275.77	2540.31	1519.95	216.146	2554.75	1421.66	214.24	2479.97	1138.85	203.081	2676.85	1328.13	200.18	2742.01	1135.59	296.662	2468.66	1215.42	29.1026	2608.68	1349.49	-33.5566	2557.66	1105.18	-31.1988	2545.48	1030.57	-52.0418	2611.78	869.466	-2.45995	2626.89	790.974	-65.2465	2590.15	781.792	-39.2584	2634.13	717.125
991	0	154.975	2708.86	1562.35	274.015	2718.23	1559.65	165.845	2540.59	1525.07	273.418	2551.49	1520.23	214.091	2566.06	1421.86	212.929	2491.85	1138.97	201.386	2688.3	1328.44	198.986	2753.77	1136.03	295.175	2480.12	1215.81	27.294	2620.22	1349.15	-34.6247	2569.94	1104.54	-31.96	2557.76	1029.94	-52.3941	2623.64	868.671	-2.55275	2638.06	790.097	-65.7946	2601.8	781.136	-39.2838	2645.04	716.13
992	0	152.565	2720.03	1562.78	271.604	2729.34	1560.51	163.437	2551.83	1525.21	271.022	2562.68	1520.78	212.031	2577.36	1422.27	211.607	2503.69	1139.32	199.715	2699.74	1328.97	197.818	2765.48	1136.72	293.686	2491.57	1216.42	25.4914	2631.76	1349.04	-35.7101	2582.24	1104.15	-32.774	2570.1	1029.55	-52.8352	2635.67	868.162	-2.75886	2649.5	789.53	-66.4246	2613.68	780.766	-39.4493	2656.24	715.468
993	0	150.106	2731.19	1563.37	269.139	2740.48	1561.58	161.001	2563.08	1525.55	268.6	2573.88	1521.56	209.977	2588.63	1422.88	210.274	2515.46	1139.89	198.083	2711.16	1329.7	196.694	2777.13	1137.66	292.192	2502.97	1217.24	23.707	2643.3	1349.15	-36.8149	2594.56	1104.03	-33.6443	2582.5	1029.4	-53.3652	2647.86	867.935	-3.07882	2661.19	789.272	-67.1327	2625.77	780.677	-39.7506	2667.74	715.134
994	0	147.615	2742.36	1564.08	266.638	2751.63	1562.83	158.555	2574.32	1526.07	266.169	2585.08	1522.57	207.939	2599.86	1423.68	208.929	2527.16	1140.66	196.505	2722.55	1330.62	195.634	2788.69	1138.79	290.691	2514.32	1218.26	21.9521	2654.84	1349.47	-37.9421	2606.89	1104.16	-34.5742	2594.95	1029.48	-53.9829	2660.21	867.981	-3.5111	2673.15	789.312	-67.915	2638.09	780.853	-40.1812	2679.56	715.118
995	0	145.108	2753.51	1564.91	264.119	2762.77	1564.22	156.116	2585.54	1526.77	263.745	2596.26	1523.79	205.929	2611.05	1424.63	207.566	2538.76	1141.6	194.994	2733.89	1331.71	194.656	2800.15	1140.09	289.18	2525.59	1219.43	20.2372	2666.38	1349.98	-39.0953	2619.22	1104.52	-35.5666	2607.43	1029.77	-54.6858	2672.73	868.286	-4.05214	2685.38	789.637	-68.7668	2650.64	781.274	-40.733	2691.7	715.402
996	0	142.602	2764.64	1565.83	261.599	2773.92	1565.74	153.701	2596.74	1527.62	261.347	2607.43	1525.19	203.954	2622.18	1425.73	206.184	2550.25	1142.7	193.562	2745.18	1332.94	193.775	2811.48	1141.53	287.653	2536.76	1220.76	18.5717	2677.9	1350.65	-40.2783	2631.54	1105.08	-36.6238	2619.94	1030.25	-55.47	2685.39	868.83	-4.69641	2697.86	790.225	-69.683	2663.4	781.919	-41.3962	2704.15	715.965
997	0	140.117	2775.74	1566.82	259.099	2785.05	1567.35	151.326	2607.9	1528.61	258.988	2618.57	1526.74	202.023	2633.24	1426.95	204.777	2561.61	1143.93	192.217	2756.4	1334.27	193.004	2822.66	1143.06	286.107	2547.8	1222.2	16.9635	2689.41	1351.47	-41.4948	2643.86	1105.82	-37.747	2632.47	1030.9	-56.3305	2698.2	869.591	-5.43662	2710.59	791.054	-70.6583	2676.39	782.76	-42.1602	2716.94	716.782
998	0	137.669	2786.81	1567.86	256.636	2796.16	1569.03	149.005	2619.01	1529.72	256.686	2629.67	1528.42	200.142	2644.23	1428.27	203.342	2572.83	1145.27	190.967	2767.55	1335.7	192.354	2833.69	1144.64	284.537	2558.7	1223.73	15.4191	2700.9	1352.42	-42.7475	2656.18	1106.72	-38.9362	2645.02	1031.7	-57.2609	2711.15	870.546	-6.26392	2723.57	792.097	-71.6866	2689.58	783.77	-43.0137	2730.04	717.826
999	0	135.276	2797.83	1568.93	254.229	2807.24	1570.74	146.752	2630.08	1530.93	254.453	2640.73	1530.21	198.315	2655.14	1429.67	201.874	2583.9	1146.69	189.815	2778.61	1337.19	191.831	2844.56	1146.25	282.938	2569.46	1225.32	13.9436	2712.36	1353.46	-44.0381	2668.48	1107.74	-40.19	2657.58	1032.62	-58.2541	2724.23	871.67	-7.16823	2736.77	793.327	-72.7617	2702.99	784.92	-43.945	2743.46	719.07
1000	0	132.955	2808.8	1570.02	251.895	2818.29	1572.45	144.58	2641.1	1532.22	252.302	2651.74	1532.06	196.548	2665.97	1431.13	200.372	2594.82	1148.18	188.764	2789.57	1338.71	191.438	2855.27	1147.86	281.308	2580.05	1226.96	12.5401	2723.8	1354.57	-45.3662	2680.77	1108.86	-41.5057	2670.14	1033.62	-59.3018	2737.43	872.938	-8.13856	2750.19	794.717	-73.8768	2716.59	786.183	-44.9422	2757.19	720.488
1001	0	130.721	2819.72	1571.1	249.652	2829.29	1574.15	142.498	2652.05	1533.57	250.244	2662.69	1533.96	194.843	2676.71	1432.61	198.833	2605.59	1149.69	187.812	2800.43	1340.25	191.172	2865.81	1149.42	279.645	2590.47	1228.62	11.2105	2735.2	1355.73	-46.7298	2693.04	1110.05	-42.8788	2682.71	1034.7	-60.3951	2750.75	874.325	-9.16337	2763.81	796.24	-75.025	2730.37	787.536	-45.9936	2771.22	722.054
1002	0	128.588	2830.58	1572.17	247.514	2840.24	1575.8	140.516	2662.94	1534.98	248.286	2673.58	1535.89	193.201	2687.37	1434.12	197.258	2616.21	1151.23	186.958	2811.19	1341.79	191.028	2876.18	1150.94	277.95	2600.72	1230.28	9.95492	2746.55	1356.91	-48.1245	2705.31	1111.28	-44.304	2695.28	1035.83	-61.5247	2764.19	875.81	-10.2309	2777.62	797.873	-76.1993	2744.34	788.955	-47.0875	2785.52	723.745
1003	0	126.57	2841.37	1573.21	245.493	2851.13	1577.39	138.641	2673.76	1536.42	246.436	2684.4	1537.81	191.624	2697.93	1435.62	195.647	2626.67	1152.77	186.197	2821.82	1343.3	190.996	2886.39	1152.39	276.224	2610.8	1231.92	8.77246	2757.86	1358.12	-49.5444	2717.56	1112.54	-45.7746	2707.85	1037	-62.6811	2777.72	877.373	-11.3295	2791.59	799.594	-77.3925	2758.46	790.424	-48.2129	2800.08	725.544
1004	0	124.677	2852.1	1574.22	243.602	2861.96	1578.91	136.877	2684.5	1537.88	244.699	2695.14	1539.72	190.113	2708.39	1437.11	194.004	2636.99	1154.29	185.522	2832.35	1344.77	191.063	2896.45	1153.75	274.47	2620.72	1233.53	7.66104	2769.12	1359.31	-50.9815	2729.8	1113.81	-47.2834	2720.43	1038.17	-63.8548	2791.35	878.997	-12.4481	2805.72	801.385	-78.5979	2772.74	791.928	-49.359	2814.89	727.432
1005	0	122.918	2862.76	1575.18	241.85	2872.72	1580.33	135.229	2695.17	1539.36	243.079	2705.8	1541.59	188.666	2718.76	1438.57	192.332	2647.17	1155.79	184.926	2842.75	1346.19	191.213	2906.37	1155.04	272.692	2630.47	1235.1	6.61779	2780.32	1360.5	-52.4269	2742.03	1115.07	-48.8226	2733	1039.35	-65.0369	2805.06	880.668	-13.5764	2819.98	803.231	-79.8086	2787.15	793.457	-50.516	2829.92	729.398
1006	0	121.302	2873.35	1576.1	240.244	2883.4	1581.65	133.698	2705.77	1540.83	241.576	2716.38	1543.4	187.282	2729.04	1439.99	190.636	2657.21	1157.25	184.402	2853.03	1347.55	191.428	2916.15	1156.24	270.896	2640.07	1236.62	5.63921	2791.44	1361.66	-53.8706	2754.25	1116.32	-50.3844	2745.57	1040.52	-66.2189	2818.86	882.375	-14.7048	2834.36	805.12	-81.0183	2801.69	795.004	-51.6746	2845.14	731.431
1007	0	119.833	2883.87	1576.96	238.791	2894	1582.87	132.286	2716.29	1542.29	240.193	2726.87	1545.15	185.962	2739.22	1441.37	188.922	2667.12	1158.66	183.94	2863.19	1348.84	191.689	2925.8	1157.37	269.087	2649.54	1238.08	4.72145	2802.5	1362.79	-55.3024	2766.46	1117.54	-51.961	2758.13	1041.67	-67.3928	2832.73	884.11	-15.825	2848.85	807.045	-82.2211	2816.35	796.565	-52.8266	2860.54	733.524
1008	0	118.518	2894.31	1577.78	237.494	2904.51	1583.96	130.992	2726.73	1543.74	238.928	2737.27	1546.82	184.703	2749.31	1442.68	187.195	2676.92	1160.02	183.533	2873.22	1350.05	191.976	2935.34	1158.41	267.271	2658.86	1239.47	3.86053	2813.47	1363.88	-56.7126	2778.66	1118.74	-53.5453	2770.69	1042.81	-68.552	2846.66	885.866	-16.9297	2863.42	808.999	-83.4114	2831.11	798.139	-53.9643	2876.09	735.671
1009	0	117.358	2904.68	1578.53	236.357	2914.94	1584.94	129.815	2737.1	1545.17	237.781	2747.58	1548.41	183.505	2759.3	1443.94	185.461	2686.6	1161.32	183.172	2883.14	1351.19	192.271	2944.78	1159.39	265.456	2668.07	1240.79	3.0525	2824.36	1364.93	-58.0919	2790.84	1119.9	-55.1307	2783.24	1043.92	-69.6904	2860.66	887.64	-18.0127	2878.08	810.978	-84.5839	2845.97	799.725	-55.081	2891.78	737.869
1010	0	116.356	2914.98	1579.23	235.381	2925.28	1585.79	128.754	2747.38	1546.58	236.75	2757.8	1549.91	182.366	2769.2	1445.13	183.725	2696.18	1162.56	182.852	2892.93	1352.25	192.557	2954.12	1160.31	263.647	2677.17	1242.04	2.29366	2835.16	1365.95	-59.4326	2803.01	1121.02	-56.7116	2795.77	1045	-70.8031	2874.71	889.429	-19.0686	2892.8	812.981	-85.7342	2860.92	801.326	-56.171	2907.59	740.116
1011	0	115.514	2925.21	1579.87	234.568	2935.53	1586.52	127.808	2757.59	1547.96	235.833	2767.92	1551.32	181.285	2779.01	1446.26	181.991	2705.66	1163.73	182.566	2902.61	1353.22	192.82	2963.37	1161.16	261.848	2686.15	1243.21	1.58075	2845.86	1366.93	-60.728	2815.17	1122.1	-58.2832	2808.3	1046.06	-71.8862	2888.81	891.231	-20.0931	2907.59	815.006	-86.858	2875.95	802.943	-57.229	2923.49	742.409
1012	0	114.831	2935.36	1580.45	233.918	2945.68	1587.12	126.975	2767.72	1549.3	235.029	2777.94	1552.63	180.262	2788.72	1447.31	180.264	2715.05	1164.83	182.308	2912.17	1354.11	193.048	2972.53	1161.97	260.065	2695.05	1244.3	0.911004	2856.47	1367.86	-61.973	2827.3	1123.15	-59.842	2820.8	1047.09	-72.9365	2902.97	893.045	-21.0829	2922.43	817.052	-87.9522	2891.05	804.577	-58.2511	2939.48	744.747
1013	0	114.308	2945.44	1580.98	233.43	2955.74	1587.6	126.254	2777.77	1550.62	234.335	2787.87	1553.83	179.296	2798.34	1448.28	178.546	2724.34	1165.85	182.076	2921.61	1354.91	193.232	2981.62	1162.72	258.302	2703.85	1245.31	0.282296	2866.98	1368.75	-63.1639	2839.41	1124.16	-61.385	2833.29	1048.09	-73.9518	2917.17	894.871	-22.0353	2937.33	819.119	-89.014	2906.24	806.23	-59.2339	2955.56	747.128
1014	0	113.946	2955.45	1581.44	233.105	2965.7	1587.95	125.643	2787.74	1551.89	233.751	2797.7	1554.94	178.385	2807.87	1449.18	176.84	2733.56	1166.8	181.867	2930.94	1355.63	193.364	2990.64	1163.43	256.56	2712.56	1246.24	-0.306932	2877.4	1369.6	-64.2982	2851.5	1125.12	-62.9103	2845.76	1049.06	-74.9305	2931.42	896.709	-22.9487	2952.27	821.206	-90.0418	2921.49	807.903	-60.1751	2971.7	749.552
1015	0	113.743	2965.39	1581.85	232.942	2975.56	1588.17	125.143	2797.64	1553.14	233.275	2807.43	1555.94	177.531	2817.3	1450.01	175.146	2742.68	1167.68	181.678	2940.16	1356.25	193.441	2999.59	1164.08	254.841	2721.18	1247.08	-0.857707	2887.7	1370.41	-65.3745	2863.56	1126.05	-64.4166	2858.21	1050.01	-75.8717	2945.72	898.557	-23.8217	2967.26	823.314	-91.0343	2936.81	809.597	-61.0731	2987.92	752.017
1016	0	113.7	2975.25	1582.2	232.941	2985.33	1588.26	124.751	2807.46	1554.35	232.908	2817.06	1556.84	176.733	2826.65	1450.76	173.467	2751.73	1168.48	181.51	2949.26	1356.8	193.459	3008.47	1164.7	253.148	2729.72	1247.84	-1.37062	2897.91	1371.18	-66.392	2875.6	1126.93	-65.9033	2870.64	1050.93	-76.7748	2960.06	900.417	-24.6539	2982.29	825.443	-91.9913	2952.2	811.313	-61.9272	3004.2	754.523
1017	0	113.817	2985.04	1582.49	233.101	2995	1588.22	124.469	2817.2	1555.52	232.648	2826.6	1557.64	175.991	2835.9	1451.43	171.803	2760.69	1169.21	181.36	2958.25	1357.25	193.419	3017.28	1165.27	251.479	2738.18	1248.52	-1.84597	2908.02	1371.91	-67.3503	2887.61	1127.78	-67.3699	2883.05	1051.82	-77.6397	2974.44	902.287	-25.4448	2997.37	827.592	-92.9124	2967.67	813.05	-62.7369	3020.54	757.07
1018	0	114.093	2994.76	1582.72	233.423	3004.58	1588.05	124.296	2826.86	1556.65	232.495	2836.03	1558.33	175.304	2845.06	1452.03	170.152	2769.58	1169.86	181.23	2967.13	1357.61	193.319	3026.02	1165.79	249.835	2746.56	1249.11	-2.28385	2918.02	1372.59	-68.2494	2899.59	1128.58	-68.8163	2895.44	1052.68	-78.4663	2988.87	904.169	-26.1944	3012.49	829.761	-93.7977	2983.2	814.809	-63.5019	3036.95	759.658
[truncated: 69 more columns]

## Sheet: Sheet2
Devices
		025370 - Force			025370 - Moment			025370 - CoP			027571 - Force			027571 - Moment			027571 - CoP			037720 - Force			037720 - Moment			037720 - CoP
Frame	Sub Frame	Fx	Fy	Fz	Mx	My	Mz	Cx	Cy	Cz	Fx	Fy	Fz	Mx	My	Mz	Cx	Cy	Cz	Fx	Fy	Fz	Mx	My	Mz	Cx	Cy	Cz
		N	N	N	N.mm	N.mm	N.mm	mm	mm	mm	N	N	N	N.mm	N.mm	N.mm	mm	mm	mm	N	N	N	N.mm	N.mm	N.mm	mm	mm	mm
528	0	0	0	0	0	0	0	200	300	0	0	0	0	0	0	0	200	903	0	0	0	0	0	0	0	603	903	0
528	1	0	0	0	0	0	0	200	300	0	0	0	0	0	0	0	200	903	0	0	0	0	0	0	0	603	903	0
528	2	0	0	0	0	0	0	200	300	0	0	0	0	0	0	0	200	903	0	0	0	0	0	0	0	603	903	0
528	3	0	0	0	0	0	0	200	300	0	0	0	0	0	0	0	200	903	0	0	0	0	0	0	0	603	903	0
528	4	0	0	0	0	0	0	200	300	0	0	0	0	0	0	0	200	903	0	0	0	0	0	0	0	603	903	0
528	5	0	0	0	0	0	0	200	300	0	0	0	0	0	0	0	200	903	0	0	0	0	0	0	0	603	903	0
528	6	0	0	0	0	0	0	200	300	0	0	0	0	0	0	0	200	903	0	0	0	0	0	0	0	603	903	0
528	7	0	0	0	0	0	0	200	300	0	0	0	0	0	0	0	200	903	0	0	0	0	0	0	0	603	903	0
528	8	0	0	0	0	0	0	200	300	0	0	0	0	0	0	0	200	903	0	0	0	0	0	0	0	603	903	0
528	9	0	0	0	0	0	0	200	300	0	0	0	0	0	0	0	200	903	0	0	0	0	0	0	0	603	903	0
529	0	0	0	0	0	0	0	200	300	0	0	0	0	0	0	0	200	903	0	0	0	0	0	0	0	603	903	0
529	1	0	0	0	0	0	0	200	300	0	0	0	0	0	0	0	200	903	0	0	0	0	0	0	0	603	903	0
529	2	0	0	0	0	0	0	200	300	0	0	0	0	0	0	0	200	903	0	0	0	0	0	0	0	603	903	0
529	3	0	0	0	0	0	0	200	300	0	0	0	0	0	0	0	200	903	0	0	0	0	0	0	0	603	903	0
529	4	0	0	0	0	0	0	200	300	0	0	0	0	0	0	0	200	903	0	0	0	0	0	0	0	603	903	0
529	5	0	0	0	0	0	0	200	300	0	0	0	0	0	0	0	200	903	0	0	0	0	0	0	0	603	903	0
529	6	0	0	0	0	0	0	200	300	0	0	0	0	0	0	0	200	903	0	0	0	0	0	0	0	603	903	0
529	7	0	0	0	0	0	0	200	300	0	0	0	0	0	0	0	200	903	0	0	0	0	0	0	0	603	903	0
529	8	0	0	0	0	0	0	200	300	0	0	0	0	0	0	0	200	903	0	0	0	0	0	0	0	603	903	0
529	9	0	0	0	0	0	0	200	300	0	0	0	0	0	0	0	200	903	0	0	0	0	0	0	0	603	903	0
530	0	0	0	0	0	0	0	200	300	0	0	0	0	0	0	0	200	903	0	0	0	0	0	0	0	603	903	0
530	1	0	0	0	0	0	0	200	300	0	0	0	0	0	0	0	200	903	0	0	0	0	0	0	0	603	903	0
530	2	0	0	0	0	0	0	200	300	0	0	0	0	0	0	0	200	903	0	0	0	0	0	0	0	603	903	0
530	3	0	0	0	0	0	0	200	300	0	0	0	0	0	0	0	200	903	0	0	0	0	0	0	0	603	903	0
530	4	0	0	0	0	0	0	200	300	0	0	0	0	0	0	0	200	903	0	0	0	0	0	0	0	603	903	0
530	5	0	0	0	0	0	0	200	300	0	0	0	0	0	0	0	200	903	0	0	0	0	0	0	0	603	903	0
530	6	0	0	0	0	0	0	200	300	0	0	0	0	0	0	0	200	903	0	0	0	0	0	0	0	603	903	0
530	7	0	0	0	0	0	0	200	300	0	0	0	0	0	0	0	200	903	0	0	0	0	0	0	0	603	903	0
530	8	0	0	0	0	0	0	200	300	0	0	0	0	0	0	0	200	903	0	0	0	0	0	0	0	603	903	0
530	9	0	0	0	0	0	0	200	300	0	0	0	0	0	0	0	200	903	0	0	0	0	0	0	0	603	903	0
531	0	0	0	0	0	0	0	200	300	0	0	0	0	0	0	0	200	903	0	0	0	0	0	0	0	603	903	0
531	1	0	0	0	0	0	0	200	300	0	0	0	0	0	0	0	200	903	0	0	0	0	0	0	0	603	903	0
531	2	0	0	0	0	0	0	200	300	0	0	0	0	0	0	0	200	903	0	0	0	0	0	0	0	603	903	0
531	3	0	0	0	0	0	0	200	300	0	0	0	0	0	0	0	200	903	0	0	0	0	0	0	0	603	903	0
531	4	0	0	0	0	0	0	200	300	0	0	0	0	0	0	0	200	903	0	0	0	0	0	0	0	603	903	0
531	5	0	0	0	0	0	0	200	300	0	0	0	0	0	0	0	200	903	0	0	0	0	0	0	0	603	903	0
531	6	0	0	0	0	0	0	200	300	0	0	0	0	0	0	0	200	903	0	0	0	0	0	0	0	603	903	0
531	7	0	0	0	0	0	0	200	300	0	0	0	0	0	0	0	200	903	0	0	0	0	0	0	0	603	903	0
531	8	0	0	0	0	0	0	200	300	0	0	0	0	0	0	0	200	903	0	0	0	0	0	0	0	603	903	0
531	9	0	0	0	0	0	0	200	300	0	0	0	0	0	0	0	200	903	0	0	0	0	0	0	0	603	903	0
532	0	0	0	0	0	0	0	200	300	0	0	0	0	0	0	0	200	903	0	0	0	0	0	0	0	603	903	0
532	1	0	0	0	0	0	0	200	300	0	0	0	0	0	0	0	200	903	0	0	0	0	0	0	0	603	903	0
532	2	0	0	0	0	0	0	200	300	0	0	0	0	0	0	0	200	903	0	0	0	0	0	0	0	603	903	0
532	3	0	0	0	0	0	0	200	300	0	0	0	0	0	0	0	200	903	0	0	0	0	0	0	0	603	903	0
532	4	0	0	0	0	0	0	200	300	0	0	0	0	0	0	0	200	903	0	0	0	0	0	0	0	603	903	0
532	5	0	0	0	0	0	0	200	300	0	0	0	0	0	0	0	200	903	0	0	0	0	0	0	0	603	903	0
532	6	0	0	0	0	0	0	200	300	0	0	0	0	0	0	0	200	903	0	0	0	0	0	0	0	603	903	0
532	7	0	0	0	0	0	0	200	300	0	0	0	0	0	0	0	200	903	0	0	0	0	0	0	0	603	903	0
532	8	0	0	0	0	0	0	200	300	0	0	0	0	0	0	0	200	903	0	0	0	0	0	0	0	603	903	0
532	9	0	0	0	0	0	0	200	300	0	0	0	0	0	0	0	200	903	0	0	0	0	0	0	0	603	903	0
533	0	0	0	0	0	0	0	200	300	0	0	0	0	0	0	0	200	903	0	0	0	0	0	0	0	603	903	0
533	1	0	0	0	0	0	0	200	300	0	0	0	0	0	0	0	200	903	0	0	0	0	0	0	0	603	903	0
533	2	0	0	0	0	0	0	200	300	0	0	0	0	0	0	0	200	903	0	0	0	0	0	0	0	603	903	0
533	3	0	0	0	0	0	0	200	300	0	0	0	0	0	0	0	200	903	0	0	0	0	0	0	0	603	903	0
533	4	0	0	0	0	0	0	200	300	0	0	0	0	0	0	0	200	903	0	0	0	0	0	0	0	603	903	0
533	5	0	0	0	0	0	0	200	300	0	0	0	0	0	0	0	200	903	0	0	0	0	0	0	0	603	903	0
533	6	0	0	0	0	0	0	200	300	0	0	0	0	0	0	0	200	903	0	0	0	0	0	0	0	603	903	0
533	7	0	0	0	0	0	0	200	300	0	0	0	0	0	0	0	200	903	0	0	0	0	0	0	0	603	903	0
533	8	0	0	0	0	0	0	200	300	0	0	0	0	0	0	0	200	903	0	0	0	0	0	0	0	603	903	0
533	9	0	0	0	0	0	0	200	300	0	0	0	0	0	0	0	200	903	0	0	0	0	0	0	0	603	903	0
534	0	0	0	0	0	0	0	200	300	0	0	0	0	0	0	0	200	903	0	0	0	0	0	0	0	603	903	0
534	1	0	0	0	0	0	0	200	300	0	0	0	0	0	0	0	200	903	0	0	0	0	0	0	0	603	903	0
534	2	0	0	0	0	0	0	200	300	0	0	0	0	0	0	0	200	903	0	0	0	0	0	0	0	603	903	0
534	3	0	0	0	0	0	0	200	300	0	0	0	0	0	0	0	200	903	0	0	0	0	0	0	0	603	903	0
534	4	0	0	0	0	0	0	200	300	0	0	0	0	0	0	0	200	903	0	0	0	0	0	0	0	603	903	0
534	5	0	0	0	0	0	0	200	300	0	0	0	0	0	0	0	200	903	0	0	0	0	0	0	0	603	903	0
534	6	0	0	0	0	0	0	200	300	0	0	0	0	0	0	0	200	903	0	0	0	0	0	0	0	603	903	0
534	7	0	0	0	0	0	0	200	300	0	0	0	0	0	0	0	200	903	0	0	0	0	0	0	0	603	903	0
534	8	0	0	0	0	0	0	200	300	0	0	0	0	0	0	0	200	903	0	0	0	0	0	0	0	603	903	0
534	9	0	0	0	0	0	0	200	300	0	0	0	0	0	0	0	200	903	0	0	0	0	0	0	0	603	903	0
535	0	0	0	0	0	0	0	200	300	0	0	0	0	0	0	0	200	903	0	0	0	0	0	0	0	603	903	0
535	1	0	0	0	0	0	0	200	300	0	0	0	0	0	0	0	200	903	0	0	0	0	0	0	0	603	903	0
535	2	0	0	0	0	0	0	200	300	0	0	0	0	0	0	0	200	903	0	0	0	0	0	0	0	603	903	0
535	3	0	0	0	0	0	0	200	300	0	0	0	0	0	0	0	200	903	0	0	0	0	0	0	0	603	903	0
535	4	0	0	0	0	0	0	200	300	0	0	0	0	0	0	0	200	903	0	0	0	0	0	0	0	603	903	0
535	5	0	0	0	0	0	0	200	300	0	0	0	0	0	0	0	200	903	0	0	0	0	0	0	0	603	903	0
535	6	0	0	0	0	0	0	200	300	0	0	0	0	0	0	0	200	903	0	0	0	0	0	0	0	603	903	0
535	7	0	0	0	0	0	0	200	300	0	0	0	0	0	0	0	200	903	0	0	0	0	0	0	0	603	903	0
535	8	0	0	0	0	0	0	200	300	0	0	0	0	0	0	0	200	903	0	0	0	0	0	0	0	603	903	0
535	9	0	0	0	0	0	0	200	300	0	0	0	0	0	0	0	200	903	0	0	0	0	0	0	0	603	903	0
536	0	0	0	0	0	0	0	200	300	0	0	0	0	0	0	0	200	903	0	0	0	0	0	0	0	603	903	0
536	1	0	0	0	0	0	0	200	300	0	0	0	0	0	0	0	200	903	0	0	0	0	0	0	0	603	903	0
536	2	0	0	0	0	0	0	200	300	0	0	0	0	0	0	0	200	903	0	0	0	0	0	0	0	603	903	0
536	3	0	0	0	0	0	0	200	300	0	0	0	0	0	0	0	200	903	0	0	0	0	0	0	0	603	903	0
536	4	0	0	0	0	0	0	200	300	0	0	0	0	0	0	0	200	903	0	0	0	0	0	0	0	603	903	0
536	5	0	0	0	0	0	0	200	300	0	0	0	0	0	0	0	200	903	0	0	0	0	0	0	0	603	903	0
536	6	0	0	0	0	0	0	200	300	0	0	0	0	0	0	0	200	903	0	0	0	0	0	0	0	603	903	0
536	7	0	0	0	0	0	0	200	300	0	0	0	0	0	0	0	200	903	0	0	0	0	0	0	0	603	903	0
536	8	0	0	0	0	0	0	200	300	0	0	0	0	0	0	0	200	903	0	0	0	0	0	0	0	603	903	0
536	9	0	0	0	0	0	0	200	300	0	0	0	0	0	0	0	200	903	0	0	0	0	0	0	0	603	903	0
537	0	0	0	0	0	0	0	200	300	0	0	0	0	0	0	0	200	903	0	0	0	0	0	0	0	603	903	0
537	1	0	0	0	0	0	0	200	300	0	0	0	0	0	0	0	200	903	0	0	0	0	0	0	0	603	903	0
537	2	0	0	0	0	0	0	200	300	0	0	0	0	0	0	0	200	903	0	0	0	0	0	0	0	603	903	0
537	3	0	0	0	0	0	0	200	300	0	0	0	0	0	0	0	200	903	0	0	0	0	0	0	0	603	903	0
537	4	0	0	0	0	0	0	200	300	0	0	0	0	0	0	0	200	903	0	0	0	0	0	0	0	603	903	0
537	5	0	0	0	0	0	0	200	300	0	0	0	0	0	0	0	200	903	0	0	0	0	0	0	0	603	903	0
537	6	0	0	0	0	0	0	200	300	0	0	0	0	0	0	0	200	903	0	0	0	0	0	0	0	603	903	0
537	7	0	0	0	0	0	0	200	300	0	0	0	0	0	0	0	200	903	0	0	0	0	0	0	0	603	903	0
537	8	0	0	0	0	0	0	200	300	0	0	0	0	0	0	0	200	903	0	0	0	0	0	0	0	603	903	0
537	9	0	0	0	0	0	0	200	300	0	0	0	0	0	0	0	200	903	0	0	0	0	0	0	0	603	903	0
538	0	0	0	0	0	0	0	200	300	0	0	0	0	0	0	0	200	903	0	0	0	0	0	0	0	603	903	0
538	1	0	0	0	0	0	0	200	300	0	0	0	0	0	0	0	200	903	0	0	0	0	0	0	0	603	903	0
538	2	0	0	0	0	0	0	200	300	0	0	0	0	0	0	0	200	903	0	0	0	0	0	0	0	603	903	0
538	3	0	0	0	0	0	0	200	300	0	0	0	0	0	0	0	200	903	0	0	0	0	0	0	0	603	903	0
538	4	0	0	0	0	0	0	200	300	0	0	0	0	0	0	0	200	903	0	0	0	0	0	0	0	603	903	0
538	5	0	0	0	0	0	0	200	300	0	0	0	0	0	0	0	200	903	0	0	0	0	0	0	0	603	903	0
538	6	0	0	0	0	0	0	200	300	0	0	0	0	0	0	0	200	903	0	0	0	0	0	0	0	603	903	0
538	7	0	0	0	0	0	0	200	300	0	0	0	0	0	0	0	200	903	0	0	0	0	0	0	0	603	903	0
538	8	0	0	0	0	0	0	200	300	0	0	0	0	0	0	0	200	903	0	0	0	0	0	0	0	603	903	0
538	9	0	0	0	0	0	0	200	300	0	0	0	0	0	0	0	200	903	0	0	0	0	0	0	0	603	903	0
539	0	0	0	0	0	0	0	200	300	0	0	0	0	0	0	0	200	903	0	0	0	0	0	0	0	603	903	0
539	1	0	0	0	0	0	0	200	300	0	0	0	0	0	0	0	200	903	0	0	0	0	0	0	0	603	903	0
539	2	0	0	0	0	0	0	200	300	0	0	0	0	0	0	0	200	903	0	0	0	0	0	0	0	603	903	0
539	3	0	0	0	0	0	0	200	300	0	0	0	0	0	0	0	200	903	0	0	0	0	0	0	0	603	903	0
539	4	0	0	0	0	0	0	200	300	0	0	0	0	0	0	0	200	903	0	0	0	0	0	0	0	603	903	0
539	5	0	0	0	0	0	0	200	300	0	0	0	0	0	0	0	200	903	0	0	0	0	0	0	0	603	903	0
539	6	0	0	0	0	0	0	200	300	0	0	0	0	0	0	0	200	903	0	0	0	0	0	0	0	603	903	0
539	7	0	0	0	0	0	0	200	300	0	0	0	0	0	0	0	200	903	0	0	0	0	0	0	0	603	903	0
539	8	0	0	0	0	0	0	200	300	0	0	0	0	0	0	0	200	903	0	0	0	0	0	0	0	603	903	0
539	9	0	0	0	0	0	0	200	300	0	0	0	0	0	0	0	200	903	0	0	0	0	0	0	0	603	903	0
540	0	0	0	0	0	0	0	200	300	0	0	0	0	0	0	0	200	903	0	0	0	0	0	0	0	603	903	0
540	1	0	0	0	0	0	0	200	300	0	0	0	0	0	0	0	200	903	0	0	0	0	0	0	0	603	903	0
540	2	0	0	0	0	0	0	200	300	0	0	0	0	0	0	0	200	903	0	0	0	0	0	0	0	603	903	0
540	3	0	0	0	0	0	0	200	300	0	0	0	0	0	0	0	200	903	0	0	0	0	0	0	0	603	903	0
540	4	0	0	0	0	0	0	200	300	0	0	0	0	0	0	0	200	903	0	0	0	0	0	0	0	603	903	0
540	5	0	0	0	0	0	0	200	300	0	0	0	0	0	0	0	200	903	0	0	0	0	0	0	0	603	903	0
540	6	0	0	0	0	0	0	200	300	0	0	0	0	0	0	0	200	903	0	0	0	0	0	0	0	603	903	0
540	7	0	0	0	0	0	0	200	300	0	0	0	0	0	0	0	200	903	0	0	0	0	0	0	0	603	903	0
540	8	0	0	0	0	0	0	200	300	0	0	0	0	0	0	0	200	903	0	0	0	0	0	0	0	603	903	0
540	9	0	0	0	0	0	0	200	300	0	0	0	0	0	0	0	200	903	0	0	0	0	0	0	0	603	903	0
541	0	0	0	0	0	0	0	200	300	0	0	0	0	0	0	0	200	903	0	0	0	0	0	0	0	603	903	0
541	1	0	0	0	0	0	0	200	300	0	0	0	0	0	0	0	200	903	0	0	0	0	0	0	0	603	903	0
541	2	0	0	0	0	0	0	200	300	0	0	0	0	0	0	0	200	903	0	0	0	0	0	0	0	603	903	0
541	3	0	0	0	0	0	0	200	300	0	0	0	0	0	0	0	200	903	0	0	0	0	0	0	0	603	903	0
541	4	0	0	0	0	0	0	200	300	0	0	0	0	0	0	0	200	903	0	0	0	0	0	0	0	603	903	0
541	5	0	0	0	0	0	0	200	300	0	0	0	0	0	0	0	200	903	0	0	0	0	0	0	0	603	903	0
541	6	0	0	0	0	0	0	200	300	0	0	0	0	0	0	0	200	903	0	0	0	0	0	0	0	603	903	0
541	7	0	0	0	0	0	0	200	300	0	0	0	0	0	0	0	200	903	0	0	0	0	0	0	0	603	903	0
541	8	0	0	0	0	0	0	200	300	0	0	0	0	0	0	0	200	903	0	0	0	0	0	0	0	603	903	0
541	9	0	0	0	0	0	0	200	300	0	0	0	0	0	0	0	200	903	0	0	0	0	0	0	0	603	903	0
542	0	0	0	0	0	0	0	200	300	0	0	0	0	0	0	0	200	903	0	0	0	0	0	0	0	603	903	0
542	1	0	0	0	0	0	0	200	300	0	0	0	0	0	0	0	200	903	0	0	0	0	0	0	0	603	903	0
542	2	0	0	0	0	0	0	200	300	0	0	0	0	0	0	0	200	903	0	0	0	0	0	0	0	603	903	0
542	3	0	0	0	0	0	0	200	300	0	0	0	0	0	0	0	200	903	0	0	0	0	0	0	0	603	903	0
542	4	0	0	0	0	0	0	200	300	0	0	0	0	0	0	0	200	903	0	0	0	0	0	0	0	603	903	0
542	5	0	0	0	0	0	0	200	300	0	0	0	0	0	0	0	200	903	0	0	0	0	0	0	0	603	903	0
542	6	0	0	0	0	0	0	200	300	0	0	0	0	0	0	0	200	903	0	0	0	0	0	0	0	603	903	0
542	7	0	0	0	0	0	0	200	300	0	0	0	0	0	0	0	200	903	0	0	0	0	0	0	0	603	903	0
542	8	0	0	0	0	0	0	200	300	0	0	0	0	0	0	0	200	903	0	0	0	0	0	0	0	603	903	0
542	9	0	0	0	0	0	0	200	300	0	0	0	0	0	0	0	200	903	0	0	0	0	0	0	0	603	903	0
543	0	0	0	0	0	0	0	200	300	0	0	0	0	0	0	0	200	903	0	0	0	0	0	0	0	603	903	0
543	1	0	0	0	0	0	0	200	300	0	0	0	0	0	0	0	200	903	0	0	0	0	0	0	0	603	903	0
543	2	0	0	0	0	0	0	200	300	0	0	0	0	0	0	0	200	903	0	0	0	0	0	0	0	603	903	0
543	3	0	0	0	0	0	0	200	300	0	0	0	0	0	0	0	200	903	0	0	0	0	0	0	0	603	903	0
543	4	0	0	0	0	0	0	200	300	0	0	0	0	0	0	0	200	903	0	0	0	0	0	0	0	603	903	0
543	5	0	0	0	0	0	0	200	300	0	0	0	0	0	0	0	200	903	0	0	0	0	0	0	0	603	903	0
543	6	0	0	0	0	0	0	200	300	0	0	0	0	0	0	0	200	903	0	0	0	0	0	0	0	603	903	0
543	7	0	0	0	0	0	0	200	300	0	0	0	0	0	0	0	200	903	0	0	0	0	0	0	0	603	903	0
543	8	0	0	0	0	0	0	200	300	0	0	0	0	0	0	0	200	903	0	0	0	0	0	0	0	603	903	0
543	9	0	0	0	0	0	0	200	300	0	0	0	0	0	0	0	200	903	0	0	0	0	0	0	0	603	903	0
544	0	0	0	0	0	0	0	200	300	0	0	0	0	0	0	0	200	903	0	0	0	0	0	0	0	603	903	0
544	1	0	0	0	0	0	0	200	300	0	0	0	0	0	0	0	200	903	0	0	0	0	0	0	0	603	903	0
544	2	0	0	0	0	0	0	200	300	0	0	0	0	0	0	0	200	903	0	0	0	0	0	0	0	603	903	0
544	3	0	0	0	0	0	0	200	300	0	0	0	0	0	0	0	200	903	0	0	0	0	0	0	0	603	903	0
544	4	0	0	0	0	0	0	200	300	0	0	0	0	0	0	0	200	903	0	0	0	0	0	0	0	603	903	0
544	5	0	0	0	0	0	0	200	300	0	0	0	0	0	0	0	200	903	0	0	0	0	0	0	0	603	903	0
544	6	0	0	0	0	0	0	200	300	0	0	0	0	0	0	0	200	903	0	0	0	0	0	0	0	603	903	0
544	7	0	0	0	0	0	0	200	300	0	0	0	0	0	0	0	200	903	0	0	0	0	0	0	0	603	903	0
544	8	0	0	0	0	0	0	200	300	0	0	0	0	0	0	0	200	903	0	0	0	0	0	0	0	603	903	0
544	9	0	0	0	0	0	0	200	300	0	0	0	0	0	0	0	200	903	0	0	0	0	0	0	0	603	903	0
545	0	0	0	0	0	0	0	200	300	0	0	0	0	0	0	0	200	903	0	0	0	0	0	0	0	603	903	0
545	1	0	0	0	0	0	0	200	300	0	0	0	0	0	0	0	200	903	0	0	0	0	0	0	0	603	903	0
545	2	0	0	0	0	0	0	200	300	0	0	0	0	0	0	0	200	903	0	0	0	0	0	0	0	603	903	0
545	3	0	0	0	0	0	0	200	300	0	0	0	0	0	0	0	200	903	0	0	0	0	0	0	0	603	903	0
545	4	0	0	0	0	0	0	200	300	0	0	0	0	0	0	0	200	903	0	0	0	0	0	0	0	603	903	0
545	5	0	0	0	0	0	0	200	300	0	0	0	0	0	0	0	200	903	0	0	0	0	0	0	0	603	903	0
545	6	0	0	0	0	0	0	200	300	0	0	0	0	0	0	0	200	903	0	0	0	0	0	0	0	603	903	0
545	7	0	0	0	0	0	0	200	300	0	0	0	0	0	0	0	200	903	0	0	0	0	0	0	0	603	903	0
545	8	0	0	0	0	0	0	200	300	0	0	0	0	0	0	0	200	903	0	0	0	0	0	0	0	603	903	0
545	9	0	0	0	0	0	0	200	300	0	0	0	0	0	0	0	200	903	0	0	0	0	0	0	0	603	903	0
546	0	0	0	0	0	0	0	200	300	0	0	0	0	0	0	0	200	903	0	0	0	0	0	0	0	603	903	0
546	1	0	0	0	0	0	0	200	300	0	0	0	0	0	0	0	200	903	0	0	0	0	0	0	0	603	903	0
546	2	0	0	0	0	0	0	200	300	0	0	0	0	0	0	0	200	903	0	0	0	0	0	0	0	603	903	0
546	3	0	0	0	0	0	0	200	300	0	0	0	0	0	0	0	200	903	0	0	0	0	0	0	0	603	903	0
546	4	0	0	0	0	0	0	200	300	0	0	0	0	0	0	0	200	903	0	0	0	0	0	0	0	603	903	0
546	5	0	0	0	0	0	0	200	300	0	0	0	0	0	0	0	200	903	0	0	0	0	0	0	0	603	903	0
546	6	0	0	0	0	0	0	200	300	0	0	0	0	0	0	0	200	903	0	0	0	0	0	0	0	603	903	0
546	7	0	0	0	0	0	0	200	300	0	0	0	0	0	0	0	200	903	0	0	0	0	0	0	0	603	903	0
546	8	0	0	0	0	0	0	200	300	0	0	0	0	0	0	0	200	903	0	0	0	0	0	0	0	603	903	0
546	9	0	0	0	0	0	0	200	300	0	0	0	0	0	0	0	200	903	0	0	0	0	0	0	0	603	903	0
547	0	0	0	0	0	0	0	200	300	0	0	0	0	0	0	0	200	903	0	0	0	0	0	0	0	603	903	0
547	1	0	0	0	0	0	0	200	300	0	0	0	0	0	0	0	200	903	0	0	0	0	0	0	0	603	903	0
547	2	0	0	0	0	0	0	200	300	0	0	0	0	0	0	0	200	903	0	0	0	0	0	0	0	603	903	0
547	3	0	0	0	0	0	0	200	300	0	0	0	0	0	0	0	200	903	0	0	0	0	0	0	0	603	903	0
547	4	0	0	0	0	0	0	200	300	0	0	0	0	0	0	0	200	903	0	0	0	0	0	0	0	603	903	0
547	5	0	0	0	0	0	0	200	300	0	0	0	0	0	0	0	200	903	0	0	0	0	0	0	0	603	903	0
547	6	0	0	0	0	0	0	200	300	0	0	0	0	0	0	0	200	903	0	0	0	0	0	0	0	603	903	0
547	7	0	0	0	0	0	0	200	300	0	0	0	0	0	0	0	200	903	0	0	0	0	0	0	0	603	903	0
547	8	0	0	0	0	0	0	200	300	0	0	0	0	0	0	0	200	903	0	0	0	0	0	0	0	603	903	0
547	9	0	0	0	0	0	0	200	300	0	0	0	0	0	0	0	200	903	0	0	0	0	0	0	0	603	903	0
548	0	0	0	0	0	0	0	200	300	0	0	0	0	0	0	0	200	903	0	0	0	0	0	0	0	603	903	0
548	1	0	0	0	0	0	0	200	300	0	0	0	0	0	0	0	200	903	0	0	0	0	0	0	0	603	903	0
548	2	0	0	0	0	0	0	200	300	0	0	0	0	0	0	0	200	903	0	0	0	0	0	0	0	603	903	0
548	3	0	0	0	0	0	0	200	300	0	0	0	0	0	0	0	200	903	0	0	0	0	0	0	0	603	903	0
548	4	0	0	0	0	0	0	200	300	0	0	0	0	0	0	0	200	903	0	0	0	0	0	0	0	603	903	0
548	5	0	0	0	0	0	0	200	300	0	0	0	0	0	0	0	200	903	0	0	0	0	0	0	0	603	903	0
548	6	0	0	0	0	0	0	200	300	0	0	0	0	0	0	0	200	903	0	0	0	0	0	0	0	603	903	0
548	7	0	0	0	0	0	0	200	300	0	0	0	0	0	0	0	200	903	0	0	0	0	0	0	0	603	903	0
548	8	0	0	0	0	0	0	200	300	0	0	0	0	0	0	0	200	903	0	0	0	0	0	0	0	603	903	0
548	9	0	0	0	0	0	0	200	300	0	0	0	0	0	0	0	200	903	0	0	0	0	0	0	0	603	903	0
549	0	0	0	0	0	0	0	200	300	0	0	0	0	0	0	0	200	903	0	0	0	0	0	0	0	603	903	0
549	1	0	0	0	0	0	0	200	300	0	0	0	0	0	0	0	200	903	0	0	0	0	0	0	0	603	903	0
549	2	0	0	0	0	0	0	200	300	0	0	0	0	0	0	0	200	903	0	0	0	0	0	0	0	603	903	0
549	3	0	0	0	0	0	0	200	300	0	0	0	0	0	0	0	200	903	0	0	0	0	0	0	0	603	903	0
549	4	0	0	0	0	0	0	200	300	0	0	0	0	0	0	0	200	903	0	0	0	0	0	0	0	603	903	0
549	5	0	0	0	0	0	0	200	300	0	0	0	0	0	0	0	200	903	0	0	0	0	0	0	0	603	903	0
549	6	0	0	0	0	0	0	200	300	0	0	0	0	0	0	0	200	903	0	0	0	0	0	0	0	603	903	0
549	7	0	0	0	0	0	0	200	300	0	0	0	0	0	0	0	200	903	0	0	0	0	0	0	0	603	903	0
549	8	0	0	0	0	0	0	200	300	0	0	0	0	0	0	0	200	903	0	0	0	0	0	0	0	603	903	0
549	9	0	0	0	0	0	0	200	300	0	0	0	0	0	0	0	200	903	0	0	0	0	0	0	0	603	903	0
550	0	0	0	0	0	0	0	200	300	0	0	0	0	0	0	0	200	903	0	0	0	0	0	0	0	603	903	0
550	1	0	0	0	0	0	0	200	300	0	0	0	0	0	0	0	200	903	0	0	0	0	0	0	0	603	903	0
550	2	0	0	0	0	0	0	200	300	0	0	0	0	0	0	0	200	903	0	0	0	0	0	0	0	603	903	0
550	3	0	0	0	0	0	0	200	300	0	0	0	0	0	0	0	200	903	0	0	0	0	0	0	0	603	903	0
550	4	0	0	0	0	0	0	200	300	0	0	0	0	0	0	0	200	903	0	0	0	0	0	0	0	603	903	0
550	5	0	0	0	0	0	0	200	300	0	0	0	0	0	0	0	200	903	0	0	0	0	0	0	0	603	903	0
550	6	0	0	0	0	0	0	200	300	0	0	0	0	0	0	0	200	903	0	0	0	0	0	0	0	603	903	0
550	7	0	0	0	0	0	0	200	300	0	0	0	0	0	0	0	200	903	0	0	0	0	0	0	0	603	903	0
550	8	0	0	0	0	0	0	200	300	0	0	0	0	0	0	0	200	903	0	0	0	0	0	0	0	603	903	0
550	9	0	0	0	0	0	0	200	300	0	0	0	0	0	0	0	200	903	0	0	0	0	0	0	0	603	903	0
551	0	0	0	0	0	0	0	200	300	0	0	0	0	0	0	0	200	903	0	0	0	0	0	0	0	603	903	0
551	1	0	0	0	0	0	0	200	300	0	0	0	0	0	0	0	200	903	0	0	0	0	0	0	0	603	903	0
551	2	0	0	0	0	0	0	200	300	0	0	0	0	0	0	0	200	903	0	0	0	0	0	0	0	603	903	0
551	3	0	0	0	0	0	0	200	300	0	0	0	0	0	0	0	200	903	0	0	0	0	0	0	0	603	903	0
551	4	0	0	0	0	0	0	200	300	0	0	0	0	0	0	0	200	903	0	0	0	0	0	0	0	603	903	0
551	5	0	0	0	0	0	0	200	300	0	0	0	0	0	0	0	200	903	0	0	0	0	0	0	0	603	903	0
551	6	0	0	0	0	0	0	200	300	0	0	0	0	0	0	0	200	903	0	0	0	0	0	0	0	603	903	0
551	7	0	0	0	0	0	0	200	300	0	0	0	0	0	0	0	200	903	0	0	0	0	0	0	0	603	903	0
551	8	0	0	0	0	0	0	200	300	0	0	0	0	0	0	0	200	903	0	0	0	0	0	0	0	603	903	0
551	9	0	0	0	0	0	0	200	300	0	0	0	0	0	0	0	200	903	0	0	0	0	0	0	0	603	903	0
552	0	0	0	0	0	0	0	200	300	0	0	0	0	0	0	0	200	903	0	0	0	0	0	0	0	603	903	0
552	1	0	0	0	0	0	0	200	300	0	0	0	0	0	0	0	200	903	0	0	0	0	0	0	0	603	903	0
552	2	0	0	0	0	0	0	200	300	0	0	0	0	0	0	0	200	903	0	0	0	0	0	0	0	603	903	0
552	3	0	0	0	0	0	0	200	300	0	0	0	0	0	0	0	200	903	0	0	0	0	0	0	0	603	903	0
552	4	0	0	0	0	0	0	200	300	0	0	0	0	0	0	0	200	903	0	0	0	0	0	0	0	603	903	0
552	5	0	0	0	0	0	0	200	300	0	0	0	0	0	0	0	200	903	0	0	0	0	0	0	0	603	903	0
552	6	0	0	0	0	0	0	200	300	0	0	0	0	0	0	0	200	903	0	0	0	0	0	0	0	603	903	0
552	7	0	0	0	0	0	0	200	300	0	0	0	0	0	0	0	200	903	0	0	0	0	0	0	0	603	903	0
552	8	0	0	0	0	0	0	200	300	0	0	0	0	0	0	0	200	903	0	0	0	0	0	0	0	603	903	0
552	9	0	0	0	0	0	0	200	300	0	0	0	0	0	0	0	200	903	0	0	0	0	0	0	0	603	903	0
553	0	0	0	0	0	0	0	200	300	0	0	0	0	0	0	0	200	903	0	0	0	0	0	0	0	603	903	0
553	1	0	0	0	0	0	0	200	300	0	0	0	0	0	0	0	200	903	0	0	0	0	0	0	0	603	903	0
553	2	0	0	0	0	0	0	200	300	0	0	0	0	0	0	0	200	903	0	0	0	0	0	0	0	603	903	0
553	3	0	0	0	0	0	0	200	300	0	0	0	0	0	0	0	200	903	0	0	0	0	0	0	0	603	903	0
553	4	0	0	0	0	0	0	200	300	0	0	0	0	0	0	0	200	903	0	0	0	0	0	0	0	603	903	0
553	5	0	0	0	0	0	0	200	300	0	0	0	0	0	0	0	200	903	0	0	0	0	0	0	0	603	903	0
553	6	0	0	0	0	0	0	200	300	0	0	0	0	0	0	0	200	903	0	0	0	0	0	0	0	603	903	0
553	7	0	0	0	0	0	0	200	300	0	0	0	0	0	0	0	200	903	0	0	0	0	0	0	0	603	903	0
553	8	0	0	0	0	0	0	200	300	0	0	0	0	0	0	0	200	903	0	0	0	0	0	0	0	603	903	0
553	9	0	0	0	0	0	0	200	300	0	0	0	0	0	0	0	200	903	0	0	0	0	0	0	0	603	903	0
554	0	0	0	0	0	0	0	200	300	0	0	0	0	0	0	0	200	903	0	0	0	0	0	0	0	603	903	0
554	1	0	0	0	0	0	0	200	300	0	0	0	0	0	0	0	200	903	0	0	0	0	0	0	0	603	903	0
554	2	0	0	0	0	0	0	200	300	0	0	0	0	0	0	0	200	903	0	0	0	0	0	0	0	603	903	0
554	3	0	0	0	0	0	0	200	300	0	0	0	0	0	0	0	200	903	0	0	0	0	0	0	0	603	903	0
554	4	0	0	0	0	0	0	200	300	0	0	0	0	0	0	0	200	903	0	0	0	0	0	0	0	603	903	0
554	5	0	0	0	0	0	0	200	300	0	0	0	0	0	0	0	200	903	0	0	0	0	0	0	0	603	903	0
554	6	0	0	0	0	0	0	200	300	0	0	0	0	0	0	0	200	903	0	0	0	0	0	0	0	603	903	0
554	7	0	0	0	0	0	0	200	300	0	0	0	0	0	0	0	200	903	0	0	0	0	0	0	0	603	903	0
554	8	0	0	0	0	0	0	200	300	0	0	0	0	0	0	0	200	903	0	0	0	0	0	0	0	603	903	0
554	9	0	0	0	0	0	0	200	300	0	0	0	0	0	0	0	200	903	0	0	0	0	0	0	0	603	903	0
555	0	0	0	0	0	0	0	200	300	0	0	0	0	0	0	0	200	903	0	0	0	0	0	0	0	603	903	0
555	1	0	0	0	0	0	0	200	300	0	0	0	0	0	0	0	200	903	0	0	0	0	0	0	0	603	903	0
555	2	0	0	0	0	0	0	200	300	0	0	0	0	0	0	0	200	903	0	0	0	0	0	0	0	603	903	0
555	3	0	0	0	0	0	0	200	300	0	0	0	0	0	0	0	200	903	0	0	0	0	0	0	0	603	903	0
555	4	0	0	0	0	0	0	200	300	0	0	0	0	0	0	0	200	903	0	0	0	0	0	0	0	603	903	0
555	5	0	0	0	0	0	0	200	300	0	0	0	0	0	0	0	200	903	0	0	0	0	0	0	0	603	903	0
555	6	0	0	0	0	0	0	200	300	0	0	0	0	0	0	0	200	903	0	0	0	0	0	0	0	603	903	0
555	7	0	0	0	0	0	0	200	300	0	0	0	0	0	0	0	200	903	0	0	0	0	0	0	0	603	903	0
555	8	0	0	0	0	0	0	200	300	0	0	0	0	0	0	0	200	903	0	0	0	0	0	0	0	603	903	0
555	9	0	0	0	0	0	0	200	300	0	0	0	0	0	0	0	200	903	0	0	0	0	0	0	0	603	903	0
556	0	0	0	0	0	0	0	200	300	0	0	0	0	0	0	0	200	903	0	0	0	0	0	0	0	603	903	0
556	1	0	0	0	0	0	0	200	300	0	0	0	0	0	0	0	200	903	0	0	0	0	0	0	0	603	903	0
556	2	0	0	0	0	0	0	200	300	0	0	0	0	0	0	0	200	903	0	0	0	0	0	0	0	603	903	0
556	3	0	0	0	0	0	0	200	300	0	0	0	0	0	0	0	200	903	0	0	0	0	0	0	0	603	903	0
556	4	0	0	0	0	0	0	200	300	0	0	0	0	0	0	0	200	903	0	0	0	0	0	0	0	603	903	0
556	5	0	0	0	0	0	0	200	300	0	0	0	0	0	0	0	200	903	0	0	0	0	0	0	0	603	903	0
556	6	0	0	0	0	0	0	200	300	0	0	0	0	0	0	0	200	903	0	0	0	0	0	0	0	603	903	0
556	7	0	0	0	0	0	0	200	300	0	0	0	0	0	0	0	200	903	0	0	0	0	0	0	0	603	903	0
556	8	0	0	0	0	0	0	200	300	0	0	0	0	0	0	0	200	903	0	0	0	0	0	0	0	603	903	0
556	9	0	0	0	0	0	0	200	300	0	0	0	0	0	0	0	200	903	0	0	0	0	0	0	0	603	903	0
557	0	0	0	0	0	0	0	200	300	0	0	0	0	0	0	0	200	903	0	0	0	0	0	0	0	603	903	0
557	1	0	0	0	0	0	0	200	300	0	0	0	0	0	0	0	200	903	0	0	0	0	0	0	0	603	903	0
557	2	0	0	0	0	0	0	200	300	0	0	0	0	0	0	0	200	903	0	0	0	0	0	0	0	603	903	0
557	3	0	0	0	0	0	0	200	300	0	0	0	0	0	0	0	200	903	0	0	0	0	0	0	0	603	903	0
557	4	0	0	0	0	0	0	200	300	0	0	0	0	0	0	0	200	903	0	0	0	0	0	0	0	603	903	0
557	5	0	0	0	0	0	0	200	300	0	0	0	0	0	0	0	200	903	0	0	0	0	0	0	0	603	903	0
557	6	0	0	0	0	0	0	200	300	0	0	0	0	0	0	0	200	903	0	0	0	0	0	0	0	603	903	0
557	7	0	0	0	0	0	0	200	300	0	0	0	0	0	0	0	200	903	0	0	0	0	0	0	0	603	903	0
557	8	0	0	0	0	0	0	200	300	0	0	0	0	0	0	0	200	903	0	0	0	0	0	0	0	603	903	0
557	9	0	0	0	0	0	0	200	300	0	0	0	0	0	0	0	200	903	0	0	0	0	0	0	0	603	903	0
558	0	0	0	0	0	0	0	200	300	0	0	0	0	0	0	0	200	903	0	0	0	0	0	0	0	603	903	0
558	1	0	0	0	0	0	0	200	300	0	0	0	0	0	0	0	200	903	0	0	0	0	0	0	0	603	903	0
558	2	0	0	0	0	0	0	200	300	0	0	0	0	0	0	0	200	903	0	0	0	0	0	0	0	603	903	0
558	3	0	0	0	0	0	0	200	300	0	0	0	0	0	0	0	200	903	0	0	0	0	0	0	0	603	903	0
558	4	0	0	0	0	0	0	200	300	0	0	0	0	0	0	0	200	903	0	0	0	0	0	0	0	603	903	0
558	5	0	0	0	0	0	0	200	300	0	0	0	0	0	0	0	200	903	0	0	0	0	0	0	0	603	903	0
558	6	0	0	0	0	0	0	200	300	0	0	0	0	0	0	0	200	903	0	0	0	0	0	0	0	603	903	0
558	7	0	0	0	0	0	0	200	300	0	0	0	0	0	0	0	200	903	0	0	0	0	0	0	0	603	903	0
558	8	0	0	0	0	0	0	200	300	0	0	0	0	0	0	0	200	903	0	0	0	0	0	0	0	603	903	0
558	9	0	0	0	0	0	0	200	300	0	0	0	0	0	0	0	200	903	0	0	0	0	0	0	0	603	903	0
559	0	0	0	0	0	0	0	200	300	0	0	0	0	0	0	0	200	903	0	0	0	0	0	0	0	603	903	0
559	1	0	0	0	0	0	0	200	300	0	0	0	0	0	0	0	200	903	0	0	0	0	0	0	0	603	903	0
559	2	0	0	0	0	0	0	200	300	0	0	0	0	0	0	0	200	903	0	0	0	0	0	0	0	603	903	0
559	3	0	0	0	0	0	0	200	300	0	0	0	0	0	0	0	200	903	0	0	0	0	0	0	0	603	903	0
559	4	0	0	0	0	0	0	200	300	0	0	0	0	0	0	0	200	903	0	0	0	0	0	0	0	603	903	0
559	5	0	0	0	0	0	0	200	300	0	0	0	0	0	0	0	200	903	0	0	0	0	0	0	0	603	903	0
559	6	0	0	0	0	0	0	200	300	0	0	0	0	0	0	0	200	903	0	0	0	0	0	0	0	603	903	0
559	7	0	0	0	0	0	0	200	300	0	0	0	0	0	0	0	200	903	0	0	0	0	0	0	0	603	903	0
559	8	0	0	0	0	0	0	200	300	0	0	0	0	0	0	0	200	903	0	0	0	0	0	0	0	603	903	0
559	9	0	0	0	0	0	0	200	300	0	0	0	0	0	0	0	200	903	0	0	0	0	0	0	0	603	903	0
560	0	0	0	0	0	0	0	200	300	0	0	0	0	0	0	0	200	903	0	0	0	0	0	0	0	603	903	0
560	1	0	0	0	0	0	0	200	300	0	0	0	0	0	0	0	200	903	0	0	0	0	0	0	0	603	903	0
560	2	0	0	0	0	0	0	200	300	0	0	0	0	0	0	0	200	903	0	0	0	0	0	0	0	603	903	0
560	3	0	0	0	0	0	0	200	300	0	0	0	0	0	0	0	200	903	0	0	0	0	0	0	0	603	903	0
560	4	0	0	0	0	0	0	200	300	0	0	0	0	0	0	0	200	903	0	0	0	0	0	0	0	603	903	0
560	5	0	0	0	0	0	0	200	300	0	0	0	0	0	0	0	200	903	0	0	0	0	0	0	0	603	903	0
560	6	0	0	0	0	0	0	200	300	0	0	0	0	0	0	0	200	903	0	0	0	0	0	0	0	603	903	0
560	7	0	0	0	0	0	0	200	300	0	0	0	0	0	0	0	200	903	0	0	0	0	0	0	0	603	903	0
560	8	0	0	0	0	0	0	200	300	0	0	0	0	0	0	0	200	903	0	0	0	0	0	0	0	603	903	0
560	9	0	0	0	0	0	0	200	300	0	0	0	0	0	0	0	200	903	0	0	0	0	0	0	0	603	903	0
561	0	0	0	0	0	0	0	200	300	0	0	0	0	0	0	0	200	903	0	0	0	0	0	0	0	603	903	0
561	1	0	0	0	0	0	0	200	300	0	0	0	0	0	0	0	200	903	0	0	0	0	0	0	0	603	903	0
561	2	0	0	0	0	0	0	200	300	0	0	0	0	0	0	0	200	903	0	0	0	0	0	0	0	603	903	0
561	3	0	0	0	0	0	0	200	300	0	0	0	0	0	0	0	200	903	0	0	0	0	0	0	0	603	903	0
561	4	0	0	0	0	0	0	200	300	0	0	0	0	0	0	0	200	903	0	0	0	0	0	0	0	603	903	0
561	5	0	0	0	0	0	0	200	300	0	0	0	0	0	0	0	200	903	0	0	0	0	0	0	0	603	903	0
561	6	0	0	0	0	0	0	200	300	0	0	0	0	0	0	0	200	903	0	0	0	0	0	0	0	603	903	0
561	7	0	0	0	0	0	0	200	300	0	0	0	0	0	0	0	200	903	0	0	0	0	0	0	0	603	903	0
561	8	0	0	0	0	0	0	200	300	0	0	0	0	0	0	0	200	903	0	0	0	0	0	0	0	603	903	0
561	9	0	0	0	0	0	0	200	300	0	0	0	0	0	0	0	200	903	0	0	0	0	0	0	0	603	903	0
562	0	0	0	0	0	0	0	200	300	0	0	0	0	0	0	0	200	903	0	0	0	0	0	0	0	603	903	0
562	1	0	0	0	0	0	0	200	300	0	0	0	0	0	0	0	200	903	0	0	0	0	0	0	0	603	903	0
562	2	0	0	0	0	0	0	200	300	0	0	0	0	0	0	0	200	903	0	0	0	0	0	0	0	603	903	0
562	3	0	0	0	0	0	0	200	300	0	0	0	0	0	0	0	200	903	0	0	0	0	0	0	0	603	903	0
562	4	0	0	0	0	0	0	200	300	0	0	0	0	0	0	0	200	903	0	0	0	0	0	0	0	603	903	0
562	5	0	0	0	0	0	0	200	300	0	0	0	0	0	0	0	200	903	0	0	0	0	0	0	0	603	903	0
562	6	0	0	0	0	0	0	200	300	0	0	0	0	0	0	0	200	903	0	0	0	0	0	0	0	603	903	0
562	7	0	0	0	0	0	0	200	300	0	0	0	0	0	0	0	200	903	0	0	0	0	0	0	0	603	903	0
562	8	0	0	0	0	0	0	200	300	0	0	0	0	0	0	0	200	903	0	0	0	0	0	0	0	603	903	0
562	9	0	0	0	0	0	0	200	300	0	0	0	0	0	0	0	200	903	0	0	0	0	0	0	0	603	903	0
563	0	0	0	0	0	0	0	200	300	0	0	0	0	0	0	0	200	903	0	0	0	0	0	0	0	603	903	0
563	1	0	0	0	0	0	0	200	300	0	0	0	0	0	0	0	200	903	0	0	0	0	0	0	0	603	903	0
563	2	0	0	0	0	0	0	200	300	0	0	0	0	0	0	0	200	903	0	0	0	0	0	0	0	603	903	0
563	3	0	0	0	0	0	0	200	300	0	0	0	0	0	0	0	200	903	0	0	0	0	0	0	0	603	903	0
563	4	0	0	0	0	0	0	200	300	0	0	0	0	0	0	0	200	903	0	0	0	0	0	0	0	603	903	0
563	5	0	0	0	0	0	0	200	300	0	0	0	0	0	0	0	200	903	0	0	0	0	0	0	0	603	903	0
563	6	0	0	0	0	0	0	200	300	0	0	0	0	0	0	0	200	903	0	0	0	0	0	0	0	603	903	0
563	7	0	0	0	0	0	0	200	300	0	0	0	0	0	0	0	200	903	0	0	0	0	0	0	0	603	903	0
563	8	0	0	0	0	0	0	200	300	0	0	0	0	0	0	0	200	903	0	0	0	0	0	0	0	603	903	0
563	9	0	0	0	0	0	0	200	300	0	0	0	0	0	0	0	200	903	0	0	0	0	0	0	0	603	903	0
564	0	0	0	0	0	0	0	200	300	0	0	0	0	0	0	0	200	903	0	0	0	0	0	0	0	603	903	0
564	1	0	0	0	0	0	0	200	300	0	0	0	0	0	0	0	200	903	0	0	0	0	0	0	0	603	903	0
564	2	0	0	0	0	0	0	200	300	0	0	0	0	0	0	0	200	903	0	0	0	0	0	0	0	603	903	0
564	3	0	0	0	0	0	0	200	300	0	0	0	0	0	0	0	200	903	0	0	0	0	0	0	0	603	903	0
564	4	0	0	0	0	0	0	200	300	0	0	0	0	0	0	0	200	903	0	0	0	0	0	0	0	603	903	0
564	5	0	0	0	0	0	0	200	300	0	0	0	0	0	0	0	200	903	0	0	0	0	0	0	0	603	903	0
564	6	0	0	0	0	0	0	200	300	0	0	0	0	0	0	0	200	903	0	0	0	0	0	0	0	603	903	0
564	7	0	0	0	0	0	0	200	300	0	0	0	0	0	0	0	200	903	0	0	0	0	0	0	0	603	903	0
564	8	0	0	0	0	0	0	200	300	0	0	0	0	0	0	0	200	903	0	0	0	0	0	0	0	603	903	0
564	9	0	0	0	0	0	0	200	300	0	0	0	0	0	0	0	200	903	0	0	0	0	0	0	0	603	903	0
565	0	0	0	0	0	0	0	200	300	0	0	0	0	0	0	0	200	903	0	0	0	0	0	0	0	603	903	0
565	1	0	0	0	0	0	0	200	300	0	0	0	0	0	0	0	200	903	0	0	0	0	0	0	0	603	903	0
565	2	0	0	0	0	0	0	200	300	0	0	0	0	0	0	0	200	903	0	0	0	0	0	0	0	603	903	0
565	3	0	0	0	0	0	0	200	300	0	0	0	0	0	0	0	200	903	0	0	0	0	0	0	0	603	903	0
565	4	0	0	0	0	0	0	200	300	0	0	0	0	0	0	0	200	903	0	0	0	0	0	0	0	603	903	0
565	5	0	0	0	0	0	0	200	300	0	0	0	0	0	0	0	200	903	0	0	0	0	0	0	0	603	903	0
565	6	0	0	0	0	0	0	200	300	0	0	0	0	0	0	0	200	903	0	0	0	0	0	0	0	603	903	0
565	7	0	0	0	0	0	0	200	300	0	0	0	0	0	0	0	200	903	0	0	0	0	0	0	0	603	903	0
565	8	0	0	0	0	0	0	200	300	0	0	0	0	0	0	0	200	903	0	0	0	0	0	0	0	603	903	0
565	9	0	0	0	0	0	0	200	300	0	0	0	0	0	0	0	200	903	0	0	0	0	0	0	0	603	903	0
566	0	0	0	0	0	0	0	200	300	0	0	0	0	0	0	0	200	903	0	0	0	0	0	0	0	603	903	0
566	1	0	0	0	0	0	0	200	300	0	0	0	0	0	0	0	200	903	0	0	0	0	0	0	0	603	903	0
566	2	0	0	0	0	0	0	200	300	0	0	0	0	0	0	0	200	903	0	0	0	0	0	0	0	603	903	0
566	3	0	0	0	0	0	0	200	300	0	0	0	0	0	0	0	200	903	0	0	0	0	0	0	0	603	903	0
566	4	0	0	0	0	0	0	200	300	0	0	0	0	0	0	0	200	903	0	0	0	0	0	0	0	603	903	0
566	5	0	0	0	0	0	0	200	300	0	0	0	0	0	0	0	200	903	0	0	0	0	0	0	0	603	903	0
566	6	0	0	0	0	0	0	200	300	0	0	0	0	0	0	0	200	903	0	0	0	0	0	0	0	603	903	0
566	7	0	0	0	0	0	0	200	300	0	0	0	0	0	0	0	200	903	0	0	0	0	0	0	0	603	903	0
566	8	0	0	0	0	0	0	200	300	0	0	0	0	0	0	0	200	903	0	0	0	0	0	0	0	603	903	0
566	9	0	0	0	0	0	0	200	300	0	0	0	0	0	0	0	200	903	0	0	0	0	0	0	0	603	903	0
567	0	0	0	0	0	0	0	200	300	0	0	0	0	0	0	0	200	903	0	0	0	0	0	0	0	603	903	0
567	1	0	0	0	0	0	0	200	300	0	0	0	0	0	0	0	200	903	0	0	0	0	0	0	0	603	903	0
567	2	0	0	0	0	0	0	200	300	0	0	0	0	0	0	0	200	903	0	0	0	0	0	0	0	603	903	0
567	3	0	0	0	0	0	0	200	300	0	0	0	0	0	0	0	200	903	0	0	0	0	0	0	0	603	903	0
567	4	0	0	0	0	0	0	200	300	0	0	0	0	0	0	0	200	903	0	0	0	0	0	0	0	603	903	0
567	5	0	0	0	0	0	0	200	300	0	0	0	0	0	0	0	200	903	0	0	0	0	0	0	0	603	903	0
567	6	0	0	0	0	0	0	200	300	0	0	0	0	0	0	0	200	903	0	0	0	0	0	0	0	603	903	0
567	7	0	0	0	0	0	0	200	300	0	0	0	0	0	0	0	200	903	0	0	0	0	0	0	0	603	903	0
567	8	0	0	0	0	0	0	200	300	0	0	0	0	0	0	0	200	903	0	0	0	0	0	0	0	603	903	0
567	9	0	0	0	0	0	0	200	300	0	0	0	0	0	0	0	200	903	0	0	0	0	0	0	0	603	903	0
568	0	0	0	0	0	0	0	200	300	0	0	0	0	0	0	0	200	903	0	0	0	0	0	0	0	603	903	0
568	1	0	0	0	0	0	0	200	300	0	0	0	0	0	0	0	200	903	0	0	0	0	0	0	0	603	903	0
568	2	0	0	0	0	0	0	200	300	0	0	0	0	0	0	0	200	903	0	0	0	0	0	0	0	603	903	0
568	3	0	0	0	0	0	0	200	300	0	0	0	0	0	0	0	200	903	0	0	0	0	0	0	0	603	903	0
568	4	0	0	0	0	0	0	200	300	0	0	0	0	0	0	0	200	903	0	0	0	0	0	0	0	603	903	0
568	5	0	0	0	0	0	0	200	300	0	0	0	0	0	0	0	200	903	0	0	0	0	0	0	0	603	903	0
568	6	0	0	0	0	0	0	200	300	0	0	0	0	0	0	0	200	903	0	0	0	0	0	0	0	603	903	0
568	7	0	0	0	0	0	0	200	300	0	0	0	0	0	0	0	200	903	0	0	0	0	0	0	0	603	903	0
568	8	0	0	0	0	0	0	200	300	0	0	0	0	0	0	0	200	903	0	0	0	0	0	0	0	603	903	0
568	9	0	0	0	0	0	0	200	300	0	0	0	0	0	0	0	200	903	0	0	0	0	0	0	0	603	903	0
569	0	0	0	0	0	0	0	200	300	0	0	0	0	0	0	0	200	903	0	0	0	0	0	0	0	603	903	0
569	1	0	0	0	0	0	0	200	300	0	0	0	0	0	0	0	200	903	0	0	0	0	0	0	0	603	903	0
569	2	0	0	0	0	0	0	200	300	0	0	0	0	0	0	0	200	903	0	0	0	0	0	0	0	603	903	0
569	3	0	0	0	0	0	0	200	300	0	0	0	0	0	0	0	200	903	0	0	0	0	0	0	0	603	903	0
569	4	0	0	0	0	0	0	200	300	0	0	0	0	0	0	0	200	903	0	0	0	0	0	0	0	603	903	0
569	5	0	0	0	0	0	0	200	300	0	0	0	0	0	0	0	200	903	0	0	0	0	0	0	0	603	903	0
569	6	0	0	0	0	0	0	200	300	0	0	0	0	0	0	0	200	903	0	0	0	0	0	0	0	603	903	0
569	7	0	0	0	0	0	0	200	300	0	0	0	0	0	0	0	200	903	0	0	0	0	0	0	0	603	903	0
569	8	0	0	0	0	0	0	200	300	0	0	0	0	0	0	0	200	903	0	0	0	0	0	0	0	603	903	0
569	9	0	0	0	0	0	0	200	300	0	0	0	0	0	0	0	200	903	0	0	0	0	0	0	0	603	903	0
570	0	0	0	0	0	0	0	200	300	0	0	0	0	0	0	0	200	903	0	0	0	0	0	0	0	603	903	0
570	1	0	0	0	0	0	0	200	300	0	0	0	0	0	0	0	200	903	0	0	0	0	0	0	0	603	903	0
570	2	0	0	0	0	0	0	200	300	0	0	0	0	0	0	0	200	903	0	0	0	0	0	0	0	603	903	0
570	3	0	0	0	0	0	0	200	300	0	0	0	0	0	0	0	200	903	0	0	0	0	0	0	0	603	903	0
570	4	0	0	0	0	0	0	200	300	0	0	0	0	0	0	0	200	903	0	0	0	0	0	0	0	603	903	0
570	5	0	0	0	0	0	0	200	300	0	0	0	0	0	0	0	200	903	0	0	0	0	0	0	0	603	903	0
570	6	0	0	0	0	0	0	200	300	0	0	0	0	0	0	0	200	903	0	0	0	0	0	0	0	603	903	0
570	7	0	0	0	0	0	0	200	300	0	0	0	0	0	0	0	200	903	0	0	0	0	0	0	0	603	903	0
570	8	0	0	0	0	0	0	200	300	0	0	0	0	0	0	0	200	903	0	0	0	0	0	0	0	603	903	0
570	9	0	0	0	0	0	0	200	300	0	0	0	0	0	0	0	200	903	0	0	0	0	0	0	0	603	903	0
571	0	0	0	0	0	0	0	200	300	0	0	0	0	0	0	0	200	903	0	0	0	0	0	0	0	603	903	0
571	1	0	0	0	0	0	0	200	300	0	0	0	0	0	0	0	200	903	0	0	0	0	0	0	0	603	903	0
571	2	0	0	0	0	0	0	200	300	0	0	0	0	0	0	0	200	903	0	0	0	0	0	0	0	603	903	0
571	3	0	0	0	0	0	0	200	300	0	0	0	0	0	0	0	200	903	0	0	0	0	0	0	0	603	903	0
571	4	0	0	0	0	0	0	200	300	0	0	0	0	0	0	0	200	903	0	0	0	0	0	0	0	603	903	0
571	5	0	0	0	0	0	0	200	300	0	0	0	0	0	0	0	200	903	0	0	0	0	0	0	0	603	903	0
571	6	0	0	0	0	0	0	200	300	0	0	0	0	0	0	0	200	903	0	0	0	0	0	0	0	603	903	0
571	7	0	0	0	0	0	0	200	300	0	0	0	0	0	0	0	200	903	0	0	0	0	0	0	0	603	903	0
571	8	0	0	0	0	0	0	200	300	0	0	0	0	0	0	0	200	903	0	0	0	0	0	0	0	603	903	0
571	9	0	0	0	0	0	0	200	300	0	0	0	0	0	0	0	200	903	0	0	0	0	0	0	0	603	903	0
572	0	0	0	0	0	0	0	200	300	0	0	0	0	0	0	0	200	903	0	0	0	0	0	0	0	603	903	0
572	1	0	0	0	0	0	0	200	300	0	0	0	0	0	0	0	200	903	0	0	0	0	0	0	0	603	903	0
572	2	0	0	0	0	0	0	200	300	0	0	0	0	0	0	0	200	903	0	0	0	0	0	0	0	603	903	0
572	3	0	0	0	0	0	0	200	300	0	0	0	0	0	0	0	200	903	0	0	0	0	0	0	0	603	903	0
572	4	0	0	0	0	0	0	200	300	0	0	0	0	0	0	0	200	903	0	0	0	0	0	0	0	603	903	0
572	5	0	0	0	0	0	0	200	300	0	0	0	0	0	0	0	200	903	0	0	0	0	0	0	0	603	903	0
572	6	0	0	0	0	0	0	200	300	0	0	0	0	0	0	0	200	903	0	0	0	0	0	0	0	603	903	0
572	7	0	0	0	0	0	0	200	300	0	0	0	0	0	0	0	200	903	0	0	0	0	0	0	0	603	903	0
572	8	0	0	0	0	0	0	200	300	0	0	0	0	0	0	0	200	903	0	0	0	0	0	0	0	603	903	0
572	9	0	0	0	0	0	0	200	300	0	0	0	0	0	0	0	200	903	0	0	0	0	0	0	0	603	903	0
573	0	0	0	0	0	0	0	200	300	0	0	0	0	0	0	0	200	903	0	0	0	0	0	0	0	603	903	0
573	1	0	0	0	0	0	0	200	300	0	0	0	0	0	0	0	200	903	0	0	0	0	0	0	0	603	903	0
573	2	0	0	0	0	0	0	200	300	0	0	0	0	0	0	0	200	903	0	0	0	0	0	0	0	603	903	0
573	3	0	0	0	0	0	0	200	300	0	0	0	0	0	0	0	200	903	0	0	0	0	0	0	0	603	903	0
573	4	0	0	0	0	0	0	200	300	0	0	0	0	0	0	0	200	903	0	0	0	0	0	0	0	603	903	0
573	5	0	0	0	0	0	0	200	300	0	0	0	0	0	0	0	200	903	0	0	0	0	0	0	0	603	903	0
573	6	0	0	0	0	0	0	200	300	0	0	0	0	0	0	0	200	903	0	0	0	0	0	0	0	603	903	0
573	7	0	0	0	0	0	0	200	300	0	0	0	0	0	0	0	200	903	0	0	0	0	0	0	0	603	903	0
573	8	0	0	0	0	0	0	200	300	0	0	0	0	0	0	0	200	903	0	0	0	0	0	0	0	603	903	0
573	9	0	0	0	0	0	0	200	300	0	0	0	0	0	0	0	200	903	0	0	0	0	0	0	0	603	903	0
574	0	0	0	0	0	0	0	200	300	0	0	0	0	0	0	0	200	903	0	0	0	0	0	0	0	603	903	0
574	1	0	0	0	0	0	0	200	300	0	0	0	0	0	0	0	200	903	0	0	0	0	0	0	0	603	903	0
574	2	0	0	0	0	0	0	200	300	0	0	0	0	0	0	0	200	903	0	0	0	0	0	0	0	603	903	0
574	3	0	0	0	0	0	0	200	300	0	0	0	0	0	0	0	200	903	0	0	0	0	0	0	0	603	903	0
574	4	0	0	0	0	0	0	200	300	0	0	0	0	0	0	0	200	903	0	0	0	0	0	0	0	603	903	0
574	5	0	0	0	0	0	0	200	300	0	0	0	0	0	0	0	200	903	0	0	0	0	0	0	0	603	903	0
574	6	0	0	0	0	0	0	200	300	0	0	0	0	0	0	0	200	903	0	0	0	0	0	0	0	603	903	0
574	7	0	0	0	0	0	0	200	300	0	0	0	0	0	0	0	200	903	0	0	0	0	0	0	0	603	903	0
574	8	0	0	0	0	0	0	200	300	0	0	0	0	0	0	0	200	903	0	0	0	0	0	0	0	603	903	0
574	9	0	0	0	0	0	0	200	300	0	0	0	0	0	0	0	200	903	0	0	0	0	0	0	0	603	903	0
575	0	0	0	0	0	0	0	200	300	0	0	0	0	0	0	0	200	903	0	0	0	0	0	0	0	603	903	0
575	1	0	0	0	0	0	0	200	300	0	0	0	0	0	0	0	200	903	0	0	0	0	0	0	0	603	903	0
575	2	0	0	0	0	0	0	200	300	0	0	0	0	0	0	0	200	903	0	0	0	0	0	0	0	603	903	0
575	3	0	0	0	0	0	0	200	300	0	0	0	0	0	0	0	200	903	0	0	0	0	0	0	0	603	903	0
575	4	0	0	0	0	0	0	200	300	0	0	0	0	0	0	0	200	903	0	0	0	0	0	0	0	603	903	0
575	5	0	0	0	0	0	0	200	300	0	0	0	0	0	0	0	200	903	0	0	0	0	0	0	0	603	903	0
575	6	0	0	0	0	0	0	200	300	0	0	0	0	0	0	0	200	903	0	0	0	0	0	0	0	603	903	0
575	7	0	0	0	0	0	0	200	300	0	0	0	0	0	0	0	200	903	0	0	0	0	0	0	0	603	903	0
575	8	0	0	0	0	0	0	200	300	0	0	0	0	0	0	0	200	903	0	0	0	0	0	0	0	603	903	0
575	9	0	0	0	0	0	0	200	300	0	0	0	0	0	0	0	200	903	0	0	0	0	0	0	0	603	903	0
576	0	0	0	0	0	0	0	200	300	0	0	0	0	0	0	0	200	903	0	0	0	0	0	0	0	603	903	0
576	1	0	0	0	0	0	0	200	300	0	0	0	0	0	0	0	200	903	0	0	0	0	0	0	0	603	903	0
576	2	0	0	0	0	0	0	200	300	0	0	0	0	0	0	0	200	903	0	0	0	0	0	0	0	603	903	0
576	3	0	0	0	0	0	0	200	300	0	0	0	0	0	0	0	200	903	0	0	0	0	0	0	0	603	903	0
576	4	0	0	0	0	0	0	200	300	0	0	0	0	0	0	0	200	903	0	0	0	0	0	0	0	603	903	0
576	5	0	0	0	0	0	0	200	300	0	0	0	0	0	0	0	200	903	0	0	0	0	0	0	0	603	903	0
576	6	0	0	0	0	0	0	200	300	0	0	0	0	0	0	0	200	903	0	0	0	0	0	0	0	603	903	0
576	7	0	0	0	0	0	0	200	300	0	0	0	0	0	0	0	200	903	0	0	0	0	0	0	0	603	903	0
576	8	0	0	0	0	0	0	200	300	0	0	0	0	0	0	0	200	903	0	0	0	0	0	0	0	603	903	0
576	9	0	0	0	0	0	0	200	300	0	0	0	0	0	0	0	200	903	0	0	0	0	0	0	0	603	903	0
577	0	0	0	0	0	0	0	200	300	0	0	0	0	0	0	0	200	903	0	0	0	0	0	0	0	603	903	0
577	1	0	0	0	0	0	0	200	300	0	0	0	0	0	0	0	200	903	0	0	0	0	0	0	0	603	903	0
577	2	0	0	0	0	0	0	200	300	0	0	0	0	0	0	0	200	903	0	0	0	0	0	0	0	603	903	0
577	3	0	0	0	0	0	0	200	300	0	0	0	0	0	0	0	200	903	0	0	0	0	0	0	0	603	903	0
577	4	0	0	0	0	0	0	200	300	0	0	0	0	0	0	0	200	903	0	0	0	0	0	0	0	603	903	0
577	5	0	0	0	0	0	0	200	300	0	0	0	0	0	0	0	200	903	0	0	0	0	0	0	0	603	903	0
577	6	0	0	0	0	0	0	200	300	0	0	0	0	0	0	0	200	903	0	0	0	0	0	0	0	603	903	0
577	7	0	0	0	0	0	0	200	300	0	0	0	0	0	0	0	200	903	0	0	0	0	0	0	0	603	903	0
577	8	0	0	0	0	0	0	200	300	0	0	0	0	0	0	0	200	903	0	0	0	0	0	0	0	603	903	0
577	9	0	0	0	0	0	0	200	300	0	0	0	0	0	0	0	200	903	0	0	0	0	0	0	0	603	903	0
578	0	0	0	0	0	0	0	200	300	0	0	0	0	0	0	0	200	903	0	0	0	0	0	0	0	603	903	0
578	1	0	0	0	0	0	0	200	300	0	0	0	0	0	0	0	200	903	0	0	0	0	0	0	0	603	903	0
578	2	0	0	0	0	0	0	200	300	0	0	0	0	0	0	0	200	903	0	0	0	0	0	0	0	603	903	0
578	3	0	0	0	0	0	0	200	300	0	0	0	0	0	0	0	200	903	0	0	0	0	0	0	0	603	903	0
578	4	0	0	0	0	0	0	200	300	0	0	0	0	0	0	0	200	903	0	0	0	0	0	0	0	603	903	0
578	5	0	0	0	0	0	0	200	300	0	0	0	0	0	0	0	200	903	0	0	0	0	0	0	0	603	903	0
578	6	0	0	0	0	0	0	200	300	0	0	0	0	0	0	0	200	903	0	0	0	0	0	0	0	603	903	0
578	7	0	0	0	0	0	0	200	300	0	0	0	0	0	0	0	200	903	0	0	0	0	0	0	0	603	903	0
578	8	0	0	0	0	0	0	200	300	0	0	0	0	0	0	0	200	903	0	0	0	0	0	0	0	603	903	0
578	9	0	0	0	0	0	0	200	300	0	0	0	0	0	0	0	200	903	0	0	0	0	0	0	0	603	903	0
579	0	0	0	0	0	0	0	200	300	0	0	0	0	0	0	0	200	903	0	0	0	0	0	0	0	603	903	0
579	1	0	0	0	0	0	0	200	300	0	0	0	0	0	0	0	200	903	0	0	0	0	0	0	0	603	903	0
579	2	0	0	0	0	0	0	200	300	0	0	0	0	0	0	0	200	903	0	0	0	0	0	0	0	603	903	0
579	3	0	0	0	0	0	0	200	300	0	0	0	0	0	0	0	200	903	0	0	0	0	0	0	0	603	903	0
579	4	0	0	0	0	0	0	200	300	0	0	0	0	0	0	0	200	903	0	0	0	0	0	0	0	603	903	0
579	5	0	0	0	0	0	0	200	300	0	0	0	0	0	0	0	200	903	0	0	0	0	0	0	0	603	903	0
579	6	0	0	0	0	0	0	200	300	0	0	0	0	0	0	0	200	903	0	0	0	0	0	0	0	603	903	0
579	7	0	0	0	0	0	0	200	300	0	0	0	0	0	0	0	200	903	0	0	0	0	0	0	0	603	903	0
579	8	0	0	0	0	0	0	200	300	0	0	0	0	0	0	0	200	903	0	0	0	0	0	0	0	603	903	0
579	9	0	0	0	0	0	0	200	300	0	0	0	0	0	0	0	200	903	0	0	0	0	0	0	0	603	903	0
580	0	0	0	0	0	0	0	200	300	0	0	0	0	0	0	0	200	903	0	0	0	0	0	0	0	603	903	0
580	1	0	0	0	0	0	0	200	300	0	0	0	0	0	0	0	200	903	0	0	0	0	0	0	0	603	903	0
580	2	0	0	0	0	0	0	200	300	0	0	0	0	0	0	0	200	903	0	0	0	0	0	0	0	603	903	0
580	3	0	0	0	0	0	0	200	300	0	0	0	0	0	0	0	200	903	0	0	0	0	0	0	0	603	903	0
580	4	0	0	0	0	0	0	200	300	0	0	0	0	0	0	0	200	903	0	0	0	0	0	0	0	603	903	0
580	5	0	0	0	0	0	0	200	300	0	0	0	0	0	0	0	200	903	0	0	0	0	0	0	0	603	903	0
580	6	0	0	0	0	0	0	200	300	0	0	0	0	0	0	0	200	903	0	0	0	0	0	0	0	603	903	0
580	7	0	0	0	0	0	0	200	300	0	0	0	0	0	0	0	200	903	0	0	0	0	0	0	0	603	903	0
580	8	0	0	0	0	0	0	200	300	0	0	0	0	0	0	0	200	903	0	0	0	0	0	0	0	603	903	0
580	9	0	0	0	0	0	0	200	300	0	0	0	0	0	0	0	200	903	0	0	0	0	0	0	0	603	903	0
581	0	0	0	0	0	0	0	200	300	0	0	0	0	0	0	0	200	903	0	0	0	0	0	0	0	603	903	0
581	1	0	0	0	0	0	0	200	300	0	0	0	0	0	0	0	200	903	0	0	0	0	0	0	0	603	903	0
581	2	0	0	0	0	0	0	200	300	0	0	0	0	0	0	0	200	903	0	0	0	0	0	0	0	603	903	0
581	3	0	0	0	0	0	0	200	300	0	0	0	0	0	0	0	200	903	0	0	0	0	0	0	0	603	903	0
581	4	0	0	0	0	0	0	200	300	0	0	0	0	0	0	0	200	903	0	0	0	0	0	0	0	603	903	0
581	5	0	0	0	0	0	0	200	300	0	0	0	0	0	0	0	200	903	0	0	0	0	0	0	0	603	903	0
581	6	0	0	0	0	0	0	200	300	0	0	0	0	0	0	0	200	903	0	0	0	0	0	0	0	603	903	0
581	7	0	0	0	0	0	0	200	300	0	0	0	0	0	0	0	200	903	0	0	0	0	0	0	0	603	903	0
581	8	0	0	0	0	0	0	200	300	0	0	0	0	0	0	0	200	903	0	0	0	0	0	0	0	603	903	0
581	9	0	0	0	0	0	0	200	300	0	0	0	0	0	0	0	200	903	0	0	0	0	0	0	0	603	903	0
582	0	0	0	0	0	0	0	200	300	0	0	0	0	0	0	0	200	903	0	0	0	0	0	0	0	603	903	0
582	1	0	0	0	0	0	0	200	300	0	0	0	0	0	0	0	200	903	0	0	0	0	0	0	0	603	903	0
582	2	0	0	0	0	0	0	200	300	0	0	0	0	0	0	0	200	903	0	0	0	0	0	0	0	603	903	0
582	3	0	0	0	0	0	0	200	300	0	0	0	0	0	0	0	200	903	0	0	0	0	0	0	0	603	903	0
582	4	0	0	0	0	0	0	200	300	0	0	0	0	0	0	0	200	903	0	0	0	0	0	0	0	603	903	0
582	5	0	0	0	0	0	0	200	300	0	0	0	0	0	0	0	200	903	0	0	0	0	0	0	0	603	903	0
582	6	0	0	0	0	0	0	200	300	0	0	0	0	0	0	0	200	903	0	0	0	0	0	0	0	603	903	0
582	7	0	0	0	0	0	0	200	300	0	0	0	0	0	0	0	200	903	0	0	0	0	0	0	0	603	903	0
582	8	0	0	0	0	0	0	200	300	0	0	0	0	0	0	0	200	903	0	0	0	0	0	0	0	603	903	0
582	9	0	0	0	0	0	0	200	300	0	0	0	0	0	0	0	200	903	0	0	0	0	0	0	0	603	903	0
583	0	0	0	0	0	0	0	200	300	0	0	0	0	0	0	0	200	903	0	0	0	0	0	0	0	603	903	0
583	1	0	0	0	0	0	0	200	300	0	0	0	0	0	0	0	200	903	0	0	0	0	0	0	0	603	903	0
583	2	0	0	0	0	0	0	200	300	0	0	0	0	0	0	0	200	903	0	0	0	0	0	0	0	603	903	0
583	3	0	0	0	0	0	0	200	300	0	0	0	0	0	0	0	200	903	0	0	0	0	0	0	0	603	903	0
583	4	0	0	0	0	0	0	200	300	0	0	0	0	0	0	0	200	903	0	0	0	0	0	0	0	603	903	0
583	5	0	0	0	0	0	0	200	300	0	0	0	0	0	0	0	200	903	0	0	0	0	0	0	0	603	903	0
583	6	0	0	0	0	0	0	200	300	0	0	0	0	0	0	0	200	903	0	0	0	0	0	0	0	603	903	0
583	7	0	0	0	0	0	0	200	300	0	0	0	0	0	0	0	200	903	0	0	0	0	0	0	0	603	903	0
583	8	0	0	0	0	0	0	200	300	0	0	0	0	0	0	0	200	903	0	0	0	0	0	0	0	603	903	0
583	9	0	0	0	0	0	0	200	300	0	0	0	0	0	0	0	200	903	0	0	0	0	0	0	0	603	903	0
584	0	0	0	0	0	0	0	200	300	0	0	0	0	0	0	0	200	903	0	0	0	0	0	0	0	603	903	0
584	1	0	0	0	0	0	0	200	300	0	0	0	0	0	0	0	200	903	0	0	0	0	0	0	0	603	903	0
584	2	0	0	0	0	0	0	200	300	0	0	0	0	0	0	0	200	903	0	0	0	0	0	0	0	603	903	0
584	3	0	0	0	0	0	0	200	300	0	0	0	0	0	0	0	200	903	0	0	0	0	0	0	0	603	903	0
584	4	0	0	0	0	0	0	200	300	0	0	0	0	0	0	0	200	903	0	0	0	0	0	0	0	603	903	0
584	5	0	0	0	0	0	0	200	300	0	0	0	0	0	0	0	200	903	0	0	0	0	0	0	0	603	903	0
584	6	0	0	0	0	0	0	200	300	0	0	0	0	0	0	0	200	903	0	0	0	0	0	0	0	603	903	0
584	7	0	0	0	0	0	0	200	300	0	0	0	0	0	0	0	200	903	0	0	0	0	0	0	0	603	903	0
584	8	0	0	0	0	0	0	200	300	0	0	0	0	0	0	0	200	903	0	0	0	0	0	0	0	603	903	0
584	9	0	0	0	0	0	0	200	300	0	0	0	0	0	0	0	200	903	0	0	0	0	0	0	0	603	903	0
585	0	0	0	0	0	0	0	200	300	0	0	0	0	0	0	0	200	903	0	0	0	0	0	0	0	603	903	0
585	1	0	0	0	0	0	0	200	300	0	0	0	0	0	0	0	200	903	0	0	0	0	0	0	0	603	903	0
585	2	0	0	0	0	0	0	200	300	0	0	0	0	0	0	0	200	903	0	0	0	0	0	0	0	603	903	0
585	3	0	0	0	0	0	0	200	300	0	0	0	0	0	0	0	200	903	0	0	0	0	0	0	0	603	903	0
585	4	0	0	0	0	0	0	200	300	0	0	0	0	0	0	0	200	903	0	0	0	0	0	0	0	603	903	0
585	5	0	0	0	0	0	0	200	300	0	0	0	0	0	0	0	200	903	0	0	0	0	0	0	0	603	903	0
585	6	0	0	0	0	0	0	200	300	0	0	0	0	0	0	0	200	903	0	0	0	0	0	0	0	603	903	0
585	7	0	0	0	0	0	0	200	300	0	0	0	0	0	0	0	200	903	0	0	0	0	0	0	0	603	903	0
585	8	0	0	0	0	0	0	200	300	0	0	0	0	0	0	0	200	903	0	0	0	0	0	0	0	603	903	0
585	9	0	0	0	0	0	0	200	300	0	0	0	0	0	0	0	200	903	0	0	0	0	0	0	0	603	903	0
586	0	0	0	0	0	0	0	200	300	0	0	0	0	0	0	0	200	903	0	0	0	0	0	0	0	603	903	0
586	1	0	0	0	0	0	0	200	300	0	0	0	0	0	0	0	200	903	0	0	0	0	0	0	0	603	903	0
586	2	0	0	0	0	0	0	200	300	0	0	0	0	0	0	0	200	903	0	0	0	0	0	0	0	603	903	0
586	3	0	0	0	0	0	0	200	300	0	0	0	0	0	0	0	200	903	0	0	0	0	0	0	0	603	903	0
586	4	0	0	0	0	0	0	200	300	0	0	0	0	0	0	0	200	903	0	0	0	0	0	0	0	603	903	0
586	5	0	0	0	0	0	0	200	300	0	0	0	0	0	0	0	200	903	0	0	0	0	0	0	0	603	903	0
586	6	0	0	0	0	0	0	200	300	0	0	0	0	0	0	0	200	903	0	0	0	0	0	0	0	603	903	0
586	7	0	0	0	0	0	0	200	300	0	0	0	0	0	0	0	200	903	0	0	0	0	0	0	0	603	903	0
586	8	0	0	0	0	0	0	200	300	0	0	0	0	0	0	0	200	903	0	0	0	0	0	0	0	603	903	0
586	9	0	0	0	0	0	0	200	300	0	0	0	0	0	0	0	200	903	0	0	0	0	0	0	0	603	903	0
587	0	0	0	0	0	0	0	200	300	0	0	0	0	0	0	0	200	903	0	0	0	0	0	0	0	603	903	0
587	1	0	0	0	0	0	0	200	300	0	0	0	0	0	0	0	200	903	0	0	0	0	0	0	0	603	903	0
587	2	0	0	0	0	0	0	200	300	0	0	0	0	0	0	0	200	903	0	0	0	0	0	0	0	603	903	0
587	3	0	0	0	0	0	0	200	300	0	0	0	0	0	0	0	200	903	0	0	0	0	0	0	0	603	903	0
587	4	0	0	0	0	0	0	200	300	0	0	0	0	0	0	0	200	903	0	0	0	0	0	0	0	603	903	0
587	5	0	0	0	0	0	0	200	300	0	0	0	0	0	0	0	200	903	0	0	0	0	0	0	0	603	903	0
587	6	0	0	0	0	0	0	200	300	0	0	0	0	0	0	0	200	903	0	0	0	0	0	0	0	603	903	0
587	7	0	0	0	0	0	0	200	300	0	0	0	0	0	0	0	200	903	0	0	0	0	0	0	0	603	903	0
587	8	0	0	0	0	0	0	200	300	0	0	0	0	0	0	0	200	903	0	0	0	0	0	0	0	603	903	0
587	9	0	0	0	0	0	0	200	300	0	0	0	0	0	0	0	200	903	0	0	0	0	0	0	0	603	903	0
588	0	0	0	0	0	0	0	200	300	0	0	0	0	0	0	0	200	903	0	0	0	0	0	0	0	603	903	0
588	1	0	0	0	0	0	0	200	300	0	0	0	0	0	0	0	200	903	0	0	0	0	0	0	0	603	903	0
588	2	0	0	0	0	0	0	200	300	0	0	0	0	0	0	0	200	903	0	0	0	0	0	0	0	603	903	0
588	3	0	0	0	0	0	0	200	300	0	0	0	0	0	0	0	200	903	0	0	0	0	0	0	0	603	903	0
588	4	0	0	0	0	0	0	200	300	0	0	0	0	0	0	0	200	903	0	0	0	0	0	0	0	603	903	0
588	5	0	0	0	0	0	0	200	300	0	0	0	0	0	0	0	200	903	0	0	0	0	0	0	0	603	903	0
588	6	0	0	0	0	0	0	200	300	0	0	0	0	0	0	0	200	903	0	0	0	0	0	0	0	603	903	0
588	7	0	0	0	0	0	0	200	300	0	0	0	0	0	0	0	200	903	0	0	0	0	0	0	0	603	903	0
588	8	0	0	0	0	0	0	200	300	0	0	0	0	0	0	0	200	903	0	0	0	0	0	0	0	603	903	0
588	9	0	0	0	0	0	0	200	300	0	0	0	0	0	0	0	200	903	0	0	0	0	0	0	0	603	903	0
589	0	0	0	0	0	0	0	200	300	0	0	0	0	0	0	0	200	903	0	0	0	0	0	0	0	603	903	0
589	1	0	0	0	0	0	0	200	300	0	0	0	0	0	0	0	200	903	0	0	0	0	0	0	0	603	903	0
589	2	0	0	0	0	0	0	200	300	0	0	0	0	0	0	0	200	903	0	0	0	0	0	0	0	603	903	0
589	3	0	0	0	0	0	0	200	300	0	0	0	0	0	0	0	200	903	0	0	0	0	0	0	0	603	903	0
589	4	0	0	0	0	0	0	200	300	0	0	0	0	0	0	0	200	903	0	0	0	0	0	0	0	603	903	0
589	5	0	0	0	0	0	0	200	300	0	0	0	0	0	0	0	200	903	0	0	0	0	0	0	0	603	903	0
589	6	0	0	0	0	0	0	200	300	0	0	0	0	0	0	0	200	903	0	0	0	0	0	0	0	603	903	0
589	7	0	0	0	0	0	0	200	300	0	0	0	0	0	0	0	200	903	0	0	0	0	0	0	0	603	903	0
589	8	0	0	0	0	0	0	200	300	0	0	0	0	0	0	0	200	903	0	0	0	0	0	0	0	603	903	0
589	9	0	0	0	0	0	0	200	300	0	0	0	0	0	0	0	200	903	0	0	0	0	0	0	0	603	903	0
590	0	0	0	0	0	0	0	200	300	0	0	0	0	0	0	0	200	903	0	0	0	0	0	0	0	603	903	0
590	1	0	0	0	0	0	0	200	300	0	0	0	0	0	0	0	200	903	0	0	0	0	0	0	0	603	903	0
590	2	0	0	0	0	0	0	200	300	0	0	0	0	0	0	0	200	903	0	0	0	0	0	0	0	603	903	0
590	3	0	0	0	0	0	0	200	300	0	0	0	0	0	0	0	200	903	0	0	0	0	0	0	0	603	903	0
590	4	0	0	0	0	0	0	200	300	0	0	0	0	0	0	0	200	903	0	0	0	0	0	0	0	603	903	0
590	5	0	0	0	0	0	0	200	300	0	0	0	0	0	0	0	200	903	0	0	0	0	0	0	0	603	903	0
590	6	0	0	0	0	0	0	200	300	0	0	0	0	0	0	0	200	903	0	0	0	0	0	0	0	603	903	0
590	7	0	0	0	0	0	0	200	300	0	0	0	0	0	0	0	200	903	0	0	0	0	0	0	0	603	903	0
590	8	0	0	0	0	0	0	200	300	0	0	0	0	0	0	0	200	903	0	0	0	0	0	0	0	603	903	0
590	9	0	0	0	0	0	0	200	300	0	0	0	0	0	0	0	200	903	0	0	0	0	0	0	0	603	903	0
591	0	0	0	0	0	0	0	200	300	0	0	0	0	0	0	0	200	903	0	0	0	0	0	0	0	603	903	0
591	1	0	0	0	0	0	0	200	300	0	0	0	0	0	0	0	200	903	0	0	0	0	0	0	0	603	903	0
591	2	0	0	0	0	0	0	200	300	0	0	0	0	0	0	0	200	903	0	0	0	0	0	0	0	603	903	0
591	3	0	0	0	0	0	0	200	300	0	0	0	0	0	0	0	200	903	0	0	0	0	0	0	0	603	903	0
591	4	0	0	0	0	0	0	200	300	0	0	0	0	0	0	0	200	903	0	0	0	0	0	0	0	603	903	0
591	5	0	0	0	0	0	0	200	300	0	0	0	0	0	0	0	200	903	0	0	0	0	0	0	0	603	903	0
591	6	0	0	0	0	0	0	200	300	0	0	0	0	0	0	0	200	903	0	0	0	0	0	0	0	603	903	0
591	7	0	0	0	0	0	0	200	300	0	0	0	0	0	0	0	200	903	0	0	0	0	0	0	0	603	903	0
591	8	0	0	0	0	0	0	200	300	0	0	0	0	0	0	0	200	903	0	0	0	0	0	0	0	603	903	0
591	9	0	0	0	0	0	0	200	300	0	0	0	0	0	0	0	200	903	0	0	0	0	0	0	0	603	903	0
592	0	0	0	0	0	0	0	200	300	0	0	0	0	0	0	0	200	903	0	0	0	0	0	0	0	603	903	0
592	1	0	0	0	0	0	0	200	300	0	0	0	0	0	0	0	200	903	0	0	0	0	0	0	0	603	903	0
592	2	0	0	0	0	0	0	200	300	0	0	0	0	0	0	0	200	903	0	0	0	0	0	0	0	603	903	0
592	3	0	0	0	0	0	0	200	300	0	0	0	0	0	0	0	200	903	0	0	0	0	0	0	0	603	903	0
592	4	0	0	0	0	0	0	200	300	0	0	0	0	0	0	0	200	903	0	0	0	0	0	0	0	603	903	0
592	5	0	0	0	0	0	0	200	300	0	0	0	0	0	0	0	200	903	0	0	0	0	0	0	0	603	903	0
592	6	0	0	0	0	0	0	200	300	0	0	0	0	0	0	0	200	903	0	0	0	0	0	0	0	603	903	0
592	7	0	0	0	0	0	0	200	300	0	0	0	0	0	0	0	200	903	0	0	0	0	0	0	0	603	903	0
592	8	0	0	0	0	0	0	200	300	0	0	0	0	0	0	0	200	903	0	0	0	0	0	0	0	603	903	0
592	9	0	0	0	0	0	0	200	300	0	0	0	0	0	0	0	200	903	0	0	0	0	0	0	0	603	903	0
593	0	0	0	0	0	0	0	200	300	0	0	0	0	0	0	0	200	903	0	0	0	0	0	0	0	603	903	0
593	1	0	0	0	0	0	0	200	300	0	0	0	0	0	0	0	200	903	0	0	0	0	0	0	0	603	903	0
593	2	0	0	0	0	0	0	200	300	0	0	0	0	0	0	0	200	903	0	0	0	0	0	0	0	603	903	0
593	3	0	0	0	0	0	0	200	300	0	0	0	0	0	0	0	200	903	0	0	0	0	0	0	0	603	903	0
593	4	0	0	0	0	0	0	200	300	0	0	0	0	0	0	0	200	903	0	0	0	0	0	0	0	603	903	0
593	5	0	0	0	0	0	0	200	300	0	0	0	0	0	0	0	200	903	0	0	0	0	0	0	0	603	903	0
593	6	0	0	0	0	0	0	200	300	0	0	0	0	0	0	0	200	903	0	0	0	0	0	0	0	603	903	0
593	7	0	0	0	0	0	0	200	300	0	0	0	0	0	0	0	200	903	0	0	0	0	0	0	0	603	903	0
593	8	0	0	0	0	0	0	200	300	0	0	0	0	0	0	0	200	903	0	0	0	0	0	0	0	603	903	0
593	9	0	0	0	0	0	0	200	300	0	0	0	0	0	0	0	200	903	0	0	0	0	0	0	0	603	903	0
594	0	0	0	0	0	0	0	200	300	0	0	0	0	0	0	0	200	903	0	0	0	0	0	0	0	603	903	0
594	1	0	0	0	0	0	0	200	300	0	0	0	0	0	0	0	200	903	0	0	0	0	0	0	0	603	903	0
594	2	0	0	0	0	0	0	200	300	0	0	0	0	0	0	0	200	903	0	0	0	0	0	0	0	603	903	0
594	3	0	0	0	0	0	0	200	300	0	0	0	0	0	0	0	200	903	0	0	0	0	0	0	0	603	903	0
594	4	0	0	0	0	0	0	200	300	0	0	0	0	0	0	0	200	903	0	0	0	0	0	0	0	603	903	0
594	5	0	0	0	0	0	0	200	300	0	0	0	0	0	0	0	200	903	0	0	0	0	0	0	0	603	903	0
594	6	0	0	0	0	0	0	200	300	0	0	0	0	0	0	0	200	903	0	0	0	0	0	0	0	603	903	0
594	7	0	0	0	0	0	0	200	300	0	0	0	0	0	0	0	200	903	0	0	0	0	0	0	0	603	903	0
594	8	0	0	0	0	0	0	200	300	0	0	0	0	0	0	0	200	903	0	0	0	0	0	0	0	603	903	0
594	9	0	0	0	0	0	0	200	300	0	0	0	0	0	0	0	200	903	0	0	0	0	0	0	0	603	903	0
595	0	0	0	0	0	0	0	200	300	0	0	0	0	0	0	0	200	903	0	0	0	0	0	0	0	603	903	0
595	1	0	0	0	0	0	0	200	300	0	0	0	0	0	0	0	200	903	0	0	0	0	0	0	0	603	903	0
595	2	0	0	0	0	0	0	200	300	0	0	0	0	0	0	0	200	903	0	0	0	0	0	0	0	603	903	0
595	3	0	0	0	0	0	0	200	300	0	0	0	0	0	0	0	200	903	0	0	0	0	0	0	0	603	903	0
595	4	0	0	0	0	0	0	200	300	0	0	0	0	0	0	0	200	903	0	0	0	0	0	0	0	603	903	0
595	5	0	0	0	0	0	0	200	300	0	0	0	0	0	0	0	200	903	0	0	0	0	0	0	0	603	903	0
595	6	0	0	0	0	0	0	200	300	0	0	0	0	0	0	0	200	903	0	0	0	0	0	0	0	603	903	0
595	7	0	0	0	0	0	0	200	300	0	0	0	0	0	0	0	200	903	0	0	0	0	0	0	0	603	903	0
595	8	0	0	0	0	0	0	200	300	0	0	0	0	0	0	0	200	903	0	0	0	0	0	0	0	603	903	0
595	9	0	0	0	0	0	0	200	300	0	0	0	0	0	0	0	200	903	0	0	0	0	0	0	0	603	903	0
596	0	0	0	0	0	0	0	200	300	0	0	0	0	0	0	0	200	903	0	0	0	0	0	0	0	603	903	0
596	1	0	0	0	0	0	0	200	300	0	0	0	0	0	0	0	200	903	0	0	0	0	0	0	0	603	903	0
596	2	0	0	0	0	0	0	200	300	0	0	0	0	0	0	0	200	903	0	0	0	0	0	0	0	603	903	0
596	3	0	0	0	0	0	0	200	300	0	0	0	0	0	0	0	200	903	0	0	0	0	0	0	0	603	903	0
596	4	0	0	0	0	0	0	200	300	0	0	0	0	0	0	0	200	903	0	0	0	0	0	0	0	603	903	0
596	5	0	0	0	0	0	0	200	300	0	0	0	0	0	0	0	200	903	0	0	0	0	0	0	0	603	903	0
596	6	0	0	0	0	0	0	200	300	0	0	0	0	0	0	0	200	903	0	0	0	0	0	0	0	603	903	0
596	7	0	0	0	0	0	0	200	300	0	0	0	0	0	0	0	200	903	0	0	0	0	0	0	0	603	903	0
596	8	0	0	0	0	0	0	200	300	0	0	0	0	0	0	0	200	903	0	0	0	0	0	0	0	603	903	0
596	9	0	0	0	0	0	0	200	300	0	0	0	0	0	0	0	200	903	0	0	0	0	0	0	0	603	903	0
597	0	0	0	0	0	0	0	200	300	0	0	0	0	0	0	0	200	903	0	0	0	0	0	0	0	603	903	0
597	1	0	0	0	0	0	0	200	300	0	0	0	0	0	0	0	200	903	0	0	0	0	0	0	0	603	903	0
597	2	0	0	0	0	0	0	200	300	0	0	0	0	0	0	0	200	903	0	0	0	0	0	0	0	603	903	0
597	3	0	0	0	0	0	0	200	300	0	0	0	0	0	0	0	200	903	0	0	0	0	0	0	0	603	903	0
597	4	0	0	0	0	0	0	200	300	0	0	0	0	0	0	0	200	903	0	0	0	0	0	0	0	603	903	0
597	5	0	0	0	0	0	0	200	300	0	0	0	0	0	0	0	200	903	0	0	0	0	0	0	0	603	903	0
597	6	0	0	0	0	0	0	200	300	0	0	0	0	0	0	0	200	903	0	0	0	0	0	0	0	603	903	0
597	7	0	0	0	0	0	0	200	300	0	0	0	0	0	0	0	200	903	0	0	0	0	0	0	0	603	903	0
597	8	0	0	0	0	0	0	200	300	0	0	0	0	0	0	0	200	903	0	0	0	0	0	0	0	603	903	0
597	9	0	0	0	0	0	0	200	300	0	0	0	0	0	0	0	200	903	0	0	0	0	0	0	0	603	903	0
598	0	0	0	0	0	0	0	200	300	0	0	0	0	0	0	0	200	903	0	0	0	0	0	0	0	603	903	0
598	1	0	0	0	0	0	0	200	300	0	0	0	0	0	0	0	200	903	0	0	0	0	0	0	0	603	903	0
598	2	0	0	0	0	0	0	200	300	0	0	0	0	0	0	0	200	903	0	0	0	0	0	0	0	603	903	0
598	3	0	0	0	0	0	0	200	300	0	0	0	0	0	0	0	200	903	0	0	0	0	0	0	0	603	903	0
598	4	0	0	0	0	0	0	200	300	0	0	0	0	0	0	0	200	903	0	0	0	0	0	0	0	603	903	0
598	5	0	0	0	0	0	0	200	300	0	0	0	0	0	0	0	200	903	0	0	0	0	0	0	0	603	903	0
598	6	0	0	0	0	0	0	200	300	0	0	0	0	0	0	0	200	903	0	0	0	0	0	0	0	603	903	0
598	7	0	0	0	0	0	0	200	300	0	0	0	0	0	0	0	200	903	0	0	0	0	0	0	0	603	903	0
598	8	0	0	0	0	0	0	200	300	0	0	0	0	0	0	0	200	903	0	0	0	0	0	0	0	603	903	0
598	9	0	0	0	0	0	0	200	300	0	0	0	0	0	0	0	200	903	0	0	0	0	0	0	0	603	903	0
599	0	0	0	0	0	0	0	200	300	0	0	0	0	0	0	0	200	903	0	0	0	0	0	0	0	603	903	0
599	1	0	0	0	0	0	0	200	300	0	0	0	0	0	0	0	200	903	0	0	0	0	0	0	0	603	903	0
599	2	0	0	0	0	0	0	200	300	0	0	0	0	0	0	0	200	903	0	0	0	0	0	0	0	603	903	0
599	3	0	0	0	0	0	0	200	300	0	0	0	0	0	0	0	200	903	0	0	0	0	0	0	0	603	903	0
599	4	0	0	0	0	0	0	200	300	0	0	0	0	0	0	0	200	903	0	0	0	0	0	0	0	603	903	0
599	5	0	0	0	0	0	0	200	300	0	0	0	0	0	0	0	200	903	0	0	0	0	0	0	0	603	903	0
599	6	0	0	0	0	0	0	200	300	0	0	0	0	0	0	0	200	903	0	0	0	0	0	0	0	603	903	0
599	7	0	0	0	0	0	0	200	300	0	0	0	0	0	0	0	200	903	0	0	0	0	0	0	0	603	903	0
599	8	0	0	0	0	0	0	200	300	0	0	0	0	0	0	0	200	903	0	0	0	0	0	0	0	603	903	0
599	9	0	0	0	0	0	0	200	300	0	0	0	0	0	0	0	200	903	0	0	0	0	0	0	0	603	903	0
600	0	0	0	0	0	0	0	200	300	0	0	0	0	0	0	0	200	903	0	0	0	0	0	0	0	603	903	0
600	1	0	0	0	0	0	0	200	300	0	0	0	0	0	0	0	200	903	0	0	0	0	0	0	0	603	903	0
600	2	0	0	0	0	0	0	200	300	0	0	0	0	0	0	0	200	903	0	0	0	0	0	0	0	603	903	0
600	3	0	0	0	0	0	0	200	300	0	0	0	0	0	0	0	200	903	0	0	0	0	0	0	0	603	903	0
600	4	0	0	0	0	0	0	200	300	0	0	0	0	0	0	0	200	903	0	0	0	0	0	0	0	603	903	0
600	5	0	0	0	0	0	0	200	300	0	0	0	0	0	0	0	200	903	0	0	0	0	0	0	0	603	903	0
600	6	0	0	0	0	0	0	200	300	0	0	0	0	0	0	0	200	903	0	0	0	0	0	0	0	603	903	0
600	7	0	0	0	0	0	0	200	300	0	0	0	0	0	0	0	200	903	0	0	0	0	0	0	0	603	903	0
600	8	0	0	0	0	0	0	200	300	0	0	0	0	0	0	0	200	903	0	0	0	0	0	0	0	603	903	0
600	9	0	0	0	0	0	0	200	300	0	0	0	0	0	0	0	200	903	0	0	0	0	0	0	0	603	903	0
601	0	0	0	0	0	0	0	200	300	0	0	0	0	0	0	0	200	903	0	0	0	0	0	0	0	603	903	0
601	1	0	0	0	0	0	0	200	300	0	0	0	0	0	0	0	200	903	0	0	0	0	0	0	0	603	903	0
601	2	0	0	0	0	0	0	200	300	0	0	0	0	0	0	0	200	903	0	0	0	0	0	0	0	603	903	0
601	3	0	0	0	0	0	0	200	300	0	0	0	0	0	0	0	200	903	0	0	0	0	0	0	0	603	903	0
601	4	0	0	0	0	0	0	200	300	0	0	0	0	0	0	0	200	903	0	0	0	0	0	0	0	603	903	0
601	5	0	0	0	0	0	0	200	300	0	0	0	0	0	0	0	200	903	0	0	0	0	0	0	0	603	903	0
601	6	0	0	0	0	0	0	200	300	0	0	0	0	0	0	0	200	903	0	0	0	0	0	0	0	603	903	0
601	7	0	0	0	0	0	0	200	300	0	0	0	0	0	0	0	200	903	0	0	0	0	0	0	0	603	903	0
601	8	0	0	0	0	0	0	200	300	0	0	0	0	0	0	0	200	903	0	0	0	0	0	0	0	603	903	0
601	9	0	0	0	0	0	0	200	300	0	0	0	0	0	0	0	200	903	0	0	0	0	0	0	0	603	903	0
602	0	0	0	0	0	0	0	200	300	0	0	0	0	0	0	0	200	903	0	0	0	0	0	0	0	603	903	0
602	1	0	0	0	0	0	0	200	300	0	0	0	0	0	0	0	200	903	0	0	0	0	0	0	0	603	903	0
602	2	0	0	0	0	0	0	200	300	0	0	0	0	0	0	0	200	903	0	0	0	0	0	0	0	603	903	0
602	3	0	0	0	0	0	0	200	300	0	0	0	0	0	0	0	200	903	0	0	0	0	0	0	0	603	903	0
602	4	0	0	0	0	0	0	200	300	0	0	0	0	0	0	0	200	903	0	0	0	0	0	0	0	603	903	0
602	5	0	0	0	0	0	0	200	300	0	0	0	0	0	0	0	200	903	0	0	0	0	0	0	0	603	903	0
602	6	0	0	0	0	0	0	200	300	0	0	0	0	0	0	0	200	903	0	0	0	0	0	0	0	603	903	0
602	7	0	0	0	0	0	0	200	300	0	0	0	0	0	0	0	200	903	0	0	0	0	0	0	0	603	903	0
602	8	0	0	0	0	0	0	200	300	0	0	0	0	0	0	0	200	903	0	0	0	0	0	0	0	603	903	0
602	9	0	0	0	0	0	0	200	300	0	0	0	0	0	0	0	200	903	0	0	0	0	0	0	0	603	903	0
603	0	0	0	0	0	0	0	200	300	0	0	0	0	0	0	0	200	903	0	0	0	0	0	0	0	603	903	0
603	1	0	0	0	0	0	0	200	300	0	0	0	0	0	0	0	200	903	0	0	0	0	0	0	0	603	903	0
603	2	0	0	0	0	0	0	200	300	0	0	0	0	0	0	0	200	903	0	0	0	0	0	0	0	603	903	0
603	3	0	0	0	0	0	0	200	300	0	0	0	0	0	0	0	200	903	0	0	0	0	0	0	0	603	903	0
603	4	0	0	0	0	0	0	200	300	0	0	0	0	0	0	0	200	903	0	0	0	0	0	0	0	603	903	0
603	5	0	0	0	0	0	0	200	300	0	0	0	0	0	0	0	200	903	0	0	0	0	0	0	0	603	903	0
603	6	0	0	0	0	0	0	200	300	0	0	0	0	0	0	0	200	903	0	0	0	0	0	0	0	603	903	0
603	7	0	0	0	0	0	0	200	300	0	0	0	0	0	0	0	200	903	0	0	0	0	0	0	0	603	903	0
603	8	0	0	0	0	0	0	200	300	0	0	0	0	0	0	0	200	903	0	0	0	0	0	0	0	603	903	0
603	9	0	0	0	0	0	0	200	300	0	0	0	0	0	0	0	200	903	0	0	0	0	0	0	0	603	903	0
604	0	0	0	0	0	0	0	200	300	0	0	0	0	0	0	0	200	903	0	0	0	0	0	0	0	603	903	0
604	1	0	0	0	0	0	0	200	300	0	0	0	0	0	0	0	200	903	0	0	0	0	0	0	0	603	903	0
604	2	0	0	0	0	0	0	200	300	0	0	0	0	0	0	0	200	903	0	0	0	0	0	0	0	603	903	0
604	3	0	0	0	0	0	0	200	300	0	0	0	0	0	0	0	200	903	0	0	0	0	0	0	0	603	903	0
604	4	0	0	0	0	0	0	200	300	0	0	0	0	0	0	0	200	903	0	0	0	0	0	0	0	603	903	0
604	5	0	0	0	0	0	0	200	300	0	0	0	0	0	0	0	200	903	0	0	0	0	0	0	0	603	903	0
604	6	0	0	0	0	0	0	200	300	0	0	0	0	0	0	0	200	903	0	0	0	0	0	0	0	603	903	0
604	7	0	0	0	0	0	0	200	300	0	0	0	0	0	0	0	200	903	0	0	0	0	0	0	0	603	903	0
604	8	0	0	0	0	0	0	200	300	0	0	0	0	0	0	0	200	903	0	0	0	0	0	0	0	603	903	0
604	9	0	0	0	0	0	0	200	300	0	0	0	0	0	0	0	200	903	0	0	0	0	0	0	0	603	903	0
605	0	0	0	0	0	0	0	200	300	0	0	0	0	0	0	0	200	903	0	0	0	0	0	0	0	603	903	0
605	1	0	0	0	0	0	0	200	300	0	0	0	0	0	0	0	200	903	0	0	0	0	0	0	0	603	903	0
605	2	0	0	0	0	0	0	200	300	0	0	0	0	0	0	0	200	903	0	0	0	0	0	0	0	603	903	0
605	3	0	0	0	0	0	0	200	300	0	0	0	0	0	0	0	200	903	0	0	0	0	0	0	0	603	903	0
605	4	0	0	0	0	0	0	200	300	0	0	0	0	0	0	0	200	903	0	0	0	0	0	0	0	603	903	0
605	5	0	0	0	0	0	0	200	300	0	0	0	0	0	0	0	200	903	0	0	0	0	0	0	0	603	903	0
605	6	0	0	0	0	0	0	200	300	0	0	0	0	0	0	0	200	903	0	0	0	0	0	0	0	603	903	0
605	7	0	0	0	0	0	0	200	300	0	0	0	0	0	0	0	200	903	0	0	0	0	0	0	0	603	903	0
605	8	0	0	0	0	0	0	200	300	0	0	0	0	0	0	0	200	903	0	0	0	0	0	0	0	603	903	0
605	9	0	0	0	0	0	0	200	300	0	0	0	0	0	0	0	200	903	0	0	0	0	0	0	0	603	903	0
606	0	0	0	0	0	0	0	200	300	0	0	0	0	0	0	0	200	903	0	0	0	0	0	0	0	603	903	0
606	1	0	0	0	0	0	0	200	300	0	0	0	0	0	0	0	200	903	0	0	0	0	0	0	0	603	903	0
606	2	0	0	0	0	0	0	200	300	0	0	0	0	0	0	0	200	903	0	0	0	0	0	0	0	603	903	0
606	3	0	0	0	0	0	0	200	300	0	0	0	0	0	0	0	200	903	0	0	0	0	0	0	0	603	903	0
606	4	0	0	0	0	0	0	200	300	0	0	0	0	0	0	0	200	903	0	0	0	0	0	0	0	603	903	0
606	5	0	0	0	0	0	0	200	300	0	0	0	0	0	0	0	200	903	0	0	0	0	0	0	0	603	903	0
606	6	0	0	0	0	0	0	200	300	0	0	0	0	0	0	0	200	903	0	0	0	0	0	0	0	603	903	0
606	7	0	0	0	0	0	0	200	300	0	0	0	0	0	0	0	200	903	0	0	0	0	0	0	0	603	903	0
606	8	0	0	0	0	0	0	200	300	0	0	0	0	0	0	0	200	903	0	0	0	0	0	0	0	603	903	0
606	9	0	0	0	0	0	0	200	300	0	0	0	0	0	0	0	200	903	0	0	0	0	0	0	0	603	903	0
607	0	0	0	0	0	0	0	200	300	0	0	0	0	0	0	0	200	903	0	0	0	0	0	0	0	603	903	0
607	1	0	0	0	0	0	0	200	300	0	0	0	0	0	0	0	200	903	0	0	0	0	0	0	0	603	903	0
607	2	0	0	0	0	0	0	200	300	0	0	0	0	0	0	0	200	903	0	0	0	0	0	0	0	603	903	0
607	3	0	0	0	0	0	0	200	300	0	0	0	0	0	0	0	200	903	0	0	0	0	0	0	0	603	903	0
607	4	0	0	0	0	0	0	200	300	0	0	0	0	0	0	0	200	903	0	0	0	0	0	0	0	603	903	0
607	5	0	0	0	0	0	0	200	300	0	0	0	0	0	0	0	200	903	0	0	0	0	0	0	0	603	903	0
607	6	0	0	0	0	0	0	200	300	0	0	0	0	0	0	0	200	903	0	0	0	0	0	0	0	603	903	0
607	7	0	0	0	0	0	0	200	300	0	0	0	0	0	0	0	200	903	0	0	0	0	0	0	0	603	903	0
607	8	0	0	0	0	0	0	200	300	0	0	0	0	0	0	0	200	903	0	0	0	0	0	0	0	603	903	0
607	9	0	0	0	0	0	0	200	300	0	0	0	0	0	0	0	200	903	0	0	0	0	0	0	0	603	903	0
608	0	0	0	0	0	0	0	200	300	0	0	0	0	0	0	0	200	903	0	0	0	0	0	0	0	603	903	0
608	1	0	0	0	0	0	0	200	300	0	0	0	0	0	0	0	200	903	0	0	0	0	0	0	0	603	903	0
608	2	0	0	0	0	0	0	200	300	0	0	0	0	0	0	0	200	903	0	0	0	0	0	0	0	603	903	0
608	3	0	0	0	0	0	0	200	300	0	0	0	0	0	0	0	200	903	0	0	0	0	0	0	0	603	903	0
608	4	0	0	0	0	0	0	200	300	0	0	0	0	0	0	0	200	903	0	0	0	0	0	0	0	603	903	0
608	5	0	0	0	0	0	0	200	300	0	0	0	0	0	0	0	200	903	0	0	0	0	0	0	0	603	903	0
608	6	0	0	0	0	0	0	200	300	0	0	0	0	0	0	0	200	903	0	0	0	0	0	0	0	603	903	0
608	7	0	0	0	0	0	0	200	300	0	0	0	0	0	0	0	200	903	0	0	0	0	0	0	0	603	903	0
608	8	0	0	0	0	0	0	200	300	0	0	0	0	0	0	0	200	903	0	0	0	0	0	0	0	603	903	0
608	9	0	0	0	0	0	0	200	300	0	0	0	0	0	0	0	200	903	0	0	0	0	0	0	0	603	903	0
609	0	0	0	0	0	0	0	200	300	0	0	0	0	0	0	0	200	903	0	0	0	0	0	0	0	603	903	0
609	1	0	0	0	0	0	0	200	300	0	0	0	0	0	0	0	200	903	0	0	0	0	0	0	0	603	903	0
609	2	0	0	0	0	0	0	200	300	0	0	0	0	0	0	0	200	903	0	0	0	0	0	0	0	603	903	0
609	3	0	0	0	0	0	0	200	300	0	0	0	0	0	0	0	200	903	0	0	0	0	0	0	0	603	903	0
609	4	0	0	0	0	0	0	200	300	0	0	0	0	0	0	0	200	903	0	0	0	0	0	0	0	603	903	0
609	5	0	0	0	0	0	0	200	300	0	0	0	0	0	0	0	200	903	0	0	0	0	0	0	0	603	903	0
609	6	0	0	0	0	0	0	200	300	0	0	0	0	0	0	0	200	903	0	0	0	0	0	0	0	603	903	0
609	7	0	0	0	0	0	0	200	300	0	0	0	0	0	0	0	200	903	0	0	0	0	0	0	0	603	903	0
609	8	0	0	0	0	0	0	200	300	0	0	0	0	0	0	0	200	903	0	0	0	0	0	0	0	603	903	0
609	9	0	0	0	0	0	0	200	300	0	0	0	0	0	0	0	200	903	0	0	0	0	0	0	0	603	903	0
610	0	0	0	0	0	0	0	200	300	0	0	0	0	0	0	0	200	903	0	0	0	0	0	0	0	603	903	0
610	1	0	0	0	0	0	0	200	300	0	0	0	0	0	0	0	200	903	0	0	0	0	0	0	0	603	903	0
610	2	0	0	0	0	0	0	200	300	0	0	0	0	0	0	0	200	903	0	0	0	0	0	0	0	603	903	0
610	3	0	0	0	0	0	0	200	300	0	0	0	0	0	0	0	200	903	0	0	0	0	0	0	0	603	903	0
610	4	0	0	0	0	0	0	200	300	0	0	0	0	0	0	0	200	903	0	0	0	0	0	0	0	603	903	0
610	5	0	0	0	0	0	0	200	300	0	0	0	0	0	0	0	200	903	0	0	0	0	0	0	0	603	903	0
610	6	0	0	0	0	0	0	200	300	0	0	0	0	0	0	0	200	903	0	0	0	0	0	0	0	603	903	0
610	7	0	0	0	0	0	0	200	300	0	0	0	0	0	0	0	200	903	0	0	0	0	0	0	0	603	903	0
610	8	0	0	0	0	0	0	200	300	0	0	0	0	0	0	0	200	903	0	0	0	0	0	0	0	603	903	0
610	9	0	0	0	0	0	0	200	300	0	0	0	0	0	0	0	200	903	0	0	0	0	0	0	0	603	903	0
611	0	0	0	0	0	0	0	200	300	0	0	0	0	0	0	0	200	903	0	0	0	0	0	0	0	603	903	0
611	1	0	0	0	0	0	0	200	300	0	0	0	0	0	0	0	200	903	0	0	0	0	0	0	0	603	903	0
611	2	0	0	0	0	0	0	200	300	0	0	0	0	0	0	0	200	903	0	0	0	0	0	0	0	603	903	0
611	3	0	0	0	0	0	0	200	300	0	0	0	0	0	0	0	200	903	0	0	0	0	0	0	0	603	903	0
611	4	0	0	0	0	0	0	200	300	0	0	0	0	0	0	0	200	903	0	0	0	0	0	0	0	603	903	0
611	5	0	0	0	0	0	0	200	300	0	0	0	0	0	0	0	200	903	0	0	0	0	0	0	0	603	903	0
611	6	0	0	0	0	0	0	200	300	0	0	0	0	0	0	0	200	903	0	0	0	0	0	0	0	603	903	0
611	7	0	0	0	0	0	0	200	300	0	0	0	0	0	0	0	200	903	0	0	0	0	0	0	0	603	903	0
611	8	0	0	0	0	0	0	200	300	0	0	0	0	0	0	0	200	903	0	0	0	0	0	0	0	603	903	0
611	9	0	0	0	0	0	0	200	300	0	0	0	0	0	0	0	200	903	0	0	0	0	0	0	0	603	903	0
612	0	0	0	0	0	0	0	200	300	0	0	0	0	0	0	0	200	903	0	0	0	0	0	0	0	603	903	0
612	1	0	0	0	0	0	0	200	300	0	0	0	0	0	0	0	200	903	0	0	0	0	0	0	0	603	903	0
612	2	0	0	0	0	0	0	200	300	0	0	0	0	0	0	0	200	903	0	0	0	0	0	0	0	603	903	0
612	3	0	0	0	0	0	0	200	300	0	0	0	0	0	0	0	200	903	0	0	0	0	0	0	0	603	903	0
612	4	0	0	0	0	0	0	200	300	0	0	0	0	0	0	0	200	903	0	0	0	0	0	0	0	603	903	0
612	5	0	0	0	0	0	0	200	300	0	0	0	0	0	0	0	200	903	0	0	0	0	0	0	0	603	903	0
612	6	0	0	0	0	0	0	200	300	0	0	0	0	0	0	0	200	903	0	0	0	0	0	0	0	603	903	0
612	7	0	0	0	0	0	0	200	300	0	0	0	0	0	0	0	200	903	0	0	0	0	0	0	0	603	903	0
612	8	0	0	0	0	0	0	200	300	0	0	0	0	0	0	0	200	903	0	0	0	0	0	0	0	603	903	0
612	9	0	0	0	0	0	0	200	300	0	0	0	0	0	0	0	200	903	0	0	0	0	0	0	0	603	903	0
613	0	0	0	0	0	0	0	200	300	0	0	0	0	0	0	0	200	903	0	0	0	0	0	0	0	603	903	0
613	1	0	0	0	0	0	0	200	300	0	0	0	0	0	0	0	200	903	0	0	0	0	0	0	0	603	903	0
613	2	0	0	0	0	0	0	200	300	0	0	0	0	0	0	0	200	903	0	0	0	0	0	0	0	603	903	0
613	3	0	0	0	0	0	0	200	300	0	0	0	0	0	0	0	200	903	0	0	0	0	0	0	0	603	903	0
613	4	0	0	0	0	0	0	200	300	0	0	0	0	0	0	0	200	903	0	0	0	0	0	0	0	603	903	0
613	5	0	0	0	0	0	0	200	300	0	0	0	0	0	0	0	200	903	0	0	0	0	0	0	0	603	903	0
613	6	0	0	0	0	0	0	200	300	0	0	0	0	0	0	0	200	903	0	0	0	0	0	0	0	603	903	0
613	7	0	0	0	0	0	0	200	300	0	0	0	0	0	0	0	200	903	0	0	0	0	0	0	0	603	903	0
613	8	0	0	0	0	0	0	200	300	0	0	0	0	0	0	0	200	903	0	0	0	0	0	0	0	603	903	0
613	9	0	0	0	0	0	0	200	300	0	0	0	0	0	0	0	200	903	0	0	0	0	0	0	0	603	903	0
614	0	0	0	0	0	0	0	200	300	0	0	0	0	0	0	0	200	903	0	0	0	0	0	0	0	603	903	0
614	1	0	0	0	0	0	0	200	300	0	0	0	0	0	0	0	200	903	0	0	0	0	0	0	0	603	903	0
614	2	0	0	0	0	0	0	200	300	0	0	0	0	0	0	0	200	903	0	0	0	0	0	0	0	603	903	0
614	3	0	0	0	0	0	0	200	300	0	0	0	0	0	0	0	200	903	0	0	0	0	0	0	0	603	903	0
614	4	0	0	0	0	0	0	200	300	0	0	0	0	0	0	0	200	903	0	0	0	0	0	0	0	603	903	0
614	5	0	0	0	0	0	0	200	300	0	0	0	0	0	0	0	200	903	0	0	0	0	0	0	0	603	903	0
614	6	0	0	0	0	0	0	200	300	0	0	0	0	0	0	0	200	903	0	0	0	0	0	0	0	603	903	0
614	7	0	0	0	0	0	0	200	300	0	0	0	0	0	0	0	200	903	0	0	0	0	0	0	0	603	903	0
614	8	0	0	0	0	0	0	200	300	0	0	0	0	0	0	0	200	903	0	0	0	0	0	0	0	603	903	0
614	9	0	0	0	0	0	0	200	300	0	0	0	0	0	0	0	200	903	0	0	0	0	0	0	0	603	903	0
615	0	0	0	0	0	0	0	200	300	0	0	0	0	0	0	0	200	903	0	0	0	0	0	0	0	603	903	0
615	1	0	0	0	0	0	0	200	300	0	0	0	0	0	0	0	200	903	0	0	0	0	0	0	0	603	903	0
615	2	0	0	0	0	0	0	200	300	0	0	0	0	0	0	0	200	903	0	0	0	0	0	0	0	603	903	0
615	3	0	0	0	0	0	0	200	300	0	0	0	0	0	0	0	200	903	0	0	0	0	0	0	0	603	903	0
615	4	0	0	0	0	0	0	200	300	0	0	0	0	0	0	0	200	903	0	0	0	0	0	0	0	603	903	0
615	5	0	0	0	0	0	0	200	300	0	0	0	0	0	0	0	200	903	0	0	0	0	0	0	0	603	903	0
615	6	0	0	0	0	0	0	200	300	0	0	0	0	0	0	0	200	903	0	0	0	0	0	0	0	603	903	0
615	7	0	0	0	0	0	0	200	300	0	0	0	0	0	0	0	200	903	0	0	0	0	0	0	0	603	903	0
615	8	0	0	0	0	0	0	200	300	0	0	0	0	0	0	0	200	903	0	0	0	0	0	0	0	603	903	0
615	9	0	0	0	0	0	0	200	300	0	0	0	0	0	0	0	200	903	0	0	0	0	0	0	0	603	903	0
616	0	0	0	0	0	0	0	200	300	0	0	0	0	0	0	0	200	903	0	0	0	0	0	0	0	603	903	0
616	1	0	0	0	0	0	0	200	300	0	0	0	0	0	0	0	200	903	0	0	0	0	0	0	0	603	903	0
616	2	0	0	0	0	0	0	200	300	0	0	0	0	0	0	0	200	903	0	0	0	0	0	0	0	603	903	0
616	3	0	0	0	0	0	0	200	300	0	0	0	0	0	0	0	200	903	0	0	0	0	0	0	0	603	903	0
616	4	0	0	0	0	0	0	200	300	0	0	0	0	0	0	0	200	903	0	0	0	0	0	0	0	603	903	0
616	5	0	0	0	0	0	0	200	300	0	0	0	0	0	0	0	200	903	0	0	0	0	0	0	0	603	903	0
616	6	0	0	0	0	0	0	200	300	0	0	0	0	0	0	0	200	903	0	0	0	0	0	0	0	603	903	0
616	7	0	0	0	0	0	0	200	300	0	0	0	0	0	0	0	200	903	0	0	0	0	0	0	0	603	903	0
616	8	0	0	0	0	0	0	200	300	0	0	0	0	0	0	0	200	903	0	0	0	0	0	0	0	603	903	0
616	9	0	0	0	0	0	0	200	300	0	0	0	0	0	0	0	200	903	0	0	0	0	0	0	0	603	903	0
617	0	0	0	0	0	0	0	200	300	0	0	0	0	0	0	0	200	903	0	0	0	0	0	0	0	603	903	0
617	1	0	0	0	0	0	0	200	300	0	0	0	0	0	0	0	200	903	0	0	0	0	0	0	0	603	903	0
617	2	0	0	0	0	0	0	200	300	0	0	0	0	0	0	0	200	903	0	0	0	0	0	0	0	603	903	0
617	3	0	0	0	0	0	0	200	300	0	0	0	0	0	0	0	200	903	0	0	0	0	0	0	0	603	903	0
617	4	0	0	0	0	0	0	200	300	0	0	0	0	0	0	0	200	903	0	0	0	0	0	0	0	603	903	0
617	5	0	0	0	0	0	0	200	300	0	0	0	0	0	0	0	200	903	0	0	0	0	0	0	0	603	903	0
617	6	0	0	0	0	0	0	200	300	0	0	0	0	0	0	0	200	903	0	0	0	0	0	0	0	603	903	0
617	7	0	0	0	0	0	0	200	300	0	0	0	0	0	0	0	200	903	0	0	0	0	0	0	0	603	903	0
617	8	0	0	0	0	0	0	200	300	0	0	0	0	0	0	0	200	903	0	0	0	0	0	0	0	603	903	0
617	9	0	0	0	0	0	0	200	300	0	0	0	0	0	0	0	200	903	0	0	0	0	0	0	0	603	903	0
618	0	0	0	0	0	0	0	200	300	0	0	0	0	0	0	0	200	903	0	0	0	0	0	0	0	603	903	0
618	1	0	0	0	0	0	0	200	300	0	0	0	0	0	0	0	200	903	0	0	0	0	0	0	0	603	903	0
618	2	0	0	0	0	0	0	200	300	0	0	0	0	0	0	0	200	903	0	0	0	0	0	0	0	603	903	0
618	3	0	0	0	0	0	0	200	300	0	0	0	0	0	0	0	200	903	0	0	0	0	0	0	0	603	903	0
618	4	0	0	0	0	0	0	200	300	0	0	0	0	0	0	0	200	903	0	0	0	0	0	0	0	603	903	0
618	5	0	0	0	0	0	0	200	300	0	0	0	0	0	0	0	200	903	0	0	0	0	0	0	0	603	903	0
618	6	0	0	0	0	0	0	200	300	0	0	0	0	0	0	0	200	903	0	0	0	0	0	0	0	603	903	0
618	7	0	0	0	0	0	0	200	300	0	0	0	0	0	0	0	200	903	0	0	0	0	0	0	0	603	903	0
618	8	0	0	0	0	0	0	200	300	0	0	0	0	0	0	0	200	903	0	0	0	0	0	0	0	603	903	0
618	9	0	0	0	0	0	0	200	300	0	0	0	0	0	0	0	200	903	0	0	0	0	0	0	0	603	903	0
619	0	0	0	0	0	0	0	200	300	0	0	0	0	0	0	0	200	903	0	0	0	0	0	0	0	603	903	0
619	1	0	0	0	0	0	0	200	300	0	0	0	0	0	0	0	200	903	0	0	0	0	0	0	0	603	903	0
619	2	0	0	0	0	0	0	200	300	0	0	0	0	0	0	0	200	903	0	0	0	0	0	0	0	603	903	0
619	3	0	0	0	0	0	0	200	300	0	0	0	0	0	0	0	200	903	0	0	0	0	0	0	0	603	903	0
619	4	0	0	0	0	0	0	200	300	0	0	0	0	0	0	0	200	903	0	0	0	0	0	0	0	603	903	0
619	5	0	0	0	0	0	0	200	300	0	0	0	0	0	0	0	200	903	0	0	0	0	0	0	0	603	903	0
619	6	0	0	0	0	0	0	200	300	0	0	0	0	0	0	0	200	903	0	0	0	0	0	0	0	603	903	0
619	7	0	0	0	0	0	0	200	300	0	0	0	0	0	0	0	200	903	0	0	0	0	0	0	0	603	903	0
619	8	0	0	0	0	0	0	200	300	0	0	0	0	0	0	0	200	903	0	0	0	0	0	0	0	603	903	0
619	9	0	0	0	0	0	0	200	300	0	0	0	0	0	0	0	200	903	0	0	0	0	0	0	0	603	903	0
620	0	0	0	0	0	0	0	200	300	0	0	0	0	0	0	0	200	903	0	0	0	0	0	0	0	603	903	0
620	1	0	0	0	0	0	0	200	300	0	0	0	0	0	0	0	200	903	0	0	0	0	0	0	0	603	903	0
620	2	0	0	0	0	0	0	200	300	0	0	0	0	0	0	0	200	903	0	0	0	0	0	0	0	603	903	0
620	3	0	0	0	0	0	0	200	300	0	0	0	0	0	0	0	200	903	0	0	0	0	0	0	0	603	903	0
620	4	0	0	0	0	0	0	200	300	0	0	0	0	0	0	0	200	903	0	0	0	0	0	0	0	603	903	0
620	5	0	0	0	0	0	0	200	300	0	0	0	0	0	0	0	200	903	0	0	0	0	0	0	0	603	903	0
620	6	0	0	0	0	0	0	200	300	0	0	0	0	0	0	0	200	903	0	0	0	0	0	0	0	603	903	0
620	7	0	0	0	0	0	0	200	300	0	0	0	0	0	0	0	200	903	0	0	0	0	0	0	0	603	903	0
620	8	0	0	0	0	0	0	200	300	0	0	0	0	0	0	0	200	903	0	0	0	0	0	0	0	603	903	0
620	9	0	0	0	0	0	0	200	300	0	0	0	0	0	0	0	200	903	0	0	0	0	0	0	0	603	903	0
621	0	0	0	0	0	0	0	200	300	0	0	0	0	0	0	0	200	903	0	0	0	0	0	0	0	603	903	0
621	1	0	0	0	0	0	0	200	300	0	0	0	0	0	0	0	200	903	0	0	0	0	0	0	0	603	903	0
621	2	0	0	0	0	0	0	200	300	0	0	0	0	0	0	0	200	903	0	0	0	0	0	0	0	603	903	0
621	3	0	0	0	0	0	0	200	300	0	0	0	0	0	0	0	200	903	0	0	0	0	0	0	0	603	903	0
621	4	0	0	0	0	0	0	200	300	0	0	0	0	0	0	0	200	903	0	0	0	0	0	0	0	603	903	0
621	5	0	0	0	0	0	0	200	300	0	0	0	0	0	0	0	200	903	0	0	0	0	0	0	0	603	903	0
621	6	0	0	0	0	0	0	200	300	0	0	0	0	0	0	0	200	903	0	0	0	0	0	0	0	603	903	0
621	7	0	0	0	0	0	0	200	300	0	0	0	0	0	0	0	200	903	0	0	0	0	0	0	0	603	903	0
621	8	0	0	0	0	0	0	200	300	0	0	0	0	0	0	0	200	903	0	0	0	0	0	0	0	603	903	0
621	9	0	0	0	0	0	0	200	300	0	0	0	0	0	0	0	200	903	0	0	0	0	0	0	0	603	903	0
622	0	0	0	0	0	0	0	200	300	0	0	0	0	0	0	0	200	903	0	0	0	0	0	0	0	603	903	0
622	1	0	0	0	0	0	0	200	300	0	0	0	0	0	0	0	200	903	0	0	0	0	0	0	0	603	903	0
622	2	0	0	0	0	0	0	200	300	0	0	0	0	0	0	0	200	903	0	0	0	0	0	0	0	603	903	0
622	3	0	0	0	0	0	0	200	300	0	0	0	0	0	0	0	200	903	0	0	0	0	0	0	0	603	903	0
622	4	0	0	0	0	0	0	200	300	0	0	0	0	0	0	0	200	903	0	0	0	0	0	0	0	603	903	0
622	5	0	0	0	0	0	0	200	300	0	0	0	0	0	0	0	200	903	0	0	0	0	0	0	0	603	903	0
622	6	0	0	0	0	0	0	200	300	0	0	0	0	0	0	0	200	903	0	0	0	0	0	0	0	603	903	0
622	7	0	0	0	0	0	0	200	300	0	0	0	0	0	0	0	200	903	0	0	0	0	0	0	0	603	903	0
622	8	0	0	0	0	0	0	200	300	0	0	0	0	0	0	0	200	903	0	0	0	0	0	0	0	603	903	0
622	9	0	0	0	0	0	0	200	300	0	0	0	0	0	0	0	200	903	0	0	0	0	0	0	0	603	903	0
623	0	0	0	0	0	0	0	200	300	0	0	0	0	0	0	0	200	903	0	0	0	0	0	0	0	603	903	0
623	1	0	0	0	0	0	0	200	300	0	0	0	0	0	0	0	200	903	0	0	0	0	0	0	0	603	903	0
623	2	0	0	0	0	0	0	200	300	0	0	0	0	0	0	0	200	903	0	0	0	0	0	0	0	603	903	0
623	3	0	0	0	0	0	0	200	300	0	0	0	0	0	0	0	200	903	0	0	0	0	0	0	0	603	903	0
623	4	0	0	0	0	0	0	200	300	0	0	0	0	0	0	0	200	903	0	0	0	0	0	0	0	603	903	0
623	5	0	0	0	0	0	0	200	300	0	0	0	0	0	0	0	200	903	0	0	0	0	0	0	0	603	903	0
623	6	0	0	0	0	0	0	200	300	0	0	0	0	0	0	0	200	903	0	0	0	0	0	0	0	603	903	0
623	7	0	0	0	0	0	0	200	300	0	0	0	0	0	0	0	200	903	0	0	0	0	0	0	0	603	903	0
623	8	0	0	0	0	0	0	200	300	0	0	0	0	0	0	0	200	903	0	0	0	0	0	0	0	603	903	0
623	9	0	0	0	0	0	0	200	300	0	0	0	0	0	0	0	200	903	0	0	0	0	0	0	0	603	903	0
624	0	0	0	0	0	0	0	200	300	0	0	0	0	0	0	0	200	903	0	0	0	0	0	0	0	603	903	0
624	1	0	0	0	0	0	0	200	300	0	0	0	0	0	0	0	200	903	0	0	0	0	0	0	0	603	903	0
624	2	0	0	0	0	0	0	200	300	0	0	0	0	0	0	0	200	903	0	0	0	0	0	0	0	603	903	0
624	3	0	0	0	0	0	0	200	300	0	0	0	0	0	0	0	200	903	0	0	0	0	0	0	0	603	903	0
624	4	0	0	0	0	0	0	200	300	0	0	0	0	0	0	0	200	903	0	0	0	0	0	0	0	603	903	0
624	5	0	0	0	0	0	0	200	300	0	0	0	0	0	0	0	200	903	0	0	0	0	0	0	0	603	903	0
624	6	0	0	0	0	0	0	200	300	0	0	0	0	0	0	0	200	903	0	0	0	0	0	0	0	603	903	0
624	7	0	0	0	0	0	0	200	300	0	0	0	0	0	0	0	200	903	0	0	0	0	0	0	0	603	903	0
624	8	0	0	0	0	0	0	200	300	0	0	0	0	0	0	0	200	903	0	0	0	0	0	0	0	603	903	0
624	9	0	0	0	0	0	0	200	300	0	0	0	0	0	0	0	200	903	0	0	0	0	0	0	0	603	903	0
625	0	0	0	0	0	0	0	200	300	0	0	0	0	0	0	0	200	903	0	0	0	0	0	0	0	603	903	0
625	1	0	0	0	0	0	0	200	300	0	0	0	0	0	0	0	200	903	0	0	0	0	0	0	0	603	903	0
625	2	0	0	0	0	0	0	200	300	0	0	0	0	0	0	0	200	903	0	0	0	0	0	0	0	603	903	0
625	3	0	0	0	0	0	0	200	300	0	0	0	0	0	0	0	200	903	0	0	0	0	0	0	0	603	903	0
625	4	0	0	0	0	0	0	200	300	0	0	0	0	0	0	0	200	903	0	0	0	0	0	0	0	603	903	0
625	5	0	0	0	0	0	0	200	300	0	0	0	0	0	0	0	200	903	0	0	0	0	0	0	0	603	903	0
625	6	0	0	0	0	0	0	200	300	0	0	0	0	0	0	0	200	903	0	0	0	0	0	0	0	603	903	0
625	7	0	0	0	0	0	0	200	300	0	0	0	0	0	0	0	200	903	0	0	0	0	0	0	0	603	903	0
625	8	0	0	0	0	0	0	200	300	0	0	0	0	0	0	0	200	903	0	0	0	0	0	0	0	603	903	0
625	9	0	0	0	0	0	0	200	300	0	0	0	0	0	0	0	200	903	0	0	0	0	0	0	0	603	903	0
626	0	0	0	0	0	0	0	200	300	0	0	0	0	0	0	0	200	903	0	0	0	0	0	0	0	603	903	0
626	1	0	0	0	0	0	0	200	300	0	0	0	0	0	0	0	200	903	0	0	0	0	0	0	0	603	903	0
626	2	0	0	0	0	0	0	200	300	0	0	0	0	0	0	0	200	903	0	0	0	0	0	0	0	603	903	0
626	3	0	0	0	0	0	0	200	300	0	0	0	0	0	0	0	200	903	0	0	0	0	0	0	0	603	903	0
626	4	0	0	0	0	0	0	200	300	0	0	0	0	0	0	0	200	903	0	0	0	0	0	0	0	603	903	0
626	5	0	0	0	0	0	0	200	300	0	0	0	0	0	0	0	200	903	0	0	0	0	0	0	0	603	903	0
626	6	0	0	0	0	0	0	200	300	0	0	0	0	0	0	0	200	903	0	0	0	0	0	0	0	603	903	0
626	7	0	0	0	0	0	0	200	300	0	0	0	0	0	0	0	200	903	0	0	0	0	0	0	0	603	903	0
626	8	0	0	0	0	0	0	200	300	0	0	0	0	0	0	0	200	903	0	0	0	0	0	0	0	603	903	0
626	9	0	0	0	0	0	0	200	300	0	0	0	0	0	0	0	200	903	0	0	0	0	0	0	0	603	903	0
627	0	0	0	0	0	0	0	200	300	0	0	0	0	0	0	0	200	903	0	0	0	0	0	0	0	603	903	0
627	1	0	0	0	0	0	0	200	300	0	0	0	0	0	0	0	200	903	0	0	0	0	0	0	0	603	903	0
627	2	0	0	0	0	0	0	200	300	0	0	0	0	0	0	0	200	903	0	0	0	0	0	0	0	603	903	0
627	3	0	0	0	0	0	0	200	300	0	0	0	0	0	0	0	200	903	0	0	0	0	0	0	0	603	903	0
627	4	0	0	0	0	0	0	200	300	0	0	0	0	0	0	0	200	903	0	0	0	0	0	0	0	603	903	0
627	5	0	0	0	0	0	0	200	300	0	0	0	0	0	0	0	200	903	0	0	0	0	0	0	0	603	903	0
627	6	0	0	0	0	0	0	200	300	0	0	0	0	0	0	0	200	903	0	0	0	0	0	0	0	603	903	0
627	7	0	0	0	0	0	0	200	300	0	0	0	0	0	0	0	200	903	0	0	0	0	0	0	0	603	903	0
627	8	0	0	0	0	0	0	200	300	0	0	0	0	0	0	0	200	903	0	0	0	0	0	0	0	603	903	0
627	9	0	0	0	0	0	0	200	300	0	0	0	0	0	0	0	200	903	0	0	0	0	0	0	0	603	903	0
628	0	0	0	0	0	0	0	200	300	0	0	0	0	0	0	0	200	903	0	0	0	0	0	0	0	603	903	0
628	1	0	0	0	0	0	0	200	300	0	0	0	0	0	0	0	200	903	0	0	0	0	0	0	0	603	903	0
628	2	0	0	0	0	0	0	200	300	0	0	0	0	0	0	0	200	903	0	0	0	0	0	0	0	603	903	0
628	3	0	0	0	0	0	0	200	300	0	0	0	0	0	0	0	200	903	0	0	0	0	0	0	0	603	903	0
628	4	0	0	0	0	0	0	200	300	0	0	0	0	0	0	0	200	903	0	0	0	0	0	0	0	603	903	0
628	5	0	0	0	0	0	0	200	300	0	0	0	0	0	0	0	200	903	0	0	0	0	0	0	0	603	903	0
628	6	0	0	0	0	0	0	200	300	0	0	0	0	0	0	0	200	903	0	0	0	0	0	0	0	603	903	0
628	7	0	0	0	0	0	0	200	300	0	0	0	0	0	0	0	200	903	0	0	0	0	0	0	0	603	903	0
628	8	0	0	0	0	0	0	200	300	0	0	0	0	0	0	0	200	903	0	0	0	0	0	0	0	603	903	0
628	9	0	0	0	0	0	0	200	300	0	0	0	0	0	0	0	200	903	0	0	0	0	0	0	0	603	903	0
629	0	0	0	0	0	0	0	200	300	0	0	0	0	0	0	0	200	903	0	0	0	0	0	0	0	603	903	0
629	1	0	0	0	0	0	0	200	300	0	0	0	0	0	0	0	200	903	0	0	0	0	0	0	0	603	903	0
629	2	0	0	0	0	0	0	200	300	0	0	0	0	0	0	0	200	903	0	0	0	0	0	0	0	603	903	0
629	3	0	0	0	0	0	0	200	300	0	0	0	0	0	0	0	200	903	0	0	0	0	0	0	0	603	903	0
629	4	0	0	0	0	0	0	200	300	0	0	0	0	0	0	0	200	903	0	0	0	0	0	0	0	603	903	0
629	5	0	0	0	0	0	0	200	300	0	0	0	0	0	0	0	200	903	0	0	0	0	0	0	0	603	903	0
629	6	0	0	0	0	0	0	200	300	0	0	0	0	0	0	0	200	903	0	0	0	0	0	0	0	603	903	0
629	7	0	0	0	0	0	0	200	300	0	0	0	0	0	0	0	200	903	0	0	0	0	0	0	0	603	903	0
629	8	0	0	0	0	0	0	200	300	0	0	0	0	0	0	0	200	903	0	0	0	0	0	0	0	603	903	0
629	9	0	0	0	0	0	0	200	300	0	0	0	0	0	0	0	200	903	0	0	0	0	0	0	0	603	903	0
630	0	0	0	0	0	0	0	200	300	0	0	0	0	0	0	0	200	903	0	0	0	0	0	0	0	603	903	0
630	1	0	0	0	0	0	0	200	300	0	0	0	0	0	0	0	200	903	0	0	0	0	0	0	0	603	903	0
630	2	0	0	0	0	0	0	200	300	0	0	0	0	0	0	0	200	903	0	0	0	0	0	0	0	603	903	0
630	3	0	0	0	0	0	0	200	300	0	0	0	0	0	0	0	200	903	0	0	0	0	0	0	0	603	903	0
630	4	0	0	0	0	0	0	200	300	0	0	0	0	0	0	0	200	903	0	0	0	0	0	0	0	603	903	0
630	5	0	0	0	0	0	0	200	300	0	0	0	0	0	0	0	200	903	0	0	0	0	0	0	0	603	903	0
630	6	0	0	0	0	0	0	200	300	0	0	0	0	0	0	0	200	903	0	0	0	0	0	0	0	603	903	0
630	7	0	0	0	0	0	0	200	300	0	0	0	0	0	0	0	200	903	0	0	0	0	0	0	0	603	903	0
630	8	0	0	0	0	0	0	200	300	0	0	0	0	0	0	0	200	903	0	0	0	0	0	0	0	603	903	0
630	9	0	0	0	0	0	0	200	300	0	0	0	0	0	0	0	200	903	0	0	0	0	0	0	0	603	903	0
631	0	0	0	0	0	0	0	200	300	0	0	0	0	0	0	0	200	903	0	0	0	0	0	0	0	603	903	0
631	1	0	0	0	0	0	0	200	300	0	0	0	0	0	0	0	200	903	0	0	0	0	0	0	0	603	903	0
631	2	0	0	0	0	0	0	200	300	0	0	0	0	0	0	0	200	903	0	0	0	0	0	0	0	603	903	0
631	3	0	0	0	0	0	0	200	300	0	0	0	0	0	0	0	200	903	0	0	0	0	0	0	0	603	903	0
631	4	0	0	0	0	0	0	200	300	0	0	0	0	0	0	0	200	903	0	0	0	0	0	0	0	603	903	0
631	5	0	0	0	0	0	0	200	300	0	0	0	0	0	0	0	200	903	0	0	0	0	0	0	0	603	903	0
631	6	0	0	0	0	0	0	200	300	0	0	0	0	0	0	0	200	903	0	0	0	0	0	0	0	603	903	0
631	7	0	0	0	0	0	0	200	300	0	0	0	0	0	0	0	200	903	0	0	0	0	0	0	0	603	903	0
631	8	0	0	0	0	0	0	200	300	0	0	0	0	0	0	0	200	903	0	0	0	0	0	0	0	603	903	0
631	9	0	0	0	0	0	0	200	300	0	0	0	0	0	0	0	200	903	0	0	0	0	0	0	0	603	903	0
632	0	0	0	0	0	0	0	200	300	0	0	0	0	0	0	0	200	903	0	0	0	0	0	0	0	603	903	0
632	1	0	0	0	0	0	0	200	300	0	0	0	0	0	0	0	200	903	0	0	0	0	0	0	0	603	903	0
632	2	0	0	0	0	0	0	200	300	0	0	0	0	0	0	0	200	903	0	0	0	0	0	0	0	603	903	0
632	3	0	0	0	0	0	0	200	300	0	0	0	0	0	0	0	200	903	0	0	0	0	0	0	0	603	903	0
632	4	0	0	0	0	0	0	200	300	0	0	0	0	0	0	0	200	903	0	0	0	0	0	0	0	603	903	0
632	5	0	0	0	0	0	0	200	300	0	0	0	0	0	0	0	200	903	0	0	0	0	0	0	0	603	903	0
632	6	0	0	0	0	0	0	200	300	0	0	0	0	0	0	0	200	903	0	0	0	0	0	0	0	603	903	0
632	7	0	0	0	0	0	0	200	300	0	0	0	0	0	0	0	200	903	0	0	0	0	0	0	0	603	903	0
632	8	0	0	0	0	0	0	200	300	0	0	0	0	0	0	0	200	903	0	0	0	0	0	0	0	603	903	0
632	9	0	0	0	0	0	0	200	300	0	0	0	0	0	0	0	200	903	0	0	0	0	0	0	0	603	903	0
633	0	0	0	0	0	0	0	200	300	0	0	0	0	0	0	0	200	903	0	0	0	0	0	0	0	603	903	0
633	1	0	0	0	0	0	0	200	300	0	0	0	0	0	0	0	200	903	0	0	0	0	0	0	0	603	903	0
633	2	0	0	0	0	0	0	200	300	0	0	0	0	0	0	0	200	903	0	0	0	0	0	0	0	603	903	0
633	3	0	0	0	0	0	0	200	300	0	0	0	0	0	0	0	200	903	0	0	0	0	0	0	0	603	903	0
633	4	0	0	0	0	0	0	200	300	0	0	0	0	0	0	0	200	903	0	0	0	0	0	0	0	603	903	0
633	5	0	0	0	0	0	0	200	300	0	0	0	0	0	0	0	200	903	0	0	0	0	0	0	0	603	903	0
633	6	0	0	0	0	0	0	200	300	0	0	0	0	0	0	0	200	903	0	0	0	0	0	0	0	603	903	0
633	7	0	0	0	0	0	0	200	300	0	0	0	0	0	0	0	200	903	0	0	0	0	0	0	0	603	903	0
633	8	0	0	0	0	0	0	200	300	0	0	0	0	0	0	0	200	903	0	0	0	0	0	0	0	603	903	0
633	9	0	0	0	0	0	0	200	300	0	0	0	0	0	0	0	200	903	0	0	0	0	0	0	0	603	903	0
634	0	0	0	0	0	0	0	200	300	0	0	0	0	0	0	0	200	903	0	0	0	0	0	0	0	603	903	0
634	1	0	0	0	0	0	0	200	300	0	0	0	0	0	0	0	200	903	0	0	0	0	0	0	0	603	903	0
634	2	0	0	0	0	0	0	200	300	0	0	0	0	0	0	0	200	903	0	0	0	0	0	0	0	603	903	0
634	3	0	0	0	0	0	0	200	300	0	0	0	0	0	0	0	200	903	0	0	0	0	0	0	0	603	903	0
634	4	0	0	0	0	0	0	200	300	0	0	0	0	0	0	0	200	903	0	0	0	0	0	0	0	603	903	0
634	5	0	0	0	0	0	0	200	300	0	0	0	0	0	0	0	200	903	0	0	0	0	0	0	0	603	903	0
634	6	0	0	0	0	0	0	200	300	0	0	0	0	0	0	0	200	903	0	0	0	0	0	0	0	603	903	0
634	7	0	0	0	0	0	0	200	300	0	0	0	0	0	0	0	200	903	0	0	0	0	0	0	0	603	903	0
634	8	0	0	0	0	0	0	200	300	0	0	0	0	0	0	0	200	903	0	0	0	0	0	0	0	603	903	0
634	9	0	0	0	0	0	0	200	300	0	0	0	0	0	0	0	200	903	0	0	0	0	0	0	0	603	903	0
635	0	0	0	0	0	0	0	200	300	0	0	0	0	0	0	0	200	903	0	0	0	0	0	0	0	603	903	0
635	1	0	0	0	0	0	0	200	300	0	0	0	0	0	0	0	200	903	0	0	0	0	0	0	0	603	903	0
635	2	0	0	0	0	0	0	200	300	0	0	0	0	0	0	0	200	903	0	0	0	0	0	0	0	603	903	0
635	3	0	0	0	0	0	0	200	300	0	0	0	0	0	0	0	200	903	0	0	0	0	0	0	0	603	903	0
635	4	0	0	0	0	0	0	200	300	0	0	0	0	0	0	0	200	903	0	0	0	0	0	0	0	603	903	0
635	5	0	0	0	0	0	0	200	300	0	0	0	0	0	0	0	200	903	0	0	0	0	0	0	0	603	903	0
635	6	0	0	0	0	0	0	200	300	0	0	0	0	0	0	0	200	903	0	0	0	0	0	0	0	603	903	0
635	7	0	0	0	0	0	0	200	300	0	0	0	0	0	0	0	200	903	0	0	0	0	0	0	0	603	903	0
635	8	0	0	0	0	0	0	200	300	0	0	0	0	0	0	0	200	903	0	0	0	0	0	0	0	603	903	0
635	9	0	0	0	0	0	0	200	300	0	0	0	0	0	0	0	200	903	0	0	0	0	0	0	0	603	903	0
636	0	0	0	0	0	0	0	200	300	0	0	0	0	0	0	0	200	903	0	0	0	0	0	0	0	603	903	0
636	1	0	0	0	0	0	0	200	300	0	0	0	0	0	0	0	200	903	0	0	0	0	0	0	0	603	903	0
636	2	0	0	0	0	0	0	200	300	0	0	0	0	0	0	0	200	903	0	0	0	0	0	0	0	603	903	0
636	3	0	0	0	0	0	0	200	300	0	0	0	0	0	0	0	200	903	0	0	0	0	0	0	0	603	903	0
636	4	0	0	0	0	0	0	200	300	0	0	0	0	0	0	0	200	903	0	0	0	0	0	0	0	603	903	0
636	5	0	0	0	0	0	0	200	300	0	0	0	0	0	0	0	200	903	0	0	0	0	0	0	0	603	903	0
636	6	0	0	0	0	0	0	200	300	0	0	0	0	0	0	0	200	903	0	0	0	0	0	0	0	603	903	0
636	7	0	0	0	0	0	0	200	300	0	0	0	0	0	0	0	200	903	0	0	0	0	0	0	0	603	903	0
636	8	0	0	0	0	0	0	200	300	0	0	0	0	0	0	0	200	903	0	0	0	0	0	0	0	603	903	0
636	9	0	0	0	0	0	0	200	300	0	0	0	0	0	0	0	200	903	0	0	0	0	0	0	0	603	903	0
637	0	0	0	0	0	0	0	200	300	0	0	0	0	0	0	0	200	903	0	0	0	0	0	0	0	603	903	0
637	1	0	0	0	0	0	0	200	300	0	0	0	0	0	0	0	200	903	0	0	0	0	0	0	0	603	903	0
637	2	0	0	0	0	0	0	200	300	0	0	0	0	0	0	0	200	903	0	0	0	0	0	0	0	603	903	0
637	3	0	0	0	0	0	0	200	300	0	0	0	0	0	0	0	200	903	0	0	0	0	0	0	0	603	903	0
637	4	0	0	0	0	0	0	200	300	0	0	0	0	0	0	0	200	903	0	0	0	0	0	0	0	603	903	0
637	5	0	0	0	0	0	0	200	300	0	0	0	0	0	0	0	200	903	0	0	0	0	0	0	0	603	903	0
637	6	0	0	0	0	0	0	200	300	0	0	0	0	0	0	0	200	903	0	0	0	0	0	0	0	603	903	0
637	7	0	0	0	0	0	0	200	300	0	0	0	0	0	0	0	200	903	0	0	0	0	0	0	0	603	903	0
637	8	0	0	0	0	0	0	200	300	0	0	0	0	0	0	0	200	903	0	0	0	0	0	0	0	603	903	0
637	9	0	0	0	0	0	0	200	300	0	0	0	0	0	0	0	200	903	0	0	0	0	0	0	0	603	903	0
638	0	0	0	0	0	0	0	200	300	0	0	0	0	0	0	0	200	903	0	0	0	0	0	0	0	603	903	0
638	1	0	0	0	0	0	0	200	300	0	0	0	0	0	0	0	200	903	0	0	0	0	0	0	0	603	903	0
638	2	0	0	0	0	0	0	200	300	0	0	0	0	0	0	0	200	903	0	0	0	0	0	0	0	603	903	0
638	3	0	0	0	0	0	0	200	300	0	0	0	0	0	0	0	200	903	0	0	0	0	0	0	0	603	903	0
638	4	0	0	0	0	0	0	200	300	0	0	0	0	0	0	0	200	903	0	0	0	0	0	0	0	603	903	0
638	5	0	0	0	0	0	0	200	300	0	0	0	0	0	0	0	200	903	0	0	0	0	0	0	0	603	903	0
638	6	0	0	0	0	0	0	200	300	0	0	0	0	0	0	0	200	903	0	0	0	0	0	0	0	603	903	0
638	7	0	0	0	0	0	0	200	300	0	0	0	0	0	0	0	200	903	0	0	0	0	0	0	0	603	903	0
638	8	0	0	0	0	0	0	200	300	0	0	0	0	0	0	0	200	903	0	0	0	0	0	0	0	603	903	0
638	9	0	0	0	0	0	0	200	300	0	0	0	0	0	0	0	200	903	0	0	0	0	0	0	0	603	903	0
639	0	0	0	0	0	0	0	200	300	0	0	0	0	0	0	0	200	903	0	0	0	0	0	0	0	603	903	0
639	1	0	0	0	0	0	0	200	300	0	0	0	0	0	0	0	200	903	0	0	0	0	0	0	0	603	903	0
639	2	0	0	0	0	0	0	200	300	0	0	0	0	0	0	0	200	903	0	0	0	0	0	0	0	603	903	0
639	3	0	0	0	0	0	0	200	300	0	0	0	0	0	0	0	200	903	0	0	0	0	0	0	0	603	903	0
639	4	0	0	0	0	0	0	200	300	0	0	0	0	0	0	0	200	903	0	0	0	0	0	0	0	603	903	0
639	5	0	0	0	0	0	0	200	300	0	0	0	0	0	0	0	200	903	0	0	0	0	0	0	0	603	903	0
639	6	0	0	0	0	0	0	200	300	0	0	0	0	0	0	0	200	903	0	0	0	0	0	0	0	603	903	0
639	7	0	0	0	0	0	0	200	300	0	0	0	0	0	0	0	200	903	0	0	0	0	0	0	0	603	903	0
639	8	0	0	0	0	0	0	200	300	0	0	0	0	0	0	0	200	903	0	0	0	0	0	0	0	603	903	0
639	9	0	0	0	0	0	0	200	300	0	0	0	0	0	0	0	200	903	0	0	0	0	0	0	0	603	903	0
640	0	0	0	0	0	0	0	200	300	0	0	0	0	0	0	0	200	903	0	0	0	0	0	0	0	603	903	0
640	1	0	0	0	0	0	0	200	300	0	0	0	0	0	0	0	200	903	0	0	0	0	0	0	0	603	903	0
640	2	0	0	0	0	0	0	200	300	0	0	0	0	0	0	0	200	903	0	0	0	0	0	0	0	603	903	0
640	3	0	0	0	0	0	0	200	300	0	0	0	0	0	0	0	200	903	0	0	0	0	0	0	0	603	903	0
640	4	0	0	0	0	0	0	200	300	0	0	0	0	0	0	0	200	903	0	0	0	0	0	0	0	603	903	0
640	5	0	0	0	0	0	0	200	300	0	0	0	0	0	0	0	200	903	0	0	0	0	0	0	0	603	903	0
640	6	0	0	0	0	0	0	200	300	0	0	0	0	0	0	0	200	903	0	0	0	0	0	0	0	603	903	0
640	7	0	0	0	0	0	0	200	300	0	0	0	0	0	0	0	200	903	0	0	0	0	0	0	0	603	903	0
640	8	0	0	0	0	0	0	200	300	0	0	0	0	0	0	0	200	903	0	0	0	0	0	0	0	603	903	0
640	9	0	0	0	0	0	0	200	300	0	0	0	0	0	0	0	200	903	0	0	0	0	0	0	0	603	903	0
641	0	0	0	0	0	0	0	200	300	0	0	0	0	0	0	0	200	903	0	0	0	0	0	0	0	603	903	0
641	1	0	0	0	0	0	0	200	300	0	0	0	0	0	0	0	200	903	0	0	0	0	0	0	0	603	903	0
641	2	0	0	0	0	0	0	200	300	0	0	0	0	0	0	0	200	903	0	0	0	0	0	0	0	603	903	0
641	3	0	0	0	0	0	0	200	300	0	0	0	0	0	0	0	200	903	0	0	0	0	0	0	0	603	903	0
641	4	0	0	0	0	0	0	200	300	0	0	0	0	0	0	0	200	903	0	0	0	0	0	0	0	603	903	0
641	5	0	0	0	0	0	0	200	300	0	0	0	0	0	0	0	200	903	0	0	0	0	0	0	0	603	903	0
641	6	0	0	0	0	0	0	200	300	0	0	0	0	0	0	0	200	903	0	0	0	0	0	0	0	603	903	0
641	7	0	0	0	0	0	0	200	300	0	0	0	0	0	0	0	200	903	0	0	0	0	0	0	0	603	903	0
641	8	0	0	0	0	0	0	200	300	0	0	0	0	0	0	0	200	903	0	0	0	0	0	0	0	603	903	0
641	9	0	0	0	0	0	0	200	300	0	0	0	0	0	0	0	200	903	0	0	0	0	0	0	0	603	903	0
642	0	0	0	0	0	0	0	200	300	0	0	0	0	0	0	0	200	903	0	0	0	0	0	0	0	603	903	0
642	1	0	0	0	0	0	0	200	300	0	0	0	0	0	0	0	200	903	0	0	0	0	0	0	0	603	903	0
642	2	0	0	0	0	0	0	200	300	0	0	0	0	0	0	0	200	903	0	0	0	0	0	0	0	603	903	0
642	3	0	0	0	0	0	0	200	300	0	0	0	0	0	0	0	200	903	0	0	0	0	0	0	0	603	903	0
642	4	0	0	0	0	0	0	200	300	0	0	0	0	0	0	0	200	903	0	0	0	0	0	0	0	603	903	0
642	5	0	0	0	0	0	0	200	300	0	0	0	0	0	0	0	200	903	0	0	0	0	0	0	0	603	903	0
642	6	0	0	0	0	0	0	200	300	0	0	0	0	0	0	0	200	903	0	0	0	0	0	0	0	603	903	0
642	7	0	0	0	0	0	0	200	300	0	0	0	0	0	0	0	200	903	0	0	0	0	0	0	0	603	903	0
642	8	0	0	0	0	0	0	200	300	0	0	0	0	0	0	0	200	903	0	0	0	0	0	0	0	603	903	0
642	9	0	0	0	0	0	0	200	300	0	0	0	0	0	0	0	200	903	0	0	0	0	0	0	0	603	903	0
643	0	0	0	0	0	0	0	200	300	0	0	0	0	0	0	0	200	903	0	0	0	0	0	0	0	603	903	0
643	1	0	0	0	0	0	0	200	300	0	0	0	0	0	0	0	200	903	0	0	0	0	0	0	0	603	903	0
643	2	0	0	0	0	0	0	200	300	0	0	0	0	0	0	0	200	903	0	0	0	0	0	0	0	603	903	0
643	3	0	0	0	0	0	0	200	300	0	0	0	0	0	0	0	200	903	0	0	0	0	0	0	0	603	903	0
643	4	0	0	0	0	0	0	200	300	0	0	0	0	0	0	0	200	903	0	0	0	0	0	0	0	603	903	0
643	5	0	0	0	0	0	0	200	300	0	0	0	0	0	0	0	200	903	0	0	0	0	0	0	0	603	903	0
643	6	0	0	0	0	0	0	200	300	0	0	0	0	0	0	0	200	903	0	0	0	0	0	0	0	603	903	0
643	7	0	0	0	0	0	0	200	300	0	0	0	0	0	0	0	200	903	0	0	0	0	0	0	0	603	903	0
643	8	0	0	0	0	0	0	200	300	0	0	0	0	0	0	0	200	903	0	0	0	0	0	0	0	603	903	0
643	9	0	0	0	0	0	0	200	300	0	0	0	0	0	0	0	200	903	0	0	0	0	0	0	0	603	903	0
644	0	0	0	0	0	0	0	200	300	0	0	0	0	0	0	0	200	903	0	0	0	0	0	0	0	603	903	0
644	1	0	0	0	0	0	0	200	300	0	0	0	0	0	0	0	200	903	0	0	0	0	0	0	0	603	903	0
644	2	0	0	0	0	0	0	200	300	0	0	0	0	0	0	0	200	903	0	0	0	0	0	0	0	603	903	0
644	3	0	0	0	0	0	0	200	300	0	0	0	0	0	0	0	200	903	0	0	0	0	0	0	0	603	903	0
644	4	0	0	0	0	0	0	200	300	0	0	0	0	0	0	0	200	903	0	0	0	0	0	0	0	603	903	0
644	5	0	0	0	0	0	0	200	300	0	0	0	0	0	0	0	200	903	0	0	0	0	0	0	0	603	903	0
644	6	0	0	0	0	0	0	200	300	0	0	0	0	0	0	0	200	903	0	0	0	0	0	0	0	603	903	0
644	7	0	0	0	0	0	0	200	300	0	0	0	0	0	0	0	200	903	0	0	0	0	0	0	0	603	903	0
644	8	0	0	0	0	0	0	200	300	0	0	0	0	0	0	0	200	903	0	0	0	0	0	0	0	603	903	0
644	9	0	0	0	0	0	0	200	300	0	0	0	0	0	0	0	200	903	0	0	0	0	0	0	0	603	903	0
645	0	0	0	0	0	0	0	200	300	0	0	0	0	0	0	0	200	903	0	0	0	0	0	0	0	603	903	0
645	1	0	0	0	0	0	0	200	300	0	0	0	0	0	0	0	200	903	0	0	0	0	0	0	0	603	903	0
645	2	0	0	0	0	0	0	200	300	0	0	0	0	0	0	0	200	903	0	0	0	0	0	0	0	603	903	0
645	3	0	0	0	0	0	0	200	300	0	0	0	0	0	0	0	200	903	0	0	0	0	0	0	0	603	903	0
645	4	0	0	0	0	0	0	200	300	0	0	0	0	0	0	0	200	903	0	0	0	0	0	0	0	603	903	0
645	5	0	0	0	0	0	0	200	300	0	0	0	0	0	0	0	200	903	0	0	0	0	0	0	0	603	903	0
645	6	0	0	0	0	0	0	200	300	0	0	0	0	0	0	0	200	903	0	0	0	0	0	0	0	603	903	0
645	7	0	0	0	0	0	0	200	300	0	0	0	0	0	0	0	200	903	0	0	0	0	0	0	0	603	903	0
645	8	0	0	0	0	0	0	200	300	0	0	0	0	0	0	0	200	903	0	0	0	0	0	0	0	603	903	0
645	9	0	0	0	0	0	0	200	300	0	0	0	0	0	0	0	200	903	0	0	0	0	0	0	0	603	903	0
646	0	0	0	0	0	0	0	200	300	0	0	0	0	0	0	0	200	903	0	0	0	0	0	0	0	603	903	0
646	1	0	0	0	0	0	0	200	300	0	0	0	0	0	0	0	200	903	0	0	0	0	0	0	0	603	903	0
646	2	0	0	0	0	0	0	200	300	0	0	0	0	0	0	0	200	903	0	0	0	0	0	0	0	603	903	0
646	3	0	0	0	0	0	0	200	300	0	0	0	0	0	0	0	200	903	0	0	0	0	0	0	0	603	903	0
646	4	0	0	0	0	0	0	200	300	0	0	0	0	0	0	0	200	903	0	0	0	0	0	0	0	603	903	0
646	5	0	0	0	0	0	0	200	300	0	0	0	0	0	0	0	200	903	0	0	0	0	0	0	0	603	903	0
646	6	0	0	0	0	0	0	200	300	0	0	0	0	0	0	0	200	903	0	0	0	0	0	0	0	603	903	0
646	7	0	0	0	0	0	0	200	300	0	0	0	0	0	0	0	200	903	0	0	0	0	0	0	0	603	903	0
646	8	0	0	0	0	0	0	200	300	0	0	0	0	0	0	0	200	903	0	0	0	0	0	0	0	603	903	0
646	9	0	0	0	0	0	0	200	300	0	0	0	0	0	0	0	200	903	0	0	0	0	0	0	0	603	903	0
647	0	0	0	0	0	0	0	200	300	0	0	0	0	0	0	0	200	903	0	0	0	0	0	0	0	603	903	0
647	1	0	0	0	0	0	0	200	300	0	0	0	0	0	0	0	200	903	0	0	0	0	0	0	0	603	903	0
647	2	0	0	0	0	0	0	200	300	0	0	0	0	0	0	0	200	903	0	0	0	0	0	0	0	603	903	0
647	3	0	0	0	0	0	0	200	300	0	0	0	0	0	0	0	200	903	0	0	0	0	0	0	0	603	903	0
647	4	0	0	0	0	0	0	200	300	0	0	0	0	0	0	0	200	903	0	0	0	0	0	0	0	603	903	0
647	5	0	0	0	0	0	0	200	300	0	0	0	0	0	0	0	200	903	0	0	0	0	0	0	0	603	903	0
647	6	0	0	0	0	0	0	200	300	0	0	0	0	0	0	0	200	903	0	0	0	0	0	0	0	603	903	0
647	7	0	0	0	0	0	0	200	300	0	0	0	0	0	0	0	200	903	0	0	0	0	0	0	0	603	903	0
647	8	0	0	0	0	0	0	200	300	0	0	0	0	0	0	0	200	903	0	0	0	0	0	0	0	603	903	0
647	9	0	0	0	0	0	0	200	300	0	0	0	0	0	0	0	200	903	0	0	0	0	0	0	0	603	903	0
648	0	0	0	0	0	0	0	200	300	0	0	0	0	0	0	0	200	903	0	0	0	0	0	0	0	603	903	0
648	1	0	0	0	0	0	0	200	300	0	0	0	0	0	0	0	200	903	0	0	0	0	0	0	0	603	903	0
648	2	0	0	0	0	0	0	200	300	0	0	0	0	0	0	0	200	903	0	0	0	0	0	0	0	603	903	0
648	3	0	0	0	0	0	0	200	300	0	0	0	0	0	0	0	200	903	0	0	0	0	0	0	0	603	903	0
648	4	0	0	0	0	0	0	200	300	0	0	0	0	0	0	0	200	903	0	0	0	0	0	0	0	603	903	0
648	5	0	0	0	0	0	0	200	300	0	0	0	0	0	0	0	200	903	0	0	0	0	0	0	0	603	903	0
648	6	0	0	0	0	0	0	200	300	0	0	0	0	0	0	0	200	903	0	0	0	0	0	0	0	603	903	0
648	7	0	0	0	0	0	0	200	300	0	0	0	0	0	0	0	200	903	0	0	0	0	0	0	0	603	903	0
648	8	0	0	0	0	0	0	200	300	0	0	0	0	0	0	0	200	903	0	0	0	0	0	0	0	603	903	0
648	9	0	0	0	0	0	0	200	300	0	0	0	0	0	0	0	200	903	0	0	0	0	0	0	0	603	903	0
649	0	0	0	0	0	0	0	200	300	0	0	0	0	0	0	0	200	903	0	0	0	0	0	0	0	603	903	0
649	1	0	0	0	0	0	0	200	300	0	0	0	0	0	0	0	200	903	0	0	0	0	0	0	0	603	903	0
649	2	0	0	0	0	0	0	200	300	0	0	0	0	0	0	0	200	903	0	0	0	0	0	0	0	603	903	0
649	3	0	0	0	0	0	0	200	300	0	0	0	0	0	0	0	200	903	0	0	0	0	0	0	0	603	903	0
649	4	0	0	0	0	0	0	200	300	0	0	0	0	0	0	0	200	903	0	0	0	0	0	0	0	603	903	0
649	5	0	0	0	0	0	0	200	300	0	0	0	0	0	0	0	200	903	0	0	0	0	0	0	0	603	903	0
649	6	0	0	0	0	0	0	200	300	0	0	0	0	0	0	0	200	903	0	0	0	0	0	0	0	603	903	0
649	7	0	0	0	0	0	0	200	300	0	0	0	0	0	0	0	200	903	0	0	0	0	0	0	0	603	903	0
649	8	0	0	0	0	0	0	200	300	0	0	0	0	0	0	0	200	903	0	0	0	0	0	0	0	603	903	0
649	9	0	0	0	0	0	0	200	300	0	0	0	0	0	0	0	200	903	0	0	0	0	0	0	0	603	903	0
650	0	0	0	0	0	0	0	200	300	0	0	0	0	0	0	0	200	903	0	0	0	0	0	0	0	603	903	0
650	1	0	0	0	0	0	0	200	300	0	0	0	0	0	0	0	200	903	0	0	0	0	0	0	0	603	903	0
650	2	0	0	0	0	0	0	200	300	0	0	0	0	0	0	0	200	903	0	0	0	0	0	0	0	603	903	0
650	3	0	0	0	0	0	0	200	300	0	0	0	0	0	0	0	200	903	0	0	0	0	0	0	0	603	903	0
650	4	0	0	0	0	0	0	200	300	0	0	0	0	0	0	0	200	903	0	0	0	0	0	0	0	603	903	0
650	5	0	0	0	0	0	0	200	300	0	0	0	0	0	0	0	200	903	0	0	0	0	0	0	0	603	903	0
650	6	0	0	0	0	0	0	200	300	0	0	0	0	0	0	0	200	903	0	0	0	0	0	0	0	603	903	0
650	7	0	0	0	0	0	0	200	300	0	0	0	0	0	0	0	200	903	0	0	0	0	0	0	0	603	903	0
650	8	0	0	0	0	0	0	200	300	0	0	0	0	0	0	0	200	903	0	0	0	0	0	0	0	603	903	0
650	9	0	0	0	0	0	0	200	300	0	0	0	0	0	0	0	200	903	0	0	0	0	0	0	0	603	903	0
651	0	0	0	0	0	0	0	200	300	0	0	0	0	0	0	0	200	903	0	0	0	0	0	0	0	603	903	0
651	1	0	0	0	0	0	0	200	300	0	0	0	0	0	0	0	200	903	0	0	0	0	0	0	0	603	903	0
651	2	0	0	0	0	0	0	200	300	0	0	0	0	0	0	0	200	903	0	0	0	0	0	0	0	603	903	0
651	3	0	0	0	0	0	0	200	300	0	0	0	0	0	0	0	200	903	0	0	0	0	0	0	0	603	903	0
651	4	0	0	0	0	0	0	200	300	0	0	0	0	0	0	0	200	903	0	0	0	0	0	0	0	603	903	0
651	5	0	0	0	0	0	0	200	300	0	0	0	0	0	0	0	200	903	0	0	0	0	0	0	0	603	903	0
651	6	0	0	0	0	0	0	200	300	0	0	0	0	0	0	0	200	903	0	0	0	0	0	0	0	603	903	0
651	7	0	0	0	0	0	0	200	300	0	0	0	0	0	0	0	200	903	0	0	0	0	0	0	0	603	903	0
651	8	0	0	0	0	0	0	200	300	0	0	0	0	0	0	0	200	903	0	0	0	0	0	0	0	603	903	0
651	9	0	0	0	0	0	0	200	300	0	0	0	0	0	0	0	200	903	0	0	0	0	0	0	0	603	903	0
652	0	0	0	0	0	0	0	200	300	0	0	0	0	0	0	0	200	903	0	0	0	0	0	0	0	603	903	0
652	1	0	0	0	0	0	0	200	300	0	0	0	0	0	0	0	200	903	0	0	0	0	0	0	0	603	903	0
652	2	0	0	0	0	0	0	200	300	0	0	0	0	0	0	0	200	903	0	0	0	0	0	0	0	603	903	0
652	3	0	0	0	0	0	0	200	300	0	0	0	0	0	0	0	200	903	0	0	0	0	0	0	0	603	903	0
652	4	0	0	0	0	0	0	200	300	0	0	0	0	0	0	0	200	903	0	0	0	0	0	0	0	603	903	0
652	5	0	0	0	0	0	0	200	300	0	0	0	0	0	0	0	200	903	0	0	0	0	0	0	0	603	903	0
652	6	0	0	0	0	0	0	200	300	0	0	0	0	0	0	0	200	903	0	0	0	0	0	0	0	603	903	0
652	7	0	0	0	0	0	0	200	300	0	0	0	0	0	0	0	200	903	0	0	0	0	0	0	0	603	903	0
652	8	0	0	0	0	0	0	200	300	0	0	0	0	0	0	0	200	903	0	0	0	0	0	0	0	603	903	0
652	9	0	0	0	0	0	0	200	300	0	0	0	0	0	0	0	200	903	0	0	0	0	0	0	0	603	903	0
653	0	0	0	0	0	0	0	200	300	0	0	0	0	0	0	0	200	903	0	0	0	0	0	0	0	603	903	0
653	1	0	0	0	0	0	0	200	300	0	0	0	0	0	0	0	200	903	0	0	0	0	0	0	0	603	903	0
653	2	0	0	0	0	0	0	200	300	0	0	0	0	0	0	0	200	903	0	0	0	0	0	0	0	603	903	0
653	3	0	0	0	0	0	0	200	300	0	0	0	0	0	0	0	200	903	0	0	0	0	0	0	0	603	903	0
653	4	0	0	0	0	0	0	200	300	0	0	0	0	0	0	0	200	903	0	0	0	0	0	0	0	603	903	0
653	5	0	0	0	0	0	0	200	300	0	0	0	0	0	0	0	200	903	0	0	0	0	0	0	0	603	903	0
653	6	0	0	0	0	0	0	200	300	0	0	0	0	0	0	0	200	903	0	0	0	0	0	0	0	603	903	0
653	7	0	0	0	0	0	0	200	300	0	0	0	0	0	0	0	200	903	0	0	0	0	0	0	0	603	903	0
653	8	0	0	0	0	0	0	200	300	0	0	0	0	0	0	0	200	903	0	0	0	0	0	0	0	603	903	0
653	9	0	0	0	0	0	0	200	300	0	0	0	0	0	0	0	200	903	0	0	0	0	0	0	0	603	903	0
654	0	0	0	0	0	0	0	200	300	0	0	0	0	0	0	0	200	903	0	0	0	0	0	0	0	603	903	0
654	1	0	0	0	0	0	0	200	300	0	0	0	0	0	0	0	200	903	0	0	0	0	0	0	0	603	903	0
654	2	0	0	0	0	0	0	200	300	0	0	0	0	0	0	0	200	903	0	0	0	0	0	0	0	603	903	0
654	3	0	0	0	0	0	0	200	300	0	0	0	0	0	0	0	200	903	0	0	0	0	0	0	0	603	903	0
654	4	0	0	0	0	0	0	200	300	0	0	0	0	0	0	0	200	903	0	0	0	0	0	0	0	603	903	0
654	5	0	0	0	0	0	0	200	300	0	0	0	0	0	0	0	200	903	0	0	0	0	0	0	0	603	903	0
654	6	0	0	0	0	0	0	200	300	0	0	0	0	0	0	0	200	903	0	0	0	0	0	0	0	603	903	0
654	7	0	0	0	0	0	0	200	300	0	0	0	0	0	0	0	200	903	0	0	0	0	0	0	0	603	903	0
654	8	0	0	0	0	0	0	200	300	0	0	0	0	0	0	0	200	903	0	0	0	0	0	0	0	603	903	0
654	9	0	0	0	0	0	0	200	300	0	0	0	0	0	0	0	200	903	0	0	0	0	0	0	0	603	903	0
655	0	0	0	0	0	0	0	200	300	0	0	0	0	0	0	0	200	903	0	0	0	0	0	0	0	603	903	0
655	1	0	0	0	0	0	0	200	300	0	0	0	0	0	0	0	200	903	0	0	0	0	0	0	0	603	903	0
655	2	0	0	0	0	0	0	200	300	0	0	0	0	0	0	0	200	903	0	0	0	0	0	0	0	603	903	0
655	3	0	0	0	0	0	0	200	300	0	0	0	0	0	0	0	200	903	0	0	0	0	0	0	0	603	903	0
655	4	0	0	0	0	0	0	200	300	0	0	0	0	0	0	0	200	903	0	0	0	0	0	0	0	603	903	0
655	5	0	0	0	0	0	0	200	300	0	0	0	0	0	0	0	200	903	0	0	0	0	0	0	0	603	903	0
655	6	0	0	0	0	0	0	200	300	0	0	0	0	0	0	0	200	903	0	0	0	0	0	0	0	603	903	0
655	7	0	0	0	0	0	0	200	300	0	0	0	0	0	0	0	200	903	0	0	0	0	0	0	0	603	903	0
655	8	0	0	0	0	0	0	200	300	0	0	0	0	0	0	0	200	903	0	0	0	0	0	0	0	603	903	0
655	9	0	0	0	0	0	0	200	300	0	0	0	0	0	0	0	200	903	0	0	0	0	0	0	0	603	903	0
656	0	0	0	0	0	0	0	200	300	0	0	0	0	0	0	0	200	903	0	0	0	0	0	0	0	603	903	0
656	1	0	0	0	0	0	0	200	300	0	0	0	0	0	0	0	200	903	0	0	0	0	0	0	0	603	903	0
656	2	0	0	0	0	0	0	200	300	0	0	0	0	0	0	0	200	903	0	0	0	0	0	0	0	603	903	0
656	3	0	0	0	0	0	0	200	300	0	0	0	0	0	0	0	200	903	0	0	0	0	0	0	0	603	903	0
656	4	0	0	0	0	0	0	200	300	0	0	0	0	0	0	0	200	903	0	0	0	0	0	0	0	603	903	0
656	5	0	0	0	0	0	0	200	300	0	0	0	0	0	0	0	200	903	0	0	0	0	0	0	0	603	903	0
656	6	0	0	0	0	0	0	200	300	0	0	0	0	0	0	0	200	903	0	0	0	0	0	0	0	603	903	0
656	7	0	0	0	0	0	0	200	300	0	0	0	0	0	0	0	200	903	0	0	0	0	0	0	0	603	903	0
656	8	0	0	0	0	0	0	200	300	0	0	0	0	0	0	0	200	903	0	0	0	0	0	0	0	603	903	0
656	9	0	0	0	0	0	0	200	300	0	0	0	0	0	0	0	200	903	0	0	0	0	0	0	0	603	903	0
657	0	0	0	0	0	0	0	200	300	0	0	0	0	0	0	0	200	903	0	0	0	0	0	0	0	603	903	0
657	1	0	0	0	0	0	0	200	300	0	0	0	0	0	0	0	200	903	0	0	0	0	0	0	0	603	903	0
657	2	0	0	0	0	0	0	200	300	0	0	0	0	0	0	0	200	903	0	0	0	0	0	0	0	603	903	0
657	3	0	0	0	0	0	0	200	300	0	0	0	0	0	0	0	200	903	0	0	0	0	0	0	0	603	903	0
657	4	0	0	0	0	0	0	200	300	0	0	0	0	0	0	0	200	903	0	0	0	0	0	0	0	603	903	0
657	5	0	0	0	0	0	0	200	300	0	0	0	0	0	0	0	200	903	0	0	0	0	0	0	0	603	903	0
657	6	0	0	0	0	0	0	200	300	0	0	0	0	0	0	0	200	903	0	0	0	0	0	0	0	603	903	0
657	7	0	0	0	0	0	0	200	300	0	0	0	0	0	0	0	200	903	0	0	0	0	0	0	0	603	903	0
657	8	0	0	0	0	0	0	200	300	0	0	0	0	0	0	0	200	903	0	0	0	0	0	0	0	603	903	0
657	9	0	0	0	0	0	0	200	300	0	0	0	0	0	0	0	200	903	0	0	0	0	0	0	0	603	903	0
658	0	0	0	0	0	0	0	200	300	0	0	0	0	0	0	0	200	903	0	0	0	0	0	0	0	603	903	0
658	1	0	0	0	0	0	0	200	300	0	0	0	0	0	0	0	200	903	0	0	0	0	0	0	0	603	903	0
658	2	0	0	0	0	0	0	200	300	0	0	0	0	0	0	0	200	903	0	0	0	0	0	0	0	603	903	0
658	3	0	0	0	0	0	0	200	300	0	0	0	0	0	0	0	200	903	0	0	0	0	0	0	0	603	903	0
658	4	0	0	0	0	0	0	200	300	0	0	0	0	0	0	0	200	903	0	0	0	0	0	0	0	603	903	0
658	5	0	0	0	0	0	0	200	300	0	0	0	0	0	0	0	200	903	0	0	0	0	0	0	0	603	903	0
658	6	0	0	0	0	0	0	200	300	0	0	0	0	0	0	0	200	903	0	0	0	0	0	0	0	603	903	0
658	7	0	0	0	0	0	0	200	300	0	0	0	0	0	0	0	200	903	0	0	0	0	0	0	0	603	903	0
658	8	0	0	0	0	0	0	200	300	0	0	0	0	0	0	0	200	903	0	0	0	0	0	0	0	603	903	0
658	9	0	0	0	0	0	0	200	300	0	0	0	0	0	0	0	200	903	0	0	0	0	0	0	0	603	903	0
659	0	0	0	0	0	0	0	200	300	0	0	0	0	0	0	0	200	903	0	0	0	0	0	0	0	603	903	0
659	1	0	0	0	0	0	0	200	300	0	0	0	0	0	0	0	200	903	0	0	0	0	0	0	0	603	903	0
659	2	0	0	0	0	0	0	200	300	0	0	0	0	0	0	0	200	903	0	0	0	0	0	0	0	603	903	0
659	3	0	0	0	0	0	0	200	300	0	0	0	0	0	0	0	200	903	0	0	0	0	0	0	0	603	903	0
659	4	0	0	0	0	0	0	200	300	0	0	0	0	0	0	0	200	903	0	0	0	0	0	0	0	603	903	0
659	5	0	0	0	0	0	0	200	300	0	0	0	0	0	0	0	200	903	0	0	0	0	0	0	0	603	903	0
659	6	0	0	0	0	0	0	200	300	0	0	0	0	0	0	0	200	903	0	0	0	0	0	0	0	603	903	0
659	7	0	0	0	0	0	0	200	300	0	0	0	0	0	0	0	200	903	0	0	0	0	0	0	0	603	903	0
659	8	0	0	0	0	0	0	200	300	0	0	0	0	0	0	0	200	903	0	0	0	0	0	0	0	603	903	0
659	9	0	0	0	0	0	0	200	300	0	0	0	0	0	0	0	200	903	0	0	0	0	0	0	0	603	903	0
660	0	0	0	0	0	0	0	200	300	0	0	0	0	0	0	0	200	903	0	0	0	0	0	0	0	603	903	0
660	1	0	0	0	0	0	0	200	300	0	0	0	0	0	0	0	200	903	0	0	0	0	0	0	0	603	903	0
660	2	0	0	0	0	0	0	200	300	0	0	0	0	0	0	0	200	903	0	0	0	0	0	0	0	603	903	0
660	3	0	0	0	0	0	0	200	300	0	0	0	0	0	0	0	200	903	0	0	0	0	0	0	0	603	903	0
660	4	0	0	0	0	0	0	200	300	0	0	0	0	0	0	0	200	903	0	0	0	0	0	0	0	603	903	0
660	5	0	0	0	0	0	0	200	300	0	0	0	0	0	0	0	200	903	0	0	0	0	0	0	0	603	903	0
660	6	0	0	0	0	0	0	200	300	0	0	0	0	0	0	0	200	903	0	0	0	0	0	0	0	603	903	0
660	7	0	0	0	0	0	0	200	300	0	0	0	0	0	0	0	200	903	0	0	0	0	0	0	0	603	903	0
660	8	0	0	0	0	0	0	200	300	0	0	0	0	0	0	0	200	903	0	0	0	0	0	0	0	603	903	0
660	9	0	0	0	0	0	0	200	300	0	0	0	0	0	0	0	200	903	0	0	0	0	0	0	0	603	903	0
661	0	0	0	0	0	0	0	200	300	0	0	0	0	0	0	0	200	903	0	0	0	0	0	0	0	603	903	0
661	1	0	0	0	0	0	0	200	300	0	0	0	0	0	0	0	200	903	0	0	0	0	0	0	0	603	903	0
661	2	0	0	0	0	0	0	200	300	0	0	0	0	0	0	0	200	903	0	0	0	0	0	0	0	603	903	0
661	3	0	0	0	0	0	0	200	300	0	0	0	0	0	0	0	200	903	0	0	0	0	0	0	0	603	903	0
661	4	0	0	0	0	0	0	200	300	0	0	0	0	0	0	0	200	903	0	0	0	0	0	0	0	603	903	0
661	5	0	0	0	0	0	0	200	300	0	0	0	0	0	0	0	200	903	0	0	0	0	0	0	0	603	903	0
661	6	0	0	0	0	0	0	200	300	0	0	0	0	0	0	0	200	903	0	0	0	0	0	0	0	603	903	0
661	7	0	0	0	0	0	0	200	300	0	0	0	0	0	0	0	200	903	0	0	0	0	0	0	0	603	903	0
661	8	0	0	0	0	0	0	200	300	0	0	0	0	0	0	0	200	903	0	0	0	0	0	0	0	603	903	0
661	9	0	0	0	0	0	0	200	300	0	0	0	0	0	0	0	200	903	0	0	0	0	0	0	0	603	903	0
662	0	0	0	0	0	0	0	200	300	0	0	0	0	0	0	0	200	903	0	0	0	0	0	0	0	603	903	0
662	1	0	0	0	0	0	0	200	300	0	0	0	0	0	0	0	200	903	0	0	0	0	0	0	0	603	903	0
662	2	0	0	0	0	0	0	200	300	0	0	0	0	0	0	0	200	903	0	0	0	0	0	0	0	603	903	0
662	3	0	0	0	0	0	0	200	300	0	0	0	0	0	0	0	200	903	0	0	0	0	0	0	0	603	903	0
662	4	0	0	0	0	0	0	200	300	0	0	0	0	0	0	0	200	903	0	0	0	0	0	0	0	603	903	0
662	5	0	0	0	0	0	0	200	300	0	0	0	0	0	0	0	200	903	0	0	0	0	0	0	0	603	903	0
662	6	0	0	0	0	0	0	200	300	0	0	0	0	0	0	0	200	903	0	0	0	0	0	0	0	603	903	0
662	7	0	0	0	0	0	0	200	300	0	0	0	0	0	0	0	200	903	0	0	0	0	0	0	0	603	903	0
662	8	0	0	0	0	0	0	200	300	0	0	0	0	0	0	0	200	903	0	0	0	0	0	0	0	603	903	0
662	9	0	0	0	0	0	0	200	300	0	0	0	0	0	0	0	200	903	0	0	0	0	0	0	0	603	903	0
663	0	0	0	0	0	0	0	200	300	0	0	0	0	0	0	0	200	903	0	0	0	0	0	0	0	603	903	0
663	1	0	0	0	0	0	0	200	300	0	0	0	0	0	0	0	200	903	0	0	0	0	0	0	0	603	903	0
663	2	0	0	0	0	0	0	200	300	0	0	0	0	0	0	0	200	903	0	0	0	0	0	0	0	603	903	0
663	3	0	0	0	0	0	0	200	300	0	0	0	0	0	0	0	200	903	0	0	0	0	0	0	0	603	903	0
663	4	0	0	0	0	0	0	200	300	0	0	0	0	0	0	0	200	903	0	0	0	0	0	0	0	603	903	0
663	5	0	0	0	0	0	0	200	300	0	0	0	0	0	0	0	200	903	0	0	0	0	0	0	0	603	903	0
663	6	0	0	0	0	0	0	200	300	0	0	0	0	0	0	0	200	903	0	0	0	0	0	0	0	603	903	0
663	7	0	0	0	0	0	0	200	300	0	0	0	0	0	0	0	200	903	0	0	0	0	0	0	0	603	903	0
663	8	0	0	0	0	0	0	200	300	0	0	0	0	0	0	0	200	903	0	0	0	0	0	0	0	603	903	0
663	9	0	0	0	0	0	0	200	300	0	0	0	0	0	0	0	200	903	0	0	0	0	0	0	0	603	903	0
664	0	0	0	0	0	0	0	200	300	0	0	0	0	0	0	0	200	903	0	0	0	0	0	0	0	603	903	0
664	1	0	0	0	0	0	0	200	300	0	0	0	0	0	0	0	200	903	0	0	0	0	0	0	0	603	903	0
664	2	0	0	0	0	0	0	200	300	0	0	0	0	0	0	0	200	903	0	0	0	0	0	0	0	603	903	0
664	3	0	0	0	0	0	0	200	300	0	0	0	0	0	0	0	200	903	0	0	0	0	0	0	0	603	903	0
664	4	0	0	0	0	0	0	200	300	0	0	0	0	0	0	0	200	903	0	0	0	0	0	0	0	603	903	0
664	5	0	0	0	0	0	0	200	300	0	0	0	0	0	0	0	200	903	0	0	0	0	0	0	0	603	903	0
664	6	0	0	0	0	0	0	200	300	0	0	0	0	0	0	0	200	903	0	0	0	0	0	0	0	603	903	0
664	7	0	0	0	0	0	0	200	300	0	0	0	0	0	0	0	200	903	0	0	0	0	0	0	0	603	903	0
664	8	0	0	0	0	0	0	200	300	0	0	0	0	0	0	0	200	903	0	0	0	0	0	0	0	603	903	0
664	9	0	0	0	0	0	0	200	300	0	0	0	0	0	0	0	200	903	0	0	0	0	0	0	0	603	903	0
665	0	0	0	0	0	0	0	200	300	0	0	0	0	0	0	0	200	903	0	0	0	0	0	0	0	603	903	0
665	1	0	0	0	0	0	0	200	300	0	0	0	0	0	0	0	200	903	0	0	0	0	0	0	0	603	903	0
665	2	0	0	0	0	0	0	200	300	0	0	0	0	0	0	0	200	903	0	0	0	0	0	0	0	603	903	0
665	3	0	0	0	0	0	0	200	300	0	0	0	0	0	0	0	200	903	0	0	0	0	0	0	0	603	903	0
665	4	0	0	0	0	0	0	200	300	0	0	0	0	0	0	0	200	903	0	0	0	0	0	0	0	603	903	0
665	5	0	0	0	0	0	0	200	300	0	0	0	0	0	0	0	200	903	0	0	0	0	0	0	0	603	903	0
665	6	0	0	0	0	0	0	200	300	0	0	0	0	0	0	0	200	903	0	0	0	0	0	0	0	603	903	0
665	7	0	0	0	0	0	0	200	300	0	0	0	0	0	0	0	200	903	0	0	0	0	0	0	0	603	903	0
665	8	0	0	0	0	0	0	200	300	0	0	0	0	0	0	0	200	903	0	0	0	0	0	0	0	603	903	0
665	9	0	0	0	0	0	0	200	300	0	0	0	0	0	0	0	200	903	0	0	0	0	0	0	0	603	903	0
666	0	0	0	0	0	0	0	200	300	0	0	0	0	0	0	0	200	903	0	0	0	0	0	0	0	603	903	0
666	1	0	0	0	0	0	0	200	300	0	0	0	0	0	0	0	200	903	0	0	0	0	0	0	0	603	903	0
666	2	0	0	0	0	0	0	200	300	0	0	0	0	0	0	0	200	903	0	0	0	0	0	0	0	603	903	0
666	3	0	0	0	0	0	0	200	300	0	0	0	0	0	0	0	200	903	0	0	0	0	0	0	0	603	903	0
666	4	0	0	0	0	0	0	200	300	0	0	0	0	0	0	0	200	903	0	0	0	0	0	0	0	603	903	0
666	5	0	0	0	0	0	0	200	300	0	0	0	0	0	0	0	200	903	0	0	0	0	0	0	0	603	903	0
666	6	0	0	0	0	0	0	200	300	0	0	0	0	0	0	0	200	903	0	0	0	0	0	0	0	603	903	0
666	7	0	0	0	0	0	0	200	300	0	0	0	0	0	0	0	200	903	0	0	0	0	0	0	0	603	903	0
666	8	0	0	0	0	0	0	200	300	0	0	0	0	0	0	0	200	903	0	0	0	0	0	0	0	603	903	0
666	9	0	0	0	0	0	0	200	300	0	0	0	0	0	0	0	200	903	0	0	0	0	0	0	0	603	903	0
667	0	0	0	0	0	0	0	200	300	0	0	0	0	0	0	0	200	903	0	0	0	0	0	0	0	603	903	0
667	1	0	0	0	0	0	0	200	300	0	0	0	0	0	0	0	200	903	0	0	0	0	0	0	0	603	903	0
667	2	0	0	0	0	0	0	200	300	0	0	0	0	0	0	0	200	903	0	0	0	0	0	0	0	603	903	0
667	3	0	0	0	0	0	0	200	300	0	0	0	0	0	0	0	200	903	0	0	0	0	0	0	0	603	903	0
667	4	0	0	0	0	0	0	200	300	0	0	0	0	0	0	0	200	903	0	0	0	0	0	0	0	603	903	0
667	5	0	0	0	0	0	0	200	300	0	0	0	0	0	0	0	200	903	0	0	0	0	0	0	0	603	903	0
667	6	0	0	0	0	0	0	200	300	0	0	0	0	0	0	0	200	903	0	0	0	0	0	0	0	603	903	0
667	7	0	0	0	0	0	0	200	300	0	0	0	0	0	0	0	200	903	0	0	0	0	0	0	0	603	903	0
667	8	0	0	0	0	0	0	200	300	0	0	0	0	0	0	0	200	903	0	0	0	0	0	0	0	603	903	0
667	9	0	0	0	0	0	0	200	300	0	0	0	0	0	0	0	200	903	0	0	0	0	0	0	0	603	903	0
668	0	0	0	0	0	0	0	200	300	0	0	0	0	0	0	0	200	903	0	0	0	0	0	0	0	603	903	0
668	1	0	0	0	0	0	0	200	300	0	0	0	0	0	0	0	200	903	0	0	0	0	0	0	0	603	903	0
668	2	0	0	0	0	0	0	200	300	0	0	0	0	0	0	0	200	903	0	0	0	0	0	0	0	603	903	0
668	3	0	0	0	0	0	0	200	300	0	0	0	0	0	0	0	200	903	0	0	0	0	0	0	0	603	903	0
668	4	0	0	0	0	0	0	200	300	0	0	0	0	0	0	0	200	903	0	0	0	0	0	0	0	603	903	0
668	5	0	0	0	0	0	0	200	300	0	0	0	0	0	0	0	200	903	0	0	0	0	0	0	0	603	903	0
668	6	0	0	0	0	0	0	200	300	0	0	0	0	0	0	0	200	903	0	0	0	0	0	0	0	603	903	0
668	7	0	0	0	0	0	0	200	300	0	0	0	0	0	0	0	200	903	0	0	0	0	0	0	0	603	903	0
668	8	0	0	0	0	0	0	200	300	0	0	0	0	0	0	0	200	903	0	0	0	0	0	0	0	603	903	0
668	9	0	0	0	0	0	0	200	300	0	0	0	0	0	0	0	200	903	0	0	0	0	0	0	0	603	903	0
669	0	0	0	0	0	0	0	200	300	0	0	0	0	0	0	0	200	903	0	0	0	0	0	0	0	603	903	0
669	1	0	0	0	0	0	0	200	300	0	0	0	0	0	0	0	200	903	0	0	0	0	0	0	0	603	903	0
669	2	0	0	0	0	0	0	200	300	0	0	0	0	0	0	0	200	903	0	0	0	0	0	0	0	603	903	0
669	3	0	0	0	0	0	0	200	300	0	0	0	0	0	0	0	200	903	0	0	0	0	0	0	0	603	903	0
669	4	0	0	0	0	0	0	200	300	0	0	0	0	0	0	0	200	903	0	0	0	0	0	0	0	603	903	0
669	5	0	0	0	0	0	0	200	300	0	0	0	0	0	0	0	200	903	0	0	0	0	0	0	0	603	903	0
669	6	0	0	0	0	0	0	200	300	0	0	0	0	0	0	0	200	903	0	0	0	0	0	0	0	603	903	0
669	7	0	0	0	0	0	0	200	300	0	0	0	0	0	0	0	200	903	0	0	0	0	0	0	0	603	903	0
669	8	0	0	0	0	0	0	200	300	0	0	0	0	0	0	0	200	903	0	0	0	0	0	0	0	603	903	0
669	9	0	0	0	0	0	0	200	300	0	0	0	0	0	0	0	200	903	0	0	0	0	0	0	0	603	903	0
670	0	0	0	0	0	0	0	200	300	0	0	0	0	0	0	0	200	903	0	0	0	0	0	0	0	603	903	0
670	1	0	0	0	0	0	0	200	300	0	0	0	0	0	0	0	200	903	0	0	0	0	0	0	0	603	903	0
670	2	0	0	0	0	0	0	200	300	0	0	0	0	0	0	0	200	903	0	0	0	0	0	0	0	603	903	0
670	3	0	0	0	0	0	0	200	300	0	0	0	0	0	0	0	200	903	0	0	0	0	0	0	0	603	903	0
670	4	0	0	0	0	0	0	200	300	0	0	0	0	0	0	0	200	903	0	0	0	0	0	0	0	603	903	0
670	5	0	0	0	0	0	0	200	300	0	0	0	0	0	0	0	200	903	0	0	0	0	0	0	0	603	903	0
670	6	0	0	0	0	0	0	200	300	0	0	0	0	0	0	0	200	903	0	0	0	0	0	0	0	603	903	0
670	7	0	0	0	0	0	0	200	300	0	0	0	0	0	0	0	200	903	0	0	0	0	0	0	0	603	903	0
670	8	0	0	0	0	0	0	200	300	0	0	0	0	0	0	0	200	903	0	0	0	0	0	0	0	603	903	0
670	9	0	0	0	0	0	0	200	300	0	0	0	0	0	0	0	200	903	0	0	0	0	0	0	0	603	903	0
671	0	0	0	0	0	0	0	200	300	0	0	0	0	0	0	0	200	903	0	0	0	0	0	0	0	603	903	0
671	1	0	0	0	0	0	0	200	300	0	0	0	0	0	0	0	200	903	0	0	0	0	0	0	0	603	903	0
671	2	0	0	0	0	0	0	200	300	0	0	0	0	0	0	0	200	903	0	0	0	0	0	0	0	603	903	0
671	3	0	0	0	0	0	0	200	300	0	0	0	0	0	0	0	200	903	0	0	0	0	0	0	0	603	903	0
671	4	0	0	0	0	0	0	200	300	0	0	0	0	0	0	0	200	903	0	0	0	0	0	0	0	603	903	0
671	5	0	0	0	0	0	0	200	300	0	0	0	0	0	0	0	200	903	0	0	0	0	0	0	0	603	903	0
671	6	0	0	0	0	0	0	200	300	0	0	0	0	0	0	0	200	903	0	0	0	0	0	0	0	603	903	0
671	7	0	0	0	0	0	0	200	300	0	0	0	0	0	0	0	200	903	0	0	0	0	0	0	0	603	903	0
671	8	0	0	0	0	0	0	200	300	0	0	0	0	0	0	0	200	903	0	0	0	0	0	0	0	603	903	0
671	9	0	0	0	0	0	0	200	300	0	0	0	0	0	0	0	200	903	0	0	0	0	0	0	0	603	903	0
672	0	0	0	0	0	0	0	200	300	0	0	0	0	0	0	0	200	903	0	0	0	0	0	0	0	603	903	0
672	1	0	0	0	0	0	0	200	300	0	0	0	0	0	0	0	200	903	0	0	0	0	0	0	0	603	903	0
672	2	0	0	0	0	0	0	200	300	0	0	0	0	0	0	0	200	903	0	0	0	0	0	0	0	603	903	0
672	3	0	0	0	0	0	0	200	300	0	0	0	0	0	0	0	200	903	0	0	0	0	0	0	0	603	903	0
672	4	0	0	0	0	0	0	200	300	0	0	0	0	0	0	0	200	903	0	0	0	0	0	0	0	603	903	0
672	5	0	0	0	0	0	0	200	300	0	0	0	0	0	0	0	200	903	0	0	0	0	0	0	0	603	903	0
672	6	0	0	0	0	0	0	200	300	0	0	0	0	0	0	0	200	903	0	0	0	0	0	0	0	603	903	0
672	7	0	0	0	0	0	0	200	300	0	0	0	0	0	0	0	200	903	0	0	0	0	0	0	0	603	903	0
672	8	0	0	0	0	0	0	200	300	0	0	0	0	0	0	0	200	903	0	0	0	0	0	0	0	603	903	0
672	9	0	0	0	0	0	0	200	300	0	0	0	0	0	0	0	200	903	0	0	0	0	0	0	0	603	903	0
673	0	0	0	0	0	0	0	200	300	0	0	0	0	0	0	0	200	903	0	0	0	0	0	0	0	603	903	0
673	1	0	0	0	0	0	0	200	300	0	0	0	0	0	0	0	200	903	0	0	0	0	0	0	0	603	903	0
673	2	0	0	0	0	0	0	200	300	0	0	0	0	0	0	0	200	903	0	0	0	0	0	0	0	603	903	0
673	3	0	0	0	0	0	0	200	300	0	0	0	0	0	0	0	200	903	0	0	0	0	0	0	0	603	903	0
673	4	0	0	0	0	0	0	200	300	0	0	0	0	0	0	0	200	903	0	0	0	0	0	0	0	603	903	0
673	5	0	0	0	0	0	0	200	300	0	0	0	0	0	0	0	200	903	0	0	0	0	0	0	0	603	903	0
673	6	0	0	0	0	0	0	200	300	0	0	0	0	0	0	0	200	903	0	0	0	0	0	0	0	603	903	0
673	7	0	0	0	0	0	0	200	300	0	0	0	0	0	0	0	200	903	0	0	0	0	0	0	0	603	903	0
673	8	0	0	0	0	0	0	200	300	0	0	0	0	0	0	0	200	903	0	0	0	0	0	0	0	603	903	0
673	9	0	0	0	0	0	0	200	300	0	0	0	0	0	0	0	200	903	0	0	0	0	0	0	0	603	903	0
674	0	0	0	0	0	0	0	200	300	0	0	0	0	0	0	0	200	903	0	0	0	0	0	0	0	603	903	0
674	1	0	0	0	0	0	0	200	300	0	0	0	0	0	0	0	200	903	0	0	0	0	0	0	0	603	903	0
674	2	0	0	0	0	0	0	200	300	0	0	0	0	0	0	0	200	903	0	0	0	0	0	0	0	603	903	0
674	3	0	0	0	0	0	0	200	300	0	0	0	0	0	0	0	200	903	0	0	0	0	0	0	0	603	903	0
674	4	0	0	0	0	0	0	200	300	0	0	0	0	0	0	0	200	903	0	0	0	0	0	0	0	603	903	0
674	5	0	0	0	0	0	0	200	300	0	0	0	0	0	0	0	200	903	0	0	0	0	0	0	0	603	903	0
674	6	0	0	0	0	0	0	200	300	0	0	0	0	0	0	0	200	903	0	0	0	0	0	0	0	603	903	0
674	7	0	0	0	0	0	0	200	300	0	0	0	0	0	0	0	200	903	0	0	0	0	0	0	0	603	903	0
674	8	0	0	0	0	0	0	200	300	0	0	0	0	0	0	0	200	903	0	0	0	0	0	0	0	603	903	0
674	9	0	0	0	0	0	0	200	300	0	0	0	0	0	0	0	200	903	0	0	0	0	0	0	0	603	903	0
675	0	0	0	0	0	0	0	200	300	0	0	0	0	0	0	0	200	903	0	0	0	0	0	0	0	603	903	0
675	1	0	0	0	0	0	0	200	300	0	0	0	0	0	0	0	200	903	0	0	0	0	0	0	0	603	903	0
675	2	0	0	0	0	0	0	200	300	0	0	0	0	0	0	0	200	903	0	0	0	0	0	0	0	603	903	0
675	3	0	0	0	0	0	0	200	300	0	0	0	0	0	0	0	200	903	0	0	0	0	0	0	0	603	903	0
675	4	0	0	0	0	0	0	200	300	0	0	0	0	0	0	0	200	903	0	0	0	0	0	0	0	603	903	0
675	5	0	0	0	0	0	0	200	300	0	0	0	0	0	0	0	200	903	0	0	0	0	0	0	0	603	903	0
675	6	0	0	0	0	0	0	200	300	0	0	0	0	0	0	0	200	903	0	0	0	0	0	0	0	603	903	0
675	7	0	0	0	0	0	0	200	300	0	0	0	0	0	0	0	200	903	0	0	0	0	0	0	0	603	903	0
675	8	0	0	0	0	0	0	200	300	0	0	0	0	0	0	0	200	903	0	0	0	0	0	0	0	603	903	0
675	9	0	0	0	0	0	0	200	300	0	0	0	0	0	0	0	200	903	0	0	0	0	0	0	0	603	903	0
676	0	0	0	0	0	0	0	200	300	0	0	0	0	0	0	0	200	903	0	0	0	0	0	0	0	603	903	0
676	1	0	0	0	0	0	0	200	300	0	0	0	0	0	0	0	200	903	0	0	0	0	0	0	0	603	903	0
676	2	0	0	0	0	0	0	200	300	0	0	0	0	0	0	0	200	903	0	0	0	0	0	0	0	603	903	0
676	3	0	0	0	0	0	0	200	300	0	0	0	0	0	0	0	200	903	0	0	0	0	0	0	0	603	903	0
676	4	0	0	0	0	0	0	200	300	0	0	0	0	0	0	0	200	903	0	0	0	0	0	0	0	603	903	0
676	5	0	0	0	0	0	0	200	300	0	0	0	0	0	0	0	200	903	0	0	0	0	0	0	0	603	903	0
676	6	0	0	0	0	0	0	200	300	0	0	0	0	0	0	0	200	903	0	0	0	0	0	0	0	603	903	0
676	7	0	0	0	0	0	0	200	300	0	0	0	0	0	0	0	200	903	0	0	0	0	0	0	0	603	903	0
676	8	0	0	0	0	0	0	200	300	0	0	0	0	0	0	0	200	903	0	0	0	0	0	0	0	603	903	0
676	9	0	0	0	0	0	0	200	300	0	0	0	0	0	0	0	200	903	0	0	0	0	0	0	0	603	903	0
677	0	0	0	0	0	0	0	200	300	0	0	0	0	0	0	0	200	903	0	0	0	0	0	0	0	603	903	0
677	1	0	0	0	0	0	0	200	300	0	0	0	0	0	0	0	200	903	0	0	0	0	0	0	0	603	903	0
677	2	0	0	0	0	0	0	200	300	0	0	0	0	0	0	0	200	903	0	0	0	0	0	0	0	603	903	0
677	3	0	0	0	0	0	0	200	300	0	0	0	0	0	0	0	200	903	0	0	0	0	0	0	0	603	903	0
677	4	0	0	0	0	0	0	200	300	0	0	0	0	0	0	0	200	903	0	0	0	0	0	0	0	603	903	0
677	5	0	0	0	0	0	0	200	300	0	0	0	0	0	0	0	200	903	0	0	0	0	0	0	0	603	903	0
677	6	0	0	0	0	0	0	200	300	0	0	0	0	0	0	0	200	903	0	0	0	0	0	0	0	603	903	0
677	7	0	0	0	0	0	0	200	300	0	0	0	0	0	0	0	200	903	0	0	0	0	0	0	0	603	903	0
677	8	0	0	0	0	0	0	200	300	0	0	0	0	0	0	0	200	903	0	0	0	0	0	0	0	603	903	0
677	9	0	0	0	0	0	0	200	300	0	0	0	0	0	0	0	200	903	0	0	0	0	0	0	0	603	903	0
678	0	0	0	0	0	0	0	200	300	0	0	0	0	0	0	0	200	903	0	0	0	0	0	0	0	603	903	0
678	1	0	0	0	0	0	0	200	300	0	0	0	0	0	0	0	200	903	0	0	0	0	0	0	0	603	903	0
678	2	0	0	0	0	0	0	200	300	0	0	0	0	0	0	0	200	903	0	0	0	0	0	0	0	603	903	0
678	3	0	0	0	0	0	0	200	300	0	0	0	0	0	0	0	200	903	0	0	0	0	0	0	0	603	903	0
678	4	0	0	0	0	0	0	200	300	0	0	0	0	0	0	0	200	903	0	0	0	0	0	0	0	603	903	0
678	5	0	0	0	0	0	0	200	300	0	0	0	0	0	0	0	200	903	0	0	0	0	0	0	0	603	903	0
678	6	0	0	0	0	0	0	200	300	0	0	0	0	0	0	0	200	903	0	0	0	0	0	0	0	603	903	0
678	7	0	0	0	0	0	0	200	300	0	0	0	0	0	0	0	200	903	0	0	0	0	0	0	0	603	903	0
678	8	0	0	0	0	0	0	200	300	0	0	0	0	0	0	0	200	903	0	0	0	0	0	0	0	603	903	0
678	9	0	0	0	0	0	0	200	300	0	0	0	0	0	0	0	200	903	0	0	0	0	0	0	0	603	903	0
679	0	0	0	0	0	0	0	200	300	0	0	0	0	0	0	0	200	903	0	0	0	0	0	0	0	603	903	0
679	1	0	0	0	0	0	0	200	300	0	0	0	0	0	0	0	200	903	0	0	0	0	0	0	0	603	903	0
679	2	0	0	0	0	0	0	200	300	0	0	0	0	0	0	0	200	903	0	0	0	0	0	0	0	603	903	0
679	3	0	0	0	0	0	0	200	300	0	0	0	0	0	0	0	200	903	0	0	0	0	0	0	0	603	903	0
679	4	0	0	0	0	0	0	200	300	0	0	0	0	0	0	0	200	903	0	0	0	0	0	0	0	603	903	0
679	5	0	0	0	0	0	0	200	300	0	0	0	0	0	0	0	200	903	0	0	0	0	0	0	0	603	903	0
679	6	0	0	0	0	0	0	200	300	0	0	0	0	0	0	0	200	903	0	0	0	0	0	0	0	603	903	0
679	7	0	0	0	0	0	0	200	300	0	0	0	0	0	0	0	200	903	0	0	0	0	0	0	0	603	903	0
679	8	0	0	0	0	0	0	200	300	0	0	0	0	0	0	0	200	903	0	0	0	0	0	0	0	603	903	0
679	9	0	0	0	0	0	0	200	300	0	0	0	0	0	0	0	200	903	0	0	0	0	0	0	0	603	903	0
680	0	0	0	0	0	0	0	200	300	0	0	0	0	0	0	0	200	903	0	0	0	0	0	0	0	603	903	0
680	1	0	0	0	0	0	0	200	300	0	0	0	0	0	0	0	200	903	0	0	0	0	0	0	0	603	903	0
680	2	0	0	0	0	0	0	200	300	0	0	0	0	0	0	0	200	903	0	0	0	0	0	0	0	603	903	0
680	3	0	0	0	0	0	0	200	300	0	0	0	0	0	0	0	200	903	0	0	0	0	0	0	0	603	903	0
680	4	0	0	0	0	0	0	200	300	0	0	0	0	0	0	0	200	903	0	0	0	0	0	0	0	603	903	0
680	5	0	0	0	0	0	0	200	300	0	0	0	0	0	0	0	200	903	0	0	0	0	0	0	0	603	903	0
680	6	0	0	0	0	0	0	200	300	0	0	0	0	0	0	0	200	903	0	0	0	0	0	0	0	603	903	0
680	7	0	0	0	0	0	0	200	300	0	0	0	0	0	0	0	200	903	0	0	0	0	0	0	0	603	903	0
680	8	0	0	0	0	0	0	200	300	0	0	0	0	0	0	0	200	903	0	0	0	0	0	0	0	603	903	0
680	9	0	0	0	0	0	0	200	300	0	0	0	0	0	0	0	200	903	0	0	0	0	0	0	0	603	903	0
681	0	0	0	0	0	0	0	200	300	0	0	0	0	0	0	0	200	903	0	0	0	0	0	0	0	603	903	0
681	1	0	0	0	0	0	0	200	300	0	0	0	0	0	0	0	200	903	0	0	0	0	0	0	0	603	903	0
681	2	0	0	0	0	0	0	200	300	0	0	0	0	0	0	0	200	903	0	0	0	0	0	0	0	603	903	0
681	3	0	0	0	0	0	0	200	300	0	0	0	0	0	0	0	200	903	0	0	0	0	0	0	0	603	903	0
681	4	0	0	0	0	0	0	200	300	0	0	0	0	0	0	0	200	903	0	0	0	0	0	0	0	603	903	0
681	5	0	0	0	0	0	0	200	300	0	0	0	0	0	0	0	200	903	0	0	0	0	0	0	0	603	903	0
681	6	0	0	0	0	0	0	200	300	0	0	0	0	0	0	0	200	903	0	0	0	0	0	0	0	603	903	0
681	7	0	0	0	0	0	0	200	300	0	0	0	0	0	0	0	200	903	0	0	0	0	0	0	0	603	903	0
681	8	0	0	0	0	0	0	200	300	0	0	0	0	0	0	0	200	903	0	0	0	0	0	0	0	603	903	0
681	9	0	0	0	0	0	0	200	300	0	0	0	0	0	0	0	200	903	0	0	0	0	0	0	0	603	903	0
682	0	0	0	0	0	0	0	200	300	0	0	0	0	0	0	0	200	903	0	0	0	0	0	0	0	603	903	0
682	1	0	0	0	0	0	0	200	300	0	0	0	0	0	0	0	200	903	0	0	0	0	0	0	0	603	903	0
682	2	0	0	0	0	0	0	200	300	0	0	0	0	0	0	0	200	903	0	0	0	0	0	0	0	603	903	0
682	3	0	0	0	0	0	0	200	300	0	0	0	0	0	0	0	200	903	0	0	0	0	0	0	0	603	903	0
682	4	0	0	0	0	0	0	200	300	0	0	0	0	0	0	0	200	903	0	0	0	0	0	0	0	603	903	0
682	5	0	0	0	0	0	0	200	300	0	0	0	0	0	0	0	200	903	0	0	0	0	0	0	0	603	903	0
682	6	0	0	0	0	0	0	200	300	0	0	0	0	0	0	0	200	903	0	0	0	0	0	0	0	603	903	0
682	7	0	0	0	0	0	0	200	300	0	0	0	0	0	0	0	200	903	0	0	0	0	0	0	0	603	903	0
682	8	0	0	0	0	0	0	200	300	0	0	0	0	0	0	0	200	903	0	0	0	0	0	0	0	603	903	0
682	9	0	0	0	0	0	0	200	300	0	0	0	0	0	0	0	200	903	0	0	0	0	0	0	0	603	903	0
683	0	0	0	0	0	0	0	200	300	0	0	0	0	0	0	0	200	903	0	0	0	0	0	0	0	603	903	0
683	1	0	0	0	0	0	0	200	300	0	0	0	0	0	0	0	200	903	0	0	0	0	0	0	0	603	903	0
683	2	0	0	0	0	0	0	200	300	0	0	0	0	0	0	0	200	903	0	0	0	0	0	0	0	603	903	0
683	3	0	0	0	0	0	0	200	300	0	0	0	0	0	0	0	200	903	0	0	0	0	0	0	0	603	903	0
683	4	0	0	0	0	0	0	200	300	0	0	0	0	0	0	0	200	903	0	0	0	0	0	0	0	603	903	0
683	5	0	0	0	0	0	0	200	300	0	0	0	0	0	0	0	200	903	0	0	0	0	0	0	0	603	903	0
683	6	0	0	0	0	0	0	200	300	0	0	0	0	0	0	0	200	903	0	0	0	0	0	0	0	603	903	0
683	7	0	0	0	0	0	0	200	300	0	0	0	0	0	0	0	200	903	0	0	0	0	0	0	0	603	903	0
683	8	0	0	0	0	0	0	200	300	0	0	0	0	0	0	0	200	903	0	0	0	0	0	0	0	603	903	0
683	9	0	0	0	0	0	0	200	300	0	0	0	0	0	0	0	200	903	0	0	0	0	0	0	0	603	903	0
684	0	0	0	0	0	0	0	200	300	0	0	0	0	0	0	0	200	903	0	0	0	0	0	0	0	603	903	0
684	1	0	0	0	0	0	0	200	300	0	0	0	0	0	0	0	200	903	0	0	0	0	0	0	0	603	903	0
684	2	0	0	0	0	0	0	200	300	0	0	0	0	0	0	0	200	903	0	0	0	0	0	0	0	603	903	0
684	3	0	0	0	0	0	0	200	300	0	0	0	0	0	0	0	200	903	0	0	0	0	0	0	0	603	903	0
684	4	0	0	0	0	0	0	200	300	0	0	0	0	0	0	0	200	903	0	0	0	0	0	0	0	603	903	0
684	5	0	0	0	0	0	0	200	300	0	0	0	0	0	0	0	200	903	0	0	0	0	0	0	0	603	903	0
684	6	0	0	0	0	0	0	200	300	0	0	0	0	0	0	0	200	903	0	0	0	0	0	0	0	603	903	0
684	7	0	0	0	0	0	0	200	300	0	0	0	0	0	0	0	200	903	0	0	0	0	0	0	0	603	903	0
684	8	0	0	0	0	0	0	200	300	0	0	0	0	0	0	0	200	903	0	0	0	0	0	0	0	603	903	0
684	9	0	0	0	0	0	0	200	300	0	0	0	0	0	0	0	200	903	0	0	0	0	0	0	0	603	903	0
685	0	0	0	0	0	0	0	200	300	0	0	0	0	0	0	0	200	903	0	0	0	0	0	0	0	603	903	0
685	1	0	0	0	0	0	0	200	300	0	0	0	0	0	0	0	200	903	0	0	0	0	0	0	0	603	903	0
685	2	0	0	0	0	0	0	200	300	0	0	0	0	0	0	0	200	903	0	0	0	0	0	0	0	603	903	0
685	3	0	0	0	0	0	0	200	300	0	0	0	0	0	0	0	200	903	0	0	0	0	0	0	0	603	903	0
685	4	0	0	0	0	0	0	200	300	0	0	0	0	0	0	0	200	903	0	0	0	0	0	0	0	603	903	0
685	5	0	0	0	0	0	0	200	300	0	0	0	0	0	0	0	200	903	0	0	0	0	0	0	0	603	903	0
685	6	0	0	0	0	0	0	200	300	0	0	0	0	0	0	0	200	903	0	0	0	0	0	0	0	603	903	0
685	7	0	0	0	0	0	0	200	300	0	0	0	0	0	0	0	200	903	0	0	0	0	0	0	0	603	903	0
685	8	0	0	0	0	0	0	200	300	0	0	0	0	0	0	0	200	903	0	0	0	0	0	0	0	603	903	0
685	9	0	0	0	0	0	0	200	300	0	0	0	0	0	0	0	200	903	0	0	0	0	0	0	0	603	903	0
686	0	0	0	0	0	0	0	200	300	0	0	0	0	0	0	0	200	903	0	0	0	0	0	0	0	603	903	0
686	1	0	0	0	0	0	0	200	300	0	0	0	0	0	0	0	200	903	0	0	0	0	0	0	0	603	903	0
686	2	0	0	0	0	0	0	200	300	0	0	0	0	0	0	0	200	903	0	0	0	0	0	0	0	603	903	0
686	3	0	0	0	0	0	0	200	300	0	0	0	0	0	0	0	200	903	0	0	0	0	0	0	0	603	903	0
686	4	0	0	0	0	0	0	200	300	0	0	0	0	0	0	0	200	903	0	0	0	0	0	0	0	603	903	0
686	5	0	0	0	0	0	0	200	300	0	0	0	0	0	0	0	200	903	0	0	0	0	0	0	0	603	903	0
686	6	0	0	0	0	0	0	200	300	0	0	0	0	0	0	0	200	903	0	0	0	0	0	0	0	603	903	0
686	7	0	0	0	0	0	0	200	300	0	0	0	0	0	0	0	200	903	0	0	0	0	0	0	0	603	903	0
686	8	0	0	0	0	0	0	200	300	0	0	0	0	0	0	0	200	903	0	0	0	0	0	0	0	603	903	0
686	9	0	0	0	0	0	0	200	300	0	0	0	0	0	0	0	200	903	0	0	0	0	0	0	0	603	903	0
687	0	0	0	0	0	0	0	200	300	0	0	0	0	0	0	0	200	903	0	0	0	0	0	0	0	603	903	0
687	1	0	0	0	0	0	0	200	300	0	0	0	0	0	0	0	200	903	0	0	0	0	0	0	0	603	903	0
687	2	0	0	0	0	0	0	200	300	0	0	0	0	0	0	0	200	903	0	0	0	0	0	0	0	603	903	0
687	3	0	0	0	0	0	0	200	300	0	0	0	0	0	0	0	200	903	0	0	0	0	0	0	0	603	903	0
687	4	0	0	0	0	0	0	200	300	0	0	0	0	0	0	0	200	903	0	0	0	0	0	0	0	603	903	0
687	5	0	0	0	0	0	0	200	300	0	0	0	0	0	0	0	200	903	0	0	0	0	0	0	0	603	903	0
687	6	0	0	0	0	0	0	200	300	0	0	0	0	0	0	0	200	903	0	0	0	0	0	0	0	603	903	0
687	7	0	0	0	0	0	0	200	300	0	0	0	0	0	0	0	200	903	0	0	0	0	0	0	0	603	903	0
687	8	0	0	0	0	0	0	200	300	0	0	0	0	0	0	0	200	903	0	0	0	0	0	0	0	603	903	0
687	9	0	0	0	0	0	0	200	300	0	0	0	0	0	0	0	200	903	0	0	0	0	0	0	0	603	903	0
688	0	0	0	0	0	0	0	200	300	0	0	0	0	0	0	0	200	903	0	0	0	0	0	0	0	603	903	0
688	1	0	0	0	0	0	0	200	300	0	0	0	0	0	0	0	200	903	0	0	0	0	0	0	0	603	903	0
688	2	0	0	0	0	0	0	200	300	0	0	0	0	0	0	0	200	903	0	0	0	0	0	0	0	603	903	0
688	3	0	0	0	0	0	0	200	300	0	0	0	0	0	0	0	200	903	0	0	0	0	0	0	0	603	903	0
688	4	0	0	0	0	0	0	200	300	0	0	0	0	0	0	0	200	903	0	0	0	0	0	0	0	603	903	0
688	5	0	0	0	0	0	0	200	300	0	0	0	0	0	0	0	200	903	0	0	0	0	0	0	0	603	903	0
688	6	0	0	0	0	0	0	200	300	0	0	0	0	0	0	0	200	903	0	0	0	0	0	0	0	603	903	0
688	7	0	0	0	0	0	0	200	300	0	0	0	0	0	0	0	200	903	0	0	0	0	0	0	0	603	903	0
688	8	0	0	0	0	0	0	200	300	0	0	0	0	0	0	0	200	903	0	0	0	0	0	0	0	603	903	0
688	9	0	0	0	0	0	0	200	300	0	0	0	0	0	0	0	200	903	0	0	0	0	0	0	0	603	903	0
689	0	0	0	0	0	0	0	200	300	0	0	0	0	0	0	0	200	903	0	0	0	0	0	0	0	603	903	0
689	1	0	0	0	0	0	0	200	300	0	0	0	0	0	0	0	200	903	0	0	0	0	0	0	0	603	903	0
689	2	0	0	0	0	0	0	200	300	0	0	0	0	0	0	0	200	903	0	0	0	0	0	0	0	603	903	0
689	3	0	0	0	0	0	0	200	300	0	0	0	0	0	0	0	200	903	0	0	0	0	0	0	0	603	903	0
689	4	0	0	0	0	0	0	200	300	0	0	0	0	0	0	0	200	903	0	0	0	0	0	0	0	603	903	0
689	5	0	0	0	0	0	0	200	300	0	0	0	0	0	0	0	200	903	0	0	0	0	0	0	0	603	903	0
689	6	0	0	0	0	0	0	200	300	0	0	0	0	0	0	0	200	903	0	0	0	0	0	0	0	603	903	0
689	7	0	0	0	0	0	0	200	300	0	0	0	0	0	0	0	200	903	0	0	0	0	0	0	0	603	903	0
689	8	0	0	0	0	0	0	200	300	0	0	0	0	0	0	0	200	903	0	0	0	0	0	0	0	603	903	0
689	9	0	0	0	0	0	0	200	300	0	0	0	0	0	0	0	200	903	0	0	0	0	0	0	0	603	903	0
690	0	0	0	0	0	0	0	200	300	0	0	0	0	0	0	0	200	903	0	0	0	0	0	0	0	603	903	0
690	1	0	0	0	0	0	0	200	300	0	0	0	0	0	0	0	200	903	0	0	0	0	0	0	0	603	903	0
690	2	0	0	0	0	0	0	200	300	0	0	0	0	0	0	0	200	903	0	0	0	0	0	0	0	603	903	0
690	3	0	0	0	0	0	0	200	300	0	0	0	0	0	0	0	200	903	0	0	0	0	0	0	0	603	903	0
690	4	0	0	0	0	0	0	200	300	0	0	0	0	0	0	0	200	903	0	0	0	0	0	0	0	603	903	0
690	5	0	0	0	0	0	0	200	300	0	0	0	0	0	0	0	200	903	0	0	0	0	0	0	0	603	903	0
690	6	0	0	0	0	0	0	200	300	0	0	0	0	0	0	0	200	903	0	0	0	0	0	0	0	603	903	0
690	7	0	0	0	0	0	0	200	300	0	0	0	0	0	0	0	200	903	0	0	0	0	0	0	0	603	903	0
690	8	0	0	0	0	0	0	200	300	0	0	0	0	0	0	0	200	903	0	0	0	0	0	0	0	603	903	0
690	9	0	0	0	0	0	0	200	300	0	0	0	0	0	0	0	200	903	0	0	0	0	0	0	0	603	903	0
691	0	0	0	0	0	0	0	200	300	0	0	0	0	0	0	0	200	903	0	0	0	0	0	0	0	603	903	0
691	1	0	0	0	0	0	0	200	300	0	0	0	0	0	0	0	200	903	0	0	0	0	0	0	0	603	903	0
691	2	0	0	0	0	0	0	200	300	0	0	0	0	0	0	0	200	903	0	0	0	0	0	0	0	603	903	0
691	3	0	0	0	0	0	0	200	300	0	0	0	0	0	0	0	200	903	0	0	0	0	0	0	0	603	903	0
691	4	0	0	0	0	0	0	200	300	0	0	0	0	0	0	0	200	903	0	0	0	0	0	0	0	603	903	0
691	5	0	0	0	0	0	0	200	300	0	0	0	0	0	0	0	200	903	0	0	0	0	0	0	0	603	903	0
691	6	0	0	0	0	0	0	200	300	0	0	0	0	0	0	0	200	903	0	0	0	0	0	0	0	603	903	0
691	7	0	0	0	0	0	0	200	300	0	0	0	0	0	0	0	200	903	0	0	0	0	0	0	0	603	903	0
691	8	0	0	0	0	0	0	200	300	0	0	0	0	0	0	0	200	903	0	0	0	0	0	0	0	603	903	0
691	9	0	0	0	0	0	0	200	300	0	0	0	0	0	0	0	200	903	0	0	0	0	0	0	0	603	903	0
692	0	0	0	0	0	0	0	200	300	0	0	0	0	0	0	0	200	903	0	0	0	0	0	0	0	603	903	0
692	1	0	0	0	0	0	0	200	300	0	0	0	0	0	0	0	200	903	0	0	0	0	0	0	0	603	903	0
692	2	0	0	0	0	0	0	200	300	0	0	0	0	0	0	0	200	903	0	0	0	0	0	0	0	603	903	0
692	3	0	0	0	0	0	0	200	300	0	0	0	0	0	0	0	200	903	0	0	0	0	0	0	0	603	903	0
692	4	0	0	0	0	0	0	200	300	0	0	0	0	0	0	0	200	903	0	0	0	0	0	0	0	603	903	0
692	5	0	0	0	0	0	0	200	300	0	0	0	0	0	0	0	200	903	0	0	0	0	0	0	0	603	903	0
692	6	0	0	0	0	0	0	200	300	0	0	0	0	0	0	0	200	903	0	0	0	0	0	0	0	603	903	0
692	7	0	0	0	0	0	0	200	300	0	0	0	0	0	0	0	200	903	0	0	0	0	0	0	0	603	903	0
692	8	0	0	0	0	0	0	200	300	0	0	0	0	0	0	0	200	903	0	0	0	0	0	0	0	603	903	0
692	9	0	0	0	0	0	0	200	300	0	0	0	0	0	0	0	200	903	0	0	0	0	0	0	0	603	903	0
693	0	0	0	0	0	0	0	200	300	0	0	0	0	0	0	0	200	903	0	0	0	0	0	0	0	603	903	0
693	1	0	0	0	0	0	0	200	300	0	0	0	0	0	0	0	200	903	0	0	0	0	0	0	0	603	903	0
693	2	0	0	0	0	0	0	200	300	0	0	0	0	0	0	0	200	903	0	0	0	0	0	0	0	603	903	0
693	3	0	0	0	0	0	0	200	300	0	0	0	0	0	0	0	200	903	0	0	0	0	0	0	0	603	903	0
693	4	0	0	0	0	0	0	200	300	0	0	0	0	0	0	0	200	903	0	0	0	0	0	0	0	603	903	0
693	5	0	0	0	0	0	0	200	300	0	0	0	0	0	0	0	200	903	0	0	0	0	0	0	0	603	903	0
693	6	0	0	0	0	0	0	200	300	0	0	0	0	0	0	0	200	903	0	0	0	0	0	0	0	603	903	0
693	7	0	0	0	0	0	0	200	300	0	0	0	0	0	0	0	200	903	0	0	0	0	0	0	0	603	903	0
693	8	0	0	0	0	0	0	200	300	0	0	0	0	0	0	0	200	903	0	0	0	0	0	0	0	603	903	0
693	9	0	0	0	0	0	0	200	300	0	0	0	0	0	0	0	200	903	0	0	0	0	0	0	0	603	903	0
694	0	0	0	0	0	0	0	200	300	0	0	0	0	0	0	0	200	903	0	0	0	0	0	0	0	603	903	0
694	1	0	0	0	0	0	0	200	300	0	0	0	0	0	0	0	200	903	0	0	0	0	0	0	0	603	903	0
694	2	0	0	0	0	0	0	200	300	0	0	0	0	0	0	0	200	903	0	0	0	0	0	0	0	603	903	0
694	3	0	0	0	0	0	0	200	300	0	0	0	0	0	0	0	200	903	0	0	0	0	0	0	0	603	903	0
694	4	0	0	0	0	0	0	200	300	0	0	0	0	0	0	0	200	903	0	0	0	0	0	0	0	603	903	0
694	5	0	0	0	0	0	0	200	300	0	0	0	0	0	0	0	200	903	0	0	0	0	0	0	0	603	903	0
694	6	0	0	0	0	0	0	200	300	0	0	0	0	0	0	0	200	903	0	0	0	0	0	0	0	603	903	0
694	7	0	0	0	0	0	0	200	300	0	0	0	0	0	0	0	200	903	0	0	0	0	0	0	0	603	903	0
694	8	0	0	0	0	0	0	200	300	0	0	0	0	0	0	0	200	903	0	0	0	0	0	0	0	603	903	0
694	9	0	0	0	0	0	0	200	300	0	0	0	0	0	0	0	200	903	0	0	0	0	0	0	0	603	903	0
695	0	0	0	0	0	0	0	200	300	0	0	0	0	0	0	0	200	903	0	0	0	0	0	0	0	603	903	0
695	1	0	0	0	0	0	0	200	300	0	0	0	0	0	0	0	200	903	0	0	0	0	0	0	0	603	903	0
695	2	0	0	0	0	0	0	200	300	0	0	0	0	0	0	0	200	903	0	0	0	0	0	0	0	603	903	0
695	3	0	0	0	0	0	0	200	300	0	0	0	0	0	0	0	200	903	0	0	0	0	0	0	0	603	903	0
695	4	0	0	0	0	0	0	200	300	0	0	0	0	0	0	0	200	903	0	0	0	0	0	0	0	603	903	0
695	5	0	0	0	0	0	0	200	300	0	0	0	0	0	0	0	200	903	0	0	0	0	0	0	0	603	903	0
695	6	0	0	0	0	0	0	200	300	0	0	0	0	0	0	0	200	903	0	0	0	0	0	0	0	603	903	0
695	7	0	0	0	0	0	0	200	300	0	0	0	0	0	0	0	200	903	0	0	0	0	0	0	0	603	903	0
695	8	0	0	0	0	0	0	200	300	0	0	0	0	0	0	0	200	903	0	0	0	0	0	0	0	603	903	0
695	9	0	0	0	0	0	0	200	300	0	0	0	0	0	0	0	200	903	0	0	0	0	0	0	0	603	903	0
696	0	0	0	0	0	0	0	200	300	0	0	0	0	0	0	0	200	903	0	0	0	0	0	0	0	603	903	0
696	1	0	0	0	0	0	0	200	300	0	0	0	0	0	0	0	200	903	0	0	0	0	0	0	0	603	903	0
696	2	0	0	0	0	0	0	200	300	0	0	0	0	0	0	0	200	903	0	0	0	0	0	0	0	603	903	0
696	3	0	0	0	0	0	0	200	300	0	0	0	0	0	0	0	200	903	0	0	0	0	0	0	0	603	903	0
696	4	0	0	0	0	0	0	200	300	0	0	0	0	0	0	0	200	903	0	0	0	0	0	0	0	603	903	0
696	5	0	0	0	0	0	0	200	300	0	0	0	0	0	0	0	200	903	0	0	0	0	0	0	0	603	903	0
696	6	0	0	0	0	0	0	200	300	0	0	0	0	0	0	0	200	903	0	0	0	0	0	0	0	603	903	0
696	7	0	0	0	0	0	0	200	300	0	0	0	0	0	0	0	200	903	0	0	0	0	0	0	0	603	903	0
696	8	0	0	0	0	0	0	200	300	0	0	0	0	0	0	0	200	903	0	0	0	0	0	0	0	603	903	0
696	9	0	0	0	0	0	0	200	300	0	0	0	0	0	0	0	200	903	0	0	0	0	0	0	0	603	903	0
697	0	0	0	0	0	0	0	200	300	0	0	0	0	0	0	0	200	903	0	0	0	0	0	0	0	603	903	0
697	1	0	0	0	0	0	0	200	300	0	0	0	0	0	0	0	200	903	0	0	0	0	0	0	0	603	903	0
697	2	0	0	0	0	0	0	200	300	0	0	0	0	0	0	0	200	903	0	0	0	0	0	0	0	603	903	0
697	3	0	0	0	0	0	0	200	300	0	0	0	0	0	0	0	200	903	0	0	0	0	0	0	0	603	903	0
697	4	0	0	0	0	0	0	200	300	0	0	0	0	0	0	0	200	903	0	0	0	0	0	0	0	603	903	0
697	5	0	0	0	0	0	0	200	300	0	0	0	0	0	0	0	200	903	0	0	0	0	0	0	0	603	903	0
697	6	0	0	0	0	0	0	200	300	0	0	0	0	0	0	0	200	903	0	0	0	0	0	0	0	603	903	0
697	7	0	0	0	0	0	0	200	300	0	0	0	0	0	0	0	200	903	0	0	0	0	0	0	0	603	903	0
697	8	0	0	0	0	0	0	200	300	0	0	0	0	0	0	0	200	903	0	0	0	0	0	0	0	603	903	0
697	9	0	0	0	0	0	0	200	300	0	0	0	0	0	0	0	200	903	0	0	0	0	0	0	0	603	903	0
698	0	0	0	0	0	0	0	200	300	0	0	0	0	0	0	0	200	903	0	0	0	0	0	0	0	603	903	0
698	1	0	0	0	0	0	0	200	300	0	0	0	0	0	0	0	200	903	0	0	0	0	0	0	0	603	903	0
698	2	0	0	0	0	0	0	200	300	0	0	0	0	0	0	0	200	903	0	0	0	0	0	0	0	603	903	0
698	3	0	0	0	0	0	0	200	300	0	0	0	0	0	0	0	200	903	0	0	0	0	0	0	0	603	903	0
698	4	0	0	0	0	0	0	200	300	0	0	0	0	0	0	0	200	903	0	0	0	0	0	0	0	603	903	0
698	5	0	0	0	0	0	0	200	300	0	0	0	0	0	0	0	200	903	0	0	0	0	0	0	0	603	903	0
698	6	0	0	0	0	0	0	200	300	0	0	0	0	0	0	0	200	903	0	0	0	0	0	0	0	603	903	0
698	7	0	0	0	0	0	0	200	300	0	0	0	0	0	0	0	200	903	0	0	0	0	0	0	0	603	903	0
698	8	0	0	0	0	0	0	200	300	0	0	0	0	0	0	0	200	903	0	0	0	0	0	0	0	603	903	0
698	9	0	0	0	0	0	0	200	300	0	0	0	0	0	0	0	200	903	0	0	0	0	0	0	0	603	903	0
699	0	0	0	0	0	0	0	200	300	0	0	0	0	0	0	0	200	903	0	0	0	0	0	0	0	603	903	0
699	1	0	0	0	0	0	0	200	300	0	0	0	0	0	0	0	200	903	0	0	0	0	0	0	0	603	903	0
699	2	0	0	0	0	0	0	200	300	0	0	0	0	0	0	0	200	903	0	0	0	0	0	0	0	603	903	0
699	3	0	0	0	0	0	0	200	300	0	0	0	0	0	0	0	200	903	0	0	0	0	0	0	0	603	903	0
699	4	0	0	0	0	0	0	200	300	0	0	0	0	0	0	0	200	903	0	0	0	0	0	0	0	603	903	0
699	5	0	0	0	0	0	0	200	300	0	0	0	0	0	0	0	200	903	0	0	0	0	0	0	0	603	903	0
699	6	0	0	0	0	0	0	200	300	0	0	0	0	0	0	0	200	903	0	0	0	0	0	0	0	603	903	0
699	7	0	0	0	0	0	0	200	300	0	0	0	0	0	0	0	200	903	0	0	0	0	0	0	0	603	903	0
699	8	0	0	0	0	0	0	200	300	0	0	0	0	0	0	0	200	903	0	0	0	0	0	0	0	603	903	0
699	9	0	0	0	0	0	0	200	300	0	0	0	0	0	0	0	200	903	0	0	0	0	0	0	0	603	903	0
700	0	0	0	0	0	0	0	200	300	0	0	0	0	0	0	0	200	903	0	0	0	0	0	0	0	603	903	0
700	1	0	0	0	0	0	0	200	300	0	0	0	0	0	0	0	200	903	0	0	0	0	0	0	0	603	903	0
700	2	0	0	0	0	0	0	200	300	0	0	0	0	0	0	0	200	903	0	0	0	0	0	0	0	603	903	0
700	3	0	0	0	0	0	0	200	300	0	0	0	0	0	0	0	200	903	0	0	0	0	0	0	0	603	903	0
700	4	0	0	0	0	0	0	200	300	0	0	0	0	0	0	0	200	903	0	0	0	0	0	0	0	603	903	0
700	5	0	0	0	0	0	0	200	300	0	0	0	0	0	0	0	200	903	0	0	0	0	0	0	0	603	903	0
700	6	0	0	0	0	0	0	200	300	0	0	0	0	0	0	0	200	903	0	0	0	0	0	0	0	603	903	0
700	7	0	0	0	0	0	0	200	300	0	0	0	0	0	0	0	200	903	0	0	0	0	0	0	0	603	903	0
700	8	0	0	0	0	0	0	200	300	0	0	0	0	0	0	0	200	903	0	0	0	0	0	0	0	603	903	0
700	9	0	0	0	0	0	0	200	300	0	0	0	0	0	0	0	200	903	0	0	0	0	0	0	0	603	903	0
701	0	0	0	0	0	0	0	200	300	0	0	0	0	0	0	0	200	903	0	0	0	0	0	0	0	603	903	0
701	1	0	0	0	0	0	0	200	300	0	0	0	0	0	0	0	200	903	0	0	0	0	0	0	0	603	903	0
701	2	0	0	0	0	0	0	200	300	0	0	0	0	0	0	0	200	903	0	0	0	0	0	0	0	603	903	0
701	3	0	0	0	0	0	0	200	300	0	0	0	0	0	0	0	200	903	0	0	0	0	0	0	0	603	903	0
701	4	0	0	0	0	0	0	200	300	0	0	0	0	0	0	0	200	903	0	0	0	0	0	0	0	603	903	0
701	5	0	0	0	0	0	0	200	300	0	0	0	0	0	0	0	200	903	0	0	0	0	0	0	0	603	903	0
701	6	0	0	0	0	0	0	200	300	0	0	0	0	0	0	0	200	903	0	0	0	0	0	0	0	603	903	0
701	7	0	0	0	0	0	0	200	300	0	0	0	0	0	0	0	200	903	0	0	0	0	0	0	0	603	903	0
701	8	0	0	0	0	0	0	200	300	0	0	0	0	0	0	0	200	903	0	0	0	0	0	0	0	603	903	0
701	9	0	0	0	0	0	0	200	300	0	0	0	0	0	0	0	200	903	0	0	0	0	0	0	0	603	903	0
702	0	0	0	0	0	0	0	200	300	0	0	0	0	0	0	0	200	903	0	0	0	0	0	0	0	603	903	0
702	1	0	0	0	0	0	0	200	300	0	0	0	0	0	0	0	200	903	0	0	0	0	0	0	0	603	903	0
702	2	0	0	0	0	0	0	200	300	0	0	0	0	0	0	0	200	903	0	0	0	0	0	0	0	603	903	0
702	3	0	0	0	0	0	0	200	300	0	0	0	0	0	0	0	200	903	0	0	0	0	0	0	0	603	903	0
702	4	0	0	0	0	0	0	200	300	0	0	0	0	0	0	0	200	903	0	0	0	0	0	0	0	603	903	0
702	5	0	0	0	0	0	0	200	300	0	0	0	0	0	0	0	200	903	0	0	0	0	0	0	0	603	903	0
702	6	0	0	0	0	0	0	200	300	0	0	0	0	0	0	0	200	903	0	0	0	0	0	0	0	603	903	0
702	7	0	0	0	0	0	0	200	300	0	0	0	0	0	0	0	200	903	0	0	0	0	0	0	0	603	903	0
702	8	0	0	0	0	0	0	200	300	0	0	0	0	0	0	0	200	903	0	0	0	0	0	0	0	603	903	0
702	9	0	0	0	0	0	0	200	300	0	0	0	0	0	0	0	200	903	0	0	0	0	0	0	0	603	903	0
703	0	0	0	0	0	0	0	200	300	0	0	0	0	0	0	0	200	903	0	0	0	0	0	0	0	603	903	0
703	1	0	0	0	0	0	0	200	300	0	0	0	0	0	0	0	200	903	0	0	0	0	0	0	0	603	903	0
703	2	0	0	0	0	0	0	200	300	0	0	0	0	0	0	0	200	903	0	0	0	0	0	0	0	603	903	0
703	3	0	0	0	0	0	0	200	300	0	0	0	0	0	0	0	200	903	0	0	0	0	0	0	0	603	903	0
703	4	0	0	0	0	0	0	200	300	0	0	0	0	0	0	0	200	903	0	0	0	0	0	0	0	603	903	0
703	5	0	0	0	0	0	0	200	300	0	0	0	0	0	0	0	200	903	0	0	0	0	0	0	0	603	903	0
703	6	0	0	0	0	0	0	200	300	0	0	0	0	0	0	0	200	903	0	0	0	0	0	0	0	603	903	0
703	7	0	0	0	0	0	0	200	300	0	0	0	0	0	0	0	200	903	0	0	0	0	0	0	0	603	903	0
703	8	0	0	0	0	0	0	200	300	0	0	0	0	0	0	0	200	903	0	0	0	0	0	0	0	603	903	0
703	9	0	0	0	0	0	0	200	300	0	0	0	0	0	0	0	200	903	0	0	0	0	0	0	0	603	903	0
704	0	0	0	0	0	0	0	200	300	0	0	0	0	0	0	0	200	903	0	0	0	0	0	0	0	603	903	0
704	1	0	0	0	0	0	0	200	300	0	0	0	0	0	0	0	200	903	0	0	0	0	0	0	0	603	903	0
704	2	0	0	0	0	0	0	200	300	0	0	0	0	0	0	0	200	903	0	0	0	0	0	0	0	603	903	0
704	3	0	0	0	0	0	0	200	300	0	0	0	0	0	0	0	200	903	0	0	0	0	0	0	0	603	903	0
704	4	0	0	0	0	0	0	200	300	0	0	0	0	0	0	0	200	903	0	0	0	0	0	0	0	603	903	0
704	5	0	0	0	0	0	0	200	300	0	0	0	0	0	0	0	200	903	0	0	0	0	0	0	0	603	903	0
704	6	0	0	0	0	0	0	200	300	0	0	0	0	0	0	0	200	903	0	0	0	0	0	0	0	603	903	0
704	7	0	0	0	0	0	0	200	300	0	0	0	0	0	0	0	200	903	0	0	0	0	0	0	0	603	903	0
704	8	0	0	0	0	0	0	200	300	0	0	0	0	0	0	0	200	903	0	0	0	0	0	0	0	603	903	0
704	9	0	0	0	0	0	0	200	300	0	0	0	0	0	0	0	200	903	0	0	0	0	0	0	0	603	903	0
705	0	0	0	0	0	0	0	200	300	0	0	0	0	0	0	0	200	903	0	0	0	0	0	0	0	603	903	0
705	1	0	0	0	0	0	0	200	300	0	0	0	0	0	0	0	200	903	0	0	0	0	0	0	0	603	903	0
705	2	0	0	0	0	0	0	200	300	0	0	0	0	0	0	0	200	903	0	0	0	0	0	0	0	603	903	0
705	3	0	0	0	0	0	0	200	300	0	0	0	0	0	0	0	200	903	0	0	0	0	0	0	0	603	903	0
705	4	0	0	0	0	0	0	200	300	0	0	0	0	0	0	0	200	903	0	0	0	0	0	0	0	603	903	0
705	5	0	0	0	0	0	0	200	300	0	0	0	0	0	0	0	200	903	0	0	0	0	0	0	0	603	903	0
705	6	0	0	0	0	0	0	200	300	0	0	0	0	0	0	0	200	903	0	0	0	0	0	0	0	603	903	0
705	7	0	0	0	0	0	0	200	300	0	0	0	0	0	0	0	200	903	0	0	0	0	0	0	0	603	903	0
705	8	0	0	0	0	0	0	200	300	0	0	0	0	0	0	0	200	903	0	0	0	0	0	0	0	603	903	0
705	9	0	0	0	0	0	0	200	300	0	0	0	0	0	0	0	200	903	0	0	0	0	0	0	0	603	903	0
706	0	0	0	0	0	0	0	200	300	0	0	0	0	0	0	0	200	903	0	0	0	0	0	0	0	603	903	0
706	1	0	0	0	0	0	0	200	300	0	0	0	0	0	0	0	200	903	0	0	0	0	0	0	0	603	903	0
706	2	0	0	0	0	0	0	200	300	0	0	0	0	0	0	0	200	903	0	0	0	0	0	0	0	603	903	0
706	3	0	0	0	0	0	0	200	300	0	0	0	0	0	0	0	200	903	0	0	0	0	0	0	0	603	903	0
706	4	0	0	0	0	0	0	200	300	0	0	0	0	0	0	0	200	903	0	0	0	0	0	0	0	603	903	0
706	5	0	0	0	0	0	0	200	300	0	0	0	0	0	0	0	200	903	0	0	0	0	0	0	0	603	903	0
706	6	0	0	0	0	0	0	200	300	0	0	0	0	0	0	0	200	903	0	0	0	0	0	0	0	603	903	0
706	7	0	0	0	0	0	0	200	300	0	0	0	0	0	0	0	200	903	0	0	0	0	0	0	0	603	903	0
706	8	0	0	0	0	0	0	200	300	0	0	0	0	0	0	0	200	903	0	0	0	0	0	0	0	603	903	0
706	9	0	0	0	0	0	0	200	300	0	0	0	0	0	0	0	200	903	0	0	0	0	0	0	0	603	903	0
707	0	0	0	0	0	0	0	200	300	0	0	0	0	0	0	0	200	903	0	0	0	0	0	0	0	603	903	0
707	1	0	0	0	0	0	0	200	300	0	0	0	0	0	0	0	200	903	0	0	0	0	0	0	0	603	903	0
707	2	0	0	0	0	0	0	200	300	0	0	0	0	0	0	0	200	903	0	0	0	0	0	0	0	603	903	0
707	3	0	0	0	0	0	0	200	300	0	0	0	0	0	0	0	200	903	0	0	0	0	0	0	0	603	903	0
707	4	0	0	0	0	0	0	200	300	0	0	0	0	0	0	0	200	903	0	0	0	0	0	0	0	603	903	0
707	5	0	0	0	0	0	0	200	300	0	0	0	0	0	0	0	200	903	0	0	0	0	0	0	0	603	903	0
707	6	0	0	0	0	0	0	200	300	0	0	0	0	0	0	0	200	903	0	0	0	0	0	0	0	603	903	0
707	7	0	0	0	0	0	0	200	300	0	0	0	0	0	0	0	200	903	0	0	0	0	0	0	0	603	903	0
707	8	0	0	0	0	0	0	200	300	0	0	0	0	0	0	0	200	903	0	0	0	0	0	0	0	603	903	0
707	9	0	0	0	0	0	0	200	300	0	0	0	0	0	0	0	200	903	0	0	0	0	0	0	0	603	903	0
708	0	0	0	0	0	0	0	200	300	0	0	0	0	0	0	0	200	903	0	0	0	0	0	0	0	603	903	0
708	1	0	0	0	0	0	0	200	300	0	0	0	0	0	0	0	200	903	0	0	0	0	0	0	0	603	903	0
708	2	0	0	0	0	0	0	200	300	0	0	0	0	0	0	0	200	903	0	0	0	0	0	0	0	603	903	0
708	3	0	0	0	0	0	0	200	300	0	0	0	0	0	0	0	200	903	0	0	0	0	0	0	0	603	903	0
708	4	0	0	0	0	0	0	200	300	0	0	0	0	0	0	0	200	903	0	0	0	0	0	0	0	603	903	0
708	5	0	0	0	0	0	0	200	300	0	0	0	0	0	0	0	200	903	0	0	0	0	0	0	0	603	903	0
708	6	0	0	0	0	0	0	200	300	0	0	0	0	0	0	0	200	903	0	0	0	0	0	0	0	603	903	0
708	7	0	0	0	0	0	0	200	300	0	0	0	0	0	0	0	200	903	0	0	0	0	0	0	0	603	903	0
708	8	0	0	0	0	0	0	200	300	0	0	0	0	0	0	0	200	903	0	0	0	0	0	0	0	603	903	0
708	9	0	0	0	0	0	0	200	300	0	0	0	0	0	0	0	200	903	0	0	0	0	0	0	0	603	903	0
709	0	0	0	0	0	0	0	200	300	0	0	0	0	0	0	0	200	903	0	0	0	0	0	0	0	603	903	0
709	1	0	0	0	0	0	0	200	300	0	0	0	0	0	0	0	200	903	0	0	0	0	0	0	0	603	903	0
709	2	0	0	0	0	0	0	200	300	0	0	0	0	0	0	0	200	903	0	0	0	0	0	0	0	603	903	0
709	3	0	0	0	0	0	0	200	300	0	0	0	0	0	0	0	200	903	0	0	0	0	0	0	0	603	903	0
709	4	0	0	0	0	0	0	200	300	0	0	0	0	0	0	0	200	903	0	0	0	0	0	0	0	603	903	0
709	5	0	0	0	0	0	0	200	300	0	0	0	0	0	0	0	200	903	0	0	0	0	0	0	0	603	903	0
709	6	0	0	0	0	0	0	200	300	0	0	0	0	0	0	0	200	903	0	0	0	0	0	0	0	603	903	0
709	7	0	0	0	0	0	0	200	300	0	0	0	0	0	0	0	200	903	0	0	0	0	0	0	0	603	903	0
709	8	0	0	0	0	0	0	200	300	0	0	0	0	0	0	0	200	903	0	0	0	0	0	0	0	603	903	0
709	9	0	0	0	0	0	0	200	300	0	0	0	0	0	0	0	200	903	0	0	0	0	0	0	0	603	903	0
710	0	0	0	0	0	0	0	200	300	0	0	0	0	0	0	0	200	903	0	0	0	0	0	0	0	603	903	0
710	1	0	0	0	0	0	0	200	300	0	0	0	0	0	0	0	200	903	0	0	0	0	0	0	0	603	903	0
710	2	0	0	0	0	0	0	200	300	0	0	0	0	0	0	0	200	903	0	0	0	0	0	0	0	603	903	0
710	3	0	0	0	0	0	0	200	300	0	0	0	0	0	0	0	200	903	0	0	0	0	0	0	0	603	903	0
710	4	0	0	0	0	0	0	200	300	0	0	0	0	0	0	0	200	903	0	0	0	0	0	0	0	603	903	0
710	5	0	0	0	0	0	0	200	300	0	0	0	0	0	0	0	200	903	0	0	0	0	0	0	0	603	903	0
710	6	0	0	0	0	0	0	200	300	0	0	0	0	0	0	0	200	903	0	0	0	0	0	0	0	603	903	0
710	7	0	0	0	0	0	0	200	300	0	0	0	0	0	0	0	200	903	0	0	0	0	0	0	0	603	903	0
710	8	0	0	0	0	0	0	200	300	0	0	0	0	0	0	0	200	903	0	0	0	0	0	0	0	603	903	0
710	9	0	0	0	0	0	0	200	300	0	0	0	0	0	0	0	200	903	0	0	0	0	0	0	0	603	903	0
711	0	0	0	0	0	0	0	200	300	0	0	0	0	0	0	0	200	903	0	0	0	0	0	0	0	603	903	0
711	1	0	0	0	0	0	0	200	300	0	0	0	0	0	0	0	200	903	0	0	0	0	0	0	0	603	903	0
711	2	0	0	0	0	0	0	200	300	0	0	0	0	0	0	0	200	903	0	0	0	0	0	0	0	603	903	0
711	3	0	0	0	0	0	0	200	300	0	0	0	0	0	0	0	200	903	0	0	0	0	0	0	0	603	903	0
711	4	0	0	0	0	0	0	200	300	0	0	0	0	0	0	0	200	903	0	0	0	0	0	0	0	603	903	0
711	5	0	0	0	0	0	0	200	300	0	0	0	0	0	0	0	200	903	0	0	0	0	0	0	0	603	903	0
711	6	0	0	0	0	0	0	200	300	0	0	0	0	0	0	0	200	903	0	0	0	0	0	0	0	603	903	0
711	7	0	0	0	0	0	0	200	300	0	0	0	0	0	0	0	200	903	0	0	0	0	0	0	0	603	903	0
711	8	0	0	0	0	0	0	200	300	0	0	0	0	0	0	0	200	903	0	0	0	0	0	0	0	603	903	0
711	9	0	0	0	0	0	0	200	300	0	0	0	0	0	0	0	200	903	0	0	0	0	0	0	0	603	903	0
712	0	0	0	0	0	0	0	200	300	0	0	0	0	0	0	0	200	903	0	0	0	0	0	0	0	603	903	0
712	1	0	0	0	0	0	0	200	300	0	0	0	0	0	0	0	200	903	0	0	0	0	0	0	0	603	903	0
712	2	0	0	0	0	0	0	200	300	0	0	0	0	0	0	0	200	903	0	0	0	0	0	0	0	603	903	0
712	3	0	0	0	0	0	0	200	300	0	0	0	0	0	0	0	200	903	0	0	0	0	0	0	0	603	903	0
712	4	0	0	0	0	0	0	200	300	0	0	0	0	0	0	0	200	903	0	0	0	0	0	0	0	603	903	0
712	5	0	0	0	0	0	0	200	300	0	0	0	0	0	0	0	200	903	0	0	0	0	0	0	0	603	903	0
712	6	0	0	0	0	0	0	200	300	0	0	0	0	0	0	0	200	903	0	0	0	0	0	0	0	603	903	0
712	7	0	0	0	0	0	0	200	300	0	0	0	0	0	0	0	200	903	0	0	0	0	0	0	0	603	903	0
712	8	0	0	0	0	0	0	200	300	0	0	0	0	0	0	0	200	903	0	0	0	0	0	0	0	603	903	0
712	9	0	0	0	0	0	0	200	300	0	0	0	0	0	0	0	200	903	0	0	0	0	0	0	0	603	903	0
713	0	0	0	0	0	0	0	200	300	0	0	0	0	0	0	0	200	903	0	0	0	0	0	0	0	603	903	0
713	1	0	0	0	0	0	0	200	300	0	0	0	0	0	0	0	200	903	0	0	0	0	0	0	0	603	903	0
713	2	0	0	0	0	0	0	200	300	0	0	0	0	0	0	0	200	903	0	0	0	0	0	0	0	603	903	0
713	3	0	0	0	0	0	0	200	300	0	0	0	0	0	0	0	200	903	0	0	0	0	0	0	0	603	903	0
713	4	0	0	0	0	0	0	200	300	0	0	0	0	0	0	0	200	903	0	0	0	0	0	0	0	603	903	0
713	5	0	0	0	0	0	0	200	300	0	0	0	0	0	0	0	200	903	0	0	0	0	0	0	0	603	903	0
713	6	0	0	0	0	0	0	200	300	0	0	0	0	0	0	0	200	903	0	0	0	0	0	0	0	603	903	0
713	7	0	0	0	0	0	0	200	300	0	0	0	0	0	0	0	200	903	0	0	0	0	0	0	0	603	903	0
713	8	0	0	0	0	0	0	200	300	0	0	0	0	0	0	0	200	903	0	0	0	0	0	0	0	603	903	0
713	9	0	0	0	0	0	0	200	300	0	0	0	0	0	0	0	200	903	0	0	0	0	0	0	0	603	903	0
714	0	0	0	0	0	0	0	200	300	0	0	0	0	0	0	0	200	903	0	0	0	0	0	0	0	603	903	0
714	1	0	0	0	0	0	0	200	300	0	0	0	0	0	0	0	200	903	0	0	0	0	0	0	0	603	903	0
714	2	0	0	0	0	0	0	200	300	0	0	0	0	0	0	0	200	903	0	0	0	0	0	0	0	603	903	0
714	3	0	0	0	0	0	0	200	300	0	0	0	0	0	0	0	200	903	0	0	0	0	0	0	0	603	903	0
714	4	0	0	0	0	0	0	200	300	0	0	0	0	0	0	0	200	903	0	0	0	0	0	0	0	603	903	0
714	5	0	0	0	0	0	0	200	300	0	0	0	0	0	0	0	200	903	0	0	0	0	0	0	0	603	903	0
714	6	0	0	0	0	0	0	200	300	0	0	0	0	0	0	0	200	903	0	0	0	0	0	0	0	603	903	0
714	7	0	0	0	0	0	0	200	300	0	0	0	0	0	0	0	200	903	0	0	0	0	0	0	0	603	903	0
714	8	0	0	0	0	0	0	200	300	0	0	0	0	0	0	0	200	903	0	0	0	0	0	0	0	603	903	0
714	9	0	0	0	0	0	0	200	300	0	0	0	0	0	0	0	200	903	0	0	0	0	0	0	0	603	903	0
715	0	0	0	0	0	0	0	200	300	0	0	0	0	0	0	0	200	903	0	0	0	0	0	0	0	603	903	0
715	1	0	0	0	0	0	0	200	300	0	0	0	0	0	0	0	200	903	0	0	0	0	0	0	0	603	903	0
715	2	0	0	0	0	0	0	200	300	0	0	0	0	0	0	0	200	903	0	0	0	0	0	0	0	603	903	0
715	3	0	0	0	0	0	0	200	300	0	0	0	0	0	0	0	200	903	0	0	0	0	0	0	0	603	903	0
715	4	0	0	0	0	0	0	200	300	0	0	0	0	0	0	0	200	903	0	0	0	0	0	0	0	603	903	0
715	5	0	0	0	0	0	0	200	300	0	0	0	0	0	0	0	200	903	0	0	0	0	0	0	0	603	903	0
715	6	0	0	0	0	0	0	200	300	0	0	0	0	0	0	0	200	903	0	0	0	0	0	0	0	603	903	0
715	7	0	0	0	0	0	0	200	300	0	0	0	0	0	0	0	200	903	0	0	0	0	0	0	0	603	903	0
715	8	0	0	0	0	0	0	200	300	0	0	0	0	0	0	0	200	903	0	0	0	0	0	0	0	603	903	0
715	9	0	0	0	0	0	0	200	300	0	0	0	0	0	0	0	200	903	0	0	0	0	0	0	0	603	903	0
716	0	0	0	0	0	0	0	200	300	0	0	0	0	0	0	0	200	903	0	0	0	0	0	0	0	603	903	0
716	1	0	0	0	0	0	0	200	300	0	0	0	0	0	0	0	200	903	0	0	0	0	0	0	0	603	903	0
716	2	0	0	0	0	0	0	200	300	0	0	0	0	0	0	0	200	903	0	0	0	0	0	0	0	603	903	0
716	3	0	0	0	0	0	0	200	300	0	0	0	0	0	0	0	200	903	0	0	0	0	0	0	0	603	903	0
716	4	0	0	0	0	0	0	200	300	0	0	0	0	0	0	0	200	903	0	0	0	0	0	0	0	603	903	0
716	5	0	0	0	0	0	0	200	300	0	0	0	0	0	0	0	200	903	0	0	0	0	0	0	0	603	903	0
716	6	0	0	0	0	0	0	200	300	0	0	0	0	0	0	0	200	903	0	0	0	0	0	0	0	603	903	0
716	7	0	0	0	0	0	0	200	300	0	0	0	0	0	0	0	200	903	0	0	0	0	0	0	0	603	903	0
716	8	0	0	0	0	0	0	200	300	0	0	0	0	0	0	0	200	903	0	0	0	0	0	0	0	603	903	0
716	9	0	0	0	0	0	0	200	300	0	0	0	0	0	0	0	200	903	0	0	0	0	0	0	0	603	903	0
717	0	0	0	0	0	0	0	200	300	0	0	0	0	0	0	0	200	903	0	0	0	0	0	0	0	603	903	0
717	1	0	0	0	0	0	0	200	300	0	0	0	0	0	0	0	200	903	0	0	0	0	0	0	0	603	903	0
717	2	0	0	0	0	0	0	200	300	0	0	0	0	0	0	0	200	903	0	0	0	0	0	0	0	603	903	0
717	3	0	0	0	0	0	0	200	300	0	0	0	0	0	0	0	200	903	0	0	0	0	0	0	0	603	903	0
717	4	0	0	0	0	0	0	200	300	0	0	0	0	0	0	0	200	903	0	0	0	0	0	0	0	603	903	0
717	5	0	0	0	0	0	0	200	300	0	0	0	0	0	0	0	200	903	0	0	0	0	0	0	0	603	903	0
717	6	0	0	0	0	0	0	200	300	0	0	0	0	0	0	0	200	903	0	0	0	0	0	0	0	603	903	0
717	7	0	0	0	0	0	0	200	300	0	0	0	0	0	0	0	200	903	0	0	0	0	0	0	0	603	903	0
717	8	0	0	0	0	0	0	200	300	0	0	0	0	0	0	0	200	903	0	0	0	0	0	0	0	603	903	0
717	9	0	0	0	0	0	0	200	300	0	0	0	0	0	0	0	200	903	0	0	0	0	0	0	0	603	903	0
718	0	0	0	0	0	0	0	200	300	0	0	0	0	0	0	0	200	903	0	0	0	0	0	0	0	603	903	0
718	1	0	0	0	0	0	0	200	300	0	0	0	0	0	0	0	200	903	0	0	0	0	0	0	0	603	903	0
718	2	0	0	0	0	0	0	200	300	0	0	0	0	0	0	0	200	903	0	0	0	0	0	0	0	603	903	0
718	3	0	0	0	0	0	0	200	300	0	0	0	0	0	0	0	200	903	0	0	0	0	0	0	0	603	903	0
718	4	0	0	0	0	0	0	200	300	0	0	0	0	0	0	0	200	903	0	0	0	0	0	0	0	603	903	0
718	5	0	0	0	0	0	0	200	300	0	0	0	0	0	0	0	200	903	0	0	0	0	0	0	0	603	903	0
718	6	0	0	0	0	0	0	200	300	0	0	0	0	0	0	0	200	903	0	0	0	0	0	0	0	603	903	0
718	7	0	0	0	0	0	0	200	300	0	0	0	0	0	0	0	200	903	0	0	0	0	0	0	0	603	903	0
718	8	0	0	0	0	0	0	200	300	0	0	0	0	0	0	0	200	903	0	0	0	0	0	0	0	603	903	0
718	9	0	0	0	0	0	0	200	300	0	0	0	0	0	0	0	200	903	0	0	0	0	0	0	0	603	903	0
719	0	0	0	0	0	0	0	200	300	0	0	0	0	0	0	0	200	903	0	0	0	0	0	0	0	603	903	0
719	1	0	0	0	0	0	0	200	300	0	0	0	0	0	0	0	200	903	0	0	0	0	0	0	0	603	903	0
719	2	0	0	0	0	0	0	200	300	0	0	0	0	0	0	0	200	903	0	0	0	0	0	0	0	603	903	0
719	3	0	0	0	0	0	0	200	300	0	0	0	0	0	0	0	200	903	0	0	0	0	0	0	0	603	903	0
719	4	0	0	0	0	0	0	200	300	0	0	0	0	0	0	0	200	903	0	0	0	0	0	0	0	603	903	0
719	5	0	0	0	0	0	0	200	300	0	0	0	0	0	0	0	200	903	0	0	0	0	0	0	0	603	903	0
719	6	0	0	0	0	0	0	200	300	0	0	0	0	0	0	0	200	903	0	0	0	0	0	0	0	603	903	0
719	7	0	0	0	0	0	0	200	300	0	0	0	0	0	0	0	200	903	0	0	0	0	0	0	0	603	903	0
719	8	0	0	0	0	0	0	200	300	0	0	0	0	0	0	0	200	903	0	0	0	0	0	0	0	603	903	0
719	9	0	0	0	0	0	0	200	300	0	0	0	0	0	0	0	200	903	0	0	0	0	0	0	0	603	903	0
720	0	0	0	0	0	0	0	200	300	0	0	0	0	0	0	0	200	903	0	0	0	0	0	0	0	603	903	0
720	1	0	0	0	0	0	0	200	300	0	0	0	0	0	0	0	200	903	0	0	0	0	0	0	0	603	903	0
720	2	0	0	0	0	0	0	200	300	0	0	0	0	0	0	0	200	903	0	0	0	0	0	0	0	603	903	0
720	3	0	0	0	0	0	0	200	300	0	0	0	0	0	0	0	200	903	0	0	0	0	0	0	0	603	903	0
720	4	0	0	0	0	0	0	200	300	0	0	0	0	0	0	0	200	903	0	0	0	0	0	0	0	603	903	0
720	5	0	0	0	0	0	0	200	300	0	0	0	0	0	0	0	200	903	0	0	0	0	0	0	0	603	903	0
720	6	0	0	0	0	0	0	200	300	0	0	0	0	0	0	0	200	903	0	0	0	0	0	0	0	603	903	0
720	7	0	0	0	0	0	0	200	300	0	0	0	0	0	0	0	200	903	0	0	0	0	0	0	0	603	903	0
720	8	0	0	0	0	0	0	200	300	0	0	0	0	0	0	0	200	903	0	0	0	0	0	0	0	603	903	0
720	9	0	0	0	0	0	0	200	300	0	0	0	0	0	0	0	200	903	0	0	0	0	0	0	0	603	903	0
721	0	0	0	0	0	0	0	200	300	0	0	0	0	0	0	0	200	903	0	0	0	0	0	0	0	603	903	0
721	1	0	0	0	0	0	0	200	300	0	0	0	0	0	0	0	200	903	0	0	0	0	0	0	0	603	903	0
721	2	0	0	0	0	0	0	200	300	0	0	0	0	0	0	0	200	903	0	0	0	0	0	0	0	603	903	0
721	3	0	0	0	0	0	0	200	300	0	0	0	0	0	0	0	200	903	0	0	0	0	0	0	0	603	903	0
721	4	0	0	0	0	0	0	200	300	0	0	0	0	0	0	0	200	903	0	0	0	0	0	0	0	603	903	0
721	5	0	0	0	0	0	0	200	300	0	0	0	0	0	0	0	200	903	0	0	0	0	0	0	0	603	903	0
721	6	0	0	0	0	0	0	200	300	0	0	0	0	0	0	0	200	903	0	0	0	0	0	0	0	603	903	0
721	7	0	0	0	0	0	0	200	300	0	0	0	0	0	0	0	200	903	0	0	0	0	0	0	0	603	903	0
721	8	0	0	0	0	0	0	200	300	0	0	0	0	0	0	0	200	903	0	0	0	0	0	0	0	603	903	0
721	9	0	0	0	0	0	0	200	300	0	0	0	0	0	0	0	200	903	0	0	0	0	0	0	0	603	903	0
722	0	0	0	0	0	0	0	200	300	0	0	0	0	0	0	0	200	903	0	0	0	0	0	0	0	603	903	0
722	1	0	0	0	0	0	0	200	300	0	0	0	0	0	0	0	200	903	0	0	0	0	0	0	0	603	903	0
722	2	0	0	0	0	0	0	200	300	0	0	0	0	0	0	0	200	903	0	0	0	0	0	0	0	603	903	0
722	3	0	0	0	0	0	0	200	300	0	0	0	0	0	0	0	200	903	0	0	0	0	0	0	0	603	903	0
722	4	0	0	0	0	0	0	200	300	0	0	0	0	0	0	0	200	903	0	0	0	0	0	0	0	603	903	0
722	5	0	0	0	0	0	0	200	300	0	0	0	0	0	0	0	200	903	0	0	0	0	0	0	0	603	903	0
722	6	0	0	0	0	0	0	200	300	0	0	0	0	0	0	0	200	903	0	0	0	0	0	0	0	603	903	0
722	7	0	0	0	0	0	0	200	300	0	0	0	0	0	0	0	200	903	0	0	0	0	0	0	0	603	903	0
722	8	0	0	0	0	0	0	200	300	0	0	0	0	0	0	0	200	903	0	0	0	0	0	0	0	603	903	0
722	9	0	0	0	0	0	0	200	300	0	0	0	0	0	0	0	200	903	0	0	0	0	0	0	0	603	903	0
723	0	0	0	0	0	0	0	200	300	0	0	0	0	0	0	0	200	903	0	0	0	0	0	0	0	603	903	0
723	1	0	0	0	0	0	0	200	300	0	0	0	0	0	0	0	200	903	0	0	0	0	0	0	0	603	903	0
723	2	0	0	0	0	0	0	200	300	0	0	0	0	0	0	0	200	903	0	0	0	0	0	0	0	603	903	0
723	3	0	0	0	0	0	0	200	300	0	0	0	0	0	0	0	200	903	0	0	0	0	0	0	0	603	903	0
723	4	0	0	0	0	0	0	200	300	0	0	0	0	0	0	0	200	903	0	0	0	0	0	0	0	603	903	0
723	5	0	0	0	0	0	0	200	300	0	0	0	0	0	0	0	200	903	0	0	0	0	0	0	0	603	903	0
723	6	0	0	0	0	0	0	200	300	0	0	0	0	0	0	0	200	903	0	0	0	0	0	0	0	603	903	0
723	7	0	0	0	0	0	0	200	300	0	0	0	0	0	0	0	200	903	0	0	0	0	0	0	0	603	903	0
723	8	0	0	0	0	0	0	200	300	0	0	0	0	0	0	0	200	903	0	0	0	0	0	0	0	603	903	0
723	9	0	0	0	0	0	0	200	300	0	0	0	0	0	0	0	200	903	0	0	0	0	0	0	0	603	903	0
724	0	0	0	0	0	0	0	200	300	0	0	0	0	0	0	0	200	903	0	0	0	0	0	0	0	603	903	0
724	1	0	0	0	0	0	0	200	300	0	0	0	0	0	0	0	200	903	0	0	0	0	0	0	0	603	903	0
724	2	0	0	0	0	0	0	200	300	0	0	0	0	0	0	0	200	903	0	0	0	0	0	0	0	603	903	0
724	3	0	0	0	0	0	0	200	300	0	0	0	0	0	0	0	200	903	0	0	0	0	0	0	0	603	903	0
724	4	0	0	0	0	0	0	200	300	0	0	0	0	0	0	0	200	903	0	0	0	0	0	0	0	603	903	0
724	5	0	0	0	0	0	0	200	300	0	0	0	0	0	0	0	200	903	0	0	0	0	0	0	0	603	903	0
724	6	0	0	0	0	0	0	200	300	0	0	0	0	0	0	0	200	903	0	0	0	0	0	0	0	603	903	0
724	7	0	0	0	0	0	0	200	300	0	0	0	0	0	0	0	200	903	0	0	0	0	0	0	0	603	903	0
724	8	0	0	0	0	0	0	200	300	0	0	0	0	0	0	0	200	903	0	0	0	0	0	0	0	603	903	0
724	9	0	0	0	0	0	0	200	300	0	0	0	0	0	0	0	200	903	0	0	0	0	0	0	0	603	903	0
725	0	0	0	0	0	0	0	200	300	0	0	0	0	0	0	0	200	903	0	0	0	0	0	0	0	603	903	0
725	1	0	0	0	0	0	0	200	300	0	0	0	0	0	0	0	200	903	0	0	0	0	0	0	0	603	903	0
725	2	0	0	0	0	0	0	200	300	0	0	0	0	0	0	0	200	903	0	0	0	0	0	0	0	603	903	0
725	3	0	0	0	0	0	0	200	300	0	0	0	0	0	0	0	200	903	0	0	0	0	0	0	0	603	903	0
725	4	0	0	0	0	0	0	200	300	0	0	0	0	0	0	0	200	903	0	0	0	0	0	0	0	603	903	0
725	5	0	0	0	0	0	0	200	300	0	0	0	0	0	0	0	200	903	0	0	0	0	0	0	0	603	903	0
725	6	0	0	0	0	0	0	200	300	0	0	0	0	0	0	0	200	903	0	0	0	0	0	0	0	603	903	0
725	7	0	0	0	0	0	0	200	300	0	0	0	0	0	0	0	200	903	0	0	0	0	0	0	0	603	903	0
725	8	0	0	0	0	0	0	200	300	0	0	0	0	0	0	0	200	903	0	0	0	0	0	0	0	603	903	0
725	9	0	0	0	0	0	0	200	300	0	0	0	0	0	0	0	200	903	0	0	0	0	0	0	0	603	903	0
726	0	0	0	0	0	0	0	200	300	0	0	0	0	0	0	0	200	903	0	0	0	0	0	0	0	603	903	0
726	1	0	0	0	0	0	0	200	300	0	0	0	0	0	0	0	200	903	0	0	0	0	0	0	0	603	903	0
726	2	0	0	0	0	0	0	200	300	0	0	0	0	0	0	0	200	903	0	0	0	0	0	0	0	603	903	0
726	3	0	0	0	0	0	0	200	300	0	0	0	0	0	0	0	200	903	0	0	0	0	0	0	0	603	903	0
726	4	0	0	0	0	0	0	200	300	0	0	0	0	0	0	0	200	903	0	0	0	0	0	0	0	603	903	0
726	5	0	0	0	0	0	0	200	300	0	0	0	0	0	0	0	200	903	0	0	0	0	0	0	0	603	903	0
726	6	0	0	0	0	0	0	200	300	0	0	0	0	0	0	0	200	903	0	0	0	0	0	0	0	603	903	0
726	7	0	0	0	0	0	0	200	300	0	0	0	0	0	0	0	200	903	0	0	0	0	0	0	0	603	903	0
726	8	0	0	0	0	0	0	200	300	0	0	0	0	0	0	0	200	903	0	0	0	0	0	0	0	603	903	0
726	9	0	0	0	0	0	0	200	300	0	0	0	0	0	0	0	200	903	0	0	0	0	0	0	0	603	903	0
727	0	0	0	0	0	0	0	200	300	0	0	0	0	0	0	0	200	903	0	0	0	0	0	0	0	603	903	0
727	1	0	0	0	0	0	0	200	300	0	0	0	0	0	0	0	200	903	0	0	0	0	0	0	0	603	903	0
727	2	0	0	0	0	0	0	200	300	0	0	0	0	0	0	0	200	903	0	0	0	0	0	0	0	603	903	0
727	3	0	0	0	0	0	0	200	300	0	0	0	0	0	0	0	200	903	0	0	0	0	0	0	0	603	903	0
727	4	0	0	0	0	0	0	200	300	0	0	0	0	0	0	0	200	903	0	0	0	0	0	0	0	603	903	0
727	5	0	0	0	0	0	0	200	300	0	0	0	0	0	0	0	200	903	0	0	0	0	0	0	0	603	903	0
[truncated: 2,914 more rows]
