# Supplementary material for: The Effects of an Extemporaneous Speech Dual-task on Older Adult Gait Control
Source: Research Square preprint supplement (doi:10.21203/rs.3.rs-7674245/v1), 2025-11-18
Supplement: Supplementary file 161 [file Over4ground3.xlsx]

## Sheet: Sheet1
Trajectories
		04:LFHD			04:RFHD			04:LBHD			04:RBHD			04:C7			04:T10			04:CLAV			04:STRN			04:RBAK			04:LSHO			04:LUPA			04:LELB			04:LFRM			04:LWRA			04:LWRB			04:LFIN
Frame	Sub Frame	X	Y	Z	X	Y	Z	X	Y	Z	X	Y	Z	X	Y	Z	X	Y	Z	X	Y	Z	X	Y	Z	X	Y	Z	X	Y	Z	X	Y	Z	X	Y	Z	X	Y	Z	X	Y	Z	X	Y	Z	X	Y	Z
		mm	mm	mm	mm	mm	mm	mm	mm	mm	mm	mm	mm	mm	mm	mm	mm	mm	mm	mm	mm	mm	mm	mm	mm	mm	mm	mm	mm	mm	mm	mm	mm	mm	mm	mm	mm	mm	mm	mm	mm	mm	mm	mm	mm	mm	mm	mm	mm
555	0	283.303	1980.84	1575.66	166.076	1980.03	1564.73	288.43	2146.51	1523.04	180.406	2141.48	1511.69	235.841	2117.21	1426.41	241.155	2197.42	1147.28	253.904	1996.2	1333.19	262.042	1932.5	1139.67	155.452	2201.5	1220.62	426.492	2064.68	1358.83	496.782	2129.06	1119.41	498.812	2143.06	1044.83	514.537	2075.08	881.181	465.076	2057.28	804.203	526.338	2096.53	794.039	501.486	2048.45	731.039
556	0	285.415	1970.57	1574.45	168.072	1969.93	1563.65	290.093	2136	1521.66	182.715	2131.25	1510.46	238.102	2106.85	1425.26	242.869	2186.58	1145.93	255.791	1985.78	1332.16	262.933	1921.64	1138.62	157.414	2191.07	1219.53	428.428	2053.82	1357.23	498.236	2117.85	1117.65	500.091	2132.1	1043.17	515.005	2064.66	879.136	465.423	2047.22	802.328	526.311	2086.06	791.811	501.463	2038.52	729.017
557	0	287.634	1960.23	1573.37	170.179	1959.61	1562.76	292.792	2125.8	1520.53	185.082	2121.12	1509.43	240.381	2096.52	1424.09	244.9	2175.39	1144.77	257.808	1975.03	1331.21	264.077	1910.98	1137.72	159.494	2180.49	1218.56	430.609	2042.98	1355.74	499.852	2106.47	1115.89	500.988	2120.7	1041.27	515.541	2053.74	877.233	465.745	2036.93	800.537	526.486	2075.74	789.91	501.411	2028.25	726.848
558	0	290.022	1949.77	1572.45	172.583	1949.46	1561.84	295.375	2115.54	1519.59	187.426	2110.76	1508.59	242.853	2086.1	1423.13	246.955	2164.05	1143.75	259.85	1964.48	1330.38	265.47	1899.92	1136.96	161.582	2169.71	1217.68	432.836	2032.11	1354.35	501.096	2094.75	1113.88	502.239	2109.36	1039.48	516.173	2042.79	875.317	466.117	2026.26	798.656	527.298	2064.71	787.995	501.798	2017.98	724.972
559	0	292.421	1939.38	1571.95	174.981	1939.32	1561.35	298.078	2105.11	1519.16	190.106	2100.68	1508.18	245.575	2075.7	1422.61	248.664	2152.21	1142.98	261.896	1953.76	1329.87	266.863	1888.73	1136.45	163.617	2159.02	1217.22	435.167	2021.16	1353.24	502.45	2083	1112.16	503.784	2097.85	1038.1	516.739	2031.67	873.553	466.614	2015.8	796.865	527.222	2053.86	785.815	502.139	2007.19	723.13
560	0	294.77	1928.98	1571.77	177.355	1928.98	1561.45	300.326	2094.49	1518.67	192.703	2090.14	1507.85	248.15	2065.05	1422.1	250.387	2140.31	1142.22	264.126	1943.06	1329.65	268.244	1877.41	1136.42	165.692	2148.08	1216.77	437.492	2010.32	1352.2	504.026	2071.22	1110.71	505.117	2086.13	1036.58	517.648	2020.18	872.117	467.036	2005.05	795.363	528.981	2042.41	784.958	502.276	1996.77	721.426
561	0	297.421	1918.66	1571.75	179.966	1918.74	1561.74	303.447	2084.22	1518.53	195.412	2079.91	1507.84	250.773	2054.66	1422	251.312	2127.78	1141.3	266.504	1932.25	1329.68	269.711	1865.91	1136.55	167.666	2137.26	1216.66	439.757	1999.4	1351.25	505.487	2059.31	1109.34	505.31	2074.01	1034.82	518.23	2008.69	870.51	467.604	1993.8	793.934	529.255	2031.21	783.294	502.717	1985.67	719.86
562	0	300.254	1908.26	1572.03	182.758	1908.37	1562.18	306.078	2073.63	1518.57	198.143	2069.44	1508.25	253.408	2043.99	1422.11	253.752	2116.98	1141.61	268.589	1921.35	1330.12	271.207	1854.12	1137.07	169.487	2126.33	1216.93	441.924	1988.46	1350.61	506.983	2047.27	1108.24	507.355	2061.62	1034	518.996	1996.91	869.289	468.047	1982.71	792.415	530.406	2019.19	782.216	502.831	1974.7	718.128
563	0	303.146	1897.85	1572.78	185.533	1898.15	1563.11	308.477	2063.13	1518.87	200.898	2059.11	1508.85	256.042	2033.59	1422.62	255.425	2105.53	1141.77	270.738	1910.55	1330.83	272.721	1842.35	1138.11	171.289	2115.58	1217.54	444.281	1977.52	1350.35	508.477	2035.09	1107.44	507.249	2049.08	1032.91	520.128	1984.93	868.487	469.127	1971.33	791.64	531.678	2007.32	781.607	503.964	1963.2	717.491
564	0	305.897	1887.45	1573.79	188.259	1887.73	1564.5	311.322	2052.75	1519.6	203.804	2048.69	1509.81	258.651	2022.98	1423.4	256.917	2094.19	1142.27	272.81	1899.57	1332.05	273.978	1830.54	1139.43	172.929	2104.47	1218.58	446.509	1966.77	1350.44	510.088	2022.8	1107.12	509.327	2036.51	1032.66	521.152	1972.53	868.028	469.958	1959.68	791.168	532.968	1995.49	781.165	504.486	1951.91	716.783
565	0	308.841	1877.1	1574.93	191.177	1877.42	1565.93	314.675	2042.37	1520.69	206.577	2038.34	1511.17	261.162	2012.51	1424.46	258.401	2083.3	1143.22	275.03	1888.86	1333.24	275.343	1819.09	1140.88	174.547	2093.27	1219.74	448.473	1955.96	1350.73	511.377	2010.16	1106.92	510.401	2023.83	1032.42	522.165	1960.18	867.811	470.817	1947.69	790.765	534.167	1983.02	781.095	505.561	1939.87	716.428
566	0	311.655	1866.74	1576.26	194.174	1867.19	1567.64	317.58	2031.87	1521.89	209.2	2027.88	1512.69	263.477	2001.96	1425.83	259.238	2071.85	1144.04	276.939	1878.18	1334.77	276.517	1807.72	1142.51	175.844	2081.94	1221.26	450.505	1945.24	1351.27	512.524	1997.73	1106.83	510.109	2010.89	1032.14	523.113	1947.49	867.971	472.008	1935.64	790.749	535.906	1970.36	781.406	506.637	1927.82	716.386
567	0	314.648	1856.34	1577.56	197.098	1856.81	1569.58	319.823	2021.42	1522.99	211.905	2017.59	1514.54	265.606	1991.66	1427.35	260.98	2061.4	1145.9	278.771	1867.6	1336.53	277.497	1796.47	1144.6	177.182	2070.93	1222.99	452.02	1934.25	1352.08	513.648	1985	1107.24	512.407	1997.91	1033.21	524.103	1934.71	868.564	473.191	1923.16	791.16	537.401	1957.44	782.27	507.943	1915.62	716.768
568	0	317.636	1846.08	1578.98	199.972	1846.62	1571.63	322.837	2011.21	1524.42	214.659	2007.38	1516.44	267.721	1981.48	1428.9	262.222	2050.54	1147.44	280.556	1857.23	1338.31	278.346	1785.76	1146.6	178.568	2060.12	1224.71	453.87	1923.78	1353.12	514.863	1972.22	1107.86	513.405	1985.18	1033.86	525.328	1921.51	869.722	474.639	1910.31	791.975	538.982	1944.32	783.276	509.365	1902.83	717.494
569	0	320.612	1835.92	1580.16	202.945	1836.47	1573.59	325.337	2000.95	1525.88	217.091	1997.29	1518.55	269.689	1971.42	1430.44	262.581	2038.89	1148.39	282.202	1846.91	1340.14	279.139	1775.05	1148.63	180.035	2049.48	1226.28	455.441	1913.36	1354.22	515.57	1959.51	1108.33	514.356	1972.23	1034.6	526.576	1908.16	870.772	476.252	1897.19	792.965	540.951	1930.76	784.382	511.133	1890.01	718.26
570	0	323.44	1825.75	1581.43	205.609	1826.34	1575.67	327.987	1990.89	1527.43	219.577	1987.33	1520.74	271.57	1961.52	1432.01	264.272	2028.89	1150.39	283.552	1836.74	1341.89	279.695	1764.71	1150.71	181.32	2039.05	1227.94	456.964	1903.1	1355.29	516.393	1947.06	1108.97	515.305	1959.39	1035.42	527.76	1894.74	871.841	477.645	1883.74	793.918	542.557	1917.14	785.522	512.851	1876.75	719.207
571	0	326.14	1815.89	1582.63	208.239	1816.2	1577.76	330.314	1980.95	1529.05	221.925	1977.43	1523.09	273.287	1951.77	1433.55	265.247	2018.19	1151.79	284.807	1826.7	1343.79	280.237	1754.45	1152.86	182.588	2028.88	1229.58	458.059	1893.02	1356.56	517.215	1934.61	1109.85	515.292	1946.69	1035.89	529.137	1881.1	873.317	479.132	1870.03	795.164	544.168	1902.96	787.068	514.612	1862.95	720.579
572	0	328.718	1805.87	1583.77	210.779	1806.33	1579.83	332.254	1971.09	1530.53	224.001	1967.59	1525.39	274.719	1942.08	1435.22	266.404	2008.2	1153.22	285.816	1816.78	1345.58	280.433	1744.26	1154.89	183.84	2019.07	1231.19	459.155	1882.78	1357.71	518.01	1922.15	1110.7	517.173	1934.06	1037.31	530.371	1867.42	874.73	480.725	1856.16	796.485	546.122	1888.72	788.679	516.563	1848.78	722.042
573	0	331.211	1795.99	1584.86	213.174	1796.38	1581.83	334.306	1961.24	1532.11	226.008	1957.8	1527.77	276.153	1932.49	1436.71	267.673	1998.1	1154.66	286.68	1806.93	1347.23	280.742	1734.37	1156.7	185.227	2009.5	1232.79	460.066	1872.66	1358.69	518.97	1909.93	1111.53	517.812	1921.14	1038.05	531.662	1853.49	876.24	482.279	1842.01	797.788	547.9	1874.25	790.124	518.352	1834.47	723.281
574	0	333.354	1786.26	1586.08	215.525	1786.51	1583.8	336.307	1951.72	1533.69	227.786	1948.25	1530.07	277.486	1922.91	1438.28	268.915	1988.44	1156.15	287.446	1797.16	1349.03	280.853	1724.54	1158.44	186.299	1999.81	1234.39	461.059	1862.51	1360.08	520.064	1898.04	1112.62	518.267	1908.61	1038.83	533.053	1839.67	877.923	483.903	1827.78	799.393	549.722	1859.76	791.749	520.18	1819.75	724.88
575	0	335.73	1776.52	1587.43	217.444	1776.91	1585.91	337.975	1941.88	1535.15	229.479	1938.53	1532.14	278.605	1913.35	1439.87	270.316	1979.05	1157.85	287.99	1787.43	1350.67	280.706	1714.73	1160.28	187.6	1990.47	1235.98	461.883	1852.45	1361.33	520.89	1886.18	1113.75	519.306	1896.04	1039.71	534.441	1825.76	879.656	485.82	1812.95	801.495	551.396	1845.11	793.517	522.047	1804.15	727.047
576	0	337.588	1767.03	1588.79	219.435	1767.19	1587.88	339.528	1932.35	1536.63	230.758	1928.88	1534.23	279.553	1903.7	1441.48	271.266	1969.33	1159.41	288.599	1777.85	1352.23	280.543	1705.22	1161.75	188.842	1981.1	1237.54	462.715	1842.42	1362.59	522.143	1874.38	1115.14	520.563	1883.52	1040.94	535.543	1811.69	881.439	486.922	1798.68	803.07	552.814	1830.24	795.198	523.831	1789.21	728.968
577	0	339.217	1757.44	1589.91	221.231	1757.54	1589.7	340.939	1922.75	1537.98	232.087	1919.21	1536.14	280.521	1894.24	1443.05	272.622	1960.42	1160.99	288.917	1768.24	1353.76	280.389	1695.68	1163.18	190.03	1971.78	1239.16	463.2	1832.15	1363.83	523.098	1862.68	1116.2	521.698	1870.99	1042.14	536.889	1797.57	883.329	488.358	1784.11	804.954	554.195	1815.21	796.777	525.177	1773.41	730.992
578	0	340.674	1747.72	1591.21	222.66	1747.88	1591.67	342.017	1913.24	1539.07	233.337	1909.74	1537.74	281.185	1884.62	1444.49	273.793	1951.29	1162.43	289.112	1758.72	1355.2	280.076	1686.23	1164.55	191.48	1962.81	1240.72	463.578	1822.23	1364.99	524.174	1851.27	1117.52	523.917	1857.99	1043.89	538.089	1783.59	885.292	489.358	1769.63	806.776	554.732	1800.43	798.16	526.844	1757.72	733.359
579	0	342.031	1738.29	1592.61	224.059	1738.46	1593.55	343.025	1903.8	1540.21	234.086	1900.03	1539.4	281.935	1875.01	1446.05	275.012	1942.54	1163.99	289.495	1749.33	1356.58	279.808	1677.09	1165.83	192.722	1953.73	1242.23	464.165	1812.16	1366.41	525.165	1839.78	1118.99	525.019	1846.22	1044.99	539.242	1769.42	887.44	490.528	1754.86	809.091	556.779	1785.36	800.646	528.393	1741.7	736.147
580	0	343.18	1728.94	1593.92	225.242	1728.84	1595.4	343.76	1894.34	1541.23	235.012	1890.49	1540.71	282.829	1865.56	1447.53	276.55	1933.81	1165.61	289.737	1739.94	1357.97	279.681	1667.85	1167.01	194.102	1944.72	1243.76	464.664	1802.13	1367.83	526.363	1828.43	1120.64	526.112	1833.86	1046.31	540.502	1755.46	889.816	491.76	1740.05	811.572	558.123	1770.17	802.829	529.874	1725.37	739.087
581	0	344.32	1719.59	1595.37	226.167	1719.03	1597.17	344.166	1884.81	1542.24	235.734	1881.04	1542.14	283.547	1855.99	1448.99	277.858	1925.28	1167.16	290.036	1730.48	1359.43	279.859	1658.74	1168.31	195.5	1935.68	1245.21	465.091	1792.02	1369.23	527.579	1817.08	1122.29	527.756	1821.83	1048.04	541.657	1741.31	892.241	492.957	1725.2	814.119	559.381	1754.96	805.049	531.099	1709.19	742.284
582	0	344.987	1710.34	1596.65	227.018	1709.71	1598.74	344.705	1875.46	1543.4	236.211	1871.44	1543.51	284.347	1846.49	1450.41	279.496	1916.56	1168.77	290.376	1721.17	1360.65	279.87	1649.75	1169.55	196.982	1926.75	1246.57	465.525	1781.93	1370.71	528.709	1806.07	1123.98	529.068	1809.91	1049.68	542.589	1727.47	894.751	494.005	1710.21	817.111	560.416	1739.88	807.403	532.184	1692.74	745.55
583	0	345.694	1700.88	1597.85	227.532	1700.23	1600.11	345.048	1866	1544.4	236.663	1861.94	1544.67	285.118	1837.12	1451.67	280.917	1907.44	1170.12	290.598	1711.88	1361.87	280.119	1640.79	1170.68	198.495	1917.97	1247.87	465.802	1772.1	1372.18	529.664	1794.99	1125.54	530.746	1798.01	1051.41	543.625	1713.39	897.489	495.017	1695.5	820.04	561.321	1724.97	809.829	533.135	1676.34	748.996
584	0	346.17	1691.57	1598.96	228.167	1690.92	1601.25	345.663	1856.7	1545.48	236.859	1852.49	1545.84	285.668	1827.66	1452.94	282.028	1898.26	1171.39	290.918	1702.5	1362.95	280.655	1631.91	1171.74	199.737	1909.04	1249.22	466.585	1761.84	1373.89	530.866	1783.88	1127.32	532.104	1786.2	1052.99	544.656	1699.61	900.153	495.862	1680.35	823.13	562.075	1709.81	812.321	534.122	1660.06	752.524
585	0	346.478	1682.15	1600	228.38	1681.48	1602.29	345.846	1847.48	1546.49	237.185	1843.06	1546.96	286.432	1818.36	1454.11	283.467	1889.15	1172.58	291.398	1693.21	1363.99	281.068	1623.01	1172.68	201.093	1900.38	1250.43	467.079	1752.02	1375.41	532.238	1772.9	1129.21	533.681	1774.68	1054.7	545.73	1685.71	903.018	496.778	1665.23	826.308	563.087	1694.77	815.005	534.974	1643.51	756.209
586	0	346.8	1672.9	1600.85	228.579	1672.15	1603.16	346.007	1838.01	1547.36	237.442	1833.81	1547.86	287.01	1809.04	1454.95	284.51	1879.87	1173.42	291.814	1684.06	1364.85	281.544	1614.24	1173.62	202.476	1891.5	1251.22	467.615	1742.06	1376.78	533.627	1761.98	1130.9	535.261	1763.11	1056.33	546.842	1671.99	905.631	497.756	1650.19	829.63	563.654	1679.75	817.349	535.747	1627.53	759.714
587	0	346.854	1663.61	1601.47	228.865	1662.93	1603.71	346.251	1828.75	1548.08	237.573	1824.52	1548.56	287.631	1799.73	1455.59	285.758	1870.51	1173.87	292.161	1674.84	1365.48	282.283	1605.39	1174.39	203.737	1882.8	1251.91	468.109	1732.36	1378.04	534.785	1751.26	1132.23	536.864	1751.64	1057.68	547.853	1658.34	908.218	498.666	1635.12	832.898	564.421	1664.74	819.696	536.402	1611.45	763.181
588	0	346.891	1654.16	1601.87	228.871	1653.59	1604.08	346.372	1819.53	1548.68	237.719	1815.29	1549.03	288.174	1790.6	1456.15	286.777	1861.19	1174.34	292.496	1665.53	1365.93	282.946	1596.58	1174.8	205.106	1874.4	1252.36	468.6	1722.54	1378.96	536.027	1740.58	1133.51	537.104	1740.37	1058.31	548.89	1644.61	910.69	499.356	1620.04	835.82	564.887	1649.59	821.908	536.908	1595.27	766.423
589	0	346.912	1644.83	1602.23	228.749	1644.25	1604.22	346.412	1810.2	1549.32	237.789	1806.14	1549.35	288.612	1781.31	1456.46	287.905	1852.01	1174.68	292.743	1656.36	1366.27	283.681	1587.67	1175.02	206.258	1865.75	1252.69	469.097	1713.02	1379.86	537.262	1729.81	1134.75	539.766	1728.98	1059.99	549.746	1631.02	912.92	500.141	1604.69	839.084	565.371	1634.81	824.128	537.357	1579.35	769.705
590	0	346.745	1635.53	1602.39	228.691	1635	1604.35	346.273	1800.94	1549.59	237.806	1796.8	1549.46	288.994	1772.13	1456.57	288.829	1842.61	1174.7	293.088	1647.15	1366.38	284.38	1578.74	1175.25	207.409	1857.23	1252.71	469.358	1703.38	1380.5	538.688	1719.11	1135.74	540.564	1717.72	1060.54	550.903	1617.61	915.206	500.732	1590.1	841.823	566.066	1619.9	826.25	537.732	1563.44	772.828
591	0	346.63	1626.17	1602.34	228.487	1625.54	1604.23	346.32	1791.61	1549.63	237.678	1787.58	1549.46	289.32	1762.76	1456.59	289.907	1833.25	1174.62	293.481	1637.88	1366.32	285.087	1569.63	1175.02	208.68	1848.82	1252.62	469.714	1693.66	1380.75	540.113	1708.46	1136.48	542.766	1706.56	1061.4	552.003	1604.31	917.151	501.435	1575.12	844.705	566.347	1605.17	827.96	538.159	1547.63	775.684
592	0	346.56	1616.81	1602.33	228.417	1616.3	1603.87	345.839	1781.99	1549.49	237.505	1778.15	1549.26	289.75	1753.55	1456.44	291.023	1823.76	1174.65	293.612	1628.63	1366.11	285.843	1560.56	1174.75	209.801	1840.24	1252.64	470.13	1684.26	1381.02	541.276	1697.86	1136.96	544.159	1695.37	1061.75	552.764	1590.87	918.929	502.112	1560.31	847.437	566.73	1590.41	829.762	538.366	1531.95	778.64
593	0	346.188	1607.38	1602.06	228.186	1606.8	1603.44	345.938	1772.7	1549.33	237.409	1768.69	1548.92	289.979	1744.13	1456.05	291.751	1814.14	1174.38	294.049	1619.44	1365.76	286.401	1551.57	1174.12	210.658	1831.62	1252.43	470.452	1674.59	1381.15	542.685	1687.09	1137.65	545.399	1684.55	1062.09	553.612	1577.74	920.625	502.645	1545.64	850.04	566.88	1575.88	831.476	538.546	1516.48	781.457
594	0	345.907	1598.06	1601.57	227.774	1597.31	1602.77	345.386	1763.27	1548.92	237.048	1759.35	1548.36	290.13	1734.66	1455.56	292.368	1805.47	1173.94	294.194	1610.15	1365.13	287.036	1542.4	1173.37	211.494	1822.81	1251.83	470.642	1665.17	1380.84	543.709	1676.5	1137.67	546.857	1673.54	1062.01	554.312	1564.55	922.14	502.995	1530.99	852.546	566.706	1561.35	832.784	538.579	1501.01	783.98
595	0	345.574	1588.64	1600.86	227.62	1588.13	1601.78	345.093	1753.94	1548.33	236.691	1749.87	1547.61	290.381	1725.26	1454.87	292.776	1796.65	1173.26	294.303	1600.73	1364.19	287.682	1533.46	1172.27	211.969	1813.51	1250.99	470.941	1655.66	1380.32	544.825	1665.76	1137.53	548.144	1662.47	1061.88	555.014	1551.2	923.542	503.425	1516.62	854.792	566.043	1547.2	833.754	538.606	1485.65	786.441
596	0	345.147	1579.21	1600.13	227.16	1578.36	1600.8	344.624	1744.38	1547.6	236.324	1740.3	1546.53	290.298	1715.71	1454.07	292.733	1787.62	1172.38	294.383	1591.36	1363.14	288.351	1524.27	1171.04	212.708	1804.39	1250.02	471.007	1646.04	1379.58	545.883	1655.27	1137.35	549.558	1651.43	1061.76	555.559	1538.29	924.724	503.557	1502.31	856.837	566.105	1532.82	834.998	538.498	1470.45	788.804
597	0	344.858	1569.66	1599.38	226.864	1568.9	1599.73	344.421	1734.89	1546.83	235.925	1730.67	1545.39	290.353	1706.11	1453.21	293.021	1778.7	1171.64	294.508	1582.06	1362.07	288.845	1515.22	1169.65	213.157	1795.04	1248.94	471.083	1636.69	1378.78	546.933	1644.66	1137	550.671	1640.57	1061.18	555.947	1525.52	925.744	503.828	1488.35	858.916	566.278	1518.62	836.137	538.411	1455.57	791.116
598	0	344.333	1560.12	1598.59	226.208	1559.07	1598.57	343.606	1725.24	1545.89	235.466	1721.07	1544.21	290.457	1696.6	1452.22	293.013	1769.36	1170.8	294.693	1572.5	1360.99	289.288	1505.9	1168.2	213.324	1785.56	1248	470.805	1627.17	1377.64	547.748	1634.19	1136.45	551.764	1629.67	1060.45	556.319	1512.94	926.569	503.778	1474.53	860.729	565.918	1504.77	836.857	538.057	1440.67	793.262
599	0	343.725	1550.39	1597.6	225.797	1549.48	1597.21	343.518	1715.56	1545.03	235.029	1711.34	1542.94	290.325	1686.78	1451.24	293.475	1760.36	1169.83	294.685	1563.1	1359.72	289.63	1496.84	1166.63	213.553	1776.14	1246.97	471.156	1617.63	1376.71	548.525	1623.85	1135.78	552.64	1618.84	1059.68	556.453	1500.28	927.227	503.79	1461.05	862.237	565.607	1490.99	837.522	537.755	1426.16	795.195
600	0	343.074	1540.64	1596.57	224.996	1539.68	1595.88	342.834	1705.83	1544.08	234.613	1701.64	1541.74	290.262	1677.13	1450.11	293.33	1751.04	1168.74	294.677	1553.6	1358.31	289.837	1487.44	1165.04	213.54	1766.51	1245.83	470.941	1608.32	1375.5	548.926	1613.51	1134.88	553.685	1607.98	1058.96	556.446	1487.81	927.698	503.445	1447.74	863.554	565.011	1477.44	837.972	537.171	1411.86	797.012
601	0	342.338	1530.89	1595.56	224.327	1529.75	1594.51	342.082	1696.04	1543.03	233.896	1691.85	1540.38	290.03	1667.48	1448.95	293.328	1741.88	1167.7	294.516	1544.13	1356.95	289.924	1478.08	1163.65	213.52	1757.09	1244.84	470.888	1598.81	1374.3	549.492	1603.58	1134.06	554.499	1597.29	1058.15	556.38	1475.62	928.112	503.239	1434.71	864.825	564.705	1464.12	838.587	536.578	1397.83	798.75
602	0	341.775	1520.91	1594.43	223.556	1519.72	1592.93	341.789	1686.06	1542.06	233.428	1681.87	1539.02	289.746	1657.59	1447.73	293.179	1732.65	1166.71	294.445	1534.37	1355.72	289.989	1468.53	1162.11	213.385	1747.7	1243.9	470.656	1589.2	1373.01	549.837	1593.41	1133.05	554.808	1586.69	1057.01	556.235	1463.56	928.361	502.929	1421.94	865.749	563.917	1451.31	838.749	536.12	1384.19	800.227
603	0	341.033	1510.76	1593.22	222.909	1509.79	1591.35	340.954	1676.12	1541.03	232.785	1671.99	1537.82	289.29	1647.69	1446.59	292.622	1723.27	1165.54	294.353	1524.78	1354.19	289.842	1459	1160.59	212.937	1738.06	1242.89	470.488	1579.74	1371.72	549.983	1583.5	1131.94	555.415	1576.08	1056.07	556.076	1451.76	928.423	502.487	1409.4	866.539	563.547	1438.37	838.867	535.496	1370.8	801.487
604	0	340.317	1500.65	1591.95	222.165	1499.7	1589.76	340.383	1666.05	1539.99	232.208	1662.13	1536.31	288.919	1637.8	1445.45	292.371	1714.06	1164.49	293.974	1515.09	1352.73	289.712	1449.44	1159.27	212.344	1728.3	1241.8	470.247	1570.19	1370.5	550.103	1573.63	1130.96	555.57	1565.72	1055.03	555.681	1440.1	928.457	502.097	1397.21	867.204	562.944	1425.9	839.094	534.831	1357.77	802.646
605	0	339.542	1490.55	1590.49	221.411	1489.56	1588.16	339.984	1655.96	1538.88	231.479	1651.86	1534.95	288.506	1627.86	1444.05	291.664	1704.4	1163.24	293.676	1505.16	1351.38	289.306	1439.84	1157.88	211.803	1718.42	1240.44	469.805	1560.61	1369.17	549.717	1563.84	1129.68	555.412	1555.36	1053.82	555.281	1428.77	928.252	501.453	1385.24	867.671	562.072	1413.82	838.884	534.217	1345.15	803.446
606	0	338.805	1480.35	1589.04	220.577	1479.24	1586.46	338.602	1645.85	1537.48	230.742	1641.77	1533.64	287.819	1617.99	1442.7	290.904	1694.69	1161.91	293.229	1495.31	1349.84	288.851	1430.2	1156.38	211.221	1708.47	1239.13	469.139	1550.96	1367.72	549.305	1554.18	1128.35	555.185	1545.13	1052.6	554.808	1417.6	927.929	500.86	1373.49	867.875	561.479	1401.99	838.698	533.492	1332.85	803.958
607	0	338.029	1469.98	1587.46	219.851	1468.9	1584.83	338.068	1635.65	1536.29	230.092	1631.68	1532.26	287.027	1607.93	1441.31	290.046	1684.77	1160.66	292.537	1485.37	1348.27	288.49	1420.37	1154.96	210.44	1698.14	1237.88	468.556	1541.27	1366.36	548.778	1544.51	1127.15	554.8	1535	1051.39	554.286	1406.7	927.469	500.212	1362.03	867.802	560.42	1390.47	838.142	532.744	1320.93	804.299
608	0	337.307	1459.79	1585.98	219.102	1458.51	1583.35	337.243	1625.38	1535.06	229.159	1621.32	1530.95	286.175	1597.83	1439.92	289.242	1674.87	1159.19	291.945	1475.31	1346.87	287.941	1410.63	1153.48	209.551	1687.96	1236.33	467.812	1531.61	1365	548.096	1534.82	1125.82	553.949	1525.15	1049.99	553.536	1396.08	926.878	499.411	1350.78	867.815	559.566	1379.38	837.706	532.101	1309.41	804.355
609	0	336.503	1449.3	1584.52	218.186	1448	1581.86	336.267	1615.04	1533.7	228.339	1611.05	1529.49	285.23	1587.64	1438.4	288.568	1664.86	1157.73	291.326	1465.12	1345.43	287.583	1400.55	1152.14	208.673	1677.76	1234.81	467.118	1521.87	1363.63	547.505	1525.54	1124.54	553.361	1515.21	1048.63	552.703	1385.56	926.005	498.697	1339.97	867.284	558.726	1368.64	836.933	531.412	1298.32	804.09
610	0	335.598	1438.87	1582.94	217.43	1437.47	1580.24	334.926	1604.64	1532.25	227.416	1600.46	1528.31	284.141	1577.4	1436.92	287.941	1654.57	1156.31	290.473	1455.05	1343.92	286.806	1390.51	1150.39	207.871	1667.43	1233.33	466.168	1511.94	1362.16	546.384	1516.18	1122.88	552.378	1505.44	1047.25	551.886	1375.33	924.866	497.756	1329.26	866.531	556.758	1358.23	835.432	530.544	1287.62	803.453
611	0	334.699	1428.39	1581.43	216.397	1426.8	1578.75	334.275	1594.16	1531.12	226.365	1590.11	1526.9	283.171	1566.93	1435.59	287.033	1644.35	1155.06	289.605	1444.69	1342.32	286.304	1380.09	1148.87	206.924	1657.38	1232.05	465.421	1501.84	1360.85	545.357	1506.78	1121.43	551.297	1495.53	1045.72	550.894	1365.39	923.605	496.704	1318.93	865.582	556.3	1347.99	834.567	529.635	1277.19	802.558
612	0	333.576	1417.76	1580.09	215.355	1416.12	1577.34	333.151	1583.67	1529.89	225.185	1579.29	1525.55	282.15	1556.59	1434.25	286.056	1633.89	1153.8	288.635	1434.24	1340.96	285.652	1369.86	1147.37	206.055	1647.06	1230.75	464.425	1491.71	1359.66	544.13	1497.22	1119.98	550.336	1486.13	1044.64	549.815	1355.63	922.248	495.618	1308.9	864.389	555.076	1338.3	833.317	528.624	1267.2	801.474
613	0	332.552	1407.11	1578.78	214.184	1405.44	1575.91	331.827	1573.03	1528.47	223.886	1568.71	1524.26	280.914	1545.9	1432.9	285.087	1623.37	1152.53	287.903	1423.81	1339.61	284.998	1359.21	1145.89	205.24	1636.69	1229.38	463.437	1481.21	1358.39	542.869	1487.81	1118.49	548.784	1476.34	1043.08	548.6	1346.08	920.633	494.564	1299.28	862.923	553.68	1328.9	831.677	527.535	1257.64	799.989
614	0	331.338	1396.42	1577.49	213.094	1394.67	1574.5	330.32	1562.27	1527.09	222.614	1557.84	1522.69	279.743	1535.11	1431.67	283.949	1612.66	1150.98	286.73	1413.15	1338.05	284.395	1348.62	1144.38	204.355	1626.35	1228.22	462.461	1470.62	1357.24	541.721	1478.43	1117.04	547.501	1466.85	1041.7	547.471	1336.8	918.84	493.384	1289.86	861.104	552.167	1319.82	829.619	526.541	1248.51	798.229
615	0	329.99	1385.65	1576.33	211.676	1383.88	1573.3	329.35	1551.5	1525.94	221.217	1546.94	1521.45	278.695	1524.29	1430.56	283.646	1602.69	1150.36	285.704	1402.68	1336.58	283.616	1338.04	1142.86	203.501	1615.83	1227.14	461.45	1459.84	1356.2	540.162	1468.86	1115.68	545.952	1457.33	1040.1	546.152	1327.71	917	492.139	1280.89	859.228	550.68	1311.09	827.646	525.313	1239.79	796.184
616	0	328.608	1374.79	1575.44	210.213	1372.99	1572.18	327.903	1540.54	1524.83	219.823	1536.06	1520.18	277.506	1513.36	1429.55	282.256	1591.86	1149.33	284.599	1391.87	1335.56	282.763	1327.22	1141.58	202.476	1605.25	1226.16	460.261	1448.82	1355.37	538.639	1459.29	1114.64	544.415	1447.72	1039.03	544.712	1318.84	915.119	490.744	1272.4	857.112	549.338	1302.78	825.799	524.011	1231.51	794.02
617	0	327.046	1363.92	1574.38	208.579	1362.06	1571.08	326.302	1529.58	1523.59	217.964	1524.79	1519.07	276.243	1502.35	1428.47	281.714	1581.6	1148.36	283.205	1380.79	1334.3	281.596	1316.58	1140.2	201.573	1594.51	1225.05	459.074	1437.73	1354.41	537.256	1449.66	1113.54	542.985	1438.23	1037.91	543.088	1310.12	912.897	489.185	1263.97	854.712	547.72	1294.85	823.502	522.552	1223.58	791.431
618	0	325.379	1353.04	1573.34	207.128	1351.07	1569.98	324.737	1518.56	1522.47	216.454	1513.87	1517.78	274.861	1491.33	1427.46	280.331	1569.9	1147.15	281.956	1369.89	1333.27	280.505	1305.56	1139.04	200.643	1583.46	1223.89	457.59	1426.48	1353.4	535.658	1439.82	1112.29	541.119	1428.81	1036.69	541.62	1301.52	910.683	487.736	1255.99	852.095	546.155	1287.08	821.087	521.102	1216.06	788.555
619	0	323.657	1341.86	1572.48	205.405	1340.04	1569.04	323.11	1507.57	1521.57	215.266	1502.91	1516.78	273.342	1480.36	1426.54	279.721	1558.82	1146.24	280.431	1358.71	1332.4	279.342	1294.54	1138.22	199.444	1572.25	1222.75	456.04	1415.19	1352.68	533.902	1429.67	1111.57	539.565	1419.35	1035.94	540.013	1293.25	908.479	486.129	1248.28	849.609	544.729	1279.89	818.853	519.644	1209.03	785.61
620	0	321.961	1330.8	1571.7	203.654	1328.98	1568.17	321.47	1496.56	1520.76	213.515	1492.07	1515.8	271.652	1469.27	1425.56	278.868	1547.58	1145.24	278.924	1347.86	1331.46	277.893	1283.21	1137.57	198.194	1560.9	1221.46	454.575	1404.07	1352.05	532.428	1419.59	1111.1	537.648	1409.75	1035.11	538.381	1285.52	906.271	484.801	1241.34	846.603	542.575	1272.85	816.346	517.991	1202.39	782.587
621	0	320.056	1319.89	1570.82	201.871	1317.91	1567.36	319.617	1485.56	1520.11	211.775	1480.87	1515.08	269.879	1458.27	1424.8	278.05	1535.58	1144.07	277.264	1336.53	1330.93	276.492	1271.67	1137.03	196.973	1549.48	1220.31	452.974	1392.76	1351.48	530.629	1409.34	1110.34	535.723	1400.25	1034.37	536.94	1277.62	904.075	483.109	1234.16	843.616	541.669	1266.02	814.037	516.395	1196.11	779.177
622	0	318.238	1308.72	1570.43	200.016	1306.75	1566.8	317.696	1474.39	1519.78	209.859	1469.94	1514.69	268.227	1447.18	1424.24	276.749	1523.39	1143.34	275.502	1325.32	1330.39	275.072	1259.96	1136.84	195.84	1537.89	1219.17	451.187	1381.58	1351.19	528.883	1398.71	1110.03	533.685	1390.77	1033.63	535.234	1269.93	901.777	481.513	1227.36	840.689	540.175	1259.49	811.594	514.789	1190.28	775.758
623	0	316.163	1297.74	1570.32	197.913	1295.61	1566.6	315.436	1463.28	1519.77	207.829	1458.6	1514.57	266.376	1436.21	1423.84	275.481	1511.87	1142.88	273.746	1313.95	1330.35	273.606	1247.92	1137	194.235	1526.28	1218.4	449.416	1370.32	1351.07	527.06	1388.17	1109.77	531.887	1381.24	1033.52	533.615	1262.45	899.74	479.9	1220.98	837.801	538.661	1253.4	809.495	513.059	1184.76	772.392
624	0	314.049	1286.73	1570.45	195.962	1284.49	1566.49	313.711	1452.26	1520.01	205.795	1447.54	1514.5	264.57	1425.19	1423.6	273.743	1499.61	1141.93	271.956	1302.67	1330.54	272.334	1235.77	1137.4	192.825	1514.63	1217.78	447.795	1359.18	1351.31	525.149	1377.48	1109.94	529.746	1371.74	1033.45	532.011	1255.2	897.857	478.234	1214.85	835.02	537.583	1247.39	807.56	511.539	1179.76	769.022
625	0	311.951	1275.61	1570.82	193.83	1273.26	1566.54	311.808	1441.29	1520.43	203.279	1436.5	1514.65	262.455	1413.99	1423.72	272.432	1488.31	1142.12	270.197	1291.31	1330.85	270.972	1223.37	1137.97	191.333	1503.01	1217.35	446.117	1347.96	1351.66	523.31	1366.55	1110.19	527.634	1362.13	1033.72	530.339	1248.04	896.109	476.876	1209.1	832.194	536.091	1241.97	805.644	510.005	1175.03	765.803
626	0	309.773	1264.68	1571.45	191.593	1262.2	1566.93	309.204	1430.19	1520.87	201.089	1425.29	1515.05	260.58	1402.83	1423.98	270.974	1476.4	1142.21	268.385	1279.96	1331.54	269.678	1211.06	1138.81	189.626	1491.26	1217.26	444.289	1336.69	1352.3	521.349	1355.62	1110.68	525.251	1352.63	1033.9	528.763	1241.2	894.645	475.232	1203.3	829.629	535.356	1236.49	804.094	508.721	1170.8	762.724
627	0	307.402	1253.64	1572.46	189.401	1251.11	1567.51	307.183	1419.17	1521.82	198.81	1414.1	1515.62	258.737	1391.8	1424.54	269.453	1465.28	1142.75	266.673	1268.69	1332.47	268.475	1198.66	1140.18	188.242	1479.56	1217.47	442.696	1325.51	1353.58	519.251	1344.74	1111.62	523.206	1343.22	1034.85	527.132	1234.4	893.6	474.054	1198.59	827.503	534.289	1231.53	803.054	507.481	1166.94	760.018
628	0	305.027	1242.68	1573.53	186.937	1240.02	1568.44	304.811	1408.3	1522.84	196.368	1403.2	1516.31	256.928	1380.74	1425.41	267.694	1453.49	1143.48	264.836	1257.36	1333.64	267.304	1186.31	1141.6	186.392	1467.86	1218.05	440.87	1314.21	1354.88	517.29	1333.73	1112.8	520.881	1333.64	1036.07	525.357	1227.94	892.672	472.524	1193.61	825.433	533.166	1226.76	802.182	506.199	1163.37	757.479
629	0	302.674	1232	1574.97	184.63	1229	1569.47	302.462	1397.38	1524.04	193.847	1391.94	1517.36	254.652	1369.52	1426.56	266.102	1442.13	1144.42	263.133	1246.13	1334.95	266.088	1174.26	1143.13	184.64	1456.17	1218.8	438.968	1303.18	1356.43	515.185	1322.78	1114.12	518.799	1324.02	1037.63	523.568	1221.54	892.087	471.104	1189.11	823.599	531.712	1222.3	801.542	505.051	1160.1	755.221
630	0	300.243	1221.18	1576.55	182.211	1218.08	1570.79	299.868	1386.58	1525.51	191.439	1380.98	1518.41	252.577	1358.67	1427.91	264.402	1430.96	1145.91	261.429	1235.09	1336.47	264.986	1162.52	1144.89	182.771	1444.71	1219.89	437.121	1292.32	1358.33	512.839	1311.94	1115.73	516.713	1314.44	1039.55	521.824	1215.13	891.991	469.506	1184.75	822.249	531.395	1217.75	801.793	503.94	1157.17	753.441
631	0	297.839	1210.41	1578.33	179.802	1207.22	1572.26	297.482	1375.86	1527.06	188.9	1370.37	1519.51	250.697	1347.9	1429.47	262.83	1420.17	1147.28	259.844	1224.15	1338.24	264.064	1151.22	1146.83	180.772	1433.19	1221.05	435.359	1281.55	1360.57	510.86	1301.27	1117.9	514.54	1304.93	1041.73	520.194	1208.86	892.426	468.236	1180.6	821.396	530.336	1213.4	802.195	502.9	1154.3	752.173
632	0	295.438	1199.77	1580.04	177.553	1196.51	1573.56	294.969	1365.29	1528.62	186.532	1359.47	1521.04	248.295	1336.98	1430.98	261.302	1408.92	1149	258.214	1213.22	1340.09	263.238	1140.33	1148.81	178.89	1421.87	1222.41	433.564	1270.97	1362.83	508.988	1290.81	1120.12	512.555	1295.61	1043.98	518.547	1202.48	893.082	466.951	1176.57	820.906	529.722	1208.81	802.978	501.983	1151.79	751.099
633	0	293.049	1189.34	1581.73	175.188	1185.81	1574.74	292.616	1354.77	1530.49	184.146	1348.84	1522.45	246.337	1326.45	1432.7	259.913	1397.75	1150.66	256.848	1202.48	1341.86	262.415	1129.81	1150.69	176.994	1410.54	1223.77	431.968	1260.58	1365.26	506.941	1280.67	1122.38	510.679	1286.52	1046.5	516.973	1196.17	894.196	465.755	1172.37	820.934	529.863	1203.9	804.518	500.89	1149.07	750.494
634	0	290.692	1178.93	1583.47	172.753	1175.32	1576.15	290.535	1344.43	1532.32	182.009	1338.3	1523.93	244.56	1316.06	1434.24	258.323	1387.08	1152.48	255.291	1191.84	1343.68	261.701	1119.58	1152.53	174.958	1399.17	1225.19	430.282	1250.37	1367.81	504.899	1270.84	1124.79	509.108	1277.77	1049.34	515.58	1189.73	895.69	464.558	1168.22	821.33	529.705	1198.79	806.387	499.72	1146.34	750.189
635	0	288.345	1168.59	1585.13	170.564	1164.88	1577.38	287.826	1334.2	1534.17	180.006	1328.15	1525.22	242.505	1305.59	1435.87	256.916	1375.92	1153.79	253.971	1181.41	1345.31	261.065	1109.69	1154.33	172.897	1387.96	1226.41	428.614	1240.39	1370.24	503.299	1261.4	1127.21	507.629	1269.3	1052.12	514.401	1183.3	897.271	463.896	1163.87	822.067	529.426	1193.47	808.235	498.733	1143.51	750.147
636	0	286.079	1158.43	1586.77	168.454	1154.61	1578.6	286.041	1324.06	1535.74	177.636	1317.87	1526.43	240.47	1295.37	1437.42	255.488	1365.01	1155.52	252.716	1171.11	1346.94	260.788	1099.93	1155.98	170.978	1376.81	1227.65	427.014	1230.71	1372.44	501.956	1252.39	1129.56	506.104	1261.26	1054.49	513.415	1176.9	898.914	463.292	1159.43	822.942	529.512	1187.79	810.235	497.771	1140.49	750.175
637	0	284.104	1148.31	1588.48	166.345	1144.4	1579.85	283.861	1313.92	1537.39	175.926	1307.6	1527.73	238.636	1285.13	1439.04	253.822	1354.36	1157.17	251.61	1160.98	1348.5	260.403	1090.2	1157.61	168.959	1365.76	1228.93	425.726	1221.28	1374.69	500.816	1243.82	1131.91	505.173	1253.36	1056.97	512.663	1170.25	900.739	462.605	1154.35	824.173	529.692	1181.91	812.433	496.986	1137.16	750.623
638	0	282.043	1138.31	1590.15	164.331	1134.3	1581.05	281.915	1303.94	1538.97	173.642	1297.46	1528.92	236.89	1275.06	1440.47	251.946	1344.03	1158.78	250.575	1151.05	1350.03	260.315	1080.78	1158.99	167.033	1354.92	1230.34	424.523	1212.14	1376.88	499.972	1235.65	1134.41	504.197	1245.59	1059.32	512.163	1163.8	902.602	462.15	1149.21	825.686	529.988	1175.97	814.682	496.483	1133.7	751.261
639	0	280.102	1128.38	1591.68	162.559	1124.22	1582.08	280.107	1293.92	1540.49	172.142	1287.37	1530.12	235.235	1265.12	1441.92	249.451	1333.22	1159.93	249.548	1141.21	1351.3	260.185	1071.26	1160.22	165.24	1344.4	1231.47	422.788	1203.27	1378.58	499.343	1227.87	1136.4	503.512	1238.24	1061.4	511.848	1157.25	904.254	461.908	1143.8	827.029	529.739	1170.07	816.419	496.15	1129.83	752.008
640	0	278.271	1118.55	1593.25	160.617	1114.3	1583.3	278.278	1284.08	1541.84	169.95	1277.3	1531.15	233.415	1255.2	1443.29	248.33	1324.07	1161.91	248.656	1131.45	1352.57	260.344	1061.88	1161.37	163.414	1334.17	1232.68	421.777	1194.42	1380.35	498.864	1220.26	1138.37	503.045	1230.9	1063.44	511.694	1150.69	905.855	461.934	1138.33	828.309	530.52	1163.79	818.592	495.925	1125.58	752.819
641	0	276.534	1108.76	1594.66	158.983	1104.3	1584.32	276.211	1274.25	1543.39	168.68	1267.3	1532.13	231.405	1245.26	1444.73	246.72	1314.86	1163.13	247.851	1121.91	1353.78	260.485	1052.58	1162.53	161.669	1324.39	1233.9	420.644	1185.96	1381.85	498.53	1213.01	1140.24	502.952	1223.93	1065.36	511.916	1144.54	907.35	462.122	1132.95	829.606	530.911	1157.75	820.472	495.968	1120.86	753.892
642	0	274.864	1099.11	1596.14	157.39	1094.36	1585.49	274.281	1264.52	1544.67	166.936	1257.64	1533.09	230.053	1235.61	1445.83	244.944	1305.68	1164.29	247.277	1112.46	1355.08	260.74	1043.28	1163.72	160.022	1314.81	1235.11	419.634	1177.58	1383.45	498.38	1206.15	1142.24	502.791	1217.2	1067.25	512.197	1138.24	909.037	462.352	1126.62	831.327	531.24	1151.65	822.326	496.355	1115.8	755.158
643	0	273.464	1089.47	1597.65	155.879	1084.58	1586.68	272.782	1254.85	1546.13	165.288	1247.65	1534.27	228.652	1226.02	1447.21	243.551	1297.01	1165.72	246.627	1103.15	1356.31	261.03	1034.12	1164.91	158.328	1305.28	1236.49	418.562	1169.16	1384.91	498.275	1199.43	1144.01	502.538	1210.43	1068.92	512.473	1131.97	910.653	463.038	1120.38	832.912	531.59	1145.73	823.972	496.939	1110.31	756.601
644	0	272.027	1079.76	1599.01	154.603	1074.74	1587.54	271.459	1245.26	1547.53	163.741	1237.86	1535.4	227.344	1216.45	1448.6	241.772	1287.81	1167.47	245.934	1093.75	1357.47	261.249	1024.93	1165.94	156.544	1295.82	1237.98	417.727	1160.68	1386.34	497.974	1193.05	1145.72	502.377	1203.93	1070.67	512.87	1125.7	912.22	463.622	1113.76	834.57	531.987	1139.8	825.515	497.699	1104.44	758.124
645	0	270.638	1070.21	1600.32	153.316	1064.98	1588.49	269.865	1235.78	1549.03	162.391	1228.16	1536.63	225.896	1206.82	1449.97	240.178	1278.87	1168.98	245.334	1084.6	1358.57	261.306	1015.99	1167.03	154.854	1286.59	1239.58	416.895	1152.31	1387.87	497.513	1186.77	1147.52	502.266	1197.52	1072.41	513.208	1119.72	913.772	464.557	1108.02	835.838	532.135	1134.11	827.132	498.511	1098.16	759.871
646	0	269.434	1060.62	1601.38	152.123	1055.28	1589.48	268.27	1226.2	1550.29	160.614	1218.49	1537.73	224.535	1197.33	1451.22	238.971	1270.02	1170.38	244.696	1075.41	1359.64	261.258	1007.09	1168.07	153.324	1277.13	1240.73	415.653	1143.87	1389.24	497.297	1180.67	1149.28	501.936	1191.27	1074.19	513.809	1113.8	915.381	464.891	1101.79	837.393	532.886	1128.41	828.827	499.49	1091.51	761.71
647	0	268.414	1051.13	1602.38	151.143	1045.49	1590.21	267.181	1216.88	1551.53	159.63	1208.82	1538.76	223.357	1188.01	1452.32	237.543	1261.13	1171.43	244.069	1066.28	1360.62	261.393	998.267	1169.14	151.681	1267.93	1242.09	415.005	1135.4	1390.52	496.931	1174.79	1151.01	501.782	1185.16	1075.98	514.486	1107.88	916.943	465.652	1095.1	839.042	533.294	1122.75	830.35	500.718	1084.56	763.671
648	0	267.415	1041.61	1603.15	150.097	1035.92	1590.88	265.835	1207.39	1552.64	158.576	1199.39	1539.67	222.133	1178.61	1453.37	236.3	1253.17	1172.75	243.427	1057.14	1361.48	261.256	989.496	1170.05	150.126	1258.63	1243.1	414.097	1126.96	1391.74	496.362	1168.79	1152.71	501.463	1178.93	1077.56	515.145	1102.04	918.499	466.486	1088.34	840.637	533.717	1117.15	831.85	501.968	1077.43	765.649
649	0	266.552	1032.15	1603.87	149.247	1026.2	1591.56	264.759	1197.98	1553.51	157.422	1189.88	1540.56	221.076	1169.41	1454.14	235.242	1244.02	1173.47	242.8	1048.13	1362.32	261.068	980.838	1171	148.819	1249.31	1243.96	413.09	1118.46	1392.74	495.855	1162.86	1154.34	501.159	1172.73	1079.24	515.868	1096.09	920.04	467.317	1081.76	842.169	533.972	1111.72	833.218	503.457	1070.11	767.744
650	0	265.747	1022.76	1604.36	148.387	1016.62	1592.09	263.899	1188.81	1554.3	156.296	1180.45	1541.23	219.978	1160.14	1454.74	234.209	1235.4	1174.35	242.251	1039.17	1362.95	260.717	972.233	1171.72	147.449	1239.89	1244.63	412.351	1110.01	1393.57	495.019	1156.83	1155.57	500.657	1166.6	1080.56	516.548	1090.1	921.451	468.267	1075.02	843.561	533.717	1106.44	834.167	504.875	1062.74	769.761
651	0	264.936	1013.22	1604.7	147.7	1007.02	1592.42	262.74	1179.27	1555.13	155.704	1170.98	1542.07	218.866	1151.13	1455.42	233.574	1226.63	1174.91	241.531	1030.1	1363.42	260.237	963.549	1172.26	146.329	1230.57	1245.19	411.556	1101.47	1394.28	494.273	1150.58	1156.83	500.42	1160.33	1081.9	517.16	1084.18	922.628	469.197	1068.08	844.784	534.282	1100.6	835.399	506.352	1055.29	771.565
652	0	264.279	1003.81	1605.02	146.933	997.486	1592.57	261.993	1170.04	1555.84	154.759	1161.68	1542.64	218.086	1141.84	1456.06	232.552	1217.46	1175.69	240.959	1021.12	1363.74	259.726	954.984	1172.69	145.197	1221.35	1245.88	410.886	1092.83	1394.92	493.504	1144.13	1157.86	500.016	1154.07	1083.18	517.481	1077.96	923.741	470.13	1060.69	846.018	534.346	1094.89	836.379	507.808	1047.75	773.311
653	0	263.712	994.357	1605.26	146.408	987.933	1592.67	261.055	1160.74	1556.45	153.635	1152.04	1543.16	217.234	1132.84	1456.41	232.004	1208.95	1175.97	240.501	1012.23	1364.04	259.132	946.415	1173.01	144.033	1212.04	1246.41	410.279	1084.27	1395.44	492.965	1137.67	1158.9	499.787	1147.71	1084.24	517.657	1072.14	924.468	471.183	1053.25	847.159	534.449	1089.19	837.247	509.239	1040.34	774.867
654	0	263.227	984.962	1605.34	145.918	978.399	1592.68	260.597	1151.4	1556.79	153.272	1142.67	1543.67	216.414	1123.61	1456.69	231.293	1199.97	1176.49	239.978	1003.21	1364.14	258.605	937.821	1173.07	142.932	1202.71	1246.78	409.873	1075.63	1395.78	492.104	1130.85	1159.47	499.113	1141.23	1084.73	518.237	1065.87	925.135	472.08	1045.78	848.022	534.487	1083.11	837.631	510.85	1032.98	776.073
655	0	262.923	975.526	1605.3	145.633	968.852	1592.51	259.983	1142	1557.13	152.592	1133.23	1543.94	215.985	1114.62	1456.92	230.644	1190.79	1176.75	239.562	994.209	1364.07	258.071	929.244	1172.98	142.142	1194.02	1246.87	409.324	1066.88	1395.88	491.652	1123.77	1160.04	498.778	1134.73	1085.27	518.544	1059.42	925.609	472.585	1038.98	848.344	533.999	1077.09	837.784	512.123	1025.53	777.122
656	0	262.549	966.214	1605.13	145.301	959.44	1592.29	259.288	1132.87	1557.39	151.754	1123.8	1544.13	215.052	1105.47	1456.83	229.989	1182.14	1176.92	239.124	985.269	1363.89	257.588	920.583	1172.7	141.702	1185.36	1247.08	408.936	1058.14	1395.88	491.408	1116.49	1160.55	498.511	1127.87	1085.73	518.948	1052.81	926.098	473.46	1031.05	849.183	533.75	1070.65	838.198	513.193	1018.21	777.954
657	0	262.269	956.816	1604.61	144.966	949.927	1591.94	258.943	1123.49	1557.13	151.202	1114.43	1543.91	214.629	1096.36	1456.47	229.739	1173.6	1176.72	238.746	976.37	1363.51	256.903	911.97	1172.28	141.292	1176.72	1246.94	408.332	1049.31	1395.44	491.003	1109.04	1160.57	498.458	1120.94	1086.11	519.253	1046.1	926.181	473.95	1023.46	849.341	534.281	1064.15	838.433	514.127	1010.76	778.37
658	0	262.048	947.473	1603.86	144.933	940.366	1591.36	258.547	1114.41	1556.73	151.299	1105.16	1543.63	214.162	1087.24	1456.14	229.508	1165.25	1176.4	238.356	967.37	1362.89	256.447	903.186	1171.63	140.937	1167.84	1246.53	407.888	1040.42	1394.76	490.615	1101.35	1160.24	498.105	1113.8	1085.94	519.519	1039.15	925.885	473.854	1016.2	848.832	534.026	1057.33	838.215	514.776	1003.39	778.36
659	0	262.13	938.158	1603.08	144.874	930.897	1590.75	257.916	1104.98	1556.22	150.94	1095.82	1543.11	213.628	1077.98	1455.57	229.273	1156.87	1175.9	238.063	958.377	1362.26	256.104	894.503	1170.8	140.598	1159.19	1246.15	406.909	1031.51	1393.72	490.31	1093.44	1159.91	497.699	1106.37	1085.56	519.619	1032.09	925.571	474.213	1008.57	848.602	533.726	1050.29	837.859	515.255	996.092	778.208
660	0	262.219	928.739	1602.33	144.928	921.371	1590.12	257.753	1095.8	1555.76	150.391	1086.38	1542.69	213.4	1068.86	1454.97	228.976	1148.52	1175.55	237.794	949.305	1361.56	255.704	885.695	1170.03	140.329	1150.49	1245.78	407.08	1022.46	1393.27	490.116	1085.44	1159.6	497.313	1098.79	1085.19	519.718	1024.76	925.19	474.384	1000.76	848.402	533.467	1043.3	837.414	515.292	988.991	777.711
661	0	262.314	919.412	1601.5	145.109	911.774	1589.35	257.311	1086.57	1555.14	150.253	1076.71	1542.31	213.165	1059.61	1454.43	228.848	1140.02	1175.21	237.555	940.248	1360.77	255.399	876.912	1169.18	140.099	1141.65	1245.43	406.883	1013.35	1392.46	489.913	1077.17	1159.06	496.956	1090.92	1084.56	519.6	1017.24	924.492	474.309	992.985	847.818	533.371	1036.07	836.734	515.283	981.688	777.006
662	0	262.438	909.898	1600.51	145.194	902.335	1588.45	257.217	1077.01	1554.48	150.089	1067.35	1541.81	212.967	1050.33	1453.73	228.628	1131.39	1174.79	237.452	931.193	1359.69	255.083	867.985	1168.04	139.966	1132.88	1245.01	406.852	1004.1	1391.63	489.673	1068.67	1158.35	497.018	1082.84	1083.95	519.428	1009.6	923.491	474.218	985.439	846.818	532.805	1028.53	835.627	515.028	974.267	775.906
663	0	262.66	900.416	1599.4	145.345	892.735	1587.45	257.474	1067.78	1553.85	150.123	1057.75	1541.15	213.168	1041.13	1452.95	228.623	1122.72	1174.1	237.212	922.02	1358.62	254.839	859.114	1166.79	139.901	1124.15	1244.37	406.371	994.834	1390.51	489.507	1060.11	1157.5	496.854	1074.56	1083.14	519.177	1001.75	922.457	473.854	977.737	845.643	532.742	1021.05	834.697	514.626	966.888	774.734
664	0	262.998	890.958	1598.28	145.774	883.166	1586.34	257.463	1058.21	1552.91	149.983	1048.3	1540.37	212.968	1031.74	1452.08	228.575	1113.97	1173.15	237.255	912.89	1357.52	254.636	850.077	1165.7	139.82	1115.28	1243.58	406.854	985.48	1389.7	489.387	1051.36	1156.62	496.721	1066.16	1082.27	518.781	993.749	921.268	473.564	970.119	844.572	532.4	1013.33	833.602	514.08	959.357	773.466
665	0	263.353	881.506	1596.97	146.135	873.467	1585.19	257.394	1048.78	1551.92	150.179	1038.72	1539.53	213.09	1022.27	1451	228.549	1104.82	1172.32	237.201	903.552	1356.28	254.6	840.961	1164.36	139.9	1106.36	1242.63	406.506	976.077	1388.28	489.33	1042.5	1155.48	496.644	1057.54	1081.19	518.659	985.906	919.804	473.002	962.386	843.037	531.928	1005.4	832.237	513.547	951.865	771.944
666	0	263.874	871.876	1595.51	146.521	863.916	1583.95	258.071	1039.38	1550.62	150.446	1029.19	1538.39	213.346	1013.08	1449.77	228.859	1095.66	1171.02	237.334	894.195	1354.96	254.63	831.707	1162.95	140.055	1097.26	1241.45	407.072	966.594	1386.98	489.213	1033.39	1154.02	496.273	1048.71	1079.67	518.132	977.542	918.243	472.496	954.425	841.418	531.294	997.132	830.549	512.672	944.156	770.056
667	0	264.433	862.332	1594	146.936	854.257	1582.6	257.79	1029.85	1549.25	150.724	1019.62	1537.14	213.701	1003.6	1448.39	229.063	1086.21	1169.77	237.492	884.783	1353.56	254.596	822.434	1161.59	140.415	1088.19	1240.16	407.275	956.986	1385.44	489.173	1024.36	1152.54	496.176	1039.84	1078.29	517.762	969.076	916.632	471.892	946.437	839.787	531.059	989.253	828.932	511.934	936.483	768.197
668	0	264.912	852.704	1592.34	147.525	844.622	1581.17	258.341	1020.27	1547.78	151.143	1010.06	1535.87	214.045	993.856	1446.82	229.126	1077.11	1168.31	237.706	875.314	1352.11	254.66	813.051	1160.08	140.804	1078.93	1238.84	407.69	947.343	1383.85	489.114	1015.06	1150.91	495.937	1030.74	1076.77	517.428	960.645	914.87	471.276	938.688	837.828	530.783	981.09	827.323	510.9	928.708	766.114
669	0	265.648	843.086	1590.67	148.211	834.871	1579.65	258.982	1010.81	1546.25	151.595	1000.37	1534.45	214.728	984.45	1445.34	229.684	1067.44	1166.72	238.104	865.716	1350.51	254.691	803.361	1158.57	141.243	1069.69	1237.32	408.114	937.626	1382.11	489.168	1005.66	1149.08	495.856	1021.62	1075.06	516.877	951.893	912.921	470.682	930.653	835.667	530.3	972.642	825.347	509.68	921.264	763.578
670	0	266.25	833.43	1588.92	148.945	825.145	1578.01	258.935	1001.05	1544.61	152.318	990.662	1532.87	215.365	974.817	1443.74	230.407	1057.84	1165.31	238.481	855.975	1348.84	254.929	793.663	1156.76	141.93	1060.29	1235.94	408.209	927.721	1380.07	489.23	996.083	1147.22	496.062	1012.38	1073.3	516.395	943.236	910.535	469.895	922.428	833.389	529.283	964.298	823.117	508.911	913.197	761.284
671	0	267.051	823.674	1587.27	149.643	815.422	1576.36	260.18	991.199	1543.06	152.964	980.9	1531.39	216.309	964.741	1441.91	230.966	1048.1	1163.64	239.018	846.204	1347.18	255.059	783.826	1155.2	142.53	1050.74	1234.48	409.231	917.639	1378.49	489.377	986.368	1145.36	495.563	1002.94	1071.19	515.923	934.396	908.338	469.294	914.046	831.287	528.887	955.674	821.058	507.985	905.167	758.853
672	0	267.925	813.914	1585.58	150.501	805.685	1574.84	260.892	981.433	1541.33	153.811	971.162	1529.79	217.121	955	1440.4	231.525	1038.63	1162.02	239.646	836.369	1345.43	255.308	773.833	1153.42	143.29	1041.17	1232.92	409.918	907.469	1376.58	489.676	976.657	1143.33	495.658	993.449	1069.13	515.612	925.369	905.989	468.748	905.625	828.986	528.515	946.934	818.797	506.966	897.247	756.112
673	0	268.878	804.006	1583.89	151.357	795.911	1573.12	262.003	971.755	1539.62	154.703	961.365	1528.19	218.158	945.201	1438.76	232.273	1028.94	1160.28	240.207	826.347	1343.62	255.518	763.659	1151.48	144.005	1031.35	1231.33	410.724	897.101	1374.53	489.768	966.769	1141.06	495.466	983.679	1066.8	515.196	916.3	903.383	468.034	896.999	826.339	528.395	938.014	816.323	505.947	888.881	753.301
674	0	269.755	793.968	1582.31	152.351	786.093	1571.57	263.168	961.697	1537.92	155.845	951.408	1526.52	218.976	935.087	1436.98	232.919	1018.96	1158.74	240.876	816.328	1341.84	255.748	753.434	1149.51	144.887	1021.6	1229.84	411.22	886.774	1372.29	490.032	956.786	1138.78	495.403	973.711	1064.54	514.878	907.053	900.766	467.404	888.377	823.595	528.177	929.053	813.926	505.028	880.436	750.507
675	0	270.957	784.072	1580.78	153.364	776.249	1570.26	264.133	951.489	1536.08	157.068	941.512	1524.86	220.001	924.887	1435.34	234.041	1008.93	1156.77	241.635	806.197	1340.17	255.97	742.994	1147.75	145.798	1011.54	1228.28	412.119	876.45	1370.28	490.363	946.729	1136.5	495.715	963.721	1062.4	514.488	897.626	898.178	466.72	879.425	821.043	527.726	919.958	811.383	504.262	871.909	747.786
676	0	272.089	774.02	1579.21	154.475	766.284	1568.96	265.726	941.579	1534.31	158.338	931.544	1523.15	221.329	914.733	1433.72	234.895	998.706	1155.17	242.458	795.973	1338.52	256.3	732.725	1145.79	146.9	1001.6	1226.64	413.255	866.21	1368.04	490.711	936.396	1134.09	495.595	953.401	1059.86	514.234	888.101	895.473	466.278	870.423	818.366	527.124	910.984	808.834	503.56	863.221	744.929
677	0	273.375	763.89	1577.71	155.847	756.295	1567.62	267.21	931.427	1532.52	159.844	921.556	1521.6	222.607	904.611	1432.04	235.694	988.504	1153.33	243.496	785.665	1336.93	256.682	722.225	1144.07	147.936	991.35	1225.11	414.416	855.569	1365.88	491.086	925.961	1131.58	495.741	942.834	1057.39	513.9	878.198	892.747	465.846	861.144	815.632	526.954	901.35	806.169	502.859	854.239	742.023
678	0	274.779	753.778	1576.38	157.188	746.325	1566.39	268.697	921.213	1530.95	161.343	911.369	1520.19	223.844	894.154	1430.59	236.87	977.68	1151.95	244.483	775.259	1335.57	257.025	711.717	1142.44	148.998	980.956	1223.77	415.59	844.979	1363.95	491.61	915.204	1129.33	495.555	932.078	1055.03	513.755	868.39	890.199	465.452	851.828	813.119	526.868	891.946	803.687	502.317	845.243	739.416
679	0	276.136	743.659	1575.2	158.618	736.281	1565.37	270.273	910.883	1529.5	162.913	901.263	1518.93	225.161	883.73	1429.31	237.583	966.91	1150.69	245.617	764.825	1334.28	257.499	701.096	1141.14	150.102	970.484	1222.54	416.887	834.39	1362.29	492.105	904.316	1127.26	496.066	921.266	1053.12	513.459	858.247	887.885	465.017	842.259	810.687	526.317	882.244	801.443	501.839	836.005	736.957
680	0	277.763	733.327	1574.04	160.23	726.179	1564.34	272.133	900.555	1528.25	164.578	891.149	1517.71	226.776	873.516	1428.2	238.098	955.998	1149.27	246.762	754.274	1333.02	258.081	690.348	1139.79	151.187	959.798	1221.47	418.191	823.801	1360.61	492.539	893.013	1125.09	496.122	910.079	1050.96	513.231	847.86	885.396	464.805	832.579	808.061	526.491	872.08	799.155	501.291	826.455	734.224
681	0	279.354	722.996	1572.95	161.826	715.993	1563.44	274.083	890.378	1527.03	166.367	880.821	1516.64	228.348	863.064	1427.1	239.092	944.848	1148.27	248.155	743.783	1331.91	258.919	679.568	1138.66	152.184	949.073	1220.51	419.638	813.2	1359.01	493.069	881.736	1122.95	496.262	898.96	1048.82	513.074	837.185	883.102	464.64	822.531	805.655	526.082	862.033	796.841	500.991	816.772	731.768
682	0	281.138	712.751	1572.04	163.406	705.816	1562.73	276.053	879.966	1526	168.262	870.774	1515.65	229.851	852.677	1426.1	239.749	933.589	1146.93	249.572	733.195	1331.07	259.78	668.458	1137.99	153.343	938.352	1219.51	421.133	802.526	1357.57	493.614	870.4	1120.94	496.374	887.519	1046.9	513.102	826.383	881.14	464.524	812.079	803.733	526.667	851.452	795.039	500.615	806.84	729.594
683	0	283.049	702.448	1571.32	165.19	695.686	1562.18	277.911	869.685	1525.17	170.247	860.464	1515.07	231.845	842.325	1425.25	240.362	922.095	1145.74	251.045	722.562	1330.48	260.883	657.288	1137.6	154.508	927.518	1218.67	422.853	791.908	1356.27	494.135	858.853	1118.96	496.717	876.144	1045	513.194	815.342	879.196	464.503	801.717	801.755	526.815	840.558	793.268	500.466	796.628	727.491
684	0	284.973	692.094	1570.95	167.06	685.543	1561.93	280.091	859.196	1524.78	172.395	850.306	1514.75	233.83	832.013	1424.58	241.422	910.538	1144.64	252.689	711.87	1330.08	261.882	645.823	1137.32	155.929	916.612	1218.02	424.507	781.213	1355.06	494.916	847.303	1117.05	496.996	864.377	1043.19	513.395	803.978	877.423	464.499	790.758	799.765	526.456	829.568	791.251	500.322	786.125	725.425
685	0	286.783	681.687	1570.77	168.899	675.419	1561.94	282.068	848.963	1524.69	174.427	840.083	1514.89	235.729	821.766	1424.27	242.211	898.873	1143.91	254.102	701.111	1330	262.894	634.149	1137.37	157.202	905.561	1217.57	426.23	770.365	1354.15	495.788	835.6	1115.41	497.452	852.561	1041.66	513.585	792.386	875.779	464.387	780.221	797.815	526.691	818.396	789.761	500.273	775.418	723.616
686	0	288.825	671.379	1570.88	170.856	665.261	1562.46	284.544	838.608	1524.72	176.624	829.939	1515.24	237.548	811.226	1424.15	243.405	887.228	1143.34	255.609	690.407	1330.34	263.81	622.304	1137.82	158.535	894.528	1217.25	427.436	759.59	1353.32	496.464	823.964	1114.13	497.49	840.272	1040.23	513.573	780.863	874.218	464.373	768.606	796.613	527.234	806.857	788.548	500.339	764.465	722.142
687	0	290.816	661.081	1571.3	173	655.11	1563.32	286.688	828.291	1524.97	178.74	819.787	1515.86	239.461	800.646	1424.33	244.285	875.547	1142.93	256.951	679.55	1330.96	264.666	610.378	1138.68	159.799	883.378	1217.41	429.158	748.596	1352.95	497.409	812.083	1113.2	496.908	827.76	1038.8	513.891	768.97	873.153	464.376	758.025	795.07	527.625	795.299	787.626	500.441	753.153	720.963
688	0	293.001	650.641	1572.05	175.068	644.99	1564.51	289.107	817.783	1525.42	181.038	809.602	1516.76	241.379	790.08	1424.69	245.303	864.042	1143.15	258.459	668.69	1331.92	265.419	598.559	1139.68	161.14	872.042	1217.84	430.848	737.568	1352.8	498.068	800.014	1112.49	497.16	815.085	1037.96	514.177	756.798	872.306	464.466	746.907	793.832	527.834	783.308	786.798	500.566	741.576	720.089
689	0	295.191	640.332	1573.28	177.144	634.919	1565.96	291.237	807.25	1526.3	183.274	799.353	1517.91	243.302	779.595	1425.79	246.483	852.839	1143.68	259.811	657.894	1333.12	265.965	586.705	1141.03	162.369	860.774	1218.86	432.241	726.422	1353.15	498.818	787.778	1112.26	498.134	802.365	1037.94	514.055	744.736	871.696	464.702	735.05	793.289	528.171	771.196	786.373	500.839	729.779	719.622
690	0	297.272	629.933	1574.75	179.128	624.848	1567.99	293.96	796.758	1527.29	185.607	789.137	1519.34	244.88	768.875	1426.9	247.485	841.368	1144.88	261.093	647.011	1334.69	266.244	575.029	1142.72	163.629	849.564	1220.1	433.758	715.22	1353.97	499.497	775.314	1112.31	498.487	789.35	1038.01	514.312	732.009	871.846	464.933	722.786	793.398	528.222	758.519	786.612	501.097	717.643	719.6
691	0	299.394	619.613	1576.24	181.255	614.829	1569.85	296.165	786.299	1528.21	187.915	778.786	1520.73	246.698	758.196	1428.41	248.408	829.769	1145.96	262.179	636.164	1336.27	266.542	563.718	1144.49	165.029	838.586	1221.68	435.145	704.051	1354.79	500.049	762.596	1112.52	498.815	776.16	1038.24	514.459	718.927	872.101	465.198	710.042	793.672	529.273	745.628	787.104	501.508	705.164	719.804
692	0	301.561	609.394	1577.75	183.411	604.832	1571.93	298.469	775.962	1529.35	190.322	768.671	1522.25	248.517	747.66	1429.82	249.464	818.072	1147.69	263.228	625.341	1337.93	266.663	552.587	1146.28	166.266	827.585	1223.38	436.355	692.716	1355.81	500.477	749.562	1112.87	499.139	762.971	1038.9	514.987	705.311	873.07	465.535	697.055	794.127	529.453	732.3	787.8	501.75	692.141	720.232
693	0	303.785	599.164	1579.36	185.575	594.773	1574.17	300.73	765.611	1530.46	192.671	758.48	1523.92	249.981	737.226	1431.36	250.4	806.721	1149.17	264.243	614.651	1339.72	266.535	541.924	1147.98	167.332	816.798	1225.16	437.485	681.576	1356.97	500.929	736.522	1113.6	499.762	749.748	1039.75	515.228	691.62	874.075	465.921	683.794	795.107	530.4	718.21	788.944	502.097	678.947	721.035
694	0	306.177	589.112	1580.99	187.789	584.797	1576.52	302.871	755.298	1531.6	194.932	748.409	1525.72	251.51	726.826	1433.09	251.493	795.901	1150.7	265.075	604.068	1341.66	266.412	531.355	1150.06	168.545	806.248	1226.78	438.53	670.248	1358.24	501.486	723.369	1114.37	500.228	736.443	1040.62	515.702	677.744	875.346	466.366	670.107	796.318	530.945	704.27	790.078	502.587	665.264	722.103
695	0	308.41	579.084	1582.38	190.022	574.852	1578.78	305.117	745.153	1532.78	197.001	738.413	1527.59	253.055	716.483	1434.66	252.531	785.354	1152.39	265.823	593.603	1343.43	266.106	520.88	1151.99	169.571	796.013	1228.72	439.525	659.099	1359.41	502.034	710.174	1115.19	500.733	723.06	1041.42	516.082	663.591	876.598	466.936	655.917	797.614	532.147	689.52	791.437	503.077	651.217	723.097
696	0	310.535	569.032	1583.69	192.139	564.918	1580.78	307.14	735.145	1533.98	198.933	728.528	1529.65	254.643	706.48	1436.24	254.299	775.125	1153.98	266.409	583.201	1345.1	265.613	510.641	1153.75	170.82	786.003	1230.69	440.503	647.845	1360.78	502.61	697.003	1115.9	501.486	709.753	1042.33	516.32	649.24	877.866	467.206	641.682	798.679	532.441	674.624	792.536	503.404	636.69	724.209
697	0	312.621	559.134	1584.92	194.168	555.193	1582.87	308.874	725.261	1535.29	200.636	718.614	1531.63	256.065	696.713	1437.89	254.945	765.369	1155.72	266.799	573.05	1346.72	265.142	500.539	1155.4	172.144	776.249	1232.28	441.256	636.699	1361.95	503.241	683.784	1116.86	502.546	696.476	1043.46	516.765	634.728	879.197	467.748	626.975	800.1	533.407	659.105	793.939	503.731	621.764	725.323
698	0	314.672	549.365	1585.95	196.164	545.443	1584.94	310.586	715.393	1536.41	202.354	708.96	1533.53	257.319	686.872	1439.13	255.991	754.932	1156.64	267.098	562.954	1348.27	264.528	490.657	1156.96	173.407	766.667	1233.66	441.931	625.556	1363.1	503.977	670.633	1117.66	503.31	683.073	1044.17	517.243	619.966	880.443	468.069	612.066	801.401	534.218	643.731	795.159	504.333	606.192	726.617
699	0	316.571	539.53	1586.96	198.087	535.835	1586.77	312.362	705.64	1537.38	204.248	699.301	1535.38	258.411	676.914	1440.59	257.216	745.027	1158.4	267.436	552.994	1349.66	263.703	480.933	1158.28	174.891	757.205	1235.1	442.732	614.442	1364.01	504.976	657.571	1118.49	504.305	669.623	1044.92	517.782	605.173	881.699	468.534	596.857	802.638	534.908	628.024	796.208	504.691	590.673	727.837
700	0	318.488	529.804	1588.03	199.832	526.281	1588.53	313.795	695.891	1538.54	205.786	689.689	1537.29	259.573	667.07	1441.81	258.522	734.959	1159.47	267.604	543.144	1351.05	262.799	470.85	1159.7	176.357	747.791	1236.44	443.39	603.388	1365.02	505.899	644.528	1119.24	505.476	656.302	1045.43	518.368	590.265	882.942	469.021	581.658	804.024	534.856	612.012	797.002	505.109	574.552	729.206
701	0	320.115	520.156	1589.07	201.332	516.686	1590.47	315.45	686.22	1539.54	207.248	680.089	1538.97	260.631	657.457	1443.23	259.978	725.149	1160.72	267.636	533.383	1352.41	261.949	461.133	1161.07	177.972	738.598	1237.63	443.994	592.468	1365.95	506.916	631.506	1120.13	506.48	642.808	1046.17	518.833	575.342	884.207	469.312	566.326	805.508	536.247	596.214	798.472	505.55	557.956	730.848
702	0	321.509	510.535	1590.03	202.82	507.264	1592.06	317.084	676.564	1540.52	208.546	670.717	1540.53	261.757	647.791	1444.37	262.051	715.398	1161.88	267.721	523.756	1353.67	260.908	451.477	1162.16	179.6	729.743	1239.01	444.352	581.629	1366.66	507.834	618.604	1120.87	507.652	629.422	1046.78	519.301	560.154	885.42	469.749	550.71	806.866	536.512	579.904	799.352	505.68	541.268	732.338
703	0	322.74	501.047	1590.98	204.091	497.77	1593.75	318.115	667.019	1541.34	209.793	661.216	1541.98	262.843	638.274	1445.48	263.021	706.072	1163.15	267.729	514.219	1354.89	259.992	441.961	1163.19	181.116	720.912	1240.12	444.546	570.877	1367.24	508.818	605.533	1121.63	508.666	615.881	1047.46	519.701	544.954	886.686	470.075	535.098	808.206	536.924	563.672	800.319	505.975	524.237	734.022
704	0	323.663	491.571	1592.17	205.24	488.42	1595.42	319.45	657.687	1542.18	211.026	651.865	1543.28	264.107	628.678	1446.48	264.526	696.609	1164.31	267.757	504.67	1356.15	259.16	432.411	1164.3	182.775	712.164	1241.32	444.976	560.226	1367.93	509.676	592.657	1122.43	509.832	602.568	1048.06	519.955	529.804	888.066	470.229	519.462	809.733	537.451	547.451	801.491	506.253	506.957	735.906
705	0	324.777	482.113	1593.33	206.231	479.113	1597.04	319.988	648.081	1543.25	211.827	642.437	1544.74	265.364	619.363	1447.78	266.068	687.434	1165.89	267.854	495.265	1357.51	258.401	423.076	1165.64	184.396	703.19	1242.76	445.469	549.6	1369.03	510.769	579.85	1123.63	510.935	589.163	1049.11	520.372	514.681	889.759	470.792	503.226	811.994	537.985	531.103	803.062	506.596	489.304	738.391
706	0	325.521	472.691	1594.6	207.107	469.844	1598.55	321.391	638.699	1544.39	212.648	633.097	1546.11	266.265	609.985	1449.1	267.167	678.19	1167.01	268.02	485.811	1358.78	257.802	413.71	1166.92	185.989	694.284	1244.03	446.001	539.094	1370.11	511.554	567.024	1124.68	511.975	575.82	1049.95	520.893	499.424	891.579	470.966	487.494	813.843	537.832	514.696	804.38	506.593	471.589	740.936
707	0	326.356	463.289	1595.65	207.742	460.655	1599.81	322.017	629.249	1545.55	213.443	623.797	1547.57	267.264	600.681	1450.48	268.527	669.311	1168.36	268.212	476.461	1359.99	257.233	404.539	1168.2	187.651	685.369	1245.59	446.547	528.565	1371.31	512.31	554.409	1125.75	512.883	562.565	1050.96	521.23	484.124	893.504	471.146	471.626	815.841	538.135	498.354	806.036	506.908	454.128	743.488
708	0	326.902	454.058	1596.78	208.275	451.533	1601.08	322.79	619.947	1546.77	214.051	614.594	1548.85	268.333	591.27	1451.5	269.765	660.006	1169.49	268.305	467.165	1361.24	256.82	395.405	1169.64	189.225	676.517	1246.77	447.025	518.327	1372.46	513.093	541.932	1127.06	514.139	549.478	1052.28	521.581	468.865	895.748	471.292	455.632	818.336	538.845	481.825	808.172	507.086	436.412	746.395
709	0	327.29	444.834	1597.76	208.651	442.36	1602.19	323.513	610.801	1547.81	214.647	605.577	1549.85	269.179	582.067	1452.62	271.085	650.958	1170.44	268.535	457.845	1362.4	256.696	386.677	1170.85	190.718	667.755	1247.77	447.45	508.007	1373.75	513.83	529.659	1128.42	515.071	536.446	1053.6	521.686	453.838	897.94	471.591	439.101	821.174	539.024	465.381	810.26	507.237	418.706	749.546
710	0	327.718	435.68	1598.72	209.148	433.283	1602.99	323.805	601.505	1548.78	215.165	596.466	1550.95	270.068	572.811	1453.49	271.986	641.543	1171.37	268.878	448.562	1363.43	256.606	377.494	1172.05	192.164	658.954	1248.91	447.946	497.786	1374.83	514.635	517.411	1129.76	515.941	523.484	1054.81	521.975	438.65	900.279	471.71	423.113	823.678	539.093	448.876	812.352	507.432	400.87	752.758
711	0	328.028	426.481	1599.53	209.395	424.259	1603.78	323.988	592.474	1549.66	215.64	587.421	1551.72	270.836	563.656	1454.39	273.21	632.324	1172.23	269.209	439.328	1364.4	256.772	368.689	1173.04	193.51	650.201	1249.63	448.508	487.685	1375.95	515.322	505.419	1130.98	516.855	510.686	1055.86	522.346	423.393	902.957	471.935	406.84	826.41	539.199	432.416	814.521	507.456	383.252	755.959
712	0	328.182	417.42	1600.21	209.578	415.392	1604.51	324.306	583.424	1550.38	216.155	578.601	1552.38	271.69	554.563	1455.03	274.027	622.848	1172.22	269.493	430.147	1365.22	256.862	359.742	1174.01	194.836	641.427	1250.06	448.862	477.835	1376.91	516.031	493.605	1132.15	517.949	497.936	1057.12	522.854	408.648	905.145	472.038	390.542	829.38	539.381	415.971	816.726	507.513	365.665	759.213
713	0	328.057	408.421	1600.79	209.644	406.44	1605	325.001	574.35	1551.03	216.518	569.706	1552.98	272.351	545.445	1455.39	275.37	613.276	1172.98	269.638	420.951	1365.9	257.147	350.768	1174.65	196.133	632.66	1250.61	449.143	467.912	1377.64	516.824	481.971	1133.06	518.794	485.439	1058.1	523.093	393.472	907.372	472.021	374.214	832.159	539.48	399.538	818.905	507.579	348.16	762.369
714	0	328.192	399.378	1601.15	209.642	397.444	1605.33	325.385	565.323	1551.52	216.805	560.822	1553.39	272.886	536.275	1455.78	276.078	603.864	1173.27	269.91	411.776	1366.37	257.399	341.787	1175.06	197.124	623.782	1250.76	449.598	458.101	1378.37	517.476	470.343	1133.95	519.388	473.183	1058.72	523.31	378.543	909.593	472.186	357.996	834.754	538.944	383.275	820.839	507.439	330.625	765.499
715	0	328.17	390.311	1601.61	209.568	388.63	1605.55	325.596	556.26	1551.95	216.995	551.989	1553.57	273.403	527.141	1456.17	277.156	594.26	1173.22	270.161	402.618	1366.69	257.596	332.803	1175.32	198.014	614.757	1250.89	449.905	448.322	1378.97	518.145	459.07	1134.68	520.238	460.863	1059.36	523.64	363.767	911.703	472.25	341.738	837.552	539.201	366.863	822.967	507.231	313.286	768.507
716	0	328.135	381.322	1601.82	209.409	379.852	1605.7	325.795	547.167	1552.18	217.133	543.053	1553.74	273.784	518.014	1456.25	278.236	584.403	1173.22	270.315	393.454	1366.91	257.924	324.022	1175.32	198.93	605.631	1250.86	450.172	438.744	1379.43	518.843	447.893	1135.35	521.047	448.623	1059.96	523.987	349.081	913.714	472.329	325.537	840.368	539.127	350.823	824.908	506.954	296.211	771.629
717	0	327.958	372.235	1601.88	209.275	370.984	1605.64	326.047	538.058	1552.17	217.124	534.115	1553.7	274.158	508.772	1456.29	279.108	574.779	1173.22	270.453	384.183	1366.89	258.235	315.096	1175.11	199.702	596.478	1250.77	450.383	429.036	1379.66	519.629	436.744	1135.75	521.643	436.464	1060.18	524.375	334.495	915.57	472.505	309.804	842.695	538.896	334.783	826.573	506.714	279.14	774.533
718	0	327.769	363.113	1601.84	209.04	362.042	1605.43	325.831	528.954	1552.01	217.271	525.124	1553.41	274.629	499.409	1456.16	279.851	565.127	1173.2	270.416	375.004	1366.67	258.595	305.889	1174.81	200.437	587.16	1250.51	450.478	419.367	1379.7	520.266	425.632	1136.08	522.268	424.281	1060.29	524.595	319.994	917.203	472.318	293.781	845.271	538.597	318.838	828.167	506.366	262.181	777.268
719	0	327.299	354.083	1601.57	208.62	353.244	1605.09	326.115	519.859	1551.65	217.226	516.214	1552.92	274.636	490.218	1455.81	280.105	555.686	1173.1	270.372	365.7	1366.3	258.749	296.782	1174.3	201.031	577.88	1250.18	450.499	409.793	1379.51	520.813	414.597	1136.3	522.91	412.253	1060.55	524.635	305.799	918.84	472.033	278.019	847.747	538.253	303.195	829.797	505.926	245.419	780.053
720	0	326.842	345.045	1601.2	208.288	344.427	1604.52	325.852	510.747	1551.1	217.165	507.249	1552.22	274.766	480.84	1455.31	280.29	546.872	1172.48	270.222	356.354	1365.79	258.885	287.757	1173.51	201.411	568.644	1249.58	450.381	400.175	1379.08	521.136	403.654	1136.29	523.609	400.383	1060.61	524.847	291.635	920.311	471.929	262.769	849.961	537.906	287.756	831.346	505.628	228.997	782.83
721	0	326.506	335.91	1600.65	207.923	335.378	1603.92	325.554	501.522	1550.24	217.139	498.219	1551.3	274.673	471.583	1454.58	280.691	538.748	1171.74	270.181	346.949	1365.1	259.121	278.788	1172.6	201.659	559.517	1248.83	450.235	390.547	1378.39	521.423	392.685	1135.98	524.007	388.543	1060.21	524.836	277.671	921.603	471.693	247.299	852.13	537.401	272.416	832.511	505.207	212.656	785.334
722	0	325.968	326.758	1600.06	207.452	326.372	1603.19	325.365	492.322	1549.44	216.798	489.108	1550.43	274.691	462.084	1453.95	280.88	530.746	1171.15	269.959	337.581	1364.37	258.975	269.587	1171.62	201.78	550.249	1248.13	450.047	380.932	1377.71	521.808	381.808	1135.72	524.465	376.76	1059.93	524.761	263.918	922.902	471.479	232.278	854.143	536.914	257.318	833.766	504.773	196.65	787.894
723	0	325.226	317.508	1599.67	206.839	317.372	1602.43	325.167	483.056	1548.63	216.457	479.939	1549.38	274.374	452.595	1453.15	280.937	522.325	1170.52	269.645	328.156	1363.56	258.843	260.566	1170.54	201.73	540.926	1247.49	449.854	371.364	1377.13	522.071	370.994	1135.46	524.878	365.096	1059.68	524.717	250.266	924.175	471.098	217.477	856.159	536.508	242.515	835.074	504.201	180.979	790.292
724	0	324.613	308.267	1598.92	206.277	308.29	1601.5	324.895	473.677	1547.73	216.057	470.649	1548.31	273.947	443.085	1452.26	280.724	513.859	1169.98	269.09	318.859	1362.58	258.545	251.344	1169.4	201.525	531.652	1246.85	449.498	361.674	1376.32	522.26	360.237	1135.03	525.215	353.69	1059.18	524.638	237.114	925.111	470.643	202.999	858.023	535.967	227.985	836.149	503.645	165.4	792.729
725	0	323.802	298.952	1597.94	205.566	299.11	1600.48	324.518	464.15	1546.65	215.625	461.269	1547.18	273.554	433.321	1451.36	280.374	505.191	1169.19	268.702	309.193	1361.52	258.364	242.852	1167.62	201.306	522.255	1246.09	448.984	351.975	1375.27	522.228	349.542	1134.36	525.286	342.283	1058.43	524.228	223.835	925.879	470.166	189.048	859.406	535.234	213.687	836.857	503.072	150.405	794.696
726	0	322.978	289.552	1597	204.763	289.94	1599.39	323.944	454.625	1545.37	215.085	452.023	1545.78	272.991	423.806	1450.39	279.946	496.164	1168.34	268.148	299.587	1360.26	257.712	233.35	1166.39	200.946	512.972	1245.25	448.383	342.258	1374.26	522.096	338.947	1133.65	525.352	330.955	1057.83	523.776	210.925	926.647	469.621	174.929	860.955	534.659	199.601	837.737	502.426	135.58	796.738
727	0	322.197	280.091	1596.08	203.865	280.724	1598.24	323.347	445.121	1544.05	214.742	442.583	1544.29	272.399	414.156	1449.38	279.23	486.973	1167.17	267.548	289.947	1359.05	257.163	224.083	1165.06	200.397	503.623	1244.21	447.739	332.702	1373.22	521.885	328.537	1132.99	525.505	319.883	1057.32	523.503	198.178	927.377	469.055	161.472	862.371	533.848	185.963	838.593	501.853	121.12	798.707
728	0	321.337	270.635	1594.85	203.003	271.314	1597.01	322.754	435.469	1542.39	214.129	433.18	1542.77	271.566	404.414	1447.93	278.257	477.49	1166.05	266.948	280.195	1357.67	256.605	214.842	1163.49	199.762	494.001	1242.93	446.972	323.134	1371.87	521.533	318.251	1132.05	525.143	309.001	1056.4	522.979	185.801	927.818	468.579	148.24	863.401	533.263	172.543	839.133	501.15	107.037	800.317
729	0	320.393	261.121	1593.58	202.081	261.881	1595.76	321.934	425.826	1540.64	213.429	423.595	1540.91	270.662	394.413	1446.6	277.298	467.878	1164.77	266.142	270.403	1356.2	255.876	205.326	1161.86	198.752	484.087	1241.66	446.034	313.573	1370.31	521.053	308.038	1131.02	524.888	298.181	1055.37	522.479	173.654	928.268	467.592	135.25	864.394	532.447	159.394	839.455	500.499	93.3883	801.796
730	0	319.426	251.592	1592.34	201.021	252.339	1594.43	321.108	416.113	1538.83	212.557	413.967	1539.05	269.715	384.5	1445.19	276.585	458.404	1163.26	265.086	260.722	1354.71	255.112	195.742	1160.28	197.892	474.185	1240.19	445.422	304.201	1369.04	520.472	298.046	1129.88	524.548	287.658	1054.29	521.964	161.739	928.347	467.055	122.61	865.195	531.694	146.639	839.746	499.761	79.9257	802.99
731	0	318.261	241.96	1591.05	199.934	242.849	1593.09	320.129	406.363	1536.96	211.608	404.306	1537.05	268.575	374.649	1443.5	275.977	448.867	1162.14	264.269	250.74	1353.14	254.285	186.095	1158.48	196.729	464.185	1238.46	444.37	294.616	1367.49	519.753	288.141	1128.55	524.053	277.35	1053.11	521.315	150.214	928.262	466.426	110.416	865.727	530.949	134.212	839.909	498.992	67.1205	803.9
732	0	317.211	232.258	1589.74	198.877	233.307	1591.75	318.916	396.556	1535.14	210.531	394.52	1535.25	267.145	364.653	1441.94	274.775	439.172	1160.52	263.253	240.83	1351.51	253.653	176.449	1156.66	195.346	454.142	1236.92	443.215	284.94	1365.95	518.942	278.355	1127.18	523.348	267.094	1051.8	520.578	138.906	928.05	465.717	98.4186	865.956	529.958	122.149	839.843	498.194	54.47	804.646
733	0	315.918	222.459	1588.41	197.598	223.403	1590.27	317.721	386.624	1533.33	209.104	384.514	1533.41	265.97	354.486	1440.64	273.273	429.15	1159.16	262.103	230.881	1349.9	252.959	166.533	1154.76	194.146	444.223	1235.68	441.848	274.985	1364.44	518.085	268.636	1125.84	522.587	256.961	1050.47	519.847	127.924	927.646	464.916	86.6991	865.906	529.064	110.466	839.466	497.501	42.3859	805.133
734	0	314.655	212.711	1587.15	196.299	213.504	1589.08	316.299	376.623	1531.78	207.613	374.455	1531.82	264.583	344.374	1439.32	272.156	419.399	1157.99	261.184	220.767	1348.35	252.233	156.634	1152.98	192.687	434.119	1234.38	440.776	265.156	1363.15	517.143	259.003	1124.68	521.957	247.119	1049.38	519.009	117.233	927.051	464.095	75.5213	865.82	528.186	99.2423	839.014	496.789	30.842	805.443
735	0	313.273	202.782	1586.09	194.927	203.581	1587.7	314.99	366.542	1530.27	206.09	364.247	1530.24	263.041	334.026	1438.13	270.992	409.49	1157.02	260.025	210.663	1346.9	251.533	146.575	1151.37	191.336	424.121	1233.15	439.564	255.3	1361.95	516.173	249.46	1123.61	521.158	237.378	1048.32	518.152	106.792	926.438	463.229	64.6511	865.57	527.105	88.5302	838.469	495.949	19.6794	805.408
736	0	311.717	192.897	1584.83	193.423	193.476	1586.37	313.33	356.482	1528.78	204.388	354.016	1528.67	261.686	323.965	1436.96	269.585	399.175	1156	258.79	200.445	1345.39	250.894	136.443	1149.64	189.821	414.057	1232.03	438.323	245.344	1360.64	515.016	240.015	1122.32	520.013	227.617	1047.02	517.156	96.6807	925.458	462.251	54.1738	864.8	525.937	78.0932	837.425	495.142	8.94868	805.013
737	0	310.024	182.848	1583.79	191.627	183.257	1585.24	311.582	346.382	1527.37	202.74	343.847	1527.1	260.003	313.566	1435.62	268.432	389.36	1154.67	257.514	190.238	1344.08	250.054	126.278	1148.13	188.15	403.841	1230.87	436.891	235.361	1359.45	513.726	230.704	1121.1	518.684	218.107	1045.86	516.139	86.8734	924.429	461.277	44.0895	864.057	524.832	68.2645	836.435	494.379	-1.23195	804.563
738	0	308.337	172.735	1582.86	190.024	173.302	1584.01	309.75	336.186	1526.13	200.907	333.538	1525.62	258.149	303.383	1434.45	266.913	379.039	1153.49	256.143	179.951	1342.9	249.286	116.003	1146.86	186.662	393.725	1229.59	435.453	225.317	1358.51	512.351	221.428	1120.08	517.475	208.683	1044.83	515.096	77.4741	923.395	460.222	34.5203	863.044	523.563	59.0359	835.367	493.447	-10.8668	803.743
739	0	306.477	162.575	1581.92	188.015	162.964	1582.99	307.872	325.941	1524.88	199.199	323.328	1524.24	256.485	293.134	1433.39	265.438	368.609	1152.36	254.809	169.652	1341.84	248.411	105.667	1145.75	184.968	383.234	1228.13	433.771	215.431	1357.56	511.094	212.431	1118.99	515.915	199.473	1043.67	513.994	68.507	922.037	459.239	25.3995	861.937	522.028	50.1889	833.938	492.764	-20.0503	802.758
740	0	304.529	152.364	1581.11	186.169	152.714	1581.96	305.757	315.737	1523.76	197.324	312.935	1523.03	254.646	282.857	1432.08	264.12	358.297	1151.17	253.26	159.312	1340.89	247.459	95.1391	1144.81	183.527	372.863	1227.01	432.282	205.207	1356.75	509.636	203.212	1118.05	514.44	190.228	1042.59	512.818	59.7541	920.65	458.064	16.5735	860.483	520.838	41.7175	832.323	491.709	-28.6645	801.353
741	0	302.499	142.106	1580.38	184.085	142.396	1581.05	303.711	305.548	1522.9	195.419	302.779	1521.93	252.759	272.591	1431.08	262.566	347.518	1150.23	251.628	148.898	1340.11	246.276	84.4931	1144.25	181.823	362.154	1225.95	430.699	194.969	1356.3	508.002	193.947	1117.35	512.845	181.287	1041.78	511.599	51.3137	919.326	456.989	8.09098	859.18	519.571	33.7363	830.847	490.739	-36.6807	799.925
742	0	300.387	131.878	1579.77	181.982	132.118	1580.1	301.84	295.188	1522.54	193.281	292.34	1521.28	250.778	262.333	1430.4	261.148	336.898	1149.19	250.067	138.382	1339.58	244.977	73.688	1143.82	180.142	351.479	1224.84	429.088	184.76	1356.03	506.448	184.706	1116.95	511.297	172.29	1041.34	510.276	43.1284	917.958	455.724	0.115054	857.609	518.236	26.1834	829.438	489.719	-44.3663	798.181
743	0	298.211	121.57	1579.24	179.856	121.784	1579.36	299.64	285.091	1522.23	191.161	282.159	1520.79	249.013	251.949	1429.93	259.515	325.914	1148.65	248.323	127.836	1339.1	243.538	62.6101	1143.55	178.501	340.598	1223.94	427.274	174.493	1355.82	504.703	175.385	1116.68	509.78	163.452	1041.09	509.001	35.1143	916.655	454.578	-7.52423	855.798	516.89	18.8846	827.933	488.502	-51.545	796.056
744	0	296.068	111.238	1578.94	177.665	111.407	1578.75	297.654	274.838	1522.13	188.941	271.761	1520.53	246.919	241.653	1429.49	257.882	314.842	1147.9	246.524	117.265	1338.81	242.083	51.3254	1143.57	176.613	329.48	1223.05	425.509	164.149	1355.67	502.799	165.903	1116.32	508.047	154.635	1040.8	507.642	27.4397	915.087	453.375	-14.974	854.087	515.578	11.9229	826.301	487.304	-58.2185	793.763
745	0	293.909	100.975	1579.06	175.474	101.166	1578.5	295.486	264.514	1522.26	186.982	261.38	1520.17	244.866	231.253	1429.13	256.316	303.787	1147.31	244.673	106.748	1338.91	240.559	39.8056	1143.98	175.015	318.446	1222.29	423.791	153.815	1355.87	501.092	156.731	1116.38	506.27	146.118	1040.66	506.349	20.1234	913.81	452.099	-21.871	852.252	514.329	5.36803	824.81	485.964	-64.3891	791.391
746	0	291.664	90.7134	1579.4	173.22	90.8495	1578.58	293.255	254.203	1522.46	184.673	251.061	1520.2	242.828	220.8	1429.03	254.34	292.223	1146.87	243.001	96.0403	1339.27	239.095	28.1544	1144.63	173.264	307.359	1221.76	421.935	143.462	1356.24	499.255	147.477	1116.54	504.416	137.646	1040.67	505.109	12.9928	912.409	450.911	-28.3527	850.41	513.149	-0.724642	823.358	484.894	-69.8531	789.074
747	0	289.411	80.4214	1579.85	170.93	80.3927	1578.83	290.947	243.884	1522.63	182.582	240.775	1520.16	240.845	210.258	1429	253.04	281.164	1146.56	241.145	85.3477	1339.75	237.57	16.3493	1145.37	171.383	296.147	1221.4	420.037	133.044	1356.52	497.382	138.297	1116.61	502.518	129.269	1040.66	503.774	6.27769	911.027	449.773	-34.5546	848.519	511.418	-6.18795	821.71	483.696	-75.0105	786.461
748	0	287.063	70.1835	1580.61	168.779	70.0952	1579.26	288.562	233.567	1523.01	180.175	230.265	1520.32	238.8	199.803	1429.29	251.356	269.844	1146.59	239.205	74.6433	1340.41	236.132	4.52417	1146.35	169.819	285.07	1221.14	418.182	122.436	1357.22	495.448	129.126	1117.09	500.512	121.114	1040.94	502.313	-0.126441	909.646	448.358	-40.2438	846.591	510.358	-11.5268	820.214	482.49	-79.782	784.102
749	0	284.806	59.943	1581.58	166.34	59.6722	1580.18	286.15	223.296	1523.56	178.036	219.813	1520.68	236.721	189.158	1429.83	249.719	258.505	1146.85	237.429	63.8285	1341.39	234.546	-7.2075	1147.71	168.113	273.939	1221.18	416.412	111.771	1358.25	493.556	120.159	1117.83	498.413	113.1	1041.56	500.908	-6.15603	908.669	447.027	-45.5049	844.869	508.911	-16.1412	819.067	481.275	-83.982	781.866
750	0	282.586	49.7646	1582.83	164.186	49.3745	1581.1	283.77	212.996	1524.27	175.666	209.34	1521.25	234.77	178.644	1430.56	248.306	247.545	1147.55	235.558	53.1257	1342.54	233.247	-18.8775	1149.15	166.326	262.742	1221.53	414.748	100.996	1359.64	491.678	111.009	1118.9	496.578	105.114	1042.56	499.322	-11.9981	907.712	445.832	-50.3017	843.311	507.867	-20.5901	818.027	480.23	-87.6899	779.574
751	0	280.326	39.6124	1584.14	161.881	39.0013	1582.18	281.449	202.677	1525.26	173.309	198.968	1522.03	232.8	167.977	1431.53	246.907	236.484	1148.34	233.782	42.3922	1343.79	231.874	-30.4297	1150.69	164.813	251.918	1222.41	412.97	90.2101	1361.22	489.754	101.957	1120.2	494.5	97.0596	1043.82	497.898	-17.6512	907.188	444.586	-54.3182	841.363	506.557	-24.7125	817.212	479.031	-90.9489	777.509
752	0	278.041	29.4777	1585.6	159.734	28.8156	1583.3	279.141	192.324	1526.42	170.851	188.481	1523.07	230.874	157.562	1432.74	245.301	225.351	1149.66	232.052	31.5675	1345.19	230.536	-41.7827	1152.44	163.013	240.955	1223.53	411.229	79.5106	1363.02	487.984	92.7608	1121.85	492.746	89.1521	1045.48	496.238	-23.0425	906.829	443.294	-58.3088	840.034	505.363	-28.3745	816.772	478.017	-93.8815	775.642
753	0	275.847	19.4155	1587.08	157.4	18.4917	1584.51	276.993	181.973	1527.91	168.781	178.176	1523.92	229.045	147.068	1434.12	244.248	214.711	1150.95	230.413	20.9714	1346.66	229.211	-52.851	1154.17	161.27	229.975	1224.46	409.669	68.8034	1365.09	486.07	83.6566	1123.66	490.938	81.3677	1047.39	494.678	-28.2204	906.508	441.871	-61.9884	838.692	504.041	-31.7273	816.643	476.688	-96.3268	773.641
754	0	273.825	9.25049	1588.73	155.352	8.3879	1585.6	274.756	172	1529.13	166.521	167.786	1525.02	227.305	136.723	1435.4	242.88	203.758	1152.1	228.74	10.508	1348.14	227.938	-63.6785	1155.87	159.604	219.344	1225.66	408.006	58.279	1367	484.303	74.5454	1125.47	489.121	73.6208	1049.29	493.076	-33.3267	906.394	440.45	-65.5042	837.569	502.867	-35.0699	816.576	475.5	-98.6256	771.956
755	0	271.682	-0.803042	1590.02	153.214	-1.87713	1586.6	272.639	161.922	1530.46	164.445	157.636	1526	225.559	126.389	1436.54	241.666	192.893	1153.54	227.35	-0.034348	1349.56	226.811	-74.2717	1157.46	157.771	208.489	1226.79	406.391	47.9422	1368.79	482.512	65.503	1127.08	487.452	65.9739	1051.04	491.547	-38.4933	906.41	439.1	-68.9256	836.54	502.128	-38.6145	816.437	474.066	-100.719	770.131
756	0	269.511	-10.7735	1591.28	151.266	-11.9529	1587.52	270.727	151.807	1531.84	162.399	147.614	1527.01	223.975	116.41	1437.7	240.404	182.028	1154.34	225.993	-10.3523	1350.97	225.766	-84.6373	1159.09	156.34	198.063	1227.61	404.922	37.8175	1370.52	480.828	56.5378	1128.7	485.727	58.4304	1052.66	490.09	-43.054	906.344	437.714	-71.9999	835.575	501.112	-41.8971	816.303	472.71	-102.52	768.563
757	0	267.829	-20.7521	1592.57	149.37	-21.9672	1588.38	268.736	142.037	1532.97	160.735	137.644	1527.81	222.373	106.237	1438.68	239.213	171.169	1155.39	224.697	-20.5525	1352.33	224.872	-94.8173	1160.64	154.674	187.453	1228.32	403.659	27.8426	1372.19	479.273	47.6139	1130.28	484.184	50.9972	1054.22	488.683	-47.9652	906.361	436.428	-75.143	834.874	500.11	-45.2154	816.319	471.175	-104.277	766.855
758	0	265.9	-30.6451	1593.63	147.506	-32.0314	1589.18	266.961	132.076	1534.07	159.027	127.546	1528.62	220.908	96.2543	1439.57	238.101	160.267	1156.44	223.608	-30.6455	1353.43	224.087	-104.913	1161.93	153.399	177.184	1229.16	402.43	18.0148	1373.6	477.954	38.8145	1131.61	482.687	43.6513	1055.64	487.44	-52.9415	906.24	435.116	-78.2443	833.946	499.301	-48.8166	816.322	469.762	-106.052	765.195
759	0	264.303	-40.6589	1594.8	145.925	-41.9667	1589.88	265.35	122.19	1535.35	157.542	117.701	1529.44	219.415	86.5434	1440.69	237.047	149.668	1157.5	222.574	-40.6555	1354.47	223.378	-114.872	1163.1	152.026	166.619	1229.97	401.256	8.45519	1375.03	476.697	30.0281	1133.02	481.386	36.279	1057.11	486.196	-57.952	906.282	434.029	-81.596	833.247	499.053	-52.6733	816.682	468.266	-107.839	763.529
760	0	262.563	-50.5273	1595.88	144.345	-51.902	1590.6	263.972	112.245	1536.77	156.043	107.757	1530.42	218.341	76.5146	1441.85	235.628	139.027	1158.47	221.633	-50.4879	1355.51	222.808	-124.702	1164.16	150.9	156.25	1230.75	400.479	-0.969216	1376.5	475.664	21.5104	1134.34	480.315	28.9764	1058.85	484.991	-62.9621	906.474	432.694	-84.3124	832.591	498.401	-56.3521	817.189	466.86	-109.496	762.125
761	0	261.265	-60.4058	1596.94	142.835	-61.9361	1591.24	262.462	102.506	1537.72	154.493	97.8561	1531.29	216.956	66.6943	1442.69	234.309	128.599	1159.69	220.961	-60.2868	1356.36	222.502	-134.422	1165.05	149.719	145.903	1231.5	399.431	-10.1989	1377.61	474.832	13.1392	1135.6	479.281	21.708	1060.07	484.074	-68.0933	906.506	432.005	-87.6351	831.906	498.316	-60.5178	817.498	465.534	-111.295	760.575
762	0	259.815	-70.2266	1597.79	141.537	-71.8392	1591.83	261.207	92.7489	1538.69	153.314	88.0341	1532.07	215.714	57.0412	1443.54	233.263	118.487	1160.35	220.336	-70.0376	1357.19	222.443	-144.025	1165.81	148.396	135.539	1232.36	398.637	-19.1988	1378.58	474.127	5.10098	1136.67	478.313	14.4406	1061.21	483.086	-73.1548	906.377	431.115	-90.8266	831.192	498.187	-64.7126	817.82	464.436	-113.467	759.357
763	0	258.707	-80.023	1598.79	140.329	-81.6638	1592.44	260.061	82.9514	1539.69	152.201	78.2706	1532.71	214.706	47.4252	1444.47	231.826	108.588	1161.12	219.843	-79.6011	1357.96	222.542	-153.53	1166.49	147.321	125.662	1233.11	398.105	-28.1348	1379.65	473.517	-2.71703	1137.64	477.376	7.36067	1062.1	482.388	-78.3256	906.443	430.401	-94.3146	830.815	497.939	-68.9298	818.106	463.447	-115.252	758.057
764	0	257.531	-89.75	1599.57	139.324	-91.4617	1593.01	259.006	73.2165	1540.64	151.113	68.3931	1533.28	213.838	37.7203	1445.38	230.246	98.8271	1162.19	219.417	-89.1247	1358.63	222.746	-162.843	1167.09	146.122	116.073	1233.77	397.475	-36.9205	1380.55	472.892	-10.164	1138.43	476.455	0.479162	1063	481.594	-83.4283	906.414	429.578	-97.9262	830.497	497.788	-73.1275	818.387	462.635	-117.447	757.137
765	0	256.548	-99.519	1600.34	138.376	-101.298	1593.56	258.044	63.4388	1541.41	150.186	58.536	1533.8	212.72	28.1023	1446.08	228.78	89.5563	1163.2	219.135	-98.6031	1359.23	223.093	-172.111	1167.52	144.895	106.602	1234.74	397.011	-45.5849	1381.23	472.237	-17.3719	1138.98	475.572	-6.41725	1063.69	480.767	-88.6141	906.33	429.056	-101.525	829.932	497.682	-77.4508	818.594	462.139	-119.888	756.266
766	0	255.647	-109.359	1601.14	137.464	-111.151	1594.1	257.131	53.7017	1542.09	149.415	48.7185	1534.52	211.799	18.3975	1446.85	227.614	80.4068	1163.79	218.922	-108.096	1359.79	223.558	-181.394	1167.99	143.816	97.41	1235.77	396.563	-54.2657	1381.95	471.557	-24.2941	1139.63	474.745	-13.0699	1064.38	480.453	-93.7904	906.51	429.018	-105.594	829.525	497.635	-81.7455	818.816	461.789	-122.537	755.527
767	0	255.02	-119.08	1601.84	136.727	-121.043	1594.71	256.272	43.9683	1542.95	148.721	38.9782	1535.15	210.962	8.73729	1447.69	226.445	71.5456	1165.1	218.662	-117.451	1360.46	224.035	-190.564	1168.63	142.743	88.4023	1236.79	396.152	-62.8045	1382.81	470.929	-30.8832	1140.4	473.978	-19.5921	1065.26	480.128	-98.8062	906.749	428.854	-109.46	829.48	497.614	-85.884	819.284	461.76	-125.557	755.161
768	0	254.371	-128.861	1602.63	136.007	-130.837	1595.31	255.726	34.233	1543.85	148.006	29.0649	1535.87	210.068	-0.777118	1448.6	224.931	62.299	1166.06	218.539	-126.862	1361.11	224.565	-199.752	1169.29	141.635	79.2487	1237.78	395.863	-71.3733	1383.74	470.432	-37.3305	1141.29	473.264	-25.9785	1066.19	479.771	-103.73	907.072	428.814	-114.35	829.992	497.599	-89.972	819.838	461.839	-128.659	755.15
769	0	253.64	-138.697	1603.17	135.495	-140.711	1595.77	255.026	24.4741	1544.53	147.452	19.4111	1536.4	209.274	-10.2881	1449.36	223.856	53.3457	1167.12	218.343	-136.096	1361.61	225.162	-208.889	1169.83	140.448	70.1885	1238.88	394.858	-79.7689	1384.21	469.786	-43.6274	1142.17	472.498	-32.3997	1067.1	479.803	-108.666	907.439	428.911	-118.076	829.884	497.786	-94.1141	820.456	462.334	-132.241	755.195
770	0	253.211	-148.505	1603.57	135.074	-150.608	1596.09	254.531	14.7432	1545.29	146.894	9.67049	1537.18	208.641	-19.8386	1450.04	222.94	44.7562	1168.02	218.242	-145.452	1362.04	225.68	-217.955	1170.36	139.352	60.7579	1239.66	394.995	-88.3776	1385.29	469.177	-49.8218	1143.04	471.843	-38.5965	1068.09	479.566	-113.631	907.793	428.796	-122.338	830.006	497.805	-98.2719	821.08	462.933	-136.14	755.431
771	0	252.833	-158.289	1603.99	134.499	-160.486	1596.44	254.029	4.99411	1546.08	146.375	-0.032281	1537.83	207.948	-29.3042	1450.68	221.775	35.5738	1168.74	218.118	-154.757	1362.52	226.125	-226.943	1170.91	138.214	51.234	1240.27	394.527	-96.8466	1386.16	468.625	-55.8999	1143.93	471.305	-44.5717	1069.23	479.814	-118.558	908.35	429.295	-127.259	830.479	498.029	-102.148	821.712	463.706	-140.444	755.934
772	0	252.502	-168.195	1604.35	134.25	-170.335	1596.62	253.74	-4.65639	1546.83	145.984	-9.75755	1538.41	207.324	-38.8037	1451.3	220.861	26.6928	1169.51	218.055	-164.132	1362.94	226.632	-235.858	1171.4	137.123	41.5383	1240.93	394.659	-105.499	1387.03	468.079	-61.984	1144.82	470.729	-50.5782	1070.24	480.081	-123.52	908.867	429.476	-132.02	830.67	498.169	-106.495	822.399	464.347	-144.413	756.062
773	0	252.246	-178.062	1604.48	134.024	-180.307	1596.77	253.402	-14.3932	1547.4	145.602	-19.5978	1539.07	206.748	-48.247	1451.71	220	17.626	1169.82	218.095	-173.525	1363.21	227.165	-244.771	1171.68	136.228	31.6776	1241.4	394.394	-114.034	1387.53	467.672	-68.1621	1145.45	469.953	-56.8532	1070.86	480.539	-128.579	909.129	430.397	-137.427	830.913	498.604	-110.536	822.824	465.633	-149.137	756.359
774	0	252.003	-187.875	1604.68	133.854	-190.252	1596.84	252.96	-24.1624	1547.89	145.319	-29.3387	1539.5	206.315	-57.7504	1452.05	219.274	9.02606	1170.29	218.143	-182.867	1363.52	227.649	-253.736	1172.01	135.311	22.0776	1241.77	394.263	-122.655	1387.89	467.127	-74.3828	1146.06	469.283	-62.9444	1071.45	480.934	-133.673	909.489	431.11	-142.839	831.326	498.92	-115.038	823.211	466.44	-154.161	756.892
775	0	251.876	-197.753	1604.82	133.641	-200.207	1596.86	252.778	-33.9462	1548.37	145.09	-39.2756	1539.86	205.932	-67.295	1452.34	218.829	-0.223341	1170.77	218.202	-192.226	1363.74	228.095	-262.635	1172.28	134.402	12.4371	1242.02	394.143	-131.244	1388.3	466.911	-80.7379	1146.77	468.981	-69.0107	1072.2	481.608	-138.866	909.89	431.551	-148.265	831.606	499.124	-119.594	823.628	467.546	-159.2	757.391
776	0	251.817	-207.718	1604.77	133.583	-210.129	1596.79	252.64	-43.7205	1548.68	145.069	-48.9577	1539.86	205.629	-76.8464	1452.5	218.431	-9.44822	1171.11	218.356	-201.608	1363.8	228.451	-271.744	1172.34	133.662	2.85796	1242.18	394.183	-139.884	1388.51	466.593	-87.3158	1147.16	468.63	-75.2002	1072.61	482.26	-144.275	910.11	432.488	-154.343	831.786	499.438	-124.298	823.811	468.59	-164.359	757.583
777	0	251.756	-217.697	1604.59	133.525	-220.183	1596.52	252.511	-53.5994	1548.83	145.03	-58.8322	1540.04	205.399	-86.4392	1452.65	217.767	-18.4493	1171.2	218.508	-211.051	1363.66	228.884	-280.878	1172.14	132.947	-6.60548	1242.47	394.175	-148.783	1388.54	466.35	-94.1045	1147.4	468.276	-81.7147	1073.02	482.947	-150.118	910.179	433.531	-160.571	831.712	499.657	-129.285	823.911	469.589	-169.941	757.596
778	0	251.866	-227.635	1604.4	133.668	-230.2	1596.22	252.507	-63.444	1549	144.906	-68.9632	1540.2	205.235	-96.133	1452.64	217.227	-27.2153	1171.54	218.743	-220.524	1363.54	229.317	-290.02	1171.89	132.347	-16.095	1242.73	393.84	-157.525	1388.38	466.126	-101.022	1147.67	468.054	-88.2744	1073.31	483.677	-155.945	910.208	434.281	-166.886	831.674	499.953	-134.383	824.022	470.719	-175.583	757.6
779	0	252.011	-237.575	1604.15	133.866	-240.217	1595.87	252.715	-73.298	1549	145.073	-78.7744	1540.02	205.164	-105.872	1452.55	217.546	-36.1936	1171.43	219.017	-230.048	1363.31	229.752	-299.233	1171.62	131.882	-25.5625	1242.87	394.032	-166.537	1388.23	466.302	-108.287	1147.91	467.928	-95.1612	1073.58	484.231	-161.548	910.06	435.456	-173.721	831.795	500.162	-139.684	823.977	471.946	-181.408	757.621
780	0	252.251	-247.603	1603.69	134.063	-250.377	1595.38	252.771	-83.2693	1548.71	145.265	-88.7879	1539.76	205.287	-115.748	1452.29	217.218	-45.1976	1171.37	219.347	-239.698	1362.79	230.159	-308.512	1171.09	131.627	-35.175	1242.85	393.948	-175.555	1387.58	466.194	-115.694	1147.81	467.846	-102.324	1073.47	485	-167.723	909.73	436.119	-180.17	831.367	500.52	-145.318	823.676	473.039	-187.52	757.334
781	0	252.652	-257.717	1603.09	134.402	-260.519	1594.73	252.907	-93.2745	1548.32	145.498	-98.7444	1539.43	205.432	-125.695	1451.91	217.325	-54.3807	1171.08	219.708	-249.359	1362.13	230.594	-317.92	1170.32	131.404	-44.9199	1242.78	394.155	-184.813	1387.03	466.2	-123.298	1147.53	467.923	-109.551	1073.34	485.648	-174.157	909.3	437.184	-187.172	830.876	500.372	-150.975	823.181	474.022	-193.761	756.86
782	0	253.029	-267.758	1602.41	134.758	-270.687	1594.06	253.387	-103.021	1547.92	145.83	-108.809	1538.91	205.484	-135.54	1451.51	217.304	-63.7105	1170.73	220.019	-258.981	1361.49	231.072	-327.268	1169.55	131.153	-54.4896	1242.59	394.963	-194.304	1386.82	466.305	-131.145	1147.28	468.051	-117.014	1073.14	486.359	-180.65	908.867	437.968	-194.203	830.513	500.713	-156.943	822.817	474.946	-200.179	756.397
783	0	253.56	-277.926	1601.58	135.242	-280.815	1593.31	253.835	-113.108	1547.32	146.337	-118.922	1538.26	205.646	-145.397	1451.01	217.366	-72.6771	1170.52	220.456	-268.661	1360.69	231.524	-336.508	1168.6	130.907	-64.062	1242.3	395.21	-203.689	1386.08	466.207	-138.883	1146.87	468.203	-124.668	1072.75	487.017	-187.519	908.188	438.845	-201.457	829.847	500.94	-163.387	822.252	475.841	-206.818	755.796
784	0	254.055	-288.051	1600.5	135.864	-290.969	1592.41	254.271	-123.216	1546.49	146.652	-129.102	1537.67	206.009	-155.406	1450.24	217.792	-81.5674	1169.97	220.934	-278.5	1359.66	232.01	-345.871	1167.41	130.85	-73.7478	1241.79	395.153	-213.134	1384.91	466.173	-147.336	1146.05	468.107	-132.694	1071.99	487.581	-194.747	907.283	439.691	-208.839	828.978	501.391	-170.133	821.383	476.732	-213.721	754.973
785	0	254.759	-298.266	1599.38	136.482	-301.183	1591.38	254.867	-133.353	1545.49	147.008	-139.118	1536.69	206.454	-165.513	1449.33	218.108	-91.3978	1169.2	221.459	-288.393	1358.64	232.474	-355.294	1166.2	130.984	-83.3799	1241.15	395.917	-222.825	1383.97	466.649	-156.015	1145.26	468.198	-140.95	1071.13	488.132	-202.187	906.284	440.366	-216.359	827.948	501.757	-177.124	820.37	477.455	-220.797	753.989
786	0	255.456	-308.445	1598.29	137.224	-311.415	1590.39	255.559	-143.509	1544.53	147.935	-149.369	1535.75	206.882	-175.553	1448.41	217.866	-100.735	1168.26	221.986	-298.201	1357.58	233.008	-364.885	1165.06	131.233	-93.0284	1240.44	396.433	-232.53	1382.86	466.823	-164.559	1144.42	468.322	-149.412	1070.35	488.817	-209.798	905.427	441.216	-223.893	827.07	502.07	-184.314	819.38	478.243	-227.977	753.075
787	0	256.284	-318.724	1596.97	137.893	-321.654	1589.23	256.43	-153.746	1543.49	148.77	-159.501	1534.8	207.429	-185.692	1447.43	217.799	-110.52	1167.55	222.585	-308.232	1356.26	233.57	-374.553	1163.69	131.511	-102.84	1239.72	396.467	-242.164	1381.46	467.357	-173.765	1143.57	468.835	-158.017	1069.62	489.347	-217.907	904.372	441.719	-231.999	825.84	502.626	-192.074	818.487	478.934	-235.512	751.852
788	0	257.031	-329.097	1595.59	138.86	-331.896	1587.78	257.256	-164.016	1542.26	149.672	-169.692	1533.67	208.096	-195.874	1446.23	218.195	-120.757	1166.84	223.245	-318.34	1354.9	234.056	-384.27	1162.14	131.802	-112.819	1238.86	397.276	-252.156	1380.33	467.951	-183.092	1142.53	469.125	-166.984	1068.63	489.876	-226.186	903.075	442.288	-240.159	824.329	503.194	-200.048	817.43	479.421	-243.332	750.383
789	0	258.035	-339.488	1593.99	139.755	-342.165	1586.4	258.235	-174.381	1540.96	150.636	-179.914	1532.39	208.805	-206.041	1445.04	218.848	-130.646	1165.23	223.882	-328.367	1353.29	234.602	-394.091	1160.57	132.219	-122.852	1237.78	398.334	-262.293	1379.06	468.266	-192.642	1141.21	469.712	-176.048	1067.52	490.397	-234.871	901.669	442.947	-248.333	822.755	503.759	-208.347	816.132	480.048	-251.361	748.856
790	0	259.235	-349.829	1592.42	140.816	-352.58	1584.88	259.323	-184.619	1539.4	151.534	-190.232	1531.14	209.616	-216.294	1443.52	219.491	-140.402	1163.72	224.726	-338.641	1351.88	235.313	-404.059	1158.99	132.805	-132.879	1236.48	399.179	-272.341	1377.5	468.901	-202.143	1139.8	470.296	-185.257	1066.18	491.036	-243.739	900.245	443.609	-256.952	821.289	504.411	-216.936	814.681	480.63	-259.623	747.305
791	0	260.289	-360.262	1590.56	141.974	-362.856	1583.2	260.377	-194.966	1537.61	152.613	-200.589	1529.51	210.549	-226.571	1441.92	220.096	-150.748	1162.5	225.545	-348.747	1350.06	235.999	-414.023	1157.25	133.592	-142.907	1234.94	399.727	-282.417	1375.56	469.514	-212.003	1138.12	470.777	-194.846	1064.58	491.679	-252.799	898.531	444.244	-265.712	819.58	505.076	-225.759	812.977	481.303	-268.063	745.469
792	0	261.61	-370.643	1588.67	143.195	-373.267	1581.49	261.559	-205.394	1535.83	153.669	-210.931	1527.77	211.545	-236.981	1440.12	220.818	-160.717	1161.16	226.562	-359.121	1348.31	236.746	-424.286	1155.37	134.472	-153.05	1233.38	400.593	-292.811	1373.6	469.793	-221.969	1136.11	471.429	-204.643	1062.73	492.258	-262.139	896.645	444.811	-274.774	817.611	505.786	-234.879	811.095	481.887	-276.868	743.536
793	0	262.836	-381.158	1586.63	144.447	-383.722	1579.7	262.803	-215.81	1533.92	155.357	-221.273	1526.03	212.724	-247.324	1438.41	221.243	-170.993	1159.28	227.469	-369.369	1346.35	237.317	-434.474	1153.44	135.4	-163.2	1231.74	402.031	-303.265	1371.76	470.957	-232.138	1134.13	472.087	-214.626	1060.67	492.826	-271.695	894.47	445.333	-283.918	815.525	506.513	-244.382	809.176	482.486	-285.939	741.393
794	0	264.163	-391.63	1584.82	145.705	-394.168	1578.01	264.283	-226.219	1532.03	156.48	-231.805	1524.23	214.006	-257.788	1436.55	222.598	-181.111	1157.36	228.585	-379.882	1344.58	238.06	-444.887	1151.48	136.615	-173.292	1230.09	403.231	-313.741	1369.74	471.408	-242.22	1131.98	472.958	-224.728	1058.56	493.546	-281.467	892.27	445.932	-293.336	813.289	507.304	-253.799	807.079	483.05	-295.278	739.252
795	0	265.495	-402.138	1583.04	147.157	-404.652	1576.27	265.645	-236.802	1530.26	157.796	-242.301	1522.35	215.395	-268.282	1434.84	223.791	-191.492	1155.66	229.668	-390.212	1342.64	238.829	-455.3	1149.39	138.009	-183.377	1228.34	404.155	-324.334	1367.46	472.803	-252.764	1129.83	473.795	-235.172	1056.38	494.336	-291.487	889.928	446.631	-303.121	810.986	507.99	-263.739	804.802	483.645	-304.955	736.936
796	0	267.103	-412.764	1581.36	148.657	-415.288	1574.62	267.163	-247.402	1528.51	159.551	-252.931	1520.71	216.934	-278.853	1433.28	224.814	-201.474	1153.84	231.023	-400.733	1340.92	239.691	-465.919	1147.45	139.257	-193.659	1226.88	405.405	-335.091	1365.41	473.835	-263.54	1127.7	474.808	-245.809	1054.33	495.115	-301.819	887.664	447.365	-313.106	808.756	508.904	-273.769	802.652	484.295	-314.886	734.726
797	0	268.627	-423.405	1579.81	150.271	-425.816	1573.06	268.689	-258.012	1526.89	160.809	-263.419	1519.33	218.462	-289.389	1431.76	226.401	-211.521	1152.78	232.433	-411.329	1339.26	240.54	-476.435	1145.59	140.672	-204.02	1225.54	406.923	-345.852	1363.51	474.707	-274.363	1125.63	475.838	-256.782	1052.27	495.994	-312.391	885.536	448.13	-322.707	806.28	509.965	-284.088	800.661	485.032	-325.005	732.479
798	0	270.349	-434.005	1578.3	151.797	-436.429	1571.63	270.43	-268.66	1525.42	162.358	-274.176	1517.86	220.203	-299.952	1430.24	227.906	-221.664	1151.66	233.891	-421.881	1337.66	241.533	-487.176	1143.96	142.196	-214.342	1224.22	408.298	-356.516	1361.6	476.259	-285.389	1123.86	477.059	-267.827	1050.32	496.853	-323.173	883.496	448.853	-333.695	804.4	510.845	-294.82	798.675	485.778	-335.462	730.342
799	0	271.93	-444.686	1576.81	153.515	-447.143	1570.01	272.077	-279.343	1524.07	164.207	-284.812	1516.38	221.959	-310.543	1428.79	229.497	-232.538	1149.99	235.503	-432.571	1336.13	242.609	-498.057	1142.44	143.837	-224.996	1222.91	410.186	-367.316	1359.95	477.595	-296.779	1121.83	478.305	-279.189	1048.42	497.764	-334.286	881.351	449.715	-343.997	802.01	511.803	-305.883	796.628	486.496	-346.296	728.209
800	0	273.83	-455.441	1575.34	155.377	-457.771	1568.6	273.997	-289.984	1522.76	166.106	-295.355	1515.03	223.841	-321.132	1427.48	230.788	-243.647	1148.25	237.238	-443.237	1334.78	243.711	-508.86	1141.15	145.498	-235.61	1221.43	411.804	-377.95	1358.25	479.212	-308.533	1119.92	479.481	-290.665	1046.5	498.799	-345.593	879.347	450.55	-355.578	800.196	512.669	-317.329	794.599	487.286	-357.403	726.24
801	0	275.544	-466.09	1573.96	157.151	-468.373	1567.38	275.977	-300.603	1521.54	167.893	-306.039	1513.87	225.847	-331.712	1426.17	233.071	-254.421	1146.48	239.057	-453.867	1333.56	245.116	-519.82	1140.13	147.308	-246.259	1220.11	413.556	-388.797	1356.8	480.68	-320.193	1118.04	480.81	-302.264	1044.61	499.855	-357.12	877.528	451.678	-366.914	798.552	513.81	-328.647	792.769	488.196	-368.799	724.565
802	0	277.613	-476.831	1572.75	159.232	-478.939	1566.09	278.028	-311.273	1520.32	170.301	-316.479	1512.68	227.96	-342.234	1424.83	234.492	-265.84	1145.12	240.986	-464.67	1332.61	246.746	-530.911	1139.28	149.369	-257.028	1218.73	415.833	-399.63	1355.36	482.289	-331.942	1116.1	482.222	-314.068	1042.62	500.964	-368.997	875.672	452.739	-378.476	796.78	514.983	-340.639	790.848	489.152	-380.543	722.782
803	0	279.789	-487.516	1571.61	161.281	-489.505	1564.96	280.317	-321.917	1519.3	172.748	-327.137	1511.8	230.361	-352.699	1423.73	236.104	-277.149	1144.02	243.058	-475.45	1331.77	248.608	-542.064	1138.61	151.456	-267.958	1217.46	417.923	-410.384	1353.99	483.863	-343.844	1114.3	483.663	-326.059	1040.79	502.195	-381.153	874.074	453.835	-390.411	795.216	516.151	-352.931	789.079	490.126	-392.643	721.084
804	0	281.553	-498.242	1570.69	163.337	-500.09	1564.06	282.641	-332.654	1518.74	175.068	-337.528	1511.11	232.745	-363.234	1422.82	238.066	-288.696	1142.71	245.251	-486.289	1331.08	250.426	-553.406	1138.19	153.756	-278.69	1216.33	419.946	-421.154	1352.95	485.475	-355.816	1112.77	485.298	-338.022	1039.42	503.37	-393.611	872.767	455.02	-402.788	793.881	517.477	-365.523	787.736	491.171	-405.108	719.617
805	0	283.937	-508.986	1570.18	165.485	-510.622	1563.52	285.238	-343.271	1518.58	177.413	-348.039	1510.79	235.352	-373.791	1422.19	240.188	-300.155	1142.08	247.593	-497.061	1330.57	252.31	-564.982	1138.07	156.058	-289.43	1215.55	422.764	-432.074	1352.38	487.389	-367.809	1111.6	487.068	-350.107	1038.28	504.789	-406.267	871.654	456.235	-415.345	792.719	518.951	-378.342	786.651	492.231	-417.898	718.471
806	0	285.907	-519.691	1569.92	167.847	-521.03	1563.29	287.836	-354.047	1518.44	180.083	-358.592	1510.64	237.848	-384.362	1421.75	242.113	-311.742	1141.54	249.962	-507.644	1330.22	254.276	-576.824	1138.08	158.362	-300.329	1215.05	424.814	-442.984	1351.48	489.014	-379.669	1110.39	488.793	-362.495	1037.04	506.169	-419.15	870.417	457.188	-428.814	791.647	520.346	-391.551	785.576	493.349	-431.107	717.219
807	0	288.316	-530.441	1569.98	170.344	-531.445	1563.42	290.443	-364.855	1518.39	182.797	-369.206	1510.65	240.403	-395	1421.62	244.208	-323.471	1141.2	252.185	-518.804	1330.54	256.207	-588.875	1138.44	160.619	-311.32	1214.82	427.403	-454.091	1350.93	491.246	-391.95	1109.34	490.496	-375.129	1035.94	507.526	-432.248	869.471	458.68	-441.503	790.52	521.667	-404.988	784.482	494.629	-444.643	716.238
808	0	290.889	-541.05	1570.54	172.773	-541.871	1564.05	293.172	-375.556	1518.59	185.326	-379.728	1511.06	242.842	-405.788	1421.73	246.23	-335.253	1140.84	254.442	-529.746	1331.1	257.997	-600.868	1139.19	162.541	-322.755	1214.75	429.403	-464.988	1350.5	493.021	-403.815	1108.69	492.069	-387.849	1035.05	509.195	-445.451	868.81	459.921	-454.986	790.201	523.288	-418.48	783.838	495.909	-458.401	715.809
809	0	293.371	-551.668	1571.49	175.288	-552.337	1565.05	295.896	-386.335	1518.96	188.177	-390.3	1511.67	245.227	-416.648	1422.25	248.092	-346.703	1141.1	256.781	-540.836	1331.92	259.694	-612.772	1140.18	164.101	-334.373	1215.31	431.935	-476.115	1350.62	495.261	-416.15	1108.42	493.82	-400.758	1034.43	510.709	-458.803	868.555	461.527	-468.341	789.87	524.57	-432.497	783.283	497.322	-472.49	715.686
810	0	295.95	-562.42	1572.58	177.936	-562.824	1566.38	298.698	-397.158	1519.4	190.601	-400.944	1512.31	247.659	-427.616	1423.08	249.839	-357.839	1141.57	258.918	-551.895	1332.87	261.269	-624.554	1141.12	165.508	-346.114	1216.37	433.616	-487.1	1350.57	496.83	-428.591	1108.14	495.395	-413.93	1033.96	512.224	-472.634	868.345	462.994	-482.484	789.788	526.18	-446.521	782.966	498.773	-486.952	715.705
811	0	298.557	-573.007	1573.76	180.456	-573.38	1568.05	301.385	-408.027	1520.06	193.592	-411.65	1513.43	249.769	-438.605	1424.17	250.768	-368.924	1142.3	260.969	-562.892	1334.01	262.605	-636.011	1142.37	166.727	-357.636	1217.77	435.983	-498.155	1351.16	498.817	-441.344	1108.12	496.846	-427.016	1033.81	513.764	-486.584	868.56	464.478	-496.847	790.011	527.711	-461.081	783.159	500.257	-501.774	716.051
812	0	301.313	-583.534	1575.2	183.113	-583.826	1569.89	304.174	-418.698	1520.7	196.105	-422.419	1514.35	251.825	-449.536	1425.58	251.944	-379.834	1143.57	262.92	-573.762	1335.47	263.958	-647.207	1143.95	167.94	-368.806	1219.26	437.787	-509.03	1351.86	500.016	-453.831	1108.38	498.46	-440.239	1034.1	515.337	-500.749	869.34	466.153	-511.807	791.121	529.344	-475.726	783.709	501.933	-516.766	716.958
813	0	304.033	-594.002	1576.48	185.948	-594.153	1571.71	306.792	-429.473	1521.56	198.852	-432.961	1515.66	253.886	-460.269	1426.96	253.133	-390.7	1145.27	264.75	-584.5	1337.01	265.187	-658.171	1145.56	169.367	-379.923	1221	439.314	-519.79	1352.65	501.871	-467.118	1109.03	500.107	-453.476	1034.71	516.91	-515.173	870.388	467.755	-527.061	792.315	531.07	-490.726	784.577	503.738	-532.176	718.007
814	0	306.874	-604.438	1577.74	188.699	-604.583	1573.64	309.389	-440.067	1522.47	200.986	-443.492	1517.24	255.77	-470.9	1428.4	254.284	-401.572	1146.81	266.606	-595.199	1338.43	266.292	-668.761	1147.14	170.701	-391.019	1222.69	441.319	-530.599	1353.84	503.303	-480.105	1109.62	501.521	-466.964	1035.29	518.545	-529.959	871.664	469.444	-542.253	793.479	532.9	-506.077	785.625	505.544	-547.77	719.186
815	0	309.505	-614.886	1578.9	191.255	-615.104	1575.46	311.807	-450.598	1523.59	203.612	-453.887	1519.11	257.619	-481.247	1429.96	255.61	-412.247	1148.2	268.086	-605.682	1339.95	267.252	-679.224	1148.82	171.764	-402.039	1224.37	442.639	-541.139	1354.94	504.628	-493.166	1110.39	503.288	-480.372	1036.36	520.161	-544.84	873.129	471.129	-557.563	794.8	534.708	-521.812	786.889	507.437	-563.735	720.601
816	0	312.12	-625.303	1580.04	193.995	-625.323	1577.3	314.204	-460.863	1524.96	205.847	-464.319	1520.82	259.446	-491.445	1431.33	256.612	-423.26	1149.99	269.476	-615.99	1341.51	268.058	-689.487	1150.45	172.83	-412.674	1225.93	444.587	-551.742	1356.39	506.077	-506.167	1111.33	504.657	-493.655	1037.27	521.732	-559.92	874.69	472.876	-573.181	796.314	536.744	-537.497	788.443	509.324	-579.917	722.157
817	0	314.672	-635.592	1580.97	196.49	-635.622	1578.98	316.383	-471.069	1526.14	208.254	-474.392	1522.9	260.981	-501.48	1432.64	257.693	-433.944	1151.11	270.716	-626.339	1342.95	268.788	-699.662	1151.97	174.093	-422.652	1227.42	445.925	-562.2	1357.48	507.3	-519.094	1111.97	506.29	-507.026	1037.96	523.327	-574.978	876.118	474.666	-589.118	797.858	538.433	-553.589	789.805	511.184	-596.455	723.753
818	0	316.82	-645.524	1581.69	198.776	-645.997	1580.78	318.459	-481.26	1527.53	210.301	-484.528	1524.94	262.654	-511.439	1434	259.524	-444.901	1152.37	271.773	-636.417	1344.36	269.293	-709.748	1153.47	175.632	-432.654	1228.64	447.157	-572.753	1358.48	508.51	-531.906	1112.67	507.663	-520.509	1038.62	524.782	-590.123	877.521	476.142	-605.035	799.307	540.199	-569.751	790.99	513	-613.231	725.384
819	0	319.316	-655.854	1582.83	201.072	-656.129	1582.35	320.354	-491.249	1528.91	212.024	-494.439	1526.85	264.074	-521.201	1435.35	260.404	-455.875	1153.63	272.874	-646.353	1345.9	269.76	-719.79	1155.01	177.052	-442.191	1229.93	448.01	-583.122	1359.37	509.873	-544.638	1113.49	508.952	-533.903	1039.32	526.345	-605.323	879.056	477.871	-621.123	801.05	541.852	-585.928	792.332	514.944	-630.185	727.467
820	0	321.46	-665.943	1583.76	203.264	-666.383	1583.99	322.169	-501.199	1530.43	213.768	-504.423	1529.05	265.652	-530.993	1436.61	261.939	-466.712	1154.59	273.643	-656.229	1347.43	269.944	-729.552	1156.44	178.531	-451.555	1231.33	449.122	-593.617	1360.5	511.29	-557.249	1114.48	510.517	-547.292	1040.03	527.907	-620.798	880.805	479.269	-636.83	802.833	543.507	-602.243	793.879	516.736	-647.384	729.604
821	0	323.313	-675.793	1584.5	205.258	-676.436	1585.44	323.907	-511.009	1531.87	215.842	-514.375	1530.82	266.948	-540.709	1438.06	263.325	-476.925	1156.29	274.395	-665.69	1348.56	270.056	-739.35	1157.71	180.232	-460.712	1232.68	450.511	-604.268	1361.68	512.615	-569.851	1115.41	511.817	-560.791	1040.8	529.309	-636.015	882.409	480.549	-652.898	804.544	545.029	-618.64	795.367	518.517	-665.007	731.799
822	0	325.218	-685.954	1585.53	207.094	-686.481	1586.9	325.458	-520.881	1533.42	217.297	-524.166	1532.96	268.416	-550.312	1439.44	265.47	-486.076	1157.78	275.238	-675.351	1349.87	269.997	-749.003	1158.97	181.876	-469.702	1234.17	451.376	-614.798	1362.8	513.977	-582.318	1116.47	513.287	-574.244	1041.65	530.606	-651.389	884.266	482.152	-669.246	806.566	546.466	-635.206	796.974	519.988	-682.195	734.08
823	0	326.935	-695.92	1586.58	208.765	-696.517	1588.45	326.964	-530.613	1535.05	218.784	-534.006	1534.74	269.662	-560.115	1441	266.776	-494.981	1158.92	275.733	-684.763	1351.29	269.781	-758.6	1160.39	183.571	-478.744	1235.7	452.246	-625.222	1364.09	515.268	-594.667	1117.73	514.862	-587.549	1042.83	531.906	-666.771	886.291	483.691	-686.115	809.157	547.816	-651.499	798.975	521.521	-699.777	736.821
824	0	328.434	-705.618	1587.64	210.485	-706.307	1589.81	328.37	-540.399	1536.61	220.189	-543.812	1536.73	270.907	-569.469	1442.49	268.405	-503.942	1160.79	276.381	-694.356	1352.82	269.658	-768.022	1161.85	185.292	-487.706	1237.3	453.141	-635.581	1365.39	516.636	-607.14	1119.08	516.26	-601.177	1044.13	532.964	-682.236	888.419	484.569	-701.612	811.181	549.212	-667.852	800.977	522.923	-717.292	739.607
825	0	329.948	-715.66	1588.84	211.88	-716.346	1591.35	329.561	-550.201	1538.14	221.337	-553.694	1538.6	272.103	-578.975	1443.96	270.081	-512.519	1162.13	277.006	-703.904	1354.17	269.526	-777.563	1163.35	187.082	-496.795	1238.89	453.935	-645.987	1366.57	517.888	-619.574	1120.35	517.734	-614.682	1045.38	534.134	-697.581	890.724	485.657	-717.89	813.709	550.587	-684.905	803.066	524.206	-734.879	742.559
826	0	331.167	-725.462	1590.05	213.121	-726.158	1592.82	330.736	-559.904	1539.65	222.577	-563.347	1540.4	273.374	-588.38	1445.46	271.664	-521.478	1164.06	277.632	-713.165	1355.57	269.424	-786.921	1164.96	188.788	-505.834	1240.51	454.471	-656.184	1367.92	519.298	-631.952	1121.93	519.151	-628.074	1046.92	535.292	-713.081	893.422	486.854	-734.101	816.434	551.365	-701.536	805.407	525.389	-752.404	745.818
827	0	332.325	-735.143	1591.28	214.186	-735.872	1594.2	331.834	-569.457	1541.38	223.454	-572.947	1542.22	274.539	-597.694	1447.08	273.177	-530.494	1165.51	278.188	-722.545	1357.18	269.363	-796.059	1166.58	190.528	-514.778	1242.08	455.714	-666.409	1369.68	520.512	-644.1	1123.57	520.776	-641.125	1048.48	536.28	-728.348	896.046	487.822	-750.276	819.449	552.766	-718.107	808.094	526.427	-769.893	749.214
828	0	333.108	-744.738	1592.34	215.148	-745.59	1595.39	332.815	-579.099	1542.81	224.615	-582.563	1543.62	275.888	-607.076	1448.32	274.693	-539.153	1166.62	278.853	-731.91	1358.5	269.365	-805.254	1168.13	192.18	-523.792	1243.43	456.465	-676.545	1370.97	521.565	-656.196	1125.07	521.996	-654.154	1050.04	537.228	-743.615	898.705	488.649	-766.473	822.525	553.578	-734.562	810.64	527.299	-787.379	752.691
829	0	334.006	-754.56	1593.42	216.136	-755.106	1596.4	333.611	-588.685	1544.27	225.039	-591.963	1545.34	277.03	-616.35	1449.61	276.013	-548.167	1168.24	279.499	-741.262	1359.77	269.546	-814.342	1169.52	193.894	-532.683	1244.82	457.257	-686.669	1372.32	522.724	-668.306	1126.55	523.282	-667.013	1051.4	538.145	-758.756	901.427	489.812	-782.927	825.586	554.545	-751.212	813.106	528.085	-804.842	756.143
830	0	334.8	-764.243	1594.49	216.827	-764.657	1597.47	334.577	-598.087	1545.65	226.203	-601.566	1546.66	278.165	-625.547	1450.79	277.562	-556.446	1169.34	280.145	-750.482	1360.99	269.884	-823.36	1171.08	195.511	-541.591	1245.99	458.13	-696.609	1373.71	523.856	-680.165	1128.12	524.686	-679.681	1052.96	539.067	-773.772	904.314	490.304	-798.834	829.019	555.12	-767.402	815.885	528.816	-822.099	759.878
831	0	335.343	-773.524	1595.38	217.526	-774.133	1598.33	335.289	-607.6	1546.97	227.127	-611.012	1547.78	279.177	-634.886	1451.89	278.658	-564.992	1170.33	280.817	-759.853	1362.26	270.231	-832.378	1172.5	196.961	-550.596	1247.14	458.659	-706.387	1374.98	525.076	-691.941	1129.73	526.089	-692.334	1054.52	539.873	-788.647	907.299	491.162	-814.767	832.418	555.944	-783.695	818.644	529.437	-839.27	763.673
832	0	336.076	-783.267	1596.18	217.973	-783.549	1598.93	336.112	-617.003	1548.09	227.746	-620.215	1548.83	280.335	-644.064	1452.81	280.469	-575.07	1171.02	281.587	-769.043	1363.14	270.77	-841.32	1173.62	198.378	-559.625	1247.92	459.76	-716.384	1376.39	526.163	-703.684	1131.15	527.395	-704.818	1055.98	540.915	-803.484	910.068	491.784	-830.761	835.732	556.861	-800.177	821.429	529.959	-856.427	767.23
833	0	336.504	-792.739	1596.71	218.551	-792.995	1599.33	336.677	-626.556	1549.01	228.47	-629.53	1549.61	281.175	-653.354	1453.55	282.078	-584.712	1171.95	282.092	-778.425	1363.97	271.359	-850.368	1174.5	199.725	-568.777	1248.59	460.592	-726.183	1377.47	527.514	-715.588	1132.58	528.721	-717.099	1057.18	541.6	-818.157	912.698	492.287	-846.532	838.923	557.23	-816.148	824.025	530.337	-873.44	770.842
834	0	336.91	-802.191	1597.22	218.937	-802.413	1599.66	337.309	-635.808	1549.73	229.023	-638.967	1550.11	282.282	-662.6	1453.95	283.581	-594.208	1172.53	282.627	-787.887	1364.62	271.898	-859.486	1175.22	200.857	-577.835	1249.08	461.346	-735.838	1378.33	528.599	-726.933	1133.76	530.046	-729.208	1058.32	542.479	-832.774	915.326	492.892	-862.305	842.105	557.742	-832.078	826.571	530.563	-890.451	774.322
835	0	337.376	-811.558	1597.5	219.438	-811.714	1599.85	337.759	-645.156	1550.05	229.55	-648.278	1550.4	282.879	-672.018	1454.24	284.672	-603.657	1172.76	283.317	-797.152	1364.88	272.613	-868.544	1175.67	201.99	-586.866	1249.34	461.964	-745.453	1378.99	529.691	-738.262	1134.57	531.24	-741.255	1059.2	543.189	-847.137	917.63	493.384	-877.992	845.293	558.323	-847.925	828.846	530.821	-907.073	777.658
836	0	337.687	-820.761	1597.53	219.813	-821.237	1599.8	338.137	-654.572	1550.19	229.825	-657.657	1550.37	283.686	-681.302	1454.35	285.377	-612.998	1172.68	283.924	-806.66	1364.98	273.416	-877.6	1175.71	203.038	-595.949	1249.45	462.569	-755.14	1379.36	530.772	-749.551	1135.22	532.545	-753.314	1059.74	543.895	-861.306	919.744	493.736	-893.397	848.158	558.473	-863.541	830.926	531.066	-923.662	781.026
837	0	338.024	-830.132	1597.55	220.145	-830.554	1599.71	338.525	-663.954	1550.1	230.245	-667.069	1550.13	284.388	-690.961	1454.3	285.833	-622.416	1172.29	284.472	-816.143	1364.9	274.151	-886.744	1175.49	204.17	-605.032	1249.38	463.181	-764.855	1379.5	531.992	-760.758	1135.75	533.712	-765.201	1060.09	544.475	-875.38	921.74	494.297	-908.568	850.846	558.618	-879.005	832.734	531.16	-940.104	784.172
838	0	338.46	-839.663	1597.51	220.353	-839.957	1599.34	338.814	-673.35	1549.97	230.534	-676.541	1549.74	285.019	-700.37	1454.12	286.146	-631.889	1172.3	284.857	-825.599	1364.61	274.954	-895.964	1175.07	205.048	-613.998	1249.28	463.832	-774.51	1379.58	532.926	-771.818	1136.05	534.989	-776.91	1060.51	545.095	-889.18	923.618	494.273	-924.001	853.766	559.082	-894.383	834.756	531.174	-956.229	787.325
839	0	338.582	-848.953	1597.21	220.664	-849.583	1598.79	339.016	-682.761	1549.54	230.646	-686.046	1549.15	285.438	-710.079	1453.8	286.671	-640.914	1172.02	285.307	-835.155	1364.19	275.657	-905.095	1174.38	205.95	-623.066	1249.06	464.261	-784.212	1379.37	533.91	-782.845	1136.16	536.001	-788.672	1060.7	545.58	-902.84	925.316	494.589	-938.645	856.197	558.651	-909.589	836.178	531.211	-972.244	790.279
840	0	338.736	-858.406	1596.74	220.876	-859.105	1598.14	338.977	-692.23	1548.68	230.801	-695.589	1548.34	286.072	-719.756	1453.26	287.349	-649.788	1171.54	285.755	-844.721	1363.39	276.356	-914.424	1173.27	206.822	-632.226	1248.65	464.647	-793.937	1378.78	534.817	-793.915	1135.97	537.103	-800.071	1060.46	545.998	-916.408	926.704	494.754	-953.325	858.446	558.663	-924.496	837.694	531.059	-988.045	793.046
841	0	338.812	-867.825	1596.26	220.922	-868.638	1597.52	339.126	-701.646	1547.81	230.864	-705.072	1547.25	286.208	-729.438	1452.69	287.966	-658.691	1170.78	286.052	-854.382	1362.59	276.922	-923.779	1172.15	207.337	-641.571	1248.12	465.022	-803.661	1378.11	535.619	-804.689	1135.68	538.06	-811.387	1060.14	546.311	-929.751	928.012	494.894	-967.727	860.711	558.643	-939.137	839.167	530.858	-1003.5	795.745
842	0	338.839	-877.081	1595.61	221.014	-878.094	1596.8	339.1	-711.202	1546.96	230.968	-714.761	1546.11	286.639	-739.301	1451.94	288.645	-667.481	1170.2	286.405	-864.013	1361.78	277.42	-933.052	1170.94	207.67	-650.99	1247.51	465.346	-813.33	1377.43	536.424	-815.412	1135.41	539.106	-822.487	1059.81	546.57	-942.809	929.196	494.994	-981.824	862.843	558.79	-953.655	840.626	530.561	-1018.73	798.382
843	0	338.883	-886.794	1594.87	220.964	-887.751	1595.87	339.08	-720.818	1545.83	230.92	-724.44	1544.92	286.891	-749.07	1451.17	288.997	-676.322	1169.65	286.573	-873.724	1360.65	277.836	-942.397	1169.47	207.979	-660.622	1246.94	465.471	-823.164	1376.43	537.121	-826.052	1134.9	539.959	-833.484	1059.17	546.836	-955.686	930.201	494.841	-995.603	864.609	558.44	-967.751	841.752	530.177	-1033.62	800.745
844	0	338.685	-896.204	1593.96	220.871	-897.269	1594.86	338.982	-730.609	1544.71	230.706	-734.102	1543.92	286.838	-759.092	1450.44	288.937	-685.383	1169.25	286.804	-883.423	1359.39	278.082	-951.772	1167.99	208.13	-670.192	1246.27	465.641	-832.938	1375.39	537.661	-836.418	1134.25	540.799	-844.346	1058.55	546.812	-968.331	931.086	494.53	-1009.16	866.292	558.48	-981.852	843.014	529.82	-1048.31	803.045
845	0	338.519	-905.87	1593.11	220.623	-906.97	1594.01	338.832	-740.28	1543.57	230.567	-743.908	1542.57	286.933	-769.02	1449.49	288.698	-694.646	1168.49	286.776	-893.259	1358.31	278.167	-961.167	1166.62	208.118	-679.846	1245.56	465.55	-842.634	1374.36	538.201	-846.497	1133.63	541.469	-854.919	1057.92	546.863	-980.697	931.895	494.236	-1022.34	867.968	557.997	-995.215	844.078	529.352	-1062.53	805.281
846	0	338.391	-915.637	1592.17	220.57	-916.681	1593.02	338.719	-750.101	1542.37	230.306	-753.704	1541.25	286.766	-778.967	1448.53	288.459	-704.073	1167.6	286.732	-903.099	1357.07	278.193	-970.557	1165.15	207.975	-689.44	1244.79	465.558	-852.38	1373.15	538.534	-856.368	1132.75	542.053	-865.361	1057.2	546.861	-992.719	932.533	494.083	-1035.12	869.281	557.794	-1008.55	844.968	528.86	-1076.41	807.257
847	0	338.077	-925.38	1591.01	220.19	-926.297	1591.87	338.52	-759.989	1540.83	230.112	-763.523	1539.84	286.558	-789.094	1447.41	288.187	-713.682	1166.55	286.42	-912.992	1355.84	278.105	-980.11	1163.68	207.769	-699.164	1243.92	465.238	-862.114	1371.8	538.692	-866.153	1131.74	542.527	-875.764	1056.1	546.741	-1004.63	933.008	493.685	-1047.69	870.287	557.368	-1021.56	845.541	528.251	-1089.9	808.968
848	0	337.844	-935.365	1589.95	219.89	-936.171	1590.72	338.155	-769.976	1539.32	230.003	-773.519	1538.36	286.186	-798.984	1446.19	287.841	-723.602	1165.66	286.355	-922.972	1354.49	277.848	-989.719	1162.33	207.314	-709.082	1242.94	465.156	-871.929	1370.5	538.903	-875.737	1130.63	542.808	-886.049	1055.02	546.575	-1016.27	933.328	493.161	-1059.91	871.274	556.911	-1034.16	845.92	527.659	-1103.05	810.559
849	0	337.445	-945.161	1588.75	219.481	-945.949	1589.62	337.861	-779.931	1537.96	229.618	-783.348	1536.81	285.952	-809.135	1444.95	287.325	-733.4	1164.27	285.883	-932.826	1353.2	277.439	-999.315	1160.92	206.733	-719.124	1241.82	464.658	-881.565	1369.16	538.948	-885.136	1129.63	543.14	-896.055	1054	546.286	-1027.57	933.409	492.846	-1071.89	872.266	556.465	-1046.31	846.327	526.995	-1115.69	811.821
850	0	336.983	-955.218	1587.39	218.966	-955.936	1588.24	337.449	-789.929	1536.4	229.261	-793.448	1535.4	285.132	-819.07	1443.63	286.714	-743.191	1163.01	285.577	-942.796	1351.79	276.969	-1008.96	1159.42	205.946	-729.19	1240.53	464.107	-891.185	1367.78	538.894	-894.508	1128.4	543.216	-905.979	1052.94	546.008	-1038.57	933.417	492.395	-1083.47	872.716	555.943	-1058.18	846.492	526.298	-1128.08	812.845
851	0	336.272	-965.258	1585.79	218.371	-965.937	1586.68	336.832	-799.959	1534.83	228.627	-803.315	1533.74	284.489	-829.188	1442.12	285.97	-753.04	1161.77	284.853	-952.883	1350.19	276.43	-1018.94	1157.87	205.116	-739.394	1239.19	463.378	-900.917	1366.15	538.567	-903.802	1126.98	543.196	-915.856	1051.54	545.683	-1049.52	933.111	491.975	-1094.94	872.925	555.117	-1069.79	846.267	525.707	-1140.08	813.427
852	0	335.624	-975.341	1584.21	217.719	-975.933	1585.22	336.195	-810.11	1533.4	228.071	-813.506	1532.38	283.694	-839.1	1440.7	285.177	-762.908	1160.15	284.403	-962.855	1348.55	275.861	-1028.94	1156.4	204.055	-749.586	1237.88	462.64	-910.582	1364.61	538.237	-913.026	1125.62	542.953	-925.602	1050.3	545.339	-1060.1	932.608	491.429	-1105.98	872.965	554.38	-1081.07	845.709	525.096	-1151.66	813.906
853	0	334.935	-985.458	1582.7	216.855	-986.075	1583.62	335.428	-820.125	1531.84	227.107	-823.441	1530.91	282.681	-849.111	1439.07	284.34	-773.064	1158.65	283.551	-972.923	1347.2	275.354	-1038.94	1154.97	202.933	-759.811	1236.34	461.402	-920.002	1363.03	537.772	-922.075	1124.33	542.643	-935.04	1048.97	544.931	-1070.44	932.165	490.888	-1116.63	872.892	553.984	-1092.04	845.202	524.436	-1162.73	813.967
854	0	333.992	-995.465	1581.03	216.016	-996.165	1581.95	334.533	-830.137	1530.37	226.146	-833.606	1529.47	281.647	-859.302	1437.55	283.473	-783.02	1157.18	282.931	-982.921	1345.43	274.726	-1049.11	1153.44	201.745	-770.046	1234.68	460.861	-929.705	1361.64	537.171	-931.216	1122.87	542.28	-944.489	1047.53	544.513	-1080.55	931.333	490.472	-1127.08	872.393	553.276	-1102.56	844.578	523.855	-1173.52	813.786
855	0	333.051	-1005.68	1579.28	215.112	-1006.35	1580.25	333.527	-840.332	1528.9	224.964	-843.517	1527.71	280.369	-869.311	1436.01	282.498	-793.076	1155.66	281.887	-993.197	1343.86	274.155	-1059.42	1151.75	200.667	-780.325	1233.15	459.78	-939.469	1360.12	536.391	-940.362	1121.41	541.615	-953.966	1046.11	543.948	-1090.38	930.422	489.89	-1137.3	871.694	552.65	-1112.79	843.649	523.264	-1183.91	813.213
856	0	331.91	-1015.9	1577.61	213.865	-1016.56	1578.48	332.174	-850.432	1527.41	223.858	-853.764	1526.2	279.265	-879.454	1434.22	281.366	-803.381	1153.93	280.955	-1003.22	1342.21	273.518	-1069.75	1150.16	199.455	-790.67	1231.39	458.746	-949.261	1358.63	535.727	-949.51	1120.03	540.922	-963.164	1044.7	543.349	-1100.01	929.225	489.278	-1147.12	870.699	552.072	-1122.61	842.625	522.698	-1193.92	812.38
857	0	330.689	-1025.91	1575.98	212.69	-1026.89	1576.96	330.985	-860.513	1525.98	222.538	-864.056	1524.54	277.826	-889.583	1432.6	280.249	-813.747	1152.18	279.928	-1013.45	1340.57	272.951	-1080.18	1148.6	198.125	-801.005	1229.54	457.63	-959.001	1357.29	534.588	-958.441	1118.54	540.072	-972.221	1043.32	542.765	-1109.38	927.969	488.792	-1156.68	869.58	551.402	-1131.96	841.435	522.141	-1203.42	811.141
858	0	329.354	-1036.13	1574.25	211.313	-1037.19	1575.23	329.428	-870.741	1524.35	221.096	-874.324	1523.03	276.409	-899.846	1430.9	279.098	-823.744	1150.46	278.736	-1023.8	1338.86	272.226	-1090.61	1146.93	196.894	-811.333	1227.7	456.341	-968.978	1355.78	533.574	-967.514	1117.04	538.99	-981.448	1041.72	542.071	-1118.52	926.37	488.14	-1165.93	867.986	550.658	-1141.06	839.796	521.713	-1212.55	809.662
859	0	327.999	-1046.41	1572.68	209.987	-1047.64	1573.55	327.864	-881.026	1522.74	219.453	-884.64	1521.4	274.977	-910.144	1429.2	277.844	-834.352	1148.65	277.369	-1034.29	1337.37	271.583	-1101.3	1145.31	195.643	-821.699	1225.82	454.658	-979.039	1354.28	532.302	-976.659	1115.56	537.902	-990.638	1040.23	541.28	-1127.44	924.543	487.464	-1174.84	866.155	549.859	-1149.8	837.899	521.206	-1221.29	807.795
860	0	326.579	-1056.61	1571.28	208.478	-1057.97	1572.09	326.173	-891.223	1521.29	217.708	-895.098	1519.91	273.254	-920.497	1427.74	276.608	-844.763	1147.17	276.153	-1044.61	1335.81	270.802	-1111.88	1143.87	194.358	-832.189	1224.07	453.622	-989.375	1353.18	530.949	-985.732	1114.27	536.706	-999.722	1039.03	540.503	-1136.05	922.777	486.801	-1183.34	864.156	549.254	-1158.18	836.061	520.715	-1229.52	805.661
861	0	324.943	-1066.8	1569.97	206.957	-1068.42	1570.69	324.297	-901.489	1519.93	215.885	-905.433	1518.34	271.556	-931.017	1426.13	275.365	-855.597	1145.57	274.671	-1055.16	1334.4	269.745	-1122.68	1142.59	193.017	-842.757	1222.31	452.298	-999.762	1352.07	529.644	-994.896	1113.1	535.573	-1008.7	1037.8	539.628	-1144.46	920.977	485.966	-1191.54	861.931	548.56	-1166.07	834.089	520.135	-1237.39	803.344
862	0	323.168	-1077.08	1568.66	205.19	-1078.9	1569.32	322.403	-911.8	1518.49	214.002	-916.031	1516.85	269.81	-941.458	1424.92	273.957	-866.432	1144.05	273.135	-1065.71	1333.09	268.693	-1133.72	1141.25	191.591	-853.501	1220.63	450.639	-1010.27	1350.9	528.148	-1004.15	1111.91	534.245	-1017.67	1036.61	538.67	-1152.72	918.863	485.206	-1199.41	859.491	547.62	-1173.64	831.869	519.534	-1244.93	800.733
863	0	321.445	-1087.48	1567.72	203.426	-1089.47	1568.2	320.671	-922.195	1517.28	212.225	-926.767	1515.66	267.974	-952.065	1423.51	272.687	-876.668	1142.29	271.477	-1076.46	1331.99	267.496	-1144.83	1140.21	190.341	-864.333	1219.04	449.007	-1020.79	1349.96	526.635	-1013.45	1110.8	532.703	-1026.62	1035.45	537.657	-1160.73	916.642	484.443	-1207.06	856.809	547.041	-1181.03	829.601	518.895	-1251.94	797.769
864	0	319.665	-1097.83	1567.13	201.474	-1100.07	1567.31	318.351	-932.532	1516.34	210.157	-937.33	1514.42	266.069	-962.689	1422.47	271.328	-888.312	1141.21	269.59	-1087.2	1331.18	266.213	-1156.08	1139.47	188.952	-875.303	1217.44	447.359	-1031.5	1349.27	524.64	-1022.57	1109.81	531.315	-1035.55	1034.64	536.648	-1168.37	914.481	483.57	-1214.23	854.142	546.201	-1187.72	827.338	518.258	-1258.52	794.698
865	0	317.734	-1108.2	1566.72	199.631	-1110.61	1566.86	316.245	-943.056	1515.58	207.921	-947.979	1513.52	264.236	-973.442	1421.71	270.177	-899.584	1140.31	268.069	-1098.01	1330.57	264.873	-1167.52	1139.01	187.559	-886.289	1216.21	445.659	-1042.37	1348.74	523.23	-1032.16	1109.22	529.641	-1044.42	1033.75	535.658	-1175.95	912.301	482.767	-1221.44	851.423	545.783	-1194.58	825.184	517.605	-1264.67	791.537
866	0	315.798	-1118.58	1566.62	197.784	-1121.33	1566.48	314.135	-953.582	1515.05	205.834	-958.8	1512.89	262.348	-984.213	1421.37	268.813	-911.028	1139.63	266.275	-1108.94	1330.23	263.485	-1179.11	1138.87	186.087	-897.252	1215.29	443.906	-1053.39	1348.53	521.531	-1041.71	1108.86	527.734	-1053.25	1033.13	534.563	-1183.26	910.253	482.015	-1227.29	848.292	544.854	-1200.67	822.775	517	-1270.34	788.219
867	0	313.802	-1129.03	1566.87	195.736	-1131.87	1566.53	311.912	-964.17	1514.8	203.765	-969.754	1512.53	260.574	-995.113	1421.23	267.475	-922.297	1139.48	264.398	-1119.84	1330.26	261.98	-1190.8	1139.12	184.818	-908.258	1214.87	442.239	-1064.4	1348.73	519.819	-1051.3	1108.97	525.928	-1062.18	1033.08	533.531	-1190.21	908.285	481.079	-1233.3	845.401	543.999	-1206.34	820.594	516.393	-1275.41	784.878
868	0	311.749	-1139.58	1567.42	193.698	-1142.69	1566.91	309.54	-974.904	1514.91	201.353	-980.489	1512.3	258.68	-1005.93	1421.35	266.175	-933.433	1139.52	262.537	-1130.89	1330.58	260.457	-1202.48	1139.62	183.676	-919.104	1214.84	440.432	-1075.57	1349.18	518.098	-1060.95	1109.33	524.071	-1071	1033.36	532.257	-1196.98	906.347	480.089	-1238.99	842.578	543.043	-1211.51	818.531	515.689	-1280.02	781.558
869	0	309.7	-1150.22	1568.23	191.57	-1153.47	1567.52	307.204	-985.632	1515.08	199.096	-991.571	1512.41	256.857	-1016.84	1421.75	264.675	-944.615	1139.81	260.518	-1141.94	1331.16	258.877	-1214.14	1140.44	182.338	-930.068	1214.99	438.564	-1086.8	1349.88	516.09	-1070.81	1109.87	521.939	-1079.95	1033.71	530.927	-1203.42	904.483	479.052	-1244.34	839.809	541.986	-1215.98	816.42	515.009	-1284.21	778.307
870	0	307.526	-1160.9	1569.36	189.42	-1164.26	1568.48	304.979	-996.466	1515.63	196.878	-1002.53	1512.85	255.013	-1027.7	1422.54	263.165	-955.744	1140.53	258.851	-1152.97	1332.02	257.402	-1225.72	1141.58	180.96	-941.028	1215.67	436.763	-1098.1	1350.92	513.932	-1080.73	1110.49	519.832	-1089	1034.46	529.62	-1209.71	903.061	478.127	-1249.24	837.204	541.07	-1220.42	814.603	514.495	-1287.54	775.078
871	0	305.371	-1171.43	1570.8	187.4	-1175.16	1569.64	302.651	-1007.2	1516.77	194.604	-1013.55	1513.66	253.152	-1038.61	1423.6	261.625	-966.935	1141.74	256.976	-1163.95	1333.27	255.847	-1237.08	1143.05	179.599	-951.987	1216.69	434.56	-1109.11	1352.26	512.125	-1090.94	1111.94	517.678	-1097.95	1035.81	528.194	-1215.6	901.917	476.945	-1253.59	834.818	540.06	-1224.31	813.332	513.871	-1290.59	772.259
872	0	303.344	-1182.11	1572.39	185.238	-1185.9	1570.9	300.573	-1018.03	1518.04	192.388	-1024.4	1514.76	251.202	-1049.4	1424.99	260.254	-977.933	1143.02	255.151	-1174.77	1334.74	254.383	-1248.27	1144.68	178.142	-962.897	1217.99	433.171	-1120.27	1354.3	509.775	-1101.1	1113.53	515.546	-1106.91	1037.54	526.753	-1221.42	901.133	475.816	-1257.74	832.759	539.315	-1228.19	812.487	513.123	-1293.28	769.637
873	0	301.203	-1192.94	1574.04	183.158	-1196.81	1572.19	298.367	-1028.77	1519.58	190.347	-1035.36	1516.1	249.38	-1060.12	1426.57	258.788	-989.32	1144.53	253.366	-1185.57	1336.26	252.974	-1259.24	1146.37	176.604	-973.831	1219.17	431.419	-1131.27	1356.29	508.076	-1111.94	1115.48	513.291	-1115.94	1039.4	525.107	-1227.03	900.315	474.649	-1261.55	830.839	538.321	-1231.71	811.839	512.202	-1295.51	766.977
874	0	299.093	-1203.7	1575.61	181.166	-1207.78	1573.57	296.225	-1039.53	1521.35	188.175	-1046.22	1517.53	247.544	-1070.63	1428.16	257.265	-1000.66	1146.16	251.658	-1196.28	1338.03	251.601	-1270.13	1148.32	175.047	-984.746	1220.77	429.655	-1142.09	1358.4	505.992	-1122.63	1117.41	511.031	-1124.87	1041.42	523.476	-1232.57	899.969	473.24	-1265.21	829.205	537.075	-1234.94	811.275	511.15	-1297.59	764.591
875	0	297.012	-1214.31	1577.34	179.274	-1218.45	1574.88	294.151	-1050.05	1523.39	185.993	-1056.91	1519.32	245.693	-1081.11	1429.76	255.714	-1011.98	1147.73	249.956	-1206.8	1339.85	250.424	-1280.65	1150.44	173.467	-995.538	1222.2	428.028	-1152.58	1360.75	503.848	-1133.24	1119.51	508.922	-1133.6	1043.69	521.892	-1237.98	899.945	471.921	-1268.69	828.013	536.286	-1238.27	811.37	509.992	-1299.14	762.28
876	0	295.145	-1224.92	1578.85	177.279	-1229.24	1576.07	292.097	-1060.58	1525.4	183.873	-1067.5	1520.98	244.047	-1091.26	1431.45	254.251	-1023.26	1149.24	248.353	-1217.13	1341.59	249.381	-1291.13	1152.58	171.845	-1006.46	1223.48	426.432	-1162.9	1363.02	501.841	-1143.83	1121.56	506.841	-1142.43	1045.91	520.302	-1243.39	900.109	470.48	-1272.18	827.109	535.358	-1241.8	811.56	508.824	-1300.71	760.453
877	0	293.295	-1235.59	1580.2	175.42	-1240.09	1577.05	290.199	-1070.82	1527.34	182.06	-1078.11	1522.85	242.421	-1101.5	1433.06	252.789	-1034.24	1150.92	246.92	-1227.44	1343.23	248.39	-1301.47	1154.64	170.286	-1017.29	1224.9	425.112	-1173.11	1365.13	499.909	-1154.35	1123.41	504.873	-1151.14	1048.04	518.546	-1248.91	900.379	469.174	-1275.52	826.209	534.512	-1245.59	811.942	507.459	-1302.28	758.58
878	0	291.424	-1246.19	1581.54	173.51	-1250.69	1578	288.324	-1081.3	1529.53	180.197	-1088.38	1524.58	240.791	-1111.68	1434.49	251.553	-1045.12	1152.58	245.596	-1237.69	1344.8	247.419	-1311.65	1156.65	168.888	-1027.96	1226.23	423.679	-1183.1	1367.27	498.106	-1164.57	1125.29	503.083	-1159.66	1050.11	516.976	-1254.53	900.788	467.915	-1278.64	825.325	533.65	-1249.48	812.53	506.016	-1303.92	756.94
879	0	289.57	-1256.56	1582.81	171.637	-1261.31	1578.89	286.63	-1091.49	1531.64	178.464	-1098.72	1526.2	239.165	-1121.81	1435.96	250.459	-1055.42	1153.9	244.418	-1247.76	1346.37	246.7	-1321.62	1158.41	167.498	-1038.7	1227.19	422.489	-1192.87	1369.33	496.463	-1174.37	1127.13	501.395	-1167.88	1052.14	515.449	-1259.89	901.231	467.18	-1281.47	824.572	532.917	-1253.45	813.29	504.466	-1305.44	755.454
880	0	287.769	-1267.05	1584.1	169.945	-1271.82	1579.7	284.987	-1101.66	1533.61	176.873	-1109.03	1527.62	237.733	-1131.78	1437.39	249.204	-1065.62	1155.27	243.419	-1257.85	1347.7	246.074	-1331.65	1159.94	166.137	-1049.17	1228.32	421.354	-1202.53	1371.01	494.882	-1183.95	1128.64	499.754	-1176.09	1053.83	513.778	-1265.8	901.472	465.726	-1284.91	824.011	532.066	-1257.75	813.913	502.882	-1307.19	754.044
881	0	286.082	-1277.55	1585.24	168.234	-1282.11	1580.43	283.365	-1111.86	1535.32	175.342	-1119.29	1529.11	236.525	-1141.65	1438.63	247.906	-1075.35	1156.45	242.491	-1267.67	1348.97	245.831	-1341.31	1161.02	164.935	-1059.39	1229.6	420.213	-1212.04	1372.41	493.632	-1193.07	1129.92	498.166	-1184.18	1055.18	512.331	-1271.49	901.706	464.415	-1288.56	823.521	531.536	-1262.29	814.447	501.398	-1309.25	752.778
882	0	284.503	-1287.83	1586.44	166.72	-1292.55	1581.29	281.888	-1122.06	1537.02	173.784	-1129.29	1530.5	235.274	-1151.57	1439.95	246.614	-1084.88	1157.97	241.718	-1277.52	1350.13	245.338	-1351.16	1162.26	163.925	-1069.32	1230.68	419.246	-1221.36	1373.79	492.466	-1201.79	1131.32	496.748	-1192.03	1056.52	510.93	-1277.3	902.108	463.01	-1292.28	823.354	530.932	-1267	815.215	500.015	-1311.43	751.761
883	0	282.982	-1298.09	1587.65	165.156	-1302.7	1582.02	280.503	-1132.28	1538.64	172.575	-1139.43	1531.67	234.098	-1161.41	1441.15	245.535	-1094.09	1159.22	241.108	-1287.1	1351.23	245.091	-1360.42	1163.12	162.644	-1079.25	1231.69	418.501	-1230.49	1375.17	491.471	-1209.99	1132.58	495.498	-1199.63	1057.84	509.68	-1283	902.578	461.71	-1296.26	823.309	530.022	-1271.69	815.917	498.617	-1313.86	750.982
884	0	281.396	-1308.26	1588.51	163.645	-1312.84	1582.67	279.098	-1142.32	1540.05	171.272	-1149.52	1532.79	232.975	-1171.21	1442.38	244.17	-1103.85	1160.59	240.466	-1296.83	1352.07	245.011	-1369.83	1163.71	161.333	-1089.06	1232.8	417.836	-1239.63	1376.28	490.598	-1217.88	1133.58	494.314	-1207.02	1058.88	508.384	-1288.71	902.768	460.915	-1301.21	823.16	529.35	-1276.99	816.527	497.366	-1316.7	750.375
885	0	280.005	-1318.33	1589.47	162.376	-1322.97	1583.29	277.903	-1152.31	1541.44	169.964	-1159.49	1533.86	232.117	-1180.92	1443.44	243.085	-1112.98	1161.75	239.997	-1306.3	1352.85	245.186	-1378.58	1164.06	160.157	-1098.58	1234.04	417.043	-1248.54	1377.25	489.791	-1225.34	1134.47	493.299	-1214.17	1059.8	507.396	-1294.79	903.18	459.73	-1304.54	823.028	528.286	-1281.71	816.996	496.118	-1319.56	749.812
886	0	278.711	-1328.38	1590.51	161.091	-1332.75	1584	276.907	-1162.18	1542.79	168.841	-1169.19	1534.92	231.026	-1190.55	1444.5	241.527	-1122.28	1162.66	239.545	-1315.72	1353.73	245.169	-1387.64	1164.78	158.759	-1108.16	1235.16	416.248	-1257.23	1378.21	489.069	-1232.34	1135.34	492.325	-1221.01	1060.79	506.174	-1300.02	903.398	458.417	-1308.94	823.276	527.546	-1286.69	817.733	494.944	-1323.03	749.648
887	0	277.563	-1338.34	1591.56	159.937	-1342.77	1584.69	275.823	-1171.99	1544.13	167.446	-1179.04	1536.02	230.075	-1200.07	1445.62	240.32	-1131.32	1163.84	239.11	-1325.01	1354.58	245.305	-1396.86	1165.5	157.389	-1117.57	1236.18	415.602	-1265.9	1379.25	488.347	-1239.01	1136.22	491.399	-1227.62	1061.7	505.33	-1305.66	903.902	457.495	-1313.72	823.643	526.852	-1291.63	818.476	494.129	-1327.13	749.813
888	0	276.564	-1348.24	1592.35	158.849	-1352.56	1585.33	274.691	-1181.74	1545.31	166.8	-1188.85	1537.16	229.137	-1209.49	1446.71	239.015	-1140.17	1165.11	238.931	-1334.36	1355.36	245.394	-1405.81	1166.13	156.151	-1126.87	1237.55	414.916	-1274.45	1380.02	487.754	-1245.4	1137.11	490.366	-1234.15	1062.39	504.568	-1311.18	904.225	456.709	-1318.78	824.036	526.47	-1296.8	818.914	493.363	-1331.43	750.076
889	0	275.521	-1357.93	1593.14	158.007	-1362.34	1585.97	273.855	-1191.42	1546.56	166.032	-1198.56	1538.22	228.152	-1218.9	1447.8	237.77	-1149.27	1166.07	238.544	-1343.59	1356.18	245.639	-1414.53	1166.77	154.525	-1135.9	1238.66	414.054	-1282.8	1380.85	487.14	-1251.53	1138	489.444	-1240.55	1063.27	503.908	-1316.65	904.77	456.06	-1323.96	824.551	525.424	-1301.85	819.354	492.674	-1336.22	750.589
890	0	274.613	-1367.59	1593.99	157.001	-1372.08	1586.61	273.029	-1200.95	1547.92	165.246	-1207.92	1539.26	227.141	-1228.27	1448.75	236.425	-1157.54	1166.96	237.995	-1352.57	1357.01	245.608	-1423.79	1167.8	153.198	-1145.11	1239.72	413.482	-1291.1	1382.04	486.573	-1257.41	1139.15	488.644	-1246.65	1064.46	503.521	-1322.13	905.508	455.448	-1329.31	825.279	524.726	-1306.72	820.19	492.028	-1341.2	751.218
891	0	273.795	-1377.22	1594.67	156.255	-1381.62	1587.18	272.064	-1210.46	1549.02	164.058	-1217.67	1540.43	226.329	-1237.38	1449.61	235.237	-1166.79	1167.94	237.721	-1361.71	1357.8	245.651	-1432.44	1168.57	151.696	-1154.25	1240.61	412.836	-1299.38	1382.96	486.072	-1263.29	1140.17	487.807	-1252.82	1065.41	502.97	-1327.53	906.093	455.179	-1335.01	825.951	523.983	-1311.48	820.781	491.59	-1346.72	752.04
892	0	273.268	-1386.8	1595.24	155.687	-1391.36	1587.73	271.37	-1219.85	1550.04	163.558	-1226.97	1541.42	225.192	-1246.6	1450.46	234.243	-1175.72	1168.83	237.425	-1370.73	1358.47	245.836	-1441.1	1169.34	150.426	-1163.7	1241.6	411.92	-1307.55	1383.7	485.295	-1269.14	1141.16	486.955	-1258.98	1066.34	502.803	-1333.12	906.818	454.556	-1340.86	826.776	523.185	-1316.6	821.433	491.463	-1352.35	752.663
893	0	272.727	-1396.28	1595.85	155.06	-1400.77	1588.35	270.511	-1229.1	1551.06	162.764	-1236.57	1542.32	224.382	-1255.72	1451.22	233.243	-1184.79	1169.6	236.919	-1379.66	1359.25	246.018	-1449.65	1170.06	149.266	-1172.77	1242.38	411.324	-1315.71	1384.65	484.447	-1274.97	1142.31	486.084	-1265.13	1067.39	502.329	-1338.54	907.629	454.548	-1347.07	827.762	522.205	-1321.56	822.014	491.321	-1358.83	753.945
894	0	272.234	-1405.56	1596.44	154.641	-1410.35	1588.94	269.931	-1238.31	1552	162.108	-1245.84	1543.21	223.431	-1264.8	1451.92	232.129	-1193.31	1170.17	236.553	-1388.61	1359.99	246.104	-1458.25	1170.94	148.124	-1182.16	1243.11	410.807	-1323.85	1385.58	483.484	-1280.81	1143.31	485.494	-1271.17	1068.58	502.434	-1344.24	908.624	454.421	-1353.49	828.915	521.678	-1326.65	822.901	491.054	-1365.09	755.299
895	0	271.801	-1414.89	1596.9	154.182	-1419.64	1589.42	269.289	-1247.68	1552.9	161.341	-1255.14	1544.15	222.625	-1273.78	1452.56	231.359	-1202.69	1171.08	236.212	-1397.6	1360.49	246.195	-1466.97	1171.55	146.966	-1191.45	1243.72	410.238	-1332.05	1386.4	482.631	-1286.82	1144.25	484.903	-1277.33	1069.63	502.251	-1350.06	909.413	454.119	-1360.25	829.948	521.068	-1332.07	823.664	490.997	-1371.68	756.374
896	0	271.361	-1424.16	1597.27	153.869	-1429.28	1589.89	268.766	-1256.84	1553.52	160.724	-1264.57	1544.89	221.733	-1283	1453.14	230.548	-1211.86	1171.59	235.861	-1406.57	1360.96	246.245	-1475.93	1172.07	146.04	-1200.85	1244.2	409.728	-1340.34	1386.99	481.893	-1293.14	1145.09	484.249	-1283.63	1070.45	502.214	-1356.06	910.148	454.175	-1367.16	830.728	520.415	-1337.76	824.283	491.17	-1378.74	757.406
897	0	271.26	-1433.36	1597.71	153.512	-1438.49	1590.26	268.106	-1265.98	1554.16	159.946	-1273.81	1545.31	221.206	-1292	1453.48	229.719	-1220.68	1171.92	235.647	-1415.6	1361.43	246.288	-1484.74	1172.56	145.011	-1210.15	1244.47	409.191	-1348.53	1387.54	481.246	-1299.65	1145.89	483.671	-1289.8	1071.31	502.146	-1362.12	910.87	454.118	-1374.23	831.704	519.707	-1343.48	824.853	491.279	-1385.68	758.567
898	0	270.943	-1442.5	1598.04	153.29	-1447.96	1590.6	267.547	-1274.89	1554.58	159.798	-1283.2	1545.81	220.326	-1301.08	1453.81	229.15	-1229.39	1172.08	235.413	-1424.58	1361.82	246.309	-1493.87	1172.78	144.188	-1219.31	1244.85	408.981	-1356.9	1388.01	480.767	-1306.26	1146.61	483.328	-1296.24	1072.05	502.124	-1368.36	911.537	454.217	-1381.47	832.513	518.98	-1349.43	825.304	491.415	-1392.86	759.519
899	0	270.878	-1451.61	1598.2	153.167	-1457.27	1590.78	266.916	-1284.11	1554.84	159.237	-1292.35	1546.1	219.967	-1310.1	1453.94	228.891	-1237.92	1172.14	235.322	-1433.63	1362.07	246.417	-1502.77	1173.01	143.343	-1228.88	1244.93	408.417	-1365.31	1388.16	480.08	-1312.91	1146.9	482.808	-1302.86	1072.51	502.151	-1374.82	912.001	454.454	-1389.17	833.221	518.297	-1355.8	825.452	491.54	-1400.16	760.222
900	0	270.765	-1460.71	1598.33	153.113	-1466.43	1590.93	266.589	-1293.14	1555.03	158.561	-1301.62	1546.49	219.194	-1319.33	1454.06	228.345	-1247.28	1172.34	235.169	-1442.7	1362.18	246.517	-1511.89	1173.15	142.771	-1238.25	1245.17	408.03	-1373.85	1388.24	479.588	-1320.02	1147.42	482.56	-1309.59	1072.87	502.08	-1381.41	912.419	454.526	-1396.9	833.953	517.635	-1362.31	825.672	491.615	-1407.53	760.887
901	0	270.505	-1469.66	1598.38	152.941	-1475.75	1591.04	266.202	-1302.24	1555.28	158.395	-1310.85	1546.87	218.782	-1328.51	1454.08	227.803	-1256.68	1172.57	235.055	-1451.77	1362.21	246.501	-1521.15	1173.2	142.124	-1247.81	1245.16	407.831	-1382.38	1388.47	479.286	-1327.07	1147.96	482.059	-1316.07	1073.29	502.182	-1388.21	912.855	454.588	-1404.6	834.543	516.956	-1368.9	825.801	491.649	-1415.08	761.597
902	0	270.602	-1478.71	1598.36	152.891	-1484.9	1591.04	265.885	-1311.13	1555.25	158.356	-1320	1546.73	218.414	-1337.76	1454.02	227.019	-1265.52	1172.32	234.956	-1460.93	1362.16	246.459	-1530.3	1173.06	141.488	-1257.15	1245.03	407.639	-1391.04	1388.53	479.007	-1334.37	1148.36	481.94	-1323.01	1073.84	502.063	-1395.18	913.037	454.557	-1412.46	834.985	516.401	-1375.8	826.111	491.642	-1422.78	761.974
903	0	270.692	-1487.85	1598.15	153.176	-1494.18	1590.92	265.67	-1320.17	1555.11	157.735	-1329.25	1546.62	218.059	-1347.01	1453.9	226.648	-1274.98	1172.27	234.969	-1470.15	1361.95	246.533	-1539.56	1172.66	141.024	-1266.72	1244.77	407.373	-1399.92	1388.17	478.778	-1341.98	1148.41	481.491	-1330.25	1073.62	502.079	-1402.45	913.007	454.566	-1420.6	835.232	515.783	-1383.08	825.967	491.596	-1430.66	762.084
904	0	270.782	-1496.9	1598	153.13	-1503.33	1590.93	265.432	-1329.23	1554.8	157.785	-1338.46	1546.47	218.01	-1356.25	1453.62	226.182	-1283.76	1171.85	235.05	-1479.44	1361.73	246.673	-1548.62	1172.24	140.596	-1276.2	1244.42	407.268	-1408.86	1387.89	478.619	-1349.56	1148.42	481.253	-1337.6	1073.56	502.035	-1409.8	912.994	454.564	-1428.75	835.439	515.202	-1390.55	825.691	491.444	-1438.64	762.23
905	0	271.002	-1505.79	1597.75	153.312	-1512.62	1590.78	265.403	-1338.24	1554.58	157.756	-1347.65	1546.27	217.673	-1365.59	1453.17	225.861	-1293.15	1171.49	235.086	-1488.65	1361.44	246.78	-1557.7	1171.67	140.225	-1285.62	1244.01	407.241	-1417.79	1387.61	478.494	-1357.44	1148.45	481.318	-1344.96	1073.65	501.99	-1417.33	912.893	454.478	-1436.8	835.499	514.712	-1398	825.563	491.412	-1446.66	762.336
906	0	271.286	-1514.77	1597.4	153.587	-1521.79	1590.47	265.388	-1347.36	1553.88	157.605	-1357	1545.71	217.711	-1374.98	1452.78	225.958	-1302.37	1170.95	235.209	-1498.07	1361.05	246.89	-1566.87	1171.1	140.126	-1295.17	1243.44	407.158	-1427	1387	478.388	-1365.41	1148.16	481.118	-1352.86	1073.36	501.925	-1425.17	912.563	454.432	-1445.2	835.393	514.475	-1405.91	825.109	491.265	-1454.91	762.208
907	0	271.5	-1523.82	1596.84	153.953	-1530.92	1590.07	265.401	-1356.46	1553.06	157.825	-1366.17	1544.91	217.906	-1384.35	1452.04	225.645	-1311.55	1170.41	235.362	-1507.48	1360.47	246.914	-1576.43	1170.14	140.292	-1304.8	1242.64	407.174	-1436.32	1386.19	478.306	-1373.66	1147.64	480.975	-1360.95	1072.76	501.854	-1433.28	912.001	454.38	-1453.54	834.917	514.004	-1414.07	824.364	491.035	-1463.3	761.682
908	0	271.848	-1532.89	1596.34	154.282	-1540.21	1589.74	265.458	-1365.54	1552.15	158.15	-1375.48	1544.09	218.051	-1393.99	1451.28	225.627	-1320.74	1169.58	235.527	-1517.01	1359.78	246.924	-1585.74	1169.45	140.566	-1314.49	1241.81	407.308	-1445.68	1385.46	478.401	-1382.02	1147.19	480.974	-1369.18	1072.31	501.767	-1441.43	911.365	454.283	-1462.18	834.505	513.835	-1422.18	823.845	490.895	-1471.97	761.401
909	0	272.337	-1541.96	1595.76	154.743	-1549.31	1589.18	265.658	-1374.63	1551.2	157.733	-1384.76	1542.96	218.126	-1403.48	1450.42	226.554	-1330.24	1168.96	235.796	-1526.64	1359.08	246.959	-1595.33	1168.56	140.754	-1324.18	1240.97	407.5	-1455.11	1384.63	478.35	-1390.65	1146.6	481.014	-1377.52	1071.65	501.774	-1449.93	910.611	454.194	-1470.82	833.896	513.623	-1430.6	823.145	490.768	-1480.35	760.53
910	0	272.921	-1551.09	1595.06	155.268	-1558.69	1588.47	265.994	-1384.03	1550.02	158.473	-1394.23	1542.3	218.513	-1413.07	1449.41	226.802	-1339.67	1167.85	236.112	-1536.32	1358.12	247.09	-1605.04	1167.48	140.97	-1333.83	1240.05	407.8	-1464.78	1383.58	478.412	-1399.61	1145.72	480.993	-1386.33	1070.82	501.758	-1458.62	909.712	454.24	-1479.45	832.823	513.448	-1439.29	822.159	490.703	-1489.07	759.56
911	0	273.528	-1560.23	1594.17	155.949	-1567.97	1587.78	266.452	-1393.35	1548.69	158.607	-1403.69	1541.09	218.928	-1422.88	1448.42	227.329	-1349.23	1166.89	236.476	-1546.1	1357.15	247.201	-1614.86	1166.24	141.657	-1343.62	1239.07	408.189	-1474.66	1382.42	478.528	-1408.79	1144.68	481.209	-1395.34	1069.93	501.952	-1467.52	908.671	454.269	-1488.49	831.791	513.454	-1448.12	820.989	490.605	-1497.91	758.46
912	0	274.219	-1569.38	1593.31	156.556	-1577.2	1586.94	266.897	-1402.63	1547.25	159.128	-1412.99	1539.65	219.374	-1432.62	1447.26	227.749	-1358.73	1165.82	236.88	-1555.86	1356.06	247.338	-1624.63	1165.03	142.094	-1353.42	1237.92	408.661	-1484.45	1381.28	478.762	-1417.95	1143.61	481.443	-1404.47	1068.85	502.026	-1476.48	907.518	454.346	-1497.4	830.637	513.494	-1456.97	819.905	490.642	-1506.7	757.231
913	0	274.953	-1578.74	1592.2	157.304	-1586.6	1586.07	267.528	-1411.96	1545.68	159.584	-1422.65	1538.18	220.058	-1442.34	1445.91	228.429	-1368.38	1164.3	237.333	-1565.69	1354.9	247.519	-1634.65	1163.67	142.673	-1363.24	1236.55	409.208	-1494.48	1379.95	479.028	-1427.44	1142.36	481.74	-1413.61	1067.62	502.204	-1485.64	906.076	454.483	-1506.51	829.253	513.787	-1466.24	818.568	490.724	-1515.64	755.762
914	0	275.64	-1588.13	1590.89	158.038	-1596.07	1584.88	268.221	-1421.55	1543.89	160.351	-1432.19	1536.59	220.947	-1452.3	1444.41	229.098	-1378.05	1162.74	237.84	-1575.75	1353.51	247.685	-1644.92	1162.08	143.499	-1373.2	1235.13	409.759	-1504.69	1378.16	479.273	-1437.2	1140.66	481.85	-1423.37	1066.03	502.46	-1495.13	904.327	454.736	-1515.96	827.638	513.675	-1475.27	816.804	490.772	-1524.87	754.058
915	0	276.56	-1597.54	1589.51	158.985	-1605.46	1583.74	269.008	-1431.12	1542.07	161.488	-1441.64	1535.09	221.663	-1462.24	1442.88	230.03	-1387.85	1161.35	238.402	-1585.83	1352.09	247.965	-1655.2	1160.38	144.406	-1383.09	1233.52	410.473	-1515.03	1376.4	479.715	-1447.13	1138.93	482.171	-1433.32	1064.24	502.733	-1504.68	902.432	454.978	-1525.39	825.701	513.978	-1484.67	814.939	491.105	-1534.12	752.178
916	0	277.528	-1607.03	1588.26	159.823	-1614.95	1582.66	269.953	-1440.72	1540.26	162.358	-1451.31	1533.23	222.771	-1472.21	1441.42	231.215	-1397.73	1159.78	239.055	-1595.9	1350.76	248.288	-1665.47	1158.87	145.463	-1392.99	1232.04	411.301	-1525.43	1374.86	480.239	-1457.18	1137.31	482.669	-1443.23	1062.68	503.168	-1514.28	900.758	455.334	-1534.91	824.033	514.273	-1494.23	813.26	491.553	-1543.64	750.49
917	0	278.635	-1616.66	1587.02	160.835	-1624.63	1581.53	271.16	-1450.55	1538.55	163.357	-1461.13	1531.79	223.858	-1482.28	1439.79	232.262	-1407.61	1158.23	239.802	-1606.02	1349.29	248.627	-1675.81	1157.25	146.547	-1402.98	1230.58	412.207	-1536	1373.12	480.803	-1467.54	1135.54	482.889	-1453.84	1060.76	503.675	-1524.19	898.798	455.755	-1544.54	822.05	514.676	-1503.89	811.349	491.778	-1552.97	748.447
918	0	279.727	-1626.45	1585.62	161.914	-1634.27	1580.16	272.329	-1460.4	1536.67	164.504	-1470.79	1530.04	225.166	-1492.34	1438.21	233.441	-1417.67	1156.65	240.572	-1616.31	1347.74	248.968	-1686.33	1155.41	147.939	-1413.03	1228.98	413.2	-1546.77	1371.23	481.528	-1478.25	1133.57	483.613	-1464.39	1058.77	504.251	-1534.3	896.629	456.256	-1554.5	819.866	515.127	-1513.73	809.243	492.185	-1562.66	746.182
919	0	280.936	-1636.34	1584.21	163.076	-1643.87	1578.96	273.751	-1470.33	1534.98	165.802	-1480.67	1528.37	226.606	-1502.56	1436.69	234.79	-1427.83	1154.97	241.431	-1626.64	1346.31	249.269	-1696.89	1153.76	149.391	-1423.12	1227.51	414.391	-1557.66	1369.5	482.321	-1489.09	1131.72	484.425	-1475.06	1057.08	504.824	-1544.6	894.54	456.764	-1564.64	817.737	515.655	-1523.68	807.322	492.727	-1572.51	744.042
920	0	282.141	-1646.22	1582.95	164.32	-1653.56	1577.72	275.095	-1480.27	1533.4	167.307	-1490.47	1526.77	227.98	-1512.83	1435.17	236.137	-1438.2	1153.47	242.374	-1637	1344.91	249.645	-1707.47	1152.32	150.917	-1433.27	1225.93	415.628	-1568.5	1367.88	483.376	-1500.22	1130.03	485.183	-1486.11	1055.28	505.484	-1555.07	892.487	457.347	-1574.59	815.514	516.346	-1533.85	805.412	493.291	-1582.35	741.836
921	0	283.456	-1656.23	1581.65	165.662	-1663.27	1576.69	276.826	-1490.51	1531.73	168.918	-1500.45	1525.37	229.58	-1523.19	1433.81	238.052	-1448.71	1151.88	243.43	-1647.47	1343.54	250.103	-1718.02	1150.78	152.592	-1443.42	1224.62	416.87	-1579.6	1366.1	484.431	-1511.66	1128.08	486.157	-1497.47	1053.48	506.199	-1565.81	890.349	458.106	-1585.68	813.662	517.174	-1544.31	803.35	494.034	-1592.5	739.663
922	0	284.783	-1666.38	1580.42	167.127	-1673.16	1575.62	278.585	-1500.78	1530.02	170.594	-1510.38	1524.05	231.317	-1533.61	1432.38	239.395	-1459.31	1150.39	244.602	-1658	1342.25	250.483	-1728.67	1149.36	154.282	-1453.79	1223.31	418.159	-1590.82	1364.25	485.456	-1523.47	1126.07	487.051	-1509.32	1051.4	507.051	-1576.88	888.293	458.854	-1595.47	811.107	518.098	-1555.1	801.296	494.818	-1602.77	737.453
923	0	286.313	-1676.45	1579.3	168.636	-1683.02	1574.72	280.524	-1511.12	1528.6	172.449	-1520.48	1522.61	233.072	-1544.05	1431.17	240.691	-1470.12	1149.08	245.837	-1668.59	1341.16	250.992	-1739.33	1148.17	155.878	-1464.16	1222.23	419.656	-1601.92	1362.69	486.761	-1535.41	1124.3	487.945	-1521.06	1049.66	507.976	-1588.07	886.396	459.695	-1605.94	808.989	519.17	-1565.97	799.416	495.553	-1613.11	735.355
924	0	287.983	-1686.75	1578.28	170.224	-1693.08	1573.98	282.383	-1521.31	1527.21	174.319	-1530.52	1521.3	234.903	-1554.59	1429.92	242.306	-1481.3	1147.91	247.088	-1679.21	1340.08	251.644	-1750.19	1147.1	157.57	-1474.71	1221.04	421.196	-1613.04	1361.28	488.038	-1547.44	1122.54	488.966	-1533.12	1047.97	508.911	-1599.49	884.551	460.705	-1616.64	806.984	520.33	-1577.07	797.722	496.628	-1623.77	733.37
925	0	289.59	-1697.03	1577.17	171.858	-1703.16	1573.08	284.404	-1531.79	1525.77	176.418	-1540.8	1520.09	236.808	-1565.02	1428.93	243.874	-1492.81	1146.69	248.412	-1689.93	1339.06	252.368	-1761.15	1146.05	159.409	-1485.08	1220.05	422.68	-1624.29	1359.77	489.217	-1559.92	1120.68	490.149	-1545.31	1046.04	509.915	-1611.31	882.705	461.654	-1627.99	805.119	521.677	-1588.62	796.048	497.538	-1634.72	731.36
926	0	291.485	-1707.51	1576.37	173.638	-1713.33	1572.55	286.355	-1542.25	1524.61	178.309	-1550.93	1519.28	238.842	-1575.71	1428.01	245.209	-1504.45	1145.67	249.869	-1700.72	1338.21	253.231	-1772.4	1145.36	161.362	-1495.67	1219.08	424.303	-1635.48	1358.5	490.489	-1572.47	1118.9	491.214	-1557.92	1044.55	510.935	-1623.22	880.984	462.744	-1639.34	803.264	523.172	-1600.52	794.464	498.499	-1645.9	729.536
927	0	293.28	-1717.81	1576.04	175.519	-1723.5	1572.47	288.339	-1552.74	1523.94	180.403	-1561.29	1519.04	240.601	-1586.23	1427.35	246.7	-1515.84	1144.71	251.377	-1711.54	1337.84	254.202	-1783.75	1145.05	163.431	-1506.11	1218.51	426.026	-1646.59	1357.55	491.991	-1585.19	1117.62	492.59	-1570.19	1043.13	512.157	-1635.45	879.649	463.903	-1650.94	801.872	524.79	-1612.42	793.298	499.68	-1656.92	727.669
928	0	295.238	-1728.27	1575.94	177.393	-1733.67	1572.56	290.562	-1563.22	1523.53	182.557	-1571.52	1518.78	242.626	-1596.81	1427.08	248.499	-1527.96	1144.22	252.859	-1722.32	1337.77	255.21	-1795.38	1145.1	165.352	-1516.64	1218.06	427.743	-1657.83	1356.76	493.464	-1597.83	1116.32	493.706	-1583.11	1042.11	513.381	-1647.76	878.464	465.065	-1662.52	800.335	526.348	-1624.59	792.247	500.997	-1668.55	726.347
929	0	297.167	-1738.71	1575.95	179.31	-1743.97	1572.9	292.572	-1573.77	1523.48	184.579	-1581.92	1519.07	244.456	-1607.29	1426.98	250.231	-1539.9	1143.58	254.341	-1733.17	1337.98	256.234	-1807.12	1145.54	167.25	-1527.32	1217.89	429.222	-1668.86	1356.04	494.842	-1610.73	1115.43	495.121	-1595.95	1041.12	514.66	-1660.35	877.509	466.293	-1674.5	799.226	527.9	-1637.1	791.47	502.505	-1680.46	725.3
930	0	299.118	-1749.21	1576.29	181.21	-1754.22	1573.57	294.892	-1584.26	1523.82	186.889	-1592.13	1519.41	246.548	-1617.85	1427.12	251.183	-1551.86	1143.42	255.827	-1744.06	1338.51	257.282	-1818.97	1146.43	169.169	-1538.01	1217.98	430.974	-1680.1	1356.05	496.094	-1623.4	1114.78	496.205	-1609.04	1040.61	515.839	-1673.06	876.969	467.628	-1686.52	798.389	529.492	-1649.27	790.853	503.966	-1692.52	724.526
931	0	301.07	-1759.62	1577.06	183.15	-1764.45	1574.51	297.052	-1594.7	1524.51	188.799	-1602.53	1520.29	248.538	-1628.46	1427.54	252.65	-1563.88	1143.58	257.259	-1754.98	1339.45	258.332	-1830.72	1147.73	170.76	-1548.78	1218.41	432.643	-1691.1	1356.35	497.539	-1636.14	1114.74	497.368	-1622.31	1040.59	517.097	-1685.9	876.675	468.914	-1698.78	798.015	531.252	-1662.12	790.949	505.587	-1704.89	724.271
932	0	303.142	-1770.14	1578.11	185.172	-1774.75	1575.74	299.12	-1605.11	1525.03	191.073	-1612.86	1521.24	250.366	-1639.01	1428.26	253.925	-1575.87	1144.04	258.697	-1765.85	1340.67	259.34	-1842.5	1149.2	172.471	-1559.95	1219.03	434.236	-1702.26	1356.73	498.605	-1648.93	1114.62	498.5	-1635.43	1040.22	518.467	-1698.96	876.798	470.487	-1711.35	797.866	533.022	-1675.1	791.112	507.297	-1717.58	724.299
933	0	305.157	-1780.6	1579.27	187.245	-1785.11	1577.23	301.47	-1615.91	1525.96	193.07	-1623.23	1522.48	252.147	-1649.68	1429.22	255.174	-1587.93	1144.71	260.121	-1776.68	1342.03	260.275	-1854.15	1150.91	173.739	-1571.36	1220.12	435.444	-1713.22	1357.04	499.661	-1661.92	1114.71	499.332	-1648.73	1040.26	519.802	-1712.28	877.267	471.803	-1724.31	798.215	534.855	-1688.63	791.569	509.134	-1730.53	724.7
934	0	307.221	-1790.96	1580.63	189.281	-1795.32	1579.04	303.529	-1626.35	1527.15	195.303	-1633.53	1523.62	253.769	-1660.42	1430.4	256.987	-1599.6	1145.99	261.441	-1787.56	1343.66	261.129	-1865.59	1152.83	175.227	-1582.71	1221.56	437.074	-1724.41	1358.28	500.741	-1674.74	1115.24	500.485	-1662.07	1041.18	521.077	-1725.71	878.129	473.663	-1737.42	798.935	536.697	-1702	792.521	510.974	-1743.77	725.506
935	0	309.195	-1801.21	1582.01	191.315	-1805.51	1580.77	305.485	-1636.81	1528.07	197.42	-1643.9	1525.15	255.394	-1671	1431.87	258.283	-1611.12	1147.28	262.703	-1798.3	1345.29	261.905	-1876.79	1154.83	176.284	-1593.88	1223.06	438.433	-1735.45	1359.56	501.786	-1687.62	1116.18	501.518	-1675.11	1041.99	522.502	-1739.32	879.512	475.203	-1750.68	799.887	538.62	-1715.82	793.895	512.896	-1757.32	726.676
936	0	311.145	-1811.61	1583.63	193.337	-1815.76	1582.77	307.435	-1647.35	1529.34	199.353	-1654.21	1526.79	257.066	-1681.54	1433.42	259.531	-1622.53	1148.85	263.892	-1808.98	1346.98	262.666	-1887.85	1156.74	177.604	-1605.04	1224.79	439.796	-1746.52	1360.93	502.755	-1700.47	1117.17	502.519	-1688.18	1043.05	524.04	-1753.24	881.025	476.825	-1764.69	801.308	540.405	-1729.97	795.439	514.87	-1771.28	728.036
937	0	313.11	-1822.02	1585.19	195.294	-1825.91	1584.74	309.463	-1657.7	1530.62	201.196	-1664.59	1528.14	258.471	-1691.93	1435.15	260.872	-1633.96	1150.67	264.988	-1819.61	1348.72	263.228	-1898.65	1158.68	178.773	-1615.98	1226.42	441	-1757.59	1362.42	503.853	-1713.28	1118.32	503.674	-1701.45	1044.37	525.494	-1767.2	882.718	478.75	-1778.74	802.722	542.491	-1744.4	797.272	516.812	-1785.52	729.463
938	0	314.978	-1832.19	1586.74	197.184	-1836.09	1586.82	311.444	-1668.17	1531.89	203.209	-1674.62	1529.95	259.896	-1702.4	1436.66	261.982	-1645.06	1152.42	265.984	-1830.11	1350.5	263.702	-1909.18	1160.72	179.893	-1626.85	1228.33	442.216	-1768.47	1364.1	504.878	-1725.7	1119.75	504.655	-1714.33	1045.81	527.04	-1781.27	884.667	480.446	-1793.04	804.433	544.349	-1758.78	799.201	518.772	-1800.05	731.289
939	0	316.855	-1842.4	1588.2	198.983	-1846.16	1588.75	313.08	-1678.27	1533.04	204.82	-1684.92	1531.6	261.352	-1712.72	1438.22	263.35	-1656.34	1153.91	266.895	-1840.49	1352.12	264.058	-1919.58	1162.58	181.247	-1637.61	1229.93	443.288	-1779.45	1365.58	505.889	-1738.16	1121.01	506.116	-1727.43	1047.25	528.531	-1795.45	886.582	482.281	-1807.6	806.291	546.133	-1773.76	801.058	520.748	-1814.91	733.149
940	0	318.494	-1852.56	1589.47	200.687	-1856.28	1590.49	314.807	-1688.65	1534.23	206.247	-1695.14	1533.33	262.683	-1722.91	1439.68	264.373	-1667.13	1155.37	267.717	-1850.8	1353.64	264.264	-1929.83	1164.22	182.462	-1647.83	1231.37	444.174	-1790.39	1366.84	507.016	-1750.72	1122.15	507.33	-1740.36	1048.31	530.073	-1809.74	888.419	483.912	-1822.39	808.05	547.888	-1788.8	802.785	522.693	-1830.19	735.019
941	0	320.075	-1862.7	1590.67	202.257	-1866.33	1592.21	316.262	-1698.76	1535.24	208.029	-1705.16	1534.77	263.997	-1733.01	1440.93	265.243	-1678.04	1156.48	268.33	-1861.07	1355.08	264.334	-1939.88	1165.73	183.901	-1657.93	1232.55	445.104	-1801.39	1368.1	508.136	-1762.94	1123.27	508.759	-1753.33	1049.41	531.552	-1824.16	890.175	485.556	-1837.47	809.9	549.567	-1803.93	804.384	524.536	-1845.73	736.906
942	0	321.554	-1872.72	1591.84	203.645	-1876.24	1593.86	317.532	-1708.85	1536.43	209.294	-1714.97	1536.17	265.018	-1742.96	1442.23	266.943	-1688.56	1157.48	268.895	-1871.18	1356.45	264.191	-1949.84	1167.12	185.294	-1667.82	1233.84	445.94	-1812.19	1369.35	509.379	-1775.06	1124.55	509.799	-1766.13	1050.45	532.914	-1838.6	891.959	487.199	-1852.56	811.781	551.217	-1818.99	806.092	526.257	-1861.54	738.924
943	0	322.879	-1882.75	1592.88	204.979	-1886.19	1595.24	318.858	-1718.76	1537.59	210.75	-1724.91	1537.5	266.107	-1753.1	1443.28	268.444	-1698.79	1158.85	269.311	-1881.2	1357.61	263.973	-1959.65	1168.19	186.647	-1677.23	1234.98	446.612	-1823.1	1370.37	510.703	-1787.27	1125.58	511.223	-1779.07	1051.35	534.42	-1853.16	893.606	488.663	-1867.88	813.56	552.855	-1834.38	807.626	527.924	-1877.75	740.906
944	0	324.14	-1892.74	1593.87	206.282	-1896.17	1596.67	319.953	-1728.8	1538.54	211.764	-1734.81	1539.13	267.101	-1762.97	1444.53	270.015	-1708.71	1159.58	269.661	-1891.09	1358.8	263.629	-1969.39	1169.26	188.169	-1686.34	1236.2	447.206	-1834.03	1371.16	511.954	-1799.57	1126.46	512.806	-1792.06	1052.24	535.799	-1867.75	895.231	489.891	-1883.19	815.304	554.154	-1849.95	808.939	529.457	-1894.09	742.958
945	0	325.475	-1902.81	1595.02	207.424	-1906.08	1598.09	320.939	-1738.72	1539.47	212.613	-1744.79	1540.41	268.235	-1772.95	1445.76	271.577	-1718.43	1160.93	269.922	-1900.88	1359.95	263.231	-1978.9	1170.24	189.475	-1695.35	1237.43	447.752	-1844.79	1372.18	513.31	-1811.75	1127.64	514.3	-1804.97	1053.19	537.128	-1882.32	897.016	491.377	-1898.63	817.377	555.523	-1865.56	810.631	530.933	-1910.59	745.266
946	0	326.363	-1912.54	1596.01	208.39	-1915.88	1599.38	321.562	-1748.53	1540.65	213.534	-1754.78	1541.84	269.232	-1782.79	1446.94	273.162	-1727.9	1162.48	270.077	-1910.59	1360.99	262.768	-1988.45	1171.19	191.056	-1704.37	1238.61	448.253	-1855.52	1373.27	514.666	-1823.77	1128.94	515.744	-1817.67	1054.25	538.415	-1896.93	898.934	492.617	-1914.12	819.445	556.746	-1881.16	812.258	532.231	-1927.31	747.67
947	0	327.195	-1922.47	1597.03	209.185	-1925.71	1600.53	322.23	-1758.17	1541.83	214.084	-1764.34	1543.15	270.013	-1792.51	1448.11	274.757	-1737.1	1163.62	270.23	-1920.2	1362.02	262.285	-1997.88	1172.04	192.744	-1713.2	1240.01	449.048	-1866.59	1374.44	516.077	-1836.1	1130.12	517.281	-1830.69	1055.37	539.578	-1911.7	900.8	493.668	-1929.74	821.558	557.667	-1897	813.741	533.466	-1944.23	750.173
948	0	327.789	-1932.29	1597.93	209.789	-1935.55	1601.59	322.925	-1767.97	1543.01	214.586	-1774.15	1544.45	270.902	-1802.21	1449.4	276.079	-1746.06	1165.03	270.333	-1929.85	1363.02	261.788	-2007.28	1172.77	194.389	-1722.11	1241.16	449.668	-1877.43	1375.41	517.292	-1848.29	1131.26	518.806	-1843.5	1056.33	540.585	-1926.43	902.754	494.827	-1945.56	823.757	558.822	-1912.96	815.543	534.625	-1961.62	752.901
949	0	328.348	-1942.05	1599.07	210.231	-1945.29	1602.7	323.438	-1777.65	1543.98	215.362	-1783.98	1545.42	271.771	-1811.98	1450.5	277.477	-1755.07	1166.19	270.49	-1939.39	1364	261.332	-2016.51	1173.58	195.827	-1730.94	1242.21	449.994	-1887.97	1376.45	518.457	-1860.31	1132.56	520.112	-1856.07	1057.51	541.542	-1941.08	904.719	495.583	-1961.4	826.329	559.701	-1928.73	817.452	535.458	-1978.08	755.469
950	0	328.806	-1951.64	1599.88	210.69	-1954.95	1603.67	323.662	-1787.23	1544.96	215.592	-1793.73	1546.69	272.589	-1821.55	1451.49	279.073	-1763.89	1167.19	270.624	-1948.85	1364.99	261.062	-2025.52	1174.45	197.367	-1740.11	1243.46	450.842	-1898.74	1377.54	519.609	-1872.35	1133.75	521.522	-1868.74	1058.64	542.496	-1955.89	907.123	496.654	-1977.25	828.927	560.41	-1944.62	819.365	536.354	-1995.18	758.506
951	0	329.109	-1961.48	1600.83	211.083	-1964.66	1604.48	324.22	-1797	1546.07	216.147	-1803.16	1547.56	273.346	-1830.97	1452.45	280.492	-1772.85	1168.49	270.796	-1958.3	1365.88	260.849	-2034.64	1175.19	198.71	-1749.03	1244.48	450.368	-1908.67	1377.86	520.604	-1884.44	1134.81	522.883	-1881.35	1059.68	543.286	-1970.62	909.413	497.398	-1993.78	831.859	561.203	-1960.78	821.533	537.142	-2012.32	761.682
952	0	329.324	-1971.07	1601.55	211.253	-1974.32	1605.21	324.742	-1806.6	1547.14	216.431	-1812.73	1548.6	274.083	-1840.55	1453.43	281.458	-1781.83	1168.82	270.996	-1967.7	1366.75	260.697	-2043.38	1176	200.398	-1757.86	1245.55	451.465	-1919.49	1379.41	521.664	-1896.32	1136.11	524.221	-1893.85	1060.98	544.306	-1985.78	912.091	497.925	-2009.25	834.705	561.651	-1976.79	823.687	537.657	-2029.42	764.891
953	0	329.473	-1980.84	1602.51	211.396	-1983.84	1605.88	324.963	-1816.17	1548.17	216.725	-1822.19	1549.4	274.897	-1849.97	1454.31	283.049	-1790.6	1170.17	271.159	-1976.99	1367.6	260.59	-2052.24	1176.85	201.985	-1766.86	1246.35	451.978	-1929.82	1380.72	523.157	-1908.43	1137.8	525.64	-1906.06	1062.42	544.887	-2000.4	914.696	498.349	-2025.21	837.942	562.132	-1992.94	826.352	538.171	-2046.54	768.326
954	0	329.409	-1990.47	1603.03	211.356	-1993.38	1606.38	325.18	-1825.7	1549.02	216.959	-1831.85	1550.13	275.466	-1859.28	1455.06	284.424	-1799.73	1171.01	271.367	-1986.33	1368.26	260.635	-2061.05	1177.47	203.274	-1775.32	1247.24	452.249	-1939.81	1381.59	524.668	-1920.51	1139.31	526.948	-1918.34	1063.75	545.455	-2015.08	917.232	498.593	-2041.25	841.156	563.064	-2009.45	829.067	538.212	-2063.64	771.728
955	0	329.562	-2000.19	1603.55	211.524	-2002.99	1606.73	325.412	-1835.37	1549.84	217.432	-1841.19	1550.98	276.057	-1868.68	1455.69	285.415	-1808.62	1171.93	271.614	-1995.57	1368.82	260.75	-2069.89	1178.05	204.701	-1784.58	1247.74	452.613	-1950.07	1382.54	525.197	-1931.85	1140.24	528.854	-1931.03	1064.99	545.991	-2029.74	919.801	498.955	-2057.26	844.338	562.771	-2025.36	831.012	538.262	-2080.78	775.169
956	0	329.535	-2009.83	1603.97	211.542	-2012.44	1606.9	325.959	-1844.86	1550.55	217.663	-1850.48	1551.56	276.566	-1878	1456.24	286.908	-1817.55	1172.22	271.827	-2004.88	1369.24	260.86	-2078.77	1178.54	205.775	-1793.56	1248.23	453.046	-1960.11	1383.48	526.984	-1943.85	1141.64	530.117	-1943.08	1066.07	546.486	-2044.31	922.348	498.996	-2073.09	847.555	562.978	-2041.67	833.518	538.016	-2097.82	778.621
957	0	329.499	-2019.43	1604.34	211.447	-2021.79	1607.03	326.372	-1854.36	1551.37	217.851	-1859.8	1551.59	277.142	-1887.37	1456.68	288.133	-1826.73	1172.53	272.061	-2014.02	1369.51	260.997	-2087.7	1178.88	206.744	-1802.57	1248.69	453.406	-1970.03	1384.29	528.261	-1955.35	1142.9	531.592	-1955.14	1067.24	546.828	-2058.74	924.752	498.993	-2088.87	850.916	562.949	-2057.68	836.017	537.609	-2115	782.31
958	0	329.398	-2029.11	1604.43	211.315	-2031.29	1606.97	326.555	-1863.91	1551.82	218.157	-1869.19	1552.15	277.761	-1896.71	1457.01	289.089	-1835.61	1173.05	272.295	-2023.34	1369.62	261.168	-2096.85	1178.73	207.616	-1811.74	1248.88	453.423	-1979.66	1384.63	529.28	-1966.75	1143.8	532.714	-1967.05	1067.93	547.159	-2073.15	926.999	498.818	-2104.63	854.06	562.801	-2073.75	838.268	537.062	-2132.07	785.784
959	0	329.266	-2038.72	1604.44	211.212	-2040.77	1606.96	326.778	-1873.57	1552.12	218.321	-1878.65	1552.35	278.174	-1906.01	1457.13	289.849	-1844.61	1172.93	272.535	-2032.58	1369.65	261.438	-2105.77	1178.77	208.422	-1821.07	1248.88	453.738	-1989.43	1385.1	530.21	-1977.97	1144.44	533.814	-1978.9	1068.45	547.413	-2087.34	928.99	498.542	-2120.22	857.103	562.543	-2089.89	840.517	536.35	-2148.98	789.176
960	0	329.117	-2048.33	1604.5	211.049	-2050.14	1606.65	326.968	-1883.02	1552.22	218.579	-1887.92	1552.16	278.481	-1915.39	1457.09	290.282	-1853.48	1172.85	272.685	-2041.81	1369.62	261.738	-2114.72	1178.64	209.107	-1830.32	1248.84	454.121	-1999.21	1385.37	531.18	-1988.92	1144.99	534.826	-1990.49	1068.91	547.453	-2101.58	931.207	498.055	-2135.63	860.188	561.84	-2105.32	842.355	535.502	-2165.68	792.562
961	0	328.962	-2057.87	1604.34	210.893	-2059.45	1606.28	327.085	-1892.33	1552.16	218.882	-1897.3	1551.99	278.831	-1924.7	1456.88	291.026	-1862.41	1172.7	272.883	-2051.06	1369.36	262.071	-2123.65	1178.3	209.838	-1839.65	1248.59	454.619	-2008.97	1385.43	532.066	-1999.9	1145.41	535.79	-2002.13	1069.15	547.484	-2115.61	933.153	497.724	-2150.99	863.235	561.436	-2121.15	844.501	534.525	-2182.32	795.873
962	0	328.919	-2067.52	1604.14	210.841	-2068.97	1605.92	327.299	-1901.92	1552	219.096	-1906.61	1551.72	279.188	-1934.04	1456.72	291.833	-1871.36	1172.67	273.124	-2060.3	1369.06	262.53	-2132.71	1177.86	210.529	-1849.02	1248.33	454.873	-2018.61	1385.2	532.955	-2010.83	1145.46	536.668	-2013.76	1069.05	547.437	-2129.61	934.989	497.047	-2166.2	866.194	560.399	-2136.45	845.826	533.573	-2198.81	799.139
963	0	328.782	-2077.05	1603.62	210.733	-2078.31	1605.26	327.514	-1911.6	1551.8	219.141	-1915.96	1551.39	279.428	-1943.53	1456.38	292.458	-1880.27	1172.01	273.279	-2069.67	1368.63	262.905	-2141.66	1177.2	211.142	-1858.16	1248.08	454.853	-2028.07	1384.88	533.656	-2021.51	1145.46	537.477	-2025.3	1068.95	547.271	-2143.35	936.734	496.673	-2181.25	869.015	559.583	-2151.8	847.559	532.522	-2215.08	802.38
964	0	328.568	-2086.63	1603.24	210.365	-2087.75	1604.76	327.915	-1921.31	1551.68	219.221	-1925.27	1550.91	279.695	-1952.97	1455.91	292.767	-1888.35	1171.83	273.433	-2078.91	1368.01	263.209	-2150.74	1176.58	211.677	-1867.2	1247.77	455.191	-2037.59	1384.54	534.505	-2032.33	1145.59	538.329	-2036.72	1069.06	546.958	-2157.07	938.432	495.908	-2196.04	871.769	558.782	-2166.89	849.449	531.368	-2230.99	805.456
965	0	328.466	-2096.2	1602.51	210.276	-2097.26	1603.91	327.943	-1930.83	1551.33	219.305	-1934.86	1550.31	280.003	-1962.36	1455.53	293.308	-1896.62	1171.69	273.568	-2088.3	1367.33	263.496	-2159.86	1175.72	212.048	-1876.17	1247.36	455.537	-2047.22	1384.03	535.045	-2042.93	1145.41	539.046	-2048.03	1068.92	546.619	-2170.58	939.955	495.195	-2210.73	874.297	557.968	-2182.08	851.373	530.185	-2246.86	808.484
966	0	328.357	-2105.88	1601.84	210.202	-2106.79	1602.98	328.048	-1940.3	1550.67	219.262	-1944.31	1549.8	280.089	-1971.86	1454.85	293.711	-1905	1171.13	273.699	-2097.64	1366.47	263.805	-2169.07	1174.79	212.238	-1885.1	1246.84	455.581	-2056.61	1383.23	535.66	-2053.6	1144.98	539.689	-2059.45	1068.46	546.203	-2183.99	941.297	494.207	-2225.17	876.737	556.764	-2196.7	852.529	529.003	-2262.54	811.47
967	0	328.171	-2115.38	1601.07	210.002	-2116.22	1602	328.158	-1949.51	1549.94	219.202	-1953.68	1549.1	280.11	-1981.28	1454.21	293.976	-1913.72	1170.63	273.855	-2107.03	1365.68	263.94	-2178.28	1173.89	212.317	-1894.22	1246.23	455.025	-2065.55	1382.35	536.018	-2063.94	1144.51	540.013	-2070.52	1068	545.751	-2197.09	942.704	493.502	-2239.36	879.061	555.691	-2211.26	854.009	527.681	-2277.72	814.146
968	0	328.059	-2124.9	1600.26	209.927	-2125.73	1601.08	327.815	-1959.27	1549.29	219.214	-1963.16	1548.27	280.178	-1990.79	1453.35	293.871	-1922.39	1170.09	273.892	-2116.41	1364.85	264.134	-2187.45	1173.02	212.342	-1903.44	1245.46	455.521	-2074.99	1381.54	536.304	-2074.23	1143.96	540.465	-2081.58	1067.45	545.237	-2209.96	943.927	492.594	-2253.28	881.361	554.807	-2225.79	855.597	526.348	-2292.82	816.983
969	0	327.968	-2134.43	1599.28	209.818	-2135.3	1599.99	327.772	-1968.68	1548.36	219.088	-1972.7	1547.23	280.387	-2000.45	1452.45	293.667	-1931.4	1169.16	273.982	-2125.96	1363.85	264.235	-2196.77	1171.98	212.276	-1912.87	1244.5	455.593	-2084.36	1380.46	536.511	-2084.48	1143.18	540.754	-2092.57	1066.68	544.631	-2222.78	944.783	491.343	-2267.16	883.595	553.596	-2239.88	856.664	524.992	-2307.6	819.484
970	0	327.731	-2144.04	1598.09	209.582	-2144.97	1598.71	327.45	-1978.12	1547.15	219.072	-1982.39	1546.02	279.949	-2009.9	1451.24	292.88	-1940.54	1167.73	274.025	-2135.49	1362.72	264.244	-2206.12	1170.75	212.017	-1922.64	1243.44	455.682	-2093.63	1379.16	536.405	-2094.49	1142.05	540.844	-2103.43	1065.57	543.951	-2235.47	945.514	490.682	-2280.58	885.172	552.167	-2253.67	857.336	523.515	-2322.08	821.578
971	0	327.579	-2153.62	1596.95	209.437	-2154.48	1597.51	327.448	-1987.57	1546.19	218.977	-1991.88	1544.8	280.066	-2019.52	1450.03	292.982	-1950.08	1166.47	273.955	-2145.14	1361.49	264.25	-2215.58	1169.64	211.319	-1932.47	1242.33	454.841	-2102.27	1377.57	535.908	-2104.17	1140.78	540.837	-2114.12	1064.54	543.328	-2247.79	946.218	489.482	-2293.94	887.07	551.008	-2267.29	858.18	522.036	-2336.37	823.774
972	0	327.459	-2163.15	1595.7	209.226	-2164.13	1596.2	327.257	-1997.27	1544.73	218.783	-2001.5	1543.4	279.708	-2029.18	1448.65	292.079	-1959.35	1165.64	273.954	-2154.72	1360.26	264.283	-2225.09	1168.43	210.628	-1942.5	1240.98	455.322	-2111.65	1376.29	535.927	-2114.06	1139.52	540.74	-2124.66	1063.35	542.703	-2260.13	946.714	488.639	-2306.83	888.345	549.425	-2280.25	858.579	520.594	-2350.26	825.616
973	0	327.326	-2172.77	1594.28	209.144	-2173.81	1594.73	326.97	-2006.96	1543.3	218.484	-2011.18	1541.79	279.318	-2038.81	1447.31	291.345	-1968.95	1163.94	273.903	-2164.43	1358.83	264.315	-2234.72	1166.95	209.824	-1952.6	1239.63	454.84	-2120.65	1374.59	535.73	-2123.95	1138.05	540.674	-2135.33	1061.97	542.003	-2272.29	946.927	487.647	-2319.58	889.339	548.288	-2293.56	858.964	519.199	-2363.95	827.111
974	0	327.024	-2182.34	1592.87	208.955	-2183.5	1593.23	326.766	-2016.74	1541.76	218.201	-2020.88	1540.5	278.675	-2048.6	1445.97	290.416	-1978.14	1162.53	273.687	-2174.18	1357.34	264.287	-2244.39	1165.52	208.908	-1962.77	1238.35	454.741	-2129.86	1373.03	534.303	-2132.93	1136.04	540.32	-2145.88	1060.55	541.189	-2284.1	947.145	486.624	-2332.13	890.218	547.583	-2306.99	859.681	517.864	-2377.25	828.477
975	0	326.803	-2191.96	1591.47	208.655	-2193.13	1591.88	326.377	-2026.16	1540.28	217.777	-2030.66	1538.95	278.303	-2058.35	1444.57	289.363	-1986.88	1161.04	273.465	-2183.99	1355.88	264.28	-2254.15	1164.07	207.87	-1972.83	1236.98	454.304	-2138.8	1371.47	533.91	-2142.43	1134.69	540.042	-2156.21	1059.35	540.404	-2295.79	947.173	485.542	-2344.36	891.212	546.587	-2319.62	860.187	516.571	-2390.2	829.71
976	0	326.413	-2201.5	1589.91	208.306	-2202.84	1590.34	325.862	-2035.88	1538.69	217.339	-2040.77	1537.25	277.735	-2068.12	1442.95	288.477	-1996.87	1159.69	273.319	-2193.83	1354.25	264.318	-2263.96	1162.47	206.868	-1982.98	1235.44	453.962	-2147.87	1369.91	533.413	-2151.84	1133.2	539.498	-2166.45	1057.98	539.764	-2307.28	946.908	484.656	-2356.39	891.574	545.597	-2331.94	860.428	515.355	-2402.84	830.562
977	0	326.014	-2211.24	1588.39	207.881	-2212.69	1588.77	325.276	-2045.65	1536.84	216.736	-2050.64	1535.47	276.901	-2078.08	1441.35	286.893	-2006.58	1157.99	272.932	-2203.83	1352.62	264.313	-2274.13	1160.58	205.802	-1993.21	1233.86	453.518	-2157.11	1368.14	532.661	-2161.19	1131.28	538.754	-2176.59	1056.16	538.783	-2318.36	946.352	483.687	-2368.12	891.763	544.262	-2343.75	859.906	514.289	-2415.15	831.158
978	0	325.604	-2221.01	1586.96	207.373	-2222.63	1587.33	324.627	-2055.45	1535.01	216.266	-2060.56	1533.59	276.092	-2088.13	1439.73	285.839	-2016.11	1156.58	272.596	-2213.87	1351.06	264.424	-2284.04	1158.98	204.721	-2003.36	1232.25	452.683	-2166.11	1366.17	531.766	-2170.39	1129.35	537.971	-2186.65	1054.38	537.91	-2329.35	945.805	482.732	-2379.51	891.654	543.132	-2355.3	859.266	513.246	-2427.07	831.464
979	0	324.94	-2230.57	1585.61	206.873	-2232.4	1585.94	323.765	-2065.22	1533.19	215.59	-2070.41	1531.9	275.29	-2098.26	1438.16	284.863	-2025.27	1154.12	272.255	-2223.92	1349.47	264.574	-2294	1157.34	203.586	-2013.62	1230.48	452.559	-2175.59	1364.84	531.088	-2179.55	1127.62	537.187	-2196.44	1052.83	537.106	-2339.96	945.171	481.882	-2390.56	891.547	542.081	-2366.38	858.67	512.365	-2438.5	831.633
980	0	324.31	-2240.32	1584.21	206.172	-2242.23	1584.45	322.99	-2075.24	1531.48	214.621	-2080.49	1530.03	274.28	-2108.38	1436.63	283.602	-2035.22	1153.11	271.864	-2233.98	1347.83	264.669	-2304.17	1155.65	202.372	-2023.87	1228.94	451.953	-2184.97	1363.13	530.178	-2188.77	1125.88	536.33	-2206.29	1051.16	536.255	-2350.38	944.237	480.905	-2401.24	890.935	541.172	-2377.29	857.971	511.551	-2449.63	831.518
981	0	323.539	-2250.2	1582.87	205.395	-2252.28	1583.04	321.991	-2085.27	1529.78	213.683	-2090.6	1528.26	273.493	-2118.62	1435.16	282.344	-2045.11	1151.9	271.272	-2244.29	1346.25	264.719	-2314.45	1153.89	201.305	-2034.29	1227.5	450.713	-2194.33	1361.32	529.101	-2197.94	1124.04	535.271	-2215.97	1049.49	535.392	-2360.53	943.061	480.211	-2411.82	890.16	540.123	-2387.7	856.83	510.829	-2460.3	831.007
982	0	322.639	-2260.04	1581.67	204.541	-2262.37	1581.81	320.871	-2095.22	1528.26	212.566	-2100.8	1526.44	272.334	-2128.87	1433.67	281.233	-2055.04	1149.92	270.737	-2254.58	1344.8	264.69	-2324.71	1152.34	199.926	-2044.59	1225.93	450.008	-2203.91	1360.01	528.038	-2207.02	1122.56	534.155	-2225.34	1048	534.523	-2370.21	941.916	479.409	-2421.84	889.224	539.255	-2397.65	855.823	510.111	-2470.44	830.046
983	0	321.71	-2269.91	1580.57	203.632	-2272.44	1580.61	319.634	-2105.18	1526.52	211.528	-2111.09	1524.76	271.111	-2139.33	1432.2	279.996	-2065.45	1149.14	270.131	-2264.85	1343.44	264.534	-2335.2	1150.93	198.633	-2055.13	1224.47	449.331	-2213.68	1358.9	526.906	-2216.06	1121.17	533.125	-2234.72	1046.71	533.738	-2379.81	940.602	478.512	-2431.48	888.034	538.415	-2407.16	854.549	509.525	-2480.18	829.132
984	0	320.758	-2279.84	1579.51	202.689	-2282.56	1579.39	318.506	-2115.41	1525.15	210.318	-2121.36	1523.26	269.956	-2149.69	1431.07	278.513	-2075.68	1148.19	269.359	-2275.38	1342.27	264.365	-2345.69	1149.72	197.212	-2065.79	1223.21	448.342	-2223.55	1357.74	525.788	-2225.27	1119.78	531.988	-2244.02	1045.32	532.981	-2389.05	939.17	477.988	-2440.82	886.507	537.74	-2416.45	853.103	509.032	-2489.54	827.935
985	0	319.671	-2289.92	1578.66	201.589	-2292.84	1578.47	317.246	-2125.53	1523.77	208.752	-2131.76	1522.13	268.685	-2160.08	1430.04	277.569	-2086.45	1146.61	268.488	-2285.99	1341.16	263.958	-2356.43	1148.66	195.874	-2076.45	1221.9	447.307	-2233.43	1356.57	524.566	-2234.45	1118.53	530.883	-2253.27	1044.08	532.185	-2397.91	937.552	477.338	-2449.86	884.939	536.87	-2425.23	851.397	508.518	-2498.43	826.239
986	0	318.535	-2299.88	1577.71	200.36	-2303.05	1577.59	315.757	-2135.64	1522.65	207.495	-2142.02	1520.81	267.07	-2170.48	1428.91	275.985	-2097.17	1145.32	267.696	-2296.46	1340.19	263.433	-2367.23	1147.91	194.395	-2087.5	1220.66	446.294	-2243.4	1355.9	523.237	-2243.46	1117.53	529.666	-2262.26	1043.08	531.506	-2406.51	935.944	476.742	-2458.5	883.205	536.152	-2433.43	849.691	508.077	-2506.8	824.45
987	0	317.291	-2310.02	1577.23	199.104	-2313.35	1576.79	314.186	-2145.84	1521.64	205.85	-2152.51	1519.55	265.622	-2180.97	1427.78	274.835	-2108.33	1144.29	266.737	-2307.1	1339.45	262.796	-2378.3	1147.36	192.861	-2098.59	1219.29	445.043	-2253.34	1355.22	521.965	-2252.62	1116.66	528.418	-2271.23	1042.11	530.798	-2414.96	934.192	476.23	-2466.8	881.138	535.619	-2441.36	847.825	507.751	-2514.74	822.283
988	0	315.885	-2320.16	1576.84	197.733	-2323.81	1576.19	312.507	-2156.22	1520.8	204.254	-2163.02	1518.55	264.319	-2191.55	1427.09	273.613	-2119.14	1143.08	265.912	-2317.52	1338.68	262.128	-2389.66	1146.98	191.286	-2109.83	1218.15	443.825	-2263.52	1354.67	520.544	-2261.8	1115.68	526.917	-2280.09	1041.01	530.072	-2423.07	932.179	475.719	-2474.74	878.799	534.929	-2448.85	845.585	507.464	-2522.25	819.832
989	0	314.417	-2330.26	1576.62	196.383	-2334.15	1575.99	310.841	-2166.42	1520.14	202.658	-2173.57	1517.85	262.886	-2202.19	1426.55	271.8	-2130.83	1141.94	264.833	-2328.42	1338.48	261.449	-2401.07	1146.91	189.824	-2121.09	1217.36	442.666	-2273.87	1354.32	519.284	-2271.21	1115.24	525.442	-2288.91	1040.26	529.381	-2430.99	930.253	475.228	-2482.29	876.311	534.26	-2455.82	843.228	507.224	-2529.22	817.173
990	0	312.951	-2340.43	1576.77	194.758	-2344.64	1575.85	309.011	-2176.83	1519.76	200.93	-2184.19	1517.39	261.393	-2212.96	1426.08	270.702	-2142.37	1142.1	263.673	-2339.17	1338.44	260.655	-2412.5	1147.14	188.538	-2132.11	1216.78	441.583	-2284.36	1354.39	518.126	-2280.59	1115.06	524.142	-2297.66	1039.95	528.685	-2438.33	928.255	474.795	-2489.32	873.787	533.751	-2462.24	841.077	507.097	-2535.61	814.34
991	0	311.304	-2350.69	1577.12	193.217	-2354.91	1575.92	307.219	-2187.25	1519.61	199.176	-2194.84	1516.92	260.157	-2223.6	1426	269.377	-2153.74	1142.06	262.578	-2350.19	1338.66	259.81	-2424.34	1147.38	187.104	-2143.32	1216.5	440.262	-2294.99	1354.51	516.79	-2290.09	1115.1	522.742	-2306.52	1039.77	528.087	-2445.77	926.427	474.363	-2496	871.076	533.492	-2468.53	838.957	507.055	-2541.5	811.338
992	0	309.498	-2360.99	1577.7	191.461	-2365.45	1576.29	305.574	-2197.77	1519.77	197.409	-2205.41	1516.81	258.625	-2234.48	1426.15	267.904	-2164.91	1142.23	261.373	-2361.3	1339.08	259.001	-2435.82	1148.07	186.003	-2154.36	1216.4	439.098	-2305.89	1354.91	515.432	-2299.63	1115.24	521.249	-2315.28	1039.82	527.366	-2452.72	924.479	473.995	-2502.36	868.228	533.017	-2474.14	836.611	507.072	-2546.89	808.05
993	0	307.751	-2371.35	1578.68	189.656	-2375.82	1576.76	303.755	-2208.22	1520.08	195.641	-2216.13	1516.65	257.358	-2245.32	1426.49	266.954	-2176.42	1142.23	260.124	-2372.26	1339.74	258.071	-2447.52	1148.96	184.659	-2165.33	1216.51	437.896	-2316.78	1355.81	513.747	-2308.86	1115.53	519.511	-2323.68	1040	526.539	-2459.3	922.6	473.584	-2508.16	865.321	532.562	-2479.14	834.397	507.125	-2551.66	804.69
994	0	305.79	-2381.7	1579.97	187.759	-2386.23	1577.56	301.875	-2218.7	1520.78	193.828	-2226.8	1517.02	255.664	-2256.21	1427.3	265.566	-2187.85	1142.96	258.849	-2383.27	1340.67	257.124	-2459.1	1150.11	183.697	-2176.18	1216.89	436.543	-2327.68	1356.77	512.466	-2318.55	1116.4	517.969	-2332.36	1040.76	525.71	-2465.51	920.8	473.181	-2513.53	862.392	532.44	-2483.82	832.548	507.191	-2555.9	801.291
995	0	303.922	-2392.18	1581.23	185.86	-2396.7	1578.46	300.036	-2229.49	1521.57	192.142	-2237.45	1517.44	254.461	-2267.08	1428.24	264.789	-2199.32	1143.82	257.651	-2394.35	1341.78	256.097	-2470.71	1151.36	182.589	-2187.26	1217.75	435.392	-2338.82	1357.85	510.919	-2328.37	1117.24	516.315	-2341	1041.46	524.894	-2471.65	919.062	472.794	-2518.49	859.276	532.139	-2488.1	830.348	507.345	-2559.63	797.752
996	0	301.955	-2402.58	1582.8	183.887	-2407.12	1579.54	298.583	-2240.18	1522.47	190.382	-2248.04	1518.07	253.113	-2278.02	1429.28	263.488	-2210.3	1144.64	256.334	-2405.3	1343.07	254.993	-2482.36	1152.65	181.509	-2197.91	1218.77	434.004	-2349.97	1359.22	509.314	-2338.19	1118.21	514.466	-2349.66	1042.29	524.238	-2477.3	917.211	472.419	-2523.07	856.261	531.717	-2491.99	828.238	507.509	-2562.75	794.135
997	0	299.892	-2413.01	1584.53	181.908	-2417.48	1580.9	296.825	-2250.66	1523.62	188.816	-2258.52	1518.82	251.622	-2288.83	1430.44	262.492	-2221.96	1145.75	255.153	-2416.19	1344.57	253.885	-2493.61	1154.29	180.229	-2208.35	1219.78	432.713	-2360.87	1360.81	507.542	-2347.82	1119.54	512.721	-2358.32	1043.81	523.342	-2482.67	915.689	471.999	-2527.17	853.38	531.382	-2495.19	826.45	507.616	-2565.29	790.621
998	0	297.827	-2423.43	1586.22	179.965	-2427.8	1582.13	295.062	-2261.33	1524.92	187.181	-2269.03	1519.78	250.198	-2299.52	1431.87	261.382	-2233.29	1146.96	253.775	-2426.87	1346.07	252.878	-2504.57	1156.03	178.95	-2218.91	1220.94	431.454	-2371.6	1362.48	506.039	-2357.7	1121.08	510.873	-2366.86	1045.18	522.539	-2487.96	914.307	471.675	-2530.95	850.536	531.164	-2498.14	824.775	507.733	-2567.49	787.166
999	0	295.869	-2433.98	1587.97	177.944	-2438.22	1583.45	293.478	-2271.92	1526.31	185.672	-2279.55	1520.81	248.956	-2310.2	1433.11	260.732	-2244.72	1148.63	252.588	-2437.59	1347.6	251.882	-2515.53	1157.68	177.628	-2229.6	1222.24	430.113	-2382.35	1364.24	504.305	-2367.59	1122.56	508.816	-2375.31	1046.54	521.673	-2492.88	912.926	471.33	-2534.46	847.765	530.821	-2500.85	823.199	507.832	-2569.2	783.62
1000	0	293.993	-2444.43	1589.42	176.098	-2448.5	1584.66	291.868	-2282.44	1527.66	183.936	-2290.08	1521.79	247.431	-2320.71	1434.49	259.295	-2255.63	1149.6	251.534	-2448.45	1349.1	250.925	-2526.27	1159.26	176.215	-2240.26	1223.49	428.828	-2392.81	1365.93	502.492	-2377.57	1124.08	506.744	-2383.69	1048	520.832	-2497.83	911.802	470.906	-2537.61	845.074	530.703	-2503.42	821.919	507.868	-2570.53	780.196
1001	0	292.105	-2454.85	1591.1	174.208	-2458.76	1585.77	290.382	-2292.87	1529.28	182.43	-2300.34	1522.97	246.028	-2331.08	1436.01	258.622	-2267.25	1151.66	250.463	-2458.93	1350.73	250.129	-2536.74	1160.97	174.94	-2251.11	1224.91	427.776	-2403.06	1367.93	501.134	-2387.77	1126.04	504.952	-2391.98	1049.82	519.946	-2502.07	910.8	470.507	-2540.42	842.629	530.699	-2505.78	821.152	507.879	-2571.51	777.063
1002	0	290.346	-2465.24	1592.57	172.458	-2468.97	1586.85	288.755	-2303.17	1530.85	181.009	-2310.72	1524.26	244.669	-2341.47	1437.28	257.515	-2278.62	1152.73	249.494	-2469.32	1352.21	249.462	-2547.06	1162.48	173.433	-2261.92	1226.22	426.538	-2413.12	1369.68	499.5	-2397.73	1127.65	503.181	-2400.32	1051.58	519.111	-2506.72	910.137	470.127	-2543.02	840.39	530.862	-2508.31	820.598	507.82	-2572.27	774.036
1003	0	288.575	-2475.57	1593.86	170.761	-2479.31	1587.86	287.383	-2313.64	1532.41	179.397	-2320.89	1525.56	243.288	-2351.74	1438.73	256.341	-2289.78	1154.43	248.601	-2479.71	1353.57	248.949	-2557.26	1163.8	171.897	-2272.77	1227.49	425.535	-2423.06	1371.39	498.104	-2407.95	1129.17	501.284	-2408.35	1053.02	518.227	-2511.36	909.524	469.734	-2546.15	838.421	530.882	-2510.87	820.159	507.685	-2572.95	771.157
[truncated: 69 more columns]

## Sheet: Sheet2
Devices
		025370 - Force			025370 - Moment			025370 - CoP			027571 - Force			027571 - Moment			027571 - CoP			037720 - Force			037720 - Moment			037720 - CoP
Frame	Sub Frame	Fx	Fy	Fz	Mx	My	Mz	Cx	Cy	Cz	Fx	Fy	Fz	Mx	My	Mz	Cx	Cy	Cz	Fx	Fy	Fz	Mx	My	Mz	Cx	Cy	Cz
		N	N	N	N.mm	N.mm	N.mm	mm	mm	mm	N	N	N	N.mm	N.mm	N.mm	mm	mm	mm	N	N	N	N.mm	N.mm	N.mm	mm	mm	mm
555	0	0	0	0	0	0	0	200	300	0	0	0	0	0	0	0	200	903	0	0	0	0	0	0	0	603	903	0
555	1	0	0	0	0	0	0	200	300	0	0	0	0	0	0	0	200	903	0	0	0	0	0	0	0	603	903	0
555	2	0	0	0	0	0	0	200	300	0	0	0	0	0	0	0	200	903	0	0	0	0	0	0	0	603	903	0
555	3	0	0	0	0	0	0	200	300	0	0	0	0	0	0	0	200	903	0	0	0	0	0	0	0	603	903	0
555	4	0	0	0	0	0	0	200	300	0	0	0	0	0	0	0	200	903	0	0	0	0	0	0	0	603	903	0
555	5	0	0	0	0	0	0	200	300	0	0	0	0	0	0	0	200	903	0	0	0	0	0	0	0	603	903	0
555	6	0	0	0	0	0	0	200	300	0	0	0	0	0	0	0	200	903	0	0	0	0	0	0	0	603	903	0
555	7	0	0	0	0	0	0	200	300	0	0	0	0	0	0	0	200	903	0	0	0	0	0	0	0	603	903	0
555	8	0	0	0	0	0	0	200	300	0	0	0	0	0	0	0	200	903	0	0	0	0	0	0	0	603	903	0
555	9	0	0	0	0	0	0	200	300	0	0	0	0	0	0	0	200	903	0	0	0	0	0	0	0	603	903	0
556	0	0	0	0	0	0	0	200	300	0	0	0	0	0	0	0	200	903	0	0	0	0	0	0	0	603	903	0
556	1	0	0	0	0	0	0	200	300	0	0	0	0	0	0	0	200	903	0	0	0	0	0	0	0	603	903	0
556	2	0	0	0	0	0	0	200	300	0	0	0	0	0	0	0	200	903	0	0	0	0	0	0	0	603	903	0
556	3	0	0	0	0	0	0	200	300	0	0	0	0	0	0	0	200	903	0	0	0	0	0	0	0	603	903	0
556	4	0	0	0	0	0	0	200	300	0	0	0	0	0	0	0	200	903	0	0	0	0	0	0	0	603	903	0
556	5	0	0	0	0	0	0	200	300	0	0	0	0	0	0	0	200	903	0	0	0	0	0	0	0	603	903	0
556	6	0	0	0	0	0	0	200	300	0	0	0	0	0	0	0	200	903	0	0	0	0	0	0	0	603	903	0
556	7	0	0	0	0	0	0	200	300	0	0	0	0	0	0	0	200	903	0	0	0	0	0	0	0	603	903	0
556	8	0	0	0	0	0	0	200	300	0	0	0	0	0	0	0	200	903	0	0	0	0	0	0	0	603	903	0
556	9	0	0	0	0	0	0	200	300	0	0	0	0	0	0	0	200	903	0	0	0	0	0	0	0	603	903	0
557	0	0	0	0	0	0	0	200	300	0	0	0	0	0	0	0	200	903	0	0	0	0	0	0	0	603	903	0
557	1	0	0	0	0	0	0	200	300	0	0	0	0	0	0	0	200	903	0	0	0	0	0	0	0	603	903	0
557	2	0	0	0	0	0	0	200	300	0	0	0	0	0	0	0	200	903	0	0	0	0	0	0	0	603	903	0
557	3	0	0	0	0	0	0	200	300	0	0	0	0	0	0	0	200	903	0	0	0	0	0	0	0	603	903	0
557	4	0	0	0	0	0	0	200	300	0	0	0	0	0	0	0	200	903	0	0	0	0	0	0	0	603	903	0
557	5	0	0	0	0	0	0	200	300	0	0	0	0	0	0	0	200	903	0	0	0	0	0	0	0	603	903	0
557	6	0	0	0	0	0	0	200	300	0	0	0	0	0	0	0	200	903	0	0	0	0	0	0	0	603	903	0
557	7	0	0	0	0	0	0	200	300	0	0	0	0	0	0	0	200	903	0	0	0	0	0	0	0	603	903	0
557	8	0	0	0	0	0	0	200	300	0	0	0	0	0	0	0	200	903	0	0	0	0	0	0	0	603	903	0
557	9	0	0	0	0	0	0	200	300	0	0	0	0	0	0	0	200	903	0	0	0	0	0	0	0	603	903	0
558	0	0	0	0	0	0	0	200	300	0	0	0	0	0	0	0	200	903	0	0	0	0	0	0	0	603	903	0
558	1	0	0	0	0	0	0	200	300	0	0	0	0	0	0	0	200	903	0	0	0	0	0	0	0	603	903	0
558	2	0	0	0	0	0	0	200	300	0	0	0	0	0	0	0	200	903	0	0	0	0	0	0	0	603	903	0
558	3	0	0	0	0	0	0	200	300	0	0	0	0	0	0	0	200	903	0	0	0	0	0	0	0	603	903	0
558	4	0	0	0	0	0	0	200	300	0	0	0	0	0	0	0	200	903	0	0	0	0	0	0	0	603	903	0
558	5	0	0	0	0	0	0	200	300	0	0	0	0	0	0	0	200	903	0	0	0	0	0	0	0	603	903	0
558	6	0	0	0	0	0	0	200	300	0	0	0	0	0	0	0	200	903	0	0	0	0	0	0	0	603	903	0
558	7	0	0	0	0	0	0	200	300	0	0	0	0	0	0	0	200	903	0	0	0	0	0	0	0	603	903	0
558	8	0	0	0	0	0	0	200	300	0	0	0	0	0	0	0	200	903	0	0	0	0	0	0	0	603	903	0
558	9	0	0	0	0	0	0	200	300	0	0	0	0	0	0	0	200	903	0	0	0	0	0	0	0	603	903	0
559	0	0	0	0	0	0	0	200	300	0	0	0	0	0	0	0	200	903	0	0	0	0	0	0	0	603	903	0
559	1	0	0	0	0	0	0	200	300	0	0	0	0	0	0	0	200	903	0	0	0	0	0	0	0	603	903	0
559	2	0	0	0	0	0	0	200	300	0	0	0	0	0	0	0	200	903	0	0	0	0	0	0	0	603	903	0
559	3	0	0	0	0	0	0	200	300	0	0	0	0	0	0	0	200	903	0	0	0	0	0	0	0	603	903	0
559	4	0	0	0	0	0	0	200	300	0	0	0	0	0	0	0	200	903	0	0	0	0	0	0	0	603	903	0
559	5	0	0	0	0	0	0	200	300	0	0	0	0	0	0	0	200	903	0	0	0	0	0	0	0	603	903	0
559	6	0	0	0	0	0	0	200	300	0	0	0	0	0	0	0	200	903	0	0	0	0	0	0	0	603	903	0
559	7	0	0	0	0	0	0	200	300	0	0	0	0	0	0	0	200	903	0	0	0	0	0	0	0	603	903	0
559	8	0	0	0	0	0	0	200	300	0	0	0	0	0	0	0	200	903	0	0	0	0	0	0	0	603	903	0
559	9	0	0	0	0	0	0	200	300	0	0	0	0	0	0	0	200	903	0	0	0	0	0	0	0	603	903	0
560	0	0	0	0	0	0	0	200	300	0	0	0	0	0	0	0	200	903	0	0	0	0	0	0	0	603	903	0
560	1	0	0	0	0	0	0	200	300	0	0	0	0	0	0	0	200	903	0	0	0	0	0	0	0	603	903	0
560	2	0	0	0	0	0	0	200	300	0	0	0	0	0	0	0	200	903	0	0	0	0	0	0	0	603	903	0
560	3	0	0	0	0	0	0	200	300	0	0	0	0	0	0	0	200	903	0	0	0	0	0	0	0	603	903	0
560	4	0	0	0	0	0	0	200	300	0	0	0	0	0	0	0	200	903	0	0	0	0	0	0	0	603	903	0
560	5	0	0	0	0	0	0	200	300	0	0	0	0	0	0	0	200	903	0	0	0	0	0	0	0	603	903	0
560	6	0	0	0	0	0	0	200	300	0	0	0	0	0	0	0	200	903	0	0	0	0	0	0	0	603	903	0
560	7	0	0	0	0	0	0	200	300	0	0	0	0	0	0	0	200	903	0	0	0	0	0	0	0	603	903	0
560	8	0	0	0	0	0	0	200	300	0	0	0	0	0	0	0	200	903	0	0	0	0	0	0	0	603	903	0
560	9	0	0	0	0	0	0	200	300	0	0	0	0	0	0	0	200	903	0	0	0	0	0	0	0	603	903	0
561	0	0	0	0	0	0	0	200	300	0	0	0	0	0	0	0	200	903	0	0	0	0	0	0	0	603	903	0
561	1	0	0	0	0	0	0	200	300	0	0	0	0	0	0	0	200	903	0	0	0	0	0	0	0	603	903	0
561	2	0	0	0	0	0	0	200	300	0	0	0	0	0	0	0	200	903	0	0	0	0	0	0	0	603	903	0
561	3	0	0	0	0	0	0	200	300	0	0	0	0	0	0	0	200	903	0	0	0	0	0	0	0	603	903	0
561	4	0	0	0	0	0	0	200	300	0	0	0	0	0	0	0	200	903	0	0	0	0	0	0	0	603	903	0
561	5	0	0	0	0	0	0	200	300	0	0	0	0	0	0	0	200	903	0	0	0	0	0	0	0	603	903	0
561	6	0	0	0	0	0	0	200	300	0	0	0	0	0	0	0	200	903	0	0	0	0	0	0	0	603	903	0
561	7	0	0	0	0	0	0	200	300	0	0	0	0	0	0	0	200	903	0	0	0	0	0	0	0	603	903	0
561	8	0	0	0	0	0	0	200	300	0	0	0	0	0	0	0	200	903	0	0	0	0	0	0	0	603	903	0
561	9	0	0	0	0	0	0	200	300	0	0	0	0	0	0	0	200	903	0	0	0	0	0	0	0	603	903	0
562	0	0	0	0	0	0	0	200	300	0	0	0	0	0	0	0	200	903	0	0	0	0	0	0	0	603	903	0
562	1	0	0	0	0	0	0	200	300	0	0	0	0	0	0	0	200	903	0	0	0	0	0	0	0	603	903	0
562	2	0	0	0	0	0	0	200	300	0	0	0	0	0	0	0	200	903	0	0	0	0	0	0	0	603	903	0
562	3	0	0	0	0	0	0	200	300	0	0	0	0	0	0	0	200	903	0	0	0	0	0	0	0	603	903	0
562	4	0	0	0	0	0	0	200	300	0	0	0	0	0	0	0	200	903	0	0	0	0	0	0	0	603	903	0
562	5	0	0	0	0	0	0	200	300	0	0	0	0	0	0	0	200	903	0	0	0	0	0	0	0	603	903	0
562	6	0	0	0	0	0	0	200	300	0	0	0	0	0	0	0	200	903	0	0	0	0	0	0	0	603	903	0
562	7	0	0	0	0	0	0	200	300	0	0	0	0	0	0	0	200	903	0	0	0	0	0	0	0	603	903	0
562	8	0	0	0	0	0	0	200	300	0	0	0	0	0	0	0	200	903	0	0	0	0	0	0	0	603	903	0
562	9	0	0	0	0	0	0	200	300	0	0	0	0	0	0	0	200	903	0	0	0	0	0	0	0	603	903	0
563	0	0	0	0	0	0	0	200	300	0	0	0	0	0	0	0	200	903	0	0	0	0	0	0	0	603	903	0
563	1	0	0	0	0	0	0	200	300	0	0	0	0	0	0	0	200	903	0	0	0	0	0	0	0	603	903	0
563	2	0	0	0	0	0	0	200	300	0	0	0	0	0	0	0	200	903	0	0	0	0	0	0	0	603	903	0
563	3	0	0	0	0	0	0	200	300	0	0	0	0	0	0	0	200	903	0	0	0	0	0	0	0	603	903	0
563	4	0	0	0	0	0	0	200	300	0	0	0	0	0	0	0	200	903	0	0	0	0	0	0	0	603	903	0
563	5	0	0	0	0	0	0	200	300	0	0	0	0	0	0	0	200	903	0	0	0	0	0	0	0	603	903	0
563	6	0	0	0	0	0	0	200	300	0	0	0	0	0	0	0	200	903	0	0	0	0	0	0	0	603	903	0
563	7	0	0	0	0	0	0	200	300	0	0	0	0	0	0	0	200	903	0	0	0	0	0	0	0	603	903	0
563	8	0	0	0	0	0	0	200	300	0	0	0	0	0	0	0	200	903	0	0	0	0	0	0	0	603	903	0
563	9	0	0	0	0	0	0	200	300	0	0	0	0	0	0	0	200	903	0	0	0	0	0	0	0	603	903	0
564	0	0	0	0	0	0	0	200	300	0	0	0	0	0	0	0	200	903	0	0	0	0	0	0	0	603	903	0
564	1	0	0	0	0	0	0	200	300	0	0	0	0	0	0	0	200	903	0	0	0	0	0	0	0	603	903	0
564	2	0	0	0	0	0	0	200	300	0	0	0	0	0	0	0	200	903	0	0	0	0	0	0	0	603	903	0
564	3	0	0	0	0	0	0	200	300	0	0	0	0	0	0	0	200	903	0	0	0	0	0	0	0	603	903	0
564	4	0	0	0	0	0	0	200	300	0	0	0	0	0	0	0	200	903	0	0	0	0	0	0	0	603	903	0
564	5	0	0	0	0	0	0	200	300	0	0	0	0	0	0	0	200	903	0	0	0	0	0	0	0	603	903	0
564	6	0	0	0	0	0	0	200	300	0	0	0	0	0	0	0	200	903	0	0	0	0	0	0	0	603	903	0
564	7	0	0	0	0	0	0	200	300	0	0	0	0	0	0	0	200	903	0	0	0	0	0	0	0	603	903	0
564	8	0	0	0	0	0	0	200	300	0	0	0	0	0	0	0	200	903	0	0	0	0	0	0	0	603	903	0
564	9	0	0	0	0	0	0	200	300	0	0	0	0	0	0	0	200	903	0	0	0	0	0	0	0	603	903	0
565	0	0	0	0	0	0	0	200	300	0	0	0	0	0	0	0	200	903	0	0	0	0	0	0	0	603	903	0
565	1	0	0	0	0	0	0	200	300	0	0	0	0	0	0	0	200	903	0	0	0	0	0	0	0	603	903	0
565	2	0	0	0	0	0	0	200	300	0	0	0	0	0	0	0	200	903	0	0	0	0	0	0	0	603	903	0
565	3	0	0	0	0	0	0	200	300	0	0	0	0	0	0	0	200	903	0	0	0	0	0	0	0	603	903	0
565	4	0	0	0	0	0	0	200	300	0	0	0	0	0	0	0	200	903	0	0	0	0	0	0	0	603	903	0
565	5	0	0	0	0	0	0	200	300	0	0	0	0	0	0	0	200	903	0	0	0	0	0	0	0	603	903	0
565	6	0	0	0	0	0	0	200	300	0	0	0	0	0	0	0	200	903	0	0	0	0	0	0	0	603	903	0
565	7	0	0	0	0	0	0	200	300	0	0	0	0	0	0	0	200	903	0	0	0	0	0	0	0	603	903	0
565	8	0	0	0	0	0	0	200	300	0	0	0	0	0	0	0	200	903	0	0	0	0	0	0	0	603	903	0
565	9	0	0	0	0	0	0	200	300	0	0	0	0	0	0	0	200	903	0	0	0	0	0	0	0	603	903	0
566	0	0	0	0	0	0	0	200	300	0	0	0	0	0	0	0	200	903	0	0	0	0	0	0	0	603	903	0
566	1	0	0	0	0	0	0	200	300	0	0	0	0	0	0	0	200	903	0	0	0	0	0	0	0	603	903	0
566	2	0	0	0	0	0	0	200	300	0	0	0	0	0	0	0	200	903	0	0	0	0	0	0	0	603	903	0
566	3	0	0	0	0	0	0	200	300	0	0	0	0	0	0	0	200	903	0	0	0	0	0	0	0	603	903	0
566	4	0	0	0	0	0	0	200	300	0	0	0	0	0	0	0	200	903	0	0	0	0	0	0	0	603	903	0
566	5	0	0	0	0	0	0	200	300	0	0	0	0	0	0	0	200	903	0	0	0	0	0	0	0	603	903	0
566	6	0	0	0	0	0	0	200	300	0	0	0	0	0	0	0	200	903	0	0	0	0	0	0	0	603	903	0
566	7	0	0	0	0	0	0	200	300	0	0	0	0	0	0	0	200	903	0	0	0	0	0	0	0	603	903	0
566	8	0	0	0	0	0	0	200	300	0	0	0	0	0	0	0	200	903	0	0	0	0	0	0	0	603	903	0
566	9	0	0	0	0	0	0	200	300	0	0	0	0	0	0	0	200	903	0	0	0	0	0	0	0	603	903	0
567	0	0	0	0	0	0	0	200	300	0	0	0	0	0	0	0	200	903	0	0	0	0	0	0	0	603	903	0
567	1	0	0	0	0	0	0	200	300	0	0	0	0	0	0	0	200	903	0	0	0	0	0	0	0	603	903	0
567	2	0	0	0	0	0	0	200	300	0	0	0	0	0	0	0	200	903	0	0	0	0	0	0	0	603	903	0
567	3	0	0	0	0	0	0	200	300	0	0	0	0	0	0	0	200	903	0	0	0	0	0	0	0	603	903	0
567	4	0	0	0	0	0	0	200	300	0	0	0	0	0	0	0	200	903	0	0	0	0	0	0	0	603	903	0
567	5	0	0	0	0	0	0	200	300	0	0	0	0	0	0	0	200	903	0	0	0	0	0	0	0	603	903	0
567	6	0	0	0	0	0	0	200	300	0	0	0	0	0	0	0	200	903	0	0	0	0	0	0	0	603	903	0
567	7	0	0	0	0	0	0	200	300	0	0	0	0	0	0	0	200	903	0	0	0	0	0	0	0	603	903	0
567	8	0	0	0	0	0	0	200	300	0	0	0	0	0	0	0	200	903	0	0	0	0	0	0	0	603	903	0
567	9	0	0	0	0	0	0	200	300	0	0	0	0	0	0	0	200	903	0	0	0	0	0	0	0	603	903	0
568	0	0	0	0	0	0	0	200	300	0	0	0	0	0	0	0	200	903	0	0	0	0	0	0	0	603	903	0
568	1	0	0	0	0	0	0	200	300	0	0	0	0	0	0	0	200	903	0	0	0	0	0	0	0	603	903	0
568	2	0	0	0	0	0	0	200	300	0	0	0	0	0	0	0	200	903	0	0	0	0	0	0	0	603	903	0
568	3	0	0	0	0	0	0	200	300	0	0	0	0	0	0	0	200	903	0	0	0	0	0	0	0	603	903	0
568	4	0	0	0	0	0	0	200	300	0	0	0	0	0	0	0	200	903	0	0	0	0	0	0	0	603	903	0
568	5	0	0	0	0	0	0	200	300	0	0	0	0	0	0	0	200	903	0	0	0	0	0	0	0	603	903	0
568	6	0	0	0	0	0	0	200	300	0	0	0	0	0	0	0	200	903	0	0	0	0	0	0	0	603	903	0
568	7	0	0	0	0	0	0	200	300	0	0	0	0	0	0	0	200	903	0	0	0	0	0	0	0	603	903	0
568	8	0	0	0	0	0	0	200	300	0	0	0	0	0	0	0	200	903	0	0	0	0	0	0	0	603	903	0
568	9	0	0	0	0	0	0	200	300	0	0	0	0	0	0	0	200	903	0	0	0	0	0	0	0	603	903	0
569	0	0	0	0	0	0	0	200	300	0	0	0	0	0	0	0	200	903	0	0	0	0	0	0	0	603	903	0
569	1	0	0	0	0	0	0	200	300	0	0	0	0	0	0	0	200	903	0	0	0	0	0	0	0	603	903	0
569	2	0	0	0	0	0	0	200	300	0	0	0	0	0	0	0	200	903	0	0	0	0	0	0	0	603	903	0
569	3	0	0	0	0	0	0	200	300	0	0	0	0	0	0	0	200	903	0	0	0	0	0	0	0	603	903	0
569	4	0	0	0	0	0	0	200	300	0	0	0	0	0	0	0	200	903	0	0	0	0	0	0	0	603	903	0
569	5	0	0	0	0	0	0	200	300	0	0	0	0	0	0	0	200	903	0	0	0	0	0	0	0	603	903	0
569	6	0	0	0	0	0	0	200	300	0	0	0	0	0	0	0	200	903	0	0	0	0	0	0	0	603	903	0
569	7	0	0	0	0	0	0	200	300	0	0	0	0	0	0	0	200	903	0	0	0	0	0	0	0	603	903	0
569	8	0	0	0	0	0	0	200	300	0	0	0	0	0	0	0	200	903	0	0	0	0	0	0	0	603	903	0
569	9	0	0	0	0	0	0	200	300	0	0	0	0	0	0	0	200	903	0	0	0	0	0	0	0	603	903	0
570	0	0	0	0	0	0	0	200	300	0	0	0	0	0	0	0	200	903	0	0	0	0	0	0	0	603	903	0
570	1	0	0	0	0	0	0	200	300	0	0	0	0	0	0	0	200	903	0	0	0	0	0	0	0	603	903	0
570	2	0	0	0	0	0	0	200	300	0	0	0	0	0	0	0	200	903	0	0	0	0	0	0	0	603	903	0
570	3	0	0	0	0	0	0	200	300	0	0	0	0	0	0	0	200	903	0	0	0	0	0	0	0	603	903	0
570	4	0	0	0	0	0	0	200	300	0	0	0	0	0	0	0	200	903	0	0	0	0	0	0	0	603	903	0
570	5	0	0	0	0	0	0	200	300	0	0	0	0	0	0	0	200	903	0	0	0	0	0	0	0	603	903	0
570	6	0	0	0	0	0	0	200	300	0	0	0	0	0	0	0	200	903	0	0	0	0	0	0	0	603	903	0
570	7	0	0	0	0	0	0	200	300	0	0	0	0	0	0	0	200	903	0	0	0	0	0	0	0	603	903	0
570	8	0	0	0	0	0	0	200	300	0	0	0	0	0	0	0	200	903	0	0	0	0	0	0	0	603	903	0
570	9	0	0	0	0	0	0	200	300	0	0	0	0	0	0	0	200	903	0	0	0	0	0	0	0	603	903	0
571	0	0	0	0	0	0	0	200	300	0	0	0	0	0	0	0	200	903	0	0	0	0	0	0	0	603	903	0
571	1	0	0	0	0	0	0	200	300	0	0	0	0	0	0	0	200	903	0	0	0	0	0	0	0	603	903	0
571	2	0	0	0	0	0	0	200	300	0	0	0	0	0	0	0	200	903	0	0	0	0	0	0	0	603	903	0
571	3	0	0	0	0	0	0	200	300	0	0	0	0	0	0	0	200	903	0	0	0	0	0	0	0	603	903	0
571	4	0	0	0	0	0	0	200	300	0	0	0	0	0	0	0	200	903	0	0	0	0	0	0	0	603	903	0
571	5	0	0	0	0	0	0	200	300	0	0	0	0	0	0	0	200	903	0	0	0	0	0	0	0	603	903	0
571	6	0	0	0	0	0	0	200	300	0	0	0	0	0	0	0	200	903	0	0	0	0	0	0	0	603	903	0
571	7	0	0	0	0	0	0	200	300	0	0	0	0	0	0	0	200	903	0	0	0	0	0	0	0	603	903	0
571	8	0	0	0	0	0	0	200	300	0	0	0	0	0	0	0	200	903	0	0	0	0	0	0	0	603	903	0
571	9	0	0	0	0	0	0	200	300	0	0	0	0	0	0	0	200	903	0	0	0	0	0	0	0	603	903	0
572	0	0	0	0	0	0	0	200	300	0	0	0	0	0	0	0	200	903	0	0	0	0	0	0	0	603	903	0
572	1	0	0	0	0	0	0	200	300	0	0	0	0	0	0	0	200	903	0	0	0	0	0	0	0	603	903	0
572	2	0	0	0	0	0	0	200	300	0	0	0	0	0	0	0	200	903	0	0	0	0	0	0	0	603	903	0
572	3	0	0	0	0	0	0	200	300	0	0	0	0	0	0	0	200	903	0	0	0	0	0	0	0	603	903	0
572	4	0	0	0	0	0	0	200	300	0	0	0	0	0	0	0	200	903	0	0	0	0	0	0	0	603	903	0
572	5	0	0	0	0	0	0	200	300	0	0	0	0	0	0	0	200	903	0	0	0	0	0	0	0	603	903	0
572	6	0	0	0	0	0	0	200	300	0	0	0	0	0	0	0	200	903	0	0	0	0	0	0	0	603	903	0
572	7	0	0	0	0	0	0	200	300	0	0	0	0	0	0	0	200	903	0	0	0	0	0	0	0	603	903	0
572	8	0	0	0	0	0	0	200	300	0	0	0	0	0	0	0	200	903	0	0	0	0	0	0	0	603	903	0
572	9	0	0	0	0	0	0	200	300	0	0	0	0	0	0	0	200	903	0	0	0	0	0	0	0	603	903	0
573	0	0	0	0	0	0	0	200	300	0	0	0	0	0	0	0	200	903	0	0	0	0	0	0	0	603	903	0
573	1	0	0	0	0	0	0	200	300	0	0	0	0	0	0	0	200	903	0	0	0	0	0	0	0	603	903	0
573	2	0	0	0	0	0	0	200	300	0	0	0	0	0	0	0	200	903	0	0	0	0	0	0	0	603	903	0
573	3	0	0	0	0	0	0	200	300	0	0	0	0	0	0	0	200	903	0	0	0	0	0	0	0	603	903	0
573	4	0	0	0	0	0	0	200	300	0	0	0	0	0	0	0	200	903	0	0	0	0	0	0	0	603	903	0
573	5	0	0	0	0	0	0	200	300	0	0	0	0	0	0	0	200	903	0	0	0	0	0	0	0	603	903	0
573	6	0	0	0	0	0	0	200	300	0	0	0	0	0	0	0	200	903	0	0	0	0	0	0	0	603	903	0
573	7	0	0	0	0	0	0	200	300	0	0	0	0	0	0	0	200	903	0	0	0	0	0	0	0	603	903	0
573	8	0	0	0	0	0	0	200	300	0	0	0	0	0	0	0	200	903	0	0	0	0	0	0	0	603	903	0
573	9	0	0	0	0	0	0	200	300	0	0	0	0	0	0	0	200	903	0	0	0	0	0	0	0	603	903	0
574	0	0	0	0	0	0	0	200	300	0	0	0	0	0	0	0	200	903	0	0	0	0	0	0	0	603	903	0
574	1	0	0	0	0	0	0	200	300	0	0	0	0	0	0	0	200	903	0	0	0	0	0	0	0	603	903	0
574	2	0	0	0	0	0	0	200	300	0	0	0	0	0	0	0	200	903	0	0	0	0	0	0	0	603	903	0
574	3	0	0	0	0	0	0	200	300	0	0	0	0	0	0	0	200	903	0	0	0	0	0	0	0	603	903	0
574	4	0	0	0	0	0	0	200	300	0	0	0	0	0	0	0	200	903	0	0	0	0	0	0	0	603	903	0
574	5	0	0	0	0	0	0	200	300	0	0	0	0	0	0	0	200	903	0	0	0	0	0	0	0	603	903	0
574	6	0	0	0	0	0	0	200	300	0	0	0	0	0	0	0	200	903	0	0	0	0	0	0	0	603	903	0
574	7	0	0	0	0	0	0	200	300	0	0	0	0	0	0	0	200	903	0	0	0	0	0	0	0	603	903	0
574	8	0	0	0	0	0	0	200	300	0	0	0	0	0	0	0	200	903	0	0	0	0	0	0	0	603	903	0
574	9	0	0	0	0	0	0	200	300	0	0	0	0	0	0	0	200	903	0	0	0	0	0	0	0	603	903	0
575	0	0	0	0	0	0	0	200	300	0	0	0	0	0	0	0	200	903	0	0	0	0	0	0	0	603	903	0
575	1	0	0	0	0	0	0	200	300	0	0	0	0	0	0	0	200	903	0	0	0	0	0	0	0	603	903	0
575	2	0	0	0	0	0	0	200	300	0	0	0	0	0	0	0	200	903	0	0	0	0	0	0	0	603	903	0
575	3	0	0	0	0	0	0	200	300	0	0	0	0	0	0	0	200	903	0	0	0	0	0	0	0	603	903	0
575	4	0	0	0	0	0	0	200	300	0	0	0	0	0	0	0	200	903	0	0	0	0	0	0	0	603	903	0
575	5	0	0	0	0	0	0	200	300	0	0	0	0	0	0	0	200	903	0	0	0	0	0	0	0	603	903	0
575	6	0	0	0	0	0	0	200	300	0	0	0	0	0	0	0	200	903	0	0	0	0	0	0	0	603	903	0
575	7	0	0	0	0	0	0	200	300	0	0	0	0	0	0	0	200	903	0	0	0	0	0	0	0	603	903	0
575	8	0	0	0	0	0	0	200	300	0	0	0	0	0	0	0	200	903	0	0	0	0	0	0	0	603	903	0
575	9	0	0	0	0	0	0	200	300	0	0	0	0	0	0	0	200	903	0	0	0	0	0	0	0	603	903	0
576	0	0	0	0	0	0	0	200	300	0	0	0	0	0	0	0	200	903	0	0	0	0	0	0	0	603	903	0
576	1	0	0	0	0	0	0	200	300	0	0	0	0	0	0	0	200	903	0	0	0	0	0	0	0	603	903	0
576	2	0	0	0	0	0	0	200	300	0	0	0	0	0	0	0	200	903	0	0	0	0	0	0	0	603	903	0
576	3	0	0	0	0	0	0	200	300	0	0	0	0	0	0	0	200	903	0	0	0	0	0	0	0	603	903	0
576	4	0	0	0	0	0	0	200	300	0	0	0	0	0	0	0	200	903	0	0	0	0	0	0	0	603	903	0
576	5	0	0	0	0	0	0	200	300	0	0	0	0	0	0	0	200	903	0	0	0	0	0	0	0	603	903	0
576	6	0	0	0	0	0	0	200	300	0	0	0	0	0	0	0	200	903	0	0	0	0	0	0	0	603	903	0
576	7	0	0	0	0	0	0	200	300	0	0	0	0	0	0	0	200	903	0	0	0	0	0	0	0	603	903	0
576	8	0	0	0	0	0	0	200	300	0	0	0	0	0	0	0	200	903	0	0	0	0	0	0	0	603	903	0
576	9	0	0	0	0	0	0	200	300	0	0	0	0	0	0	0	200	903	0	0	0	0	0	0	0	603	903	0
577	0	0	0	0	0	0	0	200	300	0	0	0	0	0	0	0	200	903	0	0	0	0	0	0	0	603	903	0
577	1	0	0	0	0	0	0	200	300	0	0	0	0	0	0	0	200	903	0	0	0	0	0	0	0	603	903	0
577	2	0	0	0	0	0	0	200	300	0	0	0	0	0	0	0	200	903	0	0	0	0	0	0	0	603	903	0
577	3	0	0	0	0	0	0	200	300	0	0	0	0	0	0	0	200	903	0	0	0	0	0	0	0	603	903	0
577	4	0	0	0	0	0	0	200	300	0	0	0	0	0	0	0	200	903	0	0	0	0	0	0	0	603	903	0
577	5	0	0	0	0	0	0	200	300	0	0	0	0	0	0	0	200	903	0	0	0	0	0	0	0	603	903	0
577	6	0	0	0	0	0	0	200	300	0	0	0	0	0	0	0	200	903	0	0	0	0	0	0	0	603	903	0
577	7	0	0	0	0	0	0	200	300	0	0	0	0	0	0	0	200	903	0	0	0	0	0	0	0	603	903	0
577	8	0	0	0	0	0	0	200	300	0	0	0	0	0	0	0	200	903	0	0	0	0	0	0	0	603	903	0
577	9	0	0	0	0	0	0	200	300	0	0	0	0	0	0	0	200	903	0	0	0	0	0	0	0	603	903	0
578	0	0	0	0	0	0	0	200	300	0	0	0	0	0	0	0	200	903	0	0	0	0	0	0	0	603	903	0
578	1	0	0	0	0	0	0	200	300	0	0	0	0	0	0	0	200	903	0	0	0	0	0	0	0	603	903	0
578	2	0	0	0	0	0	0	200	300	0	0	0	0	0	0	0	200	903	0	0	0	0	0	0	0	603	903	0
578	3	0	0	0	0	0	0	200	300	0	0	0	0	0	0	0	200	903	0	0	0	0	0	0	0	603	903	0
578	4	0	0	0	0	0	0	200	300	0	0	0	0	0	0	0	200	903	0	0	0	0	0	0	0	603	903	0
578	5	0	0	0	0	0	0	200	300	0	0	0	0	0	0	0	200	903	0	0	0	0	0	0	0	603	903	0
578	6	0	0	0	0	0	0	200	300	0	0	0	0	0	0	0	200	903	0	0	0	0	0	0	0	603	903	0
578	7	0	0	0	0	0	0	200	300	0	0	0	0	0	0	0	200	903	0	0	0	0	0	0	0	603	903	0
578	8	0	0	0	0	0	0	200	300	0	0	0	0	0	0	0	200	903	0	0	0	0	0	0	0	603	903	0
578	9	0	0	0	0	0	0	200	300	0	0	0	0	0	0	0	200	903	0	0	0	0	0	0	0	603	903	0
579	0	0	0	0	0	0	0	200	300	0	0	0	0	0	0	0	200	903	0	0	0	0	0	0	0	603	903	0
579	1	0	0	0	0	0	0	200	300	0	0	0	0	0	0	0	200	903	0	0	0	0	0	0	0	603	903	0
579	2	0	0	0	0	0	0	200	300	0	0	0	0	0	0	0	200	903	0	0	0	0	0	0	0	603	903	0
579	3	0	0	0	0	0	0	200	300	0	0	0	0	0	0	0	200	903	0	0	0	0	0	0	0	603	903	0
579	4	0	0	0	0	0	0	200	300	0	0	0	0	0	0	0	200	903	0	0	0	0	0	0	0	603	903	0
579	5	0	0	0	0	0	0	200	300	0	0	0	0	0	0	0	200	903	0	0	0	0	0	0	0	603	903	0
579	6	0	0	0	0	0	0	200	300	0	0	0	0	0	0	0	200	903	0	0	0	0	0	0	0	603	903	0
579	7	0	0	0	0	0	0	200	300	0	0	0	0	0	0	0	200	903	0	0	0	0	0	0	0	603	903	0
579	8	0	0	0	0	0	0	200	300	0	0	0	0	0	0	0	200	903	0	0	0	0	0	0	0	603	903	0
579	9	0	0	0	0	0	0	200	300	0	0	0	0	0	0	0	200	903	0	0	0	0	0	0	0	603	903	0
580	0	0	0	0	0	0	0	200	300	0	0	0	0	0	0	0	200	903	0	0	0	0	0	0	0	603	903	0
580	1	0	0	0	0	0	0	200	300	0	0	0	0	0	0	0	200	903	0	0	0	0	0	0	0	603	903	0
580	2	0	0	0	0	0	0	200	300	0	0	0	0	0	0	0	200	903	0	0	0	0	0	0	0	603	903	0
580	3	0	0	0	0	0	0	200	300	0	0	0	0	0	0	0	200	903	0	0	0	0	0	0	0	603	903	0
580	4	0	0	0	0	0	0	200	300	0	0	0	0	0	0	0	200	903	0	0	0	0	0	0	0	603	903	0
580	5	0	0	0	0	0	0	200	300	0	0	0	0	0	0	0	200	903	0	0	0	0	0	0	0	603	903	0
580	6	0	0	0	0	0	0	200	300	0	0	0	0	0	0	0	200	903	0	0	0	0	0	0	0	603	903	0
580	7	0	0	0	0	0	0	200	300	0	0	0	0	0	0	0	200	903	0	0	0	0	0	0	0	603	903	0
580	8	0	0	0	0	0	0	200	300	0	0	0	0	0	0	0	200	903	0	0	0	0	0	0	0	603	903	0
580	9	0	0	0	0	0	0	200	300	0	0	0	0	0	0	0	200	903	0	0	0	0	0	0	0	603	903	0
581	0	0	0	0	0	0	0	200	300	0	0	0	0	0	0	0	200	903	0	0	0	0	0	0	0	603	903	0
581	1	0	0	0	0	0	0	200	300	0	0	0	0	0	0	0	200	903	0	0	0	0	0	0	0	603	903	0
581	2	0	0	0	0	0	0	200	300	0	0	0	0	0	0	0	200	903	0	0	0	0	0	0	0	603	903	0
581	3	0	0	0	0	0	0	200	300	0	0	0	0	0	0	0	200	903	0	0	0	0	0	0	0	603	903	0
581	4	0	0	0	0	0	0	200	300	0	0	0	0	0	0	0	200	903	0	0	0	0	0	0	0	603	903	0
581	5	0	0	0	0	0	0	200	300	0	0	0	0	0	0	0	200	903	0	0	0	0	0	0	0	603	903	0
581	6	0	0	0	0	0	0	200	300	0	0	0	0	0	0	0	200	903	0	0	0	0	0	0	0	603	903	0
581	7	0	0	0	0	0	0	200	300	0	0	0	0	0	0	0	200	903	0	0	0	0	0	0	0	603	903	0
581	8	0	0	0	0	0	0	200	300	0	0	0	0	0	0	0	200	903	0	0	0	0	0	0	0	603	903	0
581	9	0	0	0	0	0	0	200	300	0	0	0	0	0	0	0	200	903	0	0	0	0	0	0	0	603	903	0
582	0	0	0	0	0	0	0	200	300	0	0	0	0	0	0	0	200	903	0	0	0	0	0	0	0	603	903	0
582	1	0	0	0	0	0	0	200	300	0	0	0	0	0	0	0	200	903	0	0	0	0	0	0	0	603	903	0
582	2	0	0	0	0	0	0	200	300	0	0	0	0	0	0	0	200	903	0	0	0	0	0	0	0	603	903	0
582	3	0	0	0	0	0	0	200	300	0	0	0	0	0	0	0	200	903	0	0	0	0	0	0	0	603	903	0
582	4	0	0	0	0	0	0	200	300	0	0	0	0	0	0	0	200	903	0	0	0	0	0	0	0	603	903	0
582	5	0	0	0	0	0	0	200	300	0	0	0	0	0	0	0	200	903	0	0	0	0	0	0	0	603	903	0
582	6	0	0	0	0	0	0	200	300	0	0	0	0	0	0	0	200	903	0	0	0	0	0	0	0	603	903	0
582	7	0	0	0	0	0	0	200	300	0	0	0	0	0	0	0	200	903	0	0	0	0	0	0	0	603	903	0
582	8	0	0	0	0	0	0	200	300	0	0	0	0	0	0	0	200	903	0	0	0	0	0	0	0	603	903	0
582	9	0	0	0	0	0	0	200	300	0	0	0	0	0	0	0	200	903	0	0	0	0	0	0	0	603	903	0
583	0	0	0	0	0	0	0	200	300	0	0	0	0	0	0	0	200	903	0	0	0	0	0	0	0	603	903	0
583	1	0	0	0	0	0	0	200	300	0	0	0	0	0	0	0	200	903	0	0	0	0	0	0	0	603	903	0
583	2	0	0	0	0	0	0	200	300	0	0	0	0	0	0	0	200	903	0	0	0	0	0	0	0	603	903	0
583	3	0	0	0	0	0	0	200	300	0	0	0	0	0	0	0	200	903	0	0	0	0	0	0	0	603	903	0
583	4	0	0	0	0	0	0	200	300	0	0	0	0	0	0	0	200	903	0	0	0	0	0	0	0	603	903	0
583	5	0	0	0	0	0	0	200	300	0	0	0	0	0	0	0	200	903	0	0	0	0	0	0	0	603	903	0
583	6	0	0	0	0	0	0	200	300	0	0	0	0	0	0	0	200	903	0	0	0	0	0	0	0	603	903	0
583	7	0	0	0	0	0	0	200	300	0	0	0	0	0	0	0	200	903	0	0	0	0	0	0	0	603	903	0
583	8	0	0	0	0	0	0	200	300	0	0	0	0	0	0	0	200	903	0	0	0	0	0	0	0	603	903	0
583	9	0	0	0	0	0	0	200	300	0	0	0	0	0	0	0	200	903	0	0	0	0	0	0	0	603	903	0
584	0	0	0	0	0	0	0	200	300	0	0	0	0	0	0	0	200	903	0	0	0	0	0	0	0	603	903	0
584	1	0	0	0	0	0	0	200	300	0	0	0	0	0	0	0	200	903	0	0	0	0	0	0	0	603	903	0
584	2	0	0	0	0	0	0	200	300	0	0	0	0	0	0	0	200	903	0	0	0	0	0	0	0	603	903	0
584	3	0	0	0	0	0	0	200	300	0	0	0	0	0	0	0	200	903	0	0	0	0	0	0	0	603	903	0
584	4	0	0	0	0	0	0	200	300	0	0	0	0	0	0	0	200	903	0	0	0	0	0	0	0	603	903	0
584	5	0	0	0	0	0	0	200	300	0	0	0	0	0	0	0	200	903	0	0	0	0	0	0	0	603	903	0
584	6	0	0	0	0	0	0	200	300	0	0	0	0	0	0	0	200	903	0	0	0	0	0	0	0	603	903	0
584	7	0	0	0	0	0	0	200	300	0	0	0	0	0	0	0	200	903	0	0	0	0	0	0	0	603	903	0
584	8	0	0	0	0	0	0	200	300	0	0	0	0	0	0	0	200	903	0	0	0	0	0	0	0	603	903	0
584	9	0	0	0	0	0	0	200	300	0	0	0	0	0	0	0	200	903	0	0	0	0	0	0	0	603	903	0
585	0	0	0	0	0	0	0	200	300	0	0	0	0	0	0	0	200	903	0	0	0	0	0	0	0	603	903	0
585	1	0	0	0	0	0	0	200	300	0	0	0	0	0	0	0	200	903	0	0	0	0	0	0	0	603	903	0
585	2	0	0	0	0	0	0	200	300	0	0	0	0	0	0	0	200	903	0	0	0	0	0	0	0	603	903	0
585	3	0	0	0	0	0	0	200	300	0	0	0	0	0	0	0	200	903	0	0	0	0	0	0	0	603	903	0
585	4	0	0	0	0	0	0	200	300	0	0	0	0	0	0	0	200	903	0	0	0	0	0	0	0	603	903	0
585	5	0	0	0	0	0	0	200	300	0	0	0	0	0	0	0	200	903	0	0	0	0	0	0	0	603	903	0
585	6	0	0	0	0	0	0	200	300	0	0	0	0	0	0	0	200	903	0	0	0	0	0	0	0	603	903	0
585	7	0	0	0	0	0	0	200	300	0	0	0	0	0	0	0	200	903	0	0	0	0	0	0	0	603	903	0
585	8	0	0	0	0	0	0	200	300	0	0	0	0	0	0	0	200	903	0	0	0	0	0	0	0	603	903	0
585	9	0	0	0	0	0	0	200	300	0	0	0	0	0	0	0	200	903	0	0	0	0	0	0	0	603	903	0
586	0	0	0	0	0	0	0	200	300	0	0	0	0	0	0	0	200	903	0	0	0	0	0	0	0	603	903	0
586	1	0	0	0	0	0	0	200	300	0	0	0	0	0	0	0	200	903	0	0	0	0	0	0	0	603	903	0
586	2	0	0	0	0	0	0	200	300	0	0	0	0	0	0	0	200	903	0	0	0	0	0	0	0	603	903	0
586	3	0	0	0	0	0	0	200	300	0	0	0	0	0	0	0	200	903	0	0	0	0	0	0	0	603	903	0
586	4	0	0	0	0	0	0	200	300	0	0	0	0	0	0	0	200	903	0	0	0	0	0	0	0	603	903	0
586	5	0	0	0	0	0	0	200	300	0	0	0	0	0	0	0	200	903	0	0	0	0	0	0	0	603	903	0
586	6	0	0	0	0	0	0	200	300	0	0	0	0	0	0	0	200	903	0	0	0	0	0	0	0	603	903	0
586	7	0	0	0	0	0	0	200	300	0	0	0	0	0	0	0	200	903	0	0	0	0	0	0	0	603	903	0
586	8	0	0	0	0	0	0	200	300	0	0	0	0	0	0	0	200	903	0	0	0	0	0	0	0	603	903	0
586	9	0	0	0	0	0	0	200	300	0	0	0	0	0	0	0	200	903	0	0	0	0	0	0	0	603	903	0
587	0	0	0	0	0	0	0	200	300	0	0	0	0	0	0	0	200	903	0	0	0	0	0	0	0	603	903	0
587	1	0	0	0	0	0	0	200	300	0	0	0	0	0	0	0	200	903	0	0	0	0	0	0	0	603	903	0
587	2	0	0	0	0	0	0	200	300	0	0	0	0	0	0	0	200	903	0	0	0	0	0	0	0	603	903	0
587	3	0	0	0	0	0	0	200	300	0	0	0	0	0	0	0	200	903	0	0	0	0	0	0	0	603	903	0
587	4	0	0	0	0	0	0	200	300	0	0	0	0	0	0	0	200	903	0	0	0	0	0	0	0	603	903	0
587	5	0	0	0	0	0	0	200	300	0	0	0	0	0	0	0	200	903	0	0	0	0	0	0	0	603	903	0
587	6	0	0	0	0	0	0	200	300	0	0	0	0	0	0	0	200	903	0	0	0	0	0	0	0	603	903	0
587	7	0	0	0	0	0	0	200	300	0	0	0	0	0	0	0	200	903	0	0	0	0	0	0	0	603	903	0
587	8	0	0	0	0	0	0	200	300	0	0	0	0	0	0	0	200	903	0	0	0	0	0	0	0	603	903	0
587	9	0	0	0	0	0	0	200	300	0	0	0	0	0	0	0	200	903	0	0	0	0	0	0	0	603	903	0
588	0	0	0	0	0	0	0	200	300	0	0	0	0	0	0	0	200	903	0	0	0	0	0	0	0	603	903	0
588	1	0	0	0	0	0	0	200	300	0	0	0	0	0	0	0	200	903	0	0	0	0	0	0	0	603	903	0
588	2	0	0	0	0	0	0	200	300	0	0	0	0	0	0	0	200	903	0	0	0	0	0	0	0	603	903	0
588	3	0	0	0	0	0	0	200	300	0	0	0	0	0	0	0	200	903	0	0	0	0	0	0	0	603	903	0
588	4	0	0	0	0	0	0	200	300	0	0	0	0	0	0	0	200	903	0	0	0	0	0	0	0	603	903	0
588	5	0	0	0	0	0	0	200	300	0	0	0	0	0	0	0	200	903	0	0	0	0	0	0	0	603	903	0
588	6	0	0	0	0	0	0	200	300	0	0	0	0	0	0	0	200	903	0	0	0	0	0	0	0	603	903	0
588	7	0	0	0	0	0	0	200	300	0	0	0	0	0	0	0	200	903	0	0	0	0	0	0	0	603	903	0
588	8	0	0	0	0	0	0	200	300	0	0	0	0	0	0	0	200	903	0	0	0	0	0	0	0	603	903	0
588	9	0	0	0	0	0	0	200	300	0	0	0	0	0	0	0	200	903	0	0	0	0	0	0	0	603	903	0
589	0	0	0	0	0	0	0	200	300	0	0	0	0	0	0	0	200	903	0	0	0	0	0	0	0	603	903	0
589	1	0	0	0	0	0	0	200	300	0	0	0	0	0	0	0	200	903	0	0	0	0	0	0	0	603	903	0
589	2	0	0	0	0	0	0	200	300	0	0	0	0	0	0	0	200	903	0	0	0	0	0	0	0	603	903	0
589	3	0	0	0	0	0	0	200	300	0	0	0	0	0	0	0	200	903	0	0	0	0	0	0	0	603	903	0
589	4	0	0	0	0	0	0	200	300	0	0	0	0	0	0	0	200	903	0	0	0	0	0	0	0	603	903	0
589	5	0	0	0	0	0	0	200	300	0	0	0	0	0	0	0	200	903	0	0	0	0	0	0	0	603	903	0
589	6	0	0	0	0	0	0	200	300	0	0	0	0	0	0	0	200	903	0	0	0	0	0	0	0	603	903	0
589	7	0	0	0	0	0	0	200	300	0	0	0	0	0	0	0	200	903	0	0	0	0	0	0	0	603	903	0
589	8	0	0	0	0	0	0	200	300	0	0	0	0	0	0	0	200	903	0	0	0	0	0	0	0	603	903	0
589	9	0	0	0	0	0	0	200	300	0	0	0	0	0	0	0	200	903	0	0	0	0	0	0	0	603	903	0
590	0	0	0	0	0	0	0	200	300	0	0	0	0	0	0	0	200	903	0	0	0	0	0	0	0	603	903	0
590	1	0	0	0	0	0	0	200	300	0	0	0	0	0	0	0	200	903	0	0	0	0	0	0	0	603	903	0
590	2	0	0	0	0	0	0	200	300	0	0	0	0	0	0	0	200	903	0	0	0	0	0	0	0	603	903	0
590	3	0	0	0	0	0	0	200	300	0	0	0	0	0	0	0	200	903	0	0	0	0	0	0	0	603	903	0
590	4	0	0	0	0	0	0	200	300	0	0	0	0	0	0	0	200	903	0	0	0	0	0	0	0	603	903	0
590	5	0	0	0	0	0	0	200	300	0	0	0	0	0	0	0	200	903	0	0	0	0	0	0	0	603	903	0
590	6	0	0	0	0	0	0	200	300	0	0	0	0	0	0	0	200	903	0	0	0	0	0	0	0	603	903	0
590	7	0	0	0	0	0	0	200	300	0	0	0	0	0	0	0	200	903	0	0	0	0	0	0	0	603	903	0
590	8	0	0	0	0	0	0	200	300	0	0	0	0	0	0	0	200	903	0	0	0	0	0	0	0	603	903	0
590	9	0	0	0	0	0	0	200	300	0	0	0	0	0	0	0	200	903	0	0	0	0	0	0	0	603	903	0
591	0	0	0	0	0	0	0	200	300	0	0	0	0	0	0	0	200	903	0	0	0	0	0	0	0	603	903	0
591	1	0	0	0	0	0	0	200	300	0	0	0	0	0	0	0	200	903	0	0	0	0	0	0	0	603	903	0
591	2	0	0	0	0	0	0	200	300	0	0	0	0	0	0	0	200	903	0	0	0	0	0	0	0	603	903	0
591	3	0	0	0	0	0	0	200	300	0	0	0	0	0	0	0	200	903	0	0	0	0	0	0	0	603	903	0
591	4	0	0	0	0	0	0	200	300	0	0	0	0	0	0	0	200	903	0	0	0	0	0	0	0	603	903	0
591	5	0	0	0	0	0	0	200	300	0	0	0	0	0	0	0	200	903	0	0	0	0	0	0	0	603	903	0
591	6	0	0	0	0	0	0	200	300	0	0	0	0	0	0	0	200	903	0	0	0	0	0	0	0	603	903	0
591	7	0	0	0	0	0	0	200	300	0	0	0	0	0	0	0	200	903	0	0	0	0	0	0	0	603	903	0
591	8	0	0	0	0	0	0	200	300	0	0	0	0	0	0	0	200	903	0	0	0	0	0	0	0	603	903	0
591	9	0	0	0	0	0	0	200	300	0	0	0	0	0	0	0	200	903	0	0	0	0	0	0	0	603	903	0
592	0	0	0	0	0	0	0	200	300	0	0	0	0	0	0	0	200	903	0	0	0	0	0	0	0	603	903	0
592	1	0	0	0	0	0	0	200	300	0	0	0	0	0	0	0	200	903	0	0	0	0	0	0	0	603	903	0
592	2	0	0	0	0	0	0	200	300	0	0	0	0	0	0	0	200	903	0	0	0	0	0	0	0	603	903	0
592	3	0	0	0	0	0	0	200	300	0	0	0	0	0	0	0	200	903	0	0	0	0	0	0	0	603	903	0
592	4	0	0	0	0	0	0	200	300	0	0	0	0	0	0	0	200	903	0	0	0	0	0	0	0	603	903	0
592	5	0	0	0	0	0	0	200	300	0	0	0	0	0	0	0	200	903	0	0	0	0	0	0	0	603	903	0
592	6	0	0	0	0	0	0	200	300	0	0	0	0	0	0	0	200	903	0	0	0	0	0	0	0	603	903	0
592	7	0	0	0	0	0	0	200	300	0	0	0	0	0	0	0	200	903	0	0	0	0	0	0	0	603	903	0
592	8	0	0	0	0	0	0	200	300	0	0	0	0	0	0	0	200	903	0	0	0	0	0	0	0	603	903	0
592	9	0	0	0	0	0	0	200	300	0	0	0	0	0	0	0	200	903	0	0	0	0	0	0	0	603	903	0
593	0	0	0	0	0	0	0	200	300	0	0	0	0	0	0	0	200	903	0	0	0	0	0	0	0	603	903	0
593	1	0	0	0	0	0	0	200	300	0	0	0	0	0	0	0	200	903	0	0	0	0	0	0	0	603	903	0
593	2	0	0	0	0	0	0	200	300	0	0	0	0	0	0	0	200	903	0	0	0	0	0	0	0	603	903	0
593	3	0	0	0	0	0	0	200	300	0	0	0	0	0	0	0	200	903	0	0	0	0	0	0	0	603	903	0
593	4	0	0	0	0	0	0	200	300	0	0	0	0	0	0	0	200	903	0	0	0	0	0	0	0	603	903	0
593	5	0	0	0	0	0	0	200	300	0	0	0	0	0	0	0	200	903	0	0	0	0	0	0	0	603	903	0
593	6	0	0	0	0	0	0	200	300	0	0	0	0	0	0	0	200	903	0	0	0	0	0	0	0	603	903	0
593	7	0	0	0	0	0	0	200	300	0	0	0	0	0	0	0	200	903	0	0	0	0	0	0	0	603	903	0
593	8	0	0	0	0	0	0	200	300	0	0	0	0	0	0	0	200	903	0	0	0	0	0	0	0	603	903	0
593	9	0	0	0	0	0	0	200	300	0	0	0	0	0	0	0	200	903	0	0	0	0	0	0	0	603	903	0
594	0	0	0	0	0	0	0	200	300	0	0	0	0	0	0	0	200	903	0	0	0	0	0	0	0	603	903	0
594	1	0	0	0	0	0	0	200	300	0	0	0	0	0	0	0	200	903	0	0	0	0	0	0	0	603	903	0
594	2	0	0	0	0	0	0	200	300	0	0	0	0	0	0	0	200	903	0	0	0	0	0	0	0	603	903	0
594	3	0	0	0	0	0	0	200	300	0	0	0	0	0	0	0	200	903	0	0	0	0	0	0	0	603	903	0
594	4	0	0	0	0	0	0	200	300	0	0	0	0	0	0	0	200	903	0	0	0	0	0	0	0	603	903	0
594	5	0	0	0	0	0	0	200	300	0	0	0	0	0	0	0	200	903	0	0	0	0	0	0	0	603	903	0
594	6	0	0	0	0	0	0	200	300	0	0	0	0	0	0	0	200	903	0	0	0	0	0	0	0	603	903	0
594	7	0	0	0	0	0	0	200	300	0	0	0	0	0	0	0	200	903	0	0	0	0	0	0	0	603	903	0
594	8	0	0	0	0	0	0	200	300	0	0	0	0	0	0	0	200	903	0	0	0	0	0	0	0	603	903	0
594	9	0	0	0	0	0	0	200	300	0	0	0	0	0	0	0	200	903	0	0	0	0	0	0	0	603	903	0
595	0	0	0	0	0	0	0	200	300	0	0	0	0	0	0	0	200	903	0	0	0	0	0	0	0	603	903	0
595	1	0	0	0	0	0	0	200	300	0	0	0	0	0	0	0	200	903	0	0	0	0	0	0	0	603	903	0
595	2	0	0	0	0	0	0	200	300	0	0	0	0	0	0	0	200	903	0	0	0	0	0	0	0	603	903	0
595	3	0	0	0	0	0	0	200	300	0	0	0	0	0	0	0	200	903	0	0	0	0	0	0	0	603	903	0
595	4	0	0	0	0	0	0	200	300	0	0	0	0	0	0	0	200	903	0	0	0	0	0	0	0	603	903	0
595	5	0	0	0	0	0	0	200	300	0	0	0	0	0	0	0	200	903	0	0	0	0	0	0	0	603	903	0
595	6	0	0	0	0	0	0	200	300	0	0	0	0	0	0	0	200	903	0	0	0	0	0	0	0	603	903	0
595	7	0	0	0	0	0	0	200	300	0	0	0	0	0	0	0	200	903	0	0	0	0	0	0	0	603	903	0
595	8	0	0	0	0	0	0	200	300	0	0	0	0	0	0	0	200	903	0	0	0	0	0	0	0	603	903	0
595	9	0	0	0	0	0	0	200	300	0	0	0	0	0	0	0	200	903	0	0	0	0	0	0	0	603	903	0
596	0	0	0	0	0	0	0	200	300	0	0	0	0	0	0	0	200	903	0	0	0	0	0	0	0	603	903	0
596	1	0	0	0	0	0	0	200	300	0	0	0	0	0	0	0	200	903	0	0	0	0	0	0	0	603	903	0
596	2	0	0	0	0	0	0	200	300	0	0	0	0	0	0	0	200	903	0	0	0	0	0	0	0	603	903	0
596	3	0	0	0	0	0	0	200	300	0	0	0	0	0	0	0	200	903	0	0	0	0	0	0	0	603	903	0
596	4	0	0	0	0	0	0	200	300	0	0	0	0	0	0	0	200	903	0	0	0	0	0	0	0	603	903	0
596	5	0	0	0	0	0	0	200	300	0	0	0	0	0	0	0	200	903	0	0	0	0	0	0	0	603	903	0
596	6	0	0	0	0	0	0	200	300	0	0	0	0	0	0	0	200	903	0	0	0	0	0	0	0	603	903	0
596	7	0	0	0	0	0	0	200	300	0	0	0	0	0	0	0	200	903	0	0	0	0	0	0	0	603	903	0
596	8	0	0	0	0	0	0	200	300	0	0	0	0	0	0	0	200	903	0	0	0	0	0	0	0	603	903	0
596	9	0	0	0	0	0	0	200	300	0	0	0	0	0	0	0	200	903	0	0	0	0	0	0	0	603	903	0
597	0	0	0	0	0	0	0	200	300	0	0	0	0	0	0	0	200	903	0	0	0	0	0	0	0	603	903	0
597	1	0	0	0	0	0	0	200	300	0	0	0	0	0	0	0	200	903	0	0	0	0	0	0	0	603	903	0
597	2	0	0	0	0	0	0	200	300	0	0	0	0	0	0	0	200	903	0	0	0	0	0	0	0	603	903	0
597	3	0	0	0	0	0	0	200	300	0	0	0	0	0	0	0	200	903	0	0	0	0	0	0	0	603	903	0
597	4	0	0	0	0	0	0	200	300	0	0	0	0	0	0	0	200	903	0	0	0	0	0	0	0	603	903	0
597	5	0	0	0	0	0	0	200	300	0	0	0	0	0	0	0	200	903	0	0	0	0	0	0	0	603	903	0
597	6	0	0	0	0	0	0	200	300	0	0	0	0	0	0	0	200	903	0	0	0	0	0	0	0	603	903	0
597	7	0	0	0	0	0	0	200	300	0	0	0	0	0	0	0	200	903	0	0	0	0	0	0	0	603	903	0
597	8	0	0	0	0	0	0	200	300	0	0	0	0	0	0	0	200	903	0	0	0	0	0	0	0	603	903	0
597	9	0	0	0	0	0	0	200	300	0	0	0	0	0	0	0	200	903	0	0	0	0	0	0	0	603	903	0
598	0	0	0	0	0	0	0	200	300	0	0	0	0	0	0	0	200	903	0	0	0	0	0	0	0	603	903	0
598	1	0	0	0	0	0	0	200	300	0	0	0	0	0	0	0	200	903	0	0	0	0	0	0	0	603	903	0
598	2	0	0	0	0	0	0	200	300	0	0	0	0	0	0	0	200	903	0	0	0	0	0	0	0	603	903	0
598	3	0	0	0	0	0	0	200	300	0	0	0	0	0	0	0	200	903	0	0	0	0	0	0	0	603	903	0
598	4	0	0	0	0	0	0	200	300	0	0	0	0	0	0	0	200	903	0	0	0	0	0	0	0	603	903	0
598	5	0	0	0	0	0	0	200	300	0	0	0	0	0	0	0	200	903	0	0	0	0	0	0	0	603	903	0
598	6	0	0	0	0	0	0	200	300	0	0	0	0	0	0	0	200	903	0	0	0	0	0	0	0	603	903	0
598	7	0	0	0	0	0	0	200	300	0	0	0	0	0	0	0	200	903	0	0	0	0	0	0	0	603	903	0
598	8	0	0	0	0	0	0	200	300	0	0	0	0	0	0	0	200	903	0	0	0	0	0	0	0	603	903	0
598	9	0	0	0	0	0	0	200	300	0	0	0	0	0	0	0	200	903	0	0	0	0	0	0	0	603	903	0
599	0	0	0	0	0	0	0	200	300	0	0	0	0	0	0	0	200	903	0	0	0	0	0	0	0	603	903	0
599	1	0	0	0	0	0	0	200	300	0	0	0	0	0	0	0	200	903	0	0	0	0	0	0	0	603	903	0
599	2	0	0	0	0	0	0	200	300	0	0	0	0	0	0	0	200	903	0	0	0	0	0	0	0	603	903	0
599	3	0	0	0	0	0	0	200	300	0	0	0	0	0	0	0	200	903	0	0	0	0	0	0	0	603	903	0
599	4	0	0	0	0	0	0	200	300	0	0	0	0	0	0	0	200	903	0	0	0	0	0	0	0	603	903	0
599	5	0	0	0	0	0	0	200	300	0	0	0	0	0	0	0	200	903	0	0	0	0	0	0	0	603	903	0
599	6	0	0	0	0	0	0	200	300	0	0	0	0	0	0	0	200	903	0	0	0	0	0	0	0	603	903	0
599	7	0	0	0	0	0	0	200	300	0	0	0	0	0	0	0	200	903	0	0	0	0	0	0	0	603	903	0
599	8	0	0	0	0	0	0	200	300	0	0	0	0	0	0	0	200	903	0	0	0	0	0	0	0	603	903	0
599	9	0	0	0	0	0	0	200	300	0	0	0	0	0	0	0	200	903	0	0	0	0	0	0	0	603	903	0
600	0	0	0	0	0	0	0	200	300	0	0	0	0	0	0	0	200	903	0	0	0	0	0	0	0	603	903	0
600	1	0	0	0	0	0	0	200	300	0	0	0	0	0	0	0	200	903	0	0	0	0	0	0	0	603	903	0
600	2	0	0	0	0	0	0	200	300	0	0	0	0	0	0	0	200	903	0	0	0	0	0	0	0	603	903	0
600	3	0	0	0	0	0	0	200	300	0	0	0	0	0	0	0	200	903	0	0	0	0	0	0	0	603	903	0
600	4	0	0	0	0	0	0	200	300	0	0	0	0	0	0	0	200	903	0	0	0	0	0	0	0	603	903	0
600	5	0	0	0	0	0	0	200	300	0	0	0	0	0	0	0	200	903	0	0	0	0	0	0	0	603	903	0
600	6	0	0	0	0	0	0	200	300	0	0	0	0	0	0	0	200	903	0	0	0	0	0	0	0	603	903	0
600	7	0	0	0	0	0	0	200	300	0	0	0	0	0	0	0	200	903	0	0	0	0	0	0	0	603	903	0
600	8	0	0	0	0	0	0	200	300	0	0	0	0	0	0	0	200	903	0	0	0	0	0	0	0	603	903	0
600	9	0	0	0	0	0	0	200	300	0	0	0	0	0	0	0	200	903	0	0	0	0	0	0	0	603	903	0
601	0	0	0	0	0	0	0	200	300	0	0	0	0	0	0	0	200	903	0	0	0	0	0	0	0	603	903	0
601	1	0	0	0	0	0	0	200	300	0	0	0	0	0	0	0	200	903	0	0	0	0	0	0	0	603	903	0
601	2	0	0	0	0	0	0	200	300	0	0	0	0	0	0	0	200	903	0	0	0	0	0	0	0	603	903	0
601	3	0	0	0	0	0	0	200	300	0	0	0	0	0	0	0	200	903	0	0	0	0	0	0	0	603	903	0
601	4	0	0	0	0	0	0	200	300	0	0	0	0	0	0	0	200	903	0	0	0	0	0	0	0	603	903	0
601	5	0	0	0	0	0	0	200	300	0	0	0	0	0	0	0	200	903	0	0	0	0	0	0	0	603	903	0
601	6	0	0	0	0	0	0	200	300	0	0	0	0	0	0	0	200	903	0	0	0	0	0	0	0	603	903	0
601	7	0	0	0	0	0	0	200	300	0	0	0	0	0	0	0	200	903	0	0	0	0	0	0	0	603	903	0
601	8	0	0	0	0	0	0	200	300	0	0	0	0	0	0	0	200	903	0	0	0	0	0	0	0	603	903	0
601	9	0	0	0	0	0	0	200	300	0	0	0	0	0	0	0	200	903	0	0	0	0	0	0	0	603	903	0
602	0	0	0	0	0	0	0	200	300	0	0	0	0	0	0	0	200	903	0	0	0	0	0	0	0	603	903	0
602	1	0	0	0	0	0	0	200	300	0	0	0	0	0	0	0	200	903	0	0	0	0	0	0	0	603	903	0
602	2	0	0	0	0	0	0	200	300	0	0	0	0	0	0	0	200	903	0	0	0	0	0	0	0	603	903	0
602	3	0	0	0	0	0	0	200	300	0	0	0	0	0	0	0	200	903	0	0	0	0	0	0	0	603	903	0
602	4	0	0	0	0	0	0	200	300	0	0	0	0	0	0	0	200	903	0	0	0	0	0	0	0	603	903	0
602	5	0	0	0	0	0	0	200	300	0	0	0	0	0	0	0	200	903	0	0	0	0	0	0	0	603	903	0
602	6	0	0	0	0	0	0	200	300	0	0	0	0	0	0	0	200	903	0	0	0	0	0	0	0	603	903	0
602	7	0	0	0	0	0	0	200	300	0	0	0	0	0	0	0	200	903	0	0	0	0	0	0	0	603	903	0
602	8	0	0	0	0	0	0	200	300	0	0	0	0	0	0	0	200	903	0	0	0	0	0	0	0	603	903	0
602	9	0	0	0	0	0	0	200	300	0	0	0	0	0	0	0	200	903	0	0	0	0	0	0	0	603	903	0
603	0	0	0	0	0	0	0	200	300	0	0	0	0	0	0	0	200	903	0	0	0	0	0	0	0	603	903	0
603	1	0	0	0	0	0	0	200	300	0	0	0	0	0	0	0	200	903	0	0	0	0	0	0	0	603	903	0
603	2	0	0	0	0	0	0	200	300	0	0	0	0	0	0	0	200	903	0	0	0	0	0	0	0	603	903	0
603	3	0	0	0	0	0	0	200	300	0	0	0	0	0	0	0	200	903	0	0	0	0	0	0	0	603	903	0
603	4	0	0	0	0	0	0	200	300	0	0	0	0	0	0	0	200	903	0	0	0	0	0	0	0	603	903	0
603	5	0	0	0	0	0	0	200	300	0	0	0	0	0	0	0	200	903	0	0	0	0	0	0	0	603	903	0
603	6	0	0	0	0	0	0	200	300	0	0	0	0	0	0	0	200	903	0	0	0	0	0	0	0	603	903	0
603	7	0	0	0	0	0	0	200	300	0	0	0	0	0	0	0	200	903	0	0	0	0	0	0	0	603	903	0
603	8	0	0	0	0	0	0	200	300	0	0	0	0	0	0	0	200	903	0	0	0	0	0	0	0	603	903	0
603	9	0	0	0	0	0	0	200	300	0	0	0	0	0	0	0	200	903	0	0	0	0	0	0	0	603	903	0
604	0	0	0	0	0	0	0	200	300	0	0	0	0	0	0	0	200	903	0	0	0	0	0	0	0	603	903	0
604	1	0	0	0	0	0	0	200	300	0	0	0	0	0	0	0	200	903	0	0	0	0	0	0	0	603	903	0
604	2	0	0	0	0	0	0	200	300	0	0	0	0	0	0	0	200	903	0	0	0	0	0	0	0	603	903	0
604	3	0	0	0	0	0	0	200	300	0	0	0	0	0	0	0	200	903	0	0	0	0	0	0	0	603	903	0
604	4	0	0	0	0	0	0	200	300	0	0	0	0	0	0	0	200	903	0	0	0	0	0	0	0	603	903	0
604	5	0	0	0	0	0	0	200	300	0	0	0	0	0	0	0	200	903	0	0	0	0	0	0	0	603	903	0
604	6	0	0	0	0	0	0	200	300	0	0	0	0	0	0	0	200	903	0	0	0	0	0	0	0	603	903	0
604	7	0	0	0	0	0	0	200	300	0	0	0	0	0	0	0	200	903	0	0	0	0	0	0	0	603	903	0
604	8	0	0	0	0	0	0	200	300	0	0	0	0	0	0	0	200	903	0	0	0	0	0	0	0	603	903	0
604	9	0	0	0	0	0	0	200	300	0	0	0	0	0	0	0	200	903	0	0	0	0	0	0	0	603	903	0
605	0	0	0	0	0	0	0	200	300	0	0	0	0	0	0	0	200	903	0	0	0	0	0	0	0	603	903	0
605	1	0	0	0	0	0	0	200	300	0	0	0	0	0	0	0	200	903	0	0	0	0	0	0	0	603	903	0
605	2	0	0	0	0	0	0	200	300	0	0	0	0	0	0	0	200	903	0	0	0	0	0	0	0	603	903	0
605	3	0	0	0	0	0	0	200	300	0	0	0	0	0	0	0	200	903	0	0	0	0	0	0	0	603	903	0
605	4	0	0	0	0	0	0	200	300	0	0	0	0	0	0	0	200	903	0	0	0	0	0	0	0	603	903	0
605	5	0	0	0	0	0	0	200	300	0	0	0	0	0	0	0	200	903	0	0	0	0	0	0	0	603	903	0
605	6	0	0	0	0	0	0	200	300	0	0	0	0	0	0	0	200	903	0	0	0	0	0	0	0	603	903	0
605	7	0	0	0	0	0	0	200	300	0	0	0	0	0	0	0	200	903	0	0	0	0	0	0	0	603	903	0
605	8	0	0	0	0	0	0	200	300	0	0	0	0	0	0	0	200	903	0	0	0	0	0	0	0	603	903	0
605	9	0	0	0	0	0	0	200	300	0	0	0	0	0	0	0	200	903	0	0	0	0	0	0	0	603	903	0
606	0	0	0	0	0	0	0	200	300	0	0	0	0	0	0	0	200	903	0	0	0	0	0	0	0	603	903	0
606	1	0	0	0	0	0	0	200	300	0	0	0	0	0	0	0	200	903	0	0	0	0	0	0	0	603	903	0
606	2	0	0	0	0	0	0	200	300	0	0	0	0	0	0	0	200	903	0	0	0	0	0	0	0	603	903	0
606	3	0	0	0	0	0	0	200	300	0	0	0	0	0	0	0	200	903	0	0	0	0	0	0	0	603	903	0
606	4	0	0	0	0	0	0	200	300	0	0	0	0	0	0	0	200	903	0	0	0	0	0	0	0	603	903	0
606	5	0	0	0	0	0	0	200	300	0	0	0	0	0	0	0	200	903	0	0	0	0	0	0	0	603	903	0
606	6	0	0	0	0	0	0	200	300	0	0	0	0	0	0	0	200	903	0	0	0	0	0	0	0	603	903	0
606	7	0	0	0	0	0	0	200	300	0	0	0	0	0	0	0	200	903	0	0	0	0	0	0	0	603	903	0
606	8	0	0	0	0	0	0	200	300	0	0	0	0	0	0	0	200	903	0	0	0	0	0	0	0	603	903	0
606	9	0	0	0	0	0	0	200	300	0	0	0	0	0	0	0	200	903	0	0	0	0	0	0	0	603	903	0
607	0	0	0	0	0	0	0	200	300	0	0	0	0	0	0	0	200	903	0	0	0	0	0	0	0	603	903	0
607	1	0	0	0	0	0	0	200	300	0	0	0	0	0	0	0	200	903	0	0	0	0	0	0	0	603	903	0
607	2	0	0	0	0	0	0	200	300	0	0	0	0	0	0	0	200	903	0	0	0	0	0	0	0	603	903	0
607	3	0	0	0	0	0	0	200	300	0	0	0	0	0	0	0	200	903	0	0	0	0	0	0	0	603	903	0
607	4	0	0	0	0	0	0	200	300	0	0	0	0	0	0	0	200	903	0	0	0	0	0	0	0	603	903	0
607	5	0	0	0	0	0	0	200	300	0	0	0	0	0	0	0	200	903	0	0	0	0	0	0	0	603	903	0
607	6	0	0	0	0	0	0	200	300	0	0	0	0	0	0	0	200	903	0	0	0	0	0	0	0	603	903	0
607	7	0	0	0	0	0	0	200	300	0	0	0	0	0	0	0	200	903	0	0	0	0	0	0	0	603	903	0
607	8	0	0	0	0	0	0	200	300	0	0	0	0	0	0	0	200	903	0	0	0	0	0	0	0	603	903	0
607	9	0	0	0	0	0	0	200	300	0	0	0	0	0	0	0	200	903	0	0	0	0	0	0	0	603	903	0
608	0	0	0	0	0	0	0	200	300	0	0	0	0	0	0	0	200	903	0	0	0	0	0	0	0	603	903	0
608	1	0	0	0	0	0	0	200	300	0	0	0	0	0	0	0	200	903	0	0	0	0	0	0	0	603	903	0
608	2	0	0	0	0	0	0	200	300	0	0	0	0	0	0	0	200	903	0	0	0	0	0	0	0	603	903	0
608	3	0	0	0	0	0	0	200	300	0	0	0	0	0	0	0	200	903	0	0	0	0	0	0	0	603	903	0
608	4	0	0	0	0	0	0	200	300	0	0	0	0	0	0	0	200	903	0	0	0	0	0	0	0	603	903	0
608	5	0	0	0	0	0	0	200	300	0	0	0	0	0	0	0	200	903	0	0	0	0	0	0	0	603	903	0
608	6	0	0	0	0	0	0	200	300	0	0	0	0	0	0	0	200	903	0	0	0	0	0	0	0	603	903	0
608	7	0	0	0	0	0	0	200	300	0	0	0	0	0	0	0	200	903	0	0	0	0	0	0	0	603	903	0
608	8	0	0	0	0	0	0	200	300	0	0	0	0	0	0	0	200	903	0	0	0	0	0	0	0	603	903	0
608	9	0	0	0	0	0	0	200	300	0	0	0	0	0	0	0	200	903	0	0	0	0	0	0	0	603	903	0
609	0	0	0	0	0	0	0	200	300	0	0	0	0	0	0	0	200	903	0	0	0	0	0	0	0	603	903	0
609	1	0	0	0	0	0	0	200	300	0	0	0	0	0	0	0	200	903	0	0	0	0	0	0	0	603	903	0
609	2	0	0	0	0	0	0	200	300	0	0	0	0	0	0	0	200	903	0	0	0	0	0	0	0	603	903	0
609	3	0	0	0	0	0	0	200	300	0	0	0	0	0	0	0	200	903	0	0	0	0	0	0	0	603	903	0
609	4	0	0	0	0	0	0	200	300	0	0	0	0	0	0	0	200	903	0	0	0	0	0	0	0	603	903	0
609	5	0	0	0	0	0	0	200	300	0	0	0	0	0	0	0	200	903	0	0	0	0	0	0	0	603	903	0
609	6	0	0	0	0	0	0	200	300	0	0	0	0	0	0	0	200	903	0	0	0	0	0	0	0	603	903	0
609	7	0	0	0	0	0	0	200	300	0	0	0	0	0	0	0	200	903	0	0	0	0	0	0	0	603	903	0
609	8	0	0	0	0	0	0	200	300	0	0	0	0	0	0	0	200	903	0	0	0	0	0	0	0	603	903	0
609	9	0	0	0	0	0	0	200	300	0	0	0	0	0	0	0	200	903	0	0	0	0	0	0	0	603	903	0
610	0	0	0	0	0	0	0	200	300	0	0	0	0	0	0	0	200	903	0	0	0	0	0	0	0	603	903	0
610	1	0	0	0	0	0	0	200	300	0	0	0	0	0	0	0	200	903	0	0	0	0	0	0	0	603	903	0
610	2	0	0	0	0	0	0	200	300	0	0	0	0	0	0	0	200	903	0	0	0	0	0	0	0	603	903	0
610	3	0	0	0	0	0	0	200	300	0	0	0	0	0	0	0	200	903	0	0	0	0	0	0	0	603	903	0
610	4	0	0	0	0	0	0	200	300	0	0	0	0	0	0	0	200	903	0	0	0	0	0	0	0	603	903	0
610	5	0	0	0	0	0	0	200	300	0	0	0	0	0	0	0	200	903	0	0	0	0	0	0	0	603	903	0
610	6	0	0	0	0	0	0	200	300	0	0	0	0	0	0	0	200	903	0	0	0	0	0	0	0	603	903	0
610	7	0	0	0	0	0	0	200	300	0	0	0	0	0	0	0	200	903	0	0	0	0	0	0	0	603	903	0
610	8	0	0	0	0	0	0	200	300	0	0	0	0	0	0	0	200	903	0	0	0	0	0	0	0	603	903	0
610	9	0	0	0	0	0	0	200	300	0	0	0	0	0	0	0	200	903	0	0	0	0	0	0	0	603	903	0
611	0	0	0	0	0	0	0	200	300	0	0	0	0	0	0	0	200	903	0	0	0	0	0	0	0	603	903	0
611	1	0	0	0	0	0	0	200	300	0	0	0	0	0	0	0	200	903	0	0	0	0	0	0	0	603	903	0
611	2	0	0	0	0	0	0	200	300	0	0	0	0	0	0	0	200	903	0	0	0	0	0	0	0	603	903	0
611	3	0	0	0	0	0	0	200	300	0	0	0	0	0	0	0	200	903	0	0	0	0	0	0	0	603	903	0
611	4	0	0	0	0	0	0	200	300	0	0	0	0	0	0	0	200	903	0	0	0	0	0	0	0	603	903	0
611	5	0	0	0	0	0	0	200	300	0	0	0	0	0	0	0	200	903	0	0	0	0	0	0	0	603	903	0
611	6	0	0	0	0	0	0	200	300	0	0	0	0	0	0	0	200	903	0	0	0	0	0	0	0	603	903	0
611	7	0	0	0	0	0	0	200	300	0	0	0	0	0	0	0	200	903	0	0	0	0	0	0	0	603	903	0
611	8	0	0	0	0	0	0	200	300	0	0	0	0	0	0	0	200	903	0	0	0	0	0	0	0	603	903	0
611	9	0	0	0	0	0	0	200	300	0	0	0	0	0	0	0	200	903	0	0	0	0	0	0	0	603	903	0
612	0	0	0	0	0	0	0	200	300	0	0	0	0	0	0	0	200	903	0	0	0	0	0	0	0	603	903	0
612	1	0	0	0	0	0	0	200	300	0	0	0	0	0	0	0	200	903	0	0	0	0	0	0	0	603	903	0
612	2	0	0	0	0	0	0	200	300	0	0	0	0	0	0	0	200	903	0	0	0	0	0	0	0	603	903	0
612	3	0	0	0	0	0	0	200	300	0	0	0	0	0	0	0	200	903	0	0	0	0	0	0	0	603	903	0
612	4	0	0	0	0	0	0	200	300	0	0	0	0	0	0	0	200	903	0	0	0	0	0	0	0	603	903	0
612	5	0	0	0	0	0	0	200	300	0	0	0	0	0	0	0	200	903	0	0	0	0	0	0	0	603	903	0
612	6	0	0	0	0	0	0	200	300	0	0	0	0	0	0	0	200	903	0	0	0	0	0	0	0	603	903	0
612	7	0	0	0	0	0	0	200	300	0	0	0	0	0	0	0	200	903	0	0	0	0	0	0	0	603	903	0
612	8	0	0	0	0	0	0	200	300	0	0	0	0	0	0	0	200	903	0	0	0	0	0	0	0	603	903	0
612	9	0	0	0	0	0	0	200	300	0	0	0	0	0	0	0	200	903	0	0	0	0	0	0	0	603	903	0
613	0	0	0	0	0	0	0	200	300	0	0	0	0	0	0	0	200	903	0	0	0	0	0	0	0	603	903	0
613	1	0	0	0	0	0	0	200	300	0	0	0	0	0	0	0	200	903	0	0	0	0	0	0	0	603	903	0
613	2	0	0	0	0	0	0	200	300	0	0	0	0	0	0	0	200	903	0	0	0	0	0	0	0	603	903	0
613	3	0	0	0	0	0	0	200	300	0	0	0	0	0	0	0	200	903	0	0	0	0	0	0	0	603	903	0
613	4	0	0	0	0	0	0	200	300	0	0	0	0	0	0	0	200	903	0	0	0	0	0	0	0	603	903	0
613	5	0	0	0	0	0	0	200	300	0	0	0	0	0	0	0	200	903	0	0	0	0	0	0	0	603	903	0
613	6	0	0	0	0	0	0	200	300	0	0	0	0	0	0	0	200	903	0	0	0	0	0	0	0	603	903	0
613	7	0	0	0	0	0	0	200	300	0	0	0	0	0	0	0	200	903	0	0	0	0	0	0	0	603	903	0
613	8	0	0	0	0	0	0	200	300	0	0	0	0	0	0	0	200	903	0	0	0	0	0	0	0	603	903	0
613	9	0	0	0	0	0	0	200	300	0	0	0	0	0	0	0	200	903	0	0	0	0	0	0	0	603	903	0
614	0	0	0	0	0	0	0	200	300	0	0	0	0	0	0	0	200	903	0	0	0	0	0	0	0	603	903	0
614	1	0	0	0	0	0	0	200	300	0	0	0	0	0	0	0	200	903	0	0	0	0	0	0	0	603	903	0
614	2	0	0	0	0	0	0	200	300	0	0	0	0	0	0	0	200	903	0	0	0	0	0	0	0	603	903	0
614	3	0	0	0	0	0	0	200	300	0	0	0	0	0	0	0	200	903	0	0	0	0	0	0	0	603	903	0
614	4	0	0	0	0	0	0	200	300	0	0	0	0	0	0	0	200	903	0	0	0	0	0	0	0	603	903	0
614	5	0	0	0	0	0	0	200	300	0	0	0	0	0	0	0	200	903	0	0	0	0	0	0	0	603	903	0
614	6	0	0	0	0	0	0	200	300	0	0	0	0	0	0	0	200	903	0	0	0	0	0	0	0	603	903	0
614	7	0	0	0	0	0	0	200	300	0	0	0	0	0	0	0	200	903	0	0	0	0	0	0	0	603	903	0
614	8	0	0	0	0	0	0	200	300	0	0	0	0	0	0	0	200	903	0	0	0	0	0	0	0	603	903	0
614	9	0	0	0	0	0	0	200	300	0	0	0	0	0	0	0	200	903	0	0	0	0	0	0	0	603	903	0
615	0	0	0	0	0	0	0	200	300	0	0	0	0	0	0	0	200	903	0	0	0	0	0	0	0	603	903	0
615	1	0	0	0	0	0	0	200	300	0	0	0	0	0	0	0	200	903	0	0	0	0	0	0	0	603	903	0
615	2	0	0	0	0	0	0	200	300	0	0	0	0	0	0	0	200	903	0	0	0	0	0	0	0	603	903	0
615	3	0	0	0	0	0	0	200	300	0	0	0	0	0	0	0	200	903	0	0	0	0	0	0	0	603	903	0
615	4	0	0	0	0	0	0	200	300	0	0	0	0	0	0	0	200	903	0	0	0	0	0	0	0	603	903	0
615	5	0	0	0	0	0	0	200	300	0	0	0	0	0	0	0	200	903	0	0	0	0	0	0	0	603	903	0
615	6	0	0	0	0	0	0	200	300	0	0	0	0	0	0	0	200	903	0	0	0	0	0	0	0	603	903	0
615	7	0	0	0	0	0	0	200	300	0	0	0	0	0	0	0	200	903	0	0	0	0	0	0	0	603	903	0
615	8	0	0	0	0	0	0	200	300	0	0	0	0	0	0	0	200	903	0	0	0	0	0	0	0	603	903	0
615	9	0	0	0	0	0	0	200	300	0	0	0	0	0	0	0	200	903	0	0	0	0	0	0	0	603	903	0
616	0	0	0	0	0	0	0	200	300	0	0	0	0	0	0	0	200	903	0	0	0	0	0	0	0	603	903	0
616	1	0	0	0	0	0	0	200	300	0	0	0	0	0	0	0	200	903	0	0	0	0	0	0	0	603	903	0
616	2	0	0	0	0	0	0	200	300	0	0	0	0	0	0	0	200	903	0	0	0	0	0	0	0	603	903	0
616	3	0	0	0	0	0	0	200	300	0	0	0	0	0	0	0	200	903	0	0	0	0	0	0	0	603	903	0
616	4	0	0	0	0	0	0	200	300	0	0	0	0	0	0	0	200	903	0	0	0	0	0	0	0	603	903	0
616	5	0	0	0	0	0	0	200	300	0	0	0	0	0	0	0	200	903	0	0	0	0	0	0	0	603	903	0
616	6	0	0	0	0	0	0	200	300	0	0	0	0	0	0	0	200	903	0	0	0	0	0	0	0	603	903	0
616	7	0	0	0	0	0	0	200	300	0	0	0	0	0	0	0	200	903	0	0	0	0	0	0	0	603	903	0
616	8	0	0	0	0	0	0	200	300	0	0	0	0	0	0	0	200	903	0	0	0	0	0	0	0	603	903	0
616	9	0	0	0	0	0	0	200	300	0	0	0	0	0	0	0	200	903	0	0	0	0	0	0	0	603	903	0
617	0	0	0	0	0	0	0	200	300	0	0	0	0	0	0	0	200	903	0	0	0	0	0	0	0	603	903	0
617	1	0	0	0	0	0	0	200	300	0	0	0	0	0	0	0	200	903	0	0	0	0	0	0	0	603	903	0
617	2	0	0	0	0	0	0	200	300	0	0	0	0	0	0	0	200	903	0	0	0	0	0	0	0	603	903	0
617	3	0	0	0	0	0	0	200	300	0	0	0	0	0	0	0	200	903	0	0	0	0	0	0	0	603	903	0
617	4	0	0	0	0	0	0	200	300	0	0	0	0	0	0	0	200	903	0	0	0	0	0	0	0	603	903	0
617	5	0	0	0	0	0	0	200	300	0	0	0	0	0	0	0	200	903	0	0	0	0	0	0	0	603	903	0
617	6	0	0	0	0	0	0	200	300	0	0	0	0	0	0	0	200	903	0	0	0	0	0	0	0	603	903	0
617	7	0	0	0	0	0	0	200	300	0	0	0	0	0	0	0	200	903	0	0	0	0	0	0	0	603	903	0
617	8	0	0	0	0	0	0	200	300	0	0	0	0	0	0	0	200	903	0	0	0	0	0	0	0	603	903	0
617	9	0	0	0	0	0	0	200	300	0	0	0	0	0	0	0	200	903	0	0	0	0	0	0	0	603	903	0
618	0	0	0	0	0	0	0	200	300	0	0	0	0	0	0	0	200	903	0	0	0	0	0	0	0	603	903	0
618	1	0	0	0	0	0	0	200	300	0	0	0	0	0	0	0	200	903	0	0	0	0	0	0	0	603	903	0
618	2	0	0	0	0	0	0	200	300	0	0	0	0	0	0	0	200	903	0	0	0	0	0	0	0	603	903	0
618	3	0	0	0	0	0	0	200	300	0	0	0	0	0	0	0	200	903	0	0	0	0	0	0	0	603	903	0
618	4	0	0	0	0	0	0	200	300	0	0	0	0	0	0	0	200	903	0	0	0	0	0	0	0	603	903	0
618	5	0	0	0	0	0	0	200	300	0	0	0	0	0	0	0	200	903	0	0	0	0	0	0	0	603	903	0
618	6	0	0	0	0	0	0	200	300	0	0	0	0	0	0	0	200	903	0	0	0	0	0	0	0	603	903	0
618	7	0	0	0	0	0	0	200	300	0	0	0	0	0	0	0	200	903	0	0	0	0	0	0	0	603	903	0
618	8	0	0	0	0	0	0	200	300	0	0	0	0	0	0	0	200	903	0	0	0	0	0	0	0	603	903	0
618	9	0	0	0	0	0	0	200	300	0	0	0	0	0	0	0	200	903	0	0	0	0	0	0	0	603	903	0
619	0	0	0	0	0	0	0	200	300	0	0	0	0	0	0	0	200	903	0	0	0	0	0	0	0	603	903	0
619	1	0	0	0	0	0	0	200	300	0	0	0	0	0	0	0	200	903	0	0	0	0	0	0	0	603	903	0
619	2	0	0	0	0	0	0	200	300	0	0	0	0	0	0	0	200	903	0	0	0	0	0	0	0	603	903	0
619	3	0	0	0	0	0	0	200	300	0	0	0	0	0	0	0	200	903	0	0	0	0	0	0	0	603	903	0
619	4	0	0	0	0	0	0	200	300	0	0	0	0	0	0	0	200	903	0	0	0	0	0	0	0	603	903	0
619	5	0	0	0	0	0	0	200	300	0	0	0	0	0	0	0	200	903	0	0	0	0	0	0	0	603	903	0
619	6	0	0	0	0	0	0	200	300	0	11.9632	-3.6647	-20.3662	-5774.32	505.561	-3453.74	224.824	1186.53	0	0	0	0	0	0	0	603	903	0
619	7	0	0	0	0	0	0	200	300	0	13.1839	1.98105	-19.1455	-4584.14	17.2794	-1119.14	200.903	1142.44	0	0	0	0	0	0	0	603	903	0
619	8	0	0	0	0	0	0	200	300	0	0	0	0	0	0	0	200	903	0	0	0	0	0	0	0	603	903	0
619	9	0	0	0	0	0	0	200	300	0	-6.65253	-1.37588	-17.9248	-6415.19	261.42	-1073.37	214.584	1260.9	0	0	0	0	0	0	0	603	903	0
620	0	0	0	0	0	0	0	200	300	0	6.31744	6.25351	-26.4697	-7330.72	261.42	299.926	209.876	1179.95	0	0	0	0	0	0	0	603	903	0
620	1	0	0	0	0	0	0	200	300	0	5.24933	13.7303	-33.1835	-8154.69	810.736	1078.12	224.432	1148.75	0	0	0	0	0	0	0	603	903	0
620	2	0	0	0	0	0	0	200	300	0	-5.27924	12.2044	-31.9628	-9619.54	932.807	-1027.59	229.184	1203.96	0	0	0	0	0	0	0	603	903	0
620	3	0	0	0	0	0	0	200	300	0	-1.46454	12.9674	-37.7612	-9802.64	566.596	391.479	215.005	1162.6	0	0	0	0	0	0	0	603	903	0
620	4	0	0	0	0	0	0	200	300	0	6.62262	17.0873	-44.475	-12274.6	1360.05	803.466	230.58	1178.99	0	0	0	0	0	0	0	603	903	0
620	5	0	0	0	0	0	0	200	300	0	4.18121	16.1717	-49.0527	-13464.8	1665.23	-1210.69	233.948	1177.5	0	0	0	0	0	0	0	603	903	0
620	6	0	0	0	0	0	0	200	300	0	-0.0912476	13.7303	-52.7148	-14563.4	749.701	-66.2851	214.222	1179.27	0	0	0	0	0	0	0	603	903	0
620	7	0	0	0	0	0	0	200	300	0	0.671692	12.5096	-58.208	-15570.5	1482.12	254.149	225.463	1170.5	0	0	0	0	0	0	0	603	903	0
620	8	0	0	0	0	0	0	200	300	0	7.69073	13.5777	-64.0063	-17310	2153.51	-1576.91	233.645	1173.44	0	0	0	0	0	0	0	603	903	0
620	9	0	0	0	0	0	0	200	300	0	9.21661	14.7984	-67.9736	-18408.6	1970.4	-752.931	228.988	1173.82	0	0	0	0	0	0	0	603	903	0
621	0	0	0	0	0	0	0	200	300	0	1.12946	10.526	-70.415	-19324.1	2214.54	-569.825	231.45	1177.43	0	0	0	0	0	0	0	603	903	0
621	1	0	0	0	0	0	0	200	300	0	4.94415	10.526	-75.9082	-19965	2519.72	-2446.66	233.194	1166.02	0	0	0	0	0	0	0	603	903	0
621	2	0	0	0	0	0	0	200	300	0	15.3201	12.9674	-79.8754	-20239.7	2031.44	-1668.46	225.433	1156.39	0	0	0	0	0	0	0	603	903	0
621	3	0	0	0	0	0	0	200	300	0	11.0477	10.2208	-83.2324	-22620	3008	-1164.92	236.14	1174.77	0	0	0	0	0	0	0	603	903	0
621	4	0	0	0	0	0	0	200	300	0	6.47003	6.55869	-87.5048	-23077.8	2946.97	-2950.2	233.678	1166.73	0	0	0	0	0	0	0	603	903	0
621	5	0	0	0	0	0	0	200	300	0	11.9632	7.47421	-91.1669	-23810.2	2824.9	-2721.32	230.986	1164.17	0	0	0	0	0	0	0	603	903	0
621	6	0	0	0	0	0	0	200	300	0	15.6253	5.33798	-97.5756	-25275.1	3252.14	-2172	233.329	1162.03	0	0	0	0	0	0	0	603	903	0
621	7	0	0	0	0	0	0	200	300	0	14.252	3.20175	-99.1015	-26648.4	3435.25	-3728.4	234.664	1171.9	0	0	0	0	0	0	0	603	903	0
621	8	0	0	0	0	0	0	200	300	0	14.8624	2.74399	-102.764	-26923	3130.07	-3041.75	230.459	1164.99	0	0	0	0	0	0	0	603	903	0
621	9	0	0	0	0	0	0	200	300	0	13.6417	0.455172	-109.477	-27655.4	3679.39	-2538.21	233.609	1155.61	0	0	0	0	0	0	0	603	903	0
622	0	0	0	0	0	0	0	200	300	0	16.6934	-0.918119	-113.445	-28845.6	4106.64	-3865.72	236.199	1157.27	0	0	0	0	0	0	0	603	903	0
622	1	0	0	0	0	0	0	200	300	0	16.9986	-2.13882	-114.665	-29394.9	3862.49	-3499.51	233.685	1159.35	0	0	0	0	0	0	0	603	903	0
622	2	0	0	0	0	0	0	200	300	0	11.658	-4.42764	-119.548	-31226	4167.67	-2629.76	234.862	1164.2	0	0	0	0	0	0	0	603	903	0
622	3	0	0	0	0	0	0	200	300	0	15.9305	-7.4794	-127.788	-30768.2	4167.67	-3362.18	232.614	1143.78	0	0	0	0	0	0	0	603	903	0
622	4	0	0	0	0	0	0	200	300	0	19.2874	-8.08975	-127.788	-32965.5	4472.85	-3545.29	235.002	1160.97	0	0	0	0	0	0	0	603	903	0
622	5	0	0	0	0	0	0	200	300	0	13.7943	-9.9208	-131.145	-34064.1	4411.81	-2995.97	233.641	1162.74	0	0	0	0	0	0	0	603	903	0
622	6	0	0	0	0	0	0	200	300	0	13.4891	-12.5148	-136.943	-34430.3	4472.85	-4277.71	232.662	1154.42	0	0	0	0	0	0	0	603	903	0
622	7	0	0	0	0	0	0	200	300	0	18.2193	-12.6674	-142.436	-35162.8	4472.85	-3957.28	231.402	1149.87	0	0	0	0	0	0	0	603	903	0
622	8	0	0	0	0	0	0	200	300	0	17.1512	-13.7355	-147.624	-37176.9	4655.95	-3041.75	231.539	1154.83	0	0	0	0	0	0	0	603	903	0
622	9	0	0	0	0	0	0	200	300	0	14.7098	-15.7191	-150.981	-38367.1	5083.2	-3957.28	233.668	1157.12	0	0	0	0	0	0	0	603	903	0
623	0	0	0	0	0	0	0	200	300	0	17.1512	-16.9398	-153.118	-38824.9	5083.2	-4231.93	233.198	1156.56	0	0	0	0	0	0	0	603	903	0
623	1	0	0	0	0	0	0	200	300	0	19.44	-19.6864	-159.526	-39374.2	5632.52	-3224.86	235.308	1149.82	0	0	0	0	0	0	0	603	903	0
623	2	0	0	0	0	0	0	200	300	0	16.6934	-18.6183	-166.24	-41296.8	5327.34	-4003.05	232.046	1151.42	0	0	0	0	0	0	0	603	903	0
623	3	0	0	0	0	0	0	200	300	0	17.3038	-20.602	-169.292	-42487	5510.45	-3957.28	232.55	1153.97	0	0	0	0	0	0	0	603	903	0
623	4	0	0	0	0	0	0	200	300	0	16.9986	-23.6537	-173.564	-42487	5815.62	-3362.18	233.507	1147.79	0	0	0	0	0	0	0	603	903	0
623	5	0	0	0	0	0	0	200	300	0	17.7615	-23.8063	-179.668	-44592.7	6120.8	-4094.61	234.067	1151.2	0	0	0	0	0	0	0	603	903	0
623	6	0	0	0	0	0	0	200	300	0	17.7615	-22.8908	-185.161	-45233.6	6364.94	-4231.93	234.375	1147.29	0	0	0	0	0	0	0	603	903	0
623	7	0	0	0	0	0	0	200	300	0	15.3201	-26.2477	-191.265	-46149.1	6425.97	-3591.07	233.597	1144.28	0	0	0	0	0	0	0	603	903	0
623	8	0	0	0	0	0	0	200	300	0	17.3038	-27.621	-195.537	-47613.9	5937.69	-3682.62	230.366	1146.5	0	0	0	0	0	0	0	603	903	0
623	9	0	0	0	0	0	0	200	300	0	18.3719	-27.0106	-202.251	-49078.8	6303.9	-4277.71	231.169	1145.66	0	0	0	0	0	0	0	603	903	0
624	0	0	0	0	0	0	0	200	300	0	17.9141	-28.9943	-207.744	-50085.9	6792.18	-3362.18	232.695	1144.09	0	0	0	0	0	0	0	603	903	0
624	1	0	0	0	0	0	0	200	300	0	16.3882	-30.215	-213.237	-51184.5	6914.25	-3774.17	232.425	1143.04	0	0	0	0	0	0	0	603	903	0
624	2	0	0	0	0	0	0	200	300	0	18.0667	-30.215	-218.12	-52283.1	6731.15	-4369.26	230.86	1142.7	0	0	0	0	0	0	0	603	903	0
624	3	0	0	0	0	0	0	200	300	0	15.7779	-30.215	-223.308	-53931.1	6914.25	-3316.41	230.963	1144.51	0	0	0	0	0	0	0	603	903	0
624	4	0	0	0	0	0	0	200	300	0	15.9305	-32.3512	-230.327	-54205.7	7158.4	-3316.41	231.079	1138.34	0	0	0	0	0	0	0	603	903	0
624	5	0	0	0	0	0	0	200	300	0	17.1512	-33.4193	-230.937	-55121.3	7463.57	-4003.05	232.319	1141.68	0	0	0	0	0	0	0	603	903	0
624	6	0	0	0	0	0	0	200	300	0	15.3201	-33.7245	-239.788	-57043.9	7768.75	-3499.51	232.398	1140.89	0	0	0	0	0	0	0	603	903	0
624	7	0	0	0	0	0	0	200	300	0	16.0831	-34.7926	-244.976	-57684.7	7768.75	-3545.29	231.712	1138.47	0	0	0	0	0	0	0	603	903	0
624	8	0	0	0	0	0	0	200	300	0	15.3201	-36.3185	-249.553	-58508.7	7585.64	-3728.4	230.397	1137.45	0	0	0	0	0	0	0	603	903	0
624	9	0	0	0	0	0	0	200	300	0	14.252	-37.8444	-257.793	-59882	7890.82	-3224.86	230.609	1135.29	0	0	0	0	0	0	0	603	903	0
625	0	0	0	0	0	0	0	200	300	0	13.4891	-38.7599	-261.15	-60522.9	8257.03	-3179.08	231.618	1134.76	0	0	0	0	0	0	0	603	903	0
625	1	0	0	0	0	0	0	200	300	0	13.7943	-38.4547	-264.202	-61804.6	8012.89	-3819.95	230.329	1136.93	0	0	0	0	0	0	0	603	903	0
625	2	0	0	0	0	0	0	200	300	0	12.8787	-39.2177	-271.526	-62628.6	8257.03	-3133.3	230.41	1133.65	0	0	0	0	0	0	0	603	903	0
625	3	0	0	0	0	0	0	200	300	0	12.8787	-40.591	-277.629	-64276.5	8501.17	-2629.76	230.621	1134.52	0	0	0	0	0	0	0	603	903	0
625	4	0	0	0	0	0	0	200	300	0	12.5735	-41.5065	-283.122	-65008.9	8684.27	-3362.18	230.673	1132.61	0	0	0	0	0	0	0	603	903	0
625	5	0	0	0	0	0	0	200	300	0	11.2003	-43.6427	-288.005	-66016.1	8379.1	-3179.08	229.094	1132.22	0	0	0	0	0	0	0	603	903	0
625	6	0	0	0	0	0	0	200	300	0	11.5054	-44.4057	-292.583	-66931.5	9111.52	-2950.2	231.142	1131.76	0	0	0	0	0	0	0	603	903	0
625	7	0	0	0	0	0	0	200	300	0	11.5054	-43.6427	-297.771	-67480.9	8989.45	-3179.08	230.189	1129.62	0	0	0	0	0	0	0	603	903	0
625	8	0	0	0	0	0	0	200	300	0	11.9632	-48.0678	-303.874	-68854.2	8867.38	-3179.08	229.181	1129.59	0	0	0	0	0	0	0	603	903	0
625	9	0	0	0	0	0	0	200	300	0	10.5899	-48.2204	-309.368	-69952.8	8867.38	-3133.3	228.663	1129.12	0	0	0	0	0	0	0	603	903	0
626	0	0	0	0	0	0	0	200	300	0	10.5899	-48.9833	-313.64	-70776.8	9355.66	-3453.74	229.829	1128.66	0	0	0	0	0	0	0	603	903	0
626	1	0	0	0	0	0	0	200	300	0	9.21661	-50.5092	-320.659	-71875.4	10027	-3087.53	231.27	1127.15	0	0	0	0	0	0	0	603	903	0
626	2	0	0	0	0	0	0	200	300	0	7.08038	-52.3402	-327.068	-71783.8	9355.66	-2538.21	228.605	1122.48	0	0	0	0	0	0	0	603	903	0
626	3	0	0	0	0	0	0	200	300	0	8.75885	-54.0187	-333.171	-73431.8	9843.94	-3179.08	229.546	1123.4	0	0	0	0	0	0	0	603	903	0
626	4	0	0	0	0	0	0	200	300	0	8.91144	-54.7816	-337.749	-75446	9966.01	-2858.64	229.507	1126.38	0	0	0	0	0	0	0	603	903	0
626	5	0	0	0	0	0	0	200	300	0	7.38556	-56.4601	-344.463	-76453	9966.01	-2172	228.932	1124.95	0	0	0	0	0	0	0	603	903	0
626	6	0	0	0	0	0	0	200	300	0	8.60626	-58.2912	-350.872	-76544.6	10088.1	-2950.2	228.752	1121.16	0	0	0	0	0	0	0	603	903	0
626	7	0	0	0	0	0	0	200	300	0	8.45367	-59.6645	-356.365	-78101	10210.2	-2721.32	228.651	1122.16	0	0	0	0	0	0	0	603	903	0
626	8	0	0	0	0	0	0	200	300	0	5.70709	-60.58	-362.773	-79291.2	10515.3	-2400.88	228.986	1121.57	0	0	0	0	0	0	0	603	903	0
626	9	0	0	0	0	0	0	200	300	0	7.38556	-61.9533	-368.877	-79748.9	10210.2	-2812.87	227.679	1119.19	0	0	0	0	0	0	0	603	903	0
627	0	0	0	0	0	0	0	200	300	0	7.23297	-63.4792	-374.98	-79657.4	10759.5	-2583.99	228.693	1115.43	0	0	0	0	0	0	0	603	903	0
627	1	0	0	0	0	0	0	200	300	0	5.24933	-65.1576	-381.084	-82312.4	11125.7	-2263.55	229.195	1119	0	0	0	0	0	0	0	603	903	0
627	2	0	0	0	0	0	0	200	300	0	5.40192	-65.768	-385.662	-82312.4	10454.3	-2583.99	227.107	1116.43	0	0	0	0	0	0	0	603	903	0
627	3	0	0	0	0	0	0	200	300	0	6.31744	-67.4464	-392.375	-83960.4	11369.8	-2675.54	228.977	1116.98	0	0	0	0	0	0	0	603	903	0
627	4	0	0	0	0	0	0	200	300	0	5.24933	-68.362	-399.394	-84051.9	11552.9	-2172	228.926	1113.45	0	0	0	0	0	0	0	603	903	0
627	5	0	0	0	0	0	0	200	300	0	5.70709	-70.4982	-406.108	-86340.7	11247.7	-2309.33	227.696	1115.61	0	0	0	0	0	0	0	603	903	0
627	6	0	0	0	0	0	0	200	300	0	5.24933	-72.6344	-411.907	-87622.5	11247.7	-2263.55	227.307	1115.72	0	0	0	0	0	0	0	603	903	0
627	7	0	0	0	0	0	0	200	300	0	4.02863	-73.0922	-418.315	-88080.2	11858.1	-2126.22	228.347	1113.56	0	0	0	0	0	0	0	603	903	0
627	8	0	0	0	0	0	0	200	300	0	3.57086	-73.0922	-427.776	-88904.2	11675	-1943.12	227.292	1110.83	0	0	0	0	0	0	0	603	903	0
627	9	0	0	0	0	0	0	200	300	0	1.73981	-76.7543	-438.762	-90918.4	11614	-1485.35	226.47	1110.22	0	0	0	0	0	0	0	603	903	0
628	0	0	0	0	0	0	0	200	300	0	-2.07489	-78.8905	-448.833	-91833.9	11797.1	-981.813	226.284	1107.61	0	0	0	0	0	0	0	603	903	0
628	1	0	0	0	0	0	0	200	300	0	-2.83783	-83.6208	-453.105	-92291.7	11919.1	-1210.69	226.305	1106.69	0	0	0	0	0	0	0	603	903	0
628	2	0	0	0	0	0	0	200	300	0	-2.22748	-86.5199	-459.514	-93573.4	11980.2	-1027.59	226.071	1106.64	0	0	0	0	0	0	0	603	903	0
628	3	0	0	0	0	0	0	200	300	0	-6.04218	-88.0458	-466.533	-94672	12590.5	-478.272	226.987	1105.93	0	0	0	0	0	0	0	603	903	0
628	4	0	0	0	0	0	0	200	300	0	-4.05853	-93.6916	-473.857	-95038.2	12468.5	-752.931	226.313	1103.56	0	0	0	0	0	0	0	603	903	0
628	5	0	0	0	0	0	0	200	300	0	-2.22748	-98.4218	-476.909	-96045.4	12224.3	-1164.92	225.632	1104.39	0	0	0	0	0	0	0	603	903	0
628	6	0	0	0	0	0	0	200	300	0	-2.53265	-98.5744	-481.792	-96411.6	12651.6	-844.484	226.259	1103.11	0	0	0	0	0	0	0	603	903	0
628	7	0	0	0	0	0	0	200	300	0	-1.9223	-99.0321	-486.675	-97235.5	13017.8	-1393.8	226.748	1102.8	0	0	0	0	0	0	0	603	903	0
628	8	0	0	0	0	0	0	200	300	0	-0.243835	-101.779	-491.558	-97876.4	12651.6	-1897.34	225.738	1102.11	0	0	0	0	0	0	0	603	903	0
628	9	0	0	0	0	0	0	200	300	0	-0.549011	-102.236	-493.389	-97967.9	13506	-1531.13	227.374	1101.56	0	0	0	0	0	0	0	603	903	0
629	0	0	0	0	0	0	0	200	300	0	-0.396423	-99.0321	-497.051	-98883.5	13017.8	-1485.35	226.19	1101.94	0	0	0	0	0	0	0	603	903	0
629	1	0	0	0	0	0	0	200	300	0	-0.243835	-98.727	-501.018	-100074	13078.8	-1805.79	226.104	1102.74	0	0	0	0	0	0	0	603	903	0
629	2	0	0	0	0	0	0	200	300	0	-0.396423	-99.9477	-504.68	-99707.5	13261.9	-1256.47	226.278	1100.57	0	0	0	0	0	0	0	603	903	0
629	3	0	0	0	0	0	0	200	300	0	-1.15936	-97.6588	-504.985	-99432.8	13567.1	-1210.69	226.866	1099.9	0	0	0	0	0	0	0	603	903	0
629	4	0	0	0	0	0	0	200	300	0	-3.90594	-95.0648	-508.953	-99982.1	13384	-1302.25	226.297	1099.45	0	0	0	0	0	0	0	603	903	0
629	5	0	0	0	0	0	0	200	300	0	-3.75336	-94.3019	-513.225	-100715	13322.9	-707.154	225.959	1099.24	0	0	0	0	0	0	0	603	903	0
629	6	0	0	0	0	0	0	200	300	0	-2.83783	-94.4545	-511.089	-100531	13567.1	-386.72	226.545	1099.7	0	0	0	0	0	0	0	603	903	0
629	7	0	0	0	0	0	0	200	300	0	-5.27924	-93.8441	-517.803	-100989	13506	-707.154	226.083	1098.03	0	0	0	0	0	0	0	603	903	0
629	8	0	0	0	0	0	0	200	300	0	-4.82147	-95.5226	-518.718	-101081	12895.7	-249.391	224.861	1097.87	0	0	0	0	0	0	0	603	903	0
629	9	0	0	0	0	0	0	200	300	0	-5.43182	-96.7433	-519.023	-101081	13567.1	-386.72	226.14	1097.75	0	0	0	0	0	0	0	603	903	0
630	0	0	0	0	0	0	0	200	300	0	-5.27924	-96.5907	-522.075	-101539	13506	-615.602	225.87	1097.49	0	0	0	0	0	0	0	603	903	0
630	1	0	0	0	0	0	0	200	300	0	-8.02582	-98.1166	-523.601	-101539	13261.9	208.373	225.328	1096.92	0	0	0	0	0	0	0	603	903	0
630	2	0	0	0	0	0	0	200	300	0	-8.78876	-100.253	-524.822	-101813	13261.9	299.926	225.269	1097	0	0	0	0	0	0	0	603	903	0
630	3	0	0	0	0	0	0	200	300	0	-8.02582	-100.558	-525.432	-101172	13261.9	-157.838	225.24	1095.55	0	0	0	0	0	0	0	603	903	0
630	4	0	0	0	0	0	0	200	300	0	-9.09393	-100.405	-528.789	-101630	13261.9	162.597	225.08	1095.19	0	0	0	0	0	0	0	603	903	0
630	5	0	0	0	0	0	0	200	300	0	-11.2302	-102.542	-530.62	-101264	13200.9	483.031	224.878	1093.84	0	0	0	0	0	0	0	603	903	0
630	6	0	0	0	0	0	0	200	300	0	-11.5353	-102.389	-532.756	-100989	13506	391.479	225.351	1092.56	0	0	0	0	0	0	0	603	903	0
630	7	0	0	0	0	0	0	200	300	0	-11.5353	-105.288	-536.113	-101722	13445	1078.12	225.079	1092.74	0	0	0	0	0	0	0	603	903	0
630	8	0	0	0	0	0	0	200	300	0	-12.9086	-105.136	-537.639	-102546	13017.8	940.795	224.213	1093.73	0	0	0	0	0	0	0	603	903	0
630	9	0	0	0	0	0	0	200	300	0	-14.4345	-106.814	-539.47	-102637	13078.8	757.69	224.244	1093.26	0	0	0	0	0	0	0	603	903	0
631	0	0	0	0	0	0	0	200	300	0	-14.8923	-107.882	-542.217	-101722	13384	1261.23	224.684	1090.6	0	0	0	0	0	0	0	603	903	0
631	1	0	0	0	0	0	0	200	300	0	-14.5871	-108.34	-544.353	-101996	13017.8	1535.89	223.914	1090.37	0	0	0	0	0	0	0	603	903	0
631	2	0	0	0	0	0	0	200	300	0	-15.9604	-109.256	-544.353	-103095	13017.8	1261.23	223.914	1092.39	0	0	0	0	0	0	0	603	903	0
631	3	0	0	0	0	0	0	200	300	0	-16.5707	-110.018	-545.574	-103003	13261.9	1718.99	224.308	1091.8	0	0	0	0	0	0	0	603	903	0
631	4	0	0	0	0	0	0	200	300	0	-16.4182	-109.866	-544.658	-101630	13200.9	2039.43	224.237	1089.59	0	0	0	0	0	0	0	603	903	0
631	5	0	0	0	0	0	0	200	300	0	-17.3337	-109.713	-551.372	-102820	13200.9	1535.89	223.942	1089.48	0	0	0	0	0	0	0	603	903	0
631	6	0	0	0	0	0	0	200	300	0	-19.0121	-112.002	-552.288	-102454	13261.9	2130.98	224.013	1088.51	0	0	0	0	0	0	0	603	903	0
631	7	0	0	0	0	0	0	200	300	0	-19.3173	-111.85	-553.508	-102546	12895.7	2451.42	223.298	1088.26	0	0	0	0	0	0	0	603	903	0
631	8	0	0	0	0	0	0	200	300	0	-19.0121	-110.934	-557.17	-103003	12651.6	2359.86	222.707	1087.87	0	0	0	0	0	0	0	603	903	0
631	9	0	0	0	0	0	0	200	300	0	-20.0803	-112.155	-558.391	-103278	12895.7	2680.3	223.094	1087.96	0	0	0	0	0	0	0	603	903	0
632	0	0	0	0	0	0	0	200	300	0	-22.0639	-112.918	-558.696	-103278	13078.8	2954.96	223.41	1087.86	0	0	0	0	0	0	0	603	903	0
632	1	0	0	0	0	0	0	200	300	0	-22.6743	-111.697	-561.748	-103095	12956.7	2588.74	223.065	1086.53	0	0	0	0	0	0	0	603	903	0
632	2	0	0	0	0	0	0	200	300	0	-22.6743	-111.544	-564.189	-103278	12712.6	2863.4	222.533	1086.06	0	0	0	0	0	0	0	603	903	0
632	3	0	0	0	0	0	0	200	300	0	-22.8268	-112.918	-566.631	-104010	12407.4	3366.94	221.897	1086.56	0	0	0	0	0	0	0	603	903	0
632	4	0	0	0	0	0	0	200	300	0	-24.5053	-113.528	-567.241	-104010	12773.6	3412.72	222.519	1086.36	0	0	0	0	0	0	0	603	903	0
632	5	0	0	0	0	0	0	200	300	0	-25.726	-112.155	-568.767	-104194	12895.7	3229.61	222.673	1086.19	0	0	0	0	0	0	0	603	903	0
632	6	0	0	0	0	0	0	200	300	0	-24.5053	-111.85	-571.514	-104010	12712.6	3595.83	222.244	1084.99	0	0	0	0	0	0	0	603	903	0
632	7	0	0	0	0	0	0	200	300	0	-24.9631	-113.07	-572.734	-104468	12407.4	3321.17	221.663	1085.4	0	0	0	0	0	0	0	603	903	0
632	8	0	0	0	0	0	0	200	300	0	-23.7424	-113.07	-576.702	-104743	12773.6	3595.83	222.149	1084.62	0	0	0	0	0	0	0	603	903	0
632	9	0	0	0	0	0	0	200	300	0	-25.4208	-113.375	-577.617	-104926	13017.8	3824.71	222.537	1084.65	0	0	0	0	0	0	0	603	903	0
633	0	0	0	0	0	0	0	200	300	0	-25.2682	-113.375	-580.059	-104651	12956.7	3733.15	222.337	1083.42	0	0	0	0	0	0	0	603	903	0
633	1	0	0	0	0	0	0	200	300	0	-26.3364	-113.528	-581.89	-104834	12346.4	3458.5	221.218	1083.16	0	0	0	0	0	0	0	603	903	0
633	2	0	0	0	0	0	0	200	300	0	-27.0993	-113.528	-584.331	-105292	13017.8	3641.6	222.278	1083.19	0	0	0	0	0	0	0	603	903	0
633	3	0	0	0	0	0	0	200	300	0	-25.1157	-113.833	-584.941	-105750	13017.8	3641.6	222.255	1083.79	0	0	0	0	0	0	0	603	903	0
633	4	0	0	0	0	0	0	200	300	0	-24.5053	-114.138	-587.993	-105841	12712.6	3916.26	221.62	1083	0	0	0	0	0	0	0	603	903	0
633	5	0	0	0	0	0	0	200	300	0	-26.3364	-113.223	-591.045	-106482	13200.9	3824.71	222.335	1083.16	0	0	0	0	0	0	0	603	903	0
633	6	0	0	0	0	0	0	200	300	0	-26.0312	-113.986	-590.129	-106940	13261.9	3778.93	222.473	1084.21	0	0	0	0	0	0	0	603	903	0
633	7	0	0	0	0	0	0	200	300	0	-24.8105	-111.392	-592.571	-106208	12956.7	3504.27	221.865	1082.23	0	0	0	0	0	0	0	603	903	0
633	8	0	0	0	0	0	0	200	300	0	-25.1157	-113.681	-595.012	-106482	12895.7	3687.38	221.673	1081.96	0	0	0	0	0	0	0	603	903	0
633	9	0	0	0	0	0	0	200	300	0	-26.0312	-112.612	-596.538	-107032	13078.8	3595.83	221.925	1082.42	0	0	0	0	0	0	0	603	903	0
634	0	0	0	0	0	0	0	200	300	0	-25.4208	-112.918	-598.674	-107123	13200.9	3550.05	222.05	1081.93	0	0	0	0	0	0	0	603	903	0
634	1	0	0	0	0	0	0	200	300	0	-24.6579	-113.528	-601.421	-107398	12895.7	3595.83	221.442	1081.57	0	0	0	0	0	0	0	603	903	0
634	2	0	0	0	0	0	0	200	300	0	-25.2682	-112.765	-600.505	-107856	12773.6	3641.6	221.271	1082.61	0	0	0	0	0	0	0	603	903	0
634	3	0	0	0	0	0	0	200	300	0	-23.7424	-111.85	-603.557	-107398	13750.2	3595.83	222.782	1080.94	0	0	0	0	0	0	0	603	903	0
634	4	0	0	0	0	0	0	200	300	0	-25.2682	-110.171	-602.642	-107123	12895.7	3962.04	221.399	1080.76	0	0	0	0	0	0	0	603	903	0
634	5	0	0	0	0	0	0	200	300	0	-23.895	-110.934	-606.914	-107764	12712.6	3778.93	220.946	1080.56	0	0	0	0	0	0	0	603	903	0
634	6	0	0	0	0	0	0	200	300	0	-25.4208	-112.155	-608.44	-107947	13322.9	3824.71	221.897	1080.42	0	0	0	0	0	0	0	603	903	0
634	7	0	0	0	0	0	0	200	300	0	-26.6415	-112.002	-608.44	-108039	13200.9	3916.26	221.696	1080.57	0	0	0	0	0	0	0	603	903	0
634	8	0	0	0	0	0	0	200	300	0	-24.8105	-111.087	-610.271	-107947	13200.9	3595.83	221.631	1079.88	0	0	0	0	0	0	0	603	903	0
634	9	0	0	0	0	0	0	200	300	0	-24.6579	-109.561	-612.712	-108680	13078.8	3641.6	221.346	1080.37	0	0	0	0	0	0	0	603	903	0
635	0	0	0	0	0	0	0	200	300	0	-23.5898	-108.95	-612.712	-109046	12773.6	3778.93	220.848	1080.97	0	0	0	0	0	0	0	603	903	0
635	1	0	0	0	0	0	0	200	300	0	-23.895	-109.713	-614.849	-108222	12834.7	3962.04	220.875	1079.01	0	0	0	0	0	0	0	603	903	0
635	2	0	0	0	0	0	0	200	300	0	-24.6579	-109.103	-614.849	-108313	13567.1	4007.81	222.066	1079.16	0	0	0	0	0	0	0	603	903	0
635	3	0	0	0	0	0	0	200	300	0	-26.489	-108.035	-616.985	-109137	13200.9	3870.48	221.396	1079.89	0	0	0	0	0	0	0	603	903	0
635	4	0	0	0	0	0	0	200	300	0	-25.4208	-108.493	-617.29	-108497	12407.4	3778.93	220.1	1078.76	0	0	0	0	0	0	0	603	903	0
635	5	0	0	0	0	0	0	200	300	0	-24.8105	-107.73	-618.206	-108588	13139.8	3962.04	221.255	1078.65	0	0	0	0	0	0	0	603	903	0
635	6	0	0	0	0	0	0	200	300	0	-25.1157	-105.746	-616.374	-109504	13200.9	3870.48	221.417	1080.66	0	0	0	0	0	0	0	603	903	0
635	7	0	0	0	0	0	0	200	300	0	-25.8786	-106.356	-620.342	-109687	13017.8	4374.02	220.985	1079.82	0	0	0	0	0	0	0	603	903	0
635	8	0	0	0	0	0	0	200	300	0	-25.8786	-106.509	-622.173	-109595	12956.7	4053.59	220.825	1079.15	0	0	0	0	0	0	0	603	903	0
635	9	0	0	0	0	0	0	200	300	0	-23.5898	-105.288	-623.088	-109229	12712.6	4190.92	220.403	1078.3	0	0	0	0	0	0	0	603	903	0
636	0	0	0	0	0	0	0	200	300	0	-26.0312	-105.441	-624.919	-108771	12895.7	4099.36	220.636	1077.06	0	0	0	0	0	0	0	603	903	0
636	1	0	0	0	0	0	0	200	300	0	-26.0312	-105.288	-624.309	-109412	12895.7	4053.59	220.656	1078.25	0	0	0	0	0	0	0	603	903	0
636	2	0	0	0	0	0	0	200	300	0	-24.6579	-104.525	-627.056	-109595	13261.9	4328.25	221.15	1077.78	0	0	0	0	0	0	0	603	903	0
636	3	0	0	0	0	0	0	200	300	0	-24.9631	-104.373	-627.971	-110602	13139.8	4282.47	220.924	1079.13	0	0	0	0	0	0	0	603	903	0
636	4	0	0	0	0	0	0	200	300	0	-24.0475	-104.068	-626.445	-109870	12956.7	4190.92	220.683	1078.39	0	0	0	0	0	0	0	603	903	0
636	5	0	0	0	0	0	0	200	300	0	-24.8105	-102.999	-628.581	-109320	13078.8	4328.25	220.807	1076.92	0	0	0	0	0	0	0	603	903	0
636	6	0	0	0	0	0	0	200	300	0	-24.5053	-102.389	-631.023	-110053	13017.8	4190.92	220.63	1077.4	0	0	0	0	0	0	0	603	903	0
636	7	0	0	0	0	0	0	200	300	0	-25.4208	-102.847	-632.854	-109595	12773.6	4190.92	220.184	1076.18	0	0	0	0	0	0	0	603	903	0
636	8	0	0	0	0	0	0	200	300	0	-25.726	-101.321	-631.633	-110053	13139.8	4419.8	220.803	1077.24	0	0	0	0	0	0	0	603	903	0
636	9	0	0	0	0	0	0	200	300	0	-24.5053	-100.711	-631.633	-110236	13445	4190.92	221.286	1077.53	0	0	0	0	0	0	0	603	903	0
637	0	0	0	0	0	0	0	200	300	0	-24.6579	-100.405	-633.159	-110236	13078.8	4053.59	220.656	1077.1	0	0	0	0	0	0	0	603	903	0
637	1	0	0	0	0	0	0	200	300	0	-24.6579	-99.6425	-635.295	-110419	12712.6	4282.47	220.011	1076.81	0	0	0	0	0	0	0	603	903	0
637	2	0	0	0	0	0	0	200	300	0	-24.3527	-100.253	-636.211	-110419	13078.8	4328.25	220.557	1076.56	0	0	0	0	0	0	0	603	903	0
637	3	0	0	0	0	0	0	200	300	0	-22.8268	-99.6425	-636.211	-109870	13261.9	4511.35	220.845	1075.69	0	0	0	0	0	0	0	603	903	0
637	4	0	0	0	0	0	0	200	300	0	-23.5898	-98.1166	-637.126	-110511	13139.8	4282.47	220.624	1076.45	0	0	0	0	0	0	0	603	903	0
637	5	0	0	0	0	0	0	200	300	0	-24.6579	-98.2692	-640.178	-110511	12956.7	4419.8	220.239	1075.62	0	0	0	0	0	0	0	603	903	0
637	6	0	0	0	0	0	0	200	300	0	-23.2846	-97.6588	-640.789	-110144	12773.6	3778.93	219.934	1074.89	0	0	0	0	0	0	0	603	903	0
637	7	0	0	0	0	0	0	200	300	0	-21.9113	-96.8959	-641.399	-110968	12895.7	4145.14	220.106	1076.01	0	0	0	0	0	0	0	603	903	0
637	8	0	0	0	0	0	0	200	300	0	-22.5217	-96.4381	-642.009	-110877	13200.9	4099.36	220.562	1075.7	0	0	0	0	0	0	0	603	903	0
637	9	0	0	0	0	0	0	200	300	0	-23.2846	-95.0648	-640.789	-110694	13445	4053.59	220.982	1075.75	0	0	0	0	0	0	0	603	903	0
638	0	0	0	0	0	0	0	200	300	0	-22.2165	-94.6071	-640.789	-110511	13078.8	4145.14	220.41	1075.46	0	0	0	0	0	0	0	603	903	0
638	1	0	0	0	0	0	0	200	300	0	-22.0639	-93.6916	-645.977	-111152	13261.9	3916.26	220.53	1075.07	0	0	0	0	0	0	0	603	903	0
638	2	0	0	0	0	0	0	200	300	0	-22.6743	-94.6071	-645.977	-111335	13384	4053.59	220.719	1075.35	0	0	0	0	0	0	0	603	903	0
638	3	0	0	0	0	0	0	200	300	0	-22.6743	-93.6916	-646.892	-111152	13078.8	4511.35	220.218	1074.82	0	0	0	0	0	0	0	603	903	0
638	4	0	0	0	0	0	0	200	300	0	-21.9113	-93.0812	-649.028	-110144	13384	4145.14	220.622	1072.71	0	0	0	0	0	0	0	603	903	0
638	5	0	0	0	0	0	0	200	300	0	-21.4536	-93.0812	-648.418	-110602	12956.7	4053.59	219.982	1073.57	0	0	0	0	0	0	0	603	903	0
638	6	0	0	0	0	0	0	200	300	0	-22.5217	-92.4709	-649.639	-110511	13017.8	3962.04	220.038	1073.11	0	0	0	0	0	0	0	603	903	0
638	7	0	0	0	0	0	0	200	300	0	-22.5217	-91.0976	-650.249	-111701	13017.8	4099.36	220.02	1074.78	0	0	0	0	0	0	0	603	903	0
638	8	0	0	0	0	0	0	200	300	0	-21.301	-90.7924	-651.47	-111426	13139.8	4053.59	220.17	1074.04	0	0	0	0	0	0	0	603	903	0
638	9	0	0	0	0	0	0	200	300	0	-19.3173	-91.2502	-649.639	-111335	12895.7	4053.59	219.851	1074.38	0	0	0	0	0	0	0	603	903	0
639	0	0	0	0	0	0	0	200	300	0	-22.2165	-88.8087	-650.859	-112067	13078.8	4282.47	220.095	1075.18	0	0	0	0	0	0	0	603	903	0
639	1	0	0	0	0	0	0	200	300	0	-19.1647	-90.182	-650.859	-111701	13200.9	3870.48	220.282	1074.62	0	0	0	0	0	0	0	603	903	0
639	2	0	0	0	0	0	0	200	300	0	-20.9958	-88.9613	-651.775	-111152	12956.7	4190.92	219.879	1073.54	0	0	0	0	0	0	0	603	903	0
639	3	0	0	0	0	0	0	200	300	0	-21.4536	-88.8087	-654.521	-111426	12529.5	4282.47	219.143	1073.24	0	0	0	0	0	0	0	603	903	0
639	4	0	0	0	0	0	0	200	300	0	-20.9958	-88.8087	-656.047	-111975	12712.6	4145.14	219.378	1073.68	0	0	0	0	0	0	0	603	903	0
639	5	0	0	0	0	0	0	200	300	0	-22.0639	-88.351	-654.827	-111701	12895.7	4282.47	219.693	1073.58	0	0	0	0	0	0	0	603	903	0
639	6	0	0	0	0	0	0	200	300	0	-23.4372	-86.2148	-650.859	-110968	13078.8	4282.47	220.095	1073.5	0	0	0	0	0	0	0	603	903	0
639	7	0	0	0	0	0	0	200	300	0	-21.7587	-86.3673	-654.827	-109870	13200.9	4053.59	220.159	1070.78	0	0	0	0	0	0	0	603	903	0
639	8	0	0	0	0	0	0	200	300	0	-21.7587	-85.4518	-655.742	-110785	12773.6	4236.69	219.48	1071.95	0	0	0	0	0	0	0	603	903	0
639	9	0	0	0	0	0	0	200	300	0	-23.132	-86.9777	-656.352	-110419	12895.7	4236.69	219.648	1071.23	0	0	0	0	0	0	0	603	903	0
640	0	0	0	0	0	0	0	200	300	0	-22.8268	-85.757	-656.352	-111060	12956.7	4419.8	219.741	1072.21	0	0	0	0	0	0	0	603	903	0
640	1	0	0	0	0	0	0	200	300	0	-21.4536	-84.2311	-655.132	-109229	13261.9	4374.02	220.243	1069.73	0	0	0	0	0	0	0	603	903	0
640	2	0	0	0	0	0	0	200	300	0	-22.8268	-83.7733	-656.658	-110968	12163.3	4648.68	218.523	1071.99	0	0	0	0	0	0	0	603	903	0
640	3	0	0	0	0	0	0	200	300	0	-22.9794	-84.0785	-654.827	-110877	12529.5	4190.92	219.134	1072.32	0	0	0	0	0	0	0	603	903	0
640	4	0	0	0	0	0	0	200	300	0	-22.5217	-84.0785	-654.827	-110236	12773.6	4511.35	219.507	1071.34	0	0	0	0	0	0	0	603	903	0
640	5	0	0	0	0	0	0	200	300	0	-22.0639	-83.163	-654.521	-110053	12712.6	4602.9	219.423	1071.14	0	0	0	0	0	0	0	603	903	0
640	6	0	0	0	0	0	0	200	300	0	-21.9113	-82.0949	-654.827	-110328	12468.5	4282.47	219.041	1071.48	0	0	0	0	0	0	0	603	903	0
640	7	0	0	0	0	0	0	200	300	0	-23.132	-82.5526	-654.521	-110144	12590.5	4374.02	219.236	1071.28	0	0	0	0	0	0	0	603	903	0
640	8	0	0	0	0	0	0	200	300	0	-23.2846	-81.1794	-653.911	-108954	12285.3	4465.58	218.788	1069.62	0	0	0	0	0	0	0	603	903	0
640	9	0	0	0	0	0	0	200	300	0	-22.2165	-81.3319	-652.08	-109229	12041.2	4557.13	218.466	1070.51	0	0	0	0	0	0	0	603	903	0
641	0	0	0	0	0	0	0	200	300	0	-22.0639	-80.7216	-652.08	-109412	12163.3	4831.79	218.653	1070.79	0	0	0	0	0	0	0	603	903	0
641	1	0	0	0	0	0	0	200	300	0	-23.132	-80.2638	-651.47	-109320	12163.3	4602.9	218.671	1070.81	0	0	0	0	0	0	0	603	903	0
641	2	0	0	0	0	0	0	200	300	0	-23.132	-79.5009	-651.164	-108497	12285.3	4419.8	218.867	1069.62	0	0	0	0	0	0	0	603	903	0
641	3	0	0	0	0	0	0	200	300	0	-21.9113	-79.6535	-651.164	-107215	12224.3	4648.68	218.773	1067.65	0	0	0	0	0	0	0	603	903	0
641	4	0	0	0	0	0	0	200	300	0	-22.5217	-78.7379	-649.639	-108130	11552.9	4557.13	217.784	1069.45	0	0	0	0	0	0	0	603	903	0
641	5	0	0	0	0	0	0	200	300	0	-23.132	-77.975	-648.723	-108130	12041.2	4786.01	218.561	1069.68	0	0	0	0	0	0	0	603	903	0
641	6	0	0	0	0	0	0	200	300	0	-23.132	-77.6698	-647.197	-107947	12285.3	4557.13	218.982	1069.79	0	0	0	0	0	0	0	603	903	0
641	7	0	0	0	0	0	0	200	300	0	-22.0639	-77.8224	-645.366	-106299	12224.3	4465.58	218.942	1067.71	0	0	0	0	0	0	0	603	903	0
641	8	0	0	0	0	0	0	200	300	0	-21.9113	-76.7543	-645.671	-107032	11675	4465.58	218.082	1068.77	0	0	0	0	0	0	0	603	903	0
641	9	0	0	0	0	0	0	200	300	0	-23.132	-76.144	-645.671	-107032	12102.2	4648.68	218.744	1068.77	0	0	0	0	0	0	0	603	903	0
642	0	0	0	0	0	0	0	200	300	0	-22.6743	-76.2965	-645.061	-106391	11858.1	4282.47	218.383	1067.93	0	0	0	0	0	0	0	603	903	0
642	1	0	0	0	0	0	0	200	300	0	-21.4536	-75.8388	-642.925	-106116	11552.9	4648.68	217.969	1068.05	0	0	0	0	0	0	0	603	903	0
642	2	0	0	0	0	0	0	200	300	0	-22.2165	-74.6181	-642.009	-106116	11308.8	4831.79	217.615	1068.29	0	0	0	0	0	0	0	603	903	0
642	3	0	0	0	0	0	0	200	300	0	-23.5898	-74.6181	-642.314	-105475	12102.2	4648.68	218.842	1067.21	0	0	0	0	0	0	0	603	903	0
642	4	0	0	0	0	0	0	200	300	0	-22.3691	-74.4655	-641.399	-104926	11186.7	4648.68	217.441	1066.59	0	0	0	0	0	0	0	603	903	0
642	5	0	0	0	0	0	0	200	300	0	-21.9113	-74.3129	-638.347	-105017	11369.8	4602.9	217.811	1067.51	0	0	0	0	0	0	0	603	903	0
642	6	0	0	0	0	0	0	200	300	0	-22.8268	-72.9396	-635.906	-104651	11797.1	4648.68	218.552	1067.57	0	0	0	0	0	0	0	603	903	0
642	7	0	0	0	0	0	0	200	300	0	-21.301	-72.0241	-636.516	-104377	11552.9	4328.25	218.15	1066.98	0	0	0	0	0	0	0	603	903	0
642	8	0	0	0	0	0	0	200	300	0	-22.2165	-72.6344	-635.601	-103736	11308.8	4282.47	217.792	1066.21	0	0	0	0	0	0	0	603	903	0
642	9	0	0	0	0	0	0	200	300	0	-22.2165	-71.2611	-634.38	-103370	11003.6	4374.02	217.345	1065.95	0	0	0	0	0	0	0	603	903	0
643	0	0	0	0	0	0	0	200	300	0	-22.5217	-71.1086	-633.159	-102912	11003.6	4694.46	217.379	1065.54	0	0	0	0	0	0	0	603	903	0
643	1	0	0	0	0	0	0	200	300	0	-22.6743	-71.2611	-631.328	-103095	11247.7	4694.46	217.816	1066.3	0	0	0	0	0	0	0	603	903	0
643	2	0	0	0	0	0	0	200	300	0	-22.3691	-69.8878	-631.328	-101081	11247.7	4419.8	217.816	1063.11	0	0	0	0	0	0	0	603	903	0
643	3	0	0	0	0	0	0	200	300	0	-21.9113	-70.0404	-630.107	-102454	11125.7	4511.35	217.657	1065.6	0	0	0	0	0	0	0	603	903	0
643	4	0	0	0	0	0	0	200	300	0	-23.132	-69.7353	-628.581	-102179	10942.6	4694.46	217.408	1065.56	0	0	0	0	0	0	0	603	903	0
643	5	0	0	0	0	0	0	200	300	0	-22.9794	-68.8197	-627.666	-101539	11125.7	4511.35	217.725	1064.77	0	0	0	0	0	0	0	603	903	0
643	6	0	0	0	0	0	0	200	300	0	-22.0639	-68.6671	-627.971	-100989	11064.6	4740.23	217.62	1063.82	0	0	0	0	0	0	0	603	903	0
643	7	0	0	0	0	0	0	200	300	0	-22.0639	-68.8197	-624.614	-100898	10698.4	4374.02	217.128	1064.54	0	0	0	0	0	0	0	603	903	0
643	8	0	0	0	0	0	0	200	300	0	-22.0639	-67.9042	-623.393	-100898	10881.5	4328.25	217.455	1064.85	0	0	0	0	0	0	0	603	903	0
643	9	0	0	0	0	0	0	200	300	0	-22.2165	-66.2257	-619.121	-100074	10759.5	4465.58	217.379	1064.64	0	0	0	0	0	0	0	603	903	0
644	0	0	0	0	0	0	0	200	300	0	-20.9958	-67.2939	-621.562	-99707.5	10393.3	4465.58	216.721	1063.41	0	0	0	0	0	0	0	603	903	0
644	1	0	0	0	0	0	0	200	300	0	-22.9794	-66.2257	-620.342	-99615.9	11003.6	4557.13	217.738	1063.58	0	0	0	0	0	0	0	603	903	0
644	2	0	0	0	0	0	0	200	300	0	-24.0475	-66.3783	-619.121	-99432.8	10820.5	4511.35	217.477	1063.6	0	0	0	0	0	0	0	603	903	0
644	3	0	0	0	0	0	0	200	300	0	-22.0639	-66.0732	-615.764	-97784.9	10393.3	4602.9	216.879	1061.8	0	0	0	0	0	0	0	603	903	0
644	4	0	0	0	0	0	0	200	300	0	-22.3691	-65.005	-615.154	-97418.6	10393.3	4602.9	216.895	1061.36	0	0	0	0	0	0	0	603	903	0
644	5	0	0	0	0	0	0	200	300	0	-22.8268	-64.8524	-615.459	-97510.2	10454.3	4419.8	216.986	1061.43	0	0	0	0	0	0	0	603	903	0
644	6	0	0	0	0	0	0	200	300	0	-22.3691	-65.005	-614.849	-98334.1	10149.1	4419.8	216.507	1062.93	0	0	0	0	0	0	0	603	903	0
644	7	0	0	0	0	0	0	200	300	0	-21.4536	-63.9369	-613.018	-96777.8	10210.2	4374.02	216.656	1060.87	0	0	0	0	0	0	0	603	903	0
644	8	0	0	0	0	0	0	200	300	0	-21.6061	-62.8688	-610.881	-97510.2	10271.2	4465.58	216.814	1062.62	0	0	0	0	0	0	0	603	903	0
644	9	0	0	0	0	0	0	200	300	0	-23.5898	-63.174	-609.05	-96777.8	10149.1	4145.14	216.664	1061.9	0	0	0	0	0	0	0	603	903	0
645	0	0	0	0	0	0	0	200	300	0	-22.3691	-62.1059	-609.661	-95953.8	9782.9	4648.68	216.046	1060.39	0	0	0	0	0	0	0	603	903	0
645	1	0	0	0	0	0	0	200	300	0	-19.4699	-62.411	-608.135	-96228.4	10149.1	4694.46	216.689	1061.24	0	0	0	0	0	0	0	603	903	0
645	2	0	0	0	0	0	0	200	300	0	-22.2165	-62.1059	-605.693	-96320	10271.2	4602.9	216.958	1062.02	0	0	0	0	0	0	0	603	903	0
645	3	0	0	0	0	0	0	200	300	0	-22.3691	-61.0378	-604.778	-95679.1	9843.94	4465.58	216.277	1061.21	0	0	0	0	0	0	0	603	903	0
645	4	0	0	0	0	0	0	200	300	0	-21.301	-60.7326	-604.778	-94763.6	10332.2	4236.69	217.084	1059.69	0	0	0	0	0	0	0	603	903	0
645	5	0	0	0	0	0	0	200	300	0	-20.9958	-60.2748	-604.473	-95221.4	9904.97	4145.14	216.386	1060.53	0	0	0	0	0	0	0	603	903	0
645	6	0	0	0	0	0	0	200	300	0	-21.9113	-59.817	-601.421	-94763.6	9477.73	4465.58	215.759	1060.57	0	0	0	0	0	0	0	603	903	0
645	7	0	0	0	0	0	0	200	300	0	-22.0639	-59.3593	-600.2	-94397.4	9904.97	4419.8	216.503	1060.28	0	0	0	0	0	0	0	603	903	0
645	8	0	0	0	0	0	0	200	300	0	-20.8432	-58.5963	-600.81	-93756.5	9660.83	3962.04	216.08	1059.05	0	0	0	0	0	0	0	603	903	0
645	9	0	0	0	0	0	0	200	300	0	-19.9277	-58.5963	-598.369	-93939.6	9660.83	4190.92	216.145	1059.99	0	0	0	0	0	0	0	603	903	0
646	0	0	0	0	0	0	0	200	300	0	-21.301	-58.1386	-597.148	-93573.4	9599.8	4190.92	216.076	1059.7	0	0	0	0	0	0	0	603	903	0
646	1	0	0	0	0	0	0	200	300	0	-20.0803	-57.3756	-596.843	-92749.5	9782.9	4190.92	216.391	1058.4	0	0	0	0	0	0	0	603	903	0
646	2	0	0	0	0	0	0	200	300	0	-20.6906	-56.4601	-596.843	-92657.9	9721.87	4419.8	216.289	1058.25	0	0	0	0	0	0	0	603	903	0
646	3	0	0	0	0	0	0	200	300	0	-20.9958	-56.6127	-591.655	-92474.8	9294.62	3962.04	215.71	1059.3	0	0	0	0	0	0	0	603	903	0
646	4	0	0	0	0	0	0	200	300	0	-20.9958	-56.4601	-593.486	-92017	9843.94	3778.93	216.587	1058.05	0	0	0	0	0	0	0	603	903	0
646	5	0	0	0	0	0	0	200	300	0	-19.1647	-56.3075	-592.876	-91833.9	9660.83	4053.59	216.295	1057.9	0	0	0	0	0	0	0	603	903	0
646	6	0	0	0	0	0	0	200	300	0	-20.538	-55.5446	-591.35	-91559.3	9477.73	3916.26	216.027	1057.83	0	0	0	0	0	0	0	603	903	0
646	7	0	0	0	0	0	0	200	300	0	-18.5544	-54.6291	-591.655	-92291.7	9233.59	3916.26	215.606	1058.99	0	0	0	0	0	0	0	603	903	0
646	8	0	0	0	0	0	0	200	300	0	-19.1647	-54.4765	-589.519	-91376.1	9843.94	3824.71	216.698	1058	0	0	0	0	0	0	0	603	903	0
646	9	0	0	0	0	0	0	200	300	0	-18.8596	-54.1713	-587.688	-90918.4	9355.66	3778.93	215.919	1057.71	0	0	0	0	0	0	0	603	903	0
647	0	0	0	0	0	0	0	200	300	0	-20.3854	-53.5609	-587.688	-90369	9355.66	3870.48	215.919	1056.77	0	0	0	0	0	0	0	603	903	0
647	1	0	0	0	0	0	0	200	300	0	-19.0121	-53.1032	-587.993	-90094.4	9294.62	3778.93	215.807	1056.22	0	0	0	0	0	0	0	603	903	0
647	2	0	0	0	0	0	0	200	300	0	-17.0285	-52.798	-587.688	-89911.3	9477.73	3778.93	216.127	1055.99	0	0	0	0	0	0	0	603	903	0
647	3	0	0	0	0	0	0	200	300	0	-19.1647	-52.6454	-585.247	-89911.3	8989.45	3641.6	215.36	1056.63	0	0	0	0	0	0	0	603	903	0
647	4	0	0	0	0	0	0	200	300	0	-19.0121	-51.4247	-581.584	-89545.1	9599.8	3550.05	216.506	1056.97	0	0	0	0	0	0	0	603	903	0
647	5	0	0	0	0	0	0	200	300	0	-19.0121	-50.6618	-583.11	-88904.2	9660.83	3458.5	216.568	1055.47	0	0	0	0	0	0	0	603	903	0
647	6	0	0	0	0	0	0	200	300	0	-18.2492	-50.0514	-582.805	-88904.2	9050.48	3321.17	215.529	1055.55	0	0	0	0	0	0	0	603	903	0
647	7	0	0	0	0	0	0	200	300	0	-17.1811	-50.6618	-582.805	-89087.3	8928.41	3687.38	215.32	1055.86	0	0	0	0	0	0	0	603	903	0
647	8	0	0	0	0	0	0	200	300	0	-19.3173	-50.5092	-580.669	-88538	9966.01	3366.94	217.163	1055.48	0	0	0	0	0	0	0	603	903	0
647	9	0	0	0	0	0	0	200	300	0	-15.5026	-49.7462	-580.669	-87897.2	9233.59	3321.17	215.902	1054.37	0	0	0	0	0	0	0	603	903	0
648	0	0	0	0	0	0	0	200	300	0	-18.707	-48.8307	-580.974	-88538	9233.59	3366.94	215.893	1055.4	0	0	0	0	0	0	0	603	903	0
648	1	0	0	0	0	0	0	200	300	0	-18.8596	-48.6781	-579.753	-88354.9	9172.55	3046.51	215.821	1055.4	0	0	0	0	0	0	0	603	903	0
648	2	0	0	0	0	0	0	200	300	0	-16.8759	-47.9152	-578.227	-86432.3	8867.38	3275.39	215.335	1052.48	0	0	0	0	0	0	0	603	903	0
648	3	0	0	0	0	0	0	200	300	0	-16.7233	-48.373	-577.617	-87714	9050.48	3550.05	215.669	1054.85	0	0	0	0	0	0	0	603	903	0
648	4	0	0	0	0	0	0	200	300	0	-17.944	-47.4574	-578.227	-87073.1	9416.69	3046.51	216.285	1053.59	0	0	0	0	0	0	0	603	903	0
648	5	0	0	0	0	0	0	200	300	0	-17.7914	-46.6945	-577.312	-86706.9	9233.59	3046.51	215.994	1053.19	0	0	0	0	0	0	0	603	903	0
648	6	0	0	0	0	0	0	200	300	0	-16.5707	-46.5419	-575.481	-86615.4	9294.62	3138.06	216.151	1053.51	0	0	0	0	0	0	0	603	903	0
648	7	0	0	0	0	0	0	200	300	0	-16.7233	-45.3212	-571.819	-86981.6	9355.66	2817.63	216.361	1055.11	0	0	0	0	0	0	0	603	903	0
648	8	0	0	0	0	0	0	200	300	0	-17.3337	-46.0841	-576.091	-86798.5	9172.55	3321.17	215.922	1053.67	0	0	0	0	0	0	0	603	903	0
648	9	0	0	0	0	0	0	200	300	0	-17.0285	-45.9315	-574.871	-86249.2	8989.45	3138.06	215.637	1053.03	0	0	0	0	0	0	0	603	903	0
649	0	0	0	0	0	0	0	200	300	0	-15.9604	-45.016	-573.345	-85974.5	8928.41	3000.73	215.573	1052.95	0	0	0	0	0	0	0	603	903	0
649	1	0	0	0	0	0	0	200	300	0	-15.9604	-44.4057	-573.65	-85883	9172.55	2634.52	215.99	1052.71	0	0	0	0	0	0	0	603	903	0
649	2	0	0	0	0	0	0	200	300	0	-16.4182	-44.2531	-573.039	-85883	9111.52	3183.84	215.9	1052.87	0	0	0	0	0	0	0	603	903	0
649	3	0	0	0	0	0	0	200	300	0	-17.1811	-43.6427	-573.345	-85242.1	8989.45	3092.29	215.679	1051.68	0	0	0	0	0	0	0	603	903	0
649	4	0	0	0	0	0	0	200	300	0	-15.8078	-43.6427	-572.124	-85333.6	8867.38	2726.07	215.499	1052.15	0	0	0	0	0	0	0	603	903	0
649	5	0	0	0	0	0	0	200	300	0	-15.5026	-42.8798	-569.988	-85883	9355.66	2771.85	216.414	1053.68	0	0	0	0	0	0	0	603	903	0
649	6	0	0	0	0	0	0	200	300	0	-16.5707	-42.1169	-567.241	-84967.4	8806.34	2817.63	215.525	1052.79	0	0	0	0	0	0	0	603	903	0
649	7	0	0	0	0	0	0	200	300	0	-16.4182	-40.8961	-570.903	-84235	8562.2	2817.63	214.998	1050.55	0	0	0	0	0	0	0	603	903	0
649	8	0	0	0	0	0	0	200	300	0	-15.35	-42.2694	-567.852	-84326.6	8867.38	2909.18	215.616	1051.5	0	0	0	0	0	0	0	603	903	0
649	9	0	0	0	0	0	0	200	300	0	-15.35	-41.0487	-569.988	-84784.3	8806.34	2726.07	215.45	1051.75	0	0	0	0	0	0	0	603	903	0
650	0	0	0	0	0	0	0	200	300	0	-14.4345	-40.8961	-568.462	-84784.3	8684.27	2863.4	215.277	1052.15	0	0	0	0	0	0	0	603	903	0
650	1	0	0	0	0	0	0	200	300	0	-15.5026	-39.828	-566.326	-84051.9	9355.66	2542.97	216.52	1051.42	0	0	0	0	0	0	0	603	903	0
650	2	0	0	0	0	0	0	200	300	0	-15.8078	-39.3703	-567.241	-83502.6	8867.38	2588.74	215.632	1050.21	0	0	0	0	0	0	0	603	903	0
650	3	0	0	0	0	0	0	200	300	0	-15.5026	-39.9806	-566.02	-84051.9	8318.06	2680.3	214.696	1051.5	0	0	0	0	0	0	0	603	903	0
650	4	0	0	0	0	0	0	200	300	0	-15.35	-39.5229	-565.105	-83777.2	8867.38	2588.74	215.692	1051.25	0	0	0	0	0	0	0	603	903	0
650	5	0	0	0	0	0	0	200	300	0	-14.4345	-39.3703	-565.41	-83136.4	9050.48	2680.3	216.007	1050.04	0	0	0	0	0	0	0	603	903	0
650	6	0	0	0	0	0	0	200	300	0	-14.1293	-38.9125	-566.936	-83044.8	8623.24	2680.3	215.21	1049.48	0	0	0	0	0	0	0	603	903	0
650	7	0	0	0	0	0	0	200	300	0	-15.6552	-38.6073	-566.02	-83319.5	8623.24	2497.19	215.235	1050.2	0	0	0	0	0	0	0	603	903	0
650	8	0	0	0	0	0	0	200	300	0	-14.8923	-37.5392	-565.715	-83228	8623.24	2542.97	215.243	1050.12	0	0	0	0	0	0	0	603	903	0
650	9	0	0	0	0	0	0	200	300	0	-13.3664	-37.6918	-563.884	-82495.5	8318.06	2726.07	214.751	1049.3	0	0	0	0	0	0	0	603	903	0
651	0	0	0	0	0	0	0	200	300	0	-13.3664	-37.8444	-564.495	-82587.1	8684.27	2634.52	215.384	1049.3	0	0	0	0	0	0	0	603	903	0
651	1	0	0	0	0	0	0	200	300	0	-15.35	-37.234	-563.579	-81763.1	8501.17	2222.53	215.084	1048.08	0	0	0	0	0	0	0	603	903	0
651	2	0	0	0	0	0	0	200	300	0	-14.5871	-36.4711	-562.664	-81488.4	8318.06	2497.19	214.783	1047.83	0	0	0	0	0	0	0	603	903	0
651	3	0	0	0	0	0	0	200	300	0	-13.519	-36.1659	-560.527	-81122.2	8623.24	2359.86	215.384	1047.72	0	0	0	0	0	0	0	603	903	0
651	4	0	0	0	0	0	0	200	300	0	-13.6716	-35.5556	-561.443	-81763.1	8745.31	2222.53	215.576	1048.63	0	0	0	0	0	0	0	603	903	0
651	5	0	0	0	0	0	0	200	300	0	-14.5871	-35.2504	-562.969	-80847.6	8623.24	2588.74	215.317	1046.61	0	0	0	0	0	0	0	603	903	0
651	6	0	0	0	0	0	0	200	300	0	-13.9767	-36.1659	-561.138	-81030.7	8562.2	2359.86	215.259	1047.4	0	0	0	0	0	0	0	603	903	0
651	7	0	0	0	0	0	0	200	300	0	-12.756	-34.64	-559.612	-80115.1	8562.2	2359.86	215.3	1046.16	0	0	0	0	0	0	0	603	903	0
651	8	0	0	0	0	0	0	200	300	0	-13.0612	-34.0297	-560.832	-81396.9	8623.24	2268.31	215.376	1048.14	0	0	0	0	0	0	0	603	903	0
651	9	0	0	0	0	0	0	200	300	0	-13.8242	-34.1823	-559.917	-80847.6	8501.17	2359.86	215.183	1047.39	0	0	0	0	0	0	0	603	903	0
652	0	0	0	0	0	0	0	200	300	0	-13.519	-33.8771	-556.56	-80939.1	8745.31	2039.43	215.713	1048.43	0	0	0	0	0	0	0	603	903	0
652	1	0	0	0	0	0	0	200	300	0	-11.6879	-33.2668	-558.391	-80389.8	8623.24	2130.98	215.443	1046.97	0	0	0	0	0	0	0	603	903	0
652	2	0	0	0	0	0	0	200	300	0	-13.6716	-34.0297	-555.95	-80756	8073.92	2222.53	214.523	1048.26	0	0	0	0	0	0	0	603	903	0
652	3	0	0	0	0	0	0	200	300	0	-13.6716	-32.6564	-557.476	-80115.1	8684.27	2130.98	215.578	1046.71	0	0	0	0	0	0	0	603	903	0
652	4	0	0	0	0	0	0	200	300	0	-12.2983	-32.809	-556.255	-79199.6	8440.13	2588.74	215.173	1045.38	0	0	0	0	0	0	0	603	903	0
652	5	0	0	0	0	0	0	200	300	0	-12.1457	-32.3512	-557.476	-80023.6	8257.03	2176.76	214.811	1046.55	0	0	0	0	0	0	0	603	903	0
652	6	0	0	0	0	0	0	200	300	0	-13.3664	-32.3512	-555.034	-80023.6	8562.2	2268.31	215.426	1047.18	0	0	0	0	0	0	0	603	903	0
652	7	0	0	0	0	0	0	200	300	0	-14.4345	-31.1305	-554.424	-79291.2	8745.31	2176.76	215.774	1046.02	0	0	0	0	0	0	0	603	903	0
652	8	0	0	0	0	0	0	200	300	0	-12.9086	-30.8253	-556.865	-78741.9	8379.1	2176.76	215.047	1044.4	0	0	0	0	0	0	0	603	903	0
652	9	0	0	0	0	0	0	200	300	0	-12.1457	-30.9779	-554.729	-79382.7	8134.96	2176.76	214.665	1046.1	0	0	0	0	0	0	0	603	903	0
653	0	0	0	0	0	0	0	200	300	0	-13.2138	-30.9779	-555.034	-79474.3	7890.82	2039.43	214.217	1046.19	0	0	0	0	0	0	0	603	903	0
653	1	0	0	0	0	0	0	200	300	0	-11.8405	-30.215	-552.898	-78741.9	8257.03	1902.1	214.934	1045.42	0	0	0	0	0	0	0	603	903	0
653	2	0	0	0	0	0	0	200	300	0	-10.7724	-30.215	-552.898	-78284.1	8379.1	1993.65	215.155	1044.59	0	0	0	0	0	0	0	603	903	0
653	3	0	0	0	0	0	0	200	300	0	-13.9767	-29.2995	-554.119	-78833.4	8562.2	1902.1	215.452	1045.27	0	0	0	0	0	0	0	603	903	0
653	4	0	0	0	0	0	0	200	300	0	-13.0612	-28.8417	-553.508	-78009.4	8379.1	1902.1	215.138	1043.94	0	0	0	0	0	0	0	603	903	0
653	5	0	0	0	0	0	0	200	300	0	-11.6879	-28.2314	-552.898	-76910.8	8012.89	2451.42	214.493	1042.1	0	0	0	0	0	0	0	603	903	0
653	6	0	0	0	0	0	0	200	300	0	-12.4509	-28.6891	-552.898	-78284.1	8440.13	2314.09	215.265	1044.59	0	0	0	0	0	0	0	603	903	0
653	7	0	0	0	0	0	0	200	300	0	-13.9767	-27.7736	-551.067	-78101	8318.06	2039.43	215.094	1044.73	0	0	0	0	0	0	0	603	903	0
653	8	0	0	0	0	0	0	200	300	0	-13.0612	-27.0106	-551.677	-77643.2	7768.75	1856.32	214.082	1043.74	0	0	0	0	0	0	0	603	903	0
653	9	0	0	0	0	0	0	200	300	0	-12.1457	-28.3839	-551.982	-77643.2	8257.03	1993.65	214.959	1043.66	0	0	0	0	0	0	0	603	903	0
654	0	0	0	0	0	0	0	200	300	0	-12.1457	-27.3158	-552.288	-77734.8	8257.03	2085.2	214.951	1043.75	0	0	0	0	0	0	0	603	903	0
654	1	0	0	0	0	0	0	200	300	0	-13.3664	-27.621	-551.372	-77734.8	8134.96	2085.2	214.754	1043.98	0	0	0	0	0	0	0	603	903	0
654	2	0	0	0	0	0	0	200	300	0	-13.0612	-25.9425	-551.067	-77277	8318.06	1856.32	215.094	1043.23	0	0	0	0	0	0	0	603	903	0
654	3	0	0	0	0	0	0	200	300	0	-11.9931	-26.5529	-551.067	-76727.7	8073.92	2085.2	214.651	1042.23	0	0	0	0	0	0	0	603	903	0
654	4	0	0	0	0	0	0	200	300	0	-11.8405	-26.0951	-551.372	-77093.9	7890.82	1993.65	214.311	1042.82	0	0	0	0	0	0	0	603	903	0
654	5	0	0	0	0	0	0	200	300	0	-11.6879	-25.4848	-550.151	-76910.8	7951.85	2039.43	214.454	1042.8	0	0	0	0	0	0	0	603	903	0
654	6	0	0	0	0	0	0	200	300	0	-10.925	-25.7899	-550.762	-76819.2	7707.71	2039.43	213.995	1042.48	0	0	0	0	0	0	0	603	903	0
654	7	0	0	0	0	0	0	200	300	0	-9.85687	-25.027	-551.677	-76544.6	8073.92	1902.1	214.635	1041.75	0	0	0	0	0	0	0	603	903	0
654	8	0	0	0	0	0	0	200	300	0	-12.9086	-24.4167	-550.151	-76636.2	7829.78	1856.32	214.232	1042.3	0	0	0	0	0	0	0	603	903	0
654	9	0	0	0	0	0	0	200	300	0	-13.3664	-24.1115	-550.456	-75995.3	8012.89	1856.32	214.557	1041.06	0	0	0	0	0	0	0	603	903	0
655	0	0	0	0	0	0	0	200	300	0	-11.2302	-23.6537	-549.236	-76178.4	7829.78	1581.66	214.256	1041.7	0	0	0	0	0	0	0	603	903	0
655	1	0	0	0	0	0	0	200	300	0	-11.3828	-23.0434	-550.456	-76270	7463.57	1810.55	213.559	1041.56	0	0	0	0	0	0	0	603	903	0
655	2	0	0	0	0	0	0	200	300	0	-12.6035	-22.8908	-550.151	-76361.5	8195.99	1902.1	214.898	1041.8	0	0	0	0	0	0	0	603	903	0
655	3	0	0	0	0	0	0	200	300	0	-12.2983	-23.5011	-548.32	-75903.8	8257.03	1993.65	215.059	1041.43	0	0	0	0	0	0	0	603	903	0
655	4	0	0	0	0	0	0	200	300	0	-11.6879	-21.9752	-547.71	-75171.3	8134.96	1947.88	214.853	1040.25	0	0	0	0	0	0	0	603	903	0
655	5	0	0	0	0	0	0	200	300	0	-11.3828	-21.9752	-550.151	-75812.2	7524.61	1947.88	213.677	1040.8	0	0	0	0	0	0	0	603	903	0
655	6	0	0	0	0	0	0	200	300	0	-11.5353	-22.2804	-547.71	-75995.3	7585.64	1902.1	213.85	1041.75	0	0	0	0	0	0	0	603	903	0
655	7	0	0	0	0	0	0	200	300	0	-11.3828	-21.5175	-548.625	-75171.3	7890.82	1856.32	214.383	1040.02	0	0	0	0	0	0	0	603	903	0
655	8	0	0	0	0	0	0	200	300	0	-10.925	-21.2123	-548.32	-74713.5	7890.82	1718.99	214.391	1039.26	0	0	0	0	0	0	0	603	903	0
655	9	0	0	0	0	0	0	200	300	0	-10.0095	-21.2123	-548.625	-75537.5	8012.89	1718.99	214.605	1040.69	0	0	0	0	0	0	0	603	903	0
656	0	0	0	0	0	0	0	200	300	0	-11.6879	-19.3813	-547.405	-75446	7829.78	1398.56	214.303	1040.82	0	0	0	0	0	0	0	603	903	0
656	1	0	0	0	0	0	0	200	300	0	-10.0095	-20.2968	-550.762	-74805.1	7463.57	1673.22	213.551	1038.82	0	0	0	0	0	0	0	603	903	0
656	2	0	0	0	0	0	0	200	300	0	-10.3146	-20.2968	-548.625	-75537.5	7951.85	1902.1	214.494	1040.69	0	0	0	0	0	0	0	603	903	0
656	3	0	0	0	0	0	0	200	300	0	-12.1457	-19.839	-548.625	-75079.7	8012.89	1764.77	214.605	1039.85	0	0	0	0	0	0	0	603	903	0
656	4	0	0	0	0	0	0	200	300	0	-11.9931	-18.9235	-548.931	-74347.3	7585.64	1764.77	213.819	1038.44	0	0	0	0	0	0	0	603	903	0
656	5	0	0	0	0	0	0	200	300	0	-11.2302	-19.3813	-549.541	-74530.4	7768.75	1673.22	214.137	1038.62	0	0	0	0	0	0	0	603	903	0
656	6	0	0	0	0	0	0	200	300	0	-10.7724	-18.4657	-548.625	-74896.6	7646.68	1718.99	213.938	1039.52	0	0	0	0	0	0	0	603	903	0
656	7	0	0	0	0	0	0	200	300	0	-11.3828	-18.1606	-549.236	-74622	7097.36	1856.32	212.922	1038.87	0	0	0	0	0	0	0	603	903	0
656	8	0	0	0	0	0	0	200	300	0	-12.1457	-18.6183	-549.846	-74255.8	7707.71	1856.32	214.018	1038.05	0	0	0	0	0	0	0	603	903	0
656	9	0	0	0	0	0	0	200	300	0	-10.3146	-17.5502	-549.541	-73981.1	7768.75	1490.11	214.137	1037.62	0	0	0	0	0	0	0	603	903	0
657	0	0	0	0	0	0	0	200	300	0	-10.925	-17.245	-549.541	-74255.8	7829.78	1535.89	214.248	1038.12	0	0	0	0	0	0	0	603	903	0
657	1	0	0	0	0	0	0	200	300	0	-10.162	-16.6347	-548.931	-74255.8	7463.57	1627.44	213.597	1038.27	0	0	0	0	0	0	0	603	903	0
657	2	0	0	0	0	0	0	200	300	0	-9.70428	-16.9398	-550.762	-73798	7402.54	1627.44	213.441	1036.99	0	0	0	0	0	0	0	603	903	0
657	3	0	0	0	0	0	0	200	300	0	-8.33099	-18.008	-548.015	-73981.1	7585.64	1581.66	213.842	1038	0	0	0	0	0	0	0	603	903	0
657	4	0	0	0	0	0	0	200	300	0	-11.5353	-16.6347	-549.846	-74622	7524.61	1535.89	213.685	1038.71	0	0	0	0	0	0	0	603	903	0
657	5	0	0	0	0	0	0	200	300	0	-11.3828	-15.8717	-549.541	-73614.9	7829.78	1627.44	214.248	1036.96	0	0	0	0	0	0	0	603	903	0
657	6	0	0	0	0	0	0	200	300	0	-10.0095	-15.2614	-551.067	-72424.7	7646.68	1673.22	213.876	1034.43	0	0	0	0	0	0	0	603	903	0
657	7	0	0	0	0	0	0	200	300	0	-10.3146	-14.9562	-551.372	-74347.3	7585.64	1352.78	213.758	1037.84	0	0	0	0	0	0	0	603	903	0
657	8	0	0	0	0	0	0	200	300	0	-10.6198	-14.4984	-551.067	-74255.8	7585.64	1398.56	213.765	1037.75	0	0	0	0	0	0	0	603	903	0
657	9	0	0	0	0	0	0	200	300	0	-10.0095	-14.1933	-550.456	-73614.9	7951.85	1490.11	214.446	1036.73	0	0	0	0	0	0	0	603	903	0
658	0	0	0	0	0	0	0	200	300	0	-8.17841	-14.9562	-549.846	-73431.8	8195.99	1490.11	214.906	1036.55	0	0	0	0	0	0	0	603	903	0
658	1	0	0	0	0	0	0	200	300	0	-11.2302	-13.1252	-550.762	-72882.5	7585.64	1444.34	213.773	1035.33	0	0	0	0	0	0	0	603	903	0
658	2	0	0	0	0	0	0	200	300	0	-10.6198	-13.1252	-551.372	-73248.7	7524.61	1535.89	213.647	1035.85	0	0	0	0	0	0	0	603	903	0
658	3	0	0	0	0	0	0	200	300	0	-9.70428	-13.2777	-552.288	-73523.3	8012.89	1673.22	214.509	1036.13	0	0	0	0	0	0	0	603	903	0
658	4	0	0	0	0	0	0	200	300	0	-10.162	-12.6674	-551.067	-73523.3	7707.71	1398.56	213.987	1036.42	0	0	0	0	0	0	0	603	903	0
658	5	0	0	0	0	0	0	200	300	0	-10.7724	-12.3622	-551.982	-73523.3	7768.75	1398.56	214.074	1036.2	0	0	0	0	0	0	0	603	903	0
658	6	0	0	0	0	0	0	200	300	0	-10.6198	-12.057	-549.541	-73065.6	8012.89	1261.23	214.581	1035.96	0	0	0	0	0	0	0	603	903	0
658	7	0	0	0	0	0	0	200	300	0	-7.87323	-11.4467	-553.508	-73065.6	7524.61	1261.23	213.594	1035	0	0	0	0	0	0	0	603	903	0
658	8	0	0	0	0	0	0	200	300	0	-10.3146	-11.4467	-552.898	-73431.8	7463.57	1535.89	213.499	1035.81	0	0	0	0	0	0	0	603	903	0
658	9	0	0	0	0	0	0	200	300	0	-11.5353	-11.7519	-552.898	-72974.1	8134.96	1352.78	214.713	1034.98	0	0	0	0	0	0	0	603	903	0
659	0	0	0	0	0	0	0	200	300	0	-9.5517	-10.6837	-553.203	-72790.9	7890.82	1398.56	214.264	1034.58	0	0	0	0	0	0	0	603	903	0
659	1	0	0	0	0	0	0	200	300	0	-9.85687	-9.76822	-554.119	-73340.3	7707.71	1215.45	213.91	1035.35	0	0	0	0	0	0	0	603	903	0
659	2	0	0	0	0	0	0	200	300	0	-10.925	-9.46304	-553.203	-72516.3	7524.61	1123.9	213.602	1034.08	0	0	0	0	0	0	0	603	903	0
659	3	0	0	0	0	0	0	200	300	0	-10.4672	-10.5312	-555.644	-72882.5	7768.75	1535.89	213.982	1034.17	0	0	0	0	0	0	0	603	903	0
659	4	0	0	0	0	0	0	200	300	0	-9.5517	-9.31045	-555.339	-72882.5	7585.64	1352.78	213.659	1034.24	0	0	0	0	0	0	0	603	903	0
659	5	0	0	0	0	0	0	200	300	0	-10.6198	-8.39493	-553.813	-73340.3	7463.57	1307.01	213.477	1035.43	0	0	0	0	0	0	0	603	903	0
659	6	0	0	0	0	0	0	200	300	0	-10.6198	-7.32681	-556.865	-72607.9	7585.64	1123.9	213.622	1033.39	0	0	0	0	0	0	0	603	903	0
659	7	0	0	0	0	0	0	200	300	0	-9.24652	-7.4794	-557.476	-71509.2	7707.71	1307.01	213.826	1031.27	0	0	0	0	0	0	0	603	903	0
659	8	0	0	0	0	0	0	200	300	0	-9.24652	-7.32681	-557.781	-73065.6	7158.4	1123.9	212.834	1033.99	0	0	0	0	0	0	0	603	903	0
659	9	0	0	0	0	0	0	200	300	0	-10.162	-7.32681	-556.56	-73248.7	7707.71	986.571	213.849	1034.61	0	0	0	0	0	0	0	603	903	0
660	0	0	0	0	0	0	0	200	300	0	-10.6198	-7.63199	-557.476	-72882.5	7829.78	940.795	214.045	1033.74	0	0	0	0	0	0	0	603	903	0
660	1	0	0	0	0	0	0	200	300	0	-7.87323	-6.56387	-558.086	-72607.9	7646.68	986.571	213.702	1033.1	0	0	0	0	0	0	0	603	903	0
660	2	0	0	0	0	0	0	200	300	0	-9.70428	-5.80093	-559.612	-72790.9	7707.71	1032.35	213.773	1033.07	0	0	0	0	0	0	0	603	903	0
660	3	0	0	0	0	0	0	200	300	0	-9.70428	-5.49576	-558.086	-72790.9	7829.78	1215.45	214.03	1033.43	0	0	0	0	0	0	0	603	903	0
660	4	0	0	0	0	0	0	200	300	0	-8.33099	-5.19058	-557.781	-72790.9	7402.54	1581.66	213.271	1033.5	0	0	0	0	0	0	0	603	903	0
660	5	0	0	0	0	0	0	200	300	0	-8.63617	-4.42764	-559.612	-72699.4	7585.64	1078.12	213.555	1032.91	0	0	0	0	0	0	0	603	903	0
660	6	0	0	0	0	0	0	200	300	0	-10.162	-3.96988	-555.95	-71967	8134.96	1078.12	214.633	1032.45	0	0	0	0	0	0	0	603	903	0
660	7	0	0	0	0	0	0	200	300	0	-10.3146	-5.19058	-560.527	-72058.5	7829.78	895.019	213.969	1031.55	0	0	0	0	0	0	0	603	903	0
660	8	0	0	0	0	0	0	200	300	0	-8.48358	-3.51211	-560.832	-72516.3	7280.47	940.795	212.982	1032.3	0	0	0	0	0	0	0	603	903	0
660	9	0	0	0	0	0	0	200	300	0	-8.33099	-2.74917	-560.832	-73248.7	7402.54	1032.35	213.199	1033.61	0	0	0	0	0	0	0	603	903	0
661	0	0	0	0	0	0	0	200	300	0	-10.0095	-2.90176	-561.443	-72974.1	8134.96	895.019	214.489	1032.98	0	0	0	0	0	0	0	603	903	0
661	1	0	0	0	0	0	0	200	300	0	-9.85687	-2.444	-563.579	-71967	7768.75	986.571	213.785	1030.7	0	0	0	0	0	0	0	603	903	0
661	2	0	0	0	0	0	0	200	300	0	-6.49994	-1.83365	-562.969	-72424.7	7707.71	986.571	213.691	1031.65	0	0	0	0	0	0	0	603	903	0
661	3	0	0	0	0	0	0	200	300	0	-8.63617	-0.460356	-562.969	-72882.5	7707.71	803.466	213.691	1032.46	0	0	0	0	0	0	0	603	903	0
661	4	0	0	0	0	0	0	200	300	0	-8.94135	-2.13882	-562.969	-72790.9	7646.68	1169.68	213.583	1032.3	0	0	0	0	0	0	0	603	903	0
661	5	0	0	0	0	0	0	200	300	0	-8.33099	-0.918119	-560.527	-72150.1	7402.54	986.571	213.206	1031.72	0	0	0	0	0	0	0	603	903	0
661	6	0	0	0	0	0	0	200	300	0	-9.09393	-0.765532	-564.495	-72516.3	7890.82	940.795	213.979	1031.46	0	0	0	0	0	0	0	603	903	0
661	7	0	0	0	0	0	0	200	300	0	-9.85687	-0.15518	-564.495	-72516.3	7951.85	895.019	214.087	1031.46	0	0	0	0	0	0	0	603	903	0
661	8	0	0	0	0	0	0	200	300	0	-9.39911	0.302584	-564.495	-72150.1	7585.64	757.69	213.438	1030.81	0	0	0	0	0	0	0	603	903	0
661	9	0	0	0	0	0	0	200	300	0	-7.41547	1.3707	-566.936	-72241.6	7768.75	940.795	213.703	1030.42	0	0	0	0	0	0	0	603	903	0
662	0	0	0	0	0	0	0	200	300	0	-9.85687	1.06552	-568.157	-71417.6	7707.71	1032.35	213.566	1028.7	0	0	0	0	0	0	0	603	903	0
662	1	0	0	0	0	0	0	200	300	0	-9.5517	0.760347	-566.326	-72241.6	7768.75	849.242	213.718	1030.56	0	0	0	0	0	0	0	603	903	0
662	2	0	0	0	0	0	0	200	300	0	-8.78876	2.28623	-565.41	-71875.4	7768.75	803.466	213.74	1030.12	0	0	0	0	0	0	0	603	903	0
662	3	0	0	0	0	0	0	200	300	0	-8.63617	2.5914	-568.462	-72333.2	7951.85	986.571	213.988	1030.24	0	0	0	0	0	0	0	603	903	0
662	4	0	0	0	0	0	0	200	300	0	-9.70428	2.74399	-569.683	-72150.1	8073.92	940.795	214.173	1029.65	0	0	0	0	0	0	0	603	903	0
662	5	0	0	0	0	0	0	200	300	0	-9.39911	3.65952	-568.157	-71967	7829.78	940.795	213.781	1029.67	0	0	0	0	0	0	0	603	903	0
662	6	0	0	0	0	0	0	200	300	0	-8.02582	4.11728	-569.072	-72424.7	8318.06	940.795	214.617	1030.27	0	0	0	0	0	0	0	603	903	0
662	7	0	0	0	0	0	0	200	300	0	-8.94135	3.50693	-567.546	-72333.2	7890.82	895.019	213.903	1030.45	0	0	0	0	0	0	0	603	903	0
662	8	0	0	0	0	0	0	200	300	0	-7.72064	4.42246	-570.598	-71875.4	7768.75	803.466	213.615	1028.97	0	0	0	0	0	0	0	603	903	0
662	9	0	0	0	0	0	0	200	300	0	-7.11029	4.72763	-571.514	-72150.1	7768.75	757.69	213.593	1029.24	0	0	0	0	0	0	0	603	903	0
663	0	0	0	0	0	0	0	200	300	0	-8.63617	5.03281	-570.903	-71967	7951.85	666.137	213.929	1029.06	0	0	0	0	0	0	0	603	903	0
663	1	0	0	0	0	0	0	200	300	0	-9.09393	5.49057	-572.124	-71326.1	7768.75	803.466	213.579	1027.67	0	0	0	0	0	0	0	603	903	0
663	2	0	0	0	0	0	0	200	300	0	-9.85687	6.10092	-573.039	-72333.2	7829.78	711.913	213.664	1029.23	0	0	0	0	0	0	0	603	903	0
663	3	0	0	0	0	0	0	200	300	0	-9.39911	5.94834	-573.345	-70593.7	8257.03	757.69	214.402	1026.13	0	0	0	0	0	0	0	603	903	0
663	4	0	0	0	0	0	0	200	300	0	-8.94135	5.64316	-575.481	-71783.8	8134.96	940.795	214.136	1027.74	0	0	0	0	0	0	0	603	903	0
663	5	0	0	0	0	0	0	200	300	0	-9.24652	6.71128	-572.429	-72424.7	7646.68	1032.35	213.358	1029.52	0	0	0	0	0	0	0	603	903	0
663	6	0	0	0	0	0	0	200	300	0	-10.3146	7.6268	-573.345	-71600.8	8195.99	940.795	214.295	1027.88	0	0	0	0	0	0	0	603	903	0
663	7	0	0	0	0	0	0	200	300	0	-9.70428	7.77939	-574.565	-71326.1	8195.99	895.019	214.265	1027.14	0	0	0	0	0	0	0	603	903	0
663	8	0	0	0	0	0	0	200	300	0	-9.09393	7.93198	-575.176	-71967	7768.75	940.795	213.507	1028.12	0	0	0	0	0	0	0	603	903	0
663	9	0	0	0	0	0	0	200	300	0	-10.162	8.84751	-574.871	-71967	7768.75	528.808	213.514	1028.19	0	0	0	0	0	0	0	603	903	0
664	0	0	0	0	0	0	0	200	300	0	-9.09393	9.30527	-575.481	-71600.8	7829.78	895.019	213.606	1027.42	0	0	0	0	0	0	0	603	903	0
664	1	0	0	0	0	0	0	200	300	0	-8.94135	9.30527	-577.007	-70959.9	7768.75	1078.12	213.464	1025.98	0	0	0	0	0	0	0	603	903	0
664	2	0	0	0	0	0	0	200	300	0	-10.6198	9.61045	-575.176	-70959.9	8073.92	986.571	214.037	1026.37	0	0	0	0	0	0	0	603	903	0
664	3	0	0	0	0	0	0	200	300	0	-10.6198	9.15268	-577.312	-71326.1	8012.89	895.019	213.88	1026.55	0	0	0	0	0	0	0	603	903	0
664	4	0	0	0	0	0	0	200	300	0	-9.5517	10.3734	-576.702	-71234.5	8134.96	757.69	214.106	1026.52	0	0	0	0	0	0	0	603	903	0
664	5	0	0	0	0	0	0	200	300	0	-9.39911	10.526	-577.617	-71600.8	7463.57	849.242	212.921	1026.96	0	0	0	0	0	0	0	603	903	0
664	6	0	0	0	0	0	0	200	300	0	-11.0776	11.1363	-579.143	-71600.8	8012.89	849.242	213.836	1026.63	0	0	0	0	0	0	0	603	903	0
664	7	0	0	0	0	0	0	200	300	0	-10.7724	10.8311	-580.059	-70959.9	7951.85	986.571	213.709	1025.33	0	0	0	0	0	0	0	603	903	0
664	8	0	0	0	0	0	0	200	300	0	-9.70428	11.1363	-578.533	-71051.4	7768.75	849.242	213.428	1025.81	0	0	0	0	0	0	0	603	903	0
664	9	0	0	0	0	0	0	200	300	0	-10.0095	12.9674	-580.059	-71326.1	7890.82	803.466	213.604	1025.96	0	0	0	0	0	0	0	603	903	0
665	0	0	0	0	0	0	0	200	300	0	-11.2302	12.9674	-582.5	-71143	7585.64	940.795	213.023	1025.13	0	0	0	0	0	0	0	603	903	0
665	1	0	0	0	0	0	0	200	300	0	-11.0776	12.357	-581.584	-70776.8	7768.75	1352.78	213.358	1024.7	0	0	0	0	0	0	0	603	903	0
665	2	0	0	0	0	0	0	200	300	0	-10.3146	13.5777	-580.364	-71051.4	7890.82	986.571	213.596	1025.43	0	0	0	0	0	0	0	603	903	0
665	3	0	0	0	0	0	0	200	300	0	-11.5353	14.1881	-580.669	-71600.8	8257.03	1215.45	214.22	1026.31	0	0	0	0	0	0	0	603	903	0
665	4	0	0	0	0	0	0	200	300	0	-10.0095	14.951	-582.5	-70959.9	8134.96	940.795	213.966	1024.82	0	0	0	0	0	0	0	603	903	0
665	5	0	0	0	0	0	0	200	300	0	-12.2983	13.8829	-583.721	-70227.4	7524.61	1123.9	212.891	1023.31	0	0	0	0	0	0	0	603	903	0
665	6	0	0	0	0	0	0	200	300	0	-11.0776	15.1036	-583.721	-70319	8134.96	1032.35	213.936	1023.47	0	0	0	0	0	0	0	603	903	0
665	7	0	0	0	0	0	0	200	300	0	-11.8405	15.8665	-584.331	-70502.1	8134.96	986.571	213.922	1023.65	0	0	0	0	0	0	0	603	903	0
665	8	0	0	0	0	0	0	200	300	0	-11.9931	16.0191	-584.941	-70502.1	7890.82	1078.12	213.49	1023.53	0	0	0	0	0	0	0	603	903	0
665	9	0	0	0	0	0	0	200	300	0	-10.925	16.3243	-585.857	-69403.5	8012.89	1032.35	213.677	1021.46	0	0	0	0	0	0	0	603	903	0
666	0	0	0	0	0	0	0	200	300	0	-11.9931	16.6295	-584.636	-70227.4	8257.03	849.242	214.123	1023.12	0	0	0	0	0	0	0	603	903	0
666	1	0	0	0	0	0	0	200	300	0	-12.756	17.8502	-584.941	-69952.8	7646.68	986.571	213.073	1022.59	0	0	0	0	0	0	0	603	903	0
666	2	0	0	0	0	0	0	200	300	0	-11.9931	17.6976	-587.078	-70044.4	7829.78	1261.23	213.337	1022.31	0	0	0	0	0	0	0	603	903	0
666	3	0	0	0	0	0	0	200	300	0	-10.925	17.6976	-587.993	-69952.8	8134.96	986.571	213.835	1021.97	0	0	0	0	0	0	0	603	903	0
666	4	0	0	0	0	0	0	200	300	0	-10.7724	18.6131	-586.467	-70319	8134.96	1032.35	213.871	1022.9	0	0	0	0	0	0	0	603	903	0
666	5	0	0	0	0	0	0	200	300	0	-13.0612	18.7657	-584.636	-69861.2	8195.99	1398.56	214.019	1022.5	0	0	0	0	0	0	0	603	903	0
666	6	0	0	0	0	0	0	200	300	0	-12.4509	18.6131	-587.383	-69678.2	8195.99	986.571	213.953	1021.62	0	0	0	0	0	0	0	603	903	0
666	7	0	0	0	0	0	0	200	300	0	-12.2983	19.9864	-587.383	-69495	8012.89	986.571	213.642	1021.31	0	0	0	0	0	0	0	603	903	0
666	8	0	0	0	0	0	0	200	300	0	-12.4509	19.2235	-590.129	-69952.8	7829.78	1627.44	213.268	1021.54	0	0	0	0	0	0	0	603	903	0
666	9	0	0	0	0	0	0	200	300	0	-13.3664	19.5287	-589.214	-69495	8379.1	1123.9	214.221	1020.95	0	0	0	0	0	0	0	603	903	0
667	0	0	0	0	0	0	0	200	300	0	-13.0612	20.5968	-589.824	-69220.4	8318.06	895.019	214.103	1020.36	0	0	0	0	0	0	0	603	903	0
667	1	0	0	0	0	0	0	200	300	0	-12.6035	22.2752	-591.655	-69586.6	7890.82	1261.23	213.337	1020.61	0	0	0	0	0	0	0	603	903	0
667	2	0	0	0	0	0	0	200	300	0	-12.4509	21.9701	-591.96	-69403.5	8134.96	1444.34	213.742	1020.24	0	0	0	0	0	0	0	603	903	0
667	3	0	0	0	0	0	0	200	300	0	-12.9086	22.2752	-591.96	-68945.7	8195.99	1307.01	213.846	1019.47	0	0	0	0	0	0	0	603	903	0
667	4	0	0	0	0	0	0	200	300	0	-13.2138	22.8856	-593.486	-68487.9	8073.92	1490.11	213.604	1018.4	0	0	0	0	0	0	0	603	903	0
667	5	0	0	0	0	0	0	200	300	0	-14.2819	23.1908	-593.486	-68487.9	8257.03	1261.23	213.913	1018.4	0	0	0	0	0	0	0	603	903	0
667	6	0	0	0	0	0	0	200	300	0	-14.1293	23.6485	-593.791	-68579.5	8073.92	1032.35	213.597	1018.49	0	0	0	0	0	0	0	603	903	0
667	7	0	0	0	0	0	0	200	300	0	-12.9086	24.1063	-594.402	-68762.6	7951.85	1215.45	213.378	1018.68	0	0	0	0	0	0	0	603	903	0
667	8	0	0	0	0	0	0	200	300	0	-13.3664	24.8692	-595.012	-69128.8	8073.92	1261.23	213.569	1019.18	0	0	0	0	0	0	0	603	903	0
667	9	0	0	0	0	0	0	200	300	0	-12.9086	25.6322	-597.148	-68854.2	8379.1	1169.68	214.032	1018.3	0	0	0	0	0	0	0	603	903	0
668	0	0	0	0	0	0	0	200	300	0	-13.2138	26.3951	-595.622	-69128.8	8440.13	1215.45	214.17	1019.06	0	0	0	0	0	0	0	603	903	0
668	1	0	0	0	0	0	0	200	300	0	-13.8242	25.327	-596.538	-68671.1	8440.13	1307.01	214.149	1018.12	0	0	0	0	0	0	0	603	903	0
668	2	0	0	0	0	0	0	200	300	0	-14.5871	26.0899	-596.843	-68487.9	8684.27	1307.01	214.55	1017.75	0	0	0	0	0	0	0	603	903	0
668	3	0	0	0	0	0	0	200	300	0	-15.1974	27.1581	-598.369	-68487.9	8562.2	1398.56	214.309	1017.46	0	0	0	0	0	0	0	603	903	0
668	4	0	0	0	0	0	0	200	300	0	-14.1293	27.4632	-601.421	-68396.4	8318.06	1398.56	213.831	1016.72	0	0	0	0	0	0	0	603	903	0
668	5	0	0	0	0	0	0	200	300	0	-14.1293	27.4632	-602.031	-68854.2	8745.31	1215.45	214.526	1017.37	0	0	0	0	0	0	0	603	903	0
668	6	0	0	0	0	0	0	200	300	0	-14.8923	27.6158	-601.421	-68671.1	8623.24	1352.78	214.338	1017.18	0	0	0	0	0	0	0	603	903	0
668	7	0	0	0	0	0	0	200	300	0	-14.4345	29.4469	-602.336	-67114.7	8623.24	1307.01	214.316	1014.42	0	0	0	0	0	0	0	603	903	0
668	8	0	0	0	0	0	0	200	300	0	-13.9767	29.1417	-603.557	-68213.3	8562.2	1307.01	214.186	1016.02	0	0	0	0	0	0	0	603	903	0
668	9	0	0	0	0	0	0	200	300	0	-14.7397	29.1417	-601.726	-68854.2	8562.2	1490.11	214.229	1017.43	0	0	0	0	0	0	0	603	903	0
669	0	0	0	0	0	0	0	200	300	0	-14.8923	27.921	-604.778	-68396.4	8562.2	1444.34	214.158	1016.09	0	0	0	0	0	0	0	603	903	0
669	1	0	0	0	0	0	0	200	300	0	-15.0449	30.9727	-606.304	-67938.6	8623.24	1398.56	214.223	1015.05	0	0	0	0	0	0	0	603	903	0
669	2	0	0	0	0	0	0	200	300	0	-15.0449	31.2779	-607.219	-68579.5	9111.52	1444.34	215.005	1015.94	0	0	0	0	0	0	0	603	903	0
669	3	0	0	0	0	0	0	200	300	0	-12.756	31.7357	-609.661	-68487.9	8806.34	1032.35	214.445	1015.34	0	0	0	0	0	0	0	603	903	0
669	4	0	0	0	0	0	0	200	300	0	-13.9767	32.1935	-611.797	-67938.6	8318.06	1307.01	213.596	1014.05	0	0	0	0	0	0	0	603	903	0
669	5	0	0	0	0	0	0	200	300	0	-13.3664	32.346	-612.407	-68030.2	8501.17	1535.89	213.882	1014.09	0	0	0	0	0	0	0	603	903	0
669	6	0	0	0	0	0	0	200	300	0	-15.6552	33.109	-612.407	-68579.5	8867.38	1490.11	214.48	1014.98	0	0	0	0	0	0	0	603	903	0
669	7	0	0	0	0	0	0	200	300	0	-15.35	32.4986	-612.712	-67664	8745.31	1307.01	214.273	1013.43	0	0	0	0	0	0	0	603	903	0
669	8	0	0	0	0	0	0	200	300	0	-14.5871	35.2452	-613.018	-67664	9111.52	1352.78	214.863	1013.38	0	0	0	0	0	0	0	603	903	0
669	9	0	0	0	0	0	0	200	300	0	-13.9767	33.7193	-616.374	-67847.1	8806.34	1627.44	214.287	1013.07	0	0	0	0	0	0	0	603	903	0
670	0	0	0	0	0	0	0	200	300	0	-15.35	34.6349	-616.985	-68121.7	8684.27	1581.66	214.075	1013.41	0	0	0	0	0	0	0	603	903	0
670	1	0	0	0	0	0	0	200	300	0	-15.5026	35.5504	-617.9	-67755.5	8928.41	1718.99	214.45	1012.65	0	0	0	0	0	0	0	603	903	0
670	2	0	0	0	0	0	0	200	300	0	-13.9767	36.7711	-618.206	-67572.4	9172.55	1352.78	214.837	1012.3	0	0	0	0	0	0	0	603	903	0
670	3	0	0	0	0	0	0	200	300	0	-14.4345	36.7711	-620.647	-67847.1	8562.2	1535.89	213.796	1012.32	0	0	0	0	0	0	0	603	903	0
670	4	0	0	0	0	0	0	200	300	0	-12.2983	35.0926	-623.699	-67847.1	8867.38	1535.89	214.217	1011.78	0	0	0	0	0	0	0	603	903	0
670	5	0	0	0	0	0	0	200	300	0	-15.9604	37.534	-620.952	-67480.9	9050.48	1352.78	214.575	1011.67	0	0	0	0	0	0	0	603	903	0
670	6	0	0	0	0	0	0	200	300	0	-12.9086	39.0599	-623.393	-67755.5	9294.62	1490.11	214.91	1011.69	0	0	0	0	0	0	0	603	903	0
670	7	0	0	0	0	0	0	200	300	0	-15.6552	39.0599	-624.614	-67847.1	9355.66	1627.44	214.978	1011.62	0	0	0	0	0	0	0	603	903	0
670	8	0	0	0	0	0	0	200	300	0	-15.6552	39.0599	-624.919	-67664	9416.69	1627.44	215.069	1011.28	0	0	0	0	0	0	0	603	903	0
670	9	0	0	0	0	0	0	200	300	0	-14.2819	39.3651	-626.445	-66016.1	9050.48	1535.89	214.447	1008.38	0	0	0	0	0	0	0	603	903	0
671	0	0	0	0	0	0	0	200	300	0	-14.1293	40.4332	-628.276	-67847.1	8989.45	1490.11	214.308	1010.99	0	0	0	0	0	0	0	603	903	0
671	1	0	0	0	0	0	0	200	300	0	-15.1974	40.891	-629.497	-67938.6	9233.59	1535.89	214.668	1010.93	0	0	0	0	0	0	0	603	903	0
671	2	0	0	0	0	0	0	200	300	0	-14.8923	40.7384	-627.666	-67480.9	9172.55	1444.34	214.614	1010.51	0	0	0	0	0	0	0	603	903	0
671	3	0	0	0	0	0	0	200	300	0	-14.5871	40.4332	-633.464	-67389.3	9172.55	1718.99	214.48	1009.38	0	0	0	0	0	0	0	603	903	0
671	4	0	0	0	0	0	0	200	300	0	-15.0449	41.3487	-632.244	-67114.7	9477.73	1535.89	214.991	1009.15	0	0	0	0	0	0	0	603	903	0
671	5	0	0	0	0	0	0	200	300	0	-15.35	43.0272	-634.38	-67297.8	9172.55	1535.89	214.459	1009.08	0	0	0	0	0	0	0	603	903	0
671	6	0	0	0	0	0	0	200	300	0	-15.0449	43.485	-636.211	-67480.9	8806.34	1764.77	213.842	1009.07	0	0	0	0	0	0	0	603	903	0
671	7	0	0	0	0	0	0	200	300	0	-14.8923	43.3324	-637.432	-67206.2	9660.83	1764.77	215.156	1008.43	0	0	0	0	0	0	0	603	903	0
671	8	0	0	0	0	0	0	200	300	0	-14.7397	44.0953	-637.126	-67480.9	9355.66	1764.77	214.684	1008.91	0	0	0	0	0	0	0	603	903	0
671	9	0	0	0	0	0	0	200	300	0	-16.2656	45.316	-638.347	-67480.9	9111.52	1810.55	214.274	1008.71	0	0	0	0	0	0	0	603	903	0
672	0	0	0	0	0	0	0	200	300	0	-16.2656	46.2315	-640.789	-67114.7	9355.66	1627.44	214.6	1007.74	0	0	0	0	0	0	0	603	903	0
672	1	0	0	0	0	0	0	200	300	0	-12.4509	45.7738	-642.314	-67206.2	9111.52	1718.99	214.185	1007.63	0	0	0	0	0	0	0	603	903	0
672	2	0	0	0	0	0	0	200	300	0	-15.0449	45.6212	-642.62	-67480.9	9294.62	1993.65	214.464	1008.01	0	0	0	0	0	0	0	603	903	0
672	3	0	0	0	0	0	0	200	300	0	-16.2656	46.9945	-641.399	-67114.7	9477.73	1993.65	214.777	1007.64	0	0	0	0	0	0	0	603	903	0
672	4	0	0	0	0	0	0	200	300	0	-15.0449	46.0789	-641.704	-66382.3	9660.83	1764.77	215.055	1006.45	0	0	0	0	0	0	0	603	903	0
672	5	0	0	0	0	0	0	200	300	0	-15.0449	46.5367	-643.84	-67389.3	9294.62	1627.44	214.436	1007.67	0	0	0	0	0	0	0	603	903	0
672	6	0	0	0	0	0	0	200	300	0	-15.9604	46.0789	-647.808	-66931.5	9233.59	1856.32	214.254	1006.32	0	0	0	0	0	0	0	603	903	0
672	7	0	0	0	0	0	0	200	300	0	-15.8078	48.3678	-649.333	-67023.1	9172.55	2222.53	214.126	1006.22	0	0	0	0	0	0	0	603	903	0
672	8	0	0	0	0	0	0	200	300	0	-14.8923	48.6729	-649.028	-67023.1	9355.66	2222.53	214.415	1006.27	0	0	0	0	0	0	0	603	903	0
672	9	0	0	0	0	0	0	200	300	0	-15.6552	49.4359	-650.859	-67206.2	9538.76	1993.65	214.656	1006.26	0	0	0	0	0	0	0	603	903	0
673	0	0	0	0	0	0	0	200	300	0	-13.3664	50.1988	-651.47	-66840	9782.9	1856.32	215.017	1005.6	0	0	0	0	0	0	0	603	903	0
673	1	0	0	0	0	0	0	200	300	0	-14.8923	50.1988	-652.08	-66565.3	9416.69	2085.2	214.441	1005.08	0	0	0	0	0	0	0	603	903	0
673	2	0	0	0	0	0	0	200	300	0	-14.8923	51.1143	-653.606	-66290.7	9538.76	1993.65	214.594	1004.42	0	0	0	0	0	0	0	603	903	0
673	3	0	0	0	0	0	0	200	300	0	-15.9604	51.8773	-655.132	-66748.5	9904.97	1993.65	215.119	1004.89	0	0	0	0	0	0	0	603	903	0
673	4	0	0	0	0	0	0	200	300	0	-16.2656	51.8773	-656.047	-66931.5	9721.87	1993.65	214.819	1005.02	0	0	0	0	0	0	0	603	903	0
673	5	0	0	0	0	0	0	200	300	0	-15.0449	52.3351	-655.742	-66656.9	9721.87	2039.43	214.826	1004.65	0	0	0	0	0	0	0	603	903	0
673	6	0	0	0	0	0	0	200	300	0	-15.6552	53.4032	-657.268	-66473.8	9782.9	1947.88	214.884	1004.14	0	0	0	0	0	0	0	603	903	0
673	7	0	0	0	0	0	0	200	300	0	-16.113	52.0299	-659.404	-66840	9904.97	2222.53	215.021	1004.36	0	0	0	0	0	0	0	603	903	0
673	8	0	0	0	0	0	0	200	300	0	-15.9604	54.1661	-659.099	-66382.3	9660.83	2130.98	214.658	1003.72	0	0	0	0	0	0	0	603	903	0
673	9	0	0	0	0	0	0	200	300	0	-14.1293	52.1825	-661.54	-66382.3	9538.76	2268.31	214.419	1003.35	0	0	0	0	0	0	0	603	903	0
674	0	0	0	0	0	0	0	200	300	0	-15.35	55.0816	-662.761	-66931.5	10210.2	1902.1	215.405	1003.99	0	0	0	0	0	0	0	603	903	0
674	1	0	0	0	0	0	0	200	300	0	-14.5871	55.9972	-663.372	-66290.7	9904.97	2176.76	214.931	1002.93	0	0	0	0	0	0	0	603	903	0
674	2	0	0	0	0	0	0	200	300	0	-14.5871	56.3023	-664.897	-65832.9	9477.73	2314.09	214.254	1002.01	0	0	0	0	0	0	0	603	903	0
674	3	0	0	0	0	0	0	200	300	0	-13.2138	56.3023	-665.203	-66107.6	9843.94	2359.86	214.798	1002.38	0	0	0	0	0	0	0	603	903	0
674	4	0	0	0	0	0	0	200	300	0	-15.6552	56.7601	-665.203	-66656.9	10210.2	2405.64	215.349	1003.21	0	0	0	0	0	0	0	603	903	0
674	5	0	0	0	0	0	0	200	300	0	-13.8242	57.9808	-666.728	-66656.9	9966.01	2405.64	214.948	1002.98	0	0	0	0	0	0	0	603	903	0
674	6	0	0	0	0	0	0	200	300	0	-15.35	58.7437	-667.339	-66016.1	10210.2	2176.76	215.3	1001.92	0	0	0	0	0	0	0	603	903	0
674	7	0	0	0	0	0	0	200	300	0	-15.5026	58.7437	-669.17	-66016.1	9843.94	2039.43	214.711	1001.65	0	0	0	0	0	0	0	603	903	0
674	8	0	0	0	0	0	0	200	300	0	-15.6552	59.3541	-668.56	-66290.7	9599.8	2130.98	214.359	1002.15	0	0	0	0	0	0	0	603	903	0
674	9	0	0	0	0	0	0	200	300	0	-15.8078	59.9644	-669.78	-66290.7	10149.1	2542.97	215.153	1001.97	0	0	0	0	0	0	0	603	903	0
675	0	0	0	0	0	0	0	200	300	0	-15.5026	60.7274	-671.001	-65649.8	10210.2	2451.42	215.216	1000.84	0	0	0	0	0	0	0	603	903	0
675	1	0	0	0	0	0	0	200	300	0	-15.0449	60.7274	-667.949	-65558.3	10027	2497.19	215.012	1001.15	0	0	0	0	0	0	0	603	903	0
675	2	0	0	0	0	0	0	200	300	0	-15.9604	61.3377	-672.222	-65832.9	10149.1	2771.85	215.098	1000.93	0	0	0	0	0	0	0	603	903	0
675	3	0	0	0	0	0	0	200	300	0	-16.2656	61.9481	-673.137	-65924.5	10149.1	2634.52	215.077	1000.94	0	0	0	0	0	0	0	603	903	0
675	4	0	0	0	0	0	0	200	300	0	-15.35	63.6266	-673.747	-65192	10088.1	2726.07	214.973	999.76	0	0	0	0	0	0	0	603	903	0
675	5	0	0	0	0	0	0	200	300	0	-15.1974	63.6266	-674.663	-65100.5	10149.1	2680.3	215.043	999.493	0	0	0	0	0	0	0	603	903	0
675	6	0	0	0	0	0	0	200	300	0	-16.5707	64.0843	-676.189	-65649.8	10149.1	2726.07	215.009	1000.09	0	0	0	0	0	0	0	603	903	0
675	7	0	0	0	0	0	0	200	300	0	-16.5707	64.5421	-675.579	-65558.3	10027	2588.74	214.842	1000.04	0	0	0	0	0	0	0	603	903	0
675	8	0	0	0	0	0	0	200	300	0	-16.113	65.9154	-677.715	-65192	10088.1	2680.3	214.885	999.194	0	0	0	0	0	0	0	603	903	0
675	9	0	0	0	0	0	0	200	300	0	-16.5707	66.068	-679.546	-65924.5	10332.2	2954.96	215.205	1000.01	0	0	0	0	0	0	0	603	903	0
676	0	0	0	0	0	0	0	200	300	0	-14.8923	64.6947	-676.799	-66107.6	10393.3	2954.96	215.356	1000.68	0	0	0	0	0	0	0	603	903	0
676	1	0	0	0	0	0	0	200	300	0	-15.5026	66.5257	-679.851	-65466.7	10149.1	2909.18	214.928	999.296	0	0	0	0	0	0	0	603	903	0
676	2	0	0	0	0	0	0	200	300	0	-13.8242	67.4413	-678.02	-65100.5	10576.4	3138.06	215.599	999.016	0	0	0	0	0	0	0	603	903	0
676	3	0	0	0	0	0	0	200	300	0	-16.8759	68.8145	-680.461	-65100.5	10393.3	3092.29	215.274	998.671	0	0	0	0	0	0	0	603	903	0
676	4	0	0	0	0	0	0	200	300	0	-15.35	69.2723	-682.292	-65192	10332.2	3092.29	215.143	998.549	0	0	0	0	0	0	0	603	903	0
676	5	0	0	0	0	0	0	200	300	0	-16.113	69.2723	-682.903	-65192	10271.2	3183.84	215.04	998.463	0	0	0	0	0	0	0	603	903	0
676	6	0	0	0	0	0	0	200	300	0	-14.4345	69.8827	-681.987	-65008.9	10637.4	3275.39	215.598	998.323	0	0	0	0	0	0	0	603	903	0
676	7	0	0	0	0	0	0	200	300	0	-18.0966	71.5611	-683.208	-65283.6	10881.5	3229.61	215.927	998.555	0	0	0	0	0	0	0	603	903	0
676	8	0	0	0	0	0	0	200	300	0	-18.5544	69.8827	-683.208	-64825.8	10576.4	3595.83	215.48	997.885	0	0	0	0	0	0	0	603	903	0
676	9	0	0	0	0	0	0	200	300	0	-16.2656	71.8663	-685.039	-65100.5	10576.4	3366.94	215.439	998.032	0	0	0	0	0	0	0	603	903	0
677	0	0	0	0	0	0	0	200	300	0	-16.2656	71.7137	-685.039	-65192	10637.4	3504.27	215.528	998.165	0	0	0	0	0	0	0	603	903	0
677	1	0	0	0	0	0	0	200	300	0	-18.0966	72.3241	-684.429	-65008.9	10698.4	3504.27	215.631	997.983	0	0	0	0	0	0	0	603	903	0
677	2	0	0	0	0	0	0	200	300	0	-18.707	74.1551	-685.955	-64551.2	10515.3	3641.6	215.329	997.104	0	0	0	0	0	0	0	603	903	0
677	3	0	0	0	0	0	0	200	300	0	-17.1811	74.6129	-687.48	-63910.3	10759.5	3321.17	215.651	995.963	0	0	0	0	0	0	0	603	903	0
677	4	0	0	0	0	0	0	200	300	0	-17.4863	75.0706	-686.87	-64734.3	10393.3	3504.27	215.131	997.245	0	0	0	0	0	0	0	603	903	0
677	5	0	0	0	0	0	0	200	300	0	-17.944	74.6129	-685.955	-64917.4	10454.3	3916.26	215.241	997.638	0	0	0	0	0	0	0	603	903	0
677	6	0	0	0	0	0	0	200	300	0	-18.4018	76.1388	-686.565	-64276.5	10698.4	3916.26	215.583	996.621	0	0	0	0	0	0	0	603	903	0
677	7	0	0	0	0	0	0	200	300	0	-18.0966	76.7491	-688.701	-64185	10820.5	3687.38	215.711	996.197	0	0	0	0	0	0	0	603	903	0
677	8	0	0	0	0	0	0	200	300	0	-17.1811	77.0543	-685.344	-64459.6	10759.5	3824.71	215.699	997.054	0	0	0	0	0	0	0	603	903	0
677	9	0	0	0	0	0	0	200	300	0	-19.4699	77.9698	-689.311	-64276.5	10942.6	4190.92	215.875	996.247	0	0	0	0	0	0	0	603	903	0
678	0	0	0	0	0	0	0	200	300	0	-18.0966	77.3595	-688.701	-62811.7	10759.5	4053.59	215.623	994.203	0	0	0	0	0	0	0	603	903	0
678	1	0	0	0	0	0	0	200	300	0	-18.5544	79.1905	-689.311	-64734.3	10881.5	4374.02	215.786	996.912	0	0	0	0	0	0	0	603	903	0
678	2	0	0	0	0	0	0	200	300	0	-19.4699	79.6483	-689.617	-64551.2	10942.6	4236.69	215.868	996.605	0	0	0	0	0	0	0	603	903	0
678	3	0	0	0	0	0	0	200	300	0	-19.9277	80.106	-689.311	-63544.1	11003.6	3916.26	215.963	995.185	0	0	0	0	0	0	0	603	903	0
678	4	0	0	0	0	0	0	200	300	0	-19.9277	80.2586	-689.311	-63544.1	10942.6	4465.58	215.875	995.185	0	0	0	0	0	0	0	603	903	0
678	5	0	0	0	0	0	0	200	300	0	-19.0121	81.9371	-686.26	-63635.7	11003.6	4511.35	216.034	995.728	0	0	0	0	0	0	0	603	903	0
678	6	0	0	0	0	0	0	200	300	0	-19.1647	80.106	-687.786	-63910.3	11186.7	4511.35	216.265	995.922	0	0	0	0	0	0	0	603	903	0
678	7	0	0	0	0	0	0	200	300	0	-19.3173	83.0052	-691.143	-63544.1	11003.6	4557.13	215.921	994.941	0	0	0	0	0	0	0	603	903	0
678	8	0	0	0	0	0	0	200	300	0	-18.4018	82.2423	-689.617	-63361	10881.5	4465.58	215.779	994.879	0	0	0	0	0	0	0	603	903	0
678	9	0	0	0	0	0	0	200	300	0	-20.8432	83.1578	-688.701	-62811.7	11247.7	4511.35	216.332	994.203	0	0	0	0	0	0	0	603	903	0
679	0	0	0	0	0	0	0	200	300	0	-20.8432	84.8363	-690.532	-63086.3	11125.7	4740.23	216.112	994.359	0	0	0	0	0	0	0	603	903	0
679	1	0	0	0	0	0	0	200	300	0	-19.7751	85.1414	-691.753	-62262.4	10759.5	4786.01	215.554	993.007	0	0	0	0	0	0	0	603	903	0
679	2	0	0	0	0	0	0	200	300	0	-19.9277	84.6837	-687.786	-63269.4	11125.7	4831.79	216.176	994.99	0	0	0	0	0	0	0	603	903	0
679	3	0	0	0	0	0	0	200	300	0	-20.9958	86.2096	-689.617	-62445.5	11430.9	4877.56	216.576	993.551	0	0	0	0	0	0	0	603	903	0
679	4	0	0	0	0	0	0	200	300	0	-21.1484	86.2096	-689.006	-62353.9	11369.8	4831.79	216.502	993.498	0	0	0	0	0	0	0	603	903	0
679	5	0	0	0	0	0	0	200	300	0	-20.8432	87.888	-688.396	-61896.2	11186.7	5060.67	216.25	992.914	0	0	0	0	0	0	0	603	903	0
679	6	0	0	0	0	0	0	200	300	0	-19.6225	88.4984	-689.617	-62170.8	11125.7	5106.44	216.133	993.153	0	0	0	0	0	0	0	603	903	0
679	7	0	0	0	0	0	0	200	300	0	-20.538	88.1932	-689.006	-62720.1	11308.8	5106.44	216.413	994.03	0	0	0	0	0	0	0	603	903	0
679	8	0	0	0	0	0	0	200	300	0	-20.9958	88.3458	-688.091	-61987.7	11430.9	5106.44	216.612	993.087	0	0	0	0	0	0	0	603	903	0
679	9	0	0	0	0	0	0	200	300	0	-20.2328	88.0406	-685.955	-61896.2	11552.9	5198	216.842	993.234	0	0	0	0	0	0	0	603	903	0
680	0	0	0	0	0	0	0	200	300	0	-20.6906	90.0243	-687.175	-61896.2	11491.9	5152.22	216.723	993.073	0	0	0	0	0	0	0	603	903	0
680	1	0	0	0	0	0	0	200	300	0	-21.7587	90.9398	-686.87	-61713.1	11186.7	5060.67	216.287	992.847	0	0	0	0	0	0	0	603	903	0
680	2	0	0	0	0	0	0	200	300	0	-20.6906	90.7872	-686.87	-61163.7	11064.6	5243.77	216.109	992.047	0	0	0	0	0	0	0	603	903	0
680	3	0	0	0	0	0	0	200	300	0	-17.6389	91.7027	-684.734	-61163.7	11003.6	5609.99	216.07	992.325	0	0	0	0	0	0	0	603	903	0
680	4	0	0	0	0	0	0	200	300	0	-20.0803	92.3131	-685.955	-61438.4	11491.9	5426.88	216.753	992.566	0	0	0	0	0	0	0	603	903	0
680	5	0	0	0	0	0	0	200	300	0	-21.7587	92.1605	-684.734	-61072.2	11308.8	5472.66	216.516	992.191	0	0	0	0	0	0	0	603	903	0
680	6	0	0	0	0	0	0	200	300	0	-20.3854	94.2967	-683.818	-60522.9	11369.8	5335.33	216.627	991.507	0	0	0	0	0	0	0	603	903	0
680	7	0	0	0	0	0	0	200	300	0	-20.2328	94.1441	-683.208	-60522.9	11736	5381.1	217.178	991.586	0	0	0	0	0	0	0	603	903	0
680	8	0	0	0	0	0	0	200	300	0	-21.4536	94.1441	-683.208	-60706	11125.7	5381.1	216.284	991.854	0	0	0	0	0	0	0	603	903	0
680	9	0	0	0	0	0	0	200	300	0	-19.3173	95.67	-681.987	-60431.3	11552.9	5609.99	216.94	991.611	0	0	0	0	0	0	0	603	903	0
681	0	0	0	0	0	0	0	200	300	0	-19.3173	96.7381	-679.546	-59607.3	11736	5655.76	217.27	990.716	0	0	0	0	0	0	0	603	903	0
681	1	0	0	0	0	0	0	200	300	0	-17.7914	96.8907	-677.104	-59424.2	11308.8	5564.21	216.702	990.762	0	0	0	0	0	0	0	603	903	0
681	2	0	0	0	0	0	0	200	300	0	-19.9277	96.433	-679.546	-59790.4	11491.9	5609.99	216.911	990.986	0	0	0	0	0	0	0	603	903	0
681	3	-2.78927	0.513921	-15.6889	-3593.45	1887.43	675.292	320.304	529.044	0	-19.0121	97.3485	-678.325	-59515.8	11675	5426.88	217.212	990.739	0	0	0	0	0	0	0	603	903	0
681	4	-4.9255	3.87085	-26.9804	-8354.19	3230.21	1728.15	319.724	609.639	0	-20.0803	99.3321	-676.799	-59515.8	11491.9	5564.21	216.98	990.937	0	0	0	0	0	0	0	603	903	0
681	5	-0.19528	16.3831	-34.6098	-7255.56	2802.96	2369.02	280.988	509.639	0	-18.707	99.4847	-676.799	-59149.6	11369.8	5564.21	216.799	990.396	0	0	0	0	0	0	0	603	903	0
681	6	-3.24704	16.3831	-29.1166	-7255.56	2925.03	2460.57	300.459	549.19	0	-20.0803	100.4	-674.968	-58966.5	11552.9	5609.99	217.116	990.362	0	0	0	0	0	0	0	603	903	0
681	7	-4.00998	13.1787	-26.0649	-7987.98	3230.21	2002.81	323.93	606.465	0	-18.5544	100.4	-673.137	-58783.4	11430.9	5426.88	216.981	990.328	0	0	0	0	0	0	0	603	903	0
681	8	3.16165	21.1133	-33.6943	-8537.29	3230.21	1773.92	295.868	553.375	0	-19.0121	101.011	-672.527	-58325.6	11369.8	5426.88	216.906	989.726	0	0	0	0	0	0	0	603	903	0
681	9	6.366	26.759	-44.6806	-11009.2	4389.88	1773.92	298.25	546.398	0	-18.707	101.926	-673.137	-58234.1	11675	5564.21	217.344	989.511	0	0	0	0	0	0	0	603	903	0
682	0	3.31424	24.928	-50.1737	-12657.2	4695.05	1865.48	293.576	552.267	0	-19.3173	102.536	-671.306	-58508.7	11675	5564.21	217.391	990.157	0	0	0	0	0	0	0	603	903	0
682	1	0.872836	24.4702	-52.31	-13572.7	5183.33	2140.14	299.089	559.467	0	-17.6389	102.842	-670.391	-57959.4	11369.8	5609.99	216.96	989.456	0	0	0	0	0	0	0	603	903	0
682	2	0.720248	30.5737	-55.6669	-15586.9	6098.86	2185.91	309.56	580.002	0	-19.9277	104.062	-667.949	-57227	11858.1	5381.1	217.753	988.676	0	0	0	0	0	0	0	603	903	0
682	3	5.45047	33.4729	-62.9911	-15586.9	6648.18	1636.6	305.541	547.445	0	-16.7233	102.384	-666.118	-56952.3	11491.9	5884.64	217.252	988.499	0	0	0	0	0	0	0	603	903	0
682	4	5.60306	27.6746	-66.9584	-17875.7	6770.25	1682.37	301.111	566.967	0	-18.0966	105.741	-666.728	-57776.3	11491.9	5426.88	217.236	989.656	0	0	0	0	0	0	0	603	903	0
682	5	4.38236	25.5383	-70.3153	-19249	7014.39	2094.36	299.756	573.752	0	-17.944	104.673	-665.813	-56952.3	11919.1	5381.1	217.902	988.538	0	0	0	0	0	0	0	603	903	0
682	6	7.12894	30.7263	-75.1982	-20072.9	7746.81	1499.27	303.019	566.934	0	-17.944	105.13	-663.982	-55670.6	12041.2	5518.43	218.135	986.844	0	0	0	0	0	0	0	603	903	0
682	7	5.1453	30.2686	-80.9965	-21354.7	7868.88	1545.04	297.151	563.649	0	-18.0966	107.419	-662.456	-56860.8	11797.1	5335.33	217.808	988.833	0	0	0	0	0	0	0	603	903	0
682	8	3.16165	24.4702	-81.912	-21354.7	8296.12	1728.15	301.281	560.703	0	-17.7914	107.572	-661.235	-56677.7	11247.7	5198	217.01	988.715	0	0	0	0	0	0	0	603	903	0
682	9	1.3306	22.6392	-89.8466	-23643.5	8418.19	2140.14	293.695	563.154	0	-17.4863	107.114	-659.404	-55853.7	11675	5472.66	217.705	987.703	0	0	0	0	0	0	0	603	903	0
683	0	2.39871	27.522	-91.9828	-24192.8	8357.16	2048.58	290.856	563.015	0	-17.944	105.741	-657.573	-55579	11919.1	5793.09	218.126	987.521	0	0	0	0	0	0	0	603	903	0
683	1	-0.805631	25.9961	-94.1191	-24833.7	8601.3	3055.66	291.387	563.854	0	-17.3337	108.64	-654.216	-55395.9	11736	5518.43	217.939	987.675	0	0	0	0	0	0	0	603	903	0
683	2	-5.99362	18.0615	-92.8984	-25566.1	8906.48	3055.66	295.873	575.205	0	-14.2819	109.098	-653.606	-55579	11736	5381.1	217.956	988.034	0	0	0	0	0	0	0	603	903	0
683	3	-5.99362	16.5356	-99.307	-25108.3	8784.41	2643.68	288.457	552.835	0	-16.113	109.403	-652.69	-55121.3	11858.1	5198	218.168	987.452	0	0	0	0	0	0	0	603	903	0
683	4	-4.62033	16.3831	-103.58	-26847.8	8845.44	2964.11	285.398	559.2	0	-16.8759	109.861	-650.859	-54755.1	11919.1	5106.44	218.313	987.127	0	0	0	0	0	0	0	603	903	0
683	5	-7.06173	11.6528	-106.326	-28129.6	9211.65	2918.33	286.636	564.56	0	-16.5707	110.318	-648.113	-54388.8	11614	5426.88	217.92	986.919	0	0	0	0	0	0	0	603	903	0
683	6	-7.36691	6.61744	-110.599	-28404.2	9150.62	2826.78	282.737	556.823	0	-15.8078	110.624	-645.671	-54022.6	11980.2	5518.43	218.555	986.669	0	0	0	0	0	0	0	603	903	0
683	7	-10.2661	5.70191	-113.345	-29502.9	9333.72	3238.77	282.348	560.292	0	-15.5026	111.539	-642.925	-53564.9	11858.1	5243.77	218.444	986.314	0	0	0	0	0	0	0	603	903	0
683	8	-10.8764	8.14332	-117.923	-30052.2	8784.41	3009.89	274.493	554.846	0	-15.5026	111.844	-641.094	-53839.5	11736	5243.77	218.306	986.981	0	0	0	0	0	0	0	603	903	0
683	9	-13.9282	2.19239	-120.059	-30143.7	9394.76	3284.55	278.251	551.075	0	-14.2819	111.997	-638.347	-53564.9	11675	5335.33	218.289	986.912	0	0	0	0	0	0	0	603	903	0
684	0	-16.0644	-4.2163	-124.637	-31791.7	10127.2	3284.55	281.254	555.075	0	-13.9767	113.218	-635.601	-52740.9	11858.1	5289.55	218.657	985.978	0	0	0	0	0	0	0	603	903	0
684	1	-16.0644	-2.23266	-130.435	-32798.8	10249.2	3513.43	278.577	551.457	0	-14.4345	111.387	-634.075	-52740.9	11614	5243.77	218.316	986.178	0	0	0	0	0	0	0	603	903	0
684	2	-16.0644	-2.23266	-136.233	-34996	10249.2	3467.65	275.233	556.883	0	-16.7233	113.828	-630.718	-52832.4	11552.9	5289.55	218.317	986.766	0	0	0	0	0	0	0	603	903	0
684	3	-19.4214	-6.35253	-139.285	-36094.7	10920.6	3604.98	278.405	559.142	0	-15.1974	113.675	-628.887	-52374.7	11247.7	5335.33	217.885	986.282	0	0	0	0	0	0	0	603	903	0
684	4	-21.2524	-8.64135	-142.947	-36277.8	11164.8	4200.07	278.104	553.784	0	-13.8242	113.828	-626.14	-51459.2	11491.9	5289.55	218.354	985.185	0	0	0	0	0	0	0	603	903	0
684	5	-19.7265	-7.87841	-153.323	-37742.6	11592	3696.53	275.605	546.164	0	-14.4345	115.354	-623.088	-50909.8	11369.8	5106.44	218.248	984.706	0	0	0	0	0	0	0	603	903	0
684	6	-19.8791	-7.42065	-159.732	-39756.8	11714.1	3376.1	273.336	548.897	0	-15.1974	115.506	-619.426	-51916.9	11614	5289.55	218.75	986.815	0	0	0	0	0	0	0	603	903	0
684	7	-22.9309	-12.456	-164.309	-41496.3	12446.5	3925.41	275.75	552.55	0	-13.8242	115.049	-617.29	-50452.1	11614	4923.34	218.814	984.732	0	0	0	0	0	0	0	603	903	0
684	8	-23.6938	-12.9138	-168.887	-43144.2	12629.6	3742.31	274.781	555.462	0	-13.3664	115.812	-614.543	-50085.9	11491.9	5289.55	218.7	984.501	0	0	0	0	0	0	0	603	903	0
684	9	-22.1679	-10.625	-175.296	-43510.5	13301	3650.76	275.878	548.212	0	-15.1974	116.575	-610.271	-49811.2	11614	5198	219.031	984.622	0	0	0	0	0	0	0	603	903	0
685	0	-25.0671	-12.3035	-181.705	-44242.9	14033.4	3513.43	277.232	543.488	0	-11.8405	116.88	-607.83	-49719.6	11186.7	5518.43	218.404	984.799	0	0	0	0	0	0	0	603	903	0
685	1	-24.6093	-16.2707	-185.061	-45890.8	13423.1	3650.76	272.533	547.976	0	-12.4509	118.253	-603.862	-48804.1	11369.8	5198	218.829	983.82	0	0	0	0	0	0	0	603	903	0
685	2	-23.3886	-17.3389	-192.996	-48454.3	14521.7	3330.32	275.244	551.064	0	-10.7724	118.1	-601.726	-48437.9	11614	5335.33	219.301	983.498	0	0	0	0	0	0	0	603	903	0
685	3	-23.999	-15.2026	-201.236	-49095.2	15010	3421.87	274.589	543.968	0	-12.756	117.49	-596.843	-48529.5	11491.9	5060.67	219.254	984.31	0	0	0	0	0	0	0	603	903	0
685	4	-22.6257	-18.5596	-207.339	-50834.7	15620.3	3421.87	275.337	545.176	0	-10.7724	118.406	-593.791	-47980.1	11247.7	4831.79	218.942	983.803	0	0	0	0	0	0	0	603	903	0
685	5	-25.2197	-21.001	-212.832	-51475.5	15742.4	2735.23	273.966	541.859	0	-10.3146	119.626	-591.045	-47339.3	11003.6	4877.56	218.617	983.094	0	0	0	0	0	0	0	603	903	0
685	6	-25.9826	-21.7639	-219.241	-52482.6	16047.6	2872.56	273.196	539.383	0	-10.162	118.558	-587.383	-47430.8	11247.7	5014.89	219.149	983.75	0	0	0	0	0	0	0	603	903	0
685	7	-26.1352	-22.3743	-225.039	-54313.7	16596.9	3238.77	273.751	541.352	0	-11.8405	117.948	-581.89	-46881.5	11064.6	4969.12	219.015	983.568	0	0	0	0	0	0	0	603	903	0
685	8	-25.2197	-25.7312	-230.533	-55870.1	17085.2	2964.11	274.112	542.352	0	-11.3828	119.016	-578.533	-45874.4	11003.6	4923.34	219.02	982.294	0	0	0	0	0	0	0	603	903	0
685	9	-27.0507	-27.4097	-234.805	-57243.4	17878.6	2643.68	276.143	543.791	0	-9.09393	119.779	-573.955	-45233.6	10759.5	4923.34	218.746	981.81	0	0	0	0	0	0	0	603	903	0
686	0	-27.0507	-27.8674	-240.603	-57792.7	18183.8	2369.02	275.576	540.199	0	-9.5517	119.626	-570.598	-45325.1	11064.6	4786.01	219.391	982.434	0	0	0	0	0	0	0	603	903	0
686	1	-25.5249	-29.5459	-246.707	-59166	18733.1	2460.57	275.933	539.823	0	-8.78876	119.474	-568.157	-44958.9	10881.5	4786.01	219.152	982.131	0	0	0	0	0	0	0	603	903	0
686	2	-26.593	-33.3606	-253.116	-60356.2	19160.4	2140.14	275.698	538.453	0	-8.63617	118.711	-562.969	-44226.5	11064.6	4786.01	219.654	981.559	0	0	0	0	0	0	0	603	903	0
686	3	-23.8464	-34.8865	-261.05	-62095.6	19709.7	2369.02	275.502	537.869	0	-5.27924	118.711	-558.696	-43585.6	10881.5	4465.58	219.477	981.013	0	0	0	0	0	0	0	603	903	0
686	4	-24.6093	-35.6494	-267.154	-64018.2	20381.1	1911.25	276.29	539.631	0	-8.02582	119.474	-554.424	-43402.5	10759.5	4419.8	219.407	981.284	0	0	0	0	0	0	0	603	903	0
686	5	-25.9826	-36.8701	-272.037	-65025.3	20564.2	1453.49	275.594	539.032	0	-8.48358	118.558	-547.405	-42853.2	10576.4	4602.9	219.321	981.284	0	0	0	0	0	0	0	603	903	0
686	6	-27.5085	-39.7693	-280.276	-65574.7	20991.4	1499.27	274.896	533.964	0	-6.34735	116.88	-545.268	-42212.3	10759.5	4282.47	219.732	980.416	0	0	0	0	0	0	0	603	903	0
686	7	-26.2878	-42.0581	-286.38	-66856.4	21601.8	1270.38	275.431	533.454	0	-5.88959	118.558	-540.691	-41846.1	10576.4	4419.8	219.561	980.394	0	0	0	0	0	0	0	603	903	0
686	8	-23.0835	-42.5159	-292.483	-68412.8	22517.3	1133.06	276.987	533.903	0	-7.26288	118.863	-534.282	-42120.8	10515.3	4419.8	219.681	981.836	0	0	0	0	0	0	0	603	903	0
686	9	-26.1352	-44.9573	-297.671	-69694.5	23005.6	949.95	277.285	534.133	0	-6.80511	118.863	-530.62	-40839	10515.3	4282.47	219.817	979.965	0	0	0	0	0	0	0	603	903	0
687	0	-25.6775	-47.5513	-300.723	-71525.6	23066.6	858.397	276.704	537.845	0	-4.82147	117.948	-527.568	-39831.9	10149.1	4419.8	219.238	978.501	0	0	0	0	0	0	0	603	903	0
687	1	-24.3042	-47.7039	-310.184	-72532.7	24043.2	492.186	277.513	533.838	0	-4.97406	117.643	-521.77	-39740.4	10271.2	4190.92	219.685	979.165	0	0	0	0	0	0	0	603	903	0
687	2	-23.999	-47.0935	-316.592	-73722.8	24226.3	537.963	276.522	532.864	0	-5.27924	118.406	-516.277	-39191.1	10210.2	4190.92	219.777	978.911	0	0	0	0	0	0	0	603	903	0
687	3	-22.9309	-50.4504	-325.137	-74821.5	24836.7	-11.3538	276.388	530.123	0	-5.27924	118.1	-511.699	-38733.3	10271.2	4145.14	220.073	978.696	0	0	0	0	0	0	0	603	903	0
687	4	-22.6257	-52.5867	-330.935	-75920.1	25691.1	-194.459	277.632	529.411	0	-3.90594	117.185	-506.816	-37268.5	10149.1	4053.59	220.025	976.535	0	0	0	0	0	0	0	603	903	0
687	5	-23.0835	-53.6548	-336.429	-77476.5	25813.2	-469.118	276.727	530.291	0	-4.66888	115.506	-499.492	-36993.8	10088.1	3824.71	220.197	977.063	0	0	0	0	0	0	0	603	903	0
687	6	-23.2361	-52.1289	-343.142	-78758.3	26972.9	-560.67	278.606	529.521	0	-4.97406	116.727	-492.778	-37543.1	9294.62	4053.59	218.862	979.187	0	0	0	0	0	0	0	603	903	0
687	7	-21.0998	-54.5703	-346.805	-79307.6	26850.8	-697.999	277.423	528.681	0	-3.75336	116.727	-488.506	-36810.7	9782.9	4419.8	220.026	978.354	0	0	0	0	0	0	0	603	903	0
687	8	-22.3205	-56.0962	-353.518	-81230.2	27461.2	-1064.21	277.68	529.776	0	-2.83783	116.88	-484.233	-36169.8	9782.9	4145.14	220.203	977.695	0	0	0	0	0	0	0	603	903	0
687	9	-20.9472	-55.4858	-359.317	-81688	28376.7	-972.658	278.974	527.342	0	-2.83783	115.964	-478.13	-35712.1	9782.9	4007.81	220.461	977.691	0	0	0	0	0	0	0	603	903	0
688	0	-19.1162	-56.7065	-365.42	-82511.9	28865	-1384.65	278.991	525.8	0	-4.66888	115.201	-470.806	-34979.6	9904.97	3916.26	221.038	977.297	0	0	0	0	0	0	0	603	903	0
688	1	-19.2688	-58.8428	-370.913	-83885.2	29597.4	-1659.3	279.796	526.158	0	-3.75336	115.964	-465.007	-34247.2	9111.52	3366.94	219.594	976.649	0	0	0	0	0	0	0	603	903	0
688	2	-18.9636	-59.7583	-378.848	-84800.7	29719.5	-1979.74	278.447	523.838	0	-1.61713	115.506	-460.43	-33697.9	8867.38	3962.04	219.259	976.188	0	0	0	0	0	0	0	603	903	0
688	3	-18.0481	-60.6738	-384.341	-86906.4	30146.7	-2162.84	278.437	526.118	0	-1.46454	112.912	-450.359	-33148.6	9294.62	3916.26	220.638	976.605	0	0	0	0	0	0	0	603	903	0
688	4	-15.9118	-60.3686	-389.834	-86906.4	31001.2	-1750.86	279.524	522.932	0	-3.44818	111.844	-447.002	-32690.8	9050.48	3733.15	220.247	976.134	0	0	0	0	0	0	0	603	903	0
688	5	-17.4377	-62.1997	-396.243	-88554.4	31489.5	-2529.05	279.47	523.485	0	-2.07489	112.912	-439.983	-31866.9	8928.41	3778.93	220.293	975.427	0	0	0	0	0	0	0	603	903	0
688	6	-16.9799	-63.1152	-401.431	-88920.6	32099.8	-2757.94	279.964	521.509	0	-0.701599	112.455	-434.185	-30585.1	8745.31	3733.15	220.142	973.443	0	0	0	0	0	0	0	603	903	0
688	7	-16.217	-64.9463	-404.483	-89836.1	32282.9	-3032.59	279.813	522.101	0	-0.854187	111.387	-429.302	-31134.4	8134.96	3366.94	218.949	975.523	0	0	0	0	0	0	0	603	903	0
688	8	-15.6067	-65.5566	-410.281	-90843.2	32954.3	-3307.25	280.321	521.417	0	-1.61713	109.708	-422.588	-30585.1	8562.2	3550.05	220.261	975.376	0	0	0	0	0	0	0	603	903	0
688	9	-13.4704	-67.0825	-416.079	-91026.3	33625.7	-3398.81	280.816	518.771	0	-1.00677	108.335	-414.653	-29761.1	8684.27	3412.72	220.943	974.774	0	0	0	0	0	0	0	603	903	0
689	0	-12.0971	-67.998	-420.657	-93040.5	33320.6	-3353.03	279.211	521.179	0	0.671692	108.03	-405.498	-28662.5	8379.1	3183.84	220.664	973.685	0	0	0	0	0	0	0	603	903	0
689	1	-11.9445	-68.6084	-425.845	-93589.8	34419.2	-4314.33	280.826	519.774	0	-0.243835	104.52	-399.7	-28296.3	7951.85	3138.06	219.895	973.794	0	0	0	0	0	0	0	603	903	0
689	2	-12.0971	-70.4394	-430.728	-94505.3	34968.5	-3993.9	281.185	519.408	0	0.213928	105.588	-396.343	-27747	7890.82	3138.06	219.909	973.008	0	0	0	0	0	0	0	603	903	0
689	3	-11.6394	-71.5076	-435.611	-94596.9	35029.5	-4543.22	280.415	517.159	0	0.519104	103.452	-389.934	-26923	8379.1	3229.61	221.489	972.045	0	0	0	0	0	0	0	603	903	0
689	4	-11.3342	-73.186	-439.883	-95420.8	35762	-4955.2	281.299	516.923	0	0.366516	102.994	-381.694	-26739.9	7768.75	3412.72	220.353	973.056	0	0	0	0	0	0	0	603	903	0
689	5	-10.5713	-74.7119	-442.935	-96244.8	35945.1	-5092.53	281.152	517.289	0	0.519104	102.231	-373.455	-26282.1	7829.78	3321.17	220.966	973.376	0	0	0	0	0	0	0	603	903	0
689	6	-10.5713	-74.7119	-447.207	-97709.7	36738.5	-5138.31	282.151	518.489	0	-0.396423	101.316	-367.656	-24908.8	7829.78	3092.29	221.296	970.75	0	0	0	0	0	0	0	603	903	0
689	7	-9.35055	-75.4748	-449.954	-97801.2	36921.6	-5596.07	282.056	517.358	0	0.366516	99.3321	-359.722	-24359.5	7402.54	3000.73	220.579	970.718	0	0	0	0	0	0	0	603	903	0
689	8	-8.12985	-77.3059	-457.278	-98442.1	37226.8	-6053.84	281.41	515.278	0	3.41827	95.8226	-353.618	-24084.9	6792.18	3046.51	219.208	971.11	0	0	0	0	0	0	0	603	903	0
689	9	-7.67209	-77.0007	-461.246	-98808.3	37959.2	-6236.94	282.297	514.221	0	0.82428	96.7381	-344.463	-23352.4	7219.43	3092.29	220.959	970.794	0	0	0	0	0	0	0	603	903	0
690	0	-7.21432	-78.8318	-465.823	-98259	38142.3	-6236.94	281.882	510.936	0	0.976868	96.1278	-338.97	-22711.6	7341.5	2817.63	221.658	970.002	0	0	0	0	0	0	0	603	903	0
690	1	-6.75656	-80.8154	-469.485	-99998.5	38874.8	-6648.93	282.803	512.996	0	1.73981	94.6019	-332.866	-21704.5	7158.4	2817.63	221.505	968.205	0	0	0	0	0	0	0	603	903	0
690	2	-7.21432	-80.3577	-473.453	-100822	39424.1	-6648.93	283.269	512.952	0	2.04498	92.6183	-324.932	-20972.1	6609.08	3138.06	220.34	967.543	0	0	0	0	0	0	0	603	903	0
690	3	-6.75656	-80.968	-478.946	-100548	39607.2	-7152.47	282.697	509.936	0	1.58722	90.3294	-316.997	-20697.4	6181.83	2680.3	219.501	968.292	0	0	0	0	0	0	0	603	903	0
690	4	-5.38327	-84.0198	-481.692	-102196	40095.5	-7427.13	283.239	512.16	0	1.58722	88.9561	-309.062	-19965	6303.9	2909.18	220.397	967.599	0	0	0	0	0	0	0	603	903	0
690	5	-5.23068	-83.4094	-486.575	-102379	40766.8	-7610.23	283.783	510.407	0	2.80792	87.1251	-301.738	-18591.7	6303.9	2771.85	220.892	964.615	0	0	0	0	0	0	0	603	903	0
690	6	-2.63669	-84.7827	-490.542	-102745	41438.2	-8067.99	284.474	509.452	0	2.19757	84.5311	-296.55	-18591.7	6303.9	2588.74	221.257	965.693	0	0	0	0	0	0	0	603	903	0
690	7	-1.11081	-85.8508	-495.425	-103111	41804.4	-8067.99	284.381	508.127	0	1.28204	83.3104	-287.7	-18042.4	6181.83	2405.64	221.487	965.712	0	0	0	0	0	0	0	603	903	0
690	8	1.17801	-86.4612	-502.139	-104210	42292.7	-8846.19	284.225	507.532	0	1.43463	83.0052	-280.986	-17676.2	5510.45	2268.31	219.611	965.908	0	0	0	0	0	0	0	603	903	0
690	9	0.720248	-87.6819	-505.801	-104851	42842	-9349.73	284.701	507.296	0	3.26569	79.9535	-270.61	-16211.3	5693.55	2497.19	221.04	962.907	0	0	0	0	0	0	0	603	903	0
691	0	1.78836	-90.4285	-511.294	-104485	42903.1	-9075.07	283.911	504.353	0	2.80792	78.8853	-266.033	-16394.4	5876.66	2497.19	222.09	964.626	0	0	0	0	0	0	0	603	903	0
691	1	3.16165	-91.344	-516.788	-105583	44001.7	-9075.07	285.145	504.307	0	1.12946	75.8336	-259.624	-15845.1	5510.45	2268.31	221.225	964.031	0	0	0	0	0	0	0	603	903	0
691	2	3.92459	-93.0225	-521.67	-105949	44612.1	-10265.3	285.518	503.096	0	2.19757	74.9181	-251.995	-14929.6	5388.38	2130.98	221.383	962.246	0	0	0	0	0	0	0	603	903	0
691	3	3.77201	-95.1587	-523.196	-107323	44795.2	-10585.7	285.618	505.129	0	4.63898	74.6129	-244.67	-14654.9	5327.34	2451.42	221.774	962.897	0	0	0	0	0	0	0	603	903	0
691	4	4.53495	-96.6846	-526.858	-107506	45161.4	-10723	285.718	504.051	0	3.57086	73.2396	-240.398	-14380.3	4716.99	1947.88	219.622	962.819	0	0	0	0	0	0	0	603	903	0
691	5	4.68753	-98.363	-532.657	-108238	45405.5	-11135	285.243	503.204	0	2.80792	69.2723	-233.684	-13922.5	4778.02	1947.88	220.447	962.578	0	0	0	0	0	0	0	603	903	0
691	6	6.21341	-99.4311	-535.403	-108147	45710.7	-11135	285.376	501.991	0	3.57086	66.3731	-224.224	-13098.5	4655.95	1993.65	220.765	961.417	0	0	0	0	0	0	0	603	903	0
691	7	6.82376	-101.567	-537.845	-108421	46321	-11226.6	286.123	501.585	0	3.41827	65.7628	-217.205	-12183	4411.81	1581.66	220.312	959.09	0	0	0	0	0	0	0	603	903	0
691	8	6.366	-102.635	-540.591	-108788	46015.9	-11547	285.121	501.238	0	2.35016	63.9317	-211.711	-11450.6	4411.81	1535.89	220.839	957.086	0	0	0	0	0	0	0	603	903	0
691	9	6.21341	-101.72	-544.253	-109703	46931.4	-11684.3	286.231	501.566	0	2.35016	60.4222	-205.303	-10809.7	4472.85	1718.99	221.787	955.653	0	0	0	0	0	0	0	603	903	0
692	0	6.21341	-100.804	-545.474	-110252	46626.2	-10677.3	285.478	502.122	0	3.41827	58.4386	-199.199	-10992.8	4533.88	1627.44	222.761	958.185	0	0	0	0	0	0	0	603	903	0
692	1	6.21341	-101.415	-548.831	-110435	46992.4	-11867.4	285.623	501.22	0	2.65533	56.7601	-188.518	-10626.6	4350.78	1444.34	223.079	959.369	0	0	0	0	0	0	0	603	903	0
692	2	8.50223	-101.11	-549.747	-110161	47602.8	-11821.7	286.59	500.385	0	1.43463	53.7083	-183.635	-10077.3	4167.67	1627.44	222.695	957.877	0	0	0	0	0	0	0	603	903	0
692	3	6.82376	-99.126	-551.578	-110344	47602.8	-11730.1	286.303	500.052	0	1.28204	53.5558	-179.058	-8978.67	4106.64	1490.11	222.935	953.144	0	0	0	0	0	0	0	603	903	0
692	4	9.41776	-98.5156	-553.409	-110161	47969	-12050.5	286.679	499.059	0	1.8924	51.7247	-174.48	-8887.12	3679.39	1490.11	221.088	953.935	0	0	0	0	0	0	0	603	903	0
692	5	9.26517	-98.2104	-555.85	-111076	48030	-12050.5	286.408	499.832	0	2.04498	50.9618	-165.63	-8887.12	3496.28	1718.99	221.109	956.656	0	0	0	0	0	0	0	603	903	0
692	6	10.6385	-97.7527	-560.122	-111534	48091.1	-12187.9	285.858	499.125	0	2.50275	50.3514	-158.916	-8520.9	3923.53	1490.11	224.689	956.619	0	0	0	0	0	0	0	603	903	0
692	7	10.9436	-97.6001	-559.207	-110527	48640.4	-12187.9	286.981	497.65	0	2.04498	48.5204	-154.033	-7788.48	3435.25	1535.89	222.302	953.564	0	0	0	0	0	0	0	603	903	0
692	8	11.4014	-98.363	-557.986	-109703	48823.5	-12645.6	287.499	496.605	0	1.28204	46.0789	-147.319	-6872.96	3374.21	1398.56	222.904	949.654	0	0	0	0	0	0	0	603	903	0
692	9	10.791	-98.0579	-563.479	-110435	49311.8	-12279.4	287.513	495.989	0	0.0613403	42.4168	-141.216	-6323.64	3069.04	1535.89	221.733	947.78	0	0	0	0	0	0	0	603	903	0
693	0	11.8592	-98.8208	-564.09	-111168	49372.8	-12874.5	287.526	497.075	0	0.671692	40.7384	-134.502	-6598.3	2763.86	1352.78	220.549	952.057	0	0	0	0	0	0	0	603	903	0
693	1	12.3169	-99.7363	-564.7	-111351	49067.6	-13240.7	286.891	497.186	0	0.82428	38.7547	-130.535	-5957.43	2885.93	1444.34	222.109	948.639	0	0	0	0	0	0	0	603	903	0
693	2	12.7747	-100.804	-566.226	-111626	49983.2	-13378.1	288.274	497.14	0	0.213928	36.1607	-125.041	-5957.43	2885.93	1307.01	223.08	950.644	0	0	0	0	0	0	0	603	903	0
693	3	14.148	-100.041	-567.752	-111076	49739	-13286.5	287.607	495.642	0	-1.15936	32.8038	-122.905	-5408.11	2885.93	1169.68	223.481	947.002	0	0	0	0	0	0	0	603	903	0
693	4	15.5213	-101.567	-568.973	-111168	50105.2	-13698.5	288.063	495.384	0	-1.61713	33.109	-112.834	-4767.24	2336.62	1169.68	220.708	945.25	0	0	0	0	0	0	0	603	903	0
693	5	15.2161	-101.873	-571.414	-111534	50410.4	-13927.4	288.22	495.19	0	2.35016	32.4986	-110.393	-4767.24	2153.51	1032.35	219.508	946.184	0	0	0	0	0	0	0	603	903	0
693	6	15.5213	-102.941	-573.855	-111534	50227.3	-13927.4	287.526	494.359	0	-0.243835	30.9727	-105.815	-4401.03	2336.62	1352.78	222.082	944.592	0	0	0	0	0	0	0	603	903	0
693	7	16.8946	-103.093	-575.686	-111809	50532.5	-14202	287.778	494.218	0	-1.46454	27.921	-99.7119	-4492.58	1970.4	1123.9	219.761	948.056	0	0	0	0	0	0	0	603	903	0
693	8	17.6575	-102.483	-575.992	-112358	50837.6	-14064.7	288.261	495.069	0	-0.854187	25.4796	-94.5239	-3485.51	2214.54	986.571	223.428	939.874	0	0	0	0	0	0	0	603	903	0
693	9	18.7256	-102.635	-575.686	-111168	51081.8	-15163.3	288.732	493.105	0	-0.854187	23.9537	-90.5566	-3760.16	1909.37	986.571	221.085	944.523	0	0	0	0	0	0	0	603	903	0
694	0	19.6411	-104.009	-577.212	-111351	51020.8	-14842.9	288.392	492.912	0	-1.61713	22.8856	-87.5048	-3302.4	1665.23	849.242	219.03	940.74	0	0	0	0	0	0	0	603	903	0
694	1	19.7937	-103.093	-578.128	-111809	51325.9	-15163.3	288.78	493.398	0	-1.9223	20.9019	-85.3686	-3119.29	2031.44	1123.9	223.796	939.539	0	0	0	0	0	0	0	603	903	0
694	2	21.6248	-104.009	-581.18	-112083	51936.3	-15346.4	289.364	492.855	0	-0.701599	18.308	-79.5703	-2844.64	1909.37	986.571	223.996	938.75	0	0	0	0	0	0	0	603	903	0
694	3	23.6084	-102.941	-583.011	-112267	51814.2	-15209.1	288.874	492.563	0	-0.701599	15.714	-72.8564	-3027.74	1604.19	757.69	222.019	944.558	0	0	0	0	0	0	0	603	903	0
694	4	24.0662	-102.788	-583.621	-111534	51875.2	-15987.3	288.885	491.107	0	-2.22748	13.4251	-73.1616	-2386.87	1543.16	849.242	221.092	935.625	0	0	0	0	0	0	0	603	903	0
694	5	24.0662	-103.398	-586.368	-110893	52424.6	-16033.1	289.406	489.119	0	-1.15936	13.7303	-71.3305	-2386.87	1115.91	849.242	215.644	936.462	0	0	0	0	0	0	0	603	903	0
694	6	24.2188	-103.398	-587.893	-111626	52363.5	-15941.5	289.07	489.874	0	-1.15936	12.357	-67.9736	-2295.32	1299.02	711.913	219.111	936.768	0	0	0	0	0	0	0	603	903	0
694	7	25.7447	-102.941	-590.945	-112083	52729.7	-15987.3	289.229	489.668	0	-2.68524	11.7467	-64.0063	-2569.98	1237.98	803.466	219.342	943.152	0	0	0	0	0	0	0	603	903	0
694	8	26.0498	-102.483	-588.504	-111900	53218	-16170.4	290.429	490.144	0	-2.22748	12.0519	-60.9545	-2203.77	1482.12	849.242	224.315	939.154	0	0	0	0	0	0	0	603	903	0
694	9	26.5076	-103.398	-590.03	-113091	53218	-16582.4	290.195	491.669	0	-1.46454	10.8311	-59.1235	-1562.9	1299.02	757.69	221.971	929.434	0	0	0	0	0	0	0	603	903	0
695	0	27.4231	-101.873	-591.861	-111717	53523.2	-16765.5	290.432	488.756	0	-0.854187	8.84751	-58.8183	-1746	932.807	666.137	215.859	932.685	0	0	0	0	0	0	0	603	903	0
695	1	28.4912	-102.178	-593.692	-111717	53462.2	-16307.7	290.05	488.174	0	-0.701599	8.38974	-55.1562	-2203.77	1176.95	620.36	221.338	942.955	0	0	0	0	0	0	0	603	903	0
695	2	29.5594	-102.33	-594.302	-112267	53462.2	-17131.7	289.958	488.905	0	0.82428	8.84751	-49.0527	-1379.79	1054.88	620.36	221.505	931.129	0	0	0	0	0	0	0	603	903	0
695	3	31.3904	-102.025	-597.049	-112999	53157	-16948.6	289.033	489.263	0	-0.701599	7.01645	-51.4941	-1471.34	993.842	757.69	219.3	931.573	0	0	0	0	0	0	0	603	903	0
695	4	30.4749	-102.025	-597.964	-113182	53767.3	-17040.2	289.917	489.279	0	-1.76971	6.55869	-48.4423	-1196.69	1115.91	666.137	223.036	927.703	0	0	0	0	0	0	0	603	903	0
695	5	30.3223	-101.415	-596.133	-112816	54316.6	-17543.7	291.115	489.246	0	-2.68524	6.25351	-47.832	-1013.58	1237.98	895.019	225.882	924.19	0	0	0	0	0	0	0	603	903	0
695	6	30.1697	-101.262	-602.237	-112175	54621.8	-17269	290.698	486.264	0	-0.701599	5.94834	-44.7802	-1288.24	627.631	620.36	214.016	931.768	0	0	0	0	0	0	0	603	903	0
695	7	30.3223	-102.33	-602.237	-112907	53889.4	-17497.9	289.482	487.48	0	-0.243835	5.1854	-42.9492	-1654.45	932.807	528.808	221.719	941.521	0	0	0	0	0	0	0	603	903	0
695	8	31.0852	-102.33	-603.152	-112907	54988	-17314.8	291.168	487.196	0	-2.68524	4.88022	-42.3388	-1379.79	871.772	666.137	220.59	935.589	0	0	0	0	0	0	0	603	903	0
695	9	31.0852	-102.025	-604.373	-113640	54743.9	-17452.2	290.58	488.029	0	-2.38007	4.72763	-40.2026	-830.475	749.701	803.466	218.648	923.657	0	0	0	0	0	0	0	603	903	0
696	0	32.4585	-100.957	-605.899	-113091	55049.1	-17726.8	290.855	486.649	0	-1.46454	4.26987	-38.3715	-922.028	627.631	345.702	216.357	927.029	0	0	0	0	0	0	0	603	903	0
696	1	32.3059	-100.957	-605.899	-113823	55598.4	-17497.9	291.762	487.858	0	-2.38007	4.72763	-36.5405	-1196.69	627.631	391.479	217.176	935.75	0	0	0	0	0	0	0	603	903	0
696	2	32.3059	-100.652	-609.866	-113091	55171.1	-18001.5	290.464	485.435	0	-1.46454	3.96469	-36.5405	-1288.24	810.736	757.69	222.187	938.255	0	0	0	0	0	0	0	603	903	0
696	3	32.0008	-101.873	-611.697	-113091	55415.3	-17543.7	290.593	484.88	0	-1.61713	2.89658	-33.4887	-647.37	932.807	895.019	227.854	922.331	0	0	0	0	0	0	0	603	903	0
696	4	32.9163	-101.11	-612.308	-113365	55964.6	-17589.5	291.399	485.144	0	-1.9223	3.04917	-31.9628	-738.923	871.772	483.031	227.275	926.118	0	0	0	0	0	0	0	603	903	0
696	5	32.6111	-100.804	-612.918	-114372	55781.5	-17406.4	291.01	486.603	0	-2.22748	3.35434	-29.2163	-738.923	627.631	803.466	221.482	928.292	0	0	0	0	0	0	0	603	903	0
696	6	33.3741	-100.652	-611.697	-114281	56208.7	-17772.6	291.89	486.826	0	-2.99042	3.65952	-27.08	-1196.69	505.561	391.479	218.669	947.191	0	0	0	0	0	0	0	603	903	0
696	7	32.1534	-100.194	-614.749	-113640	56025.6	-17681	291.136	484.856	0	-1.61713	3.65952	-27.9956	-830.475	261.42	574.584	209.338	932.665	0	0	0	0	0	0	0	603	903	0
696	8	32.1534	-99.8889	-612.918	-113548	56025.6	-18001.5	291.408	485.259	0	-1.15936	2.13364	-26.4697	-555.817	749.701	757.69	228.323	923.998	0	0	0	0	0	0	0	603	903	0
696	9	32.7637	-99.7363	-617.19	-113915	56391.8	-17543.7	291.369	484.57	0	-2.68524	2.43881	-22.1972	-738.923	444.526	528.808	220.026	936.289	0	0	0	0	0	0	0	603	903	0
697	0	33.8318	-99.7363	-617.19	-114738	56330.8	-17909.9	291.27	485.905	0	-2.38007	3.50693	-21.5869	-922.028	444.526	391.479	220.592	945.713	0	0	0	0	0	0	0	603	903	0
697	1	33.5266	-98.6682	-620.242	-114647	56819.1	-18001.5	291.608	484.842	0	-0.701599	2.43881	-20.9765	-6.50045	566.596	483.031	227.011	903.31	0	0	0	0	0	0	0	603	903	0
697	2	33.9844	-98.5156	-620.852	-114738	56636	-17772.6	291.223	484.808	0	-1.00677	1.67587	-19.1455	-738.923	810.736	574.584	242.346	941.595	0	0	0	0	0	0	0	603	903	0
697	3	33.0689	-98.2104	-622.684	-114098	56941.2	-18001.5	291.445	483.235	0	0	0	0	0	0	0	200	903	0	0	0	0	0	0	0	603	903	0
697	4	33.0689	-98.2104	-623.904	-114464	57185.3	-17772.6	291.657	483.464	0	0	0	0	0	0	0	200	903	0	0	0	0	0	0	0	603	903	0
697	5	33.9844	-98.0579	-622.073	-114738	57002.2	-17543.7	291.633	484.445	0	0	0	0	0	0	0	200	903	0	0	0	0	0	0	0	603	903	0
697	6	33.2215	-97.4475	-622.378	-115196	57185.3	-17772.6	291.882	485.09	0	0	0	0	0	0	0	200	903	0	0	0	0	0	0	0	603	903	0
697	7	33.2215	-96.6846	-622.073	-114372	57246.3	-18001.5	292.025	483.857	0	0	0	0	0	0	0	200	903	0	0	0	0	0	0	0	603	903	0
697	8	33.6792	-97.2949	-625.735	-115105	57490.5	-17955.7	291.877	483.951	0	0	0	0	0	0	0	200	903	0	0	0	0	0	0	0	603	903	0
697	9	33.8318	-95.4639	-627.261	-115105	57673.6	-17635.3	291.945	483.504	0	0	0	0	0	0	0	200	903	0	0	0	0	0	0	0	603	903	0
698	0	35.2051	-95.769	-628.177	-114464	57490.5	-17818.4	291.52	482.216	0	0	0	0	0	0	0	200	903	0	0	0	0	0	0	0	603	903	0
698	1	33.9844	-95.0061	-630.008	-115196	57856.7	-17772.6	291.835	482.849	0	0	0	0	0	0	0	200	903	0	0	0	0	0	0	0	603	903	0
698	2	33.9844	-94.3957	-627.566	-115562	58161.9	-17635.3	292.678	484.144	0	0	0	0	0	0	0	200	903	0	0	0	0	0	0	0	603	903	0
698	3	33.5266	-93.938	-632.144	-114830	58100.8	-17726.8	291.911	481.652	0	0	0	0	0	0	0	200	903	0	0	0	0	0	0	0	603	903	0
698	4	33.5266	-94.3957	-632.449	-115837	58039.8	-16948.6	291.77	483.156	0	0	0	0	0	0	0	200	903	0	0	0	0	0	0	0	603	903	0
698	5	33.6792	-93.0225	-631.534	-115379	58161.9	-17497.9	292.096	482.697	0	0	0	0	0	0	0	200	903	0	0	0	0	0	0	0	603	903	0
698	6	33.6792	-92.1069	-632.754	-115013	58711.2	-17406.4	292.787	481.766	0	0	0	0	0	0	0	200	903	0	0	0	0	0	0	0	603	903	0
698	7	33.5266	-93.0225	-634.28	-115562	58528.1	-17452.2	292.275	482.195	0	0	0	0	0	0	0	200	903	0	0	0	0	0	0	0	603	903	0
698	8	33.6792	-91.8018	-634.891	-116112	58406	-17681	291.994	482.885	0	0	0	0	0	0	0	200	903	0	0	0	0	0	0	0	603	903	0
698	9	33.0689	-90.8862	-636.111	-114647	58589.1	-17269	292.105	480.231	0	0	0	0	0	0	0	200	903	0	0	0	0	0	0	0	603	903	0
699	0	33.9844	-91.344	-638.247	-116661	58772.2	-17314.8	292.084	482.784	0	0	0	0	0	0	0	200	903	0	0	0	0	0	0	0	603	903	0
699	1	33.5266	-89.8181	-640.384	-115746	59199.5	-17085.9	292.444	480.744	0	0	0	0	0	0	0	200	903	0	0	0	0	0	0	0	603	903	0
699	2	33.3741	-89.6655	-637.332	-116203	58955.3	-17177.5	292.503	482.328	0	0	0	0	0	0	0	200	903	0	0	0	0	0	0	0	603	903	0
699	3	32.6111	-89.6655	-642.215	-116203	59016.4	-17360.6	291.895	480.942	0	0	0	0	0	0	0	200	903	0	0	0	0	0	0	0	603	903	0
699	4	32.4585	-89.0552	-642.215	-116844	59016.4	-16628.2	291.895	481.939	0	0	0	0	0	0	0	200	903	0	0	0	0	0	0	0	603	903	0
699	5	33.3741	-87.8345	-640.384	-117210	59443.6	-16948.6	292.825	483.032	0	0	0	0	0	0	0	200	903	0	0	0	0	0	0	0	603	903	0
699	6	32.9163	-87.3767	-643.741	-117302	59748.8	-16628.2	292.815	482.219	0	0	0	0	0	0	0	200	903	0	0	0	0	0	0	0	603	903	0
699	7	32.1534	-86.3086	-643.435	-117394	59748.8	-16994.4	292.859	482.448	0	0	0	0	0	0	0	200	903	0	0	0	0	0	0	0	603	903	0
699	8	32.3059	-86.4612	-645.877	-116386	59809.8	-16994.4	292.602	480.199	0	0	0	0	0	0	0	200	903	0	0	0	0	0	0	0	603	903	0
699	9	32.3059	-86.9189	-647.403	-116661	59870.8	-16445.1	292.479	480.199	0	0	0	0	0	0	0	200	903	0	0	0	0	0	0	0	603	903	0
700	0	33.0689	-86.4612	-648.318	-116844	59992.9	-16811.3	292.536	480.227	0	0	0	0	0	0	0	200	903	0	0	0	0	0	0	0	603	903	0
700	1	32.4585	-86.4612	-650.455	-117851	60359.1	-16765.5	292.795	481.183	0	0	0	0	0	0	0	200	903	0	0	0	0	0	0	0	603	903	0
700	2	32.0008	-84.7827	-648.623	-118309	60420.2	-16490.8	293.151	482.4	0	0	0	0	0	0	0	200	903	0	0	0	0	0	0	0	603	903	0
700	3	31.0852	-84.7827	-652.286	-116936	59809.8	-16628.2	291.693	479.271	0	0	0	0	0	0	0	200	903	0	0	0	0	0	0	0	603	903	0
700	4	30.6275	-86.3086	-654.117	-117302	60603.3	-16307.7	292.649	479.329	0	0	0	0	0	0	0	200	903	0	0	0	0	0	0	0	603	903	0
700	5	30.6275	-84.7827	-652.286	-117943	60481.2	-16445.1	292.722	480.815	0	0	0	0	0	0	0	200	903	0	0	0	0	0	0	0	603	903	0
700	6	30.7801	-84.1724	-653.201	-118401	60481.2	-16124.6	292.592	481.262	0	0	0	0	0	0	0	200	903	0	0	0	0	0	0	0	603	903	0
700	7	31.543	-83.1042	-655.032	-118401	61030.5	-16262	293.172	480.755	0	0	0	0	0	0	0	200	903	0	0	0	0	0	0	0	603	903	0
700	8	30.4749	-82.1887	-656.253	-118126	61213.6	-16307.7	293.277	480.001	0	0	0	0	0	0	0	200	903	0	0	0	0	0	0	0	603	903	0
700	9	30.9326	-81.4258	-658.084	-117394	61213.6	-15300.7	293.018	478.387	0	0	0	0	0	0	0	200	903	0	0	0	0	0	0	0	603	903	0
701	0	30.3223	-81.8835	-659.61	-117485	60664.3	-16033.1	291.97	478.113	0	0	0	0	0	0	0	200	903	0	0	0	0	0	0	0	603	903	0
701	1	29.4068	-82.6465	-657.168	-117943	61152.6	-15804.2	293.055	479.471	0	0	0	0	0	0	0	200	903	0	0	0	0	0	0	0	603	903	0
701	2	29.5594	-80.0525	-660.525	-118584	61396.7	-15758.4	292.951	479.529	0	0	0	0	0	0	0	200	903	0	0	0	0	0	0	0	603	903	0
701	3	29.4068	-79.7473	-661.441	-118675	61579.8	-15758.4	293.1	479.419	0	0	0	0	0	0	0	200	903	0	0	0	0	0	0	0	603	903	0
701	4	28.6438	-79.137	-660.525	-118492	61518.8	-15758.4	293.136	479.391	0	0	0	0	0	0	0	200	903	0	0	0	0	0	0	0	603	903	0
701	5	28.4912	-78.5266	-661.441	-118126	61640.9	-15804.2	293.192	478.589	0	0	0	0	0	0	0	200	903	0	0	0	0	0	0	0	603	903	0
701	6	29.4068	-78.8318	-661.441	-117943	61274.7	-15254.9	292.638	478.312	0	0	0	0	0	0	0	200	903	0	0	0	0	0	0	0	603	903	0
701	7	30.0171	-77.6111	-662.051	-118401	61946	-15438	293.567	478.839	0	0	0	0	0	0	0	200	903	0	0	0	0	0	0	0	603	903	0
701	8	28.949	-77.9163	-663.577	-118858	61824	-15529.5	293.168	479.118	0	0	0	0	0	0	0	200	903	0	0	0	0	0	0	0	603	903	0
701	9	28.7964	-75.9326	-664.493	-118584	61946	-15163.3	293.223	478.458	0	0	0	0	0	0	0	200	903	0	0	0	0	0	0	0	603	903	0
702	0	28.1861	-75.4748	-661.441	-117119	62068.1	-15254.9	293.838	477.066	0	0	0	0	0	0	0	200	903	0	0	0	0	0	0	0	603	903	0
702	1	27.5757	-75.3223	-666.629	-117943	61946	-14888.7	292.924	476.924	0	0	0	0	0	0	0	200	903	0	0	0	0	0	0	0	603	903	0
702	2	28.3387	-75.0171	-666.934	-118126	62068.1	-14842.9	293.065	477.118	0	0	0	0	0	0	0	200	903	0	0	0	0	0	0	0	603	903	0
702	3	27.8809	-73.949	-663.577	-117668	62129.1	-14797.1	293.628	477.324	0	0	0	0	0	0	0	200	903	0	0	0	0	0	0	0	603	903	0
702	4	26.8128	-73.6438	-663.882	-118309	62251.2	-15026	293.768	478.208	0	0	0	0	0	0	0	200	903	0	0	0	0	0	0	0	603	903	0
702	5	27.8809	-72.5757	-666.629	-118126	62129.1	-14659.8	293.199	477.199	0	0	0	0	0	0	0	200	903	0	0	0	0	0	0	0	603	903	0
702	6	28.4912	-71.6601	-665.103	-117577	62373.3	-14568.2	293.78	476.78	0	0	0	0	0	0	0	200	903	0	0	0	0	0	0	0	603	903	0
702	7	28.4912	-71.5076	-665.103	-117577	62556.4	-14797.1	294.055	476.78	0	0	0	0	0	0	0	200	903	0	0	0	0	0	0	0	603	903	0
702	8	28.3387	-71.9653	-665.713	-117943	62434.3	-14614	293.786	477.168	0	0	0	0	0	0	0	200	903	0	0	0	0	0	0	0	603	903	0
702	9	28.0335	-71.5076	-665.713	-117577	62495.4	-14476.7	293.877	476.618	0	0	0	0	0	0	0	200	903	0	0	0	0	0	0	0	603	903	0
703	0	28.3387	-69.9817	-664.187	-117302	62556.4	-14568.2	294.185	476.61	0	0	0	0	0	0	0	200	903	0	0	0	0	0	0	0	603	903	0
703	1	27.118	-69.3713	-666.324	-117577	61946	-14202	292.967	476.456	0	0	0	0	0	0	0	200	903	0	0	0	0	0	0	0	603	903	0
703	2	26.9654	-69.0662	-666.934	-117027	62617.4	-14293.6	293.889	475.471	0	0	0	0	0	0	0	200	903	0	0	0	0	0	0	0	603	903	0
703	3	28.1861	-69.6765	-662.967	-116936	62312.3	-14293.6	293.99	476.383	0	0	0	0	0	0	0	200	903	0	0	0	0	0	0	0	603	903	0
703	4	27.2705	-68.1506	-663.882	-116478	62495.4	-14110.5	294.136	475.45	0	0	0	0	0	0	0	200	903	0	0	0	0	0	0	0	603	903	0
703	5	26.6602	-67.3877	-661.441	-116661	62983.6	-14202	295.222	476.374	0	0	0	0	0	0	0	200	903	0	0	0	0	0	0	0	603	903	0
703	6	26.8128	-66.6247	-662.662	-116386	62190.2	-14202	293.849	475.635	0	0	0	0	0	0	0	200	903	0	0	0	0	0	0	0	603	903	0
703	7	27.2705	-66.4722	-661.441	-116936	62678.5	-13790	294.761	476.789	0	0	0	0	0	0	0	200	903	0	0	0	0	0	0	0	603	903	0
703	8	28.1861	-65.2515	-663.272	-115837	62922.6	-13973.1	294.867	474.645	0	0	0	0	0	0	0	200	903	0	0	0	0	0	0	0	603	903	0
703	9	26.9654	-65.5566	-662.051	-114738	61946	-13973.1	293.567	473.308	0	0	0	0	0	0	0	200	903	0	0	0	0	0	0	0	603	903	0
704	0	26.9654	-65.7092	-656.863	-115105	62800.5	-14018.9	295.607	475.234	0	0	0	0	0	0	0	200	903	0	0	0	0	0	0	0	603	903	0
704	1	25.8972	-63.8782	-661.441	-115562	62251.2	-14110.5	294.115	474.713	0	0	0	0	0	0	0	200	903	0	0	0	0	0	0	0	603	903	0
704	2	26.0498	-63.7256	-659.915	-115471	62068.1	-13606.9	294.055	474.978	0	0	0	0	0	0	0	200	903	0	0	0	0	0	0	0	603	903	0
704	3	26.8128	-62.6575	-657.168	-114830	62678.5	-13469.6	295.377	474.735	0	0	0	0	0	0	0	200	903	0	0	0	0	0	0	0	603	903	0
704	4	26.6602	-62.3523	-656.253	-114189	61946	-13606.9	294.394	474.002	0	0	0	0	0	0	0	200	903	0	0	0	0	0	0	0	603	903	0
704	5	27.4231	-62.0471	-655.032	-113915	62495.4	-13240.7	295.408	473.907	0	0	0	0	0	0	0	200	903	0	0	0	0	0	0	0	603	903	0
704	6	26.6602	-62.1997	-654.727	-114281	62129.1	-13790	294.893	474.547	0	0	0	0	0	0	0	200	903	0	0	0	0	0	0	0	603	903	0
704	7	28.3387	-60.5212	-653.811	-113640	62190.2	-13103.4	295.119	473.811	0	0	0	0	0	0	0	200	903	0	0	0	0	0	0	0	603	903	0
704	8	26.9654	-60.0635	-654.727	-113823	62434.3	-13378.1	295.359	473.848	0	0	0	0	0	0	0	200	903	0	0	0	0	0	0	0	603	903	0
704	9	27.8809	-59.6057	-653.506	-112633	61579.8	-13240.7	294.23	472.352	0	0	0	0	0	0	0	200	903	0	0	0	0	0	0	0	603	903	0
705	0	26.6602	-60.0635	-650.149	-112267	62129.1	-13332.3	295.561	472.678	0	0	0	0	0	0	0	200	903	0	0	0	0	0	0	0	603	903	0
705	1	26.0498	-59.7583	-650.149	-111809	61824	-12874.5	295.092	471.974	0	0	0	0	0	0	0	200	903	0	0	0	0	0	0	0	603	903	0
705	2	27.7283	-59.6057	-647.098	-111900	61946	-13286.5	295.729	472.927	0	0	0	0	0	0	0	200	903	0	0	0	0	0	0	0	603	903	0
705	3	26.2024	-57.7747	-646.487	-111443	62007.1	-13057.6	295.914	472.382	0	0	0	0	0	0	0	200	903	0	0	0	0	0	0	0	603	903	0
705	4	26.0498	-56.7065	-644.656	-110893	61946	-13195	296.092	472.019	0	0	0	0	0	0	0	200	903	0	0	0	0	0	0	0	603	903	0
705	5	26.6602	-57.4695	-643.13	-109703	61885	-12508.3	296.225	470.577	0	0	0	0	0	0	0	200	903	0	0	0	0	0	0	0	603	903	0
705	6	27.118	-58.2324	-641.299	-109978	61762.9	-13149.2	296.309	471.492	0	0	0	0	0	0	0	200	903	0	0	0	0	0	0	0	603	903	0
705	7	28.1861	-56.2488	-641.604	-109978	61457.8	-13195	295.788	471.41	0	0	0	0	0	0	0	200	903	0	0	0	0	0	0	0	603	903	0
705	8	27.2705	-55.1807	-640.689	-109703	61518.8	-12828.7	296.02	471.227	0	0	0	0	0	0	0	200	903	0	0	0	0	0	0	0	603	903	0
705	9	26.8128	-55.0281	-637.332	-110161	61396.7	-12508.3	296.334	472.847	0	0	0	0	0	0	0	200	903	0	0	0	0	0	0	0	603	903	0
706	0	26.6602	-54.4177	-637.332	-108330	61518.8	-12599.9	296.526	469.974	0	0	0	0	0	0	0	200	903	0	0	0	0	0	0	0	603	903	0
706	1	26.0498	-54.1125	-635.196	-108055	61701.9	-12416.8	297.138	470.113	0	0	0	0	0	0	0	200	903	0	0	0	0	0	0	0	603	903	0
706	2	27.5757	-53.6548	-633.06	-107964	61335.7	-12783	296.888	470.543	0	0	0	0	0	0	0	200	903	0	0	0	0	0	0	0	603	903	0
706	3	26.0498	-52.8918	-631.228	-107506	61213.6	-12004.8	296.975	470.312	0	0	0	0	0	0	0	200	903	0	0	0	0	0	0	0	603	903	0
706	4	28.1861	-52.2815	-630.923	-107506	60664.3	-12645.6	296.152	470.394	0	0	0	0	0	0	0	200	903	0	0	0	0	0	0	0	603	903	0
706	5	26.6602	-52.1289	-628.482	-106407	61091.6	-12233.6	297.205	469.308	0	0	0	0	0	0	0	200	903	0	0	0	0	0	0	0	603	903	0
706	6	26.8128	-50.9082	-626.956	-105858	60969.5	-12325.2	297.247	468.844	0	0	0	0	0	0	0	200	903	0	0	0	0	0	0	0	603	903	0
706	7	26.6602	-50.7556	-626.651	-105492	60847.4	-12142.1	297.099	468.342	0	0	0	0	0	0	0	200	903	0	0	0	0	0	0	0	603	903	0
706	8	26.5076	-50.603	-624.82	-104759	60603.3	-12233.6	296.993	467.663	0	0	0	0	0	0	0	200	903	0	0	0	0	0	0	0	603	903	0
706	9	25.5921	-50.603	-623.904	-105492	60298.1	-12096.3	296.646	469.083	0	0	0	0	0	0	0	200	903	0	0	0	0	0	0	0	603	903	0
707	0	25.8972	-49.6875	-622.989	-105034	60359.1	-12142.1	296.886	468.597	0	0	0	0	0	0	0	200	903	0	0	0	0	0	0	0	603	903	0
707	1	28.0335	-49.0771	-617.801	-104576	60542.2	-11547	297.996	469.272	0	0	0	0	0	0	0	200	903	0	0	0	0	0	0	0	603	903	0
707	2	26.2024	-48.009	-617.801	-103294	60420.2	-12050.5	297.799	467.197	0	0	0	0	0	0	0	200	903	0	0	0	0	0	0	0	603	903	0
707	3	25.4395	-48.772	-613.833	-103203	60359.1	-11821.7	298.331	468.128	0	0	0	0	0	0	0	200	903	0	0	0	0	0	0	0	603	903	0
707	4	25.8972	-48.009	-615.054	-102745	60115	-11959	297.739	467.05	0	0	0	0	0	0	0	200	903	0	0	0	0	0	0	0	603	903	0
707	5	26.355	-47.2461	-614.139	-103020	60115	-11638.6	297.885	467.747	0	0	0	0	0	0	0	200	903	0	0	0	0	0	0	0	603	903	0
707	6	26.0498	-46.4832	-614.444	-102928	60176	-11547	297.936	467.514	0	0	0	0	0	0	0	200	903	0	0	0	0	0	0	0	603	903	0
707	7	26.9654	-47.2461	-612.002	-102562	59748.8	-11730.1	297.628	467.584	0	0	0	0	0	0	0	200	903	0	0	0	0	0	0	0	603	903	0
707	8	25.5921	-45.2624	-609.866	-101280	59748.8	-11821.7	297.97	466.07	0	0	0	0	0	0	0	200	903	0	0	0	0	0	0	0	603	903	0
707	9	25.2869	-46.0254	-609.561	-100273	59626.7	-11455.4	297.819	464.501	0	0	0	0	0	0	0	200	903	0	0	0	0	0	0	0	603	903	0
708	0	26.8128	-45.415	-607.425	-100365	59687.7	-11043.5	298.264	465.23	0	0	0	0	0	0	0	200	903	0	0	0	0	0	0	0	603	903	0
708	1	25.4395	-45.1099	-605.594	-100914	59687.7	-11318.1	298.561	466.637	0	0	0	0	0	0	0	200	903	0	0	0	0	0	0	0	603	903	0
708	2	25.4395	-43.8892	-603.152	-99907	59504.6	-11501.2	298.656	465.641	0	0	0	0	0	0	0	200	903	0	0	0	0	0	0	0	603	903	0
708	3	25.2869	-43.1262	-601.932	-100639	59687.7	-11135	299.16	467.194	0	0	0	0	0	0	0	200	903	0	0	0	0	0	0	0	603	903	0
708	4	25.5921	-42.5159	-599.795	-98716.7	59321.5	-11180.8	298.903	464.584	0	0	0	0	0	0	0	200	903	0	0	0	0	0	0	0	603	903	0
708	5	26.355	-43.584	-601.932	-98808.3	59260.5	-11180.8	298.451	464.152	0	0	0	0	0	0	0	200	903	0	0	0	0	0	0	0	603	903	0
708	6	25.7447	-42.5159	-599.795	-98350.5	59382.6	-10860.4	299.005	463.973	0	0	0	0	0	0	0	200	903	0	0	0	0	0	0	0	603	903	0
708	7	26.8128	-42.2107	-597.049	-98899.9	58772.2	-10951.9	298.438	465.648	0	0	0	0	0	0	0	200	903	0	0	0	0	0	0	0	603	903	0
708	8	25.2869	-40.6848	-597.964	-97526.5	59382.6	-10768.8	299.308	463.098	0	0	0	0	0	0	0	200	903	0	0	0	0	0	0	0	603	903	0
708	9	23.9136	-40.3796	-592.776	-97984.3	59138.4	-10402.6	299.765	465.297	0	0	0	0	0	0	0	200	903	0	0	0	0	0	0	0	603	903	0
709	0	23.761	-39.6167	-593.081	-96427.9	58955.3	-10906.1	299.405	462.588	0	0	0	0	0	0	0	200	903	0	0	0	0	0	0	0	603	903	0
709	1	24.524	-41.2952	-592.471	-96336.4	58894.3	-10311	299.405	462.601	0	0	0	0	0	0	0	200	903	0	0	0	0	0	0	0	603	903	0
709	2	24.8291	-40.0745	-590.64	-96427.9	58650.1	-10448.4	299.299	463.26	0	0	0	0	0	0	0	200	903	0	0	0	0	0	0	0	603	903	0
709	3	24.9817	-38.8538	-588.504	-96885.7	58955.3	-10036.4	300.178	464.631	0	0	0	0	0	0	0	200	903	0	0	0	0	0	0	0	603	903	0
709	4	24.8291	-39.3115	-588.809	-96427.9	58711.2	-10082.2	299.712	463.768	0	0	0	0	0	0	0	200	903	0	0	0	0	0	0	0	603	903	0
709	5	24.524	-37.4805	-587.588	-96153.3	58650.1	-10311	299.815	463.641	0	0	0	0	0	0	0	200	903	0	0	0	0	0	0	0	603	903	0
709	6	23.6084	-37.3279	-586.368	-95054.6	58528.1	-10356.8	299.815	462.108	0	0	0	0	0	0	0	200	903	0	0	0	0	0	0	0	603	903	0
709	7	23.4558	-37.1753	-586.368	-95237.8	58100.8	-9853.28	299.086	462.42	0	0	0	0	0	0	0	200	903	0	0	0	0	0	0	0	603	903	0
709	8	25.2869	-37.1753	-584.231	-94505.3	58528.1	-9395.51	300.18	461.76	0	0	0	0	0	0	0	200	903	0	0	0	0	0	0	0	603	903	0
709	9	23.4558	-36.2598	-582.4	-94413.8	58467	-9761.72	300.39	462.112	0	0	0	0	0	0	0	200	903	0	0	0	0	0	0	0	603	903	0
710	0	22.3877	-35.6494	-579.349	-94688.4	58222.9	-9807.5	300.497	463.439	0	0	0	0	0	0	0	200	903	0	0	0	0	0	0	0	603	903	0
710	1	23.3033	-35.1916	-580.264	-94322.2	58528.1	-9853.28	300.865	462.55	0	0	0	0	0	0	0	200	903	0	0	0	0	0	0	0	603	903	0
710	2	24.0662	-34.7339	-582.706	-93498.2	58406	-9532.84	300.232	460.455	0	0	0	0	0	0	0	200	903	0	0	0	0	0	0	0	603	903	0
710	3	23.761	-34.8865	-580.874	-93223.6	58039.8	-8937.75	299.918	460.488	0	0	0	0	0	0	0	200	903	0	0	0	0	0	0	0	603	903	0
710	4	23.761	-35.1916	-576.297	-93132	58283.9	-9120.85	301.135	461.604	0	0	0	0	0	0	0	200	903	0	0	0	0	0	0	0	603	903	0
710	5	22.2351	-34.1235	-578.128	-92582.7	57978.8	-9395.51	300.287	460.142	0	0	0	0	0	0	0	200	903	0	0	0	0	0	0	0	603	903	0
710	6	21.93	-34.7339	-577.823	-93132	58161.9	-9212.4	300.657	461.177	0	0	0	0	0	0	0	200	903	0	0	0	0	0	0	0	603	903	0
710	7	22.0826	-33.208	-576.907	-92674.3	57917.7	-8983.52	300.394	460.64	0	0	0	0	0	0	0	200	903	0	0	0	0	0	0	0	603	903	0
710	8	22.0826	-32.2925	-574.466	-92308.1	57978.8	-8983.52	300.926	460.685	0	0	0	0	0	0	0	200	903	0	0	0	0	0	0	0	603	903	0
710	9	22.6929	-31.6821	-575.076	-92033.4	58039.8	-8800.42	300.925	460.037	0	0	0	0	0	0	0	200	903	0	0	0	0	0	0	0	603	903	0
711	0	22.6929	-31.9873	-572.33	-91850.3	57856.7	-8937.75	301.09	460.485	0	0	0	0	0	0	0	200	903	0	0	0	0	0	0	0	603	903	0
711	1	23.6084	-31.9873	-574.161	-91575.7	57917.7	-8571.53	300.874	459.495	0	0	0	0	0	0	0	200	903	0	0	0	0	0	0	0	603	903	0
711	2	22.0826	-30.614	-574.466	-91484.1	58100.8	-8617.31	301.139	459.251	0	0	0	0	0	0	0	200	903	0	0	0	0	0	0	0	603	903	0
711	3	22.0826	-30.4614	-571.414	-91575.7	57673.6	-8617.31	300.931	460.262	0	0	0	0	0	0	0	200	903	0	0	0	0	0	0	0	603	903	0
711	4	20.8618	-30.4614	-572.024	-91117.9	57673.6	-8251.1	300.824	459.29	0	0	0	0	0	0	0	200	903	0	0	0	0	0	0	0	603	903	0
711	5	21.0144	-30.3088	-572.024	-89836.1	57978.8	-8571.53	301.357	457.049	0	0	0	0	0	0	0	200	903	0	0	0	0	0	0	0	603	903	0
711	6	20.5567	-31.3769	-569.888	-90110.8	57978.8	-8525.76	301.737	458.12	0	0	0	0	0	0	0	200	903	0	0	0	0	0	0	0	603	903	0
711	7	20.4041	-29.3933	-567.447	-90568.5	57124.3	-8296.88	300.669	459.607	0	0	0	0	0	0	0	200	903	0	0	0	0	0	0	0	603	903	0
711	8	21.0144	-28.783	-568.362	-90660.1	57368.4	-7930.67	300.936	459.511	0	0	0	0	0	0	0	200	903	0	0	0	0	0	0	0	603	903	0
711	9	21.93	-27.7148	-567.752	-90568.5	57673.6	-7976.44	301.582	459.521	0	0	0	0	0	0	0	200	903	0	0	0	0	0	0	0	603	903	0
712	0	21.93	-27.5623	-567.447	-89561.5	57917.7	-7976.44	302.067	457.832	0	0	0	0	0	0	0	200	903	0	0	0	0	0	0	0	603	903	0
712	1	21.3196	-28.02	-568.362	-89286.8	57185.3	-8067.99	300.614	457.095	0	0	0	0	0	0	0	200	903	0	0	0	0	0	0	0	603	903	0
712	2	21.0144	-28.1726	-561.954	-89561.5	57795.7	-8067.99	302.848	459.375	0	0	0	0	0	0	0	200	903	0	0	0	0	0	0	0	603	903	0
712	3	20.0989	-26.9519	-567.752	-89286.8	57368.4	-7839.11	301.045	457.264	0	0	0	0	0	0	0	200	903	0	0	0	0	0	0	0	603	903	0
712	4	20.2515	-27.7148	-564.7	-89378.4	57307.4	-7610.23	301.483	458.276	0	0	0	0	0	0	0	200	903	0	0	0	0	0	0	0	603	903	0
712	5	20.8618	-25.7312	-565.005	-88188.2	57795.7	-7747.56	302.292	456.084	0	0	0	0	0	0	0	200	903	0	0	0	0	0	0	0	603	903	0
712	6	20.5567	-26.0364	-561.038	-88371.3	57490.5	-7747.56	302.472	457.514	0	0	0	0	0	0	0	200	903	0	0	0	0	0	0	0	603	903	0
712	7	20.8618	-27.7148	-564.09	-88096.6	57429.4	-7701.79	301.809	456.175	0	0	0	0	0	0	0	200	903	0	0	0	0	0	0	0	603	903	0
712	8	20.8618	-25.426	-563.479	-88737.5	57246.3	-7656.01	301.594	457.481	0	0	0	0	0	0	0	200	903	0	0	0	0	0	0	0	603	903	0
712	9	20.7093	-24.5105	-565.616	-88462.8	57368.4	-7335.57	301.427	456.401	0	0	0	0	0	0	0	200	903	0	0	0	0	0	0	0	603	903	0
713	0	21.167	-24.3579	-565.31	-87272.6	57673.6	-7198.25	302.021	454.38	0	0	0	0	0	0	0	200	903	0	0	0	0	0	0	0	603	903	0
713	1	20.5567	-24.2053	-563.479	-87638.9	57185.3	-7244.02	301.486	455.532	0	0	0	0	0	0	0	200	903	0	0	0	0	0	0	0	603	903	0
713	2	19.7937	-24.6631	-563.174	-87272.6	57551.5	-7289.8	302.191	454.966	0	0	0	0	0	0	0	200	903	0	0	0	0	0	0	0	603	903	0
713	3	20.5567	-24.3579	-561.038	-87822	57429.4	-6877.81	302.363	456.535	0	0	0	0	0	0	0	200	903	0	0	0	0	0	0	0	603	903	0
713	4	19.9463	-24.2053	-561.954	-87455.8	57368.4	-7015.14	302.087	455.628	0	0	0	0	0	0	0	200	903	0	0	0	0	0	0	0	603	903	0
713	5	19.4886	-22.6794	-558.597	-87638.9	57368.4	-6511.6	302.701	456.891	0	0	0	0	0	0	0	200	903	0	0	0	0	0	0	0	603	903	0
713	6	19.9463	-21.9165	-560.122	-87089.6	57246.3	-7060.92	302.203	455.483	0	0	0	0	0	0	0	200	903	0	0	0	0	0	0	0	603	903	0
713	7	19.9463	-21.9165	-560.428	-86540.2	57429.4	-6694.71	302.474	454.418	0	0	0	0	0	0	0	200	903	0	0	0	0	0	0	0	603	903	0
713	8	19.7937	-22.3743	-561.954	-86174	57429.4	-6877.81	302.196	453.347	0	0	0	0	0	0	0	200	903	0	0	0	0	0	0	0	603	903	0
713	9	20.0989	-22.0691	-561.954	-86998	57246.3	-6511.6	301.87	454.814	0	0	0	0	0	0	0	200	903	0	0	0	0	0	0	0	603	903	0
714	0	19.9463	-21.7639	-558.291	-87089.6	56941.2	-6694.71	301.992	455.993	0	0	0	0	0	0	0	200	903	0	0	0	0	0	0	0	603	903	0
714	1	19.0308	-20.238	-561.343	-86723.4	57307.4	-6969.36	302.09	454.493	0	0	0	0	0	0	0	200	903	0	0	0	0	0	0	0	603	903	0
714	2	18.8782	-19.0173	-561.038	-86448.7	57734.6	-6832.03	302.907	454.087	0	0	0	0	0	0	0	200	903	0	0	0	0	0	0	0	603	903	0
714	3	18.8782	-19.3225	-558.291	-85533.1	57490.5	-6099.61	302.976	453.205	0	0	0	0	0	0	0	200	903	0	0	0	0	0	0	0	603	903	0
714	4	19.0308	-20.3906	-558.291	-85350.1	57002.2	-6420.05	302.101	452.877	0	0	0	0	0	0	0	200	903	0	0	0	0	0	0	0	603	903	0
714	5	18.573	-19.7803	-558.902	-86174	57246.3	-6236.94	302.426	454.185	0	0	0	0	0	0	0	200	903	0	0	0	0	0	0	0	603	903	0
714	6	19.336	-19.0173	-557.986	-85807.8	57368.4	-6236.94	302.813	453.781	0	0	0	0	0	0	0	200	903	0	0	0	0	0	0	0	603	903	0
714	7	21.3196	-18.5596	-558.597	-85899.4	57246.3	-6145.39	302.482	453.777	0	0	0	0	0	0	0	200	903	0	0	0	0	0	0	0	603	903	0
714	8	19.1834	-18.8647	-559.207	-85716.3	57490.5	-5687.63	302.807	453.282	0	0	0	0	0	0	0	200	903	0	0	0	0	0	0	0	603	903	0
714	9	18.7256	-18.1018	-557.681	-84983.9	56880.1	-6282.72	301.994	452.388	0	0	0	0	0	0	0	200	903	0	0	0	0	0	0	0	603	903	0
715	0	17.9627	-19.1699	-559.817	-84526.1	57307.4	-5916.51	302.368	450.989	0	0	0	0	0	0	0	200	903	0	0	0	0	0	0	0	603	903	0
715	1	18.573	-19.3225	-559.207	-84343	57551.5	-6053.84	302.916	450.826	0	0	0	0	0	0	0	200	903	0	0	0	0	0	0	0	603	903	0
715	2	18.1153	-17.644	-558.291	-85258.5	57185.3	-6236.94	302.429	452.713	0	0	0	0	0	0	0	200	903	0	0	0	0	0	0	0	603	903	0
715	3	18.2679	-16.4233	-557.376	-84434.5	57124.3	-5916.51	302.488	451.486	0	0	0	0	0	0	0	200	903	0	0	0	0	0	0	0	603	903	0
715	4	19.0308	-17.4915	-556.766	-84617.6	57246.3	-5962.28	302.819	451.981	0	0	0	0	0	0	0	200	903	0	0	0	0	0	0	0	603	903	0
715	5	18.2679	-15.9656	-557.681	-83793.7	57063.2	-5596.07	302.322	450.254	0	0	0	0	0	0	0	200	903	0	0	0	0	0	0	0	603	903	0
715	6	19.4886	-16.5759	-559.207	-83793.7	57307.4	-5458.74	302.48	449.844	0	0	0	0	0	0	0	200	903	0	0	0	0	0	0	0	603	903	0
715	7	18.2679	-17.0337	-557.986	-83702.1	56880.1	-5596.07	301.938	450.007	0	0	0	0	0	0	0	200	903	0	0	0	0	0	0	0	603	903	0
715	8	17.9627	-16.1182	-558.902	-84068.3	57368.4	-5641.85	302.645	450.417	0	0	0	0	0	0	0	200	903	0	0	0	0	0	0	0	603	903	0
715	9	17.5049	-15.05	-559.512	-83885.2	57185.3	-5412.97	302.206	449.926	0	0	0	0	0	0	0	200	903	0	0	0	0	0	0	0	603	903	0
716	0	18.573	-14.7449	-557.071	-84068.3	57368.4	-5321.41	302.982	450.911	0	0	0	0	0	0	0	200	903	0	0	0	0	0	0	0	603	903	0
716	1	16.8946	-15.5078	-556.766	-83335.9	57185.3	-4909.43	302.71	449.679	0	0	0	0	0	0	0	200	903	0	0	0	0	0	0	0	603	903	0
716	2	16.2842	-14.7449	-554.629	-83610.5	57368.4	-5367.19	303.436	450.75	0	0	0	0	0	0	0	200	903	0	0	0	0	0	0	0	603	903	0
716	3	17.6575	-14.2871	-556.766	-82603.5	57368.4	-5229.86	303.039	448.363	0	0	0	0	0	0	0	200	903	0	0	0	0	0	0	0	603	903	0
716	4	17.5049	-13.0664	-554.019	-83152.8	57490.5	-5138.31	303.77	450.09	0	0	0	0	0	0	0	200	903	0	0	0	0	0	0	0	603	903	0
716	5	17.8101	-13.3716	-559.817	-83335.9	56880.1	-4909.43	301.605	448.863	0	0	0	0	0	0	0	200	903	0	0	0	0	0	0	0	603	903	0
716	6	17.3523	-12.9138	-558.902	-83610.5	57429.4	-4955.2	302.754	449.598	0	0	0	0	0	0	0	200	903	0	0	0	0	0	0	0	603	903	0
716	7	16.2842	-13.219	-560.122	-82878.1	57307.4	-4863.65	302.312	447.964	0	0	0	0	0	0	0	200	903	0	0	0	0	0	0	0	603	903	0
716	8	16.5894	-12.6086	-560.428	-82878.1	57368.4	-4955.2	302.365	447.884	0	0	0	0	0	0	0	200	903	0	0	0	0	0	0	0	603	903	0
716	9	16.1316	-12.1509	-557.681	-82328.8	57795.7	-4863.65	303.636	447.627	0	0	0	0	0	0	0	200	903	0	0	0	0	0	0	0	603	903	0
717	0	16.2842	-11.8457	-558.291	-82328.8	57429.4	-4772.1	302.866	447.466	0	0	0	0	0	0	0	200	903	0	0	0	0	0	0	0	603	903	0
717	1	17.3523	-11.6931	-557.681	-83061.2	57429.4	-4680.55	302.979	448.94	0	0	0	0	0	0	0	200	903	0	0	0	0	0	0	0	603	903	0
717	2	17.3523	-11.3879	-558.902	-82420.4	57490.5	-4588.99	302.863	447.468	0	0	0	0	0	0	0	200	903	0	0	0	0	0	0	0	603	903	0
717	3	18.2679	-9.86206	-562.564	-82145.7	57551.5	-4634.77	302.302	446.02	0	0	0	0	0	0	0	200	903	0	0	0	0	0	0	0	603	903	0
717	4	16.742	-11.3879	-561.343	-81962.6	57856.7	-4497.44	303.068	446.012	0	0	0	0	0	0	0	200	903	0	0	0	0	0	0	0	603	903	0
717	5	16.5894	-10.9302	-560.733	-82695	57734.6	-4680.55	302.963	447.477	0	0	0	0	0	0	0	200	903	0	0	0	0	0	0	0	603	903	0
717	6	15.5213	-11.0828	-561.343	-82237.2	57551.5	-4543.22	302.525	446.501	0	0	0	0	0	0	0	200	903	0	0	0	0	0	0	0	603	903	0
717	7	15.6739	-10.0146	-562.259	-82328.8	57673.6	-4222.78	302.575	446.425	0	0	0	0	0	0	0	200	903	0	0	0	0	0	0	0	603	903	0
717	8	16.1316	-9.86206	-560.428	-81871	57490.5	-4085.45	302.583	446.087	0	0	0	0	0	0	0	200	903	0	0	0	0	0	0	0	603	903	0
717	9	15.6739	-9.40429	-560.428	-81688	58161.9	-4085.45	303.781	445.76	0	0	0	0	0	0	0	200	903	0	0	0	0	0	0	0	603	903	0
718	0	15.979	-9.2517	-560.733	-81596.4	57978.8	-4085.45	303.398	445.517	0	0	0	0	0	0	0	200	903	0	0	0	0	0	0	0	603	903	0
718	1	16.2842	-8.79394	-561.343	-82511.9	57917.7	-4177	303.177	446.99	0	0	0	0	0	0	0	200	903	0	0	0	0	0	0	0	603	903	0
718	2	15.3687	-8.18359	-563.174	-82145.7	57795.7	-3902.35	302.625	445.862	0	0	0	0	0	0	0	200	903	0	0	0	0	0	0	0	603	903	0
718	3	16.4368	-7.42065	-564.395	-82054.2	57734.6	-3627.69	302.295	445.384	0	0	0	0	0	0	0	200	903	0	0	0	0	0	0	0	603	903	0
718	4	15.8264	-7.11547	-564.09	-81230.2	57978.8	-3719.24	302.783	444.002	0	0	0	0	0	0	0	200	903	0	0	0	0	0	0	0	603	903	0
718	5	15.2161	-7.57324	-563.785	-81413.3	58283.9	-3673.46	303.38	444.405	0	0	0	0	0	0	0	200	903	0	0	0	0	0	0	0	603	903	0
718	6	15.0635	-7.26806	-563.174	-81047.1	57978.8	-3490.36	302.95	443.911	0	0	0	0	0	0	0	200	903	0	0	0	0	0	0	0	603	903	0
718	7	15.3687	-6.96289	-564.09	-81504.8	58283.9	-3353.03	303.324	444.489	0	0	0	0	0	0	0	200	903	0	0	0	0	0	0	0	603	903	0
718	8	15.8264	-5.74218	-566.226	-81138.6	57551.5	-3490.36	301.641	443.297	0	0	0	0	0	0	0	200	903	0	0	0	0	0	0	0	603	903	0
718	9	15.8264	-6.8103	-564.395	-81779.5	58100.8	-3536.14	302.944	444.898	0	0	0	0	0	0	0	200	903	0	0	0	0	0	0	0	603	903	0
719	0	17.1997	-4.67407	-564.09	-81138.6	57978.8	-3215.7	302.783	443.84	0	0	0	0	0	0	0	200	903	0	0	0	0	0	0	0	603	903	0
719	1	15.8264	-5.74218	-566.836	-79490.7	58161.9	-3398.81	302.608	440.236	0	0	0	0	0	0	0	200	903	0	0	0	0	0	0	0	603	903	0
719	2	15.979	-6.96289	-565.31	-80589.3	58528.1	-3536.14	303.533	442.558	0	0	0	0	0	0	0	200	903	0	0	0	0	0	0	0	603	903	0
719	3	14.9109	-4.82666	-567.752	-81596.4	58283.9	-3078.37	302.657	443.718	0	0	0	0	0	0	0	200	903	0	0	0	0	0	0	0	603	903	0
719	4	14.7583	-4.2163	-567.447	-81688	58222.9	-3215.7	302.605	443.957	0	0	0	0	0	0	0	200	903	0	0	0	0	0	0	0	603	903	0
719	5	15.2161	-3.60595	-567.447	-81413.3	58650.1	-2757.94	303.358	443.473	0	0	0	0	0	0	0	200	903	0	0	0	0	0	0	0	603	903	0
719	6	14.4532	-2.84301	-568.057	-80131.6	58528.1	-3215.7	303.032	441.062	0	0	0	0	0	0	0	200	903	0	0	0	0	0	0	0	603	903	0
719	7	15.5213	-3.91113	-569.583	-79948.4	58528.1	-2895.27	302.756	440.363	0	0	0	0	0	0	0	200	903	0	0	0	0	0	0	0	603	903	0
719	8	15.3687	-3.60595	-568.973	-79948.4	58345	-2849.49	302.544	440.514	0	0	0	0	0	0	0	200	903	0	0	0	0	0	0	0	603	903	0
719	9	16.742	-4.36889	-571.719	-81321.8	58650.1	-2986.82	302.586	442.241	0	0	0	0	0	0	0	200	903	0	0	0	0	0	0	0	603	903	0
720	0	15.0635	-1.7749	-570.804	-80589.3	58955.3	-2757.94	303.285	441.186	0	0	0	0	0	0	0	200	903	0	0	0	0	0	0	0	603	903	0
720	1	16.1316	-1.01196	-572.024	-79948.4	58955.3	-2757.94	303.064	439.764	0	0	0	0	0	0	0	200	903	0	0	0	0	0	0	0	603	903	0
720	2	14.7583	-2.38525	-573.245	-79856.9	58894.3	-2941.04	302.738	439.307	0	0	0	0	0	0	0	200	903	0	0	0	0	0	0	0	603	903	0
720	3	13.6902	-1.31713	-572.635	-80131.6	58406	-2300.17	301.995	439.935	0	0	0	0	0	0	0	200	903	0	0	0	0	0	0	0	603	903	0
720	4	15.3687	-2.08007	-572.024	-80589.3	58650.1	-2483.28	302.531	440.884	0	0	0	0	0	0	0	200	903	0	0	0	0	0	0	0	603	903	0
720	5	15.0635	-0.401607	-572.33	-79307.6	59199.5	-2437.5	303.436	438.57	0	0	0	0	0	0	0	200	903	0	0	0	0	0	0	0	603	903	0
720	6	15.3687	-0.249019	-572.635	-80589.3	59382.6	-2574.83	303.701	440.734	0	0	0	0	0	0	0	200	903	0	0	0	0	0	0	0	603	903	0
720	7	14.9109	-0.096431	-573.245	-79856.9	58039.8	-2300.17	301.248	439.307	0	0	0	0	0	0	0	200	903	0	0	0	0	0	0	0	603	903	0
720	8	14.7583	-0.554195	-572.024	-79399.1	59077.4	-2391.73	303.278	438.804	0	0	0	0	0	0	0	200	903	0	0	0	0	0	0	0	603	903	0
720	9	14.9109	-0.096431	-576.907	-79856.9	59443.6	-2208.62	303.038	438.422	0	0	0	0	0	0	0	200	903	0	0	0	0	0	0	0	603	903	0
721	0	15.6739	0.361333	-578.738	-80314.6	59077.4	-1979.74	302.08	438.775	0	0	0	0	0	0	0	200	903	0	0	0	0	0	0	0	603	903	0
721	1	15.0635	0.361333	-576.602	-80040	58772.2	-1750.86	301.929	438.813	0	0	0	0	0	0	0	200	903	0	0	0	0	0	0	0	603	903	0
721	2	14.6057	1.27686	-577.212	-79948.4	59321.5	-2208.62	302.772	438.508	0	0	0	0	0	0	0	200	903	0	0	0	0	0	0	0	603	903	0
721	3	14.148	1.58204	-578.433	-78117.4	59382.6	-2345.95	302.661	435.05	0	0	0	0	0	0	0	200	903	0	0	0	0	0	0	0	603	903	0
721	4	14.6057	1.58204	-578.433	-79124.5	59565.7	-1979.74	302.978	436.791	0	0	0	0	0	0	0	200	903	0	0	0	0	0	0	0	603	903	0
721	5	15.2161	1.58204	-579.043	-79124.5	59382.6	-2345.95	302.553	436.647	0	0	0	0	0	0	0	200	903	0	0	0	0	0	0	0	603	903	0
721	6	15.5213	2.0398	-578.433	-80680.8	59626.7	-1979.74	303.083	439.482	0	0	0	0	0	0	0	200	903	0	0	0	0	0	0	0	603	903	0
721	7	16.5894	1.88721	-580.569	-79856.9	59565.7	-2025.51	302.599	437.549	0	0	0	0	0	0	0	200	903	0	0	0	0	0	0	0	603	903	0
721	8	15.2161	3.56568	-581.79	-79032.9	59565.7	-1933.96	302.383	435.844	0	0	0	0	0	0	0	200	903	0	0	0	0	0	0	0	603	903	0
721	9	15.0635	3.87085	-583.011	-78666.7	59809.8	-1613.53	302.588	434.932	0	0	0	0	0	0	0	200	903	0	0	0	0	0	0	0	603	903	0
722	0	14.7583	3.10791	-583.316	-78300.5	59321.5	-1796.63	301.697	434.233	0	0	0	0	0	0	0	200	903	0	0	0	0	0	0	0	603	903	0
722	1	16.742	3.56568	-581.79	-78758.3	59809.8	-1430.42	302.803	435.372	0	0	0	0	0	0	0	200	903	0	0	0	0	0	0	0	603	903	0
722	2	14.4532	4.17603	-582.4	-79582.2	59626.7	-1476.2	302.381	436.645	0	0	0	0	0	0	0	200	903	0	0	0	0	0	0	0	603	903	0
722	3	15.0635	5.8545	-581.18	-78758.3	59809.8	-1521.97	302.911	435.515	0	0	0	0	0	0	0	200	903	0	0	0	0	0	0	0	603	903	0
722	4	15.6739	5.09156	-583.621	-78300.5	59504.6	-1338.87	301.958	434.163	0	0	0	0	0	0	0	200	903	0	0	0	0	0	0	0	603	903	0
722	5	15.8264	5.24415	-584.842	-78666.7	59565.7	-1476.2	301.849	434.509	0	0	0	0	0	0	0	200	903	0	0	0	0	0	0	0	603	903	0
722	6	16.1316	5.09156	-587.588	-78025.9	59931.9	-1109.99	301.996	432.79	0	0	0	0	0	0	0	200	903	0	0	0	0	0	0	0	603	903	0
722	7	16.5894	5.39673	-586.978	-78025.9	60176	-1109.99	302.518	432.928	0	0	0	0	0	0	0	200	903	0	0	0	0	0	0	0	603	903	0
722	8	15.979	6.00708	-587.283	-78483.6	59748.8	-926.881	301.738	433.638	0	0	0	0	0	0	0	200	903	0	0	0	0	0	0	0	603	903	0
722	9	15.979	7.0752	-588.199	-78300.5	60176	-1430.42	302.306	433.119	0	0	0	0	0	0	0	200	903	0	0	0	0	0	0	0	603	903	0
723	0	16.5894	6.77002	-586.368	-78208.9	60115	-1338.87	302.521	433.379	0	0	0	0	0	0	0	200	903	0	0	0	0	0	0	0	603	903	0
723	1	16.2842	7.0752	-587.588	-77659.6	59931.9	-1018.43	301.996	432.167	0	0	0	0	0	0	0	200	903	0	0	0	0	0	0	0	603	903	0
723	2	16.5894	7.38038	-586.368	-77384.9	59992.9	-926.881	302.313	431.973	0	0	0	0	0	0	0	200	903	0	0	0	0	0	0	0	603	903	0
723	3	16.4368	6.61744	-588.199	-77568.1	60054	-972.658	302.098	431.874	0	0	0	0	0	0	0	200	903	0	0	0	0	0	0	0	603	903	0
723	4	16.4368	7.53296	-588.504	-77751.2	59992.9	-1064.21	301.941	432.117	0	0	0	0	0	0	0	200	903	0	0	0	0	0	0	0	603	903	0
723	5	16.742	9.21143	-590.945	-77751.2	60359.1	-1109.99	302.14	431.571	0	0	0	0	0	0	0	200	903	0	0	0	0	0	0	0	603	903	0
723	6	17.0472	8.44849	-591.861	-77751.2	59809.8	-1064.21	301.054	431.367	0	0	0	0	0	0	0	200	903	0	0	0	0	0	0	0	603	903	0
723	7	17.3523	9.36402	-590.03	-77018.7	60481.2	-743.776	302.505	430.534	0	0	0	0	0	0	0	200	903	0	0	0	0	0	0	0	603	903	0
723	8	17.1997	9.21143	-591.556	-76377.9	59809.8	-972.658	301.106	429.114	0	0	0	0	0	0	0	200	903	0	0	0	0	0	0	0	603	903	0
723	9	16.2842	8.14332	-592.471	-76469.5	60054	-926.881	301.362	429.069	0	0	0	0	0	0	0	200	903	0	0	0	0	0	0	0	603	903	0
724	0	17.5049	9.51661	-590.64	-77110.3	60115	-926.881	301.779	430.554	0	0	0	0	0	0	0	200	903	0	0	0	0	0	0	0	603	903	0
724	1	16.742	10.7373	-591.556	-75828.6	60237.1	-743.776	301.828	428.185	0	0	0	0	0	0	0	200	903	0	0	0	0	0	0	0	603	903	0
724	2	16.5894	8.60108	-589.419	-76927.2	60298.1	-606.447	302.301	430.514	0	0	0	0	0	0	0	200	903	0	0	0	0	0	0	0	603	903	0
724	3	17.6575	11.6528	-594.302	-76377.9	60298.1	-469.118	301.46	428.517	0	0	0	0	0	0	0	200	903	0	0	0	0	0	0	0	603	903	0
724	4	18.2679	10.8899	-591.861	-75920.1	60237.1	-560.67	301.776	428.274	0	0	0	0	0	0	0	200	903	0	0	0	0	0	0	0	603	903	0
724	5	17.8101	9.97437	-594.607	-75553.9	60664.3	-194.459	302.024	427.065	0	0	0	0	0	0	0	200	903	0	0	0	0	0	0	0	603	903	0
724	6	18.1153	11.5002	-596.133	-76011.7	60115	-697.999	300.842	427.508	0	0	0	0	0	0	0	200	903	0	0	0	0	0	0	0	603	903	0
724	7	17.5049	12.2632	-596.438	-75920.1	60237.1	-240.236	300.995	427.289	0	0	0	0	0	0	0	200	903	0	0	0	0	0	0	0	603	903	0
724	8	17.6575	12.8735	-594.607	-75737	60359.1	-514.894	301.511	427.373	0	0	0	0	0	0	0	200	903	0	0	0	0	0	0	0	603	903	0
724	9	19.1834	12.4158	-594.302	-75096.2	60237.1	-560.67	301.358	426.36	0	0	0	0	0	0	0	200	903	0	0	0	0	0	0	0	603	903	0
725	0	18.573	13.1787	-594.913	-74546.8	60725.3	-331.789	302.074	425.307	0	0	0	0	0	0	0	200	903	0	0	0	0	0	0	0	603	903	0
725	1	19.1834	14.2468	-595.523	-74730	60542.2	-194.459	301.662	425.486	0	0	0	0	0	0	0	200	903	0	0	0	0	0	0	0	603	903	0
725	2	19.0308	13.4839	-595.218	-75004.6	59809.8	-240.236	300.484	426.012	0	0	0	0	0	0	0	200	903	0	0	0	0	0	0	0	603	903	0
725	3	19.9463	14.7046	-594.913	-75370.8	60298.1	-102.907	301.356	426.692	0	0	0	0	0	0	0	200	903	0	0	0	0	0	0	0	603	903	0
725	4	19.6411	14.552	-596.133	-73997.5	60237.1	-240.236	301.046	424.129	0	0	0	0	0	0	0	200	903	0	0	0	0	0	0	0	603	903	0
725	5	20.0989	14.3994	-596.744	-73631.3	60298.1	-148.683	301.045	423.389	0	0	0	0	0	0	0	200	903	0	0	0	0	0	0	0	603	903	0
725	6	18.8782	15.3149	-597.964	-73448.2	60420.2	-286.012	301.043	422.83	0	0	0	0	0	0	0	200	903	0	0	0	0	0	0	0	603	903	0
725	7	19.6411	14.8572	-595.828	-74180.6	60115	-240.236	300.893	424.5	0	0	0	0	0	0	0	200	903	0	0	0	0	0	0	0	603	903	0
725	8	19.1834	15.1624	-596.744	-73906	60237.1	-148.683	300.943	423.849	0	0	0	0	0	0	0	200	903	0	0	0	0	0	0	0	603	903	0
725	9	21.4722	15.9253	-596.744	-73448.2	60298.1	-286.012	301.045	423.082	0	0	0	0	0	0	0	200	903	0	0	0	0	0	0	0	603	903	0
726	0	20.8618	16.6882	-596.133	-72715.8	60298.1	34.4225	301.149	421.979	0	0	0	0	0	0	0	200	903	0	0	0	0	0	0	0	603	903	0
726	1	20.8618	16.0779	-598.575	-72074.9	60420.2	125.975	300.94	420.411	0	0	0	0	0	0	0	200	903	0	0	0	0	0	0	0	603	903	0
726	2	20.2515	15.4675	-598.88	-72074.9	59931.9	-102.907	300.073	420.35	0	0	0	0	0	0	0	200	903	0	0	0	0	0	0	0	603	903	0
726	3	19.7937	16.6882	-598.88	-72532.7	59992.9	-11.3538	300.175	421.114	0	0	0	0	0	0	0	200	903	0	0	0	0	0	0	0	603	903	0
726	4	20.5567	17.6038	-600.406	-72349.5	59931.9	217.528	299.819	420.501	0	0	0	0	0	0	0	200	903	0	0	0	0	0	0	0	603	903	0
726	5	21.93	17.4512	-597.964	-72166.5	59931.9	583.739	300.227	420.687	0	0	0	0	0	0	0	200	903	0	0	0	0	0	0	0	603	903	0
726	6	20.4041	17.9089	-595.218	-71342.5	60115	34.4225	300.997	419.86	0	0	0	0	0	0	0	200	903	0	0	0	0	0	0	0	603	903	0
726	7	20.8618	17.6038	-597.049	-70152.3	60054	217.528	300.585	417.498	0	0	0	0	0	0	0	200	903	0	0	0	0	0	0	0	603	903	0
726	8	21.0144	15.4675	-597.659	-70701.6	59809.8	171.752	300.073	418.298	0	0	0	0	0	0	0	200	903	0	0	0	0	0	0	0	603	903	0
726	9	21.6248	18.2141	-599.185	-71067.8	59992.9	80.1989	300.124	418.608	0	0	0	0	0	0	0	200	903	0	0	0	0	0	0	0	603	903	0
727	0	21.6248	18.8245	-600.406	-71250.9	59748.8	446.41	299.514	418.671	0	0	0	0	0	0	0	200	903	0	0	0	0	0	0	0	603	903	0
727	1	20.8618	19.5874	-599.49	-71067.8	59687.7	217.528	299.564	418.547	0	0	0	0	0	0	0	200	903	0	0	0	0	0	0	0	603	903	0
727	2	20.7093	19.8926	-597.964	-69603	59809.8	354.857	300.022	416.4	0	0	0	0	0	0	0	200	903	0	0	0	0	0	0	0	603	903	0
727	3	22.0826	19.1296	-599.795	-69328.3	59626.7	354.857	299.412	415.587	0	0	0	0	0	0	0	200	903	0	0	0	0	0	0	0	603	903	0
727	4	21.0144	18.9771	-600.711	-70243.9	60481.2	400.634	300.683	416.935	0	0	0	0	0	0	0	200	903	0	0	0	0	0	0	0	603	903	0
727	5	21.3196	19.1296	-600.101	-70060.7	59809.8	812.621	299.666	416.748	0	0	0	0	0	0	0	200	903	0	0	0	0	0	0	0	603	903	0
727	6	21.6248	20.1978	-599.49	-69877.6	59626.7	537.963	299.462	416.562	0	0	0	0	0	0	0	200	903	0	0	0	0	0	0	0	603	903	0
727	7	21.7774	20.6555	-601.932	-69145.2	60054	537.963	299.769	414.872	0	0	0	0	0	0	0	200	903	0	0	0	0	0	0	0	603	903	0
727	8	22.0826	21.2659	-601.932	-68412.8	59931.9	583.739	299.566	413.655	0	0	0	0	0	0	0	200	903	0	0	0	0	0	0	0	603	903	0
727	9	21.4722	19.8926	-602.847	-68595.9	59260.5	629.515	298.301	413.787	0	0	0	0	0	0	0	200	903	0	0	0	0	0	0	0	603	903	0
728	0	21.0144	19.1296	-603.763	-68504.4	59260.5	766.844	298.152	413.462	0	0	0	0	0	0	0	200	903	0	0	0	0	0	0	0	603	903	0
728	1	22.8455	20.6555	-601.932	-68595.9	59870.8	858.397	299.465	413.96	0	0	0	0	0	0	0	200	903	0	0	0	0	0	0	0	603	903	0
728	2	20.8618	21.571	-603.457	-68595.9	59626.7	904.174	298.808	413.671	0	0	0	0	0	0	0	200	903	0	0	0	0	0	0	0	603	903	0
728	3	20.8618	22.4866	-605.594	-67955	60054	949.95	299.165	412.212	0	0	0	0	0	0	0	200	903	0	0	0	0	0	0	0	603	903	0
728	4	21.3196	22.4866	-606.204	-67771.9	59626.7	629.515	298.361	411.797	0	0	0	0	0	0	0	200	903	0	0	0	0	0	0	0	603	903	0
728	5	21.167	21.571	-607.12	-67222.6	59748.8	995.726	298.414	410.724	0	0	0	0	0	0	0	200	903	0	0	0	0	0	0	0	603	903	0
728	6	21.7774	20.8081	-608.951	-67314.1	59931.9	1270.38	298.418	410.541	0	0	0	0	0	0	0	200	903	0	0	0	0	0	0	0	603	903	0
728	7	21.3196	22.6392	-609.256	-67680.4	59870.8	949.95	298.269	411.087	0	0	0	0	0	0	0	200	903	0	0	0	0	0	0	0	603	903	0
728	8	21.4722	23.2495	-610.171	-67680.4	59748.8	949.95	297.921	410.92	0	0	0	0	0	0	0	200	903	0	0	0	0	0	0	0	603	903	0
728	9	20.2515	23.2495	-610.782	-67680.4	59809.8	1087.28	297.923	410.809	0	0	0	0	0	0	0	200	903	0	0	0	0	0	0	0	603	903	0
729	0	20.7093	23.2495	-612.308	-67588.8	60054	1041.5	298.078	410.384	0	0	0	0	0	0	0	200	903	0	0	0	0	0	0	0	603	903	0
729	1	20.2515	22.9443	-612.613	-66581.7	60115	1270.38	298.129	408.685	0	0	0	0	0	0	0	200	903	0	0	0	0	0	0	0	603	903	0
729	2	21.0144	22.6392	-612.002	-65940.9	59809.8	1499.27	297.728	407.746	0	0	0	0	0	0	0	200	903	0	0	0	0	0	0	0	603	903	0
729	3	21.167	22.9443	-613.223	-66215.5	60176	1361.94	298.131	407.98	0	0	0	0	0	0	0	200	903	0	0	0	0	0	0	0	603	903	0
729	4	20.2515	23.7073	-615.664	-66764.8	60054	1453.49	297.543	408.444	0	0	0	0	0	0	0	200	903	0	0	0	0	0	0	0	603	903	0
729	5	21.167	23.8599	-617.496	-66398.6	60054	1773.92	297.254	407.529	0	0	0	0	0	0	0	200	903	0	0	0	0	0	0	0	603	903	0
729	6	20.0989	24.6228	-620.547	-66490.2	59687.7	1865.48	296.186	407.148	0	0	0	0	0	0	0	200	903	0	0	0	0	0	0	0	603	903	0
729	7	20.2515	24.6228	-617.801	-65849.3	60298.1	1636.6	297.601	406.587	0	0	0	0	0	0	0	200	903	0	0	0	0	0	0	0	603	903	0
729	8	19.7937	24.928	-621.158	-65849.3	60176	1819.7	296.877	406.011	0	0	0	0	0	0	0	200	903	0	0	0	0	0	0	0	603	903	0
729	9	19.4886	24.4702	-621.158	-65391.5	60481.2	1819.7	297.369	405.274	0	0	0	0	0	0	0	200	903	0	0	0	0	0	0	0	603	903	0
730	0	19.7937	25.2332	-622.073	-65300	60420.2	1773.92	297.127	404.972	0	0	0	0	0	0	0	200	903	0	0	0	0	0	0	0	603	903	0
730	1	18.7256	24.928	-622.684	-65757.8	60664.3	2231.69	297.424	405.604	0	0	0	0	0	0	0	200	903	0	0	0	0	0	0	0	603	903	0
730	2	19.7937	25.6909	-622.378	-65849.3	60481.2	1682.37	297.178	405.803	0	0	0	0	0	0	0	200	903	0	0	0	0	0	0	0	603	903	0
730	3	19.336	25.5383	-624.82	-66032.4	60603.3	2002.81	296.993	405.682	0	0	0	0	0	0	0	200	903	0	0	0	0	0	0	0	603	903	0
730	4	19.336	25.9961	-627.566	-65666.2	61030.5	2002.81	297.25	404.636	0	0	0	0	0	0	0	200	903	0	0	0	0	0	0	0	603	903	0
730	5	19.6411	26.6064	-629.092	-64567.6	60908.4	2048.58	296.82	402.636	0	0	0	0	0	0	0	200	903	0	0	0	0	0	0	0	603	903	0
730	6	19.0308	26.6064	-630.313	-64476	60847.4	2460.57	296.535	402.292	0	0	0	0	0	0	0	200	903	0	0	0	0	0	0	0	603	903	0
730	7	19.1834	26.759	-631.228	-64750.7	60908.4	2369.02	296.492	402.579	0	0	0	0	0	0	0	200	903	0	0	0	0	0	0	0	603	903	0
730	8	20.4041	26.9116	-630.923	-65208.4	61335.7	2277.46	297.216	403.354	0	0	0	0	0	0	0	200	903	0	0	0	0	0	0	0	603	903	0
730	9	18.573	27.8272	-632.754	-64476	61213.6	2460.57	296.742	401.897	0	0	0	0	0	0	0	200	903	0	0	0	0	0	0	0	603	903	0
731	0	19.4886	28.4375	-632.449	-64659.1	61030.5	2506.35	296.499	402.236	0	0	0	0	0	0	0	200	903	0	0	0	0	0	0	0	603	903	0
731	1	18.4204	28.8953	-633.67	-64476	61030.5	2597.9	296.313	401.75	0	0	0	0	0	0	0	200	903	0	0	0	0	0	0	0	603	903	0
731	2	19.6411	28.2849	-637.332	-63560.5	60420.2	2597.9	294.802	399.729	0	0	0	0	0	0	0	200	903	0	0	0	0	0	0	0	603	903	0
731	3	18.8782	27.8272	-639.163	-63011.2	61213.6	2735.23	295.772	398.584	0	0	0	0	0	0	0	200	903	0	0	0	0	0	0	0	603	903	0
731	4	17.8101	28.5901	-638.553	-63743.6	61457.8	2597.9	296.245	399.825	0	0	0	0	0	0	0	200	903	0	0	0	0	0	0	0	603	903	0
731	5	17.3523	29.5056	-640.994	-64018.2	61579.8	2689.45	296.069	399.873	0	0	0	0	0	0	0	200	903	0	0	0	0	0	0	0	603	903	0
731	6	18.8782	29.9634	-640.079	-64018.2	61030.5	2735.23	295.348	400.016	0	0	0	0	0	0	0	200	903	0	0	0	0	0	0	0	603	903	0
731	7	17.0472	30.2686	-641.299	-64018.2	61518.8	2781	295.928	399.826	0	0	0	0	0	0	0	200	903	0	0	0	0	0	0	0	603	903	0
731	8	18.4204	30.8789	-642.825	-63377.4	61579.8	2781	295.796	398.592	0	0	0	0	0	0	0	200	903	0	0	0	0	0	0	0	603	903	0
731	9	18.573	31.1841	-645.267	-63285.8	61824	3238.77	295.812	398.077	0	0	0	0	0	0	0	200	903	0	0	0	0	0	0	0	603	903	0
732	0	19.1834	31.3367	-644.351	-63102.7	61579.8	2872.56	295.569	397.932	0	0	0	0	0	0	0	200	903	0	0	0	0	0	0	0	603	903	0
732	1	17.6575	31.1841	-648.623	-62553.4	61518.8	3192.99	294.845	396.44	0	0	0	0	0	0	0	200	903	0	0	0	0	0	0	0	603	903	0
732	2	18.2679	31.6418	-644.046	-63468.9	61824	3650.76	295.993	398.547	0	0	0	0	0	0	0	200	903	0	0	0	0	0	0	0	603	903	0
732	3	16.742	32.8626	-651.675	-62645	62007.1	3284.55	295.15	396.129	0	0	0	0	0	0	0	200	903	0	0	0	0	0	0	0	603	903	0
732	4	16.8946	33.0151	-652.591	-63926.7	62007.1	3604.98	295.017	397.958	0	0	0	0	0	0	0	200	903	0	0	0	0	0	0	0	603	903	0
732	5	17.5049	33.4729	-652.286	-63377.4	62251.2	3284.55	295.436	397.162	0	0	0	0	0	0	0	200	903	0	0	0	0	0	0	0	603	903	0
732	6	17.0472	33.9307	-652.591	-62645	62434.3	3238.77	295.671	395.994	0	0	0	0	0	0	0	200	903	0	0	0	0	0	0	0	603	903	0
732	7	18.1153	34.541	-654.422	-62461.9	62190.2	3284.55	295.031	395.446	0	0	0	0	0	0	0	200	903	0	0	0	0	0	0	0	603	903	0
732	8	17.9627	33.0151	-656.558	-62736.5	62312.3	3467.65	294.907	395.554	0	0	0	0	0	0	0	200	903	0	0	0	0	0	0	0	603	903	0
732	9	18.8782	35.304	-659.305	-63194.3	62312.3	3513.43	294.512	395.85	0	0	0	0	0	0	0	200	903	0	0	0	0	0	0	0	603	903	0
733	0	17.5049	35.7617	-659.915	-62461.9	62373.3	3513.43	294.517	394.651	0	0	0	0	0	0	0	200	903	0	0	0	0	0	0	0	603	903	0
733	1	17.1997	36.5247	-660.831	-63285.8	62800.5	3559.2	295.033	395.767	0	0	0	0	0	0	0	200	903	0	0	0	0	0	0	0	603	903	0
733	2	16.5894	37.7454	-662.967	-62187.2	62556.4	3650.76	294.358	393.801	0	0	0	0	0	0	0	200	903	0	0	0	0	0	0	0	603	903	0
733	3	16.8946	37.898	-660.525	-62187.2	62556.4	3696.53	294.707	394.148	0	0	0	0	0	0	0	200	903	0	0	0	0	0	0	0	603	903	0
733	4	17.1997	37.2876	-664.187	-62645	62861.6	3742.31	294.644	394.318	0	0	0	0	0	0	0	200	903	0	0	0	0	0	0	0	603	903	0
733	5	17.3523	37.898	-665.103	-63011.2	62861.6	3879.64	294.514	394.739	0	0	0	0	0	0	0	200	903	0	0	0	0	0	0	0	603	903	0
733	6	18.573	39.4238	-666.629	-62553.4	63105.7	3925.41	294.664	393.835	0	0	0	0	0	0	0	200	903	0	0	0	0	0	0	0	603	903	0
733	7	18.2679	40.1868	-667.544	-63011.2	62922.6	3833.86	294.26	394.393	0	0	0	0	0	0	0	200	903	0	0	0	0	0	0	0	603	903	0
733	8	18.1153	40.4919	-670.291	-62370.3	62739.5	3604.98	293.6	393.05	0	0	0	0	0	0	0	200	903	0	0	0	0	0	0	0	603	903	0
733	9	17.5049	38.2031	-672.427	-62095.6	62983.6	3833.86	293.666	392.346	0	0	0	0	0	0	0	200	903	0	0	0	0	0	0	0	603	903	0
734	0	18.2679	40.7971	-673.343	-62004.1	62861.6	4108.52	293.357	392.084	0	0	0	0	0	0	0	200	903	0	0	0	0	0	0	0	603	903	0
734	1	17.0472	41.4075	-674.869	-62828.1	63594	4154.3	294.232	393.097	0	0	0	0	0	0	0	200	903	0	0	0	0	0	0	0	603	903	0
734	2	16.5894	41.8652	-671.512	-62919.6	63716.1	4016.97	294.885	393.699	0	0	0	0	0	0	0	200	903	0	0	0	0	0	0	0	603	903	0
734	3	17.3523	43.5437	-674.869	-62736.5	63349.9	4062.74	293.87	392.961	0	0	0	0	0	0	0	200	903	0	0	0	0	0	0	0	603	903	0
734	4	17.0472	44.1541	-673.953	-61180.1	63471.9	4016.97	294.179	390.778	0	0	0	0	0	0	0	200	903	0	0	0	0	0	0	0	603	903	0
734	5	18.1153	43.8489	-678.531	-62095.6	63471.9	4291.62	293.543	391.515	0	0	0	0	0	0	0	200	903	0	0	0	0	0	0	0	603	903	0
734	6	18.4204	44.1541	-680.362	-62278.7	63288.8	4566.28	293.022	391.538	0	0	0	0	0	0	0	200	903	0	0	0	0	0	0	0	603	903	0
734	7	18.1153	45.2222	-681.277	-61912.5	63716.1	4291.62	293.524	390.877	0	0	0	0	0	0	0	200	903	0	0	0	0	0	0	0	603	903	0
734	8	17.1997	45.5273	-683.108	-62736.5	63533	4291.62	293.006	391.84	0	0	0	0	0	0	0	200	903	0	0	0	0	0	0	0	603	903	0
734	9	17.8101	47.2058	-685.55	-62645	63838.1	4337.4	293.12	391.379	0	0	0	0	0	0	0	200	903	0	0	0	0	0	0	0	603	903	0
735	0	18.1153	48.2739	-686.77	-62370.3	63777.1	4566.28	292.865	390.817	0	0	0	0	0	0	0	200	903	0	0	0	0	0	0	0	603	903	0
735	1	19.0308	48.5791	-684.634	-62004.1	63655	4566.28	292.977	390.565	0	0	0	0	0	0	0	200	903	0	0	0	0	0	0	0	603	903	0
735	2	17.9627	48.5791	-686.465	-62645	64204.3	4520.51	293.529	391.257	0	0	0	0	0	0	0	200	903	0	0	0	0	0	0	0	603	903	0
735	3	17.5049	47.9688	-685.245	-61637.9	64021.2	4566.28	293.428	389.95	0	0	0	0	0	0	0	200	903	0	0	0	0	0	0	0	603	903	0
735	4	17.9627	50.105	-687.381	-62095.6	64082.3	4520.51	293.227	390.337	0	0	0	0	0	0	0	200	903	0	0	0	0	0	0	0	603	903	0
735	5	18.573	51.0205	-689.822	-61729.4	64143.3	4749.39	292.985	389.486	0	0	0	0	0	0	0	200	903	0	0	0	0	0	0	0	603	903	0
735	6	18.7256	51.7835	-690.738	-62645	63838.1	4703.61	292.42	390.693	0	0	0	0	0	0	0	200	903	0	0	0	0	0	0	0	603	903	0
735	7	18.7256	52.0886	-692.264	-61912.5	64265.4	4703.61	292.834	389.435	0	0	0	0	0	0	0	200	903	0	0	0	0	0	0	0	603	903	0
735	8	18.4204	52.5464	-692.569	-62370.3	64387.5	4703.61	292.969	390.057	0	0	0	0	0	0	0	200	903	0	0	0	0	0	0	0	603	903	0
735	9	18.573	53.6145	-694.095	-62095.6	64265.4	4795.16	292.589	389.463	0	0	0	0	0	0	0	200	903	0	0	0	0	0	0	0	603	903	0
736	0	18.4204	54.3774	-692.874	-62187.2	64387.5	4795.16	292.928	389.753	0	0	0	0	0	0	0	200	903	0	0	0	0	0	0	0	603	903	0
736	1	18.2679	54.6826	-693.484	-62553.4	64082.3	4795.16	292.406	390.202	0	0	0	0	0	0	0	200	903	0	0	0	0	0	0	0	603	903	0
736	2	19.0308	56.2085	-694.095	-62278.7	64143.3	4657.84	292.413	389.727	0	0	0	0	0	0	0	200	903	0	0	0	0	0	0	0	603	903	0
736	3	19.1834	55.1404	-695.315	-62278.7	64631.6	5024.05	292.953	389.569	0	0	0	0	0	0	0	200	903	0	0	0	0	0	0	0	603	903	0
736	4	19.9463	58.0396	-698.367	-61454.8	64753.7	5024.05	292.722	387.998	0	0	0	0	0	0	0	200	903	0	0	0	0	0	0	0	603	903	0
736	5	19.6411	57.7344	-698.062	-61912.5	64753.7	4749.39	292.762	388.692	0	0	0	0	0	0	0	200	903	0	0	0	0	0	0	0	603	903	0
736	6	18.8782	58.3447	-699.588	-61546.3	64448.5	4749.39	292.124	387.975	0	0	0	0	0	0	0	200	903	0	0	0	0	0	0	0	603	903	0
736	7	19.336	58.9551	-700.198	-61912.5	64326.4	5161.38	291.869	388.421	0	0	0	0	0	0	0	200	903	0	0	0	0	0	0	0	603	903	0
736	8	21.6248	60.0232	-698.977	-62095.6	64753.7	5298.7	292.641	388.838	0	0	0	0	0	0	0	200	903	0	0	0	0	0	0	0	603	903	0
736	9	19.4886	61.3965	-698.977	-62095.6	64509.5	5161.38	292.291	388.838	0	0	0	0	0	0	0	200	903	0	0	0	0	0	0	0	603	903	0
737	0	20.2515	60.1758	-698.367	-61912.5	64997.8	5024.05	293.071	388.653	0	0	0	0	0	0	0	200	903	0	0	0	0	0	0	0	603	903	0
737	1	20.4041	62.7698	-699.588	-61180.1	64936.8	5161.38	292.822	387.452	0	0	0	0	0	0	0	200	903	0	0	0	0	0	0	0	603	903	0
737	2	21.7774	62.7698	-703.555	-61271.7	64692.6	5390.26	291.951	387.089	0	0	0	0	0	0	0	200	903	0	0	0	0	0	0	0	603	903	0
737	3	20.8618	63.3801	-702.945	-61088.6	64997.8	5344.48	292.465	386.904	0	0	0	0	0	0	0	200	903	0	0	0	0	0	0	0	603	903	0
737	4	21.167	62.1594	-700.198	-61271.7	64448.5	5069.82	292.043	387.506	0	0	0	0	0	0	0	200	903	0	0	0	0	0	0	0	603	903	0
737	5	20.0989	64.4482	-703.25	-61546.3	64631.6	5252.93	291.904	387.517	0	0	0	0	0	0	0	200	903	0	0	0	0	0	0	0	603	903	0
737	6	21.0144	65.9741	-703.86	-61363.2	64631.6	5252.93	291.824	387.181	0	0	0	0	0	0	0	200	903	0	0	0	0	0	0	0	603	903	0
737	7	20.4041	66.4319	-702.64	-61180.1	64631.6	5298.7	291.984	387.072	0	0	0	0	0	0	0	200	903	0	0	0	0	0	0	0	603	903	0
737	8	21.3196	67.6526	-703.25	-61180.1	64814.7	5115.6	292.165	386.996	0	0	0	0	0	0	0	200	903	0	0	0	0	0	0	0	603	903	0
737	9	21.93	68.4155	-701.724	-60813.9	64509.5	5161.38	291.93	386.664	0	0	0	0	0	0	0	200	903	0	0	0	0	0	0	0	603	903	0
738	0	21.4722	68.7207	-701.724	-60356.2	64570.6	5252.93	292.017	386.011	0	0	0	0	0	0	0	200	903	0	0	0	0	0	0	0	603	903	0
738	1	22.0826	69.4837	-703.86	-60081.5	63960.2	5069.82	290.871	385.36	0	0	0	0	0	0	0	200	903	0	0	0	0	0	0	0	603	903	0
738	2	22.2351	69.9414	-704.471	-60722.4	64448.5	5298.7	291.485	386.196	0	0	0	0	0	0	0	200	903	0	0	0	0	0	0	0	603	903	0
738	3	21.93	70.7044	-700.198	-60997	64692.6	5436.03	292.392	387.114	0	0	0	0	0	0	0	200	903	0	0	0	0	0	0	0	603	903	0
738	4	21.6248	71.6199	-704.471	-60905.5	64387.5	5252.93	291.398	386.456	0	0	0	0	0	0	0	200	903	0	0	0	0	0	0	0	603	903	0
738	5	21.7774	71.0095	-704.165	-60630.8	64509.5	5252.93	291.611	386.103	0	0	0	0	0	0	0	200	903	0	0	0	0	0	0	0	603	903	0
738	6	21.7774	73.6035	-702.029	-59623.7	64875.7	5161.38	292.412	384.931	0	0	0	0	0	0	0	200	903	0	0	0	0	0	0	0	603	903	0
738	7	21.7774	73.2983	-702.029	-59440.6	64143.3	5207.15	291.368	384.67	0	0	0	0	0	0	0	200	903	0	0	0	0	0	0	0	603	903	0
738	8	22.3877	72.5354	-702.029	-59623.7	63960.2	5436.03	291.108	384.931	0	0	0	0	0	0	0	200	903	0	0	0	0	0	0	0	603	903	0
738	9	22.6929	74.5191	-702.029	-60173.1	64265.4	5619.14	291.542	385.713	0	0	0	0	0	0	0	200	903	0	0	0	0	0	0	0	603	903	0
739	0	23.6084	76.1975	-701.724	-59532.2	64082.3	5664.92	291.321	384.837	0	0	0	0	0	0	0	200	903	0	0	0	0	0	0	0	603	903	0
739	1	23.4558	74.3665	-703.25	-59989.9	64509.5	5664.92	291.731	385.304	0	0	0	0	0	0	0	200	903	0	0	0	0	0	0	0	603	903	0
739	2	24.2188	76.8079	-701.724	-58891.3	64204.3	5161.38	291.495	383.924	0	0	0	0	0	0	0	200	903	0	0	0	0	0	0	0	603	903	0
739	3	22.6929	76.8079	-702.334	-58158.9	63838.1	5664.92	290.894	382.808	0	0	0	0	0	0	0	200	903	0	0	0	0	0	0	0	603	903	0
739	4	23.3033	77.4182	-702.334	-58799.7	63960.2	5481.81	291.068	383.72	0	0	0	0	0	0	0	200	903	0	0	0	0	0	0	0	603	903	0
739	5	23.6084	78.3337	-700.809	-59349.1	64021.2	5573.36	291.353	384.687	0	0	0	0	0	0	0	200	903	0	0	0	0	0	0	0	603	903	0
739	6	23.1507	79.2493	-699.588	-58799.7	64082.3	5481.81	291.6	384.049	0	0	0	0	0	0	0	200	903	0	0	0	0	0	0	0	603	903	0
739	7	23.4558	79.8596	-699.283	-58799.7	64021.2	5390.26	291.553	384.086	0	0	0	0	0	0	0	200	903	0	0	0	0	0	0	0	603	903	0
739	8	23.4558	80.47	-698.977	-58250.4	63349.9	5390.26	290.632	383.337	0	0	0	0	0	0	0	200	903	0	0	0	0	0	0	0	603	903	0
739	9	25.1343	80.6226	-700.198	-57334.9	63960.2	5802.25	291.346	381.884	0	0	0	0	0	0	0	200	903	0	0	0	0	0	0	0	603	903	0
740	0	24.8291	81.0803	-699.588	-58067.3	63716.1	5573.36	291.077	383.002	0	0	0	0	0	0	0	200	903	0	0	0	0	0	0	0	603	903	0
740	1	24.524	82.1484	-695.01	-58525.1	63533	5481.81	291.413	384.208	0	0	0	0	0	0	0	200	903	0	0	0	0	0	0	0	603	903	0
740	2	22.8455	83.064	-697.757	-57975.8	63777.1	5344.48	291.403	383.089	0	0	0	0	0	0	0	200	903	0	0	0	0	0	0	0	603	903	0
740	3	23.6084	82.9114	-698.367	-57884.2	62983.6	5481.81	290.187	382.885	0	0	0	0	0	0	0	200	903	0	0	0	0	0	0	0	603	903	0
740	4	24.0662	83.6743	-696.231	-57060.3	63349.9	5664.92	290.99	381.956	0	0	0	0	0	0	0	200	903	0	0	0	0	0	0	0	603	903	0
740	5	24.2188	83.9795	-696.231	-57609.6	63410.9	5573.36	291.077	382.745	0	0	0	0	0	0	0	200	903	0	0	0	0	0	0	0	603	903	0
740	6	24.6765	84.7424	-694.095	-57334.9	63288.8	5573.36	291.182	382.604	0	0	0	0	0	0	0	200	903	0	0	0	0	0	0	0	603	903	0
740	7	24.8291	85.2002	-691.958	-57334.9	63288.8	5436.03	291.463	382.859	0	0	0	0	0	0	0	200	903	0	0	0	0	0	0	0	603	903	0
740	8	25.1343	85.9631	-694.705	-56236.3	62617.4	5573.36	290.135	380.95	0	0	0	0	0	0	0	200	903	0	0	0	0	0	0	0	603	903	0
740	9	24.0662	86.8787	-693.484	-57334.9	63044.7	5710.69	290.91	382.677	0	0	0	0	0	0	0	200	903	0	0	0	0	0	0	0	603	903	0
741	0	24.8291	87.1838	-692.264	-56419.4	62739.5	5252.93	290.63	381.5	0	0	0	0	0	0	0	200	903	0	0	0	0	0	0	0	603	903	0
741	1	24.2188	87.0313	-691.958	-56419.4	62434.3	5619.14	290.228	381.536	0	0	0	0	0	0	0	200	903	0	0	0	0	0	0	0	603	903	0
741	2	25.1343	87.0313	-690.738	-56053.2	63044.7	5527.59	291.272	381.15	0	0	0	0	0	0	0	200	903	0	0	0	0	0	0	0	603	903	0
741	3	23.761	88.5571	-687.381	-55961.6	62678.5	5527.59	291.184	381.413	0	0	0	0	0	0	0	200	903	0	0	0	0	0	0	0	603	903	0
741	4	23.9136	87.1838	-684.024	-56053.2	62434.3	5802.25	291.275	381.946	0	0	0	0	0	0	0	200	903	0	0	0	0	0	0	0	603	903	0
741	5	24.8291	89.3201	-684.634	-56236.3	62373.3	5710.69	291.105	382.141	0	0	0	0	0	0	0	200	903	0	0	0	0	0	0	0	603	903	0
741	6	24.8291	90.5408	-683.414	-55137.6	62312.3	5664.92	291.178	380.68	0	0	0	0	0	0	0	200	903	0	0	0	0	0	0	0	603	903	0
741	7	25.5921	90.083	-683.108	-55137.6	62190.2	5848.02	291.04	380.716	0	0	0	0	0	0	0	200	903	0	0	0	0	0	0	0	603	903	0
741	8	25.5921	90.6934	-682.193	-54496.8	61885	5710.69	290.715	379.885	0	0	0	0	0	0	0	200	903	0	0	0	0	0	0	0	603	903	0
741	9	23.9136	91.4563	-675.784	-55046.1	61640.9	5710.69	291.214	381.455	0	0	0	0	0	0	0	200	903	0	0	0	0	0	0	0	603	903	0
742	0	23.4558	92.3718	-679.751	-54588.3	61396.7	5893.8	290.322	380.306	0	0	0	0	0	0	0	200	903	0	0	0	0	0	0	0	603	903	0
742	1	24.3714	92.8296	-680.057	-54313.7	61396.7	5939.58	290.282	379.866	0	0	0	0	0	0	0	200	903	0	0	0	0	0	0	0	603	903	0
742	2	24.0662	93.7451	-676.089	-53398.1	61457.8	5985.35	290.902	378.981	0	0	0	0	0	0	0	200	903	0	0	0	0	0	0	0	603	903	0
742	3	23.1507	93.4399	-675.174	-52574.2	61213.6	5802.25	290.664	377.868	0	0	0	0	0	0	0	200	903	0	0	0	0	0	0	0	603	903	0
742	4	24.8291	93.7451	-671.512	-52757.3	60847.4	5893.8	290.613	378.565	0	0	0	0	0	0	0	200	903	0	0	0	0	0	0	0	603	903	0
742	5	23.9136	94.5081	-670.901	-53489.7	60847.4	6031.13	290.695	379.728	0	0	0	0	0	0	0	200	903	0	0	0	0	0	0	0	603	903	0
742	6	25.1343	95.4236	-670.596	-52848.8	60481.2	6305.79	290.19	378.809	0	0	0	0	0	0	0	200	903	0	0	0	0	0	0	0	603	903	0
742	7	24.6765	95.271	-669.681	-53306.6	60359.1	6260.01	290.131	379.6	0	0	0	0	0	0	0	200	903	0	0	0	0	0	0	0	603	903	0
742	8	24.3714	96.6443	-666.629	-52024.8	60298.1	5985.35	290.452	378.042	0	0	0	0	0	0	0	200	903	0	0	0	0	0	0	0	603	903	0
742	9	22.8455	96.4917	-666.018	-50651.6	59809.8	5893.8	289.802	376.051	0	0	0	0	0	0	0	200	903	0	0	0	0	0	0	0	603	903	0
743	0	22.9981	95.7288	-664.493	-51658.6	59748.8	6305.79	289.916	377.741	0	0	0	0	0	0	0	200	903	0	0	0	0	0	0	0	603	903	0
743	1	22.6929	97.2546	-658.694	-52116.4	59748.8	6397.34	290.708	379.121	0	0	0	0	0	0	0	200	903	0	0	0	0	0	0	0	603	903	0
743	2	23.1507	98.3228	-658.084	-52207.9	58711.2	6260.01	289.215	379.333	0	0	0	0	0	0	0	200	903	0	0	0	0	0	0	0	603	903	0
743	3	22.6929	98.3228	-657.168	-51567.1	59565.7	6305.79	290.64	378.469	0	0	0	0	0	0	0	200	903	0	0	0	0	0	0	0	603	903	0
743	4	22.9981	99.5435	-652.896	-50376.9	58894.3	6168.46	290.205	377.159	0	0	0	0	0	0	0	200	903	0	0	0	0	0	0	0	603	903	0
743	5	22.3877	98.9331	-652.591	-49278.3	58650.1	6397.34	289.873	375.512	0	0	0	0	0	0	0	200	903	0	0	0	0	0	0	0	603	903	0
743	6	23.3033	99.3909	-654.117	-50560	58406	6305.79	289.29	377.295	0	0	0	0	0	0	0	200	903	0	0	0	0	0	0	0	603	903	0
743	7	22.8455	99.6961	-649.844	-50560	57978.8	6488.89	289.22	377.803	0	0	0	0	0	0	0	200	903	0	0	0	0	0	0	0	603	903	0
743	8	22.9981	100.306	-646.487	-49278.3	57673.6	6534.67	289.211	376.225	0	0	0	0	0	0	0	200	903	0	0	0	0	0	0	0	603	903	0
743	9	21.7774	101.375	-644.351	-49461.4	58039.8	6351.56	290.075	376.762	0	0	0	0	0	0	0	200	903	0	0	0	0	0	0	0	603	903	0
744	0	22.0826	101.985	-642.52	-48179.6	57246.3	6534.67	289.097	374.985	0	0	0	0	0	0	0	200	903	0	0	0	0	0	0	0	603	903	0
744	1	22.0826	102.9	-638.858	-48362.7	57185.3	6534.67	289.512	375.702	0	0	0	0	0	0	0	200	903	0	0	0	0	0	0	0	603	903	0
744	2	21.6248	101.68	-636.111	-48088.1	57063.2	6626.22	289.706	375.597	0	0	0	0	0	0	0	200	903	0	0	0	0	0	0	0	603	903	0
744	3	21.4722	102.9	-633.975	-47630.3	56391.8	6672	288.95	375.13	0	0	0	0	0	0	0	200	903	0	0	0	0	0	0	0	603	903	0
744	4	22.2351	102.595	-630.923	-48088.1	56330.8	6763.55	289.283	376.219	0	0	0	0	0	0	0	200	903	0	0	0	0	0	0	0	603	903	0
744	5	21.3196	103.053	-628.787	-47813.4	56025.6	6672	289.101	376.041	0	0	0	0	0	0	0	200	903	0	0	0	0	0	0	0	603	903	0
744	6	20.5567	100.764	-627.261	-47264.1	55537.4	6534.67	288.539	375.35	0	0	0	0	0	0	0	200	903	0	0	0	0	0	0	0	603	903	0
744	7	21.0144	102.748	-624.209	-46348.6	55598.4	6763.55	289.07	374.252	0	0	0	0	0	0	0	200	903	0	0	0	0	0	0	0	603	903	0
744	8	21.6248	103.511	-618.716	-45066.8	55659.4	7083.98	289.96	372.839	0	0	0	0	0	0	0	200	903	0	0	0	0	0	0	0	603	903	0
744	9	20.2515	103.358	-618.411	-45799.3	55171.1	6992.43	289.214	374.06	0	0	0	0	0	0	0	200	903	0	0	0	0	0	0	0	603	903	0
745	0	19.0308	103.969	-614.139	-46073.9	54804.9	6809.33	289.239	375.022	0	0	0	0	0	0	0	200	903	0	0	0	0	0	0	0	603	903	0
745	1	20.0989	104.731	-611.392	-44975.3	54194.6	6946.66	288.641	373.562	0	0	0	0	0	0	0	200	903	0	0	0	0	0	0	0	603	903	0
745	2	19.336	104.579	-608.34	-45158.4	54255.6	6946.66	289.186	374.232	0	0	0	0	0	0	0	200	903	0	0	0	0	0	0	0	603	903	0
745	3	18.7256	105.037	-604.983	-44334.4	53645.3	7495.97	288.672	373.282	0	0	0	0	0	0	0	200	903	0	0	0	0	0	0	0	603	903	0
745	4	19.336	104.884	-601.016	-43602	53279.1	7175.54	288.648	372.547	0	0	0	0	0	0	0	200	903	0	0	0	0	0	0	0	603	903	0
745	5	18.2679	104.426	-597.964	-43144.2	53279.1	7175.54	289.101	372.152	0	0	0	0	0	0	0	200	903	0	0	0	0	0	0	0	603	903	0
745	6	19.4886	104.731	-596.438	-43418.9	52546.6	7267.09	288.101	372.797	0	0	0	0	0	0	0	200	903	0	0	0	0	0	0	0	603	903	0
745	7	17.6575	105.342	-593.997	-42778	52546.6	7312.87	288.463	372.017	0	0	0	0	0	0	0	200	903	0	0	0	0	0	0	0	603	903	0
745	8	17.6575	105.647	-589.725	-42869.6	52180.4	7221.31	288.483	372.694	0	0	0	0	0	0	0	200	903	0	0	0	0	0	0	0	603	903	0
745	9	15.6739	105.494	-583.926	-42411.8	51814.2	7587.52	288.734	372.632	0	0	0	0	0	0	0	200	903	0	0	0	0	0	0	0	603	903	0
746	0	15.8264	105.8	-582.095	-40763.9	51142.8	7541.75	287.86	370.03	0	0	0	0	0	0	0	200	903	0	0	0	0	0	0	0	603	903	0
746	1	15.6739	105.037	-579.043	-40489.2	50898.7	7587.52	287.901	369.924	0	0	0	0	0	0	0	200	903	0	0	0	0	0	0	0	603	903	0
746	2	14.7583	105.647	-575.381	-41404.7	50959.7	7679.08	288.567	371.961	0	0	0	0	0	0	0	200	903	0	0	0	0	0	0	0	603	903	0
746	3	14.148	106.41	-569.888	-39848.3	50288.3	7679.08	288.242	369.923	0	0	0	0	0	0	0	200	903	0	0	0	0	0	0	0	603	903	0
746	4	14.4532	106.715	-565.005	-40672.3	49372.8	7679.08	287.385	371.986	0	0	0	0	0	0	0	200	903	0	0	0	0	0	0	0	603	903	0
746	5	14.7583	106.715	-562.564	-39299	49861.1	7541.75	288.632	369.857	0	0	0	0	0	0	0	200	903	0	0	0	0	0	0	0	603	903	0
746	6	14.148	107.783	-557.681	-39207.5	49311.8	7816.41	288.423	370.304	0	0	0	0	0	0	0	200	903	0	0	0	0	0	0	0	603	903	0
746	7	15.3687	106.41	-555.24	-38383.5	48579.3	7679.08	287.493	369.13	0	0	0	0	0	0	0	200	903	0	0	0	0	0	0	0	603	903	0
746	8	13.6902	105.647	-551.883	-38932.8	48396.2	7953.74	287.693	370.545	0	0	0	0	0	0	0	200	903	0	0	0	0	0	0	0	603	903	0
746	9	13.5376	105.037	-547.915	-38658.1	47969	7862.18	287.548	370.555	0	0	0	0	0	0	0	200	903	0	0	0	0	0	0	0	603	903	0
747	0	12.7747	106.868	-543.338	-38200.4	47908	8136.84	288.173	370.307	0	0	0	0	0	0	0	200	903	0	0	0	0	0	0	0	603	903	0
747	1	12.4695	107.173	-538.76	-36735.6	47419.7	7953.74	288.016	368.185	0	0	0	0	0	0	0	200	903	0	0	0	0	0	0	0	603	903	0
747	2	12.9273	107.783	-534.183	-36644	46565.2	7862.18	287.171	368.598	0	0	0	0	0	0	0	200	903	0	0	0	0	0	0	0	603	903	0
747	3	9.87552	105.952	-528.995	-36186.2	46199	7953.74	287.334	368.406	0	0	0	0	0	0	0	200	903	0	0	0	0	0	0	0	603	903	0
747	4	10.791	105.342	-522.281	-35636.9	45588.6	8228.39	287.288	368.233	0	0	0	0	0	0	0	200	903	0	0	0	0	0	0	0	603	903	0
747	5	11.4014	105.952	-519.534	-35728.5	45405.5	8228.39	287.397	368.77	0	0	0	0	0	0	0	200	903	0	0	0	0	0	0	0	603	903	0
747	6	10.791	106.41	-514.346	-35362.2	44917.2	8182.62	287.329	368.752	0	0	0	0	0	0	0	200	903	0	0	0	0	0	0	0	603	903	0
747	7	11.7066	106.868	-510.684	-34904.5	44429	8319.95	286.999	368.349	0	0	0	0	0	0	0	200	903	0	0	0	0	0	0	0	603	903	0
747	8	9.41776	105.952	-505.801	-33622.8	44184.8	8091.06	287.356	366.474	0	0	0	0	0	0	0	200	903	0	0	0	0	0	0	0	603	903	0
747	9	9.26517	104.884	-501.834	-32524.1	43696.5	8319.95	287.074	364.811	0	0	0	0	0	0	0	200	903	0	0	0	0	0	0	0	603	903	0
748	0	8.95999	103.511	-496.646	-32798.8	42964.1	8365.72	286.509	366.041	0	0	0	0	0	0	0	200	903	0	0	0	0	0	0	0	603	903	0
748	1	7.89188	104.579	-490.848	-33073.4	42475.8	7907.96	286.536	367.38	0	0	0	0	0	0	0	200	903	0	0	0	0	0	0	0	603	903	0
748	2	8.80741	104.884	-485.965	-32615.7	42170.7	8228.39	286.777	367.115	0	0	0	0	0	0	0	200	903	0	0	0	0	0	0	0	603	903	0
748	3	7.43411	102.9	-479.861	-31883.2	41682.4	8365.72	286.863	366.443	0	0	0	0	0	0	0	200	903	0	0	0	0	0	0	0	603	903	0
748	4	6.366	103.969	-476.199	-30693.1	41255.1	8228.39	286.634	364.454	0	0	0	0	0	0	0	200	903	0	0	0	0	0	0	0	603	903	0
748	5	6.97635	103.511	-470.401	-29594.4	40644.8	8182.62	286.405	362.913	0	0	0	0	0	0	0	200	903	0	0	0	0	0	0	0	603	903	0
748	6	6.06082	103.206	-463.077	-30326.9	40400.6	8136.84	287.244	365.49	0	0	0	0	0	0	0	200	903	0	0	0	0	0	0	0	603	903	0
748	7	6.51859	102.137	-461.551	-30143.7	39973.4	8411.5	286.607	365.31	0	0	0	0	0	0	0	200	903	0	0	0	0	0	0	0	603	903	0
748	8	6.06082	101.985	-456.363	-29136.7	39057.9	8274.17	285.585	363.845	0	0	0	0	0	0	0	200	903	0	0	0	0	0	0	0	603	903	0
748	9	5.29788	102.137	-450.87	-29411.3	38447.5	8411.5	285.274	365.232	0	0	0	0	0	0	0	200	903	0	0	0	0	0	0	0	603	903	0
749	0	4.68753	101.222	-445.071	-28770.5	38020.3	8274.17	285.425	364.642	0	0	0	0	0	0	0	200	903	0	0	0	0	0	0	0	603	903	0
749	1	4.07718	101.222	-439.273	-27671.8	37409.9	8228.39	285.163	362.995	0	0	0	0	0	0	0	200	903	0	0	0	0	0	0	0	603	903	0
749	2	5.1453	100.459	-431.338	-26756.3	37593	8182.62	287.154	362.031	0	0	0	0	0	0	0	200	903	0	0	0	0	0	0	0	603	903	0
749	3	2.5513	98.0176	-426.761	-26115.4	36433.3	8274.17	285.372	361.195	0	0	0	0	0	0	0	200	903	0	0	0	0	0	0	0	603	903	0
749	4	2.5513	98.1702	-420.657	-26939.4	36006.1	7953.74	285.595	364.041	0	0	0	0	0	0	0	200	903	0	0	0	0	0	0	0	603	903	0
749	5	3.31424	98.6279	-414.554	-25474.6	35578.9	8365.72	285.824	361.451	0	0	0	0	0	0	0	200	903	0	0	0	0	0	0	0	603	903	0
749	6	3.00907	98.9331	-407.229	-25566.1	34907.5	8228.39	285.719	362.781	0	0	0	0	0	0	0	200	903	0	0	0	0	0	0	0	603	903	0
749	7	3.77201	97.5598	-403.262	-24650.6	34663.3	8411.5	285.957	361.128	0	0	0	0	0	0	0	200	903	0	0	0	0	0	0	0	603	903	0
749	8	1.94095	96.9495	-398.379	-24009.7	34358.2	8182.62	286.245	360.268	0	0	0	0	0	0	0	200	903	0	0	0	0	0	0	0	603	903	0
749	9	0.872836	94.6607	-392.581	-23368.8	33198.5	7862.18	284.565	359.526	0	0	0	0	0	0	0	200	903	0	0	0	0	0	0	0	603	903	0
750	0	0.872836	93.5925	-386.172	-23368.8	32221.9	8457.27	283.439	360.514	0	0	0	0	0	0	0	200	903	0	0	0	0	0	0	0	603	903	0
750	1	-0.0426918	92.9822	-380.374	-23185.7	32160.9	8182.62	284.551	360.955	0	0	0	0	0	0	0	200	903	0	0	0	0	0	0	0	603	903	0
750	2	0.720248	93.1348	-372.439	-22544.9	31672.6	7724.85	285.041	360.533	0	0	0	0	0	0	0	200	903	0	0	0	0	0	0	0	603	903	0
750	3	-0.958219	92.3718	-364.81	-21629.3	31184.3	8228.39	285.481	359.289	0	0	0	0	0	0	0	200	903	0	0	0	0	0	0	0	603	903	0
750	4	-1.41598	90.846	-359.317	-20622.3	30574	7816.41	285.089	357.393	0	0	0	0	0	0	0	200	903	0	0	0	0	0	0	0	603	903	0
750	5	-1.56857	89.0149	-352.908	-20347.6	30207.8	7907.96	285.597	357.657	0	0	0	0	0	0	0	200	903	0	0	0	0	0	0	0	603	903	0
750	6	-1.11081	87.1838	-346.805	-19706.7	29597.4	7999.51	285.343	356.824	0	0	0	0	0	0	0	200	903	0	0	0	0	0	0	0	603	903	0
750	7	-0.805631	87.489	-338.26	-19889.8	28742.9	7770.63	284.973	358.801	0	0	0	0	0	0	0	200	903	0	0	0	0	0	0	0	603	903	0
750	8	-0.347868	86.1157	-334.292	-18516.5	28010.5	7770.63	283.79	355.39	0	0	0	0	0	0	0	200	903	0	0	0	0	0	0	0	603	903	0
750	9	-2.02633	83.3691	-328.189	-18791.2	27766.3	7724.85	284.605	357.257	0	0	0	0	0	0	0	200	903	0	0	0	0	0	0	0	603	903	0
751	0	-2.17892	84.2847	-322.085	-17509.5	26850.8	7679.08	283.366	354.363	0	0	0	0	0	0	0	200	903	0	0	0	0	0	0	0	603	903	0
751	1	-4.16256	82.301	-312.93	-16868.6	26789.8	7495.97	285.609	353.905	0	0	0	0	0	0	0	200	903	0	0	0	0	0	0	0	603	903	0
751	2	-4.00998	79.8596	-308.352	-17051.7	25508	7312.87	282.724	355.299	0	0	0	0	0	0	0	200	903	0	0	0	0	0	0	0	603	903	0
751	3	-3.7048	79.0967	-301.639	-16410.8	25752.2	7404.42	285.374	354.406	0	0	0	0	0	0	0	200	903	0	0	0	0	0	0	0	603	903	0
751	4	-3.09445	78.1812	-293.704	-15953.1	25080.8	7038.21	285.395	354.317	0	0	0	0	0	0	0	200	903	0	0	0	0	0	0	0	603	903	0
751	5	-4.16256	76.9605	-287.906	-15220.6	24287.3	7129.76	284.359	352.867	0	0	0	0	0	0	0	200	903	0	0	0	0	0	0	0	603	903	0
751	6	-4.16256	74.3665	-278.14	-14762.9	23860.1	7038.21	285.784	353.077	0	0	0	0	0	0	0	200	903	0	0	0	0	0	0	0	603	903	0
751	7	-3.24704	72.8406	-275.393	-14396.7	23127.7	6946.66	283.98	352.277	0	0	0	0	0	0	0	200	903	0	0	0	0	0	0	0	603	903	0
751	8	-3.55221	71.6199	-268.374	-14579.8	23005.6	6855.1	285.722	354.326	0	0	0	0	0	0	0	200	903	0	0	0	0	0	0	0	603	903	0
751	9	-3.24704	70.7044	-264.102	-13298	22578.4	6397.34	285.491	350.352	0	0	0	0	0	0	0	200	903	0	0	0	0	0	0	0	603	903	0
752	0	-4.9255	68.7207	-257.693	-12840.3	21662.8	6397.34	284.064	349.828	0	0	0	0	0	0	0	200	903	0	0	0	0	0	0	0	603	903	0
752	1	-4.62033	66.7371	-249.148	-12291	21052.5	6488.89	284.498	349.332	0	0	0	0	0	0	0	200	903	0	0	0	0	0	0	0	603	903	0
752	2	-5.38327	63.6853	-244.571	-11924.7	20686.3	6397.34	284.582	348.758	0	0	0	0	0	0	0	200	903	0	0	0	0	0	0	0	603	903	0
752	3	-4.9255	63.075	-237.857	-11558.5	19892.8	6122.68	283.634	348.594	0	0	0	0	0	0	0	200	903	0	0	0	0	0	0	0	603	903	0
752	4	-3.7048	61.5491	-229.922	-11375.4	19282.5	6168.46	283.865	349.475	0	0	0	0	0	0	0	200	903	0	0	0	0	0	0	0	603	903	0
752	5	-5.53586	60.9387	-223.819	-10734.6	18794.2	5436.03	283.971	347.961	0	0	0	0	0	0	0	200	903	0	0	0	0	0	0	0	603	903	0
752	6	-5.84103	57.2766	-216.495	-10551.5	17756.6	5710.69	282.019	348.738	0	0	0	0	0	0	0	200	903	0	0	0	0	0	0	0	603	903	0
752	7	-4.77292	56.8189	-211.612	-9635.93	17756.6	5802.25	283.911	345.536	0	0	0	0	0	0	0	200	903	0	0	0	0	0	0	0	603	903	0
752	8	-4.16256	55.1404	-205.203	-9178.16	17451.4	5664.92	285.045	344.727	0	0	0	0	0	0	0	200	903	0	0	0	0	0	0	0	603	903	0
752	9	-3.24704	53.9197	-199.71	-8628.85	16902.1	5390.26	284.633	343.207	0	0	0	0	0	0	0	200	903	0	0	0	0	0	0	0	603	903	0
753	0	-5.07809	51.3257	-193.606	-8720.4	15803.4	4886.72	281.627	345.042	0	0	0	0	0	0	0	200	903	0	0	0	0	0	0	0	603	903	0
753	1	-4.9255	50.8679	-187.808	-8628.85	15498.3	4978.27	282.522	345.945	0	0	0	0	0	0	0	200	903	0	0	0	0	0	0	0	603	903	0
753	2	-5.38327	48.5791	-182.925	-7621.77	15315.2	4795.16	283.724	341.666	0	0	0	0	0	0	0	200	903	0	0	0	0	0	0	0	603	903	0
753	3	-4.31515	47.0532	-177.432	-7255.56	14338.6	4886.72	280.812	340.892	0	0	0	0	0	0	0	200	903	0	0	0	0	0	0	0	603	903	0
753	4	-3.39963	45.0696	-170.108	-7072.45	14277.6	4428.95	283.932	341.576	0	0	0	0	0	0	0	200	903	0	0	0	0	0	0	0	603	903	0
753	5	-5.23068	42.9334	-163.699	-6980.9	13850.3	4291.62	284.608	342.645	0	0	0	0	0	0	0	200	903	0	0	0	0	0	0	0	603	903	0
753	6	-5.23068	42.0178	-158.206	-5790.71	13056.9	4016.97	282.531	336.602	0	0	0	0	0	0	0	200	903	0	0	0	0	0	0	0	603	903	0
753	7	-3.85739	40.3394	-154.849	-5790.71	12873.8	4016.97	283.138	337.396	0	0	0	0	0	0	0	200	903	0	0	0	0	0	0	0	603	903	0
753	8	-4.16256	39.2712	-148.135	-5424.5	12202.4	3650.76	282.373	336.619	0	0	0	0	0	0	0	200	903	0	0	0	0	0	0	0	603	903	0
753	9	-3.7048	36.9824	-144.778	-5149.84	11653.1	3971.19	280.489	335.571	0	0	0	0	0	0	0	200	903	0	0	0	0	0	0	0	603	903	0
754	0	-4.00998	36.0669	-138.064	-4783.63	11653.1	3696.53	284.403	334.648	0	0	0	0	0	0	0	200	903	0	0	0	0	0	0	0	603	903	0
754	1	-3.24704	34.2358	-133.182	-4417.42	10798.6	3421.87	281.082	333.168	0	0	0	0	0	0	0	200	903	0	0	0	0	0	0	0	603	903	0
754	2	-3.24704	31.4893	-127.994	-4508.97	10798.6	3330.32	284.368	335.228	0	0	0	0	0	0	0	200	903	0	0	0	0	0	0	0	603	903	0
754	3	-3.55221	32.0996	-124.637	-4692.08	9944.07	3147.22	279.785	337.646	0	0	0	0	0	0	0	200	903	0	0	0	0	0	0	0	603	903	0
754	4	-3.7048	29.8108	-119.754	-4417.42	9638.9	2918.33	280.489	336.888	0	0	0	0	0	0	0	200	903	0	0	0	0	0	0	0	603	903	0
754	5	-3.24704	28.8953	-113.04	-3501.89	9699.93	2781	285.81	330.979	0	0	0	0	0	0	0	200	903	0	0	0	0	0	0	0	603	903	0
[truncated: 2,494 more rows]
