# Supplementary material for: The Effects of an Extemporaneous Speech Dual-task on Older Adult Gait Control
Source: Research Square preprint supplement (doi:10.21203/rs.3.rs-7674245/v1), 2025-11-18
Supplement: Supplementary file 163 [file Over4ground5.xlsx]

## Sheet: Sheet1
Trajectories
		04:LFHD			04:RFHD			04:LBHD			04:RBHD			04:C7			04:T10			04:CLAV			04:STRN			04:RBAK			04:LSHO			04:LUPA			04:LELB			04:LFRM			04:LWRA			04:LWRB			04:LFIN
Frame	Sub Frame	X	Y	Z	X	Y	Z	X	Y	Z	X	Y	Z	X	Y	Z	X	Y	Z	X	Y	Z	X	Y	Z	X	Y	Z	X	Y	Z	X	Y	Z	X	Y	Z	X	Y	Z	X	Y	Z	X	Y	Z	X	Y	Z
		mm	mm	mm	mm	mm	mm	mm	mm	mm	mm	mm	mm	mm	mm	mm	mm	mm	mm	mm	mm	mm	mm	mm	mm	mm	mm	mm	mm	mm	mm	mm	mm	mm	mm	mm	mm	mm	mm	mm	mm	mm	mm	mm	mm	mm	mm	mm	mm
533	0	197.177	1952.35	1577.15	79.8334	1946.22	1573.2	191.689	2119.03	1529.1	84.1056	2109.89	1523.74	143.212	2089.31	1434.58	148.068	2178.83	1158.12	157.89	1971.81	1337.91	164.705	1914.88	1139.87	64.9391	2182.17	1232.86	332.506	2036.32	1362.55	398.402	2108.06	1124.13	400.176	2124.1	1050.69	411.398	2065.33	883.642	360.625	2054.59	806.003	423.066	2091.36	797.383	396.02	2048.58	731.573
534	0	198.835	1940.65	1574.91	81.4341	1934.59	1571.01	193.371	2107.18	1526.49	85.7462	2098.11	1521.2	144.934	2077.27	1432.18	149.49	2167.12	1155.74	159.15	1959.93	1335.38	165.079	1903.54	1137.15	66.4871	2170.82	1230.75	333.981	2024.17	1359.62	399.173	2096.79	1121.35	400.546	2113.34	1047.92	411.972	2056.49	880.477	361.206	2046.76	802.816	423.772	2083.41	794.63	396.467	2041.65	728.351
535	0	200.546	1928.89	1572.86	83.0938	1922.89	1569.02	195.099	2095.28	1524.09	87.4349	2086.27	1518.89	146.668	2065.19	1429.97	150.899	2155.27	1153.53	160.467	1947.97	1333.08	165.579	1892	1134.68	68.0245	2159.3	1228.79	335.485	2011.99	1356.9	399.993	2085.34	1118.72	400.985	2102.37	1045.32	412.599	2047.31	877.514	361.851	2038.54	799.828	424.545	2075.05	792.049	396.979	2034.28	725.313
536	0	202.311	1917.08	1571.01	84.8125	1911.14	1567.25	196.871	2083.33	1521.9	89.1716	2074.39	1516.8	148.416	2053.07	1427.97	152.297	2143.28	1151.5	161.842	1935.94	1331	166.205	1880.26	1132.46	69.5511	2147.61	1226.99	337.017	1999.79	1354.4	400.861	2073.7	1116.25	401.491	2091.17	1042.9	413.278	2037.77	874.752	362.56	2029.93	797.04	425.387	2066.28	789.639	397.554	2026.5	722.458
537	0	204.129	1905.22	1569.36	86.59	1899.32	1565.69	198.689	2071.34	1519.92	90.956	2062.45	1514.93	150.177	2040.9	1426.17	153.682	2131.15	1149.63	163.274	1923.84	1329.15	166.958	1868.33	1130.49	71.0667	2135.75	1225.35	338.577	1987.56	1352.11	401.777	2061.89	1113.94	402.064	2079.76	1040.65	414.01	2027.89	872.192	363.332	2020.92	794.451	426.297	2057.11	787.402	398.193	2018.29	719.787
538	0	206	1893.3	1567.9	88.4255	1887.45	1564.34	200.55	2059.3	1518.16	92.7873	2050.46	1513.28	151.95	2028.7	1424.57	155.054	2118.88	1147.94	164.761	1911.66	1327.52	167.836	1856.2	1128.78	72.5709	2123.72	1223.86	340.165	1975.31	1350.04	402.74	2049.89	1111.79	402.704	2068.13	1038.57	414.794	2017.65	869.835	364.167	2011.51	792.063	427.275	2047.52	785.339	398.897	2009.65	717.303
539	0	207.923	1881.33	1566.64	90.3183	1875.51	1563.21	202.455	2047.21	1516.6	94.6646	2038.42	1511.86	153.735	2016.46	1423.17	156.414	2106.48	1146.43	166.304	1899.42	1326.12	168.838	1843.89	1127.31	74.0626	2111.52	1222.53	341.778	1963.03	1348.18	403.75	2037.72	1109.81	403.41	2056.28	1036.67	415.632	2007.06	867.683	365.067	2001.71	789.878	428.321	2037.53	783.452	399.667	2000.59	715.008
540	0	209.897	1869.3	1565.58	92.2668	1863.52	1562.29	204.401	2035.08	1515.26	96.5861	2026.33	1510.67	155.53	2004.19	1421.98	157.762	2093.95	1145.08	167.899	1887.11	1324.95	169.962	1831.39	1126.11	75.5408	2099.17	1221.36	343.416	1950.73	1346.54	404.806	2025.38	1107.99	404.181	2044.22	1034.94	416.523	1996.11	865.738	366.029	1991.51	787.898	429.436	2027.12	781.744	400.506	1991.09	712.906
541	0	211.919	1857.23	1564.71	94.2687	1851.47	1561.58	206.386	2022.91	1514.14	98.5494	2014.19	1509.69	157.334	1991.88	1420.99	159.098	2081.29	1143.92	169.543	1874.74	1324	171.204	1818.71	1125.15	77.0039	2086.67	1220.36	345.075	1938.4	1345.11	405.905	2012.86	1106.35	405.016	2031.94	1033.39	417.469	1984.82	864.003	367.056	1980.9	786.125	430.619	2016.3	780.22	401.414	1981.14	711.003
542	0	213.987	1845.12	1564.04	96.3211	1839.37	1561.09	208.406	2010.7	1513.22	100.551	2002.01	1508.95	159.143	1979.54	1420.2	160.422	2068.52	1142.95	171.232	1862.31	1323.28	172.559	1805.86	1124.46	78.4504	2074.02	1219.53	346.753	1926.06	1343.91	407.046	2000.19	1104.88	405.913	2019.46	1032.02	418.469	1973.18	862.482	368.145	1969.88	784.563	431.87	2005.07	778.884	402.395	1970.75	709.305
543	0	216.097	1832.96	1563.56	98.4204	1827.23	1560.81	210.458	1998.46	1512.52	102.588	1989.79	1508.43	160.956	1967.17	1419.62	161.734	2055.65	1142.16	172.96	1849.84	1322.78	174.018	1792.86	1124.02	79.8786	2061.25	1218.87	348.444	1913.7	1342.92	408.227	1987.36	1103.6	406.87	2006.78	1030.84	419.525	1961.19	861.179	369.296	1958.46	783.217	433.186	1993.42	777.742	403.449	1959.9	707.819
544	0	218.245	1820.76	1563.28	100.562	1815.04	1560.74	212.537	1986.19	1512.02	104.654	1977.54	1508.13	162.769	1954.78	1419.24	163.036	2042.69	1141.56	174.72	1837.32	1322.51	175.571	1779.73	1123.84	81.2869	2048.37	1218.4	350.144	1901.33	1342.16	409.446	1974.38	1102.51	407.888	1993.9	1029.84	420.637	1948.85	860.097	370.508	1946.62	782.09	434.567	1981.35	776.797	404.58	1948.57	706.553
545	0	220.426	1808.53	1563.19	102.74	1802.81	1560.87	214.636	1973.89	1511.74	106.743	1965.26	1508.06	164.578	1942.39	1419.07	164.329	2029.65	1141.16	176.504	1824.76	1322.45	177.204	1766.49	1123.91	82.6742	2035.4	1218.12	351.848	1888.95	1341.62	410.7	1961.27	1101.61	408.963	1980.83	1029.03	421.805	1936.16	859.242	371.778	1934.37	781.186	436.008	1968.86	776.055	405.788	1936.76	705.515
546	0	222.634	1796.28	1563.28	104.95	1790.55	1561.22	216.749	1961.58	1511.66	108.85	1952.95	1508.21	166.379	1929.98	1419.09	165.613	2016.57	1140.96	178.301	1812.19	1322.62	178.9	1753.18	1124.22	84.0404	2022.37	1218.04	353.548	1876.56	1341.3	411.988	1948.03	1100.92	410.097	1967.58	1028.41	423.029	1923.14	858.616	373.104	1921.7	780.508	437.506	1955.95	775.519	407.074	1924.46	704.712
547	0	224.863	1784.01	1563.54	107.183	1778.27	1561.75	218.868	1949.26	1511.79	110.966	1940.64	1508.58	168.168	1917.58	1419.31	166.892	2003.46	1140.97	180.101	1799.61	1322.99	180.64	1739.82	1124.77	85.3858	2009.3	1218.15	355.238	1864.18	1341.19	413.307	1934.68	1100.43	411.287	1954.16	1027.98	424.309	1909.77	858.221	374.483	1908.61	780.059	439.057	1942.63	775.191	408.436	1911.65	704.151
548	0	227.105	1771.73	1563.98	109.433	1765.97	1562.48	220.986	1936.94	1512.11	113.085	1928.31	1509.15	169.941	1905.2	1419.72	168.169	1990.35	1141.17	181.893	1787.04	1323.56	182.401	1726.46	1125.54	86.7126	1996.23	1218.47	356.912	1851.8	1341.3	414.656	1921.23	1100.16	412.535	1940.59	1027.74	425.642	1896.08	858.059	375.911	1895.1	779.839	440.657	1928.88	775.071	409.872	1898.32	703.836
549	0	229.353	1759.45	1564.59	111.691	1753.67	1563.39	223.095	1924.63	1512.62	115.198	1916	1509.93	171.692	1892.83	1420.32	169.446	1977.25	1141.58	183.665	1774.48	1324.33	184.159	1713.13	1126.51	88.0238	1983.18	1218.98	358.561	1839.43	1341.62	416.034	1907.68	1100.09	413.84	1926.86	1027.69	427.028	1882.07	858.128	377.385	1881.17	779.85	442.3	1914.73	775.157	411.381	1884.46	703.771
550	0	231.598	1747.17	1565.34	113.949	1741.37	1564.46	225.185	1912.33	1513.31	117.296	1903.69	1510.91	173.42	1880.51	1421.1	170.73	1964.19	1142.17	185.404	1761.96	1325.27	185.89	1699.87	1127.66	89.3245	1970.18	1219.68	360.18	1827.07	1342.13	417.439	1894.04	1100.22	415.203	1913	1027.82	428.464	1867.73	858.425	378.899	1866.82	780.088	443.979	1900.16	775.445	412.957	1870.08	703.956
551	0	233.831	1734.91	1566.23	116.197	1729.08	1565.69	227.25	1900.06	1514.18	119.372	1891.41	1512.08	175.121	1868.23	1422.04	172.024	1951.21	1142.96	187.099	1749.49	1326.37	187.566	1686.72	1128.97	90.6207	1957.28	1220.57	361.761	1814.74	1342.83	418.871	1880.34	1100.56	416.624	1899.01	1028.13	429.947	1853.1	858.947	380.45	1852.07	780.55	445.689	1885.19	775.927	414.595	1855.16	704.392
552	0	236.045	1722.68	1567.25	118.427	1716.82	1567.06	229.281	1887.83	1515.2	121.417	1879.16	1513.41	176.792	1856.01	1423.14	173.336	1938.31	1143.93	188.739	1737.08	1327.63	189.162	1673.71	1130.42	91.92	1944.5	1221.64	363.299	1802.42	1343.69	420.329	1866.57	1101.08	418.104	1884.91	1028.61	431.473	1838.17	859.687	382.032	1836.92	781.233	447.423	1869.83	776.595	416.289	1839.72	705.075
553	0	238.229	1710.48	1568.38	120.628	1704.58	1568.55	231.271	1875.64	1516.38	123.423	1866.96	1514.91	178.431	1843.85	1424.38	174.671	1925.54	1145.06	190.314	1724.75	1329.01	190.653	1660.88	1131.99	93.2305	1931.86	1222.87	364.789	1790.14	1344.72	421.815	1852.76	1101.78	419.641	1870.72	1029.25	433.039	1822.96	860.635	383.64	1821.38	782.13	449.174	1854.09	777.438	418.029	1823.76	705.999
554	0	240.375	1698.33	1569.6	122.791	1692.39	1570.15	233.214	1863.51	1517.69	125.384	1854.82	1516.55	180.036	1831.78	1425.75	176.035	1912.9	1146.34	191.816	1712.51	1330.52	192.016	1648.25	1133.64	94.5609	1919.4	1224.24	366.226	1777.89	1345.89	423.328	1838.9	1102.65	421.236	1856.44	1030.03	434.64	1807.48	861.781	385.269	1805.48	783.232	450.934	1837.98	778.444	419.808	1807.28	707.159
555	0	242.474	1686.23	1570.91	124.907	1680.25	1571.83	235.104	1851.44	1519.13	127.293	1842.73	1518.32	181.608	1819.79	1427.24	177.435	1900.41	1147.76	193.239	1700.38	1332.12	193.233	1635.84	1135.37	95.9197	1907.14	1225.74	367.608	1765.67	1347.18	424.867	1825	1103.67	422.887	1842.08	1030.95	436.27	1791.76	863.116	386.914	1789.21	784.533	452.697	1821.53	779.6	421.615	1790.31	708.548
556	0	244.517	1674.19	1572.29	126.967	1668.18	1573.58	236.935	1839.44	1520.68	129.145	1830.73	1520.2	183.146	1807.91	1428.82	178.873	1888.1	1149.3	194.577	1688.36	1333.8	194.289	1623.65	1137.14	97.3146	1895.09	1227.36	368.934	1753.49	1348.58	426.432	1811.09	1104.82	424.59	1827.67	1032	437.924	1775.81	864.625	388.57	1772.61	786.023	454.456	1804.75	780.895	423.442	1772.87	710.156
557	0	246.496	1662.22	1573.72	128.961	1656.17	1575.38	238.704	1827.52	1522.32	130.936	1818.8	1522.17	184.65	1796.12	1430.49	180.354	1875.98	1150.94	195.827	1676.46	1335.54	195.174	1611.71	1138.94	98.7519	1883.26	1229.07	370.201	1741.36	1350.07	428.021	1797.16	1106.09	426.343	1813.2	1033.14	439.595	1759.64	866.297	390.231	1755.7	787.694	456.203	1787.67	782.316	425.278	1754.98	711.974
558	0	248.405	1650.32	1575.2	130.882	1644.24	1577.21	240.407	1815.68	1524.04	132.661	1806.96	1524.22	186.121	1784.45	1432.23	181.878	1864.05	1152.67	196.991	1664.69	1337.33	195.886	1600.01	1140.76	100.236	1871.65	1230.85	371.411	1729.27	1351.62	429.632	1783.22	1107.46	428.14	1798.7	1034.38	441.278	1743.27	868.119	391.892	1738.5	789.535	457.931	1770.31	783.853	427.113	1736.68	713.995
559	0	250.235	1638.5	1576.7	132.724	1632.4	1579.06	242.044	1803.93	1525.82	134.318	1795.22	1526.31	187.559	1772.88	1434.01	183.446	1852.32	1154.46	198.069	1653.05	1339.14	196.427	1588.54	1142.57	101.77	1860.27	1232.69	372.565	1717.24	1353.24	431.261	1769.29	1108.91	429.976	1784.16	1035.7	442.965	1726.74	870.077	393.547	1721.04	791.539	459.635	1752.69	785.495	428.938	1717.98	716.209
560	0	251.983	1626.77	1578.21	134.479	1620.65	1580.9	243.612	1792.28	1527.65	135.906	1783.58	1528.44	188.965	1761.44	1435.83	185.054	1840.78	1156.29	199.065	1641.54	1340.97	196.807	1577.29	1144.37	103.352	1849.11	1234.56	373.666	1705.26	1354.88	432.904	1755.36	1110.44	431.843	1769.6	1037.08	444.65	1710.05	872.161	395.192	1703.34	793.696	461.308	1734.85	787.235	430.743	1698.95	718.607
561	0	253.643	1615.12	1579.72	136.144	1609	1582.72	245.112	1780.71	1529.5	137.424	1772.05	1530.57	190.342	1750.11	1437.67	186.698	1829.44	1158.16	199.984	1630.16	1342.79	197.041	1566.25	1146.15	104.981	1838.15	1236.46	374.717	1693.34	1356.55	434.556	1741.45	1112.02	433.733	1755.03	1038.51	446.327	1693.22	874.356	396.821	1685.42	795.997	462.945	1716.8	789.067	432.519	1679.61	721.18
562	0	255.212	1603.56	1581.23	137.714	1597.46	1584.51	246.544	1769.25	1531.37	138.871	1760.62	1532.7	191.688	1738.89	1439.5	188.372	1818.29	1160.03	200.834	1618.92	1344.59	197.152	1555.41	1147.9	106.652	1827.39	1238.35	375.723	1681.49	1358.23	436.211	1727.56	1113.63	435.64	1740.46	1039.97	447.989	1676.29	876.653	398.429	1667.33	798.434	464.542	1698.58	790.984	434.26	1660	723.918
563	0	256.688	1592.1	1582.71	139.187	1586.01	1586.24	247.909	1757.88	1533.23	140.249	1749.3	1534.8	193.006	1727.79	1441.31	190.067	1807.31	1161.89	201.623	1607.8	1346.36	197.164	1544.75	1149.61	108.356	1816.8	1240.22	376.688	1669.71	1359.9	437.862	1713.7	1115.27	437.553	1725.88	1041.46	449.631	1659.25	879.041	400.01	1649.08	800.999	466.094	1680.2	792.984	435.957	1640.17	726.813
564	0	258.071	1580.73	1584.15	140.562	1574.68	1587.91	249.209	1746.61	1535.08	141.559	1738.09	1536.85	194.296	1716.79	1443.09	191.775	1796.49	1163.72	202.36	1596.81	1348.08	197.107	1534.24	1151.28	110.084	1806.37	1242.06	377.618	1658	1361.55	439.504	1699.87	1116.93	439.463	1711.32	1042.96	451.246	1642.15	881.508	401.559	1630.69	803.682	467.598	1661.71	795.063	437.606	1620.17	729.855
565	0	259.359	1569.45	1585.56	141.84	1563.45	1589.5	250.446	1735.44	1536.88	142.802	1726.99	1538.83	195.558	1705.9	1444.83	193.484	1785.82	1165.51	203.054	1585.93	1349.75	197.01	1523.86	1152.89	111.826	1796.07	1243.84	378.515	1646.38	1363.17	441.129	1686.08	1118.58	441.363	1696.78	1044.46	452.83	1624.99	884.044	403.072	1612.21	806.475	469.052	1643.11	797.217	439.202	1600.03	733.033
566	0	260.555	1558.27	1586.9	143.022	1552.32	1591	251.621	1724.36	1538.63	143.981	1716	1540.73	196.79	1695.11	1446.49	195.184	1775.28	1167.23	203.714	1575.16	1351.34	196.905	1513.61	1154.44	113.569	1785.88	1245.56	379.387	1634.83	1364.74	442.731	1672.34	1120.22	443.244	1682.26	1045.94	454.379	1607.8	886.639	404.545	1593.65	809.368	470.453	1624.44	799.442	440.739	1579.8	736.335
567	0	261.661	1547.19	1588.17	144.11	1541.3	1592.4	252.738	1713.38	1540.31	145.097	1705.1	1542.52	197.994	1684.41	1448.08	196.863	1764.85	1168.87	204.349	1564.49	1352.84	196.82	1503.45	1155.91	115.299	1775.79	1247.19	380.236	1623.37	1366.26	444.305	1658.65	1121.83	445.098	1667.77	1047.4	455.888	1590.59	889.281	405.972	1575.04	812.351	471.799	1605.71	801.734	442.214	1559.52	739.75
568	0	262.679	1536.19	1589.37	145.108	1530.38	1593.69	253.798	1702.48	1541.9	146.152	1694.31	1544.21	199.166	1673.8	1449.57	198.508	1754.51	1170.41	204.968	1553.91	1354.25	196.781	1493.37	1157.3	117.004	1765.76	1248.72	381.065	1612	1367.71	445.846	1645.02	1123.4	446.918	1653.31	1048.83	457.353	1573.38	891.959	407.35	1556.4	815.412	473.09	1586.96	804.087	443.623	1539.22	743.262
569	0	263.613	1525.28	1590.47	146.021	1519.56	1594.86	254.803	1691.67	1543.39	147.149	1683.6	1545.76	200.305	1663.26	1450.95	200.108	1744.26	1171.85	205.576	1543.42	1355.55	196.809	1483.35	1158.6	118.668	1755.79	1250.14	381.878	1600.73	1369.07	447.351	1631.45	1124.92	448.699	1638.9	1050.21	458.771	1556.19	894.66	408.676	1537.76	818.54	474.322	1568.2	806.493	444.962	1518.94	746.857
570	0	264.468	1514.45	1591.48	146.852	1508.83	1595.9	255.754	1680.94	1544.76	148.089	1672.99	1547.16	201.409	1652.78	1452.22	201.653	1734.06	1173.16	206.179	1532.99	1356.72	196.921	1473.37	1159.79	120.28	1745.86	1251.43	382.677	1589.54	1370.35	448.816	1617.96	1126.37	450.435	1624.54	1051.53	460.139	1539.03	897.373	409.945	1519.15	821.72	475.494	1549.45	808.942	446.23	1498.72	750.519
571	0	265.248	1503.7	1592.38	147.606	1498.18	1596.81	256.654	1670.28	1546.01	148.973	1662.45	1548.41	202.475	1642.37	1453.35	203.13	1723.91	1174.34	206.781	1522.63	1357.77	197.128	1463.43	1160.85	121.827	1735.94	1252.58	383.461	1578.45	1371.52	450.24	1604.54	1127.75	452.122	1610.24	1052.78	461.454	1521.93	900.082	411.154	1500.58	824.937	476.605	1530.74	811.423	447.422	1478.58	754.23
572	0	265.957	1493.03	1593.16	148.289	1487.61	1597.57	257.502	1659.69	1547.11	149.803	1651.98	1549.5	203.498	1632	1454.34	204.53	1713.79	1175.37	207.384	1512.32	1358.67	197.436	1453.51	1161.79	123.298	1726.02	1253.59	384.23	1567.45	1372.58	451.62	1591.2	1129.04	453.757	1595.99	1053.95	462.714	1504.9	902.774	412.301	1482.08	828.175	477.653	1512.08	813.922	448.536	1458.55	757.973
573	0	266.599	1482.42	1593.81	148.906	1477.1	1598.19	258.299	1649.15	1548.06	150.578	1641.57	1550.41	204.476	1621.67	1455.18	205.845	1703.7	1176.25	207.989	1502.05	1359.43	197.845	1443.6	1162.57	124.683	1716.09	1254.44	384.982	1556.55	1373.51	452.955	1577.95	1130.22	455.336	1581.82	1055.03	463.916	1487.95	905.435	413.382	1463.67	831.418	478.635	1493.5	816.425	449.57	1438.66	761.73
574	0	267.178	1471.87	1594.33	149.46	1466.66	1598.65	259.045	1638.67	1548.84	151.3	1631.21	1551.14	205.405	1611.37	1455.86	207.066	1693.63	1176.97	208.595	1491.82	1360.03	198.349	1433.69	1163.21	125.975	1706.13	1255.12	385.717	1545.73	1374.3	454.244	1564.8	1131.29	456.857	1567.72	1056.01	465.058	1471.11	908.048	414.395	1445.38	834.647	479.552	1475.02	818.918	450.521	1418.92	765.481
575	0	267.697	1461.38	1594.71	149.955	1456.27	1598.96	259.739	1628.24	1549.46	151.968	1620.9	1551.68	206.28	1601.1	1456.38	208.19	1683.56	1177.52	209.2	1481.61	1360.47	198.939	1423.78	1163.67	127.165	1696.15	1255.65	386.429	1534.99	1374.95	455.486	1551.76	1132.23	458.318	1553.7	1056.87	466.138	1454.38	910.598	415.337	1427.22	837.845	480.4	1456.65	821.382	451.387	1399.37	769.21
576	0	268.16	1450.93	1594.94	150.395	1445.92	1599.11	260.38	1617.84	1549.9	152.58	1610.61	1552.03	207.097	1590.83	1456.73	209.21	1673.51	1177.9	209.8	1471.41	1360.73	199.601	1413.84	1163.95	128.251	1686.13	1256	387.116	1524.34	1375.44	456.679	1538.81	1133.03	459.717	1539.78	1057.6	467.152	1437.78	913.07	416.208	1409.22	840.992	481.18	1438.42	823.803	452.169	1380.01	772.898
577	0	268.569	1440.53	1595.02	150.782	1435.6	1599.1	260.966	1607.47	1550.15	153.137	1600.35	1552.19	207.852	1580.56	1456.9	210.126	1663.45	1178.11	210.391	1461.22	1360.82	200.319	1403.89	1164.06	129.227	1676.06	1256.18	387.772	1513.75	1375.76	457.821	1525.99	1133.69	461.053	1525.94	1058.21	468.1	1421.33	915.449	417.005	1391.4	844.071	481.889	1420.34	826.163	452.864	1360.87	776.526
578	0	268.925	1430.15	1594.96	151.118	1425.31	1598.93	261.495	1597.13	1550.22	153.635	1590.1	1552.15	208.541	1570.29	1456.9	210.935	1653.38	1178.14	210.966	1451.03	1360.74	201.074	1393.91	1163.98	130.093	1665.94	1256.19	388.393	1503.23	1375.92	458.91	1513.27	1134.19	462.323	1512.21	1058.67	468.979	1405.03	917.72	417.728	1373.78	847.062	482.527	1402.44	828.444	453.474	1341.97	780.078
579	0	269.229	1419.79	1594.73	151.404	1415.03	1598.6	261.964	1586.79	1550.1	154.074	1579.86	1551.92	209.16	1560.01	1456.73	211.639	1643.31	1178.01	211.521	1440.83	1360.48	201.847	1383.9	1163.71	130.848	1655.77	1256.03	388.973	1492.77	1375.9	459.943	1500.68	1134.52	463.526	1498.59	1058.99	469.787	1388.92	919.868	418.375	1356.37	849.948	483.093	1384.73	830.632	454	1323.31	783.536
580	0	269.482	1409.45	1594.36	151.639	1404.75	1598.12	262.371	1576.46	1549.79	154.451	1569.61	1551.5	209.705	1549.7	1456.38	212.238	1633.22	1177.7	212.048	1430.61	1360.05	202.617	1373.85	1163.26	131.491	1645.54	1255.7	389.507	1482.36	1375.7	460.917	1488.22	1134.69	464.66	1485.09	1059.15	470.522	1372.99	921.878	418.946	1339.19	852.711	483.586	1367.23	832.708	454.442	1304.92	786.883
581	0	269.684	1399.11	1593.84	151.825	1394.48	1597.48	262.713	1566.13	1549.29	154.763	1559.34	1550.89	210.171	1539.37	1455.86	212.734	1623.11	1177.22	212.54	1420.37	1359.44	203.365	1363.76	1162.62	132.023	1635.26	1255.21	389.989	1471.99	1375.32	461.828	1475.89	1134.68	465.72	1471.72	1059.15	471.184	1357.26	923.737	419.442	1322.27	855.333	484.007	1349.97	834.659	454.803	1286.81	790.102
582	0	269.834	1388.77	1593.17	151.96	1384.18	1596.7	262.985	1555.78	1548.62	155.008	1549.06	1550.11	210.555	1529	1455.18	213.128	1612.96	1176.58	212.991	1410.1	1358.67	204.076	1353.63	1161.81	132.445	1624.91	1254.55	390.413	1461.64	1374.76	462.672	1463.7	1134.5	466.706	1458.48	1058.99	471.77	1341.75	925.433	419.862	1305.61	857.796	484.353	1332.96	836.467	455.086	1269	793.176
583	0	269.93	1378.42	1592.35	152.043	1373.87	1595.77	263.185	1545.42	1547.78	155.183	1538.74	1549.15	210.854	1518.6	1454.33	213.422	1602.78	1175.78	213.391	1399.78	1357.74	204.732	1343.44	1160.82	132.759	1614.51	1253.74	390.774	1451.32	1374.04	463.444	1451.64	1134.14	467.612	1445.38	1058.67	472.28	1326.46	926.951	420.206	1289.22	860.085	484.625	1316.23	838.118	455.293	1251.51	796.086
584	0	269.971	1368.05	1591.4	152.072	1363.53	1594.71	263.309	1535.03	1546.76	155.284	1528.38	1548.02	211.063	1508.15	1453.33	213.617	1592.56	1174.82	213.736	1389.42	1356.66	205.321	1333.19	1159.68	132.965	1604.04	1252.78	391.067	1441.01	1373.14	464.139	1439.72	1133.6	468.434	1432.43	1058.19	472.711	1311.42	928.282	420.476	1273.14	862.183	484.823	1299.78	839.597	455.428	1234.34	798.816
585	0	269.954	1357.66	1590.32	152.045	1353.15	1593.52	263.354	1524.61	1545.6	155.31	1517.98	1546.75	211.181	1497.65	1452.19	213.713	1582.27	1173.72	214.016	1379.01	1355.43	205.835	1322.89	1158.39	133.065	1593.51	1251.67	391.285	1430.69	1372.09	464.752	1427.95	1132.9	469.169	1419.64	1057.55	473.065	1296.63	929.413	420.672	1257.36	864.075	484.944	1283.63	840.89	455.494	1217.52	801.347
586	0	269.878	1347.24	1589.12	151.96	1342.72	1592.22	263.316	1514.16	1544.29	155.256	1507.53	1545.34	211.203	1487.1	1450.91	213.713	1571.93	1172.48	214.226	1368.54	1354.08	206.265	1312.51	1156.96	133.06	1582.91	1250.43	391.424	1420.36	1370.89	465.276	1416.33	1132.03	469.81	1407.01	1056.76	473.338	1282.11	930.336	420.794	1241.9	865.747	484.989	1267.82	841.983	455.493	1201.06	803.661
587	0	269.74	1336.78	1587.81	151.814	1332.25	1590.81	263.191	1503.66	1542.84	155.121	1497.02	1543.8	211.128	1476.49	1449.51	213.617	1561.5	1171.1	214.36	1358.01	1352.61	206.607	1302.06	1155.42	132.952	1572.24	1249.05	391.481	1410.02	1369.56	465.708	1404.85	1131	470.353	1394.55	1055.82	473.532	1267.87	931.041	420.844	1226.77	867.185	484.955	1252.35	842.863	455.43	1184.97	805.741
588	0	269.537	1326.28	1586.41	151.604	1321.72	1589.31	262.978	1493.12	1541.29	154.899	1486.46	1542.16	210.953	1465.82	1448	213.427	1551	1169.61	214.411	1347.41	1351.04	206.859	1291.53	1153.76	132.743	1561.5	1247.56	391.45	1399.64	1368.1	466.04	1393.51	1129.82	470.792	1382.27	1054.74	473.645	1253.92	931.521	420.822	1211.97	868.377	484.842	1237.24	843.519	455.308	1169.28	807.568
589	0	269.266	1315.74	1584.92	151.328	1311.14	1587.74	262.672	1482.52	1539.63	154.59	1475.83	1540.42	210.677	1455.1	1446.39	213.144	1540.4	1168	214.374	1336.74	1349.39	207.022	1280.91	1152.02	132.435	1550.67	1245.95	391.328	1389.22	1366.55	466.267	1382.31	1128.51	471.121	1370.15	1053.52	473.676	1240.26	931.77	420.729	1197.53	869.311	484.649	1222.51	843.94	455.128	1154	809.124
590	0	268.923	1305.14	1583.37	150.981	1300.49	1586.1	262.271	1471.87	1537.89	154.191	1465.13	1538.61	210.299	1444.31	1444.7	212.77	1529.69	1166.3	214.245	1326	1347.66	207.096	1270.19	1150.21	132.029	1539.77	1244.24	391.112	1378.74	1364.91	466.385	1371.25	1127.08	471.335	1358.22	1052.19	473.624	1226.92	931.784	420.566	1183.45	869.978	484.373	1208.18	844.116	454.894	1139.14	810.394
591	0	268.506	1294.49	1581.76	150.56	1289.77	1584.42	261.773	1461.16	1536.09	153.698	1454.36	1536.74	209.817	1433.45	1442.94	212.309	1518.87	1164.52	214.019	1315.17	1345.89	207.085	1259.37	1148.36	131.53	1528.77	1242.44	390.8	1368.21	1363.2	466.387	1360.31	1125.54	471.427	1346.47	1050.75	473.49	1213.9	931.561	420.333	1169.75	870.368	484.013	1194.26	844.039	454.608	1124.72	811.36
592	0	268.011	1283.78	1580.11	150.064	1278.98	1582.71	261.177	1450.39	1534.25	153.111	1443.53	1534.83	209.233	1422.53	1441.14	211.763	1507.93	1162.67	213.694	1304.26	1344.09	206.991	1248.43	1146.48	130.939	1517.69	1240.57	390.391	1357.61	1361.45	466.269	1349.49	1123.92	471.393	1334.89	1049.23	473.271	1201.22	931.099	420.03	1156.42	870.476	483.569	1180.78	843.706	454.272	1110.76	812.009
593	0	267.436	1273.01	1578.45	149.487	1268.13	1580.99	260.481	1439.56	1532.37	152.427	1432.62	1532.91	208.548	1411.54	1439.3	211.136	1496.87	1160.77	213.267	1293.27	1342.28	206.817	1237.37	1144.59	130.261	1506.51	1238.63	389.882	1346.92	1359.69	466.027	1338.78	1122.23	471.228	1323.49	1047.63	472.967	1188.87	930.402	419.658	1143.48	870.297	483.038	1167.75	843.112	453.886	1097.27	812.327
594	0	266.777	1262.18	1576.79	148.828	1257.2	1579.27	259.684	1428.67	1530.5	151.645	1421.64	1530.98	207.762	1400.49	1437.45	210.434	1485.67	1158.83	212.737	1282.19	1340.48	206.566	1226.17	1142.74	129.501	1495.23	1236.65	389.275	1336.15	1357.92	465.658	1328.16	1120.5	470.928	1312.27	1045.97	472.577	1176.86	929.474	419.215	1130.94	869.829	482.421	1155.18	842.257	453.453	1084.27	812.304
595	0	266.031	1251.29	1575.15	148.084	1246.2	1577.57	258.788	1417.71	1528.64	150.766	1410.59	1529.08	206.88	1389.37	1435.6	209.661	1474.33	1156.88	212.103	1271.02	1338.71	206.24	1214.83	1140.93	128.662	1483.86	1234.64	388.569	1325.29	1356.18	465.16	1317.62	1118.74	470.49	1301.21	1044.29	472.1	1165.21	928.32	418.703	1118.81	869.071	481.718	1143.1	841.146	452.971	1071.77	811.933
596	0	265.198	1240.34	1573.54	147.253	1235.13	1575.91	257.791	1406.7	1526.81	149.789	1399.47	1527.21	205.904	1378.19	1433.77	208.824	1462.86	1154.92	211.366	1259.76	1336.99	205.84	1203.34	1139.19	127.75	1472.38	1232.62	387.767	1314.33	1354.49	464.53	1307.15	1116.99	469.913	1290.32	1042.58	471.535	1153.91	926.952	418.119	1107.1	868.027	480.93	1131.51	839.784	452.441	1059.79	811.209
597	0	264.274	1229.33	1571.99	146.332	1224	1574.31	256.696	1395.62	1525.03	148.715	1388.28	1525.39	204.84	1366.94	1431.98	207.929	1451.25	1152.98	210.529	1248.42	1335.34	205.367	1191.68	1137.56	126.771	1460.8	1230.59	386.872	1303.27	1352.87	463.77	1296.73	1115.26	469.194	1279.58	1040.89	470.881	1142.97	925.38	417.464	1095.82	866.701	480.057	1120.43	838.182	451.86	1048.34	810.129
598	0	263.26	1218.26	1570.52	145.321	1212.81	1572.78	255.506	1384.49	1523.33	147.546	1377.03	1523.64	203.694	1355.64	1430.25	206.984	1439.51	1151.08	209.593	1236.99	1333.77	204.823	1179.85	1136.04	125.733	1449.11	1228.59	385.886	1292.09	1351.33	462.881	1286.34	1113.58	468.336	1268.99	1039.23	470.138	1132.4	923.619	416.735	1084.98	865.103	479.102	1109.86	836.354	451.226	1037.43	808.696
599	0	262.155	1207.14	1569.13	144.219	1201.55	1571.33	254.223	1373.3	1521.71	146.284	1365.73	1521.98	202.472	1344.28	1428.59	205.996	1427.63	1149.24	208.565	1225.48	1332.31	204.207	1167.85	1134.67	124.642	1437.33	1226.63	384.817	1280.81	1349.91	461.865	1275.97	1111.97	467.34	1258.53	1037.61	469.305	1122.18	921.687	415.932	1074.59	863.244	478.069	1099.82	834.316	450.537	1027.08	806.916
600	0	260.959	1195.96	1567.85	143.028	1190.24	1569.98	252.852	1362.07	1520.21	144.934	1354.36	1520.41	201.183	1332.86	1427.02	204.973	1415.64	1147.47	207.45	1213.89	1330.98	203.521	1155.68	1133.46	123.507	1425.45	1224.73	383.669	1269.43	1348.62	460.728	1265.6	1110.45	466.211	1248.2	1036.07	468.382	1112.32	919.603	415.054	1064.65	861.138	476.962	1090.29	832.091	449.789	1017.3	804.8
601	0	259.675	1184.74	1566.69	141.748	1178.88	1568.75	251.398	1350.79	1518.82	143.499	1342.95	1518.96	199.836	1321.41	1425.56	203.923	1403.53	1145.79	206.255	1202.23	1329.77	202.767	1143.33	1132.43	122.338	1413.47	1222.9	382.452	1257.93	1347.47	459.476	1255.22	1109.04	464.954	1237.99	1034.62	467.37	1102.81	917.389	414.099	1055.16	858.803	475.786	1081.29	829.703	448.977	1008.09	802.362
602	0	258.304	1173.48	1565.66	140.382	1167.48	1567.63	249.868	1339.46	1517.57	141.987	1331.5	1517.64	198.441	1309.91	1424.22	202.855	1391.32	1144.23	204.989	1190.52	1328.71	201.949	1130.83	1131.59	121.145	1401.42	1221.17	381.175	1246.34	1346.49	458.117	1244.81	1107.76	463.576	1227.88	1033.29	466.268	1093.65	915.069	413.066	1046.15	856.26	474.547	1072.8	827.181	448.096	999.465	799.622
603	0	256.851	1162.18	1564.78	138.934	1156.05	1566.65	248.269	1328.11	1516.47	140.402	1320.01	1516.44	197.009	1298.38	1423.01	201.777	1379.04	1142.79	203.664	1178.75	1327.81	201.071	1118.19	1130.95	119.94	1389.3	1219.55	379.849	1234.65	1345.67	456.662	1234.36	1106.64	462.086	1217.86	1032.08	465.079	1084.82	912.669	411.955	1037.61	853.533	473.254	1064.82	824.555	447.142	991.429	796.604
604	0	255.321	1150.85	1564.06	137.408	1144.59	1565.8	246.611	1316.72	1515.54	138.755	1308.5	1515.39	195.553	1286.82	1421.95	200.698	1366.68	1141.5	202.292	1166.94	1327.07	200.139	1105.42	1130.52	118.736	1377.12	1218.06	378.486	1222.87	1345.04	455.122	1223.86	1105.67	460.497	1207.92	1031.02	463.804	1076.31	910.216	410.766	1029.53	850.649	471.915	1057.33	821.86	446.11	983.982	793.335
605	0	253.72	1139.5	1563.5	135.811	1133.1	1565.1	244.903	1305.32	1514.77	137.054	1296.97	1514.5	194.085	1275.25	1421.04	199.626	1354.28	1140.38	200.885	1155.11	1326.5	199.164	1092.56	1130.29	117.546	1364.91	1216.72	377.1	1211.03	1344.6	453.513	1213.3	1104.87	458.821	1198.06	1030.11	462.447	1068.11	907.74	409.5	1021.92	847.638	470.54	1050.31	819.132	444.994	977.124	789.848
606	0	252.055	1128.13	1563.12	134.15	1121.61	1564.54	243.155	1293.9	1514.19	135.31	1285.43	1513.75	192.617	1263.67	1420.3	198.57	1341.86	1139.42	199.459	1143.26	1326.11	198.154	1079.63	1130.26	116.383	1352.68	1215.54	375.704	1199.12	1344.36	451.848	1202.68	1104.25	457.073	1188.25	1029.38	461.012	1060.19	905.269	408.16	1014.78	844.533	469.141	1043.73	816.408	443.789	970.847	786.178
607	0	250.336	1116.75	1562.91	132.433	1110.11	1564.12	241.381	1282.48	1513.79	133.534	1273.89	1513.17	191.162	1252.09	1419.73	197.538	1329.43	1138.66	198.028	1131.42	1325.89	197.123	1066.67	1130.42	115.262	1340.46	1214.53	374.313	1187.17	1344.31	450.146	1191.98	1103.83	455.269	1178.5	1028.83	459.504	1052.55	902.833	406.748	1008.1	841.366	467.728	1037.55	813.727	442.493	965.14	782.365
608	0	248.571	1105.37	1562.88	130.67	1098.63	1563.85	239.592	1271.07	1513.58	131.74	1262.36	1512.74	189.731	1240.53	1419.33	196.538	1317.02	1138.09	196.609	1119.59	1325.84	196.085	1053.73	1130.76	114.194	1328.26	1213.7	372.943	1175.19	1344.47	448.424	1181.21	1103.59	453.428	1168.8	1028.46	457.932	1045.15	900.462	405.271	1001.85	838.174	466.316	1031.75	811.126	441.103	959.987	778.447
609	0	246.773	1094	1563.02	128.874	1087.16	1563.72	237.802	1259.66	1513.57	129.94	1250.86	1512.48	188.338	1228.99	1419.12	195.576	1304.66	1137.71	195.218	1107.8	1325.96	195.055	1040.84	1131.27	113.191	1316.11	1213.07	371.607	1163.21	1344.81	446.702	1170.37	1103.54	451.569	1159.14	1028.29	456.304	1037.97	898.184	403.734	996.027	834.995	464.919	1026.28	808.643	439.617	955.365	774.47
610	0	244.954	1082.64	1563.34	127.055	1075.71	1563.73	236.024	1248.28	1513.74	128.149	1239.38	1512.38	186.991	1217.49	1419.08	194.658	1292.35	1137.54	193.871	1096.05	1326.25	194.05	1028.05	1131.92	112.261	1304.03	1212.63	370.319	1151.25	1345.34	444.999	1159.48	1103.67	449.712	1149.52	1028.3	454.632	1031	896.026	402.148	990.603	831.865	463.551	1021.08	806.312	438.037	951.244	770.476
611	0	243.127	1071.3	1563.82	125.227	1064.3	1563.87	234.271	1236.93	1514.11	126.38	1227.95	1512.44	185.7	1206.03	1419.22	193.788	1280.14	1137.58	192.583	1084.37	1326.69	193.089	1015.39	1132.71	111.409	1292.04	1212.39	369.093	1139.34	1346.04	443.336	1148.54	1103.99	447.878	1139.95	1028.5	452.928	1024.19	894.014	400.525	985.551	828.821	462.229	1016.11	804.167	436.368	947.589	766.51
612	0	241.306	1059.99	1564.47	123.405	1052.93	1564.13	232.557	1225.62	1514.66	124.647	1216.57	1512.65	184.472	1194.62	1419.54	192.968	1268.03	1137.81	191.369	1072.76	1327.29	192.19	1002.9	1133.6	110.639	1280.17	1212.35	367.94	1127.49	1346.92	441.731	1137.57	1104.47	446.087	1130.43	1028.89	451.208	1017.53	892.169	398.878	980.837	825.9	460.967	1011.31	802.237	434.618	944.357	762.617
613	0	239.506	1048.72	1565.27	121.604	1041.61	1564.52	230.895	1214.36	1515.4	122.965	1205.24	1513.02	183.314	1183.28	1420.03	192.195	1256.04	1138.23	190.242	1061.24	1328.02	191.372	990.615	1134.59	109.949	1268.42	1212.5	366.868	1115.74	1347.94	440.204	1126.59	1105.12	444.359	1120.96	1029.46	449.488	1010.99	890.514	397.224	976.421	823.138	459.782	1006.63	800.546	432.799	941.497	758.841
614	0	237.743	1037.5	1566.21	119.838	1030.35	1565.03	229.296	1203.15	1516.3	121.346	1193.99	1513.54	182.229	1172.02	1420.68	191.467	1244.2	1138.84	189.211	1049.83	1328.89	190.654	978.556	1135.66	109.333	1256.8	1212.85	365.886	1104.11	1349.11	438.771	1115.64	1105.91	442.713	1111.55	1030.19	447.787	1004.54	889.065	395.582	972.26	820.566	458.688	1002.02	799.115	430.929	938.955	755.225
615	0	236.03	1026.32	1567.28	118.124	1019.16	1565.64	227.771	1192	1517.37	119.802	1182.81	1514.2	181.219	1160.83	1421.48	190.778	1232.5	1139.62	188.287	1038.52	1329.87	190.052	966.742	1136.79	108.782	1245.34	1213.37	364.999	1092.61	1350.4	437.448	1104.75	1106.85	441.167	1102.23	1031.08	446.126	998.172	887.838	393.973	968.308	818.217	457.699	997.424	797.961	429.029	936.67	751.811
616	0	234.383	1015.21	1568.47	116.475	1008.03	1566.36	226.33	1180.92	1518.58	118.342	1171.7	1514.99	180.284	1149.73	1422.44	190.119	1220.97	1140.57	187.476	1027.34	1330.97	189.581	955.183	1137.97	108.284	1234.02	1214.08	364.209	1081.28	1351.8	436.249	1093.95	1107.91	439.735	1092.99	1032.12	444.525	991.853	886.844	392.42	964.513	816.116	456.829	992.801	797.093	427.128	934.576	748.638
617	0	232.817	1004.16	1569.77	114.908	996.982	1567.17	224.981	1169.91	1519.93	116.978	1160.68	1515.91	179.422	1138.72	1423.52	189.481	1209.62	1141.67	186.781	1016.27	1332.17	189.252	943.882	1139.2	107.824	1222.86	1214.96	363.517	1070.14	1353.3	435.182	1083.29	1109.08	438.43	1083.86	1033.3	443.007	985.571	886.091	390.947	960.823	814.288	456.088	988.113	796.519	425.255	932.605	745.741
618	0	231.344	993.177	1571.16	113.435	986.008	1568.08	223.73	1158.98	1521.41	115.715	1149.75	1516.96	178.631	1127.81	1424.73	188.852	1198.44	1142.91	186.204	1005.33	1333.45	189.074	932.835	1140.47	107.383	1211.85	1216	362.921	1059.18	1354.88	434.255	1072.79	1110.37	437.262	1074.86	1034.6	441.594	979.312	885.584	389.578	957.185	812.752	455.486	983.332	796.237	423.448	930.686	743.155
619	0	229.975	982.269	1572.64	112.068	975.112	1569.08	222.582	1148.13	1522.99	114.558	1138.9	1518.11	177.904	1116.99	1426.05	188.222	1187.43	1144.27	185.744	994.518	1334.81	189.048	922.033	1141.78	106.942	1200.98	1217.19	362.418	1048.44	1356.53	433.47	1062.52	1111.74	436.237	1066	1036.02	440.308	973.067	885.324	388.34	953.543	811.522	455.032	978.438	796.244	421.745	928.747	740.907
620	0	228.722	971.437	1574.17	110.817	964.295	1570.15	221.539	1137.36	1524.66	113.513	1128.13	1519.37	177.237	1106.26	1427.47	187.579	1176.61	1145.74	185.395	983.829	1336.25	189.173	911.46	1143.12	106.483	1190.24	1218.51	362.001	1037.91	1358.24	432.827	1052.5	1113.2	435.358	1057.3	1037.53	439.17	966.83	885.31	387.256	949.846	810.608	454.729	973.419	796.529	420.187	926.718	739.02
621	0	227.593	960.685	1575.76	109.693	953.557	1571.3	220.605	1126.67	1526.4	112.579	1117.45	1520.72	176.623	1095.64	1428.97	186.915	1165.95	1147.3	185.153	973.26	1337.74	189.443	901.098	1144.5	105.988	1179.63	1219.96	361.662	1027.61	1359.98	432.321	1042.77	1114.74	434.625	1048.77	1039.14	438.201	960.598	885.534	386.35	946.044	810.012	454.582	968.275	797.077	418.815	924.53	737.511
622	0	226.595	950.012	1577.38	108.701	942.896	1572.51	219.777	1116.07	1528.2	111.758	1106.86	1522.16	176.054	1085.1	1430.54	186.222	1155.45	1148.93	185.009	962.806	1339.27	189.845	890.926	1145.92	105.439	1169.12	1221.51	361.393	1017.52	1361.75	431.944	1033.37	1116.35	434.034	1040.44	1040.82	437.419	954.372	885.989	385.643	942.09	809.733	454.59	963.012	797.871	417.668	922.12	736.391
623	0	225.731	939.42	1579.02	107.845	932.309	1573.78	219.054	1105.55	1530.03	111.047	1096.34	1523.66	175.522	1074.66	1432.16	185.495	1145.1	1150.62	184.954	952.46	1340.84	190.363	880.92	1147.37	104.823	1158.71	1223.16	361.183	1007.64	1363.53	431.685	1024.3	1118.02	433.577	1032.31	1042.56	436.838	948.156	886.659	385.154	937.942	809.761	454.753	957.642	798.885	416.783	919.429	735.663
624	0	225.005	928.907	1580.67	107.128	921.793	1575.1	218.434	1095.11	1531.88	110.443	1085.9	1525.22	175.02	1064.3	1433.81	184.731	1134.89	1152.35	184.976	942.214	1342.44	190.977	871.058	1148.86	104.129	1148.37	1224.87	361.021	997.971	1365.32	431.53	1015.6	1119.73	433.245	1024.39	1044.36	436.472	941.954	887.53	384.896	933.564	810.083	455.066	952.185	800.095	416.191	916.407	735.321
625	0	224.416	918.471	1582.3	106.551	911.344	1576.45	217.911	1084.74	1533.73	109.942	1075.52	1526.82	174.542	1054.03	1435.49	183.93	1124.8	1154.1	185.064	932.058	1344.04	191.665	861.315	1150.37	103.35	1138.09	1226.63	360.896	988.493	1367.09	431.464	1007.27	1121.48	433.025	1016.69	1046.19	436.328	935.771	888.58	384.883	928.927	810.678	455.523	946.661	801.469	415.919	913.01	735.353
626	0	223.963	908.109	1583.9	106.111	900.955	1577.82	217.481	1074.46	1535.56	109.536	1065.21	1528.44	174.081	1043.82	1437.16	183.093	1114.81	1155.84	185.207	921.984	1345.64	192.403	851.669	1151.9	102.484	1127.85	1228.42	360.799	979.193	1368.84	431.47	999.301	1123.27	432.905	1009.2	1048.04	436.412	929.614	889.787	385.119	924.007	811.522	456.115	941.094	802.975	415.985	909.205	735.74
627	0	223.642	897.819	1585.45	105.804	890.624	1579.2	217.138	1064.24	1537.35	109.221	1054.96	1530.08	173.631	1033.69	1438.81	182.223	1104.91	1157.57	185.392	911.98	1347.22	193.168	842.098	1153.44	101.532	1117.64	1230.21	360.72	970.052	1370.54	431.531	991.686	1125.06	432.868	1001.92	1049.9	436.722	923.487	891.125	385.608	918.79	812.583	456.832	935.506	804.579	416.399	904.97	736.453
628	0	223.448	887.594	1586.95	105.624	880.342	1580.58	216.875	1054.09	1539.08	108.988	1044.76	1531.7	173.189	1023.61	1440.42	181.328	1095.08	1159.25	185.61	902.036	1348.76	193.935	832.583	1154.97	100.499	1107.44	1231.98	360.65	961.049	1372.19	431.63	984.402	1126.85	432.901	994.849	1051.75	437.255	917.392	892.565	386.345	913.267	813.828	457.66	929.915	806.246	417.165	900.293	737.46
629	0	223.373	877.43	1588.36	105.565	870.105	1581.93	216.686	1043.99	1540.74	108.83	1034.6	1533.3	172.752	1013.59	1441.98	180.412	1085.31	1160.88	185.85	892.142	1350.26	194.686	823.104	1156.48	99.3955	1097.25	1233.7	360.583	952.163	1373.76	431.75	977.421	1128.62	432.988	987.961	1053.57	438.001	911.331	894.079	387.324	907.435	815.22	458.584	924.336	807.941	418.274	895.173	738.721
630	0	223.41	867.322	1589.69	105.617	859.907	1583.24	216.563	1033.95	1542.3	108.74	1024.47	1534.84	172.32	1003.61	1443.47	179.486	1075.59	1162.42	186.104	882.287	1351.69	195.401	813.645	1157.95	98.2341	1087.05	1235.36	360.513	943.371	1375.25	431.877	970.705	1130.36	433.114	981.241	1055.35	438.945	905.301	895.635	388.529	901.299	816.722	459.588	918.78	809.63	419.714	889.618	740.193
631	0	223.549	857.263	1590.91	105.771	849.741	1584.49	216.501	1023.95	1543.76	108.71	1014.38	1536.33	171.892	993.665	1444.87	178.557	1065.89	1163.87	186.364	872.462	1353.03	196.068	804.189	1159.36	97.0307	1076.85	1236.93	360.438	934.648	1376.64	431.998	964.212	1132.04	433.267	974.665	1057.07	440.069	899.297	897.204	389.945	894.868	818.294	460.654	913.25	811.279	421.463	883.647	741.83
632	0	223.781	847.246	1592.01	106.017	839.602	1585.67	216.493	1013.99	1545.09	108.733	1004.31	1537.72	171.47	983.748	1446.16	177.635	1056.22	1165.21	186.625	862.655	1354.28	196.678	794.725	1160.68	95.8033	1066.63	1238.39	360.356	925.971	1377.91	432.103	957.893	1133.65	433.436	968.205	1058.7	441.352	893.311	898.755	391.549	888.157	819.896	461.762	907.744	812.859	423.491	877.285	743.583
633	0	224.096	837.265	1592.99	106.345	829.483	1586.76	216.534	1004.06	1546.29	108.803	994.258	1539.01	171.059	973.849	1447.34	176.731	1046.57	1166.43	186.884	852.858	1355.41	197.223	785.24	1161.9	94.5713	1056.41	1239.72	360.267	917.315	1379.05	432.185	951.701	1135.17	433.61	961.831	1060.24	442.769	887.33	900.258	393.317	881.182	821.49	462.895	902.252	814.342	425.764	870.567	745.406
634	0	224.484	827.311	1593.82	106.746	819.38	1587.74	216.618	994.157	1547.33	108.914	984.217	1540.18	170.662	963.96	1448.38	175.855	1036.92	1167.5	187.138	843.062	1356.41	197.705	775.726	1162.99	93.3551	1046.18	1240.91	360.173	908.657	1380.06	432.238	945.582	1136.58	433.782	955.511	1061.67	444.293	881.34	901.686	395.219	873.966	823.041	464.035	896.761	815.704	428.243	863.529	747.251
635	0	224.935	817.378	1594.51	107.208	809.287	1588.6	216.743	984.267	1548.21	109.062	974.179	1541.21	170.286	954.072	1449.27	175.017	1027.28	1168.43	187.386	833.258	1357.28	198.124	766.175	1163.94	92.1751	1035.94	1241.96	360.079	899.975	1380.91	432.261	939.485	1137.87	433.947	949.211	1062.98	445.897	875.324	903.014	397.226	866.53	824.515	465.163	891.251	816.925	430.886	856.211	749.071
636	0	225.442	807.459	1595.03	107.724	799.198	1589.32	216.905	974.385	1548.91	109.244	964.14	1542.09	169.937	944.177	1450	174.227	1017.63	1169.21	187.63	823.438	1357.98	198.487	756.583	1164.73	91.0515	1025.71	1242.84	359.989	891.246	1381.6	432.255	933.361	1139.02	434.1	942.897	1064.14	447.554	869.263	904.218	399.308	858.898	825.88	466.265	885.699	817.988	433.647	848.658	750.824
637	0	225.995	797.545	1595.4	108.284	789.108	1589.89	217.102	964.503	1549.44	109.458	954.094	1542.8	169.622	934.266	1450.58	173.498	1007.99	1169.82	187.872	813.595	1358.53	198.803	746.946	1165.34	90.0035	1015.48	1243.54	359.91	882.452	1382.13	432.223	927.161	1140.03	434.241	936.534	1065.15	449.237	863.135	905.278	401.432	851.093	827.109	467.329	880.079	818.88	436.479	840.909	752.47
638	0	226.588	787.629	1595.6	108.883	779.013	1590.31	217.335	954.612	1549.78	109.702	944.036	1543.33	169.352	924.332	1450.98	172.838	998.334	1170.26	188.115	803.721	1358.9	199.082	737.263	1165.77	89.0489	1005.26	1244.08	359.849	873.573	1382.48	432.173	920.842	1140.87	434.371	930.09	1065.99	450.92	856.919	906.175	403.569	843.139	828.178	468.343	874.363	819.591	439.337	833.006	753.971
639	0	227.216	777.703	1595.63	109.515	768.907	1590.57	217.602	944.706	1549.92	109.978	933.96	1543.67	169.133	914.368	1451.2	172.258	988.671	1170.53	188.364	793.811	1359.09	199.335	727.531	1166.01	88.2038	995.044	1244.43	359.814	864.593	1382.66	432.11	914.362	1141.54	434.491	923.532	1066.67	452.582	850.593	906.896	405.689	835.058	829.067	469.302	868.524	820.116	442.175	824.985	755.296
640	0	227.875	767.761	1595.49	110.175	758.787	1590.65	217.907	934.777	1549.88	110.286	923.862	1543.82	168.974	904.367	1451.24	171.769	978.995	1170.64	188.625	783.857	1359.1	199.575	717.752	1166.05	87.4826	984.843	1244.6	359.814	855.496	1382.65	432.047	907.686	1142.04	434.607	916.83	1067.16	454.203	844.136	907.427	407.766	826.87	829.758	470.201	862.534	820.449	444.951	816.879	756.415
641	0	228.562	757.794	1595.18	110.861	748.648	1590.56	218.253	924.816	1549.64	110.631	913.738	1543.78	168.885	894.322	1451.11	171.38	969.301	1170.57	188.903	773.855	1358.92	199.813	707.923	1165.88	86.8974	974.654	1244.6	359.858	846.27	1382.47	431.991	900.781	1142.36	434.724	909.954	1067.47	455.765	837.525	907.759	409.775	818.593	830.238	471.041	856.368	820.591	447.625	808.715	757.306
642	0	229.275	747.796	1594.71	111.572	738.486	1590.3	218.642	914.819	1549.21	111.015	903.583	1543.54	168.875	884.229	1450.79	171.1	959.585	1170.33	189.205	763.8	1358.56	200.059	698.043	1165.51	86.4581	964.475	1244.41	359.955	836.904	1382.12	431.957	893.619	1142.49	434.849	902.88	1067.6	457.256	830.743	907.885	411.696	810.244	830.496	471.824	850.004	820.541	450.163	800.515	757.949
643	0	230.016	737.76	1594.08	112.308	728.295	1589.86	219.08	904.777	1548.6	111.444	893.392	1543.1	168.951	874.081	1450.31	170.939	949.84	1169.92	189.538	753.685	1358.02	200.324	688.11	1164.94	86.1726	954.304	1244.06	360.113	827.388	1381.58	431.954	886.178	1142.44	434.988	895.583	1067.54	458.667	823.772	907.8	413.511	801.835	830.523	472.555	843.423	820.3	452.537	792.297	758.327
644	0	230.784	727.679	1593.29	113.07	718.073	1589.26	219.573	894.684	1547.81	111.924	883.162	1542.48	169.122	863.873	1449.65	170.904	940.058	1169.35	189.908	743.507	1357.31	200.614	678.121	1164.18	86.0466	944.137	1243.53	360.34	817.715	1380.88	431.996	878.438	1142.2	435.149	888.043	1067.29	459.991	816.594	907.503	415.208	793.376	830.316	473.242	836.61	819.873	454.722	784.07	758.43
645	0	231.584	717.548	1592.36	113.861	707.815	1588.5	220.126	884.534	1546.84	112.461	872.888	1541.67	169.395	853.602	1448.84	171.002	930.231	1168.63	190.323	733.262	1356.43	200.936	668.071	1163.24	86.0838	933.97	1242.84	360.644	807.879	1380.02	432.095	870.386	1141.78	435.342	880.242	1066.86	461.227	809.197	906.993	416.776	784.876	829.873	473.894	829.553	819.261	456.702	775.842	758.251
646	0	232.419	707.359	1591.29	114.685	697.517	1587.59	220.746	874.321	1545.72	113.063	862.568	1540.69	169.776	843.264	1447.87	171.237	920.35	1167.76	190.789	722.945	1355.39	201.293	657.956	1162.12	86.2859	923.797	1242.01	361.033	797.877	1379	432.26	862.009	1141.18	435.572	872.164	1066.25	462.374	801.57	906.273	418.212	776.338	829.195	474.522	822.245	818.471	458.468	767.613	757.788
647	0	233.294	697.109	1590.09	115.548	687.175	1586.54	221.441	864.041	1544.46	113.737	852.198	1539.55	170.272	832.855	1446.77	171.614	910.404	1166.75	191.313	712.554	1354.2	201.688	647.77	1160.83	86.6531	913.609	1241.03	361.513	787.706	1377.83	432.504	853.301	1140.39	435.849	863.796	1065.46	463.437	793.702	905.348	419.513	767.764	828.285	475.136	814.682	817.508	460.016	759.381	757.043
648	0	234.214	686.791	1588.79	116.454	676.785	1585.36	222.216	853.687	1543.06	114.49	841.773	1538.27	170.886	822.373	1445.54	172.135	900.383	1165.62	191.9	702.085	1352.89	202.121	637.507	1159.4	87.1836	903.4	1239.92	362.089	777.367	1376.53	432.833	844.256	1139.44	436.178	855.13	1064.51	464.42	785.587	904.224	420.683	759.152	827.15	475.748	806.863	816.379	461.349	751.138	756.02
649	0	235.185	676.401	1587.4	117.411	666.344	1584.08	223.079	843.256	1541.56	115.33	831.29	1536.86	171.623	811.814	1444.21	172.799	890.275	1164.37	192.557	691.535	1351.46	202.592	627.16	1157.83	87.8741	893.16	1238.71	362.765	766.861	1375.1	433.257	834.875	1138.32	436.566	846.158	1063.39	465.331	777.219	902.912	421.728	750.498	825.799	476.368	798.788	815.092	462.475	742.875	754.732
650	0	236.215	665.935	1585.93	118.423	655.848	1582.72	224.036	832.745	1539.95	116.263	820.747	1535.35	172.484	801.178	1442.79	173.604	880.071	1163.03	193.289	680.901	1349.93	203.1	616.723	1156.16	88.7198	882.879	1237.4	363.546	756.19	1373.56	433.78	825.159	1137.04	437.018	836.875	1062.13	466.178	768.595	901.424	422.655	741.796	824.246	477.006	790.461	813.658	463.408	734.58	753.191
651	0	237.308	655.389	1584.4	119.499	645.293	1581.28	225.092	822.149	1538.28	117.295	810.14	1533.76	173.472	790.462	1441.3	174.546	869.759	1161.6	194.098	670.181	1348.33	203.642	606.191	1154.38	89.7146	872.546	1236.01	364.432	745.359	1371.93	434.405	815.113	1135.62	437.538	827.278	1060.73	466.972	759.712	899.774	423.476	733.037	822.504	477.672	781.886	812.087	464.167	726.24	751.418
652	0	238.473	644.761	1582.84	120.645	634.677	1579.81	226.253	811.466	1536.55	118.432	799.466	1532.1	174.585	779.666	1439.76	175.62	859.329	1160.12	194.991	659.372	1346.68	204.219	595.555	1152.54	90.8507	862.151	1234.56	365.426	734.373	1370.23	435.134	804.743	1134.07	438.127	817.368	1059.22	467.722	750.57	897.979	424.204	724.211	820.593	478.373	773.067	810.396	464.771	717.838	749.433
653	0	239.714	634.048	1581.26	121.865	623.996	1578.31	227.522	800.694	1534.79	119.678	788.723	1530.42	175.823	768.788	1438.2	176.817	848.772	1158.59	195.968	648.474	1345	204.828	584.81	1150.65	92.1192	851.681	1233.08	366.527	723.239	1368.46	435.966	794.06	1132.4	438.787	807.148	1057.6	468.439	741.168	896.06	424.853	715.305	818.534	479.117	764.009	808.6	465.247	709.358	747.265
654	0	241.036	623.248	1579.68	123.167	613.249	1576.82	228.903	789.832	1533.02	121.035	777.909	1528.73	177.182	757.829	1436.63	178.129	838.081	1157.04	197.032	637.483	1343.32	205.47	573.95	1148.74	93.5101	841.126	1231.59	367.733	711.964	1366.66	436.898	783.076	1130.64	439.517	796.621	1055.9	469.131	731.507	894.039	425.437	706.306	816.352	479.908	754.714	806.721	465.618	700.783	744.943
655	0	242.445	612.362	1578.14	124.555	602.432	1575.36	230.397	778.88	1531.27	122.507	767.023	1527.05	178.658	746.788	1435.08	179.544	827.248	1155.5	198.185	626.4	1341.66	206.147	562.969	1146.85	95.0119	830.473	1230.11	369.043	700.559	1364.85	437.925	771.802	1128.8	440.313	785.793	1054.13	469.808	721.587	891.942	425.972	697.198	814.072	480.752	745.187	804.779	465.912	692.094	742.5
656	0	243.944	601.388	1576.64	126.032	591.545	1573.96	232.005	767.839	1529.56	124.093	756.062	1525.42	180.245	735.667	1433.57	181.05	816.269	1153.98	199.425	615.224	1340.05	206.86	551.862	1145	96.6123	819.712	1228.67	370.453	689.032	1363.04	439.041	760.254	1126.91	441.173	774.674	1052.33	470.48	711.41	889.795	426.471	687.964	811.724	481.651	735.427	802.801	466.154	683.272	739.974
657	0	245.535	590.329	1575.22	127.602	580.587	1572.64	233.725	756.708	1527.92	125.791	745.029	1523.87	181.936	724.468	1432.13	182.633	805.14	1152.51	200.751	603.955	1338.52	207.614	540.625	1143.24	98.2981	808.834	1227.29	371.957	677.394	1361.27	440.236	748.449	1124.99	442.091	763.271	1050.51	471.152	700.977	887.629	426.951	678.586	809.341	482.607	725.433	800.814	466.37	674.298	737.4
658	0	247.219	579.185	1573.89	129.265	569.558	1571.43	235.555	745.492	1526.36	127.6	733.921	1522.41	183.723	713.191	1430.78	184.28	793.86	1151.12	202.161	592.594	1337.09	208.414	529.253	1141.59	100.055	797.829	1225.99	373.55	665.656	1359.55	441.5	736.403	1123.08	443.062	751.598	1048.69	471.833	690.288	885.472	427.424	669.046	806.955	483.62	715.203	798.847	466.584	665.151	734.82
659	0	248.996	567.96	1572.68	131.022	558.458	1570.35	237.49	734.193	1524.91	129.515	722.741	1521.08	185.596	701.841	1429.53	185.977	782.43	1149.82	203.65	581.144	1335.79	209.264	517.744	1140.08	101.869	786.692	1224.8	375.222	653.83	1357.92	442.824	724.133	1121.19	444.08	739.665	1046.92	472.528	679.345	883.357	427.904	659.324	804.6	484.691	704.733	796.929	466.817	655.809	732.274
660	0	250.864	556.658	1571.6	132.87	547.289	1569.42	239.523	722.816	1523.6	131.53	711.492	1519.89	187.545	690.42	1428.42	187.707	770.855	1148.63	205.214	569.607	1334.64	210.171	506.096	1138.76	103.724	775.418	1223.75	376.966	641.927	1356.39	444.196	711.659	1119.36	445.137	727.488	1045.2	473.243	668.148	881.316	428.401	649.397	802.311	485.817	694.015	795.092	467.088	646.253	729.8
661	0	252.821	545.282	1570.67	134.809	536.053	1568.66	241.648	711.365	1522.42	133.638	700.176	1518.87	189.556	678.934	1427.45	189.459	759.142	1147.59	206.845	557.986	1333.66	211.138	494.31	1137.64	105.607	764.007	1222.85	378.771	629.958	1355	445.605	698.999	1117.61	446.229	715.08	1043.57	473.981	656.699	879.378	428.926	639.245	800.124	486.997	683.044	793.366	467.413	636.458	727.437
662	0	254.86	533.838	1569.89	136.832	524.754	1568.09	243.855	699.846	1521.42	135.83	688.796	1518.03	191.62	667.387	1426.64	191.216	747.299	1146.7	208.535	546.289	1332.86	212.17	482.39	1136.75	107.502	752.46	1222.12	380.627	617.936	1353.75	447.038	686.172	1115.97	447.347	702.459	1042.05	474.747	644.997	877.573	429.489	628.846	798.07	488.228	671.81	791.779	467.806	626.404	725.223
663	0	256.976	522.333	1569.3	138.933	513.396	1567.71	246.134	688.267	1520.58	138.096	677.358	1517.4	193.721	655.784	1426	192.969	735.339	1145.99	210.274	534.52	1332.28	213.269	470.34	1136.11	109.395	740.783	1221.57	382.521	605.87	1352.67	448.486	673.196	1114.47	448.488	689.64	1040.67	475.543	633.044	875.93	430.096	618.179	796.182	489.506	660.304	790.358	468.277	616.067	723.191
664	0	259.161	510.774	1568.88	141.105	501.982	1567.55	248.473	676.634	1519.93	140.424	665.867	1516.97	195.846	644.133	1425.55	194.704	723.275	1145.46	212.051	522.688	1331.9	214.432	458.171	1135.74	111.276	728.985	1221.23	384.441	593.771	1351.78	449.939	660.09	1113.14	449.645	676.641	1039.43	476.371	620.84	874.474	430.754	607.223	794.488	490.827	648.518	789.127	468.832	605.426	721.371
665	0	261.405	499.168	1568.65	143.339	490.52	1567.59	250.859	664.956	1519.48	142.801	654.329	1516.75	197.983	632.441	1425.29	196.413	711.122	1145.12	213.854	510.802	1331.75	215.657	445.895	1135.64	113.131	717.078	1221.09	386.374	581.648	1351.09	451.389	646.873	1111.98	450.815	663.479	1038.37	477.232	608.386	873.225	431.467	595.959	793.014	492.185	636.442	788.106	469.475	594.456	719.789
666	0	263.698	487.523	1568.61	145.624	479.015	1567.86	253.278	653.242	1519.21	145.214	642.751	1516.76	200.117	620.716	1425.23	198.088	698.899	1144.99	215.67	498.872	1331.82	216.937	433.53	1135.82	114.953	705.079	1221.17	388.307	569.512	1350.6	452.827	633.561	1111.02	451.996	650.171	1037.5	478.128	595.684	872.203	432.237	584.368	791.781	493.576	624.067	787.311	470.21	583.138	718.466
667	0	266.028	475.847	1568.75	147.948	467.474	1568.33	255.716	641.5	1519.15	147.648	631.141	1516.99	202.236	608.966	1425.36	199.724	686.624	1145.06	217.485	486.909	1332.1	218.263	421.095	1136.26	116.734	693.006	1221.45	390.226	557.369	1350.33	454.249	620.173	1110.28	453.185	636.736	1036.82	479.059	582.736	871.422	433.067	572.435	790.806	494.994	611.386	786.751	471.033	571.45	717.418
668	0	268.381	464.15	1569.07	150.298	455.905	1569.01	258.157	629.74	1519.28	150.087	619.507	1517.44	204.328	597.2	1425.69	201.318	674.315	1145.33	219.286	474.925	1332.6	219.622	408.615	1136.96	118.47	680.881	1221.95	392.119	545.228	1350.27	455.65	606.725	1109.75	454.383	623.191	1036.34	480.024	569.544	870.889	433.956	560.147	790.099	496.432	598.393	786.433	471.942	559.372	716.656
669	0	270.745	452.44	1569.57	152.66	444.316	1569.89	260.588	617.972	1519.59	152.517	607.857	1518.1	206.381	585.428	1426.2	202.869	661.992	1145.8	221.057	462.933	1333.3	221.001	396.116	1137.9	120.158	668.728	1222.64	393.973	533.095	1350.42	457.027	593.234	1109.44	455.589	609.551	1036.07	481.022	556.113	870.611	434.9	547.495	789.669	497.883	585.084	786.355	472.931	546.887	716.185
670	0	273.103	440.726	1570.23	155.019	432.714	1570.96	262.992	606.204	1520.08	154.921	596.199	1518.95	208.385	573.659	1426.88	204.379	649.677	1146.45	222.785	450.947	1334.19	222.381	383.624	1139.05	121.799	656.573	1223.52	395.778	520.975	1350.78	458.378	579.715	1109.35	456.804	595.834	1036	482.052	542.447	870.586	435.898	534.472	789.515	499.34	571.456	786.513	473.993	533.979	716.004
671	0	275.441	429.017	1571.04	157.359	421.109	1572.18	265.356	594.447	1520.75	157.285	584.543	1519.99	210.332	561.904	1427.74	205.852	637.387	1147.29	224.458	438.98	1335.25	223.746	371.168	1140.38	123.396	644.443	1224.57	397.523	508.874	1351.33	459.706	566.181	1109.47	458.032	582.055	1036.13	483.11	528.551	870.809	436.944	521.075	789.635	500.794	557.509	786.896	475.119	520.636	716.109
672	0	277.744	417.321	1571.98	159.665	409.509	1573.56	267.665	582.709	1521.56	159.594	572.898	1521.19	212.213	550.171	1428.74	207.292	625.143	1148.28	226.062	427.044	1336.46	225.075	358.776	1141.86	124.952	632.363	1225.77	399.2	496.795	1352.06	461.01	552.647	1109.8	459.274	568.226	1036.45	484.194	514.432	871.273	438.032	507.307	790.021	502.238	543.246	787.489	476.298	506.847	716.491
673	0	279.996	405.646	1573.05	161.922	397.921	1575.06	269.907	570.998	1522.52	161.834	561.272	1522.54	214.024	538.47	1429.89	208.708	612.964	1149.41	227.587	415.153	1337.8	226.35	346.472	1143.46	126.473	620.36	1227.1	400.8	484.742	1352.96	462.294	539.124	1110.32	460.534	554.361	1036.95	485.299	500.099	871.964	439.153	493.173	790.661	503.663	528.672	788.274	477.519	492.608	717.138
674	0	282.184	393.999	1574.22	164.115	386.355	1576.67	272.069	559.322	1523.61	163.992	549.674	1524.02	215.76	526.809	1431.15	210.106	600.866	1150.67	229.024	403.319	1339.24	227.552	334.279	1145.15	127.968	608.458	1228.54	402.318	472.717	1354	463.562	525.621	1111.01	461.813	540.47	1037.6	486.422	485.561	872.867	440.299	478.681	791.542	505.06	513.793	789.231	478.767	477.916	718.035
675	0	284.292	382.387	1575.47	166.229	374.817	1578.36	274.142	547.688	1524.8	166.059	538.11	1525.61	217.418	515.198	1432.52	211.494	588.866	1152.03	230.365	391.554	1340.77	228.664	322.217	1146.88	129.443	596.68	1230.06	403.751	460.722	1355.17	464.816	512.147	1111.86	463.116	526.563	1038.41	487.557	470.827	873.966	441.461	463.845	792.644	506.421	498.621	790.338	480.031	462.774	719.166
676	0	286.309	370.816	1576.8	168.251	363.316	1580.11	276.117	536.103	1526.09	168.024	526.589	1527.28	218.996	503.644	1433.97	212.881	576.978	1153.48	231.605	379.866	1342.36	229.671	310.303	1148.64	130.908	585.043	1231.65	405.094	448.76	1356.45	466.062	498.708	1112.84	464.443	512.646	1039.34	488.698	455.908	875.24	442.628	448.681	793.952	507.74	483.167	791.574	481.296	447.19	720.513
677	0	288.222	359.29	1578.18	170.169	351.858	1581.89	277.985	524.572	1527.46	169.879	515.118	1529.02	220.494	492.153	1435.48	214.272	565.214	1155	232.741	368.266	1343.99	230.561	298.549	1150.38	132.368	573.563	1233.28	406.347	436.832	1357.82	467.302	485.307	1113.95	465.795	498.727	1040.37	489.84	440.817	876.673	443.79	433.208	795.446	509.008	467.445	792.916	482.548	431.175	722.06
678	0	290.021	347.814	1579.59	171.972	340.449	1583.69	279.742	513.098	1528.89	171.619	503.701	1530.79	221.913	480.732	1437.05	215.674	553.583	1156.56	233.77	356.759	1345.63	231.327	286.963	1152.1	133.831	562.251	1234.93	407.51	424.939	1359.25	468.54	471.948	1115.15	467.175	484.809	1041.5	490.975	425.564	878.244	444.937	417.446	797.109	510.219	451.471	794.347	483.774	414.748	723.791
679	0	291.698	336.392	1581.03	173.652	329.094	1585.49	281.385	501.685	1530.36	173.241	492.344	1532.59	223.255	469.384	1438.64	217.091	542.094	1158.15	234.695	345.352	1347.28	231.962	275.552	1153.76	135.303	551.114	1236.59	408.586	413.085	1360.73	469.778	458.628	1116.42	468.579	470.897	1042.7	492.098	410.163	879.935	446.058	401.419	798.921	511.369	435.261	795.849	484.96	397.929	725.689
680	0	293.246	325.026	1582.48	175.202	317.798	1587.26	282.91	490.337	1531.86	174.741	481.051	1534.39	224.521	458.114	1440.25	218.525	530.75	1159.75	235.517	334.049	1348.91	232.468	264.317	1155.36	136.786	540.153	1238.25	409.577	401.271	1362.23	471.016	445.347	1117.76	470.007	456.993	1043.96	493.2	394.627	881.73	447.143	385.151	800.868	512.452	418.833	797.409	486.094	380.745	727.742
681	0	294.661	313.719	1583.91	176.617	306.564	1588.99	284.317	479.055	1533.37	176.12	469.826	1536.17	225.716	446.925	1441.85	219.975	519.554	1161.34	236.242	322.853	1350.5	232.849	253.255	1156.87	138.281	529.366	1239.88	410.487	389.5	1363.75	472.254	432.102	1119.15	471.455	443.098	1045.26	494.276	378.968	883.613	448.184	368.666	802.934	513.464	402.205	799.016	487.166	363.226	729.935
682	0	295.939	302.47	1585.33	177.895	295.396	1590.66	285.607	467.84	1534.88	177.378	458.671	1537.91	226.843	435.819	1443.44	221.44	508.505	1162.92	236.875	311.764	1352.04	233.112	242.363	1158.3	139.79	518.748	1241.47	411.323	377.777	1365.27	473.491	418.888	1120.56	472.919	429.213	1046.58	495.319	363.199	885.569	449.171	351.989	805.105	514.404	385.396	800.66	488.165	345.405	732.259
683	0	297.081	291.282	1586.71	179.035	284.296	1592.26	286.783	456.692	1536.38	178.519	447.587	1539.61	227.906	424.797	1444.99	222.916	497.601	1164.47	237.424	300.782	1353.53	233.27	231.633	1159.65	141.308	508.289	1243.02	412.089	366.104	1366.76	474.725	405.7	1121.98	474.393	415.34	1047.9	496.323	347.335	887.586	450.099	335.145	807.37	515.268	368.424	802.338	489.085	327.317	734.701
684	0	298.086	280.153	1588.05	180.037	273.263	1593.77	287.846	445.613	1537.85	179.547	436.577	1541.24	228.907	413.859	1446.49	224.397	486.835	1165.97	237.898	289.906	1354.94	233.338	221.056	1160.9	142.832	497.977	1244.51	412.791	354.487	1368.23	475.951	392.535	1123.41	475.871	401.479	1049.23	497.281	331.387	889.652	450.959	318.158	809.717	516.057	351.309	804.045	489.917	308.999	737.253
685	0	298.958	269.085	1589.34	180.905	262.3	1595.18	288.802	434.6	1539.29	180.466	425.64	1542.8	229.852	403.004	1447.93	225.877	476.201	1167.42	238.306	279.132	1356.28	233.333	210.621	1162.07	144.356	487.798	1245.93	413.437	342.93	1369.65	477.166	379.388	1124.82	477.346	387.631	1050.54	498.19	315.37	891.757	451.748	301.051	812.135	516.769	334.07	805.78	490.658	290.491	739.904
686	0	299.701	258.076	1590.55	181.642	251.405	1596.48	289.656	423.655	1540.67	181.282	414.775	1544.26	230.744	392.231	1449.3	227.345	465.689	1168.79	238.657	268.457	1357.52	233.275	200.315	1163.15	145.871	477.737	1247.28	414.033	331.439	1371.02	478.366	366.256	1126.21	478.811	373.797	1051.82	499.043	299.296	893.889	452.461	283.848	814.616	517.404	316.725	807.54	491.303	271.83	742.644
687	0	300.32	247.126	1591.68	182.256	240.577	1597.65	290.411	412.774	1541.99	182.001	403.983	1545.62	231.585	381.537	1450.58	228.794	455.29	1170.09	238.96	257.875	1358.67	233.182	190.126	1164.15	147.37	467.777	1248.53	414.583	320.018	1372.32	479.545	353.136	1127.56	480.258	359.978	1053.06	499.837	283.178	896.041	453.095	266.571	817.149	517.964	299.294	809.324	491.85	253.055	745.463
688	0	300.823	236.232	1592.73	182.753	229.813	1598.7	291.074	401.957	1543.23	182.63	393.26	1546.88	232.378	370.919	1451.76	230.212	444.991	1171.29	239.224	247.381	1359.71	233.075	180.039	1165.06	148.842	457.901	1249.7	415.094	308.671	1373.54	480.699	340.029	1128.87	481.68	346.178	1054.26	500.568	267.031	898.2	453.647	249.242	819.723	518.448	281.795	811.129	492.297	234.202	748.348
689	0	301.217	225.395	1593.67	183.141	219.112	1599.61	291.65	391.201	1544.39	183.175	382.605	1548.02	233.124	360.374	1452.83	231.591	434.779	1172.38	239.457	236.968	1360.64	232.97	170.039	1165.89	150.277	448.092	1250.75	415.571	297.404	1374.68	481.823	326.936	1130.12	483.068	332.396	1055.39	501.235	250.866	900.358	454.116	231.882	822.328	518.857	264.247	812.953	492.645	215.307	751.286
690	0	301.509	214.611	1594.5	183.427	208.471	1600.37	292.145	380.504	1545.45	183.641	372.014	1549.02	233.825	349.895	1453.79	232.92	424.643	1173.37	239.666	226.628	1361.45	232.883	160.113	1166.62	151.664	438.334	1251.69	416.016	286.22	1375.72	482.912	313.859	1131.29	484.415	318.638	1056.45	501.833	234.698	902.503	454.502	214.512	824.951	519.193	246.668	814.789	492.893	196.403	754.264
691	0	301.71	203.879	1595.22	183.621	197.884	1600.98	292.563	369.862	1546.41	184.036	361.484	1549.9	234.48	339.479	1454.61	234.189	414.569	1174.22	239.857	216.355	1362.13	232.827	150.246	1167.27	152.992	428.611	1252.5	416.431	275.121	1376.65	483.962	300.803	1132.39	485.715	304.905	1057.42	502.361	218.54	904.623	454.805	197.151	827.58	519.456	229.076	816.631	493.042	177.522	757.266
692	0	301.826	193.197	1595.8	183.731	187.349	1601.44	292.908	359.274	1547.25	184.363	351.009	1550.62	235.09	329.119	1455.3	235.388	404.546	1174.95	240.032	206.139	1362.68	232.81	140.424	1167.81	154.251	418.907	1253.18	416.82	264.11	1377.46	484.967	287.776	1133.39	486.96	291.202	1058.31	502.819	202.405	906.708	455.023	179.819	830.2	519.647	211.491	818.471	493.094	158.69	760.277
693	0	301.867	182.563	1596.25	183.766	176.86	1601.73	293.185	348.735	1547.95	184.627	340.584	1551.2	235.652	318.808	1455.84	236.511	394.56	1175.53	240.197	195.972	1363.09	232.839	130.633	1168.24	155.429	409.208	1253.72	417.181	253.187	1378.14	485.924	274.783	1134.28	488.145	277.533	1059.08	503.203	186.306	908.743	455.158	162.535	832.797	519.765	193.929	820.296	493.049	139.935	763.279
694	0	301.84	171.973	1596.55	183.733	166.412	1601.87	293.397	338.241	1548.52	184.832	330.205	1551.63	236.164	308.541	1456.22	237.547	384.602	1175.95	240.35	185.846	1363.36	232.917	120.86	1168.55	156.519	399.503	1254.1	417.513	242.352	1378.68	486.829	261.836	1135.06	489.263	263.904	1059.75	503.514	170.259	910.716	455.211	145.319	835.355	519.811	176.411	822.095	492.911	121.28	766.256
695	0	301.752	161.426	1596.7	183.638	156.001	1601.83	293.547	327.789	1548.94	184.98	319.866	1551.89	236.624	298.309	1456.45	238.493	374.661	1176.22	240.494	175.753	1363.47	233.041	111.092	1168.73	157.512	389.778	1254.33	417.816	231.603	1379.07	487.677	248.943	1135.7	490.311	250.32	1060.29	503.751	154.276	912.612	455.182	128.187	837.858	519.786	158.953	823.854	492.68	102.746	769.189
696	0	301.608	150.917	1596.7	183.489	145.621	1601.64	293.635	317.375	1549.21	185.073	309.559	1551.98	237.029	288.105	1456.51	239.34	364.728	1176.32	240.625	165.682	1363.43	233.209	101.319	1168.76	158.4	380.025	1254.39	418.086	220.938	1379.31	488.466	236.115	1136.2	491.283	236.786	1060.69	503.912	138.371	914.419	455.072	111.16	840.289	519.689	141.577	825.558	492.36	84.3548	772.062
697	0	301.415	140.443	1596.54	183.289	135.266	1601.27	293.665	306.993	1549.31	185.111	299.279	1551.91	237.374	277.923	1456.41	240.086	354.794	1176.26	240.743	155.626	1363.23	233.413	91.5289	1168.64	159.179	370.233	1254.28	418.321	210.353	1379.38	489.19	223.364	1136.55	492.174	223.311	1060.95	503.998	122.559	916.124	454.882	94.2543	842.632	519.52	124.299	827.194	491.953	66.1234	774.859
698	0	301.177	130	1596.23	183.043	124.931	1600.74	293.635	296.64	1549.25	185.094	289.02	1551.67	237.656	267.753	1456.14	240.727	344.851	1176.02	240.842	145.576	1362.87	233.644	81.714	1168.36	159.844	360.397	1254	418.516	199.843	1379.29	489.846	210.7	1136.74	492.982	209.9	1061.06	504.008	106.855	917.712	454.615	77.4878	844.871	519.28	107.14	828.745	491.463	48.0695	777.562
699	0	300.895	119.585	1595.75	182.754	114.611	1600.06	293.546	286.309	1549.02	185.021	278.773	1551.25	237.869	257.59	1455.69	241.261	334.891	1175.6	240.919	135.524	1362.34	233.893	71.866	1167.91	160.392	350.509	1253.54	418.666	189.402	1379.02	490.43	198.135	1136.76	493.701	196.563	1061.02	503.942	91.2724	919.173	454.27	60.8777	846.989	518.967	90.1201	830.197	490.892	30.2098	780.155
700	0	300.572	109.193	1595.12	182.423	104.3	1599.22	293.396	275.996	1548.61	184.891	268.534	1550.66	238.01	247.425	1455.08	241.687	324.908	1175.02	240.968	125.462	1361.65	234.147	61.9787	1167.28	160.821	340.565	1252.91	418.767	179.023	1378.57	490.938	185.679	1136.61	494.33	183.308	1060.83	503.799	75.8267	920.495	453.85	44.441	848.974	518.582	73.2578	831.535	490.244	12.5605	782.625
701	0	300.209	98.8194	1594.33	182.052	93.9925	1598.22	293.185	265.697	1548.04	184.701	258.295	1549.91	238.073	237.251	1454.31	242.002	314.895	1174.26	240.982	115.382	1360.8	234.394	52.0466	1166.47	161.129	330.561	1252.11	418.813	168.698	1377.95	491.365	173.341	1136.28	494.864	170.143	1060.47	503.58	60.533	921.667	453.356	28.194	850.81	518.125	56.5736	832.748	489.523	-4.86248	784.957
702	0	299.806	88.4603	1593.4	181.64	83.684	1597.09	292.91	255.404	1547.3	184.449	248.051	1548.99	238.053	227.062	1453.38	242.206	304.845	1173.34	240.956	105.277	1359.8	234.623	42.0654	1165.49	161.317	320.493	1251.14	418.798	158.419	1377.17	491.707	161.13	1135.77	495.301	157.079	1059.95	503.285	45.4065	922.682	452.789	12.153	852.487	517.595	40.0876	833.822	488.732	-22.0429	787.139
703	0	299.36	78.1106	1592.32	181.185	73.3693	1595.83	292.568	245.115	1546.39	184.13	237.794	1547.91	237.945	216.851	1452.3	242.299	294.751	1172.27	240.881	95.1399	1358.65	234.822	32.0318	1164.32	161.383	310.359	1250.02	418.717	148.176	1376.21	491.96	149.055	1135.09	495.638	144.126	1059.28	502.915	30.4625	923.531	452.152	-3.66614	853.994	516.992	23.8205	834.747	487.875	-38.9644	789.157
704	0	298.871	67.7657	1591.12	180.686	63.0436	1594.44	292.157	234.822	1545.33	183.742	227.521	1546.69	237.745	206.611	1451.08	242.279	284.608	1171.04	240.751	84.9644	1357.37	234.978	21.9425	1163	161.328	300.156	1248.74	418.564	137.96	1375.11	492.119	137.121	1134.23	495.87	131.292	1058.46	502.468	15.7167	924.208	451.447	-19.2478	855.322	516.316	7.79265	835.513	486.956	-55.6103	791.003
705	0	298.335	57.4208	1589.8	180.141	52.7025	1592.95	291.673	224.52	1544.13	183.281	217.225	1545.34	237.447	196.338	1449.72	242.146	274.407	1169.67	240.558	74.744	1355.95	235.083	11.7946	1161.51	161.152	289.882	1247.32	418.333	127.761	1373.86	492.179	125.334	1133.21	495.996	118.589	1057.49	501.947	1.18433	924.71	450.674	-34.5767	856.464	515.566	-7.97507	836.114	485.978	-71.9633	792.665
706	0	297.749	47.0713	1588.38	179.545	42.3417	1591.37	291.112	214.206	1542.79	182.742	206.901	1543.86	237.048	186.027	1448.25	241.897	264.143	1168.17	240.295	64.4729	1354.43	235.127	1.58471	1159.88	160.854	279.533	1245.77	418.018	117.569	1372.47	492.137	113.696	1132.04	496.011	106.025	1056.39	501.351	-13.1189	925.035	449.836	-49.6377	857.413	514.744	-23.4618	836.543	484.946	-88.0057	794.137
707	0	297.109	36.7127	1586.86	178.896	31.9571	1589.71	290.47	203.873	1541.33	182.121	196.546	1542.27	236.543	175.671	1446.67	241.534	253.807	1166.56	239.954	54.1453	1352.81	235.101	-8.69125	1158.13	160.435	269.106	1244.11	417.613	107.374	1370.98	491.987	102.21	1130.73	495.913	93.6098	1055.17	500.681	-27.1778	925.18	448.936	-64.416	858.167	513.848	-38.6467	836.796	483.864	-103.719	795.409
708	0	296.409	26.3407	1585.28	178.187	21.5453	1588	289.744	193.518	1539.77	181.415	186.154	1540.59	235.928	165.269	1445.01	241.053	243.393	1164.85	239.528	43.7562	1351.11	235	-19.0383	1156.27	159.894	258.599	1242.34	417.114	97.1664	1369.39	491.726	90.8743	1129.3	495.698	81.3525	1053.83	499.938	-40.9772	925.149	447.974	-78.8968	858.723	512.881	-53.5088	836.871	482.735	-119.086	796.476
709	0	295.646	15.9514	1583.63	177.416	11.1029	1586.24	288.929	183.135	1538.12	180.618	175.722	1538.84	235.202	154.815	1443.27	240.457	232.893	1163.06	239.01	33.3004	1349.36	234.818	-29.4626	1154.34	159.232	248.006	1240.48	416.515	86.9353	1367.72	491.349	79.687	1127.76	495.363	69.2609	1052.4	499.123	-54.5023	924.943	446.954	-93.0658	859.081	511.841	-68.0273	836.768	481.563	-134.086	797.334
710	0	294.813	5.54117	1581.96	176.577	0.627265	1584.46	288.022	172.721	1536.4	179.728	165.248	1537.04	234.36	144.306	1441.48	239.744	222.298	1161.21	238.395	22.7735	1347.57	234.549	-39.972	1152.36	158.451	237.323	1238.55	415.812	76.6709	1366.01	490.853	68.6436	1126.14	494.906	57.3417	1050.89	498.236	-67.7391	924.567	445.876	-106.909	859.242	510.731	-82.1819	836.488	480.352	-148.7	797.979
711	0	293.906	-4.89319	1580.26	175.664	-9.88403	1582.68	287.018	162.273	1534.63	178.74	154.728	1535.2	233.404	133.74	1439.66	238.917	211.601	1159.3	237.678	12.171	1345.76	234.191	-50.5756	1150.36	157.551	226.546	1236.57	415.004	66.3634	1364.26	490.235	57.7375	1124.46	494.324	45.6009	1049.32	497.278	-80.6741	924.029	444.744	-120.412	859.209	509.551	-95.9526	836.035	479.104	-162.911	798.407
712	0	292.92	-15.3544	1578.57	174.673	-20.4327	1580.92	285.915	151.787	1532.83	177.651	144.16	1533.34	232.331	123.114	1437.81	237.977	200.795	1157.36	236.854	1.48905	1343.97	233.741	-61.2841	1148.38	156.536	215.671	1234.55	414.086	56.0029	1362.51	489.492	46.9606	1122.74	493.616	34.0427	1047.72	496.25	-93.295	923.335	443.558	-133.563	858.985	508.303	-109.32	835.415	477.824	-176.699	798.619
713	0	291.849	-25.8447	1576.91	173.599	-31.0201	1579.19	284.708	141.261	1531.03	176.458	133.543	1531.49	231.144	112.427	1435.97	236.929	189.873	1155.41	235.921	-9.27595	1342.21	233.196	-72.1092	1146.45	155.409	204.691	1232.52	413.059	45.5801	1360.77	488.624	36.303	1121.01	492.78	22.6701	1046.09	495.154	-105.591	922.495	442.322	-146.347	858.577	506.987	-122.267	834.634	476.513	-190.046	798.613
714	0	290.689	-36.3656	1575.29	172.438	-41.6469	1577.52	283.397	130.692	1529.23	175.16	122.876	1529.66	229.843	101.676	1434.15	235.778	178.829	1153.47	234.877	-20.127	1340.5	232.554	-83.0638	1144.6	154.175	193.603	1230.48	411.923	35.0857	1359.09	487.629	25.7535	1119.29	491.817	11.4842	1044.47	493.99	-117.552	921.52	441.036	-158.754	857.991	505.606	-134.776	833.701	475.175	-202.935	798.391
715	0	289.435	-46.9183	1573.74	171.184	-52.3133	1575.93	281.979	120.08	1527.46	173.754	112.158	1527.88	228.433	90.8616	1432.37	234.529	167.659	1151.55	233.721	-31.0664	1338.87	231.814	-94.1611	1142.86	152.841	182.403	1228.45	410.678	24.5113	1357.46	486.509	15.2995	1117.62	490.729	0.484248	1042.87	492.761	-129.17	920.421	439.703	-170.772	857.233	504.161	-146.833	832.625	473.809	-215.351	797.953
716	0	288.084	-57.5033	1572.27	169.835	-63.0188	1574.43	280.453	109.423	1525.74	172.24	101.389	1526.14	226.917	79.9818	1430.64	233.191	156.361	1149.68	232.455	-42.0958	1337.33	230.974	-105.414	1141.27	151.412	171.088	1226.45	409.327	13.8489	1355.93	485.265	4.9279	1116.01	489.516	-10.3323	1041.32	491.467	-140.441	919.21	438.324	-182.391	856.312	502.654	-158.426	831.418	472.418	-227.28	797.303
717	0	286.633	-68.1207	1570.9	168.388	-73.7627	1573.03	278.82	98.7203	1524.09	170.618	90.5697	1524.48	225.3	69.0369	1428.98	231.772	144.935	1147.86	231.08	-53.2159	1335.9	230.033	-116.834	1139.84	149.898	159.656	1224.51	407.874	3.0918	1354.51	483.902	-5.37507	1114.48	488.182	-20.97	1039.83	490.111	-151.361	917.901	436.901	-193.603	855.237	501.09	-169.546	830.091	471.002	-238.71	796.444
718	0	285.079	-78.7701	1569.65	166.84	-84.5437	1571.76	277.08	87.9729	1522.52	168.889	79.7005	1522.9	223.591	58.0272	1427.42	230.283	133.384	1146.11	229.601	-64.4264	1334.61	228.991	-128.432	1138.61	148.308	148.106	1222.62	406.325	-7.76586	1353.21	482.425	-15.6234	1113.06	486.733	-31.4355	1038.42	488.694	-161.929	916.508	435.436	-204.4	854.017	499.471	-180.185	828.658	469.561	-249.631	795.379
719	0	283.423	-89.4507	1568.53	165.19	-95.3601	1570.61	275.236	77.1809	1521.04	167.056	68.7829	1521.42	221.795	46.9538	1425.95	228.733	121.711	1144.46	228.023	-75.7255	1333.45	227.85	-140.213	1137.59	146.651	136.441	1220.81	404.686	-18.7283	1352.06	480.84	-25.8309	1111.77	485.173	-41.7375	1037.11	487.219	-172.147	915.043	433.931	-214.778	852.66	497.802	-190.342	827.132	468.094	-260.034	794.115
720	0	281.663	-100.161	1567.56	163.439	-106.21	1569.61	273.292	66.3454	1519.67	165.123	57.8186	1520.04	219.924	35.8182	1424.6	227.135	109.925	1142.91	226.355	-87.1103	1332.45	226.611	-152.18	1136.79	144.939	124.665	1219.09	402.965	-29.7982	1351.07	479.155	-36.0112	1110.61	483.509	-51.8863	1035.93	485.688	-182.02	913.521	432.387	-224.732	851.179	496.088	-200.018	825.528	466.601	-269.916	792.659
721	0	279.801	-110.901	1566.75	161.588	-117.091	1568.76	271.251	55.468	1518.42	163.093	46.8098	1518.77	217.986	24.623	1423.38	225.5	98.036	1141.48	224.604	-98.5763	1331.62	225.278	-164.33	1136.21	143.183	112.781	1217.48	401.173	-40.9762	1350.24	477.379	-46.1774	1109.61	481.75	-61.8942	1034.87	484.104	-191.556	911.957	430.807	-234.262	849.583	494.335	-209.217	823.861	465.081	-279.273	791.017
722	0	277.838	-121.667	1566.1	159.638	-128.001	1568.05	269.12	44.5505	1517.31	160.973	35.7591	1517.61	215.992	13.3713	1422.3	223.839	86.0555	1140.18	222.782	-110.117	1330.94	223.857	-176.655	1135.86	141.395	100.801	1215.98	399.319	-52.2605	1349.6	475.524	-56.3421	1108.78	479.903	-71.7745	1033.95	482.471	-200.765	910.364	429.192	-243.369	847.883	492.551	-217.948	822.148	463.533	-288.105	789.199
723	0	275.779	-132.459	1565.63	157.592	-138.938	1567.5	266.905	33.5955	1516.33	158.77	24.6694	1516.58	213.955	2.06731	1421.36	222.165	73.9985	1139.03	220.901	-121.726	1330.44	222.357	-189.138	1135.73	139.588	88.7336	1214.62	397.416	-63.6472	1349.13	473.601	-66.5172	1108.12	477.979	-81.5419	1033.19	480.792	-209.661	908.758	427.545	-252.056	846.093	490.744	-226.225	820.406	461.957	-296.415	787.218
724	0	273.628	-143.275	1565.34	155.457	-149.898	1567.11	264.616	22.6058	1515.5	156.493	13.5443	1515.67	211.887	-9.28364	1420.58	220.49	61.8814	1138.04	218.974	-133.393	1330.11	220.788	-201.756	1135.81	137.776	76.5943	1213.4	395.479	-75.1294	1348.85	471.622	-76.7142	1107.63	475.989	-91.2115	1032.59	479.07	-218.259	907.153	425.869	-260.33	844.226	488.924	-234.066	818.652	460.353	-304.209	785.085
725	0	271.391	-154.113	1565.23	153.237	-160.88	1566.86	262.261	11.5847	1514.83	154.151	2.38781	1514.88	209.801	-20.6753	1419.95	218.824	49.7223	1137.22	217.017	-145.106	1329.94	219.163	-214.481	1136.08	135.97	64.3994	1212.34	393.519	-86.6977	1348.76	469.6	-86.9434	1107.32	473.944	-100.798	1032.15	477.312	-226.578	905.566	424.167	-268.198	842.297	487.1	-241.492	816.907	458.721	-311.494	782.816
726	0	269.076	-164.972	1565.3	150.939	-171.88	1566.76	259.851	0.535889	1514.31	151.756	-8.79555	1514.22	207.709	-32.1003	1419.49	217.177	37.5399	1136.57	215.045	-156.854	1329.94	217.498	-227.275	1136.53	134.184	52.1679	1211.44	391.554	-98.3393	1348.86	467.55	-97.2142	1107.19	471.856	-110.318	1031.89	475.521	-234.639	904.01	422.443	-275.674	840.321	485.285	-248.532	815.189	457.062	-318.283	780.428
727	0	266.69	-175.85	1565.54	148.573	-182.896	1566.8	257.399	-10.5364	1513.96	149.32	-20.0007	1513.68	205.626	-43.5501	1419.19	215.56	25.3535	1136.1	213.076	-168.622	1330.09	215.81	-240.098	1137.13	132.431	39.921	1210.71	389.596	-110.039	1349.13	465.485	-107.534	1107.24	469.74	-119.783	1031.8	473.705	-242.463	902.502	420.701	-282.772	838.316	483.49	-255.215	813.52	455.377	-324.592	777.939
728	0	264.243	-186.746	1565.96	146.147	-193.924	1566.97	254.917	-21.6276	1513.77	146.856	-31.2219	1513.26	203.564	-55.0152	1419.06	213.979	13.1826	1135.82	211.126	-180.395	1330.39	214.119	-252.906	1137.85	130.722	27.6808	1210.16	387.663	-121.778	1349.58	463.422	-117.91	1107.46	467.609	-129.207	1031.88	471.869	-250.076	901.058	418.947	-289.511	836.299	481.728	-261.579	811.92	453.667	-330.441	775.371
729	0	261.747	-197.658	1566.55	143.672	-204.963	1567.25	252.418	-32.7327	1513.76	144.377	-42.453	1512.97	201.534	-66.4852	1419.09	212.443	1.04564	1135.72	209.213	-192.157	1330.82	212.447	-265.653	1138.68	129.066	15.4704	1209.79	385.768	-133.536	1350.19	461.373	-128.344	1107.84	465.479	-138.6	1032.13	470.023	-257.502	899.691	417.188	-295.913	834.291	480.013	-267.663	810.411	451.936	-335.853	772.746
730	0	259.214	-208.585	1567.29	141.162	-216.009	1567.64	249.917	-43.8463	1513.91	141.9	-53.6873	1512.79	199.548	-77.949	1419.28	210.954	-11.0395	1135.82	207.353	-203.892	1331.39	210.816	-278.294	1139.59	127.473	3.31249	1209.6	383.925	-145.29	1350.96	459.355	-138.837	1108.38	463.364	-147.97	1032.55	468.175	-264.767	898.417	415.431	-302.002	832.312	478.359	-273.509	809.012	450.188	-340.858	770.088
731	0	256.658	-219.524	1568.18	138.629	-227.058	1568.12	247.428	-54.9628	1514.23	139.438	-64.918	1512.74	197.617	-89.395	1419.63	209.515	-23.0565	1136.09	205.563	-215.582	1332.07	209.248	-290.785	1140.56	125.947	-8.77094	1209.6	382.148	-157.013	1351.87	457.382	-149.383	1109.06	461.28	-157.321	1033.12	466.336	-271.898	897.25	413.687	-307.808	830.383	476.782	-279.163	807.744	448.427	-345.489	767.424
732	0	254.092	-230.475	1569.2	136.087	-238.108	1568.68	244.965	-66.0763	1514.72	137.007	-76.1377	1512.81	195.749	-100.812	1420.13	208.126	-34.9904	1136.55	203.857	-227.212	1332.85	207.766	-303.09	1141.56	124.491	-20.7597	1209.77	380.447	-168.681	1352.92	455.467	-159.974	1109.87	459.242	-166.655	1033.85	464.519	-278.921	896.203	411.966	-313.362	828.525	475.295	-284.672	806.625	446.662	-349.783	764.779
733	0	251.531	-241.433	1570.34	133.551	-249.156	1569.31	242.544	-77.181	1515.37	134.621	-87.3392	1513	193.951	-112.188	1420.77	206.785	-46.828	1137.17	202.248	-238.765	1333.73	206.393	-315.175	1142.58	123.106	-32.6357	1210.12	378.833	-180.266	1354.08	453.626	-170.595	1110.8	457.265	-175.969	1034.71	462.735	-285.858	895.289	410.281	-318.699	826.761	473.912	-290.083	805.672	444.902	-353.784	762.183
734	0	248.992	-252.399	1571.59	131.038	-260.197	1570	240.178	-88.2711	1516.19	132.294	-98.5155	1513.31	192.229	-123.512	1421.55	205.487	-58.5574	1137.95	200.747	-250.228	1334.7	205.147	-327.015	1143.6	121.789	-44.3841	1210.64	377.313	-191.744	1355.35	451.869	-181.226	1111.85	455.362	-185.259	1035.71	461	-292.734	894.518	408.645	-323.856	825.113	472.647	-295.441	804.899	443.16	-357.538	759.664
735	0	246.489	-263.367	1572.92	128.561	-271.228	1570.74	237.881	-99.3409	1517.17	130.04	-109.66	1513.74	190.588	-134.774	1422.45	204.224	-70.1687	1138.89	199.364	-261.588	1335.74	204.047	-338.595	1144.63	120.533	-55.9929	1211.32	375.894	-203.088	1356.71	450.209	-191.843	1112.98	453.546	-194.515	1036.82	459.327	-299.567	893.9	407.074	-328.872	823.601	471.511	-300.787	804.32	441.451	-361.096	757.253
736	0	244.039	-274.336	1574.34	126.138	-282.245	1571.52	235.665	-110.385	1518.29	127.871	-120.766	1514.28	189.03	-145.966	1423.47	202.99	-81.6533	1139.96	198.103	-272.834	1336.84	203.105	-349.905	1145.65	119.33	-67.4538	1212.14	374.578	-214.277	1358.14	448.654	-202.414	1114.2	451.829	-203.726	1038.04	457.733	-306.376	893.444	405.585	-333.788	822.247	470.515	-306.161	803.943	439.793	-364.51	754.98
737	0	241.656	-285.303	1575.81	123.783	-293.247	1572.33	233.542	-121.399	1519.55	125.798	-131.828	1514.94	187.555	-157.08	1424.59	201.775	-93.0041	1141.15	196.969	-283.959	1338.01	202.332	-360.947	1146.67	118.17	-78.7622	1213.11	373.367	-225.292	1359.64	447.212	-212.906	1115.49	450.219	-212.875	1039.35	456.234	-313.173	893.155	404.194	-338.644	821.067	469.668	-311.593	803.773	438.208	-367.837	752.875
738	0	239.356	-296.264	1577.33	121.512	-304.228	1573.16	231.521	-132.379	1520.95	123.831	-142.841	1515.72	186.162	-168.109	1425.81	200.57	-104.216	1142.45	195.962	-294.957	1339.22	201.733	-371.726	1147.69	117.04	-89.9172	1214.2	372.26	-236.117	1361.19	445.888	-223.281	1116.84	448.725	-221.947	1040.74	454.845	-319.969	893.037	402.92	-343.481	820.078	468.974	-317.108	803.814	436.718	-371.132	750.965
739	0	237.152	-307.216	1578.89	119.337	-315.186	1574.02	229.612	-143.321	1522.46	121.978	-153.802	1516.6	184.85	-179.051	1427.11	199.367	-115.284	1143.85	195.081	-305.825	1340.47	201.307	-382.256	1148.72	115.928	-100.921	1215.41	371.254	-246.742	1362.78	444.685	-233.5	1118.25	447.351	-230.922	1042.21	453.582	-326.77	893.092	401.779	-348.339	819.294	468.438	-322.724	804.063	435.351	-374.452	749.278
740	0	235.056	-318.156	1580.46	117.272	-326.118	1574.89	227.822	-154.222	1524.08	120.245	-164.708	1517.59	183.615	-189.903	1428.47	198.157	-126.207	1145.32	194.32	-316.564	1341.75	201.049	-392.558	1149.75	114.822	-111.781	1216.73	370.342	-257.161	1364.39	443.602	-243.523	1119.69	446.1	-239.783	1043.72	452.461	-333.578	893.319	400.789	-353.257	818.725	468.061	-328.449	804.516	434.132	-377.852	747.837
741	0	233.08	-329.082	1582.03	115.326	-337.022	1575.77	226.157	-165.081	1525.79	118.637	-175.558	1518.68	182.452	-200.665	1429.89	196.936	-136.985	1146.86	193.674	-327.175	1343.06	200.947	-402.655	1150.81	113.709	-122.506	1218.13	369.519	-267.371	1366.01	442.636	-253.313	1121.17	444.974	-248.511	1045.29	451.495	-340.393	893.713	399.966	-358.27	818.377	467.842	-334.285	805.16	433.09	-381.385	746.662
742	0	231.232	-339.991	1583.59	113.509	-347.896	1576.66	224.619	-175.896	1527.57	117.158	-186.35	1519.86	181.358	-211.339	1431.36	195.7	-147.621	1148.43	193.134	-337.664	1344.39	200.987	-412.572	1151.9	112.579	-133.109	1219.61	368.776	-277.376	1367.64	441.782	-262.835	1122.68	443.968	-257.089	1046.88	450.695	-347.21	894.269	399.325	-363.409	818.25	467.775	-340.227	805.985	432.25	-385.1	745.769
743	0	229.521	-350.88	1585.13	111.829	-358.739	1577.56	223.212	-186.668	1529.4	115.807	-197.086	1521.12	180.325	-221.927	1432.85	194.446	-158.119	1150.04	192.689	-348.038	1345.72	201.147	-422.339	1153.02	111.422	-143.605	1221.15	368.103	-287.183	1369.26	441.032	-272.059	1124.21	443.079	-265.501	1048.5	450.073	-354.023	894.976	398.876	-368.703	818.343	467.856	-346.262	806.97	431.638	-389.041	745.167
744	0	227.952	-361.748	1586.64	110.289	-369.549	1578.45	221.936	-197.397	1531.27	114.586	-207.767	1522.44	179.348	-232.436	1434.35	193.177	-168.487	1151.66	192.33	-358.307	1347.06	201.406	-431.982	1154.16	110.232	-154.009	1222.73	367.491	-296.806	1370.85	440.376	-280.965	1125.74	442.3	-273.735	1050.12	449.636	-360.824	895.822	398.63	-374.175	818.646	468.075	-352.373	808.096	431.275	-393.247	744.859
745	0	226.528	-372.592	1588.09	108.895	-380.328	1579.34	220.79	-208.086	1533.15	113.491	-218.397	1523.82	178.421	-242.871	1435.86	191.892	-178.734	1153.27	192.044	-368.481	1348.38	201.739	-441.531	1155.34	109.005	-164.342	1224.33	366.929	-306.258	1372.41	439.802	-289.539	1127.28	441.623	-281.785	1051.75	449.387	-367.605	896.789	398.593	-379.844	819.146	468.422	-358.54	809.338	431.178	-397.75	744.841
746	0	225.251	-383.414	1589.48	107.647	-391.076	1580.23	219.771	-218.735	1535.02	112.519	-228.98	1525.24	177.54	-253.241	1437.34	190.597	-188.871	1154.86	191.82	-378.572	1349.68	202.121	-451.011	1156.53	107.739	-174.62	1225.94	366.408	-315.56	1373.92	439.299	-297.777	1128.81	441.037	-289.645	1053.36	449.329	-374.357	897.859	398.767	-385.722	819.827	468.885	-364.742	810.667	431.359	-402.572	745.103
747	0	224.121	-394.211	1590.79	106.543	-401.794	1581.09	218.876	-229.349	1536.86	111.666	-239.52	1526.67	176.698	-263.554	1438.79	189.295	-198.911	1156.41	191.647	-388.593	1350.95	202.527	-460.446	1157.73	106.434	-184.861	1227.54	365.919	-324.731	1375.37	438.851	-305.684	1130.32	440.533	-297.318	1054.94	449.459	-381.073	899.011	399.152	-391.819	820.664	469.447	-370.959	812.055	431.824	-407.73	745.628
748	0	223.135	-404.984	1592.02	105.583	-412.485	1581.93	218.099	-239.931	1538.64	110.926	-250.023	1528.1	175.891	-273.819	1440.19	187.993	-208.865	1157.9	191.513	-398.558	1352.16	202.933	-469.86	1158.93	105.095	-195.081	1229.1	365.454	-333.794	1376.74	438.447	-313.277	1131.8	440.099	-304.808	1056.47	449.771	-387.748	900.22	399.742	-398.137	821.632	470.095	-377.17	813.469	432.574	-413.232	746.389
749	0	222.291	-415.734	1593.15	104.762	-423.151	1582.73	217.435	-250.485	1540.35	110.292	-260.495	1529.51	175.117	-284.047	1441.53	186.697	-218.746	1159.31	191.41	-408.48	1353.32	203.322	-479.272	1160.1	103.728	-205.294	1230.61	365.006	-342.773	1378.03	438.072	-320.58	1133.22	439.723	-312.128	1057.95	450.256	-394.379	901.461	400.528	-404.674	822.701	470.809	-383.361	814.879	433.601	-419.075	747.357
750	0	221.583	-426.463	1594.16	104.075	-433.796	1583.48	216.876	-261.016	1541.96	109.758	-270.943	1530.88	174.372	-294.247	1442.78	185.414	-228.565	1160.64	191.329	-418.372	1354.39	203.675	-488.699	1161.23	102.342	-215.512	1232.04	364.571	-351.692	1379.21	437.715	-327.627	1134.59	439.396	-319.294	1059.36	450.899	-400.965	902.707	401.5	-411.424	823.838	471.573	-389.521	816.251	434.892	-425.252	748.495
751	0	221.005	-437.171	1595.06	103.514	-444.424	1584.17	216.417	-271.529	1543.46	109.316	-281.375	1532.19	173.655	-304.429	1443.93	184.152	-238.334	1161.86	191.264	-428.247	1355.37	203.982	-498.155	1162.29	100.946	-225.742	1233.38	364.144	-360.576	1380.28	437.365	-334.459	1135.87	439.106	-326.326	1060.69	451.686	-407.509	903.931	402.639	-418.379	825.01	472.367	-395.643	817.555	436.428	-431.746	749.764
752	0	220.549	-447.862	1595.82	103.074	-455.04	1584.8	216.048	-282.029	1544.82	108.96	-291.796	1533.41	172.966	-314.603	1444.98	182.916	-248.063	1162.96	191.208	-438.117	1356.24	204.235	-507.651	1163.26	99.5524	-235.992	1234.62	363.724	-369.447	1381.21	437.013	-341.122	1137.07	438.845	-333.247	1061.91	452.596	-414.018	905.105	403.927	-425.527	826.181	473.173	-401.728	818.763	438.183	-438.536	751.121
753	0	220.209	-458.539	1596.44	102.746	-465.647	1585.33	215.762	-292.521	1546.03	108.681	-302.215	1534.52	172.305	-324.779	1445.89	181.715	-257.76	1163.93	191.157	-447.994	1356.98	204.429	-517.197	1164.11	98.1737	-246.263	1235.74	363.311	-378.328	1382.01	436.653	-347.666	1138.15	438.605	-340.087	1063.02	453.608	-420.501	906.202	405.343	-432.853	827.32	473.972	-407.781	819.848	440.127	-445.593	752.522
754	0	219.974	-469.204	1596.9	102.521	-476.252	1585.78	215.553	-303.01	1547.06	108.472	-312.638	1535.52	171.673	-334.965	1446.67	180.555	-267.434	1164.76	191.11	-457.888	1357.59	204.568	-526.796	1164.82	96.823	-256.557	1236.72	362.905	-387.24	1382.65	436.281	-354.145	1139.1	438.379	-346.875	1064	454.699	-426.971	907.198	406.861	-440.342	828.392	474.748	-413.811	820.786	442.226	-452.888	753.923
755	0	219.838	-479.862	1597.21	102.392	-486.858	1586.11	215.412	-313.503	1547.92	108.327	-323.072	1536.37	171.073	-345.171	1447.29	179.443	-277.092	1165.44	191.065	-467.808	1358.04	204.654	-536.454	1165.38	95.5136	-266.873	1237.56	362.509	-396.203	1383.13	435.894	-360.61	1139.92	438.161	-353.641	1064.84	455.845	-433.443	908.069	408.457	-447.979	829.366	475.485	-419.836	821.56	444.442	-460.387	755.279
756	0	219.792	-490.516	1597.35	102.351	-497.472	1586.32	215.332	-324.004	1548.58	108.241	-333.523	1537.07	170.509	-355.403	1447.76	178.387	-286.741	1165.96	191.022	-477.763	1358.34	204.695	-546.169	1165.77	94.2587	-277.207	1238.23	362.127	-405.234	1383.44	435.495	-367.115	1140.59	437.947	-360.419	1065.53	457.023	-439.935	908.793	410.101	-455.748	830.216	476.171	-425.872	822.152	446.736	-468.057	756.55
757	0	219.828	-501.171	1597.32	102.389	-508.097	1586.39	215.309	-334.518	1549.04	108.207	-343.998	1537.6	169.983	-365.669	1448.06	177.394	-296.388	1166.32	190.983	-487.76	1358.46	204.702	-555.943	1165.96	93.0711	-287.556	1238.75	361.763	-414.35	1383.58	435.085	-373.709	1141.1	437.736	-367.241	1066.05	458.209	-446.465	909.353	411.767	-463.633	830.914	476.796	-431.942	822.553	449.067	-475.865	757.696
758	0	219.939	-511.83	1597.11	102.499	-518.74	1586.33	215.337	-345.049	1549.29	108.221	-354.502	1537.95	169.502	-375.974	1448.18	176.47	-306.04	1166.51	190.95	-497.806	1358.4	204.685	-565.772	1165.94	91.9631	-297.917	1239.09	361.422	-423.564	1383.54	434.669	-380.437	1141.44	437.526	-374.138	1066.41	459.382	-453.055	909.731	413.427	-471.617	831.439	477.351	-438.07	822.753	451.393	-483.779	758.682
759	0	220.117	-522.497	1596.73	102.676	-529.403	1586.11	215.412	-355.603	1549.33	108.279	-365.039	1538.11	169.069	-386.324	1448.12	175.624	-315.704	1166.53	190.928	-507.904	1358.16	204.656	-575.654	1165.72	90.9461	-308.285	1239.26	361.111	-432.887	1383.31	434.254	-387.341	1141.6	437.317	-381.141	1066.59	460.52	-459.726	909.914	415.053	-479.686	831.771	477.835	-444.28	822.748	453.675	-491.769	759.475
760	0	220.358	-533.178	1596.17	102.913	-540.093	1585.74	215.531	-366.184	1549.16	108.38	-375.615	1538.08	168.692	-396.723	1447.88	174.863	-325.388	1166.38	190.919	-518.061	1357.72	204.628	-585.589	1165.28	90.0308	-318.658	1239.25	360.837	-442.331	1382.9	433.848	-394.457	1141.59	437.109	-388.278	1066.59	461.606	-466.497	909.893	416.621	-487.827	831.894	478.244	-450.597	822.538	455.874	-499.811	760.047
761	0	220.656	-543.876	1595.43	103.205	-550.811	1585.21	215.691	-376.795	1548.78	108.52	-386.232	1537.85	168.375	-407.175	1447.46	174.194	-335.099	1166.05	190.931	-528.28	1357.1	204.611	-595.572	1164.63	89.2268	-329.034	1239.06	360.605	-451.901	1382.31	433.459	-401.814	1141.39	436.907	-395.575	1066.4	462.626	-473.39	909.659	418.107	-496.028	831.796	478.583	-457.045	822.122	457.953	-507.884	760.376
762	0	221.007	-554.595	1594.53	103.55	-561.562	1584.51	215.893	-387.44	1548.19	108.701	-396.895	1537.42	168.126	-417.682	1446.86	173.625	-344.848	1165.56	190.968	-538.563	1356.3	204.617	-605.605	1163.77	88.5423	-339.412	1238.69	360.425	-461.605	1381.55	433.097	-409.437	1141	436.713	-403.056	1066.03	463.567	-480.424	909.208	419.49	-504.278	831.467	478.855	-463.645	821.505	459.883	-515.97	760.441
763	0	221.408	-565.34	1593.45	103.943	-572.349	1583.65	216.136	-398.123	1547.4	108.923	-407.605	1536.8	167.951	-428.248	1446.08	173.164	-354.645	1164.9	191.036	-548.914	1355.31	204.653	-615.688	1162.7	87.9847	-349.793	1238.14	360.302	-471.447	1380.6	432.771	-417.344	1140.43	436.532	-410.742	1065.47	464.421	-487.616	908.538	420.755	-512.57	830.901	479.067	-470.417	820.69	461.636	-524.059	760.228
764	0	221.857	-576.113	1592.23	104.384	-583.175	1582.63	216.422	-408.845	1546.43	109.187	-418.365	1535.99	167.857	-438.874	1445.13	172.816	-364.5	1164.07	191.144	-559.334	1354.14	204.728	-625.823	1161.44	87.56	-360.181	1237.41	360.244	-481.43	1379.49	432.491	-425.547	1139.67	436.368	-418.65	1064.73	465.181	-494.983	907.649	421.887	-520.899	830.096	479.228	-477.377	819.684	463.189	-532.141	759.729
765	0	222.354	-586.919	1590.85	104.872	-594.04	1581.46	216.753	-419.611	1545.27	109.496	-429.176	1535	167.85	-449.562	1444.02	172.588	-374.424	1163.08	191.296	-569.826	1352.82	204.845	-636.014	1159.99	87.2732	-370.578	1236.51	360.258	-491.556	1378.22	432.266	-434.054	1138.74	436.227	-426.796	1063.8	465.846	-502.54	906.543	422.877	-529.26	829.05	479.347	-484.539	818.493	464.527	-540.216	758.937
766	0	222.897	-597.761	1589.34	105.406	-604.947	1580.14	217.133	-430.423	1543.96	109.854	-440.039	1533.83	167.937	-460.313	1442.76	172.483	-384.431	1161.95	191.501	-580.39	1351.33	205.009	-646.267	1158.38	87.128	-380.991	1235.45	360.352	-501.824	1376.79	432.104	-442.868	1137.63	436.115	-435.192	1062.7	466.416	-510.298	905.227	423.719	-537.652	827.769	479.435	-491.914	817.126	465.639	-548.283	757.853
767	0	223.489	-608.642	1587.72	105.988	-615.897	1578.69	217.567	-441.283	1542.5	110.265	-450.955	1532.51	168.124	-471.128	1441.36	172.506	-394.53	1160.67	191.766	-591.03	1349.71	205.221	-656.587	1156.61	87.1268	-391.426	1234.23	360.531	-512.235	1375.22	432.014	-451.987	1136.34	436.039	-443.847	1061.43	466.894	-518.267	903.707	424.412	-546.078	826.257	479.502	-499.508	815.59	466.521	-556.347	756.48
768	0	224.131	-619.564	1585.99	106.619	-626.891	1577.12	218.059	-452.193	1540.91	110.734	-461.924	1531.05	168.416	-482.008	1439.84	172.658	-404.734	1159.27	192.097	-601.746	1347.97	205.482	-666.985	1154.71	87.2709	-401.893	1232.88	360.802	-522.786	1373.52	432.002	-461.408	1134.9	436.003	-452.768	1060.01	467.285	-526.456	901.994	424.957	-554.539	824.526	479.558	-507.326	813.895	467.175	-564.416	754.829
769	0	224.825	-630.531	1584.18	107.303	-637.929	1575.45	218.616	-463.156	1539.21	111.269	-472.946	1529.47	168.819	-492.953	1438.22	172.94	-415.053	1157.75	192.502	-612.54	1346.13	205.792	-677.467	1152.7	87.5602	-412.4	1231.4	361.17	-533.476	1371.7	432.075	-471.122	1133.3	436.013	-461.96	1058.43	467.596	-534.871	900.101	425.36	-563.043	822.587	479.613	-515.37	812.052	467.608	-572.501	752.912
770	0	225.574	-641.545	1582.32	108.04	-649.011	1573.7	219.243	-474.173	1537.43	111.874	-484.02	1527.78	169.338	-503.964	1436.51	173.351	-425.497	1156.12	192.986	-623.412	1344.21	206.152	-688.043	1150.59	87.9931	-422.958	1229.81	361.64	-544.3	1369.79	432.236	-481.122	1131.56	436.074	-471.426	1056.72	467.838	-543.517	898.042	425.631	-571.596	820.457	479.676	-523.64	810.073	467.833	-580.613	750.748
771	0	226.382	-652.609	1580.41	108.836	-660.137	1571.89	219.947	-485.247	1535.58	112.557	-495.146	1526.02	169.974	-515.042	1434.74	173.887	-436.075	1154.42	193.555	-634.366	1342.23	206.561	-698.722	1148.41	88.5667	-433.578	1228.14	362.215	-555.256	1367.79	432.488	-491.396	1129.69	436.19	-481.165	1054.88	468.019	-552.395	895.837	425.78	-580.209	818.157	479.755	-532.134	807.972	467.867	-588.768	748.359
772	0	227.252	-663.723	1578.5	109.694	-671.306	1570.05	220.734	-496.378	1533.7	113.325	-506.323	1524.2	170.731	-526.187	1432.93	174.545	-446.794	1152.65	194.215	-645.402	1340.22	207.02	-709.514	1146.19	89.2767	-444.27	1226.4	362.898	-566.338	1365.73	432.834	-501.933	1127.71	436.364	-491.176	1052.95	468.151	-561.507	893.505	425.822	-588.894	815.707	479.855	-540.851	805.767	467.731	-596.979	745.774
773	0	228.189	-674.889	1576.59	110.618	-682.518	1568.2	221.612	-507.567	1531.81	114.183	-517.551	1522.35	171.61	-537.398	1431.1	175.317	-457.66	1150.84	194.968	-656.521	1338.2	207.528	-720.428	1143.96	90.1171	-455.046	1224.63	363.692	-577.541	1363.63	433.274	-512.722	1125.63	436.599	-501.456	1050.93	468.246	-570.854	891.072	425.773	-597.663	813.136	479.984	-549.788	803.476	467.449	-605.263	743.024
774	0	229.196	-686.108	1574.73	111.611	-693.77	1566.37	222.585	-518.816	1529.92	115.138	-528.826	1520.5	172.61	-548.675	1429.29	176.198	-468.679	1149.02	195.819	-667.724	1336.21	208.09	-731.471	1141.74	91.0807	-465.917	1222.84	364.596	-588.86	1361.51	433.805	-523.751	1123.49	436.895	-512.002	1048.85	468.313	-580.436	888.562	425.649	-606.53	810.471	480.146	-558.943	801.123	467.049	-613.639	740.143
775	0	230.277	-697.382	1572.93	112.677	-705.062	1564.6	223.659	-530.125	1528.08	116.196	-540.148	1518.67	173.73	-560.017	1427.51	177.177	-479.852	1147.21	196.768	-679.011	1334.27	208.706	-742.65	1139.56	92.1589	-476.893	1221.07	365.61	-600.289	1359.4	434.426	-535.007	1121.3	437.253	-522.807	1046.74	468.366	-590.253	886.006	425.47	-615.513	807.745	480.345	-568.315	798.733	466.557	-622.123	737.171
776	0	231.435	-708.709	1571.22	113.819	-716.392	1562.9	224.837	-541.494	1526.3	117.359	-551.515	1516.9	174.966	-571.423	1425.8	178.245	-491.181	1145.43	197.815	-690.383	1332.42	209.381	-753.972	1137.47	93.3417	-487.983	1219.35	366.732	-611.82	1357.32	435.132	-546.478	1119.09	437.67	-533.866	1044.62	468.414	-600.303	883.435	425.252	-624.628	804.992	480.584	-577.903	796.333	466.003	-630.734	734.149
777	0	232.674	-720.09	1569.63	115.042	-727.757	1561.31	226.125	-552.921	1524.62	118.633	-562.924	1515.22	176.314	-582.891	1424.17	179.391	-502.663	1143.72	198.96	-701.837	1330.67	210.118	-765.439	1135.49	94.6185	-499.193	1217.7	367.958	-623.447	1355.31	435.917	-558.155	1116.88	438.146	-545.171	1042.51	468.469	-610.586	880.881	425.014	-633.892	802.248	480.866	-587.709	793.956	465.415	-639.492	731.12
778	0	233.995	-731.523	1568.18	116.346	-739.156	1559.86	227.522	-564.406	1523.05	120.018	-574.373	1513.66	177.767	-594.418	1422.66	180.604	-514.295	1142.11	200.198	-713.374	1329.07	210.92	-777.054	1133.66	95.9775	-510.53	1216.17	369.282	-635.163	1353.39	436.774	-570.026	1114.72	438.676	-556.713	1040.46	468.538	-621.103	878.38	424.775	-643.323	799.551	481.193	-597.736	791.632	464.82	-648.417	728.128
779	0	235.401	-743.007	1566.89	117.734	-750.586	1558.58	229.031	-575.945	1521.61	121.516	-585.858	1512.23	179.32	-606.001	1421.3	181.874	-526.069	1140.62	201.525	-724.99	1327.63	211.791	-788.815	1132.02	97.4066	-521.995	1214.77	370.697	-646.961	1351.58	437.697	-582.081	1112.63	439.259	-568.484	1038.48	468.632	-631.854	875.966	424.549	-652.941	796.939	481.567	-607.987	789.398	464.242	-657.529	725.219
780	0	236.89	-754.537	1565.79	119.206	-762.044	1557.48	230.649	-587.536	1520.34	123.124	-597.376	1510.97	180.961	-617.635	1420.09	183.189	-537.975	1139.27	202.933	-736.68	1326.38	212.731	-800.719	1130.59	98.8933	-533.587	1213.53	372.195	-658.833	1349.92	438.677	-594.309	1110.64	439.89	-580.473	1036.61	468.759	-642.84	873.675	424.354	-662.763	794.451	481.989	-618.471	787.286	463.704	-666.85	722.437
781	0	238.464	-766.112	1564.88	120.761	-773.526	1556.6	232.374	-599.174	1519.25	124.84	-608.923	1509.91	182.683	-629.316	1419.07	184.54	-550.002	1138.1	204.414	-748.44	1325.35	213.74	-812.757	1129.41	100.425	-545.304	1212.49	373.766	-670.772	1348.43	439.706	-606.701	1108.78	440.566	-592.67	1034.87	468.924	-654.062	871.54	424.201	-672.809	792.122	482.46	-629.194	785.333	463.226	-676.401	719.826
782	0	240.12	-777.727	1564.18	122.399	-785.029	1555.95	234.202	-610.856	1518.35	126.659	-620.494	1509.06	184.474	-641.036	1418.25	185.917	-562.135	1137.12	205.956	-760.262	1324.55	214.812	-824.919	1128.5	101.99	-557.136	1211.66	375.399	-682.772	1347.13	440.776	-619.247	1107.09	441.286	-605.064	1033.29	469.134	-665.522	869.595	424.105	-683.095	789.99	482.98	-640.166	783.57	462.826	-686.207	717.425
783	0	241.854	-789.376	1563.71	124.116	-796.549	1555.55	236.126	-622.575	1517.65	128.574	-632.084	1508.44	186.321	-652.79	1417.64	187.311	-574.354	1136.36	207.548	-772.139	1323.99	215.941	-837.188	1127.87	103.577	-569.074	1211.07	377.081	-694.826	1346.04	441.88	-631.936	1105.59	442.045	-617.642	1031.9	469.395	-677.222	867.869	424.074	-693.64	788.084	483.55	-651.397	782.029	462.517	-696.29	715.272
784	0	243.663	-801.055	1563.46	125.909	-808.082	1555.41	238.139	-634.324	1517.18	130.579	-643.689	1508.06	188.214	-664.568	1417.27	188.716	-586.642	1135.83	209.175	-784.062	1323.68	217.116	-849.545	1127.55	105.176	-581.102	1210.72	378.799	-706.926	1345.18	443.011	-644.758	1104.31	442.842	-630.392	1030.72	469.71	-689.163	866.389	424.118	-704.461	786.436	484.171	-662.899	780.735	462.309	-706.674	713.399
785	0	245.541	-812.758	1563.44	127.772	-819.622	1555.53	240.232	-646.098	1516.93	132.662	-655.302	1507.94	190.14	-676.363	1417.12	190.126	-598.976	1135.55	210.822	-796.018	1323.64	218.322	-861.968	1127.54	106.777	-593.203	1210.63	380.539	-719.067	1344.57	444.163	-657.703	1103.27	443.678	-643.299	1029.76	470.083	-701.348	865.177	424.242	-715.572	785.068	484.843	-674.684	779.709	462.21	-717.382	711.833
786	0	247.481	-824.477	1563.64	129.699	-831.167	1555.92	242.394	-657.888	1516.9	134.813	-666.916	1508.09	192.085	-688.165	1417.21	191.536	-611.334	1135.52	212.474	-807.997	1323.86	219.541	-874.428	1127.84	108.373	-605.355	1210.81	382.287	-731.242	1344.2	445.332	-670.758	1102.49	444.551	-656.35	1029.04	470.517	-713.778	864.251	424.451	-726.99	784	485.565	-686.763	778.969	462.224	-728.438	710.593
787	0	249.474	-836.206	1564.07	131.682	-842.709	1556.58	244.612	-669.685	1517.1	137.02	-678.525	1508.5	194.039	-699.964	1417.54	192.943	-623.692	1135.75	214.114	-819.985	1324.33	220.753	-886.899	1128.44	109.959	-617.534	1211.26	384.028	-743.444	1344.08	446.515	-683.913	1101.97	445.464	-669.531	1028.57	471.013	-726.453	863.621	424.746	-738.726	783.245	486.336	-699.146	778.523	462.352	-739.863	709.693
788	0	251.512	-847.937	1564.7	133.712	-854.243	1557.48	246.875	-681.481	1517.52	139.269	-690.123	1509.17	195.988	-711.749	1418.1	194.347	-636.028	1136.23	215.726	-831.969	1325.05	221.935	-899.35	1129.32	111.531	-629.714	1211.96	385.75	-755.668	1344.22	447.708	-697.156	1101.72	446.417	-682.828	1028.35	471.573	-739.375	863.294	425.13	-750.794	782.81	487.157	-711.842	778.374	462.595	-751.679	709.139
789	0	253.584	-859.664	1565.52	135.779	-865.764	1558.63	249.169	-693.268	1518.15	141.546	-701.7	1510.09	197.923	-723.51	1418.88	195.747	-648.318	1136.95	217.295	-843.933	1326	223.062	-911.753	1130.46	113.088	-641.868	1212.9	387.439	-767.907	1344.59	448.911	-710.474	1101.74	447.412	-696.225	1028.37	472.197	-752.54	863.27	425.6	-763.201	782.697	488.026	-724.861	778.516	462.949	-763.904	708.932
790	0	255.679	-871.378	1566.52	137.87	-877.266	1560	251.479	-705.036	1518.98	143.837	-713.251	1511.25	199.833	-735.235	1419.88	197.144	-660.539	1137.91	218.806	-855.864	1327.16	224.111	-924.079	1131.83	114.63	-653.967	1214.08	389.084	-780.154	1345.2	450.123	-723.855	1102.02	448.453	-709.708	1028.64	472.884	-765.947	863.542	426.155	-775.956	782.901	488.94	-738.205	778.94	463.41	-776.555	709.064
791	0	257.784	-883.072	1567.68	139.974	-888.742	1561.57	253.79	-716.776	1520	146.127	-724.768	1512.64	201.708	-746.914	1421.06	198.541	-672.672	1139.08	220.244	-867.747	1328.52	225.059	-936.305	1133.4	116.161	-665.982	1215.46	390.673	-792.404	1346.02	451.347	-737.287	1102.55	449.541	-723.266	1029.14	473.632	-779.591	864.099	426.79	-789.063	783.411	489.897	-751.879	779.628	463.972	-789.644	709.522
792	0	259.886	-894.739	1568.96	142.077	-900.187	1563.32	256.089	-728.481	1521.18	148.4	-736.244	1514.24	203.541	-758.537	1422.42	199.941	-684.697	1140.45	221.599	-879.569	1330.04	225.884	-948.408	1135.14	117.684	-677.887	1217.03	392.197	-804.65	1347.04	452.582	-750.759	1103.31	450.679	-736.885	1029.84	474.44	-793.467	864.926	427.5	-802.523	784.212	490.895	-765.881	780.557	464.628	-803.183	710.289
793	0	261.972	-906.372	1570.36	144.167	-911.594	1565.22	258.361	-740.142	1522.52	150.644	-747.672	1516.02	205.327	-770.095	1423.93	201.349	-696.598	1142	222.86	-891.316	1331.7	226.568	-960.372	1137.02	119.205	-689.656	1218.76	393.65	-816.885	1348.23	453.832	-764.259	1104.28	451.867	-750.554	1030.74	475.304	-807.567	866.001	428.279	-816.336	785.286	491.928	-780.206	781.703	465.369	-817.176	711.343
794	0	264.029	-917.964	1571.85	146.228	-922.959	1567.25	260.592	-751.751	1523.99	152.845	-759.046	1517.96	207.058	-781.579	1425.58	202.768	-708.36	1143.68	224.021	-902.976	1333.48	227.098	-972.185	1138.99	120.73	-701.267	1220.61	395.026	-829.104	1349.56	455.097	-777.777	1105.43	453.107	-764.265	1031.82	476.219	-821.883	867.303	429.118	-830.496	786.609	492.991	-794.848	783.036	466.187	-831.624	712.661
795	0	266.042	-929.511	1573.4	148.247	-934.276	1569.36	262.77	-763.303	1525.56	154.989	-770.36	1520.03	208.732	-792.981	1427.33	204.203	-719.974	1145.49	225.075	-914.541	1335.34	227.463	-983.836	1141.02	122.266	-712.702	1222.57	396.32	-841.299	1351.02	456.378	-791.302	1106.73	454.397	-778.007	1033.03	477.18	-836.403	868.804	430.01	-844.996	788.157	494.08	-809.795	784.527	467.073	-846.524	714.217
796	0	267.999	-941.006	1575	150.209	-945.54	1571.54	264.883	-774.792	1527.23	157.064	-781.61	1522.21	210.347	-804.297	1429.17	205.657	-731.431	1147.39	226.021	-926.001	1337.27	227.66	-995.323	1143.08	123.818	-723.947	1224.59	397.531	-853.464	1352.58	457.675	-804.827	1108.17	455.737	-791.776	1034.37	478.18	-851.116	870.48	430.944	-859.824	789.904	495.188	-825.033	786.146	468.017	-861.867	715.987
797	0	269.886	-952.446	1576.61	152.103	-956.747	1573.75	266.919	-786.214	1528.96	159.061	-792.793	1524.47	211.899	-815.522	1431.06	207.133	-742.727	1149.36	226.859	-937.351	1339.22	227.691	-1006.64	1145.15	125.393	-734.994	1226.67	398.659	-865.593	1354.21	458.988	-818.344	1109.71	457.123	-805.564	1035.8	479.212	-866.011	872.304	431.912	-874.966	791.824	496.307	-840.546	787.867	469.009	-877.639	717.945
798	0	271.693	-963.826	1578.23	153.914	-967.894	1575.97	268.87	-797.565	1530.74	160.97	-803.905	1526.77	213.39	-826.653	1432.99	208.633	-753.863	1151.36	227.591	-948.586	1341.18	227.564	-1017.8	1147.19	126.995	-745.838	1228.76	399.704	-877.68	1355.89	460.315	-831.847	1111.32	458.551	-819.369	1037.3	480.269	-881.074	874.25	432.902	-890.404	793.893	497.432	-856.315	789.665	470.04	-893.821	720.068
799	0	273.407	-975.144	1579.83	155.633	-978.978	1578.17	270.726	-808.842	1532.54	162.783	-814.944	1529.09	214.819	-837.688	1434.93	210.158	-764.839	1153.37	228.222	-959.703	1343.13	227.293	-1028.8	1149.19	128.626	-756.481	1230.84	400.671	-889.719	1357.59	461.651	-845.332	1112.98	460.015	-833.186	1038.85	481.342	-896.29	876.294	433.905	-906.118	796.086	498.553	-872.32	791.516	471.097	-910.39	722.336
800	0	275.02	-986.397	1581.4	157.249	-989.997	1580.33	272.481	-820.044	1534.34	164.493	-825.911	1531.4	216.186	-848.629	1436.86	211.706	-775.662	1155.38	228.76	-970.703	1345.04	226.897	-1039.64	1151.13	130.288	-766.929	1232.89	401.563	-901.702	1359.3	462.995	-858.794	1114.66	461.51	-847.013	1040.43	482.422	-911.647	878.414	434.909	-922.085	798.381	499.664	-888.541	793.404	472.171	-927.319	724.729
801	0	276.524	-997.584	1582.92	158.753	-1000.95	1582.41	274.129	-831.171	1536.13	166.097	-836.804	1533.68	217.495	-859.475	1438.76	213.277	-786.34	1157.34	229.213	-981.587	1346.89	226.4	-1050.34	1153	131.978	-777.192	1234.9	402.386	-913.626	1361	464.339	-872.23	1116.35	463.028	-860.85	1042.01	483.5	-927.131	880.59	435.905	-938.282	800.757	500.757	-904.956	795.314	473.251	-944.574	727.23
802	0	277.911	-1008.7	1584.38	160.139	-1011.84	1584.4	275.665	-842.222	1537.89	167.589	-847.626	1535.9	218.746	-870.231	1440.6	214.866	-796.881	1159.25	229.591	-992.359	1348.67	225.828	-1060.9	1154.78	133.693	-787.282	1236.84	403.144	-925.484	1362.66	465.68	-885.639	1118.03	464.561	-874.693	1043.59	484.568	-942.727	882.804	436.883	-954.681	803.197	501.826	-921.546	797.235	474.325	-962.122	729.824
803	0	279.178	-1019.76	1585.77	161.403	-1022.66	1586.29	277.088	-853.199	1539.6	168.968	-858.378	1538.04	219.942	-880.901	1442.38	216.469	-807.3	1161.09	229.903	-1003.02	1350.37	225.213	-1071.34	1156.48	135.428	-797.218	1238.69	403.846	-937.272	1364.28	467.01	-899.017	1119.68	466.102	-888.542	1045.13	485.618	-958.421	885.04	437.834	-971.257	805.683	502.862	-938.288	799.159	475.384	-979.926	732.498
804	0	280.32	-1030.74	1587.07	162.54	-1033.42	1588.04	278.395	-864.104	1541.24	170.233	-869.063	1540.07	221.083	-891.488	1444.08	218.078	-817.607	1162.84	230.162	-1013.59	1351.96	224.583	-1081.65	1158.07	137.175	-807.016	1240.45	404.496	-948.986	1365.84	468.324	-912.363	1121.28	467.64	-902.396	1046.64	486.643	-974.201	887.286	438.751	-987.982	808.201	503.859	-955.164	801.081	476.415	-997.948	735.237
805	0	281.338	-1041.67	1588.28	163.55	-1044.11	1589.66	279.586	-874.938	1542.81	171.384	-879.685	1541.99	222.172	-902.001	1445.67	219.688	-827.818	1164.48	230.377	-1024.06	1353.44	223.968	-1091.86	1159.55	138.925	-816.698	1242.1	405.102	-960.622	1367.32	469.617	-925.676	1122.83	469.169	-916.253	1048.09	487.634	-990.054	889.528	439.627	-1004.83	810.737	504.811	-972.154	802.997	477.408	-1016.15	738.029
806	0	282.231	-1052.52	1589.39	164.433	-1054.75	1591.12	280.662	-885.706	1544.27	172.422	-890.247	1543.76	223.211	-912.444	1447.15	221.289	-837.945	1166	230.56	-1034.44	1354.79	223.397	-1101.97	1160.92	140.667	-826.284	1243.63	405.67	-972.178	1368.73	470.884	-938.953	1124.3	470.681	-930.11	1049.48	488.586	-1005.97	891.755	440.456	-1021.77	813.28	505.713	-989.241	804.903	478.352	-1034.49	740.863
807	0	283.001	-1063.32	1590.39	165.193	-1065.33	1592.41	281.625	-896.41	1545.63	173.35	-900.755	1545.37	224.199	-922.826	1448.51	222.873	-848.004	1167.39	230.718	-1044.75	1356.01	222.892	-1111.99	1162.17	142.39	-835.794	1245.03	406.203	-983.652	1370.04	472.119	-952.193	1125.71	472.166	-943.966	1050.79	489.494	-1021.92	893.959	441.234	-1038.78	815.817	506.559	-1006.41	806.797	479.238	-1052.93	743.724
808	0	283.654	-1074.06	1591.27	165.832	-1075.87	1593.53	282.478	-907.055	1546.88	174.171	-911.213	1546.82	225.138	-933.155	1449.72	224.431	-858.005	1168.64	230.86	-1055	1357.09	222.475	-1121.93	1163.29	144.081	-845.249	1246.29	406.707	-995.044	1371.26	473.32	-965.393	1127.02	473.618	-957.818	1052.02	490.352	-1037.91	896.128	441.955	-1055.84	818.338	507.345	-1023.63	808.674	480.056	-1071.43	746.599
809	0	284.192	-1084.74	1592.03	166.356	-1086.35	1594.47	283.223	-917.647	1547.99	174.888	-921.629	1548.09	226.028	-943.438	1450.8	225.954	-867.962	1169.74	230.993	-1065.18	1358.01	222.16	-1131.8	1164.26	145.728	-854.667	1247.4	407.185	-1006.35	1372.36	474.483	-978.552	1128.24	475.032	-971.662	1053.16	491.157	-1053.93	898.254	442.617	-1072.91	820.832	508.067	-1040.91	810.53	480.796	-1089.97	749.475
810	0	284.623	-1095.37	1592.65	166.772	-1096.8	1595.22	283.866	-928.189	1548.95	175.505	-932.007	1549.17	226.867	-953.685	1451.71	227.432	-877.885	1170.69	231.122	-1075.32	1358.78	221.955	-1141.62	1165.07	147.319	-864.068	1248.36	407.639	-1017.58	1373.34	475.605	-991.665	1129.36	476.4	-985.494	1054.19	491.905	-1069.95	900.327	443.216	-1089.99	823.29	508.721	-1058.21	812.359	481.45	-1108.51	752.336
811	0	284.953	-1105.96	1593.15	167.086	-1107.21	1595.79	284.409	-938.688	1549.77	176.027	-942.354	1550.05	227.656	-963.904	1452.47	228.857	-887.783	1171.48	231.25	-1085.43	1359.38	221.863	-1151.38	1165.72	148.842	-873.468	1249.16	408.07	-1028.74	1374.19	476.685	-1004.73	1130.36	477.717	-999.31	1055.12	492.594	-1085.96	902.338	443.749	-1107.06	825.701	509.305	-1075.53	814.154	482.012	-1127.02	755.168
812	0	285.189	-1116.5	1593.5	167.307	-1117.59	1596.16	284.859	-949.149	1550.44	176.459	-952.677	1550.74	228.392	-974.102	1453.07	230.221	-897.663	1172.11	231.379	-1095.5	1359.82	221.882	-1161.11	1166.2	150.288	-882.882	1249.79	408.478	-1039.81	1374.91	477.721	-1017.75	1131.24	478.981	-1013.1	1055.92	493.221	-1101.96	904.277	444.213	-1124.08	828.055	509.815	-1092.84	815.907	482.475	-1145.47	757.956
813	0	285.339	-1127.01	1593.71	167.441	-1127.95	1596.35	285.221	-959.578	1550.93	176.805	-962.982	1551.22	229.073	-984.289	1453.5	231.516	-907.532	1172.57	231.51	-1105.56	1360.09	222.004	-1170.81	1166.48	151.646	-892.324	1250.27	408.863	-1050.82	1375.48	478.71	-1030.71	1132	480.186	-1026.87	1056.61	493.784	-1117.93	906.133	444.607	-1141.06	830.343	510.251	-1110.13	817.607	482.835	-1163.85	760.686
814	0	285.411	-1137.48	1593.78	167.498	-1138.29	1596.36	285.498	-969.982	1551.26	177.07	-973.276	1551.49	229.699	-994.471	1453.76	232.733	-917.395	1172.88	231.641	-1115.61	1360.18	222.215	-1180.49	1166.57	152.908	-901.805	1250.57	409.222	-1061.76	1375.89	479.652	-1043.62	1132.62	481.328	-1040.61	1057.16	494.28	-1133.86	907.899	444.928	-1157.97	832.553	510.61	-1127.39	819.245	483.089	-1182.12	763.345
815	0	285.411	-1147.93	1593.71	167.485	-1148.62	1596.18	285.697	-980.367	1551.41	177.259	-983.564	1551.56	230.266	-1004.66	1453.85	233.867	-927.256	1173.02	231.77	-1125.65	1360.09	222.5	-1190.15	1166.45	154.068	-911.334	1250.72	409.554	-1072.65	1376.15	480.544	-1056.46	1133.1	482.406	-1054.3	1057.57	494.709	-1149.73	909.563	445.175	-1174.79	834.677	510.892	-1144.59	820.809	483.235	-1200.27	765.919
816	0	285.348	-1158.35	1593.49	167.409	-1158.94	1595.83	285.821	-990.739	1551.39	177.376	-993.853	1551.43	230.772	-1014.85	1453.77	234.911	-937.117	1173.01	231.893	-1135.71	1359.83	222.84	-1199.82	1166.13	155.119	-920.917	1250.7	409.855	-1083.47	1376.24	481.383	-1069.25	1133.44	483.416	-1067.95	1057.84	495.067	-1165.52	911.118	445.346	-1191.51	836.705	511.094	-1161.72	822.289	483.272	-1218.29	768.396
817	0	285.226	-1168.76	1593.12	167.276	-1169.26	1595.31	285.874	-1001.1	1551.2	177.424	-1004.15	1551.1	231.215	-1025.06	1453.53	235.858	-946.982	1172.84	232.005	-1145.77	1359.4	223.213	-1209.48	1165.6	156.059	-930.561	1250.52	410.122	-1094.25	1376.17	482.165	-1081.97	1133.62	484.354	-1081.54	1057.97	495.354	-1181.23	912.553	445.44	-1208.12	838.626	511.217	-1178.76	823.674	483.202	-1236.15	770.767
818	0	285.053	-1179.16	1592.61	167.092	-1179.59	1594.63	285.861	-1011.47	1550.83	177.408	-1014.46	1550.58	231.591	-1035.3	1453.13	236.704	-956.854	1172.52	232.102	-1155.85	1358.81	223.598	-1219.16	1164.87	156.884	-940.268	1250.19	410.351	-1104.99	1375.92	482.887	-1094.62	1133.65	485.218	-1095.08	1057.95	495.568	-1196.84	913.862	445.457	-1224.61	840.432	511.26	-1195.68	824.954	483.027	-1253.85	773.022
819	0	284.831	-1189.55	1591.96	166.862	-1189.93	1593.79	285.785	-1021.84	1550.28	177.331	-1024.78	1549.88	231.899	-1045.56	1452.57	237.444	-966.734	1172.06	232.178	-1165.96	1358.04	223.973	-1228.84	1163.95	157.592	-950.039	1249.71	410.538	-1115.69	1375.5	483.544	-1107.2	1133.52	486.004	-1108.54	1057.78	495.707	-1212.33	915.036	445.396	-1240.95	842.113	511.222	-1212.48	826.119	482.752	-1271.36	775.152
820	0	284.565	-1199.95	1591.18	166.59	-1200.28	1592.82	285.649	-1032.22	1549.58	177.194	-1035.13	1549	232.135	-1055.85	1451.86	238.073	-976.628	1171.46	232.225	-1176.09	1357.13	224.319	-1238.55	1162.84	158.182	-959.877	1249.09	410.678	-1126.36	1374.92	484.131	-1119.7	1133.23	486.708	-1121.92	1057.47	495.77	-1227.69	916.07	445.257	-1257.13	843.662	511.104	-1229.13	827.161	482.38	-1288.68	777.149
821	0	284.258	-1210.35	1590.27	166.278	-1210.65	1591.71	285.453	-1042.61	1548.71	177	-1045.5	1547.96	232.298	-1066.17	1451.01	238.59	-986.539	1170.72	232.238	-1186.27	1356.06	224.617	-1248.28	1161.55	158.653	-969.78	1248.33	410.766	-1137	1374.17	484.641	-1132.12	1132.79	487.325	-1135.21	1057	495.754	-1242.9	916.957	445.04	-1273.14	845.071	510.905	-1245.61	828.072	481.918	-1305.79	779.009
822	0	283.91	-1220.76	1589.25	165.927	-1221.05	1590.49	285.2	-1053.02	1547.69	176.749	-1055.9	1546.77	232.385	-1076.54	1450.03	238.991	-996.474	1169.87	232.21	-1196.48	1354.86	224.851	-1258.04	1160.11	159.007	-979.748	1247.46	410.799	-1147.63	1373.26	485.07	-1144.45	1132.19	487.852	-1148.4	1056.39	495.659	-1257.96	917.692	444.745	-1288.96	846.333	510.625	-1261.9	828.844	481.372	-1322.67	780.723
823	0	283.523	-1231.19	1588.11	165.537	-1231.47	1589.16	284.89	-1063.46	1546.53	176.442	-1066.33	1545.44	232.393	-1086.94	1448.92	239.275	-1006.44	1168.89	232.134	-1206.73	1353.54	225.009	-1267.83	1158.53	159.242	-989.783	1246.46	410.77	-1158.25	1372.21	485.411	-1156.68	1131.45	488.283	-1161.48	1055.65	495.484	-1272.83	918.272	444.373	-1304.58	847.442	510.263	-1277.98	829.473	480.748	-1339.31	782.288
824	0	283.095	-1241.63	1586.87	165.109	-1241.92	1587.73	284.523	-1073.93	1545.25	176.079	-1076.8	1543.99	232.32	-1097.39	1447.7	239.441	-1016.44	1167.81	232.003	-1217.03	1352.1	225.081	-1277.66	1156.82	159.361	-999.884	1245.37	410.677	-1168.86	1371.02	485.658	-1168.82	1130.55	488.612	-1174.44	1054.77	495.227	-1287.51	918.694	443.924	-1319.99	848.392	509.82	-1293.83	829.953	480.052	-1355.69	783.697
825	0	282.626	-1252.1	1585.54	164.641	-1252.4	1586.23	284.098	-1084.42	1543.84	175.658	-1087.3	1542.43	232.165	-1107.89	1446.38	239.49	-1026.49	1166.62	231.812	-1227.38	1350.57	225.06	-1287.53	1155	159.365	-1010.05	1244.17	410.514	-1179.47	1369.7	485.806	-1180.86	1129.52	488.836	-1187.27	1053.76	494.887	-1301.98	918.955	443.398	-1335.16	849.179	509.294	-1309.43	830.28	479.291	-1371.79	784.945
826	0	282.112	-1262.6	1584.13	164.129	-1262.91	1584.67	283.613	-1094.95	1542.34	175.179	-1097.85	1540.79	231.925	-1118.43	1444.97	239.423	-1036.6	1165.34	231.555	-1237.78	1348.95	224.943	-1297.45	1153.1	159.256	-1020.29	1242.88	410.278	-1190.09	1368.27	485.849	-1192.78	1128.37	488.948	-1199.97	1052.64	494.464	-1316.23	919.056	442.796	-1350.09	849.798	508.686	-1324.76	830.451	478.47	-1387.61	786.027
827	0	281.55	-1273.13	1582.67	163.57	-1273.47	1583.05	283.067	-1105.52	1540.75	174.639	-1108.43	1539.07	231.598	-1129.03	1443.48	239.242	-1046.78	1163.98	231.226	-1248.25	1347.28	224.729	-1307.44	1151.15	159.037	-1030.61	1241.52	409.965	-1200.73	1366.75	485.782	-1204.59	1127.1	488.945	-1212.52	1051.41	493.957	-1330.25	918.996	442.118	-1364.75	850.246	507.993	-1339.79	830.465	477.593	-1403.12	786.939
828	0	280.937	-1283.69	1581.15	162.962	-1284.06	1581.41	282.456	-1116.12	1539.09	174.035	-1119.06	1537.29	231.185	-1139.67	1441.94	238.953	-1057.03	1162.55	230.82	-1258.77	1345.55	224.42	-1317.5	1149.15	158.712	-1041	1240.09	409.573	-1211.39	1365.16	485.601	-1216.28	1125.73	488.821	-1224.93	1050.09	493.366	-1344.01	918.776	441.365	-1379.14	850.522	507.216	-1354.52	830.32	476.666	-1418.3	787.676
829	0	280.268	-1294.28	1579.61	162.298	-1294.69	1579.75	281.777	-1126.77	1537.38	173.364	-1129.73	1535.48	230.683	-1150.37	1440.35	238.559	-1067.37	1161.06	230.334	-1269.36	1343.79	224.018	-1327.64	1147.13	158.287	-1051.47	1238.6	409.099	-1222.09	1363.51	485.304	-1227.85	1124.27	488.574	-1237.17	1048.69	492.69	-1357.51	918.401	440.537	-1393.24	850.624	506.353	-1368.91	830.017	475.691	-1433.13	788.233
830	0	279.538	-1304.92	1578.05	161.573	-1305.35	1578.08	281.028	-1137.46	1535.64	172.624	-1140.44	1533.65	230.093	-1161.12	1438.73	238.067	-1077.8	1159.53	229.764	-1280.02	1342.03	223.526	-1337.89	1145.13	157.766	-1062.02	1237.06	408.541	-1232.82	1361.84	484.888	-1239.29	1122.74	488.201	-1249.25	1047.22	491.929	-1370.73	917.874	439.634	-1407.03	850.553	505.402	-1382.94	829.557	474.67	-1447.61	788.607
831	0	278.742	-1315.59	1576.49	160.784	-1316.06	1576.43	280.205	-1148.18	1533.88	171.81	-1151.2	1531.82	229.413	-1171.93	1437.09	237.485	-1088.34	1157.96	229.106	-1290.75	1340.27	222.949	-1348.25	1143.15	157.156	-1072.66	1235.48	407.897	-1243.6	1360.15	484.352	-1250.62	1121.17	487.701	-1261.16	1045.71	491.085	-1383.66	917.2	438.657	-1420.5	850.31	504.363	-1396.6	828.943	473.605	-1461.7	788.792
832	0	277.875	-1326.3	1574.95	159.924	-1326.81	1574.81	279.304	-1158.96	1532.13	170.921	-1162	1530	228.646	-1182.79	1435.46	236.821	-1099	1156.36	228.36	-1301.56	1338.55	222.29	-1358.73	1141.23	156.466	-1083.39	1233.87	407.167	-1254.45	1358.47	483.696	-1261.83	1119.56	487.073	-1272.91	1044.16	490.156	-1396.29	916.386	437.607	-1433.64	849.898	503.235	-1409.87	828.179	472.494	-1475.39	788.787
833	0	276.932	-1337.05	1573.45	158.988	-1337.6	1573.24	278.323	-1169.77	1530.4	169.952	-1172.85	1528.22	227.791	-1193.71	1433.84	236.085	-1109.77	1154.77	227.524	-1312.44	1336.87	221.552	-1369.36	1139.38	155.702	-1094.21	1232.26	406.352	-1265.36	1356.82	482.921	-1272.92	1117.95	486.317	-1284.49	1042.61	489.145	-1408.62	915.441	436.484	-1446.43	849.322	502.017	-1422.74	827.271	471.336	-1488.67	788.59
834	0	275.907	-1347.84	1572.01	157.971	-1348.43	1571.73	277.259	-1180.62	1528.71	168.9	-1183.74	1526.48	226.851	-1204.68	1432.26	235.286	-1120.68	1153.18	226.596	-1323.41	1335.26	220.737	-1380.15	1137.64	154.872	-1105.13	1230.64	405.451	-1276.34	1355.23	482.029	-1283.91	1116.35	485.437	-1295.9	1041.05	488.052	-1420.64	914.375	435.287	-1458.86	848.587	500.709	-1435.18	826.227	470.13	-1501.51	788.198
835	0	274.796	-1358.66	1570.63	156.868	-1359.29	1570.29	276.109	-1191.52	1527.08	167.765	-1194.67	1524.81	225.827	-1215.71	1430.72	234.433	-1131.72	1151.62	225.579	-1334.46	1333.73	219.845	-1391.1	1136.02	153.985	-1116.16	1229.03	404.465	-1287.41	1353.72	481.025	-1294.81	1114.79	484.436	-1307.15	1039.53	486.88	-1432.34	913.2	434.019	-1470.91	847.702	499.312	-1447.19	825.055	468.872	-1513.9	787.613
836	0	273.596	-1369.53	1569.35	155.676	-1370.19	1568.94	274.873	-1202.46	1525.53	166.543	-1205.64	1523.21	224.723	-1226.81	1429.25	233.535	-1142.91	1150.09	224.473	-1345.59	1332.31	218.878	-1402.23	1134.54	153.049	-1127.29	1227.44	403.398	-1298.57	1352.31	479.913	-1305.62	1113.28	483.318	-1318.23	1038.06	485.629	-1443.72	911.929	432.68	-1482.59	846.675	497.827	-1458.76	823.767	467.557	-1525.83	786.837
837	0	272.304	-1380.43	1568.18	154.391	-1381.13	1567.7	273.549	-1213.43	1524.07	165.235	-1216.65	1521.7	223.541	-1237.95	1427.86	232.602	-1154.23	1148.62	223.282	-1356.81	1331	217.835	-1413.55	1133.22	152.069	-1138.53	1225.89	402.252	-1309.83	1351.01	478.698	-1316.35	1111.85	482.091	-1329.16	1036.65	484.302	-1454.77	910.576	431.271	-1493.88	845.519	496.258	-1469.88	822.376	466.183	-1537.29	785.874
838	0	270.916	-1391.36	1567.13	153.012	-1392.1	1566.57	272.139	-1224.44	1522.71	163.84	-1227.69	1520.29	222.286	-1249.16	1426.56	231.64	-1165.69	1147.22	222.009	-1368.11	1329.82	216.718	-1425.07	1132.07	151.055	-1149.88	1224.4	401.031	-1321.18	1349.84	477.388	-1327.03	1110.53	480.76	-1339.93	1035.33	482.902	-1465.5	909.158	429.794	-1504.77	844.245	494.609	-1480.55	820.897	464.746	-1548.27	784.729
839	0	269.433	-1402.33	1566.21	151.536	-1403.09	1565.56	270.642	-1235.49	1521.47	162.359	-1238.78	1518.99	220.962	-1260.41	1425.37	230.657	-1177.29	1145.91	220.658	-1379.5	1328.79	215.528	-1436.77	1131.11	150.011	-1161.35	1222.96	399.739	-1332.62	1348.83	475.991	-1337.66	1109.32	479.336	-1350.56	1034.12	481.433	-1475.92	907.691	428.251	-1515.26	842.868	492.885	-1490.78	819.347	463.242	-1558.75	783.412
840	0	267.853	-1413.32	1565.44	149.964	-1414.11	1564.69	269.063	-1246.57	1520.36	160.795	-1249.89	1517.8	219.575	-1271.72	1424.29	229.659	-1189.02	1144.7	219.237	-1390.96	1327.91	214.268	-1448.67	1130.35	148.944	-1172.92	1221.61	398.383	-1344.17	1347.98	474.515	-1348.26	1108.25	477.827	-1361.05	1033.03	479.899	-1486.01	906.195	426.646	-1525.34	841.404	491.095	-1500.56	817.746	461.667	-1568.74	781.934
841	0	266.179	-1424.34	1564.84	148.296	-1425.15	1563.95	267.403	-1257.68	1519.4	159.152	-1261.03	1516.74	218.13	-1283.08	1423.35	228.65	-1200.88	1143.6	217.752	-1402.5	1327.2	212.944	-1460.76	1129.79	147.859	-1184.6	1220.34	396.969	-1355.81	1347.3	472.969	-1358.84	1107.35	476.243	-1371.41	1032.08	478.303	-1495.8	904.688	424.983	-1535.02	839.87	489.247	-1509.91	816.116	460.022	-1578.22	780.31
842	0	264.412	-1435.38	1564.4	146.536	-1436.21	1563.37	265.668	-1268.82	1518.58	157.433	-1272.2	1515.81	216.633	-1294.48	1422.55	227.635	-1212.85	1142.63	216.213	-1414.11	1326.66	211.563	-1473.02	1129.44	146.761	-1196.37	1219.19	395.504	-1367.53	1346.82	471.365	-1369.42	1106.61	474.597	-1381.65	1031.3	476.651	-1505.29	903.192	423.265	-1544.3	838.286	487.353	-1518.83	814.479	458.305	-1587.21	778.557
843	0	262.557	-1446.44	1564.14	144.688	-1447.28	1562.93	263.863	-1279.97	1517.92	155.645	-1283.38	1515.01	215.091	-1305.92	1421.9	226.615	-1224.92	1141.81	214.629	-1425.77	1326.29	210.135	-1485.43	1129.31	145.656	-1208.24	1218.15	393.998	-1379.33	1346.52	469.712	-1380	1106.06	472.9	-1391.78	1030.68	474.948	-1514.48	901.726	421.498	-1553.17	836.671	485.423	-1527.35	812.861	456.517	-1595.7	776.694
844	0	260.619	-1457.51	1564.06	142.756	-1458.36	1562.65	261.996	-1291.15	1517.42	153.795	-1294.59	1514.35	213.512	-1317.39	1421.4	225.594	-1237.07	1141.14	213.01	-1437.49	1326.1	208.673	-1497.97	1129.38	144.546	-1220.18	1217.25	392.46	-1391.19	1346.43	468.021	-1390.61	1105.71	471.165	-1401.79	1030.26	473.2	-1523.4	900.313	419.687	-1561.64	835.045	483.472	-1535.49	811.288	454.661	-1603.7	774.744
845	0	258.603	-1468.59	1564.16	140.747	-1469.44	1562.53	260.074	-1302.34	1517.1	151.89	-1305.8	1513.83	211.902	-1328.88	1421.08	224.57	-1249.28	1140.65	211.369	-1449.23	1326.09	207.192	-1510.61	1129.65	143.437	-1232.19	1216.49	390.899	-1403.1	1346.54	466.303	-1401.23	1105.56	469.404	-1411.71	1030.03	471.413	-1532.06	898.973	417.841	-1569.73	833.431	481.512	-1543.26	809.785	452.741	-1611.23	772.732
846	0	256.519	-1479.68	1564.44	138.67	-1480.52	1562.55	258.106	-1313.54	1516.94	149.941	-1317.02	1513.45	210.271	-1340.39	1420.91	223.546	-1261.53	1140.32	209.717	-1461	1326.26	205.708	-1523.32	1130.11	142.33	-1244.23	1215.89	389.325	-1415.05	1346.86	464.571	-1411.89	1105.63	467.631	-1421.53	1030	469.594	-1540.47	897.725	415.965	-1577.44	831.85	479.559	-1550.69	808.379	450.761	-1618.29	770.683
847	0	254.374	-1490.77	1564.91	136.533	-1491.6	1562.72	256.103	-1324.74	1516.96	147.956	-1328.24	1513.21	208.625	-1351.91	1420.92	222.519	-1273.8	1140.18	208.068	-1472.78	1326.59	204.239	-1536.05	1130.75	141.228	-1256.3	1215.45	387.749	-1427	1347.38	462.835	-1422.58	1105.91	465.859	-1431.27	1030.18	467.753	-1548.64	896.591	414.07	-1584.79	830.323	477.628	-1557.81	807.095	448.73	-1624.9	768.625
848	0	252.179	-1501.86	1565.55	134.347	-1502.67	1563.03	254.074	-1335.95	1517.16	145.948	-1339.46	1513.12	206.972	-1363.42	1421.1	221.49	-1286.06	1140.23	206.435	-1484.55	1327.09	202.803	-1548.77	1131.55	140.132	-1268.37	1215.2	386.181	-1438.94	1348.1	461.108	-1433.29	1106.4	464.101	-1440.92	1030.58	465.898	-1556.61	895.587	412.164	-1591.79	828.872	475.735	-1564.66	805.957	446.655	-1631.09	766.585
849	0	249.945	-1512.94	1566.35	132.124	-1513.73	1563.48	252.031	-1347.14	1517.52	143.927	-1350.66	1513.17	205.321	-1374.91	1421.45	220.455	-1298.29	1140.46	204.83	-1496.3	1327.75	201.42	-1561.44	1132.5	139.043	-1280.42	1215.12	384.631	-1450.85	1349.01	459.402	-1444.03	1107.1	462.37	-1450.5	1031.18	464.039	-1564.38	894.728	410.26	-1598.46	827.516	473.895	-1571.27	804.986	444.547	-1636.88	764.588
850	0	247.685	-1524.02	1567.31	129.876	-1524.77	1564.05	249.986	-1358.32	1518.07	141.906	-1361.85	1513.36	203.678	-1386.38	1421.97	219.412	-1310.46	1140.89	203.266	-1508	1328.56	200.108	-1574	1133.58	137.958	-1292.43	1215.23	383.11	-1462.7	1350.11	457.729	-1454.76	1108.01	460.679	-1459.99	1031.99	462.188	-1571.98	894.03	408.368	-1604.83	826.275	472.126	-1577.66	804.2	442.418	-1642.3	762.662
851	0	245.412	-1535.08	1568.42	127.616	-1535.8	1564.74	247.95	-1369.49	1518.77	139.896	-1373.01	1513.69	202.05	-1397.8	1422.65	218.358	-1322.54	1141.49	201.754	-1519.65	1329.5	198.884	-1586.43	1134.77	136.877	-1304.38	1215.52	381.625	-1474.46	1351.37	456.101	-1465.49	1109.1	459.039	-1469.4	1032.99	460.356	-1579.43	893.503	406.501	-1610.92	825.165	470.442	-1583.89	803.616	440.28	-1647.39	760.83
852	0	243.138	-1546.13	1569.66	125.358	-1546.79	1565.53	245.935	-1380.63	1519.64	137.908	-1384.14	1514.16	200.443	-1409.18	1423.48	217.291	-1334.53	1142.27	200.304	-1531.23	1330.57	197.763	-1598.68	1136.06	135.795	-1316.25	1215.99	380.185	-1486.11	1352.79	454.529	-1476.19	1110.37	457.461	-1478.72	1034.18	458.559	-1586.74	893.154	404.675	-1616.77	824.202	468.86	-1589.98	803.243	438.151	-1652.18	759.115
853	0	240.879	-1557.15	1571.01	123.116	-1557.76	1566.41	243.952	-1391.74	1520.67	135.956	-1395.23	1514.76	198.862	-1420.49	1424.45	216.205	-1346.38	1143.22	198.928	-1542.72	1331.75	196.761	-1610.73	1137.41	134.708	-1328.02	1216.63	378.796	-1497.64	1354.35	453.025	-1486.82	1111.8	455.954	-1487.96	1035.55	456.81	-1593.94	892.989	402.904	-1622.4	823.399	467.392	-1595.98	803.089	436.047	-1656.72	757.536
854	0	238.647	-1568.16	1572.46	120.905	-1568.71	1567.37	242.012	-1402.81	1521.85	134.048	-1406.27	1515.5	197.313	-1431.73	1425.56	215.099	-1358.1	1144.32	197.63	-1554.1	1333.02	195.887	-1622.54	1138.82	133.61	-1339.68	1217.45	377.465	-1509	1356.04	451.599	-1497.37	1113.38	454.528	-1497.1	1037.07	455.125	-1601.04	893.01	401.204	-1627.86	822.766	466.052	-1601.92	803.156	433.988	-1661.06	756.113
855	0	236.458	-1579.14	1573.99	118.738	-1579.61	1568.4	240.124	-1413.85	1523.17	132.195	-1417.27	1516.36	195.799	-1442.89	1426.79	213.968	-1369.66	1145.57	196.419	-1565.37	1334.38	195.151	-1634.12	1140.27	132.496	-1351.2	1218.42	376.196	-1520.19	1357.83	450.261	-1507.8	1115.08	453.188	-1506.14	1038.73	453.52	-1608.06	893.216	399.591	-1633.18	822.311	464.851	-1607.82	803.443	431.998	-1665.23	754.859
856	0	234.323	-1590.09	1575.59	116.629	-1590.49	1569.48	238.298	-1424.83	1524.61	130.405	-1428.21	1517.35	194.323	-1453.95	1428.13	212.809	-1381.04	1146.94	195.297	-1576.52	1335.81	194.557	-1645.43	1141.75	131.36	-1362.59	1219.53	374.992	-1531.18	1359.71	449.017	-1518.08	1116.88	451.939	-1515.07	1040.51	452.009	-1615.01	893.603	398.084	-1638.39	822.039	463.798	-1613.72	803.942	430.099	-1669.29	753.788
857	0	232.257	-1601.01	1577.23	114.589	-1601.33	1570.61	236.541	-1435.76	1526.18	128.687	-1439.1	1518.45	192.887	-1464.91	1429.57	211.622	-1392.25	1148.42	194.266	-1587.54	1337.3	194.108	-1656.49	1143.24	130.196	-1373.82	1220.78	373.854	-1541.97	1361.65	447.872	-1528.17	1118.77	450.786	-1523.87	1042.39	450.61	-1621.9	894.163	396.698	-1643.54	821.952	462.901	-1619.63	804.644	428.318	-1673.28	752.911
858	0	230.27	-1611.89	1578.91	112.632	-1612.13	1571.77	234.859	-1446.64	1527.84	127.045	-1449.92	1519.67	191.494	-1475.76	1431.08	210.405	-1403.27	1149.99	193.327	-1598.41	1338.83	193.8	-1667.29	1144.74	128.998	-1384.9	1222.14	372.783	-1552.54	1363.65	446.832	-1538.04	1120.72	449.729	-1532.54	1044.35	449.338	-1628.74	894.888	395.45	-1648.66	822.048	462.163	-1625.57	805.536	426.68	-1677.25	752.236
859	0	228.373	-1622.73	1580.59	110.766	-1622.89	1572.96	233.259	-1457.45	1529.61	125.485	-1460.68	1520.98	190.143	-1486.5	1432.67	209.159	-1414.09	1151.63	192.478	-1609.15	1340.39	193.628	-1677.84	1146.25	127.764	-1395.81	1223.6	371.776	-1562.89	1365.67	445.895	-1547.67	1122.71	448.767	-1541.07	1046.36	448.206	-1635.55	895.765	394.357	-1653.79	822.323	461.589	-1631.55	806.599	425.214	-1681.26	751.768
860	0	226.575	-1633.53	1582.27	109.001	-1633.6	1574.15	231.744	-1468.2	1531.44	124.01	-1471.36	1522.4	188.835	-1497.12	1434.3	207.886	-1424.74	1153.33	191.714	-1619.73	1341.98	193.581	-1688.16	1147.75	126.49	-1406.57	1225.15	370.832	-1573.01	1367.71	445.06	-1557.02	1124.73	447.899	-1549.45	1048.42	447.227	-1642.31	896.782	393.432	-1658.97	822.771	461.177	-1637.58	807.815	423.946	-1685.34	751.511
861	0	224.883	-1644.28	1583.93	107.344	-1644.28	1575.36	230.315	-1478.87	1533.34	122.622	-1481.98	1523.89	187.57	-1507.63	1435.97	206.589	-1435.19	1155.07	191.032	-1630.18	1343.57	193.647	-1698.25	1149.24	125.175	-1417.17	1226.76	369.947	-1582.91	1369.74	444.322	-1566.09	1126.76	447.121	-1557.67	1050.49	446.412	-1649.04	897.923	392.689	-1664.21	823.381	460.925	-1643.64	809.163	422.901	-1689.54	751.465
862	0	223.304	-1654.99	1585.55	105.8	-1654.9	1576.56	228.975	-1489.48	1535.28	121.321	-1492.52	1525.46	186.347	-1518.01	1437.65	205.272	-1445.47	1156.82	190.424	-1640.48	1345.15	193.808	-1708.16	1150.72	123.819	-1427.62	1228.42	369.117	-1592.59	1371.75	443.675	-1574.85	1128.78	446.428	-1565.73	1052.57	445.771	-1655.74	899.17	392.139	-1669.55	824.141	460.829	-1649.74	810.618	422.103	-1693.89	751.627
863	0	221.841	-1665.63	1587.13	104.372	-1665.48	1577.74	227.724	-1500.01	1537.25	120.107	-1502.99	1527.09	185.166	-1528.28	1439.34	203.943	-1455.57	1158.58	189.883	-1650.65	1346.73	194.046	-1717.89	1152.2	122.424	-1437.93	1230.1	368.336	-1602.06	1373.72	443.108	-1583.29	1130.77	445.813	-1573.62	1054.63	445.309	-1662.4	900.507	391.789	-1675.02	825.038	460.882	-1655.86	812.158	421.57	-1698.42	751.993
864	0	220.496	-1676.22	1588.64	103.063	-1676.01	1578.9	226.559	-1510.46	1539.22	118.978	-1513.39	1528.77	184.026	-1538.43	1441.01	202.607	-1465.52	1160.32	189.402	-1660.69	1348.27	194.34	-1727.46	1153.66	120.995	-1448.11	1231.8	367.599	-1611.35	1375.64	442.612	-1591.43	1132.73	445.27	-1581.34	1056.66	445.03	-1669.02	901.915	391.646	-1680.63	826.053	461.076	-1661.98	813.758	421.32	-1703.18	752.552
865	0	219.271	-1686.75	1590.08	101.872	-1686.49	1580.03	225.48	-1520.83	1541.18	117.93	-1523.71	1530.47	182.926	-1548.47	1442.65	201.271	-1475.32	1162.02	188.972	-1670.61	1349.78	194.67	-1736.91	1155.1	119.537	-1458.16	1233.49	366.901	-1620.45	1377.49	442.172	-1599.26	1134.64	444.791	-1588.89	1058.64	444.936	-1675.6	903.373	391.712	-1686.39	827.169	461.402	-1668.11	815.392	421.362	-1708.16	753.294
866	0	218.165	-1697.21	1591.43	100.799	-1696.91	1581.13	224.483	-1531.12	1543.11	116.962	-1533.96	1532.17	181.865	-1558.4	1444.25	199.946	-1484.99	1163.67	188.585	-1680.41	1351.24	195.016	-1746.25	1156.51	118.058	-1468.11	1235.14	366.237	-1629.4	1379.26	441.779	-1606.8	1136.49	444.368	-1596.29	1060.57	445.022	-1682.14	904.863	391.986	-1692.32	828.365	461.849	-1674.22	817.037	421.701	-1713.4	754.202
867	0	217.175	-1707.6	1592.69	99.8396	-1707.28	1582.17	223.564	-1541.34	1544.99	116.069	-1544.13	1533.87	180.843	-1568.23	1445.78	198.638	-1494.55	1165.24	188.234	-1690.12	1352.64	195.36	-1755.5	1157.89	116.567	-1477.97	1236.75	365.603	-1638.2	1380.95	441.418	-1614.08	1138.26	443.996	-1603.53	1062.43	445.286	-1688.65	906.363	392.465	-1698.43	829.622	462.404	-1680.3	818.669	422.337	-1718.89	755.256
868	0	216.298	-1717.93	1593.84	98.9909	-1717.58	1583.16	222.719	-1551.47	1546.79	115.246	-1554.23	1535.53	179.861	-1577.97	1447.24	197.356	-1504	1166.74	187.911	-1699.73	1353.97	195.686	-1764.68	1159.23	115.075	-1487.74	1238.28	364.996	-1646.89	1382.52	441.08	-1621.12	1139.95	443.668	-1610.63	1064.2	445.717	-1695.11	907.854	393.14	-1704.72	830.916	463.055	-1686.34	820.266	423.261	-1724.65	756.433
869	0	215.529	-1728.17	1594.89	98.2479	-1727.84	1584.08	221.945	-1561.52	1548.51	114.489	-1564.27	1537.15	178.917	-1587.63	1448.6	196.11	-1513.37	1168.13	187.612	-1709.26	1355.22	195.98	-1773.82	1160.5	113.594	-1497.45	1239.74	364.412	-1655.48	1383.98	440.755	-1627.97	1141.55	443.378	-1617.61	1065.88	446.306	-1701.54	909.315	394.002	-1711.18	832.225	463.79	-1692.35	821.806	424.46	-1730.66	757.709
870	0	214.863	-1738.35	1595.81	97.6049	-1738.03	1584.92	221.236	-1571.5	1550.11	113.794	-1574.24	1538.69	178.015	-1597.22	1449.86	194.907	-1522.66	1169.41	187.332	-1718.72	1356.37	196.235	-1782.92	1161.71	112.137	-1507.1	1241.08	363.85	-1664	1385.32	440.435	-1634.65	1143.04	443.123	-1624.48	1067.46	447.039	-1707.94	910.727	395.035	-1717.82	833.525	464.594	-1698.32	823.27	425.914	-1736.91	759.056
871	0	214.295	-1748.45	1596.62	97.056	-1748.16	1585.69	220.588	-1581.41	1551.59	113.156	-1584.15	1540.13	177.154	-1606.73	1451	193.755	-1531.9	1170.57	187.066	-1728.13	1357.41	196.443	-1792	1162.84	110.717	-1516.7	1242.31	363.309	-1672.46	1386.52	440.118	-1641.2	1144.42	442.9	-1631.26	1068.93	447.901	-1714.32	912.071	396.225	-1724.63	834.796	465.455	-1704.26	824.639	427.598	-1743.39	760.443
872	0	213.819	-1758.47	1597.29	96.5953	-1758.23	1586.35	219.997	-1591.24	1552.92	112.571	-1594	1541.46	176.338	-1616.2	1452.02	192.662	-1541.09	1171.59	186.814	-1737.49	1358.34	196.604	-1801.06	1163.86	109.347	-1526.27	1243.41	362.791	-1680.9	1387.57	439.802	-1647.68	1145.68	442.707	-1637.97	1070.27	448.875	-1720.69	913.329	397.552	-1731.6	836.012	466.36	-1710.18	825.898	429.482	-1750.08	761.839
873	0	213.429	-1768.41	1597.83	96.2169	-1768.24	1586.92	219.459	-1601	1554.09	112.037	-1603.8	1542.66	175.569	-1625.61	1452.89	191.634	-1550.24	1172.46	186.574	-1746.81	1359.14	196.718	-1810.13	1164.77	108.041	-1535.81	1244.37	362.297	-1689.31	1388.47	439.487	-1654.12	1146.81	442.545	-1644.64	1071.49	449.943	-1727.05	914.483	398.995	-1738.72	837.154	467.299	-1716.09	827.031	431.534	-1756.96	763.214
874	0	213.119	-1778.29	1598.24	95.9153	-1778.19	1587.38	218.972	-1610.7	1555.09	111.55	-1613.55	1543.7	174.85	-1635	1453.61	190.677	-1559.37	1173.19	186.346	-1756.11	1359.8	196.79	-1819.21	1165.54	106.81	-1545.32	1245.17	361.829	-1697.74	1389.21	439.178	-1660.56	1147.81	442.414	-1651.29	1072.56	451.088	-1733.43	915.517	400.533	-1745.97	838.199	468.259	-1722.01	828.027	433.717	-1764.01	764.536
875	0	212.884	-1788.09	1598.51	95.6855	-1788.08	1587.73	218.534	-1620.34	1555.91	111.108	-1623.25	1544.58	174.186	-1644.36	1454.18	189.797	-1568.48	1173.75	186.133	-1765.39	1360.32	196.827	-1828.3	1166.17	105.666	-1554.81	1245.82	361.391	-1706.2	1389.79	438.882	-1667.05	1148.66	442.316	-1657.94	1073.49	452.292	-1739.84	916.417	402.143	-1753.35	839.129	469.233	-1727.95	828.874	435.995	-1771.19	765.775
876	0	212.721	-1797.82	1598.64	95.5233	-1797.92	1587.95	218.143	-1629.92	1556.54	110.712	-1632.92	1545.29	173.579	-1653.7	1454.58	188.997	-1577.58	1174.15	185.936	-1774.67	1360.69	196.837	-1837.41	1166.64	104.621	-1564.29	1246.3	360.986	-1714.69	1390.19	438.604	-1673.61	1149.37	442.253	-1664.62	1074.26	453.536	-1746.29	917.169	403.802	-1760.83	839.924	470.212	-1733.94	829.563	438.328	-1778.5	766.901
877	0	212.625	-1807.49	1598.62	95.4253	-1807.71	1588.04	217.8	-1639.46	1556.97	110.361	-1642.55	1545.8	173.035	-1663.04	1454.82	188.282	-1586.68	1174.39	185.76	-1783.95	1360.89	196.828	-1846.54	1166.95	103.682	-1573.76	1246.6	360.62	-1723.24	1390.42	438.355	-1680.28	1149.92	442.227	-1671.35	1074.88	454.806	-1752.8	917.761	405.489	-1768.4	840.568	471.189	-1740	830.087	440.681	-1785.9	767.887
878	0	212.593	-1817.1	1598.47	95.3892	-1817.46	1588.01	217.505	-1648.95	1557.19	110.056	-1652.16	1546.12	172.558	-1672.38	1454.88	187.656	-1595.78	1174.46	185.607	-1793.24	1360.94	196.809	-1855.71	1167.09	102.857	-1583.22	1246.74	360.297	-1731.87	1390.47	438.143	-1687.08	1150.32	442.242	-1678.16	1075.33	456.085	-1759.38	918.183	407.184	-1776.05	841.046	472.159	-1746.15	830.438	443.02	-1793.38	768.708
879	0	212.625	-1826.65	1598.17	95.4134	-1827.16	1587.83	217.26	-1658.41	1557.21	109.8	-1661.74	1546.24	172.154	-1681.73	1454.77	187.122	-1604.89	1174.36	185.483	-1802.55	1360.83	196.791	-1864.92	1167.04	102.154	-1592.67	1246.71	360.024	-1740.57	1390.35	437.976	-1694.04	1150.55	442.299	-1685.06	1075.61	457.361	-1766.04	918.425	408.867	-1783.77	841.344	473.12	-1752.4	830.614	445.312	-1800.91	769.341
880	0	212.719	-1836.17	1597.74	95.4973	-1836.83	1587.53	217.069	-1667.85	1557.03	109.597	-1671.3	1546.16	171.827	-1691.1	1454.5	186.683	-1614.03	1174.09	185.394	-1811.88	1360.54	196.78	-1874.17	1166.82	101.576	-1602.12	1246.5	359.805	-1749.37	1390.05	437.862	-1701.18	1150.61	442.401	-1692.09	1075.71	458.623	-1772.81	918.48	410.522	-1791.54	841.451	474.068	-1758.77	830.608	447.532	-1808.48	769.766
881	0	212.876	-1845.65	1597.17	95.6414	-1846.47	1587.08	216.934	-1677.26	1556.65	109.45	-1680.86	1545.87	171.581	-1700.5	1454.05	186.341	-1623.18	1173.65	185.344	-1821.24	1360.09	196.784	-1883.47	1166.42	101.126	-1611.57	1246.12	359.647	-1758.27	1389.57	437.808	-1708.52	1150.51	442.547	-1699.25	1075.64	459.86	-1779.69	918.342	412.136	-1799.36	841.357	475.005	-1765.28	830.419	449.655	-1816.09	769.967
882	0	213.095	-1855.1	1596.47	95.8467	-1856.09	1586.5	216.862	-1686.67	1556.07	109.365	-1690.42	1545.39	171.423	-1709.94	1453.44	186.097	-1632.37	1173.06	185.339	-1830.65	1359.49	196.808	-1892.82	1165.85	100.807	-1621.04	1245.58	359.555	-1767.28	1388.91	437.818	-1716.05	1150.24	442.74	-1706.56	1075.39	461.066	-1786.7	918.007	413.696	-1807.22	841.053	475.93	-1771.94	830.045	451.666	-1823.7	769.93
883	0	213.38	-1864.54	1595.64	96.1154	-1865.69	1585.79	216.856	-1696.08	1555.3	109.346	-1699.98	1544.71	171.357	-1719.41	1452.67	185.954	-1641.59	1172.3	185.386	-1840.09	1358.72	196.857	-1902.23	1165.1	100.619	-1630.51	1244.88	359.534	-1776.4	1388.09	437.895	-1723.8	1149.8	442.977	-1714.05	1074.96	462.236	-1793.85	917.471	415.194	-1815.11	840.535	476.845	-1778.75	829.485	453.552	-1831.33	769.643
884	0	213.731	-1873.97	1594.69	96.4499	-1875.29	1584.96	216.923	-1705.5	1554.35	109.401	-1709.55	1543.86	171.386	-1728.94	1451.75	185.913	-1650.87	1171.4	185.49	-1849.59	1357.8	196.934	-1911.71	1164.19	100.561	-1640.01	1244.03	359.59	-1785.64	1387.1	438.041	-1731.77	1149.18	443.258	-1721.72	1074.34	463.365	-1801.14	916.735	416.625	-1823.02	839.799	477.752	-1785.72	828.741	455.308	-1838.96	769.102
885	0	214.153	-1883.41	1593.63	96.8533	-1884.88	1584	217.068	-1714.93	1553.23	109.535	-1719.14	1542.83	171.516	-1738.52	1450.69	185.975	-1660.2	1170.35	185.656	-1859.15	1356.74	197.043	-1921.26	1163.13	100.633	-1649.53	1243.04	359.728	-1795.01	1385.96	438.256	-1739.96	1148.38	443.58	-1729.59	1073.55	464.452	-1808.58	915.798	417.985	-1830.96	838.843	478.654	-1792.85	827.812	456.932	-1846.59	768.303
886	0	214.648	-1892.86	1592.47	97.3289	-1894.49	1582.94	217.299	-1724.4	1551.96	109.754	-1728.75	1541.64	171.749	-1748.16	1449.5	186.139	-1669.6	1169.16	185.89	-1868.76	1355.55	197.184	-1930.88	1161.92	100.831	-1659.09	1241.91	359.952	-1804.49	1384.66	438.539	-1748.38	1147.42	443.939	-1737.66	1072.59	465.497	-1816.17	914.665	419.273	-1838.94	837.669	479.554	-1800.15	826.705	458.428	-1854.22	767.246
887	0	215.221	-1902.33	1591.21	97.8805	-1904.11	1581.78	217.62	-1733.9	1550.56	110.064	-1738.4	1540.31	172.088	-1757.86	1448.19	186.404	-1679.08	1167.85	186.197	-1878.45	1354.23	197.36	-1940.58	1160.57	101.153	-1668.7	1240.66	360.266	-1814.1	1383.23	438.885	-1757.03	1146.28	444.331	-1745.95	1071.46	466.499	-1823.93	913.341	420.491	-1846.94	836.281	480.453	-1807.6	825.422	459.804	-1861.86	765.937
888	0	215.874	-1911.84	1589.88	98.5116	-1913.76	1580.53	218.037	-1743.44	1549.03	110.471	-1748.08	1538.86	172.535	-1767.63	1446.78	186.77	-1688.64	1166.42	186.582	-1888.2	1352.81	197.573	-1950.37	1159.11	101.593	-1678.36	1239.29	360.673	-1823.83	1381.67	439.291	-1765.9	1144.98	444.753	-1754.47	1070.16	467.46	-1831.86	911.833	421.642	-1854.97	834.687	481.355	-1815.21	823.972	461.068	-1869.51	764.385
889	0	216.61	-1921.39	1588.49	99.2259	-1923.43	1579.22	218.556	-1753.03	1547.4	110.981	-1757.81	1537.3	173.092	-1777.47	1445.28	187.234	-1698.3	1164.9	187.049	-1898.03	1351.31	197.825	-1960.25	1157.55	102.148	-1688.08	1237.83	361.175	-1833.68	1380.01	439.752	-1775	1143.52	445.2	-1763.21	1068.72	468.383	-1839.95	910.151	422.73	-1863.05	832.895	482.26	-1822.97	822.363	462.235	-1877.18	762.603
890	0	217.435	-1930.99	1587.04	100.027	-1933.15	1577.85	219.182	-1762.69	1545.68	111.596	-1767.59	1535.66	173.758	-1787.39	1443.71	187.792	-1708.07	1163.29	187.601	-1907.95	1349.73	198.117	-1970.23	1155.9	102.811	-1697.88	1236.29	361.775	-1843.65	1378.24	440.264	-1784.33	1141.91	445.667	-1772.19	1067.13	469.271	-1848.21	908.31	423.76	-1871.18	830.92	483.17	-1830.88	820.608	463.318	-1884.87	760.606
891	0	218.349	-1940.65	1585.56	100.917	-1942.91	1576.44	219.918	-1772.41	1543.91	112.321	-1777.42	1533.95	174.535	-1797.39	1442.08	188.441	-1717.96	1161.61	188.241	-1917.94	1348.1	198.455	-1980.32	1154.19	103.577	-1707.77	1234.69	362.473	-1853.74	1376.39	440.82	-1793.88	1140.17	446.15	-1781.41	1065.42	470.125	-1856.65	906.323	424.737	-1879.37	828.776	484.085	-1838.93	818.72	464.331	-1892.6	758.416
892	0	219.356	-1950.38	1584.07	101.898	-1952.72	1575.02	220.767	-1782.2	1542.09	113.159	-1787.31	1532.21	175.421	-1807.47	1440.42	189.175	-1727.97	1159.89	188.971	-1928.03	1346.44	198.842	-1990.52	1152.43	104.438	-1717.75	1233.04	363.27	-1863.94	1374.49	441.415	-1803.66	1138.3	446.644	-1790.87	1063.61	470.949	-1865.26	904.211	425.668	-1887.63	826.485	485.005	-1847.12	816.717	465.288	-1900.37	756.056
893	0	220.457	-1960.18	1582.58	102.974	-1962.59	1573.6	221.732	-1792.07	1540.26	114.111	-1797.26	1530.45	176.413	-1817.64	1438.75	189.989	-1738.12	1158.13	189.793	-1938.21	1344.77	199.282	-2000.83	1150.65	105.387	-1727.84	1231.37	364.164	-1874.26	1372.55	442.045	-1813.65	1136.33	447.146	-1800.56	1061.7	471.746	-1874.04	901.994	426.558	-1895.96	824.067	485.93	-1855.46	814.618	466.2	-1908.21	753.553
894	0	221.654	-1970.06	1581.11	104.144	-1972.52	1572.21	222.813	-1802.01	1538.43	115.178	-1807.28	1528.7	177.508	-1827.88	1437.09	190.876	-1748.41	1156.35	190.708	-1948.48	1343.11	199.782	-2011.27	1148.88	106.416	-1738.05	1229.69	365.156	-1884.67	1370.58	442.704	-1823.86	1134.28	447.653	-1810.5	1059.73	472.519	-1883.01	899.695	427.414	-1904.4	821.548	486.859	-1863.93	812.446	467.08	-1916.11	750.937
895	0	222.946	-1980.01	1579.69	105.41	-1982.51	1570.86	224.011	-1812.04	1536.63	116.359	-1817.37	1526.98	178.704	-1838.22	1435.45	191.828	-1758.86	1154.58	191.714	-1958.85	1341.5	200.346	-2021.84	1147.15	107.518	-1748.39	1228.02	366.242	-1895.19	1368.63	443.389	-1834.28	1132.17	448.163	-1820.67	1057.71	473.27	-1892.15	897.34	428.24	-1912.94	818.957	487.791	-1872.56	810.225	467.936	-1924.1	748.238
896	0	224.333	-1990.04	1578.33	106.77	-1992.57	1569.57	225.325	-1822.16	1534.88	117.654	-1827.52	1525.31	179.994	-1848.64	1433.85	192.838	-1769.45	1152.84	192.812	-1969.32	1339.95	200.982	-2032.54	1145.48	108.684	-1758.86	1226.38	367.42	-1905.8	1366.7	444.098	-1844.91	1130.02	448.675	-1831.07	1055.66	474.002	-1901.49	894.957	429.04	-1921.6	816.324	488.725	-1881.34	807.983	468.773	-1932.19	745.491
897	0	225.814	-2000.16	1577.05	108.223	-2002.69	1568.38	226.752	-1832.36	1533.19	119.06	-1837.75	1523.72	181.374	-1859.14	1432.33	193.899	-1780.21	1151.15	193.998	-1979.89	1338.48	201.694	-2043.39	1143.9	109.906	-1769.49	1224.8	368.685	-1916.5	1364.82	444.828	-1855.73	1127.86	449.188	-1841.69	1053.62	474.719	-1911.02	892.576	429.819	-1930.41	813.681	489.659	-1890.28	805.748	469.598	-1940.41	742.73
898	0	227.385	-2010.35	1575.86	109.768	-2012.88	1567.29	228.289	-1842.64	1531.59	120.573	-1848.05	1522.23	182.838	-1869.72	1430.89	195.001	-1791.13	1149.52	195.27	-1990.55	1337.11	202.486	-2054.38	1142.45	111.176	-1780.26	1223.29	370.032	-1927.28	1363.01	445.578	-1866.74	1125.73	449.702	-1852.53	1051.61	475.421	-1920.74	890.224	430.579	-1939.36	811.06	490.594	-1899.4	803.549	470.411	-1948.76	739.99
899	0	229.044	-2020.63	1574.79	111.4	-2023.14	1566.33	229.931	-1853	1530.1	122.19	-1858.41	1520.85	184.378	-1880.39	1429.55	196.138	-1802.2	1147.98	196.624	-2001.31	1335.88	203.363	-2065.53	1141.15	112.485	-1791.19	1221.88	371.457	-1938.14	1361.31	446.349	-1877.93	1123.63	450.22	-1863.57	1049.65	476.112	-1930.67	887.932	431.325	-1948.49	808.496	491.528	-1908.71	801.417	471.213	-1957.27	737.306
900	0	230.787	-2030.98	1573.85	113.117	-2033.46	1565.51	231.674	-1863.45	1528.73	123.904	-1868.84	1519.6	185.987	-1891.13	1428.33	197.299	-1813.43	1146.55	198.053	-2012.17	1334.79	204.325	-2076.82	1140.02	113.826	-1802.28	1220.57	372.951	-1949.07	1359.71	447.141	-1889.3	1121.62	450.745	-1874.82	1047.76	476.793	-1940.81	885.729	432.058	-1957.81	806.021	492.46	-1918.23	799.378	472.002	-1965.96	734.71
901	0	232.609	-2041.4	1573.05	114.913	-2043.83	1564.84	233.511	-1873.97	1527.5	125.709	-1879.34	1518.5	187.656	-1901.95	1427.24	198.479	-1824.81	1145.24	199.552	-2023.12	1333.87	205.373	-2088.28	1139.1	115.19	-1813.53	1219.4	374.509	-1960.07	1358.25	447.956	-1900.82	1119.71	451.278	-1886.26	1045.98	477.469	-1951.16	883.643	432.78	-1967.33	803.669	493.389	-1927.97	797.462	472.776	-1974.86	732.237
902	0	234.504	-2051.89	1572.41	116.784	-2054.27	1564.35	235.434	-1884.56	1526.41	127.598	-1889.89	1517.56	189.378	-1912.84	1426.29	199.669	-1836.33	1144.07	201.113	-2034.16	1333.12	206.503	-2099.88	1138.39	116.57	-1824.94	1218.37	376.121	-1971.13	1356.94	448.795	-1912.48	1117.92	451.826	-1897.87	1044.31	478.14	-1961.74	881.7	433.494	-1977.08	801.47	494.316	-1937.94	795.693	473.531	-1983.98	729.916
903	0	236.466	-2062.43	1571.93	118.722	-2064.75	1564.03	237.435	-1895.22	1525.47	129.563	-1900.5	1516.78	191.143	-1923.79	1425.5	200.864	-1847.98	1143.05	202.728	-2045.28	1332.56	207.71	-2111.63	1137.92	117.959	-1836.49	1217.5	377.778	-1982.25	1355.8	449.659	-1924.29	1116.29	452.392	-1909.65	1042.79	478.811	-1972.54	879.923	434.201	-1987.07	799.451	495.239	-1948.17	794.095	474.264	-1993.34	727.774
904	0	238.488	-2073.04	1571.62	120.722	-2075.28	1563.91	239.505	-1905.94	1524.69	131.595	-1911.16	1516.18	192.943	-1934.81	1424.87	202.057	-1859.75	1142.2	204.387	-2056.47	1332.19	208.984	-2123.51	1137.69	119.352	-1848.18	1216.8	379.47	-1993.42	1354.83	450.551	-1936.21	1114.83	452.981	-1921.59	1041.42	479.484	-1983.56	878.333	434.903	-1997.31	797.638	496.159	-1958.68	792.686	474.973	-2002.98	725.836
905	0	240.562	-2083.69	1571.48	122.776	-2085.85	1563.97	241.634	-1916.71	1524.08	133.683	-1921.86	1515.76	194.767	-1945.87	1424.42	203.244	-1871.62	1141.52	206.078	-2067.74	1332.02	210.316	-2135.51	1137.71	120.742	-1859.99	1216.28	381.188	-2004.64	1354.05	451.471	-1948.24	1113.57	453.598	-1933.66	1040.22	480.163	-1994.82	876.948	435.602	-2007.83	796.051	497.077	-1969.46	791.483	475.655	-2012.91	724.123
906	0	242.682	-2094.38	1571.5	124.876	-2096.46	1564.23	243.811	-1927.53	1523.63	135.819	-1932.61	1515.52	196.606	-1956.99	1424.13	204.422	-1883.58	1141.02	207.792	-2079.06	1332.05	211.69	-2147.62	1137.97	122.124	-1871.9	1215.95	382.922	-2015.91	1353.45	452.422	-1960.37	1112.5	454.248	-1945.87	1039.2	480.851	-2006.32	875.781	436.301	-2018.63	794.708	497.992	-1980.55	790.496	476.309	-2023.15	722.651
907	0	244.838	-2105.1	1571.7	127.015	-2107.1	1564.68	246.024	-1938.39	1523.34	137.991	-1943.39	1515.46	198.452	-1968.15	1424.01	205.59	-1895.61	1140.71	209.517	-2090.43	1332.28	213.092	-2159.8	1138.47	123.495	-1883.9	1215.81	384.659	-2027.21	1353.04	453.404	-1972.59	1111.64	454.937	-1958.2	1038.37	481.551	-2018.05	874.842	437.002	-2029.73	793.62	498.907	-1991.94	789.733	476.937	-2033.73	721.432
908	0	247.022	-2115.85	1572.06	129.183	-2117.76	1565.31	248.263	-1949.29	1523.21	140.188	-1954.2	1515.57	200.294	-1979.35	1424.06	206.745	-1907.69	1140.58	211.24	-2101.84	1332.69	214.505	-2172.05	1139.18	124.851	-1895.96	1215.86	386.39	-2038.55	1352.82	454.417	-1984.87	1111	455.668	-1970.63	1037.73	482.266	-2030.02	874.136	437.706	-2041.14	792.795	499.82	-2003.65	789.195	477.539	-2044.67	720.474
909	0	249.227	-2126.62	1572.57	131.374	-2128.44	1566.11	250.515	-1960.21	1523.22	142.398	-1965.03	1515.85	202.125	-1990.57	1424.28	207.888	-1919.79	1140.65	212.95	-2113.29	1333.27	215.909	-2184.31	1140.1	126.191	-1908.05	1216.11	388.104	-2049.93	1352.78	455.461	-1997.23	1110.57	456.444	-1983.16	1037.28	483.001	-2042.23	873.666	438.417	-2052.87	792.235	500.733	-2015.69	788.88	478.122	-2055.97	719.78
910	0	251.442	-2137.41	1573.23	133.576	-2139.14	1567.09	252.769	-1971.15	1523.38	144.61	-1975.89	1516.28	203.936	-2001.81	1424.65	209.021	-1931.91	1140.89	214.635	-2124.75	1334.02	217.289	-2196.58	1141.19	127.514	-1920.14	1216.54	389.792	-2061.33	1352.92	456.534	-2009.63	1110.35	457.27	-1995.77	1037.01	483.757	-2054.67	873.428	439.136	-2064.91	791.94	501.647	-2028.04	788.783	478.689	-2067.67	719.349
911	0	253.66	-2148.2	1574.02	135.783	-2149.85	1568.21	255.012	-1982.11	1523.66	146.814	-1986.76	1516.87	205.72	-2013.06	1425.18	210.147	-1944.02	1141.3	216.283	-2136.21	1334.91	218.624	-2208.82	1142.43	128.821	-1932.21	1217.15	391.444	-2072.76	1353.21	457.636	-2022.09	1110.34	458.147	-2008.46	1036.93	484.537	-2067.33	873.417	439.866	-2077.29	791.903	502.563	-2040.72	788.893	479.248	-2079.76	719.177
912	0	255.872	-2159	1574.92	137.984	-2160.57	1569.47	257.233	-1993.07	1524.07	148.996	-1997.65	1517.59	207.47	-2024.32	1425.84	211.268	-1956.09	1141.88	217.884	-2147.67	1335.94	219.899	-2220.99	1143.79	130.114	-1944.24	1217.92	393.051	-2084.21	1353.66	458.766	-2034.59	1110.5	459.077	-2021.21	1037.01	485.343	-2080.23	873.624	440.609	-2089.99	792.115	503.48	-2053.71	789.196	479.806	-2092.26	719.257
913	0	258.069	-2169.79	1575.93	140.172	-2171.3	1570.86	259.422	-2004.03	1524.59	151.148	-2008.54	1518.44	209.179	-2035.58	1426.64	212.39	-1968.12	1142.62	219.427	-2159.12	1337.07	221.096	-2233.08	1145.23	131.395	-1956.18	1218.84	394.606	-2095.67	1354.25	459.922	-2047.12	1110.84	460.061	-2034.03	1037.25	486.176	-2093.34	874.039	441.366	-2103.02	792.563	504.398	-2067.02	789.678	480.37	-2105.18	719.577
914	0	260.243	-2180.57	1577.03	142.339	-2182.02	1572.35	261.567	-2014.98	1525.21	153.259	-2019.44	1519.4	210.843	-2046.82	1427.55	213.517	-1980.06	1143.49	220.903	-2170.53	1338.3	222.202	-2245.05	1146.73	132.668	-1968.01	1219.89	396.102	-2107.15	1354.96	461.102	-2059.69	1111.34	461.099	-2046.89	1037.64	487.038	-2106.67	874.649	442.138	-2116.37	793.234	505.318	-2080.64	790.321	480.948	-2118.52	720.127
915	0	262.387	-2191.35	1578.21	144.475	-2192.75	1573.93	263.66	-2025.92	1525.91	155.32	-2030.33	1520.47	212.456	-2058.04	1428.58	214.655	-1991.92	1144.49	222.304	-2181.9	1339.6	223.202	-2256.89	1148.26	133.936	-1979.72	1221.07	397.532	-2118.64	1355.79	462.305	-2072.28	1111.97	462.192	-2059.81	1038.16	487.929	-2120.2	875.44	442.926	-2130.04	794.111	506.239	-2094.55	791.108	481.548	-2132.27	720.893
916	0	264.494	-2202.11	1579.45	146.574	-2203.47	1575.59	265.691	-2036.85	1526.7	157.322	-2041.23	1521.62	214.016	-2069.24	1429.7	215.81	-2003.66	1145.61	223.622	-2193.23	1340.95	224.087	-2268.57	1149.79	135.205	-1991.27	1222.34	398.892	-2130.14	1356.7	463.529	-2084.9	1112.73	463.339	-2072.76	1038.8	488.848	-2133.94	876.397	443.733	-2144.02	795.18	507.16	-2108.74	792.02	482.177	-2146.45	721.864
917	0	266.557	-2212.85	1580.73	148.629	-2214.19	1577.3	267.654	-2047.75	1527.55	159.259	-2052.12	1522.86	215.518	-2080.41	1430.91	216.986	-2015.27	1146.82	224.852	-2204.49	1342.35	224.848	-2280.08	1151.29	136.477	-2002.65	1223.71	400.177	-2141.64	1357.7	464.772	-2097.55	1113.59	464.537	-2085.76	1039.54	489.795	-2147.87	877.508	444.557	-2158.31	796.424	508.08	-2123.22	793.041	482.839	-2161.05	723.025
918	0	268.57	-2223.58	1582.06	150.635	-2224.91	1579.06	269.542	-2058.63	1528.47	161.124	-2063	1524.16	216.96	-2091.53	1432.19	218.189	-2026.73	1148.13	225.988	-2215.7	1343.78	225.477	-2291.4	1152.75	137.758	-2013.85	1225.14	401.384	-2153.14	1358.77	466.032	-2110.21	1114.53	465.788	-2098.78	1040.38	490.769	-2161.99	878.76	445.401	-2172.9	797.83	508.997	-2137.96	794.155	483.54	-2176.07	724.367
919	0	270.529	-2234.29	1583.41	152.585	-2235.62	1580.86	271.349	-2069.49	1529.45	162.913	-2073.87	1525.54	218.34	-2102.62	1433.55	219.422	-2038.04	1149.52	227.026	-2226.82	1345.22	225.969	-2302.53	1154.15	139.05	-2024.84	1226.64	402.511	-2164.63	1359.9	467.309	-2122.9	1115.55	467.088	-2111.85	1041.3	491.768	-2176.29	880.141	446.264	-2187.78	799.385	509.912	-2152.96	795.351	484.284	-2191.5	725.878
920	0	272.429	-2244.97	1584.78	154.475	-2246.32	1582.68	273.072	-2080.32	1530.48	164.62	-2084.73	1526.96	219.657	-2113.66	1434.97	220.69	-2049.17	1150.98	227.962	-2237.87	1346.67	226.321	-2313.47	1155.48	140.358	-2035.63	1228.18	403.554	-2176.12	1361.08	468.601	-2135.6	1116.64	468.438	-2124.94	1042.29	492.792	-2190.77	881.641	447.146	-2202.94	801.078	510.822	-2168.21	796.615	485.072	-2207.34	727.552
921	0	274.267	-2255.64	1586.17	156.303	-2257.02	1584.52	274.707	-2091.12	1531.56	166.243	-2095.58	1528.44	220.909	-2124.65	1436.45	221.996	-2060.12	1152.51	228.796	-2248.84	1348.12	226.531	-2324.19	1156.72	141.682	-2046.2	1229.76	404.514	-2187.61	1362.3	469.905	-2148.32	1117.78	469.835	-2138.06	1043.35	493.839	-2205.42	883.254	448.047	-2218.39	802.902	511.727	-2183.7	797.94	485.906	-2223.58	729.38
922	0	276.04	-2266.29	1587.57	158.064	-2267.71	1586.37	276.252	-2101.9	1532.68	167.78	-2106.42	1529.97	222.096	-2135.59	1437.99	223.34	-2070.88	1154.09	229.525	-2259.72	1349.55	226.597	-2334.71	1157.87	143.025	-2056.54	1231.38	405.389	-2199.08	1363.56	471.223	-2161.06	1118.97	471.278	-2151.22	1044.48	494.908	-2220.25	884.973	448.968	-2234.12	804.85	512.625	-2199.43	799.32	486.788	-2240.22	731.358
923	0	277.748	-2276.91	1588.97	159.758	-2278.39	1588.23	277.706	-2112.64	1533.84	169.228	-2117.24	1531.55	223.217	-2146.47	1439.57	224.725	-2081.45	1155.73	230.147	-2270.51	1350.98	226.52	-2345.02	1158.93	144.388	-2066.66	1233.02	406.178	-2210.55	1364.86	472.552	-2173.81	1120.19	472.768	-2164.4	1045.66	495.998	-2235.24	886.793	449.906	-2250.12	806.916	513.517	-2215.39	800.75	487.718	-2257.26	733.482
924	0	279.388	-2287.52	1590.38	161.384	-2289.06	1590.09	279.066	-2123.35	1535.05	170.588	-2128.04	1533.17	224.272	-2157.3	1441.21	226.151	-2091.83	1157.42	230.663	-2281.22	1352.39	226.299	-2355.11	1159.88	145.772	-2076.56	1234.69	406.88	-2222	1366.19	473.892	-2186.58	1121.46	474.304	-2177.62	1046.89	497.108	-2250.41	888.713	450.864	-2266.39	809.099	514.402	-2231.58	802.228	488.696	-2274.69	735.751
925	0	280.96	-2298.1	1591.79	162.939	-2299.73	1591.96	280.334	-2134.03	1536.29	171.858	-2138.83	1534.82	225.261	-2168.08	1442.89	227.619	-2102.02	1159.16	231.072	-2291.83	1353.78	225.935	-2364.99	1160.73	147.177	-2086.22	1236.38	407.497	-2233.45	1367.55	475.243	-2199.37	1122.77	475.885	-2190.86	1048.18	498.238	-2265.74	890.731	451.839	-2282.93	811.396	515.28	-2248.01	803.752	489.722	-2292.51	738.163
926	0	282.464	-2308.66	1593.21	164.425	-2310.39	1593.83	281.508	-2144.68	1537.58	173.038	-2149.61	1536.53	226.183	-2178.8	1444.62	229.13	-2112	1160.96	231.374	-2302.36	1355.16	225.428	-2374.67	1161.49	148.604	-2095.66	1238.1	408.028	-2244.88	1368.94	476.605	-2212.17	1124.11	477.511	-2204.13	1049.52	499.388	-2281.24	892.846	452.833	-2299.74	813.807	516.15	-2264.66	805.321	490.796	-2310.72	740.717
927	0	283.9	-2319.2	1594.63	165.84	-2321.04	1595.7	282.588	-2155.3	1538.91	174.128	-2160.37	1538.27	227.039	-2189.47	1446.41	230.682	-2121.79	1162.8	231.568	-2312.79	1356.52	224.777	-2384.12	1162.14	150.052	-2104.87	1239.84	408.472	-2256.3	1370.36	477.978	-2224.99	1125.49	479.182	-2217.43	1050.91	500.557	-2296.9	895.058	453.845	-2316.82	816.331	517.014	-2281.53	806.936	491.917	-2329.33	743.414
[truncated: 69 more columns]

## Sheet: Sheet2
Devices
		025370 - Force			025370 - Moment			025370 - CoP			027571 - Force			027571 - Moment			027571 - CoP			037720 - Force			037720 - Moment			037720 - CoP
Frame	Sub Frame	Fx	Fy	Fz	Mx	My	Mz	Cx	Cy	Cz	Fx	Fy	Fz	Mx	My	Mz	Cx	Cy	Cz	Fx	Fy	Fz	Mx	My	Mz	Cx	Cy	Cz
		N	N	N	N.mm	N.mm	N.mm	mm	mm	mm	N	N	N	N.mm	N.mm	N.mm	mm	mm	mm	N	N	N	N.mm	N.mm	N.mm	mm	mm	mm
533	0	0	0	0	0	0	0	200	300	0	0	0	0	0	0	0	200	903	0	0	0	0	0	0	0	603	903	0
533	1	0	0	0	0	0	0	200	300	0	0	0	0	0	0	0	200	903	0	0	0	0	0	0	0	603	903	0
533	2	0	0	0	0	0	0	200	300	0	0	0	0	0	0	0	200	903	0	0	0	0	0	0	0	603	903	0
533	3	0	0	0	0	0	0	200	300	0	0	0	0	0	0	0	200	903	0	0	0	0	0	0	0	603	903	0
533	4	0	0	0	0	0	0	200	300	0	0	0	0	0	0	0	200	903	0	0	0	0	0	0	0	603	903	0
533	5	0	0	0	0	0	0	200	300	0	0	0	0	0	0	0	200	903	0	0	0	0	0	0	0	603	903	0
533	6	0	0	0	0	0	0	200	300	0	0	0	0	0	0	0	200	903	0	0	0	0	0	0	0	603	903	0
533	7	0	0	0	0	0	0	200	300	0	0	0	0	0	0	0	200	903	0	0	0	0	0	0	0	603	903	0
533	8	0	0	0	0	0	0	200	300	0	0	0	0	0	0	0	200	903	0	0	0	0	0	0	0	603	903	0
533	9	0	0	0	0	0	0	200	300	0	0	0	0	0	0	0	200	903	0	0	0	0	0	0	0	603	903	0
534	0	0	0	0	0	0	0	200	300	0	0	0	0	0	0	0	200	903	0	0	0	0	0	0	0	603	903	0
534	1	0	0	0	0	0	0	200	300	0	0	0	0	0	0	0	200	903	0	0	0	0	0	0	0	603	903	0
534	2	0	0	0	0	0	0	200	300	0	0	0	0	0	0	0	200	903	0	0	0	0	0	0	0	603	903	0
534	3	0	0	0	0	0	0	200	300	0	0	0	0	0	0	0	200	903	0	0	0	0	0	0	0	603	903	0
534	4	0	0	0	0	0	0	200	300	0	0	0	0	0	0	0	200	903	0	0	0	0	0	0	0	603	903	0
534	5	0	0	0	0	0	0	200	300	0	0	0	0	0	0	0	200	903	0	0	0	0	0	0	0	603	903	0
534	6	0	0	0	0	0	0	200	300	0	0	0	0	0	0	0	200	903	0	0	0	0	0	0	0	603	903	0
534	7	0	0	0	0	0	0	200	300	0	0	0	0	0	0	0	200	903	0	0	0	0	0	0	0	603	903	0
534	8	0	0	0	0	0	0	200	300	0	0	0	0	0	0	0	200	903	0	0	0	0	0	0	0	603	903	0
534	9	0	0	0	0	0	0	200	300	0	0	0	0	0	0	0	200	903	0	0	0	0	0	0	0	603	903	0
535	0	0	0	0	0	0	0	200	300	0	0	0	0	0	0	0	200	903	0	0	0	0	0	0	0	603	903	0
535	1	0	0	0	0	0	0	200	300	0	0	0	0	0	0	0	200	903	0	0	0	0	0	0	0	603	903	0
535	2	0	0	0	0	0	0	200	300	0	0	0	0	0	0	0	200	903	0	0	0	0	0	0	0	603	903	0
535	3	0	0	0	0	0	0	200	300	0	0	0	0	0	0	0	200	903	0	0	0	0	0	0	0	603	903	0
535	4	0	0	0	0	0	0	200	300	0	0	0	0	0	0	0	200	903	0	0	0	0	0	0	0	603	903	0
535	5	0	0	0	0	0	0	200	300	0	0	0	0	0	0	0	200	903	0	0	0	0	0	0	0	603	903	0
535	6	0	0	0	0	0	0	200	300	0	0	0	0	0	0	0	200	903	0	0	0	0	0	0	0	603	903	0
535	7	0	0	0	0	0	0	200	300	0	0	0	0	0	0	0	200	903	0	0	0	0	0	0	0	603	903	0
535	8	0	0	0	0	0	0	200	300	0	0	0	0	0	0	0	200	903	0	0	0	0	0	0	0	603	903	0
535	9	0	0	0	0	0	0	200	300	0	0	0	0	0	0	0	200	903	0	0	0	0	0	0	0	603	903	0
536	0	0	0	0	0	0	0	200	300	0	0	0	0	0	0	0	200	903	0	0	0	0	0	0	0	603	903	0
536	1	0	0	0	0	0	0	200	300	0	0	0	0	0	0	0	200	903	0	0	0	0	0	0	0	603	903	0
536	2	0	0	0	0	0	0	200	300	0	0	0	0	0	0	0	200	903	0	0	0	0	0	0	0	603	903	0
536	3	0	0	0	0	0	0	200	300	0	0	0	0	0	0	0	200	903	0	0	0	0	0	0	0	603	903	0
536	4	0	0	0	0	0	0	200	300	0	0	0	0	0	0	0	200	903	0	0	0	0	0	0	0	603	903	0
536	5	0	0	0	0	0	0	200	300	0	0	0	0	0	0	0	200	903	0	0	0	0	0	0	0	603	903	0
536	6	0	0	0	0	0	0	200	300	0	0	0	0	0	0	0	200	903	0	0	0	0	0	0	0	603	903	0
536	7	0	0	0	0	0	0	200	300	0	0	0	0	0	0	0	200	903	0	0	0	0	0	0	0	603	903	0
536	8	0	0	0	0	0	0	200	300	0	0	0	0	0	0	0	200	903	0	0	0	0	0	0	0	603	903	0
536	9	0	0	0	0	0	0	200	300	0	0	0	0	0	0	0	200	903	0	0	0	0	0	0	0	603	903	0
537	0	0	0	0	0	0	0	200	300	0	0	0	0	0	0	0	200	903	0	0	0	0	0	0	0	603	903	0
537	1	0	0	0	0	0	0	200	300	0	0	0	0	0	0	0	200	903	0	0	0	0	0	0	0	603	903	0
537	2	0	0	0	0	0	0	200	300	0	0	0	0	0	0	0	200	903	0	0	0	0	0	0	0	603	903	0
537	3	0	0	0	0	0	0	200	300	0	0	0	0	0	0	0	200	903	0	0	0	0	0	0	0	603	903	0
537	4	0	0	0	0	0	0	200	300	0	0	0	0	0	0	0	200	903	0	0	0	0	0	0	0	603	903	0
537	5	0	0	0	0	0	0	200	300	0	0	0	0	0	0	0	200	903	0	0	0	0	0	0	0	603	903	0
537	6	0	0	0	0	0	0	200	300	0	0	0	0	0	0	0	200	903	0	0	0	0	0	0	0	603	903	0
537	7	0	0	0	0	0	0	200	300	0	0	0	0	0	0	0	200	903	0	0	0	0	0	0	0	603	903	0
537	8	0	0	0	0	0	0	200	300	0	0	0	0	0	0	0	200	903	0	0	0	0	0	0	0	603	903	0
537	9	0	0	0	0	0	0	200	300	0	0	0	0	0	0	0	200	903	0	0	0	0	0	0	0	603	903	0
538	0	0	0	0	0	0	0	200	300	0	0	0	0	0	0	0	200	903	0	0	0	0	0	0	0	603	903	0
538	1	0	0	0	0	0	0	200	300	0	0	0	0	0	0	0	200	903	0	0	0	0	0	0	0	603	903	0
538	2	0	0	0	0	0	0	200	300	0	0	0	0	0	0	0	200	903	0	0	0	0	0	0	0	603	903	0
538	3	0	0	0	0	0	0	200	300	0	0	0	0	0	0	0	200	903	0	0	0	0	0	0	0	603	903	0
538	4	0	0	0	0	0	0	200	300	0	0	0	0	0	0	0	200	903	0	0	0	0	0	0	0	603	903	0
538	5	0	0	0	0	0	0	200	300	0	0	0	0	0	0	0	200	903	0	0	0	0	0	0	0	603	903	0
538	6	0	0	0	0	0	0	200	300	0	0	0	0	0	0	0	200	903	0	0	0	0	0	0	0	603	903	0
538	7	0	0	0	0	0	0	200	300	0	0	0	0	0	0	0	200	903	0	0	0	0	0	0	0	603	903	0
538	8	0	0	0	0	0	0	200	300	0	0	0	0	0	0	0	200	903	0	0	0	0	0	0	0	603	903	0
538	9	0	0	0	0	0	0	200	300	0	0	0	0	0	0	0	200	903	0	0	0	0	0	0	0	603	903	0
539	0	0	0	0	0	0	0	200	300	0	0	0	0	0	0	0	200	903	0	0	0	0	0	0	0	603	903	0
539	1	0	0	0	0	0	0	200	300	0	0	0	0	0	0	0	200	903	0	0	0	0	0	0	0	603	903	0
539	2	0	0	0	0	0	0	200	300	0	0	0	0	0	0	0	200	903	0	0	0	0	0	0	0	603	903	0
539	3	0	0	0	0	0	0	200	300	0	0	0	0	0	0	0	200	903	0	0	0	0	0	0	0	603	903	0
539	4	0	0	0	0	0	0	200	300	0	0	0	0	0	0	0	200	903	0	0	0	0	0	0	0	603	903	0
539	5	0	0	0	0	0	0	200	300	0	0	0	0	0	0	0	200	903	0	0	0	0	0	0	0	603	903	0
539	6	0	0	0	0	0	0	200	300	0	0	0	0	0	0	0	200	903	0	0	0	0	0	0	0	603	903	0
539	7	0	0	0	0	0	0	200	300	0	0	0	0	0	0	0	200	903	0	0	0	0	0	0	0	603	903	0
539	8	0	0	0	0	0	0	200	300	0	0	0	0	0	0	0	200	903	0	0	0	0	0	0	0	603	903	0
539	9	0	0	0	0	0	0	200	300	0	0	0	0	0	0	0	200	903	0	0	0	0	0	0	0	603	903	0
540	0	0	0	0	0	0	0	200	300	0	0	0	0	0	0	0	200	903	0	0	0	0	0	0	0	603	903	0
540	1	0	0	0	0	0	0	200	300	0	0	0	0	0	0	0	200	903	0	0	0	0	0	0	0	603	903	0
540	2	0	0	0	0	0	0	200	300	0	0	0	0	0	0	0	200	903	0	0	0	0	0	0	0	603	903	0
540	3	0	0	0	0	0	0	200	300	0	0	0	0	0	0	0	200	903	0	0	0	0	0	0	0	603	903	0
540	4	0	0	0	0	0	0	200	300	0	0	0	0	0	0	0	200	903	0	0	0	0	0	0	0	603	903	0
540	5	0	0	0	0	0	0	200	300	0	0	0	0	0	0	0	200	903	0	0	0	0	0	0	0	603	903	0
540	6	0	0	0	0	0	0	200	300	0	0	0	0	0	0	0	200	903	0	0	0	0	0	0	0	603	903	0
540	7	0	0	0	0	0	0	200	300	0	0	0	0	0	0	0	200	903	0	0	0	0	0	0	0	603	903	0
540	8	0	0	0	0	0	0	200	300	0	0	0	0	0	0	0	200	903	0	0	0	0	0	0	0	603	903	0
540	9	0	0	0	0	0	0	200	300	0	0	0	0	0	0	0	200	903	0	0	0	0	0	0	0	603	903	0
541	0	0	0	0	0	0	0	200	300	0	0	0	0	0	0	0	200	903	0	0	0	0	0	0	0	603	903	0
541	1	0	0	0	0	0	0	200	300	0	0	0	0	0	0	0	200	903	0	0	0	0	0	0	0	603	903	0
541	2	0	0	0	0	0	0	200	300	0	0	0	0	0	0	0	200	903	0	0	0	0	0	0	0	603	903	0
541	3	0	0	0	0	0	0	200	300	0	0	0	0	0	0	0	200	903	0	0	0	0	0	0	0	603	903	0
541	4	0	0	0	0	0	0	200	300	0	0	0	0	0	0	0	200	903	0	0	0	0	0	0	0	603	903	0
541	5	0	0	0	0	0	0	200	300	0	0	0	0	0	0	0	200	903	0	0	0	0	0	0	0	603	903	0
541	6	0	0	0	0	0	0	200	300	0	0	0	0	0	0	0	200	903	0	0	0	0	0	0	0	603	903	0
541	7	0	0	0	0	0	0	200	300	0	0	0	0	0	0	0	200	903	0	0	0	0	0	0	0	603	903	0
541	8	0	0	0	0	0	0	200	300	0	0	0	0	0	0	0	200	903	0	0	0	0	0	0	0	603	903	0
541	9	0	0	0	0	0	0	200	300	0	0	0	0	0	0	0	200	903	0	0	0	0	0	0	0	603	903	0
542	0	0	0	0	0	0	0	200	300	0	0	0	0	0	0	0	200	903	0	0	0	0	0	0	0	603	903	0
542	1	0	0	0	0	0	0	200	300	0	0	0	0	0	0	0	200	903	0	0	0	0	0	0	0	603	903	0
542	2	0	0	0	0	0	0	200	300	0	0	0	0	0	0	0	200	903	0	0	0	0	0	0	0	603	903	0
542	3	0	0	0	0	0	0	200	300	0	0	0	0	0	0	0	200	903	0	0	0	0	0	0	0	603	903	0
542	4	0	0	0	0	0	0	200	300	0	0	0	0	0	0	0	200	903	0	0	0	0	0	0	0	603	903	0
542	5	0	0	0	0	0	0	200	300	0	0	0	0	0	0	0	200	903	0	0	0	0	0	0	0	603	903	0
542	6	0	0	0	0	0	0	200	300	0	0	0	0	0	0	0	200	903	0	0	0	0	0	0	0	603	903	0
542	7	0	0	0	0	0	0	200	300	0	0	0	0	0	0	0	200	903	0	0	0	0	0	0	0	603	903	0
542	8	0	0	0	0	0	0	200	300	0	0	0	0	0	0	0	200	903	0	0	0	0	0	0	0	603	903	0
542	9	0	0	0	0	0	0	200	300	0	0	0	0	0	0	0	200	903	0	0	0	0	0	0	0	603	903	0
543	0	0	0	0	0	0	0	200	300	0	0	0	0	0	0	0	200	903	0	0	0	0	0	0	0	603	903	0
543	1	0	0	0	0	0	0	200	300	0	0	0	0	0	0	0	200	903	0	0	0	0	0	0	0	603	903	0
543	2	0	0	0	0	0	0	200	300	0	0	0	0	0	0	0	200	903	0	0	0	0	0	0	0	603	903	0
543	3	0	0	0	0	0	0	200	300	0	0	0	0	0	0	0	200	903	0	0	0	0	0	0	0	603	903	0
543	4	0	0	0	0	0	0	200	300	0	0	0	0	0	0	0	200	903	0	0	0	0	0	0	0	603	903	0
543	5	0	0	0	0	0	0	200	300	0	0	0	0	0	0	0	200	903	0	0	0	0	0	0	0	603	903	0
543	6	0	0	0	0	0	0	200	300	0	0	0	0	0	0	0	200	903	0	0	0	0	0	0	0	603	903	0
543	7	0	0	0	0	0	0	200	300	0	0	0	0	0	0	0	200	903	0	0	0	0	0	0	0	603	903	0
543	8	0	0	0	0	0	0	200	300	0	0	0	0	0	0	0	200	903	0	0	0	0	0	0	0	603	903	0
543	9	0	0	0	0	0	0	200	300	0	0	0	0	0	0	0	200	903	0	0	0	0	0	0	0	603	903	0
544	0	0	0	0	0	0	0	200	300	0	0	0	0	0	0	0	200	903	0	0	0	0	0	0	0	603	903	0
544	1	0	0	0	0	0	0	200	300	0	0	0	0	0	0	0	200	903	0	0	0	0	0	0	0	603	903	0
544	2	0	0	0	0	0	0	200	300	0	0	0	0	0	0	0	200	903	0	0	0	0	0	0	0	603	903	0
544	3	0	0	0	0	0	0	200	300	0	0	0	0	0	0	0	200	903	0	0	0	0	0	0	0	603	903	0
544	4	0	0	0	0	0	0	200	300	0	0	0	0	0	0	0	200	903	0	0	0	0	0	0	0	603	903	0
544	5	0	0	0	0	0	0	200	300	0	0	0	0	0	0	0	200	903	0	0	0	0	0	0	0	603	903	0
544	6	0	0	0	0	0	0	200	300	0	0	0	0	0	0	0	200	903	0	0	0	0	0	0	0	603	903	0
544	7	0	0	0	0	0	0	200	300	0	0	0	0	0	0	0	200	903	0	0	0	0	0	0	0	603	903	0
544	8	0	0	0	0	0	0	200	300	0	0	0	0	0	0	0	200	903	0	0	0	0	0	0	0	603	903	0
544	9	0	0	0	0	0	0	200	300	0	0	0	0	0	0	0	200	903	0	0	0	0	0	0	0	603	903	0
545	0	0	0	0	0	0	0	200	300	0	0	0	0	0	0	0	200	903	0	0	0	0	0	0	0	603	903	0
545	1	0	0	0	0	0	0	200	300	0	0	0	0	0	0	0	200	903	0	0	0	0	0	0	0	603	903	0
545	2	0	0	0	0	0	0	200	300	0	0	0	0	0	0	0	200	903	0	0	0	0	0	0	0	603	903	0
545	3	0	0	0	0	0	0	200	300	0	0	0	0	0	0	0	200	903	0	0	0	0	0	0	0	603	903	0
545	4	0	0	0	0	0	0	200	300	0	0	0	0	0	0	0	200	903	0	0	0	0	0	0	0	603	903	0
545	5	0	0	0	0	0	0	200	300	0	0	0	0	0	0	0	200	903	0	0	0	0	0	0	0	603	903	0
545	6	0	0	0	0	0	0	200	300	0	0	0	0	0	0	0	200	903	0	0	0	0	0	0	0	603	903	0
545	7	0	0	0	0	0	0	200	300	0	0	0	0	0	0	0	200	903	0	0	0	0	0	0	0	603	903	0
545	8	0	0	0	0	0	0	200	300	0	0	0	0	0	0	0	200	903	0	0	0	0	0	0	0	603	903	0
545	9	0	0	0	0	0	0	200	300	0	0	0	0	0	0	0	200	903	0	0	0	0	0	0	0	603	903	0
546	0	0	0	0	0	0	0	200	300	0	0	0	0	0	0	0	200	903	0	0	0	0	0	0	0	603	903	0
546	1	0	0	0	0	0	0	200	300	0	0	0	0	0	0	0	200	903	0	0	0	0	0	0	0	603	903	0
546	2	0	0	0	0	0	0	200	300	0	0	0	0	0	0	0	200	903	0	0	0	0	0	0	0	603	903	0
546	3	0	0	0	0	0	0	200	300	0	0	0	0	0	0	0	200	903	0	0	0	0	0	0	0	603	903	0
546	4	0	0	0	0	0	0	200	300	0	0	0	0	0	0	0	200	903	0	0	0	0	0	0	0	603	903	0
546	5	0	0	0	0	0	0	200	300	0	0	0	0	0	0	0	200	903	0	0	0	0	0	0	0	603	903	0
546	6	0	0	0	0	0	0	200	300	0	0	0	0	0	0	0	200	903	0	0	0	0	0	0	0	603	903	0
546	7	0	0	0	0	0	0	200	300	0	0	0	0	0	0	0	200	903	0	0	0	0	0	0	0	603	903	0
546	8	0	0	0	0	0	0	200	300	0	0	0	0	0	0	0	200	903	0	0	0	0	0	0	0	603	903	0
546	9	0	0	0	0	0	0	200	300	0	0	0	0	0	0	0	200	903	0	0	0	0	0	0	0	603	903	0
547	0	0	0	0	0	0	0	200	300	0	0	0	0	0	0	0	200	903	0	0	0	0	0	0	0	603	903	0
547	1	0	0	0	0	0	0	200	300	0	0	0	0	0	0	0	200	903	0	0	0	0	0	0	0	603	903	0
547	2	0	0	0	0	0	0	200	300	0	0	0	0	0	0	0	200	903	0	0	0	0	0	0	0	603	903	0
547	3	0	0	0	0	0	0	200	300	0	0	0	0	0	0	0	200	903	0	0	0	0	0	0	0	603	903	0
547	4	0	0	0	0	0	0	200	300	0	0	0	0	0	0	0	200	903	0	0	0	0	0	0	0	603	903	0
547	5	0	0	0	0	0	0	200	300	0	0	0	0	0	0	0	200	903	0	0	0	0	0	0	0	603	903	0
547	6	0	0	0	0	0	0	200	300	0	0	0	0	0	0	0	200	903	0	0	0	0	0	0	0	603	903	0
547	7	0	0	0	0	0	0	200	300	0	0	0	0	0	0	0	200	903	0	0	0	0	0	0	0	603	903	0
547	8	0	0	0	0	0	0	200	300	0	0	0	0	0	0	0	200	903	0	0	0	0	0	0	0	603	903	0
547	9	0	0	0	0	0	0	200	300	0	0	0	0	0	0	0	200	903	0	0	0	0	0	0	0	603	903	0
548	0	0	0	0	0	0	0	200	300	0	0	0	0	0	0	0	200	903	0	0	0	0	0	0	0	603	903	0
548	1	0	0	0	0	0	0	200	300	0	0	0	0	0	0	0	200	903	0	0	0	0	0	0	0	603	903	0
548	2	0	0	0	0	0	0	200	300	0	0	0	0	0	0	0	200	903	0	0	0	0	0	0	0	603	903	0
548	3	0	0	0	0	0	0	200	300	0	0	0	0	0	0	0	200	903	0	0	0	0	0	0	0	603	903	0
548	4	0	0	0	0	0	0	200	300	0	0	0	0	0	0	0	200	903	0	0	0	0	0	0	0	603	903	0
548	5	0	0	0	0	0	0	200	300	0	0	0	0	0	0	0	200	903	0	0	0	0	0	0	0	603	903	0
548	6	0	0	0	0	0	0	200	300	0	0	0	0	0	0	0	200	903	0	0	0	0	0	0	0	603	903	0
548	7	0	0	0	0	0	0	200	300	0	0	0	0	0	0	0	200	903	0	0	0	0	0	0	0	603	903	0
548	8	0	0	0	0	0	0	200	300	0	0	0	0	0	0	0	200	903	0	0	0	0	0	0	0	603	903	0
548	9	0	0	0	0	0	0	200	300	0	0	0	0	0	0	0	200	903	0	0	0	0	0	0	0	603	903	0
549	0	0	0	0	0	0	0	200	300	0	0	0	0	0	0	0	200	903	0	0	0	0	0	0	0	603	903	0
549	1	0	0	0	0	0	0	200	300	0	0	0	0	0	0	0	200	903	0	0	0	0	0	0	0	603	903	0
549	2	0	0	0	0	0	0	200	300	0	0	0	0	0	0	0	200	903	0	0	0	0	0	0	0	603	903	0
549	3	0	0	0	0	0	0	200	300	0	0	0	0	0	0	0	200	903	0	0	0	0	0	0	0	603	903	0
549	4	0	0	0	0	0	0	200	300	0	0	0	0	0	0	0	200	903	0	0	0	0	0	0	0	603	903	0
549	5	0	0	0	0	0	0	200	300	0	0	0	0	0	0	0	200	903	0	0	0	0	0	0	0	603	903	0
549	6	0	0	0	0	0	0	200	300	0	0	0	0	0	0	0	200	903	0	0	0	0	0	0	0	603	903	0
549	7	0	0	0	0	0	0	200	300	0	0	0	0	0	0	0	200	903	0	0	0	0	0	0	0	603	903	0
549	8	0	0	0	0	0	0	200	300	0	0	0	0	0	0	0	200	903	0	0	0	0	0	0	0	603	903	0
549	9	0	0	0	0	0	0	200	300	0	0	0	0	0	0	0	200	903	0	0	0	0	0	0	0	603	903	0
550	0	0	0	0	0	0	0	200	300	0	0	0	0	0	0	0	200	903	0	0	0	0	0	0	0	603	903	0
550	1	0	0	0	0	0	0	200	300	0	0	0	0	0	0	0	200	903	0	0	0	0	0	0	0	603	903	0
550	2	0	0	0	0	0	0	200	300	0	0	0	0	0	0	0	200	903	0	0	0	0	0	0	0	603	903	0
550	3	0	0	0	0	0	0	200	300	0	0	0	0	0	0	0	200	903	0	0	0	0	0	0	0	603	903	0
550	4	0	0	0	0	0	0	200	300	0	0	0	0	0	0	0	200	903	0	0	0	0	0	0	0	603	903	0
550	5	0	0	0	0	0	0	200	300	0	0	0	0	0	0	0	200	903	0	0	0	0	0	0	0	603	903	0
550	6	0	0	0	0	0	0	200	300	0	0	0	0	0	0	0	200	903	0	0	0	0	0	0	0	603	903	0
550	7	0	0	0	0	0	0	200	300	0	0	0	0	0	0	0	200	903	0	0	0	0	0	0	0	603	903	0
550	8	0	0	0	0	0	0	200	300	0	0	0	0	0	0	0	200	903	0	0	0	0	0	0	0	603	903	0
550	9	0	0	0	0	0	0	200	300	0	0	0	0	0	0	0	200	903	0	0	0	0	0	0	0	603	903	0
551	0	0	0	0	0	0	0	200	300	0	0	0	0	0	0	0	200	903	0	0	0	0	0	0	0	603	903	0
551	1	0	0	0	0	0	0	200	300	0	0	0	0	0	0	0	200	903	0	0	0	0	0	0	0	603	903	0
551	2	0	0	0	0	0	0	200	300	0	0	0	0	0	0	0	200	903	0	0	0	0	0	0	0	603	903	0
551	3	0	0	0	0	0	0	200	300	0	0	0	0	0	0	0	200	903	0	0	0	0	0	0	0	603	903	0
551	4	0	0	0	0	0	0	200	300	0	0	0	0	0	0	0	200	903	0	0	0	0	0	0	0	603	903	0
551	5	0	0	0	0	0	0	200	300	0	0	0	0	0	0	0	200	903	0	0	0	0	0	0	0	603	903	0
551	6	0	0	0	0	0	0	200	300	0	0	0	0	0	0	0	200	903	0	0	0	0	0	0	0	603	903	0
551	7	0	0	0	0	0	0	200	300	0	0	0	0	0	0	0	200	903	0	0	0	0	0	0	0	603	903	0
551	8	0	0	0	0	0	0	200	300	0	0	0	0	0	0	0	200	903	0	0	0	0	0	0	0	603	903	0
551	9	0	0	0	0	0	0	200	300	0	0	0	0	0	0	0	200	903	0	0	0	0	0	0	0	603	903	0
552	0	0	0	0	0	0	0	200	300	0	0	0	0	0	0	0	200	903	0	0	0	0	0	0	0	603	903	0
552	1	0	0	0	0	0	0	200	300	0	0	0	0	0	0	0	200	903	0	0	0	0	0	0	0	603	903	0
552	2	0	0	0	0	0	0	200	300	0	0	0	0	0	0	0	200	903	0	0	0	0	0	0	0	603	903	0
552	3	0	0	0	0	0	0	200	300	0	0	0	0	0	0	0	200	903	0	0	0	0	0	0	0	603	903	0
552	4	0	0	0	0	0	0	200	300	0	0	0	0	0	0	0	200	903	0	0	0	0	0	0	0	603	903	0
552	5	0	0	0	0	0	0	200	300	0	0	0	0	0	0	0	200	903	0	0	0	0	0	0	0	603	903	0
552	6	0	0	0	0	0	0	200	300	0	0	0	0	0	0	0	200	903	0	0	0	0	0	0	0	603	903	0
552	7	0	0	0	0	0	0	200	300	0	0	0	0	0	0	0	200	903	0	0	0	0	0	0	0	603	903	0
552	8	0	0	0	0	0	0	200	300	0	0	0	0	0	0	0	200	903	0	0	0	0	0	0	0	603	903	0
552	9	0	0	0	0	0	0	200	300	0	0	0	0	0	0	0	200	903	0	0	0	0	0	0	0	603	903	0
553	0	0	0	0	0	0	0	200	300	0	0	0	0	0	0	0	200	903	0	0	0	0	0	0	0	603	903	0
553	1	0	0	0	0	0	0	200	300	0	0	0	0	0	0	0	200	903	0	0	0	0	0	0	0	603	903	0
553	2	0	0	0	0	0	0	200	300	0	0	0	0	0	0	0	200	903	0	0	0	0	0	0	0	603	903	0
553	3	0	0	0	0	0	0	200	300	0	0	0	0	0	0	0	200	903	0	0	0	0	0	0	0	603	903	0
553	4	0	0	0	0	0	0	200	300	0	0	0	0	0	0	0	200	903	0	0	0	0	0	0	0	603	903	0
553	5	0	0	0	0	0	0	200	300	0	0	0	0	0	0	0	200	903	0	0	0	0	0	0	0	603	903	0
553	6	0	0	0	0	0	0	200	300	0	0	0	0	0	0	0	200	903	0	0	0	0	0	0	0	603	903	0
553	7	0	0	0	0	0	0	200	300	0	0	0	0	0	0	0	200	903	0	0	0	0	0	0	0	603	903	0
553	8	0	0	0	0	0	0	200	300	0	0	0	0	0	0	0	200	903	0	0	0	0	0	0	0	603	903	0
553	9	0	0	0	0	0	0	200	300	0	0	0	0	0	0	0	200	903	0	0	0	0	0	0	0	603	903	0
554	0	0	0	0	0	0	0	200	300	0	0	0	0	0	0	0	200	903	0	0	0	0	0	0	0	603	903	0
554	1	0	0	0	0	0	0	200	300	0	0	0	0	0	0	0	200	903	0	0	0	0	0	0	0	603	903	0
554	2	0	0	0	0	0	0	200	300	0	0	0	0	0	0	0	200	903	0	0	0	0	0	0	0	603	903	0
554	3	0	0	0	0	0	0	200	300	0	0	0	0	0	0	0	200	903	0	0	0	0	0	0	0	603	903	0
554	4	0	0	0	0	0	0	200	300	0	0	0	0	0	0	0	200	903	0	0	0	0	0	0	0	603	903	0
554	5	0	0	0	0	0	0	200	300	0	0	0	0	0	0	0	200	903	0	0	0	0	0	0	0	603	903	0
554	6	0	0	0	0	0	0	200	300	0	0	0	0	0	0	0	200	903	0	0	0	0	0	0	0	603	903	0
554	7	0	0	0	0	0	0	200	300	0	0	0	0	0	0	0	200	903	0	0	0	0	0	0	0	603	903	0
554	8	0	0	0	0	0	0	200	300	0	0	0	0	0	0	0	200	903	0	0	0	0	0	0	0	603	903	0
554	9	0	0	0	0	0	0	200	300	0	0	0	0	0	0	0	200	903	0	0	0	0	0	0	0	603	903	0
555	0	0	0	0	0	0	0	200	300	0	0	0	0	0	0	0	200	903	0	0	0	0	0	0	0	603	903	0
555	1	0	0	0	0	0	0	200	300	0	0	0	0	0	0	0	200	903	0	0	0	0	0	0	0	603	903	0
555	2	0	0	0	0	0	0	200	300	0	0	0	0	0	0	0	200	903	0	0	0	0	0	0	0	603	903	0
555	3	0	0	0	0	0	0	200	300	0	0	0	0	0	0	0	200	903	0	0	0	0	0	0	0	603	903	0
555	4	0	0	0	0	0	0	200	300	0	0	0	0	0	0	0	200	903	0	0	0	0	0	0	0	603	903	0
555	5	0	0	0	0	0	0	200	300	0	0	0	0	0	0	0	200	903	0	0	0	0	0	0	0	603	903	0
555	6	0	0	0	0	0	0	200	300	0	0	0	0	0	0	0	200	903	0	0	0	0	0	0	0	603	903	0
555	7	0	0	0	0	0	0	200	300	0	0	0	0	0	0	0	200	903	0	0	0	0	0	0	0	603	903	0
555	8	0	0	0	0	0	0	200	300	0	0	0	0	0	0	0	200	903	0	0	0	0	0	0	0	603	903	0
555	9	0	0	0	0	0	0	200	300	0	0	0	0	0	0	0	200	903	0	0	0	0	0	0	0	603	903	0
556	0	0	0	0	0	0	0	200	300	0	0	0	0	0	0	0	200	903	0	0	0	0	0	0	0	603	903	0
556	1	0	0	0	0	0	0	200	300	0	0	0	0	0	0	0	200	903	0	0	0	0	0	0	0	603	903	0
556	2	0	0	0	0	0	0	200	300	0	0	0	0	0	0	0	200	903	0	0	0	0	0	0	0	603	903	0
556	3	0	0	0	0	0	0	200	300	0	0	0	0	0	0	0	200	903	0	0	0	0	0	0	0	603	903	0
556	4	0	0	0	0	0	0	200	300	0	0	0	0	0	0	0	200	903	0	0	0	0	0	0	0	603	903	0
556	5	0	0	0	0	0	0	200	300	0	0	0	0	0	0	0	200	903	0	0	0	0	0	0	0	603	903	0
556	6	0	0	0	0	0	0	200	300	0	0	0	0	0	0	0	200	903	0	0	0	0	0	0	0	603	903	0
556	7	0	0	0	0	0	0	200	300	0	0	0	0	0	0	0	200	903	0	0	0	0	0	0	0	603	903	0
556	8	0	0	0	0	0	0	200	300	0	0	0	0	0	0	0	200	903	0	0	0	0	0	0	0	603	903	0
556	9	0	0	0	0	0	0	200	300	0	0	0	0	0	0	0	200	903	0	0	0	0	0	0	0	603	903	0
557	0	0	0	0	0	0	0	200	300	0	0	0	0	0	0	0	200	903	0	0	0	0	0	0	0	603	903	0
557	1	0	0	0	0	0	0	200	300	0	0	0	0	0	0	0	200	903	0	0	0	0	0	0	0	603	903	0
557	2	0	0	0	0	0	0	200	300	0	0	0	0	0	0	0	200	903	0	0	0	0	0	0	0	603	903	0
557	3	0	0	0	0	0	0	200	300	0	0	0	0	0	0	0	200	903	0	0	0	0	0	0	0	603	903	0
557	4	0	0	0	0	0	0	200	300	0	0	0	0	0	0	0	200	903	0	0	0	0	0	0	0	603	903	0
557	5	0	0	0	0	0	0	200	300	0	0	0	0	0	0	0	200	903	0	0	0	0	0	0	0	603	903	0
557	6	0	0	0	0	0	0	200	300	0	0	0	0	0	0	0	200	903	0	0	0	0	0	0	0	603	903	0
557	7	0	0	0	0	0	0	200	300	0	0	0	0	0	0	0	200	903	0	0	0	0	0	0	0	603	903	0
557	8	0	0	0	0	0	0	200	300	0	0	0	0	0	0	0	200	903	0	0	0	0	0	0	0	603	903	0
557	9	0	0	0	0	0	0	200	300	0	0	0	0	0	0	0	200	903	0	0	0	0	0	0	0	603	903	0
558	0	0	0	0	0	0	0	200	300	0	0	0	0	0	0	0	200	903	0	0	0	0	0	0	0	603	903	0
558	1	0	0	0	0	0	0	200	300	0	0	0	0	0	0	0	200	903	0	0	0	0	0	0	0	603	903	0
558	2	0	0	0	0	0	0	200	300	0	0	0	0	0	0	0	200	903	0	0	0	0	0	0	0	603	903	0
558	3	0	0	0	0	0	0	200	300	0	0	0	0	0	0	0	200	903	0	0	0	0	0	0	0	603	903	0
558	4	0	0	0	0	0	0	200	300	0	0	0	0	0	0	0	200	903	0	0	0	0	0	0	0	603	903	0
558	5	0	0	0	0	0	0	200	300	0	0	0	0	0	0	0	200	903	0	0	0	0	0	0	0	603	903	0
558	6	0	0	0	0	0	0	200	300	0	0	0	0	0	0	0	200	903	0	0	0	0	0	0	0	603	903	0
558	7	0	0	0	0	0	0	200	300	0	0	0	0	0	0	0	200	903	0	0	0	0	0	0	0	603	903	0
558	8	0	0	0	0	0	0	200	300	0	0	0	0	0	0	0	200	903	0	0	0	0	0	0	0	603	903	0
558	9	0	0	0	0	0	0	200	300	0	0	0	0	0	0	0	200	903	0	0	0	0	0	0	0	603	903	0
559	0	0	0	0	0	0	0	200	300	0	0	0	0	0	0	0	200	903	0	0	0	0	0	0	0	603	903	0
559	1	0	0	0	0	0	0	200	300	0	0	0	0	0	0	0	200	903	0	0	0	0	0	0	0	603	903	0
559	2	0	0	0	0	0	0	200	300	0	0	0	0	0	0	0	200	903	0	0	0	0	0	0	0	603	903	0
559	3	0	0	0	0	0	0	200	300	0	0	0	0	0	0	0	200	903	0	0	0	0	0	0	0	603	903	0
559	4	0	0	0	0	0	0	200	300	0	0	0	0	0	0	0	200	903	0	0	0	0	0	0	0	603	903	0
559	5	0	0	0	0	0	0	200	300	0	0	0	0	0	0	0	200	903	0	0	0	0	0	0	0	603	903	0
559	6	0	0	0	0	0	0	200	300	0	0	0	0	0	0	0	200	903	0	0	0	0	0	0	0	603	903	0
559	7	0	0	0	0	0	0	200	300	0	0	0	0	0	0	0	200	903	0	0	0	0	0	0	0	603	903	0
559	8	0	0	0	0	0	0	200	300	0	0	0	0	0	0	0	200	903	0	0	0	0	0	0	0	603	903	0
559	9	0	0	0	0	0	0	200	300	0	0	0	0	0	0	0	200	903	0	0	0	0	0	0	0	603	903	0
560	0	0	0	0	0	0	0	200	300	0	0	0	0	0	0	0	200	903	0	0	0	0	0	0	0	603	903	0
560	1	0	0	0	0	0	0	200	300	0	0	0	0	0	0	0	200	903	0	0	0	0	0	0	0	603	903	0
560	2	0	0	0	0	0	0	200	300	0	0	0	0	0	0	0	200	903	0	0	0	0	0	0	0	603	903	0
560	3	0	0	0	0	0	0	200	300	0	0	0	0	0	0	0	200	903	0	0	0	0	0	0	0	603	903	0
560	4	0	0	0	0	0	0	200	300	0	0	0	0	0	0	0	200	903	0	0	0	0	0	0	0	603	903	0
560	5	0	0	0	0	0	0	200	300	0	0	0	0	0	0	0	200	903	0	0	0	0	0	0	0	603	903	0
560	6	0	0	0	0	0	0	200	300	0	0	0	0	0	0	0	200	903	0	0	0	0	0	0	0	603	903	0
560	7	0	0	0	0	0	0	200	300	0	0	0	0	0	0	0	200	903	0	0	0	0	0	0	0	603	903	0
560	8	0	0	0	0	0	0	200	300	0	0	0	0	0	0	0	200	903	0	0	0	0	0	0	0	603	903	0
560	9	0	0	0	0	0	0	200	300	0	0	0	0	0	0	0	200	903	0	0	0	0	0	0	0	603	903	0
561	0	0	0	0	0	0	0	200	300	0	0	0	0	0	0	0	200	903	0	0	0	0	0	0	0	603	903	0
561	1	0	0	0	0	0	0	200	300	0	0	0	0	0	0	0	200	903	0	0	0	0	0	0	0	603	903	0
561	2	0	0	0	0	0	0	200	300	0	0	0	0	0	0	0	200	903	0	0	0	0	0	0	0	603	903	0
561	3	0	0	0	0	0	0	200	300	0	0	0	0	0	0	0	200	903	0	0	0	0	0	0	0	603	903	0
561	4	0	0	0	0	0	0	200	300	0	0	0	0	0	0	0	200	903	0	0	0	0	0	0	0	603	903	0
561	5	0	0	0	0	0	0	200	300	0	0	0	0	0	0	0	200	903	0	0	0	0	0	0	0	603	903	0
561	6	0	0	0	0	0	0	200	300	0	0	0	0	0	0	0	200	903	0	0	0	0	0	0	0	603	903	0
561	7	0	0	0	0	0	0	200	300	0	0	0	0	0	0	0	200	903	0	0	0	0	0	0	0	603	903	0
561	8	0	0	0	0	0	0	200	300	0	0	0	0	0	0	0	200	903	0	0	0	0	0	0	0	603	903	0
561	9	0	0	0	0	0	0	200	300	0	0	0	0	0	0	0	200	903	0	0	0	0	0	0	0	603	903	0
562	0	0	0	0	0	0	0	200	300	0	0	0	0	0	0	0	200	903	0	0	0	0	0	0	0	603	903	0
562	1	0	0	0	0	0	0	200	300	0	0	0	0	0	0	0	200	903	0	0	0	0	0	0	0	603	903	0
562	2	0	0	0	0	0	0	200	300	0	0	0	0	0	0	0	200	903	0	0	0	0	0	0	0	603	903	0
562	3	0	0	0	0	0	0	200	300	0	0	0	0	0	0	0	200	903	0	0	0	0	0	0	0	603	903	0
562	4	0	0	0	0	0	0	200	300	0	0	0	0	0	0	0	200	903	0	0	0	0	0	0	0	603	903	0
562	5	0	0	0	0	0	0	200	300	0	0	0	0	0	0	0	200	903	0	0	0	0	0	0	0	603	903	0
562	6	0	0	0	0	0	0	200	300	0	0	0	0	0	0	0	200	903	0	0	0	0	0	0	0	603	903	0
562	7	0	0	0	0	0	0	200	300	0	0	0	0	0	0	0	200	903	0	0	0	0	0	0	0	603	903	0
562	8	0	0	0	0	0	0	200	300	0	0	0	0	0	0	0	200	903	0	0	0	0	0	0	0	603	903	0
562	9	0	0	0	0	0	0	200	300	0	0	0	0	0	0	0	200	903	0	0	0	0	0	0	0	603	903	0
563	0	0	0	0	0	0	0	200	300	0	0	0	0	0	0	0	200	903	0	0	0	0	0	0	0	603	903	0
563	1	0	0	0	0	0	0	200	300	0	0	0	0	0	0	0	200	903	0	0	0	0	0	0	0	603	903	0
563	2	0	0	0	0	0	0	200	300	0	0	0	0	0	0	0	200	903	0	0	0	0	0	0	0	603	903	0
563	3	0	0	0	0	0	0	200	300	0	0	0	0	0	0	0	200	903	0	0	0	0	0	0	0	603	903	0
563	4	0	0	0	0	0	0	200	300	0	0	0	0	0	0	0	200	903	0	0	0	0	0	0	0	603	903	0
563	5	0	0	0	0	0	0	200	300	0	0	0	0	0	0	0	200	903	0	0	0	0	0	0	0	603	903	0
563	6	0	0	0	0	0	0	200	300	0	0	0	0	0	0	0	200	903	0	0	0	0	0	0	0	603	903	0
563	7	0	0	0	0	0	0	200	300	0	0	0	0	0	0	0	200	903	0	0	0	0	0	0	0	603	903	0
563	8	0	0	0	0	0	0	200	300	0	0	0	0	0	0	0	200	903	0	0	0	0	0	0	0	603	903	0
563	9	0	0	0	0	0	0	200	300	0	0	0	0	0	0	0	200	903	0	0	0	0	0	0	0	603	903	0
564	0	0	0	0	0	0	0	200	300	0	0	0	0	0	0	0	200	903	0	0	0	0	0	0	0	603	903	0
564	1	0	0	0	0	0	0	200	300	0	0	0	0	0	0	0	200	903	0	0	0	0	0	0	0	603	903	0
564	2	0	0	0	0	0	0	200	300	0	0	0	0	0	0	0	200	903	0	0	0	0	0	0	0	603	903	0
564	3	0	0	0	0	0	0	200	300	0	0	0	0	0	0	0	200	903	0	0	0	0	0	0	0	603	903	0
564	4	0	0	0	0	0	0	200	300	0	0	0	0	0	0	0	200	903	0	0	0	0	0	0	0	603	903	0
564	5	0	0	0	0	0	0	200	300	0	0	0	0	0	0	0	200	903	0	0	0	0	0	0	0	603	903	0
564	6	0	0	0	0	0	0	200	300	0	0	0	0	0	0	0	200	903	0	0	0	0	0	0	0	603	903	0
564	7	0	0	0	0	0	0	200	300	0	0	0	0	0	0	0	200	903	0	0	0	0	0	0	0	603	903	0
564	8	0	0	0	0	0	0	200	300	0	0	0	0	0	0	0	200	903	0	0	0	0	0	0	0	603	903	0
564	9	0	0	0	0	0	0	200	300	0	0	0	0	0	0	0	200	903	0	0	0	0	0	0	0	603	903	0
565	0	0	0	0	0	0	0	200	300	0	0	0	0	0	0	0	200	903	0	0	0	0	0	0	0	603	903	0
565	1	0	0	0	0	0	0	200	300	0	0	0	0	0	0	0	200	903	0	0	0	0	0	0	0	603	903	0
565	2	0	0	0	0	0	0	200	300	0	0	0	0	0	0	0	200	903	0	0	0	0	0	0	0	603	903	0
565	3	0	0	0	0	0	0	200	300	0	0	0	0	0	0	0	200	903	0	0	0	0	0	0	0	603	903	0
565	4	0	0	0	0	0	0	200	300	0	0	0	0	0	0	0	200	903	0	0	0	0	0	0	0	603	903	0
565	5	0	0	0	0	0	0	200	300	0	0	0	0	0	0	0	200	903	0	0	0	0	0	0	0	603	903	0
565	6	0	0	0	0	0	0	200	300	0	0	0	0	0	0	0	200	903	0	0	0	0	0	0	0	603	903	0
565	7	0	0	0	0	0	0	200	300	0	0	0	0	0	0	0	200	903	0	0	0	0	0	0	0	603	903	0
565	8	0	0	0	0	0	0	200	300	0	0	0	0	0	0	0	200	903	0	0	0	0	0	0	0	603	903	0
565	9	0	0	0	0	0	0	200	300	0	0	0	0	0	0	0	200	903	0	0	0	0	0	0	0	603	903	0
566	0	0	0	0	0	0	0	200	300	0	0	0	0	0	0	0	200	903	0	0	0	0	0	0	0	603	903	0
566	1	0	0	0	0	0	0	200	300	0	0	0	0	0	0	0	200	903	0	0	0	0	0	0	0	603	903	0
566	2	0	0	0	0	0	0	200	300	0	0	0	0	0	0	0	200	903	0	0	0	0	0	0	0	603	903	0
566	3	0	0	0	0	0	0	200	300	0	0	0	0	0	0	0	200	903	0	0	0	0	0	0	0	603	903	0
566	4	0	0	0	0	0	0	200	300	0	0	0	0	0	0	0	200	903	0	0	0	0	0	0	0	603	903	0
566	5	0	0	0	0	0	0	200	300	0	0	0	0	0	0	0	200	903	0	0	0	0	0	0	0	603	903	0
566	6	0	0	0	0	0	0	200	300	0	0	0	0	0	0	0	200	903	0	0	0	0	0	0	0	603	903	0
566	7	0	0	0	0	0	0	200	300	0	0	0	0	0	0	0	200	903	0	0	0	0	0	0	0	603	903	0
566	8	0	0	0	0	0	0	200	300	0	0	0	0	0	0	0	200	903	0	0	0	0	0	0	0	603	903	0
566	9	0	0	0	0	0	0	200	300	0	0	0	0	0	0	0	200	903	0	0	0	0	0	0	0	603	903	0
567	0	0	0	0	0	0	0	200	300	0	0	0	0	0	0	0	200	903	0	0	0	0	0	0	0	603	903	0
567	1	0	0	0	0	0	0	200	300	0	0	0	0	0	0	0	200	903	0	0	0	0	0	0	0	603	903	0
567	2	0	0	0	0	0	0	200	300	0	0	0	0	0	0	0	200	903	0	0	0	0	0	0	0	603	903	0
567	3	0	0	0	0	0	0	200	300	0	0	0	0	0	0	0	200	903	0	0	0	0	0	0	0	603	903	0
567	4	0	0	0	0	0	0	200	300	0	0	0	0	0	0	0	200	903	0	0	0	0	0	0	0	603	903	0
567	5	0	0	0	0	0	0	200	300	0	0	0	0	0	0	0	200	903	0	0	0	0	0	0	0	603	903	0
567	6	0	0	0	0	0	0	200	300	0	0	0	0	0	0	0	200	903	0	0	0	0	0	0	0	603	903	0
567	7	0	0	0	0	0	0	200	300	0	0	0	0	0	0	0	200	903	0	0	0	0	0	0	0	603	903	0
567	8	0	0	0	0	0	0	200	300	0	0	0	0	0	0	0	200	903	0	0	0	0	0	0	0	603	903	0
567	9	0	0	0	0	0	0	200	300	0	0	0	0	0	0	0	200	903	0	0	0	0	0	0	0	603	903	0
568	0	0	0	0	0	0	0	200	300	0	0	0	0	0	0	0	200	903	0	0	0	0	0	0	0	603	903	0
568	1	0	0	0	0	0	0	200	300	0	0	0	0	0	0	0	200	903	0	0	0	0	0	0	0	603	903	0
568	2	0	0	0	0	0	0	200	300	0	0	0	0	0	0	0	200	903	0	0	0	0	0	0	0	603	903	0
568	3	0	0	0	0	0	0	200	300	0	0	0	0	0	0	0	200	903	0	0	0	0	0	0	0	603	903	0
568	4	0	0	0	0	0	0	200	300	0	0	0	0	0	0	0	200	903	0	0	0	0	0	0	0	603	903	0
568	5	0	0	0	0	0	0	200	300	0	0	0	0	0	0	0	200	903	0	0	0	0	0	0	0	603	903	0
568	6	0	0	0	0	0	0	200	300	0	0	0	0	0	0	0	200	903	0	0	0	0	0	0	0	603	903	0
568	7	0	0	0	0	0	0	200	300	0	0	0	0	0	0	0	200	903	0	0	0	0	0	0	0	603	903	0
568	8	0	0	0	0	0	0	200	300	0	0	0	0	0	0	0	200	903	0	0	0	0	0	0	0	603	903	0
568	9	0	0	0	0	0	0	200	300	0	0	0	0	0	0	0	200	903	0	0	0	0	0	0	0	603	903	0
569	0	0	0	0	0	0	0	200	300	0	0	0	0	0	0	0	200	903	0	0	0	0	0	0	0	603	903	0
569	1	0	0	0	0	0	0	200	300	0	0	0	0	0	0	0	200	903	0	0	0	0	0	0	0	603	903	0
569	2	0	0	0	0	0	0	200	300	0	0	0	0	0	0	0	200	903	0	0	0	0	0	0	0	603	903	0
569	3	0	0	0	0	0	0	200	300	0	0	0	0	0	0	0	200	903	0	0	0	0	0	0	0	603	903	0
569	4	0	0	0	0	0	0	200	300	0	0	0	0	0	0	0	200	903	0	0	0	0	0	0	0	603	903	0
569	5	0	0	0	0	0	0	200	300	0	0	0	0	0	0	0	200	903	0	0	0	0	0	0	0	603	903	0
569	6	0	0	0	0	0	0	200	300	0	0	0	0	0	0	0	200	903	0	0	0	0	0	0	0	603	903	0
569	7	0	0	0	0	0	0	200	300	0	0	0	0	0	0	0	200	903	0	0	0	0	0	0	0	603	903	0
569	8	0	0	0	0	0	0	200	300	0	0	0	0	0	0	0	200	903	0	0	0	0	0	0	0	603	903	0
569	9	0	0	0	0	0	0	200	300	0	0	0	0	0	0	0	200	903	0	0	0	0	0	0	0	603	903	0
570	0	0	0	0	0	0	0	200	300	0	0	0	0	0	0	0	200	903	0	0	0	0	0	0	0	603	903	0
570	1	0	0	0	0	0	0	200	300	0	0	0	0	0	0	0	200	903	0	0	0	0	0	0	0	603	903	0
570	2	0	0	0	0	0	0	200	300	0	0	0	0	0	0	0	200	903	0	0	0	0	0	0	0	603	903	0
570	3	0	0	0	0	0	0	200	300	0	0	0	0	0	0	0	200	903	0	0	0	0	0	0	0	603	903	0
570	4	0	0	0	0	0	0	200	300	0	0	0	0	0	0	0	200	903	0	0	0	0	0	0	0	603	903	0
570	5	0	0	0	0	0	0	200	300	0	0	0	0	0	0	0	200	903	0	0	0	0	0	0	0	603	903	0
570	6	0	0	0	0	0	0	200	300	0	0	0	0	0	0	0	200	903	0	0	0	0	0	0	0	603	903	0
570	7	0	0	0	0	0	0	200	300	0	0	0	0	0	0	0	200	903	0	0	0	0	0	0	0	603	903	0
570	8	0	0	0	0	0	0	200	300	0	0	0	0	0	0	0	200	903	0	0	0	0	0	0	0	603	903	0
570	9	0	0	0	0	0	0	200	300	0	0	0	0	0	0	0	200	903	0	0	0	0	0	0	0	603	903	0
571	0	0	0	0	0	0	0	200	300	0	0	0	0	0	0	0	200	903	0	0	0	0	0	0	0	603	903	0
571	1	0	0	0	0	0	0	200	300	0	0	0	0	0	0	0	200	903	0	0	0	0	0	0	0	603	903	0
571	2	0	0	0	0	0	0	200	300	0	0	0	0	0	0	0	200	903	0	0	0	0	0	0	0	603	903	0
571	3	0	0	0	0	0	0	200	300	0	0	0	0	0	0	0	200	903	0	0	0	0	0	0	0	603	903	0
571	4	0	0	0	0	0	0	200	300	0	0	0	0	0	0	0	200	903	0	0	0	0	0	0	0	603	903	0
571	5	0	0	0	0	0	0	200	300	0	0	0	0	0	0	0	200	903	0	0	0	0	0	0	0	603	903	0
571	6	0	0	0	0	0	0	200	300	0	0	0	0	0	0	0	200	903	0	0	0	0	0	0	0	603	903	0
571	7	0	0	0	0	0	0	200	300	0	0	0	0	0	0	0	200	903	0	0	0	0	0	0	0	603	903	0
571	8	0	0	0	0	0	0	200	300	0	0	0	0	0	0	0	200	903	0	0	0	0	0	0	0	603	903	0
571	9	0	0	0	0	0	0	200	300	0	0	0	0	0	0	0	200	903	0	0	0	0	0	0	0	603	903	0
572	0	0	0	0	0	0	0	200	300	0	0	0	0	0	0	0	200	903	0	0	0	0	0	0	0	603	903	0
572	1	0	0	0	0	0	0	200	300	0	0	0	0	0	0	0	200	903	0	0	0	0	0	0	0	603	903	0
572	2	0	0	0	0	0	0	200	300	0	0	0	0	0	0	0	200	903	0	0	0	0	0	0	0	603	903	0
572	3	0	0	0	0	0	0	200	300	0	0	0	0	0	0	0	200	903	0	0	0	0	0	0	0	603	903	0
572	4	0	0	0	0	0	0	200	300	0	0	0	0	0	0	0	200	903	0	0	0	0	0	0	0	603	903	0
572	5	0	0	0	0	0	0	200	300	0	0	0	0	0	0	0	200	903	0	0	0	0	0	0	0	603	903	0
572	6	0	0	0	0	0	0	200	300	0	0	0	0	0	0	0	200	903	0	0	0	0	0	0	0	603	903	0
572	7	0	0	0	0	0	0	200	300	0	0	0	0	0	0	0	200	903	0	0	0	0	0	0	0	603	903	0
572	8	0	0	0	0	0	0	200	300	0	0	0	0	0	0	0	200	903	0	0	0	0	0	0	0	603	903	0
572	9	0	0	0	0	0	0	200	300	0	0	0	0	0	0	0	200	903	0	0	0	0	0	0	0	603	903	0
573	0	0	0	0	0	0	0	200	300	0	0	0	0	0	0	0	200	903	0	0	0	0	0	0	0	603	903	0
573	1	0	0	0	0	0	0	200	300	0	0	0	0	0	0	0	200	903	0	0	0	0	0	0	0	603	903	0
573	2	0	0	0	0	0	0	200	300	0	0	0	0	0	0	0	200	903	0	0	0	0	0	0	0	603	903	0
573	3	0	0	0	0	0	0	200	300	0	0	0	0	0	0	0	200	903	0	0	0	0	0	0	0	603	903	0
573	4	0	0	0	0	0	0	200	300	0	0	0	0	0	0	0	200	903	0	0	0	0	0	0	0	603	903	0
573	5	0	0	0	0	0	0	200	300	0	0	0	0	0	0	0	200	903	0	0	0	0	0	0	0	603	903	0
573	6	0	0	0	0	0	0	200	300	0	0	0	0	0	0	0	200	903	0	0	0	0	0	0	0	603	903	0
573	7	0	0	0	0	0	0	200	300	0	0	0	0	0	0	0	200	903	0	0	0	0	0	0	0	603	903	0
573	8	0	0	0	0	0	0	200	300	0	0	0	0	0	0	0	200	903	0	0	0	0	0	0	0	603	903	0
573	9	0	0	0	0	0	0	200	300	0	0	0	0	0	0	0	200	903	0	0	0	0	0	0	0	603	903	0
574	0	0	0	0	0	0	0	200	300	0	0	0	0	0	0	0	200	903	0	0	0	0	0	0	0	603	903	0
574	1	0	0	0	0	0	0	200	300	0	0	0	0	0	0	0	200	903	0	0	0	0	0	0	0	603	903	0
574	2	0	0	0	0	0	0	200	300	0	0	0	0	0	0	0	200	903	0	0	0	0	0	0	0	603	903	0
574	3	0	0	0	0	0	0	200	300	0	0	0	0	0	0	0	200	903	0	0	0	0	0	0	0	603	903	0
574	4	0	0	0	0	0	0	200	300	0	0	0	0	0	0	0	200	903	0	0	0	0	0	0	0	603	903	0
574	5	0	0	0	0	0	0	200	300	0	0	0	0	0	0	0	200	903	0	0	0	0	0	0	0	603	903	0
574	6	0	0	0	0	0	0	200	300	0	0	0	0	0	0	0	200	903	0	0	0	0	0	0	0	603	903	0
574	7	0	0	0	0	0	0	200	300	0	0	0	0	0	0	0	200	903	0	0	0	0	0	0	0	603	903	0
574	8	0	0	0	0	0	0	200	300	0	0	0	0	0	0	0	200	903	0	0	0	0	0	0	0	603	903	0
574	9	0	0	0	0	0	0	200	300	0	0	0	0	0	0	0	200	903	0	0	0	0	0	0	0	603	903	0
575	0	0	0	0	0	0	0	200	300	0	0	0	0	0	0	0	200	903	0	0	0	0	0	0	0	603	903	0
575	1	0	0	0	0	0	0	200	300	0	0	0	0	0	0	0	200	903	0	0	0	0	0	0	0	603	903	0
575	2	0	0	0	0	0	0	200	300	0	0	0	0	0	0	0	200	903	0	0	0	0	0	0	0	603	903	0
575	3	0	0	0	0	0	0	200	300	0	0	0	0	0	0	0	200	903	0	0	0	0	0	0	0	603	903	0
575	4	0	0	0	0	0	0	200	300	0	0	0	0	0	0	0	200	903	0	0	0	0	0	0	0	603	903	0
575	5	0	0	0	0	0	0	200	300	0	0	0	0	0	0	0	200	903	0	0	0	0	0	0	0	603	903	0
575	6	0	0	0	0	0	0	200	300	0	0	0	0	0	0	0	200	903	0	0	0	0	0	0	0	603	903	0
575	7	0	0	0	0	0	0	200	300	0	0	0	0	0	0	0	200	903	0	0	0	0	0	0	0	603	903	0
575	8	0	0	0	0	0	0	200	300	0	0	0	0	0	0	0	200	903	0	0	0	0	0	0	0	603	903	0
575	9	0	0	0	0	0	0	200	300	0	0	0	0	0	0	0	200	903	0	0	0	0	0	0	0	603	903	0
576	0	0	0	0	0	0	0	200	300	0	0	0	0	0	0	0	200	903	0	0	0	0	0	0	0	603	903	0
576	1	0	0	0	0	0	0	200	300	0	0	0	0	0	0	0	200	903	0	0	0	0	0	0	0	603	903	0
576	2	0	0	0	0	0	0	200	300	0	0	0	0	0	0	0	200	903	0	0	0	0	0	0	0	603	903	0
576	3	0	0	0	0	0	0	200	300	0	0	0	0	0	0	0	200	903	0	0	0	0	0	0	0	603	903	0
576	4	0	0	0	0	0	0	200	300	0	0	0	0	0	0	0	200	903	0	0	0	0	0	0	0	603	903	0
576	5	0	0	0	0	0	0	200	300	0	0	0	0	0	0	0	200	903	0	0	0	0	0	0	0	603	903	0
576	6	0	0	0	0	0	0	200	300	0	0	0	0	0	0	0	200	903	0	0	0	0	0	0	0	603	903	0
576	7	0	0	0	0	0	0	200	300	0	0	0	0	0	0	0	200	903	0	0	0	0	0	0	0	603	903	0
576	8	0	0	0	0	0	0	200	300	0	0	0	0	0	0	0	200	903	0	0	0	0	0	0	0	603	903	0
576	9	0	0	0	0	0	0	200	300	0	0	0	0	0	0	0	200	903	0	0	0	0	0	0	0	603	903	0
577	0	0	0	0	0	0	0	200	300	0	0	0	0	0	0	0	200	903	0	0	0	0	0	0	0	603	903	0
577	1	0	0	0	0	0	0	200	300	0	0	0	0	0	0	0	200	903	0	0	0	0	0	0	0	603	903	0
577	2	0	0	0	0	0	0	200	300	0	0	0	0	0	0	0	200	903	0	0	0	0	0	0	0	603	903	0
577	3	0	0	0	0	0	0	200	300	0	0	0	0	0	0	0	200	903	0	0	0	0	0	0	0	603	903	0
577	4	0	0	0	0	0	0	200	300	0	0	0	0	0	0	0	200	903	0	0	0	0	0	0	0	603	903	0
577	5	0	0	0	0	0	0	200	300	0	0	0	0	0	0	0	200	903	0	0	0	0	0	0	0	603	903	0
577	6	0	0	0	0	0	0	200	300	0	0	0	0	0	0	0	200	903	0	0	0	0	0	0	0	603	903	0
577	7	0	0	0	0	0	0	200	300	0	0	0	0	0	0	0	200	903	0	0	0	0	0	0	0	603	903	0
577	8	0	0	0	0	0	0	200	300	0	0	0	0	0	0	0	200	903	0	0	0	0	0	0	0	603	903	0
577	9	0	0	0	0	0	0	200	300	0	0	0	0	0	0	0	200	903	0	0	0	0	0	0	0	603	903	0
578	0	0	0	0	0	0	0	200	300	0	0	0	0	0	0	0	200	903	0	0	0	0	0	0	0	603	903	0
578	1	0	0	0	0	0	0	200	300	0	0	0	0	0	0	0	200	903	0	0	0	0	0	0	0	603	903	0
578	2	0	0	0	0	0	0	200	300	0	0	0	0	0	0	0	200	903	0	0	0	0	0	0	0	603	903	0
578	3	0	0	0	0	0	0	200	300	0	0	0	0	0	0	0	200	903	0	0	0	0	0	0	0	603	903	0
578	4	0	0	0	0	0	0	200	300	0	0	0	0	0	0	0	200	903	0	0	0	0	0	0	0	603	903	0
578	5	0	0	0	0	0	0	200	300	0	0	0	0	0	0	0	200	903	0	0	0	0	0	0	0	603	903	0
578	6	0	0	0	0	0	0	200	300	0	0	0	0	0	0	0	200	903	0	0	0	0	0	0	0	603	903	0
578	7	0	0	0	0	0	0	200	300	0	0	0	0	0	0	0	200	903	0	0	0	0	0	0	0	603	903	0
578	8	0	0	0	0	0	0	200	300	0	0	0	0	0	0	0	200	903	0	0	0	0	0	0	0	603	903	0
578	9	0	0	0	0	0	0	200	300	0	0	0	0	0	0	0	200	903	0	0	0	0	0	0	0	603	903	0
579	0	0	0	0	0	0	0	200	300	0	0	0	0	0	0	0	200	903	0	0	0	0	0	0	0	603	903	0
579	1	0	0	0	0	0	0	200	300	0	0	0	0	0	0	0	200	903	0	0	0	0	0	0	0	603	903	0
579	2	0	0	0	0	0	0	200	300	0	0	0	0	0	0	0	200	903	0	0	0	0	0	0	0	603	903	0
579	3	0	0	0	0	0	0	200	300	0	0	0	0	0	0	0	200	903	0	0	0	0	0	0	0	603	903	0
579	4	0	0	0	0	0	0	200	300	0	0	0	0	0	0	0	200	903	0	0	0	0	0	0	0	603	903	0
579	5	0	0	0	0	0	0	200	300	0	0	0	0	0	0	0	200	903	0	0	0	0	0	0	0	603	903	0
579	6	0	0	0	0	0	0	200	300	0	0	0	0	0	0	0	200	903	0	0	0	0	0	0	0	603	903	0
579	7	0	0	0	0	0	0	200	300	0	0	0	0	0	0	0	200	903	0	0	0	0	0	0	0	603	903	0
579	8	0	0	0	0	0	0	200	300	0	0	0	0	0	0	0	200	903	0	0	0	0	0	0	0	603	903	0
579	9	0	0	0	0	0	0	200	300	0	0	0	0	0	0	0	200	903	0	0	0	0	0	0	0	603	903	0
580	0	0	0	0	0	0	0	200	300	0	0	0	0	0	0	0	200	903	0	0	0	0	0	0	0	603	903	0
580	1	0	0	0	0	0	0	200	300	0	0	0	0	0	0	0	200	903	0	0	0	0	0	0	0	603	903	0
580	2	0	0	0	0	0	0	200	300	0	0	0	0	0	0	0	200	903	0	0	0	0	0	0	0	603	903	0
580	3	0	0	0	0	0	0	200	300	0	0	0	0	0	0	0	200	903	0	0	0	0	0	0	0	603	903	0
580	4	0	0	0	0	0	0	200	300	0	0	0	0	0	0	0	200	903	0	0	0	0	0	0	0	603	903	0
580	5	0	0	0	0	0	0	200	300	0	0	0	0	0	0	0	200	903	0	0	0	0	0	0	0	603	903	0
580	6	0	0	0	0	0	0	200	300	0	0	0	0	0	0	0	200	903	0	0	0	0	0	0	0	603	903	0
580	7	0	0	0	0	0	0	200	300	0	0	0	0	0	0	0	200	903	0	0	0	0	0	0	0	603	903	0
580	8	0	0	0	0	0	0	200	300	0	0	0	0	0	0	0	200	903	0	0	0	0	0	0	0	603	903	0
580	9	0	0	0	0	0	0	200	300	0	0	0	0	0	0	0	200	903	0	0	0	0	0	0	0	603	903	0
581	0	0	0	0	0	0	0	200	300	0	0	0	0	0	0	0	200	903	0	0	0	0	0	0	0	603	903	0
581	1	0	0	0	0	0	0	200	300	0	0	0	0	0	0	0	200	903	0	0	0	0	0	0	0	603	903	0
581	2	0	0	0	0	0	0	200	300	0	0	0	0	0	0	0	200	903	0	0	0	0	0	0	0	603	903	0
581	3	0	0	0	0	0	0	200	300	0	0	0	0	0	0	0	200	903	0	0	0	0	0	0	0	603	903	0
581	4	0	0	0	0	0	0	200	300	0	0	0	0	0	0	0	200	903	0	0	0	0	0	0	0	603	903	0
581	5	0	0	0	0	0	0	200	300	0	0	0	0	0	0	0	200	903	0	0	0	0	0	0	0	603	903	0
581	6	0	0	0	0	0	0	200	300	0	0	0	0	0	0	0	200	903	0	0	0	0	0	0	0	603	903	0
581	7	0	0	0	0	0	0	200	300	0	0	0	0	0	0	0	200	903	0	0	0	0	0	0	0	603	903	0
581	8	0	0	0	0	0	0	200	300	0	0	0	0	0	0	0	200	903	0	0	0	0	0	0	0	603	903	0
581	9	0	0	0	0	0	0	200	300	0	0	0	0	0	0	0	200	903	0	0	0	0	0	0	0	603	903	0
582	0	0	0	0	0	0	0	200	300	0	0	0	0	0	0	0	200	903	0	0	0	0	0	0	0	603	903	0
582	1	0	0	0	0	0	0	200	300	0	0	0	0	0	0	0	200	903	0	0	0	0	0	0	0	603	903	0
582	2	0	0	0	0	0	0	200	300	0	0	0	0	0	0	0	200	903	0	0	0	0	0	0	0	603	903	0
582	3	0	0	0	0	0	0	200	300	0	0	0	0	0	0	0	200	903	0	0	0	0	0	0	0	603	903	0
582	4	0	0	0	0	0	0	200	300	0	0	0	0	0	0	0	200	903	0	0	0	0	0	0	0	603	903	0
582	5	0	0	0	0	0	0	200	300	0	0	0	0	0	0	0	200	903	0	0	0	0	0	0	0	603	903	0
582	6	0	0	0	0	0	0	200	300	0	0	0	0	0	0	0	200	903	0	0	0	0	0	0	0	603	903	0
582	7	0	0	0	0	0	0	200	300	0	0	0	0	0	0	0	200	903	0	0	0	0	0	0	0	603	903	0
582	8	0	0	0	0	0	0	200	300	0	0	0	0	0	0	0	200	903	0	0	0	0	0	0	0	603	903	0
582	9	0	0	0	0	0	0	200	300	0	0	0	0	0	0	0	200	903	0	0	0	0	0	0	0	603	903	0
583	0	0	0	0	0	0	0	200	300	0	0	0	0	0	0	0	200	903	0	0	0	0	0	0	0	603	903	0
583	1	0	0	0	0	0	0	200	300	0	0	0	0	0	0	0	200	903	0	0	0	0	0	0	0	603	903	0
583	2	0	0	0	0	0	0	200	300	0	0	0	0	0	0	0	200	903	0	0	0	0	0	0	0	603	903	0
583	3	0	0	0	0	0	0	200	300	0	0	0	0	0	0	0	200	903	0	0	0	0	0	0	0	603	903	0
583	4	0	0	0	0	0	0	200	300	0	0	0	0	0	0	0	200	903	0	0	0	0	0	0	0	603	903	0
583	5	0	0	0	0	0	0	200	300	0	0	0	0	0	0	0	200	903	0	0	0	0	0	0	0	603	903	0
583	6	0	0	0	0	0	0	200	300	0	0	0	0	0	0	0	200	903	0	0	0	0	0	0	0	603	903	0
583	7	0	0	0	0	0	0	200	300	0	0	0	0	0	0	0	200	903	0	0	0	0	0	0	0	603	903	0
583	8	0	0	0	0	0	0	200	300	0	0	0	0	0	0	0	200	903	0	0	0	0	0	0	0	603	903	0
583	9	0	0	0	0	0	0	200	300	0	0	0	0	0	0	0	200	903	0	0	0	0	0	0	0	603	903	0
584	0	0	0	0	0	0	0	200	300	0	0	0	0	0	0	0	200	903	0	0	0	0	0	0	0	603	903	0
584	1	0	0	0	0	0	0	200	300	0	0	0	0	0	0	0	200	903	0	0	0	0	0	0	0	603	903	0
584	2	0	0	0	0	0	0	200	300	0	0	0	0	0	0	0	200	903	0	0	0	0	0	0	0	603	903	0
584	3	0	0	0	0	0	0	200	300	0	0	0	0	0	0	0	200	903	0	0	0	0	0	0	0	603	903	0
584	4	0	0	0	0	0	0	200	300	0	0	0	0	0	0	0	200	903	0	0	0	0	0	0	0	603	903	0
584	5	0	0	0	0	0	0	200	300	0	0	0	0	0	0	0	200	903	0	0	0	0	0	0	0	603	903	0
584	6	0	0	0	0	0	0	200	300	0	0	0	0	0	0	0	200	903	0	0	0	0	0	0	0	603	903	0
584	7	0	0	0	0	0	0	200	300	0	0	0	0	0	0	0	200	903	0	0	0	0	0	0	0	603	903	0
584	8	0	0	0	0	0	0	200	300	0	0	0	0	0	0	0	200	903	0	0	0	0	0	0	0	603	903	0
584	9	0	0	0	0	0	0	200	300	0	0	0	0	0	0	0	200	903	0	0	0	0	0	0	0	603	903	0
585	0	0	0	0	0	0	0	200	300	0	0	0	0	0	0	0	200	903	0	0	0	0	0	0	0	603	903	0
585	1	0	0	0	0	0	0	200	300	0	0	0	0	0	0	0	200	903	0	0	0	0	0	0	0	603	903	0
585	2	0	0	0	0	0	0	200	300	0	0	0	0	0	0	0	200	903	0	0	0	0	0	0	0	603	903	0
585	3	0	0	0	0	0	0	200	300	0	0	0	0	0	0	0	200	903	0	0	0	0	0	0	0	603	903	0
585	4	0	0	0	0	0	0	200	300	0	0	0	0	0	0	0	200	903	0	0	0	0	0	0	0	603	903	0
585	5	0	0	0	0	0	0	200	300	0	0	0	0	0	0	0	200	903	0	0	0	0	0	0	0	603	903	0
585	6	0	0	0	0	0	0	200	300	0	0	0	0	0	0	0	200	903	0	0	0	0	0	0	0	603	903	0
585	7	0	0	0	0	0	0	200	300	0	0	0	0	0	0	0	200	903	0	0	0	0	0	0	0	603	903	0
585	8	0	0	0	0	0	0	200	300	0	0	0	0	0	0	0	200	903	0	0	0	0	0	0	0	603	903	0
585	9	0	0	0	0	0	0	200	300	0	0	0	0	0	0	0	200	903	0	0	0	0	0	0	0	603	903	0
586	0	0	0	0	0	0	0	200	300	0	0	0	0	0	0	0	200	903	0	0	0	0	0	0	0	603	903	0
586	1	0	0	0	0	0	0	200	300	0	0	0	0	0	0	0	200	903	0	0	0	0	0	0	0	603	903	0
586	2	0	0	0	0	0	0	200	300	0	0	0	0	0	0	0	200	903	0	0	0	0	0	0	0	603	903	0
586	3	0	0	0	0	0	0	200	300	0	0	0	0	0	0	0	200	903	0	0	0	0	0	0	0	603	903	0
586	4	0	0	0	0	0	0	200	300	0	0	0	0	0	0	0	200	903	0	0	0	0	0	0	0	603	903	0
586	5	0	0	0	0	0	0	200	300	0	0	0	0	0	0	0	200	903	0	0	0	0	0	0	0	603	903	0
586	6	0	0	0	0	0	0	200	300	0	0	0	0	0	0	0	200	903	0	0	0	0	0	0	0	603	903	0
586	7	0	0	0	0	0	0	200	300	0	0	0	0	0	0	0	200	903	0	0	0	0	0	0	0	603	903	0
586	8	0	0	0	0	0	0	200	300	0	0	0	0	0	0	0	200	903	0	0	0	0	0	0	0	603	903	0
586	9	0	0	0	0	0	0	200	300	0	0	0	0	0	0	0	200	903	0	0	0	0	0	0	0	603	903	0
587	0	0	0	0	0	0	0	200	300	0	0	0	0	0	0	0	200	903	0	0	0	0	0	0	0	603	903	0
587	1	0	0	0	0	0	0	200	300	0	0	0	0	0	0	0	200	903	0	0	0	0	0	0	0	603	903	0
587	2	0	0	0	0	0	0	200	300	0	0	0	0	0	0	0	200	903	0	0	0	0	0	0	0	603	903	0
587	3	0	0	0	0	0	0	200	300	0	0	0	0	0	0	0	200	903	0	0	0	0	0	0	0	603	903	0
587	4	0	0	0	0	0	0	200	300	0	0	0	0	0	0	0	200	903	0	0	0	0	0	0	0	603	903	0
587	5	0	0	0	0	0	0	200	300	0	0	0	0	0	0	0	200	903	0	0	0	0	0	0	0	603	903	0
587	6	0	0	0	0	0	0	200	300	0	0	0	0	0	0	0	200	903	0	0	0	0	0	0	0	603	903	0
587	7	0	0	0	0	0	0	200	300	0	0	0	0	0	0	0	200	903	0	0	0	0	0	0	0	603	903	0
587	8	0	0	0	0	0	0	200	300	0	0	0	0	0	0	0	200	903	0	0	0	0	0	0	0	603	903	0
587	9	0	0	0	0	0	0	200	300	0	0	0	0	0	0	0	200	903	0	0	0	0	0	0	0	603	903	0
588	0	0	0	0	0	0	0	200	300	0	0	0	0	0	0	0	200	903	0	0	0	0	0	0	0	603	903	0
588	1	0	0	0	0	0	0	200	300	0	0	0	0	0	0	0	200	903	0	0	0	0	0	0	0	603	903	0
588	2	0	0	0	0	0	0	200	300	0	0	0	0	0	0	0	200	903	0	0	0	0	0	0	0	603	903	0
588	3	0	0	0	0	0	0	200	300	0	0	0	0	0	0	0	200	903	0	0	0	0	0	0	0	603	903	0
588	4	0	0	0	0	0	0	200	300	0	0	0	0	0	0	0	200	903	0	0	0	0	0	0	0	603	903	0
588	5	0	0	0	0	0	0	200	300	0	0	0	0	0	0	0	200	903	0	0	0	0	0	0	0	603	903	0
588	6	0	0	0	0	0	0	200	300	0	0	0	0	0	0	0	200	903	0	0	0	0	0	0	0	603	903	0
588	7	0	0	0	0	0	0	200	300	0	0	0	0	0	0	0	200	903	0	0	0	0	0	0	0	603	903	0
588	8	0	0	0	0	0	0	200	300	0	0	0	0	0	0	0	200	903	0	0	0	0	0	0	0	603	903	0
588	9	0	0	0	0	0	0	200	300	0	0	0	0	0	0	0	200	903	0	0	0	0	0	0	0	603	903	0
589	0	0	0	0	0	0	0	200	300	0	0	0	0	0	0	0	200	903	0	0	0	0	0	0	0	603	903	0
589	1	0	0	0	0	0	0	200	300	0	0	0	0	0	0	0	200	903	0	0	0	0	0	0	0	603	903	0
589	2	0	0	0	0	0	0	200	300	0	0	0	0	0	0	0	200	903	0	0	0	0	0	0	0	603	903	0
589	3	0	0	0	0	0	0	200	300	0	0	0	0	0	0	0	200	903	0	0	0	0	0	0	0	603	903	0
589	4	0	0	0	0	0	0	200	300	0	0	0	0	0	0	0	200	903	0	0	0	0	0	0	0	603	903	0
589	5	0	0	0	0	0	0	200	300	0	0	0	0	0	0	0	200	903	0	0	0	0	0	0	0	603	903	0
589	6	0	0	0	0	0	0	200	300	0	0	0	0	0	0	0	200	903	0	0	0	0	0	0	0	603	903	0
589	7	0	0	0	0	0	0	200	300	0	0	0	0	0	0	0	200	903	0	0	0	0	0	0	0	603	903	0
589	8	0	0	0	0	0	0	200	300	0	0	0	0	0	0	0	200	903	0	0	0	0	0	0	0	603	903	0
589	9	0	0	0	0	0	0	200	300	0	0	0	0	0	0	0	200	903	0	0	0	0	0	0	0	603	903	0
590	0	0	0	0	0	0	0	200	300	0	0	0	0	0	0	0	200	903	0	0	0	0	0	0	0	603	903	0
590	1	0	0	0	0	0	0	200	300	0	0	0	0	0	0	0	200	903	0	0	0	0	0	0	0	603	903	0
590	2	0	0	0	0	0	0	200	300	0	0	0	0	0	0	0	200	903	0	0	0	0	0	0	0	603	903	0
590	3	0	0	0	0	0	0	200	300	0	0	0	0	0	0	0	200	903	0	0	0	0	0	0	0	603	903	0
590	4	0	0	0	0	0	0	200	300	0	0	0	0	0	0	0	200	903	0	0	0	0	0	0	0	603	903	0
590	5	0	0	0	0	0	0	200	300	0	0	0	0	0	0	0	200	903	0	0	0	0	0	0	0	603	903	0
590	6	0	0	0	0	0	0	200	300	0	0	0	0	0	0	0	200	903	0	0	0	0	0	0	0	603	903	0
590	7	0	0	0	0	0	0	200	300	0	0	0	0	0	0	0	200	903	0	0	0	0	0	0	0	603	903	0
590	8	0	0	0	0	0	0	200	300	0	0	0	0	0	0	0	200	903	0	0	0	0	0	0	0	603	903	0
590	9	0	0	0	0	0	0	200	300	0	0	0	0	0	0	0	200	903	0	0	0	0	0	0	0	603	903	0
591	0	0	0	0	0	0	0	200	300	0	0	0	0	0	0	0	200	903	0	0	0	0	0	0	0	603	903	0
591	1	0	0	0	0	0	0	200	300	0	0	0	0	0	0	0	200	903	0	0	0	0	0	0	0	603	903	0
591	2	0	0	0	0	0	0	200	300	0	0	0	0	0	0	0	200	903	0	0	0	0	0	0	0	603	903	0
591	3	0	0	0	0	0	0	200	300	0	0	0	0	0	0	0	200	903	0	0	0	0	0	0	0	603	903	0
591	4	0	0	0	0	0	0	200	300	0	0	0	0	0	0	0	200	903	0	0	0	0	0	0	0	603	903	0
591	5	0	0	0	0	0	0	200	300	0	0	0	0	0	0	0	200	903	0	0	0	0	0	0	0	603	903	0
591	6	0	0	0	0	0	0	200	300	0	0	0	0	0	0	0	200	903	0	0	0	0	0	0	0	603	903	0
591	7	0	0	0	0	0	0	200	300	0	0	0	0	0	0	0	200	903	0	0	0	0	0	0	0	603	903	0
591	8	0	0	0	0	0	0	200	300	0	0	0	0	0	0	0	200	903	0	0	0	0	0	0	0	603	903	0
591	9	0	0	0	0	0	0	200	300	0	0	0	0	0	0	0	200	903	0	0	0	0	0	0	0	603	903	0
592	0	0	0	0	0	0	0	200	300	0	0	0	0	0	0	0	200	903	0	0	0	0	0	0	0	603	903	0
592	1	0	0	0	0	0	0	200	300	0	0	0	0	0	0	0	200	903	0	0	0	0	0	0	0	603	903	0
592	2	0	0	0	0	0	0	200	300	0	0	0	0	0	0	0	200	903	0	0	0	0	0	0	0	603	903	0
592	3	0	0	0	0	0	0	200	300	0	0	0	0	0	0	0	200	903	0	0	0	0	0	0	0	603	903	0
592	4	0	0	0	0	0	0	200	300	0	0	0	0	0	0	0	200	903	0	0	0	0	0	0	0	603	903	0
592	5	0	0	0	0	0	0	200	300	0	0	0	0	0	0	0	200	903	0	0	0	0	0	0	0	603	903	0
592	6	0	0	0	0	0	0	200	300	0	0	0	0	0	0	0	200	903	0	0	0	0	0	0	0	603	903	0
592	7	0	0	0	0	0	0	200	300	0	0	0	0	0	0	0	200	903	0	0	0	0	0	0	0	603	903	0
592	8	0	0	0	0	0	0	200	300	0	0	0	0	0	0	0	200	903	0	0	0	0	0	0	0	603	903	0
592	9	0	0	0	0	0	0	200	300	0	0	0	0	0	0	0	200	903	0	0	0	0	0	0	0	603	903	0
593	0	0	0	0	0	0	0	200	300	0	0	0	0	0	0	0	200	903	0	0	0	0	0	0	0	603	903	0
593	1	0	0	0	0	0	0	200	300	0	0	0	0	0	0	0	200	903	0	0	0	0	0	0	0	603	903	0
593	2	0	0	0	0	0	0	200	300	0	0	0	0	0	0	0	200	903	0	0	0	0	0	0	0	603	903	0
593	3	0	0	0	0	0	0	200	300	0	0	0	0	0	0	0	200	903	0	0	0	0	0	0	0	603	903	0
593	4	0	0	0	0	0	0	200	300	0	0	0	0	0	0	0	200	903	0	0	0	0	0	0	0	603	903	0
593	5	0	0	0	0	0	0	200	300	0	0	0	0	0	0	0	200	903	0	0	0	0	0	0	0	603	903	0
593	6	0	0	0	0	0	0	200	300	0	0	0	0	0	0	0	200	903	0	0	0	0	0	0	0	603	903	0
593	7	0	0	0	0	0	0	200	300	0	0	0	0	0	0	0	200	903	0	0	0	0	0	0	0	603	903	0
593	8	0	0	0	0	0	0	200	300	0	0	0	0	0	0	0	200	903	0	0	0	0	0	0	0	603	903	0
593	9	0	0	0	0	0	0	200	300	0	0	0	0	0	0	0	200	903	0	0	0	0	0	0	0	603	903	0
594	0	0	0	0	0	0	0	200	300	0	0	0	0	0	0	0	200	903	0	0	0	0	0	0	0	603	903	0
594	1	0	0	0	0	0	0	200	300	0	0	0	0	0	0	0	200	903	0	0	0	0	0	0	0	603	903	0
594	2	0	0	0	0	0	0	200	300	0	0	0	0	0	0	0	200	903	0	0	0	0	0	0	0	603	903	0
594	3	0	0	0	0	0	0	200	300	0	0	0	0	0	0	0	200	903	0	0	0	0	0	0	0	603	903	0
594	4	0	0	0	0	0	0	200	300	0	0	0	0	0	0	0	200	903	0	0	0	0	0	0	0	603	903	0
594	5	0	0	0	0	0	0	200	300	0	0	0	0	0	0	0	200	903	0	0	0	0	0	0	0	603	903	0
594	6	0	0	0	0	0	0	200	300	0	0	0	0	0	0	0	200	903	0	0	0	0	0	0	0	603	903	0
594	7	0	0	0	0	0	0	200	300	0	0	0	0	0	0	0	200	903	0	0	0	0	0	0	0	603	903	0
594	8	0	0	0	0	0	0	200	300	0	0	0	0	0	0	0	200	903	0	0	0	0	0	0	0	603	903	0
594	9	0	0	0	0	0	0	200	300	0	0	0	0	0	0	0	200	903	0	0	0	0	0	0	0	603	903	0
595	0	0	0	0	0	0	0	200	300	0	0	0	0	0	0	0	200	903	0	0	0	0	0	0	0	603	903	0
595	1	0	0	0	0	0	0	200	300	0	0	0	0	0	0	0	200	903	0	0	0	0	0	0	0	603	903	0
595	2	0	0	0	0	0	0	200	300	0	0	0	0	0	0	0	200	903	0	0	0	0	0	0	0	603	903	0
595	3	0	0	0	0	0	0	200	300	0	0	0	0	0	0	0	200	903	0	0	0	0	0	0	0	603	903	0
595	4	0	0	0	0	0	0	200	300	0	0	0	0	0	0	0	200	903	0	0	0	0	0	0	0	603	903	0
595	5	0	0	0	0	0	0	200	300	0	0	0	0	0	0	0	200	903	0	0	0	0	0	0	0	603	903	0
595	6	0	0	0	0	0	0	200	300	0	0	0	0	0	0	0	200	903	0	0	0	0	0	0	0	603	903	0
595	7	0	0	0	0	0	0	200	300	0	0	0	0	0	0	0	200	903	0	0	0	0	0	0	0	603	903	0
595	8	0	0	0	0	0	0	200	300	0	0	0	0	0	0	0	200	903	0	0	0	0	0	0	0	603	903	0
595	9	0	0	0	0	0	0	200	300	0	0	0	0	0	0	0	200	903	0	0	0	0	0	0	0	603	903	0
596	0	0	0	0	0	0	0	200	300	0	0	0	0	0	0	0	200	903	0	0	0	0	0	0	0	603	903	0
596	1	0	0	0	0	0	0	200	300	0	0	0	0	0	0	0	200	903	0	0	0	0	0	0	0	603	903	0
596	2	0	0	0	0	0	0	200	300	0	0	0	0	0	0	0	200	903	0	0	0	0	0	0	0	603	903	0
596	3	0	0	0	0	0	0	200	300	0	0	0	0	0	0	0	200	903	0	0	0	0	0	0	0	603	903	0
596	4	0	0	0	0	0	0	200	300	0	0	0	0	0	0	0	200	903	0	0	0	0	0	0	0	603	903	0
596	5	0	0	0	0	0	0	200	300	0	0	0	0	0	0	0	200	903	0	0	0	0	0	0	0	603	903	0
596	6	0	0	0	0	0	0	200	300	0	0	0	0	0	0	0	200	903	0	0	0	0	0	0	0	603	903	0
596	7	0	0	0	0	0	0	200	300	0	0	0	0	0	0	0	200	903	0	0	0	0	0	0	0	603	903	0
596	8	0	0	0	0	0	0	200	300	0	0	0	0	0	0	0	200	903	0	0	0	0	0	0	0	603	903	0
596	9	0	0	0	0	0	0	200	300	0	0	0	0	0	0	0	200	903	0	0	0	0	0	0	0	603	903	0
597	0	0	0	0	0	0	0	200	300	0	0	0	0	0	0	0	200	903	0	0	0	0	0	0	0	603	903	0
597	1	0	0	0	0	0	0	200	300	0	0	0	0	0	0	0	200	903	0	0	0	0	0	0	0	603	903	0
597	2	0	0	0	0	0	0	200	300	0	0	0	0	0	0	0	200	903	0	0	0	0	0	0	0	603	903	0
597	3	0	0	0	0	0	0	200	300	0	0	0	0	0	0	0	200	903	0	0	0	0	0	0	0	603	903	0
597	4	0	0	0	0	0	0	200	300	0	0	0	0	0	0	0	200	903	0	0	0	0	0	0	0	603	903	0
597	5	0	0	0	0	0	0	200	300	0	0	0	0	0	0	0	200	903	0	0	0	0	0	0	0	603	903	0
597	6	0	0	0	0	0	0	200	300	0	0	0	0	0	0	0	200	903	0	0	0	0	0	0	0	603	903	0
597	7	0	0	0	0	0	0	200	300	0	0	0	0	0	0	0	200	903	0	0	0	0	0	0	0	603	903	0
597	8	0	0	0	0	0	0	200	300	0	0	0	0	0	0	0	200	903	0	0	0	0	0	0	0	603	903	0
597	9	0	0	0	0	0	0	200	300	0	0	0	0	0	0	0	200	903	0	0	0	0	0	0	0	603	903	0
598	0	0	0	0	0	0	0	200	300	0	0	0	0	0	0	0	200	903	0	0	0	0	0	0	0	603	903	0
598	1	0	0	0	0	0	0	200	300	0	0	0	0	0	0	0	200	903	0	0	0	0	0	0	0	603	903	0
598	2	0	0	0	0	0	0	200	300	0	0	0	0	0	0	0	200	903	0	0	0	0	0	0	0	603	903	0
598	3	0	0	0	0	0	0	200	300	0	0	0	0	0	0	0	200	903	0	0	0	0	0	0	0	603	903	0
598	4	0	0	0	0	0	0	200	300	0	0	0	0	0	0	0	200	903	0	0	0	0	0	0	0	603	903	0
598	5	0	0	0	0	0	0	200	300	0	0	0	0	0	0	0	200	903	0	0	0	0	0	0	0	603	903	0
598	6	0	0	0	0	0	0	200	300	0	0	0	0	0	0	0	200	903	0	0	0	0	0	0	0	603	903	0
598	7	0	0	0	0	0	0	200	300	0	0	0	0	0	0	0	200	903	0	0	0	0	0	0	0	603	903	0
598	8	0	0	0	0	0	0	200	300	0	0	0	0	0	0	0	200	903	0	0	0	0	0	0	0	603	903	0
598	9	0	0	0	0	0	0	200	300	0	0	0	0	0	0	0	200	903	0	0	0	0	0	0	0	603	903	0
599	0	0	0	0	0	0	0	200	300	0	0	0	0	0	0	0	200	903	0	0	0	0	0	0	0	603	903	0
599	1	0	0	0	0	0	0	200	300	0	0	0	0	0	0	0	200	903	0	0	0	0	0	0	0	603	903	0
599	2	0	0	0	0	0	0	200	300	0	0	0	0	0	0	0	200	903	0	0	0	0	0	0	0	603	903	0
599	3	0	0	0	0	0	0	200	300	0	0	0	0	0	0	0	200	903	0	0	0	0	0	0	0	603	903	0
599	4	0	0	0	0	0	0	200	300	0	0	0	0	0	0	0	200	903	0	0	0	0	0	0	0	603	903	0
599	5	0	0	0	0	0	0	200	300	0	0	0	0	0	0	0	200	903	0	0	0	0	0	0	0	603	903	0
599	6	0	0	0	0	0	0	200	300	0	0	0	0	0	0	0	200	903	0	0	0	0	0	0	0	603	903	0
599	7	0	0	0	0	0	0	200	300	0	0	0	0	0	0	0	200	903	0	0	0	0	0	0	0	603	903	0
599	8	0	0	0	0	0	0	200	300	0	0	0	0	0	0	0	200	903	0	0	0	0	0	0	0	603	903	0
599	9	0	0	0	0	0	0	200	300	0	0	0	0	0	0	0	200	903	0	0	0	0	0	0	0	603	903	0
600	0	0	0	0	0	0	0	200	300	0	0	0	0	0	0	0	200	903	0	0	0	0	0	0	0	603	903	0
600	1	0	0	0	0	0	0	200	300	0	0	0	0	0	0	0	200	903	0	0	0	0	0	0	0	603	903	0
600	2	0	0	0	0	0	0	200	300	0	0	0	0	0	0	0	200	903	0	0	0	0	0	0	0	603	903	0
600	3	0	0	0	0	0	0	200	300	0	0	0	0	0	0	0	200	903	0	0	0	0	0	0	0	603	903	0
600	4	0	0	0	0	0	0	200	300	0	0	0	0	0	0	0	200	903	0	0	0	0	0	0	0	603	903	0
600	5	0	0	0	0	0	0	200	300	0	0	0	0	0	0	0	200	903	0	0	0	0	0	0	0	603	903	0
600	6	0	0	0	0	0	0	200	300	0	0	0	0	0	0	0	200	903	0	0	0	0	0	0	0	603	903	0
600	7	0	0	0	0	0	0	200	300	0	0	0	0	0	0	0	200	903	0	0	0	0	0	0	0	603	903	0
600	8	0	0	0	0	0	0	200	300	0	0	0	0	0	0	0	200	903	0	0	0	0	0	0	0	603	903	0
600	9	0	0	0	0	0	0	200	300	0	0	0	0	0	0	0	200	903	0	0	0	0	0	0	0	603	903	0
601	0	0	0	0	0	0	0	200	300	0	0	0	0	0	0	0	200	903	0	0	0	0	0	0	0	603	903	0
601	1	0	0	0	0	0	0	200	300	0	0	0	0	0	0	0	200	903	0	0	0	0	0	0	0	603	903	0
601	2	0	0	0	0	0	0	200	300	0	0	0	0	0	0	0	200	903	0	0	0	0	0	0	0	603	903	0
601	3	0	0	0	0	0	0	200	300	0	0	0	0	0	0	0	200	903	0	0	0	0	0	0	0	603	903	0
601	4	0	0	0	0	0	0	200	300	0	0	0	0	0	0	0	200	903	0	0	0	0	0	0	0	603	903	0
601	5	0	0	0	0	0	0	200	300	0	0	0	0	0	0	0	200	903	0	0	0	0	0	0	0	603	903	0
601	6	0	0	0	0	0	0	200	300	0	0	0	0	0	0	0	200	903	0	0	0	0	0	0	0	603	903	0
601	7	0	0	0	0	0	0	200	300	0	0	0	0	0	0	0	200	903	0	0	0	0	0	0	0	603	903	0
601	8	0	0	0	0	0	0	200	300	0	0	0	0	0	0	0	200	903	0	0	0	0	0	0	0	603	903	0
601	9	0	0	0	0	0	0	200	300	0	0	0	0	0	0	0	200	903	0	0	0	0	0	0	0	603	903	0
602	0	0	0	0	0	0	0	200	300	0	0	0	0	0	0	0	200	903	0	0	0	0	0	0	0	603	903	0
602	1	0	0	0	0	0	0	200	300	0	0	0	0	0	0	0	200	903	0	0	0	0	0	0	0	603	903	0
602	2	0	0	0	0	0	0	200	300	0	0	0	0	0	0	0	200	903	0	0	0	0	0	0	0	603	903	0
602	3	0	0	0	0	0	0	200	300	0	0	0	0	0	0	0	200	903	0	0	0	0	0	0	0	603	903	0
602	4	0	0	0	0	0	0	200	300	0	0	0	0	0	0	0	200	903	0	0	0	0	0	0	0	603	903	0
602	5	0	0	0	0	0	0	200	300	0	0	0	0	0	0	0	200	903	0	0	0	0	0	0	0	603	903	0
602	6	0	0	0	0	0	0	200	300	0	3.1131	-1.52847	-29.8266	-4126.37	-1691.7	-66.2851	143.282	1041.35	0	0	0	0	0	0	0	603	903	0
602	7	0	0	0	0	0	0	200	300	0	7.08038	0.302584	-41.7285	-3485.51	-1752.74	-66.2851	157.997	986.528	0	0	0	0	0	0	0	603	903	0
602	8	0	0	0	0	0	0	200	300	0	3.72345	9.00009	-34.4042	-2936.19	-1447.56	-340.943	157.925	988.344	0	0	0	0	0	0	0	603	903	0
602	9	0	0	0	0	0	0	200	300	0	0.976868	12.6622	-27.9956	-3760.16	-1447.56	-752.931	148.293	1037.31	0	0	0	0	0	0	0	603	903	0
603	0	0	0	0	0	0	0	200	300	0	4.63898	11.8993	-33.4887	-3760.16	-1935.85	-707.154	142.194	1015.28	0	0	0	0	0	0	0	603	903	0
603	1	0	0	0	0	0	0	200	300	0	7.08038	16.6295	-53.3251	-4217.93	-2302.06	-890.26	156.83	982.098	0	0	0	0	0	0	0	603	903	0
603	2	0	0	0	0	0	0	200	300	0	1.8924	22.8856	-57.5976	-4767.24	-2424.13	-1164.92	157.913	985.768	0	0	0	0	0	0	0	603	903	0
603	3	0	0	0	0	0	0	200	300	0	2.96051	21.2071	-59.7338	-6872.96	-2912.41	-890.26	151.244	1018.06	0	0	0	0	0	0	0	603	903	0
603	4	0	0	0	0	0	0	200	300	0	7.53815	23.6485	-67.9736	-6964.51	-2912.41	-1393.8	157.154	1005.46	0	0	0	0	0	0	0	603	903	0
603	5	0	0	0	0	0	0	200	300	0	7.99591	24.7166	-86.8945	-7605.38	-3400.69	-1393.8	160.864	990.524	0	0	0	0	0	0	0	603	903	0
603	6	0	0	0	0	0	0	200	300	0	4.3338	21.2071	-94.2187	-7330.72	-3705.87	-1164.92	160.667	980.805	0	0	0	0	0	0	0	603	903	0
603	7	0	0	0	0	0	0	200	300	0	4.63898	18.0028	-94.8291	-8704.01	-4865.53	-981.813	148.692	994.786	0	0	0	0	0	0	0	603	903	0
603	8	0	0	0	0	0	0	200	300	0	9.82697	19.2235	-101.848	-9161.77	-3950.01	-1119.14	161.217	992.955	0	0	0	0	0	0	0	603	903	0
603	9	0	0	0	0	0	0	200	300	0	11.8106	16.7821	-113.14	-9894.2	-4316.22	-1027.59	161.851	990.451	0	0	0	0	0	0	0	603	903	0
604	0	0	0	0	0	0	0	200	300	0	7.99591	11.8993	-119.853	-10077.3	-5170.71	-1302.25	156.858	987.08	0	0	0	0	0	0	0	603	903	0
604	1	0	0	0	0	0	0	200	300	0	8.75885	11.4415	-121.379	-10626.6	-5048.64	-1256.47	158.406	990.549	0	0	0	0	0	0	0	603	903	0
604	2	0	0	0	0	0	0	200	300	0	14.5572	13.12	-126.262	-11450.6	-4682.43	-1164.92	162.915	993.689	0	0	0	0	0	0	0	603	903	0
604	3	0	0	0	0	0	0	200	300	0	16.3882	10.6786	-134.502	-11450.6	-5475.88	-981.813	159.288	988.133	0	0	0	0	0	0	0	603	903	0
604	4	0	0	0	0	0	0	200	300	0	12.2684	4.42246	-139.08	-11359	-6025.2	-1073.37	156.678	984.673	0	0	0	0	0	0	0	603	903	0
604	5	0	0	0	0	0	0	200	300	0	13.0313	3.50693	-140.3	-12183	-5475.88	-707.154	160.97	989.835	0	0	0	0	0	0	0	603	903	0
604	6	0	0	0	0	0	0	200	300	0	16.5408	4.72763	-142.742	-11816.8	-5231.74	-798.707	163.348	985.785	0	0	0	0	0	0	0	603	903	0
604	7	0	0	0	0	0	0	200	300	0	16.5408	-1.07071	-148.235	-11908.4	-5964.17	-661.378	159.765	983.334	0	0	0	0	0	0	0	603	903	0
604	8	0	0	0	0	0	0	200	300	0	11.5054	-5.95352	-156.169	-11450.6	-5964.17	-524.049	161.81	976.322	0	0	0	0	0	0	0	603	903	0
604	9	0	0	0	0	0	0	200	300	0	13.0313	-6.86905	-160.747	-12091.5	-6269.34	-432.496	160.999	978.221	0	0	0	0	0	0	0	603	903	0
605	0	0	0	0	0	0	0	200	300	0	19.2874	-8.54751	-163.494	-13190.1	-6147.27	-524.049	162.401	983.677	0	0	0	0	0	0	0	603	903	0
605	1	0	0	0	0	0	0	200	300	0	18.9822	-11.7519	-165.935	-13281.6	-6208.31	-157.838	162.586	983.041	0	0	0	0	0	0	0	603	903	0
605	2	0	0	0	0	0	0	200	300	0	14.0994	-14.0407	-170.818	-13098.5	-6818.66	-478.272	160.082	979.681	0	0	0	0	0	0	0	603	903	0
605	3	0	0	0	0	0	0	200	300	0	14.8624	-15.414	-179.058	-12823.9	-6818.66	-569.825	161.919	974.619	0	0	0	0	0	0	0	603	903	0
605	4	0	0	0	0	0	0	200	300	0	21.7288	-17.0924	-182.109	-13373.2	-7001.76	-157.838	161.552	976.435	0	0	0	0	0	0	0	603	903	0
605	5	0	0	0	0	0	0	200	300	0	20.9659	-19.0761	-184.856	-13464.8	-7123.83	254.149	161.463	975.839	0	0	0	0	0	0	0	603	903	0
605	6	0	0	0	0	0	0	200	300	0	16.2357	-21.9752	-193.706	-14105.6	-7612.11	208.373	160.703	975.82	0	0	0	0	0	0	0	603	903	0
605	7	0	0	0	0	0	0	200	300	0	18.0667	-23.5011	-198.894	-13922.5	-7490.04	391.479	162.342	973	0	0	0	0	0	0	0	603	903	0
605	8	0	0	0	0	0	0	200	300	0	20.9659	-24.1115	-206.829	-14746.5	-7856.26	483.031	162.016	974.298	0	0	0	0	0	0	0	603	903	0
605	9	0	0	0	0	0	0	200	300	0	21.1185	-24.8744	-211.711	-14929.6	-8283.51	162.597	160.874	973.519	0	0	0	0	0	0	0	603	903	0
606	0	0	0	0	0	0	0	200	300	0	17.6089	-26.7055	-219.646	-14746.5	-8588.68	757.69	160.898	970.138	0	0	0	0	0	0	0	603	903	0
606	1	0	0	0	0	0	0	200	300	0	18.0667	-30.215	-227.581	-15112.7	-8649.72	711.913	161.993	969.406	0	0	0	0	0	0	0	603	903	0
606	2	0	0	0	0	0	0	200	300	0	18.8297	-31.4357	-231.853	-15845.1	-9382.14	574.584	159.534	971.341	0	0	0	0	0	0	0	603	903	0
606	3	0	0	0	0	0	0	200	300	0	17.1512	-30.3676	-238.567	-15478.9	-9382.14	986.571	160.673	967.883	0	0	0	0	0	0	0	603	903	0
606	4	0	0	0	0	0	0	200	300	0	16.5408	-34.1823	-244.976	-15936.7	-9748.35	895.019	160.207	968.054	0	0	0	0	0	0	0	603	903	0
606	5	0	0	0	0	0	0	200	300	0	16.2357	-36.9289	-252.3	-16211.3	-10602.8	1169.68	157.975	967.254	0	0	0	0	0	0	0	603	903	0
606	6	0	0	0	0	0	0	200	300	0	17.9141	-37.5392	-259.319	-16577.5	-10480.8	1490.11	159.583	966.927	0	0	0	0	0	0	0	603	903	0
606	7	0	0	0	0	0	0	200	300	0	15.1675	-38.3022	-265.422	-16943.8	-10724.9	1352.78	159.593	966.837	0	0	0	0	0	0	0	603	903	0
606	8	0	0	0	0	0	0	200	300	0	14.7098	-42.5746	-271.221	-16669.1	-11335.3	1398.56	158.206	964.46	0	0	0	0	0	0	0	603	903	0
606	9	0	0	0	0	0	0	200	300	0	14.0994	-43.7953	-278.24	-15845.1	-11396.3	1627.44	159.041	959.948	0	0	0	0	0	0	0	603	903	0
607	0	0	0	0	0	0	0	200	300	0	13.6417	-43.3376	-288.005	-16852.2	-11823.5	1764.77	158.947	961.514	0	0	0	0	0	0	0	603	903	0
607	1	0	0	0	0	0	0	200	300	0	13.4891	-45.9315	-291.973	-17584.6	-12372.9	1856.32	157.623	963.227	0	0	0	0	0	0	0	603	903	0
607	2	0	0	0	0	0	0	200	300	0	13.9468	-49.1359	-297.466	-17767.7	-12678	1947.88	157.38	962.73	0	0	0	0	0	0	0	603	903	0
607	3	0	0	0	0	0	0	200	300	0	12.421	-49.7462	-306.926	-17676.2	-12922.2	2085.2	157.898	960.591	0	0	0	0	0	0	0	603	903	0
607	4	0	0	0	0	0	0	200	300	0	11.5054	-51.4247	-313.03	-17218.4	-13166.3	1902.1	157.939	958.006	0	0	0	0	0	0	0	603	903	0
607	5	0	0	0	0	0	0	200	300	0	13.4891	-53.1032	-320.354	-17401.5	-14203.9	2176.76	155.662	957.32	0	0	0	0	0	0	0	603	903	0
607	6	0	0	0	0	0	0	200	300	0	10.7425	-53.8661	-325.237	-17950.8	-14448.1	2542.97	155.577	958.193	0	0	0	0	0	0	0	603	903	0
607	7	0	0	0	0	0	0	200	300	0	10.5899	-54.7816	-330.425	-17950.8	-14631.2	2268.31	155.72	957.327	0	0	0	0	0	0	0	603	903	0
607	8	0	0	0	0	0	0	200	300	0	10.7425	-56.4601	-338.359	-17035.3	-15119.4	2497.19	155.315	953.347	0	0	0	0	0	0	0	603	903	0
607	9	0	0	0	0	0	0	200	300	0	10.1321	-59.0541	-342.327	-18042.4	-14875.3	2726.07	156.546	955.705	0	0	0	0	0	0	0	603	903	0
608	0	0	0	0	0	0	0	200	300	0	7.84332	-58.1386	-350.872	-18225.5	-15668.8	2497.19	155.343	954.944	0	0	0	0	0	0	0	603	903	0
608	1	0	0	0	0	0	0	200	300	0	7.38556	-59.5119	-356.06	-17493.1	-15790.8	2542.97	155.651	952.13	0	0	0	0	0	0	0	603	903	0
608	2	0	0	0	0	0	0	200	300	0	8.60626	-62.1059	-362.163	-17767.7	-16218.1	2863.4	155.219	952.06	0	0	0	0	0	0	0	603	903	0
608	3	0	0	0	0	0	0	200	300	0	7.38556	-63.3266	-368.267	-17584.6	-16401.2	2909.18	155.464	950.75	0	0	0	0	0	0	0	603	903	0
608	4	0	0	0	0	0	0	200	300	0	5.70709	-64.3947	-374.065	-17676.2	-16462.2	2954.96	155.991	950.254	0	0	0	0	0	0	0	603	903	0
608	5	0	0	0	0	0	0	200	300	0	6.47003	-65.768	-378.643	-17401.5	-16706.4	2863.4	155.878	948.958	0	0	0	0	0	0	0	603	903	0
608	6	0	0	0	0	0	0	200	300	0	5.40192	-66.8361	-384.136	-17493.1	-17255.7	3138.06	155.079	948.539	0	0	0	0	0	0	0	603	903	0
608	7	0	0	0	0	0	0	200	300	0	6.77521	-67.2939	-389.934	-17584.6	-17560.8	3458.5	154.965	948.096	0	0	0	0	0	0	0	603	903	0
608	8	0	0	0	0	0	0	200	300	0	4.18121	-70.0404	-396.038	-17126.9	-17682.9	3641.6	155.35	946.246	0	0	0	0	0	0	0	603	903	0
608	9	0	0	0	0	0	0	200	300	0	4.79156	-71.8715	-400.31	-17493.1	-18110.2	3733.15	154.76	946.699	0	0	0	0	0	0	0	603	903	0
609	0	0	0	0	0	0	0	200	300	0	3.1131	-71.8715	-403.972	-17401.5	-19086.7	3824.71	152.752	946.076	0	0	0	0	0	0	0	603	903	0
609	1	0	0	0	0	0	0	200	300	0	2.50275	-72.4818	-408.55	-16577.5	-19269.8	3733.15	152.834	943.577	0	0	0	0	0	0	0	603	903	0
609	2	0	0	0	0	0	0	200	300	0	3.72345	-75.5336	-413.738	-16394.4	-18903.6	3916.26	154.31	942.625	0	0	0	0	0	0	0	603	903	0
609	3	0	0	0	0	0	0	200	300	0	2.65533	-76.9069	-418.315	-16669.1	-19636	4007.81	153.059	942.848	0	0	0	0	0	0	0	603	903	0
609	4	0	0	0	0	0	0	200	300	0	2.19757	-77.2121	-424.419	-16577.5	-19819.1	4328.25	153.303	942.059	0	0	0	0	0	0	0	603	903	0
609	5	0	0	0	0	0	0	200	300	0	1.8924	-78.2802	-425.945	-16119.8	-19514	4328.25	154.187	940.845	0	0	0	0	0	0	0	603	903	0
609	6	0	0	0	0	0	0	200	300	0	1.8924	-80.8742	-430.522	-16211.3	-20429.5	4419.8	152.547	940.655	0	0	0	0	0	0	0	603	903	0
609	7	0	0	0	0	0	0	200	300	0	0.0613403	-80.8742	-434.795	-15845.1	-20551.6	4923.34	152.733	939.443	0	0	0	0	0	0	0	603	903	0
609	8	0	0	0	0	0	0	200	300	0	-0.549011	-84.0785	-440.593	-15478.9	-20795.7	4877.56	152.801	938.132	0	0	0	0	0	0	0	603	903	0
609	9	0	0	0	0	0	0	200	300	0	0.213928	-86.3673	-444.255	-15295.8	-21223	4923.34	152.228	937.43	0	0	0	0	0	0	0	603	903	0
610	0	0	0	0	0	0	0	200	300	0	0.366516	-86.8251	-448.528	-15570.5	-21406.1	5106.44	152.275	937.715	0	0	0	0	0	0	0	603	903	0
610	1	0	0	0	0	0	0	200	300	0	1.28204	-88.0458	-453.411	-15478.9	-21223	5106.44	153.193	937.139	0	0	0	0	0	0	0	603	903	0
610	2	0	0	0	0	0	0	200	300	0	0.213928	-89.1139	-455.547	-14746.5	-21406.1	5243.77	153.01	935.371	0	0	0	0	0	0	0	603	903	0
610	3	0	0	0	0	0	0	200	300	0	-1.61713	-90.0294	-459.209	-14105.6	-21955.4	5426.88	152.189	933.717	0	0	0	0	0	0	0	603	903	0
610	4	0	0	0	0	0	0	200	300	0	-2.53265	-90.6398	-464.702	-14105.6	-22260.6	5564.21	152.097	933.354	0	0	0	0	0	0	0	603	903	0
610	5	0	0	0	0	0	0	200	300	0	-2.07489	-92.4709	-468.059	-14563.4	-22321.6	6067.75	152.31	934.114	0	0	0	0	0	0	0	603	903	0
610	6	0	0	0	0	0	0	200	300	0	-1.76971	-94.1493	-470.806	-13647.9	-22809.9	5976.2	151.551	931.988	0	0	0	0	0	0	0	603	903	0
610	7	0	0	0	0	0	0	200	300	0	-2.68524	-93.9967	-474.468	-13464.8	-22626.8	5747.32	152.311	931.379	0	0	0	0	0	0	0	603	903	0
610	8	0	0	0	0	0	0	200	300	0	-4.66888	-93.8441	-477.825	-13007	-23115	6021.97	151.624	930.221	0	0	0	0	0	0	0	603	903	0
610	9	0	0	0	0	0	0	200	300	0	-4.82147	-95.37	-479.961	-12457.7	-23542.3	6067.75	150.95	928.956	0	0	0	0	0	0	0	603	903	0
611	0	0	0	0	0	0	0	200	300	0	-3.90594	-96.133	-483.928	-13007	-24030.6	6113.53	150.343	929.878	0	0	0	0	0	0	0	603	903	0
611	1	0	0	0	0	0	0	200	300	0	-4.82147	-96.4381	-490.337	-12823.9	-24213.7	6250.86	150.618	929.153	0	0	0	0	0	0	0	603	903	0
611	2	0	0	0	0	0	0	200	300	0	-9.5517	-98.727	-496.135	-11816.8	-24824	6342.41	149.965	926.818	0	0	0	0	0	0	0	603	903	0
611	3	0	0	0	0	0	0	200	300	0	-10.4672	-99.6425	-502.239	-11175.9	-25129.2	6250.86	149.966	925.252	0	0	0	0	0	0	0	603	903	0
611	4	0	0	0	0	0	0	200	300	0	-11.3828	-100.405	-506.816	-10443.5	-25739.6	6296.63	149.213	923.606	0	0	0	0	0	0	0	603	903	0
611	5	0	0	0	0	0	0	200	300	0	-16.2656	-104.678	-512.31	-10443.5	-26288.9	6708.62	148.686	923.385	0	0	0	0	0	0	0	603	903	0
611	6	0	0	0	0	0	0	200	300	0	-15.1974	-108.95	-516.887	-9894.2	-26410.9	6754.4	148.904	922.142	0	0	0	0	0	0	0	603	903	0
611	7	0	0	0	0	0	0	200	300	0	-16.113	-111.087	-520.244	-8978.67	-26655.1	7120.61	148.764	920.259	0	0	0	0	0	0	0	603	903	0
611	8	0	0	0	0	0	0	200	300	0	-17.1811	-114.444	-522.991	-9527.98	-26838.2	7486.82	148.683	921.218	0	0	0	0	0	0	0	603	903	0
611	9	0	0	0	0	0	0	200	300	0	-17.4863	-118.106	-526.348	-8978.67	-27082.3	7486.82	148.547	920.058	0	0	0	0	0	0	0	603	903	0
612	0	0	0	0	0	0	0	200	300	0	-16.7233	-119.479	-531.536	-8520.9	-26960.3	7578.37	149.279	919.031	0	0	0	0	0	0	0	603	903	0
612	1	0	0	0	0	0	0	200	300	0	-13.519	-120.242	-531.841	-8246.25	-27265.4	7898.8	148.734	918.505	0	0	0	0	0	0	0	603	903	0
612	2	0	0	0	0	0	0	200	300	0	-14.4345	-121.31	-534.282	-7880.04	-27570.6	8036.13	148.397	917.749	0	0	0	0	0	0	0	603	903	0
612	3	0	0	0	0	0	0	200	300	0	-12.6035	-122.378	-536.724	-8063.14	-27204.4	7944.58	149.314	918.023	0	0	0	0	0	0	0	603	903	0
612	4	0	0	0	0	0	0	200	300	0	-13.3664	-120.547	-537.944	-7788.48	-27570.6	8265.01	148.748	917.478	0	0	0	0	0	0	0	603	903	0
612	5	0	0	0	0	0	0	200	300	0	-11.8405	-120.394	-536.113	-6964.51	-27875.8	8265.01	148.004	915.991	0	0	0	0	0	0	0	603	903	0
612	6	0	0	0	0	0	0	200	300	0	-9.70428	-121.157	-540.996	-7147.61	-27204.4	7990.36	149.714	916.212	0	0	0	0	0	0	0	603	903	0
612	7	0	0	0	0	0	0	200	300	0	-12.4509	-121.31	-543.132	-6598.3	-27936.8	8265.01	148.564	915.149	0	0	0	0	0	0	0	603	903	0
612	8	0	0	0	0	0	0	200	300	0	-12.9086	-118.563	-544.658	-6323.64	-28058.9	8081.91	148.483	914.61	0	0	0	0	0	0	0	603	903	0
612	9	0	0	0	0	0	0	200	300	0	-12.9086	-118.411	-546.184	-6232.09	-27631.6	7990.36	149.41	914.41	0	0	0	0	0	0	0	603	903	0
613	0	0	0	0	0	0	0	200	300	0	-13.9767	-120.547	-548.015	-5957.43	-27875.8	8036.13	149.133	913.871	0	0	0	0	0	0	0	603	903	0
613	1	0	0	0	0	0	0	200	300	0	-14.8923	-120.394	-549.846	-5225.01	-28364.1	8173.46	148.415	912.503	0	0	0	0	0	0	0	603	903	0
613	2	0	0	0	0	0	0	200	300	0	-15.0449	-120.089	-550.762	-5225.01	-28242	8310.79	148.722	912.487	0	0	0	0	0	0	0	603	903	0
613	3	0	0	0	0	0	0	200	300	0	-13.519	-121.157	-552.593	-5408.11	-28486.1	8356.57	148.45	912.787	0	0	0	0	0	0	0	603	903	0
613	4	0	0	0	0	0	0	200	300	0	-15.1974	-122.683	-553.508	-5133.45	-28608.2	8539.67	148.315	912.274	0	0	0	0	0	0	0	603	903	0
613	5	0	0	0	0	0	0	200	300	0	-17.0285	-123.751	-552.898	-4492.58	-28303	8173.46	148.81	911.126	0	0	0	0	0	0	0	603	903	0
613	6	0	0	0	0	0	0	200	300	0	-19.0121	-123.904	-556.56	-4126.37	-28791.3	8310.79	148.269	910.414	0	0	0	0	0	0	0	603	903	0
613	7	0	0	0	0	0	0	200	300	0	-19.4699	-124.209	-559.612	-3668.61	-29035.5	8173.46	148.115	909.556	0	0	0	0	0	0	0	603	903	0
613	8	0	0	0	0	0	0	200	300	0	-18.5544	-124.514	-563.274	-3668.61	-28608.2	8219.24	149.211	909.513	0	0	0	0	0	0	0	603	903	0
613	9	0	0	0	0	0	0	200	300	0	-19.0121	-126.651	-563.884	-3485.51	-29523.7	8631.22	147.642	909.181	0	0	0	0	0	0	0	603	903	0
614	0	0	0	0	0	0	0	200	300	0	-21.4536	-127.871	-564.495	-3393.95	-29218.6	8951.66	148.239	909.012	0	0	0	0	0	0	0	603	903	0
614	1	0	0	0	0	0	0	200	300	0	-22.2165	-128.024	-569.988	-2569.98	-29157.5	8448.12	148.845	907.509	0	0	0	0	0	0	0	603	903	0
614	2	0	0	0	0	0	0	200	300	0	-21.6061	-127.871	-573.65	-2753.08	-30134.1	8585.45	147.47	907.799	0	0	0	0	0	0	0	603	903	0
614	3	0	0	0	0	0	0	200	300	0	-21.4536	-130.618	-577.007	-2478.43	-30134.1	8951.66	147.775	907.295	0	0	0	0	0	0	0	603	903	0
614	4	0	0	0	0	0	0	200	300	0	-21.1484	-131.686	-580.669	-2386.87	-29584.8	9134.76	149.051	907.111	0	0	0	0	0	0	0	603	903	0
614	5	0	0	0	0	0	0	200	300	0	-21.6061	-131.686	-584.026	-1929.11	-30500.3	9180.54	147.776	906.303	0	0	0	0	0	0	0	603	903	0
614	6	0	0	0	0	0	0	200	300	0	-21.9113	-132.754	-587.993	-1837.56	-30622.4	9409.42	147.921	906.125	0	0	0	0	0	0	0	603	903	0
614	7	0	0	0	0	0	0	200	300	0	-23.2846	-134.585	-591.045	-1837.56	-30561.3	9043.21	148.293	906.109	0	0	0	0	0	0	0	603	903	0
614	8	0	0	0	0	0	0	200	300	0	-23.4372	-133.975	-594.097	-1379.79	-30927.5	9134.76	147.942	905.323	0	0	0	0	0	0	0	603	903	0
614	9	0	0	0	0	0	0	200	300	0	-22.3691	-133.212	-598.674	-1288.24	-31415.8	9455.2	147.524	905.152	0	0	0	0	0	0	0	603	903	0
615	0	0	0	0	0	0	0	200	300	0	-21.301	-135.195	-602.336	-1471.34	-31537.9	9409.42	147.641	905.443	0	0	0	0	0	0	0	603	903	0
615	1	0	0	0	0	0	0	200	300	0	-21.301	-135.806	-604.167	-1746	-31476.9	9455.2	147.9	905.89	0	0	0	0	0	0	0	603	903	0
615	2	0	0	0	0	0	0	200	300	0	-22.5217	-134.433	-610.881	-1288.24	-31904.1	9592.53	147.774	905.109	0	0	0	0	0	0	0	603	903	0
615	3	0	0	0	0	0	0	200	300	0	-22.5217	-137.027	-612.102	-555.817	-31843.1	9272.09	147.978	903.908	0	0	0	0	0	0	0	603	903	0
615	4	0	0	0	0	0	0	200	300	0	-23.7424	-135.806	-616.68	-6.50045	-31965.1	9363.65	148.166	903.011	0	0	0	0	0	0	0	603	903	0
615	5	0	0	0	0	0	0	200	300	0	-24.3527	-135.043	-620.647	-189.606	-32453.4	9546.75	147.71	903.306	0	0	0	0	0	0	0	603	903	0
615	6	0	0	0	0	0	0	200	300	0	-23.4372	-137.637	-622.783	-555.817	-32392.4	9363.65	147.988	903.893	0	0	0	0	0	0	0	603	903	0
615	7	0	0	0	0	0	0	200	300	0	-23.132	-137.179	-625.53	-555.817	-32819.6	9317.87	147.533	903.889	0	0	0	0	0	0	0	603	903	0
615	8	0	0	0	0	0	0	200	300	0	-22.0639	-136.264	-628.887	-189.606	-32575.5	9546.75	148.201	903.302	0	0	0	0	0	0	0	603	903	0
615	9	0	0	0	0	0	0	200	300	0	-26.0312	-135.501	-633.769	85.0523	-32270.3	9455.2	149.082	902.866	0	0	0	0	0	0	0	603	903	0
616	0	0	0	0	0	0	0	200	300	0	-24.2001	-136.416	-636.821	268.158	-33185.8	9363.65	147.888	902.579	0	0	0	0	0	0	0	603	903	0
616	1	0	0	0	0	0	0	200	300	0	-24.5053	-136.569	-638.652	85.0523	-33430	9455.2	147.655	902.867	0	0	0	0	0	0	0	603	903	0
616	2	0	0	0	0	0	0	200	300	0	-25.2682	-135.348	-641.399	-738.923	-32636.5	9546.75	149.117	904.152	0	0	0	0	0	0	0	603	903	0
616	3	0	0	0	0	0	0	200	300	0	-24.3527	-135.043	-645.366	-189.606	-33430	9272.09	148.2	903.294	0	0	0	0	0	0	0	603	903	0
616	4	0	0	0	0	0	0	200	300	0	-23.2846	-135.806	-645.977	-98.0532	-33613.1	9500.98	147.965	903.152	0	0	0	0	0	0	0	603	903	0
616	5	0	0	0	0	0	0	200	300	0	-25.2682	-133.975	-652.385	-189.606	-33246.9	9180.54	149.038	903.291	0	0	0	0	0	0	0	603	903	0
616	6	0	0	0	0	0	0	200	300	0	-24.3527	-133.822	-650.859	268.158	-33979.3	8997.44	147.793	902.588	0	0	0	0	0	0	0	603	903	0
616	7	0	0	0	0	0	0	200	300	0	-23.4372	-133.822	-654.827	-98.0532	-34284.5	9409.42	147.643	903.15	0	0	0	0	0	0	0	603	903	0
616	8	0	0	0	0	0	0	200	300	0	-24.5053	-133.822	-658.489	359.71	-33430	9500.98	149.232	902.454	0	0	0	0	0	0	0	603	903	0
616	9	0	0	0	0	0	0	200	300	0	-24.8105	-132.754	-660.015	359.71	-33735.2	9088.99	148.887	902.455	0	0	0	0	0	0	0	603	903	0
617	0	0	0	0	0	0	0	200	300	0	-24.0475	-132.754	-662.456	451.263	-34284.5	9363.65	148.246	902.319	0	0	0	0	0	0	0	603	903	0
617	1	0	0	0	0	0	0	200	300	0	-24.5053	-132.601	-665.203	451.263	-34040.3	9043.21	148.827	902.322	0	0	0	0	0	0	0	603	903	0
617	2	0	0	0	0	0	0	200	300	0	-24.8105	-131.533	-667.949	359.71	-34101.4	9134.76	148.946	902.462	0	0	0	0	0	0	0	603	903	0
617	3	0	0	0	0	0	0	200	300	0	-24.3527	-132.144	-672.222	359.71	-34650.7	9409.42	148.453	902.465	0	0	0	0	0	0	0	603	903	0
617	4	0	0	0	0	0	0	200	300	0	-23.895	-131.228	-673.442	85.0523	-34223.4	9363.65	149.181	902.874	0	0	0	0	0	0	0	603	903	0
617	5	0	0	0	0	0	0	200	300	0	-22.6743	-132.296	-672.222	176.605	-34589.7	9088.99	148.544	902.737	0	0	0	0	0	0	0	603	903	0
617	6	0	0	0	0	0	0	200	300	0	-23.4372	-130.618	-675.273	1092.13	-34772.8	9317.87	148.506	901.383	0	0	0	0	0	0	0	603	903	0
617	7	0	0	0	0	0	0	200	300	0	-24.0475	-130.16	-679.851	359.71	-34650.7	9088.99	149.032	902.471	0	0	0	0	0	0	0	603	903	0
617	8	0	0	0	0	0	0	200	300	0	-24.8105	-130.923	-681.682	542.816	-34650.7	9088.99	149.169	902.204	0	0	0	0	0	0	0	603	903	0
617	9	0	0	0	0	0	0	200	300	0	-25.4208	-129.855	-681.072	359.71	-34528.6	8997.44	149.303	902.472	0	0	0	0	0	0	0	603	903	0
618	0	0	0	0	0	0	0	200	300	0	-23.132	-128.482	-682.903	359.71	-34894.8	8951.66	148.902	902.473	0	0	0	0	0	0	0	603	903	0
618	1	0	0	0	0	0	0	200	300	0	-24.9631	-126.803	-684.123	268.158	-34772.8	8860.11	149.172	902.608	0	0	0	0	0	0	0	603	903	0
618	2	0	0	0	0	0	0	200	300	0	-24.9631	-127.566	-684.429	909.027	-35261	8814.33	148.481	901.672	0	0	0	0	0	0	0	603	903	0
618	3	0	0	0	0	0	0	200	300	0	-24.3527	-128.176	-689.311	634.369	-34955.9	8997.44	149.289	902.08	0	0	0	0	0	0	0	603	903	0
618	4	0	0	0	0	0	0	200	300	0	-23.5898	-126.345	-689.006	176.605	-34955.9	8814.33	149.266	902.744	0	0	0	0	0	0	0	603	903	0
618	5	0	0	0	0	0	0	200	300	0	-24.2001	-125.43	-690.227	176.605	-35261	8860.11	148.914	902.744	0	0	0	0	0	0	0	603	903	0
618	6	0	0	0	0	0	0	200	300	0	-23.895	-124.667	-693.889	817.474	-34955.9	8951.66	149.623	901.822	0	0	0	0	0	0	0	603	903	0
618	7	0	0	0	0	0	0	200	300	0	-23.7424	-124.972	-694.805	451.263	-35077.9	8585.45	149.514	902.351	0	0	0	0	0	0	0	603	903	0
618	8	0	0	0	0	0	0	200	300	0	-24.9631	-123.141	-695.11	542.816	-35566.2	8677	148.834	902.219	0	0	0	0	0	0	0	603	903	0
618	9	0	0	0	0	0	0	200	300	0	-24.9631	-122.683	-696.941	817.474	-36115.5	8814.33	148.18	901.827	0	0	0	0	0	0	0	603	903	0
619	0	0	0	0	0	0	0	200	300	0	-22.6743	-122.683	-697.246	634.369	-35322.1	8585.45	149.341	902.09	0	0	0	0	0	0	0	603	903	0
619	1	0	0	0	0	0	0	200	300	0	-23.895	-121.157	-699.993	359.71	-35627.2	8402.34	149.103	902.486	0	0	0	0	0	0	0	603	903	0
619	2	0	0	0	0	0	0	200	300	0	-24.3527	-121.92	-700.603	542.816	-35627.2	8585.45	149.148	902.225	0	0	0	0	0	0	0	603	903	0
619	3	0	0	0	0	0	0	200	300	0	-22.8268	-121.157	-702.434	359.71	-35139	8585.45	149.975	902.488	0	0	0	0	0	0	0	603	903	0
619	4	0	0	0	0	0	0	200	300	0	-24.0475	-118.869	-702.739	176.605	-35688.3	8402.34	149.215	902.749	0	0	0	0	0	0	0	603	903	0
619	5	0	0	0	0	0	0	200	300	0	-23.132	-117.495	-704.875	268.158	-36054.5	8402.34	148.85	902.62	0	0	0	0	0	0	0	603	903	0
619	6	0	0	0	0	0	0	200	300	0	-20.9958	-118.563	-708.538	451.263	-35688.3	8310.79	149.631	902.363	0	0	0	0	0	0	0	603	903	0
619	7	0	0	0	0	0	0	200	300	0	-22.6743	-117.953	-709.758	268.158	-35688.3	8265.01	149.718	902.622	0	0	0	0	0	0	0	603	903	0
619	8	0	0	0	0	0	0	200	300	0	-23.895	-116.885	-710.063	268.158	-35749.3	8265.01	149.653	902.622	0	0	0	0	0	0	0	603	903	0
619	9	0	0	0	0	0	0	200	300	0	-21.4536	-115.054	-710.979	85.0523	-35627.2	7944.58	149.89	902.88	0	0	0	0	0	0	0	603	903	0
620	0	0	0	0	0	0	0	200	300	0	-21.4536	-114.138	-712.505	176.605	-35871.4	7990.36	149.655	902.752	0	0	0	0	0	0	0	603	903	0
620	1	0	0	0	0	0	0	200	300	0	-20.3854	-113.986	-714.336	85.0523	-36115.5	8036.13	149.442	902.881	0	0	0	0	0	0	0	603	903	0
620	2	0	0	0	0	0	0	200	300	0	-21.4536	-112.155	-712.2	725.922	-35383.1	8219.24	150.319	901.981	0	0	0	0	0	0	0	603	903	0
620	3	0	0	0	0	0	0	200	300	0	-20.6906	-112.46	-715.251	-6.50045	-36237.6	8081.91	149.336	903.009	0	0	0	0	0	0	0	603	903	0
620	4	0	0	0	0	0	0	200	300	0	-22.0639	-110.629	-716.167	-98.0532	-35566.2	7807.25	150.338	903.137	0	0	0	0	0	0	0	603	903	0
620	5	0	0	0	0	0	0	200	300	0	-21.4536	-109.561	-718.608	542.816	-35749.3	7532.59	150.252	902.245	0	0	0	0	0	0	0	603	903	0
620	6	0	0	0	0	0	0	200	300	0	-20.3854	-109.866	-719.829	634.369	-35322.1	7807.25	150.93	902.119	0	0	0	0	0	0	0	603	903	0
620	7	0	0	0	0	0	0	200	300	0	-21.301	-108.798	-719.524	542.816	-35444.1	7486.82	150.739	902.246	0	0	0	0	0	0	0	603	903	0
620	8	0	0	0	0	0	0	200	300	0	-20.3854	-106.509	-717.693	176.605	-35383.1	7349.49	150.699	902.754	0	0	0	0	0	0	0	603	903	0
620	9	0	0	0	0	0	0	200	300	0	-20.0803	-104.678	-718.914	85.0523	-35627.2	7395.26	150.443	902.882	0	0	0	0	0	0	0	603	903	0
621	0	0	0	0	0	0	0	200	300	0	-19.4699	-104.83	-721.66	451.263	-35627.2	7395.26	150.632	902.375	0	0	0	0	0	0	0	603	903	0
621	1	0	0	0	0	0	0	200	300	0	-19.0121	-104.83	-724.712	176.605	-35688.3	7257.94	150.755	902.756	0	0	0	0	0	0	0	603	903	0
621	2	0	0	0	0	0	0	200	300	0	-19.0121	-103.61	-724.102	-6.50045	-36176.6	7257.94	150.039	903.009	0	0	0	0	0	0	0	603	903	0
621	3	0	0	0	0	0	0	200	300	0	-19.1647	-102.084	-724.102	-6.50045	-35810.4	7074.83	150.545	903.009	0	0	0	0	0	0	0	603	903	0
621	4	0	0	0	0	0	0	200	300	0	-19.4699	-100.863	-726.238	-464.264	-35688.3	6845.95	150.859	903.639	0	0	0	0	0	0	0	603	903	0
621	5	0	0	0	0	0	0	200	300	0	-19.7751	-99.9477	-723.186	176.605	-35383.1	6617.07	151.073	902.756	0	0	0	0	0	0	0	603	903	0
621	6	0	0	0	0	0	0	200	300	0	-19.4699	-100.405	-727.458	725.922	-35444.1	6845.95	151.277	902.002	0	0	0	0	0	0	0	603	903	0
621	7	0	0	0	0	0	0	200	300	0	-18.707	-99.0321	-726.238	268.158	-35749.3	6662.84	150.775	902.631	0	0	0	0	0	0	0	603	903	0
621	8	0	0	0	0	0	0	200	300	0	-19.7751	-97.3537	-726.238	-98.0532	-36115.5	6891.72	150.27	903.135	0	0	0	0	0	0	0	603	903	0
621	9	0	0	0	0	0	0	200	300	0	-18.4018	-96.5907	-728.069	-189.606	-36054.5	6891.72	150.479	903.26	0	0	0	0	0	0	0	603	903	0
622	0	0	0	0	0	0	0	200	300	0	-18.4018	-96.4381	-727.458	-6.50045	-35322.1	6754.4	151.445	903.009	0	0	0	0	0	0	0	603	903	0
622	1	0	0	0	0	0	0	200	300	0	-17.3337	-95.2174	-726.238	-98.0532	-35871.4	6205.08	150.607	903.135	0	0	0	0	0	0	0	603	903	0
622	2	0	0	0	0	0	0	200	300	0	-18.8596	-92.3183	-723.186	634.369	-35688.3	6342.41	150.651	902.123	0	0	0	0	0	0	0	603	903	0
622	3	0	0	0	0	0	0	200	300	0	-18.0966	-92.6234	-727.153	268.158	-35383.1	6296.63	151.34	902.631	0	0	0	0	0	0	0	603	903	0
622	4	0	0	0	0	0	0	200	300	0	-18.4018	-91.7079	-726.238	359.71	-36054.5	6708.62	150.354	902.505	0	0	0	0	0	0	0	603	903	0
622	5	0	0	0	0	0	0	200	300	0	-18.2492	-93.539	-726.238	817.474	-35627.2	6388.18	150.943	901.874	0	0	0	0	0	0	0	603	903	0
622	6	0	0	0	0	0	0	200	300	0	-19.1647	-91.5553	-724.407	909.027	-35139	6159.3	151.493	901.745	0	0	0	0	0	0	0	603	903	0
622	7	0	0	0	0	0	0	200	300	0	-18.8596	-89.4191	-723.796	634.369	-35993.5	6113.53	150.271	902.124	0	0	0	0	0	0	0	603	903	0
622	8	0	0	0	0	0	0	200	300	0	-19.4699	-89.1139	-724.712	1000.58	-35688.3	6250.86	150.755	901.619	0	0	0	0	0	0	0	603	903	0
622	9	0	0	0	0	0	0	200	300	0	-17.1811	-89.4191	-725.017	1000.58	-34833.8	6113.53	151.955	901.62	0	0	0	0	0	0	0	603	903	0
623	0	0	0	0	0	0	0	200	300	0	-19.7751	-89.2665	-722.576	1366.79	-35566.2	6159.3	150.779	901.109	0	0	0	0	0	0	0	603	903	0
623	1	0	0	0	0	0	0	200	300	0	-19.7751	-87.7406	-720.439	909.027	-35444.1	6021.97	150.802	901.738	0	0	0	0	0	0	0	603	903	0
623	2	0	0	0	0	0	0	200	300	0	-19.3173	-86.9777	-718.608	1366.79	-34833.8	5564.21	151.526	901.098	0	0	0	0	0	0	0	603	903	0
623	3	0	0	0	0	0	0	200	300	0	-19.4699	-86.2148	-719.829	1366.79	-35383.1	5838.87	150.845	901.101	0	0	0	0	0	0	0	603	903	0
623	4	0	0	0	0	0	0	200	300	0	-19.6225	-85.757	-718.303	1366.79	-35383.1	5793.09	150.741	901.097	0	0	0	0	0	0	0	603	903	0
623	5	0	0	0	0	0	0	200	300	0	-18.2492	-84.5363	-716.472	2190.77	-34894.8	6067.75	151.296	899.942	0	0	0	0	0	0	0	603	903	0
623	6	0	0	0	0	0	0	200	300	0	-18.5544	-83.9259	-714.946	1000.58	-34894.8	5655.76	151.192	901.6	0	0	0	0	0	0	0	603	903	0
623	7	0	0	0	0	0	0	200	300	0	-19.3173	-83.4682	-713.42	1366.79	-34833.8	5701.54	151.174	901.084	0	0	0	0	0	0	0	603	903	0
623	8	0	0	0	0	0	0	200	300	0	-19.4699	-83.9259	-711.284	2099.21	-34589.7	5609.99	151.37	900.049	0	0	0	0	0	0	0	603	903	0
623	9	0	0	0	0	0	0	200	300	0	-18.2492	-83.3156	-710.674	2831.64	-34589.7	5518.43	151.328	899.016	0	0	0	0	0	0	0	603	903	0
624	0	0	0	0	0	0	0	200	300	0	-19.7751	-81.4845	-709.453	2282.32	-34772.8	5426.88	150.987	899.783	0	0	0	0	0	0	0	603	903	0
624	1	0	0	0	0	0	0	200	300	0	-19.3173	-81.4845	-708.232	2190.77	-34406.5	5472.66	151.419	899.907	0	0	0	0	0	0	0	603	903	0
624	2	0	0	0	0	0	0	200	300	0	-18.8596	-81.4845	-708.232	2007.66	-34162.4	5381.1	151.764	900.165	0	0	0	0	0	0	0	603	903	0
624	3	0	0	0	0	0	0	200	300	0	-19.4699	-80.2638	-704.57	2373.87	-34223.4	5335.33	151.427	899.631	0	0	0	0	0	0	0	603	903	0
624	4	0	0	0	0	0	0	200	300	0	-18.707	-80.569	-703.96	2831.64	-33796.2	5335.33	151.991	898.978	0	0	0	0	0	0	0	603	903	0
624	5	0	0	0	0	0	0	200	300	0	-19.6225	-78.8905	-701.213	3472.5	-34101.4	5152.22	151.368	898.048	0	0	0	0	0	0	0	603	903	0
624	6	0	0	0	0	0	0	200	300	0	-19.4699	-77.6698	-700.603	3197.85	-34833.8	5243.77	150.28	898.436	0	0	0	0	0	0	0	603	903	0
624	7	0	0	0	0	0	0	200	300	0	-20.2328	-78.4328	-697.856	2465.42	-33735.2	4923.34	151.659	899.467	0	0	0	0	0	0	0	603	903	0
624	8	0	0	0	0	0	0	200	300	0	-20.6906	-77.0595	-695.415	3106.29	-33735.2	5152.22	151.489	898.533	0	0	0	0	0	0	0	603	903	0
624	9	0	0	0	0	0	0	200	300	0	-19.1647	-76.144	-693.584	3197.85	-33857.2	5060.67	151.185	898.389	0	0	0	0	0	0	0	603	903	0
625	0	0	0	0	0	0	0	200	300	0	-20.9958	-74.9232	-693.279	3197.85	-33552.1	4923.34	151.604	898.387	0	0	0	0	0	0	0	603	903	0
625	1	0	0	0	0	0	0	200	300	0	-21.1484	-74.7707	-688.701	3106.29	-33491	4694.46	151.371	898.49	0	0	0	0	0	0	0	603	903	0
625	2	0	0	0	0	0	0	200	300	0	-19.7751	-72.787	-689.617	3564.06	-34101.4	4877.56	150.55	897.832	0	0	0	0	0	0	0	603	903	0
625	3	0	0	0	0	0	0	200	300	0	-20.538	-74.3129	-686.26	3472.5	-33613.1	5426.88	151.02	897.94	0	0	0	0	0	0	0	603	903	0
625	4	0	0	0	0	0	0	200	300	0	-20.9958	-72.787	-684.734	3564.06	-33613.1	4740.23	150.911	897.795	0	0	0	0	0	0	0	603	903	0
625	5	0	0	0	0	0	0	200	300	0	-20.538	-71.8715	-683.208	4388.03	-33552.1	4557.13	150.89	896.577	0	0	0	0	0	0	0	603	903	0
625	6	0	0	0	0	0	0	200	300	0	-20.9958	-72.0241	-682.292	4113.37	-33735.2	4694.46	150.556	896.971	0	0	0	0	0	0	0	603	903	0
625	7	0	0	0	0	0	0	200	300	0	-22.3691	-71.2611	-679.546	4113.37	-33063.8	4557.13	151.344	896.947	0	0	0	0	0	0	0	603	903	0
625	8	0	0	0	0	0	0	200	300	0	-22.3691	-70.193	-677.715	4479.58	-33307.9	4694.46	150.853	896.39	0	0	0	0	0	0	0	603	903	0
625	9	0	0	0	0	0	0	200	300	0	-21.4536	-69.2775	-674.968	5028.9	-33246.9	4648.68	150.743	895.549	0	0	0	0	0	0	0	603	903	0
626	0	0	0	0	0	0	0	200	300	0	-22.8268	-69.2775	-675.273	4571.14	-32697.6	4190.92	151.579	896.231	0	0	0	0	0	0	0	603	903	0
626	1	0	0	0	0	0	0	200	300	0	-22.8268	-69.2775	-672.527	5028.9	-32758.6	4374.02	151.29	895.522	0	0	0	0	0	0	0	603	903	0
626	2	0	0	0	0	0	0	200	300	0	-21.7587	-68.362	-670.696	5212.01	-32941.7	4282.47	150.884	895.229	0	0	0	0	0	0	0	603	903	0
626	3	0	0	0	0	0	0	200	300	0	-21.6061	-67.4464	-669.17	5212.01	-32392.4	4419.8	151.593	895.211	0	0	0	0	0	0	0	603	903	0
626	4	0	0	0	0	0	0	200	300	0	-22.3691	-66.6835	-668.865	4754.24	-32453.4	4419.8	151.48	895.892	0	0	0	0	0	0	0	603	903	0
626	5	0	0	0	0	0	0	200	300	0	-22.2165	-66.3783	-665.508	5395.11	-32209.3	4053.59	151.602	894.893	0	0	0	0	0	0	0	603	903	0
626	6	0	0	0	0	0	0	200	300	0	-22.8268	-65.3102	-662.151	6127.53	-32209.3	4190.92	151.357	893.746	0	0	0	0	0	0	0	603	903	0
626	7	0	0	0	0	0	0	200	300	0	-23.895	-65.1576	-659.709	5761.32	-32087.2	4099.36	151.362	894.267	0	0	0	0	0	0	0	603	903	0
626	8	0	0	0	0	0	0	200	300	0	-23.5898	-64.6999	-657.573	6127.53	-32697.6	4419.8	150.275	893.682	0	0	0	0	0	0	0	603	903	0
626	9	0	0	0	0	0	0	200	300	0	-22.0639	-63.7843	-656.352	6035.98	-32636.5	4053.59	150.276	893.804	0	0	0	0	0	0	0	603	903	0
627	0	0	0	0	0	0	0	200	300	0	-23.7424	-63.7843	-655.742	5852.88	-32026.2	4282.47	151.16	894.074	0	0	0	0	0	0	0	603	903	0
627	1	0	0	0	0	0	0	200	300	0	-24.3527	-62.2585	-653.606	6219.09	-32148.2	4007.81	150.814	893.485	0	0	0	0	0	0	0	603	903	0
627	2	0	0	0	0	0	0	200	300	0	-23.7424	-62.5636	-649.944	6585.3	-31782	4007.81	151.1	892.868	0	0	0	0	0	0	0	603	903	0
627	3	0	0	0	0	0	0	200	300	0	-23.4372	-61.3429	-647.502	6676.85	-31721	3687.38	151.01	892.688	0	0	0	0	0	0	0	603	903	0
627	4	0	0	0	0	0	0	200	300	0	-24.2001	-60.1222	-646.892	6310.64	-32209.3	3870.48	150.209	893.245	0	0	0	0	0	0	0	603	903	0
627	5	0	0	0	0	0	0	200	300	0	-24.2001	-60.8852	-643.84	6859.96	-31904.1	4053.59	150.447	892.345	0	0	0	0	0	0	0	603	903	0
627	6	0	0	0	0	0	0	200	300	0	-23.2846	-60.1222	-641.704	6951.51	-31293.8	3733.15	151.233	892.167	0	0	0	0	0	0	0	603	903	0
627	7	0	0	0	0	0	0	200	300	0	-25.4208	-58.9015	-636.821	7592.38	-30744.4	3687.38	151.722	891.078	0	0	0	0	0	0	0	603	903	0
627	8	0	0	0	0	0	0	200	300	0	-25.1157	-57.5282	-636.516	7500.82	-31293.8	3504.27	150.836	891.216	0	0	0	0	0	0	0	603	903	0
627	9	0	0	0	0	0	0	200	300	0	-23.7424	-57.5282	-636.211	7500.82	-31110.7	3366.94	151.1	891.21	0	0	0	0	0	0	0	603	903	0
628	0	0	0	0	0	0	0	200	300	0	-23.4372	-57.6808	-633.769	7226.17	-30927.5	3595.83	151.201	891.598	0	0	0	0	0	0	0	603	903	0
628	1	0	0	0	0	0	0	200	300	0	-23.5898	-58.1386	-631.328	7592.38	-30744.4	3595.83	151.302	890.974	0	0	0	0	0	0	0	603	903	0
628	2	0	0	0	0	0	0	200	300	0	-24.8105	-56.4601	-628.887	8233.25	-30500.3	3595.83	151.501	889.908	0	0	0	0	0	0	0	603	903	0
628	3	0	0	0	0	0	0	200	300	0	-24.2001	-55.8498	-627.056	7683.93	-30683.4	3458.5	151.067	890.746	0	0	0	0	0	0	0	603	903	0
628	4	0	0	0	0	0	0	200	300	0	-25.5734	-55.5446	-623.088	8050.14	-30927.5	3229.61	150.364	890.08	0	0	0	0	0	0	0	603	903	0
628	5	0	0	0	0	0	0	200	300	0	-26.7941	-54.4765	-622.783	8233.25	-30988.6	3321.17	150.242	889.78	0	0	0	0	0	0	0	603	903	0
628	6	0	0	0	0	0	0	200	300	0	-24.6579	-54.3239	-621.562	8324.8	-30134.1	3504.27	151.519	889.607	0	0	0	0	0	0	0	603	903	0
628	7	0	0	0	0	0	0	200	300	0	-25.726	-53.5609	-618.511	8416.36	-30622.4	3504.27	150.49	889.393	0	0	0	0	0	0	0	603	903	0
628	8	0	0	0	0	0	0	200	300	0	-25.5734	-52.798	-616.68	8782.57	-30378.2	2909.18	150.739	888.758	0	0	0	0	0	0	0	603	903	0
628	9	0	0	0	0	0	0	200	300	0	-24.5053	-52.0351	-616.069	9148.78	-30500.3	3183.84	150.492	888.15	0	0	0	0	0	0	0	603	903	0
629	0	0	0	0	0	0	0	200	300	0	-26.0312	-52.4928	-615.459	8874.12	-30439.3	3092.29	150.542	888.581	0	0	0	0	0	0	0	603	903	0
629	1	0	0	0	0	0	0	200	300	0	-25.726	-51.8825	-610.881	9057.22	-30439.3	2909.18	150.172	888.174	0	0	0	0	0	0	0	603	903	0
629	2	0	0	0	0	0	0	200	300	0	-25.1157	-50.6618	-608.135	9057.22	-29889.9	2909.18	150.85	888.107	0	0	0	0	0	0	0	603	903	0
629	3	0	0	0	0	0	0	200	300	0	-23.132	-50.8144	-607.219	8691.01	-29584.8	3000.73	151.278	888.687	0	0	0	0	0	0	0	603	903	0
629	4	0	0	0	0	0	0	200	300	0	-26.6415	-49.7462	-604.473	9514.99	-30012	2817.63	150.35	887.259	0	0	0	0	0	0	0	603	903	0
629	5	0	0	0	0	0	0	200	300	0	-24.5053	-48.6781	-602.336	10064.3	-29706.8	3229.61	150.681	886.291	0	0	0	0	0	0	0	603	903	0
629	6	0	0	0	0	0	0	200	300	0	-24.8105	-49.2885	-602.642	9698.09	-29523.7	3000.73	151.009	886.907	0	0	0	0	0	0	0	603	903	0
629	7	0	0	0	0	0	0	200	300	0	-24.0475	-47.9152	-600.2	9789.65	-29828.9	2771.85	150.302	886.689	0	0	0	0	0	0	0	603	903	0
629	8	0	0	0	0	0	0	200	300	0	-24.3527	-47.7626	-597.454	9698.09	-29828.9	2726.07	150.073	886.768	0	0	0	0	0	0	0	603	903	0
629	9	0	0	0	0	0	0	200	300	0	-24.9631	-47.4574	-596.233	10705.2	-28730.3	2634.52	151.814	885.045	0	0	0	0	0	0	0	603	903	0
630	0	0	0	0	0	0	0	200	300	0	-26.489	-46.9997	-593.486	10522.1	-29096.5	2542.97	150.974	885.271	0	0	0	0	0	0	0	603	903	0
630	1	0	0	0	0	0	0	200	300	0	-25.5734	-46.0841	-588.909	10888.3	-29279.6	2497.19	150.282	884.511	0	0	0	0	0	0	0	603	903	0
630	2	0	0	0	0	0	0	200	300	0	-24.0475	-46.0841	-590.435	10430.5	-29035.5	2771.85	150.824	885.334	0	0	0	0	0	0	0	603	903	0
630	3	0	0	0	0	0	0	200	300	0	-25.1157	-45.016	-589.214	10155.9	-28608.2	2588.74	151.447	885.764	0	0	0	0	0	0	0	603	903	0
630	4	0	0	0	0	0	0	200	300	0	-26.0312	-45.3212	-586.772	10888.3	-28913.4	2405.64	150.725	884.444	0	0	0	0	0	0	0	603	903	0
630	5	0	0	0	0	0	0	200	300	0	-23.7424	-44.2531	-584.026	10888.3	-28486.1	2405.64	151.225	884.357	0	0	0	0	0	0	0	603	903	0
630	6	0	0	0	0	0	0	200	300	0	-24.9631	-44.1005	-582.805	11071.4	-28425.1	2085.2	151.227	884.003	0	0	0	0	0	0	0	603	903	0
630	7	0	0	0	0	0	0	200	300	0	-25.5734	-41.9643	-578.227	11254.5	-29157.5	2130.98	149.574	883.536	0	0	0	0	0	0	0	603	903	0
630	8	0	0	0	0	0	0	200	300	0	-22.8268	-41.0487	-579.753	11254.5	-29279.6	2314.09	149.496	883.587	0	0	0	0	0	0	0	603	903	0
630	9	0	0	0	0	0	0	200	300	0	-24.0475	-42.5746	-579.143	11529.1	-27936.8	2771.85	151.762	883.093	0	0	0	0	0	0	0	603	903	0
631	0	0	0	0	0	0	0	200	300	0	-25.1157	-42.422	-575.176	11620.7	-28425.1	2222.53	150.58	882.796	0	0	0	0	0	0	0	603	903	0
631	1	0	0	0	0	0	0	200	300	0	-23.5898	-40.1332	-574.871	11895.4	-28547.2	2085.2	150.342	882.308	0	0	0	0	0	0	0	603	903	0
631	2	0	0	0	0	0	0	200	300	0	-23.7424	-40.1332	-574.565	11986.9	-28303	2176.76	150.74	882.137	0	0	0	0	0	0	0	603	903	0
631	3	0	0	0	0	0	0	200	300	0	-22.5217	-40.591	-570.598	11620.7	-28364.1	1947.88	150.291	882.634	0	0	0	0	0	0	0	603	903	0
631	4	0	0	0	0	0	0	200	300	0	-23.132	-39.5229	-573.039	11986.9	-28303	2268.31	150.609	882.082	0	0	0	0	0	0	0	603	903	0
631	5	0	0	0	0	0	0	200	300	0	-23.132	-39.3703	-569.988	12353.1	-27875.8	2268.31	151.094	881.327	0	0	0	0	0	0	0	603	903	0
631	6	0	0	0	0	0	0	200	300	0	-24.0475	-38.1496	-566.631	12627.8	-27448.5	2222.53	151.558	880.714	0	0	0	0	0	0	0	603	903	0
631	7	0	0	0	0	0	0	200	300	0	-23.7424	-37.8444	-566.936	12536.2	-28058.9	1947.88	150.508	880.888	0	0	0	0	0	0	0	603	903	0
631	8	0	0	0	0	0	0	200	300	0	-23.132	-37.6918	-567.546	12810.9	-27814.8	1947.88	150.991	880.428	0	0	0	0	0	0	0	603	903	0
631	9	0	0	0	0	0	0	200	300	0	-22.6743	-37.5392	-564.495	12902.4	-27692.7	1947.88	150.943	880.143	0	0	0	0	0	0	0	603	903	0
632	0	0	0	0	0	0	0	200	300	0	-22.9794	-36.3185	-562.969	12627.8	-27814.8	1856.32	150.593	880.569	0	0	0	0	0	0	0	603	903	0
632	1	0	0	0	0	0	0	200	300	0	-22.3691	-35.403	-560.527	12719.3	-27387.5	2176.76	151.14	880.308	0	0	0	0	0	0	0	603	903	0
632	2	0	0	0	0	0	0	200	300	0	-22.0639	-35.403	-560.527	12719.3	-27509.6	1627.44	150.922	880.308	0	0	0	0	0	0	0	603	903	0
632	3	0	0	0	0	0	0	200	300	0	-22.9794	-34.9452	-559.307	13360.2	-27875.8	1902.1	150.16	879.113	0	0	0	0	0	0	0	603	903	0
632	4	0	0	0	0	0	0	200	300	0	-22.9794	-34.9452	-560.527	13634.9	-27753.7	1718.99	150.486	878.675	0	0	0	0	0	0	0	603	903	0
632	5	0	0	0	0	0	0	200	300	0	-21.6061	-34.9452	-555.95	13818	-27448.5	1718.99	150.628	878.145	0	0	0	0	0	0	0	603	903	0
632	6	0	0	0	0	0	0	200	300	0	-21.9113	-33.7245	-556.255	13451.8	-27692.7	1673.22	150.216	878.817	0	0	0	0	0	0	0	603	903	0
632	7	0	0	0	0	0	0	200	300	0	-21.7587	-32.9616	-555.95	14001.1	-27631.6	1718.99	150.298	877.816	0	0	0	0	0	0	0	603	903	0
632	8	0	0	0	0	0	0	200	300	0	-20.6906	-32.5038	-554.729	14275.7	-26838.2	1535.89	151.619	877.265	0	0	0	0	0	0	0	603	903	0
632	9	0	0	0	0	0	0	200	300	0	-22.5217	-33.1142	-552.898	14916.6	-27448.5	1444.34	150.355	876.021	0	0	0	0	0	0	0	603	903	0
633	0	0	0	0	0	0	0	200	300	0	-21.9113	-31.5883	-551.067	14550.4	-27692.7	1535.89	149.747	876.596	0	0	0	0	0	0	0	603	903	0
633	1	0	0	0	0	0	0	200	300	0	-19.9277	-31.8935	-551.677	14367.3	-26960.3	1718.99	151.13	876.957	0	0	0	0	0	0	0	603	903	0
633	2	0	0	0	0	0	0	200	300	0	-21.7587	-31.2831	-552.593	14367.3	-27326.5	1535.89	150.549	877	0	0	0	0	0	0	0	603	903	0
633	3	0	0	0	0	0	0	200	300	0	-21.6061	-30.9779	-550.456	15649	-27143.4	1490.11	150.689	874.571	0	0	0	0	0	0	0	603	903	0
633	4	0	0	0	0	0	0	200	300	0	-20.0803	-30.3676	-548.32	15374.4	-26655.1	1398.56	151.388	874.961	0	0	0	0	0	0	0	603	903	0
633	5	0	0	0	0	0	0	200	300	0	-19.9277	-29.4521	-545.879	14916.6	-27082.3	1078.12	150.388	875.674	0	0	0	0	0	0	0	603	903	0
633	6	0	0	0	0	0	0	200	300	0	-18.2492	-28.0788	-547.1	15008.2	-27509.6	1398.56	149.717	875.568	0	0	0	0	0	0	0	603	903	0
633	7	0	0	0	0	0	0	200	300	0	-18.5544	-28.9943	-548.32	15832.1	-26838.2	1627.44	151.054	874.126	0	0	0	0	0	0	0	603	903	0
633	8	0	0	0	0	0	0	200	300	0	-19.0121	-29.6046	-547.405	15282.8	-27143.4	1307.01	150.414	875.081	0	0	0	0	0	0	0	603	903	0
633	9	0	0	0	0	0	0	200	300	0	-19.9277	-28.3839	-544.963	15923.7	-27021.3	1444.34	150.416	873.78	0	0	0	0	0	0	0	603	903	0
634	0	0	0	0	0	0	0	200	300	0	-19.7751	-27.621	-544.658	15740.6	-27021.3	1078.12	150.389	874.1	0	0	0	0	0	0	0	603	903	0
634	1	0	0	0	0	0	0	200	300	0	-17.6389	-27.1632	-544.048	16106.8	-26655.1	1810.55	151.006	873.395	0	0	0	0	0	0	0	603	903	0
634	2	0	0	0	0	0	0	200	300	0	-19.3173	-27.0106	-543.437	15649	-27021.3	1215.45	150.277	874.204	0	0	0	0	0	0	0	603	903	0
634	3	0	0	0	0	0	0	200	300	0	-19.1647	-27.1632	-544.048	16381.4	-26594	1627.44	151.118	872.89	0	0	0	0	0	0	0	603	903	0
634	4	0	0	0	0	0	0	200	300	0	-17.6389	-27.0106	-540.081	16564.6	-26838.2	1398.56	150.307	872.33	0	0	0	0	0	0	0	603	903	0
634	5	0	0	0	0	0	0	200	300	0	-17.7914	-25.6374	-539.165	16564.6	-26899.2	1078.12	150.109	872.277	0	0	0	0	0	0	0	603	903	0
634	6	0	0	0	0	0	0	200	300	0	-17.1811	-24.4167	-541.301	16656.1	-26594	986.571	150.87	872.229	0	0	0	0	0	0	0	603	903	0
634	7	0	0	0	0	0	0	200	300	0	-17.1811	-25.4848	-541.301	17571.6	-26960.3	849.242	150.194	870.538	0	0	0	0	0	0	0	603	903	0
634	8	0	0	0	0	0	0	200	300	0	-16.8759	-25.3322	-539.775	17113.9	-26960.3	1078.12	150.053	871.294	0	0	0	0	0	0	0	603	903	0
634	9	0	0	0	0	0	0	200	300	0	-18.4018	-24.5692	-538.555	17022.3	-26410.9	1123.9	150.96	871.393	0	0	0	0	0	0	0	603	903	0
635	0	0	0	0	0	0	0	200	300	0	-18.4018	-24.2641	-539.775	17297	-26777.2	1169.68	150.392	870.955	0	0	0	0	0	0	0	603	903	0
635	1	0	0	0	0	0	0	200	300	0	-17.1811	-23.8063	-535.198	17480.1	-26777.2	1123.9	149.968	870.339	0	0	0	0	0	0	0	603	903	0
635	2	0	0	0	0	0	0	200	300	0	-17.6389	-23.9589	-537.334	18395.6	-26655.1	940.795	150.394	868.765	0	0	0	0	0	0	0	603	903	0
635	3	0	0	0	0	0	0	200	300	0	-18.4018	-23.8063	-537.334	18212.5	-26899.2	1123.9	149.939	869.106	0	0	0	0	0	0	0	603	903	0
635	4	0	0	0	0	0	0	200	300	0	-17.0285	-23.196	-536.418	18304.1	-26838.2	1032.35	149.968	868.877	0	0	0	0	0	0	0	603	903	0
635	5	0	0	0	0	0	0	200	300	0	-15.8078	-22.1278	-535.503	18212.5	-26777.2	1123.9	149.996	868.99	0	0	0	0	0	0	0	603	903	0
635	6	0	0	0	0	0	0	200	300	0	-15.6552	-22.5856	-535.503	18120.9	-26899.2	1215.45	149.768	869.161	0	0	0	0	0	0	0	603	903	0
635	7	0	0	0	0	0	0	200	300	0	-16.8759	-22.2804	-535.503	19036.5	-26777.2	1123.9	149.996	867.451	0	0	0	0	0	0	0	603	903	0
635	8	0	0	0	0	0	0	200	300	0	-16.4182	-21.5175	-533.977	19036.5	-26349.9	986.571	150.653	867.35	0	0	0	0	0	0	0	603	903	0
635	9	0	0	0	0	0	0	200	300	0	-17.1811	-21.9752	-533.977	19311.1	-26960.3	1032.35	149.51	866.835	0	0	0	0	0	0	0	603	903	0
636	0	0	0	0	0	0	0	200	300	0	-16.5707	-20.9071	-533.061	19219.6	-27082.3	849.242	149.195	866.945	0	0	0	0	0	0	0	603	903	0
636	1	0	0	0	0	0	0	200	300	0	-15.35	-21.2123	-532.451	19311.1	-26288.9	986.571	150.627	866.732	0	0	0	0	0	0	0	603	903	0
636	2	0	0	0	0	0	0	200	300	0	-18.0966	-21.2123	-532.451	19952	-26716.1	1032.35	149.824	865.528	0	0	0	0	0	0	0	603	903	0
636	3	0	0	0	0	0	0	200	300	0	-17.7914	-21.0597	-531.536	20043.6	-26838.2	849.242	149.508	865.291	0	0	0	0	0	0	0	603	903	0
636	4	0	0	0	0	0	0	200	300	0	-16.4182	-20.2968	-531.23	20043.6	-26533	803.466	150.054	865.27	0	0	0	0	0	0	0	603	903	0
636	5	0	0	0	0	0	0	200	300	0	-16.2656	-20.2968	-531.841	19952	-26960.3	803.466	149.308	865.485	0	0	0	0	0	0	0	603	903	0
636	6	0	0	0	0	0	0	200	300	0	-15.0449	-20.2968	-531.841	20043.6	-27326.5	1169.68	148.619	865.313	0	0	0	0	0	0	0	603	903	0
636	7	0	0	0	0	0	0	200	300	0	-16.113	-20.1442	-531.536	20135.1	-26410.9	940.795	150.312	865.119	0	0	0	0	0	0	0	603	903	0
636	8	0	0	0	0	0	0	200	300	0	-17.0285	-19.839	-529.399	20409.8	-27021.3	803.466	148.959	864.447	0	0	0	0	0	0	0	603	903	0
636	9	0	0	0	0	0	0	200	300	0	-17.4863	-19.2287	-529.094	20592.9	-26838.2	620.36	149.275	864.079	0	0	0	0	0	0	0	603	903	0
637	0	0	0	0	0	0	0	200	300	0	-18.2492	-19.2287	-530.01	21142.2	-26533	757.69	149.939	863.11	0	0	0	0	0	0	0	603	903	0
637	1	0	0	0	0	0	0	200	300	0	-16.113	-19.2287	-525.737	21416.8	-26472	757.69	149.648	862.263	0	0	0	0	0	0	0	603	903	0
637	2	0	0	0	0	0	0	200	300	0	-17.0285	-19.9916	-529.705	21050.6	-26594	986.571	149.795	863.26	0	0	0	0	0	0	0	603	903	0
637	3	0	0	0	0	0	0	200	300	0	-17.4863	-19.2287	-528.179	21508.4	-26410.9	1307.01	149.996	862.278	0	0	0	0	0	0	0	603	903	0
637	4	0	0	0	0	0	0	200	300	0	-16.4182	-18.3131	-526.958	21874.6	-26533	757.69	149.649	861.489	0	0	0	0	0	0	0	603	903	0
637	5	0	0	0	0	0	0	200	300	0	-17.1811	-18.3131	-527.873	21508.4	-26838.2	849.242	149.158	862.255	0	0	0	0	0	0	0	603	903	0
637	6	0	0	0	0	0	0	200	300	0	-17.1811	-18.008	-528.484	21966.2	-26533	757.69	149.794	861.436	0	0	0	0	0	0	0	603	903	0
637	7	0	0	0	0	0	0	200	300	0	-13.9767	-18.9235	-528.179	22240.8	-26533	986.571	149.765	860.892	0	0	0	0	0	0	0	603	903	0
637	8	0	0	0	0	0	0	200	300	0	-17.4863	-17.245	-526.958	22057.7	-27204.4	803.466	148.375	861.141	0	0	0	0	0	0	0	603	903	0
637	9	0	0	0	0	0	0	200	300	0	-17.6389	-16.7873	-526.653	22240.8	-26533	620.36	149.62	860.77	0	0	0	0	0	0	0	603	903	0
638	0	0	0	0	0	0	0	200	300	0	-16.4182	-16.7873	-526.958	22423.9	-26533	895.019	149.649	860.447	0	0	0	0	0	0	0	603	903	0
638	1	0	0	0	0	0	0	200	300	0	-16.4182	-16.0243	-523.601	23156.3	-26960.3	849.242	148.51	858.775	0	0	0	0	0	0	0	603	903	0
638	2	0	0	0	0	0	0	200	300	0	-17.3337	-17.0924	-528.789	22790.1	-26838.2	986.571	149.246	859.901	0	0	0	0	0	0	0	603	903	0
638	3	0	0	0	0	0	0	200	300	0	-15.9604	-16.1769	-526.653	22790.1	-26655.1	986.571	149.388	859.727	0	0	0	0	0	0	0	603	903	0
638	4	0	0	0	0	0	0	200	300	0	-15.5026	-15.8717	-525.432	22973.2	-27143.4	803.466	148.341	859.277	0	0	0	0	0	0	0	603	903	0
638	5	0	0	0	0	0	0	200	300	0	-14.8923	-15.414	-526.348	23247.9	-26960.3	620.36	148.779	858.832	0	0	0	0	0	0	0	603	903	0
638	6	0	0	0	0	0	0	200	300	0	-16.4182	-15.5666	-523.296	24255	-26533	711.913	149.296	856.65	0	0	0	0	0	0	0	603	903	0
638	7	0	0	0	0	0	0	200	300	0	-16.7233	-15.5666	-526.348	23522.6	-27021.3	345.702	148.663	858.31	0	0	0	0	0	0	0	603	903	0
638	8	0	0	0	0	0	0	200	300	0	-16.5707	-16.1769	-526.958	23980.3	-27265.4	711.913	148.259	857.493	0	0	0	0	0	0	0	603	903	0
638	9	0	0	0	0	0	0	200	300	0	-15.9604	-14.8036	-526.042	23980.3	-26594	757.69	149.445	857.414	0	0	0	0	0	0	0	603	903	0
639	0	0	0	0	0	0	0	200	300	0	-13.8242	-14.0407	-526.348	24346.5	-26838.2	757.69	149.011	856.744	0	0	0	0	0	0	0	603	903	0
639	1	0	0	0	0	0	0	200	300	0	-16.7233	-13.8881	-526.653	24621.2	-26777.2	757.69	149.156	856.25	0	0	0	0	0	0	0	603	903	0
639	2	0	0	0	0	0	0	200	300	0	-16.2656	-14.1933	-526.042	24804.3	-26838.2	391.479	148.981	855.847	0	0	0	0	0	0	0	603	903	0
639	3	0	0	0	0	0	0	200	300	0	-15.6552	-12.6674	-525.737	24895.9	-26899.2	666.137	148.835	855.646	0	0	0	0	0	0	0	603	903	0
639	4	0	0	0	0	0	0	200	300	0	-14.8923	-12.5148	-527.568	24895.9	-27631.6	620.36	147.625	855.81	0	0	0	0	0	0	0	603	903	0
639	5	0	0	0	0	0	0	200	300	0	-15.6552	-12.9726	-528.484	24804.3	-27692.7	574.584	147.6	856.065	0	0	0	0	0	0	0	603	903	0
639	6	0	0	0	0	0	0	200	300	0	-15.8078	-12.9726	-529.094	25628.3	-26716.1	528.808	149.506	854.562	0	0	0	0	0	0	0	603	903	0
639	7	0	0	0	0	0	0	200	300	0	-13.8242	-12.3622	-526.653	25536.7	-27265.4	391.479	148.229	854.511	0	0	0	0	0	0	0	603	903	0
639	8	0	0	0	0	0	0	200	300	0	-16.113	-12.057	-526.653	25719.8	-27570.6	437.255	147.649	854.164	0	0	0	0	0	0	0	603	903	0
639	9	0	0	0	0	0	0	200	300	0	-15.8078	-11.2941	-529.399	25811.4	-26777.2	849.242	149.42	854.244	0	0	0	0	0	0	0	603	903	0
640	0	0	0	0	0	0	0	200	300	0	-14.2819	-10.8363	-530.315	26177.6	-27326.5	574.584	148.471	853.638	0	0	0	0	0	0	0	603	903	0
640	1	0	0	0	0	0	0	200	300	0	-15.5026	-11.2941	-528.789	25628.3	-27509.6	345.702	147.976	854.534	0	0	0	0	0	0	0	603	903	0
640	2	0	0	0	0	0	0	200	300	0	-15.5026	-12.057	-527.263	26177.6	-27082.3	483.031	148.636	853.352	0	0	0	0	0	0	0	603	903	0
640	3	0	0	0	0	0	0	200	300	0	-14.1293	-10.6837	-528.484	26452.2	-27387.5	162.597	148.177	852.947	0	0	0	0	0	0	0	603	903	0
640	4	0	0	0	0	0	0	200	300	0	-14.4345	-9.61563	-530.62	26269.1	-27448.5	391.479	148.271	853.494	0	0	0	0	0	0	0	603	903	0
640	5	0	0	0	0	0	0	200	300	0	-13.3664	-9.31045	-531.23	26543.8	-27143.4	254.149	148.905	853.033	0	0	0	0	0	0	0	603	903	0
640	6	0	0	0	0	0	0	200	300	0	-13.0612	-9.15787	-530.01	27001.6	-27326.5	483.031	148.442	852.055	0	0	0	0	0	0	0	603	903	0
640	7	0	0	0	0	0	0	200	300	0	-13.8242	-8.39493	-529.399	26269.1	-27509.6	391.479	148.036	853.379	0	0	0	0	0	0	0	603	903	0
640	8	0	0	0	0	0	0	200	300	0	-15.1974	-7.78457	-531.23	26635.4	-27326.5	620.36	148.56	852.861	0	0	0	0	0	0	0	603	903	0
640	9	0	0	0	0	0	0	200	300	0	-14.8923	-7.63199	-529.705	27825.5	-27509.6	162.597	148.066	850.47	0	0	0	0	0	0	0	603	903	0
641	0	0	0	0	0	0	0	200	300	0	-10.925	-8.7001	-533.061	27825.5	-27631.6	71.0441	148.164	850.801	0	0	0	0	0	0	0	603	903	0
641	1	0	0	0	0	0	0	200	300	0	-14.2819	-6.71646	-532.451	27734	-27326.5	299.926	148.678	850.913	0	0	0	0	0	0	0	603	903	0
641	2	0	0	0	0	0	0	200	300	0	-14.4345	-6.56387	-532.756	27917.1	-27692.7	345.702	148.02	850.599	0	0	0	0	0	0	0	603	903	0
641	3	0	0	0	0	0	0	200	300	0	-13.3664	-6.41128	-534.587	27825.5	-28181	208.373	147.285	850.95	0	0	0	0	0	0	0	603	903	0
641	4	0	0	0	0	0	0	200	300	0	-13.8242	-5.34317	-534.587	27917.1	-27814.8	254.149	147.97	850.778	0	0	0	0	0	0	0	603	903	0
641	5	0	0	0	0	0	0	200	300	0	-12.4509	-5.80093	-534.587	28466.4	-27387.5	-20.5087	148.769	849.751	0	0	0	0	0	0	0	603	903	0
641	6	0	0	0	0	0	0	200	300	0	-13.3664	-4.42764	-531.841	28283.3	-28242	299.926	146.898	849.82	0	0	0	0	0	0	0	603	903	0
641	7	0	0	0	0	0	0	200	300	0	-12.6035	-5.64834	-536.418	28283.3	-28303	208.373	147.237	850.274	0	0	0	0	0	0	0	603	903	0
641	8	0	0	0	0	0	0	200	300	0	-13.9767	-3.96988	-536.418	28283.3	-27936.8	528.808	147.92	850.274	0	0	0	0	0	0	0	603	903	0
641	9	0	0	0	0	0	0	200	300	0	-14.4345	-3.96988	-537.334	29015.7	-27875.8	116.82	148.122	849.001	0	0	0	0	0	0	0	603	903	0
642	0	0	0	0	0	0	0	200	300	0	-13.3664	-3.05435	-537.029	28924.2	-28303	71.0441	147.297	849.14	0	0	0	0	0	0	0	603	903	0
642	1	0	0	0	0	0	0	200	300	0	-14.4345	-1.98623	-538.249	28558	-28242	-203.614	147.53	849.943	0	0	0	0	0	0	0	603	903	0
642	2	0	0	0	0	0	0	200	300	0	-13.6716	-1.83365	-538.86	29656.6	-28547.2	162.597	147.023	847.964	0	0	0	0	0	0	0	603	903	0
642	3	0	0	0	0	0	0	200	300	0	-12.4509	-1.98623	-539.775	29473.5	-28852.3	-20.5087	146.548	848.397	0	0	0	0	0	0	0	603	903	0
642	4	0	0	0	0	0	0	200	300	0	-12.756	-2.444	-542.217	29565	-28486.1	25.2677	147.464	848.474	0	0	0	0	0	0	0	603	903	0
642	5	0	0	0	0	0	0	200	300	0	-11.9931	-1.52847	-541.301	29748.1	-28119.9	-249.391	148.051	848.043	0	0	0	0	0	0	0	603	903	0
642	6	0	0	0	0	0	0	200	300	0	-12.9086	-0.918119	-540.996	30480.6	-28608.2	-340.943	147.119	846.658	0	0	0	0	0	0	0	603	903	0
642	7	0	0	0	0	0	0	200	300	0	-13.0612	-0.15518	-542.827	30480.6	-28791.3	-203.614	146.96	846.849	0	0	0	0	0	0	0	603	903	0
642	8	0	0	0	0	0	0	200	300	0	-13.6716	1.06552	-543.132	29473.5	-28486.1	25.2677	147.552	848.734	0	0	0	0	0	0	0	603	903	0
642	9	0	0	0	0	0	0	200	300	0	-13.0612	-0.918119	-545.574	30663.7	-29035.5	-157.838	146.78	846.796	0	0	0	0	0	0	0	603	903	0
643	0	0	0	0	0	0	0	200	300	0	-12.9086	0.149996	-544.048	30846.8	-29096.5	-203.614	146.518	846.301	0	0	0	0	0	0	0	603	903	0
643	1	0	0	0	0	0	0	200	300	0	-12.4509	1.21811	-544.963	30755.2	-28791.3	-386.72	147.168	846.565	0	0	0	0	0	0	0	603	903	0
643	2	0	0	0	0	0	0	200	300	0	-10.6198	2.28623	-546.489	31213	-29279.6	-707.154	146.422	845.885	0	0	0	0	0	0	0	603	903	0
643	3	0	0	0	0	0	0	200	300	0	-12.4509	1.3707	-547.405	31853.9	-29096.5	-340.943	146.846	844.809	0	0	0	0	0	0	0	603	903	0
643	4	0	0	0	0	0	0	200	300	0	-11.9931	2.13364	-547.405	31304.5	-28974.4	-432.496	147.069	845.813	0	0	0	0	0	0	0	603	903	0
643	5	0	0	0	0	0	0	200	300	0	-13.6716	2.74399	-548.015	31670.8	-28608.2	-432.496	147.797	845.208	0	0	0	0	0	0	0	603	903	0
643	6	0	0	0	0	0	0	200	300	0	-13.519	2.89658	-548.015	31579.2	-29035.5	-340.943	147.017	845.375	0	0	0	0	0	0	0	603	903	0
643	7	0	0	0	0	0	0	200	300	0	-12.756	3.20175	-548.931	32220.1	-28974.4	-340.943	147.217	844.304	0	0	0	0	0	0	0	603	903	0
643	8	0	0	0	0	0	0	200	300	0	-13.8242	3.81211	-551.067	32220.1	-29035.5	-615.602	147.31	844.532	0	0	0	0	0	0	0	603	903	0
643	9	0	0	0	0	0	0	200	300	0	-12.9086	3.65952	-551.982	32494.7	-29584.8	-432.496	146.403	844.131	0	0	0	0	0	0	0	603	903	0
644	0	0	0	0	0	0	0	200	300	0	-12.6035	4.26987	-550.456	33501.8	-29279.6	-569.825	146.809	842.138	0	0	0	0	0	0	0	603	903	0
644	1	0	0	0	0	0	0	200	300	0	-12.2983	5.33798	-554.119	32952.5	-29462.7	-707.154	146.83	843.532	0	0	0	0	0	0	0	603	903	0
644	2	0	0	0	0	0	0	200	300	0	-13.6716	5.33798	-551.982	32494.7	-29523.7	-386.72	146.513	844.131	0	0	0	0	0	0	0	603	903	0
644	3	0	0	0	0	0	0	200	300	0	-13.8242	5.33798	-554.424	33410.2	-29218.6	-569.825	147.299	842.739	0	0	0	0	0	0	0	603	903	0
644	4	0	0	0	0	0	0	200	300	0	-13.0612	5.79575	-554.424	33776.5	-29340.6	-569.825	147.079	842.078	0	0	0	0	0	0	0	603	903	0
644	5	0	0	0	0	0	0	200	300	0	-13.3664	6.71128	-555.95	33227.1	-30256.2	-707.154	145.578	843.234	0	0	0	0	0	0	0	603	903	0
644	6	0	0	0	0	0	0	200	300	0	-13.6716	6.71128	-557.17	33410.2	-30073.1	-569.825	146.025	843.036	0	0	0	0	0	0	0	603	903	0
644	7	0	0	0	0	0	0	200	300	0	-13.519	6.25351	-556.865	34234.2	-29462.7	-844.484	147.092	841.523	0	0	0	0	0	0	0	603	903	0
644	8	0	0	0	0	0	0	200	300	0	-13.2138	6.71128	-558.391	34234.2	-29889.9	-569.825	146.471	841.691	0	0	0	0	0	0	0	603	903	0
644	9	0	0	0	0	0	0	200	300	0	-15.0449	7.32163	-555.95	34051.1	-29889.9	-752.931	146.236	841.752	0	0	0	0	0	0	0	603	903	0
645	0	0	0	0	0	0	0	200	300	0	-14.2819	7.32163	-557.476	35149.8	-29828.9	-981.813	146.493	839.948	0	0	0	0	0	0	0	603	903	0
645	1	0	0	0	0	0	0	200	300	0	-13.0612	8.69492	-558.696	35241.3	-30012	-936.036	146.282	839.922	0	0	0	0	0	0	0	603	903	0
645	2	0	0	0	0	0	0	200	300	0	-13.0612	7.6268	-561.138	35332.9	-30256.2	-798.707	146.081	840.034	0	0	0	0	0	0	0	603	903	0
645	3	0	0	0	0	0	0	200	300	0	-12.1457	7.47421	-559.612	35607.5	-29706.8	-981.813	146.915	839.371	0	0	0	0	0	0	0	603	903	0
645	4	0	0	0	0	0	0	200	300	0	-13.6716	9.15268	-560.222	36065.3	-29828.9	-936.036	146.755	838.623	0	0	0	0	0	0	0	603	903	0
645	5	0	0	0	0	0	0	200	300	0	-13.8242	9.45786	-562.053	36523	-29951	-1164.92	146.711	838.019	0	0	0	0	0	0	0	603	903	0
645	6	0	0	0	0	0	0	200	300	0	-14.7397	9.15268	-561.748	35699.1	-29951	-1027.59	146.683	839.45	0	0	0	0	0	0	0	603	903	0
645	7	0	0	0	0	0	0	200	300	0	-15.0449	9.61045	-564.189	36523	-30073.1	-661.378	146.697	838.265	0	0	0	0	0	0	0	603	903	0
645	8	0	0	0	0	0	0	200	300	0	-14.7397	9.76303	-563.579	36614.6	-30561.3	-936.036	145.773	838.032	0	0	0	0	0	0	0	603	903	0
645	9	0	0	0	0	0	0	200	300	0	-14.1293	9.30527	-563.579	36614.6	-30805.5	-1210.69	145.34	838.032	0	0	0	0	0	0	0	603	903	0
646	0	0	0	0	0	0	0	200	300	0	-15.0449	10.6786	-563.274	36797.7	-30134.1	-1302.25	146.502	837.672	0	0	0	0	0	0	0	603	903	0
646	1	0	0	0	0	0	0	200	300	0	-13.3664	10.6786	-563.884	37438.6	-30683.4	-1393.8	145.586	836.606	0	0	0	0	0	0	0	603	903	0
646	2	0	0	0	0	0	0	200	300	0	-14.2819	11.1363	-565.715	38079.5	-30744.4	-1119.14	145.654	835.688	0	0	0	0	0	0	0	603	903	0
646	3	0	0	0	0	0	0	200	300	0	-15.5026	11.1363	-566.326	37804.8	-30622.4	-1348.02	145.928	836.246	0	0	0	0	0	0	0	603	903	0
646	4	0	0	0	0	0	0	200	300	0	-15.35	11.2889	-566.02	37987.9	-30866.5	-1256.47	145.467	835.886	0	0	0	0	0	0	0	603	903	0
646	5	0	0	0	0	0	0	200	300	0	-14.8923	13.12	-567.241	37987.9	-30927.5	-1302.25	145.477	836.03	0	0	0	0	0	0	0	603	903	0
646	6	0	0	0	0	0	0	200	300	0	-15.8078	13.12	-566.936	38079.5	-30500.3	-1531.13	146.202	835.833	0	0	0	0	0	0	0	603	903	0
646	7	0	0	0	0	0	0	200	300	0	-16.2656	12.357	-568.767	39269.6	-30622.4	-1256.47	146.16	833.957	0	0	0	0	0	0	0	603	903	0
646	8	0	0	0	0	0	0	200	300	0	-14.7397	12.9674	-569.377	39544.3	-31049.6	-1439.58	145.467	833.548	0	0	0	0	0	0	0	603	903	0
646	9	0	0	0	0	0	0	200	300	0	-15.9604	12.9674	-567.852	38720.3	-31110.7	-1622.68	145.213	834.813	0	0	0	0	0	0	0	603	903	0
647	0	0	0	0	0	0	0	200	300	0	-16.2656	13.12	-569.072	39086.5	-30805.5	-1210.69	145.867	834.315	0	0	0	0	0	0	0	603	903	0
647	1	0	0	0	0	0	0	200	300	0	-15.1974	13.8829	-571.208	39452.7	-31354.8	-1348.02	145.108	833.931	0	0	0	0	0	0	0	603	903	0
647	2	0	0	0	0	0	0	200	300	0	-15.8078	14.3407	-571.819	39818.9	-30683.4	-1485.35	146.341	833.364	0	0	0	0	0	0	0	603	903	0
647	3	0	0	0	0	0	0	200	300	0	-15.5026	14.4933	-572.429	40185.1	-30683.4	-1760.01	146.398	832.799	0	0	0	0	0	0	0	603	903	0
647	4	0	0	0	0	0	0	200	300	0	-14.8923	14.4933	-570.598	40826	-31537.9	-1622.68	144.728	831.45	0	0	0	0	0	0	0	603	903	0
647	5	0	0	0	0	0	0	200	300	0	-15.6552	14.951	-572.124	40368.3	-31476.9	-1760.01	144.982	832.441	0	0	0	0	0	0	0	603	903	0
647	6	0	0	0	0	0	0	200	300	0	-17.1811	15.4088	-573.955	40368.3	-30866.5	-1851.56	146.221	832.667	0	0	0	0	0	0	0	603	903	0
647	7	0	0	0	0	0	0	200	300	0	-17.1811	15.2562	-573.345	41466.9	-31415.8	-1668.46	145.206	830.676	0	0	0	0	0	0	0	603	903	0
647	8	0	0	0	0	0	0	200	300	0	-16.5707	15.8665	-573.345	41466.9	-31293.8	-1714.23	145.419	830.676	0	0	0	0	0	0	0	603	903	0
647	9	0	0	0	0	0	0	200	300	0	-18.4018	15.8665	-574.26	41466.9	-31232.7	-2080.45	145.612	830.791	0	0	0	0	0	0	0	603	903	0
648	0	0	0	0	0	0	0	200	300	0	-17.1811	17.545	-574.565	41558.5	-31721	-1988.89	144.791	830.67	0	0	0	0	0	0	0	603	903	0
648	1	0	0	0	0	0	0	200	300	0	-15.8078	17.3924	-575.786	42474	-31415.8	-1805.79	145.438	829.233	0	0	0	0	0	0	0	603	903	0
648	2	0	0	0	0	0	0	200	300	0	-17.1811	16.1717	-577.007	42199.3	-30988.6	-1943.12	146.294	829.865	0	0	0	0	0	0	0	603	903	0
648	3	0	0	0	0	0	0	200	300	0	-18.5544	17.545	-575.786	42565.5	-31171.7	-2263.55	145.862	829.074	0	0	0	0	0	0	0	603	903	0
648	4	0	0	0	0	0	0	200	300	0	-18.4018	18.6131	-575.481	43206.4	-32026.2	-1988.89	144.349	827.921	0	0	0	0	0	0	0	603	903	0
648	5	0	0	0	0	0	0	200	300	0	-14.2819	17.6976	-577.312	43481	-31904.1	-1805.79	144.737	827.684	0	0	0	0	0	0	0	603	903	0
648	6	0	0	0	0	0	0	200	300	0	-18.8596	19.3761	-579.753	43572.6	-31476.9	-2080.45	145.706	827.843	0	0	0	0	0	0	0	603	903	0
648	7	0	0	0	0	0	0	200	300	0	-19.1647	18.9183	-580.669	43297.9	-32026.2	-2080.45	144.846	828.434	0	0	0	0	0	0	0	603	903	0
648	8	0	0	0	0	0	0	200	300	0	-17.944	19.3761	-580.669	43572.6	-31965.1	-2034.67	144.951	827.961	0	0	0	0	0	0	0	603	903	0
648	9	0	0	0	0	0	0	200	300	0	-18.5544	20.139	-579.143	43938.8	-31904.1	-2309.33	144.912	827.131	0	0	0	0	0	0	0	603	903	0
649	0	0	0	0	0	0	0	200	300	0	-19.7751	20.4442	-579.448	44396.6	-32026.2	-2355.1	144.73	826.381	0	0	0	0	0	0	0	603	903	0
649	1	0	0	0	0	0	0	200	300	0	-18.707	21.2071	-582.195	45220.6	-32270.3	-2263.55	144.571	825.328	0	0	0	0	0	0	0	603	903	0
649	2	0	0	0	0	0	0	200	300	0	-18.0966	21.2071	-583.11	45403.7	-31721	-2126.22	145.6	825.135	0	0	0	0	0	0	0	603	903	0
649	3	0	0	0	0	0	0	200	300	0	-20.0803	21.8175	-583.11	45129	-32453.4	-2355.1	144.344	825.606	0	0	0	0	0	0	0	603	903	0
649	4	0	0	0	0	0	0	200	300	0	-19.9277	22.1227	-583.415	44854.4	-32331.4	-2446.66	144.583	826.118	0	0	0	0	0	0	0	603	903	0
649	5	0	0	0	0	0	0	200	300	0	-19.6225	21.3597	-583.415	45403.7	-31782	-2446.66	145.524	825.176	0	0	0	0	0	0	0	603	903	0
649	6	0	0	0	0	0	0	200	300	0	-19.6225	23.0382	-586.162	46410.7	-32148.2	-2492.43	145.155	823.823	0	0	0	0	0	0	0	603	903	0
649	7	0	0	0	0	0	0	200	300	0	-20.538	23.3434	-587.688	46227.6	-32575.5	-2492.43	144.57	824.34	0	0	0	0	0	0	0	603	903	0
649	8	0	0	0	0	0	0	200	300	0	-19.9277	22.5804	-586.772	46868.5	-32087.2	-2492.43	145.316	823.125	0	0	0	0	0	0	0	603	903	0
649	9	0	0	0	0	0	0	200	300	0	-19.7751	23.6485	-584.331	46776.9	-32087.2	-2629.76	145.087	822.948	0	0	0	0	0	0	0	603	903	0
650	0	0	0	0	0	0	0	200	300	0	-20.6906	23.8011	-587.383	46502.3	-32453.4	-2446.66	144.749	823.831	0	0	0	0	0	0	0	603	903	0
650	1	0	0	0	0	0	0	200	300	0	-22.5217	24.7166	-590.129	47967.1	-32209.3	-2812.87	145.42	821.718	0	0	0	0	0	0	0	603	903	0
650	2	0	0	0	0	0	0	200	300	0	-20.8432	24.4115	-590.435	48424.9	-32392.4	-2492.43	145.138	820.984	0	0	0	0	0	0	0	603	903	0
650	3	0	0	0	0	0	0	200	300	0	-19.6225	25.4796	-590.74	47875.6	-33124.8	-2950.2	143.927	821.957	0	0	0	0	0	0	0	603	903	0
650	4	0	0	0	0	0	0	200	300	0	-19.9277	25.1744	-591.655	48150.3	-32514.5	-2675.54	145.045	821.618	0	0	0	0	0	0	0	603	903	0
650	5	0	0	0	0	0	0	200	300	0	-20.2328	26.5477	-592.266	49157.3	-32453.4	-2675.54	145.205	820.001	0	0	0	0	0	0	0	603	903	0
650	6	0	0	0	0	0	0	200	300	0	-21.9113	26.0899	-593.791	49157.3	-32758.6	-2812.87	144.831	820.215	0	0	0	0	0	0	0	603	903	0
650	7	0	0	0	0	0	0	200	300	0	-22.3691	26.3951	-594.402	49523.5	-32636.5	-2858.64	145.094	819.683	0	0	0	0	0	0	0	603	903	0
650	8	0	0	0	0	0	0	200	300	0	-22.8268	25.1744	-595.928	49248.9	-33002.7	-3179.08	144.62	820.358	0	0	0	0	0	0	0	603	903	0
650	9	0	0	0	0	0	0	200	300	0	-21.1484	27.3106	-595.317	49248.9	-33368.9	-2950.2	143.948	820.273	0	0	0	0	0	0	0	603	903	0
651	0	0	0	0	0	0	0	200	300	0	-21.1484	27.3106	-594.402	49706.6	-33124.8	-2858.64	144.272	819.375	0	0	0	0	0	0	0	603	903	0
651	1	0	0	0	0	0	0	200	300	0	-23.5898	27.921	-597.148	50713.7	-33124.8	-2995.97	144.528	818.073	0	0	0	0	0	0	0	603	903	0
651	2	0	0	0	0	0	0	200	300	0	-23.132	28.0736	-598.674	51171.5	-33307.9	-3179.08	144.364	817.525	0	0	0	0	0	0	0	603	903	0
651	3	0	0	0	0	0	0	200	300	0	-21.6061	27.6158	-598.979	51354.6	-33307.9	-3270.63	144.392	817.263	0	0	0	0	0	0	0	603	903	0
651	4	0	0	0	0	0	0	200	300	0	-23.2846	28.5313	-598.979	51446.2	-32880.7	-3407.96	145.106	817.11	0	0	0	0	0	0	0	603	903	0
651	5	0	0	0	0	0	0	200	300	0	-23.5898	29.752	-600.505	51446.2	-33491	-3133.3	144.229	817.329	0	0	0	0	0	0	0	603	903	0
651	6	0	0	0	0	0	0	200	300	0	-22.8268	29.4469	-602.031	52727.9	-33491	-2995.97	144.37	815.417	0	0	0	0	0	0	0	603	903	0
651	7	0	0	0	0	0	0	200	300	0	-23.132	30.6676	-602.336	52087	-33124.8	-3545.29	145.006	816.525	0	0	0	0	0	0	0	603	903	0
651	8	0	0	0	0	0	0	200	300	0	-23.132	30.8202	-604.473	52727.9	-33124.8	-3453.74	145.2	815.771	0	0	0	0	0	0	0	603	903	0
651	9	0	0	0	0	0	0	200	300	0	-23.2846	31.2779	-603.862	53460.3	-33674.1	-2950.2	144.235	814.469	0	0	0	0	0	0	0	603	903	0
652	0	0	0	0	0	0	0	200	300	0	-22.9794	31.7357	-605.693	54009.6	-33307.9	-3362.18	145.009	813.83	0	0	0	0	0	0	0	603	903	0
652	1	0	0	0	0	0	0	200	300	0	-23.895	32.346	-607.524	53094.1	-33307.9	-3636.84	145.174	815.606	0	0	0	0	0	0	0	603	903	0
652	2	0	0	0	0	0	0	200	300	0	-24.2001	32.9564	-606.914	53460.3	-33368.9	-3453.74	145.019	814.915	0	0	0	0	0	0	0	603	903	0
652	3	0	0	0	0	0	0	200	300	0	-23.7424	32.6512	-608.44	54284.3	-33368.9	-3591.07	145.157	813.781	0	0	0	0	0	0	0	603	903	0
652	4	0	0	0	0	0	0	200	300	0	-23.895	33.109	-608.135	54375.8	-33491	-3453.74	144.928	813.586	0	0	0	0	0	0	0	603	903	0
652	5	0	0	0	0	0	0	200	300	0	-24.8105	34.0245	-610.576	55108.3	-33979.3	-3591.07	144.349	812.744	0	0	0	0	0	0	0	603	903	0
652	6	0	0	0	0	0	0	200	300	0	-23.4372	35.2452	-612.712	54467.4	-33613.1	-3545.29	145.141	814.105	0	0	0	0	0	0	0	603	903	0
652	7	0	0	0	0	0	0	200	300	0	-23.895	33.4142	-613.018	55199.8	-33674.1	-3636.84	145.068	812.954	0	0	0	0	0	0	0	603	903	0
652	8	0	0	0	0	0	0	200	300	0	-24.5053	35.2452	-613.933	55657.6	-34101.4	-3819.95	144.454	812.343	0	0	0	0	0	0	0	603	903	0
652	9	0	0	0	0	0	0	200	300	0	-24.3527	35.2452	-614.543	56298.4	-34040.3	-4003.05	144.609	811.39	0	0	0	0	0	0	0	603	903	0
653	0	0	0	0	0	0	0	200	300	0	-24.6579	36.4659	-614.849	57030.9	-33307.9	-4003.05	145.827	810.244	0	0	0	0	0	0	0	603	903	0
653	1	0	0	0	0	0	0	200	300	0	-24.9631	36.9237	-617.595	56847.7	-34284.5	-3774.17	144.487	810.953	0	0	0	0	0	0	0	603	903	0
653	2	0	0	0	0	0	0	200	300	0	-24.5053	36.7711	-615.764	57214	-34162.4	-3911.5	144.52	810.085	0	0	0	0	0	0	0	603	903	0
653	3	0	0	0	0	0	0	200	300	0	-24.0475	37.6866	-619.121	57305.5	-34406.5	-3957.28	144.427	810.441	0	0	0	0	0	0	0	603	903	0
653	4	0	0	0	0	0	0	200	300	0	-23.895	37.6866	-620.037	57397.1	-34101.4	-3957.28	145.001	810.43	0	0	0	0	0	0	0	603	903	0
653	5	0	0	0	0	0	0	200	300	0	-25.1157	38.6021	-621.562	57854.8	-34345.5	-4003.05	144.743	809.92	0	0	0	0	0	0	0	603	903	0
653	6	0	0	0	0	0	0	200	300	0	-24.6579	39.8228	-624.309	58495.7	-33979.3	-4277.71	145.573	809.303	0	0	0	0	0	0	0	603	903	0
653	7	0	0	0	0	0	0	200	300	0	-24.3527	38.4496	-620.647	58404.2	-34406.5	-4415.04	144.563	808.898	0	0	0	0	0	0	0	603	903	0
653	8	0	0	0	0	0	0	200	300	0	-23.132	39.5177	-625.53	58953.5	-34589.7	-4094.61	144.703	808.754	0	0	0	0	0	0	0	603	903	0
653	9	0	0	0	0	0	0	200	300	0	-24.2001	40.128	-627.056	58587.3	-34284.5	-4140.38	145.325	809.568	0	0	0	0	0	0	0	603	903	0
654	0	0	0	0	0	0	0	200	300	0	-24.9631	41.1961	-628.887	59594.3	-34223.4	-4415.04	145.581	808.238	0	0	0	0	0	0	0	603	903	0
654	1	0	0	0	0	0	0	200	300	0	-25.5734	42.4168	-631.023	59777.4	-34833.8	-4506.59	144.798	808.269	0	0	0	0	0	0	0	603	903	0
654	2	0	0	0	0	0	0	200	300	0	-24.5053	41.9591	-632.549	60509.9	-34528.6	-4277.71	145.414	807.34	0	0	0	0	0	0	0	603	903	0
654	3	0	0	0	0	0	0	200	300	0	-24.3527	41.0435	-635.601	60784.5	-34528.6	-4689.7	145.676	807.367	0	0	0	0	0	0	0	603	903	0
654	4	0	0	0	0	0	0	200	300	0	-25.5734	43.1798	-634.38	60418.3	-34894.8	-4277.71	144.994	807.76	0	0	0	0	0	0	0	603	903	0
654	5	0	0	0	0	0	0	200	300	0	-25.726	43.7901	-635.601	61517	-35139	-4048.83	144.715	806.214	0	0	0	0	0	0	0	603	903	0
654	6	0	0	0	0	0	0	200	300	0	-24.6579	45.316	-637.432	61700.1	-34406.5	-4689.7	146.023	806.205	0	0	0	0	0	0	0	603	903	0
654	7	0	0	0	0	0	0	200	300	0	-24.8105	45.316	-639.873	61608.5	-35016.9	-4460.82	145.275	806.718	0	0	0	0	0	0	0	603	903	0
654	8	0	0	0	0	0	0	200	300	0	-25.4208	45.4686	-640.178	61974.7	-35077.9	-4827.03	145.206	806.192	0	0	0	0	0	0	0	603	903	0
654	9	0	0	0	0	0	0	200	300	0	-24.2001	44.2479	-642.009	62340.9	-35261	-4872.81	145.077	805.897	0	0	0	0	0	0	0	603	903	0
655	0	0	0	0	0	0	0	200	300	0	-24.5053	46.2315	-644.145	62524	-34833.8	-4689.7	145.922	805.935	0	0	0	0	0	0	0	603	903	0
655	1	0	0	0	0	0	0	200	300	0	-24.8105	47.7574	-645.977	62432.5	-35200	-4872.81	145.509	806.352	0	0	0	0	0	0	0	603	903	0
655	2	0	0	0	0	0	0	200	300	0	-24.8105	48.0626	-646.892	62798.7	-34589.7	-4827.03	146.529	805.922	0	0	0	0	0	0	0	603	903	0
655	3	0	0	0	0	0	0	200	300	0	-23.7424	48.9781	-648.113	63714.2	-34955.9	-4918.58	146.065	804.693	0	0	0	0	0	0	0	603	903	0
655	4	0	0	0	0	0	0	200	300	0	-23.5898	50.504	-651.775	63164.9	-34955.9	-4964.36	146.368	806.088	0	0	0	0	0	0	0	603	903	0
655	5	0	0	0	0	0	0	200	300	0	-24.3527	50.9618	-652.69	63439.5	-35261	-5101.69	145.976	805.803	0	0	0	0	0	0	0	603	903	0
655	6	0	0	0	0	0	0	200	300	0	-24.2001	51.4195	-652.08	63988.9	-35077.9	-5055.91	146.206	804.87	0	0	0	0	0	0	0	603	903	0
655	7	0	0	0	0	0	0	200	300	0	-22.0639	52.0299	-656.352	63988.9	-35749.3	-5147.46	145.533	805.508	0	0	0	0	0	0	0	603	903	0
655	8	0	0	0	0	0	0	200	300	0	-24.9631	52.4876	-657.573	64995.9	-35200	-5010.13	146.47	804.158	0	0	0	0	0	0	0	603	903	0
655	9	0	0	0	0	0	0	200	300	0	-24.6579	54.6239	-658.794	65179	-35200	-5239.02	146.569	804.063	0	0	0	0	0	0	0	603	903	0
656	0	0	0	0	0	0	0	200	300	0	-22.2165	54.7765	-660.625	65087.5	-36054.5	-4964.36	145.424	804.476	0	0	0	0	0	0	0	603	903	0
656	1	0	0	0	0	0	0	200	300	0	-22.0639	55.0816	-661.54	64721.3	-35871.4	-5239.02	145.776	805.166	0	0	0	0	0	0	0	603	903	0
656	2	0	0	0	0	0	0	200	300	0	-23.7424	55.9972	-662.456	65362.2	-35200	-5193.24	146.864	804.334	0	0	0	0	0	0	0	603	903	0
656	3	0	0	0	0	0	0	200	300	0	-23.895	56.6075	-661.235	66186.1	-35322.1	-5467.9	146.582	802.905	0	0	0	0	0	0	0	603	903	0
656	4	0	0	0	0	0	0	200	300	0	-20.3854	57.3705	-666.423	66369.3	-35383.1	-5559.45	146.906	803.41	0	0	0	0	0	0	0	603	903	0
656	5	0	0	0	0	0	0	200	300	0	-23.7424	58.7437	-668.254	66369.3	-35566.2	-5925.66	146.777	803.683	0	0	0	0	0	0	0	603	903	0
656	6	0	0	0	0	0	0	200	300	0	-22.5217	58.7437	-669.78	67193.2	-35810.4	-5696.78	146.534	802.679	0	0	0	0	0	0	0	603	903	0
656	7	0	0	0	0	0	0	200	300	0	-21.6061	59.9644	-670.696	67193.2	-36176.6	-5422.12	146.061	802.816	0	0	0	0	0	0	0	603	903	0
656	8	0	0	0	0	0	0	200	300	0	-22.0639	60.117	-668.254	67101.7	-35749.3	-5513.67	146.503	802.587	0	0	0	0	0	0	0	603	903	0
656	9	0	0	0	0	0	0	200	300	0	-21.7587	59.5067	-672.832	67101.7	-35932.4	-5925.66	146.595	803.27	0	0	0	0	0	0	0	603	903	0
657	0	0	0	0	0	0	0	200	300	0	-21.7587	62.711	-674.663	68108.7	-36359.7	-5605.23	146.107	802.048	0	0	0	0	0	0	0	603	903	0
657	1	0	0	0	0	0	0	200	300	0	-21.6061	62.1007	-676.494	67101.7	-36115.5	-6017.21	146.614	803.81	0	0	0	0	0	0	0	603	903	0
657	2	0	0	0	0	0	0	200	300	0	-22.9794	63.0162	-677.715	67742.5	-35810.4	-5788.33	147.16	803.043	0	0	0	0	0	0	0	603	903	0
657	3	0	0	0	0	0	0	200	300	0	-22.9794	64.3895	-676.799	68017.2	-36054.5	-5467.9	146.728	802.502	0	0	0	0	0	0	0	603	903	0
657	4	0	0	0	0	0	0	200	300	0	-21.1484	64.9998	-679.241	68932.7	-36237.6	-5696.78	146.65	801.515	0	0	0	0	0	0	0	603	903	0
657	5	0	0	0	0	0	0	200	300	0	-22.6743	65.7628	-680.767	67376.3	-36054.5	-6291.87	147.038	804.029	0	0	0	0	0	0	0	603	903	0
657	6	0	0	0	0	0	0	200	300	0	-22.2165	66.3731	-683.513	69299	-35993.5	-6154.54	147.34	801.614	0	0	0	0	0	0	0	603	903	0
657	7	0	0	0	0	0	0	200	300	0	-21.1484	67.2887	-683.513	69207.4	-36725.9	-6017.21	146.269	801.748	0	0	0	0	0	0	0	603	903	0
657	8	0	0	0	0	0	0	200	300	0	-22.5217	68.0516	-681.682	69115.8	-35993.5	-6017.21	147.199	801.61	0	0	0	0	0	0	0	603	903	0
657	9	0	0	0	0	0	0	200	300	0	-22.5217	68.0516	-686.87	68841.2	-36115.5	-6062.99	147.42	802.776	0	0	0	0	0	0	0	603	903	0
658	0	0	0	0	0	0	0	200	300	0	-21.9113	69.7301	-688.091	69207.4	-36725.9	-6154.54	146.626	802.421	0	0	0	0	0	0	0	603	903	0
658	1	0	0	0	0	0	0	200	300	0	-21.7587	69.4249	-688.091	69573.6	-36481.7	-5971.44	146.981	801.889	0	0	0	0	0	0	0	603	903	0
658	2	0	0	0	0	0	0	200	300	0	-22.6743	70.6456	-688.701	70031.4	-36359.7	-6246.1	147.205	801.314	0	0	0	0	0	0	0	603	903	0
658	3	0	0	0	0	0	0	200	300	0	-22.6743	71.7137	-687.786	70122.9	-36786.9	-6200.32	146.514	801.045	0	0	0	0	0	0	0	603	903	0
658	4	0	0	0	0	0	0	200	300	0	-20.9958	71.7137	-691.143	70580.7	-36848	-6200.32	146.685	800.878	0	0	0	0	0	0	0	603	903	0
658	5	0	0	0	0	0	0	200	300	0	-22.5217	72.7818	-692.363	69482	-36481.7	-6291.87	147.308	802.645	0	0	0	0	0	0	0	603	903	0
658	6	0	0	0	0	0	0	200	300	0	-22.9794	72.6292	-693.279	70580.7	-36359.7	-6062.99	147.554	801.193	0	0	0	0	0	0	0	603	903	0
658	7	0	0	0	0	0	0	200	300	0	-21.6061	73.8499	-693.584	71221.5	-36542.8	-6246.1	147.313	800.314	0	0	0	0	0	0	0	603	903	0
658	8	0	0	0	0	0	0	200	300	0	-23.895	74.9181	-696.025	71587.7	-36359.7	-6474.98	147.761	800.148	0	0	0	0	0	0	0	603	903	0
658	9	0	0	0	0	0	0	200	300	0	-22.8268	76.4439	-695.415	71679.3	-36725.9	-6612.31	147.189	799.926	0	0	0	0	0	0	0	603	903	0
659	0	0	0	0	0	0	0	200	300	0	-21.1484	76.5965	-697.551	71221.5	-36786.9	-6429.2	147.263	800.898	0	0	0	0	0	0	0	603	903	0
659	1	0	0	0	0	0	0	200	300	0	-23.2846	76.4439	-698.772	71130	-36970	-6520.75	147.093	801.207	0	0	0	0	0	0	0	603	903	0
659	2	0	0	0	0	0	0	200	300	0	-23.895	75.3758	-699.687	71587.7	-36481.7	-6429.2	147.86	800.686	0	0	0	0	0	0	0	603	903	0
659	3	0	0	0	0	0	0	200	300	0	-22.9794	77.6646	-698.162	71953.9	-36542.8	-6337.65	147.659	799.938	0	0	0	0	0	0	0	603	903	0
659	4	0	0	0	0	0	0	200	300	0	-23.4372	79.4957	-699.687	71679.3	-36848	-6703.86	147.337	800.555	0	0	0	0	0	0	0	603	903	0
659	5	0	0	0	0	0	0	200	300	0	-24.0475	80.4112	-701.824	71953.9	-36603.8	-6658.08	147.845	800.476	0	0	0	0	0	0	0	603	903	0
659	6	0	0	0	0	0	0	200	300	0	-22.8268	80.2586	-702.129	72594.9	-36786.9	-6566.53	147.607	799.608	0	0	0	0	0	0	0	603	903	0
659	7	0	0	0	0	0	0	200	300	0	-23.7424	80.2586	-701.213	72594.9	-36603.8	-6886.97	147.799	799.473	0	0	0	0	0	0	0	603	903	0
659	8	0	0	0	0	0	0	200	300	0	-24.8105	81.1742	-700.603	72503.3	-36542.8	-6841.19	147.841	799.513	0	0	0	0	0	0	0	603	903	0
659	9	0	0	0	0	0	0	200	300	0	-25.4208	82.5475	-700.908	72777.9	-36481.7	-6703.86	147.951	799.166	0	0	0	0	0	0	0	603	903	0
660	0	0	0	0	0	0	0	200	300	0	-23.4372	84.2259	-701.518	72777.9	-36725.9	-6749.64	147.648	799.257	0	0	0	0	0	0	0	603	903	0
660	1	0	0	0	0	0	0	200	300	0	-25.2682	84.2259	-703.655	72686.4	-36359.7	-6612.31	148.327	799.702	0	0	0	0	0	0	0	603	903	0
660	2	0	0	0	0	0	0	200	300	0	-25.5734	83.9207	-704.57	73327.3	-36420.7	-6612.31	148.308	798.926	0	0	0	0	0	0	0	603	903	0
660	3	0	0	0	0	0	0	200	300	0	-24.3527	85.4466	-702.434	73327.3	-36725.9	-6932.74	147.716	798.61	0	0	0	0	0	0	0	603	903	0
660	4	0	0	0	0	0	0	200	300	0	-24.5053	86.5147	-701.824	73052.6	-36909	-6703.86	147.41	798.91	0	0	0	0	0	0	0	603	903	0
660	5	0	0	0	0	0	0	200	300	0	-22.9794	87.5829	-702.739	73235.7	-36603.8	-7115.85	147.913	798.785	0	0	0	0	0	0	0	603	903	0
660	6	0	0	0	0	0	0	200	300	0	-24.6579	88.0406	-703.96	74334.3	-36848	-7115.85	147.656	797.405	0	0	0	0	0	0	0	603	903	0
660	7	0	0	0	0	0	0	200	300	0	-24.9631	87.5829	-700.298	74609	-36848	-6932.74	147.382	796.461	0	0	0	0	0	0	0	603	903	0
660	8	0	0	0	0	0	0	200	300	0	-26.6415	88.9561	-703.655	73052.6	-36786.9	-6886.97	147.72	799.181	0	0	0	0	0	0	0	603	903	0
660	9	0	0	0	0	0	0	200	300	0	-25.8786	89.4139	-702.739	73693.5	-36664.8	-6932.74	147.826	798.134	0	0	0	0	0	0	0	603	903	0
661	0	0	0	0	0	0	0	200	300	0	-25.726	90.9398	-702.129	74517.4	-36542.8	-6978.52	147.954	796.869	0	0	0	0	0	0	0	603	903	0
661	1	0	0	0	0	0	0	200	300	0	-26.9467	92.4657	-703.655	73510.3	-36298.6	-7115.85	148.414	798.531	0	0	0	0	0	0	0	603	903	0
661	2	0	0	0	0	0	0	200	300	0	-26.489	91.8553	-702.739	74242.8	-36420.7	-7298.95	148.173	797.352	0	0	0	0	0	0	0	603	903	0
661	3	0	0	0	0	0	0	200	300	0	-24.8105	92.0079	-702.129	74151.2	-36725.9	-7207.4	147.694	797.391	0	0	0	0	0	0	0	603	903	0
661	4	0	0	0	0	0	0	200	300	0	-26.1838	93.5338	-700.908	73785	-36054.5	-7161.62	148.56	797.729	0	0	0	0	0	0	0	603	903	0
661	5	0	0	0	0	0	0	200	300	0	-27.4045	95.0597	-700.603	74517.4	-35932.4	-7390.51	148.712	796.638	0	0	0	0	0	0	0	603	903	0
661	6	0	0	0	0	0	0	200	300	0	-26.9467	94.2967	-700.603	74975.2	-36298.6	-7207.4	148.189	795.985	0	0	0	0	0	0	0	603	903	0
661	7	0	0	0	0	0	0	200	300	0	-25.5734	96.2804	-701.213	74151.2	-37092.1	-7161.62	147.103	797.253	0	0	0	0	0	0	0	603	903	0
661	8	0	0	0	0	0	0	200	300	0	-27.0993	96.433	-699.993	73968.1	-35932.4	-7253.18	148.667	797.33	0	0	0	0	0	0	0	603	903	0
661	9	0	0	0	0	0	0	200	300	0	-26.7941	96.433	-698.772	74151.2	-36176.6	-7161.62	148.228	796.884	0	0	0	0	0	0	0	603	903	0
662	0	0	0	0	0	0	0	200	300	0	-26.7941	97.8062	-697.856	74242.8	-36115.5	-7344.73	148.248	796.613	0	0	0	0	0	0	0	603	903	0
662	1	0	0	0	0	0	0	200	300	0	-26.0312	99.1795	-696.636	74425.9	-35749.3	-7619.39	148.683	796.164	0	0	0	0	0	0	0	603	903	0
662	2	0	0	0	0	0	0	200	300	0	-26.6415	100.248	-697.246	74334.3	-36420.7	-7573.61	147.765	796.389	0	0	0	0	0	0	0	603	903	0
662	3	0	0	0	0	0	0	200	300	0	-26.3364	100.4	-694.194	74334.3	-36298.6	-7619.39	147.711	795.92	0	0	0	0	0	0	0	603	903	0
662	4	0	0	0	0	0	0	200	300	0	-24.2001	100.705	-696.636	74242.8	-35749.3	-7253.18	148.683	796.427	0	0	0	0	0	0	0	603	903	0
662	5	0	0	0	0	0	0	200	300	0	-26.0312	100.4	-693.584	74242.8	-35566.2	-7390.51	148.721	795.958	0	0	0	0	0	0	0	603	903	0
662	6	0	0	0	0	0	0	200	300	0	-26.6415	102.689	-692.668	74425.9	-35871.4	-7619.39	148.213	795.552	0	0	0	0	0	0	0	603	903	0
662	7	-5.38327	4.02344	-23.0131	-1762.39	2131.57	446.41	292.624	376.582	0	-27.5571	103.299	-691.753	74517.4	-35566.2	-7344.73	148.585	795.277	0	0	0	0	0	0	0	603	903	0
662	8	-10.4187	15.4675	-45.2909	-2952.58	3413.31	1865.48	275.364	365.191	0	-28.4726	104.062	-691.753	74700.5	-35261	-7710.94	149.027	795.013	0	0	0	0	0	0	0	603	903	0
662	9	-1.26339	27.8272	-41.934	-1029.97	2497.79	2597.9	259.565	324.562	0	-27.0993	104.215	-690.837	74792.1	-35688.3	-7527.83	148.341	794.737	0	0	0	0	0	0	0	603	903	0
663	0	-0.653043	15.7727	-32.4735	-2220.15	2009.5	2140.14	261.881	368.368	0	-27.5571	104.062	-688.396	74425.9	-35505.2	-7665.16	148.423	794.885	0	0	0	0	0	0	0	603	903	0
663	1	-12.0971	13.1787	-26.37	-3410.34	3047.1	1728.15	315.552	429.326	0	-27.0993	105.283	-688.091	74609	-34955.9	-7848.27	149.199	794.571	0	0	0	0	0	0	0	603	903	0
663	2	-10.1135	33.1677	-47.7323	-2677.92	3596.42	2964.11	275.346	356.103	0	-26.0312	104.978	-686.87	74517.4	-35444.1	-8168.7	148.398	794.512	0	0	0	0	0	0	0	603	903	0
663	3	-1.41598	35.9143	-65.4325	-4234.31	4023.67	3376.1	261.493	364.713	0	-27.5571	108.335	-685.039	73876.6	-35322.1	-7848.27	148.438	795.157	0	0	0	0	0	0	0	603	903	0
663	4	-7.06173	30.116	-65.4325	-3135.68	4450.91	2826.78	268.023	347.922	0	-26.7941	107.724	-683.513	74700.5	-34772.8	-7939.82	149.126	793.711	0	0	0	0	0	0	0	603	903	0
663	5	-17.5903	35.304	-62.0756	-3501.89	5549.54	3833.86	289.4	356.413	0	-24.5053	106.504	-682.903	74517.4	-34589.7	-7848.27	149.349	793.881	0	0	0	0	0	0	0	603	903	0
663	6	-8.7402	48.4265	-77.9447	-5058.29	5305.4	4474.73	268.066	364.896	0	-27.5571	108.335	-681.987	74242.8	-34833.8	-7802.49	148.923	794.138	0	0	0	0	0	0	0	603	903	0
663	7	-2.4841	49.6472	-94.7294	-5973.82	6159.9	3513.43	265.026	363.062	0	-27.5571	111.387	-676.189	74059.7	-34589.7	-7802.49	148.846	793.475	0	0	0	0	0	0	0	603	903	0
663	8	-17.1325	34.9988	-100.528	-5882.27	7685.77	3971.19	276.454	358.514	0	-24.6579	110.624	-675.579	74700.5	-34345.5	-7802.49	149.161	792.427	0	0	0	0	0	0	0	603	903	0
663	9	-13.9282	32.2522	-97.476	-5424.5	7136.46	4245.85	273.212	355.65	0	-23.4372	108.945	-678.02	73876.6	-34772.8	-8031.37	148.714	794.041	0	0	0	0	0	0	0	603	903	0
664	0	-5.07809	41.1023	-105.716	-6248.48	7685.77	3147.22	272.702	359.106	0	-26.7941	110.166	-671.611	73785	-35016.9	-7985.6	147.861	793.137	0	0	0	0	0	0	0	603	903	0
664	1	-14.5385	38.8135	-115.787	-6614.69	8540.26	2964.11	273.759	357.128	0	-26.3364	112.455	-673.747	73693.5	-34223.4	-7527.83	149.204	793.622	0	0	0	0	0	0	0	603	903	0
664	2	-17.4377	23.0969	-121.89	-5882.27	8051.98	3650.76	266.059	348.259	0	-22.8268	111.234	-668.865	73418.8	-34528.6	-7985.6	148.377	793.234	0	0	0	0	0	0	0	603	903	0
664	3	-13.0127	22.6392	-120.059	-7804.87	8601.3	3238.77	271.642	365.009	0	-22.9794	112.455	-669.475	73601.9	-34223.4	-8260.25	148.88	793.06	0	0	0	0	0	0	0	603	903	0
664	4	-12.5549	35.4565	-125.857	-7255.56	9516.83	2231.69	275.616	357.649	0	-26.7941	112.912	-667.949	75158.3	-33918.3	-7894.05	149.22	790.479	0	0	0	0	0	0	0	603	903	0
664	5	-14.0808	27.0642	-131.351	-6248.48	9272.69	2689.45	270.595	347.571	0	-25.8786	112.912	-664.287	73693.5	-34284.5	-7939.82	148.389	792.064	0	0	0	0	0	0	0	603	903	0
664	6	-16.0644	9.36402	-136.844	-6706.24	9333.72	2597.9	268.207	349.007	0	-22.9794	113.523	-662.151	73052.6	-33918.3	-7527.83	148.776	792.674	0	0	0	0	0	0	0	603	903	0
664	7	-16.6748	12.4158	-135.623	-6523.13	9516.83	1545.04	270.171	348.098	0	-22.8268	114.133	-659.099	73510.3	-33185.8	-7802.49	149.65	791.469	0	0	0	0	0	0	0	603	903	0
664	8	-15.9118	19.1296	-138.675	-7164	10127.2	1636.6	273.028	351.661	0	-26.1838	113.981	-657.573	73876.6	-33185.8	-7802.49	149.533	790.653	0	0	0	0	0	0	0	603	903	0
664	9	-12.0971	6.31226	-138.675	-7347.11	9760.97	1453.49	270.388	352.981	0	-26.6415	115.049	-656.658	73052.6	-33613.1	-8168.7	148.812	791.751	0	0	0	0	0	0	0	603	903	0
665	0	-16.6748	-3.14819	-142.947	-6889.35	10310.3	1316.16	272.127	348.195	0	-23.5898	115.506	-654.827	73510.3	-32880.7	-8214.48	149.787	790.741	0	0	0	0	0	0	0	603	903	0
665	1	-19.7265	2.19239	-149.356	-6797.79	10432.4	309.081	269.849	345.514	0	-22.0639	115.659	-651.164	73327.3	-33063.8	-7802.49	149.224	790.391	0	0	0	0	0	0	0	603	903	0
665	2	-12.0971	3.87085	-149.966	-6797.79	9883.04	400.634	265.902	345.329	0	-26.0312	115.506	-646.892	72686.4	-33063.8	-7985.6	148.888	790.638	0	0	0	0	0	0	0	603	903	0
665	3	-17.1325	-7.72583	-151.187	-6889.35	10371.3	400.634	268.599	345.568	0	-25.8786	117.032	-645.061	73052.6	-32880.7	-7939.82	149.027	789.751	0	0	0	0	0	0	0	603	903	0
665	4	-20.7946	-12.1509	-156.375	-6340.03	10859.6	125.975	269.446	340.544	0	-20.538	116.269	-641.094	72503.3	-31721	-8031.37	150.521	789.907	0	0	0	0	0	0	0	603	903	0
665	5	-16.8274	-6.04736	-161.258	-6248.48	11103.7	-194.459	268.857	338.748	0	-23.4372	118.406	-639.263	72411.7	-32575.5	-8122.93	149.042	789.726	0	0	0	0	0	0	0	603	903	0
665	6	-13.623	-8.031	-162.478	-7438.66	11470	-286.012	270.594	345.783	0	-25.1157	117.337	-636.516	71679.3	-32148.2	-7527.83	149.493	790.388	0	0	0	0	0	0	0	603	903	0
665	7	-20.0317	-13.6768	-165.225	-6431.58	11836.2	-560.67	271.637	338.926	0	-23.5898	118.406	-633.464	72137.1	-31660	-7802.49	150.021	789.123	0	0	0	0	0	0	0	603	903	0
665	8	-19.4214	-17.3389	-172.549	-6706.24	12080.3	-652.223	270.011	338.866	0	-21.301	116.422	-631.633	71221.5	-31782	-7710.94	149.683	790.242	0	0	0	0	0	0	0	603	903	0
665	9	-11.792	-12.6086	-179.263	-7987.98	12019.3	-148.683	267.048	344.56	0	-22.6743	119.779	-627.361	71130	-31537.9	-8031.37	149.729	789.62	0	0	0	0	0	0	0	603	903	0
666	0	-16.8274	-11.2353	-182.62	-7072.45	12812.7	-835.328	270.161	338.728	0	-23.132	120.389	-623.088	71496.2	-30744.4	-7939.82	150.658	788.255	0	0	0	0	0	0	0	603	903	0
666	1	-19.7265	-20.8484	-182.62	-7072.45	13606.2	-1064.21	274.505	338.728	0	-22.0639	120.084	-620.647	71496.2	-30927.5	-8168.7	150.169	787.804	0	0	0	0	0	0	0	603	903	0
666	2	-15.1489	-20.3906	-189.334	-6889.35	13545.1	-972.658	271.541	336.387	0	-21.6061	120.389	-620.342	70855.3	-30927.5	-8077.15	150.144	788.78	0	0	0	0	0	0	0	603	903	0
666	3	-14.8437	-14.2871	-197.879	-7072.45	14033.4	-881.105	270.919	335.741	0	-21.4536	120.084	-613.628	70946.9	-31110.7	-7894.05	149.3	787.381	0	0	0	0	0	0	0	603	903	0
666	4	-15.9118	-16.8811	-200.625	-7530.21	14765.9	-1613.53	273.599	337.534	0	-22.6743	121	-608.745	70397.6	-30378.2	-7985.6	150.097	787.356	0	0	0	0	0	0	0	603	903	0
666	5	-13.623	-23.4424	-207.339	-7255.56	14704.8	-1109.99	270.922	334.994	0	-22.2165	119.016	-606.609	69665.2	-30378.2	-7894.05	149.921	788.156	0	0	0	0	0	0	0	603	903	0
666	6	-14.6911	-22.0691	-211.917	-7987.98	15376.2	-1384.65	272.558	337.694	0	-20.9958	122.068	-605.998	70397.6	-30195.1	-7939.82	150.173	786.832	0	0	0	0	0	0	0	603	903	0
666	7	-13.7756	-16.4233	-220.157	-6980.9	16047.6	-1979.74	272.892	331.709	0	-20.9958	121.457	-601.726	69939.8	-29828.9	-8031.37	150.428	786.768	0	0	0	0	0	0	0	603	903	0
666	8	-11.9445	-22.0691	-225.039	-6797.79	16291.7	-2025.51	272.395	330.207	0	-22.3691	121.763	-595.928	68841.2	-29523.7	-7894.05	150.458	787.481	0	0	0	0	0	0	0	603	903	0
666	9	-13.1653	-27.1045	-225.345	-7896.43	16352.8	-1705.08	272.568	335.042	0	-20.2328	121.763	-593.486	68841.2	-29828.9	-7939.82	149.74	787.006	0	0	0	0	0	0	0	603	903	0
667	0	-12.0971	-22.9846	-234.195	-7804.87	17512.4	-1750.86	274.777	333.326	0	-16.7233	122.373	-590.435	68841.2	-28974.4	-8031.37	150.927	786.406	0	0	0	0	0	0	0	603	903	0
667	1	-8.58761	-22.6794	-243.35	-7896.43	17695.5	-2620.61	272.716	332.449	0	-21.4536	122.983	-585.857	68566.5	-28547.2	-8122.93	151.273	785.964	0	0	0	0	0	0	0	603	903	0
667	2	-9.35055	-28.3252	-248.843	-6706.24	18183.8	-2300.17	273.073	326.95	0	-21.4536	122.831	-582.805	68566.5	-28791.3	-7894.05	150.599	785.351	0	0	0	0	0	0	0	603	903	0
667	3	-13.0127	-31.0718	-254.031	-6980.9	18794.2	-2483.28	273.984	327.48	0	-17.3337	121.457	-579.753	68291.8	-28425.1	-7939.82	150.97	785.205	0	0	0	0	0	0	0	603	903	0
667	4	-9.50314	-28.9355	-259.524	-7621.77	19160.4	-2895.27	273.829	329.368	0	-16.2656	121.763	-574.565	67101.7	-28425.1	-7756.72	150.528	786.213	0	0	0	0	0	0	0	603	903	0
667	5	-7.82467	-29.5459	-263.492	-8079.53	19221.4	-2849.49	272.949	330.663	0	-16.5707	122.678	-569.988	67101.7	-28058.9	-7619.39	150.773	785.275	0	0	0	0	0	0	0	603	903	0
667	6	-9.65573	-33.3606	-269.595	-7347.11	20014.9	-2666.38	274.241	327.252	0	-18.0966	122.678	-566.936	67467.9	-27509.6	-7756.72	151.477	783.996	0	0	0	0	0	0	0	603	903	0
667	7	-9.35055	-35.802	-274.478	-6431.58	20869.4	-3398.81	276.033	323.432	0	-16.2656	122.525	-562.664	67376.3	-27265.4	-7756.72	151.542	783.255	0	0	0	0	0	0	0	603	903	0
667	8	-4.00998	-34.1235	-280.887	-6980.9	20869.4	-3261.48	274.298	324.853	0	-17.1811	122.831	-559.001	66277.7	-27570.6	-7436.28	150.679	784.436	0	0	0	0	0	0	0	603	903	0
667	9	-7.82467	-34.8865	-287.295	-7255.56	21235.6	-2803.71	273.915	325.255	0	-17.7914	122.678	-551.067	66003.1	-27631.6	-7802.49	149.858	783.227	0	0	0	0	0	0	0	603	903	0
668	0	-10.7238	-39.4641	-291.568	-7621.77	21784.9	-3948.12	274.716	326.141	0	-15.1974	122.831	-544.353	65728.4	-26838.2	-7619.39	150.697	782.254	0	0	0	0	0	0	0	603	903	0
668	1	-8.43503	-40.5322	-297.366	-6980.9	21601.8	-3902.35	272.644	323.476	0	-13.2138	122.983	-544.658	65087.5	-26533	-7390.51	151.285	783.498	0	0	0	0	0	0	0	603	903	0
668	2	-5.68844	-38.7012	-301.333	-7072.45	22395.2	-3581.91	274.321	323.471	0	-14.2819	123.288	-540.691	64721.3	-26288.9	-7665.16	151.379	783.299	0	0	0	0	0	0	0	603	903	0
668	3	-7.06173	-40.227	-304.385	-7164	22456.3	-3490.36	273.776	323.536	0	-14.8923	122.678	-534.587	63988.9	-25068.2	-7665.16	153.107	783.302	0	0	0	0	0	0	0	603	903	0
668	4	-5.84103	-44.3469	-306.827	-6706.24	22883.5	-4222.78	274.581	321.857	0	-13.3664	120.237	-530.925	63805.8	-26044.7	-7482.06	150.945	782.822	0	0	0	0	0	0	0	603	903	0
668	5	-6.60397	-44.1943	-313.235	-6706.24	23371.8	-3948.12	274.614	321.41	0	-13.6716	122.983	-526.958	63256.4	-25556.5	-7344.73	151.502	782.959	0	0	0	0	0	0	0	603	903	0
668	6	-4.62033	-41.9055	-319.644	-6523.13	24104.2	-4360.11	275.41	320.408	0	-13.6716	122.831	-520.854	63256.4	-24946.1	-7298.95	152.105	781.553	0	0	0	0	0	0	0	603	903	0
668	7	-4.77292	-45.8728	-325.747	-6706.24	23982.2	-4131.23	273.622	320.587	0	-13.519	122.373	-515.666	62890.2	-25251.3	-6978.52	151.032	781.041	0	0	0	0	0	0	0	603	903	0
668	8	-4.9255	-48.3142	-326.053	-6706.24	24287.3	-4222.78	274.489	320.568	0	-13.6716	122.22	-510.478	61700.1	-24640.9	-7527.83	151.73	782.133	0	0	0	0	0	0	0	603	903	0
668	9	-5.84103	-45.415	-331.851	-6156.92	25080.8	-4588.99	275.578	318.553	0	-12.6035	122.22	-506.511	62157.8	-24091.6	-7298.95	152.436	780.282	0	0	0	0	0	0	0	603	903	0
669	0	-4.16256	-45.2624	-337.344	-6248.48	25019.8	-4863.65	274.167	318.523	0	-11.2302	121.152	-501.323	61517	-24030.6	-7207.4	152.066	780.291	0	0	0	0	0	0	0	603	903	0
669	1	-4.31515	-49.0771	-339.786	-6065.37	25569.1	-4360.11	275.251	317.851	0	-12.9086	121.61	-493.083	60967.6	-23847.5	-7253.18	151.636	779.354	0	0	0	0	0	0	0	603	903	0
669	2	-5.23068	-50.4504	-343.753	-5516.05	26179.4	-4497.44	276.158	316.047	0	-11.6879	121	-490.642	60784.5	-23115	-6978.52	152.888	779.112	0	0	0	0	0	0	0	603	903	0
669	3	-2.63669	-49.0771	-348.941	-5973.82	26179.4	-4955.2	275.025	317.12	0	-10.3146	120.084	-486.675	59319.7	-22870.9	-6886.97	153.006	781.112	0	0	0	0	0	0	0	603	903	0
669	4	-1.87375	-48.1616	-351.993	-6614.69	26301.5	-5138.31	274.722	318.792	0	-11.0776	119.016	-480.266	59136.6	-23054	-6612.31	151.997	779.867	0	0	0	0	0	0	0	603	903	0
669	5	-2.33151	-50.4504	-355.35	-5241.4	27156	-4268.56	276.421	314.75	0	-11.0776	118.711	-473.857	59319.7	-22687.8	-6886.97	152.121	777.815	0	0	0	0	0	0	0	603	903	0
669	6	-1.41598	-52.1289	-358.706	-4966.74	27278.1	-5229.86	276.046	313.846	0	-10.3146	117.643	-467.754	58770.4	-22260.6	-6749.64	152.41	777.356	0	0	0	0	0	0	0	603	903	0
669	7	0.262484	-51.0608	-365.115	-5882.27	27339.1	-5138.31	274.878	316.111	0	-6.34735	118.253	-463.176	57946.4	-22260.6	-6749.64	151.939	777.893	0	0	0	0	0	0	0	603	903	0
669	8	-0.958219	-51.0608	-367.251	-4966.74	28010.5	-5321.41	276.271	313.524	0	-10.0095	117.795	-458.293	56756.2	-21833.3	-6795.41	152.36	779.158	0	0	0	0	0	0	0	603	903	0
669	9	0.720248	-54.1125	-369.693	-5332.95	28193.6	-5092.53	276.262	314.425	0	-9.70428	115.964	-452.19	57122.4	-20978.8	-6429.2	153.606	776.676	0	0	0	0	0	0	0	603	903	0
670	0	-0.347868	-55.0281	-372.134	-4692.08	28193.6	-5641.85	275.762	312.609	0	-8.02582	114.438	-449.443	56573.1	-20612.6	-6612.31	154.137	777.126	0	0	0	0	0	0	0	603	903	0
670	1	1.02542	-53.197	-374.576	-4508.97	29170.2	-5641.85	277.875	312.038	0	-8.48358	115.354	-440.898	56023.8	-20795.7	-6383.43	152.833	775.933	0	0	0	0	0	0	0	603	903	0
670	2	1.48319	-55.0281	-378.238	-4325.87	29475.3	-5733.4	277.928	311.437	0	-8.63617	115.201	-435.71	54925.2	-20429.5	-6383.43	153.112	776.941	0	0	0	0	0	0	0	603	903	0
670	3	2.70389	-57.4695	-384.952	-3227.24	28987.1	-5962.28	275.301	308.383	0	-6.9577	114.133	-430.522	54009.6	-19819.1	-6154.54	153.965	777.549	0	0	0	0	0	0	0	603	903	0
670	4	2.09354	-58.6902	-386.477	-4417.42	29658.4	-6053.84	276.74	311.43	0	-6.80511	111.997	-424.114	53735	-20002.3	-6291.87	152.838	776.301	0	0	0	0	0	0	0	603	903	0
670	5	3.16165	-56.8591	-388.919	-3410.34	29780.5	-6008.06	276.573	308.769	0	-6.04218	109.403	-416.789	53368.7	-19575	-6062.99	153.034	774.953	0	0	0	0	0	0	0	603	903	0
670	6	2.39871	-59.3005	-392.886	-3410.34	29536.4	-6236.94	275.178	308.68	0	-6.80511	111.081	-410.076	53460.3	-19086.7	-6017.21	153.456	772.633	0	0	0	0	0	0	0	603	903	0
670	7	1.48319	-60.3686	-393.802	-3685	30818.1	-6236.94	278.258	309.358	0	-6.49994	110.776	-403.667	52636.3	-19208.8	-6291.87	152.414	772.605	0	0	0	0	0	0	0	603	903	0
670	8	3.31424	-59.4531	-395.022	-2952.58	30696	-6328.49	277.707	307.474	0	-5.737	110.013	-398.479	51079.9	-18781.5	-6062.99	152.867	774.813	0	0	0	0	0	0	0	603	903	0
670	9	3.77201	-60.979	-398.684	-3318.79	30451.9	-6511.6	276.381	308.324	0	-6.80511	108.335	-389.018	50988.4	-18049.1	-5513.67	153.603	771.931	0	0	0	0	0	0	0	603	903	0
671	0	4.38236	-61.8945	-402.041	-2861.02	31062.2	-6648.93	277.261	307.116	0	-4.66888	106.962	-384.441	50347.5	-17438.8	-5742.56	154.639	772.037	0	0	0	0	0	0	0	603	903	0
671	1	5.1453	-63.1152	-403.872	-2311.71	31733.6	-6282.72	278.573	305.724	0	-6.19476	106.504	-377.727	48882.7	-17805	-5467.9	152.863	773.587	0	0	0	0	0	0	0	603	903	0
671	2	7.12894	-62.3523	-407.535	-2861.02	31367.4	-6786.26	276.969	307.02	0	-5.27924	105.436	-371.318	49065.8	-17133.6	-5559.45	153.857	770.861	0	0	0	0	0	0	0	603	903	0
671	3	6.06082	-62.0471	-410.281	-2128.6	31855.7	-7198.25	277.644	305.188	0	-2.22748	104.673	-365.215	48150.3	-16584.3	-5330.57	154.59	771.159	0	0	0	0	0	0	0	603	903	0
671	4	5.45047	-64.0308	-411.197	-2311.71	32160.9	-6786.26	278.213	305.622	0	-5.43182	104.062	-358.806	47143.2	-16828.4	-5422.12	153.099	771.611	0	0	0	0	0	0	0	603	903	0
671	5	5.75565	-65.0989	-415.774	-2037.05	32160.9	-6832.03	277.352	304.899	0	-4.97406	100.858	-353.313	46868.5	-16218.1	-5193.24	154.097	770.346	0	0	0	0	0	0	0	603	903	0
671	6	7.28153	-64.7937	-418.521	-1579.29	32649.2	-6786.26	278.011	303.774	0	-4.21112	99.3321	-344.768	45953	-15729.8	-5239.02	154.376	769.713	0	0	0	0	0	0	0	603	903	0
671	7	9.26517	-65.2515	-417.3	-1853.94	32832.3	-6923.59	278.678	304.443	0	-4.82147	99.1795	-336.833	44854.4	-15851.9	-5330.57	152.939	769.835	0	0	0	0	0	0	0	603	903	0
671	8	7.73929	-65.404	-419.131	-1579.29	32649.2	-6740.48	277.897	303.768	0	-4.82147	96.433	-329.509	44121.9	-15424.6	-5193.24	153.189	769.098	0	0	0	0	0	0	0	603	903	0
671	9	7.89188	-65.8618	-421.267	-572.205	33381.6	-7198.25	279.241	301.358	0	-3.60077	96.2804	-326.457	44121.9	-15058.4	-5010.13	153.873	767.846	0	0	0	0	0	0	0	603	903	0
672	0	9.72293	-66.0144	-424.624	-755.311	33564.7	-7381.35	279.046	301.779	0	-2.83783	94.1441	-319.744	42748.6	-14814.3	-4872.81	153.668	769.303	0	0	0	0	0	0	0	603	903	0
672	1	10.6385	-66.6247	-427.066	-480.652	33259.5	-7289.8	277.879	301.125	0	-2.07489	93.5338	-311.809	41833.1	-14448.1	-4689.7	153.664	768.837	0	0	0	0	0	0	0	603	903	0
672	2	10.4859	-68.3032	-430.118	-755.311	33747.8	-7564.46	278.462	301.756	0	-3.29559	90.7872	-303.569	41009.1	-13654.6	-4735.48	155.02	767.91	0	0	0	0	0	0	0	603	903	0
672	3	11.2488	-66.6247	-431.949	-1029.97	34175	-7472.9	279.118	302.384	0	-2.83783	90.7872	-298.076	40826	-13532.5	-4689.7	154.6	766.035	0	0	0	0	0	0	0	603	903	0
672	4	11.8592	-67.5403	-433.475	-22.8885	34175	-7335.57	278.84	300.053	0	-3.60077	88.3458	-292.888	40551.4	-13166.3	-4460.82	155.047	764.547	0	0	0	0	0	0	0	603	903	0
672	5	12.3169	-68.3032	-435.611	1167.3	34053	-7472.9	278.173	297.32	0	-1.9223	85.5992	-286.479	39818.9	-12983.2	-4415.04	154.68	764.006	0	0	0	0	0	0	0	603	903	0
672	6	14.6057	-69.9817	-436.526	526.428	34846.4	-7747.56	279.827	298.794	0	-1.31195	83.3104	-280.071	38354.1	-12800.1	-4369.26	154.297	766.056	0	0	0	0	0	0	0	603	903	0
672	7	13.385	-69.5239	-439.883	68.6643	35029.5	-7472.9	279.634	299.844	0	-1.76971	82.2423	-272.747	37255.5	-12617	-4003.05	153.741	766.406	0	0	0	0	0	0	0	603	903	0
672	8	13.9954	-69.5239	-440.494	984.192	35212.6	-7472.9	279.939	297.766	0	-1.9223	81.6319	-265.727	37163.9	-12128.7	-4140.38	154.357	763.143	0	0	0	0	0	0	0	603	903	0
672	9	15.6739	-70.592	-446.597	1441.96	35639.9	-7884.89	279.803	296.771	0	-1.76971	78.8853	-256.877	37072.4	-11396.3	-4048.83	155.635	758.681	0	0	0	0	0	0	0	603	903	0
673	0	16.5894	-71.6601	-450.87	2906.8	36311.3	-7518.68	280.536	293.553	0	-2.99042	78.275	-252.605	35516	-11579.4	-3957.28	154.16	762.401	0	0	0	0	0	0	0	603	903	0
673	1	17.0472	-72.1179	-462.771	3547.67	37226.8	-7839.11	280.443	292.334	0	-2.83783	75.8336	-246.196	34600.4	-11518.4	-3957.28	153.215	762.46	0	0	0	0	0	0	0	603	903	0
673	2	17.8101	-73.949	-468.875	4005.43	37287.8	-8205.32	279.526	291.457	0	-1.15936	74.6129	-238.567	33959.6	-11213.2	-3636.84	152.998	760.652	0	0	0	0	0	0	0	603	903	0
673	3	18.8782	-80.5102	-469.18	3730.77	37348.9	-8479.98	279.605	292.048	0	-2.68524	72.4767	-230.327	32769.4	-10541.8	-3545.29	154.231	760.727	0	0	0	0	0	0	0	603	903	0
673	4	18.2679	-82.4939	-471.316	4646.3	38020.3	-8663.09	280.668	290.142	0	-2.22748	71.4085	-226.36	32220.1	-10236.6	-3407.96	154.777	760.66	0	0	0	0	0	0	0	603	903	0
673	5	17.9627	-82.0361	-473.758	5561.83	38264.4	-8846.19	280.768	288.26	0	-0.243835	69.7301	-220.561	31487.6	-9626.28	-3591.07	156.356	760.239	0	0	0	0	0	0	0	603	903	0
673	6	19.9463	-88.1396	-478.03	4829.41	38142.3	-9624.39	279.791	289.897	0	-2.68524	67.899	-212.322	30297.5	-9321.1	-3728.4	156.099	760.304	0	0	0	0	0	0	0	603	903	0
673	7	19.336	-91.0388	-478.641	4554.75	38386.5	-8708.86	280.199	290.484	0	-1.76971	66.068	-207.744	29565	-9565.24	-3453.74	153.957	760.685	0	0	0	0	0	0	0	603	903	0
673	8	17.3523	-90.581	-480.166	4646.3	38447.5	-9258.18	280.071	290.324	0	-0.396423	63.1688	-200.115	29015.7	-8893.86	-2995.97	155.556	758.005	0	0	0	0	0	0	0	603	903	0
673	9	21.167	-88.4448	-483.829	5287.17	38386.5	-9487.06	279.339	289.072	0	-1.46454	62.1007	-193.706	28374.9	-8649.72	-3087.53	155.346	756.516	0	0	0	0	0	0	0	603	903	0
674	0	21.3196	-88.9026	-488.101	5470.28	38935.8	-9303.96	279.77	288.793	0	-2.68524	61.0326	-189.128	27367.8	-8527.65	-2721.32	154.911	758.295	0	0	0	0	0	0	0	603	903	0
674	1	18.573	-88.75	-490.848	6477.36	39241	-9120.85	279.945	286.804	0	-1.00677	58.1334	-182.415	26910	-7978.33	-2858.64	156.263	755.479	0	0	0	0	0	0	0	603	903	0
674	2	20.5567	-87.6819	-493.289	6385.8	39179.9	-9258.18	279.426	287.055	0	-0.701599	54.1661	-175.701	26086	-7734.19	-2767.09	155.981	754.531	0	0	0	0	0	0	0	603	903	0
674	3	23.6084	-86.3086	-495.425	6477.36	39790.3	-9212.4	280.315	286.926	0	-2.38007	54.3187	-169.292	24438.1	-7978.33	-2858.64	152.872	758.645	0	0	0	0	0	0	0	603	903	0
674	4	21.7774	-85.2405	-500.613	7118.23	40217.5	-8663.09	280.337	285.781	0	-2.38007	53.098	-164.104	24621.2	-7184.87	-2538.21	156.218	752.966	0	0	0	0	0	0	0	603	903	0
674	5	24.3714	-86.9189	-503.055	7118.23	40156.5	-8800.42	279.825	285.85	0	-1.00677	50.6566	-158	23980.3	-6879.69	-2538.21	156.458	751.226	0	0	0	0	0	0	0	603	903	0
674	6	25.7447	-85.6982	-503.36	6843.57	40583.7	-8479.98	280.626	286.404	0	-2.38007	48.9781	-152.812	22973.2	-7001.76	-2538.21	154.181	752.664	0	0	0	0	0	0	0	603	903	0
674	7	25.1343	-84.0198	-506.412	7575.99	40705.8	-9166.63	280.381	285.04	0	-2.38007	47.2997	-145.793	22240.8	-6513.48	-2355.1	155.324	750.45	0	0	0	0	0	0	0	603	903	0
674	8	25.5921	-86.0034	-508.548	7667.54	40644.8	-8800.42	279.923	284.923	0	-1.31195	44.2479	-140.911	21600	-6269.34	-2263.55	155.508	749.712	0	0	0	0	0	0	0	603	903	0
674	9	26.9654	-87.6819	-513.125	8216.86	41011	-9029.3	279.924	283.987	0	-1.15936	43.485	-135.723	20592.9	-6269.34	-2263.55	153.808	751.272	0	0	0	0	0	0	0	603	903	0
675	0	26.355	-86.6138	-514.041	8583.07	41438.2	-8983.52	280.613	283.303	0	-2.07489	42.8746	-132.061	19860.5	-5781.06	-2034.67	156.224	752.611	0	0	0	0	0	0	0	603	903	0
675	1	27.4231	-87.0715	-514.346	8949.28	41194.1	-8800.42	280.09	282.601	0	-1.9223	40.5858	-125.652	19677.3	-5414.85	-2263.55	156.906	746.398	0	0	0	0	0	0	0	603	903	0
675	2	28.3387	-89.9707	-517.398	8033.75	41682.4	-9349.73	280.562	284.473	0	-1.9223	38.6021	-121.379	18944.9	-5597.95	-1943.12	153.881	746.92	0	0	0	0	0	0	0	603	903	0
675	3	28.1861	-89.5129	-519.839	8857.73	42048.6	-9166.63	280.888	282.961	0	-2.38007	36.0081	-117.412	18487.2	-4926.57	-1943.12	158.04	745.545	0	0	0	0	0	0	0	603	903	0
675	4	29.8645	-89.0552	-523.196	10047.9	41621.3	-8891.97	279.552	280.795	0	-2.53265	33.2616	-113.14	17571.6	-4926.57	-1668.46	156.456	747.691	0	0	0	0	0	0	0	603	903	0
675	5	31.0852	-90.581	-528.384	10047.9	42353.8	-9349.73	280.157	280.984	0	-1.61713	32.6512	-107.341	17297	-5109.67	-1622.68	152.398	741.86	0	0	0	0	0	0	0	603	903	0
675	6	30.3223	-92.7173	-531.131	9864.81	42658.9	-9303.96	280.317	281.427	0	-2.68524	30.515	-105.51	16106.8	-4682.43	-1714.23	155.621	750.344	0	0	0	0	0	0	0	603	903	0
675	7	29.4068	-91.6492	-532.657	9773.25	42231.7	-9212.4	279.285	281.652	0	-2.38007	29.2943	-100.017	15832.1	-4377.25	-1668.46	156.235	744.706	0	0	0	0	0	0	0	603	903	0
675	8	32.4585	-90.7336	-536.624	10414.1	43208.2	-9120.85	280.519	280.593	0	-0.549011	29.1417	-95.1342	15557.5	-4316.22	-1622.68	154.63	739.468	0	0	0	0	0	0	0	603	903	0
675	9	32.7637	-91.6492	-539.065	10505.7	43696.5	-9120.85	281.06	280.511	0	-3.29559	27.921	-92.998	15557.5	-4438.29	-1576.91	152.275	735.712	0	0	0	0	0	0	0	603	903	0
676	0	32.0008	-92.1069	-539.676	11329.7	43086.2	-9303.96	279.837	279.007	0	-2.22748	23.9537	-86.8945	14092.6	-3950.01	-1256.47	154.543	740.819	0	0	0	0	0	0	0	603	903	0
676	1	33.8318	-93.175	-543.338	11146.5	43757.6	-9212.4	280.535	279.485	0	-1.9223	23.8011	-85.979	13726.4	-4011.04	-1256.47	153.349	743.351	0	0	0	0	0	0	0	603	903	0
676	2	33.8318	-93.175	-547	11787.4	44123.8	-9441.29	280.665	278.451	0	-3.75336	23.6485	-81.0961	13268.7	-3766.9	-1256.47	153.55	739.384	0	0	0	0	0	0	0	603	903	0
676	3	34.7473	-94.0906	-550.357	11512.8	44306.9	-9258.18	280.506	279.081	0	-3.44818	22.4278	-78.3496	12627.8	-3583.8	-1164.92	154.259	741.828	0	0	0	0	0	0	0	603	903	0
676	4	35.6629	-94.2432	-554.935	11512.8	44917.2	-9166.63	280.942	279.254	0	-2.68524	20.4442	-77.434	12444.7	-3705.87	-1302.25	152.142	742.287	0	0	0	0	0	0	0	603	903	0
676	5	35.8155	-93.0225	-557.681	11879	45161.4	-9303.96	280.981	278.699	0	-2.38007	20.2916	-74.6875	11895.4	-3644.83	-1531.13	151.199	743.732	0	0	0	0	0	0	0	603	903	0
676	6	35.6629	-92.8699	-562.564	12245.2	44978.3	-9349.73	279.952	278.233	0	-1.46454	18.7657	-71.0253	11437.6	-3400.69	-1210.69	152.12	741.965	0	0	0	0	0	0	0	603	903	0
676	7	35.9681	-94.5483	-563.785	12702.9	45039.3	-9166.63	279.887	277.468	0	-2.68524	17.8502	-68.8891	11529.1	-3095.51	-1027.59	155.065	735.642	0	0	0	0	0	0	0	603	903	0
676	8	38.1043	-94.2432	-566.226	12428.3	45771.7	-9120.85	280.836	278.051	0	-2.99042	18.308	-63.3959	10613.6	-2912.41	-1210.69	154.06	735.582	0	0	0	0	0	0	0	603	903	0
676	9	37.9517	-92.2595	-568.362	12428.3	46076.9	-9029.3	281.07	278.133	0	-3.90594	18.4605	-63.0908	10705.2	-2790.34	-1210.69	155.773	733.321	0	0	0	0	0	0	0	603	903	0
677	0	39.325	-91.1914	-569.583	12702.9	45954.8	-9120.85	280.682	277.698	0	-3.75336	16.3243	-60.3442	10155.9	-2790.34	-1256.47	153.76	734.701	0	0	0	0	0	0	0	603	903	0
677	1	38.4095	-92.4121	-574.161	13435.4	46076.9	-9166.63	280.251	276.6	0	-0.701599	15.5614	-56.3769	9514.99	-3217.58	-1256.47	142.927	734.225	0	0	0	0	0	0	0	603	903	0
677	2	39.325	-92.8699	-578.128	13526.9	46504.1	-9120.85	280.439	276.602	0	-3.75336	14.4933	-56.0717	9057.22	-2485.16	-798.707	155.679	741.471	0	0	0	0	0	0	0	603	903	0
677	3	39.1724	-92.2595	-583.011	13160.7	46687.3	-8983.52	280.08	277.426	0	-3.75336	14.1881	-51.4941	8782.57	-2363.09	-890.26	154.109	732.445	0	0	0	0	0	0	0	603	903	0
677	4	38.7146	-91.9543	-585.757	13343.8	46809.3	-8754.64	279.913	277.22	0	-3.29559	13.2726	-49.663	8324.8	-2729.3	-1119.14	145.044	735.374	0	0	0	0	0	0	0	603	903	0
677	5	39.6302	-91.6492	-586.368	13526.9	47236.6	-8983.52	280.558	276.931	0	-3.60077	12.8148	-47.832	7867.04	-2179.99	-1164.92	154.424	738.528	0	0	0	0	0	0	0	603	903	0
677	6	40.2405	-91.1914	-589.419	14076.2	47358.6	-8891.97	280.348	276.118	0	-4.21112	12.8148	-44.475	7500.82	-2363.09	-661.378	146.867	734.348	0	0	0	0	0	0	0	603	903	0
677	7	40.0879	-90.4285	-591.556	14442.4	47541.7	-8708.86	280.367	275.586	0	-2.53265	11.8993	-41.1181	7317.72	-2179.99	-1027.59	146.982	725.032	0	0	0	0	0	0	0	603	903	0
677	8	39.9353	-91.344	-593.692	14259.3	47663.8	-8983.52	280.284	275.982	0	-2.53265	11.5941	-40.8129	6676.85	-1996.88	-844.484	151.072	739.404	0	0	0	0	0	0	0	603	903	0
677	9	39.9353	-91.1914	-596.744	14076.2	48030	-8937.75	280.487	276.412	0	-1.76971	11.8993	-38.3715	5761.32	-1935.85	-981.813	149.55	752.854	0	0	0	0	0	0	0	603	903	0
678	0	40.8509	-89.8181	-601.932	13893.1	48091.1	-8205.32	279.895	276.919	0	-3.44818	11.1363	-36.2353	6127.53	-1813.78	-1027.59	149.945	733.896	0	0	0	0	0	0	0	603	903	0
678	1	40.0879	-89.3603	-603.152	14534	48396.2	-8846.19	280.239	275.903	0	-2.83783	9.76303	-33.4887	5669.77	-1752.74	-844.484	147.662	733.696	0	0	0	0	0	0	0	603	903	0
678	2	40.0879	-89.8181	-604.068	15358	48457.3	-8663.09	280.218	274.576	0	-4.21112	8.38974	-30.7421	5303.56	-1386.53	-752.931	154.898	730.482	0	0	0	0	0	0	0	603	903	0
678	3	39.9353	-89.0552	-608.34	15541.1	48457.3	-8434.21	279.655	274.453	0	-3.60077	9.61045	-30.437	4662.69	-1508.6	-936.036	150.435	749.808	0	0	0	0	0	0	0	603	903	0
678	4	39.9353	-88.2922	-608.34	14717.1	48823.5	-8113.77	280.257	275.808	0	-0.854187	9.30527	-29.8266	4479.58	-1813.78	-432.496	139.189	752.813	0	0	0	0	0	0	0	603	903	0
678	5	40.3931	-87.9871	-607.12	14442.4	48945.6	-8479.98	280.619	276.212	0	-3.29559	8.23715	-27.6904	4296.48	-1020.32	-890.26	163.153	747.839	0	0	0	0	0	0	0	603	903	0
678	6	41.156	-88.5974	-612.613	14991.8	48823.5	-8251.1	279.697	275.528	0	-4.36371	8.08457	-24.3334	4113.37	-959.283	-569.825	160.578	733.958	0	0	0	0	0	0	0	603	903	0
678	7	41.0035	-87.2241	-614.444	15541.1	49189.7	-8434.21	280.056	274.707	0	-3.29559	6.10092	-22.1972	4021.82	-1142.39	-615.602	148.535	721.814	0	0	0	0	0	0	0	603	903	0
678	8	41.0035	-86.3086	-617.801	16090.4	49433.8	-8159.55	280.016	273.955	0	-2.22748	6.55869	-20.6713	3655.61	-1142.39	-524.049	144.736	726.156	0	0	0	0	0	0	0	603	903	0
678	9	41.4612	-86.9189	-621.158	15998.8	49372.8	-8434.21	279.485	274.243	0	-0.701599	5.64316	-20.3662	2648.53	-959.283	-569.825	152.898	772.954	0	0	0	0	0	0	0	603	903	0
679	0	40.8509	-86.7663	-621.463	15815.7	49372.8	-7656.01	279.446	274.551	0	-2.22748	5.33798	-18.8403	3106.29	-1020.32	-203.614	145.844	738.125	0	0	0	0	0	0	0	603	903	0
679	1	41.156	-87.3767	-622.684	15815.7	49616.9	-8067.99	279.682	274.601	0	0	0	0	0	0	0	200	903	0	0	0	0	0	0	0	603	903	0
679	2	41.7664	-84.7827	-623.294	16273.5	50166.3	-8022.22	280.486	273.891	0	0	0	0	0	0	0	200	903	0	0	0	0	0	0	0	603	903	0
679	3	41.3086	-85.0879	-624.82	16731.3	49983.2	-7930.67	279.996	273.222	0	0	0	0	0	0	0	200	903	0	0	0	0	0	0	0	603	903	0
679	4	42.9871	-86.156	-627.261	16456.6	50227.3	-8205.32	280.074	273.764	0	0	0	0	0	0	0	200	903	0	0	0	0	0	0	0	603	903	0
679	5	41.6138	-84.3249	-628.482	16090.4	50349.4	-8296.88	280.113	274.398	0	0	0	0	0	0	0	200	903	0	0	0	0	0	0	0	603	903	0
679	6	42.3767	-83.4094	-631.534	16548.2	50044.2	-7106.69	279.242	273.797	0	0	0	0	0	0	0	200	903	0	0	0	0	0	0	0	603	903	0
679	7	42.5293	-82.3413	-633.67	17005.9	50471.4	-7610.23	279.649	273.163	0	0	0	0	0	0	0	200	903	0	0	0	0	0	0	0	603	903	0
679	8	42.2242	-82.7991	-629.092	17555.2	50837.6	-7884.89	280.811	272.094	0	0	0	0	0	0	0	200	903	0	0	0	0	0	0	0	603	903	0
679	9	41.919	-82.3413	-635.806	17463.7	50776.6	-7564.46	279.862	272.533	0	0	0	0	0	0	0	200	903	0	0	0	0	0	0	0	603	903	0
680	0	41.7664	-81.7309	-635.196	17189	50471.4	-7656.01	279.458	272.939	0	0	0	0	0	0	0	200	903	0	0	0	0	0	0	0	603	903	0
680	1	41.0035	-80.968	-637.027	17097.5	51203.9	-7518.68	280.379	273.161	0	0	0	0	0	0	0	200	903	0	0	0	0	0	0	0	603	903	0
680	2	41.0035	-80.3577	-637.637	17097.5	51142.8	-7289.8	280.207	273.186	0	0	0	0	0	0	0	200	903	0	0	0	0	0	0	0	603	903	0
680	3	42.2242	-80.2051	-640.079	17738.3	50471.4	-7381.35	278.852	272.287	0	0	0	0	0	0	0	200	903	0	0	0	0	0	0	0	603	903	0
680	4	43.4449	-80.0525	-642.215	17829.9	51264.9	-7381.35	279.825	272.237	0	0	0	0	0	0	0	200	903	0	0	0	0	0	0	0	603	903	0
680	5	41.7664	-79.4421	-642.825	18013	51203.9	-7472.9	279.654	271.978	0	0	0	0	0	0	0	200	903	0	0	0	0	0	0	0	603	903	0
680	6	40.6983	-78.5266	-645.267	18379.2	51325.9	-7244.02	279.542	271.517	0	0	0	0	0	0	0	200	903	0	0	0	0	0	0	0	603	903	0
680	7	41.4612	-78.9844	-646.792	18287.7	51387	-6694.71	279.449	271.726	0	0	0	0	0	0	0	200	903	0	0	0	0	0	0	0	603	903	0
680	8	41.156	-77.4585	-646.182	19294.7	51509	-7106.69	279.713	270.14	0	0	0	0	0	0	0	200	903	0	0	0	0	0	0	0	603	903	0
680	9	41.156	-77.6111	-646.487	18745.4	51448	-7060.92	279.581	271.004	0	0	0	0	0	0	0	200	903	0	0	0	0	0	0	0	603	903	0
681	0	41.3086	-77.1533	-646.792	18745.4	51509	-7106.69	279.638	271.018	0	0	0	0	0	0	0	200	903	0	0	0	0	0	0	0	603	903	0
681	1	41.3086	-76.8481	-648.318	19020.1	51875.2	-7060.92	280.015	270.662	0	0	0	0	0	0	0	200	903	0	0	0	0	0	0	0	603	903	0
681	2	41.156	-76.0852	-651.98	19386.3	51570.1	-6877.81	279.098	270.266	0	0	0	0	0	0	0	200	903	0	0	0	0	0	0	0	603	903	0
681	3	41.156	-75.9326	-651.98	19752.5	51509	-6877.81	279.004	269.704	0	0	0	0	0	0	0	200	903	0	0	0	0	0	0	0	603	903	0
681	4	40.6983	-74.4067	-654.117	19935.6	51936.3	-7060.92	279.399	269.523	0	0	0	0	0	0	0	200	903	0	0	0	0	0	0	0	603	903	0
681	5	40.3931	-75.0171	-654.727	20027.2	51997.3	-6648.93	279.418	269.411	0	0	0	0	0	0	0	200	903	0	0	0	0	0	0	0	603	903	0
681	6	40.3931	-74.7119	-653.811	19752.5	52058.3	-6648.93	279.623	269.789	0	0	0	0	0	0	0	200	903	0	0	0	0	0	0	0	603	903	0
681	7	40.0879	-73.186	-654.422	20668	52424.6	-6648.93	280.108	268.418	0	0	0	0	0	0	0	200	903	0	0	0	0	0	0	0	603	903	0
681	8	40.5457	-73.4912	-655.032	20118.7	51814.2	-6511.6	279.102	269.286	0	0	0	0	0	0	0	200	903	0	0	0	0	0	0	0	603	903	0
681	9	40.3931	-73.186	-653.811	20576.5	51936.3	-6511.6	279.436	268.528	0	0	0	0	0	0	0	200	903	0	0	0	0	0	0	0	603	903	0
682	0	40.5457	-72.8809	-658.084	20484.9	52119.4	-6420.05	279.199	268.872	0	0	0	0	0	0	0	200	903	0	0	0	0	0	0	0	603	903	0
682	1	40.8509	-72.5757	-654.117	21308.9	52180.4	-6374.27	279.772	267.423	0	0	0	0	0	0	0	200	903	0	0	0	0	0	0	0	603	903	0
682	2	40.3931	-71.8127	-658.999	20668	52119.4	-6328.49	279.089	268.637	0	0	0	0	0	0	0	200	903	0	0	0	0	0	0	0	603	903	0
682	3	40.3931	-71.0498	-660.22	21492	52302.5	-6374.27	279.22	267.447	0	0	0	0	0	0	0	200	903	0	0	0	0	0	0	0	603	903	0
682	4	38.7146	-70.7446	-660.525	21308.9	52119.4	-6465.82	278.906	267.739	0	0	0	0	0	0	0	200	903	0	0	0	0	0	0	0	603	903	0
682	5	40.6983	-70.4394	-661.746	21766.7	52119.4	-6191.17	278.76	267.107	0	0	0	0	0	0	0	200	903	0	0	0	0	0	0	0	603	903	0
682	6	40.2405	-69.8291	-661.136	22407.5	52607.7	-6145.39	279.572	266.108	0	0	0	0	0	0	0	200	903	0	0	0	0	0	0	0	603	903	0
682	7	40.2405	-71.2024	-663.882	22407.5	52241.5	-6191.17	278.691	266.248	0	0	0	0	0	0	0	200	903	0	0	0	0	0	0	0	603	903	0
682	8	39.9353	-69.3713	-662.967	22132.9	52302.5	-6099.61	278.892	266.615	0	0	0	0	0	0	0	200	903	0	0	0	0	0	0	0	603	903	0
682	9	38.562	-68.3032	-663.882	22132.9	52607.7	-5596.07	279.242	266.661	0	0	0	0	0	0	0	200	903	0	0	0	0	0	0	0	603	903	0
683	0	39.325	-67.3877	-665.408	22499.1	52546.6	-6008.06	278.969	266.188	0	0	0	0	0	0	0	200	903	0	0	0	0	0	0	0	603	903	0
683	1	39.4776	-66.7773	-665.408	22956.8	52729.7	-5687.63	279.244	265.5	0	0	0	0	0	0	0	200	903	0	0	0	0	0	0	0	603	903	0
683	2	39.7827	-67.5403	-661.746	22956.8	52790.8	-5641.85	279.775	265.309	0	0	0	0	0	0	0	200	903	0	0	0	0	0	0	0	603	903	0
683	3	39.4776	-66.9299	-664.187	23140	52607.7	-6008.06	279.206	265.161	0	0	0	0	0	0	0	200	903	0	0	0	0	0	0	0	603	903	0
683	4	39.325	-66.4722	-668.155	23414.6	52668.7	-5596.07	278.827	264.956	0	0	0	0	0	0	0	200	903	0	0	0	0	0	0	0	603	903	0
683	5	39.4776	-65.404	-668.155	23323.1	52424.6	-5504.52	278.462	265.093	0	0	0	0	0	0	0	200	903	0	0	0	0	0	0	0	603	903	0
683	6	39.7827	-65.5566	-665.713	23963.9	52729.7	-5779.18	279.208	264.003	0	0	0	0	0	0	0	200	903	0	0	0	0	0	0	0	603	903	0
683	7	38.8672	-63.7256	-667.85	24330.1	52851.8	-5550.3	279.137	263.569	0	0	0	0	0	0	0	200	903	0	0	0	0	0	0	0	603	903	0
683	8	39.4776	-64.6411	-666.629	24055.5	52668.7	-5596.07	279.008	263.915	0	0	0	0	0	0	0	200	903	0	0	0	0	0	0	0	603	903	0
683	9	38.8672	-63.7256	-665.408	24971	52790.8	-5504.52	279.336	262.473	0	0	0	0	0	0	0	200	903	0	0	0	0	0	0	0	603	903	0
684	0	38.562	-62.6575	-665.103	24696.3	52729.7	-5138.31	279.281	262.868	0	0	0	0	0	0	0	200	903	0	0	0	0	0	0	0	603	903	0
684	1	39.1724	-62.3523	-667.544	24879.5	52851.8	-5321.41	279.173	262.73	0	0	0	0	0	0	0	200	903	0	0	0	0	0	0	0	603	903	0
684	2	40.0879	-61.7419	-670.291	25154.1	52607.7	-5275.64	278.485	262.473	0	0	0	0	0	0	0	200	903	0	0	0	0	0	0	0	603	903	0
684	3	38.562	-61.2842	-668.46	25337.2	52790.8	-5367.19	278.974	262.096	0	0	0	0	0	0	0	200	903	0	0	0	0	0	0	0	603	903	0
684	4	38.8672	-61.2842	-662.967	25611.9	52729.7	-5229.86	279.536	261.368	0	0	0	0	0	0	0	200	903	0	0	0	0	0	0	0	603	903	0
684	5	38.4095	-62.0471	-668.765	25978.1	52973.9	-5184.09	279.211	261.155	0	0	0	0	0	0	0	200	903	0	0	0	0	0	0	0	603	903	0
684	6	39.7827	-60.0635	-665.713	25978.1	52790.8	-5275.64	279.3	260.977	0	0	0	0	0	0	0	200	903	0	0	0	0	0	0	0	603	903	0
684	7	38.8672	-59.3005	-665.408	25611.9	52363.5	-4909.43	278.694	261.51	0	0	0	0	0	0	0	200	903	0	0	0	0	0	0	0	603	903	0
684	8	38.2569	-60.8264	-661.136	26069.6	52546.6	-4909.43	279.479	260.568	0	0	0	0	0	0	0	200	903	0	0	0	0	0	0	0	603	903	0
684	9	38.7146	-57.9272	-664.493	26802.1	53095.9	-5138.31	279.904	259.665	0	0	0	0	0	0	0	200	903	0	0	0	0	0	0	0	603	903	0
685	0	39.325	-58.2324	-664.493	26985.2	52668.7	-4726.32	279.262	259.39	0	0	0	0	0	0	0	200	903	0	0	0	0	0	0	0	603	903	0
685	1	39.0198	-58.6902	-664.798	27351.4	52668.7	-4909.43	279.225	258.858	0	0	0	0	0	0	0	200	903	0	0	0	0	0	0	0	603	903	0
685	2	38.2569	-57.0117	-661.746	27259.8	52668.7	-4955.2	279.591	258.806	0	0	0	0	0	0	0	200	903	0	0	0	0	0	0	0	603	903	0
685	3	38.1043	-56.8591	-663.882	27351.4	51753.2	-4634.77	277.955	258.801	0	0	0	0	0	0	0	200	903	0	0	0	0	0	0	0	603	903	0
685	4	38.2569	-56.554	-662.662	27626	52424.6	-4680.55	279.112	258.31	0	0	0	0	0	0	0	200	903	0	0	0	0	0	0	0	603	903	0
685	5	38.2569	-55.3332	-660.525	28358.5	52607.7	-4634.77	279.645	257.067	0	0	0	0	0	0	0	200	903	0	0	0	0	0	0	0	603	903	0
685	6	37.9517	-55.1807	-657.474	28633.1	52363.5	-4863.65	279.644	256.45	0	0	0	0	0	0	0	200	903	0	0	0	0	0	0	0	603	903	0
685	7	38.2569	-57.0117	-658.084	28724.7	52180.4	-4817.87	279.291	256.351	0	0	0	0	0	0	0	200	903	0	0	0	0	0	0	0	603	903	0
685	8	38.8672	-55.1807	-656.253	28450	52058.3	-4634.77	279.327	256.648	0	0	0	0	0	0	0	200	903	0	0	0	0	0	0	0	603	903	0
685	9	38.562	-53.197	-658.084	28541.6	52241.5	-4039.67	279.384	256.629	0	0	0	0	0	0	0	200	903	0	0	0	0	0	0	0	603	903	0
686	0	38.7146	-54.7229	-655.948	28907.8	52119.4	-4268.56	279.457	255.93	0	0	0	0	0	0	0	200	903	0	0	0	0	0	0	0	603	903	0
686	1	38.8672	-53.0444	-655.948	29457.1	52058.3	-4360.11	279.364	255.092	0	0	0	0	0	0	0	200	903	0	0	0	0	0	0	0	603	903	0
686	2	39.0198	-53.3496	-652.591	29457.1	52302.5	-4360.11	280.146	254.861	0	0	0	0	0	0	0	200	903	0	0	0	0	0	0	0	603	903	0
686	3	37.6465	-52.8918	-651.675	29914.9	51509	-4222.78	279.041	254.095	0	0	0	0	0	0	0	200	903	0	0	0	0	0	0	0	603	903	0
686	4	38.562	-52.5867	-650.76	30006.4	51875.2	-3810.79	279.715	253.89	0	0	0	0	0	0	0	200	903	0	0	0	0	0	0	0	603	903	0
686	5	38.8672	-51.9763	-649.844	30098	52058.3	-4131.23	280.109	253.684	0	0	0	0	0	0	0	200	903	0	0	0	0	0	0	0	603	903	0
686	6	38.2569	-50.7556	-649.844	30372.6	51570.1	-3902.35	279.358	253.262	0	0	0	0	0	0	0	200	903	0	0	0	0	0	0	0	603	903	0
686	7	38.2569	-50.7556	-647.708	30006.4	51142.8	-4222.78	278.96	253.673	0	0	0	0	0	0	0	200	903	0	0	0	0	0	0	0	603	903	0
686	8	38.7146	-50.603	-645.267	31013.5	51570.1	-3673.46	279.921	251.937	0	0	0	0	0	0	0	200	903	0	0	0	0	0	0	0	603	903	0
686	9	38.4095	-50.7556	-644.656	31654.4	51753.2	-4039.67	280.28	250.897	0	0	0	0	0	0	0	200	903	0	0	0	0	0	0	0	603	903	0
687	0	38.8672	-50.7556	-642.825	31745.9	51203.9	-3444.58	279.654	250.615	0	0	0	0	0	0	0	200	903	0	0	0	0	0	0	0	603	903	0
687	1	38.562	-50.9082	-639.468	31196.6	51203.9	-3993.9	280.073	251.215	0	0	0	0	0	0	0	200	903	0	0	0	0	0	0	0	603	903	0
687	2	38.7146	-49.6875	-638.553	31379.7	51264.9	-3993.9	280.283	250.858	0	0	0	0	0	0	0	200	903	0	0	0	0	0	0	0	603	903	0
687	3	38.8672	-49.0771	-636.416	31562.8	51020.8	-3765.02	280.169	250.405	0	0	0	0	0	0	0	200	903	0	0	0	0	0	0	0	603	903	0
687	4	39.325	-48.4668	-637.027	32753	51325.9	-3948.12	280.571	248.585	0	0	0	0	0	0	0	200	903	0	0	0	0	0	0	0	603	903	0
687	5	38.562	-49.0771	-632.754	33302.3	51203.9	-3719.24	280.922	247.369	0	0	0	0	0	0	0	200	903	0	0	0	0	0	0	0	603	903	0
687	6	38.562	-50.2978	-633.975	32936.1	50227.3	-3719.24	279.226	248.048	0	0	0	0	0	0	0	200	903	0	0	0	0	0	0	0	603	903	0
687	7	37.4939	-48.6194	-627.261	32661.4	50410.4	-3398.81	280.366	247.93	0	0	0	0	0	0	0	200	903	0	0	0	0	0	0	0	603	903	0
687	8	37.9517	-47.2461	-627.872	32844.5	50532.5	-3536.14	280.482	247.689	0	0	0	0	0	0	0	200	903	0	0	0	0	0	0	0	603	903	0
687	9	37.9517	-47.3987	-626.04	33210.8	50471.4	-3581.91	280.62	246.951	0	0	0	0	0	0	0	200	903	0	0	0	0	0	0	0	603	903	0
688	0	37.9517	-46.4832	-625.735	33851.6	50410.4	-3765.02	280.562	245.901	0	0	0	0	0	0	0	200	903	0	0	0	0	0	0	0	603	903	0
688	1	37.7991	-46.6357	-623.599	33760.1	50166.3	-3627.69	280.446	245.863	0	0	0	0	0	0	0	200	903	0	0	0	0	0	0	0	603	903	0
688	2	38.2569	-47.3987	-622.989	34126.3	49372.8	-3490.36	279.252	245.222	0	0	0	0	0	0	0	200	903	0	0	0	0	0	0	0	603	903	0
688	3	37.9517	-46.9409	-622.378	33851.6	50288.3	-3307.25	280.8	245.609	0	0	0	0	0	0	0	200	903	0	0	0	0	0	0	0	603	903	0
688	4	38.2569	-45.415	-617.19	35041.8	50166.3	-3307.25	281.282	243.224	0	0	0	0	0	0	0	200	903	0	0	0	0	0	0	0	603	903	0
688	5	36.731	-44.9573	-617.801	34675.6	49800	-3444.58	280.609	243.873	0	0	0	0	0	0	0	200	903	0	0	0	0	0	0	0	603	903	0
688	6	37.3413	-45.2624	-616.275	35316.5	49616.9	-3261.48	280.511	242.694	0	0	0	0	0	0	0	200	903	0	0	0	0	0	0	0	603	903	0
688	7	36.4258	-45.2624	-614.749	35774.2	49739	-3353.03	280.91	241.807	0	0	0	0	0	0	0	200	903	0	0	0	0	0	0	0	603	903	0
688	8	36.2732	-44.8047	-612.613	35591.1	49616.9	-2941.04	280.992	241.903	0	0	0	0	0	0	0	200	903	0	0	0	0	0	0	0	603	903	0
688	9	37.0362	-44.3469	-612.002	35316.5	49311.8	-2941.04	280.574	242.294	0	0	0	0	0	0	0	200	903	0	0	0	0	0	0	0	603	903	0
689	0	36.731	-43.584	-609.256	35957.3	49372.8	-2529.05	281.038	240.982	0	0	0	0	0	0	0	200	903	0	0	0	0	0	0	0	603	903	0
689	1	36.4258	-43.7366	-609.866	35957.3	49006.6	-3215.7	280.356	241.041	0	0	0	0	0	0	0	200	903	0	0	0	0	0	0	0	603	903	0
689	2	35.3577	-43.1262	-607.73	36598.2	48945.6	-2803.71	280.538	239.779	0	0	0	0	0	0	0	200	903	0	0	0	0	0	0	0	603	903	0
689	3	34.8999	-45.1099	-608.34	36964.4	49189.7	-3078.37	280.859	239.237	0	0	0	0	0	0	0	200	903	0	0	0	0	0	0	0	603	903	0
689	4	35.0525	-43.1262	-606.509	36689.8	48701.4	-3215.7	280.298	239.507	0	0	0	0	0	0	0	200	903	0	0	0	0	0	0	0	603	903	0
689	5	35.6629	-42.821	-601.626	36415.1	48823.5	-2803.71	281.153	239.472	0	0	0	0	0	0	0	200	903	0	0	0	0	0	0	0	603	903	0
689	6	34.4422	-42.9736	-599.795	36781.3	49006.6	-3078.37	281.706	238.677	0	0	0	0	0	0	0	200	903	0	0	0	0	0	0	0	603	903	0
689	7	34.2896	-41.1426	-599.795	37513.8	48640.4	-2803.71	281.095	237.456	0	0	0	0	0	0	0	200	903	0	0	0	0	0	0	0	603	903	0
689	8	34.5948	-40.8374	-598.88	37788.4	48640.4	-2529.05	281.219	236.902	0	0	0	0	0	0	0	200	903	0	0	0	0	0	0	0	603	903	0
689	9	35.3577	-40.8374	-597.049	38063.1	48213.1	-2803.71	280.752	236.248	0	0	0	0	0	0	0	200	903	0	0	0	0	0	0	0	603	903	0
690	0	34.4422	-41.9055	-597.049	38520.8	48091.1	-2483.28	280.548	235.481	0	0	0	0	0	0	0	200	903	0	0	0	0	0	0	0	603	903	0
690	1	35.6629	-42.821	-593.997	38246.2	48213.1	-2712.16	281.167	235.612	0	0	0	0	0	0	0	200	903	0	0	0	0	0	0	0	603	903	0
690	2	32.9163	-40.99	-593.997	38337.7	49006.6	-2712.16	282.503	235.458	0	0	0	0	0	0	0	200	903	0	0	0	0	0	0	0	603	903	0
690	3	33.6792	-39.1589	-591.861	39161.7	48335.2	-2620.61	281.667	233.833	0	0	0	0	0	0	0	200	903	0	0	0	0	0	0	0	603	903	0
690	4	32.7637	-40.227	-590.64	39253.2	47969	-2620.61	281.215	233.541	0	0	0	0	0	0	0	200	903	0	0	0	0	0	0	0	603	903	0
690	5	33.5266	-39.6167	-585.452	39253.2	47969	-2300.17	281.935	232.952	0	0	0	0	0	0	0	200	903	0	0	0	0	0	0	0	603	903	0
690	6	33.0689	-39.7693	-588.199	39344.8	48030	-2437.5	281.656	233.11	0	0	0	0	0	0	0	200	903	0	0	0	0	0	0	0	603	903	0
690	7	33.6792	-39.4641	-586.673	40077.2	47908	-2437.5	281.66	231.687	0	0	0	0	0	0	0	200	903	0	0	0	0	0	0	0	603	903	0
690	8	33.3741	-38.8538	-587.283	39619.4	47969	-2483.28	281.68	232.538	0	0	0	0	0	0	0	200	903	0	0	0	0	0	0	0	603	903	0
690	9	32.9163	-39.7693	-586.062	39894.1	47602.8	-2437.5	281.225	231.929	0	0	0	0	0	0	0	200	903	0	0	0	0	0	0	0	603	903	0
691	0	31.8482	-38.396	-585.452	40077.2	47419.7	-2345.95	280.997	231.545	0	0	0	0	0	0	0	200	903	0	0	0	0	0	0	0	603	903	0
691	1	32.7637	-38.7012	-585.757	40992.8	48030	-1979.74	281.996	230.018	0	0	0	0	0	0	0	200	903	0	0	0	0	0	0	0	603	903	0
691	2	32.0008	-37.6331	-582.095	41175.9	47785.9	-2300.17	282.093	229.263	0	0	0	0	0	0	0	200	903	0	0	0	0	0	0	0	603	903	0
691	3	32.1534	-37.6331	-579.959	41359	47480.7	-2254.4	281.869	228.686	0	0	0	0	0	0	0	200	903	0	0	0	0	0	0	0	603	903	0
691	4	32.1534	-37.4805	-580.874	41725.2	47358.6	-2437.5	281.53	228.168	0	0	0	0	0	0	0	200	903	0	0	0	0	0	0	0	603	903	0
691	5	31.6956	-37.9382	-578.738	41175.9	47541.7	-2391.73	282.147	228.852	0	0	0	0	0	0	0	200	903	0	0	0	0	0	0	0	603	903	0
691	6	32.1534	-36.8701	-579.959	41633.6	47358.6	-1933.96	281.659	228.213	0	0	0	0	0	0	0	200	903	0	0	0	0	0	0	0	603	903	0
691	7	32.1534	-37.7856	-579.959	41359	47663.8	-1842.41	282.185	228.686	0	0	0	0	0	0	0	200	903	0	0	0	0	0	0	0	603	903	0
691	8	32.3059	-36.7175	-577.518	42366	47480.7	-1933.96	282.215	226.641	0	0	0	0	0	0	0	200	903	0	0	0	0	0	0	0	603	903	0
691	9	30.9326	-36.8701	-576.907	42274.5	47114.5	-2162.84	281.667	226.722	0	0	0	0	0	0	0	200	903	0	0	0	0	0	0	0	603	903	0
692	0	31.8482	-38.7012	-575.076	42915.3	47419.7	-1933.96	282.458	225.375	0	0	0	0	0	0	0	200	903	0	0	0	0	0	0	0	603	903	0
692	1	30.9326	-36.5649	-573.855	42732.2	47297.6	-1659.3	282.421	225.535	0	0	0	0	0	0	0	200	903	0	0	0	0	0	0	0	603	903	0
692	2	31.0852	-35.802	-574.466	42732.2	47175.5	-1979.74	282.121	225.614	0	0	0	0	0	0	0	200	903	0	0	0	0	0	0	0	603	903	0
692	3	31.3904	-36.8701	-572.024	42640.7	47541.7	-1842.41	283.111	225.457	0	0	0	0	0	0	0	200	903	0	0	0	0	0	0	0	603	903	0
692	4	32.9163	-34.8865	-572.024	43190	47419.7	-1796.63	282.898	224.496	0	0	0	0	0	0	0	200	903	0	0	0	0	0	0	0	603	903	0
692	5	31.2378	-35.0391	-571.719	43922.4	47358.6	-1796.63	282.835	223.175	0	0	0	0	0	0	0	200	903	0	0	0	0	0	0	0	603	903	0
692	6	30.1697	-36.7175	-568.667	44105.5	47358.6	-1796.63	283.28	222.441	0	0	0	0	0	0	0	200	903	0	0	0	0	0	0	0	603	903	0
692	7	30.9326	-34.5813	-570.804	43556.2	47053.5	-1613.53	282.434	223.693	0	0	0	0	0	0	0	200	903	0	0	0	0	0	0	0	603	903	0
692	8	31.543	-33.9709	-566.226	43647.8	47175.5	-1384.65	283.316	222.915	0	0	0	0	0	0	0	200	903	0	0	0	0	0	0	0	603	903	0
692	9	30.4749	-34.2761	-568.057	44014	47358.6	-1567.75	283.37	222.518	0	0	0	0	0	0	0	200	903	0	0	0	0	0	0	0	603	903	0
693	0	30.0171	-33.208	-565.31	44746.4	47297.6	-1338.87	283.667	220.846	0	0	0	0	0	0	0	200	903	0	0	0	0	0	0	0	603	903	0
693	1	30.9326	-33.3606	-565.31	45753.5	47602.8	-1705.08	284.206	219.065	0	0	0	0	0	0	0	200	903	0	0	0	0	0	0	0	603	903	0
693	2	30.4749	-33.0554	-564.395	45478.8	47175.5	-1064.21	283.586	219.42	0	0	0	0	0	0	0	200	903	0	0	0	0	0	0	0	603	903	0
693	3	30.9326	-33.208	-565.616	44929.5	46809.3	-1521.97	282.758	220.565	0	0	0	0	0	0	0	200	903	0	0	0	0	0	0	0	603	903	0
693	4	30.9326	-31.9873	-564.7	45387.3	46626.2	-1613.53	282.568	219.626	0	0	0	0	0	0	0	200	903	0	0	0	0	0	0	0	603	903	0
693	5	31.2378	-31.2244	-564.395	45204.2	47358.6	-1338.87	283.91	219.907	0	0	0	0	0	0	0	200	903	0	0	0	0	0	0	0	603	903	0
693	6	30.4749	-31.0718	-561.648	46028.1	47053.5	-1384.65	283.777	218.048	0	0	0	0	0	0	0	200	903	0	0	0	0	0	0	0	603	903	0
693	7	30.6275	-31.0718	-561.038	45936.6	47419.7	-1476.2	284.521	218.122	0	0	0	0	0	0	0	200	903	0	0	0	0	0	0	0	603	903	0
693	8	29.8645	-31.8347	-559.817	46394.3	47114.5	-1567.75	284.16	217.126	0	0	0	0	0	0	0	200	903	0	0	0	0	0	0	0	603	903	0
693	9	30.0171	-31.8347	-558.597	46669	46992.4	-1247.32	284.126	216.453	0	0	0	0	0	0	0	200	903	0	0	0	0	0	0	0	603	903	0
694	0	30.7801	-31.2244	-557.986	45936.6	47419.7	-881.105	284.984	217.674	0	0	0	0	0	0	0	200	903	0	0	0	0	0	0	0	603	903	0
694	1	30.1697	-30.0037	-556.155	46302.8	47541.7	-1064.21	285.483	216.745	0	0	0	0	0	0	0	200	903	0	0	0	0	0	0	0	603	903	0
694	2	30.0171	-30.9192	-558.902	46211.2	47236.6	-1293.09	284.517	217.318	0	0	0	0	0	0	0	200	903	0	0	0	0	0	0	0	603	903	0
694	3	29.7119	-29.2407	-556.155	46943.7	47236.6	-1201.54	284.934	215.593	0	0	0	0	0	0	0	200	903	0	0	0	0	0	0	0	603	903	0
694	4	28.949	-29.5459	-557.986	46943.7	47419.7	-1155.76	284.984	215.87	0	0	0	0	0	0	0	200	903	0	0	0	0	0	0	0	603	903	0
694	5	29.5594	-29.2407	-557.986	46943.7	47236.6	-972.658	284.655	215.87	0	0	0	0	0	0	0	200	903	0	0	0	0	0	0	0	603	903	0
694	6	30.3223	-29.2407	-555.85	46852.1	46931.4	-926.881	284.432	215.711	0	0	0	0	0	0	0	200	903	0	0	0	0	0	0	0	603	903	0
694	7	29.5594	-28.783	-554.019	47126.8	47419.7	-881.105	285.592	214.937	0	0	0	0	0	0	0	200	903	0	0	0	0	0	0	0	603	903	0
694	8	28.7964	-27.8674	-553.103	47035.2	47236.6	-1201.54	285.403	214.961	0	0	0	0	0	0	0	200	903	0	0	0	0	0	0	0	603	903	0
694	9	28.7964	-27.7148	-554.019	47767.7	47236.6	-606.447	285.262	213.78	0	0	0	0	0	0	0	200	903	0	0	0	0	0	0	0	603	903	0
695	0	30.9326	-28.02	-554.019	48133.9	47602.8	-835.328	285.923	213.119	0	0	0	0	0	0	0	200	903	0	0	0	0	0	0	0	603	903	0
695	1	29.7119	-27.7148	-554.935	47767.7	47480.7	-469.118	285.561	213.922	0	0	0	0	0	0	0	200	903	0	0	0	0	0	0	0	603	903	0
695	2	29.5594	-26.9519	-548.526	47126.8	47541.7	-697.999	286.672	214.085	0	0	0	0	0	0	0	200	903	0	0	0	0	0	0	0	603	903	0
695	3	28.949	-27.1045	-553.103	47584.6	47724.9	-1018.43	286.286	213.968	0	0	0	0	0	0	0	200	903	0	0	0	0	0	0	0	603	903	0
695	4	28.6438	-25.8838	-553.103	48317	47541.7	-697.999	285.955	212.644	0	0	0	0	0	0	0	200	903	0	0	0	0	0	0	0	603	903	0
695	5	30.1697	-25.5786	-552.493	47859.2	47419.7	-469.118	285.829	213.376	0	0	0	0	0	0	0	200	903	0	0	0	0	0	0	0	603	903	0
695	6	28.6438	-25.2734	-551.578	48500.1	47846.9	-560.67	286.746	212.07	0	0	0	0	0	0	0	200	903	0	0	0	0	0	0	0	603	903	0
695	7	28.7964	-26.0364	-550.357	48957.8	47602.8	-697.999	286.494	211.043	0	0	0	0	0	0	0	200	903	0	0	0	0	0	0	0	603	903	0
695	8	30.3223	-25.8838	-550.052	48500.1	47602.8	-606.447	286.542	211.826	0	0	0	0	0	0	0	200	903	0	0	0	0	0	0	0	603	903	0
695	9	29.2542	-24.6631	-551.272	48957.8	47480.7	-331.789	286.129	211.191	0	0	0	0	0	0	0	200	903	0	0	0	0	0	0	0	603	903	0
696	0	30.3223	-23.4424	-551.883	49232.5	47724.9	-148.683	286.476	210.792	0	0	0	0	0	0	0	200	903	0	0	0	0	0	0	0	603	903	0
696	1	29.4068	-23.9001	-551.883	48683.2	47480.7	-286.012	286.034	211.787	0	0	0	0	0	0	0	200	903	0	0	0	0	0	0	0	603	903	0
696	2	29.5594	-24.0527	-551.578	49507.1	47969	-377.565	286.967	210.244	0	0	0	0	0	0	0	200	903	0	0	0	0	0	0	0	603	903	0
696	3	29.4068	-23.7476	-551.272	49873.4	48030	-194.459	287.126	209.531	0	0	0	0	0	0	0	200	903	0	0	0	0	0	0	0	603	903	0
696	4	29.1016	-23.4424	-550.052	49598.7	48030	-331.789	287.319	209.829	0	0	0	0	0	0	0	200	903	0	0	0	0	0	0	0	603	903	0
696	5	29.1016	-22.832	-550.662	49598.7	48335.2	-331.789	287.777	209.929	0	0	0	0	0	0	0	200	903	0	0	0	0	0	0	0	603	903	0
696	6	28.1861	-21.9165	-548.526	49873.4	48030	-377.565	287.562	209.077	0	0	0	0	0	0	0	200	903	0	0	0	0	0	0	0	603	903	0
696	7	27.7283	-21.7639	-548.526	50422.7	47846.9	-148.683	287.228	208.076	0	0	0	0	0	0	0	200	903	0	0	0	0	0	0	0	603	903	0
696	8	29.4068	-22.6794	-543.338	50422.7	48274.2	217.528	288.847	207.198	0	0	0	0	0	0	0	200	903	0	0	0	0	0	0	0	603	903	0
696	9	30.3223	-21.6113	-547.305	50697.3	48274.2	-102.907	288.203	207.369	0	0	0	0	0	0	0	200	903	0	0	0	0	0	0	0	603	903	0
697	0	29.5594	-21.3061	-546.695	50239.6	48213.1	-194.459	288.19	208.103	0	0	0	0	0	0	0	200	903	0	0	0	0	0	0	0	603	903	0
697	1	29.8645	-21.4587	-547.915	50514.2	48518.3	-194.459	288.551	207.807	0	0	0	0	0	0	0	200	903	0	0	0	0	0	0	0	603	903	0
697	2	29.1016	-20.238	-548.831	50514.2	48213.1	80.1989	287.847	207.96	0	0	0	0	0	0	0	200	903	0	0	0	0	0	0	0	603	903	0
697	3	29.7119	-20.0854	-549.441	51429.8	48213.1	-11.3538	287.749	206.396	0	0	0	0	0	0	0	200	903	0	0	0	0	0	0	0	603	903	0
697	4	30.0171	-20.238	-549.136	51429.8	48579.3	492.186	288.465	206.344	0	0	0	0	0	0	0	200	903	0	0	0	0	0	0	0	603	903	0
697	5	29.4068	-20.238	-547.305	51338.2	48396.2	354.857	288.426	206.198	0	0	0	0	0	0	0	200	903	0	0	0	0	0	0	0	603	903	0
697	6	29.7119	-19.9329	-545.474	51063.6	48457.3	354.857	288.835	206.387	0	0	0	0	0	0	0	200	903	0	0	0	0	0	0	0	603	903	0
697	7	28.949	-19.0173	-546.695	51429.8	48823.5	125.975	289.307	205.926	0	0	0	0	0	0	0	200	903	0	0	0	0	0	0	0	603	903	0
697	8	28.4912	-18.8647	-543.643	51612.9	48640.4	263.304	289.471	205.061	0	0	0	0	0	0	0	200	903	0	0	0	0	0	0	0	603	903	0
697	9	29.4068	-18.407	-547	52528.4	48762.4	217.528	289.145	203.97	0	0	0	0	0	0	0	200	903	0	0	0	0	0	0	0	603	903	0
698	0	29.8645	-17.9492	-546.39	52070.6	49006.6	400.634	289.692	204.701	0	0	0	0	0	0	0	200	903	0	0	0	0	0	0	0	603	903	0
698	1	30.9326	-18.1018	-547	51979.1	49250.7	309.081	290.038	204.974	0	0	0	0	0	0	0	200	903	0	0	0	0	0	0	0	603	903	0
698	2	29.5594	-18.5596	-547	52528.4	48701.4	309.081	289.034	203.97	0	0	0	0	0	0	0	200	903	0	0	0	0	0	0	0	603	903	0
698	3	30.6275	-17.9492	-546.39	52436.8	49006.6	766.844	289.692	204.03	0	0	0	0	0	0	0	200	903	0	0	0	0	0	0	0	603	903	0
698	4	28.7964	-16.8811	-547.61	52436.8	49189.7	537.963	289.826	204.244	0	0	0	0	0	0	0	200	903	0	0	0	0	0	0	0	603	903	0
698	5	29.8645	-17.7966	-547.61	52528.4	48701.4	629.515	288.934	204.077	0	0	0	0	0	0	0	200	903	0	0	0	0	0	0	0	603	903	0
698	6	29.8645	-16.5759	-545.474	52894.6	49250.7	492.186	290.29	203.03	0	0	0	0	0	0	0	200	903	0	0	0	0	0	0	0	603	903	0
698	7	29.4068	-16.5759	-545.779	53535.5	49250.7	675.292	290.239	201.91	0	0	0	0	0	0	0	200	903	0	0	0	0	0	0	0	603	903	0
698	8	29.1016	-16.1182	-542.117	53901.7	49372.8	583.739	291.074	200.572	0	0	0	0	0	0	0	200	903	0	0	0	0	0	0	0	603	903	0
698	9	29.8645	-15.9656	-546.084	54634.1	49433.8	583.739	290.524	199.953	0	0	0	0	0	0	0	200	903	0	0	0	0	0	0	0	603	903	0
699	0	30.1697	-15.6604	-545.779	53443.9	49311.8	766.844	290.351	202.078	0	0	0	0	0	0	0	200	903	0	0	0	0	0	0	0	603	903	0
699	1	30.9326	-15.2026	-546.695	52803.1	49311.8	1407.71	290.2	203.414	0	0	0	0	0	0	0	200	903	0	0	0	0	0	0	0	603	903	0
699	2	30.7801	-15.813	-547.305	53627	49616.9	812.621	290.657	202.016	0	0	0	0	0	0	0	200	903	0	0	0	0	0	0	0	603	903	0
699	3	31.3904	-13.9819	-542.117	54267.9	49678	675.292	291.637	199.896	0	0	0	0	0	0	0	200	903	0	0	0	0	0	0	0	603	903	0
699	4	30.3223	-14.5923	-547.61	54176.3	50227.3	904.174	291.721	201.068	0	0	0	0	0	0	0	200	903	0	0	0	0	0	0	0	603	903	0
699	5	29.8645	-14.2871	-547	54542.6	49922.1	812.621	291.265	200.288	0	0	0	0	0	0	0	200	903	0	0	0	0	0	0	0	603	903	0
699	6	30.4749	-14.4397	-545.474	54176.3	49739	1087.28	291.185	200.68	0	0	0	0	0	0	0	200	903	0	0	0	0	0	0	0	603	903	0
699	7	31.2378	-13.219	-546.084	54451	49861.1	1316.16	291.307	200.288	0	0	0	0	0	0	0	200	903	0	0	0	0	0	0	0	603	903	0
699	8	31.8482	-12.7612	-544.864	54359.5	50227.3	1224.61	292.183	200.233	0	0	0	0	0	0	0	200	903	0	0	0	0	0	0	0	603	903	0
699	9	31.6956	-12.7612	-544.864	55366.5	50105.2	1178.83	291.959	198.385	0	0	0	0	0	0	0	200	903	0	0	0	0	0	0	0	603	903	0
700	0	31.6956	-12.9138	-546.084	55549.6	49433.8	1178.83	290.524	198.276	0	0	0	0	0	0	0	200	903	0	0	0	0	0	0	0	603	903	0
700	1	30.9326	-13.0664	-547.61	55641.2	50044.2	1270.38	291.387	198.393	0	0	0	0	0	0	0	200	903	0	0	0	0	0	0	0	603	903	0
700	2	31.2378	-12.1509	-548.221	54908.8	50166.3	1499.27	291.507	199.842	0	0	0	0	0	0	0	200	903	0	0	0	0	0	0	0	603	903	0
700	3	31.2378	-11.2353	-547	55732.7	49861.1	1957.03	291.154	198.112	0	0	0	0	0	0	0	200	903	0	0	0	0	0	0	0	603	903	0
700	4	32.0008	-11.0828	-547.61	55275	50410.4	1636.6	292.055	199.061	0	0	0	0	0	0	0	200	903	0	0	0	0	0	0	0	603	903	0
700	5	31.3904	-11.0828	-546.39	56099	50532.5	1453.49	292.484	197.328	0	0	0	0	0	0	0	200	903	0	0	0	0	0	0	0	603	903	0
700	6	31.8482	-11.6931	-545.169	56739.8	49983.2	1682.37	291.684	195.923	0	0	0	0	0	0	0	200	903	0	0	0	0	0	0	0	603	903	0
700	7	32.3059	-11.3879	-546.084	56648.3	50410.4	1773.92	292.312	196.265	0	0	0	0	0	0	0	200	903	0	0	0	0	0	0	0	603	903	0
700	8	31.543	-11.2353	-543.643	56190.5	50593.5	1636.6	293.064	196.641	0	0	0	0	0	0	0	200	903	0	0	0	0	0	0	0	603	903	0
700	9	32.6111	-10.4724	-545.779	55824.3	50349.4	1728.15	292.252	197.716	0	0	0	0	0	0	0	200	903	0	0	0	0	0	0	0	603	903	0
701	0	33.0689	-9.70947	-545.779	56282.1	50410.4	2048.58	292.364	196.878	0	0	0	0	0	0	0	200	903	0	0	0	0	0	0	0	603	903	0
701	1	33.6792	-9.09912	-546.695	57197.6	50532.5	1865.48	292.433	195.376	0	0	0	0	0	0	0	200	903	0	0	0	0	0	0	0	603	903	0
701	2	32.9163	-9.2517	-548.221	57838.5	50288.3	2231.69	291.73	194.498	0	0	0	0	0	0	0	200	903	0	0	0	0	0	0	0	603	903	0
701	3	32.7637	-9.2517	-545.779	57472.2	50288.3	2048.58	292.14	194.697	0	0	0	0	0	0	0	200	903	0	0	0	0	0	0	0	603	903	0
701	4	32.1534	-10.0146	-547.915	57838.5	50532.5	2185.91	292.227	194.439	0	0	0	0	0	0	0	200	903	0	0	0	0	0	0	0	603	903	0
701	5	32.1534	-9.09912	-547.915	57014.5	50654.5	2185.91	292.45	195.943	0	0	0	0	0	0	0	200	903	0	0	0	0	0	0	0	603	903	0
701	6	33.5266	-8.64135	-545.779	57563.8	50776.6	2048.58	293.035	194.529	0	0	0	0	0	0	0	200	903	0	0	0	0	0	0	0	603	903	0
701	7	32.4585	-6.04736	-547.305	57838.5	50776.6	2506.35	292.776	194.321	0	0	0	0	0	0	0	200	903	0	0	0	0	0	0	0	603	903	0
701	8	32.4585	-6.65771	-546.695	58570.9	50715.6	2323.24	292.768	192.864	0	0	0	0	0	0	0	200	903	0	0	0	0	0	0	0	603	903	0
701	9	32.9163	-7.26806	-547.61	58662.4	50471.4	2552.12	292.167	192.876	0	0	0	0	0	0	0	200	903	0	0	0	0	0	0	0	603	903	0
702	0	33.0689	-7.42065	-546.39	58570.9	50837.6	2552.12	293.043	192.804	0	0	0	0	0	0	0	200	903	0	0	0	0	0	0	0	603	903	0
702	1	34.137	-6.19995	-549.441	59028.6	50898.7	2689.45	292.637	192.566	0	0	0	0	0	0	0	200	903	0	0	0	0	0	0	0	603	903	0
702	2	32.7637	-6.04736	-549.747	58754	50898.7	2872.56	292.586	193.125	0	0	0	0	0	0	0	200	903	0	0	0	0	0	0	0	603	903	0
702	3	33.6792	-5.43701	-550.967	58937.1	50776.6	2872.56	292.159	193.03	0	0	0	0	0	0	0	200	903	0	0	0	0	0	0	0	603	903	0
702	4	31.543	-4.97924	-550.052	59211.7	50715.6	2597.9	292.201	192.352	0	0	0	0	0	0	0	200	903	0	0	0	0	0	0	0	603	903	0
702	5	31.543	-4.36889	-550.662	59211.7	50837.6	2872.56	292.321	192.472	0	0	0	0	0	0	0	200	903	0	0	0	0	0	0	0	603	903	0
702	6	32.4585	-4.82666	-550.967	60035.7	50593.5	3147.22	291.827	191.036	0	0	0	0	0	0	0	200	903	0	0	0	0	0	0	0	603	903	0
702	7	32.7637	-3.75854	-549.136	60310.4	51264.9	2964.11	293.356	190.172	0	0	0	0	0	0	0	200	903	0	0	0	0	0	0	0	603	903	0
702	8	32.1534	-4.97924	-549.441	60035.7	51081.8	2872.56	292.97	190.733	0	0	0	0	0	0	0	200	903	0	0	0	0	0	0	0	603	903	0
702	9	33.9844	-3.30078	-550.052	59669.5	50898.7	2964.11	292.534	191.52	0	0	0	0	0	0	0	200	903	0	0	0	0	0	0	0	603	903	0
703	0	32.4585	-2.08007	-549.747	60218.8	51081.8	3055.66	292.919	190.461	0	0	0	0	0	0	0	200	903	0	0	0	0	0	0	0	603	903	0
703	1	32.4585	-2.08007	-550.662	60585	51142.8	3559.2	292.875	189.978	0	0	0	0	0	0	0	200	903	0	0	0	0	0	0	0	603	903	0
703	2	33.3741	-1.92749	-554.019	60859.7	51203.9	3421.87	292.423	190.149	0	0	0	0	0	0	0	200	903	0	0	0	0	0	0	0	603	903	0
703	3	33.2215	-1.92749	-552.493	60951.2	51387	3467.65	293.009	189.68	0	0	0	0	0	0	0	200	903	0	0	0	0	0	0	0	603	903	0
703	4	32.9163	-3.14819	-549.441	61317.5	51387	3284.55	293.526	188.4	0	0	0	0	0	0	0	200	903	0	0	0	0	0	0	0	603	903	0
703	5	31.8482	-0.706783	-552.798	61134.4	50898.7	3788.09	292.075	189.409	0	0	0	0	0	0	0	200	903	0	0	0	0	0	0	0	603	903	0
703	6	32.3059	-0.096431	-553.409	60951.2	51264.9	3696.53	292.635	189.862	0	0	0	0	0	0	0	200	903	0	0	0	0	0	0	0	603	903	0
703	7	33.0689	-0.706783	-553.103	61592.1	51203.9	4016.97	292.576	188.643	0	0	0	0	0	0	0	200	903	0	0	0	0	0	0	0	603	903	0
703	8	32.3059	1.27686	-553.103	61866.8	51325.9	3788.09	292.796	188.146	0	0	0	0	0	0	0	200	903	0	0	0	0	0	0	0	603	903	0
703	9	32.6111	0.971684	-553.409	61042.8	51570.1	3971.19	293.186	189.697	0	0	0	0	0	0	0	200	903	0	0	0	0	0	0	0	603	903	0
704	0	33.3741	1.73462	-552.798	62690.8	51631.1	4062.74	293.4	186.594	0	0	0	0	0	0	0	200	903	0	0	0	0	0	0	0	603	903	0
704	1	33.2215	2.19239	-554.019	62049.9	51570.1	4108.52	293.084	188	0	0	0	0	0	0	0	200	903	0	0	0	0	0	0	0	603	903	0
704	2	33.3741	2.65015	-556.46	62599.2	51448	4520.51	292.456	187.505	0	0	0	0	0	0	0	200	903	0	0	0	0	0	0	0	603	903	0
704	3	32.6111	2.95533	-557.376	62233	51448	4200.07	292.304	188.346	0	0	0	0	0	0	0	200	903	0	0	0	0	0	0	0	603	903	0
704	4	32.6111	3.87085	-557.071	63148.5	51753.2	4337.4	292.902	186.642	0	0	0	0	0	0	0	200	903	0	0	0	0	0	0	0	603	903	0
704	5	33.3741	3.87085	-556.46	63697.8	51875.2	4428.95	293.224	185.53	0	0	0	0	0	0	0	200	903	0	0	0	0	0	0	0	603	903	0
704	6	32.3059	4.63379	-557.681	63789.4	51936.3	4474.73	293.129	185.617	0	0	0	0	0	0	0	200	903	0	0	0	0	0	0	0	603	903	0
704	7	31.6956	4.93897	-558.291	63331.6	52058.3	4612.06	293.246	186.562	0	0	0	0	0	0	0	200	903	0	0	0	0	0	0	0	603	903	0
704	8	32.3059	5.54932	-557.681	63880.9	51753.2	4840.94	292.801	185.453	0	0	0	0	0	0	0	200	903	0	0	0	0	0	0	0	603	903	0
704	9	32.6111	6.31226	-557.986	63331.6	51753.2	5252.93	292.75	186.5	0	0	0	0	0	0	0	200	903	0	0	0	0	0	0	0	603	903	0
705	0	33.2215	6.77002	-557.071	64064	52119.4	5069.82	293.56	184.998	0	0	0	0	0	0	0	200	903	0	0	0	0	0	0	0	603	903	0
705	1	33.0689	7.68555	-558.902	64613.4	51875.2	4932.49	292.816	184.392	0	0	0	0	0	0	0	200	903	0	0	0	0	0	0	0	603	903	0
705	2	33.8318	7.53296	-562.259	65162.7	52058.3	5024.05	292.588	184.106	0	0	0	0	0	0	0	200	903	0	0	0	0	0	0	0	603	903	0
705	3	32.7637	7.99073	-562.259	65345.8	52241.5	5024.05	292.914	183.78	0	0	0	0	0	0	0	200	903	0	0	0	0	0	0	0	603	903	0
705	4	32.4585	7.99073	-562.869	64521.8	52058.3	5573.36	292.487	185.37	0	0	0	0	0	0	0	200	903	0	0	0	0	0	0	0	603	903	0
705	5	33.0689	8.90625	-562.869	64888	52546.6	5573.36	293.355	184.719	0	0	0	0	0	0	0	200	903	0	0	0	0	0	0	0	603	903	0
705	6	32.6111	10.2795	-563.174	65345.8	52607.7	5527.59	293.413	183.969	0	0	0	0	0	0	0	200	903	0	0	0	0	0	0	0	603	903	0
705	7	33.5266	10.7373	-563.174	66169.8	52424.6	5573.36	293.088	182.506	0	0	0	0	0	0	0	200	903	0	0	0	0	0	0	0	603	903	0
705	8	32.0008	10.8899	-564.09	66078.2	52546.6	5664.92	293.153	182.859	0	0	0	0	0	0	0	200	903	0	0	0	0	0	0	0	603	903	0
705	9	32.3059	9.51661	-562.869	66444.4	52607.7	5664.92	293.463	181.954	0	0	0	0	0	0	0	200	903	0	0	0	0	0	0	0	603	903	0
706	0	32.1534	11.8054	-561.343	65895.1	52668.7	5939.58	293.826	182.612	0	0	0	0	0	0	0	200	903	0	0	0	0	0	0	0	603	903	0
706	1	33.5266	13.0261	-566.226	65986.6	52668.7	6168.46	293.017	183.462	0	0	0	0	0	0	0	200	903	0	0	0	0	0	0	0	603	903	0
706	2	33.5266	13.7891	-565.616	66536	52790.8	6214.23	293.333	182.365	0	0	0	0	0	0	0	200	903	0	0	0	0	0	0	0	603	903	0
706	3	32.7637	14.2468	-567.447	67176.9	52424.6	6260.01	292.387	181.616	0	0	0	0	0	0	0	200	903	0	0	0	0	0	0	0	603	903	0
706	4	33.0689	13.7891	-570.498	67451.5	52912.8	6397.34	292.748	181.767	0	0	0	0	0	0	0	200	903	0	0	0	0	0	0	0	603	903	0
706	5	33.2215	14.552	-567.447	67726.1	52729.7	6488.89	292.925	180.648	0	0	0	0	0	0	0	200	903	0	0	0	0	0	0	0	603	903	0
706	6	32.6111	15.0098	-570.193	68275.5	52119.4	6580.44	291.407	180.259	0	0	0	0	0	0	0	200	903	0	0	0	0	0	0	0	603	903	0
706	7	32.7637	15.7727	-572.33	67085.3	53340.1	6626.22	293.198	182.786	0	0	0	0	0	0	0	200	903	0	0	0	0	0	0	0	603	903	0
706	8	33.3741	16.9934	-570.498	67359.9	53279.1	6488.89	293.39	181.928	0	0	0	0	0	0	0	200	903	0	0	0	0	0	0	0	603	903	0
706	9	32.7637	16.2305	-572.024	68183.9	52546.6	6946.66	291.861	180.802	0	0	0	0	0	0	0	200	903	0	0	0	0	0	0	0	603	903	0
707	0	32.6111	17.7564	-573.55	68824.8	53279.1	6946.66	292.893	180.002	0	0	0	0	0	0	0	200	903	0	0	0	0	0	0	0	603	903	0
707	1	33.3741	17.9089	-573.55	68733.2	53218	7175.54	292.787	180.162	0	0	0	0	0	0	0	200	903	0	0	0	0	0	0	0	603	903	0
707	2	33.2215	18.8245	-574.161	68916.3	53157	7312.87	292.582	179.97	0	0	0	0	0	0	0	200	903	0	0	0	0	0	0	0	603	903	0
707	3	33.8318	19.2822	-576.602	68092.3	53584.2	7633.3	292.931	181.908	0	0	0	0	0	0	0	200	903	0	0	0	0	0	0	0	603	903	0
707	4	33.3741	19.8926	-578.128	69282.5	53767.3	7312.87	293.003	180.161	0	0	0	0	0	0	0	200	903	0	0	0	0	0	0	0	603	903	0
707	5	33.5266	21.571	-576.602	69648.7	53279.1	7770.63	292.402	179.208	0	0	0	0	0	0	0	200	903	0	0	0	0	0	0	0	603	903	0
707	6	33.2215	20.5029	-579.654	69648.7	53462.2	7587.52	292.231	179.844	0	0	0	0	0	0	0	200	903	0	0	0	0	0	0	0	603	903	0
707	7	33.3741	22.4866	-581.18	69923.4	53828.4	7770.63	292.619	179.687	0	0	0	0	0	0	0	200	903	0	0	0	0	0	0	0	603	903	0
707	8	34.2896	22.6392	-580.874	70472.8	54011.5	7724.85	292.983	178.678	0	0	0	0	0	0	0	200	903	0	0	0	0	0	0	0	603	903	0
707	9	33.6792	23.4021	-582.095	70930.5	54072.5	7862.18	292.893	178.146	0	0	0	0	0	0	0	200	903	0	0	0	0	0	0	0	603	903	0
708	0	33.6792	24.165	-581.79	70564.3	54072.5	7679.08	292.942	178.712	0	0	0	0	0	0	0	200	903	0	0	0	0	0	0	0	603	903	0
708	1	33.6792	24.928	-584.842	71388.2	54011.5	7999.51	292.352	177.936	0	0	0	0	0	0	0	200	903	0	0	0	0	0	0	0	603	903	0
708	2	33.5266	25.0806	-585.452	71022	53584.2	8319.95	291.526	178.689	0	0	0	0	0	0	0	200	903	0	0	0	0	0	0	0	603	903	0
708	3	35.6629	26.3013	-589.725	71937.6	54377.7	8411.5	292.209	178.015	0	0	0	0	0	0	0	200	903	0	0	0	0	0	0	0	603	903	0
708	4	33.9844	26.6064	-590.335	72303.8	54560.8	8503.05	292.423	177.521	0	0	0	0	0	0	0	200	903	0	0	0	0	0	0	0	603	903	0
708	5	33.9844	26.9116	-590.64	72670	54255.6	8319.95	291.859	176.964	0	0	0	0	0	0	0	200	903	0	0	0	0	0	0	0	603	903	0
708	6	32.7637	27.2168	-592.166	72212.2	54682.9	8503.05	292.344	178.054	0	0	0	0	0	0	0	200	903	0	0	0	0	0	0	0	603	903	0
708	7	33.3741	28.7427	-593.692	72944.6	54621.8	8548.83	292.004	177.134	0	0	0	0	0	0	0	200	903	0	0	0	0	0	0	0	603	903	0
708	8	32.9163	29.353	-595.523	72670	54866	8777.71	292.131	177.973	0	0	0	0	0	0	0	200	903	0	0	0	0	0	0	0	603	903	0
708	9	33.8318	29.6582	-596.744	73494	54804.9	8915.04	291.84	176.842	0	0	0	0	0	0	0	200	903	0	0	0	0	0	0	0	603	903	0
709	0	34.8999	30.2686	-596.744	73768.6	54804.9	9052.37	291.84	176.381	0	0	0	0	0	0	0	200	903	0	0	0	0	0	0	0	603	903	0
709	1	32.7637	31.1841	-593.997	74134.9	55049.1	8915.04	292.676	175.193	0	0	0	0	0	0	0	200	903	0	0	0	0	0	0	0	603	903	0
709	2	34.4422	30.8789	-600.711	73860.2	54927	9418.58	291.437	177.045	0	0	0	0	0	0	0	200	903	0	0	0	0	0	0	0	603	903	0
709	3	34.8999	32.71	-602.542	73677.1	55171.1	9235.47	291.564	177.723	0	0	0	0	0	0	0	200	903	0	0	0	0	0	0	0	603	903	0
709	4	34.5948	31.4893	-602.237	74409.5	55415.3	9510.13	292.016	176.445	0	0	0	0	0	0	0	200	903	0	0	0	0	0	0	0	603	903	0
709	5	34.8999	34.0833	-607.12	74684.1	55354.2	9510.13	291.175	176.986	0	0	0	0	0	0	0	200	903	0	0	0	0	0	0	0	603	903	0
709	6	34.8999	34.0833	-608.951	74684.1	55110.1	9464.35	290.5	177.356	0	0	0	0	0	0	0	200	903	0	0	0	0	0	0	0	603	903	0
709	7	34.4422	33.1677	-609.561	75874.3	55781.5	9601.68	291.511	175.526	0	0	0	0	0	0	0	200	903	0	0	0	0	0	0	0	603	903	0
709	8	34.4422	34.9988	-613.528	75691.2	55842.5	9693.24	291.019	176.63	0	0	0	0	0	0	0	200	903	0	0	0	0	0	0	0	603	903	0
709	9	34.4422	36.3721	-614.444	75691.2	55964.6	9784.79	291.082	176.813	0	0	0	0	0	0	0	200	903	0	0	0	0	0	0	0	603	903	0
710	0	35.2051	36.6772	-614.749	76240.5	56025.6	9922.12	291.136	175.981	0	0	0	0	0	0	0	200	903	0	0	0	0	0	0	0	603	903	0
710	1	34.2896	38.2031	-616.58	76698.3	56147.7	10151	291.063	175.607	0	0	0	0	0	0	0	200	903	0	0	0	0	0	0	0	603	903	0
710	2	34.7473	37.7454	-619.021	77430.8	56513.9	10151	291.296	174.914	0	0	0	0	0	0	0	200	903	0	0	0	0	0	0	0	603	903	0
710	3	35.2051	38.9661	-619.937	77888.5	56513.9	10334.1	291.161	174.361	0	0	0	0	0	0	0	200	903	0	0	0	0	0	0	0	603	903	0
710	4	34.8999	39.2712	-622.378	77339.2	56452.9	10105.2	290.705	175.736	0	0	0	0	0	0	0	200	903	0	0	0	0	0	0	0	603	903	0
710	5	35.3577	39.1187	-623.294	77339.2	56636	10334.1	290.866	175.919	0	0	0	0	0	0	0	200	903	0	0	0	0	0	0	0	603	903	0
710	6	35.9681	40.6445	-627.566	77797	56880.1	10517.2	290.636	176.034	0	0	0	0	0	0	0	200	903	0	0	0	0	0	0	0	603	903	0
710	7	35.5103	41.7127	-630.008	78529.4	57368.4	10654.5	291.06	175.352	0	0	0	0	0	0	0	200	903	0	0	0	0	0	0	0	603	903	0
710	8	36.1206	41.8652	-628.787	79078.7	57429.4	10700.3	291.334	174.236	0	0	0	0	0	0	0	200	903	0	0	0	0	0	0	0	603	903	0
710	9	35.2051	42.0178	-633.06	79444.9	56819.1	10837.6	289.753	174.506	0	0	0	0	0	0	0	200	903	0	0	0	0	0	0	0	603	903	0
711	0	34.5948	41.7127	-635.501	79719.6	57917.7	10654.5	291.137	174.556	0	0	0	0	0	0	0	200	903	0	0	0	0	0	0	0	603	903	0
711	1	35.6629	43.0859	-636.416	79536.4	57307.4	10929.2	290.047	175.025	0	0	0	0	0	0	0	200	903	0	0	0	0	0	0	0	603	903	0
711	2	35.5103	44.4592	-637.942	80177.3	57673.6	11112.3	290.406	174.319	0	0	0	0	0	0	0	200	903	0	0	0	0	0	0	0	603	903	0
711	3	36.731	45.0696	-640.384	80177.3	58039.8	11066.5	290.633	174.798	0	0	0	0	0	0	0	200	903	0	0	0	0	0	0	0	603	903	0
711	4	35.9681	45.5273	-641.604	80543.5	58222.9	11020.8	290.746	174.465	0	0	0	0	0	0	0	200	903	0	0	0	0	0	0	0	603	903	0
711	5	35.9681	46.2903	-643.741	81367.5	58100.8	11203.9	290.255	173.602	0	0	0	0	0	0	0	200	903	0	0	0	0	0	0	0	603	903	0
711	6	36.731	46.1377	-647.098	81184.4	58283.9	11158.1	290.07	174.541	0	0	0	0	0	0	0	200	903	0	0	0	0	0	0	0	603	903	0
711	7	36.2732	46.4429	-650.76	81733.7	58467	11524.3	289.844	174.403	0	0	0	0	0	0	0	200	903	0	0	0	0	0	0	0	603	903	0
711	8	36.731	47.2058	-651.98	81550.6	58161.9	11753.2	289.208	174.919	0	0	0	0	0	0	0	200	903	0	0	0	0	0	0	0	603	903	0
711	9	36.2732	48.4265	-653.201	81825.3	58772.2	11524.3	289.976	174.732	0	0	0	0	0	0	0	200	903	0	0	0	0	0	0	0	603	903	0
712	0	35.5103	49.6472	-655.337	82557.7	58894.3	11982.1	289.869	174.023	0	0	0	0	0	0	0	200	903	0	0	0	0	0	0	0	603	903	0
712	1	35.8155	48.8843	-655.337	82923.9	58894.3	11661.6	289.869	173.464	0	0	0	0	0	0	0	200	903	0	0	0	0	0	0	0	603	903	0
712	2	35.9681	50.5627	-657.779	83747.9	59016.4	11890.5	289.721	172.681	0	0	0	0	0	0	0	200	903	0	0	0	0	0	0	0	603	903	0
712	3	36.1206	50.4102	-659.61	82557.7	59382.6	11844.7	290.027	174.839	0	0	0	0	0	0	0	200	903	0	0	0	0	0	0	0	603	903	0
712	4	36.731	50.8679	-661.136	84205.6	59382.6	11890.5	289.819	172.635	0	0	0	0	0	0	0	200	903	0	0	0	0	0	0	0	603	903	0
712	5	36.8836	51.7835	-662.051	83931	59443.6	11890.5	289.787	173.226	0	0	0	0	0	0	0	200	903	0	0	0	0	0	0	0	603	903	0
712	6	36.5784	51.7835	-664.798	84114.1	59565.7	11936.3	289.6	173.474	0	0	0	0	0	0	0	200	903	0	0	0	0	0	0	0	603	903	0
712	7	37.6465	53.7671	-668.765	84938	59565.7	12439.8	289.068	172.993	0	0	0	0	0	0	0	200	903	0	0	0	0	0	0	0	603	903	0
712	8	36.731	53.4619	-671.512	84755	59931.9	12348.3	289.249	173.785	0	0	0	0	0	0	0	200	903	0	0	0	0	0	0	0	603	903	0
712	9	36.731	54.3774	-668.46	85762	60054	12027.8	289.839	171.702	0	0	0	0	0	0	0	200	903	0	0	0	0	0	0	0	603	903	0
713	0	36.2732	54.53	-673.648	85762	59992.9	12394	289.057	172.69	0	0	0	0	0	0	0	200	903	0	0	0	0	0	0	0	603	903	0
713	1	36.5784	53.7671	-676.089	86402.9	60237.1	12439.8	289.096	172.202	0	0	0	0	0	0	0	200	903	0	0	0	0	0	0	0	603	903	0
713	2	37.4939	56.2085	-675.784	86586	59931.9	12485.6	288.685	171.873	0	0	0	0	0	0	0	200	903	0	0	0	0	0	0	0	603	903	0
713	3	36.1206	57.2766	-677.615	86677.6	60237.1	12577.2	288.896	172.084	0	0	0	0	0	0	0	200	903	0	0	0	0	0	0	0	603	903	0
713	4	37.1888	55.5981	-679.446	86952.2	60054	12668.7	288.387	172.025	0	0	0	0	0	0	0	200	903	0	0	0	0	0	0	0	603	903	0
713	5	37.3413	57.4292	-681.277	87318.5	60664.3	12943.4	289.045	171.831	0	0	0	0	0	0	0	200	903	0	0	0	0	0	0	0	603	903	0
713	6	37.9517	58.6499	-682.193	87959.3	60664.3	12897.6	288.925	171.064	0	0	0	0	0	0	0	200	903	0	0	0	0	0	0	0	603	903	0
713	7	39.0198	58.9551	-686.77	88233.9	60908.4	12714.5	288.688	171.523	0	0	0	0	0	0	0	200	903	0	0	0	0	0	0	0	603	903	0
713	8	37.3413	59.2603	-687.381	88417.1	60908.4	12989.1	288.609	171.371	0	0	0	0	0	0	0	200	903	0	0	0	0	0	0	0	603	903	0
713	9	37.3413	60.1758	-690.127	88325.5	60786.4	13126.5	288.08	172.016	0	0	0	0	0	0	0	200	903	0	0	0	0	0	0	0	603	903	0
714	0	36.8836	61.3965	-691.348	88691.7	60969.5	12989.1	288.189	171.712	0	0	0	0	0	0	0	200	903	0	0	0	0	0	0	0	603	903	0
714	1	37.9517	60.1758	-692.569	88874.8	61335.7	13584.2	288.563	171.674	0	0	0	0	0	0	0	200	903	0	0	0	0	0	0	0	603	903	0
714	2	38.1043	62.4646	-692.874	89607.3	61457.8	13126.5	288.7	170.673	0	0	0	0	0	0	0	200	903	0	0	0	0	0	0	0	603	903	0
714	3	37.7991	62.9224	-694.705	90065	61457.8	13446.9	288.466	170.355	0	0	0	0	0	0	0	200	903	0	0	0	0	0	0	0	603	903	0
714	4	37.3413	63.3801	-696.231	90614.4	61518.8	13401.1	288.36	169.85	0	0	0	0	0	0	0	200	903	0	0	0	0	0	0	0	603	903	0
714	5	37.6465	63.2275	-697.452	89881.9	61824	13218	288.643	171.128	0	0	0	0	0	0	0	200	903	0	0	0	0	0	0	0	603	903	0
714	6	37.6465	63.6853	-699.283	90431.2	61701.9	13630	288.236	170.68	0	0	0	0	0	0	0	200	903	0	0	0	0	0	0	0	603	903	0
714	7	38.8672	65.0586	-700.198	90431.2	61762.9	13721.6	288.208	170.849	0	0	0	0	0	0	0	200	903	0	0	0	0	0	0	0	603	903	0
714	8	39.0198	66.2793	-703.25	90522.8	62129.1	13630	288.346	171.279	0	0	0	0	0	0	0	200	903	0	0	0	0	0	0	0	603	903	0
714	9	37.7991	66.7371	-704.471	91072.1	61457.8	13263.8	287.24	170.723	0	0	0	0	0	0	0	200	903	0	0	0	0	0	0	0	603	903	0
715	0	37.9517	66.5845	-699.893	91072.1	62251.2	13584.2	288.944	169.877	0	0	0	0	0	0	0	200	903	0	0	0	0	0	0	0	603	903	0
715	1	37.9517	67.0422	-706.302	92262.3	62251.2	13858.9	288.137	169.373	0	0	0	0	0	0	0	200	903	0	0	0	0	0	0	0	603	903	0
715	2	37.6465	68.2629	-707.522	91987.6	61579.8	13950.4	287.036	169.986	0	0	0	0	0	0	0	200	903	0	0	0	0	0	0	0	603	903	0
715	3	38.4095	68.7207	-709.353	91987.6	62495.4	13996.2	288.102	170.322	0	0	0	0	0	0	0	200	903	0	0	0	0	0	0	0	603	903	0
715	4	37.1888	70.8569	-708.438	91346.8	62617.4	14087.8	288.388	171.059	0	0	0	0	0	0	0	200	903	0	0	0	0	0	0	0	603	903	0
715	5	37.3413	70.8569	-708.438	92536.9	61824	14042	287.268	169.379	0	0	0	0	0	0	0	200	903	0	0	0	0	0	0	0	603	903	0
715	6	38.562	71.7725	-711.185	94001.8	62312.3	14042	287.618	167.824	0	0	0	0	0	0	0	200	903	0	0	0	0	0	0	0	603	903	0
715	7	38.1043	71.7725	-712.71	93818.7	62495.4	14179.3	287.687	168.364	0	0	0	0	0	0	0	200	903	0	0	0	0	0	0	0	603	903	0
715	8	39.325	72.2302	-716.983	93635.6	62068.1	14316.7	286.568	169.403	0	0	0	0	0	0	0	200	903	0	0	0	0	0	0	0	603	903	0
715	9	38.4095	72.8406	-716.678	94276.5	62678.5	14270.9	287.457	168.453	0	0	0	0	0	0	0	200	903	0	0	0	0	0	0	0	603	903	0
716	0	38.2569	73.2983	-717.898	93544	62983.6	14270.9	287.733	169.697	0	0	0	0	0	0	0	200	903	0	0	0	0	0	0	0	603	903	0
716	1	38.4095	74.8242	-717.898	94093.3	62068.1	14362.4	286.458	168.932	0	0	0	0	0	0	0	200	903	0	0	0	0	0	0	0	603	903	0
716	2	37.6465	74.2139	-719.119	94368	62983.6	14499.8	287.584	168.773	0	0	0	0	0	0	0	200	903	0	0	0	0	0	0	0	603	903	0
716	3	38.1043	75.7398	-719.424	95375.1	62861.6	14408.2	287.378	167.429	0	0	0	0	0	0	0	200	903	0	0	0	0	0	0	0	603	903	0
716	4	38.4095	75.7398	-718.814	94001.8	62617.4	14408.2	287.112	169.227	0	0	0	0	0	0	0	200	903	0	0	0	0	0	0	0	603	903	0
716	5	38.2569	77.113	-719.729	95375.1	63105.7	14637.1	287.68	167.485	0	0	0	0	0	0	0	200	903	0	0	0	0	0	0	0	603	903	0
716	6	39.0198	77.7234	-720.95	95375.1	63044.7	14728.6	287.447	167.709	0	0	0	0	0	0	0	200	903	0	0	0	0	0	0	0	603	903	0
716	7	38.8672	78.7915	-721.56	95283.5	63044.7	14820.2	287.373	167.948	0	0	0	0	0	0	0	200	903	0	0	0	0	0	0	0	603	903	0
716	8	38.8672	79.707	-720.95	95192	63044.7	14637.1	287.447	167.963	0	0	0	0	0	0	0	200	903	0	0	0	0	0	0	0	603	903	0
716	9	39.6302	79.8596	-724.002	95924.4	62922.6	14591.3	286.909	167.508	0	0	0	0	0	0	0	200	903	0	0	0	0	0	0	0	603	903	0
717	0	39.6302	78.7915	-724.917	96290.6	62617.4	15094.9	286.379	167.17	0	0	0	0	0	0	0	200	903	0	0	0	0	0	0	0	603	903	0
717	1	39.7827	81.2329	-721.56	96290.6	63410.9	15003.3	287.88	166.552	0	0	0	0	0	0	0	200	903	0	0	0	0	0	0	0	603	903	0
717	2	39.325	81.8433	-725.223	95466.6	63349.9	14637.1	287.352	168.362	0	0	0	0	0	0	0	200	903	0	0	0	0	0	0	0	603	903	0
717	3	38.4095	82.9114	-726.138	96107.5	62922.6	15003.3	286.654	167.646	0	0	0	0	0	0	0	200	903	0	0	0	0	0	0	0	603	903	0
717	4	39.6302	83.6743	-725.223	96382.2	62983.6	14866	286.847	167.1	0	0	0	0	0	0	0	200	903	0	0	0	0	0	0	0	603	903	0
717	5	38.7146	83.9795	-725.223	96199.1	63349.9	14957.5	287.352	167.352	0	0	0	0	0	0	0	200	903	0	0	0	0	0	0	0	603	903	0
717	6	39.9353	85.0476	-725.833	96565.3	63044.7	15094.9	286.858	166.959	0	0	0	0	0	0	0	200	903	0	0	0	0	0	0	0	603	903	0
717	7	41.0035	84.895	-725.833	97023	62861.6	15369.5	286.606	166.329	0	0	0	0	0	0	0	200	903	0	0	0	0	0	0	0	603	903	0
717	8	40.3931	84.1321	-724.002	97297.7	63105.7	15049.1	287.162	165.611	0	0	0	0	0	0	0	200	903	0	0	0	0	0	0	0	603	903	0
717	9	40.2405	86.2683	-726.138	96565.3	63105.7	15278	286.906	167.015	0	0	0	0	0	0	0	200	903	0	0	0	0	0	0	0	603	903	0
718	0	40.5457	87.6416	-728.58	96107.5	62983.6	15232.2	286.447	168.089	0	0	0	0	0	0	0	200	903	0	0	0	0	0	0	0	603	903	0
718	1	40.5457	88.0994	-727.969	97206.1	62678.5	15278	286.1	166.469	0	0	0	0	0	0	0	200	903	0	0	0	0	0	0	0	603	903	0
718	2	40.5457	89.4727	-727.664	97663.9	63105.7	15461.1	286.724	165.784	0	0	0	0	0	0	0	200	903	0	0	0	0	0	0	0	603	903	0
718	3	39.9353	89.1675	-723.697	97297.7	62739.5	15506.8	286.693	165.555	0	0	0	0	0	0	0	200	903	0	0	0	0	0	0	0	603	903	0
718	4	40.2405	90.3882	-724.307	97663.9	63227.8	15415.3	287.294	165.162	0	0	0	0	0	0	0	200	903	0	0	0	0	0	0	0	603	903	0
718	5	41.0035	90.3882	-720.035	97389.2	62617.4	15461.1	286.965	164.744	0	0	0	0	0	0	0	200	903	0	0	0	0	0	0	0	603	903	0
718	6	41.156	90.9985	-724.002	97480.8	62922.6	15506.8	286.909	165.358	0	0	0	0	0	0	0	200	903	0	0	0	0	0	0	0	603	903	0
718	7	41.7664	92.3718	-723.697	97389.2	62617.4	15598.4	286.524	165.428	0	0	0	0	0	0	0	200	903	0	0	0	0	0	0	0	603	903	0
718	8	41.919	92.9822	-724.612	97847	62495.4	15506.8	286.247	164.966	0	0	0	0	0	0	0	200	903	0	0	0	0	0	0	0	603	903	0
718	9	42.0716	93.7451	-724.612	97755.4	62556.4	15506.8	286.331	165.093	0	0	0	0	0	0	0	200	903	0	0	0	0	0	0	0	603	903	0
719	0	41.919	94.6607	-723.392	98213.2	62312.3	15598.4	286.139	164.232	0	0	0	0	0	0	0	200	903	0	0	0	0	0	0	0	603	903	0
719	1	42.0716	94.9658	-723.392	98396.3	62434.3	15461.1	286.308	163.979	0	0	0	0	0	0	0	200	903	0	0	0	0	0	0	0	603	903	0
719	2	42.8345	95.8814	-720.645	97480.8	62434.3	15644.2	286.637	164.731	0	0	0	0	0	0	0	200	903	0	0	0	0	0	0	0	603	903	0
719	3	41.6138	96.4917	-720.035	96931.5	62495.4	15827.3	286.795	165.379	0	0	0	0	0	0	0	200	903	0	0	0	0	0	0	0	603	903	0
719	4	42.2242	95.4236	-716.983	97389.2	62251.2	15918.8	286.824	164.168	0	0	0	0	0	0	0	200	903	0	0	0	0	0	0	0	603	903	0
719	5	42.5293	98.1702	-718.204	98030.1	62434.3	15873	286.931	163.507	0	0	0	0	0	0	0	200	903	0	0	0	0	0	0	0	603	903	0
719	6	42.9871	98.1702	-717.593	96656.8	62495.4	15918.8	287.09	165.304	0	0	0	0	0	0	0	200	903	0	0	0	0	0	0	0	603	903	0
719	7	43.4449	98.7805	-718.204	98030.1	62373.3	15644.2	286.846	163.507	0	0	0	0	0	0	0	200	903	0	0	0	0	0	0	0	603	903	0
719	8	43.2923	99.0857	-717.288	97297.7	61885	15781.5	286.276	164.353	0	0	0	0	0	0	0	200	903	0	0	0	0	0	0	0	603	903	0
719	9	42.2242	99.6961	-715.762	97389.2	61762.9	15873	286.29	163.936	0	0	0	0	0	0	0	200	903	0	0	0	0	0	0	0	603	903	0
720	0	43.9026	100.306	-714.541	96931.5	61762.9	16147.7	286.437	164.344	0	0	0	0	0	0	0	200	903	0	0	0	0	0	0	0	603	903	0
720	1	43.4449	101.527	-712.71	96931.5	61640.9	16056.2	286.488	163.996	0	0	0	0	0	0	0	200	903	0	0	0	0	0	0	0	603	903	0
720	2	43.2923	102.29	-710.269	98396.3	61824	16147.7	287.043	161.466	0	0	0	0	0	0	0	200	903	0	0	0	0	0	0	0	603	903	0
720	3	43.2923	101.375	-710.574	97389.2	61640.9	15506.8	286.748	162.943	0	0	0	0	0	0	0	200	903	0	0	0	0	0	0	0	603	903	0
720	4	43.4449	102.443	-707.217	97663.9	60847.4	16101.9	286.038	161.904	0	0	0	0	0	0	0	200	903	0	0	0	0	0	0	0	603	903	0
720	5	43.5974	103.358	-707.217	97023	61274.7	16376.6	286.642	162.81	0	0	0	0	0	0	0	200	903	0	0	0	0	0	0	0	603	903	0
720	6	44.6656	103.969	-706.912	96748.4	61091.6	16193.5	286.42	163.139	0	0	0	0	0	0	0	200	903	0	0	0	0	0	0	0	603	903	0
720	7	44.6656	104.731	-704.471	96748.4	60847.4	16147.7	286.373	162.665	0	0	0	0	0	0	0	200	903	0	0	0	0	0	0	0	603	903	0
720	8	42.9871	105.342	-702.334	97206.1	60664.3	16010.4	286.375	161.596	0	0	0	0	0	0	0	200	903	0	0	0	0	0	0	0	603	903	0
720	9	42.9871	105.189	-702.029	97480.8	60359.1	15781.5	285.978	161.144	0	0	0	0	0	0	0	200	903	0	0	0	0	0	0	0	603	903	0
721	0	44.513	105.647	-699.893	97389.2	60359.1	16239.3	286.241	160.851	0	0	0	0	0	0	0	200	903	0	0	0	0	0	0	0	603	903	0
721	1	43.75	106.868	-697.146	96656.8	60115	16285	286.23	161.354	0	0	0	0	0	0	0	200	903	0	0	0	0	0	0	0	603	903	0
721	2	42.2242	106.257	-695.01	96107.5	59870.8	16056.2	286.144	161.718	0	0	0	0	0	0	0	200	903	0	0	0	0	0	0	0	603	903	0
721	3	43.2923	108.546	-692.569	96199.1	59626.7	16376.6	286.095	161.098	0	0	0	0	0	0	0	200	903	0	0	0	0	0	0	0	603	903	0
721	4	43.5974	108.546	-690.433	96656.8	59748.8	16147.7	286.538	160.005	0	0	0	0	0	0	0	200	903	0	0	0	0	0	0	0	603	903	0
721	5	43.5974	108.241	-690.738	96290.6	59260.5	16147.7	285.793	160.597	0	0	0	0	0	0	0	200	903	0	0	0	0	0	0	0	603	903	0
721	6	43.4449	109.614	-689.517	95649.8	59138.4	16468.1	285.768	161.28	0	0	0	0	0	0	0	200	903	0	0	0	0	0	0	0	603	903	0
721	7	42.8345	110.225	-686.465	95741.3	59077.4	16101.9	286.06	160.53	0	0	0	0	0	0	0	200	903	0	0	0	0	0	0	0	603	903	0
721	8	42.6819	110.225	-685.245	96016	58772.2	16193.5	285.768	159.881	0	0	0	0	0	0	0	200	903	0	0	0	0	0	0	0	603	903	0
721	9	42.9871	110.835	-681.888	95466.6	58222.9	16285	285.385	159.997	0	0	0	0	0	0	0	200	903	0	0	0	0	0	0	0	603	903	0
722	0	42.5293	111.14	-679.446	95008.9	58467	16056.2	286.051	160.167	0	0	0	0	0	0	0	200	903	0	0	0	0	0	0	0	603	903	0
722	1	42.3767	112.666	-672.732	95283.5	58100.8	16147.7	286.365	158.363	0	0	0	0	0	0	0	200	903	0	0	0	0	0	0	0	603	903	0
722	2	42.6819	111.75	-674.258	95375.1	57917.7	15964.6	285.898	158.548	0	0	0	0	0	0	0	200	903	0	0	0	0	0	0	0	603	903	0
722	3	42.8345	112.666	-669.986	94551.1	57429.4	16147.7	285.717	158.876	0	0	0	0	0	0	0	200	903	0	0	0	0	0	0	0	603	903	0
722	4	42.5293	110.682	-670.901	94917.3	57673.6	16147.7	285.964	158.523	0	0	0	0	0	0	0	200	903	0	0	0	0	0	0	0	603	903	0
722	5	42.9871	113.124	-667.85	94093.3	57246.3	16147.7	285.717	159.11	0	0	0	0	0	0	0	200	903	0	0	0	0	0	0	0	603	903	0
722	6	41.4612	113.887	-664.798	93910.2	56941.2	16147.7	285.652	158.739	0	0	0	0	0	0	0	200	903	0	0	0	0	0	0	0	603	903	0
722	7	41.0035	114.497	-662.356	94001.8	56880.1	15964.6	285.875	158.08	0	0	0	0	0	0	0	200	903	0	0	0	0	0	0	0	603	903	0
722	8	40.8509	114.497	-658.389	93910.2	56147.7	15964.6	285.28	157.364	0	0	0	0	0	0	0	200	903	0	0	0	0	0	0	0	603	903	0
722	9	41.3086	114.039	-656.558	93360.9	56147.7	16605.5	285.518	157.803	0	0	0	0	0	0	0	200	903	0	0	0	0	0	0	0	603	903	0
723	0	42.2242	115.413	-653.506	92720.1	56208.7	16147.7	286.011	158.119	0	0	0	0	0	0	0	200	903	0	0	0	0	0	0	0	603	903	0
723	1	41.156	114.802	-650.455	92628.5	55354.2	15827.3	285.101	157.594	0	0	0	0	0	0	0	200	903	0	0	0	0	0	0	0	603	903	0
723	2	41.0035	116.328	-649.234	93177.8	55537.4	16010.4	285.543	156.48	0	0	0	0	0	0	0	200	903	0	0	0	0	0	0	0	603	903	0
723	3	40.2405	115.718	-646.792	92628.5	55232.2	15873	285.394	156.788	0	0	0	0	0	0	0	200	903	0	0	0	0	0	0	0	603	903	0
723	4	39.4776	116.023	-643.741	91255.2	54682.9	16056.2	284.946	158.242	0	0	0	0	0	0	0	200	903	0	0	0	0	0	0	0	603	903	0
723	5	39.4776	117.549	-640.994	91346.8	54682.9	16147.7	285.309	157.492	0	0	0	0	0	0	0	200	903	0	0	0	0	0	0	0	603	903	0
723	6	40.2405	117.396	-636.722	91621.4	54194.6	16147.7	285.115	156.104	0	0	0	0	0	0	0	200	903	0	0	0	0	0	0	0	603	903	0
723	7	38.7146	116.786	-632.449	90156.6	53889.4	15964.6	285.208	157.449	0	0	0	0	0	0	0	200	903	0	0	0	0	0	0	0	603	903	0
723	8	38.1043	117.396	-630.008	91438.3	53828.4	15735.7	285.441	154.862	0	0	0	0	0	0	0	200	903	0	0	0	0	0	0	0	603	903	0
723	9	39.1724	117.091	-626.346	90248.1	53095.9	15918.8	284.771	155.913	0	0	0	0	0	0	0	200	903	0	0	0	0	0	0	0	603	903	0
724	0	39.0198	118.464	-623.904	89881.9	53157	15873	285.201	155.936	0	0	0	0	0	0	0	200	903	0	0	0	0	0	0	0	603	903	0
724	1	39.4776	118.159	-622.989	90248.1	52729.7	15552.6	284.64	155.137	0	0	0	0	0	0	0	200	903	0	0	0	0	0	0	0	603	903	0
724	2	38.7146	117.701	-617.801	89332.6	52241.5	15827.3	284.56	155.402	0	0	0	0	0	0	0	200	903	0	0	0	0	0	0	0	603	903	0
724	3	37.3413	118.617	-609.256	88508.6	52241.5	15827.3	285.746	154.727	0	0	0	0	0	0	0	200	903	0	0	0	0	0	0	0	603	903	0
724	4	36.2732	119.227	-610.477	88142.4	51631.1	15552.6	284.575	155.617	0	0	0	0	0	0	0	200	903	0	0	0	0	0	0	0	603	903	0
724	5	36.8836	117.396	-607.73	88142.4	51325.9	15781.5	284.455	154.965	0	0	0	0	0	0	0	200	903	0	0	0	0	0	0	0	603	903	0
724	6	36.2732	119.38	-602.542	88142.4	51081.8	15964.6	284.777	153.716	0	0	0	0	0	0	0	200	903	0	0	0	0	0	0	0	603	903	0
724	7	35.2051	118.922	-598.575	87593.1	50654.5	15598.4	284.625	153.664	0	0	0	0	0	0	0	200	903	0	0	0	0	0	0	0	603	903	0
724	8	35.9681	118.617	-593.692	86769.1	50227.3	15735.7	284.602	153.848	0	0	0	0	0	0	0	200	903	0	0	0	0	0	0	0	603	903	0
724	9	35.2051	119.99	-590.03	85762	50105.2	15461.1	284.92	154.648	0	0	0	0	0	0	0	200	903	0	0	0	0	0	0	0	603	903	0
725	0	34.8999	120.753	-587.893	85670.5	49983.2	15323.7	285.021	154.276	0	0	0	0	0	0	0	200	903	0	0	0	0	0	0	0	603	903	0
725	1	34.2896	120.753	-584.842	86311.4	49128.7	15461.1	284.003	152.419	0	0	0	0	0	0	0	200	903	0	0	0	0	0	0	0	603	903	0
725	2	33.9844	118.617	-580.264	85487.4	48762.4	15278	284.035	152.675	0	0	0	0	0	0	0	200	903	0	0	0	0	0	0	0	603	903	0
725	3	32.6111	118.922	-576.907	83931	48518.3	15369.5	284.101	154.516	0	0	0	0	0	0	0	200	903	0	0	0	0	0	0	0	603	903	0
725	4	33.5266	120.753	-570.193	83747.9	48091.1	15323.7	284.342	153.124	0	0	0	0	0	0	0	200	903	0	0	0	0	0	0	0	603	903	0
725	5	31.8482	120.295	-566.226	84205.6	48030	15278	284.825	151.286	0	0	0	0	0	0	0	200	903	0	0	0	0	0	0	0	603	903	0
725	6	32.3059	119.227	-562.869	82740.8	47602.8	15049.1	284.572	153.002	0	0	0	0	0	0	0	200	903	0	0	0	0	0	0	0	603	903	0
725	7	30.9326	117.244	-558.291	82923.9	46626.2	14911.7	283.516	151.468	0	0	0	0	0	0	0	200	903	0	0	0	0	0	0	0	603	903	0
725	8	30.9326	119.227	-555.85	81825.3	46443.1	15003.3	283.553	152.793	0	0	0	0	0	0	0	200	903	0	0	0	0	0	0	0	603	903	0
725	9	30.0171	119.075	-553.103	81459.1	46321	15186.4	283.748	152.724	0	0	0	0	0	0	0	200	903	0	0	0	0	0	0	0	603	903	0
726	0	29.1016	120.143	-547	81550.6	45649.7	14682.9	283.455	150.913	0	0	0	0	0	0	0	200	903	0	0	0	0	0	0	0	603	903	0
726	1	27.8809	119.075	-542.727	80909.7	45161.4	14499.8	283.212	150.92	0	0	0	0	0	0	0	200	903	0	0	0	0	0	0	0	603	903	0
726	2	28.3387	119.075	-536.014	79811.1	44795.2	14591.3	283.571	151.102	0	0	0	0	0	0	0	200	903	0	0	0	0	0	0	0	603	903	0
726	3	26.6602	119.38	-531.131	78529.4	44306.9	14362.4	283.42	152.147	0	0	0	0	0	0	0	200	903	0	0	0	0	0	0	0	603	903	0
726	4	27.5757	118.312	-527.774	79261.8	44245.8	14499.8	283.835	149.819	0	0	0	0	0	0	0	200	903	0	0	0	0	0	0	0	603	903	0
726	5	26.2024	118.617	-521.976	78071.6	43696.5	14499.8	283.714	150.431	0	0	0	0	0	0	0	200	903	0	0	0	0	0	0	0	603	903	0
726	6	25.8972	118.464	-517.703	78254.7	42964.1	14133.5	282.99	148.842	0	0	0	0	0	0	0	200	903	0	0	0	0	0	0	0	603	903	0
726	7	24.2188	118.617	-513.431	76973	42781	14087.8	283.324	150.081	0	0	0	0	0	0	0	200	903	0	0	0	0	0	0	0	603	903	0
726	8	23.761	116.023	-504.58	76423.7	42231.7	13950.4	283.697	148.54	0	0	0	0	0	0	0	200	903	0	0	0	0	0	0	0	603	903	0
726	9	22.8455	118.464	-503.055	76149	41682.4	13950.4	282.859	148.627	0	0	0	0	0	0	0	200	903	0	0	0	0	0	0	0	603	903	0
727	0	22.3877	117.396	-498.477	75416.6	41377.2	13904.7	283.007	148.706	0	0	0	0	0	0	0	200	903	0	0	0	0	0	0	0	603	903	0
727	1	21.167	116.938	-492.068	73951.7	40827.9	13630	282.972	149.712	0	0	0	0	0	0	0	200	903	0	0	0	0	0	0	0	603	903	0
727	2	21.167	117.396	-485.965	73127.8	39607.2	13675.8	281.502	149.52	0	0	0	0	0	0	0	200	903	0	0	0	0	0	0	0	603	903	0
727	3	20.7093	116.938	-480.777	73402.4	39973.4	13721.6	283.143	147.325	0	0	0	0	0	0	0	200	903	0	0	0	0	0	0	0	603	903	0
727	4	19.6411	116.023	-476.199	73036.2	39363	13355.3	282.661	146.627	0	0	0	0	0	0	0	200	903	0	0	0	0	0	0	0	603	903	0
727	5	19.0308	115.413	-472.232	72486.9	38569.6	13355.3	281.675	146.501	0	0	0	0	0	0	0	200	903	0	0	0	0	0	0	0	603	903	0
727	6	18.2679	115.565	-466.434	70564.3	38325.4	13218	282.167	148.715	0	0	0	0	0	0	0	200	903	0	0	0	0	0	0	0	603	903	0
727	7	18.2679	113.734	-460.94	70015	37898.2	13034.9	282.219	148.104	0	0	0	0	0	0	0	200	903	0	0	0	0	0	0	0	603	903	0
727	8	16.5894	114.039	-455.447	69648.7	37348.9	13080.7	282.005	147.076	0	0	0	0	0	0	0	200	903	0	0	0	0	0	0	0	603	903	0
727	9	16.5894	113.582	-446.902	69465.7	37287.8	12622.9	283.436	144.562	0	0	0	0	0	0	0	200	903	0	0	0	0	0	0	0	603	903	0
728	0	14.7583	113.734	-442.325	67817.7	36677.5	12714.5	282.92	146.679	0	0	0	0	0	0	0	200	903	0	0	0	0	0	0	0	603	903	0
728	1	13.9954	112.666	-434.085	67359.9	35456.8	12668.7	281.682	144.823	0	0	0	0	0	0	0	200	903	0	0	0	0	0	0	0	603	903	0
728	2	14.7583	111.598	-430.423	66719.1	35212.6	12394	281.809	144.992	0	0	0	0	0	0	0	200	903	0	0	0	0	0	0	0	603	903	0
728	3	14.148	110.835	-424.93	66078.2	35029.5	12348.3	282.436	144.496	0	0	0	0	0	0	0	200	903	0	0	0	0	0	0	0	603	903	0
728	4	13.9954	110.53	-420.047	65803.5	34175	12165.2	281.36	143.342	0	0	0	0	0	0	0	200	903	0	0	0	0	0	0	0	603	903	0
728	5	12.9273	109.767	-415.164	64521.8	33991.9	11982.1	281.876	144.587	0	0	0	0	0	0	0	200	903	0	0	0	0	0	0	0	603	903	0
728	6	11.0962	107.936	-408.755	63240.1	33320.6	11707.4	281.517	145.286	0	0	0	0	0	0	0	200	903	0	0	0	0	0	0	0	603	903	0
728	7	9.87552	107.783	-402.652	62873.9	32221.9	11432.7	280.024	143.851	0	0	0	0	0	0	0	200	903	0	0	0	0	0	0	0	603	903	0
728	8	11.0962	106.563	-395.022	61866.8	32221.9	11661.6	281.57	143.384	0	0	0	0	0	0	0	200	903	0	0	0	0	0	0	0	603	903	0
728	9	9.26517	105.647	-387.393	60401.9	31794.7	11387	282.073	144.081	0	0	0	0	0	0	0	200	903	0	0	0	0	0	0	0	603	903	0
729	0	9.11258	106.105	-378.848	59578	30635	11158.1	280.864	142.739	0	0	0	0	0	0	0	200	903	0	0	0	0	0	0	0	603	903	0
729	1	8.65482	105.189	-372.134	59303.3	30451.9	10929.2	281.83	140.64	0	0	0	0	0	0	0	200	903	0	0	0	0	0	0	0	603	903	0
729	2	8.19705	103.206	-367.862	58845.5	30085.7	10791.9	281.785	140.034	0	0	0	0	0	0	0	200	903	0	0	0	0	0	0	0	603	903	0
729	3	7.43411	101.527	-363.589	56922.9	29658.4	10654.5	281.571	143.442	0	0	0	0	0	0	0	200	903	0	0	0	0	0	0	0	603	903	0
729	4	7.28153	101.375	-358.096	55366.5	28865	10791.9	280.607	145.386	0	0	0	0	0	0	0	200	903	0	0	0	0	0	0	0	603	903	0
729	5	6.67118	99.8486	-350.467	55091.9	28376.7	10563	280.968	142.804	0	0	0	0	0	0	0	200	903	0	0	0	0	0	0	0	603	903	0
729	6	4.99271	98.0176	-342.227	53627	27644.3	9922.12	280.778	143.3	0	0	0	0	0	0	0	200	903	0	0	0	0	0	0	0	603	903	0
729	7	5.75565	96.3391	-336.123	53260.8	27339.1	9922.12	281.336	141.544	0	0	0	0	0	0	0	200	903	0	0	0	0	0	0	0	603	903	0
729	8	4.22977	95.5762	-329.104	52619.9	26606.7	10196.8	280.846	140.112	0	0	0	0	0	0	0	200	903	0	0	0	0	0	0	0	603	903	0
729	9	4.22977	93.5925	-321.78	51246.7	26118.4	9647.46	281.168	140.74	0	0	0	0	0	0	0	200	903	0	0	0	0	0	0	0	603	903	0
730	0	3.77201	92.8296	-314.761	50697.3	25691.1	9510.13	281.621	138.934	0	0	0	0	0	0	0	200	903	0	0	0	0	0	0	0	603	903	0
730	1	3.92459	90.846	-308.352	49415.6	25080.8	8960.81	281.338	139.743	0	0	0	0	0	0	0	200	903	0	0	0	0	0	0	0	603	903	0
730	2	3.16165	89.1675	-301.639	48225.4	24409.4	9006.59	280.923	140.122	0	0	0	0	0	0	0	200	903	0	0	0	0	0	0	0	603	903	0
730	3	3.00907	88.252	-293.094	47584.6	23982.2	8823.49	281.824	137.647	0	0	0	0	0	0	0	200	903	0	0	0	0	0	0	0	603	903	0
730	4	1.48319	86.2683	-289.737	47126.8	23432.8	8457.27	280.876	137.346	0	0	0	0	0	0	0	200	903	0	0	0	0	0	0	0	603	903	0
730	5	1.3306	83.6743	-282.718	45753.5	22578.4	8411.5	279.862	138.165	0	0	0	0	0	0	0	200	903	0	0	0	0	0	0	0	603	903	0
730	6	1.02542	80.9277	-274.173	44380.2	22273.2	7953.74	281.238	138.131	0	0	0	0	0	0	0	200	903	0	0	0	0	0	0	0	603	903	0
730	7	0.415072	80.0122	-267.154	43006.9	21968	7587.52	282.23	139.018	0	0	0	0	0	0	0	200	903	0	0	0	0	0	0	0	603	903	0
730	8	0.56766	78.6389	-259.524	42549.1	21113.5	7450.2	281.355	136.05	0	0	0	0	0	0	0	200	903	0	0	0	0	0	0	0	603	903	0
730	9	0.872836	75.8923	-252.81	42732.2	20503.2	7450.2	281.101	130.971	0	0	0	0	0	0	0	200	903	0	0	0	0	0	0	0	603	903	0
731	0	0.720248	72.8406	-247.622	41267.4	19892.8	7129.76	280.335	133.346	0	0	0	0	0	0	0	200	903	0	0	0	0	0	0	0	603	903	0
731	1	-0.0426918	71.0095	-241.214	39436.3	19404.5	6992.43	280.445	136.509	0	0	0	0	0	0	0	200	903	0	0	0	0	0	0	0	603	903	0
731	2	1.3306	69.4837	-232.059	38703.9	18855.2	6855.1	281.252	133.215	0	0	0	0	0	0	0	200	903	0	0	0	0	0	0	0	603	903	0
731	3	-0.805631	68.5681	-228.091	38063.1	18733.1	6305.79	282.13	133.124	0	0	0	0	0	0	0	200	903	0	0	0	0	0	0	0	603	903	0
731	4	-0.958219	65.9741	-221.072	37239.1	17817.6	6351.56	280.596	131.552	0	0	0	0	0	0	0	200	903	0	0	0	0	0	0	0	603	903	0
731	5	-1.87375	64.2957	-213.443	35774.2	17268.3	5802.25	280.904	132.394	0	0	0	0	0	0	0	200	903	0	0	0	0	0	0	0	603	903	0
731	6	-2.63669	62.4646	-207.95	34767.2	16596.9	5939.58	279.812	132.81	0	0	0	0	0	0	0	200	903	0	0	0	0	0	0	0	603	903	0
731	7	-1.11081	60.3284	-200.931	34401	15681.4	5939.58	278.044	128.792	0	0	0	0	0	0	0	200	903	0	0	0	0	0	0	0	603	903	0
731	8	-0.805631	57.887	-194.827	33485.4	15620.3	5481.81	280.175	128.127	0	0	0	0	0	0	0	200	903	0	0	0	0	0	0	0	603	903	0
731	9	0.262484	56.5137	-191.47	31471.3	15315.2	5069.82	279.987	135.634	0	0	0	0	0	0	0	200	903	0	0	0	0	0	0	0	603	903	0
732	0	-0.805631	54.3774	-183.23	30830.4	14460.7	5344.48	278.921	131.74	0	0	0	0	0	0	0	200	903	0	0	0	0	0	0	0	603	903	0
732	1	-1.11081	51.7835	-177.432	30189.5	14155.5	4749.39	279.78	129.853	0	0	0	0	0	0	0	200	903	0	0	0	0	0	0	0	603	903	0
732	2	-2.4841	50.2576	-171.939	29548.6	14033.4	4520.51	281.619	128.144	0	0	0	0	0	0	0	200	903	0	0	0	0	0	0	0	603	903	0
732	3	-2.17892	48.5791	-166.446	28541.6	13117.9	4703.61	278.812	128.523	0	0	0	0	0	0	0	200	903	0	0	0	0	0	0	0	603	903	0
732	4	-0.500455	45.9851	-157.901	27259.8	12751.7	4428.95	280.758	127.361	0	0	0	0	0	0	0	200	903	0	0	0	0	0	0	0	603	903	0
732	5	-2.94186	44.917	-150.882	26619	12568.6	4062.74	283.301	123.577	0	0	0	0	0	0	0	200	903	0	0	0	0	0	0	0	603	903	0
[truncated: 1,954 more rows]
