# Supplementary material for: The Effects of an Extemporaneous Speech Dual-task on Older Adult Gait Control
Source: Research Square preprint supplement (doi:10.21203/rs.3.rs-7674245/v1), 2025-11-18
Supplement: Supplementary file 165 [file Over4ground7.xlsx]

## Sheet: Sheet1
Trajectories
		04:LFHD			04:RFHD			04:LBHD			04:RBHD			04:C7			04:T10			04:CLAV			04:STRN			04:RBAK			04:LSHO			04:LUPA			04:LELB			04:LFRM			04:LWRA			04:LWRB			04:LFIN
Frame	Sub Frame	X	Y	Z	X	Y	Z	X	Y	Z	X	Y	Z	X	Y	Z	X	Y	Z	X	Y	Z	X	Y	Z	X	Y	Z	X	Y	Z	X	Y	Z	X	Y	Z	X	Y	Z	X	Y	Z	X	Y	Z	X	Y	Z
		mm	mm	mm	mm	mm	mm	mm	mm	mm	mm	mm	mm	mm	mm	mm	mm	mm	mm	mm	mm	mm	mm	mm	mm	mm	mm	mm	mm	mm	mm	mm	mm	mm	mm	mm	mm	mm	mm	mm	mm	mm	mm	mm	mm	mm	mm	mm	mm
481	0	244.234	2373.36	1569.51	126.305	2364.88	1573.89	231.614	2535.23	1508.57	124.143	2523.76	1511.21	189.763	2500.7	1422.3	208.91	2581	1143.76	187.713	2378	1330.98	185.576	2311.8	1136.1	125.002	2593.6	1217.75	368.929	2415.92	1353.46	449.954	2421.5	1112.57	454.625	2415.15	1035.68	440.985	2293.89	903.453	381.268	2258.58	841.27	445.708	2281.32	813.958	409.586	2212.71	780.674
482	0	241.195	2362.11	1571.87	123.282	2353.64	1575.38	229.004	2524.04	1511.03	121.54	2512.58	1512.86	187.721	2489.49	1424.39	207.178	2568.87	1145.72	186.107	2366.62	1333.05	184.355	2300.26	1138.12	123.338	2581.8	1219.35	367.094	2404.76	1355.98	447.591	2409.03	1114.89	452.59	2404.44	1038.2	439.321	2286.62	903.516	380.198	2254.16	839.603	445.66	2275.75	814.057	408.721	2210.16	777.611
483	0	238.298	2350.91	1574.16	120.4	2342.47	1576.86	226.518	2512.92	1513.45	119.06	2501.47	1514.51	185.732	2478.37	1426.43	205.44	2556.92	1147.66	184.58	2355.35	1335.07	183.257	2288.85	1140.09	121.657	2570.13	1220.94	365.339	2393.78	1358.43	445.393	2396.98	1117.16	450.679	2394.02	1040.67	437.8	2279.47	903.665	379.254	2249.74	838.128	445.684	2270.2	814.268	407.97	2207.55	774.816
484	0	235.542	2339.77	1576.38	117.659	2331.35	1578.32	224.156	2501.86	1515.82	116.702	2490.43	1516.16	183.797	2467.34	1428.43	203.697	2545.13	1149.56	183.132	2344.19	1337.05	182.284	2277.6	1142.03	119.958	2558.59	1222.53	363.663	2382.99	1360.83	443.36	2385.33	1119.38	448.893	2383.89	1043.08	436.422	2272.43	903.902	378.436	2245.3	836.844	445.779	2264.69	814.589	407.332	2204.87	772.289
485	0	232.929	2328.69	1578.53	115.06	2320.3	1579.76	221.917	2490.86	1518.15	114.468	2479.46	1517.82	181.917	2456.42	1430.39	201.949	2533.52	1151.44	181.762	2333.15	1338.98	181.432	2266.49	1143.94	118.242	2547.18	1224.12	362.066	2372.38	1363.16	441.492	2374.09	1121.56	447.231	2374.07	1045.42	435.186	2265.52	904.225	377.745	2240.85	835.75	445.944	2259.2	815.019	406.81	2202.12	770.029
486	0	230.456	2317.67	1580.61	112.601	2309.31	1581.18	219.802	2479.93	1520.43	112.356	2468.56	1519.48	180.09	2445.58	1432.31	200.198	2522.09	1153.28	180.469	2322.21	1340.87	180.701	2255.52	1145.8	116.509	2535.9	1225.71	360.548	2361.95	1365.43	439.786	2363.27	1123.7	445.692	2364.53	1047.71	434.094	2258.71	904.633	377.181	2236.38	834.845	446.179	2253.74	815.558	406.404	2199.29	768.035
487	0	228.125	2306.71	1582.63	110.284	2298.39	1582.58	217.81	2469.06	1522.66	110.365	2457.73	1521.14	178.318	2434.85	1434.18	198.444	2510.82	1155.08	179.253	2311.39	1342.72	180.085	2244.7	1147.64	114.76	2524.75	1227.29	359.108	2351.71	1367.63	438.242	2352.85	1125.79	444.275	2355.3	1049.94	433.146	2252.03	905.123	376.744	2231.9	834.126	446.484	2248.31	816.2	406.118	2196.39	766.307
488	0	225.935	2295.8	1584.57	108.106	2287.52	1583.96	215.939	2458.26	1524.84	108.496	2446.97	1522.79	176.599	2424.21	1436	196.689	2499.73	1156.85	178.111	2300.68	1344.52	179.578	2234.01	1149.44	112.995	2513.73	1228.87	357.743	2341.64	1369.77	436.854	2342.85	1127.83	442.977	2346.36	1052.11	432.343	2245.47	905.692	376.435	2227.39	833.589	446.857	2242.91	816.94	405.955	2193.41	764.843
489	0	223.885	2284.94	1586.43	106.069	2276.72	1585.32	214.19	2447.51	1526.97	106.747	2436.27	1524.45	174.934	2413.66	1437.77	194.937	2488.8	1158.57	177.041	2290.08	1346.27	179.171	2223.45	1151.2	111.216	2502.83	1230.43	356.452	2331.74	1371.84	435.619	2333.27	1129.82	441.794	2337.71	1054.21	431.685	2239.02	906.336	376.257	2222.86	833.23	447.296	2237.55	817.769	405.921	2190.33	763.636
490	0	221.974	2274.14	1588.22	104.169	2265.98	1586.65	212.56	2436.83	1529.04	105.116	2425.64	1526.09	173.322	2403.2	1439.49	193.189	2478.04	1160.25	176.04	2279.58	1347.98	178.853	2213.02	1152.93	109.425	2492.05	1231.98	355.232	2322	1373.84	434.527	2324.09	1131.76	440.721	2329.35	1056.24	431.174	2232.69	907.046	376.209	2218.28	833.038	447.798	2232.24	818.678	406.022	2187.14	762.683
491	0	220.2	2263.4	1589.92	102.407	2255.29	1587.95	211.047	2426.22	1531.05	103.602	2415.08	1527.73	171.764	2392.83	1441.16	191.45	2467.43	1161.88	175.103	2269.18	1349.62	178.611	2202.72	1154.62	107.625	2481.39	1233.5	354.079	2312.42	1375.76	433.571	2315.32	1133.65	439.754	2321.27	1058.21	430.809	2226.48	907.813	376.293	2213.65	833.004	448.361	2226.98	819.653	406.264	2183.84	761.972
492	0	218.562	2252.71	1591.54	100.779	2244.67	1589.21	209.649	2415.66	1533	102.201	2404.58	1529.35	170.26	2382.54	1442.75	189.725	2456.98	1163.45	174.226	2258.88	1351.21	178.428	2192.52	1156.27	105.819	2470.83	1234.99	352.99	2302.98	1377.6	432.737	2306.95	1135.47	438.884	2313.46	1060.09	430.59	2220.38	908.628	376.51	2208.97	833.114	448.98	2221.77	820.679	406.654	2180.39	761.492
493	0	217.056	2242.07	1593.05	99.2828	2234.1	1590.42	208.363	2405.16	1534.86	100.912	2394.14	1530.94	168.809	2372.34	1444.28	188.017	2446.67	1164.94	173.404	2248.67	1352.74	178.287	2182.42	1157.88	104.013	2460.38	1236.43	351.96	2293.68	1379.34	432.014	2298.97	1137.22	438.104	2305.92	1061.9	430.516	2214.39	909.476	376.858	2204.22	833.351	449.651	2216.64	821.737	407.198	2176.81	761.228
494	0	215.679	2231.49	1594.47	97.9154	2223.59	1591.59	207.186	2394.72	1536.64	99.7304	2383.76	1532.5	167.412	2362.21	1445.73	186.332	2436.5	1166.36	172.632	2238.55	1354.19	178.172	2172.42	1159.45	102.211	2450.03	1237.83	350.986	2284.49	1380.99	431.386	2291.36	1138.89	437.405	2298.62	1063.62	430.584	2208.5	910.343	377.337	2199.38	833.696	450.368	2211.57	822.808	407.9	2173.06	761.158
495	0	214.427	2220.95	1595.77	96.6724	2213.12	1592.69	206.113	2384.33	1538.33	98.6529	2373.44	1534.01	166.069	2352.15	1447.09	184.675	2426.45	1167.69	171.906	2228.51	1355.55	178.065	2162.51	1160.95	100.422	2439.75	1239.16	350.062	2275.41	1382.52	430.837	2284.08	1140.49	436.776	2291.56	1065.25	430.79	2202.72	911.211	377.943	2194.46	834.127	451.125	2206.59	823.87	408.763	2169.14	761.26
496	0	213.296	2210.46	1596.96	95.5494	2202.71	1593.73	205.14	2373.99	1539.92	97.6753	2363.17	1535.46	164.782	2342.16	1448.36	183.052	2416.51	1168.92	171.221	2218.54	1356.83	177.95	2152.67	1162.39	98.6509	2429.56	1240.41	349.185	2266.42	1383.94	430.351	2277.12	1141.99	436.207	2284.71	1066.77	431.127	2197.04	912.064	378.671	2189.43	834.62	451.915	2201.68	824.901	409.786	2165.04	761.507
497	0	212.281	2200.01	1598.02	94.5412	2192.34	1594.68	204.264	2363.7	1541.39	96.7932	2352.96	1536.84	163.551	2332.22	1449.52	181.47	2406.66	1170.04	170.572	2208.63	1358.01	177.813	2142.89	1163.75	96.9075	2419.42	1241.57	348.352	2257.5	1385.23	429.91	2270.44	1143.38	435.689	2278.04	1068.19	431.587	2191.44	912.882	379.516	2184.3	835.149	452.728	2196.86	825.879	410.965	2160.76	761.867
498	0	211.375	2189.61	1598.94	93.6425	2182.02	1595.55	203.479	2353.45	1542.73	96.0018	2342.78	1538.14	162.377	2322.34	1450.57	179.934	2396.9	1171.04	169.958	2198.77	1359.08	177.643	2133.16	1165.01	95.2002	2409.35	1242.63	347.56	2248.63	1386.37	429.497	2263.99	1144.66	435.211	2271.54	1069.48	432.16	2185.91	913.646	380.468	2179.05	835.687	453.557	2192.11	826.78	412.293	2156.3	762.309
499	0	210.574	2179.25	1599.73	92.8475	2171.73	1596.31	202.781	2343.25	1543.94	95.2965	2332.65	1539.33	161.262	2312.49	1451.49	178.449	2387.2	1171.91	169.374	2188.96	1360.03	177.432	2123.47	1166.17	93.5381	2399.32	1243.58	346.808	2239.8	1387.37	429.099	2257.72	1145.82	434.762	2265.16	1070.65	432.833	2180.45	914.334	381.516	2173.67	836.206	454.391	2187.44	827.582	413.758	2151.66	762.796
500	0	209.872	2168.92	1600.36	92.1506	2161.48	1596.96	202.164	2333.07	1545	94.6723	2322.56	1540.41	160.207	2302.67	1452.28	177.021	2377.57	1172.65	168.82	2179.18	1360.84	177.176	2113.82	1167.2	91.9306	2389.32	1244.4	346.093	2230.98	1388.2	428.701	2251.59	1146.83	434.333	2258.88	1071.67	433.593	2175.03	914.929	382.648	2168.18	836.679	455.22	2182.83	828.266	415.345	2146.85	763.293
501	0	209.263	2158.62	1600.84	91.546	2151.27	1597.49	201.623	2322.92	1545.9	94.1246	2312.49	1541.36	159.215	2292.87	1452.92	175.655	2367.97	1173.23	168.295	2169.42	1361.51	176.874	2104.18	1168.1	90.3864	2379.35	1245.08	345.415	2222.17	1388.87	428.291	2245.54	1147.7	433.914	2252.67	1072.55	434.422	2169.64	915.412	383.848	2162.55	837.079	456.033	2178.26	828.812	417.034	2141.86	763.765
502	0	208.741	2148.36	1601.16	91.0282	2141.07	1597.88	201.155	2312.8	1546.64	93.6487	2302.44	1542.17	158.286	2283.08	1453.42	174.355	2358.41	1173.67	167.8	2159.68	1362.03	176.53	2094.55	1168.83	88.9139	2369.4	1245.61	344.776	2213.34	1389.35	427.861	2239.53	1148.4	433.497	2246.49	1073.27	435.305	2164.26	915.764	385.099	2156.8	837.381	456.821	2173.73	829.204	418.804	2136.73	764.177
503	0	208.3	2138.11	1601.31	90.5921	2130.91	1598.14	200.754	2302.7	1547.2	93.2403	2292.41	1542.82	157.424	2273.29	1453.76	173.127	2348.87	1173.95	167.334	2149.94	1362.39	176.149	2084.91	1169.4	87.5208	2359.45	1246	344.175	2204.48	1389.66	427.405	2233.49	1148.93	433.076	2240.31	1073.83	436.221	2158.87	915.97	386.384	2150.93	837.562	457.572	2169.21	829.429	420.629	2131.45	764.495
504	0	207.937	2127.89	1601.3	90.2328	2120.75	1598.25	200.417	2292.61	1547.57	92.8955	2282.39	1543.3	156.629	2263.48	1453.94	171.973	2339.33	1174.07	166.899	2140.19	1362.58	175.741	2075.26	1169.79	86.2136	2349.51	1246.23	343.614	2195.57	1389.77	426.919	2227.39	1149.29	432.643	2234.1	1074.21	437.153	2153.46	916.016	387.683	2144.93	837.6	458.277	2164.68	829.476	422.482	2126.05	764.689
505	0	207.646	2117.69	1601.13	89.9461	2110.61	1598.2	200.14	2282.52	1547.75	92.6108	2272.38	1543.6	155.904	2253.66	1453.96	170.897	2329.79	1174.03	166.498	2130.43	1362.6	175.317	2065.59	1169.99	84.9978	2339.56	1246.29	343.096	2186.6	1389.69	426.401	2221.16	1149.45	432.194	2227.82	1074.41	438.081	2148	915.89	388.975	2138.82	837.477	458.927	2160.12	829.337	424.336	2120.53	764.733
506	0	207.423	2107.49	1600.78	89.7283	2100.48	1598	199.92	2272.44	1547.74	92.3835	2262.35	1543.71	155.251	2243.8	1453.8	169.902	2320.24	1173.83	166.134	2120.64	1362.43	174.891	2055.89	1169.98	83.8781	2329.6	1246.2	342.622	2177.56	1389.42	425.855	2214.78	1149.43	431.726	2221.43	1074.43	438.987	2142.47	915.583	390.242	2132.59	837.178	459.515	2155.5	829.008	426.16	2114.91	764.603
507	0	207.266	2097.3	1600.27	89.5761	2090.34	1597.63	199.754	2262.35	1547.54	92.2113	2252.32	1543.63	154.671	2233.91	1453.48	168.99	2310.66	1173.48	165.809	2110.81	1362.09	174.474	2046.14	1169.77	82.8579	2319.62	1245.94	342.196	2168.42	1388.96	425.283	2208.2	1149.21	431.236	2214.93	1074.27	439.853	2136.85	915.089	391.461	2126.27	836.691	460.035	2150.79	828.486	427.927	2109.21	764.28
508	0	207.172	2087.11	1599.59	89.4872	2080.2	1597.11	199.641	2252.25	1547.14	92.0927	2242.27	1543.36	154.168	2223.96	1452.99	168.164	2301.04	1172.96	165.526	2100.94	1361.57	174.08	2036.34	1169.36	81.94	2309.61	1245.52	341.819	2159.19	1388.31	424.69	2201.38	1148.81	430.723	2208.26	1073.92	440.664	2131.11	914.402	392.615	2119.84	836.008	460.481	2145.97	827.772	429.607	2103.42	763.75
509	0	207.139	2076.91	1598.76	89.4598	2070.04	1596.43	199.581	2242.12	1546.55	92.027	2232.19	1542.9	153.742	2213.95	1452.34	167.424	2291.37	1172.3	165.291	2091.01	1360.86	173.721	2026.48	1168.74	81.1261	2299.56	1244.94	341.496	2149.84	1387.48	424.084	2194.32	1148.21	430.189	2201.43	1073.38	441.404	2125.25	913.522	393.685	2113.32	835.123	460.849	2141.02	826.869	431.174	2097.57	763.002
510	0	207.167	2066.7	1597.78	89.4925	2059.87	1595.6	199.573	2231.98	1545.77	92.0141	2222.08	1542.24	153.395	2203.88	1451.52	166.774	2281.64	1171.48	165.105	2081.02	1359.98	173.408	2016.55	1167.92	80.4175	2289.47	1244.21	341.229	2140.38	1386.47	423.472	2186.98	1147.42	429.634	2194.39	1072.66	442.063	2119.24	912.45	394.656	2106.7	834.034	461.138	2135.91	825.783	432.606	2091.64	762.032
511	0	207.255	2056.47	1596.66	89.585	2049.66	1594.62	199.618	2221.8	1544.81	92.0548	2211.92	1541.4	153.13	2193.73	1450.55	166.212	2271.84	1170.52	164.973	2070.96	1358.94	173.15	2006.55	1166.9	79.8148	2279.34	1243.32	341.022	2130.79	1385.29	422.863	2179.36	1146.45	429.064	2187.14	1071.76	442.631	2113.07	911.188	395.513	2100.01	832.744	461.348	2130.61	824.52	433.88	2085.66	760.836
512	0	207.402	2046.21	1595.4	89.7373	2039.43	1593.5	199.717	2211.58	1543.68	92.1503	2201.72	1540.38	152.949	2183.5	1449.43	165.741	2261.96	1169.42	164.899	2060.82	1357.73	172.954	1996.46	1165.71	79.3182	2269.14	1242.3	340.878	2121.06	1383.95	422.266	2171.44	1145.3	428.481	2179.65	1070.68	443.101	2106.7	909.744	396.245	2093.22	831.256	461.478	2125.11	823.089	434.979	2079.6	759.419
513	0	207.611	2035.93	1594.03	89.9501	2029.15	1592.25	199.873	2201.31	1542.39	92.3028	2191.47	1539.2	152.853	2173.19	1448.17	165.359	2251.98	1168.19	164.886	2050.59	1356.38	172.825	1986.29	1164.34	78.9272	2258.89	1241.14	340.8	2111.2	1382.47	421.691	2163.22	1143.99	427.892	2171.93	1069.44	443.469	2100.14	908.125	396.845	2086.35	829.579	461.531	2119.39	821.5	435.892	2073.47	757.786
514	0	207.883	2025.6	1592.55	90.2245	2018.83	1590.89	200.088	2190.99	1540.95	92.5147	2181.16	1537.86	152.844	2162.77	1446.79	165.066	2241.89	1166.84	164.938	2040.28	1354.9	172.765	1976.01	1162.82	78.6411	2248.55	1239.86	340.791	2101.19	1380.85	421.146	2154.71	1142.51	427.303	2163.95	1068.05	443.733	2093.37	906.342	397.306	2079.38	827.724	461.511	2113.42	819.765	436.609	2067.26	755.947
515	0	208.218	2015.22	1590.98	90.5623	2008.46	1589.43	200.365	2180.62	1539.39	92.789	2170.79	1536.37	152.924	2152.27	1445.3	164.862	2231.69	1165.39	165.058	2029.86	1353.29	172.775	1965.64	1161.15	78.4585	2238.13	1238.47	340.855	2091.03	1379.11	420.64	2145.9	1140.89	426.719	2155.72	1066.51	443.896	2086.38	904.407	397.627	2072.32	825.702	461.421	2107.21	817.897	437.127	2060.96	753.916
516	0	208.62	2004.8	1589.34	90.9653	1998.04	1587.88	200.708	2170.17	1537.71	93.1292	2160.34	1534.77	153.094	2141.65	1443.71	164.744	2221.36	1163.83	165.249	2019.34	1351.59	172.857	1955.15	1159.36	78.3777	2227.63	1236.98	340.994	2080.73	1377.26	420.182	2136.8	1139.14	426.147	2147.22	1064.84	443.961	2079.14	902.336	397.81	2065.15	823.532	461.268	2100.72	815.911	437.447	2054.55	751.709
517	0	209.091	1994.32	1587.64	91.4357	1987.55	1586.27	201.121	2159.66	1535.93	93.5388	2149.82	1533.06	153.355	2130.94	1442.04	164.711	2210.91	1162.19	165.516	2008.7	1349.8	173.007	1944.54	1157.48	78.3961	2217.02	1235.41	341.21	2070.28	1375.31	419.778	2127.43	1137.26	425.595	2138.46	1063.05	443.933	2071.67	900.145	397.857	2057.86	821.231	461.057	2093.96	813.821	437.573	2048.02	749.347
518	0	209.633	1983.77	1585.91	91.9759	1976.99	1584.61	201.608	2149.07	1534.08	94.0216	2139.22	1531.27	153.709	2120.11	1440.32	164.757	2200.31	1160.49	165.86	1997.95	1347.96	173.225	1933.81	1155.51	78.5108	2206.3	1233.78	341.507	2059.68	1373.3	419.433	2117.79	1135.29	425.068	2129.44	1061.16	443.822	2063.94	897.853	397.778	2050.44	818.82	460.797	2086.92	811.646	437.516	2041.35	746.851
519	0	210.249	1973.15	1584.16	92.5882	1966.36	1582.93	202.172	2138.39	1532.18	94.5814	2128.53	1529.42	154.155	2109.17	1438.55	164.88	2189.56	1158.73	166.284	1987.08	1346.08	173.507	1922.95	1153.49	78.7178	2195.46	1232.1	341.886	2048.94	1371.23	419.154	2107.89	1133.22	424.572	2120.16	1059.18	443.636	2055.95	895.48	397.581	2042.86	816.323	460.493	2079.58	809.404	437.288	2034.51	744.247
520	0	210.941	1962.46	1582.43	93.2751	1955.66	1581.25	202.816	2127.63	1530.25	95.2217	2117.76	1527.54	154.693	2098.12	1436.76	165.075	2178.66	1156.94	166.791	1976.08	1344.19	173.853	1911.95	1151.44	79.0126	2184.49	1230.39	342.348	2038.06	1369.12	418.942	2097.75	1131.09	424.111	2110.62	1057.15	443.387	2047.69	893.048	397.281	2035.13	813.766	460.155	2071.95	807.114	436.906	2027.5	741.56
521	0	211.711	1951.69	1580.72	94.0387	1944.88	1579.59	203.545	2116.78	1528.31	95.9457	2106.9	1525.64	155.323	2086.96	1434.97	165.334	2167.59	1155.14	167.381	1964.96	1342.31	174.261	1900.8	1149.39	79.39	2173.38	1228.68	342.894	2027.03	1367	418.8	2087.38	1128.91	423.692	2100.83	1055.07	443.086	2039.17	890.58	396.891	2027.2	811.174	459.79	2064.02	804.797	436.389	2020.28	738.82
522	0	212.56	1940.85	1579.06	94.8811	1934.02	1577.98	204.36	2105.84	1526.38	96.7562	2095.94	1523.75	156.042	2075.68	1433.2	165.652	2156.35	1153.35	168.057	1953.71	1340.46	174.731	1889.5	1147.37	79.8442	2162.14	1226.99	343.523	2015.88	1364.89	418.728	2076.79	1126.72	423.316	2090.79	1052.96	442.746	2030.36	888.1	396.429	2019.06	808.576	459.406	2055.77	802.474	435.758	2012.84	736.055
523	0	213.491	1929.91	1577.47	95.8037	1923.09	1576.43	205.264	2094.8	1524.49	97.6554	2084.9	1521.9	156.848	2064.3	1431.47	166.021	2144.95	1151.58	168.817	1942.33	1338.68	175.264	1878.04	1145.42	80.3685	2150.74	1225.34	344.237	2004.6	1362.82	418.727	2066	1124.52	422.987	2080.5	1050.86	442.38	2021.28	885.633	395.911	2010.69	806	459.012	2047.21	800.167	435.035	2005.14	733.296
524	0	214.504	1918.9	1575.97	96.8076	1912.07	1574.98	206.258	2083.66	1522.66	98.6446	2073.77	1520.12	157.739	2052.8	1429.82	166.433	2133.37	1149.86	169.662	1930.82	1336.99	175.86	1866.42	1143.55	80.9563	2139.18	1223.75	345.032	1993.2	1360.79	418.794	2055.01	1122.34	422.709	2069.97	1048.77	442	2011.9	883.204	395.356	2002.06	803.473	458.615	2038.34	797.899	434.243	1997.17	730.573
525	0	215.599	1907.79	1574.58	97.893	1900.97	1573.64	207.342	2072.43	1520.91	99.7244	2062.54	1518.42	158.71	2041.2	1428.24	166.883	2121.61	1148.21	170.59	1919.19	1335.41	176.523	1854.64	1141.81	81.6003	2127.47	1222.25	345.908	1981.69	1358.84	418.929	2043.83	1120.21	422.481	2059.21	1046.73	441.619	2002.24	880.838	394.781	1993.15	801.025	458.223	2029.14	795.692	433.407	1988.91	727.917
526	0	216.775	1896.61	1573.33	99.0597	1889.79	1572.43	208.516	2061.1	1519.26	100.894	2051.23	1516.82	159.756	2029.51	1426.78	167.361	2109.68	1146.65	171.599	1907.43	1333.96	177.252	1842.69	1140.22	82.2934	2115.6	1220.85	346.861	1970.07	1357	419.128	2032.49	1118.16	422.307	2048.22	1044.76	441.249	1992.27	878.559	394.204	1983.93	798.68	457.845	2019.6	793.568	432.55	1980.32	725.355
527	0	218.031	1885.33	1572.21	100.306	1878.54	1571.37	209.778	2049.69	1517.73	102.152	2039.83	1515.35	160.872	2017.71	1425.44	167.863	2097.57	1145.2	172.683	1895.55	1332.66	178.049	1830.57	1138.81	83.0285	2103.57	1219.57	347.886	1958.36	1355.27	419.389	2020.98	1116.19	422.187	2037.01	1042.87	440.902	1982.01	876.391	393.64	1974.4	796.464	457.488	2009.74	791.548	431.694	1971.38	722.916
528	0	219.364	1873.98	1571.26	101.63	1867.21	1570.48	211.125	2038.18	1516.34	103.496	2028.35	1514.04	162.052	2005.83	1424.24	168.382	2085.31	1143.88	173.838	1883.57	1331.54	178.914	1818.29	1137.59	83.7989	2091.39	1218.44	348.979	1946.56	1353.68	419.709	2009.3	1114.35	422.123	2025.58	1041.08	440.589	1971.43	874.356	393.106	1964.51	794.399	457.158	1999.53	789.651	430.859	1962.07	720.627
529	0	220.771	1862.54	1570.47	103.028	1855.82	1569.78	212.553	2026.59	1515.1	104.921	2016.79	1512.88	163.288	1993.87	1423.19	168.914	2072.88	1142.7	175.057	1871.47	1330.61	179.843	1805.85	1136.6	84.5981	2079.06	1217.46	350.132	1934.68	1352.25	420.083	1997.48	1112.63	422.115	2013.93	1039.42	440.318	1960.55	872.475	392.614	1954.26	792.507	456.864	1988.96	787.896	430.067	1952.37	718.51
530	0	222.246	1851.03	1569.86	104.497	1844.35	1569.27	214.055	2014.92	1514.03	106.422	2005.17	1511.91	164.572	1981.83	1422.32	169.456	2060.32	1141.69	176.331	1859.29	1329.87	180.832	1793.26	1135.84	85.4201	2066.61	1216.65	351.336	1922.72	1350.99	420.51	1985.5	1111.08	422.165	2002.07	1037.9	440.099	1949.34	870.765	392.178	1943.63	790.805	456.611	1978.04	786.298	429.334	1942.25	716.587
531	0	223.785	1839.45	1569.45	106.029	1832.83	1568.97	215.625	2003.17	1513.14	107.991	1993.47	1511.14	165.896	1969.74	1421.62	170.006	2047.63	1140.85	177.65	1847.02	1329.35	181.87	1780.53	1135.32	86.2596	2054.03	1216.04	352.583	1910.7	1349.91	420.983	1973.37	1109.69	422.272	1990	1036.53	439.939	1937.82	869.243	391.809	1932.6	789.309	456.407	1966.75	784.873	428.676	1931.7	714.877
532	0	225.382	1827.8	1569.22	107.62	1821.25	1568.88	217.255	1991.35	1512.42	109.621	1981.72	1510.56	167.251	1957.58	1421.12	170.564	2034.84	1140.2	179.002	1834.68	1329.04	182.947	1767.69	1135.06	87.1118	2041.35	1215.61	353.862	1898.62	1349.03	421.502	1961.1	1108.48	422.437	1977.73	1035.34	439.843	1925.97	867.924	391.513	1921.17	788.031	456.256	1955.09	783.633	428.106	1920.7	713.395
533	0	227.027	1816.1	1569.18	109.262	1809.62	1569	218.935	1979.48	1511.9	111.301	1969.92	1510.19	168.627	1945.38	1420.81	171.13	2021.96	1139.74	180.374	1822.29	1328.95	184.046	1754.74	1135.04	87.9728	2028.59	1215.39	355.159	1886.49	1348.35	422.06	1948.67	1107.47	422.661	1965.26	1034.31	439.817	1913.8	866.818	391.3	1909.31	786.981	456.165	1943.05	782.586	427.635	1909.22	712.152
534	0	228.713	1804.33	1569.33	110.946	1797.94	1569.34	220.653	1967.55	1511.57	113.021	1958.07	1510.04	170.014	1933.15	1420.7	171.707	2009.02	1139.49	181.751	1809.85	1329.07	185.149	1741.73	1135.27	88.8394	2015.78	1215.38	356.463	1874.31	1347.87	422.656	1936.1	1106.66	422.943	1952.58	1033.47	439.862	1901.29	865.933	391.173	1897.04	786.166	456.137	1930.62	781.739	427.27	1897.25	711.16
535	0	230.431	1792.52	1569.67	112.662	1786.22	1569.89	222.398	1955.58	1511.43	114.768	1946.19	1510.11	171.402	1920.9	1420.79	172.296	1996.05	1139.45	183.119	1797.38	1329.4	186.237	1728.67	1135.73	89.7094	2002.93	1215.57	357.76	1862.08	1347.6	423.283	1923.37	1106.05	423.284	1939.72	1032.82	439.981	1888.46	865.276	391.136	1884.33	785.588	456.177	1917.8	781.099	427.019	1884.79	710.422
536	0	232.169	1780.67	1570.18	114.401	1774.46	1570.65	224.157	1943.57	1511.49	116.53	1934.27	1510.39	172.78	1908.63	1421.07	172.902	1983.07	1139.62	184.461	1784.91	1329.94	187.287	1715.6	1136.41	90.5817	1990.08	1215.97	359.036	1849.82	1347.53	423.94	1910.5	1105.64	423.683	1926.66	1032.36	440.173	1875.29	864.85	391.19	1871.2	785.25	456.288	1904.58	780.666	426.883	1871.83	709.942
537	0	233.917	1768.78	1570.86	116.151	1762.67	1571.59	225.915	1931.53	1511.73	118.293	1922.33	1510.87	174.14	1896.37	1421.55	173.53	1970.11	1140	185.762	1772.44	1330.67	188.277	1702.55	1137.29	91.4563	1977.25	1216.57	360.278	1837.53	1347.65	424.621	1897.47	1105.44	424.14	1913.42	1032.08	440.438	1861.79	864.656	391.334	1857.64	785.151	456.471	1890.96	780.44	426.865	1858.35	709.721
538	0	235.663	1756.86	1571.7	117.901	1750.85	1572.72	227.659	1919.47	1512.15	120.043	1910.37	1511.56	175.473	1884.11	1422.21	174.183	1957.2	1140.58	187.007	1759.99	1331.57	189.184	1689.56	1138.34	92.3343	1964.47	1217.37	361.474	1825.22	1347.97	425.324	1884.29	1105.43	424.655	1900	1031.99	440.771	1847.97	864.691	391.567	1843.67	785.285	456.729	1876.95	780.42	426.964	1844.35	709.754
539	0	237.395	1744.92	1572.67	119.637	1739.01	1574.01	229.374	1907.4	1512.74	121.765	1898.4	1512.45	176.769	1871.88	1423.04	174.868	1944.36	1141.36	188.181	1747.58	1332.63	189.989	1676.66	1139.54	93.2179	1951.78	1218.34	362.612	1812.89	1348.46	426.044	1870.96	1105.6	425.226	1886.41	1032.08	441.169	1833.83	864.951	391.885	1829.28	785.647	457.06	1862.54	780.6	427.177	1829.85	710.039
540	0	239.1	1732.96	1573.76	121.347	1727.15	1575.45	231.046	1895.32	1513.5	123.445	1886.43	1513.51	178.022	1859.69	1424.04	175.589	1931.62	1142.32	189.271	1735.22	1333.84	190.673	1663.88	1140.87	94.1103	1939.2	1219.49	363.682	1800.54	1349.12	426.778	1857.49	1105.94	425.853	1872.65	1032.35	441.628	1819.37	865.432	392.281	1814.5	786.231	457.464	1847.73	780.976	427.498	1814.84	710.57
541	0	240.764	1720.99	1574.96	123.018	1715.28	1577.02	232.662	1883.25	1514.41	125.069	1874.46	1514.75	179.225	1847.54	1425.19	176.35	1919	1143.46	190.266	1722.93	1335.17	191.22	1651.25	1142.3	95.0153	1926.75	1220.78	364.676	1788.19	1349.93	427.525	1843.88	1106.46	426.533	1858.74	1032.77	442.14	1804.6	866.125	392.75	1799.33	787.026	457.936	1832.54	781.54	427.92	1799.33	711.338
542	0	242.377	1709.02	1576.26	124.637	1703.39	1578.69	234.207	1871.19	1515.46	126.624	1862.51	1516.14	180.371	1835.45	1426.48	177.156	1906.52	1144.75	191.156	1710.73	1336.61	191.619	1638.79	1143.8	95.9368	1914.46	1222.22	365.586	1775.83	1350.89	428.281	1830.14	1107.12	427.264	1844.67	1033.35	442.701	1789.54	867.022	393.282	1783.8	788.024	458.475	1816.97	782.286	428.436	1783.34	712.336
543	0	243.924	1697.05	1577.63	126.19	1691.5	1580.45	235.67	1859.15	1516.65	128.097	1850.56	1517.68	181.458	1823.43	1427.88	178.009	1894.19	1146.18	191.933	1698.61	1338.13	191.861	1626.51	1145.36	96.879	1902.34	1223.77	366.407	1763.48	1351.97	429.045	1816.29	1107.92	428.044	1830.48	1034.08	443.302	1774.2	868.114	393.868	1767.93	789.216	459.074	1801.04	783.204	429.034	1766.88	713.555
544	0	245.393	1685.08	1579.05	127.666	1679.61	1582.27	237.04	1847.14	1517.95	129.478	1838.64	1519.34	182.481	1811.47	1429.39	178.909	1882.03	1147.73	192.595	1686.59	1339.72	191.944	1614.44	1146.95	97.8456	1890.42	1225.42	367.138	1751.13	1353.16	429.814	1802.33	1108.85	428.869	1816.15	1034.94	443.936	1758.6	869.392	394.5	1751.73	790.591	459.727	1784.76	784.288	429.703	1749.98	714.989
545	0	246.775	1673.13	1580.52	129.053	1667.72	1584.14	238.308	1835.16	1519.36	130.756	1826.75	1521.1	183.437	1799.6	1430.99	179.858	1870.05	1149.38	193.138	1674.68	1341.36	191.869	1602.57	1148.55	98.8393	1878.69	1227.16	367.775	1738.81	1354.45	430.588	1788.29	1109.89	429.736	1801.71	1035.92	444.595	1742.74	870.846	395.167	1735.23	792.14	460.428	1768.15	785.53	430.431	1732.65	716.63
546	0	248.059	1661.19	1582.01	130.341	1655.83	1586.02	239.465	1823.22	1520.86	131.924	1814.88	1522.96	184.325	1787.8	1432.66	180.851	1858.24	1151.12	193.564	1662.88	1343.03	191.642	1590.91	1150.16	99.8619	1867.18	1228.96	368.321	1726.5	1355.82	431.365	1774.16	1111.05	430.639	1787.17	1037.01	445.272	1726.65	872.466	395.857	1718.46	793.855	461.167	1751.23	786.924	431.204	1714.93	718.469
547	0	249.235	1649.27	1583.51	131.521	1643.95	1587.91	240.506	1811.31	1522.45	132.975	1803.05	1524.88	185.145	1776.1	1434.39	181.887	1846.62	1152.92	193.876	1651.2	1344.72	191.275	1579.47	1151.76	100.913	1855.87	1230.81	368.776	1714.22	1357.27	432.141	1759.98	1112.3	431.575	1772.55	1038.2	445.959	1710.35	874.244	396.562	1701.43	795.729	461.937	1734.02	788.463	432.008	1696.84	720.502
548	0	250.297	1637.37	1585.02	132.584	1632.09	1589.78	241.425	1799.45	1524.1	133.904	1791.26	1526.86	185.896	1764.48	1436.15	182.958	1835.17	1154.76	194.079	1639.63	1346.41	190.783	1568.22	1153.33	101.992	1844.76	1232.69	369.145	1701.98	1358.77	432.917	1745.75	1113.63	432.537	1757.84	1039.48	446.649	1693.86	876.171	397.27	1684.18	797.754	462.728	1716.54	790.141	432.831	1678.42	722.72
549	0	251.239	1625.5	1586.5	133.525	1620.24	1591.61	242.222	1787.64	1525.8	134.709	1779.51	1528.86	186.58	1752.94	1437.93	184.059	1823.88	1156.64	194.182	1628.18	1348.08	190.185	1557.18	1154.88	103.094	1833.85	1234.59	369.431	1689.77	1360.32	433.688	1731.49	1115.05	433.522	1743.08	1040.84	447.335	1677.19	878.238	397.972	1666.73	799.924	463.53	1698.82	791.954	433.657	1659.7	725.119
550	0	252.056	1613.66	1587.96	134.338	1608.41	1593.38	242.894	1775.88	1527.53	135.389	1767.8	1530.88	187.196	1741.49	1439.71	185.179	1812.76	1158.52	194.193	1616.83	1349.73	189.503	1546.31	1156.39	104.215	1823.11	1236.48	369.641	1677.61	1361.91	434.453	1717.22	1116.54	434.523	1728.27	1042.27	448.011	1660.38	880.436	398.66	1649.1	802.233	464.335	1680.88	793.897	434.474	1640.72	727.692
551	0	252.745	1601.85	1589.37	135.022	1596.61	1595.08	243.443	1764.17	1529.28	135.943	1756.13	1532.89	187.748	1730.13	1441.47	186.31	1801.79	1160.39	194.125	1605.59	1351.33	188.76	1535.61	1157.85	105.347	1812.54	1238.36	369.781	1665.5	1363.52	435.21	1702.94	1118.09	435.536	1713.43	1043.76	448.672	1643.43	882.755	399.324	1631.31	804.676	465.132	1662.74	795.964	435.268	1621.51	730.432
552	0	253.307	1590.07	1590.73	135.576	1584.83	1596.69	243.871	1752.52	1531.03	136.376	1744.51	1534.88	188.236	1718.85	1443.21	187.441	1790.96	1162.23	193.987	1594.45	1352.88	187.982	1525.06	1159.27	106.481	1802.11	1240.2	369.858	1653.44	1365.13	435.957	1688.67	1119.69	436.556	1698.58	1045.29	449.312	1626.38	885.187	399.957	1613.4	807.246	465.913	1644.42	798.15	436.028	1602.1	733.333
553	0	253.74	1578.33	1592.02	135.999	1573.09	1598.19	244.183	1740.91	1532.77	136.689	1732.94	1536.81	188.663	1707.64	1444.89	188.56	1780.25	1164.03	193.794	1583.41	1354.36	187.195	1514.64	1160.63	107.607	1791.81	1241.99	369.88	1641.45	1366.75	436.692	1674.43	1121.34	437.578	1683.72	1046.86	449.926	1609.24	887.72	400.552	1595.36	809.937	466.667	1625.96	800.449	436.743	1582.53	736.385
554	0	254.047	1566.63	1593.22	136.293	1561.37	1599.57	244.383	1729.37	1534.48	136.888	1721.42	1538.68	189.031	1696.51	1446.5	189.656	1769.64	1165.76	193.556	1572.44	1355.75	186.422	1504.35	1161.91	108.715	1781.61	1243.71	369.853	1629.53	1368.34	437.414	1660.23	1123.01	438.598	1668.87	1048.45	450.512	1592.03	890.344	401.103	1577.24	812.742	467.388	1607.38	802.853	437.401	1562.84	739.579
555	0	254.232	1554.96	1594.34	136.463	1549.69	1600.82	244.477	1717.87	1536.14	136.979	1709.94	1540.46	189.342	1685.44	1448.04	190.717	1759.14	1167.4	193.286	1561.56	1357.04	185.686	1494.15	1163.12	109.791	1771.49	1245.34	369.784	1617.67	1369.9	438.122	1646.07	1124.7	439.612	1654.06	1050.05	451.065	1574.77	893.045	401.606	1559.05	815.653	468.065	1588.69	805.352	437.993	1543.05	742.904
556	0	254.298	1543.33	1595.35	136.512	1538.05	1601.91	244.472	1706.43	1537.73	136.969	1698.51	1542.13	189.597	1674.43	1449.46	191.733	1748.71	1168.94	192.994	1550.74	1358.23	185.007	1484.02	1164.22	110.825	1761.43	1246.87	369.681	1605.9	1371.41	438.816	1631.98	1126.39	440.617	1639.28	1051.63	451.584	1557.49	895.81	402.054	1540.8	818.66	468.693	1569.92	807.937	438.512	1523.19	746.347
557	0	254.251	1531.75	1596.24	136.447	1526.45	1602.84	244.376	1695.04	1539.23	136.864	1687.14	1543.67	189.8	1663.47	1450.78	192.692	1738.35	1170.37	192.689	1539.99	1359.29	184.401	1473.97	1165.22	111.803	1751.41	1248.29	369.548	1594.2	1372.84	439.496	1617.96	1128.06	441.61	1624.55	1053.19	452.064	1540.2	898.623	402.444	1522.51	821.752	469.261	1551.1	810.593	438.948	1503.3	749.896
558	0	254.097	1520.2	1597	136.273	1514.89	1603.61	244.195	1683.7	1540.62	136.672	1675.8	1545.07	189.951	1652.57	1451.96	193.587	1728.05	1171.66	192.381	1529.28	1360.21	183.88	1463.96	1166.09	112.713	1741.41	1249.57	369.392	1582.59	1374.19	440.162	1604.02	1129.69	442.589	1609.89	1054.69	452.505	1522.92	901.468	402.773	1504.2	824.917	469.764	1532.23	813.307	439.296	1483.38	753.535
559	0	253.842	1508.7	1597.62	135.998	1503.36	1604.18	243.938	1672.4	1541.9	136.4	1664.52	1546.31	190.052	1641.7	1452.99	194.409	1717.8	1172.81	192.074	1518.62	1360.98	183.452	1453.98	1166.82	113.547	1731.42	1250.71	369.217	1571.07	1375.43	440.815	1590.18	1131.25	443.552	1595.31	1056.13	452.902	1505.67	904.327	403.036	1485.89	828.14	470.195	1513.35	816.061	439.55	1463.48	757.248
560	0	253.494	1497.23	1598.09	135.629	1491.89	1604.57	243.61	1661.15	1543.04	136.055	1653.27	1547.38	190.103	1630.87	1453.86	195.15	1707.59	1173.8	191.774	1508	1361.58	183.121	1444.02	1167.39	114.293	1721.42	1251.68	369.025	1559.63	1376.55	441.455	1576.44	1132.74	444.497	1580.81	1057.48	453.255	1488.47	907.181	403.232	1467.59	831.407	470.548	1494.48	818.84	439.704	1443.6	761.021
561	0	253.059	1485.81	1598.41	135.174	1480.45	1604.76	243.219	1649.94	1544.02	135.645	1642.07	1548.26	190.105	1620.07	1454.57	195.805	1697.42	1174.62	191.484	1497.41	1362.01	182.886	1434.07	1167.78	114.943	1711.39	1252.49	368.819	1548.29	1377.52	442.081	1562.81	1134.12	445.422	1566.41	1058.73	453.561	1471.34	910.013	403.356	1449.33	834.701	470.815	1475.64	821.624	439.756	1423.78	764.836
562	0	252.543	1474.42	1598.55	134.639	1469.06	1604.75	242.77	1638.77	1544.84	135.175	1630.91	1548.93	190.058	1609.29	1455.09	196.368	1687.27	1175.27	191.205	1486.85	1362.26	182.742	1424.12	1167.99	115.492	1701.33	1253.11	368.6	1537.03	1378.33	442.693	1549.31	1135.37	446.324	1552.11	1059.85	453.817	1454.28	912.801	403.407	1431.12	838.006	470.993	1456.85	824.394	439.701	1404.02	768.678
563	0	251.955	1463.07	1598.53	134.031	1457.7	1604.54	242.27	1627.63	1545.48	134.65	1619.78	1549.39	189.963	1598.52	1455.42	196.837	1677.15	1175.73	190.936	1476.3	1362.31	182.68	1414.15	1168	115.933	1691.23	1253.54	368.369	1525.85	1378.96	443.29	1535.93	1136.47	447.201	1537.93	1060.82	454.021	1437.33	915.528	403.383	1412.97	841.306	471.075	1438.13	827.13	439.539	1384.35	772.531
564	0	251.299	1451.76	1598.33	133.358	1446.39	1604.13	241.721	1616.53	1545.92	134.077	1608.68	1549.64	189.819	1587.78	1455.56	197.208	1667.05	1176	190.675	1465.76	1362.17	182.688	1404.16	1167.8	116.265	1681.07	1253.78	368.124	1514.76	1379.4	443.868	1522.7	1137.4	448.05	1523.86	1061.65	454.169	1420.49	918.175	403.282	1394.92	844.582	471.057	1419.5	829.814	439.267	1364.78	776.38
565	0	250.582	1440.49	1597.96	132.624	1435.11	1603.52	241.129	1605.45	1546.18	133.458	1597.62	1549.67	189.624	1577.03	1455.51	197.477	1656.97	1176.08	190.418	1455.23	1361.83	182.752	1394.14	1167.39	116.484	1670.86	1253.81	367.863	1503.75	1379.64	444.424	1509.61	1138.16	448.866	1509.91	1062.29	454.26	1403.79	920.725	403.102	1376.97	847.819	470.934	1400.99	832.427	438.886	1345.34	780.209
566	0	249.809	1429.25	1597.41	131.837	1423.87	1602.71	240.496	1594.4	1546.23	132.797	1586.58	1549.47	189.378	1566.29	1455.25	197.644	1646.9	1175.96	190.16	1444.7	1361.3	182.855	1384.09	1166.78	116.591	1660.59	1253.64	367.584	1492.82	1379.66	444.954	1496.67	1138.72	449.645	1496.1	1062.76	454.29	1387.23	923.161	402.843	1359.14	851.001	470.704	1382.62	834.952	438.397	1326.04	784.004
567	0	248.985	1418.04	1596.69	130.999	1412.66	1601.71	239.823	1583.36	1546.07	132.096	1575.56	1549.06	189.08	1555.55	1454.8	197.706	1636.84	1175.65	189.896	1434.16	1360.57	182.979	1373.99	1165.95	116.586	1650.26	1253.27	367.283	1481.95	1379.48	445.45	1483.89	1139.06	450.381	1482.42	1063.04	454.256	1370.84	925.468	402.504	1341.47	854.111	470.362	1364.41	837.371	437.801	1306.9	787.751
568	0	248.113	1406.86	1595.81	130.115	1401.48	1600.53	239.111	1572.35	1545.72	131.356	1564.56	1548.43	188.727	1544.81	1454.16	197.661	1626.77	1175.15	189.617	1423.62	1359.65	183.106	1363.86	1164.92	116.471	1639.86	1252.7	366.956	1471.15	1379.07	445.907	1471.28	1139.2	451.068	1468.88	1063.12	454.155	1354.62	927.633	402.083	1323.96	857.135	469.907	1346.39	839.669	437.1	1287.95	791.436
569	0	247.197	1395.7	1594.76	129.187	1390.33	1599.19	238.36	1561.34	1545.17	130.579	1553.58	1547.59	188.316	1534.05	1453.33	197.509	1616.7	1174.46	189.315	1413.06	1358.55	183.218	1353.67	1163.7	116.249	1629.4	1251.93	366.598	1460.4	1378.45	446.314	1458.83	1139.12	451.697	1455.49	1063	453.984	1338.6	929.644	401.581	1306.63	860.058	469.337	1328.57	841.833	436.299	1269.2	795.043
570	0	246.238	1384.57	1593.56	128.218	1379.21	1597.69	237.571	1550.35	1544.42	129.762	1542.61	1546.55	187.847	1523.28	1452.32	197.25	1606.61	1173.58	188.984	1402.48	1357.28	183.297	1343.44	1162.3	115.922	1618.87	1250.97	366.203	1449.7	1377.63	446.664	1446.56	1138.81	452.261	1442.24	1062.69	453.74	1322.78	931.492	400.998	1289.51	862.867	468.651	1310.98	843.851	435.4	1250.68	798.559
571	0	245.237	1373.46	1592.23	127.209	1368.11	1596.05	236.74	1539.36	1543.5	128.907	1531.64	1545.33	187.315	1512.5	1451.15	196.883	1596.48	1172.54	188.613	1391.87	1355.85	183.328	1333.15	1160.74	115.495	1608.28	1249.84	365.765	1439.04	1376.61	446.947	1434.46	1138.29	452.752	1429.16	1062.18	453.42	1307.18	933.167	400.334	1272.61	865.549	467.848	1293.65	845.711	434.41	1232.41	801.968
572	0	244.197	1362.36	1590.78	126.159	1357.02	1594.3	235.866	1528.38	1542.4	128.01	1520.68	1543.94	186.718	1501.7	1449.83	196.41	1586.3	1171.33	188.194	1381.24	1354.29	183.297	1322.8	1159.04	114.97	1597.64	1248.54	365.278	1428.4	1375.4	447.151	1422.53	1137.57	453.159	1416.23	1061.49	453.021	1291.82	934.663	399.587	1255.96	868.092	466.93	1276.59	847.406	433.331	1214.42	805.255
573	0	243.115	1351.28	1589.22	125.069	1345.95	1592.44	234.946	1517.39	1541.15	127.068	1509.72	1542.4	186.053	1490.87	1448.37	195.833	1576.05	1169.96	187.718	1370.57	1352.61	183.191	1312.38	1157.21	114.353	1586.92	1247.08	364.736	1417.78	1374.03	447.268	1410.79	1136.64	453.473	1403.46	1060.63	452.54	1276.71	935.976	398.76	1239.57	870.484	465.897	1259.82	848.927	432.171	1196.73	808.405
574	0	241.991	1340.21	1587.58	123.937	1334.89	1590.51	233.976	1506.39	1539.77	126.078	1498.75	1540.74	185.317	1480.02	1446.8	195.155	1565.73	1168.46	187.177	1359.85	1350.82	183	1301.88	1155.29	113.647	1576.15	1245.49	364.132	1407.16	1372.52	447.287	1399.22	1135.53	453.686	1390.87	1059.6	451.975	1261.86	937.103	397.851	1223.46	872.715	464.751	1243.38	850.269	430.933	1179.37	811.401
575	0	240.824	1329.15	1585.87	122.761	1323.83	1588.53	232.953	1495.39	1538.27	125.036	1487.77	1538.97	184.506	1469.14	1445.13	194.379	1555.31	1166.84	186.562	1349.09	1348.96	182.716	1291.31	1153.3	112.855	1565.31	1243.78	363.46	1396.54	1370.89	447.199	1387.83	1134.26	453.787	1378.44	1058.43	451.323	1247.28	938.043	396.861	1207.66	874.774	463.495	1227.27	851.426	429.624	1162.36	814.227
576	0	239.611	1318.1	1584.12	121.54	1312.78	1586.52	231.873	1484.38	1536.68	123.939	1476.78	1537.12	183.617	1458.23	1443.38	193.51	1544.78	1165.12	185.866	1338.28	1347.05	182.332	1280.65	1151.26	111.983	1554.41	1241.97	362.714	1385.89	1369.16	446.994	1376.6	1132.85	453.769	1366.19	1057.14	450.582	1232.99	938.797	395.79	1192.17	876.653	462.131	1211.53	852.397	428.248	1145.73	816.868
577	0	238.349	1307.04	1582.35	120.27	1301.73	1584.51	230.73	1473.35	1535.01	122.78	1465.78	1535.22	182.647	1447.28	1441.59	192.554	1534.13	1163.33	185.083	1327.42	1345.12	181.845	1269.89	1149.21	111.033	1543.44	1240.08	361.889	1375.2	1367.37	446.664	1365.53	1131.32	453.622	1354.11	1055.74	449.75	1219	939.366	394.639	1177.02	878.343	460.664	1196.17	853.18	426.809	1129.51	819.306
578	0	237.035	1295.99	1580.59	118.948	1290.67	1582.52	229.52	1462.31	1533.31	121.556	1454.75	1533.29	181.594	1436.29	1439.77	191.516	1523.34	1161.47	184.208	1316.48	1343.19	181.252	1259.01	1147.17	110.011	1532.4	1238.14	360.98	1364.47	1365.54	446.203	1354.61	1129.71	453.34	1342.21	1054.27	448.825	1205.31	939.757	393.409	1162.23	879.836	459.098	1181.21	853.774	425.313	1113.71	821.528
579	0	235.666	1284.93	1578.87	117.57	1279.61	1580.58	228.24	1451.25	1531.58	120.262	1443.7	1531.35	180.455	1425.26	1437.95	190.403	1512.41	1159.59	183.235	1305.49	1341.29	180.55	1248.02	1145.18	108.919	1521.28	1236.17	359.984	1353.68	1363.71	445.605	1343.82	1128.04	452.918	1330.48	1052.75	447.806	1191.94	939.974	392.099	1147.81	881.127	457.438	1166.68	854.183	423.762	1098.37	823.517
580	0	234.236	1273.86	1577.19	116.134	1268.53	1578.72	226.884	1440.16	1529.86	118.893	1432.62	1529.44	179.229	1414.18	1436.15	189.222	1501.33	1157.7	182.163	1294.41	1339.44	179.741	1236.9	1143.26	107.762	1510.08	1234.19	358.897	1342.83	1361.91	444.866	1333.15	1126.34	452.351	1318.94	1051.2	446.693	1178.9	940.025	390.712	1133.79	882.211	455.688	1152.58	854.407	422.161	1083.5	825.259
581	0	232.743	1262.79	1575.6	114.633	1257.44	1576.95	225.448	1429.05	1528.18	117.446	1421.51	1527.59	177.916	1403.06	1434.39	187.98	1490.09	1155.84	180.99	1283.27	1337.68	178.824	1225.63	1141.46	106.544	1498.8	1232.23	357.718	1331.89	1360.16	443.983	1322.57	1124.66	451.637	1307.56	1049.66	445.484	1166.2	939.919	389.249	1120.17	883.083	453.856	1138.94	854.454	420.511	1069.14	826.742
582	0	231.182	1251.7	1574.12	113.066	1246.33	1575.3	223.929	1417.92	1526.55	115.918	1410.37	1525.8	176.515	1391.88	1432.71	186.686	1478.7	1154.02	179.716	1272.04	1336.03	177.804	1214.22	1139.79	105.268	1487.42	1230.32	356.447	1320.87	1358.52	442.956	1312.08	1123.03	450.774	1296.36	1048.16	444.182	1153.84	939.667	387.711	1106.97	883.743	451.947	1125.78	854.327	418.814	1055.28	827.954
583	0	229.549	1240.61	1572.76	111.428	1235.21	1573.8	222.325	1406.77	1525.01	114.304	1399.2	1524.12	175.029	1380.65	1431.13	185.347	1467.16	1152.28	178.344	1260.73	1334.51	176.683	1202.65	1138.28	103.938	1475.96	1228.48	355.085	1309.76	1356.99	441.785	1301.65	1121.47	449.764	1285.33	1046.73	442.787	1141.82	939.279	386.1	1094.2	884.188	449.969	1113.09	854.035	417.073	1041.97	828.885
584	0	227.841	1229.5	1571.55	109.715	1224.06	1572.45	220.632	1395.59	1523.57	112.604	1388	1522.55	173.458	1369.36	1429.66	183.971	1455.47	1150.64	176.876	1249.34	1333.15	175.466	1190.92	1136.96	102.558	1464.41	1226.73	353.633	1298.56	1355.61	440.475	1291.25	1120.03	448.61	1274.46	1045.38	441.302	1130.16	938.769	384.421	1081.88	884.419	447.932	1100.9	853.587	415.288	1029.2	829.527
585	0	226.055	1218.37	1570.5	107.926	1212.9	1571.27	218.85	1384.38	1522.25	110.816	1376.76	1521.11	171.807	1358.03	1428.32	182.566	1443.66	1149.12	175.318	1237.88	1331.96	174.162	1179.04	1135.85	101.131	1452.76	1225.09	352.098	1287.26	1354.41	439.03	1280.88	1118.73	447.317	1263.75	1044.15	439.73	1118.85	938.148	382.675	1070.02	884.439	445.842	1089.21	852.993	413.46	1017.01	829.875
586	0	224.188	1207.23	1569.63	106.057	1201.71	1570.27	216.98	1373.16	1521.08	108.94	1365.48	1519.82	170.08	1346.64	1427.13	181.139	1431.72	1147.75	173.677	1226.33	1330.96	172.779	1167	1134.96	99.6624	1441.02	1223.59	350.483	1275.87	1353.41	437.459	1270.49	1117.6	445.892	1253.2	1043.07	438.076	1107.89	937.43	380.867	1058.63	884.251	443.711	1078.03	852.265	411.59	1005.38	829.924
587	0	222.239	1196.08	1568.95	104.107	1190.51	1569.46	215.021	1361.91	1520.07	106.977	1354.18	1518.7	168.283	1335.2	1426.11	179.696	1419.68	1146.55	171.962	1214.72	1330.16	171.327	1154.82	1134.32	98.1554	1429.19	1222.23	348.797	1264.39	1352.62	435.771	1260.09	1116.67	444.343	1242.8	1042.15	436.346	1097.29	936.629	379.002	1047.71	883.861	441.55	1067.36	851.415	409.679	994.351	829.674
588	0	220.209	1184.92	1568.48	102.077	1179.28	1568.85	212.977	1350.64	1519.23	104.931	1342.85	1517.74	166.422	1323.73	1425.27	178.244	1407.55	1145.52	170.183	1203.04	1329.57	169.82	1142.52	1133.91	96.6144	1417.28	1221.05	347.047	1252.82	1352.06	433.977	1249.66	1115.95	442.681	1232.53	1041.41	434.545	1087.04	935.758	377.086	1037.26	883.275	439.37	1057.2	850.457	407.729	983.911	829.127
589	0	218.098	1173.74	1568.21	99.9674	1168.04	1568.43	210.852	1339.35	1518.58	102.806	1331.49	1516.95	164.506	1312.21	1424.61	176.788	1395.35	1144.7	168.351	1191.3	1329.2	168.271	1130.1	1133.76	95.044	1405.29	1220.03	345.243	1241.18	1351.74	432.09	1239.18	1115.47	440.917	1222.4	1040.87	432.682	1077.15	934.831	375.126	1027.3	882.501	437.184	1047.54	849.406	405.743	974.068	828.289
590	0	215.909	1162.56	1568.15	97.7805	1156.78	1568.2	208.652	1328.05	1518.12	100.607	1320.12	1516.35	162.542	1300.66	1424.14	175.332	1383.1	1144.07	166.48	1179.51	1329.04	166.697	1117.59	1133.85	93.4489	1393.23	1219.21	343.397	1229.49	1351.67	430.124	1228.65	1115.23	439.065	1212.4	1040.54	430.765	1067.59	933.861	373.129	1017.82	881.548	435.005	1038.37	848.276	403.722	964.822	827.166
591	0	213.645	1151.37	1568.3	95.5205	1145.51	1568.16	206.383	1316.74	1517.85	98.3422	1308.73	1515.92	160.541	1289.08	1423.86	173.881	1370.82	1143.66	164.582	1167.7	1329.09	165.115	1105.03	1134.18	91.8341	1381.12	1218.58	341.521	1217.74	1351.85	428.095	1218.07	1115.23	437.137	1202.51	1040.42	428.803	1058.37	932.861	371.103	1008.82	880.429	432.848	1029.7	847.084	401.671	956.17	825.77
592	0	211.313	1140.17	1568.66	93.1931	1134.24	1568.3	204.055	1305.43	1517.78	96.0205	1297.32	1515.67	158.513	1277.49	1423.78	172.437	1358.53	1143.46	162.672	1155.85	1329.35	163.541	1092.43	1134.74	90.2047	1368.98	1218.14	339.626	1205.96	1352.27	426.02	1207.43	1115.49	435.15	1192.74	1040.52	426.808	1049.48	931.843	369.06	1000.3	879.154	430.727	1021.49	845.846	399.596	948.108	824.115
593	0	208.92	1128.98	1569.21	90.8057	1122.96	1568.61	201.677	1294.12	1517.9	93.6523	1285.92	1515.58	156.467	1265.9	1423.89	171.002	1346.25	1143.47	160.766	1144.01	1329.81	161.995	1079.84	1135.5	88.5658	1356.81	1217.9	337.726	1194.18	1352.93	423.914	1196.75	1115.98	433.117	1183.07	1040.84	424.79	1040.91	930.817	367.009	992.246	877.738	428.657	1013.74	844.576	397.504	940.624	822.216
594	0	206.476	1117.79	1569.94	88.3672	1111.69	1569.06	199.262	1282.82	1518.22	91.2494	1274.52	1515.65	154.415	1254.3	1424.17	169.578	1334	1143.69	158.876	1132.17	1330.45	160.493	1067.29	1136.44	86.9222	1344.64	1217.84	335.834	1182.4	1353.81	421.796	1186.03	1116.7	431.055	1173.51	1041.37	422.763	1032.64	929.795	364.964	984.65	876.195	426.655	1006.43	843.291	395.403	933.706	820.093
595	0	203.99	1106.61	1570.84	85.8881	1100.42	1569.65	196.822	1271.53	1518.71	88.8247	1263.14	1515.88	152.366	1242.72	1424.63	168.163	1321.79	1144.1	157.019	1120.35	1331.25	159.052	1054.81	1137.54	85.2786	1332.48	1217.97	333.963	1170.65	1354.9	419.682	1175.28	1117.64	428.977	1164.05	1042.1	420.741	1024.67	928.786	362.937	977.5	874.539	424.735	999.524	842.006	393.304	927.335	817.767
596	0	201.474	1095.44	1571.9	83.3806	1089.17	1570.36	194.371	1260.26	1519.38	86.3918	1251.78	1516.24	150.331	1231.16	1425.25	166.758	1309.64	1144.7	155.208	1108.57	1332.2	157.689	1042.42	1138.77	83.6393	1320.36	1218.27	332.124	1158.95	1356.18	417.59	1164.54	1118.77	426.9	1154.68	1043.02	418.736	1016.97	927.798	360.943	970.778	872.789	422.913	993.006	840.735	391.218	921.491	815.261
597	0	198.943	1084.29	1573.09	80.8578	1077.94	1571.17	191.923	1249.01	1520.2	83.9648	1240.44	1516.73	148.32	1219.64	1426.02	165.359	1297.56	1145.46	153.455	1096.85	1333.29	156.417	1030.17	1140.1	82.0077	1308.29	1218.73	330.331	1147.33	1357.62	415.536	1153.81	1120.06	424.835	1145.41	1044.11	416.764	1009.54	926.837	358.997	964.467	870.959	421.206	986.846	839.492	389.161	916.147	812.601
598	0	196.41	1073.16	1574.4	78.3341	1066.74	1572.06	189.492	1237.8	1521.18	81.5582	1229.14	1517.34	146.341	1208.17	1426.93	163.965	1285.56	1146.37	151.772	1085.19	1334.47	155.249	1018.08	1141.51	80.387	1296.29	1219.34	328.592	1135.8	1359.21	413.534	1143.12	1121.5	422.796	1136.22	1045.35	414.84	1002.36	925.911	357.116	958.545	869.067	419.626	981.016	838.288	387.149	911.275	809.815
599	0	193.89	1062.05	1575.81	75.8243	1055.56	1573.02	187.094	1226.63	1522.28	79.1862	1217.89	1518.05	144.402	1196.75	1427.95	162.571	1273.67	1147.42	150.169	1073.62	1335.75	154.196	1006.15	1142.98	78.7796	1284.37	1220.08	326.917	1124.39	1360.92	411.598	1132.5	1123.05	420.795	1127.14	1046.71	412.98	995.418	925.024	355.317	952.987	867.132	418.189	975.488	837.136	385.202	906.842	806.931
600	0	191.398	1050.98	1577.3	73.3439	1044.43	1574.03	184.742	1215.49	1523.5	76.8622	1206.68	1518.85	142.51	1185.4	1429.07	161.175	1261.88	1148.57	148.655	1062.13	1337.1	153.263	994.412	1144.47	77.1869	1272.56	1220.93	325.314	1113.11	1362.72	409.74	1121.98	1124.68	418.841	1118.15	1048.19	411.2	988.693	924.181	353.618	947.767	865.171	416.906	970.232	836.047	383.34	902.815	803.979
601	0	188.95	1039.94	1578.84	70.9082	1033.34	1575.08	182.45	1204.41	1524.83	74.5994	1195.53	1519.73	140.672	1174.13	1430.29	159.773	1250.21	1149.83	147.234	1050.76	1338.49	152.458	982.865	1145.96	75.6102	1260.86	1221.89	323.79	1101.98	1364.58	407.969	1111.59	1126.36	416.943	1109.26	1049.74	409.513	982.173	923.386	352.035	942.856	863.201	415.788	965.221	835.027	381.588	899.156	800.99
602	0	186.56	1028.95	1580.43	68.5322	1022.29	1576.15	180.229	1193.38	1526.23	72.4093	1184.45	1520.68	138.892	1162.93	1431.57	158.362	1238.66	1151.15	145.912	1039.49	1339.93	151.78	971.514	1147.45	74.0497	1249.28	1222.93	322.349	1091.01	1366.49	406.294	1101.35	1128.07	415.106	1100.47	1051.36	407.935	975.844	922.642	350.587	938.226	861.24	414.844	960.431	834.086	379.969	895.826	797.997
603	0	184.244	1017.99	1582.05	66.2305	1011.29	1577.24	178.091	1182.41	1527.71	70.3025	1173.42	1521.69	137.174	1151.82	1432.91	156.94	1227.25	1152.54	144.691	1028.34	1341.38	151.23	960.357	1148.93	72.5055	1237.84	1224.04	320.993	1080.21	1368.41	404.717	1091.3	1129.79	413.337	1091.79	1053.02	406.48	969.693	921.952	349.29	933.845	859.306	414.08	955.839	833.23	378.51	892.786	795.03
604	0	182.014	1007.09	1583.67	64.0163	1000.35	1578.33	176.046	1171.49	1529.24	68.2881	1162.47	1522.75	135.521	1140.79	1434.3	155.507	1215.97	1153.97	143.57	1017.31	1342.83	150.801	949.387	1150.37	70.9771	1226.53	1225.22	319.723	1069.59	1370.34	403.242	1081.46	1131.49	411.638	1083.23	1054.7	405.16	963.708	921.319	348.159	929.683	857.414	413.501	951.423	832.464	377.237	889.997	792.121
605	0	179.883	996.229	1585.29	61.9016	989.464	1579.43	174.102	1160.64	1530.81	66.3736	1151.58	1523.85	133.935	1129.86	1435.71	154.062	1204.83	1155.43	142.546	1006.41	1344.28	150.487	938.595	1151.78	69.4637	1215.36	1226.44	318.539	1059.14	1372.26	401.868	1071.86	1133.16	410.011	1074.78	1056.38	403.986	957.877	920.745	347.21	925.706	855.582	413.109	947.166	831.791	376.175	887.418	789.3
606	0	177.86	985.423	1586.89	59.897	978.634	1580.52	172.265	1149.85	1532.4	64.5649	1140.77	1524.99	132.416	1119.03	1437.15	152.609	1193.84	1156.9	141.617	995.619	1345.72	150.276	927.969	1153.16	67.9644	1204.33	1227.7	317.438	1048.87	1374.14	400.591	1062.5	1134.79	408.458	1066.46	1058.06	402.969	952.189	920.231	346.454	921.883	853.822	412.903	943.053	831.214	375.349	885.01	786.594
607	0	175.956	974.67	1588.46	58.0112	967.861	1581.6	170.54	1139.12	1534.01	62.8664	1130.02	1526.16	130.964	1108.29	1438.58	151.149	1182.99	1158.37	140.777	984.951	1347.14	150.154	917.495	1154.51	66.4783	1193.43	1228.99	316.417	1038.76	1375.98	399.406	1053.41	1136.37	406.978	1058.26	1059.71	402.115	946.634	919.779	345.902	918.183	852.149	412.88	939.07	830.734	374.778	882.735	784.029
608	0	174.178	963.97	1589.99	56.2512	957.145	1582.67	168.931	1128.46	1535.61	61.2809	1119.35	1527.35	129.579	1097.64	1440.02	149.687	1172.28	1159.84	140.018	974.396	1348.52	150.106	907.158	1155.82	65.0043	1182.66	1230.29	315.469	1028.82	1377.76	398.306	1044.58	1137.89	405.57	1050.19	1061.33	401.431	941.202	919.39	345.562	914.574	850.574	413.036	935.206	830.352	374.482	880.557	781.627
609	0	172.53	953.324	1591.47	54.622	946.485	1583.73	167.44	1117.86	1537.2	59.8095	1108.74	1528.55	128.259	1087.08	1441.44	148.227	1161.71	1161.28	139.334	963.948	1349.88	150.114	896.943	1157.11	63.5418	1172	1231.61	314.59	1019.02	1379.48	397.282	1036.02	1139.35	404.231	1042.26	1062.9	400.922	935.882	919.064	345.438	911.025	849.105	413.364	931.448	830.065	374.472	878.439	779.404
610	0	171.016	942.731	1592.89	53.1266	935.881	1584.76	166.065	1107.32	1538.76	58.452	1098.2	1529.77	127.002	1076.6	1442.83	146.775	1151.27	1162.69	138.714	953.599	1351.19	150.159	886.835	1158.37	62.0904	1161.45	1232.92	313.771	1009.35	1381.12	396.326	1027.72	1140.75	402.961	1034.44	1064.44	400.589	930.663	918.798	345.533	907.507	847.749	413.855	927.787	829.871	374.758	876.349	777.374
611	0	169.638	932.19	1594.24	51.7662	925.329	1585.77	164.808	1096.83	1540.28	57.2071	1087.71	1530.98	125.805	1066.21	1444.18	145.337	1140.95	1164.06	138.151	943.341	1352.45	150.223	876.818	1159.6	60.6505	1151	1234.22	313.007	999.808	1382.68	395.429	1019.66	1142.08	401.756	1026.76	1065.91	400.432	925.535	918.592	345.846	903.99	846.51	414.5	924.21	829.766	375.341	874.256	775.544
612	0	168.396	921.698	1595.52	50.5402	914.828	1586.76	163.664	1086.41	1541.76	56.0719	1077.29	1532.19	124.666	1055.89	1445.49	143.918	1130.74	1165.38	137.634	933.164	1353.66	150.287	866.878	1160.8	59.2231	1140.63	1235.5	312.291	990.362	1384.16	394.582	1011.83	1143.35	400.614	1019.19	1067.34	400.448	920.485	918.442	346.372	900.449	845.388	415.288	920.705	829.743	376.218	872.13	773.917
613	0	167.287	911.254	1596.72	49.4464	904.375	1587.71	162.63	1076.04	1543.16	55.0429	1066.92	1533.38	123.583	1045.64	1446.75	142.524	1120.62	1166.64	137.157	923.058	1354.81	150.336	857.001	1161.96	57.8104	1130.33	1236.75	311.615	980.999	1385.54	393.779	1004.18	1144.56	399.532	1011.74	1068.69	400.633	915.5	918.341	347.104	896.856	844.382	416.207	917.257	829.795	377.381	869.944	772.49
614	0	166.309	900.854	1597.82	48.4808	893.966	1588.62	161.703	1065.71	1544.5	54.1157	1056.59	1534.54	122.553	1035.44	1447.93	141.162	1110.59	1167.82	136.71	913.013	1355.9	150.356	847.174	1163.08	56.4153	1120.09	1237.95	310.973	971.702	1386.81	393.011	996.705	1145.7	398.51	1004.39	1069.99	400.979	910.565	918.285	348.031	893.19	843.485	417.246	913.852	829.912	378.816	867.675	771.253
615	0	165.456	890.496	1598.83	47.6385	883.598	1589.49	160.877	1055.43	1545.75	53.2852	1046.31	1535.66	121.573	1025.31	1449.04	139.836	1100.63	1168.92	136.286	903.019	1356.91	150.335	837.387	1164.15	55.0421	1109.89	1239.1	310.36	962.452	1387.98	392.275	989.355	1146.77	397.544	997.126	1071.21	401.476	905.663	918.264	349.141	889.427	842.688	418.39	910.469	830.084	380.502	865.3	770.194
616	0	164.724	880.175	1599.73	46.9133	873.266	1590.31	160.145	1045.19	1546.9	52.5459	1036.07	1536.73	120.641	1015.22	1450.06	138.553	1090.73	1169.94	135.879	893.065	1357.84	150.266	827.63	1165.16	53.696	1099.74	1240.17	309.771	953.232	1389.02	391.566	982.096	1147.77	396.635	989.938	1072.35	402.114	900.778	918.269	350.416	885.549	841.981	419.627	907.091	830.298	382.416	862.799	769.295
617	0	164.104	869.888	1600.52	46.2983	862.965	1591.06	159.503	1034.99	1547.94	51.8923	1025.86	1537.74	119.756	1005.16	1450.99	137.317	1080.88	1170.85	135.485	883.142	1358.67	150.144	817.892	1166.09	52.3834	1089.6	1241.17	309.203	944.024	1389.94	390.883	974.893	1148.68	395.78	982.807	1073.41	402.879	895.89	918.289	351.84	881.54	841.348	420.942	903.695	830.542	384.53	860.156	768.535
618	0	163.59	859.629	1601.19	45.7863	852.692	1591.74	158.944	1024.81	1548.86	51.3183	1015.67	1538.67	118.917	995.136	1451.81	136.134	1071.06	1171.65	135.1	873.239	1359.41	149.967	808.166	1166.92	51.1111	1079.5	1242.07	308.653	934.814	1390.73	390.223	967.709	1149.51	394.981	975.715	1074.37	403.756	890.982	918.312	353.393	877.385	840.774	422.322	900.259	830.8	386.814	857.354	767.891
619	0	163.175	849.395	1601.74	45.3695	842.442	1592.34	158.461	1014.66	1549.65	50.8184	1005.5	1539.51	118.124	985.13	1452.51	135.008	1061.27	1172.34	134.722	863.348	1360.03	149.737	798.445	1167.64	49.8869	1069.4	1242.86	308.118	925.585	1391.38	389.588	960.509	1150.24	394.236	968.641	1075.24	404.731	886.031	918.325	355.052	873.073	840.24	423.753	896.757	831.057	389.236	854.379	767.337
620	0	162.851	839.18	1602.16	45.0404	832.208	1592.85	158.048	1004.52	1550.3	50.3869	995.342	1540.24	117.376	975.136	1453.08	133.944	1051.5	1172.9	134.349	853.46	1360.54	149.459	788.724	1168.25	48.7185	1059.32	1243.54	307.6	916.325	1391.88	388.978	953.262	1150.87	393.545	961.565	1076	405.785	881.019	918.313	356.796	868.595	839.727	425.221	893.165	831.298	391.76	851.219	766.847
621	0	162.61	828.98	1602.44	44.7918	821.986	1593.26	157.7	994.391	1550.81	50.0186	985.192	1540.86	116.674	965.145	1453.52	132.946	1041.75	1173.34	133.981	843.566	1360.92	149.139	778.995	1168.71	47.6139	1049.25	1244.1	307.099	907.02	1392.23	388.394	945.938	1151.39	392.909	954.466	1076.65	406.904	875.925	918.265	358.603	863.942	839.216	426.712	889.459	831.509	394.353	847.862	766.394
622	0	162.446	818.789	1602.59	44.6166	811.771	1593.56	157.411	984.269	1551.16	49.709	975.042	1541.35	116.019	955.148	1453.83	132.021	1032	1173.65	133.621	833.659	1361.17	148.786	769.252	1169.02	46.581	1039.18	1244.52	306.616	897.659	1392.42	387.841	938.514	1151.78	392.328	947.323	1077.18	408.07	870.726	918.166	360.449	859.109	838.689	428.215	885.612	831.672	396.981	844.299	765.954
623	0	162.351	808.601	1602.59	44.5088	801.556	1593.74	157.178	974.146	1551.36	49.4541	964.887	1541.71	115.414	945.138	1453.98	131.172	1022.25	1173.82	133.27	823.731	1361.27	148.41	759.492	1169.18	45.6272	1029.12	1244.81	306.154	888.232	1392.45	387.321	930.968	1152.05	391.802	940.114	1077.58	409.267	865.405	918.003	362.314	854.089	838.128	429.715	881.6	831.775	399.612	840.519	765.502
624	0	162.321	798.412	1602.44	44.4629	791.336	1593.8	156.996	964.017	1551.39	49.2506	954.719	1541.93	114.862	935.106	1453.99	130.406	1012.51	1173.85	132.933	813.775	1361.23	148.02	749.706	1169.16	44.7596	1019.06	1244.95	305.718	878.729	1392.31	386.838	923.283	1152.18	391.331	932.821	1077.85	410.48	859.94	917.763	364.177	848.876	837.516	431.203	877.4	831.803	402.214	836.514	765.015
625	0	162.35	788.215	1602.16	44.4743	781.105	1593.73	156.863	953.874	1551.26	49.0963	944.534	1541.99	114.367	925.044	1453.85	129.73	1002.75	1173.74	132.613	803.783	1361.04	147.627	739.89	1168.98	43.9849	1009	1244.94	305.313	869.142	1392.01	386.397	915.448	1152.18	390.916	925.423	1077.98	411.697	854.312	917.435	366.02	843.467	836.838	432.668	872.988	831.744	404.76	832.274	764.474
626	0	162.434	778.005	1601.72	44.5393	770.857	1593.52	156.777	943.712	1550.97	48.9899	934.325	1541.89	113.931	914.946	1453.55	129.149	992.988	1173.49	132.315	793.749	1360.7	147.24	730.036	1168.61	43.3088	998.923	1244.78	304.942	859.463	1391.55	386	907.452	1152.04	390.556	917.903	1077.96	412.904	848.503	917.008	367.825	837.854	836.083	434.1	868.344	831.587	407.224	827.792	763.86
627	0	162.57	767.775	1601.15	44.6555	760.588	1593.17	156.739	933.525	1550.51	48.9312	924.086	1541.63	113.561	904.804	1453.09	128.673	983.201	1173.1	132.046	783.666	1360.21	146.869	720.137	1168.08	42.7368	988.837	1244.46	304.614	849.685	1390.93	385.653	899.289	1151.75	390.251	910.245	1077.8	414.092	842.497	916.475	369.578	832.03	835.238	435.492	863.445	831.321	409.586	823.057	763.158
628	0	162.757	757.521	1600.43	44.821	750.291	1592.68	156.747	923.306	1549.88	48.921	913.812	1541.21	113.261	894.612	1452.48	128.306	973.387	1172.57	131.811	773.527	1359.56	146.522	710.185	1167.38	42.2735	978.731	1243.99	304.334	839.801	1390.15	385.36	890.955	1151.32	390.001	902.433	1077.49	415.252	836.275	915.826	371.269	825.987	834.296	436.835	858.276	830.938	411.829	818.061	762.357
629	0	162.993	747.236	1599.58	45.0353	739.961	1592.05	156.805	913.048	1549.1	48.9613	903.496	1540.63	113.038	884.361	1451.72	128.056	963.534	1171.9	131.618	763.325	1358.77	146.206	700.171	1166.51	41.923	968.597	1243.37	304.11	829.806	1389.21	385.123	882.446	1150.75	389.807	894.453	1077.03	416.377	829.824	915.057	372.886	819.718	833.251	438.125	852.818	830.43	413.939	812.793	761.446
630	0	163.277	736.914	1598.59	45.2985	729.593	1591.28	156.916	902.747	1548.16	49.055	893.135	1539.89	112.897	874.048	1450.81	127.929	953.634	1171.1	131.473	753.055	1357.84	145.927	690.086	1165.49	41.6884	958.426	1242.6	303.95	819.695	1388.13	384.947	873.76	1150.03	389.668	886.293	1076.42	417.463	823.13	914.163	374.423	813.212	832.099	439.355	847.056	829.792	415.908	807.244	760.419
631	0	163.612	726.549	1597.49	45.6118	719.182	1590.38	157.082	892.395	1547.08	49.2061	882.723	1538.99	112.845	863.664	1449.77	127.929	943.674	1170.17	131.384	742.709	1356.76	145.69	679.921	1164.32	41.5725	948.209	1241.69	303.86	809.462	1386.9	384.834	864.897	1149.17	389.585	877.94	1075.65	418.505	816.178	913.141	375.876	806.458	830.836	440.524	840.978	829.019	417.729	801.402	759.271
632	0	163.998	716.135	1596.27	45.9769	708.724	1589.35	157.31	881.987	1545.86	49.4194	872.256	1537.94	112.887	853.206	1448.59	128.058	933.643	1169.11	131.358	732.282	1355.56	145.499	669.665	1163.01	41.5769	937.935	1240.63	303.849	799.103	1385.54	384.788	855.853	1148.18	389.556	869.384	1074.74	419.503	808.957	911.99	377.241	799.447	829.464	441.627	834.572	828.11	419.401	795.255	758
633	0	164.438	705.668	1594.95	46.3965	698.214	1588.21	157.604	871.517	1544.52	49.7005	861.729	1536.76	113.029	842.668	1447.29	128.319	923.527	1167.93	131.402	721.766	1354.25	145.358	659.309	1161.59	41.7028	927.593	1239.45	303.923	788.615	1384.06	384.811	846.627	1147.05	389.584	860.615	1073.68	420.455	801.457	910.712	378.517	792.166	827.983	442.663	827.828	827.062	420.926	788.792	756.606
634	0	164.935	695.14	1593.55	46.8734	687.649	1586.96	157.972	860.979	1543.06	50.0554	851.138	1535.44	113.277	832.045	1445.89	128.708	913.313	1166.64	131.522	711.158	1352.83	145.269	648.841	1160.06	41.95	917.171	1238.14	304.09	777.995	1382.46	384.905	837.214	1145.78	389.667	851.625	1072.48	421.362	793.666	909.307	379.704	784.604	826.397	443.632	820.737	825.877	422.305	782.001	755.092
635	0	165.493	684.548	1592.06	47.4114	677.027	1585.61	158.418	850.369	1541.49	50.4909	840.482	1534.01	113.635	821.334	1444.38	129.224	902.987	1165.25	131.726	700.451	1351.31	145.236	638.253	1158.43	42.3178	906.66	1236.72	304.355	767.24	1380.76	385.071	827.611	1144.4	389.806	842.405	1071.15	422.226	785.577	907.781	380.803	776.749	824.709	444.534	813.292	824.558	423.546	774.869	753.463
636	0	166.116	673.887	1590.52	48.014	666.343	1584.19	158.951	839.681	1539.85	51.0133	829.756	1532.47	114.107	810.53	1442.8	129.861	892.537	1163.76	132.019	689.642	1349.73	145.26	627.533	1156.73	42.8039	896.048	1235.22	304.722	756.349	1378.97	385.312	817.811	1142.89	389.999	832.947	1069.7	423.047	777.179	906.141	381.818	768.59	822.928	445.368	805.486	823.108	424.655	767.383	751.725
637	0	166.807	663.152	1588.93	48.6855	655.596	1582.7	159.577	828.912	1538.13	51.6293	818.959	1530.85	114.696	799.633	1441.15	130.609	881.948	1162.18	132.405	678.726	1348.08	145.345	616.673	1154.97	43.4051	885.325	1233.63	305.197	745.323	1377.1	385.628	807.808	1141.28	390.248	823.243	1068.12	423.827	768.466	904.393	382.751	760.115	821.061	446.137	797.313	821.534	425.638	759.532	749.886
638	0	167.571	652.34	1587.32	49.4296	644.785	1581.18	160.302	818.058	1536.37	52.3449	808.09	1529.17	115.404	788.64	1439.45	131.459	871.21	1160.54	132.89	667.7	1346.39	145.493	605.664	1153.18	44.1169	874.481	1231.97	305.782	734.163	1375.17	386.018	797.593	1139.56	390.551	813.289	1066.44	424.569	759.429	902.548	383.605	751.314	819.118	446.841	788.768	819.845	426.506	751.304	747.957
639	0	168.412	641.448	1585.7	50.2506	633.908	1579.63	161.13	807.117	1534.57	53.1655	797.147	1527.44	116.23	777.55	1437.73	132.397	860.31	1158.84	133.475	656.564	1344.69	145.707	594.499	1151.37	44.9333	863.51	1230.28	306.478	722.87	1373.2	386.483	787.158	1137.76	390.906	803.076	1064.67	425.273	750.062	900.618	384.385	742.177	817.11	447.484	779.845	818.051	427.266	742.688	745.951
640	0	169.334	630.476	1584.09	51.1519	622.965	1578.08	162.068	796.088	1532.76	54.0953	786.131	1525.69	117.173	766.364	1436	133.411	849.238	1157.11	134.164	645.317	1342.98	145.992	583.172	1149.56	45.8475	852.405	1228.56	307.284	711.449	1371.21	387.02	776.495	1135.88	391.313	792.6	1062.83	425.942	740.356	898.618	385.092	732.692	815.052	448.068	770.539	816.167	427.925	733.673	743.88
641	0	170.341	619.421	1582.51	52.137	611.956	1576.55	163.117	784.969	1530.97	55.1376	775.041	1523.94	118.231	755.084	1434.28	134.484	837.988	1155.35	134.957	633.96	1341.3	146.348	571.681	1147.78	46.851	841.161	1226.85	308.2	699.905	1369.21	387.629	765.596	1133.94	391.768	781.856	1060.92	426.577	730.306	896.564	385.731	722.852	812.957	448.595	760.843	814.206	428.493	724.25	741.76
642	0	171.435	608.284	1580.98	53.2088	600.88	1575.06	164.28	773.763	1529.2	56.2941	763.878	1522.21	119.401	743.713	1432.6	135.601	826.554	1153.6	135.852	622.495	1339.66	146.78	560.024	1146.05	47.9346	829.777	1225.15	309.221	688.245	1367.22	388.304	754.452	1131.96	392.27	770.839	1058.96	427.178	719.904	894.472	386.305	712.646	810.844	449.069	750.753	812.186	428.975	714.409	739.609
643	0	172.619	597.067	1579.52	54.3693	589.74	1573.64	165.557	762.47	1527.49	57.5651	752.646	1520.54	120.675	732.254	1430.97	136.747	814.934	1151.87	136.847	610.926	1338.1	147.289	548.202	1144.39	49.0882	818.252	1223.51	310.344	676.477	1365.27	389.041	743.058	1129.95	392.814	759.548	1056.99	427.746	709.145	892.364	386.816	702.068	808.729	449.494	740.262	810.127	429.379	704.143	737.445
644	0	173.893	585.772	1578.15	55.62	578.537	1572.32	166.947	751.094	1525.85	58.949	741.346	1518.94	122.048	720.714	1429.42	137.905	803.129	1150.18	137.939	599.259	1336.62	147.876	536.218	1142.84	50.3008	806.59	1221.93	311.561	664.612	1363.37	389.836	731.409	1127.94	393.397	747.979	1055	428.28	698.023	890.258	387.266	691.11	806.632	449.871	729.365	808.048	429.708	693.444	735.288
645	0	175.259	574.403	1576.88	56.9614	567.273	1571.1	168.446	739.639	1524.32	60.4425	729.982	1517.45	123.511	709.098	1427.98	139.062	791.143	1148.56	139.121	587.501	1335.25	148.539	524.081	1141.42	51.561	794.796	1220.45	312.865	652.66	1361.55	390.681	719.503	1125.94	394.013	736.132	1053.03	428.779	686.533	888.179	387.657	679.764	804.575	450.204	718.054	805.973	429.969	682.305	733.158
646	0	176.716	562.963	1575.74	58.393	555.951	1570.01	170.05	728.111	1522.89	62.0406	718.557	1516.08	125.054	697.415	1426.64	140.204	778.987	1147.02	140.386	575.661	1334.02	149.277	511.801	1140.14	52.8569	782.88	1219.09	314.246	640.635	1359.84	391.568	707.34	1123.98	394.659	724.009	1051.1	429.243	674.671	886.148	387.99	668.026	802.578	450.496	706.324	803.925	430.163	670.72	731.078
647	0	178.261	551.46	1574.73	59.9135	544.575	1569.08	171.752	716.517	1521.61	63.7363	707.078	1514.85	126.667	685.673	1425.45	141.322	766.672	1145.6	141.725	563.75	1332.94	150.083	499.391	1139.04	54.1765	770.854	1217.86	315.692	628.548	1358.23	392.49	694.923	1122.08	395.329	711.613	1049.22	429.67	662.435	884.189	388.266	655.889	800.666	450.75	694.169	801.927	430.293	658.683	729.072
648	0	179.893	539.899	1573.88	61.52	533.148	1568.31	173.544	704.865	1520.47	65.5211	695.548	1513.8	128.336	673.883	1424.41	142.405	754.217	1144.32	143.125	551.778	1332.03	150.95	486.87	1138.13	55.5079	758.732	1216.8	317.192	616.416	1356.77	393.438	682.258	1120.26	396.017	698.947	1047.42	430.057	649.822	882.325	388.485	643.352	798.859	450.967	681.584	800.005	430.362	646.19	727.162
649	0	181.606	528.288	1573.18	63.209	521.676	1567.73	175.416	693.162	1519.51	67.3846	683.975	1512.93	130.05	662.054	1423.54	143.447	741.642	1143.19	144.576	539.76	1331.3	151.866	474.26	1137.43	56.8391	746.532	1215.92	318.732	604.251	1355.46	394.402	669.354	1118.55	396.719	686.02	1045.72	430.404	636.832	880.58	388.647	630.41	797.18	451.151	668.563	798.182	430.369	633.235	725.372
650	0	183.395	516.636	1572.65	64.9753	510.162	1567.35	177.356	681.419	1518.72	69.3154	672.364	1512.27	131.795	650.199	1422.85	144.444	728.974	1142.24	146.063	527.711	1330.76	152.817	461.585	1136.95	58.1591	734.275	1215.24	320.296	592.069	1354.32	395.373	656.222	1116.97	397.429	672.841	1044.14	430.708	623.467	878.977	388.751	617.062	795.653	451.302	655.103	796.483	430.317	619.815	723.726
651	0	185.254	504.95	1572.3	66.8128	498.612	1567.16	179.353	669.646	1518.12	71.3003	660.724	1511.83	133.556	638.329	1422.35	145.394	716.241	1141.48	147.57	515.644	1330.43	153.789	448.875	1136.69	59.4573	721.984	1214.76	321.871	579.884	1353.36	396.341	642.877	1115.54	398.144	659.422	1042.69	430.967	609.731	877.536	388.798	603.309	794.298	451.422	641.203	794.928	430.203	605.925	722.245
652	0	187.175	493.24	1572.12	68.7143	487.033	1567.19	181.392	657.853	1517.72	73.3255	649.06	1511.61	135.32	626.457	1422.05	146.295	703.474	1140.94	149.083	503.575	1330.3	154.762	436.161	1136.66	60.7245	709.682	1214.51	323.44	567.712	1352.59	397.298	629.336	1114.27	398.861	645.776	1041.39	431.178	595.63	876.279	388.786	589.154	793.135	451.512	626.862	793.539	430.03	591.564	720.953
653	0	189.148	481.516	1572.11	70.6712	475.429	1567.42	183.46	646.051	1517.52	75.3763	637.382	1511.62	137.072	614.595	1421.95	147.151	690.706	1140.61	150.585	491.522	1330.37	155.719	423.474	1136.86	61.9528	697.394	1214.49	324.988	555.566	1352.02	398.235	615.618	1113.18	399.575	631.921	1040.25	431.339	581.171	875.221	388.715	574.599	792.181	451.57	612.082	792.334	429.797	576.729	719.869
654	0	191.165	469.786	1572.27	72.6739	463.808	1567.86	185.54	634.25	1517.52	77.4374	625.696	1511.87	138.8	602.755	1422.05	147.963	677.97	1140.51	152.06	479.499	1330.65	156.64	410.85	1137.27	63.136	685.147	1214.69	326.5	543.459	1351.64	399.145	601.744	1112.28	400.286	617.875	1039.29	431.45	566.366	874.38	388.584	559.653	791.454	451.597	596.868	791.328	429.503	561.419	719.012
655	0	193.213	458.06	1572.58	74.7113	452.176	1568.5	187.618	622.463	1517.71	79.4933	614.012	1512.35	140.491	590.95	1422.36	148.736	665.299	1140.64	153.493	467.523	1331.12	157.506	398.321	1137.89	64.2702	672.965	1215.11	327.961	531.403	1351.47	400.021	587.739	1111.58	400.991	603.659	1038.5	431.507	551.228	873.767	388.391	544.323	790.966	451.591	581.228	790.535	429.149	545.638	718.399
656	0	195.281	446.347	1573.05	76.7718	440.541	1569.33	189.678	610.698	1518.1	81.5288	602.336	1513.05	142.134	579.191	1422.85	149.476	652.726	1141	154.868	455.608	1331.77	158.3	385.918	1138.69	65.3533	660.874	1215.76	329.361	519.408	1351.48	400.86	573.627	1111.08	401.691	589.294	1037.91	431.51	535.774	873.391	388.137	528.623	790.728	451.548	565.173	789.964	428.734	529.387	718.044
657	0	197.355	434.656	1573.66	78.8424	428.907	1570.34	191.706	598.965	1518.67	83.5288	590.678	1513.97	143.718	567.488	1423.53	150.189	640.279	1141.57	156.172	443.768	1332.59	159.006	373.669	1139.66	66.3859	648.895	1216.61	330.686	507.483	1351.68	401.657	559.436	1110.77	402.386	574.804	1037.49	431.458	520.023	873.261	387.82	512.566	790.747	451.467	548.717	789.621	428.258	512.675	717.96
658	0	199.422	422.994	1574.4	80.9094	417.284	1571.51	193.686	587.274	1519.41	85.4789	579.044	1515.1	145.237	555.853	1424.39	150.882	627.984	1142.36	157.395	432.016	1333.56	159.611	361.597	1140.76	67.3706	637.05	1217.65	331.929	495.634	1352.05	402.413	545.193	1110.66	403.076	560.213	1037.26	431.349	503.997	873.378	387.438	496.172	791.03	451.341	531.88	789.511	427.721	495.51	718.159
659	0	201.467	411.368	1575.24	82.9585	405.677	1572.83	195.605	575.633	1520.3	87.3659	567.443	1516.41	146.682	544.292	1425.4	151.562	615.864	1143.33	158.525	420.361	1334.67	160.104	349.721	1141.99	68.3121	625.355	1218.86	333.082	483.865	1352.59	403.127	530.926	1110.74	403.764	545.544	1037.22	431.184	487.719	873.746	386.99	479.461	791.58	451.168	514.683	789.635	427.121	477.906	718.649
660	0	203.477	399.786	1576.19	84.9749	394.094	1574.26	197.451	564.049	1521.35	89.1777	555.881	1517.89	148.051	532.815	1426.56	152.237	603.937	1144.48	159.555	408.812	1335.9	160.478	338.052	1143.32	69.2169	613.825	1220.23	334.141	472.178	1353.29	403.801	516.662	1111	404.451	530.822	1037.35	430.962	471.217	874.361	386.476	462.458	792.398	450.94	497.152	789.991	426.457	459.88	719.437
661	0	205.436	388.251	1577.21	86.9439	382.541	1575.81	199.211	552.528	1522.52	90.9036	544.365	1519.52	149.339	521.425	1427.84	152.915	592.214	1145.78	160.481	397.375	1337.22	160.73	326.599	1144.73	70.0929	602.47	1221.73	335.104	460.574	1354.11	404.44	502.428	1111.43	405.14	516.069	1037.64	430.683	454.517	875.221	385.893	445.188	793.482	450.652	479.318	790.578	425.725	441.456	720.528
662	0	207.331	376.77	1578.3	88.8506	371.024	1577.43	200.878	541.075	1523.8	92.5348	532.901	1521.27	150.546	510.126	1429.23	153.604	580.702	1147.21	161.3	386.054	1338.63	160.861	315.361	1146.19	70.9491	591.296	1223.34	335.971	449.049	1355.07	405.049	488.248	1112.02	405.834	501.308	1038.1	430.348	437.65	876.32	385.241	427.681	794.831	450.299	461.211	791.391	424.924	422.658	721.927
663	0	209.148	365.346	1579.45	90.6811	359.551	1579.1	202.442	529.693	1525.19	94.0641	521.493	1523.13	151.674	498.921	1430.71	154.308	569.402	1148.75	162.012	374.851	1340.1	160.875	304.334	1147.69	71.7948	580.305	1225.04	336.744	437.599	1356.13	405.632	474.147	1112.75	406.534	486.56	1038.7	429.958	420.644	877.649	384.518	409.967	796.441	449.873	442.867	792.424	424.049	403.519	723.636
664	0	210.873	353.98	1580.63	92.422	348.126	1580.82	203.899	518.384	1526.65	95.4863	510.146	1525.07	152.724	487.81	1432.26	155.034	558.31	1150.38	162.62	363.764	1341.61	160.779	293.508	1149.21	72.6391	569.495	1226.8	337.429	426.218	1357.28	406.198	460.145	1113.62	407.244	471.844	1039.44	429.514	403.531	879.201	383.723	392.078	798.307	449.37	424.322	793.671	423.096	384.074	725.653
665	0	212.497	342.675	1581.84	94.0615	336.754	1582.55	205.243	507.149	1528.17	96.7981	498.864	1527.05	153.7	476.792	1433.86	155.787	547.418	1152.06	163.129	352.79	1343.14	160.585	282.869	1150.74	73.4908	558.861	1228.61	338.031	414.899	1358.51	406.752	446.259	1114.61	407.965	457.178	1040.31	429.018	386.339	880.964	382.856	374.046	800.423	448.785	405.613	795.123	422.061	364.363	727.975
666	0	214.008	331.432	1583.06	95.589	325.441	1584.27	206.473	495.989	1529.73	97.998	487.649	1529.06	154.607	465.862	1435.49	156.568	536.71	1153.78	163.545	341.925	1344.68	160.309	272.401	1152.26	74.3572	548.393	1230.43	338.557	403.634	1359.8	407.302	432.504	1115.72	408.698	442.576	1041.29	428.473	369.099	882.925	381.918	355.903	802.779	448.112	386.779	796.771	420.938	344.429	730.596
667	0	215.399	320.251	1584.28	96.9958	314.189	1585.96	207.588	484.9	1531.32	99.0863	476.503	1531.07	155.45	455.018	1437.13	157.38	526.169	1155.51	163.877	331.161	1346.21	159.966	262.084	1153.76	75.2441	538.08	1232.25	339.016	392.413	1361.15	407.853	418.891	1116.91	409.446	428.052	1042.37	427.881	351.839	885.071	380.908	337.683	805.367	447.348	367.856	798.606	419.724	324.318	733.506
668	0	216.663	309.13	1585.49	98.2754	303.002	1587.6	208.589	473.882	1532.92	100.065	465.425	1533.06	156.235	444.252	1438.76	158.22	515.774	1157.23	164.135	320.49	1347.72	159.575	251.897	1155.24	76.1558	527.908	1234.06	339.417	381.228	1362.53	408.413	405.428	1118.19	410.208	413.617	1043.53	427.244	334.585	887.385	379.828	319.415	808.174	446.491	348.883	800.614	418.415	304.078	736.692
669	0	217.797	298.069	1586.67	99.4232	291.882	1589.18	209.481	462.931	1534.5	100.937	454.418	1535	156.968	433.559	1440.36	159.088	505.503	1158.93	164.328	309.903	1349.19	159.157	241.82	1156.67	77.0943	517.859	1235.82	339.77	370.071	1363.94	408.987	392.118	1119.53	410.985	399.279	1044.76	426.567	317.363	889.851	378.68	301.13	811.187	445.539	329.893	802.784	417.009	283.76	740.137
670	0	218.798	287.065	1587.82	100.437	280.829	1590.67	210.266	452.043	1536.05	101.708	443.478	1536.87	157.655	422.931	1441.92	159.978	495.331	1160.57	164.469	299.39	1350.6	158.731	231.832	1158.06	78.0594	507.917	1237.53	340.082	358.934	1365.35	409.578	378.962	1120.92	411.776	385.043	1046.04	425.852	300.195	892.45	377.467	282.856	814.39	444.49	310.922	805.098	415.503	263.412	743.818
671	0	219.667	276.116	1588.92	101.316	269.844	1592.07	210.95	441.214	1537.55	102.381	432.605	1538.64	158.303	412.361	1443.42	160.887	485.234	1162.14	164.566	288.939	1351.94	158.316	221.913	1159.37	79.049	498.061	1239.16	340.363	347.81	1366.75	410.191	365.956	1122.34	412.579	370.914	1047.36	425.103	283.102	895.16	376.191	264.621	817.764	443.347	291.999	807.541	413.896	243.084	747.71
672	0	220.406	265.219	1589.96	102.064	258.924	1593.35	211.539	430.438	1538.99	102.965	421.795	1540.31	158.914	401.839	1444.84	161.807	475.188	1163.63	164.63	278.54	1353.2	157.928	212.044	1160.61	80.059	488.274	1240.71	340.619	336.694	1368.13	410.827	353.093	1123.77	413.393	356.891	1048.69	424.323	266.102	897.96	374.856	246.45	821.287	442.109	273.155	810.093	412.19	222.822	751.784
673	0	221.018	254.37	1590.92	102.683	248.069	1594.51	212.039	419.71	1540.35	103.464	411.044	1541.84	159.496	391.357	1446.16	162.734	465.173	1165.01	164.671	268.183	1354.36	157.584	202.208	1161.75	81.0838	478.535	1242.15	340.859	325.582	1369.47	411.487	340.36	1125.2	414.215	342.975	1050.02	423.515	249.211	900.825	373.465	228.365	824.936	440.78	254.413	812.733	410.386	202.67	756.006
674	0	221.51	243.565	1591.81	103.179	237.275	1595.53	212.458	409.025	1541.6	103.885	400.349	1543.23	160.05	380.907	1447.38	163.66	455.169	1166.28	164.696	257.856	1355.42	157.293	192.39	1162.79	82.1164	468.825	1243.47	341.085	314.47	1370.75	412.171	327.743	1126.61	415.041	329.162	1051.32	422.681	232.443	903.731	372.023	210.388	828.684	439.363	235.799	815.438	408.486	182.669	760.342
675	0	221.887	232.801	1592.6	103.559	226.537	1596.41	212.802	398.377	1542.74	104.236	389.705	1544.45	160.579	370.482	1448.47	164.58	445.16	1167.42	164.712	247.551	1356.36	157.064	182.576	1163.71	83.1487	459.126	1244.67	341.304	303.359	1371.95	412.875	315.226	1127.97	415.868	315.446	1052.59	421.824	215.81	906.651	370.533	192.539	832.502	437.864	217.332	818.186	406.496	162.856	764.753
676	0	222.159	222.073	1593.28	103.832	215.85	1597.13	213.078	387.759	1543.75	104.522	379.104	1545.5	161.086	360.072	1449.43	165.487	435.133	1168.41	164.725	237.257	1357.16	156.902	172.755	1164.49	84.1724	449.421	1245.72	341.517	292.246	1373.06	413.597	302.788	1129.27	416.692	301.823	1053.79	420.943	199.32	909.56	368.999	174.836	836.36	436.287	199.03	820.951	404.419	143.264	769.201
677	0	222.334	211.377	1593.85	104.006	205.21	1597.68	213.293	377.167	1544.62	104.749	368.542	1546.37	161.571	349.671	1450.24	166.378	425.076	1169.27	164.737	226.968	1357.82	156.808	162.919	1165.13	85.1786	439.695	1246.62	341.727	281.133	1374.07	414.33	290.41	1130.48	417.507	288.284	1054.91	420.041	182.982	912.429	367.426	157.296	840.225	434.639	180.908	823.706	402.261	123.92	773.647
678	0	222.421	200.707	1594.29	104.09	194.608	1598.07	213.452	366.595	1545.34	104.922	358.013	1547.05	162.034	339.273	1450.89	167.247	414.983	1169.96	164.752	216.675	1358.34	156.779	153.059	1165.62	86.159	429.933	1247.36	341.933	270.022	1374.95	415.068	278.071	1131.59	418.309	274.822	1055.93	419.117	166.801	915.233	365.816	139.934	844.063	432.927	162.979	826.427	400.03	104.847	778.051
679	0	222.428	190.061	1594.59	104.094	184.04	1598.29	213.561	356.038	1545.89	105.047	347.509	1547.53	162.475	328.873	1451.38	168.089	404.85	1170.49	164.77	206.373	1358.69	156.809	143.17	1165.93	87.105	420.125	1247.94	342.134	258.914	1375.69	415.803	265.749	1132.59	419.091	261.431	1056.84	418.169	150.783	917.944	364.173	122.764	847.84	431.158	145.254	829.086	397.733	86.066	782.375
680	0	222.367	179.432	1594.74	104.027	173.497	1598.33	213.624	345.491	1546.26	105.129	337.024	1547.8	162.892	318.464	1451.69	168.901	394.675	1170.86	164.792	196.055	1358.88	156.889	133.249	1166.08	88.009	410.262	1248.34	342.329	247.812	1376.28	416.525	253.427	1133.44	419.846	248.103	1057.61	417.196	134.932	920.537	362.5	105.801	851.522	429.339	127.742	831.658	395.378	67.5905	786.583
681	0	222.244	168.817	1594.75	103.898	162.974	1598.2	213.648	334.949	1546.46	105.17	326.553	1547.87	163.282	308.043	1451.83	169.678	384.456	1171.05	164.814	185.718	1358.89	157.008	123.292	1166.04	88.8636	400.337	1248.57	342.515	236.719	1376.69	417.223	241.089	1134.15	420.567	234.831	1058.24	416.197	119.25	922.987	360.8	89.0545	855.073	427.479	110.451	834.117	392.974	49.4322	790.64
682	0	222.068	158.211	1594.59	103.715	152.464	1597.88	213.633	324.407	1546.47	105.175	316.089	1547.74	163.643	297.606	1451.79	170.414	374.194	1171.07	164.834	175.358	1358.73	157.154	113.295	1165.83	89.6621	390.346	1248.61	342.688	225.638	1376.93	417.888	228.723	1134.7	421.248	221.612	1058.7	415.169	103.742	925.271	359.076	72.5371	858.462	425.585	93.3889	836.44	390.53	31.599	794.512
683	0	221.845	147.609	1594.27	103.485	141.96	1597.39	213.585	313.863	1546.29	105.145	305.628	1547.41	163.971	287.15	1451.57	171.105	363.891	1170.91	164.849	164.971	1358.4	157.312	103.258	1165.43	90.3983	380.287	1248.47	342.843	214.572	1376.99	418.507	216.32	1135.07	421.878	208.441	1059	414.11	88.4096	927.367	357.33	56.2583	861.654	423.665	76.5613	838.602	388.055	14.0965	798.168
684	0	221.584	137.009	1593.79	103.215	131.458	1596.72	213.504	303.312	1545.93	105.083	295.162	1546.88	164.261	276.674	1451.16	171.746	353.548	1170.57	164.853	154.555	1357.89	157.468	93.1763	1164.85	91.0663	370.158	1248.15	342.975	203.522	1376.84	419.07	203.879	1135.26	422.45	195.318	1059.12	413.017	73.257	929.254	355.566	40.2273	864.62	421.727	59.9751	840.582	385.56	-3.07213	801.581
685	0	221.287	126.405	1593.14	102.91	120.951	1595.88	213.392	292.752	1545.38	104.99	284.689	1546.15	164.51	266.174	1450.57	172.329	343.166	1170.05	164.841	144.108	1357.2	157.608	83.0484	1164.09	91.6607	359.961	1247.64	343.08	192.489	1376.51	419.565	191.402	1135.26	422.955	182.243	1059.05	411.888	58.2878	930.915	353.786	24.452	867.331	419.78	43.637	842.358	383.054	-19.9052	804.725
686	0	220.961	115.794	1592.32	102.574	110.436	1594.87	213.249	282.179	1544.64	104.866	274.204	1545.25	164.711	255.651	1449.8	172.848	332.745	1169.35	164.806	133.628	1356.34	157.718	72.8706	1163.16	92.1765	349.696	1246.95	343.15	181.475	1375.97	419.982	178.896	1135.05	423.383	169.219	1058.79	410.723	43.5069	932.334	351.993	8.94004	869.76	417.829	27.5545	843.911	380.549	-36.4019	807.576
687	0	220.606	105.172	1591.35	102.21	99.9074	1593.71	213.075	271.59	1543.73	104.711	263.703	1544.17	164.861	245.102	1448.87	173.298	322.284	1168.48	164.742	123.112	1355.31	157.785	62.6388	1162.07	92.6092	339.364	1246.09	343.181	170.48	1375.23	420.31	166.374	1134.65	423.725	156.25	1058.33	409.519	28.9196	933.495	350.191	-6.30189	871.884	415.883	11.7361	845.223	378.054	-52.5617	810.112
688	0	220.225	94.5374	1590.22	101.819	89.3626	1592.41	212.869	260.984	1542.66	104.524	253.183	1542.93	164.952	234.525	1447.77	173.671	311.78	1167.43	164.641	112.56	1354.13	157.799	52.3481	1160.82	92.9546	328.967	1245.04	343.165	159.501	1374.31	420.542	153.851	1134.03	423.97	143.341	1057.69	408.276	14.5325	934.389	348.383	-21.2674	873.683	413.947	-3.80833	846.28	375.582	-68.3838	812.316
689	0	219.818	83.8862	1588.94	101.403	78.798	1590.97	212.629	250.358	1541.42	104.303	242.64	1541.54	164.98	223.92	1446.51	173.962	301.232	1166.22	164.495	101.968	1352.81	157.749	41.9927	1159.43	93.2091	318.505	1243.83	343.097	148.537	1373.2	420.669	141.347	1133.22	424.11	130.501	1056.85	406.996	0.353038	935.005	346.573	-35.9501	875.14	412.028	-19.0674	847.066	373.142	-83.8665	814.171
690	0	219.384	73.2162	1587.53	100.96	68.2108	1589.41	212.351	239.71	1540.05	104.044	232.071	1540.03	164.939	213.285	1445.12	174.167	290.634	1164.85	164.298	91.3352	1351.35	157.629	31.566	1157.91	93.3698	307.977	1242.46	342.969	137.584	1371.92	420.686	128.883	1132.2	424.135	117.737	1055.83	405.68	-13.6101	935.339	344.767	-50.344	876.24	410.132	-34.028	847.571	370.747	-99.007	815.662
691	0	218.922	62.5252	1586.01	100.488	57.5985	1587.75	212.031	229.038	1538.54	103.744	221.474	1538.4	164.823	202.618	1443.6	174.28	279.982	1163.34	164.042	80.6582	1349.78	157.432	21.0605	1156.27	93.4344	297.384	1240.94	342.776	126.636	1370.48	420.586	116.483	1131	424.038	105.059	1054.64	404.329	-27.3476	935.386	342.97	-64.4423	876.977	408.264	-48.6756	847.786	368.408	-113.8	816.78
692	0	218.429	51.8112	1584.38	99.9855	46.9586	1586.01	211.665	218.34	1536.92	103.399	210.847	1536.68	164.626	191.916	1441.96	174.299	269.269	1161.69	163.719	69.9339	1348.11	157.154	10.4681	1154.53	93.4013	286.724	1239.29	342.512	115.687	1368.91	420.365	104.166	1129.61	423.81	92.4764	1053.29	402.949	-40.8491	935.147	341.186	-78.238	877.342	406.429	-62.9939	847.706	366.135	-128.24	817.517
693	0	217.9	41.0725	1582.67	99.4475	36.289	1584.21	211.247	207.614	1535.21	103.001	200.185	1534.89	164.345	181.177	1440.24	174.222	258.49	1159.93	163.323	59.159	1346.36	156.793	-0.21974	1152.72	93.2698	275.994	1237.52	342.172	104.73	1367.22	420.021	91.9545	1128.06	423.446	79.9991	1051.79	401.541	-54.1035	934.627	339.423	-91.7231	877.337	404.632	-76.9652	847.329	363.941	-142.317	817.867
694	0	217.332	30.3079	1580.91	98.8701	25.5874	1582.38	210.772	196.859	1533.42	102.546	189.487	1533.05	163.973	170.397	1438.45	174.048	247.637	1158.08	162.848	48.3295	1344.56	156.349	-11.012	1150.85	93.04	265.193	1235.64	341.75	93.7556	1365.44	419.552	79.8644	1126.37	422.94	67.6362	1050.17	400.113	-67.0995	933.831	337.686	-104.889	876.965	402.878	-90.5711	846.657	361.834	-156.02	817.83
695	0	216.718	19.5161	1579.1	98.2479	14.8517	1580.52	210.231	186.073	1531.59	102.025	178.749	1531.17	163.508	159.574	1436.61	173.775	236.705	1156.15	162.287	37.4414	1342.73	155.821	-21.9176	1148.95	92.7125	254.316	1233.69	341.242	82.7548	1363.6	418.955	67.91	1124.55	422.29	55.3964	1048.44	398.667	-79.8254	932.771	335.981	-117.726	876.233	401.17	-103.792	845.695	359.825	-169.335	817.408
696	0	216.054	8.69621	1577.29	97.5756	4.07997	1578.69	209.619	175.253	1529.73	101.433	167.969	1529.3	162.946	148.704	1434.74	173.406	225.687	1154.18	161.637	26.4904	1340.89	155.211	-32.9453	1147.05	92.2891	243.36	1231.67	340.645	71.7178	1361.73	418.231	56.1008	1122.64	421.495	43.2871	1046.64	397.212	-92.2698	931.461	334.316	-130.223	875.154	399.514	-116.61	844.454	357.923	-182.246	816.607
697	0	215.333	-2.15238	1575.49	96.8474	-6.72989	1576.88	208.928	164.399	1527.86	100.761	157.144	1527.43	162.284	137.784	1432.87	172.942	214.577	1152.18	160.894	15.4723	1339.08	154.521	-44.1032	1145.17	91.7719	232.321	1229.62	339.956	60.6347	1359.85	417.38	44.4415	1120.67	420.556	31.3149	1044.79	395.752	-104.422	929.921	332.696	-142.368	873.746	397.914	-129.006	842.949	356.134	-194.736	815.437
698	0	214.549	-13.0302	1573.73	96.0572	-17.5797	1575.14	208.152	153.509	1526.02	100.002	146.272	1525.61	161.521	126.81	1431.03	172.386	203.37	1150.19	160.055	4.38312	1337.31	153.753	-55.3985	1143.35	91.1641	221.194	1227.57	339.172	49.4959	1358.01	416.405	32.9319	1118.68	419.475	19.4846	1042.92	394.294	-116.271	928.171	331.127	-154.15	872.029	396.373	-140.964	841.199	354.465	-206.785	813.913
699	0	213.696	-23.9374	1572.05	95.1995	-28.4711	1573.48	207.284	142.582	1524.22	99.1514	135.35	1523.85	160.658	115.779	1429.23	171.743	192.063	1148.24	159.119	-6.78074	1335.63	152.91	-66.8372	1141.62	90.4694	209.975	1225.53	338.295	38.2923	1356.24	415.308	21.5666	1116.69	418.26	7.79976	1041.06	392.844	-127.809	926.238	329.616	-165.555	870.029	394.899	-152.468	839.229	352.919	-218.373	812.053
700	0	212.769	-34.874	1570.46	94.2687	-39.4053	1571.93	206.32	131.617	1522.49	98.202	124.377	1522.17	159.695	104.688	1427.51	171.018	180.652	1146.34	158.088	-18.0222	1334.04	151.996	-78.4238	1140	89.6921	198.66	1223.54	337.323	27.0163	1354.56	414.095	10.3358	1114.75	416.919	-3.73796	1039.25	391.408	-139.028	924.149	328.167	-176.573	867.775	393.495	-163.508	837.066	351.5	-229.481	809.878
701	0	211.762	-45.84	1568.99	93.2601	-50.3835	1570.51	205.255	120.613	1520.85	97.1502	113.35	1520.59	158.633	93.5373	1425.88	170.217	169.137	1144.53	156.963	-29.3432	1332.58	151.016	-90.1606	1138.54	88.8373	187.245	1221.62	336.26	15.6615	1353.02	412.773	-0.774942	1112.89	415.462	-15.1283	1037.52	389.993	-149.924	921.934	326.786	-187.19	865.298	392.168	-174.077	834.742	350.206	-240.09	807.416
702	0	210.672	-56.8348	1567.66	92.1693	-61.406	1569.24	204.086	109.57	1519.33	95.9929	102.269	1519.12	157.478	82.324	1424.37	169.347	157.518	1142.84	155.75	-40.7445	1331.27	149.973	-102.048	1137.25	87.9107	175.729	1219.79	335.109	4.22351	1351.63	411.349	-11.7832	1111.15	413.904	-26.3727	1035.9	388.606	-160.494	919.628	325.478	-197.397	862.633	390.924	-184.17	832.294	349.039	-250.181	804.694
703	0	209.495	-67.8578	1566.5	90.9931	-72.4728	1568.13	202.813	98.488	1517.94	94.7289	91.1343	1517.79	156.233	71.0485	1423	168.415	145.796	1141.28	154.453	-52.2257	1330.13	148.874	-114.082	1136.16	86.9184	164.111	1218.08	333.875	-7.29999	1350.44	409.835	-22.7094	1109.57	412.259	-37.4738	1034.42	387.251	-170.738	917.263	324.247	-207.185	859.818	389.77	-193.79	829.758	347.994	-259.739	801.744
704	0	208.228	-78.9081	1565.52	89.7293	-83.5831	1567.19	201.435	87.3683	1516.71	93.3592	79.9462	1516.6	154.905	59.712	1421.78	167.429	133.976	1139.88	153.08	-63.7845	1329.17	147.727	-126.258	1135.3	85.8669	152.391	1216.52	332.566	-18.9087	1349.45	408.244	-33.5757	1108.18	410.545	-48.4355	1033.12	385.937	-180.658	914.873	323.097	-216.547	856.889	388.713	-202.945	827.176	347.068	-268.754	798.602
705	0	206.872	-89.9845	1564.74	88.377	-94.7355	1566.44	199.955	76.2119	1515.63	91.8862	68.7064	1515.57	153.5	48.3166	1420.73	166.398	122.063	1138.66	151.642	-75.4174	1328.41	146.54	-138.566	1134.68	84.7634	140.575	1215.11	331.188	-30.5997	1348.68	406.59	-44.4048	1107.01	408.78	-59.2628	1032.01	384.668	-190.261	912.495	322.034	-225.482	853.885	387.761	-211.646	824.587	346.257	-277.218	795.304
706	0	205.425	-101.086	1564.17	86.9365	-105.928	1565.88	198.378	65.0208	1514.74	90.3149	57.4179	1514.7	152.029	36.8658	1419.86	165.33	110.065	1137.63	150.149	-87.1186	1327.86	145.324	-150.992	1134.3	83.615	128.666	1213.87	329.753	-42.3671	1348.16	404.89	-55.2189	1106.09	406.985	-69.9609	1031.11	383.451	-199.556	910.16	321.062	-233.989	850.846	386.923	-219.913	822.034	345.554	-285.128	791.887
707	0	203.891	-112.21	1563.81	85.4098	-117.157	1565.5	196.711	53.7975	1514.04	88.6521	46.0844	1513.99	150.499	25.3645	1419.17	164.232	97.9896	1136.81	148.614	-98.8809	1327.52	144.09	-163.522	1134.18	82.4291	116.674	1212.83	328.271	-54.2021	1347.88	403.162	-66.0386	1105.42	405.179	-80.5357	1030.45	382.293	-208.553	907.901	320.185	-242.074	847.81	386.206	-227.768	819.555	344.957	-292.49	788.39
708	0	202.272	-123.355	1563.67	83.8004	-128.419	1565.31	194.961	42.5453	1513.53	86.9066	34.7108	1513.44	148.921	13.8186	1418.68	163.111	85.8489	1136.2	147.051	-110.695	1327.39	142.853	-176.133	1134.3	81.213	104.61	1211.98	326.754	-66.0931	1347.86	401.424	-76.8817	1105.03	403.385	-90.9929	1030.03	381.2	-217.268	905.748	319.409	-249.746	844.812	385.619	-235.24	817.189	344.46	-299.312	784.851
709	0	200.574	-134.519	1563.75	82.1132	-139.71	1565.3	193.139	31.2679	1513.22	85.089	23.3031	1513.07	147.306	2.23541	1418.39	161.975	73.6542	1135.81	145.475	-122.551	1327.47	141.626	-188.803	1134.67	79.9739	92.4857	1211.33	325.216	-78.0253	1348.08	399.696	-87.7623	1104.92	401.621	-101.337	1029.86	380.18	-225.717	903.728	318.739	-257.018	841.887	385.17	-242.362	814.971	344.062	-305.613	781.309
710	0	198.804	-145.698	1564.04	80.355	-151.024	1565.47	191.258	19.9699	1513.11	83.2118	11.8679	1512.85	145.666	-9.3766	1418.28	160.827	61.4189	1135.63	143.902	-134.436	1327.75	140.425	-201.505	1135.27	78.7184	80.3166	1210.88	323.67	-89.9814	1348.54	397.996	-98.6896	1105.09	399.907	-111.574	1029.94	379.241	-233.918	901.865	318.182	-263.912	839.068	384.867	-249.169	812.931	343.76	-311.417	777.802
711	0	196.971	-156.891	1564.53	78.5339	-162.356	1565.78	189.33	8.65628	1513.2	81.2888	0.413163	1512.78	144.011	-21.0081	1418.37	159.674	49.1575	1135.67	142.346	-146.337	1328.22	139.266	-214.211	1136.07	77.4525	68.119	1210.64	322.13	-101.942	1349.24	396.343	-109.667	1105.53	398.263	-121.705	1030.26	378.39	-241.893	900.179	317.745	-270.451	836.384	384.717	-255.7	811.098	343.556	-316.755	774.363
712	0	195.083	-168.094	1565.21	76.6598	-173.699	1566.24	187.37	-2.66745	1513.48	79.3348	-11.053	1512.87	142.352	-32.6487	1418.64	158.517	36.8856	1135.91	140.825	-158.24	1328.87	138.166	-226.891	1137.05	76.1815	55.9104	1210.59	320.61	-113.884	1350.14	394.754	-120.693	1106.23	396.703	-131.732	1030.82	377.637	-249.661	898.686	317.435	-276.664	833.858	384.727	-261.995	809.491	343.453	-321.666	771.028
713	0	193.153	-179.303	1566.07	74.7436	-185.047	1566.83	185.392	-13.9954	1513.94	77.3655	-22.5217	1513.08	140.701	-44.2879	1419.08	157.358	24.6196	1136.35	139.353	-170.13	1329.67	137.139	-239.517	1138.19	74.9096	43.7085	1210.73	319.123	-125.784	1351.24	393.243	-131.756	1107.17	395.242	-141.657	1031.61	376.989	-257.246	897.398	317.259	-282.585	831.514	384.903	-268.095	808.128	343.459	-326.196	767.826
714	0	191.192	-190.514	1567.09	72.7976	-196.394	1567.53	183.413	-25.3214	1514.57	75.3967	-33.9843	1513.43	139.068	-55.9144	1419.68	156.197	12.3767	1136.97	137.944	-181.992	1330.61	136.202	-252.059	1139.45	73.6401	31.5312	1211.05	317.683	-137.619	1352.5	391.825	-142.842	1108.32	393.893	-151.475	1032.6	376.458	-264.668	896.321	317.225	-288.253	829.367	385.25	-274.038	807.018	343.582	-330.395	764.785
715	0	189.214	-201.725	1568.24	70.8349	-207.732	1568.31	181.448	-36.6393	1515.36	73.4444	-45.4317	1513.89	137.461	-67.5173	1420.42	155.034	0.174761	1137.75	136.612	-193.812	1331.67	135.368	-264.492	1140.81	72.3751	19.396	1211.53	316.301	-149.362	1353.9	390.509	-153.926	1109.65	392.663	-161.185	1033.77	376.052	-271.948	895.46	317.342	-293.709	827.432	385.77	-279.862	806.167	343.834	-334.32	761.931
716	0	187.234	-212.93	1569.52	68.8694	-219.055	1569.17	179.512	-47.9428	1516.29	71.5238	-56.8555	1514.45	135.89	-79.0857	1421.3	153.865	-11.9679	1138.68	135.368	-205.575	1332.83	134.65	-276.791	1142.23	71.1154	7.31918	1212.16	314.988	-160.991	1355.42	389.305	-164.978	1111.14	391.561	-170.781	1035.1	375.781	-279.107	894.815	317.617	-298.996	825.717	386.466	-285.599	805.573	344.229	-338.03	759.285
717	0	185.265	-224.126	1570.89	66.9154	-230.357	1570.08	177.619	-59.2258	1517.36	69.6496	-68.2477	1515.11	134.36	-90.6093	1422.29	152.689	-24.0329	1139.74	134.223	-217.269	1334.07	134.058	-288.938	1143.68	69.8608	-4.68414	1212.92	313.753	-172.483	1357.04	388.219	-175.964	1112.74	390.588	-180.255	1036.57	375.654	-286.161	894.381	318.058	-304.159	824.228	387.337	-291.281	805.231	344.783	-341.588	756.866
718	0	183.322	-235.308	1572.35	64.9874	-241.633	1571.04	175.782	-70.4825	1518.54	67.8351	-79.6013	1515.84	132.879	-102.078	1423.38	151.501	-36.002	1140.91	133.183	-228.881	1335.37	133.601	-300.914	1145.15	68.61	-16.6007	1213.8	312.603	-183.816	1358.71	387.254	-186.843	1114.43	389.747	-189.599	1038.15	375.681	-293.127	894.152	318.67	-309.244	822.967	388.382	-296.932	805.131	345.513	-345.057	754.692
719	0	181.419	-246.472	1573.86	63.0998	-252.877	1572.02	174.013	-81.7076	1519.82	66.0923	-90.91	1516.65	131.451	-113.485	1424.56	150.3	-47.8576	1142.18	132.255	-240.402	1336.7	133.284	-312.71	1146.61	67.3607	-28.4193	1214.78	311.544	-194.974	1360.43	386.413	-197.574	1116.18	389.036	-198.805	1039.82	375.868	-300.02	894.12	319.458	-314.295	821.934	389.596	-302.571	805.26	346.435	-348.501	752.774
720	0	179.571	-257.616	1575.41	61.2663	-264.085	1573.03	172.323	-92.896	1521.19	64.4315	-102.169	1517.53	130.08	-124.821	1425.81	149.082	-59.5834	1143.52	131.441	-251.823	1338.07	133.11	-324.316	1148.05	66.1098	-40.1309	1215.86	310.578	-205.94	1362.18	385.694	-208.112	1117.95	388.451	-207.863	1041.55	376.223	-306.85	894.273	320.427	-319.354	821.125	390.976	-308.214	805.601	347.565	-351.982	751.126
721	0	177.789	-268.734	1576.99	59.5001	-275.255	1574.04	170.721	-104.043	1522.63	62.8613	-113.373	1518.46	128.768	-136.08	1427.12	147.847	-71.1649	1144.92	130.742	-263.137	1339.44	133.078	-335.73	1149.44	64.8541	-51.7291	1217.01	309.707	-216.706	1363.92	385.094	-218.415	1119.73	387.986	-216.763	1043.32	376.75	-313.626	894.6	321.576	-324.463	820.536	392.512	-313.87	806.137	348.917	-355.557	749.754
722	0	176.087	-279.823	1578.57	57.8134	-286.382	1575.05	169.212	-115.146	1524.13	61.3881	-124.519	1519.44	127.517	-147.258	1428.48	146.593	-82.5899	1146.36	130.158	-274.339	1340.82	133.184	-346.951	1150.79	63.59	-63.2096	1218.23	308.93	-227.264	1365.66	384.61	-228.444	1121.5	387.635	-225.496	1045.12	377.453	-320.355	895.088	322.906	-329.657	820.161	394.196	-319.543	806.849	350.501	-359.28	748.667
723	0	174.475	-290.88	1580.15	56.2171	-297.467	1576.06	167.803	-126.199	1525.67	60.0167	-135.607	1520.46	126.326	-158.35	1429.86	145.321	-93.8494	1147.83	129.684	-285.427	1342.19	133.422	-357.983	1152.1	62.3141	-74.5708	1219.5	308.244	-237.611	1367.37	384.235	-238.162	1123.23	387.388	-234.054	1046.92	378.331	-327.043	895.725	324.414	-334.968	819.991	396.016	-325.237	807.717	352.325	-363.199	747.868
724	0	172.962	-301.902	1581.71	54.7208	-308.506	1577.05	166.496	-137.202	1527.25	58.7499	-146.633	1521.53	125.195	-169.354	1431.27	144.035	-104.938	1149.32	129.314	-296.4	1343.54	133.781	-368.832	1153.35	61.0238	-85.8134	1220.82	307.644	-247.749	1369.05	383.962	-247.542	1124.92	387.238	-242.431	1048.72	379.384	-333.694	896.499	326.093	-340.425	820.018	397.96	-330.95	808.723	354.389	-367.356	747.357
725	0	171.557	-312.887	1583.24	53.3324	-319.501	1578.04	165.293	-148.151	1528.84	57.5887	-157.599	1522.63	124.124	-180.269	1432.69	142.738	-115.853	1150.82	129.043	-307.257	1344.88	134.249	-379.506	1154.57	59.7174	-96.9404	1222.18	307.125	-257.685	1370.69	383.781	-256.562	1126.57	387.173	-250.623	1050.5	380.607	-340.309	897.395	327.936	-346.05	820.233	400.012	-336.678	809.847	356.69	-371.783	747.133
726	0	170.265	-323.831	1584.73	52.0583	-330.451	1579.01	164.194	-159.045	1530.45	56.5324	-168.505	1523.76	123.11	-191.096	1434.12	141.436	-126.597	1152.31	128.861	-318.003	1346.19	134.811	-390.016	1155.74	58.3944	-107.957	1223.56	306.678	-267.427	1372.28	383.684	-265.211	1128.17	387.184	-258.628	1052.26	381.992	-346.891	898.401	329.933	-351.859	820.626	402.156	-342.419	811.072	359.22	-376.504	747.19
727	0	169.092	-334.735	1586.17	50.903	-341.357	1579.97	163.199	-169.883	1532.06	55.5791	-179.351	1524.93	122.15	-201.834	1435.53	140.133	-137.174	1153.78	128.759	-328.64	1347.48	135.449	-400.375	1156.89	57.0558	-118.87	1224.96	306.297	-276.988	1373.83	383.66	-273.486	1129.72	387.263	-266.447	1053.99	383.531	-353.443	899.505	332.072	-357.865	821.185	404.375	-348.17	812.379	361.964	-381.536	747.519
728	0	168.039	-345.596	1587.55	49.8693	-352.22	1580.9	162.304	-180.664	1533.66	54.7258	-190.139	1526.12	121.244	-212.488	1436.93	138.838	-147.593	1155.24	128.726	-339.175	1348.73	136.147	-410.596	1158.02	55.7045	-129.687	1226.36	305.972	-286.385	1375.33	383.698	-281.396	1131.23	387.4	-274.084	1055.69	385.211	-359.966	900.693	334.338	-364.076	821.898	406.651	-353.926	813.753	364.903	-386.887	748.106
729	0	167.107	-356.412	1588.87	48.9585	-363.042	1581.82	161.508	-191.389	1535.23	53.9683	-200.872	1527.32	120.388	-223.06	1438.3	137.557	-157.865	1156.66	128.753	-349.614	1349.95	136.885	-420.693	1159.12	54.3447	-140.419	1227.77	305.695	-295.636	1376.78	383.789	-288.959	1132.71	387.586	-281.549	1057.35	387.018	-366.463	901.952	336.714	-370.495	822.751	408.964	-359.688	815.177	368.012	-392.555	748.933
730	0	166.297	-367.185	1590.11	48.1699	-373.823	1582.7	160.805	-202.058	1536.78	53.3022	-211.552	1528.54	119.581	-233.555	1439.64	136.299	-168.003	1158.03	128.829	-359.965	1351.14	137.647	-430.682	1160.22	52.9826	-151.074	1229.16	305.457	-304.761	1378.17	383.923	-296.204	1134.14	387.815	-288.852	1058.97	388.935	-372.941	903.268	339.184	-377.119	823.729	411.295	-365.457	816.634	371.265	-398.533	749.979
731	0	165.607	-377.912	1591.28	47.5016	-384.566	1583.55	160.191	-212.674	1538.29	52.7224	-222.181	1529.75	118.821	-243.979	1440.93	135.071	-178.02	1159.36	128.945	-370.237	1352.28	138.415	-440.58	1161.3	51.626	-161.663	1230.52	305.251	-313.782	1379.51	384.089	-303.166	1135.55	388.079	-296.008	1060.54	390.943	-379.403	904.625	341.729	-383.945	824.815	413.624	-371.236	818.107	374.63	-404.805	751.217
732	0	165.032	-388.596	1592.35	46.9501	-395.271	1584.37	159.663	-223.237	1539.75	52.2242	-232.762	1530.96	118.107	-254.338	1442.17	133.881	-187.933	1160.62	129.092	-380.44	1353.38	139.175	-450.403	1162.36	50.2838	-172.195	1231.84	305.07	-322.722	1380.78	384.279	-309.889	1136.92	388.374	-303.035	1062.07	393.024	-385.858	906.007	344.327	-390.966	825.99	415.932	-377.031	819.579	378.076	-411.352	752.617
733	0	164.569	-399.236	1593.33	46.511	-405.942	1585.13	159.215	-233.751	1541.14	51.8026	-243.3	1532.15	117.439	-264.639	1443.33	132.736	-197.755	1161.82	129.261	-390.583	1354.42	139.912	-460.168	1163.4	48.9664	-182.679	1233.11	304.908	-331.606	1381.98	384.487	-316.423	1138.27	388.694	-309.954	1063.54	395.156	-392.312	907.397	346.96	-398.17	827.232	418.2	-382.85	821.033	381.568	-418.148	754.145
734	0	164.212	-409.835	1594.21	46.1789	-416.579	1585.85	158.843	-244.22	1542.44	51.4532	-253.797	1533.29	116.816	-274.891	1444.42	131.645	-207.503	1162.93	129.447	-400.677	1355.39	140.617	-469.89	1164.41	47.6848	-193.123	1234.3	304.762	-340.456	1383.1	384.705	-322.822	1139.57	389.036	-316.789	1064.95	397.319	-398.777	908.775	349.606	-405.547	828.519	420.411	-388.701	822.451	385.071	-425.168	755.763
735	0	163.955	-420.393	1594.98	45.9478	-427.184	1586.49	158.544	-254.647	1543.66	51.172	-264.258	1534.38	116.24	-285.102	1445.41	130.614	-217.19	1163.95	129.644	-410.733	1356.29	141.281	-479.587	1165.37	46.4508	-203.533	1235.42	304.628	-349.297	1384.14	384.931	-329.141	1140.83	389.396	-323.564	1066.28	399.493	-405.262	910.121	352.244	-413.081	829.825	422.549	-394.598	823.813	388.554	-432.381	757.434
736	0	163.794	-430.913	1595.63	45.8112	-437.759	1587.06	158.313	-265.037	1544.76	50.9558	-274.686	1535.4	115.712	-295.281	1446.31	129.65	-226.831	1164.87	129.847	-420.761	1357.1	141.898	-489.272	1166.28	45.2763	-213.915	1236.44	304.505	-358.152	1385.07	385.162	-335.435	1142.04	389.772	-330.307	1067.54	401.657	-411.779	911.414	354.855	-420.759	831.124	424.601	-400.551	825.1	391.982	-439.758	759.115
737	0	163.72	-441.398	1596.16	45.7625	-448.307	1587.54	158.148	-275.395	1545.74	50.8018	-285.087	1536.33	115.235	-305.439	1447.08	128.762	-236.439	1165.68	130.054	-430.772	1357.81	142.466	-498.961	1167.1	44.1735	-224.274	1237.35	304.393	-367.043	1385.9	385.396	-341.759	1143.18	390.163	-337.046	1068.7	403.793	-418.339	912.632	357.418	-428.563	832.388	426.554	-406.575	826.293	395.326	-447.272	760.766
738	0	163.728	-451.853	1596.55	45.7955	-458.829	1587.93	158.047	-285.728	1546.58	50.7082	-295.464	1537.15	114.812	-315.584	1447.73	127.954	-246.024	1166.37	130.264	-440.777	1358.41	142.983	-508.664	1167.83	43.1543	-234.613	1238.14	304.295	-375.991	1386.61	385.635	-348.165	1144.24	390.567	-343.807	1069.76	405.883	-424.957	913.753	359.916	-436.478	833.587	428.398	-412.68	827.37	398.557	-454.895	762.346
739	0	163.812	-462.28	1596.8	45.9041	-469.328	1588.2	158.008	-296.04	1547.27	50.6738	-305.824	1537.85	114.447	-325.726	1448.24	127.235	-255.598	1166.93	130.475	-450.785	1358.88	143.449	-518.392	1168.44	42.23	-244.934	1238.79	304.212	-385.016	1387.18	385.878	-354.698	1145.21	390.982	-350.619	1070.69	407.91	-431.643	914.752	362.332	-444.487	834.693	430.127	-418.881	828.313	401.649	-462.602	763.815
740	0	163.967	-472.684	1596.91	46.0827	-479.808	1588.36	158.03	-306.339	1547.79	50.6983	-316.171	1538.4	114.144	-335.876	1448.61	126.61	-265.172	1167.35	130.691	-460.807	1359.2	143.869	-528.156	1168.9	41.4116	-255.239	1239.3	304.149	-394.136	1387.6	386.129	-361.4	1146.05	391.407	-357.511	1071.5	409.86	-438.411	915.607	364.648	-452.576	835.677	431.734	-425.188	829.102	404.581	-470.371	765.135
741	0	164.189	-483.071	1596.86	46.3264	-490.271	1588.39	158.112	-316.632	1548.13	50.782	-326.512	1538.79	113.909	-346.042	1448.81	126.087	-274.755	1167.62	130.912	-470.851	1359.37	144.246	-537.961	1169.21	40.7092	-265.53	1239.65	304.111	-403.368	1387.87	386.39	-368.307	1146.77	391.842	-364.507	1072.15	411.722	-445.272	916.298	366.852	-460.73	836.51	433.217	-431.612	829.718	407.335	-478.185	766.271
742	0	164.473	-493.447	1596.66	46.6314	-500.722	1588.27	158.256	-326.926	1548.29	50.9259	-336.852	1539.01	113.746	-356.233	1448.85	125.672	-284.356	1167.75	131.142	-480.925	1359.38	144.585	-547.815	1169.34	40.1318	-275.809	1239.83	304.104	-412.726	1387.97	386.663	-375.448	1147.33	392.285	-371.633	1072.64	413.484	-452.24	916.803	368.93	-468.934	837.165	434.576	-438.162	830.144	409.894	-486.029	767.191
743	0	164.817	-503.817	1596.3	46.9944	-511.166	1588.02	158.463	-337.227	1548.24	51.1316	-347.197	1539.04	113.662	-366.458	1448.73	125.372	-293.984	1167.71	131.385	-491.038	1359.21	144.891	-557.723	1169.28	39.6876	-286.078	1239.85	304.136	-422.223	1387.89	386.952	-382.847	1147.73	392.736	-378.912	1072.96	415.14	-459.325	917.104	370.873	-477.178	837.617	435.811	-444.847	830.365	412.249	-493.889	767.868
744	0	165.219	-514.189	1595.78	47.4133	-521.606	1587.61	158.734	-347.543	1548	51.4014	-357.554	1538.87	113.663	-376.725	1448.42	125.193	-303.647	1167.51	131.648	-501.197	1358.86	145.173	-567.691	1169	39.3836	-296.339	1239.69	304.213	-431.869	1387.62	387.259	-390.52	1147.94	393.194	-386.367	1073.09	416.682	-466.539	917.185	372.672	-485.453	837.844	436.925	-451.673	830.367	414.391	-501.76	768.277
745	0	165.678	-524.569	1595.1	47.887	-532.049	1587.04	159.073	-357.881	1547.55	51.7382	-367.929	1538.51	113.755	-387.04	1447.95	125.142	-313.354	1167.14	131.936	-511.407	1358.33	145.436	-577.721	1168.52	39.2258	-306.596	1239.35	304.345	-441.672	1387.16	387.587	-398.481	1147.95	393.659	-394.016	1073.02	418.106	-473.892	917.032	374.322	-493.75	837.828	437.925	-458.647	830.141	416.317	-509.635	768.399
746	0	166.194	-534.964	1594.26	48.4151	-542.5	1586.32	159.483	-368.249	1546.89	52.1453	-378.327	1537.95	113.944	-397.411	1447.29	125.224	-323.116	1166.6	132.256	-521.676	1357.6	145.688	-587.818	1167.81	39.2189	-316.853	1238.83	304.539	-451.639	1386.51	387.939	-406.735	1147.75	394.13	-401.877	1072.74	419.412	-481.394	916.634	375.817	-502.065	837.553	438.815	-465.773	829.679	418.027	-517.513	768.221
747	0	166.769	-545.383	1593.27	48.9986	-552.964	1585.45	159.967	-378.652	1546.04	52.6266	-388.755	1537.18	114.236	-407.842	1446.47	125.444	-332.941	1165.9	132.614	-532.008	1356.69	145.936	-597.986	1166.88	39.3663	-327.116	1238.14	304.805	-461.772	1385.66	388.318	-415.288	1147.34	394.607	-409.966	1072.26	420.599	-489.054	915.986	377.158	-510.397	837.008	439.604	-473.057	828.976	419.522	-525.394	767.733
748	0	167.403	-555.832	1592.13	49.639	-563.449	1584.42	160.53	-389.099	1545	53.1861	-399.218	1536.22	114.637	-418.338	1445.48	125.805	-342.841	1165.03	133.021	-542.408	1355.61	146.187	-608.229	1165.74	39.6703	-337.39	1237.28	305.15	-472.075	1384.62	388.727	-424.138	1146.69	395.091	-418.296	1071.56	421.669	-496.883	915.085	378.345	-518.745	836.187	440.299	-480.502	828.03	420.809	-533.281	766.931
749	0	168.099	-566.318	1590.86	50.3388	-573.96	1583.25	161.175	-399.594	1543.77	53.8284	-409.723	1535.08	115.152	-428.903	1444.33	126.309	-352.825	1164.01	133.482	-552.881	1354.34	146.451	-618.551	1164.38	40.1316	-347.684	1236.25	305.582	-482.544	1383.4	389.169	-433.284	1145.82	395.581	-426.877	1070.66	422.625	-504.887	913.93	379.38	-527.113	835.088	440.91	-488.113	826.846	421.894	-541.179	765.815
750	0	168.861	-576.849	1589.46	51.1009	-584.502	1581.95	161.909	-410.144	1542.39	54.558	-420.274	1533.76	115.787	-439.54	1443.04	126.956	-362.904	1162.83	134.007	-563.429	1352.92	146.733	-628.958	1162.84	40.7495	-358.004	1235.07	306.11	-493.179	1382	389.648	-442.721	1144.72	396.079	-435.719	1069.54	423.471	-513.076	912.528	380.27	-535.507	833.716	441.444	-495.893	825.428	422.786	-549.096	764.392
751	0	169.693	-587.431	1587.96	51.9292	-595.082	1580.52	162.735	-420.754	1540.85	55.3796	-430.876	1532.28	116.546	-450.252	1441.62	127.743	-373.09	1161.5	134.604	-574.056	1351.36	147.043	-639.453	1161.11	41.5214	-368.36	1233.75	306.74	-503.973	1380.43	390.167	-452.444	1143.4	396.585	-444.828	1068.22	424.216	-521.456	910.888	381.02	-543.935	832.079	441.914	-503.848	823.789	423.498	-557.04	762.674
752	0	170.598	-598.07	1586.36	52.8276	-605.704	1578.99	163.659	-431.429	1539.18	56.2979	-441.533	1530.66	117.43	-461.04	1440.08	128.666	-383.392	1160.05	135.281	-584.765	1349.67	147.389	-650.042	1159.23	42.4433	-378.762	1232.31	307.479	-514.921	1378.72	390.73	-462.446	1141.87	397.101	-454.21	1066.71	424.864	-530.035	909.025	381.64	-552.408	830.192	442.327	-511.984	821.941	424.039	-565.023	760.676
753	0	171.582	-608.771	1584.69	53.8006	-616.374	1577.38	164.684	-442.173	1537.41	57.3172	-452.248	1528.93	118.443	-471.904	1438.45	129.718	-393.821	1158.49	136.045	-595.558	1347.89	147.779	-660.73	1157.23	43.509	-389.22	1230.77	308.331	-526.013	1376.88	391.341	-472.721	1140.15	397.628	-463.867	1065.03	425.426	-538.82	906.955	382.139	-560.938	828.073	442.694	-520.307	819.903	424.425	-573.056	758.419
754	0	172.647	-619.538	1582.97	54.8526	-627.096	1575.7	165.817	-452.989	1535.56	58.4417	-463.025	1527.1	119.586	-482.847	1436.75	130.891	-404.386	1156.83	136.904	-606.437	1346.02	148.223	-671.521	1155.13	44.7106	-399.745	1229.14	309.3	-537.24	1374.92	392.003	-483.26	1138.24	398.169	-473.798	1063.19	425.909	-547.819	904.702	382.528	-569.54	825.746	443.026	-528.825	817.698	424.668	-581.155	755.93
755	0	173.8	-630.376	1581.23	55.9883	-637.872	1573.98	167.059	-463.881	1533.66	59.6748	-473.865	1525.22	120.857	-493.866	1435	132.174	-415.095	1155.1	137.863	-617.403	1344.11	148.73	-682.421	1152.96	46.0384	-410.346	1227.45	310.388	-548.589	1372.88	392.72	-494.056	1136.19	398.725	-484.004	1061.21	426.323	-557.036	902.291	382.819	-578.23	823.24	443.331	-537.548	815.351	424.782	-589.335	753.238
756	0	175.043	-641.286	1579.49	57.2118	-648.707	1572.25	168.414	-474.848	1531.74	61.0197	-484.771	1523.3	122.254	-504.961	1433.23	133.555	-425.954	1153.33	138.929	-628.457	1342.17	149.309	-693.433	1150.76	47.4807	-421.035	1225.74	311.597	-560.05	1370.78	393.493	-505.099	1134	399.298	-494.479	1059.12	426.678	-566.48	899.751	383.024	-587.023	820.586	443.619	-546.485	812.891	424.783	-597.615	750.378
757	0	176.381	-652.271	1577.77	58.527	-659.602	1570.54	169.884	-485.894	1529.82	62.4784	-495.743	1521.38	123.774	-516.131	1431.46	135.018	-436.969	1151.53	140.103	-639.599	1340.25	149.969	-704.561	1148.58	49.0244	-431.82	1224.02	312.925	-571.608	1368.65	394.325	-516.379	1131.71	399.891	-505.219	1056.94	426.983	-576.155	897.116	383.155	-595.938	817.819	443.9	-555.648	810.349	424.684	-606.014	747.388
758	0	177.817	-663.33	1576.1	59.9373	-670.558	1568.87	171.471	-497.016	1527.93	64.0519	-506.782	1519.49	125.413	-527.372	1429.72	136.55	-448.141	1149.75	141.389	-650.827	1338.37	150.718	-715.807	1146.43	50.655	-442.709	1222.34	314.37	-583.25	1366.51	395.216	-527.886	1129.36	400.506	-516.216	1054.7	427.25	-586.068	894.421	383.227	-604.994	814.978	444.181	-565.048	807.758	424.503	-614.554	744.307
759	0	179.351	-674.463	1574.51	61.4452	-681.575	1567.27	173.173	-508.215	1526.11	65.7403	-517.886	1517.67	127.162	-538.683	1428.05	138.134	-459.471	1147.99	142.786	-662.141	1336.57	151.564	-727.174	1144.37	52.3571	-453.711	1220.71	315.927	-594.961	1364.4	396.166	-539.606	1126.97	401.143	-527.459	1052.44	427.487	-596.222	891.701	383.252	-614.208	812.102	444.471	-574.698	805.156	424.253	-623.258	741.179
760	0	180.987	-685.668	1573.02	63.0524	-692.654	1565.78	174.99	-519.488	1524.38	67.5421	-529.054	1515.93	129.015	-550.058	1426.46	139.755	-470.956	1146.3	144.293	-673.536	1334.87	152.512	-738.661	1142.43	54.1144	-464.829	1219.16	317.591	-606.727	1362.34	397.171	-551.526	1124.57	401.805	-538.937	1050.18	427.704	-606.624	888.994	383.242	-623.601	809.232	444.777	-584.61	802.578	423.951	-632.15	738.049
761	0	182.723	-696.942	1571.66	64.7595	-703.793	1564.42	176.917	-530.832	1522.77	69.4543	-540.284	1514.32	130.962	-561.494	1424.98	141.397	-482.59	1144.71	145.906	-685.01	1333.3	153.564	-750.267	1140.65	55.9107	-476.066	1217.74	319.352	-618.536	1360.37	398.23	-563.63	1122.22	402.492	-550.636	1047.95	427.912	-617.276	886.34	383.212	-633.191	806.41	445.105	-594.795	800.06	423.612	-641.255	734.961
762	0	184.559	-708.281	1570.44	66.5656	-714.989	1563.22	178.951	-542.242	1521.3	71.4724	-551.572	1512.87	132.992	-572.985	1423.64	143.046	-494.362	1143.24	147.618	-696.556	1331.89	154.723	-761.989	1139.05	57.7301	-487.421	1216.46	321.202	-630.373	1358.51	399.338	-575.9	1119.93	403.206	-562.543	1045.79	428.118	-628.18	883.777	383.173	-642.999	803.678	445.461	-605.265	797.639	423.254	-650.6	731.962
763	0	186.491	-719.681	1569.39	68.4688	-726.24	1562.19	181.084	-553.713	1519.99	73.5901	-562.915	1511.59	135.093	-584.525	1422.46	144.687	-506.262	1141.92	149.422	-708.167	1330.67	155.985	-773.822	1137.67	59.5572	-498.891	1215.36	323.128	-642.227	1356.79	400.49	-588.319	1117.76	403.945	-574.639	1043.73	428.332	-639.338	881.34	383.137	-653.043	801.075	445.848	-616.028	795.35	422.89	-660.211	729.095
764	0	188.516	-731.136	1568.52	70.4653	-737.542	1561.37	183.309	-565.24	1518.88	75.7994	-574.307	1510.52	137.253	-596.105	1421.46	146.309	-518.271	1140.77	151.306	-719.836	1329.65	157.343	-785.757	1136.54	61.378	-510.47	1214.45	325.119	-654.087	1355.24	401.679	-600.866	1115.72	404.712	-586.909	1041.8	428.562	-650.75	879.065	383.116	-663.343	798.641	446.27	-627.092	793.225	422.538	-670.114	726.404
765	0	190.628	-742.638	1567.85	72.5501	-748.891	1560.77	185.615	-576.814	1517.96	78.0906	-585.743	1509.67	139.457	-607.719	1420.66	147.903	-530.371	1139.82	153.257	-731.552	1328.86	158.787	-797.783	1135.67	63.18	-522.148	1213.75	327.158	-665.943	1353.87	402.898	-613.519	1113.85	405.504	-599.334	1040.02	428.814	-662.414	876.984	383.119	-673.916	796.41	446.729	-638.462	791.293	422.213	-680.335	723.927
766	0	192.82	-754.181	1567.38	74.7165	-760.28	1560.41	187.992	-588.427	1517.25	80.4524	-597.215	1509.06	141.693	-619.357	1420.07	149.46	-542.54	1139.09	155.26	-743.306	1328.3	160.302	-809.886	1135.07	64.9526	-533.912	1213.28	329.232	-677.786	1352.71	404.139	-626.258	1112.18	406.321	-611.897	1038.42	429.095	-674.327	875.126	383.158	-684.779	794.414	447.224	-650.14	789.58	421.929	-690.899	721.701
767	0	195.083	-765.757	1567.12	76.9561	-771.706	1560.28	190.427	-600.072	1516.77	82.8719	-608.718	1508.71	143.944	-631.01	1419.7	150.975	-554.754	1138.58	157.298	-755.085	1327.99	161.869	-822.048	1134.77	66.6872	-545.747	1213.05	331.322	-689.609	1351.76	405.396	-639.06	1110.73	407.162	-624.579	1037.01	429.412	-686.484	873.515	383.239	-695.949	792.683	447.754	-662.128	788.108	421.7	-701.826	719.758
768	0	197.406	-777.357	1567.07	79.259	-783.16	1560.41	192.905	-611.738	1516.52	85.3349	-620.243	1508.62	146.198	-642.669	1419.56	152.444	-566.988	1138.3	159.353	-766.876	1327.92	163.466	-834.248	1134.75	68.3777	-557.635	1213.06	333.414	-701.405	1351.05	406.659	-651.906	1109.52	408.027	-637.363	1035.83	429.768	-698.878	872.172	383.37	-707.441	791.238	448.319	-674.422	786.892	421.539	-713.138	718.123
769	0	199.778	-788.972	1567.23	81.6138	-794.638	1560.78	195.411	-623.416	1516.49	87.8261	-631.783	1508.79	148.439	-654.322	1419.64	153.867	-579.215	1138.27	161.407	-778.667	1328.1	165.068	-846.463	1135.02	70.0204	-569.556	1213.32	335.49	-713.171	1350.56	407.923	-664.776	1108.57	408.913	-650.232	1034.87	430.167	-711.503	871.111	383.555	-719.266	790.099	448.914	-687.018	785.946	421.456	-724.852	716.817
770	0	202.186	-800.594	1567.58	84.0079	-806.13	1561.39	197.93	-635.096	1516.7	90.3295	-643.328	1509.23	150.654	-665.96	1419.95	155.244	-591.411	1138.49	163.439	-790.443	1328.51	166.648	-858.668	1135.57	71.6138	-581.489	1213.81	337.533	-724.902	1350.32	409.18	-677.652	1107.87	409.819	-663.169	1034.15	430.612	-724.35	870.344	383.8	-731.435	789.279	449.535	-699.91	785.275	421.459	-736.982	715.854
771	0	204.616	-812.215	1568.13	86.4271	-817.63	1562.23	200.446	-646.768	1517.12	92.8286	-654.87	1509.92	152.83	-677.572	1420.48	156.58	-603.551	1138.94	165.431	-802.191	1329.16	168.18	-870.838	1136.37	73.1591	-593.41	1214.53	339.528	-736.597	1350.31	410.424	-690.518	1107.43	410.746	-676.162	1033.67	431.103	-737.41	869.876	384.104	-743.956	788.785	450.179	-713.089	784.881	421.555	-749.537	715.244
772	0	207.053	-823.825	1568.85	88.8566	-829.131	1563.29	202.941	-658.421	1517.76	95.3065	-666.4	1510.86	154.956	-689.149	1421.22	157.878	-615.613	1139.61	167.364	-813.898	1330.01	169.638	-882.946	1137.4	74.6595	-605.296	1215.47	341.461	-748.253	1350.52	411.652	-703.363	1107.25	411.692	-689.196	1033.42	431.641	-750.673	869.707	384.469	-756.833	788.619	450.84	-726.545	784.76	421.747	-762.523	714.989
773	0	209.482	-835.416	1569.74	91.2807	-840.625	1564.54	205.399	-670.048	1518.59	97.7468	-677.911	1512.02	157.02	-700.682	1422.16	159.146	-627.576	1140.51	169.22	-825.552	1331.06	170.996	-894.967	1138.64	76.1202	-617.124	1216.6	343.32	-759.872	1350.95	412.858	-716.176	1107.32	412.656	-702.26	1033.41	432.225	-764.127	869.832	384.89	-770.066	788.78	451.512	-740.266	784.906	422.035	-775.942	715.085
774	0	211.885	-846.981	1570.76	93.683	-852.104	1565.98	207.805	-681.639	1519.6	100.133	-689.393	1513.41	159.014	-712.162	1423.27	160.392	-639.422	1141.6	170.984	-837.14	1332.29	172.234	-906.879	1140.06	77.5479	-628.87	1217.92	345.093	-771.453	1351.58	414.042	-728.949	1107.63	413.639	-715.345	1033.63	432.851	-777.763	870.243	385.365	-783.65	789.26	452.189	-754.241	785.307	422.415	-789.789	715.525
775	0	214.248	-858.511	1571.91	96.0472	-863.561	1567.57	210.143	-693.186	1520.78	102.451	-700.841	1514.98	160.93	-723.582	1424.55	161.625	-651.138	1142.87	172.643	-848.653	1333.66	173.333	-918.662	1141.63	78.9505	-640.512	1219.39	346.771	-782.999	1352.4	415.201	-741.677	1108.16	414.641	-728.443	1034.06	433.515	-791.569	870.927	385.885	-797.578	790.046	452.865	-768.456	785.949	422.882	-804.058	716.296
776	0	216.553	-870.001	1573.17	98.3567	-874.989	1569.28	212.4	-704.683	1522.1	104.686	-712.247	1516.71	162.762	-734.935	1425.97	162.854	-662.713	1144.29	174.185	-860.082	1335.16	174.28	-930.3	1143.31	80.3368	-652.032	1220.99	348.348	-794.512	1353.38	416.336	-754.358	1108.89	415.662	-741.548	1034.69	434.211	-805.535	871.869	386.445	-811.835	791.125	453.535	-782.899	786.816	423.424	-818.734	717.383
777	0	218.785	-881.446	1574.51	100.596	-886.381	1571.1	214.562	-716.123	1523.54	106.825	-723.604	1518.59	164.506	-746.218	1427.5	164.088	-674.14	1145.85	175.603	-871.421	1336.76	175.068	-941.78	1145.07	81.7155	-663.412	1222.69	349.82	-805.993	1354.52	417.447	-766.992	1109.81	416.703	-754.656	1035.5	434.935	-819.65	873.051	387.033	-826.406	792.476	454.191	-797.558	787.89	424.031	-833.801	718.766
778	0	220.93	-892.839	1575.91	102.749	-897.732	1573	216.62	-727.503	1525.09	108.857	-734.91	1520.58	166.16	-757.427	1429.14	165.336	-685.414	1147.52	176.892	-882.665	1338.43	175.693	-953.095	1146.89	83.0953	-674.638	1224.48	351.183	-817.448	1355.78	418.536	-779.58	1110.88	417.764	-767.764	1036.47	435.677	-833.902	874.453	387.639	-841.268	794.081	454.829	-812.418	789.152	424.686	-849.238	720.424
779	0	222.972	-904.179	1577.36	104.801	-909.037	1574.95	218.563	-738.819	1526.71	110.773	-746.158	1522.64	167.724	-768.559	1430.85	166.606	-696.536	1149.27	178.051	-893.811	1340.15	176.16	-964.24	1148.73	84.484	-685.702	1226.34	352.439	-828.878	1357.15	419.605	-792.126	1112.09	418.846	-780.871	1037.59	436.43	-848.283	876.055	388.254	-856.396	795.917	455.441	-827.469	790.582	425.375	-865.018	722.337
780	0	224.901	-915.461	1578.84	106.741	-920.29	1576.92	220.384	-750.068	1528.39	112.566	-757.346	1524.76	169.196	-779.615	1432.61	167.904	-707.508	1151.08	179.079	-904.858	1341.9	176.476	-975.214	1150.57	85.8885	-696.598	1228.22	353.589	-840.287	1358.61	420.657	-804.635	1113.42	419.949	-793.977	1038.83	437.185	-862.782	877.833	388.864	-871.763	797.96	456.024	-842.696	792.164	426.078	-881.115	724.48
781	0	226.704	-926.685	1580.32	108.555	-931.488	1578.88	222.078	-761.251	1530.1	114.229	-768.472	1526.9	170.581	-790.594	1434.4	169.234	-718.337	1152.92	179.981	-915.808	1343.65	176.656	-986.023	1152.39	87.314	-707.325	1230.12	354.638	-851.678	1360.13	421.695	-817.112	1114.85	421.073	-807.081	1040.17	437.935	-877.388	879.765	389.46	-887.339	800.187	456.571	-858.089	793.876	426.777	-897.496	726.831
782	0	228.373	-937.849	1581.8	110.235	-942.628	1580.82	223.642	-772.367	1531.83	115.76	-779.536	1529.03	171.881	-801.499	1436.19	170.6	-729.031	1154.77	180.765	-926.662	1345.39	176.718	-996.673	1154.18	88.7641	-717.887	1232.02	355.591	-863.053	1361.71	422.721	-829.565	1116.36	422.218	-820.185	1041.6	438.67	-892.093	881.83	390.031	-903.092	802.571	457.079	-873.636	795.703	427.454	-914.129	729.366
783	0	229.9	-948.954	1583.26	111.773	-953.708	1582.71	225.074	-783.418	1533.55	117.158	-790.536	1531.12	173.1	-812.333	1437.97	172	-739.601	1156.62	181.439	-937.425	1347.08	176.684	-1007.17	1155.9	90.2405	-728.291	1233.88	356.456	-874.414	1363.31	423.74	-842	1117.92	423.384	-833.29	1043.08	439.383	-906.887	884.004	390.567	-918.99	805.09	457.544	-889.324	797.625	428.09	-930.981	732.059
784	0	231.281	-960	1584.68	113.164	-964.726	1584.52	226.374	-794.406	1535.24	118.423	-801.473	1533.15	174.243	-823.099	1439.71	173.434	-750.059	1158.43	182.013	-948.103	1348.72	176.577	-1017.54	1157.55	91.7428	-738.548	1235.7	357.241	-885.761	1364.92	424.754	-854.425	1119.52	424.569	-846.399	1044.61	440.066	-921.761	886.264	391.061	-935.003	807.717	457.963	-905.142	799.626	428.669	-948.015	734.888
785	0	232.512	-970.991	1586.04	114.403	-975.683	1586.24	227.545	-805.334	1536.89	119.557	-812.349	1535.1	175.316	-833.802	1441.4	174.898	-760.418	1160.18	182.499	-958.702	1350.28	176.424	-1027.77	1159.11	93.2686	-748.672	1237.45	357.954	-897.096	1366.53	425.765	-866.846	1121.14	425.772	-859.511	1046.16	440.713	-936.704	888.59	391.506	-951.099	810.429	458.333	-921.078	801.689	429.176	-965.198	737.826
786	0	233.593	-981.928	1587.34	115.49	-986.58	1587.85	228.591	-816.206	1538.47	120.565	-823.165	1536.94	176.325	-844.448	1443.01	176.387	-770.693	1161.86	182.911	-969.229	1351.75	176.249	-1037.9	1160.58	94.8135	-758.677	1239.12	358.606	-908.417	1368.11	426.776	-879.271	1122.77	426.989	-872.629	1047.71	441.319	-951.708	890.957	391.897	-967.25	813.2	458.652	-937.118	803.796	429.597	-982.495	740.851
787	0	234.525	-992.815	1588.56	116.426	-997.417	1589.33	229.515	-827.025	1539.96	121.452	-833.925	1538.64	177.274	-855.043	1444.53	177.894	-780.899	1163.45	183.261	-979.693	1353.11	176.078	-1047.93	1161.94	96.3713	-768.581	1240.69	359.204	-919.724	1369.64	427.788	-891.706	1124.38	428.219	-885.754	1049.25	441.88	-966.764	893.346	392.228	-983.43	816.007	458.919	-953.251	805.931	429.921	-999.874	743.934
788	0	235.31	-1003.65	1589.69	117.214	-1008.2	1590.66	230.324	-837.797	1541.36	122.224	-844.633	1540.2	178.168	-865.593	1445.94	179.41	-791.05	1164.93	183.561	-990.1	1354.35	175.932	-1057.89	1163.18	97.9342	-778.402	1242.14	359.758	-931.014	1371.12	428.802	-904.156	1125.95	429.457	-898.885	1050.74	442.391	-981.86	895.732	392.498	-999.616	818.826	459.132	-969.461	808.076	430.142	-1017.3	747.052
789	0	235.956	-1014.45	1590.71	117.859	-1018.93	1591.83	231.025	-848.526	1542.64	122.889	-855.293	1541.59	179.013	-876.104	1447.23	180.926	-801.159	1166.29	183.822	-1000.46	1355.46	175.831	-1067.77	1164.28	99.4929	-788.157	1243.46	360.275	-942.286	1372.51	429.819	-916.624	1127.47	430.699	-912.025	1052.18	442.852	-996.988	898.096	392.704	-1015.79	821.634	459.293	-985.736	810.212	430.253	-1034.75	750.179
790	0	236.468	-1025.21	1591.63	118.369	-1029.61	1592.83	231.626	-859.219	1543.8	123.455	-865.909	1542.8	179.812	-886.583	1448.39	182.433	-811.24	1167.51	184.056	-1010.78	1356.42	175.789	-1077.61	1165.24	101.037	-797.866	1244.65	360.762	-953.537	1373.81	430.837	-929.116	1128.92	431.941	-925.172	1053.54	443.26	-1012.14	900.416	392.845	-1031.93	824.408	459.401	-1002.06	812.321	430.252	-1052.2	753.287
791	0	236.855	-1035.94	1592.41	118.752	-1040.24	1593.65	232.133	-869.879	1544.81	123.931	-876.488	1543.83	180.568	-897.038	1449.39	183.918	-821.301	1168.58	184.271	-1021.07	1357.23	175.818	-1087.41	1166.05	102.556	-807.544	1245.69	361.226	-964.763	1374.99	431.854	-941.632	1130.28	433.176	-938.325	1054.8	443.616	-1027.3	902.671	392.922	-1048.03	827.126	459.457	-1018.42	814.385	430.14	-1069.62	756.351
792	0	237.126	-1046.63	1593.07	119.018	-1050.84	1594.28	232.555	-880.515	1545.68	124.323	-887.036	1544.65	181.282	-907.474	1450.24	185.372	-831.352	1169.5	184.474	-1031.34	1357.87	175.922	-1097.19	1166.68	104.038	-817.21	1246.56	361.668	-975.962	1376.04	432.869	-954.174	1131.53	434.398	-951.484	1055.96	443.919	-1042.46	904.841	392.937	-1064.07	829.766	459.462	-1034.79	816.385	429.919	-1086.98	759.347
793	0	237.291	-1057.3	1593.58	119.176	-1061.4	1594.73	232.898	-891.13	1546.38	124.642	-897.559	1545.27	181.956	-917.899	1450.93	186.783	-841.4	1170.25	184.669	-1041.58	1358.34	176.103	-1106.96	1167.13	105.471	-826.878	1247.27	362.093	-987.13	1376.95	433.875	-966.741	1132.65	435.6	-964.647	1056.98	444.17	-1057.6	906.906	392.891	-1080.04	832.308	459.418	-1051.17	818.301	429.595	-1104.27	762.25
794	0	237.361	-1067.96	1593.95	119.239	-1071.94	1594.98	233.17	-901.73	1546.92	124.893	-908.063	1545.69	182.59	-928.319	1451.44	188.139	-851.45	1170.84	184.862	-1051.82	1358.63	176.358	-1116.73	1167.4	106.843	-836.561	1247.82	362.502	-998.265	1377.69	434.869	-979.33	1133.62	436.774	-977.812	1057.86	444.37	-1072.73	908.85	392.788	-1095.94	834.731	459.326	-1067.52	820.117	429.175	-1121.47	765.038
795	0	237.347	-1078.6	1594.16	119.216	-1082.47	1595.04	233.378	-912.322	1547.28	125.084	-918.556	1545.9	183.182	-938.74	1451.78	189.43	-861.507	1171.25	185.052	-1062.06	1358.74	176.679	-1126.5	1167.46	108.144	-846.271	1248.19	362.893	-1009.36	1378.26	435.842	-991.938	1134.44	437.911	-990.975	1058.58	444.519	-1087.82	910.656	392.631	-1111.75	837.018	459.19	-1083.85	821.816	428.668	-1138.57	767.691
796	0	237.258	-1089.23	1594.21	119.118	-1092.98	1594.91	233.526	-922.909	1547.47	125.221	-929.044	1545.9	183.731	-949.166	1451.95	190.643	-871.571	1171.5	185.239	-1072.29	1358.67	177.055	-1136.29	1167.32	109.363	-856.019	1248.39	363.265	-1020.42	1378.65	436.787	-1004.56	1135.09	439.003	-1004.13	1059.14	444.619	-1102.86	912.309	392.423	-1127.47	839.151	459.01	-1100.11	823.381	428.085	-1155.54	770.191
797	0	237.104	-1099.86	1594.11	118.956	-1103.48	1594.59	233.62	-933.498	1547.48	125.308	-939.533	1545.71	184.232	-959.605	1451.94	191.77	-881.644	1171.58	185.422	-1082.54	1358.41	177.473	-1146.1	1166.98	110.489	-865.812	1248.42	363.616	-1031.44	1378.84	437.694	-1017.19	1135.56	440.039	-1017.28	1059.52	444.669	-1117.84	913.797	392.168	-1143.08	841.116	458.789	-1116.31	824.801	427.437	-1172.37	772.522
798	0	236.894	-1110.49	1593.84	118.738	-1113.99	1594.09	233.664	-944.094	1547.32	125.349	-950.03	1545.32	184.684	-970.058	1451.76	192.799	-891.727	1171.49	185.597	-1092.79	1357.98	177.917	-1155.94	1166.42	111.514	-875.656	1248.29	363.94	-1042.42	1378.84	438.552	-1029.82	1135.84	441.011	-1030.41	1059.73	444.67	-1132.75	915.11	391.871	-1158.58	842.899	458.53	-1132.41	826.063	426.737	-1189.06	774.672
799	0	236.637	-1121.13	1593.42	118.473	-1124.51	1593.42	233.661	-954.7	1546.98	125.348	-960.541	1544.75	185.08	-980.532	1451.4	193.723	-901.821	1171.25	185.76	-1103.06	1357.37	178.37	-1165.8	1165.67	112.429	-885.557	1248	364.233	-1053.35	1378.64	439.349	-1042.43	1135.93	441.906	-1043.52	1059.75	444.622	-1147.58	916.24	391.533	-1173.96	844.49	458.234	-1148.4	827.16	425.997	-1205.58	776.63
800	0	236.337	-1131.78	1592.84	118.167	-1135.05	1592.59	233.611	-965.321	1546.48	125.304	-971.07	1544.01	185.417	-991.028	1450.89	194.532	-911.927	1170.85	185.903	-1113.35	1356.59	178.816	-1175.7	1164.73	113.227	-895.516	1247.55	364.489	-1064.24	1378.25	440.075	-1055.03	1135.83	442.717	-1056.6	1059.59	444.524	-1162.3	917.182	391.159	-1189.21	845.881	457.904	-1164.25	828.085	425.227	-1221.93	778.391
801	0	236.002	-1142.45	1592.11	117.825	-1145.6	1591.6	233.517	-975.96	1545.81	125.219	-981.623	1543.12	185.686	-1001.55	1450.22	195.221	-922.047	1170.31	186.022	-1123.66	1355.65	179.236	-1185.63	1163.6	113.9	-905.537	1246.97	364.701	-1075.09	1377.67	440.715	-1067.58	1135.53	443.431	-1069.63	1059.26	444.376	-1176.9	917.934	390.752	-1204.32	847.065	457.541	-1179.96	828.833	424.44	-1238.09	779.948
802	0	235.633	-1153.13	1591.23	117.452	-1156.19	1590.47	233.377	-986.62	1545	125.092	-992.204	1542.08	185.884	-1012.1	1449.4	195.782	-932.185	1169.63	186.107	-1134	1354.57	179.616	-1195.59	1162.31	114.444	-915.621	1246.25	364.861	-1085.89	1376.9	441.26	-1080.09	1135.06	444.041	-1082.62	1058.75	444.177	-1191.38	918.494	390.312	-1219.27	848.04	457.147	-1195.49	829.405	423.646	-1254.04	781.3
803	0	235.234	-1163.84	1590.22	117.049	-1166.8	1589.22	233.19	-997.305	1544.05	124.919	-1002.82	1540.91	186.002	-1022.68	1448.45	196.213	-942.344	1168.82	186.152	-1144.37	1353.35	179.94	-1205.59	1160.87	114.852	-925.769	1245.4	364.962	-1096.65	1375.96	441.697	-1092.54	1134.4	444.537	-1095.54	1058.08	443.925	-1205.71	918.866	389.843	-1234.06	848.805	456.723	-1210.84	829.799	422.852	-1269.78	782.446
804	0	234.806	-1174.57	1589.08	116.619	-1177.46	1587.85	232.953	-1008.02	1542.97	124.698	-1013.46	1539.63	186.035	-1033.29	1447.37	196.509	-952.53	1167.89	186.148	-1154.78	1352.01	180.197	-1215.63	1159.3	115.121	-935.983	1244.44	364.996	-1107.37	1374.87	442.016	-1104.9	1133.58	444.911	-1108.39	1057.26	443.619	-1219.89	919.052	389.345	-1248.67	849.361	456.27	-1225.97	830.02	422.067	-1285.28	783.387
805	0	234.348	-1185.33	1587.83	116.159	-1188.15	1586.38	232.662	-1018.75	1541.77	124.425	-1024.15	1538.25	185.974	-1043.93	1446.18	196.667	-962.751	1166.85	186.086	-1165.22	1350.57	180.374	-1225.71	1157.63	115.246	-946.266	1243.37	364.955	-1118.05	1373.63	442.208	-1117.17	1132.6	445.157	-1121.14	1056.3	443.259	-1233.89	919.06	388.819	-1263.09	849.712	455.786	-1240.87	830.071	421.295	-1300.54	784.127
806	0	233.859	-1196.11	1586.47	115.669	-1198.88	1584.83	232.313	-1029.52	1540.47	124.093	-1034.87	1536.8	185.814	-1054.6	1444.89	196.686	-973.014	1165.71	185.957	-1175.7	1349.04	180.465	-1235.83	1155.86	115.227	-956.618	1242.21	364.832	-1128.71	1372.26	442.268	-1129.34	1131.49	445.268	-1133.8	1055.21	442.842	-1247.7	918.895	388.264	-1277.3	849.863	455.272	-1255.53	829.959	420.539	-1315.54	784.67
807	0	233.335	-1206.93	1585.01	115.146	-1209.65	1583.22	231.899	-1040.31	1539.09	123.698	-1045.63	1535.28	185.547	-1065.31	1443.51	196.566	-983.328	1164.47	185.754	-1186.22	1347.43	180.463	-1246.01	1154.03	115.061	-967.043	1240.96	364.618	-1139.33	1370.79	442.188	-1141.38	1130.25	445.242	-1146.34	1054.01	442.369	-1261.31	918.567	387.681	-1291.29	849.821	454.726	-1269.92	829.691	419.802	-1330.25	785.022
808	0	232.773	-1217.77	1583.49	114.585	-1220.47	1581.55	231.416	-1051.14	1537.64	123.232	-1056.43	1533.72	185.169	-1076.05	1442.06	196.307	-993.702	1163.16	185.468	-1196.8	1345.77	180.364	-1256.24	1152.16	114.749	-977.543	1239.63	364.308	-1149.94	1369.23	441.968	-1153.28	1128.9	445.075	-1158.76	1052.71	441.838	-1274.7	918.086	387.068	-1305.05	849.595	454.147	-1284.03	829.274	419.083	-1344.68	785.188
809	0	232.168	-1228.64	1581.9	113.982	-1231.34	1579.86	230.855	-1061.99	1536.14	122.688	-1067.28	1532.13	184.672	-1086.83	1440.55	195.91	-1004.15	1161.77	185.09	-1207.42	1344.07	180.167	-1266.54	1150.26	114.292	-988.122	1238.22	363.894	-1160.53	1367.61	441.604	-1165.04	1127.47	444.768	-1171.04	1051.34	441.248	-1287.85	917.462	386.423	-1318.56	849.196	453.531	-1297.84	828.718	418.379	-1358.79	785.176
810	0	231.514	-1239.54	1580.27	113.331	-1242.25	1578.14	230.21	-1072.87	1534.6	122.059	-1078.17	1530.52	184.053	-1097.64	1438.99	195.379	-1014.67	1160.32	184.615	-1218.1	1342.35	179.87	-1276.92	1148.36	113.692	-998.781	1236.76	363.372	-1171.12	1365.95	441.1	-1176.65	1125.96	444.321	-1183.16	1049.9	440.599	-1300.77	916.708	385.745	-1331.8	848.634	452.876	-1311.33	828.032	417.688	-1372.59	784.992
811	0	230.805	-1250.47	1578.62	112.626	-1253.2	1576.43	229.474	-1083.78	1533.03	121.337	-1089.09	1528.92	183.309	-1108.48	1437.41	194.715	-1025.28	1158.83	184.036	-1228.83	1340.63	179.476	-1287.39	1146.48	112.954	-1009.52	1235.24	362.736	-1181.71	1364.27	440.457	-1188.09	1124.41	443.736	-1195.12	1048.43	439.891	-1313.42	915.835	385.032	-1344.77	847.923	452.178	-1324.48	827.225	417.005	-1386.04	784.646
812	0	230.035	-1261.42	1576.97	111.86	-1264.19	1574.74	228.64	-1094.71	1531.46	120.514	-1100.07	1527.33	182.436	-1119.37	1435.82	193.925	-1035.98	1157.3	183.348	-1239.63	1338.93	178.985	-1297.96	1144.63	112.083	-1020.35	1233.68	361.983	-1192.32	1362.59	439.681	-1199.37	1122.83	443.018	-1206.91	1046.93	439.124	-1325.81	914.857	384.28	-1357.44	847.075	451.435	-1337.29	826.309	416.323	-1399.14	784.146
813	0	229.198	-1272.39	1575.33	111.027	-1275.23	1573.09	227.701	-1105.67	1529.9	119.586	-1111.08	1525.78	181.434	-1130.29	1434.23	193.013	-1046.79	1155.74	182.548	-1250.49	1337.26	178.4	-1308.64	1142.84	111.086	-1031.27	1232.1	361.112	-1202.95	1360.94	438.777	-1210.49	1121.24	442.172	-1218.53	1045.43	438.298	-1337.91	913.788	383.489	-1369.81	846.105	450.642	-1349.74	825.294	415.636	-1411.87	783.5
814	0	228.286	-1283.38	1573.73	110.122	-1286.31	1571.5	226.651	-1116.65	1528.36	118.544	-1122.13	1524.27	180.304	-1141.25	1432.67	191.986	-1057.7	1154.18	181.632	-1261.41	1335.64	177.724	-1319.44	1141.12	109.968	-1042.27	1230.49	360.121	-1213.61	1359.34	437.754	-1221.45	1119.66	441.205	-1229.95	1043.94	437.413	-1349.72	912.641	382.656	-1381.87	845.026	449.797	-1361.82	824.192	414.937	-1424.22	782.72
815	0	227.295	-1294.39	1572.18	109.137	-1297.42	1569.98	225.485	-1127.65	1526.87	117.384	-1133.23	1522.81	179.048	-1152.26	1431.14	190.85	-1068.72	1152.63	180.601	-1272.4	1334.09	176.959	-1330.37	1139.48	108.74	-1053.36	1228.89	359.011	-1224.31	1357.8	436.621	-1232.25	1118.12	440.125	-1241.19	1042.5	436.471	-1361.24	911.431	381.779	-1393.59	843.854	448.896	-1373.52	823.016	414.216	-1436.18	781.816
816	0	226.219	-1305.41	1570.72	108.067	-1308.57	1568.55	224.198	-1138.67	1525.44	116.103	-1144.36	1521.42	177.668	-1163.3	1429.67	189.612	-1079.85	1151.11	179.455	-1283.46	1332.63	176.108	-1341.45	1137.96	107.409	-1064.55	1227.3	357.785	-1235.06	1356.36	435.385	-1242.91	1116.64	438.94	-1252.25	1041.1	435.472	-1372.46	910.173	380.856	-1404.97	842.605	447.937	-1384.82	821.778	413.467	-1447.73	780.798
817	0	225.053	-1316.44	1569.35	106.909	-1319.75	1567.23	222.79	-1149.71	1524.08	114.699	-1155.54	1520.12	176.171	-1174.39	1428.27	188.283	-1091.09	1149.63	178.198	-1294.59	1331.28	175.174	-1352.67	1136.56	105.984	-1075.83	1225.74	356.448	-1245.86	1355.02	434.057	-1253.43	1115.24	437.661	-1263.11	1039.79	434.417	-1383.36	908.884	379.886	-1416.01	841.294	446.92	-1395.72	820.495	412.681	-1458.87	779.679
818	0	223.795	-1327.49	1568.1	105.659	-1330.97	1566.02	221.259	-1160.77	1522.81	113.17	-1166.75	1518.9	174.564	-1185.52	1426.96	186.869	-1102.44	1148.22	176.835	-1305.79	1330.05	174.16	-1364.03	1135.29	104.475	-1087.19	1224.23	355.005	-1256.73	1353.82	432.646	-1263.82	1113.94	436.295	-1273.79	1038.57	433.309	-1393.96	907.58	378.867	-1426.68	839.938	445.843	-1406.23	819.18	411.851	-1469.58	778.471
819	0	222.442	-1338.54	1566.98	104.315	-1342.21	1564.95	219.606	-1171.84	1521.65	111.519	-1178	1517.79	172.855	-1196.68	1425.76	185.38	-1113.89	1146.89	175.373	-1317.05	1328.95	173.07	-1375.55	1134.19	102.893	-1098.65	1222.79	353.464	-1267.67	1352.76	431.162	-1274.12	1112.77	434.853	-1284.28	1037.47	432.148	-1404.25	906.277	377.8	-1436.99	838.554	444.708	-1416.33	817.852	410.971	-1479.85	777.187
820	0	220.993	-1349.59	1566.02	102.876	-1353.48	1564.02	217.834	-1182.92	1520.62	109.748	-1189.28	1516.8	171.055	-1207.89	1424.68	183.826	-1125.44	1145.67	173.82	-1328.37	1328	171.909	-1387.2	1133.26	101.247	-1110.19	1221.43	351.834	-1278.67	1351.87	429.615	-1284.32	1111.75	433.346	-1294.6	1036.5	430.937	-1414.23	904.992	376.684	-1446.94	837.157	443.517	-1426.03	816.527	410.034	-1489.68	775.84
821	0	219.45	-1360.65	1565.22	101.343	-1364.77	1563.25	215.948	-1194.02	1519.71	107.865	-1200.59	1515.92	169.174	-1219.12	1423.73	182.218	-1137.08	1144.56	172.188	-1339.75	1327.22	170.682	-1399	1132.51	99.5482	-1121.81	1220.18	350.128	-1289.73	1351.16	428.013	-1294.45	1110.89	431.781	-1304.75	1035.68	429.678	-1423.9	903.742	375.521	-1456.51	835.765	442.274	-1435.34	815.223	409.035	-1499.07	774.445
822	0	217.813	-1371.71	1564.59	99.7179	-1376.07	1562.63	213.956	-1205.12	1518.96	105.875	-1211.92	1515.18	167.227	-1230.38	1422.93	180.565	-1148.8	1143.59	170.491	-1351.18	1326.61	169.398	-1410.91	1131.97	97.8062	-1133.51	1219.05	348.358	-1300.85	1350.64	426.366	-1304.53	1110.21	430.17	-1314.74	1035.02	428.375	-1433.29	902.545	374.313	-1465.71	834.395	440.984	-1444.27	813.96	407.973	-1508.01	773.015
823	0	216.089	-1382.77	1564.15	98.0058	-1387.39	1562.18	211.867	-1216.22	1518.38	103.789	-1223.27	1514.58	165.225	-1241.67	1422.28	178.879	-1160.57	1142.78	168.741	-1362.64	1326.18	168.067	-1422.92	1131.63	96.0317	-1145.28	1218.05	346.537	-1312.03	1350.31	424.681	-1314.57	1109.73	428.521	-1324.58	1034.54	427.031	-1442.38	901.415	373.062	-1474.54	833.061	439.652	-1452.82	812.755	406.845	-1516.51	771.565
824	0	214.281	-1393.83	1563.91	96.2119	-1398.72	1561.89	209.691	-1227.32	1517.96	101.619	-1234.64	1514.13	163.184	-1252.97	1421.8	177.169	-1172.4	1142.13	166.956	-1374.14	1325.94	166.701	-1435.03	1131.51	94.235	-1157.1	1217.21	344.682	-1323.24	1350.2	422.969	-1324.59	1109.46	426.844	-1334.27	1034.25	425.651	-1451.2	900.368	371.772	-1483.01	831.779	438.288	-1461.01	811.628	405.651	-1524.57	770.109
825	0	212.397	-1404.88	1563.85	94.3435	-1410.05	1561.76	207.443	-1238.42	1517.73	99.3779	-1246.01	1513.83	161.119	-1264.27	1421.5	175.448	-1184.26	1141.66	165.152	-1385.65	1325.89	165.313	-1447.18	1131.61	92.4263	-1168.96	1216.52	342.807	-1334.49	1350.29	421.237	-1334.6	1109.4	425.146	-1343.83	1034.15	424.239	-1459.76	899.42	370.448	-1491.12	830.564	436.899	-1468.87	810.595	404.393	-1532.19	768.66
826	0	210.446	-1415.92	1563.99	92.4094	-1421.38	1561.79	205.137	-1249.51	1517.69	97.0811	-1257.38	1513.69	159.044	-1275.57	1421.37	173.725	-1196.14	1141.37	163.346	-1397.17	1326.03	163.92	-1459.37	1131.93	90.6153	-1180.85	1216.01	340.93	-1345.75	1350.6	419.494	-1344.61	1109.56	423.437	-1353.27	1034.25	422.802	-1468.07	898.582	369.096	-1498.9	829.429	435.496	-1476.4	809.675	403.076	-1539.4	767.233
827	0	208.438	-1426.94	1564.32	90.4199	-1432.7	1561.97	202.789	-1260.58	1517.85	94.7452	-1268.73	1513.7	156.975	-1286.86	1421.41	172.01	-1208.01	1141.27	161.557	-1408.67	1326.36	162.539	-1471.57	1132.46	88.8112	-1192.76	1215.68	339.065	-1357	1351.12	417.749	-1354.63	1109.93	421.726	-1362.59	1034.54	421.346	-1476.16	897.866	367.722	-1506.36	828.386	434.09	-1483.65	808.88	401.704	-1546.21	765.839
828	0	206.384	-1437.96	1564.84	88.3864	-1443.99	1562.29	200.417	-1271.62	1518.19	92.3879	-1280.06	1513.88	154.925	-1298.12	1421.63	170.313	-1219.86	1141.35	159.802	-1420.16	1326.87	161.188	-1483.72	1133.19	87.0225	-1204.66	1215.53	337.23	-1368.23	1351.84	416.011	-1364.66	1110.52	420.021	-1371.8	1035.03	419.878	-1484.04	897.281	366.334	-1513.51	827.446	432.693	-1490.64	808.226	400.286	-1552.63	764.49
829	0	204.296	-1448.95	1565.53	86.3217	-1455.26	1562.74	198.038	-1282.65	1518.74	90.0277	-1291.36	1514.21	152.908	-1309.34	1422.03	168.642	-1231.67	1141.63	158.098	-1431.6	1327.55	159.885	-1495.82	1134.12	85.2568	-1216.55	1215.56	335.439	-1379.41	1352.75	414.291	-1374.69	1111.31	418.33	-1380.91	1035.72	418.408	-1491.72	896.834	364.941	-1520.39	826.617	431.318	-1497.39	807.721	398.83	-1558.71	763.198
830	0	202.189	-1459.91	1566.38	84.2391	-1466.49	1563.31	195.673	-1293.63	1519.47	87.6834	-1302.62	1514.69	150.938	-1320.52	1422.59	167.003	-1243.42	1142.09	156.462	-1442.98	1328.39	158.651	-1507.83	1135.21	83.5205	-1228.39	1215.77	333.707	-1390.53	1353.84	412.598	-1384.72	1112.28	416.663	-1389.93	1036.58	416.945	-1499.24	896.529	363.554	-1527	825.906	429.977	-1503.95	807.374	397.346	-1564.46	761.973
831	0	200.076	-1470.85	1567.38	82.1528	-1477.68	1563.98	193.338	-1304.58	1520.38	85.3742	-1313.82	1515.32	149.024	-1331.64	1423.3	165.402	-1255.1	1142.71	154.907	-1454.3	1329.38	157.501	-1519.71	1136.45	81.8188	-1240.18	1216.15	332.045	-1401.56	1355.09	410.942	-1394.74	1113.43	415.027	-1398.86	1037.61	415.498	-1506.61	896.369	362.181	-1533.4	825.319	428.683	-1510.34	807.189	395.849	-1569.92	760.824
832	0	197.972	-1481.76	1568.51	80.0774	-1488.81	1564.75	191.054	-1315.48	1521.47	83.1185	-1324.96	1516.09	147.178	-1342.69	1424.16	163.843	-1266.69	1143.5	153.447	-1465.53	1330.51	156.454	-1531.44	1137.82	80.1556	-1251.89	1216.69	330.465	-1412.48	1356.49	409.334	-1404.74	1114.72	413.431	-1407.7	1038.79	414.08	-1513.85	896.353	360.836	-1539.59	824.857	427.451	-1516.59	807.167	394.352	-1575.13	759.757
833	0	195.891	-1492.62	1569.76	78.0276	-1499.88	1565.59	188.837	-1326.32	1522.71	80.9341	-1336.02	1516.98	145.406	-1353.66	1425.15	162.325	-1278.18	1144.43	152.092	-1476.67	1331.74	155.523	-1543.01	1139.3	78.5335	-1263.51	1217.38	328.975	-1423.27	1358.02	407.785	-1414.68	1116.15	411.884	-1416.45	1040.1	412.702	-1520.99	896.478	359.53	-1545.63	824.523	426.291	-1522.75	807.306	392.871	-1580.13	758.782
834	0	193.85	-1503.44	1571.1	76.0179	-1510.88	1566.5	186.704	-1337.11	1524.09	78.8377	-1347	1517.98	143.717	-1364.55	1426.26	160.848	-1289.54	1145.5	150.851	-1487.7	1333.08	154.721	-1554.39	1140.85	76.9535	-1275.02	1218.22	327.584	-1433.92	1359.65	406.304	-1424.56	1117.67	410.392	-1425.12	1041.53	411.376	-1528.03	896.738	358.277	-1551.53	824.315	425.214	-1528.83	807.601	391.423	-1584.96	757.904
835	0	191.861	-1514.22	1572.53	74.0627	-1521.8	1567.46	184.67	-1347.84	1525.6	76.8443	-1357.89	1519.09	142.115	-1375.35	1427.47	159.411	-1300.77	1146.67	149.729	-1498.61	1334.49	154.057	-1565.57	1142.45	75.4153	-1286.42	1219.18	326.294	-1444.41	1361.36	404.901	-1434.33	1119.27	408.963	-1433.69	1043.05	410.114	-1535.01	897.128	357.088	-1557.34	824.231	424.232	-1534.87	808.045	390.028	-1589.67	757.13
836	0	189.94	-1524.94	1574.02	72.1754	-1532.63	1568.47	182.749	-1358.5	1527.22	74.967	-1368.68	1520.28	140.603	-1386.05	1428.77	158.01	-1311.87	1147.94	148.731	-1509.4	1335.96	153.537	-1576.55	1144.09	73.9175	-1297.68	1220.25	325.109	-1454.72	1363.12	403.584	-1443.99	1120.92	407.603	-1442.18	1044.64	408.93	-1541.93	897.637	355.978	-1563.08	824.268	423.353	-1540.9	808.627	388.704	-1594.3	756.466
837	0	188.099	-1535.6	1575.56	70.3689	-1543.38	1569.5	180.951	-1369.09	1528.92	73.2169	-1379.38	1521.55	139.183	-1396.65	1430.14	156.64	-1322.81	1149.29	147.857	-1520.06	1337.48	153.164	-1587.32	1145.73	72.4575	-1308.8	1221.42	324.029	-1464.85	1364.92	402.359	-1453.48	1122.61	406.318	-1450.58	1046.29	407.834	-1548.81	898.257	354.961	-1568.79	824.421	422.584	-1546.92	809.336	387.473	-1598.9	755.917
838	0	186.35	-1546.2	1577.13	68.6549	-1554.03	1570.56	179.287	-1379.61	1530.69	71.6026	-1389.97	1522.88	137.854	-1407.15	1431.57	155.295	-1333.61	1150.7	147.106	-1530.6	1339.02	152.936	-1597.89	1147.37	71.0318	-1319.79	1222.67	323.052	-1474.79	1366.74	401.232	-1462.8	1124.3	405.111	-1458.88	1047.96	406.839	-1555.65	898.977	354.047	-1574.5	824.684	421.93	-1552.97	810.158	386.354	-1603.51	755.488
839	0	184.706	-1556.73	1578.71	67.0439	-1564.59	1571.64	177.763	-1390.06	1532.5	70.1303	-1400.46	1524.26	136.615	-1417.55	1433.03	153.972	-1344.24	1152.15	146.473	-1541	1340.57	152.848	-1608.27	1148.99	69.6362	-1330.62	1223.99	322.175	-1484.54	1368.55	400.205	-1471.91	1125.98	403.986	-1467.07	1049.65	405.954	-1562.47	899.784	353.251	-1580.23	825.05	421.395	-1559.04	811.078	385.367	-1608.18	755.186
840	0	183.174	-1567.2	1580.29	65.5451	-1575.05	1572.73	176.382	-1400.43	1534.34	68.8036	-1410.84	1525.67	135.463	-1427.85	1434.53	152.665	-1354.72	1153.63	145.952	-1551.28	1342.12	152.889	-1618.45	1150.57	68.2661	-1341.31	1225.37	321.391	-1494.11	1370.34	399.278	-1480.8	1127.63	402.945	-1475.17	1051.34	405.189	-1569.28	900.666	352.582	-1586.02	825.513	420.98	-1565.15	812.08	384.532	-1612.93	755.013
841	0	181.764	-1577.6	1581.86	64.166	-1585.42	1573.83	175.148	-1410.73	1536.19	67.6236	-1421.13	1527.11	134.395	-1438.05	1436.04	151.37	-1365.05	1155.12	145.537	-1561.43	1343.66	153.049	-1628.46	1152.11	66.9168	-1351.86	1226.79	320.694	-1503.5	1372.09	398.449	-1489.44	1129.25	401.986	-1483.15	1053	404.552	-1576.07	901.612	352.049	-1591.88	826.065	420.684	-1571.31	813.149	383.867	-1617.82	754.973
842	0	180.481	-1587.93	1583.4	62.9128	-1595.69	1574.92	174.058	-1420.95	1538.02	66.5888	-1431.32	1528.55	133.404	-1448.15	1437.55	150.082	-1375.23	1156.62	145.218	-1571.47	1345.16	153.309	-1638.31	1153.6	65.5836	-1362.27	1228.24	320.075	-1512.72	1373.78	397.713	-1497.83	1130.81	401.11	-1491.01	1054.63	404.048	-1582.85	902.609	351.663	-1597.84	826.697	420.506	-1577.5	814.268	383.386	-1622.85	755.068
843	0	179.331	-1598.18	1584.91	61.7899	-1605.88	1576.02	173.112	-1431.1	1539.83	65.6957	-1441.42	1530	132.485	-1458.17	1439.04	148.801	-1385.27	1158.1	144.984	-1581.39	1346.63	153.654	-1648.02	1155.04	64.2625	-1372.56	1229.7	319.525	-1521.78	1375.41	397.064	-1505.96	1132.32	400.312	-1498.77	1056.21	403.682	-1589.62	903.643	351.427	-1603.91	827.401	420.442	-1583.73	815.421	383.103	-1628.07	755.297
844	0	178.317	-1608.37	1586.36	60.7998	-1615.98	1577.1	172.302	-1441.19	1541.59	64.9383	-1451.43	1531.43	131.633	-1468.1	1440.5	147.524	-1395.17	1159.55	144.825	-1591.22	1348.06	154.062	-1657.59	1156.41	62.95	-1382.73	1231.17	319.035	-1530.69	1376.97	396.491	-1513.84	1133.77	399.591	-1506.41	1057.74	403.454	-1596.38	904.704	351.347	-1610.1	828.167	420.486	-1590	816.592	383.028	-1633.49	755.658
845	0	177.438	-1618.49	1587.75	59.9436	-1626	1578.18	171.624	-1451.2	1543.28	64.3091	-1461.37	1532.84	130.841	-1477.96	1441.93	146.251	-1404.95	1160.96	144.729	-1600.95	1349.43	154.515	-1667.06	1157.73	61.6436	-1392.8	1232.62	318.595	-1539.47	1378.44	395.984	-1521.48	1135.14	398.939	-1513.93	1059.2	403.366	-1603.13	905.777	351.424	-1616.43	828.985	420.632	-1596.29	817.766	383.165	-1639.12	756.145
846	0	176.696	-1628.53	1589.07	59.2205	-1635.95	1579.23	171.068	-1461.15	1544.9	63.7989	-1471.24	1534.22	130.102	-1487.75	1443.3	144.984	-1414.63	1162.33	144.685	-1610.6	1350.74	154.991	-1676.42	1158.99	60.342	-1402.79	1234.05	318.196	-1548.14	1379.81	395.531	-1528.89	1136.45	398.353	-1521.35	1060.6	403.413	-1609.87	906.849	351.658	-1622.91	829.842	420.87	-1602.61	818.927	383.518	-1644.98	756.749
847	0	176.087	-1638.52	1590.32	58.6281	-1645.85	1580.25	170.624	-1471.05	1546.43	63.3973	-1481.05	1535.56	129.411	-1497.47	1444.61	143.724	-1424.2	1163.63	144.684	-1620.17	1351.97	155.474	-1685.71	1160.18	59.0453	-1412.71	1235.44	317.83	-1556.7	1381.09	395.121	-1536.1	1137.68	397.825	-1528.67	1061.91	403.592	-1616.6	907.908	352.044	-1629.53	830.727	421.194	-1608.94	820.06	384.084	-1651.05	757.458
848	0	175.607	-1648.44	1591.47	58.1627	-1655.68	1581.25	170.284	-1480.88	1547.86	63.0933	-1490.81	1536.84	128.762	-1507.15	1445.85	142.475	-1433.69	1164.86	144.716	-1629.69	1353.13	155.947	-1694.94	1161.31	57.7552	-1422.57	1236.78	317.49	-1565.2	1382.26	394.741	-1543.14	1138.82	397.349	-1535.9	1063.14	403.894	-1623.32	908.939	352.578	-1636.3	831.625	421.591	-1615.28	821.151	384.856	-1657.35	758.256
849	0	175.251	-1658.31	1592.52	57.8187	-1665.47	1582.2	170.034	-1490.67	1549.17	62.8749	-1500.52	1538.06	128.15	-1516.78	1447	141.242	-1443.1	1166.01	144.772	-1639.16	1354.2	156.397	-1704.12	1162.36	56.4746	-1432.4	1238.04	317.169	-1573.63	1383.32	394.381	-1550.03	1139.88	396.919	-1543.05	1064.28	404.311	-1630.04	909.93	353.25	-1643.22	832.521	422.053	-1621.64	822.185	385.824	-1663.85	759.124
850	0	175.013	-1668.12	1593.47	57.5897	-1675.23	1583.09	169.864	-1500.41	1550.35	62.7306	-1510.21	1539.19	127.571	-1526.37	1448.06	140.029	-1452.45	1167.07	144.844	-1648.6	1355.18	156.814	-1713.26	1163.33	55.208	-1442.21	1239.23	316.863	-1582.02	1384.26	394.032	-1556.82	1140.85	396.527	-1550.12	1065.32	404.831	-1636.75	910.866	354.05	-1650.28	833.4	422.568	-1628	823.148	386.974	-1670.56	760.04
851	0	174.883	-1677.89	1594.3	57.4679	-1684.96	1583.93	169.763	-1510.11	1551.41	62.6486	-1519.88	1540.24	127.023	-1535.94	1449.01	138.843	-1461.75	1168.02	144.928	-1658	1356.05	157.191	-1722.39	1164.21	53.9615	-1452.01	1240.32	316.568	-1590.38	1385.08	393.684	-1563.53	1141.73	396.169	-1557.15	1066.25	405.442	-1643.47	911.732	354.965	-1657.49	834.242	423.125	-1634.37	824.026	388.286	-1677.45	760.981
852	0	174.854	-1687.61	1595.01	57.445	-1694.67	1584.69	169.718	-1519.78	1552.32	62.6177	-1529.53	1541.19	126.504	-1545.49	1449.84	137.69	-1471.01	1168.86	145.019	-1667.38	1356.81	157.525	-1731.51	1164.99	52.7421	-1461.8	1241.29	316.283	-1598.74	1385.77	393.334	-1570.22	1142.5	395.839	-1564.14	1067.08	406.13	-1650.19	912.514	355.978	-1664.82	835.032	423.714	-1640.75	824.807	389.739	-1684.5	761.919
853	0	174.915	-1697.3	1595.59	57.5119	-1704.37	1585.36	169.721	-1529.42	1553.07	62.6276	-1539.17	1542.03	126.012	-1555.03	1450.55	136.578	-1480.24	1169.59	145.113	-1676.76	1357.45	157.817	-1740.63	1165.67	51.558	-1471.6	1242.15	316.008	-1607.11	1386.33	392.979	-1576.91	1143.16	395.532	-1571.12	1067.79	406.88	-1656.93	913.199	357.074	-1672.28	835.75	424.322	-1647.15	825.476	391.308	-1691.7	762.827
854	0	175.058	-1706.96	1596.03	57.6593	-1714.07	1585.93	169.761	-1539.04	1553.68	62.6692	-1548.82	1542.74	125.549	-1564.57	1451.13	135.514	-1489.45	1170.19	145.21	-1686.13	1357.96	158.069	-1749.77	1166.22	50.4181	-1481.4	1242.88	315.742	-1615.51	1386.74	392.616	-1583.63	1143.7	395.245	-1578.1	1068.37	407.677	-1663.69	913.771	358.233	-1679.85	836.376	424.941	-1653.57	826.023	392.968	-1699.02	763.678
855	0	175.273	-1716.6	1596.33	57.8778	-1723.77	1586.4	169.829	-1548.64	1554.11	62.7343	-1558.47	1543.32	125.115	-1574.11	1451.56	134.506	-1498.64	1170.65	145.308	-1695.52	1358.33	158.286	-1758.93	1166.65	49.332	-1491.22	1243.46	315.488	-1623.95	1387.02	392.248	-1590.43	1144.12	394.974	-1585.11	1068.82	408.505	-1670.49	914.217	359.436	-1687.52	836.893	425.56	-1660.03	826.436	394.689	-1706.45	764.444
856	0	175.549	-1726.22	1596.49	58.1583	-1733.48	1586.74	169.92	-1558.23	1554.39	62.8164	-1568.14	1543.75	124.713	-1583.66	1451.85	133.563	-1507.83	1170.98	145.408	-1704.91	1358.56	158.475	-1768.12	1166.93	48.3095	-1501.05	1243.89	315.249	-1632.45	1387.14	391.877	-1597.31	1144.4	394.718	-1592.16	1069.14	409.35	-1677.33	914.524	360.664	-1695.27	837.282	426.171	-1666.53	826.704	396.443	-1713.96	765.098
857	0	175.879	-1735.83	1596.49	58.4921	-1743.21	1586.95	170.027	-1567.81	1554.49	62.9107	-1577.83	1544.03	124.346	-1593.23	1451.98	132.694	-1517.02	1171.15	145.511	-1714.33	1358.63	158.642	-1777.35	1167.07	47.3606	-1510.89	1244.17	315.029	-1641.02	1387.12	391.506	-1604.32	1144.55	394.476	-1599.27	1069.31	410.199	-1684.22	914.681	361.898	-1703.09	837.527	426.764	-1673.07	826.818	398.201	-1721.54	765.614
858	0	176.255	-1745.44	1596.34	58.8714	-1752.95	1587.02	170.146	-1577.4	1554.42	63.0139	-1587.55	1544.15	124.02	-1602.82	1451.95	131.909	-1526.22	1171.18	145.621	-1723.77	1358.55	158.796	-1786.62	1167.05	46.4954	-1520.73	1244.29	314.833	-1649.68	1386.95	391.142	-1611.47	1144.56	394.247	-1606.47	1069.34	411.037	-1691.17	914.676	363.119	-1710.98	837.61	427.334	-1679.69	826.769	399.936	-1729.16	765.97
859	0	176.668	-1755.05	1596.03	59.2893	-1762.72	1586.94	170.276	-1586.99	1554.18	63.1248	-1597.28	1544.1	123.738	-1612.44	1451.77	131.216	-1535.44	1171.06	145.74	-1733.25	1358.31	158.945	-1795.94	1166.86	45.7234	-1530.59	1244.23	314.665	-1658.43	1386.62	390.79	-1618.77	1144.42	394.032	-1613.76	1069.21	411.854	-1698.2	914.499	364.309	-1718.91	837.519	427.876	-1686.37	826.55	401.621	-1736.82	766.142
860	0	177.114	-1764.66	1595.57	59.7399	-1772.51	1586.7	170.416	-1596.59	1553.76	63.2437	-1607.05	1543.88	123.508	-1622.09	1451.41	130.625	-1544.68	1170.78	145.871	-1742.77	1357.91	159.094	-1805.31	1166.51	45.0542	-1540.44	1244.01	314.533	-1667.29	1386.14	390.458	-1626.23	1144.12	393.834	-1621.18	1068.92	412.64	-1705.31	914.144	365.452	-1726.88	837.241	428.384	-1693.13	826.156	403.231	-1744.5	766.114
861	0	177.588	-1774.29	1594.96	60.2185	-1782.33	1586.3	170.567	-1606.21	1553.18	63.373	-1616.85	1543.49	123.335	-1631.78	1450.9	130.144	-1553.97	1170.34	146.02	-1752.33	1357.35	159.25	-1814.74	1165.98	44.4965	-1550.3	1243.62	314.444	-1676.27	1385.5	390.152	-1633.88	1143.67	393.653	-1628.72	1068.47	413.387	-1712.51	913.603	366.536	-1734.88	836.766	428.857	-1699.99	825.583	404.747	-1752.19	765.87
862	0	178.086	-1783.94	1594.19	60.722	-1792.18	1585.74	170.733	-1615.85	1552.44	63.5165	-1626.68	1542.93	123.227	-1641.52	1450.22	129.781	-1563.3	1169.74	146.19	-1761.94	1356.63	159.417	-1824.23	1165.28	44.0586	-1560.16	1243.06	314.403	-1685.37	1384.71	389.88	-1641.71	1143.07	393.493	-1636.42	1067.86	414.089	-1719.82	912.872	367.548	-1742.9	836.086	429.293	-1706.95	824.826	406.15	-1759.89	765.396
863	0	178.608	-1793.61	1593.28	61.2484	-1802.06	1585.02	170.919	-1625.52	1551.54	63.6798	-1636.54	1542.19	123.192	-1651.29	1449.38	129.543	-1572.69	1168.97	146.388	-1771.6	1355.74	159.599	-1833.79	1164.41	43.7478	-1570.02	1242.32	314.42	-1694.6	1383.77	389.651	-1649.72	1142.3	393.358	-1644.27	1067.08	414.743	-1727.25	911.949	368.481	-1750.93	835.196	429.692	-1714.01	823.886	407.427	-1767.58	764.684
864	0	179.152	-1803.3	1592.23	61.7972	-1811.97	1584.14	171.131	-1635.21	1550.49	63.87	-1646.44	1541.29	123.236	-1661.11	1448.38	129.435	-1582.15	1168.05	146.619	-1781.32	1354.71	159.797	-1843.42	1163.38	43.5707	-1579.89	1241.43	314.5	-1703.96	1382.67	389.473	-1657.94	1141.38	393.252	-1652.29	1066.14	415.347	-1734.79	910.834	369.328	-1758.98	834.095	430.056	-1721.19	822.763	408.566	-1775.27	763.728
865	0	179.72	-1813.03	1591.05	62.3694	-1821.91	1583.11	171.377	-1644.95	1549.29	64.0952	-1656.36	1540.23	123.368	-1670.98	1447.25	129.459	-1591.7	1166.98	146.89	-1791.1	1353.54	160.014	-1853.13	1162.2	43.5323	-1589.76	1240.37	314.653	-1713.47	1381.44	389.352	-1666.35	1140.29	393.178	-1660.49	1065.04	415.901	-1742.47	909.529	370.087	-1767.04	832.784	430.387	-1728.49	821.459	409.563	-1782.96	762.527
866	0	180.315	-1822.79	1589.75	62.9671	-1831.88	1581.94	171.666	-1654.72	1547.97	64.3648	-1666.32	1539.01	123.595	-1680.9	1445.97	129.619	-1601.33	1165.75	147.205	-1800.95	1352.23	160.249	-1862.93	1160.86	43.6367	-1599.65	1239.15	314.884	-1723.12	1380.06	389.298	-1674.98	1139.05	393.142	-1668.88	1063.78	416.406	-1750.28	908.037	370.757	-1775.11	831.265	430.69	-1735.92	819.98	410.416	-1790.65	761.082
867	0	180.941	-1832.6	1588.35	63.5937	-1841.87	1580.63	172.008	-1664.53	1546.52	64.689	-1676.32	1537.65	123.924	-1690.87	1444.57	129.914	-1611.06	1164.38	147.574	-1810.87	1350.8	160.502	-1872.82	1159.4	43.8862	-1609.56	1237.8	315.202	-1732.92	1378.55	389.317	-1683.81	1137.66	393.147	-1677.47	1062.38	416.867	-1758.24	906.367	371.341	-1783.2	829.546	430.969	-1743.47	818.331	411.126	-1798.34	759.399
868	0	181.601	-1842.44	1586.87	64.2536	-1851.9	1579.22	172.413	-1674.39	1544.97	65.0785	-1686.34	1536.17	124.363	-1700.9	1443.06	130.342	-1620.91	1162.88	148.001	-1820.87	1349.27	160.774	-1882.81	1157.81	44.2814	-1619.5	1236.32	315.612	-1742.87	1376.93	389.415	-1692.85	1136.12	393.198	-1686.26	1060.83	417.287	-1766.34	904.528	371.844	-1791.33	827.638	431.23	-1751.17	816.522	411.699	-1806.04	757.488
869	0	182.303	-1852.33	1585.31	64.9521	-1861.94	1577.71	172.892	-1684.3	1543.33	65.5443	-1696.4	1534.57	124.916	-1710.99	1441.45	130.898	-1630.88	1161.26	148.495	-1830.94	1347.65	161.064	-1892.9	1156.12	44.8213	-1629.47	1234.73	316.12	-1752.96	1375.19	389.598	-1702.12	1134.45	393.299	-1695.25	1059.15	417.673	-1774.61	902.532	372.272	-1799.49	825.554	431.478	-1759.01	814.565	412.146	-1813.77	755.364
870	0	183.053	-1862.27	1583.71	65.6954	-1872.02	1576.13	173.458	-1694.27	1541.62	66.0974	-1706.49	1532.88	125.589	-1721.14	1439.77	131.578	-1640.97	1159.54	149.061	-1841.09	1345.97	161.374	-1903.12	1154.35	45.5029	-1639.5	1233.05	316.731	-1763.2	1373.35	389.869	-1711.61	1132.64	393.452	-1704.46	1057.35	418.03	-1783.03	900.394	372.635	-1807.69	823.31	431.72	-1766.99	812.475	412.477	-1821.53	753.043
871	0	183.857	-1872.27	1582.08	66.4902	-1882.12	1574.5	174.119	-1704.29	1539.85	66.7485	-1716.61	1531.11	126.385	-1731.36	1438.04	132.374	-1651.19	1157.74	149.706	-1851.33	1344.23	161.706	-1913.45	1152.51	46.3214	-1649.58	1231.29	317.45	-1773.58	1371.44	390.23	-1721.33	1130.72	393.661	-1713.89	1055.44	418.364	-1791.63	898.133	372.941	-1815.96	820.926	431.963	-1775.13	810.27	412.707	-1829.34	750.547
872	0	184.723	-1882.31	1580.45	67.3433	-1892.24	1572.85	174.888	-1714.37	1538.04	67.5078	-1726.77	1529.3	127.307	-1741.65	1436.28	133.276	-1661.56	1155.87	150.435	-1861.66	1342.48	162.063	-1923.91	1150.64	47.2703	-1659.73	1229.49	318.279	-1784.1	1369.46	390.683	-1731.27	1128.7	393.926	-1723.53	1053.46	418.684	-1800.39	895.768	373.203	-1824.3	818.425	432.214	-1783.42	807.969	412.851	-1837.21	747.903
873	0	185.658	-1892.41	1578.84	68.262	-1902.39	1571.21	175.773	-1724.52	1536.23	68.3844	-1736.96	1527.45	128.356	-1752	1434.5	134.274	-1672.07	1153.97	151.253	-1872.08	1340.72	162.45	-1934.5	1148.75	48.3414	-1669.96	1227.67	319.219	-1794.74	1367.44	391.227	-1741.45	1126.59	394.249	-1733.4	1051.4	418.996	-1809.34	893.324	373.432	-1832.73	815.833	432.48	-1791.87	805.595	412.928	-1845.15	745.138
874	0	186.671	-1902.57	1577.27	69.2535	-1912.56	1569.6	176.783	-1734.73	1534.41	69.3864	-1747.19	1525.61	129.532	-1762.42	1432.75	135.359	-1682.72	1152.06	152.165	-1882.59	1339	162.875	-1945.23	1146.88	49.5248	-1680.28	1225.86	320.272	-1805.52	1365.39	391.859	-1751.85	1124.43	394.629	-1743.48	1049.3	419.306	-1818.47	890.826	373.64	-1841.26	813.179	432.767	-1800.5	803.175	412.955	-1853.18	742.286
875	0	187.767	-1912.79	1575.78	70.3246	-1922.75	1568.06	177.925	-1745.01	1532.63	70.5203	-1757.46	1523.79	130.831	-1772.91	1431.04	136.517	-1693.52	1150.17	153.171	-1893.18	1337.32	163.343	-1956.09	1145.05	50.8098	-1690.7	1224.09	321.435	-1816.41	1363.36	392.575	-1762.48	1122.23	395.066	-1753.79	1047.18	419.621	-1827.79	888.302	373.838	-1849.92	810.491	433.082	-1809.29	800.737	412.948	-1861.32	739.379
876	0	188.953	-1923.07	1574.38	71.4817	-1932.97	1566.61	179.204	-1755.35	1530.9	71.791	-1767.76	1522.02	132.251	-1783.48	1429.39	137.737	-1704.47	1148.32	154.274	-1903.87	1335.73	163.865	-1967.09	1143.3	52.1842	-1701.22	1222.39	322.707	-1827.41	1361.35	393.37	-1773.34	1120.02	395.557	-1764.31	1045.07	419.947	-1837.3	885.783	374.038	-1858.71	807.804	433.432	-1818.28	798.31	412.927	-1869.58	736.456
877	0	190.235	-1933.4	1573.09	72.7305	-1943.21	1565.28	180.624	-1765.77	1529.25	73.2017	-1778.1	1520.34	133.786	-1794.11	1427.84	139.008	-1715.56	1146.54	155.472	-1914.64	1334.25	164.447	-1978.22	1141.65	53.6357	-1711.85	1220.78	324.083	-1838.52	1359.4	394.236	-1784.41	1117.83	396.101	-1775.05	1042.99	420.29	-1847.02	883.298	374.251	-1867.65	805.15	433.82	-1827.46	795.925	412.905	-1877.99	733.553
878	0	191.617	-1943.8	1571.94	74.076	-1953.47	1564.11	182.187	-1776.25	1527.69	74.7532	-1788.47	1518.76	135.429	-1804.81	1426.4	140.316	-1726.79	1144.87	156.762	-1925.5	1332.89	165.097	-1989.49	1140.15	55.1512	-1722.6	1219.3	325.557	-1849.71	1357.53	395.167	-1795.69	1115.68	396.695	-1785.99	1040.96	420.653	-1856.94	880.88	374.487	-1876.77	802.564	434.254	-1836.84	793.616	412.899	-1886.55	730.709
879	0	193.103	-1954.25	1570.94	75.5218	-1963.76	1563.11	183.89	-1786.79	1526.25	76.4442	-1798.88	1517.33	137.171	-1815.57	1425.11	141.653	-1738.14	1143.33	158.141	-1936.44	1331.7	165.821	-2000.88	1138.82	56.7179	-1733.45	1217.97	327.121	-1860.98	1355.78	396.155	-1807.16	1113.62	397.335	-1797.15	1039.02	421.043	-1867.07	878.56	374.754	-1886.08	800.081	434.736	-1846.43	791.413	412.921	-1895.29	727.963
880	0	194.694	-1964.77	1570.11	77.0705	-1974.08	1562.3	185.732	-1797.4	1524.95	78.2715	-1809.33	1516.06	139.002	-1826.39	1423.97	143.007	-1749.62	1141.95	159.599	-1947.45	1330.68	166.621	-2012.39	1137.68	58.3231	-1744.41	1216.81	328.766	-1872.32	1354.16	397.19	-1818.82	1111.66	398.018	-1808.49	1037.2	421.463	-1877.42	876.369	375.062	-1895.59	797.732	435.272	-1856.26	789.348	412.984	-1904.23	725.35
881	0	196.39	-1975.33	1569.46	78.7232	-1984.42	1561.71	187.707	-1808.07	1523.8	80.2291	-1819.81	1514.97	140.91	-1837.26	1423.01	144.37	-1761.2	1140.74	161.129	-1958.52	1329.86	167.498	-2023.99	1136.78	59.9548	-1755.48	1215.84	330.482	-1883.72	1352.7	398.265	-1830.65	1109.85	398.741	-1820.03	1035.51	421.916	-1887.99	874.337	375.416	-1905.32	795.55	435.862	-1866.32	787.45	413.096	-1913.39	722.907
882	0	198.191	-1985.95	1569	80.4794	-1994.78	1561.35	189.807	-1818.8	1522.83	82.309	-1830.32	1514.1	142.884	-1848.17	1422.24	145.735	-1772.86	1139.74	162.719	-1969.65	1329.25	168.447	-2035.69	1136.12	61.6016	-1766.63	1215.09	332.256	-1895.16	1351.42	399.372	-1842.64	1108.2	399.501	-1831.74	1033.98	422.407	-1898.79	872.489	375.821	-1915.28	793.565	436.511	-1876.63	785.745	413.267	-1922.78	720.666
883	0	200.093	-1996.61	1568.73	82.3368	-2005.16	1561.22	192.022	-1829.57	1522.04	84.501	-1840.86	1513.45	144.91	-1859.11	1421.68	147.096	-1784.59	1138.94	164.355	-1980.83	1328.86	169.46	-2047.46	1135.73	63.2535	-1777.86	1214.55	334.074	-1906.64	1350.34	400.503	-1854.75	1106.75	400.296	-1843.62	1032.63	422.936	-1909.81	870.851	376.281	-1925.5	791.801	437.218	-1887.21	784.257	413.503	-1932.43	718.655
884	0	202.092	-2007.31	1568.65	84.2915	-2015.57	1561.34	194.34	-1840.39	1521.45	86.7927	-1851.43	1513.05	146.973	-1870.08	1421.32	148.451	-1796.36	1138.38	166.024	-1992.04	1328.7	170.523	-2059.27	1135.62	64.9016	-1789.15	1214.25	335.921	-1918.15	1349.47	401.653	-1866.99	1105.51	401.125	-1855.66	1031.48	423.508	-1921.07	869.444	376.798	-1935.98	790.28	437.983	-1898.05	783.003	413.808	-1942.36	716.899
885	0	204.18	-2018.05	1568.76	86.3375	-2026	1561.7	196.746	-1851.24	1521.05	89.1698	-1862.01	1512.89	149.059	-1881.06	1421.17	149.796	-1808.16	1138.04	167.708	-2003.27	1328.76	171.62	-2071.12	1135.78	66.5389	-1800.48	1214.19	337.782	-1929.67	1348.82	402.815	-1879.33	1104.49	401.986	-1867.83	1030.53	424.123	-1932.55	868.282	377.373	-1946.73	789.02	438.807	-1909.18	781.998	414.186	-1952.58	715.417
886	0	206.349	-2028.81	1569.05	88.467	-2036.45	1562.3	199.225	-1862.11	1520.86	91.6162	-1872.61	1512.99	151.154	-1892.04	1421.24	151.133	-1819.96	1137.93	169.39	-2014.5	1329.06	172.731	-2082.96	1136.22	68.1595	-1811.84	1214.35	339.641	-1941.2	1348.4	403.985	-1891.75	1103.72	402.879	-1880.13	1029.8	424.783	-1944.27	867.378	378.005	-1957.76	788.032	439.687	-1920.59	781.251	414.638	-1963.12	714.223
887	0	208.589	-2039.59	1569.5	90.6702	-2046.92	1563.14	201.758	-1873	1520.86	94.1142	-1883.22	1513.34	153.242	-1903.02	1421.52	152.461	-1831.73	1138.06	171.053	-2025.73	1329.57	173.832	-2094.79	1136.91	69.7597	-1823.2	1214.74	341.481	-1952.72	1348.19	405.161	-1904.24	1103.2	403.804	-1892.55	1029.3	425.487	-1956.22	866.739	378.691	-1969.08	787.322	440.621	-1932.3	780.766	415.166	-1974	713.327
888	0	210.887	-2050.38	1570.12	92.9354	-2057.4	1564.19	204.326	-1883.9	1521.05	96.6451	-1893.84	1513.93	155.312	-1913.98	1421.99	153.783	-1843.45	1138.41	172.681	-2036.94	1330.29	174.901	-2106.57	1137.85	71.3372	-1834.53	1215.34	343.287	-1964.23	1348.21	406.339	-1916.78	1102.91	404.762	-1905.07	1029.01	426.236	-1968.4	866.368	379.428	-1980.7	786.892	441.605	-1944.3	780.539	415.768	-1985.23	712.731
889	0	213.229	-2061.18	1570.87	95.2492	-2067.89	1565.44	206.909	-1894.8	1521.43	99.1889	-1904.45	1514.77	157.348	-1924.9	1422.65	155.102	-1855.1	1138.98	174.255	-2048.12	1331.2	175.913	-2118.27	1139.01	72.8914	-1845.82	1216.15	345.043	-1975.73	1348.43	407.519	-1929.36	1102.86	405.755	-1917.67	1028.93	427.028	-1980.8	866.262	380.211	-1992.61	786.738	442.635	-1956.61	780.567	416.442	-1996.83	712.436
890	0	215.6	-2071.97	1571.75	97.5965	-2078.39	1566.88	209.487	-1905.69	1521.98	101.725	-1915.06	1515.83	159.339	-1935.79	1423.49	156.422	-1866.66	1139.74	175.761	-2059.25	1332.29	176.845	-2129.89	1140.36	74.4232	-1857.04	1217.13	346.737	-1987.2	1348.84	408.699	-1941.97	1103.04	406.782	-1930.35	1029.07	427.861	-1993.42	866.415	381.033	-2004.81	786.853	443.705	-1969.21	780.836	417.185	-2008.81	712.433
891	0	217.983	-2082.75	1572.73	99.9607	-2088.89	1568.47	212.037	-1916.55	1522.69	104.233	-1925.66	1517.09	161.274	-1946.63	1424.49	157.746	-1878.11	1140.68	177.183	-2070.33	1333.52	177.677	-2141.38	1141.86	75.9351	-1868.18	1218.27	348.355	-1998.64	1349.44	409.88	-1954.58	1103.43	407.847	-1943.08	1029.4	428.732	-2006.25	866.816	381.889	-2017.31	787.224	444.81	-1982.11	781.333	417.994	-2021.19	712.716
892	0	220.361	-2093.5	1573.8	102.324	-2099.39	1570.2	214.54	-1927.38	1523.55	106.693	-1936.23	1518.53	163.144	-1957.41	1425.63	159.078	-1889.43	1141.79	178.512	-2081.33	1334.88	178.392	-2152.75	1143.48	77.4303	-1879.2	1219.55	349.889	-2010.04	1350.19	411.062	-1967.21	1104.01	408.949	-1955.87	1029.91	429.637	-2019.29	867.454	382.771	-2030.08	787.837	445.943	-1995.3	782.041	418.861	-2033.96	713.271
893	0	222.714	-2104.23	1574.94	104.668	-2109.88	1572.03	216.975	-1938.18	1524.53	109.085	-1946.79	1520.14	164.94	-1968.13	1426.88	160.422	-1900.61	1143.03	179.736	-2092.25	1336.34	178.976	-2163.97	1145.19	78.9129	-1890.09	1220.95	351.329	-2021.41	1351.08	412.245	-1979.83	1104.76	410.09	-1968.7	1030.59	430.571	-2032.51	868.312	383.673	-2043.14	788.677	447.095	-2008.77	782.941	419.781	-2047.13	714.085
894	0	225.026	-2114.91	1576.14	106.975	-2120.36	1573.95	219.322	-1948.93	1525.62	111.39	-1957.32	1521.88	166.656	-1978.78	1428.25	161.782	-1911.64	1144.39	180.848	-2103.09	1337.88	179.421	-2175.02	1146.96	80.3876	-1900.84	1222.44	352.669	-2032.73	1352.1	413.43	-1992.44	1105.66	411.269	-1981.55	1031.42	431.529	-2045.92	869.374	384.586	-2056.46	789.726	448.259	-2022.5	784.013	420.746	-2060.71	715.142
895	0	227.276	-2125.55	1577.36	109.224	-2130.83	1575.92	221.565	-1959.62	1526.8	113.591	-1967.82	1523.73	168.287	-1989.36	1429.69	163.159	-1922.51	1145.84	181.845	-2113.84	1339.47	179.725	-2185.92	1148.75	81.8589	-1911.43	1224	353.908	-2044.01	1353.21	414.615	-2005.03	1106.7	412.485	-1994.43	1032.38	432.504	-2059.5	870.621	385.505	-2070.03	790.967	449.426	-2036.49	785.238	421.746	-2074.68	716.429
896	0	229.447	-2136.14	1578.62	111.397	-2141.27	1577.93	223.688	-1970.26	1528.05	115.673	-1978.28	1525.65	169.831	-1999.86	1431.19	164.555	-1933.22	1147.37	182.726	-2124.48	1341.11	179.889	-2196.64	1150.54	83.3315	-1921.86	1225.61	355.044	-2055.24	1354.41	415.801	-2017.6	1107.84	413.736	-2007.32	1033.46	433.489	-2073.23	872.037	386.421	-2083.85	792.385	450.587	-2050.72	786.598	422.771	-2089.03	717.93
897	0	231.522	-2146.68	1579.88	113.476	-2151.69	1579.94	225.677	-1980.83	1529.36	117.624	-1988.7	1527.63	171.286	-2010.29	1432.74	165.972	-1943.76	1148.95	183.49	-2135.03	1342.75	179.921	-2207.19	1152.3	84.8091	-1932.13	1227.24	356.078	-2066.42	1355.68	416.986	-2030.14	1109.07	415.02	-2020.21	1034.63	434.477	-2087.11	873.604	387.328	-2097.89	793.963	451.733	-2065.18	788.075	423.811	-2103.75	719.631
898	0	233.485	-2157.16	1581.14	115.445	-2162.07	1581.94	227.521	-1991.34	1530.71	119.432	-1999.08	1529.63	172.652	-2020.64	1434.31	167.408	-1954.15	1150.56	184.144	-2145.47	1344.4	179.834	-2217.57	1154.02	86.2949	-1942.22	1228.89	357.015	-2077.56	1357	418.168	-2042.65	1110.38	416.333	-2033.11	1035.88	435.462	-2101.12	875.305	388.22	-2112.15	795.689	452.855	-2079.84	789.656	424.854	-2118.82	721.52
899	0	235.322	-2167.57	1582.39	117.289	-2172.42	1583.9	229.213	-2001.77	1532.08	121.09	-2009.41	1531.63	173.931	-2030.91	1435.9	168.863	-1964.38	1152.18	184.693	-2155.82	1346.02	179.646	-2227.78	1155.68	87.7908	-1952.15	1230.53	357.859	-2088.64	1358.36	419.347	-2055.13	1111.75	417.671	-2045.99	1037.21	436.435	-2115.25	877.125	389.089	-2126.6	797.55	453.944	-2094.69	791.327	425.886	-2134.21	723.584
900	0	237.02	-2177.92	1583.62	118.995	-2182.73	1585.81	230.747	-2012.14	1533.47	122.593	-2019.69	1533.61	175.125	-2041.1	1437.47	170.334	-1974.46	1153.8	185.146	-2166.07	1347.61	179.375	-2237.84	1157.28	89.2978	-1961.92	1232.15	358.619	-2099.68	1359.75	420.519	-2067.57	1113.17	419.029	-2058.86	1038.58	437.389	-2129.47	879.05	389.929	-2141.23	799.536	454.993	-2109.71	793.079	426.897	-2149.9	725.811
901	0	238.571	-2188.21	1584.83	120.553	-2192.99	1587.64	232.12	-2022.43	1534.85	123.939	-2029.93	1535.54	176.237	-2051.23	1439.02	171.817	-1984.41	1155.4	185.513	-2176.22	1349.15	179.046	-2247.74	1158.79	90.815	-1971.54	1233.73	359.301	-2110.66	1361.16	421.684	-2079.97	1114.63	420.401	-2071.71	1040	438.32	-2143.79	881.066	390.735	-2156.02	801.638	455.993	-2124.88	794.901	427.873	-2165.86	728.189
902	0	239.965	-2198.43	1586	121.954	-2203.21	1589.39	233.332	-2032.66	1536.21	125.127	-2040.11	1537.41	177.272	-2061.29	1440.53	173.31	-1994.24	1156.95	185.805	-2186.29	1350.64	178.683	-2257.51	1160.22	92.3407	-1981.03	1235.27	359.915	-2121.6	1362.58	422.84	-2092.33	1116.12	421.782	-2084.53	1041.45	439.221	-2158.18	883.162	391.501	-2170.96	803.846	456.937	-2140.19	796.786	428.801	-2182.06	730.707
903	0	241.201	-2208.59	1587.14	123.194	-2213.38	1591.03	234.387	-2042.81	1537.55	126.161	-2050.24	1539.19	178.235	-2071.29	1442	174.805	-2003.96	1158.46	186.034	-2196.27	1352.05	178.31	-2267.15	1161.57	93.8713	-1990.4	1236.75	360.47	-2132.49	1363.99	423.986	-2104.64	1117.63	423.168	-2097.33	1042.92	440.088	-2172.63	885.324	392.221	-2186.02	806.151	457.821	-2155.61	798.727	429.671	-2198.45	733.351
904	0	242.274	-2218.68	1588.23	124.27	-2223.49	1592.56	235.288	-2052.91	1538.85	127.046	-2060.33	1540.87	179.131	-2081.23	1443.4	176.297	-2013.59	1159.91	186.211	-2206.18	1353.39	177.952	-2276.67	1162.82	95.4021	-1999.66	1238.15	360.976	-2143.33	1365.4	425.121	-2116.89	1119.15	424.551	-2110.08	1044.39	440.917	-2187.13	887.541	392.892	-2201.2	808.547	458.638	-2171.14	800.717	430.472	-2215	736.109
905	0	243.186	-2228.73	1589.27	125.182	-2233.56	1593.97	236.044	-2062.94	1540.09	127.788	-2070.35	1542.44	179.965	-2091.11	1444.74	177.781	-2023.14	1161.27	186.349	-2216.02	1354.64	177.63	-2286.1	1163.99	96.9273	-2008.84	1239.48	361.44	-2154.12	1366.79	426.246	-2129.1	1120.68	425.928	-2122.8	1045.85	441.706	-2201.67	889.801	393.51	-2216.48	811.023	459.384	-2186.75	802.749	431.194	-2231.69	738.965
906	0	243.941	-2238.71	1590.25	125.935	-2243.57	1595.25	236.662	-2072.91	1541.28	128.396	-2080.34	1543.88	180.741	-2100.96	1445.99	179.248	-2032.64	1162.55	186.458	-2225.8	1355.8	177.362	-2295.44	1165.05	98.4399	-2017.96	1240.72	361.872	-2164.86	1368.15	427.359	-2141.24	1122.19	427.295	-2135.47	1047.3	442.452	-2216.23	892.093	394.072	-2231.83	813.57	460.057	-2202.42	804.816	431.828	-2248.47	741.903
907	0	244.544	-2248.65	1591.18	126.534	-2253.53	1596.4	237.153	-2082.83	1542.4	128.881	-2090.27	1545.19	181.464	-2110.76	1447.15	180.692	-2042.09	1163.74	186.547	-2235.53	1356.86	177.164	-2304.71	1166.02	99.9324	-2027.02	1241.86	362.277	-2175.55	1369.48	428.463	-2153.32	1123.69	428.646	-2148.09	1048.72	443.155	-2230.8	894.403	394.574	-2247.25	816.178	460.653	-2218.15	806.909	432.367	-2265.32	744.905
908	0	245.002	-2258.54	1592.03	126.986	-2263.44	1597.4	237.527	-2092.71	1543.44	129.251	-2100.16	1546.36	182.139	-2120.52	1448.21	182.108	-2051.52	1164.82	186.624	-2245.22	1357.82	177.045	-2313.94	1166.89	101.397	-2036.05	1242.9	362.662	-2186.2	1370.75	429.558	-2165.33	1125.15	429.979	-2160.66	1050.1	443.814	-2245.38	896.718	395.017	-2262.72	818.834	461.173	-2233.92	809.018	432.807	-2282.2	747.955
909	0	245.325	-2268.4	1592.81	127.301	-2273.31	1598.26	237.795	-2102.54	1544.39	129.52	-2110	1547.38	182.769	-2130.26	1449.17	183.487	-2060.92	1165.78	186.695	-2254.87	1358.67	177.013	-2323.13	1167.65	102.825	-2045.07	1243.83	363.031	-2196.81	1371.97	430.644	-2177.28	1126.56	431.291	-2173.17	1051.42	444.428	-2259.94	899.026	395.397	-2278.22	821.526	461.614	-2249.71	811.133	433.142	-2299.09	751.033
910	0	245.523	-2278.22	1593.51	127.49	-2283.14	1598.97	237.97	-2112.34	1545.25	129.696	-2119.82	1548.24	183.357	-2139.98	1450.01	184.825	-2070.32	1166.63	186.766	-2264.5	1359.4	177.067	-2332.3	1168.3	104.209	-2054.09	1244.64	363.387	-2207.37	1373.11	431.721	-2189.15	1127.92	432.579	-2185.63	1052.67	444.998	-2274.49	901.313	395.716	-2293.74	824.239	461.978	-2265.52	813.242	433.371	-2315.96	754.12
911	0	245.608	-2288.01	1594.12	127.565	-2292.93	1599.54	238.061	-2122.11	1546	129.792	-2129.6	1548.95	183.906	-2149.68	1450.74	186.117	-2079.73	1167.36	186.839	-2274.11	1360.02	177.205	-2341.46	1168.82	105.542	-2063.11	1245.33	363.731	-2217.88	1374.16	432.789	-2200.96	1129.2	433.842	-2198.02	1053.84	445.524	-2289.02	903.565	395.972	-2309.27	826.958	462.264	-2281.32	815.333	433.493	-2332.79	757.199
912	0	245.591	-2297.79	1594.64	127.538	-2302.68	1599.95	238.079	-2131.86	1546.64	129.818	-2139.35	1549.49	184.417	-2159.37	1451.35	187.357	-2089.15	1167.96	186.917	-2283.7	1360.51	177.421	-2350.62	1169.23	106.816	-2072.17	1245.9	364.065	-2228.36	1375.11	433.848	-2212.7	1130.39	435.077	-2210.36	1054.91	446.005	-2303.5	905.768	396.166	-2324.78	829.668	462.474	-2297.11	817.392	433.508	-2349.57	760.252
913	0	245.483	-2307.54	1595.05	127.421	-2312.42	1600.22	238.035	-2141.59	1547.16	129.783	-2149.08	1549.88	184.893	-2169.05	1451.82	188.541	-2098.58	1168.43	186.998	-2293.29	1360.87	177.704	-2359.8	1169.5	108.026	-2081.26	1246.33	364.388	-2238.79	1375.95	434.895	-2224.37	1131.49	436.284	-2222.64	1055.89	446.442	-2317.93	907.907	396.298	-2340.26	832.353	462.611	-2312.87	819.408	433.419	-2366.27	763.263
914	0	245.297	-2317.28	1595.36	127.226	-2322.13	1600.34	237.938	-2151.32	1547.56	129.697	-2158.79	1550.11	185.334	-2178.74	1452.17	189.664	-2108.04	1168.78	187.083	-2302.88	1361.1	178.04	-2369	1169.64	109.165	-2090.39	1246.64	364.697	-2249.19	1376.67	435.927	-2235.98	1132.46	437.46	-2234.86	1056.74	446.833	-2332.31	909.971	396.37	-2355.7	834.997	462.675	-2328.58	821.366	433.228	-2382.88	766.217
915	0	245.042	-2327.02	1595.57	126.964	-2331.83	1600.31	237.796	-2161.04	1547.83	129.566	-2168.5	1550.17	185.741	-2188.43	1452.38	190.724	-2117.52	1168.99	187.169	-2312.48	1361.19	178.416	-2378.24	1169.64	110.23	-2099.57	1246.82	364.991	-2259.55	1377.25	436.94	-2247.52	1133.31	438.604	-2247.01	1057.47	447.178	-2346.63	911.948	396.383	-2371.08	837.584	462.668	-2344.25	823.255	432.941	-2399.39	769.102
916	0	244.729	-2336.76	1595.65	126.646	-2341.52	1600.14	237.617	-2170.76	1547.97	129.398	-2178.2	1550.08	186.114	-2198.14	1452.46	191.716	-2127.02	1169.06	187.254	-2322.09	1361.15	178.814	-2387.5	1169.5	111.218	-2108.81	1246.86	365.267	-2269.88	1377.68	437.931	-2259.01	1134.02	439.715	-2259.11	1058.07	447.477	-2360.88	913.824	396.336	-2386.39	840.101	462.593	-2359.85	825.063	432.562	-2415.79	771.907
917	0	244.367	-2346.5	1595.62	126.28	-2351.21	1599.82	237.406	-2180.49	1547.98	129.199	-2187.9	1549.83	186.453	-2207.85	1452.4	192.637	-2136.55	1169.01	187.335	-2331.72	1360.97	179.22	-2396.81	1169.22	112.125	-2118.1	1246.77	365.522	-2280.18	1377.96	438.894	-2270.45	1134.58	440.792	-2271.15	1058.53	447.727	-2375.04	915.592	396.232	-2401.61	842.532	462.453	-2375.37	826.78	432.097	-2432.08	774.621
918	0	243.964	-2356.25	1595.46	125.876	-2360.9	1599.36	237.169	-2190.22	1547.84	128.974	-2197.6	1549.42	186.758	-2217.59	1452.2	193.483	-2146.1	1168.83	187.409	-2341.36	1360.66	179.616	-2406.16	1168.79	112.949	-2127.46	1246.55	365.752	-2290.44	1378.07	439.823	-2281.84	1134.99	441.832	-2283.13	1058.85	447.927	-2389.12	917.242	396.07	-2416.73	844.866	462.249	-2390.8	828.396	431.551	-2448.24	777.236
919	0	243.525	-2366	1595.18	125.441	-2370.59	1598.75	236.911	-2199.97	1547.57	128.726	-2207.31	1548.86	187.028	-2227.34	1451.87	194.254	-2155.68	1168.52	187.472	-2351.03	1360.2	179.988	-2415.55	1168.22	113.69	-2136.87	1246.2	365.954	-2300.68	1378.01	440.713	-2293.18	1135.24	442.834	-2295.05	1059.01	448.076	-2403.12	918.765	395.853	-2431.75	847.091	461.984	-2406.13	829.903	430.932	-2464.27	779.747
920	0	243.058	-2375.78	1594.77	124.979	-2380.29	1598.01	236.634	-2209.74	1547.15	128.46	-2217.03	1548.14	187.262	-2237.12	1451.39	194.945	-2165.27	1168.08	187.522	-2360.73	1359.61	180.321	-2424.99	1167.52	114.347	-2146.34	1245.72	366.126	-2310.89	1377.79	441.555	-2304.48	1135.32	443.797	-2306.92	1059.02	448.173	-2417.01	920.157	395.58	-2446.64	849.199	461.659	-2421.36	831.296	430.243	-2480.15	782.147
921	0	242.566	-2385.56	1594.23	124.495	-2390.01	1597.13	236.341	-2219.53	1546.59	128.177	-2226.77	1547.28	187.46	-2246.92	1450.78	195.555	-2174.89	1167.51	187.556	-2370.45	1358.88	180.605	-2434.48	1166.67	114.918	-2155.86	1245.11	366.262	-2321.08	1377.38	442.346	-2315.73	1135.24	444.719	-2318.72	1058.88	448.216	-2430.8	921.412	395.252	-2461.41	851.181	461.276	-2436.48	832.567	429.491	-2495.9	784.433
922	0	242.053	-2395.37	1593.55	123.994	-2399.74	1596.12	236.036	-2229.34	1545.89	127.879	-2236.52	1546.27	187.621	-2256.74	1450.03	196.083	-2184.53	1166.82	187.571	-2380.2	1358.01	180.827	-2444.02	1165.69	115.403	-2165.45	1244.38	366.362	-2331.24	1376.8	443.079	-2326.93	1134.99	445.597	-2330.47	1058.58	448.204	-2444.5	922.526	394.87	-2476.04	853.031	460.838	-2451.47	833.713	428.68	-2511.49	786.6
923	0	241.522	-2405.2	1592.75	123.477	-2409.49	1594.97	235.717	-2239.17	1545.04	127.567	-2246.29	1545.12	187.744	-2266.59	1449.13	196.527	-2194.19	1166	187.565	-2389.98	1357	180.981	-2453.61	1164.57	115.801	-2175.09	1243.52	366.422	-2341.37	1376.03	443.75	-2338.1	1134.56	446.431	-2342.16	1058.12	448.137	-2458.08	923.496	394.434	-2490.52	854.743	460.344	-2466.34	834.731	427.814	-2526.94	788.647
924	0	240.975	-2415.05	1591.81	122.946	-2419.26	1593.68	235.388	-2249.03	1544.06	127.243	-2256.09	1543.82	187.829	-2276.47	1448.1	196.887	-2203.87	1165.06	187.536	-2399.79	1355.85	181.061	-2463.25	1163.32	116.112	-2184.78	1242.53	366.44	-2351.48	1375.09	444.355	-2349.22	1133.97	447.22	-2353.8	1057.51	448.013	-2471.55	924.319	393.945	-2504.87	856.314	459.795	-2481.08	835.617	426.895	-2542.22	790.572
925	0	240.412	-2424.92	1590.74	122.403	-2429.04	1592.26	235.048	-2258.91	1542.92	126.907	-2265.9	1542.37	187.876	-2286.37	1446.94	197.161	-2213.57	1163.99	187.484	-2409.63	1354.57	181.061	-2472.94	1161.94	116.336	-2194.54	1241.42	366.415	-2361.57	1373.96	444.892	-2360.3	1133.2	447.962	-2365.37	1056.73	447.833	-2484.92	924.995	393.402	-2519.06	857.741	459.194	-2495.68	836.371	425.926	-2557.35	792.372
926	0	239.835	-2434.81	1589.53	121.849	-2438.85	1590.7	234.698	-2268.81	1541.65	126.559	-2275.73	1540.79	187.883	-2296.3	1445.63	197.349	-2223.29	1162.8	187.408	-2419.5	1353.16	180.979	-2482.69	1160.42	116.471	-2204.35	1240.18	366.346	-2371.63	1372.64	445.358	-2371.33	1132.26	448.657	-2376.89	1055.79	447.597	-2498.17	925.523	392.806	-2533.1	859.023	458.539	-2510.15	836.991	424.908	-2572.32	794.049
927	0	239.244	-2444.72	1588.19	121.284	-2448.68	1589.01	234.337	-2278.75	1540.23	126.199	-2285.58	1539.06	187.851	-2306.26	1444.18	197.451	-2233.03	1161.49	187.306	-2429.41	1351.6	180.815	-2492.48	1158.78	116.518	-2214.21	1238.81	366.232	-2381.67	1371.14	445.752	-2382.32	1131.15	449.304	-2388.35	1054.7	447.303	-2511.31	925.901	392.158	-2546.99	860.158	457.832	-2524.48	837.477	423.842	-2587.13	795.6
928	0	238.639	-2454.66	1586.71	120.707	-2458.53	1587.19	233.966	-2288.7	1538.67	125.828	-2295.46	1537.19	187.779	-2316.25	1442.6	197.466	-2242.79	1160.05	187.179	-2439.34	1349.91	180.566	-2502.32	1157.01	116.477	-2224.14	1237.32	366.074	-2391.68	1369.46	446.074	-2393.26	1129.86	449.904	-2399.75	1053.45	446.952	-2524.33	926.13	391.456	-2560.73	861.147	457.072	-2538.67	837.828	422.728	-2601.78	797.025
929	0	238.021	-2464.62	1585.1	120.12	-2468.4	1585.23	233.585	-2298.69	1536.97	125.445	-2305.35	1535.18	187.669	-2326.26	1440.88	197.396	-2252.57	1158.49	187.027	-2449.31	1348.08	180.233	-2512.22	1155.11	116.347	-2234.12	1235.71	365.869	-2401.67	1367.6	446.325	-2404.16	1128.41	450.455	-2411.09	1052.04	446.544	-2537.24	926.209	390.701	-2574.32	861.989	456.26	-2552.73	838.044	421.567	-2616.27	798.325
[truncated: 69 more columns]

## Sheet: Sheet2
Devices
		025370 - Force			025370 - Moment			025370 - CoP			027571 - Force			027571 - Moment			027571 - CoP			037720 - Force			037720 - Moment			037720 - CoP
Frame	Sub Frame	Fx	Fy	Fz	Mx	My	Mz	Cx	Cy	Cz	Fx	Fy	Fz	Mx	My	Mz	Cx	Cy	Cz	Fx	Fy	Fz	Mx	My	Mz	Cx	Cy	Cz
		N	N	N	N.mm	N.mm	N.mm	mm	mm	mm	N	N	N	N.mm	N.mm	N.mm	mm	mm	mm	N	N	N	N.mm	N.mm	N.mm	mm	mm	mm
481	0	0	0	0	0	0	0	200	300	0	0	0	0	0	0	0	200	903	0	0	0	0	0	0	0	603	903	0
481	1	0	0	0	0	0	0	200	300	0	0	0	0	0	0	0	200	903	0	0	0	0	0	0	0	603	903	0
481	2	0	0	0	0	0	0	200	300	0	0	0	0	0	0	0	200	903	0	0	0	0	0	0	0	603	903	0
481	3	0	0	0	0	0	0	200	300	0	0	0	0	0	0	0	200	903	0	0	0	0	0	0	0	603	903	0
481	4	0	0	0	0	0	0	200	300	0	0	0	0	0	0	0	200	903	0	0	0	0	0	0	0	603	903	0
481	5	0	0	0	0	0	0	200	300	0	0	0	0	0	0	0	200	903	0	0	0	0	0	0	0	603	903	0
481	6	0	0	0	0	0	0	200	300	0	0	0	0	0	0	0	200	903	0	0	0	0	0	0	0	603	903	0
481	7	0	0	0	0	0	0	200	300	0	0	0	0	0	0	0	200	903	0	0	0	0	0	0	0	603	903	0
481	8	0	0	0	0	0	0	200	300	0	0	0	0	0	0	0	200	903	0	0	0	0	0	0	0	603	903	0
481	9	0	0	0	0	0	0	200	300	0	0	0	0	0	0	0	200	903	0	0	0	0	0	0	0	603	903	0
482	0	0	0	0	0	0	0	200	300	0	0	0	0	0	0	0	200	903	0	0	0	0	0	0	0	603	903	0
482	1	0	0	0	0	0	0	200	300	0	0	0	0	0	0	0	200	903	0	0	0	0	0	0	0	603	903	0
482	2	0	0	0	0	0	0	200	300	0	0	0	0	0	0	0	200	903	0	0	0	0	0	0	0	603	903	0
482	3	0	0	0	0	0	0	200	300	0	0	0	0	0	0	0	200	903	0	0	0	0	0	0	0	603	903	0
482	4	0	0	0	0	0	0	200	300	0	0	0	0	0	0	0	200	903	0	0	0	0	0	0	0	603	903	0
482	5	0	0	0	0	0	0	200	300	0	0	0	0	0	0	0	200	903	0	0	0	0	0	0	0	603	903	0
482	6	0	0	0	0	0	0	200	300	0	0	0	0	0	0	0	200	903	0	0	0	0	0	0	0	603	903	0
482	7	0	0	0	0	0	0	200	300	0	0	0	0	0	0	0	200	903	0	0	0	0	0	0	0	603	903	0
482	8	0	0	0	0	0	0	200	300	0	0	0	0	0	0	0	200	903	0	0	0	0	0	0	0	603	903	0
482	9	0	0	0	0	0	0	200	300	0	0	0	0	0	0	0	200	903	0	0	0	0	0	0	0	603	903	0
483	0	0	0	0	0	0	0	200	300	0	0	0	0	0	0	0	200	903	0	0	0	0	0	0	0	603	903	0
483	1	0	0	0	0	0	0	200	300	0	0	0	0	0	0	0	200	903	0	0	0	0	0	0	0	603	903	0
483	2	0	0	0	0	0	0	200	300	0	0	0	0	0	0	0	200	903	0	0	0	0	0	0	0	603	903	0
483	3	0	0	0	0	0	0	200	300	0	0	0	0	0	0	0	200	903	0	0	0	0	0	0	0	603	903	0
483	4	0	0	0	0	0	0	200	300	0	0	0	0	0	0	0	200	903	0	0	0	0	0	0	0	603	903	0
483	5	0	0	0	0	0	0	200	300	0	0	0	0	0	0	0	200	903	0	0	0	0	0	0	0	603	903	0
483	6	0	0	0	0	0	0	200	300	0	0	0	0	0	0	0	200	903	0	0	0	0	0	0	0	603	903	0
483	7	0	0	0	0	0	0	200	300	0	0	0	0	0	0	0	200	903	0	0	0	0	0	0	0	603	903	0
483	8	0	0	0	0	0	0	200	300	0	0	0	0	0	0	0	200	903	0	0	0	0	0	0	0	603	903	0
483	9	0	0	0	0	0	0	200	300	0	0	0	0	0	0	0	200	903	0	0	0	0	0	0	0	603	903	0
484	0	0	0	0	0	0	0	200	300	0	0	0	0	0	0	0	200	903	0	0	0	0	0	0	0	603	903	0
484	1	0	0	0	0	0	0	200	300	0	0	0	0	0	0	0	200	903	0	0	0	0	0	0	0	603	903	0
484	2	0	0	0	0	0	0	200	300	0	0	0	0	0	0	0	200	903	0	0	0	0	0	0	0	603	903	0
484	3	0	0	0	0	0	0	200	300	0	0	0	0	0	0	0	200	903	0	0	0	0	0	0	0	603	903	0
484	4	0	0	0	0	0	0	200	300	0	0	0	0	0	0	0	200	903	0	0	0	0	0	0	0	603	903	0
484	5	0	0	0	0	0	0	200	300	0	0	0	0	0	0	0	200	903	0	0	0	0	0	0	0	603	903	0
484	6	0	0	0	0	0	0	200	300	0	0	0	0	0	0	0	200	903	0	0	0	0	0	0	0	603	903	0
484	7	0	0	0	0	0	0	200	300	0	0	0	0	0	0	0	200	903	0	0	0	0	0	0	0	603	903	0
484	8	0	0	0	0	0	0	200	300	0	0	0	0	0	0	0	200	903	0	0	0	0	0	0	0	603	903	0
484	9	0	0	0	0	0	0	200	300	0	0	0	0	0	0	0	200	903	0	0	0	0	0	0	0	603	903	0
485	0	0	0	0	0	0	0	200	300	0	0	0	0	0	0	0	200	903	0	0	0	0	0	0	0	603	903	0
485	1	0	0	0	0	0	0	200	300	0	0	0	0	0	0	0	200	903	0	0	0	0	0	0	0	603	903	0
485	2	0	0	0	0	0	0	200	300	0	0	0	0	0	0	0	200	903	0	0	0	0	0	0	0	603	903	0
485	3	0	0	0	0	0	0	200	300	0	0	0	0	0	0	0	200	903	0	0	0	0	0	0	0	603	903	0
485	4	0	0	0	0	0	0	200	300	0	0	0	0	0	0	0	200	903	0	0	0	0	0	0	0	603	903	0
485	5	0	0	0	0	0	0	200	300	0	0	0	0	0	0	0	200	903	0	0	0	0	0	0	0	603	903	0
485	6	0	0	0	0	0	0	200	300	0	0	0	0	0	0	0	200	903	0	0	0	0	0	0	0	603	903	0
485	7	0	0	0	0	0	0	200	300	0	0	0	0	0	0	0	200	903	0	0	0	0	0	0	0	603	903	0
485	8	0	0	0	0	0	0	200	300	0	0	0	0	0	0	0	200	903	0	0	0	0	0	0	0	603	903	0
485	9	0	0	0	0	0	0	200	300	0	0	0	0	0	0	0	200	903	0	0	0	0	0	0	0	603	903	0
486	0	0	0	0	0	0	0	200	300	0	0	0	0	0	0	0	200	903	0	0	0	0	0	0	0	603	903	0
486	1	0	0	0	0	0	0	200	300	0	0	0	0	0	0	0	200	903	0	0	0	0	0	0	0	603	903	0
486	2	0	0	0	0	0	0	200	300	0	0	0	0	0	0	0	200	903	0	0	0	0	0	0	0	603	903	0
486	3	0	0	0	0	0	0	200	300	0	0	0	0	0	0	0	200	903	0	0	0	0	0	0	0	603	903	0
486	4	0	0	0	0	0	0	200	300	0	0	0	0	0	0	0	200	903	0	0	0	0	0	0	0	603	903	0
486	5	0	0	0	0	0	0	200	300	0	0	0	0	0	0	0	200	903	0	0	0	0	0	0	0	603	903	0
486	6	0	0	0	0	0	0	200	300	0	0	0	0	0	0	0	200	903	0	0	0	0	0	0	0	603	903	0
486	7	0	0	0	0	0	0	200	300	0	0	0	0	0	0	0	200	903	0	0	0	0	0	0	0	603	903	0
486	8	0	0	0	0	0	0	200	300	0	0	0	0	0	0	0	200	903	0	0	0	0	0	0	0	603	903	0
486	9	0	0	0	0	0	0	200	300	0	0	0	0	0	0	0	200	903	0	0	0	0	0	0	0	603	903	0
487	0	0	0	0	0	0	0	200	300	0	0	0	0	0	0	0	200	903	0	0	0	0	0	0	0	603	903	0
487	1	0	0	0	0	0	0	200	300	0	0	0	0	0	0	0	200	903	0	0	0	0	0	0	0	603	903	0
487	2	0	0	0	0	0	0	200	300	0	0	0	0	0	0	0	200	903	0	0	0	0	0	0	0	603	903	0
487	3	0	0	0	0	0	0	200	300	0	0	0	0	0	0	0	200	903	0	0	0	0	0	0	0	603	903	0
487	4	0	0	0	0	0	0	200	300	0	0	0	0	0	0	0	200	903	0	0	0	0	0	0	0	603	903	0
487	5	0	0	0	0	0	0	200	300	0	0	0	0	0	0	0	200	903	0	0	0	0	0	0	0	603	903	0
487	6	0	0	0	0	0	0	200	300	0	0	0	0	0	0	0	200	903	0	0	0	0	0	0	0	603	903	0
487	7	0	0	0	0	0	0	200	300	0	0	0	0	0	0	0	200	903	0	0	0	0	0	0	0	603	903	0
487	8	0	0	0	0	0	0	200	300	0	0	0	0	0	0	0	200	903	0	0	0	0	0	0	0	603	903	0
487	9	0	0	0	0	0	0	200	300	0	0	0	0	0	0	0	200	903	0	0	0	0	0	0	0	603	903	0
488	0	0	0	0	0	0	0	200	300	0	0	0	0	0	0	0	200	903	0	0	0	0	0	0	0	603	903	0
488	1	0	0	0	0	0	0	200	300	0	0	0	0	0	0	0	200	903	0	0	0	0	0	0	0	603	903	0
488	2	0	0	0	0	0	0	200	300	0	0	0	0	0	0	0	200	903	0	0	0	0	0	0	0	603	903	0
488	3	0	0	0	0	0	0	200	300	0	0	0	0	0	0	0	200	903	0	0	0	0	0	0	0	603	903	0
488	4	0	0	0	0	0	0	200	300	0	0	0	0	0	0	0	200	903	0	0	0	0	0	0	0	603	903	0
488	5	0	0	0	0	0	0	200	300	0	0	0	0	0	0	0	200	903	0	0	0	0	0	0	0	603	903	0
488	6	0	0	0	0	0	0	200	300	0	0	0	0	0	0	0	200	903	0	0	0	0	0	0	0	603	903	0
488	7	0	0	0	0	0	0	200	300	0	0	0	0	0	0	0	200	903	0	0	0	0	0	0	0	603	903	0
488	8	0	0	0	0	0	0	200	300	0	0	0	0	0	0	0	200	903	0	0	0	0	0	0	0	603	903	0
488	9	0	0	0	0	0	0	200	300	0	0	0	0	0	0	0	200	903	0	0	0	0	0	0	0	603	903	0
489	0	0	0	0	0	0	0	200	300	0	0	0	0	0	0	0	200	903	0	0	0	0	0	0	0	603	903	0
489	1	0	0	0	0	0	0	200	300	0	0	0	0	0	0	0	200	903	0	0	0	0	0	0	0	603	903	0
489	2	0	0	0	0	0	0	200	300	0	0	0	0	0	0	0	200	903	0	0	0	0	0	0	0	603	903	0
489	3	0	0	0	0	0	0	200	300	0	0	0	0	0	0	0	200	903	0	0	0	0	0	0	0	603	903	0
489	4	0	0	0	0	0	0	200	300	0	0	0	0	0	0	0	200	903	0	0	0	0	0	0	0	603	903	0
489	5	0	0	0	0	0	0	200	300	0	0	0	0	0	0	0	200	903	0	0	0	0	0	0	0	603	903	0
489	6	0	0	0	0	0	0	200	300	0	0	0	0	0	0	0	200	903	0	0	0	0	0	0	0	603	903	0
489	7	0	0	0	0	0	0	200	300	0	0	0	0	0	0	0	200	903	0	0	0	0	0	0	0	603	903	0
489	8	0	0	0	0	0	0	200	300	0	0	0	0	0	0	0	200	903	0	0	0	0	0	0	0	603	903	0
489	9	0	0	0	0	0	0	200	300	0	0	0	0	0	0	0	200	903	0	0	0	0	0	0	0	603	903	0
490	0	0	0	0	0	0	0	200	300	0	0	0	0	0	0	0	200	903	0	0	0	0	0	0	0	603	903	0
490	1	0	0	0	0	0	0	200	300	0	0	0	0	0	0	0	200	903	0	0	0	0	0	0	0	603	903	0
490	2	0	0	0	0	0	0	200	300	0	0	0	0	0	0	0	200	903	0	0	0	0	0	0	0	603	903	0
490	3	0	0	0	0	0	0	200	300	0	0	0	0	0	0	0	200	903	0	0	0	0	0	0	0	603	903	0
490	4	0	0	0	0	0	0	200	300	0	0	0	0	0	0	0	200	903	0	0	0	0	0	0	0	603	903	0
490	5	0	0	0	0	0	0	200	300	0	0	0	0	0	0	0	200	903	0	0	0	0	0	0	0	603	903	0
490	6	0	0	0	0	0	0	200	300	0	0	0	0	0	0	0	200	903	0	0	0	0	0	0	0	603	903	0
490	7	0	0	0	0	0	0	200	300	0	0	0	0	0	0	0	200	903	0	0	0	0	0	0	0	603	903	0
490	8	0	0	0	0	0	0	200	300	0	0	0	0	0	0	0	200	903	0	0	0	0	0	0	0	603	903	0
490	9	0	0	0	0	0	0	200	300	0	0	0	0	0	0	0	200	903	0	0	0	0	0	0	0	603	903	0
491	0	0	0	0	0	0	0	200	300	0	0	0	0	0	0	0	200	903	0	0	0	0	0	0	0	603	903	0
491	1	0	0	0	0	0	0	200	300	0	0	0	0	0	0	0	200	903	0	0	0	0	0	0	0	603	903	0
491	2	0	0	0	0	0	0	200	300	0	0	0	0	0	0	0	200	903	0	0	0	0	0	0	0	603	903	0
491	3	0	0	0	0	0	0	200	300	0	0	0	0	0	0	0	200	903	0	0	0	0	0	0	0	603	903	0
491	4	0	0	0	0	0	0	200	300	0	0	0	0	0	0	0	200	903	0	0	0	0	0	0	0	603	903	0
491	5	0	0	0	0	0	0	200	300	0	0	0	0	0	0	0	200	903	0	0	0	0	0	0	0	603	903	0
491	6	0	0	0	0	0	0	200	300	0	0	0	0	0	0	0	200	903	0	0	0	0	0	0	0	603	903	0
491	7	0	0	0	0	0	0	200	300	0	0	0	0	0	0	0	200	903	0	0	0	0	0	0	0	603	903	0
491	8	0	0	0	0	0	0	200	300	0	0	0	0	0	0	0	200	903	0	0	0	0	0	0	0	603	903	0
491	9	0	0	0	0	0	0	200	300	0	0	0	0	0	0	0	200	903	0	0	0	0	0	0	0	603	903	0
492	0	0	0	0	0	0	0	200	300	0	0	0	0	0	0	0	200	903	0	0	0	0	0	0	0	603	903	0
492	1	0	0	0	0	0	0	200	300	0	0	0	0	0	0	0	200	903	0	0	0	0	0	0	0	603	903	0
492	2	0	0	0	0	0	0	200	300	0	0	0	0	0	0	0	200	903	0	0	0	0	0	0	0	603	903	0
492	3	0	0	0	0	0	0	200	300	0	0	0	0	0	0	0	200	903	0	0	0	0	0	0	0	603	903	0
492	4	0	0	0	0	0	0	200	300	0	0	0	0	0	0	0	200	903	0	0	0	0	0	0	0	603	903	0
492	5	0	0	0	0	0	0	200	300	0	0	0	0	0	0	0	200	903	0	0	0	0	0	0	0	603	903	0
492	6	0	0	0	0	0	0	200	300	0	0	0	0	0	0	0	200	903	0	0	0	0	0	0	0	603	903	0
492	7	0	0	0	0	0	0	200	300	0	0	0	0	0	0	0	200	903	0	0	0	0	0	0	0	603	903	0
492	8	0	0	0	0	0	0	200	300	0	0	0	0	0	0	0	200	903	0	0	0	0	0	0	0	603	903	0
492	9	0	0	0	0	0	0	200	300	0	0	0	0	0	0	0	200	903	0	0	0	0	0	0	0	603	903	0
493	0	0	0	0	0	0	0	200	300	0	0	0	0	0	0	0	200	903	0	0	0	0	0	0	0	603	903	0
493	1	0	0	0	0	0	0	200	300	0	0	0	0	0	0	0	200	903	0	0	0	0	0	0	0	603	903	0
493	2	0	0	0	0	0	0	200	300	0	0	0	0	0	0	0	200	903	0	0	0	0	0	0	0	603	903	0
493	3	0	0	0	0	0	0	200	300	0	0	0	0	0	0	0	200	903	0	0	0	0	0	0	0	603	903	0
493	4	0	0	0	0	0	0	200	300	0	0	0	0	0	0	0	200	903	0	0	0	0	0	0	0	603	903	0
493	5	0	0	0	0	0	0	200	300	0	0	0	0	0	0	0	200	903	0	0	0	0	0	0	0	603	903	0
493	6	0	0	0	0	0	0	200	300	0	0	0	0	0	0	0	200	903	0	0	0	0	0	0	0	603	903	0
493	7	0	0	0	0	0	0	200	300	0	0	0	0	0	0	0	200	903	0	0	0	0	0	0	0	603	903	0
493	8	0	0	0	0	0	0	200	300	0	0	0	0	0	0	0	200	903	0	0	0	0	0	0	0	603	903	0
493	9	0	0	0	0	0	0	200	300	0	0	0	0	0	0	0	200	903	0	0	0	0	0	0	0	603	903	0
494	0	0	0	0	0	0	0	200	300	0	0	0	0	0	0	0	200	903	0	0	0	0	0	0	0	603	903	0
494	1	0	0	0	0	0	0	200	300	0	0	0	0	0	0	0	200	903	0	0	0	0	0	0	0	603	903	0
494	2	0	0	0	0	0	0	200	300	0	0	0	0	0	0	0	200	903	0	0	0	0	0	0	0	603	903	0
494	3	0	0	0	0	0	0	200	300	0	0	0	0	0	0	0	200	903	0	0	0	0	0	0	0	603	903	0
494	4	0	0	0	0	0	0	200	300	0	0	0	0	0	0	0	200	903	0	0	0	0	0	0	0	603	903	0
494	5	0	0	0	0	0	0	200	300	0	0	0	0	0	0	0	200	903	0	0	0	0	0	0	0	603	903	0
494	6	0	0	0	0	0	0	200	300	0	0	0	0	0	0	0	200	903	0	0	0	0	0	0	0	603	903	0
494	7	0	0	0	0	0	0	200	300	0	0	0	0	0	0	0	200	903	0	0	0	0	0	0	0	603	903	0
494	8	0	0	0	0	0	0	200	300	0	0	0	0	0	0	0	200	903	0	0	0	0	0	0	0	603	903	0
494	9	0	0	0	0	0	0	200	300	0	0	0	0	0	0	0	200	903	0	0	0	0	0	0	0	603	903	0
495	0	0	0	0	0	0	0	200	300	0	0	0	0	0	0	0	200	903	0	0	0	0	0	0	0	603	903	0
495	1	0	0	0	0	0	0	200	300	0	0	0	0	0	0	0	200	903	0	0	0	0	0	0	0	603	903	0
495	2	0	0	0	0	0	0	200	300	0	0	0	0	0	0	0	200	903	0	0	0	0	0	0	0	603	903	0
495	3	0	0	0	0	0	0	200	300	0	0	0	0	0	0	0	200	903	0	0	0	0	0	0	0	603	903	0
495	4	0	0	0	0	0	0	200	300	0	0	0	0	0	0	0	200	903	0	0	0	0	0	0	0	603	903	0
495	5	0	0	0	0	0	0	200	300	0	0	0	0	0	0	0	200	903	0	0	0	0	0	0	0	603	903	0
495	6	0	0	0	0	0	0	200	300	0	0	0	0	0	0	0	200	903	0	0	0	0	0	0	0	603	903	0
495	7	0	0	0	0	0	0	200	300	0	0	0	0	0	0	0	200	903	0	0	0	0	0	0	0	603	903	0
495	8	0	0	0	0	0	0	200	300	0	0	0	0	0	0	0	200	903	0	0	0	0	0	0	0	603	903	0
495	9	0	0	0	0	0	0	200	300	0	0	0	0	0	0	0	200	903	0	0	0	0	0	0	0	603	903	0
496	0	0	0	0	0	0	0	200	300	0	0	0	0	0	0	0	200	903	0	0	0	0	0	0	0	603	903	0
496	1	0	0	0	0	0	0	200	300	0	0	0	0	0	0	0	200	903	0	0	0	0	0	0	0	603	903	0
496	2	0	0	0	0	0	0	200	300	0	0	0	0	0	0	0	200	903	0	0	0	0	0	0	0	603	903	0
496	3	0	0	0	0	0	0	200	300	0	0	0	0	0	0	0	200	903	0	0	0	0	0	0	0	603	903	0
496	4	0	0	0	0	0	0	200	300	0	0	0	0	0	0	0	200	903	0	0	0	0	0	0	0	603	903	0
496	5	0	0	0	0	0	0	200	300	0	0	0	0	0	0	0	200	903	0	0	0	0	0	0	0	603	903	0
496	6	0	0	0	0	0	0	200	300	0	0	0	0	0	0	0	200	903	0	0	0	0	0	0	0	603	903	0
496	7	0	0	0	0	0	0	200	300	0	0	0	0	0	0	0	200	903	0	0	0	0	0	0	0	603	903	0
496	8	0	0	0	0	0	0	200	300	0	0	0	0	0	0	0	200	903	0	0	0	0	0	0	0	603	903	0
496	9	0	0	0	0	0	0	200	300	0	0	0	0	0	0	0	200	903	0	0	0	0	0	0	0	603	903	0
497	0	0	0	0	0	0	0	200	300	0	0	0	0	0	0	0	200	903	0	0	0	0	0	0	0	603	903	0
497	1	0	0	0	0	0	0	200	300	0	0	0	0	0	0	0	200	903	0	0	0	0	0	0	0	603	903	0
497	2	0	0	0	0	0	0	200	300	0	0	0	0	0	0	0	200	903	0	0	0	0	0	0	0	603	903	0
497	3	0	0	0	0	0	0	200	300	0	0	0	0	0	0	0	200	903	0	0	0	0	0	0	0	603	903	0
497	4	0	0	0	0	0	0	200	300	0	0	0	0	0	0	0	200	903	0	0	0	0	0	0	0	603	903	0
497	5	0	0	0	0	0	0	200	300	0	0	0	0	0	0	0	200	903	0	0	0	0	0	0	0	603	903	0
497	6	0	0	0	0	0	0	200	300	0	0	0	0	0	0	0	200	903	0	0	0	0	0	0	0	603	903	0
497	7	0	0	0	0	0	0	200	300	0	0	0	0	0	0	0	200	903	0	0	0	0	0	0	0	603	903	0
497	8	0	0	0	0	0	0	200	300	0	0	0	0	0	0	0	200	903	0	0	0	0	0	0	0	603	903	0
497	9	0	0	0	0	0	0	200	300	0	0	0	0	0	0	0	200	903	0	0	0	0	0	0	0	603	903	0
498	0	0	0	0	0	0	0	200	300	0	0	0	0	0	0	0	200	903	0	0	0	0	0	0	0	603	903	0
498	1	0	0	0	0	0	0	200	300	0	0	0	0	0	0	0	200	903	0	0	0	0	0	0	0	603	903	0
498	2	0	0	0	0	0	0	200	300	0	0	0	0	0	0	0	200	903	0	0	0	0	0	0	0	603	903	0
498	3	0	0	0	0	0	0	200	300	0	0	0	0	0	0	0	200	903	0	0	0	0	0	0	0	603	903	0
498	4	0	0	0	0	0	0	200	300	0	0	0	0	0	0	0	200	903	0	0	0	0	0	0	0	603	903	0
498	5	0	0	0	0	0	0	200	300	0	0	0	0	0	0	0	200	903	0	0	0	0	0	0	0	603	903	0
498	6	0	0	0	0	0	0	200	300	0	0	0	0	0	0	0	200	903	0	0	0	0	0	0	0	603	903	0
498	7	0	0	0	0	0	0	200	300	0	0	0	0	0	0	0	200	903	0	0	0	0	0	0	0	603	903	0
498	8	0	0	0	0	0	0	200	300	0	0	0	0	0	0	0	200	903	0	0	0	0	0	0	0	603	903	0
498	9	0	0	0	0	0	0	200	300	0	0	0	0	0	0	0	200	903	0	0	0	0	0	0	0	603	903	0
499	0	0	0	0	0	0	0	200	300	0	0	0	0	0	0	0	200	903	0	0	0	0	0	0	0	603	903	0
499	1	0	0	0	0	0	0	200	300	0	0	0	0	0	0	0	200	903	0	0	0	0	0	0	0	603	903	0
499	2	0	0	0	0	0	0	200	300	0	0	0	0	0	0	0	200	903	0	0	0	0	0	0	0	603	903	0
499	3	0	0	0	0	0	0	200	300	0	0	0	0	0	0	0	200	903	0	0	0	0	0	0	0	603	903	0
499	4	0	0	0	0	0	0	200	300	0	0	0	0	0	0	0	200	903	0	0	0	0	0	0	0	603	903	0
499	5	0	0	0	0	0	0	200	300	0	0	0	0	0	0	0	200	903	0	0	0	0	0	0	0	603	903	0
499	6	0	0	0	0	0	0	200	300	0	0	0	0	0	0	0	200	903	0	0	0	0	0	0	0	603	903	0
499	7	0	0	0	0	0	0	200	300	0	0	0	0	0	0	0	200	903	0	0	0	0	0	0	0	603	903	0
499	8	0	0	0	0	0	0	200	300	0	0	0	0	0	0	0	200	903	0	0	0	0	0	0	0	603	903	0
499	9	0	0	0	0	0	0	200	300	0	0	0	0	0	0	0	200	903	0	0	0	0	0	0	0	603	903	0
500	0	0	0	0	0	0	0	200	300	0	0	0	0	0	0	0	200	903	0	0	0	0	0	0	0	603	903	0
500	1	0	0	0	0	0	0	200	300	0	0	0	0	0	0	0	200	903	0	0	0	0	0	0	0	603	903	0
500	2	0	0	0	0	0	0	200	300	0	0	0	0	0	0	0	200	903	0	0	0	0	0	0	0	603	903	0
500	3	0	0	0	0	0	0	200	300	0	0	0	0	0	0	0	200	903	0	0	0	0	0	0	0	603	903	0
500	4	0	0	0	0	0	0	200	300	0	0	0	0	0	0	0	200	903	0	0	0	0	0	0	0	603	903	0
500	5	0	0	0	0	0	0	200	300	0	0	0	0	0	0	0	200	903	0	0	0	0	0	0	0	603	903	0
500	6	0	0	0	0	0	0	200	300	0	0	0	0	0	0	0	200	903	0	0	0	0	0	0	0	603	903	0
500	7	0	0	0	0	0	0	200	300	0	0	0	0	0	0	0	200	903	0	0	0	0	0	0	0	603	903	0
500	8	0	0	0	0	0	0	200	300	0	0	0	0	0	0	0	200	903	0	0	0	0	0	0	0	603	903	0
500	9	0	0	0	0	0	0	200	300	0	0	0	0	0	0	0	200	903	0	0	0	0	0	0	0	603	903	0
501	0	0	0	0	0	0	0	200	300	0	0	0	0	0	0	0	200	903	0	0	0	0	0	0	0	603	903	0
501	1	0	0	0	0	0	0	200	300	0	0	0	0	0	0	0	200	903	0	0	0	0	0	0	0	603	903	0
501	2	0	0	0	0	0	0	200	300	0	0	0	0	0	0	0	200	903	0	0	0	0	0	0	0	603	903	0
501	3	0	0	0	0	0	0	200	300	0	0	0	0	0	0	0	200	903	0	0	0	0	0	0	0	603	903	0
501	4	0	0	0	0	0	0	200	300	0	0	0	0	0	0	0	200	903	0	0	0	0	0	0	0	603	903	0
501	5	0	0	0	0	0	0	200	300	0	0	0	0	0	0	0	200	903	0	0	0	0	0	0	0	603	903	0
501	6	0	0	0	0	0	0	200	300	0	0	0	0	0	0	0	200	903	0	0	0	0	0	0	0	603	903	0
501	7	0	0	0	0	0	0	200	300	0	0	0	0	0	0	0	200	903	0	0	0	0	0	0	0	603	903	0
501	8	0	0	0	0	0	0	200	300	0	0	0	0	0	0	0	200	903	0	0	0	0	0	0	0	603	903	0
501	9	0	0	0	0	0	0	200	300	0	0	0	0	0	0	0	200	903	0	0	0	0	0	0	0	603	903	0
502	0	0	0	0	0	0	0	200	300	0	0	0	0	0	0	0	200	903	0	0	0	0	0	0	0	603	903	0
502	1	0	0	0	0	0	0	200	300	0	0	0	0	0	0	0	200	903	0	0	0	0	0	0	0	603	903	0
502	2	0	0	0	0	0	0	200	300	0	0	0	0	0	0	0	200	903	0	0	0	0	0	0	0	603	903	0
502	3	0	0	0	0	0	0	200	300	0	0	0	0	0	0	0	200	903	0	0	0	0	0	0	0	603	903	0
502	4	0	0	0	0	0	0	200	300	0	0	0	0	0	0	0	200	903	0	0	0	0	0	0	0	603	903	0
502	5	0	0	0	0	0	0	200	300	0	0	0	0	0	0	0	200	903	0	0	0	0	0	0	0	603	903	0
502	6	0	0	0	0	0	0	200	300	0	0	0	0	0	0	0	200	903	0	0	0	0	0	0	0	603	903	0
502	7	0	0	0	0	0	0	200	300	0	0	0	0	0	0	0	200	903	0	0	0	0	0	0	0	603	903	0
502	8	0	0	0	0	0	0	200	300	0	0	0	0	0	0	0	200	903	0	0	0	0	0	0	0	603	903	0
502	9	0	0	0	0	0	0	200	300	0	0	0	0	0	0	0	200	903	0	0	0	0	0	0	0	603	903	0
503	0	0	0	0	0	0	0	200	300	0	0	0	0	0	0	0	200	903	0	0	0	0	0	0	0	603	903	0
503	1	0	0	0	0	0	0	200	300	0	0	0	0	0	0	0	200	903	0	0	0	0	0	0	0	603	903	0
503	2	0	0	0	0	0	0	200	300	0	0	0	0	0	0	0	200	903	0	0	0	0	0	0	0	603	903	0
503	3	0	0	0	0	0	0	200	300	0	0	0	0	0	0	0	200	903	0	0	0	0	0	0	0	603	903	0
503	4	0	0	0	0	0	0	200	300	0	0	0	0	0	0	0	200	903	0	0	0	0	0	0	0	603	903	0
503	5	0	0	0	0	0	0	200	300	0	0	0	0	0	0	0	200	903	0	0	0	0	0	0	0	603	903	0
503	6	0	0	0	0	0	0	200	300	0	0	0	0	0	0	0	200	903	0	0	0	0	0	0	0	603	903	0
503	7	0	0	0	0	0	0	200	300	0	0	0	0	0	0	0	200	903	0	0	0	0	0	0	0	603	903	0
503	8	0	0	0	0	0	0	200	300	0	0	0	0	0	0	0	200	903	0	0	0	0	0	0	0	603	903	0
503	9	0	0	0	0	0	0	200	300	0	0	0	0	0	0	0	200	903	0	0	0	0	0	0	0	603	903	0
504	0	0	0	0	0	0	0	200	300	0	0	0	0	0	0	0	200	903	0	0	0	0	0	0	0	603	903	0
504	1	0	0	0	0	0	0	200	300	0	0	0	0	0	0	0	200	903	0	0	0	0	0	0	0	603	903	0
504	2	0	0	0	0	0	0	200	300	0	0	0	0	0	0	0	200	903	0	0	0	0	0	0	0	603	903	0
504	3	0	0	0	0	0	0	200	300	0	0	0	0	0	0	0	200	903	0	0	0	0	0	0	0	603	903	0
504	4	0	0	0	0	0	0	200	300	0	0	0	0	0	0	0	200	903	0	0	0	0	0	0	0	603	903	0
504	5	0	0	0	0	0	0	200	300	0	0	0	0	0	0	0	200	903	0	0	0	0	0	0	0	603	903	0
504	6	0	0	0	0	0	0	200	300	0	0	0	0	0	0	0	200	903	0	0	0	0	0	0	0	603	903	0
504	7	0	0	0	0	0	0	200	300	0	0	0	0	0	0	0	200	903	0	0	0	0	0	0	0	603	903	0
504	8	0	0	0	0	0	0	200	300	0	0	0	0	0	0	0	200	903	0	0	0	0	0	0	0	603	903	0
504	9	0	0	0	0	0	0	200	300	0	0	0	0	0	0	0	200	903	0	0	0	0	0	0	0	603	903	0
505	0	0	0	0	0	0	0	200	300	0	0	0	0	0	0	0	200	903	0	0	0	0	0	0	0	603	903	0
505	1	0	0	0	0	0	0	200	300	0	0	0	0	0	0	0	200	903	0	0	0	0	0	0	0	603	903	0
505	2	0	0	0	0	0	0	200	300	0	0	0	0	0	0	0	200	903	0	0	0	0	0	0	0	603	903	0
505	3	0	0	0	0	0	0	200	300	0	0	0	0	0	0	0	200	903	0	0	0	0	0	0	0	603	903	0
505	4	0	0	0	0	0	0	200	300	0	0	0	0	0	0	0	200	903	0	0	0	0	0	0	0	603	903	0
505	5	0	0	0	0	0	0	200	300	0	0	0	0	0	0	0	200	903	0	0	0	0	0	0	0	603	903	0
505	6	0	0	0	0	0	0	200	300	0	0	0	0	0	0	0	200	903	0	0	0	0	0	0	0	603	903	0
505	7	0	0	0	0	0	0	200	300	0	0	0	0	0	0	0	200	903	0	0	0	0	0	0	0	603	903	0
505	8	0	0	0	0	0	0	200	300	0	0	0	0	0	0	0	200	903	0	0	0	0	0	0	0	603	903	0
505	9	0	0	0	0	0	0	200	300	0	0	0	0	0	0	0	200	903	0	0	0	0	0	0	0	603	903	0
506	0	0	0	0	0	0	0	200	300	0	0	0	0	0	0	0	200	903	0	0	0	0	0	0	0	603	903	0
506	1	0	0	0	0	0	0	200	300	0	0	0	0	0	0	0	200	903	0	0	0	0	0	0	0	603	903	0
506	2	0	0	0	0	0	0	200	300	0	0	0	0	0	0	0	200	903	0	0	0	0	0	0	0	603	903	0
506	3	0	0	0	0	0	0	200	300	0	0	0	0	0	0	0	200	903	0	0	0	0	0	0	0	603	903	0
506	4	0	0	0	0	0	0	200	300	0	0	0	0	0	0	0	200	903	0	0	0	0	0	0	0	603	903	0
506	5	0	0	0	0	0	0	200	300	0	0	0	0	0	0	0	200	903	0	0	0	0	0	0	0	603	903	0
506	6	0	0	0	0	0	0	200	300	0	0	0	0	0	0	0	200	903	0	0	0	0	0	0	0	603	903	0
506	7	0	0	0	0	0	0	200	300	0	0	0	0	0	0	0	200	903	0	0	0	0	0	0	0	603	903	0
506	8	0	0	0	0	0	0	200	300	0	0	0	0	0	0	0	200	903	0	0	0	0	0	0	0	603	903	0
506	9	0	0	0	0	0	0	200	300	0	0	0	0	0	0	0	200	903	0	0	0	0	0	0	0	603	903	0
507	0	0	0	0	0	0	0	200	300	0	0	0	0	0	0	0	200	903	0	0	0	0	0	0	0	603	903	0
507	1	0	0	0	0	0	0	200	300	0	0	0	0	0	0	0	200	903	0	0	0	0	0	0	0	603	903	0
507	2	0	0	0	0	0	0	200	300	0	0	0	0	0	0	0	200	903	0	0	0	0	0	0	0	603	903	0
507	3	0	0	0	0	0	0	200	300	0	0	0	0	0	0	0	200	903	0	0	0	0	0	0	0	603	903	0
507	4	0	0	0	0	0	0	200	300	0	0	0	0	0	0	0	200	903	0	0	0	0	0	0	0	603	903	0
507	5	0	0	0	0	0	0	200	300	0	0	0	0	0	0	0	200	903	0	0	0	0	0	0	0	603	903	0
507	6	0	0	0	0	0	0	200	300	0	0	0	0	0	0	0	200	903	0	0	0	0	0	0	0	603	903	0
507	7	0	0	0	0	0	0	200	300	0	0	0	0	0	0	0	200	903	0	0	0	0	0	0	0	603	903	0
507	8	0	0	0	0	0	0	200	300	0	0	0	0	0	0	0	200	903	0	0	0	0	0	0	0	603	903	0
507	9	0	0	0	0	0	0	200	300	0	0	0	0	0	0	0	200	903	0	0	0	0	0	0	0	603	903	0
508	0	0	0	0	0	0	0	200	300	0	0	0	0	0	0	0	200	903	0	0	0	0	0	0	0	603	903	0
508	1	0	0	0	0	0	0	200	300	0	0	0	0	0	0	0	200	903	0	0	0	0	0	0	0	603	903	0
508	2	0	0	0	0	0	0	200	300	0	0	0	0	0	0	0	200	903	0	0	0	0	0	0	0	603	903	0
508	3	0	0	0	0	0	0	200	300	0	0	0	0	0	0	0	200	903	0	0	0	0	0	0	0	603	903	0
508	4	0	0	0	0	0	0	200	300	0	0	0	0	0	0	0	200	903	0	0	0	0	0	0	0	603	903	0
508	5	0	0	0	0	0	0	200	300	0	0	0	0	0	0	0	200	903	0	0	0	0	0	0	0	603	903	0
508	6	0	0	0	0	0	0	200	300	0	0	0	0	0	0	0	200	903	0	0	0	0	0	0	0	603	903	0
508	7	0	0	0	0	0	0	200	300	0	0	0	0	0	0	0	200	903	0	0	0	0	0	0	0	603	903	0
508	8	0	0	0	0	0	0	200	300	0	0	0	0	0	0	0	200	903	0	0	0	0	0	0	0	603	903	0
508	9	0	0	0	0	0	0	200	300	0	0	0	0	0	0	0	200	903	0	0	0	0	0	0	0	603	903	0
509	0	0	0	0	0	0	0	200	300	0	0	0	0	0	0	0	200	903	0	0	0	0	0	0	0	603	903	0
509	1	0	0	0	0	0	0	200	300	0	0	0	0	0	0	0	200	903	0	0	0	0	0	0	0	603	903	0
509	2	0	0	0	0	0	0	200	300	0	0	0	0	0	0	0	200	903	0	0	0	0	0	0	0	603	903	0
509	3	0	0	0	0	0	0	200	300	0	0	0	0	0	0	0	200	903	0	0	0	0	0	0	0	603	903	0
509	4	0	0	0	0	0	0	200	300	0	0	0	0	0	0	0	200	903	0	0	0	0	0	0	0	603	903	0
509	5	0	0	0	0	0	0	200	300	0	0	0	0	0	0	0	200	903	0	0	0	0	0	0	0	603	903	0
509	6	0	0	0	0	0	0	200	300	0	0	0	0	0	0	0	200	903	0	0	0	0	0	0	0	603	903	0
509	7	0	0	0	0	0	0	200	300	0	0	0	0	0	0	0	200	903	0	0	0	0	0	0	0	603	903	0
509	8	0	0	0	0	0	0	200	300	0	0	0	0	0	0	0	200	903	0	0	0	0	0	0	0	603	903	0
509	9	0	0	0	0	0	0	200	300	0	0	0	0	0	0	0	200	903	0	0	0	0	0	0	0	603	903	0
510	0	0	0	0	0	0	0	200	300	0	0	0	0	0	0	0	200	903	0	0	0	0	0	0	0	603	903	0
510	1	0	0	0	0	0	0	200	300	0	0	0	0	0	0	0	200	903	0	0	0	0	0	0	0	603	903	0
510	2	0	0	0	0	0	0	200	300	0	0	0	0	0	0	0	200	903	0	0	0	0	0	0	0	603	903	0
510	3	0	0	0	0	0	0	200	300	0	0	0	0	0	0	0	200	903	0	0	0	0	0	0	0	603	903	0
510	4	0	0	0	0	0	0	200	300	0	0	0	0	0	0	0	200	903	0	0	0	0	0	0	0	603	903	0
510	5	0	0	0	0	0	0	200	300	0	0	0	0	0	0	0	200	903	0	0	0	0	0	0	0	603	903	0
510	6	0	0	0	0	0	0	200	300	0	0	0	0	0	0	0	200	903	0	0	0	0	0	0	0	603	903	0
510	7	0	0	0	0	0	0	200	300	0	0	0	0	0	0	0	200	903	0	0	0	0	0	0	0	603	903	0
510	8	0	0	0	0	0	0	200	300	0	0	0	0	0	0	0	200	903	0	0	0	0	0	0	0	603	903	0
510	9	0	0	0	0	0	0	200	300	0	0	0	0	0	0	0	200	903	0	0	0	0	0	0	0	603	903	0
511	0	0	0	0	0	0	0	200	300	0	0	0	0	0	0	0	200	903	0	0	0	0	0	0	0	603	903	0
511	1	0	0	0	0	0	0	200	300	0	0	0	0	0	0	0	200	903	0	0	0	0	0	0	0	603	903	0
511	2	0	0	0	0	0	0	200	300	0	0	0	0	0	0	0	200	903	0	0	0	0	0	0	0	603	903	0
511	3	0	0	0	0	0	0	200	300	0	0	0	0	0	0	0	200	903	0	0	0	0	0	0	0	603	903	0
511	4	0	0	0	0	0	0	200	300	0	0	0	0	0	0	0	200	903	0	0	0	0	0	0	0	603	903	0
511	5	0	0	0	0	0	0	200	300	0	0	0	0	0	0	0	200	903	0	0	0	0	0	0	0	603	903	0
511	6	0	0	0	0	0	0	200	300	0	0	0	0	0	0	0	200	903	0	0	0	0	0	0	0	603	903	0
511	7	0	0	0	0	0	0	200	300	0	0	0	0	0	0	0	200	903	0	0	0	0	0	0	0	603	903	0
511	8	0	0	0	0	0	0	200	300	0	0	0	0	0	0	0	200	903	0	0	0	0	0	0	0	603	903	0
511	9	0	0	0	0	0	0	200	300	0	0	0	0	0	0	0	200	903	0	0	0	0	0	0	0	603	903	0
512	0	0	0	0	0	0	0	200	300	0	0	0	0	0	0	0	200	903	0	0	0	0	0	0	0	603	903	0
512	1	0	0	0	0	0	0	200	300	0	0	0	0	0	0	0	200	903	0	0	0	0	0	0	0	603	903	0
512	2	0	0	0	0	0	0	200	300	0	0	0	0	0	0	0	200	903	0	0	0	0	0	0	0	603	903	0
512	3	0	0	0	0	0	0	200	300	0	0	0	0	0	0	0	200	903	0	0	0	0	0	0	0	603	903	0
512	4	0	0	0	0	0	0	200	300	0	0	0	0	0	0	0	200	903	0	0	0	0	0	0	0	603	903	0
512	5	0	0	0	0	0	0	200	300	0	0	0	0	0	0	0	200	903	0	0	0	0	0	0	0	603	903	0
512	6	0	0	0	0	0	0	200	300	0	0	0	0	0	0	0	200	903	0	0	0	0	0	0	0	603	903	0
512	7	0	0	0	0	0	0	200	300	0	0	0	0	0	0	0	200	903	0	0	0	0	0	0	0	603	903	0
512	8	0	0	0	0	0	0	200	300	0	0	0	0	0	0	0	200	903	0	0	0	0	0	0	0	603	903	0
512	9	0	0	0	0	0	0	200	300	0	0	0	0	0	0	0	200	903	0	0	0	0	0	0	0	603	903	0
513	0	0	0	0	0	0	0	200	300	0	0	0	0	0	0	0	200	903	0	0	0	0	0	0	0	603	903	0
513	1	0	0	0	0	0	0	200	300	0	0	0	0	0	0	0	200	903	0	0	0	0	0	0	0	603	903	0
513	2	0	0	0	0	0	0	200	300	0	0	0	0	0	0	0	200	903	0	0	0	0	0	0	0	603	903	0
513	3	0	0	0	0	0	0	200	300	0	0	0	0	0	0	0	200	903	0	0	0	0	0	0	0	603	903	0
513	4	0	0	0	0	0	0	200	300	0	0	0	0	0	0	0	200	903	0	0	0	0	0	0	0	603	903	0
513	5	0	0	0	0	0	0	200	300	0	0	0	0	0	0	0	200	903	0	0	0	0	0	0	0	603	903	0
513	6	0	0	0	0	0	0	200	300	0	0	0	0	0	0	0	200	903	0	0	0	0	0	0	0	603	903	0
513	7	0	0	0	0	0	0	200	300	0	0	0	0	0	0	0	200	903	0	0	0	0	0	0	0	603	903	0
513	8	0	0	0	0	0	0	200	300	0	0	0	0	0	0	0	200	903	0	0	0	0	0	0	0	603	903	0
513	9	0	0	0	0	0	0	200	300	0	0	0	0	0	0	0	200	903	0	0	0	0	0	0	0	603	903	0
514	0	0	0	0	0	0	0	200	300	0	0	0	0	0	0	0	200	903	0	0	0	0	0	0	0	603	903	0
514	1	0	0	0	0	0	0	200	300	0	0	0	0	0	0	0	200	903	0	0	0	0	0	0	0	603	903	0
514	2	0	0	0	0	0	0	200	300	0	0	0	0	0	0	0	200	903	0	0	0	0	0	0	0	603	903	0
514	3	0	0	0	0	0	0	200	300	0	0	0	0	0	0	0	200	903	0	0	0	0	0	0	0	603	903	0
514	4	0	0	0	0	0	0	200	300	0	0	0	0	0	0	0	200	903	0	0	0	0	0	0	0	603	903	0
514	5	0	0	0	0	0	0	200	300	0	0	0	0	0	0	0	200	903	0	0	0	0	0	0	0	603	903	0
514	6	0	0	0	0	0	0	200	300	0	0	0	0	0	0	0	200	903	0	0	0	0	0	0	0	603	903	0
514	7	0	0	0	0	0	0	200	300	0	0	0	0	0	0	0	200	903	0	0	0	0	0	0	0	603	903	0
514	8	0	0	0	0	0	0	200	300	0	0	0	0	0	0	0	200	903	0	0	0	0	0	0	0	603	903	0
514	9	0	0	0	0	0	0	200	300	0	0	0	0	0	0	0	200	903	0	0	0	0	0	0	0	603	903	0
515	0	0	0	0	0	0	0	200	300	0	0	0	0	0	0	0	200	903	0	0	0	0	0	0	0	603	903	0
515	1	0	0	0	0	0	0	200	300	0	0	0	0	0	0	0	200	903	0	0	0	0	0	0	0	603	903	0
515	2	0	0	0	0	0	0	200	300	0	0	0	0	0	0	0	200	903	0	0	0	0	0	0	0	603	903	0
515	3	0	0	0	0	0	0	200	300	0	0	0	0	0	0	0	200	903	0	0	0	0	0	0	0	603	903	0
515	4	0	0	0	0	0	0	200	300	0	0	0	0	0	0	0	200	903	0	0	0	0	0	0	0	603	903	0
515	5	0	0	0	0	0	0	200	300	0	0	0	0	0	0	0	200	903	0	0	0	0	0	0	0	603	903	0
515	6	0	0	0	0	0	0	200	300	0	0	0	0	0	0	0	200	903	0	0	0	0	0	0	0	603	903	0
515	7	0	0	0	0	0	0	200	300	0	0	0	0	0	0	0	200	903	0	0	0	0	0	0	0	603	903	0
515	8	0	0	0	0	0	0	200	300	0	0	0	0	0	0	0	200	903	0	0	0	0	0	0	0	603	903	0
515	9	0	0	0	0	0	0	200	300	0	0	0	0	0	0	0	200	903	0	0	0	0	0	0	0	603	903	0
516	0	0	0	0	0	0	0	200	300	0	0	0	0	0	0	0	200	903	0	0	0	0	0	0	0	603	903	0
516	1	0	0	0	0	0	0	200	300	0	0	0	0	0	0	0	200	903	0	0	0	0	0	0	0	603	903	0
516	2	0	0	0	0	0	0	200	300	0	0	0	0	0	0	0	200	903	0	0	0	0	0	0	0	603	903	0
516	3	0	0	0	0	0	0	200	300	0	0	0	0	0	0	0	200	903	0	0	0	0	0	0	0	603	903	0
516	4	0	0	0	0	0	0	200	300	0	0	0	0	0	0	0	200	903	0	0	0	0	0	0	0	603	903	0
516	5	0	0	0	0	0	0	200	300	0	0	0	0	0	0	0	200	903	0	0	0	0	0	0	0	603	903	0
516	6	0	0	0	0	0	0	200	300	0	0	0	0	0	0	0	200	903	0	0	0	0	0	0	0	603	903	0
516	7	0	0	0	0	0	0	200	300	0	0	0	0	0	0	0	200	903	0	0	0	0	0	0	0	603	903	0
516	8	0	0	0	0	0	0	200	300	0	0	0	0	0	0	0	200	903	0	0	0	0	0	0	0	603	903	0
516	9	0	0	0	0	0	0	200	300	0	0	0	0	0	0	0	200	903	0	0	0	0	0	0	0	603	903	0
517	0	0	0	0	0	0	0	200	300	0	0	0	0	0	0	0	200	903	0	0	0	0	0	0	0	603	903	0
517	1	0	0	0	0	0	0	200	300	0	0	0	0	0	0	0	200	903	0	0	0	0	0	0	0	603	903	0
517	2	0	0	0	0	0	0	200	300	0	0	0	0	0	0	0	200	903	0	0	0	0	0	0	0	603	903	0
517	3	0	0	0	0	0	0	200	300	0	0	0	0	0	0	0	200	903	0	0	0	0	0	0	0	603	903	0
517	4	0	0	0	0	0	0	200	300	0	0	0	0	0	0	0	200	903	0	0	0	0	0	0	0	603	903	0
517	5	0	0	0	0	0	0	200	300	0	0	0	0	0	0	0	200	903	0	0	0	0	0	0	0	603	903	0
517	6	0	0	0	0	0	0	200	300	0	0	0	0	0	0	0	200	903	0	0	0	0	0	0	0	603	903	0
517	7	0	0	0	0	0	0	200	300	0	0	0	0	0	0	0	200	903	0	0	0	0	0	0	0	603	903	0
517	8	0	0	0	0	0	0	200	300	0	0	0	0	0	0	0	200	903	0	0	0	0	0	0	0	603	903	0
517	9	0	0	0	0	0	0	200	300	0	0	0	0	0	0	0	200	903	0	0	0	0	0	0	0	603	903	0
518	0	0	0	0	0	0	0	200	300	0	0	0	0	0	0	0	200	903	0	0	0	0	0	0	0	603	903	0
518	1	0	0	0	0	0	0	200	300	0	0	0	0	0	0	0	200	903	0	0	0	0	0	0	0	603	903	0
518	2	0	0	0	0	0	0	200	300	0	0	0	0	0	0	0	200	903	0	0	0	0	0	0	0	603	903	0
518	3	0	0	0	0	0	0	200	300	0	0	0	0	0	0	0	200	903	0	0	0	0	0	0	0	603	903	0
518	4	0	0	0	0	0	0	200	300	0	0	0	0	0	0	0	200	903	0	0	0	0	0	0	0	603	903	0
518	5	0	0	0	0	0	0	200	300	0	0	0	0	0	0	0	200	903	0	0	0	0	0	0	0	603	903	0
518	6	0	0	0	0	0	0	200	300	0	0	0	0	0	0	0	200	903	0	0	0	0	0	0	0	603	903	0
518	7	0	0	0	0	0	0	200	300	0	0	0	0	0	0	0	200	903	0	0	0	0	0	0	0	603	903	0
518	8	0	0	0	0	0	0	200	300	0	0	0	0	0	0	0	200	903	0	0	0	0	0	0	0	603	903	0
518	9	0	0	0	0	0	0	200	300	0	0	0	0	0	0	0	200	903	0	0	0	0	0	0	0	603	903	0
519	0	0	0	0	0	0	0	200	300	0	0	0	0	0	0	0	200	903	0	0	0	0	0	0	0	603	903	0
519	1	0	0	0	0	0	0	200	300	0	0	0	0	0	0	0	200	903	0	0	0	0	0	0	0	603	903	0
519	2	0	0	0	0	0	0	200	300	0	0	0	0	0	0	0	200	903	0	0	0	0	0	0	0	603	903	0
519	3	0	0	0	0	0	0	200	300	0	0	0	0	0	0	0	200	903	0	0	0	0	0	0	0	603	903	0
519	4	0	0	0	0	0	0	200	300	0	0	0	0	0	0	0	200	903	0	0	0	0	0	0	0	603	903	0
519	5	0	0	0	0	0	0	200	300	0	0	0	0	0	0	0	200	903	0	0	0	0	0	0	0	603	903	0
519	6	0	0	0	0	0	0	200	300	0	0	0	0	0	0	0	200	903	0	0	0	0	0	0	0	603	903	0
519	7	0	0	0	0	0	0	200	300	0	0	0	0	0	0	0	200	903	0	0	0	0	0	0	0	603	903	0
519	8	0	0	0	0	0	0	200	300	0	0	0	0	0	0	0	200	903	0	0	0	0	0	0	0	603	903	0
519	9	0	0	0	0	0	0	200	300	0	0	0	0	0	0	0	200	903	0	0	0	0	0	0	0	603	903	0
520	0	0	0	0	0	0	0	200	300	0	0	0	0	0	0	0	200	903	0	0	0	0	0	0	0	603	903	0
520	1	0	0	0	0	0	0	200	300	0	0	0	0	0	0	0	200	903	0	0	0	0	0	0	0	603	903	0
520	2	0	0	0	0	0	0	200	300	0	0	0	0	0	0	0	200	903	0	0	0	0	0	0	0	603	903	0
520	3	0	0	0	0	0	0	200	300	0	0	0	0	0	0	0	200	903	0	0	0	0	0	0	0	603	903	0
520	4	0	0	0	0	0	0	200	300	0	0	0	0	0	0	0	200	903	0	0	0	0	0	0	0	603	903	0
520	5	0	0	0	0	0	0	200	300	0	0	0	0	0	0	0	200	903	0	0	0	0	0	0	0	603	903	0
520	6	0	0	0	0	0	0	200	300	0	0	0	0	0	0	0	200	903	0	0	0	0	0	0	0	603	903	0
520	7	0	0	0	0	0	0	200	300	0	0	0	0	0	0	0	200	903	0	0	0	0	0	0	0	603	903	0
520	8	0	0	0	0	0	0	200	300	0	0	0	0	0	0	0	200	903	0	0	0	0	0	0	0	603	903	0
520	9	0	0	0	0	0	0	200	300	0	0	0	0	0	0	0	200	903	0	0	0	0	0	0	0	603	903	0
521	0	0	0	0	0	0	0	200	300	0	0	0	0	0	0	0	200	903	0	0	0	0	0	0	0	603	903	0
521	1	0	0	0	0	0	0	200	300	0	0	0	0	0	0	0	200	903	0	0	0	0	0	0	0	603	903	0
521	2	0	0	0	0	0	0	200	300	0	0	0	0	0	0	0	200	903	0	0	0	0	0	0	0	603	903	0
521	3	0	0	0	0	0	0	200	300	0	0	0	0	0	0	0	200	903	0	0	0	0	0	0	0	603	903	0
521	4	0	0	0	0	0	0	200	300	0	0	0	0	0	0	0	200	903	0	0	0	0	0	0	0	603	903	0
521	5	0	0	0	0	0	0	200	300	0	0	0	0	0	0	0	200	903	0	0	0	0	0	0	0	603	903	0
521	6	0	0	0	0	0	0	200	300	0	0	0	0	0	0	0	200	903	0	0	0	0	0	0	0	603	903	0
521	7	0	0	0	0	0	0	200	300	0	0	0	0	0	0	0	200	903	0	0	0	0	0	0	0	603	903	0
521	8	0	0	0	0	0	0	200	300	0	0	0	0	0	0	0	200	903	0	0	0	0	0	0	0	603	903	0
521	9	0	0	0	0	0	0	200	300	0	0	0	0	0	0	0	200	903	0	0	0	0	0	0	0	603	903	0
522	0	0	0	0	0	0	0	200	300	0	0	0	0	0	0	0	200	903	0	0	0	0	0	0	0	603	903	0
522	1	0	0	0	0	0	0	200	300	0	0	0	0	0	0	0	200	903	0	0	0	0	0	0	0	603	903	0
522	2	0	0	0	0	0	0	200	300	0	0	0	0	0	0	0	200	903	0	0	0	0	0	0	0	603	903	0
522	3	0	0	0	0	0	0	200	300	0	0	0	0	0	0	0	200	903	0	0	0	0	0	0	0	603	903	0
522	4	0	0	0	0	0	0	200	300	0	0	0	0	0	0	0	200	903	0	0	0	0	0	0	0	603	903	0
522	5	0	0	0	0	0	0	200	300	0	0	0	0	0	0	0	200	903	0	0	0	0	0	0	0	603	903	0
522	6	0	0	0	0	0	0	200	300	0	0	0	0	0	0	0	200	903	0	0	0	0	0	0	0	603	903	0
522	7	0	0	0	0	0	0	200	300	0	0	0	0	0	0	0	200	903	0	0	0	0	0	0	0	603	903	0
522	8	0	0	0	0	0	0	200	300	0	0	0	0	0	0	0	200	903	0	0	0	0	0	0	0	603	903	0
522	9	0	0	0	0	0	0	200	300	0	0	0	0	0	0	0	200	903	0	0	0	0	0	0	0	603	903	0
523	0	0	0	0	0	0	0	200	300	0	0	0	0	0	0	0	200	903	0	0	0	0	0	0	0	603	903	0
523	1	0	0	0	0	0	0	200	300	0	0	0	0	0	0	0	200	903	0	0	0	0	0	0	0	603	903	0
523	2	0	0	0	0	0	0	200	300	0	0	0	0	0	0	0	200	903	0	0	0	0	0	0	0	603	903	0
523	3	0	0	0	0	0	0	200	300	0	0	0	0	0	0	0	200	903	0	0	0	0	0	0	0	603	903	0
523	4	0	0	0	0	0	0	200	300	0	0	0	0	0	0	0	200	903	0	0	0	0	0	0	0	603	903	0
523	5	0	0	0	0	0	0	200	300	0	0	0	0	0	0	0	200	903	0	0	0	0	0	0	0	603	903	0
523	6	0	0	0	0	0	0	200	300	0	0	0	0	0	0	0	200	903	0	0	0	0	0	0	0	603	903	0
523	7	0	0	0	0	0	0	200	300	0	0	0	0	0	0	0	200	903	0	0	0	0	0	0	0	603	903	0
523	8	0	0	0	0	0	0	200	300	0	0	0	0	0	0	0	200	903	0	0	0	0	0	0	0	603	903	0
523	9	0	0	0	0	0	0	200	300	0	0	0	0	0	0	0	200	903	0	0	0	0	0	0	0	603	903	0
524	0	0	0	0	0	0	0	200	300	0	0	0	0	0	0	0	200	903	0	0	0	0	0	0	0	603	903	0
524	1	0	0	0	0	0	0	200	300	0	0	0	0	0	0	0	200	903	0	0	0	0	0	0	0	603	903	0
524	2	0	0	0	0	0	0	200	300	0	0	0	0	0	0	0	200	903	0	0	0	0	0	0	0	603	903	0
524	3	0	0	0	0	0	0	200	300	0	0	0	0	0	0	0	200	903	0	0	0	0	0	0	0	603	903	0
524	4	0	0	0	0	0	0	200	300	0	0	0	0	0	0	0	200	903	0	0	0	0	0	0	0	603	903	0
524	5	0	0	0	0	0	0	200	300	0	0	0	0	0	0	0	200	903	0	0	0	0	0	0	0	603	903	0
524	6	0	0	0	0	0	0	200	300	0	0	0	0	0	0	0	200	903	0	0	0	0	0	0	0	603	903	0
524	7	0	0	0	0	0	0	200	300	0	0	0	0	0	0	0	200	903	0	0	0	0	0	0	0	603	903	0
524	8	0	0	0	0	0	0	200	300	0	0	0	0	0	0	0	200	903	0	0	0	0	0	0	0	603	903	0
524	9	0	0	0	0	0	0	200	300	0	0	0	0	0	0	0	200	903	0	0	0	0	0	0	0	603	903	0
525	0	0	0	0	0	0	0	200	300	0	0	0	0	0	0	0	200	903	0	0	0	0	0	0	0	603	903	0
525	1	0	0	0	0	0	0	200	300	0	0	0	0	0	0	0	200	903	0	0	0	0	0	0	0	603	903	0
525	2	0	0	0	0	0	0	200	300	0	0	0	0	0	0	0	200	903	0	0	0	0	0	0	0	603	903	0
525	3	0	0	0	0	0	0	200	300	0	0	0	0	0	0	0	200	903	0	0	0	0	0	0	0	603	903	0
525	4	0	0	0	0	0	0	200	300	0	0	0	0	0	0	0	200	903	0	0	0	0	0	0	0	603	903	0
525	5	0	0	0	0	0	0	200	300	0	0	0	0	0	0	0	200	903	0	0	0	0	0	0	0	603	903	0
525	6	0	0	0	0	0	0	200	300	0	0	0	0	0	0	0	200	903	0	0	0	0	0	0	0	603	903	0
525	7	0	0	0	0	0	0	200	300	0	0	0	0	0	0	0	200	903	0	0	0	0	0	0	0	603	903	0
525	8	0	0	0	0	0	0	200	300	0	0	0	0	0	0	0	200	903	0	0	0	0	0	0	0	603	903	0
525	9	0	0	0	0	0	0	200	300	0	0	0	0	0	0	0	200	903	0	0	0	0	0	0	0	603	903	0
526	0	0	0	0	0	0	0	200	300	0	0	0	0	0	0	0	200	903	0	0	0	0	0	0	0	603	903	0
526	1	0	0	0	0	0	0	200	300	0	0	0	0	0	0	0	200	903	0	0	0	0	0	0	0	603	903	0
526	2	0	0	0	0	0	0	200	300	0	0	0	0	0	0	0	200	903	0	0	0	0	0	0	0	603	903	0
526	3	0	0	0	0	0	0	200	300	0	0	0	0	0	0	0	200	903	0	0	0	0	0	0	0	603	903	0
526	4	0	0	0	0	0	0	200	300	0	0	0	0	0	0	0	200	903	0	0	0	0	0	0	0	603	903	0
526	5	0	0	0	0	0	0	200	300	0	0	0	0	0	0	0	200	903	0	0	0	0	0	0	0	603	903	0
526	6	0	0	0	0	0	0	200	300	0	0	0	0	0	0	0	200	903	0	0	0	0	0	0	0	603	903	0
526	7	0	0	0	0	0	0	200	300	0	0	0	0	0	0	0	200	903	0	0	0	0	0	0	0	603	903	0
526	8	0	0	0	0	0	0	200	300	0	0	0	0	0	0	0	200	903	0	0	0	0	0	0	0	603	903	0
526	9	0	0	0	0	0	0	200	300	0	0	0	0	0	0	0	200	903	0	0	0	0	0	0	0	603	903	0
527	0	0	0	0	0	0	0	200	300	0	0	0	0	0	0	0	200	903	0	0	0	0	0	0	0	603	903	0
527	1	0	0	0	0	0	0	200	300	0	0	0	0	0	0	0	200	903	0	0	0	0	0	0	0	603	903	0
527	2	0	0	0	0	0	0	200	300	0	0	0	0	0	0	0	200	903	0	0	0	0	0	0	0	603	903	0
527	3	0	0	0	0	0	0	200	300	0	0	0	0	0	0	0	200	903	0	0	0	0	0	0	0	603	903	0
527	4	0	0	0	0	0	0	200	300	0	0	0	0	0	0	0	200	903	0	0	0	0	0	0	0	603	903	0
527	5	0	0	0	0	0	0	200	300	0	0	0	0	0	0	0	200	903	0	0	0	0	0	0	0	603	903	0
527	6	0	0	0	0	0	0	200	300	0	0	0	0	0	0	0	200	903	0	0	0	0	0	0	0	603	903	0
527	7	0	0	0	0	0	0	200	300	0	0	0	0	0	0	0	200	903	0	0	0	0	0	0	0	603	903	0
527	8	0	0	0	0	0	0	200	300	0	0	0	0	0	0	0	200	903	0	0	0	0	0	0	0	603	903	0
527	9	0	0	0	0	0	0	200	300	0	0	0	0	0	0	0	200	903	0	0	0	0	0	0	0	603	903	0
528	0	0	0	0	0	0	0	200	300	0	0	0	0	0	0	0	200	903	0	0	0	0	0	0	0	603	903	0
528	1	0	0	0	0	0	0	200	300	0	0	0	0	0	0	0	200	903	0	0	0	0	0	0	0	603	903	0
528	2	0	0	0	0	0	0	200	300	0	0	0	0	0	0	0	200	903	0	0	0	0	0	0	0	603	903	0
528	3	0	0	0	0	0	0	200	300	0	0	0	0	0	0	0	200	903	0	0	0	0	0	0	0	603	903	0
528	4	0	0	0	0	0	0	200	300	0	0	0	0	0	0	0	200	903	0	0	0	0	0	0	0	603	903	0
528	5	0	0	0	0	0	0	200	300	0	0	0	0	0	0	0	200	903	0	0	0	0	0	0	0	603	903	0
528	6	0	0	0	0	0	0	200	300	0	0	0	0	0	0	0	200	903	0	0	0	0	0	0	0	603	903	0
528	7	0	0	0	0	0	0	200	300	0	0	0	0	0	0	0	200	903	0	0	0	0	0	0	0	603	903	0
528	8	0	0	0	0	0	0	200	300	0	0	0	0	0	0	0	200	903	0	0	0	0	0	0	0	603	903	0
528	9	0	0	0	0	0	0	200	300	0	0	0	0	0	0	0	200	903	0	0	0	0	0	0	0	603	903	0
529	0	0	0	0	0	0	0	200	300	0	0	0	0	0	0	0	200	903	0	0	0	0	0	0	0	603	903	0
529	1	0	0	0	0	0	0	200	300	0	0	0	0	0	0	0	200	903	0	0	0	0	0	0	0	603	903	0
529	2	0	0	0	0	0	0	200	300	0	0	0	0	0	0	0	200	903	0	0	0	0	0	0	0	603	903	0
529	3	0	0	0	0	0	0	200	300	0	0	0	0	0	0	0	200	903	0	0	0	0	0	0	0	603	903	0
529	4	0	0	0	0	0	0	200	300	0	0	0	0	0	0	0	200	903	0	0	0	0	0	0	0	603	903	0
529	5	0	0	0	0	0	0	200	300	0	0	0	0	0	0	0	200	903	0	0	0	0	0	0	0	603	903	0
529	6	0	0	0	0	0	0	200	300	0	0	0	0	0	0	0	200	903	0	0	0	0	0	0	0	603	903	0
529	7	0	0	0	0	0	0	200	300	0	0	0	0	0	0	0	200	903	0	0	0	0	0	0	0	603	903	0
529	8	0	0	0	0	0	0	200	300	0	0	0	0	0	0	0	200	903	0	0	0	0	0	0	0	603	903	0
529	9	0	0	0	0	0	0	200	300	0	0	0	0	0	0	0	200	903	0	0	0	0	0	0	0	603	903	0
530	0	0	0	0	0	0	0	200	300	0	0	0	0	0	0	0	200	903	0	0	0	0	0	0	0	603	903	0
530	1	0	0	0	0	0	0	200	300	0	0	0	0	0	0	0	200	903	0	0	0	0	0	0	0	603	903	0
530	2	0	0	0	0	0	0	200	300	0	0	0	0	0	0	0	200	903	0	0	0	0	0	0	0	603	903	0
530	3	0	0	0	0	0	0	200	300	0	0	0	0	0	0	0	200	903	0	0	0	0	0	0	0	603	903	0
530	4	0	0	0	0	0	0	200	300	0	0	0	0	0	0	0	200	903	0	0	0	0	0	0	0	603	903	0
530	5	0	0	0	0	0	0	200	300	0	0	0	0	0	0	0	200	903	0	0	0	0	0	0	0	603	903	0
530	6	0	0	0	0	0	0	200	300	0	0	0	0	0	0	0	200	903	0	0	0	0	0	0	0	603	903	0
530	7	0	0	0	0	0	0	200	300	0	0	0	0	0	0	0	200	903	0	0	0	0	0	0	0	603	903	0
530	8	0	0	0	0	0	0	200	300	0	0	0	0	0	0	0	200	903	0	0	0	0	0	0	0	603	903	0
530	9	0	0	0	0	0	0	200	300	0	0	0	0	0	0	0	200	903	0	0	0	0	0	0	0	603	903	0
531	0	0	0	0	0	0	0	200	300	0	0	0	0	0	0	0	200	903	0	0	0	0	0	0	0	603	903	0
531	1	0	0	0	0	0	0	200	300	0	0	0	0	0	0	0	200	903	0	0	0	0	0	0	0	603	903	0
531	2	0	0	0	0	0	0	200	300	0	0	0	0	0	0	0	200	903	0	0	0	0	0	0	0	603	903	0
531	3	0	0	0	0	0	0	200	300	0	0	0	0	0	0	0	200	903	0	0	0	0	0	0	0	603	903	0
531	4	0	0	0	0	0	0	200	300	0	0	0	0	0	0	0	200	903	0	0	0	0	0	0	0	603	903	0
531	5	0	0	0	0	0	0	200	300	0	0	0	0	0	0	0	200	903	0	0	0	0	0	0	0	603	903	0
531	6	0	0	0	0	0	0	200	300	0	0	0	0	0	0	0	200	903	0	0	0	0	0	0	0	603	903	0
531	7	0	0	0	0	0	0	200	300	0	0	0	0	0	0	0	200	903	0	0	0	0	0	0	0	603	903	0
531	8	0	0	0	0	0	0	200	300	0	0	0	0	0	0	0	200	903	0	0	0	0	0	0	0	603	903	0
531	9	0	0	0	0	0	0	200	300	0	0	0	0	0	0	0	200	903	0	0	0	0	0	0	0	603	903	0
532	0	0	0	0	0	0	0	200	300	0	0	0	0	0	0	0	200	903	0	0	0	0	0	0	0	603	903	0
532	1	0	0	0	0	0	0	200	300	0	0	0	0	0	0	0	200	903	0	0	0	0	0	0	0	603	903	0
532	2	0	0	0	0	0	0	200	300	0	0	0	0	0	0	0	200	903	0	0	0	0	0	0	0	603	903	0
532	3	0	0	0	0	0	0	200	300	0	0	0	0	0	0	0	200	903	0	0	0	0	0	0	0	603	903	0
532	4	0	0	0	0	0	0	200	300	0	0	0	0	0	0	0	200	903	0	0	0	0	0	0	0	603	903	0
532	5	0	0	0	0	0	0	200	300	0	0	0	0	0	0	0	200	903	0	0	0	0	0	0	0	603	903	0
532	6	0	0	0	0	0	0	200	300	0	0	0	0	0	0	0	200	903	0	0	0	0	0	0	0	603	903	0
532	7	0	0	0	0	0	0	200	300	0	0	0	0	0	0	0	200	903	0	0	0	0	0	0	0	603	903	0
532	8	0	0	0	0	0	0	200	300	0	0	0	0	0	0	0	200	903	0	0	0	0	0	0	0	603	903	0
532	9	0	0	0	0	0	0	200	300	0	0	0	0	0	0	0	200	903	0	0	0	0	0	0	0	603	903	0
533	0	0	0	0	0	0	0	200	300	0	0	0	0	0	0	0	200	903	0	0	0	0	0	0	0	603	903	0
533	1	0	0	0	0	0	0	200	300	0	0	0	0	0	0	0	200	903	0	0	0	0	0	0	0	603	903	0
533	2	0	0	0	0	0	0	200	300	0	0	0	0	0	0	0	200	903	0	0	0	0	0	0	0	603	903	0
533	3	0	0	0	0	0	0	200	300	0	0	0	0	0	0	0	200	903	0	0	0	0	0	0	0	603	903	0
533	4	0	0	0	0	0	0	200	300	0	0	0	0	0	0	0	200	903	0	0	0	0	0	0	0	603	903	0
533	5	0	0	0	0	0	0	200	300	0	0	0	0	0	0	0	200	903	0	0	0	0	0	0	0	603	903	0
533	6	0	0	0	0	0	0	200	300	0	0	0	0	0	0	0	200	903	0	0	0	0	0	0	0	603	903	0
533	7	0	0	0	0	0	0	200	300	0	0	0	0	0	0	0	200	903	0	0	0	0	0	0	0	603	903	0
533	8	0	0	0	0	0	0	200	300	0	0	0	0	0	0	0	200	903	0	0	0	0	0	0	0	603	903	0
533	9	0	0	0	0	0	0	200	300	0	0	0	0	0	0	0	200	903	0	0	0	0	0	0	0	603	903	0
534	0	0	0	0	0	0	0	200	300	0	0	0	0	0	0	0	200	903	0	0	0	0	0	0	0	603	903	0
534	1	0	0	0	0	0	0	200	300	0	0	0	0	0	0	0	200	903	0	0	0	0	0	0	0	603	903	0
534	2	0	0	0	0	0	0	200	300	0	0	0	0	0	0	0	200	903	0	0	0	0	0	0	0	603	903	0
534	3	0	0	0	0	0	0	200	300	0	0	0	0	0	0	0	200	903	0	0	0	0	0	0	0	603	903	0
534	4	0	0	0	0	0	0	200	300	0	0	0	0	0	0	0	200	903	0	0	0	0	0	0	0	603	903	0
534	5	0	0	0	0	0	0	200	300	0	0	0	0	0	0	0	200	903	0	0	0	0	0	0	0	603	903	0
534	6	0	0	0	0	0	0	200	300	0	0	0	0	0	0	0	200	903	0	0	0	0	0	0	0	603	903	0
534	7	0	0	0	0	0	0	200	300	0	0	0	0	0	0	0	200	903	0	0	0	0	0	0	0	603	903	0
534	8	0	0	0	0	0	0	200	300	0	0	0	0	0	0	0	200	903	0	0	0	0	0	0	0	603	903	0
534	9	0	0	0	0	0	0	200	300	0	0	0	0	0	0	0	200	903	0	0	0	0	0	0	0	603	903	0
535	0	0	0	0	0	0	0	200	300	0	0	0	0	0	0	0	200	903	0	0	0	0	0	0	0	603	903	0
535	1	0	0	0	0	0	0	200	300	0	0	0	0	0	0	0	200	903	0	0	0	0	0	0	0	603	903	0
535	2	0	0	0	0	0	0	200	300	0	0	0	0	0	0	0	200	903	0	0	0	0	0	0	0	603	903	0
535	3	0	0	0	0	0	0	200	300	0	0	0	0	0	0	0	200	903	0	0	0	0	0	0	0	603	903	0
535	4	0	0	0	0	0	0	200	300	0	0	0	0	0	0	0	200	903	0	0	0	0	0	0	0	603	903	0
535	5	0	0	0	0	0	0	200	300	0	0	0	0	0	0	0	200	903	0	0	0	0	0	0	0	603	903	0
535	6	0	0	0	0	0	0	200	300	0	0	0	0	0	0	0	200	903	0	0	0	0	0	0	0	603	903	0
535	7	0	0	0	0	0	0	200	300	0	0	0	0	0	0	0	200	903	0	0	0	0	0	0	0	603	903	0
535	8	0	0	0	0	0	0	200	300	0	0	0	0	0	0	0	200	903	0	0	0	0	0	0	0	603	903	0
535	9	0	0	0	0	0	0	200	300	0	0	0	0	0	0	0	200	903	0	0	0	0	0	0	0	603	903	0
536	0	0	0	0	0	0	0	200	300	0	0	0	0	0	0	0	200	903	0	0	0	0	0	0	0	603	903	0
536	1	0	0	0	0	0	0	200	300	0	0	0	0	0	0	0	200	903	0	0	0	0	0	0	0	603	903	0
536	2	0	0	0	0	0	0	200	300	0	0	0	0	0	0	0	200	903	0	0	0	0	0	0	0	603	903	0
536	3	0	0	0	0	0	0	200	300	0	0	0	0	0	0	0	200	903	0	0	0	0	0	0	0	603	903	0
536	4	0	0	0	0	0	0	200	300	0	0	0	0	0	0	0	200	903	0	0	0	0	0	0	0	603	903	0
536	5	0	0	0	0	0	0	200	300	0	0	0	0	0	0	0	200	903	0	0	0	0	0	0	0	603	903	0
536	6	0	0	0	0	0	0	200	300	0	0	0	0	0	0	0	200	903	0	0	0	0	0	0	0	603	903	0
536	7	0	0	0	0	0	0	200	300	0	0	0	0	0	0	0	200	903	0	0	0	0	0	0	0	603	903	0
536	8	0	0	0	0	0	0	200	300	0	0	0	0	0	0	0	200	903	0	0	0	0	0	0	0	603	903	0
536	9	0	0	0	0	0	0	200	300	0	0	0	0	0	0	0	200	903	0	0	0	0	0	0	0	603	903	0
537	0	0	0	0	0	0	0	200	300	0	0	0	0	0	0	0	200	903	0	0	0	0	0	0	0	603	903	0
537	1	0	0	0	0	0	0	200	300	0	0	0	0	0	0	0	200	903	0	0	0	0	0	0	0	603	903	0
537	2	0	0	0	0	0	0	200	300	0	0	0	0	0	0	0	200	903	0	0	0	0	0	0	0	603	903	0
537	3	0	0	0	0	0	0	200	300	0	0	0	0	0	0	0	200	903	0	0	0	0	0	0	0	603	903	0
537	4	0	0	0	0	0	0	200	300	0	0	0	0	0	0	0	200	903	0	0	0	0	0	0	0	603	903	0
537	5	0	0	0	0	0	0	200	300	0	0	0	0	0	0	0	200	903	0	0	0	0	0	0	0	603	903	0
537	6	0	0	0	0	0	0	200	300	0	0	0	0	0	0	0	200	903	0	0	0	0	0	0	0	603	903	0
537	7	0	0	0	0	0	0	200	300	0	0	0	0	0	0	0	200	903	0	0	0	0	0	0	0	603	903	0
537	8	0	0	0	0	0	0	200	300	0	0	0	0	0	0	0	200	903	0	0	0	0	0	0	0	603	903	0
537	9	0	0	0	0	0	0	200	300	0	0	0	0	0	0	0	200	903	0	0	0	0	0	0	0	603	903	0
538	0	0	0	0	0	0	0	200	300	0	0	0	0	0	0	0	200	903	0	0	0	0	0	0	0	603	903	0
538	1	0	0	0	0	0	0	200	300	0	0	0	0	0	0	0	200	903	0	0	0	0	0	0	0	603	903	0
538	2	0	0	0	0	0	0	200	300	0	0	0	0	0	0	0	200	903	0	0	0	0	0	0	0	603	903	0
538	3	0	0	0	0	0	0	200	300	0	0	0	0	0	0	0	200	903	0	0	0	0	0	0	0	603	903	0
538	4	0	0	0	0	0	0	200	300	0	0	0	0	0	0	0	200	903	0	0	0	0	0	0	0	603	903	0
538	5	0	0	0	0	0	0	200	300	0	0	0	0	0	0	0	200	903	0	0	0	0	0	0	0	603	903	0
538	6	0	0	0	0	0	0	200	300	0	0	0	0	0	0	0	200	903	0	0	0	0	0	0	0	603	903	0
538	7	0	0	0	0	0	0	200	300	0	0	0	0	0	0	0	200	903	0	0	0	0	0	0	0	603	903	0
538	8	0	0	0	0	0	0	200	300	0	0	0	0	0	0	0	200	903	0	0	0	0	0	0	0	603	903	0
538	9	0	0	0	0	0	0	200	300	0	0	0	0	0	0	0	200	903	0	0	0	0	0	0	0	603	903	0
539	0	0	0	0	0	0	0	200	300	0	0	0	0	0	0	0	200	903	0	0	0	0	0	0	0	603	903	0
539	1	0	0	0	0	0	0	200	300	0	0	0	0	0	0	0	200	903	0	0	0	0	0	0	0	603	903	0
539	2	0	0	0	0	0	0	200	300	0	0	0	0	0	0	0	200	903	0	0	0	0	0	0	0	603	903	0
539	3	0	0	0	0	0	0	200	300	0	0	0	0	0	0	0	200	903	0	0	0	0	0	0	0	603	903	0
539	4	0	0	0	0	0	0	200	300	0	0	0	0	0	0	0	200	903	0	0	0	0	0	0	0	603	903	0
539	5	0	0	0	0	0	0	200	300	0	0	0	0	0	0	0	200	903	0	0	0	0	0	0	0	603	903	0
539	6	0	0	0	0	0	0	200	300	0	0	0	0	0	0	0	200	903	0	0	0	0	0	0	0	603	903	0
539	7	0	0	0	0	0	0	200	300	0	0	0	0	0	0	0	200	903	0	0	0	0	0	0	0	603	903	0
539	8	0	0	0	0	0	0	200	300	0	0	0	0	0	0	0	200	903	0	0	0	0	0	0	0	603	903	0
539	9	0	0	0	0	0	0	200	300	0	0	0	0	0	0	0	200	903	0	0	0	0	0	0	0	603	903	0
540	0	0	0	0	0	0	0	200	300	0	0	0	0	0	0	0	200	903	0	0	0	0	0	0	0	603	903	0
540	1	0	0	0	0	0	0	200	300	0	0	0	0	0	0	0	200	903	0	0	0	0	0	0	0	603	903	0
540	2	0	0	0	0	0	0	200	300	0	0	0	0	0	0	0	200	903	0	0	0	0	0	0	0	603	903	0
540	3	0	0	0	0	0	0	200	300	0	0	0	0	0	0	0	200	903	0	0	0	0	0	0	0	603	903	0
540	4	0	0	0	0	0	0	200	300	0	0	0	0	0	0	0	200	903	0	0	0	0	0	0	0	603	903	0
540	5	0	0	0	0	0	0	200	300	0	0	0	0	0	0	0	200	903	0	0	0	0	0	0	0	603	903	0
540	6	0	0	0	0	0	0	200	300	0	0	0	0	0	0	0	200	903	0	0	0	0	0	0	0	603	903	0
540	7	0	0	0	0	0	0	200	300	0	0	0	0	0	0	0	200	903	0	0	0	0	0	0	0	603	903	0
540	8	0	0	0	0	0	0	200	300	0	0	0	0	0	0	0	200	903	0	0	0	0	0	0	0	603	903	0
540	9	0	0	0	0	0	0	200	300	0	0	0	0	0	0	0	200	903	0	0	0	0	0	0	0	603	903	0
541	0	0	0	0	0	0	0	200	300	0	0	0	0	0	0	0	200	903	0	0	0	0	0	0	0	603	903	0
541	1	0	0	0	0	0	0	200	300	0	0	0	0	0	0	0	200	903	0	0	0	0	0	0	0	603	903	0
541	2	0	0	0	0	0	0	200	300	0	0	0	0	0	0	0	200	903	0	0	0	0	0	0	0	603	903	0
541	3	0	0	0	0	0	0	200	300	0	0	0	0	0	0	0	200	903	0	0	0	0	0	0	0	603	903	0
541	4	0	0	0	0	0	0	200	300	0	0	0	0	0	0	0	200	903	0	0	0	0	0	0	0	603	903	0
541	5	0	0	0	0	0	0	200	300	0	0	0	0	0	0	0	200	903	0	0	0	0	0	0	0	603	903	0
541	6	0	0	0	0	0	0	200	300	0	0	0	0	0	0	0	200	903	0	0	0	0	0	0	0	603	903	0
541	7	0	0	0	0	0	0	200	300	0	0	0	0	0	0	0	200	903	0	0	0	0	0	0	0	603	903	0
541	8	0	0	0	0	0	0	200	300	0	0	0	0	0	0	0	200	903	0	0	0	0	0	0	0	603	903	0
541	9	0	0	0	0	0	0	200	300	0	0	0	0	0	0	0	200	903	0	0	0	0	0	0	0	603	903	0
542	0	0	0	0	0	0	0	200	300	0	0	0	0	0	0	0	200	903	0	0	0	0	0	0	0	603	903	0
542	1	0	0	0	0	0	0	200	300	0	0	0	0	0	0	0	200	903	0	0	0	0	0	0	0	603	903	0
542	2	0	0	0	0	0	0	200	300	0	0	0	0	0	0	0	200	903	0	0	0	0	0	0	0	603	903	0
542	3	0	0	0	0	0	0	200	300	0	0	0	0	0	0	0	200	903	0	0	0	0	0	0	0	603	903	0
542	4	0	0	0	0	0	0	200	300	0	0	0	0	0	0	0	200	903	0	0	0	0	0	0	0	603	903	0
542	5	0	0	0	0	0	0	200	300	0	0	0	0	0	0	0	200	903	0	0	0	0	0	0	0	603	903	0
542	6	0	0	0	0	0	0	200	300	0	0	0	0	0	0	0	200	903	0	0	0	0	0	0	0	603	903	0
542	7	0	0	0	0	0	0	200	300	0	0	0	0	0	0	0	200	903	0	0	0	0	0	0	0	603	903	0
542	8	0	0	0	0	0	0	200	300	0	0	0	0	0	0	0	200	903	0	0	0	0	0	0	0	603	903	0
542	9	0	0	0	0	0	0	200	300	0	0	0	0	0	0	0	200	903	0	0	0	0	0	0	0	603	903	0
543	0	0	0	0	0	0	0	200	300	0	0	0	0	0	0	0	200	903	0	0	0	0	0	0	0	603	903	0
543	1	0	0	0	0	0	0	200	300	0	0	0	0	0	0	0	200	903	0	0	0	0	0	0	0	603	903	0
543	2	0	0	0	0	0	0	200	300	0	0	0	0	0	0	0	200	903	0	0	0	0	0	0	0	603	903	0
543	3	0	0	0	0	0	0	200	300	0	0	0	0	0	0	0	200	903	0	0	0	0	0	0	0	603	903	0
543	4	0	0	0	0	0	0	200	300	0	0	0	0	0	0	0	200	903	0	0	0	0	0	0	0	603	903	0
543	5	0	0	0	0	0	0	200	300	0	0	0	0	0	0	0	200	903	0	0	0	0	0	0	0	603	903	0
543	6	0	0	0	0	0	0	200	300	0	0	0	0	0	0	0	200	903	0	0	0	0	0	0	0	603	903	0
543	7	0	0	0	0	0	0	200	300	0	0	0	0	0	0	0	200	903	0	0	0	0	0	0	0	603	903	0
543	8	0	0	0	0	0	0	200	300	0	0	0	0	0	0	0	200	903	0	0	0	0	0	0	0	603	903	0
543	9	0	0	0	0	0	0	200	300	0	0	0	0	0	0	0	200	903	0	0	0	0	0	0	0	603	903	0
544	0	0	0	0	0	0	0	200	300	0	0	0	0	0	0	0	200	903	0	0	0	0	0	0	0	603	903	0
544	1	0	0	0	0	0	0	200	300	0	0	0	0	0	0	0	200	903	0	0	0	0	0	0	0	603	903	0
544	2	0	0	0	0	0	0	200	300	0	0	0	0	0	0	0	200	903	0	0	0	0	0	0	0	603	903	0
544	3	0	0	0	0	0	0	200	300	0	0	0	0	0	0	0	200	903	0	0	0	0	0	0	0	603	903	0
544	4	0	0	0	0	0	0	200	300	0	0	0	0	0	0	0	200	903	0	0	0	0	0	0	0	603	903	0
544	5	0	0	0	0	0	0	200	300	0	0	0	0	0	0	0	200	903	0	0	0	0	0	0	0	603	903	0
544	6	0	0	0	0	0	0	200	300	0	0	0	0	0	0	0	200	903	0	0	0	0	0	0	0	603	903	0
544	7	0	0	0	0	0	0	200	300	0	0	0	0	0	0	0	200	903	0	0	0	0	0	0	0	603	903	0
544	8	0	0	0	0	0	0	200	300	0	0	0	0	0	0	0	200	903	0	0	0	0	0	0	0	603	903	0
544	9	0	0	0	0	0	0	200	300	0	0	0	0	0	0	0	200	903	0	0	0	0	0	0	0	603	903	0
545	0	0	0	0	0	0	0	200	300	0	0	0	0	0	0	0	200	903	0	0	0	0	0	0	0	603	903	0
545	1	0	0	0	0	0	0	200	300	0	0	0	0	0	0	0	200	903	0	0	0	0	0	0	0	603	903	0
545	2	0	0	0	0	0	0	200	300	0	0	0	0	0	0	0	200	903	0	0	0	0	0	0	0	603	903	0
545	3	0	0	0	0	0	0	200	300	0	0	0	0	0	0	0	200	903	0	0	0	0	0	0	0	603	903	0
545	4	0	0	0	0	0	0	200	300	0	0	0	0	0	0	0	200	903	0	0	0	0	0	0	0	603	903	0
545	5	0	0	0	0	0	0	200	300	0	0	0	0	0	0	0	200	903	0	0	0	0	0	0	0	603	903	0
545	6	0	0	0	0	0	0	200	300	0	0	0	0	0	0	0	200	903	0	0	0	0	0	0	0	603	903	0
545	7	0	0	0	0	0	0	200	300	0	0	0	0	0	0	0	200	903	0	0	0	0	0	0	0	603	903	0
545	8	0	0	0	0	0	0	200	300	0	0	0	0	0	0	0	200	903	0	0	0	0	0	0	0	603	903	0
545	9	0	0	0	0	0	0	200	300	0	0	0	0	0	0	0	200	903	0	0	0	0	0	0	0	603	903	0
546	0	0	0	0	0	0	0	200	300	0	0	0	0	0	0	0	200	903	0	0	0	0	0	0	0	603	903	0
546	1	0	0	0	0	0	0	200	300	0	0	0	0	0	0	0	200	903	0	0	0	0	0	0	0	603	903	0
546	2	0	0	0	0	0	0	200	300	0	0	0	0	0	0	0	200	903	0	0	0	0	0	0	0	603	903	0
546	3	0	0	0	0	0	0	200	300	0	0	0	0	0	0	0	200	903	0	0	0	0	0	0	0	603	903	0
546	4	0	0	0	0	0	0	200	300	0	0	0	0	0	0	0	200	903	0	0	0	0	0	0	0	603	903	0
546	5	0	0	0	0	0	0	200	300	0	0	0	0	0	0	0	200	903	0	0	0	0	0	0	0	603	903	0
546	6	0	0	0	0	0	0	200	300	0	0	0	0	0	0	0	200	903	0	0	0	0	0	0	0	603	903	0
546	7	0	0	0	0	0	0	200	300	0	0	0	0	0	0	0	200	903	0	0	0	0	0	0	0	603	903	0
546	8	0	0	0	0	0	0	200	300	0	0	0	0	0	0	0	200	903	0	0	0	0	0	0	0	603	903	0
546	9	0	0	0	0	0	0	200	300	0	0	0	0	0	0	0	200	903	0	0	0	0	0	0	0	603	903	0
547	0	0	0	0	0	0	0	200	300	0	0	0	0	0	0	0	200	903	0	0	0	0	0	0	0	603	903	0
547	1	0	0	0	0	0	0	200	300	0	0	0	0	0	0	0	200	903	0	0	0	0	0	0	0	603	903	0
547	2	0	0	0	0	0	0	200	300	0	0	0	0	0	0	0	200	903	0	0	0	0	0	0	0	603	903	0
547	3	0	0	0	0	0	0	200	300	0	0	0	0	0	0	0	200	903	0	0	0	0	0	0	0	603	903	0
547	4	0	0	0	0	0	0	200	300	0	0	0	0	0	0	0	200	903	0	0	0	0	0	0	0	603	903	0
547	5	0	0	0	0	0	0	200	300	0	0	0	0	0	0	0	200	903	0	0	0	0	0	0	0	603	903	0
547	6	0	0	0	0	0	0	200	300	0	0	0	0	0	0	0	200	903	0	0	0	0	0	0	0	603	903	0
547	7	0	0	0	0	0	0	200	300	0	0	0	0	0	0	0	200	903	0	0	0	0	0	0	0	603	903	0
547	8	0	0	0	0	0	0	200	300	0	0	0	0	0	0	0	200	903	0	0	0	0	0	0	0	603	903	0
547	9	0	0	0	0	0	0	200	300	0	0	0	0	0	0	0	200	903	0	0	0	0	0	0	0	603	903	0
548	0	0	0	0	0	0	0	200	300	0	0	0	0	0	0	0	200	903	0	0	0	0	0	0	0	603	903	0
548	1	0	0	0	0	0	0	200	300	0	0	0	0	0	0	0	200	903	0	0	0	0	0	0	0	603	903	0
548	2	0	0	0	0	0	0	200	300	0	0	0	0	0	0	0	200	903	0	0	0	0	0	0	0	603	903	0
548	3	0	0	0	0	0	0	200	300	0	0	0	0	0	0	0	200	903	0	0	0	0	0	0	0	603	903	0
548	4	0	0	0	0	0	0	200	300	0	0	0	0	0	0	0	200	903	0	0	0	0	0	0	0	603	903	0
548	5	0	0	0	0	0	0	200	300	0	0	0	0	0	0	0	200	903	0	0	0	0	0	0	0	603	903	0
548	6	0	0	0	0	0	0	200	300	0	0	0	0	0	0	0	200	903	0	0	0	0	0	0	0	603	903	0
548	7	0	0	0	0	0	0	200	300	0	0	0	0	0	0	0	200	903	0	0	0	0	0	0	0	603	903	0
548	8	0	0	0	0	0	0	200	300	0	0	0	0	0	0	0	200	903	0	0	0	0	0	0	0	603	903	0
548	9	0	0	0	0	0	0	200	300	0	0	0	0	0	0	0	200	903	0	0	0	0	0	0	0	603	903	0
549	0	0	0	0	0	0	0	200	300	0	0	0	0	0	0	0	200	903	0	0	0	0	0	0	0	603	903	0
549	1	0	0	0	0	0	0	200	300	0	0	0	0	0	0	0	200	903	0	0	0	0	0	0	0	603	903	0
549	2	0	0	0	0	0	0	200	300	0	0	0	0	0	0	0	200	903	0	0	0	0	0	0	0	603	903	0
549	3	0	0	0	0	0	0	200	300	0	0	0	0	0	0	0	200	903	0	0	0	0	0	0	0	603	903	0
549	4	0	0	0	0	0	0	200	300	0	0	0	0	0	0	0	200	903	0	0	0	0	0	0	0	603	903	0
549	5	0	0	0	0	0	0	200	300	0	0	0	0	0	0	0	200	903	0	0	0	0	0	0	0	603	903	0
549	6	0	0	0	0	0	0	200	300	0	0	0	0	0	0	0	200	903	0	0	0	0	0	0	0	603	903	0
549	7	0	0	0	0	0	0	200	300	0	0	0	0	0	0	0	200	903	0	0	0	0	0	0	0	603	903	0
549	8	0	0	0	0	0	0	200	300	0	0	0	0	0	0	0	200	903	0	0	0	0	0	0	0	603	903	0
549	9	0	0	0	0	0	0	200	300	0	0	0	0	0	0	0	200	903	0	0	0	0	0	0	0	603	903	0
550	0	0	0	0	0	0	0	200	300	0	0	0	0	0	0	0	200	903	0	0	0	0	0	0	0	603	903	0
550	1	0	0	0	0	0	0	200	300	0	0	0	0	0	0	0	200	903	0	0	0	0	0	0	0	603	903	0
550	2	0	0	0	0	0	0	200	300	0	0	0	0	0	0	0	200	903	0	0	0	0	0	0	0	603	903	0
550	3	0	0	0	0	0	0	200	300	0	0	0	0	0	0	0	200	903	0	0	0	0	0	0	0	603	903	0
550	4	0	0	0	0	0	0	200	300	0	0	0	0	0	0	0	200	903	0	0	0	0	0	0	0	603	903	0
550	5	0	0	0	0	0	0	200	300	0	0	0	0	0	0	0	200	903	0	0	0	0	0	0	0	603	903	0
550	6	0	0	0	0	0	0	200	300	0	0	0	0	0	0	0	200	903	0	0	0	0	0	0	0	603	903	0
550	7	0	0	0	0	0	0	200	300	0	0	0	0	0	0	0	200	903	0	0	0	0	0	0	0	603	903	0
550	8	0	0	0	0	0	0	200	300	0	0	0	0	0	0	0	200	903	0	0	0	0	0	0	0	603	903	0
550	9	0	0	0	0	0	0	200	300	0	0	0	0	0	0	0	200	903	0	0	0	0	0	0	0	603	903	0
551	0	0	0	0	0	0	0	200	300	0	0	0	0	0	0	0	200	903	0	0	0	0	0	0	0	603	903	0
551	1	0	0	0	0	0	0	200	300	0	0	0	0	0	0	0	200	903	0	0	0	0	0	0	0	603	903	0
551	2	0	0	0	0	0	0	200	300	0	0	0	0	0	0	0	200	903	0	0	0	0	0	0	0	603	903	0
551	3	0	0	0	0	0	0	200	300	0	0	0	0	0	0	0	200	903	0	0	0	0	0	0	0	603	903	0
551	4	0	0	0	0	0	0	200	300	0	0	0	0	0	0	0	200	903	0	0	0	0	0	0	0	603	903	0
551	5	0	0	0	0	0	0	200	300	0	0	0	0	0	0	0	200	903	0	0	0	0	0	0	0	603	903	0
551	6	0	0	0	0	0	0	200	300	0	0	0	0	0	0	0	200	903	0	0	0	0	0	0	0	603	903	0
551	7	0	0	0	0	0	0	200	300	0	0	0	0	0	0	0	200	903	0	0	0	0	0	0	0	603	903	0
551	8	0	0	0	0	0	0	200	300	0	0	0	0	0	0	0	200	903	0	0	0	0	0	0	0	603	903	0
551	9	0	0	0	0	0	0	200	300	0	0	0	0	0	0	0	200	903	0	0	0	0	0	0	0	603	903	0
552	0	0	0	0	0	0	0	200	300	0	0	0	0	0	0	0	200	903	0	0	0	0	0	0	0	603	903	0
552	1	0	0	0	0	0	0	200	300	0	0	0	0	0	0	0	200	903	0	0	0	0	0	0	0	603	903	0
552	2	0	0	0	0	0	0	200	300	0	0	0	0	0	0	0	200	903	0	0	0	0	0	0	0	603	903	0
552	3	0	0	0	0	0	0	200	300	0	0	0	0	0	0	0	200	903	0	0	0	0	0	0	0	603	903	0
552	4	0	0	0	0	0	0	200	300	0	0	0	0	0	0	0	200	903	0	0	0	0	0	0	0	603	903	0
552	5	0	0	0	0	0	0	200	300	0	0	0	0	0	0	0	200	903	0	0	0	0	0	0	0	603	903	0
552	6	0	0	0	0	0	0	200	300	0	0	0	0	0	0	0	200	903	0	0	0	0	0	0	0	603	903	0
552	7	0	0	0	0	0	0	200	300	0	0	0	0	0	0	0	200	903	0	0	0	0	0	0	0	603	903	0
552	8	0	0	0	0	0	0	200	300	0	0	0	0	0	0	0	200	903	0	0	0	0	0	0	0	603	903	0
552	9	0	0	0	0	0	0	200	300	0	0	0	0	0	0	0	200	903	0	0	0	0	0	0	0	603	903	0
553	0	0	0	0	0	0	0	200	300	0	0	0	0	0	0	0	200	903	0	0	0	0	0	0	0	603	903	0
553	1	0	0	0	0	0	0	200	300	0	0	0	0	0	0	0	200	903	0	0	0	0	0	0	0	603	903	0
553	2	0	0	0	0	0	0	200	300	0	0	0	0	0	0	0	200	903	0	0	0	0	0	0	0	603	903	0
553	3	0	0	0	0	0	0	200	300	0	0	0	0	0	0	0	200	903	0	0	0	0	0	0	0	603	903	0
553	4	0	0	0	0	0	0	200	300	0	0	0	0	0	0	0	200	903	0	0	0	0	0	0	0	603	903	0
553	5	0	0	0	0	0	0	200	300	0	0	0	0	0	0	0	200	903	0	0	0	0	0	0	0	603	903	0
553	6	0	0	0	0	0	0	200	300	0	0	0	0	0	0	0	200	903	0	0	0	0	0	0	0	603	903	0
553	7	0	0	0	0	0	0	200	300	0	0	0	0	0	0	0	200	903	0	0	0	0	0	0	0	603	903	0
553	8	0	0	0	0	0	0	200	300	0	0	0	0	0	0	0	200	903	0	0	0	0	0	0	0	603	903	0
553	9	0	0	0	0	0	0	200	300	0	0	0	0	0	0	0	200	903	0	0	0	0	0	0	0	603	903	0
554	0	0	0	0	0	0	0	200	300	0	0	0	0	0	0	0	200	903	0	0	0	0	0	0	0	603	903	0
554	1	0	0	0	0	0	0	200	300	0	0	0	0	0	0	0	200	903	0	0	0	0	0	0	0	603	903	0
554	2	0	0	0	0	0	0	200	300	0	0	0	0	0	0	0	200	903	0	0	0	0	0	0	0	603	903	0
554	3	0	0	0	0	0	0	200	300	0	0	0	0	0	0	0	200	903	0	0	0	0	0	0	0	603	903	0
554	4	0	0	0	0	0	0	200	300	0	0	0	0	0	0	0	200	903	0	0	0	0	0	0	0	603	903	0
554	5	0	0	0	0	0	0	200	300	0	0	0	0	0	0	0	200	903	0	0	0	0	0	0	0	603	903	0
554	6	0	0	0	0	0	0	200	300	0	0	0	0	0	0	0	200	903	0	0	0	0	0	0	0	603	903	0
554	7	0	0	0	0	0	0	200	300	0	0	0	0	0	0	0	200	903	0	0	0	0	0	0	0	603	903	0
554	8	0	0	0	0	0	0	200	300	0	0	0	0	0	0	0	200	903	0	0	0	0	0	0	0	603	903	0
554	9	0	0	0	0	0	0	200	300	0	0	0	0	0	0	0	200	903	0	0	0	0	0	0	0	603	903	0
555	0	0	0	0	0	0	0	200	300	0	0	0	0	0	0	0	200	903	0	0	0	0	0	0	0	603	903	0
555	1	0	0	0	0	0	0	200	300	0	0	0	0	0	0	0	200	903	0	0	0	0	0	0	0	603	903	0
555	2	0	0	0	0	0	0	200	300	0	0	0	0	0	0	0	200	903	0	0	0	0	0	0	0	603	903	0
555	3	0	0	0	0	0	0	200	300	0	0	0	0	0	0	0	200	903	0	0	0	0	0	0	0	603	903	0
555	4	0	0	0	0	0	0	200	300	0	0	0	0	0	0	0	200	903	0	0	0	0	0	0	0	603	903	0
555	5	0	0	0	0	0	0	200	300	0	0	0	0	0	0	0	200	903	0	0	0	0	0	0	0	603	903	0
555	6	0	0	0	0	0	0	200	300	0	0	0	0	0	0	0	200	903	0	0	0	0	0	0	0	603	903	0
555	7	0	0	0	0	0	0	200	300	0	0	0	0	0	0	0	200	903	0	0	0	0	0	0	0	603	903	0
555	8	0	0	0	0	0	0	200	300	0	0	0	0	0	0	0	200	903	0	0	0	0	0	0	0	603	903	0
555	9	0	0	0	0	0	0	200	300	0	0	0	0	0	0	0	200	903	0	0	0	0	0	0	0	603	903	0
556	0	0	0	0	0	0	0	200	300	0	0	0	0	0	0	0	200	903	0	0	0	0	0	0	0	603	903	0
556	1	0	0	0	0	0	0	200	300	0	0	0	0	0	0	0	200	903	0	0	0	0	0	0	0	603	903	0
556	2	0	0	0	0	0	0	200	300	0	0	0	0	0	0	0	200	903	0	0	0	0	0	0	0	603	903	0
556	3	0	0	0	0	0	0	200	300	0	0	0	0	0	0	0	200	903	0	0	0	0	0	0	0	603	903	0
556	4	0	0	0	0	0	0	200	300	0	0	0	0	0	0	0	200	903	0	0	0	0	0	0	0	603	903	0
556	5	0	0	0	0	0	0	200	300	0	0	0	0	0	0	0	200	903	0	0	0	0	0	0	0	603	903	0
556	6	0	0	0	0	0	0	200	300	0	0	0	0	0	0	0	200	903	0	0	0	0	0	0	0	603	903	0
556	7	0	0	0	0	0	0	200	300	0	0	0	0	0	0	0	200	903	0	0	0	0	0	0	0	603	903	0
556	8	0	0	0	0	0	0	200	300	0	0	0	0	0	0	0	200	903	0	0	0	0	0	0	0	603	903	0
556	9	0	0	0	0	0	0	200	300	0	0	0	0	0	0	0	200	903	0	0	0	0	0	0	0	603	903	0
557	0	0	0	0	0	0	0	200	300	0	0	0	0	0	0	0	200	903	0	0	0	0	0	0	0	603	903	0
557	1	0	0	0	0	0	0	200	300	0	0	0	0	0	0	0	200	903	0	0	0	0	0	0	0	603	903	0
557	2	0	0	0	0	0	0	200	300	0	0	0	0	0	0	0	200	903	0	0	0	0	0	0	0	603	903	0
557	3	0	0	0	0	0	0	200	300	0	0	0	0	0	0	0	200	903	0	0	0	0	0	0	0	603	903	0
557	4	0	0	0	0	0	0	200	300	0	0	0	0	0	0	0	200	903	0	0	0	0	0	0	0	603	903	0
557	5	0	0	0	0	0	0	200	300	0	0	0	0	0	0	0	200	903	0	0	0	0	0	0	0	603	903	0
557	6	0	0	0	0	0	0	200	300	0	0	0	0	0	0	0	200	903	0	0	0	0	0	0	0	603	903	0
557	7	0	0	0	0	0	0	200	300	0	0	0	0	0	0	0	200	903	0	0	0	0	0	0	0	603	903	0
557	8	0	0	0	0	0	0	200	300	0	0	0	0	0	0	0	200	903	0	0	0	0	0	0	0	603	903	0
557	9	0	0	0	0	0	0	200	300	0	0	0	0	0	0	0	200	903	0	0	0	0	0	0	0	603	903	0
558	0	0	0	0	0	0	0	200	300	0	0	0	0	0	0	0	200	903	0	0	0	0	0	0	0	603	903	0
558	1	0	0	0	0	0	0	200	300	0	0	0	0	0	0	0	200	903	0	0	0	0	0	0	0	603	903	0
558	2	0	0	0	0	0	0	200	300	0	0	0	0	0	0	0	200	903	0	0	0	0	0	0	0	603	903	0
558	3	0	0	0	0	0	0	200	300	0	0	0	0	0	0	0	200	903	0	0	0	0	0	0	0	603	903	0
558	4	0	0	0	0	0	0	200	300	0	0	0	0	0	0	0	200	903	0	0	0	0	0	0	0	603	903	0
558	5	0	0	0	0	0	0	200	300	0	0	0	0	0	0	0	200	903	0	0	0	0	0	0	0	603	903	0
558	6	0	0	0	0	0	0	200	300	0	0	0	0	0	0	0	200	903	0	0	0	0	0	0	0	603	903	0
558	7	0	0	0	0	0	0	200	300	0	0	0	0	0	0	0	200	903	0	0	0	0	0	0	0	603	903	0
558	8	0	0	0	0	0	0	200	300	0	0	0	0	0	0	0	200	903	0	0	0	0	0	0	0	603	903	0
558	9	0	0	0	0	0	0	200	300	0	0	0	0	0	0	0	200	903	0	0	0	0	0	0	0	603	903	0
559	0	0	0	0	0	0	0	200	300	0	0	0	0	0	0	0	200	903	0	0	0	0	0	0	0	603	903	0
559	1	0	0	0	0	0	0	200	300	0	0	0	0	0	0	0	200	903	0	0	0	0	0	0	0	603	903	0
559	2	0	0	0	0	0	0	200	300	0	0	0	0	0	0	0	200	903	0	0	0	0	0	0	0	603	903	0
559	3	0	0	0	0	0	0	200	300	0	0	0	0	0	0	0	200	903	0	0	0	0	0	0	0	603	903	0
559	4	0	0	0	0	0	0	200	300	0	0	0	0	0	0	0	200	903	0	0	0	0	0	0	0	603	903	0
559	5	0	0	0	0	0	0	200	300	0	0	0	0	0	0	0	200	903	0	0	0	0	0	0	0	603	903	0
559	6	0	0	0	0	0	0	200	300	0	0	0	0	0	0	0	200	903	0	0	0	0	0	0	0	603	903	0
559	7	0	0	0	0	0	0	200	300	0	0	0	0	0	0	0	200	903	0	0	0	0	0	0	0	603	903	0
559	8	0	0	0	0	0	0	200	300	0	0	0	0	0	0	0	200	903	0	0	0	0	0	0	0	603	903	0
559	9	0	0	0	0	0	0	200	300	0	0	0	0	0	0	0	200	903	0	0	0	0	0	0	0	603	903	0
560	0	0	0	0	0	0	0	200	300	0	0	0	0	0	0	0	200	903	0	0	0	0	0	0	0	603	903	0
560	1	0	0	0	0	0	0	200	300	0	0	0	0	0	0	0	200	903	0	0	0	0	0	0	0	603	903	0
560	2	0	0	0	0	0	0	200	300	0	0	0	0	0	0	0	200	903	0	0	0	0	0	0	0	603	903	0
560	3	0	0	0	0	0	0	200	300	0	0	0	0	0	0	0	200	903	0	0	0	0	0	0	0	603	903	0
560	4	0	0	0	0	0	0	200	300	0	0	0	0	0	0	0	200	903	0	0	0	0	0	0	0	603	903	0
560	5	0	0	0	0	0	0	200	300	0	0	0	0	0	0	0	200	903	0	0	0	0	0	0	0	603	903	0
560	6	0	0	0	0	0	0	200	300	0	0	0	0	0	0	0	200	903	0	0	0	0	0	0	0	603	903	0
560	7	0	0	0	0	0	0	200	300	0	0	0	0	0	0	0	200	903	0	0	0	0	0	0	0	603	903	0
560	8	0	0	0	0	0	0	200	300	0	0	0	0	0	0	0	200	903	0	0	0	0	0	0	0	603	903	0
560	9	0	0	0	0	0	0	200	300	0	0	0	0	0	0	0	200	903	0	0	0	0	0	0	0	603	903	0
561	0	0	0	0	0	0	0	200	300	0	0	0	0	0	0	0	200	903	0	0	0	0	0	0	0	603	903	0
561	1	0	0	0	0	0	0	200	300	0	0	0	0	0	0	0	200	903	0	0	0	0	0	0	0	603	903	0
561	2	0	0	0	0	0	0	200	300	0	0	0	0	0	0	0	200	903	0	0	0	0	0	0	0	603	903	0
561	3	0	0	0	0	0	0	200	300	0	0	0	0	0	0	0	200	903	0	0	0	0	0	0	0	603	903	0
561	4	0	0	0	0	0	0	200	300	0	0	0	0	0	0	0	200	903	0	0	0	0	0	0	0	603	903	0
561	5	0	0	0	0	0	0	200	300	0	0	0	0	0	0	0	200	903	0	0	0	0	0	0	0	603	903	0
561	6	0	0	0	0	0	0	200	300	0	0	0	0	0	0	0	200	903	0	0	0	0	0	0	0	603	903	0
561	7	0	0	0	0	0	0	200	300	0	0	0	0	0	0	0	200	903	0	0	0	0	0	0	0	603	903	0
561	8	0	0	0	0	0	0	200	300	0	0	0	0	0	0	0	200	903	0	0	0	0	0	0	0	603	903	0
561	9	0	0	0	0	0	0	200	300	0	0	0	0	0	0	0	200	903	0	0	0	0	0	0	0	603	903	0
562	0	0	0	0	0	0	0	200	300	0	0	0	0	0	0	0	200	903	0	0	0	0	0	0	0	603	903	0
562	1	0	0	0	0	0	0	200	300	0	0	0	0	0	0	0	200	903	0	0	0	0	0	0	0	603	903	0
562	2	0	0	0	0	0	0	200	300	0	0	0	0	0	0	0	200	903	0	0	0	0	0	0	0	603	903	0
562	3	0	0	0	0	0	0	200	300	0	0	0	0	0	0	0	200	903	0	0	0	0	0	0	0	603	903	0
562	4	0	0	0	0	0	0	200	300	0	0	0	0	0	0	0	200	903	0	0	0	0	0	0	0	603	903	0
562	5	0	0	0	0	0	0	200	300	0	0	0	0	0	0	0	200	903	0	0	0	0	0	0	0	603	903	0
562	6	0	0	0	0	0	0	200	300	0	0	0	0	0	0	0	200	903	0	0	0	0	0	0	0	603	903	0
562	7	0	0	0	0	0	0	200	300	0	0	0	0	0	0	0	200	903	0	0	0	0	0	0	0	603	903	0
562	8	0	0	0	0	0	0	200	300	0	0	0	0	0	0	0	200	903	0	0	0	0	0	0	0	603	903	0
562	9	0	0	0	0	0	0	200	300	0	0	0	0	0	0	0	200	903	0	0	0	0	0	0	0	603	903	0
563	0	0	0	0	0	0	0	200	300	0	0	0	0	0	0	0	200	903	0	0	0	0	0	0	0	603	903	0
563	1	0	0	0	0	0	0	200	300	0	0	0	0	0	0	0	200	903	0	0	0	0	0	0	0	603	903	0
563	2	0	0	0	0	0	0	200	300	0	0	0	0	0	0	0	200	903	0	0	0	0	0	0	0	603	903	0
563	3	0	0	0	0	0	0	200	300	0	0	0	0	0	0	0	200	903	0	0	0	0	0	0	0	603	903	0
563	4	0	0	0	0	0	0	200	300	0	0	0	0	0	0	0	200	903	0	0	0	0	0	0	0	603	903	0
563	5	0	0	0	0	0	0	200	300	0	0	0	0	0	0	0	200	903	0	0	0	0	0	0	0	603	903	0
563	6	0	0	0	0	0	0	200	300	0	0	0	0	0	0	0	200	903	0	0	0	0	0	0	0	603	903	0
563	7	0	0	0	0	0	0	200	300	0	0	0	0	0	0	0	200	903	0	0	0	0	0	0	0	603	903	0
563	8	0	0	0	0	0	0	200	300	0	0	0	0	0	0	0	200	903	0	0	0	0	0	0	0	603	903	0
563	9	0	0	0	0	0	0	200	300	0	0	0	0	0	0	0	200	903	0	0	0	0	0	0	0	603	903	0
564	0	0	0	0	0	0	0	200	300	0	0	0	0	0	0	0	200	903	0	0	0	0	0	0	0	603	903	0
564	1	0	0	0	0	0	0	200	300	0	0	0	0	0	0	0	200	903	0	0	0	0	0	0	0	603	903	0
564	2	0	0	0	0	0	0	200	300	0	0	0	0	0	0	0	200	903	0	0	0	0	0	0	0	603	903	0
564	3	0	0	0	0	0	0	200	300	0	0	0	0	0	0	0	200	903	0	0	0	0	0	0	0	603	903	0
564	4	0	0	0	0	0	0	200	300	0	0	0	0	0	0	0	200	903	0	0	0	0	0	0	0	603	903	0
564	5	0	0	0	0	0	0	200	300	0	0	0	0	0	0	0	200	903	0	0	0	0	0	0	0	603	903	0
564	6	0	0	0	0	0	0	200	300	0	0	0	0	0	0	0	200	903	0	0	0	0	0	0	0	603	903	0
564	7	0	0	0	0	0	0	200	300	0	0	0	0	0	0	0	200	903	0	0	0	0	0	0	0	603	903	0
564	8	0	0	0	0	0	0	200	300	0	0	0	0	0	0	0	200	903	0	0	0	0	0	0	0	603	903	0
564	9	0	0	0	0	0	0	200	300	0	0	0	0	0	0	0	200	903	0	0	0	0	0	0	0	603	903	0
565	0	0	0	0	0	0	0	200	300	0	0	0	0	0	0	0	200	903	0	0	0	0	0	0	0	603	903	0
565	1	0	0	0	0	0	0	200	300	0	0	0	0	0	0	0	200	903	0	0	0	0	0	0	0	603	903	0
565	2	0	0	0	0	0	0	200	300	0	0	0	0	0	0	0	200	903	0	0	0	0	0	0	0	603	903	0
565	3	0	0	0	0	0	0	200	300	0	0	0	0	0	0	0	200	903	0	0	0	0	0	0	0	603	903	0
565	4	0	0	0	0	0	0	200	300	0	0	0	0	0	0	0	200	903	0	0	0	0	0	0	0	603	903	0
565	5	0	0	0	0	0	0	200	300	0	0	0	0	0	0	0	200	903	0	0	0	0	0	0	0	603	903	0
565	6	0	0	0	0	0	0	200	300	0	0	0	0	0	0	0	200	903	0	0	0	0	0	0	0	603	903	0
565	7	0	0	0	0	0	0	200	300	0	0	0	0	0	0	0	200	903	0	0	0	0	0	0	0	603	903	0
565	8	0	0	0	0	0	0	200	300	0	0	0	0	0	0	0	200	903	0	0	0	0	0	0	0	603	903	0
565	9	0	0	0	0	0	0	200	300	0	0	0	0	0	0	0	200	903	0	0	0	0	0	0	0	603	903	0
566	0	0	0	0	0	0	0	200	300	0	0	0	0	0	0	0	200	903	0	0	0	0	0	0	0	603	903	0
566	1	0	0	0	0	0	0	200	300	0	0	0	0	0	0	0	200	903	0	0	0	0	0	0	0	603	903	0
566	2	0	0	0	0	0	0	200	300	0	0	0	0	0	0	0	200	903	0	0	0	0	0	0	0	603	903	0
566	3	0	0	0	0	0	0	200	300	0	0	0	0	0	0	0	200	903	0	0	0	0	0	0	0	603	903	0
566	4	0	0	0	0	0	0	200	300	0	0	0	0	0	0	0	200	903	0	0	0	0	0	0	0	603	903	0
566	5	0	0	0	0	0	0	200	300	0	0	0	0	0	0	0	200	903	0	0	0	0	0	0	0	603	903	0
566	6	0	0	0	0	0	0	200	300	0	0	0	0	0	0	0	200	903	0	0	0	0	0	0	0	603	903	0
566	7	0	0	0	0	0	0	200	300	0	0	0	0	0	0	0	200	903	0	0	0	0	0	0	0	603	903	0
566	8	0	0	0	0	0	0	200	300	0	0	0	0	0	0	0	200	903	0	0	0	0	0	0	0	603	903	0
566	9	0	0	0	0	0	0	200	300	0	0	0	0	0	0	0	200	903	0	0	0	0	0	0	0	603	903	0
567	0	0	0	0	0	0	0	200	300	0	0	0	0	0	0	0	200	903	0	0	0	0	0	0	0	603	903	0
567	1	0	0	0	0	0	0	200	300	0	0	0	0	0	0	0	200	903	0	0	0	0	0	0	0	603	903	0
567	2	0	0	0	0	0	0	200	300	0	0	0	0	0	0	0	200	903	0	0	0	0	0	0	0	603	903	0
567	3	0	0	0	0	0	0	200	300	0	0	0	0	0	0	0	200	903	0	0	0	0	0	0	0	603	903	0
567	4	0	0	0	0	0	0	200	300	0	0	0	0	0	0	0	200	903	0	0	0	0	0	0	0	603	903	0
567	5	0	0	0	0	0	0	200	300	0	0	0	0	0	0	0	200	903	0	0	0	0	0	0	0	603	903	0
567	6	0	0	0	0	0	0	200	300	0	0	0	0	0	0	0	200	903	0	0	0	0	0	0	0	603	903	0
567	7	0	0	0	0	0	0	200	300	0	0	0	0	0	0	0	200	903	0	0	0	0	0	0	0	603	903	0
567	8	0	0	0	0	0	0	200	300	0	0	0	0	0	0	0	200	903	0	0	0	0	0	0	0	603	903	0
567	9	0	0	0	0	0	0	200	300	0	0	0	0	0	0	0	200	903	0	0	0	0	0	0	0	603	903	0
568	0	0	0	0	0	0	0	200	300	0	0	0	0	0	0	0	200	903	0	0	0	0	0	0	0	603	903	0
568	1	0	0	0	0	0	0	200	300	0	0	0	0	0	0	0	200	903	0	0	0	0	0	0	0	603	903	0
568	2	0	0	0	0	0	0	200	300	0	0	0	0	0	0	0	200	903	0	0	0	0	0	0	0	603	903	0
568	3	0	0	0	0	0	0	200	300	0	0	0	0	0	0	0	200	903	0	0	0	0	0	0	0	603	903	0
568	4	0	0	0	0	0	0	200	300	0	0	0	0	0	0	0	200	903	0	0	0	0	0	0	0	603	903	0
568	5	0	0	0	0	0	0	200	300	0	0	0	0	0	0	0	200	903	0	0	0	0	0	0	0	603	903	0
568	6	0	0	0	0	0	0	200	300	0	0	0	0	0	0	0	200	903	0	0	0	0	0	0	0	603	903	0
568	7	0	0	0	0	0	0	200	300	0	0	0	0	0	0	0	200	903	0	0	0	0	0	0	0	603	903	0
568	8	0	0	0	0	0	0	200	300	0	0	0	0	0	0	0	200	903	0	0	0	0	0	0	0	603	903	0
568	9	0	0	0	0	0	0	200	300	0	0	0	0	0	0	0	200	903	0	0	0	0	0	0	0	603	903	0
569	0	0	0	0	0	0	0	200	300	0	0	0	0	0	0	0	200	903	0	0	0	0	0	0	0	603	903	0
569	1	0	0	0	0	0	0	200	300	0	0	0	0	0	0	0	200	903	0	0	0	0	0	0	0	603	903	0
569	2	0	0	0	0	0	0	200	300	0	0	0	0	0	0	0	200	903	0	0	0	0	0	0	0	603	903	0
569	3	0	0	0	0	0	0	200	300	0	0	0	0	0	0	0	200	903	0	0	0	0	0	0	0	603	903	0
569	4	0	0	0	0	0	0	200	300	0	0	0	0	0	0	0	200	903	0	0	0	0	0	0	0	603	903	0
569	5	0	0	0	0	0	0	200	300	0	0	0	0	0	0	0	200	903	0	0	0	0	0	0	0	603	903	0
569	6	0	0	0	0	0	0	200	300	0	0	0	0	0	0	0	200	903	0	0	0	0	0	0	0	603	903	0
569	7	0	0	0	0	0	0	200	300	0	0	0	0	0	0	0	200	903	0	0	0	0	0	0	0	603	903	0
569	8	0	0	0	0	0	0	200	300	0	0	0	0	0	0	0	200	903	0	0	0	0	0	0	0	603	903	0
569	9	0	0	0	0	0	0	200	300	0	0	0	0	0	0	0	200	903	0	0	0	0	0	0	0	603	903	0
570	0	0	0	0	0	0	0	200	300	0	0	0	0	0	0	0	200	903	0	0	0	0	0	0	0	603	903	0
570	1	0	0	0	0	0	0	200	300	0	0	0	0	0	0	0	200	903	0	0	0	0	0	0	0	603	903	0
570	2	0	0	0	0	0	0	200	300	0	0	0	0	0	0	0	200	903	0	0	0	0	0	0	0	603	903	0
570	3	0	0	0	0	0	0	200	300	0	0	0	0	0	0	0	200	903	0	0	0	0	0	0	0	603	903	0
570	4	0	0	0	0	0	0	200	300	0	0	0	0	0	0	0	200	903	0	0	0	0	0	0	0	603	903	0
570	5	0	0	0	0	0	0	200	300	0	0	0	0	0	0	0	200	903	0	0	0	0	0	0	0	603	903	0
570	6	0	0	0	0	0	0	200	300	0	0	0	0	0	0	0	200	903	0	0	0	0	0	0	0	603	903	0
570	7	0	0	0	0	0	0	200	300	0	0	0	0	0	0	0	200	903	0	0	0	0	0	0	0	603	903	0
570	8	0	0	0	0	0	0	200	300	0	0	0	0	0	0	0	200	903	0	0	0	0	0	0	0	603	903	0
570	9	0	0	0	0	0	0	200	300	0	0	0	0	0	0	0	200	903	0	0	0	0	0	0	0	603	903	0
571	0	0	0	0	0	0	0	200	300	0	0	0	0	0	0	0	200	903	0	0	0	0	0	0	0	603	903	0
571	1	0	0	0	0	0	0	200	300	0	0	0	0	0	0	0	200	903	0	0	0	0	0	0	0	603	903	0
571	2	0	0	0	0	0	0	200	300	0	0	0	0	0	0	0	200	903	0	0	0	0	0	0	0	603	903	0
571	3	0	0	0	0	0	0	200	300	0	0	0	0	0	0	0	200	903	0	0	0	0	0	0	0	603	903	0
571	4	0	0	0	0	0	0	200	300	0	0	0	0	0	0	0	200	903	0	0	0	0	0	0	0	603	903	0
571	5	0	0	0	0	0	0	200	300	0	0	0	0	0	0	0	200	903	0	0	0	0	0	0	0	603	903	0
571	6	0	0	0	0	0	0	200	300	0	0	0	0	0	0	0	200	903	0	0	0	0	0	0	0	603	903	0
571	7	0	0	0	0	0	0	200	300	0	0	0	0	0	0	0	200	903	0	0	0	0	0	0	0	603	903	0
571	8	0	0	0	0	0	0	200	300	0	0	0	0	0	0	0	200	903	0	0	0	0	0	0	0	603	903	0
571	9	0	0	0	0	0	0	200	300	0	0	0	0	0	0	0	200	903	0	0	0	0	0	0	0	603	903	0
572	0	0	0	0	0	0	0	200	300	0	0	0	0	0	0	0	200	903	0	0	0	0	0	0	0	603	903	0
572	1	0	0	0	0	0	0	200	300	0	0	0	0	0	0	0	200	903	0	0	0	0	0	0	0	603	903	0
572	2	0	0	0	0	0	0	200	300	0	0	0	0	0	0	0	200	903	0	0	0	0	0	0	0	603	903	0
572	3	0	0	0	0	0	0	200	300	0	0	0	0	0	0	0	200	903	0	0	0	0	0	0	0	603	903	0
572	4	0	0	0	0	0	0	200	300	0	0	0	0	0	0	0	200	903	0	0	0	0	0	0	0	603	903	0
572	5	0	0	0	0	0	0	200	300	0	0	0	0	0	0	0	200	903	0	0	0	0	0	0	0	603	903	0
572	6	0	0	0	0	0	0	200	300	0	0	0	0	0	0	0	200	903	0	0	0	0	0	0	0	603	903	0
572	7	0	0	0	0	0	0	200	300	0	0	0	0	0	0	0	200	903	0	0	0	0	0	0	0	603	903	0
572	8	0	0	0	0	0	0	200	300	0	0	0	0	0	0	0	200	903	0	0	0	0	0	0	0	603	903	0
572	9	0	0	0	0	0	0	200	300	0	0	0	0	0	0	0	200	903	0	0	0	0	0	0	0	603	903	0
573	0	0	0	0	0	0	0	200	300	0	0	0	0	0	0	0	200	903	0	0	0	0	0	0	0	603	903	0
573	1	0	0	0	0	0	0	200	300	0	0	0	0	0	0	0	200	903	0	0	0	0	0	0	0	603	903	0
573	2	0	0	0	0	0	0	200	300	0	0	0	0	0	0	0	200	903	0	0	0	0	0	0	0	603	903	0
573	3	0	0	0	0	0	0	200	300	0	0	0	0	0	0	0	200	903	0	0	0	0	0	0	0	603	903	0
573	4	0	0	0	0	0	0	200	300	0	0	0	0	0	0	0	200	903	0	0	0	0	0	0	0	603	903	0
573	5	0	0	0	0	0	0	200	300	0	0	0	0	0	0	0	200	903	0	0	0	0	0	0	0	603	903	0
573	6	0	0	0	0	0	0	200	300	0	0	0	0	0	0	0	200	903	0	0	0	0	0	0	0	603	903	0
573	7	0	0	0	0	0	0	200	300	0	0	0	0	0	0	0	200	903	0	0	0	0	0	0	0	603	903	0
573	8	0	0	0	0	0	0	200	300	0	0	0	0	0	0	0	200	903	0	0	0	0	0	0	0	603	903	0
573	9	0	0	0	0	0	0	200	300	0	0	0	0	0	0	0	200	903	0	0	0	0	0	0	0	603	903	0
574	0	0	0	0	0	0	0	200	300	0	0	0	0	0	0	0	200	903	0	0	0	0	0	0	0	603	903	0
574	1	0	0	0	0	0	0	200	300	0	0	0	0	0	0	0	200	903	0	0	0	0	0	0	0	603	903	0
574	2	0	0	0	0	0	0	200	300	0	0	0	0	0	0	0	200	903	0	0	0	0	0	0	0	603	903	0
574	3	0	0	0	0	0	0	200	300	0	0	0	0	0	0	0	200	903	0	0	0	0	0	0	0	603	903	0
574	4	0	0	0	0	0	0	200	300	0	0	0	0	0	0	0	200	903	0	0	0	0	0	0	0	603	903	0
574	5	0	0	0	0	0	0	200	300	0	0	0	0	0	0	0	200	903	0	0	0	0	0	0	0	603	903	0
574	6	0	0	0	0	0	0	200	300	0	0	0	0	0	0	0	200	903	0	0	0	0	0	0	0	603	903	0
574	7	0	0	0	0	0	0	200	300	0	0	0	0	0	0	0	200	903	0	0	0	0	0	0	0	603	903	0
574	8	0	0	0	0	0	0	200	300	0	0	0	0	0	0	0	200	903	0	0	0	0	0	0	0	603	903	0
574	9	0	0	0	0	0	0	200	300	0	0	0	0	0	0	0	200	903	0	0	0	0	0	0	0	603	903	0
575	0	0	0	0	0	0	0	200	300	0	0	0	0	0	0	0	200	903	0	0	0	0	0	0	0	603	903	0
575	1	0	0	0	0	0	0	200	300	0	0	0	0	0	0	0	200	903	0	0	0	0	0	0	0	603	903	0
575	2	0	0	0	0	0	0	200	300	0	0	0	0	0	0	0	200	903	0	0	0	0	0	0	0	603	903	0
575	3	0	0	0	0	0	0	200	300	0	0	0	0	0	0	0	200	903	0	0	0	0	0	0	0	603	903	0
575	4	0	0	0	0	0	0	200	300	0	0	0	0	0	0	0	200	903	0	0	0	0	0	0	0	603	903	0
575	5	0	0	0	0	0	0	200	300	0	0	0	0	0	0	0	200	903	0	0	0	0	0	0	0	603	903	0
575	6	0	0	0	0	0	0	200	300	0	0	0	0	0	0	0	200	903	0	0	0	0	0	0	0	603	903	0
575	7	0	0	0	0	0	0	200	300	0	0	0	0	0	0	0	200	903	0	0	0	0	0	0	0	603	903	0
575	8	0	0	0	0	0	0	200	300	0	0	0	0	0	0	0	200	903	0	0	0	0	0	0	0	603	903	0
575	9	0	0	0	0	0	0	200	300	0	0	0	0	0	0	0	200	903	0	0	0	0	0	0	0	603	903	0
576	0	0	0	0	0	0	0	200	300	0	0	0	0	0	0	0	200	903	0	0	0	0	0	0	0	603	903	0
576	1	0	0	0	0	0	0	200	300	0	0	0	0	0	0	0	200	903	0	0	0	0	0	0	0	603	903	0
576	2	0	0	0	0	0	0	200	300	0	0	0	0	0	0	0	200	903	0	0	0	0	0	0	0	603	903	0
576	3	0	0	0	0	0	0	200	300	0	0	0	0	0	0	0	200	903	0	0	0	0	0	0	0	603	903	0
576	4	0	0	0	0	0	0	200	300	0	0	0	0	0	0	0	200	903	0	0	0	0	0	0	0	603	903	0
576	5	0	0	0	0	0	0	200	300	0	0	0	0	0	0	0	200	903	0	0	0	0	0	0	0	603	903	0
576	6	0	0	0	0	0	0	200	300	0	0	0	0	0	0	0	200	903	0	0	0	0	0	0	0	603	903	0
576	7	0	0	0	0	0	0	200	300	0	0	0	0	0	0	0	200	903	0	0	0	0	0	0	0	603	903	0
576	8	0	0	0	0	0	0	200	300	0	0	0	0	0	0	0	200	903	0	0	0	0	0	0	0	603	903	0
576	9	0	0	0	0	0	0	200	300	0	0	0	0	0	0	0	200	903	0	0	0	0	0	0	0	603	903	0
577	0	0	0	0	0	0	0	200	300	0	0	0	0	0	0	0	200	903	0	0	0	0	0	0	0	603	903	0
577	1	0	0	0	0	0	0	200	300	0	0	0	0	0	0	0	200	903	0	0	0	0	0	0	0	603	903	0
577	2	0	0	0	0	0	0	200	300	0	0	0	0	0	0	0	200	903	0	0	0	0	0	0	0	603	903	0
577	3	0	0	0	0	0	0	200	300	0	0	0	0	0	0	0	200	903	0	0	0	0	0	0	0	603	903	0
577	4	0	0	0	0	0	0	200	300	0	0	0	0	0	0	0	200	903	0	0	0	0	0	0	0	603	903	0
577	5	0	0	0	0	0	0	200	300	0	0	0	0	0	0	0	200	903	0	0	0	0	0	0	0	603	903	0
577	6	0	0	0	0	0	0	200	300	0	0	0	0	0	0	0	200	903	0	0	0	0	0	0	0	603	903	0
577	7	0	0	0	0	0	0	200	300	0	0	0	0	0	0	0	200	903	0	0	0	0	0	0	0	603	903	0
577	8	0	0	0	0	0	0	200	300	0	0	0	0	0	0	0	200	903	0	0	0	0	0	0	0	603	903	0
577	9	0	0	0	0	0	0	200	300	0	0	0	0	0	0	0	200	903	0	0	0	0	0	0	0	603	903	0
578	0	0	0	0	0	0	0	200	300	0	0	0	0	0	0	0	200	903	0	0	0	0	0	0	0	603	903	0
578	1	0	0	0	0	0	0	200	300	0	0	0	0	0	0	0	200	903	0	0	0	0	0	0	0	603	903	0
578	2	0	0	0	0	0	0	200	300	0	0	0	0	0	0	0	200	903	0	0	0	0	0	0	0	603	903	0
578	3	0	0	0	0	0	0	200	300	0	0	0	0	0	0	0	200	903	0	0	0	0	0	0	0	603	903	0
578	4	0	0	0	0	0	0	200	300	0	0	0	0	0	0	0	200	903	0	0	0	0	0	0	0	603	903	0
578	5	0	0	0	0	0	0	200	300	0	0	0	0	0	0	0	200	903	0	0	0	0	0	0	0	603	903	0
578	6	0	0	0	0	0	0	200	300	0	0	0	0	0	0	0	200	903	0	0	0	0	0	0	0	603	903	0
578	7	0	0	0	0	0	0	200	300	0	0	0	0	0	0	0	200	903	0	0	0	0	0	0	0	603	903	0
578	8	0	0	0	0	0	0	200	300	0	0	0	0	0	0	0	200	903	0	0	0	0	0	0	0	603	903	0
578	9	0	0	0	0	0	0	200	300	0	0	0	0	0	0	0	200	903	0	0	0	0	0	0	0	603	903	0
579	0	0	0	0	0	0	0	200	300	0	0	0	0	0	0	0	200	903	0	0	0	0	0	0	0	603	903	0
579	1	0	0	0	0	0	0	200	300	0	0	0	0	0	0	0	200	903	0	0	0	0	0	0	0	603	903	0
579	2	0	0	0	0	0	0	200	300	0	0	0	0	0	0	0	200	903	0	0	0	0	0	0	0	603	903	0
579	3	0	0	0	0	0	0	200	300	0	0	0	0	0	0	0	200	903	0	0	0	0	0	0	0	603	903	0
579	4	0	0	0	0	0	0	200	300	0	0	0	0	0	0	0	200	903	0	0	0	0	0	0	0	603	903	0
579	5	0	0	0	0	0	0	200	300	0	0	0	0	0	0	0	200	903	0	0	0	0	0	0	0	603	903	0
579	6	0	0	0	0	0	0	200	300	0	0	0	0	0	0	0	200	903	0	0	0	0	0	0	0	603	903	0
579	7	0	0	0	0	0	0	200	300	0	0	0	0	0	0	0	200	903	0	0	0	0	0	0	0	603	903	0
579	8	0	0	0	0	0	0	200	300	0	0	0	0	0	0	0	200	903	0	0	0	0	0	0	0	603	903	0
579	9	0	0	0	0	0	0	200	300	0	0	0	0	0	0	0	200	903	0	0	0	0	0	0	0	603	903	0
580	0	0	0	0	0	0	0	200	300	0	0	0	0	0	0	0	200	903	0	0	0	0	0	0	0	603	903	0
580	1	0	0	0	0	0	0	200	300	0	0	0	0	0	0	0	200	903	0	0	0	0	0	0	0	603	903	0
580	2	0	0	0	0	0	0	200	300	0	0	0	0	0	0	0	200	903	0	0	0	0	0	0	0	603	903	0
580	3	0	0	0	0	0	0	200	300	0	0	0	0	0	0	0	200	903	0	0	0	0	0	0	0	603	903	0
580	4	0	0	0	0	0	0	200	300	0	0	0	0	0	0	0	200	903	0	0	0	0	0	0	0	603	903	0
580	5	0	0	0	0	0	0	200	300	0	0	0	0	0	0	0	200	903	0	0	0	0	0	0	0	603	903	0
580	6	0	0	0	0	0	0	200	300	0	0	0	0	0	0	0	200	903	0	0	0	0	0	0	0	603	903	0
580	7	0	0	0	0	0	0	200	300	0	0	0	0	0	0	0	200	903	0	0	0	0	0	0	0	603	903	0
580	8	0	0	0	0	0	0	200	300	0	0	0	0	0	0	0	200	903	0	0	0	0	0	0	0	603	903	0
580	9	0	0	0	0	0	0	200	300	0	0	0	0	0	0	0	200	903	0	0	0	0	0	0	0	603	903	0
581	0	0	0	0	0	0	0	200	300	0	0	0	0	0	0	0	200	903	0	0	0	0	0	0	0	603	903	0
581	1	0	0	0	0	0	0	200	300	0	0	0	0	0	0	0	200	903	0	0	0	0	0	0	0	603	903	0
581	2	0	0	0	0	0	0	200	300	0	0	0	0	0	0	0	200	903	0	0	0	0	0	0	0	603	903	0
581	3	0	0	0	0	0	0	200	300	0	0	0	0	0	0	0	200	903	0	0	0	0	0	0	0	603	903	0
581	4	0	0	0	0	0	0	200	300	0	0	0	0	0	0	0	200	903	0	0	0	0	0	0	0	603	903	0
581	5	0	0	0	0	0	0	200	300	0	0	0	0	0	0	0	200	903	0	0	0	0	0	0	0	603	903	0
581	6	0	0	0	0	0	0	200	300	0	0	0	0	0	0	0	200	903	0	0	0	0	0	0	0	603	903	0
581	7	0	0	0	0	0	0	200	300	0	0	0	0	0	0	0	200	903	0	0	0	0	0	0	0	603	903	0
581	8	0	0	0	0	0	0	200	300	0	0	0	0	0	0	0	200	903	0	0	0	0	0	0	0	603	903	0
581	9	0	0	0	0	0	0	200	300	0	0	0	0	0	0	0	200	903	0	0	0	0	0	0	0	603	903	0
582	0	0	0	0	0	0	0	200	300	0	0	0	0	0	0	0	200	903	0	0	0	0	0	0	0	603	903	0
582	1	0	0	0	0	0	0	200	300	0	0	0	0	0	0	0	200	903	0	0	0	0	0	0	0	603	903	0
582	2	0	0	0	0	0	0	200	300	0	0	0	0	0	0	0	200	903	0	0	0	0	0	0	0	603	903	0
582	3	0	0	0	0	0	0	200	300	0	0	0	0	0	0	0	200	903	0	0	0	0	0	0	0	603	903	0
582	4	0	0	0	0	0	0	200	300	0	0	0	0	0	0	0	200	903	0	0	0	0	0	0	0	603	903	0
582	5	0	0	0	0	0	0	200	300	0	0	0	0	0	0	0	200	903	0	0	0	0	0	0	0	603	903	0
582	6	0	0	0	0	0	0	200	300	0	0	0	0	0	0	0	200	903	0	0	0	0	0	0	0	603	903	0
582	7	0	0	0	0	0	0	200	300	0	0	0	0	0	0	0	200	903	0	0	0	0	0	0	0	603	903	0
582	8	0	0	0	0	0	0	200	300	0	0	0	0	0	0	0	200	903	0	0	0	0	0	0	0	603	903	0
582	9	0	0	0	0	0	0	200	300	0	0	0	0	0	0	0	200	903	0	0	0	0	0	0	0	603	903	0
583	0	0	0	0	0	0	0	200	300	0	0	0	0	0	0	0	200	903	0	0	0	0	0	0	0	603	903	0
583	1	0	0	0	0	0	0	200	300	0	0	0	0	0	0	0	200	903	0	0	0	0	0	0	0	603	903	0
583	2	0	0	0	0	0	0	200	300	0	0	0	0	0	0	0	200	903	0	0	0	0	0	0	0	603	903	0
583	3	0	0	0	0	0	0	200	300	0	0	0	0	0	0	0	200	903	0	0	0	0	0	0	0	603	903	0
583	4	0	0	0	0	0	0	200	300	0	0	0	0	0	0	0	200	903	0	0	0	0	0	0	0	603	903	0
583	5	0	0	0	0	0	0	200	300	0	0	0	0	0	0	0	200	903	0	0	0	0	0	0	0	603	903	0
583	6	0	0	0	0	0	0	200	300	0	0	0	0	0	0	0	200	903	0	0	0	0	0	0	0	603	903	0
583	7	0	0	0	0	0	0	200	300	0	0	0	0	0	0	0	200	903	0	0	0	0	0	0	0	603	903	0
583	8	0	0	0	0	0	0	200	300	0	0	0	0	0	0	0	200	903	0	0	0	0	0	0	0	603	903	0
583	9	0	0	0	0	0	0	200	300	0	0	0	0	0	0	0	200	903	0	0	0	0	0	0	0	603	903	0
584	0	0	0	0	0	0	0	200	300	0	0	0	0	0	0	0	200	903	0	0	0	0	0	0	0	603	903	0
584	1	0	0	0	0	0	0	200	300	0	0	0	0	0	0	0	200	903	0	0	0	0	0	0	0	603	903	0
584	2	0	0	0	0	0	0	200	300	0	0	0	0	0	0	0	200	903	0	0	0	0	0	0	0	603	903	0
584	3	0	0	0	0	0	0	200	300	0	0	0	0	0	0	0	200	903	0	0	0	0	0	0	0	603	903	0
584	4	0	0	0	0	0	0	200	300	0	0	0	0	0	0	0	200	903	0	0	0	0	0	0	0	603	903	0
584	5	0	0	0	0	0	0	200	300	0	0	0	0	0	0	0	200	903	0	0	0	0	0	0	0	603	903	0
584	6	0	0	0	0	0	0	200	300	0	0	0	0	0	0	0	200	903	0	0	0	0	0	0	0	603	903	0
584	7	0	0	0	0	0	0	200	300	0	0	0	0	0	0	0	200	903	0	0	0	0	0	0	0	603	903	0
584	8	0	0	0	0	0	0	200	300	0	0	0	0	0	0	0	200	903	0	0	0	0	0	0	0	603	903	0
584	9	0	0	0	0	0	0	200	300	0	0	0	0	0	0	0	200	903	0	0	0	0	0	0	0	603	903	0
585	0	0	0	0	0	0	0	200	300	0	0	0	0	0	0	0	200	903	0	0	0	0	0	0	0	603	903	0
585	1	0	0	0	0	0	0	200	300	0	0	0	0	0	0	0	200	903	0	0	0	0	0	0	0	603	903	0
585	2	0	0	0	0	0	0	200	300	0	0	0	0	0	0	0	200	903	0	0	0	0	0	0	0	603	903	0
585	3	0	0	0	0	0	0	200	300	0	0	0	0	0	0	0	200	903	0	0	0	0	0	0	0	603	903	0
585	4	0	0	0	0	0	0	200	300	0	0	0	0	0	0	0	200	903	0	0	0	0	0	0	0	603	903	0
585	5	0	0	0	0	0	0	200	300	0	0	0	0	0	0	0	200	903	0	0	0	0	0	0	0	603	903	0
585	6	0	0	0	0	0	0	200	300	0	0	0	0	0	0	0	200	903	0	0	0	0	0	0	0	603	903	0
585	7	0	0	0	0	0	0	200	300	0	0	0	0	0	0	0	200	903	0	0	0	0	0	0	0	603	903	0
585	8	0	0	0	0	0	0	200	300	0	0	0	0	0	0	0	200	903	0	0	0	0	0	0	0	603	903	0
585	9	0	0	0	0	0	0	200	300	0	0	0	0	0	0	0	200	903	0	0	0	0	0	0	0	603	903	0
586	0	0	0	0	0	0	0	200	300	0	0	0	0	0	0	0	200	903	0	0	0	0	0	0	0	603	903	0
586	1	0	0	0	0	0	0	200	300	0	0	0	0	0	0	0	200	903	0	0	0	0	0	0	0	603	903	0
586	2	0	0	0	0	0	0	200	300	0	0	0	0	0	0	0	200	903	0	0	0	0	0	0	0	603	903	0
586	3	0	0	0	0	0	0	200	300	0	0	0	0	0	0	0	200	903	0	0	0	0	0	0	0	603	903	0
586	4	0	0	0	0	0	0	200	300	0	0	0	0	0	0	0	200	903	0	0	0	0	0	0	0	603	903	0
586	5	0	0	0	0	0	0	200	300	0	0	0	0	0	0	0	200	903	0	0	0	0	0	0	0	603	903	0
586	6	0	0	0	0	0	0	200	300	0	0	0	0	0	0	0	200	903	0	0	0	0	0	0	0	603	903	0
586	7	0	0	0	0	0	0	200	300	0	0	0	0	0	0	0	200	903	0	0	0	0	0	0	0	603	903	0
586	8	0	0	0	0	0	0	200	300	0	0	0	0	0	0	0	200	903	0	0	0	0	0	0	0	603	903	0
586	9	0	0	0	0	0	0	200	300	0	0	0	0	0	0	0	200	903	0	0	0	0	0	0	0	603	903	0
587	0	0	0	0	0	0	0	200	300	0	0	0	0	0	0	0	200	903	0	0	0	0	0	0	0	603	903	0
587	1	0	0	0	0	0	0	200	300	0	0	0	0	0	0	0	200	903	0	0	0	0	0	0	0	603	903	0
587	2	0	0	0	0	0	0	200	300	0	0	0	0	0	0	0	200	903	0	0	0	0	0	0	0	603	903	0
587	3	0	0	0	0	0	0	200	300	0	0	0	0	0	0	0	200	903	0	0	0	0	0	0	0	603	903	0
587	4	0	0	0	0	0	0	200	300	0	0	0	0	0	0	0	200	903	0	0	0	0	0	0	0	603	903	0
587	5	0	0	0	0	0	0	200	300	0	0	0	0	0	0	0	200	903	0	0	0	0	0	0	0	603	903	0
587	6	0	0	0	0	0	0	200	300	0	1.8924	-0.918119	-31.3525	-4217.93	-2729.3	25.2677	112.948	1037.53	0	0	0	0	0	0	0	603	903	0
587	7	0	0	0	0	0	0	200	300	0	-0.243835	6.10092	-32.8784	-2936.19	-2179.99	-340.943	133.695	992.305	0	0	0	0	0	0	0	603	903	0
587	8	0	0	0	0	0	0	200	300	0	0.213928	11.2889	-27.08	-4126.37	-1996.88	-890.26	126.26	1055.38	0	0	0	0	0	0	0	603	903	0
587	9	0	0	0	0	0	0	200	300	0	3.72345	12.9674	-27.08	-4767.24	-2363.09	-1027.59	112.737	1079.04	0	0	0	0	0	0	0	603	903	0
588	0	0	0	0	0	0	0	200	300	0	4.02863	15.2562	-38.9819	-5225.01	-3034.48	-1531.13	122.157	1037.04	0	0	0	0	0	0	0	603	903	0
588	1	0	0	0	0	0	0	200	300	0	0.213928	21.3597	-49.0527	-5499.66	-3705.87	-1851.56	124.451	1015.12	0	0	0	0	0	0	0	603	903	0
588	2	0	0	0	0	0	0	200	300	0	0.213928	22.2752	-49.9682	-6781.4	-4011.04	-1851.56	119.728	1038.71	0	0	0	0	0	0	0	603	903	0
588	3	0	0	0	0	0	0	200	300	0	3.41827	24.4115	-54.851	-8520.9	-4560.36	-1851.56	116.859	1058.35	0	0	0	0	0	0	0	603	903	0
588	4	0	0	0	0	0	0	200	300	0	2.04498	26.3951	-66.1425	-9344.88	-5170.71	-2217.78	121.825	1044.28	0	0	0	0	0	0	0	603	903	0
588	5	0	0	0	0	0	0	200	300	0	-1.61713	24.4115	-75.9082	-9070.22	-6208.31	-1897.34	118.213	1022.49	0	0	0	0	0	0	0	603	903	0
588	6	0	0	0	0	0	0	200	300	0	0.0613403	19.8338	-79.5703	-9711.09	-6757.62	-1714.23	115.074	1025.04	0	0	0	0	0	0	0	603	903	0
588	7	0	0	0	0	0	0	200	300	0	3.72345	21.3597	-82.622	-10992.8	-6879.69	-1760.01	116.733	1036.05	0	0	0	0	0	0	0	603	903	0
588	8	0	0	0	0	0	0	200	300	0	5.5545	22.4278	-90.5566	-11908.4	-7184.87	-1668.46	120.659	1034.5	0	0	0	0	0	0	0	603	903	0
588	9	0	0	0	0	0	0	200	300	0	2.65533	18.4605	-100.933	-11908.4	-7856.26	-1576.91	122.163	1020.98	0	0	0	0	0	0	0	603	903	0
589	0	0	0	0	0	0	0	200	300	0	2.65533	15.5614	-102.764	-11816.8	-8039.36	-1760.01	121.768	1017.99	0	0	0	0	0	0	0	603	903	0
589	1	0	0	0	0	0	0	200	300	0	4.48639	16.9347	-107.952	-13464.8	-8466.61	-1439.58	121.57	1027.73	0	0	0	0	0	0	0	603	903	0
589	2	0	0	0	0	0	0	200	300	0	6.16486	16.3243	-110.393	-13647.9	-8710.75	-1393.8	121.093	1026.63	0	0	0	0	0	0	0	603	903	0
589	3	0	0	0	0	0	0	200	300	0	6.47003	11.1363	-117.412	-14471.8	-9260.07	-1531.13	121.132	1026.26	0	0	0	0	0	0	0	603	903	0
589	4	0	0	0	0	0	0	200	300	0	3.1131	7.47421	-122.905	-14380.3	-9382.14	-1027.59	123.664	1020	0	0	0	0	0	0	0	603	903	0
589	5	0	0	0	0	0	0	200	300	0	4.94415	9.00009	-126.262	-15204.3	-10236.6	-890.26	118.926	1023.42	0	0	0	0	0	0	0	603	903	0
589	6	0	0	0	0	0	0	200	300	0	8.75885	5.03281	-129.314	-14471.8	-9931.46	-981.813	123.199	1014.91	0	0	0	0	0	0	0	603	903	0
589	7	0	0	0	0	0	0	200	300	0	7.38556	-0.0025921	-132.366	-15845.1	-10358.7	-707.154	121.742	1022.71	0	0	0	0	0	0	0	603	903	0
589	8	0	0	0	0	0	0	200	300	0	5.09674	-0.918119	-136.638	-15570.5	-10724.9	-386.72	121.509	1016.95	0	0	0	0	0	0	0	603	903	0
589	9	0	0	0	0	0	0	200	300	0	7.69073	-1.68106	-139.385	-16119.8	-10480.8	-157.838	124.807	1018.65	0	0	0	0	0	0	0	603	903	0
590	0	0	0	0	0	0	0	200	300	0	9.82697	-2.90176	-143.657	-16211.3	-10969.1	-249.391	123.644	1015.85	0	0	0	0	0	0	0	603	903	0
590	1	0	0	0	0	0	0	200	300	0	8.1485	-4.73282	-147.93	-17035.3	-11640.4	-386.72	121.311	1018.16	0	0	0	0	0	0	0	603	903	0
590	2	0	0	0	0	0	0	200	300	0	6.16486	-5.34317	-152.812	-17126.9	-11762.5	-340.943	123.027	1015.08	0	0	0	0	0	0	0	603	903	0
590	3	0	0	0	0	0	0	200	300	0	8.75885	-7.4794	-158	-17218.4	-11884.6	116.82	124.781	1011.98	0	0	0	0	0	0	0	603	903	0
590	4	0	0	0	0	0	0	200	300	0	12.7261	-9.76822	-161.052	-17859.3	-12189.8	483.031	124.312	1013.89	0	0	0	0	0	0	0	603	903	0
590	5	0	0	0	0	0	0	200	300	0	8.60626	-11.2941	-164.714	-18133.9	-12678	254.149	123.03	1013.09	0	0	0	0	0	0	0	603	903	0
590	6	0	0	0	0	0	0	200	300	0	6.9278	-11.9044	-168.987	-18317	-13349.4	116.82	121.003	1011.39	0	0	0	0	0	0	0	603	903	0
590	7	0	0	0	0	0	0	200	300	0	9.21661	-13.8881	-172.954	-18133.9	-13349.4	711.913	122.815	1007.85	0	0	0	0	0	0	0	603	903	0
590	8	0	0	0	0	0	0	200	300	0	11.0477	-14.4984	-177.532	-19232.6	-13471.5	849.242	124.118	1011.33	0	0	0	0	0	0	0	603	903	0
590	9	0	0	0	0	0	0	200	300	0	8.30109	-15.1088	-183.635	-19507.2	-13898.7	620.36	124.313	1009.23	0	0	0	0	0	0	0	603	903	0
591	0	0	0	0	0	0	0	200	300	0	7.69073	-18.6183	-184.856	-20056.5	-14814.3	986.571	119.86	1011.5	0	0	0	0	0	0	0	603	903	0
591	1	0	0	0	0	0	0	200	300	0	12.5735	-19.9916	-191.265	-19965	-15180.5	849.242	120.631	1007.38	0	0	0	0	0	0	0	603	903	0
591	2	0	0	0	0	0	0	200	300	0	8.75885	-19.3813	-196.453	-20148.1	-15302.5	1078.12	122.106	1005.56	0	0	0	0	0	0	0	603	903	0
591	3	0	0	0	0	0	0	200	300	0	6.9278	-21.0597	-202.861	-20789	-15912.9	1123.9	121.558	1005.48	0	0	0	0	0	0	0	603	903	0
591	4	0	0	0	0	0	0	200	300	0	8.60626	-24.7218	-209.88	-20697.4	-16584.3	1398.56	120.982	1001.62	0	0	0	0	0	0	0	603	903	0
591	5	0	0	0	0	0	0	200	300	0	9.21661	-25.9425	-213.848	-22253.8	-17133.6	1444.34	119.879	1007.06	0	0	0	0	0	0	0	603	903	0
591	6	0	0	0	0	0	0	200	300	0	7.08038	-25.6374	-220.561	-22620	-17682.9	1902.1	119.828	1005.56	0	0	0	0	0	0	0	603	903	0
591	7	0	0	0	0	0	0	200	300	0	8.60626	-28.8417	-227.275	-22436.9	-17805	2039.43	121.659	1001.72	0	0	0	0	0	0	0	603	903	0
591	8	0	0	0	0	0	0	200	300	0	7.38556	-31.5883	-234.6	-22345.4	-18537.4	2222.53	120.983	998.249	0	0	0	0	0	0	0	603	903	0
591	9	0	0	0	0	0	0	200	300	0	6.16486	-32.0461	-241.924	-23535.6	-19269.8	2497.19	120.348	1000.29	0	0	0	0	0	0	0	603	903	0
592	0	0	0	0	0	0	0	200	300	0	5.24933	-32.9616	-244.976	-23901.8	-20002.3	2451.42	118.35	1000.57	0	0	0	0	0	0	0	603	903	0
592	1	0	0	0	0	0	0	200	300	0	5.09674	-37.0815	-254.131	-24084.9	-20551.6	2634.52	119.13	997.773	0	0	0	0	0	0	0	603	903	0
592	2	0	0	0	0	0	0	200	300	0	4.02863	-37.997	-260.234	-25091.9	-20856.7	2954.96	119.854	999.421	0	0	0	0	0	0	0	603	903	0
592	3	0	0	0	0	0	0	200	300	0	4.3338	-38.1496	-267.864	-25366.6	-20978.8	2817.63	121.681	997.7	0	0	0	0	0	0	0	603	903	0
592	4	0	0	0	0	0	0	200	300	0	4.94415	-40.2858	-274.883	-25275.1	-22504.7	3046.51	118.13	994.949	0	0	0	0	0	0	0	603	903	0
592	5	0	0	0	0	0	0	200	300	0	4.63898	-43.185	-279.766	-25824.4	-23176.1	3595.83	117.159	995.307	0	0	0	0	0	0	0	603	903	0
592	6	0	0	0	0	0	0	200	300	0	2.35016	-44.4057	-288.616	-26190.6	-23359.2	3733.15	119.065	993.746	0	0	0	0	0	0	0	603	903	0
592	7	0	0	0	0	0	0	200	300	0	1.8924	-44.2531	-293.804	-26373.7	-23603.3	3641.6	119.663	992.766	0	0	0	0	0	0	0	603	903	0
592	8	0	0	0	0	0	0	200	300	0	4.3338	-45.779	-300.212	-26556.8	-24457.8	3824.71	118.532	991.46	0	0	0	0	0	0	0	603	903	0
592	9	0	0	0	0	0	0	200	300	0	1.12946	-46.9997	-307.842	-26648.4	-25312.3	3870.48	117.775	989.565	0	0	0	0	0	0	0	603	903	0
593	0	0	0	0	0	0	0	200	300	0	0.671692	-47.1523	-315.776	-27563.9	-25800.6	4145.14	118.295	990.289	0	0	0	0	0	0	0	603	903	0
593	1	0	0	0	0	0	0	200	300	0	1.28204	-50.3566	-322.49	-28296.3	-26349.9	4648.68	118.292	990.743	0	0	0	0	0	0	0	603	903	0
593	2	0	0	0	0	0	0	200	300	0	0.519104	-51.4247	-325.542	-27838.5	-26472	4465.58	118.683	988.514	0	0	0	0	0	0	0	603	903	0
593	3	0	0	0	0	0	0	200	300	0	1.58722	-51.4247	-331.645	-28296.3	-27082.3	4190.92	118.34	988.321	0	0	0	0	0	0	0	603	903	0
593	4	0	0	0	0	0	0	200	300	0	0.0613403	-52.1877	-340.496	-27838.5	-27692.7	4877.56	118.669	984.759	0	0	0	0	0	0	0	603	903	0
593	5	0	0	0	0	0	0	200	300	0	-0.243835	-54.0187	-344.463	-28479.4	-28608.2	5152.22	116.948	985.678	0	0	0	0	0	0	0	603	903	0
593	6	0	0	0	0	0	0	200	300	0	-1.31195	-55.392	-349.04	-29028.7	-28974.4	5106.44	116.988	986.167	0	0	0	0	0	0	0	603	903	0
593	7	0	0	0	0	0	0	200	300	0	-1.46454	-56.4601	-353.618	-29028.7	-28852.3	5335.33	118.408	985.091	0	0	0	0	0	0	0	603	903	0
593	8	0	0	0	0	0	0	200	300	0	-1.00677	-57.986	-358.501	-28662.5	-29401.7	5426.88	117.987	982.951	0	0	0	0	0	0	0	603	903	0
593	9	0	0	0	0	0	0	200	300	0	-2.68524	-57.8334	-362.163	-28937.2	-29951	5243.77	117.3	982.901	0	0	0	0	0	0	0	603	903	0
594	0	0	0	0	0	0	0	200	300	0	-2.99042	-59.3593	-371.013	-29394.9	-30988.6	5655.76	116.476	982.229	0	0	0	0	0	0	0	603	903	0
594	1	0	0	0	0	0	0	200	300	0	-2.38007	-61.8007	-374.065	-28479.4	-31293.8	5838.87	116.341	979.135	0	0	0	0	0	0	0	603	903	0
594	2	0	0	0	0	0	0	200	300	0	-1.9223	-63.6317	-377.727	-29944.3	-31721	5838.87	116.021	982.275	0	0	0	0	0	0	0	603	903	0
594	3	0	0	0	0	0	0	200	300	0	-4.05853	-63.3266	-380.474	-29761.1	-31476.9	6296.63	117.269	981.221	0	0	0	0	0	0	0	603	903	0
594	4	0	0	0	0	0	0	200	300	0	-4.82147	-64.2421	-386.577	-28754.1	-31965.1	6113.53	117.312	977.381	0	0	0	0	0	0	0	603	903	0
594	5	0	0	0	0	0	0	200	300	0	-2.99042	-66.2257	-391.46	-29120.3	-33002.7	6479.74	115.693	977.389	0	0	0	0	0	0	0	603	903	0
594	6	0	0	0	0	0	0	200	300	0	-4.36371	-68.2094	-396.038	-30035.8	-33368.9	6708.62	115.743	978.841	0	0	0	0	0	0	0	603	903	0
594	7	0	0	0	0	0	0	200	300	0	-5.43182	-68.0568	-399.7	-29578	-33857.2	6845.95	115.293	977.001	0	0	0	0	0	0	0	603	903	0
594	8	0	0	0	0	0	0	200	300	0	-4.5163	-70.6508	-403.362	-29303.4	-33552.1	7120.61	116.819	975.648	0	0	0	0	0	0	0	603	903	0
594	9	0	0	0	0	0	0	200	300	0	-6.49994	-71.5663	-406.108	-29394.9	-34101.4	7029.05	116.029	975.382	0	0	0	0	0	0	0	603	903	0
595	0	0	0	0	0	0	0	200	300	0	-6.19476	-71.1086	-411.296	-29211.8	-34528.6	6983.28	116.049	974.024	0	0	0	0	0	0	0	603	903	0
595	1	0	0	0	0	0	0	200	300	0	-4.66888	-71.8715	-414.348	-29486.5	-35505.2	7441.04	114.311	974.164	0	0	0	0	0	0	0	603	903	0
595	2	0	0	0	0	0	0	200	300	0	-5.43182	-73.8551	-419.841	-29852.7	-35810.4	7807.25	114.705	974.105	0	0	0	0	0	0	0	603	903	0
595	3	0	0	0	0	0	0	200	300	0	-4.5163	-75.9914	-422.893	-29486.5	-36054.5	7853.03	114.743	972.726	0	0	0	0	0	0	0	603	903	0
595	4	0	0	0	0	0	0	200	300	0	-7.26288	-74.4655	-427.776	-29028.7	-36298.6	8036.13	115.146	970.86	0	0	0	0	0	0	0	603	903	0
595	5	0	0	0	0	0	0	200	300	0	-8.17841	-76.4491	-432.964	-29120.3	-36848	7898.8	114.894	970.258	0	0	0	0	0	0	0	603	903	0
595	6	0	0	0	0	0	0	200	300	0	-11.6879	-78.2802	-436.931	-28754.1	-37641.4	8036.13	113.85	968.809	0	0	0	0	0	0	0	603	903	0
595	7	0	0	0	0	0	0	200	300	0	-12.756	-79.6535	-443.645	-28754.1	-38251.8	8310.79	113.778	967.813	0	0	0	0	0	0	0	603	903	0
595	8	0	0	0	0	0	0	200	300	0	-13.519	-79.9586	-447.002	-28204.8	-38740	8722.78	113.334	966.098	0	0	0	0	0	0	0	603	903	0
595	9	0	0	0	0	0	0	200	300	0	-15.8078	-82.0949	-450.664	-28662.5	-38556.9	8860.11	114.444	966.601	0	0	0	0	0	0	0	603	903	0
596	0	0	0	0	0	0	0	200	300	0	-17.0285	-84.8415	-455.242	-28754.1	-38862.1	9455.2	114.634	966.162	0	0	0	0	0	0	0	603	903	0
596	1	0	0	0	0	0	0	200	300	0	-15.35	-85.2992	-457.073	-27838.5	-39411.4	9500.98	113.774	963.906	0	0	0	0	0	0	0	603	903	0
596	2	0	0	0	0	0	0	200	300	0	-15.8078	-88.351	-462.871	-28021.6	-40449	9546.75	112.613	963.539	0	0	0	0	0	0	0	603	903	0
596	3	0	0	0	0	0	0	200	300	0	-16.8759	-90.7924	-464.702	-28571	-40632.1	9729.86	112.563	964.482	0	0	0	0	0	0	0	603	903	0
596	4	0	0	0	0	0	0	200	300	0	-15.8078	-91.4027	-465.923	-28296.3	-40632.1	10004.5	112.792	963.732	0	0	0	0	0	0	0	603	903	0
596	5	0	0	0	0	0	0	200	300	0	-16.5707	-91.0976	-467.449	-27197.7	-40510.1	10050.3	113.338	961.183	0	0	0	0	0	0	0	603	903	0
596	6	0	0	0	0	0	0	200	300	0	-15.1974	-92.776	-471.111	-27014.6	-40388	10141.8	114.271	960.342	0	0	0	0	0	0	0	603	903	0
596	7	0	0	0	0	0	0	200	300	0	-15.8078	-94.6071	-472.026	-27014.6	-41059.4	10325	113.015	960.231	0	0	0	0	0	0	0	603	903	0
596	8	0	0	0	0	0	0	200	300	0	-15.9604	-94.3019	-472.026	-27563.9	-41364.6	10325	112.368	961.395	0	0	0	0	0	0	0	603	903	0
596	9	0	0	0	0	0	0	200	300	0	-14.2819	-92.0131	-472.942	-27380.8	-41364.6	10279.2	112.538	960.895	0	0	0	0	0	0	0	603	903	0
597	0	0	0	0	0	0	0	200	300	0	-14.7397	-92.1657	-474.468	-27472.3	-40632.1	10187.6	114.363	960.901	0	0	0	0	0	0	0	603	903	0
597	1	0	0	0	0	0	0	200	300	0	-16.7233	-91.7079	-476.604	-27106.1	-40998.3	10096.1	113.978	959.873	0	0	0	0	0	0	0	603	903	0
597	2	0	0	0	0	0	0	200	300	0	-15.1974	-90.945	-477.519	-26648.4	-41547.7	9867.19	112.993	958.806	0	0	0	0	0	0	0	603	903	0
597	3	0	0	0	0	0	0	200	300	0	-15.8078	-90.945	-477.214	-27014.6	-41974.9	10050.3	112.042	959.609	0	0	0	0	0	0	0	603	903	0
597	4	0	0	0	0	0	0	200	300	0	-17.6389	-90.7924	-477.825	-26099	-41303.5	10325	113.559	957.621	0	0	0	0	0	0	0	603	903	0
597	5	0	0	0	0	0	0	200	300	0	-17.7914	-89.4191	-479.656	-26099	-41852.8	10508.1	112.744	957.412	0	0	0	0	0	0	0	603	903	0
597	6	0	0	0	0	0	0	200	300	0	-17.944	-89.4191	-480.876	-26007.5	-41791.8	10370.7	113.092	957.083	0	0	0	0	0	0	0	603	903	0
597	7	0	0	0	0	0	0	200	300	0	-18.5544	-89.5717	-481.487	-26190.6	-42158	10370.7	112.442	957.395	0	0	0	0	0	0	0	603	903	0
597	8	0	0	0	0	0	0	200	300	0	-16.7233	-91.4027	-483.928	-26099	-42646.3	10782.7	111.875	956.932	0	0	0	0	0	0	0	603	903	0
597	9	0	0	0	0	0	0	200	300	0	-18.707	-92.4709	-484.844	-25275.1	-42463.2	10645.4	112.419	955.13	0	0	0	0	0	0	0	603	903	0
598	0	0	0	0	0	0	0	200	300	0	-19.7751	-92.9286	-485.149	-25549.7	-42646.3	10782.7	112.096	955.664	0	0	0	0	0	0	0	603	903	0
598	1	0	0	0	0	0	0	200	300	0	-20.3854	-93.539	-485.759	-25000.4	-42463.2	10645.4	112.584	954.467	0	0	0	0	0	0	0	603	903	0
598	2	0	0	0	0	0	0	200	300	0	-21.6061	-94.3019	-488.506	-25091.9	-42524.2	10874.3	112.95	954.365	0	0	0	0	0	0	0	603	903	0
598	3	0	0	0	0	0	0	200	300	0	-19.1647	-96.133	-487.285	-24725.7	-42768.4	11148.9	112.231	953.742	0	0	0	0	0	0	0	603	903	0
598	4	0	0	0	0	0	0	200	300	0	-22.0639	-97.8114	-492.168	-24359.5	-43439.8	11469.4	111.738	952.494	0	0	0	0	0	0	0	603	903	0
598	5	0	0	0	0	0	0	200	300	0	-22.6743	-98.4218	-492.778	-24542.6	-43622.9	11652.5	111.476	952.805	0	0	0	0	0	0	0	603	903	0
598	6	0	0	0	0	0	0	200	300	0	-22.0639	-98.1166	-494.304	-24451.1	-43622.9	11240.5	111.749	952.466	0	0	0	0	0	0	0	603	903	0
598	7	0	0	0	0	0	0	200	300	0	-22.5217	-98.2692	-496.44	-24451.1	-43744.9	11560.9	111.883	952.253	0	0	0	0	0	0	0	603	903	0
598	8	0	0	0	0	0	0	200	300	0	-24.0475	-99.6425	-501.018	-24084.9	-43989.1	11560.9	112.201	951.072	0	0	0	0	0	0	0	603	903	0
598	9	0	0	0	0	0	0	200	300	0	-23.2846	-100.405	-502.544	-23444	-44599.4	11515.1	111.253	949.651	0	0	0	0	0	0	0	603	903	0
599	0	0	0	0	0	0	0	200	300	0	-23.7424	-101.168	-503.154	-24451.1	-44538.4	11698.2	111.482	951.596	0	0	0	0	0	0	0	603	903	0
599	1	0	0	0	0	0	0	200	300	0	-24.8105	-101.779	-504.985	-24634.2	-44843.6	11744	111.198	951.782	0	0	0	0	0	0	0	603	903	0
599	2	0	0	0	0	0	0	200	300	0	-25.1157	-101.474	-508.037	-23535.6	-44660.5	12018.7	112.092	949.327	0	0	0	0	0	0	0	603	903	0
599	3	0	0	0	0	0	0	200	300	0	-23.4372	-102.389	-512.615	-23535.6	-45087.7	12247.6	112.044	948.913	0	0	0	0	0	0	0	603	903	0
599	4	0	0	0	0	0	0	200	300	0	-25.726	-103.762	-512.92	-24268	-45392.9	12247.6	111.501	950.313	0	0	0	0	0	0	0	603	903	0
599	5	0	0	0	0	0	0	200	300	0	-26.1838	-104.22	-516.277	-23901.8	-46064.3	12201.8	110.776	949.296	0	0	0	0	0	0	0	603	903	0
599	6	0	0	0	0	0	0	200	300	0	-25.5734	-103.61	-518.108	-22711.6	-46003.2	12156	111.209	946.836	0	0	0	0	0	0	0	603	903	0
599	7	0	0	0	0	0	0	200	300	0	-26.7941	-103.305	-521.465	-23810.2	-46369.4	12201.8	111.078	948.66	0	0	0	0	0	0	0	603	903	0
599	8	0	0	0	0	0	0	200	300	0	-28.0148	-102.694	-521.465	-23444	-46369.4	12568	111.078	947.958	0	0	0	0	0	0	0	603	903	0
599	9	0	0	0	0	0	0	200	300	0	-27.5571	-103.457	-527.568	-23260.9	-46857.7	12522.2	111.182	947.091	0	0	0	0	0	0	0	603	903	0
600	0	0	0	0	0	0	0	200	300	0	-27.4045	-104.678	-530.62	-23627.1	-47162.9	12568	111.117	947.527	0	0	0	0	0	0	0	603	903	0
600	1	0	0	0	0	0	0	200	300	0	-29.0829	-105.136	-532.756	-23718.7	-47590.1	12613.8	110.672	947.521	0	0	0	0	0	0	0	603	903	0
600	2	0	0	0	0	0	0	200	300	0	-29.5407	-106.051	-533.977	-23718.7	-47834.3	12705.3	110.419	947.419	0	0	0	0	0	0	0	603	903	0
600	3	0	0	0	0	0	0	200	300	0	-29.0829	-103.915	-538.555	-23810.2	-48566.7	12705.3	109.82	947.211	0	0	0	0	0	0	0	603	903	0
600	4	0	0	0	0	0	0	200	300	0	-28.6252	-103.915	-542.217	-23718.7	-48261.5	12568	110.992	946.744	0	0	0	0	0	0	0	603	903	0
600	5	0	0	0	0	0	0	200	300	0	-29.9985	-105.288	-539.775	-23444	-48505.7	12842.7	110.137	946.433	0	0	0	0	0	0	0	603	903	0
600	6	0	0	0	0	0	0	200	300	0	-30.6088	-106.509	-548.015	-23718.7	-48810.8	12796.9	110.932	946.281	0	0	0	0	0	0	0	603	903	0
600	7	0	0	0	0	0	0	200	300	0	-29.9985	-105.899	-550.151	-24268	-49238.1	12476.4	110.501	947.112	0	0	0	0	0	0	0	603	903	0
600	8	0	0	0	0	0	0	200	300	0	-29.8459	-104.678	-552.593	-23993.3	-49726.4	12705.3	110.013	946.42	0	0	0	0	0	0	0	603	903	0
600	9	0	0	0	0	0	0	200	300	0	-30.7614	-104.373	-555.95	-24268	-49360.2	12705.3	111.215	946.651	0	0	0	0	0	0	0	603	903	0
601	0	0	0	0	0	0	0	200	300	0	-30.4562	-104.83	-559.917	-23901.8	-49909.5	13071.5	110.863	945.688	0	0	0	0	0	0	0	603	903	0
601	1	0	0	0	0	0	0	200	300	0	-27.4045	-106.051	-564.189	-23810.2	-49787.4	12980	111.754	945.203	0	0	0	0	0	0	0	603	903	0
601	2	0	0	0	0	0	0	200	300	0	-31.0666	-106.204	-564.8	-24359.5	-50458.8	12888.4	110.661	946.13	0	0	0	0	0	0	0	603	903	0
601	3	0	0	0	0	0	0	200	300	0	-31.3718	-106.204	-566.936	-23352.4	-50458.8	12705.3	110.997	944.191	0	0	0	0	0	0	0	603	903	0
601	4	0	0	0	0	0	0	200	300	0	-29.5407	-104.83	-570.598	-24084.9	-51191.2	12842.7	110.285	945.21	0	0	0	0	0	0	0	603	903	0
601	5	0	0	0	0	0	0	200	300	0	-29.2355	-105.136	-572.734	-24542.6	-50764	12659.5	111.366	945.852	0	0	0	0	0	0	0	603	903	0
601	6	0	0	0	0	0	0	200	300	0	-29.9985	-105.899	-576.702	-24725.7	-51008.1	12980	111.552	945.874	0	0	0	0	0	0	0	603	903	0
601	7	0	0	0	0	0	0	200	300	0	-30.1511	-103.915	-577.922	-24634.2	-51435.4	12888.4	111	945.625	0	0	0	0	0	0	0	603	903	0
601	8	0	0	0	0	0	0	200	300	0	-28.1674	-104.983	-579.753	-24268	-51801.6	12980	110.649	944.859	0	0	0	0	0	0	0	603	903	0
601	9	0	0	0	0	0	0	200	300	0	-29.6933	-104.373	-583.11	-24451.1	-51923.6	12934.2	110.954	944.932	0	0	0	0	0	0	0	603	903	0
602	0	0	0	0	0	0	0	200	300	0	-29.5407	-103.152	-586.772	-24451.1	-51862.6	12842.7	111.614	944.67	0	0	0	0	0	0	0	603	903	0
602	1	0	0	0	0	0	0	200	300	0	-28.0148	-102.847	-588.909	-23810.2	-52289.8	12751.1	111.209	943.431	0	0	0	0	0	0	0	603	903	0
602	2	0	0	0	0	0	0	200	300	0	-27.8622	-104.373	-591.35	-25183.5	-52228.8	12751.1	111.679	945.586	0	0	0	0	0	0	0	603	903	0
602	3	0	0	0	0	0	0	200	300	0	-29.3881	-103.61	-593.181	-25366.6	-52534	12568	111.437	945.764	0	0	0	0	0	0	0	603	903	0
602	4	0	0	0	0	0	0	200	300	0	-29.6933	-102.236	-595.622	-24451.1	-52595	12430.7	111.697	944.051	0	0	0	0	0	0	0	603	903	0
602	5	0	0	0	0	0	0	200	300	0	-28.32	-101.626	-598.064	-24542.6	-53632.6	12613.8	110.323	944.037	0	0	0	0	0	0	0	603	903	0
602	6	0	0	0	0	0	0	200	300	0	-27.8622	-101.779	-600.81	-25732.8	-52961.2	12568	111.85	945.83	0	0	0	0	0	0	0	603	903	0
602	7	0	0	0	0	0	0	200	300	0	-27.0993	-102.847	-603.252	-25091.9	-52961.2	12751.1	112.207	944.594	0	0	0	0	0	0	0	603	903	0
602	8	0	0	0	0	0	0	200	300	0	-27.4045	-100.863	-602.336	-24634.2	-53388.5	12705.3	111.364	943.898	0	0	0	0	0	0	0	603	903	0
602	9	0	0	0	0	0	0	200	300	0	-25.4208	-102.236	-605.693	-25091.9	-53693.7	12568	111.352	944.427	0	0	0	0	0	0	0	603	903	0
603	0	0	0	0	0	0	0	200	300	0	-28.32	-100.1	-608.135	-25458.2	-53876.8	12430.7	111.407	944.863	0	0	0	0	0	0	0	603	903	0
603	1	0	0	0	0	0	0	200	300	0	-27.8622	-99.3373	-611.492	-25549.7	-53815.7	12201.8	111.993	944.783	0	0	0	0	0	0	0	603	903	0
603	2	0	0	0	0	0	0	200	300	0	-27.7097	-100.1	-611.492	-25275.1	-53754.7	12568	112.093	944.333	0	0	0	0	0	0	0	603	903	0
603	3	0	0	0	0	0	0	200	300	0	-27.0993	-101.016	-615.459	-24817.3	-54059.9	12384.9	112.163	943.323	0	0	0	0	0	0	0	603	903	0
603	4	0	0	0	0	0	0	200	300	0	-27.0993	-99.6425	-616.374	-25824.4	-54609.2	12247.6	111.403	944.897	0	0	0	0	0	0	0	603	903	0
603	5	0	0	0	0	0	0	200	300	0	-25.8786	-97.964	-617.29	-25549.7	-54731.3	12430.7	111.336	944.39	0	0	0	0	0	0	0	603	903	0
603	6	0	0	0	0	0	0	200	300	0	-26.9467	-97.8114	-619.731	-25275.1	-54548.2	12339.1	111.981	943.784	0	0	0	0	0	0	0	603	903	0
603	7	0	0	0	0	0	0	200	300	0	-24.3527	-97.2011	-623.699	-25549.7	-54670.2	12339.1	112.345	943.965	0	0	0	0	0	0	0	603	903	0
603	8	0	0	0	0	0	0	200	300	0	-25.4208	-97.964	-625.225	-26007.5	-54792.3	12522.2	112.364	944.597	0	0	0	0	0	0	0	603	903	0
603	9	0	0	0	0	0	0	200	300	0	-24.9631	-95.37	-624.614	-26007.5	-55097.5	12064.5	111.79	944.638	0	0	0	0	0	0	0	603	903	0
604	0	0	0	0	0	0	0	200	300	0	-26.1838	-96.4381	-627.056	-25549.7	-55585.8	11972.9	111.354	943.746	0	0	0	0	0	0	0	603	903	0
604	1	0	0	0	0	0	0	200	300	0	-25.8786	-95.37	-628.276	-26007.5	-55524.7	11744	111.624	944.395	0	0	0	0	0	0	0	603	903	0
604	2	0	0	0	0	0	0	200	300	0	-26.6415	-94.1493	-631.938	-25641.3	-56074	11881.4	111.267	943.576	0	0	0	0	0	0	0	603	903	0
604	3	0	0	0	0	0	0	200	300	0	-26.3364	-94.3019	-632.854	-26099	-55280.6	12018.7	112.649	944.24	0	0	0	0	0	0	0	603	903	0
604	4	0	0	0	0	0	0	200	300	0	-25.2682	-94.7597	-634.38	-26373.7	-55463.7	12018.7	112.57	944.574	0	0	0	0	0	0	0	603	903	0
604	5	0	0	0	0	0	0	200	300	0	-25.2682	-94.3019	-634.38	-26099	-56074	11789.8	111.608	944.141	0	0	0	0	0	0	0	603	903	0
604	6	0	0	0	0	0	0	200	300	0	-26.0312	-94.3019	-636.211	-25915.9	-56257.1	11789.8	111.575	943.735	0	0	0	0	0	0	0	603	903	0
604	7	0	0	0	0	0	0	200	300	0	-24.8105	-92.776	-638.347	-26099	-56440.3	11789.8	111.584	943.885	0	0	0	0	0	0	0	603	903	0
604	8	0	0	0	0	0	0	200	300	0	-24.5053	-91.7079	-642.314	-26190.6	-56013	11698.2	112.795	943.775	0	0	0	0	0	0	0	603	903	0
604	9	0	0	0	0	0	0	200	300	0	-24.2001	-91.4027	-643.23	-26465.2	-56623.4	11606.7	111.97	944.144	0	0	0	0	0	0	0	603	903	0
605	0	0	0	0	0	0	0	200	300	0	-23.132	-91.8605	-645.366	-26190.6	-56074	11469.4	113.113	943.583	0	0	0	0	0	0	0	603	903	0
605	1	0	0	0	0	0	0	200	300	0	-25.8786	-91.0976	-646.587	-25732.8	-56806.5	11698.2	112.144	942.798	0	0	0	0	0	0	0	603	903	0
605	2	0	0	0	0	0	0	200	300	0	-24.5053	-90.4872	-647.197	-25641.3	-57233.7	11560.9	111.567	942.619	0	0	0	0	0	0	0	603	903	0
605	3	0	0	0	0	0	0	200	300	0	-24.9631	-88.8087	-649.333	-25915.9	-57538.9	11560.9	111.388	942.912	0	0	0	0	0	0	0	603	903	0
605	4	0	0	0	0	0	0	200	300	0	-25.2682	-88.351	-651.164	-26007.5	-56745.4	11469.4	112.855	942.94	0	0	0	0	0	0	0	603	903	0
605	5	0	0	0	0	0	0	200	300	0	-24.6579	-88.1984	-651.47	-25000.4	-57050.6	11332	112.428	941.375	0	0	0	0	0	0	0	603	903	0
605	6	0	0	0	0	0	0	200	300	0	-24.6579	-88.9613	-654.827	-26282.1	-56867.5	11057.4	113.156	943.136	0	0	0	0	0	0	0	603	903	0
605	7	0	0	0	0	0	0	200	300	0	-24.9631	-87.4355	-655.742	-26556.8	-57661	10645.4	112.068	943.499	0	0	0	0	0	0	0	603	903	0
605	8	0	0	0	0	0	0	200	300	0	-24.6579	-85.2992	-657.573	-26282.1	-58149.2	11194.7	111.57	942.968	0	0	0	0	0	0	0	603	903	0
605	9	0	0	0	0	0	0	200	300	0	-22.9794	-85.4518	-658.794	-25915.9	-57477.9	11515.1	112.753	942.338	0	0	0	0	0	0	0	603	903	0
606	0	0	0	0	0	0	0	200	300	0	-24.6579	-85.4518	-659.709	-26373.7	-57355.8	11103.2	113.059	942.978	0	0	0	0	0	0	0	603	903	0
606	1	0	0	0	0	0	0	200	300	0	-23.2846	-84.2311	-660.625	-26190.6	-57844.1	11103.2	112.44	942.645	0	0	0	0	0	0	0	603	903	0
606	2	0	0	0	0	0	0	200	300	0	-23.7424	-83.6208	-663.677	-25915.9	-58393.4	11011.6	112.015	942.049	0	0	0	0	0	0	0	603	903	0
606	3	0	0	0	0	0	0	200	300	0	-23.7424	-83.6208	-663.677	-26282.1	-58637.5	10736.9	111.647	942.601	0	0	0	0	0	0	0	603	903	0
606	4	0	0	0	0	0	0	200	300	0	-24.6579	-81.9423	-663.982	-26373.7	-58637.5	10920	111.688	942.721	0	0	0	0	0	0	0	603	903	0
606	5	0	0	0	0	0	0	200	300	0	-23.895	-82.7052	-666.118	-26007.5	-58393.4	10828.5	112.338	942.043	0	0	0	0	0	0	0	603	903	0
606	6	0	0	0	0	0	0	200	300	0	-22.6743	-81.6371	-667.339	-25366.6	-58149.2	10508.1	112.864	941.012	0	0	0	0	0	0	0	603	903	0
606	7	0	0	0	0	0	0	200	300	0	-23.2846	-82.2475	-668.56	-26190.6	-58637.5	10645.4	112.293	942.175	0	0	0	0	0	0	0	603	903	0
606	8	0	0	0	0	0	0	200	300	0	-22.6743	-81.0268	-671.001	-26190.6	-59003.7	10508.1	112.066	942.032	0	0	0	0	0	0	0	603	903	0
606	9	0	0	0	0	0	0	200	300	0	-22.5217	-80.1112	-671.001	-25549.7	-59064.8	10553.8	111.975	941.077	0	0	0	0	0	0	0	603	903	0
607	0	0	0	0	0	0	0	200	300	0	-22.0639	-79.5009	-672.222	-25824.4	-58637.5	10370.7	112.771	941.417	0	0	0	0	0	0	0	603	903	0
607	1	0	0	0	0	0	0	200	300	0	-23.5898	-77.5172	-671.001	-25732.8	-59125.8	10370.7	111.884	941.35	0	0	0	0	0	0	0	603	903	0
607	2	0	0	0	0	0	0	200	300	0	-23.2846	-77.8224	-673.137	-25549.7	-58820.6	10370.7	112.617	940.956	0	0	0	0	0	0	0	603	903	0
607	3	0	0	0	0	0	0	200	300	0	-22.0639	-78.2802	-674.053	-24908.8	-59369.9	10096.1	111.921	939.954	0	0	0	0	0	0	0	603	903	0
607	4	0	0	0	0	0	0	200	300	0	-21.301	-77.975	-678.02	-25641.3	-59492	10279.2	112.256	940.818	0	0	0	0	0	0	0	603	903	0
607	5	0	0	0	0	0	0	200	300	0	-22.3691	-77.6698	-675.273	-25824.4	-59003.7	10279.2	112.622	941.243	0	0	0	0	0	0	0	603	903	0
607	6	0	0	0	0	0	0	200	300	0	-22.0639	-76.4491	-675.884	-25275.1	-58881.7	10233.4	112.882	940.396	0	0	0	0	0	0	0	603	903	0
607	7	0	0	0	0	0	0	200	300	0	-19.3173	-75.5336	-677.41	-25183.5	-59003.7	10325	112.898	940.176	0	0	0	0	0	0	0	603	903	0
607	8	0	0	0	0	0	0	200	300	0	-23.7424	-75.381	-677.104	-25091.9	-59186.8	10096.1	112.588	940.058	0	0	0	0	0	0	0	603	903	0
607	9	0	0	0	0	0	0	200	300	0	-22.2165	-75.0758	-678.325	-24908.8	-59614.1	9638.3	112.116	939.721	0	0	0	0	0	0	0	603	903	0
608	0	0	0	0	0	0	0	200	300	0	-20.538	-75.0758	-676.799	-24817.3	-59308.9	9958.74	112.369	939.669	0	0	0	0	0	0	0	603	903	0
608	1	0	0	0	0	0	0	200	300	0	-20.538	-73.7025	-674.968	-25000.4	-58759.6	9546.75	112.945	940.039	0	0	0	0	0	0	0	603	903	0
608	2	0	0	0	0	0	0	200	300	0	-21.7587	-73.7025	-677.104	-23718.7	-59186.8	9912.96	112.588	938.03	0	0	0	0	0	0	0	603	903	0
608	3	0	0	0	0	0	0	200	300	0	-21.6061	-72.6344	-678.325	-24451.1	-59736.2	9729.86	111.936	939.046	0	0	0	0	0	0	0	603	903	0
608	4	0	0	0	0	0	0	200	300	0	-20.6906	-72.787	-678.63	-24268	-59736.2	9684.08	111.975	938.76	0	0	0	0	0	0	0	603	903	0
608	5	0	0	0	0	0	0	200	300	0	-20.538	-72.0241	-678.02	-24817.3	-59492	9500.98	112.256	939.603	0	0	0	0	0	0	0	603	903	0
608	6	0	0	0	0	0	0	200	300	0	-21.301	-72.1767	-678.02	-24268	-59369.9	9958.74	112.436	938.792	0	0	0	0	0	0	0	603	903	0
608	7	0	0	0	0	0	0	200	300	0	-21.7587	-70.956	-677.41	-23901.8	-58942.7	9729.86	112.988	938.284	0	0	0	0	0	0	0	603	903	0
608	8	0	0	0	0	0	0	200	300	0	-20.6906	-69.8878	-678.63	-23810.2	-59797.2	9409.42	111.885	938.086	0	0	0	0	0	0	0	603	903	0
608	9	0	0	0	0	0	0	200	300	0	-20.8432	-70.193	-676.494	-23901.8	-59858.2	9317.87	111.517	938.332	0	0	0	0	0	0	0	603	903	0
609	0	0	0	0	0	0	0	200	300	0	-21.4536	-69.8878	-677.104	-23718.7	-59186.8	9272.09	112.588	938.03	0	0	0	0	0	0	0	603	903	0
609	1	0	0	0	0	0	0	200	300	0	-21.1484	-68.9723	-676.494	-23444	-59186.8	9455.2	112.509	937.655	0	0	0	0	0	0	0	603	903	0
609	2	0	0	0	0	0	0	200	300	0	-19.6225	-68.5146	-676.494	-23352.4	-59186.8	9592.53	112.509	937.52	0	0	0	0	0	0	0	603	903	0
609	3	0	0	0	0	0	0	200	300	0	-19.9277	-67.599	-675.579	-23535.6	-59614.1	9455.2	111.758	937.838	0	0	0	0	0	0	0	603	903	0
609	4	0	0	0	0	0	0	200	300	0	-20.8432	-66.5309	-675.579	-23169.3	-59614.1	9043.21	111.758	937.296	0	0	0	0	0	0	0	603	903	0
609	5	0	0	0	0	0	0	200	300	0	-20.0803	-66.6835	-678.02	-22620	-59186.8	9134.76	112.706	936.362	0	0	0	0	0	0	0	603	903	0
609	6	0	0	0	0	0	0	200	300	0	-20.2328	-65.6154	-674.358	-22528.5	-59003.7	8951.66	112.504	936.407	0	0	0	0	0	0	0	603	903	0
609	7	0	0	0	0	0	0	200	300	0	-20.8432	-65.9206	-673.747	-22711.6	-59125.8	8951.66	112.243	936.709	0	0	0	0	0	0	0	603	903	0
609	8	0	0	0	0	0	0	200	300	0	-20.8432	-64.6999	-674.053	-22986.2	-59553	8905.88	111.649	937.102	0	0	0	0	0	0	0	603	903	0
609	9	0	0	0	0	0	0	200	300	0	-20.538	-62.411	-670.085	-22070.7	-59858.2	8860.11	110.671	935.937	0	0	0	0	0	0	0	603	903	0
610	0	0	0	0	0	0	0	200	300	0	-20.538	-63.4792	-673.137	-21796.1	-59003.7	8768.55	112.345	935.38	0	0	0	0	0	0	0	603	903	0
610	1	0	0	0	0	0	0	200	300	0	-21.301	-63.6317	-672.527	-21979.2	-59125.8	8814.33	112.084	935.682	0	0	0	0	0	0	0	603	903	0
610	2	0	0	0	0	0	0	200	300	0	-19.9277	-62.8688	-674.053	-21612.9	-59064.8	8814.33	112.374	935.064	0	0	0	0	0	0	0	603	903	0
610	3	0	0	0	0	0	0	200	300	0	-19.6225	-62.2585	-670.391	-21704.5	-59553	8722.78	111.167	935.376	0	0	0	0	0	0	0	603	903	0
610	4	0	0	0	0	0	0	200	300	0	-21.4536	-61.6481	-669.475	-21338.3	-59369.9	8631.22	111.319	934.873	0	0	0	0	0	0	0	603	903	0
610	5	0	0	0	0	0	0	200	300	0	-21.9113	-60.8852	-669.475	-20880.5	-59247.9	8493.9	111.501	934.189	0	0	0	0	0	0	0	603	903	0
610	6	0	0	0	0	0	0	200	300	0	-21.1484	-59.9696	-669.17	-20422.8	-59003.7	8310.79	111.825	933.52	0	0	0	0	0	0	0	603	903	0
610	7	0	0	0	0	0	0	200	300	0	-20.0803	-60.58	-667.644	-20880.5	-59186.8	8402.34	111.35	934.275	0	0	0	0	0	0	0	603	903	0
610	8	0	0	0	0	0	0	200	300	0	-19.9277	-59.9696	-666.118	-21063.6	-59125.8	8585.45	111.238	934.622	0	0	0	0	0	0	0	603	903	0
610	9	0	0	0	0	0	0	200	300	0	-21.4536	-60.4274	-663.982	-20056.5	-59186.8	8493.9	110.861	933.206	0	0	0	0	0	0	0	603	903	0
611	0	0	0	0	0	0	0	200	300	0	-20.8432	-58.9015	-663.982	-19690.3	-59003.7	8402.34	111.137	932.655	0	0	0	0	0	0	0	603	903	0
611	1	0	0	0	0	0	0	200	300	0	-22.0639	-58.4438	-664.287	-19965	-58576.5	8265.01	111.821	933.055	0	0	0	0	0	0	0	603	903	0
611	2	0	0	0	0	0	0	200	300	0	-21.9113	-57.0705	-663.066	-19415.7	-58576.5	8081.91	111.658	932.282	0	0	0	0	0	0	0	603	903	0
611	3	0	0	0	0	0	0	200	300	0	-20.8432	-57.6808	-662.151	-19141	-58881.7	8356.57	111.075	931.907	0	0	0	0	0	0	0	603	903	0
611	4	0	0	0	0	0	0	200	300	0	-21.6061	-57.8334	-660.015	-19415.7	-58698.6	8127.68	111.065	932.417	0	0	0	0	0	0	0	603	903	0
611	5	0	0	0	0	0	0	200	300	0	-21.6061	-58.2912	-657.878	-19141	-58759.6	8036.13	110.683	932.095	0	0	0	0	0	0	0	603	903	0
611	6	0	0	0	0	0	0	200	300	0	-20.9958	-56.3075	-657.268	-18591.7	-58393.4	8081.91	111.157	931.286	0	0	0	0	0	0	0	603	903	0
611	7	0	0	0	0	0	0	200	300	0	-19.0121	-55.2394	-656.963	-18408.6	-58515.4	8036.13	110.93	931.021	0	0	0	0	0	0	0	603	903	0
611	8	0	0	0	0	0	0	200	300	0	-22.8268	-55.392	-652.08	-18591.7	-58393.4	8219.24	110.451	931.511	0	0	0	0	0	0	0	603	903	0
611	9	0	0	0	0	0	0	200	300	0	-22.9794	-55.6972	-655.437	-18225.5	-58759.6	8127.68	110.351	930.807	0	0	0	0	0	0	0	603	903	0
612	0	0	0	0	0	0	0	200	300	0	-21.9113	-54.7816	-651.164	-17676.2	-58637.5	7761.48	109.95	930.146	0	0	0	0	0	0	0	603	903	0
612	1	0	0	0	0	0	0	200	300	0	-21.9113	-52.798	-649.639	-17493.1	-58698.6	7715.7	109.644	929.927	0	0	0	0	0	0	0	603	903	0
612	2	0	0	0	0	0	0	200	300	0	-23.132	-53.2558	-650.859	-16943.8	-58149.2	7669.92	110.658	929.033	0	0	0	0	0	0	0	603	903	0
612	3	0	0	0	0	0	0	200	300	0	-23.5898	-53.2558	-650.249	-16760.7	-58149.2	7669.92	110.574	928.776	0	0	0	0	0	0	0	603	903	0
612	4	0	0	0	0	0	0	200	300	0	-22.5217	-52.3402	-648.723	-16943.8	-58210.3	7669.92	110.269	929.119	0	0	0	0	0	0	0	603	903	0
612	5	0	0	0	0	0	0	200	300	0	-23.895	-51.8825	-645.977	-16852.2	-58027.2	7578.37	110.171	929.088	0	0	0	0	0	0	0	603	903	0
612	6	0	0	0	0	0	0	200	300	0	-24.2001	-52.6454	-644.451	-16119.8	-58332.3	7532.59	109.485	928.013	0	0	0	0	0	0	0	603	903	0
612	7	0	0	0	0	0	0	200	300	0	-23.4372	-50.5092	-642.62	-15570.5	-57661	7578.37	110.272	927.23	0	0	0	0	0	0	0	603	903	0
612	8	0	0	0	0	0	0	200	300	0	-23.132	-50.3566	-643.535	-16119.8	-57905.1	7349.49	110.02	928.049	0	0	0	0	0	0	0	603	903	0
612	9	0	0	0	0	0	0	200	300	0	-22.0639	-50.5092	-639.263	-15845.1	-58332.3	7349.49	108.751	927.787	0	0	0	0	0	0	0	603	903	0
613	0	0	0	0	0	0	0	200	300	0	-23.132	-50.0514	-640.178	-15662	-57844.1	7669.92	109.644	927.465	0	0	0	0	0	0	0	603	903	0
613	1	0	0	0	0	0	0	200	300	0	-23.5898	-49.8988	-638.042	-15570.5	-57844.1	7257.94	109.341	927.404	0	0	0	0	0	0	0	603	903	0
613	2	0	0	0	0	0	0	200	300	0	-25.2682	-48.9833	-636.821	-15021.1	-57355.8	7029.05	109.934	926.588	0	0	0	0	0	0	0	603	903	0
613	3	0	0	0	0	0	0	200	300	0	-25.2682	-48.0678	-634.685	-14471.8	-57050.6	7212.16	110.112	925.802	0	0	0	0	0	0	0	603	903	0
613	4	0	0	0	0	0	0	200	300	0	-22.0639	-47.9152	-634.99	-14746.5	-57477.9	7212.16	109.482	926.223	0	0	0	0	0	0	0	603	903	0
613	5	0	0	0	0	0	0	200	300	0	-25.2682	-46.6945	-630.107	-14380.3	-57661	7212.16	108.49	925.822	0	0	0	0	0	0	0	603	903	0
613	6	0	0	0	0	0	0	200	300	0	-25.2682	-46.9997	-631.633	-14014.1	-57416.8	7074.83	109.098	925.187	0	0	0	0	0	0	0	603	903	0
613	7	0	0	0	0	0	0	200	300	0	-24.0475	-46.8471	-628.887	-13007	-57416.8	7074.83	108.701	923.683	0	0	0	0	0	0	0	603	903	0
613	8	0	0	0	0	0	0	200	300	0	-24.3527	-45.4738	-624.004	-13281.6	-56989.6	6891.72	108.671	924.285	0	0	0	0	0	0	0	603	903	0
613	9	0	0	0	0	0	0	200	300	0	-25.2682	-45.016	-625.53	-12915.4	-56989.6	6754.4	108.894	923.647	0	0	0	0	0	0	0	603	903	0
614	0	0	0	0	0	0	0	200	300	0	-24.2001	-45.3212	-626.14	-12823.9	-57416.8	6937.5	108.3	923.481	0	0	0	0	0	0	0	603	903	0
614	1	0	0	0	0	0	0	200	300	0	-23.7424	-45.4738	-623.699	-12640.8	-56562.3	6937.5	109.311	923.267	0	0	0	0	0	0	0	603	903	0
614	2	0	0	0	0	0	0	200	300	0	-24.2001	-44.2531	-621.868	-12549.2	-56989.6	6525.51	108.357	923.18	0	0	0	0	0	0	0	603	903	0
614	3	0	0	0	0	0	0	200	300	0	-25.2682	-44.2531	-620.342	-12091.5	-56562.3	6754.4	108.821	922.492	0	0	0	0	0	0	0	603	903	0
614	4	0	0	0	0	0	0	200	300	0	-25.2682	-43.185	-618.511	-11633.7	-56562.3	6433.96	108.551	921.809	0	0	0	0	0	0	0	603	903	0
614	5	0	0	0	0	0	0	200	300	0	-24.0475	-43.3376	-616.985	-11359	-56867.5	6433.96	107.83	921.411	0	0	0	0	0	0	0	603	903	0
614	6	0	0	0	0	0	0	200	300	0	-24.0475	-43.0324	-617.29	-11450.6	-56745.4	6479.74	108.073	921.55	0	0	0	0	0	0	0	603	903	0
614	7	0	0	0	0	0	0	200	300	0	-22.8268	-43.185	-615.459	-11359	-56440.3	6433.96	108.296	921.456	0	0	0	0	0	0	0	603	903	0
614	8	0	0	0	0	0	0	200	300	0	-22.9794	-41.2013	-611.492	-10718.2	-56135.1	6250.86	108.2	920.528	0	0	0	0	0	0	0	603	903	0
614	9	0	0	0	0	0	0	200	300	0	-23.5898	-41.5065	-611.186	-10260.4	-55646.8	6342.41	108.953	919.788	0	0	0	0	0	0	0	603	903	0
615	0	0	0	0	0	0	0	200	300	0	-24.6579	-40.8961	-610.271	-10077.3	-55829.9	6433.96	108.516	919.513	0	0	0	0	0	0	0	603	903	0
615	1	0	0	0	0	0	0	200	300	0	-24.6579	-40.1332	-609.966	-10535.1	-56135.1	6159.3	107.97	920.272	0	0	0	0	0	0	0	603	903	0
615	2	0	0	0	0	0	0	200	300	0	-22.9794	-39.5229	-607.219	-9894.2	-56074	6067.75	107.654	919.294	0	0	0	0	0	0	0	603	903	0
615	3	0	0	0	0	0	0	200	300	0	-23.2846	-39.6754	-605.998	-9802.64	-55829.9	6021.97	107.871	919.176	0	0	0	0	0	0	0	603	903	0
615	4	0	0	0	0	0	0	200	300	0	-24.2001	-39.2177	-603.862	-9070.22	-55341.6	5884.64	108.354	918.02	0	0	0	0	0	0	0	603	903	0
615	5	0	0	0	0	0	0	200	300	0	-23.895	-38.9125	-601.116	-8887.12	-55341.6	5838.87	107.935	917.784	0	0	0	0	0	0	0	603	903	0
615	6	0	0	0	0	0	0	200	300	0	-22.5217	-38.3022	-602.336	-8887.12	-55829.9	5838.87	107.311	917.754	0	0	0	0	0	0	0	603	903	0
615	7	0	0	0	0	0	0	200	300	0	-22.0639	-37.5392	-602.031	-8978.67	-55524.7	5976.2	107.771	917.914	0	0	0	0	0	0	0	603	903	0
615	8	0	0	0	0	0	0	200	300	0	-24.0475	-37.234	-599.59	-8887.12	-55463.7	5793.09	107.497	917.822	0	0	0	0	0	0	0	603	903	0
615	9	0	0	0	0	0	0	200	300	0	-23.132	-36.4711	-597.148	-7513.82	-54731.3	5976.2	108.346	915.583	0	0	0	0	0	0	0	603	903	0
616	0	0	0	0	0	0	0	200	300	0	-23.4372	-36.6237	-597.454	-7147.61	-55036.4	5609.99	107.882	914.964	0	0	0	0	0	0	0	603	903	0
616	1	0	0	0	0	0	0	200	300	0	-23.4372	-34.7926	-594.402	-7513.82	-54853.3	5335.33	107.717	915.641	0	0	0	0	0	0	0	603	903	0
616	2	0	0	0	0	0	0	200	300	0	-23.132	-35.0978	-595.012	-7788.48	-55158.5	5564.21	107.299	916.09	0	0	0	0	0	0	0	603	903	0
616	3	0	0	0	0	0	0	200	300	0	-23.7424	-34.7926	-593.486	-7330.72	-55097.5	5472.66	107.163	915.352	0	0	0	0	0	0	0	603	903	0
616	4	0	0	0	0	0	0	200	300	0	-23.132	-34.64	-593.791	-7330.72	-54548.2	5335.33	108.136	915.346	0	0	0	0	0	0	0	603	903	0
616	5	0	0	0	0	0	0	200	300	0	-24.0475	-33.7245	-589.519	-6964.51	-54365.1	5152.22	107.781	914.814	0	0	0	0	0	0	0	603	903	0
616	6	0	0	0	0	0	0	200	300	0	-23.895	-32.5038	-588.298	-6415.19	-54792.3	4969.12	106.863	913.905	0	0	0	0	0	0	0	603	903	0
616	7	0	0	0	0	0	0	200	300	0	-21.301	-32.0461	-587.688	-6506.74	-55097.5	5106.44	106.247	914.072	0	0	0	0	0	0	0	603	903	0
616	8	0	0	0	0	0	0	200	300	0	-22.6743	-32.1986	-584.941	-6140.53	-54426.1	5060.67	106.955	913.498	0	0	0	0	0	0	0	603	903	0
616	9	0	0	0	0	0	0	200	300	0	-24.0475	-32.0461	-584.331	-6232.09	-54426.1	4740.23	106.857	913.665	0	0	0	0	0	0	0	603	903	0
617	0	0	0	0	0	0	0	200	300	0	-22.3691	-30.6728	-582.5	-5408.11	-54059.9	4831.79	107.193	912.284	0	0	0	0	0	0	0	603	903	0
617	1	0	0	0	0	0	0	200	300	0	-22.3691	-30.0624	-582.5	-5682.77	-54181.9	4648.68	106.984	912.756	0	0	0	0	0	0	0	603	903	0
617	2	0	0	0	0	0	0	200	300	0	-23.132	-29.9098	-583.415	-5499.66	-53937.8	4740.23	107.548	912.427	0	0	0	0	0	0	0	603	903	0
617	3	0	0	0	0	0	0	200	300	0	-22.5217	-29.6046	-579.143	-4950.35	-54365.1	4923.34	106.128	911.548	0	0	0	0	0	0	0	603	903	0
617	4	0	0	0	0	0	0	200	300	0	-19.6225	-29.7572	-579.753	-4584.14	-54487.1	4786.01	106.017	910.907	0	0	0	0	0	0	0	603	903	0
617	5	0	0	0	0	0	0	200	300	0	-22.9794	-28.6891	-576.702	-4309.48	-53876.8	4419.8	106.578	910.473	0	0	0	0	0	0	0	603	903	0
617	6	0	0	0	0	0	0	200	300	0	-22.8268	-28.0788	-577.312	-4492.58	-53876.8	4465.58	106.677	910.782	0	0	0	0	0	0	0	603	903	0
617	7	0	0	0	0	0	0	200	300	0	-21.9113	-28.0788	-575.786	-4126.37	-53815.7	4465.58	106.535	910.167	0	0	0	0	0	0	0	603	903	0
617	8	0	0	0	0	0	0	200	300	0	-21.301	-27.621	-574.871	-4309.48	-54120.9	4419.8	105.855	910.497	0	0	0	0	0	0	0	603	903	0
617	9	0	0	0	0	0	0	200	300	0	-20.0803	-27.621	-574.565	-4309.48	-53449.5	4465.58	106.974	910.5	0	0	0	0	0	0	0	603	903	0
618	0	0	0	0	0	0	0	200	300	0	-21.301	-27.4684	-571.208	-3485.51	-53815.7	4419.8	105.786	909.102	0	0	0	0	0	0	0	603	903	0
618	1	0	0	0	0	0	0	200	300	0	-21.4536	-26.4003	-569.377	-2936.19	-53266.4	4648.68	106.448	908.157	0	0	0	0	0	0	0	603	903	0
618	2	0	0	0	0	0	0	200	300	0	-22.2165	-26.8581	-571.819	-2569.98	-53388.5	4374.02	106.634	907.494	0	0	0	0	0	0	0	603	903	0
618	3	0	0	0	0	0	0	200	300	0	-21.6061	-25.4848	-569.377	-3027.74	-53327.4	4511.35	106.341	908.318	0	0	0	0	0	0	0	603	903	0
618	4	0	0	0	0	0	0	200	300	0	-20.8432	-25.1796	-566.631	-2844.64	-53815.7	4282.47	105.025	908.02	0	0	0	0	0	0	0	603	903	0
618	5	0	0	0	0	0	0	200	300	0	-20.538	-24.8744	-567.241	-2661.53	-53693.7	4236.69	105.342	907.692	0	0	0	0	0	0	0	603	903	0
618	6	0	0	0	0	0	0	200	300	0	-21.7587	-23.9589	-565.41	-2203.77	-52778.1	4053.59	106.655	906.898	0	0	0	0	0	0	0	603	903	0
618	7	0	0	0	0	0	0	200	300	0	-22.5217	-24.5692	-563.884	-1288.24	-52900.2	4007.81	106.186	905.285	0	0	0	0	0	0	0	603	903	0
618	8	0	0	0	0	0	0	200	300	0	-20.0803	-23.6537	-564.8	-1562.9	-53205.4	3870.48	105.798	905.767	0	0	0	0	0	0	0	603	903	0
618	9	0	0	0	0	0	0	200	300	0	-21.301	-23.5011	-563.274	-1379.79	-53388.5	4099.36	105.218	905.45	0	0	0	0	0	0	0	603	903	0
619	0	0	0	0	0	0	0	200	300	0	-22.0639	-23.6537	-562.053	-1105.13	-53144.3	3962.04	105.446	904.966	0	0	0	0	0	0	0	603	903	0
619	1	0	0	0	0	0	0	200	300	0	-20.538	-23.196	-561.138	-1105.13	-53205.4	3962.04	105.183	904.969	0	0	0	0	0	0	0	603	903	0
619	2	0	0	0	0	0	0	200	300	0	-20.2328	-22.433	-559.001	-1013.58	-52717.1	3687.38	105.694	904.813	0	0	0	0	0	0	0	603	903	0
619	3	0	0	0	0	0	0	200	300	0	-19.3173	-22.2804	-557.781	-830.475	-52900.2	3550.05	105.16	904.489	0	0	0	0	0	0	0	603	903	0
619	4	0	0	0	0	0	0	200	300	0	-20.8432	-21.3649	-558.696	-372.712	-52595	3962.04	105.861	903.667	0	0	0	0	0	0	0	603	903	0
619	5	0	0	0	0	0	0	200	300	0	-19.0121	-21.8227	-556.865	-98.0532	-52900.2	3733.15	105.004	903.176	0	0	0	0	0	0	0	603	903	0
619	6	0	0	0	0	0	0	200	300	0	-21.6061	-20.9071	-553.508	-6.50045	-52778.1	3550.05	104.648	903.012	0	0	0	0	0	0	0	603	903	0
619	7	0	0	0	0	0	0	200	300	0	-20.6906	-20.602	-555.034	268.158	-53144.3	3504.27	104.25	902.517	0	0	0	0	0	0	0	603	903	0
619	8	0	0	0	0	0	0	200	300	0	-19.6225	-19.839	-554.424	725.922	-52411.9	3595.83	105.466	901.691	0	0	0	0	0	0	0	603	903	0
619	9	0	0	0	0	0	0	200	300	0	-20.6906	-19.3813	-555.034	268.158	-52350.9	3321.17	105.68	902.517	0	0	0	0	0	0	0	603	903	0
620	0	0	0	0	0	0	0	200	300	0	-21.301	-19.3813	-553.508	634.369	-52289.8	3595.83	105.53	901.854	0	0	0	0	0	0	0	603	903	0
620	1	0	0	0	0	0	0	200	300	0	-20.8432	-19.6864	-551.372	1000.58	-52595	3412.72	104.611	901.185	0	0	0	0	0	0	0	603	903	0
620	2	0	0	0	0	0	0	200	300	0	-19.3173	-18.7709	-550.151	1275.24	-52595	3229.61	104.399	900.682	0	0	0	0	0	0	0	603	903	0
620	3	0	0	0	0	0	0	200	300	0	-20.538	-18.008	-546.794	1275.24	-52106.7	3275.39	104.705	900.668	0	0	0	0	0	0	0	603	903	0
620	4	0	0	0	0	0	0	200	300	0	-20.8432	-17.8554	-549.236	1824.55	-52106.7	3183.84	105.129	899.678	0	0	0	0	0	0	0	603	903	0
620	5	0	0	0	0	0	0	200	300	0	-19.7751	-17.3976	-548.931	2373.87	-52045.7	3412.72	105.187	898.675	0	0	0	0	0	0	0	603	903	0
620	6	0	0	0	0	0	0	200	300	0	-20.2328	-17.5502	-548.931	1458.34	-52228.8	3092.29	104.854	900.343	0	0	0	0	0	0	0	603	903	0
620	7	0	0	0	0	0	0	200	300	0	-20.9958	-17.8554	-547.405	2007.66	-52289.8	3183.84	104.477	899.332	0	0	0	0	0	0	0	603	903	0
620	8	0	0	0	0	0	0	200	300	0	-20.9958	-17.245	-545.879	3014.74	-52289.8	3046.51	104.21	897.477	0	0	0	0	0	0	0	603	903	0
620	9	0	0	0	0	0	0	200	300	0	-20.2328	-16.3295	-546.489	3197.85	-51862.6	3046.51	105.099	897.148	0	0	0	0	0	0	0	603	903	0
621	0	0	0	0	0	0	0	200	300	0	-19.9277	-16.6347	-545.574	2648.53	-51984.7	2954.96	104.716	898.146	0	0	0	0	0	0	0	603	903	0
621	1	0	0	0	0	0	0	200	300	0	-20.538	-16.3295	-545.268	3014.74	-51984.7	2954.96	104.662	897.471	0	0	0	0	0	0	0	603	903	0
621	2	0	0	0	0	0	0	200	300	0	-20.6906	-16.0243	-544.353	3197.85	-52045.7	2726.07	104.39	897.125	0	0	0	0	0	0	0	603	903	0
621	3	0	0	0	0	0	0	200	300	0	-19.3173	-15.7191	-541.912	4021.82	-51801.6	2863.4	104.41	895.578	0	0	0	0	0	0	0	603	903	0
621	4	0	0	0	0	0	0	200	300	0	-19.7751	-15.5666	-541.301	4204.93	-52167.8	3046.51	103.625	895.232	0	0	0	0	0	0	0	603	903	0
621	5	0	0	0	0	0	0	200	300	0	-18.4018	-14.4984	-541.912	4113.37	-52106.7	2909.18	103.846	895.41	0	0	0	0	0	0	0	603	903	0
621	6	0	0	0	0	0	0	200	300	0	-19.3173	-14.4984	-540.996	4296.48	-51923.6	2954.96	104.022	895.058	0	0	0	0	0	0	0	603	903	0
621	7	0	0	0	0	0	0	200	300	0	-18.8596	-14.0407	-540.386	4479.58	-51740.5	2863.4	104.253	894.71	0	0	0	0	0	0	0	603	903	0
621	8	0	0	0	0	0	0	200	300	0	-21.1484	-14.3459	-539.165	4754.24	-51984.7	2680.3	103.583	894.182	0	0	0	0	0	0	0	603	903	0
621	9	0	0	0	0	0	0	200	300	0	-20.6906	-14.651	-542.217	4845.79	-52045.7	2451.42	104.013	894.063	0	0	0	0	0	0	0	603	903	0
622	0	0	0	0	0	0	0	200	300	0	-19.3173	-13.2777	-537.334	5486.66	-51862.6	2451.42	103.482	892.789	0	0	0	0	0	0	0	603	903	0
622	1	0	0	0	0	0	0	200	300	0	-18.5544	-13.1252	-536.113	5120.45	-51679.5	2817.63	103.603	893.449	0	0	0	0	0	0	0	603	903	0
622	2	0	0	0	0	0	0	200	300	0	-20.0803	-13.4303	-537.944	5028.9	-51374.3	2497.19	104.499	893.652	0	0	0	0	0	0	0	603	903	0
622	3	0	0	0	0	0	0	200	300	0	-20.2328	-12.82	-536.418	5852.88	-52106.7	2542.97	102.862	892.089	0	0	0	0	0	0	0	603	903	0
622	4	0	0	0	0	0	0	200	300	0	-19.7751	-12.6674	-535.808	6035.98	-51923.6	2451.42	103.093	891.735	0	0	0	0	0	0	0	603	903	0
622	5	0	0	0	0	0	0	200	300	0	-19.0121	-12.2096	-533.977	6219.09	-51923.6	2176.76	102.761	891.353	0	0	0	0	0	0	0	603	903	0
622	6	0	0	0	0	0	0	200	300	0	-18.8596	-13.7355	-534.587	6219.09	-51374.3	2359.86	103.899	891.367	0	0	0	0	0	0	0	603	903	0
622	7	0	0	0	0	0	0	200	300	0	-19.7751	-11.9044	-535.808	6493.74	-51313.3	2405.64	104.232	890.881	0	0	0	0	0	0	0	603	903	0
622	8	0	0	0	0	0	0	200	300	0	-18.5544	-12.057	-534.282	6676.85	-51435.4	2359.86	103.73	890.503	0	0	0	0	0	0	0	603	903	0
622	9	0	0	0	0	0	0	200	300	0	-18.5544	-11.1415	-530.925	6676.85	-51984.7	1947.88	102.087	890.424	0	0	0	0	0	0	0	603	903	0
623	0	0	0	0	0	0	0	200	300	0	-18.0966	-10.9889	-533.672	7317.72	-51679.5	2268.31	103.162	889.288	0	0	0	0	0	0	0	603	903	0
623	1	0	0	0	0	0	0	200	300	0	-19.0121	-10.3786	-533.367	7409.27	-51984.7	2359.86	102.535	889.108	0	0	0	0	0	0	0	603	903	0
623	2	0	0	0	0	0	0	200	300	0	-18.5544	-10.226	-531.841	7409.27	-51496.4	2176.76	103.173	889.069	0	0	0	0	0	0	0	603	903	0
623	3	0	0	0	0	0	0	200	300	0	-19.9277	-10.6837	-532.146	7592.38	-51435.4	2130.98	103.344	888.733	0	0	0	0	0	0	0	603	903	0
623	4	0	0	0	0	0	0	200	300	0	-19.4699	-9.61563	-531.23	7775.48	-51374.3	1993.65	103.292	888.363	0	0	0	0	0	0	0	603	903	0
623	5	0	0	0	0	0	0	200	300	0	-19.4699	-9.46304	-530.62	8691.01	-51740.5	1947.88	102.49	886.621	0	0	0	0	0	0	0	603	903	0
623	6	0	0	0	0	0	0	200	300	0	-18.707	-9.15787	-531.536	9148.78	-52045.7	1810.55	102.084	885.788	0	0	0	0	0	0	0	603	903	0
623	7	0	0	0	0	0	0	200	300	0	-19.4699	-9.00528	-529.705	8416.36	-51313.3	1856.32	103.128	887.111	0	0	0	0	0	0	0	603	903	0
623	8	0	0	0	0	0	0	200	300	0	-19.4699	-9.15787	-530.01	9514.99	-51740.5	1993.65	102.378	885.048	0	0	0	0	0	0	0	603	903	0
623	9	0	0	0	0	0	0	200	300	0	-17.944	-7.78457	-532.146	8965.67	-51374.3	2039.43	103.458	886.152	0	0	0	0	0	0	0	603	903	0
624	0	0	0	0	0	0	0	200	300	0	-19.0121	-8.24234	-531.23	9057.22	-51801.6	1810.55	102.488	885.951	0	0	0	0	0	0	0	603	903	0
624	1	0	0	0	0	0	0	200	300	0	-20.2328	-7.78457	-529.705	9606.54	-52045.7	1718.99	101.746	884.864	0	0	0	0	0	0	0	603	903	0
624	2	0	0	0	0	0	0	200	300	0	-19.1647	-7.4794	-528.789	10064.3	-52411.9	1673.22	100.883	883.967	0	0	0	0	0	0	0	603	903	0
624	3	0	0	0	0	0	0	200	300	0	-17.7914	-7.63199	-526.653	9606.54	-51862.6	1810.55	101.524	884.759	0	0	0	0	0	0	0	603	903	0
624	4	0	0	0	0	0	0	200	300	0	-18.2492	-7.17422	-528.484	9789.65	-51557.4	1718.99	102.443	884.476	0	0	0	0	0	0	0	603	903	0
624	5	0	0	0	0	0	0	200	300	0	-16.4182	-7.17422	-528.789	10339	-51679.5	1764.77	102.268	883.448	0	0	0	0	0	0	0	603	903	0
624	6	0	0	0	0	0	0	200	300	0	-18.0966	-6.86905	-529.399	10705.2	-52167.8	1490.11	101.459	882.779	0	0	0	0	0	0	0	603	903	0
624	7	0	0	0	0	0	0	200	300	0	-17.944	-7.4794	-530.925	11071.4	-52473	1535.89	101.167	882.147	0	0	0	0	0	0	0	603	903	0
624	8	0	0	0	0	0	0	200	300	0	-18.4018	-5.80093	-528.484	10888.3	-51740.5	1581.66	102.096	882.397	0	0	0	0	0	0	0	603	903	0
624	9	0	0	0	0	0	0	200	300	0	-18.4018	-6.41128	-528.179	11162.9	-51862.6	1490.11	101.809	881.865	0	0	0	0	0	0	0	603	903	0
625	0	0	0	0	0	0	0	200	300	0	-17.944	-5.64834	-528.789	11346	-51679.5	1398.56	102.268	881.543	0	0	0	0	0	0	0	603	903	0
625	1	0	0	0	0	0	0	200	300	0	-17.944	-5.34317	-529.094	11254.5	-52473	1764.77	100.825	881.729	0	0	0	0	0	0	0	603	903	0
625	2	0	0	0	0	0	0	200	300	0	-17.0285	-5.19058	-528.789	11346	-52717.1	1123.9	100.306	881.543	0	0	0	0	0	0	0	603	903	0
625	3	0	0	0	0	0	0	200	300	0	-17.7914	-4.73282	-528.484	11803.8	-52656.1	1352.78	100.364	880.665	0	0	0	0	0	0	0	603	903	0
625	4	0	0	0	0	0	0	200	300	0	-17.7914	-4.58023	-529.094	12261.6	-51801.6	1490.11	102.094	879.825	0	0	0	0	0	0	0	603	903	0
625	5	0	0	0	0	0	0	200	300	0	-18.5544	-4.27505	-529.094	12078.5	-51862.6	1673.22	101.979	880.171	0	0	0	0	0	0	0	603	903	0
625	6	0	0	0	0	0	0	200	300	0	-18.707	-3.96988	-529.399	12353.1	-52595	1078.12	100.652	879.666	0	0	0	0	0	0	0	603	903	0
625	7	0	0	0	0	0	0	200	300	0	-17.7914	-3.05435	-527.568	12444.7	-52778.1	1078.12	99.9596	879.411	0	0	0	0	0	0	0	603	903	0
625	8	0	0	0	0	0	0	200	300	0	-17.6389	-3.6647	-531.841	12536.2	-52595	895.019	101.108	879.429	0	0	0	0	0	0	0	603	903	0
625	9	0	0	0	0	0	0	200	300	0	-16.7233	-3.51211	-530.01	12719.3	-51984.7	1307.01	101.918	879.002	0	0	0	0	0	0	0	603	903	0
626	0	0	0	0	0	0	0	200	300	0	-17.4863	-2.59659	-529.399	12810.9	-51923.6	940.795	101.92	878.801	0	0	0	0	0	0	0	603	903	0
626	1	0	0	0	0	0	0	200	300	0	-17.944	-3.20694	-530.315	13268.7	-52289.8	986.571	101.398	877.98	0	0	0	0	0	0	0	603	903	0
626	2	0	0	0	0	0	0	200	300	0	-18.707	-2.13882	-530.62	13177.1	-52778.1	1032.35	100.535	878.167	0	0	0	0	0	0	0	603	903	0
626	3	0	0	0	0	0	0	200	300	0	-18.5544	-2.444	-532.146	14001.1	-52900.2	1307.01	100.591	876.689	0	0	0	0	0	0	0	603	903	0
626	4	0	0	0	0	0	0	200	300	0	-17.0285	-2.59659	-532.756	13543.3	-52961.2	895.019	100.59	877.579	0	0	0	0	0	0	0	603	903	0
626	5	0	0	0	0	0	0	200	300	0	-17.3337	-1.52847	-530.62	13543.3	-52411.9	1032.35	101.225	877.476	0	0	0	0	0	0	0	603	903	0
626	6	0	0	0	0	0	0	200	300	0	-18.2492	-1.07071	-532.451	13818	-52411.9	849.242	101.565	877.048	0	0	0	0	0	0	0	603	903	0
626	7	0	0	0	0	0	0	200	300	0	-17.944	0.149996	-533.672	14092.6	-52167.8	483.031	102.247	876.593	0	0	0	0	0	0	0	603	903	0
626	8	0	0	0	0	0	0	200	300	0	-18.0966	-0.15518	-533.977	15099.7	-52656.1	711.913	101.389	874.722	0	0	0	0	0	0	0	603	903	0
626	9	0	0	0	0	0	0	200	300	0	-18.2492	-0.15518	-534.282	14825	-53083.3	711.913	100.646	875.252	0	0	0	0	0	0	0	603	903	0
627	0	0	0	0	0	0	0	200	300	0	-15.9604	-0.307768	-533.672	14458.8	-52961.2	711.913	100.761	875.907	0	0	0	0	0	0	0	603	903	0
627	1	0	0	0	0	0	0	200	300	0	-15.9604	0.607759	-533.367	14825	-52656.1	711.913	101.276	875.205	0	0	0	0	0	0	0	603	903	0
627	2	0	0	0	0	0	0	200	300	0	-14.4345	0.302584	-534.893	15008.2	-52839.2	620.36	101.215	874.942	0	0	0	0	0	0	0	603	903	0
627	3	0	0	0	0	0	0	200	300	0	-17.7914	0.760347	-536.113	15099.7	-53327.4	483.031	100.53	874.835	0	0	0	0	0	0	0	603	903	0
627	4	0	0	0	0	0	0	200	300	0	-17.944	1.3707	-534.587	15099.7	-53510.6	299.926	99.9031	874.755	0	0	0	0	0	0	0	603	903	0
627	5	0	0	0	0	0	0	200	300	0	-16.4182	1.06552	-537.029	15649	-53266.4	162.597	100.813	873.86	0	0	0	0	0	0	0	603	903	0
627	6	0	0	0	0	0	0	200	300	0	-16.2656	1.67587	-537.029	15740.6	-53266.4	574.584	100.813	873.69	0	0	0	0	0	0	0	603	903	0
627	7	0	0	0	0	0	0	200	300	0	-18.2492	1.98105	-537.029	15649	-53144.3	299.926	101.04	873.86	0	0	0	0	0	0	0	603	903	0
627	8	0	0	0	0	0	0	200	300	0	-17.0285	2.5914	-538.86	16106.8	-53754.7	25.2677	100.244	873.109	0	0	0	0	0	0	0	603	903	0
627	9	0	0	0	0	0	0	200	300	0	-14.5871	3.20175	-539.775	16473	-54120.9	116.82	99.7344	872.482	0	0	0	0	0	0	0	603	903	0
628	0	0	0	0	0	0	0	200	300	0	-17.6389	3.04917	-540.386	16656.1	-54120.9	71.0441	99.8476	872.177	0	0	0	0	0	0	0	603	903	0
628	1	0	0	0	0	0	0	200	300	0	-17.3337	3.20175	-540.691	17297	-53388.5	-66.2851	101.259	871.01	0	0	0	0	0	0	0	603	903	0
628	2	0	0	0	0	0	0	200	300	0	-16.5707	2.5914	-539.775	16656.1	-53571.6	116.82	100.752	872.143	0	0	0	0	0	0	0	603	903	0
628	3	0	0	0	0	0	0	200	300	0	-15.8078	3.96469	-540.996	16473	-53632.6	71.0441	100.863	872.551	0	0	0	0	0	0	0	603	903	0
628	4	0	0	0	0	0	0	200	300	0	-17.0285	5.33798	-542.217	16930.8	-54120.9	-295.167	100.186	871.775	0	0	0	0	0	0	0	603	903	0
628	5	0	0	0	0	0	0	200	300	0	-15.8078	4.88022	-544.048	17571.6	-54609.2	-112.061	99.6243	870.702	0	0	0	0	0	0	0	603	903	0
628	6	0	0	0	0	0	0	200	300	0	-14.2819	4.88022	-544.353	17663.2	-53876.8	-249.391	101.026	870.552	0	0	0	0	0	0	0	603	903	0
628	7	0	0	0	0	0	0	200	300	0	-17.0285	5.1854	-543.743	17205.4	-53998.8	-157.838	100.69	871.357	0	0	0	0	0	0	0	603	903	0
628	8	0	0	0	0	0	0	200	300	0	-17.4863	6.10092	-544.963	17297	-53937.8	-203.614	101.025	871.26	0	0	0	0	0	0	0	603	903	0
628	9	0	0	0	0	0	0	200	300	0	-16.113	6.25351	-546.184	18212.5	-54548.2	-295.167	100.129	869.655	0	0	0	0	0	0	0	603	903	0
629	0	0	0	0	0	0	0	200	300	0	-16.4182	6.55869	-547.1	19128	-54914.4	-66.2851	99.6264	868.037	0	0	0	0	0	0	0	603	903	0
629	1	0	0	0	0	0	0	200	300	0	-17.1811	7.32163	-548.931	18029.4	-55097.5	-478.272	99.6276	870.155	0	0	0	0	0	0	0	603	903	0
629	2	0	0	0	0	0	0	200	300	0	-16.7233	7.32163	-548.015	18487.2	-54487.1	-203.614	100.574	869.265	0	0	0	0	0	0	0	603	903	0
629	3	0	0	0	0	0	0	200	300	0	-15.1974	8.08457	-547.405	18761.8	-54243	-432.496	100.909	868.726	0	0	0	0	0	0	0	603	903	0
629	4	0	0	0	0	0	0	200	300	0	-15.8078	7.93198	-549.541	18395.6	-54426.1	-524.049	100.961	869.526	0	0	0	0	0	0	0	603	903	0
629	5	0	0	0	0	0	0	200	300	0	-17.3337	9.15268	-550.456	19128	-54853.3	-707.154	100.349	868.251	0	0	0	0	0	0	0	603	903	0
629	6	0	0	0	0	0	0	200	300	0	-17.1811	8.84751	-551.982	19768.9	-55097.5	-707.154	100.183	867.186	0	0	0	0	0	0	0	603	903	0
629	7	0	0	0	0	0	0	200	300	0	-13.3664	9.30527	-552.593	19494.2	-55768.9	-707.154	99.0778	867.722	0	0	0	0	0	0	0	603	903	0
629	8	0	0	0	0	0	0	200	300	0	-16.2656	9.91562	-552.593	19494.2	-54670.2	-661.378	101.066	867.722	0	0	0	0	0	0	0	603	903	0
629	9	0	0	0	0	0	0	200	300	0	-16.4182	10.6786	-552.898	19494.2	-54731.3	-752.931	101.01	867.742	0	0	0	0	0	0	0	603	903	0
630	0	0	0	0	0	0	0	200	300	0	-15.6552	10.0682	-554.424	19860.5	-55280.6	-798.707	100.292	867.178	0	0	0	0	0	0	0	603	903	0
630	1	0	0	0	0	0	0	200	300	0	-15.8078	11.2889	-557.476	19677.3	-55524.7	-936.036	100.4	867.703	0	0	0	0	0	0	0	603	903	0
630	2	0	0	0	0	0	0	200	300	0	-14.4345	11.7467	-557.476	19952	-55646.8	-1027.59	100.181	867.21	0	0	0	0	0	0	0	603	903	0
630	3	0	0	0	0	0	0	200	300	0	-15.0449	11.8993	-557.17	19768.9	-55463.7	-981.813	100.455	867.519	0	0	0	0	0	0	0	603	903	0
630	4	0	0	0	0	0	0	200	300	0	-15.1974	12.2044	-558.391	19860.5	-55585.8	-844.484	100.454	867.433	0	0	0	0	0	0	0	603	903	0
630	5	0	0	0	0	0	0	200	300	0	-17.0285	13.2726	-558.086	20409.8	-55402.7	-1073.37	100.727	866.429	0	0	0	0	0	0	0	603	903	0
630	6	0	0	0	0	0	0	200	300	0	-16.2656	13.8829	-559.917	20318.2	-56013	-1256.47	99.9619	866.712	0	0	0	0	0	0	0	603	903	0
630	7	0	0	0	0	0	0	200	300	0	-15.0449	14.4933	-561.443	20592.9	-55707.8	-1073.37	100.777	866.322	0	0	0	0	0	0	0	603	903	0
630	8	0	0	0	0	0	0	200	300	0	-14.8923	14.1881	-562.664	20959.1	-56135.1	-1439.58	100.233	865.75	0	0	0	0	0	0	0	603	903	0
630	9	0	0	0	0	0	0	200	300	0	-14.7397	14.6458	-563.579	20684.4	-55707.8	-1164.92	101.153	866.298	0	0	0	0	0	0	0	603	903	0
631	0	0	0	0	0	0	0	200	300	0	-15.8078	15.2562	-562.969	21325.3	-55463.7	-1210.69	101.48	865.12	0	0	0	0	0	0	0	603	903	0
631	1	0	0	0	0	0	0	200	300	0	-15.5026	14.7984	-563.274	21325.3	-55829.9	-1622.68	100.883	865.141	0	0	0	0	0	0	0	603	903	0
631	2	0	0	0	0	0	0	200	300	0	-16.7233	16.3243	-565.715	21325.3	-56440.3	-1485.35	100.232	865.304	0	0	0	0	0	0	0	603	903	0
631	3	0	0	0	0	0	0	200	300	0	-16.7233	16.1717	-566.631	21874.6	-56501.3	-1210.69	100.286	864.395	0	0	0	0	0	0	0	603	903	0
631	4	0	0	0	0	0	0	200	300	0	-15.5026	16.6295	-567.852	21874.6	-56989.6	-1439.58	99.64	864.478	0	0	0	0	0	0	0	603	903	0
631	5	0	0	0	0	0	0	200	300	0	-16.5707	16.6295	-568.157	21325.3	-56318.2	-1714.23	100.876	865.466	0	0	0	0	0	0	0	603	903	0
631	6	0	0	0	0	0	0	200	300	0	-14.4345	17.8502	-568.767	21691.5	-56379.2	-1622.68	100.875	864.862	0	0	0	0	0	0	0	603	903	0
631	7	0	0	0	0	0	0	200	300	0	-15.1974	18.4605	-569.683	22057.7	-56562.3	-1805.79	100.713	864.281	0	0	0	0	0	0	0	603	903	0
631	8	0	0	0	0	0	0	200	300	0	-15.0449	18.4605	-572.124	22515.5	-56989.6	-1760.01	100.389	863.646	0	0	0	0	0	0	0	603	903	0
631	9	0	0	0	0	0	0	200	300	0	-16.7233	18.0028	-572.429	22698.6	-57294.7	-1760.01	99.9095	863.347	0	0	0	0	0	0	0	603	903	0
632	0	0	0	0	0	0	0	200	300	0	-16.2656	18.7657	-572.734	22973.2	-57722	-1622.68	99.2168	862.888	0	0	0	0	0	0	0	603	903	0
632	1	0	0	0	0	0	0	200	300	0	-15.1974	19.9864	-573.039	22698.6	-56806.5	-1988.89	100.868	863.389	0	0	0	0	0	0	0	603	903	0
632	2	0	0	0	0	0	0	200	300	0	-15.5026	20.5968	-574.26	22881.7	-56684.4	-1805.79	101.291	863.155	0	0	0	0	0	0	0	603	903	0
632	3	0	0	0	0	0	0	200	300	0	-15.6552	21.3597	-575.786	23522.6	-57111.6	-2126.22	100.811	862.147	0	0	0	0	0	0	0	603	903	0
632	4	0	0	0	0	0	0	200	300	0	-15.0449	21.3597	-577.617	23614.1	-57966.1	-1988.89	99.6461	862.118	0	0	0	0	0	0	0	603	903	0
632	5	0	0	0	0	0	0	200	300	0	-12.9086	21.5123	-576.702	23339.5	-57905.1	-2263.55	99.5926	862.529	0	0	0	0	0	0	0	603	903	0
632	6	0	0	0	0	0	0	200	300	0	-16.7233	22.8856	-577.007	23705.7	-57233.7	-2309.33	100.809	861.916	0	0	0	0	0	0	0	603	903	0
632	7	0	0	0	0	0	0	200	300	0	-16.5707	21.8175	-578.533	24071.9	-57661	-2172	100.332	861.392	0	0	0	0	0	0	0	603	903	0
632	8	0	0	0	0	0	0	200	300	0	-16.113	23.1908	-580.059	24438.1	-57416.8	-2080.45	101.015	860.87	0	0	0	0	0	0	0	603	903	0
632	9	0	0	0	0	0	0	200	300	0	-15.8078	23.8011	-581.279	24712.7	-58088.2	-2492.43	100.068	860.486	0	0	0	0	0	0	0	603	903	0
633	0	0	0	0	0	0	0	200	300	0	-16.5707	24.2589	-581.584	24163.4	-58515.4	-2492.43	99.3861	861.452	0	0	0	0	0	0	0	603	903	0
633	1	0	0	0	0	0	0	200	300	0	-16.2656	24.8692	-579.143	24621.2	-58210.3	-2400.88	99.489	860.487	0	0	0	0	0	0	0	603	903	0
633	2	0	0	0	0	0	0	200	300	0	-15.6552	24.4115	-583.11	24712.7	-57844.1	-2492.43	100.801	860.619	0	0	0	0	0	0	0	603	903	0
633	3	0	0	0	0	0	0	200	300	0	-16.2656	26.3951	-584.636	24529.6	-57966.1	-2767.09	100.851	861.043	0	0	0	0	0	0	0	603	903	0
633	4	0	0	0	0	0	0	200	300	0	-16.8759	25.9373	-584.331	25170.5	-58759.6	-2721.32	99.4413	859.924	0	0	0	0	0	0	0	603	903	0
633	5	0	0	0	0	0	0	200	300	0	-16.2656	26.3951	-585.247	25353.6	-58515.4	-2721.32	100.016	859.679	0	0	0	0	0	0	0	603	903	0
633	6	0	0	0	0	0	0	200	300	0	-14.5871	27.0055	-588.298	25262.1	-59064.8	-2629.76	99.6006	860.059	0	0	0	0	0	0	0	603	903	0
633	7	0	0	0	0	0	0	200	300	0	-17.1811	27.4632	-588.909	25262.1	-58576.5	-2492.43	100.534	860.104	0	0	0	0	0	0	0	603	903	0
633	8	0	0	0	0	0	0	200	300	0	-17.6389	27.1581	-588.603	25353.6	-58698.6	-2721.32	100.275	859.926	0	0	0	0	0	0	0	603	903	0
633	9	0	0	0	0	0	0	200	300	0	-16.113	28.5313	-587.688	25902.9	-59247.9	-3041.75	99.1848	858.924	0	0	0	0	0	0	0	603	903	0
634	0	0	0	0	0	0	0	200	300	0	-16.2656	29.1417	-590.74	25902.9	-59064.8	-2950.2	100.016	859.152	0	0	0	0	0	0	0	603	903	0
634	1	0	0	0	0	0	0	200	300	0	-16.5707	28.8365	-589.824	25811.4	-59247.9	-2995.97	99.5499	859.239	0	0	0	0	0	0	0	603	903	0
634	2	0	0	0	0	0	0	200	300	0	-17.3337	30.0572	-591.35	26360.7	-58759.6	-3041.75	100.635	858.423	0	0	0	0	0	0	0	603	903	0
634	3	0	0	0	0	0	0	200	300	0	-16.7233	30.8202	-593.791	25902.9	-58942.7	-3041.75	100.735	859.377	0	0	0	0	0	0	0	603	903	0
634	4	0	0	0	0	0	0	200	300	0	-16.8759	31.2779	-593.791	25994.5	-59553	-3087.53	99.7071	859.223	0	0	0	0	0	0	0	603	903	0
634	5	0	0	0	0	0	0	200	300	0	-18.2492	30.515	-594.402	26818.5	-59369.9	-3133.3	100.118	857.882	0	0	0	0	0	0	0	603	903	0
634	6	0	0	0	0	0	0	200	300	0	-17.1811	31.4305	-594.097	27001.6	-59492	-3133.3	99.8614	857.55	0	0	0	0	0	0	0	603	903	0
634	7	0	0	0	0	0	0	200	300	0	-17.0285	32.9564	-596.843	26635.4	-59369.9	-3270.63	100.527	858.373	0	0	0	0	0	0	0	603	903	0
634	8	0	0	0	0	0	0	200	300	0	-18.2492	33.109	-596.538	26726.9	-59492	-3453.74	100.271	858.197	0	0	0	0	0	0	0	603	903	0
634	9	0	0	0	0	0	0	200	300	0	-17.7914	33.4142	-598.979	27184.7	-60102.4	-3041.75	99.6587	857.615	0	0	0	0	0	0	0	603	903	0
635	0	0	0	0	0	0	0	200	300	0	-16.7233	33.8719	-599.285	27367.8	-59858.2	-3636.84	100.117	857.333	0	0	0	0	0	0	0	603	903	0
635	1	0	0	0	0	0	0	200	300	0	-19.1647	33.7193	-598.979	27734	-59858.2	-3591.07	100.066	856.698	0	0	0	0	0	0	0	603	903	0
635	2	0	0	0	0	0	0	200	300	0	-18.2492	35.0926	-598.674	27825.5	-59858.2	-3591.07	100.015	856.521	0	0	0	0	0	0	0	603	903	0
635	3	0	0	0	0	0	0	200	300	0	-16.5707	35.2452	-601.726	28191.8	-59858.2	-3224.86	100.522	856.149	0	0	0	0	0	0	0	603	903	0
635	4	0	0	0	0	0	0	200	300	0	-17.6389	36.0081	-603.557	28191.8	-59858.2	-3636.84	100.824	856.291	0	0	0	0	0	0	0	603	903	0
635	5	0	0	0	0	0	0	200	300	0	-18.5544	35.8556	-604.473	27917.1	-60224.4	-3774.17	100.369	856.816	0	0	0	0	0	0	0	603	903	0
635	6	0	0	0	0	0	0	200	300	0	-19.1647	36.6185	-604.167	28466.4	-60224.4	-3865.72	100.318	855.883	0	0	0	0	0	0	0	603	903	0
635	7	0	0	0	0	0	0	200	300	0	-17.4863	37.0763	-602.031	28466.4	-59980.3	-4186.16	100.37	855.716	0	0	0	0	0	0	0	603	903	0
635	8	0	0	0	0	0	0	200	300	0	-17.944	38.1444	-606.609	28832.6	-60468.6	-4048.83	100.317	855.469	0	0	0	0	0	0	0	603	903	0
635	9	0	0	0	0	0	0	200	300	0	-17.944	38.4496	-609.05	28832.6	-60346.5	-3774.17	100.917	855.66	0	0	0	0	0	0	0	603	903	0
636	0	0	0	0	0	0	0	200	300	0	-17.1811	38.1444	-609.661	28741.1	-60468.6	-3911.5	100.816	855.857	0	0	0	0	0	0	0	603	903	0
636	1	0	0	0	0	0	0	200	300	0	-17.944	39.2125	-608.745	29107.3	-59919.3	-4003.05	101.569	855.185	0	0	0	0	0	0	0	603	903	0
636	2	0	0	0	0	0	0	200	300	0	-18.5544	40.7384	-607.219	29381.9	-61017.9	-4094.61	99.5126	854.612	0	0	0	0	0	0	0	603	903	0
636	3	0	0	0	0	0	0	200	300	0	-18.4018	38.4496	-612.407	29565	-60590.6	-4231.93	101.062	854.723	0	0	0	0	0	0	0	603	903	0
636	4	0	0	0	0	0	0	200	300	0	-17.6389	41.5013	-614.238	29656.6	-60529.6	-4369.26	101.456	854.718	0	0	0	0	0	0	0	603	903	0
636	5	0	0	0	0	0	0	200	300	0	-17.6389	41.0435	-615.459	29381.9	-60956.9	-3865.72	100.957	855.26	0	0	0	0	0	0	0	603	903	0
636	6	0	0	0	0	0	0	200	300	0	-19.0121	41.5013	-613.628	29656.6	-61017.9	-4460.82	100.562	854.67	0	0	0	0	0	0	0	603	903	0
636	7	0	0	0	0	0	0	200	300	0	-18.8596	43.485	-614.849	29839.7	-61201	-4781.25	100.462	854.468	0	0	0	0	0	0	0	603	903	0
636	8	0	0	0	0	0	0	200	300	0	-17.944	42.4168	-616.68	30480.6	-60956.9	-4552.37	101.153	853.573	0	0	0	0	0	0	0	603	903	0
636	9	0	0	0	0	0	0	200	300	0	-17.6389	44.2479	-618.816	30389	-60834.8	-4323.49	101.692	853.892	0	0	0	0	0	0	0	603	903	0
637	0	0	0	0	0	0	0	200	300	0	-18.707	44.5531	-620.037	30389	-61140	-4598.15	101.393	853.988	0	0	0	0	0	0	0	603	903	0
637	1	0	0	0	0	0	0	200	300	0	-18.707	45.6212	-619.121	30846.8	-61384.1	-4918.58	100.853	853.177	0	0	0	0	0	0	0	603	903	0
637	2	0	0	0	0	0	0	200	300	0	-17.4863	46.2315	-620.342	30572.1	-61506.2	-5055.91	100.851	853.717	0	0	0	0	0	0	0	603	903	0
637	3	0	0	0	0	0	0	200	300	0	-17.4863	45.0108	-620.647	31213	-60956.9	-4781.25	101.785	852.709	0	0	0	0	0	0	0	603	903	0
637	4	0	0	0	0	0	0	200	300	0	-15.9604	47.1471	-624.004	31304.5	-61078.9	-4827.03	102.118	852.833	0	0	0	0	0	0	0	603	903	0
637	5	0	0	0	0	0	0	200	300	0	-17.1811	47.7574	-624.004	31396.1	-61384.1	-4964.36	101.629	852.686	0	0	0	0	0	0	0	603	903	0
637	6	0	0	0	0	0	0	200	300	0	-17.0285	47.7574	-624.004	31762.3	-61811.3	-5055.91	100.944	852.099	0	0	0	0	0	0	0	603	903	0
637	7	0	0	0	0	0	0	200	300	0	-18.2492	49.2833	-625.53	31121.4	-61933.4	-5147.46	100.99	853.248	0	0	0	0	0	0	0	603	903	0
637	8	0	0	0	0	0	0	200	300	0	-18.5544	48.9781	-624.004	32128.5	-61384.1	-5376.35	101.629	851.512	0	0	0	0	0	0	0	603	903	0
637	9	0	0	0	0	0	0	200	300	0	-17.6389	50.504	-629.192	32311.6	-61323.1	-5376.35	102.537	851.646	0	0	0	0	0	0	0	603	903	0
638	0	0	0	0	0	0	0	200	300	0	-17.1811	50.504	-629.192	32037	-61750.3	-5605.23	101.858	852.082	0	0	0	0	0	0	0	603	903	0
638	1	0	0	0	0	0	0	200	300	0	-17.944	50.504	-629.802	31853.9	-62299.6	-5422.12	101.081	852.422	0	0	0	0	0	0	0	603	903	0
638	2	0	0	0	0	0	0	200	300	0	-17.6389	52.6402	-630.718	32311.6	-62177.6	-5467.9	101.418	851.77	0	0	0	0	0	0	0	603	903	0
638	3	0	0	0	0	0	0	200	300	0	-16.7233	53.2506	-632.854	32403.2	-62421.7	-5605.23	101.365	851.798	0	0	0	0	0	0	0	603	903	0
638	4	0	0	0	0	0	0	200	300	0	-18.2492	52.9454	-633.159	32586.3	-61750.3	-5651	102.473	851.534	0	0	0	0	0	0	0	603	903	0
638	5	0	0	0	0	0	0	200	300	0	-18.4018	53.8609	-634.075	32769.4	-61933.4	-5971.44	102.325	851.319	0	0	0	0	0	0	0	603	903	0
638	6	0	0	0	0	0	0	200	300	0	-16.8759	55.2342	-634.685	33410.2	-61628.2	-6062.99	102.899	850.359	0	0	0	0	0	0	0	603	903	0
638	7	0	0	0	0	0	0	200	300	0	-16.5707	55.692	-635.906	32952.5	-62665.8	-5559.45	101.454	851.18	0	0	0	0	0	0	0	603	903	0
638	8	0	0	0	0	0	0	200	300	0	-17.7914	56.3023	-637.126	33135.6	-62299.6	-5834.11	102.218	850.992	0	0	0	0	0	0	0	603	903	0
638	9	0	0	0	0	0	0	200	300	0	-18.2492	57.3705	-633.769	33593.4	-62055.5	-5971.44	102.085	849.994	0	0	0	0	0	0	0	603	903	0
639	0	0	0	0	0	0	0	200	300	0	-17.0285	57.3705	-638.652	33501.8	-61872.4	-6246.1	103.12	850.543	0	0	0	0	0	0	0	603	903	0
639	1	0	0	0	0	0	0	200	300	0	-16.5707	57.9808	-638.652	33868	-62421.7	-6017.21	102.26	849.97	0	0	0	0	0	0	0	603	903	0
639	2	0	0	0	0	0	0	200	300	0	-17.944	59.5067	-639.873	33684.9	-62665.8	-6383.43	102.065	850.357	0	0	0	0	0	0	0	603	903	0
639	3	0	0	0	0	0	0	200	300	0	-17.944	60.4222	-642.314	33410.2	-62787.9	-5971.44	102.247	850.985	0	0	0	0	0	0	0	603	903	0
639	4	0	0	0	0	0	0	200	300	0	-16.4182	59.9644	-641.399	33593.4	-63093.1	-6246.1	101.632	850.625	0	0	0	0	0	0	0	603	903	0
639	5	0	0	0	0	0	0	200	300	0	-16.4182	61.0326	-641.704	34417.3	-62299.6	-6383.43	102.915	849.366	0	0	0	0	0	0	0	603	903	0
639	6	0	0	0	0	0	0	200	300	0	-17.4863	62.2533	-643.23	34417.3	-62360.7	-6612.31	103.051	849.493	0	0	0	0	0	0	0	603	903	0
639	7	0	0	0	0	0	0	200	300	0	-17.7914	62.711	-644.756	34692	-63154.1	-6429.2	102.05	849.194	0	0	0	0	0	0	0	603	903	0
639	8	0	0	0	0	0	0	200	300	0	-16.4182	63.6266	-646.282	34966.6	-62787.9	-6566.53	102.847	848.896	0	0	0	0	0	0	0	603	903	0
639	9	0	0	0	0	0	0	200	300	0	-16.4182	63.9317	-646.587	34508.9	-63093.1	-6612.31	102.421	849.629	0	0	0	0	0	0	0	603	903	0
640	0	0	0	0	0	0	0	200	300	0	-17.6389	64.6947	-645.366	34417.3	-62299.6	-6749.64	103.466	849.67	0	0	0	0	0	0	0	603	903	0
640	1	0	0	0	0	0	0	200	300	0	-17.3337	66.3731	-643.84	35058.2	-62421.7	-6795.41	103.048	848.548	0	0	0	0	0	0	0	603	903	0
640	2	0	0	0	0	0	0	200	300	0	-16.113	64.9998	-648.113	35790.6	-63154.1	-6932.74	102.557	847.777	0	0	0	0	0	0	0	603	903	0
640	3	0	0	0	0	0	0	200	300	0	-15.6552	67.2887	-649.944	35241.3	-63398.3	-7024.29	102.456	848.778	0	0	0	0	0	0	0	603	903	0
640	4	0	0	0	0	0	0	200	300	0	-16.8759	67.5938	-650.249	35332.9	-63215.2	-7161.62	102.783	848.663	0	0	0	0	0	0	0	603	903	0
640	5	0	0	0	0	0	0	200	300	0	-16.5707	68.0516	-649.333	35424.4	-62604.8	-7161.62	103.586	848.445	0	0	0	0	0	0	0	603	903	0
640	6	0	0	0	0	0	0	200	300	0	-15.5026	69.5775	-649.944	35699.1	-62299.6	-7115.85	104.146	848.074	0	0	0	0	0	0	0	603	903	0
640	7	0	0	0	0	0	0	200	300	0	-16.7233	70.0352	-651.47	36065.3	-62482.7	-7070.07	104.09	847.64	0	0	0	0	0	0	0	603	903	0
640	8	0	0	0	0	0	0	200	300	0	-15.5026	68.5094	-648.418	36156.8	-63337.2	-7253.18	102.32	847.238	0	0	0	0	0	0	0	603	903	0
640	9	0	0	0	0	0	0	200	300	0	-15.5026	70.9508	-652.385	36156.8	-63520.3	-7161.62	102.634	847.578	0	0	0	0	0	0	0	603	903	0
641	0	0	0	0	0	0	0	200	300	0	-15.9604	72.0189	-651.775	36889.2	-62787.9	-7344.73	103.666	846.402	0	0	0	0	0	0	0	603	903	0
641	1	0	0	0	0	0	0	200	300	0	-17.3337	72.9344	-652.69	36339.9	-62421.7	-7436.28	104.362	847.323	0	0	0	0	0	0	0	603	903	0
641	2	0	0	0	0	0	0	200	300	0	-17.0285	74.1551	-655.132	36339.9	-62238.6	-7482.06	104.998	847.53	0	0	0	0	0	0	0	603	903	0
641	3	0	0	0	0	0	0	200	300	0	-15.9604	74.0025	-655.437	37072.4	-63032.1	-7756.72	103.832	846.439	0	0	0	0	0	0	0	603	903	0
641	4	0	0	0	0	0	0	200	300	0	-15.8078	73.6974	-655.742	36889.2	-63642.4	-7665.16	102.946	846.744	0	0	0	0	0	0	0	603	903	0
641	5	0	0	0	0	0	0	200	300	0	-16.2656	75.8336	-656.047	36889.2	-63093.1	-7344.73	103.828	846.77	0	0	0	0	0	0	0	603	903	0
641	6	0	0	0	0	0	0	200	300	0	-15.35	76.5965	-656.352	37713.2	-62604.8	-7344.73	104.617	845.541	0	0	0	0	0	0	0	603	903	0
641	7	0	0	0	0	0	0	200	300	0	-15.8078	77.5121	-657.573	37347	-62910	-7802.49	104.33	846.205	0	0	0	0	0	0	0	603	903	0
641	8	0	0	0	0	0	0	200	300	0	-16.4182	77.8172	-658.184	37804.8	-63276.2	-7848.27	103.862	845.562	0	0	0	0	0	0	0	603	903	0
641	9	0	0	0	0	0	0	200	300	0	-15.6552	78.5802	-657.573	37438.6	-63459.3	-7756.72	103.495	846.066	0	0	0	0	0	0	0	603	903	0
642	0	0	0	0	0	0	0	200	300	0	-15.35	78.7328	-656.963	38171	-63703.4	-7985.6	103.033	844.898	0	0	0	0	0	0	0	603	903	0
642	1	0	0	0	0	0	0	200	300	0	-14.8923	80.4112	-659.404	38079.5	-62848.9	-7894.05	104.688	845.252	0	0	0	0	0	0	0	603	903	0
642	2	0	0	0	0	0	0	200	300	0	-16.4182	80.2586	-660.015	37713.2	-62787.9	-7710.94	104.869	845.86	0	0	0	0	0	0	0	603	903	0
642	3	0	0	0	0	0	0	200	300	0	-16.2656	81.3268	-659.709	38079.5	-63459.3	-7848.27	103.807	845.279	0	0	0	0	0	0	0	603	903	0
642	4	0	0	0	0	0	0	200	300	0	-14.8923	82.2423	-659.404	38537.2	-63093.1	-7939.82	104.318	844.558	0	0	0	0	0	0	0	603	903	0
642	5	0	0	0	0	0	0	200	300	0	-14.8923	83.1578	-661.54	38354.1	-63398.3	-8168.7	104.166	845.023	0	0	0	0	0	0	0	603	903	0
642	6	0	0	0	0	0	0	200	300	0	-14.7397	83.7682	-661.235	38537.2	-62543.8	-8351.81	105.414	844.719	0	0	0	0	0	0	0	603	903	0
642	7	0	0	0	0	0	0	200	300	0	-15.1974	85.294	-661.846	39086.5	-62543.8	-8397.58	105.501	843.943	0	0	0	0	0	0	0	603	903	0
642	8	0	0	0	0	0	0	200	300	0	-14.7397	84.6837	-661.54	38354.1	-62543.8	-8443.36	105.457	845.023	0	0	0	0	0	0	0	603	903	0
642	9	0	0	0	0	0	0	200	300	0	-15.9604	85.1414	-661.235	38537.2	-63093.1	-8168.7	104.583	844.719	0	0	0	0	0	0	0	603	903	0
643	0	0	0	0	0	0	0	200	300	0	-16.2656	86.9725	-661.846	39727.4	-63154.1	-8306.03	104.579	842.975	0	0	0	0	0	0	0	603	903	0
643	1	0	0	0	0	0	0	200	300	0	-14.8923	87.2777	-661.846	39361.2	-62726.9	-8306.03	105.224	843.528	0	0	0	0	0	0	0	603	903	0
643	2	0	0	0	0	0	0	200	300	0	-14.5871	88.0406	-663.372	39361.2	-62910	-8489.14	105.166	843.665	0	0	0	0	0	0	0	603	903	0
643	3	0	0	0	0	0	0	200	300	0	-14.7397	88.3458	-663.677	39086.5	-62910	-8168.7	105.21	844.106	0	0	0	0	0	0	0	603	903	0
643	4	0	0	0	0	0	0	200	300	0	-15.5026	88.8036	-662.761	39452.7	-63154.1	-8672.24	104.711	843.472	0	0	0	0	0	0	0	603	903	0
643	5	0	0	0	0	0	0	200	300	0	-14.2819	90.6346	-663.677	39818.9	-62848.9	-8718.02	105.302	843.003	0	0	0	0	0	0	0	603	903	0
643	6	0	0	0	0	0	0	200	300	0	-15.9604	91.245	-665.203	39727.4	-63154.1	-8580.69	105.06	843.278	0	0	0	0	0	0	0	603	903	0
643	7	0	0	0	0	0	0	200	300	0	-15.8078	89.2613	-661.235	39818.9	-62910	-8763.79	104.86	842.781	0	0	0	0	0	0	0	603	903	0
643	8	0	0	0	0	0	0	200	300	0	-14.5871	91.5501	-664.592	39635.8	-62787.9	-8763.79	105.524	843.361	0	0	0	0	0	0	0	603	903	0
643	9	0	0	0	0	0	0	200	300	0	-14.7397	92.0079	-663.982	40551.4	-62726.9	-8718.02	105.529	841.927	0	0	0	0	0	0	0	603	903	0
644	0	0	0	0	0	0	0	200	300	0	-15.8078	93.076	-664.592	40459.8	-62910	-8672.24	105.34	842.121	0	0	0	0	0	0	0	603	903	0
644	1	0	0	0	0	0	0	200	300	0	-16.113	92.7708	-665.508	40185.1	-62971	-8580.69	105.379	842.617	0	0	0	0	0	0	0	603	903	0
644	2	0	0	0	0	0	0	200	300	0	-14.8923	95.3648	-666.423	40551.4	-63459.3	-8946.9	104.776	842.151	0	0	0	0	0	0	0	603	903	0
644	3	0	0	0	0	0	0	200	300	0	-14.4345	95.8226	-667.339	41009.1	-62848.9	-8809.57	105.822	841.548	0	0	0	0	0	0	0	603	903	0
644	4	0	0	0	0	0	0	200	300	0	-15.35	95.2122	-665.508	40093.6	-62482.7	-8901.12	106.113	842.755	0	0	0	0	0	0	0	603	903	0
644	5	0	0	0	0	0	0	200	300	0	-16.2656	96.433	-664.592	41283.8	-62971	-9038.45	105.249	840.881	0	0	0	0	0	0	0	603	903	0
644	6	0	0	0	0	0	0	200	300	0	-15.0449	97.5011	-665.508	40826	-63215.2	-9267.33	105.012	841.654	0	0	0	0	0	0	0	603	903	0
644	7	0	0	0	0	0	0	200	300	0	-15.1974	98.264	-666.728	40826	-62971	-9267.33	105.552	841.767	0	0	0	0	0	0	0	603	903	0
644	8	0	0	0	0	0	0	200	300	0	-16.113	98.5692	-666.118	41283.8	-62482.7	-9267.33	106.199	841.023	0	0	0	0	0	0	0	603	903	0
644	9	0	0	0	0	0	0	200	300	0	-16.4182	99.1795	-667.034	41283.8	-62665.8	-8672.24	106.053	841.108	0	0	0	0	0	0	0	603	903	0
645	0	0	0	0	0	0	0	200	300	0	-15.35	100.553	-664.592	41100.7	-62421.7	-9084.23	106.075	841.157	0	0	0	0	0	0	0	603	903	0
645	1	0	0	0	0	0	0	200	300	0	-15.6552	100.553	-666.118	41100.7	-63093.1	-9175.78	105.282	841.298	0	0	0	0	0	0	0	603	903	0
645	2	0	0	0	0	0	0	200	300	0	-16.7233	101.926	-667.339	41192.2	-63093.1	-9679.33	105.456	841.274	0	0	0	0	0	0	0	603	903	0
645	3	0	0	0	0	0	0	200	300	0	-15.6552	102.231	-667.339	41650	-63276.2	-9541.99	105.181	840.588	0	0	0	0	0	0	0	603	903	0
645	4	0	0	0	0	0	0	200	300	0	-13.9767	102.689	-666.423	41650	-62726.9	-9496.22	105.875	840.502	0	0	0	0	0	0	0	603	903	0
645	5	0	0	0	0	0	0	200	300	0	-14.8923	102.689	-665.203	41650	-62421.7	-9541.99	106.161	840.388	0	0	0	0	0	0	0	603	903	0
645	6	0	0	0	0	0	0	200	300	0	-15.9604	104.368	-666.118	41466.9	-62604.8	-9313.11	106.015	840.748	0	0	0	0	0	0	0	603	903	0
645	7	0	0	0	0	0	0	200	300	0	-16.5707	105.283	-666.728	42016.2	-62482.7	-9358.89	106.285	839.982	0	0	0	0	0	0	0	603	903	0
645	8	0	0	0	0	0	0	200	300	0	-16.5707	105.588	-666.118	42382.4	-62848.9	-9404.66	105.649	839.374	0	0	0	0	0	0	0	603	903	0
645	9	0	0	0	0	0	0	200	300	0	-17.6389	106.046	-666.118	42382.4	-62910	-9404.66	105.557	839.374	0	0	0	0	0	0	0	603	903	0
646	0	0	0	0	0	0	0	200	300	0	-17.4863	107.419	-665.508	42107.8	-62726.9	-9633.55	105.746	839.728	0	0	0	0	0	0	0	603	903	0
646	1	0	0	0	0	0	0	200	300	0	-16.5707	108.487	-666.118	41833.1	-62299.6	-9679.33	106.474	840.199	0	0	0	0	0	0	0	603	903	0
646	2	0	0	0	0	0	0	200	300	0	-16.8759	109.098	-664.287	42931.7	-62116.5	-9725.1	106.491	838.372	0	0	0	0	0	0	0	603	903	0
646	3	0	0	0	0	0	0	200	300	0	-18.707	109.25	-664.897	41650	-62238.6	-9541.99	106.394	840.359	0	0	0	0	0	0	0	603	903	0
646	4	0	0	0	0	0	0	200	300	0	-19.1647	109.556	-663.372	42840.2	-62238.6	-9541.99	106.178	838.421	0	0	0	0	0	0	0	603	903	0
646	5	0	0	0	0	0	0	200	300	0	-17.1811	111.081	-662.761	43114.8	-62726.9	-9633.55	105.355	837.947	0	0	0	0	0	0	0	603	903	0
646	6	0	0	0	0	0	0	200	300	0	-17.1811	111.234	-663.372	42107.8	-62116.5	-9541.99	106.362	839.525	0	0	0	0	0	0	0	603	903	0
646	7	0	0	0	0	0	0	200	300	0	-17.6389	111.387	-662.761	42290.9	-61750.3	-9725.1	106.829	839.19	0	0	0	0	0	0	0	603	903	0
646	8	0	0	0	0	0	0	200	300	0	-18.2492	112.15	-661.235	43114.8	-61872.4	-9816.66	106.429	837.797	0	0	0	0	0	0	0	603	903	0
646	9	0	0	0	0	0	0	200	300	0	-18.707	112.15	-660.93	42748.6	-62055.5	-9541.99	106.109	838.321	0	0	0	0	0	0	0	603	903	0
647	0	0	0	0	0	0	0	200	300	0	-19.6225	114.286	-660.625	42657.1	-62177.6	-10091.3	105.881	838.429	0	0	0	0	0	0	0	603	903	0
647	1	0	0	0	0	0	0	200	300	0	-19.9277	114.896	-660.93	42931.7	-62360.7	-9999.76	105.647	838.044	0	0	0	0	0	0	0	603	903	0
647	2	0	0	0	0	0	0	200	300	0	-16.7233	115.201	-660.93	42840.2	-61994.5	-9770.88	106.201	838.182	0	0	0	0	0	0	0	603	903	0
647	3	0	0	0	0	0	0	200	300	0	-19.4699	115.201	-657.573	42657.1	-61445.1	-9862.43	106.558	838.13	0	0	0	0	0	0	0	603	903	0
647	4	0	0	0	0	0	0	200	300	0	-20.2328	116.575	-656.352	43023.3	-61994.5	-10274.4	105.547	837.451	0	0	0	0	0	0	0	603	903	0
647	5	0	0	0	0	0	0	200	300	0	-18.8596	117.948	-656.352	42474	-61689.3	-10274.4	106.012	838.288	0	0	0	0	0	0	0	603	903	0
647	6	0	0	0	0	0	0	200	300	0	-18.8596	117.948	-655.742	42931.7	-61933.4	-10274.4	105.552	837.53	0	0	0	0	0	0	0	603	903	0
647	7	0	0	0	0	0	0	200	300	0	-20.0803	118.558	-654.216	42931.7	-60956.9	-10320.2	106.825	837.377	0	0	0	0	0	0	0	603	903	0
647	8	0	0	0	0	0	0	200	300	0	-18.4018	118.406	-653.301	43297.9	-60529.6	-10045.5	107.348	836.724	0	0	0	0	0	0	0	603	903	0
647	9	0	0	0	0	0	0	200	300	0	-16.8759	120.084	-652.08	43114.8	-61140	-9999.76	106.239	836.881	0	0	0	0	0	0	0	603	903	0
648	0	0	0	0	0	0	0	200	300	0	-20.2328	121.152	-650.249	42931.7	-61262	-9953.98	105.787	836.976	0	0	0	0	0	0	0	603	903	0
648	1	0	0	0	0	0	0	200	300	0	-19.4699	121.763	-650.859	43023.3	-60834.8	-10320.2	106.532	836.898	0	0	0	0	0	0	0	603	903	0
648	2	-1.41598	2.65015	-20.8769	-1304.63	605.695	-11.3538	229.013	362.492	0	-18.707	121.763	-648.723	43206.4	-61017.9	-10411.7	105.942	836.398	0	0	0	0	0	0	0	603	903	0
648	3	-0.653043	7.99073	-41.6288	-1853.94	483.625	309.081	211.618	344.535	0	-18.4018	123.288	-647.808	44030.4	-60529.6	-10594.9	106.562	835.032	0	0	0	0	0	0	0	603	903	0
648	4	0.56766	17.146	-45.5961	-2403.26	544.66	812.621	211.945	352.708	0	-19.7751	123.746	-646.587	42840.2	-60163.4	-10274.4	106.952	836.744	0	0	0	0	0	0	0	603	903	0
648	5	-2.4841	20.8081	-40.1029	-2952.58	178.449	537.963	204.45	373.625	0	-19.6225	122.983	-641.399	43114.8	-60041.3	-10594.9	106.39	835.78	0	0	0	0	0	0	0	603	903	0
648	6	-2.02633	19.74	-36.746	-3593.45	605.695	263.304	216.483	397.792	0	-18.5544	124.357	-644.145	43664.2	-60468.6	-10549.1	106.126	835.214	0	0	0	0	0	0	0	603	903	0
648	7	2.39871	25.0806	-47.4272	-3410.34	666.73	309.081	214.058	371.907	0	-18.2492	125.119	-641.399	43572.6	-60041.3	-10366	106.39	835.066	0	0	0	0	0	0	0	603	903	0
648	8	4.07718	31.1841	-66.3481	-3593.45	544.66	354.857	208.209	354.161	0	-18.707	126.645	-639.568	43114.8	-59614.1	-10457.5	106.79	835.588	0	0	0	0	0	0	0	603	903	0
648	9	4.38236	32.5574	-72.4516	-3868.1	544.66	217.528	207.518	353.389	0	-18.8596	126.645	-638.957	43206.4	-59553	-10640.6	106.797	835.38	0	0	0	0	0	0	0	603	903	0
649	0	0.56766	32.4048	-73.0619	-4966.74	117.414	263.304	201.607	367.98	0	-17.6389	126.493	-637.737	43389.5	-59247.9	-10823.7	107.097	834.963	0	0	0	0	0	0	0	603	903	0
649	1	1.48319	34.6936	-80.3861	-5424.5	605.695	-57.1302	207.535	367.481	0	-17.7914	125.882	-637.737	42931.7	-59492	-10457.5	106.714	835.681	0	0	0	0	0	0	0	603	903	0
649	2	5.45047	37.2876	-94.7294	-6248.48	483.625	309.081	205.105	365.961	0	-18.707	128.171	-631.328	43297.9	-58942.7	-10961.1	106.637	834.418	0	0	0	0	0	0	0	603	903	0
649	3	5.29788	32.4048	-101.443	-5973.82	971.906	34.4225	209.581	358.888	0	-17.3337	129.239	-630.107	43664.2	-59247.9	-10778	105.972	833.704	0	0	0	0	0	0	0	603	903	0
649	4	4.53495	28.4375	-104.8	-6248.48	300.519	80.1989	202.868	359.623	0	-16.113	129.392	-630.413	43389.5	-58454.4	-10869.5	107.276	834.173	0	0	0	0	0	0	0	603	903	0
649	5	1.78836	32.2522	-110.293	-7255.56	-370.868	125.975	196.637	365.784	0	-17.7914	130.002	-628.276	43114.8	-57844.1	-10915.3	107.932	834.376	0	0	0	0	0	0	0	603	903	0
649	6	0.415072	31.947	-114.871	-7621.77	56.3786	400.634	200.491	366.351	0	-15.8078	130.613	-624.614	42565.5	-57661	-11006.8	107.685	834.853	0	0	0	0	0	0	0	603	903	0
649	7	-3.09445	26.1487	-127.994	-7072.45	-126.727	446.41	199.01	355.256	0	-16.2656	131.528	-617.9	43023.3	-57905.1	-11144.2	106.287	833.372	0	0	0	0	0	0	0	603	903	0
649	8	-4.16256	22.6392	-129.519	-7804.87	-65.6918	766.844	199.493	360.26	0	-14.4345	131.833	-619.426	43114.8	-57661	-11006.8	106.912	833.396	0	0	0	0	0	0	0	603	903	0
649	9	-4.00998	23.5547	-128.909	-8537.29	-492.938	-11.3538	196.176	366.227	0	-17.1811	132.749	-618.816	42748.6	-57905.1	-11373.1	106.426	833.919	0	0	0	0	0	0	0	603	903	0
650	0	-7.97726	20.3503	-134.402	-8903.5	-1042.25	675.292	192.245	366.245	0	-15.9604	131.986	-615.154	42565.5	-57050.6	-10915.3	107.258	833.805	0	0	0	0	0	0	0	603	903	0
650	1	-11.1816	11.1951	-140.506	-8354.19	-1408.47	629.515	189.976	359.458	0	-14.4345	131.986	-610.881	43023.3	-56318.2	-11098.4	107.808	832.572	0	0	0	0	0	0	0	603	903	0
650	2	-9.96091	8.14332	-143.863	-8079.53	-981.219	766.844	193.179	356.161	0	-15.5026	133.512	-607.219	42382.4	-56318.2	-11373.1	107.252	833.202	0	0	0	0	0	0	0	603	903	0
650	3	-8.43503	7.38038	-145.694	-7987.98	-1286.39	537.963	191.171	354.827	0	-17.0285	133.664	-605.693	42290.9	-56501.3	-11327.3	106.716	833.178	0	0	0	0	0	0	0	603	903	0
650	4	-11.4868	2.95533	-148.746	-8354.19	-1591.57	904.174	189.3	356.164	0	-16.2656	134.427	-603.862	42748.6	-56135.1	-11601.9	107.04	832.208	0	0	0	0	0	0	0	603	903	0
650	5	-12.7075	-4.06372	-151.797	-8903.5	-1957.78	629.515	187.103	358.654	0	-14.2819	134.122	-600.505	42474	-55341.6	-11464.6	107.842	832.27	0	0	0	0	0	0	0	603	903	0
650	6	-16.217	-6.65771	-160.037	-8995.06	-2323.99	629.515	185.478	356.206	0	-14.5871	134.58	-597.148	42016.2	-54609.2	-11327.3	108.55	832.639	0	0	0	0	0	0	0	603	903	0
650	7	-16.8274	-5.28442	-163.089	-9452.82	-2201.92	812.621	186.499	357.961	0	-16.113	133.664	-593.486	42107.8	-55097.5	-11510.4	107.163	832.05	0	0	0	0	0	0	0	603	903	0
650	8	-17.7429	-10.1672	-167.056	-9452.82	-2751.24	858.397	183.531	356.585	0	-15.5026	136.106	-588.909	42107.8	-54853.3	-11601.9	106.856	831.499	0	0	0	0	0	0	0	603	903	0
650	9	-20.1843	-15.3552	-171.329	-8720.4	-2629.17	583.739	184.654	350.899	0	-13.8242	137.174	-587.688	42107.8	-54181.9	-11281.5	107.805	831.35	0	0	0	0	0	0	0	603	903	0
651	0	-20.7946	-17.1863	-179.568	-8903.5	-2629.17	766.844	185.358	349.583	0	-12.4509	136.106	-584.026	41650	-53998.8	-11556.2	107.54	831.685	0	0	0	0	0	0	0	603	903	0
651	1	-21.5576	-19.0173	-186.282	-9452.82	-3178.48	858.397	182.937	350.745	0	-13.9767	135.953	-578.838	41375.4	-53388.5	-11693.5	107.766	831.52	0	0	0	0	0	0	0	603	903	0
651	2	-22.3205	-21.4587	-194.217	-10002.1	-3117.45	812.621	183.949	351.5	0	-12.9086	136.564	-571.208	41375.4	-52656.1	-11693.5	107.816	830.565	0	0	0	0	0	0	0	603	903	0
651	3	-23.999	-23.595	-202.151	-10093.7	-3483.66	949.95	182.767	349.931	0	-12.2983	136.869	-569.988	40093.6	-52350.9	-11373.1	108.154	832.659	0	0	0	0	0	0	0	603	903	0
651	4	-23.5412	-24.0527	-206.424	-10643	-3361.59	812.621	183.715	351.559	0	-13.519	137.479	-565.715	41009.1	-52411.9	-11739.3	107.353	830.509	0	0	0	0	0	0	0	603	903	0
651	5	-24.3042	-23.595	-217.41	-10002.1	-3483.66	583.739	183.977	346.006	0	-13.2138	136.869	-561.748	41375.4	-51679.5	-11235.7	108.002	829.345	0	0	0	0	0	0	0	603	903	0
651	6	-25.5249	-27.2571	-225.955	-9635.93	-3727.8	949.95	183.502	342.645	0	-11.2302	137.174	-557.781	40826	-51313.3	-11327.3	108.005	829.806	0	0	0	0	0	0	0	603	903	0
651	7	-25.83	-29.5459	-233.279	-10368.3	-3727.8	537.963	184.02	344.446	0	-10.925	137.632	-551.067	40368.3	-51130.2	-11281.5	107.216	829.745	0	0	0	0	0	0	0	603	903	0
651	8	-25.5249	-28.9355	-243.35	-11192.3	-4094.01	583.739	183.176	345.993	0	-10.4672	135.953	-547.1	39818.9	-50153.6	-11601.9	108.328	830.218	0	0	0	0	0	0	0	603	903	0
651	9	-24.4568	-29.8511	-251.59	-11650.1	-3971.94	354.857	184.213	346.306	0	-11.6879	137.327	-544.353	40002	-49909.5	-11693.5	108.314	829.515	0	0	0	0	0	0	0	603	903	0
652	0	-25.2197	-32.1399	-259.524	-11558.5	-4155.05	583.739	183.99	344.537	0	-8.94135	137.174	-539.775	40002	-49604.3	-11739.3	108.102	828.891	0	0	0	0	0	0	0	603	903	0
652	1	-24.1516	-33.6658	-270.205	-10826.1	-4216.08	400.634	184.397	340.066	0	-10.162	136.869	-534.587	39818.9	-49726.4	-11693.5	106.982	828.515	0	0	0	0	0	0	0	603	903	0
652	2	-24.9145	-34.2761	-278.445	-10917.7	-4338.15	217.528	184.42	339.209	0	-9.24652	136.564	-529.094	38811.9	-48566.7	-11647.7	108.208	829.645	0	0	0	0	0	0	0	603	903	0
652	3	-24.3042	-37.0227	-286.99	-11558.5	-4765.4	354.857	183.395	340.275	0	-8.48358	136.716	-522.685	39269.6	-47773.2	-11464.6	108.6	827.87	0	0	0	0	0	0	0	603	903	0
652	4	-25.83	-40.8374	-296.145	-12291	-4643.33	812.621	184.321	341.503	0	-7.72064	136.258	-519.329	38811.9	-47651.2	-11098.4	108.245	828.265	0	0	0	0	0	0	0	603	903	0
652	5	-25.6775	-42.2107	-304.08	-12016.3	-4765.4	263.304	184.328	339.517	0	-8.78876	135.495	-514.751	38445.7	-47101.9	-11510.4	108.496	828.312	0	0	0	0	0	0	0	603	903	0
652	6	-25.3723	-42.3633	-311.099	-12199.4	-4582.29	217.528	185.271	339.214	0	-9.24652	135.648	-507.732	38354.1	-46796.7	-11830.8	107.832	827.46	0	0	0	0	0	0	0	603	903	0
652	7	-26.2878	-45.1099	-319.949	-11924.7	-5253.68	492.186	183.58	337.271	0	-6.49994	135.495	-502.544	38262.6	-46125.3	-11693.5	108.216	826.862	0	0	0	0	0	0	0	603	903	0
652	8	-25.83	-48.772	-327.884	-11924.7	-5253.68	354.857	183.977	336.369	0	-5.27924	134.122	-497.356	37713.2	-45453.9	-11144.2	108.609	827.173	0	0	0	0	0	0	0	603	903	0
652	9	-25.83	-51.366	-337.649	-12016.3	-5253.68	812.621	184.44	335.588	0	-6.49994	133.512	-491.558	37255.5	-44660.5	-11281.5	109.145	827.209	0	0	0	0	0	0	0	603	903	0
653	0	-22.1679	-53.5022	-345.279	-11924.7	-4948.5	629.515	185.668	334.537	0	-6.34735	132.901	-485.759	37530.1	-44599.4	-11464.6	108.186	825.739	0	0	0	0	0	0	0	603	903	0
653	1	-24.1516	-55.4858	-353.518	-12382.5	-5192.65	446.41	185.312	335.026	0	-2.38007	132.139	-479.045	37072.4	-43989.1	-11189.9	108.173	825.612	0	0	0	0	0	0	0	603	903	0
653	2	-24.9145	-57.9272	-358.401	-12565.6	-5253.68	537.963	185.341	335.06	0	-4.66888	131.07	-474.468	36614.6	-42402.2	-11235.7	110.632	825.83	0	0	0	0	0	0	0	603	903	0
653	3	-25.3723	-58.6902	-371.219	-12382.5	-5436.79	675.292	185.354	333.356	0	-4.82147	131.223	-468.059	36065.3	-42463.2	-11052.6	109.278	825.947	0	0	0	0	0	0	0	603	903	0
653	4	-24.4568	-60.8264	-378.848	-12016.3	-5497.82	675.292	185.488	331.718	0	-3.75336	130.155	-462.871	36156.8	-41791.8	-10961.1	109.712	824.886	0	0	0	0	0	0	0	603	903	0
653	5	-22.4731	-64.4885	-384.646	-11650.1	-5680.93	629.515	185.231	330.288	0	-3.14301	129.087	-454.936	35790.6	-41791.8	-11189.9	108.137	824.328	0	0	0	0	0	0	0	603	903	0
653	6	-23.0835	-67.8455	-392.886	-12016.3	-5619.89	721.068	185.696	330.585	0	-3.60077	128.934	-447.917	35516	-40937.3	-11098.4	108.605	823.709	0	0	0	0	0	0	0	603	903	0
653	7	-21.405	-67.2351	-399.905	-12107.8	-5619.89	812.621	185.947	330.277	0	-3.14301	128.476	-441.204	35241.3	-40571.1	-10869.5	108.044	823.125	0	0	0	0	0	0	0	603	903	0
653	8	-21.405	-67.8455	-408.755	-11924.7	-5680.93	629.515	186.102	329.173	0	-1.76971	127.256	-435.405	34875.1	-39350.4	-10732.2	109.624	822.902	0	0	0	0	0	0	0	603	903	0
653	9	-20.7946	-69.9817	-413.333	-11741.6	-5925.07	766.844	185.665	328.407	0	-1.15936	125.577	-426.25	34325.8	-38679	-10594.9	109.257	822.47	0	0	0	0	0	0	0	603	903	0
654	0	-19.8791	-71.9653	-424.93	-11192.3	-6169.21	675.292	185.482	326.339	0	-1.76971	122.068	-421.367	33501.8	-38190.7	-10457.5	109.365	823.493	0	0	0	0	0	0	0	603	903	0
654	1	-18.5058	-72.8809	-431.949	-11375.4	-5741.96	766.844	186.707	326.335	0	-1.76971	123.136	-413.127	33410.2	-37824.5	-10503.3	108.443	822.129	0	0	0	0	0	0	0	603	903	0
654	2	-19.2688	-74.4067	-437.747	-11741.6	-5925.07	629.515	186.465	326.823	0	-0.701599	122.525	-406.414	33776.5	-36970	-10274.4	109.033	819.891	0	0	0	0	0	0	0	603	903	0
654	3	-18.6584	-76.543	-444.461	-11192.3	-5986.1	354.857	186.532	325.182	0	-0.549011	121	-401.836	32586.3	-36481.7	-10274.4	109.212	821.906	0	0	0	0	0	0	0	603	903	0
654	4	-17.1325	-76.2378	-450.87	-11192.3	-5925.07	629.515	186.859	324.824	0	1.28204	118.863	-393.596	31579.2	-35444.1	-10182.9	109.948	822.768	0	0	0	0	0	0	0	603	903	0
654	5	-16.8274	-77.0007	-457.889	-11100.8	-5864.03	1041.5	187.193	324.243	0	0.976868	117.49	-384.441	32311.6	-34772.8	-9953.98	109.55	818.952	0	0	0	0	0	0	0	603	903	0
654	6	-15.4541	-78.9844	-463.077	-10459.9	-5925.07	904.174	187.205	322.588	0	1.12946	116.575	-377.422	31304.5	-34650.7	-9816.66	108.191	820.057	0	0	0	0	0	0	0	603	903	0
654	7	-13.9282	-81.1206	-467.654	-10368.3	-5803	537.963	187.591	322.171	0	-0.396423	115.354	-371.318	31029.9	-33674.1	-9725.1	109.312	819.433	0	0	0	0	0	0	0	603	903	0
654	8	-12.5549	-81.1206	-475.894	-10002.1	-5436.79	446.41	188.576	321.018	0	-0.396423	112.302	-360.027	30663.7	-32880.7	-9450.44	108.672	817.829	0	0	0	0	0	0	0	603	903	0
654	9	-12.5549	-82.0361	-481.387	-9819.03	-5864.03	309.081	187.818	320.397	0	2.35016	110.624	-355.144	30755.2	-32209.3	-9404.66	109.306	816.401	0	0	0	0	0	0	0	603	903	0
655	0	-11.4868	-83.562	-487.185	-9910.58	-5864.03	675.292	187.963	320.343	0	2.19757	109.556	-347.209	29473.5	-31415.8	-9084.23	109.519	818.113	0	0	0	0	0	0	0	603	903	0
655	1	-11.792	-85.6982	-492.984	-9727.48	-5741.96	263.304	188.353	319.732	0	1.58722	108.182	-339.885	28466.4	-30561.3	-9084.23	110.083	819.247	0	0	0	0	0	0	0	603	903	0
655	2	-10.7238	-86.0034	-498.172	-9269.71	-5558.86	171.752	188.842	318.608	0	1.12946	106.656	-333.782	29473.5	-30073.1	-8489.14	109.902	814.698	0	0	0	0	0	0	0	603	903	0
655	3	-8.12985	-87.5293	-501.834	-8903.5	-5375.75	309.081	189.288	317.742	0	2.04498	104.062	-325.237	28558	-29523.7	-8901.12	109.224	815.193	0	0	0	0	0	0	0	603	903	0
655	4	-9.65573	-88.5974	-506.717	-8537.29	-5497.82	446.41	189.15	316.848	0	2.35016	102.994	-316.997	27550.9	-28547.2	-8534.91	109.945	816.088	0	0	0	0	0	0	0	603	903	0
655	5	-9.50314	-90.7336	-508.548	-8445.74	-5619.89	34.4225	188.949	316.608	0	2.50275	102.231	-309.673	27093.1	-28303	-8443.36	108.603	815.51	0	0	0	0	0	0	0	603	903	0
655	6	-8.43503	-90.7336	-514.956	-8445.74	-5558.86	-240.236	189.205	316.401	0	3.1131	99.3321	-303.264	26910	-27082.3	-8077.15	110.697	814.266	0	0	0	0	0	0	0	603	903	0
655	7	-7.82467	-92.7173	-520.144	-8171.08	-5558.86	217.528	189.313	315.709	0	5.09674	96.1278	-292.278	26177.6	-26655.1	-8168.7	108.802	813.436	0	0	0	0	0	0	0	603	903	0
655	8	-6.2988	-93.7854	-526.858	-7347.11	-5192.65	-11.3538	190.144	313.945	0	2.96051	94.7545	-288.921	26086	-25739.6	-8031.37	110.911	812.712	0	0	0	0	0	0	0	603	903	0
655	9	-6.2988	-94.7009	-529.91	-6706.24	-5375.75	-194.459	189.855	312.655	0	2.96051	93.076	-280.681	25719.8	-25495.4	-7939.82	109.166	811.366	0	0	0	0	0	0	0	603	903	0
656	0	-7.06173	-95.9216	-533.572	-7072.45	-5314.72	-194.459	190.039	313.255	0	4.3338	90.9398	-273.052	24987.4	-24518.9	-7756.72	110.204	811.488	0	0	0	0	0	0	0	603	903	0
656	1	-6.60397	-96.6846	-538.455	-6889.35	-5436.79	-240.236	189.903	312.795	0	4.79156	88.3458	-266.948	24071.9	-23420.2	-7344.73	112.267	812.826	0	0	0	0	0	0	0	603	903	0
656	2	-4.46774	-99.2786	-540.896	-6706.24	-5070.57	-286.012	190.626	312.398	0	3.1131	84.3785	-260.845	23522.6	-23237.1	-6749.64	110.916	812.822	0	0	0	0	0	0	0	603	903	0
656	3	-5.38327	-98.6682	-544.559	-6431.58	-5253.68	-240.236	190.352	311.811	0	4.3338	82.7	-251.079	23431	-22809.9	-6612.31	109.153	809.679	0	0	0	0	0	0	0	603	903	0
656	4	-4.31515	-98.9734	-544.253	-6248.48	-4887.47	-331.789	191.02	311.481	0	6.77521	80.2586	-243.144	22881.7	-22321.6	-6795.41	108.196	808.893	0	0	0	0	0	0	0	603	903	0
656	5	-2.78927	-100.499	-550.357	-5424.5	-4826.43	-652.223	191.23	309.856	0	4.94415	78.7328	-236.736	22515.5	-21284	-6474.98	110.094	807.892	0	0	0	0	0	0	0	603	903	0
656	6	-2.94186	-102.025	-554.935	-4783.63	-5253.68	-469.118	190.533	308.62	0	5.24933	76.9017	-230.937	21874.6	-21039.8	-6383.43	108.894	808.279	0	0	0	0	0	0	0	603	903	0
656	7	-2.02633	-101.72	-559.817	-4783.63	-5009.54	-377.565	191.051	308.545	0	4.02863	74.3077	-224.834	21508.4	-20063.3	-6017.21	110.764	807.336	0	0	0	0	0	0	0	603	903	0
656	8	-1.11081	-102.941	-562.259	-4692.08	-4948.5	-560.67	191.199	308.345	0	4.02863	72.6292	-215.679	20684.4	-19819.1	-6154.54	108.108	807.096	0	0	0	0	0	0	0	603	903	0
656	9	-1.72116	-103.551	-564.7	-4234.31	-4887.47	-560.67	191.345	307.498	0	2.19757	71.7137	-204.998	20135.1	-19025.7	-6062.99	107.191	804.779	0	0	0	0	0	0	0	603	903	0
657	0	-0.653043	-104.467	-568.667	-4325.87	-4704.36	-697.999	191.727	307.607	0	2.50275	67.899	-200.115	19585.8	-18232.2	-5788.33	108.891	805.127	0	0	0	0	0	0	0	603	903	0
657	1	-0.19528	-104.619	-568.973	-3227.24	-5070.57	-789.552	191.088	305.672	0	3.57086	67.899	-197.063	19677.3	-17316.7	-5239.02	112.126	803.147	0	0	0	0	0	0	0	603	903	0
657	2	1.3306	-105.84	-574.771	-2677.92	-4460.22	-652.223	192.24	304.659	0	3.26569	65.305	-189.434	18395.6	-16889.5	-5422.12	110.842	805.892	0	0	0	0	0	0	0	603	903	0
657	3	2.09354	-106.908	-579.959	-2586.37	-4582.29	-606.447	192.099	304.46	0	2.65533	61.7955	-181.194	17754.7	-16340.1	-5101.69	109.819	805.012	0	0	0	0	0	0	0	603	903	0
657	4	3.92459	-107.823	-583.011	-2586.37	-4338.15	-697.999	192.559	304.436	0	2.65533	60.117	-174.175	17571.6	-16096	-5101.69	107.587	802.115	0	0	0	0	0	0	0	603	903	0
657	5	5.29788	-108.892	-587.283	-2220.15	-4216.08	-743.776	192.821	303.78	0	2.65533	57.523	-169.292	17297	-14936.3	-4918.58	111.772	800.828	0	0	0	0	0	0	0	603	903	0
657	6	7.28153	-109.655	-592.471	-1853.94	-4277.12	-606.447	192.781	303.129	0	1.43463	54.7765	-160.442	16747.7	-14326	-4689.7	110.709	798.615	0	0	0	0	0	0	0	603	903	0
657	7	7.28153	-110.723	-596.438	-938.416	-3971.94	-697.999	193.341	301.573	0	1.12946	52.1825	-157.085	16198.3	-14081.8	-4506.59	110.355	799.882	0	0	0	0	0	0	0	603	903	0
657	8	8.80741	-112.249	-595.828	-22.8885	-4094.01	-652.223	193.129	300.038	0	3.26569	52.1825	-149.761	15374.4	-13471.5	-4369.26	110.047	800.34	0	0	0	0	0	0	0	603	903	0
657	9	9.41776	-114.537	-605.594	-205.994	-4032.98	-514.894	193.34	300.34	0	3.87604	50.504	-142.436	15099.7	-13044.2	-4140.38	108.421	796.99	0	0	0	0	0	0	0	603	903	0
658	0	10.9436	-116.368	-609.866	617.981	-3849.87	-652.223	193.687	298.987	0	0.366516	47.91	-138.469	14825	-12617	-4003.05	108.882	795.936	0	0	0	0	0	0	0	603	903	0
658	1	12.1643	-118.505	-611.087	1075.74	-3605.73	-377.565	194.099	298.24	0	0.0613403	45.6212	-133.281	13909.5	-11945.6	-3911.5	110.373	798.638	0	0	0	0	0	0	0	603	903	0
658	2	13.0799	-120.183	-615.054	1167.3	-3483.66	-469.118	194.336	298.102	0	1.28204	43.6375	-127.483	13818	-11396.3	-3636.84	110.605	794.609	0	0	0	0	0	0	0	603	903	0
658	3	13.5376	-121.099	-616.885	1167.3	-3666.77	-697.999	194.056	298.108	0	1.73981	40.2806	-118.938	12994	-10969.1	-3545.29	107.775	793.75	0	0	0	0	0	0	0	603	903	0
658	4	13.5376	-123.387	-619.937	1716.61	-3727.8	-926.881	193.987	297.231	0	0.519104	35.0926	-114.971	12536.2	-10724.9	-3133.3	106.716	793.962	0	0	0	0	0	0	0	603	903	0
658	5	15.979	-125.218	-623.294	2449.04	-3910.91	-697.999	193.725	296.071	0	-0.854187	34.7874	-111.614	12444.7	-9992.49	-2904.42	110.473	791.502	0	0	0	0	0	0	0	603	903	0
658	6	15.3687	-125.218	-625.43	2540.59	-3422.63	-652.223	194.528	295.938	0	0.213928	33.7193	-106.731	11986.9	-9687.31	-2812.87	109.236	790.69	0	0	0	0	0	0	0	603	903	0
658	7	15.0635	-124.608	-621.768	2998.35	-3239.52	-926.881	194.79	295.178	0	0.671692	32.8038	-101.543	11437.6	-9321.1	-2950.2	108.205	790.362	0	0	0	0	0	0	0	603	903	0
658	8	13.385	-124.15	-629.703	2906.8	-3910.91	-926.881	193.789	295.384	0	0.0613403	30.515	-96.3549	11162.9	-8710.75	-2858.64	109.597	787.148	0	0	0	0	0	0	0	603	903	0
658	9	13.385	-124.456	-632.754	3547.67	-3361.59	-835.328	194.687	294.393	0	-1.76971	26.8529	-94.8291	10705.2	-8466.61	-2538.21	110.717	790.111	0	0	0	0	0	0	0	603	903	0
659	0	13.8428	-123.082	-634.891	4096.98	-3849.87	-1201.54	193.936	293.547	0	-0.854187	22.733	-89.9462	10522.1	-8222.47	-2217.78	108.585	786.018	0	0	0	0	0	0	0	603	903	0
659	1	13.9954	-122.777	-637.942	4646.3	-3422.63	-1018.43	194.635	292.717	0	-0.243835	21.0545	-87.5048	9881.2	-7978.33	-1897.34	108.824	790.078	0	0	0	0	0	0	0	603	903	0
659	2	14.9109	-123.387	-638.553	4646.3	-3361.59	-1064.21	194.736	292.724	0	0.82428	21.8175	-80.791	9514.99	-7612.11	-1897.34	105.78	785.227	0	0	0	0	0	0	0	603	903	0
659	3	14.7583	-123.845	-638.553	5104.06	-3483.66	-1476.2	194.544	292.007	0	-0.701599	21.6649	-78.0444	9148.78	-7123.83	-1851.56	108.721	785.775	0	0	0	0	0	0	0	603	903	0
659	4	14.7583	-123.387	-640.994	5561.83	-3666.77	-972.658	194.28	291.323	0	0.519104	21.2071	-76.5185	9606.54	-6818.66	-1622.68	110.889	777.455	0	0	0	0	0	0	0	603	903	0
659	5	15.5213	-124.303	-643.435	5195.62	-3605.73	-1384.65	194.396	291.925	0	-1.00677	19.6812	-71.3305	8782.57	-6513.48	-1714.23	108.686	779.875	0	0	0	0	0	0	0	603	903	0
659	6	15.6739	-124.15	-644.046	5653.38	-3361.59	-1613.53	194.781	291.222	0	1.43463	17.545	-69.4995	8141.69	-6391.41	-1714.23	108.037	785.852	0	0	0	0	0	0	0	603	903	0
659	7	15.5213	-124.608	-644.961	5744.94	-3361.59	-1338.87	194.788	291.093	0	-0.854187	15.2562	-67.0581	7775.48	-6147.27	-1668.46	108.329	787.049	0	0	0	0	0	0	0	603	903	0
659	8	18.7256	-123.082	-644.351	6111.15	-3300.55	-1064.21	194.878	290.516	0	-0.549011	14.951	-64.9218	8782.57	-6025.2	-1302.25	107.193	767.721	0	0	0	0	0	0	0	603	903	0
659	9	17.8101	-123.998	-643.741	7392.88	-3239.52	-1384.65	194.968	288.516	0	-1.31195	14.3407	-64.9218	7775.48	-5658.99	-1302.25	112.834	783.233	0	0	0	0	0	0	0	603	903	0
660	0	20.0989	-123.998	-645.267	7301.33	-3300.55	-926.881	194.885	288.685	0	0.671692	12.6622	-61.8701	7500.82	-5475.88	-844.484	111.494	781.765	0	0	0	0	0	0	0	603	903	0
660	1	21.6248	-123.693	-647.708	6843.57	-3117.45	-1384.65	195.187	289.434	0	0.976868	11.8993	-57.2924	7134.61	-5536.92	-1119.14	103.357	778.47	0	0	0	0	0	0	0	603	903	0
660	2	24.3714	-122.777	-650.455	7118.23	-3300.55	-1064.21	194.926	289.057	0	0.82428	10.2208	-53.6303	6768.4	-5475.88	-890.26	97.8957	776.795	0	0	0	0	0	0	0	603	903	0
660	3	24.2188	-124.15	-652.286	7209.78	-2690.2	-1201.54	195.876	288.947	0	-1.76971	10.6786	-52.7148	6493.74	-5048.64	-1164.92	104.227	779.814	0	0	0	0	0	0	0	603	903	0
660	4	25.4395	-123.845	-648.013	7942.2	-2751.24	-1384.65	195.754	287.744	0	-2.53265	10.0682	-52.1044	6310.64	-4316.22	-1164.92	117.162	781.885	0	0	0	0	0	0	0	603	903	0
660	5	25.7447	-123.54	-655.948	8766.17	-2140.89	-1476.2	196.736	286.636	0	-1.15936	10.2208	-49.9682	7043.06	-4377.25	-936.036	112.399	762.049	0	0	0	0	0	0	0	603	903	0
660	6	27.5757	-124.456	-656.558	8949.28	-2568.13	-835.328	196.088	286.369	0	-0.396423	9.30527	-46.6113	5852.88	-3888.97	-1164.92	116.566	777.432	0	0	0	0	0	0	0	603	903	0
660	7	27.8809	-125.676	-657.168	8125.31	-2995.38	-972.658	195.442	287.636	0	-2.07489	9.15268	-44.475	5486.66	-4316.22	-844.484	102.952	779.635	0	0	0	0	0	0	0	603	903	0
660	8	28.7964	-124.15	-657.779	8308.41	-2262.96	-1247.32	196.56	287.369	0	-2.38007	9.76303	-42.3388	5303.56	-4133.11	-936.036	102.38	777.735	0	0	0	0	0	0	0	603	903	0
660	9	30.1697	-124.15	-658.999	8399.96	-2385.03	-1201.54	196.381	287.253	0	0.213928	9.30527	-39.8974	5303.56	-3400.69	-981.813	114.764	770.07	0	0	0	0	0	0	0	603	903	0
661	0	30.7801	-124.913	-661.136	9132.38	-2018.82	-1201.54	196.946	286.187	0	-2.99042	8.23715	-39.2871	4662.69	-3522.76	-1073.37	110.333	784.318	0	0	0	0	0	0	0	603	903	0
661	1	31.6956	-124.303	-663.882	9681.7	-2079.85	-1247.32	196.867	285.417	0	-2.22748	8.38974	-35.625	4204.93	-3644.83	-1073.37	97.6888	784.967	0	0	0	0	0	0	0	603	903	0
661	2	31.543	-125.218	-666.018	10047.9	-2385.03	-1430.42	196.419	284.913	0	-0.854187	8.08457	-33.4887	4388.03	-3400.69	-1119.14	98.4527	771.97	0	0	0	0	0	0	0	603	903	0
661	3	30.4749	-125.981	-666.934	9864.81	-2323.99	-1293.09	196.515	285.209	0	-1.46454	7.47421	-32.5732	3655.61	-3034.48	-798.707	106.841	790.773	0	0	0	0	0	0	0	603	903	0
661	4	31.8482	-124.761	-668.765	9590.15	-2201.92	-1338.87	196.707	285.66	0	-2.83783	6.25351	-26.7749	3289.4	-2851.37	-1027.59	93.5055	780.146	0	0	0	0	0	0	0	603	903	0
661	5	31.3904	-123.998	-667.85	10231	-2323.99	-1384.65	196.52	284.681	0	-2.38007	7.01645	-27.08	3472.5	-2668.27	-981.813	101.467	774.769	0	0	0	0	0	0	0	603	903	0
661	6	31.8482	-123.998	-668.46	10139.5	-2201.92	-1705.08	196.706	284.832	0	-1.31195	7.16904	-24.0283	3197.85	-2241.02	-1027.59	106.734	769.913	0	0	0	0	0	0	0	603	903	0
661	7	31.8482	-123.082	-667.85	10780.3	-2201.92	-1659.3	196.703	283.858	0	-1.9223	7.47421	-23.7231	2556.98	-2424.13	-752.931	97.8157	795.216	0	0	0	0	0	0	0	603	903	0
661	8	32.6111	-123.54	-671.817	10871.9	-1957.78	-1567.75	197.086	283.817	0	-0.854187	6.10092	-24.0283	2556.98	-2302.06	-615.602	104.194	796.585	0	0	0	0	0	0	0	603	903	0
661	9	33.2215	-123.082	-672.732	10780.3	-2323.99	-1476.2	196.545	283.975	0	-1.46454	5.94834	-21.2817	2465.42	-2179.99	-661.378	97.5651	787.153	0	0	0	0	0	0	0	603	903	0
662	0	34.5948	-122.014	-673.953	10780.3	-1896.75	-1476.2	197.186	284.004	0	-1.31195	5.33798	-18.2299	2099.21	-1752.74	-798.707	103.854	787.848	0	0	0	0	0	0	0	603	903	0
662	1	33.6792	-122.472	-674.563	10688.8	-2262.96	-1659.3	196.645	284.155	0	0	0	0	0	0	0	200	903	0	0	0	0	0	0	0	603	903	0
662	2	33.2215	-121.404	-676.394	11146.5	-2201.92	-1613.53	196.745	283.521	0	0	0	0	0	0	0	200	903	0	0	0	0	0	0	0	603	903	0
662	3	33.9844	-121.099	-677.615	10963.4	-1957.78	-1521.97	197.111	283.821	0	0	0	0	0	0	0	200	903	0	0	0	0	0	0	0	603	903	0
662	4	35.6629	-120.183	-678.226	11329.7	-2323.99	-1705.08	196.573	283.295	0	0	0	0	0	0	0	200	903	0	0	0	0	0	0	0	603	903	0
662	5	34.4422	-120.183	-677.92	11970.5	-1774.68	-1430.42	197.382	282.342	0	0	0	0	0	0	0	200	903	0	0	0	0	0	0	0	603	903	0
662	6	35.2051	-119.725	-676.7	11238.1	-2018.82	-1155.76	197.017	283.393	0	0	0	0	0	0	0	200	903	0	0	0	0	0	0	0	603	903	0
662	7	36.1206	-119.573	-679.141	11787.4	-2385.03	-1613.53	196.488	282.644	0	0	0	0	0	0	0	200	903	0	0	0	0	0	0	0	603	903	0
662	8	36.1206	-119.115	-680.972	11970.5	-2018.82	-1338.87	197.035	282.421	0	0	0	0	0	0	0	200	903	0	0	0	0	0	0	0	603	903	0
662	9	36.5784	-118.352	-683.414	11879	-2018.82	-1521.97	197.046	282.618	0	0	0	0	0	0	0	200	903	0	0	0	0	0	0	0	603	903	0
663	0	35.9681	-117.589	-684.329	11421.2	-1957.78	-1201.54	197.139	283.31	0	0	0	0	0	0	0	200	903	0	0	0	0	0	0	0	603	903	0
663	1	36.1206	-117.131	-684.939	12336.7	-2140.89	-1430.42	196.874	281.989	0	0	0	0	0	0	0	200	903	0	0	0	0	0	0	0	603	903	0
663	2	35.9681	-116.063	-685.245	12245.2	-1713.64	-1109.99	197.499	282.13	0	0	0	0	0	0	0	200	903	0	0	0	0	0	0	0	603	903	0
663	3	35.6629	-115.758	-685.245	12702.9	-1652.61	-1659.3	197.588	281.462	0	0	0	0	0	0	0	200	903	0	0	0	0	0	0	0	603	903	0
663	4	35.9681	-115.148	-684.634	12886	-2018.82	-1476.2	197.051	281.178	0	0	0	0	0	0	0	200	903	0	0	0	0	0	0	0	603	903	0
663	5	36.1206	-114.995	-686.16	11970.5	-2385.03	-1613.53	196.524	282.554	0	0	0	0	0	0	0	200	903	0	0	0	0	0	0	0	603	903	0
663	6	36.731	-114.232	-685.855	11787.4	-2079.85	-1613.53	196.968	282.814	0	0	0	0	0	0	0	200	903	0	0	0	0	0	0	0	603	903	0
663	7	36.731	-113.469	-686.465	11970.5	-1957.78	-1567.75	197.148	282.562	0	0	0	0	0	0	0	200	903	0	0	0	0	0	0	0	603	903	0
663	8	36.8836	-112.096	-687.991	12702.9	-1957.78	-1384.65	197.154	281.536	0	0	0	0	0	0	0	200	903	0	0	0	0	0	0	0	603	903	0
663	9	36.731	-111.333	-688.602	12977.6	-2201.92	-1659.3	196.802	281.154	0	0	0	0	0	0	0	200	903	0	0	0	0	0	0	0	603	903	0
664	0	34.8999	-111.18	-688.907	12519.8	-2262.96	-1750.86	196.715	281.827	0	0	0	0	0	0	0	200	903	0	0	0	0	0	0	0	603	903	0
664	1	35.9681	-110.723	-689.822	12245.2	-2751.24	-1430.42	196.012	282.249	0	0	0	0	0	0	0	200	903	0	0	0	0	0	0	0	603	903	0
664	2	37.4939	-109.349	-688.907	12428.3	-2140.89	-926.881	196.892	281.959	0	0	0	0	0	0	0	200	903	0	0	0	0	0	0	0	603	903	0
664	3	36.2732	-107.976	-687.991	12336.7	-2079.85	-1567.75	196.977	282.068	0	0	0	0	0	0	0	200	903	0	0	0	0	0	0	0	603	903	0
664	4	37.3413	-107.976	-688.602	12977.6	-2629.17	-1521.97	196.182	281.154	0	0	0	0	0	0	0	200	903	0	0	0	0	0	0	0	603	903	0
664	5	36.5784	-107.823	-689.212	12886	-2262.96	-1521.97	196.717	281.303	0	0	0	0	0	0	0	200	903	0	0	0	0	0	0	0	603	903	0
664	6	36.2732	-106.908	-690.127	12611.4	-2446.06	-1521.97	196.456	281.726	0	0	0	0	0	0	0	200	903	0	0	0	0	0	0	0	603	903	0
664	7	37.3413	-105.992	-692.264	12245.2	-2385.03	-1247.32	196.555	282.311	0	0	0	0	0	0	0	200	903	0	0	0	0	0	0	0	603	903	0
664	8	36.8836	-104.314	-691.348	11604.3	-2323.99	-1384.65	196.638	283.215	0	0	0	0	0	0	0	200	903	0	0	0	0	0	0	0	603	903	0
664	9	36.2732	-103.551	-688.907	12519.8	-2507.1	-1888.19	196.361	281.827	0	0	0	0	0	0	0	200	903	0	0	0	0	0	0	0	603	903	0
665	0	35.5103	-102.941	-691.043	12886	-2507.1	-1476.2	196.372	281.353	0	0	0	0	0	0	0	200	903	0	0	0	0	0	0	0	603	903	0
665	1	35.2051	-102.788	-692.264	12886	-2507.1	-1155.76	196.378	281.386	0	0	0	0	0	0	0	200	903	0	0	0	0	0	0	0	603	903	0
665	2	35.8155	-101.415	-690.738	12428.3	-2629.17	-1567.75	196.194	282.007	0	0	0	0	0	0	0	200	903	0	0	0	0	0	0	0	603	903	0
665	3	34.8999	-100.652	-691.043	12519.8	-2629.17	-1201.54	196.195	281.883	0	0	0	0	0	0	0	200	903	0	0	0	0	0	0	0	603	903	0
665	4	36.4258	-100.041	-688.907	12245.2	-2751.24	-1521.97	196.006	282.225	0	0	0	0	0	0	0	200	903	0	0	0	0	0	0	0	603	903	0
665	5	35.3577	-98.6682	-689.212	12611.4	-2690.2	-1338.87	196.097	281.702	0	0	0	0	0	0	0	200	903	0	0	0	0	0	0	0	603	903	0
665	6	36.2732	-97.7527	-693.484	12702.9	-2690.2	-1430.42	196.121	281.682	0	0	0	0	0	0	0	200	903	0	0	0	0	0	0	0	603	903	0
665	7	35.0525	-98.2104	-692.264	12336.7	-2873.31	-1338.87	195.849	282.179	0	0	0	0	0	0	0	200	903	0	0	0	0	0	0	0	603	903	0
665	8	34.8999	-96.2268	-691.958	11787.4	-2751.24	-1201.54	196.024	282.965	0	0	0	0	0	0	0	200	903	0	0	0	0	0	0	0	603	903	0
665	9	33.8318	-95.3113	-691.348	11970.5	-2934.34	-1476.2	195.756	282.685	0	0	0	0	0	0	0	200	903	0	0	0	0	0	0	0	603	903	0
666	0	33.2215	-94.3957	-691.653	11604.3	-2690.2	-1247.32	196.11	283.222	0	0	0	0	0	0	0	200	903	0	0	0	0	0	0	0	603	903	0
666	1	33.6792	-93.0225	-689.517	12702.9	-2323.99	-1521.97	196.63	281.577	0	0	0	0	0	0	0	200	903	0	0	0	0	0	0	0	603	903	0
666	2	32.9163	-92.1069	-689.517	12519.8	-3117.45	-1521.97	195.479	281.843	0	0	0	0	0	0	0	200	903	0	0	0	0	0	0	0	603	903	0
666	3	33.6792	-91.4966	-689.822	12245.2	-3300.55	-1430.42	195.215	282.249	0	0	0	0	0	0	0	200	903	0	0	0	0	0	0	0	603	903	0
666	4	32.6111	-90.2759	-688.602	11512.8	-3178.48	-972.658	195.384	283.281	0	0	0	0	0	0	0	200	903	0	0	0	0	0	0	0	603	903	0
666	5	32.4585	-89.8181	-684.024	11329.7	-2995.38	-1064.21	195.621	283.437	0	0	0	0	0	0	0	200	903	0	0	0	0	0	0	0	603	903	0
666	6	32.4585	-87.8345	-690.127	11787.4	-3239.52	-1430.42	195.306	282.92	0	0	0	0	0	0	0	200	903	0	0	0	0	0	0	0	603	903	0
666	7	32.1534	-86.156	-688.907	11879	-3300.55	-1521.97	195.209	282.757	0	0	0	0	0	0	0	200	903	0	0	0	0	0	0	0	603	903	0
666	8	30.7801	-86.156	-688.602	12336.7	-3300.55	-1567.75	195.207	282.084	0	0	0	0	0	0	0	200	903	0	0	0	0	0	0	0	603	903	0
666	9	30.3223	-85.3931	-687.991	12336.7	-3483.66	-1430.42	194.936	282.068	0	0	0	0	0	0	0	200	903	0	0	0	0	0	0	0	603	903	0
667	0	32.3059	-84.6301	-686.16	12519.8	-3239.52	-1201.54	195.279	281.754	0	0	0	0	0	0	0	200	903	0	0	0	0	0	0	0	603	903	0
667	1	30.6275	-82.9517	-684.939	11604.3	-3239.52	-1247.32	195.27	283.058	0	0	0	0	0	0	0	200	903	0	0	0	0	0	0	0	603	903	0
667	2	30.1697	-81.2732	-684.634	11512.8	-3727.8	-1109.99	194.555	283.184	0	0	0	0	0	0	0	200	903	0	0	0	0	0	0	0	603	903	0
667	3	31.0852	-80.6628	-684.634	11604.3	-3483.66	-1384.65	194.912	283.05	0	0	0	0	0	0	0	200	903	0	0	0	0	0	0	0	603	903	0
667	4	29.1016	-79.4421	-685.55	11879	-3971.94	-1338.87	194.206	282.672	0	0	0	0	0	0	0	200	903	0	0	0	0	0	0	0	603	903	0
667	5	29.5594	-79.137	-683.108	11787.4	-3483.66	-1247.32	194.9	282.744	0	0	0	0	0	0	0	200	903	0	0	0	0	0	0	0	603	903	0
667	6	30.3223	-77.9163	-684.329	11512.8	-3971.94	-743.776	194.196	283.177	0	0	0	0	0	0	0	200	903	0	0	0	0	0	0	0	603	903	0
667	7	29.2542	-77.1533	-682.193	11238.1	-3910.91	-1384.65	194.267	283.527	0	0	0	0	0	0	0	200	903	0	0	0	0	0	0	0	603	903	0
667	8	27.8809	-75.6274	-682.193	11238.1	-3849.87	-1247.32	194.357	283.527	0	0	0	0	0	0	0	200	903	0	0	0	0	0	0	0	603	903	0
667	9	27.4231	-75.0171	-682.498	10963.4	-4155.05	-1201.54	193.912	283.936	0	0	0	0	0	0	0	200	903	0	0	0	0	0	0	0	603	903	0
668	0	28.1861	-73.7964	-680.362	11787.4	-3971.94	-1247.32	194.162	282.675	0	0	0	0	0	0	0	200	903	0	0	0	0	0	0	0	603	903	0
668	1	26.5076	-73.186	-678.531	11512.8	-4032.98	-835.328	194.056	283.033	0	0	0	0	0	0	0	200	903	0	0	0	0	0	0	0	603	903	0
668	2	26.0498	-72.7283	-677.31	10780.3	-4460.22	-1476.2	193.415	284.084	0	0	0	0	0	0	0	200	903	0	0	0	0	0	0	0	603	903	0
668	3	26.355	-70.592	-676.089	10780.3	-4032.98	-1155.76	194.035	284.055	0	0	0	0	0	0	0	200	903	0	0	0	0	0	0	0	603	903	0
668	4	26.2024	-69.5239	-675.784	11695.9	-4338.15	-1109.99	193.581	282.693	0	0	0	0	0	0	0	200	903	0	0	0	0	0	0	0	603	903	0
668	5	27.2705	-69.2187	-677.005	10871.9	-4216.08	-1155.76	193.772	283.941	0	0	0	0	0	0	0	200	903	0	0	0	0	0	0	0	603	903	0
668	6	25.5921	-67.998	-676.089	10597.2	-4460.22	-1018.43	193.403	284.326	0	0	0	0	0	0	0	200	903	0	0	0	0	0	0	0	603	903	0
668	7	25.4395	-68.9136	-674.258	11238.1	-4460.22	-1247.32	193.385	283.333	0	0	0	0	0	0	0	200	903	0	0	0	0	0	0	0	603	903	0
668	8	24.2188	-66.4722	-673.953	11238.1	-4521.26	-972.658	193.291	283.325	0	0	0	0	0	0	0	200	903	0	0	0	0	0	0	0	603	903	0
668	9	23.1507	-65.5566	-673.038	11055	-4277.12	-1064.21	193.645	283.574	0	0	0	0	0	0	0	200	903	0	0	0	0	0	0	0	603	903	0
669	0	24.524	-64.1833	-670.291	11055	-4277.12	-972.658	193.619	283.507	0	0	0	0	0	0	0	200	903	0	0	0	0	0	0	0	603	903	0
669	1	23.1507	-63.2678	-668.765	10414.1	-4704.36	-789.552	192.966	284.428	0	0	0	0	0	0	0	200	903	0	0	0	0	0	0	0	603	903	0
669	2	23.6084	-64.1833	-663.882	10780.3	-4582.29	-1155.76	193.098	283.762	0	0	0	0	0	0	0	200	903	0	0	0	0	0	0	0	603	903	0
669	3	23.6084	-61.8945	-666.324	11512.8	-4399.19	-1018.43	193.398	282.722	0	0	0	0	0	0	0	200	903	0	0	0	0	0	0	0	603	903	0
669	4	23.761	-61.1316	-664.798	11512.8	-4521.26	-835.328	193.199	282.682	0	0	0	0	0	0	0	200	903	0	0	0	0	0	0	0	603	903	0
669	5	23.4558	-60.6738	-664.493	10871.9	-4216.08	-1018.43	193.655	283.639	0	0	0	0	0	0	0	200	903	0	0	0	0	0	0	0	603	903	0
669	6	22.6929	-59.9109	-662.662	10505.7	-4460.22	-606.447	193.269	284.146	0	0	0	0	0	0	0	200	903	0	0	0	0	0	0	0	603	903	0
669	7	21.4722	-58.8428	-661.441	11146.5	-5009.54	-1018.43	192.426	283.148	0	0	0	0	0	0	0	200	903	0	0	0	0	0	0	0	603	903	0
669	8	21.93	-58.8428	-659.305	10597.2	-4643.33	-57.1302	192.957	283.927	0	0	0	0	0	0	0	200	903	0	0	0	0	0	0	0	603	903	0
669	9	22.8455	-56.8591	-655.032	10963.4	-4399.19	-789.552	193.284	283.263	0	0	0	0	0	0	0	200	903	0	0	0	0	0	0	0	603	903	0
670	0	21.6248	-56.4014	-655.337	11238.1	-4582.29	-286.012	193.008	282.851	0	0	0	0	0	0	0	200	903	0	0	0	0	0	0	0	603	903	0
670	1	21.4722	-56.7065	-649.234	11055	-4887.47	-926.881	192.472	282.972	0	0	0	0	0	0	0	200	903	0	0	0	0	0	0	0	603	903	0
670	2	21.6248	-55.6384	-650.455	10780.3	-4704.36	-331.789	192.768	283.426	0	0	0	0	0	0	0	200	903	0	0	0	0	0	0	0	603	903	0
670	3	21.6248	-54.2651	-650.149	11512.8	-4765.4	-743.776	192.67	282.292	0	0	0	0	0	0	0	200	903	0	0	0	0	0	0	0	603	903	0
670	4	21.6248	-53.8074	-648.929	10780.3	-5009.54	-560.67	192.28	283.387	0	0	0	0	0	0	0	200	903	0	0	0	0	0	0	0	603	903	0
670	5	21.93	-52.7393	-647.098	10963.4	-4765.4	-560.67	192.636	283.058	0	0	0	0	0	0	0	200	903	0	0	0	0	0	0	0	603	903	0
670	6	19.7937	-52.7393	-645.267	11146.5	-4887.47	-972.658	192.426	282.726	0	0	0	0	0	0	0	200	903	0	0	0	0	0	0	0	603	903	0
670	7	19.9463	-51.8237	-643.435	11238.1	-5009.54	-606.447	192.214	282.534	0	0	0	0	0	0	0	200	903	0	0	0	0	0	0	0	603	903	0
670	8	20.0989	-51.5186	-640.079	10963.4	-4826.43	-514.894	192.46	282.872	0	0	0	0	0	0	0	200	903	0	0	0	0	0	0	0	603	903	0
670	9	19.7937	-50.9082	-637.942	10780.3	-4948.5	-697.999	192.243	283.101	0	0	0	0	0	0	0	200	903	0	0	0	0	0	0	0	603	903	0
671	0	20.5567	-49.2297	-634.891	10231	-5131.61	-423.341	191.917	283.885	0	0	0	0	0	0	0	200	903	0	0	0	0	0	0	0	603	903	0
671	1	20.2515	-48.772	-632.754	10780.3	-4643.33	-743.776	192.662	282.963	0	0	0	0	0	0	0	200	903	0	0	0	0	0	0	0	603	903	0
671	2	21.7774	-48.1616	-631.534	11421.2	-5192.65	-514.894	191.778	281.915	0	0	0	0	0	0	0	200	903	0	0	0	0	0	0	0	603	903	0
671	3	19.9463	-48.009	-631.228	11512.8	-4765.4	-697.999	192.451	281.761	0	0	0	0	0	0	0	200	903	0	0	0	0	0	0	0	603	903	0
671	4	19.1834	-48.772	-628.787	11329.7	-5253.68	-560.67	191.645	281.982	0	0	0	0	0	0	0	200	903	0	0	0	0	0	0	0	603	903	0
671	5	19.9463	-47.2461	-626.651	10688.8	-4948.5	-514.894	192.103	282.943	0	0	0	0	0	0	0	200	903	0	0	0	0	0	0	0	603	903	0
671	6	20.8618	-45.5676	-624.209	10780.3	-4704.36	-560.67	192.464	282.73	0	0	0	0	0	0	0	200	903	0	0	0	0	0	0	0	603	903	0
671	7	19.6411	-44.8047	-622.684	11238.1	-4826.43	-560.67	192.249	281.952	0	0	0	0	0	0	0	200	903	0	0	0	0	0	0	0	603	903	0
671	8	19.7937	-44.1943	-617.801	12062.1	-4582.29	-514.894	192.583	280.476	0	0	0	0	0	0	0	200	903	0	0	0	0	0	0	0	603	903	0
671	9	20.2515	-44.6521	-618.106	11604.3	-5070.57	-560.67	191.797	281.226	0	0	0	0	0	0	0	200	903	0	0	0	0	0	0	0	603	903	0
672	0	20.4041	-45.5676	-615.054	11512.8	-5192.65	-331.789	191.557	281.282	0	0	0	0	0	0	0	200	903	0	0	0	0	0	0	0	603	903	0
672	1	21.4722	-43.2788	-614.444	10780.3	-4765.4	-469.118	192.244	282.455	0	0	0	0	0	0	0	200	903	0	0	0	0	0	0	0	603	903	0
672	2	20.7093	-42.2107	-612.002	10688.8	-5131.61	-240.236	191.615	282.535	0	0	0	0	0	0	0	200	903	0	0	0	0	0	0	0	603	903	0
672	3	20.5567	-42.9736	-608.951	10963.4	-4521.26	34.4225	192.575	281.996	0	0	0	0	0	0	0	200	903	0	0	0	0	0	0	0	603	903	0
672	4	19.336	-41.4478	-609.866	11512.8	-4826.43	-697.999	192.086	281.122	0	0	0	0	0	0	0	200	903	0	0	0	0	0	0	0	603	903	0
672	5	19.1834	-41.6003	-608.035	11787.4	-5131.61	-423.341	191.56	280.614	0	0	0	0	0	0	0	200	903	0	0	0	0	0	0	0	603	903	0
672	6	21.7774	-41.1426	-604.373	11695.9	-4887.47	-194.459	191.913	280.648	0	0	0	0	0	0	0	200	903	0	0	0	0	0	0	0	603	903	0
672	7	20.2515	-40.8374	-601.932	11329.7	-4765.4	-102.907	192.083	281.178	0	0	0	0	0	0	0	200	903	0	0	0	0	0	0	0	603	903	0
672	8	20.4041	-39.1589	-599.185	11787.4	-4704.36	-377.565	192.149	280.328	0	0	0	0	0	0	0	200	903	0	0	0	0	0	0	0	603	903	0
672	9	20.4041	-39.1589	-597.964	11512.8	-4399.19	-194.459	192.643	280.747	0	0	0	0	0	0	0	200	903	0	0	0	0	0	0	0	603	903	0
673	0	21.0144	-38.396	-597.049	12519.8	-4948.5	-560.67	191.712	279.03	0	0	0	0	0	0	0	200	903	0	0	0	0	0	0	0	603	903	0
673	1	19.9463	-37.3279	-595.523	11787.4	-4948.5	-57.1302	191.691	280.207	0	0	0	0	0	0	0	200	903	0	0	0	0	0	0	0	603	903	0
673	2	21.4722	-37.0227	-593.692	11695.9	-4826.43	-102.907	191.87	280.3	0	0	0	0	0	0	0	200	903	0	0	0	0	0	0	0	603	903	0
673	3	20.2515	-37.4805	-592.166	12336.7	-4887.47	125.975	191.746	279.167	0	0	0	0	0	0	0	200	903	0	0	0	0	0	0	0	603	903	0
673	4	20.5567	-36.8701	-588.199	11604.3	-4826.43	-286.012	191.795	280.271	0	0	0	0	0	0	0	200	903	0	0	0	0	0	0	0	603	903	0
673	5	19.6411	-36.4123	-586.062	11879	-4948.5	-11.3538	191.556	279.731	0	0	0	0	0	0	0	200	903	0	0	0	0	0	0	0	603	903	0
673	6	19.7937	-36.1072	-582.706	12062.1	-4765.4	-286.012	191.822	279.3	0	0	0	0	0	0	0	200	903	0	0	0	0	0	0	0	603	903	0
673	7	20.4041	-34.7339	-583.621	12428.3	-4948.5	-194.459	191.521	278.705	0	0	0	0	0	0	0	200	903	0	0	0	0	0	0	0	603	903	0
673	8	20.2515	-35.4968	-582.4	11970.5	-4948.5	-102.907	191.503	279.446	0	0	0	0	0	0	0	200	903	0	0	0	0	0	0	0	603	903	0
673	9	20.4041	-34.8865	-582.4	11970.5	-4704.36	-148.683	191.922	279.446	0	0	0	0	0	0	0	200	903	0	0	0	0	0	0	0	603	903	0
674	0	20.8618	-34.4287	-579.043	12062.1	-4765.4	-148.683	191.77	279.169	0	0	0	0	0	0	0	200	903	0	0	0	0	0	0	0	603	903	0
674	1	19.9463	-33.5132	-578.128	12977.6	-4826.43	171.752	191.652	277.552	0	0	0	0	0	0	0	200	903	0	0	0	0	0	0	0	603	903	0
674	2	19.9463	-33.208	-578.128	12428.3	-4826.43	-11.3538	191.652	278.503	0	0	0	0	0	0	0	200	903	0	0	0	0	0	0	0	603	903	0
674	3	20.7093	-32.4451	-573.55	12428.3	-4948.5	263.304	191.372	278.331	0	0	0	0	0	0	0	200	903	0	0	0	0	0	0	0	603	903	0
674	4	19.6411	-32.2925	-571.109	12886	-4704.36	-148.683	191.763	277.437	0	0	0	0	0	0	0	200	903	0	0	0	0	0	0	0	603	903	0
674	5	20.0989	-31.9873	-568.667	12611.4	-4765.4	34.4225	191.62	277.823	0	0	0	0	0	0	0	200	903	0	0	0	0	0	0	0	603	903	0
674	6	20.7093	-31.3769	-568.973	12428.3	-4460.22	-11.3538	192.161	278.157	0	0	0	0	0	0	0	200	903	0	0	0	0	0	0	0	603	903	0
674	7	20.8618	-30.4614	-568.057	12611.4	-5070.57	263.304	191.074	277.799	0	0	0	0	0	0	0	200	903	0	0	0	0	0	0	0	603	903	0
674	8	20.8618	-30.1562	-567.447	12611.4	-5009.54	-57.1302	191.172	277.775	0	0	0	0	0	0	0	200	903	0	0	0	0	0	0	0	603	903	0
674	9	19.6411	-31.9873	-566.836	12428.3	-4765.4	263.304	191.593	278.074	0	0	0	0	0	0	0	200	903	0	0	0	0	0	0	0	603	903	0
675	0	19.6411	-28.6304	-564.7	12977.6	-4765.4	217.528	191.561	277.019	0	0	0	0	0	0	0	200	903	0	0	0	0	0	0	0	603	903	0
675	1	20.2515	-28.783	-564.7	13710	-4582.29	-57.1302	191.885	275.722	0	0	0	0	0	0	0	200	903	0	0	0	0	0	0	0	603	903	0
675	2	20.8618	-28.783	-560.733	13160.7	-4765.4	171.752	191.501	276.529	0	0	0	0	0	0	0	200	903	0	0	0	0	0	0	0	603	903	0
675	3	19.4886	-28.1726	-560.428	12794.5	-5009.54	-102.907	191.061	277.17	0	0	0	0	0	0	0	200	903	0	0	0	0	0	0	0	603	903	0
675	4	19.4886	-28.1726	-557.681	12794.5	-5253.68	263.304	190.579	277.058	0	0	0	0	0	0	0	200	903	0	0	0	0	0	0	0	603	903	0
675	5	20.2515	-27.1045	-558.902	12886	-4826.43	537.963	191.364	276.944	0	0	0	0	0	0	0	200	903	0	0	0	0	0	0	0	603	903	0
675	6	20.0989	-26.0364	-557.681	12977.6	-5009.54	263.304	191.017	276.729	0	0	0	0	0	0	0	200	903	0	0	0	0	0	0	0	603	903	0
675	7	20.0989	-25.2734	-558.291	13710	-4826.43	125.975	191.355	275.443	0	0	0	0	0	0	0	200	903	0	0	0	0	0	0	0	603	903	0
675	8	20.4041	-25.7312	-556.46	13618.5	-4826.43	125.975	191.327	275.527	0	0	0	0	0	0	0	200	903	0	0	0	0	0	0	0	603	903	0
675	9	19.336	-27.1045	-556.46	13710	-4826.43	34.4225	191.327	275.362	0	0	0	0	0	0	0	200	903	0	0	0	0	0	0	0	603	903	0
676	0	19.1834	-24.3579	-556.766	13160.7	-4765.4	400.634	191.441	276.362	0	0	0	0	0	0	0	200	903	0	0	0	0	0	0	0	603	903	0
676	1	20.5567	-23.1372	-554.324	13893.1	-4948.5	492.186	191.073	274.937	0	0	0	0	0	0	0	200	903	0	0	0	0	0	0	0	603	903	0
676	2	19.6411	-24.3579	-550.662	13618.5	-4887.47	446.41	191.124	275.269	0	0	0	0	0	0	0	200	903	0	0	0	0	0	0	0	603	903	0
676	3	18.8782	-22.6794	-547.61	14076.2	-4826.43	34.4225	191.186	274.295	0	0	0	0	0	0	0	200	903	0	0	0	0	0	0	0	603	903	0
676	4	19.6411	-22.9846	-550.052	13710	-4948.5	309.081	191.004	275.075	0	0	0	0	0	0	0	200	903	0	0	0	0	0	0	0	603	903	0
676	5	19.4886	-22.0691	-549.441	14259.3	-4765.4	400.634	191.327	274.048	0	0	0	0	0	0	0	200	903	0	0	0	0	0	0	0	603	903	0
676	6	19.6411	-21.7639	-551.272	13893.1	-5253.68	354.857	190.47	274.798	0	0	0	0	0	0	0	200	903	0	0	0	0	0	0	0	603	903	0
676	7	19.6411	-21.001	-550.052	14076.2	-4704.36	492.186	191.447	274.409	0	0	0	0	0	0	0	200	903	0	0	0	0	0	0	0	603	903	0
676	8	19.6411	-20.0854	-547.61	13710	-5070.57	446.41	190.741	274.964	0	0	0	0	0	0	0	200	903	0	0	0	0	0	0	0	603	903	0
676	9	18.7256	-19.6277	-547.305	14717.1	-4765.4	354.857	191.293	273.11	0	0	0	0	0	0	0	200	903	0	0	0	0	0	0	0	603	903	0
677	0	19.336	-20.0854	-545.474	14900.2	-4826.43	858.397	191.152	272.684	0	0	0	0	0	0	0	200	903	0	0	0	0	0	0	0	603	903	0
677	1	18.1153	-19.9329	-545.779	14625.5	-5009.54	537.963	190.821	273.202	0	0	0	0	0	0	0	200	903	0	0	0	0	0	0	0	603	903	0
677	2	18.2679	-19.4751	-542.422	14625.5	-5070.57	1224.61	190.652	273.037	0	0	0	0	0	0	0	200	903	0	0	0	0	0	0	0	603	903	0
677	3	18.7256	-18.407	-544.559	14167.8	-5192.65	629.515	190.464	273.983	0	0	0	0	0	0	0	200	903	0	0	0	0	0	0	0	603	903	0
677	4	18.4204	-17.1863	-544.253	14534	-4704.36	492.186	191.356	273.296	0	0	0	0	0	0	0	200	903	0	0	0	0	0	0	0	603	903	0
677	5	18.2679	-16.7285	-544.864	14991.8	-4887.47	537.963	191.03	272.485	0	0	0	0	0	0	0	200	903	0	0	0	0	0	0	0	603	903	0
677	6	18.1153	-15.813	-544.559	15449.5	-5009.54	583.739	190.801	271.629	0	0	0	0	0	0	0	200	903	0	0	0	0	0	0	0	603	903	0
677	7	17.6575	-17.0337	-543.643	15358	-5070.57	492.186	190.673	271.75	0	0	0	0	0	0	0	200	903	0	0	0	0	0	0	0	603	903	0
677	8	17.5049	-16.7285	-543.338	15358	-5253.68	629.515	190.331	271.734	0	0	0	0	0	0	0	200	903	0	0	0	0	0	0	0	603	903	0
677	9	19.9463	-16.1182	-541.812	15724.2	-4826.43	675.292	191.092	270.979	0	0	0	0	0	0	0	200	903	0	0	0	0	0	0	0	603	903	0
678	0	17.9627	-15.3552	-541.202	15174.9	-4887.47	812.621	190.969	271.961	0	0	0	0	0	0	0	200	903	0	0	0	0	0	0	0	603	903	0
678	1	18.573	-13.9819	-540.896	15174.9	-4765.4	766.844	191.19	271.945	0	0	0	0	0	0	0	200	903	0	0	0	0	0	0	0	603	903	0
678	2	16.5894	-16.1182	-541.202	15541.1	-5070.57	537.963	190.631	271.284	0	0	0	0	0	0	0	200	903	0	0	0	0	0	0	0	603	903	0
678	3	18.2679	-13.6768	-542.117	15907.3	-5314.72	766.844	190.196	270.657	0	0	0	0	0	0	0	200	903	0	0	0	0	0	0	0	603	903	0
678	4	17.8101	-16.1182	-542.117	16365.1	-5070.57	904.174	190.647	269.813	0	0	0	0	0	0	0	200	903	0	0	0	0	0	0	0	603	903	0
678	5	17.5049	-13.0664	-537.234	16273.5	-4948.5	583.739	190.789	269.709	0	0	0	0	0	0	0	200	903	0	0	0	0	0	0	0	603	903	0
678	6	16.2842	-13.0664	-542.117	16914.4	-5009.54	721.068	190.759	268.799	0	0	0	0	0	0	0	200	903	0	0	0	0	0	0	0	603	903	0
678	7	14.9109	-12.3035	-538.15	15815.7	-5009.54	537.963	190.691	270.611	0	0	0	0	0	0	0	200	903	0	0	0	0	0	0	0	603	903	0
678	8	15.0635	-11.8457	-541.507	16273.5	-5253.68	721.068	190.298	269.948	0	0	0	0	0	0	0	200	903	0	0	0	0	0	0	0	603	903	0
678	9	15.5213	-11.6931	-536.929	16273.5	-4826.43	949.95	191.011	269.692	0	0	0	0	0	0	0	200	903	0	0	0	0	0	0	0	603	903	0
679	0	16.1316	-10.4724	-539.981	16822.8	-5070.57	858.397	190.61	268.846	0	0	0	0	0	0	0	200	903	0	0	0	0	0	0	0	603	903	0
679	1	17.1997	-10.4724	-539.981	17005.9	-5070.57	858.397	190.61	268.506	0	0	0	0	0	0	0	200	903	0	0	0	0	0	0	0	603	903	0
679	2	15.0635	-10.7776	-540.896	17372.1	-5253.68	537.963	190.287	267.883	0	0	0	0	0	0	0	200	903	0	0	0	0	0	0	0	603	903	0
679	3	14.7583	-10.3198	-540.591	17280.6	-5375.75	721.068	190.056	268.034	0	0	0	0	0	0	0	200	903	0	0	0	0	0	0	0	603	903	0
679	4	14.3006	-9.86206	-541.507	17189	-5192.65	1270.38	190.411	268.257	0	0	0	0	0	0	0	200	903	0	0	0	0	0	0	0	603	903	0
679	5	16.4368	-9.40429	-539.676	17097.5	-5558.86	904.174	189.7	268.319	0	0	0	0	0	0	0	200	903	0	0	0	0	0	0	0	603	903	0
679	6	14.148	-8.48876	-539.676	17097.5	-5131.61	1041.5	190.491	268.319	0	0	0	0	0	0	0	200	903	0	0	0	0	0	0	0	603	903	0
679	7	14.148	-7.72583	-539.371	17097.5	-5192.65	904.174	190.373	268.301	0	0	0	0	0	0	0	200	903	0	0	0	0	0	0	0	603	903	0
679	8	13.9954	-8.18359	-539.676	18104.6	-5009.54	1224.61	190.717	266.453	0	0	0	0	0	0	0	200	903	0	0	0	0	0	0	0	603	903	0
679	9	13.8428	-7.57324	-542.727	18562.3	-5131.61	1133.06	190.545	265.798	0	0	0	0	0	0	0	200	903	0	0	0	0	0	0	0	603	903	0
680	0	13.9954	-8.031	-543.338	18653.9	-5436.79	1270.38	189.994	265.668	0	0	0	0	0	0	0	200	903	0	0	0	0	0	0	0	603	903	0
680	1	13.2325	-7.72583	-542.117	18196.1	-5314.72	904.174	190.196	266.435	0	0	0	0	0	0	0	200	903	0	0	0	0	0	0	0	603	903	0
680	2	13.0799	-6.04736	-543.033	18013	-5436.79	1133.06	189.988	266.829	0	0	0	0	0	0	0	200	903	0	0	0	0	0	0	0	603	903	0
680	3	14.3006	-5.74218	-542.727	18379.2	-4948.5	1041.5	190.882	266.135	0	0	0	0	0	0	0	200	903	0	0	0	0	0	0	0	603	903	0
680	4	12.3169	-4.67407	-542.117	19111.6	-5131.61	949.95	190.534	264.746	0	0	0	0	0	0	0	200	903	0	0	0	0	0	0	0	603	903	0
680	5	13.2325	-5.58959	-541.812	19294.7	-5436.79	995.726	189.966	264.388	0	0	0	0	0	0	0	200	903	0	0	0	0	0	0	0	603	903	0
[truncated: 2,494 more rows]
