# Supplementary material for: The Effects of an Extemporaneous Speech Dual-task on Older Adult Gait Control
Source: Research Square preprint supplement (doi:10.21203/rs.3.rs-7674245/v1), 2025-11-18
Supplement: Supplementary file 167 [file Over4ground9.xlsx]

## Sheet: Sheet1
Trajectories
		04:LFHD			04:RFHD			04:LBHD			04:RBHD			04:C7			04:T10			04:CLAV			04:STRN			04:RBAK			04:LSHO			04:LUPA			04:LELB			04:LFRM			04:LWRA			04:LWRB			04:LFIN
Frame	Sub Frame	X	Y	Z	X	Y	Z	X	Y	Z	X	Y	Z	X	Y	Z	X	Y	Z	X	Y	Z	X	Y	Z	X	Y	Z	X	Y	Z	X	Y	Z	X	Y	Z	X	Y	Z	X	Y	Z	X	Y	Z	X	Y	Z
		mm	mm	mm	mm	mm	mm	mm	mm	mm	mm	mm	mm	mm	mm	mm	mm	mm	mm	mm	mm	mm	mm	mm	mm	mm	mm	mm	mm	mm	mm	mm	mm	mm	mm	mm	mm	mm	mm	mm	mm	mm	mm	mm	mm	mm	mm	mm	mm
439	0	303.314	2063.52	1603.42	185.732	2056.06	1594.58	297.75	2228.49	1550.22	190.67	2218.24	1540.95	255.265	2195.99	1453.3	266.261	2267.31	1171.1	270.108	2073.47	1362.81	279.917	2008.42	1168.02	181.249	2278.53	1244.21	444.637	2136.39	1388.09	521.232	2177.18	1145.32	523.896	2185.92	1070.92	541.229	2111.24	911.66	493.378	2101.95	831.361	563.402	2128.42	826.244	530.912	2090.82	756.974
440	0	303.703	2053.4	1602.84	186.12	2045.86	1594.4	297.885	2218.37	1549.74	190.8	2208.06	1540.79	254.873	2185.9	1452.94	265.399	2258.14	1171.11	269.964	2063.56	1362.43	279.82	1998.77	1167.8	180.399	2268.52	1244.3	444.488	2127.12	1387.64	520.85	2170.69	1145.51	523.702	2179.54	1071.04	542.495	2105.68	911.621	495.334	2094.63	831.497	563.762	2123.53	825.998	533.532	2083.91	757.586
441	0	304.158	2043.21	1602.15	186.575	2035.61	1594.08	298.106	2208.19	1549.16	191.014	2197.83	1540.5	254.609	2175.73	1452.46	264.686	2248.88	1170.97	269.906	2053.56	1361.92	279.778	1989.05	1167.43	179.703	2258.47	1244.25	444.43	2117.71	1387.05	520.527	2163.89	1145.52	523.547	2172.89	1071	543.669	2099.85	911.397	497.139	2087.22	831.434	564.081	2118.36	825.589	535.933	2076.91	757.951
442	0	304.677	2032.96	1601.36	187.095	2025.31	1593.62	298.413	2197.95	1548.46	191.314	2187.54	1540.07	254.474	2165.5	1451.87	264.124	2239.54	1170.7	269.936	2043.5	1361.28	279.791	1979.27	1166.9	179.163	2248.39	1244.07	444.463	2108.17	1386.32	520.262	2156.8	1145.34	523.432	2165.97	1070.8	544.75	2093.75	910.987	498.792	2079.69	831.174	564.36	2112.89	825.019	538.113	2069.83	758.07
443	0	305.262	2022.65	1600.45	187.683	2014.95	1593.04	298.806	2187.64	1547.64	191.699	2177.19	1539.51	254.467	2155.21	1451.16	263.712	2230.11	1170.29	270.055	2033.36	1360.51	279.859	1969.41	1166.21	178.778	2238.26	1243.74	444.587	2098.49	1385.47	520.056	2149.41	1144.99	523.356	2158.77	1070.42	545.739	2087.39	910.391	500.294	2072.07	830.716	564.599	2107.14	824.287	540.073	2062.66	757.941
444	0	305.911	2012.27	1599.45	188.336	2004.54	1592.32	299.286	2177.26	1546.72	192.169	2166.79	1538.82	254.59	2144.85	1450.35	263.451	2220.6	1169.75	270.261	2023.15	1359.6	279.982	1959.49	1165.37	178.548	2228.09	1243.27	444.803	2088.68	1384.49	519.91	2141.72	1144.45	523.319	2151.31	1069.88	546.637	2080.76	909.612	501.644	2064.34	830.061	564.8	2101.11	823.395	541.814	2055.4	757.567
445	0	306.627	2001.82	1598.34	189.057	1994.07	1591.47	299.853	2166.83	1545.68	192.726	2156.33	1538	254.842	2134.42	1449.42	263.341	2211	1169.07	270.556	2012.87	1358.57	280.161	1949.49	1164.37	178.474	2217.89	1242.67	445.111	2078.73	1383.38	519.824	2133.73	1143.73	523.324	2143.57	1069.18	547.445	2073.87	908.649	502.843	2056.5	829.209	564.963	2094.78	822.343	543.336	2048.05	756.948
446	0	307.408	1991.31	1597.12	189.844	1983.54	1590.5	300.508	2156.32	1544.54	193.371	2145.81	1537.06	255.224	2123.92	1448.39	263.381	2201.31	1168.26	270.941	2002.51	1357.42	280.398	1939.42	1163.23	178.555	2207.64	1241.93	445.514	2068.64	1382.14	519.801	2125.44	1142.84	523.37	2135.56	1068.31	548.164	2066.71	907.505	503.893	2048.56	828.164	565.091	2088.17	821.134	544.639	2040.6	756.086
447	0	308.257	1980.73	1595.82	190.7	1972.96	1589.41	301.253	2145.75	1543.29	194.104	2135.23	1535.99	255.736	2113.36	1447.25	263.573	2191.52	1167.33	271.417	1992.08	1356.14	280.693	1929.28	1161.94	178.791	2197.34	1241.06	446.011	2058.42	1380.78	519.843	2116.85	1141.77	523.457	2127.28	1067.28	548.797	2059.27	906.183	504.793	2040.51	826.926	565.188	2081.26	819.771	545.727	2033.06	754.985
448	0	309.174	1970.09	1594.42	191.624	1962.33	1588.2	302.09	2135.12	1541.95	194.929	2124.6	1534.8	256.379	2102.74	1446.02	263.915	2181.63	1166.26	271.987	1981.58	1354.76	281.048	1919.06	1160.52	179.182	2187	1240.07	446.607	2048.07	1379.3	519.953	2107.96	1140.53	523.588	2118.71	1066.1	549.346	2051.57	904.689	505.548	2032.34	825.502	565.258	2074.07	818.257	546.602	2025.42	753.651
449	0	310.16	1959.38	1592.95	192.617	1951.64	1586.89	303.021	2124.42	1540.53	195.846	2113.91	1533.51	257.152	2092.04	1444.7	264.406	2171.64	1165.09	272.651	1971	1353.27	281.464	1908.75	1158.97	179.727	2176.62	1238.95	447.302	2037.59	1377.71	520.135	2098.77	1139.13	523.763	2109.87	1064.76	549.818	2043.59	903.029	506.16	2024.07	823.897	565.304	2066.58	816.599	547.27	2017.66	752.091
450	0	311.218	1948.6	1591.41	193.682	1940.9	1585.48	304.049	2113.65	1539.02	196.86	2103.17	1532.13	258.058	2081.28	1443.29	265.045	2161.52	1163.8	273.413	1960.35	1351.69	281.945	1898.36	1157.3	180.423	2166.18	1237.74	448.098	2026.97	1376.02	520.393	2089.28	1137.56	523.983	2100.75	1063.27	550.215	2035.34	901.212	506.634	2015.68	822.12	565.333	2058.79	814.805	547.738	2009.78	750.316
451	0	312.349	1937.76	1589.81	194.819	1930.1	1583.99	305.176	2102.82	1537.46	197.971	2092.37	1530.66	259.094	2070.46	1441.82	265.826	2151.28	1162.42	274.275	1949.61	1350.04	282.491	1887.88	1155.54	181.268	2155.68	1236.43	448.999	2016.23	1374.23	520.731	2079.5	1135.85	524.25	2091.35	1061.64	550.545	2026.8	899.248	506.977	2007.16	820.181	565.349	2050.71	812.883	548.013	2001.78	748.339
452	0	313.557	1926.85	1588.17	196.032	1919.25	1582.45	306.405	2091.93	1535.84	199.184	2081.51	1529.12	260.261	2059.57	1440.3	266.746	2140.92	1160.95	275.238	1938.81	1348.32	283.107	1877.3	1153.7	182.257	2145.12	1235.04	450.005	2005.36	1372.37	521.154	2069.43	1134.01	524.564	2081.67	1059.89	550.815	2017.99	897.153	507.196	1998.51	818.094	565.36	2042.32	810.845	548.109	1993.63	746.176
453	0	314.844	1915.88	1586.51	197.321	1908.35	1580.85	307.74	2080.97	1534.19	200.501	2070.6	1527.53	261.556	2048.61	1438.74	267.799	2130.41	1159.42	276.305	1927.92	1346.57	283.794	1866.61	1151.8	183.386	2134.5	1233.6	451.117	1994.37	1370.44	521.664	2059.08	1132.04	524.929	2071.71	1058.01	551.032	2008.89	894.941	507.301	1989.71	815.876	565.369	2033.64	808.705	548.038	1985.32	743.847
454	0	316.213	1904.84	1584.85	198.691	1897.4	1579.23	309.183	2069.94	1532.53	201.925	2059.64	1525.91	262.979	2037.59	1437.16	268.975	2119.76	1157.84	277.477	1916.96	1344.79	284.555	1855.83	1149.87	184.647	2123.81	1232.11	452.337	1983.27	1368.46	522.264	2048.44	1129.97	525.345	2061.48	1056.04	551.205	1999.51	892.632	507.303	1980.77	813.549	565.385	2024.64	806.481	547.817	1976.84	741.377
455	0	317.667	1893.75	1583.2	200.143	1886.4	1577.62	310.736	2058.85	1530.86	203.457	2048.63	1524.29	264.524	2026.51	1435.58	270.268	2108.96	1156.23	278.754	1905.92	1343.02	285.393	1844.93	1147.92	186.031	2113.05	1230.62	453.664	1972.06	1366.45	522.957	2037.54	1127.82	525.814	2050.97	1053.99	551.344	1989.83	890.248	507.215	1971.65	811.134	565.413	2015.34	804.191	547.464	1968.17	738.793
456	0	319.209	1882.59	1581.59	201.68	1875.35	1576.03	312.401	2047.7	1529.23	205.101	2037.57	1522.68	266.189	2015.37	1434.02	271.664	2098.01	1154.62	280.136	1894.81	1341.27	286.31	1833.91	1146	187.53	2102.22	1229.13	455.095	1960.75	1364.43	523.743	2026.37	1125.62	526.339	2040.19	1051.88	551.457	1979.87	887.814	507.053	1962.36	808.66	565.46	2005.73	801.858	546.998	1959.29	736.123
457	0	320.84	1871.37	1580.03	203.304	1864.25	1574.48	314.178	2036.49	1527.64	206.856	2026.46	1521.1	267.966	2004.17	1432.51	273.154	2086.9	1153.02	281.622	1883.63	1339.58	287.309	1822.78	1144.13	189.131	2091.3	1227.68	456.629	1949.34	1362.43	524.622	2014.95	1123.37	526.921	2029.15	1049.74	551.556	1969.62	885.357	506.832	1952.87	806.156	565.531	1995.8	799.506	546.443	1950.18	733.403
458	0	322.563	1860.1	1578.56	205.017	1853.11	1573.02	316.067	2025.22	1526.12	208.722	2015.31	1519.6	269.85	1992.92	1431.05	274.723	2075.64	1151.47	283.208	1872.38	1337.97	288.391	1811.54	1142.34	190.822	2080.3	1226.28	458.26	1937.86	1360.47	525.59	2003.3	1121.13	527.561	2017.86	1047.58	551.649	1959.08	882.904	506.569	1943.16	803.653	565.634	1985.56	797.162	545.82	1940.82	730.666
459	0	324.38	1848.77	1577.19	206.819	1841.93	1571.65	318.066	2013.9	1524.69	210.697	2004.11	1518.18	271.832	1981.61	1429.69	276.359	2064.24	1149.98	284.89	1861.07	1336.46	289.556	1800.17	1140.67	192.59	2069.23	1224.98	459.984	1926.3	1358.57	526.643	1991.43	1118.9	528.259	2006.32	1045.44	551.748	1948.25	880.488	506.282	1933.21	801.185	565.773	1974.99	794.853	545.154	1931.19	727.951
460	0	326.289	1837.4	1575.93	208.712	1830.71	1570.41	320.172	2002.53	1523.37	212.778	1992.88	1516.88	273.902	1970.27	1428.44	278.049	2052.71	1148.59	286.661	1849.7	1335.08	290.803	1788.7	1139.14	194.421	2058.07	1223.79	461.792	1914.67	1356.75	527.777	1979.35	1116.73	529.016	1994.55	1043.35	551.861	1937.12	878.138	505.988	1923.01	798.787	565.955	1964.1	792.609	544.469	1921.28	725.294
461	0	328.29	1825.99	1574.81	210.695	1819.46	1569.32	322.379	1991.12	1522.17	214.961	1981.61	1515.72	276.049	1958.88	1427.31	279.779	2041.04	1147.32	288.512	1838.27	1333.85	292.129	1777.11	1137.79	196.299	2046.84	1222.73	463.676	1903	1355.06	528.984	1967.08	1114.64	529.832	1982.55	1041.33	551.998	1925.71	875.886	505.706	1912.54	796.493	566.184	1952.89	790.458	543.789	1911.05	722.736
462	0	330.381	1814.54	1573.85	212.765	1808.19	1568.41	324.682	1979.67	1521.13	217.238	1970.32	1514.73	278.262	1947.46	1426.33	281.535	2029.27	1146.2	290.434	1826.81	1332.79	293.528	1765.43	1136.63	198.212	2035.53	1221.84	465.626	1891.28	1353.49	530.256	1954.64	1112.66	530.705	1970.35	1039.41	552.168	1914.02	873.763	505.452	1901.78	794.336	566.464	1941.35	788.431	543.138	1900.5	720.315
463	0	332.557	1803.06	1573.05	214.919	1796.88	1567.68	327.071	1968.19	1520.25	219.603	1959	1513.92	280.528	1936.02	1425.52	283.307	2017.41	1145.23	292.413	1815.31	1331.93	294.992	1753.67	1135.7	200.145	2024.17	1221.13	467.628	1879.54	1352.09	531.584	1942.06	1110.81	531.634	1957.96	1037.61	552.378	1902.04	871.799	505.242	1890.71	792.351	566.799	1929.48	786.554	542.537	1889.59	718.065
464	0	334.814	1791.55	1572.43	217.152	1785.56	1567.17	329.538	1956.68	1519.54	222.043	1947.67	1513.31	282.833	1924.57	1424.89	285.082	2005.48	1144.46	294.436	1803.78	1331.26	296.51	1741.83	1135	202.085	2012.75	1220.61	469.67	1867.77	1350.87	532.96	1929.35	1109.13	532.617	1945.39	1035.96	552.635	1889.78	870.021	505.09	1879.32	790.565	567.191	1917.28	784.854	542.008	1878.31	716.024
465	0	337.144	1780.03	1571.99	219.458	1774.23	1566.87	332.069	1945.16	1519.03	224.549	1936.33	1512.91	285.164	1913.1	1424.45	286.851	1993.5	1143.88	296.488	1792.25	1330.81	298.068	1729.95	1134.56	204.021	2001.3	1220.3	471.737	1855.99	1349.84	534.373	1916.52	1107.64	533.652	1932.65	1034.49	552.946	1877.25	868.456	505.007	1867.59	789.007	567.641	1904.76	783.354	541.568	1866.64	714.221
466	0	339.538	1768.51	1571.73	221.828	1762.88	1566.8	334.652	1933.63	1518.7	227.108	1924.98	1512.75	287.505	1901.64	1424.21	288.607	1981.5	1143.52	298.551	1780.71	1330.59	299.648	1718.04	1134.37	205.943	1989.82	1220.22	473.814	1844.22	1349.02	535.815	1903.61	1106.36	534.736	1919.77	1033.21	553.316	1864.45	867.126	505.004	1855.52	787.699	568.151	1891.91	782.074	541.234	1854.58	712.685
467	0	341.986	1756.98	1571.66	224.252	1751.54	1566.95	337.272	1922.11	1518.59	229.703	1913.64	1512.83	289.842	1890.2	1424.18	290.341	1969.5	1143.38	300.609	1769.18	1330.59	301.232	1706.12	1134.44	207.843	1978.34	1220.35	475.884	1832.45	1348.42	537.276	1890.62	1105.3	535.868	1906.76	1032.14	553.748	1851.39	866.048	505.089	1843.09	786.661	568.72	1878.74	781.03	541.017	1842.09	711.44
468	0	344.476	1745.46	1571.78	226.719	1740.2	1567.34	339.913	1910.59	1518.67	232.321	1902.31	1513.14	292.162	1878.78	1424.35	292.051	1957.54	1143.47	302.643	1757.68	1330.81	302.797	1694.24	1134.76	209.716	1966.87	1220.72	477.934	1820.7	1348.04	538.749	1877.57	1104.47	537.044	1893.64	1031.29	554.245	1838.08	865.238	505.267	1830.31	785.907	569.348	1865.25	780.236	540.927	1829.19	710.502
469	0	346.995	1733.96	1572.07	229.215	1728.88	1567.94	342.558	1899.09	1518.96	234.944	1891	1513.7	294.45	1867.39	1424.73	293.734	1945.63	1143.79	304.637	1746.21	1331.25	304.321	1682.41	1135.32	211.558	1955.44	1221.3	479.946	1808.97	1347.89	540.227	1864.49	1103.89	538.264	1880.41	1030.66	554.807	1824.53	864.706	505.541	1817.17	785.447	570.031	1851.45	779.699	540.969	1815.84	709.886
470	0	349.527	1722.48	1572.53	231.728	1717.58	1568.76	345.191	1887.63	1519.44	237.557	1879.72	1514.49	296.695	1856.05	1425.31	295.388	1933.8	1144.33	306.572	1734.79	1331.9	305.781	1670.67	1136.09	213.367	1944.07	1222.1	481.907	1797.27	1347.96	541.703	1851.38	1103.55	539.523	1867.11	1030.27	555.436	1810.75	864.457	505.912	1803.67	785.286	570.768	1837.36	779.423	541.145	1802.07	709.598
471	0	352.057	1711.03	1573.14	234.241	1706.3	1569.77	347.795	1876.2	1520.12	240.141	1868.47	1515.51	298.885	1844.77	1426.08	297.016	1922.07	1145.08	308.433	1723.44	1332.74	307.155	1659.03	1137.06	215.144	1932.78	1223.1	483.804	1785.62	1348.26	543.173	1838.25	1103.46	540.821	1853.73	1030.11	556.13	1796.74	864.493	506.378	1789.83	785.426	571.555	1822.96	779.408	541.453	1787.86	709.643
472	0	354.569	1699.63	1573.9	236.737	1695.05	1570.97	350.351	1864.82	1520.98	242.68	1857.27	1516.75	301.01	1833.55	1427.03	298.619	1910.46	1146.03	310.206	1712.17	1333.76	308.423	1647.53	1138.21	216.89	1921.59	1224.29	485.624	1774.01	1348.76	544.632	1825.13	1103.6	542.155	1840.3	1030.18	556.886	1782.52	864.812	506.936	1775.64	785.862	572.389	1808.28	779.651	541.888	1773.22	710.017
473	0	357.047	1688.27	1574.78	239.201	1683.84	1572.32	352.845	1853.49	1522.01	245.158	1846.12	1518.18	303.061	1822.41	1428.15	300.201	1899	1147.18	311.879	1700.98	1334.94	309.567	1636.19	1139.51	218.609	1910.52	1225.65	487.358	1762.44	1349.46	546.079	1812.01	1103.98	543.524	1826.82	1030.46	557.7	1768.11	865.407	507.58	1761.13	786.588	573.263	1793.33	780.145	542.443	1758.16	710.715
474	0	359.474	1676.97	1575.78	241.616	1672.68	1573.81	355.26	1842.23	1523.2	247.56	1835.02	1519.81	305.031	1811.36	1429.42	301.767	1887.68	1148.49	313.443	1689.88	1336.27	310.571	1625.01	1140.93	220.304	1899.59	1227.15	488.998	1750.94	1350.34	547.511	1798.91	1104.57	544.924	1813.32	1030.96	558.569	1753.51	866.268	508.304	1746.31	787.594	574.173	1778.12	780.88	543.107	1742.69	711.727
475	0	361.833	1665.72	1576.87	243.966	1661.57	1575.41	357.583	1831.04	1524.54	249.871	1823.99	1521.59	306.916	1800.4	1430.83	303.321	1876.53	1149.95	314.889	1678.89	1337.71	311.426	1614.02	1142.45	221.98	1888.81	1228.79	490.539	1739.49	1351.38	548.928	1785.84	1105.36	546.355	1799.79	1031.65	559.487	1738.73	867.382	509.099	1731.19	788.865	575.114	1762.66	781.843	543.869	1726.83	713.042
476	0	364.111	1654.55	1578.03	246.235	1650.51	1577.1	359.801	1819.93	1526.01	252.08	1813.03	1523.52	308.712	1789.53	1432.35	304.867	1865.56	1151.54	316.215	1668.02	1339.26	312.125	1603.22	1144.05	223.641	1878.2	1230.53	491.975	1728.11	1352.57	550.327	1772.79	1106.33	547.812	1786.25	1032.51	560.447	1723.8	868.736	509.956	1715.8	790.388	576.079	1746.97	783.022	544.715	1710.59	714.644
477	0	366.292	1643.44	1579.27	248.408	1639.51	1578.86	361.905	1808.9	1527.59	254.177	1802.15	1525.56	310.416	1778.77	1433.96	306.408	1854.76	1153.23	317.418	1657.26	1340.88	312.668	1592.6	1145.71	225.289	1867.75	1232.35	493.308	1716.8	1353.88	551.709	1759.78	1107.47	549.293	1772.71	1033.54	561.443	1708.73	870.313	510.864	1700.16	792.145	577.063	1731.06	784.402	545.632	1694.01	716.518
478	0	368.366	1632.41	1580.54	250.474	1628.58	1580.65	363.886	1797.96	1529.28	256.152	1791.34	1527.7	312.029	1768.12	1435.65	307.947	1844.14	1155.01	318.501	1646.62	1342.57	313.057	1582.17	1147.4	226.928	1857.46	1234.24	494.537	1705.56	1355.3	553.073	1746.81	1108.75	550.794	1759.17	1034.71	562.468	1693.53	872.094	511.813	1684.29	794.12	578.059	1714.95	785.968	546.605	1677.11	718.646
479	0	370.321	1621.46	1581.85	252.421	1617.72	1582.46	365.739	1787.11	1531.04	258	1780.61	1529.9	313.552	1757.57	1437.39	309.485	1833.69	1156.84	319.467	1636.1	1344.29	313.303	1571.92	1149.11	228.558	1847.34	1236.15	495.664	1694.39	1356.81	554.419	1733.88	1110.16	552.311	1745.65	1036	563.515	1678.22	874.061	512.793	1668.23	796.294	579.062	1698.67	787.704	547.62	1659.93	721.01
480	0	372.148	1610.59	1583.18	254.24	1606.93	1584.25	367.46	1776.35	1532.86	259.718	1769.97	1532.14	314.987	1747.14	1439.16	311.019	1823.42	1158.71	320.323	1625.7	1346.03	313.419	1561.84	1150.84	230.181	1837.38	1238.09	496.696	1683.3	1358.38	555.745	1721	1111.67	553.839	1732.14	1037.4	564.575	1662.81	876.195	513.792	1651.98	798.65	580.065	1682.23	789.595	548.662	1642.48	723.592
481	0	373.843	1599.8	1584.5	255.924	1596.21	1586.01	369.049	1765.69	1534.73	261.303	1759.42	1534.4	316.336	1736.81	1440.94	312.549	1813.3	1160.59	321.077	1615.42	1347.77	313.423	1551.91	1152.56	231.793	1827.57	1240.01	497.638	1672.29	1360	557.052	1708.17	1113.26	555.372	1718.65	1038.88	565.642	1647.33	878.475	514.803	1635.59	801.167	581.063	1665.64	791.624	549.72	1624.81	726.37
482	0	375.4	1589.1	1585.81	257.47	1585.57	1587.72	370.506	1755.12	1536.62	262.758	1748.95	1536.64	317.605	1726.59	1442.72	314.068	1803.34	1162.45	321.738	1605.25	1349.48	313.335	1542.12	1154.26	233.392	1817.89	1241.91	498.496	1661.37	1361.64	558.337	1695.39	1114.91	556.905	1705.2	1040.43	566.709	1631.77	880.881	515.814	1619.07	803.826	582.05	1648.94	793.776	550.78	1606.96	729.326
483	0	376.819	1578.48	1587.1	258.876	1575.01	1589.36	371.834	1744.64	1538.51	264.083	1738.56	1538.85	318.798	1716.48	1444.46	315.573	1793.5	1164.28	322.319	1595.2	1351.16	313.178	1532.45	1155.94	234.974	1808.33	1243.76	499.279	1650.52	1363.28	559.6	1682.67	1116.6	558.431	1691.77	1042.01	567.77	1616.17	883.392	516.817	1602.45	806.609	583.022	1632.13	796.035	551.831	1588.95	732.438
484	0	378.099	1567.95	1588.34	260.141	1564.53	1590.91	373.038	1734.25	1540.39	265.284	1728.27	1540.99	319.918	1706.46	1446.16	317.057	1783.79	1166.06	322.829	1585.25	1352.79	312.977	1522.88	1157.58	236.534	1798.88	1245.54	499.995	1639.77	1364.91	560.839	1670	1118.31	559.944	1678.37	1043.62	568.818	1600.54	885.987	517.806	1585.75	809.496	583.973	1615.25	798.382	552.864	1570.83	735.685
485	0	379.245	1557.5	1589.54	261.269	1554.13	1592.35	374.125	1723.96	1542.22	266.367	1718.06	1543.06	320.97	1696.53	1447.8	318.512	1774.17	1167.76	323.281	1575.39	1354.35	312.753	1513.41	1159.16	238.064	1789.52	1247.23	500.652	1629.1	1366.51	562.052	1657.4	1120.02	561.437	1665.02	1045.23	569.848	1584.89	888.644	518.771	1569	812.467	584.899	1598.31	800.802	553.868	1552.63	739.044
486	0	380.259	1547.13	1590.66	262.264	1543.81	1593.68	375.1	1713.74	1544	267.338	1707.93	1545.01	321.959	1686.69	1449.35	319.93	1764.64	1169.36	323.685	1565.62	1355.82	312.53	1504	1160.68	239.558	1780.23	1248.82	501.259	1618.51	1368.05	563.238	1644.85	1121.7	562.904	1651.7	1046.81	570.855	1569.23	891.343	519.709	1552.21	815.501	585.795	1581.33	803.275	554.837	1534.39	742.491
487	0	381.147	1536.84	1591.72	263.132	1533.57	1594.88	375.973	1703.61	1545.7	268.206	1697.88	1546.85	322.888	1676.93	1450.8	321.304	1755.17	1170.85	324.052	1555.93	1357.19	312.327	1494.65	1162.13	241.007	1771	1250.3	501.821	1608.01	1369.52	564.394	1632.38	1123.33	564.339	1638.43	1048.36	571.835	1553.59	894.061	520.613	1535.42	818.578	586.657	1564.34	805.784	555.763	1516.12	746.002
488	0	381.919	1526.62	1592.68	263.881	1523.4	1595.94	376.75	1693.55	1547.3	268.979	1687.9	1548.54	323.76	1667.23	1452.13	322.624	1745.74	1172.22	324.389	1546.31	1358.44	312.16	1485.34	1163.47	242.402	1761.81	1251.64	502.345	1597.6	1370.9	565.52	1619.97	1124.9	565.736	1625.21	1049.85	572.783	1537.98	896.777	521.478	1518.64	821.678	587.48	1547.35	808.31	556.641	1497.88	749.555
489	0	382.58	1516.48	1593.54	264.518	1513.32	1596.86	377.441	1683.57	1548.79	269.664	1678	1550.07	324.578	1657.6	1453.34	323.883	1736.35	1173.45	324.704	1536.75	1359.58	312.042	1476.06	1164.71	243.736	1752.65	1252.84	502.837	1587.28	1372.18	566.611	1607.64	1126.39	567.089	1612.04	1051.27	573.696	1522.41	899.469	522.301	1501.89	824.779	588.26	1530.38	810.833	557.464	1479.68	753.123
490	0	383.14	1506.42	1594.3	265.054	1503.3	1597.63	378.052	1673.65	1550.13	270.269	1668.16	1551.44	325.341	1648.02	1454.41	325.07	1726.98	1174.52	325.002	1527.24	1360.57	311.981	1466.79	1165.82	245	1743.5	1253.88	503.298	1577.04	1373.34	567.667	1595.38	1127.77	568.392	1598.92	1052.58	574.57	1506.9	902.118	523.078	1485.18	827.86	588.995	1513.46	813.334	558.23	1461.56	756.685
491	0	383.609	1496.42	1594.94	265.497	1493.36	1598.25	378.59	1663.79	1551.33	270.801	1658.38	1552.61	326.051	1638.48	1455.32	326.18	1717.62	1175.44	325.286	1517.77	1361.42	311.981	1457.53	1166.79	246.185	1734.34	1254.77	503.733	1566.88	1374.36	568.683	1583.2	1129.03	569.64	1585.86	1053.79	575.402	1491.45	904.703	523.805	1468.55	830.902	589.68	1496.59	815.794	558.934	1443.54	760.215
492	0	383.994	1486.48	1595.45	265.857	1483.48	1598.72	379.061	1653.98	1552.36	271.266	1648.65	1553.6	326.707	1628.97	1456.08	327.202	1708.25	1176.19	325.559	1508.33	1362.11	312.042	1448.26	1167.61	247.283	1725.18	1255.49	504.14	1556.79	1375.23	569.657	1571.1	1130.15	570.829	1572.87	1054.87	576.188	1476.1	907.204	524.482	1452.01	833.883	590.312	1479.81	818.195	559.576	1425.64	763.693
493	0	384.304	1476.6	1595.84	266.142	1473.65	1599.03	379.471	1644.22	1553.21	271.668	1638.96	1554.38	327.307	1619.48	1456.67	328.132	1698.88	1176.76	325.819	1498.91	1362.63	312.161	1438.98	1168.25	248.286	1715.99	1256.04	504.52	1546.78	1375.93	570.584	1559.09	1131.13	571.952	1559.95	1055.81	576.925	1460.84	909.604	525.104	1435.58	836.785	590.888	1463.13	820.517	560.153	1407.89	767.097
494	0	384.546	1466.77	1596.08	266.36	1463.89	1599.19	379.821	1634.5	1553.87	272.012	1629.32	1554.96	327.849	1610.01	1457.1	328.962	1689.49	1177.16	326.066	1489.49	1362.99	312.33	1429.68	1168.72	249.189	1706.78	1256.41	504.869	1536.84	1376.47	571.461	1547.16	1131.94	573.007	1547.1	1056.61	577.611	1445.69	911.886	525.67	1419.26	839.588	591.404	1446.57	822.745	560.664	1390.3	770.409
495	0	384.727	1456.99	1596.19	266.519	1454.16	1599.21	380.115	1624.81	1554.33	272.298	1619.7	1555.33	328.329	1600.54	1457.35	329.688	1680.09	1177.38	326.294	1480.08	1363.18	312.539	1420.35	1169	249.985	1697.52	1256.61	505.185	1526.96	1376.83	572.281	1535.32	1132.59	573.987	1534.33	1057.24	578.24	1430.68	914.035	526.177	1403.1	842.276	591.86	1430.15	824.862	561.109	1372.9	773.609
496	0	384.852	1447.25	1596.15	266.622	1444.48	1599.07	380.352	1615.15	1554.58	272.528	1610.11	1555.48	328.744	1591.06	1457.42	330.306	1670.66	1177.43	326.5	1470.66	1363.2	312.776	1411	1169.08	250.668	1688.22	1256.64	505.462	1517.14	1377.01	573.04	1523.58	1133.06	574.89	1521.65	1057.71	578.811	1415.8	916.037	526.624	1387.09	844.832	592.252	1413.89	826.854	561.489	1355.7	776.683
497	0	384.926	1437.55	1595.96	266.676	1434.83	1598.79	380.532	1605.5	1554.62	272.701	1600.53	1555.43	329.089	1581.56	1457.32	330.813	1661.22	1177.31	326.677	1461.22	1363.04	313.027	1401.62	1168.97	251.235	1678.87	1256.51	505.696	1507.37	1377	573.732	1511.94	1133.35	575.71	1509.07	1058.01	579.319	1401.07	917.88	527.009	1371.26	847.242	592.578	1397.81	828.706	561.803	1338.73	779.616
498	0	384.95	1427.87	1595.63	266.682	1425.2	1598.38	380.653	1595.87	1554.46	272.814	1590.95	1555.18	329.359	1572.04	1457.05	331.207	1651.75	1177.02	326.819	1451.75	1362.71	313.275	1392.2	1168.67	251.68	1669.47	1256.21	505.88	1497.64	1376.8	574.351	1500.4	1133.45	576.445	1496.59	1058.14	579.761	1386.51	919.553	527.33	1355.62	849.492	592.836	1381.92	830.409	562.053	1321.99	782.394
499	0	384.926	1418.22	1595.16	266.641	1415.58	1597.84	380.711	1586.24	1554.08	272.866	1581.36	1554.72	329.548	1562.49	1456.61	331.487	1642.26	1176.57	326.917	1442.26	1362.21	313.505	1382.75	1168.17	252.001	1660.01	1255.75	506.008	1487.94	1376.42	574.891	1488.97	1133.38	577.09	1484.21	1058.09	580.133	1372.13	921.047	527.584	1340.2	851.57	593.025	1366.24	831.95	562.239	1305.5	785.006
500	0	384.853	1408.58	1594.55	266.554	1405.98	1597.17	380.704	1576.62	1553.49	272.852	1571.77	1554.07	329.651	1552.9	1456.01	331.654	1632.75	1175.96	326.963	1432.72	1361.55	313.701	1373.26	1167.49	252.196	1650.5	1255.15	506.071	1478.26	1375.87	575.345	1477.65	1133.12	577.643	1471.96	1057.87	580.433	1357.95	922.356	527.771	1325	853.465	593.141	1350.8	833.321	562.362	1289.29	787.44
501	0	384.731	1398.95	1593.8	266.419	1396.37	1596.38	380.624	1566.98	1552.71	272.766	1562.16	1553.24	329.661	1543.27	1455.25	331.707	1623.2	1175.2	326.951	1423.14	1360.73	313.847	1363.73	1166.64	252.263	1640.92	1254.4	506.063	1468.6	1375.14	575.708	1466.45	1132.68	578.099	1459.82	1057.49	580.656	1343.96	923.473	527.888	1310.05	855.167	593.185	1335.61	834.514	562.422	1273.37	789.685
502	0	384.554	1389.33	1592.92	266.233	1386.75	1595.48	380.467	1557.33	1551.74	272.604	1552.52	1552.24	329.574	1533.59	1454.35	331.646	1613.63	1174.3	326.87	1413.51	1359.76	313.931	1354.16	1165.62	252.201	1631.27	1253.51	505.977	1458.94	1374.25	575.974	1455.37	1132.08	578.455	1447.82	1056.94	580.801	1330.2	924.392	527.933	1295.35	856.666	593.153	1320.68	835.521	562.42	1257.74	791.733
503	0	384.321	1379.7	1591.91	265.991	1377.11	1594.48	380.227	1547.66	1550.59	272.359	1542.84	1551.08	329.382	1523.86	1453.3	331.473	1604.02	1173.27	326.713	1403.82	1358.66	313.939	1344.54	1164.44	252.008	1621.56	1252.49	505.805	1449.29	1373.2	576.136	1444.41	1131.31	578.707	1435.96	1056.25	580.863	1316.67	925.111	527.905	1280.92	857.957	593.045	1306.04	836.337	562.355	1242.44	793.572
504	0	384.025	1370.06	1590.79	265.689	1367.45	1593.39	379.896	1537.97	1549.27	272.025	1533.13	1549.78	329.08	1514.07	1452.12	331.188	1594.37	1172.12	326.473	1394.08	1357.43	313.861	1334.88	1163.14	251.686	1611.77	1251.35	505.541	1439.62	1372.02	576.191	1433.58	1130.39	578.853	1424.25	1055.4	580.84	1303.38	925.626	527.802	1266.78	859.031	592.857	1291.7	836.955	562.228	1227.46	795.194
505	0	383.659	1360.4	1589.56	265.32	1357.75	1592.21	379.468	1528.24	1547.81	271.596	1523.37	1548.34	328.663	1504.22	1450.83	330.791	1584.67	1170.85	326.141	1384.27	1356.08	313.688	1325.15	1161.7	251.236	1601.92	1250.1	505.179	1429.93	1370.72	576.132	1422.88	1129.33	578.887	1412.69	1054.42	580.729	1290.34	925.936	527.621	1252.94	859.883	592.587	1277.68	837.371	562.037	1212.84	796.589
506	0	383.219	1350.71	1588.24	264.877	1348.02	1590.95	378.937	1518.49	1546.21	271.063	1513.57	1546.79	328.127	1494.32	1449.43	330.283	1574.92	1169.47	325.712	1374.41	1354.62	313.415	1315.37	1160.17	250.658	1591.99	1248.73	504.712	1420.21	1369.3	575.957	1412.31	1128.15	578.807	1401.29	1053.32	580.529	1277.57	926.041	527.362	1239.41	860.507	592.234	1263.99	837.581	561.782	1198.58	797.747
507	0	382.696	1341	1586.83	264.353	1338.24	1589.62	378.294	1508.69	1544.49	270.422	1503.71	1545.14	327.466	1484.35	1447.93	329.665	1565.11	1168	325.179	1364.47	1353.08	313.037	1305.52	1158.54	249.954	1581.98	1247.27	504.136	1410.46	1367.79	575.661	1401.87	1126.84	578.609	1390.05	1052.1	580.237	1265.07	925.94	527.022	1226.21	860.9	591.795	1250.66	837.582	561.461	1184.7	798.66
508	0	382.082	1331.26	1585.36	263.741	1328.42	1588.25	377.535	1498.85	1542.68	269.665	1493.8	1543.4	326.679	1474.33	1446.35	328.939	1555.22	1166.44	324.536	1354.47	1351.47	312.552	1295.61	1156.84	249.129	1571.9	1245.72	503.447	1400.66	1366.2	575.241	1391.56	1125.44	578.289	1378.98	1050.78	579.85	1252.87	925.634	526.6	1213.34	861.059	591.267	1237.7	837.373	561.073	1171.21	799.319
509	0	381.37	1321.47	1583.82	263.031	1318.55	1586.82	376.652	1488.97	1540.79	268.785	1483.83	1541.61	325.762	1464.25	1444.71	328.104	1545.26	1164.81	323.78	1344.39	1349.8	311.961	1285.61	1155.08	248.184	1561.73	1244.09	502.641	1390.82	1364.56	574.695	1381.36	1123.96	577.843	1368.09	1049.38	579.368	1240.96	925.128	526.094	1200.81	860.981	590.648	1225.12	836.952	560.617	1158.14	799.715
510	0	380.553	1311.65	1582.25	262.217	1308.62	1585.36	375.64	1479.04	1538.85	267.779	1473.8	1539.76	324.714	1454.1	1443.01	327.164	1535.21	1163.12	322.907	1334.25	1348.09	311.265	1275.54	1153.28	247.125	1551.49	1242.39	501.715	1380.92	1362.88	574.02	1371.27	1122.41	577.269	1357.36	1047.9	578.789	1229.35	924.425	525.504	1188.65	860.666	589.936	1212.95	836.32	560.09	1145.48	799.842
511	0	379.623	1301.78	1580.65	261.29	1298.63	1583.89	374.493	1469.07	1536.88	266.639	1463.71	1537.89	323.534	1443.9	1441.28	326.121	1525.06	1161.38	321.914	1324.03	1346.35	310.466	1265.37	1151.46	245.955	1541.16	1240.63	500.669	1370.95	1361.19	573.214	1361.29	1120.82	576.562	1346.8	1046.37	578.11	1218.06	923.53	524.826	1176.85	860.114	589.128	1201.18	835.479	559.491	1133.27	799.694
512	0	378.572	1291.86	1579.05	260.245	1288.58	1582.4	373.208	1459.04	1534.89	265.362	1453.56	1536.01	322.223	1433.63	1439.53	324.978	1514.82	1159.61	320.799	1313.74	1344.62	309.569	1255.1	1149.64	244.68	1530.75	1238.82	499.501	1360.92	1359.49	572.278	1351.4	1119.19	575.721	1336.41	1044.81	577.331	1207.1	922.451	524.06	1165.43	859.329	588.223	1189.85	834.436	558.817	1121.5	799.269
513	0	377.395	1281.9	1577.46	259.073	1278.48	1580.92	371.78	1448.97	1532.92	263.944	1443.36	1534.13	320.781	1423.32	1437.78	323.738	1504.46	1157.81	319.563	1303.38	1342.89	308.577	1244.73	1147.83	243.305	1520.25	1236.97	498.213	1350.81	1357.82	571.209	1341.59	1117.56	574.744	1326.19	1043.22	576.451	1196.46	921.198	523.204	1154.4	858.315	587.22	1178.95	833.195	558.065	1110.2	798.564
514	0	376.087	1271.88	1575.9	257.77	1268.31	1579.46	370.208	1438.84	1530.98	262.383	1433.09	1532.28	319.211	1412.94	1436.03	322.405	1494	1156.01	318.205	1292.95	1341.21	307.496	1234.24	1146.07	241.836	1509.67	1235.1	496.804	1340.63	1356.2	570.009	1331.85	1115.94	573.628	1316.14	1041.63	575.467	1186.15	919.782	522.257	1143.77	857.079	586.117	1168.51	831.769	557.234	1099.38	797.58
515	0	374.642	1261.82	1574.39	256.331	1258.09	1578.04	368.489	1428.67	1529.09	260.676	1422.76	1530.48	317.516	1402.52	1434.32	320.982	1483.43	1154.21	316.727	1282.44	1339.57	306.329	1223.63	1144.37	240.278	1499	1233.23	495.277	1330.37	1354.64	568.678	1322.17	1114.36	572.374	1306.24	1040.07	574.378	1176.18	918.216	521.218	1133.55	855.63	584.916	1158.52	830.169	556.322	1089.05	796.323
516	0	373.058	1251.72	1572.96	254.752	1247.81	1576.67	366.623	1418.46	1527.28	258.824	1412.39	1528.74	315.701	1392.04	1432.66	319.475	1472.74	1152.45	315.133	1271.86	1338.01	305.08	1212.89	1142.76	238.638	1488.25	1231.36	493.636	1320.02	1353.16	567.216	1312.52	1112.83	570.979	1296.49	1038.54	573.185	1166.54	916.517	520.085	1123.74	853.982	583.617	1149	828.412	555.324	1079.23	794.8
517	0	371.332	1241.56	1571.61	253.031	1237.48	1575.36	364.612	1408.2	1525.56	256.827	1401.95	1527.07	313.77	1381.52	1431.06	317.888	1461.93	1150.72	313.426	1261.21	1336.55	303.754	1202.01	1141.26	236.922	1477.41	1229.51	491.884	1309.6	1351.8	565.628	1302.91	1111.38	569.447	1286.88	1037.08	571.886	1157.24	914.703	518.858	1114.36	852.147	582.221	1139.96	826.516	554.239	1069.92	793.021
518	0	369.464	1231.37	1570.37	251.168	1227.09	1574.14	362.457	1397.89	1523.96	254.688	1391.47	1525.5	311.731	1370.95	1429.55	316.226	1451.01	1149.06	311.61	1250.49	1335.19	302.355	1190.98	1139.89	235.135	1466.49	1227.71	490.027	1299.09	1350.56	563.914	1293.31	1110.03	567.778	1277.4	1035.7	570.48	1148.28	912.794	517.535	1105.4	850.145	580.732	1131.38	824.503	553.064	1061.13	791.002
519	0	367.454	1221.13	1569.25	249.164	1216.66	1573.01	360.163	1387.55	1522.5	252.41	1380.94	1524.03	309.59	1360.34	1428.13	314.495	1439.98	1147.47	309.693	1239.71	1333.97	300.885	1179.81	1138.68	233.284	1455.48	1225.96	488.072	1288.51	1349.47	562.08	1283.71	1108.79	565.976	1268.06	1034.42	568.968	1139.66	910.813	516.116	1096.88	847.994	579.154	1123.27	822.399	551.797	1052.88	788.76
520	0	365.305	1210.86	1568.28	247.02	1206.19	1571.99	357.735	1377.17	1521.18	249.999	1370.37	1522.68	307.355	1349.69	1426.83	312.7	1428.83	1145.98	307.682	1228.86	1332.89	299.349	1168.5	1137.66	231.374	1444.39	1224.3	486.026	1277.84	1348.54	560.131	1274.11	1107.7	564.045	1258.82	1033.26	567.351	1131.35	908.783	514.601	1088.79	845.718	577.49	1115.63	820.23	550.434	1045.17	786.318
521	0	363.019	1200.56	1567.47	244.741	1195.68	1571.09	355.18	1366.76	1520.02	247.46	1359.77	1521.46	305.034	1339	1425.66	310.846	1417.59	1144.61	305.584	1217.96	1331.98	297.752	1157.04	1136.83	229.412	1433.23	1222.73	483.897	1267.11	1347.79	558.072	1264.49	1106.75	561.99	1249.7	1032.24	565.628	1123.37	906.73	512.989	1081.14	843.342	575.747	1108.44	818.027	548.975	1037.99	783.7
522	0	360.604	1190.22	1566.83	242.332	1185.13	1570.33	352.505	1356.32	1519.04	244.802	1349.13	1520.38	302.638	1328.29	1424.63	308.942	1406.25	1143.37	303.411	1207	1331.24	296.098	1145.44	1136.21	227.404	1421.99	1221.27	481.694	1256.31	1347.23	555.911	1254.84	1105.98	559.82	1240.67	1031.39	563.802	1115.69	904.681	511.283	1073.92	840.893	573.933	1101.68	815.822	547.416	1031.36	780.936
523	0	358.065	1179.87	1566.37	239.799	1174.56	1569.71	349.721	1345.86	1518.24	242.034	1338.46	1519.45	300.176	1317.54	1423.75	306.992	1394.83	1142.28	301.171	1196	1330.68	294.393	1133.72	1135.83	225.356	1410.69	1219.95	479.428	1245.45	1346.87	553.656	1245.17	1105.4	557.541	1231.73	1030.71	561.876	1108.31	902.662	509.484	1067.14	838.4	572.055	1095.35	813.647	545.756	1025.27	778.055
524	0	355.41	1169.49	1566.11	237.152	1163.97	1569.24	346.839	1335.37	1517.63	239.167	1327.77	1518.68	297.658	1306.77	1423.04	305.005	1383.34	1141.35	298.878	1184.96	1330.32	292.644	1121.89	1135.67	223.274	1399.34	1218.77	477.11	1234.54	1346.73	551.319	1235.47	1105.01	555.166	1222.87	1030.21	559.854	1101.2	900.7	507.593	1060.78	835.893	570.122	1089.42	811.535	543.994	1019.71	775.09
525	0	352.649	1159.1	1566.04	234.399	1153.37	1568.94	343.871	1324.88	1517.21	236.213	1317.07	1518.06	295.095	1295.98	1422.51	302.989	1371.79	1140.6	296.544	1173.89	1330.15	290.86	1109.97	1135.76	221.164	1387.94	1217.75	474.752	1223.6	1346.8	548.91	1225.73	1104.82	552.706	1214.09	1029.92	557.74	1094.36	898.823	505.615	1054.82	833.404	568.146	1083.85	809.519	542.129	1014.67	772.077
526	0	349.793	1148.71	1566.18	231.552	1142.75	1568.79	340.829	1314.37	1516.99	233.186	1306.35	1517.6	292.498	1285.18	1422.15	300.95	1360.19	1140.04	294.181	1162.8	1330.17	289.05	1097.99	1136.08	219.031	1376.5	1216.91	472.364	1212.62	1347.09	546.443	1215.97	1104.85	550.175	1205.37	1029.84	555.542	1087.75	897.056	503.555	1049.27	830.963	566.137	1078.61	807.631	540.162	1010.13	769.05
527	0	346.852	1138.3	1566.52	228.622	1132.14	1568.8	337.73	1303.86	1516.97	230.098	1295.64	1517.3	289.878	1274.37	1421.97	298.896	1348.57	1139.68	291.803	1151.69	1330.4	287.224	1085.98	1136.63	216.881	1365.04	1216.25	469.959	1201.64	1347.6	543.931	1206.18	1105.08	547.589	1196.72	1029.97	553.267	1081.36	895.424	501.418	1044.08	828.601	564.107	1073.68	805.902	538.093	1006.06	766.045
528	0	343.841	1127.91	1567.06	225.623	1121.53	1568.97	334.586	1293.35	1517.14	226.966	1284.92	1517.16	287.245	1263.57	1421.98	296.837	1336.94	1139.51	289.425	1140.59	1330.81	285.396	1073.96	1137.39	214.72	1353.56	1215.78	467.55	1190.66	1348.33	541.391	1196.38	1105.53	544.963	1188.12	1030.31	550.925	1075.16	893.947	499.213	1039.25	826.348	562.067	1069	804.357	535.927	1002.45	763.096
529	0	340.773	1117.51	1567.79	222.567	1110.93	1569.29	331.413	1282.85	1517.5	223.805	1274.22	1517.16	284.611	1252.76	1422.17	294.777	1325.33	1139.55	287.06	1129.5	1331.41	283.578	1061.97	1138.34	212.552	1342.09	1215.5	465.148	1179.7	1349.26	538.84	1186.57	1106.18	542.318	1179.59	1030.87	548.529	1069.13	892.645	496.949	1034.74	824.233	560.031	1064.54	803.022	533.667	999.257	760.238
530	0	337.661	1107.13	1568.7	219.469	1100.35	1569.76	328.228	1272.36	1518.03	220.631	1263.53	1517.31	281.986	1241.98	1422.54	292.725	1313.74	1139.8	284.723	1118.44	1332.17	281.786	1050.05	1139.47	210.381	1330.62	1215.42	462.764	1168.78	1350.38	536.295	1176.77	1107.03	539.67	1171.11	1031.63	546.091	1063.24	891.535	494.639	1030.52	822.28	558.011	1060.25	801.914	531.319	996.436	757.502
531	0	334.521	1096.76	1569.79	216.345	1089.79	1570.37	325.045	1261.88	1518.74	217.459	1252.87	1517.6	279.378	1231.21	1423.08	290.686	1302.19	1140.23	282.427	1107.41	1333.09	280.035	1038.22	1140.74	208.212	1319.18	1215.53	460.411	1157.9	1351.68	533.775	1167	1108.07	537.042	1162.69	1032.6	543.627	1057.47	890.63	492.295	1026.54	820.515	556.021	1056.08	801.051	528.894	993.942	754.917
532	0	331.368	1086.42	1571.03	213.209	1079.26	1571.1	321.88	1251.43	1519.6	214.304	1242.23	1518.01	276.797	1220.46	1423.78	288.664	1290.71	1140.85	280.184	1096.43	1334.15	278.343	1026.51	1142.13	206.046	1307.78	1215.82	458.098	1147.11	1353.15	531.298	1157.27	1109.29	534.451	1154.33	1033.75	541.154	1051.78	889.939	489.934	1022.78	818.956	554.072	1051.98	800.441	526.403	991.723	752.51
533	0	328.217	1076.1	1572.41	210.076	1068.77	1571.94	318.747	1241	1520.6	211.183	1231.63	1518.53	274.25	1209.76	1424.64	286.661	1279.32	1141.65	278.008	1085.51	1335.34	276.726	1014.95	1143.62	203.887	1296.42	1216.28	455.836	1136.4	1354.76	528.882	1147.61	1110.66	531.919	1146.04	1035.08	538.692	1046.16	889.467	487.573	1019.17	817.621	552.179	1047.92	800.09	523.863	989.721	750.305
534	0	325.083	1065.8	1573.92	206.962	1058.31	1572.87	315.661	1230.6	1521.73	208.11	1221.07	1519.16	271.745	1199.09	1425.64	284.68	1268.02	1142.61	275.907	1074.65	1336.63	275.203	1003.56	1145.17	201.737	1285.12	1216.92	453.633	1125.79	1356.49	526.546	1138.03	1112.18	529.463	1137.83	1036.57	536.259	1040.57	889.217	485.232	1015.69	816.524	550.353	1043.85	799.998	521.291	987.875	748.323
535	0	321.982	1055.53	1575.53	203.881	1047.89	1573.9	312.633	1220.23	1522.97	205.096	1210.55	1519.88	269.288	1188.46	1426.76	282.719	1256.83	1143.72	273.893	1063.88	1338.01	273.788	992.361	1146.75	199.595	1273.9	1217.7	451.496	1115.31	1358.34	524.304	1128.57	1113.82	527.101	1129.69	1038.2	533.878	1035.01	889.189	482.932	1012.27	815.673	548.605	1039.73	800.162	518.712	986.12	746.582
536	0	318.929	1045.3	1577.23	200.849	1037.52	1574.99	309.676	1209.91	1524.31	202.156	1200.07	1520.69	266.883	1177.89	1427.99	280.778	1245.77	1144.96	271.971	1053.19	1339.45	272.498	981.358	1148.36	197.464	1262.75	1218.62	449.432	1104.96	1360.26	522.172	1119.24	1115.57	524.85	1121.64	1039.95	531.571	1029.43	889.377	480.694	1008.86	815.075	546.948	1035.52	800.572	516.152	984.388	745.096
537	0	315.936	1035.1	1579	197.879	1027.19	1576.14	306.801	1199.62	1525.73	199.299	1189.65	1521.56	264.536	1167.37	1429.33	278.855	1234.85	1146.32	270.147	1042.59	1340.95	271.343	970.558	1149.95	195.343	1251.7	1219.67	447.446	1094.76	1362.25	520.16	1110.07	1117.4	522.721	1113.69	1041.81	529.358	1023.84	889.776	478.542	1005.42	814.731	545.391	1031.2	801.215	513.64	982.612	743.878
538	0	313.019	1024.94	1580.82	194.985	1016.91	1577.34	304.017	1189.37	1527.22	196.535	1179.27	1522.5	262.247	1156.92	1430.74	276.947	1224.08	1147.77	268.426	1032.09	1342.49	270.334	959.963	1151.52	193.233	1240.74	1220.83	445.539	1084.7	1364.28	518.278	1101.08	1119.32	520.727	1105.84	1043.76	527.261	1018.22	890.374	476.499	1001.9	814.641	543.943	1026.75	802.077	511.209	980.724	742.936
539	0	310.189	1014.81	1582.68	192.178	1006.66	1578.57	301.33	1179.16	1528.76	193.872	1168.95	1523.49	260.021	1146.52	1432.22	275.051	1213.47	1149.3	266.807	1021.69	1344.05	269.473	949.569	1153.06	191.133	1229.89	1222.09	443.714	1074.81	1366.34	516.532	1092.29	1121.28	518.875	1098.1	1045.77	525.302	1012.55	891.162	474.586	998.256	814.799	542.612	1022.14	803.138	508.892	978.66	742.276
540	0	307.458	1004.71	1584.54	189.471	996.468	1579.82	298.749	1169	1530.33	191.316	1158.68	1524.52	257.857	1136.19	1433.76	273.164	1203.02	1150.89	265.29	1011.39	1345.61	268.761	939.366	1154.56	189.043	1219.16	1223.43	441.971	1065.08	1368.4	514.925	1083.72	1123.3	517.17	1090.47	1047.84	523.498	1006.83	892.126	472.826	994.438	815.197	541.403	1017.38	804.378	506.724	976.358	741.901
541	0	304.836	994.654	1586.4	186.874	986.314	1581.08	296.277	1158.89	1531.93	188.872	1148.46	1525.59	255.756	1125.93	1435.33	271.285	1192.73	1152.54	263.872	1001.2	1347.17	268.192	929.344	1156.02	186.964	1208.54	1224.84	440.307	1055.5	1370.46	513.454	1075.38	1125.34	515.613	1082.97	1049.94	521.867	1001.06	893.251	471.237	990.411	815.825	540.322	1012.46	805.774	504.738	973.762	741.811
542	0	302.332	984.629	1588.23	184.394	976.199	1582.35	293.917	1148.81	1533.54	186.543	1138.29	1526.69	253.717	1115.74	1436.92	269.413	1182.62	1154.21	262.548	991.102	1348.72	267.756	919.489	1157.42	184.895	1198.04	1226.3	438.72	1046.08	1372.49	512.116	1067.28	1127.4	514.204	1075.58	1052.06	520.422	995.224	894.52	469.838	986.142	816.667	539.371	1007.38	807.304	502.966	970.822	742.001
543	0	299.953	974.636	1590.03	182.04	966.122	1583.6	291.674	1138.78	1535.15	184.331	1128.18	1527.81	251.74	1105.61	1438.51	267.55	1172.67	1155.89	261.313	981.105	1350.23	267.438	909.785	1158.78	182.838	1187.66	1227.8	437.206	1036.8	1374.49	510.903	1059.42	1129.47	512.937	1068.32	1054.19	519.175	989.333	895.916	468.641	981.603	817.706	538.551	1002.14	808.942	501.436	967.494	742.463
544	0	297.705	964.673	1591.78	179.817	956.079	1584.84	289.547	1128.79	1536.74	182.238	1118.1	1528.95	249.823	1095.56	1440.09	265.696	1162.87	1157.57	260.158	971.202	1351.71	267.219	900.214	1160.09	180.795	1177.4	1229.32	435.759	1027.66	1376.43	509.805	1051.79	1131.53	511.805	1061.18	1056.31	518.133	983.384	897.421	467.658	976.773	818.923	537.862	996.771	810.665	500.174	963.744	743.186
545	0	295.594	954.738	1593.45	177.73	946.066	1586.05	287.538	1118.84	1538.31	180.262	1108.07	1530.11	247.966	1085.56	1441.66	263.856	1153.23	1159.24	259.075	961.388	1353.15	267.076	890.76	1161.36	178.77	1167.25	1230.85	434.375	1018.65	1378.32	508.811	1044.39	1133.58	510.801	1054.16	1058.41	517.301	977.378	899.013	466.896	971.637	820.293	537.301	991.268	812.448	499.197	959.548	744.152
546	0	293.621	944.828	1595.04	175.782	936.08	1587.22	285.645	1108.93	1539.84	178.402	1098.08	1531.26	246.167	1075.64	1443.18	262.033	1143.72	1160.87	258.055	951.655	1354.53	266.984	881.404	1162.58	176.764	1157.21	1232.37	433.049	1009.74	1380.13	507.907	1037.2	1135.6	509.911	1047.23	1060.48	516.677	971.316	900.673	466.359	966.183	821.794	536.863	985.647	814.267	498.519	954.889	745.342
547	0	291.789	934.94	1596.54	173.973	926.116	1588.34	283.867	1099.06	1541.33	176.657	1088.13	1532.41	244.426	1065.77	1444.65	260.234	1134.34	1162.46	257.09	941.998	1355.84	266.92	872.129	1163.77	174.785	1147.27	1233.86	431.775	1000.93	1381.87	507.079	1030.19	1137.59	509.126	1040.4	1062.51	516.258	965.197	902.379	466.046	960.408	823.397	536.543	979.921	816.096	498.145	949.761	746.73
548	0	290.097	925.072	1597.93	172.304	916.172	1589.41	282.201	1089.21	1542.75	175.022	1078.22	1533.55	242.741	1055.96	1446.05	258.465	1125.07	1163.98	256.171	932.408	1357.09	266.857	862.92	1164.9	172.839	1137.42	1235.31	430.547	992.189	1383.51	506.312	1023.34	1139.53	508.43	1033.64	1064.48	516.035	959.022	904.106	465.95	954.313	825.074	536.333	974.098	817.912	498.076	944.169	748.287
549	0	288.544	915.219	1599.2	170.772	906.244	1590.42	280.646	1079.4	1544.1	173.494	1068.33	1534.66	241.112	1046.21	1447.37	256.732	1115.9	1165.43	255.291	922.878	1358.25	266.773	853.762	1165.99	170.931	1127.65	1236.71	429.363	983.511	1385.05	505.593	1016.62	1141.4	507.812	1026.94	1066.38	515.997	952.785	905.832	466.064	947.903	826.794	536.223	968.186	819.69	498.303	938.124	749.98
550	0	287.126	905.381	1600.34	169.376	896.327	1591.34	279.197	1069.61	1545.37	172.07	1058.47	1535.73	239.54	1036.51	1448.61	255.043	1106.81	1166.79	254.442	913.399	1359.33	266.648	844.64	1167.02	169.071	1117.95	1238.03	428.218	974.875	1386.47	504.908	1009.99	1143.19	507.259	1020.27	1068.19	516.127	946.483	907.532	466.372	941.187	828.528	536.203	962.188	821.409	498.812	931.648	751.774
551	0	285.841	895.553	1601.34	168.11	886.418	1592.18	277.85	1059.84	1546.55	170.745	1048.63	1536.76	238.026	1026.85	1449.73	253.406	1097.78	1168.04	253.619	903.963	1360.3	266.464	835.543	1167.98	167.266	1108.32	1239.26	427.11	966.263	1387.77	504.249	1003.4	1144.88	506.758	1013.61	1069.9	516.409	940.106	909.182	466.859	934.178	830.243	536.262	956.104	823.045	499.582	924.766	753.629
552	0	284.684	885.732	1602.19	166.971	876.514	1592.92	276.602	1050.1	1547.62	169.514	1038.81	1537.72	236.57	1017.23	1450.74	251.826	1088.81	1169.19	252.818	894.561	1361.16	266.211	826.459	1168.86	165.524	1098.75	1240.39	426.037	957.658	1388.93	503.604	996.829	1146.47	506.297	1006.93	1071.49	516.821	933.646	910.756	467.505	926.89	831.91	536.387	949.93	824.577	500.588	917.511	755.506
553	0	283.649	875.917	1602.89	165.952	866.612	1593.56	275.447	1040.37	1548.58	168.372	1029.01	1538.61	235.175	1007.64	1451.62	250.313	1079.87	1170.2	252.035	885.186	1361.9	265.88	817.379	1169.65	163.855	1089.22	1241.4	424.998	949.044	1389.95	502.969	990.225	1147.92	505.867	1000.21	1072.95	517.341	927.091	912.233	468.287	919.341	833.497	536.568	943.659	825.986	501.798	909.92	757.364
554	0	282.729	866.106	1603.43	165.048	856.71	1594.07	274.382	1030.65	1549.41	167.316	1019.21	1539.41	233.844	998.082	1452.37	248.871	1070.96	1171.08	251.269	875.828	1362.52	265.468	808.295	1170.33	162.266	1079.74	1242.28	423.994	940.406	1390.81	502.337	983.553	1149.23	505.459	993.418	1074.27	517.946	920.427	913.588	469.18	911.549	834.975	536.793	937.279	827.254	503.177	902.032	759.162
555	0	281.919	856.295	1603.79	164.251	846.804	1594.46	273.401	1020.94	1550.1	166.341	1009.42	1540.11	232.578	988.546	1452.97	247.507	1062.06	1171.82	250.52	866.482	1362.99	264.979	799.199	1170.88	160.764	1070.3	1243.02	423.026	931.729	1391.52	501.706	976.774	1150.38	505.065	986.53	1075.42	518.612	913.64	914.8	470.157	903.534	836.318	537.05	930.777	828.364	504.688	893.885	760.86
556	0	281.212	846.483	1603.99	163.555	836.894	1594.71	272.502	1011.23	1550.65	165.443	999.633	1540.7	231.381	979.024	1453.41	246.227	1053.16	1172.4	249.788	857.138	1363.31	264.418	790.086	1171.3	159.355	1060.89	1243.62	422.095	923.003	1392.05	501.077	969.854	1151.35	504.679	979.519	1076.4	519.316	906.713	915.85	471.192	895.316	837.498	537.33	924.136	829.301	506.29	885.519	762.42
557	0	280.601	836.668	1604	162.954	826.977	1594.81	271.68	1001.53	1551.04	164.618	989.845	1541.15	230.256	969.512	1453.69	245.035	1044.26	1172.83	249.076	847.79	1363.48	263.797	780.95	1171.58	158.045	1051.51	1244.06	421.204	914.216	1392.4	500.449	962.762	1152.14	504.297	972.36	1077.2	520.037	899.631	916.719	472.258	886.917	838.493	537.623	917.341	830.055	507.944	876.971	763.809
558	0	280.08	826.848	1603.84	162.44	817.052	1594.75	270.932	991.83	1551.28	163.864	980.053	1541.47	229.207	960.003	1453.81	243.935	1035.34	1173.08	248.385	838.433	1363.49	263.127	771.787	1171.69	156.839	1042.15	1244.33	420.357	905.358	1392.58	499.825	955.471	1152.72	503.916	965.03	1077.8	520.752	892.378	917.393	473.327	878.354	839.283	537.922	910.373	830.613	509.608	868.272	764.994
559	0	279.642	817.023	1603.51	162.008	807.118	1594.54	270.256	982.124	1551.34	163.178	970.254	1541.63	228.237	950.492	1453.75	242.931	1026.39	1173.17	247.721	829.058	1363.32	262.426	762.593	1171.63	155.74	1032.81	1244.44	419.557	896.421	1392.57	499.21	947.959	1153.1	503.536	957.509	1078.19	521.445	884.94	917.858	474.376	869.648	839.851	538.22	903.214	830.969	511.246	859.454	765.948
560	0	279.282	807.19	1602.99	161.651	797.175	1594.17	269.649	972.412	1551.24	162.559	960.446	1541.64	227.35	940.973	1453.53	242.026	1017.41	1173.08	247.088	819.662	1362.99	261.709	753.362	1171.4	154.751	1023.48	1244.37	418.809	887.4	1392.38	498.608	940.208	1153.26	503.157	949.779	1078.37	522.098	877.303	918.104	475.381	860.815	840.182	538.512	895.848	831.116	512.821	850.541	766.649
561	0	278.995	797.349	1602.3	161.366	787.224	1593.63	269.11	962.692	1550.96	162.006	950.628	1541.48	226.55	931.441	1453.13	241.222	1008.39	1172.81	246.491	810.237	1362.49	260.993	744.091	1170.99	153.875	1014.16	1244.13	418.117	878.289	1392	498.025	932.203	1153.19	502.78	941.826	1078.33	522.699	869.455	918.125	476.321	851.87	840.267	538.795	888.26	831.052	514.301	841.551	767.078
562	0	278.776	787.499	1601.44	161.147	777.263	1592.92	268.639	952.96	1550.51	161.52	940.798	1541.15	225.84	921.89	1452.55	240.521	999.322	1172.36	245.934	800.78	1361.82	260.295	734.776	1170.4	153.113	1004.83	1243.71	417.487	869.083	1391.44	497.469	923.936	1152.91	502.409	933.639	1078.07	523.238	861.385	917.916	477.181	842.826	840.1	539.065	880.437	830.774	515.659	832.501	767.224
563	0	278.622	777.638	1600.42	160.991	767.293	1592.05	268.238	943.215	1549.89	161.1	930.955	1540.65	225.224	912.315	1451.81	239.925	990.188	1171.74	245.425	791.284	1360.98	259.63	725.411	1169.64	152.467	995.501	1243.12	416.923	859.781	1390.7	496.944	915.403	1152.4	502.048	925.21	1077.59	523.706	853.087	917.476	477.946	833.695	839.677	539.321	872.368	830.284	516.872	823.398	767.078
564	0	278.53	767.766	1599.25	160.895	757.315	1591.03	267.906	933.454	1549.11	160.75	921.099	1539.99	224.706	902.713	1450.91	239.434	980.983	1170.94	244.969	781.745	1359.97	259.012	715.991	1168.7	151.938	986.154	1242.35	416.431	850.379	1389.79	496.46	906.601	1151.68	501.701	916.534	1076.9	524.101	844.555	916.806	478.606	824.482	839.002	539.563	864.045	829.585	517.922	814.247	766.639
565	0	278.499	757.881	1597.93	160.857	747.331	1589.85	267.647	923.675	1548.16	160.47	911.227	1539.15	224.288	893.078	1449.85	239.048	971.7	1169.98	244.572	772.159	1358.82	258.452	706.511	1167.59	151.525	976.784	1241.41	416.016	840.876	1388.71	496.022	897.533	1150.74	501.374	907.61	1076	524.421	835.785	915.913	479.154	815.194	838.077	539.79	855.464	828.682	518.799	805.047	765.911
566	0	278.526	747.984	1596.48	160.877	737.339	1588.53	267.462	913.876	1547.06	160.265	901.34	1538.16	223.975	883.407	1448.64	238.768	962.328	1168.85	244.241	762.519	1357.52	257.959	696.964	1166.33	151.229	967.381	1240.31	415.683	831.271	1387.47	495.639	888.206	1149.6	501.073	898.438	1074.89	524.666	826.778	914.803	479.59	805.832	836.914	540.003	846.623	827.582	519.497	795.794	764.901
567	0	278.613	738.072	1594.92	160.953	727.342	1587.09	267.357	904.055	1545.82	160.137	891.437	1537.01	223.767	873.694	1447.3	238.592	952.862	1167.57	243.98	752.823	1356.09	257.54	687.345	1164.92	151.048	957.938	1239.06	415.436	821.565	1386.09	495.317	878.628	1148.27	500.804	889.024	1073.6	524.842	817.535	913.488	479.913	796.397	835.523	540.203	837.523	826.295	520.015	786.48	763.623
568	0	278.761	728.145	1593.26	161.088	717.339	1585.53	267.334	894.209	1544.45	160.092	881.518	1535.73	223.67	863.937	1445.84	238.518	943.293	1166.15	243.796	743.065	1354.54	257.198	677.647	1163.37	150.98	948.443	1237.68	415.281	811.756	1384.57	495.062	868.809	1146.76	500.574	879.373	1072.12	524.953	808.059	911.981	480.128	786.885	833.922	540.39	828.166	824.832	520.359	777.093	762.094
569	0	278.97	718.202	1591.52	161.283	707.332	1583.88	267.397	884.337	1542.96	160.133	871.581	1534.31	223.683	854.13	1444.28	238.544	933.615	1164.6	243.695	733.24	1352.89	256.935	667.863	1161.71	151.025	938.887	1236.17	415.221	801.847	1382.94	494.879	858.762	1145.09	500.387	869.494	1070.48	525.008	798.356	910.3	480.242	777.291	832.128	540.568	818.56	823.209	520.54	767.623	760.336
570	0	279.243	708.242	1589.73	161.541	697.32	1582.16	267.553	874.436	1541.37	160.266	861.626	1532.79	223.809	844.271	1442.63	238.666	923.821	1162.95	243.68	723.345	1351.17	256.751	657.987	1159.94	151.177	929.26	1234.55	415.26	791.838	1381.19	494.772	848.502	1143.27	500.25	859.396	1068.7	525.014	788.433	908.463	480.266	767.61	830.165	540.737	808.711	821.44	520.57	758.053	758.376
571	0	279.584	698.264	1587.9	161.864	687.304	1580.39	267.804	864.504	1539.71	160.495	851.652	1531.17	224.049	834.356	1440.91	238.881	913.907	1161.2	243.756	713.375	1349.39	256.645	648.012	1158.1	151.434	919.553	1232.86	415.4	781.73	1379.37	494.746	838.042	1141.33	500.166	849.09	1066.79	524.983	778.297	906.491	480.21	757.832	828.056	540.898	798.628	819.545	520.469	748.37	756.242
572	0	279.996	688.267	1586.07	162.255	677.283	1578.6	268.156	854.538	1537.98	160.826	841.657	1529.49	224.404	824.381	1439.15	239.183	903.866	1159.39	243.926	703.326	1347.58	256.614	637.931	1156.19	151.791	909.753	1231.1	415.643	771.527	1377.47	494.802	827.397	1139.28	500.138	838.587	1064.78	524.923	767.959	904.41	480.089	747.948	825.83	541.055	788.323	817.545	520.256	738.559	753.966
573	0	280.482	678.249	1584.24	162.72	667.256	1576.81	268.613	844.537	1536.21	161.261	831.64	1527.75	224.871	814.344	1437.36	239.567	893.695	1157.53	244.194	693.197	1345.76	256.655	627.739	1154.26	152.242	899.854	1229.3	415.992	761.23	1375.53	494.941	816.584	1137.16	500.169	827.9	1062.68	524.846	757.427	902.243	479.916	737.946	823.516	541.208	777.806	815.461	519.954	728.605	751.583
574	0	281.047	668.209	1582.46	163.262	657.223	1575.06	269.179	834.497	1534.43	161.805	821.599	1526	225.451	804.242	1435.58	240.025	883.39	1155.66	244.561	682.982	1343.97	256.766	617.43	1152.32	152.78	889.844	1227.49	416.445	750.843	1373.57	495.161	805.616	1134.98	500.26	817.041	1060.54	524.761	746.71	900.02	479.707	727.817	821.144	541.359	767.088	813.319	519.586	718.494	749.128
575	0	281.694	658.147	1580.74	163.885	647.182	1573.36	269.856	824.418	1532.66	162.46	811.533	1524.25	226.14	794.073	1433.83	240.551	872.946	1153.79	245.028	672.682	1342.21	256.943	606.999	1150.41	153.399	879.716	1225.7	417.003	740.371	1371.6	495.46	794.508	1132.78	500.411	806.021	1058.37	524.679	735.818	897.768	479.477	717.546	818.747	541.509	756.181	811.144	519.174	708.213	746.638
576	0	282.426	648.06	1579.11	164.593	637.132	1571.75	270.646	814.298	1530.91	163.23	801.44	1522.52	226.936	783.837	1432.13	241.136	862.364	1151.95	245.595	662.294	1340.53	257.185	596.441	1148.56	154.09	869.462	1223.95	417.663	729.818	1369.66	495.834	783.274	1130.59	500.619	794.851	1056.19	524.608	724.759	895.517	479.239	707.124	816.358	541.661	745.093	808.963	518.742	697.751	744.15
577	0	283.248	637.948	1577.59	165.39	627.071	1570.25	271.551	804.136	1529.22	164.113	791.318	1520.86	227.832	773.533	1430.49	241.773	851.641	1150.17	246.259	651.818	1338.95	257.488	585.752	1146.8	154.845	859.077	1222.27	418.422	719.19	1367.77	496.278	771.926	1128.41	500.881	783.542	1054.04	524.556	713.541	893.297	479.007	696.537	814.009	541.816	733.837	806.805	518.311	687.099	741.702
578	0	284.161	627.81	1576.21	166.277	616.997	1568.89	272.57	793.93	1527.6	165.11	781.167	1519.27	228.825	763.161	1428.96	242.453	840.779	1148.47	247.019	641.255	1337.5	257.85	574.928	1145.17	155.655	848.557	1220.68	419.274	708.492	1365.95	496.786	760.476	1126.3	501.195	772.104	1051.95	524.529	702.171	891.136	478.793	685.776	811.733	541.976	722.418	804.698	517.9	676.248	739.33
579	0	285.167	617.646	1574.97	167.256	606.91	1567.7	273.7	783.681	1526.09	166.22	770.985	1517.8	229.907	752.723	1427.54	243.167	829.782	1146.88	247.868	630.606	1336.19	258.271	563.969	1143.71	156.511	837.899	1219.22	420.215	697.73	1364.23	497.35	748.934	1124.27	501.556	760.545	1049.93	524.534	690.655	889.065	478.608	674.83	809.561	542.142	710.845	802.669	517.525	665.192	737.067
580	0	286.266	607.456	1573.91	168.329	596.807	1566.7	274.94	773.389	1524.69	167.437	760.771	1516.46	231.07	742.22	1426.26	243.908	818.653	1145.42	248.802	619.873	1335.06	258.746	552.873	1142.44	157.405	827.103	1217.89	421.236	686.91	1362.62	497.962	737.311	1122.34	501.957	748.873	1048.01	524.574	678.998	887.109	478.459	663.691	807.522	542.315	699.122	800.746	517.199	653.926	734.946
581	0	287.459	597.239	1573.03	169.495	586.687	1565.9	276.284	763.055	1523.43	168.758	750.525	1515.28	232.306	731.655	1425.14	244.669	807.401	1144.1	249.812	609.061	1334.11	259.272	541.641	1141.41	158.327	816.172	1216.72	422.329	676.038	1361.16	498.615	725.613	1120.55	502.395	737.095	1046.22	524.653	667.202	885.295	478.355	652.352	805.643	542.499	687.253	798.954	516.934	642.448	732.996
582	0	288.742	586.995	1572.34	170.753	576.549	1565.31	277.725	752.68	1522.32	170.176	740.247	1514.26	233.606	721.031	1424.18	245.444	796.033	1142.95	250.889	598.174	1333.37	259.845	530.278	1140.62	159.27	805.111	1215.73	423.484	665.119	1359.85	499.299	713.849	1118.9	502.862	725.217	1044.57	524.771	655.271	883.646	478.299	640.807	803.949	542.693	675.239	797.317	516.735	630.754	731.242
583	0	290.113	576.727	1571.85	172.099	566.392	1564.96	279.256	742.265	1521.37	171.683	729.938	1513.44	234.958	710.353	1423.4	246.226	784.562	1141.98	252.023	587.218	1332.85	260.458	518.791	1140.11	160.225	793.927	1214.92	424.69	654.158	1358.71	500.006	702.025	1117.43	503.354	713.243	1043.09	524.93	643.207	882.181	478.294	629.052	802.461	542.899	663.082	795.856	516.607	618.846	729.707
584	0	291.568	566.433	1571.56	173.53	556.214	1564.85	280.868	731.813	1520.59	173.27	719.597	1512.82	236.352	699.625	1422.81	247.01	773	1141.2	253.201	576.199	1332.56	261.104	507.19	1139.88	161.186	782.631	1214.32	425.935	643.159	1357.76	500.729	690.144	1116.14	503.865	701.179	1041.78	525.128	631.008	880.918	478.341	617.086	801.195	543.119	650.779	794.588	516.551	606.722	728.407
585	0	293.1	556.115	1571.47	175.039	546.016	1564.98	282.549	721.327	1519.99	174.926	709.226	1512.42	237.777	688.853	1422.41	247.794	761.362	1140.61	254.411	565.125	1332.49	261.772	495.489	1139.95	162.147	771.236	1213.91	427.207	632.126	1357	501.459	678.212	1115.05	504.39	689.027	1040.66	525.362	618.677	879.869	478.439	604.908	800.165	543.351	638.328	793.529	516.564	594.385	727.356
586	0	294.703	545.775	1571.59	176.62	535.796	1565.34	284.289	710.808	1519.57	176.64	698.826	1512.22	239.222	678.042	1422.2	248.574	749.665	1140.23	255.638	554.004	1332.64	262.453	483.706	1140.29	163.102	759.759	1213.71	428.493	621.062	1356.44	502.192	666.231	1114.16	504.925	676.791	1039.74	525.631	606.211	879.045	478.586	592.519	799.379	543.597	625.726	792.686	516.641	581.835	726.56
587	0	296.366	535.414	1571.88	178.264	525.556	1565.93	286.075	700.261	1519.32	178.398	688.4	1512.24	240.675	667.197	1422.19	249.35	737.926	1140.05	256.867	542.846	1333.01	263.133	471.862	1140.91	164.049	748.219	1213.71	429.779	609.967	1356.08	502.921	654.202	1113.48	505.467	664.474	1039.02	525.93	593.611	878.449	478.777	579.922	798.841	543.855	612.969	792.068	516.778	569.075	726.024
588	0	298.082	525.033	1572.36	179.961	515.295	1566.75	287.892	689.688	1519.25	180.187	677.949	1512.47	242.126	656.326	1422.36	250.119	726.163	1140.07	258.085	531.661	1333.58	263.8	459.98	1141.78	164.984	736.635	1213.91	431.053	598.844	1355.91	503.641	642.127	1113	506.014	652.079	1038.49	526.254	580.877	878.084	479.008	567.122	798.551	544.125	600.052	791.674	516.966	556.106	725.746
589	0	299.838	514.634	1573	181.7	505.013	1567.77	289.726	679.093	1519.34	181.994	667.474	1512.89	243.564	645.434	1422.71	250.883	714.395	1140.28	259.274	520.457	1334.34	264.438	448.084	1142.87	165.907	725.033	1214.3	432.302	587.694	1355.93	504.351	630.006	1112.73	506.563	639.608	1038.17	526.6	568.007	877.945	479.271	554.123	798.504	544.406	586.973	791.503	517.195	542.93	725.718
590	0	301.622	504.219	1573.78	183.469	494.711	1568.98	291.563	668.479	1519.57	183.803	656.979	1513.51	244.978	634.529	1423.23	251.643	702.643	1140.67	260.422	509.247	1335.27	265.035	436.201	1144.15	166.818	713.435	1214.86	433.515	576.514	1356.13	505.046	617.839	1112.65	507.114	627.065	1038.03	526.959	555.002	878.026	479.56	540.934	798.691	544.695	573.727	791.546	517.457	529.551	725.932
591	0	303.422	493.788	1574.69	185.254	484.389	1570.35	293.388	657.85	1519.95	185.601	646.466	1514.3	246.362	623.616	1423.9	252.4	690.925	1141.23	261.514	498.04	1336.35	265.575	424.355	1145.58	167.718	701.867	1215.58	434.68	565.307	1356.5	505.727	605.625	1112.75	507.666	614.451	1038.07	527.328	541.865	878.317	479.867	527.562	799.1	544.989	560.313	791.795	517.74	515.971	726.373
592	0	305.222	483.342	1575.71	187.041	474.049	1571.87	295.187	647.208	1520.45	187.373	635.937	1515.24	247.705	612.703	1424.72	253.156	679.259	1141.94	262.537	486.848	1337.55	266.044	412.57	1147.11	168.609	690.354	1216.45	435.788	554.07	1357.01	506.393	593.363	1113.01	508.221	601.769	1038.28	527.701	528.596	878.804	480.183	514.018	799.716	545.287	546.732	792.234	518.035	502.193	727.026
593	0	307.01	472.883	1576.82	188.817	463.691	1573.51	296.945	636.557	1521.05	189.105	625.395	1516.32	249.001	601.796	1425.66	253.915	667.664	1142.79	263.48	475.678	1338.85	266.429	400.87	1148.72	169.496	678.919	1217.45	436.831	542.803	1357.66	507.046	581.052	1113.43	508.779	589.023	1038.64	528.069	515.199	879.472	480.501	500.312	800.521	545.584	532.983	792.849	518.331	488.222	727.872
594	0	308.77	462.41	1577.99	190.564	453.315	1575.25	298.648	625.899	1521.75	190.785	614.841	1517.52	250.244	590.9	1426.71	254.68	656.155	1143.76	264.333	464.542	1340.23	266.717	389.275	1150.36	170.382	667.584	1218.57	437.8	531.505	1358.42	507.685	568.69	1113.98	509.34	576.214	1039.14	528.428	501.679	880.306	480.811	486.458	801.497	545.876	519.071	793.622	518.617	474.064	728.894
595	0	310.486	451.925	1579.22	192.27	442.923	1577.06	300.285	615.235	1522.53	192.398	604.278	1518.82	251.43	580.022	1427.86	255.453	644.747	1144.83	265.087	453.447	1341.66	266.899	377.8	1152	171.272	656.371	1219.78	438.692	520.175	1359.28	508.312	556.277	1114.65	509.905	563.345	1039.76	528.772	488.041	881.287	481.105	472.468	802.625	546.159	505.001	794.536	518.885	459.724	730.073
596	0	312.146	441.427	1580.49	193.918	432.514	1578.92	301.844	604.569	1523.38	193.935	593.708	1520.2	252.553	569.166	1429.08	256.239	633.453	1145.99	265.736	442.401	1343.12	266.965	366.461	1153.59	172.171	645.295	1221.06	439.5	508.814	1360.23	508.927	543.81	1115.42	510.474	550.419	1040.49	529.093	474.291	882.399	481.376	458.355	803.886	546.429	490.781	795.572	519.124	445.21	731.391
597	0	313.734	430.916	1581.77	195.494	422.09	1580.81	303.314	593.902	1524.28	195.385	583.133	1521.63	253.612	558.338	1430.36	257.041	622.282	1147.23	266.277	431.411	1344.59	266.911	355.268	1155.13	173.084	634.369	1222.41	440.222	497.421	1361.24	509.532	531.29	1116.28	511.047	537.439	1041.32	529.385	460.437	883.626	481.614	444.136	805.261	546.68	476.419	796.715	519.327	430.534	732.833
598	0	315.237	420.391	1583.07	196.984	411.651	1582.7	304.688	583.235	1525.22	196.739	572.554	1523.11	254.604	547.54	1431.7	257.863	611.241	1148.51	266.707	420.482	1346.05	266.734	344.229	1156.58	174.016	623.603	1223.81	440.857	485.998	1362.3	510.125	518.715	1117.21	511.624	524.409	1042.22	529.644	446.488	884.953	481.813	429.823	806.736	546.908	461.928	797.951	519.486	415.707	734.383
599	0	316.642	409.853	1584.35	198.376	401.198	1584.57	305.957	572.569	1526.19	197.991	561.974	1524.62	255.529	536.776	1433.06	258.706	600.335	1149.84	267.027	409.618	1347.5	266.434	333.347	1157.95	174.969	613.001	1225.24	441.405	474.547	1363.41	510.706	506.085	1118.2	512.202	511.332	1043.2	529.863	432.451	886.366	481.966	415.432	808.295	547.108	447.317	799.265	519.594	400.742	736.029
600	0	317.938	399.3	1585.63	199.659	390.73	1586.42	307.118	561.905	1527.19	199.134	551.394	1526.14	256.386	526.049	1434.44	259.574	589.564	1151.2	267.24	398.823	1348.91	266.017	322.624	1159.22	175.948	602.565	1226.7	441.868	463.072	1364.55	511.273	493.401	1119.25	512.781	498.211	1044.23	530.037	418.337	887.854	482.068	400.977	809.927	547.275	432.601	800.648	519.645	385.655	737.76
601	0	319.116	388.732	1586.87	200.821	380.25	1588.22	308.165	551.245	1528.21	200.164	540.816	1527.65	257.175	515.362	1435.84	260.466	578.928	1152.58	267.349	388.096	1350.28	265.491	312.059	1160.39	176.952	592.292	1228.17	442.246	451.576	1365.71	511.824	480.663	1120.34	513.358	485.052	1045.32	530.162	404.155	889.408	482.111	386.472	811.621	547.404	417.792	802.092	519.632	370.462	739.568
602	0	320.168	378.149	1588.09	201.857	369.756	1589.95	309.096	540.589	1529.25	201.078	530.24	1529.16	257.898	504.714	1437.23	261.384	568.422	1153.97	267.362	377.441	1351.61	264.866	301.648	1161.47	177.984	582.175	1229.64	442.545	440.065	1366.88	512.356	467.873	1121.48	513.93	471.86	1046.44	530.234	389.915	891.018	482.093	371.928	813.37	547.492	402.903	803.589	519.551	355.18	741.445
603	0	321.086	367.55	1589.27	202.758	359.25	1591.61	309.91	529.937	1530.29	201.874	519.67	1530.64	258.557	494.106	1438.61	262.326	558.039	1155.36	267.285	366.854	1352.88	264.157	291.383	1162.47	179.041	572.205	1231.1	442.767	428.545	1368.07	512.866	455.036	1122.64	514.494	458.641	1047.6	530.249	375.627	892.678	482.01	357.358	815.166	547.534	387.947	805.135	519.397	339.827	743.385
604	0	321.866	356.935	1590.41	203.521	348.732	1593.19	310.608	519.291	1531.34	202.554	509.105	1532.09	259.154	483.54	1439.96	263.289	547.772	1156.74	267.126	356.335	1354.09	263.381	281.258	1163.4	180.121	562.369	1232.55	442.919	417.022	1369.26	513.351	442.156	1123.84	515.047	445.4	1048.79	530.205	361.301	894.382	481.858	342.773	817.005	547.525	372.936	806.724	519.166	324.422	745.382
605	0	322.507	346.305	1591.5	204.144	338.203	1594.67	311.19	508.651	1532.4	203.117	498.547	1533.49	259.69	473.013	1441.28	264.269	537.61	1158.09	266.895	345.881	1355.24	262.557	271.261	1164.27	181.218	552.653	1233.97	443.005	405.504	1370.45	513.808	429.24	1125.07	515.587	432.145	1050.01	530.101	346.946	896.122	481.636	328.181	818.881	547.464	357.881	808.354	518.855	308.981	747.428
606	0	323.006	335.66	1592.53	204.626	327.664	1596.04	311.658	498.017	1533.44	203.565	487.998	1534.85	260.167	462.524	1442.56	265.262	527.541	1159.42	266.602	335.488	1356.33	261.703	261.382	1165.09	182.328	543.04	1235.35	443.031	393.997	1371.63	514.235	416.295	1126.31	516.109	418.882	1051.24	529.934	332.573	897.892	481.342	313.59	820.79	547.346	342.794	810.02	518.461	293.521	749.519
607	0	323.366	325.001	1593.5	204.968	317.116	1597.3	312.016	487.392	1534.48	203.902	477.457	1536.15	260.588	452.072	1443.79	266.261	517.553	1160.71	266.254	325.152	1357.35	260.838	251.609	1165.86	183.442	533.513	1236.69	443.002	382.508	1372.81	514.629	403.33	1127.57	516.611	405.62	1052.48	529.705	318.19	899.686	480.975	299.008	822.725	547.169	327.685	811.715	517.981	278.057	751.646
608	0	323.588	314.329	1594.41	205.174	306.559	1598.44	312.266	476.774	1535.49	204.132	466.927	1537.38	260.954	441.653	1444.95	267.259	507.634	1161.95	265.862	314.867	1358.3	259.981	241.927	1166.6	184.552	524.055	1237.97	442.924	371.045	1373.96	514.99	390.356	1128.83	517.089	392.367	1053.71	529.414	303.806	901.493	480.535	284.441	824.681	546.929	312.562	813.434	517.414	262.603	753.8
609	0	323.677	303.646	1595.23	205.247	295.995	1599.44	312.414	466.164	1536.48	204.257	456.406	1538.54	261.268	431.266	1446.04	268.25	497.772	1163.12	265.432	304.627	1359.16	259.147	232.322	1167.29	185.649	514.648	1239.19	442.8	359.613	1375.08	515.316	377.385	1130.08	517.542	379.13	1054.94	529.06	289.43	903.305	480.023	269.895	826.648	546.626	297.435	815.168	516.76	247.17	755.972
610	0	323.638	292.953	1595.98	205.194	285.425	1600.32	312.463	455.563	1537.43	204.284	445.896	1539.61	261.529	420.905	1447.05	269.224	487.955	1164.23	264.973	294.426	1359.95	258.35	222.778	1167.94	186.722	505.275	1240.33	442.636	348.218	1376.16	515.607	364.428	1131.32	517.966	365.917	1056.14	528.646	275.07	905.11	479.44	255.374	828.616	546.258	282.313	816.905	516.016	231.767	758.148
611	0	323.477	282.253	1596.63	205.021	274.851	1601.05	312.419	444.97	1538.32	204.216	435.395	1540.59	261.738	410.569	1447.96	270.175	478.173	1165.25	264.49	284.259	1360.63	257.599	213.281	1168.52	187.762	495.92	1241.37	442.434	336.864	1377.19	515.864	351.498	1132.53	518.36	352.735	1057.3	528.173	260.735	906.894	478.786	240.884	830.574	545.822	267.204	818.633	515.185	216.404	760.317
612	0	323.201	271.546	1597.18	204.734	264.272	1601.63	312.286	434.386	1539.16	204.06	424.903	1541.46	261.896	400.252	1448.78	271.095	468.417	1166.18	263.989	274.118	1361.22	256.901	203.813	1169.04	188.757	486.567	1242.32	442.198	325.555	1378.15	516.086	338.608	1133.7	518.722	339.594	1058.41	527.643	246.433	908.643	478.064	226.429	832.509	545.319	252.116	820.337	514.267	201.086	762.463
613	0	322.817	260.835	1597.62	204.341	253.691	1602.06	312.068	423.809	1539.92	203.819	414.42	1542.22	262.003	389.949	1449.47	271.974	458.678	1167.01	263.471	263.997	1361.7	256.26	194.36	1169.47	189.697	477.204	1243.16	441.929	314.295	1379.03	516.275	325.77	1134.8	519.049	326.498	1059.45	527.057	232.171	910.342	477.276	212.013	834.406	544.748	237.057	822.002	513.264	185.819	764.572
614	0	322.332	250.122	1597.95	203.849	243.109	1602.33	311.771	413.239	1540.59	203.498	403.943	1542.84	262.056	379.658	1450.05	272.805	448.95	1167.72	262.941	253.891	1362.05	255.674	184.907	1169.79	190.572	467.819	1243.88	441.628	303.085	1379.82	516.43	312.994	1135.82	519.34	313.456	1060.41	526.418	217.958	911.974	476.424	197.642	836.248	544.108	222.037	823.609	512.179	170.608	766.628
615	0	321.755	239.409	1598.16	203.266	232.526	1602.45	311.398	402.676	1541.15	203.103	393.473	1543.34	262.056	369.374	1450.5	273.579	439.228	1168.31	262.398	243.793	1362.28	255.139	175.441	1169.99	191.372	458.4	1244.46	441.296	291.927	1380.49	516.55	300.294	1136.74	519.591	300.473	1061.27	525.728	203.801	913.523	475.51	183.32	838.019	543.4	207.064	825.143	511.016	155.457	768.615
616	0	321.091	228.696	1598.24	202.599	221.943	1602.4	310.954	392.118	1541.6	202.637	383.006	1543.68	262	359.093	1450.81	274.288	429.506	1168.77	261.843	233.698	1362.37	254.647	165.952	1170.05	192.089	448.94	1244.91	440.931	280.822	1381.03	516.634	287.677	1137.55	519.8	287.556	1062.01	524.987	189.709	914.973	474.536	169.054	839.703	542.626	192.149	826.585	509.778	140.371	770.519
617	0	320.349	217.986	1598.18	201.854	211.36	1602.2	310.442	381.564	1541.93	202.103	372.543	1543.88	261.887	348.811	1450.98	274.924	419.781	1169.1	261.274	223.602	1362.32	254.191	156.43	1169.96	192.713	439.433	1245.21	440.533	269.769	1381.43	516.682	275.153	1138.24	519.963	274.71	1062.63	524.199	175.691	916.307	473.507	154.849	841.284	541.786	177.301	827.918	508.47	125.353	772.324
618	0	319.534	207.28	1597.99	201.037	200.779	1601.83	309.865	371.013	1542.12	201.506	362.081	1543.92	261.713	338.525	1451.01	275.476	410.048	1169.28	260.689	213.501	1362.12	253.756	146.868	1169.7	193.237	429.872	1245.36	440.099	258.77	1381.68	516.688	262.73	1138.77	520.076	261.941	1063.1	523.363	161.754	917.513	472.423	140.713	842.745	540.881	162.531	829.127	507.099	110.409	774.016
619	0	318.651	196.579	1597.66	200.153	190.199	1601.3	309.224	360.465	1542.16	200.848	351.619	1543.8	261.475	328.233	1450.88	275.937	400.304	1169.31	260.085	203.391	1361.76	253.333	137.264	1169.26	193.656	420.256	1245.36	439.628	247.823	1381.77	516.65	250.413	1139.15	520.136	249.255	1063.43	522.482	147.907	918.576	471.288	126.653	844.074	539.913	147.852	830.198	505.668	95.547	775.583
620	0	317.706	185.883	1597.19	199.207	179.62	1600.62	308.523	349.917	1542.07	200.131	341.156	1543.51	261.171	317.933	1450.61	276.297	390.544	1169.19	259.458	193.268	1361.25	252.906	127.615	1168.64	193.962	410.583	1245.2	439.116	236.929	1381.7	516.563	238.209	1139.37	520.135	236.657	1063.59	521.556	134.161	919.487	470.105	112.678	845.257	538.884	133.276	831.119	504.186	80.7741	777.013
621	0	316.702	175.193	1596.57	198.202	169.041	1599.79	307.762	339.37	1541.82	199.357	330.691	1543.07	260.795	307.623	1450.19	276.55	380.764	1168.92	258.803	183.132	1360.59	252.465	117.921	1167.83	194.152	400.852	1244.89	438.559	226.087	1381.45	516.419	226.121	1139.41	520.069	224.152	1063.59	520.584	120.524	920.236	468.875	98.7977	846.285	537.796	118.817	831.88	502.657	66.1003	778.297
622	0	315.642	164.509	1595.83	197.141	158.464	1598.81	306.941	328.822	1541.42	198.527	320.224	1542.47	260.346	297.303	1449.63	276.687	370.959	1168.51	258.115	172.98	1359.77	251.995	108.183	1166.84	194.221	391.066	1244.42	437.954	215.297	1381.03	516.212	214.152	1139.28	519.93	211.747	1063.42	519.568	107.008	920.818	467.602	85.0219	847.149	536.65	104.488	832.475	501.088	51.5374	779.428
623	0	314.529	153.831	1594.95	196.026	147.887	1597.7	306.061	318.273	1540.88	197.641	309.753	1541.72	259.817	286.971	1448.93	276.703	361.122	1167.94	257.389	162.81	1358.82	251.487	98.4026	1165.68	194.166	381.224	1243.81	437.296	204.559	1380.44	515.935	202.307	1138.97	519.713	199.446	1063.09	518.508	93.6214	921.229	466.287	71.3616	847.845	535.448	90.3055	832.898	499.485	37.0987	780.4
624	0	313.364	143.16	1593.95	194.858	137.31	1596.46	305.12	307.724	1540.21	196.698	299.28	1540.84	259.206	276.628	1448.1	276.591	351.248	1167.24	256.62	152.622	1357.73	250.932	88.5815	1164.37	193.984	371.329	1243.05	436.581	193.872	1379.7	515.579	190.587	1138.49	519.409	187.255	1062.6	517.401	80.3765	921.468	464.933	57.8289	848.368	534.193	76.2845	833.149	497.855	22.7991	781.21
625	0	312.147	132.495	1592.84	193.638	126.732	1595.12	304.117	297.173	1539.41	195.697	288.802	1539.82	258.507	266.274	1447.14	276.347	341.331	1166.4	255.8	142.414	1356.52	250.321	78.7206	1162.91	193.673	361.383	1242.16	435.804	183.235	1378.8	515.135	178.993	1137.84	519.012	175.182	1061.95	516.25	67.2842	921.537	463.541	44.4364	848.719	532.884	62.4416	833.23	496.203	8.65546	781.856
626	0	310.878	121.837	1591.62	192.367	116.154	1593.67	303.049	286.622	1538.49	194.636	278.321	1538.7	257.715	255.909	1446.07	275.968	331.363	1165.44	254.924	132.186	1355.21	249.649	68.8192	1161.33	193.231	351.385	1241.14	434.96	172.648	1377.77	514.597	167.526	1137.04	518.515	163.23	1061.16	515.051	54.3563	921.442	462.114	31.1974	848.901	531.525	48.7936	833.145	494.533	-5.3143	782.34
627	0	309.557	111.185	1590.32	191.042	105.574	1592.15	301.913	276.071	1537.47	193.511	267.837	1537.48	256.828	245.534	1444.91	275.451	321.339	1164.36	253.985	121.936	1353.81	248.912	58.875	1159.65	192.658	341.336	1240	434.043	162.107	1376.62	513.956	156.188	1136.1	517.911	151.408	1060.24	513.806	41.6046	921.19	460.653	18.1257	848.919	530.115	35.3578	832.901	492.852	-19.091	782.664
628	0	308.181	100.541	1588.94	189.663	94.9938	1590.56	300.707	265.52	1536.37	192.32	257.349	1536.19	255.839	235.148	1443.66	274.795	311.253	1163.17	252.978	111.662	1352.34	248.107	48.8835	1157.9	191.952	331.234	1238.76	433.051	151.611	1375.38	513.206	144.978	1135.04	517.196	139.72	1059.2	512.513	29.0409	920.791	459.159	5.23577	848.781	528.657	22.1513	832.508	491.161	-32.6549	782.835
629	0	306.748	89.9046	1587.51	188.227	84.4117	1588.93	299.425	254.972	1535.2	191.058	246.858	1534.84	254.746	224.752	1442.34	274.001	301.099	1161.9	251.897	101.364	1350.81	247.233	38.8383	1156.11	191.113	321.077	1237.43	431.976	141.156	1374.05	512.34	133.897	1133.88	516.365	128.173	1058.07	511.171	16.6772	920.257	457.632	-7.45799	848.498	527.152	9.19106	831.977	489.466	-45.9854	782.859
630	0	305.256	79.2765	1586.04	186.733	73.828	1587.28	298.065	244.426	1533.98	189.72	236.363	1533.46	253.544	214.346	1440.97	273.069	290.871	1160.56	250.736	91.0378	1349.27	246.29	28.7307	1154.32	190.142	310.862	1236.02	430.817	130.737	1372.67	511.354	122.944	1132.63	515.415	116.774	1056.87	509.782	4.52484	919.603	456.074	-19.941	848.081	525.599	-3.50649	831.324	487.767	-59.0624	782.747
631	0	303.702	68.6575	1584.56	185.177	63.243	1585.62	296.62	233.884	1532.74	188.301	225.864	1532.05	252.232	203.927	1439.56	272.003	280.566	1159.15	249.49	80.6816	1347.71	245.275	18.5503	1152.54	189.039	300.584	1234.55	429.568	120.349	1371.27	510.246	112.118	1131.33	514.343	105.527	1055.61	508.344	-7.40504	918.845	454.486	-32.1988	847.545	524.001	-15.9257	830.563	486.067	-71.8657	782.508
632	0	302.082	58.0488	1583.07	183.557	52.6567	1583.98	295.088	223.346	1531.48	186.796	215.36	1530.65	250.806	193.496	1438.14	270.805	270.178	1157.71	248.156	70.2921	1346.18	244.19	8.28565	1150.81	187.805	290.239	1233.03	428.226	109.985	1369.86	509.013	101.417	1129.99	513.151	94.4389	1054.32	506.858	-19.1022	917.999	452.867	-44.2176	846.907	522.358	-28.0522	829.711	484.365	-84.3762	782.154
633	0	300.394	47.4515	1581.62	181.869	42.0692	1582.37	293.463	212.814	1530.23	185.201	204.851	1529.27	249.266	183.05	1436.71	269.48	259.704	1156.25	246.731	59.8657	1344.68	243.033	-2.07569	1149.17	186.444	279.822	1231.49	426.789	99.6395	1368.47	507.656	90.8415	1128.66	511.84	83.5133	1053.02	505.326	-30.5573	917.084	451.218	-55.9842	846.183	520.672	-39.8729	828.787	482.662	-96.5759	781.699
634	0	298.634	36.8667	1580.2	180.111	31.4807	1580.83	291.741	202.288	1529	183.51	194.334	1527.93	247.61	172.587	1435.31	268.033	249.142	1154.79	245.211	49.3988	1343.25	241.804	-12.5461	1147.63	184.957	269.328	1229.94	425.254	89.3043	1367.13	506.178	80.3879	1127.34	510.413	72.7545	1051.74	503.748	-41.7623	916.118	449.541	-67.4864	845.391	518.945	-51.3769	827.808	480.957	-108.448	781.156
635	0	296.8	26.2957	1578.85	178.281	20.8914	1579.36	289.918	191.767	1527.82	181.719	183.81	1526.64	245.839	162.105	1433.95	266.469	238.489	1153.34	243.597	38.8878	1341.9	240.501	-23.1374	1146.22	183.348	258.752	1228.4	423.622	78.972	1365.85	504.584	70.054	1126.06	508.874	62.1654	1050.5	502.127	-52.7106	915.12	447.835	-78.7136	844.549	517.178	-62.5551	826.792	479.248	-119.979	780.538
636	0	294.888	15.7396	1577.59	176.375	10.3014	1577.99	287.991	181.254	1526.69	179.825	173.276	1525.43	243.955	151.601	1432.64	264.796	227.745	1151.93	241.889	28.3291	1340.65	239.123	-33.86	1144.97	181.622	248.09	1226.89	421.892	68.6352	1364.67	502.879	59.8366	1124.85	507.231	51.7478	1049.32	500.466	-63.3974	914.109	446.103	-89.6563	843.674	515.373	-73.4008	825.759	477.533	-131.155	779.859
637	0	292.897	5.19932	1576.42	174.391	-0.28917	1576.73	285.959	170.746	1525.63	177.824	162.73	1524.29	241.961	141.073	1431.4	263.019	216.909	1150.57	240.088	17.7198	1339.51	237.67	-44.7221	1143.89	179.782	237.337	1225.42	420.067	58.2874	1363.6	501.071	49.7316	1123.74	505.492	41.5023	1048.22	498.768	-73.8194	913.101	444.346	-100.307	842.784	513.535	-83.9101	824.725	475.81	-141.968	779.132
638	0	290.825	-5.32419	1575.38	172.329	-10.8803	1575.6	283.819	160.244	1524.65	175.716	152.172	1523.24	239.86	130.519	1430.25	261.145	205.983	1149.29	238.198	7.05789	1338.51	236.142	-55.7291	1142.99	177.834	226.492	1224.01	418.149	47.9226	1362.65	499.171	39.7347	1122.73	503.665	31.4281	1047.22	497.036	-83.9755	912.115	442.566	-110.661	841.896	511.666	-94.0815	823.708	474.078	-152.41	778.369
639	0	288.672	-15.8304	1574.47	170.188	-21.4722	1574.61	281.573	149.746	1523.77	173.499	141.599	1522.29	237.659	119.936	1429.2	259.183	194.971	1148.1	236.225	-3.65799	1337.65	234.541	-66.8828	1142.29	175.784	215.553	1222.68	416.144	37.5361	1361.85	497.189	29.8403	1121.85	501.76	21.5233	1046.34	495.275	-93.8667	911.166	440.768	-120.714	841.023	509.772	-103.916	822.722	472.335	-162.476	777.582
640	0	286.437	-26.3188	1573.7	167.968	-32.0648	1573.77	279.221	139.253	1522.99	171.176	131.01	1521.45	235.363	109.323	1428.26	257.139	183.878	1147.01	234.174	-14.4278	1336.95	232.869	-78.1808	1141.79	173.64	204.521	1221.44	414.057	27.1251	1361.2	495.136	20.0423	1121.12	499.788	11.7843	1045.59	493.49	-103.496	910.268	438.953	-130.465	840.182	507.858	-113.419	821.784	470.58	-172.166	776.782
641	0	284.123	-36.7895	1573.1	165.67	-42.6585	1573.09	276.766	128.763	1522.33	168.748	120.403	1520.72	232.98	98.68	1427.44	255.023	172.71	1146.04	232.055	-25.2501	1336.4	231.131	-89.6163	1141.5	171.409	193.399	1220.31	411.896	16.6882	1360.71	493.025	10.334	1120.54	497.761	2.20662	1044.99	491.686	-112.868	909.435	437.128	-139.914	839.383	505.931	-122.596	820.906	468.815	-181.481	775.98
642	0	281.73	-47.2425	1572.66	163.297	-53.2533	1572.56	274.213	118.275	1521.78	166.221	109.78	1520.09	230.519	88.0069	1426.76	252.842	161.476	1145.21	229.878	-36.1218	1336.02	229.337	-101.177	1141.4	169.1	182.192	1219.3	409.67	6.22623	1360.39	490.869	0.707936	1120.13	495.69	-7.21568	1044.54	489.87	-121.99	908.679	435.297	-149.067	838.639	503.997	-131.457	820.101	467.04	-190.426	775.186
643	0	279.264	-57.6783	1572.39	160.852	-63.8494	1572.19	271.568	107.788	1521.35	163.6	99.1381	1519.58	227.99	77.3051	1426.21	250.605	150.189	1144.52	227.653	-47.0384	1335.8	227.496	-112.847	1141.5	166.722	170.906	1218.41	407.389	-4.25783	1360.25	488.679	-8.84377	1119.89	493.587	-16.4894	1044.26	488.046	-130.869	908.01	433.466	-157.927	837.959	502.065	-140.013	819.382	465.259	-199.006	774.408
644	0	276.728	-68.0975	1572.29	158.34	-74.4469	1571.99	268.838	97.3036	1521.05	160.893	88.4794	1519.19	225.404	66.5772	1425.81	248.32	138.858	1143.98	225.394	-57.9934	1335.75	225.621	-124.603	1141.78	164.285	159.552	1217.67	405.066	-14.7588	1360.29	486.469	-18.329	1119.83	491.463	-25.6221	1044.14	486.222	-139.518	907.439	431.642	-166.502	837.352	500.144	-148.28	818.757	463.475	-207.234	773.656
645	0	274.128	-78.5008	1572.37	155.766	-85.0457	1571.93	266.032	86.8204	1520.88	158.109	77.805	1518.9	222.771	55.8271	1425.56	245.998	127.5	1143.6	223.114	-68.979	1335.85	223.727	-136.421	1142.23	161.798	148.142	1217.07	402.711	-25.2693	1360.49	484.25	-27.7553	1119.96	489.33	-34.6219	1044.19	484.405	-147.947	906.972	429.831	-174.803	836.824	498.244	-156.273	818.237	461.695	-215.122	772.936
646	0	271.473	-88.8891	1572.61	153.139	-95.6454	1572.03	263.161	76.3394	1520.84	155.259	67.1168	1518.73	220.105	45.0597	1425.45	243.646	116.127	1143.38	220.827	-79.9855	1336.11	221.833	-148.271	1142.84	159.273	136.688	1216.63	400.338	-35.7796	1360.87	482.034	-37.1296	1120.25	487.199	-43.4974	1044.42	482.602	-156.17	906.616	428.042	-182.84	836.381	496.375	-164.011	817.828	459.924	-222.685	772.258
647	0	268.771	-99.263	1573.03	150.467	-106.245	1572.27	260.236	65.8619	1520.94	152.356	56.4179	1518.66	217.416	34.2812	1425.49	241.274	104.756	1143.33	218.549	-91.0022	1336.51	219.956	-160.121	1143.59	156.72	125.205	1216.33	397.96	-46.2784	1361.42	479.831	-46.4573	1120.73	485.081	-52.2568	1044.82	480.821	-164.201	906.376	426.283	-190.629	836.028	494.549	-171.515	817.538	458.172	-229.941	771.626
648	0	266.031	-109.623	1573.6	147.759	-116.845	1572.63	257.271	55.3898	1521.17	149.412	45.7118	1518.7	214.718	23.4989	1425.68	238.89	93.4021	1143.44	216.294	-102.017	1337.05	218.116	-171.938	1144.46	154.149	113.71	1216.19	395.59	-56.7523	1362.13	477.652	-55.7424	1121.37	482.986	-60.9084	1045.39	479.069	-172.055	906.256	424.563	-198.184	835.767	492.776	-178.804	817.373	456.447	-236.911	771.049
649	0	263.264	-119.97	1574.32	145.026	-127.442	1573.11	254.279	44.9257	1521.52	146.442	35.0031	1518.85	212.021	12.7209	1426.01	236.503	82.0808	1143.72	214.076	-113.017	1337.71	216.333	-183.69	1145.43	151.57	102.22	1216.21	393.24	-67.1867	1362.98	475.507	-64.9864	1122.17	480.922	-69.4597	1046.11	477.354	-179.747	906.258	422.891	-205.523	835.602	491.069	-185.903	817.334	454.759	-243.617	770.53
650	0	260.484	-130.303	1575.17	142.281	-138.036	1573.7	251.274	34.4727	1522.01	143.461	24.2967	1519.1	209.338	1.95598	1426.47	234.119	70.8072	1144.15	211.908	-123.99	1338.49	214.626	-195.345	1146.48	148.992	90.7494	1216.37	390.922	-77.5663	1363.97	473.403	-74.1883	1123.12	478.899	-77.9178	1046.99	475.686	-187.294	906.383	421.276	-212.665	835.532	489.439	-192.834	817.426	453.121	-250.085	770.075
651	0	257.702	-140.622	1576.15	139.536	-148.623	1574.37	248.27	24.0346	1522.63	140.483	13.5981	1519.44	206.679	-8.78663	1427.07	231.744	59.5955	1144.73	209.803	-134.921	1339.37	213.014	-206.876	1147.59	146.424	79.3161	1216.67	388.648	-87.8754	1365.1	471.348	-83.3442	1124.21	476.924	-86.2885	1048.02	474.074	-194.71	906.63	419.729	-219.63	835.557	487.897	-199.62	817.648	451.544	-256.34	769.689
652	0	254.932	-150.927	1577.24	136.804	-159.203	1575.13	245.282	13.6158	1523.37	137.523	2.91332	1519.88	204.054	-19.4975	1427.78	229.384	48.459	1145.44	207.772	-145.799	1340.34	211.514	-218.258	1148.75	143.872	67.9352	1217.11	386.428	-98.0983	1366.33	469.351	-92.4477	1125.42	475.003	-94.5767	1049.17	472.525	-202.012	906.997	418.258	-226.438	835.678	486.453	-206.283	818.001	450.041	-262.409	769.376
653	0	252.188	-161.216	1578.42	134.099	-169.771	1575.95	242.324	3.2206	1524.23	134.596	-7.75162	1520.42	201.472	-30.1676	1428.61	227.043	37.4101	1146.29	205.824	-156.611	1341.38	210.139	-229.47	1149.94	141.343	56.6209	1217.68	384.269	-108.221	1367.67	467.417	-101.489	1126.74	473.142	-102.786	1050.44	471.05	-209.214	907.482	416.875	-233.111	835.892	485.118	-212.844	818.481	448.625	-268.322	769.14
654	0	249.483	-171.486	1579.69	131.434	-180.324	1576.82	239.409	-7.14603	1525.2	131.716	-18.3905	1521.04	198.942	-40.7879	1429.53	224.724	26.4595	1147.25	203.966	-167.346	1342.49	208.902	-240.5	1151.15	138.841	45.3862	1218.36	382.18	-118.229	1369.1	465.551	-110.457	1128.15	471.345	-110.92	1051.83	469.656	-216.328	908.08	415.588	-239.671	836.197	483.9	-219.323	819.085	447.311	-274.106	768.987
655	0	246.83	-181.737	1581.02	128.823	-190.859	1577.74	236.55	-17.4793	1526.27	128.895	-28.9975	1521.75	196.469	-51.3504	1430.55	222.43	15.6167	1148.31	202.205	-177.995	1343.66	207.811	-251.337	1152.37	136.372	34.2424	1219.15	380.166	-128.113	1370.6	463.758	-119.339	1129.65	469.616	-118.979	1053.3	468.353	-223.368	908.785	414.408	-246.138	836.591	482.807	-225.738	819.809	446.112	-279.791	768.919
656	0	244.243	-191.964	1582.4	126.278	-201.373	1578.69	233.759	-27.7745	1527.45	126.145	-39.5666	1522.54	194.061	-61.8481	1431.65	220.162	4.88934	1149.46	200.542	-188.55	1344.87	206.869	-261.979	1153.59	133.938	23.1987	1220.04	378.231	-137.863	1372.16	462.042	-128.119	1131.21	467.957	-126.964	1054.85	467.148	-230.343	909.593	413.343	-252.534	837.071	481.843	-232.103	820.645	445.041	-285.403	768.942
657	0	241.732	-202.166	1583.82	123.811	-211.86	1579.66	231.045	-38.0271	1528.71	123.478	-50.0927	1523.41	191.721	-72.2748	1432.83	217.922	-5.71662	1150.69	198.981	-199.004	1346.12	206.077	-272.425	1154.82	131.541	12.2625	1221.01	376.378	-147.474	1373.77	460.404	-136.783	1132.82	466.371	-134.876	1056.47	466.049	-237.263	910.496	412.402	-258.878	837.634	481.013	-238.43	821.588	444.113	-290.971	769.06
658	0	239.31	-212.339	1585.27	121.433	-222.318	1580.65	228.42	-48.2332	1530.06	120.902	-60.5708	1524.36	189.454	-82.6258	1434.06	215.71	-16.1972	1151.99	197.519	-209.354	1347.39	205.431	-282.683	1156.04	129.183	1.43901	1222.07	374.608	-156.943	1375.42	458.846	-145.317	1134.47	464.857	-142.714	1058.14	465.063	-244.136	911.487	411.591	-265.19	838.276	480.318	-244.729	822.629	443.34	-296.518	769.275
659	0	236.986	-222.479	1586.73	119.153	-232.742	1581.66	225.889	-58.3892	1531.47	118.424	-70.9967	1525.38	187.262	-92.898	1435.34	213.528	-26.5506	1153.33	196.154	-219.599	1348.69	204.922	-292.761	1157.27	126.867	-9.26895	1223.19	372.92	-166.271	1377.09	457.368	-153.709	1136.16	463.415	-150.478	1059.85	464.194	-250.967	912.557	410.918	-271.487	838.994	479.76	-251.007	823.758	442.733	-302.067	769.592
660	0	234.767	-232.584	1588.19	116.98	-243.128	1582.67	223.46	-68.4923	1532.95	116.052	-81.3669	1526.46	185.147	-103.09	1436.65	211.378	-36.7771	1154.71	194.883	-229.738	1350	204.537	-302.671	1158.5	124.592	-19.8608	1224.36	371.313	-175.462	1378.77	455.968	-161.946	1137.85	462.045	-158.166	1061.59	463.447	-257.762	913.698	410.388	-277.786	839.782	479.337	-257.269	824.964	442.3	-307.64	770.011
661	0	232.661	-242.65	1589.64	114.92	-253.472	1583.69	221.139	-78.5405	1534.46	113.791	-91.6785	1527.59	183.11	-113.2	1437.99	209.261	-46.8789	1156.12	193.699	-239.774	1351.32	204.261	-312.43	1159.74	122.361	-30.3386	1225.58	369.783	-184.522	1380.46	454.644	-170.023	1139.56	460.745	-165.779	1063.34	462.825	-264.524	914.899	410.003	-284.101	840.636	479.046	-263.517	826.237	442.05	-313.254	770.533
662	0	230.672	-252.675	1591.07	112.977	-263.772	1584.7	218.929	-88.5327	1536.01	111.643	-101.93	1528.78	181.151	-123.231	1439.34	207.178	-56.8605	1157.53	192.595	-249.71	1352.63	204.072	-322.052	1160.98	120.174	-40.7063	1226.83	368.327	-193.461	1382.13	453.393	-177.936	1141.27	459.513	-173.317	1065.09	462.329	-271.257	916.15	409.766	-290.447	841.549	478.881	-269.752	827.564	441.987	-318.923	771.154
663	0	228.804	-262.656	1592.47	111.155	-274.024	1585.71	216.833	-98.4687	1537.57	109.611	-112.119	1529.99	179.271	-133.186	1440.7	205.134	-66.7281	1158.95	191.564	-259.553	1353.94	203.95	-331.557	1162.23	118.033	-50.9705	1228.1	366.94	-202.292	1383.78	452.21	-185.685	1142.96	458.347	-180.783	1066.83	461.96	-277.964	917.438	409.677	-296.833	842.513	478.838	-275.975	828.93	442.113	-324.661	771.869
664	0	227.059	-272.592	1593.83	109.456	-284.226	1586.7	214.853	-108.349	1539.13	107.696	-122.247	1531.23	177.469	-143.067	1442.04	203.131	-76.4893	1160.34	190.599	-269.311	1355.23	203.873	-340.96	1163.49	115.939	-61.1393	1229.38	365.617	-211.029	1385.39	451.091	-193.277	1144.62	457.243	-188.179	1068.56	461.714	-284.647	918.75	409.734	-303.271	843.517	478.908	-282.186	830.322	442.427	-330.476	772.671
665	0	225.436	-282.483	1595.13	107.878	-294.376	1587.68	212.989	-118.176	1540.67	105.897	-132.313	1532.48	175.744	-152.882	1443.35	201.171	-86.1532	1161.7	189.692	-278.991	1356.49	203.817	-350.281	1164.74	113.896	-71.2227	1230.66	364.355	-219.687	1386.96	450.03	-200.721	1146.26	456.199	-195.51	1070.24	461.589	-291.31	920.071	409.933	-309.767	844.55	479.082	-288.384	831.722	442.924	-336.375	773.546
666	0	223.935	-292.327	1596.38	106.422	-304.473	1588.63	211.241	-127.953	1542.17	104.213	-142.321	1533.72	174.096	-162.636	1444.63	199.26	-95.7296	1163.02	188.834	-288.603	1357.71	203.76	-359.537	1165.99	111.905	-81.2313	1231.92	363.148	-228.286	1388.46	449.024	-208.034	1147.84	455.212	-202.784	1071.88	461.579	-297.954	921.386	410.27	-316.33	845.598	479.352	-294.569	833.112	443.597	-342.362	774.48
667	0	222.553	-302.126	1597.55	105.083	-314.517	1589.56	209.608	-137.682	1543.61	102.642	-152.271	1534.94	172.524	-172.338	1445.85	197.401	-105.229	1164.28	188.019	-298.158	1358.89	203.684	-368.743	1167.21	109.97	-91.1765	1233.14	361.992	-236.842	1389.88	448.066	-215.234	1149.37	454.277	-210.009	1073.46	461.677	-304.585	922.677	410.735	-322.962	846.645	479.707	-300.743	834.475	444.435	-348.438	775.455
668	0	221.286	-311.881	1598.64	103.857	-324.509	1590.44	208.088	-147.37	1544.98	101.182	-162.168	1536.12	171.027	-181.994	1447.01	195.598	-114.661	1165.48	187.241	-307.667	1360.01	203.572	-377.916	1168.4	108.096	-101.069	1234.31	360.885	-245.375	1391.22	447.152	-222.346	1150.83	453.391	-217.195	1074.96	461.875	-311.207	923.925	411.319	-329.667	847.672	480.135	-306.905	835.791	445.425	-354.602	776.448
669	0	220.13	-321.595	1599.65	102.741	-334.451	1591.28	206.678	-157.021	1546.26	99.8283	-172.016	1537.24	169.605	-191.616	1448.09	193.857	-124.038	1166.58	186.494	-317.14	1361.06	203.411	-387.069	1169.54	106.286	-110.92	1235.41	359.825	-253.904	1392.45	446.277	-229.395	1152.2	452.552	-224.355	1076.37	462.162	-317.826	925.112	412.01	-336.445	848.66	480.624	-313.059	837.04	446.552	-360.852	777.437
670	0	219.08	-331.271	1600.55	101.727	-344.346	1592.06	205.375	-166.641	1547.42	98.578	-181.821	1538.28	168.259	-201.211	1449.08	192.182	-133.368	1167.6	185.775	-326.589	1362.02	203.191	-396.216	1170.6	104.547	-120.738	1236.44	358.809	-262.447	1393.56	445.439	-236.412	1153.47	451.755	-231.503	1077.68	462.528	-324.447	926.217	412.796	-343.296	849.588	481.163	-319.209	838.202	447.798	-367.182	778.395
671	0	218.129	-340.915	1601.34	100.81	-354.196	1592.76	204.177	-176.237	1548.46	97.4271	-191.588	1539.22	166.988	-210.789	1449.95	190.578	-142.66	1168.5	185.081	-336.024	1362.88	202.909	-405.368	1171.57	102.885	-130.531	1237.38	357.837	-271.022	1394.54	444.634	-243.425	1154.62	450.999	-238.654	1078.87	462.96	-331.078	927.221	413.662	-350.218	850.434	481.74	-325.359	839.257	449.142	-373.587	779.295
672	0	217.272	-350.531	1602.01	99.9839	-364.008	1593.39	203.079	-185.817	1549.35	96.3718	-201.325	1540.05	165.793	-220.36	1450.72	189.051	-151.925	1169.3	184.41	-345.456	1363.62	202.563	-414.536	1172.42	101.304	-140.307	1238.2	356.91	-279.646	1395.38	443.861	-250.466	1155.64	450.281	-245.827	1079.93	463.445	-337.728	928.103	414.591	-357.207	851.175	482.342	-331.516	840.184	450.563	-380.06	780.11
673	0	216.502	-360.126	1602.56	99.2418	-373.786	1593.93	202.079	-195.388	1550.08	95.4083	-211.038	1540.75	164.675	-229.934	1451.35	187.607	-161.168	1169.96	183.761	-354.894	1364.24	202.157	-423.729	1173.14	99.8115	-150.07	1238.91	356.029	-288.335	1396.06	443.117	-257.565	1156.52	449.598	-253.037	1080.85	463.97	-344.404	928.846	415.567	-364.26	851.789	482.959	-337.685	840.967	452.038	-386.595	780.814
674	0	215.813	-369.707	1602.97	98.5778	-383.537	1594.35	201.172	-204.958	1550.65	94.5331	-220.735	1541.3	163.637	-239.519	1451.84	186.253	-170.397	1170.49	183.135	-364.347	1364.72	201.698	-432.954	1173.7	98.4142	-159.824	1239.49	355.195	-297.104	1396.58	442.402	-264.75	1157.24	448.949	-260.304	1081.61	464.523	-351.117	929.43	416.573	-371.37	852.256	483.578	-343.875	841.587	453.546	-393.184	781.379
675	0	215.201	-379.28	1603.23	97.9862	-393.267	1594.67	200.355	-214.534	1551.03	93.7429	-230.424	1541.69	162.679	-249.125	1452.18	184.996	-179.62	1170.89	182.533	-373.825	1365.04	201.194	-442.218	1174.1	97.1184	-169.573	1239.94	354.411	-305.967	1396.92	441.718	-272.049	1157.8	448.332	-267.646	1082.2	465.089	-357.876	929.839	417.591	-378.532	852.555	484.19	-350.096	842.029	455.061	-399.819	781.782
676	0	214.659	-388.855	1603.35	97.462	-402.985	1594.85	199.626	-224.125	1551.23	93.035	-240.112	1541.92	161.805	-258.759	1452.37	183.843	-188.84	1171.13	181.958	-383.335	1365.21	200.658	-451.527	1174.32	95.9306	-179.319	1240.23	353.681	-314.935	1397.08	441.065	-279.485	1158.17	447.747	-275.081	1082.61	465.658	-364.692	930.058	418.605	-385.742	852.667	484.786	-356.357	842.28	456.562	-406.495	782.001
677	0	214.184	-398.44	1603.32	97.0009	-412.698	1594.9	198.983	-233.738	1551.23	92.4072	-249.809	1541.96	161.016	-268.429	1452.4	182.802	-198.067	1171.22	181.413	-392.884	1365.21	200.1	-460.886	1174.34	94.8571	-189.064	1240.37	353.007	-324.019	1397.06	440.445	-287.08	1158.36	447.193	-282.626	1082.84	466.218	-371.576	930.076	419.597	-392.994	852.578	485.358	-362.669	842.33	458.027	-413.204	782.015
678	0	213.772	-408.043	1603.13	96.5995	-422.414	1594.8	198.423	-243.38	1551.04	91.8579	-259.522	1541.83	160.317	-278.143	1452.26	181.879	-207.305	1171.16	180.901	-402.479	1365.03	199.535	-470.3	1174.17	93.9041	-198.811	1240.35	352.393	-333.229	1396.85	439.861	-294.853	1158.36	446.67	-290.299	1082.88	466.758	-378.54	929.882	420.553	-400.284	852.275	485.898	-369.043	842.169	459.434	-419.943	781.809
679	0	213.42	-417.673	1602.78	96.2551	-432.141	1594.55	197.945	-253.06	1550.65	91.3863	-269.258	1541.5	159.711	-287.906	1451.95	181.082	-216.563	1170.94	180.427	-412.125	1364.68	198.973	-479.773	1173.79	93.0773	-208.56	1240.17	351.844	-342.572	1396.46	439.317	-302.818	1158.16	446.179	-298.114	1082.72	467.272	-385.595	929.468	421.459	-407.61	851.747	486.401	-375.49	841.792	460.764	-426.709	781.369
680	0	213.127	-427.339	1602.27	95.9662	-441.887	1594.15	197.549	-262.783	1550.07	90.9925	-279.024	1540.99	159.2	-297.723	1451.47	180.416	-225.85	1170.56	179.996	-421.828	1364.15	198.426	-489.311	1173.21	92.3819	-218.317	1239.82	351.365	-352.055	1395.87	438.817	-310.988	1157.76	445.72	-306.087	1082.36	467.751	-392.753	928.831	422.304	-414.97	850.989	486.865	-382.025	841.195	462.001	-433.499	780.685
681	0	212.892	-437.048	1601.6	95.7323	-451.661	1593.58	197.236	-272.556	1549.3	90.6772	-288.829	1540.29	158.79	-307.601	1450.83	179.887	-235.174	1170.02	179.613	-431.593	1363.44	197.905	-498.916	1172.43	91.8224	-228.084	1239.31	350.958	-361.683	1395.1	438.365	-319.371	1157.17	445.295	-314.23	1081.81	468.19	-400.025	927.969	423.079	-422.365	849.996	487.286	-388.659	840.379	463.13	-440.315	779.751
682	0	212.715	-446.808	1600.78	95.5539	-461.47	1592.86	197.007	-282.385	1548.36	90.4419	-298.678	1539.41	158.484	-317.542	1450.02	179.498	-244.548	1169.32	179.282	-441.425	1362.55	197.415	-508.595	1171.45	91.4025	-237.865	1238.63	350.63	-371.46	1394.15	437.965	-327.976	1156.38	444.905	-322.555	1081.05	468.586	-407.424	926.882	423.775	-429.799	848.768	487.664	-395.405	839.347	464.141	-447.16	778.566
683	0	212.598	-456.628	1599.81	95.4322	-471.32	1591.98	196.864	-292.277	1547.24	90.2891	-308.577	1538.35	158.285	-327.551	1449.06	179.252	-253.982	1168.47	179.009	-451.327	1361.49	196.965	-518.351	1170.29	91.125	-247.667	1237.8	350.385	-381.388	1393.02	437.622	-336.805	1155.4	444.553	-331.072	1080.11	468.938	-414.961	925.574	424.388	-437.275	847.309	488.001	-402.278	838.102	465.025	-454.037	777.129
684	0	212.542	-466.513	1598.7	95.3698	-481.219	1590.94	196.809	-302.235	1545.97	90.2217	-318.531	1537.13	158.196	-337.632	1447.95	179.148	-263.488	1167.46	178.8	-461.303	1360.28	196.557	-528.189	1168.96	90.9916	-257.494	1236.81	350.227	-391.469	1391.73	437.341	-345.863	1154.23	444.241	-339.79	1078.98	469.246	-422.648	924.053	424.917	-444.803	845.627	488.299	-409.291	836.652	465.777	-460.955	775.445
685	0	212.551	-476.471	1597.45	95.3697	-491.172	1589.76	196.846	-312.266	1544.55	90.2435	-328.545	1535.76	158.222	-347.786	1446.69	179.186	-273.08	1166.31	178.659	-471.356	1358.91	196.195	-538.115	1167.46	91.0023	-267.355	1235.68	350.16	-401.702	1390.28	437.126	-355.151	1152.88	443.97	-348.717	1077.67	469.51	-430.496	922.328	425.361	-452.391	843.729	488.561	-416.457	835.008	466.396	-467.924	773.523
686	0	212.628	-486.505	1596.09	95.4358	-501.185	1588.45	196.979	-322.372	1543	90.3584	-338.622	1534.25	158.364	-358.016	1445.31	179.361	-282.771	1165.02	178.592	-481.491	1357.4	195.879	-548.134	1165.81	91.1558	-277.255	1234.41	350.188	-412.087	1388.68	436.98	-364.669	1151.36	443.743	-357.857	1076.19	469.734	-438.516	920.411	425.725	-460.053	841.631	488.792	-423.79	833.182	466.885	-474.954	771.375
687	0	212.778	-496.621	1594.61	95.5726	-511.262	1587.02	197.211	-332.557	1541.34	90.571	-348.767	1532.62	158.624	-368.324	1443.82	179.668	-292.571	1163.61	178.604	-491.709	1355.78	195.609	-558.251	1164.03	91.449	-287.204	1233.03	350.314	-422.62	1386.95	436.905	-374.416	1149.68	443.561	-367.215	1074.55	469.921	-446.718	918.316	426.011	-467.802	839.347	488.997	-431.304	831.188	467.248	-482.06	769.015
688	0	213.005	-506.822	1593.05	95.785	-521.406	1585.48	197.546	-342.826	1539.58	90.8856	-358.982	1530.89	159.003	-378.711	1442.24	180.099	-302.494	1162.09	178.698	-502.013	1354.05	195.384	-568.473	1162.12	91.8773	-297.209	1231.54	350.54	-433.298	1385.1	436.905	-384.392	1147.86	443.426	-376.795	1072.76	470.076	-455.113	916.061	426.229	-475.655	836.896	489.183	-439.011	829.044	467.495	-489.259	766.462
689	0	213.314	-517.111	1591.42	96.0781	-531.621	1583.86	197.99	-353.179	1537.76	91.3066	-369.27	1529.08	159.5	-389.177	1440.57	180.643	-312.549	1160.47	178.877	-512.405	1352.23	195.204	-578.802	1160.12	92.4337	-307.28	1229.96	350.867	-444.113	1383.15	436.978	-394.594	1145.9	443.337	-386.598	1070.84	470.204	-463.71	913.665	426.384	-483.628	834.3	489.355	-446.924	826.767	467.636	-496.57	763.739
690	0	213.712	-527.49	1589.73	96.4572	-541.91	1582.18	198.544	-363.619	1535.88	91.8377	-379.631	1527.21	160.115	-399.724	1438.86	181.288	-322.747	1158.77	179.147	-522.886	1350.35	195.069	-589.244	1158.04	93.1098	-317.425	1228.32	351.297	-455.058	1381.12	437.126	-405.021	1143.83	443.296	-396.625	1068.82	470.31	-472.518	911.15	426.487	-491.741	831.581	489.519	-455.057	824.38	467.685	-504.011	760.869
691	0	214.202	-537.961	1588.02	96.9273	-552.273	1580.46	199.212	-374.146	1533.97	92.4824	-390.067	1525.31	160.844	-410.35	1437.1	182.021	-333.095	1157.01	179.508	-533.457	1348.44	194.979	-599.802	1155.9	93.895	-327.653	1226.64	351.829	-466.125	1379.02	437.345	-415.669	1141.67	443.301	-406.875	1066.69	470.399	-481.546	908.541	426.548	-500.013	828.767	489.683	-463.421	821.905	467.656	-511.604	757.881
692	0	214.789	-548.522	1586.29	97.4932	-562.712	1578.74	199.997	-384.762	1532.06	93.243	-400.578	1523.41	161.685	-421.055	1435.34	182.825	-343.6	1155.21	179.962	-544.117	1346.51	194.936	-610.478	1153.73	94.7771	-337.972	1224.94	352.461	-477.302	1376.88	437.632	-426.534	1139.42	443.35	-417.345	1064.5	470.476	-490.801	905.863	426.576	-508.461	825.884	489.851	-472.028	819.368	467.565	-519.374	754.805
693	0	215.478	-559.175	1584.58	98.1591	-573.227	1577.02	200.899	-395.465	1530.16	94.1207	-411.165	1521.52	162.632	-431.838	1433.59	183.685	-354.267	1153.4	180.509	-554.866	1344.6	194.941	-621.273	1151.57	95.7427	-348.39	1223.24	353.191	-488.578	1374.72	437.982	-437.611	1137.13	443.442	-428.034	1062.26	470.547	-500.291	903.146	426.581	-517.106	822.961	490.028	-480.89	816.796	467.43	-527.342	751.675
694	0	216.272	-569.915	1582.91	98.9286	-583.818	1575.35	201.918	-406.254	1528.31	95.1157	-421.827	1519.68	163.679	-442.695	1431.87	184.583	-365.096	1151.6	181.15	-565.701	1342.73	195.001	-632.188	1149.42	96.7769	-358.914	1221.58	354.014	-499.939	1372.56	438.39	-448.893	1134.8	443.573	-438.936	1059.99	470.614	-510.022	900.418	426.572	-525.965	820.03	490.219	-490.017	814.217	467.267	-535.535	748.527
695	0	217.174	-580.742	1581.3	99.8043	-594.483	1573.76	203.053	-417.127	1526.53	96.2264	-432.562	1517.92	164.819	-453.624	1430.21	185.504	-376.088	1149.84	181.883	-576.622	1340.93	195.118	-643.222	1147.35	97.8643	-369.549	1219.98	354.926	-511.372	1370.43	438.848	-460.373	1132.46	443.74	-450.046	1057.72	470.682	-519.999	897.71	426.557	-535.058	817.124	490.427	-499.421	811.661	467.091	-543.977	745.396
696	0	218.184	-591.651	1579.77	100.788	-605.223	1572.26	204.3	-428.08	1524.84	97.4498	-443.368	1516.26	166.043	-464.62	1428.64	186.431	-387.24	1148.13	182.704	-587.622	1339.23	195.298	-654.372	1145.37	98.9892	-380.299	1218.46	355.921	-522.861	1368.37	439.348	-472.039	1130.15	443.94	-461.356	1055.48	470.753	-530.227	895.055	426.543	-544.4	814.274	490.653	-509.11	809.159	466.918	-552.691	742.323
697	0	219.304	-602.638	1578.35	101.879	-616.033	1570.9	205.656	-439.11	1523.26	98.7816	-454.243	1514.74	167.342	-475.679	1427.18	187.349	-398.545	1146.52	183.609	-598.699	1337.65	195.548	-665.637	1143.52	100.136	-391.167	1217.06	356.992	-534.393	1366.38	439.882	-483.88	1127.89	444.168	-472.857	1053.29	470.828	-540.71	892.484	426.537	-554.01	811.515	490.899	-519.094	806.741	466.758	-561.703	739.344
698	0	220.53	-613.698	1577.06	103.078	-626.912	1569.68	207.113	-450.21	1521.82	100.215	-465.183	1513.37	168.705	-486.795	1425.84	188.245	-409.995	1145.02	184.593	-609.846	1336.22	195.872	-677.011	1141.84	101.289	-402.153	1215.79	358.13	-545.952	1364.51	440.442	-495.882	1125.7	444.421	-484.542	1051.18	470.91	-551.451	890.029	426.542	-563.902	808.88	491.164	-529.381	804.438	466.622	-571.036	736.498
699	0	221.862	-624.825	1575.91	104.382	-637.856	1568.64	208.665	-461.374	1520.53	101.743	-476.183	1512.18	170.122	-497.961	1424.66	189.109	-421.577	1143.65	185.648	-621.058	1334.96	196.273	-688.488	1140.37	102.436	-413.256	1214.67	359.327	-557.526	1362.77	441.019	-508.027	1123.62	444.696	-496.397	1049.18	470.999	-562.45	887.72	426.561	-574.09	806.401	491.447	-539.978	802.278	466.517	-580.711	733.823
700	0	223.293	-636.012	1574.92	105.786	-648.86	1567.79	210.303	-472.596	1519.42	103.357	-487.24	1511.2	171.581	-509.171	1423.63	189.931	-433.278	1142.44	186.766	-632.326	1333.9	196.753	-700.061	1139.13	103.563	-424.472	1213.73	360.572	-569.101	1361.19	441.606	-520.296	1121.68	444.989	-508.411	1047.31	471.094	-573.71	885.586	426.596	-584.586	804.111	491.745	-550.892	800.289	466.449	-590.748	731.354
701	0	224.819	-647.252	1574.1	107.286	-659.921	1567.14	212.015	-483.868	1518.5	105.045	-498.346	1510.43	173.072	-520.417	1422.79	190.707	-445.082	1141.4	187.936	-643.642	1333.05	197.312	-711.721	1138.16	104.66	-435.793	1212.98	361.855	-580.665	1359.79	442.197	-532.671	1119.88	445.299	-520.572	1045.59	471.196	-585.229	883.654	426.645	-595.402	802.037	492.053	-562.126	798.496	466.417	-601.166	729.122
702	0	226.432	-658.537	1573.46	108.874	-671.033	1566.72	213.791	-495.181	1517.78	106.796	-509.496	1509.89	174.582	-531.691	1422.13	191.433	-456.969	1140.56	189.149	-654.999	1332.42	197.945	-723.456	1137.48	105.72	-447.211	1212.43	363.164	-592.21	1358.59	442.787	-545.13	1118.27	445.624	-532.865	1044.05	471.304	-597.005	881.948	426.708	-606.548	800.208	492.368	-573.686	796.92	466.42	-611.98	727.157
703	0	228.123	-669.859	1573.01	110.541	-682.19	1566.52	215.619	-506.527	1517.26	108.597	-520.683	1509.6	176.101	-542.985	1421.67	192.109	-468.919	1139.91	190.392	-666.387	1332.02	198.646	-735.255	1137.1	106.735	-458.714	1212.08	364.489	-603.728	1357.59	443.372	-557.651	1116.87	445.964	-545.276	1042.69	471.418	-609.035	880.487	426.781	-618.03	798.645	492.684	-585.572	795.579	466.454	-623.204	725.482
704	0	229.882	-681.209	1572.74	112.279	-693.385	1566.54	217.485	-517.897	1516.95	110.437	-531.9	1509.54	177.618	-554.29	1421.41	192.737	-480.913	1139.47	191.653	-677.796	1331.86	199.403	-747.102	1137.03	107.704	-470.289	1211.95	365.818	-615.212	1356.81	443.95	-570.213	1115.67	446.321	-557.79	1041.54	471.538	-621.316	879.286	426.861	-629.855	797.367	492.995	-597.785	794.485	466.514	-634.847	724.116
705	0	231.697	-692.579	1572.66	114.076	-704.611	1566.79	219.376	-529.281	1516.86	112.301	-543.14	1509.73	179.124	-565.6	1421.34	193.322	-492.929	1139.24	192.918	-689.218	1331.93	200.204	-758.982	1137.26	108.626	-481.919	1212.02	367.139	-626.661	1356.25	444.522	-582.796	1114.71	446.694	-570.393	1040.61	471.661	-633.841	878.355	426.942	-642.026	796.388	493.295	-610.323	793.646	466.591	-646.918	723.072
706	0	233.557	-703.959	1572.76	115.92	-715.862	1567.25	221.28	-540.672	1516.97	114.176	-554.394	1510.16	180.608	-576.906	1421.47	193.87	-504.944	1139.22	194.174	-700.642	1332.21	201.033	-770.875	1137.79	109.502	-493.586	1212.28	368.441	-638.072	1355.92	445.087	-595.382	1113.98	447.088	-583.069	1039.89	471.789	-646.603	877.701	427.02	-654.544	795.717	493.578	-623.182	793.065	466.675	-659.42	722.355
707	0	235.447	-715.343	1573.02	117.797	-727.128	1567.91	223.182	-552.06	1517.27	116.049	-565.655	1510.81	182.065	-588.201	1421.79	194.39	-516.94	1139.4	195.409	-712.059	1332.71	201.871	-782.765	1138.59	110.337	-505.271	1212.74	369.715	-649.446	1355.79	445.65	-607.953	1113.48	447.505	-595.805	1039.38	471.92	-659.593	877.321	427.09	-667.407	795.355	493.836	-636.357	792.739	466.757	-672.354	721.968
708	0	237.355	-726.72	1573.44	119.694	-738.404	1568.76	225.07	-563.437	1517.75	117.907	-576.916	1511.66	183.486	-599.477	1422.28	194.893	-528.895	1139.77	196.61	-723.46	1333.4	202.7	-794.632	1139.63	111.138	-516.954	1213.37	370.952	-660.787	1355.88	446.214	-620.496	1113.21	447.949	-608.588	1039.09	472.054	-672.801	877.212	427.145	-680.61	795.301	494.065	-649.837	792.657	466.826	-685.716	721.905
709	0	239.265	-738.084	1574.01	121.597	-749.681	1569.78	226.932	-574.797	1518.4	119.738	-588.17	1512.7	184.866	-610.73	1422.93	195.389	-540.792	1140.31	197.767	-734.836	1334.26	203.499	-806.458	1140.87	111.914	-528.613	1214.16	372.142	-672.099	1356.15	446.784	-633	1113.16	448.425	-621.406	1039	472.19	-686.216	877.362	427.181	-694.145	795.545	494.258	-663.613	792.808	466.872	-699.501	722.154
710	0	241.164	-749.429	1574.7	123.491	-760.951	1570.94	228.756	-586.133	1519.19	121.53	-599.41	1513.9	186.2	-621.954	1423.73	195.889	-552.613	1141.01	198.867	-746.179	1335.27	204.249	-818.225	1142.28	112.673	-540.226	1215.09	373.281	-683.387	1356.59	447.365	-645.458	1113.31	448.937	-634.249	1039.1	472.326	-699.826	877.757	427.191	-707.999	796.075	494.408	-677.67	793.175	466.886	-713.698	722.7
711	0	243.037	-760.748	1575.51	125.36	-772.207	1572.22	230.532	-597.44	1520.11	123.273	-610.63	1515.24	187.487	-633.144	1424.66	196.407	-564.344	1141.86	199.903	-757.483	1336.41	204.933	-829.917	1143.81	113.427	-551.773	1216.14	374.362	-694.658	1357.19	447.962	-657.867	1113.65	449.487	-647.11	1039.36	472.462	-713.615	878.38	427.172	-722.158	796.873	494.511	-691.991	793.736	466.858	-728.293	723.525
712	0	244.869	-772.036	1576.41	127.191	-783.442	1573.6	232.252	-608.712	1521.14	124.958	-621.825	1516.69	188.724	-644.296	1425.7	196.952	-575.973	1142.83	200.867	-768.74	1337.64	205.533	-841.518	1145.42	114.185	-563.235	1217.29	375.382	-705.918	1357.92	448.579	-670.225	1114.16	450.078	-659.982	1039.79	472.595	-727.57	879.208	427.12	-736.6	797.917	494.561	-706.559	794.469	466.782	-743.267	724.607
713	0	246.648	-783.291	1577.38	128.969	-794.651	1575.06	233.906	-619.948	1522.25	126.578	-632.988	1518.22	189.911	-655.407	1426.83	197.535	-587.489	1143.9	201.754	-779.944	1338.94	206.035	-853.017	1147.06	114.958	-574.592	1218.52	376.339	-717.175	1358.75	449.221	-682.537	1114.81	450.712	-672.86	1040.35	472.723	-741.675	880.22	427.029	-751.303	799.185	494.554	-721.353	795.353	466.651	-758.599	725.923
714	0	248.36	-794.509	1578.41	130.681	-805.827	1576.56	235.489	-631.145	1523.42	128.126	-644.117	1519.82	191.047	-666.476	1428.03	198.165	-598.885	1145.05	202.559	-791.092	1340.29	206.43	-864.401	1148.69	115.755	-585.83	1219.81	377.23	-728.435	1359.68	449.89	-694.809	1115.58	451.389	-685.743	1041.02	472.842	-755.915	881.393	426.898	-766.24	800.65	494.485	-736.352	796.362	466.458	-774.263	727.449
715	0	249.992	-805.688	1579.49	132.315	-816.966	1578.1	236.995	-642.302	1524.65	129.597	-655.207	1521.45	192.134	-677.499	1429.29	198.85	-610.156	1146.28	203.281	-802.179	1341.66	206.71	-875.661	1150.28	116.585	-596.936	1221.15	378.058	-739.703	1360.67	450.586	-707.05	1116.45	452.108	-698.63	1041.79	472.949	-770.273	882.704	426.725	-781.382	802.287	494.351	-751.533	797.478	466.2	-790.232	729.163
716	0	251.535	-816.83	1580.59	133.859	-828.065	1579.64	238.421	-653.417	1525.9	130.989	-666.255	1523.09	193.173	-688.477	1430.59	199.594	-621.299	1147.55	203.921	-813.203	1343.03	206.871	-886.79	1151.8	117.454	-607.901	1222.52	378.823	-750.983	1361.71	451.308	-719.271	1117.4	452.865	-711.522	1042.64	473.039	-784.735	884.131	426.507	-796.699	804.071	494.149	-766.875	798.678	465.873	-806.472	731.041
717	0	252.98	-827.934	1581.71	135.303	-839.12	1581.17	239.766	-664.493	1527.17	132.298	-677.259	1524.73	194.167	-699.408	1431.92	200.4	-632.312	1148.85	204.48	-824.16	1344.39	206.917	-897.782	1153.23	118.365	-618.719	1223.9	379.527	-762.278	1362.77	452.055	-731.487	1118.42	453.656	-724.421	1043.55	473.107	-799.286	885.655	426.244	-812.16	805.979	493.877	-782.354	799.948	465.475	-822.951	733.063
718	0	254.317	-839.003	1582.83	136.638	-850.131	1582.67	241.027	-675.529	1528.45	133.524	-688.218	1526.34	195.118	-710.291	1433.25	201.271	-643.199	1150.17	204.961	-835.051	1345.72	206.852	-908.635	1154.56	119.322	-629.389	1225.28	380.174	-773.59	1363.86	452.821	-743.709	1119.48	454.476	-737.33	1044.51	473.148	-813.913	887.256	425.935	-827.736	807.988	493.535	-797.949	801.272	465.003	-839.632	735.21
719	0	255.542	-850.037	1583.94	137.859	-861.095	1584.12	242.205	-686.526	1529.72	134.668	-699.13	1527.91	196.029	-721.127	1434.58	202.204	-653.961	1151.5	205.371	-845.875	1347.01	206.685	-919.347	1155.78	120.325	-639.914	1226.66	380.768	-784.917	1364.95	453.601	-755.953	1120.56	455.317	-750.254	1045.5	473.155	-828.603	888.919	425.577	-843.397	810.079	493.121	-813.64	802.64	464.456	-856.478	737.464
720	0	256.651	-861.041	1585.03	138.961	-872.014	1585.51	243.301	-697.488	1530.97	135.73	-709.994	1529.43	196.903	-731.917	1435.9	203.196	-664.605	1152.83	205.716	-856.632	1348.24	206.431	-929.92	1156.88	121.371	-650.3	1228.02	381.314	-796.257	1366.03	454.388	-768.231	1121.67	456.172	-763.195	1046.51	473.124	-843.344	890.631	425.171	-859.118	812.235	492.638	-829.409	804.043	463.834	-873.452	739.808
721	0	257.64	-872.016	1586.09	139.941	-882.887	1586.82	244.317	-708.414	1532.2	136.712	-720.811	1530.89	197.743	-742.66	1437.18	204.244	-675.138	1154.13	206.002	-867.324	1349.41	206.105	-940.356	1157.87	122.458	-660.557	1229.35	381.815	-807.607	1367.1	455.174	-780.555	1122.78	457.032	-776.157	1047.53	473.049	-858.127	892.38	424.714	-874.874	814.44	492.085	-845.239	805.477	463.134	-890.516	742.227
722	0	258.51	-882.966	1587.1	140.797	-893.716	1588.05	245.256	-719.308	1533.4	137.616	-731.581	1532.29	198.55	-753.358	1438.43	205.341	-685.567	1155.41	206.239	-877.954	1350.52	205.724	-950.662	1158.77	123.578	-670.695	1230.65	382.277	-818.961	1368.15	455.95	-792.935	1123.89	457.889	-789.143	1048.55	472.924	-872.941	894.155	424.204	-890.643	816.681	491.466	-861.114	806.937	462.358	-907.635	744.707
723	0	259.262	-893.894	1588.07	141.533	-904.504	1589.18	246.12	-730.172	1534.56	138.447	-742.305	1533.6	199.327	-764.012	1439.63	206.479	-695.903	1156.65	206.435	-888.523	1351.56	205.309	-960.846	1159.57	124.727	-680.73	1231.91	382.706	-830.314	1369.17	456.71	-805.377	1124.99	458.734	-802.155	1049.56	472.746	-887.779	895.947	423.639	-906.407	818.946	490.784	-877.023	808.42	461.503	-924.775	747.232
724	0	259.899	-904.801	1588.98	142.149	-915.253	1590.21	246.913	-741.006	1535.69	139.206	-752.986	1534.83	200.075	-774.624	1440.77	207.65	-706.156	1157.85	206.598	-899.035	1352.51	204.878	-970.918	1160.3	125.894	-690.676	1233.11	383.106	-841.658	1370.16	457.445	-817.885	1126.07	459.559	-815.194	1050.56	472.511	-902.633	897.748	423.017	-922.148	821.224	490.042	-892.952	809.923	460.569	-941.904	749.79
725	0	260.426	-915.691	1589.82	142.651	-925.966	1591.14	247.638	-751.814	1536.76	139.896	-763.624	1535.98	200.796	-785.198	1441.84	208.845	-716.337	1158.99	206.735	-909.496	1353.39	204.451	-980.892	1160.95	127.072	-700.548	1234.25	383.481	-852.986	1371.11	458.149	-830.461	1127.12	460.355	-828.259	1051.54	472.215	-917.495	899.549	422.338	-937.854	823.504	489.245	-908.893	811.443	459.557	-958.993	752.364
726	0	260.848	-926.565	1590.59	143.045	-936.646	1591.94	248.298	-762.597	1537.78	140.523	-774.224	1537.03	201.489	-795.735	1442.84	210.054	-726.458	1160.07	206.855	-919.909	1354.18	204.045	-990.781	1161.54	128.251	-710.364	1235.33	383.835	-864.293	1372.02	458.815	-843.1	1128.14	461.116	-841.35	1052.49	471.857	-932.358	901.342	421.599	-953.512	825.775	488.396	-924.836	812.977	458.466	-976.018	754.941
727	0	261.172	-937.424	1591.28	143.338	-947.296	1592.62	248.897	-773.357	1538.74	141.087	-784.789	1537.98	202.156	-806.24	1443.75	211.267	-736.53	1161.07	206.962	-930.282	1354.88	203.675	-1000.6	1162.06	129.422	-720.138	1236.33	384.171	-875.571	1372.87	459.44	-855.798	1129.12	461.835	-854.461	1053.39	471.436	-947.215	903.116	420.8	-969.113	828.028	487.501	-940.772	814.518	457.296	-992.958	757.504
728	0	261.405	-948.269	1591.88	143.537	-957.92	1593.18	249.437	-784.096	1539.62	141.594	-795.323	1538.82	202.794	-816.718	1444.57	212.474	-746.563	1161.98	207.064	-940.62	1355.49	203.353	-1010.37	1162.52	130.575	-729.886	1237.24	384.492	-886.817	1373.66	460.02	-868.544	1130.04	462.507	-867.591	1054.24	470.952	-962.059	904.862	419.942	-984.647	830.25	486.563	-956.695	816.06	456.05	-1009.79	760.039
729	0	261.554	-959.102	1592.38	143.651	-968.521	1593.61	249.92	-794.817	1540.42	142.044	-805.829	1539.55	203.403	-827.174	1445.29	213.665	-756.567	1162.81	207.162	-950.929	1355.99	203.088	-1020.1	1162.91	131.701	-739.622	1238.05	384.799	-898.024	1374.38	460.553	-881.327	1130.89	463.128	-880.731	1055.03	470.406	-976.883	906.569	419.024	-1000.11	832.428	485.588	-972.595	817.594	454.73	-1026.51	762.529
730	0	261.628	-969.923	1592.78	143.689	-979.104	1593.91	250.349	-805.521	1541.12	142.44	-816.315	1540.15	203.98	-837.612	1445.89	214.83	-766.552	1163.53	207.261	-961.217	1356.39	202.885	-1029.8	1163.22	132.791	-749.359	1238.76	385.092	-909.19	1375.02	461.037	-894.131	1131.67	463.695	-893.876	1055.75	469.801	-991.677	908.223	418.05	-1015.49	834.551	484.579	-988.463	819.107	453.339	-1043.1	764.959
731	0	261.633	-980.733	1593.06	143.657	-989.672	1594.07	250.725	-816.212	1541.73	142.784	-826.784	1540.63	204.524	-848.04	1446.38	215.959	-776.525	1164.14	207.36	-971.492	1356.67	202.748	-1039.51	1163.44	133.836	-759.109	1239.36	385.37	-920.313	1375.57	461.473	-906.943	1132.37	464.205	-907.018	1056.38	469.138	-1006.43	909.812	417.021	-1030.78	836.604	483.54	-1004.29	820.587	451.883	-1059.55	767.312
732	0	261.577	-991.532	1593.24	143.565	-1000.23	1594.1	251.048	-826.892	1542.21	143.078	-837.242	1540.98	205.03	-858.464	1446.75	217.042	-786.493	1164.64	207.46	-981.759	1356.83	202.675	-1049.22	1163.57	134.83	-768.883	1239.84	385.633	-931.392	1376.01	461.86	-919.743	1132.96	464.656	-920.147	1056.91	468.423	-1021.14	911.322	415.941	-1045.98	838.574	482.476	-1020.07	822.02	450.366	-1075.86	769.576
733	0	261.466	-1002.32	1593.29	143.417	-1010.78	1593.99	251.319	-837.564	1542.57	143.32	-847.697	1541.18	205.495	-868.89	1446.99	218.069	-796.461	1165.01	207.559	-992.028	1356.86	202.662	-1058.94	1163.58	135.764	-778.688	1240.2	385.878	-942.428	1376.34	462.2	-932.514	1133.44	465.048	-933.255	1057.33	467.659	-1035.79	912.74	414.815	-1061.09	840.446	481.388	-1035.78	823.391	448.797	-1092.02	771.734
734	0	261.304	-1013.1	1593.22	143.222	-1021.33	1593.75	251.537	-848.233	1542.79	143.512	-858.153	1541.23	205.915	-879.325	1447.09	219.03	-806.436	1165.26	207.655	-1002.3	1356.75	202.702	-1068.7	1163.45	136.633	-788.532	1240.42	386.101	-953.422	1376.55	462.492	-945.239	1133.8	465.381	-946.329	1057.64	466.851	-1050.37	914.051	413.648	-1076.09	842.206	480.281	-1051.41	824.682	447.184	-1108.02	773.776
735	0	261.097	-1023.88	1593.02	142.982	-1031.88	1593.37	251.701	-858.901	1542.86	143.653	-868.617	1541.13	206.287	-889.775	1447.06	219.918	-816.42	1165.37	207.744	-1012.59	1356.51	202.788	-1078.49	1163.18	137.43	-798.421	1240.51	386.3	-964.376	1376.62	462.738	-957.901	1134.03	465.653	-959.361	1057.82	466.003	-1064.87	915.241	412.445	-1090.97	843.842	479.156	-1066.95	825.878	445.536	-1123.87	775.687
736	0	260.847	-1034.65	1592.69	142.702	-1042.43	1592.86	251.81	-869.573	1542.78	143.742	-879.096	1540.87	206.604	-900.247	1446.89	220.723	-826.419	1165.35	207.822	-1022.91	1356.12	202.909	-1088.33	1162.76	138.149	-808.36	1240.46	386.469	-975.293	1376.54	462.938	-970.483	1134.11	465.865	-972.338	1057.85	465.12	-1079.27	916.299	411.212	-1105.74	845.339	478.016	-1082.38	826.963	443.864	-1139.56	777.459
737	0	260.556	-1045.42	1592.24	142.384	-1052.99	1592.22	251.861	-880.253	1542.55	143.777	-889.595	1540.45	206.863	-910.745	1446.58	221.437	-836.436	1165.19	207.882	-1033.24	1355.59	203.053	-1098.21	1162.17	138.785	-818.352	1240.28	386.604	-986.178	1376.32	463.09	-982.971	1134.04	466.016	-985.249	1057.75	464.208	-1093.57	917.214	409.957	-1120.39	846.688	476.863	-1097.69	827.923	442.177	-1155.09	779.081
738	0	260.225	-1056.18	1591.66	142.029	-1063.58	1591.46	251.853	-890.944	1542.15	143.757	-900.12	1539.87	207.058	-921.276	1446.13	222.052	-846.475	1164.89	207.92	-1043.61	1354.91	203.209	-1108.14	1161.42	139.333	-828.401	1239.95	386.699	-997.033	1375.95	463.194	-995.352	1133.82	466.106	-998.084	1057.5	463.271	-1107.74	917.974	408.684	-1134.9	847.878	475.7	-1112.85	828.744	440.487	-1170.45	780.546
739	0	259.854	-1066.96	1590.95	141.637	-1074.18	1590.57	251.781	-901.651	1541.6	143.677	-910.676	1539.15	207.184	-931.844	1445.54	222.564	-856.539	1164.45	207.928	-1054.02	1354.1	203.364	-1118.13	1160.49	139.786	-838.511	1239.49	386.75	-1007.86	1375.42	463.249	-1007.61	1133.43	466.134	-1010.83	1057.1	462.314	-1121.79	918.574	407.401	-1149.27	848.9	474.527	-1127.85	829.415	438.804	-1185.63	781.846
740	0	259.443	-1077.74	1590.13	141.207	-1084.8	1589.57	251.643	-912.378	1540.9	143.537	-921.27	1538.27	207.236	-942.452	1444.82	222.964	-866.633	1163.89	207.901	-1064.47	1353.14	203.507	-1128.17	1159.39	140.141	-848.683	1238.89	386.75	-1018.67	1374.74	463.25	-1019.75	1132.89	466.099	-1023.48	1056.55	461.342	-1135.68	919.005	406.114	-1163.49	849.747	473.347	-1142.68	829.928	437.137	-1200.63	782.976
741	0	258.988	-1088.53	1589.19	140.738	-1095.45	1588.46	251.436	-923.13	1540.04	143.331	-931.904	1537.25	207.209	-953.103	1443.98	223.249	-876.763	1163.19	207.831	-1074.96	1352.06	203.626	-1138.26	1158.14	140.392	-858.92	1238.16	386.694	-1029.46	1373.91	463.195	-1031.75	1132.2	466	-1036.02	1055.85	460.357	-1149.41	919.266	404.828	-1177.54	850.415	472.163	-1157.31	830.274	435.495	-1215.43	783.931
742	0	258.488	-1099.35	1588.15	140.226	-1106.14	1587.25	251.156	-933.909	1539.05	143.057	-942.584	1536.1	207.098	-963.801	1443.02	223.415	-886.933	1162.38	207.711	-1085.5	1350.85	203.712	-1148.42	1156.73	140.535	-869.226	1237.31	386.576	-1040.24	1372.95	463.081	-1043.61	1131.36	465.834	-1048.44	1055.02	459.365	-1162.97	919.355	403.549	-1191.42	850.9	470.975	-1171.72	830.45	433.888	-1230.03	784.708
743	0	257.938	-1110.18	1587.01	139.667	-1116.87	1585.95	250.8	-944.721	1537.93	142.71	-953.312	1534.84	206.898	-974.546	1441.95	223.457	-897.15	1161.45	207.534	-1096.09	1349.54	203.753	-1158.65	1155.19	140.567	-879.604	1236.34	386.391	-1051.02	1371.86	462.903	-1055.33	1130.37	465.6	-1060.74	1054.05	458.367	-1176.34	919.272	402.282	-1205.11	851.201	469.785	-1185.89	830.453	432.321	-1244.41	785.304
744	0	257.335	-1121.04	1585.78	139.059	-1127.64	1584.58	250.363	-955.567	1536.71	142.286	-964.091	1533.47	206.606	-985.341	1440.78	223.375	-907.42	1160.41	207.294	-1106.74	1348.13	203.743	-1168.94	1153.54	140.483	-890.056	1235.26	386.132	-1061.79	1370.65	462.656	-1066.91	1129.27	465.294	-1072.9	1052.97	457.366	-1189.51	919.021	401.03	-1218.59	851.319	468.595	-1199.81	830.284	430.801	-1258.56	785.719
745	0	256.675	-1131.92	1584.49	138.395	-1138.45	1583.15	249.842	-966.451	1535.39	141.782	-974.923	1532.03	206.218	-996.184	1439.54	223.168	-917.753	1159.28	206.984	-1117.44	1346.64	203.671	-1179.31	1151.8	140.282	-900.587	1234.09	385.796	-1072.56	1369.35	462.337	-1078.35	1128.04	464.916	-1084.93	1051.78	456.364	-1202.46	918.608	399.797	-1231.87	851.256	467.408	-1213.46	829.946	429.334	-1272.45	785.953
746	0	255.953	-1142.84	1583.14	137.672	-1149.32	1581.66	249.234	-977.375	1533.99	141.193	-985.81	1530.51	205.73	-1007.08	1438.22	222.836	-928.155	1158.07	206.599	-1128.2	1345.1	203.533	-1189.75	1149.99	139.962	-911.198	1232.83	385.377	-1083.34	1367.97	461.94	-1089.66	1126.73	464.463	-1096.81	1050.51	455.362	-1215.19	918.04	398.585	-1244.91	851.019	466.224	-1226.82	829.446	427.922	-1286.07	786.009
747	0	255.164	-1153.8	1581.75	136.885	-1160.23	1580.14	248.536	-988.34	1532.55	140.516	-996.752	1528.96	205.14	-1018.02	1436.85	222.381	-938.636	1156.79	206.132	-1139.01	1343.51	203.321	-1200.29	1148.15	139.524	-921.894	1231.49	384.872	-1094.13	1366.53	461.463	-1100.83	1125.34	463.934	-1108.54	1049.17	454.362	-1227.68	917.329	397.398	-1257.71	850.613	465.046	-1239.88	828.792	426.569	-1299.4	785.889
748	0	254.304	-1164.79	1580.33	136.028	-1171.2	1578.61	247.744	-999.348	1531.07	139.747	-1007.75	1527.38	204.447	-1029.01	1435.45	221.806	-949.203	1155.46	205.579	-1149.89	1341.91	203.029	-1210.93	1146.3	138.967	-932.676	1230.1	384.277	-1104.95	1365.06	460.9	-1111.88	1123.9	463.326	-1120.12	1047.77	453.363	-1239.93	916.487	396.236	-1270.25	850.048	463.875	-1252.61	827.995	425.277	-1312.43	785.599
749	0	253.368	-1175.83	1578.91	135.097	-1182.22	1577.08	246.857	-1010.4	1529.58	138.882	-1018.8	1525.8	203.649	-1040.05	1434.03	221.116	-959.865	1154.09	204.936	-1160.84	1340.31	202.654	-1221.67	1144.48	138.295	-943.547	1228.67	383.589	-1115.79	1363.58	460.251	-1122.82	1122.44	462.64	-1131.54	1046.36	452.367	-1251.92	915.528	395.1	-1282.51	849.334	462.714	-1265.01	827.067	424.047	-1325.13	785.146
750	0	252.353	-1186.9	1577.51	134.088	-1193.3	1575.56	245.872	-1021.49	1528.1	137.92	-1029.91	1524.23	202.746	-1051.14	1432.6	220.316	-970.628	1152.7	204.2	-1171.84	1338.73	202.188	-1232.53	1142.71	137.509	-954.509	1227.22	382.807	-1126.66	1362.11	459.513	-1133.65	1120.97	461.876	-1142.81	1044.93	451.374	-1263.65	914.467	393.993	-1294.49	848.484	461.565	-1277.06	826.025	422.878	-1337.48	784.537
751	0	251.254	-1198.02	1576.13	132.998	-1204.42	1574.09	244.788	-1032.62	1526.66	136.858	-1041.06	1522.71	201.74	-1062.26	1431.2	219.413	-981.5	1151.31	203.367	-1182.91	1337.2	201.63	-1243.51	1141.02	136.615	-965.561	1225.75	381.929	-1137.57	1360.68	458.686	-1144.39	1119.52	461.035	-1153.93	1043.53	450.384	-1275.11	913.322	392.914	-1306.17	847.511	460.43	-1288.76	824.884	421.769	-1349.47	783.782
752	0	250.07	-1209.17	1574.81	131.823	-1215.6	1572.66	243.604	-1043.8	1525.27	135.695	-1052.26	1521.25	200.632	-1073.44	1429.83	218.415	-992.486	1149.93	202.439	-1194.05	1335.74	200.975	-1254.62	1139.44	135.618	-976.706	1224.3	380.954	-1148.52	1359.31	457.77	-1155.04	1118.13	460.119	-1164.89	1042.18	449.397	-1286.29	912.112	391.865	-1317.54	846.43	459.312	-1300.08	823.663	420.721	-1361.09	782.891
753	0	248.798	-1220.36	1573.55	130.561	-1226.82	1571.31	242.32	-1055.01	1523.96	134.431	-1063.51	1519.86	199.423	-1084.65	1428.52	217.329	-1003.59	1148.58	201.413	-1205.25	1334.38	200.222	-1265.87	1138	134.523	-987.941	1222.87	379.885	-1159.53	1358.03	456.767	-1165.62	1116.81	459.131	-1175.7	1040.89	448.414	-1297.2	910.855	390.845	-1328.58	845.257	458.214	-1311.03	822.382	419.73	-1372.3	781.876
754	0	247.438	-1231.59	1572.39	129.212	-1238.09	1570.04	240.936	-1066.25	1522.74	133.065	-1074.8	1518.57	198.119	-1095.89	1427.28	216.164	-1014.81	1147.29	200.292	-1216.51	1333.12	199.371	-1277.26	1136.72	133.338	-999.266	1221.48	378.722	-1170.58	1356.85	455.68	-1176.13	1115.59	458.075	-1186.36	1039.69	447.436	-1307.82	909.57	389.857	-1339.3	844.01	457.14	-1321.6	821.059	418.795	-1383.11	780.749
755	0	245.989	-1242.84	1571.32	127.775	-1249.39	1568.87	239.454	-1077.52	1521.63	131.599	-1086.12	1517.38	196.724	-1107.17	1426.12	214.929	-1026.15	1146.06	199.08	-1227.83	1331.98	198.423	-1288.8	1135.61	132.069	-1010.68	1220.16	377.47	-1181.68	1355.8	454.515	-1186.6	1114.49	456.955	-1196.88	1038.6	446.464	-1318.17	908.279	388.9	-1349.67	842.705	456.093	-1331.79	819.716	417.914	-1393.5	779.525
756	0	244.452	-1254.12	1570.38	126.252	-1260.73	1567.82	237.876	-1088.81	1520.65	130.036	-1097.48	1516.32	195.243	-1118.48	1425.07	213.631	-1037.61	1144.92	197.78	-1239.2	1330.99	197.382	-1300.47	1134.7	130.725	-1022.17	1218.91	376.133	-1192.84	1354.9	453.278	-1197.02	1113.53	455.779	-1207.26	1037.65	445.5	-1328.23	907	387.976	-1359.7	841.361	455.077	-1341.61	818.375	417.085	-1403.46	778.219
757	0	242.829	-1265.42	1569.57	124.645	-1272.1	1566.9	236.205	-1100.12	1519.81	128.377	-1108.86	1515.38	193.682	-1129.81	1424.13	212.281	-1049.18	1143.87	196.399	-1250.62	1330.15	196.254	-1312.29	1133.99	129.313	-1033.74	1217.75	374.717	-1204.04	1354.15	451.975	-1207.41	1112.73	454.551	-1217.51	1036.84	444.545	-1338.02	905.752	387.087	-1369.38	839.994	454.098	-1351.05	817.055	416.307	-1412.99	776.844
758	0	241.124	-1276.73	1568.91	122.957	-1283.49	1566.11	234.445	-1111.44	1519.11	126.629	-1120.26	1514.59	192.05	-1141.16	1423.33	210.886	-1060.85	1142.95	194.946	-1262.09	1329.48	195.049	-1324.22	1133.49	127.842	-1045.38	1216.7	373.231	-1215.29	1353.58	450.615	-1217.77	1112.11	453.28	-1227.63	1036.2	443.603	-1347.55	904.554	386.234	-1378.72	838.624	453.16	-1360.12	815.778	415.578	-1422.09	775.417
759	0	239.342	-1288.05	1568.4	121.193	-1294.89	1565.46	232.602	-1122.76	1518.58	124.796	-1131.68	1513.94	190.354	-1152.52	1422.66	209.454	-1072.61	1142.15	193.429	-1273.59	1328.98	193.778	-1336.27	1133.21	126.321	-1057.08	1215.77	371.682	-1226.58	1353.2	449.208	-1228.11	1111.67	451.973	-1237.62	1035.73	442.676	-1356.81	903.424	385.42	-1387.71	837.268	452.27	-1368.85	814.565	414.897	-1430.76	773.954
760	0	237.487	-1299.36	1568.05	119.358	-1306.3	1564.96	230.682	-1134.08	1518.21	122.885	-1143.1	1513.43	188.605	-1163.88	1422.14	207.993	-1084.44	1141.5	191.86	-1285.12	1328.66	192.456	-1348.4	1133.14	124.759	-1068.83	1214.96	370.083	-1237.9	1353.01	447.763	-1238.44	1111.44	450.639	-1247.5	1035.46	441.766	-1365.82	902.378	384.646	-1396.37	835.942	451.434	-1377.23	813.434	414.265	-1439	772.472
761	0	235.566	-1310.67	1567.88	117.459	-1317.7	1564.61	228.692	-1145.39	1518.01	120.904	-1154.52	1513.09	186.811	-1175.25	1421.77	206.511	-1096.34	1141	190.252	-1296.66	1328.52	191.098	-1360.61	1133.28	123.166	-1080.61	1214.3	368.444	-1249.23	1353.02	446.291	-1248.77	1111.4	449.287	-1257.27	1035.38	440.879	-1374.59	901.433	383.917	-1404.7	834.664	450.659	-1385.3	812.405	413.681	-1446.83	770.988
762	0	233.587	-1321.96	1567.87	115.504	-1329.1	1564.42	226.641	-1156.68	1517.98	118.863	-1165.92	1512.89	184.985	-1186.59	1421.56	205.015	-1108.28	1140.65	188.618	-1308.21	1328.56	189.724	-1372.85	1133.63	121.551	-1092.42	1213.78	366.777	-1260.56	1353.24	444.803	-1259.08	1111.57	447.926	-1266.93	1035.5	440.017	-1383.13	900.602	383.236	-1412.71	833.449	449.952	-1393.06	811.494	413.147	-1454.26	769.518
763	0	231.558	-1333.22	1568.04	113.503	-1340.48	1564.37	224.54	-1167.94	1518.13	116.772	-1177.31	1512.85	183.137	-1197.92	1421.51	203.512	-1120.24	1140.48	186.974	-1319.74	1328.78	188.353	-1385.11	1134.16	119.922	-1104.24	1213.42	365.096	-1271.88	1353.65	443.31	-1269.38	1111.95	446.565	-1276.5	1035.83	439.186	-1391.45	899.897	382.606	-1420.42	832.312	449.319	-1400.54	810.718	412.666	-1461.31	768.079
764	0	229.491	-1344.44	1568.38	111.464	-1351.84	1564.46	222.399	-1179.16	1518.45	114.642	-1188.67	1512.95	181.277	-1209.22	1421.63	202.007	-1132.21	1140.47	185.333	-1331.25	1329.17	187.003	-1397.34	1134.87	118.287	-1116.05	1213.21	363.413	-1283.18	1354.25	441.824	-1279.68	1112.53	445.214	-1285.97	1036.35	438.391	-1399.58	899.329	382.033	-1427.84	831.266	448.768	-1407.77	810.09	412.238	-1467.99	766.687
765	0	227.395	-1355.63	1568.88	109.399	-1363.16	1564.69	220.231	-1190.34	1518.94	112.487	-1200	1513.2	179.418	-1220.47	1421.9	200.507	-1144.15	1140.63	183.712	-1342.72	1329.72	185.695	-1409.52	1135.74	116.656	-1127.84	1213.17	361.743	-1294.42	1355.05	440.355	-1289.96	1113.31	443.881	-1295.35	1037.08	437.638	-1407.53	898.907	381.52	-1435	830.325	448.306	-1414.77	809.622	411.869	-1474.33	765.358
766	0	225.283	-1366.77	1569.54	107.32	-1374.43	1565.05	218.048	-1201.47	1519.59	110.32	-1211.27	1513.59	177.57	-1231.67	1422.33	199.015	-1156.05	1140.96	182.125	-1354.13	1330.43	184.447	-1421.61	1136.76	115.034	-1139.59	1213.28	360.098	-1305.59	1356.02	438.915	-1300.21	1114.27	442.577	-1304.64	1037.99	436.932	-1415.31	898.637	381.074	-1441.91	829.499	447.941	-1421.58	809.323	411.562	-1480.37	764.106
767	0	223.168	-1377.85	1570.34	105.239	-1385.66	1565.53	215.863	-1212.53	1520.41	108.155	-1222.49	1514.11	175.743	-1242.81	1422.9	197.537	-1167.88	1141.45	180.587	-1365.48	1331.29	183.278	-1433.58	1137.89	113.428	-1151.28	1213.54	358.489	-1316.68	1357.16	437.513	-1310.42	1115.41	441.309	-1313.83	1039.08	436.28	-1422.94	898.523	380.699	-1448.61	828.798	447.677	-1428.21	809.199	411.323	-1486.13	762.947
768	0	221.062	-1388.87	1571.29	103.171	-1396.82	1566.12	213.692	-1223.52	1521.38	106.005	-1233.65	1514.76	173.948	-1253.88	1423.62	196.074	-1179.63	1142.09	179.11	-1376.74	1332.27	182.201	-1445.4	1139.14	111.841	-1162.91	1213.95	356.929	-1327.66	1358.45	436.159	-1320.58	1116.7	440.085	-1322.94	1040.33	435.69	-1430.44	898.567	380.401	-1455.11	828.229	447.522	-1434.7	809.254	411.158	-1491.65	761.892
769	0	218.98	-1399.81	1572.37	101.128	-1407.91	1566.82	211.547	-1234.44	1522.48	103.886	-1244.73	1515.53	172.192	-1264.87	1424.48	194.628	-1191.27	1142.88	177.706	-1387.91	1333.38	181.232	-1457.06	1140.47	110.278	-1174.45	1214.51	355.427	-1338.51	1359.87	434.862	-1330.67	1118.13	438.911	-1331.94	1041.74	435.169	-1437.81	898.769	380.187	-1461.45	827.799	447.479	-1441.06	809.489	411.073	-1496.96	760.954
770	0	216.935	-1410.68	1573.56	99.1243	-1418.93	1567.61	209.443	-1245.28	1523.72	101.811	-1255.74	1516.41	170.484	-1275.78	1425.46	193.2	-1202.79	1143.81	176.385	-1398.98	1334.59	180.381	-1468.53	1141.87	108.739	-1185.9	1215.2	353.991	-1349.22	1361.42	433.629	-1340.66	1119.68	437.795	-1340.85	1043.28	434.723	-1445.08	899.127	380.062	-1467.65	827.512	447.552	-1447.34	809.902	411.078	-1502.11	760.145
771	0	214.942	-1421.47	1574.85	97.1742	-1429.87	1568.48	207.392	-1256.03	1525.07	99.7936	-1266.65	1517.39	168.83	-1286.59	1426.55	191.79	-1214.17	1144.86	175.156	-1409.92	1335.9	179.657	-1479.8	1143.33	107.226	-1197.24	1216.02	352.628	-1359.77	1363.06	432.467	-1350.54	1121.34	436.739	-1349.66	1044.93	434.361	-1452.26	899.636	380.032	-1473.74	827.371	447.742	-1453.55	810.488	411.182	-1507.13	759.474
772	0	213.014	-1432.17	1576.22	95.2909	-1440.73	1569.43	205.408	-1266.69	1526.53	97.8461	-1277.48	1518.46	167.236	-1297.3	1427.74	190.395	-1225.41	1146.01	174.025	-1420.75	1337.28	179.066	-1490.87	1144.83	105.738	-1208.46	1216.96	351.344	-1370.16	1364.78	431.381	-1360.27	1123.08	435.747	-1358.36	1046.68	434.089	-1459.36	900.289	380.104	-1479.76	827.377	448.05	-1459.7	811.241	411.393	-1512.07	758.949
773	0	211.163	-1442.78	1577.67	93.487	-1451.49	1570.44	203.502	-1277.25	1528.08	95.9796	-1288.2	1519.62	165.705	-1307.91	1429.02	189.013	-1236.49	1147.26	172.994	-1431.45	1338.73	178.609	-1501.73	1146.37	104.272	-1219.57	1218	350.142	-1380.36	1366.57	430.374	-1369.84	1124.89	434.822	-1366.94	1048.52	433.913	-1466.39	901.08	380.283	-1485.72	827.528	448.474	-1465.83	812.149	411.723	-1516.96	758.58
774	0	209.403	-1453.29	1579.18	91.7742	-1462.16	1571.51	201.684	-1287.71	1529.7	94.204	-1298.83	1520.85	164.241	-1318.42	1430.37	187.643	-1247.41	1148.59	172.065	-1442.02	1340.23	178.287	-1512.39	1147.93	102.827	-1230.54	1219.13	349.022	-1390.38	1368.41	429.448	-1379.22	1126.75	433.964	-1375.39	1050.41	433.84	-1473.35	901.998	380.573	-1491.67	827.822	449.012	-1471.92	813.201	412.18	-1521.84	758.371
775	0	207.743	-1463.72	1580.74	90.1629	-1472.73	1572.64	199.962	-1298.08	1531.37	92.5276	-1309.36	1522.15	162.845	-1328.82	1431.79	186.28	-1258.16	1149.98	171.238	-1452.46	1341.77	178.094	-1522.85	1149.5	101.399	-1241.4	1220.35	347.985	-1400.21	1370.27	428.602	-1388.39	1128.63	433.174	-1383.72	1052.34	433.872	-1480.26	903.033	380.979	-1497.61	828.254	449.659	-1478.01	814.384	412.775	-1526.74	758.327
776	0	206.193	-1474.04	1582.32	88.662	-1483.2	1573.81	198.345	-1308.35	1533.09	90.957	-1319.79	1523.5	161.518	-1339.12	1433.25	184.923	-1268.76	1151.43	170.51	-1462.78	1343.34	178.023	-1533.12	1151.09	99.9838	-1252.12	1221.65	347.028	-1409.86	1372.14	427.833	-1397.33	1130.53	432.448	-1391.92	1054.3	434.014	-1487.12	904.171	381.504	-1503.58	828.818	450.409	-1484.09	815.682	413.514	-1531.7	758.45
777	0	204.76	-1484.27	1583.93	87.2784	-1493.58	1575.01	196.837	-1318.52	1534.83	89.497	-1330.12	1524.9	160.259	-1349.32	1434.75	183.569	-1279.21	1152.91	169.876	-1472.97	1344.93	178.063	-1543.22	1152.68	98.5792	-1262.72	1223	346.148	-1419.34	1374.01	427.139	-1406.03	1132.42	431.785	-1399.98	1056.27	434.268	-1493.92	905.4	382.149	-1509.59	829.506	451.254	-1490.17	817.076	414.404	-1536.75	758.74
778	0	203.449	-1494.41	1585.53	86.0174	-1503.86	1576.25	195.442	-1328.6	1536.58	88.1507	-1340.35	1526.32	159.069	-1359.42	1436.27	182.216	-1289.5	1154.41	169.33	-1483.04	1346.51	178.2	-1553.17	1154.27	97.1817	-1273.2	1224.41	345.34	-1428.64	1375.86	426.513	-1414.47	1134.3	431.181	-1407.89	1058.22	434.634	-1500.69	906.704	382.913	-1515.67	830.306	452.184	-1496.24	818.55	415.449	-1541.9	759.194
779	0	202.266	-1504.45	1587.12	84.8823	-1514.06	1577.51	194.163	-1338.59	1538.32	86.9194	-1350.48	1527.77	157.944	-1369.42	1437.79	180.864	-1299.66	1155.92	168.863	-1493	1348.09	178.417	-1562.97	1155.86	95.7889	-1283.56	1225.84	344.599	-1437.78	1377.67	425.948	-1422.66	1136.15	430.632	-1415.67	1060.15	435.109	-1507.4	908.069	383.796	-1521.82	831.208	453.189	-1502.31	820.082	416.651	-1547.19	759.806
780	0	201.211	-1514.4	1588.69	83.8742	-1524.16	1578.78	193.001	-1348.49	1540.03	85.8028	-1360.53	1529.22	156.882	-1379.35	1439.3	179.514	-1309.7	1157.42	168.468	-1502.86	1349.65	178.696	-1572.65	1157.43	94.3992	-1293.82	1227.3	343.918	-1446.79	1379.43	425.436	-1430.59	1137.96	430.132	-1423.32	1062.05	435.692	-1514.08	909.475	384.794	-1528.07	832.196	454.258	-1508.38	821.652	418.009	-1552.62	760.564
781	0	200.284	-1524.28	1590.21	82.9926	-1534.17	1580.05	191.954	-1358.32	1541.7	84.7993	-1370.5	1530.66	155.881	-1389.19	1440.79	178.166	-1319.62	1158.9	168.136	-1512.62	1351.17	179.016	-1582.23	1158.98	93.0121	-1303.99	1228.77	343.291	-1455.66	1381.13	424.97	-1438.28	1139.71	429.676	-1430.83	1063.88	436.376	-1520.72	910.906	385.902	-1534.41	833.254	455.377	-1514.43	823.239	419.516	-1558.21	761.456
782	0	199.483	-1534.07	1591.69	82.2351	-1544.11	1581.32	191.021	-1368.07	1543.31	83.9058	-1380.39	1532.09	154.938	-1398.96	1442.24	176.823	-1329.45	1160.34	167.858	-1522.31	1352.65	179.359	-1591.71	1160.5	91.6284	-1314.07	1230.23	342.712	-1464.43	1382.74	424.539	-1445.73	1141.4	429.258	-1438.21	1065.65	437.153	-1527.32	912.342	387.112	-1540.86	834.364	456.535	-1520.48	824.82	421.166	-1563.96	762.462
783	0	198.805	-1543.79	1593.1	81.5974	-1553.98	1582.56	190.197	-1377.76	1544.84	83.1179	-1390.21	1533.47	154.05	-1408.67	1443.64	175.489	-1339.19	1161.73	167.624	-1531.93	1354.07	179.705	-1601.13	1161.99	90.2503	-1324.08	1231.66	342.173	-1473.11	1384.27	424.135	-1452.98	1143	428.871	-1445.49	1067.34	438.016	-1533.88	913.763	388.415	-1547.41	835.505	457.716	-1526.51	826.372	422.947	-1569.88	763.562
784	0	198.244	-1553.45	1594.43	81.0743	-1563.77	1583.78	189.477	-1387.38	1546.28	82.4306	-1399.97	1534.81	153.213	-1418.32	1444.97	174.167	-1348.85	1163.05	167.426	-1541.49	1355.42	180.037	-1610.49	1163.41	88.8812	-1334.02	1233.04	341.669	-1481.72	1385.69	423.749	-1460.03	1144.51	428.511	-1452.66	1068.94	438.952	-1540.42	915.149	389.8	-1554.08	836.656	458.909	-1532.53	827.874	424.844	-1575.96	764.731
785	0	197.795	-1563.06	1595.67	80.6591	-1573.51	1584.95	188.857	-1396.96	1547.62	81.8378	-1409.67	1536.09	152.427	-1427.93	1446.23	172.864	-1358.45	1164.3	167.256	-1551	1356.68	180.339	-1619.81	1164.77	87.5259	-1343.92	1234.37	341.196	-1490.28	1386.99	423.374	-1466.94	1145.92	428.171	-1459.75	1070.42	439.95	-1546.94	916.479	391.254	-1560.86	837.793	460.098	-1538.55	829.303	426.84	-1582.18	765.939
786	0	197.45	-1572.61	1596.8	80.3442	-1583.2	1586.06	188.33	-1406.49	1548.84	81.333	-1419.33	1537.28	151.688	-1437.5	1447.38	171.586	-1368	1165.45	167.107	-1560.47	1357.85	180.599	-1629.1	1166.04	86.1906	-1353.78	1235.63	340.749	-1498.81	1388.17	423.002	-1473.73	1147.22	427.847	-1466.77	1071.79	440.994	-1553.44	917.733	392.763	-1567.75	838.894	461.272	-1544.55	830.638	428.913	-1588.56	767.157
787	0	197.2	-1582.12	1597.82	80.1217	-1592.85	1587.1	187.888	-1415.99	1549.93	80.9095	-1428.95	1538.39	150.996	-1447.05	1448.44	170.338	-1377.51	1166.5	166.974	-1569.92	1358.91	180.809	-1638.38	1167.21	84.8826	-1363.61	1236.79	340.326	-1507.33	1389.2	422.629	-1480.43	1148.38	427.534	-1473.75	1073.03	442.071	-1559.93	918.889	394.309	-1574.75	839.933	462.416	-1550.56	831.857	431.041	-1595.06	768.353
788	0	197.039	-1591.6	1598.72	79.9829	-1602.46	1588.05	187.525	-1425.47	1550.88	80.5603	-1438.54	1539.38	150.349	-1456.57	1449.37	169.129	-1386.99	1167.43	166.851	-1579.35	1359.85	180.963	-1647.65	1168.27	83.6099	-1373.41	1237.85	339.923	-1515.86	1390.09	422.25	-1487.1	1149.41	427.228	-1480.71	1074.13	443.164	-1566.43	919.929	395.877	-1581.84	840.888	463.519	-1556.57	832.943	433.199	-1601.68	769.494
789	0	196.957	-1601.05	1599.49	79.9196	-1612.04	1588.9	187.234	-1434.92	1551.68	80.2786	-1448.11	1540.25	149.748	-1466.08	1450.18	167.967	-1396.43	1168.24	166.737	-1588.78	1360.65	181.059	-1656.93	1169.19	82.3816	-1383.2	1238.79	339.542	-1524.42	1390.83	421.863	-1493.77	1150.3	426.925	-1487.67	1075.07	444.257	-1572.94	920.834	397.446	-1589.03	841.733	464.569	-1562.59	833.876	435.361	-1608.4	770.548
790	0	196.946	-1610.49	1600.11	79.9234	-1621.6	1589.64	187.007	-1444.37	1552.31	80.0579	-1457.67	1540.99	149.192	-1475.59	1450.85	166.86	-1405.86	1168.92	166.628	-1598.2	1361.32	181.098	-1666.21	1169.95	81.2071	-1392.97	1239.6	339.181	-1533.02	1391.4	421.468	-1500.48	1151.02	426.623	-1494.65	1075.86	445.335	-1579.48	921.587	398.999	-1596.3	842.447	465.557	-1568.64	834.643	437.5	-1615.21	771.484
791	0	196.998	-1619.92	1600.58	79.9866	-1631.16	1590.26	186.838	-1453.81	1552.79	79.8922	-1467.23	1541.59	148.682	-1485.1	1451.37	165.817	-1415.26	1169.45	166.524	-1607.63	1361.83	181.085	-1675.51	1170.56	80.0963	-1402.73	1240.26	338.842	-1541.67	1391.8	421.065	-1507.28	1151.58	426.321	-1501.68	1076.48	446.381	-1586.05	922.171	400.514	-1603.65	843.01	466.474	-1574.72	835.229	439.59	-1622.08	772.274
792	0	197.106	-1629.35	1600.9	80.1021	-1640.71	1590.74	186.721	-1463.25	1553.1	79.7761	-1476.78	1542.03	148.221	-1494.62	1451.75	164.846	-1424.65	1169.84	166.425	-1617.08	1362.19	181.027	-1684.82	1170.99	79.0588	-1412.48	1240.78	338.528	-1550.39	1392.03	420.658	-1514.19	1151.97	426.017	-1508.78	1076.93	447.382	-1592.68	922.575	401.974	-1611.05	843.403	467.311	-1580.85	835.625	441.602	-1629.02	772.89
793	0	197.263	-1638.78	1601.06	80.2636	-1650.26	1591.07	186.651	-1472.71	1553.23	79.7052	-1486.35	1542.32	147.811	-1504.16	1451.97	163.955	-1434.02	1170.08	166.332	-1626.54	1362.39	180.932	-1694.16	1171.23	78.1044	-1422.22	1241.14	338.24	-1559.19	1392.09	420.25	-1521.24	1152.19	425.712	-1515.98	1077.2	448.323	-1599.38	922.787	403.36	-1618.52	843.61	468.064	-1587.05	835.821	443.512	-1635.99	773.311
794	0	197.465	-1648.23	1601.06	80.4658	-1659.83	1591.26	186.623	-1482.18	1553.19	79.676	-1495.93	1542.44	147.454	-1513.71	1452.03	163.154	-1443.38	1170.16	166.248	-1636.04	1362.41	180.81	-1703.53	1171.29	77.2424	-1431.95	1241.33	337.983	-1568.08	1391.97	419.846	-1528.47	1152.23	425.406	-1523.29	1077.3	449.192	-1606.16	922.799	404.654	-1626.03	843.618	468.727	-1593.32	835.812	445.295	-1643	773.516
795	0	197.705	-1657.69	1600.89	80.7044	-1669.41	1591.28	186.635	-1491.67	1552.98	79.6861	-1505.53	1542.4	147.154	-1523.29	1451.92	162.449	-1452.74	1170.09	166.175	-1645.56	1362.27	180.67	-1712.91	1171.15	76.4813	-1441.68	1241.37	337.76	-1577.07	1391.68	419.452	-1535.9	1152.09	425.1	-1530.73	1077.21	449.981	-1613.03	922.604	405.839	-1633.59	843.418	469.299	-1599.68	835.595	446.93	-1650.04	773.49
796	0	197.981	-1667.19	1600.57	80.9763	-1679.02	1591.15	186.685	-1501.18	1552.61	79.7344	-1515.16	1542.19	146.915	-1532.9	1451.66	161.848	-1462.09	1169.86	166.118	-1655.11	1361.96	180.522	-1722.33	1170.82	75.8293	-1451.4	1241.23	337.576	-1586.16	1391.23	419.073	-1543.55	1151.77	424.797	-1538.32	1076.94	450.68	-1620.01	922.2	406.903	-1641.17	843.003	469.777	-1606.14	835.17	448.397	-1657.1	773.222
797	0	198.291	-1676.71	1600.08	81.2793	-1688.65	1590.86	186.773	-1510.73	1552.06	79.8207	-1524.81	1541.81	146.74	-1542.55	1451.24	161.357	-1471.45	1169.48	166.08	-1664.71	1361.49	180.375	-1731.79	1170.3	75.2934	-1461.11	1240.93	337.435	-1595.37	1390.61	418.717	-1551.43	1151.27	424.499	-1546.07	1076.5	451.283	-1627.12	921.586	407.834	-1648.79	842.369	470.162	-1612.72	834.539	449.68	-1664.18	772.704
798	0	198.633	-1686.27	1599.45	81.6124	-1698.32	1590.41	186.9	-1520.32	1551.36	79.9462	-1534.5	1541.28	146.635	-1552.23	1450.66	160.98	-1480.81	1168.95	166.066	-1674.35	1360.85	180.238	-1741.28	1169.61	74.8794	-1470.81	1240.47	337.344	-1604.69	1389.83	418.391	-1559.55	1150.6	424.211	-1554	1075.87	451.788	-1634.35	920.763	408.625	-1656.44	841.517	470.458	-1619.44	833.706	450.766	-1671.28	771.934
799	0	199.007	-1695.87	1598.66	81.9759	-1708.02	1589.8	187.067	-1529.94	1550.52	80.1134	-1544.23	1540.59	146.603	-1561.95	1449.94	160.723	-1490.2	1168.26	166.082	-1684.03	1360.06	180.117	-1750.81	1168.74	74.5924	-1480.52	1239.85	337.306	-1614.13	1388.9	418.1	-1567.91	1149.76	423.935	-1562.11	1075.08	452.193	-1641.73	919.736	409.268	-1664.11	840.45	470.666	-1626.29	832.678	451.646	-1678.4	770.912
800	0	199.414	-1705.52	1597.74	82.3706	-1717.76	1589.04	187.279	-1539.61	1549.53	80.3257	-1553.99	1539.75	146.65	-1571.72	1449.07	160.587	-1499.62	1167.43	166.133	-1693.76	1359.12	180.02	-1760.39	1167.71	74.4357	-1490.22	1239.08	337.327	-1623.69	1387.82	417.854	-1576.52	1148.76	423.677	-1570.41	1074.13	452.5	-1649.26	918.513	409.764	-1671.82	839.175	470.793	-1633.31	831.462	452.317	-1685.56	769.643
801	0	199.856	-1715.21	1596.69	82.7987	-1727.55	1588.14	187.539	-1549.32	1548.41	80.5875	-1563.8	1538.77	146.781	-1581.54	1448.06	160.574	-1509.08	1166.47	166.225	-1703.55	1358.05	179.95	-1770.02	1166.54	74.4117	-1499.94	1238.16	337.414	-1633.37	1386.61	417.658	-1585.36	1147.61	423.441	-1578.91	1073.01	452.711	-1656.96	917.102	410.113	-1679.57	837.7	470.844	-1640.5	830.07	452.777	-1692.75	768.137
802	0	200.335	-1724.96	1595.52	83.263	-1737.37	1587.11	187.854	-1559.08	1547.17	80.9041	-1573.65	1537.66	147.001	-1591.4	1446.93	160.686	-1518.59	1165.37	166.364	-1713.39	1356.85	179.912	-1779.72	1165.24	74.5216	-1509.67	1237.11	337.571	-1643.17	1385.28	417.517	-1594.45	1146.31	423.232	-1587.61	1071.75	452.833	-1664.83	915.515	410.319	-1687.37	836.039	470.827	-1647.87	828.513	453.03	-1700	766.407
803	0	200.855	-1734.77	1594.24	83.7668	-1747.25	1585.97	188.23	-1568.9	1545.82	81.2816	-1583.54	1536.44	147.314	-1601.32	1445.69	160.922	-1528.16	1164.16	166.557	-1723.29	1355.54	179.908	-1789.48	1163.82	74.7653	-1519.43	1235.94	337.803	-1653.1	1383.83	417.439	-1603.77	1144.88	423.056	-1596.51	1070.35	452.874	-1672.88	913.764	410.39	-1695.22	834.206	470.749	-1655.42	826.805	453.085	-1707.31	764.467
804	0	201.421	-1744.64	1592.88	84.3145	-1757.17	1584.72	188.674	-1578.78	1544.39	81.7263	-1593.48	1535.11	147.725	-1611.3	1444.35	161.281	-1537.82	1162.83	166.808	-1733.26	1354.14	179.94	-1799.32	1162.3	75.1415	-1529.22	1234.65	338.117	-1663.15	1382.28	417.428	-1613.31	1143.33	422.917	-1605.61	1068.82	452.841	-1681.12	911.866	410.336	-1703.15	832.219	470.621	-1663.18	824.96	452.954	-1714.7	762.338
805	0	202.036	-1754.56	1591.44	84.9105	-1767.13	1583.38	189.192	-1588.72	1542.87	82.2453	-1603.47	1533.7	148.238	-1621.34	1442.93	161.76	-1547.56	1161.41	167.125	-1743.3	1352.65	180.01	-1809.25	1160.71	75.648	-1539.06	1233.27	338.515	-1673.32	1380.65	417.488	-1623.05	1141.66	422.82	-1614.92	1067.18	452.746	-1689.55	909.836	410.169	-1711.16	830.096	470.449	-1671.14	822.995	452.653	-1722.2	760.04
806	0	202.706	-1764.56	1589.94	85.5598	-1777.15	1581.97	189.793	-1598.72	1541.3	82.8455	-1613.51	1532.21	148.857	-1631.44	1441.43	162.356	-1557.4	1159.9	167.513	-1753.41	1351.11	180.12	-1819.27	1159.06	76.2813	-1548.95	1231.81	339.004	-1683.61	1378.93	417.621	-1633	1139.9	422.769	-1624.42	1065.44	452.6	-1698.17	907.693	409.903	-1719.27	827.858	470.245	-1679.32	820.926	452.199	-1729.8	757.597
807	0	203.435	-1774.62	1588.41	86.2675	-1787.21	1580.52	190.484	-1608.79	1539.67	83.5336	-1623.6	1530.67	149.583	-1641.6	1439.89	163.063	-1567.36	1158.33	167.978	-1763.6	1349.52	180.272	-1829.39	1157.36	77.037	-1558.91	1230.28	339.585	-1694.02	1377.16	417.831	-1643.14	1138.06	422.769	-1634.11	1063.61	452.415	-1707	905.456	409.555	-1727.5	825.527	470.018	-1687.71	818.772	451.615	-1737.55	755.036
808	0	204.229	-1784.74	1586.86	87.0388	-1797.33	1579.03	191.271	-1618.92	1538.02	84.3162	-1633.74	1529.1	150.419	-1651.84	1438.3	163.876	-1577.45	1156.7	168.523	-1773.87	1347.91	180.466	-1839.62	1155.65	77.9098	-1568.95	1228.71	340.263	-1704.55	1375.35	418.118	-1653.46	1136.16	422.822	-1644	1061.71	452.202	-1716.04	903.145	409.142	-1735.87	823.126	469.776	-1696.33	816.551	450.923	-1745.44	752.382
809	0	205.094	-1794.94	1585.31	87.8791	-1807.49	1577.54	192.162	-1629.13	1536.36	85.1993	-1643.93	1527.51	151.366	-1662.14	1436.71	164.789	-1587.68	1155.03	169.154	-1784.23	1346.3	180.705	-1849.97	1153.94	78.8932	-1579.08	1227.11	341.039	-1715.18	1373.5	418.483	-1663.94	1134.2	422.93	-1654.07	1059.75	451.975	-1725.28	900.782	408.681	-1744.39	820.68	469.529	-1705.17	814.283	450.148	-1753.52	749.666
810	0	206.034	-1805.21	1583.78	88.7933	-1817.69	1576.06	193.162	-1639.41	1534.7	86.1881	-1654.18	1525.91	152.423	-1672.52	1435.11	165.792	-1598.05	1153.35	169.874	-1794.67	1344.7	180.994	-1860.45	1152.25	79.9798	-1589.3	1225.5	341.915	-1725.93	1371.65	418.923	-1674.58	1132.2	423.096	-1664.33	1057.76	451.745	-1734.73	898.388	408.19	-1753.09	818.211	469.286	-1714.25	811.989	449.314	-1761.78	746.915
811	0	207.054	-1815.54	1582.29	89.7861	-1827.95	1574.62	194.274	-1649.76	1533.06	87.2867	-1664.48	1524.34	153.588	-1682.97	1433.53	166.878	-1608.57	1151.68	170.685	-1805.2	1343.15	181.334	-1871.05	1150.6	81.1612	-1599.64	1223.9	342.889	-1736.78	1369.8	419.439	-1685.37	1130.19	423.321	-1674.77	1055.75	451.523	-1744.4	895.987	407.685	-1761.97	815.745	469.055	-1723.56	809.688	448.448	-1770.26	744.158
812	0	208.158	-1825.94	1580.87	90.862	-1838.25	1573.24	195.503	-1660.18	1531.47	88.4983	-1674.83	1522.81	154.86	-1693.5	1432	168.036	-1619.25	1150.02	171.589	-1815.82	1341.65	181.73	-1881.8	1149.03	82.4283	-1610.09	1222.34	343.962	-1747.73	1367.97	420.026	-1696.3	1128.19	423.605	-1685.38	1053.73	451.32	-1754.29	893.6	407.185	-1771.07	813.306	468.844	-1733.11	807.402	447.573	-1778.97	741.425
813	0	209.351	-1836.41	1579.52	92.0246	-1848.59	1571.95	196.851	-1670.68	1529.92	89.8245	-1685.23	1521.34	156.234	-1704.1	1430.52	169.257	-1630.1	1148.4	172.585	-1826.54	1340.23	182.187	-1892.68	1147.54	83.7711	-1620.67	1220.83	345.13	-1758.77	1366.19	420.682	-1707.37	1126.2	423.947	-1696.17	1051.73	451.145	-1764.39	891.25	406.705	-1780.38	810.917	468.66	-1742.9	805.151	446.712	-1787.92	738.743
814	0	210.636	-1846.94	1578.26	93.2771	-1858.98	1570.75	198.316	-1681.25	1528.45	91.2658	-1695.69	1519.94	157.704	-1714.78	1429.12	170.529	-1641.11	1146.84	173.673	-1837.34	1338.91	182.707	-1903.71	1146.17	85.1791	-1631.38	1219.39	346.39	-1769.9	1364.46	421.402	-1718.57	1124.24	424.346	-1707.14	1049.77	451.007	-1774.72	888.96	406.259	-1789.94	808.601	468.509	-1752.94	802.956	445.886	-1797.14	736.14
815	0	212.013	-1857.53	1577.12	94.6215	-1869.42	1569.68	199.899	-1691.89	1527.06	92.821	-1706.2	1518.64	159.265	-1725.53	1427.82	171.843	-1652.28	1145.36	174.847	-1848.24	1337.7	183.295	-1914.88	1144.94	86.641	-1642.22	1218.04	347.736	-1781.11	1362.81	422.182	-1729.89	1122.35	424.802	-1718.27	1047.86	450.914	-1785.27	886.75	405.859	-1799.75	806.381	468.397	-1763.22	800.837	445.115	-1806.64	733.643
816	0	213.486	-1868.19	1576.11	96.0591	-1879.89	1568.76	201.596	-1702.6	1525.78	94.4872	-1716.76	1517.45	160.907	-1736.35	1426.62	173.187	-1663.61	1143.98	176.105	-1859.23	1336.63	183.951	-1926.2	1143.85	88.1455	-1653.18	1216.8	349.161	-1792.4	1361.26	423.016	-1741.33	1120.52	425.312	-1729.57	1046.03	450.87	-1796.04	884.643	405.516	-1809.83	804.277	468.329	-1773.75	798.813	444.414	-1816.43	731.274
817	0	215.052	-1878.9	1575.24	97.5898	-1890.4	1567.99	203.402	-1713.38	1524.6	96.2603	-1727.37	1516.39	162.622	-1747.24	1425.55	174.55	-1675.08	1142.71	177.439	-1870.3	1335.7	184.676	-1937.65	1142.95	89.6808	-1664.27	1215.68	350.657	-1803.75	1359.81	423.899	-1752.9	1118.79	425.873	-1741.04	1044.28	450.88	-1807.04	882.656	405.239	-1820.18	802.309	468.308	-1784.54	796.902	443.797	-1826.53	729.057
818	0	216.712	-1889.66	1574.51	99.2123	-1900.96	1567.39	205.311	-1724.21	1523.54	98.134	-1738.03	1515.46	164.4	-1758.2	1424.61	175.921	-1686.69	1141.56	178.84	-1881.44	1334.94	185.467	-1949.24	1142.22	91.235	-1675.48	1214.71	352.213	-1815.16	1358.49	424.824	-1764.58	1117.16	426.483	-1752.68	1042.64	450.947	-1818.28	880.81	405.034	-1830.81	800.494	468.338	-1795.58	795.121	443.274	-1836.95	727.012
819	0	218.462	-1900.47	1573.95	100.924	-1911.55	1566.98	207.314	-1735.11	1522.62	100.101	-1748.73	1514.7	166.228	-1769.21	1423.83	177.292	-1698.41	1140.57	180.298	-1892.66	1334.34	186.32	-1960.96	1141.7	92.7964	-1686.8	1213.89	353.82	-1826.62	1357.3	425.785	-1776.39	1115.66	427.139	-1764.47	1041.13	451.073	-1829.74	879.119	404.905	-1841.74	798.847	468.42	-1806.89	793.487	442.853	-1847.7	725.157
820	0	220.297	-1911.32	1573.54	102.721	-1922.17	1566.76	209.402	-1746.05	1521.84	102.151	-1759.48	1514.1	168.095	-1780.29	1423.2	178.652	-1710.24	1139.73	181.802	-1903.95	1333.92	187.226	-1972.78	1141.38	94.3538	-1698.22	1213.24	355.463	-1838.13	1356.26	426.776	-1788.31	1114.28	427.837	-1776.43	1039.74	451.256	-1841.44	877.6	404.854	-1852.97	797.384	468.557	-1818.46	792.012	442.536	-1858.78	723.506
821	0	222.212	-1922.21	1573.3	104.597	-1932.83	1566.74	211.563	-1757.05	1521.2	104.275	-1770.26	1513.66	169.988	-1791.4	1422.73	179.994	-1722.15	1139.06	183.337	-1915.29	1333.68	188.174	-1984.69	1141.27	95.8963	-1709.72	1212.76	357.131	-1849.68	1355.37	427.79	-1800.36	1113.06	428.574	-1788.54	1038.51	451.495	-1853.37	876.266	404.88	-1864.49	796.114	468.748	-1830.3	790.71	442.326	-1870.2	722.073
822	0	224.199	-1933.14	1573.23	106.546	-1943.52	1566.93	213.785	-1768.08	1520.71	106.459	-1781.08	1513.41	171.893	-1802.56	1422.44	181.309	-1734.11	1138.57	184.889	-1926.67	1333.62	189.151	-1996.67	1141.36	97.4141	-1721.27	1212.48	358.808	-1861.25	1354.64	428.821	-1812.52	1112	429.346	-1800.81	1037.44	451.788	-1865.53	875.127	404.981	-1876.32	795.048	468.993	-1842.41	789.591	442.219	-1881.97	720.867
823	0	226.25	-1944.09	1573.32	108.558	-1954.23	1567.31	216.053	-1779.15	1520.37	108.69	-1791.94	1513.34	173.797	-1813.75	1422.32	182.592	-1746.1	1138.27	186.443	-1938.09	1333.74	190.141	-2008.69	1141.65	98.8982	-1732.87	1212.38	360.481	-1872.86	1354.08	429.862	-1824.79	1111.1	430.15	-1813.23	1036.53	452.13	-1877.93	874.193	405.152	-1888.44	794.193	469.291	-1854.8	788.663	442.213	-1894.09	719.896
824	0	228.353	-1955.07	1573.56	110.624	-1964.98	1567.89	218.353	-1790.25	1520.18	110.954	-1802.82	1513.46	175.687	-1824.97	1422.37	183.837	-1758.1	1138.16	187.983	-1949.52	1334.03	191.126	-2020.73	1142.13	100.341	-1744.49	1212.48	362.134	-1884.47	1353.69	430.908	-1837.19	1110.37	430.982	-1825.79	1035.79	452.515	-1890.57	873.47	405.385	-1900.86	793.552	469.639	-1867.47	787.933	442.299	-1906.56	719.164
825	0	230.498	-1966.07	1573.95	112.732	-1975.74	1568.65	220.668	-1801.37	1520.14	113.235	-1813.73	1513.75	177.55	-1836.2	1422.6	185.042	-1770.08	1138.23	189.492	-1960.97	1334.49	192.087	-2032.75	1142.78	101.737	-1756.1	1212.77	363.753	-1896.1	1353.47	431.952	-1849.7	1109.82	431.838	-1838.5	1035.22	452.939	-1903.43	872.962	405.674	-1913.57	793.128	470.035	-1880.42	787.406	442.47	-1919.38	718.673
826	0	232.669	-1977.08	1574.47	114.87	-1986.53	1569.6	222.983	-1812.51	1520.25	115.517	-1824.66	1514.23	179.374	-1847.43	1422.99	186.203	-1782.02	1138.5	190.954	-1972.41	1335.1	193.006	-2044.72	1143.58	103.083	-1767.69	1213.25	365.325	-1907.73	1353.41	432.99	-1862.32	1109.45	432.715	-1851.33	1034.84	453.393	-1916.52	872.672	406.009	-1926.56	792.921	470.475	-1893.65	787.082	442.716	-1932.55	718.423
827	0	234.853	-1988.1	1575.12	117.022	-1997.34	1570.7	225.28	-1823.65	1520.5	117.783	-1835.6	1514.87	181.146	-1858.66	1423.54	187.32	-1793.89	1138.95	192.354	-1983.83	1335.86	193.862	-2056.62	1144.51	104.375	-1779.22	1213.91	366.837	-1919.36	1353.51	434.017	-1875.04	1109.25	433.61	-1864.29	1034.63	453.871	-1929.84	872.599	406.379	-1939.83	792.928	470.954	-1907.16	786.961	443.025	-1946.06	718.411
828	0	237.035	-1999.13	1575.88	119.175	-2008.16	1571.95	227.543	-1834.8	1520.89	120.017	-1846.54	1515.68	182.858	-1869.88	1424.25	188.394	-1805.66	1139.58	193.679	-1995.22	1336.75	194.637	-2068.42	1145.54	105.614	-1790.68	1214.74	368.276	-1930.98	1353.77	435.029	-1887.86	1109.23	434.52	-1877.37	1034.59	454.364	-1943.38	872.741	406.774	-1953.36	793.146	471.466	-1920.95	787.042	443.385	-1959.91	718.634
829	0	239.198	-2010.15	1576.74	121.311	-2019	1573.33	229.755	-1845.94	1521.4	122.201	-1857.49	1516.65	184.499	-1881.07	1425.09	189.429	-1817.33	1140.38	194.915	-2006.56	1337.76	195.315	-2080.08	1146.67	106.802	-1802.05	1215.74	369.634	-1942.58	1354.17	436.024	-1900.77	1109.37	435.441	-1890.54	1034.71	454.865	-1957.12	873.094	407.181	-1967.14	793.569	472.005	-1935.02	787.321	443.784	-1974.09	719.086
830	0	241.325	-2021.18	1577.69	123.415	-2029.85	1574.82	231.9	-1857.07	1522.04	124.32	-1868.44	1517.76	186.063	-1892.22	1426.07	190.428	-1828.86	1141.34	196.052	-2017.85	1338.87	195.881	-2091.6	1147.85	107.943	-1813.29	1216.89	370.902	-1954.16	1354.72	436.999	-1913.75	1109.67	436.372	-1903.81	1035	455.366	-1971.06	873.651	407.591	-1981.15	794.19	472.563	-1949.35	787.792	444.21	-1988.6	719.761
831	0	243.4	-2032.19	1578.7	125.469	-2040.7	1576.4	233.962	-1868.18	1522.8	126.358	-1879.38	1519.01	187.544	-1903.33	1427.17	191.397	-1840.24	1142.44	197.082	-2029.07	1340.06	196.323	-2102.94	1149.08	109.041	-1824.41	1218.17	372.074	-1965.72	1355.39	437.952	-1926.8	1110.13	437.31	-1917.16	1035.45	455.859	-1985.19	874.407	407.992	-1995.39	795.004	473.133	-1963.93	788.45	444.648	-2003.41	720.653
832	0	245.405	-2043.19	1579.76	127.458	-2051.56	1578.04	235.927	-1879.26	1523.66	128.3	-1890.3	1520.37	188.937	-1914.39	1428.37	192.342	-1851.46	1143.67	197.998	-2040.21	1341.32	196.634	-2114.1	1150.33	110.104	-1835.37	1219.56	373.147	-1977.24	1356.17	438.883	-1939.9	1110.73	438.252	-1930.57	1036.04	456.336	-1999.49	875.353	408.373	-2009.84	796.002	473.705	-1978.76	789.287	445.087	-2018.52	721.755
833	0	247.324	-2054.18	1580.86	129.363	-2062.41	1579.73	237.783	-1890.31	1524.62	130.133	-1901.21	1521.84	190.24	-1925.39	1429.66	193.271	-1862.52	1145	198.797	-2051.26	1342.63	196.81	-2125.08	1151.6	111.139	-1846.18	1221.06	374.116	-1988.73	1357.07	439.79	-1953.04	1111.48	439.197	-1944.04	1036.76	456.791	-2013.95	876.48	408.727	-2024.48	797.179	474.271	-1993.82	790.295	445.514	-2033.92	723.06
834	0	249.142	-2065.15	1581.99	131.171	-2073.27	1581.44	239.518	-1901.33	1525.68	131.847	-1912.09	1523.39	191.45	-1936.32	1431.02	194.19	-1873.39	1146.44	199.477	-2062.23	1343.98	196.85	-2135.86	1152.86	112.153	-1856.82	1222.64	374.984	-2000.19	1358.06	440.674	-1966.2	1112.35	440.142	-1957.56	1037.61	457.216	-2028.56	877.779	409.043	-2039.29	798.526	474.82	-2009.09	791.467	445.915	-2049.57	724.562
835	0	250.845	-2076.09	1583.14	132.865	-2084.12	1583.15	241.123	-1912.31	1526.82	133.431	-1922.94	1525.02	192.569	-1947.18	1432.45	195.105	-1884.09	1147.95	200.041	-2073.09	1345.36	196.759	-2146.45	1154.12	113.155	-1867.3	1224.28	375.752	-2011.6	1359.14	441.534	-1979.37	1113.34	441.086	-1971.09	1038.58	457.605	-2043.29	879.24	409.315	-2054.26	800.038	475.342	-2024.56	792.794	446.28	-2065.46	726.255
836	0	252.42	-2087.02	1584.29	134.434	-2094.95	1584.85	242.59	-1923.25	1528.02	134.877	-1933.76	1526.7	193.598	-1957.97	1433.92	196.023	-1894.62	1149.52	200.492	-2083.86	1346.75	196.547	-2156.85	1155.36	114.152	-1877.6	1225.97	376.423	-2022.98	1360.3	442.373	-1992.53	1114.44	442.028	-1984.65	1039.66	457.954	-2058.13	880.854	409.536	-2069.38	801.708	475.828	-2040.2	794.267	446.596	-2081.58	728.13
837	0	253.857	-2097.91	1585.44	135.865	-2105.78	1586.51	243.914	-1934.14	1529.29	136.181	-1944.55	1528.41	194.539	-1968.69	1435.41	196.948	-1904.97	1151.13	200.835	-2094.53	1348.14	196.227	-2167.08	1156.58	115.15	-1887.74	1227.69	377.003	-2034.31	1361.52	443.191	-2005.66	1115.64	442.966	-1998.2	1040.83	458.257	-2073.06	882.609	409.701	-2084.62	803.53	476.267	-2055.99	795.879	446.851	-2097.89	730.182
838	0	255.146	-2108.78	1586.57	137.15	-2116.58	1588.12	245.091	-1944.98	1530.61	137.338	-1955.29	1530.15	195.395	-1979.33	1436.93	197.882	-1915.17	1152.77	201.079	-2105.09	1349.51	195.816	-2177.14	1157.79	116.154	-1897.73	1229.41	377.498	-2045.59	1362.8	443.989	-2018.75	1116.92	443.899	-2011.74	1042.09	458.512	-2088.06	884.496	409.804	-2099.96	805.497	476.651	-2071.91	797.62	447.036	-2114.37	732.402
839	0	256.281	-2119.62	1587.67	138.281	-2127.37	1589.66	246.122	-1955.77	1531.97	138.348	-1966	1531.88	196.17	-1989.89	1438.43	198.828	-1925.21	1154.41	201.232	-2115.56	1350.86	195.334	-2187.05	1158.96	117.168	-1907.56	1231.14	377.915	-2056.83	1364.12	444.77	-2031.8	1118.29	444.826	-2025.25	1043.42	458.714	-2103.12	886.502	409.842	-2115.4	807.603	476.969	-2087.95	799.481	447.139	-2130.99	734.783
840	0	257.258	-2130.43	1588.74	139.255	-2138.12	1591.12	247.006	-1966.51	1533.34	139.212	-1976.66	1533.6	196.868	-2000.38	1439.93	199.786	-1935.12	1156.04	201.304	-2125.93	1352.17	194.803	-2196.83	1160.11	118.193	-1917.26	1232.84	378.261	-2068.03	1365.48	445.536	-2044.77	1119.72	445.748	-2038.72	1044.81	458.863	-2118.21	888.615	409.813	-2130.92	809.841	477.213	-2104.07	801.449	447.152	-2147.74	737.313
841	0	258.075	-2141.2	1589.77	140.068	-2148.85	1592.48	247.747	-1977.21	1534.73	139.932	-1987.28	1535.28	197.494	-2010.8	1441.39	200.753	-1944.92	1157.63	201.306	-2136.22	1353.44	194.245	-2206.49	1161.23	119.229	-1926.83	1234.49	378.545	-2079.18	1366.86	446.289	-2057.67	1121.21	446.663	-2052.15	1046.25	458.957	-2133.33	890.823	409.713	-2146.5	812.201	477.377	-2120.26	803.515	447.065	-2164.58	739.982
842	0	258.732	-2151.94	1590.75	140.721	-2159.55	1593.74	248.349	-1987.85	1536.11	140.514	-1997.85	1536.9	198.052	-2021.16	1442.8	201.727	-1954.62	1159.18	201.247	-2146.42	1354.65	193.683	-2216.05	1162.31	120.273	-1936.3	1236.1	378.774	-2090.28	1368.26	447.032	-2070.49	1122.74	447.571	-2065.52	1047.72	458.997	-2148.46	893.111	409.543	-2162.13	814.674	477.452	-2136.5	805.665	446.872	-2181.49	742.776
843	0	259.234	-2162.64	1591.67	141.217	-2170.22	1594.87	248.819	-1998.45	1537.47	140.962	-2008.38	1538.45	198.547	-2031.45	1444.15	202.703	-1964.24	1160.67	201.137	-2156.56	1355.78	193.137	-2225.53	1163.34	121.321	-1945.67	1237.63	378.954	-2101.35	1369.64	447.767	-2083.21	1124.29	448.472	-2078.82	1049.21	458.983	-2163.57	895.464	409.301	-2177.79	817.248	477.434	-2152.77	807.885	446.567	-2198.44	745.68
844	0	259.584	-2173.31	1592.52	141.561	-2180.84	1595.89	249.162	-2009	1538.78	141.285	-2018.86	1539.91	198.981	-2041.69	1445.42	203.676	-1973.8	1162.08	200.985	-2166.62	1356.84	192.627	-2234.95	1164.32	122.368	-1954.97	1239.08	379.092	-2112.37	1371.01	448.496	-2095.84	1125.85	449.366	-2092.05	1050.7	458.916	-2178.66	897.864	408.987	-2193.46	819.91	477.318	-2169.05	810.158	446.144	-2215.42	748.678
845	0	259.789	-2183.95	1593.29	141.758	-2191.44	1596.77	249.388	-2019.51	1540.04	141.492	-2029.31	1541.27	199.359	-2051.88	1446.61	204.64	-1983.32	1163.39	200.799	-2176.63	1357.81	192.165	-2244.32	1165.22	123.406	-1964.22	1240.43	379.193	-2123.36	1372.34	449.219	-2108.36	1127.39	450.252	-2105.2	1052.17	458.798	-2193.71	900.295	408.602	-2209.14	822.646	477.1	-2185.32	812.467	445.601	-2232.39	751.751
846	0	259.857	-2194.56	1593.98	141.818	-2201.99	1597.52	249.505	-2029.98	1541.23	141.59	-2039.72	1542.5	199.683	-2062.03	1447.7	205.59	-1992.81	1164.6	200.585	-2186.6	1358.67	191.763	-2253.66	1166.03	124.427	-1973.42	1241.67	379.26	-2134.31	1373.63	449.939	-2120.78	1128.91	451.129	-2118.27	1053.61	458.629	-2208.72	902.736	408.145	-2224.82	825.44	476.777	-2201.56	814.794	444.935	-2249.35	754.881
847	0	259.797	-2205.13	1594.57	141.749	-2212.51	1598.12	249.521	-2040.41	1542.32	141.589	-2050.09	1543.6	199.955	-2072.15	1448.67	206.519	-2002.28	1165.7	200.349	-2196.53	1359.41	191.427	-2262.98	1166.74	125.422	-1982.59	1242.79	379.295	-2145.22	1374.84	450.654	-2133.09	1130.39	451.996	-2131.25	1055	458.411	-2223.67	905.17	407.617	-2240.48	828.274	476.347	-2217.76	817.119	444.146	-2266.27	758.045
848	0	259.62	-2215.68	1595.06	141.562	-2222.99	1598.57	249.446	-2050.82	1543.31	141.498	-2060.42	1544.56	200.175	-2082.24	1449.52	207.421	-2011.76	1166.66	200.093	-2206.44	1360.04	191.157	-2272.3	1167.34	126.38	-1991.76	1243.78	379.3	-2156.1	1375.96	451.364	-2145.31	1131.8	452.849	-2144.14	1056.31	458.145	-2238.54	907.575	407.018	-2256.1	831.128	475.81	-2233.9	819.423	443.235	-2283.13	761.223
849	0	259.336	-2226.2	1595.43	141.268	-2233.44	1598.88	249.287	-2061.2	1544.17	141.325	-2070.74	1545.36	200.345	-2092.32	1450.24	208.291	-2021.24	1167.49	199.821	-2216.32	1360.53	190.95	-2281.63	1167.8	127.293	-2000.93	1244.62	379.274	-2166.95	1376.98	452.064	-2157.43	1133.12	453.686	-2156.95	1057.54	457.831	-2253.33	909.932	406.348	-2271.69	833.985	475.164	-2249.96	821.684	442.203	-2299.92	764.395
850	0	258.955	-2236.7	1595.69	140.876	-2243.86	1599.04	249.053	-2071.55	1544.9	141.079	-2081.02	1546	200.465	-2102.39	1450.82	209.122	-2030.74	1168.17	199.531	-2226.2	1360.88	190.798	-2290.98	1168.11	128.15	-2010.11	1245.32	379.216	-2177.77	1377.89	452.753	-2169.45	1134.35	454.502	-2169.66	1058.67	457.468	-2268.04	912.221	405.608	-2287.22	836.823	474.411	-2265.94	823.883	441.055	-2316.62	767.537
851	0	258.487	-2247.18	1595.82	140.399	-2254.25	1599.05	248.75	-2081.9	1545.49	140.767	-2091.29	1546.46	200.534	-2112.46	1451.25	209.908	-2040.25	1168.71	199.224	-2236.08	1361.09	190.69	-2300.35	1168.26	128.944	-2019.33	1245.87	379.124	-2188.56	1378.65	453.422	-2181.39	1135.46	455.292	-2182.29	1059.68	457.057	-2282.65	914.423	404.797	-2302.68	839.621	473.552	-2281.82	826	439.794	-2333.22	770.631
852	0	257.943	-2257.63	1595.83	139.845	-2264.62	1598.91	248.385	-2092.23	1545.91	140.394	-2101.55	1546.76	200.55	-2122.52	1451.54	210.644	-2049.79	1169.1	198.897	-2245.97	1361.14	190.613	-2309.76	1168.24	129.665	-2028.59	1246.26	378.996	-2199.33	1379.27	454.065	-2193.25	1136.43	456.048	-2194.83	1060.55	456.594	-2297.16	916.52	403.915	-2318.07	842.36	472.588	-2297.58	828.018	438.427	-2349.71	773.655
853	0	257.33	-2268.08	1595.7	139.225	-2274.97	1598.62	247.962	-2102.55	1546.18	139.967	-2111.8	1546.88	200.512	-2132.6	1451.67	211.322	-2059.36	1169.34	198.548	-2255.87	1361.04	190.55	-2319.2	1168.05	130.307	-2037.9	1246.49	378.827	-2210.08	1379.74	454.673	-2205.04	1137.27	456.765	-2207.29	1061.29	456.077	-2311.55	918.495	402.962	-2333.36	845.018	471.522	-2313.21	829.919	436.958	-2366.07	776.591
854	0	256.658	-2278.51	1595.43	138.546	-2285.3	1598.19	247.486	-2112.88	1546.28	139.488	-2122.04	1546.82	200.418	-2142.7	1451.65	211.936	-2068.95	1169.43	198.174	-2265.79	1360.79	190.485	-2328.69	1167.68	130.862	-2047.27	1246.57	378.615	-2220.81	1380.04	455.236	-2216.77	1137.94	457.432	-2219.67	1061.86	455.503	-2325.83	920.334	401.939	-2348.55	847.575	470.357	-2328.7	831.689	435.395	-2382.29	779.421
855	0	255.933	-2288.94	1595.03	137.815	-2295.63	1597.61	246.961	-2123.21	1546.21	138.961	-2132.29	1546.59	200.266	-2152.82	1451.48	212.481	-2078.57	1169.36	197.77	-2275.73	1360.38	190.402	-2338.22	1167.14	131.326	-2056.7	1246.49	378.355	-2231.52	1380.16	455.743	-2228.44	1138.45	458.04	-2231.98	1062.28	454.869	-2339.99	922.022	400.844	-2363.63	850.013	469.095	-2344.04	833.313	433.745	-2398.36	782.126
856	0	255.161	-2299.37	1594.49	137.039	-2305.95	1596.9	246.387	-2133.54	1545.98	138.388	-2142.54	1546.19	200.054	-2162.96	1451.16	212.948	-2088.22	1169.15	197.332	-2285.71	1359.82	190.283	-2347.79	1166.43	131.693	-2066.2	1246.26	378.044	-2242.21	1380.12	456.181	-2240.06	1138.8	458.58	-2244.21	1062.54	454.171	-2354.01	923.55	399.679	-2378.57	852.313	467.741	-2359.22	834.781	432.014	-2414.26	784.692
857	0	254.346	-2309.79	1593.81	136.222	-2316.27	1596.06	245.766	-2143.88	1545.57	137.769	-2152.8	1545.63	199.778	-2173.12	1450.69	213.331	-2097.9	1168.79	196.857	-2295.72	1359.12	190.117	-2357.41	1165.55	131.961	-2075.78	1245.88	377.678	-2252.88	1379.9	456.541	-2251.62	1138.96	459.041	-2256.37	1062.63	453.404	-2367.9	924.906	398.442	-2393.37	854.458	466.3	-2374.23	836.083	430.21	-2429.98	787.103
858	0	253.492	-2320.21	1593.01	135.368	-2326.6	1595.09	245.098	-2154.24	1545.01	137.105	-2163.08	1544.91	199.437	-2183.32	1450.08	213.625	-2107.61	1168.3	196.339	-2305.77	1358.27	189.889	-2367.07	1164.52	132.127	-2085.42	1245.36	377.254	-2263.54	1379.51	456.809	-2263.15	1138.96	459.412	-2268.45	1062.55	452.566	-2381.65	926.084	397.134	-2408.01	856.432	464.774	-2389.05	837.212	428.34	-2445.51	789.345
859	0	252.6	-2330.65	1592.08	134.478	-2336.94	1594	244.384	-2164.61	1544.3	136.394	-2173.38	1544.05	199.027	-2193.55	1449.34	213.824	-2117.35	1167.67	195.776	-2315.86	1357.29	189.593	-2376.79	1163.34	132.188	-2095.14	1244.7	376.768	-2274.18	1378.96	456.975	-2274.63	1138.77	459.683	-2280.47	1062.31	451.651	-2395.25	927.077	395.755	-2422.47	858.221	463.17	-2403.68	838.163	426.411	-2460.83	791.405
860	0	251.672	-2341.09	1591.04	133.555	-2347.29	1592.81	243.621	-2175	1543.44	135.636	-2183.69	1543.05	198.547	-2203.81	1448.47	213.923	-2127.12	1166.92	195.164	-2325.99	1356.18	189.221	-2386.55	1162.04	132.144	-2104.94	1243.92	376.217	-2284.81	1378.25	457.029	-2286.07	1138.42	459.844	-2292.41	1061.91	450.657	-2408.7	927.882	394.306	-2436.75	859.813	461.492	-2418.11	838.932	424.429	-2475.93	793.271
861	0	250.708	-2351.54	1589.89	132.597	-2357.66	1591.51	242.808	-2185.41	1542.45	134.829	-2194.03	1541.93	197.993	-2214.11	1447.49	213.919	-2136.94	1166.05	194.498	-2336.16	1354.96	188.77	-2396.37	1160.63	131.995	-2114.82	1243.01	375.601	-2295.43	1377.4	456.962	-2297.46	1137.9	459.885	-2304.28	1061.35	449.582	-2421.99	928.496	392.789	-2450.82	861.197	459.746	-2432.32	839.516	422.401	-2490.8	794.932
862	0	249.706	-2362	1588.64	131.603	-2368.05	1590.12	241.943	-2195.84	1541.34	133.97	-2204.4	1540.69	197.366	-2224.44	1446.39	213.81	-2146.8	1165.08	193.778	-2346.38	1353.64	188.24	-2406.24	1159.11	131.741	-2124.77	1241.99	374.916	-2306.04	1376.42	456.768	-2308.8	1137.22	459.799	-2316.09	1060.65	448.423	-2435.11	928.92	391.205	-2464.68	862.364	457.938	-2446.31	839.915	420.334	-2505.41	796.378
863	0	248.665	-2372.48	1587.3	130.572	-2378.45	1588.66	241.024	-2206.3	1540.12	133.057	-2214.79	1539.36	196.662	-2234.81	1445.21	213.592	-2156.71	1164	193	-2356.64	1352.23	187.633	-2416.17	1157.52	131.383	-2134.8	1240.87	374.163	-2316.64	1375.33	456.441	-2320.1	1136.4	459.577	-2327.81	1059.82	447.181	-2448.07	929.153	389.556	-2478.32	863.307	456.072	-2460.07	840.13	418.232	-2519.77	797.601
864	0	247.581	-2382.97	1585.88	129.5	-2388.88	1587.13	240.047	-2216.77	1538.81	132.087	-2225.21	1537.93	195.88	-2245.21	1443.94	213.267	-2166.67	1162.84	192.162	-2366.94	1350.74	186.952	-2426.17	1155.85	130.924	-2144.91	1239.65	373.339	-2327.24	1374.13	455.979	-2331.35	1135.44	459.215	-2339.47	1058.87	445.854	-2460.84	929.199	387.845	-2491.71	864.022	454.156	-2473.59	840.164	416.102	-2533.84	798.593
865	0	246.453	-2393.48	1584.41	128.384	-2399.34	1585.54	239.011	-2227.27	1537.42	131.058	-2235.66	1536.44	195.021	-2255.64	1442.6	212.834	-2176.7	1161.6	191.263	-2377.29	1349.19	186.204	-2436.23	1154.13	130.367	-2155.09	1238.36	372.445	-2337.84	1372.85	455.379	-2342.54	1134.36	458.708	-2351.04	1057.8	444.443	-2473.43	929.061	386.074	-2504.86	864.506	452.195	-2486.86	840.019	413.948	-2547.62	799.35
866	0	245.277	-2404.01	1582.89	127.221	-2409.82	1583.91	237.911	-2237.8	1535.98	129.966	-2246.14	1534.9	194.083	-2266.11	1441.2	212.295	-2186.79	1160.3	190.302	-2387.68	1347.59	185.392	-2446.37	1152.37	129.715	-2165.34	1236.99	371.481	-2348.44	1371.51	454.643	-2353.68	1133.17	458.055	-2362.54	1056.64	442.952	-2485.83	928.746	384.247	-2517.75	864.759	450.196	-2499.87	839.702	411.775	-2561.1	799.868
867	0	244.048	-2414.56	1581.35	126.006	-2420.33	1582.26	236.746	-2248.34	1534.49	128.809	-2256.65	1533.31	193.067	-2276.62	1439.76	211.654	-2196.95	1158.94	189.277	-2398.12	1345.97	184.524	-2456.58	1150.58	128.974	-2175.67	1235.57	370.448	-2359.05	1370.13	453.772	-2364.76	1131.89	457.253	-2373.95	1055.4	441.382	-2498.03	928.259	382.368	-2530.37	864.782	448.164	-2512.61	839.218	409.587	-2574.25	800.146
868	0	242.763	-2425.12	1579.78	124.735	-2430.86	1580.59	235.513	-2258.91	1532.97	127.584	-2267.18	1531.7	191.974	-2287.16	1438.29	210.912	-2207.18	1157.55	188.189	-2408.6	1344.33	183.602	-2466.89	1148.8	128.146	-2186.07	1234.1	369.346	-2369.68	1368.72	452.769	-2375.78	1130.54	456.306	-2385.28	1054.1	439.737	-2510.03	927.61	380.442	-2542.71	864.581	446.105	-2525.07	838.574	407.39	-2587.08	800.183
869	0	241.418	-2435.71	1578.22	123.404	-2441.41	1578.93	234.209	-2269.51	1531.45	126.289	-2277.75	1530.09	190.803	-2297.73	1436.81	210.076	-2217.49	1156.14	187.037	-2419.14	1342.69	182.631	-2477.28	1147.03	127.238	-2196.53	1232.6	368.175	-2380.32	1367.3	451.639	-2386.74	1129.14	455.213	-2396.53	1052.75	438.021	-2521.82	926.805	378.473	-2554.76	864.159	444.026	-2537.24	837.777	405.186	-2599.56	799.982
870	0	240.01	-2446.32	1576.68	122.009	-2452	1577.29	232.832	-2280.12	1529.93	124.922	-2288.35	1528.48	189.557	-2308.33	1435.33	209.149	-2227.88	1154.72	185.821	-2429.71	1341.08	181.612	-2487.77	1145.3	126.255	-2207.07	1231.09	366.937	-2390.99	1365.89	450.388	-2397.64	1127.7	453.98	-2407.68	1051.37	436.24	-2533.39	925.857	376.467	-2566.52	863.526	441.933	-2549.12	836.836	402.979	-2611.68	799.549
871	0	238.535	-2456.95	1575.18	120.547	-2462.6	1575.67	231.38	-2290.76	1528.44	123.481	-2298.97	1526.9	188.236	-2318.96	1433.86	208.137	-2238.35	1153.3	184.539	-2440.34	1339.5	180.544	-2498.36	1143.62	125.2	-2217.67	1229.57	365.632	-2401.7	1364.51	449.021	-2408.49	1126.25	452.611	-2418.75	1049.98	434.399	-2544.75	924.774	374.428	-2577.98	862.69	439.83	-2560.7	835.76	400.772	-2623.44	798.887
872	0	236.99	-2467.6	1573.72	119.015	-2473.24	1574.11	229.85	-2301.42	1526.99	121.965	-2309.62	1525.35	186.842	-2329.63	1432.42	207.046	-2248.91	1151.9	183.192	-2451.01	1337.98	179.426	-2509.05	1142.02	124.078	-2228.34	1228.06	364.262	-2412.43	1363.18	447.545	-2419.29	1124.81	451.111	-2429.72	1048.58	432.503	-2555.88	923.568	372.362	-2589.13	861.66	437.724	-2571.96	834.559	398.569	-2634.83	798.006
873	0	235.374	-2478.27	1572.33	117.41	-2483.89	1572.6	228.243	-2312.1	1525.6	120.372	-2320.29	1523.85	185.377	-2340.32	1431.01	205.881	-2259.56	1150.53	181.779	-2461.74	1336.53	178.253	-2519.86	1140.52	122.893	-2239.07	1226.57	362.826	-2423.21	1361.92	445.965	-2430.03	1123.4	449.487	-2440.6	1047.21	430.559	-2566.79	922.249	370.275	-2599.97	860.448	435.619	-2582.91	833.242	396.372	-2645.83	796.913
874	0	233.683	-2488.96	1571.01	115.729	-2494.57	1571.16	226.556	-2322.8	1524.27	118.702	-2330.99	1522.42	183.841	-2351.05	1429.66	204.648	-2270.29	1149.21	180.3	-2472.51	1335.16	177.023	-2530.79	1139.14	121.648	-2249.87	1225.12	361.326	-2434.02	1360.72	444.288	-2440.73	1122.04	447.744	-2451.39	1045.87	428.57	-2577.46	920.828	368.171	-2610.49	859.065	433.522	-2593.53	831.821	394.183	-2656.44	795.618
875	0	231.916	-2499.67	1569.78	113.972	-2505.27	1569.81	224.788	-2333.52	1523.02	116.955	-2341.72	1521.07	182.236	-2361.8	1428.36	203.352	-2281.11	1147.93	178.755	-2483.34	1333.9	175.728	-2541.83	1137.89	120.345	-2260.74	1223.7	359.761	-2444.89	1359.62	442.52	-2451.39	1120.73	445.888	-2462.08	1044.58	426.544	-2587.9	919.315	366.055	-2620.69	857.52	431.436	-2603.83	830.303	392.005	-2666.65	794.13
876	0	230.073	-2510.4	1568.66	112.138	-2515.99	1568.55	222.939	-2344.26	1521.87	115.129	-2352.47	1519.8	180.563	-2372.59	1427.13	201.997	-2292.02	1146.72	177.143	-2494.22	1332.74	174.365	-2552.99	1136.8	118.987	-2271.67	1222.35	358.133	-2455.8	1358.62	440.665	-2462.01	1119.51	443.925	-2472.67	1043.35	424.485	-2598.09	917.72	363.933	-2630.56	855.825	429.366	-2613.8	828.698	389.84	-2676.46	792.457
877	0	228.152	-2521.14	1567.64	110.224	-2526.74	1567.39	221.009	-2355.01	1520.81	113.225	-2363.24	1518.62	178.823	-2383.4	1425.98	200.588	-2303.01	1145.57	175.464	-2505.15	1331.7	172.927	-2564.28	1135.89	117.574	-2282.68	1221.05	356.44	-2466.76	1357.73	438.728	-2472.6	1118.37	441.86	-2483.17	1042.18	422.397	-2608.05	916.049	361.807	-2640.1	853.988	427.317	-2623.43	827.014	387.689	-2685.87	790.609
878	0	226.152	-2531.91	1566.73	108.232	-2537.51	1566.33	218.997	-2365.79	1519.85	111.242	-2374.04	1517.54	177.017	-2394.24	1424.9	199.128	-2314.09	1144.51	173.718	-2516.13	1330.79	171.411	-2575.69	1135.15	116.107	-2293.76	1219.82	354.684	-2477.77	1356.95	436.712	-2483.16	1117.34	439.696	-2493.57	1041.1	420.283	-2617.76	914.311	359.68	-2649.31	852.016	425.29	-2632.73	825.258	385.554	-2694.86	788.592
879	0	224.074	-2542.7	1565.94	106.161	-2548.29	1565.39	216.904	-2376.58	1519.01	109.182	-2384.85	1516.57	175.145	-2405.11	1423.92	197.619	-2325.26	1143.52	171.904	-2527.17	1330.02	169.813	-2587.23	1134.61	114.588	-2304.91	1218.66	352.864	-2488.83	1356.3	434.62	-2493.68	1116.41	437.437	-2503.87	1040.09	418.147	-2627.24	912.51	357.557	-2658.19	849.917	423.288	-2641.69	823.435	383.436	-2703.44	786.413
880	0	221.918	-2553.5	1565.27	104.01	-2559.1	1564.56	214.728	-2387.39	1518.28	107.043	-2395.69	1515.71	173.207	-2416	1423.01	196.064	-2336.51	1142.61	170.023	-2538.26	1329.38	168.13	-2598.89	1134.27	113.016	-2316.13	1217.58	350.98	-2499.95	1355.77	432.453	-2504.18	1115.6	435.085	-2514.06	1039.17	415.991	-2636.46	910.651	355.438	-2666.73	847.695	421.315	-2650.31	821.549	381.335	-2711.6	784.076
881	0	219.683	-2564.32	1564.73	101.78	-2569.93	1563.85	212.47	-2398.22	1517.67	104.826	-2406.56	1514.96	171.205	-2426.93	1422.2	194.462	-2347.85	1141.79	168.074	-2549.41	1328.89	166.362	-2610.69	1134.15	111.392	-2327.43	1216.57	349.033	-2511.11	1355.37	430.215	-2514.66	1114.91	432.642	-2524.17	1038.34	413.815	-2645.44	908.736	353.324	-2674.94	845.353	419.369	-2658.59	819.604	379.254	-2719.35	781.584
882	0	217.369	-2575.16	1564.32	99.4704	-2580.79	1563.27	210.13	-2409.06	1517.17	102.531	-2417.44	1514.32	169.137	-2437.88	1421.48	192.816	-2359.27	1141.06	166.058	-2560.61	1328.54	164.506	-2622.61	1134.23	109.716	-2338.8	1215.64	347.022	-2522.33	1355.11	427.904	-2525.1	1114.34	430.108	-2534.17	1037.6	411.621	-2654.18	906.768	351.218	-2682.82	842.893	417.453	-2666.53	817.6	377.191	-2726.69	778.939
883	0	214.976	-2586.02	1564.03	97.0817	-2591.66	1562.8	207.709	-2419.92	1516.79	100.158	-2428.35	1513.8	167.005	-2448.86	1420.85	191.125	-2370.78	1140.42	163.974	-2571.86	1328.34	162.564	-2634.66	1134.52	107.988	-2350.25	1214.79	344.947	-2533.6	1354.97	425.522	-2535.53	1113.9	427.485	-2544.07	1036.95	409.409	-2662.67	904.746	349.118	-2690.36	840.316	415.567	-2674.14	815.539	375.147	-2733.61	776.143
884	0	212.505	-2596.9	1563.87	94.6138	-2602.55	1562.45	205.205	-2430.8	1516.53	97.7074	-2439.28	1513.39	164.808	-2459.87	1420.31	189.39	-2382.38	1139.86	161.823	-2583.17	1328.28	160.534	-2646.85	1135.03	106.208	-2361.78	1214.02	342.808	-2544.93	1354.97	423.069	-2545.92	1113.57	424.772	-2553.87	1036.4	407.18	-2670.92	902.671	347.025	-2697.57	837.623	413.711	-2681.4	813.421	373.123	-2740.11	773.196
[truncated: 69 more columns]

## Sheet: Sheet2
Devices
		025370 - Force			025370 - Moment			025370 - CoP			027571 - Force			027571 - Moment			027571 - CoP			037720 - Force			037720 - Moment			037720 - CoP
Frame	Sub Frame	Fx	Fy	Fz	Mx	My	Mz	Cx	Cy	Cz	Fx	Fy	Fz	Mx	My	Mz	Cx	Cy	Cz	Fx	Fy	Fz	Mx	My	Mz	Cx	Cy	Cz
		N	N	N	N.mm	N.mm	N.mm	mm	mm	mm	N	N	N	N.mm	N.mm	N.mm	mm	mm	mm	N	N	N	N.mm	N.mm	N.mm	mm	mm	mm
439	0	0	0	0	0	0	0	200	300	0	0	0	0	0	0	0	200	903	0	0	0	0	0	0	0	603	903	0
439	1	0	0	0	0	0	0	200	300	0	0	0	0	0	0	0	200	903	0	0	0	0	0	0	0	603	903	0
439	2	0	0	0	0	0	0	200	300	0	0	0	0	0	0	0	200	903	0	0	0	0	0	0	0	603	903	0
439	3	0	0	0	0	0	0	200	300	0	0	0	0	0	0	0	200	903	0	0	0	0	0	0	0	603	903	0
439	4	0	0	0	0	0	0	200	300	0	0	0	0	0	0	0	200	903	0	0	0	0	0	0	0	603	903	0
439	5	0	0	0	0	0	0	200	300	0	0	0	0	0	0	0	200	903	0	0	0	0	0	0	0	603	903	0
439	6	0	0	0	0	0	0	200	300	0	0	0	0	0	0	0	200	903	0	0	0	0	0	0	0	603	903	0
439	7	0	0	0	0	0	0	200	300	0	0	0	0	0	0	0	200	903	0	0	0	0	0	0	0	603	903	0
439	8	0	0	0	0	0	0	200	300	0	0	0	0	0	0	0	200	903	0	0	0	0	0	0	0	603	903	0
439	9	0	0	0	0	0	0	200	300	0	0	0	0	0	0	0	200	903	0	0	0	0	0	0	0	603	903	0
440	0	0	0	0	0	0	0	200	300	0	0	0	0	0	0	0	200	903	0	0	0	0	0	0	0	603	903	0
440	1	0	0	0	0	0	0	200	300	0	0	0	0	0	0	0	200	903	0	0	0	0	0	0	0	603	903	0
440	2	0	0	0	0	0	0	200	300	0	0	0	0	0	0	0	200	903	0	0	0	0	0	0	0	603	903	0
440	3	0	0	0	0	0	0	200	300	0	0	0	0	0	0	0	200	903	0	0	0	0	0	0	0	603	903	0
440	4	0	0	0	0	0	0	200	300	0	0	0	0	0	0	0	200	903	0	0	0	0	0	0	0	603	903	0
440	5	0	0	0	0	0	0	200	300	0	0	0	0	0	0	0	200	903	0	0	0	0	0	0	0	603	903	0
440	6	0	0	0	0	0	0	200	300	0	0	0	0	0	0	0	200	903	0	0	0	0	0	0	0	603	903	0
440	7	0	0	0	0	0	0	200	300	0	0	0	0	0	0	0	200	903	0	0	0	0	0	0	0	603	903	0
440	8	0	0	0	0	0	0	200	300	0	0	0	0	0	0	0	200	903	0	0	0	0	0	0	0	603	903	0
440	9	0	0	0	0	0	0	200	300	0	0	0	0	0	0	0	200	903	0	0	0	0	0	0	0	603	903	0
441	0	0	0	0	0	0	0	200	300	0	0	0	0	0	0	0	200	903	0	0	0	0	0	0	0	603	903	0
441	1	0	0	0	0	0	0	200	300	0	0	0	0	0	0	0	200	903	0	0	0	0	0	0	0	603	903	0
441	2	0	0	0	0	0	0	200	300	0	0	0	0	0	0	0	200	903	0	0	0	0	0	0	0	603	903	0
441	3	0	0	0	0	0	0	200	300	0	0	0	0	0	0	0	200	903	0	0	0	0	0	0	0	603	903	0
441	4	0	0	0	0	0	0	200	300	0	0	0	0	0	0	0	200	903	0	0	0	0	0	0	0	603	903	0
441	5	0	0	0	0	0	0	200	300	0	0	0	0	0	0	0	200	903	0	0	0	0	0	0	0	603	903	0
441	6	0	0	0	0	0	0	200	300	0	0	0	0	0	0	0	200	903	0	0	0	0	0	0	0	603	903	0
441	7	0	0	0	0	0	0	200	300	0	0	0	0	0	0	0	200	903	0	0	0	0	0	0	0	603	903	0
441	8	0	0	0	0	0	0	200	300	0	0	0	0	0	0	0	200	903	0	0	0	0	0	0	0	603	903	0
441	9	0	0	0	0	0	0	200	300	0	0	0	0	0	0	0	200	903	0	0	0	0	0	0	0	603	903	0
442	0	0	0	0	0	0	0	200	300	0	0	0	0	0	0	0	200	903	0	0	0	0	0	0	0	603	903	0
442	1	0	0	0	0	0	0	200	300	0	0	0	0	0	0	0	200	903	0	0	0	0	0	0	0	603	903	0
442	2	0	0	0	0	0	0	200	300	0	0	0	0	0	0	0	200	903	0	0	0	0	0	0	0	603	903	0
442	3	0	0	0	0	0	0	200	300	0	0	0	0	0	0	0	200	903	0	0	0	0	0	0	0	603	903	0
442	4	0	0	0	0	0	0	200	300	0	0	0	0	0	0	0	200	903	0	0	0	0	0	0	0	603	903	0
442	5	0	0	0	0	0	0	200	300	0	0	0	0	0	0	0	200	903	0	0	0	0	0	0	0	603	903	0
442	6	0	0	0	0	0	0	200	300	0	0	0	0	0	0	0	200	903	0	0	0	0	0	0	0	603	903	0
442	7	0	0	0	0	0	0	200	300	0	0	0	0	0	0	0	200	903	0	0	0	0	0	0	0	603	903	0
442	8	0	0	0	0	0	0	200	300	0	0	0	0	0	0	0	200	903	0	0	0	0	0	0	0	603	903	0
442	9	0	0	0	0	0	0	200	300	0	0	0	0	0	0	0	200	903	0	0	0	0	0	0	0	603	903	0
443	0	0	0	0	0	0	0	200	300	0	0	0	0	0	0	0	200	903	0	0	0	0	0	0	0	603	903	0
443	1	0	0	0	0	0	0	200	300	0	0	0	0	0	0	0	200	903	0	0	0	0	0	0	0	603	903	0
443	2	0	0	0	0	0	0	200	300	0	0	0	0	0	0	0	200	903	0	0	0	0	0	0	0	603	903	0
443	3	0	0	0	0	0	0	200	300	0	0	0	0	0	0	0	200	903	0	0	0	0	0	0	0	603	903	0
443	4	0	0	0	0	0	0	200	300	0	0	0	0	0	0	0	200	903	0	0	0	0	0	0	0	603	903	0
443	5	0	0	0	0	0	0	200	300	0	0	0	0	0	0	0	200	903	0	0	0	0	0	0	0	603	903	0
443	6	0	0	0	0	0	0	200	300	0	0	0	0	0	0	0	200	903	0	0	0	0	0	0	0	603	903	0
443	7	0	0	0	0	0	0	200	300	0	0	0	0	0	0	0	200	903	0	0	0	0	0	0	0	603	903	0
443	8	0	0	0	0	0	0	200	300	0	0	0	0	0	0	0	200	903	0	0	0	0	0	0	0	603	903	0
443	9	0	0	0	0	0	0	200	300	0	0	0	0	0	0	0	200	903	0	0	0	0	0	0	0	603	903	0
444	0	0	0	0	0	0	0	200	300	0	0	0	0	0	0	0	200	903	0	0	0	0	0	0	0	603	903	0
444	1	0	0	0	0	0	0	200	300	0	0	0	0	0	0	0	200	903	0	0	0	0	0	0	0	603	903	0
444	2	0	0	0	0	0	0	200	300	0	0	0	0	0	0	0	200	903	0	0	0	0	0	0	0	603	903	0
444	3	0	0	0	0	0	0	200	300	0	0	0	0	0	0	0	200	903	0	0	0	0	0	0	0	603	903	0
444	4	0	0	0	0	0	0	200	300	0	0	0	0	0	0	0	200	903	0	0	0	0	0	0	0	603	903	0
444	5	0	0	0	0	0	0	200	300	0	0	0	0	0	0	0	200	903	0	0	0	0	0	0	0	603	903	0
444	6	0	0	0	0	0	0	200	300	0	0	0	0	0	0	0	200	903	0	0	0	0	0	0	0	603	903	0
444	7	0	0	0	0	0	0	200	300	0	0	0	0	0	0	0	200	903	0	0	0	0	0	0	0	603	903	0
444	8	0	0	0	0	0	0	200	300	0	0	0	0	0	0	0	200	903	0	0	0	0	0	0	0	603	903	0
444	9	0	0	0	0	0	0	200	300	0	0	0	0	0	0	0	200	903	0	0	0	0	0	0	0	603	903	0
445	0	0	0	0	0	0	0	200	300	0	0	0	0	0	0	0	200	903	0	0	0	0	0	0	0	603	903	0
445	1	0	0	0	0	0	0	200	300	0	0	0	0	0	0	0	200	903	0	0	0	0	0	0	0	603	903	0
445	2	0	0	0	0	0	0	200	300	0	0	0	0	0	0	0	200	903	0	0	0	0	0	0	0	603	903	0
445	3	0	0	0	0	0	0	200	300	0	0	0	0	0	0	0	200	903	0	0	0	0	0	0	0	603	903	0
445	4	0	0	0	0	0	0	200	300	0	0	0	0	0	0	0	200	903	0	0	0	0	0	0	0	603	903	0
445	5	0	0	0	0	0	0	200	300	0	0	0	0	0	0	0	200	903	0	0	0	0	0	0	0	603	903	0
445	6	0	0	0	0	0	0	200	300	0	0	0	0	0	0	0	200	903	0	0	0	0	0	0	0	603	903	0
445	7	0	0	0	0	0	0	200	300	0	0	0	0	0	0	0	200	903	0	0	0	0	0	0	0	603	903	0
445	8	0	0	0	0	0	0	200	300	0	0	0	0	0	0	0	200	903	0	0	0	0	0	0	0	603	903	0
445	9	0	0	0	0	0	0	200	300	0	0	0	0	0	0	0	200	903	0	0	0	0	0	0	0	603	903	0
446	0	0	0	0	0	0	0	200	300	0	0	0	0	0	0	0	200	903	0	0	0	0	0	0	0	603	903	0
446	1	0	0	0	0	0	0	200	300	0	0	0	0	0	0	0	200	903	0	0	0	0	0	0	0	603	903	0
446	2	0	0	0	0	0	0	200	300	0	0	0	0	0	0	0	200	903	0	0	0	0	0	0	0	603	903	0
446	3	0	0	0	0	0	0	200	300	0	0	0	0	0	0	0	200	903	0	0	0	0	0	0	0	603	903	0
446	4	0	0	0	0	0	0	200	300	0	0	0	0	0	0	0	200	903	0	0	0	0	0	0	0	603	903	0
446	5	0	0	0	0	0	0	200	300	0	0	0	0	0	0	0	200	903	0	0	0	0	0	0	0	603	903	0
446	6	0	0	0	0	0	0	200	300	0	0	0	0	0	0	0	200	903	0	0	0	0	0	0	0	603	903	0
446	7	0	0	0	0	0	0	200	300	0	0	0	0	0	0	0	200	903	0	0	0	0	0	0	0	603	903	0
446	8	0	0	0	0	0	0	200	300	0	0	0	0	0	0	0	200	903	0	0	0	0	0	0	0	603	903	0
446	9	0	0	0	0	0	0	200	300	0	0	0	0	0	0	0	200	903	0	0	0	0	0	0	0	603	903	0
447	0	0	0	0	0	0	0	200	300	0	0	0	0	0	0	0	200	903	0	0	0	0	0	0	0	603	903	0
447	1	0	0	0	0	0	0	200	300	0	0	0	0	0	0	0	200	903	0	0	0	0	0	0	0	603	903	0
447	2	0	0	0	0	0	0	200	300	0	0	0	0	0	0	0	200	903	0	0	0	0	0	0	0	603	903	0
447	3	0	0	0	0	0	0	200	300	0	0	0	0	0	0	0	200	903	0	0	0	0	0	0	0	603	903	0
447	4	0	0	0	0	0	0	200	300	0	0	0	0	0	0	0	200	903	0	0	0	0	0	0	0	603	903	0
447	5	0	0	0	0	0	0	200	300	0	0	0	0	0	0	0	200	903	0	0	0	0	0	0	0	603	903	0
447	6	0	0	0	0	0	0	200	300	0	0	0	0	0	0	0	200	903	0	0	0	0	0	0	0	603	903	0
447	7	0	0	0	0	0	0	200	300	0	0	0	0	0	0	0	200	903	0	0	0	0	0	0	0	603	903	0
447	8	0	0	0	0	0	0	200	300	0	0	0	0	0	0	0	200	903	0	0	0	0	0	0	0	603	903	0
447	9	0	0	0	0	0	0	200	300	0	0	0	0	0	0	0	200	903	0	0	0	0	0	0	0	603	903	0
448	0	0	0	0	0	0	0	200	300	0	0	0	0	0	0	0	200	903	0	0	0	0	0	0	0	603	903	0
448	1	0	0	0	0	0	0	200	300	0	0	0	0	0	0	0	200	903	0	0	0	0	0	0	0	603	903	0
448	2	0	0	0	0	0	0	200	300	0	0	0	0	0	0	0	200	903	0	0	0	0	0	0	0	603	903	0
448	3	0	0	0	0	0	0	200	300	0	0	0	0	0	0	0	200	903	0	0	0	0	0	0	0	603	903	0
448	4	0	0	0	0	0	0	200	300	0	0	0	0	0	0	0	200	903	0	0	0	0	0	0	0	603	903	0
448	5	0	0	0	0	0	0	200	300	0	0	0	0	0	0	0	200	903	0	0	0	0	0	0	0	603	903	0
448	6	0	0	0	0	0	0	200	300	0	0	0	0	0	0	0	200	903	0	0	0	0	0	0	0	603	903	0
448	7	0	0	0	0	0	0	200	300	0	0	0	0	0	0	0	200	903	0	0	0	0	0	0	0	603	903	0
448	8	0	0	0	0	0	0	200	300	0	0	0	0	0	0	0	200	903	0	0	0	0	0	0	0	603	903	0
448	9	0	0	0	0	0	0	200	300	0	0	0	0	0	0	0	200	903	0	0	0	0	0	0	0	603	903	0
449	0	0	0	0	0	0	0	200	300	0	0	0	0	0	0	0	200	903	0	0	0	0	0	0	0	603	903	0
449	1	0	0	0	0	0	0	200	300	0	0	0	0	0	0	0	200	903	0	0	0	0	0	0	0	603	903	0
449	2	0	0	0	0	0	0	200	300	0	0	0	0	0	0	0	200	903	0	0	0	0	0	0	0	603	903	0
449	3	0	0	0	0	0	0	200	300	0	0	0	0	0	0	0	200	903	0	0	0	0	0	0	0	603	903	0
449	4	0	0	0	0	0	0	200	300	0	0	0	0	0	0	0	200	903	0	0	0	0	0	0	0	603	903	0
449	5	0	0	0	0	0	0	200	300	0	0	0	0	0	0	0	200	903	0	0	0	0	0	0	0	603	903	0
449	6	0	0	0	0	0	0	200	300	0	0	0	0	0	0	0	200	903	0	0	0	0	0	0	0	603	903	0
449	7	0	0	0	0	0	0	200	300	0	0	0	0	0	0	0	200	903	0	0	0	0	0	0	0	603	903	0
449	8	0	0	0	0	0	0	200	300	0	0	0	0	0	0	0	200	903	0	0	0	0	0	0	0	603	903	0
449	9	0	0	0	0	0	0	200	300	0	0	0	0	0	0	0	200	903	0	0	0	0	0	0	0	603	903	0
450	0	0	0	0	0	0	0	200	300	0	0	0	0	0	0	0	200	903	0	0	0	0	0	0	0	603	903	0
450	1	0	0	0	0	0	0	200	300	0	0	0	0	0	0	0	200	903	0	0	0	0	0	0	0	603	903	0
450	2	0	0	0	0	0	0	200	300	0	0	0	0	0	0	0	200	903	0	0	0	0	0	0	0	603	903	0
450	3	0	0	0	0	0	0	200	300	0	0	0	0	0	0	0	200	903	0	0	0	0	0	0	0	603	903	0
450	4	0	0	0	0	0	0	200	300	0	0	0	0	0	0	0	200	903	0	0	0	0	0	0	0	603	903	0
450	5	0	0	0	0	0	0	200	300	0	0	0	0	0	0	0	200	903	0	0	0	0	0	0	0	603	903	0
450	6	0	0	0	0	0	0	200	300	0	0	0	0	0	0	0	200	903	0	0	0	0	0	0	0	603	903	0
450	7	0	0	0	0	0	0	200	300	0	0	0	0	0	0	0	200	903	0	0	0	0	0	0	0	603	903	0
450	8	0	0	0	0	0	0	200	300	0	0	0	0	0	0	0	200	903	0	0	0	0	0	0	0	603	903	0
450	9	0	0	0	0	0	0	200	300	0	0	0	0	0	0	0	200	903	0	0	0	0	0	0	0	603	903	0
451	0	0	0	0	0	0	0	200	300	0	0	0	0	0	0	0	200	903	0	0	0	0	0	0	0	603	903	0
451	1	0	0	0	0	0	0	200	300	0	0	0	0	0	0	0	200	903	0	0	0	0	0	0	0	603	903	0
451	2	0	0	0	0	0	0	200	300	0	0	0	0	0	0	0	200	903	0	0	0	0	0	0	0	603	903	0
451	3	0	0	0	0	0	0	200	300	0	0	0	0	0	0	0	200	903	0	0	0	0	0	0	0	603	903	0
451	4	0	0	0	0	0	0	200	300	0	0	0	0	0	0	0	200	903	0	0	0	0	0	0	0	603	903	0
451	5	0	0	0	0	0	0	200	300	0	0	0	0	0	0	0	200	903	0	0	0	0	0	0	0	603	903	0
451	6	0	0	0	0	0	0	200	300	0	0	0	0	0	0	0	200	903	0	0	0	0	0	0	0	603	903	0
451	7	0	0	0	0	0	0	200	300	0	0	0	0	0	0	0	200	903	0	0	0	0	0	0	0	603	903	0
451	8	0	0	0	0	0	0	200	300	0	0	0	0	0	0	0	200	903	0	0	0	0	0	0	0	603	903	0
451	9	0	0	0	0	0	0	200	300	0	0	0	0	0	0	0	200	903	0	0	0	0	0	0	0	603	903	0
452	0	0	0	0	0	0	0	200	300	0	0	0	0	0	0	0	200	903	0	0	0	0	0	0	0	603	903	0
452	1	0	0	0	0	0	0	200	300	0	0	0	0	0	0	0	200	903	0	0	0	0	0	0	0	603	903	0
452	2	0	0	0	0	0	0	200	300	0	0	0	0	0	0	0	200	903	0	0	0	0	0	0	0	603	903	0
452	3	0	0	0	0	0	0	200	300	0	0	0	0	0	0	0	200	903	0	0	0	0	0	0	0	603	903	0
452	4	0	0	0	0	0	0	200	300	0	0	0	0	0	0	0	200	903	0	0	0	0	0	0	0	603	903	0
452	5	0	0	0	0	0	0	200	300	0	0	0	0	0	0	0	200	903	0	0	0	0	0	0	0	603	903	0
452	6	0	0	0	0	0	0	200	300	0	0	0	0	0	0	0	200	903	0	0	0	0	0	0	0	603	903	0
452	7	0	0	0	0	0	0	200	300	0	0	0	0	0	0	0	200	903	0	0	0	0	0	0	0	603	903	0
452	8	0	0	0	0	0	0	200	300	0	0	0	0	0	0	0	200	903	0	0	0	0	0	0	0	603	903	0
452	9	0	0	0	0	0	0	200	300	0	0	0	0	0	0	0	200	903	0	0	0	0	0	0	0	603	903	0
453	0	0	0	0	0	0	0	200	300	0	0	0	0	0	0	0	200	903	0	0	0	0	0	0	0	603	903	0
453	1	0	0	0	0	0	0	200	300	0	0	0	0	0	0	0	200	903	0	0	0	0	0	0	0	603	903	0
453	2	0	0	0	0	0	0	200	300	0	0	0	0	0	0	0	200	903	0	0	0	0	0	0	0	603	903	0
453	3	0	0	0	0	0	0	200	300	0	0	0	0	0	0	0	200	903	0	0	0	0	0	0	0	603	903	0
453	4	0	0	0	0	0	0	200	300	0	0	0	0	0	0	0	200	903	0	0	0	0	0	0	0	603	903	0
453	5	0	0	0	0	0	0	200	300	0	0	0	0	0	0	0	200	903	0	0	0	0	0	0	0	603	903	0
453	6	0	0	0	0	0	0	200	300	0	0	0	0	0	0	0	200	903	0	0	0	0	0	0	0	603	903	0
453	7	0	0	0	0	0	0	200	300	0	0	0	0	0	0	0	200	903	0	0	0	0	0	0	0	603	903	0
453	8	0	0	0	0	0	0	200	300	0	0	0	0	0	0	0	200	903	0	0	0	0	0	0	0	603	903	0
453	9	0	0	0	0	0	0	200	300	0	0	0	0	0	0	0	200	903	0	0	0	0	0	0	0	603	903	0
454	0	0	0	0	0	0	0	200	300	0	0	0	0	0	0	0	200	903	0	0	0	0	0	0	0	603	903	0
454	1	0	0	0	0	0	0	200	300	0	0	0	0	0	0	0	200	903	0	0	0	0	0	0	0	603	903	0
454	2	0	0	0	0	0	0	200	300	0	0	0	0	0	0	0	200	903	0	0	0	0	0	0	0	603	903	0
454	3	0	0	0	0	0	0	200	300	0	0	0	0	0	0	0	200	903	0	0	0	0	0	0	0	603	903	0
454	4	0	0	0	0	0	0	200	300	0	0	0	0	0	0	0	200	903	0	0	0	0	0	0	0	603	903	0
454	5	0	0	0	0	0	0	200	300	0	0	0	0	0	0	0	200	903	0	0	0	0	0	0	0	603	903	0
454	6	0	0	0	0	0	0	200	300	0	0	0	0	0	0	0	200	903	0	0	0	0	0	0	0	603	903	0
454	7	0	0	0	0	0	0	200	300	0	0	0	0	0	0	0	200	903	0	0	0	0	0	0	0	603	903	0
454	8	0	0	0	0	0	0	200	300	0	0	0	0	0	0	0	200	903	0	0	0	0	0	0	0	603	903	0
454	9	0	0	0	0	0	0	200	300	0	0	0	0	0	0	0	200	903	0	0	0	0	0	0	0	603	903	0
455	0	0	0	0	0	0	0	200	300	0	0	0	0	0	0	0	200	903	0	0	0	0	0	0	0	603	903	0
455	1	0	0	0	0	0	0	200	300	0	0	0	0	0	0	0	200	903	0	0	0	0	0	0	0	603	903	0
455	2	0	0	0	0	0	0	200	300	0	0	0	0	0	0	0	200	903	0	0	0	0	0	0	0	603	903	0
455	3	0	0	0	0	0	0	200	300	0	0	0	0	0	0	0	200	903	0	0	0	0	0	0	0	603	903	0
455	4	0	0	0	0	0	0	200	300	0	0	0	0	0	0	0	200	903	0	0	0	0	0	0	0	603	903	0
455	5	0	0	0	0	0	0	200	300	0	0	0	0	0	0	0	200	903	0	0	0	0	0	0	0	603	903	0
455	6	0	0	0	0	0	0	200	300	0	0	0	0	0	0	0	200	903	0	0	0	0	0	0	0	603	903	0
455	7	0	0	0	0	0	0	200	300	0	0	0	0	0	0	0	200	903	0	0	0	0	0	0	0	603	903	0
455	8	0	0	0	0	0	0	200	300	0	0	0	0	0	0	0	200	903	0	0	0	0	0	0	0	603	903	0
455	9	0	0	0	0	0	0	200	300	0	0	0	0	0	0	0	200	903	0	0	0	0	0	0	0	603	903	0
456	0	0	0	0	0	0	0	200	300	0	0	0	0	0	0	0	200	903	0	0	0	0	0	0	0	603	903	0
456	1	0	0	0	0	0	0	200	300	0	0	0	0	0	0	0	200	903	0	0	0	0	0	0	0	603	903	0
456	2	0	0	0	0	0	0	200	300	0	0	0	0	0	0	0	200	903	0	0	0	0	0	0	0	603	903	0
456	3	0	0	0	0	0	0	200	300	0	0	0	0	0	0	0	200	903	0	0	0	0	0	0	0	603	903	0
456	4	0	0	0	0	0	0	200	300	0	0	0	0	0	0	0	200	903	0	0	0	0	0	0	0	603	903	0
456	5	0	0	0	0	0	0	200	300	0	0	0	0	0	0	0	200	903	0	0	0	0	0	0	0	603	903	0
456	6	0	0	0	0	0	0	200	300	0	0	0	0	0	0	0	200	903	0	0	0	0	0	0	0	603	903	0
456	7	0	0	0	0	0	0	200	300	0	0	0	0	0	0	0	200	903	0	0	0	0	0	0	0	603	903	0
456	8	0	0	0	0	0	0	200	300	0	0	0	0	0	0	0	200	903	0	0	0	0	0	0	0	603	903	0
456	9	0	0	0	0	0	0	200	300	0	0	0	0	0	0	0	200	903	0	0	0	0	0	0	0	603	903	0
457	0	0	0	0	0	0	0	200	300	0	0	0	0	0	0	0	200	903	0	0	0	0	0	0	0	603	903	0
457	1	0	0	0	0	0	0	200	300	0	0	0	0	0	0	0	200	903	0	0	0	0	0	0	0	603	903	0
457	2	0	0	0	0	0	0	200	300	0	0	0	0	0	0	0	200	903	0	0	0	0	0	0	0	603	903	0
457	3	0	0	0	0	0	0	200	300	0	0	0	0	0	0	0	200	903	0	0	0	0	0	0	0	603	903	0
457	4	0	0	0	0	0	0	200	300	0	0	0	0	0	0	0	200	903	0	0	0	0	0	0	0	603	903	0
457	5	0	0	0	0	0	0	200	300	0	0	0	0	0	0	0	200	903	0	0	0	0	0	0	0	603	903	0
457	6	0	0	0	0	0	0	200	300	0	0	0	0	0	0	0	200	903	0	0	0	0	0	0	0	603	903	0
457	7	0	0	0	0	0	0	200	300	0	0	0	0	0	0	0	200	903	0	0	0	0	0	0	0	603	903	0
457	8	0	0	0	0	0	0	200	300	0	0	0	0	0	0	0	200	903	0	0	0	0	0	0	0	603	903	0
457	9	0	0	0	0	0	0	200	300	0	0	0	0	0	0	0	200	903	0	0	0	0	0	0	0	603	903	0
458	0	0	0	0	0	0	0	200	300	0	0	0	0	0	0	0	200	903	0	0	0	0	0	0	0	603	903	0
458	1	0	0	0	0	0	0	200	300	0	0	0	0	0	0	0	200	903	0	0	0	0	0	0	0	603	903	0
458	2	0	0	0	0	0	0	200	300	0	0	0	0	0	0	0	200	903	0	0	0	0	0	0	0	603	903	0
458	3	0	0	0	0	0	0	200	300	0	0	0	0	0	0	0	200	903	0	0	0	0	0	0	0	603	903	0
458	4	0	0	0	0	0	0	200	300	0	0	0	0	0	0	0	200	903	0	0	0	0	0	0	0	603	903	0
458	5	0	0	0	0	0	0	200	300	0	0	0	0	0	0	0	200	903	0	0	0	0	0	0	0	603	903	0
458	6	0	0	0	0	0	0	200	300	0	0	0	0	0	0	0	200	903	0	0	0	0	0	0	0	603	903	0
458	7	0	0	0	0	0	0	200	300	0	0	0	0	0	0	0	200	903	0	0	0	0	0	0	0	603	903	0
458	8	0	0	0	0	0	0	200	300	0	0	0	0	0	0	0	200	903	0	0	0	0	0	0	0	603	903	0
458	9	0	0	0	0	0	0	200	300	0	0	0	0	0	0	0	200	903	0	0	0	0	0	0	0	603	903	0
459	0	0	0	0	0	0	0	200	300	0	0	0	0	0	0	0	200	903	0	0	0	0	0	0	0	603	903	0
459	1	0	0	0	0	0	0	200	300	0	0	0	0	0	0	0	200	903	0	0	0	0	0	0	0	603	903	0
459	2	0	0	0	0	0	0	200	300	0	0	0	0	0	0	0	200	903	0	0	0	0	0	0	0	603	903	0
459	3	0	0	0	0	0	0	200	300	0	0	0	0	0	0	0	200	903	0	0	0	0	0	0	0	603	903	0
459	4	0	0	0	0	0	0	200	300	0	0	0	0	0	0	0	200	903	0	0	0	0	0	0	0	603	903	0
459	5	0	0	0	0	0	0	200	300	0	0	0	0	0	0	0	200	903	0	0	0	0	0	0	0	603	903	0
459	6	0	0	0	0	0	0	200	300	0	0	0	0	0	0	0	200	903	0	0	0	0	0	0	0	603	903	0
459	7	0	0	0	0	0	0	200	300	0	0	0	0	0	0	0	200	903	0	0	0	0	0	0	0	603	903	0
459	8	0	0	0	0	0	0	200	300	0	0	0	0	0	0	0	200	903	0	0	0	0	0	0	0	603	903	0
459	9	0	0	0	0	0	0	200	300	0	0	0	0	0	0	0	200	903	0	0	0	0	0	0	0	603	903	0
460	0	0	0	0	0	0	0	200	300	0	0	0	0	0	0	0	200	903	0	0	0	0	0	0	0	603	903	0
460	1	0	0	0	0	0	0	200	300	0	0	0	0	0	0	0	200	903	0	0	0	0	0	0	0	603	903	0
460	2	0	0	0	0	0	0	200	300	0	0	0	0	0	0	0	200	903	0	0	0	0	0	0	0	603	903	0
460	3	0	0	0	0	0	0	200	300	0	0	0	0	0	0	0	200	903	0	0	0	0	0	0	0	603	903	0
460	4	0	0	0	0	0	0	200	300	0	0	0	0	0	0	0	200	903	0	0	0	0	0	0	0	603	903	0
460	5	0	0	0	0	0	0	200	300	0	0	0	0	0	0	0	200	903	0	0	0	0	0	0	0	603	903	0
460	6	0	0	0	0	0	0	200	300	0	0	0	0	0	0	0	200	903	0	0	0	0	0	0	0	603	903	0
460	7	0	0	0	0	0	0	200	300	0	0	0	0	0	0	0	200	903	0	0	0	0	0	0	0	603	903	0
460	8	0	0	0	0	0	0	200	300	0	0	0	0	0	0	0	200	903	0	0	0	0	0	0	0	603	903	0
460	9	0	0	0	0	0	0	200	300	0	0	0	0	0	0	0	200	903	0	0	0	0	0	0	0	603	903	0
461	0	0	0	0	0	0	0	200	300	0	0	0	0	0	0	0	200	903	0	0	0	0	0	0	0	603	903	0
461	1	0	0	0	0	0	0	200	300	0	0	0	0	0	0	0	200	903	0	0	0	0	0	0	0	603	903	0
461	2	0	0	0	0	0	0	200	300	0	0	0	0	0	0	0	200	903	0	0	0	0	0	0	0	603	903	0
461	3	0	0	0	0	0	0	200	300	0	0	0	0	0	0	0	200	903	0	0	0	0	0	0	0	603	903	0
461	4	0	0	0	0	0	0	200	300	0	0	0	0	0	0	0	200	903	0	0	0	0	0	0	0	603	903	0
461	5	0	0	0	0	0	0	200	300	0	0	0	0	0	0	0	200	903	0	0	0	0	0	0	0	603	903	0
461	6	0	0	0	0	0	0	200	300	0	0	0	0	0	0	0	200	903	0	0	0	0	0	0	0	603	903	0
461	7	0	0	0	0	0	0	200	300	0	0	0	0	0	0	0	200	903	0	0	0	0	0	0	0	603	903	0
461	8	0	0	0	0	0	0	200	300	0	0	0	0	0	0	0	200	903	0	0	0	0	0	0	0	603	903	0
461	9	0	0	0	0	0	0	200	300	0	0	0	0	0	0	0	200	903	0	0	0	0	0	0	0	603	903	0
462	0	0	0	0	0	0	0	200	300	0	0	0	0	0	0	0	200	903	0	0	0	0	0	0	0	603	903	0
462	1	0	0	0	0	0	0	200	300	0	0	0	0	0	0	0	200	903	0	0	0	0	0	0	0	603	903	0
462	2	0	0	0	0	0	0	200	300	0	0	0	0	0	0	0	200	903	0	0	0	0	0	0	0	603	903	0
462	3	0	0	0	0	0	0	200	300	0	0	0	0	0	0	0	200	903	0	0	0	0	0	0	0	603	903	0
462	4	0	0	0	0	0	0	200	300	0	0	0	0	0	0	0	200	903	0	0	0	0	0	0	0	603	903	0
462	5	0	0	0	0	0	0	200	300	0	0	0	0	0	0	0	200	903	0	0	0	0	0	0	0	603	903	0
462	6	0	0	0	0	0	0	200	300	0	0	0	0	0	0	0	200	903	0	0	0	0	0	0	0	603	903	0
462	7	0	0	0	0	0	0	200	300	0	0	0	0	0	0	0	200	903	0	0	0	0	0	0	0	603	903	0
462	8	0	0	0	0	0	0	200	300	0	0	0	0	0	0	0	200	903	0	0	0	0	0	0	0	603	903	0
462	9	0	0	0	0	0	0	200	300	0	0	0	0	0	0	0	200	903	0	0	0	0	0	0	0	603	903	0
463	0	0	0	0	0	0	0	200	300	0	0	0	0	0	0	0	200	903	0	0	0	0	0	0	0	603	903	0
463	1	0	0	0	0	0	0	200	300	0	0	0	0	0	0	0	200	903	0	0	0	0	0	0	0	603	903	0
463	2	0	0	0	0	0	0	200	300	0	0	0	0	0	0	0	200	903	0	0	0	0	0	0	0	603	903	0
463	3	0	0	0	0	0	0	200	300	0	0	0	0	0	0	0	200	903	0	0	0	0	0	0	0	603	903	0
463	4	0	0	0	0	0	0	200	300	0	0	0	0	0	0	0	200	903	0	0	0	0	0	0	0	603	903	0
463	5	0	0	0	0	0	0	200	300	0	0	0	0	0	0	0	200	903	0	0	0	0	0	0	0	603	903	0
463	6	0	0	0	0	0	0	200	300	0	0	0	0	0	0	0	200	903	0	0	0	0	0	0	0	603	903	0
463	7	0	0	0	0	0	0	200	300	0	0	0	0	0	0	0	200	903	0	0	0	0	0	0	0	603	903	0
463	8	0	0	0	0	0	0	200	300	0	0	0	0	0	0	0	200	903	0	0	0	0	0	0	0	603	903	0
463	9	0	0	0	0	0	0	200	300	0	0	0	0	0	0	0	200	903	0	0	0	0	0	0	0	603	903	0
464	0	0	0	0	0	0	0	200	300	0	0	0	0	0	0	0	200	903	0	0	0	0	0	0	0	603	903	0
464	1	0	0	0	0	0	0	200	300	0	0	0	0	0	0	0	200	903	0	0	0	0	0	0	0	603	903	0
464	2	0	0	0	0	0	0	200	300	0	0	0	0	0	0	0	200	903	0	0	0	0	0	0	0	603	903	0
464	3	0	0	0	0	0	0	200	300	0	0	0	0	0	0	0	200	903	0	0	0	0	0	0	0	603	903	0
464	4	0	0	0	0	0	0	200	300	0	0	0	0	0	0	0	200	903	0	0	0	0	0	0	0	603	903	0
464	5	0	0	0	0	0	0	200	300	0	0	0	0	0	0	0	200	903	0	0	0	0	0	0	0	603	903	0
464	6	0	0	0	0	0	0	200	300	0	0	0	0	0	0	0	200	903	0	0	0	0	0	0	0	603	903	0
464	7	0	0	0	0	0	0	200	300	0	0	0	0	0	0	0	200	903	0	0	0	0	0	0	0	603	903	0
464	8	0	0	0	0	0	0	200	300	0	0	0	0	0	0	0	200	903	0	0	0	0	0	0	0	603	903	0
464	9	0	0	0	0	0	0	200	300	0	0	0	0	0	0	0	200	903	0	0	0	0	0	0	0	603	903	0
465	0	0	0	0	0	0	0	200	300	0	0	0	0	0	0	0	200	903	0	0	0	0	0	0	0	603	903	0
465	1	0	0	0	0	0	0	200	300	0	0	0	0	0	0	0	200	903	0	0	0	0	0	0	0	603	903	0
465	2	0	0	0	0	0	0	200	300	0	0	0	0	0	0	0	200	903	0	0	0	0	0	0	0	603	903	0
465	3	0	0	0	0	0	0	200	300	0	0	0	0	0	0	0	200	903	0	0	0	0	0	0	0	603	903	0
465	4	0	0	0	0	0	0	200	300	0	0	0	0	0	0	0	200	903	0	0	0	0	0	0	0	603	903	0
465	5	0	0	0	0	0	0	200	300	0	0	0	0	0	0	0	200	903	0	0	0	0	0	0	0	603	903	0
465	6	0	0	0	0	0	0	200	300	0	0	0	0	0	0	0	200	903	0	0	0	0	0	0	0	603	903	0
465	7	0	0	0	0	0	0	200	300	0	0	0	0	0	0	0	200	903	0	0	0	0	0	0	0	603	903	0
465	8	0	0	0	0	0	0	200	300	0	0	0	0	0	0	0	200	903	0	0	0	0	0	0	0	603	903	0
465	9	0	0	0	0	0	0	200	300	0	0	0	0	0	0	0	200	903	0	0	0	0	0	0	0	603	903	0
466	0	0	0	0	0	0	0	200	300	0	0	0	0	0	0	0	200	903	0	0	0	0	0	0	0	603	903	0
466	1	0	0	0	0	0	0	200	300	0	0	0	0	0	0	0	200	903	0	0	0	0	0	0	0	603	903	0
466	2	0	0	0	0	0	0	200	300	0	0	0	0	0	0	0	200	903	0	0	0	0	0	0	0	603	903	0
466	3	0	0	0	0	0	0	200	300	0	0	0	0	0	0	0	200	903	0	0	0	0	0	0	0	603	903	0
466	4	0	0	0	0	0	0	200	300	0	0	0	0	0	0	0	200	903	0	0	0	0	0	0	0	603	903	0
466	5	0	0	0	0	0	0	200	300	0	0	0	0	0	0	0	200	903	0	0	0	0	0	0	0	603	903	0
466	6	0	0	0	0	0	0	200	300	0	0	0	0	0	0	0	200	903	0	0	0	0	0	0	0	603	903	0
466	7	0	0	0	0	0	0	200	300	0	0	0	0	0	0	0	200	903	0	0	0	0	0	0	0	603	903	0
466	8	0	0	0	0	0	0	200	300	0	0	0	0	0	0	0	200	903	0	0	0	0	0	0	0	603	903	0
466	9	0	0	0	0	0	0	200	300	0	0	0	0	0	0	0	200	903	0	0	0	0	0	0	0	603	903	0
467	0	0	0	0	0	0	0	200	300	0	0	0	0	0	0	0	200	903	0	0	0	0	0	0	0	603	903	0
467	1	0	0	0	0	0	0	200	300	0	0	0	0	0	0	0	200	903	0	0	0	0	0	0	0	603	903	0
467	2	0	0	0	0	0	0	200	300	0	0	0	0	0	0	0	200	903	0	0	0	0	0	0	0	603	903	0
467	3	0	0	0	0	0	0	200	300	0	0	0	0	0	0	0	200	903	0	0	0	0	0	0	0	603	903	0
467	4	0	0	0	0	0	0	200	300	0	0	0	0	0	0	0	200	903	0	0	0	0	0	0	0	603	903	0
467	5	0	0	0	0	0	0	200	300	0	0	0	0	0	0	0	200	903	0	0	0	0	0	0	0	603	903	0
467	6	0	0	0	0	0	0	200	300	0	0	0	0	0	0	0	200	903	0	0	0	0	0	0	0	603	903	0
467	7	0	0	0	0	0	0	200	300	0	0	0	0	0	0	0	200	903	0	0	0	0	0	0	0	603	903	0
467	8	0	0	0	0	0	0	200	300	0	0	0	0	0	0	0	200	903	0	0	0	0	0	0	0	603	903	0
467	9	0	0	0	0	0	0	200	300	0	0	0	0	0	0	0	200	903	0	0	0	0	0	0	0	603	903	0
468	0	0	0	0	0	0	0	200	300	0	0	0	0	0	0	0	200	903	0	0	0	0	0	0	0	603	903	0
468	1	0	0	0	0	0	0	200	300	0	0	0	0	0	0	0	200	903	0	0	0	0	0	0	0	603	903	0
468	2	0	0	0	0	0	0	200	300	0	0	0	0	0	0	0	200	903	0	0	0	0	0	0	0	603	903	0
468	3	0	0	0	0	0	0	200	300	0	0	0	0	0	0	0	200	903	0	0	0	0	0	0	0	603	903	0
468	4	0	0	0	0	0	0	200	300	0	0	0	0	0	0	0	200	903	0	0	0	0	0	0	0	603	903	0
468	5	0	0	0	0	0	0	200	300	0	0	0	0	0	0	0	200	903	0	0	0	0	0	0	0	603	903	0
468	6	0	0	0	0	0	0	200	300	0	0	0	0	0	0	0	200	903	0	0	0	0	0	0	0	603	903	0
468	7	0	0	0	0	0	0	200	300	0	0	0	0	0	0	0	200	903	0	0	0	0	0	0	0	603	903	0
468	8	0	0	0	0	0	0	200	300	0	0	0	0	0	0	0	200	903	0	0	0	0	0	0	0	603	903	0
468	9	0	0	0	0	0	0	200	300	0	0	0	0	0	0	0	200	903	0	0	0	0	0	0	0	603	903	0
469	0	0	0	0	0	0	0	200	300	0	0	0	0	0	0	0	200	903	0	0	0	0	0	0	0	603	903	0
469	1	0	0	0	0	0	0	200	300	0	0	0	0	0	0	0	200	903	0	0	0	0	0	0	0	603	903	0
469	2	0	0	0	0	0	0	200	300	0	0	0	0	0	0	0	200	903	0	0	0	0	0	0	0	603	903	0
469	3	0	0	0	0	0	0	200	300	0	0	0	0	0	0	0	200	903	0	0	0	0	0	0	0	603	903	0
469	4	0	0	0	0	0	0	200	300	0	0	0	0	0	0	0	200	903	0	0	0	0	0	0	0	603	903	0
469	5	0	0	0	0	0	0	200	300	0	0	0	0	0	0	0	200	903	0	0	0	0	0	0	0	603	903	0
469	6	0	0	0	0	0	0	200	300	0	0	0	0	0	0	0	200	903	0	0	0	0	0	0	0	603	903	0
469	7	0	0	0	0	0	0	200	300	0	0	0	0	0	0	0	200	903	0	0	0	0	0	0	0	603	903	0
469	8	0	0	0	0	0	0	200	300	0	0	0	0	0	0	0	200	903	0	0	0	0	0	0	0	603	903	0
469	9	0	0	0	0	0	0	200	300	0	0	0	0	0	0	0	200	903	0	0	0	0	0	0	0	603	903	0
470	0	0	0	0	0	0	0	200	300	0	0	0	0	0	0	0	200	903	0	0	0	0	0	0	0	603	903	0
470	1	0	0	0	0	0	0	200	300	0	0	0	0	0	0	0	200	903	0	0	0	0	0	0	0	603	903	0
470	2	0	0	0	0	0	0	200	300	0	0	0	0	0	0	0	200	903	0	0	0	0	0	0	0	603	903	0
470	3	0	0	0	0	0	0	200	300	0	0	0	0	0	0	0	200	903	0	0	0	0	0	0	0	603	903	0
470	4	0	0	0	0	0	0	200	300	0	0	0	0	0	0	0	200	903	0	0	0	0	0	0	0	603	903	0
470	5	0	0	0	0	0	0	200	300	0	0	0	0	0	0	0	200	903	0	0	0	0	0	0	0	603	903	0
470	6	0	0	0	0	0	0	200	300	0	0	0	0	0	0	0	200	903	0	0	0	0	0	0	0	603	903	0
470	7	0	0	0	0	0	0	200	300	0	0	0	0	0	0	0	200	903	0	0	0	0	0	0	0	603	903	0
470	8	0	0	0	0	0	0	200	300	0	0	0	0	0	0	0	200	903	0	0	0	0	0	0	0	603	903	0
470	9	0	0	0	0	0	0	200	300	0	0	0	0	0	0	0	200	903	0	0	0	0	0	0	0	603	903	0
471	0	0	0	0	0	0	0	200	300	0	0	0	0	0	0	0	200	903	0	0	0	0	0	0	0	603	903	0
471	1	0	0	0	0	0	0	200	300	0	0	0	0	0	0	0	200	903	0	0	0	0	0	0	0	603	903	0
471	2	0	0	0	0	0	0	200	300	0	0	0	0	0	0	0	200	903	0	0	0	0	0	0	0	603	903	0
471	3	0	0	0	0	0	0	200	300	0	0	0	0	0	0	0	200	903	0	0	0	0	0	0	0	603	903	0
471	4	0	0	0	0	0	0	200	300	0	0	0	0	0	0	0	200	903	0	0	0	0	0	0	0	603	903	0
471	5	0	0	0	0	0	0	200	300	0	0	0	0	0	0	0	200	903	0	0	0	0	0	0	0	603	903	0
471	6	0	0	0	0	0	0	200	300	0	0	0	0	0	0	0	200	903	0	0	0	0	0	0	0	603	903	0
471	7	0	0	0	0	0	0	200	300	0	0	0	0	0	0	0	200	903	0	0	0	0	0	0	0	603	903	0
471	8	0	0	0	0	0	0	200	300	0	0	0	0	0	0	0	200	903	0	0	0	0	0	0	0	603	903	0
471	9	0	0	0	0	0	0	200	300	0	0	0	0	0	0	0	200	903	0	0	0	0	0	0	0	603	903	0
472	0	0	0	0	0	0	0	200	300	0	0	0	0	0	0	0	200	903	0	0	0	0	0	0	0	603	903	0
472	1	0	0	0	0	0	0	200	300	0	0	0	0	0	0	0	200	903	0	0	0	0	0	0	0	603	903	0
472	2	0	0	0	0	0	0	200	300	0	0	0	0	0	0	0	200	903	0	0	0	0	0	0	0	603	903	0
472	3	0	0	0	0	0	0	200	300	0	0	0	0	0	0	0	200	903	0	0	0	0	0	0	0	603	903	0
472	4	0	0	0	0	0	0	200	300	0	0	0	0	0	0	0	200	903	0	0	0	0	0	0	0	603	903	0
472	5	0	0	0	0	0	0	200	300	0	0	0	0	0	0	0	200	903	0	0	0	0	0	0	0	603	903	0
472	6	0	0	0	0	0	0	200	300	0	0	0	0	0	0	0	200	903	0	0	0	0	0	0	0	603	903	0
472	7	0	0	0	0	0	0	200	300	0	0	0	0	0	0	0	200	903	0	0	0	0	0	0	0	603	903	0
472	8	0	0	0	0	0	0	200	300	0	0	0	0	0	0	0	200	903	0	0	0	0	0	0	0	603	903	0
472	9	0	0	0	0	0	0	200	300	0	0	0	0	0	0	0	200	903	0	0	0	0	0	0	0	603	903	0
473	0	0	0	0	0	0	0	200	300	0	0	0	0	0	0	0	200	903	0	0	0	0	0	0	0	603	903	0
473	1	0	0	0	0	0	0	200	300	0	0	0	0	0	0	0	200	903	0	0	0	0	0	0	0	603	903	0
473	2	0	0	0	0	0	0	200	300	0	0	0	0	0	0	0	200	903	0	0	0	0	0	0	0	603	903	0
473	3	0	0	0	0	0	0	200	300	0	0	0	0	0	0	0	200	903	0	0	0	0	0	0	0	603	903	0
473	4	0	0	0	0	0	0	200	300	0	0	0	0	0	0	0	200	903	0	0	0	0	0	0	0	603	903	0
473	5	0	0	0	0	0	0	200	300	0	0	0	0	0	0	0	200	903	0	0	0	0	0	0	0	603	903	0
473	6	0	0	0	0	0	0	200	300	0	0	0	0	0	0	0	200	903	0	0	0	0	0	0	0	603	903	0
473	7	0	0	0	0	0	0	200	300	0	0	0	0	0	0	0	200	903	0	0	0	0	0	0	0	603	903	0
473	8	0	0	0	0	0	0	200	300	0	0	0	0	0	0	0	200	903	0	0	0	0	0	0	0	603	903	0
473	9	0	0	0	0	0	0	200	300	0	0	0	0	0	0	0	200	903	0	0	0	0	0	0	0	603	903	0
474	0	0	0	0	0	0	0	200	300	0	0	0	0	0	0	0	200	903	0	0	0	0	0	0	0	603	903	0
474	1	0	0	0	0	0	0	200	300	0	0	0	0	0	0	0	200	903	0	0	0	0	0	0	0	603	903	0
474	2	0	0	0	0	0	0	200	300	0	0	0	0	0	0	0	200	903	0	0	0	0	0	0	0	603	903	0
474	3	0	0	0	0	0	0	200	300	0	0	0	0	0	0	0	200	903	0	0	0	0	0	0	0	603	903	0
474	4	0	0	0	0	0	0	200	300	0	0	0	0	0	0	0	200	903	0	0	0	0	0	0	0	603	903	0
474	5	0	0	0	0	0	0	200	300	0	0	0	0	0	0	0	200	903	0	0	0	0	0	0	0	603	903	0
474	6	0	0	0	0	0	0	200	300	0	0	0	0	0	0	0	200	903	0	0	0	0	0	0	0	603	903	0
474	7	0	0	0	0	0	0	200	300	0	0	0	0	0	0	0	200	903	0	0	0	0	0	0	0	603	903	0
474	8	0	0	0	0	0	0	200	300	0	0	0	0	0	0	0	200	903	0	0	0	0	0	0	0	603	903	0
474	9	0	0	0	0	0	0	200	300	0	0	0	0	0	0	0	200	903	0	0	0	0	0	0	0	603	903	0
475	0	0	0	0	0	0	0	200	300	0	0	0	0	0	0	0	200	903	0	0	0	0	0	0	0	603	903	0
475	1	0	0	0	0	0	0	200	300	0	0	0	0	0	0	0	200	903	0	0	0	0	0	0	0	603	903	0
475	2	0	0	0	0	0	0	200	300	0	0	0	0	0	0	0	200	903	0	0	0	0	0	0	0	603	903	0
475	3	0	0	0	0	0	0	200	300	0	0	0	0	0	0	0	200	903	0	0	0	0	0	0	0	603	903	0
475	4	0	0	0	0	0	0	200	300	0	0	0	0	0	0	0	200	903	0	0	0	0	0	0	0	603	903	0
475	5	0	0	0	0	0	0	200	300	0	0	0	0	0	0	0	200	903	0	0	0	0	0	0	0	603	903	0
475	6	0	0	0	0	0	0	200	300	0	0	0	0	0	0	0	200	903	0	0	0	0	0	0	0	603	903	0
475	7	0	0	0	0	0	0	200	300	0	0	0	0	0	0	0	200	903	0	0	0	0	0	0	0	603	903	0
475	8	0	0	0	0	0	0	200	300	0	0	0	0	0	0	0	200	903	0	0	0	0	0	0	0	603	903	0
475	9	0	0	0	0	0	0	200	300	0	0	0	0	0	0	0	200	903	0	0	0	0	0	0	0	603	903	0
476	0	0	0	0	0	0	0	200	300	0	0	0	0	0	0	0	200	903	0	0	0	0	0	0	0	603	903	0
476	1	0	0	0	0	0	0	200	300	0	0	0	0	0	0	0	200	903	0	0	0	0	0	0	0	603	903	0
476	2	0	0	0	0	0	0	200	300	0	0	0	0	0	0	0	200	903	0	0	0	0	0	0	0	603	903	0
476	3	0	0	0	0	0	0	200	300	0	0	0	0	0	0	0	200	903	0	0	0	0	0	0	0	603	903	0
476	4	0	0	0	0	0	0	200	300	0	0	0	0	0	0	0	200	903	0	0	0	0	0	0	0	603	903	0
476	5	0	0	0	0	0	0	200	300	0	0	0	0	0	0	0	200	903	0	0	0	0	0	0	0	603	903	0
476	6	0	0	0	0	0	0	200	300	0	0	0	0	0	0	0	200	903	0	0	0	0	0	0	0	603	903	0
476	7	0	0	0	0	0	0	200	300	0	0	0	0	0	0	0	200	903	0	0	0	0	0	0	0	603	903	0
476	8	0	0	0	0	0	0	200	300	0	0	0	0	0	0	0	200	903	0	0	0	0	0	0	0	603	903	0
476	9	0	0	0	0	0	0	200	300	0	0	0	0	0	0	0	200	903	0	0	0	0	0	0	0	603	903	0
477	0	0	0	0	0	0	0	200	300	0	0	0	0	0	0	0	200	903	0	0	0	0	0	0	0	603	903	0
477	1	0	0	0	0	0	0	200	300	0	0	0	0	0	0	0	200	903	0	0	0	0	0	0	0	603	903	0
477	2	0	0	0	0	0	0	200	300	0	0	0	0	0	0	0	200	903	0	0	0	0	0	0	0	603	903	0
477	3	0	0	0	0	0	0	200	300	0	0	0	0	0	0	0	200	903	0	0	0	0	0	0	0	603	903	0
477	4	0	0	0	0	0	0	200	300	0	0	0	0	0	0	0	200	903	0	0	0	0	0	0	0	603	903	0
477	5	0	0	0	0	0	0	200	300	0	0	0	0	0	0	0	200	903	0	0	0	0	0	0	0	603	903	0
477	6	0	0	0	0	0	0	200	300	0	0	0	0	0	0	0	200	903	0	0	0	0	0	0	0	603	903	0
477	7	0	0	0	0	0	0	200	300	0	0	0	0	0	0	0	200	903	0	0	0	0	0	0	0	603	903	0
477	8	0	0	0	0	0	0	200	300	0	0	0	0	0	0	0	200	903	0	0	0	0	0	0	0	603	903	0
477	9	0	0	0	0	0	0	200	300	0	0	0	0	0	0	0	200	903	0	0	0	0	0	0	0	603	903	0
478	0	0	0	0	0	0	0	200	300	0	0	0	0	0	0	0	200	903	0	0	0	0	0	0	0	603	903	0
478	1	0	0	0	0	0	0	200	300	0	0	0	0	0	0	0	200	903	0	0	0	0	0	0	0	603	903	0
478	2	0	0	0	0	0	0	200	300	0	0	0	0	0	0	0	200	903	0	0	0	0	0	0	0	603	903	0
478	3	0	0	0	0	0	0	200	300	0	0	0	0	0	0	0	200	903	0	0	0	0	0	0	0	603	903	0
478	4	0	0	0	0	0	0	200	300	0	0	0	0	0	0	0	200	903	0	0	0	0	0	0	0	603	903	0
478	5	0	0	0	0	0	0	200	300	0	0	0	0	0	0	0	200	903	0	0	0	0	0	0	0	603	903	0
478	6	0	0	0	0	0	0	200	300	0	0	0	0	0	0	0	200	903	0	0	0	0	0	0	0	603	903	0
478	7	0	0	0	0	0	0	200	300	0	0	0	0	0	0	0	200	903	0	0	0	0	0	0	0	603	903	0
478	8	0	0	0	0	0	0	200	300	0	0	0	0	0	0	0	200	903	0	0	0	0	0	0	0	603	903	0
478	9	0	0	0	0	0	0	200	300	0	0	0	0	0	0	0	200	903	0	0	0	0	0	0	0	603	903	0
479	0	0	0	0	0	0	0	200	300	0	0	0	0	0	0	0	200	903	0	0	0	0	0	0	0	603	903	0
479	1	0	0	0	0	0	0	200	300	0	0	0	0	0	0	0	200	903	0	0	0	0	0	0	0	603	903	0
479	2	0	0	0	0	0	0	200	300	0	0	0	0	0	0	0	200	903	0	0	0	0	0	0	0	603	903	0
479	3	0	0	0	0	0	0	200	300	0	0	0	0	0	0	0	200	903	0	0	0	0	0	0	0	603	903	0
479	4	0	0	0	0	0	0	200	300	0	0	0	0	0	0	0	200	903	0	0	0	0	0	0	0	603	903	0
479	5	0	0	0	0	0	0	200	300	0	0	0	0	0	0	0	200	903	0	0	0	0	0	0	0	603	903	0
479	6	0	0	0	0	0	0	200	300	0	0	0	0	0	0	0	200	903	0	0	0	0	0	0	0	603	903	0
479	7	0	0	0	0	0	0	200	300	0	0	0	0	0	0	0	200	903	0	0	0	0	0	0	0	603	903	0
479	8	0	0	0	0	0	0	200	300	0	0	0	0	0	0	0	200	903	0	0	0	0	0	0	0	603	903	0
479	9	0	0	0	0	0	0	200	300	0	0	0	0	0	0	0	200	903	0	0	0	0	0	0	0	603	903	0
480	0	0	0	0	0	0	0	200	300	0	0	0	0	0	0	0	200	903	0	0	0	0	0	0	0	603	903	0
480	1	0	0	0	0	0	0	200	300	0	0	0	0	0	0	0	200	903	0	0	0	0	0	0	0	603	903	0
480	2	0	0	0	0	0	0	200	300	0	0	0	0	0	0	0	200	903	0	0	0	0	0	0	0	603	903	0
480	3	0	0	0	0	0	0	200	300	0	0	0	0	0	0	0	200	903	0	0	0	0	0	0	0	603	903	0
480	4	0	0	0	0	0	0	200	300	0	0	0	0	0	0	0	200	903	0	0	0	0	0	0	0	603	903	0
480	5	0	0	0	0	0	0	200	300	0	0	0	0	0	0	0	200	903	0	0	0	0	0	0	0	603	903	0
480	6	0	0	0	0	0	0	200	300	0	0	0	0	0	0	0	200	903	0	0	0	0	0	0	0	603	903	0
480	7	0	0	0	0	0	0	200	300	0	0	0	0	0	0	0	200	903	0	0	0	0	0	0	0	603	903	0
480	8	0	0	0	0	0	0	200	300	0	0	0	0	0	0	0	200	903	0	0	0	0	0	0	0	603	903	0
480	9	0	0	0	0	0	0	200	300	0	0	0	0	0	0	0	200	903	0	0	0	0	0	0	0	603	903	0
481	0	0	0	0	0	0	0	200	300	0	0	0	0	0	0	0	200	903	0	0	0	0	0	0	0	603	903	0
481	1	0	0	0	0	0	0	200	300	0	0	0	0	0	0	0	200	903	0	0	0	0	0	0	0	603	903	0
481	2	0	0	0	0	0	0	200	300	0	0	0	0	0	0	0	200	903	0	0	0	0	0	0	0	603	903	0
481	3	0	0	0	0	0	0	200	300	0	0	0	0	0	0	0	200	903	0	0	0	0	0	0	0	603	903	0
481	4	0	0	0	0	0	0	200	300	0	0	0	0	0	0	0	200	903	0	0	0	0	0	0	0	603	903	0
481	5	0	0	0	0	0	0	200	300	0	0	0	0	0	0	0	200	903	0	0	0	0	0	0	0	603	903	0
481	6	0	0	0	0	0	0	200	300	0	0	0	0	0	0	0	200	903	0	0	0	0	0	0	0	603	903	0
481	7	0	0	0	0	0	0	200	300	0	0	0	0	0	0	0	200	903	0	0	0	0	0	0	0	603	903	0
481	8	0	0	0	0	0	0	200	300	0	0	0	0	0	0	0	200	903	0	0	0	0	0	0	0	603	903	0
481	9	0	0	0	0	0	0	200	300	0	0	0	0	0	0	0	200	903	0	0	0	0	0	0	0	603	903	0
482	0	0	0	0	0	0	0	200	300	0	0	0	0	0	0	0	200	903	0	0	0	0	0	0	0	603	903	0
482	1	0	0	0	0	0	0	200	300	0	0	0	0	0	0	0	200	903	0	0	0	0	0	0	0	603	903	0
482	2	0	0	0	0	0	0	200	300	0	0	0	0	0	0	0	200	903	0	0	0	0	0	0	0	603	903	0
482	3	0	0	0	0	0	0	200	300	0	0	0	0	0	0	0	200	903	0	0	0	0	0	0	0	603	903	0
482	4	0	0	0	0	0	0	200	300	0	0	0	0	0	0	0	200	903	0	0	0	0	0	0	0	603	903	0
482	5	0	0	0	0	0	0	200	300	0	0	0	0	0	0	0	200	903	0	0	0	0	0	0	0	603	903	0
482	6	0	0	0	0	0	0	200	300	0	0	0	0	0	0	0	200	903	0	0	0	0	0	0	0	603	903	0
482	7	0	0	0	0	0	0	200	300	0	0	0	0	0	0	0	200	903	0	0	0	0	0	0	0	603	903	0
482	8	0	0	0	0	0	0	200	300	0	0	0	0	0	0	0	200	903	0	0	0	0	0	0	0	603	903	0
482	9	0	0	0	0	0	0	200	300	0	0	0	0	0	0	0	200	903	0	0	0	0	0	0	0	603	903	0
483	0	0	0	0	0	0	0	200	300	0	0	0	0	0	0	0	200	903	0	0	0	0	0	0	0	603	903	0
483	1	0	0	0	0	0	0	200	300	0	0	0	0	0	0	0	200	903	0	0	0	0	0	0	0	603	903	0
483	2	0	0	0	0	0	0	200	300	0	0	0	0	0	0	0	200	903	0	0	0	0	0	0	0	603	903	0
483	3	0	0	0	0	0	0	200	300	0	0	0	0	0	0	0	200	903	0	0	0	0	0	0	0	603	903	0
483	4	0	0	0	0	0	0	200	300	0	0	0	0	0	0	0	200	903	0	0	0	0	0	0	0	603	903	0
483	5	0	0	0	0	0	0	200	300	0	0	0	0	0	0	0	200	903	0	0	0	0	0	0	0	603	903	0
483	6	0	0	0	0	0	0	200	300	0	0	0	0	0	0	0	200	903	0	0	0	0	0	0	0	603	903	0
483	7	0	0	0	0	0	0	200	300	0	0	0	0	0	0	0	200	903	0	0	0	0	0	0	0	603	903	0
483	8	0	0	0	0	0	0	200	300	0	0	0	0	0	0	0	200	903	0	0	0	0	0	0	0	603	903	0
483	9	0	0	0	0	0	0	200	300	0	0	0	0	0	0	0	200	903	0	0	0	0	0	0	0	603	903	0
484	0	0	0	0	0	0	0	200	300	0	0	0	0	0	0	0	200	903	0	0	0	0	0	0	0	603	903	0
484	1	0	0	0	0	0	0	200	300	0	0	0	0	0	0	0	200	903	0	0	0	0	0	0	0	603	903	0
484	2	0	0	0	0	0	0	200	300	0	0	0	0	0	0	0	200	903	0	0	0	0	0	0	0	603	903	0
484	3	0	0	0	0	0	0	200	300	0	0	0	0	0	0	0	200	903	0	0	0	0	0	0	0	603	903	0
484	4	0	0	0	0	0	0	200	300	0	0	0	0	0	0	0	200	903	0	0	0	0	0	0	0	603	903	0
484	5	0	0	0	0	0	0	200	300	0	0	0	0	0	0	0	200	903	0	0	0	0	0	0	0	603	903	0
484	6	0	0	0	0	0	0	200	300	0	0	0	0	0	0	0	200	903	0	0	0	0	0	0	0	603	903	0
484	7	0	0	0	0	0	0	200	300	0	0	0	0	0	0	0	200	903	0	0	0	0	0	0	0	603	903	0
484	8	0	0	0	0	0	0	200	300	0	0	0	0	0	0	0	200	903	0	0	0	0	0	0	0	603	903	0
484	9	0	0	0	0	0	0	200	300	0	0	0	0	0	0	0	200	903	0	0	0	0	0	0	0	603	903	0
485	0	0	0	0	0	0	0	200	300	0	0	0	0	0	0	0	200	903	0	0	0	0	0	0	0	603	903	0
485	1	0	0	0	0	0	0	200	300	0	0	0	0	0	0	0	200	903	0	0	0	0	0	0	0	603	903	0
485	2	0	0	0	0	0	0	200	300	0	0	0	0	0	0	0	200	903	0	0	0	0	0	0	0	603	903	0
485	3	0	0	0	0	0	0	200	300	0	0	0	0	0	0	0	200	903	0	0	0	0	0	0	0	603	903	0
485	4	0	0	0	0	0	0	200	300	0	0	0	0	0	0	0	200	903	0	0	0	0	0	0	0	603	903	0
485	5	0	0	0	0	0	0	200	300	0	0	0	0	0	0	0	200	903	0	0	0	0	0	0	0	603	903	0
485	6	0	0	0	0	0	0	200	300	0	0	0	0	0	0	0	200	903	0	0	0	0	0	0	0	603	903	0
485	7	0	0	0	0	0	0	200	300	0	0	0	0	0	0	0	200	903	0	0	0	0	0	0	0	603	903	0
485	8	0	0	0	0	0	0	200	300	0	0	0	0	0	0	0	200	903	0	0	0	0	0	0	0	603	903	0
485	9	0	0	0	0	0	0	200	300	0	0	0	0	0	0	0	200	903	0	0	0	0	0	0	0	603	903	0
486	0	0	0	0	0	0	0	200	300	0	0	0	0	0	0	0	200	903	0	0	0	0	0	0	0	603	903	0
486	1	0	0	0	0	0	0	200	300	0	0	0	0	0	0	0	200	903	0	0	0	0	0	0	0	603	903	0
486	2	0	0	0	0	0	0	200	300	0	0	0	0	0	0	0	200	903	0	0	0	0	0	0	0	603	903	0
486	3	0	0	0	0	0	0	200	300	0	0	0	0	0	0	0	200	903	0	0	0	0	0	0	0	603	903	0
486	4	0	0	0	0	0	0	200	300	0	0	0	0	0	0	0	200	903	0	0	0	0	0	0	0	603	903	0
486	5	0	0	0	0	0	0	200	300	0	0	0	0	0	0	0	200	903	0	0	0	0	0	0	0	603	903	0
486	6	0	0	0	0	0	0	200	300	0	0	0	0	0	0	0	200	903	0	0	0	0	0	0	0	603	903	0
486	7	0	0	0	0	0	0	200	300	0	0	0	0	0	0	0	200	903	0	0	0	0	0	0	0	603	903	0
486	8	0	0	0	0	0	0	200	300	0	0	0	0	0	0	0	200	903	0	0	0	0	0	0	0	603	903	0
486	9	0	0	0	0	0	0	200	300	0	0	0	0	0	0	0	200	903	0	0	0	0	0	0	0	603	903	0
487	0	0	0	0	0	0	0	200	300	0	0	0	0	0	0	0	200	903	0	0	0	0	0	0	0	603	903	0
487	1	0	0	0	0	0	0	200	300	0	0	0	0	0	0	0	200	903	0	0	0	0	0	0	0	603	903	0
487	2	0	0	0	0	0	0	200	300	0	0	0	0	0	0	0	200	903	0	0	0	0	0	0	0	603	903	0
487	3	0	0	0	0	0	0	200	300	0	0	0	0	0	0	0	200	903	0	0	0	0	0	0	0	603	903	0
487	4	0	0	0	0	0	0	200	300	0	0	0	0	0	0	0	200	903	0	0	0	0	0	0	0	603	903	0
487	5	0	0	0	0	0	0	200	300	0	0	0	0	0	0	0	200	903	0	0	0	0	0	0	0	603	903	0
487	6	0	0	0	0	0	0	200	300	0	0	0	0	0	0	0	200	903	0	0	0	0	0	0	0	603	903	0
487	7	0	0	0	0	0	0	200	300	0	0	0	0	0	0	0	200	903	0	0	0	0	0	0	0	603	903	0
487	8	0	0	0	0	0	0	200	300	0	0	0	0	0	0	0	200	903	0	0	0	0	0	0	0	603	903	0
487	9	0	0	0	0	0	0	200	300	0	0	0	0	0	0	0	200	903	0	0	0	0	0	0	0	603	903	0
488	0	0	0	0	0	0	0	200	300	0	0	0	0	0	0	0	200	903	0	0	0	0	0	0	0	603	903	0
488	1	0	0	0	0	0	0	200	300	0	0	0	0	0	0	0	200	903	0	0	0	0	0	0	0	603	903	0
488	2	0	0	0	0	0	0	200	300	0	0	0	0	0	0	0	200	903	0	0	0	0	0	0	0	603	903	0
488	3	0	0	0	0	0	0	200	300	0	0	0	0	0	0	0	200	903	0	0	0	0	0	0	0	603	903	0
488	4	0	0	0	0	0	0	200	300	0	0	0	0	0	0	0	200	903	0	0	0	0	0	0	0	603	903	0
488	5	0	0	0	0	0	0	200	300	0	0	0	0	0	0	0	200	903	0	0	0	0	0	0	0	603	903	0
488	6	0	0	0	0	0	0	200	300	0	0	0	0	0	0	0	200	903	0	0	0	0	0	0	0	603	903	0
488	7	0	0	0	0	0	0	200	300	0	0	0	0	0	0	0	200	903	0	0	0	0	0	0	0	603	903	0
488	8	0	0	0	0	0	0	200	300	0	0	0	0	0	0	0	200	903	0	0	0	0	0	0	0	603	903	0
488	9	0	0	0	0	0	0	200	300	0	0	0	0	0	0	0	200	903	0	0	0	0	0	0	0	603	903	0
489	0	0	0	0	0	0	0	200	300	0	0	0	0	0	0	0	200	903	0	0	0	0	0	0	0	603	903	0
489	1	0	0	0	0	0	0	200	300	0	0	0	0	0	0	0	200	903	0	0	0	0	0	0	0	603	903	0
489	2	0	0	0	0	0	0	200	300	0	0	0	0	0	0	0	200	903	0	0	0	0	0	0	0	603	903	0
489	3	0	0	0	0	0	0	200	300	0	0	0	0	0	0	0	200	903	0	0	0	0	0	0	0	603	903	0
489	4	0	0	0	0	0	0	200	300	0	0	0	0	0	0	0	200	903	0	0	0	0	0	0	0	603	903	0
489	5	0	0	0	0	0	0	200	300	0	0	0	0	0	0	0	200	903	0	0	0	0	0	0	0	603	903	0
489	6	0	0	0	0	0	0	200	300	0	0	0	0	0	0	0	200	903	0	0	0	0	0	0	0	603	903	0
489	7	0	0	0	0	0	0	200	300	0	0	0	0	0	0	0	200	903	0	0	0	0	0	0	0	603	903	0
489	8	0	0	0	0	0	0	200	300	0	0	0	0	0	0	0	200	903	0	0	0	0	0	0	0	603	903	0
489	9	0	0	0	0	0	0	200	300	0	0	0	0	0	0	0	200	903	0	0	0	0	0	0	0	603	903	0
490	0	0	0	0	0	0	0	200	300	0	0	0	0	0	0	0	200	903	0	0	0	0	0	0	0	603	903	0
490	1	0	0	0	0	0	0	200	300	0	0	0	0	0	0	0	200	903	0	0	0	0	0	0	0	603	903	0
490	2	0	0	0	0	0	0	200	300	0	0	0	0	0	0	0	200	903	0	0	0	0	0	0	0	603	903	0
490	3	0	0	0	0	0	0	200	300	0	0	0	0	0	0	0	200	903	0	0	0	0	0	0	0	603	903	0
490	4	0	0	0	0	0	0	200	300	0	0	0	0	0	0	0	200	903	0	0	0	0	0	0	0	603	903	0
490	5	0	0	0	0	0	0	200	300	0	0	0	0	0	0	0	200	903	0	0	0	0	0	0	0	603	903	0
490	6	0	0	0	0	0	0	200	300	0	0	0	0	0	0	0	200	903	0	0	0	0	0	0	0	603	903	0
490	7	0	0	0	0	0	0	200	300	0	0	0	0	0	0	0	200	903	0	0	0	0	0	0	0	603	903	0
490	8	0	0	0	0	0	0	200	300	0	0	0	0	0	0	0	200	903	0	0	0	0	0	0	0	603	903	0
490	9	0	0	0	0	0	0	200	300	0	0	0	0	0	0	0	200	903	0	0	0	0	0	0	0	603	903	0
491	0	0	0	0	0	0	0	200	300	0	0	0	0	0	0	0	200	903	0	0	0	0	0	0	0	603	903	0
491	1	0	0	0	0	0	0	200	300	0	0	0	0	0	0	0	200	903	0	0	0	0	0	0	0	603	903	0
491	2	0	0	0	0	0	0	200	300	0	0	0	0	0	0	0	200	903	0	0	0	0	0	0	0	603	903	0
491	3	0	0	0	0	0	0	200	300	0	0	0	0	0	0	0	200	903	0	0	0	0	0	0	0	603	903	0
491	4	0	0	0	0	0	0	200	300	0	0	0	0	0	0	0	200	903	0	0	0	0	0	0	0	603	903	0
491	5	0	0	0	0	0	0	200	300	0	0	0	0	0	0	0	200	903	0	0	0	0	0	0	0	603	903	0
491	6	0	0	0	0	0	0	200	300	0	0	0	0	0	0	0	200	903	0	0	0	0	0	0	0	603	903	0
491	7	0	0	0	0	0	0	200	300	0	0	0	0	0	0	0	200	903	0	0	0	0	0	0	0	603	903	0
491	8	0	0	0	0	0	0	200	300	0	0	0	0	0	0	0	200	903	0	0	0	0	0	0	0	603	903	0
491	9	0	0	0	0	0	0	200	300	0	0	0	0	0	0	0	200	903	0	0	0	0	0	0	0	603	903	0
492	0	0	0	0	0	0	0	200	300	0	0	0	0	0	0	0	200	903	0	0	0	0	0	0	0	603	903	0
492	1	0	0	0	0	0	0	200	300	0	0	0	0	0	0	0	200	903	0	0	0	0	0	0	0	603	903	0
492	2	0	0	0	0	0	0	200	300	0	0	0	0	0	0	0	200	903	0	0	0	0	0	0	0	603	903	0
492	3	0	0	0	0	0	0	200	300	0	0	0	0	0	0	0	200	903	0	0	0	0	0	0	0	603	903	0
492	4	0	0	0	0	0	0	200	300	0	0	0	0	0	0	0	200	903	0	0	0	0	0	0	0	603	903	0
492	5	0	0	0	0	0	0	200	300	0	0	0	0	0	0	0	200	903	0	0	0	0	0	0	0	603	903	0
492	6	0	0	0	0	0	0	200	300	0	0	0	0	0	0	0	200	903	0	0	0	0	0	0	0	603	903	0
492	7	0	0	0	0	0	0	200	300	0	0	0	0	0	0	0	200	903	0	0	0	0	0	0	0	603	903	0
492	8	0	0	0	0	0	0	200	300	0	0	0	0	0	0	0	200	903	0	0	0	0	0	0	0	603	903	0
492	9	0	0	0	0	0	0	200	300	0	0	0	0	0	0	0	200	903	0	0	0	0	0	0	0	603	903	0
493	0	0	0	0	0	0	0	200	300	0	0	0	0	0	0	0	200	903	0	0	0	0	0	0	0	603	903	0
493	1	0	0	0	0	0	0	200	300	0	0	0	0	0	0	0	200	903	0	0	0	0	0	0	0	603	903	0
493	2	0	0	0	0	0	0	200	300	0	0	0	0	0	0	0	200	903	0	0	0	0	0	0	0	603	903	0
493	3	0	0	0	0	0	0	200	300	0	0	0	0	0	0	0	200	903	0	0	0	0	0	0	0	603	903	0
493	4	0	0	0	0	0	0	200	300	0	0	0	0	0	0	0	200	903	0	0	0	0	0	0	0	603	903	0
493	5	0	0	0	0	0	0	200	300	0	0	0	0	0	0	0	200	903	0	0	0	0	0	0	0	603	903	0
493	6	0	0	0	0	0	0	200	300	0	0	0	0	0	0	0	200	903	0	0	0	0	0	0	0	603	903	0
493	7	0	0	0	0	0	0	200	300	0	0	0	0	0	0	0	200	903	0	0	0	0	0	0	0	603	903	0
493	8	0	0	0	0	0	0	200	300	0	0	0	0	0	0	0	200	903	0	0	0	0	0	0	0	603	903	0
493	9	0	0	0	0	0	0	200	300	0	0	0	0	0	0	0	200	903	0	0	0	0	0	0	0	603	903	0
494	0	0	0	0	0	0	0	200	300	0	0	0	0	0	0	0	200	903	0	0	0	0	0	0	0	603	903	0
494	1	0	0	0	0	0	0	200	300	0	0	0	0	0	0	0	200	903	0	0	0	0	0	0	0	603	903	0
494	2	0	0	0	0	0	0	200	300	0	0	0	0	0	0	0	200	903	0	0	0	0	0	0	0	603	903	0
494	3	0	0	0	0	0	0	200	300	0	0	0	0	0	0	0	200	903	0	0	0	0	0	0	0	603	903	0
494	4	0	0	0	0	0	0	200	300	0	0	0	0	0	0	0	200	903	0	0	0	0	0	0	0	603	903	0
494	5	0	0	0	0	0	0	200	300	0	0	0	0	0	0	0	200	903	0	0	0	0	0	0	0	603	903	0
494	6	0	0	0	0	0	0	200	300	0	0	0	0	0	0	0	200	903	0	0	0	0	0	0	0	603	903	0
494	7	0	0	0	0	0	0	200	300	0	0	0	0	0	0	0	200	903	0	0	0	0	0	0	0	603	903	0
494	8	0	0	0	0	0	0	200	300	0	0	0	0	0	0	0	200	903	0	0	0	0	0	0	0	603	903	0
494	9	0	0	0	0	0	0	200	300	0	0	0	0	0	0	0	200	903	0	0	0	0	0	0	0	603	903	0
495	0	0	0	0	0	0	0	200	300	0	0	0	0	0	0	0	200	903	0	0	0	0	0	0	0	603	903	0
495	1	0	0	0	0	0	0	200	300	0	0	0	0	0	0	0	200	903	0	0	0	0	0	0	0	603	903	0
495	2	0	0	0	0	0	0	200	300	0	0	0	0	0	0	0	200	903	0	0	0	0	0	0	0	603	903	0
495	3	0	0	0	0	0	0	200	300	0	0	0	0	0	0	0	200	903	0	0	0	0	0	0	0	603	903	0
495	4	0	0	0	0	0	0	200	300	0	0	0	0	0	0	0	200	903	0	0	0	0	0	0	0	603	903	0
495	5	0	0	0	0	0	0	200	300	0	0	0	0	0	0	0	200	903	0	0	0	0	0	0	0	603	903	0
495	6	0	0	0	0	0	0	200	300	0	0	0	0	0	0	0	200	903	0	0	0	0	0	0	0	603	903	0
495	7	0	0	0	0	0	0	200	300	0	0	0	0	0	0	0	200	903	0	0	0	0	0	0	0	603	903	0
495	8	0	0	0	0	0	0	200	300	0	0	0	0	0	0	0	200	903	0	0	0	0	0	0	0	603	903	0
495	9	0	0	0	0	0	0	200	300	0	0	0	0	0	0	0	200	903	0	0	0	0	0	0	0	603	903	0
496	0	0	0	0	0	0	0	200	300	0	0	0	0	0	0	0	200	903	0	0	0	0	0	0	0	603	903	0
496	1	0	0	0	0	0	0	200	300	0	0	0	0	0	0	0	200	903	0	0	0	0	0	0	0	603	903	0
496	2	0	0	0	0	0	0	200	300	0	0	0	0	0	0	0	200	903	0	0	0	0	0	0	0	603	903	0
496	3	0	0	0	0	0	0	200	300	0	0	0	0	0	0	0	200	903	0	0	0	0	0	0	0	603	903	0
496	4	0	0	0	0	0	0	200	300	0	0	0	0	0	0	0	200	903	0	0	0	0	0	0	0	603	903	0
496	5	0	0	0	0	0	0	200	300	0	0	0	0	0	0	0	200	903	0	0	0	0	0	0	0	603	903	0
496	6	0	0	0	0	0	0	200	300	0	0	0	0	0	0	0	200	903	0	0	0	0	0	0	0	603	903	0
496	7	0	0	0	0	0	0	200	300	0	0	0	0	0	0	0	200	903	0	0	0	0	0	0	0	603	903	0
496	8	0	0	0	0	0	0	200	300	0	0	0	0	0	0	0	200	903	0	0	0	0	0	0	0	603	903	0
496	9	0	0	0	0	0	0	200	300	0	0	0	0	0	0	0	200	903	0	0	0	0	0	0	0	603	903	0
497	0	0	0	0	0	0	0	200	300	0	0	0	0	0	0	0	200	903	0	0	0	0	0	0	0	603	903	0
497	1	0	0	0	0	0	0	200	300	0	0	0	0	0	0	0	200	903	0	0	0	0	0	0	0	603	903	0
497	2	0	0	0	0	0	0	200	300	0	0	0	0	0	0	0	200	903	0	0	0	0	0	0	0	603	903	0
497	3	0	0	0	0	0	0	200	300	0	0	0	0	0	0	0	200	903	0	0	0	0	0	0	0	603	903	0
497	4	0	0	0	0	0	0	200	300	0	0	0	0	0	0	0	200	903	0	0	0	0	0	0	0	603	903	0
497	5	0	0	0	0	0	0	200	300	0	0	0	0	0	0	0	200	903	0	0	0	0	0	0	0	603	903	0
497	6	0	0	0	0	0	0	200	300	0	0	0	0	0	0	0	200	903	0	0	0	0	0	0	0	603	903	0
497	7	0	0	0	0	0	0	200	300	0	0	0	0	0	0	0	200	903	0	0	0	0	0	0	0	603	903	0
497	8	0	0	0	0	0	0	200	300	0	0	0	0	0	0	0	200	903	0	0	0	0	0	0	0	603	903	0
497	9	0	0	0	0	0	0	200	300	0	0	0	0	0	0	0	200	903	0	0	0	0	0	0	0	603	903	0
498	0	0	0	0	0	0	0	200	300	0	0	0	0	0	0	0	200	903	0	0	0	0	0	0	0	603	903	0
498	1	0	0	0	0	0	0	200	300	0	0	0	0	0	0	0	200	903	0	0	0	0	0	0	0	603	903	0
498	2	0	0	0	0	0	0	200	300	0	0	0	0	0	0	0	200	903	0	0	0	0	0	0	0	603	903	0
498	3	0	0	0	0	0	0	200	300	0	0	0	0	0	0	0	200	903	0	0	0	0	0	0	0	603	903	0
498	4	0	0	0	0	0	0	200	300	0	0	0	0	0	0	0	200	903	0	0	0	0	0	0	0	603	903	0
498	5	0	0	0	0	0	0	200	300	0	0	0	0	0	0	0	200	903	0	0	0	0	0	0	0	603	903	0
498	6	0	0	0	0	0	0	200	300	0	0	0	0	0	0	0	200	903	0	0	0	0	0	0	0	603	903	0
498	7	0	0	0	0	0	0	200	300	0	0	0	0	0	0	0	200	903	0	0	0	0	0	0	0	603	903	0
498	8	0	0	0	0	0	0	200	300	0	0	0	0	0	0	0	200	903	0	0	0	0	0	0	0	603	903	0
498	9	0	0	0	0	0	0	200	300	0	0	0	0	0	0	0	200	903	0	0	0	0	0	0	0	603	903	0
499	0	0	0	0	0	0	0	200	300	0	0	0	0	0	0	0	200	903	0	0	0	0	0	0	0	603	903	0
499	1	0	0	0	0	0	0	200	300	0	0	0	0	0	0	0	200	903	0	0	0	0	0	0	0	603	903	0
499	2	0	0	0	0	0	0	200	300	0	0	0	0	0	0	0	200	903	0	0	0	0	0	0	0	603	903	0
499	3	0	0	0	0	0	0	200	300	0	0	0	0	0	0	0	200	903	0	0	0	0	0	0	0	603	903	0
499	4	0	0	0	0	0	0	200	300	0	0	0	0	0	0	0	200	903	0	0	0	0	0	0	0	603	903	0
499	5	0	0	0	0	0	0	200	300	0	0	0	0	0	0	0	200	903	0	0	0	0	0	0	0	603	903	0
499	6	0	0	0	0	0	0	200	300	0	0	0	0	0	0	0	200	903	0	0	0	0	0	0	0	603	903	0
499	7	0	0	0	0	0	0	200	300	0	0	0	0	0	0	0	200	903	0	0	0	0	0	0	0	603	903	0
499	8	0	0	0	0	0	0	200	300	0	0	0	0	0	0	0	200	903	0	0	0	0	0	0	0	603	903	0
499	9	0	0	0	0	0	0	200	300	0	0	0	0	0	0	0	200	903	0	0	0	0	0	0	0	603	903	0
500	0	0	0	0	0	0	0	200	300	0	0	0	0	0	0	0	200	903	0	0	0	0	0	0	0	603	903	0
500	1	0	0	0	0	0	0	200	300	0	0	0	0	0	0	0	200	903	0	0	0	0	0	0	0	603	903	0
500	2	0	0	0	0	0	0	200	300	0	0	0	0	0	0	0	200	903	0	0	0	0	0	0	0	603	903	0
500	3	0	0	0	0	0	0	200	300	0	0	0	0	0	0	0	200	903	0	0	0	0	0	0	0	603	903	0
500	4	0	0	0	0	0	0	200	300	0	0	0	0	0	0	0	200	903	0	0	0	0	0	0	0	603	903	0
500	5	0	0	0	0	0	0	200	300	0	0	0	0	0	0	0	200	903	0	0	0	0	0	0	0	603	903	0
500	6	0	0	0	0	0	0	200	300	0	0	0	0	0	0	0	200	903	0	0	0	0	0	0	0	603	903	0
500	7	0	0	0	0	0	0	200	300	0	0	0	0	0	0	0	200	903	0	0	0	0	0	0	0	603	903	0
500	8	0	0	0	0	0	0	200	300	0	0	0	0	0	0	0	200	903	0	0	0	0	0	0	0	603	903	0
500	9	0	0	0	0	0	0	200	300	0	0	0	0	0	0	0	200	903	0	0	0	0	0	0	0	603	903	0
501	0	0	0	0	0	0	0	200	300	0	0	0	0	0	0	0	200	903	0	0	0	0	0	0	0	603	903	0
501	1	0	0	0	0	0	0	200	300	0	0	0	0	0	0	0	200	903	0	0	0	0	0	0	0	603	903	0
501	2	0	0	0	0	0	0	200	300	0	0	0	0	0	0	0	200	903	0	0	0	0	0	0	0	603	903	0
501	3	0	0	0	0	0	0	200	300	0	0	0	0	0	0	0	200	903	0	0	0	0	0	0	0	603	903	0
501	4	0	0	0	0	0	0	200	300	0	0	0	0	0	0	0	200	903	0	0	0	0	0	0	0	603	903	0
501	5	0	0	0	0	0	0	200	300	0	0	0	0	0	0	0	200	903	0	0	0	0	0	0	0	603	903	0
501	6	0	0	0	0	0	0	200	300	0	0	0	0	0	0	0	200	903	0	0	0	0	0	0	0	603	903	0
501	7	0	0	0	0	0	0	200	300	0	0	0	0	0	0	0	200	903	0	0	0	0	0	0	0	603	903	0
501	8	0	0	0	0	0	0	200	300	0	0	0	0	0	0	0	200	903	0	0	0	0	0	0	0	603	903	0
501	9	0	0	0	0	0	0	200	300	0	0	0	0	0	0	0	200	903	0	0	0	0	0	0	0	603	903	0
502	0	0	0	0	0	0	0	200	300	0	0	0	0	0	0	0	200	903	0	0	0	0	0	0	0	603	903	0
502	1	0	0	0	0	0	0	200	300	0	0	0	0	0	0	0	200	903	0	0	0	0	0	0	0	603	903	0
502	2	0	0	0	0	0	0	200	300	0	0	0	0	0	0	0	200	903	0	0	0	0	0	0	0	603	903	0
502	3	0	0	0	0	0	0	200	300	0	0	0	0	0	0	0	200	903	0	0	0	0	0	0	0	603	903	0
502	4	0	0	0	0	0	0	200	300	0	0	0	0	0	0	0	200	903	0	0	0	0	0	0	0	603	903	0
502	5	0	0	0	0	0	0	200	300	0	0	0	0	0	0	0	200	903	0	0	0	0	0	0	0	603	903	0
502	6	0	0	0	0	0	0	200	300	0	0	0	0	0	0	0	200	903	0	0	0	0	0	0	0	603	903	0
502	7	0	0	0	0	0	0	200	300	0	0	0	0	0	0	0	200	903	0	0	0	0	0	0	0	603	903	0
502	8	0	0	0	0	0	0	200	300	0	0	0	0	0	0	0	200	903	0	0	0	0	0	0	0	603	903	0
502	9	0	0	0	0	0	0	200	300	0	0	0	0	0	0	0	200	903	0	0	0	0	0	0	0	603	903	0
503	0	0	0	0	0	0	0	200	300	0	0	0	0	0	0	0	200	903	0	0	0	0	0	0	0	603	903	0
503	1	0	0	0	0	0	0	200	300	0	0	0	0	0	0	0	200	903	0	0	0	0	0	0	0	603	903	0
503	2	0	0	0	0	0	0	200	300	0	0	0	0	0	0	0	200	903	0	0	0	0	0	0	0	603	903	0
503	3	0	0	0	0	0	0	200	300	0	0	0	0	0	0	0	200	903	0	0	0	0	0	0	0	603	903	0
503	4	0	0	0	0	0	0	200	300	0	0	0	0	0	0	0	200	903	0	0	0	0	0	0	0	603	903	0
503	5	0	0	0	0	0	0	200	300	0	0	0	0	0	0	0	200	903	0	0	0	0	0	0	0	603	903	0
503	6	0	0	0	0	0	0	200	300	0	0	0	0	0	0	0	200	903	0	0	0	0	0	0	0	603	903	0
503	7	0	0	0	0	0	0	200	300	0	0	0	0	0	0	0	200	903	0	0	0	0	0	0	0	603	903	0
503	8	0	0	0	0	0	0	200	300	0	0	0	0	0	0	0	200	903	0	0	0	0	0	0	0	603	903	0
503	9	0	0	0	0	0	0	200	300	0	0	0	0	0	0	0	200	903	0	0	0	0	0	0	0	603	903	0
504	0	0	0	0	0	0	0	200	300	0	0	0	0	0	0	0	200	903	0	0	0	0	0	0	0	603	903	0
504	1	0	0	0	0	0	0	200	300	0	0	0	0	0	0	0	200	903	0	0	0	0	0	0	0	603	903	0
504	2	0	0	0	0	0	0	200	300	0	0	0	0	0	0	0	200	903	0	0	0	0	0	0	0	603	903	0
504	3	0	0	0	0	0	0	200	300	0	0	0	0	0	0	0	200	903	0	0	0	0	0	0	0	603	903	0
504	4	0	0	0	0	0	0	200	300	0	0	0	0	0	0	0	200	903	0	0	0	0	0	0	0	603	903	0
504	5	0	0	0	0	0	0	200	300	0	0	0	0	0	0	0	200	903	0	0	0	0	0	0	0	603	903	0
504	6	0	0	0	0	0	0	200	300	0	0	0	0	0	0	0	200	903	0	0	0	0	0	0	0	603	903	0
504	7	0	0	0	0	0	0	200	300	0	0	0	0	0	0	0	200	903	0	0	0	0	0	0	0	603	903	0
504	8	0	0	0	0	0	0	200	300	0	0	0	0	0	0	0	200	903	0	0	0	0	0	0	0	603	903	0
504	9	0	0	0	0	0	0	200	300	0	0	0	0	0	0	0	200	903	0	0	0	0	0	0	0	603	903	0
505	0	0	0	0	0	0	0	200	300	0	0	0	0	0	0	0	200	903	0	0	0	0	0	0	0	603	903	0
505	1	0	0	0	0	0	0	200	300	0	0	0	0	0	0	0	200	903	0	0	0	0	0	0	0	603	903	0
505	2	0	0	0	0	0	0	200	300	0	0	0	0	0	0	0	200	903	0	0	0	0	0	0	0	603	903	0
505	3	0	0	0	0	0	0	200	300	0	0	0	0	0	0	0	200	903	0	0	0	0	0	0	0	603	903	0
505	4	0	0	0	0	0	0	200	300	0	0	0	0	0	0	0	200	903	0	0	0	0	0	0	0	603	903	0
505	5	0	0	0	0	0	0	200	300	0	0	0	0	0	0	0	200	903	0	0	0	0	0	0	0	603	903	0
505	6	0	0	0	0	0	0	200	300	0	0	0	0	0	0	0	200	903	0	0	0	0	0	0	0	603	903	0
505	7	0	0	0	0	0	0	200	300	0	0	0	0	0	0	0	200	903	0	0	0	0	0	0	0	603	903	0
505	8	0	0	0	0	0	0	200	300	0	0	0	0	0	0	0	200	903	0	0	0	0	0	0	0	603	903	0
505	9	0	0	0	0	0	0	200	300	0	0	0	0	0	0	0	200	903	0	0	0	0	0	0	0	603	903	0
506	0	0	0	0	0	0	0	200	300	0	0	0	0	0	0	0	200	903	0	0	0	0	0	0	0	603	903	0
506	1	0	0	0	0	0	0	200	300	0	0	0	0	0	0	0	200	903	0	0	0	0	0	0	0	603	903	0
506	2	0	0	0	0	0	0	200	300	0	0	0	0	0	0	0	200	903	0	0	0	0	0	0	0	603	903	0
506	3	0	0	0	0	0	0	200	300	0	0	0	0	0	0	0	200	903	0	0	0	0	0	0	0	603	903	0
506	4	0	0	0	0	0	0	200	300	0	0	0	0	0	0	0	200	903	0	0	0	0	0	0	0	603	903	0
506	5	0	0	0	0	0	0	200	300	0	0	0	0	0	0	0	200	903	0	0	0	0	0	0	0	603	903	0
506	6	0	0	0	0	0	0	200	300	0	0	0	0	0	0	0	200	903	0	0	0	0	0	0	0	603	903	0
506	7	0	0	0	0	0	0	200	300	0	0	0	0	0	0	0	200	903	0	0	0	0	0	0	0	603	903	0
506	8	0	0	0	0	0	0	200	300	0	0	0	0	0	0	0	200	903	0	0	0	0	0	0	0	603	903	0
506	9	0	0	0	0	0	0	200	300	0	0	0	0	0	0	0	200	903	0	0	0	0	0	0	0	603	903	0
507	0	0	0	0	0	0	0	200	300	0	0	0	0	0	0	0	200	903	0	0	0	0	0	0	0	603	903	0
507	1	0	0	0	0	0	0	200	300	0	0	0	0	0	0	0	200	903	0	0	0	0	0	0	0	603	903	0
507	2	0	0	0	0	0	0	200	300	0	0	0	0	0	0	0	200	903	0	0	0	0	0	0	0	603	903	0
507	3	0	0	0	0	0	0	200	300	0	0	0	0	0	0	0	200	903	0	0	0	0	0	0	0	603	903	0
507	4	0	0	0	0	0	0	200	300	0	0	0	0	0	0	0	200	903	0	0	0	0	0	0	0	603	903	0
507	5	0	0	0	0	0	0	200	300	0	0	0	0	0	0	0	200	903	0	0	0	0	0	0	0	603	903	0
507	6	0	0	0	0	0	0	200	300	0	0	0	0	0	0	0	200	903	0	0	0	0	0	0	0	603	903	0
507	7	0	0	0	0	0	0	200	300	0	0	0	0	0	0	0	200	903	0	0	0	0	0	0	0	603	903	0
507	8	0	0	0	0	0	0	200	300	0	0	0	0	0	0	0	200	903	0	0	0	0	0	0	0	603	903	0
507	9	0	0	0	0	0	0	200	300	0	0	0	0	0	0	0	200	903	0	0	0	0	0	0	0	603	903	0
508	0	0	0	0	0	0	0	200	300	0	0	0	0	0	0	0	200	903	0	0	0	0	0	0	0	603	903	0
508	1	0	0	0	0	0	0	200	300	0	0	0	0	0	0	0	200	903	0	0	0	0	0	0	0	603	903	0
508	2	0	0	0	0	0	0	200	300	0	0	0	0	0	0	0	200	903	0	0	0	0	0	0	0	603	903	0
508	3	0	0	0	0	0	0	200	300	0	0	0	0	0	0	0	200	903	0	0	0	0	0	0	0	603	903	0
508	4	0	0	0	0	0	0	200	300	0	0	0	0	0	0	0	200	903	0	0	0	0	0	0	0	603	903	0
508	5	0	0	0	0	0	0	200	300	0	0	0	0	0	0	0	200	903	0	0	0	0	0	0	0	603	903	0
508	6	0	0	0	0	0	0	200	300	0	0	0	0	0	0	0	200	903	0	0	0	0	0	0	0	603	903	0
508	7	0	0	0	0	0	0	200	300	0	0	0	0	0	0	0	200	903	0	0	0	0	0	0	0	603	903	0
508	8	0	0	0	0	0	0	200	300	0	0	0	0	0	0	0	200	903	0	0	0	0	0	0	0	603	903	0
508	9	0	0	0	0	0	0	200	300	0	0	0	0	0	0	0	200	903	0	0	0	0	0	0	0	603	903	0
509	0	0	0	0	0	0	0	200	300	0	0	0	0	0	0	0	200	903	0	0	0	0	0	0	0	603	903	0
509	1	0	0	0	0	0	0	200	300	0	0	0	0	0	0	0	200	903	0	0	0	0	0	0	0	603	903	0
509	2	0	0	0	0	0	0	200	300	0	0	0	0	0	0	0	200	903	0	0	0	0	0	0	0	603	903	0
509	3	0	0	0	0	0	0	200	300	0	0	0	0	0	0	0	200	903	0	0	0	0	0	0	0	603	903	0
509	4	0	0	0	0	0	0	200	300	0	0	0	0	0	0	0	200	903	0	0	0	0	0	0	0	603	903	0
509	5	0	0	0	0	0	0	200	300	0	0	0	0	0	0	0	200	903	0	0	0	0	0	0	0	603	903	0
509	6	0	0	0	0	0	0	200	300	0	0	0	0	0	0	0	200	903	0	0	0	0	0	0	0	603	903	0
509	7	0	0	0	0	0	0	200	300	0	0	0	0	0	0	0	200	903	0	0	0	0	0	0	0	603	903	0
509	8	0	0	0	0	0	0	200	300	0	0	0	0	0	0	0	200	903	0	0	0	0	0	0	0	603	903	0
509	9	0	0	0	0	0	0	200	300	0	0	0	0	0	0	0	200	903	0	0	0	0	0	0	0	603	903	0
510	0	0	0	0	0	0	0	200	300	0	0	0	0	0	0	0	200	903	0	0	0	0	0	0	0	603	903	0
510	1	0	0	0	0	0	0	200	300	0	0	0	0	0	0	0	200	903	0	0	0	0	0	0	0	603	903	0
510	2	0	0	0	0	0	0	200	300	0	0	0	0	0	0	0	200	903	0	0	0	0	0	0	0	603	903	0
510	3	0	0	0	0	0	0	200	300	0	0	0	0	0	0	0	200	903	0	0	0	0	0	0	0	603	903	0
510	4	0	0	0	0	0	0	200	300	0	0	0	0	0	0	0	200	903	0	0	0	0	0	0	0	603	903	0
510	5	0	0	0	0	0	0	200	300	0	0	0	0	0	0	0	200	903	0	0	0	0	0	0	0	603	903	0
510	6	0	0	0	0	0	0	200	300	0	0	0	0	0	0	0	200	903	0	0	0	0	0	0	0	603	903	0
510	7	0	0	0	0	0	0	200	300	0	0	0	0	0	0	0	200	903	0	0	0	0	0	0	0	603	903	0
510	8	0	0	0	0	0	0	200	300	0	0	0	0	0	0	0	200	903	0	0	0	0	0	0	0	603	903	0
510	9	0	0	0	0	0	0	200	300	0	0	0	0	0	0	0	200	903	0	0	0	0	0	0	0	603	903	0
511	0	0	0	0	0	0	0	200	300	0	0	0	0	0	0	0	200	903	0	0	0	0	0	0	0	603	903	0
511	1	0	0	0	0	0	0	200	300	0	0	0	0	0	0	0	200	903	0	0	0	0	0	0	0	603	903	0
511	2	0	0	0	0	0	0	200	300	0	0	0	0	0	0	0	200	903	0	0	0	0	0	0	0	603	903	0
511	3	0	0	0	0	0	0	200	300	0	0	0	0	0	0	0	200	903	0	0	0	0	0	0	0	603	903	0
511	4	0	0	0	0	0	0	200	300	0	0	0	0	0	0	0	200	903	0	0	0	0	0	0	0	603	903	0
511	5	0	0	0	0	0	0	200	300	0	0	0	0	0	0	0	200	903	0	0	0	0	0	0	0	603	903	0
511	6	0	0	0	0	0	0	200	300	0	0	0	0	0	0	0	200	903	0	0	0	0	0	0	0	603	903	0
511	7	0	0	0	0	0	0	200	300	0	0	0	0	0	0	0	200	903	0	0	0	0	0	0	0	603	903	0
511	8	0	0	0	0	0	0	200	300	0	0	0	0	0	0	0	200	903	0	0	0	0	0	0	0	603	903	0
511	9	0	0	0	0	0	0	200	300	0	0	0	0	0	0	0	200	903	0	0	0	0	0	0	0	603	903	0
512	0	0	0	0	0	0	0	200	300	0	0	0	0	0	0	0	200	903	0	0	0	0	0	0	0	603	903	0
512	1	0	0	0	0	0	0	200	300	0	0	0	0	0	0	0	200	903	0	0	0	0	0	0	0	603	903	0
512	2	0	0	0	0	0	0	200	300	0	0	0	0	0	0	0	200	903	0	0	0	0	0	0	0	603	903	0
512	3	0	0	0	0	0	0	200	300	0	0	0	0	0	0	0	200	903	0	0	0	0	0	0	0	603	903	0
512	4	0	0	0	0	0	0	200	300	0	0	0	0	0	0	0	200	903	0	0	0	0	0	0	0	603	903	0
512	5	0	0	0	0	0	0	200	300	0	0	0	0	0	0	0	200	903	0	0	0	0	0	0	0	603	903	0
512	6	0	0	0	0	0	0	200	300	0	0	0	0	0	0	0	200	903	0	0	0	0	0	0	0	603	903	0
512	7	0	0	0	0	0	0	200	300	0	0	0	0	0	0	0	200	903	0	0	0	0	0	0	0	603	903	0
512	8	0	0	0	0	0	0	200	300	0	0	0	0	0	0	0	200	903	0	0	0	0	0	0	0	603	903	0
512	9	0	0	0	0	0	0	200	300	0	0	0	0	0	0	0	200	903	0	0	0	0	0	0	0	603	903	0
513	0	0	0	0	0	0	0	200	300	0	0	0	0	0	0	0	200	903	0	0	0	0	0	0	0	603	903	0
513	1	0	0	0	0	0	0	200	300	0	0	0	0	0	0	0	200	903	0	0	0	0	0	0	0	603	903	0
513	2	0	0	0	0	0	0	200	300	0	0	0	0	0	0	0	200	903	0	0	0	0	0	0	0	603	903	0
513	3	0	0	0	0	0	0	200	300	0	0	0	0	0	0	0	200	903	0	0	0	0	0	0	0	603	903	0
513	4	0	0	0	0	0	0	200	300	0	0	0	0	0	0	0	200	903	0	0	0	0	0	0	0	603	903	0
513	5	0	0	0	0	0	0	200	300	0	0	0	0	0	0	0	200	903	0	0	0	0	0	0	0	603	903	0
513	6	0	0	0	0	0	0	200	300	0	0	0	0	0	0	0	200	903	0	0	0	0	0	0	0	603	903	0
513	7	0	0	0	0	0	0	200	300	0	0	0	0	0	0	0	200	903	0	0	0	0	0	0	0	603	903	0
513	8	0	0	0	0	0	0	200	300	0	0	0	0	0	0	0	200	903	0	0	0	0	0	0	0	603	903	0
513	9	0	0	0	0	0	0	200	300	0	0	0	0	0	0	0	200	903	0	0	0	0	0	0	0	603	903	0
514	0	0	0	0	0	0	0	200	300	0	0	0	0	0	0	0	200	903	0	0	0	0	0	0	0	603	903	0
514	1	0	0	0	0	0	0	200	300	0	0	0	0	0	0	0	200	903	0	0	0	0	0	0	0	603	903	0
514	2	0	0	0	0	0	0	200	300	0	0	0	0	0	0	0	200	903	0	0	0	0	0	0	0	603	903	0
514	3	0	0	0	0	0	0	200	300	0	0	0	0	0	0	0	200	903	0	0	0	0	0	0	0	603	903	0
514	4	0	0	0	0	0	0	200	300	0	0	0	0	0	0	0	200	903	0	0	0	0	0	0	0	603	903	0
514	5	0	0	0	0	0	0	200	300	0	0	0	0	0	0	0	200	903	0	0	0	0	0	0	0	603	903	0
514	6	0	0	0	0	0	0	200	300	0	0	0	0	0	0	0	200	903	0	0	0	0	0	0	0	603	903	0
514	7	0	0	0	0	0	0	200	300	0	0	0	0	0	0	0	200	903	0	0	0	0	0	0	0	603	903	0
514	8	0	0	0	0	0	0	200	300	0	0	0	0	0	0	0	200	903	0	0	0	0	0	0	0	603	903	0
514	9	0	0	0	0	0	0	200	300	0	0	0	0	0	0	0	200	903	0	0	0	0	0	0	0	603	903	0
515	0	0	0	0	0	0	0	200	300	0	0	0	0	0	0	0	200	903	0	0	0	0	0	0	0	603	903	0
515	1	0	0	0	0	0	0	200	300	0	0	0	0	0	0	0	200	903	0	0	0	0	0	0	0	603	903	0
515	2	0	0	0	0	0	0	200	300	0	0	0	0	0	0	0	200	903	0	0	0	0	0	0	0	603	903	0
515	3	0	0	0	0	0	0	200	300	0	0	0	0	0	0	0	200	903	0	0	0	0	0	0	0	603	903	0
515	4	0	0	0	0	0	0	200	300	0	0	0	0	0	0	0	200	903	0	0	0	0	0	0	0	603	903	0
515	5	0	0	0	0	0	0	200	300	0	0	0	0	0	0	0	200	903	0	0	0	0	0	0	0	603	903	0
515	6	0	0	0	0	0	0	200	300	0	0	0	0	0	0	0	200	903	0	0	0	0	0	0	0	603	903	0
515	7	0	0	0	0	0	0	200	300	0	0	0	0	0	0	0	200	903	0	0	0	0	0	0	0	603	903	0
515	8	0	0	0	0	0	0	200	300	0	0	0	0	0	0	0	200	903	0	0	0	0	0	0	0	603	903	0
515	9	0	0	0	0	0	0	200	300	0	0	0	0	0	0	0	200	903	0	0	0	0	0	0	0	603	903	0
516	0	0	0	0	0	0	0	200	300	0	0	0	0	0	0	0	200	903	0	0	0	0	0	0	0	603	903	0
516	1	0	0	0	0	0	0	200	300	0	0	0	0	0	0	0	200	903	0	0	0	0	0	0	0	603	903	0
516	2	0	0	0	0	0	0	200	300	0	0	0	0	0	0	0	200	903	0	0	0	0	0	0	0	603	903	0
516	3	0	0	0	0	0	0	200	300	0	0	0	0	0	0	0	200	903	0	0	0	0	0	0	0	603	903	0
516	4	0	0	0	0	0	0	200	300	0	0	0	0	0	0	0	200	903	0	0	0	0	0	0	0	603	903	0
516	5	0	0	0	0	0	0	200	300	0	0	0	0	0	0	0	200	903	0	0	0	0	0	0	0	603	903	0
516	6	0	0	0	0	0	0	200	300	0	0	0	0	0	0	0	200	903	0	0	0	0	0	0	0	603	903	0
516	7	0	0	0	0	0	0	200	300	0	0	0	0	0	0	0	200	903	0	0	0	0	0	0	0	603	903	0
516	8	0	0	0	0	0	0	200	300	0	0	0	0	0	0	0	200	903	0	0	0	0	0	0	0	603	903	0
516	9	0	0	0	0	0	0	200	300	0	0	0	0	0	0	0	200	903	0	0	0	0	0	0	0	603	903	0
517	0	0	0	0	0	0	0	200	300	0	0	0	0	0	0	0	200	903	0	0	0	0	0	0	0	603	903	0
517	1	0	0	0	0	0	0	200	300	0	0	0	0	0	0	0	200	903	0	0	0	0	0	0	0	603	903	0
517	2	0	0	0	0	0	0	200	300	0	0	0	0	0	0	0	200	903	0	0	0	0	0	0	0	603	903	0
517	3	0	0	0	0	0	0	200	300	0	0	0	0	0	0	0	200	903	0	0	0	0	0	0	0	603	903	0
517	4	0	0	0	0	0	0	200	300	0	0	0	0	0	0	0	200	903	0	0	0	0	0	0	0	603	903	0
517	5	0	0	0	0	0	0	200	300	0	0	0	0	0	0	0	200	903	0	0	0	0	0	0	0	603	903	0
517	6	0	0	0	0	0	0	200	300	0	0	0	0	0	0	0	200	903	0	0	0	0	0	0	0	603	903	0
517	7	0	0	0	0	0	0	200	300	0	0	0	0	0	0	0	200	903	0	0	0	0	0	0	0	603	903	0
517	8	0	0	0	0	0	0	200	300	0	0	0	0	0	0	0	200	903	0	0	0	0	0	0	0	603	903	0
517	9	0	0	0	0	0	0	200	300	0	0	0	0	0	0	0	200	903	0	0	0	0	0	0	0	603	903	0
518	0	0	0	0	0	0	0	200	300	0	0	0	0	0	0	0	200	903	0	0	0	0	0	0	0	603	903	0
518	1	0	0	0	0	0	0	200	300	0	0	0	0	0	0	0	200	903	0	0	0	0	0	0	0	603	903	0
518	2	0	0	0	0	0	0	200	300	0	0	0	0	0	0	0	200	903	0	0	0	0	0	0	0	603	903	0
518	3	0	0	0	0	0	0	200	300	0	0	0	0	0	0	0	200	903	0	0	0	0	0	0	0	603	903	0
518	4	0	0	0	0	0	0	200	300	0	0	0	0	0	0	0	200	903	0	0	0	0	0	0	0	603	903	0
518	5	0	0	0	0	0	0	200	300	0	0	0	0	0	0	0	200	903	0	0	0	0	0	0	0	603	903	0
518	6	0	0	0	0	0	0	200	300	0	0	0	0	0	0	0	200	903	0	0	0	0	0	0	0	603	903	0
518	7	0	0	0	0	0	0	200	300	0	0	0	0	0	0	0	200	903	0	0	0	0	0	0	0	603	903	0
518	8	0	0	0	0	0	0	200	300	0	0	0	0	0	0	0	200	903	0	0	0	0	0	0	0	603	903	0
518	9	0	0	0	0	0	0	200	300	0	0	0	0	0	0	0	200	903	0	0	0	0	0	0	0	603	903	0
519	0	0	0	0	0	0	0	200	300	0	0	0	0	0	0	0	200	903	0	0	0	0	0	0	0	603	903	0
519	1	0	0	0	0	0	0	200	300	0	0	0	0	0	0	0	200	903	0	0	0	0	0	0	0	603	903	0
519	2	0	0	0	0	0	0	200	300	0	0	0	0	0	0	0	200	903	0	0	0	0	0	0	0	603	903	0
519	3	0	0	0	0	0	0	200	300	0	0	0	0	0	0	0	200	903	0	0	0	0	0	0	0	603	903	0
519	4	0	0	0	0	0	0	200	300	0	0	0	0	0	0	0	200	903	0	0	0	0	0	0	0	603	903	0
519	5	0	0	0	0	0	0	200	300	0	0	0	0	0	0	0	200	903	0	0	0	0	0	0	0	603	903	0
519	6	0	0	0	0	0	0	200	300	0	0	0	0	0	0	0	200	903	0	0	0	0	0	0	0	603	903	0
519	7	0	0	0	0	0	0	200	300	0	0	0	0	0	0	0	200	903	0	0	0	0	0	0	0	603	903	0
519	8	0	0	0	0	0	0	200	300	0	0	0	0	0	0	0	200	903	0	0	0	0	0	0	0	603	903	0
519	9	0	0	0	0	0	0	200	300	0	0	0	0	0	0	0	200	903	0	0	0	0	0	0	0	603	903	0
520	0	0	0	0	0	0	0	200	300	0	0	0	0	0	0	0	200	903	0	0	0	0	0	0	0	603	903	0
520	1	0	0	0	0	0	0	200	300	0	0	0	0	0	0	0	200	903	0	0	0	0	0	0	0	603	903	0
520	2	0	0	0	0	0	0	200	300	0	0	0	0	0	0	0	200	903	0	0	0	0	0	0	0	603	903	0
520	3	0	0	0	0	0	0	200	300	0	0	0	0	0	0	0	200	903	0	0	0	0	0	0	0	603	903	0
520	4	0	0	0	0	0	0	200	300	0	0	0	0	0	0	0	200	903	0	0	0	0	0	0	0	603	903	0
520	5	0	0	0	0	0	0	200	300	0	0	0	0	0	0	0	200	903	0	0	0	0	0	0	0	603	903	0
520	6	0	0	0	0	0	0	200	300	0	0	0	0	0	0	0	200	903	0	0	0	0	0	0	0	603	903	0
520	7	0	0	0	0	0	0	200	300	0	0	0	0	0	0	0	200	903	0	0	0	0	0	0	0	603	903	0
520	8	0	0	0	0	0	0	200	300	0	0	0	0	0	0	0	200	903	0	0	0	0	0	0	0	603	903	0
520	9	0	0	0	0	0	0	200	300	0	0	0	0	0	0	0	200	903	0	0	0	0	0	0	0	603	903	0
521	0	0	0	0	0	0	0	200	300	0	0	0	0	0	0	0	200	903	0	0	0	0	0	0	0	603	903	0
521	1	0	0	0	0	0	0	200	300	0	0	0	0	0	0	0	200	903	0	0	0	0	0	0	0	603	903	0
521	2	0	0	0	0	0	0	200	300	0	0	0	0	0	0	0	200	903	0	0	0	0	0	0	0	603	903	0
521	3	0	0	0	0	0	0	200	300	0	0	0	0	0	0	0	200	903	0	0	0	0	0	0	0	603	903	0
521	4	0	0	0	0	0	0	200	300	0	0	0	0	0	0	0	200	903	0	0	0	0	0	0	0	603	903	0
521	5	0	0	0	0	0	0	200	300	0	0	0	0	0	0	0	200	903	0	0	0	0	0	0	0	603	903	0
521	6	0	0	0	0	0	0	200	300	0	0	0	0	0	0	0	200	903	0	0	0	0	0	0	0	603	903	0
521	7	0	0	0	0	0	0	200	300	0	0	0	0	0	0	0	200	903	0	0	0	0	0	0	0	603	903	0
521	8	0	0	0	0	0	0	200	300	0	0	0	0	0	0	0	200	903	0	0	0	0	0	0	0	603	903	0
521	9	0	0	0	0	0	0	200	300	0	0	0	0	0	0	0	200	903	0	0	0	0	0	0	0	603	903	0
522	0	0	0	0	0	0	0	200	300	0	0	0	0	0	0	0	200	903	0	0	0	0	0	0	0	603	903	0
522	1	0	0	0	0	0	0	200	300	0	-6.9577	5.49057	-30.7421	-4217.93	993.842	1032.35	232.328	1040.2	0	0	0	0	0	0	0	603	903	0
522	2	0	0	0	0	0	0	200	300	0	-0.396423	13.12	-33.7939	-3393.95	993.842	895.019	229.409	1003.43	0	0	0	0	0	0	0	603	903	0
522	3	0	0	0	0	0	0	200	300	0	3.87604	12.8148	-30.437	-3302.4	932.807	208.373	230.647	1011.5	0	0	0	0	0	0	0	603	903	0
522	4	0	0	0	0	0	0	200	300	0	1.43463	12.8148	-26.1645	-4858.79	1543.16	71.0441	258.979	1088.7	0	0	0	0	0	0	0	603	903	0
522	5	0	0	0	0	0	0	200	300	0	6.47003	19.2235	-36.5405	-5408.11	1726.26	162.597	247.243	1051	0	0	0	0	0	0	0	603	903	0
522	6	0	0	0	0	0	0	200	300	0	11.0477	23.4959	-49.0527	-5591.22	1909.37	-432.496	238.925	1016.98	0	0	0	0	0	0	0	603	903	0
522	7	0	0	0	0	0	0	200	300	0	6.62262	22.4278	-53.6303	-6964.51	2397.65	116.82	244.707	1032.86	0	0	0	0	0	0	0	603	903	0
522	8	0	0	0	0	0	0	200	300	0	4.02863	27.0055	-55.4614	-7330.72	2092.47	574.584	237.729	1035.18	0	0	0	0	0	0	0	603	903	0
522	9	0	0	0	0	0	0	200	300	0	11.0477	27.3106	-63.0908	-8520.9	2336.62	-20.5087	237.036	1038.06	0	0	0	0	0	0	0	603	903	0
523	0	0	0	0	0	0	0	200	300	0	8.60626	23.6485	-75.603	-9344.88	3191.11	208.373	242.209	1026.6	0	0	0	0	0	0	0	603	903	0
523	1	0	0	0	0	0	0	200	300	0	6.31744	23.4959	-80.1806	-9894.2	3130.07	391.479	239.038	1026.4	0	0	0	0	0	0	0	603	903	0
523	2	0	0	0	0	0	0	200	300	0	8.45367	24.7166	-82.9272	-10260.4	3130.07	-478.272	237.745	1026.73	0	0	0	0	0	0	0	603	903	0
523	3	0	0	0	0	0	0	200	300	0	9.82697	20.139	-87.81	-11267.5	3557.32	-203.614	240.512	1031.32	0	0	0	0	0	0	0	603	903	0
523	4	0	0	0	0	0	0	200	300	0	13.3365	18.1554	-95.4394	-11359	3557.32	391.479	237.273	1022.02	0	0	0	0	0	0	0	603	903	0
523	5	0	0	0	0	0	0	200	300	0	9.82697	18.6131	-100.017	-11725.2	3313.18	-661.378	233.126	1020.23	0	0	0	0	0	0	0	603	903	0
523	6	0	0	0	0	0	0	200	300	0	7.38556	16.0191	-101.238	-12732.3	3984.56	-386.72	239.359	1028.77	0	0	0	0	0	0	0	603	903	0
523	7	0	0	0	0	0	0	200	300	0	10.4373	12.2044	-104.29	-12915.4	3923.53	299.926	237.622	1026.84	0	0	0	0	0	0	0	603	903	0
523	8	0	0	0	0	0	0	200	300	0	10.7425	11.1363	-107.036	-12366.1	4106.64	-661.378	238.367	1018.53	0	0	0	0	0	0	0	603	903	0
523	9	0	0	0	0	0	0	200	300	0	7.53815	9.30527	-110.393	-12915.4	4411.81	-340.943	239.965	1020	0	0	0	0	0	0	0	603	903	0
524	0	0	0	0	0	0	0	200	300	0	6.77521	7.01645	-114.971	-13647.9	4228.71	-203.614	236.781	1021.71	0	0	0	0	0	0	0	603	903	0
524	1	0	0	0	0	0	0	200	300	0	12.2684	3.65952	-118.022	-14197.2	3740.42	-615.602	231.693	1023.29	0	0	0	0	0	0	0	603	903	0
524	2	0	0	0	0	0	0	200	300	0	9.3692	1.82846	-120.769	-13922.5	4716.99	-661.378	239.058	1018.28	0	0	0	0	0	0	0	603	903	0
524	3	0	0	0	0	0	0	200	300	0	5.85968	0.302584	-123.516	-14105.6	4839.06	-157.838	239.178	1017.2	0	0	0	0	0	0	0	603	903	0
524	4	0	0	0	0	0	0	200	300	0	7.38556	-3.6647	-126.873	-14654.9	4655.95	-890.26	236.698	1018.51	0	0	0	0	0	0	0	603	903	0
524	5	0	0	0	0	0	0	200	300	0	8.75885	-3.20694	-129.619	-14288.7	4716.99	-890.26	236.391	1013.24	0	0	0	0	0	0	0	603	903	0
524	6	0	0	0	0	0	0	200	300	0	8.60626	-2.90176	-133.281	-14563.4	4533.88	-203.614	234.017	1012.27	0	0	0	0	0	0	0	603	903	0
524	7	0	0	0	0	0	0	200	300	0	6.77521	-6.56387	-135.417	-14929.6	4839.06	-752.931	235.734	1013.25	0	0	0	0	0	0	0	603	903	0
524	8	0	0	0	0	0	0	200	300	0	6.16486	-8.7001	-139.69	-15387.4	5022.16	-844.484	235.952	1013.15	0	0	0	0	0	0	0	603	903	0
524	9	0	0	0	0	0	0	200	300	0	7.99591	-5.64834	-142.131	-15295.8	4900.09	-295.167	234.476	1010.62	0	0	0	0	0	0	0	603	903	0
525	0	0	0	0	0	0	0	200	300	0	7.38556	-7.02164	-145.793	-15662	4716.99	-1256.47	232.354	1010.43	0	0	0	0	0	0	0	603	903	0
525	1	0	0	0	0	0	0	200	300	0	6.31744	-10.5312	-148.845	-15753.6	5205.27	-981.813	234.971	1008.84	0	0	0	0	0	0	0	603	903	0
525	2	0	0	0	0	0	0	200	300	0	6.31744	-9.31045	-153.423	-16028.2	5388.38	-340.943	235.121	1007.47	0	0	0	0	0	0	0	603	903	0
525	3	0	0	0	0	0	0	200	300	0	6.31744	-10.0734	-159.831	-16486	5327.34	-1164.92	233.331	1006.15	0	0	0	0	0	0	0	603	903	0
525	4	0	0	0	0	0	0	200	300	0	7.38556	-11.4467	-161.968	-17035.3	5144.23	-1119.14	231.761	1008.18	0	0	0	0	0	0	0	603	903	0
525	5	0	0	0	0	0	0	200	300	0	4.3338	-13.8881	-166.851	-17584.6	4900.09	-157.838	229.368	1008.39	0	0	0	0	0	0	0	603	903	0
525	6	0	0	0	0	0	0	200	300	0	3.87604	-13.5829	-171.123	-17310	5632.52	-890.26	232.915	1004.16	0	0	0	0	0	0	0	603	903	0
525	7	0	0	0	0	0	0	200	300	0	4.79156	-14.8036	-177.837	-17310	5693.55	-1073.37	232.016	1000.34	0	0	0	0	0	0	0	603	903	0
525	8	0	0	0	0	0	0	200	300	0	5.40192	-17.5502	-181.499	-18133.9	5205.27	-386.72	228.679	1002.91	0	0	0	0	0	0	0	603	903	0
525	9	0	0	0	0	0	0	200	300	0	2.50275	-19.3813	-185.771	-18408.6	5510.45	-936.036	229.663	1002.09	0	0	0	0	0	0	0	603	903	0
526	0	0	0	0	0	0	0	200	300	0	2.65533	-19.839	-191.265	-19415.7	6059.76	-1164.92	231.683	1004.51	0	0	0	0	0	0	0	603	903	0
526	1	0	0	0	0	0	0	200	300	0	3.87604	-22.1278	-197.063	-19232.6	6609.08	-478.272	233.538	1000.6	0	0	0	0	0	0	0	603	903	0
526	2	0	0	0	0	0	0	200	300	0	2.04498	-24.5692	-204.082	-19324.1	6120.8	-890.26	229.992	997.688	0	0	0	0	0	0	0	603	903	0
526	3	0	0	0	0	0	0	200	300	0	0.976868	-25.9425	-206.523	-20056.5	5815.62	-1210.69	228.16	1000.12	0	0	0	0	0	0	0	603	903	0
526	4	0	0	0	0	0	0	200	300	0	2.80792	-29.1469	-215.373	-20422.8	6487.01	-432.496	230.12	997.825	0	0	0	0	0	0	0	603	903	0
526	5	0	0	0	0	0	0	200	300	0	3.26569	-31.4357	-219.646	-20697.4	6975.29	-936.036	231.757	997.231	0	0	0	0	0	0	0	603	903	0
526	6	0	0	0	0	0	0	200	300	0	-0.243835	-32.0461	-227.886	-20605.9	6670.11	-1164.92	229.27	993.422	0	0	0	0	0	0	0	603	903	0
526	7	0	0	0	0	0	0	200	300	0	-1.00677	-33.2668	-234.6	-21429.8	6731.15	-752.931	228.692	994.346	0	0	0	0	0	0	0	603	903	0
526	8	0	0	0	0	0	0	200	300	0	-0.396423	-36.7763	-240.703	-21796.1	7158.4	-936.036	229.74	993.552	0	0	0	0	0	0	0	603	903	0
526	9	0	0	0	0	0	0	200	300	0	0.366516	-37.5392	-245.586	-22528.5	6914.25	-1439.58	228.154	994.734	0	0	0	0	0	0	0	603	903	0
527	0	0	0	0	0	0	0	200	300	0	0.519104	-37.997	-251.079	-23077.8	7036.32	-432.496	228.024	994.914	0	0	0	0	0	0	0	603	903	0
527	1	0	0	0	0	0	0	200	300	0	-1.76971	-40.4384	-259.319	-23077.8	7463.57	-615.602	228.781	991.994	0	0	0	0	0	0	0	603	903	0
527	2	0	0	0	0	0	0	200	300	0	-0.396423	-41.9643	-266.338	-23627.1	7585.64	-981.813	228.481	991.711	0	0	0	0	0	0	0	603	903	0
527	3	0	0	0	0	0	0	200	300	0	-2.22748	-42.7272	-272.441	-24725.7	7707.71	-478.272	228.291	993.756	0	0	0	0	0	0	0	603	903	0
527	4	0	0	0	0	0	0	200	300	0	-3.75336	-43.7953	-279.46	-24268	7768.75	-615.602	227.799	989.839	0	0	0	0	0	0	0	603	903	0
527	5	0	0	0	0	0	0	200	300	0	-0.0912476	-44.5583	-285.564	-24359.5	7768.75	-1027.59	227.205	988.303	0	0	0	0	0	0	0	603	903	0
527	6	0	0	0	0	0	0	200	300	0	-3.60077	-45.779	-292.583	-24908.8	8134.96	-157.838	227.804	988.134	0	0	0	0	0	0	0	603	903	0
527	7	0	0	0	0	0	0	200	300	0	-4.82147	-45.016	-293.498	-25366.6	8318.06	-844.484	228.341	989.429	0	0	0	0	0	0	0	603	903	0
527	8	0	0	0	0	0	0	200	300	0	-2.68524	-46.8471	-302.043	-24542.6	7951.85	-1164.92	226.327	984.255	0	0	0	0	0	0	0	603	903	0
527	9	0	0	0	0	0	0	200	300	0	-2.68524	-48.2204	-308.147	-25732.8	8134.96	-432.496	226.4	986.508	0	0	0	0	0	0	0	603	903	0
528	0	0	0	0	0	0	0	200	300	0	-4.21112	-48.373	-315.471	-25915.9	8379.1	-432.496	226.561	985.15	0	0	0	0	0	0	0	603	903	0
528	1	0	0	0	0	0	0	200	300	0	-3.60077	-48.5255	-320.049	-25732.8	8623.24	-707.154	226.944	983.403	0	0	0	0	0	0	0	603	903	0
528	2	0	0	0	0	0	0	200	300	0	-2.07489	-50.5092	-325.847	-25915.9	8501.17	-157.838	226.089	982.534	0	0	0	0	0	0	0	603	903	0
528	3	0	0	0	0	0	0	200	300	0	-2.53265	-51.7299	-330.12	-26923	8989.45	-66.2851	227.231	984.555	0	0	0	0	0	0	0	603	903	0
528	4	0	0	0	0	0	0	200	300	0	-3.60077	-50.9669	-331.951	-26465.2	8867.38	-844.484	226.713	982.727	0	0	0	0	0	0	0	603	903	0
528	5	0	0	0	0	0	0	200	300	0	-2.83783	-52.3402	-340.496	-25091.9	8989.45	-432.496	226.401	976.693	0	0	0	0	0	0	0	603	903	0
528	6	0	0	0	0	0	0	200	300	0	-2.68524	-54.6291	-345.684	-26923	8867.38	-295.167	225.652	980.883	0	0	0	0	0	0	0	603	903	0
528	7	0	0	0	0	0	0	200	300	0	-2.68524	-56.1549	-349.956	-27106.1	9050.48	-661.378	225.862	980.456	0	0	0	0	0	0	0	603	903	0
528	8	0	0	0	0	0	0	200	300	0	-3.14301	-57.0705	-353.008	-26648.4	9233.59	-249.391	226.157	978.489	0	0	0	0	0	0	0	603	903	0
528	9	0	0	0	0	0	0	200	300	0	-3.44818	-59.0541	-356.67	-26556.8	9477.73	-157.838	226.573	977.458	0	0	0	0	0	0	0	603	903	0
529	0	0	0	0	0	0	0	200	300	0	-1.46454	-59.6645	-361.858	-27014.6	9416.69	-340.943	226.023	977.655	0	0	0	0	0	0	0	603	903	0
529	1	0	0	0	0	0	0	200	300	0	-3.60077	-61.9533	-365.215	-26739.9	9111.52	-203.614	224.948	976.217	0	0	0	0	0	0	0	603	903	0
529	2	0	0	0	0	0	0	200	300	0	-2.99042	-63.9369	-368.877	-26465.2	9111.52	-157.838	224.701	974.745	0	0	0	0	0	0	0	603	903	0
529	3	0	0	0	0	0	0	200	300	0	-1.61713	-65.6154	-372.234	-27014.6	9233.59	-478.272	224.806	975.574	0	0	0	0	0	0	0	603	903	0
529	4	0	0	0	0	0	0	200	300	0	-3.60077	-66.8361	-376.811	-27014.6	9599.8	-157.838	225.476	974.693	0	0	0	0	0	0	0	603	903	0
529	5	0	0	0	0	0	0	200	300	0	-4.82147	-67.599	-381.694	-26739.9	9416.69	-20.5087	224.671	973.056	0	0	0	0	0	0	0	603	903	0
529	6	0	0	0	0	0	0	200	300	0	-0.701599	-69.8878	-386.272	-26648.4	9416.69	-340.943	224.378	971.989	0	0	0	0	0	0	0	603	903	0
529	7	0	0	0	0	0	0	200	300	0	-4.21112	-70.956	-389.629	-25824.4	9416.69	-203.614	224.168	969.279	0	0	0	0	0	0	0	603	903	0
529	8	0	0	0	0	0	0	200	300	0	-4.21112	-70.8034	-392.986	-26739.9	9416.69	116.82	223.962	971.043	0	0	0	0	0	0	0	603	903	0
529	9	0	0	0	0	0	0	200	300	0	-2.07489	-72.4818	-397.869	-26648.4	9050.48	-112.061	222.747	969.978	0	0	0	0	0	0	0	603	903	0
530	0	0	0	0	0	0	0	200	300	0	-3.44818	-75.2284	-402.751	-27106.1	9477.73	-66.2851	223.532	970.302	0	0	0	0	0	0	0	603	903	0
530	1	0	0	0	0	0	0	200	300	0	-3.75336	-75.0758	-407.024	-26923	9721.87	-20.5087	223.885	969.146	0	0	0	0	0	0	0	603	903	0
530	2	0	0	0	0	0	0	200	300	0	-3.90594	-76.7543	-409.77	-26831.5	9416.69	-340.943	222.98	968.479	0	0	0	0	0	0	0	603	903	0
530	3	0	0	0	0	0	0	200	300	0	-4.66888	-76.7543	-412.517	-26831.5	9233.59	-249.391	222.384	968.043	0	0	0	0	0	0	0	603	903	0
530	4	0	0	0	0	0	0	200	300	0	-6.49994	-77.5172	-418.01	-26190.6	9111.52	162.597	221.797	965.655	0	0	0	0	0	0	0	603	903	0
530	5	0	0	0	0	0	0	200	300	0	-6.34735	-79.1957	-422.893	-26373.7	9355.66	574.584	222.123	965.365	0	0	0	0	0	0	0	603	903	0
530	6	0	0	0	0	0	0	200	300	0	-6.04218	-80.8742	-425.334	-26099	9782.9	71.0441	223.001	964.361	0	0	0	0	0	0	0	603	903	0
530	7	0	0	0	0	0	0	200	300	0	-8.33099	-81.0268	-429.912	-26465.2	9599.8	162.597	222.33	964.56	0	0	0	0	0	0	0	603	903	0
530	8	0	0	0	0	0	0	200	300	0	-9.39911	-81.7897	-438.762	-26099	9233.59	-203.614	221.045	962.483	0	0	0	0	0	0	0	603	903	0
530	9	0	0	0	0	0	0	200	300	0	-10.0095	-83.9259	-448.833	-24542.6	9050.48	116.82	220.164	957.681	0	0	0	0	0	0	0	603	903	0
531	0	0	0	0	0	0	0	200	300	0	-13.6716	-85.1466	-456.462	-25366.6	9294.62	208.373	220.362	958.572	0	0	0	0	0	0	0	603	903	0
531	1	0	0	0	0	0	0	200	300	0	-18.5544	-91.0976	-460.735	-25000.4	9538.76	-249.391	220.703	957.262	0	0	0	0	0	0	0	603	903	0
531	2	0	0	0	0	0	0	200	300	0	-19.3173	-93.6916	-464.397	-24908.8	9172.55	-249.391	219.752	956.637	0	0	0	0	0	0	0	603	903	0
531	3	0	0	0	0	0	0	200	300	0	-19.1647	-95.6752	-470.5	-24359.5	9355.66	254.149	219.885	954.774	0	0	0	0	0	0	0	603	903	0
531	4	0	0	0	0	0	0	200	300	0	-20.8432	-101.779	-479.351	-24176.4	9233.59	-66.2851	219.263	953.436	0	0	0	0	0	0	0	603	903	0
531	5	0	0	0	0	0	0	200	300	0	-20.3854	-106.967	-480.876	-24268	9294.62	71.0441	219.329	953.466	0	0	0	0	0	0	0	603	903	0
531	6	0	0	0	0	0	0	200	300	0	-19.3173	-107.577	-483.318	-23901.8	9599.8	620.36	219.862	952.454	0	0	0	0	0	0	0	603	903	0
531	7	0	0	0	0	0	0	200	300	0	-18.2492	-108.493	-488.201	-24817.3	9538.76	25.2677	219.539	953.834	0	0	0	0	0	0	0	603	903	0
531	8	0	0	0	0	0	0	200	300	0	-18.4018	-112.46	-490.032	-24634.2	9721.87	-157.838	219.839	953.271	0	0	0	0	0	0	0	603	903	0
531	9	0	0	0	0	0	0	200	300	0	-19.3173	-113.223	-493.083	-23718.7	10149.1	162.597	220.583	951.103	0	0	0	0	0	0	0	603	903	0
532	0	0	0	0	0	0	0	200	300	0	-16.8759	-109.256	-492.473	-23901.8	9843.94	-203.614	219.989	951.534	0	0	0	0	0	0	0	603	903	0
532	1	0	0	0	0	0	0	200	300	0	-15.1974	-109.408	-499.187	-24634.2	9477.73	-203.614	218.986	952.349	0	0	0	0	0	0	0	603	903	0
532	2	0	0	0	0	0	0	200	300	0	-17.1811	-109.103	-502.544	-24359.5	9721.87	116.82	219.345	951.472	0	0	0	0	0	0	0	603	903	0
532	3	0	0	0	0	0	0	200	300	0	-18.4018	-108.493	-504.985	-23077.8	10454.3	-157.838	220.702	948.7	0	0	0	0	0	0	0	603	903	0
532	4	0	0	0	0	0	0	200	300	0	-17.6389	-105.899	-506.206	-23993.3	10149.1	116.82	220.049	950.398	0	0	0	0	0	0	0	603	903	0
532	5	0	0	0	0	0	0	200	300	0	-18.0966	-104.678	-508.037	-23718.7	9843.94	299.926	219.376	949.687	0	0	0	0	0	0	0	603	903	0
532	6	0	0	0	0	0	0	200	300	0	-18.8596	-104.83	-511.699	-23444	9599.8	345.702	218.761	948.816	0	0	0	0	0	0	0	603	903	0
532	7	0	0	0	0	0	0	200	300	0	-19.0121	-105.288	-513.53	-22528.5	10088.1	299.926	219.645	946.87	0	0	0	0	0	0	0	603	903	0
532	8	0	0	0	0	0	0	200	300	0	-19.3173	-106.509	-515.056	-23260.9	10210.2	711.913	219.823	948.162	0	0	0	0	0	0	0	603	903	0
532	9	0	0	0	0	0	0	200	300	0	-19.9277	-106.967	-514.751	-23260.9	10088.1	208.373	219.598	948.189	0	0	0	0	0	0	0	603	903	0
533	0	0	0	0	0	0	0	200	300	0	-19.4699	-106.204	-518.108	-22803.1	10088.1	25.2677	219.471	947.012	0	0	0	0	0	0	0	603	903	0
533	1	0	0	0	0	0	0	200	300	0	-21.1484	-108.187	-521.16	-22986.2	10210.2	208.373	219.591	947.106	0	0	0	0	0	0	0	603	903	0
533	2	0	0	0	0	0	0	200	300	0	-21.6061	-108.493	-523.906	-23077.8	9966.01	208.373	219.023	947.049	0	0	0	0	0	0	0	603	903	0
533	3	0	0	0	0	0	0	200	300	0	-21.7587	-112.002	-525.127	-22711.6	10332.2	299.926	219.676	946.25	0	0	0	0	0	0	0	603	903	0
533	4	0	0	0	0	0	0	200	300	0	-20.6906	-111.392	-528.179	-22345.4	9966.01	574.584	218.869	945.306	0	0	0	0	0	0	0	603	903	0
533	5	0	0	0	0	0	0	200	300	0	-23.895	-111.85	-530.01	-21979.2	9966.01	162.597	218.803	944.469	0	0	0	0	0	0	0	603	903	0
533	6	0	0	0	0	0	0	200	300	0	-23.5898	-113.986	-533.672	-21796.1	10271.2	71.0441	219.246	943.842	0	0	0	0	0	0	0	603	903	0
533	7	0	0	0	0	0	0	200	300	0	-23.7424	-114.444	-536.724	-21063.6	10454.3	299.926	219.478	942.245	0	0	0	0	0	0	0	603	903	0
533	8	0	0	0	0	0	0	200	300	0	-24.5053	-115.054	-538.86	-21887.6	10149.1	116.82	218.834	943.618	0	0	0	0	0	0	0	603	903	0
533	9	0	0	0	0	0	0	200	300	0	-25.726	-115.969	-543.437	-21979.2	9966.01	-20.5087	218.339	943.445	0	0	0	0	0	0	0	603	903	0
534	0	0	0	0	0	0	0	200	300	0	-24.9631	-117.648	-545.268	-21796.1	10576.4	299.926	219.397	942.973	0	0	0	0	0	0	0	603	903	0
534	1	0	0	0	0	0	0	200	300	0	-23.2846	-117.8	-547.1	-21521.4	10576.4	254.149	219.332	942.337	0	0	0	0	0	0	0	603	903	0
534	2	0	0	0	0	0	0	200	300	0	-27.2519	-117.8	-549.846	-20697.4	10149.1	345.702	218.458	940.642	0	0	0	0	0	0	0	603	903	0
534	3	0	0	0	0	0	0	200	300	0	-26.489	-118.716	-554.424	-21521.4	10149.1	345.702	218.306	941.818	0	0	0	0	0	0	0	603	903	0
534	4	0	0	0	0	0	0	200	300	0	-25.5734	-119.632	-557.476	-20789	10210.2	986.571	218.315	940.291	0	0	0	0	0	0	0	603	903	0
534	5	0	0	0	0	0	0	200	300	0	-25.5734	-119.021	-558.696	-21246.7	10088.1	208.373	218.056	941.029	0	0	0	0	0	0	0	603	903	0
534	6	0	0	0	0	0	0	200	300	0	-27.4045	-119.174	-562.053	-21155.2	10759.5	254.149	219.143	940.639	0	0	0	0	0	0	0	603	903	0
534	7	0	0	0	0	0	0	200	300	0	-28.0148	-119.021	-564.8	-21704.5	10637.4	208.373	218.834	941.429	0	0	0	0	0	0	0	603	903	0
534	8	0	0	0	0	0	0	200	300	0	-27.0993	-119.174	-569.072	-21155.2	10515.3	254.149	218.478	940.175	0	0	0	0	0	0	0	603	903	0
534	9	0	0	0	0	0	0	200	300	0	-26.6415	-118.869	-569.377	-21796.1	10637.4	528.808	218.683	941.281	0	0	0	0	0	0	0	603	903	0
535	0	0	0	0	0	0	0	200	300	0	-27.8622	-118.869	-570.598	-22162.3	10881.5	620.36	219.07	941.84	0	0	0	0	0	0	0	603	903	0
535	1	0	0	0	0	0	0	200	300	0	-28.7778	-117.8	-574.26	-21429.8	10759.5	437.255	218.736	940.317	0	0	0	0	0	0	0	603	903	0
535	2	0	0	0	0	0	0	200	300	0	-28.0148	-118.258	-578.838	-21429.8	10576.4	483.031	218.272	940.022	0	0	0	0	0	0	0	603	903	0
535	3	0	0	0	0	0	0	200	300	0	-29.0829	-120.089	-581.584	-22070.7	11064.6	254.149	219.025	940.949	0	0	0	0	0	0	0	603	903	0
535	4	0	0	0	0	0	0	200	300	0	-30.4562	-119.021	-584.331	-21612.9	10942.6	71.0441	218.727	939.988	0	0	0	0	0	0	0	603	903	0
535	5	0	0	0	0	0	0	200	300	0	-28.32	-117.19	-586.162	-21338.3	10515.3	299.926	217.939	939.403	0	0	0	0	0	0	0	603	903	0
535	6	0	0	0	0	0	0	200	300	0	-28.6252	-118.258	-590.74	-21246.7	10454.3	803.466	217.697	938.966	0	0	0	0	0	0	0	603	903	0
535	7	0	0	0	0	0	0	200	300	0	-29.9985	-119.021	-592.876	-20880.5	11186.7	574.584	218.869	938.219	0	0	0	0	0	0	0	603	903	0
535	8	0	0	0	0	0	0	200	300	0	-30.4562	-117.8	-594.097	-21521.4	10942.6	574.584	218.419	939.225	0	0	0	0	0	0	0	603	903	0
535	9	0	0	0	0	0	0	200	300	0	-29.6933	-116.885	-597.454	-21612.9	11247.7	620.36	218.826	939.175	0	0	0	0	0	0	0	603	903	0
536	0	0	0	0	0	0	0	200	300	0	-29.5407	-115.359	-598.674	-22070.7	11125.7	1123.9	218.584	939.866	0	0	0	0	0	0	0	603	903	0
536	1	0	0	0	0	0	0	200	300	0	-30.914	-116.275	-603.557	-22253.8	11064.6	345.702	218.332	939.871	0	0	0	0	0	0	0	603	903	0
536	2	0	0	0	0	0	0	200	300	0	-30.7614	-117.648	-605.693	-21796.1	11552.9	666.137	219.074	938.985	0	0	0	0	0	0	0	603	903	0
536	3	0	0	0	0	0	0	200	300	0	-29.3881	-117.19	-606.914	-21887.6	11552.9	345.702	219.036	939.064	0	0	0	0	0	0	0	603	903	0
536	4	0	0	0	0	0	0	200	300	0	-28.6252	-115.359	-608.745	-22436.9	11308.8	391.479	218.577	939.858	0	0	0	0	0	0	0	603	903	0
536	5	0	0	0	0	0	0	200	300	0	-30.914	-114.444	-612.102	-22070.7	11369.8	757.69	218.575	939.057	0	0	0	0	0	0	0	603	903	0
536	6	0	0	0	0	0	0	200	300	0	-30.914	-115.054	-615.459	-21887.6	11614	528.808	218.87	938.563	0	0	0	0	0	0	0	603	903	0
536	7	0	0	0	0	0	0	200	300	0	-29.8459	-114.291	-616.374	-22162.3	11736	528.808	219.04	938.956	0	0	0	0	0	0	0	603	903	0
536	8	0	0	0	0	0	0	200	300	0	-30.6088	-113.986	-617.9	-22528.5	11491.9	391.479	218.598	939.46	0	0	0	0	0	0	0	603	903	0
536	9	0	0	0	0	0	0	200	300	0	-28.9304	-113.223	-619.426	-23077.8	11675	345.702	218.848	940.257	0	0	0	0	0	0	0	603	903	0
537	0	0	0	0	0	0	0	200	300	0	-30.914	-112.765	-622.173	-22345.4	11980.2	437.255	219.255	938.915	0	0	0	0	0	0	0	603	903	0
537	1	0	0	0	0	0	0	200	300	0	-31.0666	-113.681	-625.225	-22162.3	11797.1	757.69	218.869	938.447	0	0	0	0	0	0	0	603	903	0
537	2	0	0	0	0	0	0	200	300	0	-31.5244	-112.612	-626.445	-22436.9	12041.2	666.137	219.221	938.816	0	0	0	0	0	0	0	603	903	0
537	3	0	0	0	0	0	0	200	300	0	-31.8295	-111.239	-626.445	-23260.9	11430.9	620.36	218.247	940.132	0	0	0	0	0	0	0	603	903	0
537	4	0	0	0	0	0	0	200	300	0	-30.7614	-110.476	-629.192	-21796.1	11552.9	757.69	218.362	937.641	0	0	0	0	0	0	0	603	903	0
537	5	0	0	0	0	0	0	200	300	0	-30.914	-109.713	-631.023	-23260.9	11858.1	437.255	218.792	939.862	0	0	0	0	0	0	0	603	903	0
537	6	0	0	0	0	0	0	200	300	0	-32.7451	-110.629	-632.854	-22803.1	12407.4	620.36	219.605	939.032	0	0	0	0	0	0	0	603	903	0
537	7	0	0	0	0	0	0	200	300	0	-32.7451	-109.561	-634.38	-22436.9	11919.1	711.913	218.789	938.368	0	0	0	0	0	0	0	603	903	0
537	8	0	0	0	0	0	0	200	300	0	-29.2355	-108.34	-635.295	-22620	11858.1	620.36	218.666	938.606	0	0	0	0	0	0	0	603	903	0
537	9	0	0	0	0	0	0	200	300	0	-32.2873	-108.035	-638.652	-22436.9	12163.3	986.571	219.045	938.132	0	0	0	0	0	0	0	603	903	0
538	0	0	0	0	0	0	0	200	300	0	-32.2873	-108.493	-638.957	-22162.3	12346.4	711.913	219.323	937.685	0	0	0	0	0	0	0	603	903	0
538	1	0	0	0	0	0	0	200	300	0	-31.6769	-106.814	-641.704	-23169.3	12285.3	620.36	219.145	939.106	0	0	0	0	0	0	0	603	903	0
538	2	0	0	0	0	0	0	200	300	0	-31.8295	-107.577	-639.568	-23444	12102.2	483.031	218.923	939.656	0	0	0	0	0	0	0	603	903	0
538	3	0	0	0	0	0	0	200	300	0	-30.914	-104.983	-642.62	-23444	12285.3	528.808	219.118	939.482	0	0	0	0	0	0	0	603	903	0
538	4	0	0	0	0	0	0	200	300	0	-29.8459	-105.136	-645.366	-23169.3	12163.3	528.808	218.847	938.901	0	0	0	0	0	0	0	603	903	0
538	5	0	0	0	0	0	0	200	300	0	-30.7614	-105.288	-646.892	-23444	12224.3	895.019	218.897	939.241	0	0	0	0	0	0	0	603	903	0
538	6	0	0	0	0	0	0	200	300	0	-32.5925	-104.068	-646.587	-23077.8	12529.5	895.019	219.378	938.692	0	0	0	0	0	0	0	603	903	0
538	7	0	0	0	0	0	0	200	300	0	-32.7451	-103.915	-647.502	-22436.9	12590.5	711.913	219.445	937.651	0	0	0	0	0	0	0	603	903	0
538	8	0	0	0	0	0	0	200	300	0	-31.0666	-101.321	-649.333	-23627.1	12651.6	666.137	219.484	939.387	0	0	0	0	0	0	0	603	903	0
538	9	0	0	0	0	0	0	200	300	0	-31.0666	-101.168	-652.69	-23901.8	12407.4	711.913	219.01	939.62	0	0	0	0	0	0	0	603	903	0
539	0	0	0	0	0	0	0	200	300	0	-31.9821	-101.168	-653.911	-24176.4	12163.3	711.913	218.601	939.972	0	0	0	0	0	0	0	603	903	0
539	1	0	0	0	0	0	0	200	300	0	-30.4562	-101.626	-654.216	-23169.3	12712.6	803.466	219.432	938.415	0	0	0	0	0	0	0	603	903	0
539	2	0	0	0	0	0	0	200	300	0	-28.9304	-100.558	-654.216	-23901.8	12529.5	666.137	219.152	939.535	0	0	0	0	0	0	0	603	903	0
539	3	0	0	0	0	0	0	200	300	0	-32.2873	-99.1847	-656.658	-23993.3	12651.6	666.137	219.267	939.539	0	0	0	0	0	0	0	603	903	0
539	4	0	0	0	0	0	0	200	300	0	-31.8295	-99.0321	-658.489	-23901.8	12529.5	803.466	219.028	939.298	0	0	0	0	0	0	0	603	903	0
539	5	0	0	0	0	0	0	200	300	0	-30.6088	-99.3373	-660.93	-23444	12529.5	940.795	218.957	938.471	0	0	0	0	0	0	0	603	903	0
539	6	0	0	0	0	0	0	200	300	0	-30.914	-97.8114	-660.93	-23993.3	12956.7	849.242	219.604	939.302	0	0	0	0	0	0	0	603	903	0
539	7	0	0	0	0	0	0	200	300	0	-32.1347	-96.4381	-662.151	-23810.2	12712.6	620.36	219.199	938.959	0	0	0	0	0	0	0	603	903	0
539	8	0	0	0	0	0	0	200	300	0	-32.1347	-95.8278	-663.982	-24542.6	12712.6	803.466	219.146	939.963	0	0	0	0	0	0	0	603	903	0
539	9	0	0	0	0	0	0	200	300	0	-30.914	-96.133	-664.287	-23901.8	12712.6	940.795	219.137	938.981	0	0	0	0	0	0	0	603	903	0
540	0	0	0	0	0	0	0	200	300	0	-30.7614	-94.9123	-665.813	-23535.6	12956.7	711.913	219.46	938.349	0	0	0	0	0	0	0	603	903	0
540	1	0	0	0	0	0	0	200	300	0	-31.2192	-93.9967	-663.677	-23901.8	12529.5	986.571	218.879	939.014	0	0	0	0	0	0	0	603	903	0
540	2	0	0	0	0	0	0	200	300	0	-30.7614	-94.6071	-667.949	-24084.9	12712.6	895.019	219.032	939.058	0	0	0	0	0	0	0	603	903	0
540	3	0	0	0	0	0	0	200	300	0	-30.1511	-92.6234	-668.865	-24176.4	12773.6	803.466	219.097	939.146	0	0	0	0	0	0	0	603	903	0
540	4	0	0	0	0	0	0	200	300	0	-30.4562	-92.4709	-670.085	-24634.2	12895.7	803.466	219.245	939.763	0	0	0	0	0	0	0	603	903	0
540	5	0	0	0	0	0	0	200	300	0	-31.9821	-91.8605	-670.391	-23993.3	13445	757.69	220.056	938.79	0	0	0	0	0	0	0	603	903	0
540	6	0	0	0	0	0	0	200	300	0	-31.2192	-90.4872	-670.085	-23627.1	12895.7	711.913	219.245	938.26	0	0	0	0	0	0	0	603	903	0
540	7	0	0	0	0	0	0	200	300	0	-28.0148	-90.182	-672.832	-24084.9	12712.6	849.242	218.894	938.796	0	0	0	0	0	0	0	603	903	0
540	8	0	0	0	0	0	0	200	300	0	-29.2355	-90.3346	-671.611	-24451.1	13017.8	757.69	219.383	939.407	0	0	0	0	0	0	0	603	903	0
540	9	0	0	0	0	0	0	200	300	0	-31.3718	-90.0294	-674.053	-24268	13384	895.019	219.856	939.003	0	0	0	0	0	0	0	603	903	0
541	0	0	0	0	0	0	0	200	300	0	-29.9985	-89.1139	-673.747	-24084.9	13261.9	940.795	219.684	938.748	0	0	0	0	0	0	0	603	903	0
541	1	0	0	0	0	0	0	200	300	0	-29.3881	-87.4355	-674.968	-23718.7	13200.9	803.466	219.558	938.14	0	0	0	0	0	0	0	603	903	0
541	2	0	0	0	0	0	0	200	300	0	-29.9985	-86.5199	-677.715	-23718.7	12895.7	528.808	219.028	937.998	0	0	0	0	0	0	0	603	903	0
541	3	0	0	0	0	0	0	200	300	0	-29.8459	-86.9777	-677.104	-23260.9	12712.6	940.795	218.775	937.354	0	0	0	0	0	0	0	603	903	0
541	4	0	0	0	0	0	0	200	300	0	-29.0829	-86.2148	-679.241	-23810.2	13139.8	940.795	219.345	938.054	0	0	0	0	0	0	0	603	903	0
541	5	0	0	0	0	0	0	200	300	0	-29.2355	-86.9777	-676.494	-24084.9	13384	757.69	219.784	938.602	0	0	0	0	0	0	0	603	903	0
541	6	0	0	0	0	0	0	200	300	0	-29.9985	-84.5363	-677.715	-23993.3	12956.7	986.571	219.118	938.403	0	0	0	0	0	0	0	603	903	0
541	7	0	0	0	0	0	0	200	300	0	-30.1511	-83.6208	-679.851	-23444	13200.9	711.913	219.417	937.484	0	0	0	0	0	0	0	603	903	0
541	8	0	0	0	0	0	0	200	300	0	-28.7778	-83.9259	-679.546	-23627.1	13200.9	849.242	219.426	937.769	0	0	0	0	0	0	0	603	903	0
541	9	0	0	0	0	0	0	200	300	0	-28.4726	-83.4682	-679.546	-23993.3	13200.9	986.571	219.426	938.308	0	0	0	0	0	0	0	603	903	0
542	0	0	0	0	0	0	0	200	300	0	-29.5407	-82.2475	-680.156	-23810.2	12956.7	1078.12	219.05	938.007	0	0	0	0	0	0	0	603	903	0
542	1	0	0	0	0	0	0	200	300	0	-28.7778	-80.8742	-678.325	-23444	13078.8	757.69	219.281	937.562	0	0	0	0	0	0	0	603	903	0
542	2	0	0	0	0	0	0	200	300	0	-28.6252	-81.0268	-678.935	-23169.3	13017.8	711.913	219.174	937.126	0	0	0	0	0	0	0	603	903	0
542	3	0	0	0	0	0	0	200	300	0	-28.9304	-80.8742	-680.156	-22711.6	12956.7	940.795	219.05	936.392	0	0	0	0	0	0	0	603	903	0
542	4	0	0	0	0	0	0	200	300	0	-29.2355	-80.4164	-679.546	-22620	13017.8	895.019	219.157	936.287	0	0	0	0	0	0	0	603	903	0
542	5	0	0	0	0	0	0	200	300	0	-28.1674	-79.8061	-678.935	-23077.8	13017.8	940.795	219.174	936.991	0	0	0	0	0	0	0	603	903	0
542	6	0	0	0	0	0	0	200	300	0	-28.4726	-79.6535	-679.546	-23718.7	12773.6	895.019	218.797	937.904	0	0	0	0	0	0	0	603	903	0
542	7	0	0	0	0	0	0	200	300	0	-29.6933	-79.8061	-678.02	-23077.8	13078.8	895.019	219.29	937.037	0	0	0	0	0	0	0	603	903	0
542	8	0	0	0	0	0	0	200	300	0	-29.5407	-78.4328	-677.715	-21979.2	12895.7	940.795	219.028	935.431	0	0	0	0	0	0	0	603	903	0
542	9	0	0	0	0	0	0	200	300	0	-28.4726	-79.6535	-678.63	-22345.4	12590.5	940.795	218.553	935.927	0	0	0	0	0	0	0	603	903	0
543	0	0	0	0	0	0	0	200	300	0	-29.3881	-77.3647	-677.41	-22894.7	12346.4	849.242	218.226	936.797	0	0	0	0	0	0	0	603	903	0
543	1	0	0	0	0	0	0	200	300	0	-29.6933	-76.144	-677.41	-22253.8	12651.6	1123.9	218.676	935.851	0	0	0	0	0	0	0	603	903	0
543	2	0	0	0	0	0	0	200	300	0	-28.0148	-76.9069	-676.799	-21887.6	12834.7	986.571	218.964	935.34	0	0	0	0	0	0	0	603	903	0
543	3	0	0	0	0	0	0	200	300	0	-29.0829	-75.9914	-677.104	-21521.4	13017.8	940.795	219.226	934.784	0	0	0	0	0	0	0	603	903	0
543	4	0	0	0	0	0	0	200	300	0	-30.1511	-74.6181	-675.579	-21063.6	12712.6	1123.9	218.817	934.179	0	0	0	0	0	0	0	603	903	0
543	5	0	0	0	0	0	0	200	300	0	-29.5407	-74.6181	-675.884	-21521.4	12285.3	1215.45	218.177	934.842	0	0	0	0	0	0	0	603	903	0
543	6	0	0	0	0	0	0	200	300	0	-28.4726	-74.6181	-674.358	-21429.8	12590.5	1169.68	218.67	934.778	0	0	0	0	0	0	0	603	903	0
543	7	0	0	0	0	0	0	200	300	0	-28.7778	-74.3129	-671.916	-21521.4	12773.6	1215.45	219.011	935.03	0	0	0	0	0	0	0	603	903	0
543	8	0	0	0	0	0	0	200	300	0	-29.8459	-73.0922	-668.56	-20972.1	12773.6	1169.68	219.106	934.369	0	0	0	0	0	0	0	603	903	0
543	9	0	0	0	0	0	0	200	300	0	-29.6933	-73.0922	-670.391	-20514.3	12468.5	986.571	218.599	933.601	0	0	0	0	0	0	0	603	903	0
544	0	0	0	0	0	0	0	200	300	0	-26.6415	-72.3293	-671.001	-20331.2	12529.5	803.466	218.673	933.3	0	0	0	0	0	0	0	603	903	0
544	1	0	0	0	0	0	0	200	300	0	-29.3881	-72.3293	-670.085	-20789	11980.2	986.571	217.879	934.024	0	0	0	0	0	0	0	603	903	0
544	2	0	0	0	0	0	0	200	300	0	-29.5407	-72.1767	-668.254	-20697.4	12102.2	1307.01	218.11	933.972	0	0	0	0	0	0	0	603	903	0
544	3	0	0	0	0	0	0	200	300	0	-29.2355	-71.7189	-666.728	-20056.5	12224.3	1032.35	218.335	933.082	0	0	0	0	0	0	0	603	903	0
544	4	0	0	0	0	0	0	200	300	0	-28.9304	-71.1086	-666.728	-19690.3	12102.2	940.795	218.152	932.533	0	0	0	0	0	0	0	603	903	0
544	5	0	0	0	0	0	0	200	300	0	-30.4562	-71.2611	-666.423	-19965	11797.1	940.795	217.702	932.958	0	0	0	0	0	0	0	603	903	0
544	6	0	0	0	0	0	0	200	300	0	-29.9985	-70.193	-664.287	-19141	12224.3	1078.12	218.402	931.814	0	0	0	0	0	0	0	603	903	0
544	7	0	0	0	0	0	0	200	300	0	-29.0829	-68.9723	-662.761	-18866.4	12041.2	1169.68	218.168	931.466	0	0	0	0	0	0	0	603	903	0
544	8	0	0	0	0	0	0	200	300	0	-29.2355	-67.7516	-663.677	-19141	11980.2	1352.78	218.051	931.841	0	0	0	0	0	0	0	603	903	0
544	9	0	0	0	0	0	0	200	300	0	-30.6088	-68.0568	-657.878	-18774.8	11919.1	1215.45	218.118	931.539	0	0	0	0	0	0	0	603	903	0
545	0	0	0	0	0	0	0	200	300	0	-30.1511	-67.1413	-658.184	-18225.5	11858.1	1123.9	218.016	930.691	0	0	0	0	0	0	0	603	903	0
545	1	0	0	0	0	0	0	200	300	0	-29.0829	-68.5146	-656.658	-17950.8	11858.1	1078.12	218.058	930.337	0	0	0	0	0	0	0	603	903	0
545	2	0	0	0	0	0	0	200	300	0	-29.5407	-66.6835	-656.963	-18225.5	11675	1261.23	217.771	930.742	0	0	0	0	0	0	0	603	903	0
545	3	0	0	0	0	0	0	200	300	0	-28.6252	-66.2257	-656.352	-17859.3	11919.1	895.019	218.16	930.21	0	0	0	0	0	0	0	603	903	0
545	4	0	0	0	0	0	0	200	300	0	-29.9985	-66.5309	-655.132	-17584.6	11858.1	1078.12	218.1	929.841	0	0	0	0	0	0	0	603	903	0
545	5	0	0	0	0	0	0	200	300	0	-27.8622	-66.3783	-652.69	-17401.5	11491.9	1078.12	217.607	929.661	0	0	0	0	0	0	0	603	903	0
545	6	0	0	0	0	0	0	200	300	0	-30.7614	-65.3102	-650.554	-17401.5	11369.8	1215.45	217.477	929.749	0	0	0	0	0	0	0	603	903	0
545	7	0	0	0	0	0	0	200	300	0	-29.0829	-65.005	-650.859	-16486	11430.9	1261.23	217.563	928.33	0	0	0	0	0	0	0	603	903	0
545	8	0	0	0	0	0	0	200	300	0	-29.5407	-65.005	-650.249	-16577.5	11491.9	1123.9	217.673	928.494	0	0	0	0	0	0	0	603	903	0
545	9	0	0	0	0	0	0	200	300	0	-29.3881	-64.5473	-646.587	-16669.1	11003.6	1261.23	217.018	928.78	0	0	0	0	0	0	0	603	903	0
546	0	0	0	0	0	0	0	200	300	0	-30.4562	-63.6317	-646.282	-16394.4	10637.4	1032.35	216.459	928.367	0	0	0	0	0	0	0	603	903	0
546	1	0	0	0	0	0	0	200	300	0	-30.914	-62.8688	-645.671	-16119.8	10820.5	1032.35	216.759	927.966	0	0	0	0	0	0	0	603	903	0
546	2	0	0	0	0	0	0	200	300	0	-29.9985	-62.5636	-639.873	-15204.3	11369.8	986.571	217.769	926.761	0	0	0	0	0	0	0	603	903	0
546	3	0	0	0	0	0	0	200	300	0	-29.5407	-61.4955	-643.23	-15295.8	11125.7	895.019	217.297	926.78	0	0	0	0	0	0	0	603	903	0
546	4	0	0	0	0	0	0	200	300	0	-29.6933	-62.411	-641.094	-15295.8	10637.4	1307.01	216.593	926.859	0	0	0	0	0	0	0	603	903	0
546	5	0	0	0	0	0	0	200	300	0	-30.4562	-61.0378	-638.042	-15478.9	10820.5	1444.34	216.959	927.26	0	0	0	0	0	0	0	603	903	0
546	6	0	0	0	0	0	0	200	300	0	-29.0829	-60.58	-638.957	-14929.6	11003.6	986.571	217.221	926.366	0	0	0	0	0	0	0	603	903	0
546	7	0	0	0	0	0	0	200	300	0	-29.6933	-60.4274	-637.126	-14838	11064.6	1032.35	217.367	926.289	0	0	0	0	0	0	0	603	903	0
546	8	0	0	0	0	0	0	200	300	0	-29.9985	-60.1222	-635.295	-14380.3	10820.5	940.795	217.032	925.636	0	0	0	0	0	0	0	603	903	0
546	9	0	0	0	0	0	0	200	300	0	-29.5407	-58.5963	-634.99	-14105.6	10454.3	940.795	216.464	925.214	0	0	0	0	0	0	0	603	903	0
547	0	0	0	0	0	0	0	200	300	0	-28.1674	-57.8334	-634.075	-13922.5	10088.1	940.795	215.91	924.957	0	0	0	0	0	0	0	603	903	0
547	1	0	0	0	0	0	0	200	300	0	-30.3036	-58.5963	-631.328	-13831	10454.3	1169.68	216.559	924.908	0	0	0	0	0	0	0	603	903	0
547	2	0	0	0	0	0	0	200	300	0	-28.9304	-59.0541	-628.581	-13647.9	10393.3	1123.9	216.534	924.712	0	0	0	0	0	0	0	603	903	0
547	3	0	0	0	0	0	0	200	300	0	-31.0666	-57.3756	-627.666	-12823.9	10271.2	986.571	216.364	923.431	0	0	0	0	0	0	0	603	903	0
547	4	0	0	0	0	0	0	200	300	0	-27.4045	-56.6127	-627.666	-12823.9	10210.2	1032.35	216.267	923.431	0	0	0	0	0	0	0	603	903	0
547	5	0	0	0	0	0	0	200	300	0	-30.1511	-56.4601	-623.088	-12915.4	10210.2	1169.68	216.386	923.728	0	0	0	0	0	0	0	603	903	0
547	6	0	0	0	0	0	0	200	300	0	-28.6252	-55.8498	-624.614	-12549.2	9782.9	986.571	215.662	923.091	0	0	0	0	0	0	0	603	903	0
547	7	0	0	0	0	0	0	200	300	0	-30.1511	-56.3075	-622.173	-12366.1	9966.01	1307.01	216.018	922.876	0	0	0	0	0	0	0	603	903	0
547	8	0	0	0	0	0	0	200	300	0	-28.1674	-55.8498	-620.647	-11999.9	10149.1	1123.9	216.352	922.335	0	0	0	0	0	0	0	603	903	0
547	9	0	0	0	0	0	0	200	300	0	-30.3036	-54.7816	-619.426	-11999.9	10271.2	986.571	216.582	922.373	0	0	0	0	0	0	0	603	903	0
548	0	0	0	0	0	0	0	200	300	0	-30.1511	-55.0868	-618.511	-11633.7	9721.87	986.571	215.718	921.809	0	0	0	0	0	0	0	603	903	0
548	1	0	0	0	0	0	0	200	300	0	-29.2355	-54.6291	-616.985	-10901.3	9233.59	895.019	214.966	920.669	0	0	0	0	0	0	0	603	903	0
548	2	0	0	0	0	0	0	200	300	0	-28.9304	-53.5609	-615.764	-11267.5	9172.55	1078.12	214.896	921.298	0	0	0	0	0	0	0	603	903	0
548	3	0	0	0	0	0	0	200	300	0	-29.9985	-53.5609	-615.764	-10718.2	9599.8	1123.9	215.59	920.406	0	0	0	0	0	0	0	603	903	0
548	4	0	0	0	0	0	0	200	300	0	-29.5407	-53.4084	-613.323	-10992.8	9233.59	849.242	215.055	920.923	0	0	0	0	0	0	0	603	903	0
548	5	0	0	0	0	0	0	200	300	0	-28.4726	-52.798	-609.966	-9894.2	9294.62	849.242	215.238	919.221	0	0	0	0	0	0	0	603	903	0
548	6	0	0	0	0	0	0	200	300	0	-28.4726	-53.8661	-609.966	-10077.3	9477.73	895.019	215.538	919.521	0	0	0	0	0	0	0	603	903	0
548	7	0	0	0	0	0	0	200	300	0	-29.3881	-51.8825	-609.355	-10168.9	9355.66	849.242	215.353	919.688	0	0	0	0	0	0	0	603	903	0
548	8	0	0	0	0	0	0	200	300	0	-29.2355	-51.2721	-608.44	-9802.64	9843.94	1078.12	216.179	919.111	0	0	0	0	0	0	0	603	903	0
548	9	0	0	0	0	0	0	200	300	0	-25.5734	-51.1195	-606.304	-9711.09	9233.59	940.795	215.229	919.017	0	0	0	0	0	0	0	603	903	0
549	0	0	0	0	0	0	0	200	300	0	-28.1674	-51.1195	-603.557	-9894.2	9294.62	849.242	215.4	919.393	0	0	0	0	0	0	0	603	903	0
549	1	0	0	0	0	0	0	200	300	0	-28.9304	-49.4411	-602.642	-9161.77	9843.94	849.242	216.335	918.203	0	0	0	0	0	0	0	603	903	0
549	2	0	0	0	0	0	0	200	300	0	-28.0148	-50.204	-601.116	-8154.69	9599.8	803.466	215.97	916.566	0	0	0	0	0	0	0	603	903	0
549	3	0	0	0	0	0	0	200	300	0	-27.2519	-49.1359	-602.947	-8978.67	8684.27	711.913	214.403	917.891	0	0	0	0	0	0	0	603	903	0
549	4	0	0	0	0	0	0	200	300	0	-28.4726	-49.7462	-601.726	-8978.67	8989.45	757.69	214.939	917.922	0	0	0	0	0	0	0	603	903	0
549	5	0	0	0	0	0	0	200	300	0	-28.4726	-48.9833	-598.369	-8429.35	9416.69	757.69	215.737	917.087	0	0	0	0	0	0	0	603	903	0
549	6	0	0	0	0	0	0	200	300	0	-26.1838	-48.6781	-597.148	-8246.25	9111.52	757.69	215.258	916.809	0	0	0	0	0	0	0	603	903	0
549	7	0	0	0	0	0	0	200	300	0	-28.6252	-47.61	-596.233	-8063.14	8989.45	940.795	215.077	916.523	0	0	0	0	0	0	0	603	903	0
549	8	0	0	0	0	0	0	200	300	0	-28.32	-46.6945	-591.35	-7422.27	8867.38	711.913	214.995	915.551	0	0	0	0	0	0	0	603	903	0
549	9	0	0	0	0	0	0	200	300	0	-26.7941	-48.0678	-595.012	-7422.27	8684.27	711.913	214.595	915.474	0	0	0	0	0	0	0	603	903	0
550	0	0	0	0	0	0	0	200	300	0	-25.726	-47.4574	-592.266	-7422.27	8867.38	986.571	214.972	915.532	0	0	0	0	0	0	0	603	903	0
550	1	0	0	0	0	0	0	200	300	0	-27.8622	-46.3893	-591.96	-7422.27	8745.31	711.913	214.773	915.539	0	0	0	0	0	0	0	603	903	0
550	2	0	0	0	0	0	0	200	300	0	-26.6415	-45.6264	-591.35	-6781.4	8928.41	574.584	215.098	914.468	0	0	0	0	0	0	0	603	903	0
550	3	0	0	0	0	0	0	200	300	0	-24.5053	-45.4738	-589.824	-6689.85	8989.45	483.031	215.241	914.342	0	0	0	0	0	0	0	603	903	0
550	4	0	0	0	0	0	0	200	300	0	-27.2519	-45.6264	-588.603	-6415.19	8806.34	620.36	214.961	913.899	0	0	0	0	0	0	0	603	903	0
550	5	0	0	0	0	0	0	200	300	0	-27.2519	-44.8634	-588.298	-6872.96	8623.24	711.913	214.658	914.683	0	0	0	0	0	0	0	603	903	0
550	6	0	0	0	0	0	0	200	300	0	-25.8786	-44.4057	-587.993	-6323.64	8623.24	895.019	214.666	913.755	0	0	0	0	0	0	0	603	903	0
550	7	0	0	0	0	0	0	200	300	0	-25.4208	-45.3212	-586.772	-6232.09	9050.48	803.466	215.424	913.621	0	0	0	0	0	0	0	603	903	0
550	8	0	0	0	0	0	0	200	300	0	-26.9467	-44.4057	-584.026	-5865.88	8867.38	666.137	215.183	913.044	0	0	0	0	0	0	0	603	903	0
550	9	0	0	0	0	0	0	200	300	0	-26.7941	-42.7272	-579.753	-5499.66	8379.1	391.479	214.453	912.486	0	0	0	0	0	0	0	603	903	0
551	0	0	0	0	0	0	0	200	300	0	-25.726	-43.7953	-582.195	-5499.66	8379.1	849.242	214.392	912.446	0	0	0	0	0	0	0	603	903	0
551	1	0	0	0	0	0	0	200	300	0	-26.1838	-42.7272	-583.11	-5408.11	8501.17	391.479	214.579	912.275	0	0	0	0	0	0	0	603	903	0
551	2	0	0	0	0	0	0	200	300	0	-24.5053	-43.0324	-580.974	-5316.56	8684.27	528.808	214.948	912.151	0	0	0	0	0	0	0	603	903	0
551	3	0	0	0	0	0	0	200	300	0	-25.5734	-42.2694	-578.533	-4950.35	8318.06	620.36	214.378	911.557	0	0	0	0	0	0	0	603	903	0
551	4	0	0	0	0	0	0	200	300	0	-25.8786	-41.6591	-577.617	-4584.14	7890.82	666.137	213.661	910.936	0	0	0	0	0	0	0	603	903	0
551	5	0	0	0	0	0	0	200	300	0	-26.3364	-41.5065	-577.007	-3577.06	7951.85	483.031	213.781	909.199	0	0	0	0	0	0	0	603	903	0
551	6	0	0	0	0	0	0	200	300	0	-26.3364	-41.3539	-577.922	-4126.37	8073.92	574.584	213.971	910.14	0	0	0	0	0	0	0	603	903	0
551	7	0	0	0	0	0	0	200	300	0	-24.8105	-41.0487	-575.176	-3851.72	8195.99	437.255	214.25	909.697	0	0	0	0	0	0	0	603	903	0
551	8	0	0	0	0	0	0	200	300	0	-24.5053	-40.591	-574.26	-4309.48	8134.96	574.584	214.166	910.504	0	0	0	0	0	0	0	603	903	0
551	9	0	0	0	0	0	0	200	300	0	-25.8786	-39.5229	-575.176	-4034.82	7768.75	391.479	213.507	910.015	0	0	0	0	0	0	0	603	903	0
552	0	0	0	0	0	0	0	200	300	0	-26.0312	-40.1332	-573.65	-3577.06	8562.2	116.82	214.926	909.236	0	0	0	0	0	0	0	603	903	0
552	1	0	0	0	0	0	0	200	300	0	-25.2682	-39.5229	-571.819	-3393.95	8379.1	299.926	214.653	908.935	0	0	0	0	0	0	0	603	903	0
552	2	0	0	0	0	0	0	200	300	0	-25.726	-38.4547	-570.598	-2936.19	7829.78	574.584	213.722	908.146	0	0	0	0	0	0	0	603	903	0
552	3	0	0	0	0	0	0	200	300	0	-24.8105	-38.1496	-570.598	-3393.95	7646.68	345.702	213.401	908.948	0	0	0	0	0	0	0	603	903	0
552	4	0	0	0	0	0	0	200	300	0	-24.0475	-38.6073	-570.903	-3393.95	8195.99	254.149	214.356	908.945	0	0	0	0	0	0	0	603	903	0
552	5	0	0	0	0	0	0	200	300	0	-23.895	-37.8444	-567.241	-3119.29	8257.03	254.149	214.556	908.499	0	0	0	0	0	0	0	603	903	0
552	6	0	0	0	0	0	0	200	300	0	-25.726	-37.0815	-563.884	-2844.64	7951.85	254.149	214.102	908.045	0	0	0	0	0	0	0	603	903	0
552	7	0	0	0	0	0	0	200	300	0	-25.5734	-36.9289	-564.189	-2569.98	7951.85	71.0441	214.094	907.555	0	0	0	0	0	0	0	603	903	0
552	8	0	0	0	0	0	0	200	300	0	-24.3527	-36.1659	-565.715	-2569.98	7951.85	-66.2851	214.056	907.543	0	0	0	0	0	0	0	603	903	0
552	9	0	0	0	0	0	0	200	300	0	-24.5053	-36.4711	-564.8	-2569.98	7646.68	208.373	213.539	907.55	0	0	0	0	0	0	0	603	903	0
553	0	0	0	0	0	0	0	200	300	0	-24.0475	-37.3866	-562.358	-2203.77	8012.89	437.255	214.249	906.919	0	0	0	0	0	0	0	603	903	0
553	1	0	0	0	0	0	0	200	300	0	-24.0475	-36.0133	-562.053	-1562.9	7890.82	437.255	214.039	905.781	0	0	0	0	0	0	0	603	903	0
553	2	0	0	0	0	0	0	200	300	0	-23.5898	-35.2504	-561.443	-1562.9	7768.75	254.149	213.837	905.784	0	0	0	0	0	0	0	603	903	0
553	3	0	0	0	0	0	0	200	300	0	-24.8105	-34.9452	-560.832	-1379.79	7890.82	254.149	214.07	905.46	0	0	0	0	0	0	0	603	903	0
553	4	0	0	0	0	0	0	200	300	0	-24.3527	-35.2504	-559.307	-1562.9	7707.71	162.597	213.781	905.794	0	0	0	0	0	0	0	603	903	0
553	5	0	0	0	0	0	0	200	300	0	-23.4372	-33.7245	-559.001	-1013.58	7646.68	162.597	213.679	904.813	0	0	0	0	0	0	0	603	903	0
553	6	0	0	0	0	0	0	200	300	0	-23.132	-33.7245	-559.307	-1013.58	7585.64	391.479	213.563	904.812	0	0	0	0	0	0	0	603	903	0
553	7	0	0	0	0	0	0	200	300	0	-24.2001	-33.8771	-557.17	-1013.58	8012.89	116.82	214.381	904.819	0	0	0	0	0	0	0	603	903	0
553	8	0	0	0	0	0	0	200	300	0	-23.895	-33.1142	-555.339	-738.923	7646.68	25.2677	213.769	904.331	0	0	0	0	0	0	0	603	903	0
553	9	0	0	0	0	0	0	200	300	0	-22.6743	-32.3512	-555.339	-464.264	7585.64	162.597	213.659	903.836	0	0	0	0	0	0	0	603	903	0
554	0	0	0	0	0	0	0	200	300	0	-22.6743	-31.8935	-555.644	-647.37	7280.47	437.255	213.103	904.165	0	0	0	0	0	0	0	603	903	0
554	1	0	0	0	0	0	0	200	300	0	-23.7424	-31.8935	-554.424	-98.0532	7402.54	162.597	213.352	903.177	0	0	0	0	0	0	0	603	903	0
554	2	0	0	0	0	0	0	200	300	0	-23.5898	-32.3512	-553.813	-372.712	7707.71	162.597	213.918	903.673	0	0	0	0	0	0	0	603	903	0
554	3	0	0	0	0	0	0	200	300	0	-22.5217	-31.5883	-549.541	-647.37	7768.75	-112.061	214.137	904.178	0	0	0	0	0	0	0	603	903	0
554	4	0	0	0	0	0	0	200	300	0	-22.9794	-31.5883	-548.32	-98.0532	7463.57	-20.5087	213.612	903.179	0	0	0	0	0	0	0	603	903	0
554	5	0	0	0	0	0	0	200	300	0	-23.5898	-29.9098	-550.762	542.816	7280.47	299.926	213.219	902.014	0	0	0	0	0	0	0	603	903	0
554	6	0	0	0	0	0	0	200	300	0	-23.2846	-30.215	-550.762	817.474	7585.64	-66.2851	213.773	901.516	0	0	0	0	0	0	0	603	903	0
554	7	0	0	0	0	0	0	200	300	0	-21.9113	-30.6728	-548.32	268.158	7402.54	-112.061	213.5	902.511	0	0	0	0	0	0	0	603	903	0
554	8	0	0	0	0	0	0	200	300	0	-22.0639	-29.4521	-547.1	451.263	7219.43	116.82	213.196	902.175	0	0	0	0	0	0	0	603	903	0
554	9	0	0	0	0	0	0	200	300	0	-22.0639	-28.9943	-548.015	451.263	7097.36	-20.5087	212.951	902.177	0	0	0	0	0	0	0	603	903	0
555	0	0	0	0	0	0	0	200	300	0	-23.132	-28.6891	-546.794	1000.58	7768.75	-20.5087	214.208	901.17	0	0	0	0	0	0	0	603	903	0
555	1	0	0	0	0	0	0	200	300	0	-22.2165	-28.5365	-545.879	1458.34	7524.61	71.0441	213.784	900.328	0	0	0	0	0	0	0	603	903	0
555	2	0	0	0	0	0	0	200	300	0	-22.3691	-27.7736	-544.658	1000.58	7280.47	25.2677	213.367	901.163	0	0	0	0	0	0	0	603	903	0
555	3	0	0	0	0	0	0	200	300	0	-22.6743	-27.1632	-544.658	817.474	7341.5	71.0441	213.479	901.499	0	0	0	0	0	0	0	603	903	0
555	4	0	0	0	0	0	0	200	300	0	-22.5217	-27.0106	-544.658	1549.9	7402.54	116.82	213.591	900.154	0	0	0	0	0	0	0	603	903	0
555	5	0	0	0	0	0	0	200	300	0	-22.5217	-27.3158	-541.606	1458.34	7585.64	-20.5087	214.006	900.307	0	0	0	0	0	0	0	603	903	0
555	6	0	0	0	0	0	0	200	300	0	-21.6061	-25.7899	-541.301	1733	7646.68	71.0441	214.126	899.799	0	0	0	0	0	0	0	603	903	0
555	7	0	0	0	0	0	0	200	300	0	-21.1484	-25.4848	-542.522	1366.79	6792.18	116.82	212.52	900.481	0	0	0	0	0	0	0	603	903	0
555	8	0	0	0	0	0	0	200	300	0	-20.3854	-25.1796	-539.775	1916.11	7036.32	25.2677	213.036	899.45	0	0	0	0	0	0	0	603	903	0
555	9	0	0	0	0	0	0	200	300	0	-18.8596	-25.3322	-540.081	2190.77	7158.4	299.926	213.254	898.944	0	0	0	0	0	0	0	603	903	0
556	0	0	0	0	0	0	0	200	300	0	-21.9113	-26.0951	-539.775	2007.66	7585.64	-66.2851	214.053	899.281	0	0	0	0	0	0	0	603	903	0
556	1	0	0	0	0	0	0	200	300	0	-22.6743	-24.8744	-537.944	2282.32	7463.57	-249.391	213.874	898.757	0	0	0	0	0	0	0	603	903	0
556	2	0	0	0	0	0	0	200	300	0	-21.301	-23.5011	-538.86	2831.64	7036.32	-20.5087	213.058	897.745	0	0	0	0	0	0	0	603	903	0
556	3	0	0	0	0	0	0	200	300	0	-21.301	-23.5011	-537.029	2556.98	7158.4	-66.2851	213.33	898.239	0	0	0	0	0	0	0	603	903	0
556	4	0	0	0	0	0	0	200	300	0	-22.2165	-23.5011	-537.334	2648.53	7463.57	-66.2851	213.89	898.071	0	0	0	0	0	0	0	603	903	0
556	5	0	0	0	0	0	0	200	300	0	-21.7587	-23.196	-536.418	2740.08	7219.43	116.82	213.459	897.892	0	0	0	0	0	0	0	603	903	0
556	6	0	0	0	0	0	0	200	300	0	-20.6906	-23.0434	-536.113	3197.85	7402.54	254.149	213.808	897.035	0	0	0	0	0	0	0	603	903	0
556	7	0	0	0	0	0	0	200	300	0	-20.3854	-22.1278	-533.367	3380.95	7036.32	-66.2851	213.192	896.661	0	0	0	0	0	0	0	603	903	0
556	8	0	0	0	0	0	0	200	300	0	-21.7587	-21.6701	-534.587	3564.06	6975.29	-20.5087	213.048	896.333	0	0	0	0	0	0	0	603	903	0
556	9	0	0	0	0	0	0	200	300	0	-21.6061	-21.2123	-531.23	3289.4	7463.57	25.2677	214.05	896.808	0	0	0	0	0	0	0	603	903	0
557	0	0	0	0	0	0	0	200	300	0	-20.2328	-20.7545	-533.977	3655.61	7158.4	-157.838	213.406	896.154	0	0	0	0	0	0	0	603	903	0
557	1	0	0	0	0	0	0	200	300	0	-20.2328	-20.1442	-534.893	3472.5	7341.5	-203.614	213.725	896.508	0	0	0	0	0	0	0	603	903	0
557	2	0	0	0	0	0	0	200	300	0	-21.7587	-20.1442	-534.282	2831.64	7158.4	-249.391	213.398	897.7	0	0	0	0	0	0	0	603	903	0
557	3	0	0	0	0	0	0	200	300	0	-21.1484	-20.4494	-531.536	4021.82	7219.43	-112.061	213.582	895.434	0	0	0	0	0	0	0	603	903	0
557	4	0	0	0	0	0	0	200	300	0	-20.3854	-19.839	-531.841	4845.79	7280.47	-295.167	213.689	893.889	0	0	0	0	0	0	0	603	903	0
557	5	0	0	0	0	0	0	200	300	0	-20.2328	-18.9235	-533.061	4296.48	7280.47	-112.061	213.658	894.94	0	0	0	0	0	0	0	603	903	0
557	6	0	0	0	0	0	0	200	300	0	-20.538	-18.7709	-532.146	4296.48	6914.25	-66.2851	212.993	894.926	0	0	0	0	0	0	0	603	903	0
557	7	0	0	0	0	0	0	200	300	0	-20.538	-18.6183	-530.315	4296.48	7158.4	-249.391	213.498	894.898	0	0	0	0	0	0	0	603	903	0
557	8	0	0	0	0	0	0	200	300	0	-19.4699	-17.7028	-530.01	4937.35	7463.57	-203.614	214.082	893.685	0	0	0	0	0	0	0	603	903	0
557	9	0	0	0	0	0	0	200	300	0	-20.2328	-17.3976	-530.925	4937.35	7097.36	-66.2851	213.368	893.701	0	0	0	0	0	0	0	603	903	0
558	0	0	0	0	0	0	0	200	300	0	-21.6061	-17.5502	-527.568	5669.77	7341.5	-432.496	213.916	892.253	0	0	0	0	0	0	0	603	903	0
558	1	0	0	0	0	0	0	200	300	0	-20.2328	-17.8554	-531.536	5578.22	6853.22	-432.496	212.893	892.506	0	0	0	0	0	0	0	603	903	0
558	2	0	0	0	0	0	0	200	300	0	-18.707	-17.7028	-528.179	5212.01	6975.29	-203.614	213.206	893.132	0	0	0	0	0	0	0	603	903	0
558	3	0	0	0	0	0	0	200	300	0	-19.3173	-16.9398	-528.789	5212.01	7463.57	-203.614	214.114	893.144	0	0	0	0	0	0	0	603	903	0
558	4	0	0	0	0	0	0	200	300	0	-20.2328	-15.8717	-530.925	5669.77	7463.57	-203.614	214.058	892.321	0	0	0	0	0	0	0	603	903	0
558	5	0	0	0	0	0	0	200	300	0	-20.2328	-15.7191	-529.705	5761.32	7036.32	-203.614	213.284	892.124	0	0	0	0	0	0	0	603	903	0
558	6	0	0	0	0	0	0	200	300	0	-19.0121	-14.8036	-528.484	5852.88	7219.43	-295.167	213.661	891.925	0	0	0	0	0	0	0	603	903	0
558	7	0	0	0	0	0	0	200	300	0	-18.8596	-14.4984	-528.484	5944.43	7097.36	-478.272	213.43	891.752	0	0	0	0	0	0	0	603	903	0
558	8	0	0	0	0	0	0	200	300	0	-18.8596	-14.3459	-529.094	6219.09	6975.29	-249.391	213.183	891.246	0	0	0	0	0	0	0	603	903	0
558	9	0	0	0	0	0	0	200	300	0	-19.7751	-14.4984	-529.094	6127.53	7280.47	-66.2851	213.76	891.419	0	0	0	0	0	0	0	603	903	0
559	0	0	0	0	0	0	0	200	300	0	-19.0121	-13.5829	-527.263	6585.3	6975.29	-615.602	213.229	890.51	0	0	0	0	0	0	0	603	903	0
559	1	0	0	0	0	0	0	200	300	0	-18.707	-12.2096	-527.873	7043.06	6853.22	-249.391	212.983	889.658	0	0	0	0	0	0	0	603	903	0
559	2	0	0	0	0	0	0	200	300	0	-18.5544	-12.5148	-528.484	6310.64	7158.4	-203.614	213.545	891.059	0	0	0	0	0	0	0	603	903	0
559	3	0	0	0	0	0	0	200	300	0	-18.707	-11.9044	-528.789	6310.64	7341.5	-432.496	213.884	891.066	0	0	0	0	0	0	0	603	903	0
559	4	0	0	0	0	0	0	200	300	0	-17.944	-12.057	-527.568	7226.17	7097.36	-340.943	213.453	889.303	0	0	0	0	0	0	0	603	903	0
559	5	0	0	0	0	0	0	200	300	0	-17.944	-11.9044	-526.958	7500.82	7097.36	-157.838	213.469	888.766	0	0	0	0	0	0	0	603	903	0
559	6	0	0	0	0	0	0	200	300	0	-19.0121	-11.7519	-526.958	7043.06	7280.47	-203.614	213.816	889.635	0	0	0	0	0	0	0	603	903	0
559	7	0	0	0	0	0	0	200	300	0	-19.1647	-10.0734	-523.601	7043.06	7341.5	-524.049	214.021	889.549	0	0	0	0	0	0	0	603	903	0
559	8	0	0	0	0	0	0	200	300	0	-17.3337	-10.3786	-528.179	8050.14	6914.25	-340.943	213.091	887.759	0	0	0	0	0	0	0	603	903	0
559	9	0	0	0	0	0	0	200	300	0	-17.6389	-9.9208	-527.873	7775.48	6975.29	-432.496	213.214	888.27	0	0	0	0	0	0	0	603	903	0
560	0	0	0	0	0	0	0	200	300	0	-18.5544	-10.226	-529.399	7958.59	7097.36	-478.272	213.406	887.967	0	0	0	0	0	0	0	603	903	0
560	1	0	0	0	0	0	0	200	300	0	-18.2492	-9.00528	-529.705	7317.72	7219.43	-203.614	213.629	889.185	0	0	0	0	0	0	0	603	903	0
560	2	0	0	0	0	0	0	200	300	0	-17.6389	-9.15787	-529.094	8141.69	7646.68	-386.72	214.452	887.612	0	0	0	0	0	0	0	603	903	0
560	3	0	0	0	0	0	0	200	300	0	-17.3337	-8.39493	-528.789	8233.25	7158.4	-478.272	213.537	887.43	0	0	0	0	0	0	0	603	903	0
560	4	0	0	0	0	0	0	200	300	0	-18.4018	-8.39493	-526.653	8416.36	7036.32	-386.72	213.36	887.019	0	0	0	0	0	0	0	603	903	0
560	5	0	0	0	0	0	0	200	300	0	-18.0966	-8.54751	-529.705	8416.36	7158.4	-340.943	213.514	887.111	0	0	0	0	0	0	0	603	903	0
560	6	0	0	0	0	0	0	200	300	0	-17.1811	-7.63199	-530.62	8324.8	7341.5	-432.496	213.836	887.311	0	0	0	0	0	0	0	603	903	0
560	7	0	0	0	0	0	0	200	300	0	-16.8759	-7.63199	-531.536	8324.8	6914.25	-340.943	213.008	887.338	0	0	0	0	0	0	0	603	903	0
560	8	0	0	0	0	0	0	200	300	0	-16.4182	-7.4794	-530.62	8507.91	7280.47	-478.272	213.721	886.966	0	0	0	0	0	0	0	603	903	0
560	9	0	0	0	0	0	0	200	300	0	-17.4863	-6.41128	-530.315	9331.88	7524.61	-569.825	214.189	885.403	0	0	0	0	0	0	0	603	903	0
561	0	0	0	0	0	0	0	200	300	0	-15.35	-5.80093	-531.536	9606.54	6853.22	-524.049	212.893	884.927	0	0	0	0	0	0	0	603	903	0
561	1	0	0	0	0	0	0	200	300	0	-17.0285	-5.49576	-532.146	9240.33	6975.29	-524.049	213.108	885.636	0	0	0	0	0	0	0	603	903	0
561	2	0	0	0	0	0	0	200	300	0	-17.3337	-6.41128	-533.977	8965.67	7036.32	-615.602	213.177	886.21	0	0	0	0	0	0	0	603	903	0
561	3	0	0	0	0	0	0	200	300	0	-16.4182	-5.64834	-531.23	9789.65	6975.29	-707.154	213.13	884.572	0	0	0	0	0	0	0	603	903	0
561	4	0	0	0	0	0	0	200	300	0	-16.5707	-5.34317	-533.061	9606.54	7524.61	-615.602	214.116	884.979	0	0	0	0	0	0	0	603	903	0
561	5	0	0	0	0	0	0	200	300	0	-17.6389	-4.42764	-533.672	9514.99	7463.57	-432.496	213.985	885.171	0	0	0	0	0	0	0	603	903	0
561	6	0	0	0	0	0	0	200	300	0	-17.6389	-3.96988	-534.587	10339	6975.29	-752.931	213.048	883.66	0	0	0	0	0	0	0	603	903	0
561	7	0	0	0	0	0	0	200	300	0	-15.8078	-2.90176	-533.977	10430.5	6914.25	-432.496	212.949	883.466	0	0	0	0	0	0	0	603	903	0
561	8	0	0	0	0	0	0	200	300	0	-15.6552	-3.05435	-534.282	9789.65	7341.5	-340.943	213.741	884.677	0	0	0	0	0	0	0	603	903	0
561	9	0	0	0	0	0	0	200	300	0	-16.7233	-2.29141	-535.808	9789.65	7341.5	-524.049	213.702	884.729	0	0	0	0	0	0	0	603	903	0
562	0	0	0	0	0	0	0	200	300	0	-17.3337	-2.13882	-535.808	10613.6	7280.47	-752.931	213.588	883.191	0	0	0	0	0	0	0	603	903	0
562	1	0	0	0	0	0	0	200	300	0	-15.8078	-2.13882	-534.893	10888.3	6914.25	-615.602	212.926	882.644	0	0	0	0	0	0	0	603	903	0
562	2	0	0	0	0	0	0	200	300	0	-15.35	-1.2233	-534.282	10522.1	7036.32	-661.378	213.17	883.306	0	0	0	0	0	0	0	603	903	0
562	3	0	0	0	0	0	0	200	300	0	-16.5707	-1.37588	-537.639	10705.2	7341.5	-478.272	213.655	883.089	0	0	0	0	0	0	0	603	903	0
562	4	0	0	0	0	0	0	200	300	0	-16.7233	-1.52847	-534.587	10888.3	7341.5	-844.484	213.733	882.632	0	0	0	0	0	0	0	603	903	0
562	5	0	0	0	0	0	0	200	300	0	-15.0449	-0.765532	-538.555	11254.5	6975.29	-524.049	212.952	882.102	0	0	0	0	0	0	0	603	903	0
562	6	0	0	0	0	0	0	200	300	0	-15.6552	0.302584	-536.724	11071.4	7036.32	-798.707	213.11	882.372	0	0	0	0	0	0	0	603	903	0
562	7	0	0	0	0	0	0	200	300	0	-13.8242	1.3707	-538.86	11254.5	7463.57	-707.154	213.851	882.114	0	0	0	0	0	0	0	603	903	0
562	8	0	0	0	0	0	0	200	300	0	-15.6552	1.82846	-540.996	11803.8	7219.43	-478.272	213.345	881.181	0	0	0	0	0	0	0	603	903	0
562	9	0	0	0	0	0	0	200	300	0	-15.6552	1.67587	-541.606	11986.9	7341.5	-615.602	213.555	880.868	0	0	0	0	0	0	0	603	903	0
563	0	0	0	0	0	0	0	200	300	0	-16.5707	1.98105	-540.081	11620.7	7158.4	-615.602	213.254	881.483	0	0	0	0	0	0	0	603	903	0
563	1	0	0	0	0	0	0	200	300	0	-16.2656	2.13364	-540.996	11254.5	7341.5	-752.931	213.57	882.197	0	0	0	0	0	0	0	603	903	0
563	2	0	0	0	0	0	0	200	300	0	-14.8923	2.5914	-540.691	11986.9	7463.57	-615.602	213.804	880.83	0	0	0	0	0	0	0	603	903	0
563	3	0	0	0	0	0	0	200	300	0	-15.35	3.50693	-541.301	12536.2	7280.47	-661.378	213.45	879.841	0	0	0	0	0	0	0	603	903	0
563	4	0	0	0	0	0	0	200	300	0	-16.2656	3.81211	-543.437	12261.6	7280.47	-752.931	213.397	880.437	0	0	0	0	0	0	0	603	903	0
563	5	0	0	0	0	0	0	200	300	0	-15.9604	3.96469	-542.522	12719.3	6914.25	-661.378	212.745	879.555	0	0	0	0	0	0	0	603	903	0
563	6	0	0	0	0	0	0	200	300	0	-14.8923	4.72763	-542.827	12810.9	6914.25	-936.036	212.738	879.4	0	0	0	0	0	0	0	603	903	0
563	7	0	0	0	0	0	0	200	300	0	-15.0449	5.33798	-544.658	12627.8	7341.5	-844.484	213.479	879.815	0	0	0	0	0	0	0	603	903	0
563	8	0	0	0	0	0	0	200	300	0	-16.7233	5.33798	-544.353	13177.1	7463.57	-752.931	213.711	878.793	0	0	0	0	0	0	0	603	903	0
563	9	0	0	0	0	0	0	200	300	0	-16.4182	4.88022	-545.574	13543.3	6975.29	-981.813	212.785	878.176	0	0	0	0	0	0	0	603	903	0
564	0	0	0	0	0	0	0	200	300	0	-14.7397	5.33798	-544.353	13818	6731.15	-478.272	212.365	877.616	0	0	0	0	0	0	0	603	903	0
564	1	0	0	0	0	0	0	200	300	0	-13.9767	6.10092	-547.71	13177.1	7158.4	-752.931	213.07	878.942	0	0	0	0	0	0	0	603	903	0
564	2	0	0	0	0	0	0	200	300	0	-14.4345	7.01645	-547.405	13726.4	6792.18	-707.154	212.408	877.925	0	0	0	0	0	0	0	603	903	0
564	3	0	0	0	0	0	0	200	300	0	-15.1974	7.32163	-546.489	14184.2	7463.57	-798.707	213.657	877.045	0	0	0	0	0	0	0	603	903	0
564	4	0	0	0	0	0	0	200	300	0	-15.1974	7.6268	-547.1	14184.2	6914.25	-844.484	212.638	877.074	0	0	0	0	0	0	0	603	903	0
564	5	0	0	0	0	0	0	200	300	0	-15.5026	9.00009	-547.1	14001.1	6792.18	-1210.69	212.415	877.409	0	0	0	0	0	0	0	603	903	0
564	6	0	0	0	0	0	0	200	300	0	-15.35	8.84751	-549.236	14367.3	6975.29	-981.813	212.7	876.841	0	0	0	0	0	0	0	603	903	0
564	7	0	0	0	0	0	0	200	300	0	-15.35	8.69492	-547.405	14550.4	7158.4	-340.943	213.077	876.419	0	0	0	0	0	0	0	603	903	0
564	8	0	0	0	0	0	0	200	300	0	-15.1974	7.47421	-549.846	14916.6	7036.32	-752.931	212.797	875.871	0	0	0	0	0	0	0	603	903	0
564	9	0	0	0	0	0	0	200	300	0	-15.35	10.2208	-548.931	15008.2	6731.15	-890.26	212.262	875.659	0	0	0	0	0	0	0	603	903	0
565	0	0	0	0	0	0	0	200	300	0	-16.113	10.0682	-550.151	15099.7	7097.36	-890.26	212.901	875.554	0	0	0	0	0	0	0	603	903	0
565	1	0	0	0	0	0	0	200	300	0	-16.4182	10.9837	-551.677	15282.8	7402.54	-752.931	213.418	875.298	0	0	0	0	0	0	0	603	903	0
565	2	0	0	0	0	0	0	200	300	0	-14.8923	10.9837	-553.508	15282.8	6731.15	-844.484	212.161	875.389	0	0	0	0	0	0	0	603	903	0
565	3	0	0	0	0	0	0	200	300	0	-15.1974	10.8311	-553.508	15465.9	6364.94	-569.825	211.499	875.058	0	0	0	0	0	0	0	603	903	0
565	4	0	0	0	0	0	0	200	300	0	-15.9604	10.6786	-550.151	15649	6731.15	-981.813	212.235	874.555	0	0	0	0	0	0	0	603	903	0
565	5	0	0	0	0	0	0	200	300	0	-16.113	11.7467	-552.593	16198.3	7036.32	-1164.92	212.733	873.687	0	0	0	0	0	0	0	603	903	0
565	6	0	0	0	0	0	0	200	300	0	-15.8078	12.5096	-554.729	16289.9	7036.32	-844.484	212.684	873.635	0	0	0	0	0	0	0	603	903	0
565	7	0	0	0	0	0	0	200	300	0	-15.1974	12.9674	-556.865	16289.9	6914.25	-981.813	212.416	873.747	0	0	0	0	0	0	0	603	903	0
565	8	0	0	0	0	0	0	200	300	0	-16.2656	13.12	-555.95	16564.6	6853.22	-844.484	212.327	873.205	0	0	0	0	0	0	0	603	903	0
565	9	0	0	0	0	0	0	200	300	0	-15.35	13.5777	-556.56	16656.1	6303.9	-524.049	211.327	873.073	0	0	0	0	0	0	0	603	903	0
566	0	0	0	0	0	0	0	200	300	0	-15.35	14.3407	-558.086	16747.7	7036.32	-798.707	212.608	872.991	0	0	0	0	0	0	0	603	903	0
566	1	0	0	0	0	0	0	200	300	0	-16.8759	14.3407	-558.391	16930.8	6914.25	-1027.59	212.382	872.679	0	0	0	0	0	0	0	603	903	0
566	2	0	0	0	0	0	0	200	300	0	-16.5707	14.6458	-559.307	17754.7	6792.18	-1027.59	212.144	871.256	0	0	0	0	0	0	0	603	903	0
566	3	0	0	0	0	0	0	200	300	0	-15.6552	15.4088	-556.865	17205.4	6609.08	-936.036	211.868	872.103	0	0	0	0	0	0	0	603	903	0
566	4	0	0	0	0	0	0	200	300	0	-15.0449	14.1881	-560.527	17663.2	6670.11	-844.484	211.9	871.488	0	0	0	0	0	0	0	603	903	0
566	5	0	0	0	0	0	0	200	300	0	-16.2656	14.4933	-560.527	17846.3	6731.15	-752.931	212.009	871.162	0	0	0	0	0	0	0	603	903	0
566	6	0	0	0	0	0	0	200	300	0	-16.2656	14.7984	-563.274	18120.9	7158.4	-844.484	212.709	870.829	0	0	0	0	0	0	0	603	903	0
566	7	0	0	0	0	0	0	200	300	0	-16.2656	16.6295	-562.358	18578.7	6792.18	-1073.37	212.078	869.963	0	0	0	0	0	0	0	603	903	0
566	8	0	0	0	0	0	0	200	300	0	-16.113	16.9347	-563.579	18487.2	6609.08	-1119.14	211.727	870.197	0	0	0	0	0	0	0	603	903	0
566	9	0	0	0	0	0	0	200	300	0	-16.113	17.3924	-565.105	18212.5	6548.04	-936.036	211.587	870.772	0	0	0	0	0	0	0	603	903	0
567	0	0	0	0	0	0	0	200	300	0	-15.35	17.2398	-565.41	18944.9	6853.22	-936.036	212.121	869.493	0	0	0	0	0	0	0	603	903	0
567	1	0	0	0	0	0	0	200	300	0	-15.35	17.545	-566.02	19311.1	6425.97	-890.26	211.353	868.883	0	0	0	0	0	0	0	603	903	0
567	2	0	0	0	0	0	0	200	300	0	-17.1811	18.1554	-566.631	19402.7	6609.08	-981.813	211.664	868.758	0	0	0	0	0	0	0	603	903	0
567	3	0	0	0	0	0	0	200	300	0	-17.7914	18.1554	-568.157	19219.6	6914.25	-1164.92	212.17	869.172	0	0	0	0	0	0	0	603	903	0
567	4	0	0	0	0	0	0	200	300	0	-16.7233	19.0709	-569.377	19585.8	6670.11	-1027.59	211.715	868.601	0	0	0	0	0	0	0	603	903	0
567	5	0	0	0	0	0	0	200	300	0	-16.2656	18.7657	-569.072	19585.8	6242.87	-844.484	210.97	868.583	0	0	0	0	0	0	0	603	903	0
567	6	0	0	0	0	0	0	200	300	0	-17.4863	19.5287	-569.683	19860.5	6548.04	-844.484	211.494	868.138	0	0	0	0	0	0	0	603	903	0
567	7	0	0	0	0	0	0	200	300	0	-18.4018	19.9864	-571.514	20226.7	6792.18	-1073.37	211.885	867.609	0	0	0	0	0	0	0	603	903	0
567	8	0	0	0	0	0	0	200	300	0	-16.2656	20.5968	-571.208	20135.1	6425.97	-844.484	211.25	867.75	0	0	0	0	0	0	0	603	903	0
567	9	0	0	0	0	0	0	200	300	0	-17.1811	20.4442	-571.208	20592.9	6853.22	-1073.37	211.998	866.949	0	0	0	0	0	0	0	603	903	0
568	0	0	0	0	0	0	0	200	300	0	-18.4018	21.5123	-572.734	20684.4	6242.87	-890.26	210.9	866.885	0	0	0	0	0	0	0	603	903	0
568	1	0	0	0	0	0	0	200	300	0	-17.1811	20.5968	-571.514	21233.7	6303.9	-707.154	211.03	865.846	0	0	0	0	0	0	0	603	903	0
568	2	0	0	0	0	0	0	200	300	0	-17.3337	20.7494	-575.481	21874.6	6303.9	-707.154	210.954	864.989	0	0	0	0	0	0	0	603	903	0
568	3	0	0	0	0	0	0	200	300	0	-18.0966	20.9019	-576.396	21325.3	6487.01	-936.036	211.254	866.002	0	0	0	0	0	0	0	603	903	0
568	4	0	0	0	0	0	0	200	300	0	-18.4018	23.0382	-576.091	21783.1	6364.94	-936.036	211.048	865.188	0	0	0	0	0	0	0	603	903	0
568	5	0	0	0	0	0	0	200	300	0	-17.6389	23.4959	-579.143	21966.2	6364.94	-981.813	210.99	865.071	0	0	0	0	0	0	0	603	903	0
568	6	0	0	0	0	0	0	200	300	0	-17.1811	22.8856	-579.753	22057.7	6425.97	-981.813	211.084	864.953	0	0	0	0	0	0	0	603	903	0
568	7	0	0	0	0	0	0	200	300	0	-18.707	23.3434	-580.364	22057.7	6487.01	-1027.59	211.178	864.993	0	0	0	0	0	0	0	603	903	0
568	8	0	0	0	0	0	0	200	300	0	-18.5544	23.6485	-580.364	22240.8	6425.97	-981.813	211.072	864.678	0	0	0	0	0	0	0	603	903	0
568	9	0	0	0	0	0	0	200	300	0	-16.2656	24.4115	-580.364	22057.7	6303.9	-1073.37	210.862	864.993	0	0	0	0	0	0	0	603	903	0
569	0	0	0	0	0	0	0	200	300	0	-16.7233	25.0218	-582.195	22881.7	6487.01	-981.813	211.142	863.698	0	0	0	0	0	0	0	603	903	0
569	1	0	0	0	0	0	0	200	300	0	-19.1647	24.5641	-583.11	23247.9	6364.94	-890.26	210.916	863.131	0	0	0	0	0	0	0	603	903	0
569	2	0	0	0	0	0	0	200	300	0	-18.0966	23.4959	-584.636	22881.7	6120.8	-981.813	210.469	863.862	0	0	0	0	0	0	0	603	903	0
569	3	0	0	0	0	0	0	200	300	0	-18.0966	25.4796	-585.247	23064.8	6120.8	-1073.37	210.458	863.59	0	0	0	0	0	0	0	603	903	0
569	4	0	0	0	0	0	0	200	300	0	-19.0121	26.5477	-586.467	23247.9	6425.97	-981.813	210.957	863.359	0	0	0	0	0	0	0	603	903	0
569	5	0	0	0	0	0	0	200	300	0	-20.2328	26.7003	-588.909	23797.2	6548.04	-1073.37	211.119	862.591	0	0	0	0	0	0	0	603	903	0
569	6	0	0	0	0	0	0	200	300	0	-18.8596	26.5477	-590.435	24163.4	6303.9	-1119.14	210.677	862.075	0	0	0	0	0	0	0	603	903	0
569	7	0	0	0	0	0	0	200	300	0	-19.6225	27.1581	-589.214	24346.5	5937.69	-890.26	210.077	861.68	0	0	0	0	0	0	0	603	903	0
569	8	0	0	0	0	0	0	200	300	0	-18.2492	27.7684	-588.603	23888.8	5998.73	-890.26	210.191	862.415	0	0	0	0	0	0	0	603	903	0
569	9	0	0	0	0	0	0	200	300	0	-19.0121	27.6158	-591.35	24438.1	6425.97	-1073.37	210.867	861.674	0	0	0	0	0	0	0	603	903	0
570	0	0	0	0	0	0	0	200	300	0	-19.4699	28.0736	-592.266	24712.7	6181.83	-844.484	210.438	861.274	0	0	0	0	0	0	0	603	903	0
570	1	0	0	0	0	0	0	200	300	0	-20.9958	28.5313	-594.097	25079	6181.83	-798.707	210.405	860.786	0	0	0	0	0	0	0	603	903	0
570	2	0	0	0	0	0	0	200	300	0	-21.4536	29.752	-594.402	24438.1	6364.94	-1164.92	210.708	861.886	0	0	0	0	0	0	0	603	903	0
570	3	0	0	0	0	0	0	200	300	0	-20.0803	30.6676	-596.843	25902.9	5937.69	-1119.14	209.949	859.6	0	0	0	0	0	0	0	603	903	0
570	4	0	0	0	0	0	0	200	300	0	-19.7751	30.2098	-599.59	26086	6120.8	-478.272	210.208	859.494	0	0	0	0	0	0	0	603	903	0
570	5	0	0	0	0	0	0	200	300	0	-21.4536	29.752	-599.895	26177.6	6303.9	-844.484	210.508	859.363	0	0	0	0	0	0	0	603	903	0
570	6	0	0	0	0	0	0	200	300	0	-21.6061	30.9727	-599.59	25353.6	6059.76	-1073.37	210.107	860.715	0	0	0	0	0	0	0	603	903	0
570	7	0	0	0	0	0	0	200	300	0	-20.3854	31.7357	-600.2	26543.8	6303.9	-936.036	210.503	858.775	0	0	0	0	0	0	0	603	903	0
570	8	0	0	0	0	0	0	200	300	0	-20.538	32.0409	-602.947	27001.6	5937.69	-981.813	209.848	858.217	0	0	0	0	0	0	0	603	903	0
570	9	0	0	0	0	0	0	200	300	0	-22.0639	32.346	-603.862	26269.1	5998.73	-1073.37	209.934	859.498	0	0	0	0	0	0	0	603	903	0
571	0	0	0	0	0	0	0	200	300	0	-22.0639	32.4986	-604.778	26726.9	6059.76	-798.707	210.02	858.807	0	0	0	0	0	0	0	603	903	0
571	1	0	0	0	0	0	0	200	300	0	-20.8432	33.2616	-605.693	27367.8	6059.76	-661.378	210.005	857.816	0	0	0	0	0	0	0	603	903	0
571	2	0	0	0	0	0	0	200	300	0	-20.9958	33.7193	-606.609	26910	6059.76	-1073.37	209.99	858.639	0	0	0	0	0	0	0	603	903	0
571	3	0	0	0	0	0	0	200	300	0	-21.9113	33.5667	-607.524	27184.7	5937.69	-1073.37	209.774	858.253	0	0	0	0	0	0	0	603	903	0
571	4	0	0	0	0	0	0	200	300	0	-22.3691	33.8719	-609.355	27917.1	5510.45	-1027.59	209.043	857.186	0	0	0	0	0	0	0	603	903	0
571	5	0	0	0	0	0	0	200	300	0	-20.538	35.0926	-610.881	28100.2	6120.8	-936.036	210.02	857.001	0	0	0	0	0	0	0	603	903	0
571	6	0	0	0	0	0	0	200	300	0	-21.9113	35.5504	-611.186	27642.4	5876.66	-981.813	209.615	857.773	0	0	0	0	0	0	0	603	903	0
571	7	0	0	0	0	0	0	200	300	0	-21.1484	35.5504	-612.102	27642.4	5998.73	-798.707	209.8	857.84	0	0	0	0	0	0	0	603	903	0
571	8	0	0	0	0	0	0	200	300	0	-20.538	36.0081	-612.102	28283.3	5815.62	-478.272	209.501	856.793	0	0	0	0	0	0	0	603	903	0
571	9	0	0	0	0	0	0	200	300	0	-21.301	37.0763	-613.323	29290.4	5693.55	-844.484	209.283	855.243	0	0	0	0	0	0	0	603	903	0
572	0	0	0	0	0	0	0	200	300	0	-21.7587	37.534	-617.29	28558	5815.62	-798.707	209.421	856.737	0	0	0	0	0	0	0	603	903	0
572	1	0	0	0	0	0	0	200	300	0	-21.6061	37.2289	-616.68	29015.7	5815.62	-798.707	209.431	855.948	0	0	0	0	0	0	0	603	903	0
572	2	0	0	0	0	0	0	200	300	0	-22.0639	35.703	-618.816	29656.6	5449.41	-752.931	208.806	855.075	0	0	0	0	0	0	0	603	903	0
572	3	0	0	0	0	0	0	200	300	0	-21.1484	37.9918	-619.426	29565	5632.52	-936.036	209.093	855.27	0	0	0	0	0	0	0	603	903	0
572	4	0	0	0	0	0	0	200	300	0	-24.0475	39.6703	-621.257	29931.3	6181.83	-844.484	209.951	854.822	0	0	0	0	0	0	0	603	903	0
572	5	0	0	0	0	0	0	200	300	0	-22.3691	39.8228	-623.088	30480.6	5815.62	-752.931	209.334	854.081	0	0	0	0	0	0	0	603	903	0
572	6	0	0	0	0	0	0	200	300	0	-22.3691	39.5177	-624.614	30755.2	5327.34	-752.931	208.529	853.761	0	0	0	0	0	0	0	603	903	0
572	7	0	0	0	0	0	0	200	300	0	-22.9794	39.5177	-624.309	30297.5	5144.23	-340.943	208.24	854.47	0	0	0	0	0	0	0	603	903	0
572	8	0	0	0	0	0	0	200	300	0	-23.7424	41.3487	-625.225	30389	5693.55	-798.707	209.106	854.395	0	0	0	0	0	0	0	603	903	0
572	9	0	0	0	0	0	0	200	300	0	-24.3527	41.1961	-628.581	31121.4	5632.52	-386.72	208.961	853.489	0	0	0	0	0	0	0	603	903	0
573	0	0	0	0	0	0	0	200	300	0	-23.2846	41.1961	-630.413	31121.4	5998.73	-798.707	209.516	853.633	0	0	0	0	0	0	0	603	903	0
573	1	0	0	0	0	0	0	200	300	0	-23.5898	41.9591	-629.802	31029.9	5571.48	-936.036	208.846	853.731	0	0	0	0	0	0	0	603	903	0
573	2	0	0	0	0	0	0	200	300	0	-24.0475	43.3324	-631.023	31213	5266.31	-844.484	208.346	853.536	0	0	0	0	0	0	0	603	903	0
573	3	0	0	0	0	0	0	200	300	0	-24.0475	43.3324	-633.159	31396.1	5815.62	-569.825	209.185	853.414	0	0	0	0	0	0	0	603	903	0
573	4	0	0	0	0	0	0	200	300	0	-23.132	43.3324	-631.633	32220.1	6120.8	-478.272	209.69	851.989	0	0	0	0	0	0	0	603	903	0
573	5	0	0	0	0	0	0	200	300	0	-23.7424	42.4168	-635.601	31853.9	5632.52	-615.602	208.862	852.884	0	0	0	0	0	0	0	603	903	0
573	6	0	0	0	0	0	0	200	300	0	-24.5053	44.4005	-632.244	32220.1	5510.45	-203.614	208.716	852.039	0	0	0	0	0	0	0	603	903	0
573	7	0	0	0	0	0	0	200	300	0	-23.895	44.8582	-637.126	32677.8	5998.73	-707.154	209.415	851.711	0	0	0	0	0	0	0	603	903	0
573	8	0	0	0	0	0	0	200	300	0	-24.0475	46.3841	-637.737	32311.6	5571.48	-752.931	208.736	852.334	0	0	0	0	0	0	0	603	903	0
573	9	0	0	0	0	0	0	200	300	0	-25.1157	45.0108	-640.178	32952.5	5571.48	-478.272	208.703	851.526	0	0	0	0	0	0	0	603	903	0
574	0	0	0	0	0	0	0	200	300	0	-25.2682	46.2315	-638.652	33227.1	5510.45	-615.602	208.628	850.973	0	0	0	0	0	0	0	603	903	0
574	1	0	0	0	0	0	0	200	300	0	-24.3527	47.4522	-640.178	33776.5	5815.62	-844.484	209.084	850.239	0	0	0	0	0	0	0	603	903	0
574	2	0	0	0	0	0	0	200	300	0	-24.2001	47.91	-642.314	33776.5	5632.52	-707.154	208.769	850.414	0	0	0	0	0	0	0	603	903	0
574	3	0	0	0	0	0	0	200	300	0	-23.132	47.7574	-644.145	33959.6	5632.52	-569.825	208.744	850.28	0	0	0	0	0	0	0	603	903	0
574	4	0	0	0	0	0	0	200	300	0	-23.2846	48.0626	-643.84	34508.9	5327.34	-569.825	208.274	849.402	0	0	0	0	0	0	0	603	903	0
574	5	0	0	0	0	0	0	200	300	0	-24.9631	49.7411	-644.756	34142.7	5998.73	-615.602	209.304	850.046	0	0	0	0	0	0	0	603	903	0
574	6	0	0	0	0	0	0	200	300	0	-25.2682	49.8936	-645.671	34325.8	5632.52	-524.049	208.724	849.837	0	0	0	0	0	0	0	603	903	0
574	7	0	0	0	0	0	0	200	300	0	-25.726	49.5885	-647.502	35058.2	5937.69	-661.378	209.17	848.856	0	0	0	0	0	0	0	603	903	0
574	8	0	0	0	0	0	0	200	300	0	-24.9631	50.3514	-647.808	35332.9	5449.41	-615.602	208.412	848.458	0	0	0	0	0	0	0	603	903	0
574	9	0	0	0	0	0	0	200	300	0	-24.8105	51.5721	-647.502	34875.1	5510.45	-478.272	208.51	849.139	0	0	0	0	0	0	0	603	903	0
575	0	0	0	0	0	0	0	200	300	0	-25.2682	50.504	-649.333	35241.3	5815.62	-707.154	208.956	848.727	0	0	0	0	0	0	0	603	903	0
575	1	0	0	0	0	0	0	200	300	0	-24.6579	50.8092	-649.944	35699.1	5815.62	-478.272	208.948	848.074	0	0	0	0	0	0	0	603	903	0
575	2	0	0	0	0	0	0	200	300	0	-25.1157	51.1143	-651.47	36339.9	5754.59	-524.049	208.833	847.219	0	0	0	0	0	0	0	603	903	0
575	3	0	0	0	0	0	0	200	300	0	-26.489	52.9454	-652.69	36065.3	6059.76	-478.272	209.284	847.744	0	0	0	0	0	0	0	603	903	0
575	4	0	0	0	0	0	0	200	300	0	-25.8786	53.7083	-653.911	36889.2	5693.55	-295.167	208.707	846.587	0	0	0	0	0	0	0	603	903	0
575	5	0	0	0	0	0	0	200	300	0	-24.5053	54.6239	-656.963	36523	5693.55	-295.167	208.666	847.406	0	0	0	0	0	0	0	603	903	0
575	6	0	0	0	0	0	0	200	300	0	-24.5053	54.3187	-657.268	36431.5	5876.66	-478.272	208.941	847.571	0	0	0	0	0	0	0	603	903	0
575	7	0	0	0	0	0	0	200	300	0	-25.8786	54.6239	-657.268	36980.8	5815.62	-478.272	208.848	846.736	0	0	0	0	0	0	0	603	903	0
575	8	0	0	0	0	0	0	200	300	0	-24.8105	56.1497	-656.352	37072.4	6059.76	-386.72	209.232	846.518	0	0	0	0	0	0	0	603	903	0
575	9	0	0	0	0	0	0	200	300	0	-22.6743	54.7765	-658.489	37438.6	6059.76	-615.602	209.203	846.145	0	0	0	0	0	0	0	603	903	0
576	0	0	0	0	0	0	0	200	300	0	-25.5734	57.0653	-661.235	37255.5	5449.41	-432.496	208.241	846.658	0	0	0	0	0	0	0	603	903	0
576	1	0	0	0	0	0	0	200	300	0	-25.1157	57.3705	-663.677	37621.7	5510.45	-249.391	208.303	846.313	0	0	0	0	0	0	0	603	903	0
576	2	0	0	0	0	0	0	200	300	0	-24.2001	57.0653	-664.287	37713.2	6120.8	-112.061	209.214	846.228	0	0	0	0	0	0	0	603	903	0
576	3	0	0	0	0	0	0	200	300	0	-24.8105	58.7437	-665.813	38537.2	6120.8	-340.943	209.193	845.12	0	0	0	0	0	0	0	603	903	0
576	4	0	0	0	0	0	0	200	300	0	-25.8786	59.5067	-667.339	37713.2	5876.66	-340.943	208.806	846.487	0	0	0	0	0	0	0	603	903	0
576	5	0	0	0	0	0	0	200	300	0	-25.726	59.3541	-667.949	38537.2	5693.55	-524.049	208.524	845.305	0	0	0	0	0	0	0	603	903	0
576	6	0	0	0	0	0	0	200	300	0	-24.0475	59.9644	-668.254	38628.8	6059.76	-478.272	209.068	845.195	0	0	0	0	0	0	0	603	903	0
576	7	0	0	0	0	0	0	200	300	0	-24.2001	61.4903	-670.085	38720.3	6120.8	-249.391	209.134	845.216	0	0	0	0	0	0	0	603	903	0
576	8	0	0	0	0	0	0	200	300	0	-23.895	61.4903	-673.137	38537.2	5876.66	-112.061	208.73	845.75	0	0	0	0	0	0	0	603	903	0
576	9	0	0	0	0	0	0	200	300	0	-22.5217	61.3377	-673.137	39361.2	5815.62	-478.272	208.64	844.526	0	0	0	0	0	0	0	603	903	0
577	0	0	0	0	0	0	0	200	300	0	-23.7424	62.2533	-672.832	39635.8	6181.83	-295.167	209.188	844.091	0	0	0	0	0	0	0	603	903	0
577	1	0	0	0	0	0	0	200	300	0	-24.9631	63.474	-675.884	39635.8	6059.76	25.2677	208.966	844.357	0	0	0	0	0	0	0	603	903	0
577	2	0	0	0	0	0	0	200	300	0	-25.5734	64.0843	-678.02	39818.9	5937.69	-203.614	208.757	844.272	0	0	0	0	0	0	0	603	903	0
577	3	0	0	0	0	0	0	200	300	0	-24.5053	64.2369	-678.935	40276.7	6059.76	-20.5087	208.925	843.677	0	0	0	0	0	0	0	603	903	0
577	4	0	0	0	0	0	0	200	300	0	-24.9631	65.6102	-679.851	40185.1	6242.87	-112.061	209.183	843.891	0	0	0	0	0	0	0	603	903	0
577	5	0	0	0	0	0	0	200	300	0	-25.8786	66.068	-679.851	40185.1	6487.01	-203.614	209.542	843.891	0	0	0	0	0	0	0	603	903	0
577	6	0	0	0	0	0	0	200	300	0	-26.1838	66.5257	-682.598	40185.1	5876.66	-249.391	208.609	844.129	0	0	0	0	0	0	0	603	903	0
577	7	0	0	0	0	0	0	200	300	0	-25.1157	66.5257	-683.818	41100.7	6242.87	-203.614	209.129	842.895	0	0	0	0	0	0	0	603	903	0
577	8	0	0	0	0	0	0	200	300	0	-25.1157	67.1361	-684.429	41192.2	6120.8	-20.5087	208.943	842.815	0	0	0	0	0	0	0	603	903	0
577	9	0	0	0	0	0	0	200	300	0	-26.1838	69.1197	-685.955	40917.6	6059.76	162.597	208.834	843.349	0	0	0	0	0	0	0	603	903	0
578	0	0	0	0	0	0	0	200	300	0	-26.3364	69.7301	-687.175	40826	6181.83	208.373	208.996	843.589	0	0	0	0	0	0	0	603	903	0
578	1	0	0	0	0	0	0	200	300	0	-25.726	69.2723	-688.701	41375.4	5693.55	299.926	208.267	842.923	0	0	0	0	0	0	0	603	903	0
578	2	0	0	0	0	0	0	200	300	0	-25.8786	70.1878	-688.701	41833.1	5388.38	254.149	207.824	842.258	0	0	0	0	0	0	0	603	903	0
578	3	0	0	0	0	0	0	200	300	0	-26.7941	71.4085	-689.311	41558.5	6120.8	345.702	208.88	842.71	0	0	0	0	0	0	0	603	903	0
578	4	0	0	0	0	0	0	200	300	0	-26.489	72.1715	-689.311	41375.4	6609.08	299.926	209.588	842.976	0	0	0	0	0	0	0	603	903	0
578	5	0	0	0	0	0	0	200	300	0	-26.0312	72.7818	-689.617	41833.1	6242.87	437.255	209.053	842.339	0	0	0	0	0	0	0	603	903	0
578	6	0	0	0	0	0	0	200	300	0	-27.0993	73.3922	-693.279	42657.1	6670.11	666.137	209.621	841.471	0	0	0	0	0	0	0	603	903	0
578	7	0	0	0	0	0	0	200	300	0	-28.6252	73.6974	-693.584	42016.2	6792.18	391.479	209.793	842.422	0	0	0	0	0	0	0	603	903	0
578	8	0	0	0	0	0	0	200	300	0	-28.7778	74.9181	-695.11	42748.6	6242.87	528.808	208.981	841.501	0	0	0	0	0	0	0	603	903	0
578	9	0	0	0	0	0	0	200	300	0	-27.0993	75.8336	-696.331	42748.6	6059.76	437.255	208.702	841.609	0	0	0	0	0	0	0	603	903	0
579	0	0	0	0	0	0	0	200	300	0	-27.2519	75.9862	-697.551	42382.4	6487.01	757.69	209.3	842.241	0	0	0	0	0	0	0	603	903	0
579	1	0	0	0	0	0	0	200	300	0	-29.3881	75.5284	-698.162	42748.6	6975.29	666.137	209.991	841.77	0	0	0	0	0	0	0	603	903	0
579	2	0	0	0	0	0	0	200	300	0	-29.0829	77.3595	-698.162	43297.9	6364.94	345.702	209.117	840.983	0	0	0	0	0	0	0	603	903	0
579	3	0	0	0	0	0	0	200	300	0	-28.0148	78.5802	-699.687	43297.9	5754.59	528.808	208.225	841.118	0	0	0	0	0	0	0	603	903	0
579	4	0	0	0	0	0	0	200	300	0	-28.32	78.7328	-701.213	42931.7	6364.94	711.913	209.077	841.775	0	0	0	0	0	0	0	603	903	0
579	5	0	0	0	0	0	0	200	300	0	-28.4726	79.8009	-701.213	43206.4	6242.87	895.019	208.903	841.383	0	0	0	0	0	0	0	603	903	0
579	6	0	0	0	0	0	0	200	300	0	-29.2355	80.4112	-700.298	43572.6	6364.94	986.571	209.089	840.78	0	0	0	0	0	0	0	603	903	0
579	7	0	0	0	0	0	0	200	300	0	-29.2355	79.8009	-701.518	43755.7	6364.94	1215.45	209.073	840.627	0	0	0	0	0	0	0	603	903	0
579	8	0	0	0	0	0	0	200	300	0	-30.3036	81.9371	-702.739	43572.6	6487.01	849.242	209.231	840.996	0	0	0	0	0	0	0	603	903	0
579	9	0	0	0	0	0	0	200	300	0	-30.4562	83.3104	-706.096	43664.2	6670.11	757.69	209.446	841.161	0	0	0	0	0	0	0	603	903	0
580	0	0	0	0	0	0	0	200	300	0	-29.6933	83.1578	-704.265	44213.5	6609.08	986.571	209.384	840.22	0	0	0	0	0	0	0	603	903	0
580	1	0	0	0	0	0	0	200	300	0	-29.6933	84.3785	-704.875	44121.9	6425.97	849.242	209.116	840.405	0	0	0	0	0	0	0	603	903	0
580	2	0	0	0	0	0	0	200	300	0	-31.2192	85.294	-705.486	43847.3	6364.94	1032.35	209.022	840.848	0	0	0	0	0	0	0	603	903	0
580	3	0	0	0	0	0	0	200	300	0	-31.3718	85.7518	-706.401	44305	6670.11	849.242	209.442	840.281	0	0	0	0	0	0	0	603	903	0
580	4	0	0	0	0	0	0	200	300	0	-30.4562	86.2096	-705.181	44854.4	6853.22	849.242	209.718	839.393	0	0	0	0	0	0	0	603	903	0
580	5	0	0	0	0	0	0	200	300	0	-30.4562	87.5829	-706.401	45129	6670.11	1169.68	209.442	839.114	0	0	0	0	0	0	0	603	903	0
580	6	0	0	0	0	0	0	200	300	0	-29.8459	86.9725	-706.401	44671.2	6181.83	1123.9	208.751	839.762	0	0	0	0	0	0	0	603	903	0
580	7	0	0	0	0	0	0	200	300	0	-28.4726	88.3458	-704.265	45037.5	6425.97	1261.23	209.124	839.05	0	0	0	0	0	0	0	603	903	0
580	8	0	0	0	0	0	0	200	300	0	-30.1511	88.8036	-707.317	45312.1	6609.08	1261.23	209.344	838.938	0	0	0	0	0	0	0	603	903	0
580	9	0	0	0	0	0	0	200	300	0	-31.9821	89.5665	-706.706	45220.6	6975.29	1261.23	209.87	839.012	0	0	0	0	0	0	0	603	903	0
581	0	0	0	0	0	0	0	200	300	0	-32.4399	91.3976	-706.401	45129	6670.11	986.571	209.442	839.114	0	0	0	0	0	0	0	603	903	0
581	1	0	0	0	0	0	0	200	300	0	-30.914	91.7027	-707.622	45861.4	6853.22	1352.78	209.685	838.189	0	0	0	0	0	0	0	603	903	0
581	2	0	0	0	0	0	0	200	300	0	-30.3036	91.8553	-707.622	46136.1	6731.15	1307.01	209.512	837.801	0	0	0	0	0	0	0	603	903	0
581	3	0	0	0	0	0	0	200	300	0	-30.7614	92.6183	-706.706	44945.9	7036.32	1627.44	209.957	839.401	0	0	0	0	0	0	0	603	903	0
581	4	0	0	0	0	0	0	200	300	0	-31.2192	94.1441	-706.706	46227.6	6914.25	1535.89	209.784	837.587	0	0	0	0	0	0	0	603	903	0
581	5	0	0	0	0	0	0	200	300	0	-30.4562	94.6019	-707.622	46044.5	6975.29	1581.66	209.857	837.931	0	0	0	0	0	0	0	603	903	0
581	6	0	0	0	0	0	0	200	300	0	-30.1511	94.9071	-707.317	45861.4	7219.43	1169.68	210.207	838.161	0	0	0	0	0	0	0	603	903	0
581	7	0	0	0	0	0	0	200	300	0	-30.914	95.67	-705.486	45953	6914.25	1444.34	209.801	837.863	0	0	0	0	0	0	0	603	903	0
581	8	0	0	0	0	0	0	200	300	0	-29.3881	96.5855	-706.401	46319.2	6731.15	1352.78	209.529	837.429	0	0	0	0	0	0	0	603	903	0
581	9	0	0	0	0	0	0	200	300	0	-28.9304	94.2967	-704.265	46502.3	6914.25	1810.55	209.818	836.971	0	0	0	0	0	0	0	603	903	0
582	0	0	0	0	0	0	0	200	300	0	-29.3881	97.3485	-705.181	46136.1	7402.54	1352.78	210.497	837.576	0	0	0	0	0	0	0	603	903	0
582	1	-1.41598	6.15967	-24.539	-3868.1	3413.31	1087.28	339.098	457.631	0	-29.8459	99.1795	-704.265	46136.1	6853.22	1490.11	209.731	837.49	0	0	0	0	0	0	0	603	903	0
582	2	-3.09445	25.6909	-48.6479	-4875.19	5915.76	2826.78	321.604	400.214	0	-27.7097	99.4847	-701.213	46776.9	7341.5	1490.11	210.47	836.292	0	0	0	0	0	0	0	603	903	0
582	3	8.04447	34.0833	-48.6479	-3501.89	4511.95	3650.76	292.747	371.985	0	-26.1838	101.316	-702.739	46960.1	7097.36	1581.66	210.1	836.176	0	0	0	0	0	0	0	603	903	0
582	4	4.22977	16.3831	-33.6943	-3410.34	4023.67	2323.24	319.417	401.214	0	-27.8622	100.858	-703.655	45953	7158.4	1535.89	210.173	837.694	0	0	0	0	0	0	0	603	903	0
582	5	-7.97726	10.2795	-26.0649	-3685	4389.88	2231.69	368.421	441.378	0	-28.0148	100.553	-701.518	46227.6	7463.57	1856.32	210.639	837.104	0	0	0	0	0	0	0	603	903	0
582	6	-6.60397	34.3884	-44.6806	-4966.74	5366.44	3879.64	320.107	411.161	0	-28.1674	103.299	-698.162	47143.2	7341.5	1490.11	210.515	835.475	0	0	0	0	0	0	0	603	903	0
582	7	3.77201	43.3911	-61.4652	-7713.32	5976.79	4474.73	297.239	425.491	0	-26.9467	104.368	-697.856	47143.2	7402.54	1535.89	210.608	835.446	0	0	0	0	0	0	0	603	903	0
582	8	3.00907	32.5574	-65.1274	-6706.24	7685.77	3650.76	318.012	402.971	0	-25.726	102.384	-699.687	46776.9	7280.47	1398.56	210.405	836.146	0	0	0	0	0	0	0	603	903	0
582	9	-3.09445	33.0151	-65.7377	-6980.9	8662.33	5298.7	331.771	406.193	0	-26.6415	104.062	-696.331	47143.2	7402.54	1581.66	210.631	835.298	0	0	0	0	0	0	0	603	903	0
583	0	4.07718	50.8679	-78.2499	-9178.16	9272.69	5893.8	318.501	417.293	0	-26.9467	107.114	-695.415	47417.8	7768.75	1535.89	211.171	834.814	0	0	0	0	0	0	0	603	903	0
583	1	4.53495	56.6663	-92.5932	-9178.16	9638.9	4657.84	304.099	399.124	0	-23.7424	105.436	-694.499	47143.2	7707.71	1627.44	211.098	835.119	0	0	0	0	0	0	0	603	903	0
583	2	-9.50314	37.898	-96.8656	-9819.03	10798.6	5390.26	311.48	401.368	0	-25.5734	105.588	-694.194	47051.6	7524.61	1444.34	210.839	835.221	0	0	0	0	0	0	0	603	903	0
583	3	-5.07809	31.0315	-96.5605	-11283.9	11531	5527.59	319.417	416.858	0	-26.0312	107.114	-693.889	47417.8	7524.61	1581.66	210.844	834.664	0	0	0	0	0	0	0	603	903	0
583	4	4.68753	42.6282	-98.3915	-11375.4	11714.1	4108.52	319.056	415.614	0	-25.2682	107.724	-691.143	47692.5	7890.82	1810.55	211.417	833.995	0	0	0	0	0	0	0	603	903	0
583	5	-2.33151	40.3394	-106.936	-11192.3	12141.3	3559.2	313.538	404.663	0	-20.0803	108.335	-688.396	47143.2	7951.85	1627.44	211.551	834.517	0	0	0	0	0	0	0	603	903	0
583	6	-8.89279	24.4702	-111.514	-10826.1	11653.1	4657.84	304.499	397.083	0	-24.3527	108.182	-687.786	47326.3	7646.68	1581.66	211.118	834.19	0	0	0	0	0	0	0	603	903	0
583	7	-6.60397	19.1296	-113.345	-12107.8	11775.1	3833.86	303.887	406.823	0	-26.3364	109.708	-687.786	47875.6	7646.68	1535.89	211.118	833.392	0	0	0	0	0	0	0	603	903	0
583	8	-4.62033	32.5574	-116.092	-12931.8	12263.4	2872.56	305.636	411.393	0	-23.5898	109.556	-683.818	47600.9	8318.06	1627.44	212.164	833.39	0	0	0	0	0	0	0	603	903	0
583	9	-2.78927	27.8272	-116.702	-12291	12812.7	3101.44	309.79	405.319	0	-21.4536	107.877	-684.734	47417.8	7829.78	1718.99	211.435	833.75	0	0	0	0	0	0	0	603	903	0
584	0	-6.45138	8.75367	-117.923	-12107.8	12812.7	3238.77	308.654	402.676	0	-23.132	110.471	-681.072	47509.4	7890.82	1718.99	211.586	833.243	0	0	0	0	0	0	0	603	903	0
584	1	-8.28244	9.66919	-117.618	-11467	11958.2	2094.36	301.67	397.494	0	-24.8105	110.929	-679.241	47509.4	7646.68	1764.77	211.258	833.055	0	0	0	0	0	0	0	603	903	0
584	2	-9.96091	16.5356	-122.195	-12474.1	12141.3	2002.81	299.36	402.083	0	-22.0639	111.692	-679.546	47875.6	8318.06	1856.32	212.241	832.548	0	0	0	0	0	0	0	603	903	0
584	3	-7.21432	6.15967	-118.228	-12291	12080.3	1728.15	302.178	403.96	0	-20.2328	112.15	-677.41	47509.4	8318.06	1902.1	212.279	832.866	0	0	0	0	0	0	0	603	903	0
584	4	-12.4023	-5.58959	-118.533	-11283.9	12507.5	1270.38	305.52	395.196	0	-22.8268	112.76	-674.358	47326.3	8073.92	1673.22	211.973	832.82	0	0	0	0	0	0	0	603	903	0
584	5	-12.5549	-2.53784	-120.669	-12382.5	12873.8	629.515	306.686	402.615	0	-23.895	113.37	-670.391	47967.1	7829.78	1535.89	211.679	831.449	0	0	0	0	0	0	0	603	903	0
584	6	-6.45138	2.0398	-125.247	-12748.7	12751.7	537.963	301.812	401.789	0	-18.4018	115.201	-670.391	47417.8	7829.78	1718.99	211.679	832.268	0	0	0	0	0	0	0	603	903	0
584	7	-10.4187	-7.26806	-127.994	-12657.2	12446.5	-240.236	297.243	398.889	0	-19.9277	113.981	-663.677	47417.8	8073.92	1993.65	212.165	831.553	0	0	0	0	0	0	0	603	903	0
584	8	-19.7265	-15.2026	-128.909	-12291	12629.6	-57.1302	297.973	395.346	0	-19.7751	113.218	-665.203	47326.3	8318.06	1718.99	212.505	831.854	0	0	0	0	0	0	0	603	903	0
584	9	-13.1653	-11.0828	-131.961	-12291	13178.9	34.4225	299.87	393.141	0	-22.6743	115.049	-661.54	47692.5	7890.82	1718.99	211.928	830.907	0	0	0	0	0	0	0	603	903	0
585	0	-11.4868	-9.86206	-136.538	-13023.4	13484.1	-469.118	298.757	395.382	0	-19.3173	117.337	-658.489	47234.7	7890.82	1856.32	211.983	831.268	0	0	0	0	0	0	0	603	903	0
585	1	-18.3532	-17.4915	-137.759	-12382.5	13911.4	-743.776	300.983	389.885	0	-19.4699	117.032	-658.184	47417.8	8257.03	1718.99	212.545	830.957	0	0	0	0	0	0	0	603	903	0
585	2	-19.5739	-20.5432	-139.59	-12931.8	14033.4	-881.105	300.533	392.641	0	-21.1484	116.727	-655.742	47234.7	8012.89	2222.53	212.22	830.968	0	0	0	0	0	0	0	603	903	0
585	3	-16.3696	-14.4397	-145.083	-13572.7	14460.7	-652.223	299.671	393.551	0	-20.8432	117.49	-651.775	47326.3	7768.75	2039.43	211.919	830.389	0	0	0	0	0	0	0	603	903	0
585	4	-16.6748	-11.9983	-151.492	-13389.6	15071	-560.67	299.484	388.385	0	-18.2492	118.406	-648.723	47051.6	8257.03	1993.65	212.728	830.47	0	0	0	0	0	0	0	603	903	0
585	5	-18.5058	-21.1536	-153.323	-13481.1	15742.4	-697.999	302.675	387.926	0	-18.4018	119.321	-646.282	47051.6	8440.13	1718.99	213.06	830.196	0	0	0	0	0	0	0	603	903	0
585	6	-16.3696	-22.5269	-158.816	-13755.8	15803.4	-881.105	299.508	386.615	0	-19.9277	119.474	-641.094	47326.3	8257.03	1718.99	212.88	829.179	0	0	0	0	0	0	0	603	903	0
585	7	-15.4541	-14.5923	-166.446	-14305.1	16657.9	-1018.43	300.08	385.945	0	-18.707	118.711	-639.568	47326.3	8073.92	2176.76	212.624	829.003	0	0	0	0	0	0	0	603	903	0
585	8	-18.5058	-14.8975	-173.465	-15037.5	17146.2	-1476.2	298.846	386.689	0	-15.8078	119.931	-636.516	47509.4	8073.92	1902.1	212.685	828.36	0	0	0	0	0	0	0	603	903	0
585	9	-18.811	-23.1372	-177.127	-15403.7	17207.3	-743.776	297.147	386.965	0	-15.35	120.542	-634.075	46960.1	8501.17	1902.1	213.407	828.939	0	0	0	0	0	0	0	603	903	0
586	0	-17.5903	-19.4751	-179.873	-15495.3	18428	-1155.76	302.45	386.146	0	-16.8759	120.389	-631.023	46776.9	8195.99	1947.88	212.988	828.871	0	0	0	0	0	0	0	603	903	0
586	1	-17.1325	-14.2871	-186.282	-15953.1	18733.1	-1201.54	300.563	385.639	0	-15.9604	120.542	-625.53	47143.2	8501.17	2222.53	213.59	827.635	0	0	0	0	0	0	0	603	903	0
586	2	-16.217	-20.0854	-187.198	-16136.2	19526.6	-1430.42	304.31	386.199	0	-12.4509	121	-623.699	46776.9	8012.89	1993.65	212.847	828.001	0	0	0	0	0	0	0	603	903	0
586	3	-16.5222	-23.595	-194.522	-16502.4	20014.9	-1155.76	302.893	384.836	0	-14.7397	121.915	-617.595	46502.3	8195.99	1993.65	213.271	827.704	0	0	0	0	0	0	0	603	903	0
586	4	-17.5903	-19.1699	-201.541	-16868.6	20381.1	-1750.86	301.126	383.698	0	-15.0449	120.389	-616.68	47143.2	8440.13	1902.1	213.686	826.553	0	0	0	0	0	0	0	603	903	0
586	5	-14.5385	-18.8647	-208.255	-17875.7	20869.4	-2025.51	300.211	385.836	0	-13.3664	121.763	-614.849	46227.6	8440.13	2039.43	213.727	827.815	0	0	0	0	0	0	0	603	903	0
586	6	-13.623	-23.2898	-211.917	-17234.8	21235.6	-2117.07	300.207	381.328	0	-11.9931	121.61	-610.271	45953	8318.06	1902.1	213.63	827.701	0	0	0	0	0	0	0	603	903	0
586	7	-17.8955	-27.2571	-217.715	-17143.3	22456.3	-2254.4	303.145	378.742	0	-11.0776	122.678	-605.998	46410.7	8501.17	1947.88	214.028	826.414	0	0	0	0	0	0	0	603	903	0
586	8	-15.3015	-26.0364	-222.598	-17417.9	23249.7	-2849.49	304.447	378.248	0	-13.519	123.136	-601.726	47234.7	8562.2	2222.53	214.229	824.501	0	0	0	0	0	0	0	603	903	0
586	9	-13.0127	-25.1208	-225.65	-18425	23127.7	-2895.27	302.494	381.653	0	-10.7724	122.983	-598.674	46685.4	8134.96	2176.76	213.588	825.019	0	0	0	0	0	0	0	603	903	0
587	0	-16.9799	-29.3933	-229.922	-18974.3	23310.8	-2574.83	301.385	382.525	0	-9.85687	122.678	-592.876	45678.3	8379.1	2176.76	214.133	825.955	0	0	0	0	0	0	0	603	903	0
587	1	-15.6067	-32.2925	-233.279	-18791.2	23921.1	-3581.91	302.543	380.552	0	-11.5353	122.831	-591.35	45495.2	8318.06	2497.19	214.066	826.066	0	0	0	0	0	0	0	603	903	0
587	2	-11.792	-31.3769	-239.993	-18791.2	24226.3	-3536.14	300.946	378.299	0	-10.162	121.457	-585.552	45953	8501.17	2085.2	214.518	824.522	0	0	0	0	0	0	0	603	903	0
587	3	-10.7238	-32.2925	-246.402	-18882.8	25386	-3490.36	303.027	376.634	0	-8.63617	122.831	-582.195	45037.5	8684.27	2268.31	214.916	825.642	0	0	0	0	0	0	0	603	903	0
587	4	-13.9282	-37.0227	-250.674	-19706.7	25630.1	-3536.14	302.245	378.615	0	-9.5517	123.746	-578.838	44854.4	8134.96	1902.1	214.054	825.51	0	0	0	0	0	0	0	603	903	0
587	5	-12.4023	-38.2434	-253.116	-20256.1	26118.4	-4268.56	303.188	380.027	0	-9.5517	123.136	-574.565	45220.6	8073.92	2039.43	214.052	824.296	0	0	0	0	0	0	0	603	903	0
587	6	-13.4704	-35.9546	-261.05	-20347.6	26667.7	-4222.78	302.155	377.945	0	-8.02582	120.542	-571.208	44945.9	8318.06	2314.09	214.562	824.314	0	0	0	0	0	0	0	603	903	0
587	7	-13.0127	-38.8538	-264.407	-20072.9	26911.8	-4497.44	301.782	375.917	0	-7.11029	122.068	-564.8	44762.8	8562.2	2314.09	215.16	823.746	0	0	0	0	0	0	0	603	903	0
587	8	-11.792	-44.6521	-266.543	-20256.1	27095	-4634.77	301.653	375.995	0	-7.72064	124.051	-561.443	44488.1	8257.03	1993.65	214.707	823.761	0	0	0	0	0	0	0	603	903	0
587	9	-11.9445	-42.821	-272.342	-20256.1	27888.4	-4634.77	302.402	374.377	0	-7.72064	123.288	-556.56	44488.1	8012.89	2268.31	214.397	823.066	0	0	0	0	0	0	0	603	903	0
588	0	-11.029	-41.4478	-277.53	-21171.6	28559.8	-4817.87	302.907	376.286	0	-7.11029	122.983	-552.288	44396.6	8379.1	2451.42	215.172	822.613	0	0	0	0	0	0	0	603	903	0
588	1	-10.4187	-45.2624	-281.192	-20988.5	28926	-4909.43	302.869	374.641	0	-6.34735	123.594	-547.71	43664.2	8318.06	2359.86	215.187	823.279	0	0	0	0	0	0	0	603	903	0
588	2	-10.7238	-47.0935	-286.99	-21446.2	28865	-5367.19	300.578	374.728	0	-3.90594	123.594	-544.048	43297.9	8440.13	2451.42	215.514	823.415	0	0	0	0	0	0	0	603	903	0
588	3	-9.96091	-45.2624	-293.094	-20713.8	30024.6	-4955.2	302.44	370.673	0	-6.19476	123.441	-538.86	43664.2	8073.92	2542.97	214.983	821.969	0	0	0	0	0	0	0	603	903	0
588	4	-8.43503	-46.178	-297.671	-21720.9	30574	-5321.41	302.711	372.969	0	-5.27924	123.136	-531.841	42474	8134.96	2268.31	215.296	823.138	0	0	0	0	0	0	0	603	903	0
588	5	-9.50314	-48.772	-299.197	-20896.9	30635	-5596.07	302.391	369.843	0	-4.66888	121.305	-528.789	42840.2	7768.75	2359.86	214.692	821.984	0	0	0	0	0	0	0	603	903	0
588	6	-8.12985	-49.6875	-303.775	-21629.3	31123.3	-5321.41	302.455	371.202	0	-4.66888	122.983	-522.991	42840.2	7707.71	2451.42	214.738	821.086	0	0	0	0	0	0	0	603	903	0
588	7	-8.7402	-48.4668	-309.268	-21720.9	31672.6	-5687.63	302.412	370.233	0	-4.66888	122.983	-517.497	42840.2	7707.71	2222.53	214.894	820.217	0	0	0	0	0	0	0	603	903	0
588	8	-5.68844	-48.1616	-313.846	-21904	32282.9	-5824.95	302.862	369.792	0	-3.75336	123.288	-514.751	41924.7	8073.92	2405.64	215.685	821.554	0	0	0	0	0	0	0	603	903	0
588	9	-6.90915	-50.1453	-315.982	-22087.1	32893.3	-5687.63	304.099	369.9	0	-3.14301	122.068	-508.342	41375.4	7951.85	2680.3	215.643	821.607	0	0	0	0	0	0	0	603	903	0
589	0	-4.77292	-51.366	-323.611	-22087.1	32710.2	-5916.51	301.079	368.252	0	-4.36371	121.763	-501.628	41558.5	7524.61	2634.52	215	820.153	0	0	0	0	0	0	0	603	903	0
589	1	-5.38327	-50.7556	-326.053	-21904	33930.9	-6557.38	304.066	367.179	0	-3.29559	122.068	-495.22	41924.7	7402.54	2634.52	214.948	818.341	0	0	0	0	0	0	0	603	903	0
589	2	-5.38327	-50.7556	-327.579	-21720.9	34114	-6008.06	304.14	366.307	0	-2.07489	118.863	-490.642	40917.6	7646.68	2451.42	215.585	819.604	0	0	0	0	0	0	0	603	903	0
589	3	-6.2988	-53.96	-334.903	-22453.3	34724.4	-6374.27	303.685	367.044	0	-2.38007	121.305	-486.675	40459.8	7585.64	2680.3	215.587	819.865	0	0	0	0	0	0	0	603	903	0
589	4	-5.38327	-53.5022	-339.175	-23094.2	35212.6	-6832.03	303.818	368.089	0	-3.14301	120.542	-480.876	40459.8	7341.5	2451.42	215.267	818.862	0	0	0	0	0	0	0	603	903	0
589	5	-4.62033	-54.2651	-340.396	-22728	35334.7	-6694.71	303.805	366.769	0	-2.38007	119.626	-473.552	39818.9	7341.5	2497.19	215.503	818.914	0	0	0	0	0	0	0	603	903	0
589	6	-5.07809	-54.2651	-344.363	-22178.7	36067.1	-6740.48	304.736	364.405	0	-2.22748	119.779	-468.364	39727.4	7768.75	2497.19	216.587	818.178	0	0	0	0	0	0	0	603	903	0
589	7	-4.31515	-56.8591	-348.636	-22178.7	36738.5	-7152.47	305.378	363.616	0	-3.29559	119.474	-464.092	39818.9	7890.82	2726.07	217.003	817.2	0	0	0	0	0	0	0	603	903	0
589	8	-4.16256	-58.0798	-351.687	-21904	36982.7	-7198.25	305.158	362.283	0	-1.61713	117.185	-457.683	39269.6	6853.22	2542.97	214.974	817.199	0	0	0	0	0	0	0	603	903	0
589	9	-2.63669	-56.4014	-357.791	-22544.9	37226.8	-7427.13	304.046	363.011	0	-1.46454	116.88	-450.969	38537.2	6975.29	2451.42	215.467	817.546	0	0	0	0	0	0	0	603	903	0
590	0	-2.94186	-58.9954	-361.453	-23185.7	37348.9	-7564.46	303.33	364.146	0	-1.31195	117.49	-444.255	38079.5	7158.4	2634.52	216.113	817.285	0	0	0	0	0	0	0	603	903	0
590	1	-3.55221	-60.5212	-363.284	-23277.3	38142.3	-7793.34	304.993	364.075	0	0.671692	114.591	-437.847	37987.9	6975.29	2405.64	215.931	816.239	0	0	0	0	0	0	0	603	903	0
590	2	-3.85739	-59.1479	-368.167	-21995.6	38874.8	-7701.79	305.59	359.743	0	-0.701599	115.506	-432.353	38354.1	6792.18	2451.42	215.71	814.29	0	0	0	0	0	0	0	603	903	0
590	3	-0.958219	-60.5212	-370.608	-22361.8	38935.8	-7976.44	305.059	360.338	0	-0.0912476	113.981	-425.64	37713.2	6670.11	2359.86	215.671	814.396	0	0	0	0	0	0	0	603	903	0
590	4	-3.55221	-63.573	-373.05	-22544.9	39424.1	-8617.31	305.68	360.434	0	-0.0912476	113.523	-419.231	36889.2	6609.08	2451.42	215.765	815.007	0	0	0	0	0	0	0	603	903	0
590	5	-3.39963	-63.7256	-376.712	-22911.1	39790.3	-8342.65	305.625	360.819	0	0.213928	113.065	-411.907	36797.7	6670.11	2726.07	216.193	813.665	0	0	0	0	0	0	0	603	903	0
590	6	-1.87375	-63.2678	-379.764	-22911.1	39851.3	-8251.1	304.937	360.33	0	0.519104	111.844	-406.719	35973.7	6670.11	2497.19	216.4	814.551	0	0	0	0	0	0	0	603	903	0
590	7	-1.56857	-64.0308	-384.646	-23094.2	40522.7	-8708.86	305.351	360.04	0	0.0613403	110.318	-396.953	35699.1	6609.08	2314.09	216.65	813.067	0	0	0	0	0	0	0	603	903	0
590	8	-2.4841	-64.1833	-386.477	-22453.3	40583.7	-8937.75	305.009	358.097	0	0.366516	109.25	-392.681	34875.1	6425.97	2405.64	216.364	814.187	0	0	0	0	0	0	0	603	903	0
590	9	-2.78927	-65.8618	-388.919	-22636.4	41133.1	-8846.19	305.763	358.203	0	1.12946	108.487	-384.746	34783.5	6364.94	2359.86	216.543	812.594	0	0	0	0	0	0	0	603	903	0
591	0	-1.56857	-65.0989	-392.886	-22453.3	41377.2	-9120.85	305.316	357.15	0	1.12946	107.877	-378.337	34142.7	6120.8	2314.09	216.178	812.756	0	0	0	0	0	0	0	603	903	0
591	1	-2.63669	-64.7937	-394.412	-22728	40888.9	-8983.52	303.671	357.625	0	0.519104	106.199	-372.844	33593.4	5998.73	2497.19	216.089	812.9	0	0	0	0	0	0	0	603	903	0
591	2	-2.33151	-66.3196	-396.853	-23368.8	41987.5	-8937.75	305.801	358.885	0	0.671692	104.52	-364.91	33227.1	5937.69	2680.3	216.272	811.944	0	0	0	0	0	0	0	603	903	0
591	3	-0.347868	-66.167	-398.074	-23002.6	41804.4	-8983.52	305.017	357.785	0	1.73981	104.215	-356.67	32952.5	5998.73	2314.09	216.819	810.611	0	0	0	0	0	0	0	603	903	0
591	4	-0.958219	-66.167	-395.633	-22544.9	42170.7	-9303.96	306.59	356.984	0	2.04498	101.468	-349.651	32037	5754.59	2405.64	216.458	811.375	0	0	0	0	0	0	0	603	903	0
591	5	-0.500455	-67.0825	-403.872	-21995.6	42231.7	-9075.07	304.567	354.462	0	1.28204	101.621	-342.632	31853.9	5266.31	2405.64	215.37	810.032	0	0	0	0	0	0	0	603	903	0
591	6	-0.347868	-68.6084	-401.736	-21995.6	42231.7	-9487.06	305.123	354.751	0	1.43463	100.248	-337.444	31304.5	5632.52	2314.09	216.692	810.23	0	0	0	0	0	0	0	603	903	0
591	7	-0.958219	-67.3877	-409.06	-22544.9	42842	-9395.51	304.733	355.114	0	5.09674	98.4166	-329.814	30846.8	5388.38	2222.53	216.338	809.472	0	0	0	0	0	0	0	603	903	0
591	8	2.09354	-66.9299	-409.06	-23002.6	43208.2	-9807.5	305.628	356.233	0	1.73981	96.7381	-319.744	30022.8	5632.52	2314.09	217.616	809.104	0	0	0	0	0	0	0	603	903	0
591	9	0.56766	-68.1506	-408.45	-22636.4	43147.2	-9624.39	305.636	355.42	0	2.19757	96.1278	-312.419	29473.5	5022.16	2314.09	216.075	808.661	0	0	0	0	0	0	0	603	903	0
592	0	1.48319	-68.761	-411.807	-21904	43818.6	-10036.4	306.406	353.19	0	3.26569	93.5338	-304.485	29839.7	5388.38	2268.31	217.697	804.999	0	0	0	0	0	0	0	603	903	0
592	1	1.63577	-68.9136	-411.502	-21537.8	43879.6	-9944.83	306.633	352.34	0	3.41827	91.8553	-300.823	28741.1	5083.2	2176.76	216.898	807.458	0	0	0	0	0	0	0	603	903	0
592	2	1.94095	-69.2187	-417.3	-21995.6	43940.7	-9349.73	305.298	352.709	0	3.87604	90.7872	-294.109	28008.6	4961.13	2222.53	216.868	807.768	0	0	0	0	0	0	0	603	903	0
592	3	2.24613	-70.1343	-418.216	-23094.2	44367.9	-10173.7	306.089	355.221	0	4.02863	88.0406	-285.564	27734	4655.95	1993.65	216.304	805.88	0	0	0	0	0	0	0	603	903	0
592	4	2.09354	-69.6765	-418.826	-22361.8	44429	-10127.9	306.08	353.392	0	4.3338	86.8199	-278.85	27642.4	4778.02	2039.43	217.135	803.87	0	0	0	0	0	0	0	603	903	0
592	5	2.70389	-69.8291	-421.573	-21812.4	45039.3	-10127.9	306.836	351.741	0	2.35016	84.8363	-273.052	26360.7	4961.13	1764.77	218.169	806.459	0	0	0	0	0	0	0	603	903	0
592	6	3.16165	-70.8972	-422.488	-21812.4	45405.5	-10448.4	307.472	351.629	0	2.50275	82.3949	-266.033	26635.4	4716.99	1856.32	217.731	802.879	0	0	0	0	0	0	0	603	903	0
592	7	3.46683	-71.6601	-421.267	-21080	45283.4	-10356.8	307.493	350.04	0	4.02863	78.4276	-259.319	25536.7	4045.6	2039.43	215.601	804.524	0	0	0	0	0	0	0	603	903	0
592	8	4.53495	-72.7283	-425.845	-21537.8	45527.6	-10356.8	306.911	350.577	0	4.63898	78.275	-249.248	24804.3	4167.67	2222.53	216.721	803.483	0	0	0	0	0	0	0	603	903	0
592	9	5.45047	-73.186	-427.981	-21995.6	45832.8	-10585.7	307.091	351.394	0	2.19757	77.2069	-243.144	23888.8	4411.81	1947.88	218.145	804.751	0	0	0	0	0	0	0	603	903	0
593	0	6.21341	-72.2705	-432.254	-21720.9	46321	-10585.7	307.162	350.25	0	3.26569	74.7655	-237.041	24438.1	4594.92	1902.1	219.385	799.904	0	0	0	0	0	0	0	603	903	0
593	1	7.12894	-72.8809	-432.254	-21537.8	46748.3	-10677.3	308.15	349.827	0	3.72345	72.7818	-230.327	23339.5	4106.64	1764.77	217.83	801.668	0	0	0	0	0	0	0	603	903	0
593	2	7.28153	-73.949	-436.221	-20805.4	46748.3	-10814.6	307.167	347.695	0	1.8924	72.0189	-223.308	22515.5	3984.56	1581.66	217.843	802.173	0	0	0	0	0	0	0	603	903	0
593	3	8.04447	-73.949	-437.137	-20896.9	47358.6	-10768.8	308.338	347.804	0	3.87604	71.7137	-216.594	22240.8	3740.42	1581.66	217.269	800.316	0	0	0	0	0	0	0	603	903	0
593	4	7.5867	-74.8645	-441.104	-21537.8	47297.6	-11089.2	307.226	348.827	0	4.79156	67.2887	-210.186	21874.6	3801.46	1718.99	218.086	798.927	0	0	0	0	0	0	0	603	903	0
593	5	8.80741	-75.0171	-444.461	-20072.9	47480.7	-10997.7	306.828	345.162	0	2.96051	67.7464	-202.861	20959.1	3679.39	1718.99	218.137	799.683	0	0	0	0	0	0	0	603	903	0
593	6	10.791	-75.4748	-445.987	-20988.5	48518.3	-11089.2	308.789	347.061	0	1.58722	64.6947	-196.147	20684.4	3557.32	1261.23	218.136	797.547	0	0	0	0	0	0	0	603	903	0
593	7	11.554	-75.3223	-451.175	-20439.2	48640.4	-11272.3	307.808	345.302	0	2.19757	63.0162	-187.908	20226.7	3374.21	1444.34	217.957	795.359	0	0	0	0	0	0	0	603	903	0
593	8	12.1643	-77.0007	-454.226	-19249	49128.7	-11363.9	308.159	342.377	0	1.8924	60.88	-182.72	19494.2	3191.11	1398.56	217.465	796.311	0	0	0	0	0	0	0	603	903	0
593	9	11.2488	-78.374	-456.058	-19981.4	49433.8	-11638.6	308.394	343.813	0	3.57086	58.4386	-177.837	18578.7	3069.04	1352.78	217.258	798.529	0	0	0	0	0	0	0	603	903	0
594	0	12.3169	-77.7637	-464.908	-19981.4	50349.4	-11775.9	308.3	342.979	0	2.50275	55.0816	-169.902	18761.8	3374.21	1581.66	219.86	792.573	0	0	0	0	0	0	0	603	903	0
594	1	15.3687	-78.2214	-471.011	-19981.4	51264.9	-11226.6	308.84	342.422	0	1.8924	53.8609	-164.409	18212.5	3069.04	1718.99	218.667	792.225	0	0	0	0	0	0	0	603	903	0
594	2	16.742	-83.2568	-475.894	-19340.5	51387	-12050.5	307.98	340.64	0	0.82428	52.0299	-157.695	17388.5	2946.97	1123.9	218.688	792.733	0	0	0	0	0	0	0	603	903	0
594	3	16.5894	-85.8508	-474.673	-18699.7	51875.2	-12462.5	309.286	339.395	0	1.12946	51.7247	-150.981	16930.8	2641.79	1123.9	217.497	790.862	0	0	0	0	0	0	0	603	903	0
594	4	14.9109	-86.156	-476.809	-18699.7	52241.5	-12599.9	309.565	339.218	0	2.04498	49.7411	-148.845	16656.1	2702.83	1352.78	218.159	791.098	0	0	0	0	0	0	0	603	903	0
594	5	17.5049	-87.2241	-484.134	-19157.4	52241.5	-13057.6	307.907	339.571	0	1.8924	46.9945	-142.436	16015.2	2763.86	1398.56	219.404	790.562	0	0	0	0	0	0	0	603	903	0
594	6	17.0472	-91.1914	-487.796	-19340.5	52485.6	-13195	307.597	339.649	0	1.12946	43.7901	-136.333	15191.3	2641.79	940.795	219.378	791.572	0	0	0	0	0	0	0	603	903	0
594	7	16.2842	-91.0388	-485.049	-19157.4	53034.9	-13240.7	309.339	339.496	0	0.0613403	41.5013	-126.873	14458.8	2458.69	1261.23	219.379	789.036	0	0	0	0	0	0	0	603	903	0
594	8	17.0472	-89.9707	-491.153	-20072.9	53157	-13332.3	308.229	340.869	0	0.671692	37.9918	-124.126	14367.3	2275.58	940.795	218.333	787.252	0	0	0	0	0	0	0	603	903	0
594	9	17.6575	-88.75	-494.51	-19432.1	53767.3	-13240.7	308.729	339.296	0	1.28204	37.534	-119.548	13909.5	2336.62	1032.35	219.545	786.649	0	0	0	0	0	0	0	603	903	0
595	0	16.742	-89.9707	-494.815	-18608.1	54194.6	-12462.5	309.525	337.606	0	-0.0912476	34.6349	-116.497	13543.3	2519.72	895.019	221.629	786.745	0	0	0	0	0	0	0	603	903	0
595	1	17.6575	-89.6655	-500.308	-19432.1	54255.6	-12599.9	308.444	338.84	0	-0.549011	32.8038	-110.088	12810.9	2031.44	620.36	218.453	786.63	0	0	0	0	0	0	0	603	903	0
595	2	19.6411	-87.6819	-503.97	-19615.2	54743.9	-13057.6	308.625	338.921	0	0.0613403	31.2779	-105.815	12261.6	1604.19	849.242	215.16	787.123	0	0	0	0	0	0	0	603	903	0
595	3	20.4041	-86.156	-506.106	-19432.1	55110.1	-12874.5	308.89	338.395	0	0.366516	30.0572	-102.153	12078.5	1604.19	986.571	215.704	784.761	0	0	0	0	0	0	0	603	903	0
595	4	22.2351	-86.9189	-514.041	-18516.5	55659.4	-12462.5	308.278	336.022	0	-0.701599	28.9891	-97.5756	11437.6	2092.47	757.69	221.445	785.782	0	0	0	0	0	0	0	603	903	0
595	5	22.2351	-87.0715	-514.346	-18699.7	56269.8	-13057.6	309.401	336.356	0	-1.76971	27.3106	-91.7773	11895.4	2153.51	666.137	223.465	773.389	0	0	0	0	0	0	0	603	903	0
595	6	22.6929	-85.5456	-517.398	-18608.1	56574.9	-13103.4	309.345	335.965	0	-0.854187	25.6322	-88.7255	11529.1	1482.12	803.466	216.705	773.058	0	0	0	0	0	0	0	603	903	0
595	7	22.6929	-86.0034	-519.534	-18608.1	56636	-12142.1	309.013	335.817	0	0.213928	23.8011	-86.2841	10339	1115.91	620.36	212.933	783.175	0	0	0	0	0	0	0	603	903	0
595	8	23.3033	-89.3603	-522.586	-18791.2	56636	-13057.6	308.376	335.958	0	1.58722	21.6649	-83.5376	10247.4	1665.23	574.584	219.934	780.332	0	0	0	0	0	0	0	603	903	0
595	9	23.761	-87.9871	-525.638	-18882.8	57063.2	-13057.6	308.56	335.924	0	-0.396423	18.9183	-78.0444	9606.54	1787.3	620.36	222.901	779.909	0	0	0	0	0	0	0	603	903	0
596	0	24.6765	-87.3767	-525.943	-18974.3	57856.7	-13011.8	310.006	336.077	0	-0.701599	19.2235	-71.9409	9972.75	1299.02	574.584	218.057	764.376	0	0	0	0	0	0	0	603	903	0
596	1	25.4395	-88.9026	-528.079	-17509.5	57856.7	-12874.5	309.561	333.157	0	-2.07489	17.2398	-73.1616	9057.22	1054.88	391.479	214.418	779.202	0	0	0	0	0	0	0	603	903	0
596	2	25.4395	-90.581	-531.436	-17967.2	58039.8	-13286.5	309.213	333.809	0	-1.31195	18.6131	-70.7202	9057.22	1115.91	437.255	215.779	774.929	0	0	0	0	0	0	0	603	903	0
596	3	25.5921	-89.9707	-536.014	-18608.1	58650.1	-13561.2	309.419	334.716	0	-0.243835	17.2398	-67.6684	8691.01	993.842	574.584	214.687	774.565	0	0	0	0	0	0	0	603	903	0
596	4	26.8128	-90.581	-540.896	-18241.9	58589.1	-13561.2	308.319	333.725	0	-0.0912476	15.714	-64.9218	8599.46	1237.98	849.242	219.069	770.541	0	0	0	0	0	0	0	603	903	0
596	5	26.9654	-91.8018	-542.727	-17967.2	59138.4	-13240.7	308.965	333.105	0	-0.243835	14.7984	-63.0908	8141.69	1237.98	483.031	219.622	773.953	0	0	0	0	0	0	0	603	903	0
596	6	27.118	-91.9543	-547	-17326.4	59870.8	-13561.2	309.453	331.675	0	-0.549011	14.3407	-61.5649	8324.8	993.842	208.373	216.143	767.78	0	0	0	0	0	0	0	603	903	0
596	7	27.2705	-92.7173	-549.136	-17326.4	59870.8	-13698.5	309.027	331.552	0	-0.549011	12.9674	-55.1562	7317.72	1237.98	391.479	222.445	770.327	0	0	0	0	0	0	0	603	903	0
596	8	27.7283	-92.5647	-550.357	-17417.9	60298.1	-13469.6	309.562	331.648	0	-2.07489	12.357	-57.2924	7500.82	1054.88	208.373	218.412	772.078	0	0	0	0	0	0	0	603	903	0
596	9	27.4231	-93.175	-554.019	-17601	60481.2	-13927.4	309.168	331.77	0	-1.76971	12.0519	-54.5458	7317.72	871.772	528.808	215.982	768.843	0	0	0	0	0	0	0	603	903	0
597	0	29.5594	-92.8699	-558.597	-17234.8	60786.4	-13606.9	308.82	330.854	0	-0.396423	11.4415	-52.1044	6676.85	932.807	620.36	217.903	774.857	0	0	0	0	0	0	0	603	903	0
597	1	30.1697	-92.8699	-559.512	-17417.9	61701.9	-13332.3	310.278	331.131	0	-1.15936	11.2889	-49.663	6493.74	1115.91	620.36	222.47	772.244	0	0	0	0	0	0	0	603	903	0
597	2	30.0171	-93.0225	-564.395	-17051.7	61457.8	-13286.5	308.891	330.212	0	0.213928	10.6786	-47.2216	6035.98	1054.88	299.926	222.339	775.178	0	0	0	0	0	0	0	603	903	0
597	3	30.0171	-93.175	-566.226	-16593.9	62068.1	-13652.7	309.617	329.306	0	0.0613403	10.3734	-45.6958	6219.09	810.736	254.149	217.742	766.902	0	0	0	0	0	0	0	603	903	0
597	4	29.5594	-93.7854	-569.888	-17234.8	62495.4	-13561.2	309.663	330.242	0	-0.854187	9.15268	-44.1699	6585.3	810.736	299.926	218.355	753.91	0	0	0	0	0	0	0	603	903	0
597	5	29.5594	-93.0225	-573.55	-17143.3	62556.4	-13881.6	309.069	329.89	0	-2.68524	9.61045	-41.7285	5395.11	871.772	299.926	220.892	773.709	0	0	0	0	0	0	0	603	903	0
597	6	30.7801	-92.2595	-573.855	-16502.4	63044.7	-13515.4	309.862	328.757	0	-2.22748	9.45786	-41.4233	4937.35	1054.88	208.373	225.466	783.807	0	0	0	0	0	0	0	603	903	0
597	7	30.4749	-92.4121	-576.907	-17509.5	63044.7	-13561.2	309.28	330.351	0	-1.15936	9.00009	-38.0664	4571.14	688.666	391.479	218.091	782.917	0	0	0	0	0	0	0	603	903	0
597	8	31.0852	-91.8018	-576.602	-17234.8	63410.9	-13698.5	309.973	329.89	0	-2.22748	8.69492	-33.7939	4479.58	627.631	254.149	218.572	770.444	0	0	0	0	0	0	0	603	903	0
597	9	31.2378	-91.9543	-582.4	-16502.4	63838.1	-13057.6	309.612	328.335	0	-2.53265	8.54233	-29.5214	4662.69	688.666	299.926	223.328	745.057	0	0	0	0	0	0	0	603	903	0
598	0	32.1534	-91.8018	-588.504	-16319.3	63899.2	-13561.2	308.579	327.73	0	-1.00677	8.23715	-31.6577	4296.48	627.631	162.597	219.826	767.283	0	0	0	0	0	0	0	603	903	0
598	1	31.6956	-91.8018	-590.03	-16960.2	64448.5	-13103.4	309.229	328.745	0	-1.61713	8.38974	-30.437	3472.5	383.49	25.2677	212.6	788.912	0	0	0	0	0	0	0	603	903	0
598	2	31.543	-90.7336	-588.809	-16777	64631.6	-13378.1	309.767	328.493	0	-2.68524	8.08457	-27.9956	3380.95	261.42	71.0441	209.338	782.233	0	0	0	0	0	0	0	603	903	0
598	3	32.1534	-91.6492	-595.828	-17143.3	64753.7	-13240.7	308.678	328.772	0	-2.68524	7.77939	-24.9438	2923.19	688.666	71.0441	227.609	785.809	0	0	0	0	0	0	0	603	903	0
598	4	32.7637	-90.7336	-597.964	-16502.4	65486.1	-13240.7	309.515	327.598	0	-1.61713	7.93198	-22.8076	3197.85	749.701	116.82	232.871	762.79	0	0	0	0	0	0	0	603	903	0
598	5	32.1534	-90.2759	-598.269	-15678.4	65608.2	-13332.3	309.663	326.206	0	-3.14301	8.08457	-22.8076	3014.74	261.42	116.82	211.462	770.818	0	0	0	0	0	0	0	603	903	0
598	6	32.7637	-90.1233	-601.626	-16593.9	65730.2	-13423.8	309.254	327.582	0	0	0	0	0	0	0	200	903	0	0	0	0	0	0	0	603	903	0
598	7	33.5266	-89.9707	-604.373	-17051.7	65608.2	-12508.3	308.556	328.214	0	-1.76971	5.79575	-18.5351	2099.21	261.42	391.479	214.104	789.744	0	0	0	0	0	0	0	603	903	0
598	8	33.5266	-89.8181	-606.814	-16777	66096.5	-13240.7	308.924	327.648	0	0	0	0	0	0	0	200	903	0	0	0	0	0	0	0	603	903	0
598	9	33.8318	-90.2759	-610.782	-16960.2	66950.9	-13103.4	309.615	327.768	0	0	0	0	0	0	0	200	903	0	0	0	0	0	0	0	603	903	0
599	0	34.2896	-88.9026	-613.528	-16227.7	67011.9	-12874.5	309.224	326.45	0	0	0	0	0	0	0	200	903	0	0	0	0	0	0	0	603	903	0
599	1	33.6792	-89.5129	-615.054	-16410.8	67317.2	-13469.6	309.449	326.682	0	0	0	0	0	0	0	200	903	0	0	0	0	0	0	0	603	903	0
599	2	33.5266	-89.8181	-619.021	-16227.7	67317.2	-13103.4	308.748	326.215	0	0	0	0	0	0	0	200	903	0	0	0	0	0	0	0	603	903	0
599	3	33.8318	-89.5129	-618.716	-16868.6	67195.1	-12920.3	308.604	327.264	0	0	0	0	0	0	0	200	903	0	0	0	0	0	0	0	603	903	0
599	4	34.7473	-88.4448	-618.106	-16502.4	67805.4	-12828.7	309.699	326.698	0	0	0	0	0	0	0	200	903	0	0	0	0	0	0	0	603	903	0
599	5	35.5103	-88.9026	-624.209	-16960.2	68476.8	-12966.1	309.702	327.171	0	0	0	0	0	0	0	200	903	0	0	0	0	0	0	0	603	903	0
599	6	34.7473	-87.5293	-624.82	-16044.6	68293.7	-13240.7	309.301	325.679	0	0	0	0	0	0	0	200	903	0	0	0	0	0	0	0	603	903	0
599	7	34.8999	-88.75	-629.092	-15861.5	68598.9	-12874.5	309.044	325.213	0	0	0	0	0	0	0	200	903	0	0	0	0	0	0	0	603	903	0
599	8	36.1206	-87.8345	-631.839	-16136.2	68843	-12966.1	308.957	325.538	0	0	0	0	0	0	0	200	903	0	0	0	0	0	0	0	603	903	0
599	9	35.2051	-87.8345	-634.891	-16685.5	69026.1	-12966.1	308.721	326.281	0	0	0	0	0	0	0	200	903	0	0	0	0	0	0	0	603	903	0
600	0	35.6629	-87.2241	-636.416	-16593.9	69514.4	-12599.9	309.228	326.074	0	0	0	0	0	0	0	200	903	0	0	0	0	0	0	0	603	903	0
600	1	36.731	-86.7663	-634.891	-16685.5	69331.3	-12966.1	309.202	326.281	0	0	0	0	0	0	0	200	903	0	0	0	0	0	0	0	603	903	0
600	2	35.8155	-86.3086	-638.247	-14854.4	69758.6	-12783	309.297	323.274	0	0	0	0	0	0	0	200	903	0	0	0	0	0	0	0	603	903	0
600	3	35.2051	-86.9189	-638.247	-16136.2	70124.8	-12783	309.871	325.282	0	0	0	0	0	0	0	200	903	0	0	0	0	0	0	0	603	903	0
600	4	36.1206	-87.0715	-642.52	-15678.4	69758.6	-12416.8	308.57	324.401	0	0	0	0	0	0	0	200	903	0	0	0	0	0	0	0	603	903	0
600	5	36.1206	-86.6138	-644.656	-16136.2	70613.1	-12645.6	309.536	325.031	0	0	0	0	0	0	0	200	903	0	0	0	0	0	0	0	603	903	0
600	6	36.8836	-85.8508	-648.623	-16319.3	70491	-12737.2	308.678	325.16	0	0	0	0	0	0	0	200	903	0	0	0	0	0	0	0	603	903	0
600	7	36.731	-85.5456	-649.234	-16593.9	70979.3	-12828.7	309.328	325.559	0	0	0	0	0	0	0	200	903	0	0	0	0	0	0	0	603	903	0
600	8	35.5103	-85.3931	-651.37	-16044.6	71162.3	-12508.3	309.25	324.632	0	0	0	0	0	0	0	200	903	0	0	0	0	0	0	0	603	903	0
600	9	35.9681	-85.0879	-654.422	-15220.6	70979.3	-12645.6	308.461	323.258	0	0	0	0	0	0	0	200	903	0	0	0	0	0	0	0	603	903	0
601	0	35.5103	-85.0879	-655.948	-15403.7	71345.5	-12371	308.767	323.483	0	0	0	0	0	0	0	200	903	0	0	0	0	0	0	0	603	903	0
601	1	35.6629	-85.0879	-655.337	-15770	71589.6	-12416.8	309.241	324.064	0	0	0	0	0	0	0	200	903	0	0	0	0	0	0	0	603	903	0
601	2	35.5103	-84.4775	-658.389	-15861.5	71711.7	-12462.5	308.92	324.091	0	0	0	0	0	0	0	200	903	0	0	0	0	0	0	0	603	903	0
601	3	36.4258	-83.562	-658.389	-15678.4	71711.7	-12233.6	308.92	323.813	0	0	0	0	0	0	0	200	903	0	0	0	0	0	0	0	603	903	0
601	4	35.5103	-83.2568	-660.831	-14762.9	72138.9	-12554.1	309.164	322.34	0	0	0	0	0	0	0	200	903	0	0	0	0	0	0	0	603	903	0
601	5	36.5784	-83.562	-662.967	-14488.2	72016.8	-12416.8	308.628	321.854	0	0	0	0	0	0	0	200	903	0	0	0	0	0	0	0	603	903	0
601	6	36.1206	-84.3249	-666.018	-15037.5	72810.3	-12050.5	309.322	322.578	0	0	0	0	0	0	0	200	903	0	0	0	0	0	0	0	603	903	0
601	7	36.4258	-83.4094	-664.187	-15495.3	72322	-12233.6	308.888	323.33	0	0	0	0	0	0	0	200	903	0	0	0	0	0	0	0	603	903	0
601	8	36.4258	-82.3413	-668.765	-14762.9	72932.4	-12004.8	309.055	322.075	0	0	0	0	0	0	0	200	903	0	0	0	0	0	0	0	603	903	0
601	9	35.9681	-83.562	-669.07	-15220.6	72627.2	-12187.9	308.549	322.749	0	0	0	0	0	0	0	200	903	0	0	0	0	0	0	0	603	903	0
602	0	35.9681	-81.4258	-669.681	-14213.6	72810.3	-11684.3	308.724	321.224	0	0	0	0	0	0	0	200	903	0	0	0	0	0	0	0	603	903	0
602	1	34.2896	-82.3413	-668.155	-14213.6	72932.4	-12004.8	309.155	321.273	0	0	0	0	0	0	0	200	903	0	0	0	0	0	0	0	603	903	0
602	2	35.3577	-83.1042	-672.427	-14396.7	72261	-11913.2	307.463	321.41	0	0	0	0	0	0	0	200	903	0	0	0	0	0	0	0	603	903	0
602	3	36.1206	-82.9517	-673.648	-14488.2	73359.6	-11775.9	308.899	321.507	0	0	0	0	0	0	0	200	903	0	0	0	0	0	0	0	603	903	0
602	4	35.8155	-80.0525	-676.7	-14671.3	73847.9	-11775.9	309.13	321.681	0	0	0	0	0	0	0	200	903	0	0	0	0	0	0	0	603	903	0
602	5	35.6629	-79.8999	-679.141	-13938.9	73542.7	-11867.4	308.288	320.524	0	0	0	0	0	0	0	200	903	0	0	0	0	0	0	0	603	903	0
602	6	34.8999	-80.2051	-678.531	-13847.4	73420.7	-11867.4	308.205	320.408	0	0	0	0	0	0	0	200	903	0	0	0	0	0	0	0	603	903	0
602	7	34.2896	-80.0525	-682.193	-13755.8	73786.9	-11730.1	308.161	320.164	0	0	0	0	0	0	0	200	903	0	0	0	0	0	0	0	603	903	0
602	8	36.2732	-80.0525	-681.582	-14396.7	73909	-11684.3	308.437	321.122	0	0	0	0	0	0	0	200	903	0	0	0	0	0	0	0	603	903	0
602	9	35.0525	-78.5266	-682.498	-14305.1	74397.2	-11409.7	309.007	320.96	0	0	0	0	0	0	0	200	903	0	0	0	0	0	0	0	603	903	0
603	0	37.6465	-78.5266	-681.277	-13847.4	73725.8	-11363.9	308.217	320.326	0	0	0	0	0	0	0	200	903	0	0	0	0	0	0	0	603	903	0
603	1	34.7473	-77.9163	-683.719	-13023.4	74214.1	-11272.3	308.545	319.048	0	0	0	0	0	0	0	200	903	0	0	0	0	0	0	0	603	903	0
603	2	35.9681	-77.7637	-685.55	-13206.5	74702.4	-11363.9	308.967	319.264	0	0	0	0	0	0	0	200	903	0	0	0	0	0	0	0	603	903	0
603	3	34.5948	-78.374	-687.686	-12931.8	74519.3	-11226.6	308.362	318.805	0	0	0	0	0	0	0	200	903	0	0	0	0	0	0	0	603	903	0
603	4	34.5948	-77.3059	-686.16	-13755.8	74031	-11455.4	307.892	320.048	0	0	0	0	0	0	0	200	903	0	0	0	0	0	0	0	603	903	0
603	5	33.9844	-76.2378	-688.602	-13847.4	74519.3	-10997.7	308.218	320.109	0	0	0	0	0	0	0	200	903	0	0	0	0	0	0	0	603	903	0
603	6	33.9844	-75.1697	-689.822	-13114.9	74885.5	-11272.3	308.558	319.012	0	0	0	0	0	0	0	200	903	0	0	0	0	0	0	0	603	903	0
603	7	35.0525	-74.7119	-688.296	-12565.6	74702.4	-10997.7	308.532	318.256	0	0	0	0	0	0	0	200	903	0	0	0	0	0	0	0	603	903	0
603	8	33.3741	-74.7119	-689.822	-12291	74702.4	-10906.1	308.292	317.818	0	0	0	0	0	0	0	200	903	0	0	0	0	0	0	0	603	903	0
603	9	33.9844	-75.3223	-687.381	-12931.8	75068.6	-10494.1	309.21	318.813	0	0	0	0	0	0	0	200	903	0	0	0	0	0	0	0	603	903	0
604	0	34.2896	-75.1697	-691.043	-12565.6	74641.4	-10768.8	308.013	318.184	0	0	0	0	0	0	0	200	903	0	0	0	0	0	0	0	603	903	0
604	1	33.9844	-73.186	-691.348	-12840.3	75312.7	-10448.4	308.936	318.573	0	0	0	0	0	0	0	200	903	0	0	0	0	0	0	0	603	903	0
604	2	35.0525	-72.8809	-693.484	-12291	75312.7	-10860.4	308.6	317.723	0	0	0	0	0	0	0	200	903	0	0	0	0	0	0	0	603	903	0
604	3	33.6792	-72.2705	-693.789	-11192.3	75068.6	-10356.8	308.201	316.132	0	0	0	0	0	0	0	200	903	0	0	0	0	0	0	0	603	903	0
604	4	33.5266	-72.8809	-690.738	-11741.6	75007.6	-10860.4	308.591	316.999	0	0	0	0	0	0	0	200	903	0	0	0	0	0	0	0	603	903	0
604	5	33.5266	-72.4231	-695.315	-12474.1	74763.4	-10814.6	307.525	317.94	0	0	0	0	0	0	0	200	903	0	0	0	0	0	0	0	603	903	0
604	6	33.3741	-71.0498	-695.01	-11924.7	74641.4	-10494.1	307.396	317.158	0	0	0	0	0	0	0	200	903	0	0	0	0	0	0	0	603	903	0
604	7	34.8999	-71.0498	-693.179	-12107.8	75434.8	-10402.6	308.824	317.467	0	0	0	0	0	0	0	200	903	0	0	0	0	0	0	0	603	903	0
604	8	33.3741	-69.5239	-693.179	-11375.4	75129.7	-10356.8	308.384	316.411	0	0	0	0	0	0	0	200	903	0	0	0	0	0	0	0	603	903	0
604	9	32.7637	-69.9817	-693.179	-11100.8	75373.8	-10219.5	308.736	316.014	0	0	0	0	0	0	0	200	903	0	0	0	0	0	0	0	603	903	0
605	0	32.6111	-69.6765	-693.484	-10368.3	75190.7	-10127.9	308.424	314.951	0	0	0	0	0	0	0	200	903	0	0	0	0	0	0	0	603	903	0
605	1	32.9163	-69.5239	-692.874	-11467	74763.4	-9944.83	307.903	316.55	0	0	0	0	0	0	0	200	903	0	0	0	0	0	0	0	603	903	0
605	2	34.8999	-68.3032	-694.095	-11192.3	75373.8	-9899.05	308.593	316.125	0	0	0	0	0	0	0	200	903	0	0	0	0	0	0	0	603	903	0
605	3	33.8318	-67.0825	-694.4	-10551.5	75129.7	-10127.9	308.194	315.195	0	0	0	0	0	0	0	200	903	0	0	0	0	0	0	0	603	903	0
605	4	33.5266	-67.2351	-693.484	-10093.7	75007.6	-9853.28	308.16	314.555	0	0	0	0	0	0	0	200	903	0	0	0	0	0	0	0	603	903	0
605	5	33.0689	-67.2351	-693.484	-10185.2	75007.6	-9944.83	308.16	314.687	0	0	0	0	0	0	0	200	903	0	0	0	0	0	0	0	603	903	0
605	6	32.6111	-67.2351	-692.264	-10643	74214.1	-9899.05	307.205	315.374	0	0	0	0	0	0	0	200	903	0	0	0	0	0	0	0	603	903	0
605	7	32.6111	-65.7092	-690.738	-10276.8	74824.4	-9349.73	308.325	314.878	0	0	0	0	0	0	0	200	903	0	0	0	0	0	0	0	603	903	0
605	8	33.2215	-66.3196	-690.433	-10276.8	74641.4	-9441.29	308.108	314.885	0	0	0	0	0	0	0	200	903	0	0	0	0	0	0	0	603	903	0
605	9	33.2215	-64.3359	-688.602	-9544.37	74397.2	-9395.51	308.041	313.861	0	0	0	0	0	0	0	200	903	0	0	0	0	0	0	0	603	903	0
606	0	32.3059	-64.9463	-688.296	-9361.27	74824.4	-9212.4	308.71	313.601	0	0	0	0	0	0	0	200	903	0	0	0	0	0	0	0	603	903	0
606	1	33.0689	-64.6411	-687.381	-8903.5	74336.2	-9395.51	308.144	312.953	0	0	0	0	0	0	0	200	903	0	0	0	0	0	0	0	603	903	0
606	2	33.6792	-63.7256	-686.77	-9635.93	74397.2	-9303.96	308.329	314.031	0	0	0	0	0	0	0	200	903	0	0	0	0	0	0	0	603	903	0
606	3	34.137	-62.6575	-687.686	-9727.48	74153.1	-9349.73	307.83	314.145	0	0	0	0	0	0	0	200	903	0	0	0	0	0	0	0	603	903	0
606	4	34.137	-62.1997	-685.55	-8811.95	74153.1	-9029.3	308.166	312.854	0	0	0	0	0	0	0	200	903	0	0	0	0	0	0	0	603	903	0
606	5	33.0689	-62.1997	-681.277	-8903.5	73603.7	-9075.07	308.038	313.069	0	0	0	0	0	0	0	200	903	0	0	0	0	0	0	0	603	903	0
606	6	32.1534	-62.3523	-683.108	-8262.63	73847.9	-8983.52	308.106	312.096	0	0	0	0	0	0	0	200	903	0	0	0	0	0	0	0	603	903	0
606	7	32.9163	-61.5894	-683.108	-8903.5	73786.9	-8937.75	308.016	313.034	0	0	0	0	0	0	0	200	903	0	0	0	0	0	0	0	603	903	0
606	8	33.3741	-61.2842	-679.446	-9178.16	73786.9	-8663.09	308.599	313.508	0	0	0	0	0	0	0	200	903	0	0	0	0	0	0	0	603	903	0
606	9	32.7637	-60.3686	-677.31	-8903.5	72627.2	-8205.32	307.229	313.145	0	0	0	0	0	0	0	200	903	0	0	0	0	0	0	0	603	903	0
607	0	33.8318	-59.1479	-676.394	-8262.63	73542.7	-8617.31	308.728	312.216	0	0	0	0	0	0	0	200	903	0	0	0	0	0	0	0	603	903	0
607	1	33.2215	-58.5376	-675.479	-7713.32	73359.6	-8617.31	308.604	311.419	0	0	0	0	0	0	0	200	903	0	0	0	0	0	0	0	603	903	0
607	2	34.2896	-58.6902	-675.174	-7438.66	72993.4	-8571.53	308.111	311.017	0	0	0	0	0	0	0	200	903	0	0	0	0	0	0	0	603	903	0
607	3	33.3741	-58.385	-673.953	-7164	72993.4	-8251.1	308.306	310.63	0	0	0	0	0	0	0	200	903	0	0	0	0	0	0	0	603	903	0
607	4	33.3741	-57.6221	-672.122	-7804.87	72627.2	-8617.31	308.057	311.612	0	0	0	0	0	0	0	200	903	0	0	0	0	0	0	0	603	903	0
607	5	33.2215	-57.0117	-671.206	-7713.32	72932.4	-8342.65	308.659	311.492	0	0	0	0	0	0	0	200	903	0	0	0	0	0	0	0	603	903	0
607	6	33.6792	-56.4014	-667.544	-6797.79	72932.4	-8159.55	309.255	310.183	0	0	0	0	0	0	0	200	903	0	0	0	0	0	0	0	603	903	0
607	7	32.7637	-56.0962	-666.934	-5882.27	72138.9	-8388.43	308.165	308.82	0	0	0	0	0	0	0	200	903	0	0	0	0	0	0	0	603	903	0
607	8	33.2215	-57.1643	-663.577	-6523.13	72138.9	-8113.77	308.712	309.83	0	0	0	0	0	0	0	200	903	0	0	0	0	0	0	0	603	903	0
607	9	33.3741	-55.6384	-663.882	-6980.9	71223.4	-7930.67	307.283	310.515	0	0	0	0	0	0	0	200	903	0	0	0	0	0	0	0	603	903	0
608	0	33.6792	-54.7229	-662.662	-6797.79	71406.5	-7839.11	307.757	310.258	0	0	0	0	0	0	0	200	903	0	0	0	0	0	0	0	603	903	0
608	1	33.9844	-53.5022	-661.136	-6706.24	71833.8	-7793.34	308.652	310.144	0	0	0	0	0	0	0	200	903	0	0	0	0	0	0	0	603	903	0
608	2	32.6111	-53.6548	-656.253	-5699.16	71162.3	-8067.99	308.437	308.684	0	0	0	0	0	0	0	200	903	0	0	0	0	0	0	0	603	903	0
608	3	32.1534	-52.5867	-656.253	-5607.61	71528.5	-7884.89	308.995	308.545	0	0	0	0	0	0	0	200	903	0	0	0	0	0	0	0	603	903	0
608	4	32.1534	-52.5867	-654.117	-5790.71	71101.3	-7610.23	308.698	308.853	0	0	0	0	0	0	0	200	903	0	0	0	0	0	0	0	603	903	0
608	5	32.3059	-51.5186	-653.506	-4783.63	70796.1	-7518.68	308.333	307.32	0	0	0	0	0	0	0	200	903	0	0	0	0	0	0	0	603	903	0
608	6	33.2215	-51.9763	-650.455	-5424.5	70674.1	-7289.8	308.653	308.34	0	0	0	0	0	0	0	200	903	0	0	0	0	0	0	0	603	903	0
608	7	33.5266	-50.1453	-647.098	-4966.74	70124.8	-7289.8	308.368	307.675	0	0	0	0	0	0	0	200	903	0	0	0	0	0	0	0	603	903	0
608	8	32.6111	-50.2978	-645.267	-4234.31	69758.6	-7106.69	308.108	306.562	0	0	0	0	0	0	0	200	903	0	0	0	0	0	0	0	603	903	0
608	9	33.3741	-51.9763	-645.877	-4417.42	70063.7	-7244.02	308.478	306.839	0	0	0	0	0	0	0	200	903	0	0	0	0	0	0	0	603	903	0
609	0	33.0689	-49.5349	-644.351	-4600.53	70002.7	-7427.13	308.641	307.14	0	0	0	0	0	0	0	200	903	0	0	0	0	0	0	0	603	903	0
609	1	32.6111	-48.1616	-641.91	-4875.19	69636.5	-7244.02	308.483	307.595	0	0	0	0	0	0	0	200	903	0	0	0	0	0	0	0	603	903	0
609	2	32.6111	-47.7039	-641.299	-4234.31	69514.4	-6832.03	308.396	306.603	0	0	0	0	0	0	0	200	903	0	0	0	0	0	0	0	603	903	0
609	3	33.3741	-48.1616	-635.806	-4051.21	69148.2	-7015.14	308.757	306.372	0	0	0	0	0	0	0	200	903	0	0	0	0	0	0	0	603	903	0
609	4	32.0008	-47.0935	-634.585	-3410.34	68293.7	-6969.36	307.619	305.374	0	0	0	0	0	0	0	200	903	0	0	0	0	0	0	0	603	903	0
609	5	33.0689	-46.9409	-632.754	-3868.1	68659.9	-6694.71	308.51	306.113	0	0	0	0	0	0	0	200	903	0	0	0	0	0	0	0	603	903	0
609	6	32.6111	-45.7202	-630.618	-4142.76	68415.8	-6328.49	308.49	306.569	0	0	0	0	0	0	0	200	903	0	0	0	0	0	0	0	603	903	0
609	7	33.0689	-45.7202	-626.956	-3501.89	68537.9	-6465.82	309.318	305.586	0	0	0	0	0	0	0	200	903	0	0	0	0	0	0	0	603	903	0
609	8	32.4585	-44.9573	-629.397	-3135.68	67866.4	-6648.93	307.828	304.982	0	0	0	0	0	0	0	200	903	0	0	0	0	0	0	0	603	903	0
609	9	32.7637	-44.4995	-626.651	-2952.58	68171.6	-6374.27	308.787	304.712	0	0	0	0	0	0	0	200	903	0	0	0	0	0	0	0	603	903	0
610	0	31.8482	-44.1943	-624.515	-2861.02	67744.4	-6236.94	308.475	304.581	0	0	0	0	0	0	0	200	903	0	0	0	0	0	0	0	603	903	0
610	1	31.543	-43.8892	-623.294	-2769.47	67195.1	-6374.27	307.806	304.443	0	0	0	0	0	0	0	200	903	0	0	0	0	0	0	0	603	903	0
610	2	31.543	-43.1262	-619.327	-3318.79	67439.2	-6145.39	308.891	305.359	0	0	0	0	0	0	0	200	903	0	0	0	0	0	0	0	603	903	0
610	3	31.8482	-41.6003	-617.496	-2403.26	67073	-5641.85	308.621	303.892	0	0	0	0	0	0	0	200	903	0	0	0	0	0	0	0	603	903	0
610	4	32.0008	-42.0581	-616.58	-1853.94	67195.1	-6008.06	308.98	303.007	0	0	0	0	0	0	0	200	903	0	0	0	0	0	0	0	603	903	0
610	5	31.543	-42.2107	-615.359	-2403.26	67073	-6053.84	308.998	303.905	0	0	0	0	0	0	0	200	903	0	0	0	0	0	0	0	603	903	0
610	6	31.2378	-41.2952	-614.749	-2128.6	66096.5	-5962.28	307.518	303.463	0	0	0	0	0	0	0	200	903	0	0	0	0	0	0	0	603	903	0
610	7	30.6275	-40.5322	-612.613	-1853.94	66523.7	-5779.18	308.59	303.026	0	0	0	0	0	0	0	200	903	0	0	0	0	0	0	0	603	903	0
610	8	31.2378	-39.7693	-611.087	-1762.39	66218.5	-5458.74	308.362	302.884	0	0	0	0	0	0	0	200	903	0	0	0	0	0	0	0	603	903	0
610	9	30.6275	-38.8538	-608.34	-1304.63	66096.5	-5550.3	308.65	302.145	0	0	0	0	0	0	0	200	903	0	0	0	0	0	0	0	603	903	0
611	0	30.7801	-40.0745	-605.594	-1121.52	66157.5	-5550.3	309.244	301.852	0	0	0	0	0	0	0	200	903	0	0	0	0	0	0	0	603	903	0
611	1	29.7119	-38.5486	-604.678	-1396.18	65791.2	-5321.41	308.804	302.309	0	0	0	0	0	0	0	200	903	0	0	0	0	0	0	0	603	903	0
611	2	30.0171	-38.0908	-602.847	-1121.52	65913.3	-5458.74	309.337	301.86	0	0	0	0	0	0	0	200	903	0	0	0	0	0	0	0	603	903	0
611	3	29.8645	-37.0227	-602.847	-389.1	65608.2	-5229.86	308.831	300.645	0	0	0	0	0	0	0	200	903	0	0	0	0	0	0	0	603	903	0
611	4	32.0008	-37.3279	-602.847	-1213.07	64936.8	-4588.99	307.717	302.012	0	0	0	0	0	0	0	200	903	0	0	0	0	0	0	0	603	903	0
611	5	30.3223	-36.1072	-598.88	-114.441	65241.9	-5275.64	308.94	300.191	0	0	0	0	0	0	0	200	903	0	0	0	0	0	0	0	603	903	0
611	6	29.4068	-36.5649	-595.218	-22.8885	64875.7	-5092.53	308.995	300.038	0	0	0	0	0	0	0	200	903	0	0	0	0	0	0	0	603	903	0
611	7	28.4912	-36.8701	-597.354	68.6643	64936.8	-4817.87	308.707	299.885	0	0	0	0	0	0	0	200	903	0	0	0	0	0	0	0	603	903	0
611	8	28.4912	-35.4968	-596.133	-22.8885	64814.7	-5046.76	308.725	300.038	0	0	0	0	0	0	0	200	903	0	0	0	0	0	0	0	603	903	0
611	9	27.8809	-34.4287	-592.471	-114.441	64509.5	-4772.1	308.882	300.193	0	0	0	0	0	0	0	200	903	0	0	0	0	0	0	0	603	903	0
612	0	28.1861	-33.6658	-591.25	434.875	64509.5	-4588.99	309.107	299.265	0	0	0	0	0	0	0	200	903	0	0	0	0	0	0	0	603	903	0
612	1	28.7964	-33.3606	-589.725	526.428	64143.3	-4726.32	308.768	299.107	0	0	0	0	0	0	0	200	903	0	0	0	0	0	0	0	603	903	0
612	2	28.3387	-33.5132	-587.283	1441.96	64021.2	-4360.11	309.013	297.545	0	0	0	0	0	0	0	200	903	0	0	0	0	0	0	0	603	903	0
612	3	29.4068	-32.9028	-588.809	892.639	64082.3	-4405.89	308.834	298.484	0	0	0	0	0	0	0	200	903	0	0	0	0	0	0	0	603	903	0
612	4	28.949	-33.3606	-586.673	801.086	62983.6	-4451.66	307.357	298.635	0	0	0	0	0	0	0	200	903	0	0	0	0	0	0	0	603	903	0
612	5	27.5757	-31.6821	-583.011	1167.3	63777.1	-3856.57	309.393	297.998	0	0	0	0	0	0	0	200	903	0	0	0	0	0	0	0	603	903	0
612	6	27.118	-31.2244	-583.926	1716.61	63288.8	-4222.78	308.385	297.06	0	0	0	0	0	0	0	200	903	0	0	0	0	0	0	0	603	903	0
612	7	26.6602	-31.0718	-582.095	2174.38	63349.9	-4131.23	308.831	296.265	0	0	0	0	0	0	0	200	903	0	0	0	0	0	0	0	603	903	0
612	8	27.2705	-30.1562	-580.569	2357.48	63410.9	-4085.45	309.222	295.939	0	0	0	0	0	0	0	200	903	0	0	0	0	0	0	0	603	903	0
612	9	26.5076	-30.7666	-579.043	1808.17	62617.4	-4039.67	308.139	296.877	0	0	0	0	0	0	0	200	903	0	0	0	0	0	0	0	603	903	0
613	0	29.4068	-29.8511	-577.823	2174.38	63105.7	-3856.57	309.213	296.237	0	0	0	0	0	0	0	200	903	0	0	0	0	0	0	0	603	903	0
613	1	27.118	-29.5459	-575.992	2174.38	63044.7	-3719.24	309.454	296.225	0	0	0	0	0	0	0	200	903	0	0	0	0	0	0	0	603	903	0
613	2	26.6602	-28.1726	-574.466	2632.14	62983.6	-3765.02	309.639	295.418	0	0	0	0	0	0	0	200	903	0	0	0	0	0	0	0	603	903	0
613	3	26.355	-28.4778	-575.381	3089.91	62800.5	-3398.81	309.146	294.63	0	0	0	0	0	0	0	200	903	0	0	0	0	0	0	0	603	903	0
613	4	25.7447	-27.8674	-574.161	2906.8	62190.2	-3856.57	308.315	294.937	0	0	0	0	0	0	0	200	903	0	0	0	0	0	0	0	603	903	0
613	5	24.0662	-28.02	-571.109	2998.35	62190.2	-3536.14	308.894	294.75	0	0	0	0	0	0	0	200	903	0	0	0	0	0	0	0	603	903	0
613	6	25.2869	-27.1045	-572.635	3273.01	62068.1	-3215.7	308.39	294.284	0	0	0	0	0	0	0	200	903	0	0	0	0	0	0	0	603	903	0
613	7	25.1343	-26.3415	-571.719	3181.46	62068.1	-3032.59	308.564	294.435	0	0	0	0	0	0	0	200	903	0	0	0	0	0	0	0	603	903	0
613	8	24.8291	-26.0364	-567.752	4005.43	61640.9	-3261.48	308.57	292.945	0	0	0	0	0	0	0	200	903	0	0	0	0	0	0	0	603	903	0
613	9	24.524	-25.8838	-567.447	3730.77	61762.9	-3215.7	308.844	293.425	0	0	0	0	0	0	0	200	903	0	0	0	0	0	0	0	603	903	0
614	0	25.2869	-25.5786	-566.531	3639.22	61824	-3261.48	309.127	293.576	0	0	0	0	0	0	0	200	903	0	0	0	0	0	0	0	603	903	0
614	1	24.9817	-25.7312	-565.921	3913.88	61885	-2895.27	309.353	293.084	0	0	0	0	0	0	0	200	903	0	0	0	0	0	0	0	603	903	0
614	2	25.1343	-24.0527	-566.226	3547.67	61274.7	-2849.49	308.216	293.735	0	0	0	0	0	0	0	200	903	0	0	0	0	0	0	0	603	903	0
614	3	25.1343	-23.4424	-565.921	4829.41	61518.8	-2895.27	308.706	291.466	0	0	0	0	0	0	0	200	903	0	0	0	0	0	0	0	603	903	0
614	4	24.524	-24.2053	-563.479	5104.06	61091.6	-2666.38	308.418	290.942	0	0	0	0	0	0	0	200	903	0	0	0	0	0	0	0	603	903	0
614	5	24.2188	-22.832	-559.817	5287.17	61030.5	-2803.71	309.019	290.556	0	0	0	0	0	0	0	200	903	0	0	0	0	0	0	0	603	903	0
614	6	23.9136	-22.9846	-563.174	5104.06	61091.6	-2666.38	308.477	290.937	0	0	0	0	0	0	0	200	903	0	0	0	0	0	0	0	603	903	0
614	7	23.9136	-22.2217	-562.259	5012.51	60481.2	-2574.83	307.568	291.085	0	0	0	0	0	0	0	200	903	0	0	0	0	0	0	0	603	903	0
614	8	24.8291	-22.832	-557.986	4737.85	61213.6	-2620.61	309.705	291.509	0	0	0	0	0	0	0	200	903	0	0	0	0	0	0	0	603	903	0
614	9	23.1507	-21.9165	-556.46	5561.83	60603.3	-2437.5	308.909	290.005	0	0	0	0	0	0	0	200	903	0	0	0	0	0	0	0	603	903	0
615	0	23.4558	-22.5269	-554.935	6202.7	60664.3	-2300.17	309.318	288.823	0	0	0	0	0	0	0	200	903	0	0	0	0	0	0	0	603	903	0
615	1	23.4558	-21.4587	-555.85	6111.15	60603.3	-2208.62	309.028	289.006	0	0	0	0	0	0	0	200	903	0	0	0	0	0	0	0	603	903	0
615	2	23.761	-21.6113	-555.24	6111.15	60237.1	-2345.95	308.488	288.994	0	0	0	0	0	0	0	200	903	0	0	0	0	0	0	0	603	903	0
615	3	23.761	-20.8484	-554.629	6111.15	60481.2	-2208.62	309.048	288.982	0	0	0	0	0	0	0	200	903	0	0	0	0	0	0	0	603	903	0
615	4	23.6084	-20.0854	-555.85	6385.8	60481.2	-2162.84	308.808	288.512	0	0	0	0	0	0	0	200	903	0	0	0	0	0	0	0	603	903	0
615	5	23.3033	-20.3906	-554.019	6935.12	60115	-2117.07	308.507	287.482	0	0	0	0	0	0	0	200	903	0	0	0	0	0	0	0	603	903	0
615	6	22.3877	-19.4751	-552.188	7301.33	60359.1	-1842.41	309.309	286.777	0	0	0	0	0	0	0	200	903	0	0	0	0	0	0	0	603	903	0
615	7	22.5403	-19.7803	-551.883	6660.46	59931.9	-2025.51	308.595	287.931	0	0	0	0	0	0	0	200	903	0	0	0	0	0	0	0	603	903	0
615	8	22.3877	-19.3225	-551.272	7118.23	59870.8	-1613.53	308.605	287.088	0	0	0	0	0	0	0	200	903	0	0	0	0	0	0	0	603	903	0
615	9	22.5403	-20.0854	-548.831	7575.99	59992.9	-1796.63	309.31	286.196	0	0	0	0	0	0	0	200	903	0	0	0	0	0	0	0	603	903	0
616	0	22.6929	-18.2544	-548.831	7667.54	59748.8	-2117.07	308.866	286.029	0	0	0	0	0	0	0	200	903	0	0	0	0	0	0	0	603	903	0
616	1	23.1507	-18.5596	-546.695	8125.31	59870.8	-1567.75	309.514	285.137	0	0	0	0	0	0	0	200	903	0	0	0	0	0	0	0	603	903	0
616	2	22.3877	-18.1018	-547.305	7942.2	59748.8	-1567.75	309.169	285.489	0	0	0	0	0	0	0	200	903	0	0	0	0	0	0	0	603	903	0
616	3	22.5403	-18.7122	-547.305	8308.41	59199.5	-1613.53	308.165	284.819	0	0	0	0	0	0	0	200	903	0	0	0	0	0	0	0	603	903	0
616	4	23.4558	-17.644	-546.695	8399.96	58955.3	-972.658	307.84	284.635	0	0	0	0	0	0	0	200	903	0	0	0	0	0	0	0	603	903	0
616	5	22.9981	-16.4233	-545.779	8857.73	59504.6	-1430.42	309.027	283.771	0	0	0	0	0	0	0	200	903	0	0	0	0	0	0	0	603	903	0
616	6	21.3196	-16.5759	-544.864	9315.49	59443.6	-1476.2	309.098	282.903	0	0	0	0	0	0	0	200	903	0	0	0	0	0	0	0	603	903	0
616	7	21.7774	-17.3389	-545.474	9407.04	59504.6	-1476.2	309.088	282.754	0	0	0	0	0	0	0	200	903	0	0	0	0	0	0	0	603	903	0
616	8	21.6248	-16.4233	-543.033	9407.04	58711.2	-1384.65	308.117	282.677	0	0	0	0	0	0	0	200	903	0	0	0	0	0	0	0	603	903	0
616	9	21.4722	-15.9656	-543.033	9315.49	59443.6	-1201.54	309.466	282.845	0	0	0	0	0	0	0	200	903	0	0	0	0	0	0	0	603	903	0
617	0	22.2351	-15.9656	-541.812	9498.6	59321.5	-1155.76	309.487	282.469	0	0	0	0	0	0	0	200	903	0	0	0	0	0	0	0	603	903	0
617	1	23.1507	-14.5923	-540.286	10322.6	59382.6	-697.999	309.909	280.894	0	0	0	0	0	0	0	200	903	0	0	0	0	0	0	0	603	903	0
617	2	22.2351	-15.5078	-538.76	10322.6	59077.4	-1155.76	309.654	280.84	0	0	0	0	0	0	0	200	903	0	0	0	0	0	0	0	603	903	0
617	3	22.2351	-15.05	-539.371	10414.1	59016.4	-972.658	309.417	280.692	0	0	0	0	0	0	0	200	903	0	0	0	0	0	0	0	603	903	0
617	4	22.2351	-14.8975	-540.591	10231	59016.4	-789.552	309.17	281.074	0	0	0	0	0	0	0	200	903	0	0	0	0	0	0	0	603	903	0
617	5	22.8455	-13.6768	-540.591	10688.8	59077.4	-926.881	309.283	280.228	0	0	0	0	0	0	0	200	903	0	0	0	0	0	0	0	603	903	0
617	6	23.1507	-14.2871	-537.539	10505.7	58772.2	-835.328	309.336	280.456	0	0	0	0	0	0	0	200	903	0	0	0	0	0	0	0	603	903	0
617	7	22.2351	-12.7612	-539.981	11146.5	59199.5	-789.552	309.633	279.358	0	0	0	0	0	0	0	200	903	0	0	0	0	0	0	0	603	903	0
617	8	22.5403	-13.5242	-539.065	11879	59199.5	-789.552	309.819	277.964	0	0	0	0	0	0	0	200	903	0	0	0	0	0	0	0	603	903	0
617	9	22.5403	-15.05	-537.845	12062.1	58955.3	-606.447	309.614	277.573	0	0	0	0	0	0	0	200	903	0	0	0	0	0	0	0	603	903	0
618	0	22.5403	-13.3716	-538.455	11512.8	58955.3	-652.223	309.49	278.619	0	0	0	0	0	0	0	200	903	0	0	0	0	0	0	0	603	903	0
618	1	23.761	-12.3035	-537.539	12062.1	58772.2	-514.894	309.336	277.561	0	0	0	0	0	0	0	200	903	0	0	0	0	0	0	0	603	903	0
618	2	23.3033	-11.8457	-536.014	11787.4	58772.2	-423.341	309.647	278.009	0	0	0	0	0	0	0	200	903	0	0	0	0	0	0	0	603	903	0
618	3	23.9136	-11.9983	-536.929	12886	59077.4	-469.118	310.028	276	0	0	0	0	0	0	0	200	903	0	0	0	0	0	0	0	603	903	0
618	4	22.8455	-11.8457	-538.15	12977.6	58283.9	-514.894	308.304	275.885	0	0	0	0	0	0	0	200	903	0	0	0	0	0	0	0	603	903	0
618	5	22.8455	-11.6931	-537.845	13252.3	59016.4	-240.236	309.728	275.36	0	0	0	0	0	0	0	200	903	0	0	0	0	0	0	0	603	903	0
618	6	22.6929	-11.3879	-537.539	13252.3	59138.4	-240.236	310.017	275.346	0	0	0	0	0	0	0	200	903	0	0	0	0	0	0	0	603	903	0
618	7	23.9136	-12.1509	-535.098	13069.2	58589.1	-57.1302	309.492	275.576	0	0	0	0	0	0	0	200	903	0	0	0	0	0	0	0	603	903	0
618	8	22.2351	-10.3198	-535.708	13984.7	58711.2	-57.1302	309.595	273.895	0	0	0	0	0	0	0	200	903	0	0	0	0	0	0	0	603	903	0
618	9	22.3877	-11.0828	-533.267	14167.8	58772.2	-11.3538	310.212	273.432	0	0	0	0	0	0	0	200	903	0	0	0	0	0	0	0	603	903	0
619	0	23.6084	-10.3198	-535.708	14808.7	59016.4	-148.683	310.165	272.357	0	0	0	0	0	0	0	200	903	0	0	0	0	0	0	0	603	903	0
619	1	22.8455	-9.86206	-535.708	14076.2	58955.3	-148.683	310.051	273.724	0	0	0	0	0	0	0	200	903	0	0	0	0	0	0	0	603	903	0
619	2	23.6084	-9.86206	-536.014	14442.4	58345	80.1989	308.85	273.056	0	0	0	0	0	0	0	200	903	0	0	0	0	0	0	0	603	903	0
619	3	23.761	-9.40429	-536.319	14991.8	58894.3	354.857	309.812	272.047	0	0	0	0	0	0	0	200	903	0	0	0	0	0	0	0	603	903	0
619	4	22.2351	-9.40429	-533.572	15815.7	58772.2	125.975	310.149	270.359	0	0	0	0	0	0	0	200	903	0	0	0	0	0	0	0	603	903	0
619	5	22.3877	-9.70947	-536.624	15449.5	58833.2	263.304	309.636	271.21	0	0	0	0	0	0	0	200	903	0	0	0	0	0	0	0	603	903	0
619	6	22.0826	-8.48876	-536.624	15266.4	59077.4	217.528	310.091	271.551	0	0	0	0	0	0	0	200	903	0	0	0	0	0	0	0	603	903	0
619	7	22.6929	-8.031	-535.098	15724.2	58833.2	171.752	309.949	270.614	0	0	0	0	0	0	0	200	903	0	0	0	0	0	0	0	603	903	0
619	8	22.5403	-6.96289	-535.708	15632.6	59016.4	537.963	310.165	270.819	0	0	0	0	0	0	0	200	903	0	0	0	0	0	0	0	603	903	0
619	9	23.9136	-7.72583	-535.403	16456.6	58955.3	629.515	310.114	269.263	0	0	0	0	0	0	0	200	903	0	0	0	0	0	0	0	603	903	0
620	0	23.1507	-7.57324	-534.488	16914.4	58650.1	537.963	309.732	268.354	0	0	0	0	0	0	0	200	903	0	0	0	0	0	0	0	603	903	0
620	1	22.6929	-7.57324	-535.403	16822.8	58955.3	400.634	310.114	268.579	0	0	0	0	0	0	0	200	903	0	0	0	0	0	0	0	603	903	0
620	2	23.3033	-6.04736	-538.15	17463.7	58894.3	766.844	309.438	267.549	0	0	0	0	0	0	0	200	903	0	0	0	0	0	0	0	603	903	0
620	3	23.4558	-8.64135	-537.234	17280.6	58955.3	812.621	309.739	267.834	0	0	0	0	0	0	0	200	903	0	0	0	0	0	0	0	603	903	0
620	4	22.6929	-5.28442	-536.319	17829.9	59016.4	949.95	310.04	266.755	0	0	0	0	0	0	0	200	903	0	0	0	0	0	0	0	603	903	0
620	5	22.2351	-5.89477	-536.624	18013	58955.3	904.174	309.863	266.433	0	0	0	0	0	0	0	200	903	0	0	0	0	0	0	0	603	903	0
620	6	24.0662	-5.58959	-535.708	17555.2	59260.5	766.844	310.621	267.23	0	0	0	0	0	0	0	200	903	0	0	0	0	0	0	0	603	903	0
620	7	22.3877	-4.97924	-536.014	19020.1	59077.4	1499.27	310.216	264.516	0	0	0	0	0	0	0	200	903	0	0	0	0	0	0	0	603	903	0
620	8	22.3877	-5.13183	-535.403	18287.7	59138.4	1087.28	310.456	265.843	0	0	0	0	0	0	0	200	903	0	0	0	0	0	0	0	603	903	0
620	9	22.9981	-4.82666	-536.319	18837	59565.7	1453.49	311.064	264.877	0	0	0	0	0	0	0	200	903	0	0	0	0	0	0	0	603	903	0
621	0	22.9981	-4.52148	-537.539	19111.6	59138.4	1270.38	310.017	264.446	0	0	0	0	0	0	0	200	903	0	0	0	0	0	0	0	603	903	0
621	1	23.6084	-5.43701	-539.981	19294.7	59443.6	1407.71	310.085	264.268	0	0	0	0	0	0	0	200	903	0	0	0	0	0	0	0	603	903	0
621	2	23.3033	-3.45336	-539.676	19569.4	59687.7	1224.61	310.599	263.739	0	0	0	0	0	0	0	200	903	0	0	0	0	0	0	0	603	903	0
621	3	22.8455	-2.84301	-539.981	20027.2	59504.6	1453.49	310.198	262.911	0	0	0	0	0	0	0	200	903	0	0	0	0	0	0	0	603	903	0
621	4	22.8455	-2.38525	-540.286	20210.3	59199.5	1407.71	309.571	262.593	0	0	0	0	0	0	0	200	903	0	0	0	0	0	0	0	603	903	0
621	5	24.9817	-2.9956	-539.676	20484.9	59626.7	1636.6	310.486	262.042	0	0	0	0	0	0	0	200	903	0	0	0	0	0	0	0	603	903	0
621	6	23.4558	-2.23266	-540.286	20942.7	59748.8	1682.37	310.587	261.238	0	0	0	0	0	0	0	200	903	0	0	0	0	0	0	0	603	903	0
621	7	23.1507	-1.7749	-538.455	21308.9	60115	1682.37	311.643	260.426	0	0	0	0	0	0	0	200	903	0	0	0	0	0	0	0	603	903	0
621	8	23.9136	-1.46972	-541.507	20942.7	59748.8	2094.36	310.338	261.325	0	0	0	0	0	0	0	200	903	0	0	0	0	0	0	0	603	903	0
621	9	23.4558	-0.249019	-542.727	21492	59748.8	1636.6	310.09	260.4	0	0	0	0	0	0	0	200	903	0	0	0	0	0	0	0	603	903	0
622	0	24.524	-1.16455	-544.864	21858.2	59992.9	1911.25	310.106	259.883	0	0	0	0	0	0	0	200	903	0	0	0	0	0	0	0	603	903	0
622	1	24.0662	0.208745	-545.779	22224.4	59931.9	2140.14	309.81	259.279	0	0	0	0	0	0	0	200	903	0	0	0	0	0	0	0	603	903	0
622	2	24.0662	-1.01196	-542.117	22499.1	60481.2	2048.58	311.565	258.498	0	0	0	0	0	0	0	200	903	0	0	0	0	0	0	0	603	903	0
622	3	23.3033	0.208745	-546.084	22773.7	60420.2	2185.91	310.643	258.296	0	0	0	0	0	0	0	200	903	0	0	0	0	0	0	0	603	903	0
622	4	23.3033	0.208745	-547	22865.3	60176	1911.25	310.011	258.199	0	0	0	0	0	0	0	200	903	0	0	0	0	0	0	0	603	903	0
622	5	23.9136	-1.46972	-545.779	23140	60237.1	2048.58	310.369	257.602	0	0	0	0	0	0	0	200	903	0	0	0	0	0	0	0	603	903	0
622	6	23.1507	0.971684	-547	23780.8	60420.2	2323.24	310.457	256.525	0	0	0	0	0	0	0	200	903	0	0	0	0	0	0	0	603	903	0
622	7	23.9136	0.666508	-547.915	23963.9	60725.3	2597.9	310.83	256.263	0	0	0	0	0	0	0	200	903	0	0	0	0	0	0	0	603	903	0
622	8	24.6765	-0.249019	-548.831	24238.6	60908.4	2506.35	310.979	255.836	0	0	0	0	0	0	0	200	903	0	0	0	0	0	0	0	603	903	0
622	9	23.9136	1.42945	-548.221	24421.7	60603.3	2460.57	310.545	255.453	0	0	0	0	0	0	0	200	903	0	0	0	0	0	0	0	603	903	0
623	0	23.761	2.0398	-546.695	24604.8	60725.3	2048.58	311.077	254.994	0	0	0	0	0	0	0	200	903	0	0	0	0	0	0	0	603	903	0
623	1	24.3714	2.49756	-551.883	25428.8	60786.4	2689.45	310.144	253.924	0	0	0	0	0	0	0	200	903	0	0	0	0	0	0	0	603	903	0
623	2	23.9136	1.42945	-552.188	25428.8	61091.6	2552.12	310.635	253.949	0	0	0	0	0	0	0	200	903	0	0	0	0	0	0	0	603	903	0
623	3	24.2188	0.666508	-553.714	25428.8	61274.7	2597.9	310.661	254.076	0	0	0	0	0	0	0	200	903	0	0	0	0	0	0	0	603	903	0
623	4	22.9981	1.88721	-553.409	25154.1	60603.3	2735.23	309.509	254.547	0	0	0	0	0	0	0	200	903	0	0	0	0	0	0	0	603	903	0
623	5	24.2188	3.41309	-551.272	26344.3	61579.8	2643.68	311.705	252.212	0	0	0	0	0	0	0	200	903	0	0	0	0	0	0	0	603	903	0
623	6	23.6084	3.10791	-554.629	26710.5	60908.4	3284.55	309.818	251.841	0	0	0	0	0	0	0	200	903	0	0	0	0	0	0	0	603	903	0
623	7	23.761	2.0398	-553.409	27168.3	61274.7	2918.33	310.722	250.907	0	0	0	0	0	0	0	200	903	0	0	0	0	0	0	0	603	903	0
623	8	24.3714	2.19239	-557.376	26893.6	61640.9	3101.44	310.591	251.75	0	0	0	0	0	0	0	200	903	0	0	0	0	0	0	0	603	903	0
623	9	24.6765	3.10791	-558.291	26985.2	61701.9	3009.89	310.519	251.665	0	0	0	0	0	0	0	200	903	0	0	0	0	0	0	0	603	903	0
624	0	25.1343	4.17603	-559.817	27442.9	61762.9	2964.11	310.327	250.979	0	0	0	0	0	0	0	200	903	0	0	0	0	0	0	0	603	903	0
624	1	24.2188	4.32862	-561.343	28175.4	62373.3	3101.44	311.114	249.807	0	0	0	0	0	0	0	200	903	0	0	0	0	0	0	0	603	903	0
624	2	23.3033	4.32862	-562.564	28816.2	61457.8	3330.32	309.246	248.777	0	0	0	0	0	0	0	200	903	0	0	0	0	0	0	0	603	903	0
624	3	23.761	4.02344	-563.479	28541.6	62190.2	3376.1	310.368	249.348	0	0	0	0	0	0	0	200	903	0	0	0	0	0	0	0	603	903	0
624	4	23.6084	4.63379	-562.259	28358.5	62434.3	3192.99	311.042	249.563	0	0	0	0	0	0	0	200	903	0	0	0	0	0	0	0	603	903	0
624	5	23.9136	5.09156	-563.174	29274	62434.3	3376.1	310.861	248.02	0	0	0	0	0	0	0	200	903	0	0	0	0	0	0	0	603	903	0
624	6	24.3714	3.87085	-563.785	29457.1	62800.5	3650.76	311.391	247.751	0	0	0	0	0	0	0	200	903	0	0	0	0	0	0	0	603	903	0
624	7	24.2188	6.15967	-564.7	30098	62434.3	3376.1	310.562	246.701	0	0	0	0	0	0	0	200	903	0	0	0	0	0	0	0	603	903	0
624	8	24.8291	4.93897	-566.226	30098	62678.5	3650.76	310.695	246.845	0	0	0	0	0	0	0	200	903	0	0	0	0	0	0	0	603	903	0
624	9	26.355	5.39673	-570.193	30830.4	62922.6	3788.09	310.353	245.93	0	0	0	0	0	0	0	200	903	0	0	0	0	0	0	0	603	903	0
625	0	25.5921	6.31226	-568.973	30372.6	62861.6	3971.19	310.483	246.618	0	0	0	0	0	0	0	200	903	0	0	0	0	0	0	0	603	903	0
625	1	25.4395	7.22779	-570.804	30830.4	62861.6	3513.43	310.128	245.988	0	0	0	0	0	0	0	200	903	0	0	0	0	0	0	0	603	903	0
625	2	24.0662	7.38038	-571.109	31929	63166.7	3742.31	310.604	244.093	0	0	0	0	0	0	0	200	903	0	0	0	0	0	0	0	603	903	0
625	3	24.2188	6.46485	-572.024	32295.2	63349.9	3696.53	310.747	243.542	0	0	0	0	0	0	0	200	903	0	0	0	0	0	0	0	603	903	0
625	4	25.8972	7.22779	-570.804	31837.5	63471.9	3833.86	311.197	244.223	0	0	0	0	0	0	0	200	903	0	0	0	0	0	0	0	603	903	0
625	5	25.1343	7.83814	-573.55	32020.6	63410.9	4612.06	310.559	244.171	0	0	0	0	0	0	0	200	903	0	0	0	0	0	0	0	603	903	0
625	6	24.9817	8.14332	-573.245	32386.8	63838.1	4154.3	311.363	243.503	0	0	0	0	0	0	0	200	903	0	0	0	0	0	0	0	603	903	0
625	7	24.9817	8.60108	-573.855	33302.3	63838.1	4016.97	311.244	241.967	0	0	0	0	0	0	0	200	903	0	0	0	0	0	0	0	603	903	0
625	8	25.1343	7.68555	-575.381	33943.2	63777.1	3833.86	310.843	241.008	0	0	0	0	0	0	0	200	903	0	0	0	0	0	0	0	603	903	0
625	9	27.4231	6.00708	-579.043	34217.9	63960.2	4291.62	310.458	240.906	0	0	0	0	0	0	0	200	903	0	0	0	0	0	0	0	603	903	0
626	0	25.7447	8.60108	-579.349	33577	64082.3	3971.19	310.611	242.044	0	0	0	0	0	0	0	200	903	0	0	0	0	0	0	0	603	903	0
626	1	26.0498	9.36402	-579.959	33943.2	64448.5	4291.62	311.126	241.473	0	0	0	0	0	0	0	200	903	0	0	0	0	0	0	0	603	903	0
626	2	25.4395	9.21143	-579.959	34675.6	64326.4	4383.18	310.915	240.21	0	0	0	0	0	0	0	200	903	0	0	0	0	0	0	0	603	903	0
626	3	25.2869	9.21143	-580.874	35316.5	64326.4	4337.4	310.741	239.201	0	0	0	0	0	0	0	200	903	0	0	0	0	0	0	0	603	903	0
626	4	27.118	9.36402	-580.264	36048.9	64387.5	4612.06	310.962	237.875	0	0	0	0	0	0	0	200	903	0	0	0	0	0	0	0	603	903	0
626	5	25.8972	10.2795	-582.095	35774.2	64509.5	4383.18	310.823	238.542	0	0	0	0	0	0	0	200	903	0	0	0	0	0	0	0	603	903	0
626	6	25.8972	8.2959	-582.4	35316.5	64631.6	4383.18	310.975	239.36	0	0	0	0	0	0	0	200	903	0	0	0	0	0	0	0	603	903	0
626	7	26.5076	10.2795	-583.011	36140.4	64875.7	4612.06	311.277	238.011	0	0	0	0	0	0	0	200	903	0	0	0	0	0	0	0	603	903	0
626	8	26.8128	10.2795	-584.842	36689.8	64875.7	4612.06	310.929	237.266	0	0	0	0	0	0	0	200	903	0	0	0	0	0	0	0	603	903	0
626	9	27.118	10.4321	-585.452	37696.9	65547.1	4612.06	311.96	235.611	0	0	0	0	0	0	0	200	903	0	0	0	0	0	0	0	603	903	0
627	0	26.355	11.0425	-588.199	36872.9	65119.9	4795.16	310.711	237.312	0	0	0	0	0	0	0	200	903	0	0	0	0	0	0	0	603	903	0
627	1	26.8128	11.1951	-588.809	36964.4	64875.7	4795.16	310.181	237.222	0	0	0	0	0	0	0	200	903	0	0	0	0	0	0	0	603	903	0
627	2	26.355	11.958	-590.945	37605.3	65547.1	5161.38	310.919	236.364	0	0	0	0	0	0	0	200	903	0	0	0	0	0	0	0	603	903	0
627	3	26.6602	11.6528	-591.861	38703.9	65486.1	4978.27	310.644	234.606	0	0	0	0	0	0	0	200	903	0	0	0	0	0	0	0	603	903	0
627	4	28.4912	11.1951	-591.861	38887	65913.3	5069.82	311.366	234.297	0	0	0	0	0	0	0	200	903	0	0	0	0	0	0	0	603	903	0
627	5	26.6602	12.8735	-590.64	38337.7	65913.3	4932.49	311.596	235.091	0	0	0	0	0	0	0	200	903	0	0	0	0	0	0	0	603	903	0
627	6	26.2024	13.1787	-590.03	38703.9	65608.2	4932.49	311.195	234.403	0	0	0	0	0	0	0	200	903	0	0	0	0	0	0	0	603	903	0
627	7	26.2024	12.2632	-593.387	39436.3	65608.2	5161.38	310.566	233.54	0	0	0	0	0	0	0	200	903	0	0	0	0	0	0	0	603	903	0
627	8	27.8809	12.1106	-594.913	39527.9	66035.4	5344.48	311	233.557	0	0	0	0	0	0	0	200	903	0	0	0	0	0	0	0	603	903	0
627	9	28.1861	11.0425	-596.744	40260.3	66340.6	4932.49	311.171	232.533	0	0	0	0	0	0	0	200	903	0	0	0	0	0	0	0	603	903	0
628	0	27.7283	13.3313	-597.049	39894.1	66523.7	5252.93	311.421	233.181	0	0	0	0	0	0	0	200	903	0	0	0	0	0	0	0	603	903	0
628	1	27.7283	13.9417	-595.523	40535	66279.5	5756.47	311.296	231.934	0	0	0	0	0	0	0	200	903	0	0	0	0	0	0	0	603	903	0
628	2	27.4231	13.7891	-600.406	40809.6	66523.7	5207.15	310.798	232.03	0	0	0	0	0	0	0	200	903	0	0	0	0	0	0	0	603	903	0
628	3	27.2705	13.3313	-602.542	41999.8	66523.7	5664.92	310.405	230.296	0	0	0	0	0	0	0	200	903	0	0	0	0	0	0	0	603	903	0
628	4	29.5594	13.6365	-601.626	41816.7	66767.8	5527.59	310.979	230.494	0	0	0	0	0	0	0	200	903	0	0	0	0	0	0	0	603	903	0
628	5	27.7283	13.9417	-601.016	41359	67011.9	5344.48	311.498	231.185	0	0	0	0	0	0	0	200	903	0	0	0	0	0	0	0	603	903	0
628	6	26.355	15.0098	-602.542	41816.7	66950.9	5664.92	311.114	230.6	0	0	0	0	0	0	0	200	903	0	0	0	0	0	0	0	603	903	0
628	7	28.0335	15.1624	-604.373	42274.5	67195.1	5481.81	311.182	230.052	0	0	0	0	0	0	0	200	903	0	0	0	0	0	0	0	603	903	0
628	8	28.6438	14.8572	-606.204	43281.6	67073	5527.59	310.644	228.602	0	0	0	0	0	0	0	200	903	0	0	0	0	0	0	0	603	903	0
628	9	28.949	14.8572	-609.561	43739.3	67256.1	5756.47	310.335	228.245	0	0	0	0	0	0	0	200	903	0	0	0	0	0	0	0	603	903	0
629	0	28.949	15.0098	-609.866	43098.4	67622.3	5664.92	310.881	229.331	0	0	0	0	0	0	0	200	903	0	0	0	0	0	0	0	603	903	0
629	1	30.6275	16.3831	-608.645	43739.3	67561.3	5802.25	311.003	228.137	0	0	0	0	0	0	0	200	903	0	0	0	0	0	0	0	603	903	0
629	2	28.3387	14.552	-612.002	44288.7	67744.4	5802.25	310.693	227.633	0	0	0	0	0	0	0	200	903	0	0	0	0	0	0	0	603	903	0
629	3	28.949	16.9934	-614.444	44746.4	67744.4	6076.9	310.253	227.176	0	0	0	0	0	0	0	200	903	0	0	0	0	0	0	0	603	903	0
629	4	30.1697	16.6882	-613.528	44838	67439.2	5939.58	309.92	226.918	0	0	0	0	0	0	0	200	903	0	0	0	0	0	0	0	603	903	0
629	5	29.1016	16.3831	-615.054	45112.6	68110.6	5985.35	310.739	226.653	0	0	0	0	0	0	0	200	903	0	0	0	0	0	0	0	603	903	0
629	6	29.5594	17.2986	-612.918	45204.2	68354.7	5802.25	311.523	226.248	0	0	0	0	0	0	0	200	903	0	0	0	0	0	0	0	603	903	0
629	7	29.7119	17.7564	-617.19	45112.6	68782	6076.9	311.444	226.907	0	0	0	0	0	0	0	200	903	0	0	0	0	0	0	0	603	903	0
629	8	30.3223	19.2822	-617.801	46760.6	68720.9	6214.23	311.235	224.311	0	0	0	0	0	0	0	200	903	0	0	0	0	0	0	0	603	903	0
629	9	31.8482	18.0615	-622.378	46852.1	68720.9	6260.01	310.417	224.721	0	0	0	0	0	0	0	200	903	0	0	0	0	0	0	0	603	903	0
630	0	30.0171	17.6038	-622.989	46760.6	68904.1	6443.12	310.602	224.942	0	0	0	0	0	0	0	200	903	0	0	0	0	0	0	0	603	903	0
630	1	30.4749	18.3667	-624.82	46302.8	69026.1	7129.76	310.474	225.894	0	0	0	0	0	0	0	200	903	0	0	0	0	0	0	0	603	903	0
630	2	30.1697	20.1978	-626.04	46485.9	69758.6	6397.34	311.428	225.746	0	0	0	0	0	0	0	200	903	0	0	0	0	0	0	0	603	903	0
630	3	30.4749	19.1296	-628.177	47218.3	69575.4	6580.44	310.758	224.833	0	0	0	0	0	0	0	200	903	0	0	0	0	0	0	0	603	903	0
630	4	30.3223	20.6555	-626.956	48042.3	69697.5	6351.56	311.168	223.372	0	0	0	0	0	0	0	200	903	0	0	0	0	0	0	0	603	903	0
630	5	29.4068	20.3503	-629.397	48042.3	69819.6	6351.56	310.931	223.669	0	0	0	0	0	0	0	200	903	0	0	0	0	0	0	0	603	903	0
630	6	30.0171	20.9607	-631.839	48683.2	69697.5	6809.33	310.309	222.95	0	0	0	0	0	0	0	200	903	0	0	0	0	0	0	0	603	903	0
630	7	31.3904	20.9607	-633.975	48317	70246.8	6809.33	310.804	223.787	0	0	0	0	0	0	0	200	903	0	0	0	0	0	0	0	603	903	0
630	8	30.4749	23.0969	-635.501	48500.1	70552	6855.1	311.018	223.682	0	0	0	0	0	0	0	200	903	0	0	0	0	0	0	0	603	903	0
630	9	30.6275	22.7918	-636.722	49140.9	70735.1	6855.1	311.093	222.822	0	0	0	0	0	0	0	200	903	0	0	0	0	0	0	0	603	903	0
631	0	30.4749	22.6392	-640.079	49598.7	70429.9	6855.1	310.033	222.512	0	0	0	0	0	0	0	200	903	0	0	0	0	0	0	0	603	903	0
631	1	30.0171	24.165	-642.825	49598.7	70979.3	7083.98	310.418	222.843	0	0	0	0	0	0	0	200	903	0	0	0	0	0	0	0	603	903	0
631	2	30.7801	24.0125	-644.656	49232.5	71345.5	7175.54	310.672	223.63	0	0	0	0	0	0	0	200	903	0	0	0	0	0	0	0	603	903	0
631	3	30.1697	25.2332	-647.403	49598.7	71162.3	7495.97	309.92	223.388	0	0	0	0	0	0	0	200	903	0	0	0	0	0	0	0	603	903	0
631	4	29.7119	23.7073	-647.403	49598.7	71345.5	7404.42	310.203	223.388	0	0	0	0	0	0	0	200	903	0	0	0	0	0	0	0	603	903	0
631	5	30.9326	26.1487	-648.623	50514.2	71650.6	7450.2	310.466	222.121	0	0	0	0	0	0	0	200	903	0	0	0	0	0	0	0	603	903	0
631	6	29.5594	26.6064	-651.065	50514.2	72200	7450.2	310.895	222.413	0	0	0	0	0	0	0	200	903	0	0	0	0	0	0	0	603	903	0
631	7	30.1697	27.522	-652.896	51246.7	72200	7724.85	310.584	221.509	0	0	0	0	0	0	0	200	903	0	0	0	0	0	0	0	603	903	0
631	8	30.1697	27.3694	-654.727	50422.7	71955.8	7404.42	309.902	222.987	0	0	0	0	0	0	0	200	903	0	0	0	0	0	0	0	603	903	0
631	9	30.1697	28.8953	-655.337	50422.7	72627.2	7724.85	310.824	223.058	0	0	0	0	0	0	0	200	903	0	0	0	0	0	0	0	603	903	0
632	0	31.543	29.6582	-658.389	51612.9	72627.2	8091.06	310.31	221.607	0	0	0	0	0	0	0	200	903	0	0	0	0	0	0	0	603	903	0
632	1	30.6275	29.5056	-661.136	52619.9	72810.3	7953.74	310.129	220.41	0	0	0	0	0	0	0	200	903	0	0	0	0	0	0	0	603	903	0
632	2	30.9326	29.5056	-664.798	52345.3	72871.3	8091.06	309.614	221.261	0	0	0	0	0	0	0	200	903	0	0	0	0	0	0	0	603	903	0
632	3	30.3223	30.7263	-666.018	51338.2	73054.5	8045.29	309.688	222.918	0	0	0	0	0	0	0	200	903	0	0	0	0	0	0	0	603	903	0
632	4	30.4749	31.947	-666.629	51063.6	73481.7	8228.39	310.229	223.4	0	0	0	0	0	0	0	200	903	0	0	0	0	0	0	0	603	903	0
632	5	32.6111	31.6418	-665.713	51979.1	73420.7	8045.29	310.289	221.92	0	0	0	0	0	0	0	200	903	0	0	0	0	0	0	0	603	903	0
632	6	30.4749	33.9307	-667.85	53077.7	73970	8274.17	310.758	220.524	0	0	0	0	0	0	0	200	903	0	0	0	0	0	0	0	603	903	0
632	7	31.8482	33.7781	-670.291	53352.4	73786.9	8457.27	310.082	220.404	0	0	0	0	0	0	0	200	903	0	0	0	0	0	0	0	603	903	0
632	8	31.0852	34.3884	-671.512	53718.6	73725.8	8640.38	309.791	220.004	0	0	0	0	0	0	0	200	903	0	0	0	0	0	0	0	603	903	0
632	9	31.2378	34.9988	-670.291	52711.5	73970	8777.71	310.355	221.36	0	0	0	0	0	0	0	200	903	0	0	0	0	0	0	0	603	903	0
633	0	31.8482	36.2195	-675.784	53169.3	74519.3	8731.93	310.271	221.322	0	0	0	0	0	0	0	200	903	0	0	0	0	0	0	0	603	903	0
633	1	31.8482	36.9824	-677.615	53627	74336.2	8915.04	309.703	220.859	0	0	0	0	0	0	0	200	903	0	0	0	0	0	0	0	603	903	0
633	2	31.3904	37.898	-678.531	54176.3	74641.4	8777.71	310.004	220.156	0	0	0	0	0	0	0	200	903	0	0	0	0	0	0	0	603	903	0
633	3	31.2378	37.5928	-680.362	54359.5	74946.5	8731.93	310.157	220.102	0	0	0	0	0	0	0	200	903	0	0	0	0	0	0	0	603	903	0
633	4	30.9326	38.5083	-680.972	54451	74824.4	9006.59	309.879	220.039	0	0	0	0	0	0	0	200	903	0	0	0	0	0	0	0	603	903	0
633	5	31.543	38.8135	-681.582	54084.8	74641.4	9143.92	309.512	220.648	0	0	0	0	0	0	0	200	903	0	0	0	0	0	0	0	603	903	0
633	6	32.6111	39.729	-682.498	54176.3	75251.7	9281.25	310.259	220.621	0	0	0	0	0	0	0	200	903	0	0	0	0	0	0	0	603	903	0
633	7	32.1534	41.1023	-684.634	54725.7	75190.7	9372.8	309.826	220.066	0	0	0	0	0	0	0	200	903	0	0	0	0	0	0	0	603	903	0
633	8	32.3059	42.0178	-687.686	55549.6	75556.9	9052.37	309.871	219.222	0	0	0	0	0	0	0	200	903	0	0	0	0	0	0	0	603	903	0
633	9	32.0008	41.7127	-688.602	55549.6	75556.9	9372.8	309.725	219.33	0	0	0	0	0	0	0	200	903	0	0	0	0	0	0	0	603	903	0
634	0	31.8482	42.4756	-689.212	55091.9	75495.9	9281.25	309.539	220.065	0	0	0	0	0	0	0	200	903	0	0	0	0	0	0	0	603	903	0
634	1	32.0008	44.0015	-693.179	55915.8	75373.8	9647.46	308.736	219.334	0	0	0	0	0	0	0	200	903	0	0	0	0	0	0	0	603	903	0
634	2	33.5266	44.1541	-691.958	55458.1	75556.9	10013.7	309.193	219.853	0	0	0	0	0	0	0	200	903	0	0	0	0	0	0	0	603	903	0
634	3	32.7637	45.2222	-692.264	56373.6	76045.1	9693.24	309.85	218.566	0	0	0	0	0	0	0	200	903	0	0	0	0	0	0	0	603	903	0
634	4	32.7637	44.7644	-691.043	56282.1	75984.1	9876.34	309.956	218.555	0	0	0	0	0	0	0	200	903	0	0	0	0	0	0	0	603	903	0
634	5	33.3741	44.3066	-694.095	56373.6	76045.1	9876.34	309.56	218.781	0	0	0	0	0	0	0	200	903	0	0	0	0	0	0	0	603	903	0
634	6	34.2896	46.2903	-696.536	56282.1	76228.3	9830.57	309.439	219.197	0	0	0	0	0	0	0	200	903	0	0	0	0	0	0	0	603	903	0
634	7	34.2896	47.511	-698.367	56282.1	76472.4	10379.9	309.502	219.409	0	0	0	0	0	0	0	200	903	0	0	0	0	0	0	0	603	903	0
634	8	34.137	48.4265	-699.893	56831.4	76350.4	10059.4	309.089	218.8	0	0	0	0	0	0	0	200	903	0	0	0	0	0	0	0	603	903	0
634	9	33.6792	48.4265	-700.503	57014.5	76533.4	10334.1	309.255	218.609	0	0	0	0	0	0	0	200	903	0	0	0	0	0	0	0	603	903	0
635	0	33.6792	49.7998	-701.419	57563.8	76594.5	10288.3	309.199	217.932	0	0	0	0	0	0	0	200	903	0	0	0	0	0	0	0	603	903	0
635	1	33.8318	49.9524	-701.114	57380.7	76899.6	10379.9	309.682	218.158	0	0	0	0	0	0	0	200	903	0	0	0	0	0	0	0	603	903	0
635	2	34.4422	51.3257	-702.029	56922.9	76838.6	10471.4	309.452	218.917	0	0	0	0	0	0	0	200	903	0	0	0	0	0	0	0	603	903	0
635	3	35.2051	50.8679	-702.029	57380.7	76777.6	10517.2	309.365	218.265	0	0	0	0	0	0	0	200	903	0	0	0	0	0	0	0	603	903	0
635	4	35.5103	53.1567	-703.86	57746.9	76960.7	10563	309.341	217.957	0	0	0	0	0	0	0	200	903	0	0	0	0	0	0	0	603	903	0
635	5	36.2732	52.699	-705.081	58021.6	76899.6	10608.8	309.065	217.709	0	0	0	0	0	0	0	200	903	0	0	0	0	0	0	0	603	903	0
635	6	35.9681	53.6145	-707.217	58570.9	77571.1	10654.5	309.685	217.181	0	0	0	0	0	0	0	200	903	0	0	0	0	0	0	0	603	903	0
635	7	35.8155	54.2249	-705.081	58021.6	77387.9	10654.5	309.758	217.709	0	0	0	0	0	0	0	200	903	0	0	0	0	0	0	0	603	903	0
635	8	35.3577	55.4456	-708.743	57838.5	76960.7	11066.5	308.588	218.393	0	0	0	0	0	0	0	200	903	0	0	0	0	0	0	0	603	903	0
635	9	35.9681	55.9033	-709.659	58662.4	77265.9	10791.9	308.878	217.337	0	0	0	0	0	0	0	200	903	0	0	0	0	0	0	0	603	903	0
636	0	38.2569	56.6663	-708.133	59211.7	77632.1	10837.6	309.629	216.383	0	0	0	0	0	0	0	200	903	0	0	0	0	0	0	0	603	903	0
636	1	36.5784	56.8189	-708.438	59028.6	77754.1	11249.6	309.754	216.678	0	0	0	0	0	0	0	200	903	0	0	0	0	0	0	0	603	903	0
636	2	37.6465	58.0396	-709.048	58296.2	77754.1	11020.8	309.66	217.782	0	0	0	0	0	0	0	200	903	0	0	0	0	0	0	0	603	903	0
636	3	37.3413	59.1077	-709.964	59486.4	77510	10929.2	309.175	216.212	0	0	0	0	0	0	0	200	903	0	0	0	0	0	0	0	603	903	0
636	4	36.8836	59.1077	-712.71	58845.5	77510	11295.4	308.754	217.434	0	0	0	0	0	0	0	200	903	0	0	0	0	0	0	0	603	903	0
636	5	37.9517	60.7861	-712.71	59303.3	77510	11387	308.754	216.792	0	0	0	0	0	0	0	200	903	0	0	0	0	0	0	0	603	903	0
636	6	38.1043	61.2439	-712.71	59394.9	77937.3	11478.5	309.353	216.663	0	0	0	0	0	0	0	200	903	0	0	0	0	0	0	0	603	903	0
636	7	37.9517	60.6335	-713.321	59852.6	77937.3	11158.1	309.26	216.093	0	0	0	0	0	0	0	200	903	0	0	0	0	0	0	0	603	903	0
636	8	38.4095	62.312	-712.1	59028.6	77449	11432.7	308.761	217.106	0	0	0	0	0	0	0	200	903	0	0	0	0	0	0	0	603	903	0
636	9	38.4095	63.8379	-713.321	59120.2	77876.2	11524.3	309.174	217.12	0	0	0	0	0	0	0	200	903	0	0	0	0	0	0	0	603	903	0
637	0	38.2569	64.4482	-714.236	59944.2	77632.1	11982.1	308.692	216.072	0	0	0	0	0	0	0	200	903	0	0	0	0	0	0	0	603	903	0
637	1	40.6983	65.2112	-713.931	60127.3	77632.1	11982.1	308.739	215.78	0	0	0	0	0	0	0	200	903	0	0	0	0	0	0	0	603	903	0
637	2	41.6138	64.906	-714.847	60127.3	77998.3	12119.4	309.112	215.888	0	0	0	0	0	0	0	200	903	0	0	0	0	0	0	0	603	903	0
637	3	40.0879	65.669	-714.236	59944.2	77754.1	11707.4	308.863	216.072	0	0	0	0	0	0	0	200	903	0	0	0	0	0	0	0	603	903	0
637	4	40.5457	67.0422	-709.353	59852.6	78120.3	11753.2	310.129	215.624	0	0	0	0	0	0	0	200	903	0	0	0	0	0	0	0	603	903	0
637	5	40.2405	65.5164	-714.847	60310.4	78120.3	11890.5	309.283	215.632	0	0	0	0	0	0	0	200	903	0	0	0	0	0	0	0	603	903	0
637	6	40.2405	68.4155	-710.574	60585	77754.1	11936.3	309.424	214.738	0	0	0	0	0	0	0	200	903	0	0	0	0	0	0	0	603	903	0
637	7	41.0035	68.4155	-713.626	60401.9	77510	12027.8	308.614	215.359	0	0	0	0	0	0	0	200	903	0	0	0	0	0	0	0	603	903	0
637	8	41.0035	69.4837	-712.1	60585	77693.1	12119.4	309.104	214.921	0	0	0	0	0	0	0	200	903	0	0	0	0	0	0	0	603	903	0
637	9	41.919	70.3992	-711.795	60310.4	77876.2	12073.6	309.408	215.27	0	0	0	0	0	0	0	200	903	0	0	0	0	0	0	0	603	903	0
638	0	41.919	71.6199	-713.016	60585	77876.2	12348.3	309.221	215.03	0	0	0	0	0	0	0	200	903	0	0	0	0	0	0	0	603	903	0
638	1	43.2923	70.8569	-715.457	60401.9	77143.8	12256.7	307.825	215.576	0	0	0	0	0	0	0	200	903	0	0	0	0	0	0	0	603	903	0
638	2	43.1397	72.688	-713.626	60951.2	77815.2	12577.2	309.042	214.589	0	0	0	0	0	0	0	200	903	0	0	0	0	0	0	0	603	903	0
638	3	41.919	72.688	-711.185	61225.9	77571.1	12668.7	309.073	213.91	0	0	0	0	0	0	0	200	903	0	0	0	0	0	0	0	603	903	0
638	4	42.8345	73.4509	-713.931	61225.9	77754.1	12531.4	308.91	214.241	0	0	0	0	0	0	0	200	903	0	0	0	0	0	0	0	603	903	0
638	5	42.8345	74.2139	-707.828	61042.8	77815.2	12531.4	309.935	213.76	0	0	0	0	0	0	0	200	903	0	0	0	0	0	0	0	603	903	0
[truncated: 2,464 more rows]
